# Supplementary material for: Remodeling of epigenome and transcriptome landscapes with aging in mice reveals widespread induction of inflammatory responses
Source: PubMed Central journal article supplement — Genome Res. 2019 Apr;29(4):697–709. doi: 10.1101/gr.240093.118 (PMC6442391; doi:10.1101/gr.240093.118), 2019-04
Supplement: supp_gr.240093.118_Supplemental_tables.pdf [file supp_gr.240093.118_Supplemental_tables.pdf]

## **Supplemental Tables**

**Supplemental Table S1:** Sample design, biological information, and quality metrics.

**Supplemental Table S2:** Accession numbers of reanalyzed publicly available datasets.

**Supplemental Table S3:** Performance of machine-learning models.

**Supplemental Table S4:** Genes with significant tissue-independent transcriptional changes with aging as called by DESeq2 with FDR < 5%.

**Supplemental Table S5:** Functional annotation analysis information (IPA and KEGG)

**Supplemental Table S6:** Analysis of repeat element transcriptional and chromatin remodeling with mouse aging.

**Supplemental Table S7:** Detailed results of CIBERSORT RNA deconvolution algorithm.
