# Supplementary material for: Remodeling of epigenome and transcriptome landscapes with aging in mice reveals widespread induction of inflammatory responses
Source: HighWire-hosted journal article supplement (doi:10.1101/gr.240093.118), 2019-03-11
Supplement: Supplemental_Code_Figure1_General.zip [file HOMER_Cerebellum_Diffbind_H3K27ac_in_SE.xls]

PeakID (cmd=annotatePeaks.pl Cerebellum_Diffbind_H3K27ac_in_SE-Lite_coord.bed mm9)	Chr	Start	End	Strand	Peak Score	Focus Ratio/Region Size	Annotation	Detailed Annotation	Distance to TSS	Nearest PromoterID	Entrez ID	Nearest Unigene	Nearest Refseq	Nearest Ensembl	Gene Name	Gene Alias	Gene Description	Gene Type
1049	chr9	65193036	65195161	+	0	NA	exon (NM_016688, exon 1 of 5)	exon (NM_016688, exon 1 of 5)	223	NM_016688	50996	Mm.29193	NM_016688	ENSMUSG00000041837	Pdcd7	C80112|ES18	programmed cell death 7	protein-coding
127	chr10	81166999	81168442	+	0	NA	intron (NM_001243067, intron 1 of 3)	CpG	150	NM_001243067	73610	Mm.490466	NM_001243067		Zfp433	1700123A16Rik	RIKEN cDNA 1700123A16 gene	protein-coding
71	chr1	167165834	167168284	+	0	NA	promoter-TSS (NM_145513)	promoter-TSS (NM_145513)	30	NM_145513	226591	Mm.21520	NM_145513	ENSMUSG00000040843	Tiprl	1810011K17Rik	TIP41, TOR signalling pathway regulator-like (S. cerevisiae)	protein-coding
882	chr7	4690316	4694907	+	0	NA	intron (NM_146177, intron 1 of 8)	intron (NM_146177, intron 1 of 8)	882	NM_001115018	232811	Mm.247844	NM_146177	ENSMUSG00000059851	Suv420h2	BC024816|KMT5C|Suv4-20h2	suppressor of variegation 4-20 homolog 2 (Drosophila)	protein-coding
1050	chr9	66197511	66199370	+	0	NA	intron (NM_145617, intron 1 of 77)	CpG	183	NM_145617	235439	Mm.244179	NM_145617	ENSMUSG00000038664	Herc1	2810449H11Rik|B230218H07|D130015N03Rik|tbl	hect (homologous to the E6-AP (UBE3A) carboxyl terminus) domain and RCC1 (CHC1)-like domain (RLD) 1	protein-coding
560	chr2	18615056	18616702	+	0	NA	Intergenic	CpG	-4770	NM_001001334	381350	Mm.330024	NM_001001334		BC061194	-	cDNA sequence BC061194	protein-coding
898	chr7	35439022	35440939	+	0	NA	Intergenic	CpG	-2120	NM_146188	233107	Mm.486198	NM_146188	ENSMUSG00000030499	Kctd15	BC031749	potassium channel tetramerisation domain containing 15	protein-coding
798	chr5	93469159	93483987	+	0	NA	Intergenic	Intergenic	-2525	NM_175270	78088	Mm.245085	NM_175270	ENSMUSG00000045314	Sowahb	5730467H21Rik|Ankrd56	sosondowah ankyrin repeat domain family member B	protein-coding
1031	chr9	30836892	30839160	+	0	NA	promoter-TSS (NM_001115130)	promoter-TSS (NM_001115130)	-203	NM_001115130	235132	Mm.239355	NM_172765	ENSMUSG00000047412	Zbtb44	6030404E16Rik|Btbd15|E230011F09	zinc finger and BTB domain containing 44	protein-coding
512	chr18	63851211	63852804	+	0	NA	promoter-TSS (NM_016792)	promoter-TSS (NM_016792)	6	NM_016792	53382	Mm.19169	NM_016792	ENSMUSG00000024583	Txnl1	32kDa|TRP32|Txnl	thioredoxin-like 1	protein-coding
463	chr17	46464026	46466164	+	0	NA	promoter-TSS (NM_170680)	promoter-TSS (NM_170680)	-123	NM_170680	224814	Mm.76543	NM_145140	ENSMUSG00000032842	Abcc10	Mrp7|mFLJ00002	ATP-binding cassette, sub-family C (CFTR/MRP), member 10	protein-coding
517	chr18	76400246	76402388	+	0	NA	promoter-TSS (NM_010754)	promoter-TSS (NM_010754)	-38	NM_010754	17126	Mm.152699	NM_010754		Smad2	7120426M23Rik|Madh2|Madr2|Smad-2|mMad2	SMAD family member 2	protein-coding
458	chr17	31795020	31796464	+	0	NA	promoter-TSS (NM_001163769)	promoter-TSS (NM_001163769)	-43	NM_001163769	108121	Mm.379289	NM_024187	ENSMUSG00000061613	U2af1	2010107D16Rik|35kDa	U2 small nuclear ribonucleoprotein auxiliary factor (U2AF) 1	protein-coding
451	chr17	23810091	23815029	+	0	NA	TTS (NM_181821)	TTS (NM_181821)	-1823	NM_001008425	386612	Mm.328831	NM_001008425	ENSMUSG00000041319	Thoc6	F830014G06Rik|Wdr58	THO complex 6 homolog (Drosophila)	protein-coding
454	chr17	27290250	27292588	+	0	NA	intron (NM_173027, intron 2 of 5)	intron (NM_173027, intron 2 of 5)	13290	NM_173027	271424	Mm.209679	NM_173027	ENSMUSG00000024210	Ip6k3	D830007E07Rik|Ihpk3	inositol hexaphosphate kinase 3	protein-coding
722	chr4	48291793	48293866	+	0	NA	promoter-TSS (NM_029572)	promoter-TSS (NM_029572)	197	NM_001281977	16348	Mm.317706	NM_010569	ENSMUSG00000028344	Invs	Nphp2|inv	inversin	protein-coding
634	chr2	166730743	166733331	+	0	NA	intron (NM_023565, intron 1 of 24)	CpG	441	NM_023565	110750	Mm.22417	NM_023565	ENSMUSG00000002718	Cse1l	2610100P18Rik|AA407533|Capts|Cas|Xpo2	chromosome segregation 1-like (S. cerevisiae)	protein-coding
578	chr2	39045307	39047067	+	0	NA	promoter-TSS (NM_178778)	promoter-TSS (NM_178778)	63	NM_178778	320271	Mm.204836	NM_178778	ENSMUSG00000035236	Scai	9330112M16|A930041I02Rik|AI662729	suppressor of cancer cell invasion	protein-coding
695	chr3	154326181	154328447	+	0	NA	Intergenic	Intergenic	-46783	NM_175176	209601	Mm.331454	NM_175176	ENSMUSG00000042943	Erich3	1700013E18Rik|4922501L14Rik|5031409G23Rik|AI596448|Gm133	glutamate rich 3	protein-coding
978	chr8	47771850	47773037	+	0	NA	Intergenic	Intergenic	52426	NR_045750	100503498	Mm.187358	NR_045750	ENSMUSG00000097534	Gm16675	-	predicted gene, 16675	ncRNA
728	chr4	81371349	81375744	+	0	NA	Intergenic	Intergenic	-284837	NM_010820	17475	Mm.153039	NM_010820	ENSMUSG00000028402	Mpdz	AI225843|B930003D11Rik|MUPP1	multiple PDZ domain protein	protein-coding
742	chr4	114805180	114807887	+	0	NA	promoter-TSS (NM_001003947)	promoter-TSS (NM_001003947)	49	NM_001003947	81906	Mm.215544	NM_001003947	ENSMUSG00000047155	Cyp4x1	A230025G20|CYPIVX1|CYP_a|Cyp4a28-ps	cytochrome P450, family 4, subfamily x, polypeptide 1	protein-coding
378	chr15	39028094	39031350	+	0	NA	promoter-TSS (NM_001256383)	promoter-TSS (NM_001256383)	-110	NM_001256382	116838	Mm.309296	NM_053271		Rims2	2810036I15Rik|AW048769|RIM2|Rab3ip2|Rim2(+40A)|Rim2(+44A)|Rim2(+4A)|Serg2|Syt3-rs|mKIAA0751	regulating synaptic membrane exocytosis 2	protein-coding
325	chr13	112278766	112281208	+	0	NA	5' UTR (NM_028487, exon 1 of 13)	5' UTR (NM_028487, exon 1 of 13)	262	NM_028487	73274	Mm.57286	NM_028487	ENSMUSG00000032745	Gpbp1	1700034P14Rik|AU019836|D230035M11Rik|Gpbp|mGPBP	GC-rich promoter binding protein 1	protein-coding
29	chr1	59818996	59822424	+	0	NA	promoter-TSS (NM_007561)	promoter-TSS (NM_007561)	-413	NM_007561	12168	Mm.7106	NM_007561		Bmpr2	2610024H22Rik|AL117858|AW546137|BB189135|BMP-2|BMPR-2|BMPR-II|BMPRII|BRK-3|Gm20272	bone morphogenetic protein receptor, type II (serine/threonine kinase)	protein-coding
889	chr7	16505423	16509013	+	0	NA	intron (NM_009156, intron 1 of 5)	intron (NM_009156, intron 1 of 5)	502	NM_009156	20364	Mm.42829	NM_009156	ENSMUSG00000041571	Sepw1	selW	selenoprotein W, muscle 1	protein-coding
350	chr14	62057508	62059636	+	0	NA	exon (NM_008466, exon 1 of 17)	exon (NM_008466, exon 1 of 17)	212	NM_008466	16648	Mm.25548	NM_008466	ENSMUSG00000021929	Kpna3	IPOA4	karyopherin (importin) alpha 3	protein-coding
540	chr19	36907457	36909892	+	0	NA	promoter-TSS (NM_001163635)	promoter-TSS (NM_001163635)	-48	NM_001163635	74493	Mm.249310	NM_001163635	ENSMUSG00000024811	Tnks2	5430432P15Rik|AA517131|AI662480|ARTD6|TNKS-2|Tank2	tankyrase, TRF1-interacting ankyrin-related ADP-ribose polymerase 2	protein-coding
58	chr1	138156011	138158239	+	0	NA	exon (NM_001101516, exon 1 of 1)	exon (NM_001101516, exon 1 of 1)	325	NM_001101516	383563	Mm.40367	NM_001101516	ENSMUSG00000052759	Gpr25	Gm1300	G protein-coupled receptor 25	protein-coding
684	chr3	123209916	123213204	+	0	NA	promoter-TSS (NR_028573)	promoter-TSS (NR_028573)	-306	NR_028574	69895	Mm.260791	NR_028574		Snhg8	1110065M07Rik|2010109N14Rik	small nucleolar RNA host gene 8	ncRNA
211	chr11	79805876	79807590	+	0	NA	5' UTR (NM_001163018, exon 1 of 15)	5' UTR (NM_001163018, exon 1 of 15)	125	NM_199196	52615	Mm.283410	NM_199196	ENSMUSG00000017548	Suz12	2610028O16Rik|AI195385|AU016842|AW536442|D11Ertd530e|mKIAA0160	suppressor of zeste 12 homolog (Drosophila)	protein-coding
153	chr10	121176159	121177857	+	0	NA	promoter-TSS (NM_173022)	promoter-TSS (NM_173022)	15	NM_173022	270802	Mm.209172	NM_173022	ENSMUSG00000053684	BC048403	E030027L10	cDNA sequence BC048403	protein-coding
861	chr6	86387586	86389424	+	0	NA	promoter-TSS (NM_001243742)	promoter-TSS (NM_001243742)	113	NM_146170	232196	Mm.404040	NM_146170	ENSMUSG00000046679	C87436	-	expressed sequence C87436	protein-coding
337	chr14	32063409	32065227	+	0	NA	promoter-TSS (NM_027088)	promoter-TSS (NM_027088)	86	NM_027949	71838	Mm.5348	NM_027949	ENSMUSG00000021902	Phf7	1700006H01Rik|1700010P14Rik|AI427892|AW555949	PHD finger protein 7	protein-coding
101	chr10	40020611	40022888	+	0	NA	5' UTR (NM_007444, exon 1 of 8)	5' UTR (NM_007444, exon 1 of 8)	243	NM_007444	100041585	Mm.476925	NM_007444	ENSMUSG00000063953	Amd2	AdoMetDC|Amd1|Amd3|ENSMUSG00000063953	S-adenosylmethionine decarboxylase 2	protein-coding
340	chr14	45837484	45841961	+	0	NA	promoter-TSS (NM_172597)	promoter-TSS (NM_172597)	330	NM_027518	70713	Mm.343793	NM_027518	ENSMUSG00000049092	Gpr137c	6330416L11Rik|Gm908|TM7SF1L2	G protein-coupled receptor 137C	protein-coding
76	chr1	174012176	174013456	+	0	NA	promoter-TSS (NM_021607)	promoter-TSS (NM_021607)	64	NM_021607	59287	Mm.218203	NM_021607	ENSMUSG00000003458	Ncstn	9430068N19Rik|AA727311|Aph2|D1Dau13e|Kiaa0253|Nct|mKIAA0253	nicastrin	protein-coding
311	chr13	91946627	91948486	+	0	NA	promoter-TSS (NM_145453)	promoter-TSS (NM_145453)	-255	NM_145453	69085	Mm.52356	NM_145453	ENSMUSG00000021621	Zcchc9	1810019C21Rik	zinc finger, CCHC domain containing 9	protein-coding
982	chr8	72147851	72150278	+	0	NA	promoter-TSS (NM_001045553)	promoter-TSS (NM_001045553)	10	NM_001045553	234362	Mm.458487	NM_172754	ENSMUSG00000060427	Zfp868	AI449175|AW108241|C530032E20|mszf62	zinc finger protein 868	protein-coding
571	chr2	31543326	31545135	+	0	NA	5' UTR (NM_001112703, exon 1 of 11)	5' UTR (NM_001112703, exon 1 of 11)	173	NM_001283046	11350	Mm.1318	NM_009594	ENSMUSG00000026842	Abl1	AI325092|Abl|E430008G22Rik|c-Abl	c-abl oncogene 1, non-receptor tyrosine kinase	protein-coding
825	chr5	145900429	145901897	+	0	NA	promoter-TSS (NM_001008705)	promoter-TSS (NM_001008705)	-103	NM_001008705	231889	Mm.277413	NM_001008705	ENSMUSG00000038722	Bud31	C77604|EDG-2|EDG2|G10	BUD31 homolog (yeast)	protein-coding
389	chr15	81352069	81355192	+	0	NA	Intergenic	CpG	56884	NM_019712	56438	Mm.29405	NM_019712	ENSMUSG00000022400	Rbx1	1500002P15Rik|AA517855|ROC1	ring-box 1	protein-coding
917	chr7	88933220	88935251	+	0	NA	intron (NM_026077, intron 1 of 4)	intron (NM_026077, intron 1 of 4)	104	NM_026077	67290	Mm.248391	NM_026077	ENSMUSG00000025102	3110040N11Rik	AI851475	RIKEN cDNA 3110040N11 gene	protein-coding
495	chr18	32227102	32228361	+	0	NA	intron (NM_173441, intron 1 of 13)	CpG	343	NM_173441	73473	Mm.66853	NM_173441	ENSMUSG00000024384	Iws1	1700069O15Rik|3000008H23|AL117927|AW214353	IWS1 homolog (S. cerevisiae)	protein-coding
966	chr8	19711190	19712135	+	0	NA	Intergenic	Intergenic	-17914	NM_001270553	100861668	Mm.491087	NM_001270553		Gm21119	-	predicted gene, 21119	protein-coding
992	chr8	83261527	83264647	+	0	NA	5' UTR (NM_053124, exon 1 of 24)	5' UTR (NM_053124, exon 1 of 24)	271	NM_053124	93762	Mm.246803	NM_053124		Smarca5	4933427E24Rik|D030040M08Rik|D330027N15Rik|MommeD4|Snf2h	SWI/SNF related, matrix associated, actin dependent regulator of chromatin, subfamily a, member 5	protein-coding
758	chr4	142801273	142803478	+	0	NA	intron (NM_001081355, intron 1 of 9)	CpG	237	NM_001081355	110593	Mm.332020	NM_001081355	ENSMUSG00000057637	Prdm2	4833427P12Rik|E330024L24Rik|Gm1033|Gm19732|KMT8|Riz|Riz1|Znfpr1c1	PR domain containing 2, with ZNF domain	protein-coding
236	chr11	120875176	120877886	+	0	NA	Intergenic	Intergenic	-23884	NM_027874	104318	Mm.216227	NM_027874	ENSMUSG00000025162	Csnk1d	1200006A05Rik|AA409348|D930010H05Rik	casein kinase 1, delta	protein-coding
706	chr4	33117141	33119917	+	0	NA	promoter-TSS (NR_036602)	promoter-TSS (NR_036602)	129	NM_019586	56228	Mm.259095	NM_019586	ENSMUSG00000028277	Ube2j1	0710008M05Rik|1110030I22Rik|NCUBE-1|Ncube|Ncube1|Ubc6p	ubiquitin-conjugating enzyme E2J 1	protein-coding
218	chr11	93500299	93507504	+	0	NA	Intergenic	Intergenic	243179	NM_001013375	217109	Mm.379350	NM_001013375	ENSMUSG00000054079	Utp18	6230425C22Rik|6430513M13|Wdr50	UTP18, small subunit (SSU) processome component, homolog (yeast)	protein-coding
14	chr1	39570712	39574592	+	0	NA	Intergenic	Intergenic	-19995	NM_028043	52846	Mm.259421	NM_028043	ENSMUSG00000003135	Cnot11	2410015L18Rik|C40|D1Bwg0212e	CCR4-NOT transcription complex, subunit 11	protein-coding
834	chr6	8726730	8728631	+	0	NA	intron (NM_010492, intron 1 of 13)	intron (NM_010492, intron 1 of 13)	804	NM_010492	15893	Mm.275683	NM_010492	ENSMUSG00000062995	Ica1	69kDa|ICA69	islet cell autoantigen 1	protein-coding
285	chr13	23711003	23715665	+	0	NA	promoter-TSS (NM_178194)	promoter-TSS (NM_178194)	-341	NM_178194	319179	Mm.440391	NM_178194	ENSMUSG00000047246	Hist1h2be	-	histone cluster 1, H2be	protein-coding
234	chr11	118150143	118152588	+	0	NA	5' UTR (NM_001033528, exon 1 of 21)	5' UTR (NM_001033528, exon 1 of 21)	193	NM_001033528	72344	Mm.232293	NM_001033528	ENSMUSG00000033909	Usp36	2700002L06Rik|mKIAA1453	ubiquitin specific peptidase 36	protein-coding
594	chr2	101741481	101752624	+	0	NA	Intergenic	(TCC)n|Simple_repeat|Simple_repeat	20633	NM_029635	76501	Mm.330424	NM_029635	ENSMUSG00000027163	Commd9	1810029F08Rik|AA409293	COMM domain containing 9	protein-coding
96	chr10	17666809	17668559	+	0	NA	5' UTR (NM_001033432, exon 1 of 4)	5' UTR (NM_001033432, exon 1 of 4)	189	NM_001033432	380629	Mm.276430	NM_001033432	ENSMUSG00000039879	Heca	Gm869|HDC|HDCL	headcase homolog (Drosophila)	protein-coding
1068	chr9	103266336	103269381	+	0	NA	promoter-TSS (NM_001134427)	promoter-TSS (NM_001134427)	252	NM_175833	321022	Mm.261025	NM_175565	ENSMUSG00000032803	Cdv3	2510010F10Rik|C230084J24Rik|C79446|TPP36	carnitine deficiency-associated gene expressed in ventricle 3	protein-coding
486	chr18	5333030	5335544	+	0	NA	intron (NM_178722, intron 1 of 4)	CpG	150	NM_178722	240186	Mm.118257	NM_178722	ENSMUSG00000050945	Zfp438	9430031G09|9430091M14Rik|B830013J05Rik	zinc finger protein 438	protein-coding
160	chr11	3023271	3026403	+	0	NA	intron (NR_003517, intron 1 of 6)	B4A|SINE|B4	807	NR_003518	66776	Mm.247625	NR_003518		Pisd-ps3	4933439C20Rik	phosphatidylserine decarboxylase, pseudogene 3	pseudo
569	chr2	28495544	28497512	+	0	NA	promoter-TSS (NM_001289576)	promoter-TSS (NM_001289576)	-225	NM_001289575	64930	Mm.224354	NM_022887	ENSMUSG00000026812	Tsc1	-	tuberous sclerosis 1	protein-coding
8	chr1	30929137	30932004	+	0	NA	Intergenic	CpG	-10469	NM_001081080	213109	Mm.194486	NM_025871	ENSMUSG00000048874	Phf3	2310061N19Rik|mKIAA0244	PHD finger protein 3	protein-coding
98	chr10	29032379	29033787	+	0	NA	promoter-TSS (NM_025855)	promoter-TSS (NM_025855)	111	NM_001110195	52665	Mm.28930	NM_025855	ENSMUSG00000019883	Echdc1	1700028A24Rik|AI314462|AI930038|D10Ertd667e|MMCD	enoyl Coenzyme A hydratase domain containing 1	protein-coding
1048	chr9	64583783	64586205	+	0	NA	intron (NM_017382, intron 1 of 4)	GA-rich|Low_complexity|Low_complexity	569	NM_017382	53869	Mm.1387	NM_017382	ENSMUSG00000004771	Rab11a	-	RAB11A, member RAS oncogene family	protein-coding
1000	chr8	96091502	96098032	+	0	NA	Intergenic	Intergenic	-35160	NM_001003951	67935	Mm.65457	NM_001003951	ENSMUSG00000058019	Ces5a	1700081L16Rik|1700122C07Rik|BB081581|Ces7|Gm503|cauxin	carboxylesterase 5A	protein-coding
1061	chr9	91240998	91284968	+	0	NA	promoter-TSS (NM_009576)	promoter-TSS (NM_009576)	-827	NM_009576	22774	Mm.8062	NM_009576		Zic4	-	zinc finger protein of the cerebellum 4	protein-coding
43	chr1	88255108	88256853	+	0	NA	promoter-TSS (NM_010880)	promoter-TSS (NM_010880)	50	NM_010880	17975	Mm.154378	NM_010880	ENSMUSG00000026234	Ncl	B530004O11Rik|C23|D0Nds28|D1Nds28|Nucl	nucleolin	protein-coding
686	chr3	132346436	132347809	+	0	NA	promoter-TSS (NM_001163455)	promoter-TSS (NM_001163455)	14	NM_173032	271981	Mm.257864	NM_173032	ENSMUSG00000028030	Tbck	1700120J03Rik|9430001M19|A630047E20Rik|C030007I09Rik|Tbckl	TBC1 domain containing kinase	protein-coding
391	chr15	83997354	84000254	+	0	NA	TTS (NR_105816)	TTS (NR_105816)	104	NR_105816	102466642		NR_105816		Mir6392	mmu-mir-6392	microRNA mir-6392	ncRNA
943	chr7	134654623	134657351	+	0	NA	non-coding (NR_024331, exon 1 of 1)	non-coding (NR_024331, exon 1 of 1)	396	NR_024331	629159	Mm.256720	NR_024331		1700008J07Rik	AW048743	RIKEN cDNA 1700008J07 gene	ncRNA
288	chr13	41095574	41097208	+	0	NA	promoter-TSS (NM_026550)	promoter-TSS (NM_026550)	12	NM_026550	68083	Mm.24789	NM_026550	ENSMUSG00000038683	Pak1ip1	5830431I15Rik|5930415H02Rik|AA419825|AI314040|AW556169|Gdpd1|PIP1	PAK1 interacting protein 1	protein-coding
193	chr11	53243195	53245821	+	0	NA	promoter-TSS (NM_025352)	promoter-TSS (NM_025352)	-175	NM_025352	22272	Mm.251621	NM_025352	ENSMUSG00000044894	Uqcrq	1100001F06Rik|1500040F11Rik|5830407L17Rik|9.5kDa|AA959903|QP-C|Qpc|Uqcrb|c1502	ubiquinol-cytochrome c reductase, complex III subunit VII	protein-coding
119	chr10	66102644	66105504	+	0	NA	Intergenic	Intergenic	-363749	NR_110511	102634101	Mm.445258	NR_110511		LOC102634101	-	uncharacterized LOC102634101	ncRNA
586	chr2	72816482	72820201	+	0	NA	5' UTR (NM_001018042, exon 1 of 7)	5' UTR (NM_001018042, exon 1 of 7)	162	NM_001018042	20687	Mm.124328	NM_011450	ENSMUSG00000027109	Sp3	D130027J01Rik	trans-acting transcription factor 3	protein-coding
180	chr11	23669801	23672094	+	0	NA	promoter-TSS (NM_009044)	promoter-TSS (NM_009044)	23	NM_009044	19696	Mm.4869	NM_009044	ENSMUSG00000020275	Rel	c-Rel	reticuloendotheliosis oncogene	protein-coding
410	chr16	10784594	10787153	+	0	NA	promoter-TSS (NM_001271603)	promoter-TSS (NM_001271603)	-244	NM_001271603	12703	Mm.130	NM_009896	ENSMUSG00000038037	Socs1	Cish1|Cish7|JAB|SOCS-1|SSI-1	suppressor of cytokine signaling 1	protein-coding
246	chr12	32183826	32185582	+	0	NA	promoter-TSS (NM_001253848)	promoter-TSS (NM_001253848)	-223	NM_001253848	104836	Mm.273270	NM_134048	ENSMUSG00000020659	Cbll1	AI467391|Hakai|c-Cbl-like	Casitas B-lineage lymphoma-like 1	protein-coding
999	chr8	90661427	90662836	+	0	NA	promoter-TSS (NR_106039)	promoter-TSS (NR_106039)	26	NR_106039	102465649		NR_106039		Mir7071	mmu-mir-7071	microRNA mir-7071	ncRNA
690	chr3	138868092	138869376	+	0	NA	promoter-TSS (NM_198659)	promoter-TSS (NM_198659)	-123	NM_198659	381476	Mm.188334	NM_198659	ENSMUSG00000047940	Stpg2	B930007M17Rik|Gm1017	sperm tail PG rich repeat containing 2	protein-coding
61	chr1	148339952	148347472	+	0	NA	intron (NM_153539, intron 1 of 7)	intron (NM_153539, intron 1 of 7)	916	NM_153539	215378	Mm.441817	NM_153539	ENSMUSG00000035131	Brinp3	B830045N13Rik|Fam5c	bone morphogenetic protein/retinoic acid inducible neural specific 3	protein-coding
430	chr16	64850540	64852824	+	0	NA	promoter-TSS (NM_178647)	promoter-TSS (NM_178647)	-229	NM_178647	106143	Mm.10160	NM_178647	ENSMUSG00000054604	Cggbp1	AA960172|AL023996|AW045841	CGG triplet repeat binding protein 1	protein-coding
447	chr17	15129047	15131219	+	0	NA	Intergenic	(CCCCG)n|Simple_repeat|Simple_repeat	14305	NM_001123370	100041574	Mm.393767	NM_001123370	ENSMUSG00000073455	9030025P20Rik	D17Zt9e	RIKEN cDNA 9030025P20 gene	protein-coding
536	chr19	32827489	32835465	+	0	NA	promoter-TSS (NM_008960)	promoter-TSS (NM_008960)	-590	NM_008960	19211	Mm.245395	NM_008960	ENSMUSG00000013663	Pten	2310035O07Rik|A130070J02Rik|AI463227|B430203M17Rik|MMAC1|TEP1	phosphatase and tensin homolog	protein-coding
415	chr16	18685893	18688414	+	0	NA	Intergenic	Intergenic	-57122	NM_213614	18951	Mm.20365	NM_213614	ENSMUSG00000072214	Sept5	Cdcrel-1|Cdcrel1|Pnutl1	septin 5	protein-coding
189	chr11	51501637	51503322	+	0	NA	promoter-TSS (NM_025319)	promoter-TSS (NM_025319)	-343	NM_025319	66050	Mm.35693	NM_025319	ENSMUSG00000007777	0610009B22Rik	-	RIKEN cDNA 0610009B22 gene	protein-coding
480	chr17	85189262	85191029	+	0	NA	promoter-TSS (NM_028233)	promoter-TSS (NM_028233)	-19	NM_028233	72416	Mm.217027	NM_028233	ENSMUSG00000024120	Lrpprc	3110001K13Rik|C76645|Gp130|Lrp130|Lsfc	leucine-rich PPR-motif containing	protein-coding
438	chr16	96348315	96351085	+	0	NA	promoter-TSS (NM_008251)	promoter-TSS (NM_008251)	-368	NM_008251	15312	Mm.2756	NM_008251		Hmgn1	HMG-14|Hmg14	high mobility group nucleosomal binding domain 1	protein-coding
107	chr10	57908212	57910386	+	0	NA	promoter-TSS (NM_011240)	promoter-TSS (NM_011240)	-301	NM_011240	19386	Mm.431695	NM_011240	ENSMUSG00000003226	Ranbp2	A430087B05Rik|AI256741|NUP358	RAN binding protein 2	protein-coding
87	chr1	183139865	183143715	+	0	NA	5' UTR (NM_145514, exon 1 of 14)	5' UTR (NM_145514, exon 1 of 14)	319	NM_145514	226757	Mm.289082	NM_145514	ENSMUSG00000038733	Wdr26	1600024A01Rik|AA693241|AI447817|AU044014|C77982|Gid7	WD repeat domain 26	protein-coding
1022	chr8	129183457	129193553	+	0	NA	Intergenic	Intergenic	-71169	NM_001164598	270110	Mm.334918	NM_001164598	ENSMUSG00000051495	Irf2bp2	E130305N23Rik|IRF-2BP2	interferon regulatory factor 2 binding protein 2	protein-coding
444	chr17	7030118	7033495	+	0	NA	Intergenic	Intergenic	-44677	NM_009510	22350	Mm.277812	NM_009510	ENSMUSG00000052397	Ezr	AW146364|R75297|Vil2|p81	ezrin	protein-coding
508	chr18	38759115	38762572	+	0	NA	promoter-TSS (NM_011898)	promoter-TSS (NM_011898)	79	NM_011898	24066	Mm.42038	NM_011898	ENSMUSG00000024427	Spry4	A030006O18Rik|sprouty4	sprouty homolog 4 (Drosophila)	protein-coding
953	chr7	146131637	146134536	+	0	NA	intron (NM_028708, intron 1 of 14)	intron (NM_028708, intron 1 of 14)	673	NM_028708	74004	Mm.334298	NM_028708		Jakmip3	6330417G02Rik|AI593226|mKIAA4091	janus kinase and microtubule interacting protein 3	protein-coding
221	chr11	98009994	98011888	+	0	NA	promoter-TSS (NM_028149)	promoter-TSS (NM_028149)	-11	NM_028149	72194	Mm.218350	NM_028149	ENSMUSG00000020883	Fbxl20	2610511F20Rik|4632423N09Rik|AI849362|AL117906|C86145|Fbl2|Scr|mKIAA4147	F-box and leucine-rich repeat protein 20	protein-coding
39	chr1	75500385	75504055	+	0	NA	exon (NM_178884, exon 1 of 20)	exon (NM_178884, exon 1 of 20)	807	NM_178884	98733	Mm.236454	NM_178884	ENSMUSG00000026211	Obsl1	AW822216	obscurin-like 1	protein-coding
1089	chrX	74754080	74757711	+	0	NA	promoter-TSS (NM_020601)	promoter-TSS (NM_020601)	-671	NM_020601	21372	Mm.258476	NM_020601	ENSMUSG00000025246	Tbl1x	5330429M20|Tbl1	transducin (beta)-like 1 X-linked	protein-coding
558	chr2	18529056	18531732	+	0	NA	Intergenic	Intergenic	-63695	NM_147778	12238	Mm.249586	NM_147778	ENSMUSG00000051154	Commd3	AW550818|Bup|D2Ertd542e	COMM domain containing 3	protein-coding
417	chr16	20096942	20099012	+	0	NA	intron (NM_029436, intron 1 of 7)	CpG	350	NM_029436	75785	Mm.392450	NM_029436	ENSMUSG00000062901	Klhl24	1110046J11Rik|4930429H24Rik|6530402O20Rik|C85082	kelch-like 24	protein-coding
12	chr1	38053276	38055575	+	0	NA	promoter-TSS (NM_198303)	promoter-TSS (NM_198303)	-372	NM_172054	98258	Mm.28438	NM_172054	ENSMUSG00000058407	Txndc9	AI098020|APACD	thioredoxin domain containing 9	protein-coding
784	chr5	35103254	35105363	+	0	NA	promoter-TSS (NM_010414)	promoter-TSS (NM_010414)	-81	NM_010414	15194	Mm.209071	NM_010414	ENSMUSG00000029104	Htt	AI256365|C430023I11Rik|Hd|Hdh|IT15	huntingtin	protein-coding
260	chr12	79326114	79329425	+	0	NA	exon (NM_172952, exon 1 of 24)	exon (NM_172952, exon 1 of 24)	127	NM_145965	268566	Mm.341742	NM_145965	ENSMUSG00000047454	Gphn	5730552E08Rik|AI662856|BC027112|C230040D23|GPH|GPHRYN|geph	gephyrin	protein-coding
573	chr2	35054924	35057305	+	0	NA	intron (NM_026697, intron 1 of 7)	CpG	526	NM_026697	68365	Mm.198264	NM_026697	ENSMUSG00000026878	Rab14	0610030G24Rik|2810475J17Rik|A830021G03Rik|AI314285|AI649155|D030017L14Rik	RAB14, member RAS oncogene family	protein-coding
1084	chrX	35916157	35918849	+	0	NA	intron (NM_001110142, intron 3 of 22)	G-rich|Low_complexity|Low_complexity	11870	NM_028288	72584	Mm.327675	NM_028288		Cul4b	2700050M05Rik|AA409770|CUL-4B|mKIAA0695	cullin 4B	protein-coding
762	chr4	151234549	151238156	+	0	NA	promoter-TSS (NM_001195565)	promoter-TSS (NM_001195565)	-475	NM_001195565	100072	Mm.318846	NM_001081557	ENSMUSG00000014592	Camta1	1810059M14Rik|2310058O09Rik|AI316882|AW987475|mKIAA0833	calmodulin binding transcription activator 1	protein-coding
638	chr2	170635923	170638449	+	0	NA	intron (NM_029761, intron 2 of 7)	intron (NM_029761, intron 2 of 7)	79879	NM_001163686	76829	Mm.41633	NM_029761	ENSMUSG00000027560	Dok5	2700055C10Rik	docking protein 5	protein-coding
734	chr4	95633145	95635514	+	0	NA	promoter-TSS (NR_045777)	promoter-TSS (NR_045777)	17	NR_045776	319247	Mm.473527	NM_175680	ENSMUSG00000044125	9530080O11Rik	-	RIKEN cDNA 9530080O11 gene	ncRNA
875	chr6	133053924	133056459	+	0	NA	promoter-TSS (NM_001271583)	promoter-TSS (NM_001271583)	-66	NM_001271583	381820	Mm.291762	NM_001163445	ENSMUSG00000072704	2700089E24Rik	AI662692	RIKEN cDNA 2700089E24 gene	protein-coding
1	CHR	1	END	+	0	NA	NA	NA	NA	NA
506	chr18	36718001	36721361	+	0	NA	promoter-TSS (NM_175375)	promoter-TSS (NM_175375)	-576	NM_175375	108857	Mm.482287	NM_175375	ENSMUSG00000024483	Ankhd1	1110004O12Rik|4933432B13Rik|9130019P20Rik|A530027J04Rik|A630021B20Rik|AA571404|Mask|mFLJ00246|mKIAA1085	ankyrin repeat and KH domain containing 1	protein-coding
136	chr10	88192968	88194889	+	0	NA	promoter-TSS (NM_025859)	promoter-TSS (NM_025859)	-82	NM_001037166	237433	Mm.478763	NM_001037166		Gm4925	EG237433	predicted gene 4925	protein-coding
116	chr10	62441705	62444010	+	0	NA	promoter-TSS (NM_027425)	promoter-TSS (NM_027425)	-114	NM_027425	70432	Mm.234587	NM_027425		Rufy2	2610111M19Rik|AI844453|Denn|LZ-FYVE|ZFYVE13	RUN and FYVE domain-containing 2	protein-coding
144	chr10	105905510	105908433	+	0	NA	promoter-TSS (NM_177373)	promoter-TSS (NM_177373)	-395	NM_177373	327814	Mm.391424	NM_177373	ENSMUSG00000053825	Ppfia2	5330438O12|B230207K17Rik|E130120L08Rik|mKIAA4112	protein tyrosine phosphatase, receptor type, f polypeptide (PTPRF), interacting protein (liprin), alpha 2	protein-coding
661	chr3	79087882	79092509	+	0	NA	Intergenic	Intergenic	-59103	NM_001142953	100233207	Mm.373801	NM_001142953	ENSMUSG00000091685	Gm17359	-	predicted gene, 17359	protein-coding
381	chr15	44449971	44452317	+	0	NA	promoter-TSS (NM_019480)	promoter-TSS (NM_019480)	-43	NM_019480	55960	Mm.287896	NM_019480	ENSMUSG00000022339	Ebag9	AI835379|Rcas1	estrogen receptor-binding fragment-associated gene 9	protein-coding
581	chr2	56966525	56977608	+	0	NA	intron (NM_001139509, intron 1 of 7)	intron (NM_001139509, intron 1 of 7)	4348	NM_001139509	18227	Mm.3507	NM_013613	ENSMUSG00000026826	Nr4a2	HZF-3|NOT|Nurr1|RNR-1|TINOR|TINUR	nuclear receptor subfamily 4, group A, member 2	protein-coding
308	chr13	86185420	86186487	+	0	NA	intron (NM_007749, intron 1 of 2)	CpG	447	NM_007749	12867	Mm.378898	NM_007749		Cox7c	COXVIIc|Cox7c1	cytochrome c oxidase subunit VIIc	protein-coding
906	chr7	51518267	51519042	+	0	NA	Intergenic	Intergenic	-6080	NM_001195034	100503991	Mm.367353	NM_001195034	ENSMUSG00000012777	Acpt	EG546967|Gm1432	acid phosphatase, testicular	protein-coding
177	chr11	23204837	23207630	+	0	NA	promoter-TSS (NM_001190401)	promoter-TSS (NM_001190401)	-662	NM_001190401	17847	Mm.119155	NM_001190401	ENSMUSG00000056342	Usp34	A530081C03Rik|Murr2	ubiquitin specific peptidase 34	protein-coding
678	chr3	107135000	107138189	+	0	NA	promoter-TSS (NM_001045807)	promoter-TSS (NM_001045807)	-387	NM_001045807	229700	Mm.27966	NM_001045807	ENSMUSG00000048109	Rbm15	C230088J01Rik|mKIAA1438	RNA binding motif protein 15	protein-coding
373	chr15	35300615	35302172	+	0	NA	promoter-TSS (NM_177151)	promoter-TSS (NM_177151)	92	NM_177151	666173	Mm.309250	NM_177151	ENSMUSG00000037646	Vps13b	1810042B05Rik|2310042E16Rik|4732488H20|C330002D13Rik|C87206|Coh1|D230005K13|mKIAA0532|mKIAA5032	vacuolar protein sorting 13B (yeast)	protein-coding
773	chr5	24728111	24729545	+	0	NA	5' UTR (NM_144908, exon 1 of 12)	5' UTR (NM_144908, exon 1 of 12)	117	NM_144908	231050	Mm.246718	NM_144908	ENSMUSG00000038072	Galnt11	A430075I06Rik|AI648252|E430002F06Rik	UDP-N-acetyl-alpha-D-galactosamine:polypeptide N-acetylgalactosaminyltransferase 11	protein-coding
205	chr11	70244736	70247820	+	0	NA	intron (NM_001271360, intron 1 of 15)	CpG	196	NM_001271358	216869	Mm.203747	NM_145429	ENSMUSG00000060216	Arrb2	AI326910|AW122872	arrestin, beta 2	protein-coding
22	chr1	55143435	55146013	+	0	NA	promoter-TSS (NM_008303)	promoter-TSS (NM_008303)	52	NM_010477	15510	Mm.1777	NM_010477	ENSMUSG00000025980	Hspd1	60kDa|Hsp60	heat shock protein 1 (chaperonin)	protein-coding
927	chr7	107755034	107757692	+	0	NA	5' UTR (NM_024287, exon 1 of 8)	5' UTR (NM_024287, exon 1 of 8)	147	NR_003559	52443	Mm.473730	NM_198831		Mrpl48	1810030E20Rik|2610028L11Rik|CGI-118|D4Ertd786e	mitochondrial ribosomal protein L48	protein-coding
301	chr13	69873685	69880463	+	0	NA	intron (NM_001145162, intron 1 of 1)	intron (NM_001145162, intron 1 of 1)	1701	NM_001145162	76980	Mm.23960	NM_001145162	ENSMUSG00000052981	Ube2ql1	3110006E14Rik	ubiquitin-conjugating enzyme E2Q family-like 1	protein-coding
51	chr1	123223519	123225908	+	0	NA	promoter-TSS (NM_133748)	promoter-TSS (NM_133748)	-112	NM_133748	72999	Mm.27136	NM_133748	ENSMUSG00000003721	Insig2	2900053I11Rik|C730043J18Rik|Insig-2	insulin induced gene 2	protein-coding
456	chr17	28936897	28939397	+	0	NA	promoter-TSS (NM_001081315)	promoter-TSS (NM_001081315)	76	NM_001081315	268936	Mm.291877	NM_199061	ENSMUSG00000063952	Brpf3	AI413466|AW493400|mKIAA1286	bromodomain and PHD finger containing, 3	protein-coding
874	chr6	128241379	128251398	+	0	NA	intron (NM_001080979, intron 1 of 10)	intron (NM_001080979, intron 1 of 10)	4443	NM_001080979	21679	Mm.14774	NM_011567	ENSMUSG00000030353	Tead4	ETFR-2|Etfr2|FR-19|Rtef1|TEAD-4|TEF-3|Tcf13r1|Tef3|Tefr|Tefr1|Tefr1a	TEA domain family member 4	protein-coding
652	chr3	40548097	40550504	+	0	NA	promoter-TSS (NM_011020)	promoter-TSS (NM_011020)	-235	NM_011020	18415	Mm.39330	NM_011020		Hspa4l	94kDa|AI461691|APG-1|Osp94	heat shock protein 4 like	protein-coding
975	chr8	37310133	37315410	+	0	NA	promoter-TSS (NM_001081150)	promoter-TSS (NM_001081150)	-201	NM_001081150	244421	Mm.324032	NM_001081150	ENSMUSG00000039633	Lonrf1	-	LON peptidase N-terminal domain and ring finger 1	protein-coding
493	chr18	31917642	31920779	+	0	NA	promoter-TSS (NM_153515)	promoter-TSS (NM_153515)	-268	NM_153515	225339	Mm.290804	NM_153515	ENSMUSG00000041915	Ammecr1l	5430429D03Rik|AU022236|AU040755|AW111353|E230022H04Rik	AMME chromosomal region gene 1-like	protein-coding
1033	chr9	44747075	44754571	+	0	NA	exon (NM_145400, exon 12 of 20)	exon (NM_145400, exon 12 of 20)	-21998	NM_013795	27425	Mm.14663	NM_013795	ENSMUSG00000038717	Atp5l	4933437C06Rik	ATP synthase, H+ transporting, mitochondrial F0 complex, subunit G	protein-coding
796	chr5	90793161	90796465	+	0	NA	exon (NM_198010, exon 2 of 34)	exon (NM_198010, exon 2 of 34)	398	NM_030886	81702	Mm.245522	NM_030886	ENSMUSG00000055204	Ankrd17	4933425K22Rik|A130069E23Rik|A930008M01|AA407558|AA516750|AU040470|Foe|Gtar|Mask|mKIAA0697	ankyrin repeat domain 17	protein-coding
1026	chr9	20296386	20298696	+	0	NA	promoter-TSS (NM_001110309)	promoter-TSS (NM_001110309)	-351	NM_001110309	235028	Mm.297660	NM_146221	ENSMUSG00000059475	Zfp426	2900057C04Rik|KRAB1|Zfo61|Zfp68-rs1|Znf426|mKIAA4237	zinc finger protein 426	protein-coding
366	chr14	122848062	122910600	+	0	NA	3' UTR (NM_009574, exon 3 of 3)	3' UTR (NM_009574, exon 3 of 3)	4725	NM_009574	22772	Mm.308936	NM_009574	ENSMUSG00000061524	Zic2	HPE5|Ku	zinc finger protein of the cerebellum 2	protein-coding
844	chr6	39154982	39157808	+	0	NA	intron (NM_001033430, intron 1 of 19)	CpG	377	NM_001033430	338523	Mm.293175	NM_001033430	ENSMUSG00000042599	Kdm7a	A630082K20Rik|BB041802|ENSMUSG00000073143|Jhdm1d|mKIAA1718	lysine (K)-specific demethylase 7A	protein-coding
272	chr12	100157758	100159516	+	0	NA	promoter-TSS (NM_029553)	promoter-TSS (NM_029553)	-147	NM_029553	76260	Mm.282660	NM_029553	ENSMUSG00000021013	Ttc8	0610012F22Rik|AV001447|BBS8	tetratricopeptide repeat domain 8	protein-coding
775	chr5	25032416	25037607	+	0	NA	promoter-TSS (NR_027388)	promoter-TSS (NR_027388)	-825	NR_027388	73571	Mm.105263	NR_027388		1700096K18Rik	-	RIKEN cDNA 1700096K18 gene	ncRNA
919	chr7	96777957	96784016	+	0	NA	promoter-TSS (NM_181407)	promoter-TSS (NM_181407)	-342	NM_181407	109264	Mm.334011	NM_181407	ENSMUSG00000030621	Me3	1700020C08Rik|B230207H15Rik	malic enzyme 3, NADP(+)-dependent, mitochondrial	protein-coding
746	chr4	119211270	119213709	+	0	NA	intron (NM_001290696, intron 1 of 11)	CpG	223	NM_172699	230700	Mm.259227	NM_172699	ENSMUSG00000032998	Foxj3	C330039G02Rik|Fhd6	forkhead box J3	protein-coding
534	chr19	29595785	29598144	+	0	NA	promoter-TSS (NR_015567)	promoter-TSS (NR_015567)	192	NM_001081319	226089	Mm.353838	NM_177641	ENSMUSG00000038658	Ric1	C030046E11Rik|C130057E09Rik|Kiaa1432	RAB6A GEF complex partner 1	protein-coding
400	chr15	96289995	96292837	+	0	NA	promoter-TSS (NM_028148)	promoter-TSS (NM_028148)	-142	NM_028148	72193	Mm.324474	NM_028148	ENSMUSG00000033228	Scaf11	1110061H03Rik|2610510E10Rik|AI462454|CASP11|SIP1|SRRP129|Sfrs2ip|Srsf2ip|mKIAA3013	SR-related CTD-associated factor 11	protein-coding
744	chr4	116228034	116231056	+	0	NA	promoter-TSS (NM_029868)	promoter-TSS (NM_029868)	-787	NM_029868	77110	Mm.41715	NM_029868	ENSMUSG00000034042	Gpbp1l1	5330440M15Rik|BC002292	GC-rich promoter binding protein 1-like 1	protein-coding
20	chr1	52687347	52688452	+	0	NA	intron (NR_024590, intron 1 of 8)	intron (NR_024590, intron 1 of 8)	350	NM_001142647	227094	Mm.83541	NM_172654	ENSMUSG00000043015	Tmem194b	5330401P04Rik|9830163O08	transmembrane protein 194B	protein-coding
888	chr7	13388168	13389784	+	0	NA	TTS (NM_026046)	TTS (NM_026046)	15233	NM_026046	67230	Mm.333574	NM_026046	ENSMUSG00000057894	Zfp329	2810439M05Rik|4632409L22Rik|ZNF329	zinc finger protein 329	protein-coding
633	chr2	164895523	164901565	+	0	NA	Intergenic	Intergenic	17408	NM_011611	21939	Mm.271833	NM_011611	ENSMUSG00000017652	Cd40	AI326936|Bp50|GP39|HIGM1|IGM|IMD3|T-BAM|TRAP|Tnfrsf5|p50	CD40 antigen	protein-coding
1011	chr8	119444590	119446397	+	0	NA	promoter-TSS (NM_028131)	promoter-TSS (NM_028131)	-147	NM_028131	72155	Mm.23185	NM_028131	ENSMUSG00000031756	Cenpn	2610510J17Rik|AI426416|AW545024	centromere protein N	protein-coding
151	chr10	116386125	116387834	+	0	NA	promoter-TSS (NR_038025)	promoter-TSS (NR_038025)	457	NM_001003950	216363	Mm.336394	NM_001003950	ENSMUSG00000064181	Rab3ip	B230311A06|Gtpat12|Rabin3	RAB3A interacting protein	protein-coding
468	chr17	64680500	64682895	+	0	NA	promoter-TSS (NM_144859)	promoter-TSS (NM_144859)	-474	NM_001025309	224938	Mm.489681	NM_144859	ENSMUSG00000024083	Pja2	AI447901|AL022700|Neurodap1|mKIAA0438	praja 2, RING-H2 motif containing	protein-coding
1019	chr8	127777376	127779643	+	0	NA	intron (NM_174854, intron 12 of 12)	intron (NM_174854, intron 12 of 12)	200414	NM_174854	244667	Mm.233504	NM_170596	ENSMUSG00000043051	Disc1	-	disrupted in schizophrenia 1	protein-coding
700	chr4	14790678	14792710	+	0	NA	intron (NM_028264, intron 1 of 6)	intron (NM_028264, intron 1 of 6)	328	NM_028264	72519	Mm.279158	NM_028264	ENSMUSG00000028221	Tmem55a	2610319K07Rik|AI315591|AV001360	transmembrane protein 55A	protein-coding
287	chr13	36815039	36829838	+	0	NA	intron (NM_153529, intron 1 of 2)	intron (NM_153529, intron 1 of 2)	3908	NM_153529	68404	Mm.232930	NM_153529	ENSMUSG00000039114	Nrn1	0710008J23Rik|Cpg15|Nrn	neuritin 1	protein-coding
475	chr17	73184964	73188048	+	0	NA	intron (NM_027166, intron 1 of 2)	CpG	462	NM_027166	383295	Mm.277533	NM_027166	ENSMUSG00000039770	Ypel5	2310076K21Rik|CGI-127	yippee-like 5 (Drosophila)	protein-coding
78	chr1	179187076	179189626	+	0	NA	Intergenic	CpG	-9453	NM_011785	23797	Mm.235194	NM_011785	ENSMUSG00000019699	Akt3	AI851531|D930002M15Rik|Nmf350	thymoma viral proto-oncogene 3	protein-coding
990	chr8	81032012	81034203	+	0	NA	promoter-TSS (NM_009033)	promoter-TSS (NM_009033)	-120	NM_001282109	76775	Mm.334631	NM_029736	ENSMUSG00000031684	Slc10a7	2410193C02Rik|P7	solute carrier family 10 (sodium/bile acid cotransporter family), member 7	protein-coding
413	chr16	13779505	13781312	+	0	NA	promoter-TSS (NM_001039521)	promoter-TSS (NM_001039521)	-384	NM_001039521	106298	Mm.490362	NM_001039521	ENSMUSG00000022682	Rrn3	AL023001|E130302O19Rik|R75565|TIF-1A|Tif1a	RRN3 RNA polymerase I transcription factor homolog (yeast)	protein-coding
294	chr13	58502333	58504971	+	0	NA	promoter-TSS (NM_028904)	promoter-TSS (NM_028904)	43	NR_031761	74386	Mm.85289	NM_028904	ENSMUSG00000035367	Rmi1	4932432N11Rik|C79893	RMI1, RecQ mediated genome instability 1, homolog (S. cerevisiae)	protein-coding
932	chr7	118264861	118267057	+	0	NA	non-coding (NR_015573, exon 1 of 3)	non-coding (NR_015573, exon 1 of 3)	230	NR_015573	75479	Mm.381620	NR_015573		1700012D14Rik	-	RIKEN cDNA 1700012D14 gene	ncRNA
764	chr4	154997827	154999472	+	0	NA	promoter-TSS (NM_007661)	promoter-TSS (NM_007661)	215	NR_040441	100502734	Mm.306018	NR_040441	ENSMUSG00000086682	Gm16023	OTTMUSG00000029160	predicted gene 16023	ncRNA
349	chr14	59404660	59408661	+	0	NA	Intergenic	Intergenic	355070	NM_026461	67932	Mm.65550	NM_026461	ENSMUSG00000021977	1700129C05Rik	-	RIKEN cDNA 1700129C05 gene	protein-coding
515	chr18	73730907	73734455	+	0	NA	5' UTR (NM_001039214, exon 1 of 2)	5' UTR (NM_001039214, exon 1 of 2)	322	NM_001039214	240396	Mm.24131	NM_001039214	ENSMUSG00000037253	Mex3c	A130001D14Rik|BC035207|BM-013|Rkhd2	mex3 homolog C (C. elegans)	protein-coding
138	chr10	94150071	94152239	+	0	NA	promoter-TSS (NM_029852)	promoter-TSS (NM_029852)	203	NR_015524	67723	Mm.116284	NR_015524	ENSMUSG00000097164	Cep83os	4932415G12Rik|Ccdc41os1	centrosomal protein 83, opposite strand	ncRNA
606	chr2	119697427	119700850	+	0	NA	Intergenic	Intergenic	-23826	NM_001164274	29808	Mm.87532	NM_013720	ENSMUSG00000033943	Mga	AV312082|C130042M01Rik|C80739|D030062C11Rik|Mad5	MAX gene associated	protein-coding
137	chr10	90585552	90587702	+	0	NA	promoter-TSS (NM_133668)	promoter-TSS (NM_133668)	81	NM_133668	18674	Mm.298	NM_133668	ENSMUSG00000061904	Slc25a3	5730556H19Rik|PTP|Phc	solute carrier family 25 (mitochondrial carrier, phosphate carrier), member 3	protein-coding
724	chr4	56814519	56816090	+	0	NA	promoter-TSS (NM_026079)	promoter-TSS (NM_026079)	-101	NM_026079	230233	Mm.282743	NM_026079	ENSMUSG00000028431	Ikbkap	3110040G09Rik|6030413P05|C78473|Elp1|IKAP	inhibitor of kappa light polypeptide enhancer in B cells, kinase complex-associated protein	protein-coding
666	chr3	95619660	95624883	+	0	NA	intron (NM_001081293, intron 1 of 10)	intron (NM_001081293, intron 1 of 10)	605	NM_001081293	75137	Mm.196275	NM_028328	ENSMUSG00000028106	Rprd2	2810036A19Rik|4930535B03Rik|6720469I21Rik|AL022841|AL022940|AU021304|BB077382|mKIAA0460	regulation of nuclear pre-mRNA domain containing 2	protein-coding
432	chr16	84831612	84837741	+	0	NA	promoter-TSS (NM_008065)	promoter-TSS (NM_008065)	-693	NM_008065	14390	Mm.18974	NM_008065	ENSMUSG00000008976	Gabpa	GABPalpha	GA repeat binding protein, alpha	protein-coding
519	chr18	80346656	80349353	+	0	NA	intron (NM_175028, intron 1 of 3)	CpG	217	NM_175028	240442	Mm.26594	NM_175028	ENSMUSG00000053950	Adnp2	8430420L05Rik|BC024969|Kiaa0863|Zfp508|mKIAA0863	ADNP homeobox 2	protein-coding
1074	chr9	118135211	118139951	+	0	NA	Intergenic	Intergenic	-78267	NM_026442	67899	Mm.9953	NM_026442	ENSMUSG00000039163	Cmc1	2010110K16Rik|2010312P05Rik|AI596001	COX assembly mitochondrial protein 1	protein-coding
860	chr6	85910691	85912736	+	0	NA	promoter-TSS (NM_028099)	promoter-TSS (NM_028099)	-52	NM_028099	72102	Mm.24007	NM_028099	ENSMUSG00000030002	Dusp11	2010300F21Rik|AI481497	dual specificity phosphatase 11 (RNA/RNP complex 1-interacting)	protein-coding
1063	chr9	97010706	97012270	+	0	NA	promoter-TSS (NM_138756)	promoter-TSS (NM_138756)	-28	NM_138756	192287	Mm.228067	NM_138756	ENSMUSG00000032449	Slc25a36	C330005L02Rik	solute carrier family 25, member 36	protein-coding
17	chr1	45851299	45852841	+	0	NA	promoter-TSS (NM_028599)	promoter-TSS (NM_028599)	-276	NM_028599	73674	Mm.270376	NM_028599	ENSMUSG00000025995	Wdr75	1300003A18Rik|2410118I19Rik|C77608	WD repeat domain 75	protein-coding
708	chr4	33295378	33297353	+	0	NA	intron (NM_177774, intron 1 of 2)	CpG	399	NM_177774	272009	Mm.156636	NM_177774	ENSMUSG00000054679	Srsf12	B830039L16|Sfrs13b|Srrp|Srsf13b	serine/arginine-rich splicing factor 12	protein-coding
110	chr10	60635424	60641294	+	0	NA	intron (NM_001017407, intron 1 of 3)	intron (NM_001017407, intron 1 of 3)	349	NM_023064	65971	Mm.30227	NM_023064	ENSMUSG00000020096	Tbata	1700021K02Rik|AI428928|Spatial|Titest	thymus, brain and testes associated	protein-coding
333	chr14	27025616	27026804	+	0	NA	promoter-TSS (NM_025311).3	promoter-TSS (NM_025311).3	-105	NM_025311	66039	Mm.33344	NM_025311		Tmem254a	0610008K04Rik|0610010A22Rik|AA960404|D14Ertd449e|Tmem254	transmembrane protein 254a	protein-coding
710	chr4	40667290	40670793	+	0	NA	promoter-TSS (NM_008298)	promoter-TSS (NM_008298)	309	NR_077221	622208	Mm.471544	NR_077221		Gm6297	-	predicted gene 6297	ncRNA
323	chr13	109905479	109910469	+	0	NA	intron (NM_011056, intron 3 of 16)	(TG)n|Simple_repeat|Simple_repeat	-206964	NR_030644	100124489		NR_030644		Mir582	Mirn582|mmu-mir-582	microRNA 582	ncRNA
856	chr6	72848572	72851200	+	0	NA	promoter-TSS (NM_019715)	promoter-TSS (NM_019715)	87	NM_019715	74287	Mm.29194	NM_019715	ENSMUSG00000055239	Kcmf1	1700094M07Rik|Debt91|Pmcf	potassium channel modulatory factor 1	protein-coding
112	chr10	61244683	61248023	+	0	NA	intron (NM_207000, intron 1 of 8)	CpG	259	NM_207000	404634	Mm.272870	NM_207000	ENSMUSG00000020086	H2afy2	macroH2A2	H2A histone family, member Y2	protein-coding
545	chr19	41555648	41558470	+	0	NA	Intergenic	GC_rich|Low_complexity|Low_complexity	-67070	NM_172154	212391	Mm.422910	NM_172154	ENSMUSG00000025019	Lcor	3110023F06Rik|A630025C20Rik|Mlr2|mKIAA1795	ligand dependent nuclear receptor corepressor	protein-coding
191	chr11	52044435	52048344	+	0	NA	intron (NM_011543, intron 1 of 5)	intron (NM_011543, intron 1 of 5)	892	NM_011543	21402	Mm.42944	NM_011543	ENSMUSG00000036309	Skp1a	15kDa|2610043E24Rik|2610206H23Rik|EMC19|OCP-II|OCP2|SKP1|Tceb1l|p19A|p19Skp1	S-phase kinase-associated protein 1A	protein-coding
187	chr11	51075709	51079002	+	0	NA	promoter-TSS (NM_177567)	promoter-TSS (NM_177567)	682	NM_007714	12750	Mm.239354	NM_007714	ENSMUSG00000020385	Clk4	AI987988|C85119	CDC like kinase 4	protein-coding
588	chr2	80154907	80156659	+	0	NA	5' UTR (NM_024181, exon 1 of 23)	5' UTR (NM_024181, exon 1 of 23)	160	NM_024181	66861	Mm.21762	NM_024181	ENSMUSG00000027006	Dnajc10	1200006L06Rik|D2Ertd706e|ERdj5|JPDI	DnaJ (Hsp40) homolog, subfamily C, member 10	protein-coding
646	chr3	25040861	25044529	+	0	NA	Intergenic	CpG	1009534	NM_001163387	192167	Mm.316080	NM_138666	ENSMUSG00000063887	Nlgn1	6330415N05Rik|BB179718|NL1|Nlg1|mKIAA1070	neuroligin 1	protein-coding
756	chr4	138907822	138909061	+	0	NA	promoter-TSS (NM_001290810)	promoter-TSS (NM_001290810)	50	NM_001290810	69902	Mm.27871	NM_023536	ENSMUSG00000028741	Mrto4	2610012O22Rik|Mg684|Mrt4	MRT4, mRNA turnover 4, homolog (S. cerevisiae)	protein-coding
446	chr17	13182998	13186213	+	0	NA	intron (NM_175394, intron 1 of 5)	CpG	520	NM_001113533	60532	Mm.275521	NM_175394	ENSMUSG00000060475	Wtap	2810408K05Rik|9430038B09Rik	Wilms tumour 1-associating protein	protein-coding
262	chr12	82045760	82047601	+	0	NA	promoter-TSS (NR_045057)	promoter-TSS (NR_045057)	189	NM_009159	20384	Mm.43331	NM_009159	ENSMUSG00000021134	Srsf5	Sfrs5	serine/arginine-rich splicing factor 5	protein-coding
212	chr11	83777329	83778718	+	0	NA	promoter-TSS (NM_194341)	promoter-TSS (NM_194341)	90	NM_194341	217030	Mm.82680	NM_194341	ENSMUSG00000034940	Synrg	Ap1gbp1|SYNG	synergin, gamma	protein-coding
542	chr19	40947095	40948526	+	0	NA	intron (NR_045343, intron 1 of 4)	CpG	5004	NR_045343	381223	Mm.136844	NR_045343		E030044B06Rik	E030007J07Rik|Gm1618	RIKEN cDNA E030044B06 gene	ncRNA
961	chr8	11634497	11637105	+	0	NA	promoter-TSS (NM_001167967)	promoter-TSS (NM_001167967)	-44	NM_001281974	102334	Mm.12459	NM_133971	ENSMUSG00000031508	Ankrd10	4833425P12Rik|AW549277	ankyrin repeat domain 10	protein-coding
1087	chrX	70472443	70475264	+	0	NA	exon (NM_007978, exon 1 of 1)	exon (NM_007978, exon 1 of 1)	208	NM_007978	14070	Mm.165807	NM_007978	ENSMUSG00000078317	F8a	AI852759|DXUcsf1|F8a1	factor 8-associated gene A	protein-coding
810	chr5	122160440	122164120	+	0	NA	exon (NM_009125, exon 1 of 25)	exon (NM_009125, exon 1 of 25)	662	NM_009125	20239	Mm.260900	NM_009125	ENSMUSG00000042605	Atxn2	9630045M23Rik|ATX2|AW544490|Sca2	ataxin 2	protein-coding
574	chr2	35991448	35992951	+	0	NA	promoter-TSS (NM_001159635)	promoter-TSS (NM_001159635)	25	NM_026434	67889	Mm.205937	NM_026434	ENSMUSG00000026889	Rbm18	2010004P11Rik|AU015530	RNA binding motif protein 18	protein-coding
170	chr11	20729174	20733162	+	0	NA	promoter-TSS (NM_173752)	promoter-TSS (NM_173752)	-57	NM_173752	216551	Mm.76694	NM_173752	ENSMUSG00000042363	Lgalsl	1110067D22Rik|A530071M23|Grpa|Hspc159|Lgalsla	lectin, galactoside binding-like	protein-coding
33	chr1	64662531	64665474	+	0	NA	promoter-TSS (NM_025964)	promoter-TSS (NM_025964)	-260	NM_025964	67099	Mm.46394	NM_025964	ENSMUSG00000025956	Mettl21a	2310038H17Rik|AI464204|Fam119a	methyltransferase like 21A	protein-coding
660	chr3	69663267	69666800	+	0	NA	Intergenic	Intergenic	-1217	NM_001286959	66183	Mm.45481	NM_133675	ENSMUSG00000043461	Sptssb	1110032A04Rik|ADMP|Sssptb	serine palmitoyltransferase, small subunit B	protein-coding
7	chr1	18890777	18895599	+	0	NA	Intergenic	MIR|SINE|MIR	-199915	NM_153154	226896	Mm.244858	NM_153154	ENSMUSG00000042596	Tfap2d	Tcfap2d	transcription factor AP-2, delta	protein-coding
26	chr1	58479475	58481405	+	0	NA	intron (NR_027853, intron 1 of 11)	CpG	492	NR_027853	12747	Mm.1761	NM_009905	ENSMUSG00000026034	Clk1	STY	CDC-like kinase 1	protein-coding
227	chr11	105040789	105044547	+	0	NA	promoter-TSS (NR_027956)	promoter-TSS (NR_027956)	79	NR_027956	73431	Mm.351426	NM_028539		1700052K11Rik	AI840954	RIKEN cDNA 1700052K11 gene	ncRNA
977	chr8	45772446	45783073	+	0	NA	Intergenic	Intergenic	-257803	NM_001081286	14107	Mm.27365	NM_001081286	ENSMUSG00000070047	Fat1	2310038E12Rik|AU023433|Fath|mFat1	FAT tumor suppressor homolog 1 (Drosophila)	protein-coding
566	chr2	27329938	27332682	+	0	NA	promoter-TSS (NM_023336)	promoter-TSS (NM_023336)	-117	NM_001113574	67382	Mm.28721	NM_023336	ENSMUSG00000026918	Brd3	2410084F24Rik|AW060456|Fsrg2|ORFX|RINGL3	bromodomain containing 3	protein-coding
526	chr19	5566925	5569406	+	0	NA	promoter-TSS (NM_001033448)	promoter-TSS (NM_001033448)	91	NM_001033448	381201	Mm.441906	NM_001033448	ENSMUSG00000049562	Ap5b1	Gm962	adaptor-related protein complex 5, beta 1 subunit	protein-coding
806	chr5	121900885	121903576	+	0	NA	promoter-TSS (NM_029912)	promoter-TSS (NM_029912)	253	NM_026129	67397	Mm.154570	NM_026129		Erp29	1200015M03Rik|2810446M09Rik|AW209030|Erp28|Erp31|PDI-Db	endoplasmic reticulum protein 29	protein-coding
264	chr12	85656644	85658709	+	0	NA	promoter-TSS (NM_001252583)	promoter-TSS (NM_001252583)	-133	NR_045546	52708	Mm.255150	NM_144833	ENSMUSG00000042472	Zfp410	Apa1|D12Ertd748e|Znf410	zinc finger protein 410	protein-coding
255	chr12	60318352	60321553	+	0	NA	exon (NM_001033156, exon 1 of 4)	exon (NM_001033156, exon 1 of 4)	518	NM_001033156	70611	Mm.311026	NM_001033156	ENSMUSG00000035329	Fbxo33	5730501N20Rik|AI642135	F-box protein 33	protein-coding
359	chr14	76954600	76958272	+	0	NA	promoter-TSS (NM_001160326)	promoter-TSS (NM_001160326)	58	NM_001160326	72661	Mm.320384	NM_001160326	ENSMUSG00000052584	Serp2	2810032E02Rik	stress-associated endoplasmic reticulum protein family member 2	protein-coding
182	chr11	29592171	29594541	+	0	NA	promoter-TSS (NM_194051)	promoter-TSS (NM_194051)	-418	NM_194051	68585	Mm.192580	NM_024226	ENSMUSG00000020458	Rtn4	1110020G17Rik|AA407876|AA409940|AA960376|ASY|C130026I10Rik|NOGO|NSP-CL|NgA|Nogo-A|Nogo-B|Nogo-C|mKIAA0886|mKIAA4153	reticulon 4	protein-coding
108	chr10	59464368	59466960	+	0	NA	promoter-TSS (NM_001199187)	promoter-TSS (NM_001199187)	111	NM_026937	69090	Mm.155839	NM_026937	ENSMUSG00000044475	Ascc1	1810015P09Rik|AI550520|ASC1p50|CGI-18	activating signal cointegrator 1 complex subunit 1	protein-coding
604	chr2	118937932	118938653	+	0	NA	promoter-TSS (NM_011234)	promoter-TSS (NM_011234)	-261	NM_011234	19361	Mm.330492	NM_011234		Rad51	AV304093|Rad51a|Reca	RAD51 homolog	protein-coding
1001	chr8	98330294	98332527	+	0	NA	promoter-TSS (NM_178078)	promoter-TSS (NM_178078)	-48	NM_001205226	234594	Mm.259220	NM_153164	ENSMUSG00000036550	Cnot1	6030411K04Rik|AA815922|D830048B13	CCR4-NOT transcription complex, subunit 1	protein-coding
556	chr2	13994292	13996736	+	0	NA	promoter-TSS (NM_011484)	promoter-TSS (NM_011484)	47	NR_038162	70957	Mm.399049	NR_038162	ENSMUSG00000086657	Stamos	4921530L18Rik	signal transducing adaptor molecule (SH3 domain and ITAM motif) 1, opposite strand	ncRNA
717	chr4	46316412	46321400	+	0	NA	Intergenic	Intergenic	-38160	NM_183298	110805	Mm.354634	NM_183298		Foxe1	Titf2	forkhead box E1	protein-coding
232	chr11	115396246	115398616	+	0	NA	exon (NM_133354, exon 1 of 4)	exon (NM_133354, exon 1 of 4)	113	NM_133354	170930	Mm.29923	NM_133354	ENSMUSG00000020738	Sumo2	SUMO-2|Smt3A|Smt3b|Smt3h2	SMT3 suppressor of mif two 3 homolog 2 (yeast)	protein-coding
477	chr17	79752740	79755995	+	0	NA	promoter-TSS (NM_026514)	promoter-TSS (NM_026514)	64	NM_026514	260409	Mm.140601	NM_026514	ENSMUSG00000036533	Cdc42ep3	3200001F04Rik|AA986861|Borg2|Cep3|UB1	CDC42 effector protein (Rho GTPase binding) 3	protein-coding
815	chr5	130006400	130007777	+	0	NA	promoter-TSS (NM_172276)	promoter-TSS (NM_172276)	-18	NM_172276	231769	Mm.288714	NM_172276	ENSMUSG00000029439	Sfswap	1190005N23Rik|6330437E22Rik|AI197402|AW212079|SWAP|Sfrs8|Srsf8	splicing factor, suppressor of white-apricot homolog (Drosophila)	protein-coding
671	chr3	99965744	99967068	+	0	NA	promoter-TSS (NR_104341)	promoter-TSS (NR_104341)	20	NR_104341	14547	Mm.279228	NM_010269	ENSMUSG00000027865	Gdap2	C77050|D3Ertd801e	ganglioside-induced differentiation-associated-protein 2	protein-coding
225	chr11	103558465	103560177	+	0	NA	promoter-TSS (NM_019650)	promoter-TSS (NM_019650)	283	NR_102396	399609	Mm.351922	NR_102388		C130046K22Rik	-	RIKEN cDNA C130046K22 gene	ncRNA
330	chr14	21459164	21461193	+	0	NA	Intergenic	CpG	15584	NM_021508	59011	Mm.439911	NM_021508	ENSMUSG00000068697	Myoz1	2310001N11Rik|AV090278|FATZ|Myoz	myozenin 1	protein-coding
142	chr10	98569043	98571151	+	0	NA	promoter-TSS (NM_015737)	promoter-TSS (NM_015737)	292	NM_027740	382406	Mm.440656	NM_027740	ENSMUSG00000019952	Poc1b	4933430F16Rik|Wdr51b	POC1 centriolar protein homolog B (Chlamydomonas)	protein-coding
207	chr11	70576950	70578627	+	0	NA	promoter-TSS (NM_177565)	promoter-TSS (NM_177565)	-161	NM_177565	193043	Mm.40966	NM_177565	ENSMUSG00000043602	Zfp3	AI854635|B230309J24|Fnp-1|Zfp-3	zinc finger protein 3	protein-coding
167	chr11	16950962	16954886	+	0	NA	intron (NM_029861, intron 1 of 2)	intron (NM_029861, intron 1 of 2)	987	NM_029861	380686	Mm.425666	NM_029861	ENSMUSG00000044629	Cnrip1	1500041B16Rik|3110054C06Rik|5330437A18Rik|AI854501|C2orf32	cannabinoid receptor interacting protein 1	protein-coding
48	chr1	95374075	95376628	+	0	NA	promoter-TSS (NM_001159717)	promoter-TSS (NM_001159717)	143	NM_133808	110611	Mm.30012	NM_133808	ENSMUSG00000034088	Hdlbp	1110005P14Rik|AA960365|AI118566|D1Ertd101e	high density lipoprotein (HDL) binding protein	protein-coding
360	chr14	79986517	79988091	+	0	NA	promoter-TSS (NM_026474)	promoter-TSS (NM_026474)	-194	NM_026474	67955	Mm.18972	NM_026474	ENSMUSG00000022024	Sugt1	2410174K12Rik|SGT1	SGT1, suppressor of G2 allele of SKP1 (S. cerevisiae)	protein-coding
692	chr3	146474946	146477151	+	0	NA	promoter-TSS (NM_011100)	promoter-TSS (NM_011100)	-138	NM_011100	18749	Mm.16766	NM_011100	ENSMUSG00000005034	Prkacb	Pkacb	protein kinase, cAMP dependent, catalytic, beta	protein-coding
663	chr3	86027180	86029402	+	0	NA	promoter-TSS (NM_001077687)	promoter-TSS (NM_001077687)	-321	NM_001077688	80877	Mm.439825	NM_030695	ENSMUSG00000028080	Lrba	C80285|D3Ertd775e|Lab300|Lba	LPS-responsive beige-like anchor	protein-coding
854	chr6	61129353	61131618	+	0	NA	5' UTR (NM_001164316, exon 1 of 11)	5' UTR (NM_001164316, exon 1 of 11)	166	NM_183310	232035	Mm.150324	NM_183310	ENSMUSG00000039578	Ccser1	6230405M12Rik|C130092O11Rik|Fam190a	coiled-coil serine rich 1	protein-coding
969	chr8	19892315	19893712	+	0	NA	promoter-TSS (NR_030708)	promoter-TSS (NR_030708)	-3	NR_030708	547150	Mm.359054	NR_030708	ENSMUSG00000071796	6820431F20Rik	-	cadherin 11 pseudogene	pseudo
1076	chr9	122859193	122860208	+	0	NA	promoter-TSS (NM_010620)	promoter-TSS (NM_010620)	418	NM_025419	66202	Mm.268307	NM_025419	ENSMUSG00000032551	1110059G10Rik	-	RIKEN cDNA 1110059G10 gene	protein-coding
766	chr5	4103633	4105903	+	0	NA	promoter-TSS (NM_020010)	promoter-TSS (NM_020010)	-71	NM_020010	13121	Mm.140158	NM_020010	ENSMUSG00000001467	Cyp51	AI426508|CYPLI|Cyp51a1|Ldm|P450-14DM|P450LI	cytochrome P450, family 51	protein-coding
510	chr18	49914737	49916262	+	0	NA	promoter-TSS (NM_001170960)	promoter-TSS (NM_001170960)	-244	NM_001170960	68857	Mm.96010	NM_026854	ENSMUSG00000024505	Dtwd2	1190002H09Rik|8030470C17Rik|AI414673|BB115449	DTW domain containing 2	protein-coding
393	chr15	87014061	87015868	+	0	NA	Intergenic	Intergenic	-359765	NM_001252310	106014	Mm.244319	NM_134096	ENSMUSG00000054863	Fam19a5	TAFA5|Tafa-5|Tara-5	family with sequence similarity 19, member A5	protein-coding
449	chr17	15840917	15843305	+	0	NA	5' UTR (NM_007690, exon 1 of 36)	5' UTR (NM_007690, exon 1 of 36)	180	NM_007690	12648	Mm.8137	NM_007690	ENSMUSG00000023852	Chd1	4930525N21Rik|AI851787|AW555109	chromodomain helicase DNA binding protein 1	protein-coding
658	chr3	65331282	65334177	+	0	NA	non-coding (NR_027955, exon 2 of 2)	non-coding (NR_027955, exon 2 of 2)	360	NM_178892	99929	Mm.246398	NM_178892	ENSMUSG00000034640	Tiparp	ARTD14|AW558171|PARP7	TCDD-inducible poly(ADP-ribose) polymerase	protein-coding
274	chr12	103213140	103215346	+	0	NA	promoter-TSS (NM_016856)	promoter-TSS (NM_016856)	59	NM_016856	51786	Mm.716	NM_016856	ENSMUSG00000041781	Cpsf2	100kDa|2610024B04Rik|AI662483|Cpsf|MCPSF|mKIAA1367	cleavage and polyadenylation specific factor 2	protein-coding
549	chr19	46764032	46765134	+	0	NA	intron (NM_025563, intron 1 of 4)	CpG	187	NM_025563	66439	Mm.87163	NM_025563	ENSMUSG00000062376	2010012O05Rik	4930569L17Rik|AI413851|AI467257	RIKEN cDNA 2010012O05 gene	protein-coding
877	chr6	143046471	143049384	+	0	NA	intron (NM_001286578, intron 2 of 24)	intron (NM_001286578, intron 2 of 24)	745	NM_001286578	74741	Mm.130260	NM_029081	ENSMUSG00000030279	C2cd5	5730419I09Rik|C030008B15Rik|CDP138	C2 calcium-dependent domain containing 5	protein-coding
659	chr3	65777331	65780093	+	0	NA	Intergenic	CpG	-16565	NM_019937	56706	Mm.175612	NM_019937	ENSMUSG00000027829	Ccnl1	2610030E23Rik|AU018493|Ccnl|ania-6a	cyclin L1	protein-coding
682	chr3	113332247	113334007	+	0	NA	promoter-TSS (NM_026043)	promoter-TSS (NM_026043)	-60	NM_001038696	67225	Mm.316928	NM_026043	ENSMUSG00000027981	Rnpc3	2810441O16Rik|AI447568|C030014B17Rik	RNA-binding region (RNP1, RRM) containing 3	protein-coding
353	chr14	65187251	65219191	+	0	NA	Intergenic	Intergenic	-3731	NR_040709	268755	Mm.194050	NR_040709		A930011O12Rik	Rncr3	RIKEN cDNA A930011O12 gene	ncRNA
375	chr15	37064066	37066531	+	0	NA	Intergenic	CpG	-97493	NM_026496	252973	Mm.244612	NM_026496	ENSMUSG00000022286	Grhl2	0610015A08Rik|BOM|Tcfcp2l3	grainyhead-like 2 (Drosophila)	protein-coding
984	chr8	72272745	72275108	+	0	NA	promoter-TSS (NM_001200023)	promoter-TSS (NM_001200023)	-65	NM_001200023	620419	Mm.460423	NM_001200023	ENSMUSG00000092260	Zfp963	-	zinc finger protein 963	protein-coding
946	chr7	135814666	135817477	+	0	NA	intron (NM_178641, intron 9 of 19)	intron (NM_178641, intron 9 of 19)	61192	NM_178641	101490	Mm.490344	NM_178641	ENSMUSG00000042105	Inpp5f	5830435P03Rik|AI115354|AW561896|SAC2|cI-27|mKIAA0966	inositol polyphosphate-5-phosphatase F	protein-coding
788	chr5	64550092	64552463	+	0	NA	promoter-TSS (NM_019636)	promoter-TSS (NM_019636)	-222	NM_019636	57915	Mm.286353	NM_019636	ENSMUSG00000029174	Tbc1d1	1110062G02Rik|AI385682|AW555803|Tbc1|mKIAA1108	TBC1 domain family, member 1	protein-coding
128	chr10	81233119	81234675	+	0	NA	promoter-TSS (NM_199062)	promoter-TSS (NM_199062)	-10	NM_199062	331188	Mm.351497	NM_199062		Zfp781	A130081B01	zinc finger protein 781	protein-coding
303	chr13	74345629	74347548	+	0	NA	promoter-TSS (NM_177333)	promoter-TSS (NM_177333)	-440	NM_177333	211446	Mm.261859	NM_177333	ENSMUSG00000034152	Exoc3	2810050O03Rik|E430013E20Rik|Sec6|Sec6l1	exocyst complex component 3	protein-coding
250	chr12	47916632	47921853	+	0	NA	intron (NM_021361, intron 1 of 4)	intron (NM_021361, intron 1 of 4)	520	NM_021361	664883	Mm.247195	NM_021361	ENSMUSG00000021047	Nova1	9430099M15Rik|G630039L02|Nova-1	neuro-oncological ventral antigen 1	protein-coding
614	chr2	130249171	130251527	+	0	NA	promoter-TSS (NM_001114541)	promoter-TSS (NM_001114541)	28	NM_001114541	319513	Mm.482539	NM_178762	ENSMUSG00000037773	Pced1a	A930025D01Rik|AI480484|Fam113a	PC-esterase domain containing 1A	protein-coding
501	chr18	35090505	35092591	+	0	NA	5' UTR (NM_144866, exon 1 of 11)	5' UTR (NM_144866, exon 1 of 11)	109	NM_144866	225363	Mm.329353	NM_144866	ENSMUSG00000024360	Etf1	AI463371|D6Ertd109e|ERF|ERF1|SUP45L1|TB3-1	eukaryotic translation termination factor 1	protein-coding
278	chr12	110030007	110034121	+	0	NA	exon (NM_009537, exon 1 of 5)	exon (NM_009537, exon 1 of 5)	543	NM_009537	22632	Mm.3868	NM_009537	ENSMUSG00000021264	Yy1	AW488674|NF-E1	YY1 transcription factor	protein-coding
490	chr18	24178162	24181638	+	0	NA	promoter-TSS (NM_021559)	promoter-TSS (NM_021559)	-628	NM_021559	59057	Mm.417427	NM_021559		Zfp191	3526401F17Rik|5033419P20Rik|AI480505|AI642085|AL024422|KOX17|ZF-12|Znf191|Znf24|Znp191	zinc finger protein 191	protein-coding
130	chr10	81392465	81393963	+	0	NA	promoter-TSS (NM_199062).2	promoter-TSS (NM_199062).2	11	NM_199062	331188	Mm.351497	NM_199062		Zfp781	A130081B01	zinc finger protein 781	protein-coding
155	chr10	126816918	126818752	+	0	NA	Intergenic	C-rich|Low_complexity|Low_complexity	-9532	NM_001168292	71750	Mm.29342	NM_027900	ENSMUSG00000025404	R3hdm2	1300003K24Rik|AU041262|mKIAA1002	R3H domain containing 2	protein-coding
387	chr15	81229280	81231153	+	0	NA	promoter-TSS (NM_133726)	promoter-TSS (NM_133726)	-92	NM_133726	70356	Mm.180337	NM_133726	ENSMUSG00000022403	St13	1110007I03Rik|3110002K08Rik|AW555194|HIP|HOP|HSPABP|HSPABP1|PRO0786|SNC6|p48	suppression of tumorigenicity 13	protein-coding
53	chr1	127455915	127458712	+	0	NA	promoter-TSS (NM_028787)	promoter-TSS (NM_028787)	-280	NM_028787	74150	Mm.28654	NM_028787	ENSMUSG00000026342	Slc35f5	1300003P13Rik|AI646727	solute carrier family 35, member F5	protein-coding
626	chr2	155297952	155300519	+	0	NA	Intergenic	Intergenic	-32716	NM_019825	56406	Mm.27592	NM_019825	ENSMUSG00000038369	Ncoa6	AIB3|ASC-2|ASC2|NRC|Ncoa7|PRIP|RAP250|mKIAA0181	nuclear receptor coactivator 6	protein-coding
941	chr7	134488346	134491322	+	0	NA	Intergenic	CpG-13598	-1006	NM_146202	233890	Mm.23031	NM_146202	ENSMUSG00000047371	Zfp768	BC026432|Znf768	zinc finger protein 768	protein-coding
461	chr17	34535165	34536960	+	0	NA	intron (NM_001001177, intron 1 of 19)	RMER21A|LTR|ERV1	297	NM_001163855	407788	Mm.73205	NM_001001177	ENSMUSG00000057246	BC051142	NG8|TSBP|Tesb|Tesbp	cDNA sequence BC051142	protein-coding
583	chr2	69659743	69667891	+	0	NA	intron (NM_177784, intron 2 of 3)	intron (NM_177784, intron 2 of 3)	3390	NM_177784	277396	Mm.138073	NM_177784	ENSMUSG00000042155	Klhl23	C130068N17Rik	kelch-like 23	protein-coding
257	chr12	73507847	73511309	+	0	NA	5' UTR (NM_001286448, exon 1 of 7)	5' UTR (NM_001286448, exon 1 of 7)	463	NM_001286448	104001	Mm.221275	NM_153457	ENSMUSG00000021087	Rtn1	Nsp	reticulon 1	protein-coding
951	chr7	140828367	140830272	+	0	NA	promoter-TSS (NM_178115)	promoter-TSS (NM_178115)	-39	NM_178115	214764	Mm.174044	NM_145995	ENSMUSG00000039990	Edrf1	2700050L05Rik|AU022667|AW558805	erythroid differentiation regulatory factor 1	protein-coding
782	chr5	34161758	34164855	+	0	NA	Intergenic	CpG	-22455	NM_175231	107823	Mm.19892	NM_175231	ENSMUSG00000057406	Whsc1	5830445G22Rik|9430010A17Rik|AW555663|C130020C13Rik|D030027O06Rik|D930023B08Rik|MMSET|NSD2|Whsc1l|mKIAA1090	Wolf-Hirschhorn syndrome candidate 1 (human)	protein-coding
85	chr1	181732324	181735006	+	0	NA	5' UTR (NM_026375, exon 1 of 36)	5' UTR (NM_026375, exon 1 of 36)	481	NM_026375	226747	Mm.128165	NM_026375	ENSMUSG00000026491	Ahctf1	6230412P20Rik|AV011447|Elys	AT hook containing transcription factor 1	protein-coding
809	chr5	122109567	122111491	+	0	NA	promoter-TSS (NM_028227)	promoter-TSS (NM_028227)	-10	NM_028037	71985	Mm.45423	NM_028037	ENSMUSG00000029456	Acad10	2410021P16Rik	acyl-Coenzyme A dehydrogenase family, member 10	protein-coding
425	chr16	44329404	44334306	+	0	NA	intron (NM_198034, intron 1 of 24)	intron (NM_198034, intron 1 of 24)	1096	NM_198034	320007	Mm.242144	NM_198034	ENSMUSG00000022696	Sidt1	AW045928|B830021E24Rik	SID1 transmembrane family, member 1	protein-coding
591	chr2	90584713	90586846	+	0	NA	exon (NM_018828, exon 1 of 17)	exon (NM_018828, exon 1 of 17)	252	NM_018828	55935	Mm.489638	NM_018828	ENSMUSG00000008200	Fnbp4	FBP30|Fnbp30|mKIAA1014	formin binding protein 4	protein-coding
832	chr6	4550217	4552284	+	0	NA	exon (NM_145398, exon 1 of 18)	exon (NM_145398, exon 1 of 18)	184	NM_145398	213819	Mm.270703	NM_145398	ENSMUSG00000015189	Casd1	Cas1|Cast1	CAS1 domain containing 1	protein-coding
736	chr4	101022323	101030863	+	0	NA	intron (NR_040640, intron 1 of 3)	B1_Mur2|SINE|Alu	205	NR_040640	68400	Mm.272098	NR_040640	ENSMUSG00000087361	0610043K17Rik	-	RIKEN cDNA 0610043K17 gene	ncRNA
539	chr19	36627507	36630001	+	0	NA	promoter-TSS (NM_172637)	promoter-TSS (NM_172637)	-375	NM_001163471	226098	Mm.61107	NM_172637	ENSMUSG00000041180	Hectd2	4921524L07|A630025O09Rik|AW212605	HECT domain containing 2	protein-coding
781	chr5	33015606	33016451	+	0	NA	Intergenic	Intergenic	102484	NM_009535	22612	Mm.4558	NM_009535	ENSMUSG00000014932	Yes1	Yes|p61-Yes	Yamaguchi sarcoma viral (v-yes) oncogene homolog 1	protein-coding
828	chr5	149739411	149741229	+	0	NA	promoter-TSS (NM_153572)	promoter-TSS (NM_153572)	-97	NM_153572	231912	Mm.397405	NM_153572		Katnal1	-	katanin p60 subunit A-like 1	protein-coding
276	chr12	105989341	105991411	+	0	NA	promoter-TSS (NM_148948)	promoter-TSS (NM_148948)	-214	NM_148948	192119	Mm.21135	NM_148948	ENSMUSG00000041415	Dicer1	1110006F08Rik|D12Ertd7e|mKIAA0928	dicer 1, ribonuclease type III	protein-coding
102	chr10	41237325	41241032	+	0	NA	promoter-TSS (NM_016898)	promoter-TSS (NM_016898)	-128	NM_016898	53599	Mm.269815	NM_016898	ENSMUSG00000019818	Cd164	A115|A24|AA589639|AW540279|MGC-24|MSSP	CD164 antigen	protein-coding
520	chr18	80665748	80667875	+	0	NA	promoter-TSS (NM_026295)	promoter-TSS (NM_026295)	-405	NM_026295	67655	Mm.312893	NM_026295	ENSMUSG00000033323	Ctdp1	4930563P03Rik|AW553592	CTD (carboxy-terminal domain, RNA polymerase II, polypeptide A) phosphatase, subunit 1	protein-coding
532	chr19	23204255	23246779	+	0	NA	intron (NM_010638, intron 1 of 1)	intron (NM_010638, intron 1 of 1)	1596	NR_035423	100316672		NR_035423		Mir1192	Mirn1192|mmu-mir-1192	microRNA 1192	ncRNA
55	chr1	133806331	133808214	+	0	NA	5' UTR (NM_175294, exon 1 of 7)	5' UTR (NM_175294, exon 1 of 7)	237	NM_001145804	98415	Mm.246869	NM_175294	ENSMUSG00000026434	Nucks1	2700010L10Rik|8430423A01Rik|AI647518|C78391|Nucks	nuclear casein kinase and cyclin-dependent kinase substrate 1	protein-coding
57	chr1	136390498	136392009	+	0	NA	promoter-TSS (NM_145510)	promoter-TSS (NM_145510)	16	NM_145510	98710	Mm.198119	NM_145510	ENSMUSG00000042229	Rabif	AI842864|AW549708|E130318E12Rik|MSS4|RASGFR3	RAB interacting factor	protein-coding
259	chr12	77466865	77472849	+	0	NA	intron (NM_028356, intron 1 of 2)	intron (NM_028356, intron 1 of 2)	594	NM_001172104	109929	Mm.41880	NM_028356	ENSMUSG00000056459	Zbtb25	2810462M08Rik|2900064P18Rik|AI842128|Kup|Zfp-50|Zfp50	zinc finger and BTB domain containing 25	protein-coding
424	chr16	38522164	38523810	+	0	NA	promoter-TSS (NM_024273)	promoter-TSS (NM_024273)	-240	NM_024273	76916	Mm.132231	NM_024273		Timmdc1	2810021C21Rik|4930455C21Rik|AV135763	translocase of inner mitochondrial membrane domain containing 1	protein-coding
872	chr6	122823239	122825567	+	0	NA	promoter-TSS (NM_026267)	promoter-TSS (NM_026267)	-172	NM_026267	67602	Mm.288114	NM_026267	ENSMUSG00000030327	Necap1	1200016B17Rik|AI747569|mFLJ00061	NECAP endocytosis associated 1	protein-coding
163	chr11	4995467	5001246	+	0	NA	promoter-TSS (NM_001290492)	promoter-TSS (NM_001290492)	735	NM_001283062	14030	Mm.142822	NM_007968	ENSMUSG00000009079	Ewsr1	Ews|Ewsh	Ewing sarcoma breakpoint region 1	protein-coding
395	chr15	88581076	88582985	+	0	NA	promoter-TSS (NM_181412)	promoter-TSS (NM_181412)	-111	NM_181412	223773	Mm.396622	NM_181412	ENSMUSG00000034333	Zbed4	1700009F06Rik	zinc finger, BED domain containing 4	protein-coding
89	chr1	187186057	187188243	+	0	NA	intron (NM_029735, intron 1 of 31)	CpG	176	NM_029735	107508	Mm.154511	NM_029735	ENSMUSG00000026615	Eprs	2410081F06Rik|3010002K18Rik|C79379|Qprs	glutamyl-prolyl-tRNA synthetase	protein-coding
175	chr11	22966958	22968780	+	0	NA	Intergenic	CpG	54482	NM_028672	73873	Mm.252406	NM_028672	ENSMUSG00000049811	Fam161a	4930430E16Rik	family with sequence similarity 161, member A	protein-coding
584	chr2	70662410	70664454	+	0	NA	5' UTR (NM_172664, exon 1 of 20)	5' UTR (NM_172664, exon 1 of 20)	105	NM_172664	228012	Mm.136511	NM_172664	ENSMUSG00000041997	Tlk1	4930545J15Rik	tousled-like kinase 1	protein-coding
988	chr8	74446039	74447915	+	0	NA	intron (NM_133358, intron 1 of 3)	CpG	253	NM_133358	170938	Mm.480419	NM_133358	ENSMUSG00000066880	Zfp617	Zfps11-6	zinc finger protein 617	protein-coding
35	chr1	74862948	74864204	+	0	NA	Intergenic	CpG	24983	NM_009518	22409	Mm.5130	NM_009518		Wnt10a	-	wingless-type MMTV integration site family, member 10A	protein-coding
347	chr14	58283007	58284732	+	0	NA	promoter-TSS (NM_020506)	promoter-TSS (NM_020506)	-76	NM_020506	57258	Mm.202747	NM_020506	ENSMUSG00000021952	Xpo4	B430309A01Rik|mKIAA1721	exportin 4	protein-coding
665	chr3	94385189	94387596	+	0	NA	exon (NM_029721, exon 1 of 12)	exon (NM_029721, exon 1 of 12)	246	NM_001082484	76742	Mm.28160	NM_029721	ENSMUSG00000028136	Snx27	5730552M22Rik|ESTM45|ESTM47|R75405	sorting nexin family member 27	protein-coding
434	chr16	91646325	91648887	+	0	NA	promoter-TSS (NM_010256)	promoter-TSS (NM_010256)	-389	NM_010256	14450	Mm.4505	NM_010256	ENSMUSG00000022962	Gart	Gaps|Prgs	phosphoribosylglycinamide formyltransferase	protein-coding
865	chr6	108014198	108016579	+	0	NA	intron (NM_178391, intron 1 of 1)	intron (NM_178391, intron 1 of 1)	349	NM_178391	74729	Mm.56539	NM_178391	ENSMUSG00000034639	Setmar	5830404F24Rik|Etet2	SET domain without mariner transposase fusion	protein-coding
904	chr7	48886725	48890332	+	0	NA	promoter-TSS (NM_023363)	promoter-TSS (NM_023363)	-373	NM_023363	67607	Mm.384626	NM_023363	ENSMUSG00000074165	Zfp788	2810426N06Rik|AI256342|AI605193	zinc finger protein 788	protein-coding
930	chr7	117200843	117207965	+	0	NA	promoter-TSS (NM_009281)	promoter-TSS (NM_009281)	-812	NM_009281	20841	Mm.10815	NM_009281	ENSMUSG00000061079	Zfp143	AA959806|AU015869|D7Ertd805e|KRAB14|SBF|Staf|Zfp79|Zfp80-rs1|Znf143|pHZ-1	zinc finger protein 143	protein-coding
442	chr17	4906011	4909545	+	0	NA	Intergenic	(TTTTTA)n|Simple_repeat|Simple_repeat	-87296	NM_001085355	239985	Mm.133401	NM_001085355	ENSMUSG00000069729	Arid1b	8030481M12|9330189K18Rik|AI836955|Ardi1b|B230217J03Rik|mKIAA1235	AT rich interactive domain 1B (SWI-like)	protein-coding
649	chr3	30992115	30995488	+	0	NA	promoter-TSS (NM_011386)	promoter-TSS (NM_011386)	-179	NM_011386	20482	Mm.15406	NM_011386	ENSMUSG00000027660	Skil	Skir|SnoN|sno	SKI-like	protein-coding
689	chr3	137805240	137808041	+	0	NA	promoter-TSS (NM_001163457)	promoter-TSS (NM_001163457)	138	NM_175389	108943	Mm.471692	NM_175389	ENSMUSG00000004127	Trmt10a	3110023L08Rik|AA794508|Rg9mtd2|Rnmtd2	tRNA methyltransferase 10A	protein-coding
886	chr7	7250425	7253700	+	0	NA	TTS (NR_049193)	TTS (NR_049193)	160	NM_011334	12727	Mm.297883	NM_011334	ENSMUSG00000000605	Clcn4-2	Clc4-2|Clcn4	chloride channel 4-2	protein-coding
648	chr3	30691313	30693219	+	0	NA	5' UTR (NM_027016, exon 1 of 8)	5' UTR (NM_027016, exon 1 of 8)	468	NM_027016	69276	Mm.26017	NM_027016	ENSMUSG00000027706	Sec62	3100002M17Rik|AI844545|AW545092|Dtrp1|HTP1|Tloc1	SEC62 homolog (S. cerevisiae)	protein-coding
642	chr3	10439321	10440597	+	0	NA	5' UTR (NM_001127191, exon 1 of 7)	5' UTR (NM_001127191, exon 1 of 7)	171	NM_029068	74718	Mm.440548	NM_029068	ENSMUSG00000027534	Snx16	4930522N22Rik|AI117577|AI747675	sorting nexin 16	protein-coding
1028	chr9	20411251	20412436	+	0	NA	promoter-TSS (NR_033729)	promoter-TSS (NR_033729)	-76	NR_033729	66662	Mm.477847	NM_175110	ENSMUSG00000062470	Fbxl12os	5730577I03Rik	F-box and leucine-rich repeat protein 12, opposite strand	pseudo
198	chr11	61667330	61669749	+	0	NA	promoter-TSS (NM_013881)	promoter-TSS (NM_013881)	55	NM_013881	29869	Mm.162025	NM_013881	ENSMUSG00000004798	Ulk2	A830085I22Rik|AU015340|Unc51.2|mKIAA0623	unc-51 like kinase 2	protein-coding
1059	chr9	88375478	88378489	+	0	NA	5' UTR (NM_019796, exon 1 of 12)	5' UTR (NM_019796, exon 1 of 12)	252	NM_019666	56403	Mm.260545	NM_019666	ENSMUSG00000032423	Syncrip	2610109K23Rik|4632417O19Rik|GRY-RBP|Nsap1|Nsap1l|pp68	synaptotagmin binding, cytoplasmic RNA interacting protein	protein-coding
727	chr4	62242073	62245797	+	0	NA	intron (NM_019492, intron 3 of 19)	intron (NM_019492, intron 3 of 19)	23054	NM_019492	50780	Mm.286753	NM_019492	ENSMUSG00000059810	Rgs3	4930506N09Rik|C2PA-RGS3|C2pa|PDZ-RGS3|RGS3S	regulator of G-protein signaling 3	protein-coding
939	chr7	133342269	133344956	+	0	NA	5' UTR (NM_028816, exon 1 of 24)	5' UTR (NM_028816, exon 1 of 24)	310	NM_028816	74204	Mm.235663	NM_028816	ENSMUSG00000000131	Xpo6	2610005L19Rik|AI854665|AL022631|C230091E20Rik|R75304|Ranbp20|mKIAA0370	exportin 6	protein-coding
320	chr13	105606476	105607964	+	0	NA	promoter-TSS (NM_026075)	promoter-TSS (NM_026075)	-99	NM_026075	67288	Mm.125465	NM_026075		Srek1ip1	3110031B13Rik|AI462702|AV348305|AW121048|Sfrs12ip1|Srsf12ip1	splicing regulatory glutamine/lysine-rich protein 1interacting protein 1	protein-coding
913	chr7	66481830	66485589	+	0	NA	promoter-TSS (NM_173010)	promoter-TSS (NM_173010)	-411	NM_173010	22215	Mm.9002	NM_011668	ENSMUSG00000025326	Ube3a	4732496B02|5830462N02Rik|A130086L21Rik|Hpve6a|mKIAA4216	ubiquitin protein ligase E3A	protein-coding
811	chr5	123270767	123272026	+	0	NA	promoter-TSS (NM_001042491)	promoter-TSS (NM_001042491)	-45	NM_001289517	59008	Mm.332667	NM_021505	ENSMUSG00000029472	Anapc5	2510006G12Rik|AA408751|AA536819|AA986414|APC5|Anpc5	anaphase-promoting complex subunit 5	protein-coding
202	chr11	68665548	68668037	+	0	NA	promoter-TSS (NM_023668)	promoter-TSS (NM_023668)	-159	NM_023668	83431	Mm.31979	NM_023668	ENSMUSG00000018736	Ndel1	2600006O07Rik|MITAP1|NUDEL|mNudel	nuclear distribution gene E-like homolog 1 (A. nidulans)	protein-coding
249	chr12	40946588	40950637	+	0	NA	TTS (NR_035459)	TTS (NR_035459)	786	NR_035459	100316693		NR_035459		Mir1938	mmu-mir-1938	microRNA 1938	ncRNA
361	chr14	87815122	87818905	+	0	NA	intron (NM_172605, intron 1 of 13)	CpG	623	NM_001253755	219249	Mm.35168	NM_172605	ENSMUSG00000022019	Tdrd3	4732418C03Rik|6720468N18	tudor domain containing 3	protein-coding
465	chr17	53617358	53619531	+	0	NA	promoter-TSS (NM_025887)	promoter-TSS (NM_025887)	-115	NM_025887	271457	Mm.329123	NM_025887	ENSMUSG00000017831	Rab5a	2410015H04Rik|AI663973|AU021172|nnyRab5a	RAB5A, member RAS oncogene family	protein-coding
184	chr11	33062237	33064015	+	0	NA	promoter-TSS (NM_008722)	promoter-TSS (NM_008722)	80	NM_001252261	18148	Mm.485384	NM_008722	ENSMUSG00000057113	Npm1	B23|NO38|Npm	nucleophosmin 1	protein-coding
819	chr5	135483779	135486555	+	0	NA	promoter-TSS (NM_145215)	promoter-TSS (NM_145215)	-2	NM_145215	68758	Mm.389700	NM_145215	ENSMUSG00000040532	Abhd11	1110054D16Rik|A630008N09Rik|Wbscr21	abhydrolase domain containing 11	protein-coding
776	chr5	28116504	28118874	+	0	NA	intron (NM_018878, intron 1 of 20)	CpG	401	NM_018878	55982	Mm.277190	NM_018878	ENSMUSG00000002221	Paxip1	D5Ertd149e|PTIP	PAX interacting (with transcription-activation domain) protein 1	protein-coding
894	chr7	29477454	29479781	+	0	NA	exon (NM_207238, exon 2 of 6)	exon (NM_207238, exon 2 of 6)	454	NM_001163702	233040	Mm.116116	NM_207238	ENSMUSG00000037463	Fbxo27	E130008B10Rik|FBG5|Gm161	F-box protein 27	protein-coding
858	chr6	83863999	83865423	+	0	NA	intron (NM_008717, intron 1 of 26)	CpG	364	NM_008717	18139	Mm.132392	NM_008717	ENSMUSG00000030016	Zfml	AI323587|Np220|Znf638|mNP220	zinc finger, matrin-like	protein-coding
140	chr10	96618420	96625054	+	0	NA	Intergenic	Intergenic	123335	NR_045358	75301	Mm.108650	NR_045358		4930556N09Rik	-	RIKEN cDNA 4930556N09 gene	ncRNA
181	chr11	29447330	29449047	+	0	NA	promoter-TSS (NM_024277)	promoter-TSS (NM_024277)	-148	NM_001033865	78294	Mm.180003	NM_024277	ENSMUSG00000020460	Rps27a	0610006J14Rik|Uba52|Ubb|Ubc	ribosomal protein S27A	protein-coding
412	chr16	13255600	13257303	+	0	NA	promoter-TSS (NM_001122667)	promoter-TSS (NM_001122667)	-123	NM_001122667	239719	Mm.270643	NM_153588	ENSMUSG00000009569	Mkl2	ENSMUSG00000075401|Gt4-1|MRTF-B|Mrtfb|mKIAA1243	MKL/myocardin-like 2	protein-coding
954	chr7	147221701	147223090	+	0	NA	promoter-TSS (NM_001286011)	promoter-TSS (NM_001286011)	105	NM_027201	69752	Mm.200818	NM_027201	ENSMUSG00000025470	Zfp511	2410004P19Rik|C86579|Znf511	zinc finger protein 511	protein-coding
385	chr15	72920053	72921859	+	0	NA	exon (NM_053068, exon 1 of 3)	exon (NM_053068, exon 1 of 3)	114	NM_053068	93696	Mm.23095	NM_053068	ENSMUSG00000068391	Chrac1	2410152E03Rik|2810406L04Rik|YCL1	chromatin accessibility complex 1	protein-coding
307	chr13	84482889	84491288	+	0	NA	Intergenic	Intergenic	125187	NM_175187	72745	Mm.295063	NM_175187	ENSMUSG00000035762	Tmem161b	2810446P07Rik|AI843389	transmembrane protein 161B	protein-coding
801	chr5	109985162	109988526	+	0	NA	intron (NM_016715, intron 1 of 7)	intron (NM_016715, intron 1 of 7)	1168	NM_016715	57914	Mm.35771	NM_016715	ENSMUSG00000033467	Crlf2	CRLM2|Ly114|Tpte2|Tslpr	cytokine receptor-like factor 2	protein-coding
985	chr8	72298072	72299500	+	0	NA	promoter-TSS (NM_177899)	promoter-TSS (NM_177899)	24	NM_177899	330788	Mm.41364	NM_177899		Zfp866	9830167H18Rik|AI875089|C85843|D330038O06Rik	zinc finger protein 866	protein-coding
971	chr8	26414198	26419196	+	0	NA	promoter-TSS (NR_040352)	promoter-TSS (NR_040352)	45	NR_040352	74489	Mm.256468	NR_040352		5430421F17Rik	-	RIKEN cDNA 5430421F17 gene	ncRNA
830	chr5	150213400	150216010	+	0	NA	exon (NM_027519, exon 1 of 5)	exon (NM_027519, exon 1 of 5)	324	NM_027519	70717	Mm.252139	NM_027519	ENSMUSG00000029659	Medag	6330406I15Rik|Awms3|MEDA-4|Meda4|mAWMS3	mesenteric estrogen dependent adipogenesis	protein-coding
154	chr10	124824864	124828312	+	0	NA	Intergenic	Intergenic	-60997	NM_011391	20503	Mm.29161	NM_011391	ENSMUSG00000020102	Slc16a7	4921534N07Rik|Mct2	solute carrier family 16 (monocarboxylic acid transporters), member 7	protein-coding
754	chr4	135410163	135413114	+	0	NA	promoter-TSS (NM_001284196)	promoter-TSS (NM_001284196)	-348	NM_001284196	14105	Mm.10229	NM_010178	ENSMUSG00000028676	Srsf10	FUSIP2|Fusip1|NSSR1|NSSR2|Nssr|SRrp40|Sfrs13a|Srsf13a|TASR|TASR1|TASR2	serine/arginine-rich splicing factor 10	protein-coding
847	chr6	47402977	47406341	+	0	NA	intron (NM_012042, intron 1 of 21)	CpG	336	NM_012042	26965	Mm.87611	NM_012042	ENSMUSG00000029686	Cul1	-	cullin 1	protein-coding
479	chr17	83913050	83914769	+	0	NA	promoter-TSS (NM_001159529)	promoter-TSS (NM_001159529)	-236	NM_001159529	20463	Mm.30072	NM_009187	ENSMUSG00000024248	Cox7a2l	COX7AR|COX7RP|EB1|SIG-81|SIG81|Silg81	cytochrome c oxidase subunit VIIa polypeptide 2-like	protein-coding
704	chr4	32050190	32051692	+	0	NA	promoter-TSS (NM_009316)	promoter-TSS (NM_009316)	-141	NM_009316	26409	Mm.258589	NM_009316	ENSMUSG00000028284	Map3k7	B430101B05|C87327|Tak1	mitogen-activated protein kinase kinase kinase 7	protein-coding
326	chr14	8912686	8913756	+	0	NA	intron (NM_025938, intron 1 of 5)	intron (NM_025938, intron 1 of 5)	394	NM_025938	67053	Mm.210048	NM_025938	ENSMUSG00000023156	Rpp14	2610511E03Rik|AA682089	ribonuclease P 14 subunit	protein-coding
1003	chr8	109816323	109819212	+	0	NA	exon (NM_018823, exon 1 of 15)	exon (NM_018823, exon 1 of 15)	397	NM_133957	54446	Mm.390057	NM_018823	ENSMUSG00000003847	Nfat5	AI225870|B130038B15Rik|CAG-8|CAG80|NFATL1|OREBP|TonEBP|mKIAA0827|nfatz	nuclear factor of activated T cells 5	protein-coding
1054	chr9	79606926	79608289	+	0	NA	promoter-TSS (NM_009945)	promoter-TSS (NM_009945)	53	NM_009945	12866	Mm.152627	NM_009945	ENSMUSG00000032330	Cox7a2	COX7AL|Cox7a3|CoxVIIa-L	cytochrome c oxidase subunit VIIa 2	protein-coding
681	chr3	110052198	110054552	+	0	NA	exon (NM_178891, exon 1 of 1)	exon (NM_178891, exon 1 of 1)	542	NM_178891	99890	Mm.36115	NM_178891	ENSMUSG00000049300	Prmt6	AW124876|BB233495|Hrmt1l6	protein arginine N-methyltransferase 6	protein-coding
619	chr2	144095572	144097150	+	0	NA	promoter-TSS (NM_028984)	promoter-TSS (NM_028984)	-53	NM_024225	69178	Mm.273379	NM_024225	ENSMUSG00000027423	Snx5	0910001N05Rik|1810032P22Rik|AU019504|D2Ertd52e	sorting nexin 5	protein-coding
335	chr14	28241248	28243583	+	0	NA	exon (NM_001114879, exon 1 of 24)	exon (NM_001114879, exon 1 of 24)	382	NM_001114879	218850	Mm.247767	NM_028945	ENSMUSG00000040651	Fam208a	4732418E12|4933409E02Rik|D14Abb1e	family with sequence similarity 208, member A	protein-coding
1029	chr9	21312817	21315697	+	0	NA	intron (NM_010744, intron 1 of 3)	intron (NM_010744, intron 1 of 3)	373	NM_010744	17083	Mm.196618	NM_010744	ENSMUSG00000032180	Tmed1	Il1rl1l|Ly84l|St2l	transmembrane emp24 domain containing 1	protein-coding
698	chr4	8934746	8957539	+	0	NA	Intergenic	Intergenic	-250322	NM_028940	74438	Mm.473368	NM_028940	ENSMUSG00000041216	Clvs1	4933402J24Rik|Clvl1|Rlbp1l1	clavesin 1	protein-coding
5	chr1	13579116	13580444	+	0	NA	exon (NM_028173, exon 1 of 11)	exon (NM_028173, exon 1 of 11)	165	NM_028173	72265	Mm.28765	NM_028173	ENSMUSG00000025935	Tram1	1810049E02Rik|TRAMP	translocating chain-associating membrane protein 1	protein-coding
621	chr2	150863762	150865933	+	0	NA	intron (NM_026086, intron 1 of 1)	CpG	268	NM_026086	67311	Mm.480682	NM_026086	ENSMUSG00000053916	Nanp	1600031M04Rik|Hdhd4	N-acetylneuraminic acid phosphatase	protein-coding
524	chr19	5022804	5025008	+	0	NA	promoter-TSS (NM_007854)	promoter-TSS (NM_007854)	-100	NM_007854	13340	Mm.4930	NM_007854	ENSMUSG00000024891	Slc29a2	Der12|Ent2|Hnp36	solute carrier family 29 (nucleoside transporters), member 2	protein-coding
554	chr2	3429396	3431811	+	0	NA	promoter-TSS (NM_015765)	promoter-TSS (NM_015765)	266	NM_177647	227526	Mm.211455	NM_177647	ENSMUSG00000039496	Cdnf	9330140G23|Armetl1	cerebral dopamine neurotrophic factor	protein-coding
552	chr19	53924354	53928954	+	0	NA	intron (NM_001170847, intron 11 of 13)	intron (NM_001170847, intron 11 of 13)	-40067	NM_011050	18569	Mm.1605	NM_011050	ENSMUSG00000024975	Pdcd4	D19Ucla1|Ma3|Tis	programmed cell death 4	protein-coding
598	chr2	106533007	106535907	+	0	NA	intron (NM_001143683, intron 1 of 6)	CpG	841	NM_001143683	77015	Mm.45628	NM_029837	ENSMUSG00000016386	Mpped2	239Fb|2700082O15Rik|AV354767|AW060960	metallophosphoesterase domain containing 2	protein-coding
780	chr5	32434772	32439810	+	0	NA	Intergenic	(A)n|Simple_repeat|Simple_repeat	-1554	NM_008037	14284	Mm.24684	NM_008037	ENSMUSG00000029135	Fosl2	Fra-2	fos-like antigen 2	protein-coding
74	chr1	172104318	172106360	+	0	NA	promoter-TSS (NM_133806)	promoter-TSS (NM_133806)	-262	NM_133806	107652	Mm.27969	NM_133806	ENSMUSG00000026670	Uap1	AA420407|AA437972|AGX-1|AGX-2|AGX1|AgX|ESTM38|SPAG2	UDP-N-acetylglucosamine pyrophosphorylase 1	protein-coding
240	chr12	4233443	4235218	+	0	NA	promoter-TSS (NM_134046)	promoter-TSS (NM_134046)	-36	NM_134046	52504	Mm.70546	NM_134046	ENSMUSG00000020652	Cenpo	2810429O05Rik|8430427C03Rik|D12Ertd482e	centromere protein O	protein-coding
890	chr7	16972672	16993454	+	0	NA	Intergenic	B1_Mur4|SINE|Alu	-3482	NM_198631	330474	Mm.333594	NM_198631	ENSMUSG00000059273	Zc3h4	Bwq1|Gm768|Kiaa1064-hp|mKIAA1064	zinc finger CCCH-type containing 4	protein-coding
440	chr16	98182651	98184716	+	0	NA	5' UTR (NM_001081685, exon 1 of 4)	5' UTR (NM_001081685, exon 1 of 4)	103	NM_001081685	114565	Mm.474489	NM_175428	ENSMUSG00000046962	Zbtb21	5430437K12Rik|B430213I24Rik|Zfp295|Znf295|mKIAA1227	zinc finger and BTB domain containing 21	protein-coding
230	chr11	109509042	109515287	+	0	NA	promoter-TSS (NM_021880)	promoter-TSS (NM_021880)	-99	NM_021880	19084	Mm.30039	NM_021880	ENSMUSG00000020612	Prkar1a	1300018C22Rik|RIalpha|Tse-1|Tse1	protein kinase, cAMP dependent regulatory, type I, alpha	protein-coding
115	chr10	62382233	62384440	+	0	NA	promoter-TSS (NM_175194)	promoter-TSS (NM_175194)	-45	NM_175194	73132	Mm.37457	NM_175194	ENSMUSG00000071253	Slc25a16	3110021G18Rik|GDA|GDC|HGT.1|ML7	solute carrier family 25 (mitochondrial carrier, Graves disease autoantigen), member 16	protein-coding
299	chr13	67584159	67585948	+	0	NA	intron (NM_001076791, intron 1 of 3)	intron (NM_001076791, intron 1 of 3)	136	NM_001076791	408067	Mm.315879	NM_001076791	ENSMUSG00000059839	Zfp874b	9630025I21Rik|Rslcan16	zinc finger protein 874b	protein-coding
377	chr15	38447112	38450139	+	0	NA	intron (NM_001102458, intron 1 of 12)	CpG	396	NM_001102458	54375	Mm.250214	NM_018745	ENSMUSG00000037458	Azin1	1700085L02Rik|AI414949|Oazi|Oazin	antizyme inhibitor 1	protein-coding
922	chr7	99816999	99819432	+	0	NA	5' UTR (NM_029078, exon 1 of 16)	5' UTR (NM_029078, exon 1 of 16)	207	NM_029078	74737	Mm.288645	NM_029078	ENSMUSG00000041328	Pcf11	2500001H09Rik|5730417B17Rik|C77803	cleavage and polyadenylation factor subunit homolog (S. cerevisiae)	protein-coding
602	chr2	116797856	116803276	+	0	NA	Intergenic	Intergenic	74678	NR_040335	320975	Mm.132509	NR_040335	ENSMUSG00000085316	D330050G23Rik	-	RIKEN cDNA D330050G23 gene	ncRNA
841	chr6	34730000	34731436	+	0	NA	5' UTR (NM_001289658, exon 1 of 4)	5' UTR (NM_001289658, exon 1 of 4)	286	NM_001289656	76223	Mm.150047	NM_178630	ENSMUSG00000038836	Agbl3	2900053G10Rik|4930431N21Rik|6530406M24Rik|CCP3	ATP/GTP binding protein-like 3	protein-coding
1044	chr9	62261824	62408967	+	0	NA	intron (NM_175484, intron 2 of 11)	intron (NM_175484, intron 2 of 11)	49456	NM_175484	235431	Mm.335229	NM_175484	ENSMUSG00000041729	Coro2b	CLIPINC|E130012P22Rik	coronin, actin binding protein, 2B	protein-coding
1072	chr9	117949005	117951052	+	0	NA	5' UTR (NM_013727, exon 1 of 8)	5' UTR (NM_013727, exon 1 of 8)	388	NM_013727	27215	Mm.92705	NM_013727	ENSMUSG00000039285	Azi2	AA410145|AZ2	5-azacytidine induced gene 2	protein-coding
612	chr2	126757186	126759933	+	0	NA	intron (NM_023220, intron 1 of 14)	GA-rich|Low_complexity|Low_complexity	412	NM_023220	66552	Mm.269928	NM_023220	ENSMUSG00000027366	Sppl2a	2010106G01Rik|C130089K23Rik	signal peptide peptidase like 2A	protein-coding
936	chr7	129209825	129211727	+	0	NA	promoter-TSS (NM_138589)	promoter-TSS (NM_138589)	64	NM_138589	28018	Mm.282122	NM_138589	ENSMUSG00000030870	Ubfd1	AI467302|D7Wsu105e|D7Wsu128e|Ubph	ubiquitin family domain containing 1	protein-coding
91	chr1	193958625	193963422	+	0	NA	intron (NR_033536, intron 1 of 3)	CpG	243	NR_033536	100038712	Mm.474908	NR_033536	ENSMUSG00000097316	Gm10516	ENSMUSG00000073476	predicted gene 10516	ncRNA
1086	chrX	54305887	54307489	+	0	NA	promoter-TSS (NM_028242)	promoter-TSS (NM_028242)	-59	NM_028242	72459	Mm.2152	NM_028242	ENSMUSG00000067873	Htatsf1	1600023H17Rik|2600017A12Rik|2700077B20Rik|TAT-SF1	HIV TAT specific factor 1	protein-coding
701	chr4	21774300	21775944	+	0	NA	non-coding (NR_028384, exon 1 of 1)	non-coding (NR_028384, exon 1 of 1)	392	NM_025669	66625	Mm.100117	NM_025669	ENSMUSG00000028248	Pnisr	5730406M06Rik|AA673174|Pinsr|Sfrs18|Srsf18	PNN interacting serine/arginine-rich	protein-coding
467	chr17	57170166	57172311	+	0	NA	promoter-TSS (NM_010613)	promoter-TSS (NM_010613)	-308	NM_010613	16549	Mm.34296	NM_010613	ENSMUSG00000007670	Khsrp	6330409F21Rik|Fbp2|Fubp2|Ksrp	KH-type splicing regulatory protein	protein-coding
474	chr17	71947304	71948784	+	0	NA	promoter-TSS (NR_027952)	promoter-TSS (NR_027952)	57	NR_015549	68789	Mm.75202	NR_015549	ENSMUSG00000085492	Trmt61b	1110039F03Rik|623451|Gm6431	tRNA methyltransferase 61B	ncRNA
481	chr17	85488353	85490865	+	0	NA	promoter-TSS (NM_001163624)	promoter-TSS (NM_001163624)	-2	NM_001163622	213760	Mm.259035	NM_145984	ENSMUSG00000024127	Prepl	2810457N15Rik|9530014L06Rik|D030028O16Rik|mKIAA0436	prolyl endopeptidase-like	protein-coding
867	chr6	115262055	115264333	+	0	NA	Intergenic	Intergenic	-48045	NM_001127330	19016	Mm.3020	NM_011146	ENSMUSG00000000440	Pparg	Nr1c3|PPAR-gamma|PPAR-gamma2|PPARgamma|PPARgamma2	peroxisome proliferator activated receptor gamma	protein-coding
214	chr11	84952192	84954980	+	0	NA	promoter-TSS (NM_001029934)	promoter-TSS (NM_001029934)	-129	NM_001029934	237898	Mm.178524	NM_001029934	ENSMUSG00000000804	Usp32	2900074J03Rik|6430526O11Rik|AW045245	ubiquitin specific peptidase 32	protein-coding
564	chr2	22922727	22926119	+	0	NA	promoter-TSS (NM_001102437)	promoter-TSS (NM_001102437)	-169	NM_001102437	74159	Mm.181973	NM_028793	ENSMUSG00000026781	Acbd5	1300014E15Rik	acyl-Coenzyme A binding domain containing 5	protein-coding
817	chr5	131781257	131784669	+	0	NA	5' UTR (NM_145218, exon 1 of 11)	5' UTR (NM_145218, exon 1 of 11)	429	NM_145218	212996	Mm.299204	NM_145218		Wbscr17	AA388321|E330012B09Rik	Williams-Beuren syndrome chromosome region 17 homolog (human)	protein-coding
563	chr2	22750144	22751871	+	0	NA	promoter-TSS (NM_019501)	promoter-TSS (NM_019501)	-35	NM_019501	56075	Mm.249752	NM_019501	ENSMUSG00000026784	Pdss1	2610203G20Rik|2700031G06Rik|TPT|TPT 1|Tprt|mDLP1|mSPS1	prenyl (solanesyl) diphosphate synthase, subunit 1	protein-coding
731	chr4	86393489	86395822	+	0	NA	5' UTR (NM_184088, exon 1 of 32)	5' UTR (NM_184088, exon 1 of 32)	196	NM_184088	329877	Mm.273718	NM_184088	ENSMUSG00000038024	Dennd4c	1700065A05Rik|AA420392	DENN/MADD domain containing 4C	protein-coding
657	chr3	54538407	54540365	+	0	NA	promoter-TSS (NM_027148)	promoter-TSS (NM_027148)	-75	NM_025442	66248	Mm.144218	NM_025442	ENSMUSG00000036632	Alg5	1500026A19Rik|2600005J22Rik|AV009521|AV170001|AW545564	asparagine-linked glycosylation 5 (dolichyl-phosphate beta-glucosyltransferase)	protein-coding
229	chr11	106076798	106079002	+	0	NA	promoter-TSS (NM_028074)	promoter-TSS (NM_028074)	-219	NM_026009	67163	Mm.22109	NM_026009		Ccdc47	2610204L23Rik|C88307|asp4|calumin	coiled-coil domain containing 47	protein-coding
768	chr5	15438811	15443025	+	0	NA	exon (NM_001110843, exon 1 of 39)	exon (NM_001110843, exon 1 of 39)	409	NM_001110846	12293	Mm.159842	NM_009784	ENSMUSG00000040118	Cacna2d1	Ca(v)alpha2delta1|Cacna2|Cchl2a	calcium channel, voltage-dependent, alpha2/delta subunit 1	protein-coding
1092	chrX	146912277	146913216	+	0	NA	Intergenic	Intergenic	-19053	NM_001164683	382245	Mm.277309	NM_001164683	ENSMUSG00000041353	Tmem29	2700081K05Rik|6330540D07Rik|CXorf44-like	transmembrane protein 29	protein-coding
673	chr3	103082206	103085151	+	0	NA	5' UTR (NM_053170, exon 1 of 20)	5' UTR (NM_053170, exon 1 of 20)	462	NM_001079830	94093	Mm.195036	NM_053170	ENSMUSG00000033014	Trim33	8030451N04Rik|AI413936|Ecto|Tif1g	tripartite motif-containing 33	protein-coding
503	chr18	35757776	35759499	+	0	NA	intron (NM_026420, intron 1 of 3)	CpG	316	NM_026420	67869	Mm.126534	NM_026420	ENSMUSG00000037058	Paip2	2310050K10Rik|AU045972	polyadenylate-binding protein-interacting protein 2	protein-coding
68	chr1	164499906	164502142	+	0	NA	promoter-TSS (NM_016796)	promoter-TSS (NM_016796)	65	NM_016796	53330	Mm.10699	NM_016796	ENSMUSG00000026696	Vamp4	D1Ertd147e	vesicle-associated membrane protein 4	protein-coding
315	chr13	99032478	99033922	+	0	NA	promoter-TSS (NM_178918)	promoter-TSS (NM_178918)	169	NM_001271388	68558	Mm.209642	NM_023472	ENSMUSG00000021661	Ankra2	1110004M18Rik|Ankra	ankyrin repeat, family A (RFXANK-like), 2	protein-coding
338	chr14	35361114	35363812	+	0	NA	intron (NM_011918, intron 9 of 13)	CpG	-26476	NM_030062	78243	Mm.117483	NM_030062	ENSMUSG00000021797	9230112D13Rik	-	RIKEN cDNA 9230112D13 gene	protein-coding
761	chr4	150498765	150515873	+	0	NA	intron (NM_001081557, intron 10 of 23)	intron (NM_001081557, intron 10 of 23)	-75257	NM_009498	22319	Mm.273930	NM_009498	ENSMUSG00000028955	Vamp3	D130027G05Rik|VAMP-3|ceb	vesicle-associated membrane protein 3	protein-coding
576	chr2	38233915	38236198	+	0	NA	Intergenic	Intergenic	28228	NM_010710	16870	Mm.142856	NM_010710	ENSMUSG00000000247	Lhx2	LH2A|Lh-2|Lim2|ap|apterous	LIM homeobox protein 2	protein-coding
222	chr11	98411980	98413207	+	0	NA	exon (NM_027061, exon 1 of 8)	exon (NM_027061, exon 1 of 8)	182	NM_001166494	69376	Mm.55996	NM_027061	ENSMUSG00000017195	Zpbp2	1700017D11Rik|2610022C02Rik|ZPBPL	zona pellucida binding protein 2	protein-coding
25	chr1	58448295	58450915	+	0	NA	promoter-TSS (NM_025824)	promoter-TSS (NM_025824)	-375	NM_025824	66882	Mm.21848	NM_025824	ENSMUSG00000051223	Bzw1	1200015E15Rik|mKIAA0005	basic leucine zipper and W2 domains 1	protein-coding
738	chr4	108130230	108134184	+	0	NA	5' UTR (NM_175472, exon 1 of 31)	5' UTR (NM_175472, exon 1 of 31)	176	NM_175472	230594	Mm.25181	NM_175472	ENSMUSG00000034610	Zcchc11	6030404K05Rik|9230115F04Rik|PPAPD3|mKIAA0191	zinc finger, CCHC domain containing 11	protein-coding
484	chr18	3382085	3383924	+	0	NA	promoter-TSS (NM_029402)	promoter-TSS (NM_029402)	-219	NM_029402	71745	Mm.291707	NM_029402	ENSMUSG00000024231	Cul2	1300003D18Rik|4932411N15Rik|AI327301|mKIAA4106	cullin 2	protein-coding
1078	chr9	123021534	123023443	+	0	NA	promoter-TSS (NM_026917)	promoter-TSS (NM_026917)	139	NM_001081188	66446	Mm.41562	NM_001081188	ENSMUSG00000025785	Exosc7	2610002K22Rik|AV212732|mKIAA0116	exosome component 7	protein-coding
1036	chr9	48302717	48304330	+	0	NA	promoter-TSS (NM_001004191)	promoter-TSS (NM_001004191)	75	NM_001004191	434402	Mm.386950	NM_001004191	ENSMUSG00000042293	Gm5617	EG434402	predicted gene 5617	protein-coding
305	chr13	81021301	81027640	+	0	NA	intron (NM_001042591, intron 1 of 7)	intron (NM_001042591, intron 1 of 7)	1787	NM_001042591	105171	Mm.423137	NM_001042591	ENSMUSG00000074794	Arrdc3	AI450344|mKIAA1376	arrestin domain containing 3	protein-coding
928	chr7	107853802	107857516	+	0	NA	intron (NM_178764, intron 1 of 8)	intron (NM_178764, intron 1 of 8)	443	NM_178764	319604	Mm.260362	NM_178764	ENSMUSG00000029461	Fam168a	2610030B18Rik|B930006L02Rik|mKIAA0280	family with sequence similarity 168, member A	protein-coding
623	chr2	153565774	153568197	+	0	NA	promoter-TSS (NM_007896)	promoter-TSS (NM_007896)	-38	NM_007896	13589	Mm.143877	NM_007896	ENSMUSG00000027479	Mapre1	5530600P05Rik|AI462499|AI504412|AW260097|BIM1p|D2Ertd459e|Eb1	microtubule-associated protein, RP/EB family, member 1	protein-coding
544	chr19	41337548	41339722	+	0	NA	promoter-TSS (NM_133352)	promoter-TSS (NM_133352)	-141	NM_133352	107358	Mm.246440	NM_133352	ENSMUSG00000025016	Tm9sf3	1810073M23Rik|2810031D16Rik|AI115521|AI413748|AW146116|AW549777|Smbp|mKIAA4036	transmembrane 9 superfamily member 3	protein-coding
217	chr11	89092437	89093002	+	0	NA	Intergenic	Intergenic	71154	NM_008711	18121	Mm.135266	NM_008711	ENSMUSG00000048616	Nog	-	noggin	protein-coding
328	chr14	14844138	14847971	+	0	NA	intron (NM_139227, intron 2 of 11)	intron (NM_139227, intron 2 of 11)	1049	NM_139227	246103	Mm.133625	NM_139227	ENSMUSG00000021738	Atxn7	A430107N12Rik|AI627028|Sca7|ataxin-7	ataxin 7	protein-coding
239	chr12	3234747	3236875	+	0	NA	promoter-TSS (NR_015551)	promoter-TSS (NR_015551)	20	NR_015551	74173	Mm.309774	NM_028796	ENSMUSG00000079179	Rab10os	1700012B15Rik|1810036A22Rik	RAB10, member RAS oncogene family, opposite strand	ncRNA
122	chr10	75259533	75261813	+	0	NA	intron (NM_008185, intron 1 of 4)	intron (NM_008185, intron 1 of 4)	656	NM_008185	14871	Mm.2746	NM_008185	ENSMUSG00000001663	Gstt1	AI255817|Gstt1-1	glutathione S-transferase, theta 1	protein-coding
878	chr6	146525376	146527667	+	0	NA	promoter-TSS (NM_026218)	promoter-TSS (NM_026218)	88	NM_026218	67529	Mm.333499	NM_026218	ENSMUSG00000040242	Fgfr1op2	1500031J01Rik	FGFR1 oncogene partner 2	protein-coding
628	chr2	155781464	155782757	+	0	NA	promoter-TSS (NM_001130000)	promoter-TSS (NM_001130000)	-184	NM_001129999	16328	Mm.288729	NM_008383	ENSMUSG00000038241	Cep250	AW490617|B230210E21Rik|Cep2|Inmp	centrosomal protein 250	protein-coding
158	chr10	128240106	128243434	+	0	NA	promoter-TSS (NM_178066)	promoter-TSS (NM_178066)	-344	NM_178066	73827	Mm.24630	NM_178066	ENSMUSG00000047090	Tmem198b	1110012D08Rik	transmembrane protein 198b	protein-coding
269	chr12	91657849	91668153	+	0	NA	Intergenic	B4A|SINE|B4	313877	NM_010050	13371	Mm.21389	NM_010050	ENSMUSG00000007682	Dio2	5DII|AI324267|DIOII	deiodinase, iodothyronine, type II	protein-coding
281	chr13	9275491	9277688	+	0	NA	intron (NM_001081426, intron 1 of 36)	(TG)n|Simple_repeat|Simple_repeat	818	NM_001081426	208440	Mm.217326	NM_172459	ENSMUSG00000048264	Dip2c	2900024P20Rik|9630044M06|mKIAA0934	DIP2 disco-interacting protein 2 homolog C (Drosophila)	protein-coding
363	chr14	121309530	121311343	+	0	NA	promoter-TSS (NM_023579)	promoter-TSS (NM_023579)	20	NM_023579	70572	Mm.221452	NM_023579	ENSMUSG00000030662	Ipo5	1110011C18Rik|5730478E03Rik|AA409333|C76941|IMB3|Kpnb3|Ranbp5	importin 5	protein-coding
46	chr1	94803044	94809450	+	0	NA	Intergenic	Intergenic	-1155	NM_181405	108657	Mm.200971	NM_181405	ENSMUSG00000026269	Rnpepl1	1110014H17Rik|AI894167	arginyl aminopeptidase (aminopeptidase B)-like 1	protein-coding
733	chr4	94716475	94721874	+	0	NA	promoter-TSS (NM_010591)	promoter-TSS (NM_010591)	-261	NM_010591	16476	Mm.275071	NM_010591	ENSMUSG00000052684	Jun	AP-1|Junc|c-jun	jun proto-oncogene	protein-coding
997	chr8	88363376	88365521	+	0	NA	promoter-TSS (NM_199446)	promoter-TSS (NM_199446)	400	NM_028007	71927	Mm.61018	NM_028007	ENSMUSG00000031703	Itfg1	2310047C21Rik|AI314457|Cda08|D8Wsu49e	integrin alpha FG-GAP repeat containing 1	protein-coding
630	chr2	157029754	157031463	+	0	NA	promoter-TSS (NM_011249)	promoter-TSS (NM_011249)	-338	NM_001139516	19650	Mm.244671	NM_011249	ENSMUSG00000027641	Rbl1	AW547426|PRB1|p107	retinoblastoma-like 1 (p107)	protein-coding
36	chr1	74900654	74906188	+	0	NA	3' UTR (NM_009872, exon 1 of 1)	3' UTR (NM_009872, exon 1 of 1)	1818	NM_009872	12570	Mm.153833	NM_009872	ENSMUSG00000090071	Cdk5r2	B230310J22Rik|p39	cyclin-dependent kinase 5, regulatory subunit 2 (p39)	protein-coding
748	chr4	128549882	128602979	+	0	NA	intron (NM_178110, intron 2 of 4)	intron (NM_178110, intron 2 of 4)	15046	NM_178110	67525	Mm.30653	NM_178110	ENSMUSG00000041000	Trim62	6330414G21Rik|AI450348	tripartite motif-containing 62	protein-coding
472	chr17	71876091	71877284	+	0	NA	promoter-TSS (NM_023294)	promoter-TSS (NM_023294)	-490	NM_023294	67052	Mm.225956	NM_023294	ENSMUSG00000024056	Ndc80	2610020P18Rik|AV139730|HEC|HEC1|Kntc2	NDC80 homolog, kinetochore complex component (S. cerevisiae)	protein-coding
317	chr13	102459352	102466599	+	0	NA	promoter-TSS (NM_001024955)	promoter-TSS (NM_001024955)	-390	NM_001024955	18708	Mm.259333	NM_001024955	ENSMUSG00000041417	Pik3r1	PI3K|p50alpha|p55alpha|p85alpha	phosphatidylinositol 3-kinase, regulatory subunit, polypeptide 1 (p85 alpha)	protein-coding
608	chr2	122171207	122207796	+	0	NA	intron (NM_001013829, intron 1 of 5)	intron (NM_001013829, intron 1 of 5)	5153	NM_001013829	435684	Mm.458215	NM_001013829	ENSMUSG00000033256	Shf	-	Src homology 2 domain containing F	protein-coding
711	chr4	40916769	40918799	+	0	NA	promoter-TSS (NM_023739)	promoter-TSS (NM_023739)	-155	NM_001290449	74164	Mm.247456	NM_023739	ENSMUSG00000028423	Nfx1	1300017N15Rik|3000003M19Rik|NFX.1|TEG-42|Tex42	nuclear transcription factor, X-box binding 1	protein-coding
132	chr10	81640313	81642026	+	0	NA	Intergenic	CpG	50411	NM_001163064	216177	Mm.482395	NM_001163064		AU041133	-	expressed sequence AU041133	protein-coding
892	chr7	25963235	25965823	+	0	NA	Intergenic	CpG	24441	NR_045848	434147	Mm.59171	NM_001033781	ENSMUSG00000074274	D930028M14Rik	EG434147	RIKEN cDNA D930028M14 gene	ncRNA
546	chr19	41985765	41987814	+	0	NA	intron (NM_023418, intron 1 of 3)	CpG	428	NM_023418	18648	Mm.391589	NM_023418	ENSMUSG00000011752	Pgam1	2310050F24Rik|Pgam-1	phosphoglycerate mutase 1	protein-coding
537	chr19	33465602	33467220	+	0	NA	intron (NM_001167818, intron 1 of 6)	CpG	374	NM_001167818	67795	Mm.204591	NM_001146342	ENSMUSG00000071573	Rnls	6530404N21Rik|AI452315|AW060440|C10orf59	renalase, FAD-dependent amine oxidase	protein-coding
522	chr18	85120046	85121862	+	0	NA	promoter-TSS (NM_025969)	promoter-TSS (NM_025969)	-38	NM_025969	67105	Mm.250617	NM_025969	ENSMUSG00000024645	Timm21	1700034H14Rik|2700002I20Rik	tranlocase of inner mitochondrial membrane 21	protein-coding
125	chr10	79816051	79821766	+	0	NA	promoter-TSS (NM_183152)	promoter-TSS (NM_183152)	-296	NM_183152	216166	Mm.17613	NM_183152	ENSMUSG00000035486	Plk5	6330514A18Rik	polo-like kinase 5	protein-coding
1018	chr8	126000646	126003292	+	0	NA	intron (NR_028260, intron 1 of 15)	CpG	207	NR_028260	114896	Mm.287475	NM_054070	ENSMUSG00000031967	Afg3l1	1700047G05Rik|3110061K15Rik	AFG3-like AAA ATPase 1	protein-coding
44	chr1	88329168	88345275	+	0	NA	Intergenic	Intergenic	14317	NM_027966	71863	Mm.179627	NM_027966	ENSMUSG00000036574	1700019O17Rik	-	RIKEN cDNA 1700019O17 gene	protein-coding
1007	chr8	113668756	113670429	+	0	NA	promoter-TSS (NR_040364)	promoter-TSS (NR_040364)	-194	NR_040364	434350	Mm.442061	NR_040363		9430091E24Rik	-	RIKEN cDNA 9430091E24 gene	ncRNA
667	chr3	95754046	95756191	+	0	NA	Intergenic	CpG	21938	NM_023210	66471	Mm.218657	NM_023210	ENSMUSG00000015749	Anp32e	2810018A15Rik|AI047746|AI326868|CPD1|LANP-L|LANPL|mLANP-L	acidic (leucine-rich) nuclear phosphoprotein 32 family, member E	protein-coding
741	chr4	109147704	109149915	+	0	NA	exon (NM_013876, exon 1 of 3)	exon (NM_013876, exon 1 of 3)	301	NM_013876	29864	Mm.392580	NM_013876	ENSMUSG00000028557	Rnf11	-	ring finger protein 11	protein-coding
998	chr8	89731434	89768825	+	0	NA	Intergenic	MIRb|SINE|MIR	-26380	NR_040697	100038706	Mm.334690	NR_040697	ENSMUSG00000099207	Gm10637	ENSMUSG00000074176	predicted gene 10637	ncRNA
714	chr4	45420591	45422545	+	0	NA	promoter-TSS (NM_001009949)	promoter-TSS (NM_001009949)	70	NM_001009949	230125	Mm.260210	NM_001009949	ENSMUSG00000045973	Slc25a51	9130208E07Rik|D130005A03Rik|Gm138|Mcart1	solute carrier family 25, member 51	protein-coding
313	chr13	95745788	95746991	+	0	NA	promoter-TSS (NM_172590)	promoter-TSS (NM_172590)	90	NM_172590	218460	Mm.33856	NM_172590	ENSMUSG00000042015	Wdr41	B830029I03Rik|MSTP048	WD repeat domain 41	protein-coding
529	chr19	10599036	10600741	+	0	NA	promoter-TSS (NM_025333)	promoter-TSS (NM_025333)	154	NM_172302	269061	Mm.490260	NM_172302	ENSMUSG00000034820	Cpsf7	5730453I16Rik|AL022757|C330017N18Rik	cleavage and polyadenylation specific factor 7	protein-coding
1058	chr9	86772096	86776649	+	0	NA	non-coding (NR_102729, exon 2 of 30)	non-coding (NR_102729, exon 2 of 30)	860	NM_001277982	20616	Mm.281651	NM_013669	ENSMUSG00000033419	Snap91	91kDa|AP180|F1-20|mKIAA0656	synaptosomal-associated protein 91	protein-coding
987	chr8	72565927	72567843	+	0	NA	promoter-TSS (NM_001167939)	promoter-TSS (NM_001167939)	173	NM_027481	70616	Mm.17665	NM_027481	ENSMUSG00000011306	Sugp1	5730496N02Rik|Sf4	SURP and G patch domain containing 1	protein-coding
397	chr15	90878201	90881544	+	0	NA	intron (NM_001109040, intron 1 of 36)	CpG	510	NM_001109041	16564	Mm.41379	NM_016705	ENSMUSG00000022629	Kif21a	-	kinesin family member 21A	protein-coding
908	chr7	53152321	53153770	+	0	NA	promoter-TSS (NM_021482)	promoter-TSS (NM_021482)	606	NM_144801	70209	Mm.163766	NM_144801	ENSMUSG00000002781	Tmem143	2310076O21Rik|AI481604	transmembrane protein 143	protein-coding
459	chr17	32420001	32422610	+	0	NA	promoter-TSS (NM_198094)	promoter-TSS (NM_198094)	-227	NM_020508	57261	Mm.253518	NM_020508	ENSMUSG00000024002	Brd4	Brd5|HUNK1|MCAP|WI-11513	bromodomain containing 4	protein-coding
284	chr13	17894960	17898169	+	0	NA	5' UTR (NM_027118, exon 1 of 14)	5' UTR (NM_027118, exon 1 of 14)	367	NM_001081058	69562	Mm.193924	NM_027118	ENSMUSG00000041297	Cdk13	2310015O17Rik|Cdc2l5	cyclin-dependent kinase 13	protein-coding
823	chr5	140893961	140895885	+	0	NA	promoter-TSS (NM_133916)	promoter-TSS (NM_133916)	-336	NM_133916	27979	Mm.21671	NM_133916	ENSMUSG00000056076	Eif3b	AL033316|AL033334|AL033369|AW208965|D5Wsu45e|EIF3-ETA|EIF3-P110|EIF3-P116|Eif3s9|PRT1	eukaryotic translation initiation factor 3, subunit B	protein-coding
903	chr7	48648421	48649839	+	0	NA	promoter-TSS (NM_001199330)	promoter-TSS (NM_001199330)	-381	NM_001199330	233168	Mm.379390	NM_183167		AI987944	-	expressed sequence AI987944	protein-coding
247	chr12	32632737	32636480	+	0	NA	intron (NM_177993, intron 1 of 8)	CpG	792	NM_177993	73389	Mm.390461	NM_153198	ENSMUSG00000002996	Hbp1	1700058O05Rik|BE629963|C330012F01Rik|C86454	high mobility group box transcription factor 1	protein-coding
165	chr11	6190929	6193315	+	0	NA	promoter-TSS (NM_001252288)	promoter-TSS (NM_001252288)	-439	NM_001252288	18293	Mm.276348	NM_010956	ENSMUSG00000020456	Ogdh	2210403E04Rik|2210412K19Rik|AA409584|d1401|mKIAA4192	oxoglutarate (alpha-ketoglutarate) dehydrogenase (lipoamide)	protein-coding
289	chr13	43994058	44000676	+	0	NA	Intergenic	L1ME2|LINE|L1	116886	NM_001289915	12522	Mm.57175	NM_009856	ENSMUSG00000015396	Cd83	-	CD83 antigen	protein-coding
729	chr4	83130295	83134134	+	0	NA	5' UTR (NM_133948, exon 1 of 16)	5' UTR (NM_133948, exon 1 of 16)	138	NM_001290527	101739	Mm.105331	NM_133948	ENSMUSG00000028484	Psip1	AA408851|AU015605|Dfs70|Ledgfa|Ledgfb|Psip2	PC4 and SFRS1 interacting protein 1	protein-coding
771	chr5	20559427	20562934	+	0	NA	intron (NM_011203, intron 1 of 17)	CpG	435	NM_011203	19248	Mm.319117	NM_011203	ENSMUSG00000028771	Ptpn12	P19-PTP|PTP-P19|PTP-PEST|PTPG1	protein tyrosine phosphatase, non-receptor type 12	protein-coding
2	chr1	4796912	4798901	+	0	NA	promoter-TSS (NM_008866)	promoter-TSS (NM_008866)	-68	NM_008866	18777	Mm.299955	NM_008866	ENSMUSG00000025903	Lypla1	Pla1a	lysophospholipase 1	protein-coding
808	chr5	122068085	122070434	+	0	NA	promoter-TSS (NM_178799)	promoter-TSS (NM_178799)	-312	NM_178799	338350	Mm.482918	NM_178799	ENSMUSG00000042647	Acad12	9330129D05Rik	acyl-Coenzyme A dehydrogenase family, member 12	protein-coding
401	chr15	97922947	97925014	+	0	NA	promoter-TSS (NM_144851)	promoter-TSS (NM_144851)	20	NM_144851	223870	Mm.384023	NM_144851	ENSMUSG00000033075	Senp1	2310046A20Rik|D15Ertd528e|E330036L07Rik|suPr-2	SUMO1/sentrin specific peptidase 1	protein-coding
845	chr6	39674001	39676070	+	0	NA	intron (NM_139294, intron 1 of 21)	CpG	427	NM_139294	109880	Mm.245513	NM_139294	ENSMUSG00000002413	Braf	9930012E13Rik|AA120551|AA387315|AA473386|B-raf|Braf-2|Braf2|C230098H17|C87398|D6Ertd631e	Braf transforming gene	protein-coding
186	chr11	49015614	49018395	+	0	NA	promoter-TSS (NM_009562)	promoter-TSS (NM_009562)	2	NM_009562	22720	Mm.16650	NM_009562	ENSMUSG00000046311	Zfp62	-	zinc finger protein 62	protein-coding
147	chr10	114445702	114458944	+	0	NA	Intergenic	Intergenic	169755	NM_173391	216343	Mm.31597	NM_173391	ENSMUSG00000006764	Tph2	AU043594|Ntph	tryptophan hydroxylase 2	protein-coding
973	chr8	32278623	32280261	+	0	NA	promoter-TSS (NM_026453)	promoter-TSS (NM_026453)	-246	NM_026453	67920	Mm.289818	NM_026453	ENSMUSG00000031578	Mak16	2600016B03Rik|AI314911|Rbm13	MAK16 homolog (S. cerevisiae)	protein-coding
1046	chr9	63246099	63247972	+	0	NA	promoter-TSS (NM_027090)	promoter-TSS (NM_027090)	16	NM_027090	69478	Mm.113942	NM_027090	ENSMUSG00000032403	2300009A05Rik	-	RIKEN cDNA 2300009A05 gene	protein-coding
915	chr7	75095390	75100255	+	0	NA	exon (NM_010513, exon 1 of 21)	exon (NM_010513, exon 1 of 21)	679	NM_010513	16001	Mm.275742	NM_010513		Igf1r	A330103N21Rik|CD221|D930020L01|IGF-1R|hyft	insulin-like growth factor I receptor	protein-coding
319	chr13	105482457	105487534	+	0	NA	intron (NM_026072, intron 11 of 13)	intron (NM_026072, intron 11 of 13)	122038	NM_026072	67285	Mm.235398	NM_026072	ENSMUSG00000021715	Cwc27	3110009E13Rik|NY-CO-10|Sdccag10	CWC27 spliceosome-associated protein homolog (S. cerevisiae)	protein-coding
1052	chr9	72121992	72125077	+	0	NA	intron (NM_146224, intron 1 of 21)	intron (NM_146224, intron 1 of 21)	828	NM_146224	235469	Mm.242791	NM_146224	ENSMUSG00000038535	Zfp280d	A930005F02Rik|BC027163|Suhw4|ZNF634|Znf280d	zinc finger protein 280D	protein-coding
735	chr4	98588690	98591592	+	0	NA	promoter-TSS (NM_146144)	promoter-TSS (NM_146144)	-360	NM_146144	230484	Mm.371692	NM_146144	ENSMUSG00000028560	Usp1	-	ubiquitin specific peptidase 1	protein-coding
404	chr15	98956069	98957821	+	0	NA	promoter-TSS (NM_139140)	promoter-TSS (NM_139140)	-331	NM_139140	72572	Mm.276650	NM_139140	ENSMUSG00000051934	Spats2	2700012F11Rik|59kDa|Scr59|p59	spermatogenesis associated, serine-rich 2	protein-coding
516	chr18	73974108	73976500	+	0	NA	promoter-TSS (NM_145494)	promoter-TSS (NM_145494)	-258	NM_145494	107029	Mm.36817	NM_145494	ENSMUSG00000024556	Me2	AW120568|D030040L20Rik|NAD-ME	malic enzyme 2, NAD(+)-dependent, mitochondrial	protein-coding
974	chr8	35868836	35872454	+	0	NA	promoter-TSS (NM_176933)	promoter-TSS (NM_176933)	-19	NM_176933	319520	Mm.170276	NM_176933	ENSMUSG00000031530	Dusp4	2700078F24Rik|AI844617|BB104621|E130306H24Rik|MKP2	dual specificity phosphatase 4	protein-coding
702	chr4	25208062	25209811	+	0	NA	promoter-TSS (NM_026194)	promoter-TSS (NM_026194)	32	NM_026194	67490	Mm.226295	NM_026194	ENSMUSG00000040359	Ufl1	1810074P20Rik|AI429228|Kiaa0776|Maxer|Rcad|mKIAA0776	UFM1 specific ligase 1	protein-coding
344	chr14	56491063	56520499	+	0	NA	exon (NM_027143, exon 3 of 8)	exon (NM_027143, exon 3 of 8)	1975	NM_027143	219094	Mm.37592	NM_027143	ENSMUSG00000047153	Khnyn	6330555F21|9130227C08Rik|AI605259|Kiaa0323|mKIAA0323	KH and NYN domain containing	protein-coding
636	chr2	168030622	168033604	+	0	NA	5' UTR (NM_009628, exon 1 of 4)	5' UTR (NM_009628, exon 1 of 4)	449	NM_009628	11538	Mm.201322	NM_009628	ENSMUSG00000051149	Adnp	AA589558|mKIAA0784	activity-dependent neuroprotective protein	protein-coding
561	chr2	19577791	19581021	+	0	NA	promoter-TSS (NM_027715)	promoter-TSS (NM_027715)	118	NR_033642	100041244	Mm.407223	NR_033642		Gm3230	-	predicted gene 3230	ncRNA
209	chr11	77419992	77422161	+	0	NA	5' UTR (NM_144825, exon 1 of 20)	5' UTR (NM_144825, exon 1 of 20)	241	NM_144825	216965	Mm.340436	NM_144825	ENSMUSG00000017291	Taok1	2810468K05Rik|AU020252|D130018F14Rik|Map3k16|Markk|Psk2|mKIAA1361	TAO kinase 1	protein-coding
357	chr14	73924040	73925511	+	0	NA	intron (NM_172527, intron 3 of 4)	CpG	14919	NM_026119	67381	Mm.282888	NM_026119	ENSMUSG00000022109	Med4	2410046H15Rik|DRIP36|HSPC126|TRAP36|Vdirp|Vdrip	mediator complex subunit 4	protein-coding
117	chr10	62483858	62489289	+	0	NA	promoter-TSS (NM_026085)	promoter-TSS (NM_026085)	24	NM_001079824	432467	Mm.274784	NM_001079824	ENSMUSG00000020069	Hnrnph3	AA693301|AI666703|Hnrph3	heterogeneous nuclear ribonucleoprotein H3	protein-coding
455	chr17	27558377	27665525	+	0	NA	intron (NM_001291045, intron 1 of 9)	intron (NM_001291045, intron 1 of 9)	28527	NM_001013385	268934	Mm.358940	NM_001013385	ENSMUSG00000063239	Grm4	Gprc1d|mGluR4	glutamate receptor, metabotropic 4	protein-coding
600	chr2	113688641	113689892	+	0	NA	promoter-TSS (NM_181416)	promoter-TSS (NM_181416)	-448	NM_181416	228482	Mm.45753	NM_181416	ENSMUSG00000041219	Arhgap11a	6530401L14Rik|mKIAA0013	Rho GTPase activating protein 11A	protein-coding
80	chr1	179611815	179615105	+	0	NA	Intergenic	Intergenic	-40386	NR_037994	75589	Mm.86666	NR_037994		2310043L19Rik	-	RIKEN cDNA 2310043L19 gene	ncRNA
336	chr14	31831685	31833316	+	0	NA	promoter-TSS (NR_104298)	promoter-TSS (NR_104298)	176	NM_001081251	66923	Mm.27913	NM_025847	ENSMUSG00000042323	Pbrm1	2610016F04Rik|AI507524|BAF180|Pb1	polybromo 1	protein-coding
457	chr17	30748848	30749670	+	0	NA	intron (NM_025374, intron 1 of 5)	intron (NM_025374, intron 1 of 5)	345	NM_025374	109801	Mm.261984	NM_025374	ENSMUSG00000024026	Glo1	0610009E22Rik|1110008E19Rik|2510049H23Rik|AW550643|GLY1|Glo-1|Glo-1r|Glo-1s|Glo1-r|Glo1-s|Qglo	glyoxalase 1	protein-coding
821	chr5	138557387	138559136	+	0	NA	intron (NM_001044703, intron 1 of 3)	CpG	128	NM_001044705	22697	Mm.2760	NM_011757	ENSMUSG00000037017	Zscan21	AI326272|CTfin51|RU49|Zfp-38|Zfp38|Zipro1	zinc finger and SCAN domain containing 21	protein-coding
696	chr3	157196669	157198250	+	0	NA	promoter-TSS (NM_017381)	promoter-TSS (NM_017381)	98	NM_017381	53861	Mm.259036	NM_017381	ENSMUSG00000028180	Zranb2	AI227013|Zfp265|Zis|Znf265	zinc finger, RAN-binding domain containing 2	protein-coding
383	chr15	72187897	72192722	+	0	NA	Intergenic	Intergenic	186400	NM_001033876	223604	Mm.386856	NM_001033876	ENSMUSG00000036760	Kcnk9	Task3	potassium channel, subfamily K, member 9	protein-coding
963	chr8	13104367	13106826	+	0	NA	promoter-TSS (NM_178708)	promoter-TSS (NM_178708)	-125	NM_146207	99375	Mm.212861	NM_146207	ENSMUSG00000031446	Cul4a	2810470J21Rik|AW495282	cullin 4A	protein-coding
297	chr13	67033185	67035007	+	0	NA	promoter-TSS (NM_025547)	promoter-TSS (NM_025547)	-88	NM_025547	66410	Mm.347939	NM_025547	ENSMUSG00000021519	Mterf3	2410017I18Rik|Mterfd1	mitochondrial transcription termination factor 3	protein-coding
92	chr10	3260447	3273706	+	0	NA	Intergenic	Lx|LINE|L1	-56280	NM_001033391	320495	Mm.331674	NM_001033391	ENSMUSG00000064065	Ipcef1	A130090K04Rik	interaction protein for cytohesin exchange factors 1	protein-coding
980	chr8	48798379	48800694	+	0	NA	promoter-TSS (NM_172407)	promoter-TSS (NM_172407)	-251	NM_172407	70925	Mm.393807	NM_172407	ENSMUSG00000038069	Cdkn2aip	4921511I16Rik|AW208986|CARF	CDKN2A interacting protein	protein-coding
10	chr1	36747731	36749242	+	0	NA	exon (NM_009942, exon 1 of 4)	exon (NM_009942, exon 1 of 4)	154	NM_009942	12859	Mm.180182	NM_009942	ENSMUSG00000061518	Cox5b	-	cytochrome c oxidase subunit Vb	protein-coding
550	chr19	47164043	47165938	+	0	NA	promoter-TSS (NM_011053)	promoter-TSS (NM_011053)	125	NM_023211	66477	Mm.29722	NM_023211	ENSMUSG00000071528	Usmg5	2010301L15Rik	upregulated during skeletal muscle growth 5	protein-coding
1081	chrX	12646582	12650376	+	0	NA	promoter-TSS (NM_009481)	promoter-TSS (NM_009481)	-145	NM_009481	22284	Mm.242646	NM_009481	ENSMUSG00000031010	Usp9x	5730589N07Rik|AA407302|AA407699|AL022658|AL022749|Dffrx|FAF-X|Fafl	ubiquitin specific peptidase 9, X chromosome	protein-coding
505	chr18	36439084	36447861	+	0	NA	intron (NM_008989, intron 1 of 1)	intron (NM_008989, intron 1 of 1)	2656	NM_008989	19290	Mm.231802	NM_008989		Pura	CAGER-1|Pur-alpha|ssCRE-BP	purine rich element binding protein A	protein-coding
670	chr3	96289372	96306351	+	0	NA	Intergenic	IAPEz-int|LTR|ERVK	-31247	NM_027126	69585	Mm.171314	NM_027126	ENSMUSG00000038403	Hfe2	2310035L15Rik|5230400G09Rik|AI414844|AI789733|DL-M|HJV|Rgmc|hemojuvelin	hemochromatosis type 2 (juvenile) (human homolog)	protein-coding
958	chr8	4275354	4276632	+	0	NA	promoter-TSS (NM_011592)	promoter-TSS (NM_011592)	-88	NM_011592	21856	Mm.195249	NM_011592	ENSMUSG00000002949	Timm44	0710005E20Rik|D8Ertd118e|Mimt44|Tim44	translocase of inner mitochondrial membrane 44	protein-coding
419	chr16	23106782	23108992	+	0	NA	non-coding (NR_110335, exon 1 of 12)	non-coding (NR_110335, exon 1 of 12)	346	NR_110335	13682	Mm.260084	NM_013506	ENSMUSG00000022884	Eif4a2	4833432N07Rik|BM-010|Ddx2b|Eif4|eIF-4A-II|eIF4A-II	eukaryotic translation initiation factor 4A2	protein-coding
995	chr8	87822764	87824345	+	0	NA	promoter-TSS (NM_019716)	promoter-TSS (NM_019716)	23	NR_028268	56452	Mm.29709	NM_019716	ENSMUSG00000031697	Orc6	6720420I10Rik|Orc6l	origin recognition complex, subunit 6	protein-coding
837	chr6	21898699	21901175	+	0	NA	intron (NM_023626, intron 1 of 11)	CpG	322	NM_023626	71777	Mm.39999	NM_023626	ENSMUSG00000029670	Ing3	1300013A07Rik|P47ING3	inhibitor of growth family, member 3	protein-coding
290	chr13	46822160	46824423	+	0	NA	promoter-TSS (NM_175749)	promoter-TSS (NM_175749)	-73	NM_175749	218210	Mm.255398	NM_175749	ENSMUSG00000021374	Nup153	B130015D15Rik|C88147	nucleoporin 153	protein-coding
625	chr2	154875721	154877195	+	0	NA	exon (NM_015770, exon 4 of 4)	exon (NM_015770, exon 4 of 4)	23775	NM_016661	269378	Mm.330692	NM_016661	ENSMUSG00000027597	Ahcy	AA987153|AL024110|CuBP|SAHH	S-adenosylhomocysteine hydrolase	protein-coding
592	chr2	94081284	94088832	+	0	NA	Intergenic	Intergenic	-3448	NR_029752	723953		NR_029752	miRBase:MI0000585	Mir129-2	Mirn129-2	microRNA 129-2	ncRNA
149	chr10	114750742	114754581	+	0	NA	promoter-TSS (NM_024454)	promoter-TSS (NM_024454)	-14	NM_024454	216344	Mm.21936	NM_024454	ENSMUSG00000020132	Rab21	9630024B22	RAB21, member RAS oncogene family	protein-coding
712	chr4	41221479	41223095	+	0	NA	promoter-TSS (NM_026872)	promoter-TSS (NM_026872)	-119	NM_026872	68926	Mm.41864	NM_026872	ENSMUSG00000028433	Ubap2	1190005K07Rik|AA408600|AU045235|UBAP-2|mKIAA1491	ubiquitin-associated protein 2	protein-coding
210	chr11	77498585	77502333	+	0	NA	intron (NM_001024205, intron 1 of 3)	CpG	818	NM_001024205	68564	Mm.428996	NM_001024205		Nufip2	1110001M19Rik|9530056D24Rik|AI256692|AI461731|PIG1|mKIAA1321	nuclear fragile X mental retardation protein interacting protein 2	protein-coding
406	chr15	103069457	103071673	+	0	NA	promoter-TSS (NR_002885)	promoter-TSS (NR_002885)	-263	NR_104427	15382	Mm.237064	NM_010447	ENSMUSG00000046434	Hnrnpa1	HDP-1|Hdp|Hnrpa1|hnRNP A1|hnrnp-A1	heterogeneous nuclear ribonucleoprotein A1	protein-coding
173	chr11	22411767	22413540	+	0	NA	intron (NM_153596, intron 1 of 3)	CpG	367	NM_153596	103765	Mm.221274	NM_153596	ENSMUSG00000049904	Tmem17	AI503894|AW049890	transmembrane protein 17	protein-coding
530	chr19	11985680	11987847	+	0	NA	promoter-TSS (NM_172635)	promoter-TSS (NM_172635)	-126	NM_172635	225929	Mm.42711	NM_172635	ENSMUSG00000046139	Patl1	AV312086|D430024J04|Pat1b	protein associated with topoisomerase II homolog 1 (yeast)	protein-coding
66	chr1	161161266	161163427	+	0	NA	promoter-TSS (NM_011931)	promoter-TSS (NM_011931)	-111	NM_011931	26374	Mm.328135	NM_011931	ENSMUSG00000040782	Rfwd2	AI316802|C80879|Cop1	ring finger and WD repeat domain 2	protein-coding
19	chr1	50979292	50986204	+	0	NA	Intergenic	Intergenic	-1619	NM_019790	56363	Mm.245154	NM_019790	ENSMUSG00000026109	Tmeff2	4832418D20Rik|7630402F16Rik|TR-2	transmembrane protein with EGF-like and two follistatin-like domains 2	protein-coding
1030	chr9	24953373	24957553	+	0	NA	exon (NM_020586, exon 1 of 8)	exon (NM_020586, exon 1 of 8)	817	NM_020586	80517	Mm.142843	NM_020586	ENSMUSG00000008429	Herpud2	5031400M07Rik|AB041580	HERPUD family member 2	protein-coding
365	chr14	122276930	122278632	+	0	NA	promoter-TSS (NM_026861)	promoter-TSS (NM_026861)	-47	NM_026861	68889	Mm.441151	NM_026861	ENSMUSG00000041765	Ubac2	1190008A14Rik|AW554959|Phgdhl1	ubiquitin associated domain containing 2	protein-coding
763	chr4	154973909	154976746	+	0	NA	promoter-TSS (NM_177186)	promoter-TSS (NM_177186)	-198	NM_177186	320541	Mm.306018	NM_177186	ENSMUSG00000042202	Slc35e2	A530082C11Rik|AI957035	solute carrier family 35, member E2	protein-coding
470	chr17	69730436	69735769	+	0	NA	promoter-TSS (NM_009547)	promoter-TSS (NM_009547)	-216	NM_009547	22666	Mm.29434	NM_009547	ENSMUSG00000049672	Zbtb14	ZF5|Zfp161|b2b1982Clo	zinc finger and BTB domain containing 14	protein-coding
793	chr5	76732410	76735059	+	0	NA	promoter-TSS (NM_001289826)	promoter-TSS (NM_001289826)	83	NM_001289826	12753	Mm.3552	NM_007715	ENSMUSG00000029238	Clock	5330400M04Rik|KAT13D|bHLHe8|mKIAA0334	circadian locomotor output cycles kaput	protein-coding
654	chr3	51079703	51082254	+	0	NA	non-coding (NR_073429, exon 1 of 1)	non-coding (NR_073429, exon 1 of 1)	295	NR_073429	67746	Mm.441177	NR_073429		4930577N17Rik	-	RIKEN cDNA 4930577N17 gene	ncRNA
570	chr2	28979565	28982179	+	0	NA	5' UTR (NM_198033, exon 1 of 26)	5' UTR (NM_198033, exon 1 of 26)	360	NM_198033	269254	Mm.41867	NM_198033	ENSMUSG00000043535	Setx	A130090N03|A930037J23Rik|AOA2|AW060766|Als4|SCAR1|Sen1|mKIAA0625	senataxin	protein-coding
252	chr12	53703005	53707329	+	0	NA	Intergenic	Intergenic	-1858	NR_045910	73278	Mm.396209	NR_045910		1700031P21Rik	-	RIKEN cDNA 1700031P21 gene	ncRNA
883	chr7	4894929	4895577	+	0	NA	exon (NM_173008, exon 14 of 14)	exon (NM_173008, exon 14 of 14)	17807	NM_173008	269855	Mm.44190	NM_173008	ENSMUSG00000035279	Ssc5d	A430110N23Rik|S5D-SRCRB	scavenger receptor cysteine rich family, 5 domains	protein-coding
156	chr10	127494854	127497110	+	0	NA	promoter-TSS (NM_019766)	promoter-TSS (NM_019766)	-56	NM_019766	56351	Mm.305816	NM_019766	ENSMUSG00000071072	Ptges3	5730442A20Rik|Ptges|Tebp|cPGES|p23|sid3177	prostaglandin E synthase 3 (cytosolic)	protein-coding
283	chr13	14154704	14157705	+	0	NA	promoter-TSS (NM_010282)	promoter-TSS (NM_010282)	153	NM_198122	94246	Mm.439784	NM_194262	ENSMUSG00000039219	Arid4b	BCAA|BRCAA1|RBBP1L1|Rbp1l1|SAP180	AT rich interactive domain 4B (RBP1-like)	protein-coding
655	chr3	51847885	51852131	+	0	NA	intron (NM_001004176, intron 1 of 4)	intron (NM_001004176, intron 1 of 4)	58920	NM_001004176	433586	Mm.234972	NM_001004176	ENSMUSG00000061143	Maml3	AV234550|BC049812|Mam-2|mKIAA1816	mastermind like 3 (Drosophila)	protein-coding
59	chr1	138311299	138313167	+	0	NA	promoter-TSS (NR_024328)	promoter-TSS (NR_024328)	-137	NR_024328	320054	Mm.208000	NR_024328	ENSMUSG00000097403	9230116N13Rik	-	RIKEN cDNA 9230116N13 gene	ncRNA
421	chr16	33379732	33382943	+	0	NA	promoter-TSS (NR_045709)	promoter-TSS (NR_045709)	476	NM_011749	22661	Mm.392667	NM_011749	ENSMUSG00000022811	Zfp148	2210405J08Rik|AI480666|AW045217|BERF-1|BFCOL1|ZBP-89|Znf148	zinc finger protein 148	protein-coding
271	chr12	99496510	99498242	+	0	NA	exon (NM_008079, exon 1 of 17)	exon (NM_008079, exon 1 of 17)	171	NM_008079	14420	Mm.5120	NM_008079	ENSMUSG00000021003	Galc	2310068B06Rik|A930008M05Rik|AW212969|AW413532|Gacy|twi|twitcher	galactosylceramidase	protein-coding
1070	chr9	110309709	110311626	+	0	NA	promoter-TSS (NM_001081043)	promoter-TSS (NM_001081043)	47	NM_001081043	104831	Mm.335477	NM_001081043	ENSMUSG00000036057	Ptpn23	AI462446|PTP-TD14	protein tyrosine phosphatase, non-receptor type 23	protein-coding
1024	chr9	13630130	13633279	+	0	NA	promoter-TSS (NM_026665)	promoter-TSS (NM_026665)	-153	NM_026665	74360	Mm.157212	NM_026665	ENSMUSG00000031922	Cep57	3110002L15Rik|4921510P06Rik|4931428M20Rik|AI467480|Tsp57|mKIAA0092	centrosomal protein 57	protein-coding
491	chr18	24363304	24365367	+	0	NA	promoter-TSS (NM_001160404)	promoter-TSS (NM_001160404)	-160	NM_001160404	14423	Mm.30249	NM_013814	ENSMUSG00000000420	Galnt1	-	UDP-N-acetyl-alpha-D-galactosamine:polypeptide N-acetylgalactosaminyltransferase 1	protein-coding
864	chr6	100236353	100238095	+	0	NA	intron (NM_019743, intron 1 of 4)	CpG	128	NM_019743	56353	Mm.321633	NM_019743	ENSMUSG00000072872	Rybp	2410018J24Rik|DEDAF|YEAF1	RING1 and YY1 binding protein	protein-coding
1016	chr8	125563317	125567530	+	0	NA	intron (NR_037865, intron 1 of 13)	CpG	761	NR_037865	77087	Mm.31567	NM_001081379	ENSMUSG00000035569	Ankrd11	2410104C19Rik|3010027A04Rik|6330578C09Rik|9530048I21Rik|AA930108|Gm176|Yod	ankyrin repeat domain 11	protein-coding
219	chr11	93745768	93748536	+	0	NA	promoter-TSS (NM_134012)	promoter-TSS (NM_134012)	-72	NM_001013375	217109	Mm.379350	NM_001013375	ENSMUSG00000054079	Utp18	6230425C22Rik|6430513M13|Wdr50	UTP18, small subunit (SSU) processome component, homolog (yeast)	protein-coding
13	chr1	38184860	38188444	+	0	NA	promoter-TSS (NM_019570)	promoter-TSS (NM_019570)	-145	NM_019570	56210	Mm.389103	NM_019570	ENSMUSG00000026082	Rev1	1110027I23Rik|AU022044|Rev1l	REV1 homolog (S. cerevisiae)	protein-coding
799	chr5	107124582	107126464	+	0	NA	intron (NM_026856, intron 1 of 6)	CpG	326	NM_026856	52397	Mm.249474	NM_026856	ENSMUSG00000049606	Zfp644	1110068L01Rik|AA408882|BM-005|D5Ertd689e|Zep-2	zinc finger protein 644	protein-coding
105	chr10	50311360	50313415	+	0	NA	promoter-TSS (NM_198007)	promoter-TSS (NM_198007)	-88	NM_198007	77987	Mm.222497	NM_198007	ENSMUSG00000038774	Ascc3	ASC1p200|B630009I04Rik|BC023451|D430001L07Rik|D630041L21|Helic1|RNAH	activating signal cointegrator 1 complex subunit 3	protein-coding
925	chr7	105803981	105806236	+	0	NA	promoter-TSS (NM_172280)	promoter-TSS (NM_172280)	-29	NM_172280	233545	Mm.387819	NM_172280	ENSMUSG00000035401	2210018M11Rik	2310016L09Rik|AU019521|AU019557|Emsy	RIKEN cDNA 2210018M11 gene	protein-coding
840	chr6	29297014	29298722	+	0	NA	promoter-TSS (NM_184053)	promoter-TSS (NM_184053)	-238	NM_007594	12321	Mm.392075	NM_007594	ENSMUSG00000029767	Calu	9530075H20Rik	calumenin	protein-coding
597	chr2	104332607	104335992	+	0	NA	5' UTR (NM_001145824, exon 1 of 16)	5' UTR (NM_001145824, exon 1 of 16)	347	NM_010434	15259	Mm.257925	NM_010434	ENSMUSG00000027177	Hipk3	DYRK6|FIST3|PKY	homeodomain interacting protein kinase 3	protein-coding
390	chr15	81414792	81419783	+	0	NA	intron (NM_177821, intron 1 of 30)	intron (NM_177821, intron 1 of 30)	643	NM_177821	328572	Mm.258397	NM_177821	ENSMUSG00000055024	Ep300	A430090G16|A730011L11|KAT3B|p300|p300 HAT	E1A binding protein p300	protein-coding
111	chr10	61142092	61143771	+	0	NA	promoter-TSS (NM_009120)	promoter-TSS (NM_009120)	-138	NM_009120	20224	Mm.391794	NM_009120	ENSMUSG00000020088	Sar1a	1600019H17Rik|Sara|Sara1	SAR1 gene homolog A (S. cerevisiae)	protein-coding
1042	chr9	59332460	59335551	+	0	NA	exon (NM_019927, exon 1 of 14)	exon (NM_019927, exon 1 of 14)	176	NM_019927	23806	Mm.305925	NM_019927	ENSMUSG00000025234	Arih1	AU021774|Ari|Ari1|Hari|Hhari|Ubch7bp|Uip77	ariadne ubiquitin-conjugating enzyme E2 binding protein homolog 1 (Drosophila)	protein-coding
38	chr1	75137097	75140857	+	0	NA	promoter-TSS (NM_170755)	promoter-TSS (NM_170755)	-35	NM_026977	69171	Mm.28193	NM_026977	ENSMUSG00000033159	Cnppd1	1810031K17Rik|AU043960	cyclin Pas1/PHO80 domain containing 1	protein-coding
408	chr16	4003019	4004560	+	0	NA	Intergenic	CpG	-2111	NM_177472	52864	Mm.29935	NM_177472	ENSMUSG00000039738	Slx4	AI256635|AI426760|Btbd12|D16Bwg1016e	SLX4 structure-specific endonuclease subunit homolog (S. cerevisiae)	protein-coding
196	chr11	60643672	60644965	+	0	NA	intron (NM_001172112, intron 1 of 6)	intron (NM_001172112, intron 1 of 6)	185	NM_145428	216820	Mm.21475	NM_145428	ENSMUSG00000042569	Dhrs7b	BC003479|C79874|C80074|PexRAP	dehydrogenase/reductase (SDR family) member 7B	protein-coding
945	chr7	135109259	135112107	+	0	NA	promoter-TSS (NM_139149)	promoter-TSS (NM_139149)	-310	NM_139149	233908	Mm.277680	NM_139149	ENSMUSG00000030795	Fus	D430004D17Rik|D930039C12Rik|Fus1|Tls	fused in sarcoma	protein-coding
242	chr12	8679947	8682254	+	0	NA	promoter-TSS (NM_001160219)	promoter-TSS (NM_001160219)	35	NM_001160220	80913	Mm.341243	NM_030723	ENSMUSG00000020594	Pum2	5730503J23Rik|Pumm2|mKIAA0235	pumilio RNA-binding family member 2	protein-coding
559	chr2	18593266	18600004	+	0	NA	exon (NM_147778, exon 7 of 8)	exon (NM_147778, exon 7 of 8)	-2010	NM_007552	12151	Mm.289584	NM_007552	ENSMUSG00000026739	Bmi1	AW546694|Bmi-1|Pcgf4	Bmi1 polycomb ring finger oncogene	protein-coding
32	chr1	64385206	64389575	+	0	NA	Intergenic	RSINE1|SINE|B4	-191988	NM_133828	12912	Mm.422634	NM_009952	ENSMUSG00000025958	Creb1	2310001E10Rik|3526402H21Rik|AV083133|Creb|Creb-1	cAMP responsive element binding protein 1	protein-coding
118	chr10	62800055	62803036	+	0	NA	exon (NM_019812, exon 1 of 9)	exon (NM_019812, exon 1 of 9)	235	NM_019812	93759	Mm.351459	NM_019812	ENSMUSG00000020063	Sirt1	AA673258|SIR2L1|Sir2|Sir2a|Sir2alpha	sirtuin 1	protein-coding
206	chr11	70264883	70266185	+	0	NA	exon (NM_025397, exon 1 of 3)	exon (NM_025397, exon 1 of 3)	101	NM_025397	66172	Mm.46424	NM_025397	ENSMUSG00000018923	Med11	1110030J09Rik|AI465144|AW545069	mediator complex subunit 11	protein-coding
443	chr17	4944439	4948123	+	0	NA	Intergenic	Intergenic	-48793	NM_001085355	239985	Mm.133401	NM_001085355	ENSMUSG00000069729	Arid1b	8030481M12|9330189K18Rik|AI836955|Ardi1b|B230217J03Rik|mKIAA1235	AT rich interactive domain 1B (SWI-like)	protein-coding
959	chr8	4676615	4679038	+	0	NA	Intergenic	CpG	64656	NM_145591	233987	Mm.102799	NM_145591		Zfp958	-	zinc finger protein 958	protein-coding
1065	chr9	100540656	100547409	+	0	NA	promoter-TSS (NM_009282)	promoter-TSS (NM_009282)	-10	NM_009282	20842	Mm.42135	NM_009282	ENSMUSG00000037286	Stag1	AU045003|SA-1|Scc3	stromal antigen 1	protein-coding
331	chr14	22318103	22321493	+	0	NA	intron (NM_017479, intron 1 of 16)	CpG	791	NM_017479	54169	Mm.248967	NM_017479	ENSMUSG00000021767	Kat6b	AI507552|B130044K16Rik|MYST-4|Morf|Myst4|mKIAA0383|qkf|querkopf	K(lysine) acetyltransferase 6B	protein-coding
358	chr14	76813399	76818742	+	0	NA	exon (NM_207652, exon 1 of 3)	exon (NM_207652, exon 1 of 3)	442	NM_207652	21807	Mm.153272	NM_009366	ENSMUSG00000022010	Tsc22d1	AA589566|AW105905|Egr5|TSC-22|Tgfb1i4|Tsc|Tsc22	TSC22 domain family, member 1	protein-coding
737	chr4	107040221	107040952	+	0	NA	5' UTR (NM_028355, exon 1 of 18)	5' UTR (NM_028355, exon 1 of 18)	197	NM_028355	72787	Mm.28478	NM_028355	ENSMUSG00000028614	Ndc1	2810475A17Rik|AI450313|Tmem48	NDC1 transmembrane nucleoporin	protein-coding
580	chr2	53049597	53051935	+	0	NA	promoter-TSS (NM_018785)	promoter-TSS (NM_018785)	-352	NM_022989	65103	Mm.37623	NM_022989	ENSMUSG00000026960	Arl6ip6	2310057C01Rik|2610529A11Rik|Aip-6	ADP-ribosylation factor-like 6 interacting protein 6	protein-coding
767	chr5	9160719	9162741	+	0	NA	promoter-TSS (NM_011806)	promoter-TSS (NM_011806)	46	NM_001110327	23857	Mm.22480	NM_011806	ENSMUSG00000042508	Dmtf1	Dimp|Dmp1	cyclin D binding myb-like transcription factor 1	protein-coding
84	chr1	180334277	180339681	+	0	NA	intron (NM_026626, intron 1 of 6)	intron (NM_026626, intron 1 of 6)	967	NM_026626	68226	Mm.252132	NM_026626	ENSMUSG00000026495	Efcab2	1700073K01Rik|D830011E08Rik	EF-hand calcium binding domain 2	protein-coding
805	chr5	117862616	117866667	+	0	NA	5' UTR (NM_001114545, exon 1 of 20)	5' UTR (NM_001114545, exon 1 of 20)	630	NM_001114545	333050	Mm.437947	NM_001034873	ENSMUSG00000061578	Ksr2	-	kinase suppressor of ras 2	protein-coding
1020	chr8	128997266	128999509	+	0	NA	exon (NM_001159907, exon 1 of 30)	exon (NM_001159907, exon 1 of 30)	578	NM_001159907	212728	Mm.482479	NM_001159907	ENSMUSG00000090290	Gm17296	Gm179|Tarbp1	predicted gene, 17296	protein-coding
437	chr16	96302614	96305507	+	0	NA	promoter-TSS (NM_001103179)	promoter-TSS (NM_001103179)	-25	NM_145125	93871	Mm.240871	NM_145125	ENSMUSG00000022914	Brwd1	5330419I02Rik|D530019K20Rik|G1-403-16|Wdr9|repro5	bromodomain and WD repeat domain containing 1	protein-coding
194	chr11	59318634	59321032	+	0	NA	non-coding (NR_015585, exon 1 of 5)	non-coding (NR_015585, exon 1 of 5)	309	NM_001291014	268417	Mm.239793	NM_172941	ENSMUSG00000020472	Zkscan17	Nizp1|Zfp496|Znf496	zinc finger with KRAB and SCAN domains 17	protein-coding
220	chr11	97627331	97628601	+	0	NA	promoter-TSS (NM_026186)	promoter-TSS (NM_026186)	-39	NM_026186	67480	Mm.33206	NM_026186	ENSMUSG00000018541	Cwc25	1300013D05Rik|AA473636|Ccdc49|R75228	CWC25 spliceosome-associated protein homolog (S. cerevisiae)	protein-coding
846	chr6	45008450	45011337	+	0	NA	promoter-TSS (NM_001004357)	promoter-TSS (NM_001004357)	-167	NM_001004357	66797	Mm.440084	NM_025771	ENSMUSG00000039419	Cntnap2	5430425M22Rik|Caspr2|mKIAA0868	contactin associated protein-like 2	protein-coding
1021	chr8	129021127	129023119	+	0	NA	Intergenic	Intergenic	-23158	NM_001159907	212728	Mm.482479	NM_001159907	ENSMUSG00000090290	Gm17296	Gm179|Tarbp1	predicted gene, 17296	protein-coding
31	chr1	63222411	63224274	+	0	NA	promoter-TSS (NM_018796)	promoter-TSS (NM_018796)	54	NM_145518	227197	Mm.290791	NM_145518	ENSMUSG00000025968	Ndufs1	5830412M15Rik|9930026A05Rik	NADH dehydrogenase (ubiquinone) Fe-S protein 1	protein-coding
934	chr7	125675617	125677648	+	0	NA	intron (NM_009940, intron 1 of 5)	CpG	195	NM_009940	12850	Mm.20634	NM_009940	ENSMUSG00000030652	Coq7	clk-1	demethyl-Q 7	protein-coding
948	chr7	138703779	138704546	+	0	NA	intron (NM_009774, intron 1 of 7)	CpG	257	NM_009774	12237	Mm.927	NM_009774	ENSMUSG00000066979	Bub3	AU019800|AU021329|AU043350|AW146323|C78067	budding uninhibited by benzimidazoles 3 homolog (S. cerevisiae)	protein-coding
572	chr2	34608502	34610870	+	0	NA	intron (NM_025709, intron 2 of 26)	CpG	1066	NM_025709	66691	Mm.156452	NM_025709	ENSMUSG00000026867	Gapvd1	2010005B09Rik|4432404J10Rik|AW108497|Gapex-5|RAP6|RME-6|mKIAA1521	GTPase activating protein and VPS9 domains 1	protein-coding
968	chr8	19783919	19785316	+	0	NA	Intergenic	CpG	55041	NM_001039553	626415	Mm.425517	NM_001039553		4930467E23Rik	ENSMUSG00000074453|OTTMUSG00000018948|TSAP	RIKEN cDNA 4930467E23 gene	protein-coding
675	chr3	104666712	104668656	+	0	NA	promoter-TSS (NM_009797)	promoter-TSS (NM_009797)	260	NM_153091	229681	Mm.206379	NM_153091		St7l	St7r	suppression of tumorigenicity 7-like	protein-coding
226	chr11	104301513	104306570	+	0	NA	promoter-TSS (NM_001081045)	promoter-TSS (NM_001081045)	-436	NM_001081045	76719	Mm.136418	NM_001081045	ENSMUSG00000018412	Kansl1	1700081L11Rik|9430041J06Rik|mKIAA1267	KAT8 regulatory NSL complex subunit 1	protein-coding
15	chr1	43989176	43991556	+	0	NA	promoter-TSS (NM_009418)	promoter-TSS (NM_009418)	-486	NM_009418	22019	Mm.401675	NM_009418	ENSMUSG00000041763	Tpp2	TPP-2|TppII	tripeptidyl peptidase II	protein-coding
431	chr16	77593176	77597986	+	0	NA	Intergenic	Intergenic	-3600	NR_029535	387229		NR_029535	miRBase:MI0000146	Mir99a	Mirn99a|mmu-mir-99a	microRNA 99a	ncRNA
527	chr19	6261910	6318814	+	0	NA	intron (NM_010119, intron 2 of 4)	intron (NM_010119, intron 2 of 4)	13466	NM_010119	13660	Mm.30169	NM_010119	ENSMUSG00000024772	Ehd1	AA409636|Past1|RME-1	EH-domain containing 1	protein-coding
382	chr15	66408377	66410124	+	0	NA	5' UTR (NM_001081409, exon 1 of 21)	5' UTR (NM_001081409, exon 1 of 21)	116	NM_001081409	239510	Mm.267473	NM_178718	ENSMUSG00000072501	Phf20l1	CGI-72|E130113K22Rik	PHD finger protein 20-like 1	protein-coding
62	chr1	152239049	152241093	+	0	NA	5' UTR (NM_001077237, exon 1 of 13)	5' UTR (NM_001077237, exon 1 of 13)	103	NM_133780	108989	Mm.174256	NM_133780	ENSMUSG00000006005	Tpr	2610029M07Rik|C77892	translocated promoter region, nuclear basket protein	protein-coding
833	chr6	4852350	4854345	+	0	NA	promoter-TSS (NM_181595)	promoter-TSS (NM_181595)	27	NM_181595	243725	Mm.332901	NM_181595	ENSMUSG00000032827	Ppp1r9a	2810430P21Rik|4930518N04Rik|5330407E15|A230094E16Rik|BB181831|NRB|mKIAA1222|neurabin-I	protein phosphatase 1, regulatory (inhibitor) subunit 9A	protein-coding
139	chr10	95402254	95404311	+	0	NA	promoter-TSS (NM_001001932)	promoter-TSS (NM_001001932)	-15	NM_001001932	216238	Mm.210035	NM_001001932	ENSMUSG00000036499	Eea1	A430109M19Rik|B230358H09Rik|ZFYVE2	early endosome antigen 1	protein-coding
129	chr10	81326058	81327527	+	0	NA	intron (NM_001243067, intron 1 of 3).2	CpG	113	NM_001243067	73610	Mm.490466	NM_001243067		Zfp433	1700123A16Rik	RIKEN cDNA 1700123A16 gene	protein-coding
548	chr19	45856680	45859300	+	0	NA	promoter-TSS (NM_023799)	promoter-TSS (NM_023799)	-209	NM_023799	76055	Mm.122725	NM_023799	ENSMUSG00000025220	Mgea5	2810009A20Rik|4833427O07Rik|5830447M11Rik|AA408215|Hy5|Ncoat|mKIAA0679	meningioma expressed antigen 5 (hyaluronidase)	protein-coding
926	chr7	107307526	107309165	+	0	NA	intron (NM_026010, intron 1 of 1)	intron (NM_026010, intron 1 of 1)	558	NM_026010	67164	Mm.46777	NM_026010		Lipt2	2610209A20Rik	lipoyl(octanoyl) transferase 2 (putative)	protein-coding
859	chr6	85491148	85495852	+	0	NA	Intergenic	MTE2b|LTR|MaLR	-29964	NM_020596	13656	Mm.44137	NM_020596	ENSMUSG00000071341	Egr4	NGF1-C|NGFI-C|NGFIC|pAT133	early growth response 4	protein-coding
1083	chrX	16194971	16197506	+	0	NA	promoter-TSS (NM_173740)	promoter-TSS (NM_173740)	-586	NM_173740	17161	Mm.21108	NM_173740	ENSMUSG00000025037	Maoa	1110061B18Rik|AA407771	monoamine oxidase A	protein-coding
739	chr4	108450394	108457279	+	0	NA	3' UTR (NM_001254730, exon 4 of 4)	3' UTR (NM_001254730, exon 4 of 4)	52353	NM_027453	70533	Mm.379178	NM_027453	ENSMUSG00000028568	Btf3l4	4632412E09Rik|5730434I03Rik|AI316863|AU022207|AW552446	basic transcription factor 3-like 4	protein-coding
876	chr6	137682799	137684348	+	0	NA	promoter-TSS (NM_011499)	promoter-TSS (NM_011499)	-30	NM_011499	20901	Mm.22584	NM_011499	ENSMUSG00000030224	Strap	AW557906|C78091|C79202|Unrip	serine/threonine kinase receptor associated protein	protein-coding
662	chr3	80601333	80608005	+	0	NA	intron (NM_001039195, intron 2 of 12)	intron (NM_001039195, intron 2 of 12)	2044	NM_013540	14800	Mm.220224	NM_013540	ENSMUSG00000033981	Gria2	GluA2|GluR-B|Glur-2|Glur2	glutamate receptor, ionotropic, AMPA2 (alpha 2)	protein-coding
418	chr16	22264649	22266962	+	0	NA	intron (NM_009186, intron 1 of 8)	CpG	197	NM_009186	20462	Mm.210352	NM_009186		Tra2b	5730405G21Rik|D16Ertd266e|SIG-41|Sfrs10|Silg41|TRA2beta	transformer 2 beta homolog (Drosophila)	protein-coding
783	chr5	34711063	34713536	+	0	NA	promoter-TSS (NM_001243123)	promoter-TSS (NM_001243123)	-283	NM_001243123	231128	Mm.286885	NM_001030306	ENSMUSG00000037210	Fam193a	-	family with sequence similarity 193, member A	protein-coding
933	chr7	123476889	123478375	+	0	NA	promoter-TSS (NM_026533)	promoter-TSS (NM_026533)	72	NM_026533	68052	Mm.14798	NM_026533	ENSMUSG00000090862	Rps13	2700063M04Rik	ribosomal protein S13	protein-coding
168	chr11	17058295	17061094	+	0	NA	intron (NM_024459, intron 1 of 5)	CpG	393	NM_024459	19058	Mm.41840	NM_024459	ENSMUSG00000033953	Ppp3r1	CaNB1|Cnb1|MCIP1	protein phosphatase 3, regulatory subunit B, alpha isoform (calcineurin B, type I)	protein-coding
135	chr10	86167060	86170725	+	0	NA	promoter-TSS (NM_011631)	promoter-TSS (NM_011631)	336	NM_001003939	103220	Mm.440762	NM_153595	ENSMUSG00000044937	BC030307	AI449705|AU041509|Gnn	cDNA sequence BC030307	protein-coding
348	chr14	58617468	58618538	+	0	NA	promoter-TSS (NM_028643)	promoter-TSS (NM_028643)	96	NM_028643	68514	Mm.26834	NM_028643	ENSMUSG00000021973	Micu2	1110008L20Rik|4833427E09Rik|AU041871|Efha1|Smhs2	mitochondrial calcium uptake 2	protein-coding
145	chr10	107597882	107600492	+	0	NA	promoter-TSS (NM_027892)	promoter-TSS (NM_027892)	-269	NM_027892	17931	Mm.422959	NM_027892	ENSMUSG00000019907	Ppp1r12a	1200015F06Rik|5730577I22Rik|AA792106|AV099298|D10Ertd625e|Mypt1	protein phosphatase 1, regulatory (inhibitor) subunit 12A	protein-coding
49	chr1	95697830	95701934	+	0	NA	promoter-TSS (NM_025454)	promoter-TSS (NM_025454)	-660	NM_025454	66262	Mm.64065	NM_025454	ENSMUSG00000026283	Ing5	1700001C14Rik|1700027H23Rik|1810018M11Rik|AI225768	inhibitor of growth family, member 5	protein-coding
789	chr5	66087896	66090450	+	0	NA	promoter-TSS (NM_001081321)	promoter-TSS (NM_001081321)	-78	NM_001081321	71521	Mm.278974	NM_027818	ENSMUSG00000029202	Pds5a	9030416H16Rik|E230024D05Rik|mKIAA0648	PDS5, regulator of cohesion maintenance, homolog A (S. cerevisiae)	protein-coding
178	chr11	23532834	23534765	+	0	NA	promoter-TSS (NM_027860)	promoter-TSS (NM_027860)	-168	NM_027860	71675	Mm.48031	NM_027860	ENSMUSG00000042208	0610010F05Rik	Kiaa1841|mKIAA1841	RIKEN cDNA 0610010F05 gene	protein-coding
124	chr10	77471514	77473026	+	0	NA	intron (NM_008826, intron 1 of 21)	CpG	271	NM_008826	18641	Mm.269649	NM_008826	ENSMUSG00000020277	Pfkl	AA407869|ATP-PFK|PFK-L	phosphofructokinase, liver, B-type	protein-coding
772	chr5	24346090	24349846	+	0	NA	intron (NM_053075, intron 1 of 7)	CpG	211	NM_053075	19744	Mm.319175	NM_053075	ENSMUSG00000028945	Rheb	-	Ras homolog enriched in brain	protein-coding
1090	chrX	91366546	91369402	+	0	NA	intron (NM_001044386, intron 1 of 8)	CpG	772	NM_011768	22764	Mm.919	NM_011768	ENSMUSG00000079509	Zfx	Zfx5|Zfx5,6|Zfx6	zinc finger protein X-linked	protein-coding
627	chr2	155582672	155653392	+	0	NA	intron (NM_010808, intron 1 of 8)	intron (NM_010808, intron 1 of 8)	16952	NM_010808	17391	Mm.330707	NM_010808	ENSMUSG00000027612	Mmp24	AU040325|MT5-MMP|MT5MMP|MTMMP5	matrix metallopeptidase 24	protein-coding
993	chr8	83537877	83539922	+	0	NA	promoter-TSS (NM_027554)	promoter-TSS (NM_027554)	-94	NM_027554	74841	Mm.246018	NM_027554	ENSMUSG00000038250	Usp38	4631402N15Rik|4833420O05Rik|AA536967|AU044701|AW544820|mKIAA1891	ubiquitin specific peptidase 38	protein-coding
715	chr4	45767380	45769483	+	0	NA	Intergenic	Intergenic	8664	NR_046068	100040567	Mm.490816	NR_046068	ENSMUSG00000085876	Gm12409	OTTMUSG00000006726	predicted gene 12409	ncRNA
23	chr1	55186992	55188940	+	0	NA	promoter-TSS (NM_025283)	promoter-TSS (NM_025283)	-123	NM_025283	19070	Mm.291037	NM_025283	ENSMUSG00000025979	Mob4	2610109B12Rik|Mobkl3|Phocn|Prei3	MOB family member 4, phocein	protein-coding
364	chr14	122221476	122234977	+	0	NA	Intergenic	L1MC|LINE|L1	-31270	NM_134074	105445	Mm.441054	NM_134074	ENSMUSG00000025558	Dock9	AA959601|AW538057|B230309H04Rik|D14Wsu89e|Zizimin1|mKIAA1058	dedicator of cytokinesis 9	protein-coding
388	chr15	81295447	81297832	+	0	NA	promoter-TSS (NM_019712)	promoter-TSS (NM_019712)	-107	NM_019712	56438	Mm.29405	NM_019712	ENSMUSG00000022400	Rbx1	1500002P15Rik|AA517855|ROC1	ring-box 1	protein-coding
653	chr3	40649218	40652513	+	0	NA	promoter-TSS (NM_028140)	promoter-TSS (NM_028140)	-56	NR_038067	100039027	Mm.482948	NR_038067		Gm2011	-	predicted gene 2011	pseudo
950	chr7	140079163	140090870	+	0	NA	Intergenic	MTD|LTR|MaLR	34108	NM_198017	109359	Mm.274824	NM_198017	ENSMUSG00000030965	Fam175b	AA589499|AI853413|Abro1|C430003P19Rik	family with sequence similarity 175, member B	protein-coding
509	chr18	44987338	44989541	+	0	NA	exon (NM_001163013, exon 1 of 30)	exon (NM_001163013, exon 1 of 30)	120	NM_001163013	240255	Mm.244482	NM_001163013	ENSMUSG00000034653	Ythdc2	3010002F02Rik|BC037178	YTH domain containing 2	protein-coding
1025	chr9	14588484	14589864	+	0	NA	promoter-TSS (NM_018736)	promoter-TSS (NM_018736)	23	NM_018736	17535	Mm.149071	NM_018736	ENSMUSG00000031928	Mre11a	Mre11|Mre11b	meiotic recombination 11 homolog A (S. cerevisiae)	protein-coding
1015	chr8	123631409	123632928	+	0	NA	5' UTR (NM_172761, exon 1 of 8)	5' UTR (NM_172761, exon 1 of 8)	111	NM_172761	234814	Mm.31690	NM_172761	ENSMUSG00000031816	Mthfsd	AW049977|BC052066|C920004D05	methenyltetrahydrofolate synthetase domain containing	protein-coding
367	chr15	3928277	3930462	+	0	NA	exon (NM_134099, exon 1 of 7)	exon (NM_134099, exon 1 of 7)	204	NM_134099	106052	Mm.234191	NM_134099		Fbxo4	1700096C12Rik|AI851261|AW494535|Fbx4	F-box protein 4	protein-coding
976	chr8	41596157	41598037	+	0	NA	promoter-TSS (NM_033560)	promoter-TSS (NM_033560)	11	NM_001271543	18983	Mm.272551	NM_011135	ENSMUSG00000031601	Cnot7	AU022737|CAF-1|Caf1|Pop2	CCR4-NOT transcription complex, subunit 7	protein-coding
716	chr4	46150706	46152357	+	0	NA	promoter-TSS (NM_173033)	promoter-TSS (NM_173033)	148	NM_001033201	433702	Mm.389536	NM_001033201	ENSMUSG00000028330	Ncbp1	AU014645|AW538051|CBP80	nuclear cap binding protein subunit 1	protein-coding
940	chr7	133645154	133648020	+	0	NA	exon (NM_183020, exon 1 of 23)	exon (NM_183020, exon 1 of 23)	229	NM_183020	233871	Mm.231450	NM_183020	ENSMUSG00000032637	Atxn2l	A2D|A2LG|A2RP|A2lp|Atxnl2	ataxin 2-like	protein-coding
485	chr18	4351745	4355550	+	0	NA	promoter-TSS (NM_007746)	promoter-TSS (NM_007746)	102	NR_040328	73915	Mm.482777	NR_040328		4833419F23Rik	-	RIKEN cDNA 4833419F23 gene	ncRNA
685	chr3	127255450	127256746	+	0	NA	promoter-TSS (NM_197997)	promoter-TSS (NM_197997)	169	NM_138593	28036	Mm.291032	NM_138593	ENSMUSG00000027968	Larp7	C330027G06Rik|D3Wsu161e	La ribonucleoprotein domain family, member 7	protein-coding
743	chr4	116135633	116138389	+	0	NA	promoter-TSS (NM_001042743)	promoter-TSS (NM_001042743)	-225	NM_008641	17776	Mm.9287	NM_008641	ENSMUSG00000003810	Mast2	MAST205|Mtssk	microtubule associated serine/threonine kinase 2	protein-coding
778	chr5	30061105	30063706	+	0	NA	promoter-TSS (NM_001127367)	promoter-TSS (NM_001127367)	-33	NM_001037941	23950	Mm.290110	NM_011847	ENSMUSG00000029131	Dnajb6	Mrj|mDj4	DnaJ (Hsp40) homolog, subfamily B, member 6	protein-coding
21	chr1	55108040	55111229	+	0	NA	promoter-TSS (NM_026424)	promoter-TSS (NM_026424)	20	NM_001039710	67876	Mm.281019	NM_026424	ENSMUSG00000025981	Coq10b	1500041J02Rik|1700030I21Rik|9530077A17Rik|AV002237|AW742641	coenzyme Q10 homolog B (S. cerevisiae)	protein-coding
523	chr19	4230366	4233243	+	0	NA	promoter-TSS (NM_027196)	promoter-TSS (NM_027196)	-95	NM_027196	69745	Mm.32518	NM_027196	ENSMUSG00000024854	Pold4	2410012M21Rik|AI463381|AW060307|Polds|p12	polymerase (DNA-directed), delta 4	protein-coding
720	chr4	47486238	47488101	+	0	NA	promoter-TSS (NM_024171)	promoter-TSS (NM_024171)	70	NM_019998	56737	Mm.22218	NM_019998	ENSMUSG00000039740	Alg2	1110018A23Rik|1300013N08Rik|ALPG2|CDGIi|MNCb-5081	asparagine-linked glycosylation 2 (alpha-1,3-mannosyltransferase)	protein-coding
460	chr17	34253715	34272897	+	0	NA	intron (NM_010386, intron 1 of 5)	intron (NM_010386, intron 1 of 5)	3529	NM_010386	14998	Mm.16373	NM_010386	ENSMUSG00000037649	H2-DMa	H-2Ma|H2-Ma	histocompatibility 2, class II, locus DMa	protein-coding
324	chr13	111183941	111186856	+	0	NA	exon (NM_152804, exon 1 of 14)	exon (NM_152804, exon 1 of 14)	146	NM_152804	20620	Mm.380	NM_152804	ENSMUSG00000021701	Plk2	Snk	polo-like kinase 2	protein-coding
453	chr17	24060507	24063132	+	0	NA	Intergenic	CpG	7394	NM_001077633	620253	Mm.390964	NM_001077633	ENSMUSG00000057417	Dcpp3	Dcpp-3|EG620253|SPT-3	demilune cell and parotid protein 3	protein-coding
723	chr4	55361818	55363958	+	0	NA	promoter-TSS (NM_009011)	promoter-TSS (NM_009011)	-26	NM_009011	19359	Mm.196846	NM_009011	ENSMUSG00000028426	Rad23b	0610007D13Rik|AV001138|HR23B|mHR23B|p58	RAD23b homolog (S. cerevisiae)	protein-coding
244	chr12	10397005	10398996	+	0	NA	exon (NM_023697, exon 1 of 2)	exon (NM_023697, exon 1 of 2)	414	NM_023697	105014	Mm.119343	NM_023697	ENSMUSG00000020621	Rdh14	3110030G19Rik|AW215439|PAN2	retinol dehydrogenase 14 (all-trans and 9-cis)	protein-coding
637	chr2	168054867	168057126	+	0	NA	promoter-TSS (NM_001160330)	promoter-TSS (NM_001160330)	-117	NM_010072	13480	Mm.422657	NM_010072	ENSMUSG00000078919	Dpm1	AI118379|AI194292	dolichol-phosphate (beta-D) mannosyltransferase 1	protein-coding
351	chr14	62298038	62303214	+	0	NA	intron (NR_028264, intron 1 of 6)	CpG	584	NR_028264	668253	Mm.32886	NR_028264	ENSMUSG00000097589	Dleu2	1810047A16Rik|4932411A06Rik|7730401J12Rik|AI197277|AI788824|Alt1|Gm9069|Leu2	deleted in lymphocytic leukemia, 2	ncRNA
1040	chr9	58883073	58885767	+	0	NA	promoter-TSS (NM_008684)	promoter-TSS (NM_008684)	-172	NM_001042752	18007	Mm.42249	NM_008684	ENSMUSG00000032340	Neo1	2610028H22Rik|AI327052|D930014N22Rik|Igdcc2	neogenin	protein-coding
595	chr2	102240357	102242351	+	0	NA	promoter-TSS (NM_020267)	promoter-TSS (NM_020267)	-297	NM_020267	80985	Mm.315002	NM_020267	ENSMUSG00000027189	Trim44	Dipb|Mc7	tripartite motif-containing 44	protein-coding
488	chr18	13129752	13133283	+	0	NA	intron (NM_008378, intron 1 of 10)	intron (NM_008378, intron 1 of 10)	756	NM_008378	16210	Mm.8154	NM_008378	ENSMUSG00000024423	Impact	E430016J11Rik	impact, RWD domain protein	protein-coding
752	chr4	133842562	133844555	+	0	NA	promoter-TSS (NM_001163794)	promoter-TSS (NM_001163794)	203	NM_146156	230809	Mm.22778	NM_146156	ENSMUSG00000050890	Pdik1l	BC027088|stk35l2	PDLIM1 interacting kinase 1 like	protein-coding
1012	chr8	121402516	121406210	+	0	NA	intron (NM_019707, intron 5 of 13)	intron (NM_019707, intron 5 of 13)	-464075	NM_024219	68196	Mm.358714	NM_024219	ENSMUSG00000031839	Hsbp1	0610007A03Rik|AA408769|Hsp25	heat shock factor binding protein 1	protein-coding
835	chr6	11856473	11858514	+	0	NA	promoter-TSS (NM_010886)	promoter-TSS (NM_010886)	-47	NM_010886	17992	Mm.415865	NM_010886	ENSMUSG00000029632	Ndufa4	MLRQ	NADH dehydrogenase (ubiquinone) 1 alpha subcomplex, 4	protein-coding
379	chr15	39774239	39776920	+	0	NA	promoter-TSS (NM_172814)	promoter-TSS (NM_172814)	-276	NM_172814	239393	Mm.39874	NM_172814	ENSMUSG00000022305	Lrp12	AI848829|C820005L12Rik|LRP-12	low density lipoprotein-related protein 12	protein-coding
1032	chr9	37295400	37298110	+	0	NA	promoter-TSS (NM_146222)	promoter-TSS (NM_146222)	-151	NM_146222	235184	Mm.127892	NM_146222	ENSMUSG00000042138	Msantd2	2810450G17Rik|9530092B10Rik	Myb/SANT-like DNA-binding domain containing 2	protein-coding
113	chr10	61911907	61913426	+	0	NA	promoter-TSS (NM_181423)	promoter-TSS (NM_181423)	-225	NM_181423	338359	Mm.235898	NM_181423	ENSMUSG00000020079	Supv3l1	6330443E10Rik	suppressor of var1, 3-like 1 (S. cerevisiae)	protein-coding
901	chr7	46772464	46773962	+	0	NA	promoter-TSS (NM_001004139)	promoter-TSS (NM_001004139)	77	NM_001004139	70227	Mm.333800	NM_001004139	ENSMUSG00000068959	Zfp619	3000002G13Rik	zinc finger protein 619	protein-coding
1035	chr9	45713494	45715679	+	0	NA	promoter-TSS (NM_001281934)	promoter-TSS (NM_001281934)	-66	NM_008794	18554	Mm.3255	NM_008794	ENSMUSG00000035382	Pcsk7	AA959856|PC7|SPC7	proprotein convertase subtilisin/kexin type 7	protein-coding
152	chr10	117281888	117284140	+	0	NA	promoter-TSS (NM_024457)	promoter-TSS (NM_024457)	16	NM_024457	215449	Mm.233009	NM_024457	ENSMUSG00000052681	Rap1b	2810443E11Rik	RAS related protein 1b	protein-coding
342	chr14	52816274	52817642	+	0	NA	promoter-TSS (NM_033618)	promoter-TSS (NM_033618)	-44	NM_033618	114741	Mm.21662	NM_033618	ENSMUSG00000035726	Supt16	Cdc68|Fact140|Spt16|Supt16h	suppressor of Ty 16	protein-coding
452	chr17	23835669	23838158	+	0	NA	Intergenic	CpG	-15920	NM_020293	56863	Mm.491368	NM_020293	ENSMUSG00000066720	Cldn9	nmf329	claudin 9	protein-coding
862	chr6	86465324	86480037	+	0	NA	Intergenic	Intergenic	3479	NM_011865	23983	Mm.274146	NM_011865	ENSMUSG00000051695	Pcbp1	WBP17|[a]CP-1|alphaCP-1	poly(rC) binding protein 1	protein-coding
295	chr13	63915080	63917744	+	0	NA	promoter-TSS (NM_023507)	promoter-TSS (NM_023507)	-216	NM_001013608	76251	Mm.186610	NM_023507	ENSMUSG00000021470	Ercc6l2	0610007P08Rik|1700019D06Rik|9330134C04Rik|Rad26l|Sr278	excision repair cross-complementing rodent repair deficiency, complementation group 6 like 2	protein-coding
579	chr2	48804060	48806373	+	0	NA	promoter-TSS (NM_011958)	promoter-TSS (NM_011958)	188	NM_029924	109241	Mm.440436	NM_029924	ENSMUSG00000036792	Mbd5	9430004D19Rik|AA536666|AI426407|C030040A15Rik|Gm1630|OTTMUSG00000012483	methyl-CpG binding domain protein 5	protein-coding
341	chr14	52621590	52644386	+	0	NA	intron (NM_027248, intron 1 of 4)	intron (NM_027248, intron 1 of 4)	1245	NM_001253695	69890	Mm.475652	NM_027248	ENSMUSG00000049295	Zfp219	2010302A17Rik	zinc finger protein 219	protein-coding
1056	chr9	82722531	82724338	+	0	NA	promoter-TSS (NM_001168240)	promoter-TSS (NM_001168240)	21	NM_022986	65099	Mm.41415	NM_022986	ENSMUSG00000032251	Irak1bp1	4921528N06Rik|AI851240|Aabp3|Aip70|Simpl	interleukin-1 receptor-associated kinase 1 binding protein 1	protein-coding
535	chr19	30104220	30105984	+	0	NA	promoter-TSS (NM_144873)	promoter-TSS (NM_144873)	99	NM_144873	109113	Mm.313364	NM_144873	ENSMUSG00000024817	Uhrf2	2310065A22Rik|AI426270|AW214556|D130071B19Rik|Nirf	ubiquitin-like, containing PHD and RING finger domains 2	protein-coding
77	chr1	177810550	177811029	+	0	NA	promoter-TSS (NM_012012)	promoter-TSS (NM_012012)	-120	NM_012012	26909	Mm.283046	NM_012012	ENSMUSG00000039748	Exo1	5730442G03Rik|Msa	exonuclease 1	protein-coding
683	chr3	121516992	121519119	+	0	NA	promoter-TSS (NM_008991)	promoter-TSS (NM_008991)	78	NM_008991	19299	Mm.399042	NM_008991	ENSMUSG00000028127	Abcd3	AI313901|AU018866|AW146054|PMP68|PMP70|Pxmp1	ATP-binding cassette, sub-family D (ALD), member 3	protein-coding
541	chr19	37449487	37450868	+	0	NA	promoter-TSS (NM_010615)	promoter-TSS (NM_010615)	-716	NM_010615	16551	Mm.42203	NM_010615	ENSMUSG00000012443	Kif11	Eg5|Kif8|Kifl1|Knsl1	kinesin family member 11	protein-coding
64	chr1	157819461	157822363	+	0	NA	promoter-TSS (NM_001039184)	promoter-TSS (NM_001039184)	-527	NM_001039184	74081	Mm.260247	NM_001039184	ENSMUSG00000033671	Cep350	4933409L06Rik|6430546F08Rik	centrosomal protein 350	protein-coding
765	chr4	155365937	155368113	+	0	NA	promoter-TSS (NM_080445)	promoter-TSS (NM_080445)	2	NM_011341	20318	Mm.293517	NM_011341	ENSMUSG00000029076	Sdf4	Cab45	stromal cell derived factor 4	protein-coding
881	chr7	4561530	4565958	+	0	NA	Intergenic	Intergenic	-8101	NM_207270	545902	Mm.188925	NM_207270	ENSMUSG00000035429	Ptprh	sap-1	protein tyrosine phosphatase, receptor type, H	protein-coding
312	chr13	93300136	93301698	+	0	NA	promoter-TSS (NM_173392)	promoter-TSS (NM_173392)	-152	NM_173392	218441	Mm.259585	NM_173392	ENSMUSG00000021706	Zfyve16	AI035632|B130024H06Rik|B130031L15|mKIAA0305	zinc finger, FYVE domain containing 16	protein-coding
897	chr7	31893684	31916510	+	0	NA	intron (NM_011322, intron 3 of 5)	ID_B1|SINE|B4	-4752	NM_001110252	15451	Mm.19182	NM_008281	ENSMUSG00000001249	Hpn	Hlb320	hepsin	protein-coding
45	chr1	94369734	94371311	+	0	NA	promoter-TSS (NM_024197)	promoter-TSS (NM_024197)	-187	NM_024197	67273	Mm.248778	NM_024197		Ndufa10	2900053E13Rik	NADH dehydrogenase (ubiquinone) 1 alpha subcomplex 10	protein-coding
405	chr15	99802604	99804508	+	0	NA	non-coding (NR_028124, exon 1 of 1)	non-coding (NR_028124, exon 1 of 1)	162	NR_028124	70281	Mm.484037	NR_028124		2310068J16Rik	-	RIKEN cDNA 2310068J16 gene	ncRNA
507	chr18	38227142	38229440	+	0	NA	Intergenic	L2a|LINE|L2	-69668	NM_001205336	106952	Mm.247642	NM_139206	ENSMUSG00000024451	Arap3	Centd3|Drag1|E030006K04Rik|cnt-d3	ArfGAP with RhoGAP domain, ankyrin repeat and PH domain 3	protein-coding
237	chr11	121119644	121122223	+	0	NA	promoter-TSS (NM_001080932)	promoter-TSS (NM_001080932)	-368	NM_001080932	68837	Mm.209750	NM_001080932	ENSMUSG00000039275	Foxk2	1110054H05Rik|5730434B08Rik|6230415M23Rik|ILF|Ilf1	forkhead box K2	protein-coding
1002	chr8	108088987	108091136	+	0	NA	promoter-TSS (NM_013477)	promoter-TSS (NM_013477)	-121	NM_013477	11972	Mm.17708	NM_013477	ENSMUSG00000013160	Atp6v0d1	AI267038|Ac39|Atp6d|P39|VATX|Vma6	ATPase, H+ transporting, lysosomal V0 subunit D1	protein-coding
370	chr15	12046455	12049138	+	0	NA	intron (NM_011767, intron 1 of 19)	CpG	190	NM_011767	22763	Mm.273496	NM_011767	ENSMUSG00000022201	Zfr	C920030H05Rik	zinc finger RNA binding protein	protein-coding
309	chr13	91062072	91063279	+	0	NA	promoter-TSS (NM_024175)	promoter-TSS (NM_024175)	-52	NM_024175	66475	Mm.306302	NM_024175		Rps23	2410044J15Rik	ribosomal protein S23	protein-coding
567	chr2	28266241	28275580	+	0	NA	Intergenic	Intergenic	-32551	NM_001005420	241289	Mm.330095	NM_001005420	ENSMUSG00000035829	Ppp1r26	Gm347|Kiaa0649|mKIAA0649	protein phosphatase 1, regulatory subunit 26	protein-coding
416	chr16	18875737	18878567	+	0	NA	promoter-TSS (NM_010922)	promoter-TSS (NM_010922)	309	NM_010435	15260	Mm.15694	NM_010435	ENSMUSG00000022702	Hira	AA138857|D16Ertd95e|N28177|Tuple1	histone cell cycle regulation defective homolog A (S. cerevisiae)	protein-coding
100	chr10	39450205	39454855	+	0	NA	promoter-TSS (NR_038037)	promoter-TSS (NR_038037)	564	NM_011264	19714	Mm.439723	NM_011264	ENSMUSG00000019841	Rev3l	Rev|Rev3|Sez4	REV3-like, catalytic subunit of DNA polymerase zeta RAD54 like (S. cerevisiae)	protein-coding
380	chr15	40484590	40490503	+	0	NA	intron (NM_011766, intron 1 of 7)	intron (NM_011766, intron 1 of 7)	958	NM_011766	22762	Mm.39496	NM_011766	ENSMUSG00000022306	Zfpm2	B330005D23Rik|FOG-2|FOG2	zinc finger protein, multitype 2	protein-coding
914	chr7	74516250	74520184	+	0	NA	promoter-TSS (NM_001291195)	promoter-TSS (NM_001291195)	-473	NM_001291195	17258	Mm.132788	NM_001033713	ENSMUSG00000030557	Mef2a	A430079H05Rik	myocyte enhancer factor 2A	protein-coding
300	chr13	69749450	69751322	+	0	NA	promoter-TSS (NM_175283)	promoter-TSS (NM_175283)	-45	NM_175283	78925	Mm.451912	NM_175283	ENSMUSG00000021594	Srd5a1	0610031P22Rik|4930435F02Rik|S5AR 1|Srd5a-1	steroid 5 alpha-reductase 1	protein-coding
965	chr8	13785237	13786634	+	0	NA	intron (NM_025924, intron 1 of 8)	CpG	320	NM_025924	67031	Mm.44858	NM_025924	ENSMUSG00000038398	Upf3a	2600001C03Rik|4930546M19Rik|RENT3A|UPF3	UPF3 regulator of nonsense transcripts homolog A (yeast)	protein-coding
824	chr5	144491920	144494380	+	0	NA	promoter-TSS (NM_029749)	promoter-TSS (NM_029749)	-1	NM_029749	76800	Mm.259620	NM_029749	ENSMUSG00000051306	Usp42	2410140K03Rik|3110031A07Rik|A630018G05Rik|D5Ertd591e	ubiquitin specific peptidase 42	protein-coding
120	chr10	67737150	67746386	+	0	NA	promoter-TSS (NM_023598)	promoter-TSS (NM_023598)	-294	NM_023598	71371	Mm.440357	NM_023598	ENSMUSG00000019947	Arid5b	4930580B11|5430435G07Rik|AI467247|Desrt|Mrf2|Mrf2alpha|Mrf2beta	AT rich interactive domain 5B (MRF1-like)	protein-coding
286	chr13	30636276	30638054	+	0	NA	promoter-TSS (NM_025710)	promoter-TSS (NM_025710)	20	NM_025710	66694	Mm.181933	NM_025710	ENSMUSG00000038462	Uqcrfs1	4430402G14Rik|AI875505	ubiquinol-cytochrome c reductase, Rieske iron-sulfur polypeptide 1	protein-coding
1075	chr9	121765784	121767618	+	0	NA	5' UTR (NM_019814, exon 1 of 4)	5' UTR (NM_019814, exon 1 of 4)	417	NM_019814	56295	Mm.347915	NM_019814	ENSMUSG00000038412	Higd1a	2210020B17Rik|7420700H20Rik|AI303276|AW049839|HIMP1|Hig1	HIG1 domain family, member 1A	protein-coding
800	chr5	107392953	107394276	+	0	NA	promoter-TSS (NM_001271566)	promoter-TSS (NM_001271566)	34	NM_001271566	12545	Mm.20842	NM_009863	ENSMUSG00000029283	Cdc7	AI597260|Cdc7l1|muCdc7	cell division cycle 7 (S. cerevisiae)	protein-coding
254	chr12	56403058	56404708	+	0	NA	5' UTR (NM_025373, exon 1 of 7)	5' UTR (NM_025373, exon 1 of 7)	104	NM_021529	59032	Mm.427307	NM_021529	ENSMUSG00000021022	Ppp2r3c	4930511A21Rik|5730412A08Rik|G4-1|G5pr	protein phosphatase 2, regulatory subunit B'', gamma	protein-coding
392	chr15	85708455	85710680	+	0	NA	promoter-TSS (NM_028063)	promoter-TSS (NM_028063)	-190	NM_028063	72026	Mm.158211	NM_028063	ENSMUSG00000022386	Trmu	1110005N20Rik|1600025P05Rik|AI314320|Trmt1	tRNA 5-methylaminomethyl-2-thiouridylate methyltransferase	protein-coding
496	chr18	33808440	33814592	+	0	NA	Intergenic	MTA_Mm|LTR|MaLR	-143030	NR_038152	69749	Mm.248787	NR_038151	ENSMUSG00000087590	2410004N09Rik	-	RIKEN cDNA 2410004N09 gene	ncRNA
605	chr2	119302252	119304520	+	0	NA	promoter-TSS (NM_026574)	promoter-TSS (NM_026574)	-21	NM_026574	68142	Mm.330496	NM_026574	ENSMUSG00000034154	Ino80	2310079N15Rik|4632409L19Rik|Inoc1	INO80 homolog (S. cerevisiae)	protein-coding
607	chr2	120962778	120968348	+	0	NA	promoter-TSS (NM_001290811)	promoter-TSS (NM_001290811)	-601	NM_001290811	75894	Mm.384805	NM_029475	ENSMUSG00000027259	Adal	4930578F03Rik	adenosine deaminase-like	protein-coding
813	chr5	124379930	124381457	+	0	NA	promoter-TSS (NM_001134767)	promoter-TSS (NM_001134767)	-5	NM_001134767	208908	Mm.243679	NM_001134767	ENSMUSG00000061882	Ccdc62	AI661708|Gm150	coiled-coil domain containing 62	protein-coding
42	chr1	82312417	82313977	+	0	NA	promoter-TSS (NM_029777)	promoter-TSS (NM_029777)	43	NM_029777	76867	Mm.226994	NM_029777	ENSMUSG00000026142	Rhbdd1	4930418P06Rik|RRP4|mRHBDD1	rhomboid domain containing 1	protein-coding
644	chr3	19210000	19212827	+	0	NA	promoter-TSS (NM_001122759)	promoter-TSS (NM_001122759)	-91	NM_001122759	18583	Mm.355614	NM_008802	ENSMUSG00000069094	Pde7a	AU015378|AW047537	phosphodiesterase 7A	protein-coding
759	chr4	147931946	147933064	+	0	NA	promoter-TSS (NM_016699)	promoter-TSS (NM_016699)	-31	NM_016699	50912	Mm.266635	NM_016699	ENSMUSG00000017264	Exosc10	PM-Scl|PM/Scl-100|Pmscl2|RRP6|p2|p3|p4	exosome component 10	protein-coding
851	chr6	53235817	53238214	+	0	NA	promoter-TSS (NR_015553)	promoter-TSS (NR_015553)	-274	NR_015553	320189	Mm.227444	NR_015553		9430076C15Rik	-	RIKEN cDNA 9430076C15 gene	ncRNA
399	chr15	96112760	96119782	+	0	NA	Intergenic	CpG	-1682	NM_175251	77044	Mm.17166	NM_175251	ENSMUSG00000033237	Arid2	1700124K17Rik|4432409D24Rik|zipzap/p200	AT rich interactive domain 2 (ARID, RFX-like)	protein-coding
1073	chr9	118087380	118089940	+	0	NA	Intergenic	Intergenic	-29346	NM_026442	67899	Mm.9953	NM_026442	ENSMUSG00000039163	Cmc1	2010110K16Rik|2010312P05Rik|AI596001	COX assembly mitochondrial protein 1	protein-coding
235	chr11	119160708	119162199	+	0	NA	promoter-TSS (NM_138669)	promoter-TSS (NM_138669)	-96	NM_138669	192170	Mm.197555	NM_138669	ENSMUSG00000025580	Eif4a3	2400003O03Rik|Ddx48|eIF4A-III|mKIAA0111	eukaryotic translation initiation factor 4A3	protein-coding
694	chr3	153574188	153577377	+	0	NA	promoter-TSS (NR_028525)	promoter-TSS (NR_028525)	148	NM_001163478	19352	Mm.277831	NM_011231	ENSMUSG00000038975	Rabggtb	-	Rab geranylgeranyl transferase, b subunit	protein-coding
436	chr16	95922956	95926875	+	0	NA	intron (NM_011809, intron 1 of 9)	intron (NM_011809, intron 1 of 9)	901	NM_011809	23872	Mm.290207	NM_011809	ENSMUSG00000022895	Ets2	AU022856|Ets-2	E26 avian leukemia oncogene 2, 3' domain	protein-coding
94	chr10	11062065	11065017	+	0	NA	exon (NM_010146, exon 1 of 4)	exon (NM_010146, exon 1 of 4)	298	NM_010146	13853	Mm.89946	NM_010146		Epm2a	TG-B|Tg(TcraK,TcrbK)TG-BFlv	epilepsy, progressive myoclonic epilepsy, type 2 gene alpha	protein-coding
213	chr11	84769817	84785860	+	0	NA	intron (NM_007607, intron 4 of 7)	intron (NM_007607, intron 4 of 7)	6582	NM_007607	12351	Mm.1641	NM_007607	ENSMUSG00000000805	Car4	AW456718|Ca4	carbonic anhydrase 4	protein-coding
816	chr5	130646357	130648610	+	0	NA	promoter-TSS (NM_001199059)	promoter-TSS (NM_001199059)	-206	NM_001199059	56715	Mm.288639	NM_019983	ENSMUSG00000025340	Rabgef1	Rab5ef|Rabex5|Rin2	RAB guanine nucleotide exchange factor (GEF) 1	protein-coding
568	chr2	28367763	28408254	+	0	NA	promoter-TSS (NM_001145835)	promoter-TSS (NM_001145835)	-976	NM_001145835	19730	Mm.5236	NM_009058	ENSMUSG00000026821	Ralgds	Gnds|Rgds|mKIAA1308	ral guanine nucleotide dissociation stimulator	protein-coding
1062	chr9	91905826	91916823	+	0	NA	Intergenic	Intergenic	-176450	NM_001195693	100504689	Mm.464262	NM_001195693	ENSMUSG00000095654	Plscr5	331000	phospholipid scramblase family, member 5	protein-coding
265	chr12	86795468	86797744	+	0	NA	Intergenic	Intergenic	-18245	NM_010234	14281	Mm.246513	NM_010234	ENSMUSG00000021250	Fos	D12Rfj1|c-fos|cFos	FBJ osteosarcoma oncogene	protein-coding
296	chr13	65341471	65343397	+	0	NA	Intergenic	CpG	-35410	NM_175290	97895	Mm.315815	NM_175290	ENSMUSG00000032999	Nlrp4f	C330026N02Rik|C86045|Nalp-kappa|Nalp4f	NLR family, pyrin domain containing 4F	protein-coding
791	chr5	69947374	69949213	+	0	NA	5' UTR (NM_172711, exon 1 of 17)	5' UTR (NM_172711, exon 1 of 17)	112	NM_172711	231279	Mm.21105	NM_172711	ENSMUSG00000029208	Guf1	4631409J12|AA407526|EF-4	GUF1 GTPase homolog (S. cerevisiae)	protein-coding
171	chr11	21137143	21140309	+	0	NA	promoter-TSS (NM_139061)	promoter-TSS (NM_139061)	-309	NM_139061	245944	Mm.170103	NM_139061	ENSMUSG00000020128	Vps54	Hcc8|Vps54l|mSLP8|wr	vacuolar protein sorting 54 (yeast)	protein-coding
386	chr15	79376011	79378159	+	0	NA	promoter-TSS (NM_199079)	promoter-TSS (NM_199079)	86	NM_001040187	67040	Mm.29644	NM_152806	ENSMUSG00000055065	Ddx17	2610007K22Rik|A430025E01Rik|AI047725|C80929|Gm926|p72	DEAD (Asp-Glu-Ala-Asp) box polypeptide 17	protein-coding
916	chr7	88091815	88093360	+	0	NA	promoter-TSS (NM_019951)	promoter-TSS (NM_019951)	-151	NM_019951	56529	Mm.43760	NM_019951	ENSMUSG00000025724	Sec11a	1810012E07Rik|18kDa|Sec11l1|Sid2895p|Spc18|sid2895	SEC11 homolog A (S. cerevisiae)	protein-coding
445	chr17	13152283	13155026	+	0	NA	promoter-TSS (NM_009338)	promoter-TSS (NM_009338)	-63	NM_009338	110460	Mm.439711	NM_009338	ENSMUSG00000023832	Acat2	AW742799|Tcp-1x|Tcp1-rs1	acetyl-Coenzyme A acetyltransferase 2	protein-coding
200	chr11	62093858	62095910	+	0	NA	promoter-TSS (NM_027198)	promoter-TSS (NM_027198)	13	NM_027198	69747	Mm.141150	NM_027198	ENSMUSG00000014243	Zswim7	2410012H22Rik	zinc finger SWIM-type containing 7	protein-coding
329	chr14	20901076	20903241	+	0	NA	exon (NM_026209, exon 1 of 2)	exon (NM_026209, exon 1 of 2)	236	NM_026209	67509	Mm.292423	NM_026209	ENSMUSG00000045107	Saysd1	1810063B07Rik|4930488P03Rik	SAYSVFN motif domain containing 1	protein-coding
525	chr19	5453820	5494505	+	0	NA	promoter-TSS (NM_021474)	promoter-TSS (NM_021474)	-528	NM_021474	58859	Mm.276367	NM_021474	ENSMUSG00000024909	Efemp2	0610011K11Rik|Fbln4|MBP1	epidermal growth factor-containing fibulin-like extracellular matrix protein 2	protein-coding
27	chr1	58641238	58643982	+	0	NA	promoter-TSS (NM_025597)	promoter-TSS (NM_025597)	567	NM_172513	213056	Mm.26272	NM_172513	ENSMUSG00000038174	Fam126b	C130065N10Rik|D1Ertd53e|D630010C10	family with sequence similarity 126, member B	protein-coding
787	chr5	53979679	53983040	+	0	NA	promoter-TSS (NM_001277116)	promoter-TSS (NM_001277116)	-226	NM_009035	19664	Mm.209292	NM_009035	ENSMUSG00000039191	Rbpj	AI843960|CBF1|Igkjrb|Igkrsbp|RBP-J|RBP-J kappa|RBPjk|Rbpsuh	recombination signal binding protein for immunoglobulin kappa J region	protein-coding
161	chr11	3101859	3103285	+	0	NA	promoter-TSS (NM_001166549)	promoter-TSS (NM_001166549)	-14	NM_023743	74203	Mm.255649	NM_023743	ENSMUSG00000020454	Eif4enif1	2610509L04Rik|A930019J01Rik|AA410001|AU021239|Clast4|D11Ertd166e	eukaryotic translation initiation factor 4E nuclear import factor 1	protein-coding
582	chr2	61883663	61886762	+	0	NA	intron (NM_001242383, intron 1 of 24)	intron (NM_001242383, intron 1 of 24)	640	NM_033552	94229	Mm.314497	NM_033552	ENSMUSG00000026904	Slc4a10	NCBE|mKIAA4136	solute carrier family 4, sodium bicarbonate cotransporter-like, member 10	protein-coding
109	chr10	59567248	59584486	+	0	NA	intron (NM_052994, intron 1 of 10)	intron (NM_052994, intron 1 of 10)	6862	NM_052994	94214	Mm.153429	NM_052994	ENSMUSG00000058297	Spock2	AA407235|Gcap26|mKIAA0275	sparc/osteonectin, cwcv and kazal-like domains proteoglycan 2	protein-coding
557	chr2	18313563	18314963	+	0	NA	5' UTR (NM_001190817, exon 1 of 13)	5' UTR (NM_001190817, exon 1 of 13)	194	NM_001190817	13418	Mm.246674	NM_007869	ENSMUSG00000026740	Dnajc1	4733401K02Rik|AA960110|D230036H06Rik|Dnajl1|ERdj1|ERj1p|MTJ1	DnaJ (Hsp40) homolog, subfamily C, member 1	protein-coding
718	chr4	46401569	46403594	+	0	NA	promoter-TSS (NM_029086)	promoter-TSS (NM_029086)	-286	NM_029086	74753	Mm.45973	NM_029086	ENSMUSG00000028331	5830415F09Rik	AV014846|Nap1	RIKEN cDNA 5830415F09 gene	protein-coding
441	chr17	3113289	3116309	+	0	NA	promoter-TSS (NM_134123)	promoter-TSS (NM_134123)	-173	NM_134123	106583	Mm.124373	NM_134123	ENSMUSG00000046201	Scaf8	A630086M08Rik|A930036P18Rik|AA408306|AI447644|AI448652|AU015035|Rbm16|mKIAA1116	SR-related CTD-associated factor 8	protein-coding
868	chr6	115740799	115744085	+	0	NA	exon (NM_025958, exon 10 of 15)	exon (NM_025958, exon 10 of 15)	15679	NR_028546	100217451	Mm.484708	NR_028546	ENSMUSG00000064563	Snora7a	MBI-141	small nucleolar RNA, H/ACA box 7A	snoRNA
672	chr3	102823436	102825489	+	0	NA	promoter-TSS (NM_144901)	promoter-TSS (NM_144901)	-7	NM_001161854	229663	Mm.277713	NM_144901	ENSMUSG00000068823	Csde1	AA960392|BC016898|D3Jfr1|mKIAA0885|unr	cold shock domain containing E1, RNA binding	protein-coding
769	chr5	18730459	18735808	+	0	NA	promoter-TSS (NR_102341)	promoter-TSS (NR_102341)	269	NM_001170746	50791	Mm.332231	NM_015823	ENSMUSG00000040003	Magi2	AIP-1|Acvri1|Acvrinp1|Acvrip1|Magi-2|S-SCAM|mKIAA0705	membrane associated guanylate kinase, WW and PDZ domain containing 2	protein-coding
275	chr12	104186566	104188671	+	0	NA	5' UTR (NM_001081017, exon 1 of 49)	5' UTR (NM_001081017, exon 1 of 49)	549	NM_001081017	217843	Mm.387073	NM_177621	ENSMUSG00000021198	Unc79	9030205A07Rik|Mlca3	unc-79 homolog (C. elegans)	protein-coding
983	chr8	72239190	72241606	+	0	NA	promoter-TSS (NM_181274)	promoter-TSS (NM_181274)	-13	NM_181274	66869	Mm.334581	NM_181274		Zfp869	1200003I07Rik	zinc finger protein 869	protein-coding
803	chr5	114159399	114203108	+	0	NA	Intergenic	Intergenic	-4538	NM_001010825	231630	Mm.21926	NM_001010825	ENSMUSG00000053334	Ficd	D5Ertd40e|Hype	FIC domain containing	protein-coding
197	chr11	61078596	61081972	+	0	NA	intron (NM_007437, intron 1 of 9)	intron (NM_007437, intron 1 of 9)	345	NM_007437	11671	Mm.398221	NM_007437	ENSMUSG00000010025	Aldh3a2	AI194803|Ahd-3|Ahd-3r|Ahd3|Ahd3-r|Aldh4|Aldh4-r|FALDH	aldehyde dehydrogenase family 3, subfamily A2	protein-coding
853	chr6	58912039	58919692	+	0	NA	intron (NM_153574, intron 7 of 17)	intron (NM_153574, intron 7 of 17)	58631	NM_153574	58909	Mm.28813	NM_153574		Fam13a	AI462012|D430015B01Rik|FAM13A1|Precm1	family with sequence similarity 13, member A	protein-coding
751	chr4	133303807	133313792	+	0	NA	exon (NM_001080819, exon 1 of 20)	exon (NM_001080819, exon 1 of 20)	727	NM_001080819	93760	Mm.22478	NM_001080819	ENSMUSG00000007880	Arid1a	1110030E03Rik|BAF250a|Osa1|Smarcf1	AT rich interactive domain 1A (SWI-like)	protein-coding
60	chr1	141318091	141319679	+	0	NA	promoter-TSS (NM_172643)	promoter-TSS (NM_172643)	-75	NM_172643	226470	Mm.119711	NM_172643	ENSMUSG00000033964	Zbtb41	8430415N23Rik|9430031N01|9830132G07Rik|AI316857	zinc finger and BTB domain containing 41 homolog	protein-coding
1067	chr9	102527350	102529967	+	0	NA	promoter-TSS (NM_001081122)	promoter-TSS (NM_001081122)	32	NM_181394	69010	Mm.2000	NM_181394	ENSMUSG00000035048	Anapc13	1810004D07Rik|APC13|SWM1	anaphase promoting complex subunit 13	protein-coding
691	chr3	144780754	144782524	+	0	NA	promoter-TSS (NM_001162539)	promoter-TSS (NM_001162539)	75	NM_025714	52184	Mm.259105	NM_025714	ENSMUSG00000028256	Odf2l	4733401D09Rik|9630045K08Rik|D3Ertd250e	outer dense fiber of sperm tails 2-like	protein-coding
346	chr14	57504128	57507642	+	0	NA	promoter-TSS (NM_029498)	promoter-TSS (NM_029498)	-747	NM_029498	76007	Mm.31417	NM_029498	ENSMUSG00000021945	Zmym2	5830413P05Rik|FIM|MYM|RAMP|SCLL|Zfp198|Znf198	zinc finger, MYM-type 2	protein-coding
911	chr7	59116450	59118066	+	0	NA	exon (NM_001115087, exon 1 of 1)	exon (NM_001115087, exon 1 of 1)	379	NM_001115087	100040608	Mm.322643	NM_001115087	ENSMUSG00000092118	Fancf	A730016A17	Fanconi anemia, complementation group F	protein-coding
427	chr16	46496004	46499152	+	0	NA	promoter-TSS (NM_021496)	promoter-TSS (NM_021496)	-498	NM_021497	58998	Mm.328072	NM_021495	ENSMUSG00000022656	Pvrl3	2610301B19Rik|3000002N23Rik|4921513D19Rik|AA407785|AU016832|AW538082|CD113	poliovirus receptor-related 3	protein-coding
677	chr3	106524000	106526392	+	0	NA	intron (NM_028081, intron 1 of 2)	CpG	596	NM_001286685	321000	Mm.259638	NM_028081	ENSMUSG00000056260	Lrif1	2010012G17Rik|4933421E11Rik|AI450568	ligand dependent nuclear receptor interacting factor 1	protein-coding
907	chr7	53085914	53086843	+	0	NA	promoter-TSS (NM_153419)	promoter-TSS (NM_153419)	-219	NM_153419	101612	Mm.274847	NM_153419	ENSMUSG00000053801	Grwd1	A301|AI504353|Grwd|Wdr28	glutamate-rich WD repeat containing 1	protein-coding
82	chr1	180265958	180270164	+	0	NA	promoter-TSS (NM_016805)	promoter-TSS (NM_016805)	-146	NM_016805	51810	Mm.86589	NM_016805	ENSMUSG00000039630	Hnrnpu	AA408410|AI256620|AL024194|AL024437|AW557595|C86794|Hnrpu|SAFA|Sp120|hnRNP U	heterogeneous nuclear ribonucleoprotein U	protein-coding
650	chr3	32635054	32636688	+	0	NA	promoter-TSS (NM_029017)	promoter-TSS (NM_029017)	-114	NM_025316	66046	Mm.28058	NM_025316	ENSMUSG00000027673	Ndufb5	0610007D05Rik|AU015782|SGDH	NADH dehydrogenase (ubiquinone) 1 beta subcomplex, 5	protein-coding
590	chr2	81892187	81894993	+	0	NA	promoter-TSS (NM_175513)	promoter-TSS (NM_175513)	-225	NM_175513	241514	Mm.119383	NM_175513	ENSMUSG00000070866	Zfp804a	C630007C17Rik|Znf804a	zinc finger protein 804A	protein-coding
895	chr7	30690755	30694429	+	0	NA	promoter-TSS (NM_001243908)	promoter-TSS (NM_001243908)	-944	NM_001243908	73729	Mm.333743	NM_001243908		Zfp383	1110003H10Rik	zinc finger protein 383	protein-coding
69	chr1	164669316	164671390	+	0	NA	intron (NM_001081290, intron 1 of 34)	CpG	334	NM_001081290	226562	Mm.245446	NM_001081290	ENSMUSG00000040225	Prrc2c	1810043M20Rik|9630039I18Rik|A630006J20|Bat2d|Bat2d1|Bat2l2|E130112L15Rik|Prrc3|mKIAA1096	proline-rich coiled-coil 2C	protein-coding
664	chr3	88411264	88436949	+	0	NA	promoter-TSS (NM_008487)	promoter-TSS (NM_008487)	-922	NM_008487	16800	Mm.239329	NM_008487	ENSMUSG00000028059	Arhgef2	AA408978|GEF|GEF-H1|GEFH1|LFP40|Lbcl1|Lfc|P40|mKIAA0651	rho/rac guanine nucleotide exchange factor (GEF) 2	protein-coding
224	chr11	101413309	101415145	+	0	NA	promoter-TSS (NM_009764)	promoter-TSS (NM_009764)	259	NM_001252223	17966	Mm.784	NM_008676	ENSMUSG00000017119	Nbr1	mKIAA0049	neighbor of Brca1 gene 1	protein-coding
79	chr1	179371221	179410532	+	0	NA	Intergenic	Intergenic	14924	NM_013915	30928	Mm.330700	NM_013915	ENSMUSG00000063659	Zbtb18	RP58|Zfp238|Znf238	zinc finger and BTB domain containing 18	protein-coding
617	chr2	136716071	136718491	+	0	NA	promoter-TSS (NM_001141946)	promoter-TSS (NM_001141946)	-139	NM_001286983	59030	Mm.272570	NM_021527	ENSMUSG00000027274	Mkks	1300013E18Rik|AI463362|AI957237|Bbs6	McKusick-Kaufman syndrome	protein-coding
352	chr14	63377876	63382963	+	0	NA	promoter-TSS (NM_008715)	promoter-TSS (NM_008715)	-470	NM_008715	18130	Mm.319684	NM_008715	ENSMUSG00000035161	Ints6	2900075H24Rik|AI480962|DICE1|Ddx26|HDB|Notch2l	integrator complex subunit 6	protein-coding
1006	chr8	113617636	113619474	+	0	NA	promoter-TSS (NM_198308)	promoter-TSS (NM_198308)	-90	NM_198308	319518	Mm.28350	NM_198308		Pdpr	4930402E16Rik|AU018056|mKIAA1990	pyruvate dehydrogenase phosphatase regulatory subunit	protein-coding
126	chr10	80839570	80899115	+	0	NA	intron (NM_026756, intron 6 of 8)	intron (NM_026756, intron 6 of 8)	9700	NR_106141	102465778		NR_106141		Mir1191b	mmu-mir-1191b	microRNA mir-1191b	ncRNA
1034	chr9	44890096	44900920	+	0	NA	intron (NM_001005421, intron 4 of 10)	(GGA)n|Simple_repeat|Simple_repeat	8242	NM_001005421	270152	Mm.190461	NM_001005421	ENSMUSG00000048534	Amica1	AMICA|Crea7|Gm638	adhesion molecule, interacts with CXADR antigen 1	protein-coding
251	chr12	48262032	48267031	+	0	NA	Intergenic	Intergenic	-344769	NM_021361	664883	Mm.247195	NM_021361	ENSMUSG00000021047	Nova1	9430099M15Rik|G630039L02|Nova-1	neuro-oncological ventral antigen 1	protein-coding
426	chr16	45157651	45160179	+	0	NA	promoter-TSS (NM_026402)	promoter-TSS (NM_026402)	-27	NM_026402	67841	Mm.41775	NM_026402	ENSMUSG00000022663	Atg3	2610016C12Rik|APG3|Apg3l|Atg3l|PC3-96	autophagy related 3	protein-coding
369	chr15	8118267	8119997	+	0	NA	promoter-TSS (NM_001162906)	promoter-TSS (NM_001162906)	26	NM_001162906	73692	Mm.164436	NM_001162906	ENSMUSG00000039801	2410089E03Rik	4732468D17Rik|b2b012Clo	RIKEN cDNA 2410089E03 gene	protein-coding
996	chr8	88078068	88080598	+	0	NA	promoter-TSS (NM_019794)	promoter-TSS (NM_019794)	-163	NM_019794	56445	Mm.475573	NM_019794	ENSMUSG00000031701	Dnaja2	1500017M13Rik|2010206B19Rik|DNAJ|DNJ3|Dnaj3|HIRIP4|PRO3015|mDj3	DnaJ (Hsp40) homolog, subfamily A, member 2	protein-coding
279	chr12	112773316	112777507	+	0	NA	promoter-TSS (NM_173363)	promoter-TSS (NM_173363)	-901	NM_178041	217869	Mm.271222	NM_173363	ENSMUSG00000021282	Eif5	2810011H21Rik|D12Ertd549e	eukaryotic translation initiation factor 5	protein-coding
651	chr3	35830439	35832889	+	0	NA	promoter-TSS (NM_001205362)	promoter-TSS (NM_001205362)	224	NM_001205361	114893	Mm.374810	NM_033623	ENSMUSG00000027708	Dcun1d1	Rp42|SCCRO|Tes3|pTes3	DCN1, defective in cullin neddylation 1, domain containing 1 (S. cerevisiae)	protein-coding
176	chr11	23154691	23158067	+	0	NA	intron (NM_001035226, intron 1 of 25)	intron (NM_001035226, intron 1 of 25)	338	NM_134014	103573	Mm.217547	NM_134014	ENSMUSG00000020290	Xpo1	AA420417|Crm1|Exp1	exportin 1, CRM1 homolog (yeast)	protein-coding
956	chr7	147338189	147341885	+	0	NA	intron (NM_183147, intron 1 of 1)	intron (NM_183147, intron 1 of 1)	521	NM_183147	212518	Mm.246858	NM_183147	ENSMUSG00000045733	Sprn	C630041J07	shadow of prion protein	protein-coding
483	chr18	3335795	3339079	+	0	NA	5' UTR (NM_001110852, exon 1 of 4)	5' UTR (NM_001110852, exon 1 of 4)	150	NM_001110851	12916	Mm.5244	NM_013498	ENSMUSG00000063889	Crem	ICER|ICERI	cAMP responsive element modulator	protein-coding
498	chr18	34490066	34491241	+	0	NA	promoter-TSS (NM_025527)	promoter-TSS (NM_025527)	-146	NM_025527	66384	Mm.29452	NM_025527	ENSMUSG00000014504	Srp19	2310020D23Rik	signal recognition particle 19	protein-coding
629	chr2	155936824	155938130	+	0	NA	intron (NM_029397, intron 1 of 2)	CpG	224	NM_170598	75710	Mm.27660	NM_029397		Rbm12	5730420G12Rik|9430070C08Rik|AI852903|SWAN|mKIAA0765	RNA binding motif protein 12	protein-coding
947	chr7	137661434	137664034	+	0	NA	intron (NM_001029895, intron 1 of 11)	CpG	360	NM_001136054	11907	Mm.216321	NM_013799	ENSMUSG00000030850	Ate1	AI225793|AW547406	arginyltransferase 1	protein-coding
256	chr12	72528768	72537414	+	0	NA	Intergenic	URR1B|DNA|MER1_type	-108503	NR_045941	73815	Mm.416916	NR_045941		4930404H11Rik	-	RIKEN cDNA 4930404H11 gene	ncRNA
372	chr15	30101296	30105116	+	0	NA	intron (NM_008729, intron 1 of 22)	CpG	858	NM_008729	18163	Mm.321648	NM_008729	ENSMUSG00000022240	Ctnnd2	Catnd2|Nprap|neurojugin	catenin (cadherin associated protein), delta 2	protein-coding
920	chr7	97623786	97628365	+	0	NA	Intergenic	Intergenic	-1570	NM_026734	68472	Mm.289791	NM_026734		Tmem126b	1110001A23Rik	transmembrane protein 126B	protein-coding
428	chr16	50008139	50012915	+	0	NA	Intergenic	Intergenic	29954	NR_045001	628951	Mm.428032	NR_045001		Gm6936	-	predicted gene 6936	ncRNA
887	chr7	13063100	13064348	+	0	NA	promoter-TSS (NM_026112)	promoter-TSS (NM_026112)	70	NM_026112	67370	Mm.98929	NM_026112	ENSMUSG00000030386	Zfp606	2410022M24Rik|AW494727	zinc finger protein 606	protein-coding
99	chr10	36693465	36695347	+	0	NA	promoter-TSS (NM_008229)	promoter-TSS (NM_008229)	56	NM_008229	15182	Mm.19806	NM_008229	ENSMUSG00000019777	Hdac2	D10Wsu179e|YAF1|Yy1bp|mRPD3	histone deacetylase 2	protein-coding
72	chr1	167389469	167392366	+	0	NA	promoter-TSS (NM_028759)	promoter-TSS (NM_028759)	-323	NM_028759	74106	Mm.227605	NM_028759	ENSMUSG00000026571	Dcaf6	1200006M05Rik|Iqwd1|PC326	DDB1 and CUL4 associated factor 6	protein-coding
500	chr18	34998847	35029652	+	0	NA	Intergenic	ID_B1|SINE|B4	-6612	NM_007913	13653	Mm.181959	NM_007913		Egr1	A530045N19Rik|ETR103|Egr-1|Krox-1|Krox-24|Krox24|NGF1-A|NGFI-A|NGFIA|TIS8|Zenk|Zfp-6|Zif268|egr	early growth response 1	protein-coding
869	chr6	117828577	117831921	+	0	NA	Intergenic	ID4|SINE|ID	17154	NM_001001792	22685	Mm.249661	NM_008616	ENSMUSG00000042097	Zfp239	Mok-2|Mok2|Znf239	zinc finger protein 239	protein-coding
790	chr5	66154234	66156911	+	0	NA	intron (NM_001024917, intron 1 of 19)	CpG	812	NM_001024917	333789	Mm.332398	NM_001024917	ENSMUSG00000037795	N4bp2	B3bp|E430014I16|Gm1791|Gm868	NEDD4 binding protein 2	protein-coding
533	chr19	28084146	28087778	+	0	NA	promoter-TSS (NM_011265)	promoter-TSS (NM_011265)	-306	NM_011265	19726	Mm.313321	NM_011265	ENSMUSG00000040929	Rfx3	C230093O12Rik|MRFX3	regulatory factor X, 3 (influences HLA class II expression)	protein-coding
918	chr7	90013451	90018757	+	0	NA	5' UTR (NM_175366, exon 1 of 2)	5' UTR (NM_175366, exon 1 of 2)	261	NM_175366	108797	Mm.306789	NM_175366	ENSMUSG00000057706	Mex3b	4931439A04Rik|M-04814|Rkhd3|mKIAA2009	mex3 homolog B (C. elegans)	protein-coding
1053	chr9	72377923	72381362	+	0	NA	promoter-TSS (NR_045735)	promoter-TSS (NR_045735)	23	NR_045735	75115	Mm.280755	NR_045735	ENSMUSG00000096986	4930509E16Rik	-	RIKEN cDNA 4930509E16 gene	ncRNA
414	chr16	14316619	14318306	+	0	NA	promoter-TSS (NM_025345)	promoter-TSS (NM_025345)	-37	NM_025345	66086	Mm.42072	NM_025345	ENSMUSG00000022677	Fopnl	0610037P05Rik	Fgfr1op N-terminal like	protein-coding
462	chr17	36451578	36453373	+	0	NA	Intergenic	RNERVK23-int|LTR|ERVK	10620	NM_013544	14985	Mm.347438	NM_013544	ENSMUSG00000024448	H2-M10.1	9.5H	histocompatibility 2, M region locus 10.1	protein-coding
1014	chr8	122081793	122083498	+	0	NA	promoter-TSS (NM_019709)	promoter-TSS (NM_019709)	16	NM_001167910	56453	Mm.206934	NM_019709	ENSMUSG00000031835	Mbtps1	0610038M03Rik|AV003995|S1P|SKI-1|Ski1|mKIAA0091	membrane-bound transcription factor peptidase, site 1	protein-coding
843	chr6	38382605	38385083	+	0	NA	promoter-TSS (NM_177185)	promoter-TSS (NM_177185)	-81	NM_177185	320538	Mm.302831	NM_177185	ENSMUSG00000038538	Ubn2	2900060J04Rik|6030408G03Rik|BC060116|D130059P03Rik|mKIAA2030	ubinuclein 2	protein-coding
263	chr12	85028384	85030239	+	0	NA	promoter-TSS (NM_008943)	promoter-TSS (NM_008943)	-202	NM_008943	19164	Mm.998	NM_008943	ENSMUSG00000019969	Psen1	Ad3h|PS-1|PS1|S182	presenilin 1	protein-coding
632	chr2	157853665	157855378	+	0	NA	5' UTR (NM_001291134, exon 1 of 7)	5' UTR (NM_001291134, exon 1 of 7)	288	NM_001291135	70470	Mm.290810	NM_027434	ENSMUSG00000027651	Rprd1b	2610304G08Rik|2810446G03Rik|Crept	regulation of nuclear pre-mRNA domain containing 1B	protein-coding
394	chr15	87029212	87032732	+	0	NA	Intergenic	Intergenic	-343757	NM_001252310	106014	Mm.244319	NM_134096	ENSMUSG00000054863	Fam19a5	TAFA5|Tafa-5|Tara-5	family with sequence similarity 19, member A5	protein-coding
991	chr8	81920503	81924157	+	0	NA	intron (NM_008539, intron 1 of 6)	CpG	1037	NM_008539	17125	Mm.223717	NM_008539	ENSMUSG00000031681	Smad1	AI528653|Madh1|Madr1|Mlp1|MusMLP	SMAD family member 1	protein-coding
514	chr18	67800218	67801822	+	0	NA	promoter-TSS (NM_134138)	promoter-TSS (NM_134138)	-30	NM_001081073	225659	Mm.111928	NM_001081073	ENSMUSG00000073542	Cep76	6230425F05Rik|9630013E05	centrosomal protein 76	protein-coding
610	chr2	126499835	126502500	+	0	NA	non-coding (NR_073183, exon 1 of 6)	non-coding (NR_073183, exon 1 of 6)	161	NM_001271469	14391	Mm.293266	NM_010249	ENSMUSG00000027361	Gabpb1	BABPB2|E4TF1|E4TF1-47|E4TF1-53|E4Tf1B|GABPB|GABPB-1|GABPB-2|GABPB1-1|GABPB1-2|NRF2B1|NRF2B2	GA repeat binding protein, beta 1	protein-coding
725	chr4	58923413	58927053	+	0	NA	intron (NM_172381, intron 1 of 48)	CpG	364	NM_172381	230249	Mm.234801	NM_172381	ENSMUSG00000050812	AI314180	AW558785|BB181316|mKIAA0368	expressed sequence AI314180	protein-coding
931	chr7	118224849	118228452	+	0	NA	promoter-TSS (NM_013507)	promoter-TSS (NM_013507)	-106	NM_013507	13690	Mm.185453	NM_013507	ENSMUSG00000005610	Eif4g2	AA589388|DAP-5|E130105L11Rik|Nat1|Natm1|p97	eukaryotic translation initiation factor 4, gamma 2	protein-coding
513	chr18	67403869	67405966	+	0	NA	intron (NM_172630, intron 1 of 10)	CpG	567	NM_172630	225651	Mm.235792	NM_172630	ENSMUSG00000062526	Mppe1	A530095G11	metallophosphoesterase 1	protein-coding
615	chr2	132332921	132343056	+	0	NA	intron (NR_028286, intron 2 of 3)	L1M3|LINE|L1	21524	NR_028286	70371	Mm.394667	NR_028286	ENSMUSG00000086379	1700026D11Rik	-	RIKEN cDNA 1700026D11 gene	ncRNA
50	chr1	107886265	107891096	+	0	NA	intron (NM_001122675, intron 1 of 12)	intron (NM_001122675, intron 1 of 12)	1697	NM_001122675	227449	Mm.210188	NM_001122675	ENSMUSG00000038866	Zcchc2	9930114B20Rik|AW212015	zinc finger, CCHC domain containing 2	protein-coding
476	chr17	74926333	74929105	+	0	NA	promoter-TSS (NM_007566)	promoter-TSS (NM_007566)	84	NM_007566	12211	Mm.442564	NM_007566	ENSMUSG00000024073	Birc6	A430032G04Rik|A430040A19Rik|AA501170|Bruce|D630005A10Rik|mKIAA1289	baculoviral IAP repeat-containing 6	protein-coding
797	chr5	92389504	92393143	+	0	NA	promoter-TSS (NR_028429)	promoter-TSS (NR_028429)	259	NR_073442	68098	Mm.159453	NM_026557	ENSMUSG00000029397	Rchy1	ARNIP|CHIMP|Pirh2|Zfp363|Znf363	ring finger and CHY zinc finger domain containing 1	protein-coding
1077	chr9	122929368	122931931	+	0	NA	exon (NM_001164823, exon 1 of 3)	exon (NM_001164823, exon 1 of 3)	205	NM_001164823	66079	Mm.482265	NM_025339	ENSMUSG00000066233	Tmem42	0610027O18Rik|4933429E06Rik|AV003444|D9Ertd662e	transmembrane protein 42	protein-coding
293	chr13	55793740	55795268	+	0	NA	promoter-TSS (NM_181278)	promoter-TSS (NM_181278)	19	NM_181278	78521	Mm.28449	NM_181278	ENSMUSG00000045767	B230219D22Rik	AA119856|D530037I19Rik	RIKEN cDNA B230219D22 gene	protein-coding
967	chr8	19758568	19760638	+	0	NA	Intergenic	Intergenic	30027	NM_001039553	626415	Mm.425517	NM_001039553		4930467E23Rik	ENSMUSG00000074453|OTTMUSG00000018948|TSAP	RIKEN cDNA 4930467E23 gene	protein-coding
322	chr13	108238957	108240760	+	0	NA	Intergenic	Intergenic	-20044	NR_045083	105120	Mm.417700	NR_045083		AI197445	-	expressed sequence AI197445	ncRNA
645	chr3	19527593	19529980	+	0	NA	Intergenic	tRNA-Tyr-TAC|tRNA|tRNA	-15674	NM_001081281	381485	Mm.35419	NM_001081281	ENSMUSG00000060913	Trim55	D830041C10Rik|Murf2|Rnf29	tripartite motif-containing 55	protein-coding
469	chr17	65961614	65964386	+	0	NA	promoter-TSS (NM_013933)	promoter-TSS (NM_013933)	-105	NM_013933	30960	Mm.266767	NM_013933	ENSMUSG00000024091	Vapa	33kDa|VAP33	vesicle-associated membrane protein, associated protein A	protein-coding
635	chr2	167905506	167907568	+	0	NA	promoter-TSS (NM_021409)	promoter-TSS (NM_021409)	33	NM_021409	58220	Mm.292834	NM_021409	ENSMUSG00000044641	Pard6b	AV025615|Par6b	par-6 family cell polarity regulator beta	protein-coding
1088	chrX	71209837	71214555	+	0	NA	promoter-TSS (NM_008224)	promoter-TSS (NM_008224)	-500	NM_008224	15161	Mm.491126	NM_008224	ENSMUSG00000031386	Hcfc1	AW060991|HCF|HCF1	host cell factor C1	protein-coding
575	chr2	37556301	37561020	+	0	NA	Intergenic	CpG	-14856	NR_039590	100628597		NR_039590	miRBase:MI0018040	Mir5128	mmu-mir-5128|mu-mir-5128	microRNA 5128	ncRNA
1039	chr9	58427467	58431643	+	0	NA	promoter-TSS (NM_009145)	promoter-TSS (NM_009145)	-492	NM_001293673	20320	Mm.15125	NM_009145	ENSMUSG00000032336	Nptn	AW554172|SDR-1|Sdfr1	neuroplastin	protein-coding
979	chr8	48758451	48761889	+	0	NA	5' UTR (NM_023503, exon 1 of 2)	5' UTR (NM_023503, exon 1 of 2)	343	NM_023503	69260	Mm.430733	NM_023503	ENSMUSG00000063049	Ing2	2810011M06Rik|Ing1l|Ing2b|P33ING2	inhibitor of growth family, member 2	protein-coding
709	chr4	40649302	40651788	+	0	NA	promoter-TSS (NM_001025445)	promoter-TSS (NM_001025445)	-318	NM_001025445	66408	Mm.430710	NM_025545	ENSMUSG00000028411	Aptx	2410016G21Rik|AA388047|FHA-HIT	aprataxin	protein-coding
1005	chr8	113370183	113371574	+	0	NA	promoter-TSS (NM_133953)	promoter-TSS (NM_133953)	-46	NM_133973	102339	Mm.272930	NM_133973	ENSMUSG00000031753	Cog4	AW554810|D8Ertd515e	component of oligomeric golgi complex 4	protein-coding
28	chr1	59726838	59728431	+	0	NA	promoter-TSS (NM_009460)	promoter-TSS (NM_009460)	44	NM_009460	22218	Mm.362118	NM_009460	ENSMUSG00000026021	Sumo1	GMP1|PIC1|SENTRIN|SMT3|SMT3H3|SMTP3|SUMO-1|Smt3C|Ubl1	SMT3 suppressor of mif two 3 homolog 1 (yeast)	protein-coding
40	chr1	78484879	78486358	+	0	NA	promoter-TSS (NM_011811)	promoter-TSS (NM_011811)	-146	NR_102757	23874	Mm.28922	NM_011811	ENSMUSG00000026245	Farsb	C76708|Farsa|Farsl|Farslb|Frsb	phenylalanyl-tRNA synthetase, beta subunit	protein-coding
310	chr13	91362466	91364523	+	0	NA	promoter-TSS (NM_025770)	promoter-TSS (NM_025770)	98	NM_025770	66795	Mm.235385	NM_025770	ENSMUSG00000021619	Atg10	5330424L23Rik|5430428K15Rik|AI852123|APG10|Agp10|Apg10l|Apg10p|Atg10l	autophagy related 10	protein-coding
192	chr11	53162836	53166228	+	0	NA	5' UTR (NM_033565, exon 1 of 21)	5' UTR (NM_033565, exon 1 of 21)	263	NM_033565	93736	Mm.395281	NM_033565	ENSMUSG00000049470	Aff4	AF5Q31|Alf4|Laf4l|MCEF	AF4/FMR2 family, member 4	protein-coding
589	chr2	80418470	80422357	+	0	NA	intron (NM_001290745, intron 1 of 31)	intron (NM_001290745, intron 1 of 31)	926	NM_001290745	50884	Mm.25203	NM_016965	ENSMUSG00000027002	Nckap1	C79304|H19|Hem-2|Hem2|Nap1|mKIAA0587|mh19|p125Nap1	NCK-associated protein 1	protein-coding
215	chr11	85047167	85049342	+	0	NA	promoter-TSS (NR_028329)	promoter-TSS (NR_028329)	368	NM_025825	66884	Mm.271997	NM_025825		Appbp2	1300003O07Rik|AI465480|PAT1	amyloid beta precursor protein (cytoplasmic tail) binding protein 2	protein-coding
699	chr4	9111243	9113691	+	0	NA	Intergenic	Intergenic	-83997	NM_028940	74438	Mm.473368	NM_028940	ENSMUSG00000041216	Clvs1	4933402J24Rik|Clvl1|Rlbp1l1	clavesin 1	protein-coding
687	chr3	132753752	132755631	+	0	NA	promoter-TSS (NM_026231)	promoter-TSS (NM_026231)	13	NM_026231	67553	Mm.304899	NM_026231	ENSMUSG00000028018	Gstcd	4933434L15Rik	glutathione S-transferase, C-terminal domain containing	protein-coding
960	chr8	8689465	8690962	+	0	NA	promoter-TSS (NR_106114)	promoter-TSS (NR_106114)	-51	NR_106114	102465762		NR_106114		Mir7654	mmu-mir-7654	microRNA mir-7654	ncRNA
818	chr5	134390627	134420640	+	0	NA	Intergenic	MTD|LTR|MaLR	-169985	NM_030719	80909	Mm.45218	NM_030719		Gatsl2	7530428J21Rik|AW742413|Gats|Gatsl1	GATS protein-like 2	protein-coding
150	chr10	115454272	115458582	+	0	NA	intron (NM_011217, intron 1 of 13)	intron (NM_011217, intron 1 of 13)	1008	NM_011217	19279	Mm.336316	NM_011217	ENSMUSG00000020151	Ptprr	Gmcp1|PTP-SL|PTPBR7|RPTPRR|mPTP213	protein tyrosine phosphatase, receptor type, R	protein-coding
1038	chr9	53474450	53476272	+	0	NA	exon (NM_027807, exon 1 of 19)	exon (NM_027807, exon 1 of 19)	251	NM_001161618	75717	Mm.218910	NM_027807	ENSMUSG00000032030	Cul5	4921514I20Rik|8430423K24Rik|AI852817|C030032G03Rik|C330021I08Rik|VACM-1|VACM1	cullin 5	protein-coding
245	chr12	11272486	11274140	+	0	NA	promoter-TSS (NM_177331)	promoter-TSS (NM_177331)	621	NM_025695	67241	Mm.173953	NM_025695	ENSMUSG00000020608	Smc6	2810489L22Rik|3830418C19Rik|AA990493|AU018782|AW742439|SMC-6|Smc6l1|mKIAA4103	structural maintenance of chromosomes 6	protein-coding
267	chr12	88606566	88608412	+	0	NA	promoter-TSS (NM_001142581)	promoter-TSS (NM_001142581)	-189	NM_146036	217737	Mm.22626	NM_146036	ENSMUSG00000021037	Ahsa1	BC023857|p38	AHA1, activator of heat shock protein ATPase 1	protein-coding
543	chr19	40968576	40969940	+	0	NA	promoter-TSS (NM_028319)	promoter-TSS (NM_028319)	63	NM_028319	72672	Mm.313523	NM_028319	ENSMUSG00000049164	Zfp518a	2810401C22Rik|6330417C12Rik|AI426493|Zfp518|Znf518|Znf518a|mKIAA0335	zinc finger protein 518A	protein-coding
826	chr5	145991584	145993388	+	0	NA	promoter-TSS (NM_028298)	promoter-TSS (NM_028298)	-98	NM_001083958	72611	Mm.206555	NM_028298	ENSMUSG00000007812	Zfp655	2700038I16Rik|9030409O18Rik|mKIAA4222	zinc finger protein 655	protein-coding
354	chr14	70687973	70690156	+	0	NA	5' UTR (NM_008915, exon 1 of 14)	5' UTR (NM_008915, exon 1 of 14)	192	NM_008915	19057	Mm.439683	NM_008915	ENSMUSG00000022092	Ppp3cc	Calnc	protein phosphatase 3, catalytic subunit, gamma isoform	protein-coding
1064	chr9	100346502	100374907	+	0	NA	intron (NM_001033543, intron 6 of 6)	intron (NM_001033543, intron 6 of 6)	26188	NM_001033543	213208	Mm.242896	NM_001033543	ENSMUSG00000044244	Il20rb	AV228068|Fndc6|Gm186|Il20R2	interleukin 20 receptor beta	protein-coding
757	chr4	142751113	142753264	+	0	NA	intron (NM_001081355, intron 5 of 9)	CpG-10622	-26123	NR_105988	102465618		NR_105988		Mir7021	mmu-mir-7021	microRNA mir-7021	ncRNA
332	chr14	26746208	26747432	+	0	NA	promoter-TSS (NM_025311)	promoter-TSS (NM_025311)	-84	NM_025311	66039	Mm.33344	NM_025311		Tmem254a	0610008K04Rik|0610010A22Rik|AA960404|D14Ertd449e|Tmem254	transmembrane protein 254a	protein-coding
9	chr1	34805469	34809491	+	0	NA	Intergenic	CpG	-51087	NM_183019	226970	Mm.41604	NM_183019	ENSMUSG00000037509	Arhgef4	9330140K16Rik|Asef|ENSMUSG00000070955	Rho guanine nucleotide exchange factor (GEF) 4	protein-coding
34	chr1	66861258	66865027	+	0	NA	intron (NM_001122738, intron 1 of 14)	CpG	1027	NM_177645	68691	Mm.240912	NM_177645	ENSMUSG00000026004	Kansl1l	1110028C15Rik|1190030G24|AI427598|C430010P07Rik|mKIAA4189	KAT8 regulatory NSL complex subunit 1-like	protein-coding
745	chr4	118031594	118034475	+	0	NA	intron (NM_026601, intron 2 of 7)	intron (NM_026601, intron 2 of 7)	430	NR_003946	68180	Mm.193212	NM_026601	ENSMUSG00000006395	Hyi	2700033B16Rik|6430559E15Rik|HT036	hydroxypyruvate isomerase homolog (E. coli)	protein-coding
603	chr2	116943772	116949180	+	0	NA	promoter-TSS (NM_033524)	promoter-TSS (NM_033524)	-331	NM_001277256	114715	Mm.245890	NM_033524	ENSMUSG00000027351	Spred1	5730461F13Rik|AL024345|AW047647	sprouty protein with EVH-1 domain 1, related sequence	protein-coding
90	chr1	193047020	193049546	+	0	NA	Intergenic	CpG	-41071	NM_007498	11910	Mm.2706	NM_007498	ENSMUSG00000026628	Atf3	LRG-21	activating transcription factor 3	protein-coding
565	chr2	23010972	23012628	+	0	NA	promoter-TSS (NM_013771)	promoter-TSS (NM_013771)	-225	NM_013771	27377	Mm.23335	NM_013771	ENSMUSG00000026775	Yme1l1	FtsH1|Ftsh	YME1-like 1 (S. cerevisiae)	protein-coding
620	chr2	144351680	144353991	+	0	NA	promoter-TSS (NM_029763)	promoter-TSS (NM_029763)	299	NM_172859	241688	Mm.442156	NM_172859	ENSMUSG00000037259	Dzank1	2810039F03Rik|6330439K17Rik|6430408C01|AI851115|Ankrd64	double zinc ribbon and ankyrin repeat domains 1	protein-coding
850	chr6	51418452	51422856	+	0	NA	promoter-TSS (NM_007624)	promoter-TSS (NM_007624)	39	NM_007624	12417	Mm.280968	NM_007624	ENSMUSG00000029836	Cbx3	HP1g|M32	chromobox 3	protein-coding
1045	chr9	62658304	62661651	+	0	NA	promoter-TSS (NM_010193)	promoter-TSS (NM_010193)	-522	NM_010193	14155	Mm.24069	NM_010193	ENSMUSG00000032244	Fem1b	mKIAA0396	feminization 1 homolog b (C. elegans)	protein-coding
891	chr7	20300005	20302444	+	0	NA	promoter-TSS (NM_016871)	promoter-TSS (NM_016871)	-446	NM_016871	53333	Mm.416870	NM_016871	ENSMUSG00000002984	Tomm40	AW539759|Mom35|Tom40	translocase of outer mitochondrial membrane 40 homolog (yeast)	protein-coding
937	chr7	130642848	130645045	+	0	NA	promoter-TSS (NM_001081329)	promoter-TSS (NM_001081329)	17	NM_001081329	210162	Mm.135397	NM_175435	ENSMUSG00000030757	Zkscan2	9430065N20Rik|AW493225|Zfp694	zinc finger with KRAB and SCAN domains 2	protein-coding
1004	chr8	112301750	112303673	+	0	NA	5' UTR (NM_001301211, exon 1 of 23)	5' UTR (NM_001301211, exon 1 of 23)	228	NM_001301211	11765	Mm.37210	NM_009677		Ap1g1	AA409002|AU041323|AW551707|Adtg|D8Ertd374e	adaptor protein complex AP-1, gamma 1 subunit	protein-coding
16	chr1	44174987	44177656	+	0	NA	promoter-TSS (NM_023645)	promoter-TSS (NM_023645)	-492	NM_144558	246229	Mm.386883	NM_144558	ENSMUSG00000041684	Bivm	AI854267	basic, immunoglobulin-like variable motif containing	protein-coding
730	chr4	83169858	83171981	+	0	NA	promoter-TSS (NM_001081012)	promoter-TSS (NM_001081012)	-530	NM_001081012	320226	Mm.180032	NM_029117	ENSMUSG00000052407	Ccdc171	4930418J05Rik|4930473A06Rik|A330015D16Rik	coiled-coil domain containing 171	protein-coding
921	chr7	99708905	99710510	+	0	NA	promoter-TSS (NM_001162918)	promoter-TSS (NM_001162918)	48	NM_001162918	66365	Mm.21173	NM_025515	ENSMUSG00000030613	Ccdc90b	2310015N07Rik|C86558	coiled-coil domain containing 90B	protein-coding
1069	chr9	107903448	107906480	+	0	NA	promoter-TSS (NM_013785)	promoter-TSS (NM_013785)	-15	NM_013785	27399	Mm.276155	NM_013785	ENSMUSG00000032594	Ip6k1	1200016D08Rik|AU022776|Ihpk1|InsP6|InsP6k1|Itpk6	inositol hexaphosphate kinase 1	protein-coding
233	chr11	115424881	115426223	+	0	NA	promoter-TSS (NM_001002929)	promoter-TSS (NM_001002929)	-206	NM_001002929	445007	Mm.4379	NM_001002929	ENSMUSG00000020739	Nup85	Pcnt1|frount	nucleoporin 85	protein-coding
1013	chr8	121917885	121919885	+	0	NA	promoter-TSS (NM_019966)	promoter-TSS (NM_019966)	93	NM_019966	56690	Mm.423037	NM_019966	ENSMUSG00000074064	Mlycd	AI324784|Mcd	malonyl-CoA decarboxylase	protein-coding
368	chr15	3944453	3947304	+	0	NA	promoter-TSS (NM_145930)	promoter-TSS (NM_145930)	-126	NM_145930	106064	Mm.21299	NM_145930	ENSMUSG00000041935	AW549877	AI195826	expressed sequence AW549877	protein-coding
316	chr13	101420361	101421873	+	0	NA	promoter-TSS (NM_001283011)	promoter-TSS (NM_001283011)	-101	NM_001283011	19356	Mm.248489	NM_011233	ENSMUSG00000021635	Rad17	MmRad24	RAD17 homolog (S. pombe)	protein-coding
994	chr8	86397832	86401167	+	0	NA	Intergenic	Intergenic	-24498	NM_181039	330814	Mm.260733	NM_181039	ENSMUSG00000013033	Lphn1	2900070I05Rik|AI182398|CLIBA|Lec2|mKIAA0821	latrophilin 1	protein-coding
611	chr2	126700505	126703365	+	0	NA	promoter-TSS (NM_001164325)	promoter-TSS (NM_001164325)	62	NM_001164325	58800	Mm.244705	NM_021450	ENSMUSG00000027365	Trpm7	2310022G15Rik|4833414K03Rik|5033407O22Rik|CHAK|CHAK1|LTrpC-7|Ltpr7|Ltrpc7|TRPPLIK	transient receptor potential cation channel, subfamily M, member 7	protein-coding
849	chr6	50515368	50517917	+	0	NA	promoter-TSS (NM_007808)	promoter-TSS (NM_007808)	0	NR_015581	73183	Mm.430720	NR_015581	ENSMUSG00000085776	5430402O13Rik	3110047M22Rik	RIKEN cDNA 5430402O13 gene	ncRNA
11	chr1	36995391	36997428	+	0	NA	promoter-TSS (NM_018872)	promoter-TSS (NM_018872)	-37	NM_018872	56030	Mm.186943	NM_018872	ENSMUSG00000026116	Tmem131	2610524E03Rik|CC28|D1Bwg0491e|Neg|RW1|YR-23|mKIAA0257	transmembrane protein 131	protein-coding
492	chr18	30688177	30692345	+	0	NA	Intergenic	Intergenic	257711	NM_181414	225326	Mm.194127	NM_181414	ENSMUSG00000033628	Pik3c3	5330434F23Rik|Vps34	phosphoinositide-3-kinase, class 3	protein-coding
208	chr11	72420002	72423647	+	0	NA	intron (NM_025985, intron 1 of 5)	CpG	1061	NM_025985	67128	Mm.458052	NM_025985	ENSMUSG00000020794	Ube2g1	2700059C12Rik|AI256795|AU014992|AW552068|D130023C12Rik	ubiquitin-conjugating enzyme E2G 1	protein-coding
511	chr18	61335832	61337756	+	0	NA	promoter-TSS (NM_178277)	promoter-TSS (NM_178277)	-90	NM_134134	106894	Mm.22574	NM_134134	ENSMUSG00000024622	Hmgxb3	2510002C16Rik|A630042L21Rik|AI413166|mKIAA0194	HMG box domain containing 3	protein-coding
842	chr6	35127198	35128378	+	0	NA	intron (NM_027513, intron 1 of 42)	CpG	172	NM_027513	70699	Mm.261208	NM_027513	ENSMUSG00000038759	Nup205	3830404O05Rik|AV248391|mKIAA0225	nucleoporin 205	protein-coding
93	chr10	10999717	11001907	+	0	NA	promoter-TSS (NM_027968)	promoter-TSS (NM_027968)	-316	NM_027968	71865	Mm.276229	NM_027968	ENSMUSG00000047648	Fbxo30	1700026A16Rik|MUSA1	F-box protein 30	protein-coding
899	chr7	36339155	36341680	+	0	NA	exon (NM_033080, exon 1 of 3)	exon (NM_033080, exon 1 of 3)	530	NM_033080	110959	Mm.410206	NM_033080	ENSMUSG00000034875	Nudt19	D7Rp2|D7Rp2-r|D7Rp2-s|D7Rp2e|RP2-r|RP2-s	nudix (nucleoside diphosphate linked moiety X)-type motif 19	protein-coding
292	chr13	55310661	55315362	+	0	NA	intron (NM_008739, intron 1 of 22)	CpG	1868	NM_008739	18193	Mm.12964	NM_008739	ENSMUSG00000021488	Nsd1	AI528500|KMT3B	nuclear receptor-binding SET-domain protein 1	protein-coding
291	chr13	51194180	51198396	+	0	NA	promoter-TSS (NM_001283029)	promoter-TSS (NM_001283029)	39	NM_146043	20729	Mm.188432	NM_011462	ENSMUSG00000021395	Spin1	Spin	spindlin 1	protein-coding
374	chr15	36537550	36540133	+	0	NA	promoter-TSS (NM_008774)	promoter-TSS (NM_008774)	-113	NM_008774	18458	Mm.371570	NM_008774	ENSMUSG00000022283	Pabpc1	PABP|Pabp1|PabpI|Pabpl1|ePAB	poly(A) binding protein, cytoplasmic 1	protein-coding
199	chr11	61742361	61746601	+	0	NA	promoter-TSS (NM_019921)	promoter-TSS (NM_019921)	-722	NM_019921	56697	Mm.274404	NM_019921	ENSMUSG00000047804	Akap10	1500031L16Rik|B130049N18Rik|D-AKAP-2|D-AKAP2|PRKA10	A kinase (PRKA) anchor protein 10	protein-coding
114	chr10	62254017	62256612	+	0	NA	promoter-TSS (NM_026201)	promoter-TSS (NM_026201)	-198	NM_026201	67500	Mm.196371	NM_026201	ENSMUSG00000020074	Ccar1	2610511G16Rik|9430036H15Rik|Carp1	cell division cycle and apoptosis regulator 1	protein-coding
429	chr16	57120706	57122633	+	0	NA	promoter-TSS (NM_138599)	promoter-TSS (NM_138599)	-158	NM_138599	28185	Mm.213292	NM_138599	ENSMUSG00000022752	Tomm70a	2610044B22Rik|D16Ium22|D16Ium22e|D16Wsu109e|Tom70|mKIAA0719	translocase of outer mitochondrial membrane 70 homolog A (yeast)	protein-coding
1091	chrX	103414219	103415824	+	0	NA	exon (NM_001167988, exon 2 of 8)	exon (NM_001167988, exon 2 of 8)	160	NM_001001176	407786	Mm.19440	NM_001001176	ENSMUSG00000047242	Taf9b	BC066223|Taf9l	TAF9B RNA polymerase II, TATA box binding protein (TBP)-associated factor	protein-coding
409	chr16	5049240	5051614	+	0	NA	promoter-TSS (NM_028720)	promoter-TSS (NM_028720)	266	NM_026666	170644	Mm.66356	NM_026666	ENSMUSG00000039473	Ubn1	1110029L11Rik|2610108L02Rik|AA673476|AW124741	ubinuclein 1	protein-coding
73	chr1	169237820	169239347	+	0	NA	promoter-TSS (NM_001039483)	promoter-TSS (NM_001039483)	-218	NM_001039483	68944	Mm.330045	NM_026881	ENSMUSG00000052428	Tmco1	1190006A08Rik|4930403O06Rik|AA109065|AU022572|ESTM39	transmembrane and coiled-coil domains 1	protein-coding
67	chr1	162142162	162144555	+	0	NA	promoter-TSS (NM_009786)	promoter-TSS (NM_009786)	-335	NM_009786	12301	Mm.10702	NM_009786	ENSMUSG00000014226	Cacybp	SIP	calcyclin binding protein	protein-coding
241	chr12	8647008	8648859	+	0	NA	Intergenic	CpG	-33007	NM_001160221	80913	Mm.341243	NM_030723	ENSMUSG00000020594	Pum2	5730503J23Rik|Pumm2|mKIAA0235	pumilio RNA-binding family member 2	protein-coding
795	chr5	89103539	89105499	+	0	NA	promoter-TSS (NM_001098476)	promoter-TSS (NM_001098476)	86	NM_001098476	231413	Mm.332474	NM_178700	ENSMUSG00000044221	Grsf1	BB232551|C80280|D5Wsu31e	G-rich RNA sequence binding factor 1	protein-coding
812	chr5	123578654	123602557	+	0	NA	Intergenic	Intergenic	-1597	NM_001040398	208043	Mm.250391	NM_177581	ENSMUSG00000038384	Setd1b	AA516740|BC035291|KMT2G|mKIAA1076	SET domain containing 1B	protein-coding
489	chr18	21159152	21161561	+	0	NA	intron (NM_207623, intron 1 of 7)	CpG	514	NM_207623	56515	Mm.253542	NM_019706	ENSMUSG00000024317	Rnf138	2410015A17Rik|2810480D20Rik|STRIN|Trif|Trif-d	ring finger protein 138	protein-coding
585	chr2	71204384	71206566	+	0	NA	intron (NM_172436, intron 1 of 17)	intron (NM_172436, intron 1 of 17)	136	NM_172436	78830	Mm.30928	NM_172436		Slc25a12	2610002D09Rik|AI839531|B230107K20Rik|BB129864	solute carrier family 25 (mitochondrial carrier, Aralar), member 12	protein-coding
794	chr5	86600995	86602908	+	0	NA	promoter-TSS (NM_172712)	promoter-TSS (NM_172712)	-183	NM_172712	231380	Mm.34012	NM_172712	ENSMUSG00000035898	Uba6	4930542H01|5730469D23Rik|AU021846|AW124799|E1-L2|Ube1l2	ubiquitin-like modifier activating enzyme 6	protein-coding
327	chr14	12384866	12389764	+	0	NA	intron (NM_008981, intron 1 of 29)	intron (NM_008981, intron 1 of 29)	1248	NM_008981	19270	Mm.431266	NM_008981	ENSMUSG00000021745	Ptprg	5430405N12Rik|AW046354|AW549872|RPTPgamma	protein tyrosine phosphatase, receptor type, G	protein-coding
1080	chrX	7672526	7674764	+	0	NA	promoter-TSS (NR_003632)	promoter-TSS (NR_003632)	-568	NR_003632	627782	Mm.305432	NM_001037930	ENSMUSG00000086404	Gm6787	EG627782	proteasome (prosome, macropain) subunit, beta type 7 pseudogene	pseudo
944	chr7	134938847	134986758	+	0	NA	intron (NM_024414, intron 1 of 9)	intron (NM_024414, intron 1 of 9)	5243	NM_024414	56216	Mm.439759	NM_024414		Stx1b	Stx1b2|Stx1bl|Syn1b	syntaxin 1B	protein-coding
674	chr3	104314894	104317042	+	0	NA	promoter-TSS (NM_001025067)	promoter-TSS (NM_001025067)	-189	NM_001025067	269473	Mm.34855	NM_001025067	ENSMUSG00000032913	Lrig2	4632419I10Rik|BB096938	leucine-rich repeats and immunoglobulin-like domains 2	protein-coding
732	chr4	88366221	88369104	+	0	NA	exon (NM_172871, exon 1 of 1)	exon (NM_172871, exon 1 of 1)	750	NM_172871	242521	Mm.260601	NM_172871	ENSMUSG00000070923	Klhl9	8030469P05|C530050O22Rik|ENSMUSG00000070923|mKIAA1354	kelch-like 9	protein-coding
280	chr13	8994720	8996781	+	0	NA	promoter-TSS (NM_027000)	promoter-TSS (NM_027000)	-492	NM_027000	69237	Mm.41800	NM_027000	ENSMUSG00000021149	Gtpbp4	2610028C09Rik|Crfg|Gtpbp3|NGB|Nog1	GTP binding protein 4	protein-coding
957	chr7	150734097	150735790	+	0	NA	promoter-TSS (NM_008672)	promoter-TSS (NM_008672)	82	NM_001285489	17955	Mm.294625	NM_008672	ENSMUSG00000059119	Nap1l4	2810410H14Rik|AI316776|D7Wsu30e|Nap2	nucleosome assembly protein 1-like 4	protein-coding
273	chr12	102320676	102323308	+	0	NA	promoter-TSS (NM_211355)	promoter-TSS (NM_211355)	-80	NM_001160214	68734	Mm.87077	NM_211355	ENSMUSG00000041846	Smek1	1110034C04Rik|BC064465|mKIAA2010	SMEK homolog 1, suppressor of mek1 (Dictyostelium)	protein-coding
471	chr17	69765875	69767632	+	0	NA	non-coding (NR_026848, exon 1 of 1)	non-coding (NR_026848, exon 1 of 1)	966	NR_026848	77533	Mm.266592	NR_026848		C030034I22Rik	-	RIKEN cDNA C030034I22 gene	ncRNA
622	chr2	152051363	152053489	+	0	NA	promoter-TSS (NM_007788)	promoter-TSS (NM_007788)	-150	NM_007788	12995	Mm.23692	NM_007788	ENSMUSG00000074698	Csnk2a1	Csnk2a1-rs4	casein kinase 2, alpha 1 polypeptide	protein-coding
970	chr8	20019591	20021010	+	0	NA	promoter-TSS (NR_030708).2	promoter-TSS (NR_030708).2	-22	NR_030708	547150	Mm.359054	NR_030708	ENSMUSG00000071796	6820431F20Rik	-	cadherin 11 pseudogene	pseudo
24	chr1	57462639	57464251	+	0	NA	promoter-TSS (NM_001037742)	promoter-TSS (NM_001037742)	53	NM_001081181	68115	Mm.275428	NM_001081181		9430016H08Rik	AA409999|C78988	RIKEN cDNA 9430016H08 gene	protein-coding
104	chr10	42220883	42223158	+	0	NA	5' UTR (NM_017472, exon 1 of 4)	5' UTR (NM_017472, exon 1 of 4)	160	NM_017472	54198	Mm.277870	NM_017472	ENSMUSG00000019804	Snx3	SDP3	sorting nexin 3	protein-coding
131	chr10	81459187	81460751	+	0	NA	Intergenic	CpG	-50903	NM_001024626	408062	Mm.391409	NM_001024626		Zfp873	-	zinc finger protein 873	protein-coding
502	chr18	35176931	35182646	+	0	NA	Intergenic	Intergenic	-65783	NM_010481	15526	Mm.209419	NM_010481	ENSMUSG00000024359	Hspa9	74kDa|Csa|Grp75|Hsc74|Hsp74|Hsp74a|Hspa9a|Mortalin|Mot-2|Mot2|Mthsp70|Pbp74	heat shock protein 9	protein-coding
314	chr13	97312000	97314321	+	0	NA	promoter-TSS (NM_012048)	promoter-TSS (NM_012048)	470	NM_023420	68018	Mm.24125	NM_023420	ENSMUSG00000021669	Col4a3bp	2810404O15Rik|9230101K08Rik|AU016711|CERT|GPBP	collagen, type IV, alpha 3 (Goodpasture antigen) binding protein	protein-coding
355	chr14	70842544	70875281	+	0	NA	intron (NM_145981, intron 1 of 4)	intron (NM_145981, intron 1 of 4)	1588	NM_145981	105653	Mm.192598	NM_145981	ENSMUSG00000003469	Phyhip	AW049870|C630010D02Rik|Lnap1ip|PAHX-AP#1|PAHX-AP1	phytanoyl-CoA hydroxylase interacting protein	protein-coding
159	chr10	129849216	129849619	+	0	NA	Intergenic	Intergenic	17251	NM_001102602	623734	Mm.469840	NM_001102602	ENSMUSG00000092048	Vmn2r85	EG623734	vomeronasal 2, receptor 85	protein-coding
553	chr19	60865543	60868074	+	0	NA	promoter-TSS (NM_010123)	promoter-TSS (NM_010123)	-212	NM_010123	13669	Mm.2238	NM_010123	ENSMUSG00000024991	Eif3a	A830012B05Rik|Csma|Eif3|Eif3s10|mKIAA0139	eukaryotic translation initiation factor 3, subunit A	protein-coding
747	chr4	126644396	126646117	+	0	NA	promoter-TSS (NM_001114399)	promoter-TSS (NM_001114399)	-89	NM_001114399	67785	Mm.165401	NM_001114399	ENSMUSG00000042446	Zmym4	6330503C17Rik|AI480785|AW493829|CDIR|D630001M21|MYM|Zfp262|Znf262|mKIAA0425	zinc finger, MYM-type 4	protein-coding
555	chr2	6242677	6244652	+	0	NA	promoter-TSS (NM_001080548)	promoter-TSS (NM_001080548)	-139	NM_001080548	98910	Mm.40673	NM_181399	ENSMUSG00000039046	Usp6nl	AI316785|RNTRE|TRE2NL|mKIAA0019	USP6 N-terminal like	protein-coding
1037	chr9	50466701	50468920	+	0	NA	promoter-TSS (NM_145614)	promoter-TSS (NM_145614)	75	NM_145614	235339	Mm.285076	NM_145614	ENSMUSG00000000168	Dlat	6332404G05Rik|DLTA|PDC-E2	dihydrolipoamide S-acetyltransferase (E2 component of pyruvate dehydrogenase complex)	protein-coding
47	chr1	94830146	94832387	+	0	NA	non-coding (NR_015525, exon 2 of 2)	non-coding (NR_015525, exon 2 of 2)	281	NM_011796	23830	Mm.294315	NM_011796	ENSMUSG00000026270	Capn10	AW049679|Capn8|mKIAA1845	calpain 10	protein-coding
37	chr1	75120296	75122513	+	0	NA	TTS (NM_194333)	TTS (NM_194333)	396	NM_029342	75570	Mm.442409	NM_029342		Nhej1	1700029B21Rik|XLF|cernunnos	nonhomologous end-joining factor 1	protein-coding
1017	chr8	125588023	125590700	+	0	NA	promoter-TSS (NM_153176)	promoter-TSS (NM_153176)	-47	NM_153176	234847	Mm.292075	NM_153176	ENSMUSG00000000738	Spg7	AI452278|AU015315|Cmar|PGN	spastic paraplegia 7 homolog (human)	protein-coding
855	chr6	71220267	71223246	+	0	NA	promoter-TSS (NM_145568)	promoter-TSS (NM_145568)	91	NR_106192	102465900		NR_106192	miRBase:MI0026044	Mir8112	mmu-mir-8112	microRNA mir-8112	ncRNA
270	chr12	92825399	92829799	+	0	NA	intron (NM_175335, intron 1 of 8)	intron (NM_175335, intron 1 of 8)	490	NM_031391	83602	Mm.275728	NM_031391	ENSMUSG00000020962	Gtf2a1	6330549H03Rik|AA536742|AA959775|AW060250|TfIIAa/b|Tfiia1	general transcription factor II A, 1	protein-coding
195	chr11	60348651	60354705	+	0	NA	5' UTR (NM_172943, exon 1 of 4)	5' UTR (NM_172943, exon 1 of 4)	493	NM_172943	268420	Mm.262056	NM_172943	ENSMUSG00000042650	Alkbh5	AW050020|AW215868|Abh5|E130207K11|Ofoxd	alkB, alkylation repair homolog 5 (E. coli)	protein-coding
1057	chr9	83727239	83728336	+	0	NA	promoter-TSS (NM_001110265)	promoter-TSS (NM_001110265)	-509	NM_009445	22137	Mm.1904	NM_009445	ENSMUSG00000038379	Ttk	AL022661|Esk1|Mps1|PYT|esk	Ttk protein kinase	protein-coding
538	chr19	36421964	36424296	+	0	NA	Intergenic	CpG	-30427	NM_029508	76073	Mm.259180	NM_029508	ENSMUSG00000024805	Pcgf5	0610009F02Rik|1110054A01Rik|5830406C17Rik|5830443C21Rik|9530023M17Rik|AI324127	polycomb group ring finger 5	protein-coding
679	chr3	107433390	107435876	+	0	NA	promoter-TSS (NM_153563)	promoter-TSS (NM_153563)	-5	NM_153563	229707	Mm.278643	NM_153563	ENSMUSG00000014601	Strip1	6330569M22Rik|6530401O14Rik|Fam40a	striatin interacting protein 1	protein-coding
680	chr3	108393389	108395352	+	0	NA	5' UTR (NM_181400, exon 1 of 15)	5' UTR (NM_181400, exon 1 of 15)	174	NM_181400	99512	Mm.285968	NM_181400	ENSMUSG00000040389	Wdr47	1810073M12Rik|AA552998|mKIAA0893	WD repeat domain 47	protein-coding
831	chr5	152170110	152172409	+	0	NA	promoter-TSS (NR_045699)	promoter-TSS (NR_045699)	9	NR_045699	625175	Mm.443286	NR_045699	ENSMUSG00000097321	1700028E10Rik	A630054D14|Gm6561	RIKEN cDNA 1700028E10 gene	ncRNA
521	chr18	84757768	84760089	+	0	NA	promoter-TSS (NM_001033341)	promoter-TSS (NM_001033341)	-32	NM_001033341	240476	Mm.329575	NM_001033341	ENSMUSG00000048410	Zfp407	6430585N13Rik|Gm333|Gm334|Gm948|ZNF407	zinc finger protein 407	protein-coding
162	chr11	3548212	3549999	+	0	NA	promoter-TSS (NM_001159288)	promoter-TSS (NM_001159288)	-288	NR_002321	544752	Mm.390314	NR_002321	ENSMUSG00000056579	Tug1	AI316828	taurine upregulated gene 1	ncRNA
433	chr16	90829434	90834393	+	0	NA	intron (NM_001199210, intron 1 of 7)	intron (NM_001199210, intron 1 of 7)	809	NM_001199210	70967	Mm.253077	NM_027627		Eva1c	1700092M14Rik|4931408A02Rik|Fam176c	eva-1 homolog C (C. elegans)	protein-coding
880	chr6	149256963	149258825	+	0	NA	promoter-TSS (NM_026054)	promoter-TSS (NM_026054)	-42	NM_001289661	67246	Mm.333515	NM_026054	ENSMUSG00000032712	2810474O19Rik	6720435I21Rik|AA536804|AU020969|GET|Kiaa1551	RIKEN cDNA 2810474O19 gene	protein-coding
647	chr3	28161116	28167153	+	0	NA	intron (NM_001163007, intron 1 of 31)	intron (NM_001163007, intron 1 of 31)	1998	NM_001163009	665113	Mm.126193	NM_026910	ENSMUSG00000027692	Tnik	1500031A17Rik|4831440I19Rik|AI451411|C530008O15Rik|C630040K21Rik	TRAF2 and NCK interacting kinase	protein-coding
334	chr14	27782247	27784317	+	0	NA	intron (NM_145221, intron 1 of 21)	CpG	455	NM_145221	72993	Mm.202322	NM_145221	ENSMUSG00000040760	Appl1	2900057D21Rik|7330406P05Rik|AI585782|AW209077|BB022931|C88264|DIP13	adaptor protein, phosphotyrosine interaction, PH domain and leucine zipper containing 1	protein-coding
786	chr5	46247389	46249493	+	0	NA	promoter-TSS (NM_172153)	promoter-TSS (NM_172153)	338	NM_178142	209707	Mm.71498	NM_172153	ENSMUSG00000015882	Lcorl	Mlr1	ligand dependent nuclear receptor corepressor-like	protein-coding
986	chr8	72424929	72427912	+	0	NA	promoter-TSS (NM_023312)	promoter-TSS (NM_023312)	37	NM_023312	67184	Mm.21162	NM_023312	ENSMUSG00000036199	Ndufa13	2700054G14Rik|AU022060|CDA016|CGI-39|GRIM-19|Grim19	NADH dehydrogenase (ubiquinone) 1 alpha subcomplex, 13	protein-coding
740	chr4	108672138	108674163	+	0	NA	promoter-TSS (NM_146150)	promoter-TSS (NM_146150)	-260	NM_146150	230598	Mm.274950	NM_146150	ENSMUSG00000053510	Nrd1	2600011I06Rik|AI875733|NRD-C	nardilysin, N-arginine dibasic convertase, NRD convertase 1	protein-coding
1008	chr8	113782068	113783839	+	0	NA	exon (NM_009149, exon 1 of 26)	exon (NM_009149, exon 1 of 26)	149	NM_009149	20340	Mm.276271	NM_009149	ENSMUSG00000003316	Glg1	AI593353|AW537898|CFR|CFR-1|ESL-1|MG-160|MG160|Selel	golgi apparatus protein 1	protein-coding
1027	chr9	20324435	20327129	+	0	NA	promoter-TSS (NM_001135019)	promoter-TSS (NM_001135019)	81	NM_001135019	77519	Mm.431849	NM_001082485	ENSMUSG00000060510	Zfp266	5330440G10Rik|5730601F06Rik|AW552317	zinc finger protein 266	protein-coding
103	chr10	41834625	41842978	+	0	NA	Intergenic	Intergenic	-100613	NM_001034858	213402	Mm.211320	NM_001034858	ENSMUSG00000071324	Armc2	2610018I05Rik	armadillo repeat containing 2	protein-coding
201	chr11	67456007	67504207	+	0	NA	intron (NM_001277079, intron 8 of 13)	L1MB5|LINE|L1	-28721	NM_009038	19674	Mm.439726	NM_009038	ENSMUSG00000020907	Rcvrn	CAR|S-modulin	recoverin	protein-coding
871	chr6	118403882	118406981	+	0	NA	promoter-TSS (NM_028335)	promoter-TSS (NM_028335)	93	NM_028335	72720	Mm.212572	NM_028335	ENSMUSG00000030145	Zfp248	2810037F07Rik|E130106N01Rik	zinc finger protein 248	protein-coding
423	chr16	37867284	37871875	+	0	NA	intron (NM_177093, intron 1 of 3)	intron (NM_177093, intron 1 of 3)	1093	NM_177093	320184	Mm.390882	NM_177093	ENSMUSG00000034158	Lrrc58	1810012N18Rik|C330018J07Rik	leucine rich repeat containing 58	protein-coding
719	chr4	46456726	46465843	+	0	NA	Intergenic	Intergenic	-2705	NM_130889	67628	Mm.263913	NM_130889	ENSMUSG00000028333	Anp32b	2410015B15Rik|PAL31|PHAPI2a|Ssp29	acidic (leucine-rich) nuclear phosphoprotein 32 family, member B	protein-coding
902	chr7	46843407	46844852	+	0	NA	Intergenic	CpG	70993	NM_001004139	70227	Mm.333800	NM_001004139	ENSMUSG00000068959	Zfp619	3000002G13Rik	zinc finger protein 619	protein-coding
827	chr5	147759485	147760843	+	0	NA	promoter-TSS (NM_025652)	promoter-TSS (NM_025652)	-69	NM_025652	66596	Mm.196528	NM_025652	ENSMUSG00000016503	Gtf3a	2010015D03Rik|2610111I01Rik|5330403M05Rik	general transcription factor III A	protein-coding
266	chr12	88487745	88489459	+	0	NA	promoter-TSS (NM_010363)	promoter-TSS (NM_010363)	-55	NM_001252556	14874	Mm.29652	NM_010363	ENSMUSG00000021033	Gstz1	MAAI	glutathione transferase zeta 1 (maleylacetoacetate isomerase)	protein-coding
174	chr11	22906949	22909047	+	0	NA	Intergenic	Intergenic	-5389	NM_028672	73873	Mm.252406	NM_028672	ENSMUSG00000049811	Fam161a	4930430E16Rik	family with sequence similarity 161, member A	protein-coding
820	chr5	138219333	138229211	+	0	NA	intron (NM_144913, intron 2 of 3)	ID4_|SINE|ID	3657	NM_144913	231803	Mm.61193	NM_144913	ENSMUSG00000029726	Mepce	Bcdin3|D5Wsu46e	methylphosphate capping enzyme	protein-coding
422	chr16	35021827	35023278	+	0	NA	promoter-TSS (NM_023587)	promoter-TSS (NM_023587)	45	NM_023587	70757	Mm.27286	NM_023587	ENSMUSG00000035376	Ptplb	6330408J20Rik|AI255777|AI481689|HACD2	protein tyrosine phosphatase-like (proline instead of catalytic arginine), member b	protein-coding
905	chr7	51501268	51503001	+	0	NA	promoter-TSS (NM_025880)	promoter-TSS (NM_025880)	42	NM_025880	668661	Mm.274492	NM_025880	ENSMUSG00000045411	2410002F23Rik	-	RIKEN cDNA 2410002F23 gene	protein-coding
97	chr10	20030638	20033480	+	0	NA	promoter-TSS (NM_001025393)	promoter-TSS (NM_001025393)	-216	NM_001025392	72567	Mm.294783	NM_153787	ENSMUSG00000037608	Bclaf1	2610102K23Rik|2700025J07Rik|2810454G14Rik|5730534O06Rik|AI450190|AW556225|Btf|mKIAA0164	BCL2-associated transcription factor 1	protein-coding
41	chr1	80334067	80338525	+	0	NA	intron (NM_016716, intron 1 of 15)	intron (NM_016716, intron 1 of 15)	709	NM_016716	26554	Mm.12665	NM_016716	ENSMUSG00000004364	Cul3	AI467304|AW146203|mKIAA0617	cullin 3	protein-coding
668	chr3	96022466	96028548	+	0	NA	promoter-TSS (NM_175662)	promoter-TSS (NM_175662)	463	NM_178214	319190	Mm.439791	NM_178214	ENSMUSG00000068854	Hist2h2be	AV127319|H2b-613|T25626	histone cluster 2, H2be	protein-coding
52	chr1	127330924	127333331	+	0	NA	5' UTR (NM_023735, exon 1 of 12)	5' UTR (NM_023735, exon 1 of 12)	177	NM_023735	74117	Mm.183102	NM_023735	ENSMUSG00000026341	Actr3	1200003A09Rik|Arp3	ARP3 actin-related protein 3	protein-coding
688	chr3	132972778	132974219	+	0	NA	intron (NM_146141, intron 1 of 11)	CpG	424	NM_146141	74776	Mm.210305	NM_146141	ENSMUSG00000028013	Ppa2	1110013G13Rik|Sid6306	pyrophosphatase (inorganic) 2	protein-coding
750	chr4	132832882	132834685	+	0	NA	promoter-TSS (NM_025667)	promoter-TSS (NM_025667)	-78	NR_110978	52174	Mm.244748	NM_025667	ENSMUSG00000028857	Tmem222	5730406H10Rik|AA409341|D4Ertd196e	transmembrane protein 222	protein-coding
302	chr13	70775823	70777659	+	0	NA	promoter-TSS (NM_144837)	promoter-TSS (NM_144837)	-229	NM_144837	218333	Mm.139738	NM_144837	ENSMUSG00000034525	Ice1	C77245|mKIAA0947	interactor of little elongation complex ELL subunit 1	protein-coding
774	chr5	25003059	25007737	+	0	NA	promoter-TSS (NR_030700)	promoter-TSS (NR_030700)	-217	NR_030700	320965	Mm.32025	NR_030700		4831440E17Rik	-	RIKEN cDNA 4831440E17 gene	ncRNA
866	chr6	108607149	108619310	+	0	NA	intron (NM_011498, intron 4 of 4)	intron (NM_011498, intron 4 of 4)	-2301	NR_104577	75394	Mm.395061	NR_040757	ENSMUSG00000087341	0610040F04Rik	-	RIKEN cDNA 0610040F04 gene	ncRNA
910	chr7	54174715	54176149	+	0	NA	promoter-TSS (NM_021884)	promoter-TSS (NM_021884)	-132	NM_021884	22088	Mm.241334	NM_021884	ENSMUSG00000014402	Tsg101	AI255943|CC2	tumor susceptibility gene 101	protein-coding
693	chr3	151871473	151875224	+	0	NA	promoter-TSS (NM_057172)	promoter-TSS (NM_057172)	-74	NM_057172	51886	Mm.278922	NM_057172	ENSMUSG00000028034	Fubp1	9530027K12Rik|D3Ertd330e|FBP|Fubp|Fubp4	far upstream element (FUSE) binding protein 1	protein-coding
593	chr2	101301093	101306654	+	0	NA	Intergenic	Intergenic	-161032	NM_009020	19374	Mm.4988	NM_009020	ENSMUSG00000032864	Rag2	Rag-2	recombination activating gene 2	protein-coding
770	chr5	20207370	20209350	+	0	NA	3' UTR (NM_001170746, exon 23 of 23)	3' UTR (NM_001170746, exon 23 of 23)	179582	NM_172992	68770	Mm.86410	NM_172992	ENSMUSG00000039987	Phtf2	1110054G21Rik|9530062N20Rik|AI447096|C77923	putative homeodomain transcription factor 2	protein-coding
188	chr11	51396869	51399398	+	0	NA	promoter-TSS (NM_028398)	promoter-TSS (NM_028398)	-126	NM_028398	72947	Mm.256875	NM_028398		Phykpl	2900006B13Rik|Agxt2l2	5-phosphohydroxy-L-lysine phospholyase	protein-coding
402	chr15	98363121	98365259	+	0	NA	exon (NM_001289437, exon 2 of 10)	exon (NM_001289437, exon 2 of 10)	510	NM_001289438	69612	Mm.296240	NM_133714	ENSMUSG00000022992	Kansl2	2310037I24Rik|B930009D17	KAT8 regulatory NSL complex subunit 2	protein-coding
641	chr3	9832241	9834054	+	0	NA	intron (NM_001195031, intron 1 of 8)	CpG	532	NM_053182	94212	Mm.23897	NM_053182	ENSMUSG00000027508	Pag1	Cbp|F730007C19Rik|Pag	phosphoprotein associated with glycosphingolipid microdomains 1	protein-coding
893	chr7	26538555	26541636	+	0	NA	promoter-TSS (NM_178089)	promoter-TSS (NM_178089)	-356	NM_144922	232989	Mm.254223	NM_144922	ENSMUSG00000040725	Hnrnpul1	E130317O14Rik|E1B-AP5|E1BAP5|Hnrnpul|Hnrpul1	heterogeneous nuclear ribonucleoprotein U-like 1	protein-coding
838	chr6	25758466	25760188	+	0	NA	promoter-TSS (NM_133931)	promoter-TSS (NM_133931)	-101	NM_133931	101185	Mm.274589	NM_133931	ENSMUSG00000029676	Pot1a	1500031H18Rik|AI851169|Pot1	protection of telomeres 1A	protein-coding
616	chr2	136212306	136214584	+	0	NA	5' UTR (NM_172858, exon 1 of 10)	5' UTR (NM_172858, exon 1 of 10)	258	NM_172858	241656	Mm.131572	NM_172858	ENSMUSG00000039913	Pak7	2900083L08Rik|6430627N20|Pak5	p21 protein (Cdc42/Rac)-activated kinase 7	protein-coding
640	chr3	8922259	8924528	+	0	NA	intron (NM_025434, intron 1 of 2)	intron (NM_025434, intron 1 of 2)	464	NM_025434	66230	Mm.38460	NM_025434	ENSMUSG00000040269	Mrps28	1500012D08Rik|AW061224	mitochondrial ribosomal protein S28	protein-coding
83	chr1	180297759	180301042	+	0	NA	Intergenic	Intergenic	-31485	NM_016805	51810	Mm.86589	NM_016805	ENSMUSG00000039630	Hnrnpu	AA408410|AI256620|AL024194|AL024437|AW557595|C86794|Hnrpu|SAFA|Sp120|hnRNP U	heterogeneous nuclear ribonucleoprotein U	protein-coding
804	chr5	116179542	116183681	+	0	NA	promoter-TSS (NM_001080808)	promoter-TSS (NM_001080808)	-43	NM_001080808	75665	Mm.233914	NM_001080808	ENSMUSG00000041609	Ccdc64	2210403N09Rik|BICDR-1	coiled-coil domain containing 64	protein-coding
870	chr6	118369042	118371108	+	0	NA	promoter-TSS (NM_194339)	promoter-TSS (NM_194339)	-640	NM_194339	213895	Mm.25269	NM_194339	ENSMUSG00000030138	Bms1	AA408648|AU020092|AU043373|BB007109|BC030906|Bms1l|mKIAA0187	BMS1 homolog, ribosome assembly protein (yeast)	protein-coding
896	chr7	30767948	30769529	+	0	NA	promoter-TSS (NM_001167873)	promoter-TSS (NM_001167873)	-236	NM_001167873	243905	Mm.322432	NM_001033355	ENSMUSG00000074221	Zfp568	C80731|Gm1691|chato	zinc finger protein 568	protein-coding
962	chr8	12671466	12673480	+	0	NA	promoter-TSS (NM_198031)	promoter-TSS (NM_198031)	-373	NM_198031	259279	Mm.246402	NM_198031	ENSMUSG00000000759	Tubgcp3	GCP3|Spc98p	tubulin, gamma complex associated protein 3	protein-coding
1085	chrX	39501372	39506831	+	0	NA	intron (NM_021465, intron 1 of 32)	intron (NM_021465, intron 1 of 32)	223	NM_021465	20843	Mm.290422	NM_021465	ENSMUSG00000025862	Stag2	9230105L23Rik|B230112I07Rik|SA-2|SAP2	stromal antigen 2	protein-coding
755	chr4	137149167	137151150	+	0	NA	promoter-TSS (NM_130879)	promoter-TSS (NM_130879)	54	NM_130879	170707	Mm.218478	NM_130879	ENSMUSG00000043411	Usp48	2810449C13Rik|AI115503|BC021769|D330022K21Rik|Usp31	ubiquitin specific peptidase 48	protein-coding
777	chr5	28558705	28584647	+	0	NA	Intergenic	Intergenic	-7263	NM_175651	269637	Mm.68286	NM_175651	ENSMUSG00000044681	Cnpy1	1500012D20Rik|9630008K15Rik|AI853839	canopy 1 homolog (zebrafish)	protein-coding
143	chr10	102829554	102832350	+	0	NA	intron (NM_001252330, intron 1 of 11)	intron (NM_001252330, intron 1 of 11)	510	NM_175328	103098	Mm.458408	NM_175328	ENSMUSG00000019894	Slc6a15	AA536730|AI326450|AI326451|v7-3	solute carrier family 6 (neurotransmitter transporter), member 15	protein-coding
464	chr17	50543901	50549037	+	0	NA	Intergenic	Intergenic	-102403	NM_013880	224860	Mm.217362	NM_013880	ENSMUSG00000038910	Plcl2	PLC-L2|PRIP-2|Plce2|mKIAA1092	phospholipase C-like 2	protein-coding
1051	chr9	71332629	71334333	+	0	NA	promoter-TSS (NM_001164793)	promoter-TSS (NM_001164793)	309	NM_178602	28015	Mm.21094	NM_178602	ENSMUSG00000032199	Polr2m	AA407243|AA408799|AI303746|AW553238|D9Wsu138e|Grinl1a|mKIAA4185	polymerase (RNA) II (DNA directed) polypeptide M	protein-coding
6	chr1	16608160	16610908	+	0	NA	promoter-TSS (NM_025773)	promoter-TSS (NM_025773)	-115	NM_001271017	66799	Mm.122430	NM_025773	ENSMUSG00000025939	Ube2w	6130401J04Rik	ubiquitin-conjugating enzyme E2W (putative)	protein-coding
562	chr2	21287311	21293630	+	0	NA	exon (NM_001004761, exon 1 of 11)	exon (NM_001004761, exon 1 of 11)	1276	NM_001004761	241263	Mm.166647	NM_175706	ENSMUSG00000045967	Gpr158	5330427M13Rik|mKIAA1136	G protein-coupled receptor 158	protein-coding
497	chr18	34379262	34383854	+	0	NA	promoter-TSS (NR_040534)	promoter-TSS (NR_040534)	-132	NR_040534	633395	Mm.414290	NR_040534	ENSMUSG00000073607	Gm10548	ENSMUSG00000073607	ribosomal protein L29 pseudogene	pseudo
183	chr11	30783914	30787216	+	0	NA	intron (NM_175490, intron 1 of 1)	CpG	207	NM_175490	237716	Mm.338361	NM_175490	ENSMUSG00000043999	Gpr75	-	G protein-coupled receptor 75	protein-coding
518	chr18	77182213	77183660	+	0	NA	promoter-TSS (NM_001039202)	promoter-TSS (NM_001039202)	82	NM_001039202	76987	Mm.236127	NM_029826	ENSMUSG00000025421	Hdhd2	0610039H12Rik|3110052N05Rik	haloacid dehalogenase-like hydrolase domain containing 2	protein-coding
439	chr16	98070279	98074264	+	0	NA	intron (NM_144789, intron 1 of 23)	intron (NM_144789, intron 1 of 23)	563	NM_144789	114604	Mm.328741	NM_144789	ENSMUSG00000014039	Prdm15	C21orf83|E130018M06Rik|ORF62|Zfp298	PR domain containing 15	protein-coding
362	chr14	106287922	106298779	+	0	NA	intron (NM_011897, intron 1 of 1)	intron (NM_011897, intron 1 of 1)	2686	NM_011897	24064	Mm.89982	NM_011897	ENSMUSG00000022114	Spry2	sprouty2	sprouty homolog 2 (Drosophila)	protein-coding
411	chr16	11253205	11256259	+	0	NA	promoter-TSS (NM_146066)	promoter-TSS (NM_146066)	-194	NR_035466	100316833		NR_035466	miRBase:MI0009934	Mir1945	mmu-mir-1945	microRNA 1945	ncRNA
169	chr11	17111172	17112530	+	0	NA	promoter-TSS (NM_025443)	promoter-TSS (NM_025443)	-45	NM_178909	103784	Mm.298132	NM_178909		Wdr92	AI553587|HZGJ	WD repeat domain 92	protein-coding
705	chr4	32886490	32888211	+	0	NA	intron (NM_175364, intron 1 of 2)	CpG	116	NM_175364	108755	Mm.1182	NM_175364		Lyrm2	2610208E05Rik	LYR motif containing 2	protein-coding
478	chr17	80013817	80015364	+	0	NA	intron (NM_201361, intron 1 of 10)	CpG	350	NM_201361	381110	Mm.293063	NM_201361	ENSMUSG00000036368	Rmdn2	AW061290|Fam82a1|RMD-2|mRMD-2	regulator of microtubule dynamics 2	protein-coding
398	chr15	93166285	93168546	+	0	NA	promoter-TSS (NM_024189)	promoter-TSS (NM_024189)	-49	NM_024189	67057	Mm.4714	NM_024189		Yaf2	2810021M11Rik	YY1 associated factor 2	protein-coding
384	chr15	72638149	72641800	+	0	NA	non-coding (NR_002864, exon 1 of 1)	non-coding (NR_002864, exon 1 of 1)	780	NR_002864	353342	Mm.440245	NR_002864		Peg13	-	paternally expressed 13	ncRNA
836	chr6	13019132	13020843	+	0	NA	intron (NM_027992, intron 1 of 8)	CpG	228	NM_027992	71900	Mm.27742	NM_027992	ENSMUSG00000029571	Tmem106b	2310036D22Rik|5830455K21Rik|6430519M21Rik|AI428776|AI661344	transmembrane protein 106B	protein-coding
942	chr7	134591092	134593252	+	0	NA	exon (NM_175163, exon 1 of 3)	exon (NM_175163, exon 1 of 3)	500	NM_175163	71131	Mm.474533	NM_175163		Zfp689	4933416E05Rik|Znf689	zinc finger protein 689	protein-coding
955	chr7	147264851	147269357	+	0	NA	intron (NM_001190385, intron 1 of 4)	intron (NM_001190385, intron 1 of 4)	1096	NM_001190386	68566	Mm.44241	NM_026769	ENSMUSG00000025468	Caly	0710001P07Rik|1110004A22Rik|Calcyon|Drd1ip	calcyon neuron-specific vesicular protein	protein-coding
407	chr16	3742382	3744847	+	0	NA	promoter-TSS (NM_148924)	promoter-TSS (NM_148924)	-485	NM_148924	74120	Mm.29081	NM_148924	ENSMUSG00000022529	Zfp263	1200014J04Rik|AI326880|AU020888|NT2|mFPM315	zinc finger protein 263	protein-coding
18	chr1	46908452	46911937	+	0	NA	intron (NM_172653, intron 1 of 9)	CpG	160	NM_172653	227059	Mm.233889	NM_172653	ENSMUSG00000025986	Slc39a10	2900042E17Rik|5430433I10|mKIAA1265	solute carrier family 39 (zinc transporter), member 10	protein-coding
376	chr15	38226825	38233051	+	0	NA	intron (NM_001289471, intron 1 of 4)	CpG	528	NM_013692	21847	Mm.4292	NM_013692	ENSMUSG00000037465	Klf10	AI115143|EGR[a]|Egral|Gdnfif|TIEG-1|Tieg|Tieg1|mGIF	Kruppel-like factor 10	protein-coding
912	chr7	65651540	65655567	+	0	NA	Intergenic	Intergenic	-260019	NM_009728	11982	Mm.135129	NM_009728	ENSMUSG00000025324	Atp10a	Atp10c|pfatp	ATPase, class V, type 10A	protein-coding
785	chr5	38651080	38652152	+	0	NA	promoter-TSS (NM_025480)	promoter-TSS (NM_025480)	2	NM_025480	66309	Mm.256185	NM_025480	ENSMUSG00000067365	Tmem128	2810021O14Rik	transmembrane protein 128	protein-coding
599	chr2	112331535	112334733	+	0	NA	promoter-TSS (NM_028844)	promoter-TSS (NM_028844)	13	NM_028844	74268	Mm.315125	NM_028844		Aven	1700013A01Rik|1700056A21Rik|mAven-L|mAven-S	apoptosis, caspase activation inhibitor	protein-coding
587	chr2	75495393	75498796	+	0	NA	promoter-TSS (NM_146130)	promoter-TSS (NM_146130)	-222	NM_146130	229279	Mm.316306	NM_053263	ENSMUSG00000059005	Hnrnpa3	2410013L13Rik|2610209F03Rik|2610510D13Rik|Hnrpa3	heterogeneous nuclear ribonucleoprotein A3	protein-coding
609	chr2	124856543	124860002	+	0	NA	Intergenic	Intergenic	-35591	NM_175034	317750	Mm.330538	NM_175034	ENSMUSG00000035183	Slc24a5	F630045L20Rik|JSX|NCKX5|NCX5|Oca6	solute carrier family 24, member 5	protein-coding
190	chr11	51812590	51818431	+	0	NA	Intergenic	Intergenic	-1542	NM_009458	22210	Mm.384918	NM_009458	ENSMUSG00000020390	Ube2b	2610301N02Rik|E2-14k|HR6B|Rad6b|mHR6B	ubiquitin-conjugating enzyme E2B	protein-coding
298	chr13	67406686	67407992	+	0	NA	promoter-TSS (NM_001003666)	promoter-TSS (NM_001003666)	9	NM_001003666	431706	Mm.439456	NM_001003666	ENSMUSG00000055341	Zfp457	Rslcan-6	zinc finger protein 457	protein-coding
95	chr10	17440137	17449441	+	0	NA	3' UTR (NM_010828, exon 2 of 2)	3' UTR (NM_010828, exon 2 of 2)	1755	NM_010828	17684	Mm.272321	NM_010828	ENSMUSG00000039910	Cited2	AI835299|ER154-like|Mrg1|Msg2|p35srj	Cbp/p300-interacting transactivator, with Glu/Asp-rich carboxy-terminal domain, 2	protein-coding
923	chr7	100022475	100025389	+	0	NA	exon (NM_028243, exon 1 of 9)	exon (NM_028243, exon 1 of 9)	169	NM_028243	72461	Mm.389969	NM_028243	ENSMUSG00000061119	Prcp	2510048K03Rik|2610104A14Rik|AI451719|HUMPCP|PCP	prolylcarboxypeptidase (angiotensinase C)	protein-coding
601	chr2	114479662	114481190	+	0	NA	intron (NM_025675, intron 1 of 8)	CpG	238	NM_025675	66632	Mm.117809	NM_025675	ENSMUSG00000057147	Dph6	5730421E18Rik|Atpbd4	diphthamine biosynthesis 6	protein-coding
822	chr5	139959797	139961193	+	0	NA	promoter-TSS (NM_133349)	promoter-TSS (NM_133349)	-50	NM_001159908	100494	Mm.24521	NM_133349	ENSMUSG00000053581	Zfand2a	AA407930|AU016206|Airap	zinc finger, AN1-type domain 2A	protein-coding
231	chr11	114707788	114739138	+	0	NA	intron (NM_147217, intron 1 of 3)	intron (NM_147217, intron 1 of 3)	10119	NM_147217	70355	Mm.242413	NM_147217	ENSMUSG00000051043	Gprc5c	1110028I06Rik|3200002M13Rik|Raig3	G protein-coupled receptor, family C, group 5, member C	protein-coding
243	chr12	9036643	9038490	+	0	NA	intron (NM_029321, intron 1 of 2)	intron (NM_029321, intron 1 of 2)	763	NM_029321	75516	Mm.37581	NM_029321	ENSMUSG00000066637	Ttc32	1700013G20Rik	tetratricopeptide repeat domain 32	protein-coding
779	chr5	31999450	32001787	+	0	NA	promoter-TSS (NM_153196)	promoter-TSS (NM_153196)	195	NM_181282	107976	Mm.482126	NM_144541	ENSMUSG00000052139	Bre	6030405P19Rik|AI429776|B830038C02Rik	brain and reproductive organ-expressed protein	protein-coding
551	chr19	47804884	47806850	+	0	NA	promoter-TSS (NM_026377)	promoter-TSS (NM_026377)	-379	NM_026377	67788	Mm.181610	NM_026377	ENSMUSG00000025066	Sfr1	6330577E15Rik|Meir5	SWI5 dependent recombination repair 1	protein-coding
148	chr10	114486397	114488745	+	0	NA	Intergenic	MLT1D|LTR|MaLR	134507	NM_173391	216343	Mm.31597	NM_173391	ENSMUSG00000006764	Tph2	AU043594|Ntph	tryptophan hydroxylase 2	protein-coding
504	chr18	35930418	35932298	+	0	NA	5' UTR (NM_019912, exon 1 of 7)	5' UTR (NM_019912, exon 1 of 7)	145	NM_019912	56550	Mm.180052	NM_019912	ENSMUSG00000091896	Ube2d2a	1500034D03Rik|Ubc2e|Ube2d2|ubc4	ubiquitin-conjugating enzyme E2D 2A	protein-coding
343	chr14	55304506	55306406	+	0	NA	exon (NM_023190, exon 1 of 19)	exon (NM_023190, exon 1 of 19)	312	NM_001085473	56215	Mm.297078	NM_019567	ENSMUSG00000022185	Acin1	2610036I19Rik|2610510L13Rik|Acinus|Acn|C79325|acinusL|acinusS|mKIAA0670	apoptotic chromatin condensation inducer 1	protein-coding
753	chr4	134407658	134410398	+	0	NA	exon (NM_025382, exon 1 of 11)	exon (NM_025382, exon 1 of 11)	232	NM_025382	66146	Mm.99793	NM_025382	ENSMUSG00000028826	Tmem57	1110007C24Rik|9230118A01Rik|AI317300|AI606104|C61	transmembrane protein 57	protein-coding
697	chr4	8573408	8577097	+	0	NA	Intergenic	Intergenic	-42301	NM_001277149	320790	Mm.138792	NM_001033395	ENSMUSG00000041235	Chd7	A730019I05Rik|Cycn|Cyn|Dz|Edy|Flo|GENA 47|GENA 60|Gena 52|Lda|Mt|Obt|Todo|WBE1|Whi|metis	chromodomain helicase DNA binding protein 7	protein-coding
981	chr8	71998145	72000134	+	0	NA	Intergenic	Intergenic	-79696	NR_038043	378466	Mm.37846	NM_194351		Gm10033	9330175B10Rik|ENSMUSG00000057924|ENSMUSG00000071083|Gm10311	predicted gene 10033	ncRNA
726	chr4	59201369	59203397	+	0	NA	promoter-TSS (NM_011673)	promoter-TSS (NM_011673)	-39	NM_011673	22234	Mm.198803	NM_011673	ENSMUSG00000028381	Ugcg	AU043821|C80537|Epcs21|GlcT-1|Ugcgl	UDP-glucose ceramide glucosyltransferase	protein-coding
857	chr6	83027352	83029188	+	0	NA	promoter-TSS (NM_197992)	promoter-TSS (NM_197992)	-114	NM_197992	69837	Mm.12261	NM_197992	ENSMUSG00000069678	Pcgf1	2010002K04Rik|AU024121|Nspc1	polycomb group ring finger 1	protein-coding
106	chr10	55947776	55949440	+	0	NA	promoter-TSS (NM_001033385)	promoter-TSS (NM_001033385)	-113	NM_001033385	544696	Mm.411188	NM_001033385	ENSMUSG00000038122	Tbc1d32	Bromi|D630037F22Rik|b2b2284Clo	TBC1 domain family, member 32	protein-coding
707	chr4	33274708	33277005	+	0	NA	intron (NM_001034867, intron 1 of 6)	CpG	856	NM_001034867	242377	Mm.372465	NM_001034867		Pm20d2	Acy1l2|Gm424	peptidase M20 domain containing 2	protein-coding
1010	chr8	119255004	119257872	+	0	NA	intron (NM_029441, intron 1 of 6)	CpG	453	NM_029441	75796	Mm.159575	NM_029441	ENSMUSG00000031758	Cdyl2	1700029M19Rik|4930453I21Rik|Gm20194	chromodomain protein, Y chromosome-like 2	protein-coding
157	chr10	127630586	127633735	+	0	NA	intron (NM_001285779, intron 1 of 17)	CpG	469	NM_001285779	216456	Mm.30102	NM_001033264	ENSMUSG00000044005	Gls2	A330074B06Rik|AI195532|GA|GLS|Lga	glutaminase 2 (liver, mitochondrial)	protein-coding
964	chr8	13286629	13288777	+	0	NA	promoter-TSS (NM_172282)	promoter-TSS (NM_172282)	-310	NM_172282	234076	Mm.219813	NM_172282	ENSMUSG00000038497	Tmco3	B230339H12Rik|C87304	transmembrane and coiled-coil domains 3	protein-coding
65	chr1	158868579	158870922	+	0	NA	promoter-TSS (NR_027640)	promoter-TSS (NR_027640)	7	NM_001159968	78255	Mm.28376	NM_023884	ENSMUSG00000026594	Ralgps2	1810020P17Rik|2210408F11Rik|4921528G01Rik|9130014M22Rik|AU043409|AW046161	Ral GEF with PH domain and SH3 binding motif 2	protein-coding
935	chr7	128177307	128179406	+	0	NA	exon (NM_021554, exon 1 of 5)	exon (NM_021554, exon 1 of 5)	397	NM_021554	59052	Mm.29122	NM_021554	ENSMUSG00000030876	Mettl9	0610012D09Rik|AA517660|Drev	methyltransferase like 9	protein-coding
203	chr11	69048114	69050537	+	0	NA	intron (NM_008192, intron 2 of 18)	CpG	1199	NM_008192	14919	Mm.291816	NM_008192	ENSMUSG00000020890	Gucy2e	GC-E|GC1|ROS-GC1	guanylate cyclase 2e	protein-coding
261	chr12	80272879	80274287	+	0	NA	promoter-TSS (NM_016800)	promoter-TSS (NM_016800)	-138	NM_016800	53612	Mm.265929	NM_016800	ENSMUSG00000021124	Vti1b	AU015348|GES30|MVti1b|SNARE|Vti1-rp1	vesicle transport through interaction with t-SNAREs 1B	protein-coding
1093	chrX	147954231	147957258	+	0	NA	5' UTR (NM_177201, exon 1 of 19)	5' UTR (NM_177201, exon 1 of 19)	529	NM_001113354	320595	Mm.17156	NM_177201	ENSMUSG00000041229	Phf8	9830141C09Rik|mKIAA1111	PHD finger protein 8	protein-coding
81	chr1	180244279	180251712	+	0	NA	Intergenic	Intergenic	-1289	NM_025511	66359	Mm.489720	NM_025511	ENSMUSG00000026500	Cox20	2310005N03Rik|Fam36a	COX20 Cox2 chaperone	protein-coding
1023	chr8	131207930	131210568	+	0	NA	promoter-TSS (NM_010578)	promoter-TSS (NM_010578)	-305	NM_010578	16412	Mm.263396	NM_010578	ENSMUSG00000025809	Itgb1	4633401G24Rik|AA409975|AA960159|CD29|ENSMUSG00000051907|Fnrb|Gm9863|gpIIa	integrin beta 1 (fibronectin receptor beta)	protein-coding
321	chr13	107811098	107813375	+	0	NA	promoter-TSS (NR_015471)	promoter-TSS (NR_015471)	-42	NM_008442	16563	Mm.355686	NM_008442	ENSMUSG00000021693	Kif2a	C530030B14Rik|Kif2|Kns2|M-kinesin	kinesin family member 2A	protein-coding
86	chr1	182777537	182781838	+	0	NA	Intergenic	Intergenic	-1595	NM_145943	208768	Mm.272625	NM_145943	ENSMUSG00000038806	Sde2	-	SDE2 telomere maintenance homolog (S. pombe)	protein-coding
624	chr2	153651899	153654222	+	0	NA	Intergenic	ORR1B1|LTR|MaLR	43760	NM_029599	76407	Mm.33629	NM_029599	ENSMUSG00000027480	Sun5	1700021O15Rik|SPAG4L-2|SRG4|Spag4l	Sad1 and UNC84 domain containing 5	protein-coding
792	chr5	75072964	75074941	+	0	NA	promoter-TSS (NM_001159580)	promoter-TSS (NM_001159580)	-55	NM_001159579	16924	Mm.440403	NM_010727	ENSMUSG00000029228	Lnx1	Lnx	ligand of numb-protein X 1	protein-coding
371	chr15	12379880	12383164	+	0	NA	intron (NM_001081064, intron 2 of 23)	intron (NM_001081064, intron 2 of 23)	130271	NM_025673	66629	Mm.157655	NM_025673	ENSMUSG00000022200	Golph3	4733401N08Rik|5730410D03Rik|AW413496	golgi phosphoprotein 3	protein-coding
656	chr3	52403056	52406529	+	0	NA	Intergenic	Intergenic	-138854	NR_038079	329639	Mm.131245	NR_038079		Gm2447	100039832|A530017F20	predicted gene 2447	ncRNA
1079	chrX	7475400	7477809	+	0	NA	promoter-TSS (NM_001252528)	promoter-TSS (NM_001252528)	80	NM_011591	21855	Mm.27393	NM_011591		Timm17b	17kDa|Sfc3|mTim17b	translocase of inner mitochondrial membrane 17b	protein-coding
204	chr11	70223070	70223940	+	0	NA	promoter-TSS (NM_029231)	promoter-TSS (NM_029231)	28	NM_029231	75273	Mm.340601	NM_029231	ENSMUSG00000018921	Pelp1	4930563C04Rik|MNAR	proline, glutamic acid and leucine rich protein 1	protein-coding
1041	chr9	59138305	59140230	+	0	NA	promoter-TSS (NM_028121)	promoter-TSS (NM_028121)	-112	NM_028121	72141	Mm.22456	NM_028121	ENSMUSG00000025236	Adpgk	2610017G09Rik|Adp-gk|C77577	ADP-dependent glucokinase	protein-coding
435	chr16	94588807	94593837	+	0	NA	intron (NM_001159616, intron 2 of 4)	intron (NM_001159616, intron 2 of 4)	615	NM_001159619	56176	Mm.474449	NM_019543	ENSMUSG00000022940	Pigp	Dcrc|Dscr5	phosphatidylinositol glycan anchor biosynthesis, class P	protein-coding
814	chr5	129954902	129965982	+	0	NA	Intergenic	Intergenic	-46664	NM_172276	231769	Mm.288714	NM_172276	ENSMUSG00000029439	Sfswap	1190005N23Rik|6330437E22Rik|AI197402|AW212079|SWAP|Sfrs8|Srsf8	splicing factor, suppressor of white-apricot homolog (Drosophila)	protein-coding
924	chr7	104099254	104100617	+	0	NA	promoter-TSS (NM_153591)	promoter-TSS (NM_153591)	-102	NM_153591	244141	Mm.274864	NM_153591	ENSMUSG00000018995	Nars2	AI875199	asparaginyl-tRNA synthetase 2 (mitochondrial)(putative)	protein-coding
885	chr7	6679619	6684054	+	0	NA	intron (NM_008817, intron 1 of 8)	intron (NM_008817, intron 1 of 8)	1294	NM_008817	18616	Mm.389800	NM_008817		Peg3	AL022617|ASF-1|End4|Gcap4|Pw1|Zfp102|mKIAA0287	paternally expressed 3	protein-coding
884	chr7	5031095	5032603	+	0	NA	promoter-TSS (NM_001252454)	promoter-TSS (NM_001252454)	12	NM_001252454	13854	Mm.3091	NM_010147	ENSMUSG00000035203	Epn1	AA269831|Ibp1	epsin 1	protein-coding
339	chr14	37947490	37949221	+	0	NA	promoter-TSS (NM_001199122)	promoter-TSS (NM_001199122)	-30	NM_001199122	66092	Mm.182912	NM_078478	ENSMUSG00000041028	Ghitm	1010001P14Rik|C77840|MICS1|PTD010|Tmbim5	growth hormone inducible transmembrane protein	protein-coding
228	chr11	105944864	105947055	+	0	NA	promoter-TSS (NM_011947)	promoter-TSS (NM_011947)	-257	NM_011947	26406	Mm.27041	NM_011947	ENSMUSG00000020700	Map3k3	AW548911|MAPKKK3|Mekk3|mKIAA4031	mitogen-activated protein kinase kinase kinase 3	protein-coding
760	chr4	148000210	148001814	+	0	NA	promoter-TSS (NR_027864)	promoter-TSS (NR_027864)	93	NR_027864	230908	Mm.22453	NM_145556	ENSMUSG00000041459	Tardbp	1190002A23Rik|C85084|TDP-43|Tdp43	TAR DNA binding protein	protein-coding
863	chr6	92040164	92043548	+	0	NA	intron (NM_011630, intron 1 of 14)	CpG	444	NM_011630	22026	Mm.87062	NM_011630	ENSMUSG00000005893	Nr2c2	TAK1|Tr4|mKIAA4145	nuclear receptor subfamily 2, group C, member 2	protein-coding
749	chr4	132477403	132479389	+	0	NA	promoter-TSS (NM_145553)	promoter-TSS (NM_145553)	70	NM_145553	230789	Mm.11473	NM_145553	ENSMUSG00000028878	Fam76a	-	family with sequence similarity 76, member A	protein-coding
268	chr12	88812486	88813382	+	0	NA	intron (NM_025507, intron 1 of 13)	CpG	315	NM_025507	66354	Mm.271174	NM_025507	ENSMUSG00000021039	Snw1	2310008B08Rik|AW048543|NCoA-62|SKIP|Skiip	SNW domain containing 1	protein-coding
531	chr19	21344846	21351544	+	0	NA	intron (NM_009551, intron 1 of 5)	intron (NM_009551, intron 1 of 5)	1427	NM_009551	22682	Mm.292405	NM_009551		Zfand5	2310057A04Rik|5830475F03Rik|AA415485|Za20d2|Zfp216	zinc finger, AN1-type domain 5	protein-coding
829	chr5	149994814	149997262	+	0	NA	promoter-TSS (NM_001115153)	promoter-TSS (NM_001115153)	-98	NM_001115153	231915	Mm.29402	NM_001013378	ENSMUSG00000041264	Uspl1	E430026A01Rik	ubiquitin specific peptidase like 1	protein-coding
345	chr14	57428982	57433250	+	0	NA	promoter-TSS (NM_001253752)	promoter-TSS (NM_001253752)	-563	NM_144842	219105	Mm.473172	NM_144842	ENSMUSG00000040123	Zmym5	9830124H08Rik	zinc finger, MYM-type 5	protein-coding
172	chr11	22185298	22188099	+	0	NA	promoter-TSS (NM_001252515)	promoter-TSS (NM_001252515)	100	NM_153078	216565	Mm.491265	NM_153078	ENSMUSG00000042302	Ehbp1	AF424697|Flj21950|NACSIN	EH domain binding protein 1	protein-coding
596	chr2	103635760	103638633	+	0	NA	promoter-TSS (NM_001111289)	promoter-TSS (NM_001111289)	39	NM_001111290	53872	Mm.427589	NM_016739	ENSMUSG00000027184	Caprin1	AL022980|Caprin-1|Gpiap|Gpiap1|Mmgpip137|P137|rng105	cell cycle associated protein 1	protein-coding
223	chr11	99845724	99848721	+	0	NA	exon (NM_001256057, exon 1 of 1)	exon (NM_001256057, exon 1 of 1)	685	NM_001256057	100504183	Mm.426560	NM_001256057	ENSMUSG00000078253	Gm11570	Krtap16-1|OTTMUSG00000002209	predicted gene 11570	protein-coding
613	chr2	129122792	129124356	+	0	NA	promoter-TSS (NM_181589)	promoter-TSS (NM_181589)	468	NR_040371	100503468	Mm.446943	NR_040371	ENSMUSG00000085498	Gm14023	OTTMUSG00000015408	predicted gene 14023	ncRNA
721	chr4	48054637	48062546	+	0	NA	Intergenic	CpG	-5529	NM_015743	18124	Mm.247261	NM_015743	ENSMUSG00000028341	Nr4a3	AI573420|CHN|CSMF|MINOR|NOR-1|Nor1|TEC	nuclear receptor subfamily 4, group A, member 3	protein-coding
1043	chr9	59597708	59600107	+	0	NA	promoter-TSS (NM_173018)	promoter-TSS (NM_173018)	-74	NM_173018	270163	Mm.249545	NM_173018	ENSMUSG00000039585	Myo9a	4732465J09Rik|C130068I12Rik|C230003M11	myosin IXa	protein-coding
282	chr13	13663888	13667947	+	0	NA	Intergenic	Intergenic	-16759	NM_010748	17101	Mm.342337	NM_010748	ENSMUSG00000019726	Lyst	D13Sfk13|beige|bg	lysosomal trafficking regulator	protein-coding
669	chr3	96042380	96051317	+	0	NA	Intergenic	MT2A|LTR|ERVL	-2532	NM_178212	319192	Mm.5220	NM_178212	ENSMUSG00000064220	Hist2h2aa2	H2a-614|H2a-615	histone cluster 2, H2aa2	protein-coding
1082	chrX	12855954	12859488	+	0	NA	promoter-TSS (NM_010028)	promoter-TSS (NM_010028)	-427	NM_010028	13205	Mm.289662	NM_010028	ENSMUSG00000000787	Ddx3x	D1Pas1-rs2|Ddx3|Fin14	DEAD/H (Asp-Glu-Ala-Asp/His) box polypeptide 3, X-linked	protein-coding
420	chr16	23127412	23129409	+	0	NA	promoter-TSS (NM_145480)	promoter-TSS (NM_145480)	-607	NM_145480	106344	Mm.386835	NM_145480	ENSMUSG00000022881	Rfc4	A1|AI894123|AU040575|RFC37	replication factor C (activator 1) 4	protein-coding
1066	chr9	100933838	100936531	+	0	NA	exon (NM_025835, exon 1 of 15)	exon (NM_025835, exon 1 of 15)	110	NM_025835	66904	Mm.335385	NM_025835	ENSMUSG00000032527	Pccb	1300012P06Rik|AI314687|R74805	propionyl Coenzyme A carboxylase, beta polypeptide	protein-coding
121	chr10	69665540	69670572	+	0	NA	intron (NR_038041, intron 1 of 2)	MIRb|SINE|MIR	641	NR_038041	69563	Mm.64672	NR_038041	ENSMUSG00000019933	2310015B20Rik	-	RIKEN cDNA 2310015B20 gene	ncRNA
639	chr3	5575226	5577348	+	0	NA	promoter-TSS (NM_008994)	promoter-TSS (NM_008994)	-39	NM_001163305	19302	Mm.132336	NM_008994	ENSMUSG00000040374	Pex2	D3Ertd138e|PAF-1|PMP35|Pxmp3	peroxisomal biogenesis factor 2	protein-coding
952	chr7	140900144	140901455	+	0	NA	promoter-TSS (NM_025392)	promoter-TSS (NM_025392)	179	NM_009479	22276	Mm.3160	NM_009479	ENSMUSG00000030979	Uros	AI415298|Uros3	uroporphyrinogen III synthase	protein-coding
989	chr8	75094437	75097792	+	0	NA	exon (NM_144534, exon 1 of 6)	exon (NM_144534, exon 1 of 6)	112	NM_144534	74166	Mm.212927	NM_144534	ENSMUSG00000031791	Tmem38a	1110001E17Rik|AI413399|TRIC-A|mg33a	transmembrane protein 38A	protein-coding
1071	chr9	115218038	115220595	+	0	NA	5' UTR (NM_024222, exon 1 of 16)	5' UTR (NM_024222, exon 1 of 16)	223	NM_024222	68292	Mm.296158	NM_024222	ENSMUSG00000032437	Stt3b	1300006C19Rik|Simp	STT3, subunit of the oligosaccharyltransferase complex, homolog B (S. cerevisiae)	protein-coding
494	chr18	32069528	32071405	+	0	NA	exon (NM_026006, exon 1 of 1)	exon (NM_026006, exon 1 of 1)	1091	NM_026006	67158	Mm.31537	NM_026006	ENSMUSG00000044982	Sft2d3	2610206C24Rik|AI847965|AW046173	SFT2 domain containing 3	protein-coding
487	chr18	7867659	7870916	+	0	NA	promoter-TSS (NM_001146298)	promoter-TSS (NM_001146298)	92	NM_153085	225131	Mm.204524	NM_153085	ENSMUSG00000024283	Wac	1110067P07Rik|A230035H12Rik|AI256735|AI256776|Wwp4	WW domain containing adaptor with coiled-coil	protein-coding
238	chr11	121214790	121216835	+	0	NA	promoter-TSS (NM_025793)	promoter-TSS (NM_025793)	-51	NM_025793	66840	Mm.103986	NM_025793	ENSMUSG00000025173	Wdr45b	0610008N23Rik|AA408735|D16Bwg0193e|WIPI-3|Wdr45l	WD repeat domain 45B	protein-coding
873	chr6	124914744	124916399	+	0	NA	promoter-TSS (NM_001164089)	promoter-TSS (NM_001164089)	-24	NM_001164089	26894	Mm.244536	NM_012003	ENSMUSG00000030127	Cops7a	D6Ertd35e	COP9 (constitutive photomorphogenic) homolog, subunit 7a (Arabidopsis thaliana)	protein-coding
577	chr2	38920359	38921710	+	0	NA	promoter-TSS (NM_029793)	promoter-TSS (NM_029793)	27	NR_110968	76899	Mm.131098	NM_029793	ENSMUSG00000026754	Golga1	0710001G09Rik|2210418B03Rik|AW107649|Golgi97|golgin-97	golgi autoantigen, golgin subfamily a, 1	protein-coding
253	chr12	56180670	56182193	+	0	NA	promoter-TSS (NM_028314)	promoter-TSS (NM_028314)	-52	NM_011899	24067	Mm.471968	NM_011899		Srp54a	54kDa|Srp54	signal recognition particle 54A	protein-coding
448	chr17	15700732	15702184	+	0	NA	Intergenic	CpG	-1171	NM_144809	213389	Mm.215162	NM_144809	ENSMUSG00000051977	Prdm9	BC012016|Dsbc1|G1-419-29|Meisetz|Rcr1|repro7	PR domain containing 9	protein-coding
216	chr11	87217008	87218723	+	0	NA	promoter-TSS (NM_031386)	promoter-TSS (NM_031386)	132	NM_053269	114714	Mm.37376	NM_053269		Rad51c	R51H3|Rad51l2	RAD51 homolog C	protein-coding
852	chr6	56745183	56749720	+	0	NA	intron (NM_145958, intron 1 of 3)	CpG	356	NM_145958	210973	Mm.57295	NM_145958	ENSMUSG00000059486	Kbtbd2	BC022962|Bklhd1|mKIAA1489	kelch repeat and BTB (POZ) domain containing 2	protein-coding
643	chr3	16082419	16084515	+	0	NA	non-coding (NR_027375, exon 1 of 6)	non-coding (NR_027375, exon 1 of 6)	284	NM_001145919	229096	Mm.23834	NM_172677	ENSMUSG00000047213	Ythdf3	9130022A11Rik	YTH domain family 3	protein-coding
63	chr1	154748501	154752256	+	0	NA	promoter-TSS (NM_001160256)	promoter-TSS (NM_001160256)	-602	NM_001005507	226517	Mm.270775	NM_001005507	ENSMUSG00000042772	Smg7	9430023P16Rik|mKIAA0250	Smg-7 homolog, nonsense mediated mRNA decay factor (C. elegans)	protein-coding
179	chr11	23565172	23566814	+	0	NA	promoter-TSS (NM_023651)	promoter-TSS (NM_023651)	17	NM_028304	74467	Mm.29536	NM_028304	ENSMUSG00000020280	Pus10	2810013G11Rik|4933435A13Rik|AU014648|C77560|Ccdc139	pseudouridylate synthase 10	protein-coding
713	chr4	43641497	43647883	+	0	NA	promoter-TSS (NM_173788)	promoter-TSS (NM_173788)	-117	NM_173788	230103	Mm.103477	NM_173788	ENSMUSG00000028469	Npr2	GC-B|GC-B2|GC-B3|cn|mNPR-B|pwe	natriuretic peptide receptor 2	protein-coding
676	chr3	105761197	105763063	+	0	NA	promoter-TSS (NM_027432)	promoter-TSS (NM_027432)	-286	NM_027432	70465	Mm.5110	NM_027432	ENSMUSG00000000561	Wdr77	2610003I18Rik|2610312E17Rik|C79984|p44/MEP50	WD repeat domain 77	protein-coding
277	chr12	107022362	107023967	+	0	NA	intron (NM_011112, intron 1 of 21)	CpG	252	NM_011112	18789	Mm.255877	NM_011112	ENSMUSG00000021111	Papola	Pap|PapIII|Plap	poly (A) polymerase alpha	protein-coding
879	chr6	147423677	147425625	+	0	NA	intron (NM_025911, intron 1 of 12)	CpG	258	NM_025911	67015	Mm.209774	NM_025911	ENSMUSG00000030301	Ccdc91	1700086G08Rik|1810060J02Rik|AU045683|AW555238|p56	coiled-coil domain containing 91	protein-coding
938	chr7	132587086	132589358	+	0	NA	promoter-TSS (NM_029842)	promoter-TSS (NM_029842)	88	NM_029842	77035	Mm.307239	NM_029842	ENSMUSG00000030752	Kdm8	3110005O21Rik|Jmjd5	lysine (K)-specific demethylase 8	protein-coding
929	chr7	116895024	116897236	+	0	NA	promoter-TSS (NM_020050)	promoter-TSS (NM_020050)	-353	NM_020050	56786	Mm.240668	NM_020050	ENSMUSG00000031021	Tmem9b	2310004K06Rik|AW539847|D7H11orf15|ICRFP703B1614Q5.3	TMEM9 domain family, member B	protein-coding
133	chr10	81816133	81817931	+	0	NA	Intergenic	Intergenic	-113012	NM_001105557	237411		NM_172789	ENSMUSG00000062931	Zfp938	B230315N10Rik	zinc finger protein 938	protein-coding
123	chr10	77006470	77009001	+	0	NA	intron (NM_008404, intron 3 of 15)	intron (NM_008404, intron 3 of 15)	14642	NM_008404	16414	Mm.1137	NM_008404	ENSMUSG00000000290	Itgb2	2E6|AI528527|Cd18|LAD|LCAMB|Lfa1|MF17	integrin beta 2	protein-coding
304	chr13	76192803	76195117	+	0	NA	exon (NM_175495, exon 1 of 1)	exon (NM_175495, exon 1 of 1)	484	NM_175495	238725	Mm.167172	NM_175495	ENSMUSG00000045509	Gpr150	C030001A19Rik|PGR11	G protein-coupled receptor 150	protein-coding
547	chr19	43826839	43829080	+	0	NA	promoter-TSS (NM_144874)	promoter-TSS (NM_144874)	446	NM_025530	66388	Mm.20257	NM_025530	ENSMUSG00000025193	Cutc	2310039I18Rik|AI326282|CGI-32	cutC copper transporter homolog (E.coli)	protein-coding
631	chr2	157104639	157105958	+	0	NA	promoter-TSS (NM_001039557)	promoter-TSS (NM_001039557)	-13	NM_001039557	629499	Mm.384235	NM_001039557	ENSMUSG00000074627	Mroh8	4922505G16Rik	maestro heat-like repeat family member 8	protein-coding
396	chr15	90053934	90055470	+	0	NA	promoter-TSS (NM_001033441)	promoter-TSS (NM_001033441)	-40	NM_001033441	380959	Mm.17853	NM_001033441	ENSMUSG00000075470	Alg10b	AA469671|AU045404|AW123895|C85569|Gm917	asparagine-linked glycosylation 10B (alpha-1,2-glucosyltransferase)	protein-coding
258	chr12	76695495	76698672	+	0	NA	5' UTR (NM_012024, exon 1 of 14)	5' UTR (NM_012024, exon 1 of 14)	104	NM_012024	26932	Mm.259626	NM_012024	ENSMUSG00000021051	Ppp2r5e	4633401M22Rik|AI449017|B56beta	protein phosphatase 2, regulatory subunit B', epsilon	protein-coding
482	chr17	88462281	88466819	+	0	NA	promoter-TSS (NM_001081034)	promoter-TSS (NM_001081034)	75	NM_001081034	225055	Mm.386857	NM_001081034	ENSMUSG00000005371	Fbxo11	C80048|Jf	F-box protein 11	protein-coding
949	chr7	139401393	139405934	+	0	NA	Intergenic	Intergenic	-57239	NM_018867	55987	Mm.471654	NM_018867	ENSMUSG00000030862	Cpxm2	4632435C11Rik|CPX-2|Cpx2	carboxypeptidase X 2 (M14 family)	protein-coding
499	chr18	34917999	34920873	+	0	NA	intron (NM_175104, intron 1 of 4)	CpG	876	NM_175104	66306	Mm.29424	NM_175104	ENSMUSG00000034300	Fam53c	2810012G03Rik|Gm21179	family with sequence similarity 53, member C	protein-coding
56	chr1	133903318	133905794	+	0	NA	intron (NM_007923, intron 1 of 4)	CpG	374	NM_007923	13714	Mm.254233	NM_007923	ENSMUSG00000026436	Elk4	2310011G17Rik|A130026I01Rik|BB162516|SAP-1|Sap1	ELK4, member of ETS oncogene family	protein-coding
54	chr1	132611545	132615447	+	0	NA	promoter-TSS (NM_178691)	promoter-TSS (NM_178691)	-408	NM_178691	226418	Mm.106553	NM_178691	ENSMUSG00000046404	Yod1	9930028C20Rik|Hshin7	YOD1 OTU deubiquitinating enzyme 1 homologue (S. cerevisiae)	protein-coding
306	chr13	83852099	83890308	+	0	NA	intron (NR_015561, intron 2 of 3)	intron (NR_015561, intron 2 of 3)	3492	NR_015561	320203	Mm.245636	NM_177100	ENSMUSG00000050334	C130071C03Rik	2810449C10Rik	RIKEN cDNA C130071C03 gene	ncRNA
70	chr1	166825871	166831517	+	0	NA	Intergenic	Intergenic	35442	NR_040303	433374	Mm.251149	NR_040303		Gm20743	-	predicted gene, 20743	ncRNA
1047	chr9	64187046	64191235	+	0	NA	promoter-TSS (NM_172519)	promoter-TSS (NM_172519)	-76	NM_001001295	213550	Mm.268341	NM_172519	ENSMUSG00000032396	Dis3l	AV340375	DIS3 mitotic control homolog (S. cerevisiae)-like	protein-coding
839	chr6	28920986	28940894	+	0	NA	Intergenic	CpG	-41679	NR_029567	387237		NR_029567	miRBase:MI0000222	Mir129-1	Mirn129-1|Mirn129b|miR-129b	microRNA 129-1	ncRNA
1055	chr9	79913973	79916961	+	0	NA	intron (NM_146003, intron 1 of 22)	CpG	757	NM_146003	215351	Mm.28232	NM_146003	ENSMUSG00000034252	Senp6	2810017C20Rik|E130319N12Rik|Susp1|mKIAA0797	SUMO/sentrin specific peptidase 6	protein-coding
166	chr11	6786339	6804300	+	0	NA	Intergenic	Intergenic	-168173	NM_009622	432530	Mm.259733	NM_009622	ENSMUSG00000020431	Adcy1	AC1|D11Bwg1392e|I-AC|brl|mKIAA4070	adenylate cyclase 1	protein-coding
88	chr1	184270964	184272532	+	0	NA	promoter-TSS (NM_175127)	promoter-TSS (NM_175127)	-11	NM_175127	67948	Mm.30737	NM_175127	ENSMUSG00000047539	Fbxo28	4833428J17Rik|5730505P19Rik|D1Ertd578e|Fbx28|mKIAA0483	F-box protein 28	protein-coding
1009	chr8	116158040	116160369	+	0	NA	promoter-TSS (NM_001048143)	promoter-TSS (NM_001048143)	-282	NM_001048143	270096	Mm.74689	NM_173015	ENSMUSG00000078908	Mon1b	5031407H10|5033413H12Rik	MON1 homolog b (yeast)	protein-coding
30	chr1	60154063	60156345	+	0	NA	promoter-TSS (NM_001199061)	promoter-TSS (NM_001199061)	113	NM_139150	241066	Mm.276441	NM_139150	ENSMUSG00000026017	Carf	Als2cr8|ECBRC-FC1|ECBRC-FC2	calcium response factor	protein-coding
141	chr10	96773568	96778707	+	0	NA	Intergenic	Intergenic	-109975	NR_039547	100628616		NR_039547		Mir3966	mmu-mir-3966|mu-mir-3966	microRNA 3966	ncRNA
909	chr7	54050539	54052084	+	0	NA	promoter-TSS (NM_001167864)	promoter-TSS (NM_001167864)	-60	NM_001005247	246694	Mm.379442	NM_178742	ENSMUSG00000014418	Hps5	AI646796|AL022647|C85120|haze|hz|maroon|mr|ru-2|ru2	Hermansky-Pudlak syndrome 5 homolog (human)	protein-coding
403	chr15	98904480	98905448	+	0	NA	promoter-TSS (NM_001162506)	promoter-TSS (NM_001162506)	-440	NM_001162506	78733	Mm.124905	NM_030159	ENSMUSG00000032783	Troap	AW476063|E130301L11Rik|tastin	trophinin associated protein	protein-coding
466	chr17	56901097	56905397	+	0	NA	promoter-TSS (NM_144858)	promoter-TSS (NM_144858)	-927	NM_144858	224907	Mm.293973	NM_144858	ENSMUSG00000007603	Dus3l	AI662135|AW557805	dihydrouridine synthase 3-like (S. cerevisiae)	protein-coding
75	chr1	173079978	173082137	+	0	NA	promoter-TSS (NM_025321)	promoter-TSS (NM_025321)	213	NM_008623	17528	Mm.9986	NM_008623	ENSMUSG00000056569	Mpz	Mpp|P-zero|P0	myelin protein zero	protein-coding
134	chr10	84683775	84685113	+	0	NA	Intergenic	Intergenic	-36645	NM_007771	12952	Mm.26237	NM_007771	ENSMUSG00000020038	Cry1	AU020726|AU021000|Phll1	cryptochrome 1 (photolyase-like)	protein-coding
618	chr2	139096954	139111939	+	0	NA	Intergenic	Intergenic	-215210	NM_175467	228677	Mm.100450	NM_175467	ENSMUSG00000039092	Sptlc3	C130053K05Rik	serine palmitoyltransferase, long chain base subunit 3	protein-coding
848	chr6	49212730	49214634	+	0	NA	intron (NM_198102, intron 1 of 7)	CpG	369	NM_198102	101214	Mm.196598	NM_198102	ENSMUSG00000029817	Tra2a	1500010G04Rik|AL022798|G430041M01Rik|mAWMS1	transformer 2 alpha homolog (Drosophila)	protein-coding
450	chr17	21081064	21083939	+	0	NA	promoter-TSS (NM_016891)	promoter-TSS (NM_016891)	83	NM_016891	51792	Mm.294138	NM_016891	ENSMUSG00000007564	Ppp2r1a	6330556D22Rik|PP2A|PR65	protein phosphatase 2, regulatory subunit A, alpha	protein-coding
1060	chr9	90584796	90600960	+	0	NA	Intergenic	Intergenic	-427271	NM_194334	67016	Mm.335347	NM_194334	ENSMUSG00000037410	Tbc1d2b	1810061M12Rik|AI480956|AV021536|AV023399|AW491493|mKIAA1055	TBC1 domain family, member 2B	protein-coding
703	chr4	25722047	25729137	+	0	NA	intron (NM_010243, intron 1 of 2)	intron (NM_010243, intron 1 of 2)	1558	NM_010243	14348	Mm.39101	NM_010243	ENSMUSG00000055373	Fut9	AI746471|AU067636|mFUT9|mFuc-TIX	fucosyltransferase 9	protein-coding
900	chr7	38119377	38131798	+	0	NA	Intergenic	Intergenic	429184	NM_172385	243937	Mm.322505	NM_172385	ENSMUSG00000043456	Zfp536	9630010P11Rik|Znf536|mKIAA0390	zinc finger protein 536	protein-coding
318	chr13	104562882	104565225	+	0	NA	Intergenic	CpG	-9391	NM_172592	218543	Mm.458176	NM_172592	ENSMUSG00000032621	Srek1	8430401B01|AI450757|AI462342|SRrp508|SRrp86|Sfrs12|Srsf12	splicing regulatory glutamine/lysine-rich protein 1	protein-coding
972	chr8	26573348	26580104	+	0	NA	Intergenic	Intergenic	-52505	NM_001079909	14182	Mm.265716	NM_010206	ENSMUSG00000031565	Fgfr1	AW208770|Eask|FLG|Fgfr-1|Flt-2|Hspy|MFR|bFGF-R-1|c-fgr	fibroblast growth factor receptor 1	protein-coding
473	chr17	71900831	71901962	+	0	NA	promoter-TSS (NM_029254)	promoter-TSS (NM_029254)	-5	NM_001142631	70891	Mm.477599	NM_029254	ENSMUSG00000052525	Spdya	4921517J08Rik|4930548B21Rik|GS4|MLZ-465|Spdy1	speedy homolog A (Xenopus laevis)	protein-coding
3	chr1	6203378	6205986	+	0	NA	promoter-TSS (NM_009826)	promoter-TSS (NM_009826)	-61	NM_009826	12421	Mm.293811	NM_009826	ENSMUSG00000025907	Rb1cc1	2900055E04Rik|5930404L04Rik|Cc1|FIP200|LaXp180	RB1-inducible coiled-coil 1	protein-coding
185	chr11	33412653	33414146	+	0	NA	intron (NR_110973, intron 1 of 28)	CpG	347	NR_110973	66011	Mm.383775	NM_023146	ENSMUSG00000040594	Ranbp17	-	RAN binding protein 17	protein-coding
248	chr12	37107165	37109612	+	0	NA	promoter-TSS (NM_001289503)	promoter-TSS (NM_001289503)	-346	NM_001289503	75847	Mm.261764	NM_178629	ENSMUSG00000043153	Ispd	4930579E17Rik|AV040780	isoprenoid synthase domain containing	protein-coding
146	chr10	110909004	110911471	+	0	NA	promoter-TSS (NM_015781)	promoter-TSS (NM_015781)	-11	NM_015781	53605	Mm.290407	NM_015781	ENSMUSG00000058799	Nap1l1	AA407126|AI256722|D10Ertd68e|NAP-1	nucleosome assembly protein 1-like 1	protein-coding
356	chr14	73541651	73544350	+	0	NA	intron (NR_033185, intron 1 of 15)	CpG	408	NR_033185	105670	Mm.280068	NM_134083	ENSMUSG00000022106	Rcbtb2	2610028E02Rik|2810420M18Rik|AI448345|AW240694|Chc1l|RC/BTB2	regulator of chromosome condensation (RCC1) and BTB (POZ) domain containing protein 2	protein-coding
802	chr5	111759007	111760293	+	0	NA	promoter-TSS (NM_019640)	promoter-TSS (NM_019640)	-133	NM_019640	56305	Mm.200516	NM_019640	ENSMUSG00000050017	Pitpnb	AI256223|AU040890	phosphatidylinositol transfer protein, beta	protein-coding
4	chr1	10027530	10030469	+	0	NA	promoter-TSS (NM_001277101)	promoter-TSS (NM_001277101)	700	NM_026493	211660	Mm.244046	NM_026493	ENSMUSG00000056763	Cspp1	2310020J12Rik|4930413O22Rik|AA387550|BC055915|Cspp2|Cspp3	centrosome and spindle pole associated protein 1	protein-coding
528	chr19	7113576	7116174	+	0	NA	promoter-TSS (NM_016737)	promoter-TSS (NM_016737)	-359	NM_016737	20867	Mm.258633	NM_016737	ENSMUSG00000024966	Stip1	Hop|Sti1|p60	stress-induced phosphoprotein 1	protein-coding
164	chr11	5419888	5422658	+	0	NA	intron (NM_001271730, intron 1 of 5)	CpG	629	NM_001271730	22433	Mm.469937	NM_013842	ENSMUSG00000020484	Xbp1	D11Ertd39e|TREB-5|TREB5|XBP-1	X-box binding protein 1	protein-coding
807	chr5	121994806	121996791	+	0	NA	5' UTR (NM_010765, exon 1 of 14)	5' UTR (NM_010765, exon 1 of 14)	103	NM_010765	17165	Mm.272206	NM_010765	ENSMUSG00000029454	Mapkapk5	MK5|PRAK	MAP kinase-activated protein kinase 5	protein-coding
