# Supplementary material for: Remodeling of epigenome and transcriptome landscapes with aging in mice reveals widespread induction of inflammatory responses
Source: HighWire-hosted journal article supplement (doi:10.1101/gr.240093.118), 2019-03-11
Supplement: Supplemental_Code_Figure1_General.zip [file HOMER_Heart_Diffbind_H3K27ac_in_SE.xls]

PeakID (cmd=annotatePeaks.pl Heart_Diffbind_H3K27ac_in_SE-Lite_coord.bed mm9)	Chr	Start	End	Strand	Peak Score	Focus Ratio/Region Size	Annotation	Detailed Annotation	Distance to TSS	Nearest PromoterID	Entrez ID	Nearest Unigene	Nearest Refseq	Nearest Ensembl	Gene Name	Gene Alias	Gene Description	Gene Type
127	chr1	145549000	145550507	+	0	NA	promoter-TSS (NM_145991)	promoter-TSS (NM_145991)	61	NM_145991	214498	Mm.156727	NM_145991		Cdc73	8430414L16Rik|BC027756|C130030P16Rik|C81219|Hrpt2	cell division cycle 73, Paf1/RNA polymerase II complex component	protein-coding
1801	chr5	20207307	20209053	+	0	NA	3' UTR (NM_001170746, exon 23 of 23)	3' UTR (NM_001170746, exon 23 of 23)	179762	NM_172992	68770	Mm.86410	NM_172992	ENSMUSG00000039987	Phtf2	1110054G21Rik|9530062N20Rik|AI447096|C77923	putative homeodomain transcription factor 2	protein-coding
71	chr1	75501657	75503743	+	0	NA	promoter-TSS (NM_010564)	promoter-TSS (NM_010564)	327	NM_178884	98733	Mm.236454	NM_178884	ENSMUSG00000026211	Obsl1	AW822216	obscurin-like 1	protein-coding
1648	chr4	32701507	32702960	+	0	NA	promoter-TSS (NM_011997)	promoter-TSS (NM_011997)	-215	NM_001122978	26885	Mm.22279	NM_011997	ENSMUSG00000028282	Casp8ap2	AA387232|D4Ertd659e|FLASH|mKIAA1315	caspase 8 associated protein 2	protein-coding
1481	chr3	19209896	19212188	+	0	NA	5' UTR (NM_001122759, exon 1 of 13)	5' UTR (NM_001122759, exon 1 of 13)	280	NM_001122759	18583	Mm.355614	NM_008802	ENSMUSG00000069094	Pde7a	AU015378|AW047537	phosphodiesterase 7A	protein-coding
2266	chr8	72273149	72274745	+	0	NA	promoter-TSS (NM_001200023)	promoter-TSS (NM_001200023)	-86	NM_001200023	620419	Mm.460423	NM_001200023	ENSMUSG00000092260	Zfp963	-	zinc finger protein 963	protein-coding
1178	chr18	49914592	49916242	+	0	NA	promoter-TSS (NM_001170960)	promoter-TSS (NM_001170960)	-162	NM_001170960	68857	Mm.96010	NM_026854	ENSMUSG00000024505	Dtwd2	1190002H09Rik|8030470C17Rik|AI414673|BB115449	DTW domain containing 2	protein-coding
1387	chr2	119300806	119304575	+	0	NA	intron (NM_026574, intron 1 of 35)	CpG	675	NM_026574	68142	Mm.330496	NM_026574	ENSMUSG00000034154	Ino80	2310079N15Rik|4632409L19Rik|Inoc1	INO80 homolog (S. cerevisiae)	protein-coding
512	chr12	72237084	72238593	+	0	NA	promoter-TSS (NM_029818)	promoter-TSS (NM_029818)	3	NM_001163378	76967	Mm.87290	NM_029818	ENSMUSG00000034601	2700049A03Rik	Talpid3|mKIAA0586	RIKEN cDNA 2700049A03 gene	protein-coding
1932	chr5	143996426	143997849	+	0	NA	TTS (NR_040700)	TTS (NR_040700)	295	NM_177681	231866	Mm.55211	NM_177681	ENSMUSG00000029587	Zfp12	C530015C18|Krox-7|Zfp-12|Znf12	zinc finger protein 12	protein-coding
463	chr11	120684287	120687001	+	0	NA	5' UTR (NM_007988, exon 1 of 43)	5' UTR (NM_007988, exon 1 of 43)	217	NM_007988	14104	Mm.236443	NM_007988	ENSMUSG00000025153	Fasn	A630082H08Rik|FAS	fatty acid synthase	protein-coding
517	chr12	76696195	76698117	+	0	NA	promoter-TSS (NM_012024)	promoter-TSS (NM_012024)	31	NM_012024	26932	Mm.259626	NM_012024	ENSMUSG00000021051	Ppp2r5e	4633401M22Rik|AI449017|B56beta	protein phosphatase 2, regulatory subunit B', epsilon	protein-coding
458	chr11	117708752	117710624	+	0	NA	promoter-TSS (NM_009689)	promoter-TSS (NM_009689)	-863	NM_001012273	11799	Mm.8552	NM_009689	ENSMUSG00000017716	Birc5	AAC-11|Api4|TIAP|survivin40	baculoviral IAP repeat-containing 5	protein-coding
1785	chr4	155106455	155110007	+	0	NA	promoter-TSS (NM_001101506)	promoter-TSS (NM_001101506)	-682	NM_001101506	381582	Mm.379515	NM_001101506	ENSMUSG00000084845	Tmem240	EG381582|Gm5151	transmembrane protein 240	protein-coding
1250	chr19	27385097	27388444	+	0	NA	Intergenic	Intergenic	-10339	NM_183179	240595	Mm.269759	NM_183179	ENSMUSG00000047298	Kcnv2	KV11.1	potassium channel, subfamily V, member 2	protein-coding
1363	chr2	75775310	75777357	+	0	NA	exon (NM_028235, exon 1 of 1)	exon (NM_028235, exon 1 of 1)	186	NM_028235	72421	Mm.275109	NM_028235	ENSMUSG00000075273	Ttc30b	2510042P03Rik|Tcc30b	tetratricopeptide repeat domain 30B	protein-coding
722	chr14	28241397	28243292	+	0	NA	exon (NM_001114879, exon 1 of 24)	exon (NM_001114879, exon 1 of 24)	311	NM_001114879	218850	Mm.247767	NM_028945	ENSMUSG00000040651	Fam208a	4732418E12|4933409E02Rik|D14Abb1e	family with sequence similarity 208, member A	protein-coding
2507	chrX	70960539	70965300	+	0	NA	exon (NM_007435, exon 1 of 10)	exon (NM_007435, exon 1 of 10)	983	NM_007435	11666	Mm.365	NM_007435	ENSMUSG00000031378	Abcd1	ALDP|Ald|Aldgh	ATP-binding cassette, sub-family D (ALD), member 1	protein-coding
1109	chr17	79418896	79420606	+	0	NA	intron (NM_001171004, intron 1 of 18)	CpG	405	NM_001171004	75292	Mm.252776	NM_029239	ENSMUSG00000024070	Prkd3	4930557O20Rik|5730497N19Rik|PKD3|Pkcnu|Prkcn	protein kinase D3	protein-coding
2067	chr6	148159967	148161421	+	0	NA	promoter-TSS (NR_015615)	promoter-TSS (NR_015615)	-116	NR_015615	320737	Mm.137858	NR_015615		4732416N19Rik	-	RIKEN cDNA 4732416N19 gene	ncRNA
1630	chr4	3801847	3802919	+	0	NA	Intergenic	CpG	-3131	NM_020021	17451	Mm.459300	NM_020021	ENSMUSG00000078365	Mos	c-mos	Moloney sarcoma oncogene	protein-coding
1597	chr3	131226907	131228451	+	0	NA	promoter-TSS (NM_011863)	promoter-TSS (NM_011863)	-53	NM_001289479	23971	Mm.244912	NM_011863	ENSMUSG00000028032	Papss1	AI325286|Asapk|SK1	3'-phosphoadenosine 5'-phosphosulfate synthase 1	protein-coding
728	chr14	33495376	33500673	+	0	NA	intron (NM_001195097, intron 1 of 3)	intron (NM_001195097, intron 1 of 3)	434	NM_001195097	100504518	Mm.318319	NM_001195097	ENSMUSG00000071540	3425401B19Rik	-	RIKEN cDNA 3425401B19 gene	protein-coding
1244	chr19	21811596	21813720	+	0	NA	Intergenic	Intergenic	-40172	NM_001033759	83921	Mm.329776	NM_031997	ENSMUSG00000024754	Tmem2	-	transmembrane protein 2	protein-coding
2154	chr7	99709173	99710592	+	0	NA	5' UTR (NM_001162918, exon 1 of 8)	5' UTR (NM_001162918, exon 1 of 8)	223	NM_001162918	66365	Mm.21173	NM_025515	ENSMUSG00000030613	Ccdc90b	2310015N07Rik|C86558	coiled-coil domain containing 90B	protein-coding
1638	chr4	12833688	12835051	+	0	NA	intron (NM_173746, intron 1 of 4)	CpG	385	NM_001171801	208820	Mm.12057	NM_173746		Triqk	C130086A10|Gm11818|OTTMUSG00000004461	triple QxxK/R motif containing	protein-coding
742	chr14	52816272	52817924	+	0	NA	promoter-TSS (NM_033618)	promoter-TSS (NM_033618)	-184	NM_033618	114741	Mm.21662	NM_033618	ENSMUSG00000035726	Supt16	Cdc68|Fact140|Spt16|Supt16h	suppressor of Ty 16	protein-coding
29	chr1	37946301	37948035	+	0	NA	promoter-TSS (NM_026913)	promoter-TSS (NM_026913)	88	NM_026913	69028	Mm.63984	NM_026913	ENSMUSG00000026088	Mitd1	1500032H18Rik	MIT, microtubule interacting and transport, domain containing 1	protein-coding
350	chr11	40503191	40508983	+	0	NA	promoter-TSS (NM_134017)	promoter-TSS (NM_134017)	97	NM_134017	108645	Mm.293771	NM_134017	ENSMUSG00000042032	Mat2b	1110064C04Rik|2410018D16Rik|AI182287|AU022853|MAT-II|MATIIbeta|TGR	methionine adenosyltransferase II, beta	protein-coding
1969	chr6	39154366	39157937	+	0	NA	intron (NM_001033430, intron 1 of 19)	CpG	621	NM_001033430	338523	Mm.293175	NM_001033430	ENSMUSG00000042599	Kdm7a	A630082K20Rik|BB041802|ENSMUSG00000073143|Jhdm1d|mKIAA1718	lysine (K)-specific demethylase 7A	protein-coding
1810	chr5	25003088	25006363	+	0	NA	promoter-TSS (NR_030700)	promoter-TSS (NR_030700)	-124	NM_001081383	231051	Mm.332268	NM_001081383	ENSMUSG00000038056	Kmt2c	E330008K23Rik|HALR|Mll3|mKIAA1506	lysine (K)-specific methyltransferase 2C	protein-coding
2203	chr7	135380187	135392530	+	0	NA	intron (NM_146205, intron 4 of 5)	intron (NM_146205, intron 4 of 5)	-3968	NM_001289553	21804	Mm.3248	NM_009365	ENSMUSG00000030782	Tgfb1i1	ARA55|Hic5|TSC-5|hic-5	transforming growth factor beta 1 induced transcript 1	protein-coding
58	chr1	59819117	59828962	+	0	NA	intron (NM_007561, intron 1 of 12)	intron (NM_007561, intron 1 of 12)	2916	NM_007561	12168	Mm.7106	NM_007561		Bmpr2	2610024H22Rik|AL117858|AW546137|BB189135|BMP-2|BMPR-2|BMPR-II|BMPRII|BRK-3|Gm20272	bone morphogenetic protein receptor, type II (serine/threonine kinase)	protein-coding
153	chr1	174305915	174307438	+	0	NA	promoter-TSS (NM_026234)	promoter-TSS (NM_026234)	14	NM_026234	67556	Mm.26612	NM_026234	ENSMUSG00000050229	Pigm	4933437L05Rik|AI644422|AV302080|C920011G20Rik	phosphatidylinositol glycan anchor biosynthesis, class M	protein-coding
2387	chr9	51769056	51772564	+	0	NA	intron (NM_007996, intron 1 of 3)	intron (NM_007996, intron 1 of 3)	828	NM_007996	14148	Mm.1061	NM_007996	ENSMUSG00000032051	Fdx1	-	ferredoxin 1	protein-coding
1546	chr3	94113259	94114878	+	0	NA	promoter-TSS (NM_029431)	promoter-TSS (NM_029431)	14	NM_029431	75778	Mm.45092	NM_029431	ENSMUSG00000028145	Them4	2700077M13Rik|4921507I02Rik	thioesterase superfamily member 4	protein-coding
101	chr1	95697980	95701412	+	0	NA	promoter-TSS (NM_025454)	promoter-TSS (NM_025454)	-846	NM_025454	66262	Mm.64065	NM_025454	ENSMUSG00000026283	Ing5	1700001C14Rik|1700027H23Rik|1810018M11Rik|AI225768	inhibitor of growth family, member 5	protein-coding
340	chr11	29071918	29074089	+	0	NA	promoter-TSS (NM_134034)	promoter-TSS (NM_134034)	96	NM_134034	104570	Mm.276386	NM_134034	ENSMUSG00000020463	Smek2	AW011752|AW557776|mKIAA1387	SMEK homolog 2, suppressor of mek1 (Dictyostelium)	protein-coding
311	chr11	3101661	3103397	+	0	NA	promoter-TSS (NM_001166549)	promoter-TSS (NM_001166549)	-57	NM_023743	74203	Mm.255649	NM_023743	ENSMUSG00000020454	Eif4enif1	2610509L04Rik|A930019J01Rik|AA410001|AU021239|Clast4|D11Ertd166e	eukaryotic translation initiation factor 4E nuclear import factor 1	protein-coding
825	chr15	36706850	36724927	+	0	NA	intron (NM_001253807, intron 1 of 4)	MTC|LTR|MaLR	4799	NM_001253807	22631	Mm.3360	NM_011740	ENSMUSG00000022285	Ywhaz	1110013I11Rik|14-3-3zeta|AI596267|AL022924|AU020854	tyrosine 3-monooxygenase/tryptophan 5-monooxygenase activation protein, zeta polypeptide	protein-coding
917	chr16	13779891	13781332	+	0	NA	promoter-TSS (NM_001039521)	promoter-TSS (NM_001039521)	-181	NM_001039521	106298	Mm.490362	NM_001039521	ENSMUSG00000022682	Rrn3	AL023001|E130302O19Rik|R75565|TIF-1A|Tif1a	RRN3 RNA polymerase I transcription factor homolog (yeast)	protein-coding
2425	chr9	75472901	75480985	+	0	NA	intron (NM_027309, intron 1 of 2)	(TTTTG)n|Simple_repeat|Simple_repeat	3404	NM_027309	70082	Mm.19119	NM_027309	ENSMUSG00000032184	Lysmd2	2210402C18Rik|AV033872|AW538442	LysM, putative peptidoglycan-binding, domain containing 2	protein-coding
495	chr12	54133519	54135417	+	0	NA	intron (NM_198111, intron 9 of 13)	intron (NM_198111, intron 9 of 13)	-215196	NM_013780	27386	Mm.247044	NM_013780	ENSMUSG00000021010	Npas3	4930423H22Rik|bHLHe12	neuronal PAS domain protein 3	protein-coding
1703	chr4	102986072	102987530	+	0	NA	intron (NM_025909, intron 1 of 8)	intron (NM_025909, intron 1 of 8)	350	NM_025909	67013	Mm.30021	NM_025909	ENSMUSG00000035069	Oma1	2010001O09Rik|MPRP-1|ZMPOMA1	OMA1 homolog, zinc metallopeptidase (S. cerevisiae)	protein-coding
2086	chr7	25313949	25316964	+	0	NA	promoter-TSS (NM_153134)	promoter-TSS (NM_153134)	-211	NM_153134	210146	Mm.41108	NM_153134	ENSMUSG00000041037	Irgq	AF322649|FKSG27|Irgq1	immunity-related GTPase family, Q	protein-coding
1322	chr2	27394820	27396617	+	0	NA	Intergenic	Intergenic	25051	NM_080848	140858	Mm.28265	NM_080848	ENSMUSG00000026917	Wdr5	2410008O07Rik|AA408785|AA960360|Big|Big-3	WD repeat domain 5	protein-coding
1816	chr5	31189052	31192275	+	0	NA	promoter-TSS (NR_122117)	promoter-TSS (NR_122117)	-562	NM_174849	231093	Mm.440364	NM_174849	ENSMUSG00000029165	Agbl5	4930455N08|9430057O19Rik|CCP5	ATP/GTP binding protein-like 5	protein-coding
2460	chr9	107774342	107775761	+	0	NA	promoter-TSS (NM_011251)	promoter-TSS (NM_011251)	99	NM_011251	19654	Mm.139926	NM_011251	ENSMUSG00000032582	Rbm6	4930506F14Rik|Def-3|NY-LU-12|g16|mKIAA4015	RNA binding motif protein 6	protein-coding
2510	chrX	71669061	71675617	+	0	NA	intron (NM_001136067, intron 1 of 10)	intron (NM_001136067, intron 1 of 10)	2161	NM_008062	14381	Mm.27210	NM_008062	ENSMUSG00000031400	G6pdx	G28A|G6pd|Gpdx	glucose-6-phosphate dehydrogenase X-linked	protein-coding
1172	chr18	38036214	38044076	+	0	NA	intron (NM_007858, intron 16 of 26)	intron (NM_007858, intron 16 of 26)	-25831	NR_105945	102465592		NR_105945		Mir6979	mmu-mir-6979	microRNA mir-6979	ncRNA
2458	chr9	106723657	106725311	+	0	NA	intron (NM_001015507, intron 1 of 22)	CpG	177	NM_001015507	321006	Mm.440089	NM_001015507	ENSMUSG00000040325	Vprbp	AI447437|B930007L02Rik|mKIAA0800	Vpr (HIV-1) binding protein	protein-coding
1259	chr19	34681098	34684276	+	0	NA	intron (NM_001005858, intron 1 of 1)	intron (NM_001005858, intron 1 of 1)	240	NM_001005858	667370	Mm.271850	NM_001005858	ENSMUSG00000062488	I830012O16Rik	-	RIKEN cDNA I830012O16 gene	protein-coding
834	chr15	44449992	44451829	+	0	NA	promoter-TSS (NM_019480)	promoter-TSS (NM_019480)	-277	NM_019480	55960	Mm.287896	NM_019480	ENSMUSG00000022339	Ebag9	AI835379|Rcas1	estrogen receptor-binding fragment-associated gene 9	protein-coding
285	chr10	114686722	114689861	+	0	NA	intron (NM_025706, intron 1 of 16)	CpG	258	NM_025706	66687	Mm.22252	NM_025706	ENSMUSG00000020130	Tbc1d15	4432405K22Rik|AU022358|AU023730|AW557774|Ly6dl|Rab7-GAP	TBC1 domain family, member 15	protein-coding
2441	chr9	95411542	95415343	+	0	NA	Intergenic	Intergenic	-1027	NM_001114977	67958	Mm.292742	NM_026476	ENSMUSG00000032407	U2surp	2610101N10Rik|AU023006|Sr140	U2 snRNP-associated SURP domain containing	protein-coding
2414	chr9	68939133	68941115	+	0	NA	intron (NM_013646, intron 1 of 10)	intron (NM_013646, intron 1 of 10)	-197524	NM_001289916	19883	Mm.378450	NM_013646	ENSMUSG00000032238	Rora	9530021D13Rik|Nr1f1|ROR1|ROR2|ROR3|nmf267|sg|staggerer|tmgc26	RAR-related orphan receptor alpha	protein-coding
1216	chr19	3321085	3337349	+	0	NA	intron (NM_013495, intron 1 of 18)	B1_Mur4|SINE|Alu	5916	NM_013495	12894	Mm.18522	NM_013495	ENSMUSG00000024900	Cpt1a	C730027G07|CPTI|Cpt1	carnitine palmitoyltransferase 1a, liver	protein-coding
2285	chr8	82234945	82236088	+	0	NA	promoter-TSS (NM_026904)	promoter-TSS (NM_026904)	123	NM_015751	24015	Mm.5831	NM_015751	ENSMUSG00000058355	Abce1	C79080|Oabp|RLI|RNS41|Rnaseli	ATP-binding cassette, sub-family E (OABP), member 1	protein-coding
2274	chr8	74446091	74447937	+	0	NA	intron (NM_133358, intron 1 of 3)	CpG	290	NM_133358	170938	Mm.480419	NM_133358	ENSMUSG00000066880	Zfp617	Zfps11-6	zinc finger protein 617	protein-coding
2194	chr7	134116704	134120706	+	0	NA	promoter-TSS (NM_026638)	promoter-TSS (NM_026638)	-723	NM_026638	52858	Mm.28219	NM_026638	ENSMUSG00000030682	Cdipt	9530042F15Rik|D7Bwg0575e|Pis|Pis1	CDP-diacylglycerol--inositol 3-phosphatidyltransferase (phosphatidylinositol synthase)	protein-coding
1135	chr18	10028786	10030340	+	0	NA	intron (NM_001038589, intron 1 of 14)	intron (NM_001038589, intron 1 of 14)	584	NM_021522	59025	Mm.329277	NM_021522	ENSMUSG00000047879	Usp14	2610005K12Rik|2610037B11Rik|AW107924|C78769|ax|nmf375	ubiquitin specific peptidase 14	protein-coding
2002	chr6	71443093	71446048	+	0	NA	5' UTR (NM_009543, exon 1 of 4)	5' UTR (NM_009543, exon 1 of 4)	682	NM_009543	22644	Mm.422969	NM_009543	ENSMUSG00000052656	Rnf103	AW146237|AW212918|Zfp103|kf-1	ring finger protein 103	protein-coding
1203	chr18	73974656	73976728	+	0	NA	promoter-TSS (NM_145494)	promoter-TSS (NM_145494)	-646	NM_145494	107029	Mm.36817	NM_145494	ENSMUSG00000024556	Me2	AW120568|D030040L20Rik|NAD-ME	malic enzyme 2, NAD(+)-dependent, mitochondrial	protein-coding
96	chr1	93246388	93248521	+	0	NA	promoter-TSS (NM_027551)	promoter-TSS (NM_027551)	-196	NM_027551	70788	Mm.68617	NM_027551	ENSMUSG00000026308	Klhl30	4631423F02Rik	kelch-like 30	protein-coding
2088	chr7	26022135	26038059	+	0	NA	exon (NM_010155, exon 4 of 4)	exon (NM_010155, exon 4 of 4)	5680	NM_010155	13875	Mm.8068	NM_010155	ENSMUSG00000040857	Erf	-	Ets2 repressor factor	protein-coding
1068	chr17	35394225	35402154	+	0	NA	Intergenic	MERVK26-int|LTR|ERVK	-1850	NM_010380	14964	Mm.439675	NM_010380	ENSMUSG00000073411	H2-D1	H-2D|H2-D	histocompatibility 2, D region locus 1	protein-coding
1667	chr4	46150601	46152384	+	0	NA	promoter-TSS (NM_173033)	promoter-TSS (NM_173033)	109	NM_001033201	433702	Mm.389536	NM_001033201	ENSMUSG00000028330	Ncbp1	AU014645|AW538051|CBP80	nuclear cap binding protein subunit 1	protein-coding
2114	chr7	50834423	50836038	+	0	NA	intron (NM_172482, intron 1 of 3)	intron (NM_172482, intron 1 of 3)	274	NM_172482	210105	Mm.234422	NM_172482	ENSMUSG00000030469	Zfp719	8030458J18|9430094P17Rik|C630016O21Rik|mszf6	zinc finger protein 719	protein-coding
486	chr12	36750605	36769458	+	0	NA	intron (NM_025359, intron 1 of 5)	ORR1D1|LTR|MaLR	9034	NM_025359	66109	Mm.254663	NM_025359	ENSMUSG00000020577	Tspan13	1100001I23Rik|NET-6|Tm4sf13	tetraspanin 13	protein-coding
2134	chr7	71002761	71004854	+	0	NA	Intergenic	Intergenic	-57936	NM_001256311	381994	Mm.425466	NM_001256311	ENSMUSG00000095061	E030018B13Rik	Gm1697	RIKEN cDNA E030018B13 gene	protein-coding
1354	chr2	60975017	60978897	+	0	NA	Intergenic	Intergenic	-163749	NR_045335	100038493	Mm.388076	NR_045335	ENSMUSG00000075325	Gm13582	ENSMUSG00000075325|OTTMUSG00000012844	predicted gene 13582	ncRNA
569	chr12	119538002	119541777	+	0	NA	promoter-TSS (NM_001166385)	promoter-TSS (NM_001166385)	24	NM_009239	20688	Mm.34699	NM_009239	ENSMUSG00000025323	Sp4	5730497N03Rik|HF-1b|HF1-b	trans-acting transcription factor 4	protein-coding
8	chr1	9737483	9739032	+	0	NA	non-coding (NR_040462, exon 1 of 4)	non-coding (NR_040462, exon 1 of 4)	206	NM_173443	70675	Mm.274493	NM_173443		Vcpip1	4932442A08|5730421J18Rik|5730538E15Rik|VCIP135|mKIAA1850	valosin containing protein (p97)/p47 complex interacting protein 1	protein-coding
2359	chr9	21171224	21173298	+	0	NA	promoter-TSS (NM_010561)	promoter-TSS (NM_010561)	-54	NM_001042708	16201	Mm.440026	NM_010561	ENSMUSG00000032178	Ilf3	MBII-26|MPHOSPH4|NF90|NFAR	interleukin enhancer binding factor 3	protein-coding
2045	chr6	121160215	121176270	+	0	NA	intron (NM_017379, intron 1 of 4)	intron (NM_017379, intron 1 of 4)	7454	NM_017379	53857	Mm.32884	NM_017379		Tuba8	-	tubulin, alpha 8	protein-coding
1396	chr2	121273288	121283501	+	0	NA	exon (NM_001025371, exon 10 of 12)	exon (NM_001025371, exon 10 of 12)	3460	NR_110986	378702	Mm.262252	NM_011354	ENSMUSG00000074884	Serf2	C80083|Msmac1l|m4F5rel	small EDRK-rich factor 2	protein-coding
686	chr13	105018301	105019030	+	0	NA	promoter-TSS (NM_181061)	promoter-TSS (NM_181061)	-26	NM_181061	60411	Mm.281498	NM_021790	ENSMUSG00000021714	Cenpk	B130045K24Rik|BB232189|C530004N04Rik|Cenp-K|Solt|Solzt	centromere protein K	protein-coding
1760	chr4	137002869	137096965	+	0	NA	intron (NM_008305, intron 1 of 96)	intron (NM_008305, intron 1 of 96)	25199	NM_008305	15530	Mm.273662	NM_008305	ENSMUSG00000028763	Hspg2	AI852380|Pcn|Plc|per	perlecan (heparan sulfate proteoglycan 2)	protein-coding
2033	chr6	116157536	116158782	+	0	NA	intron (NM_026585, intron 1 of 30)	CpG	108	NM_026585	28006	Mm.28524	NM_026585	ENSMUSG00000024104	Fam21	A130095H06|C530005J20Rik|D6Wsu116e	family with sequence similarity 21	protein-coding
391	chr11	72420082	72424614	+	0	NA	intron (NM_025985, intron 1 of 5)	intron (NM_025985, intron 1 of 5)	1585	NM_025985	67128	Mm.458052	NM_025985	ENSMUSG00000020794	Ube2g1	2700059C12Rik|AI256795|AU014992|AW552068|D130023C12Rik	ubiquitin-conjugating enzyme E2G 1	protein-coding
943	chr16	29208638	29210755	+	0	NA	promoter-TSS (NM_013751)	promoter-TSS (NM_013751)	-85	NM_013751	27281	Mm.103650	NM_013751	ENSMUSG00000022525	Hrasls	2810012B06Rik|A-C1|HRSL1|Hrasrs	HRAS-like suppressor	protein-coding
1887	chr5	111759078	111760310	+	0	NA	promoter-TSS (NM_019640)	promoter-TSS (NM_019640)	-89	NM_019640	56305	Mm.200516	NM_019640	ENSMUSG00000050017	Pitpnb	AI256223|AU040890	phosphatidylinositol transfer protein, beta	protein-coding
1375	chr2	102240451	102241992	+	0	NA	promoter-TSS (NM_020267)	promoter-TSS (NM_020267)	-164	NM_020267	80985	Mm.315002	NM_020267	ENSMUSG00000027189	Trim44	Dipb|Mc7	tripartite motif-containing 44	protein-coding
180	chr10	4539535	4541094	+	0	NA	promoter-TSS (NM_025995)	promoter-TSS (NM_025995)	-762	NM_025995	67141	Mm.197520	NM_025995	ENSMUSG00000019773	Fbxo5	2510044I10Rik|C85305|Emi1|Fbxo31	F-box protein 5	protein-coding
1585	chr3	116297255	116298375	+	0	NA	promoter-TSS (NM_001289568)	promoter-TSS (NM_001289568)	-61	NM_001289568	72776	Mm.440836	NM_028349	ENSMUSG00000027959	Sass6	2810453L12Rik	spindle assembly 6 homolog (C. elegans)	protein-coding
1877	chr5	105946853	105960963	+	0	NA	intron (NM_133897, intron 1 of 3)	intron (NM_133897, intron 1 of 3)	5418	NM_133897	100604	Mm.319847	NM_133897	ENSMUSG00000054720	Lrrc8c	AD158|AI326115|E430036I04Rik|fad158	leucine rich repeat containing 8 family, member C	protein-coding
246	chr10	75931177	75932088	+	0	NA	promoter-TSS (NM_019434)	promoter-TSS (NM_019434)	-84	NM_019434	54387	Mm.30098	NM_019434	ENSMUSG00000001150	Mcm3ap	GANP|mKIAA0572	minichromosome maintenance deficient 3 (S. cerevisiae) associated protein	protein-coding
2227	chr8	8990328	8996116	+	0	NA	Intergenic	Intergenic	139066	NR_045854	71249	Mm.158635	NR_045854		4933430N04Rik	-	RIKEN cDNA 4933430N04 gene	ncRNA
690	chr13	108833163	108835397	+	0	NA	promoter-TSS (NM_001048250)	promoter-TSS (NM_001048250)	-388	NM_001048250	75616	Mm.491164	NM_001048250		Smim15	2810008M24Rik	small integral membrane protein 15	protein-coding
1168	chr18	35833027	35839045	+	0	NA	intron (NM_029669, intron 7 of 7)	intron (NM_029669, intron 7 of 7)	-14196	NM_027733	71242	Mm.151498	NM_027733	ENSMUSG00000024352	Spata24	2700012K08Rik|4930583E11Rik|5133400G04Rik|AU016220|TIPT|TIPT2	spermatogenesis associated 24	protein-coding
61	chr1	63159212	63162667	+	0	NA	promoter-TSS (NR_045915)	promoter-TSS (NR_045915)	-98	NM_001114609	227195	Mm.74718	NM_001081436	ENSMUSG00000040865	Ino80d	7330405I11|A430093A21Rik|BC010584|OTTMUSG00000002594	INO80 complex subunit D	protein-coding
536	chr12	86450688	86454155	+	0	NA	intron (NM_030225, intron 1 of 14)	intron (NM_030225, intron 1 of 14)	638	NM_030225	78920	Mm.296221	NM_030225	ENSMUSG00000004789	Dlst	1600017E01Rik|4632413C10Rik|4930529O08Rik|DLTS	dihydrolipoamide S-succinyltransferase (E2 component of 2-oxo-glutarate complex)	protein-coding
1767	chr4	138987960	138990442	+	0	NA	intron (NM_001160319, intron 49 of 105)	intron (NM_001160319, intron 49 of 105)	52627	NM_001160319	69116	Mm.271956	NM_001160319	ENSMUSG00000066036	Ubr4	1810009A16Rik|A930005E13Rik|D930005K06Rik|Gm1032|Gm1666|N28143|RBAF600|Zubr1|mKIAA0462|p600	ubiquitin protein ligase E3 component n-recognin 4	protein-coding
1653	chr4	33326334	33349913	+	0	NA	Intergenic	B1_Mur2|SINE|Alu	-2361	NM_001033225	108767	Mm.27769	NM_001033225	ENSMUSG00000040128	Pnrc1	5730463C12Rik|B4-2|PRR2|Prol2	proline-rich nuclear receptor coactivator 1	protein-coding
2237	chr8	26384530	26387378	+	0	NA	Intergenic	Intergenic	30788	NR_040352	74489	Mm.256468	NR_040352		5430421F17Rik	-	RIKEN cDNA 5430421F17 gene	ncRNA
1688	chr4	70195060	70198782	+	0	NA	promoter-TSS (NM_172694)	promoter-TSS (NM_172694)	-959	NM_172694	230316	Mm.251188	NM_172694		Megf9	4933405H16Rik|9630025C07|Egfl5|mKIAA0818	multiple EGF-like-domains 9	protein-coding
2394	chr9	55355139	55360485	+	0	NA	intron (NM_145615, intron 1 of 11)	L1MC4|LINE|L1	2238	NM_145615	110842	Mm.290853	NM_145615	ENSMUSG00000032314	Etfa	2010200I21Rik|D9Ertd394e	electron transferring flavoprotein, alpha polypeptide	protein-coding
1266	chr19	36805340	36812353	+	0	NA	intron (NM_016854, intron 1 of 1)	intron (NM_016854, intron 1 of 1)	2248	NM_016854	53412	Mm.24724	NM_016854	ENSMUSG00000067279	Ppp1r3c	PTG|Ppp1r5	protein phosphatase 1, regulatory (inhibitor) subunit 3C	protein-coding
1458	chr2	172196002	172197008	+	0	NA	promoter-TSS (NM_024199)	promoter-TSS (NM_024199)	2	NM_024199	67337	Mm.26944	NM_024199	ENSMUSG00000027498	Cstf1	1700057K18Rik|AI788832	cleavage stimulation factor, 3' pre-RNA, subunit 1	protein-coding
444	chr11	102267767	102273204	+	0	NA	Intergenic	CT-rich|Low_complexity|Low_complexity	-1654	NM_026542	68066	Mm.44226	NM_026542	ENSMUSG00000018677	Slc25a39	3010027G13Rik|D11Ertd333e	solute carrier family 25, member 39	protein-coding
508	chr12	70396872	70400898	+	0	NA	intron (NM_027117, intron 1 of 12)	intron (NM_027117, intron 1 of 12)	1217	NM_027117	69554	Mm.234368	NM_027117	ENSMUSG00000020978	Klhdc2	2310022K15Rik|D12Ertd522e|HCLP-1|LCP	kelch domain containing 2	protein-coding
1336	chr2	35833878	35835790	+	0	NA	exon (NM_029774, exon 1 of 10)	exon (NM_029774, exon 1 of 10)	310	NM_029774	74410	Mm.21591	NM_028921	ENSMUSG00000026885	Ttll11	4932702F08Rik|4933424A20Rik|AU043211|D2Ertd624e	tubulin tyrosine ligase-like family, member 11	protein-coding
39	chr1	51389758	51391093	+	0	NA	intron (NR_045151, intron 1 of 4)	intron (NR_045151, intron 1 of 4)	198	NR_045151	442821	Mm.118030	NR_045151		9330175M20Rik	-	RIKEN cDNA 9330175M20 gene	ncRNA
1089	chr17	56722591	56726177	+	0	NA	promoter-TSS (NM_001163300)	promoter-TSS (NM_001163300)	-21	NM_001163300	224903	Mm.255066	NM_001163300	ENSMUSG00000071054	Safb	3110021E02Rik|5330423C17Rik|AU018122|D18386|E130307D12|HAP|HET|SAF-B1|SAFB1	scaffold attachment factor B	protein-coding
558	chr12	110101578	110104439	+	0	NA	intron (NM_001164314, intron 8 of 9)	intron (NM_001164314, intron 8 of 9)	13669	NM_001012310	104910	Mm.202653	NM_001012310	ENSMUSG00000048856	Slc25a47	AI132487|AI876593|HDMCP	solute carrier family 25, member 47	protein-coding
12	chr1	13578500	13580443	+	0	NA	intron (NM_028173, intron 1 of 10)	CpG	474	NM_028173	72265	Mm.28765	NM_028173	ENSMUSG00000025935	Tram1	1810049E02Rik|TRAMP	translocating chain-associating membrane protein 1	protein-coding
1554	chr3	96022670	96082782	+	0	NA	Intergenic	Intergenic	2103	NM_054045	97114	Mm.358797	NM_054045	ENSMUSG00000081058	Hist2h3c2	H3-614|H3.2-614|Hist2h3c2-ps|Hist2h3ca1|M32461	histone cluster 2, H3c2	protein-coding
2168	chr7	111500454	111502765	+	0	NA	intron (NM_175677, intron 1 of 7)	(TTG)n|Simple_repeat|Simple_repeat	254	NM_175677	319236	Mm.425502	NM_175677	ENSMUSG00000057143	Trim12c	9230105E10Rik|Trim12-2	tripartite motif-containing 12C	protein-coding
573	chr13	8884308	8885569	+	0	NA	promoter-TSS (NM_145360)	promoter-TSS (NM_145360)	86	NM_145360	319554	Mm.29847	NM_145360	ENSMUSG00000058258	Idi1	4832416K17Rik	isopentenyl-diphosphate delta isomerase	protein-coding
1084	chr17	49567333	49572720	+	0	NA	intron (NM_028464, intron 1 of 10)	intron (NM_028464, intron 1 of 10)	2337	NM_020042	56738	Mm.22256	NM_020042	ENSMUSG00000064120	Mocs1	3110045D15Rik|AI043170|AW536397	molybdenum cofactor synthesis 1	protein-coding
638	chr13	67653507	67654402	+	0	NA	intron (NM_001035231, intron 1 of 3)	CpG	134	NM_001035231	212276	Mm.422831	NM_183145	ENSMUSG00000095432	Zfp748	KRAB-O|Rslcan20/21|Zfp208|mszf54	zinc finger protein 748	protein-coding
2350	chr9	15513502	15515404	+	0	NA	intron (NM_172289, intron 1 of 10)	CpG	240	NM_172289	234967	Mm.138815	NM_172289	ENSMUSG00000043885	Slc36a4	6330573I15Rik|PAT4	solute carrier family 36 (proton/amino acid symporter), member 4	protein-coding
875	chr15	81877404	81878568	+	0	NA	promoter-TSS (NM_011482)	promoter-TSS (NM_011482)	42	NM_011482	20826	Mm.299312	NM_011482	ENSMUSG00000063480	Nhp2l1	FA-1|Fta1|Ssfa1	NHP2 non-histone chromosome protein 2-like 1 (S. cerevisiae)	protein-coding
2479	chr9	122259209	122262274	+	0	NA	promoter-TSS (NM_026179)	promoter-TSS (NM_026179)	7	NM_026179	67469	Mm.280254	NM_026179	ENSMUSG00000032540	Abhd5	1300003D03Rik|2010002J10Rik|CDS|CGI-58|IECN5|NCIE2	abhydrolase domain containing 5	protein-coding
1522	chr3	75759759	75761566	+	0	NA	5' UTR (NM_001291069, exon 1 of 16)	5' UTR (NM_001291069, exon 1 of 16)	209	NM_175193	73124	Mm.249232	NM_175193	ENSMUSG00000034109	Golim4	3110027H23Rik|GIMPC|GPP130|Golph4|P138	golgi integral membrane protein 4	protein-coding
1	CHR	1	END	+	0	NA	NA	NA	NA	NA
506	chr12	66136857	66138456	+	0	NA	intron (NM_177806, intron 1 of 13)	CpG	335	NM_177806	328110	Mm.283339	NM_177806	ENSMUSG00000035597	Prpf39	Srcs1	PRP39 pre-mRNA processing factor 39 homolog (yeast)	protein-coding
136	chr1	162141935	162144052	+	0	NA	promoter-TSS (NM_009786)	promoter-TSS (NM_009786)	30	NM_009786	12301	Mm.10702	NM_009786	ENSMUSG00000014226	Cacybp	SIP	calcyclin binding protein	protein-coding
116	chr1	135506206	135507085	+	0	NA	intron (NM_009227, intron 1 of 4)	CpG	212	NM_009227	20643	Mm.249110	NM_009227	ENSMUSG00000090553	Snrpe	AL022645|C76690|SME	small nuclear ribonucleoprotein E	protein-coding
1197	chr18	69355554	69360134	+	0	NA	Intergenic	Intergenic	-146302	NM_013685	21413	Mm.4269	NM_013685	ENSMUSG00000053477	Tcf4	5730422P05Rik|ASP-I2|E2-2|E2.2|ITF-2|ITF-2b|ITF2|ME2|MITF-2A|MITF-2B|SEF-2|SEF2|SEF2-1|TFE|Tcf-4|bHLHb19	transcription factor 4	protein-coding
1580	chr3	110052590	110054857	+	0	NA	exon (NM_178891, exon 1 of 1)	exon (NM_178891, exon 1 of 1)	194	NM_178891	99890	Mm.36115	NM_178891	ENSMUSG00000049300	Prmt6	AW124876|BB233495|Hrmt1l6	protein arginine N-methyltransferase 6	protein-coding
2419	chr9	71958304	71960428	+	0	NA	promoter-TSS (NM_001253862)	promoter-TSS (NM_001253862)	260	NM_011544	21406	Mm.171615	NM_011544	ENSMUSG00000032228	Tcf12	A130037E08Rik|ALF1|HEB|HEBAlt|HTF-4|HTF4|ME1|REB|bHLHb20	transcription factor 12	protein-coding
2146	chr7	88933481	88934956	+	0	NA	intron (NM_026077, intron 1 of 4)	intron (NM_026077, intron 1 of 4)	121	NM_026077	67290	Mm.248391	NM_026077	ENSMUSG00000025102	3110040N11Rik	AI851475	RIKEN cDNA 3110040N11 gene	protein-coding
661	chr13	86185452	86186543	+	0	NA	intron (NM_007749, intron 1 of 2)	CpG	403	NM_007749	12867	Mm.378898	NM_007749		Cox7c	COXVIIc|Cox7c1	cytochrome c oxidase subunit VIIc	protein-coding
2482	chr9	123144224	123149304	+	0	NA	Intergenic	Intergenic	-21608	NM_133974	109332	Mm.27519	NM_133974	ENSMUSG00000035498	Cdcp1	9030022E12Rik|AA409659|E030027H19Rik	CUB domain containing protein 1	protein-coding
1935	chr5	145528390	145529978	+	0	NA	promoter-TSS (NM_001081362)	promoter-TSS (NM_001081362)	-477	NM_001081362	100683	Mm.273570	NM_001081362	ENSMUSG00000045482	Trrap	AI481500	transformation/transcription domain-associated protein	protein-coding
581	chr13	18035252	18036719	+	0	NA	promoter-TSS (NM_019491)	promoter-TSS (NM_019491)	66	NM_019491	56044	Mm.27348	NM_019491	ENSMUSG00000008859	Rala	3010001O15Rik|AW322615|Ral|Rasl1	v-ral simian leukemia viral oncogene homolog A (ras related)	protein-coding
308	chr10	129849199	129849620	+	0	NA	Intergenic	Intergenic	17259	NM_001102602	623734	Mm.469840	NM_001102602	ENSMUSG00000092048	Vmn2r85	EG623734	vomeronasal 2, receptor 85	protein-coding
678	chr13	100180295	100184427	+	0	NA	non-coding (NR_015515, exon 1 of 2)	non-coding (NR_015515, exon 1 of 2)	420	NR_015515	320893	Mm.470842	NR_015515		6430562O15Rik	-	RIKEN cDNA 6430562O15 gene	ncRNA
1517	chr3	65331264	65334098	+	0	NA	non-coding (NR_027955, exon 2 of 2)	non-coding (NR_027955, exon 2 of 2)	312	NM_178892	99929	Mm.246398	NM_178892	ENSMUSG00000034640	Tiparp	ARTD14|AW558171|PARP7	TCDD-inducible poly(ADP-ribose) polymerase	protein-coding
1975	chr6	42641780	42643388	+	0	NA	intron (NM_029930, intron 1 of 7)	intron (NM_029930, intron 1 of 7)	474	NM_029930	77574	Mm.24652	NM_029930	ENSMUSG00000036667	Fam115a	2810407D09Rik|3321401G04Rik|A230020K05Rik|AI848529	family with sequence similarity 115, member A	protein-coding
1973	chr6	40420904	40422078	+	0	NA	promoter-TSS (NM_028358)	promoter-TSS (NM_028358)	24	NM_001286663	381760	Mm.276356	NM_028358	ENSMUSG00000029911	Ssbp1	2810480P10Rik|G630031O20Rik|MtSSB|mtDBP	single-stranded DNA binding protein 1	protein-coding
1991	chr6	53768529	53771824	+	0	NA	exon (NM_025817, exon 1 of 1)	exon (NM_025817, exon 1 of 1)	643	NM_025817	66873	Mm.422727	NM_025817	ENSMUSG00000043496	Tril	1200009O22Rik|AI316813|mKIAA0644	TLR4 interactor with leucine-rich repeats	protein-coding
927	chr16	17233021	17234404	+	0	NA	promoter-TSS (NM_178922)	promoter-TSS (NM_178922)	32	NM_178922	58180	Mm.261602	NM_178922	ENSMUSG00000050240	Hic2	AA409108|HRG22|mKIAA1020	hypermethylated in cancer 2	protein-coding
301	chr10	127471580	127478174	+	0	NA	intron (NM_001282976, intron 2 of 7)	intron (NM_001282976, intron 2 of 7)	2475	NM_001113199	17938	Mm.3746	NM_013608	ENSMUSG00000061315	Naca	AL022831|AL024382|Gm1878|mKIAA0363|skNAC	nascent polypeptide-associated complex alpha polypeptide	protein-coding
2302	chr8	90721056	90724879	+	0	NA	promoter-TSS (NM_001164499)	promoter-TSS (NM_001164499)	-145	NM_001164499	214627	Mm.491211	NM_001164497	ENSMUSG00000036779	Papd5	5730445M16Rik|5830428A09	PAP associated domain containing 5	protein-coding
51	chr1	58479327	58481399	+	0	NA	intron (NR_027853, intron 1 of 11)	CpG	569	NR_027853	12747	Mm.1761	NM_009905	ENSMUSG00000026034	Clk1	STY	CDC-like kinase 1	protein-coding
1758	chr4	135865554	135867842	+	0	NA	promoter-TSS (NM_001277122)	promoter-TSS (NM_001277122)	-159	NM_001277122	74326	Mm.31051	NM_028871	ENSMUSG00000066037	Hnrnpr	2610003J05Rik|2610528B01Rik|Hnrpr	heterogeneous nuclear ribonucleoprotein R	protein-coding
1822	chr5	33015691	33016449	+	0	NA	Intergenic	Intergenic	102526	NM_009535	22612	Mm.4558	NM_009535	ENSMUSG00000014932	Yes1	Yes|p61-Yes	Yamaguchi sarcoma viral (v-yes) oncogene homolog 1	protein-coding
456	chr11	115759864	115769352	+	0	NA	intron (NM_183259, intron 1 of 2)	intron (NM_183259, intron 1 of 2)	3155	NM_183259	66528	Mm.275740	NM_183259	ENSMUSG00000048442	Smim5	2210020M01Rik	small integral membrane protein 5	protein-coding
652	chr13	74775852	74778200	+	0	NA	promoter-TSS (NM_030711)	promoter-TSS (NM_030711)	-294	NM_030711	80898	Mm.83526	NM_030711	ENSMUSG00000021583	Erap1	Arts1|ERAAP|PILSA|PILSAP	endoplasmic reticulum aminopeptidase 1	protein-coding
1033	chr17	22098920	22100134	+	0	NA	promoter-TSS (NM_001199048)	promoter-TSS (NM_001199048)	1	NM_001025373	74670	Mm.26540	NM_001025373	ENSMUSG00000053347	Zfp943	4930432O21Rik	zinc finger prtoein 943	protein-coding
2400	chr9	58882974	58885357	+	0	NA	promoter-TSS (NM_008684)	promoter-TSS (NM_008684)	83	NM_008684	18007	Mm.42249	NM_008684	ENSMUSG00000032340	Neo1	2610028H22Rik|AI327052|D930014N22Rik|Igdcc2	neogenin	protein-coding
2258	chr8	59965060	59968106	+	0	NA	promoter-TSS (NM_021788)	promoter-TSS (NM_021788)	74	NM_021788	60406	Mm.118	NM_021788	ENSMUSG00000031609	Sap30	30kDa	sin3 associated polypeptide	protein-coding
2034	chr6	117666352	117667126	+	0	NA	intron (NR_045731, intron 2 of 3)	RLTR45-int|LTR|ERVK	35048	NR_045731	72263	Mm.443289	NR_045731		1700030F04Rik	-	RIKEN cDNA 1700030F04 gene	ncRNA
1539	chr3	89533942	89535642	+	0	NA	intron (NM_019655, intron 1 of 14)	intron (NM_019655, intron 1 of 14)	152	NM_019655	56417	Mm.316628	NM_019655	ENSMUSG00000027951	Adar	AV242451|Adar1|Adar1p110|Adar1p150|mZaADAR	adenosine deaminase, RNA-specific	protein-coding
2029	chr6	108607443	108628824	+	0	NA	Intergenic	Intergenic	-7205	NR_104577	75394	Mm.395061	NR_040757	ENSMUSG00000087341	0610040F04Rik	-	RIKEN cDNA 0610040F04 gene	ncRNA
796	chr14	106289471	106298697	+	0	NA	intron (NM_011897, intron 1 of 1)	intron (NM_011897, intron 1 of 1)	1952	NM_011897	24064	Mm.89982	NM_011897	ENSMUSG00000022114	Spry2	sprouty2	sprouty homolog 2 (Drosophila)	protein-coding
2349	chr9	14588568	14589700	+	0	NA	promoter-TSS (NM_018736)	promoter-TSS (NM_018736)	-17	NM_018736	17535	Mm.149071	NM_018736	ENSMUSG00000031928	Mre11a	Mre11|Mre11b	meiotic recombination 11 homolog A (S. cerevisiae)	protein-coding
366	chr11	57775251	57776739	+	0	NA	Intergenic	Intergenic	-46571	NM_028451	73158	Mm.248843	NM_028451	ENSMUSG00000037331	Larp1	1810024J12Rik|3110040D16Rik|Larp|mKIAA0731	La ribonucleoprotein domain family, member 1	protein-coding
844	chr15	58017871	58052345	+	0	NA	intron (NM_026346, intron 4 of 8)	intron (NM_026346, intron 4 of 8)	11339	NM_026346	67731	Mm.25683	NM_026346	ENSMUSG00000022358	Fbxo32	4833442G10Rik|AI430017|ATROGIN1|Gm20361|MAFbx	F-box protein 32	protein-coding
1541	chr3	89802054	89803686	+	0	NA	promoter-TSS (NM_011826)	promoter-TSS (NM_011826)	188	NR_045749	100503469	Mm.440636	NR_045749		Gm19710	-	predicted gene, 19710	ncRNA
272	chr10	88193080	88194753	+	0	NA	promoter-TSS (NM_025859)	promoter-TSS (NM_025859)	-70	NM_001037166	237433	Mm.478763	NM_001037166		Gm4925	EG237433	predicted gene 4925	protein-coding
2343	chr9	3403299	3404621	+	0	NA	promoter-TSS (NM_027545)	promoter-TSS (NM_027545)	-125	NM_027545	244672	Mm.245482	NM_027545	ENSMUSG00000025898	Cwf19l2	3230401L03Rik|9030209E10	CWF19-like 2, cell cycle control (S. pombe)	protein-coding
775	chr14	73952036	73953547	+	0	NA	intron (NM_011506, intron 1 of 10)	CpG	198	NM_011506	20916	Mm.38951	NM_011506	ENSMUSG00000022110	Sucla2	4930547K18Rik	succinate-Coenzyme A ligase, ADP-forming, beta subunit	protein-coding
2518	chrX	91479479	91480894	+	0	NA	promoter-TSS (NM_001039061)	promoter-TSS (NM_001039061)	-83	NM_001039059	236904	Mm.115533	NM_153165	ENSMUSG00000043929	Klhl15	6330500C13Rik	kelch-like 15	protein-coding
2108	chr7	46772518	46774190	+	0	NA	intron (NM_001004139, intron 1 of 3)	CpG	218	NM_001004139	70227	Mm.333800	NM_001004139	ENSMUSG00000068959	Zfp619	3000002G13Rik	zinc finger protein 619	protein-coding
20	chr1	24684567	24686635	+	0	NA	exon (NM_026719, exon 1 of 16)	exon (NM_026719, exon 1 of 16)	218	NM_026719	68421	Mm.336563	NM_026719	ENSMUSG00000073725	Lmbrd1	0910001K20Rik|AV347960	LMBR1 domain containing 1	protein-coding
2376	chr9	43550247	43552957	+	0	NA	Intergenic	MIR3|SINE|MIR	-1057	NM_021424	58235	Mm.335096	NM_021424	ENSMUSG00000032012	Pvrl1	AI835281|AW549174|Cd111|HIgR|HveC|PRR|PRR1|nectin-1	poliovirus receptor-related 1	protein-coding
888	chr15	97641407	97680628	+	0	NA	intron (NM_001204276, intron 1 of 25)	intron (NM_001204276, intron 1 of 25)	1181	NM_019572	56233	Mm.384027	NM_019572	ENSMUSG00000022475	Hdac7	5830434K02Rik|HD7|HD7a|Hdac7a|mFLJ00062	histone deacetylase 7	protein-coding
1983	chr6	49045811	49048382	+	0	NA	intron (NM_023670, intron 10 of 14)	intron (NM_023670, intron 10 of 14)	23302	NM_029353	75593	Mm.439947	NM_029353	ENSMUSG00000029815	Malsu1	2410003K15Rik|Matsu1	mitochondrial assembly of ribosomal large subunit 1	protein-coding
1011	chr17	15596520	15600990	+	0	NA	Intergenic	Intergenic	36485	NM_011185	19170	Mm.32912	NM_011185	ENSMUSG00000014769	Psmb1	AA409053|C81484|Lmpc5	proteasome (prosome, macropain) subunit, beta type 1	protein-coding
1754	chr4	134908124	134910566	+	0	NA	promoter-TSS (NM_016799)	promoter-TSS (NM_016799)	-216	NM_001130477	51796	Mm.1963	NM_016799	ENSMUSG00000028809	Srrm1	AA407769|POP101|Srm160	serine/arginine repetitive matrix 1	protein-coding
1627	chr3	159502237	159505537	+	0	NA	intron (NM_026582, intron 1 of 11)	intron (NM_026582, intron 1 of 11)	1228	NM_026582	68151	Mm.6766	NM_026582		Wls	5031439A09Rik|AI173978|AI987742|Gpr177	wntless homolog (Drosophila)	protein-coding
1161	chr18	34380030	34383824	+	0	NA	promoter-TSS (NR_040534)	promoter-TSS (NR_040534)	-501	NR_040534	633395	Mm.414290	NR_040534	ENSMUSG00000073607	Gm10548	ENSMUSG00000073607	ribosomal protein L29 pseudogene	pseudo
468	chr12	4233425	4237098	+	0	NA	promoter-TSS (NM_134046)	promoter-TSS (NM_134046)	-967	NM_134046	52504	Mm.70546	NM_134046	ENSMUSG00000020652	Cenpo	2810429O05Rik|8430427C03Rik|D12Ertd482e	centromere protein O	protein-coding
2093	chr7	28041584	28045914	+	0	NA	promoter-TSS (NM_010950)	promoter-TSS (NM_010950)	-31	NM_010950	18223	Mm.458153	NM_010950	ENSMUSG00000063160	Numbl	nbl	numb-like	protein-coding
1019	chr17	17315475	17316949	+	0	NA	Intergenic	Intergenic	57865	NM_011765	22759	Mm.436633	NM_011765	ENSMUSG00000095990	Zfp97	NGD16-4	zinc finger protein 97	protein-coding
700	chr14	6747754	6749389	+	0	NA	intron (NM_001270812, intron 2 of 5).2	CpG	-5053	NM_001291094	100041515	Mm.443041	NM_001205306	ENSMUSG00000096629	Gm3383	ENSMUSG00000079376	predicted gene 3383	protein-coding
1927	chr5	140893937	140895868	+	0	NA	promoter-TSS (NM_133916)	promoter-TSS (NM_133916)	-357	NM_133916	27979	Mm.21671	NM_133916	ENSMUSG00000056076	Eif3b	AL033316|AL033334|AL033369|AW208965|D5Wsu45e|EIF3-ETA|EIF3-P110|EIF3-P116|Eif3s9|PRT1	eukaryotic translation initiation factor 3, subunit B	protein-coding
78	chr1	85193199	85197469	+	0	NA	promoter-TSS (NM_001081746)	promoter-TSS (NM_001081746)	-852	NM_001081746	665378	Mm.449722	NM_001081746		Gm7609	EG665378	predicted pseudogene 7609	protein-coding
1380	chr2	105744270	105745351	+	0	NA	promoter-TSS (NM_028260)	promoter-TSS (NM_028260)	15	NM_028260	66541	Mm.272253	NM_028260	ENSMUSG00000042670	Immp1l	1500034J20Rik|2610528O17Rik|AU042386	IMP1 inner mitochondrial membrane peptidase-like (S. cerevisiae)	protein-coding
990	chr16	98216933	98218925	+	0	NA	Intergenic	Intergenic	-34143	NM_175428	114565	Mm.474489	NM_175428	ENSMUSG00000046962	Zbtb21	5430437K12Rik|B430213I24Rik|Zfp295|Znf295|mKIAA1227	zinc finger and BTB domain containing 21	protein-coding
413	chr11	85046892	85049349	+	0	NA	promoter-TSS (NR_028329)	promoter-TSS (NR_028329)	502	NM_025825	66884	Mm.271997	NM_025825		Appbp2	1300003O07Rik|AI465480|PAT1	amyloid beta precursor protein (cytoplasmic tail) binding protein 2	protein-coding
294	chr10	122115407	122117995	+	0	NA	TTS (NR_106182)	TTS (NR_106182)	330	NR_106182	102466884		NR_106182		Mir8104	mmu-mir-8104	microRNA mir-8104	ncRNA
2316	chr8	109815507	109819079	+	0	NA	promoter-TSS (NM_133957)	promoter-TSS (NM_133957)	-77	NM_018823	54446	Mm.390057	NM_018823	ENSMUSG00000003847	Nfat5	AI225870|B130038B15Rik|CAG-8|CAG80|NFATL1|OREBP|TonEBP|mKIAA0827|nfatz	nuclear factor of activated T cells 5	protein-coding
2218	chr7	148066495	148068712	+	0	NA	promoter-TSS (NM_011875)	promoter-TSS (NM_011875)	165	NM_001127351	64384	Mm.244216	NM_022433	ENSMUSG00000025486	Sirt3	2310003L23Rik|AI848213|Sir2l3	sirtuin 3	protein-coding
1614	chr3	142543706	142545976	+	0	NA	5' UTR (NM_178654, exon 1 of 22)	5' UTR (NM_178654, exon 1 of 22)	127	NM_178654	109333	Mm.244236	NM_178654	ENSMUSG00000004591	Pkn2	6030436C20Rik|AI507382|PRK2|Prkcl2|Stk7	protein kinase N2	protein-coding
1442	chr2	162756377	162758219	+	0	NA	promoter-TSS (NM_026499)	promoter-TSS (NM_026499)	54	NM_026499	67996	Mm.24042	NM_026499	ENSMUSG00000016921	Srsf6	1210001E11Rik|AI314910|AW146126|Sfrs6	serine/arginine-rich splicing factor 6	protein-coding
764	chr14	64715658	64720169	+	0	NA	TTS (NR_046192)	TTS (NR_046192)	5159	NR_046192	78176	Mm.108055	NR_046192	ENSMUSG00000091686	4930471C04Rik	-	RIKEN cDNA 4930471C04 gene	ncRNA
349	chr11	35582278	35584304	+	0	NA	5' UTR (NM_145962, exon 1 of 7)	5' UTR (NM_145962, exon 1 of 7)	294	NM_145962	211347	Mm.255044	NM_145962	ENSMUSG00000018846	Pank3	-	pantothenate kinase 3	protein-coding
1743	chr4	129418287	129421509	+	0	NA	promoter-TSS (NM_011317)	promoter-TSS (NM_011317)	-351	NR_045036	20218	Mm.8256	NM_011317	ENSMUSG00000028790	Khdrbs1	Sam68|p62|p68	KH domain containing, RNA binding, signal transduction associated 1	protein-coding
2075	chr7	6679898	6683038	+	0	NA	intron (NM_008817, intron 1 of 8)	intron (NM_008817, intron 1 of 8)	1662	NM_008817	18616	Mm.389800	NM_008817		Peg3	AL022617|ASF-1|End4|Gcap4|Pw1|Zfp102|mKIAA0287	paternally expressed 3	protein-coding
1981	chr6	48393238	48399269	+	0	NA	promoter-TSS (NM_001085417)	promoter-TSS (NM_001085417)	-429	NM_001085417	68910	Mm.2464	NM_020589	ENSMUSG00000068551	Zfp467	1190001I08Rik|AB041616|AI426952|AV017623|EZI|Znf467	zinc finger protein 467	protein-coding
2081	chr7	19443044	19445059	+	0	NA	TTS (NM_153761)	TTS (NM_153761)	18736	NM_153760	243864	Mm.233503	NM_153760	ENSMUSG00000040987	Mill2	Micb	MHC I like leukocyte 2	protein-coding
1383	chr2	113688083	113689623	+	0	NA	promoter-TSS (NM_181416)	promoter-TSS (NM_181416)	-35	NM_181416	228482	Mm.45753	NM_181416	ENSMUSG00000041219	Arhgap11a	6530401L14Rik|mKIAA0013	Rho GTPase activating protein 11A	protein-coding
606	chr13	46665967	46669472	+	0	NA	intron (NM_026056, intron 4 of 12)	intron (NM_026056, intron 4 of 12)	70447	NM_026056	67252	Mm.44529	NM_026056	ENSMUSG00000021373	Cap2	2810452G09Rik|AV045235	CAP, adenylate cyclase-associated protein, 2 (yeast)	protein-coding
137	chr1	162721716	162723701	+	0	NA	intron (NM_013862, intron 1 of 20)	CpG	361	NM_013862	29809	Mm.25833	NM_013862	ENSMUSG00000026721	Rabgap1l	5830411O09Rik|8430421H08Rik|9630005B12Rik|AW049894|HHL|Hh1|mKIAA0471	RAB GTPase activating protein 1-like	protein-coding
1414	chr2	139891949	139893041	+	0	NA	promoter-TSS (NM_175225)	promoter-TSS (NM_175225)	46	NM_001159640	75812	Mm.293449	NM_175225	ENSMUSG00000039033	Tasp1	4930485D02Rik|AW986064	taspase, threonine aspartase 1	protein-coding
2522	chrX	99838659	99841436	+	0	NA	promoter-TSS (NM_008832)	promoter-TSS (NM_008832)	-462	NM_173021	18679	Mm.212889	NM_008832	ENSMUSG00000034055	Phka1	5330411D17|9830108K24Rik|Phka	phosphorylase kinase alpha 1	protein-coding
1855	chr5	76732409	76734605	+	0	NA	promoter-TSS (NM_007715)	promoter-TSS (NM_007715)	66	NM_007715	12753	Mm.3552	NM_007715	ENSMUSG00000029238	Clock	5330400M04Rik|KAT13D|bHLHe8|mKIAA0334	circadian locomotor output cycles kaput	protein-coding
666	chr13	92010125	92018559	+	0	NA	intron (NM_198415, intron 1 of 9)	intron (NM_198415, intron 1 of 9)	2148	NM_198415	76722	Mm.316438	NM_198415	ENSMUSG00000021622	Ckmt2	2300008A19Rik|ScCKmit	creatine kinase, mitochondrial 2	protein-coding
432	chr11	95719498	95721616	+	0	NA	intron (NR_045187, intron 1 of 1)	CpG	426	NR_045187	73906	Mm.399894	NR_045187	ENSMUSG00000086015	4833417C18Rik	-	RIKEN cDNA 4833417C18 gene	ncRNA
1074	chr17	41071010	41072620	+	0	NA	promoter-TSS (NM_031863)	promoter-TSS (NM_031863)	181	NM_008650	17850	Mm.259884	NM_008650	ENSMUSG00000023921	Mut	D230010K02Rik|Mcm	methylmalonyl-Coenzyme A mutase	protein-coding
860	chr15	76755290	76756723	+	0	NA	promoter-TSS (NM_172817)	promoter-TSS (NM_172817)	-128	NM_001168276	239546	Mm.183650	NM_172817		Zfp647	6030449J21|Es492|Znf250	zinc finger protein 647	protein-coding
2308	chr8	97124641	97127107	+	0	NA	promoter-TSS (NM_026274)	promoter-TSS (NM_026274)	33	NM_026274	67610	Mm.109074	NM_026274	ENSMUSG00000050079	Rspry1	4930470D19Rik|AI608258	ring finger and SPRY domain containing 1	protein-coding
1567	chr3	103717623	103720625	+	0	NA	intron (NM_172684, intron 1 of 6)	intron (NM_172684, intron 1 of 6)	1081	NM_172684	229675	Mm.29366	NM_172684	ENSMUSG00000044098	Rsbn1	C230004D03Rik|E330004N01|Rosbin|Rsbn|Rsbp|mKIAA3002	rosbin, round spermatid basic protein 1	protein-coding
1063	chr17	34114941	34119223	+	0	NA	Intergenic	PB1D9|SINE|Alu	-1346	NR_004446	630499	Mm.440940	NM_001081015		H2-K2	EG630499|Gm7035|H-2K1|H-2K1K|H-2K2|H2-K1	histocompatibility 2, K region locus 2	pseudo
1776	chr4	147999905	148001645	+	0	NA	intron (NM_001003899, intron 1 of 6)	CpG	330	NR_027864	230908	Mm.22453	NM_145556	ENSMUSG00000041459	Tardbp	1190002A23Rik|C85084|TDP-43|Tdp43	TAR DNA binding protein	protein-coding
2158	chr7	104099548	104100690	+	0	NA	promoter-TSS (NM_153591)	promoter-TSS (NM_153591)	82	NM_153591	244141	Mm.274864	NM_153591	ENSMUSG00000018995	Nars2	AI875199	asparaginyl-tRNA synthetase 2 (mitochondrial)(putative)	protein-coding
2415	chr9	69245342	69246394	+	0	NA	promoter-TSS (NM_145618)	promoter-TSS (NM_145618)	63	NM_145618	93697	Mm.35911	NM_145618	ENSMUSG00000032235	Ice2	B230343B06Rik|Narg2	interactor of little elongation complex ELL subunit 2	protein-coding
2362	chr9	25054199	25062268	+	0	NA	Intergenic	Intergenic	-1807	NM_009859	235072	Mm.270259	NM_009859	ENSMUSG00000001833	Sept7	Cdc10|E430034N22	septin 7	protein-coding
708	chr14	14844398	14846493	+	0	NA	intron (NM_139227, intron 1 of 11)	CpG	440	NM_139227	246103	Mm.133625	NM_139227	ENSMUSG00000021738	Atxn7	A430107N12Rik|AI627028|Sca7|ataxin-7	ataxin 7	protein-coding
1601	chr3	133205927	133210364	+	0	NA	promoter-TSS (NM_001040400)	promoter-TSS (NM_001040400)	-791	NM_001040400	214133	Mm.347816	NM_145989	ENSMUSG00000040943	Tet2	Ayu17-449|E130014J05Rik|mKIAA1546	tet methylcytosine dioxygenase 2	protein-coding
710	chr14	15464583	15466865	+	0	NA	Intergenic	Intergenic	-69815	NM_001033270	218756	Mm.258893	NM_001033270	ENSMUSG00000021733	Slc4a7	E430014N10Rik|NBC3|NBCn1|NBCn1-G	solute carrier family 4, sodium bicarbonate cotransporter, member 7	protein-coding
1656	chr4	40648710	40651766	+	0	NA	promoter-TSS (NM_001025445)	promoter-TSS (NM_001025445)	-11	NM_001025445	66408	Mm.430710	NM_025545	ENSMUSG00000028411	Aptx	2410016G21Rik|AA388047|FHA-HIT	aprataxin	protein-coding
323	chr11	16407441	16408874	+	0	NA	exon (NM_011343, exon 1 of 4)	exon (NM_011343, exon 1 of 4)	330	NM_011343	20335	Mm.325350	NM_011343	ENSMUSG00000078974	Sec61g	-	SEC61, gamma subunit	protein-coding
856	chr15	74817766	74836401	+	0	NA	intron (NM_001271446, intron 2 of 3)	intron (NM_001271446, intron 2 of 3)	1378	NM_001271417	110454	Mm.425949	NM_010738	ENSMUSG00000075602	Ly6a	Ly-6A.2|Ly-6A/E|Ly-6E.1|Sca-1|Sca1|TAP	lymphocyte antigen 6 complex, locus A	protein-coding
2142	chr7	87468464	87470228	+	0	NA	promoter-TSS (NM_173445)	promoter-TSS (NM_173445)	-6	NM_173445	269955	Mm.474502	NM_173445	ENSMUSG00000038930	Rccd1	5830436H09|E430018M08Rik	RCC1 domain containing 1	protein-coding
1834	chr5	38650997	38652091	+	0	NA	promoter-TSS (NM_025480)	promoter-TSS (NM_025480)	-70	NM_025480	66309	Mm.256185	NM_025480	ENSMUSG00000067365	Tmem128	2810021O14Rik	transmembrane protein 128	protein-coding
1664	chr4	44768557	44770315	+	0	NA	promoter-TSS (NM_138590)	promoter-TSS (NM_138590)	5	NM_138590	319885	Mm.331576	NM_138590	ENSMUSG00000035649	Zcchc7	4930572I07Rik|D4Wsu132e	zinc finger, CCHC domain containing 7	protein-coding
112	chr1	134312703	134315388	+	0	NA	promoter-TSS (NM_172516)	promoter-TSS (NM_172516)	15	NM_172516	213452	Mm.257120	NM_172516	ENSMUSG00000042046	Dstyk	A930019K20Rik|C430014H23Rik|C820013G01|Ripk5	dual serine/threonine and tyrosine protein kinase	protein-coding
545	chr12	89598612	89599755	+	0	NA	promoter-TSS (NM_028105)	promoter-TSS (NM_028105)	-43	NM_028105	72113	Mm.181387	NM_028105	ENSMUSG00000021044	Adck1	2610005A10Rik	aarF domain containing kinase 1	protein-coding
191	chr10	17440468	17447950	+	0	NA	exon (NM_010828, exon 2 of 2)	exon (NM_010828, exon 2 of 2)	1175	NM_010828	17684	Mm.272321	NM_010828	ENSMUSG00000039910	Cited2	AI835299|ER154-like|Mrg1|Msg2|p35srj	Cbp/p300-interacting transactivator, with Glu/Asp-rich carboxy-terminal domain, 2	protein-coding
2467	chr9	110033348	110035116	+	0	NA	promoter-TSS (NM_009211)	promoter-TSS (NM_009211)	-296	NM_009211	20588	Mm.85410	NM_009211	ENSMUSG00000032481	Smarcc1	AI115498|BAF155|Rsc8|SRG3	SWI/SNF related, matrix associated, actin dependent regulator of chromatin, subfamily c, member 1	protein-coding
187	chr10	11062443	11064190	+	0	NA	promoter-TSS (NM_010146)	promoter-TSS (NM_010146)	73	NM_010146	13853	Mm.89946	NM_010146		Epm2a	TG-B|Tg(TcraK,TcrbK)TG-BFlv	epilepsy, progressive myoclonic epilepsy, type 2 gene alpha	protein-coding
588	chr13	24852263	24854466	+	0	NA	intron (NM_020567, intron 1 of 6)	intron (NM_020567, intron 1 of 6)	442	NM_020567	57441	Mm.12239	NM_020567	ENSMUSG00000006715	Gmnn	AW546347|Gem	geminin	protein-coding
1684	chr4	61868992	61870426	+	0	NA	promoter-TSS (NM_001290353)	promoter-TSS (NM_001290353)	-129	NM_001290350	22696	Mm.5011	NM_009554	ENSMUSG00000028389	Zfp37	Tzn|Zfp-37	zinc finger protein 37	protein-coding
756	chr14	59819375	59820821	+	0	NA	promoter-TSS (NM_027764)	promoter-TSS (NM_027764)	33	NM_027764	71330	Mm.234195	NM_027764	ENSMUSG00000035469	Rcbtb1	5430409I18Rik|AW111883|CLLD7|CLLL7	regulator of chromosome condensation (RCC1) and BTB (POZ) domain containing protein 1	protein-coding
2326	chr8	119444373	119446253	+	0	NA	promoter-TSS (NM_028131)	promoter-TSS (NM_028131)	23	NM_026844	66531	Mm.4011	NM_026844	ENSMUSG00000014633	Cmc2	1110046L09Rik|2310061C15Rik|DC13	COX assembly mitochondrial protein 2	protein-coding
1283	chr19	47207214	47213517	+	0	NA	exon (NM_133746, exon 2 of 3)	exon (NM_133746, exon 2 of 3)	2419	NM_133746	72691	Mm.31663	NM_133746	ENSMUSG00000033033	Calhm2	2810048G17Rik|Fam26b	calcium homeostasis modulator 2	protein-coding
262	chr10	81510228	81511618	+	0	NA	promoter-TSS (NM_001024626)	promoter-TSS (NM_001024626)	51	NM_001024626	408062	Mm.391409	NM_001024626		Zfp873	-	zinc finger protein 873	protein-coding
1944	chr6	4550516	4551815	+	0	NA	promoter-TSS (NM_145398)	promoter-TSS (NM_145398)	99	NM_145398	213819	Mm.270703	NM_145398	ENSMUSG00000015189	Casd1	Cas1|Cast1	CAS1 domain containing 1	protein-coding
212	chr10	42940098	42941866	+	0	NA	promoter-TSS (NM_001168289)	promoter-TSS (NM_001168289)	-310	NM_027772	71365	Mm.490430	NM_027772	ENSMUSG00000038240	Pdss2	5430420P03Rik|Gm60|Plmp|kd|mDLP1	prenyl (solanesyl) diphosphate synthase, subunit 2	protein-coding
2436	chr9	86916444	86917505	+	0	NA	5' UTR (NM_024195, exon 1 of 16)	5' UTR (NM_024195, exon 1 of 16)	110	NM_024195	266690	Mm.30166	NM_024195	ENSMUSG00000032872	Cyb5r4	2810034J18Rik|B5+B5R|C79736|Cb5cb5r|Ncb5or|b5/b5r|b5b5r	cytochrome b5 reductase 4	protein-coding
1331	chr2	34626081	34628881	+	0	NA	promoter-TSS (NM_001163434)	promoter-TSS (NM_001163434)	-129	NM_001163434	14828	Mm.330160	NM_022310	ENSMUSG00000026864	Hspa5	AL022860|AU019543|Bip|D2Wsu141e|D2Wsu17e|Grp78|Hsce70|SEZ-7|Sez7|baffled|mBiP	heat shock protein 5	protein-coding
2383	chr9	48512122	48645822	+	0	NA	intron (NM_001033324, intron 2 of 6)	intron (NM_001033324, intron 2 of 6)	65078	NM_001033324	235320	Mm.457803	NM_001033324	ENSMUSG00000066687	Zbtb16	AI467657|PLZF|Zfp145|lu	zinc finger and BTB domain containing 16	protein-coding
542	chr12	88487690	88489342	+	0	NA	promoter-TSS (NM_010363)	promoter-TSS (NM_010363)	-141	NM_001252556	14874	Mm.29652	NM_010363	ENSMUSG00000021033	Gstz1	MAAI	glutathione transferase zeta 1 (maleylacetoacetate isomerase)	protein-coding
1305	chr2	6242840	6244816	+	0	NA	promoter-TSS (NM_001080548)	promoter-TSS (NM_001080548)	25	NM_001080548	98910	Mm.40673	NM_181399	ENSMUSG00000039046	Usp6nl	AI316785|RNTRE|TRE2NL|mKIAA0019	USP6 N-terminal like	protein-coding
961	chr16	44745669	44746713	+	0	NA	exon (NM_025332, exon 1 of 6)	exon (NM_025332, exon 1 of 6)	285	NM_001159329	66067	Mm.34520	NM_025332		Gtpbp8	0610037H22Rik	GTP-binding protein 8 (putative)	protein-coding
2099	chr7	29995731	29997444	+	0	NA	intron (NM_001164658, intron 1 of 27)	intron (NM_001164658, intron 1 of 27)	2465	NM_001164658	320225	Mm.349382	NM_001039721	ENSMUSG00000049676	Catsperg1	A230107C01Rik|Catsperg	catsper channel auxiliary subunit gamma 1	protein-coding
1662	chr4	43733589	43774005	+	0	NA	Intergenic	B3|SINE|B2	10891	NR_033355	71406	Mm.33063	NM_027789	ENSMUSG00000028475	5430416O09Rik	AI481365	RIKEN cDNA 5430416O09 gene	ncRNA
2476	chr9	120019165	120020660	+	0	NA	intron (NM_144793, intron 1 of 6)	CpG	395	NM_144793	208638	Mm.236656	NM_144793	ENSMUSG00000032519	Slc25a38	AV019094|BC010801	solute carrier family 25, member 38	protein-coding
574	chr13	8994721	8996100	+	0	NA	promoter-TSS (NM_027000)	promoter-TSS (NM_027000)	-152	NM_027000	69237	Mm.41800	NM_027000	ENSMUSG00000021149	Gtpbp4	2610028C09Rik|Crfg|Gtpbp3|NGB|Nog1	GTP binding protein 4	protein-coding
170	chr1	182935280	182948052	+	0	NA	intron (NM_010145, intron 1 of 8)	intron (NM_010145, intron 1 of 8)	5960	NM_010145	13849	Mm.9075	NM_010145	ENSMUSG00000038776	Ephx1	AI195553|Eph-1|Eph1|mEH	epoxide hydrolase 1, microsomal	protein-coding
1921	chr5	137967391	137975359	+	0	NA	promoter-TSS (NR_105846)	promoter-TSS (NR_105846)	-553	NR_105846	102465227		NR_105846		Mir6418	mmu-mir-6418	microRNA mir-6418	ncRNA
660	chr13	85427376	85430673	+	0	NA	promoter-TSS (NM_145452)	promoter-TSS (NM_145452)	67	NM_145452	218397	Mm.259653	NM_145452	ENSMUSG00000021549	Rasa1	Gap|RasGAP|Rasa	RAS p21 protein activator 1	protein-coding
26	chr1	36747751	36749376	+	0	NA	intron (NM_009942, intron 1 of 3)	CpG	231	NM_009942	12859	Mm.180182	NM_009942	ENSMUSG00000061518	Cox5b	-	cytochrome c oxidase subunit Vb	protein-coding
2116	chr7	51559659	51562306	+	0	NA	intron (NM_009131, intron 3 of 3)	intron (NM_009131, intron 3 of 3)	1347	NM_009131	20256	Mm.20428	NM_009131	ENSMUSG00000004473	Clec11a	AW457320|Clecsf3|Scgf	C-type lectin domain family 11, member a	protein-coding
977	chr16	77593223	77597377	+	0	NA	Intergenic	Intergenic	-3881	NR_029535	387229		NR_029535	miRBase:MI0000146	Mir99a	Mirn99a|mmu-mir-99a	microRNA 99a	ncRNA
2250	chr8	41392697	41393913	+	0	NA	promoter-TSS (NM_030110)	promoter-TSS (NM_030110)	-22	NR_106126	102466237		NR_106126	miRBase:MI0025006	Mir7666	mmu-mir-7666	microRNA mir-7666	ncRNA
566	chr12	114312061	114313681	+	0	NA	TTS (NM_001291445)	TTS (NM_001291445)	158	NM_029381	75671	Mm.23377	NM_029381	ENSMUSG00000012211	Tex22	1700028O09Rik|AV210422|Tep22	testis expressed gene 22	protein-coding
526	chr12	79961762	79963623	+	0	NA	promoter-TSS (NM_026114)	promoter-TSS (NM_026114)	-67	NM_023721	73834	Mm.491124	NM_023721	ENSMUSG00000021114	Atp6v1d	1110004P10Rik|Atp6m|VATD|Vma8	ATPase, H+ transporting, lysosomal V1 subunit D	protein-coding
1901	chr5	122821532	122823060	+	0	NA	promoter-TSS (NM_024216)	promoter-TSS (NM_024216)	-221	NM_024216	68080	Mm.266328	NM_024216	ENSMUSG00000029464	Gpn3	A930018B01Rik|Atpbd1c|D5Ertd708e	GPN-loop GTPase 3	protein-coding
359	chr11	51668331	51673713	+	0	NA	promoter-TSS (NM_199299)	promoter-TSS (NM_199299)	-39	NM_199299	76901	Mm.259996	NM_199299	ENSMUSG00000020387	Jade2	1200017K05Rik|AI480685|Phf15|mKIAA0239	jade family PHD finger 2	protein-coding
1229	chr19	5786298	5852996	+	0	NA	Intergenic	Intergenic	-16976	NR_002847	72289	Mm.298256	NR_002847	ENSMUSG00000092341	Malat1	2210401K01Rik|9430072K23Rik|AI647968|Neat2	metastasis associated lung adenocarcinoma transcript 1 (non-coding RNA)	ncRNA
2299	chr8	89147305	89149422	+	0	NA	intron (NM_025827, intron 1 of 14)	CpG	421	NM_025827	66887	Mm.324550	NM_025827	ENSMUSG00000047866	Lonp2	1300002A08Rik|AU015403|Lonp	lon peptidase 2, peroxisomal	protein-coding
108	chr1	129669524	129671923	+	0	NA	promoter-TSS (NR_045298)	promoter-TSS (NR_045298)	-18	NM_028399	72949	Mm.268672	NM_028399		Ccnt2	2900041I18Rik|C81304|CycT2|CycT2a|CycT2b	cyclin T2	protein-coding
604	chr13	46050939	46072414	+	0	NA	Intergenic	Intergenic	-1316	NM_009124	20238	Mm.342683	NM_009124	ENSMUSG00000046876	Atxn1	2900016G23Rik|Atx1|C85907|ENSMUSG00000074917|Gm10786|Sca1	ataxin 1	protein-coding
1001	chr17	9224111	9225979	+	0	NA	Intergenic	Intergenic	43847	NM_025851	66931	Mm.67591	NM_025851	ENSMUSG00000023873	1700010I14Rik	-	RIKEN cDNA 1700010I14 gene	protein-coding
232	chr10	61911893	61913328	+	0	NA	promoter-TSS (NM_181423)	promoter-TSS (NM_181423)	-169	NM_181423	338359	Mm.235898	NM_181423	ENSMUSG00000020079	Supv3l1	6330443E10Rik	suppressor of var1, 3-like 1 (S. cerevisiae)	protein-coding
477	chr12	27866967	27868536	+	0	NA	Intergenic	Intergenic	-22370	NR_045870	636791	Mm.423496	NM_001039248	ENSMUSG00000094002	Gm9866	EG636791|ENSMUSG00000052076	predicted gene 9866	ncRNA
1338	chr2	37558109	37559762	+	0	NA	Intergenic	CpG	-15131	NR_039590	100628597		NR_039590	miRBase:MI0018040	Mir5128	mmu-mir-5128|mu-mir-5128	microRNA 5128	ncRNA
1182	chr18	60681985	60686700	+	0	NA	Intergenic	Intergenic	-1533	NM_026302	67665	Mm.272801	NM_026302	ENSMUSG00000024603	Dctn4	1110001K06Rik|4930547K17Rik|C130039E17Rik|p62	dynactin 4	protein-coding
225	chr10	57251519	57252686	+	0	NA	intron (NM_019760, intron 1 of 8)	CpG	233	NM_019760	56442	Mm.29344	NM_019760	ENSMUSG00000019877	Serinc1	1500011D18Rik|AI315070|AIGP-2|TMS-2|Tde1l|Tde2|Tms2|mKIAA1253	serine incorporator 1	protein-coding
1447	chr2	164859588	164860609	+	0	NA	intron (NM_144892, intron 1 of 7)	CpG	181	NM_144892	228869	Mm.233080	NM_144892	ENSMUSG00000039804	Ncoa5	CIA	nuclear receptor coactivator 5	protein-coding
330	chr11	20813710	20816780	+	0	NA	Intergenic	Intergenic	-84134	NM_173752	216551	Mm.76694	NM_173752	ENSMUSG00000042363	Lgalsl	1110067D22Rik|A530071M23|Grpa|Hspc159|Lgalsla	lectin, galactoside binding-like	protein-coding
142	chr1	165333446	165334352	+	0	NA	promoter-TSS (NM_178883)	promoter-TSS (NM_178883)	-127	NM_178883	98376	Mm.32901	NM_178883	ENSMUSG00000040124	Gorab	AI467484|NTKL-BP1|Scyl1bp1	golgin, RAB6-interacting	protein-coding
207	chr10	39677643	39680398	+	0	NA	3' UTR (NM_001113388, exon 4 of 4)	3' UTR (NM_001113388, exon 4 of 4)	939	NM_001173500	100041085	Mm.332530	NM_001173500	ENSMUSG00000071335	G630090E17Rik	Naglt1c	RIKEN cDNA G630090E17 gene	protein-coding
1510	chr3	58217575	58222859	+	0	NA	exon (NM_001081229, exon 1 of 4)	exon (NM_001081229, exon 1 of 4)	606	NM_001081229	72033	Mm.218409	NM_028067	ENSMUSG00000027806	Tsc22d2	1810043J12Rik|5530402M19Rik	TSC22 domain family, member 2	protein-coding
48	chr1	58026175	58027719	+	0	NA	promoter-TSS (NR_027630)	promoter-TSS (NR_027630)	-19	NM_001159865	51960	Mm.339711	NM_030211	ENSMUSG00000054770	Kctd18	4932411A20Rik|6530404F10Rik	potassium channel tetramerisation domain containing 18	protein-coding
1857	chr5	77333844	77335272	+	0	NA	promoter-TSS (NM_173765)	promoter-TSS (NM_173765)	-19	NM_173765	231326	Mm.39271	NM_173765	ENSMUSG00000055923	Aasdh	A230062G08Rik|A830035E16|Acsf4|U26	aminoadipate-semialdehyde dehydrogenase	protein-coding
360	chr11	51811712	51818602	+	0	NA	Intergenic	Intergenic	-1189	NM_009458	22210	Mm.384918	NM_009458	ENSMUSG00000020390	Ube2b	2610301N02Rik|E2-14k|HR6B|Rad6b|mHR6B	ubiquitin-conjugating enzyme E2B	protein-coding
2321	chr8	113615033	113619302	+	0	NA	Intergenic	Intergenic	-1478	NM_198308	319518	Mm.28350	NM_198308		Pdpr	4930402E16Rik|AU018056|mKIAA1990	pyruvate dehydrogenase phosphatase regulatory subunit	protein-coding
1988	chr6	52589311	52590869	+	0	NA	intron (NM_145567, intron 1 of 7)	CpG	204	NM_145567	58875	Mm.286458	NM_145567	ENSMUSG00000029776	Hibadh	6430402H10Rik|AI265272	3-hydroxyisobutyrate dehydrogenase	protein-coding
1076	chr17	45948174	45954203	+	0	NA	Intergenic	Intergenic	-80395	NM_028164	72240	Mm.482897	NM_028164	ENSMUSG00000094690	1600014C23Rik	-	RIKEN cDNA 1600014C23 gene	protein-coding
766	chr14	66585949	66592584	+	0	NA	intron (NM_013492, intron 1 of 8)	intron (NM_013492, intron 1 of 8)	1946	NM_013492	12759	Mm.200608	NM_013492	ENSMUSG00000022037	Clu	AI893575|ApoJ|Cli|D14Ucla3|SP-40|Sgp-2|Sgp2|Sugp-2	clusterin	protein-coding
449	chr11	105450206	105452070	+	0	NA	promoter-TSS (NM_181071)	promoter-TSS (NM_181071)	-162	NM_181071	77097	Mm.22501	NM_175492	ENSMUSG00000053580	Tanc2	3526402J09Rik|5730590C14Rik	tetratricopeptide repeat, ankyrin repeat and coiled-coil containing 2	protein-coding
1574	chr3	105760627	105762947	+	0	NA	promoter-TSS (NM_027432)	promoter-TSS (NM_027432)	-629	NM_027432	70465	Mm.5110	NM_027432	ENSMUSG00000000561	Wdr77	2610003I18Rik|2610312E17Rik|C79984|p44/MEP50	WD repeat domain 77	protein-coding
1579	chr3	108925442	108927597	+	0	NA	intron (NM_172685, intron 1 of 9)	intron (NM_172685, intron 1 of 9)	452	NM_172685	229731	Mm.33574	NM_172685	ENSMUSG00000040322	Slc25a24	2610016M12Rik	solute carrier family 25 (mitochondrial carrier, phosphate carrier), member 24	protein-coding
659	chr13	85328457	85329705	+	0	NA	promoter-TSS (NM_023243)	promoter-TSS (NM_023243)	-1	NM_023243	66671	Mm.18474	NM_023243	ENSMUSG00000021548	Ccnh	6330408H09Rik|AI661354|AV102684|AW538719	cyclin H	protein-coding
1141	chr18	14125590	14133531	+	0	NA	intron (NM_145492, intron 2 of 7)	CpG	1682	NM_145492	225207	Mm.40325	NM_145492	ENSMUSG00000024420	Zfp521	B930086A16Rik|Evi3|Znf521	zinc finger protein 521	protein-coding
682	chr13	103804253	103805952	+	0	NA	intron (NM_175171, intron 4 of 28)	intron (NM_175171, intron 4 of 28)	319470	NM_175171	328329	Mm.202606	NM_175171	ENSMUSG00000034751	Mast4	4930420O11Rik|AI642422|mKIAA0303	microtubule associated serine/threonine kinase family member 4	protein-coding
353	chr11	43494742	43496477	+	0	NA	exon (NM_027557, exon 1 of 2)	exon (NM_027557, exon 1 of 2)	109	NM_001164231	70802	Mm.397449	NM_027557	ENSMUSG00000044950	Pwwp2a	4631424J17Rik|AI891583|AU024105|D930040F23Rik	PWWP domain containing 2A	protein-coding
375	chr11	61741960	61745391	+	0	NA	promoter-TSS (NM_019921)	promoter-TSS (NM_019921)	84	NM_019921	56697	Mm.274404	NM_019921	ENSMUSG00000047804	Akap10	1500031L16Rik|B130049N18Rik|D-AKAP-2|D-AKAP2|PRKA10	A kinase (PRKA) anchor protein 10	protein-coding
984	chr16	94591074	94593969	+	0	NA	promoter-TSS (NM_001159618)	promoter-TSS (NM_001159618)	101	NM_019543	56176	Mm.474449	NM_019543	ENSMUSG00000022940	Pigp	Dcrc|Dscr5	phosphatidylinositol glycan anchor biosynthesis, class P	protein-coding
2409	chr9	63246191	63247831	+	0	NA	promoter-TSS (NM_027090)	promoter-TSS (NM_027090)	40	NM_027090	69478	Mm.113942	NM_027090	ENSMUSG00000032403	2300009A05Rik	-	RIKEN cDNA 2300009A05 gene	protein-coding
1155	chr18	32226856	32228342	+	0	NA	5' UTR (NM_173441, exon 1 of 14)	5' UTR (NM_173441, exon 1 of 14)	211	NM_173441	73473	Mm.66853	NM_173441	ENSMUSG00000024384	Iws1	1700069O15Rik|3000008H23|AL117927|AW214353	IWS1 homolog (S. cerevisiae)	protein-coding
1485	chr3	28704074	28704978	+	0	NA	promoter-TSS (NM_026517)	promoter-TSS (NM_026517)	93	NM_026517	68028	Mm.371630	NM_026517	ENSMUSG00000039221	Rpl22l1	3110001N18Rik|AU041196	ribosomal protein L22 like 1	protein-coding
788	chr14	87815091	87818140	+	0	NA	exon (NM_001253755, exon 1 of 12)	exon (NM_001253755, exon 1 of 12)	225	NM_001253755	219249	Mm.35168	NM_172605	ENSMUSG00000022019	Tdrd3	4732418C03Rik|6720468N18	tudor domain containing 3	protein-coding
128	chr1	152239341	152241183	+	0	NA	promoter-TSS (NM_001077237)	promoter-TSS (NM_001077237)	-77	NM_145511	226499	Mm.222093	NM_145511	ENSMUSG00000006010	BC003331	1810053E15Rik|Odr4|odr-4	cDNA sequence BC003331	protein-coding
501	chr12	56936839	56938235	+	0	NA	exon (NM_001037756, exon 1 of 10)	exon (NM_001037756, exon 1 of 10)	184	NM_001037756	52592	Mm.24761	NM_027867	ENSMUSG00000012076	Brms1l	0710008O11Rik|AI159718|BRMS1|D12Ertd407e	breast cancer metastasis-suppressor 1-like	protein-coding
1313	chr2	21126432	21127978	+	0	NA	promoter-TSS (NM_027728)	promoter-TSS (NM_027728)	-146	NM_001001297	208967	Mm.268841	NM_177588	ENSMUSG00000048550	Thnsl1	AW413632	threonine synthase-like 1 (bacterial)	protein-coding
278	chr10	95402338	95404744	+	0	NA	5' UTR (NM_001001932, exon 1 of 29)	5' UTR (NM_001001932, exon 1 of 29)	244	NM_001001932	216238	Mm.210035	NM_001001932	ENSMUSG00000036499	Eea1	A430109M19Rik|B230358H09Rik|ZFYVE2	early endosome antigen 1	protein-coding
1617	chr3	146161655	146167727	+	0	NA	intron (NM_010318, intron 1 of 2)	intron (NM_010318, intron 1 of 2)	1891	NM_010318	14707	Mm.140804	NM_010318	ENSMUSG00000068523	Gng5	G(y)5	guanine nucleotide binding protein (G protein), gamma 5	protein-coding
490	chr12	40944088	40951243	+	0	NA	intron (NM_013562, intron 1 of 11)	intron (NM_013562, intron 1 of 11)	1733	NR_035459	100316693		NR_035459		Mir1938	mmu-mir-1938	microRNA 1938	ncRNA
1843	chr5	65186633	65216930	+	0	NA	intron (NM_008453, intron 1 of 5)	intron (NM_008453, intron 1 of 5)	7019	NM_008453	16599	Mm.392759	NM_008453	ENSMUSG00000029178	Klf3	9930027G08Rik|AL024007|Bklf|Tef-2	Kruppel-like factor 3 (basic)	protein-coding
155	chr1	175807223	175811467	+	0	NA	intron (NM_001170853, intron 2 of 9)	intron (NM_001170853, intron 2 of 9)	973	NM_001170853	100040462	Mm.463437	NM_001170853	ENSMUSG00000090272	Mndal	Gm2785	myeloid nuclear differentiation antigen like	protein-coding
387	chr11	70020207	70054088	+	0	NA	TTS (NM_007528)	TTS (NM_007528)	-2651	NM_172371	69309	Mm.93266	NM_172371	ENSMUSG00000044367	Slc16a13	1700007D07Rik	solute carrier family 16 (monocarboxylic acid transporters), member 13	protein-coding
1913	chr5	130384061	130385005	+	0	NA	exon (NM_026916, exon 1 of 3)	exon (NM_026916, exon 1 of 3)	123	NM_026916	69034	Mm.211372	NM_026916		Nupr1l	1810010E01Rik|4930579G22Rik	nuclear protein transcriptional regulator 1 like	protein-coding
1112	chr17	80526323	80532231	+	0	NA	intron (NM_176963, intron 1 of 6)	intron (NM_176963, intron 1 of 6)	2466	NM_176963	319625	Mm.29098	NM_176963	ENSMUSG00000035473	Galm	A530057M15Rik|AU015645|AU020959	galactose mutarotase	protein-coding
626	chr13	64230089	64231464	+	0	NA	promoter-TSS (NM_001001321)	promoter-TSS (NM_001001321)	-138	NM_001001321	70484	Mm.133731	NM_001001321	ENSMUSG00000033114	Slc35d2	5730408I21Rik|SQV7L|UGTrel8|hfrc|mUGTrel8	solute carrier family 35, member D2	protein-coding
1294	chr19	60655886	60657782	+	0	NA	promoter-TSS (NM_001172097)	promoter-TSS (NM_001172097)	92	NM_001172097	78832	Mm.259026	NM_030197	ENSMUSG00000033417	Cacul1	2700078E11Rik|2810417M16Rik|9830127L17Rik|AI450346|D130033C15Rik	CDK2 associated, cullin domain 1	protein-coding
461	chr11	120298246	120299398	+	0	NA	exon (NM_001195023, exon 1 of 17)	exon (NM_001195023, exon 1 of 17)	192	NM_001195023	217365	Mm.309520	NM_199469	ENSMUSG00000039703	Nploc4	AK129375|Npl4|mKIAA1499	nuclear protein localization 4 homolog (S. cerevisiae)	protein-coding
1562	chr3	101606221	101611026	+	0	NA	Intergenic	Intergenic	31523	NM_172295	242125	Mm.32900	NM_172295	ENSMUSG00000044313	Mab21l3	-	mab-21-like 3 (C. elegans)	protein-coding
1426	chr2	154482106	154485788	+	0	NA	intron (NM_029362, intron 1 of 4)	intron (NM_029362, intron 1 of 4)	1185	NM_029362	75608	Mm.262480	NM_029362	ENSMUSG00000038467	Chmp4b	2010012F05Rik|C76846|Snf7-2	charged multivesicular body protein 4B	protein-coding
257	chr10	80753706	80766795	+	0	NA	intron (NM_008844, intron 1 of 17)	ID_B1|SINE|B4	4542	NM_001146687	18717	Mm.29836	NM_008844	ENSMUSG00000034902	Pip5k1c	AI115456|AI835305|Pip5kIgamma	phosphatidylinositol-4-phosphate 5-kinase, type 1 gamma	protein-coding
1358	chr2	70893224	70894431	+	0	NA	promoter-TSS (NM_001165982)	promoter-TSS (NM_001165982)	26	NM_001165980	75763	Mm.281668	NM_198005	ENSMUSG00000041966	Dcaf17	2810055O12Rik|4833418A01Rik|A030004A10Rik|A930009G19Rik|AI448937	DDB1 and CUL4 associated factor 17	protein-coding
951	chr16	36555047	36556466	+	0	NA	intron (NM_013803, intron 1 of 6)	intron (NM_013803, intron 1 of 6)	6464	NM_013803	12374	Mm.103619	NM_013803	ENSMUSG00000051980	Casr	CaR|Gprc2a	calcium-sensing receptor	protein-coding
782	chr14	77884336	77885704	+	0	NA	intron (NR_033141, intron 4 of 5)	LTR86B2|LTR|ERVL	21655	NR_033141	629678	Mm.390721	NM_001037935	ENSMUSG00000067973	Gm6994	EG629678	predicted gene 6994	ncRNA
85	chr1	87689578	87691598	+	0	NA	intron (NM_133781, intron 1 of 8)	CpG	566	NM_133781	12283	Mm.26135	NM_133781	ENSMUSG00000036707	Cab39	AA408805|AA960512|C78372|MO25|MO25alpha	calcium binding protein 39	protein-coding
809	chr15	8392046	8401684	+	0	NA	Intergenic	Intergenic	-2402	NM_201232	71175	Mm.240329	NM_027707	ENSMUSG00000022141	Nipbl	Idn3	Nipped-B homolog (Drosophila)	protein-coding
2200	chr7	134731213	134732829	+	0	NA	promoter-TSS (NM_001033040)	promoter-TSS (NM_001033040)	88	NM_001033040	233899	Mm.25220	NM_001033040	ENSMUSG00000057176	Gm166	-	predicted gene 166	protein-coding
1156	chr18	32321914	32323796	+	0	NA	5' UTR (NM_011946, exon 1 of 17)	5' UTR (NM_011946, exon 1 of 17)	112	NM_011946	26405	Mm.211762	NM_011946	ENSMUSG00000024383	Map3k2	9630061B06Rik|AI585793|Mekk2|Mekk2b	mitogen-activated protein kinase kinase kinase 2	protein-coding
2281	chr8	81343362	81345426	+	0	NA	intron (NM_001191004, intron 1 of 4)	intron (NM_001191004, intron 1 of 4)	657	NM_001191004	78651	Mm.28694	NM_030145	ENSMUSG00000031683	Lsm6	1500031N17Rik|2410088K19Rik|AI747288	LSM6 homolog, U6 small nuclear RNA associated (S. cerevisiae)	protein-coding
1557	chr3	96353425	96409422	+	0	NA	TTS (NM_001293701)	TTS (NM_001293701)	-10699	NR_040409	100038464	Mm.475126	NR_040409	ENSMUSG00000074398	Gm15441	ENSMUSG00000074398|OTTMUSG00000021867	predicted gene 15441	ncRNA
1486	chr3	30444879	30447910	+	0	NA	Intergenic	Intergenic	-37985	NM_021442	14013	Mm.56965	NM_007963	ENSMUSG00000027684	Mecom	D630039M04Rik|Evi-1|Evi1|Jbo|Mds|Mds1|Mds1-Evi1|Prdm3|Znfpr1b1	MDS1 and EVI1 complex locus	protein-coding
425	chr11	93746106	93748444	+	0	NA	promoter-TSS (NM_134012)	promoter-TSS (NM_134012)	-195	NM_001013375	217109	Mm.379350	NM_001013375	ENSMUSG00000054079	Utp18	6230425C22Rik|6430513M13|Wdr50	UTP18, small subunit (SSU) processome component, homolog (yeast)	protein-coding
2056	chr6	134847129	134849496	+	0	NA	promoter-TSS (NM_001167696)	promoter-TSS (NM_001167696)	333	NR_029441	72813	Mm.409034	NR_029441		2810454H06Rik	-	RIKEN cDNA 2810454H06 gene	ncRNA
736	chr14	48064257	48066141	+	0	NA	Intergenic	Intergenic	-27037	NR_027414	78938	Mm.11935	NM_030236	ENSMUSG00000037536	Fbxo34	2900057B08Rik|5830426G16Rik	F-box protein 34	protein-coding
539	chr12	88109102	88179929	+	0	NA	Intergenic	Intergenic	69196	NM_001195767	627607	Mm.341880	NM_001195767	ENSMUSG00000059114	Lrrc74	EG627607|Gm6772	leucine rich repeat containing 74	protein-coding
781	chr14	76903175	76907994	+	0	NA	intron (NM_001177751, intron 2 of 2)	intron (NM_001177751, intron 2 of 2)	1267	NM_009366	21807	Mm.153272	NM_009366	ENSMUSG00000022010	Tsc22d1	AA589566|AW105905|Egr5|TSC-22|Tgfb1i4|Tsc|Tsc22	TSC22 domain family, member 1	protein-coding
1950	chr6	13627056	13628434	+	0	NA	exon (NM_175312, exon 1 of 5)	exon (NM_175312, exon 1 of 5)	221	NM_175312	101148	Mm.354863	NM_175312	ENSMUSG00000042742	B630005N14Rik	AI666701	RIKEN cDNA B630005N14 gene	protein-coding
1698	chr4	98588688	98591626	+	0	NA	promoter-TSS (NM_146144)	promoter-TSS (NM_146144)	-344	NM_146144	230484	Mm.371692	NM_146144	ENSMUSG00000028560	Usp1	-	ubiquitin specific peptidase 1	protein-coding
520	chr12	77504048	77505816	+	0	NA	promoter-TSS (NM_008301)	promoter-TSS (NM_008301)	-231	NM_001002012	15512	Mm.296181	NM_008301	ENSMUSG00000059970	Hspa2	70kDa|HSP70.2|HSP70A2|Hsp70-2	heat shock protein 2	protein-coding
2037	chr6	118404640	118406161	+	0	NA	intron (NM_028335, intron 1 of 5)	CpG	124	NM_028335	72720	Mm.212572	NM_028335	ENSMUSG00000030145	Zfp248	2810037F07Rik|E130106N01Rik	zinc finger protein 248	protein-coding
532	chr12	82585195	82586489	+	0	NA	intron (NM_025461, intron 1 of 3)	CpG	255	NM_025461	66272	Mm.439970	NM_025461	ENSMUSG00000091803	Cox16	1810020G14Rik|1810055I05Rik|BB388670	cytochrome c oxidase assembly protein 16	protein-coding
1193	chr18	65798984	65801864	+	0	NA	intron (NM_207255, intron 3 of 5)	intron (NM_207255, intron 3 of 5)	-57498	NM_177028	319888	Mm.183576	NM_177028	ENSMUSG00000046610	Oacyl	5330437I02Rik|Acyl3	O-acyltransferase like	protein-coding
2455	chr9	105297364	105298445	+	0	NA	promoter-TSS (NM_172461)	promoter-TSS (NM_172461)	182	NM_025651	66595	Mm.84941	NM_025651	ENSMUSG00000032567	Aste1	1100001A21Rik|AV006403	asteroid homolog 1 (Drosophila)	protein-coding
55	chr1	58766808	58802569	+	0	NA	intron (NM_001293804, intron 3 of 9)	PB1D10|SINE|Alu	-2708	NM_001293805	12633	Mm.336848	NM_009805	ENSMUSG00000026031	Cflar	2310024N18Rik|A430105C05Rik|CLARP|Cash|Casper|ENSMUSG00000072980|FLAME|FLAME-1|Flip|Gm9845|I-FLICE|MRIT|c-Flip	CASP8 and FADD-like apoptosis regulator	protein-coding
1890	chr5	114185019	114186558	+	0	NA	promoter-TSS (NM_001010825)	promoter-TSS (NM_001010825)	-3	NM_001010825	231630	Mm.21926	NM_001010825	ENSMUSG00000053334	Ficd	D5Ertd40e|Hype	FIC domain containing	protein-coding
1681	chr4	57967328	57971048	+	0	NA	promoter-TSS (NM_011660)	promoter-TSS (NM_011660)	95	NM_011660	22166	Mm.260618	NM_011660	ENSMUSG00000028367	Txn1	ADF|AW550880|Trx1|Txn	thioredoxin 1	protein-coding
57	chr1	59726628	59728347	+	0	NA	intron (NM_009460, intron 1 of 4)	L1MDb|LINE|L1	191	NM_009460	22218	Mm.362118	NM_009460	ENSMUSG00000026021	Sumo1	GMP1|PIC1|SENTRIN|SMT3|SMT3H3|SMTP3|SUMO-1|Smt3C|Ubl1	SMT3 suppressor of mif two 3 homolog 1 (yeast)	protein-coding
872	chr15	81414951	81418200	+	0	NA	promoter-TSS (NM_177821)	promoter-TSS (NM_177821)	-69	NM_177821	328572	Mm.258397	NM_177821	ENSMUSG00000055024	Ep300	A430090G16|A730011L11|KAT3B|p300|p300 HAT	E1A binding protein p300	protein-coding
2354	chr9	20296590	20298162	+	0	NA	promoter-TSS (NM_001110309)	promoter-TSS (NM_001110309)	-186	NM_001110309	235028	Mm.297660	NM_146221	ENSMUSG00000059475	Zfp426	2900057C04Rik|KRAB1|Zfo61|Zfp68-rs1|Znf426|mKIAA4237	zinc finger protein 426	protein-coding
1146	chr18	23908431	23913460	+	0	NA	intron (NM_001162942, intron 1 of 7)	CpG	111	NM_001162942	212307	Mm.132237	NM_153058	ENSMUSG00000024277	Mapre2	AI314113|C820009F03Rik|D18Abb1e|EB1|EB2|RP1	microtubule-associated protein, RP/EB family, member 2	protein-coding
395	chr11	75267664	75282259	+	0	NA	promoter-TSS (NR_030711)	promoter-TSS (NR_030711)	-80	NR_030711	100042498	Mm.482242	NR_030711	ENSMUSG00000085148	Mir22hg	2210403K04Rik	Mir22 host gene (non-protein coding)	ncRNA
89	chr1	88418771	88429333	+	0	NA	intron (NM_008972, intron 1 of 4)	CpG-365	741	NM_008972	19231	Mm.19187	NM_008972	ENSMUSG00000026238	Ptma	Thym	prothymosin alpha	protein-coding
175	chr1	193047490	193055005	+	0	NA	Intergenic	Intergenic	-44035	NM_007498	11910	Mm.2706	NM_007498	ENSMUSG00000026628	Atf3	LRG-21	activating transcription factor 3	protein-coding
584	chr13	21622522	21623244	+	0	NA	promoter-TSS (NM_139141)	promoter-TSS (NM_139141)	100	NM_139141	93681	Mm.290601	NM_139141	ENSMUSG00000063894	Zkscan8	2510038J07Rik|D430019P06Rik|LD5-1|Zfp192	zinc finger with KRAB and SCAN domains 8	protein-coding
988	chr16	97755152	97758996	+	0	NA	promoter-TSS (NM_013606)	promoter-TSS (NM_013606)	-614	NR_003508	17858	Mm.14157	NM_013606	ENSMUSG00000023341	Mx2	AI528743|Mx-2	MX dynamin-like GTPase 2	protein-coding
35	chr1	44203995	44205688	+	0	NA	5' UTR (NM_011729, exon 1 of 15)	5' UTR (NM_011729, exon 1 of 15)	252	NM_011729	22592	Mm.2213	NM_011729	ENSMUSG00000026048	Ercc5	Xpg	excision repair cross-complementing rodent repair deficiency, complementation group 5	protein-coding
2453	chr9	104955294	104956226	+	0	NA	exon (NM_053159, exon 1 of 10)	exon (NM_053159, exon 1 of 10)	162	NM_053159	94062	Mm.29746	NM_053159	ENSMUSG00000032563	Mrpl3	2010320L16Rik|5930422H18Rik|AA407889	mitochondrial ribosomal protein L3	protein-coding
2295	chr8	87483625	87514885	+	0	NA	Intergenic	Intergenic	3392	NM_008416	16477	Mm.1167	NM_008416	ENSMUSG00000052837	Junb	-	jun B proto-oncogene	protein-coding
1882	chr5	108741077	108742415	+	0	NA	promoter-TSS (NM_001081234)	promoter-TSS (NM_001081234)	-198	NM_001081234	433931	Mm.319881	NM_001081234	ENSMUSG00000029263	Pigg	Gpi7	phosphatidylinositol glycan anchor biosynthesis, class G	protein-coding
1550	chr3	94757092	94758656	+	0	NA	Intergenic	Intergenic	-1063	NM_017395	53970	Mm.24308	NM_017395	ENSMUSG00000005774	Rfx5	-	regulatory factor X, 5 (influences HLA class II expression)	protein-coding
1454	chr2	168590696	168592579	+	0	NA	intron (NM_175303, intron 1 of 3)	CpG	1064	NM_201395	99377	Mm.434054	NM_175303	ENSMUSG00000027547	Sall4	5730441M18Rik|AA407717|AL022809|AW536104|C330011P20Rik|C78083|C78563|Tex20	sal-like 4 (Drosophila)	protein-coding
1421	chr2	152119049	152120614	+	0	NA	intron (NM_024196, intron 1 of 7)	CpG	223	NM_024196	67231	Mm.288733	NM_024196		Tbc1d20	1110028I04Rik|2810442O16Rik|AI414693	TBC1 domain family, member 20	protein-coding
665	chr13	91946676	91947877	+	0	NA	promoter-TSS (NM_145453)	promoter-TSS (NM_145453)	25	NM_145453	69085	Mm.52356	NM_145453	ENSMUSG00000021621	Zcchc9	1810019C21Rik	zinc finger, CCHC domain containing 9	protein-coding
1476	chr3	10134535	10158339	+	0	NA	Intergenic	Intergenic	37448	NM_001030305	18857	Mm.371777	NM_001030305	ENSMUSG00000052468	Pmp2	P2	peripheral myelin protein 2	protein-coding
2533	chrX	149932019	149933541	+	0	NA	promoter-TSS (NM_018798)	promoter-TSS (NM_018798)	5	NM_018798	54609	Mm.430772	NM_018798	ENSMUSG00000050148	Ubqln2	Chap1|Dsk2|HRIHFB2157|Plic-2|Plic2	ubiquilin 2	protein-coding
1207	chr18	77182404	77183893	+	0	NA	promoter-TSS (NM_001039201)	promoter-TSS (NM_001039201)	-9	NM_001039201	76987	Mm.236127	NM_029826	ENSMUSG00000025421	Hdhd2	0610039H12Rik|3110052N05Rik	haloacid dehalogenase-like hydrolase domain containing 2	protein-coding
1584	chr3	116265175	116267073	+	0	NA	intron (NM_175413, intron 1 of 8)	intron (NM_175413, intron 1 of 8)	233	NM_175413	109245	Mm.216027	NM_027321	ENSMUSG00000027961	Lrrc39	2010005E21Rik|9430028I06Rik	leucine rich repeat containing 39	protein-coding
904	chr15	102551911	102553797	+	0	NA	promoter-TSS (NM_026192)	promoter-TSS (NM_026192)	-245	NM_026192	67488	Mm.71682	NM_026192	ENSMUSG00000023055	Calcoco1	1810009B06Rik|Cocoa|Gcap11|mKIAA1536	calcium binding and coiled coil domain 1	protein-coding
930	chr16	17530147	17531734	+	0	NA	exon (NM_026909, exon 2 of 5)	exon (NM_026909, exon 2 of 5)	205	NM_026909	69009	Mm.10174	NM_026909	ENSMUSG00000022760	Thap7	1810004B07Rik	THAP domain containing 7	protein-coding
1675	chr4	52451336	52452460	+	0	NA	promoter-TSS (NM_008017)	promoter-TSS (NM_008017)	-62	NR_045175	72648	Mm.391869	NR_045175	ENSMUSG00000085763	Smc2os	2700081L22Rik	structural maintenance of chromosomes 2, opposite strand	ncRNA
649	chr13	74659561	74660947	+	0	NA	Intergenic	Intergenic	-28856	NM_146231	235956	Mm.296909	NM_146231		Zfp825	-	zinc finger protein 825	protein-coding
2150	chr7	97089018	97089823	+	0	NA	non-coding (NR_111916, exon 1 of 1)	non-coding (NR_111916, exon 1 of 1)	294	NM_001291289	67669	Mm.28679	NM_026304		l7Rn6	0610007P06Rik|1110002N09Rik|l(7)6Rn	lethal, Chr 7, Rinchik 6	protein-coding
1318	chr2	25187460	25188822	+	0	NA	promoter-TSS (NM_001029983)	promoter-TSS (NM_001029983)	-50	NR_027448	100272219	Mm.382103	NR_027448	ENSMUSG00000097345	AA543186	-	expressed sequence AA543186	ncRNA
648	chr13	74631029	74632454	+	0	NA	promoter-TSS (NM_146231)	promoter-TSS (NM_146231)	-343	NM_146231	235956	Mm.296909	NM_146231		Zfp825	-	zinc finger protein 825	protein-coding
642	chr13	70775989	70778682	+	0	NA	promoter-TSS (NM_144837)	promoter-TSS (NM_144837)	-823	NM_144837	218333	Mm.139738	NM_144837	ENSMUSG00000034525	Ice1	C77245|mKIAA0947	interactor of little elongation complex ELL subunit 1	protein-coding
2006	chr6	83298980	83300223	+	0	NA	intron (NM_175277, intron 1 of 3)	CpG	123	NM_175277	78653	Mm.391470	NM_175277		Bola3	1810056O20Rik	bolA-like 3 (E. coli)	protein-coding
2245	chr8	32259139	32261584	+	0	NA	promoter-TSS (NM_001199988)	promoter-TSS (NM_001199988)	-427	NM_144927	234138	Mm.349800	NM_144927	ENSMUSG00000031577	Tti2	-	TELO2 interacting protein 2	protein-coding
1764	chr4	138527267	138532218	+	0	NA	intron (NM_029857, intron 1 of 16)	intron (NM_029857, intron 1 of 16)	922	NM_029857	77056	Mm.122336	NM_029857	ENSMUSG00000041143	Tmco4	4632413C14Rik|AI430825	transmembrane and coiled-coil domains 4	protein-coding
2130	chr7	59116752	59118025	+	0	NA	exon (NM_001115087, exon 1 of 1)	exon (NM_001115087, exon 1 of 1)	249	NM_001115087	100040608	Mm.322643	NM_001115087	ENSMUSG00000092118	Fancf	A730016A17	Fanconi anemia, complementation group F	protein-coding
1908	chr5	124380101	124381407	+	0	NA	promoter-TSS (NM_001134767)	promoter-TSS (NM_001134767)	56	NM_001134767	208908	Mm.243679	NM_001134767	ENSMUSG00000061882	Ccdc62	AI661708|Gm150	coiled-coil domain containing 62	protein-coding
1028	chr17	21667690	21674627	+	0	NA	Intergenic	Intergenic	-1345	NM_144515	22710	Mm.296100	NM_144515		Zfp52	KRAB11|Zfp-52|Zfp76|mszf23-2|mszf24|mszf34|mszf75|zfec29	zinc finger protein 52	protein-coding
1589	chr3	122431582	122434273	+	0	NA	intron (NM_153422, intron 1 of 20)	CpG	851	NM_153422	242202	Mm.134911	NM_153422	ENSMUSG00000053965	Pde5a	Cgbpde|Cn5n|Pde5|Pde5a1	phosphodiesterase 5A, cGMP-specific	protein-coding
198	chr10	30320013	30321159	+	0	NA	promoter-TSS (NM_028604)	promoter-TSS (NM_028604)	-31	NM_028604	73681	Mm.294503	NM_028604	ENSMUSG00000019792	Trmt11	2410075D05Rik|3110045I18Rik|AW213713	tRNA methyltransferase 11	protein-coding
1718	chr4	116228112	116231290	+	0	NA	promoter-TSS (NM_029868)	promoter-TSS (NM_029868)	-631	NM_029868	77110	Mm.41715	NM_029868	ENSMUSG00000034042	Gpbp1l1	5330440M15Rik|BC002292	GC-rich promoter binding protein 1-like 1	protein-coding
1098	chr17	66425061	66427724	+	0	NA	promoter-TSS (NM_001025572)	promoter-TSS (NM_001025572)	-6	NM_001025572	106585	Mm.34706	NM_001025572	ENSMUSG00000034647	Ankrd12	2900001A12Rik|AI447928|ANCO-2|AV347965|GAC-1|mKIAA0874	ankyrin repeat domain 12	protein-coding
1059	chr17	33061383	33062395	+	0	NA	exon (NM_130882, exon 13 of 13)	exon (NM_130882, exon 13 of 13)	-7602	NM_001204336	64385	Mm.486449	NM_022434	ENSMUSG00000024292	Cyp4f14	1300014O15Rik|cyp4f-14	cytochrome P450, family 4, subfamily f, polypeptide 14	protein-coding
913	chr16	10781149	10787951	+	0	NA	exon (NM_001271603, exon 2 of 2)	exon (NM_001271603, exon 2 of 2)	1079	NM_009896	12703	Mm.130	NM_009896	ENSMUSG00000038037	Socs1	Cish1|Cish7|JAB|SOCS-1|SSI-1	suppressor of cytokine signaling 1	protein-coding
2019	chr6	87863358	87864818	+	0	NA	TTS (NM_017477)	TTS (NM_017477)	118	NM_173737	232210	Mm.246241	NM_173737	ENSMUSG00000030060	Hmces	8430410A17Rik|C85376	5-hydroxymethylcytosine (hmC) binding, ES cell specific	protein-coding
202	chr10	34137691	34138800	+	0	NA	promoter-TSS (NM_176968)	promoter-TSS (NM_176968)	89	NM_176968	319638	Mm.73467	NM_176968	ENSMUSG00000039480	Nt5dc1	6030401B09Rik|AW987726|Nt5c2l1	5'-nucleotidase domain containing 1	protein-coding
361	chr11	52209368	52210763	+	0	NA	exon (NM_153117, exon 1 of 3)	exon (NM_153117, exon 1 of 3)	135	NM_153117	213673	Mm.291979	NM_153117	ENSMUSG00000036275	9530068E07Rik	C85061|Kct2	RIKEN cDNA 9530068E07 gene	protein-coding
2468	chr9	110207093	110208339	+	0	NA	promoter-TSS (NM_001081381)	promoter-TSS (NM_001081381)	20	NM_001081381	72341	Mm.374250	NM_001081381	ENSMUSG00000054836	Elp6	2610001P13Rik|2610002I17Rik|AV159994|Tmem103	elongator acetyltransferase complex subunit 6	protein-coding
184	chr10	7674469	7676967	+	0	NA	5' UTR (NM_138667, exon 1 of 7)	5' UTR (NM_138667, exon 1 of 7)	203	NM_138667	68652	Mm.193041	NM_138667	ENSMUSG00000015755	Tab2	1110030N06Rik|A530078N03Rik|Map3k7ip2|mKIAA0733	TGF-beta activated kinase 1/MAP3K7 binding protein 2	protein-coding
776	chr14	74030594	74033603	+	0	NA	Intergenic	Intergenic	79505	NM_011506	20916	Mm.38951	NM_011506	ENSMUSG00000022110	Sucla2	4930547K18Rik	succinate-Coenzyme A ligase, ADP-forming, beta subunit	protein-coding
2183	chr7	121705772	121707287	+	0	NA	promoter-TSS (NM_177382)	promoter-TSS (NM_177382)	-43	NM_177382	244209	Mm.108037	NM_177382	ENSMUSG00000030670	Cyp2r1	-	cytochrome P450, family 2, subfamily r, polypeptide 1	protein-coding
1819	chr5	31522016	31523931	+	0	NA	promoter-TSS (NM_008014)	promoter-TSS (NM_008014)	-55	NM_008014	14208	Mm.14501	NM_008014	ENSMUSG00000029147	Ppm1g	AI385652|Fin13	protein phosphatase 1G (formerly 2C), magnesium-dependent, gamma isoform	protein-coding
1459	chr2	172825186	172826386	+	0	NA	5' UTR (NM_175112, exon 1 of 12)	5' UTR (NM_175112, exon 1 of 12)	168	NM_175112	66679	Mm.4113	NM_175112	ENSMUSG00000027509	Rae1	3230401I12Rik|41|D2Ertd342e|MNRP|MNRP41	RAE1 RNA export 1 homolog (S. pombe)	protein-coding
1570	chr3	104620000	104623774	+	0	NA	promoter-TSS (NM_001163441)	promoter-TSS (NM_001163441)	-406	NM_001163440	17454	Mm.1597	NM_008619	ENSMUSG00000002227	Mov10	C77703|Mov-10	Moloney leukemia virus 10	protein-coding
1984	chr6	49212520	49214507	+	0	NA	intron (NM_198102, intron 1 of 7)	CpG	538	NM_198102	101214	Mm.196598	NM_198102	ENSMUSG00000029817	Tra2a	1500010G04Rik|AL022798|G430041M01Rik|mAWMS1	transformer 2 alpha homolog (Drosophila)	protein-coding
1269	chr19	40968656	40970004	+	0	NA	TTS (NR_106167)	TTS (NR_106167)	135	NM_028319	72672	Mm.313523	NM_028319	ENSMUSG00000049164	Zfp518a	2810401C22Rik|6330417C12Rik|AI426493|Zfp518|Znf518|Znf518a|mKIAA0335	zinc finger protein 518A	protein-coding
181	chr10	4741873	4755916	+	0	NA	intron (NM_026793, intron 1 of 1)	intron (NM_026793, intron 1 of 1)	3919	NM_026793	68632	Mm.338242	NM_026793	ENSMUSG00000046916	Myct1	1110020B04Rik|AI225941|AI642973|Mtmc1	myc target 1	protein-coding
412	chr11	84952269	84954461	+	0	NA	promoter-TSS (NM_001029934)	promoter-TSS (NM_001029934)	92	NM_001029934	237898	Mm.178524	NM_001029934	ENSMUSG00000000804	Usp32	2900074J03Rik|6430526O11Rik|AW045245	ubiquitin specific peptidase 32	protein-coding
307	chr10	128179613	128186067	+	0	NA	Intergenic	Intergenic	-1728	NM_016811	13139	Mm.291235	NM_016811	ENSMUSG00000025357	Dgka	80kDa|AW146112|Dagk1	diacylglycerol kinase, alpha	protein-coding
1671	chr4	48054843	48059708	+	0	NA	Intergenic	Intergenic	-6845	NM_015743	18124	Mm.247261	NM_015743	ENSMUSG00000028341	Nr4a3	AI573420|CHN|CSMF|MINOR|NOR-1|Nor1|TEC	nuclear receptor subfamily 4, group A, member 3	protein-coding
2041	chr6	120057757	120067347	+	0	NA	intron (NM_016718, intron 1 of 3)	intron (NM_016718, intron 1 of 3)	19154	NM_016718	29862	Mm.103668	NM_016718	ENSMUSG00000041377	Ninj2	-	ninjurin 2	protein-coding
1467	chr2	180921273	180924779	+	0	NA	3' UTR (NM_025598, exon 5 of 5)	3' UTR (NM_025598, exon 5 of 5)	978	NM_025598	66496	Mm.213943	NM_025598	ENSMUSG00000016344	Ppdpf	0610012G23Rik|2610317A05Rik|2700038C09Rik|3110053G12Rik	pancreatic progenitor cell differentiation and proliferation factor homolog (zebrafish)RIKEN cDNA 2700038C09 gene	protein-coding
1463	chr2	179601832	179603546	+	0	NA	intron (NM_009867, intron 7 of 15)	intron (NM_009867, intron 7 of 15)	108662	NM_001081092	228980	Mm.235542	NM_001081092	ENSMUSG00000039117	Taf4a	135kDa|AI450312|TAFII130|TAFII135|Taf2c1	TAF4A RNA polymerase II, TATA box binding protein (TBP)-associated factor	protein-coding
830	chr15	41619643	41621624	+	0	NA	promoter-TSS (NM_001130165)	promoter-TSS (NM_001130165)	53	NM_001130165	170719	Mm.254267	NM_130885	ENSMUSG00000022307	Oxr1	2210416C20Rik|C7|C7B	oxidation resistance 1	protein-coding
154	chr1	174429370	174463206	+	0	NA	Intergenic	Intergenic	-4973	NM_027972	71870	Mm.78373	NM_027972	ENSMUSG00000026546	Ccdc19	1700028D05Rik|Nesg1	coiled-coil domain containing 19	protein-coding
2062	chr6	145159012	145160944	+	0	NA	promoter-TSS (NM_177222)	promoter-TSS (NM_177222)	311	NM_133688	67636	Mm.486359	NM_133688	ENSMUSG00000040370	Lyrm5	4930469P12Rik|AL022899|Ghiso	LYR motif containing 5	protein-coding
1101	chr17	71875956	71877128	+	0	NA	promoter-TSS (NM_023294)	promoter-TSS (NM_023294)	-345	NM_023294	67052	Mm.225956	NM_023294	ENSMUSG00000024056	Ndc80	2610020P18Rik|AV139730|HEC|HEC1|Kntc2	NDC80 homolog, kinetochore complex component (S. cerevisiae)	protein-coding
704	chr14	8146530	8148242	+	0	NA	Intergenic	CpG	17523	NM_001025085	545013	Mm.422841	NM_001025085	ENSMUSG00000072726	Gm5797	EG545013	predicted gene 5797	protein-coding
326	chr11	18907004	18927886	+	0	NA	intron (NM_010789, intron 1 of 11)	intron (NM_010789, intron 1 of 11)	1527	NM_001193271	17268	Mm.356578	NM_010789	ENSMUSG00000020160	Meis1	C530044H18Rik|Evi8	Meis homeobox 1	protein-coding
1462	chr2	178911856	178912222	+	0	NA	Intergenic	Intergenic	-237602	NM_026596	68175	Mm.158187	NM_026596		4930591A17Rik	-	RIKEN cDNA 4930591A17 gene	protein-coding
1165	chr18	35086696	35092793	+	0	NA	intron (NM_144866, intron 2 of 10)	intron (NM_144866, intron 2 of 10)	1913	NM_144866	225363	Mm.329353	NM_144866	ENSMUSG00000024360	Etf1	AI463371|D6Ertd109e|ERF|ERF1|SUP45L1|TB3-1	eukaryotic translation termination factor 1	protein-coding
2543	chrY	581246	582465	+	0	NA	exon (NM_009484, exon 1 of 27)	exon (NM_009484, exon 1 of 27)	326	NM_009484	22290	Mm.20477	NM_009484	ENSMUSG00000068457	Uty	Hydb|mKIAA4057	ubiquitously transcribed tetratricopeptide repeat gene, Y chromosome	protein-coding
681	chr13	101420426	101421984	+	0	NA	promoter-TSS (NM_001283011)	promoter-TSS (NM_001283011)	-93	NM_027139	108143	Mm.301148	NM_027139	ENSMUSG00000052293	Taf9	2310012M09Rik|AA673500|AU045423|TAFII31|TAFII32|Taf2g	TAF9 RNA polymerase II, TATA box binding protein (TBP)-associated factor	protein-coding
335	chr11	23396848	23398776	+	0	NA	exon (NM_172391, exon 1 of 9)	exon (NM_172391, exon 1 of 9)	227	NM_001290655	268390	Mm.13148	NM_172391	ENSMUSG00000020288	Ahsa2	-	AHA1, activator of heat shock protein ATPase 2	protein-coding
1029	chr17	21702836	21705418	+	0	NA	5' UTR (NM_001002008, exon 1 of 6)	5' UTR (NM_001002008, exon 1 of 6)	117	NM_001002008	381066	Mm.441097	NM_001002008	ENSMUSG00000067931	Zfp948	-	zinc finger protein 948	protein-coding
5	chr1	6203348	6205956	+	0	NA	promoter-TSS (NM_009826)	promoter-TSS (NM_009826)	-91	NM_009826	12421	Mm.293811	NM_009826	ENSMUSG00000025907	Rb1cc1	2900055E04Rik|5930404L04Rik|Cc1|FIP200|LaXp180	RB1-inducible coiled-coil 1	protein-coding
2105	chr7	36339751	36341587	+	0	NA	exon (NM_033080, exon 1 of 3)	exon (NM_033080, exon 1 of 3)	278	NM_033080	110959	Mm.410206	NM_033080	ENSMUSG00000034875	Nudt19	D7Rp2|D7Rp2-r|D7Rp2-s|D7Rp2e|RP2-r|RP2-s	nudix (nucleoside diphosphate linked moiety X)-type motif 19	protein-coding
1957	chr6	29559038	29560466	+	0	NA	promoter-TSS (NM_177296)	promoter-TSS (NM_177296)	-145	NM_177296	320938	Mm.276381	NM_177296	ENSMUSG00000012535	Tnpo3	5730544L10Rik|C430013M08Rik|C81142|D6Ertd313e|Trn-SR|mKIAA4133	transportin 3	protein-coding
554	chr12	105278941	105280936	+	0	NA	intron (NM_026535, intron 1 of 4)	intron (NM_026535, intron 1 of 4)	2715	NM_026535	68054	Mm.20286	NM_026535	ENSMUSG00000041567	Serpina12	4632419J12Rik	serine (or cysteine) peptidase inhibitor, clade A (alpha-1 antiproteinase, antitrypsin), member 12	protein-coding
552	chr12	103213177	103215196	+	0	NA	promoter-TSS (NM_016856)	promoter-TSS (NM_016856)	2	NM_016856	51786	Mm.716	NM_016856	ENSMUSG00000041781	Cpsf2	100kDa|2610024B04Rik|AI662483|Cpsf|MCPSF|mKIAA1367	cleavage and polyadenylation specific factor 2	protein-coding
1867	chr5	91359727	91361107	+	0	NA	exon (NM_026788, exon 1 of 8)	exon (NM_026788, exon 1 of 8)	195	NM_026788	665563	Mm.153030	NM_026788	ENSMUSG00000029376	Mthfd2l	1110019K23Rik|C630010D07Rik	methylenetetrahydrofolate dehydrogenase (NADP+ dependent) 2-like	protein-coding
1623	chr3	154755800	154756926	+	0	NA	promoter-TSS (NM_028938)	promoter-TSS (NM_028938)	-21	NM_029330	75540	Mm.35218	NM_029330	ENSMUSG00000053870	Fpgt	1700016E03Rik	fucose-1-phosphate guanylyltransferase	protein-coding
2505	chrX	69060617	69062677	+	0	NA	promoter-TSS (NM_001081356)	promoter-TSS (NM_001081356)	228	NM_001290781	67048	Mm.41102	NM_001081356	ENSMUSG00000073131	Vma21	2610030H06Rik|AI840175	VMA21 vacuolar H+-ATPase homolog (S. cerevisiae)	protein-coding
74	chr1	80335722	80338104	+	0	NA	promoter-TSS (NM_016716)	promoter-TSS (NM_016716)	92	NM_016716	26554	Mm.12665	NM_016716	ENSMUSG00000004364	Cul3	AI467304|AW146203|mKIAA0617	cullin 3	protein-coding
890	chr15	98311585	98316375	+	0	NA	promoter-TSS (NM_010679)	promoter-TSS (NM_010679)	-866	NM_010679	16770	Mm.5074	NM_010679	ENSMUSG00000022991	Lalba	AW208827	lactalbumin, alpha	protein-coding
440	chr11	98543037	98691282	+	0	NA	intron (NM_178060, intron 2 of 8)	intron (NM_178060, intron 2 of 8)	13972	NM_178060	21833	Mm.265917	NM_178060	ENSMUSG00000058756	Thra	6430529J03Rik|AW259572|Erba|Nr1a1|Rvr|T3R[a]|T3Ralpha|Thra1|Thra2	thyroid hormone receptor alpha	protein-coding
1926	chr5	140251277	140280659	+	0	NA	Intergenic	Intergenic	-1522	NM_010757	17135	Mm.157313	NM_010757	ENSMUSG00000018143	Mafk	AW061068|NF-E2|Nfe2u	v-maf musculoaponeurotic fibrosarcoma oncogene family, protein K (avian)	protein-coding
1289	chr19	55717474	55718940	+	0	NA	intron (NR_045318, intron 2 of 3)	MIR|SINE|MIR	58487	NR_045318	77594	Mm.329924	NR_045318	ENSMUSG00000097632	4930552P12Rik	-	RIKEN cDNA 4930552P12 gene	ncRNA
299	chr10	126816978	126819178	+	0	NA	Intergenic	GC_rich|Low_complexity|Low_complexity	-9289	NM_001168292	71750	Mm.29342	NM_027900	ENSMUSG00000025404	R3hdm2	1300003K24Rik|AU041262|mKIAA1002	R3H domain containing 2	protein-coding
2024	chr6	99469217	99474718	+	0	NA	Intergenic	CpG	-86628	NM_053202	108655	Mm.234965	NM_053202	ENSMUSG00000030067	Foxp1	3110052D19Rik|4932443N09Rik|AI461938|AW494214	forkhead box P1	protein-coding
2525	chrX	106028051	106030661	+	0	NA	promoter-TSS (NR_015493)	promoter-TSS (NR_015493)	338	NM_001081477	382236	Mm.100112	NM_001081477	ENSMUSG00000063663	Brwd3	Brodl|D030064D06Rik|Gm596	bromodomain and WD repeat domain containing 3	protein-coding
1282	chr19	47163879	47165867	+	0	NA	promoter-TSS (NM_011053)	promoter-TSS (NM_011053)	242	NM_023211	66477	Mm.29722	NM_023211	ENSMUSG00000071528	Usmg5	2010301L15Rik	upregulated during skeletal muscle growth 5	protein-coding
1694	chr4	86501640	86504136	+	0	NA	intron (NM_009096, intron 1 of 4)	CpG	383	NM_009096	20104	Mm.379007	NM_009096		Rps6	S6R	ribosomal protein S6	protein-coding
841	chr15	55388414	55389564	+	0	NA	promoter-TSS (NM_001168250)	promoter-TSS (NM_001168250)	26	NM_001168250	105837	Mm.390829	NM_134092	ENSMUSG00000022369	Mtbp	AI429604|MDM2BP	Mdm2, transformed 3T3 cell double minute p53 binding protein	protein-coding
1898	chr5	122520536	122522186	+	0	NA	Intergenic	Intergenic	-23527	NM_007804	13048	Mm.156172	NM_007804	ENSMUSG00000042589	Cux2	1700051K22Rik|Cutl2|Cux-2|ENSMUSG00000072641	cut-like homeobox 2	protein-coding
1044	chr17	24769096	24791511	+	0	NA	intron (NM_023055, intron 2 of 6)	intron (NM_023055, intron 2 of 6)	1599	NM_023449	65962	Mm.21587	NM_023055	ENSMUSG00000002504	Slc9a3r2	0610011L07Rik|1200011K07Rik|2010007A20Rik|E3karp|NHERF-2|Octs2|Sip-1|Sip1|Sryip1|Tka-1	solute carrier family 9 (sodium/hydrogen exchanger), member 3 regulator 2	protein-coding
1350	chr2	57960360	57960732	+	0	NA	Intergenic	Intergenic	51987	NM_139200	227929	Mm.273905	NM_139200	ENSMUSG00000026832	Cytip	A130053M09Rik|AI462064|C80816|Cbp|Cybr|Pscdbp	cytohesin 1 interacting protein	protein-coding
1751	chr4	133305790	133314032	+	0	NA	promoter-TSS (NM_001080819)	promoter-TSS (NM_001080819)	-385	NM_001080819	93760	Mm.22478	NM_001080819	ENSMUSG00000007880	Arid1a	1110030E03Rik|BAF250a|Osa1|Smarcf1	AT rich interactive domain 1A (SWI-like)	protein-coding
91	chr1	89222952	89224406	+	0	NA	intron (NM_146112, intron 1 of 28)	CpG	106	NM_001110212	227331	Mm.23065	NM_146112	ENSMUSG00000048000	Gigyf2	2610016F01Rik|A830080H02Rik|AI852361|AW259676|BC006835|Tnrc15|mKIAA0642	GRB10 interacting GYF protein 2	protein-coding
2137	chr7	72017250	72018422	+	0	NA	promoter-TSS (NM_023239)	promoter-TSS (NM_023239)	90	NM_023239	66647	Mm.19944	NM_023239		Ndnl2	5730494G16Rik|AI642138|BB044375|HCA4|Mageg1|mage-g1	necdin-like 2	protein-coding
1240	chr19	16854553	16856208	+	0	NA	promoter-TSS (NM_173028)	promoter-TSS (NM_173028)	43	NM_173028	271564	Mm.211963	NM_173028	ENSMUSG00000046230	Vps13a	4930425F11|4930516E05Rik|4930543C13Rik|9930023P20|Chac|Chorein|D330038K10Rik|mKIAA0986	vacuolar protein sorting 13A (yeast)	protein-coding
467	chr12	4081835	4083573	+	0	NA	5' UTR (NM_153082, exon 1 of 7)	5' UTR (NM_153082, exon 1 of 7)	130	NM_153082	217378	Mm.271656	NM_153082	ENSMUSG00000020657	Dnajc27	AI639580|C330021A05Rik|Rabj|Rbj	DnaJ (Hsp40) homolog, subfamily C, member 27	protein-coding
2121	chr7	52270787	52282018	+	0	NA	intron (NM_009101, intron 4 of 5)	intron (NM_009101, intron 4 of 5)	3025	NM_009101	20130	Mm.389894	NM_009101	ENSMUSG00000038387	Rras	AI573426	Harvey rat sarcoma oncogene, subgroup R	protein-coding
474	chr12	17550864	17553065	+	0	NA	5' UTR (NM_013614, exon 1 of 12)	5' UTR (NM_013614, exon 1 of 12)	285	NM_013614	18263	Mm.34102	NM_013614	ENSMUSG00000011179	Odc1	ODC	ornithine decarboxylase, structural 1	protein-coding
481	chr12	32183794	32185470	+	0	NA	promoter-TSS (NM_001253848)	promoter-TSS (NM_001253848)	-151	NM_001253848	104836	Mm.273270	NM_134048	ENSMUSG00000020659	Cbll1	AI467391|Hakai|c-Cbl-like	Casitas B-lineage lymphoma-like 1	protein-coding
867	chr15	80063528	80065175	+	0	NA	promoter-TSS (NM_178719)	promoter-TSS (NM_178719)	-159	NM_178719	239555	Mm.307163	NM_178719	ENSMUSG00000022412	Mief1	A230016E22|AI452372|Smcr7l	mitochondrial elongation factor 1	protein-coding
1976	chr6	43615359	43616829	+	0	NA	promoter-TSS (NM_013861)	promoter-TSS (NM_013861)	80	NM_013861	29807	Mm.320979	NM_013861	ENSMUSG00000029735	Tpk1	-	thiamine pyrophosphokinase	protein-coding
817	chr15	31530879	31532554	+	0	NA	promoter-TSS (NM_026546)	promoter-TSS (NM_026546)	-155	NM_026546	68073	Mm.119185	NM_026546	ENSMUSG00000039065	Fam173b	A930016P21Rik|AA987072	family with sequence similarity 173, member B	protein-coding
563	chr12	113725927	113730955	+	0	NA	intron (NM_177039, intron 1 of 4)	intron (NM_177039, intron 1 of 4)	782	NM_177039	319942	Mm.185209	NM_177039	ENSMUSG00000043122	A530016L24Rik	Nrac	RIKEN cDNA A530016L24 gene	protein-coding
229	chr10	58683487	58685715	+	0	NA	promoter-TSS (NM_001024911)	promoter-TSS (NM_001024911)	-6	NM_001024910	103080	Mm.346842	NM_001024910	ENSMUSG00000019917	Sept10	4921515A04Rik|9430099J10Rik|AA408298|AI874685	septin 10	protein-coding
673	chr13	95558721	95559625	+	0	NA	intron (NM_009321, intron 1 of 3)	CpG	275	NM_009321	21371	Mm.379025	NM_009321	ENSMUSG00000042043	Tbca	Tbca13	tubulin cofactor A	protein-coding
68	chr1	75120500	75122486	+	0	NA	TTS (NM_194333)	TTS (NM_194333)	307	NM_029342	75570	Mm.442409	NM_029342		Nhej1	1700029B21Rik|XLF|cernunnos	nonhomologous end-joining factor 1	protein-coding
2059	chr6	142293698	142294697	+	0	NA	promoter-TSS (NM_183165)	promoter-TSS (NM_183165)	-20	NM_183165	232491	Mm.490474	NM_183165		Pyroxd1	-	pyridine nucleotide-disulphide oxidoreductase domain 1	protein-coding
315	chr11	3994449	3997558	+	0	NA	promoter-TSS (NM_026443)	promoter-TSS (NM_026443)	-569	NM_026443	67900	Mm.41719	NM_026443	ENSMUSG00000004748	Mtfp1	1700020C11Rik|2610507A21Rik|AV005788|Mtp18	mitochondrial fission process 1	protein-coding
2514	chrX	83020906	83024091	+	0	NA	promoter-TSS (NM_008194)	promoter-TSS (NM_008194)	-340	NM_001294138	14933	Mm.246682	NM_008194	ENSMUSG00000025059	Gyk	D930012N15Rik|GK	glycerol kinase	protein-coding
1827	chr5	34124465	34126055	+	0	NA	promoter-TSS (NM_019694)	promoter-TSS (NM_019694)	93	NM_019694	56384	Mm.260538	NM_019694		Letm1	-	leucine zipper-EF-hand containing transmembrane protein 1	protein-coding
2501	chrX	54645051	54646915	+	0	NA	intron (NM_001166623, intron 1 of 8)	CpG	230	NM_011252	19655	Mm.28275	NM_011252	ENSMUSG00000031134	Rbmx	hnRNP G	RNA binding motif protein, X chromosome	protein-coding
2366	chr9	33535696	33536090	+	0	NA	Intergenic	CpG	-314063	NR_040744	77119	Mm.367930	NR_040744	ENSMUSG00000098758	7630403G23Rik	-	RIKEN cDNA 7630403G23 gene	ncRNA
1947	chr6	8158880	8160103	+	0	NA	intron (NM_145374, intron 1 of 11)	CpG	264	NM_145374	252875	Mm.257151	NM_145374	ENSMUSG00000042447	Mios	C81488	missing oocyte, meiosis regulator, homolog (Drosophila)	protein-coding
1347	chr2	53049622	53051980	+	0	NA	promoter-TSS (NM_018785)	promoter-TSS (NM_018785)	-317	NM_022989	65103	Mm.37623	NM_022989	ENSMUSG00000026960	Arl6ip6	2310057C01Rik|2610529A11Rik|Aip-6	ADP-ribosylation factor-like 6 interacting protein 6	protein-coding
222	chr10	53315590	53317880	+	0	NA	promoter-TSS (NM_025541)	promoter-TSS (NM_025541)	-32	NM_025541	66403	Mm.272989	NM_025541	ENSMUSG00000019857	Asf1a	2310079C17Rik|C79052	anti-silencing function 1A histone chaperone	protein-coding
1504	chr3	52403629	52407939	+	0	NA	Intergenic	Intergenic	-137862	NR_038079	329639	Mm.131245	NR_038079		Gm2447	100039832|A530017F20	predicted gene 2447	ncRNA
25	chr1	36424539	36426192	+	0	NA	intron (NM_172652, intron 1 of 20)	intron (NM_172652, intron 1 of 20)	661	NM_172652	226976	Mm.24734	NM_172652	ENSMUSG00000010453	Kansl3	4632411B12Rik|4932435K23|AI431067|AI647574|C85723|Kiaa1310|mKIAA1310	KAT8 regulatory NSL complex subunit 3	protein-coding
2270	chr8	73264628	73301957	+	0	NA	TTS (NM_001166399)	TTS (NM_001166399)	1528	NM_183170	234384	Mm.213010	NM_183170	ENSMUSG00000035559	Mpv17l2	Fksg24	MPV17 mitochondrial membrane protein-like 2	protein-coding
2418	chr9	70526155	70528258	+	0	NA	intron (NM_007399, intron 1 of 15)	CpG	398	NM_007399	11487	Mm.3037	NM_007399	ENSMUSG00000054693	Adam10	1700031C13Rik|MADM|kuz|kuzbanian	a disintegrin and metallopeptidase domain 10	protein-coding
305	chr10	128062957	128064264	+	0	NA	promoter-TSS (NM_013765)	promoter-TSS (NM_013765)	-48	NM_013765	27370	Mm.261679	NM_013765	ENSMUSG00000025362	Rps26	-	ribosomal protein S26	protein-coding
1253	chr19	29063983	29071166	+	0	NA	intron (NM_025950, intron 1 of 6)	ID4_|SINE|ID	2590	NM_025950	67072	Mm.78875	NM_025950	ENSMUSG00000024780	Cdc37l1	2700033A15Rik|BB159850|Cdc37l|Harc	cell division cycle 37-like 1	protein-coding
928	chr16	17451179	17453007	+	0	NA	promoter-TSS (NM_007764)	promoter-TSS (NM_007764)	15	NM_007764	12929	Mm.21048	NM_007764		Crkl	1110025F07Rik|AA589403|AI325100|Crkol	v-crk sarcoma virus CT10 oncogene homolog (avian)-like	protein-coding
1644	chr4	24423148	24423839	+	0	NA	promoter-TSS (NM_199467)	promoter-TSS (NM_199467)	-116	NM_199467	212377	Mm.120919	NM_199467	ENSMUSG00000045751	Mms22l	F730047E07Rik|Gm134	MMS22-like, DNA repair protein	protein-coding
1526	chr3	84062621	84064521	+	0	NA	5' UTR (NM_001271727, exon 1 of 12)	5' UTR (NM_001271727, exon 1 of 12)	130	NM_001271727	80890	Mm.44876	NM_030706	ENSMUSG00000027993	Trim2	mKIAA0517|narf	tripartite motif-containing 2	protein-coding
217	chr10	44786219	44787744	+	0	NA	promoter-TSS (NM_011156)	promoter-TSS (NM_011156)	-39	NM_011156	19072	Mm.37294	NM_011156	ENSMUSG00000019849	Prep	AI047692|AI450383|D10Wsu136e|PEP|Pop	prolyl endopeptidase	protein-coding
1730	chr4	122878024	122881456	+	0	NA	intron (NM_001085502, intron 1 of 5)	intron (NM_001085502, intron 1 of 5)	944	NM_001085502	230718	Mm.354635	NM_001085502	ENSMUSG00000054958	Nt5c1a	Cn1a|Gm49	5'-nucleotidase, cytosolic IA	protein-coding
158	chr1	179371078	179374111	+	0	NA	Intergenic	CpG	-2198	NM_001012330	30928	Mm.330700	NM_013915	ENSMUSG00000063659	Zbtb18	RP58|Zfp238|Znf238	zinc finger and BTB domain containing 18	protein-coding
281	chr10	98569201	98571349	+	0	NA	promoter-TSS (NM_015737)	promoter-TSS (NM_015737)	470	NM_027740	382406	Mm.440656	NM_027740	ENSMUSG00000019952	Poc1b	4933430F16Rik|Wdr51b	POC1 centriolar protein homolog B (Chlamydomonas)	protein-coding
46	chr1	55187200	55189509	+	0	NA	intron (NM_025283, intron 1 of 7)	CpG	265	NM_025283	19070	Mm.291037	NM_025283	ENSMUSG00000025979	Mob4	2610109B12Rik|Mobkl3|Phocn|Prei3	MOB family member 4, phocein	protein-coding
1851	chr5	69947674	69948959	+	0	NA	exon (NM_172711, exon 1 of 17)	exon (NM_172711, exon 1 of 17)	135	NM_172711	231279	Mm.21105	NM_172711	ENSMUSG00000029208	Guf1	4631409J12|AA407526|EF-4	GUF1 GTPase homolog (S. cerevisiae)	protein-coding
1316	chr2	23011071	23012625	+	0	NA	promoter-TSS (NM_013771)	promoter-TSS (NM_013771)	-177	NM_013771	27377	Mm.23335	NM_013771	ENSMUSG00000026775	Yme1l1	FtsH1|Ftsh	YME1-like 1 (S. cerevisiae)	protein-coding
2373	chr9	38525332	38527285	+	0	NA	intron (NM_001145957, intron 1 of 18)	intron (NM_001145957, intron 1 of 18)	455	NM_172767	67776	Mm.290950	NM_172767	ENSMUSG00000023186	Vwa5a	5830475I06Rik|AW552491|BCSC-1|E130119J22|Loh11cr2a	von Willebrand factor A domain containing 5A	protein-coding
1418	chr2	146681163	146682447	+	0	NA	intron (NM_001033298, intron 1 of 13)	CpG	180	NM_001033298	228730	Mm.292352	NM_001033298	ENSMUSG00000074749	Kiz	Gm114|Ncrna00153|Plk1s1	kizuna centrosomal protein	protein-coding
36	chr1	44608123	44610729	+	0	NA	intron (NM_028450, intron 1 of 10)	intron (NM_028450, intron 1 of 10)	910	NM_028450	70676	Mm.133132	NM_027506	ENSMUSG00000056870	Gulp1	3110030A04Rik|5730529O06Rik|CED-6|Ced6|GULP|Gulp-2	GULP, engulfment adaptor PTB domain containing 1	protein-coding
2263	chr8	71732429	71733492	+	0	NA	promoter-TSS (NM_001013379)	promoter-TSS (NM_001013379)	15	NM_001013379	234358	Mm.334577	NM_001013379		Zfp930	-	zinc finger protein 930	protein-coding
1368	chr2	83484204	83485342	+	0	NA	promoter-TSS (NM_026934)	promoter-TSS (NM_026934)	38	NM_026934	69082	Mm.27804	NM_026934	ENSMUSG00000027091	Zc3h15	1700006A17Rik|1810012H02Rik|2610312B22Rik|FM22|Ierepo4	zinc finger CCCH-type containing 15	protein-coding
748	chr14	57286411	57288122	+	0	NA	exon (NM_023773, exon 1 of 14)	exon (NM_023773, exon 1 of 14)	181	NM_023773	75339	Mm.152466	NM_023773	ENSMUSG00000079184	Mphosph8	1500035L22Rik|4930548G07Rik|AU040635	M-phase phosphoprotein 8	protein-coding
472	chr12	11272248	11274098	+	0	NA	promoter-TSS (NM_177331)	promoter-TSS (NM_177331)	481	NM_025695	67241	Mm.173953	NM_025695	ENSMUSG00000020608	Smc6	2810489L22Rik|3830418C19Rik|AA990493|AU018782|AW742439|SMC-6|Smc6l1|mKIAA4103	structural maintenance of chromosomes 6	protein-coding
1655	chr4	40185439	40187542	+	0	NA	intron (NM_172689, intron 1 of 17)	intron (NM_172689, intron 1 of 17)	368	NM_172689	230073	Mm.86382	NM_172689		Ddx58	6430573D20Rik|C330021E21|RIG-I|RLR-1	DEAD (Asp-Glu-Ala-Asp) box polypeptide 58	protein-coding
1943	chr6	3949276	3960455	+	0	NA	intron (NM_025331, intron 1 of 1)	intron (NM_025331, intron 1 of 1)	878	NM_025331	66066	Mm.25547	NM_025331	ENSMUSG00000032766	Gng11	0610037B21Rik	guanine nucleotide binding protein (G protein), gamma 11	protein-coding
317	chr11	4997766	5000815	+	0	NA	promoter-TSS (NM_007968)	promoter-TSS (NM_007968)	14	NM_177370	279766	Mm.260866	NM_177370	ENSMUSG00000034175	Rhbdd3	Ptag	rhomboid domain containing 3	protein-coding
711	chr14	17196256	17199630	+	0	NA	5' UTR (NM_009409, exon 1 of 36)	5' UTR (NM_009409, exon 1 of 36)	223	NM_009409	21974	Mm.130362	NM_009409	ENSMUSG00000017485	Top2b	D230016L12Rik|Top-2	topoisomerase (DNA) II beta	protein-coding
132	chr1	154748770	154752067	+	0	NA	promoter-TSS (NM_001160256)	promoter-TSS (NM_001160256)	-642	NM_001005507	226517	Mm.270775	NM_001005507	ENSMUSG00000042772	Smg7	9430023P16Rik|mKIAA0250	Smg-7 homolog, nonsense mediated mRNA decay factor (C. elegans)	protein-coding
1791	chr5	3802069	3804388	+	0	NA	promoter-TSS (NM_030675)	promoter-TSS (NM_030675)	47	NR_033173	79264	Mm.32368	NM_030675	ENSMUSG00000000600	Krit1	2010007K12Rik|A630036P20Rik|AA432855|AI450393|AI643869|BB155247|BB235701|Ccm1	KRIT1, ankyrin repeat containing	protein-coding
1254	chr19	30104149	30106389	+	0	NA	exon (NM_144873, exon 1 of 16)	exon (NM_144873, exon 1 of 16)	266	NM_144873	109113	Mm.313364	NM_144873	ENSMUSG00000024817	Uhrf2	2310065A22Rik|AI426270|AW214556|D130071B19Rik|Nirf	ubiquitin-like, containing PHD and RING finger domains 2	protein-coding
1642	chr4	21806444	21807706	+	0	NA	intron (NM_172687, intron 1 of 6)	CpG	253	NM_172687	230027	Mm.5662	NM_172687	ENSMUSG00000028247	Coq3	4732433J24|C77934	coenzyme Q3 homolog, methyltransferase (yeast)	protein-coding
892	chr15	98660560	98663436	+	0	NA	promoter-TSS (NM_016781)	promoter-TSS (NM_016781)	-59	NM_016781	19082	Mm.6670	NM_016781	ENSMUSG00000067713	Prkag1	AA571379|BB036179|Prkaac	protein kinase, AMP-activated, gamma 1 non-catalytic subunit	protein-coding
2180	chr7	120656506	120658337	+	0	NA	promoter-TSS (NM_027379)	promoter-TSS (NM_027379)	73	NM_027379	67420	Mm.206919	NM_026143	ENSMUSG00000030759	Far1	2600011M19Rik|2900034E22Rik|3732409C05Rik|AI850429|Mlstd2	fatty acyl CoA reductase 1	protein-coding
2071	chr7	4763119	4765286	+	0	NA	promoter-TSS (NM_133777)	promoter-TSS (NM_133777)	-260	NM_133777	77891	Mm.389787	NM_133777	ENSMUSG00000060860	Ube2s	0910001J09Rik|6720465F12Rik|AA409170|E2-EPF	ubiquitin-conjugating enzyme E2S	protein-coding
1428	chr2	154717505	154719138	+	0	NA	intron (NM_026030, intron 1 of 8)	CpG	321	NM_026030	67204	Mm.377134	NM_026030	ENSMUSG00000074656	Eif2s2	2810026E11Rik|38kDa|AA408636|AA571381|AA986487|AW822225|D2Ertd303e|EIF2|EIF2B	eukaryotic translation initiation factor 2, subunit 2 (beta)	protein-coding
546	chr12	92825929	92829878	+	0	NA	intron (NM_175335, intron 1 of 8)	(TCCG)n|Simple_repeat|Simple_repeat	186	NM_031391	83602	Mm.275728	NM_031391	ENSMUSG00000020962	Gtf2a1	6330549H03Rik|AA536742|AA959775|AW060250|TfIIAa/b|Tfiia1	general transcription factor II A, 1	protein-coding
537	chr12	86938779	86946055	+	0	NA	intron (NM_001205053, intron 1 of 3)	intron (NM_001205053, intron 1 of 3)	1449	NM_001205053	81703	Mm.103560	NM_030887	ENSMUSG00000034271	Jdp2	Jundm2|Jundp2|TIF	Jun dimerization protein 2	protein-coding
1018	chr17	17257535	17259003	+	0	NA	promoter-TSS (NM_011765)	promoter-TSS (NM_011765)	-78	NM_011765	22759	Mm.436633	NM_011765	ENSMUSG00000095990	Zfp97	NGD16-4	zinc finger protein 97	protein-coding
1125	chr17	95233444	95234712	+	0	NA	promoter-TSS (NR_045963)	promoter-TSS (NR_045963)	61	NR_045964	100038746	Mm.456686	NR_045963	ENSMUSG00000066057	Gm1976	100038868	predicted gene 1976	ncRNA
2279	chr8	80072813	80074202	+	0	NA	exon (NM_001081240, exon 1 of 12)	exon (NM_001081240, exon 1 of 12)	211	NM_001081240	102182	Mm.197630	NM_178903	ENSMUSG00000037134	Prmt10	AI931714|Prmt9	protein arginine methyltransferase 10 (putative)	protein-coding
1007	chr17	13896126	13899106	+	0	NA	promoter-TSS (NM_010806)	promoter-TSS (NM_010806)	68	NM_010806	17356	Mm.59167	NM_010806	ENSMUSG00000068036	Mllt4	5033403D15Rik|AF6|Af-6|Afadin|Gm314|I-afadin|S-afadin	myeloid/lymphoid or mixed-lineage leukemia (trithorax homolog, Drosophila); translocated to, 4	protein-coding
1443	chr2	162842605	162843493	+	0	NA	promoter-TSS (NM_172150)	promoter-TSS (NM_172150)	-159	NM_172150	245866	Mm.34034	NM_172150	ENSMUSG00000017858	Ift52	BC037708|NGD5	intraflagellar transport 52	protein-coding
741	chr14	52631107	52643497	+	0	NA	intron (NM_001033805, intron 2 of 6)	intron (NM_001033805, intron 2 of 6)	762	NM_001033805	619301	Mm.475177	NM_001033805	ENSMUSG00000072571	Tmem253	G630016D24Rik	transmembrane protein 253	protein-coding
1833	chr5	35103606	35105269	+	0	NA	promoter-TSS (NM_010414)	promoter-TSS (NM_010414)	48	NM_010414	15194	Mm.209071	NM_010414	ENSMUSG00000029104	Htt	AI256365|C430023I11Rik|Hd|Hdh|IT15	huntingtin	protein-coding
1186	chr18	61335811	61337597	+	0	NA	promoter-TSS (NM_178277)	promoter-TSS (NM_178277)	0	NM_134134	106894	Mm.22574	NM_134134	ENSMUSG00000024622	Hmgxb3	2510002C16Rik|A630042L21Rik|AI413166|mKIAA0194	HMG box domain containing 3	protein-coding
998	chr17	6079217	6080272	+	0	NA	promoter-TSS (NM_001111017)	promoter-TSS (NM_001111017)	-5	NM_177311	321007	Mm.5548	NM_177311	ENSMUSG00000015659	Serac1	4930511N22Rik|D17Ertd141e	serine active site containing 1	protein-coding
1789	chr5	3595692	3596741	+	0	NA	5' UTR (NM_172991, exon 1 of 5)	5' UTR (NM_172991, exon 1 of 5)	150	NM_001293806	71382	Mm.379196	NM_027777	ENSMUSG00000005907	Pex1	5430414H02Rik|E330005K07Rik|ZWS1	peroxisomal biogenesis factor 1	protein-coding
2240	chr8	27228758	27230733	+	0	NA	promoter-TSS (NM_029965)	promoter-TSS (NM_029965)	-49	NM_207659	320191	Mm.334464	NM_207659	ENSMUSG00000037234	Hook3	5830454D03Rik|AI317159|E330005F07Rik	hook homolog 3 (Drosophila)	protein-coding
2076	chr7	7250563	7253512	+	0	NA	TTS (NR_049193)	TTS (NR_049193)	185	NM_011334	12727	Mm.297883	NM_011334	ENSMUSG00000000605	Clcn4-2	Clc4-2|Clcn4	chloride channel 4-2	protein-coding
529	chr12	81207858	81248572	+	0	NA	intron (NR_033514, intron 2 of 2)	ORR1A1|LTR|MaLR	5616	NR_033514	69548	Mm.269712	NR_033514	ENSMUSG00000097729	2310015A10Rik	5330419I17Rik	RIKEN cDNA 2310015A10 gene	ncRNA
1545	chr3	90294192	90295409	+	0	NA	exon (NM_133854, exon 1 of 4)	exon (NM_133854, exon 1 of 4)	135	NM_133854	20615	Mm.331182	NM_133854	ENSMUSG00000001018	Snapin	25kDa|AA407989|AV026596|Bloc1s7|Snap25bp|Snapap	SNAP-associated protein	protein-coding
1838	chr5	46247341	46249540	+	0	NA	promoter-TSS (NM_172153)	promoter-TSS (NM_172153)	339	NM_178142	209707	Mm.71498	NM_172153	ENSMUSG00000015882	Lcorl	Mlr1	ligand dependent nuclear receptor corepressor-like	protein-coding
1773	chr4	147301445	147315804	+	0	NA	intron (NM_011122, intron 1 of 18)	intron (NM_011122, intron 1 of 18)	2261	NM_011122	18822	Mm.37371	NM_011122	ENSMUSG00000019055	Plod1	2410042F05Rik|AI854890|AV007929|Lh1|Plod	procollagen-lysine, 2-oxoglutarate 5-dioxygenase 1	protein-coding
1058	chr17	32924241	32925474	+	0	NA	intron (NM_172458, intron 1 of 3)	CpG	375	NM_172458	208292	Mm.38813	NM_172458		Zfp871	4732483N19|9030612M13Rik|AI118577|AI265322|mKIAA3006	zinc finger protein 871	protein-coding
987	chr16	96348395	96350438	+	0	NA	promoter-TSS (NM_008251)	promoter-TSS (NM_008251)	-84	NM_008251	15312	Mm.2756	NM_008251		Hmgn1	HMG-14|Hmg14	high mobility group nucleosomal binding domain 1	protein-coding
1150	chr18	31768418	31769835	+	0	NA	intron (NM_026165, intron 1 of 7)	CpG	430	NM_026165	67453	Mm.23896	NM_026165	ENSMUSG00000024259	Slc25a46	1200007B05Rik|AI325987	solute carrier family 25, member 46	protein-coding
1535	chr3	88634391	88639634	+	0	NA	promoter-TSS (NR_015498)	promoter-TSS (NR_015498)	-603	NR_015498	319830	Mm.400394	NR_015498		1500004A13Rik	5430404N14Rik|BB132176	RIKEN cDNA 1500004A13 gene	ncRNA
2390	chr9	54348734	54350287	+	0	NA	promoter-TSS (NM_172771)	promoter-TSS (NM_172771)	-77	NM_172771	235380	Mm.93636	NM_172771	ENSMUSG00000041268	Dmxl2	6330586A12|6430411K14Rik|E130119P06Rik|mKIAA0856	Dmx-like 2	protein-coding
1335	chr2	34964269	34965913	+	0	NA	promoter-TSS (NM_012018)	promoter-TSS (NM_012018)	79	NM_012018	26920	Mm.231332	NM_012018	ENSMUSG00000057110	Cntrl	6720467O09Rik|AA968343|Cep1|Cep110|IB3/5|Ma2a8|b2b1468Clo	centriolin	protein-coding
908	chr16	4212801	4214659	+	0	NA	promoter-TSS (NM_001025432)	promoter-TSS (NM_001025432)	-326	NM_001025432	12914	Mm.132238	NM_001025432	ENSMUSG00000022521	Crebbp	AW558298|CBP|CBP/p300|KAT3A|p300/CBP	CREB binding protein	protein-coding
284	chr10	112365185	112366528	+	0	NA	5' UTR (NM_001033474, exon 1 of 1)	5' UTR (NM_001033474, exon 1 of 1)	226	NM_001033474	382423	Mm.431239	NM_001033474	ENSMUSG00000074748	Atxn7l3b	4921506J03Rik|6230409E21Rik|AI315132|ENSMUSG00000074747	ataxin 7-like 3B	protein-coding
1340	chr2	39080683	39082483	+	0	NA	intron (NM_024209, intron 1 of 6)	CpG	275	NM_024209	67857	Mm.389242	NM_024209		Ppp6c	2310003C10Rik	protein phosphatase 6, catalytic subunit	protein-coding
903	chr15	102454607	102456725	+	0	NA	intron (NM_146065, intron 1 of 10)	intron (NM_146065, intron 1 of 10)	186	NM_146065	223922	Mm.208714	NM_146065	ENSMUSG00000099083	Atf7	1110012F10Rik|9430065F09Rik|AI549878|C130020M04Rik	activating transcription factor 7	protein-coding
247	chr10	77067470	77102903	+	0	NA	intron (NM_019803, intron 1 of 5)	CpG	120	NM_019803	22213	Mm.458125	NM_019803	ENSMUSG00000009293	Ube2g2	1110003O05Rik|D10Xrf369|UBC7|Ubc7p	ubiquitin-conjugating enzyme E2G 2	protein-coding
165	chr1	181732308	181734772	+	0	NA	5' UTR (NM_026375, exon 1 of 36)	5' UTR (NM_026375, exon 1 of 36)	606	NM_026375	226747	Mm.128165	NM_026375	ENSMUSG00000026491	Ahctf1	6230412P20Rik|AV011447|Elys	AT hook containing transcription factor 1	protein-coding
289	chr10	116812720	116814410	+	0	NA	intron (NM_001013391, intron 1 of 9)	CpG	464	NM_001013391	432508	Mm.478881	NM_001013391	ENSMUSG00000055531	Cpsf6	4733401N12Rik|AI256641|CFIM|CFIM68|HPBRII-4|HPBRII-7	cleavage and polyadenylation specific factor 6	protein-coding
2351	chr9	18096060	18097617	+	0	NA	5' UTR (NM_025844, exon 1 of 11)	5' UTR (NM_025844, exon 1 of 11)	127	NM_025844	66917	Mm.103534	NM_025844	ENSMUSG00000001774	Chordc1	1110001O09Rik|AA409036|Chp-1|morgana	cysteine and histidine-rich domain (CHORD)-containing, zinc-binding protein 1	protein-coding
729	chr14	34259581	34260882	+	0	NA	5' UTR (NM_016700, exon 1 of 12)	5' UTR (NM_016700, exon 1 of 12)	113	NM_016700	26419	Mm.21495	NM_016700	ENSMUSG00000021936	Mapk8	AI849689|JNK|JNK1|Prkm8|SAPK1	mitogen-activated protein kinase 8	protein-coding
2119	chr7	51751234	51752423	+	0	NA	promoter-TSS (NM_197991)	promoter-TSS (NM_197991)	55	NM_197991	69683	Mm.294759	NM_197991	ENSMUSG00000008140	Emc10	2310044H10Rik|5430410O10Rik|Inm02|Mirta22	ER membrane protein complex subunit 10	protein-coding
2	chr1	4481560	4488604	+	0	NA	intron (NM_001289467, intron 1 of 2)	(GGAA)n|Simple_repeat|Simple_repeat	2353	NM_001289464	20671	Mm.279103	NM_011441	ENSMUSG00000025902	Sox17	-	SRY (sex determining region Y)-box 17	protein-coding
808	chr15	8118503	8119536	+	0	NA	promoter-TSS (NM_001162906)	promoter-TSS (NM_001162906)	-87	NM_001162906	73692	Mm.164436	NM_001162906	ENSMUSG00000039801	2410089E03Rik	4732468D17Rik|b2b012Clo	RIKEN cDNA 2410089E03 gene	protein-coding
845	chr15	58536917	58540044	+	0	NA	Intergenic	Intergenic	116502	NM_175212	74868	Mm.293754	NM_175212	ENSMUSG00000062373	Tmem65	2610029O13Rik|4930438D12Rik	transmembrane protein 65	protein-coding
2125	chr7	53085942	53086583	+	0	NA	promoter-TSS (NM_153419)	promoter-TSS (NM_153419)	-103	NM_153419	101612	Mm.274847	NM_153419	ENSMUSG00000053801	Grwd1	A301|AI504353|Grwd|Wdr28	glutamate-rich WD repeat containing 1	protein-coding
1847	chr5	66153983	66159363	+	0	NA	intron (NM_001024917, intron 1 of 19)	intron (NM_001024917, intron 1 of 19)	1913	NM_001024917	333789	Mm.332398	NM_001024917	ENSMUSG00000037795	N4bp2	B3bp|E430014I16|Gm1791|Gm868	NEDD4 binding protein 2	protein-coding
1231	chr19	6263450	6307030	+	0	NA	intron (NM_010119, intron 2 of 4)	intron (NM_010119, intron 2 of 4)	8344	NM_010119	13660	Mm.30169	NM_010119	ENSMUSG00000024772	Ehd1	AA409636|Past1|RME-1	EH-domain containing 1	protein-coding
1249	chr19	27284332	27303987	+	0	NA	intron (NM_013703, intron 1 of 18)	intron (NM_013703, intron 1 of 18)	2649	NM_001161420	22359	Mm.4141	NM_013703	ENSMUSG00000024924	Vldlr	AA408956|AI451093|AW047288	very low density lipoprotein receptor	protein-coding
147	chr1	168308242	168312040	+	0	NA	intron (NM_030245, intron 1 of 7)	intron (NM_030245, intron 1 of 7)	843	NM_030245	27878	Mm.100665	NM_030245	ENSMUSG00000026563	Tada1	2900026B15Rik|D1Ertd251e|Staf42|Tada1l	transcriptional adaptor 1	protein-coding
2446	chr9	98196711	98198411	+	0	NA	intron (NM_144533, intron 1 of 4)	intron (NM_144533, intron 1 of 4)	559	NM_144533	74080	Mm.294082	NM_144533	ENSMUSG00000032456	Nmnat3	4933408N02Rik|PNAT3	nicotinamide nucleotide adenylyltransferase 3	protein-coding
973	chr16	62785847	62787339	+	0	NA	promoter-TSS (NM_178925)	promoter-TSS (NM_178925)	-51	NM_178925	106338	Mm.26321	NM_178925		Nsun3	6720484A09Rik|AU022521	NOL1/NOP2/Sun domain family member 3	protein-coding
1046	chr17	25180954	25222197	+	0	NA	intron (NM_001001183, intron 2 of 2)	intron (NM_001001183, intron 2 of 2)	16484	NM_001001183	407831	Mm.34379	NM_001001183	ENSMUSG00000024168	Tmem204	-	transmembrane protein 204	protein-coding
1142	chr18	14488234	14491326	+	0	NA	Intergenic	Intergenic	98965	NR_045373	74529	Mm.400519	NR_045373		8430422H06Rik	-	RIKEN cDNA 8430422H06 gene	ncRNA
2095	chr7	28516143	28517200	+	0	NA	5' UTR (NM_009560, exon 1 of 5)	5' UTR (NM_009560, exon 1 of 5)	243	NM_009560	22718	Mm.66913	NM_009560		Zfp60	6330516O17Rik|AI426106|AI449354|Mfg-3|Mfg3	zinc finger protein 60	protein-coding
1291	chr19	59418976	59420986	+	0	NA	exon (NM_001033222, exon 1 of 5)	exon (NM_001033222, exon 1 of 5)	289	NM_001033222	107368	Mm.268797	NM_001033222	ENSMUSG00000074746	Pdzd8	A630041P07Rik|AV329468|AW228944|Pdzk8	PDZ domain containing 8	protein-coding
319	chr11	6342319	6345149	+	0	NA	intron (NM_029938, intron 1 of 4)	intron (NM_029938, intron 1 of 4)	712	NM_029938	77605	Mm.27624	NM_029938	ENSMUSG00000041126	H2afv	C530002L11Rik|H2a.z-2|H2av	H2A histone family, member V	protein-coding
1179	chr18	49991303	49994088	+	0	NA	promoter-TSS (NM_001081371)	promoter-TSS (NM_001081371)	44	NM_001081371	240283	Mm.257790	NM_001081371	ENSMUSG00000037416	Dmxl1	C630007L23Rik|D030030C22	Dmx-like 1	protein-coding
1052	chr17	29797068	29798567	+	0	NA	intron (NM_028791, intron 1 of 23)	CpG	271	NM_028791	74157	Mm.475060	NM_028791		Cmtr1	1300018I05Rik|AI451264|Ftsjd2|MTr1|mKIAA0082	cap methyltransferase 1	protein-coding
1922	chr5	138182352	138202084	+	0	NA	intron (NM_029805, intron 2 of 5)	intron (NM_029805, intron 2 of 5)	5021	NM_023910	78829	Mm.286399	NM_023910	ENSMUSG00000029723	Tsc22d4	0610009M14Rik|1700023B23Rik|AI415410|Thg-1pit|Tilz2	TSC22 domain family, member 4	protein-coding
735	chr14	47917437	47919158	+	0	NA	intron (NM_178684, intron 1 of 3)	CpG	308	NM_178684	218975	Mm.212297	NM_178684	ENSMUSG00000021840	Mapk1ip1l	9130202B12|C130032J12Rik	mitogen-activated protein kinase 1 interacting protein 1-like	protein-coding
1493	chr3	35830399	35832652	+	0	NA	promoter-TSS (NM_001205362)	promoter-TSS (NM_001205362)	-269	NM_001205362	114893	Mm.374810	NM_033623	ENSMUSG00000027708	Dcun1d1	Rp42|SCCRO|Tes3|pTes3	DCN1, defective in cullin neddylation 1, domain containing 1 (S. cerevisiae)	protein-coding
2397	chr9	56919240	56925495	+	0	NA	intron (NM_001110351, intron 1 of 21)	intron (NM_001110351, intron 1 of 21)	-1816	NM_001110350	20466	Mm.15755	NM_011378	ENSMUSG00000042557	Sin3a	AW553200|Sin3|mKIAA4126|mSin3A	transcriptional regulator, SIN3A (yeast)	protein-coding
974	chr16	64850597	64852941	+	0	NA	promoter-TSS (NM_178647)	promoter-TSS (NM_178647)	-142	NM_178647	106143	Mm.10160	NM_178647	ENSMUSG00000054604	Cggbp1	AA960172|AL023996|AW045841	CGG triplet repeat binding protein 1	protein-coding
1271	chr19	41920676	41923294	+	0	NA	exon (NM_177603, exon 1 of 1)	exon (NM_177603, exon 1 of 1)	637	NM_177603	212398	Mm.222723	NM_177603	ENSMUSG00000047604	Frat2	-	frequently rearranged in advanced T cell lymphomas 2	protein-coding
1668	chr4	46208480	46209837	+	0	NA	promoter-TSS (NM_011728)	promoter-TSS (NM_011728)	25	NM_011728	22590	Mm.247036	NM_011728	ENSMUSG00000028329	Xpa	AI573865|Xpac	xeroderma pigmentosum, complementation group A	protein-coding
1715	chr4	115725385	115726992	+	0	NA	intron (NM_028142, intron 1 of 5)	intron (NM_028142, intron 1 of 5)	293	NM_028142	72181	Mm.282560	NM_028142		Nsun4	2310010O12Rik|2810405F18Rik|AI507900|Shtap	NOL1/NOP2/Sun domain family, member 4	protein-coding
344	chr11	31769942	31775662	+	0	NA	exon (NM_001290676, exon 1 of 9)	exon (NM_001290676, exon 1 of 9)	1862	NM_026252	67579	Mm.339792	NM_026252	ENSMUSG00000020300	Cpeb4	Cpe-bp4|Cpeb-4|mCPEB-4	cytoplasmic polyadenylation element binding protein 4	protein-coding
1613	chr3	142281491	142284812	+	0	NA	promoter-TSS (NM_010260)	promoter-TSS (NM_010260)	-476	NM_010260	14469	Mm.24038	NM_010260	ENSMUSG00000028270	Gbp2	-	guanylate binding protein 2	protein-coding
2103	chr7	35437679	35440991	+	0	NA	Intergenic	CpG	-1475	NM_146188	233107	Mm.486198	NM_146188	ENSMUSG00000030499	Kctd15	BC031749	potassium channel tetramerisation domain containing 15	protein-coding
636	chr13	67460900	67461867	+	0	NA	intron (NM_001038651, intron 1 of 3)	intron (NM_001038651, intron 1 of 3)	125	NM_001038651	629016	Mm.440800	NM_001038651	ENSMUSG00000098905	Zfp953	E130120F12Rik	zinc finger protein 953	protein-coding
1710	chr4	108291882	108293183	+	0	NA	promoter-TSS (NM_177045)	promoter-TSS (NM_177045)	-29	NM_177045	319965	Mm.151129	NM_177045	ENSMUSG00000028582	Cc2d1b	A830039B04Rik|Freud2	coiled-coil and C2 domain containing 1B	protein-coding
1406	chr2	130004051	130005659	+	0	NA	intron (NM_009225, intron 1 of 6)	CpG	245	NM_009225	20638	Mm.88216	NM_009225	ENSMUSG00000027404	Snrpb	AL024368|AU018828|SM-B|SM11|SMB|SNRNP-B	small nuclear ribonucleoprotein B	protein-coding
1104	chr17	74737524	74739284	+	0	NA	promoter-TSS (NM_016962)	promoter-TSS (NM_016962)	77	NM_016962	50850	Mm.19804	NM_016962	ENSMUSG00000024068	Spast	Spg4|mKIAA1083	spastin	protein-coding
2224	chr7	151654786	151657478	+	0	NA	intron (NM_007803, intron 1 of 17)	(CCCCAA)n|Simple_repeat|Simple_repeat	708	NM_007803	13043	Mm.205601	NM_007803	ENSMUSG00000031078	Cttn	1110020L01Rik|Ems1	cortactin	protein-coding
1133	chr18	9445043	9451438	+	0	NA	intron (NM_026484, intron 1 of 9)	intron (NM_026484, intron 1 of 9)	1908	NM_026484	67974	Mm.86523	NM_026484	ENSMUSG00000024286	Ccny	1700025H17Rik|3110050L10Rik|4631402G10Rik|5730405I09Rik	cyclin Y	protein-coding
2421	chr9	72122232	72124176	+	0	NA	intron (NM_146224, intron 1 of 21)	CpG	498	NM_146224	235469	Mm.242791	NM_146224	ENSMUSG00000038535	Zfp280d	A930005F02Rik|BC027163|Suhw4|ZNF634|Znf280d	zinc finger protein 280D	protein-coding
209	chr10	41238225	41243719	+	0	NA	intron (NM_016898, intron 1 of 5)	URR1B|DNA|MER1_type	1666	NM_016898	53599	Mm.269815	NM_016898	ENSMUSG00000019818	Cd164	A115|A24|AA589639|AW540279|MGC-24|MSSP	CD164 antigen	protein-coding
1905	chr5	123793713	123797796	+	0	NA	intron (NM_029850, intron 1 of 5)	intron (NM_029850, intron 1 of 5)	1297	NM_029850	77045	Mm.151960	NM_029850	ENSMUSG00000029438	Bcl7a	4432415N06Rik|AI448316	B cell CLL/lymphoma 7A	protein-coding
1118	chr17	86543893	86545581	+	0	NA	promoter-TSS (NM_030133)	promoter-TSS (NM_030133)	-222	NM_030133	78586	Mm.146236	NM_030133	ENSMUSG00000024135	Srbd1	AI461933|C85414|D530025C17Rik	S1 RNA binding domain 1	protein-coding
1575	chr3	106524143	106525940	+	0	NA	intron (NM_028081, intron 1 of 2)	CpG	441	NM_001286685	321000	Mm.259638	NM_028081	ENSMUSG00000056260	Lrif1	2010012G17Rik|4933421E11Rik|AI450568	ligand dependent nuclear receptor interacting factor 1	protein-coding
117	chr1	135556923	135558451	+	0	NA	promoter-TSS (NM_001166552)	promoter-TSS (NM_001166552)	-225	NM_001166552	667118	Mm.245357	NM_001166552		Zbed6	Gm8466|MGR	zinc finger, BED domain containing 6	protein-coding
2428	chr9	78669428	78669814	+	0	NA	Intergenic	CpG	206268	NM_153098	235505	Mm.32955	NM_153098	ENSMUSG00000046186	Cd109	9930012E15Rik|AI480638|GARP	CD109 antigen	protein-coding
2207	chr7	137661212	137664474	+	0	NA	intron (NM_001029895, intron 1 of 11)	CpG	251	NM_001136054	11907	Mm.216321	NM_013799	ENSMUSG00000030850	Ate1	AI225793|AW547406	arginyltransferase 1	protein-coding
600	chr13	43493524	43494756	+	0	NA	exon (NM_023554, exon 2 of 8)	exon (NM_023554, exon 2 of 8)	395	NM_023554	70078	Mm.439927	NM_023554	ENSMUSG00000063200	Nol7	2210008F15Rik|5730556I21Rik|NOP27|RARG-1	nucleolar protein 7	protein-coding
80	chr1	85321916	85326950	+	0	NA	Intergenic	Intergenic	-57292	NM_001037909	620078	Mm.386456	NM_175219	ENSMUSG00000052477	C130026I21Rik	4930565N07Rik|OTTMUSG00000029174	RIKEN cDNA C130026I21 gene	protein-coding
336	chr11	23532904	23534261	+	0	NA	promoter-TSS (NM_027860)	promoter-TSS (NM_027860)	49	NM_027860	71675	Mm.48031	NM_027860	ENSMUSG00000042208	0610010F05Rik	Kiaa1841|mKIAA1841	RIKEN cDNA 0610010F05 gene	protein-coding
2472	chr9	115215327	115220604	+	0	NA	intron (NM_024222, intron 1 of 15)	intron (NM_024222, intron 1 of 15)	1574	NM_024222	68292	Mm.296158	NM_024222	ENSMUSG00000032437	Stt3b	1300006C19Rik|Simp	STT3, subunit of the oligosaccharyltransferase complex, homolog B (S. cerevisiae)	protein-coding
457	chr11	116937363	117016039	+	0	NA	intron (NR_029459, intron 1 of 2)	CpG	215	NM_001166506	74136	Mm.272312	NM_028777	ENSMUSG00000020823	Sec14l1	1200017E04Rik|2810012L19Rik|Naa-35	SEC14-like 1 (S. cerevisiae)	protein-coding
1301	chr2	4802040	4804090	+	0	NA	intron (NM_175400, intron 1 of 8)	CpG	455	NM_175400	109079	Mm.34329	NM_175400	ENSMUSG00000026662	Sephs1	1110046B24Rik|AA589574|AI505014|AW111620|SELD|SPS|SPS1	selenophosphate synthetase 1	protein-coding
821	chr15	34372330	34374105	+	0	NA	promoter-TSS (NM_009083)	promoter-TSS (NM_009083)	-186	NM_001163485	19946	Mm.358632	NM_009083	ENSMUSG00000058600	Rpl30	-	ribosomal protein L30	protein-coding
696	chr13	114583922	114587734	+	0	NA	intron (NM_172595, intron 1 of 4)	intron (NM_172595, intron 1 of 4)	1112	NM_172595	218639	Mm.79837	NM_172595	ENSMUSG00000042348	Arl15	A430036I03|Arfrp2|C230032K13Rik	ADP-ribosylation factor-like 15	protein-coding
383	chr11	69208084	69234343	+	0	NA	intron (NM_001017426, intron 5 of 22)	intron (NM_001017426, intron 5 of 22)	5964	NM_001017426	216850	Mm.261201	NM_001017426	ENSMUSG00000018476	Kdm6b	1700064E03Rik|BC038313|Jmjd3|mKIAA0346	KDM1 lysine (K)-specific demethylase 6B	protein-coding
2532	chrX	148666920	148668920	+	0	NA	5' UTR (NM_013668, exon 1 of 26)	5' UTR (NM_013668, exon 1 of 26)	150	NM_013668	20591	Mm.142655	NM_013668	ENSMUSG00000025332	Kdm5c	D930009K15Rik|Jarid1c|Smcx|mKIAA0234	lysine (K)-specific demethylase 5C	protein-coding
1873	chr5	104475031	104477502	+	0	NA	promoter-TSS (NR_049192)	promoter-TSS (NR_049192)	236	NM_028794	74167	Mm.241484	NM_028794	ENSMUSG00000029310	Nudt9	1190002C07Rik|AI462474	nudix (nucleoside diphosphate linked moiety X)-type motif 9	protein-coding
1721	chr4	116827834	116829281	+	0	NA	promoter-TSS (NR_030704)	promoter-TSS (NR_030704)	-104	NR_030704	100216533		NR_030704		Snord55	-	small nucleolar RNA, C/D box 55	snoRNA
2497	chrX	39500233	39507017	+	0	NA	promoter-TSS (NM_021465)	promoter-TSS (NM_021465)	-253	NM_021465	20843	Mm.290422	NM_021465	ENSMUSG00000025862	Stag2	9230105L23Rik|B230112I07Rik|SA-2|SAP2	stromal antigen 2	protein-coding
2179	chr7	120512177	120513764	+	0	NA	promoter-TSS (NM_133700)	promoter-TSS (NM_133700)	-117	NM_133700	68815	Mm.238034	NM_133700	ENSMUSG00000038187	Btbd10	1110056N09Rik|Gmrp1	BTB (POZ) domain containing 10	protein-coding
2172	chr7	113670204	113674208	+	0	NA	Intergenic	Intergenic	-87619	NR_003967	209380	Mm.461779	NM_001001318	ENSMUSG00000053541	Gm4759	EG209380	GTPase, very large interferon inducible 1 pseudogene	pseudo
1431	chr2	155754829	155756632	+	0	NA	intron (NR_024487, intron 1 of 9)	CpG	316	NM_018888	56046	Mm.158827	NM_018888	ENSMUSG00000005882	Uqcc1	2310079L17Rik|2410003P15Rik|3110038N19Rik|Bfzb|Bfzp|Cbp3|Uqcc	ubiquinol-cytochrome c reductase complex assembly factor 1	protein-coding
92	chr1	89651832	89653263	+	0	NA	promoter-TSS (NM_001205391)	promoter-TSS (NM_001205391)	-39	NM_029846	77040	Mm.272972	NM_029846	ENSMUSG00000026289	Atg16l1	1500009K01Rik|Apg16l|Atg16l|WDR30	autophagy related 16-like 1 (S. cerevisiae)	protein-coding
1489	chr3	32407819	32410820	+	0	NA	promoter-TSS (NM_001161818)	promoter-TSS (NM_001161818)	-153	NM_001161818	67778	Mm.285620	NM_144519		Zfp639	6230400O18Rik|ANC-2H01|ZASC1|Znf639	zinc finger protein 639	protein-coding
1212	chr18	82857119	82863057	+	0	NA	intron (NM_177832, intron 1 of 29)	intron (NM_177832, intron 1 of 29)	2038	NM_177832	329002	Mm.34438	NM_177832	ENSMUSG00000041258	Zfp236	AI447957|Gm335	zinc finger protein 236	protein-coding
2253	chr8	47060232	47061514	+	0	NA	promoter-TSS (NM_138668)	promoter-TSS (NM_138668)	-9	NM_138668	192169	Mm.210882	NM_138668	ENSMUSG00000031634	Ufsp2	1810047C23Rik	UFM1-specific peptidase 2	protein-coding
2433	chr9	83727619	83728359	+	0	NA	promoter-TSS (NM_001110265)	promoter-TSS (NM_001110265)	-307	NM_009445	22137	Mm.1904	NM_009445	ENSMUSG00000038379	Ttk	AL022661|Esk1|Mps1|PYT|esk	Ttk protein kinase	protein-coding
1805	chr5	23629801	23633576	+	0	NA	intron (NM_026448, intron 1 of 10)	intron (NM_026448, intron 1 of 10)	25280	NM_026448	52323	Mm.273768	NM_026448	ENSMUSG00000028986	Klhl7	2700038B03Rik|D5Ertd363e|SBBI26	kelch-like 7	protein-coding
1727	chr4	120338430	120341681	+	0	NA	3' UTR (NM_019563, exon 1 of 1)	3' UTR (NM_019563, exon 1 of 1)	887	NM_019563	56222	Mm.272646	NM_019563	ENSMUSG00000070803	Cited4	MRG-2|Mrg2	Cbp/p300-interacting transactivator, with Glu/Asp-rich carboxy-terminal domain, 4	protein-coding
1477	chr3	10439539	10440476	+	0	NA	5' UTR (NM_001127191, exon 1 of 7)	5' UTR (NM_001127191, exon 1 of 7)	123	NM_029068	74718	Mm.440548	NM_029068	ENSMUSG00000027534	Snx16	4930522N22Rik|AI117577|AI747675	sorting nexin 16	protein-coding
1164	chr18	34917843	34920284	+	0	NA	intron (NM_175104, intron 1 of 4)	CpG	503	NM_175104	66306	Mm.29424	NM_175104	ENSMUSG00000034300	Fam53c	2810012G03Rik|Gm21179	family with sequence similarity 53, member C	protein-coding
505	chr12	60230065	60235133	+	0	NA	intron (NM_001165253, intron 1 of 22)	CpG	159	NM_001165253	217615	Mm.244118	NM_146034	ENSMUSG00000021000	Ctage5	D12Bwg0579e|Mea6|Mgea|Mgea6	CTAGE family, member 5	protein-coding
670	chr13	94264946	94270552	+	0	NA	intron (NM_021310, intron 1 of 10)	intron (NM_021310, intron 1 of 10)	2014	NM_021310	57748	Mm.100273	NM_021310	ENSMUSG00000021690	Jmy	-	junction-mediating and regulatory protein	protein-coding
1094	chr17	59150513	59152946	+	0	NA	intron (NM_026497, intron 1 of 6)	intron (NM_026497, intron 1 of 6)	1016	NM_026497	67993	Mm.36507	NM_026497		Nudt12	0610016O18Rik	nudix (nucleoside diphosphate linked moiety X)-type motif 12	protein-coding
419	chr11	86729116	86736409	+	0	NA	Intergenic	(TAAA)n|Simple_repeat|Simple_repeat	74502	NM_001005341	77864	Mm.191894	NM_001005341	ENSMUSG00000018427	Ypel2	6430570G24|E130113K08Rik	yippee-like 2 (Drosophila)	protein-coding
2178	chr7	119570335	119572663	+	0	NA	exon (NM_020606, exon 1 of 13)	exon (NM_020606, exon 1 of 13)	279	NM_020606	57342	Mm.143763	NM_020606	ENSMUSG00000030770	Parva	2010012A22Rik|5430400F08Rik|AI225929|AU042898|Actp|CH-ILKBP|Parvin	parvin, alpha	protein-coding
995	chr17	4906668	4909482	+	0	NA	Intergenic	CpG	-86999	NM_001085355	239985	Mm.133401	NM_001085355	ENSMUSG00000069729	Arid1b	8030481M12|9330189K18Rik|AI836955|Ardi1b|B230217J03Rik|mKIAA1235	AT rich interactive domain 1B (SWI-like)	protein-coding
1225	chr19	5363621	5367504	+	0	NA	intron (NR_104482, intron 1 of 1)	PB1D7|SINE|Alu	801	NM_001038231	23825	Mm.358649	NM_011793	ENSMUSG00000024844	Banf1	Baf|Bcrp1|L2bp1/Baf	barrier to autointegration factor 1	protein-coding
837	chr15	51541093	51543284	+	0	NA	Intergenic	Intergenic	154819	NM_080635	68135	Mm.289800	NM_080635	ENSMUSG00000022312	Eif3h	1110008A16Rik|40kD|9430017H16Rik|EIF3-P40|EIF3-gamma|Eif3s3	eukaryotic translation initiation factor 3, subunit H	protein-coding
2015	chr6	86634075	86635041	+	0	NA	promoter-TSS (NM_025665)	promoter-TSS (NM_025665)	-73	NM_025665	66618	Mm.182650	NM_025665	ENSMUSG00000001158	Snrnp27	2610209M04Rik|AI449063|AU022368|Ry1	small nuclear ribonucleoprotein 27 (U4/U6.U5)	protein-coding
290	chr10	117229359	117230766	+	0	NA	promoter-TSS (NM_134010)	promoter-TSS (NM_134010)	-301	NM_134010	103468	Mm.12568	NM_134010	ENSMUSG00000052798	Nup107	AW541137|C76801	nucleoporin 107	protein-coding
625	chr13	63915741	63917234	+	0	NA	promoter-TSS (NM_023507)	promoter-TSS (NM_023507)	-141	NM_001013608	76251	Mm.186610	NM_023507	ENSMUSG00000021470	Ercc6l2	0610007P08Rik|1700019D06Rik|9330134C04Rik|Rad26l|Sr278	excision repair cross-complementing rodent repair deficiency, complementation group 6 like 2	protein-coding
149	chr1	170406179	170408061	+	0	NA	Intergenic	Intergenic	-13654	NR_105766	102465178		NR_105766	miRBase:MI0021876	Mir6348	mmu-mir-6348	microRNA mir-6348	ncRNA
712	chr14	19102795	19104444	+	0	NA	promoter-TSS (NM_025586)	promoter-TSS (NM_025586)	-37	NM_023526	69721	Mm.25648	NM_023526	ENSMUSG00000021772	Nkiras1	2400004O09Rik|KBRAS1|kappaB-Ras1	NFKB inhibitor interacting Ras-like protein 1	protein-coding
210	chr10	41650845	41658595	+	0	NA	intron (NM_001034858, intron 12 of 17)	intron (NM_001034858, intron 12 of 17)	47475	NM_001013370	140742	Mm.139418	NM_001013370	ENSMUSG00000038332	Sesn1	1110002G11Rik|AU044290|Pa26|Sest1	sestrin 1	protein-coding
406	chr11	80241950	80243500	+	0	NA	intron (NM_178616, intron 1 of 13)	CpG	608	NM_178616	69077	Mm.260539	NM_178616	ENSMUSG00000017428	Psmd11	1700089D09Rik|1810019E17Rik|2610024G20Rik|2810055C24Rik|C78232|P44.5|S9	proteasome (prosome, macropain) 26S subunit, non-ATPase, 11	protein-coding
2289	chr8	86216788	86224832	+	0	NA	intron (NM_177262, intron 1 of 21)	intron (NM_177262, intron 1 of 21)	2268	NM_177262	320795	Mm.213000	NM_177262	ENSMUSG00000057672	Pkn1	DBK|F730027O18Rik|PAK1|PRK1|Pkn|Prkcl1|Stk3	protein kinase N1	protein-coding
2312	chr8	97816753	97818533	+	0	NA	intron (NM_001195413, intron 11 of 32)	intron (NM_001195413, intron 11 of 32)	12842	NM_001195413	333329	Mm.484049	NM_145601	ENSMUSG00000031789	Cngb1	Cngb1b|Gm1959	cyclic nucleotide gated channel beta 1	protein-coding
19	chr1	24618440	24623067	+	0	NA	Intergenic	Intergenic	-26477	NM_007733	12823	Mm.329196	NM_007733		Col19a1	-	collagen, type XIX, alpha 1	protein-coding
1030	chr17	21786963	21788029	+	0	NA	promoter-TSS (NM_001166497)	promoter-TSS (NM_001166497)	-82	NM_001166497	73229	Mm.296733	NM_001166497		3110052M02Rik	mszf57|mszf71	RIKEN cDNA 3110052M02 gene	protein-coding
365	chr11	57457332	57459593	+	0	NA	promoter-TSS (NM_134189)	promoter-TSS (NM_134189)	-482	NM_134189	171212	Mm.271670	NM_134189	ENSMUSG00000020520	Galnt10	AU018154|C330012K04Rik|GalNAc-T10|GalNAc-T9|Galnt9|ppGaNTase	UDP-N-acetyl-alpha-D-galactosamine:polypeptide N-acetylgalactosaminyltransferase 10	protein-coding
763	chr14	64162068	64163462	+	0	NA	promoter-TSS (NM_177594)	promoter-TSS (NM_177594)	25	NM_177594	210376	Mm.441613	NM_177594	ENSMUSG00000035078	Mtmr9	9430075G12Rik|AA516943|AF073881|LIP-STYX|MTMR8|mMTMH3	myotubularin related protein 9	protein-coding
2021	chr6	88467273	88469635	+	0	NA	intron (NM_016906, intron 1 of 11)	intron (NM_016906, intron 1 of 11)	340	NM_016906	53421	Mm.28375	NM_016906	ENSMUSG00000030082	Sec61a1	AA408394|AA410007|Sec61a	Sec61 alpha 1 subunit (S. cerevisiae)	protein-coding
1895	chr5	121778727	121781343	+	0	NA	intron (NM_181421, intron 49 of 75)	(CATA)n|Simple_repeat|Simple_repeat	55589	NM_001163470	231712	Mm.20488	NM_172275	ENSMUSG00000042726	Trafd1	1110008K06Rik|Fln29	TRAF type zinc finger domain containing 1	protein-coding
2038	chr6	118511930	118512914	+	0	NA	promoter-TSS (NM_001081112)	promoter-TSS (NM_001081112)	-148	NM_001081112	232339	Mm.276116	NM_001081112	ENSMUSG00000007827	Ankrd26	5730521P14Rik|BC008111|mKIAA1074	ankyrin repeat domain 26	protein-coding
570	chr12	120475810	120478236	+	0	NA	promoter-TSS (NM_177290)	promoter-TSS (NM_177290)	-274	NM_177290	320910	Mm.217000	NM_177290	ENSMUSG00000025321	Itgb8	4832412O06Rik	integrin beta 8	protein-coding
1880	chr5	108329503	108330436	+	0	NA	intron (NM_016980, intron 1 of 7)	CpG	422	NM_016980	100503670	Mm.277897	NM_016980	ENSMUSG00000058558	Rpl5	U21RNA	ribosomal protein L5	protein-coding
252	chr10	79688468	79690927	+	0	NA	intron (NM_023431, intron 1 of 13)	intron (NM_023431, intron 1 of 13)	354	NM_023431	68114	Mm.273418	NM_023431	ENSMUSG00000020156	Mum1	2610019J09|9430059D04Rik|UBE-1C2	melanoma associated antigen (mutated) 1	protein-coding
1159	chr18	33451629	33453425	+	0	NA	Intergenic	Intergenic	-79057	NM_133774	170459	Mm.127058	NM_133774		Stard4	4632419C16Rik|9030213J02Rik|AA517649|AW324468	StAR-related lipid transfer (START) domain containing 4	protein-coding
883	chr15	93104931	93107065	+	0	NA	promoter-TSS (NM_001033275)	promoter-TSS (NM_001033275)	-483	NM_001033275	223827	Mm.22819	NM_001033275	ENSMUSG00000036197	Gxylt1	Glt8d3|Gm1228|Gm87	glucoside xylosyltransferase 1	protein-coding
2048	chr6	126798465	126799752	+	0	NA	promoter-TSS (NM_025358)	promoter-TSS (NM_025358)	54	NM_025358	66108	Mm.29939	NM_025358	ENSMUSG00000000399	Ndufa9	1010001N11Rik	NADH dehydrogenase (ubiquinone) 1 alpha subcomplex, 9	protein-coding
655	chr13	76235492	76236827	+	0	NA	promoter-TSS (NM_029847)	promoter-TSS (NM_029847)	-23	NM_001081352	218343	Mm.277964	NM_001081352	ENSMUSG00000033991	Ttc37	mKIAA0372	tetratricopeptide repeat domain 37	protein-coding
421	chr11	87217142	87218760	+	0	NA	promoter-TSS (NM_031386)	promoter-TSS (NM_031386)	46	NM_053269	114714	Mm.37376	NM_053269		Rad51c	R51H3|Rad51l2	RAD51 homolog C	protein-coding
1998	chr6	64992176	64993521	+	0	NA	promoter-TSS (NM_001253392)	promoter-TSS (NM_001253392)	187	NM_007958	13990	Mm.99113	NM_007958	ENSMUSG00000029920	Smarcad1	AV081750|AW226546|D6Pas1|Etl1|mKIAA1122	SWI/SNF-related, matrix-associated actin-dependent regulator of chromatin, subfamily a, containing DEAD/H box 1	protein-coding
2332	chr8	123142307	123144615	+	0	NA	intron (NM_197988, intron 2 of 3)	intron (NM_197988, intron 2 of 3)	14821	NM_197988	68918	Mm.473736	NM_197988	ENSMUSG00000043687	1190005I06Rik	-	RIKEN cDNA 1190005I06 gene	protein-coding
1367	chr2	80418747	80422383	+	0	NA	intron (NM_001290745, intron 1 of 31)	intron (NM_001290745, intron 1 of 31)	774	NM_001290745	50884	Mm.25203	NM_016965	ENSMUSG00000027002	Nckap1	C79304|H19|Hem-2|Hem2|Nap1|mKIAA0587|mh19|p125Nap1	NCK-associated protein 1	protein-coding
271	chr10	86166741	86170383	+	0	NA	promoter-TSS (NM_011631)	promoter-TSS (NM_011631)	6	NM_001003939	103220	Mm.440762	NM_153595	ENSMUSG00000044937	BC030307	AI449705|AU041509|Gnn	cDNA sequence BC030307	protein-coding
1070	chr17	35575552	35576755	+	0	NA	promoter-TSS (NM_001201460)	promoter-TSS (NM_001201460)	41	NM_001201460	110558	Mm.431282	NM_001201460		H2-Q9	H-2Q9|Ped|Qa-2|Qa-9|Qa9	histocompatibility 2, Q region locus 9	protein-coding
1024	chr17	17962575	17976264	+	0	NA	intron (NM_001162909, intron 2 of 8)	intron (NM_001162909, intron 2 of 8)	1480	NM_001162909	75202	Mm.227456	NM_029205	ENSMUSG00000080316	Spaca6	4930546H06Rik|9530079D04Rik|B230206P06Rik|Ncrna00085	sperm acrosome associated 6	protein-coding
491	chr12	52448004	52449948	+	0	NA	promoter-TSS (NM_001167964)	promoter-TSS (NM_001167964)	-241	NM_001167964	217558	Mm.253264	NM_001015099	ENSMUSG00000035293	G2e3	6030408C04Rik|9030416F18|AW046379|D930034K21Rik|mKIAA1333	G2/M-phase specific E3 ubiquitin ligase	protein-coding
1863	chr5	87232600	87234672	+	0	NA	intron (NM_177680, intron 1 of 16)	CpG	121	NM_177680	231386	Mm.196325	NM_177680	ENSMUSG00000035851	Ythdc1	A730098D12Rik|C80342|mKIAA1966	YTH domain containing 1	protein-coding
2463	chr9	108380272	108395176	+	0	NA	intron (NM_008483, intron 17 of 32)	intron (NM_008483, intron 17 of 32)	-5283	NM_001168372	71472	Mm.289706	NM_027804	ENSMUSG00000006676	Usp19	8430421I07Rik|AI047774|Zmynd9	ubiquitin specific peptidase 19	protein-coding
13	chr1	13649566	13651169	+	0	NA	intron (NM_145381, intron 1 of 6)	CpG	223	NM_145381	212442	Mm.89572	NM_145381		Lactb2	Cgi-83|E430032H21Rik	lactamase, beta 2	protein-coding
2493	chrX	20193628	20195875	+	0	NA	promoter-TSS (NM_145627)	promoter-TSS (NM_145627)	-61	NM_019435	104130	Mm.30084	NM_019435	ENSMUSG00000031059	Ndufb11	D5Bwg0566e|D5Bwg0577e|NP15.6|Np15	NADH dehydrogenase (ubiquinone) 1 beta subcomplex, 11	protein-coding
105	chr1	121421744	121423372	+	0	NA	promoter-TSS (NM_146103)	promoter-TSS (NM_146103)	-173	NM_146103	226351	Mm.439806	NM_146103	ENSMUSG00000098923	Tmem185b	2500001K11Rik	transmembrane protein 185B	protein-coding
1514	chr3	60805988	60807665	+	0	NA	5' UTR (NM_001282016, exon 1 of 2)	5' UTR (NM_001282016, exon 1 of 2)	119	NM_001282016	18441	Mm.281452	NM_008772	ENSMUSG00000027765	P2ry1	P2Y1	purinergic receptor P2Y, G-protein coupled 1	protein-coding
840	chr15	54903288	54904241	+	0	NA	promoter-TSS (NM_001081288)	promoter-TSS (NM_001081288)	-57	NM_001081288	319944	Mm.380957	NM_001081288	ENSMUSG00000037343	Taf2	150kDa|4732460C16Rik|AI425886|CIF150|TAF2B|TAFII-150|TAFII150	TAF2 RNA polymerase II, TATA box binding protein (TBP)-associated factor	protein-coding
1647	chr4	26272332	26274680	+	0	NA	intron (NM_172865, intron 1 of 4)	intron (NM_172865, intron 1 of 4)	293	NM_172865	242362	Mm.245602	NM_172865	ENSMUSG00000040520	Manea	4932703L02Rik	mannosidase, endo-alpha	protein-coding
597	chr13	37596050	37607985	+	0	NA	Intergenic	Intergenic	164803	NM_010745	17084	Mm.2639	NM_010745	ENSMUSG00000021423	Ly86	MD-1|MD1	lymphocyte antigen 86	protein-coding
2380	chr9	44727661	44729958	+	0	NA	promoter-TSS (NM_013795)	promoter-TSS (NM_013795)	16	NM_013795	27425	Mm.14663	NM_013795	ENSMUSG00000038717	Atp5l	4933437C06Rik	ATP synthase, H+ transporting, mitochondrial F0 complex, subunit G	protein-coding
111	chr1	133806499	133808434	+	0	NA	intron (NM_001145804, intron 1 of 6)	CpG	431	NM_001145804	98415	Mm.246869	NM_175294	ENSMUSG00000026434	Nucks1	2700010L10Rik|8430423A01Rik|AI647518|C78391|Nucks	nuclear casein kinase and cyclin-dependent kinase substrate 1	protein-coding
1411	chr2	134468903	134470358	+	0	NA	exon (NM_029148, exon 1 of 8)	exon (NM_029148, exon 1 of 8)	227	NM_029148	52837	Mm.264096	NM_029148	ENSMUSG00000034723	Tmx4	2810417D04Rik|4930500L08Rik|AI843224|AW046784|D2Bwg1356e|Txndc13|mKIAA1162	thioredoxin-related transmembrane protein 4	protein-coding
408	chr11	82594082	82595816	+	0	NA	intron (NM_001291247, intron 1 of 19)	CpG	338	NM_010716	16882	Mm.277136	NM_010716	ENSMUSG00000020697	Lig3	D11Wsu78e	ligase III, DNA, ATP-dependent	protein-coding
1480	chr3	19062478	19063632	+	0	NA	promoter-TSS (NM_028840)	promoter-TSS (NM_028840)	10	NM_028840	74252	Mm.200383	NM_028840	ENSMUSG00000027599	Armc1	2310016N05Rik|2900046P06Rik|3110009G21Rik|AA409258|AW048872|Arcp|C330014L16Rik	armadillo repeat containing 1	protein-coding
242	chr10	72116918	72118472	+	0	NA	exon (NM_001293683, exon 1 of 8)	exon (NM_001293683, exon 1 of 8)	101	NM_001293683	52696	Mm.62876	NM_025635	ENSMUSG00000019923	Zwint	2010007E07Rik|2600001N01Rik|D10Ertd749e|Zwint-1	ZW10 interactor	protein-coding
559	chr12	112126927	112128364	+	0	NA	promoter-TSS (NM_027223)	promoter-TSS (NM_027223)	171	NM_001081057	104859	Mm.35583	NM_175336	ENSMUSG00000021275	Tecpr2	4930573I19Rik|AI604920|mKIAA0297	tectonin beta-propeller repeat containing 2	protein-coding
1588	chr3	121947970	121949584	+	0	NA	5' UTR (NM_008129, exon 1 of 7)	5' UTR (NM_008129, exon 1 of 7)	302	NM_008129	14630	Mm.292676	NM_008129		Gclm	AI649393|Gcmc|Glclr	glutamate-cysteine ligase, modifier subunit	protein-coding
32	chr1	39043539	39045659	+	0	NA	promoter-TSS (NM_026850)	promoter-TSS (NM_026850)	-60	NM_026850	68833	Mm.28121	NM_026850	ENSMUSG00000026078	Pdcl3	1110061A19Rik|C80025|Viaf1	phosducin-like 3	protein-coding
443	chr11	102068711	102092325	+	0	NA	5' UTR (NM_001284248, exon 4 of 29)	5' UTR (NM_001284248, exon 4 of 29)	10946	NR_106179	102465892		NR_106179	miRBase:MI0026031	Mir8101	mmu-mir-8101	microRNA mir-8101	ncRNA
2234	chr8	19784066	19785291	+	0	NA	Intergenic	CpG	55102	NM_001039553	626415	Mm.425517	NM_001039553		4930467E23Rik	ENSMUSG00000074453|OTTMUSG00000018948|TSAP	RIKEN cDNA 4930467E23 gene	protein-coding
1795	chr5	8055497	8058737	+	0	NA	intron (NM_001080974, intron 1 of 7)	intron (NM_001080974, intron 1 of 7)	575	NM_001080974	109552	Mm.96211	NM_025618	ENSMUSG00000003161	Sri	2210417O06Rik|2900070H08Rik|Sor	sorcin	protein-coding
580	chr13	17895017	17898194	+	0	NA	5' UTR (NM_027118, exon 1 of 14)	5' UTR (NM_027118, exon 1 of 14)	326	NM_001081058	69562	Mm.193924	NM_027118	ENSMUSG00000041297	Cdk13	2310015O17Rik|Cdc2l5	cyclin-dependent kinase 13	protein-coding
2523	chrX	101543552	101543918	+	0	NA	intron (NM_009592, intron 1 of 15)	CpG	65450	NM_009592	11306	Mm.426128	NM_009592	ENSMUSG00000031333	Abcb7	AA517758|AU019072|Abc7	ATP-binding cassette, sub-family B (MDR/TAP), member 7	protein-coding
1257	chr19	33465934	33467175	+	0	NA	5' UTR (NM_001146342, exon 1 of 5)	5' UTR (NM_001146342, exon 1 of 5)	231	NM_001167818	67795	Mm.204591	NM_001146342	ENSMUSG00000071573	Rnls	6530404N21Rik|AI452315|AW060440|C10orf59	renalase, FAD-dependent amine oxidase	protein-coding
846	chr15	59205310	59206344	+	0	NA	promoter-TSS (NM_001164604)	promoter-TSS (NM_001164604)	74	NM_001164604	68501	Mm.27762	NM_026746	ENSMUSG00000059586	Nsmce2	1110014D18Rik|AI661537	non-SMC element 2 homolog (MMS21, S. cerevisiae)	protein-coding
31	chr1	38185613	38187365	+	0	NA	promoter-TSS (NM_019570)	promoter-TSS (NM_019570)	18	NM_019570	56210	Mm.389103	NM_019570	ENSMUSG00000026082	Rev1	1110027I23Rik|AU022044|Rev1l	REV1 homolog (S. cerevisiae)	protein-coding
1689	chr4	71859141	71863089	+	0	NA	5' UTR (NM_011599, exon 1 of 20)	5' UTR (NM_011599, exon 1 of 20)	812	NM_011599	21885	Mm.278444	NM_011599	ENSMUSG00000008305	Tle1	C230057C06Rik|Estm14|Grg-1|Grg1|Tle4l	transducin-like enhancer of split 1, homolog of Drosophila E(spl)	protein-coding
2307	chr8	96092612	96096989	+	0	NA	Intergenic	Intergenic	-35193	NM_001003951	67935	Mm.65457	NM_001003951	ENSMUSG00000058019	Ces5a	1700081L16Rik|1700122C07Rik|BB081581|Ces7|Gm503|cauxin	carboxylesterase 5A	protein-coding
1861	chr5	77783716	77837552	+	0	NA	intron (NM_008048, intron 1 of 4)	MLT1A0|LTR|MaLR	26436	NM_001159518	29817	Mm.233470	NM_008048	ENSMUSG00000036256	Igfbp7	AGM|Fstl2|Mac25	insulin-like growth factor binding protein 7	protein-coding
1296	chr19	61275483	61275954	+	0	NA	Intergenic	Intergenic	-23506	NM_001177513	633057	Mm.426097	NM_001177513	ENSMUSG00000094649	Gm7102	EG633057	predicted gene 7102	protein-coding
1553	chr3	96000761	96001752	+	0	NA	intron (NM_026975, intron 1 of 1)	CpG	253	NM_026975	69168	Mm.104531	NM_026975	ENSMUSG00000015943	Bola1	1810037G04Rik	bolA-like 1 (E. coli)	protein-coding
2161	chr7	106497704	106510099	+	0	NA	Intergenic	Intergenic	-2152	NM_001111044	12406	Mm.22708	NM_009825	ENSMUSG00000070436	Serpinh1	BERF-1|Cbp1|Cbp2|Hsp47|J6|Serpinh2|gp46	serine (or cysteine) peptidase inhibitor, clade H, member 1	protein-coding
1303	chr2	5765441	5766870	+	0	NA	promoter-TSS (NM_133837)	promoter-TSS (NM_133837)	75	NM_016918	53893	Mm.251904	NM_016918	ENSMUSG00000025817	Nudt5	-	nudix (nucleoside diphosphate linked moiety X)-type motif 5	protein-coding
2133	chr7	67300345	67300728	+	0	NA	Intergenic	Intergenic	-15431	NM_001082962	20646	Mm.274995	NM_013670	ENSMUSG00000000948	Snrpn	2410045I01Rik|HCERN3|Peg4|Pwcr1|SMN	small nuclear ribonucleoprotein N	protein-coding
1654	chr4	34633929	34635220	+	0	NA	5' UTR (NM_011895, exon 1 of 8)	5' UTR (NM_011895, exon 1 of 8)	113	NM_011895	24060	Mm.281885	NM_011895	ENSMUSG00000028293	Slc35a1	AA408150|AI314851	solute carrier family 35 (CMP-sialic acid transporter), member 1	protein-coding
968	chr16	57230836	57231989	+	0	NA	intron (NM_026254, intron 1 of 17)	intron (NM_026254, intron 1 of 17)	167	NM_026254	67581	Mm.257819	NM_026254	ENSMUSG00000022749	Tbc1d23	4930451A13Rik|AU015720|AU043671|AU043778|D030022P07Rik|W51689	TBC1 domain family, member 23	protein-coding
675	chr13	97312006	97314226	+	0	NA	promoter-TSS (NM_012048)	promoter-TSS (NM_012048)	426	NM_023420	68018	Mm.24125	NM_023420	ENSMUSG00000021669	Col4a3bp	2810404O15Rik|9230101K08Rik|AU016711|CERT|GPBP	collagen, type IV, alpha 3 (Goodpasture antigen) binding protein	protein-coding
15	chr1	16093805	16104386	+	0	NA	intron (NM_133832, intron 2 of 5)	intron (NM_133832, intron 2 of 5)	3132	NM_133832	98711	Mm.274376	NM_133832		Rdh10	3110069K09Rik|4921506A21Rik|AI875664|AW549993|D1Ertd762e|m366Asp	retinol dehydrogenase 10 (all-trans)	protein-coding
431	chr11	95684865	95706309	+	0	NA	intron (NM_001163464, intron 4 of 7)	intron (NM_001163464, intron 4 of 7)	-8022	NM_023121	14710	Mm.46299	NM_023121	ENSMUSG00000038811	Gngt2	AV096488	guanine nucleotide binding protein (G protein), gamma transducing activity polypeptide 2	protein-coding
382	chr11	69177752	69184689	+	0	NA	intron (NM_146019, intron 1 of 39)	intron (NM_146019, intron 1 of 39)	1708	NM_146019	216848	Mm.178246	NM_146019	ENSMUSG00000018474	Chd3	2600010P09Rik|AF020312|Chd7|Prp7|Prp9-1	chromodomain helicase DNA binding protein 3	protein-coding
2236	chr8	20019610	20020910	+	0	NA	promoter-TSS (NR_030708).2	promoter-TSS (NR_030708).2	18	NR_030708	547150	Mm.359054	NR_030708	ENSMUSG00000071796	6820431F20Rik	-	cadherin 11 pseudogene	pseudo
1506	chr3	53667264	53668230	+	0	NA	promoter-TSS (NM_026435)	promoter-TSS (NM_026435)	-18	NM_026435	67890	Mm.23067	NM_026435		Ufm1	1810045K17Rik|AI132708|AI463323|ENSMUSG00000074598|Gm10726	ubiquitin-fold modifier 1	protein-coding
139	chr1	163805629	163807822	+	0	NA	promoter-TSS (NM_172645)	promoter-TSS (NM_172645)	67	NM_172645	226551	Mm.170002	NM_172645	ENSMUSG00000040297	Suco	4732491B11|AI848100|AU016931|Opt	SUN domain containing ossification factor	protein-coding
129	chr1	153185180	153199586	+	0	NA	intron (NM_001039511, intron 1 of 7)	CpG	755	NM_001039511	117198	Mm.33764	NM_028582	ENSMUSG00000023150	Ivns1abp	1190004M08Rik|1700126I16Rik|AA960440|HSPC068|ND1|NS-1|NS1-BP|Nd1-L|Nd1-S|mKIAA0850	influenza virus NS1A binding protein	protein-coding
926	chr16	16982955	16984612	+	0	NA	exon (NM_001038663, exon 1 of 8)	exon (NM_001038663, exon 1 of 8)	308	NM_001038663	26413	Mm.196581	NM_011949	ENSMUSG00000063358	Mapk1	9030612K14Rik|AA407128|AU018647|C78273|ERK|Erk2|MAPK2|PRKM2|Prkm1|p41mapk|p42mapk	mitogen-activated protein kinase 1	protein-coding
2145	chr7	88667691	88668973	+	0	NA	promoter-TSS (NR_045299)	promoter-TSS (NR_045299)	-104	NR_045299	100504421	Mm.217071	NR_045299	ENSMUSG00000097277	2900076A07Rik	WI1-1616M8.2	RIKEN cDNA 2900076A07 gene	ncRNA
1246	chr19	23198920	23239529	+	0	NA	intron (NM_010638, intron 1 of 1)	MER102b|DNA|MER1_type	3508	NM_010638	16601	Mm.291595	NM_010638	ENSMUSG00000033863	Klf9	2310051E17Rik|AA589643|BTEB-1|Bteb1|ENSMUSG00000055440|Gm9971	Kruppel-like factor 9	protein-coding
859	chr15	76019087	76039147	+	0	NA	promoter-TSS (NM_201393)	promoter-TSS (NM_201393)	-478	NM_201393	18810	Mm.234912	NM_011117	ENSMUSG00000022565	Plec	AA591047|AU042537|EBS1|PCN|PLTN|Plec1	plectin	protein-coding
1083	chr17	48159552	48162105	+	0	NA	Intergenic	Intergenic	14415	NM_029689	76651	Mm.76918	NM_029689	ENSMUSG00000094928	1700122O11Rik	-	RIKEN cDNA 1700122O11 gene	protein-coding
739	chr14	51682357	51686393	+	0	NA	Intergenic	Intergenic	6742	NM_207558	404319	Mm.377276	NM_207558	ENSMUSG00000035932	Olfr750	GA_x5J8B7W5WBF-6267395-6266441|GA_x6K02T2PMLR-6808276-6807281|MOR103-18	olfactory receptor 750	protein-coding
1293	chr19	60301979	60302894	+	0	NA	5' UTR (NM_029648, exon 1 of 8)	5' UTR (NM_029648, exon 1 of 8)	164	NM_029648	76539	Mm.290183	NM_029648	ENSMUSG00000057858	Fam204a	2310065H12Rik|2610015K05Rik|D19Ertd737e	family with sequence similarity 204, member A	protein-coding
876	chr15	82168678	82212238	+	0	NA	Intergenic	MT2C_Mm|LTR|ERVL	-5737	NM_025987	67130	Mm.27570	NM_025987	ENSMUSG00000022450	Ndufa6	14kDa|2700038D15Rik|B230217P19Rik	NADH dehydrogenase (ubiquinone) 1 alpha subcomplex, 6 (B14)	protein-coding
1792	chr5	3927786	3929087	+	0	NA	5' UTR (NM_194462, exon 1 of 48)	5' UTR (NM_194462, exon 1 of 48)	250	NM_194462	100986	Mm.46044	NM_194462	ENSMUSG00000040407	Akap9	5730481H23Rik|AKAP-9|AKAP450|AW545847|C79026|G1-448-15|PRKA9|mKIAA0803|mei2-5|repro12	A kinase (PRKA) anchor protein (yotiao) 9	protein-coding
662	chr13	90228387	90229905	+	0	NA	promoter-TSS (NM_025335)	promoter-TSS (NM_025335)	67	NM_028012	108138	Mm.37531	NM_028012	ENSMUSG00000021615	Xrcc4	2310057B22Rik|AW413319|AW545101	X-ray repair complementing defective repair in Chinese hamster cells 4	protein-coding
168	chr1	182258739	182359147	+	0	NA	intron (NM_001081175, intron 2 of 7)	B4A|SINE|B4	-48263	NR_003623	277333	Mm.389223	NM_199472		Gm5069	EG277333	glyceraldehyde-3-phosphate dehydrogenase pseudogene	pseudo
135	chr1	161161437	161163797	+	0	NA	exon (NM_011931, exon 1 of 20)	exon (NM_011931, exon 1 of 20)	160	NM_011931	26374	Mm.328135	NM_011931	ENSMUSG00000040782	Rfwd2	AI316802|C80879|Cop1	ring finger and WD repeat domain 2	protein-coding
1518	chr3	65760865	65763502	+	0	NA	promoter-TSS (NM_019937)	promoter-TSS (NM_019937)	-36	NM_019937	56706	Mm.175612	NM_019937	ENSMUSG00000027829	Ccnl1	2610030E23Rik|AU018493|Ccnl|ania-6a	cyclin L1	protein-coding
145	chr1	166825610	166831288	+	0	NA	Intergenic	LTR37A|LTR|ERV1	35197	NR_040303	433374	Mm.251149	NR_040303		Gm20743	-	predicted gene, 20743	ncRNA
178	chr1	196956114	196958965	+	0	NA	5' UTR (NM_013499, exon 1 of 10)	5' UTR (NM_013499, exon 1 of 10)	225	NM_013499	12946	Mm.301652	NM_013499	ENSMUSG00000016481	Cr1l	Crry|Mcp|mCRY	complement component (3b/4b) receptor 1-like	protein-coding
1131	chr18	6236911	6242306	+	0	NA	intron (NM_008448, intron 1 of 25)	intron (NM_008448, intron 1 of 25)	1914	NM_008448	16573	Mm.223744	NM_008448	ENSMUSG00000006740	Kif5b	AL022807|Khc|Khcs|Kns1|Ukhc	kinesin family member 5B	protein-coding
1876	chr5	105288448	105289632	+	0	NA	promoter-TSS (NM_001039231)	promoter-TSS (NM_001039231)	47	NM_001039231	626391	Mm.385405	NM_001039231		Zfp951	C230055K05Rik	zinc finger protein 951	protein-coding
124	chr1	140752670	140753664	+	0	NA	exon (NM_001081226, exon 1 of 3)	exon (NM_001081226, exon 1 of 3)	264	NM_001081226	69549	Mm.264673	NM_001081226	ENSMUSG00000079283	2310009B15Rik	-	RIKEN cDNA 2310009B15 gene	protein-coding
772	chr14	70998708	71000312	+	0	NA	intron (NM_194345, intron 1 of 16)	(CCCG)n|Simple_repeat|Simple_repeat	132	NM_194345	239170	Mm.247582	NM_194345	ENSMUSG00000022095	Fam160b2	G430067P06Rik|Rai16	family with sequence similarity 160, member B2	protein-coding
1759	chr4	136157546	136158991	+	0	NA	exon (NM_133872, exon 1 of 19)	exon (NM_133872, exon 1 of 19)	370	NM_133872	99982	Mm.28540	NM_133872	ENSMUSG00000036940	Kdm1a	1810043O07Rik|AA408884|Aof2|D4Ertd478e|Kdm1|Lsd1|mKIAA0601	lysine (K)-specific demethylase 1A	protein-coding
1429	chr2	155298064	155299974	+	0	NA	Intergenic	Intergenic	-32500	NM_019825	56406	Mm.27592	NM_019825	ENSMUSG00000038369	Ncoa6	AIB3|ASC-2|ASC2|NRC|Ncoa7|PRIP|RAP250|mKIAA0181	nuclear receptor coactivator 6	protein-coding
1974	chr6	42214330	42216193	+	0	NA	TTS (NM_175408)	TTS (NM_175408)	223	NM_007610	12366	Mm.3921	NM_007610	ENSMUSG00000029863	Casp2	Caspase-2|ICH-1|Nedd2	caspase 2	protein-coding
2032	chr6	115642158	115648506	+	0	NA	Intergenic	Intergenic	-18679	NM_029780	110157	Mm.184163	NM_029780	ENSMUSG00000000441	Raf1	6430402F14Rik|AA990557|BB129353|Craf1|D830050J10Rik|Raf-1|c-Raf|v-Raf	v-raf-leukemia viral oncogene 1	protein-coding
2536	chrX	155970495	155971383	+	0	NA	intron (NM_001033472, intron 1 of 11)	CpG	339	NM_001033472	382252	Mm.296254	NM_001033472	ENSMUSG00000044150	A830080D01Rik	2310067E24Rik|Gm1146	RIKEN cDNA A830080D01 gene	protein-coding
2483	chr9	123751995	123762533	+	0	NA	intron (NM_148925, intron 1 of 18)	intron (NM_148925, intron 1 of 18)	3518	NM_148925	17281	Mm.252941	NM_148925	ENSMUSG00000025241	Fyco1	2810409M01Rik|Mem2|RUFY3|ZFYVE7	FYVE and coiled-coil domain containing 1	protein-coding
1374	chr2	94276153	94278432	+	0	NA	intron (NM_007466, intron 1 of 13)	intron (NM_007466, intron 1 of 13)	1012	NM_007466	11800	Mm.181824	NM_007466	ENSMUSG00000027193	Api5	AAC-11|AI196452	apoptosis inhibitor 5	protein-coding
1528	chr3	87420757	87422111	+	0	NA	Intergenic	CpG	-1239	NM_001003912	213498	Mm.287267	NM_001003912	ENSMUSG00000041977	Arhgef11	B930073M02|E130307F09|PDZ-RhoGEF|Prg|RhoGEF|mKIAA0380	Rho guanine nucleotide exchange factor (GEF) 11	protein-coding
2303	chr8	91220050	91222205	+	0	NA	intron (NM_173369, intron 1 of 16)	CpG	200	NM_001128171	74256	Mm.490395	NM_173369	ENSMUSG00000036712	Cyld	2010013M14Rik|2900009M21Rik|C130039D01Rik|CDMT|CYLD1|EAC|mKIAA0849	cylindromatosis (turban tumor syndrome)	protein-coding
653	chr13	74943058	74946943	+	0	NA	intron (NM_001301153, intron 1 of 31)	intron (NM_001301153, intron 1 of 31)	408	NM_009817	12380	Mm.29163	NM_009817	ENSMUSG00000021585	Cast	-	calpastatin	protein-coding
1692	chr4	84529766	84531203	+	0	NA	exon (NM_175275, exon 1 of 26)	exon (NM_175275, exon 1 of 26)	271	NM_177385	338349	Mm.440562	NM_175275	ENSMUSG00000038070	Cntln	AI448092|B430108F07Rik|D530005L17Rik	centlein, centrosomal protein	protein-coding
2259	chr8	63966210	63967328	+	0	NA	exon (NM_145595, exon 1 of 5)	exon (NM_145595, exon 1 of 5)	238	NM_145595	234309	Mm.29059	NM_145595	ENSMUSG00000031641	Cbr4	A730083J17Rik|BC009118	carbonyl reductase 4	protein-coding
509	chr12	70457613	70475570	+	0	NA	Intergenic	Intergenic	-6546	NM_007481	11845	Mm.27308	NM_007481	ENSMUSG00000044147	Arf6	AI788669|AW496366	ADP-ribosylation factor 6	protein-coding
2212	chr7	140828517	140829970	+	0	NA	promoter-TSS (NM_178115)	promoter-TSS (NM_178115)	-115	NM_178115	214764	Mm.174044	NM_145995	ENSMUSG00000039990	Edrf1	2700050L05Rik|AU022667|AW558805	erythroid differentiation regulatory factor 1	protein-coding
1015	chr17	15840738	15843790	+	0	NA	5' UTR (NM_007690, exon 1 of 36)	5' UTR (NM_007690, exon 1 of 36)	333	NM_007690	12648	Mm.8137	NM_007690	ENSMUSG00000023852	Chd1	4930525N21Rik|AI851787|AW555109	chromodomain helicase DNA binding protein 1	protein-coding
367	chr11	58974659	58980036	+	0	NA	promoter-TSS (NM_173785)	promoter-TSS (NM_173785)	-100	NM_173785	216792	Mm.266175	NM_173785	ENSMUSG00000049287	Iba57	4930543L23Rik|A230051G13Rik|C1orf69	IBA57, iron-sulfur cluster assembly homolog (S. cerevisiae)	protein-coding
976	chr16	77328316	77332452	+	0	NA	intron (NR_015543, intron 1 of 4)	intron (NR_015543, intron 1 of 4)	811	NR_015543	77994	Mm.394688	NR_015543	ENSMUSG00000090386	2810055G20Rik	D730043B02Rik	RIKEN cDNA 2810055G20 gene	ncRNA
716	chr14	21364377	21366366	+	0	NA	promoter-TSS (NR_033571)	promoter-TSS (NR_033571)	-144	NR_033571	75602	Mm.437061	NR_033571	ENSMUSG00000084925	1810062O18Rik	-	RIKEN cDNA 1810062O18 gene	ncRNA
1886	chr5	110564233	110565372	+	0	NA	promoter-TSS (NM_172717)	promoter-TSS (NM_172717)	-47	NM_172717	231600	Mm.30264	NM_172717	ENSMUSG00000014668	Chfr	5730484M20Rik|C230082M18|RNF116	checkpoint with forkhead and ring finger domains	protein-coding
1821	chr5	31999350	32002184	+	0	NA	promoter-TSS (NM_153196)	promoter-TSS (NM_153196)	344	NM_181282	107976	Mm.482126	NM_144541	ENSMUSG00000052139	Bre	6030405P19Rik|AI429776|B830038C02Rik	brain and reproductive organ-expressed protein	protein-coding
1972	chr6	39760256	39761073	+	0	NA	intron (NM_001010930, intron 1 of 2)	intron (NM_001010930, intron 1 of 2)	271	NM_010270	14548	Mm.377071	NM_010270	ENSMUSG00000029918	Mrps33	AI841153|CGI-139|Gdap3|MRP-S33|PTD003	mitochondrial ribosomal protein S33	protein-coding
940	chr16	23963951	23994692	+	0	NA	intron (NM_009744, intron 1 of 9)	intron (NM_009744, intron 1 of 9)	9377	NM_009744	12053	Mm.347398	NM_009744	ENSMUSG00000022508	Bcl6	Bcl5	B cell leukemia/lymphoma 6	protein-coding
685	chr13	104967899	104969765	+	0	NA	promoter-TSS (NM_001093760)	promoter-TSS (NM_001093760)	-286	NM_001093760	66975	Mm.272541	NM_025879	ENSMUSG00000021711	Trappc13	2410002O22Rik|2610524F24Rik|AI451892|AU017229	trafficking protein particle complex 13	protein-coding
743	chr14	52898237	52899888	+	0	NA	promoter-TSS (NM_172601)	promoter-TSS (NM_172601)	8	NM_172601	76338	Mm.32870	NM_172601	ENSMUSG00000022159	Rab2b	1500012D09Rik|4930528G15Rik|A230002G14|D530043M21Rik	RAB2B, member RAS oncogene family	protein-coding
2265	chr8	72239516	72241427	+	0	NA	promoter-TSS (NM_181274)	promoter-TSS (NM_181274)	-86	NM_181274	66869	Mm.334581	NM_181274		Zfp869	1200003I07Rik	zinc finger protein 869	protein-coding
21	chr1	30928885	30931820	+	0	NA	Intergenic	CpG	-10251	NM_001081080	213109	Mm.194486	NM_025871	ENSMUSG00000048874	Phf3	2310061N19Rik|mKIAA0244	PHD finger protein 3	protein-coding
523	chr12	77938250	77939304	+	0	NA	intron (NM_145927, intron 1 of 11)	CpG	323	NM_145927	110606	Mm.151174	NM_145927	ENSMUSG00000033373	Fntb	2010013E13Rik|AA409500	farnesyltransferase, CAAX box, beta	protein-coding
2377	chr9	44074511	44077216	+	0	NA	intron (NM_001163742, intron 1 of 9)	intron (NM_001163742, intron 1 of 9)	407	NM_001163743	270151	Mm.3957	NM_178420	ENSMUSG00000032109	Nlrx1	BC034204|NOD9	NLR family member X1	protein-coding
2129	chr7	54174407	54175966	+	0	NA	intron (NM_021884, intron 1 of 9)	CpG	114	NM_021884	22088	Mm.241334	NM_021884	ENSMUSG00000014402	Tsg101	AI255943|CC2	tumor susceptibility gene 101	protein-coding
1460	chr2	173562633	173563655	+	0	NA	promoter-TSS (NM_019806)	promoter-TSS (NM_019806)	72	NM_019806	56491	Mm.260456	NM_019806	ENSMUSG00000054455	Vapb	AI225786|AI840687|AI848259|D2Abb2e|R75548|VAP33b|Vamp33b	vesicle-associated membrane protein, associated protein B and C	protein-coding
453	chr11	113510264	113512684	+	0	NA	intron (NM_013581, intron 1 of 13)	intron (NM_013581, intron 1 of 13)	631	NM_013581	16834	Mm.261620	NM_013581	ENSMUSG00000018661	Cog1	6030445I15|Ldlb|mKIAA1381	component of oligomeric golgi complex 1	protein-coding
723	chr14	31292274	31293360	+	0	NA	promoter-TSS (NM_133761)	promoter-TSS (NM_133761)	66	NM_133761	75901	Mm.28733	NM_133761	ENSMUSG00000021962	Dcp1a	1110066A22Rik|4930568L04Rik|AU019772|D14Ertd817e|Mitc1|SMIF	DCP1 decapping enzyme homolog A (S. cerevisiae)	protein-coding
2500	chrX	54306090	54307423	+	0	NA	promoter-TSS (NM_028242)	promoter-TSS (NM_028242)	9	NM_028242	72459	Mm.2152	NM_028242	ENSMUSG00000067873	Htatsf1	1600023H17Rik|2600017A12Rik|2700077B20Rik|TAT-SF1	HIV TAT specific factor 1	protein-coding
1202	chr18	73730438	73734467	+	0	NA	promoter-TSS (NM_001039214)	promoter-TSS (NM_001039214)	93	NM_001039214	240396	Mm.24131	NM_001039214	ENSMUSG00000037253	Mex3c	A130001D14Rik|BC035207|BM-013|Rkhd2	mex3 homolog C (C. elegans)	protein-coding
351	chr11	40547076	40547787	+	0	NA	promoter-TSS (NM_013552)	promoter-TSS (NM_013552)	268	NM_001290697	52653	Mm.276504	NM_026023	ENSMUSG00000020328	Nudcd2	-	NudC domain containing 2	protein-coding
1040	chr17	24209879	24210728	+	0	NA	TTS (NM_011062)	TTS (NM_011062)	149	NM_027008	69259	Mm.28171	NM_027008	ENSMUSG00000016946	Kctd5	2610030N08Rik|mKIAA0176	potassium channel tetramerisation domain containing 5	protein-coding
595	chr13	34965633	34968606	+	0	NA	promoter-TSS (NM_013830)	promoter-TSS (NM_013830)	-244	NM_013830	19134	Mm.10027	NM_013830	ENSMUSG00000021413	Prpf4b	2610037H07|Prp4|Prp4k|Prpk|cbp143	PRP4 pre-mRNA processing factor 4 homolog B (yeast)	protein-coding
1755	chr4	135542689	135543805	+	0	NA	promoter-TSS (NM_025411)	promoter-TSS (NM_025411)	-88	NM_025411	66193	Mm.29131	NM_025411	ENSMUSG00000028669	Pithd1	1110049F12Rik|AA408179|Trp26	PITH (C-terminal proteasome-interacting domain of thioredoxin-like) domain containing 1	protein-coding
1138	chr18	11510052	11512489	+	0	NA	Intergenic	Intergenic	-280515	NM_001252495	225182	Mm.154275	NM_175458	ENSMUSG00000041238	Rbbp8	9930104E21Rik|CtIP|RBBP-8|RIM|SAE2	retinoblastoma binding protein 8	protein-coding
488	chr12	40762257	40765425	+	0	NA	intron (NM_001039515, intron 1 of 1)	intron (NM_001039515, intron 1 of 1)	122	NM_007487	11861	Mm.12723	NM_007487	ENSMUSG00000047446	Arl4a	AI467555|Arl4	ADP-ribosylation factor-like 4A	protein-coding
1854	chr5	76564372	76570879	+	0	NA	Intergenic	RMER15|LTR|ERVL	-1673	NM_020611	57357	Mm.289446	NM_020611	ENSMUSG00000029233	Srd5a3	1110025P14Rik|A430076C09|AV364670|AW987574|D730040M03Rik|H5ar|S5AR 3|Srd5a2l	steroid 5 alpha-reductase 3	protein-coding
1012	chr17	15634436	15637392	+	0	NA	promoter-TSS (NM_011185)	promoter-TSS (NM_011185)	-674	NM_011185	19170	Mm.32912	NM_011185	ENSMUSG00000014769	Psmb1	AA409053|C81484|Lmpc5	proteasome (prosome, macropain) subunit, beta type 1	protein-coding
1498	chr3	39257455	39258050	+	0	NA	Intergenic	Intergenic	471890	NM_183221	329628	Mm.316210	NM_183221	ENSMUSG00000046743	Fat4	6030410K14Rik|9430004M15	FAT tumor suppressor homolog 4 (Drosophila)	protein-coding
835	chr15	50718302	50722396	+	0	NA	TTS (NR_035444)	TTS (NR_035444)	311	NR_035444	100316685		NR_035444	miRBase:MI0008325	Mir1907	Mirn1907|mmu-mir-1907	microRNA 1907	ncRNA
2182	chr7	121418880	121420510	+	0	NA	promoter-TSS (NM_011965)	promoter-TSS (NM_011965)	-65	NM_011965	26440	Mm.121265	NM_011965	ENSMUSG00000030751	Psma1	C2|HC2|Pros-30|alpha-type	proteasome (prosome, macropain) subunit, alpha type 1	protein-coding
1267	chr19	37508759	37511715	+	0	NA	intron (NM_008245, intron 1 of 3)	intron (NM_008245, intron 1 of 3)	906	NM_008245	15242	Mm.33896	NM_008245		Hhex	Hex|Hex1|Hhex-rs2|Prh|Prhx	hematopoietically expressed homeobox	protein-coding
1032	chr17	21870077	21871187	+	0	NA	promoter-TSS (NM_001164676)	promoter-TSS (NM_001164676)	-59	NM_001164676	381067	Mm.482723	NM_001164676	ENSMUSG00000061544	Zfp229	-	zinc finger protein 229	protein-coding
113	chr1	134373162	134374426	+	0	NA	promoter-TSS (NM_172517)	promoter-TSS (NM_172517)	-150	NM_172517	213464	Mm.132868	NM_172517	ENSMUSG00000026439	Rbbp5	4933411J24Rik|C330016J05	retinoblastoma binding protein 5	protein-coding
901	chr15	101920860	101981999	+	0	NA	intron (NM_001033277, intron 6 of 10)	intron (NM_001033277, intron 6 of 10)	15217	NM_001033277	223918	Mm.385009	NM_001033277	ENSMUSG00000036966	Spryd3	BC008150	SPRY domain containing 3	protein-coding
2191	chr7	133076638	133077739	+	0	NA	intron (NM_001101488, intron 3 of 6)	L3b|LINE|CR1	148737	NM_001101488	269994	Mm.39599	NM_001101488	ENSMUSG00000046182	Gsg1l	AI852434|C230098I05Rik|G630023A01Rik|Gm637|g1l	GSG1-like	protein-coding
152	chr1	173258191	173260983	+	0	NA	5' UTR (NM_011615, exon 1 of 5)	5' UTR (NM_011615, exon 1 of 5)	311	NM_011615	21945	Mm.270139	NM_011615	ENSMUSG00000013973	Dedd	CASP8IP1|DEFT|Dedpro1|FLDED1|KE05	death effector domain-containing	protein-coding
342	chr11	30547921	30550239	+	0	NA	intron (NM_029344, intron 1 of 3)	intron (NM_029344, intron 1 of 3)	316	NM_029344	75572	Mm.390319	NM_029344		Acyp2	2310004B09Rik	acylphosphatase 2, muscle type	protein-coding
1419	chr2	150463792	150500730	+	0	NA	intron (NM_080575, intron 2 of 13)	intron (NM_080575, intron 2 of 13)	-10969	NR_040331	109344	Mm.440012	NR_040331	ENSMUSG00000087406	E130215H24Rik	-	RIKEN cDNA E130215H24 gene	ncRNA
862	chr15	77800568	77802161	+	0	NA	promoter-TSS (NM_018749)	promoter-TSS (NM_018749)	-110	NM_018749	55944	Mm.3955	NM_018749	ENSMUSG00000016554	Eif3d	66/67kDa|AA407891|Eif3s7|eIF3p66	eukaryotic translation initiation factor 3, subunit D	protein-coding
341	chr11	29273155	29274493	+	0	NA	promoter-TSS (NM_176841)	promoter-TSS (NM_176841)	-348	NM_176841	108686	Mm.338284	NM_176841	ENSMUSG00000032740	Ccdc88a	A430106J12Rik|AI848406|Ape|C130096N06Rik|C330012F17Rik|D130005J21Rik|Girdin|Giv|Grdn|Hkrp1	coiled coil domain containing 88A	protein-coding
1056	chr17	31839522	31841907	+	0	NA	Intergenic	Intergenic	25838	NM_001278570	12954	Mm.1228	NM_013501	ENSMUSG00000024041	Cryaa	Acry-1|Crya-1|Crya1|DAcry-1|lop18	crystallin, alpha A	protein-coding
2189	chr7	130112754	130117252	+	0	NA	intron (NM_011247, intron 1 of 17)	intron (NM_011247, intron 1 of 17)	925	NM_175023	19647	Mm.4480	NM_011247	ENSMUSG00000030779	Rbbp6	4933422O15Rik|AI316869|BB233631|C030034J04Rik|C77662|P2P-R|PACT	retinoblastoma binding protein 6	protein-coding
2287	chr8	85491251	85494693	+	0	NA	intron (NM_177378, intron 1 of 6)	intron (NM_177378, intron 1 of 6)	105717	NM_177378	330812	Mm.491438	NM_177378	ENSMUSG00000047747	Rnf150	A630007N06Rik|C030044C12Rik|Greul5|mKIAA1214	ring finger protein 150	protein-coding
2540	chrX	162878029	162879110	+	0	NA	promoter-TSS (NM_025432)	promoter-TSS (NM_025432)	67	NM_177429	237222	Mm.247480	NM_177429	ENSMUSG00000040586	Ofd1	Cxorf5|DXGgc7e|ORF2	oral-facial-digital syndrome 1 gene homolog (human)	protein-coding
2284	chr8	82024623	82026357	+	0	NA	Intergenic	(TTCG)n|Simple_repeat|Simple_repeat	-102123	NM_008539	17125	Mm.223717	NM_008539	ENSMUSG00000031681	Smad1	AI528653|Madh1|Madr1|Mlp1|MusMLP	SMAD family member 1	protein-coding
64	chr1	69149927	69155028	+	0	NA	intron (NM_010154, intron 1 of 26)	intron (NM_010154, intron 1 of 26)	2156	NM_010154	13869	Mm.442420	NM_010154	ENSMUSG00000062209	Erbb4	Her4|c-erbB-4	v-erb-a erythroblastic leukemia viral oncogene homolog 4 (avian)	protein-coding
1473	chr3	8662147	8670477	+	0	NA	exon (NM_010423, exon 3 of 5)	exon (NM_010423, exon 3 of 5)	726	NM_010423	15213	Mm.29581	NM_010423	ENSMUSG00000040289	Hey1	AI316788|AI414254|CHF2|HRT1|Herp2|Hesr1|bHLHb31|hesr-1	hairy/enhancer-of-split related with YRPW motif 1	protein-coding
881	chr15	89245375	89262420	+	0	NA	intron (NM_009948, intron 7 of 18)	intron (NM_009948, intron 7 of 18)	2396	NM_009948	12895	Mm.227738	NM_009948	ENSMUSG00000078937	Cpt1b	Cpt1|Cpt1-m|Cpti|Cpti-m|M-cpti	carnitine palmitoyltransferase 1b, muscle	protein-coding
2461	chr9	107852789	107853329	+	0	NA	promoter-TSS (NM_011634)	promoter-TSS (NM_011634)	-235	NM_011634	22036	Mm.297870	NM_011634	ENSMUSG00000032586	Traip	Trip	TRAF-interacting protein	protein-coding
45	chr1	55108217	55112503	+	0	NA	intron (NM_026424, intron 1 of 3)	intron (NM_026424, intron 1 of 3)	746	NM_001039710	67876	Mm.281019	NM_026424	ENSMUSG00000025981	Coq10b	1500041J02Rik|1700030I21Rik|9530077A17Rik|AV002237|AW742641	coenzyme Q10 homolog B (S. cerevisiae)	protein-coding
405	chr11	79805883	79807572	+	0	NA	5' UTR (NM_001163018, exon 1 of 15)	5' UTR (NM_001163018, exon 1 of 15)	119	NM_199196	52615	Mm.283410	NM_199196	ENSMUSG00000017548	Suz12	2610028O16Rik|AI195385|AU016842|AW536442|D11Ertd530e|mKIAA0160	suppressor of zeste 12 homolog (Drosophila)	protein-coding
507	chr12	66273529	66274649	+	0	NA	promoter-TSS (NM_172578)	promoter-TSS (NM_172578)	-522	NM_172578	217653	Mm.21144	NM_172578	ENSMUSG00000047534	Mis18bp1	6720403H11|C79407|Knl2|mKIAA1903	MIS18 binding protein 1	protein-coding
1173	chr18	39638461	39651736	+	0	NA	intron (NM_008173, intron 1 of 7)	intron (NM_008173, intron 1 of 7)	1801	NM_008173	14815	Mm.129481	NM_008173	ENSMUSG00000024431	Nr3c1	GR|Grl-1|Grl1	nuclear receptor subfamily 3, group C, member 1	protein-coding
1963	chr6	35127065	35128081	+	0	NA	promoter-TSS (NM_027513)	promoter-TSS (NM_027513)	-43	NM_027513	70699	Mm.261208	NM_027513	ENSMUSG00000038759	Nup205	3830404O05Rik|AV248391|mKIAA0225	nucleoporin 205	protein-coding
309	chr11	3022784	3024851	+	0	NA	promoter-TSS (NR_003518)	promoter-TSS (NR_003518)	-207	NR_003517	236604	Mm.247625	NM_001004146		Pisd-ps1	-	phosphatidylserine decarboxylase, pseudogene 1	pseudo
1734	chr4	125874187	125882118	+	0	NA	intron (NM_146153, intron 1 of 10)	intron (NM_146153, intron 1 of 10)	1802	NM_146153	230753	Mm.29813	NM_146153	ENSMUSG00000043962	Thrap3	9330151F09Rik|B230333E16Rik|Trap150	thyroid hormone receptor associated protein 3	protein-coding
2085	chr7	25290770	25293236	+	0	NA	promoter-TSS (NM_001290461)	promoter-TSS (NM_001290461)	-103	NM_001290461	232969	Mm.181332	NM_146183	ENSMUSG00000064264	Zfp428	2410005H09Rik|AV271806|AW047854|Znf428	zinc finger protein 428	protein-coding
1733	chr4	124762115	124763120	+	0	NA	intron (NM_001290701, intron 1 of 6)	CpG	239	NM_001290701	70088	Mm.291214	NM_027310	ENSMUSG00000028863	Meaf6	2310005N01Rik|2810036M01Rik	MYST/Esa1-associated factor 6	protein-coding
2113	chr7	50698034	50706284	+	0	NA	intron (NM_026695, intron 1 of 5)	intron (NM_026695, intron 1 of 5)	2717	NR_075104	110826	Mm.30200	NM_026695	ENSMUSG00000004610	Etfb	0610009I16Rik|2810441H06Rik	electron transferring flavoprotein, beta polypeptide	protein-coding
2153	chr7	97623806	97625638	+	0	NA	promoter-TSS (NM_026734)	promoter-TSS (NM_026734)	-217	NM_026734	68472	Mm.289791	NM_026734		Tmem126b	1110001A23Rik	transmembrane protein 126B	protein-coding
1258	chr19	33663962	33665097	+	0	NA	5' UTR (NM_001013770, exon 1 of 11)	5' UTR (NM_001013770, exon 1 of 11)	272	NM_001013770	381236	Mm.491242	NM_001013770	ENSMUSG00000024766	Lipo1	AI747699	lipase, member O1	protein-coding
824	chr15	36537389	36539922	+	0	NA	promoter-TSS (NM_008774)	promoter-TSS (NM_008774)	73	NM_008774	18458	Mm.371570	NM_008774	ENSMUSG00000022283	Pabpc1	PABP|Pabp1|PabpI|Pabpl1|ePAB	poly(A) binding protein, cytoplasmic 1	protein-coding
120	chr1	136351572	136352513	+	0	NA	promoter-TSS (NM_153128)	promoter-TSS (NM_153128)	-90	NM_153128	240756	Mm.87398	NM_153128	ENSMUSG00000026455	Klhl12	C3ip1	kelch-like 12	protein-coding
1148	chr18	24761392	24762913	+	0	NA	promoter-TSS (NM_021448)	promoter-TSS (NM_021448)	166	NM_139143	106957	Mm.21688	NM_139143	ENSMUSG00000024270	Slc39a6	Ermelin	solute carrier family 39 (metal ion transporter), member 6	protein-coding
2386	chr9	51085452	51087704	+	0	NA	promoter-TSS (NM_001195681)	promoter-TSS (NM_001195681)	81	NM_001195681	100502940	Mm.235705	NM_001195681	ENSMUSG00000079559	Gm684	-	predicted gene 684	protein-coding
2313	chr8	107693858	107696378	+	0	NA	intron (NM_001161456, intron 1 of 4)	CpG	544	NM_001161458	12400	Mm.2018	NM_022309	ENSMUSG00000031885	Cbfb	AI893578|PEA2|PEBP2b|Pebp2|Pebpb2	core binding factor beta	protein-coding
254	chr10	80118456	80166181	+	0	NA	Intergenic	Intergenic	-7597	NM_021462	17347	Mm.42126	NM_021462	ENSMUSG00000020190	Mknk2	2010016G11Rik|Gprk7|Mnk2	MAP kinase-interacting serine/threonine kinase 2	protein-coding
392	chr11	72860801	72862964	+	0	NA	intron (NM_025818, intron 1 of 12)	CpG	513	NM_025818	66874	Mm.41903	NM_025818		1200014J11Rik	C130061O14Rik|C78393	RIKEN cDNA 1200014J11 gene	protein-coding
1321	chr2	26819440	26820630	+	0	NA	promoter-TSS (NM_207234)	promoter-TSS (NM_207234)	-129	NM_207234	227656	Mm.291874	NM_207234	ENSMUSG00000052406	Rexo4	Gm111|Xpmc2h	REX4, RNA exonuclease 4 homolog (S. cerevisiae)	protein-coding
2242	chr8	28131910	28134952	+	0	NA	promoter-TSS (NM_153592)	promoter-TSS (NM_153592)	-840	NM_153592	244373	Mm.277699	NM_153592	ENSMUSG00000031483	Erlin2	BC036333|C87251|Spfh2	ER lipid raft associated 2	protein-coding
2442	chr9	95854514	95855978	+	0	NA	promoter-TSS (NM_011916)	promoter-TSS (NM_011916)	67	NM_011916	24127	Mm.291179	NM_011916	ENSMUSG00000032410	Xrn1	Dhm2|exo|mXrn1	5'-3' exoribonuclease 1	protein-coding
2254	chr8	47771926	47772857	+	0	NA	Intergenic	Intergenic	52478	NR_045750	100503498	Mm.187358	NR_045750	ENSMUSG00000097534	Gm16675	-	predicted gene, 16675	ncRNA
1987	chr6	51418273	51422082	+	0	NA	promoter-TSS (NM_007624)	promoter-TSS (NM_007624)	-284	NM_016806	53379	Mm.155896	NM_016806		Hnrnpa2b1	9130414A06Rik|Hnrpa2|Hnrpa2b1|hnrnp-A	heterogeneous nuclear ribonucleoprotein A2/B1	protein-coding
813	chr15	11924497	11926130	+	0	NA	intron (NM_011294, intron 1 of 4)	CpG	449	NM_011294	20024	Mm.41746	NM_011294	ENSMUSG00000022205	Sub1	AI842364|P15|P9|Pc4|Rpo2tc1	SUB1 homolog (S. cerevisiae)	protein-coding
2014	chr6	86464355	86478694	+	0	NA	Intergenic	ID_B1|SINE|B4	4635	NM_011865	23983	Mm.274146	NM_011865	ENSMUSG00000051695	Pcbp1	WBP17|[a]CP-1|alphaCP-1	poly(rC) binding protein 1	protein-coding
644	chr13	74075148	74075849	+	0	NA	promoter-TSS (NM_027182)	promoter-TSS (NM_027182)	212	NM_001024508	105246	Mm.278509	NM_001024508	ENSMUSG00000057649	Brd9	AL022779	bromodomain containing 9	protein-coding
2477	chr9	120036088	120037614	+	0	NA	promoter-TSS (NM_011029)	promoter-TSS (NM_011029)	-33	NM_011029	16785	Mm.4071	NM_011029	ENSMUSG00000032518	Rpsa	67kDa|67lr|AL022858|Lamr|Lamr1|Lamrl1|MLR|P40|P40-3|P40-8	ribosomal protein SA	protein-coding
851	chr15	66408713	66410197	+	0	NA	intron (NM_001081409, intron 1 of 20)	CpG	321	NM_001081409	239510	Mm.267473	NM_178718	ENSMUSG00000072501	Phf20l1	CGI-72|E130113K22Rik	PHD finger protein 20-like 1	protein-coding
1820	chr5	31828739	31829648	+	0	NA	promoter-TSS (NM_009206)	promoter-TSS (NM_009206)	-58	NM_028150	72195	Mm.164187	NM_028150	ENSMUSG00000053134	Supt7l	2610524B01Rik|6030455L14Rik	suppressor of Ty 7-like	protein-coding
399	chr11	76029916	76031618	+	0	NA	promoter-TSS (NM_021294)	promoter-TSS (NM_021294)	307	NM_177367	276919	Mm.482713	NM_177367	ENSMUSG00000049396	Gemin4	4932415L08Rik|AU015359	gem (nuclear organelle) associated protein 4	protein-coding
2296	chr8	87822675	87824365	+	0	NA	promoter-TSS (NM_019716)	promoter-TSS (NM_019716)	-11	NM_001163791	56452	Mm.29709	NM_019716	ENSMUSG00000031697	Orc6	6720420I10Rik|Orc6l	origin recognition complex, subunit 6	protein-coding
2110	chr7	48648270	48649461	+	0	NA	promoter-TSS (NM_001199330)	promoter-TSS (NM_001199330)	-116	NM_001199330	233168	Mm.379390	NM_183167		AI987944	-	expressed sequence AI987944	protein-coding
1811	chr5	25031785	25036810	+	0	NA	Intergenic	B1_Mus1|SINE|Alu	-1539	NR_027388	73571	Mm.105263	NR_027388		1700096K18Rik	-	RIKEN cDNA 1700096K18 gene	ncRNA
436	chr11	97642929	97644353	+	0	NA	promoter-TSS (NR_028078)	promoter-TSS (NR_028078)	112	NM_022891	65019	Mm.140380	NM_022891	ENSMUSG00000071415	Rpl23	2810009A01Rik	ribosomal protein L23	protein-coding
1342	chr2	48668643	48671051	+	0	NA	5' UTR (NM_007396, exon 1 of 11)	5' UTR (NM_007396, exon 1 of 11)	218	NM_007396	11480	Mm.314338	NM_007396	ENSMUSG00000052155	Acvr2a	ActrIIa|Acvr2|TactrII	activin receptor IIA	protein-coding
2457	chr9	106586965	106588821	+	0	NA	5' UTR (NM_011573, exon 1 of 6)	5' UTR (NM_011573, exon 1 of 6)	254	NM_011573	21767	Mm.22266	NM_011573	ENSMUSG00000040813	Tex264	TEG-264	testis expressed gene 264	protein-coding
1968	chr6	39066352	39070843	+	0	NA	promoter-TSS (NM_172893)	promoter-TSS (NM_172893)	125	NR_045813	75379	Mm.348014	NR_045813	ENSMUSG00000073144	4930599N23Rik	-	RIKEN cDNA 4930599N23 gene	ncRNA
1802	chr5	20830178	20838597	+	0	NA	intron (NM_029195, intron 4 of 18)	PB1D9|SINE|Alu	-44104	NM_008013	14190	Mm.292100	NM_008013	ENSMUSG00000039899	Fgl2	AI385601|musfiblp	fibrinogen-like protein 2	protein-coding
94	chr1	90173464	90174756	+	0	NA	promoter-TSS (NM_198652)	promoter-TSS (NM_198652)	22	NM_172505	212427	Mm.384762	NM_172505		A730008H23Rik	mFleg1	RIKEN cDNA A730008H23 gene	protein-coding
213	chr10	43173836	43175363	+	0	NA	intron (NM_001168289, intron 7 of 7)	intron (NM_001168289, intron 7 of 7)	-24347	NM_199028	331623	Mm.490388	NM_199028	ENSMUSG00000038214	Bend3	mKIAA1553	BEN domain containing 3	protein-coding
1450	chr2	166840100	166841323	+	0	NA	promoter-TSS (NM_153065)	promoter-TSS (NM_153065)	-102	NM_153065	228889	Mm.295031	NM_153065	ENSMUSG00000017999	Ddx27	C86129	DEAD (Asp-Glu-Ala-Asp) box polypeptide 27	protein-coding
568	chr12	117285304	117287834	+	0	NA	intron (NM_001004066, intron 1 of 2)	intron (NM_001004066, intron 1 of 2)	634	NM_019565	56220	Mm.254997	NM_019565	ENSMUSG00000042063	Zfp386	Kzf1|mKIAA4205	zinc finger protein 386 (Kruppel-like)	protein-coding
2273	chr8	74432094	74433288	+	0	NA	intron (NM_001166645, intron 1 of 2)	CpG	186	NM_001166645	382019	Mm.251482	NM_001166645		Zfp882	ENSMUSG00000052439|Gm15468|OTTMUSG00000022410	zinc finger protein 882	protein-coding
2411	chr9	66642304	66644330	+	0	NA	promoter-TSS (NM_177583)	promoter-TSS (NM_177583)	-87	NM_177583	208117	Mm.41291	NM_177583	ENSMUSG00000032375	Aph1b	2310057K14Rik|Aph1c	anterior pharynx defective 1b homolog (C. elegans)	protein-coding
1129	chr18	5333514	5335617	+	0	NA	promoter-TSS (NM_178722)	promoter-TSS (NM_178722)	-128	NM_178722	240186	Mm.118257	NM_178722	ENSMUSG00000050945	Zfp438	9430031G09|9430091M14Rik|B830013J05Rik	zinc finger protein 438	protein-coding
791	chr14	102127711	102129796	+	0	NA	promoter-TSS (NM_201529)	promoter-TSS (NM_201529)	-392	NM_201529	380928	Mm.218981	NM_201529	ENSMUSG00000033060	Lmo7	C78582|FBXO20|Gm914|mKIAA0858	LIM domain only 7	protein-coding
1143	chr18	14840171	14842162	+	0	NA	intron (NM_001161370, intron 1 of 9)	CpG	257	NM_001161369	268996	Mm.31761	NM_009280	ENSMUSG00000037013	Ss18	D130059H17|Ssxt|Syt	synovial sarcoma translocation, Chromosome 18	protein-coding
1355	chr2	61291163	61292737	+	0	NA	Intergenic	Intergenic	-124693	NM_011529	21353	Mm.244393	NM_011529	ENSMUSG00000064289	Tank	C86182|E430026L09Rik|I-TRAF	TRAF family member-associated Nf-kappa B activator	protein-coding
2231	chr8	13282442	13288665	+	0	NA	intron (NM_001042650, intron 1 of 4)	intron (NM_001042650, intron 1 of 4)	-2460	NM_172282	234076	Mm.219813	NM_172282	ENSMUSG00000038497	Tmco3	B230339H12Rik|C87304	transmembrane and coiled-coil domains 3	protein-coding
1961	chr6	34333926	34335275	+	0	NA	intron (NM_172398, intron 1 of 9)	intron (NM_172398, intron 1 of 9)	353	NM_172398	67861	Mm.70371	NM_172398	ENSMUSG00000061758	Akr1b10	2310005E10Rik|Akr1b16	aldo-keto reductase family 1, member B10 (aldose reductase)	protein-coding
386	chr11	69793178	69814793	+	0	NA	promoter-TSS (NM_019749)	promoter-TSS (NM_019749)	-887	NM_019749	56486	Mm.272460	NM_019749	ENSMUSG00000018567	Gabarap	-	gamma-aminobutyric acid receptor associated protein	protein-coding
916	chr16	13109332	13110559	+	0	NA	5' UTR (NM_015769, exon 1 of 11)	5' UTR (NM_015769, exon 1 of 11)	116	NM_015769	50505	Mm.287837	NM_015769		Ercc4	AI606920|Xpf	excision repair cross-complementing rodent repair deficiency, complementation group 4	protein-coding
2043	chr6	120592655	120599127	+	0	NA	Intergenic	PB1D9|SINE|Alu	-20548	NM_001128151	330409	Mm.333357	NM_001128151	ENSMUSG00000071226	Cecr2	2610101O16Rik|2810409N01Rik|Gtl4|mKIAA1740	cat eye syndrome chromosome region, candidate 2	protein-coding
1457	chr2	170334647	170337314	+	0	NA	promoter-TSS (NM_001110152)	promoter-TSS (NM_001110152)	-750	NM_001110152	109054	Mm.28808	NM_001013369	ENSMUSG00000052033	Pfdn4	0610025M10Rik|1810063B06Rik|C-1|C1|Pfd4	prefoldin 4	protein-coding
200	chr10	33670194	33671427	+	0	NA	intron (NM_028287, intron 1 of 9)	CpG	208	NM_028287	72580	Mm.479929	NM_028287	ENSMUSG00000039531	Zufsp	2700019D07Rik	zinc finger with UFM1-specific peptidase domain	protein-coding
1261	chr19	36239288	36244420	+	0	NA	Intergenic	Intergenic	-47520	NM_013468	107765	Mm.10279	NM_013468	ENSMUSG00000024803	Ankrd1	Alrp|CARP|Crap|MARP1	ankyrin repeat domain 1 (cardiac muscle)	protein-coding
1352	chr2	60047049	60050229	+	0	NA	intron (NM_020575, intron 1 of 9)	intron (NM_020575, intron 1 of 9)	646	NM_020575	57438	Mm.260635	NM_020575	ENSMUSG00000026977	March7	Axo|Axot|Gtrgeo17	membrane-associated ring finger (C3HC4) 7	protein-coding
329	chr11	20729165	20732023	+	0	NA	intron (NM_173752, intron 1 of 4)	CpG	517	NM_173752	216551	Mm.76694	NM_173752	ENSMUSG00000042363	Lgalsl	1110067D22Rik|A530071M23|Grpa|Hspc159|Lgalsla	lectin, galactoside binding-like	protein-coding
525	chr12	79849248	79851204	+	0	NA	intron (NM_019579, intron 1 of 14)	CpG	292	NM_019579	56217	Mm.425777	NM_019579	ENSMUSG00000021112	Mpp5	3830420B02Rik|AI255216|AI644496|Pals1	membrane protein, palmitoylated 5 (MAGUK p55 subfamily member 5)	protein-coding
1621	chr3	151871714	151875526	+	0	NA	promoter-TSS (NM_027287)	promoter-TSS (NM_027287)	198	NM_057172	51886	Mm.278922	NM_057172	ENSMUSG00000028034	Fubp1	9530027K12Rik|D3Ertd330e|FBP|Fubp|Fubp4	far upstream element (FUSE) binding protein 1	protein-coding
27	chr1	36766100	36767351	+	0	NA	promoter-TSS (NM_146107)	promoter-TSS (NM_146107)	45	NM_146107	226977	Mm.28521	NM_146107	ENSMUSG00000037351	Actr1b	2310066K23Rik|AA960180|AI851923|Arp1b	ARP1 actin-related protein 1B, centractin beta	protein-coding
787	chr14	80111961	80114013	+	0	NA	TTS (NR_045060)	TTS (NR_045060)	10260	NR_045060	73989	Mm.107775	NR_045060		4930452G13Rik	-	RIKEN cDNA 4930452G13 gene	ncRNA
2331	chr8	122081826	122083344	+	0	NA	promoter-TSS (NM_019709)	promoter-TSS (NM_019709)	76	NM_001167910	56453	Mm.206934	NM_019709	ENSMUSG00000031835	Mbtps1	0610038M03Rik|AV003995|S1P|SKI-1|Ski1|mKIAA0091	membrane-bound transcription factor peptidase, site 1	protein-coding
1902	chr5	123270735	123272066	+	0	NA	promoter-TSS (NM_001042491)	promoter-TSS (NM_001042491)	-49	NM_001289517	59008	Mm.332667	NM_021505	ENSMUSG00000029472	Anapc5	2510006G12Rik|AA408751|AA536819|AA986414|APC5|Anpc5	anaphase-promoting complex subunit 5	protein-coding
1561	chr3	100725377	100727045	+	0	NA	promoter-TSS (NM_001165952)	promoter-TSS (NM_001165952)	-205	NM_001165952	229644	Mm.189351	NM_194343	ENSMUSG00000033233	Trim45	4921530N01Rik	tripartite motif-containing 45	protein-coding
161	chr1	180246454	180252234	+	0	NA	promoter-TSS (NM_025511)	promoter-TSS (NM_025511)	60	NM_025511	66359	Mm.489720	NM_025511	ENSMUSG00000026500	Cox20	2310005N03Rik|Fam36a	COX20 Cox2 chaperone	protein-coding
1866	chr5	90793465	90796507	+	0	NA	exon (NM_198010, exon 2 of 34)	exon (NM_198010, exon 2 of 34)	225	NM_030886	81702	Mm.245522	NM_030886	ENSMUSG00000055204	Ankrd17	4933425K22Rik|A130069E23Rik|A930008M01|AA407558|AA516750|AU040470|Foe|Gtar|Mask|mKIAA0697	ankyrin repeat domain 17	protein-coding
2001	chr6	67215954	67218239	+	0	NA	exon (NM_001113564, exon 1 of 8)	exon (NM_001113564, exon 1 of 8)	123	NM_025814	66870	Mm.240490	NM_025814	ENSMUSG00000036371	Serbp1	1200009K13Rik|9330147J08Rik|AL022786|Pairbp1	serpine1 mRNA binding protein 1	protein-coding
1310	chr2	17967520	17988090	+	0	NA	intron (NM_010804, intron 1 of 22)	intron (NM_010804, intron 1 of 22)	941	NM_010804	17354	Mm.209175	NM_010804	ENSMUSG00000026743	Mllt10	Af10|B130021D15Rik|D630001B22Rik|mKIAA4140	myeloid/lymphoid or mixed-lineage leukemia (trithorax homolog, Drosophila); translocated to, 10	protein-coding
109	chr1	130140346	130141831	+	0	NA	exon (NM_026390, exon 1 of 13)	exon (NM_026390, exon 1 of 13)	330	NM_026390	67812	Mm.293321	NM_026390	ENSMUSG00000026353	Ubxn4	1300013G12Rik|Ubxd2|mKIAA0242	UBX domain protein 4	protein-coding
2115	chr7	51501190	51502813	+	0	NA	promoter-TSS (NM_025880)	promoter-TSS (NM_025880)	-91	NM_025880	668661	Mm.274492	NM_025880	ENSMUSG00000045411	2410002F23Rik	-	RIKEN cDNA 2410002F23 gene	protein-coding
2318	chr8	112131975	112133542	+	0	NA	promoter-TSS (NM_020046)	promoter-TSS (NM_020046)	-185	NM_020046	56749	Mm.23894	NM_020046	ENSMUSG00000031730	Dhodh	2810417D19Rik|AI834883	dihydroorotate dehydrogenase	protein-coding
1239	chr19	12861896	12875714	+	0	NA	intron (NR_024093, intron 1 of 12)	intron (NR_024093, intron 1 of 12)	1808	NR_024093	664779	Mm.290924	NM_001039718		Zfp91Cntf	Zfp91-Cntf	Zfp91-Cntf readthrough transcript (NMD candidate)	ncRNA
769	chr14	69954797	69955930	+	0	NA	promoter-TSS (NR_045091)	promoter-TSS (NR_045091)	155	NM_026174	67464	Mm.489765	NM_026174	ENSMUSG00000095463	Entpd4	1200014F22Rik|4930513O14Rik|A430102M06Rik|AI414893|Lysal1|mKIAA0392	ectonucleoside triphosphate diphosphohydrolase 4	protein-coding
1556	chr3	96327584	96331005	+	0	NA	intron (NM_027126, intron 1 of 3)	intron (NM_027126, intron 1 of 3)	186	NM_027126	69585	Mm.171314	NM_027126	ENSMUSG00000038403	Hfe2	2310035L15Rik|5230400G09Rik|AI414844|AI789733|DL-M|HJV|Rgmc|hemojuvelin	hemochromatosis type 2 (juvenile) (human homolog)	protein-coding
1181	chr18	58037273	58040153	+	0	NA	exon (NM_009194, exon 1 of 27)	exon (NM_009194, exon 1 of 27)	381	NM_009194	20496	Mm.399997	NM_009194	ENSMUSG00000024597	Slc12a2	9330166H04Rik|Nkcc1|mBSC2|sy-ns	solute carrier family 12, member 2	protein-coding
1809	chr5	24728336	24729502	+	0	NA	intron (NM_144908, intron 1 of 11)	CpG	208	NM_144908	231050	Mm.246718	NM_144908	ENSMUSG00000038072	Galnt11	A430075I06Rik|AI648252|E430002F06Rik	UDP-N-acetyl-alpha-D-galactosamine:polypeptide N-acetylgalactosaminyltransferase 11	protein-coding
803	chr15	3530231	3533808	+	0	NA	promoter-TSS (NM_001286370)	promoter-TSS (NM_001286370)	-177	NM_001286370	14600	Mm.3986	NM_010284	ENSMUSG00000055737	Ghr	GHBP|GHR/BP	growth hormone receptor	protein-coding
1766	chr4	138907852	138908893	+	0	NA	promoter-TSS (NM_001039200)	promoter-TSS (NM_001039200)	119	NM_001290810	69902	Mm.27871	NM_023536	ENSMUSG00000028741	Mrto4	2610012O22Rik|Mg684|Mrt4	MRT4, mRNA turnover 4, homolog (S. cerevisiae)	protein-coding
60	chr1	60399267	60403252	+	0	NA	intron (NM_030013, intron 1 of 12)	ID_B1|SINE|B4	1043	NM_030013	77951	Mm.197640	NM_030013		Cyp20a1	A930011N14Rik|Cypm	cytochrome P450, family 20, subfamily a, polypeptide 1	protein-coding
1245	chr19	21986517	21990956	+	0	NA	Intergenic	Intergenic	135906	NM_031997	83921	Mm.329776	NM_031997	ENSMUSG00000024754	Tmem2	-	transmembrane protein 2	protein-coding
1400	chr2	122174036	122175352	+	0	NA	TTS (NM_001099297)	TTS (NM_001099297)	19960	NM_001013829	435684	Mm.458215	NM_001013829	ENSMUSG00000033256	Shf	-	Src homology 2 domain containing F	protein-coding
1067	chr17	34692809	34703180	+	0	NA	Intergenic	Intergenic	-3246	NM_010929	18132	Mm.173813	NM_010929	ENSMUSG00000015468	Notch4	Int-3|Int3|N4	notch 4	protein-coding
691	chr13	110611577	110615362	+	0	NA	intron (NM_011056, intron 7 of 16)	(CA)n|Simple_repeat|Simple_repeat	-80548	NR_035442	100316683		NR_035442		Mir1904	Mirn1904|mmu-mir-1904	microRNA 1904	ncRNA
1676	chr4	53024364	53025656	+	0	NA	intron (NM_025623, intron 1 of 5)	CpG	214	NM_025623	66536	Mm.38244	NM_025623	ENSMUSG00000015247	Nipsnap3b	2700063N13Rik|Nipsnap3a	nipsnap homolog 3B (C. elegans)	protein-coding
1388	chr2	119372169	119375197	+	0	NA	promoter-TSS (NM_172857)	promoter-TSS (NM_172857)	240	NM_019769	56398	Mm.214765	NM_019769	ENSMUSG00000014077	Chp1	1500003O03Rik|AA960066|AI046351|Cahp|Chp|Sid470p|p24|vac	calcineurin-like EF hand protein 1	protein-coding
346	chr11	32353309	32356812	+	0	NA	promoter-TSS (NM_173784)	promoter-TSS (NM_173784)	-312	NM_173784	327900	Mm.260956	NM_173784		Ubtd2	4930571L24|9630054F20Rik|AI645720	ubiquitin domain containing 2	protein-coding
911	chr16	8662784	8672676	+	0	NA	intron (NM_025821, intron 1 of 3)	intron (NM_025821, intron 1 of 3)	4516	NM_025821	52502	Mm.142095	NM_025821	ENSMUSG00000008393	Carhsp1	1200011K09Rik|Crhsp-24|D16Ertd465e	calcium regulated heat stable protein 1	protein-coding
427	chr11	94182209	94191206	+	0	NA	Intergenic	ID2|SINE|ID	-2608	NM_027799	71452	Mm.141054	NM_027799	ENSMUSG00000020864	Ankrd40	1110011C06Rik|5530600A18Rik|Gcap15	ankyrin repeat domain 40	protein-coding
2072	chr7	4965527	4973848	+	0	NA	exon (NM_025324, exon 2 of 2)	exon (NM_025324, exon 2 of 2)	-2291	NM_001290426	319748	Mm.86607	NM_001033383	ENSMUSG00000074405	Zfp865	6430526N21Rik|Znf865	zinc finger protein 865	protein-coding
82	chr1	87494731	87505773	+	0	NA	intron (NM_001013817, intron 1 of 16)	MERVL-int|LTR|ERVL	214	NM_175397	109032	Mm.335802	NM_030194	ENSMUSG00000070034	Sp110	5031415C07Rik|52kDa|5830484A20Rik|ENSMUSG00000075603|Ifi75|Ipr1	Sp110 nuclear body protein	protein-coding
2202	chr7	135109693	135118094	+	0	NA	intron (NM_139149, intron 3 of 14)	B1_Mur3|SINE|Alu	2900	NM_139149	233908	Mm.277680	NM_139149	ENSMUSG00000030795	Fus	D430004D17Rik|D930039C12Rik|Fus1|Tls	fused in sarcoma	protein-coding
650	chr13	74700886	74702438	+	0	NA	Intergenic	Intergenic	-70264	NM_146231	235956	Mm.296909	NM_146231		Zfp825	-	zinc finger protein 825	protein-coding
1154	chr18	32061190	32112379	+	0	NA	Intergenic	MT2A|LTR|ERVL	-4377	NM_144862	225341	Mm.24551	NM_144862	ENSMUSG00000024395	Lims2	PINCH2	LIM and senescent cell antigen like domains 2	protein-coding
895	chr15	99077536	99090850	+	0	NA	intron (NR_045627, intron 1 of 2)	MTEb|LTR|MaLR	-1801	NM_016766	51812	Mm.383472	NM_016766	ENSMUSG00000037570	Mcrs1	C78274|ICP22BP|MSP58|P78	microspherule protein 1	protein-coding
1763	chr4	137875735	137884577	+	0	NA	intron (NM_026880, intron 1 of 7)	intron (NM_026880, intron 1 of 7)	2055	NM_026880	68943	Mm.18539	NM_026880	ENSMUSG00000028756	Pink1	1190006F07Rik|AU042772|AW557854|BRPK|mFLJ00387	PTEN induced putative kinase 1	protein-coding
69	chr1	75137329	75140159	+	0	NA	promoter-TSS (NM_170755)	promoter-TSS (NM_170755)	198	NM_026977	69171	Mm.28193	NM_026977	ENSMUSG00000033159	Cnppd1	1810031K17Rik|AU043960	cyclin Pas1/PHO80 domain containing 1	protein-coding
1910	chr5	129797495	129806369	+	0	NA	Intergenic	Intergenic	199307	NM_001081342	243277	Mm.440501	NM_177734	ENSMUSG00000044017	Gpr133	E230012M21Rik	G protein-coupled receptor 133	protein-coding
1157	chr18	32399103	32400433	+	0	NA	promoter-TSS (NM_133658)	promoter-TSS (NM_133658)	-217	NM_133658	13872	Mm.282335	NM_133658	ENSMUSG00000024382	Ercc3	BTF2 p89|Ercc-3|XPB	excision repair cross-complementing rodent repair deficiency, complementation group 3	protein-coding
1470	chr2	181391506	181429092	+	0	NA	Intergenic	Intergenic	-3954	NM_009236	20672	Mm.264904	NM_009236	ENSMUSG00000046470	Sox18	AI385749|Ra|Ragl	SRY (sex determining region Y)-box 18	protein-coding
224	chr10	56093091	56108768	+	0	NA	intron (NM_010288, intron 1 of 1)	intron (NM_010288, intron 1 of 1)	3823	NM_010288	14609	Mm.378921	NM_010288	ENSMUSG00000050953	Gja1	AU042049|AW546267|Cnx43|Cx43|Cx43alpha1|Gja-1|Npm1|connexin43	gap junction protein, alpha 1	protein-coding
2100	chr7	31513569	31515401	+	0	NA	promoter-TSS (NM_027215)	promoter-TSS (NM_027215)	68	NM_027215	69804	Mm.27499	NM_027215	ENSMUSG00000006315	Tmem147	2010004E11Rik|5033425B17Rik|Nifie14	transmembrane protein 147	protein-coding
1982	chr6	49023259	49024856	+	0	NA	exon (NM_029353, exon 1 of 4)	exon (NM_029353, exon 1 of 4)	263	NM_029353	75593	Mm.439947	NM_029353	ENSMUSG00000029815	Malsu1	2410003K15Rik|Matsu1	mitochondrial assembly of ribosomal large subunit 1	protein-coding
1006	chr17	13199724	13203404	+	0	NA	intron (NM_013671, intron 2 of 4)	intron (NM_013671, intron 2 of 4)	859	NM_013671	20656	Mm.290876	NM_013671	ENSMUSG00000006818	Sod2	MnSOD|Sod-2	superoxide dismutase 2, mitochondrial	protein-coding
2393	chr9	54798025	54799317	+	0	NA	promoter-TSS (NM_145229)	promoter-TSS (NM_145229)	5	NM_011966	26441	Mm.30270	NM_011966	ENSMUSG00000032301	Psma4	C9	proteasome (prosome, macropain) subunit, alpha type 4	protein-coding
426	chr11	93847110	93869059	+	0	NA	intron (NM_027569, intron 1 of 28)	intron (NM_027569, intron 1 of 28)	679	NM_027569	70834	Mm.260737	NM_027569	ENSMUSG00000020859	Spag9	3110018C07Rik|4733401I23Rik|4831406C20Rik|AW552012|JLP|JSAP2|JSAP2a|Jip4|Mapk8ip4|syd1	sperm associated antigen 9	protein-coding
996	chr17	4992843	5008801	+	0	NA	intron (NM_001085355, intron 1 of 19)	intron (NM_001085355, intron 1 of 19)	5748	NM_001085355	239985	Mm.133401	NM_001085355	ENSMUSG00000069729	Arid1b	8030481M12|9330189K18Rik|AI836955|Ardi1b|B230217J03Rik|mKIAA1235	AT rich interactive domain 1B (SWI-like)	protein-coding
1435	chr2	156408498	156411770	+	0	NA	Intergenic	Intergenic	29024	NR_040372	100504350	Mm.94426	NR_040372	ENSMUSG00000086118	Gm14169	OTTMUSG00000015869	predicted gene 14169	ncRNA
1840	chr5	52580718	52582685	+	0	NA	promoter-TSS (NR_104311)	promoter-TSS (NR_104311)	84	NM_001042620	13204	Mm.993	NM_007839	ENSMUSG00000029169	Dhx15	DBP1|DEAH9|Ddx15|HRH2|mDEAH9	DEAH (Asp-Glu-Ala-His) box polypeptide 15	protein-coding
279	chr10	96772786	96776981	+	0	NA	Intergenic	Intergenic	-111229	NR_039547	100628616		NR_039547		Mir3966	mmu-mir-3966|mu-mir-3966	microRNA 3966	ncRNA
2408	chr9	63224831	63226309	+	0	NA	promoter-TSS (NM_011840)	promoter-TSS (NM_011840)	89	NM_011840	23938	Mm.325746	NM_011840	ENSMUSG00000058444	Map2k5	AI324775|AI428457|MEK5|Mapkk5|Prkmk5	mitogen-activated protein kinase kinase 5	protein-coding
2069	chr7	3616153	3618823	+	0	NA	promoter-TSS (NM_027203)	promoter-TSS (NM_027203)	-46	NM_027203	69757	Mm.389782	NM_027203	ENSMUSG00000078813	Leng1	1500001K17Rik	leukocyte receptor cluster (LRC) member 1	protein-coding
956	chr16	38522069	38523720	+	0	NA	promoter-TSS (NM_024273)	promoter-TSS (NM_024273)	-147	NM_024273	76916	Mm.132231	NM_024273		Timmdc1	2810021C21Rik|4930455C21Rik|AV135763	translocase of inner mitochondrial membrane domain containing 1	protein-coding
483	chr12	32339126	32340397	+	0	NA	promoter-TSS (NM_028002)	promoter-TSS (NM_028002)	27	NM_001163126	238123	Mm.173068	NM_001163126	ENSMUSG00000035933	Cog5	5430405C01Rik|C87247|D18362|GOLTC1|GTC90	component of oligomeric golgi complex 5	protein-coding
498	chr12	56180665	56182497	+	0	NA	promoter-TSS (NM_028314)	promoter-TSS (NM_028314)	98	NM_011899	24067	Mm.471968	NM_011899		Srp54a	54kDa|Srp54	signal recognition particle 54A	protein-coding
629	chr13	65379188	65380632	+	0	NA	promoter-TSS (NM_178364)	promoter-TSS (NM_178364)	-252	NM_178364	170936	Mm.151546	NM_178364	ENSMUSG00000021514	Zfp369	B930030B22Rik|D230020H11Rik|NRIF2	zinc finger protein 369	protein-coding
2055	chr6	134778872	134781011	+	0	NA	promoter-TSS (NM_177687)	promoter-TSS (NM_177687)	-276	NM_177687	232430	Mm.267010	NM_177687		Crebl2	AI046348|B230205M03	cAMP responsive element binding protein-like 2	protein-coding
1487	chr3	30687292	30693235	+	0	NA	Intergenic	RLTR22_Mur|LTR|ERVK	-1535	NM_027016	69276	Mm.26017	NM_027016	ENSMUSG00000027706	Sec62	3100002M17Rik|AI844545|AW545092|Dtrp1|HTP1|Tloc1	SEC62 homolog (S. cerevisiae)	protein-coding
372	chr11	61079773	61081845	+	0	NA	promoter-TSS (NM_007437)	promoter-TSS (NM_007437)	-180	NM_007437	11671	Mm.398221	NM_007437	ENSMUSG00000010025	Aldh3a2	AI194803|Ahd-3|Ahd-3r|Ahd3|Ahd3-r|Aldh4|Aldh4-r|FALDH	aldehyde dehydrogenase family 3, subfamily A2	protein-coding
2028	chr6	108518119	108521971	+	0	NA	Intergenic	Intergenic	53116	NR_040757	75394	Mm.395061	NR_040757	ENSMUSG00000087341	0610040F04Rik	-	RIKEN cDNA 0610040F04 gene	ncRNA
1540	chr3	89764111	89768645	+	0	NA	intron (NM_001081182, intron 1 of 27)	intron (NM_001081182, intron 1 of 27)	876	NM_001081182	54667	Mm.30455	NM_001081182	ENSMUSG00000060671	Atp8b2	Id	ATPase, class I, type 8B, member 2	protein-coding
1661	chr4	43504977	43507091	+	0	NA	promoter-TSS (NR_001460)	promoter-TSS (NR_001460)	-103	NR_001460	19782		NR_001460	ENSMUSG00000088088	Rmrp	1110032O22Rik|Rmrpr	RNA component of mitochondrial RNAase P	ncRNA
1330	chr2	34609174	34610683	+	0	NA	5' UTR (NM_025709, exon 2 of 27)	5' UTR (NM_025709, exon 2 of 27)	824	NM_025709	66691	Mm.156452	NM_025709	ENSMUSG00000026867	Gapvd1	2010005B09Rik|4432404J10Rik|AW108497|Gapex-5|RAP6|RME-6|mKIAA1521	GTPase activating protein and VPS9 domains 1	protein-coding
1284	chr19	47804388	47811313	+	0	NA	intron (NM_026377, intron 2 of 3)	intron (NM_026377, intron 2 of 3)	1604	NM_026377	67788	Mm.181610	NM_026377	ENSMUSG00000025066	Sfr1	6330577E15Rik|Meir5	SWI5 dependent recombination repair 1	protein-coding
1606	chr3	137802499	137808009	+	0	NA	intron (NM_001163457, intron 1 of 19)	intron (NM_001163457, intron 1 of 19)	1098	NM_001163457	17777	Mm.2941	NM_008642	ENSMUSG00000028158	Mttp	1810043K16Rik|MTP	microsomal triglyceride transfer protein	protein-coding
2064	chr6	146525594	146527660	+	0	NA	promoter-TSS (NM_138757)	promoter-TSS (NM_138757)	194	NM_026218	67529	Mm.333499	NM_026218	ENSMUSG00000040242	Fgfr1op2	1500031J01Rik	FGFR1 oncogene partner 2	protein-coding
1160	chr18	33954089	33955162	+	0	NA	promoter-TSS (NR_038151)	promoter-TSS (NR_038151)	79	NR_038151	69749	Mm.248787	NR_038151	ENSMUSG00000087590	2410004N09Rik	-	RIKEN cDNA 2410004N09 gene	ncRNA
99	chr1	95530624	95533211	+	0	NA	5' UTR (NM_021537, exon 2 of 12)	5' UTR (NM_021537, exon 2 of 12)	387	NM_021537	59041	Mm.28761	NM_021537	ENSMUSG00000026277	Stk25	1500019J11Rik|AU018434|C86992|Ste20-like|Ysk1	serine/threonine kinase 25 (yeast)	protein-coding
869	chr15	80778325	80779675	+	0	NA	promoter-TSS (NM_009634)	promoter-TSS (NM_009634)	80	NM_009634	11564	Mm.38151	NM_009634	ENSMUSG00000022407	Adsl	Adl|Asl	adenylosuccinate lyase	protein-coding
1592	chr3	126825910	126828097	+	0	NA	Intergenic	Intergenic	-37220	NR_105030	100862268	Mm.444603	NR_105029	ENSMUSG00000097456	LOC100862268	-	uncharacterized LOC100862268	ncRNA
1933	chr5	144491938	144494042	+	0	NA	intron (NM_029749, intron 1 of 17)	CpG	159	NM_029749	76800	Mm.259620	NM_029749	ENSMUSG00000051306	Usp42	2410140K03Rik|3110031A07Rik|A630018G05Rik|D5Ertd591e	ubiquitin specific peptidase 42	protein-coding
2022	chr6	92040730	92043026	+	0	NA	intron (NM_011630, intron 1 of 14)	CpG	466	NM_011630	22026	Mm.87062	NM_011630	ENSMUSG00000005893	Nr2c2	TAK1|Tr4|mKIAA4145	nuclear receptor subfamily 2, group C, member 2	protein-coding
790	chr14	100679931	100687013	+	0	NA	Intergenic	Intergenic	-134457	NM_010636	16597	Mm.396499	NM_010636		Klf12	2700063E05Rik|AI225908|AI315654|AP-2rep|B130052C06Rik|D530033K05Rik	Kruppel-like factor 12	protein-coding
533	chr12	84972348	84974173	+	0	NA	promoter-TSS (NM_027349)	promoter-TSS (NM_027349)	76	NM_027349	67039	Mm.46005	NM_027349	ENSMUSG00000010608	Rbm25	2600011C06Rik|2610015J01Rik|A130095G20Rik|AI159652|AL023075|AU043498|RNPC7	RNA binding motif protein 25	protein-coding
2080	chr7	19424593	19427486	+	0	NA	intron (NM_153760, intron 1 of 4)	intron (NM_153760, intron 1 of 4)	724	NM_153760	243864	Mm.233503	NM_153760	ENSMUSG00000040987	Mill2	Micb	MHC I like leukocyte 2	protein-coding
1122	chr17	87928599	87932353	+	0	NA	Intergenic	Intergenic	-84201	NM_007589	12314	Mm.329243	NM_007589	ENSMUSG00000036438	Calm2	1500001E21Rik|AL024017	calmodulin 2	protein-coding
2416	chr9	70390069	70392078	+	0	NA	intron (NM_026337, intron 1 of 20)	CpG	396	NM_025690	66660	Mm.22379	NM_025690	ENSMUSG00000032212	Sltm	5730455C01Rik|5730555F13Rik|9130215G10Rik|Met	SAFB-like, transcription modulator	protein-coding
1697	chr4	94704486	94721767	+	0	NA	Intergenic	Intergenic	5787	NM_010591	16476	Mm.275071	NM_010591	ENSMUSG00000052684	Jun	AP-1|Junc|c-jun	jun proto-oncogene	protein-coding
1053	chr17	29960012	29962582	+	0	NA	Intergenic	Intergenic	63530	NM_001081160	74762	Mm.40901	NM_001081160	ENSMUSG00000043557	Mdga1	1200011I03Rik|GPIM|Mamdc3	MAM domain containing glycosylphosphatidylinositol anchor 1	protein-coding
414	chr11	85123513	85127130	+	0	NA	exon (NM_016910, exon 1 of 6)	exon (NM_016910, exon 1 of 6)	565	NM_016910	53892	Mm.45609	NM_016910	ENSMUSG00000020525	Ppm1d	AV338790|Wip1	protein phosphatase 1D magnesium-dependent, delta isoform	protein-coding
462	chr11	120433493	120443942	+	0	NA	3' UTR (NM_133796, exon 6 of 6)	3' UTR (NM_133796, exon 6 of 6)	4217	NM_133796	192662	Mm.30016	NM_133796	ENSMUSG00000025132	Arhgdia	5330430M07Rik|Gdi-1|Rho-GDI|RhoDGI|RhoGDI-1	Rho GDP dissociation inhibitor (GDI) alpha	protein-coding
1770	chr4	142800932	142804399	+	0	NA	promoter-TSS (NM_001256380)	promoter-TSS (NM_001256380)	-53	NM_001256380	110593	Mm.332020	NM_001081355	ENSMUSG00000057637	Prdm2	4833427P12Rik|E330024L24Rik|Gm1033|Gm19732|KMT8|Riz|Riz1|Znfpr1c1	PR domain containing 2, with ZNF domain	protein-coding
1209	chr18	79302890	79307301	+	0	NA	intron (NM_053099, intron 1 of 5)	intron (NM_053099, intron 1 of 5)	1035	NM_053099	240427	Mm.312871	NM_053099	ENSMUSG00000024548	Setbp1	C130092E12|Seb|mKIAA0437	SET binding protein 1	protein-coding
263	chr10	81545641	81546725	+	0	NA	Intergenic	CpG	35311	NM_001024626	408062	Mm.391409	NM_001024626		Zfp873	-	zinc finger protein 873	protein-coding
991	chr17	3082849	3085029	+	0	NA	intron (NR_003519, intron 1 of 7)	intron (NR_003519, intron 1 of 7)	244	NR_003519	328734	Mm.335641	NR_003519		Pisd-ps2	D030013I16Rik	phosphatidylserine decarboxylase, pseudogene 2	pseudo
2348	chr9	14079167	14082208	+	0	NA	promoter-TSS (NM_030261)	promoter-TSS (NM_030261)	-58	NM_030261	75747	Mm.325126	NM_030261	ENSMUSG00000032009	Sesn3	5630400E15Rik|BC003348|SEST3	sestrin 3	protein-coding
931	chr16	17890834	17893002	+	0	NA	promoter-TSS (NM_001109750)	promoter-TSS (NM_001109750)	-97	NM_001109750	13356	Mm.254515	NM_010048	ENSMUSG00000003166	Dgcr2	9930034O06Rik|DGS-C|Dgsc|Idd|Lan|Sez12|mKIAA0163	DiGeorge syndrome critical region gene 2	protein-coding
2246	chr8	32278721	32280087	+	0	NA	promoter-TSS (NM_026453)	promoter-TSS (NM_026453)	-208	NM_026453	67920	Mm.289818	NM_026453	ENSMUSG00000031578	Mak16	2600016B03Rik|AI314911|Rbm13	MAK16 homolog (S. cerevisiae)	protein-coding
615	chr13	56235818	56237672	+	0	NA	5' UTR (NM_001159515, exon 1 of 9)	5' UTR (NM_001159515, exon 1 of 9)	166	NM_012015	26914	Mm.283802	NM_012015	ENSMUSG00000015937	H2afy	H2AF12M|mH2a1|macroH2A1	H2A histone family, member Y	protein-coding
476	chr12	21290977	21293675	+	0	NA	promoter-TSS (NM_008403)	promoter-TSS (NM_008403)	168	NM_018813	54451	Mm.356778	NM_018813	ENSMUSG00000054309	Cpsf3	-	cleavage and polyadenylation specificity factor 3	protein-coding
1198	chr18	69501585	69512589	+	0	NA	intron (NM_001083967, intron 2 of 19)	intron (NM_001083967, intron 2 of 19)	1712	NM_001083967	21413	Mm.4269	NM_013685	ENSMUSG00000053477	Tcf4	5730422P05Rik|ASP-I2|E2-2|E2.2|ITF-2|ITF-2b|ITF2|ME2|MITF-2A|MITF-2B|SEF-2|SEF2|SEF2-1|TFE|Tcf-4|bHLHb19	transcription factor 4	protein-coding
1626	chr3	157609359	157611047	+	0	NA	promoter-TSS (NM_001013806)	promoter-TSS (NM_001013806)	-227	NM_001013806	433667	Mm.265806	NM_001013806	ENSMUSG00000039988	Ankrd13c	AI505652|AU022220	ankyrin repeat domain 13c	protein-coding
1409	chr2	131058876	131061436	+	0	NA	intron (NM_144888, intron 1 of 6)	CpG	357	NM_144888	228607	Mm.287226	NM_144888	ENSMUSG00000037523	Mavs	D430028G21Rik|IPS-1|Visa|cardif	mitochondrial antiviral signaling protein	protein-coding
2219	chr7	148084691	148088773	+	0	NA	promoter-TSS (NM_007751)	promoter-TSS (NM_007751)	-387	NM_007751	12869	Mm.3841	NM_007751	ENSMUSG00000025488	Cox8b	Cox8h|CoxVIII-H	cytochrome c oxidase subunit VIIIb	protein-coding
2141	chr7	86609953	86612111	+	0	NA	5' UTR (NM_017462, exon 1 of 23)	5' UTR (NM_017462, exon 1 of 23)	127	NM_017462	18975	Mm.3616	NM_017462	ENSMUSG00000039176	Polg	AA409516|PolgA	polymerase (DNA directed), gamma	protein-coding
2464	chr9	108753635	108762229	+	0	NA	intron (NM_134420, intron 1 of 19)	intron (NM_134420, intron 1 of 19)	1558	NM_134420	171429	Mm.45201	NM_134420		Slc26a6	B930010B04Rik|CFEX|Pat-1|Pat1	solute carrier family 26, member 6	protein-coding
1077	chr17	45984036	45987638	+	0	NA	Intergenic	Intergenic	-115044	NM_028164	72240	Mm.482897	NM_028164	ENSMUSG00000094690	1600014C23Rik	-	RIKEN cDNA 1600014C23 gene	protein-coding
1716	chr4	115746905	115750581	+	0	NA	intron (NM_153521, intron 1 of 9)	CpG	673	NM_153521	230654	Mm.3655	NM_153521	ENSMUSG00000028703	Lrrc41	AA409966|AW555107|D630045E04Rik|D730026A16Rik|MUF1	leucine rich repeat containing 41	protein-coding
293	chr10	121533533	121535049	+	0	NA	promoter-TSS (NM_153059)	promoter-TSS (NM_153059)	-133	NM_153059	216395	Mm.236764	NM_153059		Tmem5	6330415D21Rik	transmembrane protein 5	protein-coding
1272	chr19	41985661	41988925	+	0	NA	intron (NM_023418, intron 1 of 3)	MIRc|SINE|MIR	932	NM_023418	18648	Mm.391589	NM_023418	ENSMUSG00000011752	Pgam1	2310050F24Rik|Pgam-1	phosphoglycerate mutase 1	protein-coding
1781	chr4	153516314	153516904	+	0	NA	exon (NM_021499, exon 1 of 12)	exon (NM_021499, exon 1 of 12)	128	NM_021499	59002	Mm.46508	NM_021499	ENSMUSG00000029029	Wrap73	2610044M17Rik|5330425N03Rik|Dd57|Wdr8	WD repeat containing, antisense to Trp73	protein-coding
1299	chr2	4172988	4175843	+	0	NA	intron (NM_172475, intron 1 of 22)	intron (NM_172475, intron 1 of 22)	100506	NM_172475	209630	Mm.37932	NM_172475	ENSMUSG00000026657	Frmd4a	2700017I06Rik|5330420J21|AI594879|C230040M21Rik|Frmd4|Gm13190|OTTMUSG00000010806|mKIAA1294	FERM domain containing 4A	protein-coding
1663	chr4	44180018	44182376	+	0	NA	promoter-TSS (NM_175201)	promoter-TSS (NM_175201)	-42	NM_001038993	73469	Mm.262859	NM_175201	ENSMUSG00000035696	Rnf38	1700065B19Rik|2610202O07Rik|AA673263|Oip1	ring finger protein 38	protein-coding
967	chr16	56716180	56718202	+	0	NA	intron (NM_019678, intron 1 of 7)	intron (NM_019678, intron 1 of 7)	372	NM_001252443	21787	Mm.425970	NM_019678	ENSMUSG00000022757	Tfg	AI173908	Trk-fused gene	protein-coding
2157	chr7	99889204	99891298	+	0	NA	promoter-TSS (NM_029494)	promoter-TSS (NM_029494)	27	NM_029494	75985	Mm.389966	NM_029494	ENSMUSG00000030643	Rab30	5033421K01Rik|AI323892|Rsb30	RAB30, member RAS oncogene family	protein-coding
1611	chr3	142155985	142162536	+	0	NA	promoter-TSS (NM_153564)	promoter-TSS (NM_153564)	-638	NM_153564	229898	Mm.459245	NM_153564	ENSMUSG00000040264	Gbp5	5330409J06Rik|Gbp5a	guanylate binding protein 5	protein-coding
322	chr11	11361617	11362654	+	0	NA	exon (NM_015785, exon 1 of 8)	exon (NM_015785, exon 1 of 8)	287	NM_015785	53604	Mm.9500	NM_015785	ENSMUSG00000020193	Zpbp	4930486K01Rik|Iam38|Sp38	zona pellucida binding protein	protein-coding
469	chr12	4775371	4776416	+	0	NA	promoter-TSS (NM_028376)	promoter-TSS (NM_028376)	180	NM_175431	207921	Mm.184898	NM_175431	ENSMUSG00000050545	Fam228b	A830093I24Rik	family with sequence similarity 228, member B	protein-coding
635	chr13	67406479	67408451	+	0	NA	promoter-TSS (NM_001003666)	promoter-TSS (NM_001003666)	-117	NM_001003666	431706	Mm.439456	NM_001003666	ENSMUSG00000055341	Zfp457	Rslcan-6	zinc finger protein 457	protein-coding
1088	chr17	56238493	56279816	+	0	NA	TTS (NM_029796)	TTS (NM_029796)	-2183	NM_025874	66968	Mm.254985	NM_025874	ENSMUSG00000011305	Plin5	2310076L09Rik|AI415325|AW109675|Lsdp5|MLDP|PAT-1	perilipin 5	protein-coding
575	chr13	9275424	9277505	+	0	NA	intron (NM_001081426, intron 1 of 36)	intron (NM_001081426, intron 1 of 36)	693	NM_001081426	208440	Mm.217326	NM_172459	ENSMUSG00000048264	Dip2c	2900024P20Rik|9630044M06|mKIAA0934	DIP2 disco-interacting protein 2 homolog C (Drosophila)	protein-coding
1835	chr5	42098340	42100054	+	0	NA	exon (NM_027295, exon 1 of 7)	exon (NM_027295, exon 1 of 7)	197	NM_027295	100972	Mm.41555	NM_027295	ENSMUSG00000029128	Rab28	2700023P08Rik|AW496496	RAB28, member RAS oncogene family	protein-coding
1566	chr3	103082588	103084560	+	0	NA	5' UTR (NM_053170, exon 1 of 20)	5' UTR (NM_053170, exon 1 of 20)	358	NM_001079830	94093	Mm.195036	NM_053170	ENSMUSG00000033014	Trim33	8030451N04Rik|AI413936|Ecto|Tif1g	tripartite motif-containing 33	protein-coding
979	chr16	85800258	85808039	+	0	NA	promoter-TSS (NM_009621)	promoter-TSS (NM_009621)	-788	NM_009621	11504	Mm.1421	NM_009621	ENSMUSG00000022893	Adamts1	ADAM-TS1|ADAMTS|ADAMTS-1|C3-C5|METH-1|METH1	a disintegrin-like and metallopeptidase (reprolysin type) with thrombospondin type 1 motif, 1	protein-coding
709	chr14	15177636	15179914	+	0	NA	promoter-TSS (NM_008369)	promoter-TSS (NM_008369)	-234	NM_008369	16188	Mm.425857	NM_008369	ENSMUSG00000068758	Il3ra	CD123|CDw123|SUT-1	interleukin 3 receptor, alpha chain	protein-coding
40	chr1	51534065	51537914	+	0	NA	promoter-TSS (NM_028696)	promoter-TSS (NM_028696)	-746	NM_028696	109019	Mm.196290	NM_028696	ENSMUSG00000026107	Nabp1	4930434H03Rik|4930442A21Rik|4930488J04Rik|4933440J18Rik|5830411E10Rik|AI852561|Nbp1|Obfc2a|Ssb2	nucleic acid binding protein 1	protein-coding
310	chr11	3044477	3050027	+	0	NA	intron (NM_030207, intron 14 of 32)	B2_Mm2|SINE|B2	23222	NR_003518	66776	Mm.247625	NR_003518		Pisd-ps3	4933439C20Rik	phosphatidylserine decarboxylase, pseudogene 3	pseudo
192	chr10	17741604	17743407	+	0	NA	intron (NM_028440, intron 1 of 2)	CpG	553	NM_028440	73112	Mm.276041	NM_028440	ENSMUSG00000078453	Abracl	1700028I04Rik|3110003A17Rik	ABRA C-terminal like	protein-coding
699	chr14	6169244	6171449	+	0	NA	intron (NM_001270812, intron 1 of 7)	CpG	70291	NM_001270812	100861615	Mm.488431	NM_001270812	ENSMUSG00000079396	LOC100861615	-	alpha takusan-like	protein-coding
1115	chr17	84578976	84596211	+	0	NA	promoter-TSS (NM_001001806)	promoter-TSS (NM_001001806)	-306	NM_001001806	12193	Mm.259321	NM_001001806	ENSMUSG00000045817	Zfp36l2	Brf2|ERF2|Tis11d	zinc finger protein 36, C3H type-like 2	protein-coding
960	chr16	44723128	44726720	+	0	NA	intron (NM_145972, intron 1 of 8)	intron (NM_145972, intron 1 of 8)	510	NM_145972	212547	Mm.310573	NM_145972	ENSMUSG00000036208	BC027231	Nepro	cDNA sequence BC027231	protein-coding
818	chr15	33012449	33013697	+	0	NA	5' UTR (NM_018755, exon 1 of 9)	5' UTR (NM_018755, exon 1 of 9)	189	NM_176073	54381	Mm.158251	NM_018755	ENSMUSG00000039007	Cpq	1190003P12Rik|2610034C17Rik|Hls2|Lal-1|Pgcp	carboxypeptidase Q	protein-coding
2363	chr9	26836516	26838708	+	0	NA	promoter-TSS (NM_178027)	promoter-TSS (NM_178027)	67	NM_178027	69091	Mm.218717	NM_178027	ENSMUSG00000031988	Vps26b	1810012I05Rik|2310075A12Rik|AI848392	vacuolar protein sorting 26 homolog B (yeast)	protein-coding
1038	chr17	23810213	23814688	+	0	NA	TTS (NM_181821)	TTS (NM_181821)	-1713	NM_001008425	386612	Mm.328831	NM_001008425	ENSMUSG00000041319	Thoc6	F830014G06Rik|Wdr58	THO complex 6 homolog (Drosophila)	protein-coding
2293	chr8	86707318	86747204	+	0	NA	Intergenic	Intergenic	-5156	NR_029740	387216		NR_029740	miRBase:MI0000571	Mir23a	Mirn23a|mmu-mir-23a	microRNA 23a	ncRNA
1707	chr4	108078110	108080034	+	0	NA	intron (NM_024198, intron 1 of 2)	CpG	246	NM_024198	67305	Mm.20164	NM_024198		Gpx7	3110050F08Rik|AI327032|GPX6	glutathione peroxidase 7	protein-coding
267	chr10	83692180	83694297	+	0	NA	Intergenic	Intergenic	209978	NM_001004363	77976	Mm.25874	NM_001004363	ENSMUSG00000020032	Nuak1	AU014801|AW494241|B230104P22Rik|Omphk1	NUAK family, SNF1-like kinase, 1	protein-coding
543	chr12	88606435	88608570	+	0	NA	promoter-TSS (NM_001142581)	promoter-TSS (NM_001142581)	-176	NM_146036	217737	Mm.22626	NM_146036	ENSMUSG00000021037	Ahsa1	BC023857|p38	AHA1, activator of heat shock protein ATPase 1	protein-coding
1892	chr5	116468471	116475160	+	0	NA	intron (NM_031869, intron 1 of 6)	intron (NM_031869, intron 1 of 6)	2622	NM_031869	19079	Mm.458152	NM_031869	ENSMUSG00000029513	Prkab1	1300015D22Rik|AU021155|E430008F22	protein kinase, AMP-activated, beta 1 non-catalytic subunit	protein-coding
1777	chr4	150567927	150569670	+	0	NA	intron (NM_001081557, intron 6 of 23)	intron (NM_001081557, intron 6 of 23)	-136736	NM_009498	22319	Mm.273930	NM_009498	ENSMUSG00000028955	Vamp3	D130027G05Rik|VAMP-3|ceb	vesicle-associated membrane protein 3	protein-coding
2044	chr6	120614959	120618400	+	0	NA	exon (NM_001128151, exon 1 of 19)	exon (NM_001128151, exon 1 of 19)	240	NM_001128151	330409	Mm.333357	NM_001128151	ENSMUSG00000071226	Cecr2	2610101O16Rik|2810409N01Rik|Gtl4|mKIAA1740	cat eye syndrome chromosome region, candidate 2	protein-coding
354	chr11	49525457	49527746	+	0	NA	promoter-TSS (NM_212484)	promoter-TSS (NM_212484)	-377	NM_212484	104625	Mm.247113	NM_212484	ENSMUSG00000020362	Cnot6	CCR4	CCR4-NOT transcription complex, subunit 6	protein-coding
1437	chr2	158235020	158236206	+	0	NA	promoter-TSS (NM_001291137)	promoter-TSS (NM_001291137)	24	NM_001291138	228850	Mm.398185	NM_177227	ENSMUSG00000027652	Ralgapb	9330195P16|AI507211|B230339M05Rik|mKIAA1219|p170	Ral GTPase activating protein, beta subunit (non-catalytic)	protein-coding
1064	chr17	34135758	34138362	+	0	NA	intron (NM_001001892, intron 1 of 7)	CpG-6273	218	NM_001001892	14972	Mm.422886	NM_001001892	ENSMUSG00000061232	H2-K1	H-2K|H-2K(d)|H2-K|K-f	histocompatibility 2, K1, K region	protein-coding
2517	chrX	91457586	91459054	+	0	NA	promoter-TSS (NM_012010)	promoter-TSS (NM_012010)	-330	NM_012010	26905	Mm.218851	NM_012010	ENSMUSG00000035150	Eif2s3x	AA409828|AA547477|AI314668|Eif-2gx	eukaryotic translation initiation factor 2, subunit 3, structural gene X-linked	protein-coding
757	chr14	59982591	59986293	+	0	NA	promoter-TSS (NM_199015)	promoter-TSS (NM_199015)	-115	NM_199015	219132	Mm.479285	NM_199015	ENSMUSG00000068245	Phf11d	D14Ertd668e|Phf11|Phf11l	PHD finger protein 11D	protein-coding
9	chr1	9787248	9790015	+	0	NA	intron (NM_177547, intron 1 of 16)	CpG	420	NM_177547	170755	Mm.336410	NM_133220	ENSMUSG00000025915	Sgk3	2510015P22Rik|A330005P07Rik|Cisk|fy|fz	serum/glucocorticoid regulated kinase 3	protein-coding
1217	chr19	3767089	3769923	+	0	NA	intron (NM_001167889, intron 2 of 10)	CpG-7177	1085	NM_001167885	225888	Mm.278578	NM_144871	ENSMUSG00000045098	Suv420h1	AA117471|C630029K18Rik|KMT5B|Suv4-20h1	suppressor of variegation 4-20 homolog 1 (Drosophila)	protein-coding
1740	chr4	129137978	129139818	+	0	NA	promoter-TSS (NM_133889)	promoter-TSS (NM_133889)	-25	NM_133889	100383	Mm.17918	NM_133889	ENSMUSG00000040859	Bsdc1	1110063F24Rik|AW011758	BSD domain containing 1	protein-coding
1600	chr3	132972869	132974235	+	0	NA	intron (NM_146141, intron 1 of 11)	CpG	478	NM_146141	74776	Mm.210305	NM_146141	ENSMUSG00000028013	Ppa2	1110013G13Rik|Sid6306	pyrophosphatase (inorganic) 2	protein-coding
603	chr13	45173957	45174597	+	0	NA	Intergenic	CpG	-76812	NM_025772	94245	Mm.352311	NM_025772	ENSMUSG00000057531	Dtnbp1	5430437B18Rik|AW048963|Bloc1s8|dysbindin|sdy	dystrobrevin binding protein 1	protein-coding
2527	chrX	131075342	131076811	+	0	NA	promoter-TSS (NM_013898)	promoter-TSS (NM_013898)	92	NM_013898	30058	Mm.214504	NM_013898	ENSMUSG00000048007	Timm8a1	DXHXS1274E|Ddp1|Fci-12|Tim8a|Timm8a	translocase of inner mitochondrial membrane 8A1	protein-coding
90	chr1	88599900	88601020	+	0	NA	promoter-TSS (NM_001172157)	promoter-TSS (NM_001172157)	81	NM_001172157	208718	Mm.389152	NM_153530	ENSMUSG00000053333	Dis3l2	4930429A22Rik|8030493P09Rik	DIS3 mitotic control homolog (S. cerevisiae)-like 2	protein-coding
1850	chr5	68085632	68091237	+	0	NA	intron (NM_001038999, intron 24 of 36)	intron (NM_001038999, intron 24 of 36)	89312	NM_001033415	330096	Mm.442747	NM_001033415	ENSMUSG00000050010	Shisa3	D830007B15Rik	shisa homolog 3 (Xenopus laevis)	protein-coding
565	chr12	114213918	114215840	+	0	NA	exon (NM_201646, exon 1 of 4)	exon (NM_201646, exon 1 of 4)	105	NM_201646	399566	Mm.440140	NM_201646	ENSMUSG00000002803	Btbd6	-	BTB (POZ) domain containing 6	protein-coding
1346	chr2	52600515	52602006	+	0	NA	promoter-TSS (NM_019667)	promoter-TSS (NM_019667)	-77	NM_019667	56324	Mm.263639	NM_019667	ENSMUSG00000055371	Stam2	1200004O12Rik|5730456G07Rik|BB145015|Hbp	signal transducing adaptor molecule (SH3 domain and ITAM motif) 2	protein-coding
1964	chr6	35488801	35490122	+	0	NA	intron (NM_008098, intron 1 of 3)	CpG	427	NM_008098	14489	Mm.182746	NM_008098	ENSMUSG00000029840	Mtpn	5033418D15Rik|Gcdp|V1	myotrophin	protein-coding
850	chr15	66390583	66393241	+	0	NA	intron (NM_172514, intron 1 of 9)	intron (NM_172514, intron 1 of 9)	696	NM_172514	213068	Mm.132299	NM_172514	ENSMUSG00000036944	Tmem71	AI661017|E430024D12	transmembrane protein 71	protein-coding
2424	chr9	74799533	74803723	+	0	NA	exon (NM_001113283, exon 2 of 13)	exon (NM_001113283, exon 2 of 13)	768	NM_001113283	235493	Mm.208955	NM_153584	ENSMUSG00000034858	Fam214a	6330415I01Rik|AI553555|C130047D21Rik|Kiaa1370|mKIAA1370	family with sequence similarity 214, member A	protein-coding
891	chr15	98397255	98399166	+	0	NA	promoter-TSS (NM_009833)	promoter-TSS (NM_009833)	-143	NM_009833	12455	Mm.29941	NM_009833	ENSMUSG00000011960	Ccnt1	2810478G24Rik|AI115585|CycT1	cyclin T1	protein-coding
1004	chr17	13108137	13110105	+	0	NA	promoter-TSS (NM_026310)	promoter-TSS (NM_026310)	-74	NM_001290712	21454	Mm.229342	NM_013686	ENSMUSG00000068039	Tcp1	AI528772|CCT|Cct1|Ccta|TRic|Tcp-1|Tp63|c-cpn|p63	t-complex protein 1	protein-coding
2106	chr7	37480595	37484036	+	0	NA	promoter-TSS (NM_172298)	promoter-TSS (NM_172298)	-822	NM_172298	243931	Mm.44141	NM_172298	ENSMUSG00000021217	Tshz3	A630038G13Rik|Tsh3|Zfp537|mKIAA1474|teashirt3	teashirt zinc finger family member 3	protein-coding
1360	chr2	73729856	73731507	+	0	NA	promoter-TSS (NM_001025093)	promoter-TSS (NM_001025093)	15	NM_001284371	11909	Mm.209903	NM_009715	ENSMUSG00000027104	Atf2	Atf-2|CRE-BP|Creb2|D130078H02Rik|D18875|Tg(Gzma-Klra1)7Wum|mXBP	activating transcription factor 2	protein-coding
233	chr10	62064498	62065388	+	0	NA	exon (NM_019553, exon 1 of 15)	exon (NM_019553, exon 1 of 15)	103	NM_019553	56200	Mm.413275	NM_019553	ENSMUSG00000020075	Ddx21	AI255159|AL022742|D10Ertd645e|D10Wsu42e	DEAD (Asp-Glu-Ala-Asp) box polypeptide 21	protein-coding
1013	chr17	15663689	15665215	+	0	NA	promoter-TSS (NM_008799)	promoter-TSS (NM_008799)	-187	NM_008799	18567	Mm.323	NM_008799	ENSMUSG00000014771	Pdcd2	AI528543|Pcd2|RP-8	programmed cell death 2	protein-coding
1490	chr3	32607041	32608536	+	0	NA	exon (NM_019673, exon 1 of 14)	exon (NM_019673, exon 1 of 14)	320	NM_019673	56456	Mm.41077	NM_019673	ENSMUSG00000027671	Actl6a	2810432C06Rik|AI851094|ARP4|Actl6|Baf53a|C79802	actin-like 6A	protein-coding
2198	chr7	134613509	134624451	+	0	NA	exon (NM_145589, exon 7 of 11)	exon (NM_145589, exon 7 of 11)	3852	NM_145589	233895	Mm.44183	NM_145589	ENSMUSG00000030822	Prr14	BC006909	proline rich 14	protein-coding
1693	chr4	86393512	86397602	+	0	NA	intron (NM_184088, intron 1 of 31)	intron (NM_184088, intron 1 of 31)	1098	NM_184088	329877	Mm.273718	NM_184088	ENSMUSG00000038024	Dennd4c	1700065A05Rik|AA420392	DENN/MADD domain containing 4C	protein-coding
316	chr11	4748596	4750326	+	0	NA	promoter-TSS (NM_010898)	promoter-TSS (NM_010898)	86	NM_001252250	18016	Mm.297109	NM_010898	ENSMUSG00000009073	Nf2	merlin	neurofibromatosis 2	protein-coding
1806	chr5	24044806	24047581	+	0	NA	promoter-TSS (NM_080444)	promoter-TSS (NM_080444)	73	NM_080444	117590	Mm.207071	NM_080444	ENSMUSG00000038204	Asb10	Asb-10|BB137407	ankyrin repeat and SOCS box-containing 10	protein-coding
2288	chr8	85688895	85690546	+	0	NA	5' UTR (NM_001111304, exon 1 of 21)	5' UTR (NM_001111304, exon 1 of 21)	469	NM_027758	71310	Mm.24031	NM_027758	ENSMUSG00000031709	Tbc1d9	4933431N12Rik|AI847101|AW490653|C76116	TBC1 domain family, member 9	protein-coding
1738	chr4	126754000	126755253	+	0	NA	promoter-TSS (NR_104366)	promoter-TSS (NR_104366)	-1	NM_001285885	100177	Mm.276096	NM_177462	ENSMUSG00000042408	Zmym6	9330177P20Rik|AI593204|AI661340|D4Wsu24e|Zfp258	zinc finger, MYM-type 6	protein-coding
2025	chr6	100236457	100238078	+	0	NA	promoter-TSS (NM_019743)	promoter-TSS (NM_019743)	85	NM_019743	56353	Mm.321633	NM_019743	ENSMUSG00000072872	Rybp	2410018J24Rik|DEDAF|YEAF1	RING1 and YY1 binding protein	protein-coding
1370	chr2	90780234	90781688	+	0	NA	intron (NM_198683, intron 1 of 13)	CpG	407	NM_017368	13046	Mm.29495	NM_017368	ENSMUSG00000005506	Celf1	1600010O03Rik|AA407467|Brunol2|CUG-BP|CUG-BP1|CUGBP|Cugbp1|D2Wsu101e|HNAB50|NAB50	CUGBP, Elav-like family member 1	protein-coding
11	chr1	13356313	13364990	+	0	NA	intron (NM_001077695, intron 1 of 21)	intron (NM_001077695, intron 1 of 21)	3513	NM_001077695	17978	Mm.2537	NM_008678	ENSMUSG00000005886	Ncoa2	9530095N19|D1Ertd433e|GRIP-1|Grip1|KAT13C|SRC-2|TIF-2|TIF2|bHLHe75	nuclear receptor coactivator 2	protein-coding
511	chr12	72068313	72077147	+	0	NA	Intergenic	PB1D10|SINE|Alu	-2880	NM_011184	19167	Mm.296338	NM_011184		Psma3	Lmpc8	proteasome (prosome, macropain) subunit, alpha type 3	protein-coding
842	chr15	57865164	57866546	+	0	NA	promoter-TSS (NM_029418)	promoter-TSS (NM_029418)	-6	NM_029418	75758	Mm.455792	NM_029418	ENSMUSG00000022362	9130401M01Rik	AI849328	RIKEN cDNA 9130401M01 gene	protein-coding
2367	chr9	36574754	36576564	+	0	NA	promoter-TSS (NM_008408)	promoter-TSS (NM_008408)	-496	NM_008408	16430	Mm.2863	NM_008408	ENSMUSG00000032116	Stt3a	AA408947|BB081708|Itm1	STT3, subunit of the oligosaccharyltransferase complex, homolog A (S. cerevisiae)	protein-coding
899	chr15	100381299	100383147	+	0	NA	intron (NM_033476, intron 1 of 15)	CpG	216	NM_033476	21422	Mm.219040	NM_033476	ENSMUSG00000009733	Tfcp2	CP-2|CP2|D230015P20Rik|LBP-1c|LBP-1d|LBP1|LSF|Tcfcp2|UBP-1	transcription factor CP2	protein-coding
2000	chr6	67051706	67053581	+	0	NA	Intergenic	Intergenic	-65242	NM_007836	13197	Mm.72235	NM_007836	ENSMUSG00000036390	Gadd45a	AA545191|Ddit1|GADD45	growth arrest and DNA-damage-inducible 45 alpha	protein-coding
2437	chr9	88135206	88136832	+	0	NA	Intergenic	RSINE1|SINE|B4	-86428	NM_011851	23959	Mm.244235	NM_011851	ENSMUSG00000032420	Nt5e	2210401F01Rik|AI447961|CD73|NT|Nt5|eNT	5' nucleotidase, ecto	protein-coding
2531	chrX	147954266	147956745	+	0	NA	5' UTR (NM_177201, exon 1 of 19)	5' UTR (NM_177201, exon 1 of 19)	290	NM_001113354	320595	Mm.17156	NM_177201	ENSMUSG00000041229	Phf8	9830141C09Rik|mKIAA1111	PHD finger protein 8	protein-coding
199	chr10	30337332	30338795	+	0	NA	exon (NM_025798, exon 1 of 5)	exon (NM_025798, exon 1 of 5)	109	NM_025798	66847	Mm.46218	NM_025798		Hint3	0610010I17Rik|AV009015|HINT-3|HINT-4|HINT4	histidine triad nucleotide binding protein 3	protein-coding
2410	chr9	64581736	64586055	+	0	NA	intron (NM_017382, intron 1 of 4)	intron (NM_017382, intron 1 of 4)	1668	NM_017382	53869	Mm.1387	NM_017382	ENSMUSG00000004771	Rab11a	-	RAB11A, member RAS oncogene family	protein-coding
1979	chr6	47762623	47764278	+	0	NA	promoter-TSS (NM_009787)	promoter-TSS (NM_009787)	61	NM_009787	12304	Mm.2442	NM_009787	ENSMUSG00000025823	Pdia4	AI987846|Cai|ERp-72|Erp72	protein disulfide isomerase associated 4	protein-coding
1899	chr5	122541460	122560034	+	0	NA	promoter-TSS (NM_010861)	promoter-TSS (NM_010861)	-242	NM_010861	17906	Mm.1529	NM_010861	ENSMUSG00000013936	Myl2	MLC-2|MLC-2v|Mlc2v|Mylpc	myosin, light polypeptide 2, regulatory, cardiac, slow	protein-coding
1929	chr5	143431031	143432977	+	0	NA	intron (NM_145601, intron 11 of 12)	intron (NM_145601, intron 11 of 12)	12732	NM_145601	333329	Mm.484049	NM_145601	ENSMUSG00000031789	Cngb1	Cngb1b|Gm1959	cyclic nucleotide gated channel beta 1	protein-coding
2485	chrX	7366255	7367574	+	0	NA	promoter-TSS (NM_001290455)	promoter-TSS (NM_001290455)	-205	NM_001290455	54645	Mm.194811	NM_207670	ENSMUSG00000031153	Gripap1	AI854681|DXImx47e|GRASP-1|Sfc10|mKIAA1167	GRIP1 associated protein 1	protein-coding
1737	chr4	126644339	126645896	+	0	NA	promoter-TSS (NM_001114399)	promoter-TSS (NM_001114399)	50	NM_001114399	67785	Mm.165401	NM_001114399	ENSMUSG00000042446	Zmym4	6330503C17Rik|AI480785|AW493829|CDIR|D630001M21|MYM|Zfp262|Znf262|mKIAA0425	zinc finger, MYM-type 4	protein-coding
1948	chr6	11855608	11858376	+	0	NA	intron (NM_010886, intron 1 of 3)	intron (NM_010886, intron 1 of 3)	454	NM_010886	17992	Mm.415865	NM_010886	ENSMUSG00000029632	Ndufa4	MLRQ	NADH dehydrogenase (ubiquinone) 1 alpha subcomplex, 4	protein-coding
795	chr14	105727188	105728546	+	0	NA	Intergenic	Intergenic	69977	NM_001190989	76273	Mm.290669	NM_029561	ENSMUSG00000053253	Ndfip2	0710001O20Rik|2810436B12Rik|9130207N19Rik|N4wbp5a|mKIAA1165	Nedd4 family interacting protein 2	protein-coding
1609	chr3	138736865	138739212	+	0	NA	5' UTR (NM_001040690, exon 1 of 15)	5' UTR (NM_001040690, exon 1 of 15)	127	NM_145544	229877	Mm.28893	NM_145544	ENSMUSG00000028149	Rap1gds1	BC011279|GDS1	RAP1, GTP-GDP dissociation stimulator 1	protein-coding
794	chr14	105657512	105658705	+	0	NA	exon (NM_029561, exon 1 of 8)	exon (NM_029561, exon 1 of 8)	218	NM_001190989	76273	Mm.290669	NM_029561	ENSMUSG00000053253	Ndfip2	0710001O20Rik|2810436B12Rik|9130207N19Rik|N4wbp5a|mKIAA1165	Nedd4 family interacting protein 2	protein-coding
944	chr16	30056694	30071499	+	0	NA	Intergenic	CpG	-1347	NM_008235	15205	Mm.390859	NM_008235	ENSMUSG00000022528	Hes1	Hry|bHLHb39	hairy and enhancer of split 1 (Drosophila)	protein-coding
1780	chr4	153330773	153332180	+	0	NA	intron (NM_001163019, intron 1 of 2)	CpG	130	NM_001163019	97159	Mm.7066	NM_175287	ENSMUSG00000047613	A430005L14Rik	C79672	RIKEN cDNA A430005L14 gene	protein-coding
1113	chr17	80605367	80607187	+	0	NA	intron (NM_001195485, intron 1 of 7)	CpG	368	NM_001195486	225027	Mm.292016	NM_146083	ENSMUSG00000024097	Srsf7	35kDa|9430065L19Rik|9G8|NX-96|Sfrs7	serine/arginine-rich splicing factor 7	protein-coding
2122	chr7	52822620	52830505	+	0	NA	promoter-TSS (NM_001243052)	promoter-TSS (NM_001243052)	-87	NM_001243052	12036	Mm.24210	NM_009737	ENSMUSG00000030826	Bcat2	Bcat-2|Eca40	branched chain aminotransferase 2, mitochondrial	protein-coding
674	chr13	95745865	95746932	+	0	NA	promoter-TSS (NM_172590)	promoter-TSS (NM_172590)	99	NM_172590	218460	Mm.33856	NM_172590	ENSMUSG00000042015	Wdr41	B830029I03Rik|MSTP048	WD repeat domain 41	protein-coding
2280	chr8	81032014	81034356	+	0	NA	promoter-TSS (NM_009033)	promoter-TSS (NM_009033)	-42	NM_001282109	76775	Mm.334631	NM_029736	ENSMUSG00000031684	Slc10a7	2410193C02Rik|P7	solute carrier family 10 (sodium/bile acid cotransporter family), member 7	protein-coding
1317	chr2	23426906	23427872	+	0	NA	5' UTR (NM_029773, exon 1 of 11)	5' UTR (NM_029773, exon 1 of 11)	235	NM_029773	76857	Mm.276415	NM_029773	ENSMUSG00000026771	Spopl	4921517N04Rik|AU014935|BB233739|E430033K04Rik	speckle-type POZ protein-like	protein-coding
280	chr10	98375877	98379986	+	0	NA	5' UTR (NM_026482, exon 1 of 21)	5' UTR (NM_026482, exon 1 of 21)	145	NM_026482	67972	Mm.166944	NM_026482	ENSMUSG00000019943	Atp2b1	2810442I22Rik|E130111D10Rik|Pmca1	ATPase, Ca++ transporting, plasma membrane 1	protein-coding
957	chr16	42874077	42878308	+	0	NA	promoter-TSS (NR_040522)	promoter-TSS (NR_040522)	-317	NR_040522	75722	Mm.243747	NR_040521	ENSMUSG00000075070	4932412D23Rik	ENSMUSG00000075070|Gm10809	RIKEN cDNA 4932412D23 gene	ncRNA
273	chr10	92530080	92534803	+	0	NA	Intergenic	Intergenic	-91180	NM_146239	237459	Mm.217404	NM_146239	ENSMUSG00000020015	Cdk17	6430598J10Rik|Pctk2	cyclin-dependent kinase 17	protein-coding
2430	chr9	79640406	79642062	+	0	NA	promoter-TSS (NR_040734)	promoter-TSS (NR_040734)	3	NM_133718	69981	Mm.486324	NM_133718	ENSMUSG00000032328	Tmem30a	2010200I23Rik|AW540225|Cdc50a|D9Wsu20e	transmembrane protein 30A	protein-coding
471	chr12	10397307	10399018	+	0	NA	intron (NM_023697, intron 1 of 1)	intron (NM_023697, intron 1 of 1)	576	NM_023697	105014	Mm.119343	NM_023697	ENSMUSG00000020621	Rdh14	3110030G19Rik|AW215439|PAN2	retinol dehydrogenase 14 (all-trans and 9-cis)	protein-coding
1503	chr3	41545576	41547345	+	0	NA	promoter-TSS (NM_001081411)	promoter-TSS (NM_001081411)	-24	NM_001081411	67161	Mm.331001	NM_026008	ENSMUSG00000059834	Sclt1	2610207F23Rik|4931421F20Rik	sodium channel and clathrin linker 1	protein-coding
2262	chr8	71317296	71318459	+	0	NA	promoter-TSS (NM_027590)	promoter-TSS (NM_027590)	24	NM_027590	70885	Mm.252421	NM_027590	ENSMUSG00000031864	Ints10	4921521J11Rik|AI462004	integrator complex subunit 10	protein-coding
1509	chr3	58175130	58178477	+	0	NA	Intergenic	Intergenic	-42808	NM_001081229	72033	Mm.218409	NM_028067	ENSMUSG00000027806	Tsc22d2	1810043J12Rik|5530402M19Rik	TSC22 domain family, member 2	protein-coding
1936	chr5	146041192	146042190	+	0	NA	Intergenic	CpG	-2521	NM_001081431	666311	Mm.260773	NM_001081431	ENSMUSG00000070420	Zscan25	EG666311|Zfp498	zinc finger and SCAN domain containing 25	protein-coding
1325	chr2	28979665	28981586	+	0	NA	5' UTR (NM_198033, exon 1 of 26)	5' UTR (NM_198033, exon 1 of 26)	113	NM_198033	269254	Mm.41867	NM_198033	ENSMUSG00000043535	Setx	A130090N03|A930037J23Rik|AOA2|AW060766|Als4|SCAR1|Sen1|mKIAA0625	senataxin	protein-coding
2512	chrX	73118621	73121577	+	0	NA	promoter-TSS (NM_145629)	promoter-TSS (NM_145629)	-186	NM_145629	102866	Mm.28777	NM_145629	ENSMUSG00000016382	Pls3	AI115446|AL024105|T-fimbrin	plastin 3 (T-isoform)	protein-coding
1643	chr4	22283547	22285856	+	0	NA	promoter-TSS (NR_104378)	promoter-TSS (NR_104378)	11	NR_104380	269514	Mm.40708	NM_172988	ENSMUSG00000040410	Fbxl4	AI836810|FBL4|FBL5	F-box and leucine-rich repeat protein 4	protein-coding
131	chr1	154613043	154615435	+	0	NA	intron (NM_026369, intron 1 of 3)	CpG	567	NM_026369	67771	Mm.288974	NM_026369	ENSMUSG00000008475	Arpc5	5830443F10Rik|p16-Arc	actin related protein 2/3 complex, subunit 5	protein-coding
1565	chr3	102861688	102863115	+	0	NA	TTS (NM_144901)	TTS (NM_144901)	193	NM_010937	18176	Mm.400954	NM_010937	ENSMUSG00000027852	Nras	AV095280|N-ras	neuroblastoma ras oncogene	protein-coding
502	chr12	58330832	58332207	+	0	NA	5' UTR (NM_001164370, exon 1 of 10)	5' UTR (NM_001164370, exon 1 of 10)	107	NM_001164370	73490	Mm.268180	NM_001164370	ENSMUSG00000047022	Mipol1	1700081O04Rik|6030439O22Rik|AU021838|AW536152|D12Ertd19e	mirror-image polydactyly gene 1 homolog (human)	protein-coding
1286	chr19	53464210	53465968	+	0	NA	promoter-TSS (NM_172429)	promoter-TSS (NM_172429)	-26	NM_172429	76479	Mm.313687	NM_172429	ENSMUSG00000025024	Smndc1	2410004J23Rik|4933440I19Rik	survival motor neuron domain containing 1	protein-coding
314	chr11	3863322	3864474	+	0	NA	promoter-TSS (NM_022889)	promoter-TSS (NM_022889)	-80	NM_022889	64934	Mm.28659	NM_022889	ENSMUSG00000020430	Pes1	-	pescadillo homolog 1, containing BRCT domain (zebrafish)	protein-coding
1796	chr5	8861685	8866610	+	0	NA	exon (NM_011075, exon 27 of 28)	exon (NM_011075, exon 27 of 28)	-29574	NM_008830	18670	Mm.297825	NM_008830	ENSMUSG00000042476	Abcb4	Mdr2|Pgy-2|Pgy2|mdr-2	ATP-binding cassette, sub-family B (MDR/TAP), member 4	protein-coding
1502	chr3	40885747	40888044	+	0	NA	promoter-TSS (NM_027558)	promoter-TSS (NM_027558)	73	NM_027558	70804	Mm.40321	NM_027558	ENSMUSG00000049940	Pgrmc2	4631434O19Rik|5730409G06Rik|DG6|PMBP	progesterone receptor membrane component 2	protein-coding
1872	chr5	101337978	101339676	+	0	NA	Intergenic	Intergenic	63579	NM_172715	231510	Mm.271911	NM_172715	ENSMUSG00000029314	Agpat9	1-AGPAT|1-AGPAT 9|4933407I02Rik|4933408F15|9|A230097K15Rik|GPAT-3|mGPAT3	1-acylglycerol-3-phosphate O-acyltransferase 9	protein-coding
355	chr11	50729144	50729736	+	0	NA	intron (NM_001294323, intron 1 of 5)	CpG	238	NM_178447	22678	Mm.259230	NM_009550	ENSMUSG00000049321	Zfp2	9930007F06Rik|Fnp-2|Zfp-2|mKR2|mkr-2|mszf87	zinc finger protein 2	protein-coding
553	chr12	104115039	104117878	+	0	NA	5' UTR (NM_172806, exon 1 of 12)	5' UTR (NM_172806, exon 1 of 12)	158	NM_172806	238386	Mm.63456	NM_172806	ENSMUSG00000041702	Btbd7	5730507E09Rik|8030448M07|E130118E17Rik|FUP1|mKIAA1525	BTB (POZ) domain containing 7	protein-coding
2058	chr6	137683001	137684243	+	0	NA	promoter-TSS (NM_011499)	promoter-TSS (NM_011499)	19	NM_011499	20901	Mm.22584	NM_011499	ENSMUSG00000030224	Strap	AW557906|C78091|C79202|Unrip	serine/threonine kinase receptor associated protein	protein-coding
1252	chr19	28084315	28087116	+	0	NA	promoter-TSS (NM_011265)	promoter-TSS (NM_011265)	-59	NM_011265	19726	Mm.313321	NM_011265	ENSMUSG00000040929	Rfx3	C230093O12Rik|MRFX3	regulatory factor X, 3 (influences HLA class II expression)	protein-coding
555	chr12	106922233	106924541	+	0	NA	promoter-TSS (NM_178613)	promoter-TSS (NM_178613)	64	NM_029654	76559	Mm.114362	NM_029654	ENSMUSG00000041341	Atg2b	2410024A21Rik|AI047755|AI503411|AW558123|C030004M05Rik|C630028L02Rik|mKIAA4067	autophagy related 2B	protein-coding
1037	chr17	22560344	22562384	+	0	NA	5' UTR (NM_198003, exon 1 of 7)	5' UTR (NM_198003, exon 1 of 7)	129	NM_198003	74149	Mm.30767	NM_198003	ENSMUSG00000071266	Zfp946	1300003B13Rik	zinc finger protein 946	protein-coding
2513	chrX	75055918	75056698	+	0	NA	Intergenic	RLTR42|LTR|ERVK	-15009	NM_016979	19108	Mm.290338	NM_016979	ENSMUSG00000035725	Prkx	PKX1|Pkare	protein kinase, X-linked	protein-coding
37	chr1	45851402	45852763	+	0	NA	promoter-TSS (NM_028599)	promoter-TSS (NM_028599)	-264	NM_028599	73674	Mm.270376	NM_028599	ENSMUSG00000025995	Wdr75	1300003A18Rik|2410118I19Rik|C77608	WD repeat domain 75	protein-coding
855	chr15	74726957	74799632	+	0	NA	Intergenic	RLTR6-int|LTR|ERV1	-22187	NM_001164039	17069	Mm.788	NM_008529	ENSMUSG00000022587	Ly6e	9804|Ly67|RIG-E|Sca-2|TSA-1|Tsa1	lymphocyte antigen 6 complex, locus E	protein-coding
195	chr10	21710018	21720946	+	0	NA	intron (NM_001161845, intron 5 of 13)	intron (NM_001161845, intron 5 of 13)	1010	NM_011361	20393	Mm.28405	NM_011361	ENSMUSG00000019970	Sgk1	Sgk	serum/glucocorticoid regulated kinase 1	protein-coding
2005	chr6	82689959	82725375	+	0	NA	intron (NM_013820, intron 2 of 17)	MIRb|SINE|MIR	16781	NM_013820	15277	Mm.255848	NM_013820	ENSMUSG00000000628	Hk2	AI642394|HKII	hexokinase 2	protein-coding
1706	chr4	107972169	107974483	+	0	NA	intron (NM_001033634, intron 1 of 13)	intron (NM_001033634, intron 1 of 13)	369	NM_001033634	414872	Mm.426241	NM_001033634	ENSMUSG00000034636	Zyg11b	1110046I03Rik|2810482G21Rik|D4Mgi23|Gm431|mKIAA1730	zyg-ll family member B, cell cycle regulator	protein-coding
1839	chr5	48691606	48693717	+	0	NA	intron (NM_001291227, intron 36 of 38)	intron (NM_001291227, intron 36 of 38)	-70970	NM_025755	66768	Mm.29409	NM_025755	ENSMUSG00000029089	Pacrgl	4933428G09Rik	PARK2 co-regulated-like	protein-coding
1788	chr5	3543708	3544396	+	0	NA	intron (NM_001042501, intron 1 of 10)	CpG	219	NM_001042501	68152	Mm.240265	NM_026583		Fam133b	2900022K02Rik|5830415L20Rik	family with sequence similarity 133, member B	protein-coding
2186	chr7	125675894	125679114	+	0	NA	promoter-TSS (NM_009940)	promoter-TSS (NM_009940)	-677	NM_009940	12850	Mm.20634	NM_009940	ENSMUSG00000030652	Coq7	clk-1	demethyl-Q 7	protein-coding
679	chr13	100873370	100874144	+	0	NA	exon (NM_001081061, exon 1 of 39)	exon (NM_001081061, exon 1 of 39)	268	NM_001081061	544971	Mm.288546	NM_001081061	ENSMUSG00000049658	Bdp1	AI662220|AW049390|AW456745|B130055N23Rik|G630013P12Rik|TAF3B1|TFC5|TFIIIB150|TFIIIB90|Tfnr|mKIAA1241	B double prime 1, subunit of RNA polymerase III transcription initiation factor IIIB	protein-coding
680	chr13	101261895	101262672	+	0	NA	intron (NM_022011, intron 1 of 15)	CpG	281	NM_022011	23894	Mm.272533	NM_022011	ENSMUSG00000021639	Gtf2h2	44kDa|BTF2 p44|BTF2-p44|Btf2p44|p44	general transcription factor II H, polypeptide 2	protein-coding
831	chr15	41697524	41702333	+	0	NA	intron (NM_175456, intron 1 of 1)	B4A|SINE|B4	1338	NM_175456	223513	Mm.148913	NM_175456	ENSMUSG00000042895	Abra	C130068O12Rik|STARS	actin-binding Rho activating protein	protein-coding
1147	chr18	24687333	24689364	+	0	NA	intron (NM_144861, intron 1 of 6)	CpG	357	NM_144861	225283	Mm.28427	NM_144861	ENSMUSG00000040446	Rprd1a	C77387|mKIAA4077	regulation of nuclear pre-mRNA domain containing 1A	protein-coding
1960	chr6	30845871	30847312	+	0	NA	TTS (NM_054073)	TTS (NM_054073)	203	NM_017478	54160	Mm.39896	NM_017478	ENSMUSG00000025607	Copg2	AW227625|gamma-2-COP	coatomer protein complex, subunit gamma 2	protein-coding
2355	chr9	20325159	20326747	+	0	NA	promoter-TSS (NM_001135019)	promoter-TSS (NM_001135019)	-90	NM_001082485	77519	Mm.431849	NM_001082485	ENSMUSG00000060510	Zfp266	5330440G10Rik|5730601F06Rik|AW552317	zinc finger protein 266	protein-coding
1241	chr19	18744630	18746609	+	0	NA	exon (NM_026120, exon 1 of 8)	exon (NM_026120, exon 1 of 8)	349	NM_026120	67383	Mm.306602	NM_026120	ENSMUSG00000024726	2410127L17Rik	-	RIKEN cDNA 2410127L17 gene	protein-coding
1441	chr2	162406894	162408686	+	0	NA	intron (NM_001291149, intron 1 of 30)	intron (NM_001291149, intron 1 of 30)	79093	NM_001291151	19281	Mm.235807	NM_021464	ENSMUSG00000053141	Ptprt	R-PTP-T|RPTP-rfo|RPTP-rho|RPTPmam4|RPTPrho|mKIAA0283|mRPTPrho	protein tyrosine phosphatase, receptor type, T	protein-coding
647	chr13	74454104	74455445	+	0	NA	promoter-TSS (NM_011051)	promoter-TSS (NM_011051)	0	NM_011051	18570	Mm.24254	NM_011051	ENSMUSG00000021576	Pdcd6	AV299538|Alg2|MA-3|PS2|alg-2	programmed cell death 6	protein-coding
1206	chr18	74862786	74864817	+	0	NA	intron (NM_201600, intron 21 of 38)	intron (NM_201600, intron 21 of 38)	74308	NR_028560	100217466		NR_028560		Scarna17	MBII-119	small Cajal body-specific RNA 17	ncRNA
334	chr11	23205462	23207617	+	0	NA	promoter-TSS (NM_001190401)	promoter-TSS (NM_001190401)	-356	NM_001190401	17847	Mm.119155	NM_001190401	ENSMUSG00000056342	Usp34	A530081C03Rik|Murr2	ubiquitin specific peptidase 34	protein-coding
2292	chr8	86627931	86629367	+	0	NA	promoter-TSS (NM_172502)	promoter-TSS (NM_172502)	12	NM_172502	212123	Mm.260557	NM_172502	ENSMUSG00000037103	Dcaf15	6720484B16	DDB1 and CUL4 associated factor 15	protein-coding
1997	chr6	59158509	59159809	+	0	NA	5' UTR (NM_001081145, exon 1 of 2)	5' UTR (NM_001081145, exon 1 of 2)	295	NM_001081145	68140	Mm.25843	NM_001081145	ENSMUSG00000049232	Tigd2	3632410O17Rik	tigger transposable element derived 2	protein-coding
1027	chr17	21586658	21588229	+	0	NA	intron (NM_009558, intron 1 of 4)	intron (NM_009558, intron 1 of 4)	127	NM_009558	22709	Mm.293030	NM_009558	ENSMUSG00000023892	Zfp51	Zfp-51|mszf92|zfec12	zinc finger protein 51	protein-coding
1680	chr4	56814745	56815804	+	0	NA	promoter-TSS (NM_026079)	promoter-TSS (NM_026079)	-71	NM_026079	230233	Mm.282743	NM_026079	ENSMUSG00000028431	Ikbkap	3110040G09Rik|6030413P05|C78473|Elp1|IKAP	inhibitor of kappa light polypeptide enhancer in B cells, kinase complex-associated protein	protein-coding
423	chr11	87880647	87884681	+	0	NA	intron (NM_016686, intron 1 of 5)	CpG	883	NM_016686	22344	Mm.46628	NM_016686	ENSMUSG00000018377	Vezf1	AI848691|AW046909|db1	vascular endothelial zinc finger 1	protein-coding
1953	chr6	17641608	17645359	+	0	NA	promoter-TSS (NM_001289626)	promoter-TSS (NM_001289626)	-511	NM_001289624	64213	Mm.12051	NM_022332	ENSMUSG00000029534	St7	9430001H04Rik|Fam4a2|HELG|RAY1|SEN4|TSG7	suppression of tumorigenicity 7	protein-coding
1139	chr18	12323899	12328162	+	0	NA	Intergenic	Intergenic	-1209	NM_029623	76482	Mm.196596	NM_029623	ENSMUSG00000024410	3110002H16Rik	2400010D15Rik|Mic-1|Mic1	RIKEN cDNA 3110002H16 gene	protein-coding
1319	chr2	25355806	25357061	+	0	NA	promoter-TSS (NM_027062)	promoter-TSS (NM_027062)	135	NM_013908	30839	Mm.29170	NM_013908	ENSMUSG00000015095	Fbxw5	AI159739|Fbw5	F-box and WD-40 domain protein 5	protein-coding
1826	chr5	33720163	33722133	+	0	NA	promoter-TSS (NM_001081101)	promoter-TSS (NM_001081101)	-197	NM_001081101	71101	Mm.132178	NM_001081101	ENSMUSG00000037355	Uvssa	4933407H18Rik|D330017J19Rik|Kiaa1530|mKIAA1530	UV stimulated scaffold protein A	protein-coding
2454	chr9	105033380	105034779	+	0	NA	promoter-TSS (NM_029385)	promoter-TSS (NM_029385)	56	NM_029385	75686	Mm.305810	NM_029385	ENSMUSG00000032565	Nudt16	2310041H06Rik|2810047L04Rik|2900006H04Rik|AI851783	nudix (nucleoside diphosphate linked moiety X)-type motif 16	protein-coding
2077	chr7	13063288	13065091	+	0	NA	intron (NM_001039951, intron 1 of 3)	intron (NM_001039951, intron 1 of 3)	535	NM_026112	67370	Mm.98929	NM_026112	ENSMUSG00000030386	Zfp606	2410022M24Rik|AW494727	zinc finger protein 606	protein-coding
1222	chr19	4809951	4812640	+	0	NA	exon (NM_019869, exon 1 of 3)	exon (NM_019869, exon 1 of 3)	339	NM_001290127	102902673	Mm.426069	NM_001290127		Rbm14-rbm4	-	Rbm14-Rbm4 readthrough	protein-coding
2036	chr6	118368964	118370296	+	0	NA	promoter-TSS (NM_194339)	promoter-TSS (NM_194339)	-195	NM_194339	213895	Mm.25269	NM_194339	ENSMUSG00000030138	Bms1	AA408648|AU020092|AU043373|BB007109|BC030906|Bms1l|mKIAA0187	BMS1 homolog, ribosome assembly protein (yeast)	protein-coding
1747	chr4	131884506	131886122	+	0	NA	5' UTR (NM_027925, exon 1 of 9)	5' UTR (NM_027925, exon 1 of 9)	139	NM_027925	71787	Mm.239183	NM_027925	ENSMUSG00000028898	Trnau1ap	1110007F05Rik|AA387999|Secp43|Trspap1	tRNA selenocysteine 1 associated protein 1	protein-coding
174	chr1	192751721	192753731	+	0	NA	intron (NR_037579, intron 1 of 7)	CpG	342	NR_037579	52477	Mm.289914	NM_021421	ENSMUSG00000026634	Angel2	2610307I21Rik|5730410O10Rik|AI845692|D1Ertd396e|D1Ertd654e	angel homolog 2 (Drosophila)	protein-coding
820	chr15	34166955	34169692	+	0	NA	intron (NM_033521, intron 1 of 6)	CpG	542	NM_033521	114128	Mm.197518	NM_033521	ENSMUSG00000022257	Laptm4b	C330023P13Rik|LAPTM4beta	lysosomal-associated protein transmembrane 4B	protein-coding
1799	chr5	15439759	15442046	+	0	NA	exon (NM_001110843, exon 1 of 39)	exon (NM_001110843, exon 1 of 39)	393	NM_001110846	12293	Mm.159842	NM_009784	ENSMUSG00000040118	Cacna2d1	Ca(v)alpha2delta1|Cacna2|Cchl2a	calcium channel, voltage-dependent, alpha2/delta subunit 1	protein-coding
1571	chr3	104666450	104668716	+	0	NA	promoter-TSS (NM_009797)	promoter-TSS (NM_009797)	159	NM_153091	229681	Mm.206379	NM_153091		St7l	St7r	suppression of tumorigenicity 7-like	protein-coding
422	chr11	87860246	87862975	+	0	NA	intron (NM_173374, intron 1 of 3)	CpG	735	NM_173374	110809	Mm.391719	NM_173374	ENSMUSG00000018379	Srsf1	1110054N12Rik|5730507C05Rik|6330415C05Rik|AI482334|AW491331|Asf|Sf2|Sfrs1	serine/arginine-rich splicing factor 1	protein-coding
905	chr15	103069541	103071686	+	0	NA	promoter-TSS (NR_002885)	promoter-TSS (NR_002885)	-215	NR_104427	15382	Mm.237064	NM_010447	ENSMUSG00000046434	Hnrnpa1	HDP-1|Hdp|Hnrpa1|hnRNP A1|hnrnp-A1	heterogeneous nuclear ribonucleoprotein A1	protein-coding
1552	chr3	95621448	95624372	+	0	NA	promoter-TSS (NM_001081293)	promoter-TSS (NM_001081293)	-34	NM_001081293	75137	Mm.196275	NM_028328	ENSMUSG00000028106	Rprd2	2810036A19Rik|4930535B03Rik|6720469I21Rik|AL022841|AL022940|AU021304|BB077382|mKIAA0460	regulation of nuclear pre-mRNA domain containing 2	protein-coding
1194	chr18	67800365	67801737	+	0	NA	promoter-TSS (NM_134138)	promoter-TSS (NM_134138)	-61	NM_001081073	225659	Mm.111928	NM_001081073	ENSMUSG00000073542	Cep76	6230425F05Rik|9630013E05	centrosomal protein 76	protein-coding
41	chr1	52687412	52688348	+	0	NA	intron (NR_024590, intron 1 of 8)	intron (NR_024590, intron 1 of 8)	331	NM_001142647	227094	Mm.83541	NM_172654	ENSMUSG00000043015	Tmem194b	5330401P04Rik|9830163O08	transmembrane protein 194B	protein-coding
52	chr1	58501785	58503084	+	0	NA	promoter-TSS (NM_001285827)	promoter-TSS (NM_001285827)	-104	NM_001285827	70225	Mm.340195	NM_027351	ENSMUSG00000026035	Ppil3	2310076N22Rik|2510026K04Rik|Cyp10l	peptidylprolyl isomerase (cyclophilin)-like 3	protein-coding
1451	chr2	167246207	167248095	+	0	NA	promoter-TSS (NM_148929)	promoter-TSS (NM_148929)	-70	NM_148929	77031	Mm.278924	NM_148929	ENSMUSG00000039463	Slc9a8	1200006P13Rik|6430709P13Rik|AI182282|NHE8	solute carrier family 9 (sodium/hydrogen exchanger), member 8	protein-coding
302	chr10	127739457	127741696	+	0	NA	intron (NM_001252326, intron 1 of 25)	intron (NM_001252326, intron 1 of 25)	185	NM_001252326	103135	Mm.244183	NM_133992	ENSMUSG00000005682	Pan2	1200014O24Rik|AI047843|AW742773|Usp52|mKIAA0710	PAN2 polyA specific ribonuclease subunit homolog (S. cerevisiae)	protein-coding
1453	chr2	168055047	168056876	+	0	NA	promoter-TSS (NM_001160330)	promoter-TSS (NM_001160330)	-82	NM_010072	13480	Mm.422657	NM_010072	ENSMUSG00000078919	Dpm1	AI118379|AI194292	dolichol-phosphate (beta-D) mannosyltransferase 1	protein-coding
866	chr15	79375217	79378190	+	0	NA	5' UTR (NM_199079, exon 1 of 11)	5' UTR (NM_199079, exon 1 of 11)	286	NM_199079	67040	Mm.29644	NM_152806	ENSMUSG00000055065	Ddx17	2610007K22Rik|A430025E01Rik|AI047725|C80929|Gm926|p72	DEAD (Asp-Glu-Ala-Asp) box polypeptide 17	protein-coding
2452	chr9	103965004	103966968	+	0	NA	promoter-TSS (NM_175324)	promoter-TSS (NM_175324)	-47	NM_175324	102632	Mm.41274	NM_175324	ENSMUSG00000090150	Acad11	5730439E10Rik|AI987948	acyl-Coenzyme A dehydrogenase family, member 11	protein-coding
2223	chr7	150734011	150735732	+	0	NA	promoter-TSS (NM_001285490)	promoter-TSS (NM_001285490)	-138	NM_001285490	17955	Mm.294625	NM_008672	ENSMUSG00000059119	Nap1l4	2810410H14Rik|AI316776|D7Wsu30e|Nap2	nucleosome assembly protein 1-like 4	protein-coding
593	chr13	32429937	32431405	+	0	NA	promoter-TSS (NM_146041)	promoter-TSS (NM_146041)	-258	NM_146041	218138	Mm.247143	NM_146041	ENSMUSG00000038372	Gmds	BC031788|C87208	GDP-mannose 4, 6-dehydratase	protein-coding
770	chr14	70131777	70133644	+	0	NA	promoter-TSS (NM_134078)	promoter-TSS (NM_134078)	-333	NM_134078	105513	Mm.159637	NM_134078	ENSMUSG00000034190	Chmp7	4930596K11Rik|6330407G04Rik|AI450338|AW550775	charged multivesicular body protein 7	protein-coding
188	chr10	12073592	12075342	+	0	NA	Intergenic	Intergenic	507066	NM_011682	22288	Mm.331784	NM_011682	ENSMUSG00000019820	Utrn	AA589569|DRP|Dmdl	utrophin	protein-coding
402	chr11	77028960	77030771	+	0	NA	promoter-TSS (NM_177710)	promoter-TSS (NM_177710)	-62	NM_177710	237860	Mm.440381	NM_177710	ENSMUSG00000037926	Ssh2	SSH-2|SSH-2L|mSSH-2L	slingshot homolog 2 (Drosophila)	protein-coding
1940	chr5	150437903	150439717	+	0	NA	promoter-TSS (NM_013559)	promoter-TSS (NM_013559)	80	NM_013559	15505	Mm.270681	NM_013559	ENSMUSG00000029657	Hsph1	105kDa|AI790491|Hsp105|Hsp110|hsp-E7I	heat shock 105kDa/110kDa protein 1	protein-coding
1097	chr17	65953856	65964288	+	0	NA	intron (NM_013933, intron 1 of 5)	B3A|SINE|B2	3823	NM_013933	30960	Mm.266767	NM_013933	ENSMUSG00000024091	Vapa	33kDa|VAP33	vesicle-associated membrane protein, associated protein A	protein-coding
641	chr13	69750092	69751247	+	0	NA	promoter-TSS (NM_175283)	promoter-TSS (NM_175283)	-225	NM_145354	28114	Mm.260009	NM_145354	ENSMUSG00000021595	Nsun2	D13Wsu123e|Misu	NOL1/NOP2/Sun domain family member 2	protein-coding
1641	chr4	21774279	21775849	+	0	NA	non-coding (NR_028384, exon 1 of 1)	non-coding (NR_028384, exon 1 of 1)	334	NM_025669	66625	Mm.100117	NM_025669	ENSMUSG00000028248	Pnisr	5730406M06Rik|AA673174|Pinsr|Sfrs18|Srsf18	PNN interacting serine/arginine-rich	protein-coding
838	chr15	51821921	51824035	+	0	NA	intron (NM_009009, intron 1 of 13)	CpG	328	NM_009009	19357	Mm.182628	NM_009009	ENSMUSG00000022314	Rad21	SCC1|mKIAA0078	RAD21 homolog (S. pombe)	protein-coding
616	chr13	56803733	56806717	+	0	NA	intron (NM_001164042, intron 1 of 6)	CpG	196	NM_001164042	17129	Mm.272920	NM_008541	ENSMUSG00000021540	Smad5	1110051M15Rik|AI451355|Dwf-C|Madh5|MusMLP	SMAD family member 5	protein-coding
640	chr13	67914287	67915893	+	0	NA	intron (NM_198322, intron 1 of 3)	intron (NM_198322, intron 1 of 3)	337	NM_198322	212569	Mm.358842	NM_198322	ENSMUSG00000030446	Zfp273	6820416H06Rik|Rslcan1	zinc finger protein 273	protein-coding
1121	chr17	87680875	87683598	+	0	NA	promoter-TSS (NR_015506)	promoter-TSS (NR_015506)	10	NM_028639	225049	Mm.77396	NM_028639	ENSMUSG00000036918	Ttc7	1110035E02Rik|1700007L07Rik|Ttc7a|fsn|hea	tetratricopeptide repeat domain 7	protein-coding
870	chr15	81229027	81231206	+	0	NA	promoter-TSS (NM_133726)	promoter-TSS (NM_133726)	8	NM_133726	70356	Mm.180337	NM_133726	ENSMUSG00000022403	St13	1110007I03Rik|3110002K08Rik|AW555194|HIP|HOP|HSPABP|HSPABP1|PRO0786|SNC6|p48	suppression of tumorigenicity 13	protein-coding
1384	chr2	114479773	114481210	+	0	NA	intron (NM_025675, intron 1 of 8)	CpG	173	NM_025675	66632	Mm.117809	NM_025675	ENSMUSG00000057147	Dph6	5730421E18Rik|Atpbd4	diphthamine biosynthesis 6	protein-coding
896	chr15	99601792	99603805	+	0	NA	exon (NM_028015, exon 1 of 10)	exon (NM_028015, exon 1 of 10)	148	NM_028015	71949	Mm.390821	NM_028015		Cers5	2310081H14Rik|AU045339|AW544927|Lass5|Trh4	ceramide synthase 5	protein-coding
1468	chr2	181053919	181054918	+	0	NA	promoter-TSS (NM_001166666)	promoter-TSS (NM_001166666)	-11	NM_001166665	269400	Mm.11333	NM_001001882	ENSMUSG00000038685	Rtel1	AI451565|AW540478|Rtel	regulator of telomere elongation helicase 1	protein-coding
2068	chr7	3596087	3597939	+	0	NA	5' UTR (NM_146176, exon 1 of 18)	5' UTR (NM_146176, exon 1 of 18)	142	NM_146176	232791	Mm.358731	NM_146176	ENSMUSG00000035632	Cnot3	A930039N10Rik	CCR4-NOT transcription complex, subunit 3	protein-coding
1726	chr4	120283810	120290240	+	0	NA	Intergenic	Intergenic	25675	NM_001101603	667063	Mm.90231	NM_001101603	ENSMUSG00000091297	Gm8439	EG667063|Gm1664	predicted gene 8439	protein-coding
1464	chr2	179937799	179966208	+	0	NA	intron (NM_001081171, intron 2 of 78)	intron (NM_001081171, intron 2 of 78)	8561	NM_001081171	16776	Mm.4339	NM_001081171	ENSMUSG00000015647	Lama5	AA408760|AA408762|AI853660|[a]5|laminin-511|mKIAA0533	laminin, alpha 5	protein-coding
2165	chr7	109117442	109124046	+	0	NA	intron (NM_133947, intron 1 of 24)	B1_Mus1|SINE|Alu	2387	NM_133947	101706	Mm.27259	NM_133947	ENSMUSG00000066306	Numa1	6720401E04Rik|AA764025|AL022610|AU014979	nuclear mitotic apparatus protein 1	protein-coding
2347	chr9	13630482	13633246	+	0	NA	promoter-TSS (NM_026665)	promoter-TSS (NM_026665)	-307	NM_176836	72826	Mm.246174	NM_176836	ENSMUSG00000037808	Fam76b	2810485I05Rik|C78303	family with sequence similarity 76, member B	protein-coding
1494	chr3	36470840	36471706	+	0	NA	promoter-TSS (NM_009828)	promoter-TSS (NM_009828)	-355	NM_009828	12428	Mm.4189	NM_009828	ENSMUSG00000027715	Ccna2	AA408589|Ccn-1|Ccn1|Ccna|CycA2|Cyca	cyclin A2	protein-coding
777	chr14	75683481	75684773	+	0	NA	promoter-TSS (NM_026083)	promoter-TSS (NM_026083)	-53	NM_026083	67302	Mm.74704	NM_026083	ENSMUSG00000022000	Zc3h13	2600010B19Rik|3110050K21Rik|4930570G11Rik|C87618	zinc finger CCCH type containing 13	protein-coding
2018	chr6	87754779	87763052	+	0	NA	intron (NR_104478, intron 1 of 2)	intron (NR_104478, intron 1 of 2)	836	NM_133717	69834	Mm.37380	NM_133717	ENSMUSG00000030055	Rab43	1810048P08Rik|2500004H21Rik|AW490415	RAB43, member RAS oncogene family	protein-coding
1906	chr5	124170143	124171368	+	0	NA	exon (NM_027494, exon 1 of 14)	exon (NM_027494, exon 1 of 14)	298	NM_027494	70650	Mm.279427	NM_027494	ENSMUSG00000029427	Zcchc8	5730565F05Rik	zinc finger, CCHC domain containing 8	protein-coding
464	chr12	3235125	3236276	+	0	NA	promoter-TSS (NR_015551)	promoter-TSS (NR_015551)	-91	NR_015551	74173	Mm.309774	NM_028796	ENSMUSG00000079179	Rab10os	1700012B15Rik|1810036A22Rik	RAB10, member RAS oncogene family, opposite strand	ncRNA
1672	chr4	48137691	48138420	+	0	NA	intron (NM_026343, intron 1 of 7)	CpG	264	NM_026343	67727	Mm.171334	NM_026343	ENSMUSG00000061455	Stx17	4833418L03Rik|6330411F21Rik|9030425C21Rik|AW048351	syntaxin 17	protein-coding
2325	chr8	119256226	119257432	+	0	NA	promoter-TSS (NM_029441)	promoter-TSS (NM_029441)	62	NM_029441	75796	Mm.159575	NM_029441	ENSMUSG00000031758	Cdyl2	1700029M19Rik|4930453I21Rik|Gm20194	chromodomain protein, Y chromosome-like 2	protein-coding
1685	chr4	62068315	62070785	+	0	NA	promoter-TSS (NM_027297)	promoter-TSS (NM_027297)	107	NM_139291	66440	Mm.109930	NM_139291	ENSMUSG00000066149	Cdc26	2010012C09Rik	cell division cycle 26	protein-coding
2011	chr6	85910633	85917217	+	0	NA	Intergenic	Intergenic	-2264	NM_028099	72102	Mm.24007	NM_028099	ENSMUSG00000030002	Dusp11	2010300F21Rik|AI481497	dual specificity phosphatase 11 (RNA/RNP complex 1-interacting)	protein-coding
1891	chr5	115749721	115751691	+	0	NA	intron (NM_019682, intron 1 of 2)	CpG-11403	293	NM_019682	56455	Mm.256858	NM_019682	ENSMUSG00000009013	Dynll1	Dlc8|Dnclc1|Pin	dynein light chain LC8-type 1	protein-coding
6	chr1	7387168	7388844	+	0	NA	Intergenic	CpG	309005	NM_183028	319263	Mm.21539	NM_183028	ENSMUSG00000051285	Pcmtd1	8430411F12Rik|A030012M09Rik	protein-L-isoaspartate (D-aspartate) O-methyltransferase domain containing 1	protein-coding
562	chr12	112773691	112777596	+	0	NA	promoter-TSS (NM_173363)	promoter-TSS (NM_173363)	-669	NM_178041	217869	Mm.271222	NM_173363	ENSMUSG00000021282	Eif5	2810011H21Rik|D12Ertd549e	eukaryotic translation initiation factor 5	protein-coding
1304	chr2	6133056	6135114	+	0	NA	promoter-TSS (NM_024208)	promoter-TSS (NM_024208)	-45	NM_024208	67856	Mm.38342	NM_024208	ENSMUSG00000039063	Echdc3	2310005D12Rik|AI662097	enoyl Coenzyme A hydratase domain containing 3	protein-coding
2327	chr8	119681221	119682690	+	0	NA	promoter-TSS (NM_001081151)	promoter-TSS (NM_001081151)	-80	NM_001081151	209239	Mm.132992	NM_001081151	ENSMUSG00000052557	Gan	A330045G18|gigaxonin	giant axonal neuropathy	protein-coding
2269	chr8	72825999	72827131	+	0	NA	promoter-TSS (NM_021538)	promoter-TSS (NM_021538)	-119	NM_021538	59042	Mm.28668	NM_021538		Cope	1110005D17Rik|Cope1	coatomer protein complex, subunit epsilon	protein-coding
1102	chr17	73183578	73188144	+	0	NA	promoter-TSS (NM_027166)	promoter-TSS (NM_027166)	-183	NM_027166	383295	Mm.277533	NM_027166	ENSMUSG00000039770	Ypel5	2310076K21Rik|CGI-127	yippee-like 5 (Drosophila)	protein-coding
183	chr10	6372237	6373836	+	0	NA	intron (NM_001170786, intron 1 of 27)	CpG	430	NM_001170786	270685	Mm.184752	NM_172308	ENSMUSG00000040675	Mthfd1l	2410004L15Rik|AI647056|Fthfsdc1	methylenetetrahydrofolate dehydrogenase (NADP+ dependent) 1-like	protein-coding
2544	chrY	621869	623385	+	0	NA	intron (NM_012008, intron 1 of 16)	intron (NM_012008, intron 1 of 16)	429	NM_012008	26900	Mm.302938	NM_012008	ENSMUSG00000069045	Ddx3y	8030469F12Rik|D1Pas1-rs1|Dby	DEAD (Asp-Glu-Ala-Asp) box polypeptide 3, Y-linked	protein-coding
1478	chr3	14610848	14611803	+	0	NA	promoter-TSS (NM_001099674)	promoter-TSS (NM_001099674)	-69	NM_001099674	69126	Mm.389020	NM_001099674	ENSMUSG00000078784	1810022K09Rik	AI746582|AL023036	RIKEN cDNA 1810022K09 gene	protein-coding
2541	chrX	163638629	163651178	+	0	NA	TTS (NM_021278)	TTS (NM_021278)	2247	NM_021278	19241	Mm.142729	NM_021278	ENSMUSG00000049775	Tmsb4x	Ptmb4|Tb4	thymosin, beta 4, X chromosome	protein-coding
439	chr11	98446724	98450889	+	0	NA	promoter-TSS (NM_025661)	promoter-TSS (NM_025661)	-247	NM_025661	66612	Mm.180546	NM_025661	ENSMUSG00000038150	Ormdl3	2810011N17Rik|AI315223	ORM1-like 3 (S. cerevisiae)	protein-coding
362	chr11	53163533	53166279	+	0	NA	intron (NM_033565, intron 1 of 20)	intron (NM_033565, intron 1 of 20)	637	NM_033565	93736	Mm.395281	NM_033565	ENSMUSG00000049470	Aff4	AF5Q31|Alf4|Laf4l|MCEF	AF4/FMR2 family, member 4	protein-coding
1379	chr2	105238133	105240437	+	0	NA	exon (NM_009037, exon 1 of 6)	exon (NM_009037, exon 1 of 6)	191	NM_009037	19672	Mm.4876	NM_009037	ENSMUSG00000005973	Rcn1	Rcn	reticulocalbin 1	protein-coding
1593	chr3	127255394	127256713	+	0	NA	promoter-TSS (NM_197997)	promoter-TSS (NM_197997)	214	NM_138593	28036	Mm.291032	NM_138593	ENSMUSG00000027968	Larp7	C330027G06Rik|D3Wsu161e	La ribonucleoprotein domain family, member 7	protein-coding
705	chr14	8912659	8913716	+	0	NA	intron (NM_025938, intron 1 of 5)	intron (NM_025938, intron 1 of 5)	360	NM_025938	67053	Mm.210048	NM_025938	ENSMUSG00000023156	Rpp14	2610511E03Rik|AA682089	ribonuclease P 14 subunit	protein-coding
1720	chr4	116792327	116809425	+	0	NA	TTS (NM_013807)	TTS (NM_013807)	1458	NM_175030	242646	Mm.358914	NM_175030	ENSMUSG00000047671	Tctex1d4	4833401D15Rik	Tctex1 domain containing 4	protein-coding
2206	chr7	136734828	136736171	+	0	NA	exon (NM_172255, exon 1 of 29)	exon (NM_172255, exon 1 of 29)	122	NM_172255	207425	Mm.229323	NM_172255	ENSMUSG00000042055	Wdr11	2900055P10Rik|AW489876|Brwd2|mKIAA1351	WD repeat domain 11	protein-coding
2496	chrX	35953313	35954675	+	0	NA	intron (NM_026902, intron 1 of 5)	intron (NM_026902, intron 1 of 5)	159	NM_026902	68995	Mm.262453	NM_026902	ENSMUSG00000000355	Mcts1	1500019M23Rik|MCT-1	malignant T cell amplified sequence 1	protein-coding
2177	chr7	118264927	118267066	+	0	NA	non-coding (NR_015573, exon 1 of 3)	non-coding (NR_015573, exon 1 of 3)	193	NR_015573	75479	Mm.381620	NR_015573		1700012D14Rik	-	RIKEN cDNA 1700012D14 gene	ncRNA
407	chr11	82576991	82578266	+	0	NA	promoter-TSS (NM_025884)	promoter-TSS (NM_025884)	195	NM_009839	12467	Mm.4126	NM_009839	ENSMUSG00000020698	Cct6b	CCT-zeta-2|CCTzeta-2|Cctz-2|TCP-1-zeta-2	chaperonin containing Tcp1, subunit 6b (zeta)	protein-coding
18	chr1	24011837	24012822	+	0	NA	intron (NM_026503, intron 1 of 2)	CpG	150	NM_026503	68002	Mm.250424	NM_026503	ENSMUSG00000026154	1110058L19Rik	1700001E18Rik|C6orf57	RIKEN cDNA 1110058L19 gene	protein-coding
376	chr11	62094010	62095640	+	0	NA	promoter-TSS (NM_027198)	promoter-TSS (NM_027198)	72	NM_027198	69747	Mm.141150	NM_027198	ENSMUSG00000014243	Zswim7	2410012H22Rik	zinc finger SWIM-type containing 7	protein-coding
912	chr16	10736681	10741955	+	0	NA	intron (NM_177562, intron 22 of 22)	intron (NM_177562, intron 22 of 22)	46311	NM_009896	12703	Mm.130	NM_009896	ENSMUSG00000038037	Socs1	Cish1|Cish7|JAB|SOCS-1|SSI-1	suppressor of cytokine signaling 1	protein-coding
1432	chr2	155781670	155782768	+	0	NA	promoter-TSS (NM_001130000)	promoter-TSS (NM_001130000)	-75	NM_001129999	16328	Mm.288729	NM_008383	ENSMUSG00000038241	Cep250	AW490617|B230210E21Rik|Cep2|Inmp	centrosomal protein 250	protein-coding
785	chr14	79851435	79852346	+	0	NA	exon (NM_001034882, exon 1 of 1)	exon (NM_001034882, exon 1 of 1)	248	NM_001034882	432879	Mm.308666	NM_001034882	ENSMUSG00000075502	Zbtbd6	EG432879|Gm5465	kelch repeat and BTB (POZ) domain containing 6	protein-coding
1930	chr5	143555751	143586201	+	0	NA	intron (NM_001122730, intron 2 of 18)	intron (NM_001122730, intron 2 of 18)	8090	NM_178242	231861	Mm.354649	NM_178242	ENSMUSG00000039477	Tnrc18	BC025631|EG381742|Zfp469	trinucleotide repeat containing 18	protein-coding
599	chr13	38084954	38086565	+	0	NA	intron (NM_025965, intron 1 of 7)	CpG	300	NM_025965	107513	Mm.426670	NM_025965	ENSMUSG00000021427	Ssr1	2510001K09Rik|6330400D04|AI159733|AI452176|SSR|TRAPA	signal sequence receptor, alpha	protein-coding
1393	chr2	120964430	120967047	+	0	NA	promoter-TSS (NM_001290811)	promoter-TSS (NM_001290811)	-426	NM_001290811	75894	Mm.384805	NM_029475	ENSMUSG00000027259	Adal	4930578F03Rik	adenosine deaminase-like	protein-coding
1167	chr18	35181197	35214504	+	0	NA	Intergenic	Intergenic	-80716	NM_009818	12385	Mm.18962	NM_009818	ENSMUSG00000037815	Ctnna1	2010010M04Rik|AA517462|AI988031|Catna1	catenin (cadherin associated protein), alpha 1	protein-coding
587	chr13	23712084	23715275	+	0	NA	promoter-TSS (NM_178194)	promoter-TSS (NM_178194)	-686	NM_178194	319179	Mm.440391	NM_178194	ENSMUSG00000047246	Hist1h2be	-	histone cluster 1, H2be	protein-coding
609	chr13	48720292	48721452	+	0	NA	promoter-TSS (NM_207232)	promoter-TSS (NM_207232)	70	NM_207232	218232	Mm.315089	NM_207232	ENSMUSG00000038042	Ptpdc1	AI843923|AW456874|Naa-1	protein tyrosine phosphatase domain containing 1	protein-coding
1235	chr19	8830802	8832244	+	0	NA	promoter-TSS (NM_016813)	promoter-TSS (NM_016813)	-70	NM_016813	53319	Mm.7271	NM_016813	ENSMUSG00000010097	Nxf1	Mex67|Mvb1|Tap	nuclear RNA export factor 1	protein-coding
298	chr10	126719543	126734970	+	0	NA	promoter-TSS (NM_001290183)	promoter-TSS (NM_001290183)	-593	NM_007837	13198	Mm.110220	NM_007837	ENSMUSG00000025408	Ddit3	CHOP-10|CHOP10|chop|gadd153	DNA-damage inducible transcript 3	protein-coding
95	chr1	90595445	90599596	+	0	NA	3' UTR (NM_177305, exon 1 of 1)	3' UTR (NM_177305, exon 1 of 1)	1246	NM_177305	320982	Mm.27968	NM_177305	ENSMUSG00000049866	Arl4c	A630084M22Rik|Arl7|LAK	ADP-ribosylation factor-like 4C	protein-coding
923	chr16	16302187	16303807	+	0	NA	promoter-TSS (NR_038046)	promoter-TSS (NR_038046)	-61	NR_038046	70120	Mm.37486	NM_198246	ENSMUSG00000022792	Yars2	2210023C10Rik|tyrRS	tyrosyl-tRNA synthetase 2 (mitochondrial)	protein-coding
243	chr10	75700149	75701146	+	0	NA	promoter-TSS (NM_133182)	promoter-TSS (NM_133182)	-37	NM_133182	15468	Mm.32020	NM_133182	ENSMUSG00000020230	Prmt2	AI504737|Hrmt1l1	protein arginine N-methyltransferase 2	protein-coding
2051	chr6	129158664	129188911	+	0	NA	Intergenic	Lx5|LINE|L1	14276	NR_040265	76432	Mm.261738	NR_040265	ENSMUSG00000097354	2310001H17Rik	AI646108	RIKEN cDNA 2310001H17 gene	ncRNA
148	chr1	169238158	169239264	+	0	NA	promoter-TSS (NM_001039483)	promoter-TSS (NM_001039483)	-90	NM_001039483	68944	Mm.330045	NM_026881	ENSMUSG00000052428	Tmco1	1190006A08Rik|4930403O06Rik|AA109065|AU022572|ESTM39	transmembrane and coiled-coil domains 1	protein-coding
753	chr14	58283107	58284764	+	0	NA	promoter-TSS (NM_020506)	promoter-TSS (NM_020506)	-142	NM_020506	57258	Mm.202747	NM_020506	ENSMUSG00000021952	Xpo4	B430309A01Rik|mKIAA1721	exportin 4	protein-coding
1343	chr2	48804193	48806123	+	0	NA	promoter-TSS (NM_011958)	promoter-TSS (NM_011958)	130	NM_029924	109241	Mm.440436	NM_029924	ENSMUSG00000036792	Mbd5	9430004D19Rik|AA536666|AI426407|C030040A15Rik|Gm1630|OTTMUSG00000012483	methyl-CpG binding domain protein 5	protein-coding
2489	chrX	12647346	12650460	+	0	NA	intron (NM_009481, intron 1 of 44)	CpG	279	NM_009481	22284	Mm.242646	NM_009481	ENSMUSG00000031010	Usp9x	5730589N07Rik|AA407302|AA407699|AL022658|AL022749|Dffrx|FAF-X|Fafl	ubiquitin specific peptidase 9, X chromosome	protein-coding
2404	chr9	60641118	60643974	+	0	NA	intron (NM_028283, intron 1 of 18)	CpG	191	NM_028283	72565	Mm.68819	NM_028283	ENSMUSG00000034485	Uaca	2700059D02Rik|nucling	uveal autoantigen with coiled-coil domains and ankyrin repeats	protein-coding
726	chr14	32642659	32644635	+	0	NA	promoter-TSS (NM_001024604)	promoter-TSS (NM_001024604)	-46	NM_001024604	105522	Mm.37660	NM_001024604	ENSMUSG00000014496	Ankrd28	AI465466|AI604979|E430019N21Rik|mKIAA0379	ankyrin repeat domain 28	protein-coding
2509	chrX	71488053	71501308	+	0	NA	Intergenic	Intergenic	-2807	NM_001290421	192176	Mm.295533	NM_010227	ENSMUSG00000031328	Flna	ABP-280|Dilp2|F730004A14Rik|Fln1|GENA 379|filamin-1	filamin, alpha	protein-coding
2171	chr7	112729063	112730738	+	0	NA	5' UTR (NM_001253885, exon 1 of 14)	5' UTR (NM_001253885, exon 1 of 14)	105	NM_001253885	11785	Mm.38469	NM_009685	ENSMUSG00000037032	Apbb1	Fe65|Rir	amyloid beta (A4) precursor protein-binding, family B, member 1	protein-coding
106	chr1	122011539	122019478	+	0	NA	intron (NM_001037999, intron 2 of 3)	intron (NM_001037999, intron 2 of 3)	1988	NM_001037999	13167	Mm.2785	NM_007830	ENSMUSG00000026385	Dbi	ACBD1|Acbp|EP|endozepine	diazepam binding inhibitor	protein-coding
157	chr1	179187054	179190803	+	0	NA	Intergenic	CpG	-10030	NM_011785	23797	Mm.235194	NM_011785	ENSMUSG00000019699	Akt3	AI851531|D930002M15Rik|Nmf350	thymoma viral proto-oncogene 3	protein-coding
964	chr16	50528332	50530629	+	0	NA	intron (NR_040379, intron 1 of 5)	CpG	865	NR_040379	619312	Mm.427671	NR_040379		G730013B05Rik	-	RIKEN cDNA G730013B05 gene	ncRNA
2009	chr6	85086833	85088607	+	0	NA	promoter-TSS (NM_011467)	promoter-TSS (NM_011467)	38	NM_011467	20751	Mm.28393	NM_011467	ENSMUSG00000033735	Spr	AA409688|ENSMUSG00000071345|Gm10328	sepiapterin reductase	protein-coding
65	chr1	72757269	72758611	+	0	NA	intron (NM_009084, intron 1 of 3)	CpG	106	NM_009084	19981	Mm.21529	NM_009084	ENSMUSG00000046330	Rpl37a	-	ribosomal protein L37a	protein-coding
1909	chr5	125862141	125930076	+	0	NA	intron (NM_203319, intron 25 of 26)	intron (NM_203319, intron 25 of 26)	18310	NM_203319	208144	Mm.296385	NM_203319	ENSMUSG00000029480	Dhx37	Gm1050|Gm451|mKIAA1517	DEAH (Asp-Glu-Ala-His) box polypeptide 37	protein-coding
935	chr16	20651335	20652301	+	0	NA	promoter-TSS (NM_134101)	promoter-TSS (NM_134101)	93	NM_134101	21762	Mm.243234	NM_134101	ENSMUSG00000006998	Psmd2	9430095H01Rik|AA407121|TEG-190|Tex190	proteasome (prosome, macropain) 26S subunit, non-ATPase, 2	protein-coding
203	chr10	36693723	36695336	+	0	NA	5' UTR (NM_008229, exon 1 of 14)	5' UTR (NM_008229, exon 1 of 14)	179	NM_008229	15182	Mm.19806	NM_008229	ENSMUSG00000019777	Hdac2	D10Wsu179e|YAF1|Yy1bp|mRPD3	histone deacetylase 2	protein-coding
1213	chr18	84757820	84760061	+	0	NA	promoter-TSS (NM_001033341)	promoter-TSS (NM_001033341)	-44	NM_001033341	240476	Mm.329575	NM_001033341	ENSMUSG00000048410	Zfp407	6430585N13Rik|Gm333|Gm334|Gm948|ZNF407	zinc finger protein 407	protein-coding
1093	chr17	57197512	57200404	+	0	NA	exon (NM_025877, exon 1 of 10)	exon (NM_025877, exon 1 of 10)	328	NM_025877	66972	Mm.23720	NM_025877	ENSMUSG00000046329	Slc25a23	2310067G05Rik|SCaMC-3	solute carrier family 25 (mitochondrial carrier; phosphate carrier), member 23	protein-coding
81	chr1	87420072	87424599	+	0	NA	Intergenic	Intergenic	73050	NM_030194	109032	Mm.335802	NM_030194	ENSMUSG00000070034	Sp110	5031415C07Rik|52kDa|5830484A20Rik|ENSMUSG00000075603|Ifi75|Ipr1	Sp110 nuclear body protein	protein-coding
1023	chr17	17510410	17512723	+	0	NA	5' UTR (NM_025934, exon 1 of 10)	5' UTR (NM_025934, exon 1 of 10)	270	NM_025934	67045	Mm.35117	NM_025934	ENSMUSG00000023846	Riok2	2010110K24Rik|2410085M17Rik	RIO kinase 2 (yeast)	protein-coding
2473	chr9	117949089	117950817	+	0	NA	5' UTR (NM_013727, exon 1 of 8)	5' UTR (NM_013727, exon 1 of 8)	313	NM_013727	27215	Mm.92705	NM_013727	ENSMUSG00000039285	Azi2	AA410145|AZ2	5-azacytidine induced gene 2	protein-coding
2084	chr7	24896739	24898317	+	0	NA	intron (NM_021307, intron 1 of 4)	intron (NM_021307, intron 1 of 4)	189	NM_021307	57745	Mm.82678	NM_021307	ENSMUSG00000052675	Zfp112	Znf112|Znf228	zinc finger protein 112	protein-coding
1300	chr2	4572603	4573313	+	0	NA	intron (NM_026045, intron 1 of 9)	intron (NM_026045, intron 1 of 9)	174	NM_026045	67229	Mm.38529	NM_026045	ENSMUSG00000039449	Prpf18	2810441A10Rik	PRP18 pre-mRNA processing factor 18 homolog (yeast)	protein-coding
1199	chr18	69870322	69872791	+	0	NA	Intergenic	Intergenic	-213657	NM_201362	381175	Mm.266831	NM_201362	ENSMUSG00000038903	Ccdc68	BC046343	coiled-coil domain containing 68	protein-coding
86	chr1	88254969	88256715	+	0	NA	promoter-TSS (NR_015507)	promoter-TSS (NR_015507)	188	NM_010880	17975	Mm.154378	NM_010880	ENSMUSG00000026234	Ncl	B530004O11Rik|C23|D0Nds28|D1Nds28|Nucl	nucleolin	protein-coding
624	chr13	63742957	63748527	+	0	NA	Intergenic	Lx8|LINE|L1	-78914	NM_008957	19206	Mm.228798	NM_008957	ENSMUSG00000021466	Ptch1	A230106A15Rik|Ptc|Ptc1|Ptch|mes	patched homolog 1	protein-coding
1158	chr18	33418670	33421924	+	0	NA	Intergenic	Intergenic	-46827	NM_133774	170459	Mm.127058	NM_133774		Stard4	4632419C16Rik|9030213J02Rik|AA517649|AW324468	StAR-related lipid transfer (START) domain containing 4	protein-coding
2170	chr7	112622990	112636673	+	0	NA	intron (NM_028444, intron 1 of 1)	intron (NM_028444, intron 1 of 1)	880	NM_028444	109042	Mm.3124	NM_028444	ENSMUSG00000037060	Prkcdbp	3110015B12Rik|6330514M23Rik|SRBC	protein kinase C, delta binding protein	protein-coding
371	chr11	60986803	60989323	+	0	NA	intron (NM_001004143, intron 1 of 12)	CpG	498	NM_001004143	216825	Mm.30602	NM_001004143	ENSMUSG00000042506	Usp22	AI427806	ubiquitin specific peptidase 22	protein-coding
656	chr13	81021493	81026469	+	0	NA	intron (NM_001042591, intron 1 of 7)	intron (NM_001042591, intron 1 of 7)	1298	NM_001042591	105171	Mm.423137	NM_001042591	ENSMUSG00000074794	Arrdc3	AI450344|mKIAA1376	arrestin domain containing 3	protein-coding
204	chr10	36765878	36770098	+	0	NA	Intergenic	Intergenic	73638	NM_008229	15182	Mm.19806	NM_008229	ENSMUSG00000019777	Hdac2	D10Wsu179e|YAF1|Yy1bp|mRPD3	histone deacetylase 2	protein-coding
2335	chr8	125588230	125590373	+	0	NA	promoter-TSS (NM_153176)	promoter-TSS (NM_153176)	-107	NM_153176	234847	Mm.292075	NM_153176	ENSMUSG00000000738	Spg7	AI452278|AU015315|Cmar|PGN	spastic paraplegia 7 homolog (human)	protein-coding
1041	chr17	24277524	24279053	+	0	NA	intron (NM_001286662, intron 1 of 13)	CpG	273	NM_011062	18607	Mm.10504	NM_011062	ENSMUSG00000024122	Pdpk1	Pdk1	3-phosphoinositide dependent protein kinase 1	protein-coding
1990	chr6	53236007	53239618	+	0	NA	intron (NR_015553, intron 1 of 4)	CpG	523	NR_015553	320189	Mm.227444	NR_015553		9430076C15Rik	-	RIKEN cDNA 9430076C15 gene	ncRNA
435	chr11	97627371	97628638	+	0	NA	promoter-TSS (NM_026186)	promoter-TSS (NM_026186)	-77	NM_026186	67480	Mm.33206	NM_026186	ENSMUSG00000018541	Cwc25	1300013D05Rik|AA473636|Ccdc49|R75228	CWC25 spliceosome-associated protein homolog (S. cerevisiae)	protein-coding
814	chr15	12040602	12049075	+	0	NA	Intergenic	Intergenic	-2768	NM_011767	22763	Mm.273496	NM_011767	ENSMUSG00000022201	Zfr	C920030H05Rik	zinc finger RNA binding protein	protein-coding
2492	chrX	17737746	17741717	+	0	NA	promoter-TSS (NM_009483)	promoter-TSS (NM_009483)	-62	NM_009483	22289	Mm.257498	NM_009483	ENSMUSG00000037369	Kdm6a	Utx	lysine (K)-specific demethylase 6A	protein-coding
1482	chr3	19543752	19546114	+	0	NA	intron (NM_001081281, intron 1 of 9)	intron (NM_001081281, intron 1 of 9)	473	NM_001081281	381485	Mm.35419	NM_001081281	ENSMUSG00000060913	Trim55	D830041C10Rik|Murf2|Rnf29	tripartite motif-containing 55	protein-coding
2109	chr7	46910161	46911764	+	0	NA	Intergenic	IAPLTR2_Mm|LTR|ERVK	137826	NM_001004139	70227	Mm.333800	NM_001004139	ENSMUSG00000068959	Zfp619	3000002G13Rik	zinc finger protein 619	protein-coding
885	chr15	94373441	94375002	+	0	NA	promoter-TSS (NM_172437)	promoter-TSS (NM_172437)	130	NM_029926	266632	Mm.422858	NM_029926	ENSMUSG00000059883	Irak4	8430405M07Rik|9330209D03Rik|IRAK-4|NY-REN-64	interleukin-1 receptor-associated kinase 4	protein-coding
1412	chr2	135383441	135404122	+	0	NA	Intergenic	Intergenic	15175	NR_015544	320684	Mm.421433	NR_015544	ENSMUSG00000085631	9630028H03Rik	-	RIKEN cDNA 9630028H03 gene	ncRNA
884	chr15	93228248	93229372	+	0	NA	promoter-TSS (NM_026025)	promoter-TSS (NM_026025)	29	NM_175363	223828	Mm.74208	NM_146062	ENSMUSG00000036167	Pphln1	CR|HSPC206|HSPC232	periphilin 1	protein-coding
1709	chr4	108251151	108252104	+	0	NA	promoter-TSS (NM_011015)	promoter-TSS (NM_011015)	314	NM_172697	230596	Mm.157534	NM_172697	ENSMUSG00000063800	Prpf38a	2410002M20Rik	PRP38 pre-mRNA processing factor 38 (yeast) domain containing A	protein-coding
339	chr11	26287007	26287712	+	0	NA	intron (NM_001277273, intron 1 of 13)	CpG	275	NR_102382	67030	Mm.18875	NM_025923		Fancl	2010322C19Rik|AW554273|B230118H11Rik|Phf9|Pog|gcd	Fanconi anemia, complementation group L	protein-coding
228	chr10	57959954	57961359	+	0	NA	promoter-TSS (NM_001162956)	promoter-TSS (NM_001162956)	-29	NM_001162956	76138	Mm.211744	NM_001162956	ENSMUSG00000038010	Ccdc138	6230424H07Rik|BC042726	coiled-coil domain containing 138	protein-coding
749	chr14	57396152	57398207	+	0	NA	promoter-TSS (NM_025682)	promoter-TSS (NM_025682)	-26	NM_025682	66645	Mm.20129	NM_025682	ENSMUSG00000021938	Pspc1	5730470C09Rik|AI327109|AI449052|PSP1	paraspeckle protein 1	protein-coding
268	chr10	84564564	84566573	+	0	NA	promoter-TSS (NM_010214)	promoter-TSS (NM_010214)	196	NM_001013028	103266	Mm.335025	NM_001013028	ENSMUSG00000060935	Tmem263	AI597468	transmembrane protein 263	protein-coding
829	chr15	41277707	41280406	+	0	NA	promoter-TSS (NM_001130166)	promoter-TSS (NM_001130166)	28	NM_001130166	170719	Mm.254267	NM_130885	ENSMUSG00000022307	Oxr1	2210416C20Rik|C7|C7B	oxidation resistance 1	protein-coding
345	chr11	32166845	32168249	+	0	NA	non-coding (NR_104306, exon 1 of 14)	non-coding (NR_104306, exon 1 of 14)	160	NM_181569	17168	Mm.263161	NM_181569	ENSMUSG00000020289	Nprl3	Aag|CGTHBA|HS-26|HS-40|Mare|Phg|Prox1|m(alpha)RE	nitrogen permease regulator-like 3	protein-coding
596	chr13	35085007	35087039	+	0	NA	promoter-TSS (NM_011868)	promoter-TSS (NM_011868)	-10	NM_001110331	23986	Mm.491141	NM_011868	ENSMUSG00000021417	Eci2	Acbd2|Drs1|Hca88|Peci	enoyl-Coenzyme A delta isomerase 2	protein-coding
1297	chr19	61302107	61304447	+	0	NA	intron (NM_009970, intron 1 of 11)	CpG-7700	1044	NM_009970	12982	Mm.287228	NM_009970	ENSMUSG00000059326	Csf2ra	CD116|Csfgmra|GM-CSF-Ra|GM-CSFR	colony stimulating factor 2 receptor, alpha, low-affinity (granulocyte-macrophage)	protein-coding
2090	chr7	26161332	26182112	+	0	NA	TTS (NR_073028)	TTS (NR_073028)	3409	NM_001039507	16890	Mm.158548	NM_010719	ENSMUSG00000003123	Lipe	4933403G17Rik|HSL	lipase, hormone sensitive	protein-coding
1521	chr3	69525439	69527046	+	0	NA	intron (NM_133787, intron 1 of 15)	CpG	265	NM_133787	97112	Mm.21062	NM_133787	ENSMUSG00000027787	Nmd3	C87860	NMD3 homolog (S. cerevisiae)	protein-coding
1862	chr5	86601070	86602697	+	0	NA	promoter-TSS (NM_172712)	promoter-TSS (NM_172712)	-115	NM_172712	231380	Mm.34012	NM_172712	ENSMUSG00000035898	Uba6	4930542H01|5730469D23Rik|AU021846|AW124799|E1-L2|Ube1l2	ubiquitin-like modifier activating enzyme 6	protein-coding
2352	chr9	18277651	18278710	+	0	NA	promoter-TSS (NM_028935)	promoter-TSS (NM_028935)	-177	NM_028935	72230	Mm.289689	NM_028935	ENSMUSG00000074500	Zfp558	1700007A21Rik|4932704I17Rik|Zfp558-ps	zinc finger protein 558	protein-coding
613	chr13	54787393	54796517	+	0	NA	intron (NR_027395, intron 1 of 10)	intron (NR_027395, intron 1 of 10)	-2394	NM_001146027	105239	Mm.25366	NM_134064	ENSMUSG00000034928	Rnf44	AI854545|mKIAA1100	ring finger protein 44	protein-coding
1082	chr17	48110216	48114225	+	0	NA	Intergenic	CpG	-50639	NM_001110825	74123	Mm.240062	NM_028767	ENSMUSG00000023991	Foxp4	1200010K03Rik|2310007G05Rik|mFKHLA	forkhead box P4	protein-coding
1066	chr17	34254091	34290864	+	0	NA	5' UTR (NM_010386, exon 2 of 6)	5' UTR (NM_010386, exon 2 of 6)	-9884	NM_010388	15000	Mm.195060	NM_010388		H2-DMb2	H-2Mb2|H2-Mb2	histocompatibility 2, class II, locus Mb2	protein-coding
121	chr1	136390428	136392025	+	0	NA	promoter-TSS (NM_145510)	promoter-TSS (NM_145510)	-11	NM_145510	98710	Mm.198119	NM_145510	ENSMUSG00000042229	Rabif	AI842864|AW549708|E130318E12Rik|MSS4|RASGFR3	RAB interacting factor	protein-coding
952	chr16	36874344	36876475	+	0	NA	promoter-TSS (NM_134111)	promoter-TSS (NM_134111)	-497	NM_134111	106389	Mm.432078	NM_134111	ENSMUSG00000022838	Eaf2	AW048865|FESTA-L|FESTA-S|Festa|Traits|U19	ELL associated factor 2	protein-coding
1071	chr17	35997507	36017170	+	0	NA	intron (NM_001146710, intron 2 of 3)	intron (NM_001146710, intron 2 of 3)	3778	NM_175242	76448	Mm.359982	NM_175242	ENSMUSG00000034595	Ppp1r18	2310014H01Rik|AA407849|AI450394	protein phosphatase 1, regulatory subunit 18	protein-coding
494	chr12	53703181	53706572	+	0	NA	Intergenic	U6|snRNA|snRNA	-1567	NR_045910	73278	Mm.396209	NR_045910		1700031P21Rik	-	RIKEN cDNA 1700031P21 gene	ncRNA
487	chr12	37107397	37109151	+	0	NA	promoter-TSS (NM_001289503)	promoter-TSS (NM_001289503)	237	NM_178629	75847	Mm.261764	NM_178629	ENSMUSG00000043153	Ispd	4930579E17Rik|AV040780	isoprenoid synthase domain containing	protein-coding
1956	chr6	29380299	29389894	+	0	NA	intron (NM_001081185, intron 1 of 47)	intron (NM_001081185, intron 1 of 47)	1943	NM_001081185	68794	Mm.39046	NM_001081185	ENSMUSG00000068699	Flnc	1110055E19Rik|ABP-280|ABPL|Fln2	filamin C, gamma	protein-coding
2235	chr8	19892313	19893617	+	0	NA	promoter-TSS (NR_030708)	promoter-TSS (NR_030708)	45	NR_030708	547150	Mm.359054	NR_030708	ENSMUSG00000071796	6820431F20Rik	-	cadherin 11 pseudogene	pseudo
238	chr10	66462707	66468196	+	0	NA	Intergenic	Intergenic	-2372	NR_110511	102634101	Mm.445258	NR_110511		LOC102634101	-	uncharacterized LOC102634101	ncRNA
873	chr15	81626101	81645125	+	0	NA	intron (NM_153484, intron 1 of 3)	intron (NM_153484, intron 1 of 3)	2510	NM_153484	21685	Mm.270278	NM_017376	ENSMUSG00000022389	Tef	2310028D20Rik	thyrotroph embryonic factor	protein-coding
253	chr10	79892597	79897299	+	0	NA	intron (NM_011548, intron 1 of 18)	intron (NM_011548, intron 1 of 18)	1450	NM_001164150	21423	Mm.3406	NM_011548	ENSMUSG00000020167	Tcf3	A1|AA408400|ALF2|AW209082|E12|E12/E47|E2A|E47|ME2|Pan1|Pan2|TCF-3|Tcfe2a|VDIR|bHLHb21	transcription factor 3	protein-coding
448	chr11	105040518	105044535	+	0	NA	promoter-TSS (NM_001294330)	promoter-TSS (NM_001294330)	221	NR_027956	73431	Mm.351426	NM_028539		1700052K11Rik	AI840954	RIKEN cDNA 1700052K11 gene	ncRNA
2278	chr8	79421099	79427732	+	0	NA	promoter-TSS (NR_028579)	promoter-TSS (NR_028579)	-343	NR_028579	100039211	Mm.367571	NR_028579	ENSMUSG00000074235	Gm10649	ENSMUSG00000074235	predicted gene 10649	ncRNA
2427	chr9	77935815	77938053	+	0	NA	intron (NM_001081490, intron 7 of 12)	intron (NM_001081490, intron 7 of 12)	19529	NM_023605	71538	Mm.28584	NM_023605	ENSMUSG00000001366	Fbxo9	9030401P18Rik|AA986398	f-box protein 9	protein-coding
63	chr1	66856240	66864887	+	0	NA	intron (NM_001122738, intron 1 of 14)	intron (NM_001122738, intron 1 of 14)	3606	NM_177645	68691	Mm.240912	NM_177645	ENSMUSG00000026004	Kansl1l	1110028C15Rik|1190030G24|AI427598|C430010P07Rik|mKIAA4189	KAT8 regulatory NSL complex subunit 1-like	protein-coding
1637	chr4	11412191	11413757	+	0	NA	promoter-TSS (NM_001081183)	promoter-TSS (NM_001081183)	-131	NM_001081183	66185	Mm.331487	NM_001081183	ENSMUSG00000040720	1110037F02Rik	4930422M05Rik|Kiaa1429|mKIAA1429	RIKEN cDNA 1110037F02 gene	protein-coding
179	chr10	4521492	4523259	+	0	NA	promoter-TSS (NM_175374)	promoter-TSS (NM_175374)	-223	NM_175374	108853	Mm.55082	NM_175374	ENSMUSG00000019774	Mtrf1l	9130004K12Rik	mitochondrial translational release factor 1-like	protein-coding
1532	chr3	88098255	88101887	+	0	NA	promoter-TSS (NM_009836)	promoter-TSS (NM_009836)	689	NM_029801	76927	Mm.273330	NM_029801	ENSMUSG00000010538	Tsacc	1700021C14Rik|SIP	TSSK6 activating co-chaperone	protein-coding
1105	chr17	74794421	74795557	+	0	NA	promoter-TSS (NM_001252478)	promoter-TSS (NM_001252478)	41	NM_144798	210148	Mm.243943	NM_144798	ENSMUSG00000024069	Slc30a6	9530029F08Rik|ZnT6	solute carrier family 30 (zinc transporter), member 6	protein-coding
713	chr14	20899988	20903231	+	0	NA	intron (NM_026209, intron 1 of 1)	RMER10B|LTR|ERVL	785	NM_026209	67509	Mm.292423	NM_026209	ENSMUSG00000045107	Saysd1	1810063B07Rik|4930488P03Rik	SAYSVFN motif domain containing 1	protein-coding
1334	chr2	34726060	34727489	+	0	NA	promoter-TSS (NM_080554)	promoter-TSS (NM_080554)	-292	NM_080554	66998	Mm.270632	NM_080554	ENSMUSG00000026869	Psmd5	1500032A03Rik|AW475925|S5b|W91691|mKIAA0072	proteasome (prosome, macropain) 26S subunit, non-ATPase, 5	protein-coding
2499	chrX	48370111	48373681	+	0	NA	promoter-TSS (NM_172413)	promoter-TSS (NM_172413)	-701	NM_172413	72065	Mm.43152	NM_172413	ENSMUSG00000050029	Rap2c	2010200P20Rik|AI194294|AL022976	RAP2C, member of RAS oncogene family	protein-coding
2096	chr7	28644456	28646644	+	0	NA	promoter-TSS (NM_001024726)	promoter-TSS (NM_001024726)	-54	NM_001024726	545938	Mm.458180	NM_001024726		Zfp607	4732475C15Rik	zinc finger proten 607	protein-coding
1784	chr4	154997889	154999530	+	0	NA	promoter-TSS (NM_007661)	promoter-TSS (NM_007661)	155	NR_040441	100502734	Mm.306018	NR_040441	ENSMUSG00000086682	Gm16023	OTTMUSG00000029160	predicted gene 16023	ncRNA
938	chr16	23102795	23109056	+	0	NA	Intergenic	B1_Mur2|SINE|Alu	-1616	NM_001123038	13682	Mm.260084	NM_013506	ENSMUSG00000022884	Eif4a2	4833432N07Rik|BM-010|Ddx2b|Eif4|eIF-4A-II|eIF4A-II	eukaryotic translation initiation factor 4A2	protein-coding
2149	chr7	91025051	91041525	+	0	NA	promoter-TSS (NM_030705)	promoter-TSS (NM_030705)	-437	NM_030705	80889	Mm.272998	NM_030705	ENSMUSG00000070462	Mesdc1	AW061151	mesoderm development candidate 1	protein-coding
1679	chr4	56125722	56128086	+	0	NA	Intergenic	Intergenic	-581557	NM_010637	16600	Mm.4325	NM_010637	ENSMUSG00000003032	Klf4	EZF|Gklf|Zie	Kruppel-like factor 4 (gut)	protein-coding
1830	chr5	34678127	34680389	+	0	NA	intron (NM_011278, intron 1 of 7)	CpG	219	NM_011278	19822	Mm.21281	NM_011278	ENSMUSG00000029110	Rnf4	AU018689|Gtrgeo8	ring finger protein 4	protein-coding
1620	chr3	151848658	151857498	+	0	NA	intron (NM_027287, intron 2 of 3)	intron (NM_027287, intron 2 of 3)	3731	NM_025926	67035	Mm.46746	NM_025926	ENSMUSG00000028035	Dnajb4	1700029A20Rik|2010306G19Rik|5730460G06Rik	DnaJ (Hsp40) homolog, subfamily B, member 4	protein-coding
2241	chr8	27268081	27270051	+	0	NA	intron (NM_199042, intron 1 of 2)	CpG	425	NM_199042	73754	Mm.383241	NM_199042		Thap1	4833431A01Rik|AW490810	THAP domain containing, apoptosis associated protein 1	protein-coding
1262	chr19	36330394	36341697	+	0	NA	Intergenic	RLTR28|LTR|ERVL	-117512	NM_029508	76073	Mm.259180	NM_029508	ENSMUSG00000024805	Pcgf5	0610009F02Rik|1110054A01Rik|5830406C17Rik|5830443C21Rik|9530023M17Rik|AI324127	polycomb group ring finger 5	protein-coding
1290	chr19	57429237	57442294	+	0	NA	promoter-TSS (NR_040316)	promoter-TSS (NR_040316)	266	NM_145505	226252	Mm.358870	NM_145505	ENSMUSG00000033478	Fam160b1	AI450540|mKIAA1600	family with sequence similarity 160, member B1	protein-coding
1527	chr3	86027452	86029368	+	0	NA	promoter-TSS (NM_001077687)	promoter-TSS (NM_001077687)	-202	NM_001077688	80877	Mm.439825	NM_030695	ENSMUSG00000028080	Lrba	C80285|D3Ertd775e|Lab300|Lba	LPS-responsive beige-like anchor	protein-coding
2162	chr7	107640732	107651578	+	0	NA	intron (NM_011671, intron 4 of 7)	PB1D9|SINE|Alu	4301	NM_011671	22228	Mm.171378	NM_011671	ENSMUSG00000033685	Ucp2	Slc25a8	uncoupling protein 2 (mitochondrial, proton carrier)	protein-coding
1132	chr18	7868011	7870814	+	0	NA	5' UTR (NM_001146298, exon 1 of 13)	5' UTR (NM_001146298, exon 1 of 13)	217	NM_153085	225131	Mm.204524	NM_153085	ENSMUSG00000024283	Wac	1110067P07Rik|A230035H12Rik|AI256735|AI256776|Wwp4	WW domain containing adaptor with coiled-coil	protein-coding
2370	chr9	37334108	37354289	+	0	NA	exon (NM_027102, exon 5 of 7)	exon (NM_027102, exon 5 of 7)	-2642	NM_020518	57276	Mm.27478	NM_020518	ENSMUSG00000001943	Vsig2	1190004B15Rik|2210413P10Rik|AU040484|CTX|Ctm	V-set and immunoglobulin domain containing 2	protein-coding
929	chr16	17508240	17509646	+	0	NA	promoter-TSS (NM_025808)	promoter-TSS (NM_025808)	-121	NM_025808	66863	Mm.161726	NM_025808	ENSMUSG00000022761	Lztr1	1200003E21Rik|AI591627|AW550890	leucine-zipper-like transcriptional regulator, 1	protein-coding
1925	chr5	139959773	139961224	+	0	NA	promoter-TSS (NM_133349)	promoter-TSS (NM_133349)	-53	NM_001159908	100494	Mm.24521	NM_133349	ENSMUSG00000053581	Zfand2a	AA407930|AU016206|Airap	zinc finger, AN1-type domain 2A	protein-coding
547	chr12	98299543	98299997	+	0	NA	Intergenic	Intergenic	-1014338	NR_103800	69423	Mm.46121	NM_027076	ENSMUSG00000059695	1700019M22Rik	-	NFX-like protein	pseudo
631	chr13	67033234	67034891	+	0	NA	promoter-TSS (NM_025547)	promoter-TSS (NM_025547)	-54	NM_025547	66410	Mm.347939	NM_025547	ENSMUSG00000021519	Mterf3	2410017I18Rik|Mterfd1	mitochondrial transcription termination factor 3	protein-coding
1616	chr3	145303683	145320569	+	0	NA	intron (NM_010516, intron 2 of 4)	intron (NM_010516, intron 2 of 4)	823	NM_010516	16007	Mm.1231	NM_010516	ENSMUSG00000028195	Cyr61	AI325051|CCN1|Igfbp10	cysteine rich protein 61	protein-coding
1583	chr3	115709510	115711638	+	0	NA	promoter-TSS (NM_023214)	promoter-TSS (NM_023214)	207	NM_001163515	58193	Mm.41739	NM_021388	ENSMUSG00000027963	Extl2	3000001D04Rik|AW146439	exostoses (multiple)-like 2	protein-coding
1544	chr3	90095833	90099656	+	0	NA	Intergenic	CpG	23673	NR_105979	102465612		NR_105979		Mir7012	mmu-mir-7012	microRNA mir-7012	ncRNA
1538	chr3	89182156	89201150	+	0	NA	intron (NM_009565, intron 1 of 2)	intron (NM_009565, intron 1 of 2)	-4133	NR_040403	545539	Mm.393389	NR_040403	ENSMUSG00000074466	Gm15417	ENSMUSG00000074466|OTTMUSG00000021274	predicted gene 15417	ncRNA
396	chr11	75433066	75473404	+	0	NA	intron (NM_008916, intron 7 of 11)	intron (NM_008916, intron 7 of 11)	8713	NM_008916	19062	Mm.1458	NM_008916	ENSMUSG00000006127	Inpp5k	C62|Pps|SKIP	inositol polyphosphate 5-phosphatase K	protein-coding
258	chr10	81089574	81091106	+	0	NA	promoter-TSS (NM_027480)	promoter-TSS (NM_027480)	13	NM_181586	50721	Mm.25643	NM_181586	ENSMUSG00000034748	Sirt6	2810449N18Rik|AI043036|Sir2l6	sirtuin 6	protein-coding
1422	chr2	152261328	152263456	+	0	NA	intron (NM_177656, intron 5 of 11)	intron (NM_177656, intron 5 of 11)	21069	NR_110368	228778	Mm.70959	NM_177656	ENSMUSG00000032680	6820408C15Rik	-	RIKEN cDNA 6820408C15 gene	protein-coding
482	chr12	32318949	32319999	+	0	NA	promoter-TSS (NM_007530)	promoter-TSS (NM_007530)	-12	NM_007530	12033	Mm.242379	NM_007530	ENSMUSG00000020650	Bcap29	AW208404|Bap29	B cell receptor associated protein 29	protein-coding
949	chr16	35681156	35682460	+	0	NA	Intergenic	Intergenic	87634	NM_153550	224132	Mm.24094	NM_153550	ENSMUSG00000022848	Dirc2	RCC4	disrupted in renal carcinoma 2 (human)	protein-coding
499	chr12	56225017	56226183	+	0	NA	promoter-TSS (NM_001100116)	promoter-TSS (NM_001100116)	85	NM_028527	73385	Mm.439875	NM_028527	ENSMUSG00000095595	Fam177a	1700047I17Rik|1700047I17Rik1|C14orf24|D730001C10Rik|Fam177a1	family with sequence similarity 177, member A	protein-coding
1047	chr17	25320463	25326358	+	0	NA	3' UTR (NM_183150, exon 2 of 2)	3' UTR (NM_183150, exon 2 of 2)	1904	NM_183150	214489	Mm.274433	NM_183150	ENSMUSG00000067722	BC003965	Ccsmst1	cDNA sequence BC003965	protein-coding
2138	chr7	73204714	73205889	+	0	NA	promoter-TSS (NM_021336)	promoter-TSS (NM_021336)	79	NM_021336	68981	Mm.22362	NM_021336	ENSMUSG00000030512	Snrpa1	1500015N06Rik	small nuclear ribonucleoprotein polypeptide A'	protein-coding
1055	chr17	31794991	31796354	+	0	NA	promoter-TSS (NM_001163769)	promoter-TSS (NM_001163769)	27	NM_024187	108121	Mm.379289	NM_024187	ENSMUSG00000061613	U2af1	2010107D16Rik|35kDa	U2 small nuclear ribonucleoprotein auxiliary factor (U2AF) 1	protein-coding
2447	chr9	100444771	100447300	+	0	NA	intron (NM_010878, intron 1 of 3)	CpG	437	NM_010878	17973	Mm.181485	NM_010878	ENSMUSG00000032475	Nck1	6330586M15Rik|D230010O13Rik|Nck|Nck-1	non-catalytic region of tyrosine kinase adaptor protein 1	protein-coding
1276	chr19	45080098	45105858	+	0	NA	intron (NM_001130526, intron 1 of 4)	intron (NM_001130526, intron 1 of 4)	353	NM_001130526	226154	Mm.28204	NM_145503	ENSMUSG00000035342	Lzts2	BC014695|LAPSER1|mKIAA1813	leucine zipper, putative tumor suppressor 2	protein-coding
141	chr1	164669494	164671138	+	0	NA	intron (NM_001081290, intron 1 of 34)	CpG	371	NM_001081290	226562	Mm.245446	NM_001081290	ENSMUSG00000040225	Prrc2c	1810043M20Rik|9630039I18Rik|A630006J20|Bat2d|Bat2d1|Bat2l2|E130112L15Rik|Prrc3|mKIAA1096	proline-rich coiled-coil 2C	protein-coding
909	chr16	4624171	4625449	+	0	NA	intron (NM_025571, intron 1 of 4)	CpG	136	NM_025571	66449	Mm.354760	NM_025571	ENSMUSG00000014301	Pam16	2010110I09Rik|AV006767|CGI-136|Magmas|Tim16|Timm16	presequence translocase-asssociated motor 16 homolog (S. cerevisiae)	protein-coding
1124	chr17	95148255	95149738	+	0	NA	promoter-TSS (NR_024720)	promoter-TSS (NR_024720)	236	NM_176917	76781	Mm.139146	NM_176917	ENSMUSG00000055660	Mettl4	2410198H06Rik|A730091E08Rik|AV296509|HsT661	methyltransferase like 4	protein-coding
1230	chr19	6014796	6016160	+	0	NA	promoter-TSS (NM_007600)	promoter-TSS (NM_007600)	-231	NM_007600	12333	Mm.6221	NM_007600	ENSMUSG00000024942	Capn1	Capa-1|Capa1|mu-calpin	calpain 1	protein-coding
75	chr1	82312554	82313782	+	0	NA	promoter-TSS (NM_029777)	promoter-TSS (NM_029777)	14	NM_029777	76867	Mm.226994	NM_029777	ENSMUSG00000026142	Rhbdd1	4930418P06Rik|RRP4|mRHBDD1	rhomboid domain containing 1	protein-coding
1917	chr5	134786459	134792414	+	0	NA	intron (NM_001080747, intron 1 of 33)	CpG	1194	NM_001080748	14886	Mm.261570	NM_010365	ENSMUSG00000060261	Gtf2i	6030441I21Rik|BAP-135|Diws1t|GtfII-I|Spin|TFII-I|WBSCR6	general transcription factor II I	protein-coding
1163	chr18	34783208	34784733	+	0	NA	promoter-TSS (NM_001166406)	promoter-TSS (NM_001166406)	-308	NM_001166407	19348	Mm.258846	NM_009004	ENSMUSG00000003779	Kif20a	AA415432|Rab6kifl	kinesin family member 20A	protein-coding
450	chr11	105926780	105928241	+	0	NA	promoter-TSS (NM_027346)	promoter-TSS (NM_027346)	89	NM_027346	70207	Mm.343857	NM_027346	ENSMUSG00000001983	Taco1	2310066I18Rik|Ccdc44	translational activator of mitochondrially encoded cytochrome c oxidase I	protein-coding
1702	chr4	102886413	102888556	+	0	NA	promoter-TSS (NM_177732)	promoter-TSS (NM_177732)	5	NM_177732	242585	Mm.281800	NM_177732		Slc35d1	AI834976|C330011J09|UGTREL7|mKIAA0260	solute carrier family 35 (UDP-glucuronic acid/UDP-N-acetylgalactosamine dual transporter), member D1	protein-coding
1405	chr2	129122692	129123922	+	0	NA	promoter-TSS (NM_181589)	promoter-TSS (NM_181589)	201	NR_040371	100503468	Mm.446943	NR_040371	ENSMUSG00000085498	Gm14023	OTTMUSG00000015408	predicted gene 14023	ncRNA
1713	chr4	114580960	114582402	+	0	NA	promoter-TSS (NR_030721)	promoter-TSS (NR_030721)	-178	NM_008593	17301	Mm.7997	NM_008593	ENSMUSG00000055210	Foxd2	AI426778|Mf2	forkhead box D2	protein-coding
1060	chr17	33083198	33085292	+	0	NA	promoter-TSS (NM_130882)	promoter-TSS (NM_130882)	61	NM_130882	170716	Mm.254838	NM_130882	ENSMUSG00000024055	Cyp4f13	0610030I10Rik|Cypf13	cytochrome P450, family 4, subfamily f, polypeptide 13	protein-coding
2420	chr9	71980122	71982048	+	0	NA	Intergenic	CpG	-21459	NM_001253865	21406	Mm.171615	NM_011544	ENSMUSG00000032228	Tcf12	A130037E08Rik|ALF1|HEB|HEBAlt|HTF-4|HTF4|ME1|REB|bHLHb20	transcription factor 12	protein-coding
2104	chr7	36019056	36020854	+	0	NA	Intergenic	Intergenic	-19591	NM_001024707	435965	Mm.333783	NM_001024707	ENSMUSG00000001802	Lrp3	-	low density lipoprotein receptor-related protein 3	protein-coding
2126	chr7	53152201	53153413	+	0	NA	promoter-TSS (NM_021482)	promoter-TSS (NM_021482)	368	NM_144801	70209	Mm.163766	NM_144801	ENSMUSG00000002781	Tmem143	2310076O21Rik|AI481604	transmembrane protein 143	protein-coding
900	chr15	101903433	101905155	+	0	NA	promoter-TSS (NM_145625)	promoter-TSS (NM_145625)	90	NM_145625	75705	Mm.290022	NM_145625	ENSMUSG00000058655	Eif4b	2310046H11Rik|AL024095|C85189|Eif4a2	eukaryotic translation initiation factor 4B	protein-coding
318	chr11	6099530	6101023	+	0	NA	5' UTR (NM_173748, exon 1 of 6)	5' UTR (NM_173748, exon 1 of 6)	178	NM_173748	209586	Mm.25321	NM_173748	ENSMUSG00000053838	Nudcd3	AI427847|BC024322|mKIAA1068	NudC domain containing 3	protein-coding
1729	chr4	120886908	120888104	+	0	NA	Intergenic	CpG	-26367	NM_001081013	109263	Mm.215745	NM_001081013	ENSMUSG00000049878	Rlf	9230110M18Rik|AI195322|MommeD8	rearranged L-myc fusion sequence	protein-coding
2526	chrX	120216253	120218995	+	0	NA	intron (NM_028426, intron 1 of 3)	RLTR1B-int|LTR|ERV1	456	NM_028426	73061	Mm.292979	NM_028426	ENSMUSG00000079450	3110007F17Rik	-	RIKEN cDNA 3110007F17 gene	protein-coding
972	chr16	59638771	59640070	+	0	NA	promoter-TSS (NM_019665)	promoter-TSS (NM_019665)	-255	NM_019665	56297	Mm.392505	NM_019665	ENSMUSG00000022722	Arl6	1110018H24Rik|2210411E14Rik|BBS3	ADP-ribosylation factor-like 6	protein-coding
473	chr12	15800198	15825106	+	0	NA	intron (NM_144551, intron 2 of 2)	intron (NM_144551, intron 2 of 2)	-4745	NR_105809	102465204		NR_105809		Mir6387	mmu-mir-6387	microRNA mir-6387	ncRNA
1774	chr4	147334508	147344353	+	0	NA	Intergenic	Intergenic	-20467	NM_008726	18158	Mm.2740	NM_008726	ENSMUSG00000029019	Nppb	AA408272|BNF|BNP	natriuretic peptide type B	protein-coding
3	chr1	4797063	4798596	+	0	NA	promoter-TSS (NM_008866)	promoter-TSS (NM_008866)	-145	NM_008866	18777	Mm.299955	NM_008866	ENSMUSG00000025903	Lypla1	Pla1a	lysophospholipase 1	protein-coding
248	chr10	77758670	77762659	+	0	NA	intron (NM_053014, intron 2 of 9)	intron (NM_053014, intron 2 of 9)	42288	NR_106119	102465765		NR_106119		Mir7659	mmu-mir-7659	microRNA mir-7659	ncRNA
146	chr1	167389111	167400642	+	0	NA	intron (NM_027430, intron 1 of 4)	L4|LINE|RTE	3537	NM_027430	70456	Mm.195625	NM_027430	ENSMUSG00000026568	Mpc2	0610006C01Rik|2010002I07Rik|2610205H19Rik|AA108335|Brp44|ESTM43	mitochondrial pyruvate carrier 2	protein-coding
1351	chr2	59719551	59721123	+	0	NA	intron (NM_001159636, intron 1 of 10)	CpG	326	NM_001159636	72137	Mm.288734	NM_028118	ENSMUSG00000026988	Wdsub1	1700048E19Rik|2610014F08Rik	WD repeat, SAM and U-box domain containing 1	protein-coding
2396	chr9	56337220	56365871	+	0	NA	Intergenic	Intergenic	84892	NM_025812	66867	Mm.150856	NM_025812	ENSMUSG00000032329	Hmg20a	1200004E06Rik|5730490E10Rik|Hmgxb1|Ibraf	high mobility group 20A	protein-coding
356	chr11	51075954	51078867	+	0	NA	promoter-TSS (NM_177567)	promoter-TSS (NM_177567)	737	NM_007714	12750	Mm.239354	NM_007714	ENSMUSG00000020385	Clk4	AI987988|C85119	CDC like kinase 4	protein-coding
802	chr14	122222604	122226574	+	0	NA	Intergenic	Intergenic	-27633	NM_134074	105445	Mm.441054	NM_134074	ENSMUSG00000025558	Dock9	AA959601|AW538057|B230309H04Rik|D14Wsu89e|Zizimin1|mKIAA1058	dedicator of cytokinesis 9	protein-coding
2063	chr6	145799229	145820374	+	0	NA	3' UTR (NM_024469, exon 5 of 5)	3' UTR (NM_024469, exon 5 of 5)	4139	NM_001271768	79362	Mm.154529	NM_024469	ENSMUSG00000030256	Bhlhe41	6430520M22Rik|Bhlhb2l|Bhlhb3|DEC2|Sharp1	basic helix-loop-helix family, member e41	protein-coding
528	chr12	81182252	81193850	+	0	NA	Intergenic	L1MA5|LINE|L1	25949	NM_007564	12192	Mm.235132	NM_007564	ENSMUSG00000021127	Zfp36l1	AW742437|AW743212|Berg36|Brf1|D530020L18Rik|ERF1|TIS11b|cMG1	zinc finger protein 36, C3H type-like 1	protein-coding
164	chr1	180378084	180380072	+	0	NA	intron (NM_026626, intron 2 of 6)	intron (NM_026626, intron 2 of 6)	43066	NM_026626	68226	Mm.252132	NM_026626	ENSMUSG00000026495	Efcab2	1700073K01Rik|D830011E08Rik	EF-hand calcium binding domain 2	protein-coding
807	chr15	6657288	6659401	+	0	NA	promoter-TSS (NM_030168)	promoter-TSS (NM_030168)	-37	NM_030168	78757	Mm.275811	NM_030168	ENSMUSG00000050310	Rictor	4921505C17Rik|6030405M08Rik|AVO3|AW492497|D530039E11Rik	RPTOR independent companion of MTOR, complex 2	protein-coding
2040	chr6	119852130	119853501	+	0	NA	promoter-TSS (NM_001166383)	promoter-TSS (NM_001166383)	99	NM_001166381	19365	Mm.149	NM_011236	ENSMUSG00000030166	Rad52	Rad52yh	RAD52 homolog (S. cerevisiae)	protein-coding
1049	chr17	28621581	28625708	+	0	NA	promoter-TSS (NM_010220)	promoter-TSS (NM_010220)	-550	NM_010220	14229	Mm.276405	NM_010220	ENSMUSG00000024222	Fkbp5	D17Ertd592e|Dit1|FKBP-5|FKBP51	FK506 binding protein 5	protein-coding
882	chr15	90507993	90510626	+	0	NA	intron (NM_001033851, intron 1 of 3)	intron (NM_001033851, intron 1 of 3)	510	NM_025815	66871	Mm.290991	NM_025815	ENSMUSG00000052560	Cpne8	1200003E11Rik|1500031E20Rik	copine VIII	protein-coding
1050	chr17	28638744	28665069	+	0	NA	Intergenic	Intergenic	-15900	NM_026290	67645	Mm.46170	NM_026290	ENSMUSG00000024223	Armc12	4930511I11Rik|AV041658	armadillo repeat containing 12	protein-coding
1488	chr3	30867002	30868956	+	0	NA	intron (NM_001165954, intron 1 of 14)	CpG	358	NM_001165954	241915	Mm.233173	NM_153421	ENSMUSG00000037652	Phc3	E030046K01Rik|Edr3|Hph3	polyhomeotic-like 3 (Drosophila)	protein-coding
560	chr12	112211310	112231004	+	0	NA	Intergenic	RMER2|LTR|ERV1	-3926	NM_175207	74251	Mm.250989	NM_175207	ENSMUSG00000037904	Ankrd9	2500003O20Rik	ankyrin repeat domain 9	protein-coding
798	chr14	118487110	118489490	+	0	NA	Intergenic	Intergenic	-36832	NM_010024	13190	Mm.19987	NM_010024	ENSMUSG00000022129	Dct	DT|TRP-2|TRP2|Tyrp-2|Tyrp2|slaty|slt	dopachrome tautomerase	protein-coding
898	chr15	100325184	100326137	+	0	NA	promoter-TSS (NM_153407)	promoter-TSS (NM_153407)	10	NM_153407	207785	Mm.294969	NM_153407	ENSMUSG00000044636	Csrnp2	CSRNP-2|Csnrp2|taip-12	cysteine-serine-rich nuclear protein 2	protein-coding
1031	chr17	21815991	21817390	+	0	NA	Intergenic	Intergenic	-10489	NR_045766	100310809	Mm.463100	NR_045766		Gm10509	ENSMUSG00000073448	zinc finger protein 51 pseudogene	pseudo
1273	chr19	42163490	42166618	+	0	NA	exon (NM_145501, exon 1 of 9)	exon (NM_145501, exon 1 of 9)	129	NM_145501	84095	Mm.117037	NM_145501	ENSMUSG00000025178	Pi4k2a	Pi4k2	phosphatidylinositol 4-kinase type 2 alpha	protein-coding
2516	chrX	91422515	91424246	+	0	NA	Intergenic	CpG	34610	NM_012010	26905	Mm.218851	NM_012010	ENSMUSG00000035150	Eif2s3x	AA409828|AA547477|AI314668|Eif-2gx	eukaryotic translation initiation factor 2, subunit 3, structural gene X-linked	protein-coding
451	chr11	106639837	106657654	+	0	NA	intron (NM_007840, intron 1 of 12)	intron (NM_007840, intron 1 of 12)	1063	NM_007840	13207	Mm.491096	NM_007840	ENSMUSG00000020719	Ddx5	2600009A06Rik|G17P1|HUMP68|Hlr1|p68	DEAD (Asp-Glu-Ala-Asp) box polypeptide 5	protein-coding
454	chr11	115395997	115398372	+	0	NA	intron (NM_133354, intron 1 of 3)	CpG	360	NM_133354	170930	Mm.29923	NM_133354	ENSMUSG00000020738	Sumo2	SUMO-2|Smt3A|Smt3b|Smt3h2	SMT3 suppressor of mif two 3 homolog 2 (yeast)	protein-coding
2538	chrX	159197094	159199769	+	0	NA	5' UTR (NM_009031, exon 1 of 12)	5' UTR (NM_009031, exon 1 of 12)	127	NM_009031	245688	Mm.270186	NM_009031	ENSMUSG00000031353	Rbbp7	AA409861|AI173248|AU019541|BB114024|mRbAp46	retinoblastoma binding protein 7	protein-coding
1364	chr2	76485378	76487252	+	0	NA	promoter-TSS (NM_011871)	promoter-TSS (NM_011871)	-264	NM_011871	23992	Mm.277250	NM_011871	ENSMUSG00000002731	Prkra	AV120107|PRK|Pact|RAX|lear	protein kinase, interferon inducible double stranded RNA dependent activator	protein-coding
1408	chr2	130489602	130493979	+	0	NA	Intergenic	(TA)n|Simple_repeat|Simple_repeat	-1409	NM_029832	77006	Mm.440063	NM_029832	ENSMUSG00000068290	Ddrgk1	1110001I20Rik|2600009E05Rik|AI326138|Ufbp1	DDRGK domain containing 1	protein-coding
2448	chr9	100541942	100546028	+	0	NA	promoter-TSS (NM_009282)	promoter-TSS (NM_009282)	-57	NM_009282	20842	Mm.42135	NM_009282	ENSMUSG00000037286	Stag1	AU045003|SA-1|Scc3	stromal antigen 1	protein-coding
634	chr13	67208732	67210214	+	0	NA	intron (NM_001256052, intron 2 of 6)	intron (NM_001256052, intron 2 of 6)	5491	NM_001256052	432770	Mm.124021	NM_001256052	ENSMUSG00000074824	Rslcan18	mszf51	regulator of sex-limitation candidate 18	protein-coding
578	chr13	14705002	14706152	+	0	NA	promoter-TSS (NM_008944)	promoter-TSS (NM_008944)	68	NM_008944	19166	Mm.252255	NM_008944	ENSMUSG00000015671	Psma2	Lmpc3	proteasome (prosome, macropain) subunit, alpha type 2	protein-coding
695	chr13	113717030	113718527	+	0	NA	promoter-TSS (NM_172594)	promoter-TSS (NM_172594)	-190	NM_028151	72198	Mm.291029	NM_028151	ENSMUSG00000016018	Skiv2l2	2610528A15Rik|mKIAA0052	superkiller viralicidic activity 2-like 2 (S. cerevisiae)	protein-coding
978	chr16	85536126	85553806	+	0	NA	intron (NM_144853, intron 2 of 3)	intron (NM_144853, intron 2 of 3)	5652	NM_144853	224405	Mm.213203	NM_144853	ENSMUSG00000041134	Cyyr1	-	cysteine and tyrosine-rich protein 1	protein-coding
2144	chr7	88356020	88365103	+	0	NA	intron (NM_008803, intron 1 of 21)	intron (NM_008803, intron 1 of 21)	1871	NM_008803	18584	Mm.371577	NM_008803		Pde8a	AI551852|Pde8	phosphodiesterase 8A	protein-coding
325	chr11	17157179	17158381	+	0	NA	intron (NM_020558, intron 1 of 4)	CpG	159	NM_020558	57316	Mm.287982	NM_020558	ENSMUSG00000000581	C1d	1110036E10Rik|AI875855|SUN-CoR	C1D nuclear receptor co-repressor	protein-coding
378	chr11	62690602	62693607	+	0	NA	promoter-TSS (NM_026210)	promoter-TSS (NM_026210)	-888	NM_026210	67510	Mm.9806	NM_026210	ENSMUSG00000014177	Tvp23b	1810036I24Rik|Fam18b|Fam18b1	trans-golgi network vesicle protein 23B	protein-coding
889	chr15	97919582	97924694	+	0	NA	promoter-TSS (NM_001163488)	promoter-TSS (NM_001163488)	-882	NM_001163488	18642	Mm.272582	NM_021514	ENSMUSG00000033065	Pfkm	AI131669|ATP-PFK|PFK-A|PFK-M|Pfk-4|Pfk4|Pfka|Pfkx	phosphofructokinase, muscle	protein-coding
1233	chr19	7456294	7458478	+	0	NA	promoter-TSS (NR_045703)	promoter-TSS (NR_045703)	-107	NR_045703	654802	Mm.414924	NR_045703		1700105P06Rik	-	RIKEN cDNA 1700105P06 gene	ncRNA
540	chr12	88196654	88316087	+	0	NA	Intergenic	ID_B1|SINE|B4	-30606	NM_145836	238330	Mm.248358	NM_145836	ENSMUSG00000034168	Irf2bpl	6430527G18Rik|Eap1	interferon regulatory factor 2 binding protein-like	protein-coding
1162	chr18	34665215	34667673	+	0	NA	promoter-TSS (NM_146084)	promoter-TSS (NM_146084)	33	NM_146084	225358	Mm.226899	NM_146084	ENSMUSG00000036501	Fam13b	2610024E20Rik|AW060714|AW546153	family with sequence similarity 13, member B	protein-coding
1615	chr3	143861317	143869408	+	0	NA	promoter-TSS (NM_001161770)	promoter-TSS (NM_001161770)	-2	NM_001161769	16911	Mm.29187	NM_010723	ENSMUSG00000028266	Lmo4	A730077C12Rik|Crp3|Etohi4	LIM domain only 4	protein-coding
211	chr10	42480904	42482794	+	0	NA	intron (NM_153055, intron 1 of 20)	CpG	547	NM_153055	140740	Mm.214344	NM_153055	ENSMUSG00000019802	Sec63	5730478J10Rik|AI649014|AW319215	SEC63-like (S. cerevisiae)	protein-coding
684	chr13	104708661	104712514	+	0	NA	promoter-TSS (NM_001289474)	promoter-TSS (NM_001289474)	79	NM_001289473	59079	Mm.277354	NM_021563	ENSMUSG00000021709	Erbb2ip	1700028E05Rik|Erbin|mKIAA1225	Erbb2 interacting protein	protein-coding
2073	chr7	5031055	5036242	+	0	NA	5' UTR (NM_010147, exon 2 of 12)	5' UTR (NM_010147, exon 2 of 12)	1811	NM_001252454	13854	Mm.3091	NM_010147	ENSMUSG00000035203	Epn1	AA269831|Ibp1	epsin 1	protein-coding
1732	chr4	124526908	124529014	+	0	NA	promoter-TSS (NM_153566)	promoter-TSS (NM_153566)	13	NM_001142727	68920	Mm.272397	NM_001142727	ENSMUSG00000078570	1110065P20Rik	C530005M16Rik	RIKEN cDNA 1110065P20 gene	protein-coding
861	chr15	76827824	76876640	+	0	NA	intron (NM_001164048, intron 2 of 3)	intron (NM_001164048, intron 2 of 3)	925	NM_001164048	17189	Mm.404074	NM_013593	ENSMUSG00000018893	Mb	AI325109	myoglobin	protein-coding
337	chr11	23564982	23566856	+	0	NA	promoter-TSS (NM_023651)	promoter-TSS (NM_023651)	16	NM_023651	72129	Mm.29536	NM_023651	ENSMUSG00000020283	Pex13	2610008O20Rik	peroxisomal biogenesis factor 13	protein-coding
2406	chr9	61969305	61971236	+	0	NA	TTS (NR_039595)	TTS (NR_039595)	131	NR_039595	100628602		NR_039595	miRBase:MI0018045	Mir5133	mmu-mir-5133|mu-mir-5133	microRNA 5133	ncRNA
76	chr1	82721176	82722214	+	0	NA	intron (NM_029409, intron 1 of 8)	CpG	202	NM_029409	75734	Mm.396863	NM_029409	ENSMUSG00000026150	Mff	5230400G24Rik|AI314724	mitochondrial fission factor	protein-coding
1924	chr5	138882601	138883205	+	0	NA	intron (NM_028130, intron 1 of 4)	CpG	199	NM_028130	72154	Mm.20263	NM_028130	ENSMUSG00000036898	Zfp157	2610020C11Rik|A630094N24Rik|AI327407|mszf12|mszf23-1	zinc finger protein 157	protein-coding
982	chr16	92056739	92059822	+	0	NA	promoter-TSS (NM_080456)	promoter-TSS (NM_080456)	-287	NM_017391	53881	Mm.217354	NM_017391	ENSMUSG00000089774	Slc5a3	AA623876|BF642829|Smit1	solute carrier family 5 (inositol transporters), member 3	protein-coding
571	chr13	3609345	3610933	+	0	NA	5' UTR (NM_134063, exon 1 of 20)	5' UTR (NM_134063, exon 1 of 20)	215	NM_134063	105203	Mm.221609	NM_134063	ENSMUSG00000033799	Fam208b	AI645998|Pap20|mKIAA2006	family with sequence similarity 208, member B	protein-coding
1214	chr18	85120138	85121678	+	0	NA	promoter-TSS (NM_025969)	promoter-TSS (NM_025969)	8	NM_025969	67105	Mm.250617	NM_025969	ENSMUSG00000024645	Timm21	1700034H14Rik|2700002I20Rik	tranlocase of inner mitochondrial membrane 21	protein-coding
1190	chr18	63850527	63852810	+	0	NA	intron (NM_016792, intron 1 of 7)	CpG	345	NM_016792	53382	Mm.19169	NM_016792	ENSMUSG00000024583	Txnl1	32kDa|TRP32|Txnl	thioredoxin-like 1	protein-coding
389	chr11	70657231	70660027	+	0	NA	intron (NM_001291141, intron 1 of 16)	G-rich|Low_complexity|Low_complexity	366	NM_001291142	54189	Mm.7087	NM_019400	ENSMUSG00000020817	Rabep1	Rab5ep|rabaptin-5|rabaptin-5alpha	rabaptin, RAB GTPase binding effector protein 1	protein-coding
1660	chr4	42961901	42973082	+	0	NA	intron (NM_019874, intron 1 of 2)	intron (NM_019874, intron 1 of 2)	1525	NM_019874	56323	Mm.20437	NM_019874	ENSMUSG00000036052	Dnajb5	1110058L06Rik|AI462558|Hsc40|Hsp40-3	DnaJ (Hsp40) homolog, subfamily B, member 5	protein-coding
1171	chr18	36718851	36721915	+	0	NA	5' UTR (NM_175375, exon 1 of 34)	5' UTR (NM_175375, exon 1 of 34)	126	NM_175375	108857	Mm.482287	NM_175375	ENSMUSG00000024483	Ankhd1	1110004O12Rik|4933432B13Rik|9130019P20Rik|A530027J04Rik|A630021B20Rik|AA571404|Mask|mFLJ00246|mKIAA1085	ankyrin repeat and KH domain containing 1	protein-coding
1345	chr2	50151215	50152599	+	0	NA	promoter-TSS (NR_040362)	promoter-TSS (NR_040362)	290	NM_133839	109129	Mm.29214	NM_133839	ENSMUSG00000026766	Mmadhc	2010311D03Rik|AI314967	methylmalonic aciduria (cobalamin deficiency) cblD type, with homocystinuria	protein-coding
2290	chr8	86259888	86274040	+	0	NA	Intergenic	PB1D7|SINE|Alu	-1754	NM_001163031	26364	Mm.334648	NM_011925	ENSMUSG00000002885	Cd97	AA409984|TM7LN1	CD97 antigen	protein-coding
966	chr16	55817453	55824344	+	0	NA	intron (NM_001159395, intron 2 of 12)	intron (NM_001159395, intron 2 of 12)	1353	NM_001159394	80859	Mm.247272	NM_030612	ENSMUSG00000035356	Nfkbiz	AA408868|INAP|Mail	nuclear factor of kappa light polypeptide gene enhancer in B cells inhibitor, zeta	protein-coding
1123	chr17	88839334	88841597	+	0	NA	intron (NM_180974, intron 1 of 5)	CpG	413	NM_180974	14236	Mm.112824	NM_180974	ENSMUSG00000034998	Foxn2	3230402J05Rik|6030465J18Rik|Fkh19|Foxn1|HTLF	forkhead box N2	protein-coding
2314	chr8	108734183	108735568	+	0	NA	promoter-TSS (NM_001007567)	promoter-TSS (NM_001007567)	-42	NM_001007567	66432	Mm.269029	NM_001007567	ENSMUSG00000033106	Slc7a6os	2010007L18Rik|2400002F02Rik	solute carrier family 7, member 6 opposite strand	protein-coding
2216	chr7	147221542	147222877	+	0	NA	promoter-TSS (NM_027201)	promoter-TSS (NM_027201)	40	NM_133755	74237	Mm.40888	NM_133755	ENSMUSG00000025474	Tubgcp2	1700022B05Rik	tubulin, gamma complex associated protein 2	protein-coding
992	chr17	3556996	3558878	+	0	NA	promoter-TSS (NM_146074)	promoter-TSS (NM_146074)	113	NR_045302	68230	Mm.431352	NR_045302		1700102H20Rik	-	RIKEN cDNA 1700102H20 gene	ncRNA
236	chr10	62483957	62488485	+	0	NA	intron (NM_001079824, intron 1 of 9)	CpG	376	NM_001079824	432467	Mm.274784	NM_001079824	ENSMUSG00000020069	Hnrnph3	AA693301|AI666703|Hnrph3	heterogeneous nuclear ribonucleoprotein H3	protein-coding
758	chr14	60058069	60060522	+	0	NA	promoter-TSS (NM_026908)	promoter-TSS (NM_026908)	419	NM_001081024	239122	Mm.205022	NM_001081024	ENSMUSG00000071350	Setdb2	Clld8|Gm293|KMT1F	SET domain, bifurcated 2	protein-coding
1954	chr6	25758568	25760037	+	0	NA	promoter-TSS (NM_133931)	promoter-TSS (NM_133931)	-76	NM_133931	101185	Mm.274589	NM_133931	ENSMUSG00000029676	Pot1a	1500031H18Rik|AI851169|Pot1	protection of telomeres 1A	protein-coding
218	chr10	45082206	45084961	+	0	NA	intron (NM_024285, intron 7 of 7)	intron (NM_024285, intron 7 of 7)	28015	NM_024285	23828	Mm.332793	NM_024285	ENSMUSG00000071317	Bves	Pop1|Popdc1|mBVES	blood vessel epicardial substance	protein-coding
706	chr14	12384354	12389711	+	0	NA	intron (NM_008981, intron 1 of 29)	intron (NM_008981, intron 1 of 29)	965	NM_008981	19270	Mm.431266	NM_008981	ENSMUSG00000021745	Ptprg	5430405N12Rik|AW046354|AW549872|RPTPgamma	protein tyrosine phosphatase, receptor type, G	protein-coding
14	chr1	15795105	15797378	+	0	NA	intron (NM_001286628, intron 1 of 8)	intron (NM_001286628, intron 1 of 8)	514	NM_001286628	21749	Mm.4306	NM_009352		Terf1	Pin2|Trbf1|Trf1	telomeric repeat binding factor 1	protein-coding
2345	chr9	6164500	6172713	+	0	NA	promoter-TSS (NM_027924)	promoter-TSS (NM_027924)	-6	NM_027924	71785	Mm.390122	NM_027924	ENSMUSG00000032006	Pdgfd	1110003I09Rik	platelet-derived growth factor, D polypeptide	protein-coding
1608	chr3	138212065	138214886	+	0	NA	intron (NM_007917, intron 5 of 7)	intron (NM_007917, intron 5 of 7)	24090	NR_035481	100316706		NR_035481	miRBase:MI0009952	Mir1956	mmu-mir-1956	microRNA 1956	ncRNA
2328	chr8	120325347	120326676	+	0	NA	promoter-TSS (NM_026758)	promoter-TSS (NM_026758)	-182	NM_026758	68533	Mm.181836	NM_026758	ENSMUSG00000031843	Mphosph6	1110001M01Rik|AA536809|C86426	M phase phosphoprotein 6	protein-coding
2474	chr9	119803486	119804817	+	0	NA	intron (NM_026236, intron 1 of 18)	CpG	138	NM_026236	67561	Mm.104789	NM_026236	ENSMUSG00000032512	Wdr48	8430408H12Rik|Uaf1|mKIAA1449	WD repeat domain 48	protein-coding
234	chr10	62254062	62259984	+	0	NA	Intergenic	Intergenic	-1907	NM_026201	67500	Mm.196371	NM_026201	ENSMUSG00000020074	Ccar1	2610511G16Rik|9430036H15Rik|Carp1	cell division cycle and apoptosis regulator 1	protein-coding
594	chr13	34735310	34746085	+	0	NA	intron (NM_025831, intron 1 of 4)	intron (NM_025831, intron 1 of 4)	3853	NM_025831	66895	Mm.28943	NM_025831	ENSMUSG00000021411	Pxdc1	1300014I06Rik	PX domain containing 1	protein-coding
1438	chr2	158450377	158451450	+	0	NA	exon (NM_175419, exon 1 of 9)	exon (NM_175419, exon 1 of 9)	264	NM_175419	109275	Mm.27747	NM_175419	ENSMUSG00000037761	Actr5	AA545173|B430109J19Rik	ARP5 actin-related protein 5	protein-coding
1903	chr5	123299252	123300940	+	0	NA	promoter-TSS (NM_030564)	promoter-TSS (NM_030564)	-101	NM_030564	80751	Mm.388529	NM_030564	ENSMUSG00000029474	Rnf34	AW061037|AW536122|BC004042|C88279|RIFF	ring finger protein 34	protein-coding
2188	chr7	129244291	129245734	+	0	NA	intron (NM_028177, intron 1 of 4)	intron (NM_028177, intron 1 of 4)	350	NM_028177	70316	Mm.3014	NM_028177		Ndufab1	2210401F17Rik|2310039H15Rik|2610003B19Rik|8kDa|9130423F15Rik|ACP|CI-SDAP|SDAP	NADH dehydrogenase (ubiquinone) 1, alpha/beta subcomplex, 1	protein-coding
1778	chr4	151272516	151282606	+	0	NA	Intergenic	Intergenic	-30268	NM_172704	230935	Mm.21353	NM_172704	ENSMUSG00000039768	Dnajc11	E030019A03Rik	DnaJ (Hsp40) homolog, subfamily C, member 11	protein-coding
2339	chr8	129962776	129965745	+	0	NA	intron (NM_033620, intron 20 of 24)	intron (NM_033620, intron 20 of 24)	140708	NM_001013580	93742	Mm.299254	NM_033620	ENSMUSG00000025812	Pard3	AA960621|AI256638|ASIP|D8Ertd580e|PAR-3|Par3|Pard3a	par-3 family cell polarity regulator	protein-coding
1859	chr5	77694016	77696204	+	0	NA	intron (NM_011263, intron 1 of 3)	CpG	591	NM_011263	19712	Mm.28840	NM_011263	ENSMUSG00000029249	Rest	2610008J04Rik|AA407358|NRSF	RE1-silencing transcription factor	protein-coding
160	chr1	180116765	180118908	+	0	NA	5' UTR (NM_024282, exon 1 of 5)	5' UTR (NM_024282, exon 1 of 5)	288	NM_024282	78825	Mm.440132	NM_024282	ENSMUSG00000026502	Desi2	5830417C01Rik|DeSI-2|Fam152a|Pppde1	desumoylating isopeptidase 2	protein-coding
98	chr1	95407851	95409439	+	0	NA	promoter-TSS (NM_145519)	promoter-TSS (NM_145519)	-36	NM_145519	227377	Mm.243091	NM_145519	ENSMUSG00000034066	Farp2	AI465173|BC009153|D030026M03Rik|Fir|mKIAA0793	FERM, RhoGEF and pleckstrin domain protein 2	protein-coding
1048	chr17	28044221	28048958	+	0	NA	exon (NM_001286040, exon 1 of 25)	exon (NM_001286040, exon 1 of 25)	338	NM_181413	224650	Mm.32556	NM_181413	ENSMUSG00000024219	Anks1	Anks1a|mKIAA0229	ankyrin repeat and SAM domain containing 1	protein-coding
1278	chr19	45148643	45155503	+	0	NA	intron (NM_178929, intron 2 of 4)	intron (NM_178929, intron 2 of 4)	1444	NM_178929	107250	Mm.24417	NM_178929	ENSMUSG00000025213	Kazald1	AI842353|Bono1|IGFBP-rP10	Kazal-type serine peptidase inhibitor domain 1	protein-coding
2434	chr9	85217484	85225879	+	0	NA	promoter-TSS (NM_001160379)	promoter-TSS (NM_001160379)	-924	NM_001160379	212943	Mm.74610	NM_001160378	ENSMUSG00000032265	Fam46a	D930050G01Rik	family with sequence similarity 46, member A	protein-coding
1000	chr17	6475691	6476555	+	0	NA	Intergenic	CpG	-25981	NR_033520	547127	Mm.297552	NM_001045538		Tmem181b-ps	Tmem181b	transmembrane protein 181B, pseudogene	pseudo
1381	chr2	112079278	112080335	+	0	NA	promoter-TSS (NM_207206)	promoter-TSS (NM_207206)	-192	NM_207206	99010	Mm.33438	NM_207206	ENSMUSG00000027134	Lpcat4	AI505034|Agpat7|Aytl3|LPEAT2	lysophosphatidylcholine acyltransferase 4	protein-coding
43	chr1	53353423	53354470	+	0	NA	promoter-TSS (NM_153556)	promoter-TSS (NM_153556)	7	NM_145517	227102	Mm.212846	NM_145517	ENSMUSG00000026097	Ormdl1	C730042F17Rik	ORM1-like 1 (S. cerevisiae)	protein-coding
1061	chr17	33531051	33532159	+	0	NA	promoter-TSS (NM_009542)	promoter-TSS (NM_009542)	-23	NM_009542	22643	Mm.4417	NM_009542	ENSMUSG00000055240	Zfp101	AI316498|AI325003	zinc finger protein 101	protein-coding
2054	chr6	133984053	133995704	+	0	NA	intron (NM_007961, intron 1 of 7)	intron (NM_007961, intron 1 of 7)	4153	NM_007961	14011	Mm.269995	NM_007961	ENSMUSG00000030199	Etv6	AW123102|AW557856|Tel	ets variant 6	protein-coding
1728	chr4	120597222	120598482	+	0	NA	promoter-TSS (NM_028457)	promoter-TSS (NM_028457)	-242	NM_001160043	73172	Mm.151436	NM_028457	ENSMUSG00000028629	Exo5	3110037I16Rik|AV297100|Dem1|Exo V|mExo5	exonuclease 5	protein-coding
193	chr10	19626954	19627727	+	0	NA	exon (NM_001161825, exon 1 of 9)	exon (NM_001161825, exon 1 of 9)	140	NM_008822	18634	Mm.338363	NM_008822	ENSMUSG00000020003	Pex7	MmPEX7	peroxisomal biogenesis factor 7	protein-coding
288	chr10	116017498	116020236	+	0	NA	promoter-TSS (NM_001037846)	promoter-TSS (NM_001037846)	-300	NM_001037846	72068	Mm.351553	NM_028082	ENSMUSG00000020166	Cnot2	2600016M12Rik|2810470K03Rik|AA537049|AA959607|AW557563|C79650	CCR4-NOT transcription complex, subunit 2	protein-coding
119	chr1	136257806	136259104	+	0	NA	5' UTR (NM_020588, exon 1 of 8)	5' UTR (NM_020588, exon 1 of 8)	121	NM_001042485	57439	Mm.393140	NM_020588	ENSMUSG00000042305	Tmem183a	1300007B12Rik|1700020N19Rik|Tmem183	transmembrane protein 183A	protein-coding
1555	chr3	96289424	96311257	+	0	NA	Intergenic	Intergenic	-28768	NM_027126	69585	Mm.171314	NM_027126	ENSMUSG00000038403	Hfe2	2310035L15Rik|5230400G09Rik|AI414844|AI789733|DL-M|HJV|Rgmc|hemojuvelin	hemochromatosis type 2 (juvenile) (human homolog)	protein-coding
586	chr13	23460279	23461817	+	0	NA	promoter-TSS (NM_001111107)	promoter-TSS (NM_001111107)	29	NM_001286156	218100	Mm.286454	NM_172586	ENSMUSG00000046351	Zfp322a	Znf322|Znf322a	zinc finger protein 322A	protein-coding
410	chr11	84631495	84643591	+	0	NA	intron (NM_177564, intron 2 of 6)	intron (NM_177564, intron 2 of 6)	-4526	NM_145433	217038	Mm.280825	NM_145433	ENSMUSG00000018405	Mrm1	A530065E19Rik|ENSMUSG00000054212	mitochondrial rRNA methyltransferase 1 homolog (S. cerevisiae)	protein-coding
999	chr17	6105993	6108421	+	0	NA	intron (NM_001103181, intron 1 of 13)	CpG	377	NM_001103181	68842	Mm.449307	NM_054040	ENSMUSG00000034377	Tulp4	1110057P05Rik|2210038L17Rik|Tusp	tubby like protein 4	protein-coding
1180	chr18	53903475	53905575	+	0	NA	promoter-TSS (NM_178686)	promoter-TSS (NM_178686)	-324	NM_178686	225523	Mm.193678	NM_178686	ENSMUSG00000048799	Cep120	A230075C01|AU016693|Ccdc100	centrosomal protein 120	protein-coding
2169	chr7	112547816	112549523	+	0	NA	promoter-TSS (NM_199009)	promoter-TSS (NM_199009)	-101	NM_001242363	74349	Mm.30254	NM_199009	ENSMUSG00000044465	Fam160a2	4632419K20Rik|6530415H11Rik|FHIP	family with sequence similarity 160, member A2	protein-coding
430	chr11	95573266	95576076	+	0	NA	promoter-TSS (NR_045780)	promoter-TSS (NR_045780)	-603	NR_045780	432396	Mm.426849	NR_045780	ENSMUSG00000086191	Zfp652os	1110035M17Rik	zinc finger protein 652, opposite strand	ncRNA
1185	chr18	61122038	61124139	+	0	NA	promoter-TSS (NM_009792)	promoter-TSS (NM_009792)	-120	NM_009792	12322	Mm.131530	NM_009792	ENSMUSG00000024617	Camk2a	CaMKII|R74975|mKIAA0968	calcium/calmodulin-dependent protein kinase II alpha	protein-coding
447	chr11	104301789	104304803	+	0	NA	5' UTR (NM_001081045, exon 1 of 14)	5' UTR (NM_001081045, exon 1 of 14)	309	NM_001081045	76719	Mm.136418	NM_001081045	ENSMUSG00000018412	Kansl1	1700081L11Rik|9430041J06Rik|mKIAA1267	KAT8 regulatory NSL complex subunit 1	protein-coding
1446	chr2	163284342	163298650	+	0	NA	Intergenic	Intergenic	-6785	NR_028122	69517	Mm.395343	NR_028122	ENSMUSG00000053353	2310001K24Rik	-	RIKEN cDNA 2310001K24 gene	ncRNA
1741	chr4	129316540	129318696	+	0	NA	exon (NM_001005506, exon 1 of 10)	exon (NM_001005506, exon 1 of 10)	431	NM_001005506	109658	Mm.268863	NM_001005506	ENSMUSG00000053841	Txlna	2600010N21Rik|AI425952|AW209241|Il14|Txln	taxilin alpha	protein-coding
2118	chr7	51722902	51731175	+	0	NA	TTS (NM_025368)	TTS (NM_025368)	1321	NR_106019	102465637		NR_106019		Mir7052	mmu-mir-7052	microRNA mir-7052	ncRNA
415	chr11	85165721	85167222	+	0	NA	promoter-TSS (NM_138681)	promoter-TSS (NM_138681)	-195	NM_001166642	192197	Mm.287663	NM_138681	ENSMUSG00000059439	Bcas3	1500019F07Rik|2610028P08Rik|AU021018|BC028339|K20D4|rudhira	breast carcinoma amplified sequence 3	protein-coding
1130	chr18	5985990	5990690	+	0	NA	Intergenic	RMER17B|LTR|ERVK	147756	NM_029277	75415	Mm.239675	NM_029277	ENSMUSG00000041225	Arhgap12	2810011M08Rik	Rho GTPase activating protein 12	protein-coding
1315	chr2	22922652	22925537	+	0	NA	promoter-TSS (NM_001102437)	promoter-TSS (NM_001102437)	373	NM_001102436	74159	Mm.181973	NM_028793	ENSMUSG00000026781	Acbd5	1300014E15Rik	acyl-Coenzyme A binding domain containing 5	protein-coding
189	chr10	12912159	12913461	+	0	NA	intron (NM_181470, intron 1 of 10)	CpG	133	NM_181470	353258	Mm.117581	NM_181470	ENSMUSG00000019814	Ltv1	2610020N02Rik	LTV1 homolog (S. cerevisiae)	protein-coding
1292	chr19	60018556	60019905	+	0	NA	promoter-TSS (NM_001033172)	promoter-TSS (NM_001033172)	37	NM_001033172	74998	Mm.24167	NM_001033172	ENSMUSG00000040022	Rab11fip2	4930470G04Rik|A830046J09Rik|AW558126|Nrip11	RAB11 family interacting protein 2 (class I)	protein-coding
2330	chr8	121918162	121925329	+	0	NA	intron (NM_019966, intron 1 of 4)	intron (NM_019966, intron 1 of 4)	2953	NM_019966	56690	Mm.423037	NM_019966	ENSMUSG00000074064	Mlycd	AI324784|Mcd	malonyl-CoA decarboxylase	protein-coding
1356	chr2	70498989	70500686	+	0	NA	intron (NM_027352, intron 1 of 9)	CpG	271	NM_027352	70231	Mm.271950	NM_027352	ENSMUSG00000014959	Gorasp2	0610011A07Rik|2410043M02Rik|5730520M13Rik|9430094F20Rik|AW552058|GOLPH2|GRASP55|GRS2|p59	golgi reassembly stacking protein 2	protein-coding
480	chr12	32035486	32036590	+	0	NA	intron (NM_007861, intron 1 of 13)	CpG	298	NM_007861	13382	Mm.3131	NM_007861	ENSMUSG00000020664	Dld	-	dihydrolipoamide dehydrogenase	protein-coding
107	chr1	127455654	127477859	+	0	NA	intron (NM_028787, intron 5 of 15)	ORR1A4|LTR|MaLR	9163	NM_028787	74150	Mm.28654	NM_028787	ENSMUSG00000026342	Slc35f5	1300003P13Rik|AI646727	solute carrier family 35, member F5	protein-coding
438	chr11	97883254	97889155	+	0	NA	Intergenic	B1_Mur1|SINE|Alu	-1820	NM_001159483	19921	Mm.10247	NM_009078	ENSMUSG00000017404	Rpl19	-	ribosomal protein L19	protein-coding
1153	chr18	31963213	31964952	+	0	NA	intron (NM_028866, intron 1 of 21)	CpG	371	NM_001170966	74320	Mm.277705	NM_028866	ENSMUSG00000024400	Wdr33	1110001N06Rik|2310011G05Rik|2810021O11Rik|8430413N20Rik|WDC146	WD repeat domain 33	protein-coding
1871	chr5	100405509	100408988	+	0	NA	intron (NM_007516, intron 1 of 7)	CpG	709	NM_001077266	11991	Mm.150231	NM_007516		Hnrnpd	Auf1|Hnrpd	heterogeneous nuclear ribonucleoprotein D	protein-coding
2385	chr9	50815814	50817761	+	0	NA	intron (NM_178710, intron 1 of 15)	CpG	391	NM_178710	235344	Mm.104932	NM_178710	ENSMUSG00000037112	Sik2	G630080D20Rik|Snf1lk2	salt inducible kinase 2	protein-coding
87	chr1	88360284	88370525	+	0	NA	Intergenic	CT-rich|Low_complexity|Low_complexity	42500	NM_027966	71863	Mm.179627	NM_027966	ENSMUSG00000036574	1700019O17Rik	-	RIKEN cDNA 1700019O17 gene	protein-coding
1022	chr17	17482877	17483253	+	0	NA	Intergenic	CpG	-28231	NM_025934	67045	Mm.35117	NM_025934	ENSMUSG00000023846	Riok2	2010110K24Rik|2410085M17Rik	RIO kinase 2 (yeast)	protein-coding
1832	chr5	35002143	35004207	+	0	NA	promoter-TSS (NM_029278)	promoter-TSS (NM_029278)	147	NM_019497	14772	Mm.117076	NM_019497	ENSMUSG00000052783	Grk4	A830025H08Rik|GRK|Gprk2l|Gprk4	G protein-coupled receptor kinase 4	protein-coding
953	chr16	37010514	37011927	+	0	NA	promoter-TSS (NM_001159369)	promoter-TSS (NM_001159369)	-652	NM_029977	77782	Mm.259114	NM_029977	ENSMUSG00000034206	Polq	A430110D14Rik	polymerase (DNA directed), theta	protein-coding
221	chr10	52893960	52902008	+	0	NA	Intergenic	Intergenic	-102092	NR_038015	100502820	Mm.55827	NR_038015		Gm19395	-	predicted gene, 19395	ncRNA
1424	chr2	153170627	153177733	+	0	NA	intron (NM_001039939, intron 1 of 11)	intron (NM_001039939, intron 1 of 11)	2305	NM_001039939	228790	Mm.330677	NM_001039939	ENSMUSG00000042548	Asxl1	mKIAA0978	additional sex combs like 1	protein-coding
1560	chr3	98944711	98945805	+	0	NA	intron (NM_027462, intron 1 of 5)	CpG	245	NM_027462	70560	Mm.316754	NM_027462	ENSMUSG00000004233	Wars2	5730427B17Rik|9430020O07Rik|AI413375|TrpRS	tryptophanyl tRNA synthetase 2 (mitochondrial)	protein-coding
417	chr11	86168674	86172002	+	0	NA	intron (NM_001080931, intron 1 of 29)	intron (NM_001080931, intron 1 of 29)	689	NM_001080931	327987	Mm.341886	NM_001080931	ENSMUSG00000034297	Med13	1110067M05Rik|D030023K18|Thrap1|Trap240	mediator complex subunit 13	protein-coding
784	chr14	79825905	79827194	+	0	NA	exon (NM_001024135, exon 1 of 1)	exon (NM_001024135, exon 1 of 1)	231	NM_001024135	211255	Mm.284526	NM_001024135	ENSMUSG00000043881	Kbtbd7	1110008P08Rik|AU045792|Gm295	kelch repeat and BTB (POZ) domain containing 7	protein-coding
1762	chr4	137769602	137774141	+	0	NA	promoter-TSS (NM_001285479)	promoter-TSS (NM_001285479)	-656	NM_001122896	15441	Mm.348429	NM_010470	ENSMUSG00000028759	Hp1bp3	Hp1bp74	heterochromatin protein 1, binding protein 3	protein-coding
260	chr10	81326244	81327349	+	0	NA	intron (NM_001243067, intron 1 of 3).2	CpG	117	NM_001243067	73610	Mm.490466	NM_001243067		Zfp433	1700123A16Rik	RIKEN cDNA 1700123A16 gene	protein-coding
2061	chr6	145130289	145133612	+	0	NA	intron (NM_177222, intron 10 of 15)	intron (NM_177222, intron 10 of 15)	27540	NM_177222	320662	Mm.207779	NM_177222	ENSMUSG00000043541	Casc1	A230084G12Rik|Las1	cancer susceptibility candidate 1	protein-coding
1844	chr5	65781732	65783269	+	0	NA	promoter-TSS (NM_024471)	promoter-TSS (NM_024471)	170	NM_011292	20005	Mm.300271	NM_011292	ENSMUSG00000047215	Rpl9	-	ribosomal protein L9	protein-coding
1530	chr3	87688538	87690214	+	0	NA	5' UTR (NM_033573, exon 1 of 7)	5' UTR (NM_033573, exon 1 of 7)	108	NM_033573	94315	Mm.35089	NM_033573	ENSMUSG00000004895	Prcc	-	papillary renal cell carcinoma (translocation-associated)	protein-coding
2504	chrX	68745066	68747043	+	0	NA	promoter-TSS (NM_001199349)	promoter-TSS (NM_001199349)	-30	NM_001199349	171486	Mm.283879	NM_138309	ENSMUSG00000035776	Cd99l2	AW548191|Mic2l1|Xap89	CD99 antigen-like 2	protein-coding
762	chr14	63740687	63753094	+	0	NA	intron (NM_007798, intron 1 of 9)	intron (NM_007798, intron 1 of 9)	5591	NM_007798	13030	Mm.236553	NM_007798	ENSMUSG00000021939	Ctsb	CB	cathepsin B	protein-coding
1144	chr18	21053970	21055576	+	0	NA	promoter-TSS (NM_029491)	promoter-TSS (NM_029491)	-194	NM_029491	75964	Mm.273769	NM_029491	ENSMUSG00000033382	Trappc8	5033403J15Rik|AI845423|D030074E01Rik|Trs85|mKIAA1012	trafficking protein particle complex 8	protein-coding
734	chr14	47896046	47897509	+	0	NA	promoter-TSS (NM_080843)	promoter-TSS (NM_080843)	-41	NM_080843	67296	Mm.23957	NM_080843		Socs4	3110032M18Rik|A730004F22Rik|AI427843|AU015727|AU015859|Socs7	suppressor of cytokine signaling 4	protein-coding
1723	chr4	117851701	117853480	+	0	NA	promoter-TSS (NM_172382)	promoter-TSS (NM_172382)	58	NM_172382	230674	Mm.234234	NM_172382	ENSMUSG00000033326	Kdm4a	D4Ertd222e|JHDM3A|Jmjd2|Jmjd2a|mKIAA0677	lysine (K)-specific demethylase 4A	protein-coding
2047	chr6	124914753	124916433	+	0	NA	promoter-TSS (NM_001164089)	promoter-TSS (NM_001164089)	-46	NM_001164089	26894	Mm.244536	NM_012003	ENSMUSG00000030127	Cops7a	D6Ertd35e	COP9 (constitutive photomorphogenic) homolog, subunit 7a (Arabidopsis thaliana)	protein-coding
144	chr1	166177569	166181440	+	0	NA	exon (NM_054087, exon 1 of 6)	exon (NM_054087, exon 1 of 6)	327	NM_001276455	116914	Mm.35444	NM_054087	ENSMUSG00000040918	Slc19a2	AV276020|AW322295|DDA1|THTR1|TRMA	solute carrier family 19 (thiamine transporter), member 2	protein-coding
1440	chr2	160933895	160935357	+	0	NA	intron (NM_173368, intron 1 of 36)	CpG	166	NM_173368	71389	Mm.122738	NM_173368	ENSMUSG00000057133	Chd6	5430439G14Rik|6330406J24Rik|CHD-6	chromodomain helicase DNA binding protein 6	protein-coding
2524	chrX	101608378	101609733	+	0	NA	exon (NM_009592, exon 1 of 16)	exon (NM_009592, exon 1 of 16)	130	NM_009592	11306	Mm.426128	NM_009592	ENSMUSG00000031333	Abcb7	AA517758|AU019072|Abc7	ATP-binding cassette, sub-family B (MDR/TAP), member 7	protein-coding
381	chr11	68844807	68939799	+	0	NA	Intergenic	MLT1K|LTR|MaLR	7992	NM_028336	66910	Mm.33964	NM_025838	ENSMUSG00000020895	Tmem107	1110004B13Rik|2810049P21Rik	transmembrane protein 107	protein-coding
1471	chr2	181572056	181573824	+	0	NA	intron (NM_153594, intron 1 of 6)	intron (NM_153594, intron 1 of 6)	381	NM_001291211	245867	Mm.491085	NM_153594	ENSMUSG00000027589	Pcmtd2	5330414D10Rik|AI314201	protein-L-isoaspartate (D-aspartate) O-methyltransferase domain containing 2	protein-coding
1814	chr5	28642765	28644376	+	0	NA	promoter-TSS (NM_028234)	promoter-TSS (NM_028234)	-159	NM_028234	381626	Mm.304075	NM_028234	ENSMUSG00000048271	Rbm33	3200001K10Rik|6430512A10Rik|AA386890|Prr8	RNA binding motif protein 33	protein-coding
906	chr16	3742877	3745223	+	0	NA	promoter-TSS (NM_148924)	promoter-TSS (NM_148924)	-49	NM_148924	74120	Mm.29081	NM_148924	ENSMUSG00000022529	Zfp263	1200014J04Rik|AI326880|AU020888|NT2|mFPM315	zinc finger protein 263	protein-coding
2205	chr7	135666066	135698850	+	0	NA	intron (NM_013863, intron 1 of 3)	MER31A|LTR|ERV1	15361	NM_013863	29810	Mm.84073	NM_013863	ENSMUSG00000030847	Bag3	AA407278|Bis|mg638	BCL2-associated athanogene 3	protein-coding
1349	chr2	57089821	57091611	+	0	NA	promoter-TSS (NM_010274)	promoter-TSS (NM_010274)	-77	NM_010274	14571	Mm.3711	NM_010274	ENSMUSG00000026827	Gpd2	AA408484|AI448216|AU021455|AW494132|GPDH|Gdm1|Gpd-m|Gpdh-m|TISP38	glycerol phosphate dehydrogenase 2, mitochondrial	protein-coding
177	chr1	194998969	195001190	+	0	NA	intron (NM_181048, intron 1 of 1)	intron (NM_181048, intron 1 of 1)	308	NM_181048	319266	Mm.482460	NM_181048	ENSMUSG00000079144	A130010J15Rik	-	RIKEN cDNA A130010J15 gene	protein-coding
2213	chr7	144601618	144603768	+	0	NA	promoter-TSS (NM_029886)	promoter-TSS (NM_029886)	-254	NM_029886	77252	Mm.29184	NM_029886	ENSMUSG00000040139	9430038I01Rik	-	RIKEN cDNA 9430038I01 gene	protein-coding
373	chr11	61213818	61223723	+	0	NA	Intergenic	Intergenic	-27193	NM_026183	67473	Mm.100741	NM_026183	ENSMUSG00000010122	Slc47a1	1300013J15Rik|AI036982|MATE1|mMATE1	solute carrier family 47, member 1	protein-coding
2078	chr7	13419594	13421121	+	0	NA	5' UTR (NM_022981, exon 1 of 8)	5' UTR (NM_022981, exon 1 of 8)	198	NM_022981	65020	Mm.292297	NM_022981	ENSMUSG00000058638	Zfp110	2900024E01Rik|N28112|NRIF|Nrif1	zinc finger protein 110	protein-coding
773	chr14	73108448	73110757	+	0	NA	5' UTR (NM_207636, exon 1 of 26)	5' UTR (NM_207636, exon 1 of 26)	208	NM_207636	319448	Mm.205421	NM_207636	ENSMUSG00000033487	Fndc3a	1700094E19Rik|D14Ertd453e|F730017H24Rik|Fndc3|sys	fibronectin type III domain containing 3A	protein-coding
1247	chr19	23832555	23834409	+	0	NA	5' UTR (NM_177034, exon 1 of 13)	5' UTR (NM_177034, exon 1 of 13)	116	NM_177034	319924	Mm.22879	NM_177034	ENSMUSG00000024897	Apba1	6430513E09Rik|Lin-10|Mint|Mint1|Urop11|X11|X11alpha	amyloid beta (A4) precursor protein binding, family A, member 1	protein-coding
22	chr1	31003530	31008066	+	0	NA	intron (NM_011200, intron 1 of 5)	CpG	757	NR_002688	433406	Mm.389003	NR_002688		Gm13363	OTTMUSG00000011595	predicted gene 13363	pseudo
205	chr10	36854647	36866149	+	0	NA	Intergenic	Intergenic	-1666	NM_008538	17118	Mm.30059	NM_008538	ENSMUSG00000069662	Marcks	Macs|PKCSL	myristoylated alanine rich protein kinase C substrate	protein-coding
1309	chr2	17947649	17953933	+	0	NA	non-coding (NR_028378, exon 1 of 1)	non-coding (NR_028378, exon 1 of 1)	1915	NR_028378	100034739	Mm.401643	NR_028378		Gm17762	-	predicted gene, 17762	ncRNA
1752	chr4	133359613	133377504	+	0	NA	Intergenic	Intergenic	-59032	NM_001080819	93760	Mm.22478	NM_001080819	ENSMUSG00000007880	Arid1a	1110030E03Rik|BAF250a|Osa1|Smarcf1	AT rich interactive domain 1A (SWI-like)	protein-coding
1576	chr3	107133989	107137844	+	0	NA	exon (NM_001045807, exon 1 of 2)	exon (NM_001045807, exon 1 of 2)	291	NM_001045807	229700	Mm.27966	NM_001045807	ENSMUSG00000048109	Rbm15	C230088J01Rik|mKIAA1438	RNA binding motif protein 15	protein-coding
1622	chr3	154259253	154260563	+	0	NA	exon (NM_001168358, exon 1 of 5)	exon (NM_001168358, exon 1 of 5)	154	NM_001168358	209584	Mm.347513	NM_172474	ENSMUSG00000047583	Tyw3	5230400J09Rik	tRNA-yW synthesizing protein 3 homolog (S. cerevisiae)	protein-coding
1260	chr19	34951164	34956187	+	0	NA	5' UTR (NM_001114339, exon 1 of 7)	5' UTR (NM_001114339, exon 1 of 7)	270	NM_001114339	75735	Mm.24742	NM_023792	ENSMUSG00000033610	Pank1	Pank|Pank1b	pantothenate kinase 1	protein-coding
874	chr15	81845648	81847378	+	0	NA	promoter-TSS (NM_010247)	promoter-TSS (NM_010247)	57	NM_134095	28075	Mm.474453	NM_134095	ENSMUSG00000022472	Desi1	AI427858|AI850401|D15Wsu75e|DeSI-1|Fam152b|Pppde2	desumoylating isopeptidase 1	protein-coding
975	chr16	64871964	64874302	+	0	NA	Intergenic	(A)n|Simple_repeat|Simple_repeat	21222	NM_178647	106143	Mm.10160	NM_178647	ENSMUSG00000054604	Cggbp1	AA960172|AL023996|AW045841	CGG triplet repeat binding protein 1	protein-coding
493	chr12	52965407	52968430	+	0	NA	Intergenic	Intergenic	-36395	NM_144788	207304	Mm.249391	NM_144788	ENSMUSG00000035247	Hectd1	A630086P08Rik|AI844876|b2b327Clo|opm	HECT domain containing 1	protein-coding
1708	chr4	108130876	108135056	+	0	NA	intron (NM_175472, intron 2 of 30)	CpG-10141	935	NM_175472	230594	Mm.25181	NM_175472	ENSMUSG00000034610	Zcchc11	6030404K05Rik|9230115F04Rik|PPAPD3|mKIAA0191	zinc finger, CCHC domain containing 11	protein-coding
2220	chr7	148125573	148161550	+	0	NA	Intergenic	ORR1B2|LTR|MaLR	-1701	NM_030694	80876	Mm.379266	NM_030694	ENSMUSG00000060591	Ifitm2	DSPA2c|Ifitm3l|fragilis3|mil-3	interferon induced transmembrane protein 2	protein-coding
1436	chr2	157104575	157105650	+	0	NA	exon (NM_001039557, exon 1 of 25)	exon (NM_001039557, exon 1 of 25)	173	NM_001039557	629499	Mm.384235	NM_001039557	ENSMUSG00000074627	Mroh8	4922505G16Rik	maestro heat-like repeat family member 8	protein-coding
1911	chr5	130006376	130007813	+	0	NA	promoter-TSS (NM_172276)	promoter-TSS (NM_172276)	-12	NM_172276	231769	Mm.288714	NM_172276	ENSMUSG00000029439	Sfswap	1190005N23Rik|6330437E22Rik|AI197402|AW212079|SWAP|Sfrs8|Srsf8	splicing factor, suppressor of white-apricot homolog (Drosophila)	protein-coding
2528	chrX	131542388	131544361	+	0	NA	intron (NM_175446, intron 1 of 6)	CpG	374	NM_175446	215693	Mm.336238	NM_175446	ENSMUSG00000052676	Zmat1	A230096A06|AW990744|B930008K04Rik	zinc finger, matrin type 1	protein-coding
1591	chr3	123210114	123212432	+	0	NA	promoter-TSS (NR_028573)	promoter-TSS (NR_028573)	-19	NR_028574	69895	Mm.260791	NR_028574		Snhg8	1110065M07Rik|2010109N14Rik	small nucleolar RNA host gene 8	ncRNA
1677	chr4	55089241	55092299	+	0	NA	intron (NM_172867, intron 11 of 12)	intron (NM_172867, intron 11 of 12)	129953	NM_172867	242466	Mm.102904	NM_172867	ENSMUSG00000060206	Zfp462	6030417H05|9430078C22Rik|Gt4-2|Zfpip	zinc finger protein 462	protein-coding
2199	chr7	134654943	134657558	+	0	NA	non-coding (NR_024331, exon 1 of 1)	non-coding (NR_024331, exon 1 of 1)	133	NR_024331	629159	Mm.256720	NR_024331		1700008J07Rik	AW048743	RIKEN cDNA 1700008J07 gene	ncRNA
2174	chr7	116894376	116896589	+	0	NA	intron (NM_020050, intron 1 of 4)	intron (NM_020050, intron 1 of 4)	295	NM_020050	56786	Mm.240668	NM_020050	ENSMUSG00000031021	Tmem9b	2310004K06Rik|AW539847|D7H11orf15|ICRFP703B1614Q5.3	TMEM9 domain family, member B	protein-coding
1320	chr2	25875554	25877955	+	0	NA	intron (NM_133835, intron 1 of 9)	intron (NM_133835, intron 1 of 9)	526	NM_133835	98766	Mm.247824	NM_133835	ENSMUSG00000036352	Ubac1	1110033G07Rik|AA407978|GBDR1|Gdbr1|Ubadc1	ubiquitin associated domain containing 1	protein-coding
1026	chr17	21559703	21560704	+	0	NA	promoter-TSS (NM_011760)	promoter-TSS (NM_011760)	12	NM_011760	22712	Mm.12916	NM_011760	ENSMUSG00000023882	Zfp54	2810034D10Rik|KRAB10|Zfp-54|Zfp76|mszf83	zinc finger protein 54	protein-coding
1390	chr2	119722101	119724167	+	0	NA	intron (NM_001164274, intron 1 of 22)	CpG	170	NM_013720	29808	Mm.87532	NM_013720	ENSMUSG00000033943	Mga	AV312082|C130042M01Rik|C80739|D030062C11Rik|Mad5	MAX gene associated	protein-coding
1993	chr6	56745046	56749054	+	0	NA	intron (NM_145958, intron 1 of 3)	intron (NM_145958, intron 1 of 3)	757	NM_145958	210973	Mm.57295	NM_145958	ENSMUSG00000059486	Kbtbd2	BC022962|Bklhd1|mKIAA1489	kelch repeat and BTB (POZ) domain containing 2	protein-coding
1893	chr5	117449608	117453090	+	0	NA	Intergenic	Intergenic	114653	NM_001122666	71954	Mm.34456	NM_178622	ENSMUSG00000066900	Suds3	2400003N08Rik|2410008L21Rik|AU067672|mSds3	suppressor of defective silencing 3 homolog (S. cerevisiae)	protein-coding
1469	chr2	181099247	181101472	+	0	NA	promoter-TSS (NR_028585)	promoter-TSS (NR_028585)	231	NM_001048148	229007	Mm.87720	NM_144894	ENSMUSG00000027582	Zgpat	1500006I01Rik|BC021513	zinc finger, CCCH-type with G patch domain	protein-coding
1499	chr3	40548548	40550449	+	0	NA	promoter-TSS (NM_011020)	promoter-TSS (NM_011020)	-37	NM_011020	18415	Mm.39330	NM_011020		Hspa4l	94kDa|AI461691|APG-1|Osp94	heat shock protein 4 like	protein-coding
1646	chr4	25208281	25209361	+	0	NA	intron (NM_026194, intron 1 of 18)	CpG	147	NM_026194	67490	Mm.226295	NM_026194	ENSMUSG00000040359	Ufl1	1810074P20Rik|AI429228|Kiaa0776|Maxer|Rcad|mKIAA0776	UFM1 specific ligase 1	protein-coding
400	chr11	76576357	76577430	+	0	NA	intron (NM_016810, intron 1 of 8)	intron (NM_016810, intron 1 of 8)	164	NM_016810	53334	Mm.20931	NM_016810	ENSMUSG00000010392	Gosr1	AI414660|AI426320|BB145494|GOS-28|GOSRI|GS28	golgi SNAP receptor complex member 1	protein-coding
534	chr12	85028597	85030363	+	0	NA	promoter-TSS (NM_008943)	promoter-TSS (NM_008943)	-33	NM_008943	19164	Mm.998	NM_008943	ENSMUSG00000019969	Psen1	Ad3h|PS-1|PS1|S182	presenilin 1	protein-coding
746	chr14	55172539	55173958	+	0	NA	promoter-TSS (NM_145462)	promoter-TSS (NM_145462)	-50	NM_145462	219072	Mm.202152	NM_145462	ENSMUSG00000022177	Haus4	9430093H08Rik|AU016300|D14Ertd500e	HAUS augmin-like complex, subunit 4	protein-coding
919	chr16	15637083	15638366	+	0	NA	promoter-TSS (NM_008565)	promoter-TSS (NM_008565)	-231	NM_008565	17217	Mm.1500	NM_008565	ENSMUSG00000022673	Mcm4	19G|AI325074|AU045576|Cdc21|Mcmd4|mKIAA4003|mcdc21	minichromosome maintenance deficient 4 homolog (S. cerevisiae)	protein-coding
744	chr14	54980000	54981521	+	0	NA	intron (NM_026936, intron 1 of 9)	CpG	235	NM_026936	69089	Mm.182340	NM_026936	ENSMUSG00000000959	Oxa1l	1810020M02Rik|AI894287	oxidase assembly 1-like	protein-coding
1268	chr19	38910442	38912352	+	0	NA	exon (NM_145952, exon 1 of 13)	exon (NM_145952, exon 1 of 13)	328	NM_145952	209478	Mm.391153	NM_145952	ENSMUSG00000048720	Tbc1d12	BC033574	TBC1D12: TBC1 domain family, member 12	protein-coding
633	chr13	67181393	67183346	+	0	NA	intron (NM_001012449, intron 1 of 2)	intron (NM_001012449, intron 1 of 2)	112	NM_001012448	432769	Mm.458849	NM_001012325	ENSMUSG00000058883	Zfp708	Rslcan11	zinc finger protein 708	protein-coding
1372	chr2	92022730	92027388	+	0	NA	promoter-TSS (NM_001109691)	promoter-TSS (NM_001109691)	-581	NM_001109691	192285	Mm.330408	NM_138755	ENSMUSG00000058318	Phf21a	80kDa|Bhc|Bhc80|D030065N23Rik|PFTF1	PHD finger protein 21A	protein-coding
151	chr1	173078259	173081649	+	0	NA	promoter-TSS (NM_008623)	promoter-TSS (NM_008623)	780	NM_025321	66052	Mm.198138	NM_025321		Sdhc	0610010E03Rik|AI316496|AU019277	succinate dehydrogenase complex, subunit C, integral membrane protein	protein-coding
1977	chr6	47403366	47405580	+	0	NA	5' UTR (NM_012042, exon 1 of 22)	5' UTR (NM_012042, exon 1 of 22)	150	NM_012042	26965	Mm.87611	NM_012042	ENSMUSG00000029686	Cul1	-	cullin 1	protein-coding
2023	chr6	97128403	97130178	+	0	NA	promoter-TSS (NM_001081111)	promoter-TSS (NM_001081111)	-172	NM_001081111	232286	Mm.30893	NM_001081111		Tmf1	7030402D04Rik|Gm153|Tmf1`	TATA element modulatory factor 1	protein-coding
1669	chr4	46401610	46403166	+	0	NA	promoter-TSS (NM_029086)	promoter-TSS (NM_029086)	-93	NM_029086	74753	Mm.45973	NM_029086	ENSMUSG00000028331	5830415F09Rik	AV014846|Nap1	RIKEN cDNA 5830415F09 gene	protein-coding
1825	chr5	33613786	33618235	+	0	NA	intron (NM_001198860, intron 1 of 9)	intron (NM_001198860, intron 1 of 9)	1643	NM_001198861	13016	Mm.7286	NM_013502	ENSMUSG00000037373	Ctbp1	BARS|CtBP1-L|CtBP1-S|CtBP3/BARS|D4S115h|D5H4S115|D5H4S115E	C-terminal binding protein 1	protein-coding
1285	chr19	53384557	53407056	+	0	NA	intron (NM_001008542, intron 1 of 5)	intron (NM_001008542, intron 1 of 5)	-8097	NM_010847	17859	Mm.2154	NM_010847	ENSMUSG00000025025	Mxi1	ENSMUSG00000067085|Gm10197|Mad2|bHLHc11	Max interacting protein 1	protein-coding
1952	chr6	14702290	14708150	+	0	NA	promoter-TSS (NM_080464)	promoter-TSS (NM_080464)	54	NM_080464	140491	Mm.209429	NM_080464	ENSMUSG00000042717	Ppp1r3a	GM|RG1|RGL	protein phosphatase 1, regulatory (inhibitor) subunit 3A	protein-coding
287	chr10	114820029	114823595	+	0	NA	promoter-TSS (NM_001033261)	promoter-TSS (NM_001033261)	-203	NM_001033261	216345	Mm.207621	NM_001033261	ENSMUSG00000034163	Zfc3h1	BC033596|Ccdc131|Psrc2	zinc finger, C3H1-type containing	protein-coding
475	chr12	21266305	21272600	+	0	NA	intron (NM_001098168, intron 24 of 27)	ORR1D1|LTR|MaLR	22646	NM_008403	16413	Mm.273333	NM_008403	ENSMUSG00000062352	Itgb1bp1	AI449260|AU019480|Icap1	integrin beta 1 binding protein 1	protein-coding
932	chr16	18288544	18290158	+	0	NA	promoter-TSS (NM_033324)	promoter-TSS (NM_033324)	-90	NM_033324	94223	Mm.447352	NM_033324	ENSMUSG00000022718	Dgcr8	D16H22S1742E|D16H22S788E|D16Wis2|Gy1|N41|Vo59c07	DiGeorge syndrome critical region gene 8	protein-coding
1549	chr3	94690264	94691356	+	0	NA	promoter-TSS (NM_008945)	promoter-TSS (NM_008945)	70	NM_008945	19172	Mm.368	NM_008945	ENSMUSG00000005779	Psmb4	Pros-27	proteasome (prosome, macropain) subunit, beta type 4	protein-coding
1959	chr6	30459066	30460617	+	0	NA	promoter-TSS (NM_178625)	promoter-TSS (NM_178625)	-8	NM_027073	75647	Mm.46117	NM_027073	ENSMUSG00000029784	Ssmem1	1700016K02Rik|1700025E21Rik	serine-rich single-pass membrane protein 1	protein-coding
515	chr12	75007687	75011835	+	0	NA	intron (NM_010431, intron 1 of 14)	CpG	907	NM_010431	15251	Mm.3879	NM_010431	ENSMUSG00000021109	Hif1a	AA959795|HIF1alpha|MOP1|bHLHe78	hypoxia inducible factor 1, alpha subunit	protein-coding
1525	chr3	83666113	83669876	+	0	NA	Intergenic	RMER19B|LTR|ERVK	-22464	NM_011905	24088	Mm.87596	NM_011905	ENSMUSG00000027995	Tlr2	Ly105	toll-like receptor 2	protein-coding
1242	chr19	18786810	18788272	+	0	NA	promoter-TSS (NM_177640)	promoter-TSS (NM_177640)	-185	NM_177640	225995	Mm.28101	NM_177640	ENSMUSG00000047044	D030056L22Rik	-	RIKEN cDNA D030056L22 gene	protein-coding
138	chr1	163178272	163182308	+	0	NA	intron (NM_007453, intron 1 of 4)	intron (NM_007453, intron 1 of 4)	1007	NM_007453	11758	Mm.186185	NM_007453	ENSMUSG00000026701	Prdx6	1-cysPrx|9430088D19Rik|AA690119|Aop2|Aop2-rs3|Brp-12|CC26|CP-3|GPx|Ltw-4|Ltw4|Lvtw-4|NSGP|NSGPx|ORF06|Prdx5|Prdx6-rs3|aiPLA2|mKIAA0106	peroxiredoxin 6	protein-coding
1107	chr17	74926216	74929101	+	0	NA	promoter-TSS (NM_007566)	promoter-TSS (NM_007566)	23	NM_007566	12211	Mm.442564	NM_007566	ENSMUSG00000024073	Birc6	A430032G04Rik|A430040A19Rik|AA501170|Bruce|D630005A10Rik|mKIAA1289	baculoviral IAP repeat-containing 6	protein-coding
1208	chr18	77739788	77741118	+	0	NA	intron (NM_001164504, intron 1 of 7)	intron (NM_001164504, intron 1 of 7)	63422	NM_001164504	225743	Mm.23293	NM_001164504	ENSMUSG00000025427	Rnf165	2900024M11Rik|AI427432|Ark2c|G630064H08Rik|Gm96	ring finger protein 165	protein-coding
1874	chr5	104524232	104560478	+	0	NA	intron (NM_010097, intron 1 of 10)	intron (NM_010097, intron 1 of 10)	752	NM_010097	13602	Mm.29027	NM_010097	ENSMUSG00000029309	Sparcl1	Ecm2|Sc1|hevin|mast9	SPARC-like 1	protein-coding
1803	chr5	22055204	22056722	+	0	NA	promoter-TSS (NR_102315)	promoter-TSS (NR_102315)	186	NM_011959	26429	Mm.412217	NM_011959	ENSMUSG00000029012	Orc5	AL033327|MmORC5|Orc5l	origin recognition complex, subunit 5	protein-coding
724	chr14	31814037	31815493	+	0	NA	promoter-TSS (NM_026911)	promoter-TSS (NM_026911)	87	NM_026911	69019	Mm.28852	NM_026911	ENSMUSG00000021917	Spcs1	1810004F21Rik	signal peptidase complex subunit 1 homolog (S. cerevisiae)	protein-coding
1201	chr18	70802306	70804851	+	0	NA	Intergenic	Intergenic	75632	NM_010773	17191	Mm.322	NM_010773	ENSMUSG00000024513	Mbd2	MBD2a	methyl-CpG binding domain protein 2	protein-coding
519	chr12	77468203	77473865	+	0	NA	promoter-TSS (NM_178744)	promoter-TSS (NM_178744)	-219	NM_178744	268564	Mm.77065	NM_178744		Zbtb1	9430077A12|AI256369|Bsg2|C430003J21Rik	zinc finger and BTB domain containing 1	protein-coding
1195	chr18	68652811	68660734	+	0	NA	Intergenic	Intergenic	-67798	NM_001271716	17200	Mm.426053	NM_008560	ENSMUSG00000045569	Mc2r	ACTH-R|ACTHR|MC2-R	melanocortin 2 receptor	protein-coding
17	chr1	23928167	23929647	+	0	NA	exon (NM_028534, exon 1 of 10)	exon (NM_028534, exon 1 of 10)	313	NM_028534	98366	Mm.329963	NM_028534	ENSMUSG00000026155	Smap1	1700056O10Rik|4921514B13Rik|4921525H11Rik|AI462175	small ArfGAP 1	protein-coding
2451	chr9	103904125	103905735	+	0	NA	promoter-TSS (NM_172460)	promoter-TSS (NM_172460)	56	NM_028721	74025	Mm.479273	NM_028721	ENSMUSG00000032558	Nphp3	3632410F03Rik|AI550417|C230078J01|D330020E01Rik|pcy	nephronophthisis 3 (adolescent)	protein-coding
1327	chr2	30091925	30126421	+	0	NA	intron (NM_177725, intron 2 of 3)	intron (NM_177725, intron 2 of 3)	-12550	NM_001252568	227696	Mm.297949	NM_172267	ENSMUSG00000079484	Phyhd1	-	phytanoyl-CoA dioxygenase domain containing 1	protein-coding
2192	chr7	133645137	133647714	+	0	NA	exon (NM_183020, exon 1 of 23)	exon (NM_183020, exon 1 of 23)	391	NM_183020	233871	Mm.231450	NM_183020	ENSMUSG00000032637	Atxn2l	A2D|A2LG|A2RP|A2lp|Atxnl2	ataxin 2-like	protein-coding
1274	chr19	42312108	42314090	+	0	NA	Intergenic	Intergenic	-8969	NM_001141983	71146	Mm.329851	NM_027694	ENSMUSG00000042532	Golga7b	4933417O08Rik|AI839934	golgi autoantigen, golgin subfamily a, 7B	protein-coding
110	chr1	130312938	130314738	+	0	NA	5' UTR (NM_177445, exon 1 of 16)	5' UTR (NM_177445, exon 1 of 16)	155	NM_177445	226414	Mm.28693	NM_145507	ENSMUSG00000026356	Dars	5730439G15Rik	aspartyl-tRNA synthetase	protein-coding
333	chr11	23154652	23158110	+	0	NA	intron (NM_001035226, intron 1 of 25)	intron (NM_001035226, intron 1 of 25)	340	NM_134014	103573	Mm.217547	NM_134014	ENSMUSG00000020290	Xpo1	AA420417|Crm1|Exp1	exportin 1, CRM1 homolog (yeast)	protein-coding
1995	chr6	57530225	57533190	+	0	NA	intron (NM_025992, intron 1 of 22)	B3|SINE|B2	721	NM_025992	67138	Mm.297393	NM_025992	ENSMUSG00000029798	Herc6	1700121D12Rik|2510038N07Rik|4930427L17Rik|AI451296|CEB1|Herc5	hect domain and RLD 6	protein-coding
2356	chr9	20411225	20412553	+	0	NA	promoter-TSS (NR_033729)	promoter-TSS (NR_033729)	-30	NR_033729	66662	Mm.477847	NM_175110	ENSMUSG00000062470	Fbxl12os	5730577I03Rik	F-box and leucine-rich repeat protein 12, opposite strand	pseudo
2210	chr7	140122188	140124384	+	0	NA	Intergenic	CpG	-18019	NM_207302	360216	Mm.389984	NM_207302	ENSMUSG00000030967	Zranb1	9330160G10Rik|D7Wsu87e|Gm1956|Trabid	zinc finger, RAN-binding domain containing 1	protein-coding
646	chr13	74199212	74199963	+	0	NA	intron (NM_028959, intron 1 of 11)	CpG	146	NM_028959	74470	Mm.73234	NM_028959	ENSMUSG00000021572	Cep72	2610029E11Rik|4933440J22Rik	centrosomal protein 72	protein-coding
446	chr11	102741804	102742952	+	0	NA	promoter-TSS (NM_011431)	promoter-TSS (NM_011431)	-89	NM_001109995	20624	Mm.873	NM_011431	ENSMUSG00000020929	Eftud2	116kDa|Snrp116|U5-116kD	elongation factor Tu GTP binding domain containing 2	protein-coding
2181	chr7	121397531	121398836	+	0	NA	promoter-TSS (NM_033370)	promoter-TSS (NM_033370)	11	NM_033370	70349	Mm.277024	NM_033370	ENSMUSG00000030754	Copb1	2610019B04Rik	coatomer protein complex, subunit beta 1	protein-coding
2229	chr8	11497057	11497969	+	0	NA	promoter-TSS (NM_001190357)	promoter-TSS (NM_001190357)	7	NM_001293661	69225	Mm.64911	NM_026995	ENSMUSG00000031505	Carkd	0710008K08Rik|2810407E01Rik	carbohydrate kinase domain containing	protein-coding
1220	chr19	4395439	4398890	+	0	NA	promoter-TSS (NM_001001984)	promoter-TSS (NM_001001984)	-87	NM_001001984	225876	Mm.31941	NM_001001984	ENSMUSG00000054611	Kdm2a	100043628|5530401A10Rik|AA589516|AW536790|Cxxc8|Fbl11|Fbl7|Fbxl11|Gm4560|Jhdm1|Jhdm1a|lalina	lysine (K)-specific demethylase 2A	protein-coding
1582	chr3	115589752	115591577	+	0	NA	promoter-TSS (NM_027193)	promoter-TSS (NM_027193)	313	NR_027894	68161	Mm.392043	NR_015487		A930005H10Rik	-	RIKEN cDNA A930005H10 gene	ncRNA
1599	chr3	132754106	132755774	+	0	NA	promoter-TSS (NM_026231)	promoter-TSS (NM_026231)	23	NM_027927	71793	Mm.246726	NM_027927	ENSMUSG00000028016	Ints12	1110020M19Rik|2810027J24Rik|4930529N21Rik|A230056J18Rik|AI666778|Phf22	integrator complex subunit 12	protein-coding
2306	chr8	95740446	95743211	+	0	NA	intron (NM_133660, intron 4 of 13)	intron (NM_133660, intron 4 of 13)	11690	NM_133660	13897	Mm.63490	NM_133660	ENSMUSG00000061959	Ces1e	Eg|Es-22|Es22|egasyn	carboxylesterase 1E	protein-coding
1149	chr18	24866911	24875001	+	0	NA	intron (NM_001289654, intron 1 of 24)	intron (NM_001289654, intron 1 of 24)	3832	NM_001289655	225288	Mm.329322	NM_175276	ENSMUSG00000034295	Fhod3	A930009H06Rik|FHOS2|mKIAA1695	formin homology 2 domain containing 3	protein-coding
2337	chr8	125897017	125898845	+	0	NA	exon (NM_025804, exon 1 of 18)	exon (NM_025804, exon 1 of 18)	320	NM_001286363	66855	Mm.178818	NM_025804	ENSMUSG00000001472	Tcf25	1100001J13Rik|1810041K11Rik|D8Ertd325e|Nulp1|mKIAA1049	transcription factor 25 (basic helix-loop-helix)	protein-coding
2283	chr8	81730531	81734545	+	0	NA	Intergenic	Intergenic	39944	NM_026315	67687	Mm.178707	NM_026315	ENSMUSG00000031682	1700011L22Rik	-	RIKEN cDNA 1700011L22 gene	protein-coding
2243	chr8	28369365	28389413	+	0	NA	intron (NM_007918, intron 1 of 2)	B1_Mus2|SINE|Alu	8590	NM_007918	13685	Mm.6700	NM_007918	ENSMUSG00000031490	Eif4ebp1	4e-bp1|AA959816|PHAS-I	eukaryotic translation initiation factor 4E binding protein 1	protein-coding
2407	chr9	62184505	62231300	+	0	NA	intron (NM_009672, intron 1 of 6)	intron (NM_009672, intron 1 of 6)	18752	NM_009672	11737	Mm.269088	NM_009672	ENSMUSG00000032249	Anp32a	Anp32|I1PP2A|LANP|PHAP1|W91701|pp32	acidic (leucine-rich) nuclear phosphoprotein 32 family, member A	protein-coding
1087	chr17	53617211	53619821	+	0	NA	promoter-TSS (NM_025887)	promoter-TSS (NM_025887)	-43	NM_025887	271457	Mm.329123	NM_025887	ENSMUSG00000017831	Rab5a	2410015H04Rik|AI663973|AU021172|nnyRab5a	RAB5A, member RAS oncogene family	protein-coding
1288	chr19	55390136	55391306	+	0	NA	promoter-TSS (NM_025883)	promoter-TSS (NM_025883)	174	NM_001293686	53611	Mm.258637	NM_016862	ENSMUSG00000024983	Vti1a	1110014F16Rik|1110018K19Rik|4921537J05Rik|MVti1|MVti1a|Vti1|Vti1-rp2	vesicle transport through interaction with t-SNAREs 1A	protein-coding
810	chr15	10399499	10400861	+	0	NA	promoter-TSS (NM_030046)	promoter-TSS (NM_030046)	91	NM_030046	78244	Mm.297862	NM_030046	ENSMUSG00000044224	Dnajc21	4930461P20Rik|9930116P15Rik	DnaJ (Hsp40) homolog, subfamily C, member 21	protein-coding
1238	chr19	11985644	11988019	+	0	NA	promoter-TSS (NM_172635)	promoter-TSS (NM_172635)	-58	NM_172635	225929	Mm.42711	NM_172635	ENSMUSG00000046139	Patl1	AV312086|D430024J04|Pat1b	protein associated with topoisomerase II homolog 1 (yeast)	protein-coding
33	chr1	43989759	43992121	+	0	NA	promoter-TSS (NM_009418)	promoter-TSS (NM_009418)	88	NM_009418	22019	Mm.401675	NM_009418	ENSMUSG00000041763	Tpp2	TPP-2|TppII	tripeptidyl peptidase II	protein-coding
1587	chr3	121517081	121518995	+	0	NA	promoter-TSS (NM_008991)	promoter-TSS (NM_008991)	95	NM_008991	19299	Mm.399042	NM_008991	ENSMUSG00000028127	Abcd3	AI313901|AU018866|AW146054|PMP68|PMP70|Pxmp1	ATP-binding cassette, sub-family D (ALD), member 3	protein-coding
1559	chr3	97670343	97675522	+	0	NA	intron (NM_001289702, intron 1 of 45)	intron (NM_001289702, intron 1 of 45)	19698	NM_001289702	83679	Mm.129840	NM_031401	ENSMUSG00000038170	Pde4dip	4732458A06Rik|9430063L05Rik|C87016|D130016K21Rik|D3Bwg1078e|Usmg4|mKIAA0454	phosphodiesterase 4D interacting protein (myomegalin)	protein-coding
7	chr1	9535062	9540141	+	0	NA	promoter-TSS (NR_027664)	promoter-TSS (NR_027664)	-526	NM_175236	76187	Mm.28514	NM_175236	ENSMUSG00000025911	Adhfe1	6330565B14Rik|AI043035|Adh8	alcohol dehydrogenase, iron containing, 1	protein-coding
1793	chr5	4529881	4531745	+	0	NA	Intergenic	Intergenic	227403	NM_021457	14362	Mm.246003	NM_021457	ENSMUSG00000044674	Fzd1	AW227548|FZ-1|Fz1	frizzled homolog 1 (Drosophila)	protein-coding
227	chr10	57908201	57910565	+	0	NA	promoter-TSS (NM_011240)	promoter-TSS (NM_011240)	-217	NM_011240	19386	Mm.431695	NM_011240	ENSMUSG00000003226	Ranbp2	A430087B05Rik|AI256741|NUP358	RAN binding protein 2	protein-coding
1701	chr4	102850028	102853015	+	0	NA	intron (NM_177732, intron 9 of 9)	intron (NM_177732, intron 9 of 9)	35968	NM_177732	242585	Mm.281800	NM_177732		Slc35d1	AI834976|C330011J09|UGTREL7|mKIAA0260	solute carrier family 35 (UDP-glucuronic acid/UDP-N-acetylgalactosamine dual transporter), member D1	protein-coding
1860	chr5	77738674	77739976	+	0	NA	promoter-TSS (NM_019836)	promoter-TSS (NM_019836)	-184	NM_153798	231329	Mm.273217	NM_153798	ENSMUSG00000029250	Polr2b	Pol2rb|Rpb140|Rpb2	polymerase (RNA) II (DNA directed) polypeptide B	protein-coding
2443	chr9	96095915	96099507	+	0	NA	intron (NM_178667, intron 1 of 13)	intron (NM_178667, intron 1 of 13)	1017	NM_001184706	211586	Mm.17977	NM_178667	ENSMUSG00000032411	Tfdp2	1110029I05Rik|A330080J22Rik|DP-3|DP3	transcription factor Dp 2	protein-coding
1937	chr5	148837940	148839598	+	0	NA	intron (NM_029920, intron 1 of 14)	intron (NM_029920, intron 1 of 14)	69873	NM_029920	77521	Mm.244177	NM_029920	ENSMUSG00000029651	Mtus2	5730592G18Rik|A730013O20Rik|AU067634|C130038G02Rik|Cazip|Gm763|mKIAA0774	microtubule associated tumor suppressor candidate 2	protein-coding
2013	chr6	86421408	86448379	+	0	NA	intron (NR_040292, intron 1 of 1)	B1_Mur1|SINE|Alu	3328	NR_040293	381792	Mm.333223	NR_040292		2310040G24Rik	-	RIKEN cDNA 2310040G24 gene	ncRNA
255	chr10	80567670	80569597	+	0	NA	promoter-TSS (NM_023138)	promoter-TSS (NM_023138)	-59	NM_023138	26396	Mm.275436	NM_023138	ENSMUSG00000035027	Map2k2	AA589381|MEK2|MK2|Prkmk2	mitogen-activated protein kinase kinase 2	protein-coding
264	chr10	81640587	81641775	+	0	NA	Intergenic	CpG	50423	NM_001163064	216177	Mm.482395	NM_001163064		AU041133	-	expressed sequence AU041133	protein-coding
806	chr15	6209149	6211740	+	0	NA	Intergenic	Intergenic	-39345	NM_001008702	13132	Mm.240830	NM_023118	ENSMUSG00000022150	Dab2	5730435J12Rik|AA960054|AI957090|D15Wsu122e|D630005B22Rik|Doc-2|Doc2|p96	disabled 2, mitogen-responsive phosphoprotein	protein-coding
2230	chr8	13104389	13106524	+	0	NA	promoter-TSS (NM_178708)	promoter-TSS (NM_178708)	-113	NM_178708	234069	Mm.103427	NM_178708	ENSMUSG00000038542	Pcid2	A730042J05Rik	PCI domain containing 2	protein-coding
1885	chr5	110486794	110487573	+	0	NA	Intergenic	Intergenic	-41805	NM_207279	403178	Mm.297057	NM_207279	ENSMUSG00000064247	Plcxd1	A330045H12Rik|Gm576	phosphatidylinositol-specific phospholipase C, X domain containing 1	protein-coding
182	chr10	6265014	6269355	+	0	NA	intron (NM_001170786, intron 20 of 27)	intron (NM_001170786, intron 20 of 27)	106282	NM_001170786	270685	Mm.184752	NM_172308	ENSMUSG00000040675	Mthfd1l	2410004L15Rik|AI647056|Fthfsdc1	methylenetetrahydrofolate dehydrogenase (NADP+ dependent) 1-like	protein-coding
1817	chr5	31209355	31225153	+	0	NA	intron (NM_133918, intron 1 of 7)	intron (NM_133918, intron 1 of 7)	1095	NM_133918	100952	Mm.286375	NM_133918	ENSMUSG00000029163	Emilin1	5830419M17Rik|AW229038|BB105748|EMILIN-1|gp115	elastin microfibril interfacer 1	protein-coding
556	chr12	107022431	107024050	+	0	NA	intron (NM_011112, intron 1 of 21)	CpG	328	NM_011112	18789	Mm.255877	NM_011112	ENSMUSG00000021111	Papola	Pap|PapIII|Plap	poly (A) polymerase alpha	protein-coding
717	chr14	22569291	22571181	+	0	NA	intron (NM_026283, intron 1 of 5)	intron (NM_026283, intron 1 of 5)	483	NM_026283	67630	Mm.102765	NM_026283	ENSMUSG00000021770	Samd8	1110053F04Rik|1700010P07Rik|SMSr	sterile alpha motif domain containing 8	protein-coding
815	chr15	25913295	25915392	+	0	NA	exon (NM_144523, exon 1 of 6)	exon (NM_144523, exon 1 of 6)	222	NM_144523	52521	Mm.29145	NM_144523	ENSMUSG00000052253	Zfp622	1110033B05Rik|D15Ertd806e|ZPR9|Znf622	zinc finger protein 622	protein-coding
671	chr13	94541120	94542792	+	0	NA	exon (NM_009712, exon 1 of 8)	exon (NM_009712, exon 1 of 8)	322	NM_009712	11881	Mm.300178	NM_009712	ENSMUSG00000042082	Arsb	1110007C02Rik|AI480648|As-1|As-1r|As-1s|As-1t|As1|As1-r|As1-s|As1-t|Asr-1|Ast-1	arylsulfatase B	protein-coding
1511	chr3	58380102	58382072	+	0	NA	intron (NM_001040396, intron 1 of 5)	CpG	507	NM_001040396	69227	Mm.270950	NM_001040396	ENSMUSG00000075700	Selt	2810407C02Rik|5730408P04Rik	selenoprotein T	protein-coding
2249	chr8	37353512	37355740	+	0	NA	Intergenic	Intergenic	-42056	NM_001081150	244421	Mm.324032	NM_001081150	ENSMUSG00000039633	Lonrf1	-	LON peptidase N-terminal domain and ring finger 1	protein-coding
167	chr1	182098007	182141704	+	0	NA	intron (NM_023341, intron 1 of 14)	intron (NM_023341, intron 1 of 14)	3761	NM_001163290	67426	Mm.38330	NM_023341	ENSMUSG00000026489	Adck3	4632432J16Rik|AI462003|Cabc1|mKIAA0451	aarF domain containing kinase 3	protein-coding
2423	chr9	72748931	72751214	+	0	NA	intron (NM_175485, intron 15 of 19)	intron (NM_175485, intron 15 of 19)	-23385	NM_028116	72135	Mm.273605	NM_028116		Pygo1	2600014C22Rik	pygopus 1	protein-coding
692	chr13	111432719	111434478	+	0	NA	Intergenic	Intergenic	248346	NM_152804	20620	Mm.380	NM_152804	ENSMUSG00000021701	Plk2	Snk	polo-like kinase 2	protein-coding
1605	chr3	137580819	137582199	+	0	NA	promoter-TSS (NM_019920)	promoter-TSS (NM_019920)	-10	NM_019920	56692	Mm.331392	NM_019920	ENSMUSG00000091512	Lamtor3	AW556229|Map2k1ip1|Mapbp|Mapksp1|Mp1	late endosomal/lysosomal adaptor, MAPK and MTOR activator 3	protein-coding
663	chr13	91062260	91063670	+	0	NA	intron (NM_024175, intron 1 of 3)	CpG	238	NM_024175	66475	Mm.306302	NM_024175		Rps23	2410044J15Rik	ribosomal protein S23	protein-coding
2431	chr9	79914292	79916546	+	0	NA	intron (NM_146003, intron 1 of 22)	CpG	709	NM_146003	215351	Mm.28232	NM_146003	ENSMUSG00000034252	Senp6	2810017C20Rik|E130319N12Rik|Susp1|mKIAA0797	SUMO/sentrin specific peptidase 6	protein-coding
1907	chr5	124356779	124357888	+	0	NA	promoter-TSS (NM_026603)	promoter-TSS (NM_026603)	49	NM_026603	68184	Mm.28549	NM_026603	ENSMUSG00000023106	Denr	1500003K04Rik	density-regulated protein	protein-coding
854	chr15	74579476	74583655	+	0	NA	3' UTR (NM_011838, exon 4 of 4)	3' UTR (NM_011838, exon 4 of 4)	1844	NM_011838	23936	Mm.257067	NM_011838	ENSMUSG00000022594	Lynx1	AI838844|SLURP-2	Ly6/neurotoxin 1	protein-coding
1945	chr6	5247004	5248774	+	0	NA	intron (NM_183308, intron 1 of 8)	intron (NM_183308, intron 1 of 8)	484	NM_183308	330260	Mm.126984	NM_183308		Pon2	6330405I24Rik|AI481612	paraoxonase 2	protein-coding
969	chr16	57606690	57607341	+	0	NA	promoter-TSS (NM_025599)	promoter-TSS (NM_025599)	-35	NM_025599	66497	Mm.425976	NM_025599		Cmss1	1110001A06Rik|2610528E23Rik|4930572F24Rik|AV099812|AV122629	cms small ribosomal subunit 1	protein-coding
1174	chr18	44987455	44989093	+	0	NA	promoter-TSS (NM_001163013)	promoter-TSS (NM_001163013)	-45	NM_001163013	240255	Mm.244482	NM_001163013	ENSMUSG00000034653	Ythdc2	3010002F02Rik|BC037178	YTH domain containing 2	protein-coding
1946	chr6	6527496	6529153	+	0	NA	intron (NM_009169, intron 1 of 2)	CpG	334	NM_009169	20422	Mm.2469	NM_009169		Shfm1	DSS1|Shfdg1|Shfg	split hand/foot malformation (ectrodactyly) type 1	protein-coding
510	chr12	72038024	72039653	+	0	NA	promoter-TSS (NM_019785)	promoter-TSS (NM_019785)	-6	NM_019785	56444	Mm.29317	NM_019785	ENSMUSG00000021076	Actr10	Actr11|Arp11	ARP10 actin-related protein 10	protein-coding
393	chr11	74636412	74657769	+	0	NA	intron (NM_010813, intron 1 of 5)	intron (NM_010813, intron 1 of 5)	2664	NM_010813	17428	Mm.3759	NM_010813	ENSMUSG00000000282	Mnt	Rox|bHLHd3	max binding protein	protein-coding
2276	chr8	77632610	77633346	+	0	NA	promoter-TSS (NM_008566)	promoter-TSS (NM_008566)	-449	NM_008566	17218	Mm.5048	NM_008566	ENSMUSG00000005410	Mcm5	AA617332|AI324988|AL033333|Cdc46|Mcmd5|P1-CDC46|mCD46|mCDC46	minichromosome maintenance deficient 5, cell division cycle 46 (S. cerevisiae)	protein-coding
1501	chr3	40752371	40756628	+	0	NA	promoter-TSS (NM_001040399)	promoter-TSS (NM_001040399)	-54	NM_001040399	214048	Mm.46782	NM_027663	ENSMUSG00000037814	Larp1b	1700108L22Rik|4933421B21Rik|AA690246|Larp2	La ribonucleoprotein domain family, member 1B	protein-coding
658	chr13	81921728	81923262	+	0	NA	intron (NM_007684, intron 1 of 4)	CpG	204	NM_007684	12626	Mm.12481	NM_007684	ENSMUSG00000021537	Cetn3	MmCEN3	centrin 3	protein-coding
274	chr10	92914940	92916933	+	0	NA	promoter-TSS (NM_008517)	promoter-TSS (NM_008517)	-205	NM_008517	16993	Mm.271071	NM_008517	ENSMUSG00000015889	Lta4h	-	leukotriene A4 hydrolase	protein-coding
549	chr12	100450587	100456485	+	0	NA	intron (NM_183186, intron 4 of 5)	intron (NM_183186, intron 4 of 5)	-52518	NR_038130	67639	Mm.87374	NR_038130		4930474N09Rik	-	RIKEN cDNA 4930474N09 gene	ncRNA
877	chr15	83961237	83964868	+	0	NA	Intergenic	Intergenic	-9447	NM_029427	75772	Mm.159565	NM_029427	ENSMUSG00000018868	Pnpla5	4833426H19Rik|GS2L	patatin-like phospholipase domain containing 5	protein-coding
1508	chr3	57538801	57541237	+	0	NA	promoter-TSS (NM_011883)	promoter-TSS (NM_011883)	31	NM_001113413	24017	Mm.274360	NM_011883	ENSMUSG00000036503	Rnf13	2010001H16Rik|Rzf	ring finger protein 13	protein-coding
1128	chr18	4333342	4356303	+	0	NA	intron (NM_007746, intron 2 of 7)	intron (NM_007746, intron 2 of 7)	8129	NM_007746	26410	Mm.3275	NM_007746	ENSMUSG00000024235	Map3k8	Cot|Cot/Tpl2|Est|Estf|Tpl-2|Tpl2|c-COT	mitogen-activated protein kinase kinase kinase 8	protein-coding
1771	chr4	143001753	143003396	+	0	NA	5' UTR (NM_172877, exon 1 of 5)	5' UTR (NM_172877, exon 1 of 5)	245	NM_172877	242736	Mm.275953	NM_172877	ENSMUSG00000046862	Pramef8	4732496O08Rik|AU023234	PRAME family member 8	protein-coding
946	chr16	31428474	31433382	+	0	NA	intron (NM_001122683, intron 1 of 6)	B2_Mm2|SINE|B2	2089	NM_001122683	71911	Mm.293470	NM_175177	ENSMUSG00000046598	Bdh1	2310032J20Rik|AI327223|Bdh	3-hydroxybutyrate dehydrogenase, type 1	protein-coding
1724	chr4	119094308	119095889	+	0	NA	promoter-TSS (NM_026494)	promoter-TSS (NM_026494)	-73	NM_026494	106564	Mm.27245	NM_026494	ENSMUSG00000028636	Ppcs	6330579B17Rik|AI413471|AI790434	phosphopantothenoylcysteine synthetase	protein-coding
1520	chr3	68807964	68811423	+	0	NA	intron (NM_133786, intron 1 of 23)	CpG	799	NM_133786	70099	Mm.206841	NM_133786	ENSMUSG00000034349	Smc4	2500002A22Rik|C79747|SMC-4|Smc4l1	structural maintenance of chromosomes 4	protein-coding
2148	chr7	90013832	90016934	+	0	NA	promoter-TSS (NM_175366)	promoter-TSS (NM_175366)	-460	NM_175366	108797	Mm.306789	NM_175366	ENSMUSG00000057706	Mex3b	4931439A04Rik|M-04814|Rkhd3|mKIAA2009	mex3 homolog B (C. elegans)	protein-coding
250	chr10	78559625	78560642	+	0	NA	intron (NM_001004362, intron 1 of 5)	intron (NM_001004362, intron 1 of 5)	212	NM_001004362	72128	Mm.297854	NM_001004362	ENSMUSG00000060301	2610008E11Rik	-	RIKEN cDNA 2610008E11 gene	protein-coding
303	chr10	127925379	127942582	+	0	NA	intron (NM_172259, intron 2 of 6)	intron (NM_172259, intron 2 of 6)	1761	NM_172259	216459	Mm.291688	NM_172259	ENSMUSG00000039824	Myl6b	5730437E04Rik|BC037527|MLC1SA	myosin, light polypeptide 6B	protein-coding
1361	chr2	73747220	73750558	+	0	NA	intron (NM_175015, intron 2 of 4)	CpG	462	NM_175015	228033	Mm.2966	NM_175015	ENSMUSG00000018770	Atp5g3	6030447M23	ATP synthase, H+ transporting, mitochondrial F0 complex, subunit C3 (subunit 9)	protein-coding
614	chr13	55793776	55795318	+	0	NA	promoter-TSS (NM_181278)	promoter-TSS (NM_181278)	62	NM_181278	78521	Mm.28449	NM_181278	ENSMUSG00000045767	B230219D22Rik	AA119856|D530037I19Rik	RIKEN cDNA B230219D22 gene	protein-coding
1765	chr4	138685624	138687749	+	0	NA	intron (NM_001163006, intron 1 of 3)	CpG	266	NR_033745	433771	Mm.305990	NM_001163006	ENSMUSG00000050608	Minos1	2310028O11Rik	mitochondrial inner membrane organizing system 1	protein-coding
130	chr1	153274409	153276739	+	0	NA	promoter-TSS (NM_025819)	promoter-TSS (NM_025819)	-9	NM_025819	66875	Mm.290905	NM_025819	ENSMUSG00000052748	Swt1	1200016B10Rik|C1orf26	SWT1 RNA endoribonuclease homolog (S. cerevisiae)	protein-coding
53	chr1	58642294	58643969	+	0	NA	promoter-TSS (NM_025597)	promoter-TSS (NM_025597)	46	NM_172513	213056	Mm.26272	NM_172513	ENSMUSG00000038174	Fam126b	C130065N10Rik|D1Ertd53e|D630010C10	family with sequence similarity 126, member B	protein-coding
1373	chr2	92251620	92278293	+	0	NA	intron (NM_009963, intron 2 of 11)	intron (NM_009963, intron 2 of 11)	9270	NM_009963	12953	Mm.254181	NM_009963	ENSMUSG00000068742	Cry2	AV006279|D130054K12Rik	cryptochrome 2 (photolyase-like)	protein-coding
1465	chr2	180119019	180136755	+	0	NA	intron (NR_045331, intron 3 of 3)	intron (NR_045331, intron 3 of 3)	4134	NR_029528	387136		NR_029528	miRBase:MI0000139	Mir1a-1	Mir1-1|Mirn1-1|Mirn1b|Mirn1c|Mirn1d|mmu-mir-1-1|mmu-mir-1a-1	microRNA 1a-1	ncRNA
1302	chr2	4838195	4840849	+	0	NA	promoter-TSS (NM_010726)	promoter-TSS (NM_010726)	-520	NM_010726	16922	Mm.391704	NM_010726	ENSMUSG00000026664	Phyh	AI256161|AI265699|Lnap1|PAHX	phytanoyl-CoA hydroxylase	protein-coding
2239	chr8	26950643	26952152	+	0	NA	promoter-TSS (NM_011791)	promoter-TSS (NM_011791)	-138	NM_011791	23808	Mm.27706	NM_011791	ENSMUSG00000031575	Ash2l	-	ash2 (absent, small, or homeotic)-like (Drosophila)	protein-coding
1397	chr2	121371756	121378185	+	0	NA	intron (NM_172673, intron 13 of 14)	intron (NM_172673, intron 13 of 14)	42511	NM_001290986	241627	Mm.293284	NM_030234	ENSMUSG00000027242	Wdr76	5830411K18Rik|6030457D09|AA517836	WD repeat domain 76	protein-coding
941	chr16	24347283	24349504	+	0	NA	Intergenic	Intergenic	-45043	NM_178665	210126	Mm.209385	NM_178665	ENSMUSG00000033306	Lpp	9430020K16Rik|AA959454|AU024130|B130055L10Rik|C79715|D630048H16	LIM domain containing preferred translocation partner in lipoma	protein-coding
583	chr13	19485662	19488252	+	0	NA	intron (NM_024270, intron 1 of 8)	intron (NM_024270, intron 1 of 8)	664	NM_024270	76205	Mm.41940	NM_024270	ENSMUSG00000003062	Stard3nl	0610035N01Rik|6530409L22Rik|AW124774|MENTHO	STARD3 N-terminal like	protein-coding
2392	chr9	54711042	54712297	+	0	NA	5' UTR (NM_022655, exon 1 of 22)	5' UTR (NM_022655, exon 1 of 22)	107	NM_022655	64602	Mm.208991	NM_022655	ENSMUSG00000032293	Ireb2	D9Ertd85e|Irp2	iron responsive element binding protein 2	protein-coding
1879	chr5	108026208	108027344	+	0	NA	promoter-TSS (NM_001161739)	promoter-TSS (NM_001161739)	61	NM_001289569	231571	Mm.482420	NM_144911	ENSMUSG00000033773	Rpap2	AW060207	RNA polymerase II associated protein 2	protein-coding
1824	chr5	33332032	33334635	+	0	NA	intron (NM_001170567, intron 41 of 42)	intron (NM_001170567, intron 41 of 42)	-28132	NM_011738	22629	Mm.332314	NM_011738	ENSMUSG00000018965	Ywhah	-	tyrosine 3-monooxygenase/tryptophan 5-monooxygenase activation protein, eta polypeptide	protein-coding
1869	chr5	93693813	93698122	+	0	NA	promoter-TSS (NM_007635)	promoter-TSS (NM_007635)	-632	NM_007635	12452	Mm.3527	NM_007635	ENSMUSG00000029385	Ccng2	-	cyclin G2	protein-coding
2342	chr8	131197019	131211874	+	0	NA	Intergenic	Intergenic	-5108	NM_010578	16412	Mm.263396	NM_010578	ENSMUSG00000025809	Itgb1	4633401G24Rik|AA409975|AA960159|CD29|ENSMUSG00000051907|Fnrb|Gm9863|gpIIa	integrin beta 1 (fibronectin receptor beta)	protein-coding
591	chr13	30326312	30328098	+	0	NA	intron (NM_153546, intron 9 of 12)	intron (NM_153546, intron 9 of 12)	98846	NM_153546	218121	Mm.89682	NM_153546	ENSMUSG00000038732	Mboat1	9130215M02Rik|BC023845|LPEAT1|Moact1|Oact1	membrane bound O-acyltransferase domain containing 1	protein-coding
2304	chr8	93431314	93433710	+	0	NA	intron (NM_177224, intron 2 of 39)	CpG	79778	NM_177224	109151	Mm.100615	NM_177224	ENSMUSG00000056608	Chd9	1810014J18Rik|9030205D12Rik|A330063D19Rik|AD013|PRIC320|mKIAA0308	chromodomain helicase DNA binding protein 9	protein-coding
832	chr15	43308538	43309456	+	0	NA	promoter-TSS (NR_046064)	promoter-TSS (NR_046064)	222	NM_025736	66736	Mm.244512	NM_025736	ENSMUSG00000022337	Emc2	4921531G14Rik|AV060620|AW209495|Ttc35	ER membrane protein complex subunit 2	protein-coding
2341	chr8	131173878	131179800	+	0	NA	Intergenic	B2_Mm2|SINE|B2	-32715	NM_010578	16412	Mm.263396	NM_010578	ENSMUSG00000025809	Itgb1	4633401G24Rik|AA409975|AA960159|CD29|ENSMUSG00000051907|Fnrb|Gm9863|gpIIa	integrin beta 1 (fibronectin receptor beta)	protein-coding
2135	chr7	71017735	71085482	+	0	NA	intron (NM_021366, intron 1 of 1)	Lx8|LINE|L1	-10135	NM_001256311	381994	Mm.425466	NM_001256311	ENSMUSG00000095061	E030018B13Rik	Gm1697	RIKEN cDNA E030018B13 gene	protein-coding
828	chr15	39774362	39776379	+	0	NA	promoter-TSS (NM_172814)	promoter-TSS (NM_172814)	-67	NM_172814	239393	Mm.39874	NM_172814	ENSMUSG00000022305	Lrp12	AI848829|C820005L12Rik|LRP-12	low density lipoprotein-related protein 12	protein-coding
276	chr10	93661149	93662478	+	0	NA	promoter-TSS (NM_025551)	promoter-TSS (NM_025551)	59	NM_025551	66414	Mm.27886	NM_025551	ENSMUSG00000020022	Ndufa12	2410011G03Rik|AW112974	NADH dehydrogenase (ubiquinone) 1 alpha subcomplex, 12	protein-coding
102	chr1	107559435	107560957	+	0	NA	promoter-TSS (NM_173187)	promoter-TSS (NM_173187)	57	NM_013784	27392	Mm.268911	NM_013784	ENSMUSG00000056536	Pign	Gm20308|PIG-N	phosphatidylinositol glycan anchor biosynthesis, class N	protein-coding
1920	chr5	136674435	136675889	+	0	NA	promoter-TSS (NM_025774)	promoter-TSS (NM_025774)	-338	NM_025774	66801	Mm.425295	NM_025774		Prkrip1	8430424D23Rik|C114	Prkr interacting protein 1 (IL11 inducible)	protein-coding
2465	chr9	109734692	109735888	+	0	NA	promoter-TSS (NM_018757)	promoter-TSS (NM_018757)	-18	NM_018757	54369	Mm.12951	NM_018757	ENSMUSG00000032478	Nme6	nm23-M6	NME/NM23 nucleoside diphosphate kinase 6	protein-coding
1831	chr5	34711627	34713969	+	0	NA	5' UTR (NM_001243123, exon 1 of 21)	5' UTR (NM_001243123, exon 1 of 21)	216	NM_001243123	231128	Mm.286885	NM_001030306	ENSMUSG00000037210	Fam193a	-	family with sequence similarity 193, member A	protein-coding
1218	chr19	3849890	3853844	+	0	NA	promoter-TSS (NM_001271496)	promoter-TSS (NM_001271496)	94	NR_073190	12660	Mm.225505	NM_013490	ENSMUSG00000024843	Chka	CK|CK/EK-alpha|Chetk-alpha|Chk|ChoK|EK|EtnK-alpha	choline kinase alpha	protein-coding
1404	chr2	128954724	128956331	+	0	NA	promoter-TSS (NM_025395)	promoter-TSS (NM_025395)	91	NM_025395	66170	Mm.40621	NM_025395	ENSMUSG00000037938	Chchd5	1110027L01Rik|AW045710	coiled-coil-helix-coiled-coil-helix domain containing 5	protein-coding
2398	chr9	56977965	56979668	+	0	NA	non-coding (NR_102289, exon 1 of 2)	non-coding (NR_102289, exon 1 of 2)	232	NM_028636	73744	Mm.30110	NM_028636	ENSMUSG00000032295	Man2c1	1110025H24Rik	mannosidase, alpha, class 2C, member 1	protein-coding
1543	chr3	89882897	89890662	+	0	NA	intron (NM_001293749, intron 1 of 7)	intron (NM_001293749, intron 1 of 7)	3336	NM_001293749	59069	Mm.240839	NM_022314	ENSMUSG00000027940	Tpm3	TM30nm|TMnm|Tm5NM|Tpm-5|Tpm5|Trop-5|gamma-TM|hTM30nm|hTMnm	tropomyosin 3, gamma	protein-coding
259	chr10	81167104	81168260	+	0	NA	intron (NM_001243067, intron 1 of 3)	CpG	112	NM_001243067	73610	Mm.490466	NM_001243067		Zfp433	1700123A16Rik	RIKEN cDNA 1700123A16 gene	protein-coding
424	chr11	88854565	88866760	+	0	NA	promoter-TSS (NM_009546)	promoter-TSS (NM_009546)	-55	NM_009546	217069	Mm.248445	NM_009546	ENSMUSG00000000275	Trim25	AA960166|AL022677|EFP|Zfp147	tripartite motif-containing 25	protein-coding
1625	chr3	157196733	157198146	+	0	NA	promoter-TSS (NM_017381)	promoter-TSS (NM_017381)	78	NM_017381	53861	Mm.259036	NM_017381	ENSMUSG00000028180	Zranb2	AI227013|Zfp265|Zis|Znf265	zinc finger, RAN-binding domain containing 2	protein-coding
163	chr1	180335015	180339716	+	0	NA	intron (NM_026626, intron 1 of 6)	intron (NM_026626, intron 1 of 6)	1353	NM_026626	68226	Mm.252132	NM_026626	ENSMUSG00000026495	Efcab2	1700073K01Rik|D830011E08Rik	EF-hand calcium binding domain 2	protein-coding
1106	chr17	74888298	74890248	+	0	NA	intron (NM_026417, intron 1 of 5)	CpG	440	NM_026417	67864	Mm.41891	NM_026417	ENSMUSG00000024072	Yipf4	2310034L04Rik	Yip1 domain family, member 4	protein-coding
1402	chr2	126757511	126760586	+	0	NA	promoter-TSS (NM_023220)	promoter-TSS (NM_023220)	-77	NM_023220	66552	Mm.269928	NM_023220	ENSMUSG00000027366	Sppl2a	2010106G01Rik|C130089K23Rik	signal peptide peptidase like 2A	protein-coding
1836	chr5	42234998	42236985	+	0	NA	promoter-TSS (NM_001081422)	promoter-TSS (NM_001081422)	-437	NM_001081422	665775	Mm.158726	NM_001081422	ENSMUSG00000061755	Bod1l	A230054D04Rik|AI853319|FAM44A|mKIAA1327	biorientation of chromosomes in cell division 1-like	protein-coding
2402	chr9	59332576	59339740	+	0	NA	Intergenic	Intergenic	-1977	NM_019927	23806	Mm.305925	NM_019927	ENSMUSG00000025234	Arih1	AU021774|Ari|Ari1|Hari|Hhari|Ubch7bp|Uip77	ariadne ubiquitin-conjugating enzyme E2 binding protein homolog 1 (Drosophila)	protein-coding
1531	chr3	87905683	87982641	+	0	NA	Intergenic	Intergenic	-2155	NM_133665	17261	Mm.28184	NM_133665	ENSMUSG00000001419	Mef2d	C80750	myocyte enhancer factor 2D	protein-coding
1841	chr5	52899663	52903977	+	0	NA	Intergenic	Intergenic	-39038	NM_001256059	100503884	Mm.332379	NM_001256059	ENSMUSG00000045790	Ccdc149	Gm447	coiled-coil domain containing 149	protein-coding
347	chr11	32536919	32544940	+	0	NA	Intergenic	MIR3|SINE|MIR	-1626	NM_001271348	103583	Mm.28017	NM_134015	ENSMUSG00000020271	Fbxw11	2310065A07Rik|AA536858|BTRC2|BTRCP2|Fbxw1b|HOS	F-box and WD-40 domain protein 11	protein-coding
1333	chr2	34681173	34682367	+	0	NA	promoter-TSS (NM_001164772)	promoter-TSS (NM_001164772)	-15	NM_001164772	30050	Mm.4465	NM_013890	ENSMUSG00000035949	Fbxw2	2700071L08Rik|FBW2|Fwd2|MD6	F-box and WD-40 domain protein 2	protein-coding
434	chr11	97047955	97050518	+	0	NA	promoter-TSS (NM_008379)	promoter-TSS (NM_008379)	-30	NM_008379	16211	Mm.251013	NM_008379	ENSMUSG00000001440	Kpnb1	AA409963|IPOB|Impnb	karyopherin (importin) beta 1	protein-coding
865	chr15	78857813	78861675	+	0	NA	3' UTR (NM_008197, exon 1 of 1)	3' UTR (NM_008197, exon 1 of 1)	1102	NM_008197	14958	Mm.24350	NM_008197	ENSMUSG00000096210	H1f0	D130017D06Rik|H1(0)|H1fv	H1 histone family, member 0	protein-coding
1184	chr18	61025109	61028014	+	0	NA	Intergenic	Intergenic	-17943	NM_001198984	21453	Mm.486251	NM_011552	ENSMUSG00000024613	Tcof1	AA408847|AW209012|treacle	Treacher Collins Franceschetti syndrome 1, homolog	protein-coding
442	chr11	100869301	100872547	+	0	NA	intron (NM_001243049, intron 1 of 20)	CpG	158	NM_001243051	11975	Mm.340818	NM_016920	ENSMUSG00000019302	Atp6v0a1	AA959968|ATP6a1|Atp6n1|Atp6n1a|Atpv0a1|Vpp-1|Vpp1	ATPase, H+ transporting, lysosomal V0 subunit A1	protein-coding
2156	chr7	99816989	99819374	+	0	NA	5' UTR (NM_029078, exon 1 of 16)	5' UTR (NM_029078, exon 1 of 16)	241	NM_029078	74737	Mm.288645	NM_029078	ENSMUSG00000041328	Pcf11	2500001H09Rik|5730417B17Rik|C77803	cleavage and polyadenylation factor subunit homolog (S. cerevisiae)	protein-coding
1577	chr3	107433710	107435389	+	0	NA	promoter-TSS (NM_153563)	promoter-TSS (NM_153563)	79	NM_153563	229707	Mm.278643	NM_153563	ENSMUSG00000014601	Strip1	6330569M22Rik|6530401O14Rik|Fam40a	striatin interacting protein 1	protein-coding
1572	chr3	105177491	105179859	+	0	NA	Intergenic	Intergenic	-76573	NM_001039347	56543	Mm.44530	NM_019931	ENSMUSG00000040896	Kcnd3	AW045978|Kncd3|Kv4.3	potassium voltage-gated channel, Shal-related family, member 3	protein-coding
689	chr13	107811414	107813283	+	0	NA	promoter-TSS (NR_015471)	promoter-TSS (NR_015471)	-154	NM_008442	16563	Mm.355686	NM_008442	ENSMUSG00000021693	Kif2a	C530030B14Rik|Kif2|Kns2|M-kinesin	kinesin family member 2A	protein-coding
886	chr15	96113667	96128047	+	0	NA	intron (NM_175251, intron 3 of 20)	intron (NM_175251, intron 3 of 20)	2904	NM_175251	77044	Mm.17166	NM_175251	ENSMUSG00000033237	Arid2	1700124K17Rik|4432409D24Rik|zipzap/p200	AT rich interactive domain 2 (ARID, RFX-like)	protein-coding
1116	chr17	85355370	85359747	+	0	NA	promoter-TSS (NR_027929)	promoter-TSS (NR_027929)	217	NM_001159496	19043	Mm.249695	NM_011151	ENSMUSG00000061130	Ppm1b	PP2CB	protein phosphatase 1B, magnesium dependent, beta isoform	protein-coding
1329	chr2	33322745	33324459	+	0	NA	intron (NM_001025594, intron 1 of 2)	intron (NM_001025594, intron 1 of 2)	450	NM_027947	71834	Mm.44186	NM_027947	ENSMUSG00000026788	Zbtb43	1700010E06Rik|Zfp297b|mKIAA0414	zinc finger and BTB domain containing 43	protein-coding
1725	chr4	120239740	120244948	+	0	NA	intron (NM_016748, intron 1 of 18)	CpG	537	NM_016748	51797	Mm.1815	NM_016748	ENSMUSG00000028633	Ctps	Ctps1	cytidine 5'-triphosphate synthase	protein-coding
2379	chr9	44186711	44188235	+	0	NA	promoter-TSS (NM_021395)	promoter-TSS (NM_021395)	-100	NM_021395	12282	Mm.116721	NM_021395	ENSMUSG00000032115	Hyou1	AI415631|CBP-140|Cab140|Grp170|Orp150	hypoxia up-regulated 1	protein-coding
727	chr14	33135124	33137393	+	0	NA	intron (NM_001081130, intron 1 of 23)	intron (NM_001081130, intron 1 of 23)	1053	NM_001081130	239017	Mm.318302	NM_001081130	ENSMUSG00000021913	Ogdhl	-	oxoglutarate dehydrogenase-like	protein-coding
320	chr11	6524466	6528437	+	0	NA	promoter-TSS (NM_134011)	promoter-TSS (NM_134011)	-381	NM_134011	21379	Mm.247761	NM_134011	ENSMUSG00000000384	Tbrg4	2310042P22Rik|AA120735|AA408001|AI527316|Cpr2|R74877|Tb-12|mKIAA0948	transforming growth factor beta regulated gene 4	protein-coding
939	chr16	23127370	23129093	+	0	NA	promoter-TSS (NM_145480)	promoter-TSS (NM_145480)	-428	NM_145480	106344	Mm.386835	NM_145480	ENSMUSG00000022881	Rfc4	A1|AI894123|AU040575|RFC37	replication factor C (activator 1) 4	protein-coding
811	chr15	10643387	10645505	+	0	NA	promoter-TSS (NM_001166408)	promoter-TSS (NM_001166408)	-60	NM_001166408	75646	Mm.212395	NM_030690	ENSMUSG00000022246	Rai14	1700008J19Rik|1700020L11Rik|Ankycorbin|Norpeg|mKIAA1334	retinoic acid induced 14	protein-coding
1670	chr4	47486580	47488052	+	0	NA	promoter-TSS (NM_024171)	promoter-TSS (NM_024171)	-77	NM_019998	56737	Mm.22218	NM_019998	ENSMUSG00000039740	Alg2	1110018A23Rik|1300013N08Rik|ALPG2|CDGIi|MNCb-5081	asparagine-linked glycosylation 2 (alpha-1,3-mannosyltransferase)	protein-coding
2010	chr6	85886265	85888029	+	0	NA	Intergenic	CpG	21434	NM_001170488	69786	Mm.218434	NM_176842	ENSMUSG00000054226	Tprkb	0610033G21Rik|1810034M08Rik|Cgi-121|DRWMS1|mDRWMS1	Tp53rk binding protein	protein-coding
465	chr12	3422416	3428331	+	0	NA	intron (NR_030694, intron 1 of 2)	intron (NR_030694, intron 1 of 2)	1374	NR_030694	100043040	Mm.415417	NR_030694	ENSMUSG00000071456	1110002L01Rik	-	RIKEN cDNA 1110002L01 gene	ncRNA
249	chr10	78053012	78055316	+	0	NA	intron (NM_027875, intron 1 of 7)	intron (NM_027875, intron 1 of 7)	545	NM_027875	71709	Mm.86439	NM_027875	ENSMUSG00000032714	Syde1	1200008N06Rik|BB043000|mSYD1A	synapse defective 1, Rho GTPase, homolog 1 (C. elegans)	protein-coding
1612	chr3	142221737	142224510	+	0	NA	promoter-TSS (NM_001289493)	promoter-TSS (NM_001289493)	107	NM_001289492	55932	Mm.439718	NM_018734	ENSMUSG00000028268	Gbp3	AW228655|Gbp4	guanylate binding protein 3	protein-coding
819	chr15	34011488	34014376	+	0	NA	exon (NM_026002, exon 1 of 12)	exon (NM_026002, exon 1 of 12)	458	NM_026002	67154	Mm.130883	NM_026002	ENSMUSG00000022255	Mtdh	2610103J23Rik|3D3|3D3/Lyric|AEG-1|AV353288|D8Bwg1112e|Lyric	metadherin	protein-coding
1177	chr18	47118293	47119023	+	0	NA	intron (NM_178377, intron 1 of 6)	CpG	128	NM_178377	69456	Mm.210734	NM_178377	ENSMUSG00000042705	Commd10	2310003A05Rik|AU019438|DRWMS2	COMM domain containing 10	protein-coding
1189	chr18	62707887	62708957	+	0	NA	promoter-TSS (NM_177829)	promoter-TSS (NM_177829)	-25	NM_134136	107035	Mm.21295	NM_134136	ENSMUSG00000042211	Fbxo38	6030410I24Rik|AU044865|AW214031|Moka|SP329	F-box protein 38	protein-coding
1127	chr18	3382694	3383865	+	0	NA	promoter-TSS (NM_029402)	promoter-TSS (NM_029402)	56	NM_029402	71745	Mm.291707	NM_029402	ENSMUSG00000024231	Cul2	1300003D18Rik|4932411N15Rik|AI327301|mKIAA4106	cullin 2	protein-coding
1537	chr3	88753165	88763045	+	0	NA	Intergenic	Intergenic	-3901	NM_001164533	65111	Mm.29028	NM_022994	ENSMUSG00000068921	Dap3	4921514D13Rik|DAP-3|MRP-S29|S29mt	death associated protein 3	protein-coding
894	chr15	98904425	98905625	+	0	NA	promoter-TSS (NM_001162506)	promoter-TSS (NM_001162506)	-379	NM_001162506	78733	Mm.124905	NM_030159	ENSMUSG00000032783	Troap	AW476063|E130301L11Rik|tastin	trophinin associated protein	protein-coding
1748	chr4	132459681	132463911	+	0	NA	intron (NM_001163792, intron 5 of 7)	intron (NM_001163792, intron 5 of 7)	16670	NM_145553	230789	Mm.11473	NM_145553	ENSMUSG00000028878	Fam76a	-	family with sequence similarity 76, member A	protein-coding
2127	chr7	53171401	53180072	+	0	NA	exon (NM_010129, exon 2 of 5)	exon (NM_010129, exon 2 of 5)	483	NM_001146346	13732	Mm.20829	NM_010129	ENSMUSG00000040212	Emp3	H-4|H4|HNMP-1|MI-35|Ymp	epithelial membrane protein 3	protein-coding
858	chr15	75420828	75447539	+	0	NA	Intergenic	Intergenic	7095	NM_026730	68453	Mm.46367	NM_026730	ENSMUSG00000022579	Gpihbp1	1110002J19Rik|GPI-HBP1	GPI-anchored HDL-binding protein 1	protein-coding
1298	chr2	3249274	3250832	+	0	NA	promoter-TSS (NM_001013376)	promoter-TSS (NM_001013376)	-153	NM_001013376	227522	Mm.293948	NM_001013376	ENSMUSG00000049950	Rpp38	C330006A15Rik	ribonuclease P/MRP 38 subunit	protein-coding
140	chr1	164500188	164502133	+	0	NA	intron (NM_016796, intron 1 of 7)	CpG	201	NM_016796	53330	Mm.10699	NM_016796	ENSMUSG00000026696	Vamp4	D1Ertd147e	vesicle-associated membrane protein 4	protein-coding
2222	chr7	148615447	148670678	+	0	NA	intron (NR_028142, intron 2 of 9)	intron (NR_028142, intron 2 of 9)	1975	NM_001163689	66853	Mm.29998	NM_025802	ENSMUSG00000025509	Pnpla2	0610039C21Rik|1110001C14Rik|Atgl|TTS-2.2	patatin-like phospholipase domain containing 2	protein-coding
1900	chr5	122803793	122805194	+	0	NA	promoter-TSS (NM_144912)	promoter-TSS (NM_144912)	71	NM_019780	56433	Mm.216528	NM_019780	ENSMUSG00000029462	Vps29	2010015D08Rik|AW049835|PEP11	vacuolar protein sorting 29 (S. pombe)	protein-coding
385	chr11	69568004	69583553	+	0	NA	promoter-TSS (NM_019871)	promoter-TSS (NM_019871)	-432	NM_019871	56293	Mm.6211	NM_019871	ENSMUSG00000018776	Slc35g3	Amac1	solute carrier family 35, member G3	protein-coding
954	chr16	37867471	37875310	+	0	NA	intron (NM_177093, intron 1 of 3)	intron (NM_177093, intron 1 of 3)	2904	NM_177093	320184	Mm.390882	NM_177093	ENSMUSG00000034158	Lrrc58	1810012N18Rik|C330018J07Rik	leucine rich repeat containing 58	protein-coding
1359	chr2	73150049	73151934	+	0	NA	promoter-TSS (NM_025854)	promoter-TSS (NM_025854)	282	NM_029022	74616	Mm.247457	NM_029022	ENSMUSG00000008226	Scrn3	4833415E20Rik|AI427019|AV002033|Ses3	secernin 3	protein-coding
1479	chr3	16082712	16084571	+	0	NA	intron (NR_027375, intron 1 of 5)	CpG	458	NM_001145919	229096	Mm.23834	NM_172677	ENSMUSG00000047213	Ythdf3	9130022A11Rik	YTH domain family 3	protein-coding
801	chr14	121624334	121626102	+	0	NA	intron (NM_134082, intron 5 of 26)	intron (NM_134082, intron 5 of 26)	153234	NM_145465	223255	Mm.390756	NM_145465	ENSMUSG00000063410	Stk24	1810013H02Rik|C76483|MST-3|Mst3|STE20	serine/threonine kinase 24	protein-coding
985	chr16	94687610	94695633	+	0	NA	TTS (NM_009441)	TTS (NM_009441)	56615	NM_007834	13185	Mm.7472	NM_007834	ENSMUSG00000022898	Dscr3	AW538125|Dcra	Down syndrome critical region gene 3	protein-coding
971	chr16	59471456	59472275	+	0	NA	intron (NM_025910, intron 1 of 9)	CpG	264	NM_025910	67014	Mm.289150	NM_025910	ENSMUSG00000022724	Mina	1810047J07Rik|2410057H13Rik|3830408E23Rik|AI449204	myc induced nuclear antigen	protein-coding
754	chr14	58444639	58446120	+	0	NA	promoter-TSS (NM_198605)	promoter-TSS (NM_198605)	303	NM_026401	67840	Mm.319530	NM_026401	ENSMUSG00000021967	Mrpl57	2610025P17Rik|AV005697|Mrp63	mitochondrial ribosomal protein L53	protein-coding
479	chr12	31268668	31269882	+	0	NA	promoter-TSS (NM_172049)	promoter-TSS (NM_172049)	-33	NM_172049	211986	Mm.34035	NM_172049	ENSMUSG00000043061	Tmem18	BC024093	transmembrane protein 18	protein-coding
847	chr15	59310095	59314895	+	0	NA	intron (NM_026746, intron 4 of 6)	intron (NM_026746, intron 4 of 6)	106742	NM_001164604	68501	Mm.27762	NM_026746	ENSMUSG00000059586	Nsmce2	1110014D18Rik|AI661537	non-SMC element 2 homolog (MMS21, S. cerevisiae)	protein-coding
1166	chr18	35113121	35119318	+	0	NA	Intergenic	Intergenic	-2214	NM_010481	15526	Mm.209419	NM_010481	ENSMUSG00000024359	Hspa9	74kDa|Csa|Grp75|Hsc74|Hsp74|Hsp74a|Hspa9a|Mortalin|Mot-2|Mot2|Mthsp70|Pbp74	heat shock protein 9	protein-coding
2166	chr7	109213136	109214607	+	0	NA	promoter-TSS (NM_001286689)	promoter-TSS (NM_001286689)	-134	NR_104582	102443351	Mm.292904	NM_011644	ENSMUSG00000070425	Xntrpc	Xndr-trpc2	Xndc1-transient receptor potential cation channel, subfamily C, member 2 readthrough	protein-coding
1563	chr3	102798999	102801817	+	0	NA	intron (NM_025679, intron 2 of 4)	intron (NM_025679, intron 2 of 4)	745	NM_025679	66641	Mm.33937	NM_025679	ENSMUSG00000027854	Sike1	2810005O12Rik|5730470L24Rik|AI450236|AI839862|Sike|Sikeb	suppressor of IKBKE 1	protein-coding
1003	chr17	12311215	12312875	+	0	NA	promoter-TSS (NM_026644)	promoter-TSS (NM_026644)	-105	NM_026644	68262	Mm.258300	NM_026644	ENSMUSG00000023827	Agpat4	1500003P24Rik	1-acylglycerol-3-phosphate O-acyltransferase 4 (lysophosphatidic acid acyltransferase, delta)	protein-coding
1378	chr2	104856653	104857698	+	0	NA	promoter-TSS (NM_145380)	promoter-TSS (NM_145380)	9	NM_145380	98221	Mm.379278	NM_145380	ENSMUSG00000027170	Eif3m	Ga17|Pcid1|Tango7	eukaryotic translation initiation factor 3, subunit M	protein-coding
1054	chr17	30748788	30749845	+	0	NA	intron (NM_025374, intron 1 of 5)	CpG	288	NM_025374	109801	Mm.261984	NM_025374	ENSMUSG00000024026	Glo1	0610009E22Rik|1110008E19Rik|2510049H23Rik|AW550643|GLY1|Glo-1|Glo-1r|Glo-1s|Glo1-r|Glo1-s|Qglo	glyoxalase 1	protein-coding
1800	chr5	18731070	18734684	+	0	NA	promoter-TSS (NR_102341)	promoter-TSS (NR_102341)	13	NM_001170746	50791	Mm.332231	NM_015823	ENSMUSG00000040003	Magi2	AIP-1|Acvri1|Acvrinp1|Acvrip1|Magi-2|S-SCAM|mKIAA0705	membrane associated guanylate kinase, WW and PDZ domain containing 2	protein-coding
2101	chr7	35011315	35020368	+	0	NA	promoter-TSS (NM_008155)	promoter-TSS (NM_008155)	-486	NM_008155	14751	Mm.589	NM_008155		Gpi1	Amf|Gpi|Gpi-1|Gpi-1r|Gpi-1s|Gpi-1t|Gpi1-r|Gpi1-s|Gpi1-t|Gpi1s|MF|NK|NK/GPI|Nlk|Org|Pgi|Phi	glucose phosphate isomerase 1	protein-coding
619	chr13	58316043	58317979	+	0	NA	promoter-TSS (NM_152234)	promoter-TSS (NM_152234)	3	NM_152234	56085	Mm.182053	NM_026842	ENSMUSG00000005312	Ubqln1	1110046H03Rik|1810030E05Rik|AU019746|C77538|D13Ertd372e|Da41|Dsk2|Plic-1|Plic1|Xdrp1	ubiquilin 1	protein-coding
1717	chr4	115891658	115895424	+	0	NA	promoter-TSS (NM_181585)	promoter-TSS (NM_181585)	-978	NM_181585	18710	Mm.253819	NM_181585	ENSMUSG00000028698	Pik3r3	AA414954|p55pik	phosphatidylinositol 3 kinase, regulatory subunit, polypeptide 3 (p55)	protein-coding
698	chr14	4828683	4830749	+	0	NA	Intergenic	CpG	-144465	NM_001242945	100041306	Mm.396155	NM_001242945	ENSMUSG00000094132	Gm3264	-	predicted gene 3264	protein-coding
1634	chr4	10800791	10802569	+	0	NA	promoter-TSS (NM_026005)	promoter-TSS (NM_026005)	35	NM_026005	67157	Mm.440552	NM_026005	ENSMUSG00000059482	2610301B20Rik	AI428449	RIKEN cDNA 2610301B20 gene	protein-coding
621	chr13	60274576	60280455	+	0	NA	exon (NM_008086, exon 1 of 1)	exon (NM_008086, exon 1 of 1)	1381	NM_008086	14451	Mm.22701	NM_008086	ENSMUSG00000052957	Gas1	AW554192|Gas-1	growth arrest specific 1	protein-coding
524	chr12	78338650	78341182	+	0	NA	non-coding (NR_045554, exon 1 of 12)	non-coding (NR_045554, exon 1 of 12)	190	NR_045554	53618	Mm.35628	NM_016893	ENSMUSG00000021065	Fut8	-	fucosyltransferase 8	protein-coding
2176	chr7	117252120	117268734	+	0	NA	Intergenic	Intergenic	-5146	NM_009516	22390	Mm.287173	NM_009516		Wee1	Wee1A	WEE 1 homolog 1 (S. pombe)	protein-coding
1848	chr5	67651089	67652852	+	0	NA	5' UTR (NM_030108, exon 1 of 9)	5' UTR (NM_030108, exon 1 of 9)	166	NM_030108	67878	Mm.23217	NM_028975	ENSMUSG00000037720	Tmem33	1110006G02Rik|1600019D15Rik|2410089A21Rik|2700052H22Rik|5430406L04Rik|AA388285|AI314185|AI426615|db83	transmembrane protein 33	protein-coding
2310	chr8	97507179	97526648	+	0	NA	intron (NM_018882, intron 1 of 13)	intron (NM_018882, intron 1 of 13)	8614	NM_018882	14766	Mm.290834	NM_018882	ENSMUSG00000031785	Gpr56	Cyt28|TM7LN4|TM7XN1	G protein-coupled receptor 56	protein-coding
2495	chrX	34442559	34444078	+	0	NA	promoter-TSS (NM_029891)	promoter-TSS (NM_029891)	-424	NM_029891	77286	Mm.21649	NM_029891	ENSMUSG00000044149	Nkrf	9430034D17Rik|AW124770|C80287	NF-kappaB repressing factor	protein-coding
598	chr13	37852470	37854883	+	0	NA	Intergenic	Intergenic	-64231	NM_026830	68750	Mm.491109	NM_026830	ENSMUSG00000039087	Rreb1	1110037N09Rik|AA414966|B930013M22Rik	ras responsive element binding protein 1	protein-coding
2486	chrX	7417560	7419999	+	0	NA	promoter-TSS (NM_138604)	promoter-TSS (NM_138604)	-178	NM_001290536	54644	Mm.142827	NM_138604	ENSMUSG00000031154	Otud5	AA407879|AI553596|BB114028|DUBA|DXImx46e|Sfc7	OTU domain containing 5	protein-coding
2322	chr8	113860839	113862787	+	0	NA	promoter-TSS (NM_029005)	promoter-TSS (NM_029005)	-10	NM_029005	74568	Mm.207971	NM_029005	ENSMUSG00000012519	Mlkl	9130019I15Rik	mixed lineage kinase domain-like	protein-coding
780	chr14	76813641	76816227	+	0	NA	promoter-TSS (NM_207652)	promoter-TSS (NM_207652)	-694	NM_207652	21807	Mm.153272	NM_009366	ENSMUSG00000022010	Tsc22d1	AA589566|AW105905|Egr5|TSC-22|Tgfb1i4|Tsc|Tsc22	TSC22 domain family, member 1	protein-coding
2438	chr9	88333016	88334586	+	0	NA	promoter-TSS (NM_172926)	promoter-TSS (NM_172926)	-12	NM_172926	244962	Mm.439873	NM_172926	ENSMUSG00000032422	Snx14	B830022K16|C330035N22Rik|YR-14	sorting nexin 14	protein-coding
2317	chr8	110111508	110112678	+	0	NA	intron (NM_010817, intron 1 of 6)	CpG	289	NM_010817	17463	Mm.18347	NM_010817	ENSMUSG00000039067	Psmd7	AW107203|Mov-34|Mov34	proteasome (prosome, macropain) 26S subunit, non-ATPase, 7	protein-coding
240	chr10	67737460	67746258	+	0	NA	promoter-TSS (NM_023598)	promoter-TSS (NM_023598)	-385	NM_023598	71371	Mm.440357	NM_023598	ENSMUSG00000019947	Arid5b	4930580B11|5430435G07Rik|AI467247|Desrt|Mrf2|Mrf2alpha|Mrf2beta	AT rich interactive domain 5B (MRF1-like)	protein-coding
1433	chr2	155936747	155938130	+	0	NA	intron (NM_029397, intron 1 of 2)	CpG	263	NM_170598	75710	Mm.27660	NM_029397		Rbm12	5730420G12Rik|9430070C08Rik|AI852903|SWAN|mKIAA0765	RNA binding motif protein 12	protein-coding
1666	chr4	45354379	45355946	+	0	NA	exon (NM_153167, exon 1 of 7)	exon (NM_153167, exon 1 of 7)	189	NM_153167	242418	Mm.317668	NM_153167	ENSMUSG00000035572	Dcaf10	AA959934|Wdr32	DDB1 and CUL4 associated factor 10	protein-coding
2209	chr7	138703782	138704498	+	0	NA	intron (NM_009774, intron 1 of 7)	CpG	235	NM_009774	12237	Mm.927	NM_009774	ENSMUSG00000066979	Bub3	AU019800|AU021329|AU043350|AW146323|C78067	budding uninhibited by benzimidazoles 3 homolog (S. cerevisiae)	protein-coding
230	chr10	59078072	59079755	+	0	NA	intron (NM_001033259, intron 1 of 7)	CpG	527	NM_001033259	215999	Mm.296470	NM_001033259	ENSMUSG00000009647	Mcu	2010012O16Rik|AV064928|C10orf42|Ccdc109a|D130073L02Rik|Gm64	mitochondrial calcium uniporter	protein-coding
115	chr1	135388083	135391586	+	0	NA	Intergenic	Intergenic	-69045	NM_011439	20668	Mm.8575	NM_011439	ENSMUSG00000070643	Sox13	AA407916|AW259412|AW540933|Sox-13	SRY (sex determining region Y)-box 13	protein-coding
377	chr11	62307792	62310066	+	0	NA	intron (NM_001039536, intron 2 of 6)	intron (NM_001039536, intron 2 of 6)	36967	NM_001039536	327942	Mm.390358	NM_199026		Pigl	Gm737	phosphatidylinositol glycan anchor biosynthesis, class L	protein-coding
2374	chr9	41036919	41037866	+	0	NA	Intergenic	Intergenic	23154	NR_040392	78500	Mm.275715	NR_040392		1700063D05Rik	-	RIKEN cDNA 1700063D05 gene	ncRNA
2050	chr6	129128029	129144855	+	0	NA	3' UTR (NM_053109, exon 5 of 5)	3' UTR (NM_053109, exon 5 of 5)	5809	NM_053109	93694	Mm.197536	NM_053109	ENSMUSG00000030157	Clec2d	Clr-b|Clrb|Ocil	C-type lectin domain family 2, member d	protein-coding
602	chr13	44824790	44833199	+	0	NA	intron (NM_021878, intron 2 of 18)	CpG	2354	NM_001205043	16468	Mm.25059	NM_021878	ENSMUSG00000038518	Jarid2	Jmj|jumonji	jumonji, AT rich interactive domain 2	protein-coding
922	chr16	15946291	15959601	+	0	NA	intron (NM_146068, intron 10 of 19)	intron (NM_146068, intron 10 of 19)	65567	NM_007679	12609	Mm.347407	NM_007679		Cebpd	-	CCAAT/enhancer binding protein (C/EBP), delta	protein-coding
2319	chr8	113369976	113371583	+	0	NA	promoter-TSS (NM_133953)	promoter-TSS (NM_133953)	-76	NM_133953	101943	Mm.236123	NM_133953	ENSMUSG00000033732	Sf3b3	1810061H24Rik|5730409A01Rik|AA409318|D8Ertd633e|RSE1|SAP130|mKIAA0017	splicing factor 3b, subunit 3	protein-coding
1311	chr2	18313357	18315033	+	0	NA	5' UTR (NM_001190817, exon 1 of 13)	5' UTR (NM_001190817, exon 1 of 13)	262	NM_001190817	13418	Mm.246674	NM_007869	ENSMUSG00000026740	Dnajc1	4733401K02Rik|AA960110|D230036H06Rik|Dnajl1|ERdj1|ERj1p|MTJ1	DnaJ (Hsp40) homolog, subfamily C, member 1	protein-coding
1072	chr17	37406697	37408515	+	0	NA	exon (NM_013819, exon 2 of 8)	exon (NM_013819, exon 2 of 8)	427	NM_013819	14991	Mm.14437	NM_013819	ENSMUSG00000016206	H2-M3	H-2M3|Hmt|M3a|R4B2	histocompatibility 2, M region locus 3	protein-coding
2470	chr9	113837973	113842242	+	0	NA	promoter-TSS (NM_001083319)	promoter-TSS (NM_001083319)	55	NM_013699	22221	Mm.28052	NM_013699	ENSMUSG00000009741	Ubp1	Cp2b|LBP-1a|LBP-1b|NF2d9	upstream binding protein 1	protein-coding
1787	chr4	155366031	155368107	+	0	NA	promoter-TSS (NM_080445)	promoter-TSS (NM_080445)	46	NM_011341	20318	Mm.293517	NM_011341	ENSMUSG00000029076	Sdf4	Cab45	stromal cell derived factor 4	protein-coding
1394	chr2	121178339	121181266	+	0	NA	Intergenic	Intergenic	-3053	NM_178795	327655	Mm.386076	NM_178795	ENSMUSG00000033526	Ppip5k1	B430315C20Rik|Hisppd2a|mKIAA0377	diphosphoinositol pentakisphosphate kinase 1	protein-coding
612	chr13	54396765	54399639	+	0	NA	Intergenic	CpG	-74511	NM_009946	12890	Mm.268902	NM_009946	ENSMUSG00000025867	Cplx2	921-L|AI413745|AW492120	complexin 2	protein-coding
936	chr16	21693622	21696093	+	0	NA	promoter-TSS (NM_001001881)	promoter-TSS (NM_001001881)	-119	NM_001001881	72190	Mm.131606	NM_001001881	ENSMUSG00000043391	2510009E07Rik	AI194952	RIKEN cDNA 2510009E07 gene	protein-coding
1391	chr2	120229283	120231458	+	0	NA	promoter-TSS (NM_001110497)	promoter-TSS (NM_001110497)	-518	NM_001110496	211499	Mm.260712	NM_173734	ENSMUSG00000033808	Tmem87a	A930025J12Rik	transmembrane protein 87A	protein-coding
2251	chr8	41596261	41597950	+	0	NA	promoter-TSS (NM_033560)	promoter-TSS (NM_033560)	3	NM_001271543	18983	Mm.272551	NM_011135	ENSMUSG00000031601	Cnot7	AU022737|CAF-1|Caf1|Pop2	CCR4-NOT transcription complex, subunit 7	protein-coding
1277	chr19	45120807	45134138	+	0	NA	intron (NM_053197, intron 8 of 10)	B1_Mur1|SINE|Alu	5406	NM_001178013	94280	Mm.36169	NM_053197	ENSMUSG00000025212	Sfxn3	-	sideroflexin 3	protein-coding
1086	chr17	51317014	51319291	+	0	NA	intron (NM_001285991, intron 1 of 22)	CpG	525	NM_028162	72238	Mm.120650	NM_028162	ENSMUSG00000023923	Tbc1d5	1600014N05Rik	TBC1 domain family, member 5	protein-coding
701	chr14	7258690	7261721	+	0	NA	Intergenic	Intergenic	-140481	NM_001270812	100861615	Mm.488431	NM_001270812	ENSMUSG00000079396	LOC100861615	-	alpha takusan-like	protein-coding
214	chr10	43258964	43261164	+	0	NA	intron (NM_026411, intron 1 of 3)	intron (NM_026411, intron 1 of 3)	736	NM_026411	67851	Mm.209953	NM_026411	ENSMUSG00000019797	1700021F05Rik	-	RIKEN cDNA 1700021F05 gene	protein-coding
564	chr12	114132003	114137445	+	0	NA	Intergenic	RSINE1|SINE|B4	24028	NR_105906	102465567		NR_105906		Mir6941	mmu-mir-6941	microRNA mir-6941	ncRNA
1650	chr4	33116651	33119902	+	0	NA	promoter-TSS (NM_019586)	promoter-TSS (NM_019586)	22	NR_036602	100504166	Mm.426309	NR_036602	ENSMUSG00000085037	4933421O10Rik	-	RIKEN cDNA 4933421O10 gene	ncRNA
2074	chr7	5076644	5077891	+	0	NA	exon (NM_009028, exon 1 of 1)	exon (NM_009028, exon 1 of 1)	285	NM_009028	19428	Mm.322186	NM_009028	ENSMUSG00000083649	Rasl2-9	M2|Ran|Ran/M2|Rasl2-9-ps	RAS-like, family 2, locus 9	protein-coding
2539	chrX	160395454	160397287	+	0	NA	5' UTR (NM_009453, exon 1 of 11)	5' UTR (NM_009453, exon 1 of 11)	228	NM_009453	22184	Mm.426178	NM_009453	ENSMUSG00000031370	Zrsr2	35kDa|5031411E02Rik|A230052C13Rik|C77286|U2af1-rs2|URP	zinc finger (CCCH type), RNA binding motif and serine/arginine rich 2	protein-coding
731	chr14	37947668	37949215	+	0	NA	promoter-TSS (NM_001199122)	promoter-TSS (NM_001199122)	67	NM_078478	66092	Mm.182912	NM_078478	ENSMUSG00000041028	Ghitm	1010001P14Rik|C77840|MICS1|PTD010|Tmbim5	growth hormone inducible transmembrane protein	protein-coding
1967	chr6	38824197	38827091	+	0	NA	intron (NM_001294144, intron 1 of 14)	intron (NM_001294144, intron 1 of 14)	545	NM_010433	15258	Mm.23790	NM_010433	ENSMUSG00000061436	Hipk2	1110014O20Rik|B230339E18Rik|Stank	homeodomain interacting protein kinase 2	protein-coding
657	chr13	81796015	81797708	+	0	NA	promoter-TSS (NM_030257)	promoter-TSS (NM_030257)	56	NM_030257	80289	Mm.259969	NM_030257	ENSMUSG00000035840	Lysmd3	1110030H10Rik|BC003322	LysM, putative peptidoglycan-binding, domain containing 3	protein-coding
2139	chr7	81695535	81700839	+	0	NA	intron (NM_001038643, intron 1 of 10)	intron (NM_001038643, intron 1 of 10)	1479	NM_023908	108116	Mm.425467	NM_023908	ENSMUSG00000025790	Slco3a1	5830414C08Rik|Anr1|MJAM|OATP-D|R75096|Slc21a11	solute carrier organic anion transporter family, member 3a1	protein-coding
1865	chr5	90652419	90653933	+	0	NA	promoter-TSS (NM_001163456)	promoter-TSS (NM_001163456)	-155	NM_001163456	231430	Mm.319697	NM_001033310	ENSMUSG00000035505	Cox18	BC038311	cytochrome c oxidase assembly protein 18	protein-coding
[truncated: 832 more rows]
