# Supplementary material for: Remodeling of epigenome and transcriptome landscapes with aging in mice reveals widespread induction of inflammatory responses
Source: HighWire-hosted journal article supplement (doi:10.1101/gr.240093.118), 2019-03-11
Supplement: Supplemental_Code_Figure1_General.zip [file HOMER_Liver_Diffbind_H3K27ac_in_SE.xls]

PeakID (cmd=annotatePeaks.pl Liver_Diffbind_H3K27ac_in_SE-Lite_coord.bed mm9)	Chr	Start	End	Strand	Peak Score	Focus Ratio/Region Size	Annotation	Detailed Annotation	Distance to TSS	Nearest PromoterID	Entrez ID	Nearest Unigene	Nearest Refseq	Nearest Ensembl	Gene Name	Gene Alias	Gene Description	Gene Type
127	chr1	138124345	138126224	+	0	NA	intron (NM_028872, intron 1 of 9)	intron (NM_028872, intron 1 of 9)	5573	NM_028872	67313	Mm.36763	NM_028872	ENSMUSG00000041605	5730559C18Rik	1700034M08Rik|4933426C09Rik|AI586180|D1Mgi54	RIKEN cDNA 5730559C18 gene	protein-coding
1801	chr3	138868274	138869171	+	0	NA	promoter-TSS (NM_198659)	promoter-TSS (NM_198659)	-135	NM_198659	381476	Mm.188334	NM_198659	ENSMUSG00000047940	Stpg2	B930007M17Rik|Gm1017	sperm tail PG rich repeat containing 2	protein-coding
71	chr1	78533500	78535772	+	0	NA	exon (NM_026713, exon 7 of 7)	exon (NM_026713, exon 7 of 7)	27001	NM_026713	68393	Mm.41325	NM_026713	ENSMUSG00000012187	Mogat1	0610030A14Rik|1110064N14Rik|Dgat2l|Dgat2l1|MGAT1|mDC2	monoacylglycerol O-acyltransferase 1	protein-coding
1648	chr2	179775017	179778096	+	0	NA	promoter-TSS (NM_178750)	promoter-TSS (NM_178750)	613	NM_001289476	26444	Mm.21728	NM_011969	ENSMUSG00000027566	Psma7	C6-I	proteasome (prosome, macropain) subunit, alpha type 7	protein-coding
1481	chr2	23427000	23427671	+	0	NA	intron (NM_001165997, intron 1 of 11)	CpG	289	NM_029773	76857	Mm.276415	NM_029773	ENSMUSG00000026771	Spopl	4921517N04Rik|AU014935|BB233739|E430033K04Rik	speckle-type POZ protein-like	protein-coding
2266	chr6	90487847	90555278	+	0	NA	intron (NM_027406, intron 11 of 22)	intron (NM_027406, intron 11 of 22)	20720	NM_027406	107747	Mm.30035	NM_027406	ENSMUSG00000030088	Aldh1l1	1810048F20Rik|FDH|Fthfd|Neut2	aldehyde dehydrogenase 1 family, member L1	protein-coding
1178	chr17	17315662	17317083	+	0	NA	Intergenic	Intergenic	58025	NM_011765	22759	Mm.436633	NM_011765	ENSMUSG00000095990	Zfp97	NGD16-4	zinc finger protein 97	protein-coding
1387	chr19	4961899	4962718	+	0	NA	promoter-TSS (NM_025553)	promoter-TSS (NM_025553)	2	NM_025553	66419	Mm.28494	NM_025553	ENSMUSG00000024902	Mrpl11	2410001P07Rik|L11mt	mitochondrial ribosomal protein L11	protein-coding
512	chr11	102558750	102559409	+	0	NA	promoter-TSS (NM_025918)	promoter-TSS (NM_025918)	-40	NM_025918	52715	Mm.277638	NM_025918	ENSMUSG00000020925	Ccdc43	2610001E01Rik|D11Ertd707e	coiled-coil domain containing 43	protein-coding
1932	chr4	116666137	116669064	+	0	NA	promoter-TSS (NM_175244)	promoter-TSS (NM_175244)	-353	NM_175244	76608	Mm.251420	NM_175244	ENSMUSG00000046861	Hectd3	1700064K09Rik|AI467540|AW743312	HECT domain containing 3	protein-coding
463	chr11	77576183	77626440	+	0	NA	intron (NM_011586, intron 1 of 39)	intron (NM_011586, intron 1 of 39)	10574	NM_001291212	360013	Mm.341248	NM_011586	ENSMUSG00000000631	Myo18a	MAJN|MyoPDZ|MysPDZ	myosin XVIIIA	protein-coding
517	chr11	106779301	106790037	+	0	NA	Intergenic	Intergenic	-2640	NM_025481	66313	Mm.340955	NM_025481	ENSMUSG00000018363	Smurf2	2810411E22Rik|AI558114|AI649275	SMAD specific E3 ubiquitin protein ligase 2	protein-coding
458	chr11	76787559	76789185	+	0	NA	intron (NM_178645, intron 11 of 11)	intron (NM_178645, intron 11 of 11)	-23727	NM_010484	15567	Mm.300318	NM_010484	ENSMUSG00000020838	Slc6a4	5-HTT|AI323329|Htt|Sert	solute carrier family 6 (neurotransmitter transporter, serotonin), member 4	protein-coding
2634	chr8	112492730	112529188	+	0	NA	Intergenic	PB1D7|SINE|Alu	-3377	NM_146214	234724	Mm.28110	NM_146214	ENSMUSG00000001670	Tat	-	tyrosine aminotransferase	protein-coding
1785	chr3	129173760	129175984	+	0	NA	Intergenic	Intergenic	38281	NR_033594	435755	Mm.430561	NR_033594		Gm5712	EG435755	POU domain, class 5, transcription factor 1 pseudogene	pseudo
1250	chr17	56213566	56219910	+	0	NA	Intergenic	B1F|SINE|Alu	-2326	NM_024432	66530	Mm.28000	NM_024432		Ubxn6	1200008L11Rik|2210415J11Rik|AU040909|Ubxd1|Ubxdc2	UBX domain protein 6	protein-coding
1363	chr18	65556959	65558079	+	0	NA	Intergenic	MTEa|LTR|MaLR	-3977	NM_001037294	225638	Mm.296528	NM_001037294	ENSMUSG00000032845	Alpk2	Gm549|Hak	alpha-kinase 2	protein-coding
722	chr13	52245392	52252169	+	0	NA	Intergenic	Intergenic	56670	NR_045061	74050	Mm.84860	NR_045061		4921525O09Rik	-	RIKEN cDNA 4921525O09 gene	ncRNA
2507	chr7	147221837	147222741	+	0	NA	promoter-TSS (NM_027201)	promoter-TSS (NM_027201)	-1	NM_027201	69752	Mm.200818	NM_027201	ENSMUSG00000025470	Zfp511	2410004P19Rik|C86579|Znf511	zinc finger protein 511	protein-coding
1109	chr16	35867707	35872677	+	0	NA	intron (NM_001039530, intron 1 of 16)	URR1B|DNA|MER1_type	1276	NM_001039530	547253	Mm.244406	NM_001039530	ENSMUSG00000034422	Parp14	1600029O10Rik|ARTD8|BC021340|CoaSt6|mKIAA1268	poly (ADP-ribose) polymerase family, member 14	protein-coding
2067	chr5	77403022	77404828	+	0	NA	intron (NM_025691, intron 1 of 18)	CpG	199	NM_025691	66661	Mm.296976	NM_025691	ENSMUSG00000036323	Srp72	5730576P14Rik|72kDa|AI132477|BC019196|C77589	signal recognition particle 72	protein-coding
1630	chr2	166731001	166732631	+	0	NA	intron (NM_023565, intron 1 of 24)	CpG	220	NM_023565	110750	Mm.22417	NM_023565	ENSMUSG00000002718	Cse1l	2610100P18Rik|AA407533|Capts|Cas|Xpo2	chromosome segregation 1-like (S. cerevisiae)	protein-coding
1597	chr2	148497627	148520202	+	0	NA	intron (NM_028986, intron 1 of 5)	B3A|SINE|B2	2058	NM_028986	74533	Mm.136913	NM_028986	ENSMUSG00000027439	Gzf1	8430437G08Rik|Zfp336|mGZF1	GDNF-inducible zinc finger protein 1	protein-coding
728	chr13	55491755	55494846	+	0	NA	Intergenic	Intergenic	-7709	NM_011392	20505	Mm.276355	NM_011392	ENSMUSG00000021490	Slc34a1	NaPi-IIa|Npt2|Npt2a|Slc17a2	solute carrier family 34 (sodium phosphate), member 1	protein-coding
1244	chr17	49506360	49510119	+	0	NA	Intergenic	MER21B|LTR|ERV1	-55954	NR_033486	100415784	Mm.400421	NR_033486		Gm17830	-	predicted gene, 17830	ncRNA
2154	chr5	143572884	143586159	+	0	NA	promoter-TSS (NM_178242)	promoter-TSS (NM_178242)	-455	NM_001122730	231861	Mm.354649	NM_178242	ENSMUSG00000039477	Tnrc18	BC025631|EG381742|Zfp469	trinucleotide repeat containing 18	protein-coding
1638	chr2	172195908	172196947	+	0	NA	promoter-TSS (NM_024199)	promoter-TSS (NM_024199)	-76	NM_024199	67337	Mm.26944	NM_024199	ENSMUSG00000027498	Cstf1	1700057K18Rik|AI788832	cleavage stimulation factor, 3' pre-RNA, subunit 1	protein-coding
742	chr13	64279226	64287740	+	0	NA	exon (NM_019986, exon 6 of 8)	exon (NM_019986, exon 6 of 8)	20309	NM_019986	56541	Mm.40989	NM_019986	ENSMUSG00000021476	Habp4	4933413D03Rik|4933428J01Rik	hyaluronic acid binding protein 4	protein-coding
29	chr1	38053321	38056204	+	0	NA	promoter-TSS (NM_198303)	promoter-TSS (NM_198303)	-93	NM_198303	226982	Mm.260943	NM_198303	ENSMUSG00000026083	Eif5b	A030003E17Rik|BC018347|IF2	eukaryotic translation initiation factor 5B	protein-coding
350	chr10	127846263	127849543	+	0	NA	promoter-TSS (NR_104289)	promoter-TSS (NR_104289)	-769	NR_104288	67588	Mm.294120	NM_026259	ENSMUSG00000025373	Rnf41	2210404G21Rik|4930511A05Rik|4933415P08Rik|D10Ertd722e|FLRF|Nrdp1	ring finger protein 41	protein-coding
1969	chr4	135672358	135705542	+	0	NA	Intergenic	Intergenic	-10787	NM_008321	15903	Mm.110	NM_008321		Id3	Hlh462|Idb3|bHLHb25	inhibitor of DNA binding 3	protein-coding
1810	chr3	146161560	146165383	+	0	NA	promoter-TSS (NM_027617)	promoter-TSS (NM_027617)	671	NM_010318	14707	Mm.140804	NM_010318	ENSMUSG00000068523	Gng5	G(y)5	guanine nucleotide binding protein (G protein), gamma 5	protein-coding
2203	chr6	33199050	33199422	+	0	NA	promoter-TSS (NM_009148)	promoter-TSS (NM_009148)	86	NM_009148	20336	Mm.265512	NM_009148		Exoc4	C78892|Sec8|Sec8l1	exocyst complex component 4	protein-coding
58	chr1	66861162	66864808	+	0	NA	intron (NM_001122738, intron 1 of 14)	intron (NM_001122738, intron 1 of 14)	1184	NM_177645	68691	Mm.240912	NM_177645	ENSMUSG00000026004	Kansl1l	1110028C15Rik|1190030G24|AI427598|C430010P07Rik|mKIAA4189	KAT8 regulatory NSL complex subunit 1-like	protein-coding
153	chr1	162906694	162938307	+	0	NA	intron (NM_080844, intron 3 of 7)	B4|SINE|B4	13763	NM_080844	11905	Mm.260770	NM_080844	ENSMUSG00000026715	Serpinc1	AI114908|ATIII|At-3|At3	serine (or cysteine) peptidase inhibitor, clade C (antithrombin), member 1	protein-coding
2754	chr9	74518526	74522309	+	0	NA	Intergenic	Intergenic	-175827	NR_045284	100503019	Mm.482658	NR_045284	ENSMUSG00000066477	Gm16551	-	predicted gene 16551	ncRNA
2387	chr7	46704030	46705542	+	0	NA	promoter-TSS (NM_001243021)	promoter-TSS (NM_001243021)	-102	NM_001243021	233147	Mm.148946	NM_001243021	ENSMUSG00000030424	Zfp939	9430025M13Rik	zinc finger protein 939	protein-coding
1546	chr2	104856733	104857757	+	0	NA	promoter-TSS (NM_145380)	promoter-TSS (NM_145380)	-61	NM_145380	98221	Mm.379278	NM_145380	ENSMUSG00000027170	Eif3m	Ga17|Pcid1|Tango7	eukaryotic translation initiation factor 3, subunit M	protein-coding
101	chr1	120284564	120286814	+	0	NA	promoter-TSS (NM_029709)	promoter-TSS (NM_029709)	54	NM_001293301	76707	Mm.138740	NM_029709	ENSMUSG00000064302	Clasp1	1700030C23Rik|5730583A19Rik|B130045P17Rik|CLASP1alpha	CLIP associating protein 1	protein-coding
340	chr10	122633095	122634811	+	0	NA	promoter-TSS (NM_027604)	promoter-TSS (NM_027604)	26	NM_027604	14479	Mm.244209	NM_027604	ENSMUSG00000020124	Usp15	4921514G19Rik|AI327321|E430033I05Rik|Gcap18	ubiquitin specific peptidase 15	protein-coding
311	chr10	90632304	90650900	+	0	NA	Intergenic	Intergenic	-7238	NM_001080130	21917	Mm.159684	NM_011605	ENSMUSG00000019961	Tmpo	5630400D24Rik|AI195756|AI606875|AW214352|AW547477|LAP2|TP	thymopoietin	protein-coding
825	chr14	14897234	14904710	+	0	NA	intron (NM_139227, intron 4 of 11)	intron (NM_139227, intron 4 of 11)	52446	NM_025550	66413	Mm.27591	NM_025550	ENSMUSG00000021737	Psmd6	2400006A19Rik	proteasome (prosome, macropain) 26S subunit, non-ATPase, 6	protein-coding
917	chr14	87815077	87817829	+	0	NA	promoter-TSS (NM_001253755)	promoter-TSS (NM_001253755)	63	NM_001253755	219249	Mm.35168	NM_172605	ENSMUSG00000022019	Tdrd3	4732418C03Rik|6720468N18	tudor domain containing 3	protein-coding
2425	chr7	73833725	73835387	+	0	NA	promoter-TSS (NM_001191001)	promoter-TSS (NM_001191001)	-109	NR_003961	117589	Mm.34785	NM_080443	ENSMUSG00000030509	Asb7	AI449039|Asb-7|D030055C23Rik	ankyrin repeat and SOCS box-containing 7	protein-coding
495	chr11	95244883	95247053	+	0	NA	promoter-TSS (NM_016752)	promoter-TSS (NM_016752)	-268	NM_016752	110172	Mm.4593	NM_016752		Slc35b1	Ugalt2	solute carrier family 35, member B1	protein-coding
1703	chr3	69525449	69528634	+	0	NA	intron (NM_133787, intron 2 of 15)	intron (NM_133787, intron 2 of 15)	1064	NM_133787	97112	Mm.21062	NM_133787	ENSMUSG00000027787	Nmd3	C87860	NMD3 homolog (S. cerevisiae)	protein-coding
2086	chr5	93633655	93636361	+	0	NA	promoter-TSS (NM_029363)	promoter-TSS (NM_029363)	513	NM_017367	12453	Mm.250419	NM_017367	ENSMUSG00000063015	Ccni	-	cyclin I	protein-coding
1322	chr18	32226782	32230734	+	0	NA	intron (NM_173441, intron 1 of 13)	intron (NM_173441, intron 1 of 13)	1370	NM_173441	73473	Mm.66853	NM_173441	ENSMUSG00000024384	Iws1	1700069O15Rik|3000008H23|AL117927|AW214353	IWS1 homolog (S. cerevisiae)	protein-coding
1816	chr3	154755042	154756903	+	0	NA	promoter-TSS (NM_028938)	promoter-TSS (NM_028938)	370	NM_029330	75540	Mm.35218	NM_029330	ENSMUSG00000053870	Fpgt	1700016E03Rik	fucose-1-phosphate guanylyltransferase	protein-coding
2460	chr7	113379050	113381498	+	0	NA	Intergenic	RMER5|LTR|ERV1	-21420	NM_029000	74558	Mm.458429	NM_029000	ENSMUSG00000045868	Gvin1	9130002C22Rik|9830104F22Rik|Iigs1|VLIG|VLIG-1	GTPase, very large interferon inducible 1	protein-coding
2510	chr7	148353904	148359664	+	0	NA	intron (NM_001172100, intron 1 of 9)	intron (NM_001172100, intron 1 of 9)	-1949	NM_145135	107702	Mm.279485	NM_145135	ENSMUSG00000038650	Rnh1	AW546468|C80305|RNH	ribonuclease/angiogenin inhibitor 1	protein-coding
1172	chr17	15663682	15664814	+	0	NA	promoter-TSS (NM_008799)	promoter-TSS (NM_008799)	17	NM_008799	18567	Mm.323	NM_008799	ENSMUSG00000014771	Pdcd2	AI528543|Pcd2|RP-8	programmed cell death 2	protein-coding
2699	chr9	36574291	36576901	+	0	NA	promoter-TSS (NM_008408)	promoter-TSS (NM_008408)	-433	NM_008408	16430	Mm.2863	NM_008408	ENSMUSG00000032116	Stt3a	AA408947|BB081708|Itm1	STT3, subunit of the oligosaccharyltransferase complex, homolog A (S. cerevisiae)	protein-coding
2458	chr7	109713416	109714292	+	0	NA	intron (NM_009277, intron 1 of 7)	intron (NM_009277, intron 1 of 7)	142	NM_001082552	20821	Mm.321227	NM_009277	ENSMUSG00000030966	Trim21	Ro52|Ssa1	tripartite motif-containing 21	protein-coding
1259	chr17	64212457	64215084	+	0	NA	intron (NM_001037997, intron 1 of 18)	CpG	440	NM_001037997	14158	Mm.23039	NM_008000	ENSMUSG00000000127	Fert2	AV082135|C330004K01Rik|Fer|Fert	fer (fms/fps related) protein kinase, testis specific 2	protein-coding
834	chr14	20642381	20643927	+	0	NA	promoter-TSS (NM_026528)	promoter-TSS (NM_026528)	-109	NM_026528	68045	Mm.21932	NM_026528	ENSMUSG00000021807	2700060E02Rik	-	RIKEN cDNA 2700060E02 gene	protein-coding
285	chr10	80729119	80732627	+	0	NA	promoter-TSS (NM_018758)	promoter-TSS (NM_018758)	-44	NM_018758	57267	Mm.293931	NM_018758	ENSMUSG00000004931	Apba3	AW208791|Mint-3|X11gamma|lin-10|mint3	amyloid beta (A4) precursor protein-binding, family A, member 3	protein-coding
2441	chr7	91743167	91756875	+	0	NA	intron (NM_010176, intron 2 of 13)	intron (NM_010176, intron 2 of 13)	4431	NM_010176	14085	Mm.3798	NM_010176	ENSMUSG00000030630	Fah	-	fumarylacetoacetate hydrolase	protein-coding
2414	chr7	67300358	67300713	+	0	NA	Intergenic	Intergenic	-15430	NM_001082962	20646	Mm.274995	NM_013670	ENSMUSG00000000948	Snrpn	2410045I01Rik|HCERN3|Peg4|Pwcr1|SMN	small nuclear ribonucleoprotein N	protein-coding
1216	chr17	33102014	33103518	+	0	NA	promoter-TSS (NM_153063)	promoter-TSS (NM_153063)	-10	NM_153063	224691	Mm.328953	NM_153063	ENSMUSG00000053600	Zfp472	KRIM-1|Krim-1A|Krim-1B|Krim1	zinc finger protein 472	protein-coding
2285	chr6	116859881	116861696	+	0	NA	Intergenic	Intergenic	-194012	NM_178768	319776	Mm.133120	NM_178768	ENSMUSG00000048108	Tmem72	C230095G01Rik	transmembrane protein 72	protein-coding
2274	chr6	100236393	100238205	+	0	NA	promoter-TSS (NM_019743)	promoter-TSS (NM_019743)	53	NM_019743	56353	Mm.321633	NM_019743	ENSMUSG00000072872	Rybp	2410018J24Rik|DEDAF|YEAF1	RING1 and YY1 binding protein	protein-coding
2194	chr6	29297353	29298789	+	0	NA	promoter-TSS (NM_184053)	promoter-TSS (NM_184053)	-35	NM_007594	12321	Mm.392075	NM_007594	ENSMUSG00000029767	Calu	9530075H20Rik	calumenin	protein-coding
1135	chr16	85020599	85022094	+	0	NA	intron (NM_001198823, intron 11 of 17)	intron (NM_001198823, intron 11 of 17)	48890	NR_045889	100038614	Mm.441351	NR_045889		Gm10791	ENSMUSG00000074933	predicted gene 10791	ncRNA
2002	chr4	155316814	155319221	+	0	NA	promoter-TSS (NM_021402)	promoter-TSS (NM_021402)	95	NM_021402	140499	Mm.371673	NM_021402	ENSMUSG00000023286	Ube2j2	1200007B18Rik|2400008G19Rik|5730472G04Rik|AL022923|NCUBE-2|Ubc6|Ubc6p	ubiquitin-conjugating enzyme E2J 2	protein-coding
2864	chrX	148450109	148452667	+	0	NA	promoter-TSS (NM_025660)	promoter-TSS (NM_025660)	417	NM_019710	24061	Mm.482095	NM_019710	ENSMUSG00000041133	Smc1a	5830426I24Rik|SMC-1A|Sb1.8|Smc1|Smc1alpha|Smc1l1|Smcb|mKIAA0178	structural maintenance of chromosomes 1A	protein-coding
1203	chr17	29230676	29232615	+	0	NA	intron (NM_007669, intron 1 of 2)	CpG	928	NM_007669	12575	Mm.195663	NM_007669	ENSMUSG00000023067	Cdkn1a	CAP20|CDKI|CIP1|Cdkn1|P21|SDI1|Waf1|mda6|p21Cip1|p21WAF	cyclin-dependent kinase inhibitor 1A (P21)	protein-coding
96	chr1	97209707	97211245	+	0	NA	exon (NM_026321, exon 1 of 3)	exon (NM_026321, exon 1 of 3)	271	NM_026321	67698	Mm.272705	NM_026321	ENSMUSG00000051185	Fam174a	2310044D20Rik|Fam174|Naa6|Tmem157	family with sequence similarity 174, member A	protein-coding
2088	chr5	97165598	97169466	+	0	NA	intron (NM_175473, intron 54 of 73)	intron (NM_175473, intron 54 of 73)	-54872	NM_013470	11745	Mm.7214	NM_013470	ENSMUSG00000029484	Anxa3	Anx3	annexin A3	protein-coding
1068	chr16	17110807	17111464	+	0	NA	intron (NM_144954, intron 1 of 20)	CpG	210	NM_001252445	66053	Mm.253614	NM_144954	ENSMUSG00000022771	Ppil2	0610009L05Rik|1700016N17Rik|4921520K19Rik|4930511F14Rik|AA589416|C130078A06Rik	peptidylprolyl isomerase (cyclophilin)-like 2	protein-coding
1667	chr3	19794543	19795477	+	0	NA	non-coding (NR_027985, exon 1 of 1)	non-coding (NR_027985, exon 1 of 1)	139	NR_027985	70808	Mm.427103	NR_027985		4632415L05Rik	AI662792	RRS1 ribosome biogenesis regulator homolog pseudogene	pseudo
2114	chr5	114184495	114186774	+	0	NA	promoter-TSS (NM_001010825)	promoter-TSS (NM_001010825)	-157	NM_001010825	231630	Mm.21926	NM_001010825	ENSMUSG00000053334	Ficd	D5Ertd40e|Hype	FIC domain containing	protein-coding
486	chr11	87880747	87883011	+	0	NA	promoter-TSS (NM_016686)	promoter-TSS (NM_016686)	98	NM_016686	22344	Mm.46628	NM_016686	ENSMUSG00000018377	Vezf1	AI848691|AW046909|db1	vascular endothelial zinc finger 1	protein-coding
2134	chr5	124777248	124778775	+	0	NA	promoter-TSS (NM_001277867)	promoter-TSS (NM_001277867)	-30	NM_001277867	269702	Mm.60224	NM_001081323	ENSMUSG00000038126	Mphosph9	4930548D04Rik|9630025B04Rik|AW413446|AW547060|B930097C17Rik|C87456|MPP-9|MPP9	M-phase phosphoprotein 9	protein-coding
1354	chr18	58818708	58820105	+	0	NA	exon (NM_025478, exon 1 of 5)	exon (NM_025478, exon 1 of 5)	270	NM_025478	66307	Mm.182574	NM_025478	ENSMUSG00000024601	Isoc1	2610034N03Rik	isochorismatase domain containing 1	protein-coding
569	chr12	37107373	37109161	+	0	NA	promoter-TSS (NM_001289503)	promoter-TSS (NM_001289503)	230	NM_178629	75847	Mm.261764	NM_178629	ENSMUSG00000043153	Ispd	4930579E17Rik|AV040780	isoprenoid synthase domain containing	protein-coding
8	chr1	10221844	10223796	+	0	NA	promoter-TSS (NM_001102430)	promoter-TSS (NM_001102430)	-69	NM_001102430	211673	Mm.229141	NM_001102430	ENSMUSG00000067851	Arfgef1	ARFGEP1|BIG1|D130059B05Rik|D730028O18Rik|P200	ADP-ribosylation factor guanine nucleotide-exchange factor 1(brefeldin A-inhibited)	protein-coding
2359	chr7	20449362	20457621	+	0	NA	Intergenic	L2a|LINE|L2	-6843	NM_001033419	330483	Mm.260192	NM_001033419	ENSMUSG00000014686	Ceacam16	Gm769	carcinoembryonic antigen-related cell adhesion molecule 16	protein-coding
2045	chr5	43606721	43628785	+	0	NA	intron (NR_028417, intron 1 of 7)	intron (NR_028417, intron 1 of 7)	-6949	NM_175937	231207	Mm.7233	NM_175937	ENSMUSG00000039782	Cpeb2	A630055H10Rik|Cpe-bp2	cytoplasmic polyadenylation element binding protein 2	protein-coding
1396	chr19	6979017	7029342	+	0	NA	intron (NM_008431, intron 2 of 6)	L1Md_F2|LINE|L1	-4309	NM_001039494	67077	Mm.251306	NM_001039494	ENSMUSG00000050623	Tex40	1700019N12Rik|A430107B04Rik|MLZ-622	testis expressed 40	protein-coding
686	chr13	30075445	30079044	+	0	NA	promoter-TSS (NM_001289920)	promoter-TSS (NM_001289920)	688	NM_010093	13557	Mm.268356	NM_010093	ENSMUSG00000016477	E2f3	E2F3b|E2f3a	E2F transcription factor 3	protein-coding
1760	chr3	106524103	106525828	+	0	NA	exon (NM_001039488, exon 1 of 4)	exon (NM_001039488, exon 1 of 4)	365	NM_001286685	321000	Mm.259638	NM_028081	ENSMUSG00000056260	Lrif1	2010012G17Rik|4933421E11Rik|AI450568	ligand dependent nuclear receptor interacting factor 1	protein-coding
2033	chr5	32583963	32586632	+	0	NA	intron (NM_030072, intron 11 of 38)	intron (NM_030072, intron 11 of 38)	43840	NM_001081407	665270	Mm.160067	NM_030072	ENSMUSG00000029134	Plb1	4632413E21Rik|4930433E17Rik|4930539A06Rik|BC033606	phospholipase B1	protein-coding
391	chr11	29446741	29448787	+	0	NA	promoter-TSS (NM_001163521)	promoter-TSS (NM_001163521)	-186	NM_028504	73324	Mm.69388	NM_028504	ENSMUSG00000020461	1700034F02Rik	Clhc1	RIKEN cDNA 1700034F02 gene	protein-coding
943	chr15	10399348	10400812	+	0	NA	exon (NM_030046, exon 1 of 12)	exon (NM_030046, exon 1 of 12)	191	NM_030046	78244	Mm.297862	NM_030046	ENSMUSG00000044224	Dnajc21	4930461P20Rik|9930116P15Rik	DnaJ (Hsp40) homolog, subfamily C, member 21	protein-coding
2676	chr9	18277647	18278552	+	0	NA	promoter-TSS (NM_028935)	promoter-TSS (NM_028935)	-96	NM_028935	72230	Mm.289689	NM_028935	ENSMUSG00000074500	Zfp558	1700007A21Rik|4932704I17Rik|Zfp558-ps	zinc finger protein 558	protein-coding
1887	chr4	61741930	61764514	+	0	NA	Intergenic	L1Md_A|LINE|L1	-4876	NM_001039544	17842	Mm.250267	NM_010845	ENSMUSG00000066154	Mup3	MUP15|MUPIII|Mup-3|Mup25	major urinary protein 3	protein-coding
1375	chr18	80665050	80667422	+	0	NA	exon (NM_026295, exon 1 of 13)	exon (NM_026295, exon 1 of 13)	170	NM_026295	67655	Mm.312893	NM_026295	ENSMUSG00000033323	Ctdp1	4930563P03Rik|AW553592	CTD (carboxy-terminal domain, RNA polymerase II, polypeptide A) phosphatase, subunit 1	protein-coding
180	chr1	180297884	180300235	+	0	NA	Intergenic	Intergenic	-31144	NM_016805	51810	Mm.86589	NM_016805	ENSMUSG00000039630	Hnrnpu	AA408410|AI256620|AL024194|AL024437|AW557595|C86794|Hnrpu|SAFA|Sp120|hnRNP U	heterogeneous nuclear ribonucleoprotein U	protein-coding
1585	chr2	132672116	132675391	+	0	NA	intron (NM_025646, intron 1 of 6)	B1_Mur3|SINE|Alu	283	NM_025646	66586	Mm.357342	NM_025646	ENSMUSG00000027357	Crls1	0610009I22Rik|4930557M15Rik|5730490M08Rik	cardiolipin synthase 1	protein-coding
1877	chr4	53726668	53727592	+	0	NA	promoter-TSS (NM_139309)	promoter-TSS (NM_139309)	76	NM_139309	246179	Mm.247210	NM_139309	ENSMUSG00000028414	Fktn	D830030O17Rik|Fcmd	fukutin	protein-coding
246	chr10	43621047	43622017	+	0	NA	promoter-TSS (NM_130892)	promoter-TSS (NM_130892)	10	NM_001081054	76563	Mm.5904	NM_001081054	ENSMUSG00000019863	Qrsl1	2700038P16Rik|C80053|GatA	glutaminyl-tRNA synthase (glutamine-hydrolyzing)-like 1	protein-coding
2705	chr9	43550056	43591918	+	0	NA	intron (NM_021424, intron 1 of 5)	intron (NM_021424, intron 1 of 5)	18328	NM_021424	58235	Mm.335096	NM_021424	ENSMUSG00000032012	Pvrl1	AI835281|AW549174|Cd111|HIgR|HveC|PRR|PRR1|nectin-1	poliovirus receptor-related 1	protein-coding
2227	chr6	51217802	51223078	+	0	NA	promoter-TSS (NR_029719)	promoter-TSS (NR_029719)	-531	NR_029719	387166		NR_029719	miRBase:MI0000550	Mir148a	Mirn148|Mirn148a	microRNA 148a	ncRNA
690	chr13	34093698	34099821	+	0	NA	intron (NM_009068, intron 1 of 10)	intron (NM_009068, intron 1 of 10)	2016	NM_009068	19766	Mm.374799	NM_009068	ENSMUSG00000021408	Ripk1	D330015H01Rik|RIP|Rinp|Rip1	receptor (TNFRSF)-interacting serine-threonine kinase 1	protein-coding
1168	chr17	15097640	15099562	+	0	NA	promoter-TSS (NM_024250)	promoter-TSS (NM_024250)	-364	NM_024250	72057	Mm.440085	NM_024250	ENSMUSG00000023883	Phf10	1810055P05Rik|AV024533	PHD finger protein 10	protein-coding
61	chr1	72217428	72230669	+	0	NA	intron (NM_001005423, intron 2 of 4)	LTR40b|LTR|ERVL	34833	NM_001005423	381269	Mm.422636	NM_001005423	ENSMUSG00000039395	Mreg	Gm974|Wdt2|dsu	melanoregulin	protein-coding
536	chr11	119352321	119353253	+	0	NA	promoter-TSS (NM_177394)	promoter-TSS (NM_177394)	126	NM_001164636	338371	Mm.271946	NM_177394	ENSMUSG00000039850	Endov	A730011L01Rik	endonuclease V	protein-coding
1767	chr3	115590099	115591602	+	0	NA	promoter-TSS (NM_027193)	promoter-TSS (NM_027193)	127	NR_027894	68161	Mm.392043	NR_015487		A930005H10Rik	-	RIKEN cDNA A930005H10 gene	ncRNA
1653	chr2	181572032	181573302	+	0	NA	5' UTR (NM_001291211, exon 1 of 7)	5' UTR (NM_001291211, exon 1 of 7)	108	NM_001291211	245867	Mm.491085	NM_153594	ENSMUSG00000027589	Pcmtd2	5330414D10Rik|AI314201	protein-L-isoaspartate (D-aspartate) O-methyltransferase domain containing 2	protein-coding
2237	chr6	67215714	67218408	+	0	NA	promoter-TSS (NM_001113564)	promoter-TSS (NM_001113564)	88	NM_025814	66870	Mm.240490	NM_025814	ENSMUSG00000036371	Serbp1	1200009K13Rik|9330147J08Rik|AL022786|Pairbp1	serpine1 mRNA binding protein 1	protein-coding
1688	chr3	53667283	53668106	+	0	NA	promoter-TSS (NM_026435)	promoter-TSS (NM_026435)	35	NM_026435	67890	Mm.23067	NM_026435		Ufm1	1810045K17Rik|AI132708|AI463323|ENSMUSG00000074598|Gm10726	ubiquitin-fold modifier 1	protein-coding
2394	chr7	51615477	51616077	+	0	NA	intron (NM_027049, intron 5 of 5)	CpG	14623	NM_027049	69349	Mm.358922	NM_027049	ENSMUSG00000008028	1700008O03Rik	-	RIKEN cDNA 1700008O03 gene	protein-coding
1266	chr17	71334915	71354081	+	0	NA	intron (NM_026064, intron 3 of 3)	intron (NM_026064, intron 3 of 3)	-4642	NM_023402	67938	Mm.261329	NM_023402		Myl12b	1500001M02Rik|C77744|Mylc2b|RLC-B	myosin, light chain 12B, regulatory	protein-coding
2654	chr8	124219063	124220527	+	0	NA	Intergenic	Intergenic	-34664	NM_020605	57340	Mm.306870	NM_020605	ENSMUSG00000025318	Jph3	JP-3|Jp3	junctophilin 3	protein-coding
1458	chr19	60863499	60872027	+	0	NA	Intergenic	B3A|SINE|B2	-1167	NM_010123	13669	Mm.2238	NM_010123	ENSMUSG00000024991	Eif3a	A830012B05Rik|Csma|Eif3|Eif3s10|mKIAA0139	eukaryotic translation initiation factor 3, subunit A	protein-coding
444	chr11	70352760	70354290	+	0	NA	promoter-TSS (NM_008876)	promoter-TSS (NM_008876)	-141	NM_008876	18806	Mm.260177	NM_008876	ENSMUSG00000020828	Pld2	-	phospholipase D2	protein-coding
508	chr11	99246706	99248263	+	0	NA	exon (NM_010660, exon 7 of 8)	exon (NM_010660, exon 7 of 8)	3194	NM_010660	16661	Mm.22662	NM_010660	ENSMUSG00000019761	Krt10	D130054E02Rik|K10|K1C1|Krt-1.10|Krt1-10	keratin 10	protein-coding
1336	chr18	36613696	36614454	+	0	NA	promoter-TSS (NM_026027)	promoter-TSS (NM_026027)	74	NM_026027	67199	Mm.30184	NM_026027	ENSMUSG00000024346	Pfdn1	2700086I23Rik|AA408327|AU044714	prefoldin 1	protein-coding
39	chr1	52806485	52807734	+	0	NA	Intergenic	Intergenic	-22947	NM_133829	98682	Mm.491173	NM_133829	ENSMUSG00000041439	Mfsd6	2210010L05Rik|9630025I22Rik|AI836200|AW212394|MMR2	major facilitator superfamily domain containing 6	protein-coding
1089	chr16	22263065	22266653	+	0	NA	intron (NM_009186, intron 1 of 8)	intron (NM_009186, intron 1 of 8)	1143	NM_009186	20462	Mm.210352	NM_009186		Tra2b	5730405G21Rik|D16Ertd266e|SIG-41|Sfrs10|Silg41|TRA2beta	transformer 2 beta homolog (Drosophila)	protein-coding
558	chr12	17550924	17552580	+	0	NA	promoter-TSS (NM_013614)	promoter-TSS (NM_013614)	73	NM_013614	18263	Mm.34102	NM_013614	ENSMUSG00000011179	Odc1	ODC	ornithine decarboxylase, structural 1	protein-coding
12	chr1	23169395	23171301	+	0	NA	Intergenic	Intergenic	-61256	NM_025746	66755	Mm.431297	NM_025746	ENSMUSG00000073730	4933415F23Rik	-	RIKEN cDNA 4933415F23 gene	protein-coding
1554	chr2	117075383	117076000	+	0	NA	intron (NM_026620, intron 1 of 7)	CpG	216	NM_026620	68215	Mm.219389	NM_026620	ENSMUSG00000027349	Fam98b	2610510H03Rik	family with sequence similarity 98, member B	protein-coding
2168	chr5	149550441	149560879	+	0	NA	TTS (NR_028285)	TTS (NR_028285)	2244	NR_028285	70138	Mm.417834	NR_028285	ENSMUSG00000086494	2210417A02Rik	AV081004	RIKEN cDNA 2210417A02 gene	ncRNA
573	chr12	52712200	52715094	+	0	NA	intron (NM_052973, intron 16 of 17)	RLTR20B3|LTR|ERVK	19319	NM_001198835	12810	Mm.21325	NM_007728	ENSMUSG00000020953	Coch	AW122937|Coch-5B2|D12H14S564E	coagulation factor C homolog (Limulus polyphemus)	protein-coding
2710	chr9	45792109	45793534	+	0	NA	5' UTR (NM_008775, exon 1 of 6)	5' UTR (NM_008775, exon 1 of 6)	133	NM_008775	18475	Mm.200859	NM_008775	ENSMUSG00000003131	Pafah1b2	AI747451|AU021353|Pafahb|mus[b]	platelet-activating factor acetylhydrolase, isoform 1b, subunit 2	protein-coding
1084	chr16	20515977	20518369	+	0	NA	promoter-TSS (NM_007889)	promoter-TSS (NM_007889)	36	NM_007889	13544	Mm.247259	NM_007889	ENSMUSG00000003233	Dvl3	-	dishevelled 3, dsh homolog (Drosophila)	protein-coding
638	chr12	104964652	104980206	+	0	NA	intron (NM_009244, intron 1 of 4)	MIRb|SINE|MIR	3970	NM_009244	20701	Mm.439692	NM_009244	ENSMUSG00000071178	Serpina1b	D12Ucla2|Dom2|PI2|Spi1-2	serine (or cysteine) preptidase inhibitor, clade A, member 1B	protein-coding
2350	chr7	17086786	17095677	+	0	NA	intron (NM_172739, intron 5 of 6)	ORR1A2-int|LTR|MaLR	-29102	NM_008718	18142	Mm.145821	NM_008718	ENSMUSG00000001988	Npas1	MOP5|bHLHe11	neuronal PAS domain protein 1	protein-coding
875	chr14	54980240	54981562	+	0	NA	intron (NM_026936, intron 1 of 9)	CpG	376	NM_026936	69089	Mm.182340	NM_026936	ENSMUSG00000000959	Oxa1l	1810020M02Rik|AI894287	oxidase assembly 1-like	protein-coding
2479	chr7	132587496	132589146	+	0	NA	intron (NM_029842, intron 1 of 7)	CpG	187	NM_029842	77035	Mm.307239	NM_029842	ENSMUSG00000030752	Kdm8	3110005O21Rik|Jmjd5	lysine (K)-specific demethylase 8	protein-coding
1522	chr2	71088968	71095627	+	0	NA	intron (NM_001198872, intron 16 of 18)	MamRep605|Unknown|Unknown	42294	NM_010064	13427	Mm.249479	NM_010064	ENSMUSG00000027012	Dync1i2	3110079H08Rik|AW554389|Dncic2	dynein cytoplasmic 1 intermediate chain 2	protein-coding
1	CHR	1	END	+	0	NA	NA	NA	NA	NA
506	chr11	98901175	98935251	+	0	NA	Intergenic	ORR1A3|LTR|MaLR	15639	NM_010517	16010	Mm.233799	NM_010517		Igfbp4	AI875747|Deb2|IGFBP-4	insulin-like growth factor binding protein 4	protein-coding
136	chr1	153274277	153277479	+	0	NA	promoter-TSS (NM_025819)	promoter-TSS (NM_025819)	100	NM_026876	98685	Mm.289373	NM_026876	ENSMUSG00000053286	Trmt1l	1190005F20Rik|AW226554|C1orf25|Trm1-like|Trm1l	tRNA methyltransferase 1 like	protein-coding
116	chr1	133692005	133694800	+	0	NA	promoter-TSS (NM_178079)	promoter-TSS (NM_178079)	-570	NM_178079	212933	Mm.23844	NM_178079	ENSMUSG00000042251	Pm20d1	4732466D17Rik|AI098026	peptidase M20 domain containing 1	protein-coding
1197	chr17	26205889	26207097	+	0	NA	promoter-TSS (NM_001162869)	promoter-TSS (NM_001162869)	-371	NM_001162869	215445	Mm.41191	NM_153140	ENSMUSG00000037098	Rab11fip3	Cart1|D030060O14Rik|Rab11-FIP3|mKIAA0665	RAB11 family interacting protein 3 (class II)	protein-coding
1580	chr2	130004148	130005638	+	0	NA	intron (NM_009225, intron 1 of 6)	CpG	207	NM_009225	20638	Mm.88216	NM_009225	ENSMUSG00000027404	Snrpb	AL024368|AU018828|SM-B|SM11|SMB|SNRNP-B	small nuclear ribonucleoprotein B	protein-coding
2419	chr7	72789679	72790363	+	0	NA	exon (NM_172310, exon 1 of 19)	exon (NM_172310, exon 1 of 19)	237	NM_172310	272396	Mm.35127	NM_172310	ENSMUSG00000030515	Tarsl2	A530046H20Rik	threonyl-tRNA synthetase-like 2	protein-coding
2146	chr5	138414546	138433623	+	0	NA	intron (NM_013478, intron 1 of 3)	intron (NM_013478, intron 1 of 3)	1335	NM_013478	12007	Mm.30061	NM_013478	ENSMUSG00000037053	Azgp1	Zag	alpha-2-glycoprotein 1, zinc	protein-coding
661	chr13	8694971	8700236	+	0	NA	intron (NM_001289530, intron 5 of 9)	intron (NM_001289530, intron 5 of 9)	172687	NM_001039389	207615	Mm.284654	NM_172445	ENSMUSG00000021147	Wdr37	-	WD repeat domain 37	protein-coding
2845	chrX	71208536	71213709	+	0	NA	intron (NM_008224, intron 1 of 25)	intron (NM_008224, intron 1 of 25)	574	NM_008224	15161	Mm.491126	NM_008224	ENSMUSG00000031386	Hcfc1	AW060991|HCF|HCF1	host cell factor C1	protein-coding
2482	chr7	134004965	134006271	+	0	NA	promoter-TSS (NM_153580)	promoter-TSS (NM_153580)	132	NM_172746	233876	Mm.363427	NM_172746	ENSMUSG00000042606	Hirip3	B130036O03|C86302	HIRA interacting protein 3	protein-coding
2719	chr9	50604350	50607185	+	0	NA	intron (NR_045601, intron 7 of 13)	intron (NR_045601, intron 7 of 13)	22437	NR_045601	102580	Mm.160035	NM_133981	ENSMUSG00000032059	Alg9	8230402H15Rik|AI747665|B430313H07Rik|Dibd1	asparagine-linked glycosylation 9 (alpha 1,2 mannosyltransferase)	protein-coding
1935	chr4	116924304	116927442	+	0	NA	intron (NM_001285814, intron 2 of 3)	intron (NM_001285814, intron 2 of 3)	928	NM_029589	68777	Mm.331805	NM_026837	ENSMUSG00000048772	Tmem53	1110038M16Rik|1500001P22Rik|1700012A05Rik	transmembrane protein 53	protein-coding
2690	chr9	26805233	26807656	+	0	NA	promoter-TSS (NM_144543)	promoter-TSS (NM_144543)	690	NM_025862	66948	Mm.289244	NM_025862	ENSMUSG00000031969	Acad8	2310016C19Rik|AI786953	acyl-Coenzyme A dehydrogenase family, member 8	protein-coding
581	chr12	56402972	56404649	+	0	NA	5' UTR (NM_025373, exon 1 of 7)	5' UTR (NM_025373, exon 1 of 7)	177	NM_021529	59032	Mm.427307	NM_021529	ENSMUSG00000021022	Ppp2r3c	4930511A21Rik|5730412A08Rik|G4-1|G5pr	protein phosphatase 2, regulatory subunit B'', gamma	protein-coding
2727	chr9	55353322	55360672	+	0	NA	intron (NM_145615, intron 1 of 11)	intron (NM_145615, intron 1 of 11)	3053	NM_145615	110842	Mm.290853	NM_145615	ENSMUSG00000032314	Etfa	2010200I21Rik|D9Ertd394e	electron transferring flavoprotein, alpha polypeptide	protein-coding
308	chr10	88246509	88248165	+	0	NA	intron (NM_175158, intron 27 of 61)	intron (NM_175158, intron 27 of 61)	42222	NM_175158	70683	Mm.29631	NM_175158	ENSMUSG00000004356	Utp20	3830408P06Rik|AA617408|Drim|mDRIM|mDRIN	UTP20, small subunit (SSU) processome component, homolog (yeast)	protein-coding
678	chr13	23712263	23715314	+	0	NA	promoter-TSS (NM_178194)	promoter-TSS (NM_178194)	639	NM_015787	50709	Mm.170587	NM_015787		Hist1h1e	H1-4|H1e|H1f4|H1s-4|H1var2	histone cluster 1, H1e	protein-coding
1517	chr2	61132671	61135999	+	0	NA	Intergenic	Intergenic	-282308	NM_011529	21353	Mm.244393	NM_011529	ENSMUSG00000064289	Tank	C86182|E430026L09Rik|I-TRAF	TRAF family member-associated Nf-kappa B activator	protein-coding
2808	chr9	114492948	114495205	+	0	NA	TTS (NM_153585)	TTS (NM_153585)	-20589	NM_001042503	636931	Mm.17857	NM_001042503		Trim71	2610206G21Rik|AL022943|Gm1127|Lin41|Ripply2|lin-41|mLin41|mlin-41	tripartite motif-containing 71	protein-coding
1975	chr4	138469279	138469973	+	0	NA	exon (NM_028453, exon 1 of 8)	exon (NM_028453, exon 1 of 8)	236	NM_028453	73162	Mm.238081	NM_028453	ENSMUSG00000041161	Otud3	3110030K17Rik	OTU domain containing 3	protein-coding
1973	chr4	137771632	137775520	+	0	NA	intron (NM_001122897, intron 1 of 12)	CpG	534	NM_001122897	15441	Mm.348429	NM_010470	ENSMUSG00000028759	Hp1bp3	Hp1bp74	heterochromatin protein 1, binding protein 3	protein-coding
1991	chr4	150057575	150182681	+	0	NA	Intergenic	Intergenic	-93845	NM_173774	242773	Mm.29280	NM_173774		Slc45a1	C230078B22|Dnb5	solute carrier family 45, member 1	protein-coding
927	chr14	121451509	121453557	+	0	NA	intron (NM_134082, intron 1 of 26)	intron (NM_134082, intron 1 of 26)	17737	NM_134082	223254	Mm.223980	NM_134082	ENSMUSG00000025555	Farp1	AW228844|BC030329|Cdep	FERM, RhoGEF (Arhgef) and pleckstrin domain protein 1 (chondrocyte-derived)	protein-coding
301	chr10	85334222	85335265	+	0	NA	exon (NM_133993, exon 1 of 15)	exon (NM_133993, exon 1 of 15)	167	NM_133993	103136	Mm.18834	NM_133993	ENSMUSG00000001785	Pwp1	2310058A11Rik|2610205J09Rik|AI098170|AL022879|AV083409|AW550690	PWP1 homolog (S. cerevisiae)	protein-coding
2302	chr6	125141334	125143509	+	0	NA	promoter-TSS (NM_146171)	promoter-TSS (NM_146171)	203	NM_025595	66493	Mm.138749	NM_025595		Mrpl51	2610511M02Rik|CDA09|HSPC241|Mrp64	mitochondrial ribosomal protein L51	protein-coding
51	chr1	59725427	59728305	+	0	NA	intron (NM_009460, intron 1 of 4)	intron (NM_009460, intron 1 of 4)	812	NM_009460	22218	Mm.362118	NM_009460	ENSMUSG00000026021	Sumo1	GMP1|PIC1|SENTRIN|SMT3|SMT3H3|SMTP3|SUMO-1|Smt3C|Ubl1	SMT3 suppressor of mif two 3 homolog 1 (yeast)	protein-coding
1758	chr3	105489885	105491333	+	0	NA	promoter-TSS (NM_017397)	promoter-TSS (NM_017397)	-120	NM_017397	53975	Mm.272826	NM_017397	ENSMUSG00000027905	Ddx20	GEMIN3|dp103	DEAD (Asp-Glu-Ala-Asp) box polypeptide 20	protein-coding
1822	chr4	8462476	8464944	+	0	NA	intron (NM_021518, intron 1 of 7)	intron (NM_021518, intron 1 of 7)	919	NM_021518	59021	Mm.397471	NM_021518	ENSMUSG00000047187	Rab2a	9330148M11Rik|C80220|Rab2	RAB2A, member RAS oncogene family	protein-coding
456	chr11	76576236	76577281	+	0	NA	intron (NM_016810, intron 1 of 8)	intron (NM_016810, intron 1 of 8)	299	NM_016810	53334	Mm.20931	NM_016810	ENSMUSG00000010392	Gosr1	AI414660|AI426320|BB145494|GOS-28|GOSRI|GS28	golgi SNAP receptor complex member 1	protein-coding
2745	chr9	65971978	65975432	+	0	NA	promoter-TSS (NM_026635)	promoter-TSS (NM_026635)	-713	NM_026635	68250	Mm.27107	NM_026635	ENSMUSG00000032381	Fam96a	5730536A07Rik	family with sequence similarity 96, member A	protein-coding
652	chr12	112126932	112128889	+	0	NA	promoter-TSS (NM_027223)	promoter-TSS (NM_027223)	436	NM_001081057	104859	Mm.35583	NM_175336	ENSMUSG00000021275	Tecpr2	4930573I19Rik|AI604920|mKIAA0297	tectonin beta-propeller repeat containing 2	protein-coding
1033	chr15	98859239	98876249	+	0	NA	exon (NM_009448, exon 4 of 4)	exon (NM_009448, exon 4 of 4)	7422	NM_009448	22146	Mm.88212	NM_009448	ENSMUSG00000043091	Tuba1c	M[a]6|Tuba6	tubulin, alpha 1C	protein-coding
2736	chr9	62658840	62660527	+	0	NA	promoter-TSS (NM_010193)	promoter-TSS (NM_010193)	-228	NM_010193	14155	Mm.24069	NM_010193	ENSMUSG00000032244	Fem1b	mKIAA0396	feminization 1 homolog b (C. elegans)	protein-coding
2400	chr7	52650543	52651810	+	0	NA	promoter-TSS (NM_009224)	promoter-TSS (NM_009224)	-159	NM_009224	20637	Mm.216386	NM_009224	ENSMUSG00000063511	Snrnp70	2700022N21Rik|3200002N22Rik|70kDa|AI325098|R74807|Rnulp70|Snrp70|Srnp70|U1-70|U1-70K	small nuclear ribonucleoprotein 70 (U1)	protein-coding
2258	chr6	87788075	87801774	+	0	NA	intron (NM_013493, intron 4 of 4)	intron (NM_013493, intron 4 of 4)	-6171	NM_133934	57905	Mm.241546	NM_133934	ENSMUSG00000030056	Isy1	5830446M03Rik|AI181014|AU020769	ISY1 splicing factor homolog (S. cerevisiae)	protein-coding
2034	chr5	33615889	33618179	+	0	NA	intron (NM_001198860, intron 1 of 9)	CpG	619	NM_001198861	13016	Mm.7286	NM_013502	ENSMUSG00000037373	Ctbp1	BARS|CtBP1-L|CtBP1-S|CtBP3/BARS|D4S115h|D5H4S115|D5H4S115E	C-terminal binding protein 1	protein-coding
1539	chr2	92885355	92886685	+	0	NA	intron (NM_001177536, intron 1 of 6)	CpG	281	NM_001177536	100042784	Mm.102816	NM_001177536	ENSMUSG00000075028	Prdm11	8030443D09Rik|AA163972|Gm707	PR domain containing 11	protein-coding
2029	chr5	31456085	31457242	+	0	NA	promoter-TSS (NM_001294324)	promoter-TSS (NM_001294324)	-39	NM_008622	17527	Mm.435472	NM_008622	ENSMUSG00000090262	Mpv17	Tg.Mpv17	MpV17 mitochondrial inner membrane protein	protein-coding
796	chr13	94070916	94075019	+	0	NA	Intergenic	Intergenic	-1483	NM_147176	26556	Mm.37533	NM_011982		Homer1	PSD-Zip45|SYN47|Ves-1|homer-1|vesl-1	homer homolog 1 (Drosophila)	protein-coding
2349	chr7	16972795	17008699	+	0	NA	intron (NM_198631, intron 1 of 13)	intron (NM_198631, intron 1 of 13)	4202	NM_198631	330474	Mm.333594	NM_198631	ENSMUSG00000059273	Zc3h4	Bwq1|Gm768|Kiaa1064-hp|mKIAA1064	zinc finger CCCH-type containing 4	protein-coding
366	chr11	5661599	5662850	+	0	NA	promoter-TSS (NR_015577)	promoter-TSS (NR_015577)	71	NR_015577	76508	Mm.260203	NR_015577	ENSMUSG00000083844	2210015D19Rik	1600028I17Rik|AI596465	RIKEN cDNA 2210015D19 gene	ncRNA
844	chr14	27487838	27489883	+	0	NA	TTS (NR_106132)	TTS (NR_106132)	234	NR_106132	102465773		NR_106132		Mir7672	mmu-mir-7672	microRNA mir-7672	ncRNA
1541	chr2	102025881	102027085	+	0	NA	5' UTR (NM_001290784, exon 1 of 6)	5' UTR (NM_001290784, exon 1 of 6)	134	NM_178886	241576	Mm.489740	NM_178886	ENSMUSG00000048058	Ldlrad3	6430500P08|AI194318|Lrad3	low density lipoprotein receptor class A domain containing 3	protein-coding
2723	chr9	53474639	53475780	+	0	NA	exon (NM_027807, exon 1 of 19)	exon (NM_027807, exon 1 of 19)	403	NM_001161618	75717	Mm.218910	NM_027807	ENSMUSG00000032030	Cul5	4921514I20Rik|8430423K24Rik|AI852817|C030032G03Rik|C330021I08Rik|VACM-1|VACM1	cullin 5	protein-coding
272	chr10	75290697	75300953	+	0	NA	intron (NM_010361, intron 2 of 4)	intron (NM_010361, intron 2 of 4)	1801	NM_010361	14872	Mm.24118	NM_010361	ENSMUSG00000033318	Gstt2	AI266894|Yrs|mGSTT2	glutathione S-transferase, theta 2	protein-coding
2343	chr7	13419568	13421206	+	0	NA	5' UTR (NM_022981, exon 1 of 8)	5' UTR (NM_022981, exon 1 of 8)	228	NM_022981	65020	Mm.292297	NM_022981	ENSMUSG00000058638	Zfp110	2900024E01Rik|N28112|NRIF|Nrif1	zinc finger protein 110	protein-coding
775	chr13	76080524	76081634	+	0	NA	5' UTR (NM_028493, exon 1 of 12)	5' UTR (NM_028493, exon 1 of 12)	193	NM_028493	73296	Mm.276200	NM_028493	ENSMUSG00000021589	Rhobtb3	1700040C17Rik|2610033K01Rik|4930503C18Rik|AI317148|AW208826|mKIAA0878	Rho-related BTB domain containing 3	protein-coding
2518	chr8	3461546	3475298	+	0	NA	promoter-TSS (NM_026951)	promoter-TSS (NM_026951)	-774	NM_026951	69129	Mm.45279	NM_026951		Pex11g	1810022F11Rik|1810049N02Rik|Pex11c|Pex11gamma	peroxisomal biogenesis factor 11 gamma	protein-coding
2108	chr5	110486719	110487512	+	0	NA	Intergenic	Intergenic	-41873	NM_207279	403178	Mm.297057	NM_207279	ENSMUSG00000064247	Plcxd1	A330045H12Rik|Gm576	phosphatidylinositol-specific phospholipase C, X domain containing 1	protein-coding
20	chr1	30993750	31009038	+	0	NA	non-coding (NR_002688, exon 5 of 7)	non-coding (NR_002688, exon 5 of 7)	5161	NR_002688	433406	Mm.389003	NR_002688		Gm13363	OTTMUSG00000011595	predicted gene 13363	pseudo
2376	chr7	30954231	30955781	+	0	NA	promoter-TSS (NM_011980)	promoter-TSS (NM_011980)	65	NM_001033540	330503	Mm.434058	NM_001033540	ENSMUSG00000066647	Gm5113	B430201F14|EG330503	predicted gene 5113	protein-coding
888	chr14	59379206	59381282	+	0	NA	Intergenic	Intergenic	381486	NM_026461	67932	Mm.65550	NM_026461	ENSMUSG00000021977	1700129C05Rik	-	RIKEN cDNA 1700129C05 gene	protein-coding
1983	chr4	142828159	142828926	+	0	NA	Intergenic	Intergenic	-25930	NM_001256380	110593	Mm.332020	NM_001081355	ENSMUSG00000057637	Prdm2	4833427P12Rik|E330024L24Rik|Gm1033|Gm19732|KMT8|Riz|Riz1|Znfpr1c1	PR domain containing 2, with ZNF domain	protein-coding
1011	chr15	84752776	84754887	+	0	NA	promoter-TSS (NM_016714)	promoter-TSS (NM_016714)	-27	NM_016714	18141	Mm.28379	NM_016714	ENSMUSG00000016619	Nup50	1700030K07Rik|AI413123|Npap60	nucleoporin 50	protein-coding
1754	chr3	103771688	103772830	+	0	NA	promoter-TSS (NR_030676)	promoter-TSS (NR_030676)	-20	NR_030676	100125931	Mm.400392	NR_030676	ENSMUSG00000089998	Phtf1os	A130049A11Rik	putative homeodomain transcription factor 1, opposite strand	ncRNA
1627	chr2	164242968	164287324	+	0	NA	intron (NM_011521, intron 1 of 4)	MIRb|SINE|MIR	3542	NM_011521	20971	Mm.3815	NM_011521	ENSMUSG00000017009	Sdc4	AA959608|AW108331|Synd4|ryudocan|syndecan-4	syndecan 4	protein-coding
1161	chr17	8137947	8139386	+	0	NA	5' UTR (NM_025789, exon 1 of 8)	5' UTR (NM_025789, exon 1 of 8)	187	NM_025789	66832	Mm.29830	NM_025789	ENSMUSG00000073471	Rsph3a	1700012G05Rik|4930524H12Rik|R74860|Rshl2|Rshl2a	radial spoke 3A homolog (Chlamydomonas)	protein-coding
468	chr11	79806007	79807375	+	0	NA	promoter-TSS (NM_001163018)	promoter-TSS (NM_001163018)	83	NM_199196	52615	Mm.283410	NM_199196	ENSMUSG00000017548	Suz12	2610028O16Rik|AI195385|AU016842|AW536442|D11Ertd530e|mKIAA0160	suppressor of zeste 12 homolog (Drosophila)	protein-coding
2093	chr5	104356581	104357320	+	0	NA	Intergenic	Intergenic	-16702	NM_178741	246293	Mm.179871	NM_178741	ENSMUSG00000029312	Klhl8	2310001P09Rik|D5Ertd431e	kelch-like 8	protein-coding
1019	chr15	89202762	89210248	+	0	NA	intron (NM_138302, intron 3 of 10)	intron (NM_138302, intron 3 of 10)	963	NM_138302	72962	Mm.287977	NM_138302	ENSMUSG00000022615	Tymp	2900072D10Rik|Ecgf1|PD-ECGF|PDECGF|Pdgfec	thymidine phosphorylase	protein-coding
700	chr13	38029992	38036783	+	0	NA	intron (NR_033218, intron 10 of 11)	intron (NR_033218, intron 10 of 11)	52647	NM_001177869	68750	Mm.491109	NM_026830	ENSMUSG00000039087	Rreb1	1110037N09Rik|AA414966|B930013M22Rik	ras responsive element binding protein 1	protein-coding
1927	chr4	116179791	116180889	+	0	NA	intron (NM_008389, intron 1 of 8)	CpG	186	NM_008389	16351	Mm.1350	NM_008389	ENSMUSG00000028696	Ipp	D4Jhu8|Mipp	IAP promoted placental gene	protein-coding
78	chr1	87689732	87691607	+	0	NA	intron (NM_133781, intron 1 of 8)	CpG	647	NM_133781	12283	Mm.26135	NM_133781	ENSMUSG00000036707	Cab39	AA408805|AA960512|C78372|MO25|MO25alpha	calcium binding protein 39	protein-coding
2853	chrX	100360339	100360957	+	0	NA	Intergenic	CpG	21355	NM_008671	17954	Mm.388694	NM_008671	ENSMUSG00000082229	Nap1l2	Bpx	nucleosome assembly protein 1-like 2	protein-coding
1380	chr18	85120186	85121563	+	0	NA	promoter-TSS (NM_025969)	promoter-TSS (NM_025969)	42	NM_025969	67105	Mm.250617	NM_025969	ENSMUSG00000024645	Timm21	1700034H14Rik|2700002I20Rik	tranlocase of inner mitochondrial membrane 21	protein-coding
990	chr15	76341827	76345320	+	0	NA	Intergenic	Intergenic	-1325	NM_010046	13350	Mm.22633	NM_010046	ENSMUSG00000022555	Dgat1	ARAT|C75990|D15Ertd23e|Dgat	diacylglycerol O-acyltransferase 1	protein-coding
413	chr11	51558565	51599654	+	0	NA	intron (NM_025535, intron 1 of 6)	intron (NM_025535, intron 1 of 6)	1944	NM_025535	66397	Mm.196592	NM_025535	ENSMUSG00000020386	Sar1b	2310075M17Rik|2900019I22Rik|CMRD|Sara1b|Sara2|Sarb	SAR1 gene homolog B (S. cerevisiae)	protein-coding
294	chr10	82085240	82093157	+	0	NA	Intergenic	RMER10B|LTR|ERVL	-3225	NM_001135567	544717	Mm.334867	NM_001135567	ENSMUSG00000063320	1190007I07Rik	-	RIKEN cDNA 1190007I07 gene	protein-coding
2316	chr6	139894865	139897136	+	0	NA	intron (NM_011084, intron 14 of 15)	intron (NM_011084, intron 14 of 15)	93938	NM_054066	114875	Mm.50808	NM_054066	ENSMUSG00000030230	Plcz1	1700041H07Rik|PLCzeta	phospholipase C, zeta 1	protein-coding
2218	chr6	47827274	47829305	+	0	NA	intron (NM_146175, intron 1 of 7)	intron (NM_146175, intron 1 of 7)	735	NM_146175	101095	Mm.440186	NM_146175	ENSMUSG00000025821	Zfp282	AI449432|C81429|E430019K09Rik|HUB1	zinc finger protein 282	protein-coding
1614	chr2	155755345	155756431	+	0	NA	non-coding (NR_024487, exon 1 of 10)	non-coding (NR_024487, exon 1 of 10)	158	NM_018888	56046	Mm.158827	NM_018888	ENSMUSG00000005882	Uqcc1	2310079L17Rik|2410003P15Rik|3110038N19Rik|Bfzb|Bfzp|Cbp3|Uqcc	ubiquinol-cytochrome c reductase complex assembly factor 1	protein-coding
1442	chr19	47653185	47655133	+	0	NA	promoter-TSS (NM_001164639)	promoter-TSS (NM_001164639)	-350	NM_009289	20874	Mm.281011	NM_009289	ENSMUSG00000025060	Slk	9A2|AV021402|AW411554|Etk4|SMAK|Stk2|mKIAA0204|mSLK	STE20-like kinase	protein-coding
764	chr13	73740986	73742356	+	0	NA	5' UTR (NM_146047, exon 1 of 17)	5' UTR (NM_146047, exon 1 of 17)	221	NM_146047	218335	Mm.30099	NM_146047	ENSMUSG00000021610	Clptm1l	C130052I12Rik|Crr9	CLPTM1-like	protein-coding
349	chr10	127804390	127814839	+	0	NA	Intergenic	RLTR14|LTR|ERV1	-2521	NM_001081040	210582	Mm.296876	NM_001081040	ENSMUSG00000039914	Coq10a	Gm1	coenzyme Q10 homolog A (yeast)	protein-coding
1743	chr3	98028434	98091466	+	0	NA	Intergenic	L1_Rod|LINE|L1	-24404	NM_008256	15360	Mm.289131	NM_008256	ENSMUSG00000027875	Hmgcs2	1300002P16|mHS	3-hydroxy-3-methylglutaryl-Coenzyme A synthase 2	protein-coding
2075	chr5	88982226	88995916	+	0	NA	Intergenic	Lx4A|LINE|L1	-4994	NM_001289774	52822	Mm.270469	NM_027530	ENSMUSG00000029291	Rufy3	2810428M05Rik|6330416M07Rik|AW455998|AW538594|D5Bwg0860e|Ripx|Rpipx	RUN and FYVE domain containing 3	protein-coding
1981	chr4	141260425	141308172	+	0	NA	Intergenic	MTEb|LTR|MaLR	-4964	NM_001017966	68817	Mm.393721	NM_001017966		Ddi2	1110056G13Rik|1700027M01Rik|9130022E05Rik|AI604911|AU040698	DNA-damage inducible protein 2	protein-coding
2081	chr5	92389478	92392856	+	0	NA	promoter-TSS (NR_028429)	promoter-TSS (NR_028429)	415	NR_073442	68098	Mm.159453	NM_026557	ENSMUSG00000029397	Rchy1	ARNIP|CHIMP|Pirh2|Zfp363|Znf363	ring finger and CHY zinc finger domain containing 1	protein-coding
1383	chr19	4395270	4398879	+	0	NA	promoter-TSS (NM_001001984)	promoter-TSS (NM_001001984)	3	NM_001001984	225876	Mm.31941	NM_001001984	ENSMUSG00000054611	Kdm2a	100043628|5530401A10Rik|AA589516|AW536790|Cxxc8|Fbl11|Fbl7|Fbxl11|Gm4560|Jhdm1|Jhdm1a|lalina	lysine (K)-specific demethylase 2A	protein-coding
606	chr12	77938344	77939158	+	0	NA	intron (NM_145927, intron 1 of 11)	CpG	297	NM_145927	110606	Mm.151174	NM_145927	ENSMUSG00000033373	Fntb	2010013E13Rik|AA409500	farnesyltransferase, CAAX box, beta	protein-coding
137	chr1	153599714	153603411	+	0	NA	promoter-TSS (NM_001039644)	promoter-TSS (NM_001039644)	-942	NM_001039644	66967	Mm.337691	NM_001039644	ENSMUSG00000043019	Edem3	2310050N11Rik	ER degradation enhancer, mannosidase alpha-like 3	protein-coding
1414	chr19	28084515	28087025	+	0	NA	promoter-TSS (NM_011265)	promoter-TSS (NM_011265)	-114	NM_011265	19726	Mm.313321	NM_011265	ENSMUSG00000040929	Rfx3	C230093O12Rik|MRFX3	regulatory factor X, 3 (influences HLA class II expression)	protein-coding
2522	chr8	4275336	4276561	+	0	NA	promoter-TSS (NM_011592)	promoter-TSS (NM_011592)	-43	NM_011592	21856	Mm.195249	NM_011592	ENSMUSG00000002949	Timm44	0710005E20Rik|D8Ertd118e|Mimt44|Tim44	translocase of inner mitochondrial membrane 44	protein-coding
1855	chr4	44245372	44247913	+	0	NA	Intergenic	CpG	-12503	NR_039565	100628618		NR_039565	miRBase:MI0018014	Mir5106	mmu-mir-5106|mu-mir-5106	microRNA 5106	ncRNA
666	chr13	9275615	9277194	+	0	NA	intron (NM_001081426, intron 1 of 36)	intron (NM_001081426, intron 1 of 36)	633	NM_001081426	208440	Mm.217326	NM_172459	ENSMUSG00000048264	Dip2c	2900024P20Rik|9630044M06|mKIAA0934	DIP2 disco-interacting protein 2 homolog C (Drosophila)	protein-coding
432	chr11	61890163	61891124	+	0	NA	5' UTR (NM_001029936, exon 1 of 13)	5' UTR (NM_001029936, exon 1 of 13)	117	NM_001029936	432572	Mm.458025	NM_001029936	ENSMUSG00000042331	Specc1	2810012G08Rik|B230396K10Rik|Cytsb	sperm antigen with calponin homology and coiled-coil domains 1	protein-coding
1074	chr16	18065941	18090512	+	0	NA	intron (NM_011172, intron 8 of 13)	intron (NM_011172, intron 8 of 13)	11057	NM_011172	19125	Mm.28456	NM_011172	ENSMUSG00000003526	Prodh	Pro-1|Pro1|Ym24d07	proline dehydrogenase	protein-coding
860	chr14	41907646	41988565	+	0	NA	3' UTR (NM_023134, exon 6 of 6)	3' UTR (NM_023134, exon 6 of 6)	3028	NM_023134	20387	Mm.46062	NM_023134	ENSMUSG00000021789	Sftpa1	SP-A|Sftp-1|Sftp1	surfactant associated protein A1	protein-coding
2308	chr6	134739245	134753182	+	0	NA	Intergenic	Intergenic	-3567	NM_001048054	70686	Mm.491182	NM_130447	ENSMUSG00000030203	Dusp16	3830417M17Rik|AW558566|D6Ertd213e|MKP-7|MKP7|Mkpm	dual specificity phosphatase 16	protein-coding
1567	chr2	121331793	121332493	+	0	NA	promoter-TSS (NM_030234)	promoter-TSS (NM_030234)	249	NM_026220	67532	Mm.440764	NM_026220	ENSMUSG00000068479	Mfap1a	4432409M24Rik|Mfap1	microfibrillar-associated protein 1A	protein-coding
1063	chr16	15862413	15863951	+	0	NA	5' UTR (NM_029354, exon 1 of 3)	5' UTR (NM_029354, exon 1 of 3)	233	NM_029354	72083	Mm.22351	NM_029354	ENSMUSG00000022671	Mzt2	2410018G20Rik|2610001E06Rik|Fam128|Fam128b	mitotic spindle organizing protein 2	protein-coding
1776	chr3	122508194	122508707	+	0	NA	intron (NM_153422, intron 11 of 20)	intron (NM_153422, intron 11 of 20)	-3552	NR_045168	71647	Mm.449992	NR_045168		4930447N08Rik	-	RIKEN cDNA 4930447N08 gene	ncRNA
2565	chr8	48758550	48761896	+	0	NA	5' UTR (NM_023503, exon 1 of 2)	5' UTR (NM_023503, exon 1 of 2)	290	NM_023503	69260	Mm.430733	NM_023503	ENSMUSG00000063049	Ing2	2810011M06Rik|Ing1l|Ing2b|P33ING2	inhibitor of growth family, member 2	protein-coding
2158	chr5	144578025	144580057	+	0	NA	intron (NM_013557, intron 1 of 14)	CpG	380	NM_013557	15467	Mm.389709	NM_013557		Eif2ak1	HCR|Hri	eukaryotic translation initiation factor 2 alpha kinase 1	protein-coding
2576	chr8	72240026	72241496	+	0	NA	promoter-TSS (NM_181274)	promoter-TSS (NM_181274)	40	NM_001039967	66869	Mm.334581	NM_181274		Zfp869	1200003I07Rik	zinc finger protein 869	protein-coding
2415	chr7	71018788	71086839	+	0	NA	intron (NM_021366, intron 1 of 1)	intron (NM_021366, intron 1 of 1)	-8930	NM_001256311	381994	Mm.425466	NM_001256311	ENSMUSG00000095061	E030018B13Rik	Gm1697	RIKEN cDNA E030018B13 gene	protein-coding
2362	chr7	25756562	25758134	+	0	NA	intron (NM_010261, intron 1 of 4)	intron (NM_010261, intron 1 of 4)	399	NM_010261	14470	Mm.22473	NM_010261	ENSMUSG00000003380	Rabac1	2310040I06Rik|Gbpap1|PRA1|prenylin	Rab acceptor 1 (prenylated)	protein-coding
708	chr13	45096344	45097734	+	0	NA	intron (NM_025772, intron 1 of 9)	CpG	426	NM_025772	94245	Mm.352311	NM_025772	ENSMUSG00000057531	Dtnbp1	5430437B18Rik|AW048963|Bloc1s8|dysbindin|sdy	dystrobrevin binding protein 1	protein-coding
2583	chr8	73242361	73250210	+	0	NA	3' UTR (NM_001195253, exon 4 of 4)	3' UTR (NM_001195253, exon 4 of 4)	-1678	NM_201607	110385	Mm.255180	NM_201607	ENSMUSG00000031842	Pde4c	Dpde1|E130301F19Rik|dunce	phosphodiesterase 4C, cAMP specific	protein-coding
2796	chr9	107973794	107999232	+	0	NA	exon (NM_008243, exon 15 of 18)	exon (NM_008243, exon 15 of 18)	2684	NR_106056	102466914		NR_106056		Mir7088	mmu-mir-7088	microRNA mir-7088	ncRNA
2589	chr8	77517389	77518333	+	0	NA	intron (NM_178017, intron 1 of 10)	CpG	259	NM_178017	70823	Mm.261739	NM_178017	ENSMUSG00000034518	Hmgxb4	4733401K04Rik|AI316803|E430025G12|Hmgb2l1	HMG box domain containing 4	protein-coding
1601	chr2	150864345	150865498	+	0	NA	intron (NM_026086, intron 1 of 1)	CpG	194	NM_026086	67311	Mm.480682	NM_026086	ENSMUSG00000053916	Nanp	1600031M04Rik|Hdhd4	N-acetylneuraminic acid phosphatase	protein-coding
2814	chr9	120510612	120512091	+	0	NA	Intergenic	Intergenic	24903	NR_073359	76100	Mm.48212	NR_073359	ENSMUSG00000052658	5830454E08Rik	-	RIKEN cDNA 5830454E08 gene	ncRNA
710	chr13	47024475	47026298	+	0	NA	promoter-TSS (NM_010617)	promoter-TSS (NM_010617)	-299	NM_010617	16553	Mm.342703	NM_010617	ENSMUSG00000021375	Kif13a	4930505I07Rik|mKIAA4109	kinesin family member 13A	protein-coding
1656	chr3	8923139	8924812	+	0	NA	promoter-TSS (NM_025434)	promoter-TSS (NM_025434)	-118	NM_025434	66230	Mm.38460	NM_025434	ENSMUSG00000040269	Mrps28	1500012D08Rik|AW061224	mitochondrial ribosomal protein S28	protein-coding
323	chr10	107598151	107601148	+	0	NA	exon (NM_027892, exon 1 of 26)	exon (NM_027892, exon 1 of 26)	193	NM_027892	17931	Mm.422959	NM_027892	ENSMUSG00000019907	Ppp1r12a	1200015F06Rik|5730577I22Rik|AA792106|AV099298|D10Ertd625e|Mypt1	protein phosphatase 1, regulatory (inhibitor) subunit 12A	protein-coding
856	chr14	33326162	33327293	+	0	NA	promoter-TSS (NM_001081221)	promoter-TSS (NM_001081221)	20	NM_001081221	319955	Mm.318310	NM_177043	ENSMUSG00000054051	Ercc6	4732403I04|C130058G22Rik|CSB	excision repair cross-complementing rodent repair deficiency, complementation group 6	protein-coding
2142	chr5	136470610	136471364	+	0	NA	intron (NM_023742, intron 1 of 10)	CpG	317	NM_001256098	74198	Mm.275574	NM_023742	ENSMUSG00000004947	Dtx2	2610524D08Rik|AA408415|AU022494|Deltex2	deltex 2 homolog (Drosophila)	protein-coding
1834	chr4	26272808	26274317	+	0	NA	intron (NM_172865, intron 1 of 4)	CpG	237	NM_172865	242362	Mm.245602	NM_172865	ENSMUSG00000040520	Manea	4932703L02Rik	mannosidase, endo-alpha	protein-coding
1664	chr3	18523515	18526553	+	0	NA	Intergenic	Intergenic	-144557	NR_040544	73959	Mm.60616	NR_040544		4930433B08Rik	-	RIKEN cDNA 4930433B08 gene	ncRNA
112	chr1	132574392	132579164	+	0	NA	intron (NR_028304, intron 1 of 5)	intron (NR_028304, intron 1 of 5)	1370	NR_028304	12270	Mm.380517	NR_028304		C4bp-ps1	C4bpb	complement component 4 binding protein, pseudogene 1	pseudo
545	chr12	3307370	3310868	+	0	NA	intron (NM_016676, intron 1 of 5)	intron (NM_016676, intron 1 of 5)	850	NM_016676	19325	Mm.378993	NM_016676	ENSMUSG00000020671	Rab10	AW107754	RAB10, member RAS oncogene family	protein-coding
191	chr1	186630497	186707354	+	0	NA	intron (NM_133684, intron 1 of 7)	intron (NM_133684, intron 1 of 7)	801	NM_133684	67247	Mm.177724	NM_133684	ENSMUSG00000073481	Marc2	2810484M10Rik|Mosc2|mARC1	mitochondrial amidoxime reducing component 2	protein-coding
2733	chr9	59332866	59335238	+	0	NA	exon (NM_019927, exon 1 of 14)	exon (NM_019927, exon 1 of 14)	129	NM_019927	23806	Mm.305925	NM_019927	ENSMUSG00000025234	Arih1	AU021774|Ari|Ari1|Hari|Hhari|Ubch7bp|Uip77	ariadne ubiquitin-conjugating enzyme E2 binding protein homolog 1 (Drosophila)	protein-coding
2467	chr7	121397455	121398806	+	0	NA	promoter-TSS (NM_033370)	promoter-TSS (NM_033370)	64	NM_033370	70349	Mm.277024	NM_033370	ENSMUSG00000030754	Copb1	2610019B04Rik	coatomer protein complex, subunit beta 1	protein-coding
187	chr1	184271081	184272112	+	0	NA	exon (NM_175127, exon 1 of 5)	exon (NM_175127, exon 1 of 5)	141	NM_175127	67948	Mm.30737	NM_175127	ENSMUSG00000047539	Fbxo28	4833428J17Rik|5730505P19Rik|D1Ertd578e|Fbx28|mKIAA0483	F-box protein 28	protein-coding
588	chr12	60229251	60235156	+	0	NA	promoter-TSS (NM_001165253)	promoter-TSS (NM_001165253)	-237	NM_001165253	217615	Mm.244118	NM_146034	ENSMUSG00000021000	Ctage5	D12Bwg0579e|Mea6|Mgea|Mgea6	CTAGE family, member 5	protein-coding
1684	chr3	51079676	51082273	+	0	NA	non-coding (NR_073429, exon 1 of 1)	non-coding (NR_073429, exon 1 of 1)	291	NR_073429	67746	Mm.441177	NR_073429		4930577N17Rik	-	RIKEN cDNA 4930577N17 gene	ncRNA
756	chr13	67460870	67461854	+	0	NA	intron (NM_001038651, intron 1 of 3)	intron (NM_001038651, intron 1 of 3)	146	NM_001038651	629016	Mm.440800	NM_001038651	ENSMUSG00000098905	Zfp953	E130120F12Rik	zinc finger protein 953	protein-coding
2326	chr6	146525635	146527608	+	0	NA	promoter-TSS (NM_138757)	promoter-TSS (NM_138757)	188	NM_026218	67529	Mm.333499	NM_026218	ENSMUSG00000040242	Fgfr1op2	1500031J01Rik	FGFR1 oncogene partner 2	protein-coding
1283	chr17	86564077	86568098	+	0	NA	Intergenic	CpG	-1038	NM_011104	18754	Mm.24614	NM_011104	ENSMUSG00000045038	Prkce	5830406C15Rik|PKC[e]|PKCepsilon|Pkce|R75156	protein kinase C, epsilon	protein-coding
262	chr10	62254177	62256090	+	0	NA	promoter-TSS (NM_026201)	promoter-TSS (NM_026201)	-17	NM_026201	67500	Mm.196371	NM_026201	ENSMUSG00000020074	Ccar1	2610511G16Rik|9430036H15Rik|Carp1	cell division cycle and apoptosis regulator 1	protein-coding
1944	chr4	122816343	122817566	+	0	NA	intron (NM_019489, intron 1 of 9)	intron (NM_019489, intron 1 of 9)	230	NM_019489	56031	Mm.126873	NM_019489	ENSMUSG00000028651	Ppie	2010010D16Rik|Cyp33	peptidylprolyl isomerase E (cyclophilin E)	protein-coding
212	chr10	11062796	11063970	+	0	NA	exon (NM_010146, exon 1 of 4)	exon (NM_010146, exon 1 of 4)	140	NM_010146	13853	Mm.89946	NM_010146		Epm2a	TG-B|Tg(TcraK,TcrbK)TG-BFlv	epilepsy, progressive myoclonic epilepsy, type 2 gene alpha	protein-coding
2436	chr7	88667022	88669124	+	0	NA	promoter-TSS (NR_045299)	promoter-TSS (NR_045299)	-363	NR_045299	100504421	Mm.217071	NR_045299	ENSMUSG00000097277	2900076A07Rik	WI1-1616M8.2	RIKEN cDNA 2900076A07 gene	ncRNA
1331	chr18	35657585	35659016	+	0	NA	intron (NM_030749, intron 1 of 9)	CpG	279	NM_030749	81500	Mm.291482	NM_030749	ENSMUSG00000024357	Sil1	1810057E01Rik|AI042831|wz	endoplasmic reticulum chaperone SIL1 homolog (S. cerevisiae)	protein-coding
2590	chr8	80072905	80074045	+	0	NA	exon (NM_001081240, exon 1 of 12)	exon (NM_001081240, exon 1 of 12)	179	NM_001081240	102182	Mm.197630	NM_178903	ENSMUSG00000037134	Prmt10	AI931714|Prmt9	protein arginine methyltransferase 10 (putative)	protein-coding
2383	chr7	35949403	35957118	+	0	NA	Intergenic	Intergenic	-18144	NM_017394	53896	Mm.35567	NM_017394	ENSMUSG00000030495	Slc7a10	AL024237|Asc-1|D7Bwg0847e	solute carrier family 7 (cationic amino acid transporter, y+ system), member 10	protein-coding
542	chr11	120711785	120714310	+	0	NA	intron (NM_027745, intron 18 of 18)	intron (NM_027745, intron 18 of 18)	-27186	NM_007988	14104	Mm.236443	NM_007988	ENSMUSG00000025153	Fasn	A630082H08Rik|FAS	fatty acid synthase	protein-coding
1305	chr18	11047878	11059666	+	0	NA	intron (NM_010258, intron 1 of 6)	intron (NM_010258, intron 1 of 6)	-1207	NR_105023	68434	Mm.57626	NR_105022	ENSMUSG00000097222	1010001N08Rik	-	RIKEN cDNA 1010001N08 gene	ncRNA
961	chr15	43482078	43483382	+	0	NA	Intergenic	Intergenic	173955	NM_025736	66736	Mm.244512	NM_025736	ENSMUSG00000022337	Emc2	4921531G14Rik|AV060620|AW209495|Ttc35	ER membrane protein complex subunit 2	protein-coding
2686	chr9	21889085	21890680	+	0	NA	promoter-TSS (NM_001253898)	promoter-TSS (NM_001253898)	-11	NM_012029	26940	Mm.425568	NM_012029	ENSMUSG00000066839	Ecsit	Sitpec	ECSIT homolog (Drosophila)	protein-coding
2099	chr5	108026228	108027322	+	0	NA	promoter-TSS (NM_001161739)	promoter-TSS (NM_001161739)	60	NM_001289569	231571	Mm.482420	NM_144911	ENSMUSG00000033773	Rpap2	AW060207	RNA polymerase II associated protein 2	protein-coding
1662	chr3	16082778	16084544	+	0	NA	intron (NR_027375, intron 1 of 5)	CpG	478	NM_001145919	229096	Mm.23834	NM_172677	ENSMUSG00000047213	Ythdf3	9130022A11Rik	YTH domain family 3	protein-coding
2476	chr7	129244285	129245700	+	0	NA	intron (NM_028177, intron 1 of 4)	intron (NM_028177, intron 1 of 4)	370	NM_028177	70316	Mm.3014	NM_028177		Ndufab1	2210401F17Rik|2310039H15Rik|2610003B19Rik|8kDa|9130423F15Rik|ACP|CI-SDAP|SDAP	NADH dehydrogenase (ubiquinone) 1, alpha/beta subcomplex, 1	protein-coding
574	chr12	53539812	53550746	+	0	NA	Intergenic	Intergenic	-71785	NM_009706	11855	Mm.35059	NM_009706	ENSMUSG00000035133	Arhgap5	p190-B|p190B	Rho GTPase activating protein 5	protein-coding
170	chr1	174056258	174058551	+	0	NA	intron (NM_001159525, intron 1 of 5)	intron (NM_001159525, intron 1 of 5)	518	NM_023041	19298	Mm.247764	NM_023041	ENSMUSG00000003464	Pex19	Pxf	peroxisomal biogenesis factor 19	protein-coding
1921	chr4	108672423	108674109	+	0	NA	promoter-TSS (NM_146150)	promoter-TSS (NM_146150)	-144	NM_146150	230598	Mm.274950	NM_146150	ENSMUSG00000053510	Nrd1	2600011I06Rik|AI875733|NRD-C	nardilysin, N-arginine dibasic convertase, NRD convertase 1	protein-coding
660	chr13	5859705	5870551	+	0	NA	intron (NM_011803, intron 2 of 3)	intron (NM_011803, intron 2 of 3)	4393	NM_011803	23849	Mm.275036	NM_011803	ENSMUSG00000000078	Klf6	AI448727|BCD1|C86813|CPBP|Copeb|FM2|FM6|Ierepo1|Ierepo3|R75280|Zf9	Kruppel-like factor 6	protein-coding
26	chr1	36747860	36749298	+	0	NA	intron (NM_009942, intron 1 of 3)	CpG	247	NM_009942	12859	Mm.180182	NM_009942	ENSMUSG00000061518	Cox5b	-	cytochrome c oxidase subunit Vb	protein-coding
2116	chr5	115549026	115551394	+	0	NA	Intergenic	Intergenic	7761	NM_001271591	100502825	Mm.361657	NM_001271590		Gm13826	OTTMUSG00000014624	predicted gene 13826	protein-coding
977	chr15	66440135	66445677	+	0	NA	intron (NM_001081409, intron 9 of 20)	intron (NM_001081409, intron 9 of 20)	33772	NM_001081409	239510	Mm.267473	NM_178718	ENSMUSG00000072501	Phf20l1	CGI-72|E130113K22Rik	PHD finger protein 20-like 1	protein-coding
2250	chr6	83864255	83865252	+	0	NA	intron (NM_008717, intron 1 of 26)	CpG	406	NM_008717	18139	Mm.132392	NM_008717	ENSMUSG00000030016	Zfml	AI323587|Np220|Znf638|mNP220	zinc finger, matrin-like	protein-coding
566	chr12	32339142	32340342	+	0	NA	promoter-TSS (NM_028002)	promoter-TSS (NM_028002)	8	NM_001163126	238123	Mm.173068	NM_001163126	ENSMUSG00000035933	Cog5	5430405C01Rik|C87247|D18362|GOLTC1|GTC90	component of oligomeric golgi complex 5	protein-coding
526	chr11	116134480	116136310	+	0	NA	exon (NM_146032, exon 1 of 16)	exon (NM_146032, exon 1 of 16)	136	NM_146032	217337	Mm.29655	NM_146032	ENSMUSG00000020780	Srp68	2610024I03Rik	signal recognition particle 68	protein-coding
1901	chr4	95459670	95462294	+	0	NA	intron (NM_001113412, intron 8 of 15)	intron (NM_001113412, intron 8 of 15)	172744	NR_045777	319247	Mm.473527	NM_175680	ENSMUSG00000044125	9530080O11Rik	-	RIKEN cDNA 9530080O11 gene	ncRNA
359	chr11	3023018	3103485	+	0	NA	intron (NM_030207, intron 9 of 32)	intron (NM_030207, intron 9 of 32)	30215	NM_030207	78887	Mm.485866	NM_030207	ENSMUSG00000023764	Sfi1	-	Sfi1 homolog, spindle assembly associated (yeast)	protein-coding
2765	chr9	91087215	91090278	+	0	NA	Intergenic	Intergenic	171891	NM_009573	22771	Mm.335350	NM_009573	ENSMUSG00000032368	Zic1	ZIC|ZNF201	zinc finger protein of the cerebellum 1	protein-coding
1229	chr17	35438657	35439189	+	0	NA	intron (NM_001025208, intron 1 of 3)	intron (NM_001025208, intron 1 of 3)	-18580	NM_010390	15006	Mm.466882	NM_010390	ENSMUSG00000079507	H2-Q1	H-2Q1|Q1|Q1b|Q1d|Q1k|Qa-1|Qa1|Qed-1	histocompatibility 2, Q region locus 1	protein-coding
2299	chr6	124850780	124882427	+	0	NA	intron (NM_026988, intron 1 of 4)	intron (NM_026988, intron 1 of 4)	1361	NM_026988	69202	Mm.142187	NM_026988	ENSMUSG00000030122	Ptms	2610009E16Rik	parathymosin	protein-coding
108	chr1	129765254	129766150	+	0	NA	intron (NM_178690, intron 2 of 23)	intron (NM_178690, intron 2 of 23)	352	NM_178690	226407	Mm.489713	NM_178690	ENSMUSG00000036104	Rab3gap1	1700003B17Rik|4732493F09Rik|AL117896|Rab3gap|p130	RAB3 GTPase activating protein subunit 1	protein-coding
2820	chrX	7149754	7152294	+	0	NA	exon (NM_138605, exon 1 of 4)	exon (NM_138605, exon 1 of 4)	298	NR_029473	78185	Mm.160055	NR_029473	ENSMUSG00000039545	Ppp1r3fos	4930524L23Rik	protein phosphatase 1, regulatory subunit 3F, opposite strand	ncRNA
604	chr12	77462759	77472929	+	0	NA	intron (NM_028356, intron 1 of 2)	ID4|SINE|ID	2607	NM_001172104	109929	Mm.41880	NM_028356	ENSMUSG00000056459	Zbtb25	2810462M08Rik|2900064P18Rik|AI842128|Kup|Zfp-50|Zfp50	zinc finger and BTB domain containing 25	protein-coding
2614	chr8	97945484	97959623	+	0	NA	intron (NM_008187, intron 1 of 5)	B3|SINE|B2	6216	NM_008187	14894	Mm.2080	NM_008187	ENSMUSG00000031796	Cfap20	2600014O15Rik|AL024127|Gtl3|T10-2A2	cilia and flagella associated protein 20	protein-coding
2608	chr8	96497977	96500709	+	0	NA	intron (NM_011787, intron 11 of 13)	intron (NM_011787, intron 11 of 13)	37197	NM_011787	23802	Mm.34641	NM_011787	ENSMUSG00000031751	Amfr	gp78	autocrine motility factor receptor	protein-coding
1001	chr15	81414996	81418279	+	0	NA	promoter-TSS (NM_177821)	promoter-TSS (NM_177821)	-7	NM_177821	328572	Mm.258397	NM_177821	ENSMUSG00000055024	Ep300	A430090G16|A730011L11|KAT3B|p300|p300 HAT	E1A binding protein p300	protein-coding
232	chr10	34000562	34003217	+	0	NA	promoter-TSS (NM_009433)	promoter-TSS (NM_009433)	-107	NM_009433	22110	Mm.20445	NM_009433	ENSMUSG00000047514	Tspyl1	Tspyl	testis-specific protein, Y-encoded-like 1	protein-coding
477	chr11	84255296	84257534	+	0	NA	intron (NM_019816, intron 11 of 12)	B1_Mus2|SINE|Alu	70588	NM_019816	56321	Mm.257482	NM_019816	ENSMUSG00000018697	Aatf	4933415H02Rik|5830465M17Rik|Che-1|Trb	apoptosis antagonizing transcription factor	protein-coding
1338	chr18	38330453	38372574	+	0	NA	Intergenic	Intergenic	17903	NM_029357	75599	Mm.36560	NM_029357	ENSMUSG00000051375	Pcdh1	2010005A06Rik|AI585920	protocadherin 1	protein-coding
2623	chr8	107390515	107393325	+	0	NA	non-coding (NR_033726, exon 2 of 12)	non-coding (NR_033726, exon 2 of 12)	596	NR_033726	667754	Mm.28191	NR_033726	ENSMUSG00000031884	Ces2d-ps	ENSMUSG00000031884|Gm9756	carboxylesterase 2D, pseudogene	pseudo
1182	chr17	21559743	21560705	+	0	NA	promoter-TSS (NM_011760)	promoter-TSS (NM_011760)	33	NM_011760	22712	Mm.12916	NM_011760	ENSMUSG00000023882	Zfp54	2810034D10Rik|KRAB10|Zfp-54|Zfp76|mszf83	zinc finger protein 54	protein-coding
225	chr10	23708307	23708515	+	0	NA	Intergenic	PB1D9|SINE|Alu	-2959	NM_001010828	215855	Mm.377237	NM_001010828	ENSMUSG00000045111	Taar6	Gm228|taR-6	trace amine-associated receptor 6	protein-coding
1447	chr19	54017892	54020205	+	0	NA	promoter-TSS (NM_001195348)	promoter-TSS (NM_001195348)	69	NM_001195348	100503572	Mm.375091	NM_001195338	ENSMUSG00000084957	Bbip1	2310002J21Rik|2610002B11Rik|4930560M04Rik|Ncrna00081	BBSome interacting protein 1	protein-coding
330	chr10	116500145	116500994	+	0	NA	intron (NM_007636, intron 1 of 15)	CpG	301	NM_007636	12461	Mm.247788	NM_007636	ENSMUSG00000034024	Cct2	Cctb	chaperonin containing Tcp1, subunit 2 (beta)	protein-coding
142	chr1	157379542	157381427	+	0	NA	Intergenic	Intergenic	-24766	NM_001145781	72482	Mm.288249	NM_026683	ENSMUSG00000033701	Acbd6	0610010G04Rik|2610100E10Rik	acyl-Coenzyme A binding domain containing 6	protein-coding
207	chr10	5951887	5960431	+	0	NA	Intergenic	Intergenic	-2274	NM_001033466	381990	Mm.262466	NM_001033466	ENSMUSG00000075327	Zbtb2	Gm1103	zinc finger and BTB domain containing 2	protein-coding
1510	chr2	57960377	57960719	+	0	NA	Intergenic	Intergenic	51985	NM_139200	227929	Mm.273905	NM_139200	ENSMUSG00000026832	Cytip	A130053M09Rik|AI462064|C80816|Cbp|Cybr|Pscdbp	cytohesin 1 interacting protein	protein-coding
48	chr1	58642048	58644316	+	0	NA	promoter-TSS (NM_025597)	promoter-TSS (NM_025597)	-5	NM_172513	213056	Mm.26272	NM_172513	ENSMUSG00000038174	Fam126b	C130065N10Rik|D1Ertd53e|D630010C10	family with sequence similarity 126, member B	protein-coding
1857	chr4	45120126	45121113	+	0	NA	intron (NM_001134646, intron 1 of 2)	CpG	366	NM_001134646	68512	Mm.282081	NM_001099675	ENSMUSG00000078713	Tomm5	1110019J04Rik|Tom5	translocase of outer mitochondrial membrane 5 homolog (yeast)	protein-coding
360	chr11	3165784	3166958	+	0	NA	promoter-TSS (NM_007879)	promoter-TSS (NM_007879)	18	NM_007879	13494	Mm.3250	NM_007879	ENSMUSG00000020457	Drg1	AA408859|AI132520|Nedd3	developmentally regulated GTP binding protein 1	protein-coding
2321	chr6	143047805	143049065	+	0	NA	intron (NM_001286578, intron 1 of 24)	CpG-12566	237	NM_001286578	74741	Mm.130260	NM_029081	ENSMUSG00000030279	C2cd5	5730419I09Rik|C030008B15Rik|CDP138	C2 calcium-dependent domain containing 5	protein-coding
1988	chr4	148675682	148682501	+	0	NA	intron (NM_207682, intron 1 of 46)	intron (NM_207682, intron 1 of 46)	2716	NM_207682	16561	Mm.402393	NM_008441	ENSMUSG00000063077	Kif1b	A530096N05Rik|AI448212|AI506502|D4Mil1e|KIF1Bp130|KIF1Bp204	kinesin family member 1B	protein-coding
1076	chr16	18376605	18435186	+	0	NA	3' UTR (NM_033474, exon 19 of 19)	3' UTR (NM_033474, exon 19 of 19)	7692	NM_001111063	12846	Mm.100940	NM_007744	ENSMUSG00000000326	Comt	Comt1|D16Wsu103e|D330014B15Rik	catechol-O-methyltransferase	protein-coding
766	chr13	74075145	74075807	+	0	NA	promoter-TSS (NM_027182)	promoter-TSS (NM_027182)	190	NM_001024508	105246	Mm.278509	NM_001024508	ENSMUSG00000057649	Brd9	AL022779	bromodomain containing 9	protein-coding
449	chr11	73012055	73015352	+	0	NA	intron (NM_029031, intron 1 of 6)	intron (NM_029031, intron 1 of 6)	719	NM_029031	74637	Mm.200905	NM_029031	ENSMUSG00000005951	Shpk	4930431K22Rik|AI194947|AW260459|Carkl	sedoheptulokinase	protein-coding
1574	chr2	127008246	127009132	+	0	NA	Intergenic	Intergenic	25327	NM_198630	329509	Mm.120738	NM_198630	ENSMUSG00000044145	1810024B03Rik	-	RIKEN cDNA 1810024B03 gene	protein-coding
1579	chr2	128954734	128956130	+	0	NA	promoter-TSS (NM_025395)	promoter-TSS (NM_025395)	-4	NM_025395	66170	Mm.40621	NM_025395	ENSMUSG00000037938	Chchd5	1110027L01Rik|AW045710	coiled-coil-helix-coiled-coil-helix domain containing 5	protein-coding
659	chr13	5801099	5804740	+	0	NA	Intergenic	Intergenic	54419	NR_045891	71867	Mm.179181	NR_045891		1700016G22Rik	-	RIKEN cDNA 1700016G22 gene	ncRNA
2774	chr9	99143195	99144434	+	0	NA	promoter-TSS (NM_023873)	promoter-TSS (NM_023873)	-73	NM_023873	68121	Mm.288739	NM_023873	ENSMUSG00000056267	Cep70	6720484E09Rik|Bite|C030018L16Rik	centrosomal protein 70	protein-coding
2763	chr9	88332998	88334513	+	0	NA	promoter-TSS (NM_172926)	promoter-TSS (NM_172926)	34	NM_172926	244962	Mm.439873	NM_172926	ENSMUSG00000032422	Snx14	B830022K16|C330035N22Rik|YR-14	sorting nexin 14	protein-coding
1141	chr16	91043484	91045692	+	0	NA	promoter-TSS (NM_026110)	promoter-TSS (NM_026110)	36	NM_026110	67367	Mm.347	NM_026110	ENSMUSG00000022974	Paxbp1	1810007M14Rik|C21orf66|Gcfc|Gcfc1|Pax3/7bp	PAX3 and PAX7 binding protein 1	protein-coding
682	chr13	24532881	24539367	+	0	NA	intron (NM_001284520, intron 9 of 14)	intron (NM_001284520, intron 9 of 14)	29133	NM_001284520	12763	Mm.8396	NM_007717	ENSMUSG00000016756	Cmah	-	cytidine monophospho-N-acetylneuraminic acid hydroxylase	protein-coding
353	chr10	128180295	128185940	+	0	NA	Intergenic	B1_Mus1|SINE|Alu	-1818	NM_030100	78428	Mm.27358	NM_030100	ENSMUSG00000064030	Wibg	A030010B05Rik|Pym	within bgcn homolog (Drosophila)	protein-coding
375	chr11	16407129	16408947	+	0	NA	intron (NM_011343, intron 1 of 3)	CpG	449	NM_011343	20335	Mm.325350	NM_011343	ENSMUSG00000078974	Sec61g	-	SEC61, gamma subunit	protein-coding
984	chr15	74784364	74804008	+	0	NA	Intergenic	Intergenic	8650	NM_001164040	17069	Mm.788	NM_008529	ENSMUSG00000022587	Ly6e	9804|Ly67|RIG-E|Sca-2|TSA-1|Tsa1	lymphocyte antigen 6 complex, locus E	protein-coding
2833	chrX	35916549	35919363	+	0	NA	intron (NM_001110142, intron 3 of 22)	CpG	11417	NM_028288	72584	Mm.327675	NM_028288		Cul4b	2700050M05Rik|AA409770|CUL-4B|mKIAA0695	cullin 4B	protein-coding
2409	chr7	56129007	56139701	+	0	NA	intron (NM_001013368, intron 2 of 12)	intron (NM_001013368, intron 2 of 12)	2057	NM_001013368	108961	Mm.240566	NM_001013368	ENSMUSG00000046179	E2f8	4432406C08Rik|AA410048	E2F transcription factor 8	protein-coding
1155	chr17	3556614	3558993	+	0	NA	promoter-TSS (NR_045303)	promoter-TSS (NR_045303)	-21	NR_045303	68230	Mm.431352	NR_045302		1700102H20Rik	-	RIKEN cDNA 1700102H20 gene	ncRNA
1485	chr2	25973528	25996807	+	0	NA	Intergenic	ORR1C1|LTR|MaLR	-6836	NM_026495	67991	Mm.131074	NM_026495	ENSMUSG00000026932	Nacc2	0610020I02Rik|AI448087|Btbd14a|C030048H19Rik	nucleus accumbens associated 2, BEN and BTB (POZ) domain containing	protein-coding
788	chr13	91062109	91063479	+	0	NA	promoter-TSS (NM_024175)	promoter-TSS (NM_024175)	67	NM_024175	66475	Mm.306302	NM_024175		Rps23	2410044J15Rik	ribosomal protein S23	protein-coding
128	chr1	138240993	138243077	+	0	NA	5' UTR (NM_001081360, exon 1 of 19)	5' UTR (NM_001081360, exon 1 of 19)	646	NM_001081360	67886	Mm.144143	NM_001081360	ENSMUSG00000041570	Camsap2	1600013L13Rik|4930541M15Rik|Camsap1l1|mKIAA1078	calmodulin regulated spectrin-associated protein family, member 2	protein-coding
501	chr11	97642926	97644300	+	0	NA	promoter-TSS (NR_028078)	promoter-TSS (NR_028078)	140	NM_022891	65019	Mm.140380	NM_022891	ENSMUSG00000071415	Rpl23	2810009A01Rik	ribosomal protein L23	protein-coding
1313	chr18	14941249	14942396	+	0	NA	promoter-TSS (NM_001100449)	promoter-TSS (NM_001100449)	68	NM_001100449	72504	Mm.312233	NM_001100449	ENSMUSG00000054321	Taf4b	105kDa|2610524B04Rik|4932409F03Rik|AW987595|TAFII105|Taf2c2	TAF4B RNA polymerase II, TATA box binding protein (TBP)-associated factor	protein-coding
278	chr10	78036763	78038469	+	0	NA	intron (NM_173751, intron 1 of 15)	CpG	371	NM_173751	216136	Mm.2644	NM_173751	ENSMUSG00000032763	Ilvbl	5830463I21|AI415009	ilvB (bacterial acetolactate synthase)-like	protein-coding
1617	chr2	155936539	155938099	+	0	NA	intron (NM_029397, intron 1 of 2)	CpG	382	NM_170598	75710	Mm.27660	NM_029397		Rbm12	5730420G12Rik|9430070C08Rik|AI852903|SWAN|mKIAA0765	RNA binding motif protein 12	protein-coding
490	chr11	93746202	93748556	+	0	NA	promoter-TSS (NM_134012)	promoter-TSS (NM_134012)	-154	NM_134012	103537	Mm.210334	NM_134012	ENSMUSG00000059474	Mbtd1	AA408199|AI194990|hemp	mbt domain containing 1	protein-coding
2650	chr8	120168949	120273292	+	0	NA	Intergenic	Intergenic	-4726	NM_008290	15486	Mm.276466	NM_008290	ENSMUSG00000031844	Hsd17b2	AI194836|AI194967|AI255511	hydroxysteroid (17-beta) dehydrogenase 2	protein-coding
1843	chr4	40214402	40227048	+	0	NA	intron (NM_001033305, intron 2 of 3)	intron (NM_001033305, intron 2 of 3)	-3851	NM_134097	106021	Mm.251548	NM_134097	ENSMUSG00000036822	Topors	AW105885|LUN|TP53BPL|p53BP3/LUN	topoisomerase I binding, arginine/serine-rich	protein-coding
155	chr1	163657387	163657874	+	0	NA	Intergenic	CpG	60996	NM_001205243	14103	Mm.3355	NM_010177	ENSMUSG00000000817	Fasl	APT1LG1|CD178|CD95-L|CD95L|Fas-L|Faslg|Tnfsf6|gld	Fas ligand (TNF superfamily, member 6)	protein-coding
387	chr11	23564744	23566822	+	0	NA	promoter-TSS (NM_028304)	promoter-TSS (NM_028304)	109	NM_001033654	74467	Mm.29536	NM_028304	ENSMUSG00000020280	Pus10	2810013G11Rik|4933435A13Rik|AU014648|C77560|Ccdc139	pseudouridylate synthase 10	protein-coding
2626	chr8	107747790	107751559	+	0	NA	intron (NM_145604, intron 1 of 15)	intron (NM_145604, intron 1 of 15)	586	NM_145604	234678	Mm.27186	NM_145604	ENSMUSG00000031889	D230025D16Rik	BC006874|Lin10	RIKEN cDNA D230025D16 gene	protein-coding
1913	chr4	105036656	105038336	+	0	NA	Intergenic	Intergenic	207544	NM_080555	67916	Mm.348326	NM_080555	ENSMUSG00000028517	Ppap2b	1110003O22Rik|2610002D05Rik|AV025606|D4Bwg0538e|D4Bwg1535e|Lpp3|Ppab2b	phosphatidic acid phosphatase type 2B	protein-coding
1112	chr16	37565182	37598120	+	0	NA	intron (NR_027778, intron 1 of 12)	intron (NR_027778, intron 1 of 12)	1412	NM_013547	15233	Mm.157442	NM_013547	ENSMUSG00000022821	Hgd	Hgo|aku	homogentisate 1, 2-dioxygenase	protein-coding
626	chr12	88812462	88813359	+	0	NA	intron (NM_025507, intron 1 of 13)	CpG	339	NM_025507	66354	Mm.271174	NM_025507	ENSMUSG00000021039	Snw1	2310008B08Rik|AW048543|NCoA-62|SKIP|Skiip	SNW domain containing 1	protein-coding
1294	chr18	7692779	7693761	+	0	NA	Intergenic	CpG	-66409	NM_001161620	75739	Mm.133293	NM_001081287	ENSMUSG00000057440	Mpp7	1110068J02Rik|2810038M04Rik|5430426E14Rik|AI415104|Gm955	membrane protein, palmitoylated 7 (MAGUK p55 subfamily member 7)	protein-coding
461	chr11	77420070	77422051	+	0	NA	5' UTR (NM_144825, exon 1 of 20)	5' UTR (NM_144825, exon 1 of 20)	257	NM_144825	216965	Mm.340436	NM_144825	ENSMUSG00000017291	Taok1	2810468K05Rik|AU020252|D130018F14Rik|Map3k16|Markk|Psk2|mKIAA1361	TAO kinase 1	protein-coding
2712	chr9	47128089	47131130	+	0	NA	Intergenic	Intergenic	-208826	NM_207675	54725	Mm.234832	NM_018770	ENSMUSG00000032076	Cadm1	2900073G06Rik|3100001I08Rik|AI987920|Bl2|Igsf4|Igsf4a|Necl2|RA175|RA175A|RA175B|RA175C|RA175N|ST17|SgIGSF|SynCam|Tslc1	cell adhesion molecule 1	protein-coding
1562	chr2	120963349	120967050	+	0	NA	promoter-TSS (NM_001290811)	promoter-TSS (NM_001290811)	-965	NM_001290811	75894	Mm.384805	NM_029475	ENSMUSG00000027259	Adal	4930578F03Rik	adenosine deaminase-like	protein-coding
1426	chr19	36628050	36629743	+	0	NA	promoter-TSS (NM_172637)	promoter-TSS (NM_172637)	-233	NM_001163471	226098	Mm.61107	NM_172637	ENSMUSG00000041180	Hectd2	4921524L07|A630025O09Rik|AW212605	HECT domain containing 2	protein-coding
257	chr10	58865201	58868382	+	0	NA	intron (NM_023530, intron 1 of 3)	intron (NM_023530, intron 1 of 3)	358	NM_023530	69836	Mm.30268	NM_023530	ENSMUSG00000009646	Pla2g12b	2010002E04Rik|Pla2g13|hlb218	phospholipase A2, group XIIB	protein-coding
1358	chr18	61974297	61975934	+	0	NA	intron (NM_001164491, intron 15 of 23)	intron (NM_001164491, intron 15 of 23)	-28799	NM_178928	106877	Mm.26632	NM_178928	ENSMUSG00000033032	Afap1l1	AI173486	actin filament associated protein 1-like 1	protein-coding
951	chr15	36537426	36539954	+	0	NA	promoter-TSS (NM_008774)	promoter-TSS (NM_008774)	38	NM_008774	18458	Mm.371570	NM_008774	ENSMUSG00000022283	Pabpc1	PABP|Pabp1|PabpI|Pabpl1|ePAB	poly(A) binding protein, cytoplasmic 1	protein-coding
782	chr13	81921744	81923265	+	0	NA	intron (NM_007684, intron 1 of 4)	CpG	213	NM_007684	12626	Mm.12481	NM_007684	ENSMUSG00000021537	Cetn3	MmCEN3	centrin 3	protein-coding
85	chr1	92863762	92866703	+	0	NA	promoter-TSS (NM_001159725)	promoter-TSS (NM_001159725)	965	NM_008998	19329	Mm.279780	NM_008998	ENSMUSG00000026304	Rab17	AW413472	RAB17, member RAS oncogene family	protein-coding
809	chr13	104967856	104969784	+	0	NA	promoter-TSS (NM_001093760)	promoter-TSS (NM_001093760)	-274	NM_001093760	66975	Mm.272541	NM_025879	ENSMUSG00000021711	Trappc13	2410002O22Rik|2610524F24Rik|AI451892|AU017229	trafficking protein particle complex 13	protein-coding
2200	chr6	31264095	31272831	+	0	NA	intron (NR_040261, intron 3 of 4)	intron (NR_040261, intron 3 of 4)	80310	NR_040300	100503869	Mm.370532	NR_040300	ENSMUSG00000086212	Mkln1os	Gm13845|OTTMUSG00000014733	muskelin 1, intracellular mediator containing kelch motifs, opposite strand	ncRNA
1156	chr17	4867761	4869542	+	0	NA	Intergenic	Intergenic	-126423	NM_001085355	239985	Mm.133401	NM_001085355	ENSMUSG00000069729	Arid1b	8030481M12|9330189K18Rik|AI836955|Ardi1b|B230217J03Rik|mKIAA1235	AT rich interactive domain 1B (SWI-like)	protein-coding
2281	chr6	113481107	113481830	+	0	NA	promoter-TSS (NM_001033244)	promoter-TSS (NM_001033244)	164	NM_175101	66087	Mm.275989	NM_175101	ENSMUSG00000030286	Emc3	0610039A15Rik|AI225901|AW260416|Pob|Tmem111	ER membrane protein complex subunit 3	protein-coding
1557	chr2	119033384	119035123	+	0	NA	promoter-TSS (NM_001164827)	promoter-TSS (NM_001164827)	-203	NM_001164827	72008	Mm.386807	NM_028054	ENSMUSG00000068580	Zfyve19	1500041L05Rik|ANCHR	zinc finger, FYVE domain containing 19	protein-coding
1486	chr2	26864792	26866508	+	0	NA	TTS (NM_001290463)	TTS (NM_001290463)	204	NM_001243239	381356	Mm.150270	NM_029862	ENSMUSG00000015488	Cacfd1	5930434B04Rik|mFwe	calcium channel flower domain containing 1	protein-coding
425	chr11	59622207	59629892	+	0	NA	intron (NR_045686, intron 1 of 1)	RLTR20A|LTR|ERVK	2467	NR_045686	100504104	Mm.391737	NR_045686	ENSMUSG00000087249	Gm16062	ENSMUSG00000072890|OTTMUSG00000029633	predicted gene 16062	ncRNA
2056	chr5	65185677	65205130	+	0	NA	intron (NM_008453, intron 1 of 5)	CpG	641	NM_008453	16599	Mm.392759	NM_008453	ENSMUSG00000029178	Klf3	9930027G08Rik|AL024007|Bklf|Tef-2	Kruppel-like factor 3 (basic)	protein-coding
736	chr13	59868243	59877035	+	0	NA	TTS (NM_153538)	TTS (NM_153538)	1312	NR_015349	13996	Mm.490435	NR_015349	ENSMUSG00000089875	Etohd2	AW491659	ethanol decreased 2	ncRNA
539	chr11	120239262	120240985	+	0	NA	promoter-TSS (NM_027980)	promoter-TSS (NM_027980)	-63	NM_027980	71885	Mm.274890	NM_027980	ENSMUSG00000025384	2310003H01Rik	Faap100	RIKEN cDNA 2310003H01 gene	protein-coding
781	chr13	81849682	81851441	+	0	NA	promoter-TSS (NM_001081176)	promoter-TSS (NM_001081176)	145	NM_028372	72852	Mm.31095	NM_028372	ENSMUSG00000051098	Mblac2	2900024O10Rik	metallo-beta-lactamase domain containing 2	protein-coding
2847	chrX	71668610	71675508	+	0	NA	intron (NM_001136067, intron 1 of 10)	intron (NM_001136067, intron 1 of 10)	2108	NM_001136067	16151	Mm.12967	NM_010547	ENSMUSG00000004221	Ikbkg	1110037D23Rik|AI848108|AI851264|AW124339|IKK[g]|NEMO	inhibitor of kappaB kinase gamma	protein-coding
1950	chr4	125998274	125999079	+	0	NA	TTS (NM_011902)	TTS (NM_011902)	271	NM_133883	100206	Mm.11285	NM_133883	ENSMUSG00000042558	Adprhl2	AI836109|Arh3	ADP-ribosylhydrolase like 2	protein-coding
2865	chrX	149931998	149933346	+	0	NA	promoter-TSS (NM_018798)	promoter-TSS (NM_018798)	-103	NM_018798	54609	Mm.430772	NM_018798	ENSMUSG00000050148	Ubqln2	Chap1|Dsk2|HRIHFB2157|Plic-2|Plic2	ubiquilin 2	protein-coding
1698	chr3	62141838	62158830	+	0	NA	intron (NM_001081295, intron 3 of 13)	(TA)n|Simple_repeat|Simple_repeat	7635	NM_001081295	622434	Mm.153974	NM_001081295	ENSMUSG00000036885	Arhgef26	4631416L12Rik|8430436L14Rik|AI303572|AW491953|SGEF	Rho guanine nucleotide exchange factor (GEF) 26	protein-coding
520	chr11	109871066	109874598	+	0	NA	Intergenic	Intergenic	-15702	NM_013851	27404	Mm.341004	NM_013851	ENSMUSG00000020620	Abca8b	Abca8	ATP-binding cassette, sub-family A (ABC1), member 8b	protein-coding
2782	chr9	105297560	105298372	+	0	NA	promoter-TSS (NM_172461)	promoter-TSS (NM_172461)	244	NM_025651	66595	Mm.84941	NM_025651	ENSMUSG00000032567	Aste1	1100001A21Rik|AV006403	asteroid homolog 1 (Drosophila)	protein-coding
2037	chr5	34162576	34164282	+	0	NA	Intergenic	CpG	-22332	NM_175231	107823	Mm.19892	NM_175231	ENSMUSG00000057406	Whsc1	5830445G22Rik|9430010A17Rik|AW555663|C130020C13Rik|D030027O06Rik|D930023B08Rik|MMSET|NSD2|Whsc1l|mKIAA1090	Wolf-Hirschhorn syndrome candidate 1 (human)	protein-coding
532	chr11	118939708	118954225	+	0	NA	intron (NM_007625, intron 2 of 4)	C-rich|Low_complexity|Low_complexity	585	NM_007625	12418	Mm.268070	NM_007625	ENSMUSG00000039989	Cbx4	MPc2|PC2	chromobox 4	protein-coding
1193	chr17	24591030	24593100	+	0	NA	intron (NM_007893, intron 1 of 13)	CpG	191	NM_007893	13560	Mm.163132	NM_007893	ENSMUSG00000024137	E4f1	-	E4F transcription factor 1	protein-coding
2455	chr7	107854480	107855670	+	0	NA	promoter-TSS (NM_178764)	promoter-TSS (NM_178764)	-141	NM_178764	319604	Mm.260362	NM_178764	ENSMUSG00000029461	Fam168a	2610030B18Rik|B930006L02Rik|mKIAA0280	family with sequence similarity 168, member A	protein-coding
55	chr1	63222487	63224760	+	0	NA	promoter-TSS (NM_001160039)	promoter-TSS (NM_001160039)	218	NM_018796	55949	Mm.2718	NM_018796	ENSMUSG00000025967	Eef1b2	2810017J07Rik|Eef1b	eukaryotic translation elongation factor 1 beta 2	protein-coding
1890	chr4	62998925	63028112	+	0	NA	Intergenic	Intergenic	-3678	NM_013623	18407	Mm.381399	NM_013623	ENSMUSG00000028359	Orm3	Agp-3|Orm-3	orosomucoid 3	protein-coding
1681	chr3	40648657	40651601	+	0	NA	promoter-TSS (NR_038067)	promoter-TSS (NR_038067)	647	NM_028140	72175	Mm.130610	NM_028140	ENSMUSG00000025759	Mfsd8	2810423E13Rik|AI836898|AV142426|Cln7	major facilitator superfamily domain containing 8	protein-coding
57	chr1	64661762	64664862	+	0	NA	5' UTR (NM_025964, exon 1 of 3)	5' UTR (NM_025964, exon 1 of 3)	430	NM_025964	67099	Mm.46394	NM_025964	ENSMUSG00000025956	Mettl21a	2310038H17Rik|AI464204|Fam119a	methyltransferase like 21A	protein-coding
2642	chr8	114463575	114465921	+	0	NA	exon (NM_026693, exon 1 of 4)	exon (NM_026693, exon 1 of 4)	145	NM_026693	93739	Mm.371666	NM_026693		Gabarapl2	0610012F20Rik|2900019O08Rik|AI173605|GATE-16|Gef2	gamma-aminobutyric acid (GABA) A receptor-associated protein-like 2	protein-coding
872	chr14	52518087	52564418	+	0	NA	TTS (NM_001011687)	TTS (NM_001011687)	1196	NM_001011687	497071	Mm.378602	NM_001011687	ENSMUSG00000068392	Rnase13	-	ribonuclease, RNase A family, 13 (non-active)	protein-coding
2354	chr7	19796270	19822538	+	0	NA	3' UTR (NM_175668, exon 2 of 2)	3' UTR (NM_175668, exon 2 of 2)	-4334	NM_207525	403187	Mm.239583	NM_207525		Opa3	D630048P19Rik|Gm1425|Gm472	optic atrophy 3	protein-coding
1146	chr16	92608686	92612893	+	0	NA	intron (NM_001111022, intron 6 of 6)	intron (NM_001111022, intron 6 of 6)	86785	NM_001111023	12394	Mm.4081	NM_009821	ENSMUSG00000022952	Runx1	AML1|CBF-alpha-2|Cbfa2|Pebp2a2|Pebpa2b	runt related transcription factor 1	protein-coding
395	chr11	32167162	32168059	+	0	NA	promoter-TSS (NM_181569)	promoter-TSS (NM_181569)	97	NM_181569	17168	Mm.263161	NM_181569	ENSMUSG00000020289	Nprl3	Aag|CGTHBA|HS-26|HS-40|Mare|Phg|Prox1|m(alpha)RE	nitrogen permease regulator-like 3	protein-coding
89	chr1	94075662	94077971	+	0	NA	Intergenic	CpG	-31846	NM_207225	208727	Mm.318567	NM_207225	ENSMUSG00000026313	Hdac4	4932408F19Rik|AI047285	histone deacetylase 4	protein-coding
175	chr1	179371079	179374026	+	0	NA	Intergenic	CpG	-2240	NM_001012330	30928	Mm.330700	NM_013915	ENSMUSG00000063659	Zbtb18	RP58|Zfp238|Znf238	zinc finger and BTB domain containing 18	protein-coding
584	chr12	58297379	58298974	+	0	NA	5' UTR (NM_172577, exon 1 of 10)	5' UTR (NM_172577, exon 1 of 10)	283	NM_172577	217593	Mm.32835	NM_172577	ENSMUSG00000035472	Slc25a21	9930033G19Rik|A630030I10|BB158148	solute carrier family 25 (mitochondrial oxodicarboxylate carrier), member 21	protein-coding
988	chr15	75505844	75509903	+	0	NA	intron (NM_028404, intron 1 of 13)	intron (NM_028404, intron 1 of 13)	1347	NM_028404	72960	Mm.182401	NM_028404	ENSMUSG00000000934	Top1mt	2900052H09Rik	DNA topoisomerase 1, mitochondrial	protein-coding
35	chr1	43989870	43993312	+	0	NA	intron (NM_009418, intron 1 of 29)	intron (NM_009418, intron 1 of 29)	739	NM_009418	22019	Mm.401675	NM_009418	ENSMUSG00000041763	Tpp2	TPP-2|TppII	tripeptidyl peptidase II	protein-coding
2453	chr7	107158648	107161615	+	0	NA	intron (NM_001291320, intron 1 of 10)	intron (NM_001291320, intron 1 of 10)	1703	NM_001291320	69121	Mm.285295	NM_133709	ENSMUSG00000030732	Chrdl2	1810022C01Rik|Chl2	chordin-like 2	protein-coding
2295	chr6	121249263	121298031	+	0	NA	intron (NM_144512, intron 4 of 14)	intron (NM_144512, intron 4 of 14)	-23068	NM_133661	14411	Mm.274506	NM_133661	ENSMUSG00000030109	Slc6a12	BGT1|GAT2|Gabt2	solute carrier family 6 (neurotransmitter transporter, betaine/GABA), member 12	protein-coding
1882	chr4	59015858	59023339	+	0	NA	intron (NM_001033165, intron 1 of 3)	intron (NM_001033165, intron 1 of 3)	3533	NM_001033165	72429	Mm.317801	NM_001033165		Dnajc25	2010109C08Rik|2010203O07Rik	DnaJ (Hsp40) homolog, subfamily C, member 25	protein-coding
1550	chr2	112332297	112334142	+	0	NA	promoter-TSS (NM_028844)	promoter-TSS (NM_028844)	98	NM_028844	74268	Mm.315125	NM_028844		Aven	1700013A01Rik|1700056A21Rik|mAven-L|mAven-S	apoptosis, caspase activation inhibitor	protein-coding
1454	chr19	57998756	58001222	+	0	NA	intron (NM_181415, intron 26 of 28)	intron (NM_181415, intron 26 of 28)	-125668	NR_049196	100885835		NR_049196		Mir5623	mmu-mir-5623	microRNA mir-5623	ncRNA
1421	chr19	33465946	33467035	+	0	NA	5' UTR (NM_001146342, exon 1 of 5)	5' UTR (NM_001146342, exon 1 of 5)	295	NM_001167818	67795	Mm.204591	NM_001146342	ENSMUSG00000071573	Rnls	6530404N21Rik|AI452315|AW060440|C10orf59	renalase, FAD-dependent amine oxidase	protein-coding
2827	chrX	12338207	12340306	+	0	NA	promoter-TSS (NM_012005)	promoter-TSS (NM_012005)	-148	NR_045852	552913	Mm.216846	NR_045852	ENSMUSG00000085891	Gm14634	OTTMUSG00000017535	predicted gene 14634	ncRNA
665	chr13	9011572	9017952	+	0	NA	Intergenic	B4A|SINE|B4	-19504	NM_027000	69237	Mm.41800	NM_027000	ENSMUSG00000021149	Gtpbp4	2610028C09Rik|Crfg|Gtpbp3|NGB|Nog1	GTP binding protein 4	protein-coding
2758	chr9	78353626	78390502	+	0	NA	Intergenic	RodERV21-int|LTR|ERV1	-42533	NM_010106	13627	Mm.138471	NM_010106	ENSMUSG00000037742	Eef1a1	-	eukaryotic translation elongation factor 1 alpha 1	protein-coding
1476	chr2	19292893	19293762	+	0	NA	promoter-TSS (NM_029619)	promoter-TSS (NM_029619)	64	NM_029619	76467	Mm.27166	NM_029619	ENSMUSG00000023094	Msrb2	2310050L06Rik|Mrsb|Msrb|Pilb	methionine sulfoxide reductase B2	protein-coding
2533	chr8	13154949	13164281	+	0	NA	intron (NM_010684, intron 1 of 8)	intron (NM_010684, intron 1 of 8)	480	NM_010684	16783	Mm.16716	NM_010684	ENSMUSG00000031447	Lamp1	AI196048|CD107a|Lamp-1	lysosomal-associated membrane protein 1	protein-coding
1207	chr17	31288847	31290562	+	0	NA	promoter-TSS (NR_110503).2	promoter-TSS (NR_110503).2	7	NR_110503	102631757	Mm.373036	NR_110502		LOC102631757	-	uncharacterized LOC102631757	ncRNA
2641	chr8	114399705	114400828	+	0	NA	intron (NM_025781, intron 1 of 2)	intron (NM_025781, intron 1 of 2)	309	NM_025781	66817	Mm.345350	NM_025781	ENSMUSG00000031953	Tmem170	9030409E16Rik|AA403674|D8Bwg1414e|Tmem170a	transmembrane protein 170	protein-coding
2670	chr9	7183830	7185099	+	0	NA	promoter-TSS (NM_029775)	promoter-TSS (NM_029775)	-102	NM_029775	76863	Mm.27293	NM_029775	ENSMUSG00000032002	Dcun1d5	3110001A18Rik|4833420K19Rik|AW060460|D430047L21Rik	DCN1, defective in cullin neddylation 1, domain containing 5 (S. cerevisiae)	protein-coding
1584	chr2	132501524	132532420	+	0	NA	intron (NM_028637, intron 1 of 2)	PB1D7|SINE|Alu	953	NM_028637	73747	Mm.284114	NM_028637	ENSMUSG00000044991	1110034G24Rik	-	RIKEN cDNA 1110034G24 gene	protein-coding
904	chr14	70842624	70843832	+	0	NA	promoter-TSS (NR_029802)	promoter-TSS (NR_029802)	50	NM_025945	67065	Mm.20420	NM_025945	ENSMUSG00000000776	Polr3d	2810426M17Rik|44kDa|AI326118|AW489084|BN51T|RPC4|TSBN51	polymerase (RNA) III (DNA directed) polypeptide D	protein-coding
930	chr14	123299292	123312853	+	0	NA	intron (NM_145466, intron 1 of 2)	L1_Mur3|LINE|L1	6315	NM_145466	223267	Mm.379358	NM_145466	ENSMUSG00000041625	Ggact	A2ld1	gamma-glutamylamine cyclotransferase	protein-coding
1675	chr3	33698168	33699723	+	0	NA	promoter-TSS (NM_001290500)	promoter-TSS (NM_001290500)	-160	NM_027619	67120	Mm.275710	NM_025978	ENSMUSG00000027677	Ttc14	2700016E08Rik|4930434D01Rik|4931403I22Rik|4933402I15Rik|AI662468|AU014779|AW561908|cI-44|mKIAA1980	tetratricopeptide repeat domain 14	protein-coding
649	chr12	111036304	111038065	+	0	NA	Intergenic	Intergenic	51096	NR_037233	100499517		NR_037233	miRBase:MI0014035	Mir3072	mmu-mir-3072	microRNA 3072	ncRNA
2150	chr5	141177804	141182026	+	0	NA	Intergenic	Intergenic	-1050	NM_181066	231841	Mm.271932	NM_172724	ENSMUSG00000000148	Brat1	AA881470|Baat1	BRCA1-associated ATM activator 1	protein-coding
1318	chr18	21455253	21459276	+	0	NA	intron (NM_001033445, intron 1 of 5)	intron (NM_001033445, intron 1 of 5)	1376	NM_001033445	381126	Mm.312276	NM_001033445	ENSMUSG00000042680	Garem	C86169|Fam59a|Gm944|mKIAA4238	GRB2 associated, regulator of MAPK1	protein-coding
648	chr12	110073380	110104305	+	0	NA	promoter-TSS (NM_001012310)	promoter-TSS (NM_001012310)	-497	NM_001012310	104910	Mm.202653	NM_001012310	ENSMUSG00000048856	Slc25a47	AI132487|AI876593|HDMCP	solute carrier family 25, member 47	protein-coding
642	chr12	105573889	105587264	+	0	NA	intron (NM_011458, intron 2 of 4)	intron (NM_011458, intron 2 of 4)	3880	NM_011458	20714	Mm.291569	NM_011458	ENSMUSG00000058207	Serpina3k	1300001I07Rik|D12Rp54|MMCM2|MMSpi2|RP54|Spi-2|Spi2|contrapsin	serine (or cysteine) peptidase inhibitor, clade A, member 3K	protein-coding
2006	chr5	3646817	3648366	+	0	NA	exon (NM_026033, exon 1 of 5)	exon (NM_026033, exon 1 of 5)	345	NM_026033	67210	Mm.178424	NM_026033	ENSMUSG00000007415	Gatad1	2310031E19Rik|2810047M21Rik|8430439A17Rik|9130430G15Rik|B330017N08Rik|ENSMUSG00000073241|Odag	GATA zinc finger domain containing 1	protein-coding
2245	chr6	72846927	72853504	+	0	NA	promoter-TSS (NM_019715)	promoter-TSS (NM_019715)	-242	NM_019715	74287	Mm.29194	NM_019715	ENSMUSG00000055239	Kcmf1	1700094M07Rik|Debt91|Pmcf	potassium channel modulatory factor 1	protein-coding
1764	chr3	113332269	113333966	+	0	NA	promoter-TSS (NM_026043)	promoter-TSS (NM_026043)	-50	NM_001038696	67225	Mm.316928	NM_026043	ENSMUSG00000027981	Rnpc3	2810441O16Rik|AI447568|C030014B17Rik	RNA-binding region (RNP1, RRM) containing 3	protein-coding
2130	chr5	123793735	123797176	+	0	NA	intron (NM_029850, intron 1 of 5)	CpG	998	NM_029850	77045	Mm.151960	NM_029850	ENSMUSG00000029438	Bcl7a	4432415N06Rik|AI448316	B cell CLL/lymphoma 7A	protein-coding
1908	chr4	102786545	102796072	+	0	NA	promoter-TSS (NM_001039081)	promoter-TSS (NM_001039081)	-687	NM_001039081	71148	Mm.288721	NM_027696	ENSMUSG00000028522	Mier1	4933425I22Rik|5830411K19Rik|er1	mesoderm induction early response 1 homolog (Xenopus laevis	protein-coding
1028	chr15	97975226	97976551	+	0	NA	intron (NM_001170711, intron 1 of 3)	CpG	245	NM_030121	78541	Mm.200766	NM_030121	ENSMUSG00000048175	Asb8	4930539L19Rik|AI788835|C430011H06Rik	ankyrin repeat and SOCS box-containing 8	protein-coding
1589	chr2	136939249	136943773	+	0	NA	intron (NM_013822, intron 1 of 25)	CpG-8606	745	NM_013822	16449	Mm.22398	NM_013822	ENSMUSG00000027276	Jag1	ABE2|Gsfabe2|Htu|Ozz|Ser-1	jagged 1	protein-coding
198	chr1	194435861	194437001	+	0	NA	intron (NM_144881, intron 9 of 11)	intron (NM_144881, intron 9 of 11)	160982	NM_144881	226861	Mm.145857	NM_144881	ENSMUSG00000037375	Hhat	2810432O22Rik|AI462858|AP-2CRE|Skn|Tg(TFAP2A-cre)1Will	hedgehog acyltransferase	protein-coding
2792	chr9	107774300	107775680	+	0	NA	5' UTR (NM_011251, exon 1 of 21)	5' UTR (NM_011251, exon 1 of 21)	160	NM_011251	19654	Mm.139926	NM_011251	ENSMUSG00000032582	Rbm6	4930506F14Rik|Def-3|NY-LU-12|g16|mKIAA4015	RNA binding motif protein 6	protein-coding
2550	chr8	34494652	34496722	+	0	NA	intron (NM_001122822, intron 1 of 33)	intron (NM_001122822, intron 1 of 33)	312	NM_001122822	22427	Mm.228805	NM_011721	ENSMUSG00000031583	Wrn	AI846146	Werner syndrome homolog (human)	protein-coding
1718	chr3	87861904	87862759	+	0	NA	promoter-TSS (NM_144897)	promoter-TSS (NM_144897)	86	NM_144897	246703	Mm.205996	NM_144897	ENSMUSG00000028070	Apoa1bp	AA087124|AI-BP|AIBP|Apoa1ip|ESTM37	apolipoprotein A-I binding protein	protein-coding
1098	chr16	26748581	26756843	+	0	NA	intron (NR_105063, intron 1 of 2)	MT2A|LTR|ERVL	2876	NR_105063	100504628	Mm.393275	NR_105063	ENSMUSG00000092545	Gm20319	-	predicted gene, 20319	ncRNA
1059	chr16	14002581	14005788	+	0	NA	intron (NM_144518, intron 1 of 5)	intron (NM_144518, intron 1 of 5)	-17224	NM_001270718	74482	Mm.484026	NM_028968	ENSMUSG00000065968	Ifitm7	4933438K12Rik|Mil4	interferon induced transmembrane protein 7	protein-coding
2683	chr9	21396501	21398529	+	0	NA	promoter-TSS (NM_138303)	promoter-TSS (NM_138303)	-240	NM_001205157	74766	Mm.475712	NM_138303	ENSMUSG00000032182	Yipf2	1300010K09Rik	Yip1 domain family, member 2	protein-coding
913	chr14	76903823	76906828	+	0	NA	intron (NM_001177751, intron 2 of 2)	intron (NM_001177751, intron 2 of 2)	1008	NM_009366	21807	Mm.153272	NM_009366	ENSMUSG00000022010	Tsc22d1	AA589566|AW105905|Egr5|TSC-22|Tgfb1i4|Tsc|Tsc22	TSC22 domain family, member 1	protein-coding
2019	chr5	24346814	24349632	+	0	NA	promoter-TSS (NM_053075)	promoter-TSS (NM_053075)	-44	NM_053075	19744	Mm.319175	NM_053075	ENSMUSG00000028945	Rheb	-	Ras homolog enriched in brain	protein-coding
2665	chr8	127536346	127537351	+	0	NA	promoter-TSS (NM_016909)	promoter-TSS (NM_016909)	-49	NM_016909	53424	Mm.5248	NM_016909	ENSMUSG00000056820	Tsnax	R74833|Trax	translin-associated factor X	protein-coding
202	chr10	3132940	3136332	+	0	NA	5' UTR (NM_172546, exon 1 of 13)	5' UTR (NM_172546, exon 1 of 13)	332	NM_172546	215748	Mm.37984	NM_172546	ENSMUSG00000015202	Cnksr3	6820402C05|BC024086|Magi1	Cnksr family member 3	protein-coding
361	chr11	3548110	3550049	+	0	NA	promoter-TSS (NM_001159288)	promoter-TSS (NM_001159288)	-262	NR_002321	544752	Mm.390314	NR_002321	ENSMUSG00000056579	Tug1	AI316828	taurine upregulated gene 1	ncRNA
2468	chr7	121418169	121420348	+	0	NA	intron (NM_011965, intron 1 of 9)	intron (NM_011965, intron 1 of 9)	372	NM_011965	26440	Mm.121265	NM_011965	ENSMUSG00000030751	Psma1	C2|HC2|Pros-30|alpha-type	proteasome (prosome, macropain) subunit, alpha type 1	protein-coding
184	chr1	183139800	183143552	+	0	NA	5' UTR (NM_145514, exon 1 of 14)	5' UTR (NM_145514, exon 1 of 14)	433	NM_145514	226757	Mm.289082	NM_145514	ENSMUSG00000038733	Wdr26	1600024A01Rik|AA693241|AI447817|AU044014|C77982|Gid7	WD repeat domain 26	protein-coding
776	chr13	76154907	76156900	+	0	NA	5' UTR (NM_001131068, exon 1 of 4)	5' UTR (NM_001131068, exon 1 of 4)	107	NM_178916	218341	Mm.266515	NM_178916	ENSMUSG00000043190	Rfesd	AI256775|D030068K09	Rieske (Fe-S) domain containing	protein-coding
2183	chr6	13627094	13628431	+	0	NA	exon (NM_175312, exon 1 of 5)	exon (NM_175312, exon 1 of 5)	204	NM_175312	101148	Mm.354863	NM_175312	ENSMUSG00000042742	B630005N14Rik	AI666701	RIKEN cDNA B630005N14 gene	protein-coding
1819	chr4	3865905	3866815	+	0	NA	promoter-TSS (NM_019969)	promoter-TSS (NM_019969)	-211	NR_104356	66433	Mm.27406	NM_181391	ENSMUSG00000042198	Chchd7	1810049H20Rik	coiled-coil-helix-coiled-coil-helix domain containing 7	protein-coding
1459	chr19	61275426	61275945	+	0	NA	Intergenic	Intergenic	-23473	NM_001177513	633057	Mm.426097	NM_001177513	ENSMUSG00000094649	Gm7102	EG633057	predicted gene 7102	protein-coding
1570	chr2	121943467	121944830	+	0	NA	promoter-TSS (NM_145531)	promoter-TSS (NM_145531)	-26	NM_145531	214585	Mm.222303	NM_145531	ENSMUSG00000033396	Spg11	6030465E24Rik|A330015I11|C530005A01Rik	spastic paraplegia 11	protein-coding
2673	chr9	14079137	14081634	+	0	NA	promoter-TSS (NM_030261)	promoter-TSS (NM_030261)	-360	NM_030261	75747	Mm.325126	NM_030261	ENSMUSG00000032009	Sesn3	5630400E15Rik|BC003348|SEST3	sestrin 3	protein-coding
1984	chr4	143001944	143003189	+	0	NA	5' UTR (NM_172877, exon 1 of 5)	5' UTR (NM_172877, exon 1 of 5)	237	NM_172877	242736	Mm.275953	NM_172877	ENSMUSG00000046862	Pramef8	4732496O08Rik|AU023234	PRAME family member 8	protein-coding
1269	chr17	71947383	71949040	+	0	NA	promoter-TSS (NR_027952)	promoter-TSS (NR_027952)	-110	NR_027952	68789	Mm.75202	NR_015549	ENSMUSG00000085492	Trmt61b	1110039F03Rik|623451|Gm6431	tRNA methyltransferase 61B	ncRNA
181	chr1	181732313	181736675	+	0	NA	promoter-TSS (NM_026375)	promoter-TSS (NM_026375)	-348	NM_026375	226747	Mm.128165	NM_026375	ENSMUSG00000026491	Ahctf1	6230412P20Rik|AV011447|Elys	AT hook containing transcription factor 1	protein-coding
412	chr11	51501663	51503213	+	0	NA	promoter-TSS (NM_025319)	promoter-TSS (NM_025319)	-302	NM_025319	66050	Mm.35693	NM_025319	ENSMUSG00000007777	0610009B22Rik	-	RIKEN cDNA 0610009B22 gene	protein-coding
307	chr10	87290403	87397852	+	0	NA	intron (NM_001111275, intron 2 of 3)	Lx3C|LINE|L1	20271	NM_001111276	16000	Mm.268521	NM_010512	ENSMUSG00000020053	Igf1	C730016P09Rik|Igf-1|Igf-I	insulin-like growth factor 1	protein-coding
1671	chr3	30867158	30868778	+	0	NA	intron (NM_001165954, intron 1 of 14)	CpG	369	NM_001165954	241915	Mm.233173	NM_153421	ENSMUSG00000037652	Phc3	E030046K01Rik|Edr3|Hph3	polyhomeotic-like 3 (Drosophila)	protein-coding
2041	chr5	35291264	35292518	+	0	NA	promoter-TSS (NM_173402)	promoter-TSS (NM_173402)	-206	NM_173402	71729	Mm.196208	NM_173402	ENSMUSG00000029101	Rgs12	1200016K18Rik|4632412M04Rik|AI481290|E130309H11	regulator of G-protein signaling 12	protein-coding
1467	chr2	12845119	12848145	+	0	NA	intron (NM_008961, intron 1 of 4)	GA-rich|Low_complexity|Low_complexity	964	NM_008961	19212	Mm.229322	NM_008961	ENSMUSG00000026730	Pter	AI790318|Mpr56-1	phosphotriesterase related	protein-coding
1463	chr2	5589668	5598777	+	0	NA	intron (NM_177343, intron 1 of 10)	intron (NM_177343, intron 1 of 10)	2870	NM_001290376	227541	Mm.191949	NM_177343	ENSMUSG00000039145	Camk1d	A630059D12Rik|CKLiK|CaMKIdelta|E030025C11Rik|mCKLiK	calcium/calmodulin-dependent protein kinase ID	protein-coding
830	chr14	18491521	18495388	+	0	NA	promoter-TSS (NM_001113417)	promoter-TSS (NM_001113417)	-20	NM_001113417	21834	Mm.32563	NM_009380	ENSMUSG00000021779	Thrb	Nr1a2|T3R[b]|T3Rbeta|Thrb1|Thrb2|c-erbAbeta	thyroid hormone receptor beta	protein-coding
154	chr1	162963842	162966956	+	0	NA	non-coding (NR_002840, exon 1 of 4)	non-coding (NR_002840, exon 1 of 4)	102	NR_002840	14455	Mm.270065	NR_002840	ENSMUSG00000053332	Gas5	Gas-5|Mir5117	growth arrest specific 5	ncRNA
2062	chr5	73645783	73648881	+	0	NA	intron (NM_028194, intron 1 of 62)	CpG	525	NM_028194	72313	Mm.260594	NM_028194	ENSMUSG00000070733	Fryl	2010313D22Rik|2310004H21Rik|2510002A14Rik|9030227G01Rik|mKIAA0826	furry homolog-like (Drosophila)	protein-coding
1101	chr16	30238747	30268469	+	0	NA	Intergenic	Intergenic	14010	NM_027904	71756	Mm.290614	NM_027904	ENSMUSG00000023176	Cpn2	1300018K11Rik	carboxypeptidase N, polypeptide 2	protein-coding
2801	chr9	110033518	110035075	+	0	NA	promoter-TSS (NM_009211)	promoter-TSS (NM_009211)	-232	NM_009211	20588	Mm.85410	NM_009211	ENSMUSG00000032481	Smarcc1	AI115498|BAF155|Rsc8|SRG3	SWI/SNF related, matrix associated, actin dependent regulator of chromatin, subfamily c, member 1	protein-coding
704	chr13	42144067	42150579	+	0	NA	promoter-TSS (NM_007772)	promoter-TSS (NM_007772)	-67	NM_007772	110521	Mm.4808	NM_007772	ENSMUSG00000021366	Hivep1	Cryabp1	human immunodeficiency virus type I enhancer binding protein 1	protein-coding
326	chr10	111409551	111410366	+	0	NA	intron (NM_178610, intron 1 of 9)	CpG	207	NM_178610	52705	Mm.34606	NM_178610	ENSMUSG00000063334	Krr1	2610511F02Rik|AI255219|AI428520|D10Ertd773e|Hrb2	KRR1, small subunit (SSU) processome component, homolog (yeast)	protein-coding
1462	chr2	4979281	4985334	+	0	NA	intron (NM_181848, intron 1 of 14)	intron (NM_181848, intron 1 of 14)	2677	NM_181848	71648	Mm.116942	NM_181848	ENSMUSG00000026672	Optn	4930441O07Rik|FIP2|HYPL|NRP	optineurin	protein-coding
1165	chr17	13200002	13203321	+	0	NA	intron (NM_013671, intron 2 of 4)	intron (NM_013671, intron 2 of 4)	956	NM_013671	20656	Mm.290876	NM_013671	ENSMUSG00000006818	Sod2	MnSOD|Sod-2	superoxide dismutase 2, mitochondrial	protein-coding
2543	chr8	23699740	23705053	+	0	NA	intron (NM_001198998, intron 1 of 8)	intron (NM_001198998, intron 1 of 8)	1889	NM_001198998	22335	Mm.227704	NM_011696	ENSMUSG00000008892	Vdac3	-	voltage-dependent anion channel 3	protein-coding
681	chr13	24412137	24485877	+	0	NA	intron (NM_001284519, intron 2 of 17)	intron (NM_001284519, intron 2 of 17)	29734	NM_001111110	12763	Mm.8396	NM_007717	ENSMUSG00000016756	Cmah	-	cytidine monophospho-N-acetylneuraminic acid hydroxylase	protein-coding
335	chr10	118158645	118160005	+	0	NA	Intergenic	Intergenic	146634	NM_001014390	69181	Mm.45565	NM_001014390	ENSMUSG00000028630	Dyrk2	1810038L18Rik	dual-specificity tyrosine-(Y)-phosphorylation regulated kinase 2	protein-coding
1029	chr15	98362560	98365181	+	0	NA	intron (NM_133714, intron 2 of 9)	intron (NM_133714, intron 2 of 9)	830	NM_001289438	69612	Mm.296240	NM_133714	ENSMUSG00000022992	Kansl2	2310037I24Rik|B930009D17	KAT8 regulatory NSL complex subunit 2	protein-coding
2715	chr9	48302627	48304210	+	0	NA	promoter-TSS (NM_001004191)	promoter-TSS (NM_001004191)	17	NR_037589	67010	Mm.76911	NM_144948	ENSMUSG00000042396	Rbm7	1200007M24Rik|1500011D06Rik|AU041934|AW554393	RNA binding motif protein 7	protein-coding
5	chr1	9735048	9739292	+	0	NA	promoter-TSS (NR_040462)	promoter-TSS (NR_040462)	-559	NR_040462	73331	Mm.460470	NR_040462		1700034P13Rik	-	RIKEN cDNA 1700034P13 gene	ncRNA
2694	chr9	30952288	30953865	+	0	NA	intron (NR_037304, intron 1 of 3)	Charlie7|DNA|MER1_type	-13692	NM_011176	19143	Mm.243926	NM_011176	ENSMUSG00000031995	St14	Epithin|MT-SP1|Prss14|Tmprss14|mCAP3|matriptase	suppression of tumorigenicity 14 (colon carcinoma)	protein-coding
2105	chr5	109088644	109108135	+	0	NA	exon (NM_008325, exon 2 of 15)	exon (NM_008325, exon 2 of 15)	6279	NM_174870	231583	Mm.440571	NM_174870	ENSMUSG00000046959	Slc26a1	Sat1	solute carrier family 26 (sulfate transporter), member 1	protein-coding
2791	chr9	107672257	107673944	+	0	NA	intron (NM_148930, intron 1 of 24)	CpG	233	NM_148930	83486	Mm.259197	NM_148930	ENSMUSG00000032580	Rbm5	D030069N10Rik	RNA binding motif protein 5	protein-coding
1957	chr4	129348857	129350857	+	0	NA	intron (NM_008468, intron 1 of 13)	CpG	154	NM_008468	16650	Mm.202358	NM_008468	ENSMUSG00000003731	Kpna6	IPOA7|Kpna5|NPI-2	karyopherin (importin) alpha 6	protein-coding
554	chr12	10397258	10398865	+	0	NA	intron (NM_023697, intron 1 of 1)	intron (NM_023697, intron 1 of 1)	475	NM_023697	105014	Mm.119343	NM_023697	ENSMUSG00000020621	Rdh14	3110030G19Rik|AW215439|PAN2	retinol dehydrogenase 14 (all-trans and 9-cis)	protein-coding
2657	chr8	125966488	125968288	+	0	NA	intron (NM_001281803, intron 1 of 11)	intron (NM_001281803, intron 1 of 11)	229	NM_001281803	23854	Mm.275127	NM_054046	ENSMUSG00000001482	Def8	AI449518|D8Ertd713e|DEF-8	differentially expressed in FDCP 8	protein-coding
552	chr12	8680396	8683694	+	0	NA	intron (NM_030723, intron 1 of 20)	intron (NM_030723, intron 1 of 20)	558	NM_030723	80913	Mm.341243	NM_030723	ENSMUSG00000020594	Pum2	5730503J23Rik|Pumm2|mKIAA0235	pumilio RNA-binding family member 2	protein-coding
1867	chr4	46662786	46663686	+	0	NA	promoter-TSS (NM_198664)	promoter-TSS (NM_198664)	-165	NM_198664	381605	Mm.331595	NM_198664	ENSMUSG00000039813	Tbc1d2	A630005A06Rik|BC022630|Gm1037|PARIS-1|PARIS1	TBC1 domain family, member 2	protein-coding
1623	chr2	158450326	158451514	+	0	NA	exon (NM_175419, exon 1 of 9)	exon (NM_175419, exon 1 of 9)	271	NM_175419	109275	Mm.27747	NM_175419	ENSMUSG00000037761	Actr5	AA545173|B430109J19Rik	ARP5 actin-related protein 5	protein-coding
2505	chr7	145729121	145731104	+	0	NA	Intergenic	Intergenic	-140699	NM_183289	70571	Mm.334297	NM_183289	ENSMUSG00000091002	Tcerg1l	5730476P14Rik	transcription elongation regulator 1-like	protein-coding
74	chr1	82312616	82313696	+	0	NA	promoter-TSS (NM_029777)	promoter-TSS (NM_029777)	2	NM_029777	76867	Mm.226994	NM_029777	ENSMUSG00000026142	Rhbdd1	4930418P06Rik|RRP4|mRHBDD1	rhomboid domain containing 1	protein-coding
890	chr14	61968372	61983873	+	0	NA	intron (NM_026598, intron 1 of 3)	intron (NM_026598, intron 1 of 3)	3160	NM_026598	68177	Mm.22758	NM_026598	ENSMUSG00000021928	Ebpl	5730442K12Rik|EBRP	emopamil binding protein-like	protein-coding
440	chr11	68502656	68506267	+	0	NA	promoter-TSS (NM_175260)	promoter-TSS (NM_175260)	-956	NM_175260	77579	Mm.218233	NM_175260	ENSMUSG00000020900	Myh10	5730504C04Rik|9330167F11Rik|Fltn|Myhn-2|Myhn2|NMHC II-B|NMHC-B|NMHCII-B|NMMHC II-b|NMMHC-B|NMMHC-IIB|SMemb|mKIAA3005	myosin, heavy polypeptide 10, non-muscle	protein-coding
1926	chr4	115893253	115894761	+	0	NA	promoter-TSS (NM_181585)	promoter-TSS (NM_181585)	-512	NM_181585	18710	Mm.253819	NM_181585	ENSMUSG00000028698	Pik3r3	AA414954|p55pik	phosphatidylinositol 3 kinase, regulatory subunit, polypeptide 3 (p55)	protein-coding
1289	chr17	95263587	95264756	+	0	NA	Intergenic	Intergenic	-30011	NM_153780	72139	Mm.426514	NM_153780		2610044O15Rik8	2610044O15Rik	RIKEN cDNA 2610044O15 gene	protein-coding
299	chr10	84376868	84380842	+	0	NA	Intergenic	Intergenic	-1503	NM_001013441	237422	Mm.18936	NM_183172		Ric8b	BC051080|Ric-8|Ric-8b	resistance to inhibitors of cholinesterase 8 homolog B (C. elegans)	protein-coding
2024	chr5	28357170	28408300	+	0	NA	Intergenic	B1_Mus2|SINE|Alu	-15217	NM_153526	231070	Mm.30221	NM_153526	ENSMUSG00000045294	Insig1	1810013C12Rik|Insig-1	insulin induced gene 1	protein-coding
2525	chr8	8689486	8690683	+	0	NA	promoter-TSS (NR_106114)	promoter-TSS (NR_106114)	78	NR_106114	102465762		NR_106114		Mir7654	mmu-mir-7654	microRNA mir-7654	ncRNA
1282	chr17	85489049	85490583	+	0	NA	promoter-TSS (NM_001163624)	promoter-TSS (NM_001163624)	-202	NM_001163624	213760	Mm.259035	NM_145984	ENSMUSG00000024127	Prepl	2810457N15Rik|9530014L06Rik|D030028O16Rik|mKIAA0436	prolyl endopeptidase-like	protein-coding
1694	chr3	58038710	58040440	+	0	NA	Intergenic	Intergenic	-71846	NR_040538	67850	Mm.416968	NR_040538		1700007F19Rik	-	RIKEN cDNA 1700007F19 gene	ncRNA
841	chr14	26825038	26825962	+	0	NA	Intergenic	RMER17C-int|LTR|ERVK	23009	NM_001177538	100039227	Mm.428840	NM_001177538	ENSMUSG00000072675	Duxbl2	ENSMUSG00000072675|Gm10394	doubl homeobox B-like 2	protein-coding
1898	chr4	93001191	93002638	+	0	NA	exon (NM_026954, exon 1 of 1)	exon (NM_026954, exon 1 of 1)	288	NM_026954	69136	Mm.171558	NM_026954	ENSMUSG00000054000	Tusc1	2200001D17Rik|TSG-9	tumor suppressor candidate 1	protein-coding
1044	chr15	102500604	102504635	+	0	NA	promoter-TSS (NR_030460)	promoter-TSS (NR_030460)	-322	NR_030460	751542		NR_030460	miRBase:MI0004653	Mir688	Mirn688|mmu-mir-688	microRNA 688	ncRNA
1350	chr18	51309299	51328492	+	0	NA	intron (NM_001081224, intron 1 of 1)	intron (NM_001081224, intron 1 of 1)	41343	NM_001081224	71373	Mm.63546	NM_001081224	ENSMUSG00000073565	Prr16	5430406M13Rik|AI607429	proline rich 16	protein-coding
1751	chr3	102861848	102862838	+	0	NA	TTS (NM_144901)	TTS (NM_144901)	135	NM_010937	18176	Mm.400954	NM_010937	ENSMUSG00000027852	Nras	AV095280|N-ras	neuroblastoma ras oncogene	protein-coding
91	chr1	95372036	95376783	+	0	NA	intron (NM_133808, intron 1 of 27)	intron (NM_133808, intron 1 of 27)	1085	NM_133808	110611	Mm.30012	NM_133808	ENSMUSG00000034088	Hdlbp	1110005P14Rik|AA960365|AI118566|D1Ertd101e	high density lipoprotein (HDL) binding protein	protein-coding
2137	chr5	130089751	130090056	+	0	NA	promoter-TSS (NM_011846)	promoter-TSS (NM_011846)	-186	NM_011846	23948	Mm.42047	NM_011846	ENSMUSG00000029436	Mmp17	MT4-MMP|MT4MMP|MTMMP4	matrix metallopeptidase 17	protein-coding
1240	chr17	46841476	46889658	+	0	NA	intron (NM_010321, intron 1 of 5)	intron (NM_010321, intron 1 of 5)	547	NM_010321	14711	Mm.29395	NM_010321	ENSMUSG00000002769	Gnmt	-	glycine N-methyltransferase	protein-coding
2815	chr9	121606594	121629671	+	0	NA	Intergenic	Intergenic	-1375	NM_026794	26901	Mm.24848	NM_026794	ENSMUSG00000032526	Deb1	1110020I04Rik|AI463209|Ss18l2	differentially expressed in B16F10 1	protein-coding
467	chr11	79152204	79154276	+	0	NA	promoter-TSS (NM_010897)	promoter-TSS (NM_010897)	-154	NM_010897	18015	Mm.255596	NM_010897	ENSMUSG00000020716	Nf1	AW494271|E030030H24Rik|Nf-1	neurofibromatosis 1	protein-coding
2121	chr5	121778644	121787563	+	0	NA	intron (NM_181421, intron 51 of 75)	intron (NM_181421, intron 51 of 75)	52521	NM_001163470	231712	Mm.20488	NM_172275	ENSMUSG00000042726	Trafd1	1110008K06Rik|Fln29	TRAF type zinc finger domain containing 1	protein-coding
474	chr11	83285388	83288282	+	0	NA	intron (NM_027427, intron 1 of 15)	CpG	225	NM_027427	70439	Mm.181050	NM_027427	ENSMUSG00000020680	Taf15	2610111C21Rik|68kDa|TAFII68|Taf2n	TAF15 RNA polymerase II, TATA box binding protein (TBP)-associated factor	protein-coding
481	chr11	86014051	86015744	+	0	NA	promoter-TSS (NM_178309)	promoter-TSS (NM_178309)	-202	NM_178309	237911	Mm.186143	NM_178309	ENSMUSG00000034329	Brip1	3110009N10Rik|8030460J03Rik|Bach1|FACJ|Fancj|OF	BRCA1 interacting protein C-terminal helicase 1	protein-coding
867	chr14	49790707	49793719	+	0	NA	intron (NM_001081430, intron 1 of 4)	GC_rich|Low_complexity|Low_complexity	311	NM_001081430	70646	Mm.275688	NM_001081430	ENSMUSG00000036282	Naa30	4930487N19Rik|5730533P17Rik|AI447922|AW322455|Nat12	N(alpha)-acetyltransferase 30, NatC catalytic subunit	protein-coding
1976	chr4	138522396	138537512	+	0	NA	intron (NM_029857, intron 1 of 16)	intron (NM_029857, intron 1 of 16)	1134	NM_029857	77056	Mm.122336	NM_029857	ENSMUSG00000041143	Tmco4	4632413C14Rik|AI430825	transmembrane and coiled-coil domains 4	protein-coding
817	chr13	112475933	112477947	+	0	NA	intron (NM_172593, intron 1 of 12)	CpG	554	NM_172593	218613	Mm.31012	NM_172593	ENSMUSG00000032727	Mier3	5730509D14|AU015422|D130064H19Rik	mesoderm induction early response 1, family member 3	protein-coding
563	chr12	31595881	31597732	+	0	NA	promoter-TSS (NM_001110239)	promoter-TSS (NM_001110239)	272	NM_013709	24057	Mm.218624	NM_013709	ENSMUSG00000020669	Sh3yl1	AI314953|Ray|YSC84	Sh3 domain YSC-like 1	protein-coding
2751	chr9	72377945	72381244	+	0	NA	promoter-TSS (NR_045735)	promoter-TSS (NR_045735)	71	NR_045735	75115	Mm.280755	NR_045735	ENSMUSG00000096986	4930509E16Rik	-	RIKEN cDNA 4930509E16 gene	ncRNA
229	chr10	30320028	30321076	+	0	NA	promoter-TSS (NM_028604)	promoter-TSS (NM_028604)	3	NM_028604	73681	Mm.294503	NM_028604	ENSMUSG00000019792	Trmt11	2410075D05Rik|3110045I18Rik|AW213713	tRNA methyltransferase 11	protein-coding
673	chr13	18035191	18036580	+	0	NA	5' UTR (NM_019491, exon 1 of 5)	5' UTR (NM_019491, exon 1 of 5)	166	NM_019491	56044	Mm.27348	NM_019491	ENSMUSG00000008859	Rala	3010001O15Rik|AW322615|Ral|Rasl1	v-ral simian leukemia viral oncogene homolog A (ras related)	protein-coding
68	chr1	75432328	75432924	+	0	NA	intron (NM_133708, intron 1 of 12)	intron (NM_133708, intron 1 of 12)	108	NM_133708	69080	Mm.23951	NM_133708	ENSMUSG00000033021	Gmppa	1810012N01Rik	GDP-mannose pyrophosphorylase A	protein-coding
2059	chr5	67651317	67655787	+	0	NA	intron (NM_001285452, intron 1 of 6)	B3A|SINE|B2	1748	NM_030108	67878	Mm.23217	NM_028975	ENSMUSG00000037720	Tmem33	1110006G02Rik|1600019D15Rik|2410089A21Rik|2700052H22Rik|5430406L04Rik|AA388285|AI314185|AI426615|db83	transmembrane protein 33	protein-coding
315	chr10	93660675	93662500	+	0	NA	promoter-TSS (NM_025551)	promoter-TSS (NM_025551)	-167	NM_025551	66414	Mm.27886	NM_025551	ENSMUSG00000020022	Ndufa12	2410011G03Rik|AW112974	NADH dehydrogenase (ubiquinone) 1 alpha subcomplex, 12	protein-coding
2514	chr7	150659197	150663839	+	0	NA	intron (NM_001042760, intron 1 of 10)	intron (NM_001042760, intron 1 of 10)	497	NM_001042760	18400	Mm.271740	NM_008767	ENSMUSG00000000154	Slc22a18	AW260131|BWR1A|BWSCR1A|HET|ITM|Impt1|Orctl2|Slc22a1l|TSSC5|p45-BWR1A	solute carrier family 22 (organic cation transporter), member 18	protein-coding
1827	chr4	15192177	15198150	+	0	NA	intron (NM_181401, intron 1 of 2)	intron (NM_181401, intron 1 of 2)	2196	NM_181401	100201	Mm.394111	NM_181401	ENSMUSG00000043252	Tmem64	9630015D15Rik|AI790744|AV300874	transmembrane protein 64	protein-coding
2501	chr7	140313307	140316810	+	0	NA	5' UTR (NM_009980, exon 1 of 11)	5' UTR (NM_009980, exon 1 of 11)	108	NM_009980	13017	Mm.246240	NM_009980	ENSMUSG00000030970	Ctbp2	AA407280|D7Ertd45e|Gtrgeo6|Ribeye	C-terminal binding protein 2	protein-coding
2366	chr7	28375672	28394755	+	0	NA	intron (NM_001110208, intron 1 of 13)	intron (NM_001110208, intron 1 of 13)	-5666	NM_007434	11652	Mm.177194	NM_007434	ENSMUSG00000004056	Akt2	2410016A19Rik|AW554154|PKB|PKBbeta	thymoma viral proto-oncogene 2	protein-coding
1947	chr4	124762084	124763040	+	0	NA	intron (NM_001290701, intron 1 of 6)	CpG	184	NM_001290701	70088	Mm.291214	NM_027310	ENSMUSG00000028863	Meaf6	2310005N01Rik|2810036M01Rik	MYST/Esa1-associated factor 6	protein-coding
1347	chr18	49914816	49916166	+	0	NA	promoter-TSS (NM_001170960)	promoter-TSS (NM_001170960)	-236	NM_001170960	68857	Mm.96010	NM_026854	ENSMUSG00000024505	Dtwd2	1190002H09Rik|8030470C17Rik|AI414673|BB115449	DTW domain containing 2	protein-coding
222	chr10	20671609	20672819	+	0	NA	promoter-TSS (NM_026203)	promoter-TSS (NM_026203)	-139	NM_026203	52906	Mm.253280	NM_026203	ENSMUSG00000019986	Ahi1	1700015F03Rik|Ahi-1|D10Bwg0629e	Abelson helper integration site 1	protein-coding
1504	chr2	38920405	38922220	+	0	NA	promoter-TSS (NM_029793)	promoter-TSS (NM_029793)	-251	NM_029793	76899	Mm.131098	NM_029793	ENSMUSG00000026754	Golga1	0710001G09Rik|2210418B03Rik|AW107649|Golgi97|golgin-97	golgi autoantigen, golgin subfamily a, 1	protein-coding
25	chr1	36121538	36167155	+	0	NA	intron (NM_015818, intron 1 of 1)	L1MB3|LINE|L1	19101	NM_015818	50785	Mm.213566	NM_015818	ENSMUSG00000045216	Hs6st1	6Ost1	heparan sulfate 6-O-sulfotransferase 1	protein-coding
2270	chr6	94946092	94954052	+	0	NA	Intergenic	Intergenic	56244	NR_040761	78773	Mm.67065	NR_040761		4930511E03Rik	-	RIKEN cDNA 4930511E03 gene	ncRNA
2418	chr7	72017307	72018440	+	0	NA	promoter-TSS (NM_023239)	promoter-TSS (NM_023239)	53	NM_023239	66647	Mm.19944	NM_023239		Ndnl2	5730494G16Rik|AI642138|BB044375|HCA4|Mageg1|mage-g1	necdin-like 2	protein-coding
305	chr10	85960937	85961950	+	0	NA	intron (NM_001164495, intron 1 of 6)	intron (NM_001164495, intron 1 of 6)	198	NM_001164495	27204	Mm.394931	NM_013722	ENSMUSG00000059602	Syn3	-	synapsin III	protein-coding
1253	chr17	56855848	56857782	+	0	NA	promoter-TSS (NM_178926)	promoter-TSS (NM_178926)	307	NM_001166474	106639	Mm.37290	NM_178926	ENSMUSG00000054723	Vmac	AI662250	vimentin-type intermediate filament associated coiled-coil protein	protein-coding
928	chr14	122196436	122198195	+	0	NA	promoter-TSS (NM_134074)	promoter-TSS (NM_134074)	-359	NM_134074	105445	Mm.441054	NM_134074	ENSMUSG00000025558	Dock9	AA959601|AW538057|B230309H04Rik|D14Wsu89e|Zizimin1|mKIAA1058	dedicator of cytokinesis 9	protein-coding
1644	chr2	174261386	174265674	+	0	NA	intron (NM_022325, intron 2 of 5)	intron (NM_022325, intron 2 of 5)	963	NM_022325	64138	Mm.156919	NM_022325	ENSMUSG00000016256	Ctsz	AI787083|AU019819|CTSX|D2Wsu143e	cathepsin Z	protein-coding
1526	chr2	73807769	73810201	+	0	NA	Intergenic	Intergenic	-59634	NM_175015	228033	Mm.2966	NM_175015	ENSMUSG00000018770	Atp5g3	6030447M23	ATP synthase, H+ transporting, mitochondrial F0 complex, subunit C3 (subunit 9)	protein-coding
217	chr10	17741755	17743292	+	0	NA	intron (NM_028440, intron 1 of 2)	CpG	535	NM_028440	73112	Mm.276041	NM_028440	ENSMUSG00000078453	Abracl	1700028I04Rik|3110003A17Rik	ABRA C-terminal like	protein-coding
2648	chr8	119256211	119257398	+	0	NA	promoter-TSS (NM_029441)	promoter-TSS (NM_029441)	87	NM_029441	75796	Mm.159575	NM_029441	ENSMUSG00000031758	Cdyl2	1700029M19Rik|4930453I21Rik|Gm20194	chromodomain protein, Y chromosome-like 2	protein-coding
1730	chr3	94561532	94562885	+	0	NA	Intergenic	CpG	28229	NM_001293727	70737	Mm.87634	NM_001037711	ENSMUSG00000068876	Cgn	6330408J11Rik	cingulin	protein-coding
158	chr1	164669614	164671306	+	0	NA	5' UTR (NM_001081290, exon 1 of 35)	5' UTR (NM_001081290, exon 1 of 35)	227	NM_001081290	226562	Mm.245446	NM_001081290	ENSMUSG00000040225	Prrc2c	1810043M20Rik|9630039I18Rik|A630006J20|Bat2d|Bat2d1|Bat2l2|E130112L15Rik|Prrc3|mKIAA1096	proline-rich coiled-coil 2C	protein-coding
281	chr10	80118706	80166506	+	0	NA	Intergenic	Intergenic	-7885	NM_021462	17347	Mm.42126	NM_021462	ENSMUSG00000020190	Mknk2	2010016G11Rik|Gprk7|Mnk2	MAP kinase-interacting serine/threonine kinase 2	protein-coding
46	chr1	57462868	57464265	+	0	NA	promoter-TSS (NM_001037742)	promoter-TSS (NM_001037742)	-48	NM_001037742	68736	Mm.288490	NM_001037742	ENSMUSG00000048495	Tyw5	1110034B05Rik	tRNA-yW synthesizing protein 5	protein-coding
1851	chr4	41411202	41412814	+	0	NA	promoter-TSS (NM_025539)	promoter-TSS (NM_025539)	-127	NM_024241	109242	Mm.370288	NM_024241	ENSMUSG00000028438	Kif24	4933425J19Rik|9430029L23Rik	kinesin family member 24	protein-coding
1316	chr18	21159416	21161556	+	0	NA	5' UTR (NM_019706, exon 2 of 7)	5' UTR (NM_019706, exon 2 of 7)	644	NM_207623	56515	Mm.253542	NM_019706	ENSMUSG00000024317	Rnf138	2410015A17Rik|2810480D20Rik|STRIN|Trif|Trif-d	ring finger protein 138	protein-coding
2630	chr8	109816327	109818705	+	0	NA	5' UTR (NM_133957, exon 1 of 16)	5' UTR (NM_133957, exon 1 of 16)	146	NM_133957	54446	Mm.390057	NM_018823	ENSMUSG00000003847	Nfat5	AI225870|B130038B15Rik|CAG-8|CAG80|NFATL1|OREBP|TonEBP|mKIAA0827|nfatz	nuclear factor of activated T cells 5	protein-coding
2373	chr7	30551761	30554664	+	0	NA	promoter-TSS (NM_023750)	promoter-TSS (NM_023750)	-359	NM_023750	74352	Mm.251083	NM_023750		Zfp84	2210410P13Rik|4633401C23Rik|AI415447|BB081605|C86188|KRAB18|Zfp69	zinc finger protein 84	protein-coding
1418	chr19	32785933	32787522	+	0	NA	promoter-TSS (NM_026487)	promoter-TSS (NM_026487)	61	NM_026487	67979	Mm.27123	NM_026487	ENSMUSG00000013662	Atad1	4921525H23Rik|AW107648|Thorase	ATPase family, AAA domain containing 1	protein-coding
36	chr1	45851678	45852799	+	0	NA	promoter-TSS (NM_028599)	promoter-TSS (NM_028599)	-108	NM_028599	73674	Mm.270376	NM_028599	ENSMUSG00000025995	Wdr75	1300003A18Rik|2410118I19Rik|C77608	WD repeat domain 75	protein-coding
2263	chr6	89592810	89595008	+	0	NA	promoter-TSS (NM_001178058)	promoter-TSS (NM_001178058)	-73	NM_001178060	232223	Mm.229332	NM_153162	ENSMUSG00000000811	Txnrd3	AI196535|TR2|Tgr	thioredoxin reductase 3	protein-coding
1368	chr18	74918030	74947930	+	0	NA	Intergenic	ORR1B1|LTR|MaLR	5129	NR_028560	100217466		NR_028560		Scarna17	MBII-119	small Cajal body-specific RNA 17	ncRNA
748	chr13	67033032	67034820	+	0	NA	promoter-TSS (NM_025547)	promoter-TSS (NM_025547)	82	NM_025547	66410	Mm.347939	NM_025547	ENSMUSG00000021519	Mterf3	2410017I18Rik|Mterfd1	mitochondrial transcription termination factor 3	protein-coding
472	chr11	82700741	82704227	+	0	NA	intron (NR_102719, intron 2 of 8)	URR1A|DNA|MER1_type	1642	NR_102719	19364	Mm.9286	NM_011235		Rad51d	R51H3|Rad51l3|TRAD	RAD51 homolog D	protein-coding
1655	chr3	8666605	8668522	+	0	NA	promoter-TSS (NM_010423)	promoter-TSS (NM_010423)	-525	NM_010423	15213	Mm.29581	NM_010423	ENSMUSG00000040289	Hey1	AI316788|AI414254|CHF2|HRT1|Herp2|Hesr1|bHLHb31|hesr-1	hairy/enhancer-of-split related with YRPW motif 1	protein-coding
1943	chr4	120884230	120888064	+	0	NA	Intergenic	Intergenic	-25008	NM_001081013	109263	Mm.215745	NM_001081013	ENSMUSG00000049878	Rlf	9230110M18Rik|AI195322|MommeD8	rearranged L-myc fusion sequence	protein-coding
317	chr10	95220120	95245752	+	0	NA	Intergenic	MTB|LTR|MaLR	-170361	NM_001001932	216238	Mm.210035	NM_001001932	ENSMUSG00000036499	Eea1	A430109M19Rik|B230358H09Rik|ZFYVE2	early endosome antigen 1	protein-coding
711	chr13	47200268	47202187	+	0	NA	intron (NM_025900, intron 1 of 10)	CpG	362	NM_025900	110052	Mm.131150	NM_025900	ENSMUSG00000021377	Dek	1810019E15Rik|D13H6S231E	DEK oncogene (DNA binding)	protein-coding
132	chr1	141318190	141319772	+	0	NA	promoter-TSS (NM_172643)	promoter-TSS (NM_172643)	21	NM_172643	226470	Mm.119711	NM_172643	ENSMUSG00000033964	Zbtb41	8430415N23Rik|9430031N01|9830132G07Rik|AI316857	zinc finger and BTB domain containing 41 homolog	protein-coding
1791	chr3	132972871	132974193	+	0	NA	intron (NM_146141, intron 1 of 11)	CpG	458	NM_146141	74776	Mm.210305	NM_146141	ENSMUSG00000028013	Ppa2	1110013G13Rik|Sid6306	pyrophosphatase (inorganic) 2	protein-coding
1254	chr17	57150257	57151517	+	0	NA	promoter-TSS (NM_133801)	promoter-TSS (NM_133801)	-176	NM_133801	98053	Mm.24632	NM_133801	ENSMUSG00000002658	Gtf2f1	2810405L04Rik|C76800|RAP74	general transcription factor IIF, polypeptide 1	protein-coding
1642	chr2	173935201	173936645	+	0	NA	promoter-TSS (NM_213733)	promoter-TSS (NM_213733)	71	NM_213733	228961	Mm.295629	NM_213733	ENSMUSG00000039263	Npepl1	BC023239|C85514|mKIAA1974	aminopeptidase-like 1	protein-coding
892	chr14	64162290	64163375	+	0	NA	promoter-TSS (NM_177594)	promoter-TSS (NM_177594)	-42	NM_177594	210376	Mm.441613	NM_177594	ENSMUSG00000035078	Mtmr9	9430075G12Rik|AA516943|AF073881|LIP-STYX|MTMR8|mMTMH3	myotubularin related protein 9	protein-coding
2180	chr6	8158910	8160013	+	0	NA	intron (NM_145374, intron 1 of 11)	CpG	234	NM_145374	252875	Mm.257151	NM_145374	ENSMUSG00000042447	Mios	C81488	missing oocyte, meiosis regulator, homolog (Drosophila)	protein-coding
2769	chr9	96095966	96098001	+	0	NA	intron (NM_178667, intron 1 of 13)	CpG	289	NM_001184706	211586	Mm.17977	NM_178667	ENSMUSG00000032411	Tfdp2	1110029I05Rik|A330080J22Rik|DP-3|DP3	transcription factor Dp 2	protein-coding
2071	chr5	87232509	87234726	+	0	NA	intron (NM_177680, intron 1 of 16)	CpG	102	NM_177680	231386	Mm.196325	NM_177680	ENSMUSG00000035851	Ythdc1	A730098D12Rik|C80342|mKIAA1966	YTH domain containing 1	protein-coding
1428	chr19	36907473	36910508	+	0	NA	5' UTR (NM_001163635, exon 1 of 27)	5' UTR (NM_001163635, exon 1 of 27)	268	NM_001163635	74493	Mm.249310	NM_001163635	ENSMUSG00000024811	Tnks2	5430432P15Rik|AA517131|AI662480|ARTD6|TNKS-2|Tank2	tankyrase, TRF1-interacting ankyrin-related ADP-ribose polymerase 2	protein-coding
546	chr12	3571875	3573458	+	0	NA	promoter-TSS (NM_007886)	promoter-TSS (NM_007886)	275	NR_027870	13528	Mm.286202	NM_007886	ENSMUSG00000071454	Dtnb	-	dystrobrevin, beta	protein-coding
537	chr11	120044870	120053042	+	0	NA	non-coding (NR_030682, exon 3 of 3)	non-coding (NR_030682, exon 3 of 3)	2214	NR_030682	100042332	Mm.269766	NR_030682		2810410L24Rik	-	RIKEN cDNA 2810410L24 gene	ncRNA
1018	chr15	88999361	89046674	+	0	NA	intron (NM_027081, intron 1 of 20)	B1_Mus1|SINE|Alu	3888	NM_027081	69440	Mm.482128	NM_027081	ENSMUSG00000015377	Dennd6b	1700027J05Rik|AI414881|Fam116b	DENN/MADD domain containing 6B	protein-coding
1125	chr16	48993662	48994373	+	0	NA	promoter-TSS (NM_172616)	promoter-TSS (NM_172616)	208	NM_001110017	224170	Mm.275138	NM_027341	ENSMUSG00000064061	Dzip3	2310047C04Rik|2A-HUB|6430549P11Rik|A230104G20	DAZ interacting protein 3, zinc finger	protein-coding
2279	chr6	113187404	113188628	+	0	NA	exon (NM_026849, exon 1 of 19)	exon (NM_026849, exon 1 of 19)	179	NM_026849	97287	Mm.197816	NM_026849	ENSMUSG00000030269	Mtmr14	1110061O04Rik|AW553738|C76151	myotubularin related protein 14	protein-coding
1007	chr15	82168563	82291175	+	0	NA	Intergenic	MTD|LTR|MaLR	-5417	NM_001104531	545123	Mm.482764	NM_001104531	ENSMUSG00000068085	Cyp2d11	Cyp2d|P450-2D	cytochrome P450, family 2, subfamily d, polypeptide 11	protein-coding
1443	chr19	47805048	47806689	+	0	NA	promoter-TSS (NM_026377)	promoter-TSS (NM_026377)	-378	NM_026377	67788	Mm.181610	NM_026377	ENSMUSG00000025066	Sfr1	6330577E15Rik|Meir5	SWI5 dependent recombination repair 1	protein-coding
741	chr13	63915852	63917256	+	0	NA	promoter-TSS (NM_023507)	promoter-TSS (NM_023507)	-74	NM_001013608	76251	Mm.186610	NM_023507	ENSMUSG00000021470	Ercc6l2	0610007P08Rik|1700019D06Rik|9330134C04Rik|Rad26l|Sr278	excision repair cross-complementing rodent repair deficiency, complementation group 6 like 2	protein-coding
1833	chr4	25208160	25209226	+	0	NA	intron (NM_026194, intron 1 of 18)	CpG	275	NM_026194	67490	Mm.226295	NM_026194	ENSMUSG00000040359	Ufl1	1810074P20Rik|AI429228|Kiaa0776|Maxer|Rcad|mKIAA0776	UFM1 specific ligase 1	protein-coding
1186	chr17	22098808	22100153	+	0	NA	promoter-TSS (NM_001199048)	promoter-TSS (NM_001199048)	-46	NM_001025373	74670	Mm.26540	NM_001025373	ENSMUSG00000053347	Zfp943	4930432O21Rik	zinc finger prtoein 943	protein-coding
998	chr15	81077384	81084591	+	0	NA	intron (NR_077230, intron 1 of 1)	intron (NR_077230, intron 1 of 1)	1305	NR_077230	78102	Mm.296832	NR_077229		8430426J06Rik	-	RIKEN cDNA 8430426J06 gene	ncRNA
2806	chr9	111191873	111192554	+	0	NA	Intergenic	MTC|LTR|MaLR	17864	NM_175266	77781	Mm.209005	NM_175266	ENSMUSG00000046785	Epm2aip1	A930003G21Rik|mKIAA0766	EPM2A (laforin) interacting protein 1	protein-coding
1789	chr3	132346475	132347664	+	0	NA	promoter-TSS (NM_001163455)	promoter-TSS (NM_001163455)	-39	NM_001163455	271981	Mm.257864	NM_173032	ENSMUSG00000028030	Tbck	1700120J03Rik|9430001M19|A630047E20Rik|C030007I09Rik|Tbckl	TBC1 domain containing kinase	protein-coding
2240	chr6	71581788	71583816	+	0	NA	promoter-TSS (NM_173001)	promoter-TSS (NM_173001)	109	NM_001038695	104263	Mm.260479	NM_173001	ENSMUSG00000053470	Kdm3a	1700105C21Rik|C230043E16Rik|JHDM2a|Jmjd1|Jmjd1a|KDM2A|TGSA|Tsga	lysine (K)-specific demethylase 3A	protein-coding
2076	chr5	89705484	89708671	+	0	NA	Intergenic	Intergenic	179846	NM_008096	14473	Mm.196595	NM_008096	ENSMUSG00000035540	Gc	DBP|VDB	group specific component	protein-coding
529	chr11	118261338	118266756	+	0	NA	promoter-TSS (NM_011150)	promoter-TSS (NM_011150)	-802	NM_011150	19039	Mm.3152	NM_011150	ENSMUSG00000033880	Lgals3bp	90K|CyCAP|MAC-2BP|Ppicap|Tango10b	lectin, galactoside-binding, soluble, 3 binding protein	protein-coding
1545	chr2	104571842	104584626	+	0	NA	intron (NM_144804, intron 1 of 8)	B1_Mus1|SINE|Alu	4724	NM_144804	211896	Mm.288805	NM_144804	ENSMUSG00000027173	Depdc7	AV216087	DEP domain containing 7	protein-coding
1838	chr4	34560870	34563180	+	0	NA	promoter-TSS (NM_181406)	promoter-TSS (NM_181406)	166	NM_001159563	50793	Mm.399624	NM_015824		Orc3	Orc3l	origin recognition complex, subunit 3	protein-coding
1773	chr3	121947984	121957255	+	0	NA	intron (NM_008129, intron 1 of 6)	intron (NM_008129, intron 1 of 6)	4144	NM_008129	14630	Mm.292676	NM_008129		Gclm	AI649393|Gcmc|Glclr	glutamate-cysteine ligase, modifier subunit	protein-coding
1058	chr16	13940403	13941369	+	0	NA	exon (NM_033564, exon 1 of 4)	exon (NM_033564, exon 1 of 4)	128	NM_033564	93734	Mm.76554	NM_033564	ENSMUSG00000022679	Mpv17l	M-LP	Mpv17 transgene, kidney disease mutant-like	protein-coding
2573	chr8	72068403	72069128	+	0	NA	Intergenic	Intergenic	80309	NM_001045553	234362	Mm.458487	NM_172754	ENSMUSG00000060427	Zfp868	AI449175|AW108241|C530032E20|mszf62	zinc finger protein 868	protein-coding
987	chr15	75444263	75447377	+	0	NA	Intergenic	L1MD|LINE|L1	-1294	NM_001044718	22701	Mm.87210	NM_011759	ENSMUSG00000047003	Zfp41	CTfin92|Zfp-41	zinc finger protein 41	protein-coding
1150	chr16	96348551	96350253	+	0	NA	promoter-TSS (NM_008251)	promoter-TSS (NM_008251)	-70	NM_008251	15312	Mm.2756	NM_008251		Hmgn1	HMG-14|Hmg14	high mobility group nucleosomal binding domain 1	protein-coding
2860	chrX	136144148	136147272	+	0	NA	exon (NM_023270, exon 1 of 7)	exon (NM_023270, exon 1 of 7)	551	NM_023270	66889	Mm.27764	NM_023270	ENSMUSG00000031438	Rnf128	1300002C13Rik|AI987883|GRAIL|Greul1	ring finger protein 128	protein-coding
1535	chr2	90584838	90586764	+	0	NA	exon (NM_018828, exon 1 of 17)	exon (NM_018828, exon 1 of 17)	274	NM_018828	55935	Mm.489638	NM_018828	ENSMUSG00000008200	Fnbp4	FBP30|Fnbp30|mKIAA1014	formin binding protein 4	protein-coding
2390	chr7	48754003	48756175	+	0	NA	5' UTR (NM_001033530, exon 1 of 4)	5' UTR (NM_001033530, exon 1 of 4)	171	NM_001033530	101835	Mm.370336	NM_001033530	ENSMUSG00000074166	AW146154	AI451288	expressed sequence AW146154	protein-coding
1335	chr18	36439775	36447813	+	0	NA	intron (NM_008989, intron 1 of 1)	intron (NM_008989, intron 1 of 1)	2978	NM_008989	19290	Mm.231802	NM_008989		Pura	CAGER-1|Pur-alpha|ssCRE-BP	purine rich element binding protein A	protein-coding
908	chr14	73724532	73726667	+	0	NA	promoter-TSS (NM_009029)	promoter-TSS (NM_009029)	-1	NM_009029	19645	Mm.273862	NM_009029	ENSMUSG00000022105	Rb1	Rb|Rb-1|pRb	retinoblastoma 1	protein-coding
2580	chr8	72695829	72696688	+	0	NA	promoter-TSS (NM_001293797)	promoter-TSS (NM_001293797)	-49	NM_145597	234371	Mm.23488	NM_145597	ENSMUSG00000002342	Tmem161a	AI428876|BB161850|BC021367	transmembrane protein 161A	protein-coding
284	chr10	80695504	80697778	+	0	NA	intron (NM_001034895, intron 1 of 17)	intron (NM_001034895, intron 1 of 17)	733	NM_001034895	103406	Mm.158783	NM_001034895	ENSMUSG00000034949	Zfr2	2010013I23Rik|9130206N08Rik|AW045600|mKIAA1086	zinc finger RNA binding protein 2	protein-coding
1340	chr18	40378381	40379336	+	0	NA	intron (NM_023311, intron 1 of 5)	CpG	195	NM_023311	67180	Mm.270382	NM_023311	ENSMUSG00000024487	Yipf5	2610311I19Rik|AA408236|Yip1a	Yip1 domain family, member 5	protein-coding
903	chr14	70704321	70764202	+	0	NA	intron (NM_001135151, intron 1 of 9)	intron (NM_001135151, intron 1 of 9)	13979	NM_001135152	213053	Mm.270647	NM_144808	ENSMUSG00000022094	Slc39a14	FAD-123|ZIP-14|Zip14|fad123	solute carrier family 39 (zinc transporter), member 14	protein-coding
247	chr10	43647369	43649181	+	0	NA	intron (NM_130892, intron 6 of 8)	intron (NM_130892, intron 6 of 8)	26662	NM_130892	170728	Mm.390253	NM_130892	ENSMUSG00000019864	Rtn4ip1	D10Ertd690e|NIMP	reticulon 4 interacting protein 1	protein-coding
165	chr1	169547991	169548963	+	0	NA	promoter-TSS (NM_001159731)	promoter-TSS (NM_001159731)	81	NM_001159731	20183	Mm.3475	NM_009107	ENSMUSG00000015843	Rxrg	Nr2b3	retinoid X receptor gamma	protein-coding
289	chr10	81167156	81168289	+	0	NA	intron (NM_001243067, intron 1 of 3)	CpG	152	NM_001243067	73610	Mm.490466	NM_001243067		Zfp433	1700123A16Rik	RIKEN cDNA 1700123A16 gene	protein-coding
2351	chr7	17459617	17461099	+	0	NA	promoter-TSS (NM_001081655)	promoter-TSS (NM_001081655)	-308	NM_001081655	629378	Mm.491123	NM_001081655	ENSMUSG00000078794	Dact3	EG666671|naa-3	dapper homolog 3, antagonist of beta-catenin (xenopus)	protein-coding
729	chr13	55671939	55672990	+	0	NA	promoter-TSS (NM_145382)	promoter-TSS (NM_145382)	17	NM_145382	212483	Mm.35661	NM_145382	ENSMUSG00000021495	Fam193b	IRIZIO|Kiaa1931	family with sequence similarity 193, member B	protein-coding
2119	chr5	116468484	116475067	+	0	NA	intron (NM_031869, intron 1 of 6)	intron (NM_031869, intron 1 of 6)	2662	NM_031869	19079	Mm.458152	NM_031869	ENSMUSG00000029513	Prkab1	1300015D22Rik|AU021155|E430008F22	protein kinase, AMP-activated, beta 1 non-catalytic subunit	protein-coding
2	chr1	4773846	4776357	+	0	NA	intron (NM_001177658, intron 1 of 4)	intron (NM_001177658, intron 1 of 4)	706	NR_033530	27395	Mm.182927	NM_025300	ENSMUSG00000033845	Mrpl15	HSPC145|MRP-L7|Rpml7	mitochondrial ribosomal protein L15	protein-coding
808	chr13	104708558	104712180	+	0	NA	5' UTR (NM_001289474, exon 1 of 24)	5' UTR (NM_001289474, exon 1 of 24)	297	NM_001289473	59079	Mm.277354	NM_021563	ENSMUSG00000021709	Erbb2ip	1700028E05Rik|Erbin|mKIAA1225	Erbb2 interacting protein	protein-coding
845	chr14	30780650	30792754	+	0	NA	intron (NM_019979, intron 4 of 4)	B1_Mur4|SINE|Alu	-4821	NM_027493	56249	Mm.215110	NM_027493	ENSMUSG00000015971	Actr8	5730542K05Rik|ARP8	ARP8 actin-related protein 8	protein-coding
2125	chr5	122947083	122953069	+	0	NA	intron (NM_001110140, intron 3 of 19)	intron (NM_001110140, intron 3 of 19)	2158	NM_001110140	11938	Mm.227583	NM_009722	ENSMUSG00000029467	Atp2a2	9530097L16Rik|D5Wsu150e|SERCA2|SERCA2B|mKIAA4195	ATPase, Ca++ transporting, cardiac muscle, slow twitch 2	protein-coding
2553	chr8	36436324	36453565	+	0	NA	intron (NM_177741, intron 1 of 1)	B1_Mur3|SINE|Alu	6149	NM_177741	244416	Mm.247126	NM_177741	ENSMUSG00000046794	Ppp1r3b	6430576E21|AW821953|GL|PTG	protein phosphatase 1, regulatory (inhibitor) subunit 3B	protein-coding
1847	chr4	40855048	40856333	+	0	NA	Intergenic	Intergenic	-11399	NM_011463	20731	Mm.25246	NM_011463	ENSMUSG00000028415	Spink4	MPGC60	serine peptidase inhibitor, Kazal type 4	protein-coding
1231	chr17	36394285	36395124	+	0	NA	promoter-TSS (NM_026308)	promoter-TSS (NM_026308)	87	NM_026308	67676	Mm.27131	NM_026308		Rpp21	0610037N01Rik	ribonuclease P 21 subunit	protein-coding
1249	chr17	53828512	53829623	+	0	NA	promoter-TSS (NM_028232)	promoter-TSS (NM_028232)	-427	NM_028232	72415	Mm.153202	NM_028232	ENSMUSG00000023940	Sgol1	3300001M08Rik|C81037|Sgo1	shugoshin-like 1 (S. pombe)	protein-coding
147	chr1	158868703	158870223	+	0	NA	promoter-TSS (NM_001159966)	promoter-TSS (NM_001159966)	55	NM_001159966	78255	Mm.28376	NM_023884	ENSMUSG00000026594	Ralgps2	1810020P17Rik|2210408F11Rik|4921528G01Rik|9130014M22Rik|AU043409|AW046161	Ral GEF with PH domain and SH3 binding motif 2	protein-coding
2446	chr7	99785367	99786384	+	0	NA	promoter-TSS (NM_028665)	promoter-TSS (NM_028665)	-223	NM_028665	73845	Mm.73248	NM_028665	ENSMUSG00000041343	Ankrd42	4931426M20|4933417L02Rik|Ikbn	ankyrin repeat domain 42	protein-coding
973	chr15	59205290	59206207	+	0	NA	promoter-TSS (NM_001164604)	promoter-TSS (NM_001164604)	-5	NM_026746	68501	Mm.27762	NM_026746	ENSMUSG00000059586	Nsmce2	1110014D18Rik|AI661537	non-SMC element 2 homolog (MMS21, S. cerevisiae)	protein-coding
2569	chr8	59965356	59967488	+	0	NA	5' UTR (NM_021788, exon 1 of 4)	5' UTR (NM_021788, exon 1 of 4)	235	NM_021788	60406	Mm.118	NM_021788	ENSMUSG00000031609	Sap30	30kDa	sin3 associated polypeptide	protein-coding
1046	chr16	3846757	3847756	+	0	NA	promoter-TSS (NM_001081217)	promoter-TSS (NM_001081217)	33	NM_001081217	385674	Mm.244261	NM_001081217	ENSMUSG00000054939	Zfp174	Gm1754	zinc finger protein 174	protein-coding
1142	chr16	91596946	91598521	+	0	NA	intron (NM_030018, intron 1 of 6)	CpG	192	NM_030018	77975	Mm.290341	NM_030018	ENSMUSG00000022964	Tmem50b	AU015466|AU019872|B230114J08Rik	transmembrane protein 50B	protein-coding
2095	chr5	104999901	105001212	+	0	NA	Intergenic	RMER13A|LTR|ERVK	45802	NR_030673	100662	Mm.319836	NR_030673	ENSMUSG00000097392	D930016D06Rik	100041172|1110004B06Rik|AI451450|Gm3179	RIKEN cDNA D930016D06 gene	ncRNA
1291	chr18	3382692	3387368	+	0	NA	intron (NM_029402, intron 1 of 20)	intron (NM_029402, intron 1 of 20)	1807	NM_029402	71745	Mm.291707	NM_029402	ENSMUSG00000024231	Cul2	1300003D18Rik|4932411N15Rik|AI327301|mKIAA4106	cullin 2	protein-coding
2601	chr8	90642078	90643408	+	0	NA	promoter-TSS (NM_029074)	promoter-TSS (NM_029074)	85	NM_029074	382030	Mm.216574	NM_029074	ENSMUSG00000036810	Cnep1r1	5033428A16Rik|NEP1-R1|Tmem188	CTD nuclear envelope phosphatase 1 regulatory subunit 1	protein-coding
2599	chr8	88364105	88365835	+	0	NA	promoter-TSS (NM_199446)	promoter-TSS (NM_199446)	69	NM_199446	102093	Mm.237296	NM_199446	ENSMUSG00000036879	Phkb	AI463271	phosphorylase kinase beta	protein-coding
319	chr10	100948134	100954376	+	0	NA	Intergenic	Intergenic	-192866	NM_001205098	67569	Mm.25252	NM_026243	ENSMUSG00000019888	Mgat4c	9130411I17Rik|GntIVh	MGAT4 family, member C	protein-coding
2571	chr8	63966209	63967408	+	0	NA	intron (NM_145595, intron 1 of 4)	CpG	277	NM_145595	234309	Mm.29059	NM_145595	ENSMUSG00000031641	Cbr4	A730083J17Rik|BC009118	carbonyl reductase 4	protein-coding
2857	chrX	120725857	120726461	+	0	NA	Intergenic	Intergenic	508991	NM_028426	73061	Mm.292979	NM_028426	ENSMUSG00000079450	3110007F17Rik	-	RIKEN cDNA 3110007F17 gene	protein-coding
1179	chr17	17370950	17372819	+	0	NA	Intergenic	Intergenic	113537	NM_011765	22759	Mm.436633	NM_011765	ENSMUSG00000095990	Zfp97	NGD16-4	zinc finger protein 97	protein-coding
1052	chr16	5049150	5051254	+	0	NA	promoter-TSS (NM_028720)	promoter-TSS (NM_028720)	41	NM_026666	170644	Mm.66356	NM_026666	ENSMUSG00000039473	Ubn1	1110029L11Rik|2610108L02Rik|AA673476|AW124741	ubinuclein 1	protein-coding
1922	chr4	108952600	108953845	+	0	NA	intron (NM_007943, intron 1 of 24)	CpG	342	NM_007943	13858	Mm.318250	NM_007943	ENSMUSG00000028552	Eps15	2410112D09Rik	epidermal growth factor receptor pathway substrate 15	protein-coding
735	chr13	59685773	59687665	+	0	NA	promoter-TSS (NM_030153)	promoter-TSS (NM_030153)	25	NM_030153	78689	Mm.253902	NM_030153	ENSMUSG00000021555	Naa35	A330021G12Rik|A330027C19Rik|AI158944|C030004C14Rik|Mak10	N(alpha)-acetyltransferase 35, NatC auxiliary subunit	protein-coding
1493	chr2	30141243	30142400	+	0	NA	promoter-TSS (NM_198304)	promoter-TSS (NM_198304)	53	NM_177648	227697	Mm.26690	NM_177648	ENSMUSG00000075419	Dolk	BC026973|Tmem15|mKIAA1094	dolichol kinase	protein-coding
2397	chr7	52067403	52077339	+	0	NA	promoter-TSS (NR_033136)	promoter-TSS (NR_033136)	-343	NR_033136	107503	Mm.389890	NM_030693	ENSMUSG00000038539	Atf5	AFTA|Atf7|Atfx|ODA-10	activating transcription factor 5	protein-coding
974	chr15	59465207	59517674	+	0	NA	Intergenic	Intergenic	11231	NM_144549	211770	Mm.40298	NM_144549	ENSMUSG00000032501	Trib1	A530090O15Rik|TRB-1|Trb1	tribbles homolog 1 (Drosophila)	protein-coding
2629	chr8	109619542	109620774	+	0	NA	promoter-TSS (NR_106043)	promoter-TSS (NR_106043)	-152	NR_106043	102465652		NR_106043		Mir7075	mmu-mir-7075	microRNA mir-7075	ncRNA
1271	chr17	74794198	74795817	+	0	NA	promoter-TSS (NM_001252478)	promoter-TSS (NM_001252478)	59	NM_144798	210148	Mm.243943	NM_144798	ENSMUSG00000024069	Slc30a6	9530029F08Rik|ZnT6	solute carrier family 30 (zinc transporter), member 6	protein-coding
1668	chr3	27607570	27610447	+	0	NA	intron (NM_173182, intron 1 of 25)	CpG	353	NM_173182	72007	Mm.38832	NM_173182	ENSMUSG00000039286	Fndc3b	1600019O04Rik|AW550168|Fad104|mKIAA4164	fibronectin type III domain containing 3B	protein-coding
1715	chr3	85690337	85692470	+	0	NA	promoter-TSS (NM_177130)	promoter-TSS (NM_177130)	37	NM_177130	320302	Mm.482978	NM_177130	ENSMUSG00000031286	Glt28d2	4732486J07Rik|Glt28d1l	glycosyltransferase 28 domain containing 2	protein-coding
344	chr10	126719379	126730640	+	0	NA	intron (NM_033072, intron 1 of 12)	intron (NM_033072, intron 1 of 12)	818	NM_033072	110962	Mm.372826	NM_033072	ENSMUSG00000025409	Mbd6	D10Wsu93e	methyl-CpG binding domain protein 6	protein-coding
1613	chr2	155462775	155469040	+	0	NA	intron (NM_019828, intron 13 of 18)	intron (NM_019828, intron 13 of 18)	17291	NR_030757	735275		NR_030757		Mir499	Mirn499|mmu-mir-499	microRNA 499	ncRNA
2103	chr5	108862642	108863786	+	0	NA	intron (NM_007507, intron 1 of 3)	CpG-11307	183	NM_007507	11958	Mm.136093	NM_007507		Atp5k	2610008D24Rik|Atp5i|Lfm1	ATP synthase, H+ transporting, mitochondrial F1F0 complex, subunit E	protein-coding
636	chr12	104115129	104117444	+	0	NA	intron (NM_172806, intron 1 of 11)	CpG	330	NM_172806	238386	Mm.63456	NM_172806	ENSMUSG00000041702	Btbd7	5730507E09Rik|8030448M07|E130118E17Rik|FUP1|mKIAA1525	BTB (POZ) domain containing 7	protein-coding
1710	chr3	83834721	83845054	+	0	NA	intron (NM_172681, intron 2 of 34)	intron (NM_172681, intron 2 of 34)	4196	NM_172681	229473	Mm.28838	NM_172681	ENSMUSG00000033767	D930015E06Rik	Kiaa0922|mKIAA0922	RIKEN cDNA D930015E06 gene	protein-coding
1406	chr19	16853985	16856112	+	0	NA	intron (NM_173028, intron 1 of 71)	CpG	375	NM_173028	271564	Mm.211963	NM_173028	ENSMUSG00000046230	Vps13a	4930425F11|4930516E05Rik|4930543C13Rik|9930023P20|Chac|Chorein|D330038K10Rik|mKIAA0986	vacuolar protein sorting 13A (yeast)	protein-coding
1104	chr16	33056192	33063655	+	0	NA	intron (NM_021338, intron 4 of 4)	B4A|SINE|B4	-2684	NM_172823	239833	Mm.131951	NM_172823		Lmln	5330415H22Rik|AI465495	leishmanolysin-like (metallopeptidase M8 family)	protein-coding
2224	chr6	49269005	49269873	+	0	NA	promoter-TSS (NM_175098)	promoter-TSS (NM_175098)	87	NM_175098	57895	Mm.32416	NM_175098	ENSMUSG00000050786	Ccdc126	6330407D12Rik|AA675040|AI465320|AL022711	coiled-coil domain containing 126	protein-coding
1133	chr16	78296070	78322611	+	0	NA	intron (NM_001025192, intron 1 of 6)	intron (NM_001025192, intron 1 of 6)	7424	NM_001276263	13052	Mm.66222	NM_009988	ENSMUSG00000022865	Cxadr	2610206D03Rik|AU016810|AW553441|CAR|MCAR|MCVADR	coxsackie virus and adenovirus receptor	protein-coding
2421	chr7	73101541	73104176	+	0	NA	intron (NM_001291184, intron 7 of 20)	intron (NM_001291184, intron 7 of 20)	95836	NM_011048	18553	Mm.294007	NM_011048	ENSMUSG00000030513	Pcsk6	C86343|Pace4|SPC4	proprotein convertase subtilisin/kexin type 6	protein-coding
209	chr10	7674412	7676877	+	0	NA	5' UTR (NM_138667, exon 1 of 7)	5' UTR (NM_138667, exon 1 of 7)	277	NM_138667	68652	Mm.193041	NM_138667	ENSMUSG00000015755	Tab2	1110030N06Rik|A530078N03Rik|Map3k7ip2|mKIAA0733	TGF-beta activated kinase 1/MAP3K7 binding protein 2	protein-coding
2837	chrX	45609006	45611153	+	0	NA	promoter-TSS (NM_028276)	promoter-TSS (NM_028276)	-32	NM_028276	72554	Mm.336045	NM_028276	ENSMUSG00000063785	Utp14a	2700066J21Rik|JsdX|NY-CO-16|SDCCAG16|T25628|mKIAA0266	UTP14, U3 small nucleolar ribonucleoprotein, homolog A (yeast)	protein-coding
1905	chr4	98174902	98177375	+	0	NA	intron (NM_172696, intron 21 of 43)	intron (NM_172696, intron 21 of 43)	-37187	NM_007704	12695	Mm.90218	NM_007704	ENSMUSG00000061859	Inadl	Cipp|Patj	InaD-like (Drosophila)	protein-coding
1118	chr16	42874173	42877351	+	0	NA	promoter-TSS (NR_040521)	promoter-TSS (NR_040521)	-62	NR_040521	75722	Mm.243747	NR_040521	ENSMUSG00000075070	4932412D23Rik	ENSMUSG00000075070|Gm10809	RIKEN cDNA 4932412D23 gene	ncRNA
1575	chr2	127072995	127074536	+	0	NA	promoter-TSS (NM_025296)	promoter-TSS (NM_025296)	54	NM_175145	69470	Mm.200889	NM_175145	ENSMUSG00000034850	Tmem127	2310003P10Rik|AI314202|AI317350	transmembrane protein 127	protein-coding
117	chr1	133723309	133725357	+	0	NA	promoter-TSS (NM_173865)	promoter-TSS (NM_173865)	-256	NM_173865	98396	Mm.389181	NM_173865	ENSMUSG00000013275	Slc41a1	AI573938|B230315F01Rik	solute carrier family 41, member 1	protein-coding
2428	chr7	82642156	82646185	+	0	NA	intron (NM_029332, intron 1 of 36)	intron (NM_029332, intron 1 of 36)	43750	NM_029332	75547	Mm.216107	NM_029332	ENSMUSG00000066406	Akap13	1700026G02Rik|5730522G15Rik|5830460E08Rik|AKAP-Lbc|BRX|Ht31|LBC|PROTO-LB|PROTO-LBC	A kinase (PRKA) anchor protein 13	protein-coding
2207	chr6	35127261	35128025	+	0	NA	promoter-TSS (NM_027513)	promoter-TSS (NM_027513)	27	NM_027513	70699	Mm.261208	NM_027513	ENSMUSG00000038759	Nup205	3830404O05Rik|AV248391|mKIAA0225	nucleoporin 205	protein-coding
600	chr12	75065116	75065967	+	0	NA	promoter-TSS (NM_178392)	promoter-TSS (NM_178392)	24	NM_178392	75627	Mm.25937	NM_178392	ENSMUSG00000021113	Snapc1	2700033G17Rik|AU015787	small nuclear RNA activating complex, polypeptide 1	protein-coding
80	chr1	88255096	88256687	+	0	NA	promoter-TSS (NR_015507)	promoter-TSS (NR_015507)	139	NM_010880	17975	Mm.154378	NM_010880	ENSMUSG00000026234	Ncl	B530004O11Rik|C23|D0Nds28|D1Nds28|Nucl	nucleolin	protein-coding
336	chr10	118698797	118701068	+	0	NA	Intergenic	Intergenic	-22821	NM_027994	71902	Mm.203965	NM_027994	ENSMUSG00000020114	Cand1	2310038O07Rik|6330512O03Rik|AI195005|AI846556|D10Ertd516e|Tp120a|mKIAA0829	cullin associated and neddylation disassociated 1	protein-coding
2472	chr7	127315234	127334581	+	0	NA	intron (NM_028085, intron 1 of 1)	intron (NM_028085, intron 1 of 1)	7535	NM_028085	72074	Mm.23165	NM_028085	ENSMUSG00000030909	Anks4b	2010013E14Rik|AI956809|Harp	ankyrin repeat and sterile alpha motif domain containing 4B	protein-coding
457	chr11	76758664	76759944	+	0	NA	5' UTR (NM_178645, exon 1 of 12)	5' UTR (NM_178645, exon 1 of 12)	146	NM_178645	104184	Mm.399785	NM_178645	ENSMUSG00000020840	Blmh	AI035728|Bh|Bmh	bleomycin hydrolase	protein-coding
1301	chr18	9957587	9958645	+	0	NA	promoter-TSS (NM_153552)	promoter-TSS (NM_153552)	-62	NM_153552	225160	Mm.219648	NM_153552	ENSMUSG00000024287	Thoc1	3110002N20Rik|AW107452|NMP-84	THO complex 1	protein-coding
821	chr14	9004097	9009282	+	0	NA	Intergenic	Intergenic	-1183	NM_024221	68263	Mm.301527	NM_024221	ENSMUSG00000021748	Pdhb	2610103L06Rik|AL024199|C81408	pyruvate dehydrogenase (lipoamide) beta	protein-coding
696	chr13	36208534	36210447	+	0	NA	promoter-TSS (NM_024274)	promoter-TSS (NM_024274)	-22	NM_024274	69955	Mm.70690	NM_024274	ENSMUSG00000021420	Fars2	Fars1|pheRS	phenylalanine-tRNA synthetase 2 (mitochondrial)	protein-coding
383	chr11	22333963	22341966	+	0	NA	Intergenic	Intergenic	-74322	NM_153596	103765	Mm.221274	NM_153596	ENSMUSG00000049904	Tmem17	AI503894|AW049890	transmembrane protein 17	protein-coding
2532	chr8	13103669	13106858	+	0	NA	promoter-TSS (NM_178708)	promoter-TSS (NM_178708)	80	NM_178708	234069	Mm.103427	NM_178708	ENSMUSG00000038542	Pcid2	A730042J05Rik	PCI domain containing 2	protein-coding
1873	chr4	49547376	49574217	+	0	NA	intron (NM_144903, intron 1 of 8)	intron (NM_144903, intron 1 of 8)	1559	NM_144903	230163	Mm.482116	NM_144903	ENSMUSG00000028307	Aldob	Aldo-2|Aldo2|BC016435	aldolase B, fructose-bisphosphate	protein-coding
1721	chr3	88717483	88718853	+	0	NA	promoter-TSS (NM_144898)	promoter-TSS (NM_144898)	-296	NM_144898	229524	Mm.440405	NM_144898	ENSMUSG00000068922	Msto1	BC008103|mst	misato homolog 1 (Drosophila)	protein-coding
2497	chr7	136734811	136736132	+	0	NA	promoter-TSS (NM_172255)	promoter-TSS (NM_172255)	94	NM_172255	207425	Mm.229323	NM_172255	ENSMUSG00000042055	Wdr11	2900055P10Rik|AW489876|Brwd2|mKIAA1351	WD repeat domain 11	protein-coding
2179	chr6	6527504	6529077	+	0	NA	intron (NM_009169, intron 1 of 2)	intron (NM_009169, intron 1 of 2)	368	NM_009169	20422	Mm.2469	NM_009169		Shfm1	DSS1|Shfdg1|Shfg	split hand/foot malformation (ectrodactyly) type 1	protein-coding
2172	chr5	151324574	151325559	+	0	NA	promoter-TSS (NM_009765)	promoter-TSS (NM_009765)	-130	NM_009765	12190	Mm.236256	NM_009765	ENSMUSG00000041147	Brca2	Fancd1|RAB163	breast cancer 2	protein-coding
1431	chr19	38189067	38209087	+	0	NA	exon (NM_011255, exon 2 of 6)	exon (NM_011255, exon 2 of 6)	224	NM_011255	19662	Mm.2605	NM_011255	ENSMUSG00000024990	Rbp4	Rbp-4	retinol binding protein 4, plasma	protein-coding
92	chr1	95407764	95410969	+	0	NA	intron (NM_145519, intron 1 of 26)	intron (NM_145519, intron 1 of 26)	685	NM_145519	227377	Mm.243091	NM_145519	ENSMUSG00000034066	Farp2	AI465173|BC009153|D030026M03Rik|Fir|mKIAA0793	FERM, RhoGEF and pleckstrin domain protein 2	protein-coding
1489	chr2	27526399	27631758	+	0	NA	intron (NM_001290482, intron 1 of 9)	intron (NM_001290482, intron 1 of 9)	12975	NM_001290482	20181	Mm.24624	NM_011305	ENSMUSG00000015846	Rxra	9530071D11Rik|Nr2b1|RXRalpha1	retinoid X receptor alpha	protein-coding
1212	chr17	32525587	32526628	+	0	NA	promoter-TSS (NM_011717)	promoter-TSS (NM_011717)	-212	NM_011717	22404	Mm.274948	NM_011717	ENSMUSG00000024050	Wiz	-	widely-interspaced zinc finger motifs	protein-coding
2253	chr6	85845262	85888113	+	0	NA	intron (NM_176842, intron 1 of 5)	intron (NM_176842, intron 1 of 5)	974	NM_001170488	69786	Mm.218434	NM_176842	ENSMUSG00000054226	Tprkb	0610033G21Rik|1810034M08Rik|Cgi-121|DRWMS1|mDRWMS1	Tp53rk binding protein	protein-coding
2787	chr9	106331173	106356640	+	0	NA	intron (NM_001110272, intron 3 of 4)	RMER4A|LTR|ERVK	-3339	NM_001276442	109652	Mm.7165	NM_025371	ENSMUSG00000023262	Acy1	1110014J22Rik|Acy-1	aminoacylase 1	protein-coding
2433	chr7	87679672	87680686	+	0	NA	promoter-TSS (NM_001042527)	promoter-TSS (NM_001042527)	-174	NM_001042527	12144	Mm.12932	NM_007550	ENSMUSG00000030528	Blm	-	Bloom syndrome, RecQ helicase-like	protein-coding
1805	chr3	144781010	144782306	+	0	NA	promoter-TSS (NM_025714)	promoter-TSS (NM_025714)	94	NM_025714	52184	Mm.259105	NM_025714	ENSMUSG00000028256	Odf2l	4733401D09Rik|9630045K08Rik|D3Ertd250e	outer dense fiber of sperm tails 2-like	protein-coding
1727	chr3	90095853	90098156	+	0	NA	Intergenic	Intergenic	22933	NR_105979	102465612		NR_105979		Mir7012	mmu-mir-7012	microRNA mir-7012	ncRNA
1477	chr2	19475253	19476265	+	0	NA	promoter-TSS (NM_027600)	promoter-TSS (NM_027600)	-222	NM_027600	70909	Mm.158488	NM_027600	ENSMUSG00000026734	4921504E06Rik	4921522E24Rik	RIKEN cDNA 4921504E06 gene	protein-coding
1164	chr17	13183735	13186137	+	0	NA	intron (NM_175394, intron 1 of 5)	CpG	189	NM_001113533	60532	Mm.275521	NM_175394	ENSMUSG00000060475	Wtap	2810408K05Rik|9430038B09Rik	Wilms tumour 1-associating protein	protein-coding
2824	chrX	7829009	7830309	+	0	NA	promoter-TSS (NM_001290430)	promoter-TSS (NM_001290430)	-127	NM_001290430	54632	Mm.327529	NM_133991	ENSMUSG00000031171	Ftsj1	AI931847|Ftsj|Ftsjl|Sfc12	FtsJ homolog 1 (E. coli)	protein-coding
505	chr11	98439150	98452739	+	0	NA	intron (NM_025661, intron 1 of 3)	intron (NM_025661, intron 1 of 3)	2615	NM_025661	66612	Mm.180546	NM_025661	ENSMUSG00000038150	Ormdl3	2810011N17Rik|AI315223	ORM1-like 3 (S. cerevisiae)	protein-coding
2739	chr9	64583822	64585946	+	0	NA	intron (NM_017382, intron 1 of 4)	intron (NM_017382, intron 1 of 4)	679	NM_017382	53869	Mm.1387	NM_017382	ENSMUSG00000004771	Rab11a	-	RAB11A, member RAS oncogene family	protein-coding
670	chr13	16099819	16106457	+	0	NA	Intergenic	Intergenic	-3170	NM_008380	16323	Mm.8042	NM_008380	ENSMUSG00000041324	Inhba	-	inhibin beta-A	protein-coding
1094	chr16	23496088	23524183	+	0	NA	intron (NM_008555, intron 2 of 15)	intron (NM_008555, intron 2 of 15)	10528	NM_008555	17174	Mm.1213	NM_008555	ENSMUSG00000022887	Masp1	AW048060|CCPII|Crarf|Masp1/3	mannan-binding lectin serine peptidase 1	protein-coding
419	chr11	55262258	55284454	+	0	NA	intron (NM_009720, intron 1 of 3)	intron (NM_009720, intron 1 of 3)	1284	NM_009720	11927	Mm.217759	NM_009720	ENSMUSG00000018585	Atox1	AI256639|Atx1	ATX1 (antioxidant protein 1) homolog 1 (yeast)	protein-coding
2178	chr6	6128046	6171132	+	0	NA	intron (NM_015829, intron 1 of 17)	intron (NM_015829, intron 1 of 17)	17584	NM_015829	50799	Mm.24513	NM_015829	ENSMUSG00000015112	Slc25a13	AI785475|Ctrn	solute carrier family 25 (mitochondrial carrier, adenine nucleotide translocator), member 13	protein-coding
995	chr15	80063437	80095365	+	0	NA	intron (NM_178719, intron 5 of 5)	intron (NM_178719, intron 5 of 5)	-6213	NM_001287180	11911	Mm.641	NM_009716	ENSMUSG00000042406	Atf4	Atf-4|C/ATF|CREB2|TAXREB67	activating transcription factor 4	protein-coding
1225	chr17	34723620	34744035	+	0	NA	promoter-TSS (NM_001271423)	promoter-TSS (NM_001271423)	-968	NM_001271424	11596	Mm.3383	NM_007425	ENSMUSG00000015452	Ager	RAGE	advanced glycosylation end product-specific receptor	protein-coding
837	chr14	21550161	21554126	+	0	NA	intron (NM_010811, intron 2 of 14)	CT-rich|Low_complexity|Low_complexity	1641	NM_010811	17423	Mm.4084	NM_010811	ENSMUSG00000039308	Ndst2	Mndns|NDST-2	N-deacetylase/N-sulfotransferase (heparan glucosaminyl) 2	protein-coding
2015	chr5	22055301	22056655	+	0	NA	promoter-TSS (NR_102315)	promoter-TSS (NR_102315)	171	NM_011959	26429	Mm.412217	NM_011959	ENSMUSG00000029012	Orc5	AL033327|MmORC5|Orc5l	origin recognition complex, subunit 5	protein-coding
290	chr10	81326269	81327409	+	0	NA	intron (NM_001243067, intron 1 of 3).2	CpG	160	NM_001243067	73610	Mm.490466	NM_001243067		Zfp433	1700123A16Rik	RIKEN cDNA 1700123A16 gene	protein-coding
625	chr12	88487765	88502935	+	0	NA	intron (NM_001252556, intron 1 of 7)	MMERVK10C-int|LTR|ERVK	-6498	NM_153415	217734	Mm.388249	NM_153415	ENSMUSG00000034126	Pomt2	A830009D15Rik|AW046274	protein-O-mannosyltransferase 2	protein-coding
149	chr1	159454880	159459250	+	0	NA	intron (NM_001159986, intron 1 of 25)	intron (NM_001159986, intron 1 of 25)	764	NM_001159986	89867	Mm.87114	NM_033354	ENSMUSG00000026589	Sec16b	Lztr2|Rgpr|Rgpr-p117	SEC16 homolog B (S. cerevisiae)	protein-coding
712	chr13	48608227	48608921	+	0	NA	intron (NM_001164575, intron 1 of 4)	intron (NM_001164575, intron 1 of 4)	205	NM_001164575	67911	Mm.251375	NM_026450	ENSMUSG00000050954	Zfp169	1700025J14Rik|4930429A13Rik|BE688704	zinc finger protein 169	protein-coding
210	chr10	10274279	10278160	+	0	NA	intron (NM_026405, intron 1 of 2)	intron (NM_026405, intron 1 of 2)	1786	NM_026405	67844	Mm.31486	NM_026405	ENSMUSG00000019832	Rab32	2810011A17Rik|AU022057	RAB32, member RAS oncogene family	protein-coding
406	chr11	49525309	49527360	+	0	NA	promoter-TSS (NM_212484)	promoter-TSS (NM_212484)	-110	NM_212484	104625	Mm.247113	NM_212484	ENSMUSG00000020362	Cnot6	CCR4	CCR4-NOT transcription complex, subunit 6	protein-coding
2560	chr8	42502052	42502589	+	0	NA	5' UTR (NM_013522, exon 1 of 9)	5' UTR (NM_013522, exon 1 of 9)	152	NM_013522	14300	Mm.217312	NM_013522	ENSMUSG00000031590	Frg1	-	FSHD region gene 1	protein-coding
2289	chr6	117790700	117792243	+	0	NA	intron (NM_177684, intron 1 of 2)	CpG	211	NM_177684	232337	Mm.290847	NM_177684	ENSMUSG00000059689	Zfp637	AI646709|BC021601|Znf32	zinc finger protein 637	protein-coding
2312	chr6	135100445	135118590	+	0	NA	intron (NM_013546, intron 1 of 3)	intron (NM_013546, intron 1 of 3)	8716	NM_013546	15199	Mm.378937	NM_013546	ENSMUSG00000042770	Hebp1	Hebp	heme binding protein 1	protein-coding
19	chr1	30929432	30931991	+	0	NA	Intergenic	CpG	-10610	NM_001081080	213109	Mm.194486	NM_025871	ENSMUSG00000048874	Phf3	2310061N19Rik|mKIAA0244	PHD finger protein 3	protein-coding
2702	chr9	42024622	42026908	+	0	NA	Intergenic	Intergenic	-8451	NR_040754	78194	Mm.251457	NR_040754		4930546K05Rik	-	RIKEN cDNA 4930546K05 gene	ncRNA
1030	chr15	98397332	98399645	+	0	NA	promoter-TSS (NM_009833)	promoter-TSS (NM_009833)	-421	NM_009833	12455	Mm.29941	NM_009833	ENSMUSG00000011960	Ccnt1	2810478G24Rik|AI115585|CycT1	cyclin T1	protein-coding
365	chr11	4996961	5000499	+	0	NA	promoter-TSS (NM_001290492)	promoter-TSS (NM_001290492)	361	NM_001283062	14030	Mm.142822	NM_007968	ENSMUSG00000009079	Ewsr1	Ews|Ewsh	Ewing sarcoma breakpoint region 1	protein-coding
2730	chr9	56977939	56979411	+	0	NA	promoter-TSS (NM_028636)	promoter-TSS (NM_028636)	91	NM_028636	73744	Mm.30110	NM_028636	ENSMUSG00000032295	Man2c1	1110025H24Rik	mannosidase, alpha, class 2C, member 1	protein-coding
763	chr13	67914285	67915802	+	0	NA	intron (NM_198322, intron 1 of 3)	intron (NM_198322, intron 1 of 3)	290	NM_198322	212569	Mm.358842	NM_198322	ENSMUSG00000030446	Zfp273	6820416H06Rik|Rslcan1	zinc finger protein 273	protein-coding
2593	chr8	83262153	83264264	+	0	NA	5' UTR (NM_053124, exon 1 of 24)	5' UTR (NM_053124, exon 1 of 24)	150	NM_053124	93762	Mm.246803	NM_053124		Smarca5	4933427E24Rik|D030040M08Rik|D330027N15Rik|MommeD4|Snf2h	SWI/SNF related, matrix associated, actin dependent regulator of chromatin, subfamily a, member 5	protein-coding
2021	chr5	25003077	25006448	+	0	NA	promoter-TSS (NR_030700)	promoter-TSS (NR_030700)	-161	NM_001081383	231051	Mm.332268	NM_001081383	ENSMUSG00000038056	Kmt2c	E330008K23Rik|HALR|Mll3|mKIAA1506	lysine (K)-specific methyltransferase 2C	protein-coding
1895	chr4	87740001	87741186	+	0	NA	promoter-TSS (NM_001081184)	promoter-TSS (NM_001081184)	59	NM_001081184	230393	Mm.287210	NM_001081184	ENSMUSG00000038368	Focad	Kiaa1797|mKIAA1797	focadhesin	protein-coding
2038	chr5	34677371	34681127	+	0	NA	intron (NM_011278, intron 1 of 7)	CpG	210	NM_011278	19822	Mm.21281	NM_011278	ENSMUSG00000029110	Rnf4	AU018689|Gtrgeo8	ring finger protein 4	protein-coding
570	chr12	40943777	40951572	+	0	NA	intron (NM_013562, intron 1 of 11)	intron (NM_013562, intron 1 of 11)	1724	NR_035459	100316693		NR_035459		Mir1938	mmu-mir-1938	microRNA 1938	ncRNA
1880	chr4	57960593	57970964	+	0	NA	intron (NM_011660, intron 1 of 4)	intron (NM_011660, intron 1 of 4)	3505	NM_011660	22166	Mm.260618	NM_011660	ENSMUSG00000028367	Txn1	ADF|AW550880|Trx1|Txn	thioredoxin 1	protein-coding
252	chr10	55948248	55949283	+	0	NA	promoter-TSS (NM_001033385)	promoter-TSS (NM_001033385)	-270	NM_001033385	544696	Mm.411188	NM_001033385	ENSMUSG00000038122	Tbc1d32	Bromi|D630037F22Rik|b2b2284Clo	TBC1 domain family, member 32	protein-coding
1159	chr17	6079212	6080332	+	0	NA	promoter-TSS (NM_001111017)	promoter-TSS (NM_001111017)	-33	NM_177311	321007	Mm.5548	NM_177311	ENSMUSG00000015659	Serac1	4930511N22Rik|D17Ertd141e	serine active site containing 1	protein-coding
883	chr14	57702987	57727183	+	0	NA	Intergenic	Intergenic	8454	NM_008125	14619	Mm.390683	NM_008125	ENSMUSG00000046352	Gjb2	AI325222|Cnx26|Cx26|Gjb-2	gap junction protein, beta 2	protein-coding
2048	chr5	45902994	45912408	+	0	NA	Intergenic	RLTR6-int|LTR|ERV1	-3767	NM_025895	66999	Mm.283045	NM_025895	ENSMUSG00000015804	Med28	1500003D12Rik|AI451633|AU045690|Eg1|FKSG20|magicin	mediator complex subunit 28	protein-coding
655	chr12	114214161	114215770	+	0	NA	exon (NM_201646, exon 1 of 4)	exon (NM_201646, exon 1 of 4)	191	NM_201646	399566	Mm.440140	NM_201646	ENSMUSG00000002803	Btbd6	-	BTB (POZ) domain containing 6	protein-coding
421	chr11	57457641	57459313	+	0	NA	promoter-TSS (NM_134189)	promoter-TSS (NM_134189)	-467	NM_134189	171212	Mm.271670	NM_134189	ENSMUSG00000020520	Galnt10	AU018154|C330012K04Rik|GalNAc-T10|GalNAc-T9|Galnt9|ppGaNTase	UDP-N-acetyl-alpha-D-galactosamine:polypeptide N-acetylgalactosaminyltransferase 10	protein-coding
1998	chr4	154337907	154339178	+	0	NA	intron (NM_172990, intron 1 of 18)	CpG	300	NM_172990	269614	Mm.30042	NM_172990	ENSMUSG00000029056	Pank4	D030031I12Rik|R75150	pantothenate kinase 4	protein-coding
2332	chr6	149066030	149143467	+	0	NA	Intergenic	Intergenic	14713	NM_177101	320204	Mm.274099	NM_177101	ENSMUSG00000039958	Mettl20	4833442J19Rik|AI256744	methyltransferase like 20	protein-coding
1367	chr18	74426196	74429705	+	0	NA	promoter-TSS (NM_013594)	promoter-TSS (NM_013594)	8	NM_013594	17190	Mm.22522	NM_013594	ENSMUSG00000024561	Mbd1	Cxxc3|PCM1	methyl-CpG binding domain protein 1	protein-coding
271	chr10	74957534	74985163	+	0	NA	3' UTR (NM_175133, exon 6 of 6)	3' UTR (NM_175133, exon 6 of 6)	8719	NM_175133	68778	Mm.29382	NM_175133	ENSMUSG00000033416	Gucd1	1110038D17Rik	guanylyl cyclase domain containing 1	protein-coding
1070	chr16	17233136	17234165	+	0	NA	promoter-TSS (NM_178922)	promoter-TSS (NM_178922)	-30	NM_178922	58180	Mm.261602	NM_178922	ENSMUSG00000050240	Hic2	AA409108|HRG22|mKIAA1020	hypermethylated in cancer 2	protein-coding
1024	chr15	93228261	93229507	+	0	NA	promoter-TSS (NM_026025)	promoter-TSS (NM_026025)	-11	NM_001285863	223828	Mm.74208	NM_146062	ENSMUSG00000036167	Pphln1	CR|HSPC206|HSPC232	periphilin 1	protein-coding
2867	chrX	158398890	158402780	+	0	NA	intron (NM_001290526, intron 1 of 8)	intron (NM_001290526, intron 1 of 8)	196538	NM_001081052	195727	Mm.336313	NM_001081052	ENSMUSG00000059493	Nhs	Gm389|Gm48|Nhs1|Xcat	Nance-Horan syndrome (human)	protein-coding
2871	chrX	165110113	165113546	+	0	NA	promoter-TSS (NM_010832)	promoter-TSS (NM_010832)	5	NM_010832	17692	Mm.24248	NM_010832	ENSMUSG00000031358	Msl3	AU018931|Msl31|Msl3l1	male-specific lethal 3 homolog (Drosophila)	protein-coding
491	chr11	93847558	93872280	+	0	NA	intron (NM_027569, intron 1 of 28)	(CAG)n|Simple_repeat|Simple_repeat	2514	NM_027569	70834	Mm.260737	NM_027569	ENSMUSG00000020859	Spag9	3110018C07Rik|4733401I23Rik|4831406C20Rik|AW552012|JLP|JSAP2|JSAP2a|Jip4|Mapk8ip4|syd1	sperm associated antigen 9	protein-coding
1863	chr4	46208364	46209693	+	0	NA	exon (NM_011728, exon 1 of 6)	exon (NM_011728, exon 1 of 6)	155	NM_011728	22590	Mm.247036	NM_011728	ENSMUSG00000028329	Xpa	AI573865|Xpac	xeroderma pigmentosum, complementation group A	protein-coding
2463	chr7	117307091	117308760	+	0	NA	Intergenic	Intergenic	42352	NM_009516	22390	Mm.287173	NM_009516		Wee1	Wee1A	WEE 1 homolog 1 (S. pombe)	protein-coding
13	chr1	23928321	23929516	+	0	NA	exon (NM_028534, exon 1 of 10)	exon (NM_028534, exon 1 of 10)	302	NM_028534	98366	Mm.329963	NM_028534	ENSMUSG00000026155	Smap1	1700056O10Rik|4921514B13Rik|4921525H11Rik|AI462175	small ArfGAP 1	protein-coding
2493	chr7	134983462	134995420	+	0	NA	intron (NM_009294, intron 5 of 10)	intron (NM_009294, intron 5 of 10)	4119	NM_009294	20909	Mm.24867	NM_009294	ENSMUSG00000030805	Stx4a	Stx4|Syn-4|Syn4	syntaxin 4A (placental)	protein-coding
105	chr1	123327585	123328307	+	0	NA	intron (NM_001025156, intron 1 of 23)	intron (NM_001025156, intron 1 of 23)	302	NM_001025156	70829	Mm.25788	NM_027567	ENSMUSG00000026339	Ccdc93	4633402D15Rik|9230102M16Rik	coiled-coil domain containing 93	protein-coding
1514	chr2	59961165	59965103	+	0	NA	intron (NM_001001182, intron 1 of 35)	GC_rich|Low_complexity|Low_complexity	663	NM_001001182	407823	Mm.228071	NM_001001182	ENSMUSG00000026987	Baz2b	5830435C13Rik|BC053917|D2Ertd794e	bromodomain adjacent to zinc finger domain, 2B	protein-coding
840	chr14	26196697	26199556	+	0	NA	Intergenic	Intergenic	-80545	NM_183208	328365	Mm.227484	NM_183208	ENSMUSG00000007817	Zmiz1	BC065120|E330020C23|ENSMUSG00000072684|Gm10397|I920194n01|Rai17|Zimp10	zinc finger, MIZ-type containing 1	protein-coding
1647	chr2	179758987	179760481	+	0	NA	promoter-TSS (NM_177727)	promoter-TSS (NM_177727)	42	NM_177727	241846	Mm.21577	NM_177727	ENSMUSG00000039108	Lsm14b	9430078B04|BC040823	LSM14 homolog B (SCD6, S. cerevisiae)	protein-coding
597	chr12	73179238	73188008	+	0	NA	intron (NM_026038, intron 1 of 4)	intron (NM_026038, intron 1 of 4)	2677	NM_026038	67217	Mm.286120	NM_026038	ENSMUSG00000019718	L3hypdh	2810055F11Rik	L-3-hydroxyproline dehydratase (trans-)	protein-coding
2380	chr7	34952970	34953986	+	0	NA	promoter-TSS (NM_016682)	promoter-TSS (NM_016682)	70	NM_016682	50995	Mm.27560	NM_016682	ENSMUSG00000052997	Uba2	AA986091|Arx|Sae2|UBA1|Ubl1a2|Uble1b	ubiquitin-like modifier activating enzyme 2	protein-coding
111	chr1	132553671	132561110	+	0	NA	intron (NM_007576, intron 1 of 9)	Lx9|LINE|L1	805	NM_007576	12269	Mm.306720	NM_007576		C4bp	AI195242|C4bpa	complement component 4 binding protein	protein-coding
1411	chr19	23199525	23239879	+	0	NA	intron (NM_010638, intron 1 of 1)	B1_Mur1|SINE|Alu	3986	NM_010638	16601	Mm.291595	NM_010638	ENSMUSG00000033863	Klf9	2310051E17Rik|AA589643|BTEB-1|Bteb1|ENSMUSG00000055440|Gm9971	Kruppel-like factor 9	protein-coding
408	chr11	50190079	50193550	+	0	NA	5' UTR (NM_021510, exon 2 of 14)	5' UTR (NM_021510, exon 2 of 14)	593	NM_021510	59013	Mm.21740	NM_021510	ENSMUSG00000007850	Hnrnph1	AI642080|E430005G16Rik|Hnrnph|Hnrph1	heterogeneous nuclear ribonucleoprotein H1	protein-coding
1480	chr2	23011082	23012548	+	0	NA	promoter-TSS (NM_013771)	promoter-TSS (NM_013771)	-210	NM_013771	27377	Mm.23335	NM_013771	ENSMUSG00000026775	Yme1l1	FtsH1|Ftsh	YME1-like 1 (S. cerevisiae)	protein-coding
2777	chr9	100542137	100546063	+	0	NA	promoter-TSS (NM_009282)	promoter-TSS (NM_009282)	58	NM_009282	20842	Mm.42135	NM_009282	ENSMUSG00000037286	Stag1	AU045003|SA-1|Scc3	stromal antigen 1	protein-coding
242	chr10	41238207	41243643	+	0	NA	intron (NM_016898, intron 1 of 5)	URR1B|DNA|MER1_type	1619	NM_016898	53599	Mm.269815	NM_016898	ENSMUSG00000019818	Cd164	A115|A24|AA589639|AW540279|MGC-24|MSSP	CD164 antigen	protein-coding
559	chr12	21291369	21293232	+	0	NA	promoter-TSS (NM_008403)	promoter-TSS (NM_008403)	142	NM_018813	54451	Mm.356778	NM_018813	ENSMUSG00000054309	Cpsf3	-	cleavage and polyadenylation specificity factor 3	protein-coding
1588	chr2	136716299	136718399	+	0	NA	promoter-TSS (NM_001141946)	promoter-TSS (NM_001141946)	-207	NM_001286983	59030	Mm.272570	NM_021527	ENSMUSG00000027274	Mkks	1300013E18Rik|AI463362|AI957237|Bbs6	McKusick-Kaufman syndrome	protein-coding
32	chr1	39592273	39593314	+	0	NA	exon (NM_028043, exon 1 of 7)	exon (NM_028043, exon 1 of 7)	146	NM_028043	52846	Mm.259421	NM_028043	ENSMUSG00000003135	Cnot11	2410015L18Rik|C40|D1Bwg0212e	CCR4-NOT transcription complex, subunit 11	protein-coding
443	chr11	69793357	69814772	+	0	NA	promoter-TSS (NM_019749)	promoter-TSS (NM_019749)	-808	NM_019749	56486	Mm.272460	NM_019749	ENSMUSG00000018567	Gabarap	-	gamma-aminobutyric acid receptor associated protein	protein-coding
2234	chr6	59158620	59159793	+	0	NA	intron (NM_001081145, intron 1 of 1)	intron (NM_001081145, intron 1 of 1)	342	NM_001081145	68140	Mm.25843	NM_001081145	ENSMUSG00000049232	Tigd2	3632410O17Rik	tigger transposable element derived 2	protein-coding
1795	chr3	135487446	135489925	+	0	NA	promoter-TSS (NM_001135150)	promoter-TSS (NM_001135150)	64	NM_001135149	67547	Mm.30239	NM_026228	ENSMUSG00000053897	Slc39a8	4933419D20Rik|AA986696|BIGM103|ZIP-8|Zip8	solute carrier family 39 (metal ion transporter), member 8	protein-coding
580	chr12	56330547	56332093	+	0	NA	promoter-TSS (NM_001100110)	promoter-TSS (NM_001100110)	-145	NM_001100110	100101806	Mm.471968	NM_001100110	ENSMUSG00000021020	Srp54c	E330029E12Rik	signal recognition particle 54C	protein-coding
2800	chr9	110019257	110020587	+	0	NA	5' UTR (NM_001252682, exon 1 of 23)	5' UTR (NM_001252682, exon 1 of 23)	198	NM_001252682	72831	Mm.276305	NM_133347	ENSMUSG00000032480	Dhx30	2810477H02Rik|C130058C04Rik|Ddx30|HELG|Ret-CoR	DEAH (Asp-Glu-Ala-His) box polypeptide 30	protein-coding
2523	chr8	4676968	4679038	+	0	NA	Intergenic	CpG	64833	NM_145591	233987	Mm.102799	NM_145591		Zfp958	-	zinc finger protein 958	protein-coding
1257	chr17	59150777	59152979	+	0	NA	intron (NM_026497, intron 1 of 6)	intron (NM_026497, intron 1 of 6)	867	NM_026497	67993	Mm.36507	NM_026497		Nudt12	0610016O18Rik	nudix (nucleoside diphosphate linked moiety X)-type motif 12	protein-coding
846	chr14	30807487	30842170	+	0	NA	intron (NM_001136240, intron 1 of 7)	MIRb|SINE|MIR	2642	NM_001136240	218865	Mm.259916	NM_172264	ENSMUSG00000015970	Chdh	AU041472|D630034H06Rik	choline dehydrogenase	protein-coding
31	chr1	39043718	39045394	+	0	NA	promoter-TSS (NM_026850)	promoter-TSS (NM_026850)	-103	NM_026850	68833	Mm.28121	NM_026850	ENSMUSG00000026078	Pdcl3	1110061A19Rik|C80025|Viaf1	phosducin-like 3	protein-coding
1689	chr3	54496211	54497407	+	0	NA	promoter-TSS (NM_019995)	promoter-TSS (NM_019995)	-218	NM_019995	56790	Mm.486375	NM_019995	ENSMUSG00000027751	Supt20	AA667204|AI450544|D3Ertd300e|Fam48a|Supt20h|p38IP	suppressor of Ty 20	protein-coding
2307	chr6	134211426	134214252	+	0	NA	intron (NM_007961, intron 6 of 7)	intron (NM_007961, intron 6 of 7)	-133508	NM_025778	66813	Mm.474472	NM_025778	ENSMUSG00000030200	Bcl2l14	4930452K23Rik|4933405K19Rik|9030625M01Rik|AI429211|Bclg	BCL2-like 14 (apoptosis facilitator)	protein-coding
1861	chr4	45975327	45992932	+	0	NA	intron (NM_001290475, intron 1 of 16)	L1M5|LINE|L1	-1040	NM_146142	100121	Mm.275413	NM_146142	ENSMUSG00000035517	Tdrd7	5730495N10Rik|AI447470|PCTAIRE2BP	tudor domain containing 7	protein-coding
2825	chrX	11654109	11669493	+	0	NA	intron (NM_001168321, intron 1 of 13)	intron (NM_001168321, intron 1 of 13)	-4122	NM_029510	71458	Mm.196328	NM_029510	ENSMUSG00000040363	Bcor	5830466J11Rik|8430401K06Rik|BcorR|D930024N20Rik|mKIAA1575	BCL6 interacting corepressor	protein-coding
2706	chr9	44411189	44416830	+	0	NA	intron (NM_001110826, intron 1 of 13)	intron (NM_001110826, intron 1 of 13)	1034	NM_181324	13209	Mm.267061	NM_007841	ENSMUSG00000032097	Ddx6	1110001P04Rik|E230023J21Rik|HLR2|mRCK/P54|p54|rck	DEAD (Asp-Glu-Ala-Asp) box polypeptide 6	protein-coding
1296	chr18	8693146	8694850	+	0	NA	Intergenic	CpG	-518856	NM_008058	14370	Mm.184289	NM_008058	ENSMUSG00000036904	Fzd8	Fz8	frizzled homolog 8 (Drosophila)	protein-coding
1553	chr2	115407025	115407872	+	0	NA	promoter-TSS (NM_001145898)	promoter-TSS (NM_001145898)	-4	NM_207264	399568	Mm.134929	NM_207264	ENSMUSG00000040282	BC052040	-	cDNA sequence BC052040	protein-coding
2161	chr5	145528158	145531637	+	0	NA	intron (NM_001081362, intron 1 of 70)	intron (NM_001081362, intron 1 of 70)	236	NM_001081362	100683	Mm.273570	NM_001081362	ENSMUSG00000045482	Trrap	AI481500	transformation/transcription domain-associated protein	protein-coding
1303	chr18	10706069	10707424	+	0	NA	promoter-TSS (NM_134130)	promoter-TSS (NM_134130)	-52	NM_134130	106861	Mm.273108	NM_134130	ENSMUSG00000002475	Abhd3	AA675331|LABH3	abhydrolase domain containing 3	protein-coding
2133	chr5	124561273	124566707	+	0	NA	intron (NM_025671, intron 4 of 6)	intron (NM_025671, intron 4 of 6)	1643	NM_025671	66627	Mm.7050	NM_025671	ENSMUSG00000023707	Ogfod2	1300006G11Rik|5730405M13Rik|AU041636|AW552395	2-oxoglutarate and iron-dependent oxygenase domain containing 2	protein-coding
1654	chr3	5574220	5577235	+	0	NA	intron (NM_001163305, intron 1 of 4)	intron (NM_001163305, intron 1 of 4)	521	NM_001163301	19302	Mm.132336	NM_008994	ENSMUSG00000040374	Pex2	D3Ertd138e|PAF-1|PMP35|Pxmp3	peroxisomal biogenesis factor 2	protein-coding
968	chr15	55735817	55738970	+	0	NA	intron (NM_016667, intron 1 of 6)	intron (NM_016667, intron 1 of 6)	1111	NM_016667	20649	Mm.309425	NM_016667	ENSMUSG00000060429	Sntb1	-	syntrophin, basic 1	protein-coding
675	chr13	21622634	21623244	+	0	NA	promoter-TSS (NM_139141)	promoter-TSS (NM_139141)	44	NM_139141	93681	Mm.290601	NM_139141	ENSMUSG00000063894	Zkscan8	2510038J07Rik|D430019P06Rik|LD5-1|Zfp192	zinc finger with KRAB and SCAN domains 8	protein-coding
15	chr1	24618384	24623078	+	0	NA	Intergenic	Intergenic	-26455	NM_007733	12823	Mm.329196	NM_007733		Col19a1	-	collagen, type XIX, alpha 1	protein-coding
431	chr11	61743042	61745252	+	0	NA	promoter-TSS (NM_019921)	promoter-TSS (NM_019921)	-388	NM_019921	56697	Mm.274404	NM_019921	ENSMUSG00000047804	Akap10	1500031L16Rik|B130049N18Rik|D-AKAP-2|D-AKAP2|PRKA10	A kinase (PRKA) anchor protein 10	protein-coding
382	chr11	21263041	21274801	+	0	NA	intron (NM_001290634, intron 1 of 9)	intron (NM_001290634, intron 1 of 9)	1711	NM_139297	216558	Mm.28877	NM_139297	ENSMUSG00000001891	Ugp2	UDPGP|UGPase	UDP-glucose pyrophosphorylase 2	protein-coding
2236	chr6	64992459	64993394	+	0	NA	promoter-TSS (NM_001253392)	promoter-TSS (NM_001253392)	265	NM_007958	13990	Mm.99113	NM_007958	ENSMUSG00000029920	Smarcad1	AV081750|AW226546|D6Pas1|Etl1|mKIAA1122	SWI/SNF-related, matrix-associated actin-dependent regulator of chromatin, subfamily a, containing DEAD/H box 1	protein-coding
2846	chrX	71329543	71331693	+	0	NA	intron (NM_010788, intron 1 of 3)	CpG	411	NM_010788	17257	Mm.131408	NM_010788	ENSMUSG00000031393	Mecp2	1500041B07Rik|D630021H01Rik|Mbd5|WBP10	methyl CpG binding protein 2	protein-coding
1506	chr2	48804111	48806296	+	0	NA	promoter-TSS (NM_011958)	promoter-TSS (NM_011958)	175	NM_029924	109241	Mm.440436	NM_029924	ENSMUSG00000036792	Mbd5	9430004D19Rik|AA536666|AI426407|C030040A15Rik|Gm1630|OTTMUSG00000012483	methyl-CpG binding domain protein 5	protein-coding
2855	chrX	106028038	106030427	+	0	NA	promoter-TSS (NR_015493)	promoter-TSS (NR_015493)	462	NM_001081477	382236	Mm.100112	NM_001081477	ENSMUSG00000063663	Brwd3	Brodl|D030064D06Rik|Gm596	bromodomain and WD repeat domain containing 3	protein-coding
139	chr1	154748943	154752309	+	0	NA	promoter-TSS (NM_001160256)	promoter-TSS (NM_001160256)	-850	NM_001005507	226517	Mm.270775	NM_001005507	ENSMUSG00000042772	Smg7	9430023P16Rik|mKIAA0250	Smg-7 homolog, nonsense mediated mRNA decay factor (C. elegans)	protein-coding
129	chr1	138311277	138312617	+	0	NA	promoter-TSS (NM_026500)	promoter-TSS (NM_026500)	99	NM_026500	67997	Mm.385462	NM_026500	ENSMUSG00000026404	Ddx59	1210002B07Rik|4833411G06Rik	DEAD (Asp-Glu-Ala-Asp) box polypeptide 59	protein-coding
926	chr14	121308598	121311271	+	0	NA	promoter-TSS (NM_023579)	promoter-TSS (NM_023579)	-482	NM_023579	70572	Mm.221452	NM_023579	ENSMUSG00000030662	Ipo5	1110011C18Rik|5730478E03Rik|AA409333|C76941|IMB3|Kpnb3|Ranbp5	importin 5	protein-coding
2145	chr5	138219517	138229230	+	0	NA	exon (NM_144913, exon 2 of 4)	exon (NM_144913, exon 2 of 4)	3556	NM_144913	231803	Mm.61193	NM_144913	ENSMUSG00000029726	Mepce	Bcdin3|D5Wsu46e	methylphosphate capping enzyme	protein-coding
1246	chr17	50608641	50611229	+	0	NA	Intergenic	Intergenic	-38937	NM_013880	224860	Mm.217362	NM_013880	ENSMUSG00000038910	Plcl2	PLC-L2|PRIP-2|Plce2|mKIAA1092	phospholipase C-like 2	protein-coding
859	chr14	35966824	35968921	+	0	NA	intron (NM_008166, intron 4 of 15)	intron (NM_008166, intron 4 of 15)	260077	NR_029774	723847		NR_029774		Mir346	Mirn346|mmu-mir-346	microRNA 346	ncRNA
1083	chr16	20301902	20302585	+	0	NA	intron (NM_001005767, intron 1 of 9)	CpG	192	NM_001005767	381038	Mm.371737	NM_001005767	ENSMUSG00000033918	Parl	D16Ertd607e|PRO2207|PSARL1|PSENIP2|Psarl	presenilin associated, rhomboid-like	protein-coding
739	chr13	63532100	63533689	+	0	NA	5' UTR (NM_007985, exon 1 of 15)	5' UTR (NM_007985, exon 1 of 15)	159	NM_007985	14088	Mm.126106	NM_007985	ENSMUSG00000021461	Fancc	Facc	Fanconi anemia, complementation group C	protein-coding
1293	chr18	5989366	5990461	+	0	NA	Intergenic	Intergenic	146183	NM_029277	75415	Mm.239675	NM_029277	ENSMUSG00000041225	Arhgap12	2810011M08Rik	Rho GTPase activating protein 12	protein-coding
876	chr14	55172629	55173939	+	0	NA	promoter-TSS (NM_145462)	promoter-TSS (NM_145462)	-86	NM_145462	219072	Mm.202152	NM_145462	ENSMUSG00000022177	Haus4	9430093H08Rik|AU016300|D14Ertd500e	HAUS augmin-like complex, subunit 4	protein-coding
1792	chr3	135083418	135087638	+	0	NA	intron (NM_025902, intron 1 of 2)	intron (NM_025902, intron 1 of 2)	869	NM_025902	67006	Mm.269993	NM_025902	ENSMUSG00000028165	Cisd2	1500009M05Rik|1500026J14Rik|1500031D15Rik|AI848398|B630006A20Rik|Miner1|Noxp70|Zcd2	CDGSH iron sulfur domain 2	protein-coding
662	chr13	8869452	8871457	+	0	NA	promoter-TSS (NM_001039389)	promoter-TSS (NM_001039389)	-164	NM_172445	207615	Mm.284654	NM_172445	ENSMUSG00000021147	Wdr37	-	WD repeat domain 37	protein-coding
168	chr1	172185166	172186120	+	0	NA	Intergenic	CpG	-21812	NM_012009	26904	Mm.57009	NM_012009	ENSMUSG00000096334	Sh2d1b1	EAT-2|EAT-2A|Eat2|Eat2a|Sh2d1b	SH2 domain protein 1B1	protein-coding
135	chr1	145549196	145550433	+	0	NA	promoter-TSS (NM_145991)	promoter-TSS (NM_145991)	0	NM_145991	214498	Mm.156727	NM_145991		Cdc73	8430414L16Rik|BC027756|C130030P16Rik|C81219|Hrpt2	cell division cycle 73, Paf1/RNA polymerase II complex component	protein-coding
1518	chr2	64299421	64300970	+	0	NA	Intergenic	Intergenic	-364100	NM_001267847	60344	Mm.130769	NM_021716	ENSMUSG00000075324	Fign	fi|fidget	fidgetin	protein-coding
145	chr1	157881909	157891969	+	0	NA	intron (NM_172843, intron 1 of 6)	intron (NM_172843, intron 1 of 6)	-1052	NM_001160181	240832	Mm.253335	NM_022329	ENSMUSG00000050565	Tor1aip2	1110020D10Rik|15kDa|A130072J07|AA103493|AW060462|AW610675|C77739|Ifrg15|Lull1	torsin A interacting protein 2	protein-coding
178	chr1	180116901	180121773	+	0	NA	intron (NM_024282, intron 1 of 4)	intron (NM_024282, intron 1 of 4)	1789	NM_024282	78825	Mm.440132	NM_024282	ENSMUSG00000026502	Desi2	5830417C01Rik|DeSI-2|Fam152a|Pppde1	desumoylating isopeptidase 2	protein-coding
2674	chr9	15513399	15515049	+	0	NA	promoter-TSS (NM_172289)	promoter-TSS (NM_172289)	11	NM_172289	234967	Mm.138815	NM_172289	ENSMUSG00000043885	Slc36a4	6330573I15Rik|PAT4	solute carrier family 36 (proton/amino acid symporter), member 4	protein-coding
1131	chr16	77329205	77332068	+	0	NA	intron (NR_015543, intron 1 of 4)	intron (NR_015543, intron 1 of 4)	1063	NR_015543	77994	Mm.394688	NR_015543	ENSMUSG00000090386	2810055G20Rik	D730043B02Rik	RIKEN cDNA 2810055G20 gene	ncRNA
2728	chr9	55785496	55786493	+	0	NA	promoter-TSS (NM_001081341)	promoter-TSS (NM_001081341)	-72	NM_001081341	244891	Mm.86588	NM_175536	ENSMUSG00000034007	Scaper	C430017I08|D530014O03Rik|Zfp291	S phase cyclin A-associated protein in the ER	protein-coding
1876	chr4	53603620	53610422	+	0	NA	intron (NM_133891, intron 15 of 15)	intron (NM_133891, intron 15 of 15)	-37322	NM_176966	319636	Mm.103464	NM_176966	ENSMUSG00000054752	Fsd1l	A230072O16Rik|Ccdc10|Csdufd1|Fsd1nl|OTTMUSG00000007002	fibronectin type III and SPRY domain containing 1-like	protein-coding
124	chr1	136351594	136352491	+	0	NA	promoter-TSS (NM_153128)	promoter-TSS (NM_153128)	-90	NM_153128	240756	Mm.87398	NM_153128	ENSMUSG00000026455	Klhl12	C3ip1	kelch-like 12	protein-coding
772	chr13	74944892	74946704	+	0	NA	promoter-TSS (NM_009817)	promoter-TSS (NM_009817)	-390	NM_009817	12380	Mm.29163	NM_009817	ENSMUSG00000021585	Cast	-	calpastatin	protein-coding
1759	chr3	105761276	105762921	+	0	NA	promoter-TSS (NM_027432)	promoter-TSS (NM_027432)	-318	NM_027432	70465	Mm.5110	NM_027432	ENSMUSG00000000561	Wdr77	2610003I18Rik|2610312E17Rik|C79984|p44/MEP50	WD repeat domain 77	protein-coding
1429	chr19	37280535	37289658	+	0	NA	intron (NM_027314, intron 1 of 5)	intron (NM_027314, intron 1 of 5)	3061	NM_001164336	69104	Mm.175989	NM_027314	ENSMUSG00000023307	March5	1810015H18Rik|2310008I22Rik|2700055A20Rik|5730499H23Rik|E130202O05Rik|MARCH-V|MITOL|Marchv|Rnf153	membrane-associated ring finger (C3HC4) 5	protein-coding
1974	chr4	138009095	138021338	+	0	NA	3' UTR (NM_025451, exon 2 of 2)	3' UTR (NM_025451, exon 2 of 2)	4153	NM_025451	66259	Mm.41603	NM_025451	ENSMUSG00000046447	Camk2n1	1810006K23Rik|AI848599|AI891706	calcium/calmodulin-dependent protein kinase II inhibitor 1	protein-coding
2032	chr5	31999394	32001747	+	0	NA	promoter-TSS (NM_153196)	promoter-TSS (NM_153196)	147	NM_181282	107976	Mm.482126	NM_144541	ENSMUSG00000052139	Bre	6030405P19Rik|AI429776|B830038C02Rik	brain and reproductive organ-expressed protein	protein-coding
2536	chr8	13785263	13786218	+	0	NA	exon (NM_025924, exon 1 of 9)	exon (NM_025924, exon 1 of 9)	125	NM_025924	67031	Mm.44858	NM_025924	ENSMUSG00000038398	Upf3a	2600001C03Rik|4930546M19Rik|RENT3A|UPF3	UPF3 regulator of nonsense transcripts homolog A (yeast)	protein-coding
2483	chr7	134062476	134072869	+	0	NA	Intergenic	Intergenic	-4721	NM_172747	233877	Mm.245897	NM_172747	ENSMUSG00000030685	Kctd13	1500003N18Rik|AV259508|PDIP1alpha|Pdip1|Poldip1	potassium channel tetramerisation domain containing 13	protein-coding
1374	chr18	80346250	80349021	+	0	NA	intron (NM_175028, intron 1 of 3)	CpG	586	NM_175028	240442	Mm.26594	NM_175028	ENSMUSG00000053950	Adnp2	8430420L05Rik|BC024969|Kiaa0863|Zfp508|mKIAA0863	ADNP homeobox 2	protein-coding
1528	chr2	75776023	75777135	+	0	NA	promoter-TSS (NM_028235)	promoter-TSS (NM_028235)	-60	NM_028235	72421	Mm.275109	NM_028235	ENSMUSG00000075273	Ttc30b	2510042P03Rik|Tcc30b	tetratricopeptide repeat domain 30B	protein-coding
2807	chr9	113615888	113618023	+	0	NA	intron (NM_001164677, intron 1 of 17)	GA-rich|Low_complexity|Low_complexity	422	NM_001164678	18571	Mm.29816	NM_011052	ENSMUSG00000032504	Pdcd6ip	AI480591|AW544830|Aip1|Alix|C76364|Eig2|mKIAA1375	programmed cell death 6 interacting protein	protein-coding
2303	chr6	128373928	128389458	+	0	NA	intron (NM_010219, intron 9 of 9)	intron (NM_010219, intron 9 of 9)	-6765	NM_133927	101142	Mm.31345	NM_133927	ENSMUSG00000001518	Itfg2	2700050P07Rik|AI646725	integrin alpha FG-GAP repeat containing 2	protein-coding
653	chr12	112812259	112814290	+	0	NA	promoter-TSS (NR_045295)	promoter-TSS (NR_045295)	553	NM_022801	17169	Mm.260504	NM_021516	ENSMUSG00000007411	Mark3	1600015G02Rik|A430080F22Rik|C-TAK1|ETK-1|ETK1|Emk2|MPK10	MAP/microtubule affinity-regulating kinase 3	protein-coding
1692	chr3	57499367	57501959	+	0	NA	Intergenic	Intergenic	-4204	NM_001033349	242037	Mm.291091	NM_001033349		Ankub1	Gm410	ankrin repeat and ubiquitin domain containing 1	protein-coding
2677	chr9	19426364	19427055	+	0	NA	5' UTR (NM_172918, exon 1 of 9)	5' UTR (NM_172918, exon 1 of 9)	174	NM_172918	244713	Mm.67366	NM_172918		Zfp317	4932416G03|D230022C05Rik|KRAB9|Zfp67|Zfp75|mszf40	zinc finger protein 317	protein-coding
2259	chr6	87863609	87864772	+	0	NA	TTS (NM_017477)	TTS (NM_017477)	220	NM_173737	232210	Mm.246241	NM_173737	ENSMUSG00000030060	Hmces	8430410A17Rik|C85376	5-hydroxymethylcytosine (hmC) binding, ES cell specific	protein-coding
509	chr11	101404976	101420653	+	0	NA	promoter-TSS (NM_001252220)	promoter-TSS (NM_001252220)	455	NM_009764	12189	Mm.244975	NM_009764	ENSMUSG00000017146	Brca1	-	breast cancer 1	protein-coding
2212	chr6	39541867	39543340	+	0	NA	promoter-TSS (NM_026612)	promoter-TSS (NM_026612)	21	NM_026612	68198	Mm.29415	NM_026612	ENSMUSG00000002416	Ndufb2	1810011O01Rik|8kDa|AGGG|AI325567|CI-AGGG	NADH dehydrogenase (ubiquinone) 1 beta subcomplex, 2	protein-coding
1015	chr15	88562927	88565357	+	0	NA	intron (NM_001033274, intron 1 of 12)	intron (NM_001033274, intron 1 of 12)	507	NM_001033274	223770	Mm.254438	NM_001033274	ENSMUSG00000022387	Brd1	1110059H06Rik|AI316859|mKIAA4191	bromodomain containing 1	protein-coding
367	chr11	5777520	5778963	+	0	NA	promoter-TSS (NM_008894)	promoter-TSS (NM_008894)	18	NM_008894	18972	Mm.35788	NM_008894	ENSMUSG00000020471	Pold2	50kDa|p50|po1D2	polymerase (DNA directed), delta 2, regulatory subunit	protein-coding
976	chr15	66408755	66410032	+	0	NA	5' UTR (NM_001081409, exon 1 of 21)	5' UTR (NM_001081409, exon 1 of 21)	259	NM_001081409	239510	Mm.267473	NM_178718	ENSMUSG00000072501	Phf20l1	CGI-72|E130113K22Rik	PHD finger protein 20-like 1	protein-coding
716	chr13	49748013	49749072	+	0	NA	promoter-TSS (NM_001271397)	promoter-TSS (NM_001271397)	95	NR_073167	70930	Mm.258915	NM_001081350	ENSMUSG00000021392	Nol8	4921532D18Rik|5730412B09Rik	nucleolar protein 8	protein-coding
1886	chr4	61671956	61690449	+	0	NA	Intergenic	RMER16-int|LTR|ERVK	33949	NM_001012323	381530	Mm.460005	NM_001012323	ENSMUSG00000078672	Mup20	Gm12560|Mup24|OTTMUSG00000007485|darcin	major urinary protein 20	protein-coding
1821	chr4	8287614	8290030	+	0	NA	Intergenic	Intergenic	-122634	NM_007592	12319	Mm.119320	NM_007592		Car8	AW546993|Ca8|Cals|Cals1|Carp|wdl	carbonic anhydrase 8	protein-coding
1972	chr4	136157883	136158844	+	0	NA	exon (NM_133872, exon 1 of 19)	exon (NM_133872, exon 1 of 19)	275	NM_133872	99982	Mm.28540	NM_133872	ENSMUSG00000036940	Kdm1a	1810043O07Rik|AA408884|Aof2|D4Ertd478e|Kdm1|Lsd1|mKIAA0601	lysine (K)-specific demethylase 1A	protein-coding
940	chr15	8998154	9013161	+	0	NA	intron (NM_001040395, intron 1 of 11)	intron (NM_001040395, intron 1 of 11)	4648	NM_001040395	68646	Mm.244226	NM_001040395	ENSMUSG00000022253	Nadk2	MNADK|Nadkd1	NAD kinase 2, mitochondrial	protein-coding
685	chr13	29946879	29947731	+	0	NA	intron (NM_144536, intron 1 of 15)	CpG	152	NM_144536	68916	Mm.212227	NM_144536	ENSMUSG00000006191	Cdkal1	1190005B03Rik|6620401C13Rik	CDK5 regulatory subunit associated protein 1-like 1	protein-coding
743	chr13	64335841	64353422	+	0	NA	intron (NM_001122989, intron 4 of 13)	intron (NM_001122989, intron 4 of 13)	5215	NM_001122989	218294	Mm.25335	NM_172587	ENSMUSG00000033102	Cdc14b	2810432N10Rik|A530086E13Rik|AA472821|CDC14B3|Cdc14B1	CDC14 cell division cycle 14B	protein-coding
2265	chr6	90400091	90466082	+	0	NA	Intergenic	(TTTTTG)n|Simple_repeat|Simple_repeat	20466	NM_023184	66277	Mm.41389	NM_023184	ENSMUSG00000030087	Klf15	1810013I09Rik|AV048136|AW494632|CKLF|KKLF	Kruppel-like factor 15	protein-coding
21	chr1	31070102	31077557	+	0	NA	Intergenic	Intergenic	-67229	NM_011200	19243	Mm.491181	NM_011200	ENSMUSG00000026064	Ptp4a1	AA415290|AU019864|C130021B01|Prl-1	protein tyrosine phosphatase 4a1	protein-coding
523	chr11	115396156	115398262	+	0	NA	intron (NM_133354, intron 1 of 3)	CpG	335	NM_133354	170930	Mm.29923	NM_133354	ENSMUSG00000020738	Sumo2	SUMO-2|Smt3A|Smt3b|Smt3h2	SMT3 suppressor of mif two 3 homolog 2 (yeast)	protein-coding
2377	chr7	31064383	31066373	+	0	NA	promoter-TSS (NM_146186)	promoter-TSS (NM_146186)	62	NM_146186	233064	Mm.271677	NM_146186	ENSMUSG00000037020	Wdr62	2310038K02Rik	WD repeat domain 62	protein-coding
2129	chr5	123618758	123654684	+	0	NA	Intergenic	Intergenic	-4026	NM_008277	15445	Mm.439709	NM_008277	ENSMUSG00000029445	Hpd	Fla|Flp|Hppd|Laf	4-hydroxyphenylpyruvic acid dioxygenase	protein-coding
1460	chr2	4638363	4639675	+	0	NA	5' UTR (NM_001190400, exon 1 of 9)	5' UTR (NM_001190400, exon 1 of 9)	142	NM_178663	209645	Mm.149539	NM_178663	ENSMUSG00000048186	Bend7	1110017O21Rik|E130319B15Rik	BEN domain containing 7	protein-coding
453	chr11	74737434	74741398	+	0	NA	promoter-TSS (NM_001163311)	promoter-TSS (NM_001163311)	42	NM_001002764	103677	Mm.288460	NM_001002764	ENSMUSG00000038290	Smg6	AI317223|AU041178	Smg-6 homolog, nonsense mediated mRNA decay factor (C. elegans)	protein-coding
723	chr13	53024446	53025405	+	0	NA	exon (NM_016709, exon 1 of 10)	exon (NM_016709, exon 1 of 10)	121	NM_016709	11992	Mm.252034	NM_016709	ENSMUSG00000021460	Auh	C77140|W91705	AU RNA binding protein/enoyl-coenzyme A hydratase	protein-coding
2500	chr7	138703789	138704501	+	0	NA	intron (NM_009774, intron 1 of 7)	CpG	240	NM_009774	12237	Mm.927	NM_009774	ENSMUSG00000066979	Bub3	AU019800|AU021329|AU043350|AW146323|C78067	budding uninhibited by benzimidazoles 3 homolog (S. cerevisiae)	protein-coding
1202	chr17	29141984	29146675	+	0	NA	intron (NM_134115, intron 1 of 13)	intron (NM_134115, intron 1 of 13)	553	NM_134115	106504	Mm.439986	NM_134115	ENSMUSG00000024006	Stk38	5830476G13Rik|9530097A09Rik|AA617404|Ndr1	serine/threonine kinase 38	protein-coding
351	chr10	128001970	128005006	+	0	NA	promoter-TSS (NM_011119)	promoter-TSS (NM_011119)	-498	NM_011119	18813	Mm.4742	NM_011119	ENSMUSG00000025364	Pa2g4	38kDa|AA672939|Ebp1|Plfap	proliferation-associated 2G4	protein-coding
1040	chr15	100381458	100383087	+	0	NA	intron (NM_033476, intron 1 of 15)	CpG	167	NM_033476	21422	Mm.219040	NM_033476	ENSMUSG00000009733	Tfcp2	CP-2|CP2|D230015P20Rik|LBP-1c|LBP-1d|LBP1|LSF|Tcfcp2|UBP-1	transcription factor CP2	protein-coding
2838	chrX	54306107	54307444	+	0	NA	promoter-TSS (NM_028242)	promoter-TSS (NM_028242)	28	NM_028242	72459	Mm.2152	NM_028242	ENSMUSG00000067873	Htatsf1	1600023H17Rik|2600017A12Rik|2700077B20Rik|TAT-SF1	HIV TAT specific factor 1	protein-coding
595	chr12	72236595	72238631	+	0	NA	promoter-TSS (NM_029818)	promoter-TSS (NM_029818)	49	NM_001024853	30056	Mm.207767	NM_013896	ENSMUSG00000021079	Timm9	2810011L15Rik|Tim10a|Timm10	translocase of inner mitochondrial membrane 9	protein-coding
1755	chr3	104441546	104443889	+	0	NA	5' UTR (NM_009196, exon 1 of 5)	5' UTR (NM_009196, exon 1 of 5)	130	NM_009196	20501	Mm.9086	NM_009196	ENSMUSG00000032902	Slc16a1	AL022710|Mct1	solute carrier family 16 (monocarboxylic acid transporters), member 1	protein-coding
1138	chr16	90213840	90224387	+	0	NA	Intergenic	B2_Mm2|SINE|B2	-1874	NM_011434	20655	Mm.276325	NM_011434	ENSMUSG00000022982	Sod1	B430204E11Rik|Cu/Zn-SOD|CuZnSOD|Ipo-1|Ipo1|SODC|Sod-1	superoxide dismutase 1, soluble	protein-coding
488	chr11	88835186	88835610	+	0	NA	exon (NM_016706, exon 1 of 7)	exon (NM_016706, exon 1 of 7)	149	NM_016706	12812	Mm.268004	NM_016706	ENSMUSG00000033983	Coil	C79982|Cln80|p80|p80-coilin	coilin	protein-coding
1854	chr4	44077806	44087122	+	0	NA	intron (NM_015828, intron 1 of 11)	B1_Mur1|SINE|Alu	3081	NM_001190414	50798	Mm.256718	NM_015828	ENSMUSG00000028479	Gne	2310066H07Rik|DMRV|GLCNE|IBM2|NM|Uae1	glucosamine (UDP-N-acetyl)-2-epimerase/N-acetylmannosamine kinase	protein-coding
1012	chr15	85429465	85621581	+	0	NA	Intergenic	Intergenic	-8680	NR_110483	102800312	Mm.33117	NR_110483		Mirlet7bhg	linc-Ppara	MIRLET7B host gene (non-protein coding)	ncRNA
1498	chr2	34261781	34263469	+	0	NA	5' UTR (NM_177345, exon 1 of 12)	5' UTR (NM_177345, exon 1 of 12)	254	NM_001290626	227743	Mm.270866	NM_177345	ENSMUSG00000038696	Mapkap1	AI591529|D230039K05Rik|Sin1	mitogen-activated protein kinase associated protein 1	protein-coding
835	chr14	21296718	21299530	+	0	NA	intron (NM_001110794, intron 1 of 12)	intron (NM_001110794, intron 1 of 12)	1231	NM_001110794	11750	Mm.280231	NM_009674	ENSMUSG00000021814	Anxa7	AI265384|AI316497|Anx7|synexin	annexin A7	protein-coding
2182	chr6	13556203	13558347	+	0	NA	intron (NM_028990, intron 1 of 4)	intron (NM_028990, intron 1 of 4)	788	NM_028990	101118	Mm.254845	NM_028990	ENSMUSG00000029569	Tmem168	5730526F17Rik|8430437G11Rik|AI462344|AI504145	transmembrane protein 168	protein-coding
1267	chr17	71430881	71452651	+	0	NA	intron (NM_001083934, intron 21 of 36)	intron (NM_001083934, intron 21 of 36)	72869	NM_001083934	17929	Mm.4103	NM_010867	ENSMUSG00000024049	Myom1	D430047A17Rik	myomesin 1	protein-coding
1032	chr15	98661065	98663263	+	0	NA	promoter-TSS (NM_016781)	promoter-TSS (NM_016781)	-225	NM_016781	19082	Mm.6670	NM_016781	ENSMUSG00000067713	Prkag1	AA571379|BB036179|Prkaac	protein kinase, AMP-activated, gamma 1 non-catalytic subunit	protein-coding
113	chr1	132656190	132672711	+	0	NA	Intergenic	Intergenic	-33029	NM_001170632	64435	Mm.31821	NM_144960	ENSMUSG00000026415	Fcamr	-	Fc receptor, IgA, IgM, high affinity	protein-coding
901	chr14	70204591	70205901	+	0	NA	5' UTR (NM_153514, exon 1 of 10)	5' UTR (NM_153514, exon 1 of 10)	106	NM_153514	246710	Mm.102367	NM_153514	ENSMUSG00000022075	Rhobtb2	Dbc2|E130206H14Rik|mKIAA0717	Rho-related BTB domain containing 2	protein-coding
2191	chr6	27611462	27612862	+	0	NA	intron (NM_008174, intron 6 of 10)	intron (NM_008174, intron 6 of 10)	274588	NR_030420	735266		NR_030420		Mir592	Mirn592|mir-592|mmu-mir-592	microRNA 592	ncRNA
152	chr1	162618797	162623866	+	0	NA	intron (NM_013862, intron 10 of 20)	ORR1B1-int|LTR|MaLR	101738	NM_013862	29809	Mm.25833	NM_013862	ENSMUSG00000026721	Rabgap1l	5830411O09Rik|8430421H08Rik|9630005B12Rik|AW049894|HHL|Hh1|mKIAA0471	RAB GTPase activating protein 1-like	protein-coding
342	chr10	126648184	126649028	+	0	NA	promoter-TSS (NM_054097)	promoter-TSS (NM_054097)	72	NM_054097	117150	Mm.22682	NM_054097	ENSMUSG00000025417	Pip4k2c	Pip5k2c	phosphatidylinositol-5-phosphate 4-kinase, type II, gamma	protein-coding
1419	chr19	32829007	32837328	+	0	NA	intron (NM_008960, intron 1 of 8)	intron (NM_008960, intron 1 of 8)	1100	NM_008960	19211	Mm.245395	NM_008960	ENSMUSG00000013663	Pten	2310035O07Rik|A130070J02Rik|AI463227|B430203M17Rik|MMAC1|TEP1	phosphatase and tensin homolog	protein-coding
862	chr14	46034515	46039742	+	0	NA	Intergenic	Intergenic	-28657	NM_019425	54342	Mm.312945	NM_019425	ENSMUSG00000037722	Gnpnat1	AU017428|AU040593|EMeg32|Gpnat1|Gsnpat	glucosamine-phosphate N-acetyltransferase 1	protein-coding
341	chr10	126557514	126558492	+	0	NA	intron (NM_001171026, intron 1 of 14)	intron (NM_001171026, intron 1 of 14)	213	NM_177614	216440	Mm.295246	NM_177614	ENSMUSG00000040462	Os9	4632413K17Rik|AU022351	amplified in osteosarcoma	protein-coding
1056	chr16	11132239	11136133	+	0	NA	intron (NM_029582, intron 1 of 11)	CpG	439	NM_029582	106200	Mm.291015	NM_029582	ENSMUSG00000022498	Txndc11	2810408E11Rik|AI427833|EFP1|Txdc11	thioredoxin domain containing 11	protein-coding
2189	chr6	25236467	25242979	+	0	NA	Intergenic	Intergenic	-333598	NM_177013	319832	Mm.127446	NM_177013	ENSMUSG00000048022	Tmem229a	6332401O19Rik	transmembrane protein 229A	protein-coding
2287	chr6	117247296	117250992	+	0	NA	Intergenic	Intergenic	130591	NM_021704	20315	Mm.303231	NM_013655	ENSMUSG00000061353	Cxcl12	Pbsf|Scyb12|Sdf1|Tlsf|Tpar1	chemokine (C-X-C motif) ligand 12	protein-coding
2540	chr8	19979832	19980843	+	0	NA	Intergenic	MIRc|SINE|MIR	-21557	NM_001177408	100040599	Mm.491087	NM_001177408	ENSMUSG00000074449	Gm15319	OTTMUSG00000020118	predicted gene 15319	protein-coding
2284	chr6	116233397	116237645	+	0	NA	intron (NM_001290339, intron 2 of 6)	B1_Mur4|SINE|Alu	18971	NM_001290339	67492	Mm.272772	NM_001081317	ENSMUSG00000042213	Zfand4	Anubl1	zinc finger, AN1-type domain 4	protein-coding
64	chr1	74552005	74553670	+	0	NA	5' UTR (NM_021383, exon 1 of 8)	5' UTR (NM_021383, exon 1 of 8)	203	NM_021383	58184	Mm.291708	NM_021383	ENSMUSG00000026174	Rqcd1	2610007F23Rik|AI593551|Fl10	rcd1 (required for cell differentiation) homolog 1 (S. pombe)	protein-coding
2753	chr9	72832942	72834097	+	0	NA	promoter-TSS (NM_001198789)	promoter-TSS (NM_001198789)	208	NM_028181	72278	Mm.268475	NM_028181	ENSMUSG00000034563	Ccpg1	1700030B06Rik|1810073J13Rik|9430028F23Rik|AI426686|AI875170|CPR8|D9Ertd392e	cell cycle progression 1	protein-coding
1473	chr2	18508695	18510047	+	0	NA	Intergenic	Intergenic	-84718	NM_147778	12238	Mm.249586	NM_147778	ENSMUSG00000051154	Commd3	AW550818|Bup|D2Ertd542e	COMM domain containing 3	protein-coding
881	chr14	57429288	57432401	+	0	NA	promoter-TSS (NM_001253752)	promoter-TSS (NM_001253752)	-291	NM_144842	219105	Mm.473172	NM_144842	ENSMUSG00000040123	Zmym5	9830124H08Rik	zinc finger, MYM-type 5	protein-coding
2461	chr7	116077789	116078537	+	0	NA	exon (NM_025344, exon 1 of 8)	exon (NM_025344, exon 1 of 8)	234	NM_025344	66085	Mm.182962	NM_025344		Eif3f	0610037M02Rik|AA409853|Eif3s5	eukaryotic translation initiation factor 3, subunit F	protein-coding
45	chr1	55227167	55231815	+	0	NA	intron (NM_028713, intron 8 of 8)	intron (NM_028713, intron 8 of 8)	41402	NM_025283	19070	Mm.291037	NM_025283	ENSMUSG00000025979	Mob4	2610109B12Rik|Mobkl3|Phocn|Prei3	MOB family member 4, phocein	protein-coding
405	chr11	49046974	49082641	+	0	NA	intron (NM_001110150, intron 1 of 2)	intron (NM_001110150, intron 1 of 2)	753	NM_001110150	17308	Mm.196933	NM_010794	ENSMUSG00000020346	Mgat1	Mgat-1	mannoside acetylglucosaminyltransferase 1	protein-coding
507	chr11	99091301	99092421	+	0	NA	5' UTR (NM_020618, exon 1 of 11)	5' UTR (NM_020618, exon 1 of 11)	470	NM_020618	57376	Mm.379086	NM_020618	ENSMUSG00000037935	Smarce1	2810417B20Rik|5830412H02Rik|9030408N19Rik|Baf27	SWI/SNF related, matrix associated, actin dependent regulator of chromatin, subfamily e, member 1	protein-coding
1173	chr17	15700813	15702170	+	0	NA	Intergenic	CpG	-1204	NM_144809	213389	Mm.215162	NM_144809	ENSMUSG00000051977	Prdm9	BC012016|Dsbc1|G1-419-29|Meisetz|Rcr1|repro7	PR domain containing 9	protein-coding
1963	chr4	133306944	133313808	+	0	NA	promoter-TSS (NM_001080819)	promoter-TSS (NM_001080819)	-850	NM_001080819	93760	Mm.22478	NM_001080819	ENSMUSG00000007880	Arid1a	1110030E03Rik|BAF250a|Osa1|Smarcf1	AT rich interactive domain 1A (SWI-like)	protein-coding
309	chr10	89132703	89134216	+	0	NA	intron (NM_198021, intron 2 of 17)	intron (NM_198021, intron 2 of 17)	15571	NM_198021	213326	Mm.27651	NM_198021	ENSMUSG00000069539	Scyl2	AU015688|AW536445|BC030932|CVAK104|D10Ertd802e	SCY1-like 2 (S. cerevisiae)	protein-coding
1734	chr3	95754348	95755763	+	0	NA	Intergenic	CpG	21875	NM_023210	66471	Mm.218657	NM_023210	ENSMUSG00000015749	Anp32e	2810018A15Rik|AI047746|AI326868|CPD1|LANP-L|LANPL|mLANP-L	acidic (leucine-rich) nuclear phosphoprotein 32 family, member E	protein-coding
2085	chr5	92912836	92955313	+	0	NA	intron (NM_007644, intron 1 of 11)	intron (NM_007644, intron 1 of 11)	560	NM_007644	12492	Mm.297964	NM_007644	ENSMUSG00000029426	Scarb2	9330185J12Rik|Cd36l2|LGP85|LIMP-2|MLGP85	scavenger receptor class B, member 2	protein-coding
1733	chr3	95621706	95624330	+	0	NA	promoter-TSS (NM_001081293)	promoter-TSS (NM_001081293)	-142	NM_001081293	75137	Mm.196275	NM_028328	ENSMUSG00000028106	Rprd2	2810036A19Rik|4930535B03Rik|6720469I21Rik|AL022841|AL022940|AU021304|BB077382|mKIAA0460	regulation of nuclear pre-mRNA domain containing 2	protein-coding
2113	chr5	113533751	113594757	+	0	NA	intron (NM_172884, intron 1 of 7)	(CA)n|Simple_repeat|Simple_repeat	28079	NM_172884	243219	Mm.160131	NM_172884	ENSMUSG00000051339	2900026A02Rik	8430408O14Rik|A530094D01|AW539426|Gm449|Kiaa1671|mKIAA1671	RIKEN cDNA 2900026A02 gene	protein-coding
2153	chr5	143276109	143277818	+	0	NA	promoter-TSS (NR_110503)	promoter-TSS (NR_110503)	30	NR_110502	102631757	Mm.373036	NR_110502		LOC102631757	-	uncharacterized LOC102631757	ncRNA
1258	chr17	63838809	63850542	+	0	NA	intron (NM_015794, intron 1 of 8)	L1M4b|LINE|L1	5254	NM_015794	50758	Mm.136366	NM_015794		Fbxl17	6330576B01Rik|AI452053|BB073797|C130023C01Rik|Fbx13|Fbxo13	F-box and leucine-rich repeat protein 17	protein-coding
824	chr14	14844462	14848032	+	0	NA	intron (NM_139227, intron 3 of 11)	intron (NM_139227, intron 3 of 11)	1242	NM_139227	246103	Mm.133625	NM_139227	ENSMUSG00000021738	Atxn7	A430107N12Rik|AI627028|Sca7|ataxin-7	ataxin 7	protein-coding
120	chr1	134373097	134374319	+	0	NA	promoter-TSS (NM_172517)	promoter-TSS (NM_172517)	-236	NM_172517	213464	Mm.132868	NM_172517	ENSMUSG00000026439	Rbbp5	4933411J24Rik|C330016J05	retinoblastoma binding protein 5	protein-coding
2568	chr8	54597040	54597574	+	0	NA	intron (NM_001005847, intron 1 of 8)	intron (NM_001005847, intron 1 of 8)	251	NM_001005847	11593	Mm.334535	NM_001005847	ENSMUSG00000031521	Aga	AW060726	aspartylglucosaminidase	protein-coding
1148	chr16	95921224	95930803	+	0	NA	intron (NM_011809, intron 1 of 9)	intron (NM_011809, intron 1 of 9)	1999	NM_011809	23872	Mm.290207	NM_011809	ENSMUSG00000022895	Ets2	AU022856|Ets-2	E26 avian leukemia oncogene 2, 3' domain	protein-coding
2841	chrX	69061221	69062720	+	0	NA	promoter-TSS (NM_001081356)	promoter-TSS (NM_001081356)	-127	NM_001081356	67048	Mm.41102	NM_001081356	ENSMUSG00000073131	Vma21	2610030H06Rik|AI840175	VMA21 vacuolar H+-ATPase homolog (S. cerevisiae)	protein-coding
2386	chr7	38802835	38804856	+	0	NA	intron (NM_011274, intron 1 of 10)	intron (NM_011274, intron 1 of 10)	726	NM_011274	19777	Mm.387220	NM_011274	ENSMUSG00000030421	Uri1	C80913|NNX3|Rmp	URI1, prefoldin-like chaperone	protein-coding
2313	chr6	136751899	136760303	+	0	NA	promoter-TSS (NM_177688)	promoter-TSS (NM_177688)	-668	NM_177688	232440	Mm.154564	NM_177688	ENSMUSG00000060032	H2afj	E130307C13	H2A histone family, member J	protein-coding
254	chr10	57717466	57719228	+	0	NA	promoter-TSS (NM_027375)	promoter-TSS (NM_027375)	73	NM_027375	70297	Mm.25531	NM_027375	ENSMUSG00000038039	Gcc2	0610043A03Rik|2210420P05Rik|2600014C01Rik|AW112121|mKIAA0336	GRIP and coiled-coil domain containing 2	protein-coding
392	chr11	30671202	30673047	+	0	NA	exon (NM_134013, exon 1 of 47)	exon (NM_134013, exon 1 of 47)	349	NM_134013	103554	Mm.240066	NM_134013	ENSMUSG00000040850	Psme4	AA409398|AU041366|TEMO|mKIAA0077	proteasome (prosome, macropain) activator subunit 4	protein-coding
1321	chr18	24809831	24813498	+	0	NA	promoter-TSS (NM_026779)	promoter-TSS (NM_026779)	-528	NM_026779	68591	Mm.28252	NM_026779	ENSMUSG00000039616	Mocos	1110018O12Rik|HMCS|MCS|MOS	molybdenum cofactor sulfurase	protein-coding
2242	chr6	71976621	71980044	+	0	NA	intron (NR_046180, intron 1 of 2)	intron (NR_046180, intron 1 of 2)	14190	NR_046180	330350	Mm.246787	NR_046180		9130221F21Rik	9130221F21	RIKEN cDNA 9130221F21 gene	ncRNA
2442	chr7	97088761	97089838	+	0	NA	non-coding (NR_111916, exon 1 of 1)	non-coding (NR_111916, exon 1 of 1)	415	NM_001291289	67669	Mm.28679	NM_026304		l7Rn6	0610007P06Rik|1110002N09Rik|l(7)6Rn	lethal, Chr 7, Rinchik 6	protein-coding
2254	chr6	85910760	85912472	+	0	NA	promoter-TSS (NM_028099)	promoter-TSS (NM_028099)	45	NM_028099	72102	Mm.24007	NM_028099	ENSMUSG00000030002	Dusp11	2010300F21Rik|AI481497	dual specificity phosphatase 11 (RNA/RNP complex 1-interacting)	protein-coding
1987	chr4	147932107	147933064	+	0	NA	promoter-TSS (NM_016699)	promoter-TSS (NM_016699)	49	NM_016699	50912	Mm.266635	NM_016699	ENSMUSG00000017264	Exosc10	PM-Scl|PM/Scl-100|Pmscl2|RRP6|p2|p3|p4	exosome component 10	protein-coding
813	chr13	105606548	105608255	+	0	NA	promoter-TSS (NM_026075)	promoter-TSS (NM_026075)	82	NM_026075	67288	Mm.125465	NM_026075		Srek1ip1	3110031B13Rik|AI462702|AV348305|AW121048|Sfrs12ip1|Srsf12ip1	splicing regulatory glutamine/lysine-rich protein 1interacting protein 1	protein-coding
2014	chr5	21206896	21209406	+	0	NA	promoter-TSS (NM_178728)	promoter-TSS (NM_178728)	-988	NM_178728	242864	Mm.153292	NM_178728	ENSMUSG00000044968	Napepld	A530089G06|Mbldc1|NAPE-PLD	N-acyl phosphatidylethanolamine phospholipase D	protein-coding
2602	chr8	90661621	90662459	+	0	NA	promoter-TSS (NR_106039)	promoter-TSS (NR_106039)	-65	NR_106039	102465649		NR_106039		Mir7071	mmu-mir-7071	microRNA mir-7071	ncRNA
644	chr12	106921586	106926751	+	0	NA	promoter-TSS (NM_029654)	promoter-TSS (NM_029654)	606	NM_178613	66787	Mm.248019	NM_178613	ENSMUSG00000044715	Gskip	4933433P14Rik	GSK3B interacting protein	protein-coding
2477	chr7	130112892	130115357	+	0	NA	promoter-TSS (NM_175023)	promoter-TSS (NM_175023)	46	NM_175023	19647	Mm.4480	NM_011247	ENSMUSG00000030779	Rbbp6	4933422O15Rik|AI316869|BB233631|C030034J04Rik|C77662|P2P-R|PACT	retinoblastoma binding protein 6	protein-coding
851	chr14	31831244	31837534	+	0	NA	intron (NM_001081251, intron 1 of 32)	B2_Mm2|SINE|B2	2065	NM_001081251	66923	Mm.27913	NM_025847	ENSMUSG00000042323	Pbrm1	2610016F04Rik|AI507524|BAF180|Pb1	polybromo 1	protein-coding
1820	chr4	4719599	4720584	+	0	NA	exon (NM_177730, exon 1 of 5)	exon (NM_177730, exon 1 of 5)	362	NM_177730	242291	Mm.218889	NM_177730		Impad1	1110001C20Rik|AA408880|AI451589|AL022796|B230207P20|Jaws|gPAPP	inositol monophosphatase domain containing 1	protein-coding
399	chr11	40547068	40547842	+	0	NA	promoter-TSS (NM_013552)	promoter-TSS (NM_013552)	292	NM_001290697	52653	Mm.276504	NM_026023	ENSMUSG00000020328	Nudcd2	-	NudC domain containing 2	protein-coding
2296	chr6	122289372	122290516	+	0	NA	promoter-TSS (NM_007905)	promoter-TSS (NM_007905)	-269	NM_007905	13619	Mm.6822	NM_007905	ENSMUSG00000040669	Phc1	AW557034|Edr|Edr1|Mph1|Rae-28|rae28	polyhomeotic-like 1 (Drosophila)	protein-coding
2110	chr5	110659289	110660644	+	0	NA	promoter-TSS (NM_027922)	promoter-TSS (NM_027922)	-57	NM_001253814	71782	Mm.288442	NM_027922	ENSMUSG00000029501	Ankle2	1110001J12Rik|AI661024|D5Ertd585e	ankyrin repeat and LEM domain containing 2	protein-coding
1811	chr3	146183576	146185005	+	0	NA	promoter-TSS (NM_027332)	promoter-TSS (NM_027332)	97	NM_027332	70285	Mm.28128	NM_027332	ENSMUSG00000028187	Rpf1	2210420E24Rik|2310066N05Rik|Bxdc5	ribosome production factor 1 homolog (S. cerevisiae)	protein-coding
436	chr11	62415759	62417468	+	0	NA	promoter-TSS (NR_028550)	promoter-TSS (NR_028550)	25	NR_028526	100217426		NR_028526	ENSMUSG00000064437	Snord49b	MBII-252|MBII-366	small nucleolar RNA, C/D box 49B	snoRNA
1342	chr18	44539634	44540943	+	0	NA	exon (NM_027490, exon 1 of 11)	exon (NM_027490, exon 1 of 11)	134	NM_027490	70640	Mm.87629	NM_027490	ENSMUSG00000024472	Dcp2	2410015D23Rik|5730537H01Rik|AL118268	DCP2 decapping enzyme homolog (S. cerevisiae)	protein-coding
2457	chr7	108812167	108812836	+	0	NA	exon (NM_009191, exon 1 of 16)	exon (NM_009191, exon 1 of 16)	219	NM_009191	20480	Mm.3990	NM_009191	ENSMUSG00000001829	Clpb	AL118244|Skd3	ClpB caseinolytic peptidase B	protein-coding
1968	chr4	135608235	135609650	+	0	NA	intron (NM_025919, intron 1 of 5)	CpG	344	NM_025919	67025	Mm.276856	NM_025919	ENSMUSG00000059291	Rpl11	2010203J19Rik	ribosomal protein L11	protein-coding
1802	chr3	142362705	142380164	+	0	NA	intron (NM_173763, intron 2 of 13)	intron (NM_173763, intron 2 of 13)	7422	NM_001293560	229905	Mm.289643	NM_173763	ENSMUSG00000040213	Ccbl2	KATIII|Kat3	cysteine conjugate-beta lyase 2	protein-coding
94	chr1	95697712	95701409	+	0	NA	promoter-TSS (NM_025454)	promoter-TSS (NM_025454)	-982	NM_025454	66262	Mm.64065	NM_025454	ENSMUSG00000026283	Ing5	1700001C14Rik|1700027H23Rik|1810018M11Rik|AI225768	inhibitor of growth family, member 5	protein-coding
213	chr10	12911981	12913278	+	0	NA	intron (NM_181470, intron 1 of 10)	CpG	314	NM_181470	353258	Mm.117581	NM_181470	ENSMUSG00000019814	Ltv1	2610020N02Rik	LTV1 homolog (S. cerevisiae)	protein-coding
2775	chr9	99336172	99337754	+	0	NA	5' UTR (NM_008624, exon 1 of 6)	5' UTR (NM_008624, exon 1 of 6)	168	NM_008624	17532	Mm.2045	NM_008624	ENSMUSG00000032470	Mras	2900078C09Rik|AI326250	muscle and microspikes RAS	protein-coding
1450	chr19	55774301	55778489	+	0	NA	intron (NR_045318, intron 1 of 3)	intron (NR_045318, intron 1 of 3)	299	NR_045318	77594	Mm.329924	NR_045318	ENSMUSG00000097632	4930552P12Rik	-	RIKEN cDNA 4930552P12 gene	ncRNA
2863	chrX	147954300	147957226	+	0	NA	5' UTR (NM_177201, exon 1 of 19)	5' UTR (NM_177201, exon 1 of 19)	548	NM_001113354	320595	Mm.17156	NM_177201	ENSMUSG00000041229	Phf8	9830141C09Rik|mKIAA1111	PHD finger protein 8	protein-coding
2668	chr8	129321725	129412596	+	0	NA	Intergenic	MIRb|SINE|MIR	102661	NM_024214	67952	Mm.6932	NM_024214	ENSMUSG00000093904	Tomm20	1810060K07Rik|BB284719|Gm19268|MAS20|MOM19|TOM20|mKIAA0016	translocase of outer mitochondrial membrane 20 homolog (yeast)	protein-coding
568	chr12	36882905	36885048	+	0	NA	promoter-TSS (NM_025840)	promoter-TSS (NM_025840)	265	NM_146033	217473	Mm.130422	NM_146033	ENSMUSG00000036188	Ankmy2	AI035571|ZMYND20	ankyrin repeat and MYND domain containing 2	protein-coding
2273	chr6	99467776	99474291	+	0	NA	Intergenic	CpG	-85694	NM_053202	108655	Mm.234965	NM_053202	ENSMUSG00000030067	Foxp1	3110052D19Rik|4932443N09Rik|AI461938|AW494214	forkhead box P1	protein-coding
2411	chr7	59260695	59262296	+	0	NA	promoter-TSS (NM_001160345)	promoter-TSS (NM_001160345)	-107	NM_001160345	75744	Mm.386823	NM_001160345	ENSMUSG00000074093	Svip	1700006C13Rik|6620401M08Rik	small VCP/p97-interacting protein	protein-coding
1129	chr16	59638842	59639767	+	0	NA	promoter-TSS (NM_019665)	promoter-TSS (NM_019665)	-139	NM_019665	56297	Mm.392505	NM_019665	ENSMUSG00000022722	Arl6	1110018H24Rik|2210411E14Rik|BBS3	ADP-ribosylation factor-like 6	protein-coding
791	chr13	91946720	91948031	+	0	NA	promoter-TSS (NM_145453)	promoter-TSS (NM_145453)	-74	NM_145453	69085	Mm.52356	NM_145453	ENSMUSG00000021621	Zcchc9	1810019C21Rik	zinc finger, CCHC domain containing 9	protein-coding
1143	chr16	91931070	91933999	+	0	NA	promoter-TSS (NM_138597)	promoter-TSS (NM_138597)	-659	NM_138597	28080	Mm.41	NM_138597	ENSMUSG00000022956	Atp5o	ATPO|D12Wsu28e|OSCP	ATP synthase, H+ transporting, mitochondrial F1 complex, O subunit	protein-coding
1355	chr18	60720105	60721063	+	0	NA	intron (NM_025776, intron 1 of 10)	CpG	144	NM_025776	66810	Mm.275106	NM_025776	ENSMUSG00000024604	Rbm22	8430430L24Rik	RNA binding motif protein 22	protein-coding
2848	chrX	91364019	91369141	+	0	NA	intron (NM_001044386, intron 1 of 8)	intron (NM_001044386, intron 1 of 8)	2166	NM_011768	22764	Mm.919	NM_011768	ENSMUSG00000079509	Zfx	Zfx5|Zfx5,6|Zfx6	zinc finger protein X-linked	protein-coding
2231	chr6	54542718	54552206	+	0	NA	intron (NM_001164361, intron 1 of 13)	Lx8|LINE|L1	2357	NM_001164361	231999	Mm.35416	NM_001001335	ENSMUSG00000005225	Plekha8	6330400G01|AA517676|BC052360|Fapp-2|Fapp2	pleckstrin homology domain containing, family A (phosphoinositide binding specific) member 8	protein-coding
1961	chr4	132477794	132479271	+	0	NA	promoter-TSS (NM_145553)	promoter-TSS (NM_145553)	-66	NM_001163792	230789	Mm.11473	NM_145553	ENSMUSG00000028878	Fam76a	-	family with sequence similarity 76, member A	protein-coding
386	chr11	23532924	23534297	+	0	NA	promoter-TSS (NM_027860)	promoter-TSS (NM_027860)	21	NM_027860	71675	Mm.48031	NM_027860	ENSMUSG00000042208	0610010F05Rik	Kiaa1841|mKIAA1841	RIKEN cDNA 0610010F05 gene	protein-coding
916	chr14	79986604	79988056	+	0	NA	promoter-TSS (NM_026474)	promoter-TSS (NM_026474)	-168	NM_026474	67955	Mm.18972	NM_026474	ENSMUSG00000022024	Sugt1	2410174K12Rik|SGT1	SGT1, suppressor of G2 allele of SKP1 (S. cerevisiae)	protein-coding
2043	chr5	37186872	37189040	+	0	NA	promoter-TSS (NM_026242)	promoter-TSS (NM_026242)	37	NM_026242	67568	Mm.332336	NM_026242	ENSMUSG00000055302	Mrfap1	9130413I22Rik|AL022827|Pam14	Morf4 family associated protein 1	protein-coding
1457	chr19	60302038	60302679	+	0	NA	5' UTR (NM_029648, exon 1 of 8)	5' UTR (NM_029648, exon 1 of 8)	242	NM_029648	76539	Mm.290183	NM_029648	ENSMUSG00000057858	Fam204a	2310065H12Rik|2610015K05Rik|D19Ertd737e	family with sequence similarity 204, member A	protein-coding
200	chr1	196917889	196918885	+	0	NA	promoter-TSS (NM_010778)	promoter-TSS (NM_010778)	55	NM_010778	17221	Mm.12884	NM_010778	ENSMUSG00000016493	Cd46	Mcp	CD46 antigen, complement regulatory protein	protein-coding
1261	chr17	64941577	64974044	+	0	NA	intron (NM_008549, intron 1 of 21)	intron (NM_008549, intron 1 of 21)	6821	NM_008549	17158	Mm.2433	NM_008549	ENSMUSG00000024085	Man2a1	Mana-2|Mana2|Map-2	mannosidase 2, alpha 1	protein-coding
1352	chr18	53903281	53905508	+	0	NA	promoter-TSS (NM_178686)	promoter-TSS (NM_178686)	-193	NM_178686	225523	Mm.193678	NM_178686	ENSMUSG00000048799	Cep120	A230075C01|AU016693|Ccdc100	centrosomal protein 120	protein-coding
329	chr10	116384927	116388200	+	0	NA	intron (NM_001003950, intron 1 of 9)	intron (NM_001003950, intron 1 of 9)	873	NM_001003950	216363	Mm.336394	NM_001003950	ENSMUSG00000064181	Rab3ip	B230311A06|Gtpat12|Rabin3	RAB3A interacting protein	protein-coding
525	chr11	115937869	115972518	+	0	NA	Intergenic	Arthur1B|DNA|Tip100	-6915	NM_016852	22378	Mm.284792	NM_016852	ENSMUSG00000034341	Wbp2	-	WW domain binding protein 2	protein-coding
1621	chr2	157104644	157105630	+	0	NA	exon (NM_001039557, exon 1 of 25)	exon (NM_001039557, exon 1 of 25)	148	NM_001039557	629499	Mm.384235	NM_001039557	ENSMUSG00000074627	Mroh8	4922505G16Rik	maestro heat-like repeat family member 8	protein-coding
27	chr1	36765812	36767310	+	0	NA	intron (NM_146107, intron 1 of 10)	CpG	209	NM_146107	226977	Mm.28521	NM_146107	ENSMUSG00000037351	Actr1b	2310066K23Rik|AA960180|AI851923|Arp1b	ARP1 actin-related protein 1B, centractin beta	protein-coding
787	chr13	90228534	90230034	+	0	NA	promoter-TSS (NM_025335)	promoter-TSS (NM_025335)	12	NM_025335	66074	Mm.241387	NM_025335		Tmem167	0610041E09Rik|5730424F14Rik|AU041184|AW537806|ENSMUSG00000060669|Gm10085|Tmem167a	transmembrane protein 167	protein-coding
2331	chr6	149041517	149050785	+	0	NA	intron (NM_177192, intron 1 of 20)	RCHARR1|DNA|MER1_type	4051	NM_177192	320560	Mm.426874	NM_177192	ENSMUSG00000030313	Dennd5b	9330160C06Rik|AI852444|D030011O10Rik|ENSMUSG00000072657|Gm17524	DENN/MADD domain containing 5B	protein-coding
1902	chr4	95633186	95634938	+	0	NA	promoter-TSS (NM_030014)	promoter-TSS (NM_030014)	-8	NM_030014	77963	Mm.49994	NM_030014		Hook1	A930033L17Rik|azh	hook homolog 1 (Drosophila)	protein-coding
1561	chr2	120556566	120557997	+	0	NA	promoter-TSS (NM_026891)	promoter-TSS (NM_026891)	-28	NM_026891	68968	Mm.2289	NM_026891	ENSMUSG00000027284	Cdan1	1500015A01Rik|AI448026|AW492297|CDA-I|CDA1|CDAI	congenital dyserythropoietic anemia, type I (human)	protein-coding
161	chr1	167389153	167400827	+	0	NA	intron (NM_027430, intron 1 of 4)	intron (NM_027430, intron 1 of 4)	3651	NM_027430	70456	Mm.195625	NM_027430	ENSMUSG00000026568	Mpc2	0610006C01Rik|2010002I07Rik|2610205H19Rik|AA108335|Brp44|ESTM43	mitochondrial pyruvate carrier 2	protein-coding
1866	chr4	46538287	46553044	+	0	NA	intron (NM_029077, intron 2 of 5)	Arthur1A|DNA|Tip100	3348	NM_029077	74735	Mm.240252	NM_029077	ENSMUSG00000039853	Trim14	5830400N10Rik|pub	tripartite motif-containing 14	protein-coding
2001	chr4	155242594	155244117	+	0	NA	promoter-TSS (NM_028020)	promoter-TSS (NM_028020)	194	NM_024472	79554	Mm.25556	NM_024472	ENSMUSG00000029073	Cptp	Gltpd1	ceramide-1-phosphate transfer protein	protein-coding
1310	chr18	12780208	12901212	+	0	NA	intron (NM_028341, intron 1 of 13)	RMER17B|LTR|ERVK	-32610	NR_035471	100316699		NR_035471		Mir1948	mmu-mir-1948	microRNA 1948	ncRNA
109	chr1	129998761	130000766	+	0	NA	promoter-TSS (NM_181750)	promoter-TSS (NM_181750)	-120	NM_181750	226412	Mm.221041	NM_181750	ENSMUSG00000056211	R3hdm1	R3hdm	R3H domain containing 1	protein-coding
2115	chr5	114893070	114894897	+	0	NA	promoter-TSS (NM_023556)	promoter-TSS (NM_023556)	53	NM_029956	77697	Mm.105182	NM_029956	ENSMUSG00000029575	Mmab	9130222L19Rik|ATR	methylmalonic aciduria (cobalamin deficiency) type B homolog (human)	protein-coding
2318	chr6	140372095	140374538	+	0	NA	intron (NM_144920, intron 2 of 30)	CpG-12556	696	NM_144920	109135	Mm.247670	NM_144920	ENSMUSG00000030231	Plekha5	2810431N21Rik|AI428202|AK129423|AMH-Cre|Ayu21-9|Gt(pU21)9Imeg|Pepp2|Tg(AMH-cre)1Flor	pleckstrin homology domain containing, family A member 5	protein-coding
2651	chr8	122078089	122083516	+	0	NA	intron (NM_019709, intron 1 of 23)	B3|SINE|B2	1859	NM_001167910	56453	Mm.206934	NM_019709	ENSMUSG00000031835	Mbtps1	0610038M03Rik|AV003995|S1P|SKI-1|Ski1|mKIAA0091	membrane-bound transcription factor peptidase, site 1	protein-coding
1239	chr17	46519932	46521702	+	0	NA	exon (NM_021346, exon 1 of 8)	exon (NM_021346, exon 1 of 8)	102	NM_021346	57908	Mm.439916	NM_021346	ENSMUSG00000015597	Zfp318	2610034E08Rik|D530032D06Rik|TZF|Znf318	zinc finger protein 318	protein-coding
2764	chr9	88375483	88378557	+	0	NA	5' UTR (NM_019796, exon 1 of 12)	5' UTR (NM_019796, exon 1 of 12)	215	NM_019666	56403	Mm.260545	NM_019666	ENSMUSG00000032423	Syncrip	2610109K23Rik|4632417O19Rik|GRY-RBP|Nsap1|Nsap1l|pp68	synaptotagmin binding, cytoplasmic RNA interacting protein	protein-coding
2797	chr9	109734632	109736171	+	0	NA	promoter-TSS (NM_018757)	promoter-TSS (NM_018757)	93	NM_018757	54369	Mm.12951	NM_018757	ENSMUSG00000032478	Nme6	nm23-M6	NME/NM23 nucleoside diphosphate kinase 6	protein-coding
769	chr13	74452413	74455476	+	0	NA	intron (NM_011051, intron 1 of 5)	intron (NM_011051, intron 1 of 5)	830	NM_011051	18570	Mm.24254	NM_011051	ENSMUSG00000021576	Pdcd6	AV299538|Alg2|MA-3|PS2|alg-2	programmed cell death 6	protein-coding
1556	chr2	118938059	118938646	+	0	NA	promoter-TSS (NM_011234)	promoter-TSS (NM_011234)	-201	NM_011234	19361	Mm.330492	NM_011234		Rad51	AV304093|Rad51a|Reca	RAD51 homolog	protein-coding
1181	chr17	21081509	21083910	+	0	NA	intron (NM_016891, intron 1 of 14)	CpG	291	NM_016891	51792	Mm.294138	NM_016891	ENSMUSG00000007564	Ppp2r1a	6330556D22Rik|PP2A|PR65	protein phosphatase 2, regulatory subunit A, alpha	protein-coding
1809	chr3	146066897	146068249	+	0	NA	promoter-TSS (NM_001253768)	promoter-TSS (NM_001253768)	-33	NM_001253769	99167	Mm.200783	NM_138744	ENSMUSG00000036825	Ssx2ip	AU014939|AU042321|Adip	synovial sarcoma, X breakpoint 2 interacting protein	protein-coding
803	chr13	99032543	99033795	+	0	NA	promoter-TSS (NM_178918)	promoter-TSS (NM_178918)	138	NM_001271388	68558	Mm.209642	NM_023472	ENSMUSG00000021661	Ankra2	1110004M18Rik|Ankra	ankyrin repeat, family A (RFXANK-like), 2	protein-coding
2744	chr9	65907072	65909737	+	0	NA	intron (NM_011149, intron 1 of 4)	intron (NM_011149, intron 1 of 4)	428	NM_011149	19035	Mm.335249	NM_011149	ENSMUSG00000032383	Ppib	AA408962|AA553318|AI844835|Cphn-2|Cphn2|CyP-20b	peptidylprolyl isomerase B	protein-coding
2559	chr8	41943161	41994476	+	0	NA	intron (NM_001044740, intron 1 of 11)	RLTR10|LTR|ERVK	21097	NM_001044740	11988	Mm.4676	NM_007514	ENSMUSG00000031596	Slc7a2	20.5|AI158848|Atrc2|CAT-2|Cat2|Tea	solute carrier family 7 (cationic amino acid transporter, y+ system), member 2	protein-coding
1766	chr3	115411417	115418738	+	0	NA	exon (NM_007901, exon 2 of 2)	exon (NM_007901, exon 2 of 2)	2896	NM_007901	13609	Mm.982	NM_007901	ENSMUSG00000045092	S1pr1	AI849002|Edg1|Lpb1|S1p|S1p1	sphingosine-1-phosphate receptor 1	protein-coding
60	chr1	69151528	69154965	+	0	NA	intron (NM_010154, intron 1 of 26)	intron (NM_010154, intron 1 of 26)	1387	NM_010154	13869	Mm.442420	NM_010154	ENSMUSG00000062209	Erbb4	Her4|c-erbB-4	v-erb-a erythroblastic leukemia viral oncogene homolog 4 (avian)	protein-coding
1245	chr17	49558331	49572828	+	0	NA	Intergenic	Intergenic	-2110	NM_028464	56738	Mm.22256	NM_020042	ENSMUSG00000064120	Mocs1	3110045D15Rik|AI043170|AW536397	molybdenum cofactor synthesis 1	protein-coding
1400	chr19	8830466	8832219	+	0	NA	promoter-TSS (NM_016813)	promoter-TSS (NM_016813)	-251	NM_016813	53319	Mm.7271	NM_016813	ENSMUSG00000010097	Nxf1	Mex67|Mvb1|Tap	nuclear RNA export factor 1	protein-coding
1067	chr16	16983040	16984662	+	0	NA	intron (NM_011949, intron 1 of 8)	CpG	376	NM_001038663	26413	Mm.196581	NM_011949	ENSMUSG00000063358	Mapk1	9030612K14Rik|AA407128|AU018647|C78273|ERK|Erk2|MAPK2|PRKM2|Prkm1|p41mapk|p42mapk	mitogen-activated protein kinase 1	protein-coding
691	chr13	34127081	34153460	+	0	NA	intron (NM_026512, intron 3 of 6)	intron (NM_026512, intron 3 of 6)	10760	NM_026512	68021	Mm.140243	NM_026512	ENSMUSG00000038286	Bphl	2010012D11Rik|5730533B08Rik|AI115341	biphenyl hydrolase-like (serine hydrolase, breast epithelial mucin-associated antigen)	protein-coding
2615	chr8	97973236	97976614	+	0	NA	intron (NM_009974, intron 11 of 11)	intron (NM_009974, intron 11 of 11)	-16156	NM_008187	14894	Mm.2080	NM_008187	ENSMUSG00000031796	Cfap20	2600014O15Rik|AL024127|Gtl3|T10-2A2	cilia and flagella associated protein 20	protein-coding
1676	chr3	33918344	33920044	+	0	NA	intron (NM_001113188, intron 1 of 16)	CpG	193	NM_001113188	14359	Mm.259021	NM_008053	ENSMUSG00000027680	Fxr1	1110050J02Rik|9530073J07Rik|AI851072|Fxr1h|Fxr1p	fragile X mental retardation gene 1, autosomal homolog	protein-coding
1388	chr19	5023347	5024416	+	0	NA	promoter-TSS (NM_007854)	promoter-TSS (NM_007854)	-125	NM_007854	13340	Mm.4930	NM_007854	ENSMUSG00000024891	Slc29a2	Der12|Ent2|Hnp36	solute carrier family 29 (nucleoside transporters), member 2	protein-coding
346	chr10	126998833	127115858	+	0	NA	intron (NM_008512, intron 1 of 88)	intron (NM_008512, intron 1 of 88)	859	NM_008512	16971	Mm.271854	NM_008512	ENSMUSG00000040249	Lrp1	A2mr|AI316852|CD91|Lrp|b2b1554Clo	low density lipoprotein receptor-related protein 1	protein-coding
911	chr14	76153381	76154821	+	0	NA	exon (NM_177381, exon 1 of 23)	exon (NM_177381, exon 1 of 23)	199	NM_177381	338337	Mm.86507	NM_177381	ENSMUSG00000034893	Cog3	E430004N23	component of oligomeric golgi complex 3	protein-coding
427	chr11	60229811	60232033	+	0	NA	promoter-TSS (NM_145427)	promoter-TSS (NM_145427)	275	NM_025757	66771	Mm.29950	NM_025757	ENSMUSG00000018415	Gid4	4933439F18Rik	GID complex subunit 4, VID24 homolog (S. cerevisiae)	protein-coding
2072	chr5	87762296	87779034	+	0	NA	Intergenic	L1Md_F|LINE|L1	-4445	NM_028094	72094	Mm.482739	NM_028094	ENSMUSG00000035780	Ugt2a3	2010321J07Rik	UDP glucuronosyltransferase 2 family, polypeptide A3	protein-coding
82	chr1	89109880	89114959	+	0	NA	intron (NM_001039169, intron 1 of 6)	intron (NM_001039169, intron 1 of 6)	1905	NM_001039169	26987	Mm.227183	NM_023314	ENSMUSG00000026254	Eif4e2	2700069E09Rik|AI036339|AV129531|D0H0S6743E|Eif4el3	eukaryotic translation initiation factor 4E member 2	protein-coding
2202	chr6	33008823	33010693	+	0	NA	intron (NM_025336, intron 1 of 7)	intron (NM_025336, intron 1 of 7)	394	NM_025336	66075	Mm.21501	NM_025336	ENSMUSG00000053768	Chchd3	0610041L09Rik|1700039J09Rik|AW558177	coiled-coil-helix-coiled-coil-helix domain containing 3	protein-coding
650	chr12	111256606	111264316	+	0	NA	Intergenic	ID_B1|SINE|B4	135822	NR_045466	67280	Mm.390495	NR_045466		3110009F21Rik	-	RIKEN cDNA 3110009F21 gene	ncRNA
1154	chr17	3082683	3084925	+	0	NA	intron (NR_003519, intron 1 of 7)	AT_rich|Low_complexity|Low_complexity	379	NR_003519	328734	Mm.335641	NR_003519		Pisd-ps2	D030013I16Rik	phosphatidylserine decarboxylase, pseudogene 2	pseudo
2624	chr8	107409806	107412606	+	0	NA	Intergenic	Intergenic	19882	NR_033726	667754	Mm.28191	NR_033726	ENSMUSG00000031884	Ces2d-ps	ENSMUSG00000031884|Gm9756	carboxylesterase 2D, pseudogene	pseudo
895	chr14	66332583	66363186	+	0	NA	intron (NM_001168318, intron 3 of 7)	URR1B|DNA|MER1_type	62644	NM_001168318	71145	Mm.83840	NM_028903	ENSMUSG00000022032	Scara5	4932433F15Rik|4933425F03Rik|AV278087|Tesr	scavenger receptor class A, member 5 (putative)	protein-coding
1763	chr3	110052614	110054291	+	0	NA	exon (NM_178891, exon 1 of 1)	exon (NM_178891, exon 1 of 1)	465	NM_178891	99890	Mm.36115	NM_178891	ENSMUSG00000049300	Prmt6	AW124876|BB233495|Hrmt1l6	protein arginine N-methyltransferase 6	protein-coding
69	chr1	75517605	75518603	+	0	NA	promoter-TSS (NM_027886)	promoter-TSS (NM_027886)	0	NM_027886	71728	Mm.312650	NM_027886	ENSMUSG00000026213	Stk11ip	1200014D22Rik|BB131189|LIP1|LKB1IP	serine/threonine kinase 11 interacting protein	protein-coding
1910	chr4	102920740	102922985	+	0	NA	intron (NM_001163494, intron 4 of 7)	BC1_Mm|scRNA|scRNA	-34373	NM_177732	242585	Mm.281800	NM_177732		Slc35d1	AI834976|C330011J09|UGTREL7|mKIAA0260	solute carrier family 35 (UDP-glucuronic acid/UDP-N-acetylgalactosamine dual transporter), member D1	protein-coding
1157	chr17	4943113	4948177	+	0	NA	Intergenic	Intergenic	-49429	NM_001085355	239985	Mm.133401	NM_001085355	ENSMUSG00000069729	Arid1b	8030481M12|9330189K18Rik|AI836955|Ardi1b|B230217J03Rik|mKIAA1235	AT rich interactive domain 1B (SWI-like)	protein-coding
1470	chr2	17947581	17950848	+	0	NA	non-coding (NR_028378, exon 1 of 1)	non-coding (NR_028378, exon 1 of 1)	338	NR_028378	100034739	Mm.401643	NR_028378		Gm17762	-	predicted gene, 17762	ncRNA
2762	chr9	86916537	86917438	+	0	NA	5' UTR (NM_024195, exon 1 of 16)	5' UTR (NM_024195, exon 1 of 16)	123	NM_024195	266690	Mm.30166	NM_024195	ENSMUSG00000032872	Cyb5r4	2810034J18Rik|B5+B5R|C79736|Cb5cb5r|Ncb5or|b5/b5r|b5b5r	cytochrome b5 reductase 4	protein-coding
224	chr10	22450511	22452236	+	0	NA	promoter-TSS (NM_011603)	promoter-TSS (NM_011603)	-120	NM_011603	237336	Mm.86670	NM_011603	ENSMUSG00000071359	Tbpl1	4732475G08|AW011832|AW491032|D18347|STD|TLF|TRF2|TRP|Tlp	TATA box binding protein-like 1	protein-coding
2711	chr9	45893061	46091662	+	0	NA	intron (NM_027498, intron 6 of 24)	intron (NM_027498, intron 6 of 24)	-44352	NM_009692	11806	Mm.26743	NM_009692	ENSMUSG00000032083	Apoa1	Alp-1|Apoa-1|Brp-14|Ltw-1|Lvtw-1|Sep-1|Sep-2|Sep2|apo-AI|apoA-I	apolipoprotein A-I	protein-coding
2100	chr5	108560125	108562084	+	0	NA	promoter-TSS (NM_028481)	promoter-TSS (NM_028481)	506	NM_028876	73130	Mm.363960	NM_028876	ENSMUSG00000063406	Tmed5	3110020O18Rik|4432412D15Rik	transmembrane emp24 protein transport domain containing 5	protein-coding
1982	chr4	141448499	141450429	+	0	NA	intron (NM_177868, intron 31 of 31)	intron (NM_177868, intron 31 of 31)	-18629	NM_025994	27984	Mm.395598	NM_025994	ENSMUSG00000040659	Efhd2	2600015J22Rik|AA408606|D4Wsu27e	EF hand domain containing 2	protein-coding
1006	chr15	82012978	82016093	+	0	NA	intron (NM_033218, intron 10 of 18)	intron (NM_033218, intron 10 of 18)	-14017	NR_029804	723897		NR_029804		Mir33	Mirn33|mmu-mir-33	microRNA 33	ncRNA
2393	chr7	49947673	49949202	+	0	NA	promoter-TSS (NM_001008427)	promoter-TSS (NM_001008427)	-349	NM_001008427	434179	Mm.284947	NM_001008427	ENSMUSG00000069727	Gm5595	EG434179|mszf88	predicted gene 5595	protein-coding
426	chr11	60009902	60059418	+	0	NA	promoter-TSS (NM_011480)	promoter-TSS (NM_011480)	-554	NM_011480	20787	Mm.278701	NM_011480	ENSMUSG00000020538	Srebf1	ADD-1|ADD1|D630008H06|SREBP-1|SREBP-1a|SREBP-1c|SREBP1|SREBP1c|bHLHd1	sterol regulatory element binding transcription factor 1	protein-coding
996	chr15	80778446	80779337	+	0	NA	promoter-TSS (NM_009634)	promoter-TSS (NM_009634)	-29	NM_009634	11564	Mm.38151	NM_009634	ENSMUSG00000022407	Adsl	Adl|Asl	adenylosuccinate lyase	protein-coding
1435	chr19	42824512	42828548	+	0	NA	intron (NM_029011, intron 1 of 15)	intron (NM_029011, intron 1 of 15)	735	NM_029011	74580	Mm.329858	NM_029011	ENSMUSG00000060224	Pyroxd2	3830409H07Rik|4833409A17Rik	pyridine nucleotide-disulphide oxidoreductase domain 2	protein-coding
1840	chr4	35169010	35174573	+	0	NA	intron (NM_001081343, intron 1 of 10)	MER44B|DNA|MER2_type	1338	NM_001081343	73205	Mm.331544	NM_001081343	ENSMUSG00000028300	3110043O21Rik	AI840585	RIKEN cDNA 3110043O21 gene	protein-coding
279	chr10	79688629	79689976	+	0	NA	promoter-TSS (NM_023431)	promoter-TSS (NM_023431)	-41	NM_023431	68114	Mm.273418	NM_023431	ENSMUSG00000020156	Mum1	2610019J09|9430059D04Rik|UBE-1C2	melanoma associated antigen (mutated) 1	protein-coding
2408	chr7	54174513	54175979	+	0	NA	promoter-TSS (NM_021884)	promoter-TSS (NM_021884)	54	NM_021884	22088	Mm.241334	NM_021884	ENSMUSG00000014402	Tsg101	AI255943|CC2	tumor susceptibility gene 101	protein-coding
2069	chr5	77738601	77739959	+	0	NA	promoter-TSS (NM_019836)	promoter-TSS (NM_019836)	-169	NM_019836	56412	Mm.129136	NM_019836	ENSMUSG00000036285	Noa1	2610024G14Rik|AU022345|AtNOS1|mAtNOS1	nitric oxide associated 1	protein-coding
956	chr15	38496573	38501417	+	0	NA	intron (NR_045757, intron 2 of 2)	intron (NR_045757, intron 2 of 2)	25694	NR_045757	69679	Mm.416890	NR_045757		2310043O21Rik	-	RIKEN cDNA 2310043O21 gene	ncRNA
483	chr11	87217474	87218553	+	0	NA	promoter-TSS (NM_031386)	promoter-TSS (NM_031386)	-16	NM_053269	114714	Mm.37376	NM_053269		Rad51c	R51H3|Rad51l2	RAD51 homolog C	protein-coding
498	chr11	97042115	97050522	+	0	NA	exon (NM_008379, exon 3 of 22)	exon (NM_008379, exon 3 of 22)	2888	NM_008379	16211	Mm.251013	NM_008379	ENSMUSG00000001440	Kpnb1	AA409963|IPOB|Impnb	karyopherin (importin) beta 1	protein-coding
629	chr12	93082340	93087928	+	0	NA	intron (NM_001039089, intron 1 of 20)	intron (NM_001039089, intron 1 of 20)	2463	NM_001039089	20338	Mm.250605	NM_011344	ENSMUSG00000020964	Sel1l	AW493766|Sel1h|mKIAA4137	sel-1 suppressor of lin-12-like (C. elegans)	protein-coding
2055	chr5	64178440	64180881	+	0	NA	intron (NM_177006, intron 3 of 6)	intron (NM_177006, intron 3 of 6)	-24074	NM_029554	76261	Mm.38143	NM_029554	ENSMUSG00000060512	0610040J01Rik	AI662686	RIKEN cDNA 0610040J01 gene	protein-coding
1487	chr2	27395307	27462579	+	0	NA	Intergenic	Intergenic	58276	NM_080848	140858	Mm.28265	NM_080848	ENSMUSG00000026917	Wdr5	2410008O07Rik|AA408785|AA960360|Big|Big-3	WD repeat domain 5	protein-coding
372	chr11	6342149	6345283	+	0	NA	intron (NM_029938, intron 1 of 4)	intron (NM_029938, intron 1 of 4)	730	NM_029938	77605	Mm.27624	NM_029938	ENSMUSG00000041126	H2afv	C530002L11Rik|H2a.z-2|H2av	H2A histone family, member V	protein-coding
2028	chr5	30061663	30067816	+	0	NA	intron (NM_001037940, intron 1 of 9)	intron (NM_001037940, intron 1 of 9)	-2263	NR_028426	332993	Mm.473746	NR_028426		Gm5129	EG332993|ENSMUSG00000053121	predicted gene 5129	ncRNA
1540	chr2	93560453	93564828	+	0	NA	intron (NM_010163, intron 10 of 13)	L1MEf|LINE|L1	80049	NM_007442	11695	Mm.389389	NM_007442	ENSMUSG00000040310	Alx4	lst	aristaless-like homeobox 4	protein-coding
1661	chr3	14722883	14728664	+	0	NA	Intergenic	L1_Mur2|LINE|L1	52687	NM_001083957	12346	Mm.273195	NM_009799	ENSMUSG00000027556	Car1	AW555628|Ca1|Car-1	carbonic anhydrase 1	protein-coding
1330	chr18	34918027	34919714	+	0	NA	intron (NM_175104, intron 1 of 4)	intron (NM_175104, intron 1 of 4)	310	NM_175104	66306	Mm.29424	NM_175104	ENSMUSG00000034300	Fam53c	2810012G03Rik|Gm21179	family with sequence similarity 53, member C	protein-coding
1284	chr17	87108048	87113193	+	0	NA	Intergenic	B1_Mus1|SINE|Alu	-42584	NM_010137	13819	Mm.1415	NM_010137	ENSMUSG00000024140	Epas1	HIF-2alpha|HIF2A|HLF|HRF|MOP2|bHLHe73	endothelial PAS domain protein 1	protein-coding
1606	chr2	154616111	154621241	+	0	NA	intron (NM_001139511, intron 1 of 7)	intron (NM_001139511, intron 1 of 7)	1830	NM_001139511	19383	Mm.221440	NM_023130	ENSMUSG00000027593	Raly	AI663842|Merc	hnRNP-associated with lethal yellow	protein-coding
2064	chr5	76568971	76570064	+	0	NA	exon (NM_020611, exon 1 of 6)	exon (NM_020611, exon 1 of 6)	219	NM_020611	57357	Mm.289446	NM_020611	ENSMUSG00000029233	Srd5a3	1110025P14Rik|A430076C09|AV364670|AW987574|D730040M03Rik|H5ar|S5AR 3|Srd5a2l	steroid 5 alpha-reductase 3	protein-coding
1160	chr17	6106232	6107759	+	0	NA	5' UTR (NM_001103181, exon 1 of 14)	5' UTR (NM_001103181, exon 1 of 14)	165	NM_001103181	68842	Mm.449307	NM_054040	ENSMUSG00000034377	Tulp4	1110057P05Rik|2210038L17Rik|Tusp	tubby like protein 4	protein-coding
99	chr1	108692572	108693785	+	0	NA	5' UTR (NM_009190, exon 1 of 11)	5' UTR (NM_009190, exon 1 of 11)	124	NM_009190	20479	Mm.18705	NM_009190		Vps4b	8030489C12Rik|Skd1	vacuolar protein sorting 4b (yeast)	protein-coding
869	chr14	51515010	51516799	+	0	NA	Intergenic	Intergenic	-2974	NM_001166651	546611	Mm.390692	NM_001166651	ENSMUSG00000090799	Klhl33	EG546611	kelch-like 33	protein-coding
1592	chr2	144194109	144196134	+	0	NA	intron (NM_001164813, intron 1 of 1)	intron (NM_001164813, intron 1 of 1)	350	NM_181417	228714	Mm.227925	NM_181417	ENSMUSG00000027425	Csrp2bp	2510008M08Rik|ATAC2|AU023459|D2Ertd473e|D2Wsu131e|E430020F17	cysteine and glycine-rich protein 2 binding protein	protein-coding
1933	chr4	116792562	116812100	+	0	NA	TTS (NM_175030)	TTS (NM_175030)	2913	NM_175030	242646	Mm.358914	NM_175030	ENSMUSG00000047671	Tctex1d4	4833401D15Rik	Tctex1 domain containing 4	protein-coding
2022	chr5	25032606	25036696	+	0	NA	Intergenic	B3|SINE|B2	-1185	NR_027388	73571	Mm.105263	NR_027388		1700096K18Rik	-	RIKEN cDNA 1700096K18 gene	ncRNA
790	chr13	91599629	91601802	+	0	NA	promoter-TSS (NM_024272)	promoter-TSS (NM_024272)	13	NM_024186	66970	Mm.343095	NM_024186	ENSMUSG00000003992	Ssbp2	1500004K09Rik|2310079I02Rik|9330163K02Rik|A830008M03Rik|AU067692|AW558684|Hspc116|SSDP2	single-stranded DNA binding protein 2	protein-coding
533	chr11	118986804	118996580	+	0	NA	Intergenic	C-rich|Low_complexity|Low_complexity	23759	NR_105899	102465563		NR_105899		Mir6934	mmu-mir-6934	microRNA mir-6934	ncRNA
2080	chr5	91068770	91070823	+	0	NA	promoter-TSS (NM_028478)	promoter-TSS (NM_028478)	-283	NM_028478	73246	Mm.30172	NM_028478	ENSMUSG00000029370	Rassf6	1600016B17Rik	Ras association (RalGDS/AF-6) domain family member 6	protein-coding
1122	chr16	44347092	44348301	+	0	NA	intron (NM_144550, intron 1 of 17)	CpG	182	NM_144550	212514	Mm.24035	NM_144550	ENSMUSG00000043065	Spice1	Ccdc52|D16Ertd480e	spindle and centriole associated protein 1	protein-coding
2416	chr7	71336614	71338319	+	0	NA	intron (NM_018752, intron 1 of 13)	intron (NM_018752, intron 1 of 13)	7121	NM_018752	17364	Mm.38875	NM_018752	ENSMUSG00000030523	Trpm1	4732499L03Rik|AI606771|Ltrpc1|Mlsn1|melastatin	transient receptor potential cation channel, subfamily M, member 1	protein-coding
1697	chr3	60806166	60807600	+	0	NA	5' UTR (NM_001282016, exon 1 of 2)	5' UTR (NM_001282016, exon 1 of 2)	176	NM_001282016	18441	Mm.281452	NM_008772	ENSMUSG00000027765	P2ry1	P2Y1	purinergic receptor P2Y, G-protein coupled 1	protein-coding
1053	chr16	8636675	8640567	+	0	NA	promoter-TSS (NM_025708)	promoter-TSS (NM_025708)	821	NM_016881	54128	Mm.9699	NM_016881	ENSMUSG00000022711	Pmm2	AI585868|C86848	phosphomannomutase 2	protein-coding
414	chr11	51811296	51820019	+	0	NA	Intergenic	Intergenic	-1689	NM_009458	22210	Mm.384918	NM_009458	ENSMUSG00000020390	Ube2b	2610301N02Rik|E2-14k|HR6B|Rad6b|mHR6B	ubiquitin-conjugating enzyme E2B	protein-coding
462	chr11	77498832	77501922	+	0	NA	intron (NM_001024205, intron 1 of 3)	intron (NM_001024205, intron 1 of 3)	736	NM_001024205	68564	Mm.428996	NM_001024205		Nufip2	1110001M19Rik|9530056D24Rik|AI256692|AI461731|PIG1|mKIAA1321	nuclear fragile X mental retardation protein interacting protein 2	protein-coding
1770	chr3	116364163	116366668	+	0	NA	5' UTR (NM_008246, exon 1 of 12)	5' UTR (NM_008246, exon 1 of 12)	180	NM_008246	15247	Mm.280077	NM_008246	ENSMUSG00000089911	Hiat1	-	hippocampus abundant gene transcript 1	protein-coding
2735	chr9	62183193	62234226	+	0	NA	intron (NM_009672, intron 1 of 6)	CT-rich|Low_complexity|Low_complexity	19559	NM_009672	11737	Mm.269088	NM_009672	ENSMUSG00000032249	Anp32a	Anp32|I1PP2A|LANP|PHAP1|W91701|pp32	acidic (leucine-rich) nuclear phosphoprotein 32 family, member A	protein-coding
1209	chr17	31700334	31703653	+	0	NA	intron (NM_016670, intron 1 of 10)	CpG	275	NM_016670	18771	Mm.259295	NM_016670	ENSMUSG00000006705	Pknox1	D17Wsu76e|PREP1	Pbx/knotted 1 homeobox	protein-coding
263	chr10	62382894	62384336	+	0	NA	exon (NM_175194, exon 1 of 9)	exon (NM_175194, exon 1 of 9)	234	NM_175194	73132	Mm.37457	NM_175194	ENSMUSG00000071253	Slc25a16	3110021G18Rik|GDA|GDC|HGT.1|ML7	solute carrier family 25 (mitochondrial carrier, Graves disease autoantigen), member 16	protein-coding
991	chr15	77800243	77802376	+	0	NA	promoter-TSS (NM_018749)	promoter-TSS (NM_018749)	-55	NM_018749	55944	Mm.3955	NM_018749	ENSMUSG00000016554	Eif3d	66/67kDa|AA407891|Eif3s7|eIF3p66	eukaryotic translation initiation factor 3, subunit D	protein-coding
2348	chr7	16704745	16705817	+	0	NA	promoter-TSS (NM_133727)	promoter-TSS (NM_133727)	56	NM_133727	70394	Mm.41101	NM_133727	ENSMUSG00000006021	Kptn	2310042D10Rik|2E4|C030013F01Rik	kaptin	protein-coding
931	chr14	123381459	123383171	+	0	NA	intron (NM_028651, intron 1 of 17)	CpG	168	NM_028651	70551	Mm.271988	NM_028651	ENSMUSG00000041594	Tmtc4	4930403J22Rik|5730419O14Rik	transmembrane and tetratricopeptide repeat containing 4	protein-coding
2246	chr6	81873609	81874077	+	0	NA	exon (NM_177884, exon 1 of 17)	exon (NM_177884, exon 1 of 17)	180	NM_177884	330361	Mm.474487	NM_177884	ENSMUSG00000035125	Gcfc2	A130099G21|AW146020|GCF2|Tcf9	GC-rich sequence DNA binding factor 2	protein-coding
615	chr12	82025658	82078708	+	0	NA	TTS (NM_009159)	TTS (NM_009159)	5692	NM_009159	20384	Mm.43331	NM_009159	ENSMUSG00000021134	Srsf5	Sfrs5	serine/arginine-rich splicing factor 5	protein-coding
476	chr11	83777613	83778403	+	0	NA	promoter-TSS (NM_194341)	promoter-TSS (NM_194341)	75	NM_194341	217030	Mm.82680	NM_194341	ENSMUSG00000034940	Synrg	Ap1gbp1|SYNG	synergin, gamma	protein-coding
1198	chr17	26275183	26276294	+	0	NA	5' UTR (NM_001159598, exon 1 of 10)	5' UTR (NM_001159598, exon 1 of 10)	107	NM_001159598	12005	Mm.23684	NM_009733	ENSMUSG00000024182	Axin1	AI316800|Axin|Fu|Kb|Ki|fused|kinky|knobbly	axin 1	protein-coding
1626	chr2	163357739	163428917	+	0	NA	intron (NM_008261, intron 8 of 9)	intron (NM_008261, intron 8 of 9)	20404	NM_008261	15378	Mm.202383	NM_008261	ENSMUSG00000017950	Hnf4a	HNF-4|Hnf4|Hnf4alpha|MODY1|Nr2a1|Tcf14	hepatic nuclear factor 4, alpha	protein-coding
1409	chr19	21345682	21350227	+	0	NA	intron (NM_009551, intron 1 of 5)	intron (NM_009551, intron 1 of 5)	1186	NM_009551	22682	Mm.292405	NM_009551		Zfand5	2310057A04Rik|5830475F03Rik|AA415485|Za20d2|Zfp216	zinc finger, AN1-type domain 5	protein-coding
2219	chr6	47870286	47871398	+	0	NA	intron (NM_145576, intron 1 of 4)	CpG	275	NM_001145881	232784	Mm.196782	NM_145576	ENSMUSG00000052763	Zfp212	Znf212|mKIAA3011	Zinc finger protein 212	protein-coding
2141	chr5	136432008	136439554	+	0	NA	TTS (NM_001160366)	TTS (NM_001160366)	14565	NM_001160366	109267	Mm.332750	NM_001160366	ENSMUSG00000029699	Ssc4d	C330016E03Rik|S4D-SRCRB|SRCRB-S4D|Srcrb4d	scavenger receptor cysteine rich family, 4 domains	protein-coding
2464	chr7	117755696	117774407	+	0	NA	Intergenic	B2_Mm1a|SINE|B2	-6132	NM_009627	11535	Mm.1408	NM_009627	ENSMUSG00000030790	Adm	AM	adrenomedullin	protein-coding
1077	chr16	18498201	18499336	+	0	NA	promoter-TSS (NR_104347)	promoter-TSS (NR_104347)	-38	NM_001081682	13972	Mm.236139	NM_023120	ENSMUSG00000000884	Gnb1l	ESTM55|Gm16314|Me49f07|OTTMUSG00000033458|Wdr14|Wdvcf	guanine nucleotide binding protein (G protein), beta polypeptide 1-like	protein-coding
1716	chr3	86027506	86029231	+	0	NA	promoter-TSS (NM_001077687)	promoter-TSS (NM_001077687)	-244	NM_001077688	80877	Mm.439825	NM_030695	ENSMUSG00000028080	Lrba	C80285|D3Ertd775e|Lab300|Lba	LPS-responsive beige-like anchor	protein-coding
293	chr10	81640655	81641886	+	0	NA	Intergenic	CpG	50512	NM_001163064	216177	Mm.482395	NM_001163064		AU041133	-	expressed sequence AU041133	protein-coding
2854	chrX	101175318	101177396	+	0	NA	intron (NM_011276, intron 1 of 4)	CpG	266	NM_011276	19820	Mm.427762	NM_011276	ENSMUSG00000056537	Rlim	AL022832|AW743871|Ha1r|Rlim1|Rnf12	ring finger protein, LIM domain interacting	protein-coding
1272	chr17	74888375	74890113	+	0	NA	intron (NM_026417, intron 1 of 5)	CpG	411	NM_026417	67864	Mm.41891	NM_026417	ENSMUSG00000024072	Yipf4	2310034L04Rik	Yip1 domain family, member 4	protein-coding
1781	chr3	126707409	126711048	+	0	NA	Intergenic	RMER1A|Other|Other	-7858	NM_178655	109676	Mm.220242	NM_178655	ENSMUSG00000032826	Ank2	AI835472|AW491075|Ank-2	ankyrin 2, brain	protein-coding
1299	chr18	9211649	9214453	+	0	NA	exon (NM_008058, exon 1 of 1)	exon (NM_008058, exon 1 of 1)	197	NM_008058	14370	Mm.184289	NM_008058	ENSMUSG00000036904	Fzd8	Fz8	frizzled homolog 8 (Drosophila)	protein-coding
1663	chr3	18135743	18155317	+	0	NA	Intergenic	Lx6|LINE|L1	-2192	NM_007825	13123	Mm.316000	NM_007825	ENSMUSG00000039519	Cyp7b1	AW261589|D3Ertd552e|hct-1	cytochrome P450, family 7, subfamily b, polypeptide 1	protein-coding
967	chr15	55388256	55389620	+	0	NA	promoter-TSS (NM_001168250)	promoter-TSS (NM_001168250)	-25	NM_134092	105837	Mm.390829	NM_134092	ENSMUSG00000022369	Mtbp	AI429604|MDM2BP	Mdm2, transformed 3T3 cell double minute p53 binding protein	protein-coding
2157	chr5	144491783	144493971	+	0	NA	intron (NM_029749, intron 1 of 17)	CpG	272	NM_029749	76800	Mm.259620	NM_029749	ENSMUSG00000051306	Usp42	2410140K03Rik|3110031A07Rik|A630018G05Rik|D5Ertd591e	ubiquitin specific peptidase 42	protein-coding
1611	chr2	155295120	155299933	+	0	NA	Intergenic	B1F|SINE|Alu	-31007	NM_019825	56406	Mm.27592	NM_019825	ENSMUSG00000038369	Ncoa6	AIB3|ASC-2|ASC2|NRC|Ncoa7|PRIP|RAP250|mKIAA0181	nuclear receptor coactivator 6	protein-coding
322	chr10	106708154	106711725	+	0	NA	5' UTR (NM_001284329, exon 1 of 6)	5' UTR (NM_001284329, exon 1 of 6)	489	NM_001284329	108030	Mm.268025	NM_001033223	ENSMUSG00000019906	Lin7a	AI848705|LIN-7A|MALS-1|TIP-33|Veli|Veli1	lin-7 homolog A (C. elegans)	protein-coding
469	chr11	80241941	80245386	+	0	NA	intron (NM_178616, intron 1 of 13)	intron (NM_178616, intron 1 of 13)	1546	NM_178616	69077	Mm.260539	NM_178616	ENSMUSG00000017428	Psmd11	1700089D09Rik|1810019E17Rik|2610024G20Rik|2810055C24Rik|C78232|P44.5|S9	proteasome (prosome, macropain) 26S subunit, non-ATPase, 11	protein-coding
635	chr12	103150486	103151848	+	0	NA	5' UTR (NM_028446, exon 1 of 21)	5' UTR (NM_028446, exon 1 of 21)	214	NM_028446	109181	Mm.208618	NM_028446	ENSMUSG00000021188	Trip11	2610511G22Rik|3110031G15Rik|6030460N08Rik|AI450776|GMAP-210|TRIP230	thyroid hormone receptor interactor 11	protein-coding
1088	chr16	22009056	22010242	+	0	NA	promoter-TSS (NM_029457)	promoter-TSS (NM_029457)	92	NR_027488	75826	Mm.297431	NM_029457	ENSMUSG00000022855	Senp2	2310007L05Rik|4930538C18Rik|AI646780|AW554757|Smt3ip2|SuPr-1|mKIAA1331	SUMO/sentrin specific peptidase 2	protein-coding
575	chr12	53603320	53606690	+	0	NA	Intergenic	CpG	-12059	NM_009706	11855	Mm.35059	NM_009706	ENSMUSG00000035133	Arhgap5	p190-B|p190B	Rho GTPase activating protein 5	protein-coding
1835	chr4	32050445	32051682	+	0	NA	promoter-TSS (NM_009316)	promoter-TSS (NM_009316)	-19	NM_009316	26409	Mm.258589	NM_009316	ENSMUSG00000028284	Map3k7	B430101B05|C87327|Tak1	mitogen-activated protein kinase kinase kinase 7	protein-coding
1566	chr2	121299083	121300155	+	0	NA	exon (NM_001081975, exon 1 of 7)	exon (NM_001081975, exon 1 of 7)	140	NM_001081975	100034361	Mm.270393	NM_001081975		Mfap1b	-	microfibrillar-associated protein 1B	protein-coding
979	chr15	68192822	68198948	+	0	NA	Intergenic	Intergenic	-23034	NR_029718	387228		NR_029718	miRBase:MI0000549	Mir30d	Mirn30d|mmu-mir-30d	microRNA 30d	ncRNA
709	chr13	45174124	45174568	+	0	NA	Intergenic	CpG	-76881	NM_025772	94245	Mm.352311	NM_025772	ENSMUSG00000057531	Dtnbp1	5430437B18Rik|AW048963|Bloc1s8|dysbindin|sdy	dystrobrevin binding protein 1	protein-coding
40	chr1	52901226	52907593	+	0	NA	intron (NM_146108, intron 1 of 13)	MTC|LTR|MaLR	2519	NM_146108	227095	Mm.222063	NM_146108	ENSMUSG00000041426	Hibch	2610509I15Rik|AI648812	3-hydroxyisobutyryl-Coenzyme A hydrolase	protein-coding
310	chr10	89148033	89150208	+	0	NA	promoter-TSS (NM_198021)	promoter-TSS (NM_198021)	-90	NM_198021	213326	Mm.27651	NM_198021	ENSMUSG00000069539	Scyl2	AU015688|AW536445|BC030932|CVAK104|D10Ertd802e	SCY1-like 2 (S. cerevisiae)	protein-coding
192	chr1	187186228	187194988	+	0	NA	intron (NM_029735, intron 1 of 31)	intron (NM_029735, intron 1 of 31)	3634	NM_029735	107508	Mm.154511	NM_029735	ENSMUSG00000026615	Eprs	2410081F06Rik|3010002K18Rik|C79379|Qprs	glutamyl-prolyl-tRNA synthetase	protein-coding
699	chr13	37890622	37892493	+	0	NA	Intergenic	Intergenic	-26350	NM_026830	68750	Mm.491109	NM_026830	ENSMUSG00000039087	Rreb1	1110037N09Rik|AA414966|B930013M22Rik	ras responsive element binding protein 1	protein-coding
1115	chr16	38346631	38347655	+	0	NA	promoter-TSS (NM_001017429)	promoter-TSS (NM_001017429)	58	NM_001017429	12856	Mm.27396	NM_001017429	ENSMUSG00000046516	Cox17	AI037035	cytochrome c oxidase assembly protein 17	protein-coding
960	chr15	43308638	43309419	+	0	NA	promoter-TSS (NR_046064)	promoter-TSS (NR_046064)	253	NM_025736	66736	Mm.244512	NM_025736	ENSMUSG00000022337	Emc2	4921531G14Rik|AV060620|AW209495|Ttc35	ER membrane protein complex subunit 2	protein-coding
818	chr13	113717088	113718386	+	0	NA	promoter-TSS (NM_172594)	promoter-TSS (NM_172594)	-149	NM_028151	72198	Mm.291029	NM_028151	ENSMUSG00000016018	Skiv2l2	2610528A15Rik|mKIAA0052	superkiller viralicidic activity 2-like 2 (S. cerevisiae)	protein-coding
2363	chr7	27765984	27767767	+	0	NA	Intergenic	Intergenic	-42470	NM_001101467	233005	Mm.291574	NM_001101467	ENSMUSG00000091867	Cyp2a22	EG233005	cytochrome P450, family 2, subfamily a, polypeptide 22	protein-coding
1038	chr15	100056350	100063277	+	0	NA	intron (NM_007497, intron 1 of 6)	intron (NM_007497, intron 1 of 6)	1523	NM_007497	11908	Mm.676	NM_007497	ENSMUSG00000023027	Atf1	-	activating transcription factor 1	protein-coding
2293	chr6	119796562	119799180	+	0	NA	promoter-TSS (NR_030776)	promoter-TSS (NR_030776)	297	NM_053204	111173	Mm.288860	NM_053204	ENSMUSG00000030172	Erc1	4930404L01Rik|5033405M01Rik|9630025C19Rik|B430107L16Rik|CAST2|ELKS|RAB6IP2A|RAB6IP2B|Rab6ip2|mKIAA1081	ELKS/RAB6-interacting/CAST family member 1	protein-coding
1707	chr3	81736172	81738542	+	0	NA	intron (NM_177662, intron 1 of 7)	intron (NM_177662, intron 1 of 7)	819	NM_177662	229445	Mm.254642	NM_177662	ENSMUSG00000028015	Ctso	A330105D01Rik|A430056C07|AI118514	cathepsin O	protein-coding
267	chr10	67519148	67524330	+	0	NA	Intergenic	Intergenic	79393	NM_001081346	170799	Mm.209844	NM_133244	ENSMUSG00000037846	Rtkn2	B130039D23Rik|Mbf|Plekhk1	rhotekin 2	protein-coding
543	chr11	121563112	121565412	+	0	NA	intron (NM_144797, intron 1 of 3)	CpG	521	NM_144797	210029	Mm.153566	NM_144797		Metrnl	9430048M07Rik|BC019776	meteorin, glial cell differentiation regulator-like	protein-coding
1892	chr4	83062876	83064154	+	0	NA	promoter-TSS (NM_029949)	promoter-TSS (NM_029949)	-133	NM_029949	77634	Mm.271985	NM_029949	ENSMUSG00000028483	Snapc3	1810020H02Rik|4930558A07Rik|5031401C21Rik|AI414457|E030018J20Rik	small nuclear RNA activating complex, polypeptide 3	protein-coding
1777	chr3	122686308	122688260	+	0	NA	promoter-TSS (NM_133857)	promoter-TSS (NM_133857)	81	NM_133857	99526	Mm.491248	NM_133857	ENSMUSG00000039701	Usp53	AA939927|Phxr3|Sp6|mKIAA1350	ubiquitin specific peptidase 53	protein-coding
2044	chr5	42098426	42099817	+	0	NA	intron (NM_027295, intron 1 of 6)	CpG	273	NM_027295	100972	Mm.41555	NM_027295	ENSMUSG00000029128	Rab28	2700023P08Rik|AW496496	RAB28, member RAS oncogene family	protein-coding
354	chr10	128258109	128260009	+	0	NA	promoter-TSS (NM_024180)	promoter-TSS (NM_024180)	232	NM_025364	66118	Mm.351579	NM_025364	ENSMUSG00000078427	Sarnp	1110005A23Rik|Cip29	SAP domain containing ribonucleoprotein	protein-coding
1437	chr19	46378246	46380784	+	0	NA	promoter-TSS (NM_001177370)	promoter-TSS (NM_001177370)	288	NM_001177369	18034	Mm.102365	NM_019408	ENSMUSG00000025225	Nfkb2	NF-kappaB2|lyt|p49|p49/p100|p50B|p52	nuclear factor of kappa light polypeptide gene enhancer in B cells 2, p49/p100	protein-coding
2813	chr9	119834449	119847009	+	0	NA	intron (NM_028976, intron 3 of 8)	B4|SINE|B4	5947	NM_028976	74498	Mm.104789	NM_028976	ENSMUSG00000032513	Gorasp1	5430411C10Rik|GOLPH5|GRASP65|P65	golgi reassembly stacking protein 1	protein-coding
1064	chr16	16302385	16304013	+	0	NA	non-coding (NR_038046, exon 1 of 5)	non-coding (NR_038046, exon 1 of 5)	141	NM_198246	70120	Mm.37486	NM_198246	ENSMUSG00000022792	Yars2	2210023C10Rik|tyrRS	tyrosyl-tRNA synthetase 2 (mitochondrial)	protein-coding
2724	chr9	54433945	54435182	+	0	NA	intron (NM_029573, intron 1 of 10)	CpG	245	NM_029573	67834	Mm.279195	NM_029573	ENSMUSG00000032279	Idh3a	1110003P10Rik|1500012E04Rik|AA407078|AI316514	isocitrate dehydrogenase 3 (NAD+) alpha	protein-coding
2517	chr8	3410330	3418637	+	0	NA	intron (NM_133962, intron 1 of 19)	intron (NM_133962, intron 1 of 19)	21475	NM_133962	102098	Mm.170461	NM_133962	ENSMUSG00000004568	Arhgef18	AI467246|D030053O22Rik	rho/rac guanine nucleotide exchange factor (GEF) 18	protein-coding
757	chr13	67551444	67553888	+	0	NA	promoter-TSS (NM_177712)	promoter-TSS (NM_177712)	-106	NM_177712	238692	Mm.486478	NM_177712	ENSMUSG00000069206	Zfp874a	C330011K17Rik|Rslcan15|Zfp874	zinc finger protein 874a	protein-coding
2577	chr8	72273241	72274472	+	0	NA	promoter-TSS (NM_001200023)	promoter-TSS (NM_001200023)	5	NM_001200023	620419	Mm.460423	NM_001200023	ENSMUSG00000092260	Zfp963	-	zinc finger protein 963	protein-coding
9	chr1	13361560	13365079	+	0	NA	intron (NM_001077695, intron 1 of 21)	CpG	845	NM_001077695	17978	Mm.2537	NM_008678	ENSMUSG00000005886	Ncoa2	9530095N19|D1Ertd433e|GRIP-1|Grip1|KAT13C|SRC-2|TIF-2|TIF2|bHLHe75	nuclear receptor coactivator 2	protein-coding
2734	chr9	61761764	61763309	+	0	NA	promoter-TSS (NM_018853)	promoter-TSS (NM_018853)	-219	NM_018853	56040	Mm.3158	NM_018853	ENSMUSG00000007892	Rplp1	2410042H16Rik|Arpp1|C430017H15Rik	ribosomal protein, large, P1	protein-coding
1217	chr17	33391596	33392367	+	0	NA	exon (NM_029952, exon 1 of 4)	exon (NM_029952, exon 1 of 4)	109	NM_029952	77652	Mm.460572	NM_029952		Zfp955a	AI842447|Zfp883a	zinc finger protein 955A	protein-coding
1740	chr3	97669896	97672446	+	0	NA	intron (NM_001289702, intron 1 of 45)	intron (NM_001289702, intron 1 of 45)	21459	NM_001289702	83679	Mm.129840	NM_031401	ENSMUSG00000038170	Pde4dip	4732458A06Rik|9430063L05Rik|C87016|D130016K21Rik|D3Bwg1078e|Usmg4|mKIAA0454	phosphodiesterase 4D interacting protein (myomegalin)	protein-coding
1600	chr2	150574724	150575395	+	0	NA	intron (NM_172117, intron 1 of 13)	CpG	242	NM_172117	12497	Mm.275524	NM_172117	ENSMUSG00000033068	Entpd6	2700026H11Rik|Cd39l2|NTPDase-6	ectonucleoside triphosphate diphosphohydrolase 6	protein-coding
603	chr12	77354751	77391151	+	0	NA	intron (NM_138745, intron 2 of 27)	intron (NM_138745, intron 2 of 27)	16732	NM_138745	108156	Mm.29584	NM_138745	ENSMUSG00000021048	Mthfd1	Dcs|E430024A07Rik|Mthfd	methylenetetrahydrofolate dehydrogenase (NADP+ dependent), methenyltetrahydrofolate cyclohydrolase, formyltetrahydrofolate synthase	protein-coding
2750	chr9	71958443	71960152	+	0	NA	promoter-TSS (NM_001253862)	promoter-TSS (NM_001253862)	-289	NM_001253862	21406	Mm.171615	NM_011544	ENSMUSG00000032228	Tcf12	A130037E08Rik|ALF1|HEB|HEBAlt|HTF-4|HTF4|ME1|REB|bHLHb20	transcription factor 12	protein-coding
2527	chr8	11496947	11498183	+	0	NA	promoter-TSS (NM_001190357)	promoter-TSS (NM_001190357)	-3	NM_026995	69225	Mm.64911	NM_026995	ENSMUSG00000031505	Carkd	0710008K08Rik|2810407E01Rik	carbohydrate kinase domain containing	protein-coding
90	chr1	94369786	94371070	+	0	NA	promoter-TSS (NM_024197)	promoter-TSS (NM_024197)	-93	NM_024197	67273	Mm.248778	NM_024197		Ndufa10	2900053E13Rik	NADH dehydrogenase (ubiquinone) 1 alpha subcomplex 10	protein-coding
1850	chr4	41260937	41262399	+	0	NA	5' UTR (NM_026893, exon 1 of 9)	5' UTR (NM_026893, exon 1 of 9)	266	NM_026893	68970	Mm.28891	NM_026893	ENSMUSG00000028436	Dcaf12	1500001L20Rik|5830424K06Rik|AA420338|AI851081|Wdr40a	DDB1 and CUL4 associated factor 12	protein-coding
565	chr12	32183938	32185346	+	0	NA	promoter-TSS (NM_001253848)	promoter-TSS (NM_001253848)	-161	NM_001253848	104836	Mm.273270	NM_134048	ENSMUSG00000020659	Cbll1	AI467391|Hakai|c-Cbl-like	Casitas B-lineage lymphoma-like 1	protein-coding
1346	chr18	47118338	47118896	+	0	NA	promoter-TSS (NM_178377)	promoter-TSS (NM_178377)	87	NM_178377	69456	Mm.210734	NM_178377	ENSMUSG00000042705	Commd10	2310003A05Rik|AU019438|DRWMS2	COMM domain containing 10	protein-coding
1964	chr4	133359798	133372726	+	0	NA	Intergenic	Intergenic	-56736	NM_001080819	93760	Mm.22478	NM_001080819	ENSMUSG00000007880	Arid1a	1110030E03Rik|BAF250a|Osa1|Smarcf1	AT rich interactive domain 1A (SWI-like)	protein-coding
850	chr14	31813843	31815460	+	0	NA	promoter-TSS (NM_001165930)	promoter-TSS (NM_001165930)	32	NM_029626	76485	Mm.8766	NM_029626	ENSMUSG00000021916	Glt8d1	2410004H05Rik|5430414N14Rik|AI450005	glycosyltransferase 8 domain containing 1	protein-coding
2818	chr9	122859313	122860299	+	0	NA	promoter-TSS (NM_010620)	promoter-TSS (NM_010620)	312	NM_025419	66202	Mm.268307	NM_025419	ENSMUSG00000032551	1110059G10Rik	-	RIKEN cDNA 1110059G10 gene	protein-coding
2424	chr7	73453612	73457337	+	0	NA	intron (NM_146191, intron 6 of 33)	B3A|SINE|B2	71136	NR_106024	102465640		NR_106024	miRBase:MI0022906	Mir7057	mmu-mir-7057	microRNA mir-7057	ncRNA
891	chr14	63378227	63381827	+	0	NA	promoter-TSS (NM_008715)	promoter-TSS (NM_008715)	-78	NM_008715	18130	Mm.319684	NM_008715	ENSMUSG00000035161	Ints6	2900075H24Rik|AI480962|DICE1|Ddx26|HDB|Notch2l	integrator complex subunit 6	protein-coding
1004	chr15	81843559	81847383	+	0	NA	intron (NM_134095, intron 1 of 5)	intron (NM_134095, intron 1 of 5)	1099	NM_134095	28075	Mm.474453	NM_134095	ENSMUSG00000022472	Desi1	AI427858|AI850401|D15Wsu75e|DeSI-1|Fam152b|Pppde2	desumoylating isopeptidase 1	protein-coding
2106	chr5	109985367	109989367	+	0	NA	intron (NM_016715, intron 1 of 7)	intron (NM_016715, intron 1 of 7)	645	NM_016715	57914	Mm.35771	NM_016715	ENSMUSG00000033467	Crlf2	CRLM2|Ly114|Tpte2|Tslpr	cytokine receptor-like factor 2	protein-coding
2696	chr9	33535706	33536105	+	0	NA	Intergenic	CpG	-314051	NR_040744	77119	Mm.367930	NR_040744	ENSMUSG00000098758	7630403G23Rik	-	RIKEN cDNA 7630403G23 gene	ncRNA
1360	chr18	62053007	62071561	+	0	NA	intron (NM_001164491, intron 2 of 23)	B1_Mus1|SINE|Alu	9194	NM_198649	319713	Mm.329478	NM_198649	ENSMUSG00000032735	Ablim3	AW990719|D930036B08Rik	actin binding LIM protein family, member 3	protein-coding
233	chr10	34137801	34138711	+	0	NA	promoter-TSS (NM_176968)	promoter-TSS (NM_176968)	78	NM_176968	319638	Mm.73467	NM_176968	ENSMUSG00000039480	Nt5dc1	6030401B09Rik|AW987726|Nt5c2l1	5'-nucleotidase domain containing 1	protein-coding
1013	chr15	85709152	85710329	+	0	NA	promoter-TSS (NM_028063)	promoter-TSS (NM_028063)	-17	NM_028063	72026	Mm.158211	NM_028063	ENSMUSG00000022386	Trmu	1110005N20Rik|1600025P05Rik|AI314320|Trmt1	tRNA 5-methylaminomethyl-2-thiouridylate methyltransferase	protein-coding
1490	chr2	28323535	28324176	+	0	NA	exon (NM_080452, exon 2 of 4)	exon (NM_080452, exon 2 of 4)	269	NM_001166031	118451	Mm.294951	NM_080452	ENSMUSG00000035772	Mrps2	1500019M10Rik	mitochondrial ribosomal protein S2	protein-coding
2198	chr6	30459091	30460519	+	0	NA	promoter-TSS (NM_178625)	promoter-TSS (NM_178625)	-44	NM_027073	75647	Mm.46117	NM_027073	ENSMUSG00000029784	Ssmem1	1700016K02Rik|1700025E21Rik	serine-rich single-pass membrane protein 1	protein-coding
1693	chr3	57538782	57541558	+	0	NA	intron (NM_001113413, intron 1 of 9)	CpG	182	NM_001113413	24017	Mm.274360	NM_011883	ENSMUSG00000036503	Rnf13	2010001H16Rik|Rzf	ring finger protein 13	protein-coding
316	chr10	94150653	94152245	+	0	NA	promoter-TSS (NM_029852)	promoter-TSS (NM_029852)	-86	NM_029852	77048	Mm.296971	NM_029852	ENSMUSG00000020024	Cep83	2600001G24Rik|4921537D05Rik|5730513H21Rik|Ccdc41	centrosomal protein 83	protein-coding
1806	chr3	145311613	145316770	+	0	NA	Intergenic	Intergenic	-1242	NM_010516	16007	Mm.1231	NM_010516	ENSMUSG00000028195	Cyr61	AI325051|CCN1|Igfbp10	cysteine rich protein 61	protein-coding
2288	chr6	117666347	117667332	+	0	NA	intron (NR_045731, intron 2 of 3)	RLTR45-int|LTR|ERVK	34948	NR_045731	72263	Mm.443289	NR_045731		1700030F04Rik	-	RIKEN cDNA 1700030F04 gene	ncRNA
1738	chr3	96961945	96963995	+	0	NA	5' UTR (NM_019800, exon 1 of 10)	5' UTR (NM_019800, exon 1 of 10)	270	NM_019800	66659	Mm.101368	NM_019800	ENSMUSG00000028093	Acp6	5730559A09Rik|ACPL1|AU022842|mPACPL1	acid phosphatase 6, lysophosphatidic	protein-coding
2025	chr5	28642973	28645912	+	0	NA	intron (NM_028234, intron 1 of 18)	intron (NM_028234, intron 1 of 18)	713	NM_028234	381626	Mm.304075	NM_028234	ENSMUSG00000048271	Rbm33	3200001K10Rik|6430512A10Rik|AA386890|Prr8	RNA binding motif protein 33	protein-coding
1370	chr18	75652701	75667508	+	0	NA	intron (NM_201354, intron 9 of 11)	intron (NM_201354, intron 9 of 11)	-14195	NR_045879	100038353	Mm.440724	NR_045879	ENSMUSG00000097712	Gm10532	ENSMUSG00000073534	predicted gene 10532	ncRNA
11	chr1	20121068	20122922	+	0	NA	intron (NM_153179, intron 60 of 66)	intron (NM_153179, intron 60 of 66)	-224540	NR_045734	75028	Mm.417820	NR_045734		4930486I03Rik	-	RIKEN cDNA 4930486I03 gene	ncRNA
2649	chr8	119444832	119446223	+	0	NA	promoter-TSS (NM_028131)	promoter-TSS (NM_028131)	-113	NM_028131	72155	Mm.23185	NM_028131	ENSMUSG00000031756	Cenpn	2610510J17Rik|AI426416|AW545024	centromere protein N	protein-coding
511	chr11	102145540	102182314	+	0	NA	Intergenic	Intergenic	-5984	NM_001098837	217218	Mm.390381	NM_001098836	ENSMUSG00000059995	Atxn7l3	E030022H21Rik	ataxin 7-like 3	protein-coding
842	chr14	26964661	26965637	+	0	NA	Intergenic	RMER17C-int|LTR|ERVK	23054	NM_001177539	100039293	Mm.429131	NM_001177539	ENSMUSG00000072672	Duxbl3	ENSMUSG00000072672|Gm10391	double homeobox B-like 3	protein-coding
2367	chr7	28459276	28460162	+	0	NA	promoter-TSS (NM_001290528)	promoter-TSS (NM_001290528)	39	NM_198417	112415	Mm.145362	NM_198417	ENSMUSG00000057093	C030039L03Rik	-	RIKEN cDNA C030039L03 gene	protein-coding
899	chr14	68550223	68552327	+	0	NA	intron (NM_177780, intron 1 of 51)	CpG	354	NM_177780	68813	Mm.258155	NM_177780	ENSMUSG00000044447	Dock5	1110060D06Rik|AI666732|AI956923|BC016533|E130320D18|lr2|rlc	dedicator of cytokinesis 5	protein-coding
2000	chr4	154928591	154955175	+	0	NA	intron (NM_001159637, intron 1 of 11)	B1_Mus1|SINE|Alu	3959	NM_001159637	192185	Mm.28347	NM_138671	ENSMUSG00000029063	Nadk	4432404C02Rik|BC004012	NAD kinase	protein-coding
2437	chr7	88715394	88742665	+	0	NA	intron (NM_001004185, intron 3 of 9)	L1_Mur3|LINE|L1	12851	NM_001004185	434204	Mm.181641	NM_001004185	ENSMUSG00000045795	Whamm	BB081391|Whdc1|mKIAA1971	WAS protein homolog associated with actin, golgi membranes and microtubules	protein-coding
2531	chr8	13024848	13076487	+	0	NA	exon (NM_001242368, exon 7 of 9)	exon (NM_001242368, exon 7 of 9)	-10241	NM_025834	66901	Mm.441140	NM_025834	ENSMUSG00000031445	Proz	1300015B06Rik	protein Z, vitamin K-dependent plasma glycoprotein	protein-coding
2689	chr9	25135374	25138041	+	0	NA	Intergenic	Intergenic	76667	NM_001205367	235072	Mm.270259	NM_009859	ENSMUSG00000001833	Sept7	Cdc10|E430034N22	septin 7	protein-coding
199	chr1	194595929	194597625	+	0	NA	intron (NM_144881, intron 1 of 11)	intron (NM_144881, intron 1 of 11)	636	NM_144881	226861	Mm.145857	NM_144881	ENSMUSG00000037375	Hhat	2810432O22Rik|AI462858|AP-2CRE|Skn|Tg(TFAP2A-cre)1Will	hedgehog acyltransferase	protein-coding
2410	chr7	59116722	59118779	+	0	NA	promoter-TSS (NM_001115087)	promoter-TSS (NM_001115087)	-113	NM_001115087	100040608	Mm.322643	NM_001115087	ENSMUSG00000092118	Fancf	A730016A17	Fanconi anemia, complementation group F	protein-coding
1979	chr4	140616031	140617251	+	0	NA	promoter-TSS (NM_001145958)	promoter-TSS (NM_001145958)	-181	NM_001145958	230872	Mm.80685	NM_172122	ENSMUSG00000040860	Crocc	-	ciliary rootlet coiled-coil, rootletin	protein-coding
1899	chr4	94645129	94646312	+	0	NA	promoter-TSS (NM_177239)	promoter-TSS (NM_177239)	71	NM_177239	320713	Mm.208868	NM_177239	ENSMUSG00000062627	Mysm1	C130067A03Rik|C530050H10Rik	myb-like, SWIRM and MPN domains 1	protein-coding
1929	chr4	116269348	116270902	+	0	NA	exon (NM_001037916, exon 4 of 13)	exon (NM_001037916, exon 4 of 13)	110	NR_029450	654318	Mm.255685	NR_029450	ENSMUSG00000085408	C530005A16Rik	D930044c15rik	RIKEN cDNA C530005A16 gene	ncRNA
2485	chr7	134591744	134592938	+	0	NA	exon (NM_175163, exon 1 of 3)	exon (NM_175163, exon 1 of 3)	331	NM_175163	71131	Mm.474533	NM_175163		Zfp689	4933416E05Rik|Znf689	zinc finger protein 689	protein-coding
1737	chr3	96500077	96501651	+	0	NA	promoter-TSS (NM_018812)	promoter-TSS (NM_018812)	-135	NM_001165949	229615	Mm.1635	NM_018812	ENSMUSG00000028101	Pias3	Pias3l	protein inhibitor of activated STAT 3	protein-coding
1948	chr4	125875207	125884382	+	0	NA	intron (NM_146153, intron 1 of 10)	CpG	160	NM_146153	230753	Mm.29813	NM_146153	ENSMUSG00000043962	Thrap3	9330151F09Rik|B230333E16Rik|Trap150	thyroid hormone receptor associated protein 3	protein-coding
795	chr13	93379551	93381868	+	0	NA	promoter-TSS (NM_172588)	promoter-TSS (NM_172588)	-384	NM_172588	218442	Mm.297970	NM_172588	ENSMUSG00000021703	Serinc5	A130038L21Rik|AIGP3|C86123|TPO1	serine incorporator 5	protein-coding
1609	chr2	154958755	154962079	+	0	NA	intron (NM_001243712, intron 1 of 25)	intron (NM_001243712, intron 1 of 25)	1200	NM_008395	16396	Mm.208286	NM_008395	ENSMUSG00000027598	Itch	6720481N21Rik|8030492O04Rik|A130065M08|AIP4|C230047C07Rik	itchy, E3 ubiquitin protein ligase	protein-coding
794	chr13	93300034	93301472	+	0	NA	promoter-TSS (NM_173392)	promoter-TSS (NM_173392)	12	NM_173392	218441	Mm.259585	NM_173392	ENSMUSG00000021706	Zfyve16	AI035632|B130024H06Rik|B130031L15|mKIAA0305	zinc finger, FYVE domain containing 16	protein-coding
944	chr15	12044201	12049111	+	0	NA	promoter-TSS (NM_011767)	promoter-TSS (NM_011767)	-950	NM_011767	22763	Mm.273496	NM_011767	ENSMUSG00000022201	Zfr	C920030H05Rik	zinc finger RNA binding protein	protein-coding
1780	chr3	123209824	123212608	+	0	NA	promoter-TSS (NR_028573)	promoter-TSS (NR_028573)	38	NR_028574	69895	Mm.260791	NR_028574		Snhg8	1110065M07Rik|2010109N14Rik	small nucleolar RNA host gene 8	ncRNA
1113	chr16	37651763	37655356	+	0	NA	intron (NM_026610, intron 1 of 2)	intron (NM_026610, intron 1 of 2)	895	NM_026610	68194	Mm.379154	NM_026610		Ndufb4	0610006N12Rik|1300010H20Rik	NADH dehydrogenase (ubiquinone) 1 beta subcomplex 4	protein-coding
2122	chr5	122106779	122120576	+	0	NA	intron (NM_001289544, intron 3 of 11)	intron (NM_001289544, intron 3 of 11)	2799	NM_001289544	72399	Mm.153372	NM_028227	ENSMUSG00000029458	Brap	3010002G07Rik|BRAP2|IMP	BRCA1 associated protein	protein-coding
674	chr13	21354466	21356575	+	0	NA	Intergenic	L1M4|LINE|L1	29035	NM_010343	14780	Mm.1332	NM_010343	ENSMUSG00000004344	Gpx5	AV379049|Arep	glutathione peroxidase 5	protein-coding
2280	chr6	113255750	113258718	+	0	NA	5' UTR (NM_030178, exon 1 of 13)	5' UTR (NM_030178, exon 1 of 13)	103	NM_001282126	78783	Mm.356059	NM_030178	ENSMUSG00000001632	Brpf1	4833438B11Rik|4930540D11Rik|Brpf2	bromodomain and PHD finger containing, 1	protein-coding
1317	chr18	21279936	21280737	+	0	NA	Intergenic	MTD|LTR|MaLR	49491	NM_008586	17288	Mm.2682	NM_008586	ENSMUSG00000024313	Mep1b	Mep-1b	meprin 1 beta	protein-coding
280	chr10	79711523	79765878	+	0	NA	intron (NM_001122605, intron 4 of 11)	B1_Mus2|SINE|Alu	-2209	NR_105876	102466207		NR_105876		Mir6911	mmu-mir-6911	microRNA mir-6911	ncRNA
957	chr15	38591075	38592394	+	0	NA	promoter-TSS (NM_025494)	promoter-TSS (NM_025494)	75	NM_025494	66335	Mm.276618	NM_025494	ENSMUSG00000022295	Atp6v1c1	1700025B18Rik|U13839	ATPase, H+ transporting, lysosomal V1 subunit C1	protein-coding
273	chr10	75494563	75496215	+	0	NA	promoter-TSS (NM_177475)	promoter-TSS (NM_177475)	32	NM_177475	64453	Mm.80609	NM_177475	ENSMUSG00000049764	Zfp280b	D10Jhu82e|Suhw2	zinc finger protein 280B	protein-coding
2430	chr7	86610248	86612207	+	0	NA	promoter-TSS (NM_017462)	promoter-TSS (NM_017462)	-68	NM_017462	18975	Mm.3616	NM_017462	ENSMUSG00000039176	Polg	AA409516|PolgA	polymerase (DNA directed), gamma	protein-coding
471	chr11	82593794	82595752	+	0	NA	5' UTR (NM_010716, exon 1 of 20)	5' UTR (NM_010716, exon 1 of 20)	162	NM_010716	16882	Mm.277136	NM_010716	ENSMUSG00000020697	Lig3	D11Wsu78e	ligase III, DNA, ATP-dependent	protein-coding
2596	chr8	85855804	85857134	+	0	NA	promoter-TSS (NM_001170691)	promoter-TSS (NM_001170691)	-84	NM_178736	244548	Mm.38762	NM_178736	ENSMUSG00000035151	Elmod2	9830169G11Rik	ELMO/CED-12 domain containing 2	protein-coding
1503	chr2	38498724	38499914	+	0	NA	intron (NM_011187, intron 1 of 7)	CpG	107	NM_011187	19177	Mm.389251	NM_011187	ENSMUSG00000026750	Psmb7	AU020723|MC14	proteasome (prosome, macropain) subunit, beta type 7	protein-coding
2262	chr6	88791274	88792971	+	0	NA	promoter-TSS (NR_045880)	promoter-TSS (NR_045880)	-193	NM_030251	80283	Mm.166858	NM_030251	ENSMUSG00000030083	Abtb1	AI847549|BC003234|BPOZ|EF1ABP	ankyrin repeat and BTB (POZ) domain containing 1	protein-coding
1509	chr2	52600583	52601930	+	0	NA	promoter-TSS (NM_019667)	promoter-TSS (NM_019667)	-73	NM_019667	56324	Mm.263639	NM_019667	ENSMUSG00000055371	Stam2	1200004O12Rik|5730456G07Rik|BB145015|Hbp	signal transducing adaptor molecule (SH3 domain and ITAM motif) 2	protein-coding
1936	chr4	117459514	117461874	+	0	NA	Intergenic	Intergenic	-22423	NM_029416	75753	Mm.3848	NM_029416		Klf17	7420700M05Rik|AA420409|AU043468|C85123|D4Ertd561e|Gzf|Zfp393	Kruppel-like factor 17	protein-coding
1325	chr18	33621901	33625051	+	0	NA	promoter-TSS (NR_045415)	promoter-TSS (NR_045415)	-123	NM_001109989	27528	Mm.407415	NM_053078	ENSMUSG00000042834	Nrep	AI325076|D0H4S114|Harp|P311|PTZ17|SEZ17	neuronal regeneration related protein	protein-coding
2512	chr7	148594757	148667211	+	0	NA	Intergenic	Intergenic	-1730	NM_022654	57913	Mm.334321	NM_022654	ENSMUSG00000025507	Pidd1	1200011D09Rik|AU042446|Lrdd|Pidd	p53 induced death domain protein 1	protein-coding
1643	chr2	174241182	174241899	+	0	NA	intron (NM_020580, intron 1 of 14)	CpG	235	NM_020580	57314	Mm.271709	NM_020580	ENSMUSG00000016253	Nelfcd	2410003I03Rik|C77797|Th1|Th1l	negative elongation factor complex member C/D, Th1l	protein-coding
131	chr1	140824460	140826217	+	0	NA	Intergenic	LTR33|LTR|ERVL	-34948	NM_001166501	329260	Mm.337604	NM_181347	ENSMUSG00000056268	Dennd1b	4632404N19Rik|4930467M19Rik|6820401H01Rik|F730008N07Rik	DENN/MADD domain containing 1B	protein-coding
1565	chr2	121234165	121242426	+	0	NA	intron (NM_153075, intron 1 of 12)	B1_Mus1|SINE|Alu	1233	NM_153075	212670	Mm.384318	NM_153075	ENSMUSG00000033486	Catsper2	-	cation channel, sperm associated 2	protein-coding
502	chr11	97744565	97746234	+	0	NA	promoter-TSS (NM_001081435)	promoter-TSS (NM_001081435)	69	NM_001081435	72973	Mm.245939	NM_001081435		Fbxo47	2900052P03Rik|Gm1562	F-box protein 47	protein-coding
1286	chr17	88839493	88842752	+	0	NA	intron (NM_180974, intron 1 of 5)	CpG	1070	NM_180974	14236	Mm.112824	NM_180974	ENSMUSG00000034998	Foxn2	3230402J05Rik|6030465J18Rik|Fkh19|Foxn1|HTLF	forkhead box N2	protein-coding
314	chr10	93051797	93052462	+	0	NA	promoter-TSS (NR_045810)	promoter-TSS (NR_045810)	-29	NR_045810	74454	Mm.410794	NR_045810	ENSMUSG00000097407	4933408J17Rik	-	RIKEN cDNA 4933408J17 gene	ncRNA
1796	chr3	136330573	136335881	+	0	NA	5' UTR (NM_001293622, exon 1 of 13)	5' UTR (NM_001293622, exon 1 of 13)	197	NM_001293622	19055	Mm.331389	NM_008913	ENSMUSG00000028161	Ppp3ca	2900074D19Rik|CN|Caln|Calna|CnA	protein phosphatase 3, catalytic subunit, alpha isoform	protein-coding
1502	chr2	38141106	38143330	+	0	NA	intron (NM_146122, intron 1 of 21)	intron (NM_146122, intron 1 of 21)	686	NM_146122	227801	Mm.314245	NM_146122	ENSMUSG00000035392	Dennd1a	6030446I19Rik|connecdenn	DENN/MADD domain containing 1A	protein-coding
2638	chr8	113668830	113670059	+	0	NA	promoter-TSS (NR_040364)	promoter-TSS (NR_040364)	-46	NR_040364	434350	Mm.442061	NR_040363		9430091E24Rik	-	RIKEN cDNA 9430091E24 gene	ncRNA
1872	chr4	49486350	49534713	+	0	NA	intron (NM_007519, intron 3 of 3)	MERVL-int|LTR|ERVL	8899	NM_007519	12012	Mm.2859	NM_007519	ENSMUSG00000039653	Baat	AI118337|AI158864|BAT	bile acid-Coenzyme A: amino acid N-acyltransferase	protein-coding
355	chr10	128375091	128376624	+	0	NA	intron (NM_008398, intron 1 of 24)	intron (NM_008398, intron 1 of 24)	4988	NM_008398	16404	Mm.179747	NM_008398	ENSMUSG00000025348	Itga7	[a]7|alpha7	integrin alpha 7	protein-coding
553	chr12	9036653	9038502	+	0	NA	intron (NM_029321, intron 1 of 2)	intron (NM_029321, intron 1 of 2)	774	NM_029321	75516	Mm.37581	NM_029321	ENSMUSG00000066637	Ttc32	1700013G20Rik	tetratricopeptide repeat domain 32	protein-coding
2058	chr5	66151975	66157032	+	0	NA	promoter-TSS (NM_001024917)	promoter-TSS (NM_001024917)	-257	NM_001024917	333789	Mm.332398	NM_001024917	ENSMUSG00000037795	N4bp2	B3bp|E430014I16|Gm1791|Gm868	NEDD4 binding protein 2	protein-coding
1252	chr17	56301309	56360152	+	0	NA	intron (NM_172624, intron 15 of 20)	intron (NM_172624, intron 15 of 20)	-7387	NM_080837	28106	Mm.294870	NM_080837		D17Wsu104e	Il25|Ly6elg	DNA segment, Chr 17, Wayne State University 104, expressed	protein-coding
2643	chr8	114534796	114536090	+	0	NA	promoter-TSS (NM_001130868)	promoter-TSS (NM_001130868)	184	NM_020584	57321	Mm.213064	NM_020584	ENSMUSG00000033430	Terf2ip	Rap1	telomeric repeat binding factor 2, interacting protein	protein-coding
555	chr12	11272420	11274232	+	0	NA	promoter-TSS (NM_177331)	promoter-TSS (NM_177331)	634	NM_025695	67241	Mm.173953	NM_025695	ENSMUSG00000020608	Smc6	2810489L22Rik|3830418C19Rik|AA990493|AU018782|AW742439|SMC-6|Smc6l1|mKIAA4103	structural maintenance of chromosomes 6	protein-coding
1037	chr15	99800909	99807345	+	0	NA	promoter-TSS (NR_028124)	promoter-TSS (NR_028124)	-409	NR_028124	70281	Mm.484037	NR_028124		2310068J16Rik	-	RIKEN cDNA 2310068J16 gene	ncRNA
2513	chr7	149087681	149088841	+	0	NA	promoter-TSS (NM_023764)	promoter-TSS (NM_023764)	50	NM_023764	54473	Mm.103551	NM_023764	ENSMUSG00000025139	Tollip	4930403G24Rik|4931428G15Rik	toll interacting protein	protein-coding
37	chr1	46909224	46911895	+	0	NA	promoter-TSS (NM_172653)	promoter-TSS (NM_172653)	-205	NM_172653	227059	Mm.233889	NM_172653	ENSMUSG00000025986	Slc39a10	2900042E17Rik|5430433I10|mKIAA1265	solute carrier family 39 (zinc transporter), member 10	protein-coding
855	chr14	33013574	33015774	+	0	NA	promoter-TSS (NM_011960)	promoter-TSS (NM_011960)	403	NM_016897	53600	Mm.303703	NM_016897	ENSMUSG00000013701	Timm23	Tim23	translocase of inner mitochondrial membrane 23	protein-coding
195	chr1	192751702	192753667	+	0	NA	intron (NR_037579, intron 1 of 7)	CpG	300	NR_037579	52477	Mm.289914	NM_021421	ENSMUSG00000026634	Angel2	2610307I21Rik|5730410O10Rik|AI845692|D1Ertd396e|D1Ertd654e	angel homolog 2 (Drosophila)	protein-coding
2005	chr5	3543749	3544400	+	0	NA	intron (NM_001042501, intron 1 of 10)	CpG	241	NM_001042501	68152	Mm.240265	NM_026583		Fam133b	2900022K02Rik|5830415L20Rik	family with sequence similarity 133, member B	protein-coding
1706	chr3	79431382	79433591	+	0	NA	promoter-TSS (NM_029482)	promoter-TSS (NM_029482)	203	NM_025794	66841	Mm.28336	NM_025794	ENSMUSG00000027809	Etfdh	0610010I20Rik|AV001013	electron transferring flavoprotein, dehydrogenase	protein-coding
2828	chrX	13422889	13424786	+	0	NA	promoter-TSS (NM_009806)	promoter-TSS (NM_009806)	-155	NM_009806	12361	Mm.327591	NM_009806	ENSMUSG00000031012	Cask	DXPri1|DXRib1|LIN-2|Pals3|mLin-2	calcium/calmodulin-dependent serine protein kinase (MAGUK family)	protein-coding
1839	chr4	34725249	34725775	+	0	NA	promoter-TSS (NM_025471)	promoter-TSS (NM_025471)	74	NM_025471	66291	Mm.28071	NM_025471	ENSMUSG00000028295	Smim8	1810030N24Rik|2810406B13Rik	small integral membrane protein 8	protein-coding
1788	chr3	130432453	130433842	+	0	NA	promoter-TSS (NM_001199350)	promoter-TSS (NM_001199350)	100	NM_001199350	619547	Mm.391636	NM_001199350		Rpl34-ps1	EG619547|ENSMUSG00000068396|Gm10239	ribosomal protein L34, pseudogene 1	protein-coding
2186	chr6	17643599	17645184	+	0	NA	intron (NM_001289625, intron 1 of 15)	CpG	397	NM_001289625	64213	Mm.12051	NM_022332	ENSMUSG00000029534	St7	9430001H04Rik|Fam4a2|HELG|RAY1|SEN4|TSG7	suppression of tumorigenicity 7	protein-coding
679	chr13	23956114	23962832	+	0	NA	Intergenic	Intergenic	-1414	NR_121611	20504	Mm.2656	NM_009198	ENSMUSG00000021335	Slc17a1	NAPI-1|Napi1|Npt1	solute carrier family 17 (sodium phosphate), member 1	protein-coding
680	chr13	24005156	24007518	+	0	NA	intron (NM_177016, intron 1 of 11)	(GTTTG)n|Simple_repeat|Simple_repeat	539	NM_177016	319848	Mm.97959	NM_177016	ENSMUSG00000021336	Slc17a4	9130214H05Rik	solute carrier family 17 (sodium phosphate), member 4	protein-coding
831	chr14	18615590	18619596	+	0	NA	intron (NM_001113417, intron 1 of 9)	AT_rich|Low_complexity|Low_complexity	124119	NM_001113417	21834	Mm.32563	NM_009380	ENSMUSG00000021779	Thrb	Nr1a2|T3R[b]|T3Rbeta|Thrb1|Thrb2|c-erbAbeta	thyroid hormone receptor beta	protein-coding
1147	chr16	94591167	94593667	+	0	NA	promoter-TSS (NM_001159618)	promoter-TSS (NM_001159618)	71	NM_009441	22129	Mm.213408	NM_009441	ENSMUSG00000040785	Ttc3	2610202A04Rik|AA409221|D16Ium21|D16Ium21e|TPRD|mKIAA4119	tetratricopeptide repeat domain 3	protein-coding
1960	chr4	132439439	132440969	+	0	NA	exon (NM_133887, exon 1 of 9)	exon (NM_133887, exon 1 of 9)	169	NM_133887	100226	Mm.28237	NM_133887		Stx12	AI850350|AU041521|Stx13	syntaxin 12	protein-coding
2355	chr7	20189314	20190156	+	0	NA	promoter-TSS (NM_016680)	promoter-TSS (NM_016680)	82	NM_016680	53609	Mm.20913	NM_016680	ENSMUSG00000061028	Clasrp	Clasp|Sfrs16|Srsf16|Swap2	CLK4-associating serine/arginine rich protein	protein-coding
1241	chr17	47129904	47148162	+	0	NA	intron (NM_146078, intron 1 of 46)	B1_Mus1|SINE|Alu	8448	NM_146078	224826	Mm.28234	NM_146078	ENSMUSG00000023977	Ubr2	9930021A08Rik|AI462103|AW540746|E130209G04Rik|mKIAA0349	ubiquitin protein ligase E3 component n-recognin 2	protein-coding
2783	chr9	105396664	105398379	+	0	NA	promoter-TSS (NM_001253836)	promoter-TSS (NM_001253836)	-58	NM_001253836	235574	Mm.326247	NM_175025	ENSMUSG00000032570	Atp2c1	1700121J11Rik|ATP2C1A|AW061228|BCPM|D930003G21Rik|HHD|SPCA|pmr1	ATPase, Ca++-sequestering	protein-coding
1441	chr19	47321991	47323670	+	0	NA	intron (NM_021360, intron 3 of 5)	intron (NM_021360, intron 3 of 5)	19497	NM_001163480	18011	Mm.313651	NM_021360	ENSMUSG00000006435	Neurl1a	2410129E16Rik|AI450910|AI481072|Neu1|Neur1|Neurl|Neurl1|Nlz|Rnf67	neuralized homolog 1A (Drosophila)	protein-coding
647	chr12	110030089	110034110	+	0	NA	exon (NM_009537, exon 1 of 5)	exon (NM_009537, exon 1 of 5)	578	NM_009537	22632	Mm.3868	NM_009537	ENSMUSG00000021264	Yy1	AW488674|NF-E1	YY1 transcription factor	protein-coding
1206	chr17	30140639	30148020	+	0	NA	intron (NM_148926, intron 1 of 4)	intron (NM_148926, intron 1 of 4)	2297	NM_148926	21769	Mm.220972	NM_148926	ENSMUSG00000044477	Zfand3	AW539211|TEG-27|Tex27	zinc finger, AN1-type domain 3	protein-coding
334	chr10	117099314	117107439	+	0	NA	intron (NM_027468, intron 3 of 8)	intron (NM_027468, intron 3 of 8)	36820	NM_027468	70574	Mm.339332	NM_027468	ENSMUSG00000020183	Cpm	1110060I01Rik|5730456K23Rik|AA589379|E030045M14Rik	carboxypeptidase M	protein-coding
2292	chr6	119688369	119689768	+	0	NA	intron (NM_053204, intron 13 of 20)	MTD|LTR|MaLR	109100	NM_053204	111173	Mm.288860	NM_053204	ENSMUSG00000030172	Erc1	4930404L01Rik|5033405M01Rik|9630025C19Rik|B430107L16Rik|CAST2|ELKS|RAB6IP2A|RAB6IP2B|Rab6ip2|mKIAA1081	ELKS/RAB6-interacting/CAST family member 1	protein-coding
1997	chr4	154252065	154252724	+	0	NA	intron (NM_013783, intron 2 of 23)	B4|SINE|B4	8700	NM_013783	27390	Mm.116944	NM_013783	ENSMUSG00000058183	Mmel1	Mell1|NEP2|NEPII|Nl1|SEP	membrane metallo-endopeptidase-like 1	protein-coding
1027	chr15	96831064	96881836	+	0	NA	intron (NM_027052, intron 1 of 15)	intron (NM_027052, intron 1 of 15)	29937	NM_027052	69354	Mm.250980	NM_027052	ENSMUSG00000022464	Slc38a4	1110012E16Rik|1700012A18Rik|Ata3|mATA3|mNAT3	solute carrier family 38, member 4	protein-coding
1680	chr3	40548541	40550450	+	0	NA	promoter-TSS (NM_011020)	promoter-TSS (NM_011020)	-40	NM_011020	18415	Mm.39330	NM_011020		Hspa4l	94kDa|AI461691|APG-1|Osp94	heat shock protein 4 like	protein-coding
423	chr11	58660613	58661104	+	0	NA	Intergenic	CpG	6240	NM_146537	258530	Mm.377556	NM_146537	ENSMUSG00000094805	Olfr311	MOR222-1	olfactory receptor 311	protein-coding
1953	chr4	128865602	128869307	+	0	NA	promoter-TSS (NM_029036)	promoter-TSS (NM_029036)	415	NM_134151	107271	Mm.145488	NM_134151	ENSMUSG00000028811	Yars	AL024047|AU018965	tyrosyl-tRNA synthetase	protein-coding
1139	chr16	90280481	90285473	+	0	NA	intron (NM_178923, intron 1 of 19)	B1_Mus1|SINE|Alu	1693	NM_178923	224432	Mm.439811	NM_178923	ENSMUSG00000022983	Scaf4	AA517739|Sfrs15|Sra4|Srsf15	SR-related CTD-associated factor 4	protein-coding
2757	chr9	78324280	78337383	+	0	NA	Intergenic	Intergenic	-1300	NM_010106	13627	Mm.138471	NM_010106	ENSMUSG00000037742	Eef1a1	-	eukaryotic translation elongation factor 1 alpha 1	protein-coding
1319	chr18	24112521	24113829	+	0	NA	promoter-TSS (NM_027007)	promoter-TSS (NM_027007)	-14	NM_027007	69256	Mm.218343	NM_027007	ENSMUSG00000024276	Zfp397	2810411K16Rik|6720480F11Rik|AI461664	zinc finger protein 397	protein-coding
1826	chr4	14790710	14792743	+	0	NA	intron (NM_028264, intron 1 of 6)	intron (NM_028264, intron 1 of 6)	360	NM_028264	72519	Mm.279158	NM_028264	ENSMUSG00000028221	Tmem55a	2610319K07Rik|AI315591|AV001360	transmembrane protein 55A	protein-coding
2454	chr7	107269299	107270683	+	0	NA	promoter-TSS (NM_133692)	promoter-TSS (NM_133692)	19	NM_133692	67967	Mm.37562	NM_133692	ENSMUSG00000030726	Pold3	2410142G14Rik|C85233|P66|P68	polymerase (DNA-directed), delta 3, accessory subunit	protein-coding
2077	chr5	89873229	89898136	+	0	NA	intron (NM_008096, intron 1 of 12)	intron (NM_008096, intron 1 of 12)	1241	NM_008096	14473	Mm.196595	NM_008096	ENSMUSG00000035540	Gc	DBP|VDB	group specific component	protein-coding
1222	chr17	33979815	33981087	+	0	NA	intron (NM_019421, intron 1 of 4)	intron (NM_019421, intron 1 of 4)	415	NM_019421	54219	Mm.11175	NM_019421	ENSMUSG00000002308	Cd320	425O18-1|8D6|CD320-002|D17Ertd716e|NG29|VLDL	CD320 antigen	protein-coding
2036	chr5	34124695	34125899	+	0	NA	promoter-TSS (NM_019694)	promoter-TSS (NM_019694)	56	NM_019694	56384	Mm.260538	NM_019694		Letm1	-	leucine zipper-EF-hand containing transmembrane protein 1	protein-coding
1747	chr3	101303182	101334070	+	0	NA	Intergenic	Intergenic	90004	NM_144900	11928	Mm.280103	NM_144900	ENSMUSG00000033161	Atp1a1	Atpa-1|BC010319	ATPase, Na+/K+ transporting, alpha 1 polypeptide	protein-coding
174	chr1	177810557	177811057	+	0	NA	promoter-TSS (NM_012012)	promoter-TSS (NM_012012)	-102	NM_012012	26909	Mm.283046	NM_012012	ENSMUSG00000039748	Exo1	5730442G03Rik|Msa	exonuclease 1	protein-coding
820	chr13	115469306	115474201	+	0	NA	intron (NR_045976, intron 3 of 6)	intron (NR_045976, intron 3 of 6)	74317	NR_045976	75161	Mm.50406	NM_175218	ENSMUSG00000051758	4930544M13Rik	-	RIKEN cDNA 4930544M13 gene	ncRNA
1799	chr3	138021268	138045383	+	0	NA	Intergenic	Intergenic	-3760	NR_033581	639769	Mm.484043	NR_033581	ENSMUSG00000090306	Adh6-ps1	1300002P07Rik|Adh5ps|Gm7277	alcohol dehydrogenase 6 (class V), pseudogene 1	pseudo
1571	chr2	122059526	122072030	+	0	NA	intron (NM_146126, intron 1 of 8)	intron (NM_146126, intron 1 of 8)	5203	NM_146126	20322	Mm.371580	NM_146126	ENSMUSG00000027227	Sord	Sdh-1|Sdh1|Sodh-1	sorbitol dehydrogenase	protein-coding
422	chr11	57905544	57919200	+	0	NA	Intergenic	Intergenic	-5283	NM_026949	69125	Mm.28910	NM_026949	ENSMUSG00000020515	Cnot8	1500015I04Rik|1810022F04Rik|AA536816|AU015770|AU043059	CCR4-NOT transcription complex, subunit 8	protein-coding
905	chr14	70891247	70920695	+	0	NA	intron (NR_033241, intron 6 of 19)	intron (NR_033241, intron 6 of 19)	14096	NM_009755	12153	Mm.27757	NM_009755	ENSMUSG00000022098	Bmp1	Pcp|Tld	bone morphogenetic protein 1	protein-coding
1552	chr2	114479688	114481185	+	0	NA	intron (NM_025675, intron 1 of 8)	CpG	228	NM_025675	66632	Mm.117809	NM_025675	ENSMUSG00000057147	Dph6	5730421E18Rik|Atpbd4	diphthamine biosynthesis 6	protein-coding
1194	chr17	24806107	24809828	+	0	NA	intron (NM_183149, intron 1 of 11)	B1_Mur4|SINE|Alu	1270	NM_183149	213753	Mm.219581	NM_183149	ENSMUSG00000041130	Zfp598	BC023040|Ntrap|Znf598	zinc finger protein 598	protein-coding
41	chr1	53409083	53409654	+	0	NA	intron (NM_001290984, intron 1 of 5)	CpG	228	NM_001290984	70396	Mm.285783	NM_133728	ENSMUSG00000026095	Asnsd1	2210409M21Rik	asparagine synthetase domain containing 1	protein-coding
52	chr1	60154262	60155963	+	0	NA	promoter-TSS (NM_139150)	promoter-TSS (NM_139150)	21	NM_139150	241066	Mm.276441	NM_139150	ENSMUSG00000026017	Carf	Als2cr8|ECBRC-FC1|ECBRC-FC2	calcium response factor	protein-coding
1451	chr19	55815086	55820176	+	0	NA	exon (NM_001142919, exon 3 of 14)	exon (NM_001142919, exon 3 of 14)	1331	NM_001142923	21416	Mm.139815	NM_009333	ENSMUSG00000024985	Tcf7l2	TCF4B|TCF4E|Tcf-4|Tcf4|mTcf-4B|mTcf-4E	transcription factor 7 like 2, T cell specific, HMG box	protein-coding
302	chr10	85379100	85379976	+	0	NA	intron (NM_181650, intron 1 of 11)	CpG-1415	152	NM_181650	72843	Mm.25307	NM_181650	ENSMUSG00000035529	Prdm4	1700031E19Rik|2810470D21Rik|AW552272|SC-1	PR domain containing 4	protein-coding
1453	chr19	57429550	57453295	+	0	NA	intron (NM_145505, intron 1 of 16)	(CA)n|Simple_repeat|Simple_repeat	5923	NM_145505	226252	Mm.358870	NM_145505	ENSMUSG00000033478	Fam160b1	AI450540|mKIAA1600	family with sequence similarity 160, member B1	protein-coding
866	chr14	49683522	49686761	+	0	NA	intron (NM_207214, intron 1 of 17)	intron (NM_207214, intron 1 of 17)	-1029	NM_144535	74385	Mm.379235	NM_144535	ENSMUSG00000036291	Ap5m1	4932432K03Rik|Mu5|Mudeng	adaptor-related protein complex 5, mu 1 subunit	protein-coding
2452	chr7	107092809	107130019	+	0	NA	intron (NM_175388, intron 1 of 5)	intron (NM_175388, intron 1 of 5)	17554	NM_175388	108937	Mm.323087	NM_175388	ENSMUSG00000058761	Rnf169	2900057K09Rik	ring finger protein 169	protein-coding
2223	chr6	49023368	49024529	+	0	NA	exon (NM_029353, exon 1 of 4)	exon (NM_029353, exon 1 of 4)	154	NM_029353	75593	Mm.439947	NM_029353	ENSMUSG00000029815	Malsu1	2410003K15Rik|Matsu1	mitochondrial assembly of ribosomal large subunit 1	protein-coding
593	chr12	71313400	71336456	+	0	NA	intron (NM_133198, intron 1 of 19)	intron (NM_133198, intron 1 of 19)	3742	NM_133198	110095	Mm.256926	NM_133198	ENSMUSG00000021069	Pygl	-	liver glycogen phosphorylase	protein-coding
770	chr13	74754408	74755784	+	0	NA	Intergenic	Intergenic	-22224	NM_030711	80898	Mm.83526	NM_030711	ENSMUSG00000021583	Erap1	Arts1|ERAAP|PILSA|PILSAP	endoplasmic reticulum aminopeptidase 1	protein-coding
188	chr1	184492351	184495154	+	0	NA	Intergenic	Intergenic	-1386	NM_001145806	170725	Mm.189201	NM_130890	ENSMUSG00000038599	Capn8	nCL-2|nCL-2'	calpain 8	protein-coding
402	chr11	44283126	44285202	+	0	NA	promoter-TSS (NM_024475)	promoter-TSS (NM_024475)	-114	NM_024475	79560	Mm.338784	NM_024475	ENSMUSG00000041231	Ublcp1	4930527B16Rik|8430435I17Rik|BC002236	ubiquitin-like domain containing CTD phosphatase 1	protein-coding
1940	chr4	118028533	118037815	+	0	NA	intron (NM_026601, intron 2 of 7)	intron (NM_026601, intron 2 of 7)	570	NR_003946	68180	Mm.193212	NM_026601	ENSMUSG00000006395	Hyi	2700033B16Rik|6430559E15Rik|HT036	hydroxypyruvate isomerase homolog (E. coli)	protein-coding
1097	chr16	24391331	24405390	+	0	NA	intron (NM_178665, intron 1 of 12)	intron (NM_178665, intron 1 of 12)	-4619	NR_037954	68841	Mm.361995	NR_037954		1110054M08Rik	AI481106	RIKEN cDNA 1110054M08 gene	ncRNA
641	chr12	105129300	105153816	+	0	NA	intron (NM_009245, intron 1 of 4)	intron (NM_009245, intron 1 of 4)	1602	NM_009245	20702	Mm.439692	NM_009245	ENSMUSG00000079015	Serpina1c	Pi3|Pi6|Skalp|Spi1-3|Spi1-6|Wap3	serine (or cysteine) peptidase inhibitor, clade A, member 1C	protein-coding
1641	chr2	173801365	173803826	+	0	NA	Intergenic	Intergenic	-99957	NM_172675	228960	Mm.277977	NM_172675	ENSMUSG00000027522	Stx16	4930401D03|5430410K23Rik|6330500A18Rik|AI648908|AW553605|Syn16	syntaxin 16	protein-coding
838	chr14	21870319	21947598	+	0	NA	intron (NM_001243041, intron 1 of 10)	B2_Mm1t|SINE|B2	13584	NM_001243041	11534	Mm.188734	NM_134079	ENSMUSG00000039197	Adk	2310026J05Rik|5033405D03Rik|AI255373|AI987814|Ak	adenosine kinase	protein-coding
2664	chr8	127472197	127474374	+	0	NA	promoter-TSS (NM_053207)	promoter-TSS (NM_053207)	-131	NM_053207	112405	Mm.140619	NM_053207	ENSMUSG00000031987	Egln1	AI503754|C1orf12|HIF-PH2|HPH-2|Hif-p4h-2|ORF13|Phd2|SM-20	egl-9 family hypoxia-inducible factor 1	protein-coding
616	chr12	82584794	82586371	+	0	NA	intron (NM_025461, intron 1 of 3)	intron (NM_025461, intron 1 of 3)	515	NM_025461	66272	Mm.439970	NM_025461	ENSMUSG00000091803	Cox16	1810020G14Rik|1810055I05Rik|BB388670	cytochrome c oxidase assembly protein 16	protein-coding
640	chr12	105089249	105105735	+	0	NA	intron (NM_009243, intron 1 of 4)	(GGA)n|Simple_repeat|Simple_repeat	4337	NM_001252569	20700	Mm.439692	NM_009243	ENSMUSG00000066366	Serpina1a	Aat-2|Aat2|Dom1|PI1|Spi1-1|Spi1-3	serine (or cysteine) peptidase inhibitor, clade A, member 1A	protein-coding
1121	chr16	44165003	44176539	+	0	NA	Intergenic	Intergenic	-2739	NM_001029889	207806	Mm.310566	NM_001029889	ENSMUSG00000068284	Gm608	5530400K22Rik|Gm1779|mKIAA2018	predicted gene 608	protein-coding
870	chr14	51701258	51726546	+	0	NA	intron (NM_021472, intron 1 of 1)	intron (NM_021472, intron 1 of 1)	-1773	NM_007447	11727	Mm.202665	NM_007447	ENSMUSG00000072115	Ang	AI385586|Ang1|Rnase5|Rnase5a	angiogenin, ribonuclease, RNase A family, 5	protein-coding
1384	chr19	4715398	4723007	+	0	NA	intron (NM_021287, intron 2 of 36)	intron (NM_021287, intron 2 of 36)	7979	NM_021287	20743	Mm.329668	NM_021287	ENSMUSG00000067889	Sptbn2	Spnb3|mKIAA0302	spectrin beta, non-erythrocytic 2	protein-coding
896	chr14	66586933	66602387	+	0	NA	exon (NM_013492, exon 5 of 9)	exon (NM_013492, exon 5 of 9)	7340	NM_013492	12759	Mm.200608	NM_013492	ENSMUSG00000022037	Clu	AI893575|ApoJ|Cli|D14Ucla3|SP-40|Sgp-2|Sgp2|Sugp-2	clusterin	protein-coding
1468	chr2	13976468	13978224	+	0	NA	intron (NM_001012396, intron 1 of 5)	CpG	316	NM_001012396	30963	Mm.241205	NM_013935	ENSMUSG00000063275	Ptpla	HACD1	protein tyrosine phosphatase-like (proline instead of catalytic arginine), member a	protein-coding
2068	chr5	77693893	77696266	+	0	NA	intron (NM_011263, intron 1 of 3)	CpG	560	NM_011263	19712	Mm.28840	NM_011263	ENSMUSG00000029249	Rest	2610008J04Rik|AA407358|NRSF	RE1-silencing transcription factor	protein-coding
1726	chr3	89882960	89890510	+	0	NA	intron (NM_001293749, intron 1 of 7)	intron (NM_001293749, intron 1 of 7)	3292	NM_001293749	59069	Mm.240839	NM_022314	ENSMUSG00000027940	Tpm3	TM30nm|TMnm|Tm5NM|Tpm-5|Tpm5|Trop-5|gamma-TM|hTM30nm|hTMnm	tropomyosin 3, gamma	protein-coding
1464	chr2	5815959	5816702	+	0	NA	promoter-TSS (NM_021305)	promoter-TSS (NM_021305)	69	NM_021305	57743	Mm.21435	NM_021305	ENSMUSG00000025816	Sec61a2	-	Sec61, alpha subunit 2 (S. cerevisiae)	protein-coding
2165	chr5	147759638	147760901	+	0	NA	promoter-TSS (NM_025652)	promoter-TSS (NM_025652)	36	NM_025652	66596	Mm.196528	NM_025652	ENSMUSG00000016503	Gtf3a	2010015D03Rik|2610111I01Rik|5330403M05Rik	general transcription factor III A	protein-coding
2347	chr7	16683073	16685098	+	0	NA	promoter-TSS (NM_025898)	promoter-TSS (NM_025898)	93	NM_025898	108124	Mm.104540	NM_025898	ENSMUSG00000006024	Napa	1500039N14Rik|AW209189|RA81|SNAPA|SNARE|a-SNAP|hyh	N-ethylmaleimide sensitive fusion protein attachment protein alpha	protein-coding
1494	chr2	31427396	31428796	+	0	NA	promoter-TSS (NM_001290548)	promoter-TSS (NM_001290548)	-75	NM_001033389	320267	Mm.207261	NM_001033389	ENSMUSG00000026843	Fubp3	A330051M14Rik|AV006371|FBP3|Marta2	far upstream element (FUSE) binding protein 3	protein-coding
777	chr13	76235403	76236779	+	0	NA	promoter-TSS (NM_029847)	promoter-TSS (NM_029847)	17	NM_029847	77041	Mm.196399	NM_029847	ENSMUSG00000021592	Arsk	2810429K17Rik|4833414G15Rik	arylsulfatase K	protein-coding
2018	chr5	23987416	23991349	+	0	NA	TTS (NM_001256431)	TTS (NM_001256431)	31387	NM_001256431	213990	Mm.250703	NM_139153	ENSMUSG00000023353	Agap3	AGAP-3|AV028425|Centg3|Crag|Crag.|MRIP-1|cnt-g3	ArfGAP with GTPase domain, ankyrin repeat and PH domain 3	protein-coding
1906	chr4	98588802	98592166	+	0	NA	promoter-TSS (NM_146144)	promoter-TSS (NM_146144)	-17	NM_146144	230484	Mm.371692	NM_146144	ENSMUSG00000028560	Usp1	-	ubiquitin specific peptidase 1	protein-coding
2786	chr9	106163646	106183886	+	0	NA	Intergenic	(CAAAA)n|Simple_repeat|Simple_repeat	-9626	NM_027354	70235	Mm.23054	NM_027354	ENSMUSG00000023345	Poc1a	2510040D07Rik|Wdr51a	POC1 centriolar protein homolog A (Chlamydomonas)	protein-coding
464	chr11	77794775	77799101	+	0	NA	intron (NM_174852, intron 1 of 14)	intron (NM_174852, intron 1 of 14)	620	NM_174852	268448	Mm.274329	NM_174852	ENSMUSG00000037791	Phf12	2410142K10Rik|F630045O13|PF1|mKIAA1523	PHD finger protein 12	protein-coding
1672	chr3	32409017	32410671	+	0	NA	intron (NM_144519, intron 1 of 6)	intron (NM_144519, intron 1 of 6)	330	NM_144519	67778	Mm.285620	NM_144519		Zfp639	6230400O18Rik|ANC-2H01|ZASC1|Znf639	zinc finger protein 639	protein-coding
2325	chr6	145657944	145660152	+	0	NA	Intergenic	RLTR16|LTR|ERVK	94565	NM_009449	22147	Mm.270295	NM_009449	ENSMUSG00000067338	Tuba3b	M[a]7|Tuba7	tubulin, alpha 3B	protein-coding
1685	chr3	51719636	51721945	+	0	NA	intron (NM_001004176, intron 1 of 4)	intron (NM_001004176, intron 1 of 4)	188138	NM_001004176	433586	Mm.234972	NM_001004176	ENSMUSG00000061143	Maml3	AV234550|BC049812|Mam-2|mKIAA1816	mastermind like 3 (Drosophila)	protein-coding
2011	chr5	9261105	9261481	+	0	NA	Intergenic	Intergenic	-4900	NM_172706	231014	Mm.130063	NM_172706	ENSMUSG00000056004	9330182L06Rik	Eig121l	RIKEN cDNA 9330182L06 gene	protein-coding
1891	chr4	80993715	80995651	+	0	NA	intron (NM_010820, intron 20 of 46)	intron (NM_010820, intron 20 of 46)	94026	NM_010820	17475	Mm.153039	NM_010820	ENSMUSG00000028402	Mpdz	AI225843|B930003D11Rik|MUPP1	multiple PDZ domain protein	protein-coding
6	chr1	9787446	9789471	+	0	NA	intron (NM_177547, intron 1 of 16)	CpG	247	NM_177547	170755	Mm.336410	NM_133220	ENSMUSG00000025915	Sgk3	2510015P22Rik|A330005P07Rik|Cisk|fy|fz	serum/glucocorticoid regulated kinase 3	protein-coding
2768	chr9	95854635	95855974	+	0	NA	exon (NM_011916, exon 1 of 42)	exon (NM_011916, exon 1 of 42)	125	NM_011916	24127	Mm.291179	NM_011916	ENSMUSG00000032410	Xrn1	Dhm2|exo|mXrn1	5'-3' exoribonuclease 1	protein-coding
562	chr12	25659461	25660481	+	0	NA	intron (NM_001081378, intron 1 of 31)	CpG	174	NM_001081378	77480	Mm.250641	NM_001081378	ENSMUSG00000036333	Kidins220	3110039L19Rik|AI194387|AI316525|C330002I19Rik|mKIAA1250	kinase D-interacting substrate 220	protein-coding
1304	chr18	10725114	10727120	+	0	NA	5' UTR (NM_144860, exon 1 of 21)	5' UTR (NM_144860, exon 1 of 21)	494	NM_144860	225164	Mm.21500	NM_144860	ENSMUSG00000024294	Mib1	DIP-1|E430019M12Rik|Mib|mKIAA1323	mindbomb homolog 1 (Drosophila)	protein-coding
2327	chr6	146577782	146592178	+	0	NA	Intergenic	Intergenic	-1866	NM_026281	67623	Mm.278037	NM_026281	ENSMUSG00000040234	Tm7sf3	2010003B14Rik|NARP1	transmembrane 7 superfamily member 3	protein-coding
2269	chr6	94762446	94765293	+	0	NA	Intergenic	Charlie2b|DNA|MER1_type	-113730	NM_008377	16206	Mm.245210	NM_008377	ENSMUSG00000030029	Lrig1	D6Bwg0781e|Img|LIG-1	leucine-rich repeats and immunoglobulin-like domains 1	protein-coding
1102	chr16	32246272	32247700	+	0	NA	promoter-TSS (NM_001185162)	promoter-TSS (NM_001185162)	125	NM_173439	268882	Mm.256137	NM_173439	ENSMUSG00000035764	Fbxo45	2610017J04Rik|AI463119|BC026799	F-box protein 45	protein-coding
183	chr1	182741949	182744909	+	0	NA	intron (NM_008210, intron 1 of 3)	CpG	305	NM_008210	15078	Mm.138832	NM_008210	ENSMUSG00000060743	H3f3a	H3.3A	H3 histone, family 3A	protein-coding
2544	chr8	25675511	25687216	+	0	NA	intron (NM_145949, intron 1 of 9)	intron (NM_145949, intron 1 of 9)	5442	NM_145949	209176	Mm.219580	NM_145949	ENSMUSG00000031549	Ido2	AI265623|C230043N17Rik|Ido-2|Indol1	indoleamine 2,3-dioxygenase 2	protein-coding
1478	chr2	22750436	22751673	+	0	NA	promoter-TSS (NM_019501)	promoter-TSS (NM_019501)	12	NM_019501	56075	Mm.249752	NM_019501	ENSMUSG00000026784	Pdss1	2610203G20Rik|2700031G06Rik|TPT|TPT 1|Tprt|mDLP1|mSPS1	prenyl (solanesyl) diphosphate synthase, subunit 1	protein-coding
2541	chr8	20019675	20020535	+	0	NA	intron (NR_028428, intron 1 of 5)	CpG	173	NR_030708	547150	Mm.359054	NR_030708	ENSMUSG00000071796	6820431F20Rik	-	cadherin 11 pseudogene	pseudo
439	chr11	65619588	65621437	+	0	NA	promoter-TSS (NM_026107)	promoter-TSS (NM_026107)	-234	NM_026107	52712	Mm.340052	NM_026107	ENSMUSG00000018347	Zkscan6	1700128E15Rik|D11Ertd714e|KOX11|Zfp535|Znf18	zinc finger with KRAB and SCAN domains 6	protein-coding
362	chr11	3862996	3864518	+	0	NA	promoter-TSS (NM_022889)	promoter-TSS (NM_022889)	-221	NM_022889	64934	Mm.28659	NM_022889	ENSMUSG00000020430	Pes1	-	pescadillo homolog 1, containing BRCT domain (zebrafish)	protein-coding
1379	chr18	85017381	85092459	+	0	NA	Intergenic	Intergenic	34114	NM_025797	109672	Mm.31018	NM_025797		Cyb5a	0610009N12Rik|Cyb5	cytochrome b5 type A (microsomal)	protein-coding
2607	chr8	95848594	95862196	+	0	NA	intron (NM_021456, intron 3 of 13)	intron (NM_021456, intron 3 of 13)	5713	NM_021456	12623	Mm.22720	NM_021456	ENSMUSG00000057074	Ces1g	Ces-1|Ces1|Ses-1	carboxylesterase 1G	protein-coding
1593	chr2	144284648	144285144	+	0	NA	promoter-TSS (NR_033459)	promoter-TSS (NR_033459)	-120	NR_033459	668917	Mm.152805	NR_033459	ENSMUSG00000083674	Zfp133-ps	OTTMUSG00000003825|Zfp133	zinc finger protein 133, pseudogene	pseudo
705	chr13	43266432	43267877	+	0	NA	promoter-TSS (NM_025935)	promoter-TSS (NM_025935)	-284	NM_001252640	67046	Mm.269213	NM_025935	ENSMUSG00000021368	Tbc1d7	2610009C09Rik	TBC1 domain family, member 7	protein-coding
1720	chr3	88487481	88490695	+	0	NA	promoter-TSS (NM_028814)	promoter-TSS (NM_028814)	-628	NM_028814	74200	Mm.251800	NM_028814	ENSMUSG00000028060	2810403A07Rik	A430106P18Rik|AI256352|AI451678|Blom7|Kiaa0907	RIKEN cDNA 2810403A07 gene	protein-coding
2206	chr6	35082892	35084333	+	0	NA	5' UTR (NM_001164414, exon 1 of 11)	5' UTR (NM_001164414, exon 1 of 11)	125	NM_001164412	53621	Mm.214525	NM_016877	ENSMUSG00000038784	Cnot4	Not4|Not4h|Not4hp	CCR4-NOT transcription complex, subunit 4	protein-coding
2496	chr7	135603037	135605703	+	0	NA	intron (NM_009383, intron 1 of 11)	intron (NM_009383, intron 1 of 11)	657	NM_009383	21843	Mm.242072	NM_009383	ENSMUSG00000030846	Tial1	5330433G13Rik|AL033329|TIAR|mTIAR	Tia1 cytotoxic granule-associated RNA binding protein-like 1	protein-coding
2177	chr6	5247083	5248710	+	0	NA	intron (NM_183308, intron 1 of 8)	intron (NM_183308, intron 1 of 8)	477	NM_183308	330260	Mm.126984	NM_183308		Pon2	6330405I24Rik|AI481612	paraoxonase 2	protein-coding
407	chr11	50137531	50140484	+	0	NA	5' UTR (NM_007597, exon 1 of 15)	5' UTR (NM_007597, exon 1 of 15)	168	NM_001110499	12330	Mm.248827	NM_007597	ENSMUSG00000020368	Canx	1110069N15Rik|AI988026|Cnx|D11Ertd153e	calnexin	protein-coding
18	chr1	27939116	27942541	+	0	NA	Intergenic	Intergenic	896269	NM_001013750	210962	Mm.214178	NM_001013750	ENSMUSG00000048411	Gm597	-	predicted gene 597	protein-coding
376	chr11	16487756	16492494	+	0	NA	Intergenic	L1MB3|LINE|L1	-81638	NM_001109971	20335	Mm.325350	NM_011343	ENSMUSG00000078974	Sec61g	-	SEC61, gamma subunit	protein-coding
912	chr14	76548966	76553152	+	0	NA	Intergenic	Lx8|LINE|L1	40361	NM_013745	27275	Mm.21138	NM_013745	ENSMUSG00000022009	Nufip1	Nufip	nuclear fragile X mental retardation protein interacting protein 1	protein-coding
1432	chr19	38470105	38475383	+	0	NA	intron (NM_175507, intron 1 of 2)	B1_Mm|SINE|Alu	2274	NM_175507	240660	Mm.262085	NM_175507	ENSMUSG00000044026	Slc35g1	AA590464|D330039I19Rik|Tmem20	solute carrier family 35, member G1	protein-coding
785	chr13	85427490	85430541	+	0	NA	promoter-TSS (NM_145452)	promoter-TSS (NM_145452)	76	NM_145452	218397	Mm.259653	NM_145452	ENSMUSG00000021549	Rasa1	Gap|RasGAP|Rasa	RAS p21 protein activator 1	protein-coding
1930	chr4	116299454	116300650	+	0	NA	promoter-TSS (NM_001284229)	promoter-TSS (NM_001284229)	50	NM_001081475	50927	Mm.257181	NM_016777	ENSMUSG00000028693	Nasp	5033430J04Rik|AI131596|AI317140|D4Ertd767e|Epcs32|Nasp-T	nuclear autoantigenic sperm protein (histone-binding)	protein-coding
599	chr12	75005213	75010524	+	0	NA	promoter-TSS (NM_010431)	promoter-TSS (NM_010431)	-986	NM_010431	15251	Mm.3879	NM_010431	ENSMUSG00000021109	Hif1a	AA959795|HIF1alpha|MOP1|bHLHe78	hypoxia inducible factor 1, alpha subunit	protein-coding
1393	chr19	5770646	5771774	+	0	NA	intron (NM_023912, intron 1 of 16)	CpG	191	NM_023912	78891	Mm.276063	NM_023912	ENSMUSG00000024941	Scyl1	2810011O19Rik|C85140|Ntkl|mdf|mfd|p105	SCY1-like 1 (S. cerevisiae)	protein-coding
1167	chr17	14336753	14341361	+	0	NA	intron (NM_172826, intron 1 of 3)	intron (NM_172826, intron 1 of 3)	1781	NM_172826	240025	Mm.79993	NM_172826	ENSMUSG00000048826	Dact2	2900084M21Rik|A630024E20|Dpr2|Frd2|dapper2	dapper homolog 2, antagonist of beta-catenin (xenopus)	protein-coding
587	chr12	60140762	60142060	+	0	NA	Intergenic	U2|snRNA|snRNA	21037	NM_030057	78232	Mm.290070	NM_030057	ENSMUSG00000020993	Trappc6b	5830498C14Rik|C79212	trafficking protein particle complex 6B	protein-coding
609	chr12	80272982	80275555	+	0	NA	promoter-TSS (NM_016800)	promoter-TSS (NM_016800)	-823	NM_016800	53612	Mm.265929	NM_016800	ENSMUSG00000021124	Vti1b	AU015348|GES30|MVti1b|SNARE|Vti1-rp1	vesicle transport through interaction with t-SNAREs 1B	protein-coding
1235	chr17	44913570	44914932	+	0	NA	5' UTR (NM_178652, exon 1 of 12)	5' UTR (NM_178652, exon 1 of 12)	131	NM_178652	109115	Mm.431327	NM_178652	ENSMUSG00000038954	Supt3	2310066G22Rik|AI315192|SPT3|SPT3L|Supt3h	suppressor of Ty 3	protein-coding
298	chr10	84347697	84349813	+	0	NA	intron (NM_001024918, intron 15 of 17)	intron (NM_001024918, intron 15 of 17)	-31603	NM_001013441	237422	Mm.18936	NM_183172		Ric8b	BC051080|Ric-8|Ric-8b	resistance to inhibitors of cholinesterase 8 homolog B (C. elegans)	protein-coding
95	chr1	95720835	95722713	+	0	NA	promoter-TSS (NM_178882)	promoter-TSS (NM_178882)	-43	NM_178882	98314	Mm.383401	NM_178882	ENSMUSG00000073609	D2hgdh	AA408776|AA408778|AI325464	D-2-hydroxyglutarate dehydrogenase	protein-coding
923	chr14	119405345	119407673	+	0	NA	exon (NM_001081252, exon 34 of 39)	exon (NM_001081252, exon 34 of 39)	69355	NM_008929	100037258	Mm.12616	NM_008929	ENSMUSG00000022136	Dnajc3	AA408985|AU067833|Dnajc3a|Dnajc3b|Prkri|mp58|p58|p58IPK	DnaJ (Hsp40) homolog, subfamily C, member 3	protein-coding
243	chr10	41522560	41531283	+	0	NA	intron (NM_026643, intron 1 of 10)	intron (NM_026643, intron 1 of 10)	2548	NM_001243075	103268	Mm.338605	NM_026643	ENSMUSG00000019813	Cep57l1	2410017P07Rik|4930484D11Rik|AI607327|cep57R	centrosomal protein 57-like 1	protein-coding
2051	chr5	52580905	52582548	+	0	NA	promoter-TSS (NR_104311)	promoter-TSS (NR_104311)	59	NM_001042620	13204	Mm.993	NM_007839	ENSMUSG00000029169	Dhx15	DBP1|DEAH9|Ddx15|HRH2|mDEAH9	DEAH (Asp-Glu-Ala-His) box polypeptide 15	protein-coding
2682	chr9	21349945	21352290	+	0	NA	promoter-TSS (NM_021531)	promoter-TSS (NM_021531)	-221	NM_021531	59035	Mm.178115	NM_021531	ENSMUSG00000032185	Carm1	Prmt4	coactivator-associated arginine methyltransferase 1	protein-coding
148	chr1	159183573	159187065	+	0	NA	intron (NM_177644, intron 3 of 17)	intron (NM_177644, intron 3 of 17)	-146543	NM_028540	73435	Mm.116705	NM_028540	ENSMUSG00000026592	Tex35	1700057K13Rik	testis expressed 35	protein-coding
753	chr13	67369549	67370549	+	0	NA	promoter-TSS (NM_001001152)	promoter-TSS (NM_001001152)	-45	NM_001001152	238690	Mm.306358	NM_001001152	ENSMUSG00000055480	Zfp458	BC062958|Rslcan-7|Znf728|mszf59-2	zinc finger protein 458	protein-coding
1343	chr18	45717651	45737453	+	0	NA	intron (NM_080465, intron 2 of 7)	intron (NM_080465, intron 2 of 7)	7744	NM_080465	140492	Mm.458654	NM_080465	ENSMUSG00000054477	Kcnn2	KCa2.2|SK2|SKCA2|fri	potassium intermediate/small conductance calcium-activated channel, subfamily N, member 2	protein-coding
2489	chr7	134757514	134759405	+	0	NA	promoter-TSS (NM_177226)	promoter-TSS (NM_177226)	-512	NM_177226	320683	Mm.156718	NM_177226	ENSMUSG00000045639	Zfp629	9330199A09Rik|Znf629	zinc finger protein 629	protein-coding
2655	chr8	125585467	125590320	+	0	NA	Intergenic	PB1D9|SINE|Alu	-1515	NM_153176	234847	Mm.292075	NM_153176	ENSMUSG00000000738	Spg7	AI452278|AU015315|Cmar|PGN	spastic paraplegia 7 homolog (human)	protein-coding
2404	chr7	53151999	53153652	+	0	NA	promoter-TSS (NM_021482)	promoter-TSS (NM_021482)	386	NM_144801	70209	Mm.163766	NM_144801	ENSMUSG00000002781	Tmem143	2310076O21Rik|AI481604	transmembrane protein 143	protein-coding
726	chr13	54569822	54570775	+	0	NA	promoter-TSS (NM_028597)	promoter-TSS (NM_028597)	-97	NM_028597	73666	Mm.292487	NM_028597	ENSMUSG00000025872	Thoc3	2410044K02Rik|AL033344	THO complex 3	protein-coding
2509	chr7	148226713	148239347	+	0	NA	Intergenic	Intergenic	-14143	NM_177897	330671	Mm.133741	NM_177897	ENSMUSG00000055629	B4galnt4	BC038881|Gm1095|beta4GalNAcT4	beta-1,4-N-acetyl-galactosaminyl transferase 4	protein-coding
2703	chr9	42052190	42102211	+	0	NA	Intergenic	Lx8|LINE|L1	-4817	NM_172769	235293	Mm.32700	NM_172769	ENSMUSG00000032018	Sc5d	A830037K02|A830073K23Rik|Sc5dl	sterol-C5-desaturase (fungal ERG3, delta-5-desaturase) homolog (S. cerevisae)	protein-coding
2171	chr5	151239006	151240192	+	0	NA	exon (NM_172887, exon 44 of 61)	exon (NM_172887, exon 44 of 61)	65195	NR_024513	194292	Mm.300184	NR_024513		Gm5	Gm1812	predicted gene 5	ncRNA
2611	chr8	97124620	97127437	+	0	NA	promoter-TSS (NM_028221)	promoter-TSS (NM_028221)	187	NM_026274	67610	Mm.109074	NM_026274	ENSMUSG00000050079	Rspry1	4930470D19Rik|AI608258	ring finger and SPRY domain containing 1	protein-coding
106	chr1	129623863	129633102	+	0	NA	intron (NM_001033041, intron 1 of 9)	RCHARR1|DNA|MER1_type	2492	NM_001033041	266645	Mm.25735	NM_001033041	ENSMUSG00000026348	Acmsd	-	amino carboxymuconate semialdehyde decarboxylase	protein-coding
157	chr1	164500373	164502096	+	0	NA	intron (NM_016796, intron 1 of 7)	CpG	275	NM_016796	53330	Mm.10699	NM_016796	ENSMUSG00000026696	Vamp4	D1Ertd147e	vesicle-associated membrane protein 4	protein-coding
964	chr15	51822004	51823956	+	0	NA	intron (NM_009009, intron 1 of 13)	CpG	326	NM_009009	19357	Mm.182628	NM_009009	ENSMUSG00000022314	Rad21	SCC1|mKIAA0078	RAD21 homolog (S. pombe)	protein-coding
2009	chr5	5513828	5515252	+	0	NA	intron (NM_001193660, intron 1 of 4)	CpG	249	NM_001193660	64945	Mm.40132	NM_022890	ENSMUSG00000046798	Cldn12	-	claudin 12	protein-coding
65	chr1	75118153	75122641	+	0	NA	intron (NM_029342, intron 1 of 5)	intron (NM_029342, intron 1 of 5)	1403	NM_029342	75570	Mm.442409	NM_029342		Nhej1	1700029B21Rik|XLF|cernunnos	nonhomologous end-joining factor 1	protein-coding
1909	chr4	102885249	102889849	+	0	NA	promoter-TSS (NM_177732)	promoter-TSS (NM_177732)	-60	NM_177732	242585	Mm.281800	NM_177732		Slc35d1	AI834976|C330011J09|UGTREL7|mKIAA0260	solute carrier family 35 (UDP-glucuronic acid/UDP-N-acetylgalactosamine dual transporter), member D1	protein-coding
935	chr15	3928825	3930406	+	0	NA	promoter-TSS (NM_134099)	promoter-TSS (NM_134099)	-42	NM_134099	106052	Mm.234191	NM_134099		Fbxo4	1700096C12Rik|AI851261|AW494535|Fbx4	F-box protein 4	protein-coding
203	chr10	4521503	4523238	+	0	NA	promoter-TSS (NM_175374)	promoter-TSS (NM_175374)	-228	NM_175374	108853	Mm.55082	NM_175374	ENSMUSG00000019774	Mtrf1l	9130004K12Rik	mitochondrial translational release factor 1-like	protein-coding
2627	chr8	108224363	108225887	+	0	NA	promoter-TSS (NM_001047436)	promoter-TSS (NM_001047436)	77	NM_001286344	56513	Mm.472753	NM_019695	ENSMUSG00000005699	Pard6a	0710008C04Rik|2610010A15Rik|PAR-6A|PAR6alpha|Par-6|Par6|Par6c|TAX40|Tip-40	par-6 family cell polarity regulator alpha	protein-coding
1213	chr17	32637514	32644486	+	0	NA	Intergenic	ORR1D2|LTR|MaLR	-2407	NM_001101445	208285	Mm.311422	NM_001101445	ENSMUSG00000091586	Cyp4f17	EG208285	cytochrome P450, family 4, subfamily f, polypeptide 17	protein-coding
1093	chr16	23127541	23128585	+	0	NA	promoter-TSS (NM_145480)	promoter-TSS (NM_145480)	-260	NM_145480	106344	Mm.386835	NM_145480	ENSMUSG00000022881	Rfc4	A1|AI894123|AU040575|RFC37	replication factor C (activator 1) 4	protein-coding
81	chr1	88418869	88425803	+	0	NA	promoter-TSS (NM_008972)	promoter-TSS (NM_008972)	-975	NM_008972	19231	Mm.19187	NM_008972	ENSMUSG00000026238	Ptma	Thym	prothymosin alpha	protein-coding
1023	chr15	93166287	93168011	+	0	NA	intron (NR_028315, intron 1 of 4)	CpG-5265	217	NR_028315	67057	Mm.4714	NM_024189		Yaf2	2810021M11Rik	YY1 associated factor 2	protein-coding
2742	chr9	65193304	65195094	+	0	NA	exon (NM_016688, exon 1 of 5)	exon (NM_016688, exon 1 of 5)	324	NM_016688	50996	Mm.29193	NM_016688	ENSMUSG00000041837	Pdcd7	C80112|ES18	programmed cell death 7	protein-coding
2473	chr7	128061048	128062264	+	0	NA	intron (NM_025298, intron 1 of 20)	CpG	398	NM_001164096	26939	Mm.193632	NM_025298	ENSMUSG00000030880	Polr3e	RPC5|Sin	polymerase (RNA) III (DNA directed) polypeptide E	protein-coding
2084	chr5	92706488	92708716	+	0	NA	promoter-TSS (NM_001163687)	promoter-TSS (NM_001163687)	-395	NM_025972	67111	Mm.28890	NM_025972	ENSMUSG00000029413	Naaa	2210023K21Rik|3830414F09Rik|Asahl	N-acylethanolamine acid amidase	protein-coding
1300	chr18	9448989	9450823	+	0	NA	5' UTR (NM_026484, exon 1 of 10)	5' UTR (NM_026484, exon 1 of 10)	242	NM_026484	67974	Mm.86523	NM_026484	ENSMUSG00000024286	Ccny	1700025H17Rik|3110050L10Rik|4631402G10Rik|5730405I09Rik	cyclin Y	protein-coding
1199	chr17	27270519	27271121	+	0	NA	promoter-TSS (NM_026063)	promoter-TSS (NM_026063)	16	NM_026063	67267	Mm.272389	NM_026063	ENSMUSG00000024208	Uqcc2	2900010M23Rik|Cbp6|M19|Mnf1	ubiquinol-cytochrome c reductase complex assembly factor 2	protein-coding
86	chr1	93294321	93295959	+	0	NA	intron (NM_023343, intron 1 of 11)	CpG	220	NM_023343	67444	Mm.337240	NM_023343	ENSMUSG00000026309	Ilkap	0710007A14Rik|1600009O09Rik|PP2C-DELTA	integrin-linked kinase-associated serine/threonine phosphatase 2C	protein-coding
624	chr12	85790668	85793690	+	0	NA	promoter-TSS (NM_173756)	promoter-TSS (NM_173756)	-279	NM_134042	104776	Mm.247510	NM_134042	ENSMUSG00000021238	Aldh6a1	1110038I05Rik|AI314632|Mmsdh	aldehyde dehydrogenase family 6, subfamily A1	protein-coding
2598	chr8	87548792	87562423	+	0	NA	Intergenic	L2a|LINE|L2	4875	NM_026760	68544	Mm.196005	NM_026760	ENSMUSG00000041203	2310036O22Rik	1110002H14Rik|AI854688	RIKEN cDNA 2310036O22 gene	protein-coding
1158	chr17	5491284	5493875	+	0	NA	promoter-TSS (NM_146073)	promoter-TSS (NM_146073)	-21	NM_146073	224454	Mm.487663	NM_146073	ENSMUSG00000034265	Zdhhc14	B530001K09Rik|New1cp	zinc finger, DHHC domain containing 14	protein-coding
2170	chr5	150480734	150481172	+	0	NA	exon (NM_001081204, exon 1 of 15)	exon (NM_001081204, exon 1 of 15)	121	NM_001081204	381694	Mm.45060	NM_001081204	ENSMUSG00000051950	B3glct	B3galtl|Gm1057	beta-3-glucosyltransferase	protein-coding
371	chr11	6190891	6192985	+	0	NA	promoter-TSS (NM_001252288)	promoter-TSS (NM_001252288)	338	NM_001252283	18293	Mm.276348	NM_010956	ENSMUSG00000020456	Ogdh	2210403E04Rik|2210412K19Rik|AA409584|d1401|mKIAA4192	oxoglutarate (alpha-ketoglutarate) dehydrogenase (lipoamide)	protein-coding
656	chr12	114312161	114313647	+	0	NA	TTS (NM_001291445)	TTS (NM_001291445)	191	NM_029381	75671	Mm.23377	NM_029381	ENSMUSG00000012211	Tex22	1700028O09Rik|AV210422|Tep22	testis expressed gene 22	protein-coding
204	chr10	4539836	4541020	+	0	NA	promoter-TSS (NM_025995)	promoter-TSS (NM_025995)	-648	NM_025995	67141	Mm.197520	NM_025995	ENSMUSG00000019773	Fbxo5	2510044I10Rik|C85305|Emi1|Fbxo31	F-box protein 5	protein-coding
2335	chr7	4740275	4745399	+	0	NA	Intergenic	Intergenic	-1675	NM_029384	664968	Mm.292837	NM_029384		Tmem238	2210411K11Rik	transmembrane protein 238	protein-coding
1041	chr15	102206748	102209649	+	0	NA	Intergenic	Intergenic	-11496	NM_130458	170574	Mm.263284	NM_130458		Sp7	6430578P22Rik|C22|Osx	Sp7 transcription factor 7	protein-coding
1990	chr4	149146340	149175502	+	0	NA	Intergenic	ORR1A2-int|LTR|MaLR	-12545	NM_027460	70556	Mm.41877	NM_027460	ENSMUSG00000028982	Slc25a33	5730438N18Rik|Pnc1	solute carrier family 25, member 33	protein-coding
435	chr11	62269731	62277611	+	0	NA	intron (NM_001039536, intron 1 of 6)	B3|SINE|B2	1709	NM_001039536	327942	Mm.390358	NM_199026		Pigl	Gm737	phosphatidylinositol glycan anchor biosynthesis, class L	protein-coding
814	chr13	108831858	108835346	+	0	NA	Intergenic	Intergenic	-1066	NM_001048250	75616	Mm.491164	NM_001048250		Smim15	2810008M24Rik	small integral membrane protein 15	protein-coding
2492	chr7	134943780	134970453	+	0	NA	intron (NM_024414, intron 4 of 9)	B1_Mm|SINE|Alu	10929	NM_024414	56216	Mm.439759	NM_024414		Stx1b	Stx1b2|Stx1bl|Syn1b	syntaxin 1B	protein-coding
1482	chr2	24744293	24750825	+	0	NA	intron (NM_001012518, intron 1 of 26)	intron (NM_001012518, intron 1 of 26)	27570	NM_172545	77683	Mm.24176	NM_172545	ENSMUSG00000036893	Ehmt1	9230102N17Rik|D330003E03|Eu-HMTase1|GLP|GLP1|KMT1D|mKIAA1876	euchromatic histone methyltransferase 1	protein-coding
2109	chr5	110564307	110565398	+	0	NA	promoter-TSS (NM_172717)	promoter-TSS (NM_172717)	3	NM_001289578	231600	Mm.30264	NM_172717	ENSMUSG00000014668	Chfr	5730484M20Rik|C230082M18|RNF116	checkpoint with forkhead and ring finger domains	protein-coding
885	chr14	58282943	58284558	+	0	NA	promoter-TSS (NM_020506)	promoter-TSS (NM_020506)	43	NM_020506	57258	Mm.202747	NM_020506	ENSMUSG00000021952	Xpo4	B430309A01Rik|mKIAA1721	exportin 4	protein-coding
1412	chr19	23761394	23762533	+	0	NA	promoter-TSS (NM_028208)	promoter-TSS (NM_028208)	73	NM_028208	72351	Mm.474795	NM_028208	ENSMUSG00000074925	Ptar1	1700084D09Rik|2010013L17Rik|4930428J16Rik|AI449677	protein prenyltransferase alpha subunit repeat containing 1	protein-coding
884	chr14	58042434	58043360	+	0	NA	promoter-TSS (NM_009376)	promoter-TSS (NM_009376)	-11	NM_009376	21821	Mm.4653	NM_009376	ENSMUSG00000040040	Ift88	AW552028|Tg737|Tg737Rpw|TgN737Rpw|Ttc10|flexo|fxo|orpk|polaris	intraflagellar transport 88	protein-coding
1709	chr3	82803125	82859863	+	0	NA	intron (NM_010196, intron 1 of 4)	intron (NM_010196, intron 1 of 4)	1419	NM_001111048	14161	Mm.88793	NM_010196	ENSMUSG00000028001	Fga	ENSMUSG00000059807|Fib	fibrinogen alpha chain	protein-coding
339	chr10	122421157	122424079	+	0	NA	TTS (NR_029527)	TTS (NR_029527)	162	NR_029527	387251		NR_029527	miRBase:MI0000138	Mirlet7i	Mirnlet7i|mmu-let-7i	microRNA let7i	ncRNA
228	chr10	29031269	29034120	+	0	NA	promoter-TSS (NM_025855)	promoter-TSS (NM_025855)	-278	NM_001110195	52665	Mm.28930	NM_025855	ENSMUSG00000019883	Echdc1	1700028A24Rik|AI314462|AI930038|D10Ertd667e|MMCD	enoyl Coenzyme A hydratase domain containing 1	protein-coding
749	chr13	67129777	67131648	+	0	NA	intron (NR_045851, intron 1 of 8)	RMER15|LTR|ERVL	2629	NR_045851	71226	Mm.399574	NR_045851		4933433G19Rik	-	RIKEN cDNA 4933433G19 gene	ncRNA
268	chr10	68613560	68630063	+	0	NA	Intergenic	MTE2b|LTR|MaLR	-49489	NM_001252636	69288	Mm.26659	NM_001081347	ENSMUSG00000019944	Rhobtb1	1700008H16Rik|3110048G13Rik|AI173445|AI573858|AV350930	Rho-related BTB domain containing 1	protein-coding
829	chr14	17196290	17199782	+	0	NA	5' UTR (NM_009409, exon 1 of 36)	5' UTR (NM_009409, exon 1 of 36)	316	NM_009409	21974	Mm.130362	NM_009409	ENSMUSG00000017485	Top2b	D230016L12Rik|Top-2	topoisomerase (DNA) II beta	protein-coding
2872	chrX	165757548	165758662	+	0	NA	5' UTR (NM_008222, exon 1 of 7)	5' UTR (NM_008222, exon 1 of 7)	170	NM_008222	15159	Mm.284033	NM_008222	ENSMUSG00000031352	Hccs	-	holocytochrome c synthetase	protein-coding
345	chr10	126952334	126959645	+	0	NA	exon (NM_001252316, exon 8 of 12)	exon (NM_001252316, exon 8 of 12)	3511	NM_001252316	108037	Mm.29890	NM_028230	ENSMUSG00000025403	Shmt2	2700043D08Rik|AA408223|AA986903	serine hydroxymethyltransferase 2 (mitochondrial)	protein-coding
596	chr12	72819295	72820525	+	0	NA	Intergenic	Intergenic	-112145	NM_026102	208846	Mm.87417	NM_026102	ENSMUSG00000034574	Daam1	-	dishevelled associated activator of morphogenesis 1	protein-coding
1297	chr18	8718709	8721623	+	0	NA	Intergenic	Intergenic	-492688	NM_008058	14370	Mm.184289	NM_008058	ENSMUSG00000036904	Fzd8	Fz8	frizzled homolog 8 (Drosophila)	protein-coding
2090	chr5	100465591	100469678	+	0	NA	intron (NM_016690, intron 1 of 7)	CpG	607	NM_016690	50926	Mm.389579	NM_016690	ENSMUSG00000029328	Hnrnpdl	AA407431|AA959857|D5Ertd650e|D5Wsu145e|Hnrnpdl1|Hnrpdl|JKTBP|hnRNP DL|hnRNP-DL	heterogeneous nuclear ribonucleoprotein D-like	protein-coding
1521	chr2	70893222	70894423	+	0	NA	promoter-TSS (NM_001165982)	promoter-TSS (NM_001165982)	21	NM_001165980	75763	Mm.281668	NM_198005	ENSMUSG00000041966	Dcaf17	2810055O12Rik|4833418A01Rik|A030004A10Rik|A930009G19Rik|AI448937	DDB1 and CUL4 associated factor 17	protein-coding
1862	chr4	46150709	46152268	+	0	NA	promoter-TSS (NM_173033)	promoter-TSS (NM_173033)	105	NM_001033201	433702	Mm.389536	NM_001033201	ENSMUSG00000028330	Ncbp1	AU014645|AW538051|CBP80	nuclear cap binding protein subunit 1	protein-coding
2352	chr7	19576144	19610529	+	0	NA	Intergenic	Intergenic	3922	NM_178757	272359	Mm.274237	NM_178757	ENSMUSG00000044030	Irf2bp1	6330414O09Rik|C530033F24	interferon regulatory factor 2 binding protein 1	protein-coding
613	chr12	81316287	81333604	+	0	NA	intron (NM_134156, intron 1 of 20)	intron (NM_134156, intron 1 of 20)	36413	NM_134156	109711	Mm.253564	NM_134156	ENSMUSG00000015143	Actn1	3110023F10Rik|Actn1a	actinin, alpha 1	protein-coding
1082	chr16	20140856	20141680	+	0	NA	5' UTR (NM_001145931, exon 1 of 8)	5' UTR (NM_001145931, exon 1 of 8)	132	NM_001145930	208146	Mm.390895	NM_001033237	ENSMUSG00000041215	Yeats2	BC042768|mKIAA1197	YEATS domain containing 2	protein-coding
1066	chr16	16870631	16871700	+	0	NA	intron (NM_011624, intron 1 of 17)	intron (NM_011624, intron 1 of 17)	181	NM_011624	21976	Mm.326089	NM_011624	ENSMUSG00000022779	Top3b	-	topoisomerase (DNA) III beta	protein-coding
121	chr1	135014813	135032663	+	0	NA	Intergenic	B3|SINE|B2	-4005	NM_133819	108954	Mm.293628	NM_133819	ENSMUSG00000046062	Ppp1r15b	1810033K10Rik|AI606441|C530022L24Rik|CReP	protein phosphatase 1, regulatory (inhibitor) subunit 15b	protein-coding
952	chr15	36708759	36724803	+	0	NA	intron (NM_001253807, intron 1 of 4)	intron (NM_001253807, intron 1 of 4)	3906	NM_001253807	22631	Mm.3360	NM_011740	ENSMUSG00000022285	Ywhaz	1110013I11Rik|14-3-3zeta|AI596267|AL022924|AU020854	tyrosine 3-monooxygenase/tryptophan 5-monooxygenase activation protein, zeta polypeptide	protein-coding
2691	chr9	26836741	26838548	+	0	NA	promoter-TSS (NM_178027)	promoter-TSS (NM_178027)	35	NM_178027	69091	Mm.218717	NM_178027	ENSMUSG00000031988	Vps26b	1810012I05Rik|2310075A12Rik|AI848392	vacuolar protein sorting 26 homolog B (yeast)	protein-coding
1071	chr16	17508273	17509672	+	0	NA	promoter-TSS (NM_025808)	promoter-TSS (NM_025808)	-92	NM_025808	66863	Mm.161726	NM_025808	ENSMUSG00000022761	Lztr1	1200003E21Rik|AI591627|AW550890	leucine-zipper-like transcriptional regulator, 1	protein-coding
494	chr11	95170393	95172592	+	0	NA	promoter-TSS (NM_177619)	promoter-TSS (NM_177619)	68	NM_001195004	217127	Mm.90213	NM_177619	ENSMUSG00000038909	Kat7	Hbo1|Hboa|Myst2	K(lysine) acetyltransferase 7	protein-coding
487	chr11	88578832	88580552	+	0	NA	promoter-TSS (NM_054043)	promoter-TSS (NM_054043)	-111	NM_001201341	76626	Mm.400451	NM_054043	ENSMUSG00000069769	Msi2	1700105C15Rik|AI451722|AI563628|AW489193|Msi2h	musashi RNA-binding protein 2	protein-coding
1956	chr4	129317085	129320028	+	0	NA	promoter-TSS (NM_001005506)	promoter-TSS (NM_001005506)	-247	NM_001199695	109658	Mm.268863	NM_001005506	ENSMUSG00000053841	Txlna	2600010N21Rik|AI425952|AW209241|Il14|Txln	taxilin alpha	protein-coding
2778	chr9	100977253	100982699	+	0	NA	intron (NM_001100451, intron 1 of 1)	intron (NM_001100451, intron 1 of 1)	1490	NM_001100451	77853	Mm.326206	NM_001100451		Msl2	E130103E02Rik|Msl2l1|Rnf184	male-specific lethal 2 homolog (Drosophila)	protein-coding
2235	chr6	59634681	59636111	+	0	NA	Intergenic	LTRIS_Mus|LTR|ERV1	-259112	NM_183183	243385	Mm.138080	NM_183183	ENSMUSG00000045441	Gprin3	C030038J10Rik|C730021L23	GPRIN family member 3	protein-coding
238	chr10	39743043	39745515	+	0	NA	intron (NM_144821, intron 1 of 3)	intron (NM_144821, intron 1 of 3)	795	NM_144821	215929	Mm.55513	NM_144821	ENSMUSG00000038522	AI317395	AI482555|Naglt1a	expressed sequence AI317395	protein-coding
873	chr14	52815884	52817699	+	0	NA	exon (NM_033618, exon 1 of 26)	exon (NM_033618, exon 1 of 26)	123	NM_033618	114741	Mm.21662	NM_033618	ENSMUSG00000035726	Supt16	Cdc68|Fact140|Spt16|Supt16h	suppressor of Ty 16	protein-coding
253	chr10	57251093	57252503	+	0	NA	intron (NM_019760, intron 1 of 8)	intron (NM_019760, intron 1 of 8)	537	NM_019760	56442	Mm.29344	NM_019760	ENSMUSG00000019877	Serinc1	1500011D18Rik|AI315070|AIGP-2|TMS-2|Tde1l|Tde2|Tms2|mKIAA1253	serine incorporator 1	protein-coding
448	chr11	72861081	72862880	+	0	NA	intron (NM_025818, intron 1 of 12)	intron (NM_025818, intron 1 of 12)	611	NM_025818	66874	Mm.41903	NM_025818		1200014J11Rik	C130061O14Rik|C78393	RIKEN cDNA 1200014J11 gene	protein-coding
2631	chr8	110111397	110112661	+	0	NA	intron (NM_010817, intron 1 of 6)	CpG	353	NM_010817	17463	Mm.18347	NM_010817	ENSMUSG00000039067	Psmd7	AW107203|Mov-34|Mov34	proteasome (prosome, macropain) 26S subunit, non-ATPase, 7	protein-coding
2278	chr6	108777504	108791557	+	0	NA	intron (NM_138677, intron 1 of 11)	intron (NM_138677, intron 1 of 11)	5895	NM_138677	192193	Mm.21596	NM_138677	ENSMUSG00000030104	Edem1	A130059K23Rik|EDEM|mKIAA0212	ER degradation enhancer, mannosidase alpha-like 1	protein-coding
2427	chr7	74512107	74519651	+	0	NA	intron (NM_001291191, intron 1 of 10)	intron (NM_001291191, intron 1 of 10)	1865	NM_001291192	17258	Mm.132788	NM_001033713	ENSMUSG00000030557	Mef2a	A430079H05Rik	myocyte enhancer factor 2A	protein-coding
63	chr1	72818220	72820875	+	0	NA	Intergenic	Intergenic	-51507	NM_008342	16008	Mm.141936	NM_008342	ENSMUSG00000039323	Igfbp2	AI255832|IBP-2|Igfbp-2|mIGFBP-2	insulin-like growth factor binding protein 2	protein-coding
1637	chr2	172170359	172177040	+	0	NA	intron (NM_025912, intron 1 of 2)	intron (NM_025912, intron 1 of 2)	2622	NM_025912	67017	Mm.30013	NM_025912	ENSMUSG00000027495	Fam210b	2010011I20Rik|AI430961|AV108736	family with sequence similarity 210, member B	protein-coding
179	chr1	180244325	180274673	+	0	NA	exon (NM_016805, exon 14 of 14)	exon (NM_016805, exon 14 of 14)	8416	NM_016805	51810	Mm.86589	NM_016805	ENSMUSG00000039630	Hnrnpu	AA408410|AI256620|AL024194|AL024437|AW557595|C86794|Hnrpu|SAFA|Sp120|hnRNP U	heterogeneous nuclear ribonucleoprotein U	protein-coding
1532	chr2	80154849	80156242	+	0	NA	promoter-TSS (NM_024181)	promoter-TSS (NM_024181)	-78	NM_024181	66861	Mm.21762	NM_024181	ENSMUSG00000027006	Dnajc10	1200006L06Rik|D2Ertd706e|ERdj5|JPDI	DnaJ (Hsp40) homolog, subfamily C, member 10	protein-coding
1105	chr16	33250563	33252218	+	0	NA	promoter-TSS (NM_080557)	promoter-TSS (NM_080557)	-152	NM_080557	69150	Mm.28196	NM_080557	ENSMUSG00000022808	Snx4	1810036H14Rik|AI037066	sorting nexin 4	protein-coding
713	chr13	48720513	48721364	+	0	NA	promoter-TSS (NM_207232)	promoter-TSS (NM_207232)	4	NM_207232	218232	Mm.315089	NM_207232	ENSMUSG00000038042	Ptpdc1	AI843923|AW456874|Naa-1	protein tyrosine phosphatase domain containing 1	protein-coding
1334	chr18	35930505	35932345	+	0	NA	5' UTR (NM_019912, exon 1 of 7)	5' UTR (NM_019912, exon 1 of 7)	212	NM_019912	56550	Mm.180052	NM_019912	ENSMUSG00000091896	Ube2d2a	1500034D03Rik|Ubc2e|Ube2d2|ubc4	ubiquitin-conjugating enzyme E2D 2A	protein-coding
2499	chr7	138553200	138555482	+	0	NA	promoter-TSS (NM_175115)	promoter-TSS (NM_175115)	226	NM_025826	66885	Mm.334274	NM_025826	ENSMUSG00000030861	Acadsb	1300003O09Rik|BB066609	acyl-Coenzyme A dehydrogenase, short/branched chain	protein-coding
2805	chr9	110773945	110793414	+	0	NA	intron (NM_001146060, intron 1 of 26)	intron (NM_001146060, intron 1 of 26)	853	NM_001146060	235633	Mm.86338	NM_146228	ENSMUSG00000044037	Als2cl	79H19D|79H19E|BC022645|D930044G19Rik|mRn.49018	ALS2 C-terminal like	protein-coding
2096	chr5	105288011	105289619	+	0	NA	5' UTR (NM_001039231, exon 1 of 5)	5' UTR (NM_001039231, exon 1 of 5)	272	NM_001039231	626391	Mm.385405	NM_001039231		Zfp951	C230055K05Rik	zinc finger protein 951	protein-coding
1784	chr3	127616645	127618009	+	0	NA	Intergenic	Intergenic	-1762	NR_040552	329753	Mm.119720	NR_040552		9830132P13Rik	9830132P13	RIKEN cDNA 9830132P13 gene	ncRNA
2839	chrX	54645192	54646587	+	0	NA	intron (NM_001166623, intron 1 of 8)	CpG	324	NM_011252	19655	Mm.28275	NM_011252	ENSMUSG00000031134	Rbmx	hnRNP G	RNA binding motif protein, X chromosome	protein-coding
938	chr15	6657293	6660781	+	0	NA	intron (NM_030168, intron 2 of 37)	CpG-4768	656	NM_030168	78757	Mm.275811	NM_030168	ENSMUSG00000050310	Rictor	4921505C17Rik|6030405M08Rik|AVO3|AW492497|D530039E11Rik	RPTOR independent companion of MTOR, complex 2	protein-coding
2149	chr5	138882640	138883357	+	0	NA	intron (NM_028130, intron 1 of 4)	CpG	294	NM_028130	72154	Mm.20263	NM_028130	ENSMUSG00000036898	Zfp157	2610020C11Rik|A630094N24Rik|AI327407|mszf12|mszf23-1	zinc finger protein 157	protein-coding
1679	chr3	37317061	37320178	+	0	NA	promoter-TSS (NM_021343)	promoter-TSS (NM_021343)	-101	NM_153561	229228	Mm.436967	NM_153561	ENSMUSG00000050174	Nudt6	Asfgf2b	nudix (nucleoside diphosphate linked moiety X)-type motif 6	protein-coding
1830	chr4	21806077	21807699	+	0	NA	promoter-TSS (NM_172687)	promoter-TSS (NM_172687)	66	NM_172687	230027	Mm.5662	NM_172687	ENSMUSG00000028247	Coq3	4732433J24|C77934	coenzyme Q3 homolog, methyltransferase (yeast)	protein-coding
1620	chr2	156816499	156818191	+	0	NA	intron (NM_180956, intron 1 of 16)	intron (NM_180956, intron 1 of 16)	502	NM_013865	29812	Mm.279256	NM_013865	ENSMUSG00000027634	Ndrg3	4833415O14Rik|AI747193|Ndr3	N-myc downstream regulated gene 3	protein-coding
2241	chr6	71858271	71862397	+	0	NA	intron (NM_009088, intron 1 of 33)	(TAGA)n|Simple_repeat|Simple_repeat	1287	NM_009088	20019	Mm.135581	NM_009088	ENSMUSG00000049553	Polr1a	194kDa|3010014K16Rik|RPA194|Rpo1-4|mRPA1	polymerase (RNA) I polypeptide A	protein-coding
1262	chr17	66233261	66236146	+	0	NA	promoter-TSS (NM_001198949)	promoter-TSS (NM_001198949)	392	NM_009067	19765	Mm.17009	NM_009067	ENSMUSG00000024096	Ralbp1	RLIP76|Rip1	ralA binding protein 1	protein-coding
1290	chr18	3328514	3338839	+	0	NA	intron (NM_001110851, intron 1 of 4)	intron (NM_001110851, intron 1 of 4)	-2738	NR_033457	633947	Mm.461446	NR_033457	ENSMUSG00000097746	Gm6225	EG621440	predicted gene 6225	ncRNA
1527	chr2	74663472	74664827	+	0	NA	intron (NM_016804, intron 1 of 9)	CpG	280	NM_016804	53375	Mm.292613	NM_016804		Mtx2	1500012G02Rik	metaxin 2	protein-coding
2162	chr5	145844417	145845288	+	0	NA	intron (NM_019767, intron 1 of 9)	CpG	114	NM_019767	56443	Mm.371610	NM_019767	ENSMUSG00000029621	Arpc1a	0610010H08Rik|1110030K07Rik|41kDa|AA407347|Sid32|Sid329	actin related protein 2/3 complex, subunit 1A	protein-coding
1132	chr16	78260077	78269253	+	0	NA	Intergenic	Intergenic	-8966	NR_045698	100503619	Mm.387531	NR_045698		E330011O21Rik	-	RIKEN cDNA E330011O21 gene	ncRNA
2370	chr7	29122942	29178528	+	0	NA	intron (NM_001290542, intron 9 of 18)	intron (NM_001290542, intron 9 of 18)	6946	NM_138752	101497	Mm.235700	NM_138752	ENSMUSG00000037552	Plekhg2	AI194308|Clg|Cslg	pleckstrin homology domain containing, family G (with RhoGef domain) member 2	protein-coding
929	chr14	122503752	122508254	+	0	NA	promoter-TSS (NM_080556)	promoter-TSS (NM_080556)	193	NR_015586	319727	Mm.215552	NR_015586		A330035P11Rik	-	RIKEN cDNA A330035P11 gene	ncRNA
2554	chr8	36467902	36496163	+	0	NA	Intergenic	Intergenic	43237	NM_177741	244416	Mm.247126	NM_177741	ENSMUSG00000046794	Ppp1r3b	6430576E21|AW821953|GL|PTG	protein phosphatase 1, regulatory (inhibitor) subunit 3B	protein-coding
1925	chr4	115746912	115750480	+	0	NA	intron (NM_153521, intron 1 of 9)	CpG	626	NM_153521	230654	Mm.3655	NM_153521	ENSMUSG00000028703	Lrrc41	AA409966|AW555107|D630045E04Rik|D730026A16Rik|MUF1	leucine rich repeat containing 41	protein-coding
2574	chr8	72148776	72149818	+	0	NA	promoter-TSS (NM_001045553)	promoter-TSS (NM_001045553)	150	NM_172754	234362	Mm.458487	NM_172754	ENSMUSG00000060427	Zfp868	AI449175|AW108241|C530032E20|mszf62	zinc finger protein 868	protein-coding
547	chr12	4082206	4083169	+	0	NA	5' UTR (NM_153082, exon 1 of 7)	5' UTR (NM_153082, exon 1 of 7)	113	NM_153082	217378	Mm.271656	NM_153082	ENSMUSG00000020657	Dnajc27	AI639580|C330021A05Rik|Rabj|Rbj	DnaJ (Hsp40) homolog, subfamily C, member 27	protein-coding
631	chr12	98299558	98300002	+	0	NA	Intergenic	Intergenic	-1014348	NR_103800	69423	Mm.46121	NM_027076	ENSMUSG00000059695	1700019M22Rik	-	NFX-like protein	pseudo
1616	chr2	155832587	155834331	+	0	NA	promoter-TSS (NM_025516)	promoter-TSS (NM_025516)	254	NM_001145352	320095	Mm.442175	NM_001145351	ENSMUSG00000074646	6430550D23Rik	-	RIKEN cDNA 6430550D23 gene	protein-coding
1583	chr2	130489697	130493868	+	0	NA	Intergenic	(TA)n|Simple_repeat|Simple_repeat	-1401	NM_029832	77006	Mm.440063	NM_029832	ENSMUSG00000068290	Ddrgk1	1110001I20Rik|2600009E05Rik|AI326138|Ufbp1	DDRGK domain containing 1	protein-coding
1544	chr2	103847388	103849365	+	0	NA	Intergenic	RSINE1|SINE|B4	-19580	NM_020593	57443	Mm.143768	NM_020593	ENSMUSG00000027180	Fbxo3	1200002G09Rik|1700026K02Rik|AI046358|Fba	F-box protein 3	protein-coding
1538	chr2	92019385	92026704	+	0	NA	Intergenic	Intergenic	-1295	NM_138755	192285	Mm.330408	NM_138755	ENSMUSG00000058318	Phf21a	80kDa|Bhc|Bhc80|D030065N23Rik|PFTF1	PHD finger protein 21A	protein-coding
396	chr11	32354737	32355830	+	0	NA	promoter-TSS (NM_173784)	promoter-TSS (NM_173784)	-89	NM_173784	327900	Mm.260956	NM_173784		Ubtd2	4930571L24|9630054F20Rik|AI645720	ubiquitin domain containing 2	protein-coding
258	chr10	60542893	60555119	+	0	NA	Intergenic	RSINE1|SINE|B4	-3073	NM_025273	13180	Mm.39473	NM_025273	ENSMUSG00000020098	Pcbd1	Dcoh|Pcbd|Pcd|Phs	pterin 4 alpha carbinolamine dehydratase/dimerization cofactor of hepatocyte nuclear factor 1 alpha (TCF1) 1	protein-coding
1422	chr19	34995812	34996936	+	0	NA	promoter-TSS (NM_183046)	promoter-TSS (NM_183046)	-474	NM_183046	240641	Mm.278471	NM_183046	ENSMUSG00000024795	Kif20b	33cex|B130024C23|C330014J10Rik|Mphosph1|magoo	kinesin family member 20B	protein-coding
482	chr11	86297015	86298919	+	0	NA	promoter-TSS (NM_029788)	promoter-TSS (NM_029788)	-192	NM_029788	76892	Mm.262707	NM_029788	ENSMUSG00000020521	Rnft1	0610013E23Rik|AV007605	ring finger protein, transmembrane 1	protein-coding
2620	chr8	105937360	105938716	+	0	NA	Intergenic	Intergenic	-66604	NR_036588	69794	Mm.396139	NR_036588		1600027J07Rik	-	RIKEN cDNA 1600027J07 gene	ncRNA
949	chr15	34167137	34168808	+	0	NA	5' UTR (NM_033521, exon 1 of 7)	5' UTR (NM_033521, exon 1 of 7)	191	NM_033521	114128	Mm.197518	NM_033521	ENSMUSG00000022257	Laptm4b	C330023P13Rik|LAPTM4beta	lysosomal-associated protein transmembrane 4B	protein-coding
499	chr11	97138418	97142481	+	0	NA	intron (NM_008942, intron 1 of 22)	intron (NM_008942, intron 1 of 22)	1441	NM_008942	19155	Mm.29824	NM_008942	ENSMUSG00000001441	Npepps	AAP-S|MP100|Psa|R74825|goku	aminopeptidase puromycin sensitive	protein-coding
1047	chr16	4003414	4004446	+	0	NA	Intergenic	CpG	-2252	NM_177472	52864	Mm.29935	NM_177472	ENSMUSG00000039738	Slx4	AI256635|AI426760|Btbd12|D16Bwg1016e	SLX4 structure-specific endonuclease subunit homolog (S. cerevisiae)	protein-coding
2138	chr5	131332976	131335997	+	0	NA	Intergenic	Intergenic	409824	NM_021371	140904	Mm.40875	NM_021371	ENSMUSG00000060371	Caln1	9630012C17Rik|Cabp8	calneuron 1	protein-coding
1055	chr16	10346549	10351007	+	0	NA	Intergenic	Intergenic	-34717	NM_007929	13731	Mm.246009	NM_007929	ENSMUSG00000022505	Emp2	XMP	epithelial membrane protein 2	protein-coding
2447	chr7	99817039	99819169	+	0	NA	exon (NM_029078, exon 1 of 16)	exon (NM_029078, exon 1 of 16)	318	NM_029078	74737	Mm.288645	NM_029078	ENSMUSG00000041328	Pcf11	2500001H09Rik|5730417B17Rik|C77803	cleavage and polyadenylation factor subunit homolog (S. cerevisiae)	protein-coding
1276	chr17	80285609	80295747	+	0	NA	intron (NM_019717, intron 1 of 12)	intron (NM_019717, intron 1 of 12)	4785	NM_178050	56298	Mm.175403	NM_019717	ENSMUSG00000059811	Atl2	2010110I21Rik|AA407293|AV334690|Aip-2|Arl6ip2	atlastin GTPase 2	protein-coding
141	chr1	157263518	157264812	+	0	NA	intron (NM_011273, intron 1 of 14)	CpG	409	NM_011273	19775	Mm.266215	NM_011273	ENSMUSG00000026469	Xpr1	Rmc-1|Rmc1|Sxv|Syg1|XR	xenotropic and polytropic retrovirus receptor 1	protein-coding
909	chr14	73924407	73925210	+	0	NA	intron (NM_172527, intron 3 of 4)	CpG	14952	NM_026119	67381	Mm.282888	NM_026119	ENSMUSG00000022109	Med4	2410046H15Rik|DRIP36|HSPC126|TRAP36|Vdirp|Vdrip	mediator complex subunit 4	protein-coding
2618	chr8	98376046	98378249	+	0	NA	intron (NM_172758, intron 1 of 11)	intron (NM_172758, intron 1 of 11)	244	NM_172758	234595	Mm.29267	NM_172758	ENSMUSG00000036534	Slc38a7	D430050E18	solute carrier family 38, member 7	protein-coding
1124	chr16	45154781	45161113	+	0	NA	promoter-TSS (NM_026402)	promoter-TSS (NM_026402)	839	NM_028756	74102	Mm.264984	NM_028756	ENSMUSG00000022664	Slc35a5	1010001J06Rik|AU021179|BB097433|D16Ertd450e|D730043G07Rik	solute carrier family 35, member A5	protein-coding
1230	chr17	35605883	35623421	+	0	NA	Intergenic	RMER19C|LTR|ERVK	7618	NM_010391	15007	Mm.88795	NM_010391	ENSMUSG00000067235	H2-Q10	H-2Q10|Q10|Qa10	histocompatibility 2, Q region locus 10	protein-coding
75	chr1	82721153	82722325	+	0	NA	intron (NM_029409, intron 1 of 8)	CpG	246	NM_029409	75734	Mm.396863	NM_029409	ENSMUSG00000026150	Mff	5230400G24Rik|AI314724	mitochondrial fission factor	protein-coding
2793	chr9	107789980	107791184	+	0	NA	5' UTR (NM_028369, exon 1 of 6)	5' UTR (NM_028369, exon 1 of 6)	122	NM_028369	72825	Mm.38037	NM_028369	ENSMUSG00000032583	Mon1a	2810468K17Rik	MON1 homolog A (yeast)	protein-coding
2588	chr8	74446274	74447924	+	0	NA	intron (NM_133358, intron 1 of 3)	CpG	375	NM_133358	170938	Mm.480419	NM_133358	ENSMUSG00000066880	Zfp617	Zfps11-6	zinc finger protein 617	protein-coding
1917	chr4	107592715	107596656	+	0	NA	intron (NM_009949, intron 1 of 4)	intron (NM_009949, intron 1 of 4)	1509	NM_009949	12896	Mm.307620	NM_009949	ENSMUSG00000028607	Cpt2	AI323697|CPTII	carnitine palmitoyltransferase 2	protein-coding
1163	chr17	11032920	11033920	+	0	NA	promoter-TSS (NM_027032)	promoter-TSS (NM_027032)	170	NM_016694	50873	Mm.311110	NM_016694		Park2	PRKN	Parkinson disease (autosomal recessive, juvenile) 2, parkin	protein-coding
450	chr11	73137417	73141166	+	0	NA	Intergenic	Intergenic	-1152	NM_023113	11484	Mm.293574	NM_023113	ENSMUSG00000020774	Aspa	Acy-2|Acy2|nur7	aspartoacylase	protein-coding
1702	chr3	68989065	68991003	+	0	NA	Intergenic	Intergenic	-36307	NM_027843	71619	Mm.98122	NM_027843	ENSMUSG00000098207	Arl14	9130014L17Rik|Arf7	ADP-ribosylation factor-like 14	protein-coding
1405	chr19	11985241	11987976	+	0	NA	promoter-TSS (NM_172635)	promoter-TSS (NM_172635)	-281	NM_172635	225929	Mm.42711	NM_172635	ENSMUSG00000046139	Patl1	AV312086|D430024J04|Pat1b	protein associated with topoisomerase II homolog 1 (yeast)	protein-coding
1713	chr3	84385415	84387290	+	0	NA	5' UTR (NM_001081093, exon 1 of 9)	5' UTR (NM_001081093, exon 1 of 9)	195	NM_001081093	99889	Mm.316536	NM_001081093	ENSMUSG00000074513	Arfip1	2310030I10Rik|Arfaptin|D3Ertd598e	ADP-ribosylation factor interacting protein 1	protein-coding
1060	chr16	14193324	14195651	+	0	NA	TTS (NM_013607)	TTS (NM_013607)	31119	NM_001114085	67203	Mm.24105	NM_023317	ENSMUSG00000022678	Nde1	2810027M15Rik|AU042936|AW822251|Nude|mNudE	nuclear distribution gene E homolog 1 (A nidulans)	protein-coding
2420	chr7	72837919	72838887	+	0	NA	promoter-TSS (NM_026795)	promoter-TSS (NM_026795)	100	NM_026795	68634	Mm.476828	NM_026795	ENSMUSG00000078681	Tm2d3	1110025I09Rik|5930422O05Rik|Blp2	TM2 domain containing 3	protein-coding
2104	chr5	109057918	109059489	+	0	NA	promoter-TSS (NM_001163532)	promoter-TSS (NM_001163532)	93	NM_153569	231580	Mm.276647	NM_153569	ENSMUSG00000062234	Gak	D130045N16Rik	cyclin G associated kinase	protein-coding
2126	chr5	123270809	123271844	+	0	NA	promoter-TSS (NM_001042491)	promoter-TSS (NM_001042491)	25	NM_001289518	59008	Mm.332667	NM_021505	ENSMUSG00000029472	Anapc5	2510006G12Rik|AA408751|AA536819|AA986414|APC5|Anpc5	anaphase-promoting complex subunit 5	protein-coding
2858	chrX	131542424	131544359	+	0	NA	intron (NM_175446, intron 1 of 6)	CpG	357	NM_175446	215693	Mm.336238	NM_175446	ENSMUSG00000052676	Zmat1	A230096A06|AW990744|B930008K04Rik	zinc finger, matrin type 1	protein-coding
900	chr14	69792046	69793683	+	0	NA	exon (NM_010920, exon 2 of 2)	exon (NM_010920, exon 2 of 2)	-2964	NR_045931	73554	Mm.320005	NR_045931	ENSMUSG00000092499	1700092C10Rik	-	RIKEN cDNA 1700092C10 gene	ncRNA
318	chr10	98376036	98378953	+	0	NA	promoter-TSS (NM_026482)	promoter-TSS (NM_026482)	-292	NM_026482	67972	Mm.166944	NM_026482	ENSMUSG00000019943	Atp2b1	2810442I22Rik|E130111D10Rik|Pmca1	ATPase, Ca++ transporting, plasma membrane 1	protein-coding
1729	chr3	94480739	94523677	+	0	NA	intron (NM_019414, intron 5 of 11)	intron (NM_019414, intron 5 of 11)	4713	NM_019414	20342	Mm.225405	NM_019414	ENSMUSG00000068877	Selenbp2	AP56|Lpsb2	selenium binding protein 2	protein-coding
2526	chr8	11449982	11482545	+	0	NA	intron (NM_011227, intron 1 of 1)	intron (NM_011227, intron 1 of 1)	12236	NM_011227	19332	Mm.37632	NM_011227		Rab20	AA536966|D8Ertd350e	RAB20, member RAS oncogene family	protein-coding
972	chr15	58762443	58934773	+	0	NA	intron (NM_001146180, intron 3 of 13)	Lx8|LINE|L1	64973	NM_001146180	211401	Mm.215481	NM_144800	ENSMUSG00000022353	Mtss1	2310003N14Rik|BC024131|D130001D01Rik|Mim|mKIAA0429	metastasis suppressor 1	protein-coding
473	chr11	82804336	82805853	+	0	NA	5' UTR (NM_172796, exon 1 of 5)	5' UTR (NM_172796, exon 1 of 5)	238	NM_172796	237886	Mm.270253	NM_172796	ENSMUSG00000069793	Slfn9	9830137M10Rik	schlafen 9	protein-coding
2572	chr8	67470239	67471996	+	0	NA	promoter-TSS (NM_001163747)	promoter-TSS (NM_001163747)	33	NM_028427	73067	Mm.294445	NM_028427	ENSMUSG00000025521	Tmem192	3110005G23Rik	transmembrane protein 192	protein-coding
1774	chr3	121976882	121977786	+	0	NA	promoter-TSS (NM_153806)	promoter-TSS (NM_153806)	2	NM_153806	99480	Mm.398647	NM_153806	ENSMUSG00000039756	Dnttip2	4930588M11Rik|AA408582|AU014960|HSU15552	deoxynucleotidyltransferase, terminal, interacting protein 2	protein-coding
3	chr1	6203385	6205912	+	0	NA	promoter-TSS (NM_009826)	promoter-TSS (NM_009826)	-95	NM_009826	12421	Mm.293811	NM_009826	ENSMUSG00000025907	Rb1cc1	2900055E04Rik|5930404L04Rik|Cc1|FIP200|LaXp180	RB1-inducible coiled-coil 1	protein-coding
248	chr10	43987618	43989893	+	0	NA	intron (NM_053069, intron 1 of 7)	intron (NM_053069, intron 1 of 7)	591	NM_053069	11793	Mm.22264	NM_053069	ENSMUSG00000038160	Atg5	2010107M05Rik|3110067M24Rik|AW319544|Apg5l|Atg5l|C88337|Paddy	autophagy related 5	protein-coding
146	chr1	158647990	158649599	+	0	NA	intron (NM_145413, intron 1 of 7)	CpG	247	NM_145413	215015	Mm.229107	NM_145413	ENSMUSG00000033557	Fam20b	C530043G21Rik|mKIAA0475	family with sequence similarity 20, member B	protein-coding
1351	chr18	53335405	53337499	+	0	NA	intron (NM_026386, intron 1 of 14)	CpG	433	NM_026386	67804	Mm.252171	NM_026386	ENSMUSG00000034484	Snx2	0610030A03Rik	sorting nexin 2	protein-coding
2396	chr7	51751150	51755270	+	0	NA	intron (NM_028169, intron 3 of 4)	intron (NM_028169, intron 3 of 4)	1252	NM_028169	75538	Mm.258841	NM_028169	ENSMUSG00000051113	Fam71e1	0610007G24Rik|1700021N13Rik|1700021P22Rik|GARI-L5	family with sequence similarity 71, member E1	protein-coding
356	chr10	128392652	128418832	+	0	NA	Intergenic	B1_Mur1|SINE|Alu	-7698	NM_027853	71664	Mm.337232	NM_027853	ENSMUSG00000025347	Mettl7b	0610006F02Rik|AI266817	methyltransferase like 7B	protein-coding
802	chr13	97907339	97908462	+	0	NA	promoter-TSS (NM_001271465)	promoter-TSS (NM_001271465)	8	NM_001271464	320806	Mm.219675	NM_177266	ENSMUSG00000021666	Gfm2	6530419G12Rik|A930009M04Rik|EF-G2mt|EFG2|MST027|RRF2mt	G elongation factor, mitochondrial 2	protein-coding
2720	chr9	50816217	50817563	+	0	NA	exon (NM_178710, exon 1 of 16)	exon (NM_178710, exon 1 of 16)	288	NM_178710	235344	Mm.104932	NM_178710	ENSMUSG00000037112	Sik2	G630080D20Rik|Snf1lk2	salt inducible kinase 2	protein-coding
2063	chr5	75438513	75443041	+	0	NA	promoter-TSS (NM_028850)	promoter-TSS (NM_028850)	-126	NM_028850	74277	Mm.239814	NM_028850		Chic2	1700081B18Rik|4930502K01Rik|BTL	cysteine-rich hydrophobic domain 2	protein-coding
528	chr11	118150603	118152277	+	0	NA	5' UTR (NM_001033528, exon 1 of 21)	5' UTR (NM_001033528, exon 1 of 21)	118	NM_001033528	72344	Mm.232293	NM_001033528	ENSMUSG00000033909	Usp36	2700002L06Rik|mKIAA1453	ubiquitin specific peptidase 36	protein-coding
164	chr1	168307115	168310370	+	0	NA	promoter-TSS (NM_030245)	promoter-TSS (NM_030245)	-556	NM_030245	27878	Mm.100665	NM_030245	ENSMUSG00000026563	Tada1	2900026B15Rik|D1Ertd251e|Staf42|Tada1l	transcriptional adaptor 1	protein-coding
807	chr13	104563510	104565025	+	0	NA	Intergenic	CpG	-9605	NM_172592	218543	Mm.458176	NM_172592	ENSMUSG00000032621	Srek1	8430401B01|AI450757|AI462342|SRrp508|SRrp86|Sfrs12|Srsf12	splicing regulatory glutamine/lysine-rich protein 1	protein-coding
2040	chr5	35002216	35004136	+	0	NA	promoter-TSS (NM_029278)	promoter-TSS (NM_029278)	148	NM_019497	14772	Mm.117076	NM_019497	ENSMUSG00000052783	Grk4	A830025H08Rik|GRK|Gprk2l|Gprk4	G protein-coupled receptor kinase 4	protein-coding
2678	chr9	20263883	20265001	+	0	NA	5' UTR (NM_011753, exon 1 of 10)	5' UTR (NM_011753, exon 1 of 10)	162	NM_011753	22688	Mm.107441	NM_011753	ENSMUSG00000063108	Zfp26	5033428C05Rik|KRAB15|Zfp-26|Zfp70|Zfp81-rs1|mKIAA4196|mkr-3|mszf14|mszf52	zinc finger protein 26	protein-coding
2632	chr8	112088814	112115371	+	0	NA	intron (NM_017370, intron 1 of 4)	PB1|SINE|Alu	980	NM_017370	15439	Mm.26730	NM_017370	ENSMUSG00000031722	Hp	HP-1|preHP2	haptoglobin	protein-coding
1049	chr16	4556555	4561252	+	0	NA	intron (NM_031182, intron 1 of 6)	CpG	817	NM_031182	83383	Mm.273210	NM_031182	ENSMUSG00000005718	Tfap4	AI642933|AP-4|D930048N17Rik|Tcfap4|bHLHc41	transcription factor AP4	protein-coding
882	chr14	57502728	57507163	+	0	NA	Intergenic	CpG	-1687	NM_029498	76007	Mm.31417	NM_029498	ENSMUSG00000021945	Zmym2	5830413P05Rik|FIM|MYM|RAMP|SCLL|Zfp198|Znf198	zinc finger, MYM-type 2	protein-coding
2812	chr9	119803647	119804902	+	0	NA	intron (NM_026236, intron 1 of 18)	CpG	261	NM_026236	67561	Mm.104789	NM_026236	ENSMUSG00000032512	Wdr48	8430408H12Rik|Uaf1|mKIAA1449	WD repeat domain 48	protein-coding
1050	chr16	4699427	4703911	+	0	NA	intron (NM_001135112, intron 9 of 10)	intron (NM_001135112, intron 9 of 10)	17599	NM_001135112	83945	Mm.248337	NM_023646	ENSMUSG00000004069	Dnaja3	1200003J13Rik|1810053A11Rik|C81173|Tid-1|Tid1l	DnaJ (Hsp40) homolog, subfamily A, member 3	protein-coding
1488	chr2	27476593	27496688	+	0	NA	Intergenic	MLT1E2|LTR|MaLR	-46081	NM_011305	20181	Mm.24624	NM_011305	ENSMUSG00000015846	Rxra	9530071D11Rik|Nr2b1|RXRalpha1	retinoid X receptor alpha	protein-coding
560	chr12	21573507	21576237	+	0	NA	Intergenic	Intergenic	-151575	NM_011739	22630	Mm.289630	NM_011739	ENSMUSG00000076432	Ywhaq	2700028P07Rik|AA409740|AU021156|R74690	tyrosine 3-monooxygenase/tryptophan 5-monooxygenase activation protein, theta polypeptide	protein-coding
2830	chrX	20263975	20266345	+	0	NA	promoter-TSS (NM_011049)	promoter-TSS (NM_011049)	-459	NM_011049	18555	Mm.102574	NM_011049	ENSMUSG00000031065	Cdk16	Crk5|Pctaire1|Pctk1	cyclin-dependent kinase 16	protein-coding
798	chr13	95167699	95170031	+	0	NA	intron (NM_009680, intron 3 of 26)	intron (NM_009680, intron 3 of 26)	39950	NM_009680	11774	Mm.21185	NM_009680	ENSMUSG00000021686	Ap3b1	AP-3|AU015684|C78395|Hps2|beta3A|pe|pearl|rim2	adaptor-related protein complex 3, beta 1 subunit	protein-coding
898	chr14	68333332	68335477	+	0	NA	promoter-TSS (NM_001110162)	promoter-TSS (NM_001110162)	249	NM_001285933	105440	Mm.6720	NM_134073	ENSMUSG00000034327	Kctd9	-	potassium channel tetramerisation domain containing 9	protein-coding
2725	chr9	54581023	54582769	+	0	NA	intron (NM_023191, intron 1 of 10)	intron (NM_023191, intron 1 of 10)	460	NM_023191	66317	Mm.28437	NM_023191	ENSMUSG00000061559	Wdr61	2700038L12Rik|2810418I05Rik|REC14	WD repeat domain 61	protein-coding
1031	chr15	98592798	98593682	+	0	NA	intron (NM_007478, intron 1 of 4)	CpG	309	NM_007478	11842	Mm.221298	NM_007478	ENSMUSG00000051853	Arf3	5430400P17Rik|AI854770	ADP-ribosylation factor 3	protein-coding
1273	chr17	74925436	74929101	+	0	NA	promoter-TSS (NM_007566)	promoter-TSS (NM_007566)	-367	NM_007566	12211	Mm.442564	NM_007566	ENSMUSG00000024073	Birc6	A430032G04Rik|A430040A19Rik|AA501170|Bruce|D630005A10Rik|mKIAA1289	baculoviral IAP repeat-containing 6	protein-coding
2516	chr7	151736279	151740458	+	0	NA	exon (NM_001195086, exon 2 of 32)	exon (NM_001195086, exon 2 of 32)	1266	NM_001033319	233977	Mm.490347	NM_001033319	ENSMUSG00000037519	Ppfia1	C030014K08Rik|C87158|LIP.1|LIP1	protein tyrosine phosphatase, receptor type, f polypeptide (PTPRF), interacting protein (liprin), alpha 1	protein-coding
451	chr11	74536436	74538850	+	0	NA	promoter-TSS (NR_037610)	promoter-TSS (NR_037610)	243	NM_013625	18472	Mm.397111	NM_013625	ENSMUSG00000020745	Pafah1b1	LIS-1|Lis1|MMS10-U|Mdsh|Ms10u|Pafaha	platelet-activating factor acetylhydrolase, isoform 1b, subunit 1	protein-coding
2616	chr8	98239079	98240537	+	0	NA	promoter-TSS (NM_001035123)	promoter-TSS (NM_001035123)	-5	NM_001035123	66083	Mm.261321	NM_001035123	ENSMUSG00000031671	Setd6	0610039J04Rik|3110004G14Rik|AI413388|C76402	SET domain containing 6	protein-coding
454	chr11	75233305	75286674	+	0	NA	intron (NM_138950, intron 6 of 9)	intron (NM_138950, intron 6 of 9)	-6986	NM_008878	18816	Mm.279733	NM_008878	ENSMUSG00000038224	Serpinf2	AI747498|Pli|Serpimf2	serine (or cysteine) peptidase inhibitor, clade F, member 2	protein-coding
2538	chr8	19784456	19785293	+	0	NA	Intergenic	CpG	55298	NM_001039553	626415	Mm.425517	NM_001039553		4930467E23Rik	ENSMUSG00000074453|OTTMUSG00000018948|TSAP	RIKEN cDNA 4930467E23 gene	protein-coding
1364	chr18	65589737	65591403	+	0	NA	promoter-TSS (NM_172833)	promoter-TSS (NM_172833)	-81	NM_172833	240354	Mm.132613	NM_172833	ENSMUSG00000032688	Malt1	A630046N12|D430033E09Rik	mucosa associated lymphoid tissue lymphoma translocation gene 1	protein-coding
1408	chr19	18786858	18788133	+	0	NA	promoter-TSS (NM_177640)	promoter-TSS (NM_177640)	-231	NM_177640	225995	Mm.28101	NM_177640	ENSMUSG00000047044	D030056L22Rik	-	RIKEN cDNA D030056L22 gene	protein-coding
2448	chr7	99888792	99891442	+	0	NA	promoter-TSS (NM_029494)	promoter-TSS (NM_029494)	-107	NM_029494	75985	Mm.389966	NM_029494	ENSMUSG00000030643	Rab30	5033421K01Rik|AI323892|Rsb30	RAB30, member RAS oncogene family	protein-coding
634	chr12	100335083	100336538	+	0	NA	Intergenic	Intergenic	65208	NR_038130	67639	Mm.87374	NR_038130		4930474N09Rik	-	RIKEN cDNA 4930474N09 gene	ncRNA
2721	chr9	51543467	51543939	+	0	NA	Intergenic	Intergenic	-29754	NM_175535	244867	Mm.400352	NM_175535	ENSMUSG00000053199	Arhgap20	6530403F17Rik|A530023E23Rik|mKIAA1391	Rho GTPase activating protein 20	protein-coding
578	chr12	56180679	56182128	+	0	NA	promoter-TSS (NM_028314)	promoter-TSS (NM_028314)	-80	NM_011899	24067	Mm.471968	NM_011899		Srp54a	54kDa|Srp54	signal recognition particle 54A	protein-coding
2551	chr8	34709905	34710942	+	0	NA	exon (NM_017374, exon 1 of 7)	exon (NM_017374, exon 1 of 7)	330	NM_017374	19053	Mm.29301	NM_017374	ENSMUSG00000009630	Ppp2cb	AI115466|D8Ertd766e|PP2Ac	protein phosphatase 2 (formerly 2A), catalytic subunit, beta isoform	protein-coding
695	chr13	35832381	35834162	+	0	NA	promoter-TSS (NM_001123386)	promoter-TSS (NM_001123386)	0	NM_001123386	12593	Mm.29002	NM_009881	ENSMUSG00000059288	Cdyl	AI325931	chromodomain protein, Y chromosome-like	protein-coding
978	chr15	68088815	68091711	+	0	NA	5' UTR (NM_001145888, exon 1 of 16)	5' UTR (NM_001145888, exon 1 of 16)	155	NM_001145888	380993	Mm.309526	NM_198644	ENSMUSG00000022335	Zfat	Gm922|Zfat1|Zfp406	zinc finger and AT hook domain containing	protein-coding
2144	chr5	137971547	137975285	+	0	NA	intron (NM_010312, intron 1 of 9)	intron (NM_010312, intron 1 of 9)	1041	NM_010312	14693	Mm.30141	NM_010312	ENSMUSG00000029713	Gnb2	Gnb-2	guanine nucleotide binding protein (G protein), beta 2	protein-coding
325	chr10	111193097	111194468	+	0	NA	Intergenic	(CGTG)n|Simple_repeat|Simple_repeat	117650	NR_046029	629206	Mm.391444	NR_046029		Gm20758	-	predicted gene, 20758	ncRNA
378	chr11	17111035	17112396	+	0	NA	promoter-TSS (NM_025443)	promoter-TSS (NM_025443)	-123	NM_025443	66249	Mm.27831	NM_025443	ENSMUSG00000020116	Pno1	1810003N24Rik|AA407421|AU015468|AU019495|AU042323|Emi3|Imi3	partner of NOB1 homolog (S. cerevisiae)	protein-coding
889	chr14	60215788	60217390	+	0	NA	intron (NM_001168538, intron 1 of 9)	CpG	207	NM_001168537	71891	Mm.439850	NM_027986	ENSMUSG00000021982	Cdadc1	2310010M10Rik|AI449174|AI463398|BB130816|NYD-SP15	cytidine and dCMP deaminase domain containing 1	protein-coding
1233	chr17	39979965	39983061	+	0	NA	non-coding (NR_046233, exon 1 of 1)	non-coding (NR_046233, exon 1 of 1)	1571	NR_046233	100861531		NR_046233		Rn45s	-	45S pre-ribosomal RNA	rRNA
540	chr11	120431325	120444130	+	0	NA	TTS (NM_133796)	TTS (NM_133796)	-3477	NM_011032	18453	Mm.16660	NM_011032	ENSMUSG00000025130	P4hb	ERp59|PDI|Pdia1|Thbp	prolyl 4-hydroxylase, beta polypeptide	protein-coding
1162	chr17	8356654	8360499	+	0	NA	intron (NM_001197046, intron 1 of 12)	CpG	193	NM_201230	75296	Mm.227250	NM_201230	ENSMUSG00000069135	Fgfr1op	4930553O10Rik|FOP	Fgfr1 oncogene partner	protein-coding
1615	chr2	155781675	155782674	+	0	NA	promoter-TSS (NM_001130000)	promoter-TSS (NM_001130000)	-120	NM_001129999	16328	Mm.288729	NM_008383	ENSMUSG00000038241	Cep250	AW490617|B230210E21Rik|Cep2|Inmp	centrosomal protein 250	protein-coding
2831	chrX	34184512	34186011	+	0	NA	5' UTR (NM_001081956, exon 1 of 7)	5' UTR (NM_001081956, exon 1 of 7)	148	NM_001081956	338351	Mm.116704	NM_001081956	ENSMUSG00000059708	Akap17b	AA407619|AKAP-17B|B230333C21Rik|C230056F04Rik|PRKA17B|Sfrs17b|Srsf17b|Talia	A kinase (PRKA) anchor protein 17B	protein-coding
211	chr10	10999924	11002381	+	0	NA	promoter-TSS (NM_027968)	promoter-TSS (NM_027968)	24	NM_027968	71865	Mm.276229	NM_027968	ENSMUSG00000047648	Fbxo30	1700026A16Rik|MUSA1	F-box protein 30	protein-coding
684	chr13	25111392	25114921	+	0	NA	promoter-TSS (NM_001013389)	promoter-TSS (NM_001013389)	-970	NM_001013389	380836	Mm.387097	NM_001013389	ENSMUSG00000021339	Mrs2	Gm902|HPT|Mrs2l|RPT	MRS2 magnesium homeostasis factor homolog (S. cerevisiae)	protein-coding
2073	chr5	87800936	87809802	+	0	NA	Intergenic	Intergenic	-39149	NM_028094	72094	Mm.482739	NM_028094	ENSMUSG00000035780	Ugt2a3	2010321J07Rik	UDP glucuronosyltransferase 2 family, polypeptide A3	protein-coding
1732	chr3	94690239	94691367	+	0	NA	promoter-TSS (NM_008945)	promoter-TSS (NM_008945)	77	NM_008945	19172	Mm.368	NM_008945	ENSMUSG00000005779	Psmb4	Pros-27	proteasome (prosome, macropain) subunit, beta type 4	protein-coding
861	chr14	45998282	46012952	+	0	NA	intron (NM_019425, intron 1 of 5)	intron (NM_019425, intron 1 of 5)	2854	NM_019425	54342	Mm.312945	NM_019425	ENSMUSG00000037722	Gnpnat1	AU017428|AU040593|EMeg32|Gpnat1|Gsnpat	glucosamine-phosphate N-acetyltransferase 1	protein-coding
337	chr10	119548657	119550809	+	0	NA	intron (NM_080446, intron 1 of 12)	CpG	288	NM_080446	117599	Mm.214703	NM_080446	ENSMUSG00000020228	Helb	AI447783|D10Ertd664e	helicase (DNA) B	protein-coding
2406	chr7	54050658	54052077	+	0	NA	promoter-TSS (NM_001167864)	promoter-TSS (NM_001167864)	-97	NM_008186	14884	Mm.22700	NM_008186	ENSMUSG00000006599	Gtf2h1	62kDa|AW743425|AW822074|BTF2 p62|C77871|p62	general transcription factor II H, polypeptide 1	protein-coding
76	chr1	85315766	85327007	+	0	NA	Intergenic	Intergenic	-54245	NM_001037909	620078	Mm.386456	NM_175219	ENSMUSG00000052477	C130026I21Rik	4930565N07Rik|OTTMUSG00000029174	RIKEN cDNA C130026I21 gene	protein-coding
1924	chr4	115410153	115410918	+	0	NA	promoter-TSS (NM_172698)	promoter-TSS (NM_172698)	-143	NM_172698	230648	Mm.283565	NM_172698	ENSMUSG00000034210	Efcab14	4732418C07Rik	EF-hand calcium binding domain 14	protein-coding
2718	chr9	48863587	48864195	+	0	NA	exon (NM_012039, exon 1 of 16)	exon (NM_012039, exon 1 of 16)	205	NM_012039	26951	Mm.24791	NM_012039	ENSMUSG00000032264	Zw10	6330566F14Rik|MmZw10	zw10 kinetochore protein	protein-coding
982	chr15	73014208	73016303	+	0	NA	5' UTR (NM_153178, exon 1 of 19)	5' UTR (NM_153178, exon 1 of 19)	122	NM_153178	239528	Mm.23095	NM_153178		Ago2	1110029L17Rik|2310051F07Rik|AI225898|AL022874|AW546247|ENSMUSG00000072493|Eif2c2|Gerp95|Gm10365|mKIAA4215	argonaute RISC catalytic subunit 2	protein-coding
571	chr12	41750247	41752768	+	0	NA	intron (NM_053122, intron 2 of 6)	intron (NM_053122, intron 2 of 6)	830	NM_053122	93757	Mm.363813	NM_053122	ENSMUSG00000056899	Immp2l	AI853880|IMP2	IMP2 inner mitochondrial membrane peptidase-like (S. cerevisiae)	protein-coding
1214	chr17	32922758	32927086	+	0	NA	intron (NM_172458, intron 1 of 3)	CpG	310	NM_172458	208292	Mm.38813	NM_172458		Zfp871	4732483N19|9030612M13Rik|AI118577|AI265322|mKIAA3006	zinc finger protein 871	protein-coding
1190	chr17	24209971	24210519	+	0	NA	TTS (NM_011062)	TTS (NM_011062)	207	NM_027008	69259	Mm.28171	NM_027008	ENSMUSG00000016946	Kctd5	2610030N08Rik|mKIAA0176	potassium channel tetramerisation domain containing 5	protein-coding
2592	chr8	82234824	82236069	+	0	NA	promoter-TSS (NM_026904)	promoter-TSS (NM_026904)	193	NM_015751	24015	Mm.5831	NM_015751	ENSMUSG00000058355	Abce1	C79080|Oabp|RLI|RNS41|Rnaseli	ATP-binding cassette, sub-family E (OABP), member 1	protein-coding
389	chr11	27872744	27875508	+	0	NA	Intergenic	RLTR4_MM-int|LTR|ERV1	610198	NM_001166661	216613	Mm.93759	NM_181577	ENSMUSG00000032878	Ccdc85a	-	coiled-coil domain containing 85A	protein-coding
1660	chr3	14610826	14611779	+	0	NA	promoter-TSS (NM_001099674)	promoter-TSS (NM_001099674)	-46	NM_001099674	69126	Mm.389020	NM_001099674	ENSMUSG00000078784	1810022K09Rik	AI746582|AL023036	RIKEN cDNA 1810022K09 gene	protein-coding
1171	chr17	15634380	15637326	+	0	NA	promoter-TSS (NM_011185)	promoter-TSS (NM_011185)	-613	NM_011185	19170	Mm.32912	NM_011185	ENSMUSG00000014769	Psmb1	AA409053|C81484|Lmpc5	proteasome (prosome, macropain) subunit, beta type 1	protein-coding
1345	chr18	46682911	46686487	+	0	NA	intron (NM_173423, intron 1 of 2)	intron (NM_173423, intron 1 of 2)	926	NM_173423	240263	Mm.38249	NM_173423		Fem1c	2610312A07Rik|3632443A22Rik|AI646567	fem-1 homolog c (C.elegans)	protein-coding
2290	chr6	118088563	118089331	+	0	NA	intron (NM_030165, intron 1 of 7)	CpG	211	NM_030165	78752	Mm.300317	NM_030165	ENSMUSG00000042042	Csgalnact2	4632415D10Rik|Galnact2	chondroitin sulfate N-acetylgalactosaminyltransferase 2	protein-coding
966	chr15	54943419	54990201	+	0	NA	intron (NM_001037937, intron 1 of 8)	intron (NM_001037937, intron 1 of 8)	1819	NM_001037937	97998	Mm.295397	NM_145470	ENSMUSG00000022419	Deptor	Depdc6	DEP domain containing MTOR-interacting protein	protein-coding
1123	chr16	44724099	44727441	+	0	NA	intron (NM_145972, intron 1 of 8)	intron (NM_145972, intron 1 of 8)	1356	NM_145972	212547	Mm.310573	NM_145972	ENSMUSG00000036208	BC027231	Nepro	cDNA sequence BC027231	protein-coding
2314	chr6	136775886	136777343	+	0	NA	promoter-TSS (NM_178776)	promoter-TSS (NM_178776)	123	NM_021714	60321	Mm.141197	NM_021714	ENSMUSG00000030216	Wbp11	2510026P17Rik|D6Wsu113e|Npwbp|SIPP1	WW domain binding protein 11	protein-coding
2216	chr6	40584036	40586766	+	0	NA	intron (NM_001171003, intron 1 of 47)	intron (NM_001171003, intron 1 of 47)	6571	NM_001171003	232714	Mm.33401	NM_001171003	ENSMUSG00000068587	Mgam	6030407P20Rik|MGA	maltase-glucoamylase	protein-coding
992	chr15	79059356	79060286	+	0	NA	promoter-TSS (NM_001045558)	promoter-TSS (NM_001045558)	9	NM_001045558	18693	Mm.259464	NM_008837	ENSMUSG00000068206	Pick1	Prkcabp	protein interacting with C kinase 1	protein-coding
236	chr10	39618359	39619364	+	0	NA	non-coding (NR_033628, exon 1 of 4)	non-coding (NR_033628, exon 1 of 4)	183	NR_033628	213332	Mm.484359	NR_033628		AA474331	-	expressed sequence AA474331	pseudo
758	chr13	67583158	67585861	+	0	NA	intron (NM_001076791, intron 1 of 3)	intron (NM_001076791, intron 1 of 3)	680	NM_001076791	408067	Mm.315879	NM_001076791	ENSMUSG00000059839	Zfp874b	9630025I21Rik|Rslcan16	zinc finger protein 874b	protein-coding
1954	chr4	129138122	129139733	+	0	NA	promoter-TSS (NM_133889)	promoter-TSS (NM_133889)	4	NM_133889	100383	Mm.17918	NM_133889	ENSMUSG00000040859	Bsdc1	1110063F24Rik|AW011758	BSD domain containing 1	protein-coding
2843	chrX	70960445	70965040	+	0	NA	exon (NM_007435, exon 1 of 10)	exon (NM_007435, exon 1 of 10)	806	NM_007435	11666	Mm.365	NM_007435	ENSMUSG00000031378	Abcd1	ALDP|Ald|Aldgh	ATP-binding cassette, sub-family D (ALD), member 1	protein-coding
218	chr10	17954091	17955337	+	0	NA	promoter-TSS (NM_144820)	promoter-TSS (NM_144820)	73	NM_144820	215814	Mm.296565	NM_144820	ENSMUSG00000059554	Ccdc28a	1700009P13Rik|AI480677	coiled-coil domain containing 28A	protein-coding
706	chr13	43493642	43494508	+	0	NA	intron (NM_023554, intron 1 of 7)	CpG	330	NM_023554	70078	Mm.439927	NM_023554	ENSMUSG00000063200	Nol7	2210008F15Rik|5730556I21Rik|NOP27|RARG-1	nucleolar protein 7	protein-coding
14	chr1	24011886	24012757	+	0	NA	intron (NM_026503, intron 1 of 2)	CpG	158	NM_026503	68002	Mm.250424	NM_026503	ENSMUSG00000026154	1110058L19Rik	1700001E18Rik|C6orf57	RIKEN cDNA 1110058L19 gene	protein-coding
2345	chr7	15018908	15032928	+	0	NA	intron (NM_175250, intron 1 of 6)	RMER4B|LTR|ERVK	-2018	NM_001199306	76971	Mm.290727	NM_175250	ENSMUSG00000030378	2810007J24Rik	-	RIKEN cDNA 2810007J24 gene	protein-coding
2587	chr8	74432212	74433185	+	0	NA	intron (NM_001166645, intron 1 of 2)	CpG	193	NM_001166645	382019	Mm.251482	NM_001166645		Zfp882	ENSMUSG00000052439|Gm15468|OTTMUSG00000022410	zinc finger protein 882	protein-coding
1608	chr2	154875795	154929600	+	0	NA	Intergenic	MTD|LTR|MaLR	-2464	NM_016661	269378	Mm.330692	NM_016661	ENSMUSG00000027597	Ahcy	AA987153|AL024110|CuBP|SAHH	S-adenosylhomocysteine hydrolase	protein-coding
2328	chr6	146836517	146838072	+	0	NA	intron (NM_001170433, intron 1 of 27)	intron (NM_001170433, intron 1 of 27)	278	NM_026221	67533	Mm.103382	NM_026221	ENSMUSG00000016487	Ppfibp1	4632409B19Rik|AW214454|AW261454	PTPRF interacting protein, binding protein 1 (liprin beta 1)	protein-coding
2567	chr8	50091191	50092689	+	0	NA	Intergenic	Intergenic	-331896	NM_011857	23965	Mm.42191	NM_011857	ENSMUSG00000031561	Tenm3	2610100B16Rik|Odz1|Odz3|Ten-m3|mKIAA1455	teneurin transmembrane protein 3	protein-coding
2474	chr7	128177461	128179625	+	0	NA	intron (NM_021554, intron 1 of 4)	CpG	584	NM_021554	59052	Mm.29122	NM_021554	ENSMUSG00000030876	Mettl9	0610012D09Rik|AA517660|Drev	methyltransferase like 9	protein-coding
234	chr10	36693797	36695184	+	0	NA	5' UTR (NM_008229, exon 1 of 14)	5' UTR (NM_008229, exon 1 of 14)	140	NM_008229	15182	Mm.19806	NM_008229	ENSMUSG00000019777	Hdac2	D10Wsu179e|YAF1|Yy1bp|mRPD3	histone deacetylase 2	protein-coding
594	chr12	72038187	72039506	+	0	NA	promoter-TSS (NM_019785)	promoter-TSS (NM_019785)	2	NM_019785	56444	Mm.29317	NM_019785	ENSMUSG00000021076	Actr10	Actr11|Arp11	ARP10 actin-related protein 10	protein-coding
1438	chr19	46646958	46650294	+	0	NA	intron (NM_053196, intron 1 of 11)	intron (NM_053196, intron 1 of 11)	771	NM_053196	94279	Mm.296837	NM_053196	ENSMUSG00000025036	Sfxn2	C79732|F630107H02Rik	sideroflexin 2	protein-coding
1903	chr4	96219401	96220658	+	0	NA	exon (NM_010008, exon 1 of 9)	exon (NM_010008, exon 1 of 9)	313	NM_010008	13110	Mm.98200	NM_010008	ENSMUSG00000052914	Cyp2j6	-	cytochrome P450, family 2, subfamily j, polypeptide 6	protein-coding
2767	chr9	95756819	95758874	+	0	NA	promoter-TSS (NM_019864)	promoter-TSS (NM_019864)	90	NR_073361	73410	Mm.443314	NM_028533		1700065D16Rik	-	RIKEN cDNA 1700065D16 gene	protein-coding
2188	chr6	23788442	23790316	+	0	NA	promoter-TSS (NM_001252106)	promoter-TSS (NM_001252106)	42	NM_001252106	320405	Mm.259632	NM_153163	ENSMUSG00000017978	Cadps2	A230044C21Rik|Caps-2|Caps2|Cpd2	Ca2+-dependent activator protein for secretion 2	protein-coding
1778	chr3	122967735	122971750	+	0	NA	promoter-TSS (NM_027135)	promoter-TSS (NM_027135)	-672	NM_027135	69608	Mm.29293	NM_027135	ENSMUSG00000039234	Sec24d	2310020L09Rik|Gm1349	Sec24 related gene family, member D (S. cerevisiae)	protein-coding
2339	chr7	6679903	6682615	+	0	NA	intron (NM_008817, intron 1 of 8)	intron (NM_008817, intron 1 of 8)	1871	NM_008817	18616	Mm.389800	NM_008817		Peg3	AL022617|ASF-1|End4|Gcap4|Pw1|Zfp102|mKIAA0287	paternally expressed 3	protein-coding
1859	chr4	45455108	45546076	+	0	NA	intron (NM_001033306, intron 2 of 5)	ID_B1|SINE|B4	43108	NM_001033306	230126	Mm.251716	NM_001033306	ENSMUSG00000044813	Shb	BC028832	src homology 2 domain-containing transforming protein B	protein-coding
160	chr1	166236953	166238042	+	0	NA	promoter-TSS (NM_178071)	promoter-TSS (NM_178071)	118	NM_001160209	66352	Mm.33285	NM_025505	ENSMUSG00000026577	Blzf1	1700030G05Rik|Blzf1l|Golgin-45|Jem-1	basic leucine zipper nuclear factor 1	protein-coding
2776	chr9	100445250	100447650	+	0	NA	promoter-TSS (NM_010878)	promoter-TSS (NM_010878)	22	NM_010878	17973	Mm.181485	NM_010878	ENSMUSG00000032475	Nck1	6330586M15Rik|D230010O13Rik|Nck|Nck-1	non-catalytic region of tyrosine kinase adaptor protein 1	protein-coding
98	chr1	107252260	107254208	+	0	NA	promoter-TSS (NM_178779)	promoter-TSS (NM_178779)	53	NM_178779	320311	Mm.389162	NM_178779	ENSMUSG00000047496	Rnf152	A930029B02Rik	ring finger protein 152	protein-coding
1048	chr16	4212903	4214630	+	0	NA	promoter-TSS (NM_001025432)	promoter-TSS (NM_001025432)	-362	NM_001025432	12914	Mm.132238	NM_001025432	ENSMUSG00000022521	Crebbp	AW558298|CBP|CBP/p300|KAT3A|p300/CBP	CREB binding protein	protein-coding
1278	chr17	84228226	84273951	+	0	NA	Intergenic	MER57C2|LTR|ERV1	-4958	NM_025325	107766	Mm.30100	NM_025325	ENSMUSG00000000673	Haao	0610007K21Rik|0610012J07Rik|3-HAO|3-HAOxase|3HAO	3-hydroxyanthranilate 3,4-dioxygenase	protein-coding
2434	chr7	87830455	87834540	+	0	NA	intron (NM_173863, intron 1 of 14)	intron (NM_173863, intron 1 of 14)	1266	NM_173863	70461	Mm.392175	NM_173863	ENSMUSG00000030527	Crtc3	2610312F20Rik|6332415K15Rik|AI429792|BC011210|TORC3	CREB regulated transcription coactivator 3	protein-coding
1000	chr15	81295828	81297591	+	0	NA	promoter-TSS (NM_019712)	promoter-TSS (NM_019712)	-37	NM_019712	56438	Mm.29405	NM_019712	ENSMUSG00000022400	Rbx1	1500002P15Rik|AA517855|ROC1	ring-box 1	protein-coding
1381	chr19	3743999	3744486	+	0	NA	Intergenic	L1M4c|LINE|L1	-23179	NM_001167889	225888	Mm.278578	NM_144871	ENSMUSG00000045098	Suv420h1	AA117471|C630029K18Rik|KMT5B|Suv4-20h1	suppressor of variegation 4-20 homolog 1 (Drosophila)	protein-coding
43	chr1	55135958	55147594	+	0	NA	intron (NM_010477, intron 2 of 11)	intron (NM_010477, intron 2 of 11)	3000	NM_010477	15510	Mm.1777	NM_010477	ENSMUSG00000025980	Hspd1	60kDa|Hsp60	heat shock protein 1 (chaperonin)	protein-coding
1061	chr16	14316917	14317923	+	0	NA	promoter-TSS (NM_025345)	promoter-TSS (NM_025345)	5	NM_025345	66086	Mm.42072	NM_025345	ENSMUSG00000022677	Fopnl	0610037P05Rik	Fgfr1op N-terminal like	protein-coding
2582	chr8	73028222	73227179	+	0	NA	intron (NM_133772, intron 1 of 16)	ORR1A3-int|LTR|MaLR	4513	NM_133772	76900	Mm.6667	NM_133772	ENSMUSG00000070003	Ssbp4	1210002E11Rik|AW743380|Sspb4	single stranded DNA binding protein 4	protein-coding
2054	chr5	53373464	53391957	+	0	NA	intron (NR_040413, intron 1 of 2)	(CA)n|Simple_repeat|Simple_repeat	821	NR_040413	75954	Mm.258937	NR_040413		5033403H07Rik	-	RIKEN cDNA 5033403H07 gene	ncRNA
1728	chr3	94113165	94116956	+	0	NA	intron (NM_029431, intron 1 of 5)	intron (NM_029431, intron 1 of 5)	1006	NM_029431	75778	Mm.45092	NM_029431	ENSMUSG00000028145	Them4	2700077M13Rik|4921507I02Rik	thioesterase superfamily member 4	protein-coding
2785	chr9	106056068	106075707	+	0	NA	Intergenic	RMER5|LTR|ERV1	-5418	NM_174846	235582	Mm.335420	NM_174846	ENSMUSG00000020258	Glyctk	6230410P16Rik|C430006L12	glycerate kinase	protein-coding
193	chr1	188572935	188573842	+	0	NA	promoter-TSS (NM_026041)	promoter-TSS (NM_026041)	-151	NM_026041	67223	Mm.289841	NM_026041	ENSMUSG00000001305	Rrp15	2810430M08Rik|5430437H21Rik	ribosomal RNA processing 15 homolog (S. cerevisiae)	protein-coding
288	chr10	81089704	81091067	+	0	NA	promoter-TSS (NM_027480)	promoter-TSS (NM_027480)	-32	NM_181586	50721	Mm.25643	NM_181586	ENSMUSG00000034748	Sirt6	2810449N18Rik|AI043036|Sir2l6	sirtuin 6	protein-coding
119	chr1	134313066	134314802	+	0	NA	promoter-TSS (NM_172516)	promoter-TSS (NM_172516)	-96	NM_172516	213452	Mm.257120	NM_172516	ENSMUSG00000042046	Dstyk	A930019K20Rik|C430014H23Rik|C820013G01|Ripk5	dual serine/threonine and tyrosine protein kinase	protein-coding
1555	chr2	118686513	118689419	+	0	NA	intron (NM_019826, intron 1 of 11)	intron (NM_019826, intron 1 of 11)	230	NM_019826	56357	Mm.6635	NM_019826	ENSMUSG00000027332	Ivd	1300016K07Rik|6720455E18Rik|AI463340	isovaleryl coenzyme A dehydrogenase	protein-coding
586	chr12	60111787	60119846	+	0	NA	intron (NM_025656, intron 2 of 9)	ID_B1|SINE|B4	1436	NM_025656	66603	Mm.35353	NM_025656		Gemin2	1700012N19Rik|Sip1	gem (nuclear organelle) associated protein 2	protein-coding
2870	chrX	160514049	160514827	+	0	NA	promoter-TSS (NM_009173)	promoter-TSS (NM_009173)	-457	NM_009173	20438	Mm.37215	NM_009173	ENSMUSG00000040749	Siah1b	AA960570|Sinh1b	seven in absentia 1B	protein-coding
2859	chrX	133275164	133277536	+	0	NA	promoter-TSS (NM_019768)	promoter-TSS (NM_019768)	-202	NM_019768	56397	Mm.27218	NM_019768	ENSMUSG00000031422	Morf4l2	2410017O14Rik|Mrgx|Sid393p|mKIAA0026	mortality factor 4 like 2	protein-coding
410	chr11	51075856	51079051	+	0	NA	promoter-TSS (NM_177567)	promoter-TSS (NM_177567)	780	NM_007714	12750	Mm.239354	NM_007714	ENSMUSG00000020385	Clk4	AI987988|C85119	CDC like kinase 4	protein-coding
999	chr15	81223275	81231510	+	0	NA	intron (NM_133726, intron 1 of 11)	intron (NM_133726, intron 1 of 11)	2732	NM_133726	70356	Mm.180337	NM_133726	ENSMUSG00000022403	St13	1110007I03Rik|3110002K08Rik|AW555194|HIP|HOP|HSPABP|HSPABP1|PRO0786|SNC6|p48	suppression of tumorigenicity 13	protein-coding
1180	chr17	17430665	17431865	+	0	NA	Intergenic	Intergenic	-80031	NM_025934	67045	Mm.35117	NM_025934	ENSMUSG00000023846	Riok2	2010110K24Rik|2410085M17Rik	RIO kinase 2 (yeast)	protein-coding
2169	chr5	150437915	150439609	+	0	NA	5' UTR (NM_013559, exon 1 of 18)	5' UTR (NM_013559, exon 1 of 18)	128	NM_013559	15505	Mm.270681	NM_013559	ENSMUSG00000029657	Hsph1	105kDa|AI790491|Hsp105|Hsp110|hsp-E7I	heat shock 105kDa/110kDa protein 1	protein-coding
430	chr11	61221112	61222527	+	0	NA	Intergenic	CpG	-30242	NM_026183	67473	Mm.100741	NM_026183	ENSMUSG00000010122	Slc47a1	1300013J15Rik|AI036982|MATE1|mMATE1	solute carrier family 47, member 1	protein-coding
1185	chr17	21815957	21818596	+	0	NA	Intergenic	Intergenic	-9903	NR_045766	100310809	Mm.463100	NR_045766		Gm10509	ENSMUSG00000073448	zinc finger protein 51 pseudogene	pseudo
447	chr11	72608675	72610475	+	0	NA	promoter-TSS (NM_001045536)	promoter-TSS (NM_001045536)	-153	NM_001045536	195018	Mm.272030	NM_001045536	ENSMUSG00000055670	Zzef1	8430405D05Rik|BC051585|C130099L13Rik|C85424|mKIAA0399	zinc finger, ZZ-type with EF hand domain 1	protein-coding
1446	chr19	53960752	53990689	+	0	NA	intron (NM_011050, intron 1 of 11)	intron (NM_011050, intron 1 of 11)	-2121	NM_001168492	18569	Mm.1605	NM_011050	ENSMUSG00000024975	Pdcd4	D19Ucla1|Ma3|Tis	programmed cell death 4	protein-coding
1741	chr3	97704724	97706574	+	0	NA	intron (NM_011342, intron 1 of 4)	intron (NM_011342, intron 1 of 4)	499	NM_011342	20333	Mm.2551	NM_011342		Sec22b	4930564D15Rik|AA517334|AI480645|C81333|ERS-24|Sec22l1	SEC22 vesicle trafficking protein homolog B (S. cerevisiae)	protein-coding
2118	chr5	116081323	116082871	+	0	NA	promoter-TSS (NR_027810)	promoter-TSS (NR_027810)	101	NM_198163	77407	Mm.27553	NM_198163		Rab35	9530019H02Rik|AU040256|H-ray|RAB1C|RAY	RAB35, member RAS oncogene family	protein-coding
415	chr11	51907739	51913606	+	0	NA	Intergenic	Intergenic	-1654	NM_019411	19052	Mm.260288	NM_019411		Ppp2ca	PP2A|R75353	protein phosphatase 2 (formerly 2A), catalytic subunit, alpha isoform	protein-coding
1130	chr16	64850461	64852940	+	0	NA	promoter-TSS (NM_178647)	promoter-TSS (NM_178647)	-211	NM_178647	106143	Mm.10160	NM_178647	ENSMUSG00000054604	Cggbp1	AA960172|AL023996|AW045841	CGG triplet repeat binding protein 1	protein-coding
1315	chr18	21078081	21131974	+	0	NA	intron (NM_026301, intron 1 of 5)	intron (NM_026301, intron 1 of 5)	1901	NM_026301	67664	Mm.45980	NM_026301	ENSMUSG00000033107	Rnf125	4930553F04Rik	ring finger protein 125	protein-coding
189	chr1	185923872	185925341	+	0	NA	Intergenic	Intergenic	66266	NM_022019	63953	Mm.404024	NM_022019	ENSMUSG00000039384	Dusp10	2610306G15Rik|AI158871|MKP-5|MKP5	dual specificity phosphatase 10	protein-coding
2597	chr8	87483490	87515275	+	0	NA	Intergenic	Intergenic	3265	NM_008416	16477	Mm.1167	NM_008416	ENSMUSG00000052837	Junb	-	jun B proto-oncogene	protein-coding
1292	chr18	5333763	5335297	+	0	NA	promoter-TSS (NM_178722)	promoter-TSS (NM_178722)	-93	NM_178722	240186	Mm.118257	NM_178722	ENSMUSG00000050945	Zfp438	9430031G09|9430091M14Rik|B830013J05Rik	zinc finger protein 438	protein-coding
2330	chr6	148778921	148780417	+	0	NA	intron (NM_001081113, intron 1 of 24)	GA-rich|Low_complexity|Low_complexity	320	NM_001081113	320727	Mm.260105	NM_001081113	ENSMUSG00000040029	Ipo8	6230418K12Rik|Abcc10|C130009K11Rik|MRP7|OM-1|Om1|Ranbp8	importin 8	protein-coding
1356	chr18	61335951	61337511	+	0	NA	promoter-TSS (NM_178277)	promoter-TSS (NM_178277)	-27	NM_134134	106894	Mm.22574	NM_134134	ENSMUSG00000024622	Hmgxb3	2510002C16Rik|A630042L21Rik|AI413166|mKIAA0194	HMG box domain containing 3	protein-coding
2849	chrX	91422547	91424023	+	0	NA	Intergenic	Intergenic	34705	NM_012010	26905	Mm.218851	NM_012010	ENSMUSG00000035150	Eif2s3x	AA409828|AA547477|AI314668|Eif-2gx	eukaryotic translation initiation factor 2, subunit 3, structural gene X-linked	protein-coding
480	chr11	85165757	85167165	+	0	NA	promoter-TSS (NM_138681)	promoter-TSS (NM_138681)	-205	NM_001166642	192197	Mm.287663	NM_138681	ENSMUSG00000059439	Bcas3	1500019F07Rik|2610028P08Rik|AU021018|BC028339|K20D4|rudhira	breast carcinoma amplified sequence 3	protein-coding
107	chr1	129669675	129673811	+	0	NA	exon (NM_028399, exon 2 of 9)	exon (NM_028399, exon 2 of 9)	1002	NM_028399	72949	Mm.268672	NM_028399		Ccnt2	2900041I18Rik|C81304|CycT2|CycT2a|CycT2b	cyclin T2	protein-coding
438	chr11	63892484	63893785	+	0	NA	promoter-TSS (NM_178379)	promoter-TSS (NM_178379)	148	NR_033780	66456	Mm.124828	NR_033780	ENSMUSG00000087497	2810001G20Rik	AW045514	RIKEN cDNA 2810001G20 gene	ncRNA
1153	chr16	98216859	98219511	+	0	NA	Intergenic	Intergenic	-34399	NM_175428	114565	Mm.474489	NM_175428	ENSMUSG00000046962	Zbtb21	5430437K12Rik|B430213I24Rik|Zfp295|Znf295|mKIAA1227	zinc finger and BTB domain containing 21	protein-coding
1871	chr4	49418367	49424469	+	0	NA	promoter-TSS (NM_145368)	promoter-TSS (NM_145368)	-395	NM_145368	209186	Mm.35071	NM_145368	ENSMUSG00000060317	Acnat2	C730036D15Rik	acyl-coenzyme A amino acid N-acyltransferase 2	protein-coding
2385	chr7	37989107	38002062	+	0	NA	Intergenic	(TTTC)n|Simple_repeat|Simple_repeat	512447	NM_172298	243931	Mm.44141	NM_172298	ENSMUSG00000021217	Tshz3	A630038G13Rik|Tsh3|Zfp537|mKIAA1474|teashirt3	teashirt zinc finger family member 3	protein-coding
87	chr1	93308603	93362787	+	0	NA	intron (NM_011066, intron 8 of 22)	intron (NM_011066, intron 8 of 22)	20210	NM_011066	18627	Mm.482463	NM_011066	ENSMUSG00000055866	Per2	mKIAA0347|mPer2	period circadian clock 2	protein-coding
1022	chr15	90172663	90178112	+	0	NA	Intergenic	Intergenic	120596	NR_106106	102466838		NR_106106		Mir7648	mmu-mir-7648	microRNA mir-7648	ncRNA
1832	chr4	24823047	24826133	+	0	NA	promoter-TSS (NM_026742)	promoter-TSS (NM_026742)	-640	NM_026742	68493	Mm.204831	NM_026742	ENSMUSG00000028261	Ndufaf4	1110007M04Rik|3000003G13Rik|AW214064	NADH dehydrogenase (ubiquinone) 1 alpha subcomplex, assembly factor 4	protein-coding
2795	chr9	107904165	107908103	+	0	NA	intron (NM_013785, intron 1 of 5)	intron (NM_013785, intron 1 of 5)	1155	NM_013785	27399	Mm.276155	NM_013785	ENSMUSG00000032594	Ip6k1	1200016D08Rik|AU022776|Ihpk1|InsP6|InsP6k1|Itpk6	inositol hexaphosphate kinase 1	protein-coding
2704	chr9	43018318	43092620	+	0	NA	Intergenic	CT-rich|Low_complexity|Low_complexity	-7570	NM_178644	102644	Mm.246479	NM_178644	ENSMUSG00000032014	Oaf	AL024221|D130038B21Rik|D9Ucla1	OAF homolog (Drosophila)	protein-coding
953	chr15	36934775	36938506	+	0	NA	intron (NM_026521, intron 1 of 3)	intron (NM_026521, intron 1 of 3)	517	NM_026521	68036	Mm.371631	NM_026521	ENSMUSG00000062397	Zfp706	3110006P09Rik|AA793007|AW536850|C77232|Znf706	zinc finger protein 706	protein-coding
221	chr10	20030408	20034248	+	0	NA	promoter-TSS (NM_001025393)	promoter-TSS (NM_001025393)	53	NM_001025393	72567	Mm.294783	NM_153787	ENSMUSG00000037608	Bclaf1	2610102K23Rik|2700025J07Rik|2810454G14Rik|5730534O06Rik|AI450190|AW556225|Btf|mKIAA0164	BCL2-associated transcription factor 1	protein-coding
1424	chr19	36449283	36451117	+	0	NA	Intergenic	Intergenic	-3357	NM_029508	76073	Mm.259180	NM_029508	ENSMUSG00000024805	Pcgf5	0610009F02Rik|1110054A01Rik|5830406C17Rik|5830443C21Rik|9530023M17Rik|AI324127	polycomb group ring finger 5	protein-coding
1560	chr2	120434417	120435537	+	0	NA	promoter-TSS (NM_025657)	promoter-TSS (NM_025657)	74	NM_025657	66606	Mm.428639	NM_025657	ENSMUSG00000027286	Lrrc57	2810002D13Rik|AA407405	leucine rich repeat containing 57	protein-coding
417	chr11	54250878	54254029	+	0	NA	intron (NM_173753, intron 1 of 17)	(TG)n|Simple_repeat|Simple_repeat	772	NM_173753	216742	Mm.34087	NM_173753	ENSMUSG00000035992	Fnip1	A730024A03Rik|AI838773|AW557298	folliculin interacting protein 1	protein-coding
784	chr13	85328905	85329720	+	0	NA	intron (NM_023243, intron 1 of 8)	intron (NM_023243, intron 1 of 8)	230	NM_023243	66671	Mm.18474	NM_023243	ENSMUSG00000021548	Ccnh	6330408H09Rik|AI661354|AV102684|AW538719	cyclin H	protein-coding
1762	chr3	108246619	108248531	+	0	NA	intron (NM_001204979, intron 1 of 10)	intron (NM_001204979, intron 1 of 10)	602	NM_011319	20226	Mm.28688	NM_011319	ENSMUSG00000068739	Sars	Sars1|Strs|serRS	seryl-aminoacyl-tRNA synthetase	protein-coding
260	chr10	61912033	61913376	+	0	NA	promoter-TSS (NM_181423)	promoter-TSS (NM_181423)	-263	NM_181423	338359	Mm.235898	NM_181423	ENSMUSG00000020079	Supv3l1	6330443E10Rik	suppressor of var1, 3-like 1 (S. cerevisiae)	protein-coding
2061	chr5	73304561	73306740	+	0	NA	promoter-TSS (NM_001113423)	promoter-TSS (NM_001113423)	49	NM_153567	75991	Mm.121285	NM_153567	ENSMUSG00000036087	Slain2	5033405K12Rik|8030444K12Rik|AI596370	SLAIN motif family, member 2	protein-coding
1844	chr4	40645319	40651432	+	0	NA	intron (NM_001025444, intron 1 of 7)	intron (NM_001025444, intron 1 of 7)	1574	NM_025545	66408	Mm.430710	NM_025545	ENSMUSG00000028411	Aptx	2410016G21Rik|AA388047|FHA-HIT	aprataxin	protein-coding
1530	chr2	77783667	77784579	+	0	NA	intron (NM_030560, intron 1 of 20)	CpG	290	NM_001290740	80744	Mm.288151	NM_030560	ENSMUSG00000027014	Cwc22	AA684037|AI173004|AL022752|B230213M24|mKIAA1604	CWC22 spliceosome-associated protein homolog (S. cerevisiae)	protein-coding
2504	chr7	144598953	144603854	+	0	NA	intron (NM_029886, intron 1 of 3)	intron (NM_029886, intron 1 of 3)	1036	NM_029886	77252	Mm.29184	NM_029886	ENSMUSG00000040139	9430038I01Rik	-	RIKEN cDNA 9430038I01 gene	protein-coding
762	chr13	67855251	67856412	+	0	NA	non-coding (NR_027969, exon 3 of 3)	non-coding (NR_027969, exon 3 of 3)	240	NM_001001130	22746	Mm.288396	NM_001001130	ENSMUSG00000058331	Zfp85	KRAB19|Rslcan2|Zfp71|Zfp85-rs1	zinc finger protein 85	protein-coding
1144	chr16	92057861	92059645	+	0	NA	intron (NM_080456, intron 1 of 2)	CpG	172	NM_080456	121022	Mm.217354	NM_080456	ENSMUSG00000039680	Mrps6	AW046321	mitochondrial ribosomal protein S6	protein-coding
2798	chr9	109833608	109837488	+	0	NA	intron (NM_001205332, intron 1 of 17)	intron (NM_001205332, intron 1 of 17)	1270	NM_008633	17758	Mm.217318	NM_008633	ENSMUSG00000032479	Map4	AA407148|MAP-4|Mtap-4|Mtap4	microtubule-associated protein 4	protein-coding
734	chr13	58502358	58505980	+	0	NA	promoter-TSS (NM_001301343)	promoter-TSS (NM_001301343)	211	NM_001168248	74386	Mm.85289	NM_028904	ENSMUSG00000035367	Rmi1	4932432N11Rik|C79893	RMI1, RecQ mediated genome instability 1, homolog (S. cerevisiae)	protein-coding
1723	chr3	89534021	89535608	+	0	NA	intron (NM_019655, intron 1 of 14)	intron (NM_019655, intron 1 of 14)	174	NM_019655	56417	Mm.316628	NM_019655	ENSMUSG00000027951	Adar	AV242451|Adar1|Adar1p110|Adar1p150|mZaADAR	adenosine deaminase, RNA-specific	protein-coding
2621	chr8	107057833	107059944	+	0	NA	promoter-TSS (NM_144931)	promoter-TSS (NM_144931)	288	NM_001301164	12354	Mm.129265	NM_053070	ENSMUSG00000031883	Car7	AV343731|Ca7	carbonic anhydrase 7	protein-coding
2047	chr5	45826338	45842682	+	0	NA	intron (NM_024236, intron 4 of 6)	intron (NM_024236, intron 4 of 6)	6958	NM_024236	110391	Mm.30204	NM_024236	ENSMUSG00000015806	Qdpr	2610008L04Rik|D5Ertd371e|Dhpr|PKU2	quinoid dihydropteridine reductase	protein-coding
144	chr1	157819314	157821575	+	0	NA	promoter-TSS (NM_001039184)	promoter-TSS (NM_001039184)	-59	NM_001039184	74081	Mm.260247	NM_001039184	ENSMUSG00000033671	Cep350	4933409L06Rik|6430546F08Rik	centrosomal protein 350	protein-coding
1440	chr19	47162618	47165802	+	0	NA	intron (NM_023211, intron 1 of 3)	intron (NM_023211, intron 1 of 3)	905	NM_023211	66477	Mm.29722	NM_023211	ENSMUSG00000071528	Usmg5	2010301L15Rik	upregulated during skeletal muscle growth 5	protein-coding
2524	chr8	4835226	4841207	+	0	NA	Intergenic	Intergenic	-58682	NM_011369	20419	Mm.37801	NM_011369	ENSMUSG00000022322	Shcbp1	mPAL	Shc SH2-domain binding protein 1	protein-coding
381	chr11	20232311	20233844	+	0	NA	promoter-TSS (NM_018861)	promoter-TSS (NM_018861)	-361	NM_018861	55963	Mm.6379	NM_018861	ENSMUSG00000020142	Slc1a4	ASCT-1|ASCT1|AW045657|SATT	solute carrier family 1 (glutamate/neutral amino acid transporter), member 4	protein-coding
1471	chr2	18059557	18062554	+	0	NA	intron (NR_045538, intron 8 of 22)	intron (NR_045538, intron 8 of 22)	74843	NM_001252561	17354	Mm.209175	NM_010804	ENSMUSG00000026743	Mllt10	Af10|B130021D15Rik|D630001B22Rik|mKIAA4140	myeloid/lymphoid or mixed-lineage leukemia (trithorax homolog, Drosophila); translocated to, 10	protein-coding
1814	chr3	149597464	149598930	+	0	NA	Intergenic	Intergenic	660496	NR_040591	381482	Mm.393866	NR_040591		Gm1653	-	predicted gene 1653	ncRNA
906	chr14	70998842	70999986	+	0	NA	intron (NM_194345, intron 1 of 16)	CpG	228	NM_194345	239170	Mm.247582	NM_194345	ENSMUSG00000022095	Fam160b2	G430067P06Rik|Rai16	family with sequence similarity 160, member B2	protein-coding
2205	chr6	34730292	34731397	+	0	NA	5' UTR (NM_001289658, exon 1 of 4)	5' UTR (NM_001289658, exon 1 of 4)	412	NM_001289656	76223	Mm.150047	NM_178630	ENSMUSG00000038836	Agbl3	2900053G10Rik|4930431N21Rik|6530406M24Rik|CCP3	ATP/GTP binding protein-like 3	protein-coding
1349	chr18	51276706	51293399	+	0	NA	intron (NM_001081224, intron 1 of 1)	intron (NM_001081224, intron 1 of 1)	7500	NM_001081224	71373	Mm.63546	NM_001081224	ENSMUSG00000073565	Prr16	5430406M13Rik|AI607429	proline rich 16	protein-coding
177	chr1	179912864	179914422	+	0	NA	Intergenic	CpG	-7923	NM_001034899	545391	Mm.442974	NM_001034899	ENSMUSG00000091476	Gm16432	EG545391|EG666250	predicted gene 16432	protein-coding
2213	chr6	39674710	39675977	+	0	NA	5' UTR (NM_139294, exon 1 of 22)	5' UTR (NM_139294, exon 1 of 22)	119	NM_139294	109880	Mm.245513	NM_139294	ENSMUSG00000002413	Braf	9930012E13Rik|AA120551|AA387315|AA473386|B-raf|Braf-2|Braf2|C230098H17|C87398|D6Ertd631e	Braf transforming gene	protein-coding
373	chr11	6374799	6376674	+	0	NA	exon (NM_011221, exon 1 of 1)	exon (NM_011221, exon 1 of 1)	343	NM_011221	19291	Mm.390332	NM_011221	ENSMUSG00000094483	Purb	2310015K15Rik|AA114818|Cager-2|D11Bwg0414e	purine rich element binding protein B	protein-coding
2078	chr5	90652385	90654066	+	0	NA	promoter-TSS (NM_001163456)	promoter-TSS (NM_001163456)	-204	NM_001163456	231430	Mm.319697	NM_001033310	ENSMUSG00000035505	Cox18	BC038311	cytochrome c oxidase assembly protein 18	protein-coding
773	chr13	75575541	75578459	+	0	NA	Intergenic	Intergenic	-205494	NR_030451	751556		NR_030451	miRBase:MI0004644	Mir682	Mirn682|mir-682|mmu-mir-682	microRNA 682	ncRNA
1247	chr17	51317036	51319183	+	0	NA	intron (NM_001285991, intron 1 of 22)	CpG	568	NM_028162	72238	Mm.120650	NM_028162	ENSMUSG00000023923	Tbc1d5	1600014N05Rik	TBC1 domain family, member 5	protein-coding
22	chr1	31129324	31131336	+	0	NA	Intergenic	Intergenic	-102950	NM_153601	266744	Mm.389093	NM_153601	ENSMUSG00000050217	Lgsn	Gluld1|Lgs|lengsin	lengsin, lens protein with glutamine synthetase domain	protein-coding
205	chr10	5151204	5154593	+	0	NA	intron (NM_001079686, intron 1 of 54)	URR1A|DNA|MER1_type	1064	NM_001079686	64009	Mm.331626	NM_022027	ENSMUSG00000019769	Syne1	8B|A330049M09Rik|BE692247|C130039F11Rik|CPG2|Myne1|mKIAA1756	spectrin repeat containing, nuclear envelope 1	protein-coding
1309	chr18	12706754	12723076	+	0	NA	intron (NM_010680, intron 64 of 74)	intron (NM_010680, intron 64 of 74)	-87127	NM_028341	72747	Mm.52526	NM_028341	ENSMUSG00000024424	Ttc39c	1700008N02Rik|2810439F02Rik	tetratricopeptide repeat domain 39C	protein-coding
1752	chr3	102975340	102976248	+	0	NA	intron (NM_026602, intron 1 of 6)	CpG	160	NM_026602	68183	Mm.104919	NM_026602	ENSMUSG00000005687	Bcas2	6430539P16Rik|AI132645|C76366|C80030	breast carcinoma amplified sequence 2	protein-coding
1576	chr2	127095194	127102736	+	0	NA	intron (NM_139308, intron 1 of 7)	intron (NM_139308, intron 1 of 7)	3000	NM_139308	99138	Mm.41271	NM_139308	ENSMUSG00000027367	Stard7	AI852671|AL022671|AW544915	START domain containing 7	protein-coding
2874	chrY	622090	623366	+	0	NA	intron (NM_012008, intron 1 of 16)	intron (NM_012008, intron 1 of 16)	328	NM_012008	26900	Mm.302938	NM_012008	ENSMUSG00000069045	Ddx3y	8030469F12Rik|D1Pas1-rs1|Dby	DEAD (Asp-Glu-Ala-Asp) box polypeptide 3, Y-linked	protein-coding
2681	chr9	21171217	21173294	+	0	NA	promoter-TSS (NM_010561)	promoter-TSS (NM_010561)	-60	NM_001042708	16201	Mm.440026	NM_010561	ENSMUSG00000032178	Ilf3	MBII-26|MPHOSPH4|NF90|NFAR	interleukin enhancer binding factor 3	protein-coding
1622	chr2	158127303	158134379	+	0	NA	Intergenic	Intergenic	-1388	NM_008489	16803	Mm.218846	NM_008489	ENSMUSG00000016024	Lbp	Bpifd2|Ly88	lipopolysaccharide binding protein	protein-coding
1260	chr17	64680468	64682268	+	0	NA	promoter-TSS (NM_144859)	promoter-TSS (NM_144859)	-145	NM_001025309	224938	Mm.489681	NM_144859	ENSMUSG00000024083	Pja2	AI447901|AL022700|Neurodap1|mKIAA0438	praja 2, RING-H2 motif containing	protein-coding
874	chr14	52898235	52899861	+	0	NA	promoter-TSS (NM_172601)	promoter-TSS (NM_172601)	22	NM_172601	76338	Mm.32870	NM_172601	ENSMUSG00000022159	Rab2b	1500012D09Rik|4930528G15Rik|A230002G14|D530043M21Rik	RAB2B, member RAS oncogene family	protein-coding
975	chr15	65618279	65619334	+	0	NA	exon (NM_133766, exon 1 of 23)	exon (NM_133766, exon 1 of 23)	203	NM_133766	76740	Mm.260647	NM_133766	ENSMUSG00000015002	Efr3a	A130089M23Rik|BB071175|C76891|C920006C10Rik|D030063F01Rik|mKIAA0143	EFR3 homolog A (S. cerevisiae)	protein-coding
493	chr11	94894008	94903931	+	0	NA	intron (NM_133667, intron 2 of 10)	intron (NM_133667, intron 2 of 10)	3716	NM_133667	18604	Mm.29768	NM_133667	ENSMUSG00000038967	Pdk2	-	pyruvate dehydrogenase kinase, isoenzyme 2	protein-coding
1708	chr3	82137166	82137777	+	0	NA	Intergenic	(TGGGGG)n|Simple_repeat|Simple_repeat	-24523	NM_001081230	213582	Mm.271269	NM_001081230	ENSMUSG00000033900	Map9	5033421J10Rik|5330427D05Rik|ASAP|Mtap9	microtubule-associated protein 9	protein-coding
2220	chr6	47997320	47999278	+	0	NA	promoter-TSS (NM_001081382)	promoter-TSS (NM_001081382)	-186	NM_001081382	72306	Mm.381553	NM_001081382	ENSMUSG00000071477	Zfp777	2500002G23Rik	zinc finger protein 777	protein-coding
1436	chr19	45056124	45094922	+	0	NA	intron (NM_011976, intron 14 of 14)	intron (NM_011976, intron 14 of 14)	5409	NM_053164	94067	Mm.44174	NM_053164	ENSMUSG00000025208	Mrpl43	4930442D21Rik|bMRP36a	mitochondrial ribosomal protein L43	protein-coding
1911	chr4	102986031	102987351	+	0	NA	intron (NM_025909, intron 1 of 8)	CpG	240	NM_025909	67013	Mm.30021	NM_025909	ENSMUSG00000035069	Oma1	2010001O09Rik|MPRP-1|ZMPOMA1	OMA1 homolog, zinc metallopeptidase (S. cerevisiae)	protein-coding
2856	chrX	106207209	106209550	+	0	NA	intron (NM_016710, intron 1 of 5)	intron (NM_016710, intron 1 of 5)	340	NM_016710	50887	Mm.298443	NM_016710	ENSMUSG00000031245	Hmgn5	GARP45|NBP-45|Nsbp1	high-mobility group nucleosome binding domain 5	protein-coding
2528	chr8	11549892	11558877	+	0	NA	Intergenic	Intergenic	-1682	NM_011919	26356	Mm.25709	NM_011919	ENSMUSG00000045969	Ing1	2610028J21Rik|AA407184|AI875420|mING1h|p33Ing1|p37Ing1b	inhibitor of growth family, member 1	protein-coding
1591	chr2	140221129	140221882	+	0	NA	intron (NM_001013802, intron 1 of 18)	CpG	334	NM_028387	72899	Mm.229466	NM_028387	ENSMUSG00000068205	Macrod2	1110033L15Rik|2610107G07Rik|2900006F19Rik	MACRO domain containing 2	protein-coding
1677	chr3	35652574	35654967	+	0	NA	intron (NM_029570, intron 1 of 29)	intron (NM_029570, intron 1 of 29)	710	NM_029570	76295	Mm.239416	NM_029570	ENSMUSG00000037400	Atp11b	1110019I14Rik|ATPIF|ATPIR|mKIAA0956	ATPase, class VI, type 11B	protein-coding
2199	chr6	30846128	30847244	+	0	NA	TTS (NM_054073)	TTS (NM_054073)	108	NM_017478	54160	Mm.39896	NM_017478	ENSMUSG00000025607	Copg2	AW227625|gamma-2-COP	coatomer protein complex, subunit gamma 2	protein-coding
2174	chr6	3131912	3134139	+	0	NA	Intergenic	Intergenic	-105494	NR_036696	667335	Mm.380219	NR_036696		Gm8579	EG667335	spermatogenesis associated glutamate (E)-rich protein 4a pseudogene	pseudo
1320	chr18	24363546	24366659	+	0	NA	intron (NM_001160404, intron 1 of 12)	intron (NM_001160404, intron 1 of 12)	607	NM_001160404	14423	Mm.30249	NM_013814	ENSMUSG00000000420	Galnt1	-	UDP-N-acetyl-alpha-D-galactosamine:polypeptide N-acetylgalactosaminyltransferase 1	protein-coding
1026	chr15	96099456	96120021	+	0	NA	Intergenic	Intergenic	-4032	NR_030690	319722	Mm.103823	NR_030690		E330033B04Rik	-	RIKEN cDNA E330033B04 gene	ncRNA
2752	chr9	72487143	72489263	+	0	NA	Intergenic	Intergenic	-21951	NM_010890	17999	Mm.279923	NM_010890	ENSMUSG00000032216	Nedd4	AA959633|AL023035|AU019897|E430025J12Rik|Nedd4-1|Nedd4a|mKIAA0093	neural precursor cell expressed, developmentally down-regulated 4	protein-coding
1390	chr19	5366035	5367556	+	0	NA	promoter-TSS (NM_011793)	promoter-TSS (NM_011793)	-18	NM_027236	69860	Mm.299167	NM_027236	ENSMUSG00000024841	Eif1ad	2010003J03Rik|AI131644	eukaryotic translation initiation factor 1A domain containing	protein-coding
1993	chr4	151234502	151237613	+	0	NA	promoter-TSS (NM_001195565)	promoter-TSS (NM_001195565)	-180	NM_001195565	100072	Mm.318846	NM_001081557	ENSMUSG00000014592	Camta1	1810059M14Rik|2310058O09Rik|AI316882|AW987475|mKIAA0833	calmodulin binding transcription activator 1	protein-coding
1893	chr4	83131553	83132915	+	0	NA	5' UTR (NM_133948, exon 1 of 16)	5' UTR (NM_133948, exon 1 of 16)	118	NM_001290527	101739	Mm.105331	NM_133948	ENSMUSG00000028484	Psip1	AA408851|AU015605|Dfs70|Ledgfa|Ledgfb|Psip2	PC4 and SFRS1 interacting protein 1	protein-coding
1469	chr2	13994742	13996507	+	0	NA	promoter-TSS (NM_011484)	promoter-TSS (NM_011484)	-63	NR_038162	70957	Mm.399049	NR_038162	ENSMUSG00000086657	Stamos	4921530L18Rik	signal transducing adaptor molecule (SH3 domain and ITAM motif) 1, opposite strand	ncRNA
1499	chr2	34758110	34761258	+	0	NA	intron (NM_028716, intron 6 of 14)	intron (NM_028716, intron 6 of 14)	9812	NM_028716	74016	Mm.65691	NM_028716	ENSMUSG00000026873	Phf19	3110009G19Rik|3321402G02Rik	PHD finger protein 19	protein-coding
1646	chr2	177631417	177639150	+	0	NA	intron (NR_038101, intron 1 of 1)	intron (NR_038101, intron 1 of 1)	3415	NR_038101	665205	Mm.440737	NR_038101		Gm14327	OTTMUSG00000016328	predicted gene 14327	pseudo
400	chr11	40568174	40569274	+	0	NA	promoter-TSS (NM_009831)	promoter-TSS (NM_009831)	64	NM_009831	12450	Mm.2103	NM_009831	ENSMUSG00000020326	Ccng1	AI314029	cyclin G1	protein-coding
534	chr11	119160714	119161788	+	0	NA	exon (NM_138669, exon 1 of 12)	exon (NM_138669, exon 1 of 12)	106	NM_138669	192170	Mm.197555	NM_138669	ENSMUSG00000025580	Eif4a3	2400003O03Rik|Ddx48|eIF4A-III|mKIAA0111	eukaryotic translation initiation factor 4A3	protein-coding
746	chr13	65341578	65343430	+	0	NA	Intergenic	CpG	-35480	NM_175290	97895	Mm.315815	NM_175290	ENSMUSG00000032999	Nlrp4f	C330026N02Rik|C86045|Nalp-kappa|Nalp4f	NLR family, pyrin domain containing 4F	protein-coding
919	chr14	102007544	102008651	+	0	NA	5' UTR (NM_001081278, exon 1 of 19)	5' UTR (NM_001081278, exon 1 of 19)	311	NM_001081278	210789	Mm.320639	NM_173380	ENSMUSG00000033083	Tbc1d4	5930406J04Rik|A930035N22|AV295684|As160	TBC1 domain family, member 4	protein-coding
744	chr13	64533130	64534585	+	0	NA	promoter-TSS (NM_053180)	promoter-TSS (NM_053180)	-4	NM_053180	105278	Mm.74982	NM_053180	ENSMUSG00000021483	Cdk20	4932702G04Rik|AU019450|AW558027|CDCH|Ccrk|PNQLARE|p42	cyclin-dependent kinase 20	protein-coding
1268	chr17	71876117	71877064	+	0	NA	promoter-TSS (NM_023294)	promoter-TSS (NM_023294)	-393	NM_023294	67052	Mm.225956	NM_023294	ENSMUSG00000024056	Ndc80	2610020P18Rik|AV139730|HEC|HEC1|Kntc2	NDC80 homolog, kinetochore complex component (S. cerevisiae)	protein-coding
633	chr12	100158466	100159078	+	0	NA	promoter-TSS (NM_029553)	promoter-TSS (NM_029553)	-12	NM_029553	76260	Mm.282660	NM_029553	ENSMUSG00000021013	Ttc8	0610012F22Rik|AV001447|BBS8	tetratricopeptide repeat domain 8	protein-coding
1372	chr18	77303258	77305068	+	0	NA	promoter-TSS (NM_001164170)	promoter-TSS (NM_001164170)	216	NM_001164167	17344	Mm.6370	NM_008602	ENSMUSG00000025423	Pias2	6330408K17Rik|AI462206|ARIP3|AU018068|Dib|Miz1|PIASxalpha|PIASxb|PIASxbeta|SIZ2	protein inhibitor of activated STAT 2	protein-coding
151	chr1	162142067	162143993	+	0	NA	promoter-TSS (NM_009786)	promoter-TSS (NM_009786)	-7	NM_009786	12301	Mm.10702	NM_009786	ENSMUSG00000014226	Cacybp	SIP	calcyclin binding protein	protein-coding
1977	chr4	138685578	138687312	+	0	NA	intron (NM_001163006, intron 1 of 3)	CpG	507	NR_033745	433771	Mm.305990	NM_001163006	ENSMUSG00000050608	Minos1	2310028O11Rik	mitochondrial inner membrane organizing system 1	protein-coding
2023	chr5	28117302	28118952	+	0	NA	promoter-TSS (NM_018878)	promoter-TSS (NM_018878)	-37	NM_018878	55982	Mm.277190	NM_018878	ENSMUSG00000002221	Paxip1	D5Ertd149e|PTIP	PAX interacting (with transcription-activation domain) protein 1	protein-coding
1669	chr3	28580457	28639581	+	0	NA	intron (NM_031197, intron 3 of 10)	MTC-int|LTR|MaLR	13194	NM_031197	20526	Mm.18443	NM_031197	ENSMUSG00000027690	Slc2a2	AI266973|Glut-2|Glut2	solute carrier family 2 (facilitated glucose transporter), member 2	protein-coding
1825	chr4	11180308	11181806	+	0	NA	intron (NM_001159595, intron 1 of 26)	CpG	349	NM_178112	72656	Mm.246713	NM_178112	ENSMUSG00000040738	Ints8	2810013E07Rik|AV063769|D130008D20Rik	integrator complex subunit 8	protein-coding
1285	chr17	88463180	88466436	+	0	NA	promoter-TSS (NM_001081034)	promoter-TSS (NM_001081034)	-183	NM_001081034	225055	Mm.386857	NM_001081034	ENSMUSG00000005371	Fbxo11	C80048|Jf	F-box protein 11	protein-coding
1952	chr4	126754087	126755039	+	0	NA	promoter-TSS (NR_104366)	promoter-TSS (NR_104366)	-64	NM_001285885	100177	Mm.276096	NM_177462	ENSMUSG00000042408	Zmym6	9330177P20Rik|AI593204|AI661340|D4Wsu24e|Zfp258	zinc finger, MYM-type 6	protein-coding
287	chr10	80840532	80898990	+	0	NA	intron (NM_026756, intron 6 of 8)	intron (NM_026756, intron 6 of 8)	9281	NR_106141	102465778		NR_106141		Mir1191b	mmu-mir-1191b	microRNA mir-1191b	ncRNA
475	chr11	83662283	83667560	+	0	NA	intron (NM_001291268, intron 1 of 8)	CpG	550	NM_009330	21410	Mm.7226	NM_009330	ENSMUSG00000020679	Hnf1b	HNF-1-beta|HNF-1B|HNF-1Beta|Hnf1beta|LFB3|Tcf-2|Tcf2|vHNF1	HNF1 homeobox B	protein-coding
2595	chr8	85297468	85298475	+	0	NA	promoter-TSS (NM_145600)	promoter-TSS (NM_145600)	54	NM_145600	30932	Mm.269248	NM_145600	ENSMUSG00000031711	Zfp330	BC008086|Noa36|Znf330	zinc finger protein 330	protein-coding
932	chr15	3163886	3203837	+	0	NA	Intergenic	RLTR18B|LTR|ERVK	-36906	NM_001042613	20363	Mm.392203	NM_009155	ENSMUSG00000064373	Sepp1	AU018766|D15Ucla1|Se-P|selp	selenoprotein P, plasma, 1	protein-coding
1549	chr2	112294736	112295782	+	0	NA	promoter-TSS (NM_133749)	promoter-TSS (NM_133749)	77	NM_133749	73024	Mm.268027	NM_133749		Emc7	2900064A13Rik|AI451465|ORF3|c11orf3	ER membrane protein complex subunit 7	protein-coding
1959	chr4	130036695	130037865	+	0	NA	promoter-TSS (NM_025645)	promoter-TSS (NM_025645)	-90	NM_153160	619605	Mm.297196	NM_153160	ENSMUSG00000028772	Zcchc17	2810055E05Rik|HSPC251|LDC4|pNO40|pS1D	zinc finger, CCHC domain containing 17	protein-coding
515	chr11	105450500	105451884	+	0	NA	promoter-TSS (NM_181071)	promoter-TSS (NM_181071)	-108	NM_181071	77097	Mm.22501	NM_175492	ENSMUSG00000053580	Tanc2	3526402J09Rik|5730590C14Rik	tetratricopeptide repeat, ankyrin repeat and coiled-coil containing 2	protein-coding
1525	chr2	73729882	73731476	+	0	NA	promoter-TSS (NM_001025093)	promoter-TSS (NM_001025093)	17	NM_001284371	11909	Mm.209903	NM_009715	ENSMUSG00000027104	Atf2	Atf-2|CRE-BP|Creb2|D130078H02Rik|D18875|Tg(Gzma-Klra1)7Wum|mXBP	activating transcription factor 2	protein-coding
2545	chr8	26950683	26952234	+	0	NA	promoter-TSS (NM_011791)	promoter-TSS (NM_011791)	-199	NM_011791	23808	Mm.27706	NM_011791	ENSMUSG00000031575	Ash2l	-	ash2 (absent, small, or homeotic)-like (Drosophila)	protein-coding
1242	chr17	47764887	47767577	+	0	NA	Intergenic	Intergenic	-1407	NM_198421	224836	Mm.59393	NM_198421		Usp49	C330046L10Rik|Gm545	ubiquitin specific peptidase 49	protein-coding
2761	chr9	83814507	83820609	+	0	NA	Intergenic	Intergenic	-24830	NM_199195	12040	Mm.12819	NM_199195	ENSMUSG00000032263	Bckdhb	-	branched chain ketoacid dehydrogenase E1, beta polypeptide	protein-coding
138	chr1	154613480	154614675	+	0	NA	intron (NM_026369, intron 1 of 3)	CpG	405	NM_026369	67771	Mm.288974	NM_026369	ENSMUSG00000008475	Arpc5	5830443F10Rik|p16-Arc	actin related protein 2/3 complex, subunit 5	protein-coding
1107	chr16	35363330	35364391	+	0	NA	intron (NM_133704, intron 1 of 6)	CpG	144	NM_133704	317717	Mm.259164	NM_133704	ENSMUSG00000034473	Sec22a	1810005C06Rik|Sec22l2	SEC22 vesicle trafficking protein homolog A (S. cerevisiae)	protein-coding
1208	chr17	31397409	31398848	+	0	NA	intron (NM_025290, intron 6 of 8)	intron (NM_025290, intron 6 of 8)	16173	NM_025290	22092	Mm.12743	NM_025290	ENSMUSG00000024033	Rsph1	MCA|Tsga2	radial spoke head 1 homolog (Chlamydomonas)	protein-coding
1874	chr4	49644156	49645586	+	0	NA	promoter-TSS (NM_182999)	promoter-TSS (NM_182999)	-61	NM_001163263	109331	Mm.24765	NM_182999	ENSMUSG00000028309	Rnf20	4833430L21Rik|AW540162|C79397|mKIAA4116	ring finger protein 20	protein-coding
1803	chr3	142427640	142428761	+	0	NA	promoter-TSS (NM_145546)	promoter-TSS (NM_145546)	-11	NM_145546	229906	Mm.271756	NM_145546	ENSMUSG00000028271	Gtf2b	-	general transcription factor IIB	protein-coding
724	chr13	53066757	53090264	+	0	NA	Intergenic	Intergenic	-2102	NM_017373	18030	Mm.136604	NM_017373	ENSMUSG00000056749	Nfil3	AV225605|E4BP4	nuclear factor, interleukin 3, regulated	protein-coding
1201	chr17	28758310	28759768	+	0	NA	intron (NM_016795, intron 1 of 15)	CpG-6187	360	NM_016795	20815	Mm.15252	NM_016795		Srpk1	AU017960	serine/arginine-rich protein specific kinase 1	protein-coding
519	chr11	107087134	107088200	+	0	NA	intron (NM_145823, intron 7 of 9)	intron (NM_145823, intron 7 of 9)	-36972	NM_001161329	68979	Mm.294617	NM_133702	ENSMUSG00000018433	Nol11	1500002M01Rik|AU015220|AU019874	nucleolar protein 11	protein-coding
1195	chr17	25150458	25154103	+	0	NA	promoter-TSS (NM_134126)	promoter-TSS (NM_134126)	-105	NM_020608	57354	Mm.328854	NM_020608	ENSMUSG00000038002	Cramp1l	5830477H08Rik|AI256853|AI790734|Tce4|mKIAA1426	Crm, cramped-like (Drosophila)	protein-coding
17	chr1	26318633	26321138	+	0	NA	Intergenic	RLTR6_Mm|LTR|ERV1	424420	NM_001033764	210940	Mm.297614	NM_001033764	ENSMUSG00000073722	4931408C20Rik	-	RIKEN cDNA 4931408C20 gene	protein-coding
2451	chr7	105963431	105965245	+	0	NA	Intergenic	Intergenic	-19284	NM_001285794	22411	Mm.22182	NM_009519	ENSMUSG00000015957	Wnt11	-	wingless-type MMTV integration site family, member 11	protein-coding
1327	chr18	34488150	34491246	+	0	NA	Intergenic	B1_Mus2|SINE|Alu	-1101	NM_025527	66384	Mm.29452	NM_025527	ENSMUSG00000014504	Srp19	2310020D23Rik	signal recognition particle 19	protein-coding
2192	chr6	28210912	28212766	+	0	NA	promoter-TSS (NM_001081678)	promoter-TSS (NM_001081678)	-238	NM_001081678	627049	Mm.84441	NM_001081678	ENSMUSG00000039841	Zfp800	AA407452|Znf800	zinc finger protein 800	protein-coding
1274	chr17	78598805	78601258	+	0	NA	5' UTR (NM_015800, exon 1 of 17)	5' UTR (NM_015800, exon 1 of 17)	443	NM_015800	50766	Mm.311912	NM_015800	ENSMUSG00000024074	Crim1	AU015004	cysteine rich transmembrane BMP regulator 1 (chordin like)	protein-coding
2667	chr8	129174246	129193278	+	0	NA	Intergenic	Intergenic	-66426	NM_001164598	270110	Mm.334918	NM_001164598	ENSMUSG00000051495	Irf2bp2	E130305N23Rik|IRF-2BP2	interferon regulatory factor 2 binding protein 2	protein-coding
110	chr1	130312954	130314589	+	0	NA	exon (NM_177445, exon 1 of 16)	exon (NM_177445, exon 1 of 16)	222	NM_177445	226414	Mm.28693	NM_145507	ENSMUSG00000026356	Dars	5730439G15Rik	aspartyl-tRNA synthetase	protein-coding
333	chr10	116847828	116856055	+	0	NA	Intergenic	ORR1B2|LTR|MaLR	-37912	NM_001013391	432508	Mm.478881	NM_001013391	ENSMUSG00000055531	Cpsf6	4733401N12Rik|AI256641|CFIM|CFIM68|HPBRII-4|HPBRII-7	cleavage and polyadenylation specific factor 6	protein-coding
1995	chr4	151699362	151700595	+	0	NA	non-coding (NR_102291, exon 1 of 5)	non-coding (NR_102291, exon 1 of 5)	143	NR_102291	19934	Mm.307846	NM_009079	ENSMUSG00000028936	Rpl22	2700038K18Rik	ribosomal protein L22	protein-coding
2356	chr7	20213369	20215242	+	0	NA	intron (NM_001290457, intron 1 of 10)	CpG	482	NM_001290457	19698	Mm.1741	NM_009046	ENSMUSG00000002983	Relb	shep	avian reticuloendotheliosis viral (v-rel) oncogene related B	protein-coding
2210	chr6	38499529	38502691	+	0	NA	promoter-TSS (NM_138680)	promoter-TSS (NM_138680)	-334	NM_138680	192196	Mm.276133	NM_138680	ENSMUSG00000029823	Luc7l2	4930471C18Rik|AA522013|AU015269|CGI59|Cgi74	LUC7-like 2 (S. cerevisiae)	protein-coding
2658	chr8	125996419	126002797	+	0	NA	Intergenic	Intergenic	-2154	NM_054070	114896	Mm.287475	NM_054070	ENSMUSG00000031967	Afg3l1	1700047G05Rik|3110061K15Rik	AFG3-like AAA ATPase 1	protein-coding
2780	chr9	103902419	103905661	+	0	NA	promoter-TSS (NM_172460)	promoter-TSS (NM_172460)	-834	NM_172460	74025	Mm.479273	NM_028721	ENSMUSG00000032558	Nphp3	3632410F03Rik|AI550417|C230078J01|D330020E01Rik|pcy	nephronophthisis 3 (adolescent)	protein-coding
646	chr12	109410692	109418607	+	0	NA	intron (NM_028262, intron 1 of 12)	intron (NM_028262, intron 1 of 12)	2845	NM_028262	52690	Mm.159185	NM_028262	ENSMUSG00000056770	Setd3	2610102I01Rik|2610305M23Rik|6030490B17Rik|D12Ertd771e	SET domain containing 3	protein-coding
446	chr11	72420212	72422488	+	0	NA	intron (NM_025985, intron 1 of 5)	CpG	587	NM_025985	67128	Mm.458052	NM_025985	ENSMUSG00000020794	Ube2g1	2700059C12Rik|AI256795|AU014992|AW552068|D130023C12Rik	ubiquitin-conjugating enzyme E2G 1	protein-coding
2181	chr6	8458820	8460707	+	0	NA	promoter-TSS (NR_040452)	promoter-TSS (NR_040452)	163	NM_133236	170772	Mm.210787	NM_133236	ENSMUSG00000029638	Glcci1	2310047L21Rik|A130036A18Rik|Fam117c|Gig18|Tssn1	glucocorticoid induced transcript 1	protein-coding
2229	chr6	52588569	52590966	+	0	NA	intron (NM_145567, intron 1 of 7)	intron (NM_145567, intron 1 of 7)	527	NM_145567	58875	Mm.286458	NM_145567	ENSMUSG00000029776	Hibadh	6430402H10Rik|AI265272	3-hydroxyisobutyrate dehydrogenase	protein-coding
1220	chr17	33821287	33822905	+	0	NA	TTS (NM_145486)	TTS (NM_145486)	307	NM_001109913	76936	Mm.311439	NM_029804	ENSMUSG00000059208	Hnrnpm	2610023M21Rik|AA409009|Hnrpm|mKIAA4193	heterogeneous nuclear ribonucleoprotein M	protein-coding
1582	chr2	130388825	130389998	+	0	NA	promoter-TSS (NR_040348)	promoter-TSS (NR_040348)	74	NR_040348	321014	Mm.442588	NR_040348	ENSMUSG00000060029	4930473A02Rik	-	RIKEN cDNA 4930473A02 gene	ncRNA
2842	chrX	70473109	70474798	+	0	NA	exon (NM_007978, exon 1 of 1)	exon (NM_007978, exon 1 of 1)	308	NM_007978	14070	Mm.165807	NM_007978	ENSMUSG00000078317	F8a	AI852759|DXUcsf1|F8a1	factor 8-associated gene A	protein-coding
1599	chr2	150188041	150189036	+	0	NA	promoter-TSS (NM_027017)	promoter-TSS (NM_027017)	-37	NM_027017	69277	Mm.272470	NM_027017	ENSMUSG00000063364	3300002I08Rik	2900016H11Rik	RIKEN cDNA 3300002I08 gene	protein-coding
2306	chr6	133984251	133995718	+	0	NA	intron (NM_007961, intron 1 of 7)	intron (NM_007961, intron 1 of 7)	4259	NM_007961	14011	Mm.269995	NM_007961	ENSMUSG00000030199	Etv6	AW123102|AW557856|Tel	ets variant 6	protein-coding
1149	chr16	96302733	96305653	+	0	NA	promoter-TSS (NM_001103179)	promoter-TSS (NM_001103179)	-158	NM_145125	93871	Mm.240871	NM_145125	ENSMUSG00000022914	Brwd1	5330419I02Rik|D530019K20Rik|G1-403-16|Wdr9|repro5	bromodomain and WD repeat domain containing 1	protein-coding
2652	chr8	122098523	122099321	+	0	NA	promoter-TSS (NM_026648)	promoter-TSS (NM_026648)	178	NM_175185	72552	Mm.36756	NM_175185	ENSMUSG00000034189	Hsdl1	2700067E09Rik	hydroxysteroid dehydrogenase like 1	protein-coding
2337	chr7	4965497	4974267	+	0	NA	exon (NM_025324, exon 2 of 2)	exon (NM_025324, exon 2 of 2)	-2096	NM_001290426	319748	Mm.86607	NM_001033383	ENSMUSG00000074405	Zfp865	6430526N21Rik|Znf865	zinc finger protein 865	protein-coding
2603	chr8	90884833	90886875	+	0	NA	5' UTR (NM_012047, exon 1 of 17)	5' UTR (NM_012047, exon 1 of 17)	236	NM_012047	26992	Mm.5400	NM_012047		Brd7	BP75|CELTIX1|Ptpn13ip	bromodomain containing 7	protein-coding
2283	chr6	116208772	116217330	+	0	NA	TTS (NM_026585)	TTS (NM_026585)	-1186	NM_001290338	67492	Mm.272772	NM_001081317	ENSMUSG00000042213	Zfand4	Anubl1	zinc finger, AN1-type domain 4	protein-coding
2243	chr6	72294603	72344941	+	0	NA	intron (NM_016872, intron 2 of 2)	intron (NM_016872, intron 2 of 2)	-7397	NM_025607	66510	Mm.170023	NM_025607	ENSMUSG00000055850	Rnf181	1700047F16Rik|2500002L14Rik|6230415N01Rik|C77350	ring finger protein 181	protein-coding
2407	chr7	54075936	54105191	+	0	NA	Intergenic	Intergenic	-10611	NM_010699	16828	Mm.29324	NM_010699	ENSMUSG00000063229	Ldha	Ldh1|Ldhm|l7R2	lactate dehydrogenase A	protein-coding
2695	chr9	31086158	31110807	+	0	NA	Intergenic	RSINE1|SINE|B4	19496	NM_001101597	638580	Mm.373655	NM_001101597		Gm7244	EG638580	predicted gene 7244	protein-coding
1087	chr16	20714793	20733901	+	0	NA	TTS (NM_001173505)	TTS (NM_001173505)	6324	NM_001289896	21832	Mm.3943	NM_009379	ENSMUSG00000022847	Thpo	Mgdf|Ml|Mpllg|Tpo	thrombopoietin	protein-coding
1288	chr17	95233423	95234729	+	0	NA	promoter-TSS (NR_045963)	promoter-TSS (NR_045963)	63	NR_045964	100038746	Mm.456686	NR_045963	ENSMUSG00000066057	Gm1976	100038868	predicted gene 1976	ncRNA
810	chr13	105018281	105019009	+	0	NA	promoter-TSS (NM_181061)	promoter-TSS (NM_181061)	-46	NM_181061	60411	Mm.281498	NM_021790	ENSMUSG00000021714	Cenpk	B130045K24Rik|BB232189|C530004N04Rik|Cenp-K|Solt|Solzt	centromere protein K	protein-coding
1238	chr17	46384521	46385665	+	0	NA	promoter-TSS (NM_145353)	promoter-TSS (NM_145353)	64	NM_145353	28064	Mm.248769	NM_145353	ENSMUSG00000071074	Yipf3	C6orf109|D17Wsu94e|KLIP1	Yip1 domain family, member 3	protein-coding
33	chr1	42907708	42908988	+	0	NA	intron (NM_023514, intron 1 of 10)	CpG	270	NM_023514	69527	Mm.252982	NM_023514	ENSMUSG00000060679	Mrps9	2310002A08Rik|AW322516|Mrp-S9|S9mt|mg637	mitochondrial ribosomal protein S9	protein-coding
1587	chr2	136503746	136508115	+	0	NA	Intergenic	Intergenic	-33256	NM_011428	20614	Mm.45953	NM_011428	ENSMUSG00000027273	Snap25	Bdr|GENA70|SNAP-25|SUP|sp	synaptosomal-associated protein 25	protein-coding
2866	chrX	156574132	156576986	+	0	NA	intron (NM_008810, intron 1 of 10)	intron (NM_008810, intron 1 of 10)	709	NM_008810	18597	Mm.34775	NM_008810	ENSMUSG00000031299	Pdha1	Pdha-1	pyruvate dehydrogenase E1 alpha 1	protein-coding
1559	chr2	120229126	120231331	+	0	NA	promoter-TSS (NM_001110497)	promoter-TSS (NM_001110497)	-376	NM_001110496	211499	Mm.260712	NM_173734	ENSMUSG00000033808	Tmem87a	A930025J12Rik	transmembrane protein 87A	protein-coding
7	chr1	10027449	10030459	+	0	NA	promoter-TSS (NM_001277101)	promoter-TSS (NM_001277101)	655	NM_026493	211660	Mm.244046	NM_026493	ENSMUSG00000056763	Cspp1	2310020J12Rik|4930413O22Rik|AA387550|BC055915|Cspp2|Cspp3	centrosome and spindle pole associated protein 1	protein-coding
1793	chr3	135100470	135106522	+	0	NA	intron (NM_025356, intron 2 of 7)	intron (NM_025356, intron 2 of 7)	1773	NM_025356	66105	Mm.49884	NM_025356	ENSMUSG00000078578	Ube2d3	1100001F19Rik|9430029A22Rik|AA414951	ubiquitin-conjugating enzyme E2D 3	protein-coding
227	chr10	28778286	28779395	+	0	NA	Intergenic	Lx8|LINE|L1	-72728	NM_026336	67719	Mm.440480	NM_026336	ENSMUSG00000015519	2310057J18Rik	2210414P04Rik	RIKEN cDNA 2310057J18 gene	protein-coding
1701	chr3	68808131	68810754	+	0	NA	promoter-TSS (NM_026641)	promoter-TSS (NM_026641)	548	NM_133786	70099	Mm.206841	NM_133786	ENSMUSG00000034349	Smc4	2500002A22Rik|C79747|SMC-4|Smc4l1	structural maintenance of chromosomes 4	protein-coding
1860	chr4	45860777	45867129	+	0	NA	intron (NM_028788, intron 1 of 17)	B3|SINE|B2	2134	NM_028788	74152	Mm.63645	NM_028788	ENSMUSG00000028327	Stra6l	1300002K09Rik|Rbpr2	STRA6-like	protein-coding
[truncated: 1,161 more rows]
