# Supplementary material for: Remodeling of epigenome and transcriptome landscapes with aging in mice reveals widespread induction of inflammatory responses
Source: HighWire-hosted journal article supplement (doi:10.1101/gr.240093.118), 2019-03-11
Supplement: Supplemental_Code_Figure1_General.zip [file HOMER_NPC_cultures_Diffbind_H3K27ac_pooledLane_in_SE.xls]

PeakID (cmd=annotatePeaks.pl NPC_cultures_Diffbind_H3K27ac_pooledLane_in_SE-Lite_coord.bed mm9)	Chr	Start	End	Strand	Peak Score	Focus Ratio/Region Size	Annotation	Detailed Annotation	Distance to TSS	Nearest PromoterID	Entrez ID	Nearest Unigene	Nearest Refseq	Nearest Ensembl	Gene Name	Gene Alias	Gene Description	Gene Type
1049	chr2	134917806	134919856	+	0	NA	intron (NM_001145830, intron 3 of 31)	intron (NM_001145830, intron 3 of 31)	122521	NR_040517	78805	Mm.78702	NR_040517	ENSMUSG00000085247	4930545L23Rik	-	RIKEN cDNA 4930545L23 gene	ncRNA
127	chr10	24735263	24761835	+	0	NA	Intergenic	Intergenic	-101273	NM_007482	11846	Mm.154144	NM_007482	ENSMUSG00000019987	Arg1	AI|AI256583|Arg-1|PGIF	arginase, liver	protein-coding
1801	chrX	73009193	73010683	+	0	NA	promoter-TSS (NR_029443)	promoter-TSS (NR_029443)	100	NR_029443	74396	Mm.162493	NR_029443	ENSMUSG00000087396	4933407K13Rik	A130080L05Rik	RIKEN cDNA 4933407K13 gene	ncRNA
71	chr1	128024801	128027733	+	0	NA	intron (NM_172484, intron 5 of 14)	intron (NM_172484, intron 5 of 14)	-217476	NM_145100	72585	Mm.490405	NM_145100		Lypd1	2700050C12Rik|AI853408|C530008O16Rik|Lynx2|Lypdc1	Ly6/Plaur domain containing 1	protein-coding
1648	chr8	70557327	70558955	+	0	NA	Intergenic	Intergenic	-59668	NM_177698	234353	Mm.32525	NM_027626	ENSMUSG00000030465	Psd3	4931420C21Rik|AI661273|BC003498|D430018P08|EFA6D	pleckstrin and Sec7 domain containing 3	protein-coding
1481	chr6	122289190	122290983	+	0	NA	promoter-TSS (NM_007905)	promoter-TSS (NM_007905)	159	NM_001271579	13619	Mm.6822	NM_007905	ENSMUSG00000040669	Phc1	AW557034|Edr|Edr1|Mph1|Rae-28|rae28	polyhomeotic-like 1 (Drosophila)	protein-coding
882	chr18	54060928	54065209	+	0	NA	intron (NM_152809, intron 3 of 12)	intron (NM_152809, intron 3 of 12)	41301	NM_152809	70425	Mm.368668	NM_152809	ENSMUSG00000073563	Csnk1g3	3300002K07Rik|C330049O21Rik	casein kinase 1, gamma 3	protein-coding
1488	chr6	133984274	133987101	+	0	NA	promoter-TSS (NM_007961)	promoter-TSS (NM_007961)	-38	NM_007961	14011	Mm.269995	NM_007961	ENSMUSG00000030199	Etv6	AW123102|AW557856|Tel	ets variant 6	protein-coding
1050	chr2	135808868	135810650	+	0	NA	intron (NM_013829, intron 28 of 36)	intron (NM_013829, intron 28 of 36)	-73904	NM_029530	76161	Mm.41638	NM_029530	ENSMUSG00000027270	Lamp5	3110035N03Rik|6330527O06Rik|BAD-LAMP|LAMP-5	lysosomal-associated membrane protein family, member 5	protein-coding
560	chr14	48631544	48633286	+	0	NA	Intergenic	Intergenic	-108129	NM_033602	93834	Mm.296457	NM_033602	ENSMUSG00000021846	Peli2	AW047589|BB129927	pellino 2	protein-coding
1178	chr3	121516857	121519630	+	0	NA	promoter-TSS (NM_008991)	promoter-TSS (NM_008991)	-110	NM_008991	19299	Mm.399042	NM_008991	ENSMUSG00000028127	Abcd3	AI313901|AU018866|AW146054|PMP68|PMP70|Pxmp1	ATP-binding cassette, sub-family D (ALD), member 3	protein-coding
898	chr18	69904845	69907880	+	0	NA	Intergenic	Intergenic	-178851	NM_201362	381175	Mm.266831	NM_201362	ENSMUSG00000038903	Ccdc68	BC046343	coiled-coil domain containing 68	protein-coding
798	chr17	45611035	45612617	+	0	NA	promoter-TSS (NM_027649)	promoter-TSS (NM_027649)	61	NM_027649	71020	Mm.44257	NM_027649	ENSMUSG00000023935	Spats1	1700011H05Rik|4933400B06Rik|Daip2|Ddip|Srsp1	spermatogenesis associated, serine-rich 1	protein-coding
1387	chr5	136053117	136056729	+	0	NA	Intergenic	B3A|SINE|B2	-6010	NM_019577	56221	Mm.31505	NM_019577	ENSMUSG00000004814	Ccl24	CKb-6|MPIF-2|Scya24	chemokine (C-C motif) ligand 24	protein-coding
1031	chr2	113236805	113239081	+	0	NA	intron (NM_001285458, intron 2 of 16)	intron (NM_001285458, intron 2 of 16)	-43278	NM_001285459	14260	Mm.4938	NM_010230	ENSMUSG00000044042	Fmn1	Fmn|ld	formin 1	protein-coding
512	chr13	96094385	96097963	+	0	NA	intron (NM_028106, intron 1 of 1)	intron (NM_028106, intron 1 of 1)	982	NM_028106	72114	Mm.3774	NM_028106	ENSMUSG00000041995	Zbed3	0610037K01Rik|2610005H11Rik|AU018975|AU024588	zinc finger, BED domain containing 3	protein-coding
1273	chr4	123712050	123713713	+	0	NA	Intergenic	Intergenic	118205	NM_017475	54170	Mm.220922	NM_017475	ENSMUSG00000028646	Rragc	AU041672|Gtr2|RAGC|TIB929|YGR163W	Ras-related GTP binding C	protein-coding
463	chr13	43779391	43780947	+	0	NA	Intergenic	Intergenic	-31991	NR_046022	622552	Mm.375036	NR_046022		Gm20751	-	predicted gene, 20751	ncRNA
517	chr13	100181372	100183891	+	0	NA	non-coding (NR_015515, exon 1 of 2)	non-coding (NR_015515, exon 1 of 2)	150	NR_015515	320893	Mm.470842	NR_015515		6430562O15Rik	-	RIKEN cDNA 6430562O15 gene	ncRNA
458	chr13	37240073	37245229	+	0	NA	Intergenic	Intergenic	-100538	NM_001166391	74145	Mm.235105	NM_028784	ENSMUSG00000039109	F13a1	1200014I03Rik|AI462306|F13a	coagulation factor XIII, A1 subunit	protein-coding
451	chr13	29946876	29947771	+	0	NA	intron (NM_144536, intron 1 of 15)	CpG	134	NM_144536	68916	Mm.212227	NM_144536	ENSMUSG00000006191	Cdkal1	1190005B03Rik|6620401C13Rik	CDK5 regulatory subunit associated protein 1-like 1	protein-coding
1785	chrX	13095419	13097559	+	0	NA	3' UTR (NM_009806, exon 25 of 25)	3' UTR (NM_009806, exon 25 of 25)	51691	NM_173415	236690	Mm.90233	NM_173415	ENSMUSG00000051228	Nyx	CLNP|CSNB1|CSNB4|nob	nyctalopin	protein-coding
454	chr13	34404282	34406170	+	0	NA	intron (NM_001033167, intron 1 of 10)	intron (NM_001033167, intron 1 of 10)	31825	NM_001033167	73102	Mm.23932	NM_001033167	ENSMUSG00000038267	Slc22a23	3110004L20Rik	solute carrier family 22, member 23	protein-coding
1364	chr5	112152727	112155320	+	0	NA	Intergenic	Intergenic	36725	NR_045832	269683	Mm.136946	NM_207252	ENSMUSG00000085271	E130006D01Rik	Gm16018|Gm681|OTTMUSG00000029083	RIKEN cDNA E130006D01 gene	ncRNA
1408	chr6	11255434	11257154	+	0	NA	Intergenic	Intergenic	-331916	NR_033776	57866	Mm.4397	NR_033776		AA545190	-	EST AA545190	ncRNA
1250	chr4	82560862	82563937	+	0	NA	intron (NM_177863, intron 29 of 35)	intron (NM_177863, intron 29 of 35)	-31344	NM_009887	12622	Mm.6780	NM_009887	ENSMUSG00000038192	Cer1	Cerl|Cerl1|Cerr1|cer-1	cerberus 1 homolog (Xenopus laevis)	protein-coding
1363	chr5	109985554	109988688	+	0	NA	intron (NM_016715, intron 1 of 7)	intron (NM_016715, intron 1 of 7)	891	NM_016715	57914	Mm.35771	NM_016715	ENSMUSG00000033467	Crlf2	CRLM2|Ly114|Tpte2|Tslpr	cytokine receptor-like factor 2	protein-coding
722	chr16	74396616	74398612	+	0	NA	intron (NM_175549, intron 1 of 27)	intron (NM_175549, intron 1 of 27)	13543	NM_175549	268902	Mm.171736	NM_175549	ENSMUSG00000052516	Robo2	2600013A04Rik|9430089E08Rik|BB097918|D230004I22Rik|mKIAA1568	roundabout homolog 2 (Drosophila)	protein-coding
634	chr15	50824631	50830424	+	0	NA	Intergenic	Intergenic	-105940	NM_032000	83925	Mm.30466	NM_032000	ENSMUSG00000038679	Trps1	AI115454|AI447310|D15Ertd586e	trichorhinophalangeal syndrome I (human)	protein-coding
1109	chr3	34534705	34591733	+	0	NA	intron (NR_015580, intron 4 of 4)	CpG	14292	NM_011443	20674	Mm.65396	NM_011443	ENSMUSG00000074637	Sox2	Sox-2|lcc|ysb	SRY (sex determining region Y)-box 2	protein-coding
578	chr14	73542046	73544099	+	0	NA	intron (NR_033185, intron 1 of 15)	CpG	480	NR_033185	105670	Mm.280068	NM_134083	ENSMUSG00000022106	Rcbtb2	2610028E02Rik|2810420M18Rik|AI448345|AW240694|Chc1l|RC/BTB2	regulator of chromosome condensation (RCC1) and BTB (POZ) domain containing protein 2	protein-coding
1630	chr8	32277931	32280541	+	0	NA	promoter-TSS (NM_026453)	promoter-TSS (NM_026453)	-40	NM_026453	67920	Mm.289818	NM_026453	ENSMUSG00000031578	Mak16	2600016B03Rik|AI314911|Rbm13	MAK16 homolog (S. cerevisiae)	protein-coding
1597	chr7	136276481	136280470	+	0	NA	Intergenic	Intergenic	-122133	NM_001080963	381925	Mm.39184	NM_001080963	ENSMUSG00000070366	Ppapdc1a	C030048B12Rik|Gm1090	phosphatidic acid phosphatase type 2 domain containing 1A	protein-coding
695	chr16	31932546	31934075	+	0	NA	promoter-TSS (NM_172822)	promoter-TSS (NM_172822)	-627	NM_172822	239827	Mm.440388	NM_172822	ENSMUSG00000045625	Pigz	F630022B06Rik	phosphatidylinositol glycan anchor biosynthesis, class Z	protein-coding
978	chr2	26819443	26820526	+	0	NA	promoter-TSS (NM_207234)	promoter-TSS (NM_207234)	-78	NM_207234	227656	Mm.291874	NM_207234	ENSMUSG00000052406	Rexo4	Gm111|Xpmc2h	REX4, RNA exonuclease 4 homolog (S. cerevisiae)	protein-coding
728	chr16	81284458	81286739	+	0	NA	intron (NM_001113208, intron 1 of 17)	intron (NM_001113208, intron 1 of 17)	84656	NM_010954	17968	Mm.433941	NM_010954	ENSMUSG00000022762	Ncam2	Ncam-2|Ocam|RNCAM	neural cell adhesion molecule 2	protein-coding
1244	chr4	65685955	65687507	+	0	NA	intron (NM_207109, intron 5 of 22)	intron (NM_207109, intron 5 of 22)	378786	NM_019514	56079	Mm.445312	NM_019514	ENSMUSG00000028373	Astn2	1d8|Astnl|bM452J22.1	astrotactin 2	protein-coding
1638	chr8	46959870	46961513	+	0	NA	Intergenic	Intergenic	-10148	NM_016798	53318	Mm.282900	NM_016798	ENSMUSG00000031636	Pdlim3	AI463105|ALP|Actn2lp	PDZ and LIM domain 3	protein-coding
742	chr16	97756061	97758526	+	0	NA	promoter-TSS (NM_013606)	promoter-TSS (NM_013606)	-395	NR_003508	17858	Mm.14157	NM_013606	ENSMUSG00000023341	Mx2	AI528743|Mx-2	MX dynamin-like GTPase 2	protein-coding
378	chr12	56330404	56332146	+	0	NA	promoter-TSS (NM_001100110)	promoter-TSS (NM_001100110)	-190	NM_001100110	100101806	Mm.471968	NM_001100110	ENSMUSG00000021020	Srp54c	E330029E12Rik	signal recognition particle 54C	protein-coding
325	chr11	116078946	116081694	+	0	NA	intron (NR_004853, intron 6 of 6)	intron (NR_004853, intron 6 of 6)	3004	NR_004853	69681	Mm.33677	NR_004853	ENSMUSG00000092300	Cdk3-ps	2310050O10Rik|Cdk3	cyclin-dependent kinase 3, pseudogene	pseudo
29	chr1	58767338	58773604	+	0	NA	5' UTR (NM_001293804, exon 2 of 10)	5' UTR (NM_001293804, exon 2 of 10)	341	NM_207653	12633	Mm.336848	NM_009805	ENSMUSG00000026031	Cflar	2310024N18Rik|A430105C05Rik|CLARP|Cash|Casper|ENSMUSG00000072980|FLAME|FLAME-1|Flip|Gm9845|I-FLICE|MRIT|c-Flip	CASP8 and FADD-like apoptosis regulator	protein-coding
889	chr18	63654896	63657080	+	0	NA	Intergenic	Intergenic	-109151	NM_001039485	667742	Mm.158720	NM_172629	ENSMUSG00000041482	Piezo2	5930434P17|9030411M15Rik|9430028L06Rik|Fam38b|Fam38b2	piezo-type mechanosensitive ion channel component 2	protein-coding
350	chr12	33718965	33721986	+	0	NA	intron (NM_001024478, intron 18 of 19)	intron (NM_001024478, intron 18 of 19)	57265	NM_001024478	68764	Mm.60083	NM_001024478	ENSMUSG00000035860	Cdhr3	1110049B09Rik|BB172694|Cdh28	cadherin-related family member 3	protein-coding
1233	chr4	56013690	56015038	+	0	NA	Intergenic	Intergenic	-469017	NM_010637	16600	Mm.4325	NM_010637	ENSMUSG00000003032	Klf4	EZF|Gklf|Zie	Kruppel-like factor 4 (gut)	protein-coding
1810	chrX	98623811	98626412	+	0	NA	intron (NM_001252518, intron 1 of 11)	CpG	121	NM_001252518	53610	Mm.280069	NM_023144	ENSMUSG00000031311	Nono	AA407051|AV149256|NRB54|P54NRB|nonA	non-POU-domain-containing, octamer binding protein	protein-coding
540	chr14	22070643	22073844	+	0	NA	intron (NM_134079, intron 6 of 10)	intron (NM_134079, intron 6 of 10)	176869	NM_001243041	11534	Mm.188734	NM_134079	ENSMUSG00000039197	Adk	2310026J05Rik|5033405D03Rik|AI255373|AI987814|Ak	adenosine kinase	protein-coding
1615	chr8	6603668	6609390	+	0	NA	Intergenic	Intergenic	-1501297	NM_011388	20494	Mm.3500	NM_011388	ENSMUSG00000023073	Slc10a2	ASBT|ISBT	solute carrier family 10, member 2	protein-coding
1162	chr3	103747742	103750249	+	0	NA	intron (NM_172684, intron 2 of 6)	MLT1J|LTR|MaLR	-23038	NM_001163467	18685	Mm.385178	NM_013629	ENSMUSG00000058388	Phtf1	AU041898|AW049785|Phft|Phtf	putative homeodomain transcription factor 1	protein-coding
58	chr1	93309306	93313446	+	0	NA	Intergenic	Intergenic	-1577	NM_019479	55927	Mm.280029	NM_019479	ENSMUSG00000067071	Hes6	AI326893|bHLHb41	hairy and enhancer of split 6	protein-coding
684	chr16	16302142	16304136	+	0	NA	promoter-TSS (NR_038046)	promoter-TSS (NR_038046)	81	NM_198246	70120	Mm.37486	NM_198246	ENSMUSG00000022792	Yars2	2210023C10Rik|tyrRS	tyrosyl-tRNA synthetase 2 (mitochondrial)	protein-coding
211	chr10	126724736	126728697	+	0	NA	promoter-TSS (NM_033072)	promoter-TSS (NM_033072)	-889	NM_033072	110962	Mm.372826	NM_033072	ENSMUSG00000025409	Mbd6	D10Wsu93e	methyl-CpG binding domain protein 6	protein-coding
153	chr10	59464789	59467346	+	0	NA	promoter-TSS (NM_025514)	promoter-TSS (NM_025514)	-8	NM_001199187	69090	Mm.155839	NM_026937	ENSMUSG00000044475	Ascc1	1810015P09Rik|AI550520|ASC1p50|CGI-18	activating signal cointegrator 1 complex subunit 1	protein-coding
1732	chr9	55922483	55924673	+	0	NA	Intergenic	Intergenic	-14205	NM_011193	19200	Mm.2534	NM_011193	ENSMUSG00000032322	Pstpip1	CD2BP1|def-2	proline-serine-threonine phosphatase-interacting protein 1	protein-coding
861	chr18	37960356	38012440	+	0	NA	intron (NM_001301256, intron 2 of 3)	intron (NM_001301256, intron 2 of 3)	7198	NM_033583	93708	Mm.247203	NM_033583	ENSMUSG00000023036	Pcdhgc5	-	protocadherin gamma subfamily C, 5	protein-coding
337	chr12	10085233	10087655	+	0	NA	Intergenic	Intergenic	-290333	NM_027588	70881	Mm.272843	NM_027588	ENSMUSG00000020622	Nt5c1b	4921514H13Rik|AIRP|CN-IB	5'-nucleotidase, cytosolic IB	protein-coding
1546	chr7	86491622	86538337	+	0	NA	Intergenic	Intergenic	16934	NM_020599	19771	Mm.41653	NM_020599	ENSMUSG00000039194	Rlbp1	3110056M11Rik|CRALBP	retinaldehyde binding protein 1	protein-coding
101	chr1	179340676	179343044	+	0	NA	Intergenic	Intergenic	-32932	NM_001012330	30928	Mm.330700	NM_013915	ENSMUSG00000063659	Zbtb18	RP58|Zfp238|Znf238	zinc finger and BTB domain containing 18	protein-coding
340	chr12	13850974	13853493	+	0	NA	Intergenic	Intergenic	306611	NM_029007	105005	Mm.227253	NM_029007	ENSMUSG00000020607	Fam84a	2310003N02Rik|4731402F03Rik|AW125753|Nse1	family with sequence similarity 84, member A	protein-coding
76	chr1	137306562	137311472	+	0	NA	intron (NM_153774, intron 4 of 23)	B3|SINE|B2	18051	NM_153774	226432	Mm.271642	NM_153774	ENSMUSG00000041879	Ipo9	0710008K06Rik|AI845704|C78347|Imp9|Ranbp9|mKIAA1192	importin 9	protein-coding
311	chr11	106939732	106941613	+	0	NA	intron (NM_176850, intron 7 of 27)	intron (NM_176850, intron 7 of 27)	51135	NM_001163473	69066	Mm.40679	NM_001163473		1810010H24Rik	OTTMUSG00000003581	RIKEN cDNA 1810010H24 gene	protein-coding
982	chr2	30740346	30742404	+	0	NA	Intergenic	Intergenic	17442	NM_022415	64292	Mm.28768	NM_022415	ENSMUSG00000050737	Ptges	2410099E23Rik|D2Ertd369e|Pges|mPGES|mPGES-1	prostaglandin E synthase	protein-coding
571	chr14	64580734	64582637	+	0	NA	Intergenic	Intergenic	19142	NM_011446	20680	Mm.42162	NM_011446	ENSMUSG00000063060	Sox7	-	SRY (sex determining region Y)-box 7	protein-coding
1214	chr4	33611062	33614601	+	0	NA	Intergenic	Intergenic	87775	NR_106198	102465904		NR_106198		Mir8118	mmu-mir-8118	microRNA mir-8118	ncRNA
1190	chr3	141956345	141986830	+	0	NA	intron (NM_022554, intron 4 of 8)	intron (NM_022554, intron 4 of 8)	83227	NM_022554	56376	Mm.117709	NM_019808	ENSMUSG00000028273	Pdlim5	1110001A05Rik|AI987914|C87059|Enh|Enh1|Enh2|Enh3|LIM	PDZ and LIM domain 5	protein-coding
825	chr17	84352536	84355295	+	0	NA	Intergenic	Intergenic	-107785	NM_025325	107766	Mm.30100	NM_025325	ENSMUSG00000000673	Haao	0610007K21Rik|0610012J07Rik|3-HAO|3-HAOxase|3HAO	3-hydroxyanthranilate 3,4-dioxygenase	protein-coding
389	chr12	75923796	75927678	+	0	NA	Intergenic	Intergenic	352582	NM_172805	238271	Mm.44465	NM_172805	ENSMUSG00000034402	Kcnh5	Eag2	potassium voltage-gated channel, subfamily H (eag-related), member 5	protein-coding
917	chr19	5837491	5852652	+	0	NA	non-coding (NR_003513, exon 1 of 1)	non-coding (NR_003513, exon 1 of 1)	407	NR_003513	66961	Mm.281895	NR_003513		Neat1	2310043N10Rik|VINC	nuclear paraspeckle assembly transcript 1 (non-protein coding)	ncRNA
1660	chr8	83538083	83539899	+	0	NA	promoter-TSS (NM_027554)	promoter-TSS (NM_027554)	-186	NM_027554	74841	Mm.246018	NM_027554	ENSMUSG00000038250	Usp38	4631402N15Rik|4833420O05Rik|AA536967|AU044701|AW544820|mKIAA1891	ubiquitin specific peptidase 38	protein-coding
495	chr13	78565604	78568186	+	0	NA	Intergenic	Intergenic	-228652	NM_010151	13865	Mm.439653	NM_010151	ENSMUSG00000069171	Nr2f1	COUP-TF1|COUP-TFI|COUPTFA|EAR3|Erbal3|SVP44|Tcfcoup1	nuclear receptor subfamily 2, group F, member 1	protein-coding
1703	chr9	20296309	20298537	+	0	NA	promoter-TSS (NM_001110309)	promoter-TSS (NM_001110309)	-233	NM_001110309	235028	Mm.297660	NM_146221	ENSMUSG00000059475	Zfp426	2900057C04Rik|KRAB1|Zfo61|Zfp68-rs1|Znf426|mKIAA4237	zinc finger protein 426	protein-coding
1345	chr5	82452150	82454040	+	0	NA	Intergenic	Intergenic	774995	NR_035415	100316803		NR_035415	miRBase:MI0006285	Mir1187	Mirn1187|mmu-mir-1187	microRNA 1187	ncRNA
1171	chr3	108523724	108526646	+	0	NA	promoter-TSS (NM_029522)	promoter-TSS (NM_029522)	32	NM_029522	76123	Mm.226941	NM_029522	ENSMUSG00000027883	Gpsm2	6230410J09Rik|LGN|Pins	G-protein signalling modulator 2 (AGS3-like, C. elegans)	protein-coding
1123	chr3	56182825	56185404	+	0	NA	Intergenic	Intergenic	-196491	NM_030595	26422	Mm.384353	NM_030595	ENSMUSG00000027799	Nbea	Lyst2|mKIAA1544	neurobeachin	protein-coding
966	chr2	13994505	13997224	+	0	NA	promoter-TSS (NR_038162)	promoter-TSS (NR_038162)	125	NM_011484	20844	Mm.273174	NM_011484	ENSMUSG00000026718	Stam	STAM1	signal transducing adaptor molecule (SH3 domain and ITAM motif) 1	protein-coding
1322	chr5	37756267	37758669	+	0	NA	intron (NM_145920, intron 7 of 19)	intron (NM_145920, intron 7 of 19)	27751	NM_145920	68525	Mm.25506	NM_145920	ENSMUSG00000050248	Evc2	1110017L09Rik|Lbn|limbin	Ellis van Creveld syndrome 2	protein-coding
1816	chrX	102585687	102589296	+	0	NA	promoter-TSS (NR_015552)	promoter-TSS (NR_015552)	-398	NR_015552	100043213	Mm.388967	NR_015552	ENSMUSG00000087620	5330434G04Rik	-	RIKEN cDNA 5330434G04 gene	ncRNA
992	chr2	41861835	41865416	+	0	NA	intron (NM_053011, intron 2 of 90)	intron (NM_053011, intron 2 of 90)	439463	NR_105754	102465171		NR_105754		Mir6336	mmu-mir-6336	microRNA mir-6336	ncRNA
758	chr17	9915343	9922180	+	0	NA	Intergenic	Intergenic	49970	NR_045433	71092	Mm.243827	NR_045433		4930452A19Rik	4933424P20Rik	RIKEN cDNA 4930452A19 gene	ncRNA
236	chr11	16489102	16495567	+	0	NA	Intergenic	Intergenic	-83847	NM_001109971	20335	Mm.325350	NM_011343	ENSMUSG00000078974	Sec61g	-	SEC61, gamma subunit	protein-coding
706	chr16	45684524	45699397	+	0	NA	intron (NM_172455, intron 1 of 17)	intron (NM_172455, intron 1 of 17)	1811	NM_172455	208171	Mm.186306	NM_172455	ENSMUSG00000033177	Tmprss7	B230219I23Rik|Gm1748	transmembrane serine protease 7	protein-coding
218	chr11	3023336	3024416	+	0	NA	promoter-TSS (NR_003518)	promoter-TSS (NR_003518)	-148	NR_003517	236604	Mm.247625	NM_001004146		Pisd-ps1	-	phosphatidylserine decarboxylase, pseudogene 1	pseudo
1172	chr3	108713603	108715575	+	0	NA	promoter-TSS (NM_025845)	promoter-TSS (NM_025845)	33	NM_025845	66921	Mm.51049	NM_025845	ENSMUSG00000027881	Prpf38b	1110021E09Rik|AU018955	PRP38 pre-mRNA processing factor 38 (yeast) domain containing B	protein-coding
14	chr1	38053376	38055151	+	0	NA	promoter-TSS (NM_198303)	promoter-TSS (NM_198303)	-210	NM_172054	98258	Mm.28438	NM_172054	ENSMUSG00000058407	Txndc9	AI098020|APACD	thioredoxin domain containing 9	protein-coding
1259	chr4	98588589	98592111	+	0	NA	promoter-TSS (NM_146144)	promoter-TSS (NM_146144)	-151	NM_146144	230484	Mm.371692	NM_146144	ENSMUSG00000028560	Usp1	-	ubiquitin specific peptidase 1	protein-coding
1608	chr7	152100202	152130147	+	0	NA	TTS (NM_007631)	TTS (NM_007631)	10656	NM_007631	12443	Mm.273049	NM_007631	ENSMUSG00000070348	Ccnd1	AI327039|CycD1|Cyl-1|PRAD1|bcl-1|cD1	cyclin D1	protein-coding
834	chr18	3335847	3338590	+	0	NA	intron (NR_033457, intron 1 of 1)	CpG	369	NM_001110851	12916	Mm.5244	NM_013498	ENSMUSG00000063889	Crem	ICER|ICERI	cAMP responsive element modulator	protein-coding
285	chr11	77660591	77666681	+	0	NA	intron (NM_001291212, intron 35 of 40)	intron (NM_001291212, intron 35 of 40)	43738	NM_008952	19193	Mm.8543	NM_008952	ENSMUSG00000017453	Pipox	LPIPOX|Pso	pipecolic acid oxidase	protein-coding
234	chr11	14668705	14671009	+	0	NA	Intergenic	MURVY-LTR|LTR|ERV1	170614	NM_001164166	432536	Mm.33646	NM_001164166		Pom121l12	1700054H16Rik	POM121 membrane glycoprotein-like 12	protein-coding
594	chr14	101146191	101151779	+	0	NA	Intergenic	Intergenic	450301	NM_029680	76627	Mm.31415	NM_029680	ENSMUSG00000042888	Prr30	1700110M21Rik	proline rich 30	protein-coding
1438	chr6	58851348	58857692	+	0	NA	TTS (NM_021432)	TTS (NM_021432)	2600	NM_021432	58243	Mm.389747	NM_021432	ENSMUSG00000055430	Nap1l5	1110020M21Rik	nucleosome assembly protein 1-like 5	protein-coding
1216	chr4	39880536	39882266	+	0	NA	Intergenic	Intergenic	-208897	NM_007386	11428	Mm.331547	NM_007386	ENSMUSG00000028405	Aco1	Aco-1|Irebp|Irp1	aconitase 1	protein-coding
1135	chr3	75100301	75102923	+	0	NA	Intergenic	Intergenic	-27612	NM_026460	67931	Mm.259446	NM_026460	ENSMUSG00000034139	Serpini2	Spi14	serine (or cysteine) peptidase inhibitor, clade I, member 2	protein-coding
1203	chr4	11505930	11508345	+	0	NA	exon (NM_001256142, exon 1 of 2)	exon (NM_001256142, exon 1 of 2)	328	NM_001256142	100503583	Mm.249437	NM_001256142	ENSMUSG00000094595	Fsbp	-	fibrinogen silencer binding protein	protein-coding
96	chr1	173431494	173434973	+	0	NA	promoter-TSS (NM_019484)	promoter-TSS (NM_019484)	-376	NM_019484	56009	Mm.389208	NM_019484	ENSMUSG00000060244	Alyref2	C130042O11Rik|REF2|Refbp2	Aly/REF export factor 2	protein-coding
1068	chr2	157165364	157176783	+	0	NA	intron (NM_010285, intron 1 of 4)	B2_Mm2|SINE|B2	1318	NM_010285	14601	Mm.389327	NM_010285	ENSMUSG00000027643	Ghrh	Ghrf	growth hormone releasing hormone	protein-coding
1778	chrX	5668460	5670047	+	0	NA	Intergenic	Intergenic	-8715	NM_001033211	102991	Mm.199793	NM_001033211	ENSMUSG00000073294	AU022751	AU023811	expressed sequence AU022751	protein-coding
1667	chr8	92824943	92827827	+	0	NA	intron (NM_172913, intron 1 of 6)	intron (NM_172913, intron 1 of 6)	45766	NM_172913	244579	Mm.302755	NM_172913	ENSMUSG00000043668	Tox3	500-9|BC052044|C230068E13|CAGF9|Tnrc9	TOX high mobility group box family member 3	protein-coding
486	chr13	71644334	71646417	+	0	NA	Intergenic	Intergenic	455796	NM_010573	16371	Mm.316056	NM_010573	ENSMUSG00000060969	Irx1	-	Iroquois related homeobox 1 (Drosophila)	protein-coding
1354	chr5	96588873	96594278	+	0	NA	promoter-TSS (NM_178854)	promoter-TSS (NM_178854)	-566	NM_144910	231464	Mm.28374	NM_144910	ENSMUSG00000034724	Cnot6l	4932442K20Rik	CCR4-NOT transcription complex, subunit 6-like	protein-coding
160	chr10	67652759	67656628	+	0	NA	intron (NM_023598, intron 3 of 9)	intron (NM_023598, intron 3 of 9)	86781	NM_023598	71371	Mm.440357	NM_023598	ENSMUSG00000019947	Arid5b	4930580B11|5430435G07Rik|AI467247|Desrt|Mrf2|Mrf2alpha|Mrf2beta	AT rich interactive domain 5B (MRF1-like)	protein-coding
569	chr14	55954157	55967881	+	0	NA	Intergenic	Lx5|LINE|L1	120175	NM_027790	71412	Mm.85484	NM_027790	ENSMUSG00000022209	Dhrs2	5430405K24Rik|Hep27	dehydrogenase/reductase member 2	protein-coding
8	chr1	31004655	31008206	+	0	NA	non-coding (NR_002688, exon 1 of 7)	non-coding (NR_002688, exon 1 of 7)	125	NR_002688	433406	Mm.389003	NR_002688		Gm13363	OTTMUSG00000011595	predicted gene 13363	pseudo
98	chr1	174429693	174435153	+	0	NA	intron (NM_178598, intron 1 of 4)	intron (NM_178598, intron 1 of 4)	2046	NM_178598	21346	Mm.271711	NM_178598	ENSMUSG00000026547	Tagln2	2700094C18Rik|SM22beta|Sm22B|Sm22a	transgelin 2	protein-coding
1278	chr4	130184391	130186696	+	0	NA	Intergenic	L2|LINE|L2	-33731	NM_030722	80912	Mm.440206	NM_030722	ENSMUSG00000028580	Pum1	AA517475|Pumm|mKIAA0099	pumilio RNA-binding family member 1	protein-coding
1048	chr2	129625703	129627700	+	0	NA	non-coding (NR_029452, exon 1 of 1)	non-coding (NR_029452, exon 1 of 1)	448	NM_001038635	67333	Mm.389329	NM_183262	ENSMUSG00000037885	Stk35	1700054C12Rik|CLIK1|Stk35l1	serine/threonine kinase 35	protein-coding
1381	chr5	130266095	130269614	+	0	NA	Intergenic	Intergenic	25275	NM_133900	100678	Mm.271784	NM_133900	ENSMUSG00000029446	Psph	AI480570|PSP|PSPase	phosphoserine phosphatase	protein-coding
1000	chr2	61430703	61432609	+	0	NA	intron (NM_001164072, intron 1 of 7)	intron (NM_001164072, intron 1 of 7)	502	NM_001164071	21353	Mm.244393	NM_011529	ENSMUSG00000064289	Tank	C86182|E430026L09Rik|I-TRAF	TRAF family member-associated Nf-kappa B activator	protein-coding
1061	chr2	146702987	146715492	+	0	NA	intron (NM_001033298, intron 4 of 13)	L1M4|LINE|L1	27614	NM_001033298	228730	Mm.292352	NM_001033298	ENSMUSG00000074749	Kiz	Gm114|Ncrna00153|Plk1s1	kizuna centrosomal protein	protein-coding
43	chr1	78756692	78759204	+	0	NA	Intergenic	Intergenic	-55576	NM_021342	57814	Mm.24386	NM_021342	ENSMUSG00000047330	Kcne4	AW487937|MiRP3	potassium voltage-gated channel, Isk-related subfamily, gene 4	protein-coding
1396	chr5	144261237	144263470	+	0	NA	intron (NM_144915, intron 13 of 14)	intron (NM_144915, intron 13 of 14)	26508	NM_009007	19353	Mm.292510	NM_009007	ENSMUSG00000001847	Rac1	AL023026|D5Ertd559e	RAS-related C3 botulinum substrate 1	protein-coding
686	chr16	19883065	19887116	+	0	NA	promoter-TSS (NR_015488)	promoter-TSS (NR_015488)	-723	NR_015488	68162	Mm.35159	NR_015488		A930003A15Rik	AI853191	RIKEN cDNA A930003A15 gene	ncRNA
1760	chr9	83855127	83858427	+	0	NA	intron (NM_199195, intron 3 of 10)	CT-rich|Low_complexity|Low_complexity	14389	NM_199195	12040	Mm.12819	NM_199195	ENSMUSG00000032263	Bckdhb	-	branched chain ketoacid dehydrogenase E1, beta polypeptide	protein-coding
391	chr12	77380738	77391161	+	0	NA	intron (NM_138745, intron 8 of 27)	(TA)n|Simple_repeat|Simple_repeat	29730	NM_138745	108156	Mm.29584	NM_138745	ENSMUSG00000021048	Mthfd1	Dcs|E430024A07Rik|Mthfd	methylenetetrahydrofolate dehydrogenase (NADP+ dependent), methenyltetrahydrofolate cyclohydrolase, formyltetrahydrofolate synthase	protein-coding
1728	chr9	45791203	45794080	+	0	NA	intron (NM_008775, intron 1 of 5)	CpG	313	NM_008775	18475	Mm.200859	NM_008775	ENSMUSG00000003131	Pafah1b2	AI747451|AU021353|Pafahb|mus[b]	platelet-activating factor acetylhydrolase, isoform 1b, subunit 2	protein-coding
943	chr19	42160609	42166636	+	0	NA	Intergenic	B3A|SINE|B2	-1303	NM_145501	84095	Mm.117037	NM_145501	ENSMUSG00000025178	Pi4k2a	Pi4k2	phosphatidylinositol 4-kinase type 2 alpha	protein-coding
288	chr11	84137205	84138751	+	0	NA	intron (NM_133360, intron 39 of 53)	intron (NM_133360, intron 39 of 53)	129038	NM_133360	107476	Mm.31374	NM_133360	ENSMUSG00000020532	Acaca	A530025K05Rik|Acac|Acc1|Gm738	acetyl-Coenzyme A carboxylase alpha	protein-coding
193	chr10	98627340	98637442	+	0	NA	intron (NM_027740, intron 10 of 11)	intron (NM_027740, intron 10 of 11)	61622	NM_015737	14426	Mm.314	NM_015737	ENSMUSG00000090035	Galnt4	AV011803	UDP-N-acetyl-alpha-D-galactosamine:polypeptide N-acetylgalactosaminyltransferase 4	protein-coding
1555	chr7	97381591	97385249	+	0	NA	TTS (NR_111924)	TTS (NR_111924)	30522	NM_029256	75338	Mm.487222	NM_029256	ENSMUSG00000030617	Ccdc83	4930549K11Rik|4930554C01Rik|4932423M01Rik	coiled-coil domain containing 83	protein-coding
119	chr10	6365202	6374030	+	0	NA	intron (NM_001170786, intron 1 of 27)	intron (NM_001170786, intron 1 of 27)	3850	NM_001170786	270685	Mm.184752	NM_172308	ENSMUSG00000040675	Mthfd1l	2410004L15Rik|AI647056|Fthfsdc1	methylenetetrahydrofolate dehydrogenase (NADP+ dependent) 1-like	protein-coding
1375	chr5	124776662	124805272	+	0	NA	TTS (NM_028310)	TTS (NM_028310)	12869	NM_001134717	72650	Mm.121658	NM_028310	ENSMUSG00000047635	2810006K23Rik	-	RIKEN cDNA 2810006K23 gene	protein-coding
586	chr14	87815157	87818251	+	0	NA	intron (NM_172605, intron 1 of 13)	CpG	314	NM_001253755	219249	Mm.35168	NM_172605	ENSMUSG00000022019	Tdrd3	4732418C03Rik|6720468N18	tudor domain containing 3	protein-coding
180	chr10	82321218	82324297	+	0	NA	promoter-TSS (NM_001042514)	promoter-TSS (NM_001042514)	-329	NM_001042514	50493	Mm.210155	NM_015762	ENSMUSG00000020250	Txnrd1	TR|TR1|TrxR1	thioredoxin reductase 1	protein-coding
1585	chr7	123169481	123184235	+	0	NA	intron (NM_001025559, intron 1 of 15)	intron (NM_001025559, intron 1 of 15)	-2297	NM_001025560	20679	Mm.323365	NM_011445	ENSMUSG00000051910	Sox6	AI987981|SOX-LZ	SRY (sex determining region Y)-box 6	protein-coding
410	chr12	87839064	87840580	+	0	NA	intron (NM_011934, intron 3 of 6)	intron (NM_011934, intron 3 of 6)	77228	NM_011934	26380	Mm.235550	NM_011934	ENSMUSG00000021255	Esrrb	Err2|Errb|Estrrb|Nr3b2	estrogen related receptor, beta	protein-coding
246	chr11	23040138	23041877	+	0	NA	Intergenic	Intergenic	-115034	NM_001035226	103573	Mm.217547	NM_134014	ENSMUSG00000020290	Xpo1	AA420417|Crm1|Exp1	exportin 1, CRM1 homolog (yeast)	protein-coding
999	chr2	59662044	59669072	+	0	NA	intron (NM_001290659, intron 18 of 25)	intron (NM_001290659, intron 18 of 25)	55105	NM_001159636	72137	Mm.288734	NM_028118	ENSMUSG00000026988	Wdsub1	1700048E19Rik|2610014F08Rik	WD repeat, SAM and U-box domain containing 1	protein-coding
690	chr16	27523349	27525316	+	0	NA	Intergenic	Intergenic	135290	NM_001289436	67501	Mm.258985	NM_026202	ENSMUSG00000038127	Ccdc50	C3orf6	coiled-coil domain containing 50	protein-coding
1168	chr3	106487269	106488641	+	0	NA	promoter-TSS (NM_001039478)	promoter-TSS (NM_001039478)	50	NM_001039478	321000	Mm.259638	NM_028081	ENSMUSG00000056260	Lrif1	2010012G17Rik|4933421E11Rik|AI450568	ligand dependent nuclear receptor interacting factor 1	protein-coding
61	chr1	97164238	97165560	+	0	NA	Intergenic	Intergenic	-45306	NM_026321	67698	Mm.272705	NM_026321	ENSMUSG00000051185	Fam174a	2310044D20Rik|Fam174|Naa6|Tmem157	family with sequence similarity 174, member A	protein-coding
1180	chr3	126655925	126734186	+	0	NA	intron (NM_178655, intron 2 of 24)	intron (NM_178655, intron 2 of 24)	6315	NM_178655	109676	Mm.220242	NM_178655	ENSMUSG00000032826	Ank2	AI835472|AW491075|Ank-2	ankyrin 2, brain	protein-coding
1185	chr3	135848575	135850818	+	0	NA	intron (NM_001033350, intron 7 of 16)	intron (NM_001033350, intron 7 of 16)	139314	NM_001033350	242248	Mm.30832	NM_001033350	ENSMUSG00000037922	Bank1	A530094C12Rik|AI451642|AVIEF|BANK	B cell scaffold protein with ankyrin repeats 1	protein-coding
430	chr12	120399326	120404958	+	0	NA	intron (NM_177290, intron 12 of 13)	intron (NM_177290, intron 12 of 13)	74607	NM_177290	320910	Mm.217000	NM_177290	ENSMUSG00000025321	Itgb8	4832412O06Rik	integrin beta 8	protein-coding
447	chr13	26787406	26793826	+	0	NA	Intergenic	RMER16|LTR|ERVK	71418	NM_008232	15192	Mm.7411	NM_008232	ENSMUSG00000045835	Hdgfl1	4921520N01Rik|HRP-1|Hdgfrp1|Pwwp1	hepatoma derived growth factor-like 1	protein-coding
1446	chr6	71389372	71392323	+	0	NA	promoter-TSS (NM_024288)	promoter-TSS (NM_024288)	-216	NM_024288	68477	Mm.28474	NM_024288	ENSMUSG00000002222	Rmnd5a	1110007A06Rik|AJ237586|AW125795|Gid2|MTA.D02.090	required for meiotic nuclear division 5 homolog A (S. cerevisiae)	protein-coding
536	chr14	14873520	14876052	+	0	NA	intron (NM_139227, intron 3 of 11)	L1M4|LINE|L1	29781	NM_139227	246103	Mm.133625	NM_139227	ENSMUSG00000021738	Atxn7	A430107N12Rik|AI627028|Sca7|ataxin-7	ataxin 7	protein-coding
1741	chr9	62283134	62287273	+	0	NA	intron (NM_175484, intron 3 of 11)	ID_B1|SINE|B4	96053	NM_009672	11737	Mm.269088	NM_009672	ENSMUSG00000032249	Anp32a	Anp32|I1PP2A|LANP|PHAP1|W91701|pp32	acidic (leucine-rich) nuclear phosphoprotein 32 family, member A	protein-coding
1767	chr9	102693304	102697705	+	0	NA	Intergenic	(TCCC)n|Simple_repeat|Simple_repeat	-41746	NM_013649	20187	Mm.335391	NM_013649	ENSMUSG00000032547	Ryk	AW536699|ERK-3|Vik	receptor-like tyrosine kinase	protein-coding
1653	chr8	75168754	75188437	+	0	NA	intron (NM_176940, intron 2 of 18)	B3|SINE|B2	7985	NM_176940	319555	Mm.212927	NM_176940	ENSMUSG00000048148	Nwd1	A230063L24Rik	NACHT and WD repeat domain containing 1	protein-coding
1315	chr5	30430752	30446163	+	0	NA	intron (NM_001167879, intron 2 of 5)	intron (NM_001167879, intron 2 of 5)	-5831	NM_001256263	433868	Mm.450696	NM_001256263		3110082J24Rik	ENSMUSG00000073106	RIKEN cDNA 3110082J24 gene	protein-coding
1130	chr3	67923999	67926454	+	0	NA	intron (NM_001113420, intron 1 of 6)	intron (NM_001113420, intron 1 of 6)	56502	NM_001113420	30953	Mm.331064	NM_013928	ENSMUSG00000027777	Schip1	Nf2ip|Schip-1	schwannomin interacting protein 1	protein-coding
415	chr12	92825637	92829994	+	0	NA	intron (NM_175335, intron 1 of 8)	GC_rich|Low_complexity|Low_complexity	274	NM_031391	83602	Mm.275728	NM_031391	ENSMUSG00000020962	Gtf2a1	6330549H03Rik|AA536742|AA959775|AW060250|TfIIAa/b|Tfiia1	general transcription factor II A, 1	protein-coding
1688	chr8	121850802	121852759	+	0	NA	Intergenic	RLTR13D5|LTR|ERVK	-16658	NM_024219	68196	Mm.358714	NM_024219	ENSMUSG00000031839	Hsbp1	0610007A03Rik|AA408769|Hsp25	heat shock factor binding protein 1	protein-coding
1266	chr4	115888898	115896662	+	0	NA	Intergenic	Intergenic	-1739	NM_181585	18710	Mm.253819	NM_181585	ENSMUSG00000028698	Pik3r3	AA414954|p55pik	phosphatidylinositol 3 kinase, regulatory subunit, polypeptide 3 (p55)	protein-coding
189	chr10	93692688	93694314	+	0	NA	Intergenic	Intergenic	31747	NM_025551	66414	Mm.27886	NM_025551	ENSMUSG00000020022	Ndufa12	2410011G03Rik|AW112974	NADH dehydrogenase (ubiquinone) 1 alpha subcomplex, 12	protein-coding
1292	chr4	147391768	147394285	+	0	NA	exon (NM_011929, exon 10 of 23)	exon (NM_011929, exon 10 of 23)	18171	NM_008725	230899	Mm.482123	NM_008725	ENSMUSG00000041616	Nppa	ANP|Anf|Pnd	natriuretic peptide type A	protein-coding
1356	chr5	101071705	101073826	+	0	NA	Intergenic	Intergenic	30510	NM_027978	71883	Mm.260661	NM_027978	ENSMUSG00000029319	Coq2	2310002F18Rik	coenzyme Q2 homolog, prenyltransferase (yeast)	protein-coding
480	chr13	59243931	59249895	+	0	NA	Intergenic	Intergenic	337855	NM_001025074	18212	Mm.130054	NM_008745	ENSMUSG00000055254	Ntrk2	GP145-TrkB/GP95-TrkB|Tkrb|trk-B|trkB	neurotrophic tyrosine kinase, receptor, type 2	protein-coding
1153	chr3	90358977	90361434	+	0	NA	Intergenic	Intergenic	15060	NM_026416	67860	Mm.331185	NM_026416	ENSMUSG00000074457	S100a16	2300002L21Rik|AI325039|AI663996|DT1P1A7|S100F	S100 calcium binding protein A16	protein-coding
438	chr13	20444335	20447567	+	0	NA	intron (NM_080288, intron 14 of 21)	intron (NM_080288, intron 14 of 21)	-118908	NM_198093	140580	Mm.342392	NM_080288	ENSMUSG00000041112	Elmo1	6330578D22Rik|C230095H21Rik|CED-12	engulfment and cell motility 1	protein-coding
107	chr1	183567680	183569159	+	0	NA	Intergenic	Intergenic	-126837	NM_207280	403180	Mm.220754	NM_207280	ENSMUSG00000050625	Ccdc121	6530421E24Rik|Gm755	coiled-coil domain containing 121	protein-coding
87	chr1	162299818	162302320	+	0	NA	intron (NM_013862, intron 18 of 20)	RMER10B|LTR|ERVL	-19367	NM_001038621	29809	Mm.25833	NM_013862	ENSMUSG00000026721	Rabgap1l	5830411O09Rik|8430421H08Rik|9630005B12Rik|AW049894|HHL|Hh1|mKIAA0471	RAB GTPase activating protein 1-like	protein-coding
1022	chr2	103301048	103302877	+	0	NA	intron (NM_009804, intron 9 of 12)	intron (NM_009804, intron 9 of 12)	23348	NM_009804	12359	Mm.4215	NM_009804	ENSMUSG00000027187	Cat	2210418N07|Cas-1|Cas1|Cs-1	catalase	protein-coding
1458	chr6	86990330	86993196	+	0	NA	Intergenic	Intergenic	-1077	NM_013528	14583	Mm.19893	NM_013528	ENSMUSG00000029992	Gfpt1	2810423A18Rik|AI324119|AI449986|GFA|GFAT|GFAT1|GFAT1m|Gfpt	glutamine fructose-6-phosphate transaminase 1	protein-coding
1832	chrX	163098952	163100549	+	0	NA	promoter-TSS (NR_046015)	promoter-TSS (NR_046015)	-207	NR_046015	382255	Mm.336320	NR_046015	ENSMUSG00000086860	Gm1720	-	predicted gene 1720	ncRNA
444	chr13	23829226	23856958	+	0	NA	exon (NM_175660, exon 1 of 1)	exon (NM_175660, exon 1 of 1)	135	NM_175660	319172	Mm.423402	NM_175660	ENSMUSG00000061615	Hist1h2ab	H2A.1|H2a-53	histone cluster 1, H2ab	protein-coding
508	chr13	93472074	93475426	+	0	NA	intron (NM_172588, intron 9 of 11)	intron (NM_172588, intron 9 of 11)	91023	NM_011582	21828	Mm.20865	NM_011582	ENSMUSG00000021702	Thbs4	TSP4	thrombospondin 4	protein-coding
953	chr19	56305646	56307608	+	0	NA	Intergenic	Intergenic	-55801	NM_146101	226243	Mm.25791	NM_146101	ENSMUSG00000025075	Habp2	AI035669|FSAP|HABP|HGFAL|PHBP	hyaluronic acid binding protein 2	protein-coding
1336	chr5	66152469	66156975	+	0	NA	promoter-TSS (NM_001024917)	promoter-TSS (NM_001024917)	-38	NM_001024917	333789	Mm.332398	NM_001024917	ENSMUSG00000037795	N4bp2	B3bp|E430014I16|Gm1791|Gm868	NEDD4 binding protein 2	protein-coding
221	chr11	6004289	6035480	+	0	NA	intron (NM_173748, intron 4 of 5)	intron (NM_173748, intron 4 of 5)	53450	NR_029471	100042173	Mm.441799	NR_029471		Rps15a-ps6	Gm11968|OTTMUSG00000005107	ribosomal protein S15A, pseudogene 6	pseudo
39	chr1	67095568	67097469	+	0	NA	Intergenic	Intergenic	-11072	NM_021295	14768	Mm.20522	NM_021295	ENSMUSG00000026000	Lancl1	AW124738|Gpr69|Gpr69a|p40	LanC (bacterial lantibiotic synthetase component C)-like 1	protein-coding
1424	chr6	34729710	34731486	+	0	NA	5' UTR (NM_001289658, exon 1 of 4)	5' UTR (NM_001289658, exon 1 of 4)	166	NM_001289656	76223	Mm.150047	NM_178630	ENSMUSG00000038836	Agbl3	2900053G10Rik|4930431N21Rik|6530406M24Rik|CCP3	ATP/GTP binding protein-like 3	protein-coding
1560	chr7	100184845	100188109	+	0	NA	Intergenic	Intergenic	-41912	NM_021427	58238	Mm.113787	NM_021427		Fam181b	A830059I20Rik|AB041569	family with sequence similarity 181, member B	protein-coding
1089	chr2	181253606	181256663	+	0	NA	promoter-TSS (NM_001271585)	promoter-TSS (NM_001271585)	-56	NM_016775	13002	Mm.140761	NM_016775	ENSMUSG00000000826	Dnajc5	2610314I24Rik|AU018536|Csp	DnaJ (Hsp40) homolog, subfamily C, member 5	protein-coding
558	chr14	47917017	47920223	+	0	NA	intron (NM_178684, intron 1 of 3)	intron (NM_178684, intron 1 of 3)	631	NM_178684	218975	Mm.212297	NM_178684	ENSMUSG00000021840	Mapk1ip1l	9130202B12|C130032J12Rik	mitogen-activated protein kinase 1 interacting protein 1-like	protein-coding
417	chr12	95843073	95844586	+	0	NA	Intergenic	Intergenic	678331	NR_106175	102465890		NR_106175	miRBase:MI0026027	Mir8099-1	mmu-mir-8099-1	microRNA mir-8099-1	ncRNA
12	chr1	37442787	37444545	+	0	NA	intron (NM_172971, intron 8 of 15)	intron (NM_172971, intron 8 of 15)	17604	NM_001290799	269180	Mm.5294	NM_030266	ENSMUSG00000026113	Inpp4a	107kDa|9630012D15|D130048C09Rik|R74740	inositol polyphosphate-4-phosphatase, type I	protein-coding
1762	chr9	85641439	85644311	+	0	NA	promoter-TSS (NM_001081282)	promoter-TSS (NM_001081282)	66	NM_001081282	108837	Mm.22315	NM_175371	ENSMUSG00000035941	Ibtk	5430411K16Rik|AA409502|BTKI|mKIAA1417	inhibitor of Bruton agammaglobulinemia tyrosine kinase	protein-coding
1554	chr7	97128163	97130324	+	0	NA	5' UTR (NM_021876, exon 1 of 12)	5' UTR (NM_021876, exon 1 of 12)	243	NM_021876	13626	Mm.380914	NM_021876	ENSMUSG00000030619	Eed	ENSMUSG00000039373|l(7)5Rn|l7Rn5|lusk	embryonic ectoderm development	protein-coding
784	chr17	34160796	34169744	+	0	NA	promoter-TSS (NM_013543)	promoter-TSS (NM_013543)	-270	NM_013543	14979	Mm.275452	NM_013543	ENSMUSG00000073422	H2-Ke6	D17H6S112E|H-2Ke6|Hsd17b8|Ke-6|Ke6|Ring2	H2-K region expressed gene 6	protein-coding
260	chr11	44283213	44285560	+	0	NA	promoter-TSS (NM_024475)	promoter-TSS (NM_024475)	-336	NM_024475	79560	Mm.338784	NM_024475	ENSMUSG00000041231	Ublcp1	4930527B16Rik|8430435I17Rik|BC002236	ubiquitin-like domain containing CTD phosphatase 1	protein-coding
573	chr14	65058383	65060672	+	0	NA	intron (NM_001253715, intron 1 of 4)	CpG	336	NM_001253715	110265	Mm.26713	NM_026322	ENSMUSG00000054733	Msra	2310045J23Rik|6530413P12Rik|MSR-A	methionine sulfoxide reductase A	protein-coding
1084	chr2	172799449	172804612	+	0	NA	Intergenic	RMER17C|LTR|ERVK	-3313	NM_012046	26972	Mm.23495	NM_012046	ENSMUSG00000005883	Spo11	AI449549	SPO11 meiotic protein covalently bound to DSB homolog (S. cerevisiae)	protein-coding
1530	chr7	52934715	52938341	+	0	NA	intron (NM_001271578, intron 3 of 3)	intron (NM_001271578, intron 3 of 3)	-2864	NM_001289693	243967	Mm.291240	NM_001033356	ENSMUSG00000070564	Ntn5	Gm484	netrin 5	protein-coding
1144	chr3	85103116	85107491	+	0	NA	Intergenic	Intergenic	-16138	NR_040542	73283	Mm.489084	NR_040542		1700036G14Rik	-	RIKEN cDNA 1700036G14 gene	ncRNA
762	chr17	10803681	10805877	+	0	NA	intron (NM_027032, intron 2 of 4)	intron (NM_027032, intron 2 of 4)	155697	NR_077238	319750	Mm.383485	NR_077237	ENSMUSG00000089633	A230009B12Rik	-	RIKEN cDNA A230009B12 gene	ncRNA
638	chr15	59398468	59400196	+	0	NA	intron (NM_026746, intron 4 of 6)	intron (NM_026746, intron 4 of 6)	-80877	NM_144549	211770	Mm.40298	NM_144549	ENSMUSG00000032501	Trib1	A530090O15Rik|TRB-1|Trb1	tribbles homolog 1 (Drosophila)	protein-coding
734	chr16	90709321	90710930	+	0	NA	Intergenic	Intergenic	17491	NM_025642	66578	Mm.180363	NM_025642	ENSMUSG00000022978	Mis18a	2610039C10Rik|2810018N07Rik	MIS18 kinetochore protein homolog A (S. pombe)	protein-coding
1723	chr9	41254313	41256494	+	0	NA	Intergenic	Intergenic	70759	NR_040725	73144	Mm.482850	NR_040725		3110039I08Rik	-	RIKEN cDNA 3110039I08 gene	ncRNA
875	chr18	47919231	47921014	+	0	NA	Intergenic	Intergenic	-162373	NR_045404	414127	Mm.450768	NR_045404		G630055G22Rik	-	RIKEN cDNA G630055G22 gene	ncRNA
1522	chr7	36452172	36455838	+	0	NA	Intergenic	RMER1B|Other|Other	-21504	NM_019746	56330	Mm.371609	NM_019746	ENSMUSG00000030417	Pdcd5	2200003D22Rik|AA408513|Tfar19	programmed cell death 5	protein-coding
1	chr1	4959035	4962751	+	0	NA	intron (NM_001177795, intron 2 of 5)	intron (NM_001177795, intron 2 of 5)	47922	NM_001290372	58175	Mm.103771	NM_021374	ENSMUSG00000002459	Rgs20	2900073E09Rik|Rgsz1	regulator of G-protein signaling 20	protein-coding
506	chr13	90533232	90536646	+	0	NA	Intergenic	Intergenic	305667	NM_025335	66074	Mm.241387	NM_025335		Tmem167	0610041E09Rik|5730424F14Rik|AU041184|AW537806|ENSMUSG00000060669|Gm10085|Tmem167a	transmembrane protein 167	protein-coding
136	chr10	38573512	38576534	+	0	NA	Intergenic	Intergenic	-33438	NM_001177783	215919	Mm.294313	NM_001177783	ENSMUSG00000094311	Rfpl4b	100040915|Gm3037|Gm62	ret finger protein-like 4B	protein-coding
116	chr10	5033434	5037288	+	0	NA	Intergenic	Intergenic	-116473	NM_001079686	64009	Mm.331626	NM_022027	ENSMUSG00000019769	Syne1	8B|A330049M09Rik|BE692247|C130039F11Rik|CPG2|Myne1|mKIAA1756	spectrin repeat containing, nuclear envelope 1	protein-coding
1197	chr3	151576299	151578404	+	0	NA	Intergenic	Intergenic	-76859	NM_008966	19220	Mm.331442	NM_008966	ENSMUSG00000028036	Ptgfr	AI957154|PGF|fp	prostaglandin F receptor	protein-coding
144	chr10	43647302	43648887	+	0	NA	intron (NM_130892, intron 5 of 8)	intron (NM_130892, intron 5 of 8)	26481	NM_130892	170728	Mm.390253	NM_130892	ENSMUSG00000019864	Rtn4ip1	D10Ertd690e|NIMP	reticulon 4 interacting protein 1	protein-coding
1580	chr7	118513394	118514936	+	0	NA	Intergenic	Intergenic	-247976	NR_015573	75479	Mm.381620	NR_015573		1700012D14Rik	-	RIKEN cDNA 1700012D14 gene	ncRNA
1440	chr6	59251827	59254832	+	0	NA	Intergenic	Intergenic	94465	NM_001081145	68140	Mm.25843	NM_001081145	ENSMUSG00000049232	Tigd2	3632410O17Rik	tigger transposable element derived 2	protein-coding
661	chr15	88807243	88810754	+	0	NA	promoter-TSS (NM_133241)	promoter-TSS (NM_133241)	-15	NM_133241	170790	Mm.32780	NM_133241	ENSMUSG00000035805	Mlc1	AW048630|BB074274|Kiaa0027-hp|LVM|MLC|VL|WKL1|mKIAA0027	megalencephalic leukoencephalopathy with subcortical cysts 1 homolog (human)	protein-coding
381	chr12	60921929	60925401	+	0	NA	Intergenic	L2a|LINE|L2	-603195	NM_001033156	70611	Mm.311026	NM_001033156	ENSMUSG00000035329	Fbxo33	5730501N20Rik|AI642135	F-box protein 33	protein-coding
1471	chr6	114162192	114169088	+	0	NA	intron (NM_172890, intron 6 of 13)	intron (NM_172890, intron 6 of 13)	-66989	NM_178703	232333	Mm.5260	NM_178703	ENSMUSG00000030310	Slc6a1	A730043E01|GABATHG|GABATR|GAT-1|Gabt|Gabt1|Gat1|XT-1|Xtrp1	solute carrier family 6 (neurotransmitter transporter, GABA), member 1	protein-coding
1814	chrX	100724277	100731728	+	0	NA	Intergenic	Intergenic	-12837	NR_033398	668415	Mm.483779	NR_033398		Gm9159	EG668415	predicted gene 9159	pseudo
581	chr14	76903228	76907924	+	0	NA	intron (NM_001177751, intron 2 of 2)	intron (NM_001177751, intron 2 of 2)	1259	NM_009366	21807	Mm.153272	NM_009366	ENSMUSG00000022010	Tsc22d1	AA589566|AW105905|Egr5|TSC-22|Tgfb1i4|Tsc|Tsc22	TSC22 domain family, member 1	protein-coding
308	chr11	104301135	104305322	+	0	NA	5' UTR (NM_001081045, exon 1 of 14)	5' UTR (NM_001081045, exon 1 of 14)	377	NM_001081045	76719	Mm.136418	NM_001081045	ENSMUSG00000018412	Kansl1	1700081L11Rik|9430041J06Rik|mKIAA1267	KAT8 regulatory NSL complex subunit 1	protein-coding
906	chr18	79746914	79749709	+	0	NA	Intergenic	Intergenic	-442181	NM_053099	240427	Mm.312871	NM_053099	ENSMUSG00000024548	Setbp1	C130092E12|Seb|mKIAA0437	SET binding protein 1	protein-coding
1349	chr5	85998521	86002438	+	0	NA	Intergenic	Intergenic	494129	NM_007683	12617	Mm.4649	NM_007683	ENSMUSG00000029253	Cenpc1	CENP-C|Cenpc	centromere protein C1	protein-coding
177	chr10	81166924	81168315	+	0	NA	promoter-TSS (NM_001243067)	promoter-TSS (NM_001243067)	49	NM_001243067	73610	Mm.490466	NM_001243067		Zfp433	1700123A16Rik	RIKEN cDNA 1700123A16 gene	protein-coding
678	chr15	102032628	102037341	+	0	NA	promoter-TSS (NM_001289695)	promoter-TSS (NM_001289695)	-18	NM_001289690	68744	Mm.352945	NM_153194	ENSMUSG00000046897	Zfp740	1110034O07Rik|AW548228|Znf740	zinc finger protein 740	protein-coding
1517	chr7	30953951	30955194	+	0	NA	promoter-TSS (NM_001033540)	promoter-TSS (NM_001033540)	174	NM_011980	26465	Mm.446516	NM_011980	ENSMUSG00000037029	Zfp146	OZF|Znf146	zinc finger protein 146	protein-coding
373	chr12	54122970	54144312	+	0	NA	intron (NM_198111, intron 9 of 13)	intron (NM_198111, intron 9 of 13)	-216023	NM_013780	27386	Mm.247044	NM_013780	ENSMUSG00000021010	Npas3	4930423H22Rik|bHLHe12	neuronal PAS domain protein 3	protein-coding
773	chr17	25691933	25716724	+	0	NA	exon (NM_011447, exon 3 of 3)	exon (NM_011447, exon 3 of 3)	3303	NM_011447	20681	Mm.258220	NM_011447	ENSMUSG00000024176	Sox8	-	SRY (sex determining region Y)-box 8	protein-coding
1247	chr4	70890115	70892648	+	0	NA	Intergenic	Intergenic	-695419	NM_172694	230316	Mm.251188	NM_172694		Megf9	4933405H16Rik|9630025C07|Egfl5|mKIAA0818	multiple EGF-like-domains 9	protein-coding
205	chr10	120491961	120493529	+	0	NA	intron (NM_011915, intron 2 of 9)	intron (NM_011915, intron 2 of 9)	21685	NM_011915	24117	Mm.32831	NM_011915	ENSMUSG00000020218	Wif1	AW107799|WIF-1	Wnt inhibitory factor 1	protein-coding
22	chr1	45851658	45853092	+	0	NA	promoter-TSS (NM_028599)	promoter-TSS (NM_028599)	29	NM_028599	73674	Mm.270376	NM_028599	ENSMUSG00000025995	Wdr75	1300003A18Rik|2410118I19Rik|C77608	WD repeat domain 75	protein-coding
927	chr19	22730525	22733432	+	0	NA	intron (NM_177341, intron 1 of 26)	intron (NM_177341, intron 1 of 26)	-35131	NM_001035245	226025	Mm.131943	NM_177341	ENSMUSG00000052387	Trpm3	6330504P12Rik|9330180E14|AU018608|B930001P07Rik|LTRPC3|MLSN2	transient receptor potential cation channel, subfamily M, member 3	protein-coding
1752	chr9	71332555	71334325	+	0	NA	promoter-TSS (NM_001164793)	promoter-TSS (NM_001164793)	350	NM_178602	28015	Mm.21094	NM_178602	ENSMUSG00000032199	Polr2m	AA407243|AA408799|AI303746|AW553238|D9Wsu138e|Grinl1a|mKIAA4185	polymerase (RNA) II (DNA directed) polypeptide M	protein-coding
1309	chr5	24190162	24193039	+	0	NA	promoter-TSS (NM_016736)	promoter-TSS (NM_016736)	-33	NM_016736	53312	Mm.5856	NM_016736	ENSMUSG00000028954	Nub1	4931404D21Rik|6330412F12Rik|BS4|NY-REN-18	negative regulator of ubiquitin-like proteins 1	protein-coding
1576	chr7	117306161	117309364	+	0	NA	Intergenic	Intergenic	42189	NM_009516	22390	Mm.287173	NM_009516		Wee1	Wee1A	WEE 1 homolog 1 (S. pombe)	protein-coding
301	chr11	97047419	97050951	+	0	NA	promoter-TSS (NM_008379)	promoter-TSS (NM_008379)	21	NM_008379	16211	Mm.251013	NM_008379	ENSMUSG00000001440	Kpnb1	AA409963|IPOB|Impnb	karyopherin (importin) beta 1	protein-coding
51	chr1	89679562	89690944	+	0	NA	intron (NM_029846, intron 14 of 17)	intron (NM_029846, intron 14 of 17)	4107	NR_028519	100217415	Mm.453537	NR_028519		Scarna6	MBI-46	small Cajal body-specific RNA 6	ncRNA
1758	chr9	78321775	78354710	+	0	NA	Intergenic	B2_Mm1a|SINE|B2	-8711	NM_010106	13627	Mm.138471	NM_010106	ENSMUSG00000037742	Eef1a1	-	eukaryotic translation elongation factor 1 alpha 1	protein-coding
1622	chr8	17617466	17619770	+	0	NA	Intergenic	Intergenic	-83233	NM_053171	94109	Mm.436988	NM_053171	ENSMUSG00000060924	Csmd1	B930082H09|mKIAA1890	CUB and Sushi multiple domains 1	protein-coding
1260	chr4	99495230	99497207	+	0	NA	promoter-TSS (NM_145549)	promoter-TSS (NM_145549)	27	NM_145549	230500	Mm.331727	NM_145549		Efcab7	mKIAA1799	EF-hand calcium binding domain 7	protein-coding
1822	chrX	120613806	120615724	+	0	NA	Intergenic	L1_Mur1|LINE|L1	397597	NM_028426	73061	Mm.292979	NM_028426	ENSMUSG00000079450	3110007F17Rik	-	RIKEN cDNA 3110007F17 gene	protein-coding
456	chr13	36208955	36210572	+	0	NA	promoter-TSS (NM_201358)	promoter-TSS (NM_201358)	251	NM_001039189	69955	Mm.70690	NM_024274	ENSMUSG00000021420	Fars2	Fars1|pheRS	phenylalanine-tRNA synthetase 2 (mitochondrial)	protein-coding
874	chr18	46225300	46227848	+	0	NA	Intergenic	Intergenic	-21660	NR_040342	107003	Mm.395148	NR_040342		A330093E20Rik	AU043608	RIKEN cDNA A330093E20 gene	ncRNA
652	chr15	77611041	77673705	+	0	NA	intron (NM_022410, intron 2 of 40)	intron (NM_022410, intron 2 of 40)	30232	NM_022410	17886	Mm.29677	NM_022410	ENSMUSG00000022443	Myh9	Fltn|Myhn-1|Myhn1|NMHCIIA|NMMHC-A|NMMHC-IIA|TU72.6	myosin, heavy polypeptide 9, non-muscle	protein-coding
975	chr2	21062706	21065016	+	0	NA	Intergenic	CpG	63131	NM_027728	71233	Mm.27658	NM_027728	ENSMUSG00000026679	Enkur	4933434I06Rik|AU016229	enkurin, TRPC channel interacting protein	protein-coding
1708	chr9	23180953	23186389	+	0	NA	intron (NM_028472, intron 10 of 14)	intron (NM_028472, intron 10 of 14)	156151	NM_028472	73230	Mm.335020	NM_028472	ENSMUSG00000031963	Bmper	3110056H04Rik|CV-2|Crim3|Cv2	BMP-binding endothelial regulator	protein-coding
493	chr13	75976615	75978701	+	0	NA	intron (NM_053108, intron 1 of 2)	intron (NM_053108, intron 1 of 2)	324	NM_053108	93692	Mm.25844	NM_053108	ENSMUSG00000021591	Glrx	C86710|D13Wsu156e|Glrx1|Grx1|TTase	glutaredoxin	protein-coding
1436	chr6	50716340	50771868	+	0	NA	intron (NR_045984, intron 2 of 4)	intron (NR_045984, intron 2 of 4)	17990	NR_045984	319981	Mm.131454	NR_045984		C530044C16Rik	-	RIKEN cDNA C530044C16 gene	ncRNA
1033	chr2	114020473	114027620	+	0	NA	intron (NM_175466, intron 1 of 1)	B1_Mur2|SINE|Alu	3122	NM_175466	228491	Mm.132523	NM_175466	ENSMUSG00000040321	Zfp770	6430601A21Rik|Znf770	zinc finger protein 770	protein-coding
1591	chr7	134591674	134593417	+	0	NA	5' UTR (NM_175163, exon 1 of 3)	5' UTR (NM_175163, exon 1 of 3)	127	NM_175163	71131	Mm.474533	NM_175163		Zfp689	4933416E05Rik|Znf689	zinc finger protein 689	protein-coding
1677	chr8	110648550	110650278	+	0	NA	Intergenic	Intergenic	459163	NR_077224	109215	Mm.65282	NR_077224		3010033K07Rik	-	RIKEN cDNA 3010033K07 gene	ncRNA
1539	chr7	74565596	74567590	+	0	NA	Intergenic	Intergenic	-48849	NM_001291195	17258	Mm.132788	NM_001033713	ENSMUSG00000030557	Mef2a	A430079H05Rik	myocyte enhancer factor 2A	protein-coding
1320	chr5	35331433	35333010	+	0	NA	intron (NM_173402, intron 3 of 16)	intron (NM_173402, intron 3 of 16)	-9506	NM_001163512	71729	Mm.196208	NM_173402	ENSMUSG00000029101	Rgs12	1200016K18Rik|4632412M04Rik|AI481290|E130309H11	regulator of G-protein signaling 12	protein-coding
796	chr17	45569507	45571610	+	0	NA	promoter-TSS (NM_152810)	promoter-TSS (NM_152810)	98	NM_152810	71702	Mm.28270	NM_152810	ENSMUSG00000023932	Cdc5l	1200002I02Rik|AA408004|PCDC5RP	cell division cycle 5-like (S. pombe)	protein-coding
1026	chr2	105514692	105518239	+	0	NA	5' UTR (NM_001244202, exon 1 of 12)	5' UTR (NM_001244202, exon 1 of 12)	179	NM_001244202	18508	Mm.3608	NM_013627	ENSMUSG00000027168	Pax6	1500038E17Rik|AEY11|Dey|Gsfaey11|Pax-6|Sey	paired box 6	protein-coding
366	chr12	48261853	48266705	+	0	NA	Intergenic	Intergenic	-344517	NM_021361	664883	Mm.247195	NM_021361	ENSMUSG00000021047	Nova1	9430099M15Rik|G630039L02|Nova-1	neuro-oncological ventral antigen 1	protein-coding
844	chr18	12357970	12359818	+	0	NA	intron (NM_008720, intron 14 of 24)	intron (NM_008720, intron 14 of 24)	31655	NM_029623	76482	Mm.196596	NM_029623	ENSMUSG00000024410	3110002H16Rik	2400010D15Rik|Mic-1|Mic1	RIKEN cDNA 3110002H16 gene	protein-coding
1541	chr7	75245501	75248965	+	0	NA	intron (NM_010513, intron 2 of 20)	intron (NM_010513, intron 2 of 20)	150090	NM_010513	16001	Mm.275742	NM_010513		Igf1r	A330103N21Rik|CD221|D930020L01|IGF-1R|hyft	insulin-like growth factor I receptor	protein-coding
1390	chr5	140893786	140896244	+	0	NA	promoter-TSS (NM_133916)	promoter-TSS (NM_133916)	-244	NM_133916	27979	Mm.21671	NM_133916	ENSMUSG00000056076	Eif3b	AL033316|AL033334|AL033369|AW208965|D5Wsu45e|EIF3-ETA|EIF3-P110|EIF3-P116|Eif3s9|PRT1	eukaryotic translation initiation factor 3, subunit B	protein-coding
272	chr11	67842520	67845843	+	0	NA	intron (NM_018768, intron 6 of 7)	intron (NM_018768, intron 6 of 7)	64196	NM_018768	55943	Mm.3973	NM_018768	ENSMUSG00000020903	Stx8	0610007H08Rik|1110002H11Rik|4930571E13Rik|CARB	syntaxin 8	protein-coding
1646	chr8	68445456	68447668	+	0	NA	intron (NM_001166372, intron 2 of 7)	Charlie24|DNA|MER1_type	304138	NM_175188	72925	Mm.380457	NM_175188	ENSMUSG00000036469	March1	2900024D24Rik|BB085186	membrane-associated ring finger (C3HC4) 1	protein-coding
1499	chr7	3260448	3262344	+	0	NA	Intergenic	Intergenic	-11655	NM_001033431	378425	Mm.277152	NM_001033431	ENSMUSG00000078817	Nlrp12	Nalp12|PYPAF7	NLR family, pyrin domain containing 12	protein-coding
1469	chr6	112159732	112161180	+	0	NA	promoter-TSS (NR_027865)	promoter-TSS (NR_027865)	-246	NR_027865	67336	Mm.378014	NR_027865		1700054K19Rik	-	RIKEN cDNA 1700054K19 gene	ncRNA
775	chr17	26178062	26184354	+	0	NA	intron (NM_001162868, intron 1 of 13)	intron (NM_001162868, intron 1 of 13)	-22403	NM_153140	215445	Mm.41191	NM_153140	ENSMUSG00000037098	Rab11fip3	Cart1|D030060O14Rik|Rab11-FIP3|mKIAA0665	RAB11 family interacting protein 3 (class II)	protein-coding
919	chr19	9972697	9974948	+	0	NA	intron (NM_016692, intron 1 of 17)	CpG	201	NM_016692	16319	Mm.29755	NM_016692	ENSMUSG00000024660	Incenp	2700067E22Rik|AU019509|C130081E20|C77457	inner centromere protein	protein-coding
746	chr17	3467046	3469425	+	0	NA	intron (NM_001122998, intron 14 of 26)	intron (NM_001122998, intron 14 of 26)	-14080	NM_001286758	24001	Mm.137134	NM_011878	ENSMUSG00000023800	Tiam2	3000002F19Rik|STEF|mKIAA2016	T cell lymphoma invasion and metastasis 2	protein-coding
534	chr14	14482446	14485757	+	0	NA	Intergenic	Intergenic	-19289	NM_177624	218739	Mm.39919	NM_177624	ENSMUSG00000044772	Sntn	A430083B19Rik	sentan, cilia apical structure protein	protein-coding
400	chr12	83126260	83128299	+	0	NA	Intergenic	Intergenic	-143724	NM_001167983	217692	Mm.261333	NM_172579	ENSMUSG00000042700	Sipa1l1	4931426N11Rik|AW213287|Spar|mKIAA0440	signal-induced proliferation-associated 1 like 1	protein-coding
1268	chr4	116074338	116085990	+	0	NA	intron (NM_008641, intron 3 of 28)	L1Md_T|LINE|L1	56622	NM_001042743	17776	Mm.9287	NM_008641	ENSMUSG00000003810	Mast2	MAST205|Mtssk	microtubule associated serine/threonine kinase 2	protein-coding
744	chr17	3113780	3116159	+	0	NA	promoter-TSS (NM_134123)	promoter-TSS (NM_134123)	-3	NM_134123	106583	Mm.124373	NM_134123	ENSMUSG00000046201	Scaf8	A630086M08Rik|A930036P18Rik|AA408306|AI447644|AI448652|AU015035|Rbm16|mKIAA1116	SR-related CTD-associated factor 8	protein-coding
20	chr1	44173949	44177330	+	0	NA	promoter-TSS (NM_023645)	promoter-TSS (NM_023645)	-21	NM_023645	72050	Mm.281714	NM_023645	ENSMUSG00000026047	Kdelc1	1810049A15Rik|5730416C13Rik|EP58|Kdel1	KDEL (Lys-Asp-Glu-Leu) containing 1	protein-coding
888	chr18	62203671	62211220	+	0	NA	Intergenic	Intergenic	94716	NM_172628	225608	Mm.262320	NM_172628	ENSMUSG00000045629	Sh3tc2	D430044G18Rik	SH3 domain and tetratricopeptide repeats 2	protein-coding
633	chr15	48896979	48898671	+	0	NA	Intergenic	Intergenic	-274290	NM_001081391	239420	Mm.309363	NM_001081391	ENSMUSG00000022311	Csmd3	4930500N14Rik|mKIAA1894	CUB and Sushi multiple domains 3	protein-coding
1372	chr5	123583147	123601603	+	0	NA	5' UTR (NM_001040398, exon 1 of 17)	5' UTR (NM_001040398, exon 1 of 17)	173	NM_001040398	208043	Mm.250391	NM_177581	ENSMUSG00000038384	Setd1b	AA516740|BC035291|KMT2G|mKIAA1076	SET domain containing 1B	protein-coding
1011	chr2	79052495	79056798	+	0	NA	Intergenic	Intergenic	-40937	NM_010576	16401	Mm.31903	NM_010576	ENSMUSG00000027009	Itga4	CD49D|Itga4B	integrin alpha 4	protein-coding
151	chr10	57540976	57551430	+	0	NA	Intergenic	B4|SINE|B4	31853	NM_020561	57319	Mm.2379	NM_020561	ENSMUSG00000019872	Smpdl3a	0610010C24Rik|AI529588|ASM3A|ASML3|ASML3A	sphingomyelin phosphodiesterase, acid-like 3A	protein-coding
1754	chr9	71979946	71982672	+	0	NA	Intergenic	Intergenic	-21683	NM_001253865	21406	Mm.171615	NM_011544	ENSMUSG00000032228	Tcf12	A130037E08Rik|ALF1|HEB|HEBAlt|HTF-4|HTF4|ME1|REB|bHLHb20	transcription factor 12	protein-coding
1825	chrX	142192424	142194026	+	0	NA	Intergenic	Intergenic	-271043	NM_153319	27494	Mm.100068	NM_153319	ENSMUSG00000041688	Amot	CAG-2|D0Kist1|Sii6	angiomotin	protein-coding
1669	chr8	93574070	93576544	+	0	NA	exon (NM_177224, exon 40 of 40)	exon (NM_177224, exon 40 of 40)	-18649	NM_001282001	19651	Mm.235580	NM_011250	ENSMUSG00000031666	Rbl2	PRB2|RBR-2|Rb2|p130	retinoblastoma-like 2	protein-coding
1627	chr8	29251742	29253464	+	0	NA	Intergenic	Intergenic	-57278	NR_033590	666422	Mm.484413	NR_033590		Gm8096	EG666422	3-phosphoglycerate dehydrogenase pseudogene	pseudo
1161	chr3	98120431	98125039	+	0	NA	intron (NM_016966, intron 8 of 11)	intron (NM_016966, intron 8 of 11)	21157	NM_016966	236539	Mm.16898	NM_016966	ENSMUSG00000053398	Phgdh	3-PGDH|3PGDH|4930479N23|A10|PGAD|PGD|PGDH|SERA	3-phosphoglycerate dehydrogenase	protein-coding
468	chr13	47023426	47026489	+	0	NA	exon (NM_010617, exon 1 of 38)	exon (NM_010617, exon 1 of 38)	130	NM_010617	16553	Mm.342703	NM_010617	ENSMUSG00000021375	Kif13a	4930505I07Rik|mKIAA4109	kinesin family member 13A	protein-coding
1285	chr4	134186913	134189077	+	0	NA	intron (NM_207237, intron 2 of 11)	intron (NM_207237, intron 2 of 11)	-64229	NR_105829	102465216		NR_105829		Mir6403	mmu-mir-6403	microRNA mir-6403	ncRNA
1019	chr2	100272399	100273951	+	0	NA	Intergenic	Intergenic	-1191730	NM_009020	19374	Mm.4988	NM_009020	ENSMUSG00000032864	Rag2	Rag-2	recombination activating gene 2	protein-coding
700	chr16	40288507	40304297	+	0	NA	Intergenic	Lx8|LINE|L1	-1237053	NM_175548	268890	Mm.310524	NM_175548	ENSMUSG00000061080	Lsamp	5430428I19|AW046674|B130007O04Rik|D930023J12Rik|Lam|Lamp	limbic system-associated membrane protein	protein-coding
287	chr11	82576814	82578289	+	0	NA	promoter-TSS (NM_025884)	promoter-TSS (NM_025884)	272	NM_009839	12467	Mm.4126	NM_009839	ENSMUSG00000020698	Cct6b	CCT-zeta-2|CCTzeta-2|Cctz-2|TCP-1-zeta-2	chaperonin containing Tcp1, subunit 6b (zeta)	protein-coding
475	chr13	52860162	52862287	+	0	NA	Intergenic	Intergenic	-8650	NR_027893	105404	Mm.184173	NR_027893		BB123696	-	expressed sequence BB123696	ncRNA
78	chr1	144975893	144978700	+	0	NA	Intergenic	Intergenic	-510531	NM_020025	26878	Mm.285580	NM_020025	ENSMUSG00000033849	B3galt2	-	UDP-Gal:betaGlcNAc beta 1,3-galactosyltransferase, polypeptide 2	protein-coding
1380	chr5	130006115	130009407	+	0	NA	intron (NM_172276, intron 1 of 17)	CpG	655	NM_172276	231769	Mm.288714	NM_172276	ENSMUSG00000029439	Sfswap	1190005N23Rik|6330437E22Rik|AI197402|AW212079|SWAP|Sfrs8|Srsf8	splicing factor, suppressor of white-apricot homolog (Drosophila)	protein-coding
990	chr2	41118801	41120865	+	0	NA	intron (NM_053011, intron 31 of 90)	intron (NM_053011, intron 31 of 90)	1183255	NR_105754	102465171		NR_105754		Mir6336	mmu-mir-6336	microRNA mir-6336	ncRNA
413	chr12	92153548	92155780	+	0	NA	Intergenic	Intergenic	-129624	NR_045858	71349	Mm.442093	NR_045858		5430427M07Rik	-	RIKEN cDNA 5430427M07 gene	ncRNA
294	chr11	90408622	90414754	+	0	NA	intron (NM_011505, intron 12 of 17)	L2a|LINE|L2	87734	NM_011505	20913	Mm.207203	NM_011505	ENSMUSG00000020546	Stxbp4	6030470M02Rik|Synip	syntaxin binding protein 4	protein-coding
1614	chr8	6491827	6493226	+	0	NA	Intergenic	MLT1A1|LTR|MaLR	-1387294	NM_011388	20494	Mm.3500	NM_011388	ENSMUSG00000023073	Slc10a2	ASBT|ISBT	solute carrier family 10, member 2	protein-coding
1442	chr6	64991960	64993740	+	0	NA	promoter-TSS (NM_001253392)	promoter-TSS (NM_001253392)	189	NM_007958	13990	Mm.99113	NM_007958	ENSMUSG00000029920	Smarcad1	AV081750|AW226546|D6Pas1|Etl1|mKIAA1122	SWI/SNF-related, matrix-associated actin-dependent regulator of chromatin, subfamily a, containing DEAD/H box 1	protein-coding
932	chr19	26820984	26825295	+	0	NA	intron (NM_026003, intron 1 of 8)	T-rich|Low_complexity|Low_complexity	246	NM_026003	67155	Mm.491146	NM_011416	ENSMUSG00000024921	Smarca2	2610209L14Rik|SNF2alpha|Snf2l2|brahma|brm	SWI/SNF related, matrix associated, actin dependent regulator of chromatin, subfamily a, member 2	protein-coding
764	chr17	14682605	14683823	+	0	NA	Intergenic	Intergenic	-147265	NR_027986	74917	Mm.32228	NM_183107		4930474M22Rik	-	RIKEN cDNA 4930474M22 gene	ncRNA
349	chr12	33504142	33506057	+	0	NA	promoter-TSS (NM_021524)	promoter-TSS (NM_021524)	-101	NM_021524	59027	Mm.202727	NM_021524	ENSMUSG00000020572	Nampt	1110035O14Rik|AI314458|AI480535|NAmPRTase|Pbef|Pbef1|Visfatin	nicotinamide phosphoribosyltransferase	protein-coding
1743	chr9	62955963	62958193	+	0	NA	Intergenic	Intergenic	37709	NM_172446	207667	Mm.36349	NM_172446	ENSMUSG00000022245	Skor1	AV273001|C230094B15Rik|Corl1|Lbxcor1	SKI family transcriptional corepressor 1	protein-coding
1549	chr7	88091996	88093252	+	0	NA	promoter-TSS (NM_019951)	promoter-TSS (NM_019951)	-188	NM_019951	56529	Mm.43760	NM_019951	ENSMUSG00000025724	Sec11a	1810012E07Rik|18kDa|Sec11l1|Sid2895p|Spc18|sid2895	SEC11 homolog A (S. cerevisiae)	protein-coding
1525	chr7	48887707	48889740	+	0	NA	promoter-TSS (NM_023363)	promoter-TSS (NM_023363)	-178	NM_023363	67607	Mm.384626	NM_023363	ENSMUSG00000074165	Zfp788	2810426N06Rik|AI256342|AI605193	zinc finger protein 788	protein-coding
515	chr13	99862440	99873683	+	0	NA	Intergenic	ORR1B2|LTR|MaLR	-10185	NR_045495	69603	Mm.390632	NR_045495		2310020H05Rik	-	RIKEN cDNA 2310020H05 gene	ncRNA
1242	chr4	64110927	64114225	+	0	NA	Intergenic	Intergenic	-404527	NM_011607	21923	Mm.980	NM_011607	ENSMUSG00000028364	Tnc	AI528729|C130033P17Rik|Hxb|TN|TN-C|Ten|cytotactin|tenascin-C	tenascin C	protein-coding
1208	chr4	24605968	24608129	+	0	NA	intron (NM_001033531, intron 5 of 9)	intron (NM_001033531, intron 5 of 9)	171185	NM_001163020	212390	Mm.412074	NM_001033531	ENSMUSG00000040387	Klhl32	6430524H05Rik|D4Ertd389e|Gm1356|mKIAA1900	kelch-like 32	protein-coding
1107	chr3	32262194	32265231	+	0	NA	promoter-TSS (NR_027966)	promoter-TSS (NR_027966)	-699	NR_027966	67576	Mm.435324	NR_027966	ENSMUSG00000049507	4930429B21Rik	-	RIKEN cDNA 4930429B21 gene	ncRNA
138	chr10	38979026	38991891	+	0	NA	Intergenic	Intergenic	-101858	NM_001127376	327743	Mm.208111	NM_001127376	ENSMUSG00000062074	Wisp3	CCN6|ENSMUSG00000062074|Gm735|WISP-3	WNT1 inducible signaling pathway protein 3	protein-coding
1383	chr5	133907658	133909371	+	0	NA	Intergenic	Intergenic	-667104	NM_030719	80909	Mm.45218	NM_030719		Gatsl2	7530428J21Rik|AW742413|Gats|Gatsl1	GATS protein-like 2	protein-coding
606	chr15	3945063	3947184	+	0	NA	promoter-TSS (NM_145930)	promoter-TSS (NM_145930)	84	NR_045740	328489	Mm.447020	NR_045740	ENSMUSG00000097662	A630020A06	-	uncharacterized A630020A06	ncRNA
1803	chrX	82016794	82018528	+	0	NA	intron (NM_007868, intron 55 of 78)	intron (NM_007868, intron 55 of 78)	-477355	NM_028046	71996	Mm.20201	NM_028046	ENSMUSG00000035491	1600014K23Rik	AI324104	RIKEN cDNA 1600014K23 gene	protein-coding
137	chr10	38928257	38930594	+	0	NA	Intergenic	Intergenic	-45825	NM_001127376	327743	Mm.208111	NM_001127376	ENSMUSG00000062074	Wisp3	CCN6|ENSMUSG00000062074|Gm735|WISP-3	WNT1 inducible signaling pathway protein 3	protein-coding
1414	chr6	19986963	19989040	+	0	NA	Intergenic	Intergenic	482659	NR_105789	102465192		NR_105789	miRBase:MI0021899	Mir6370	mmu-mir-6370	microRNA mir-6370	ncRNA
1201	chr4	9569370	9571666	+	0	NA	intron (NM_001290367, intron 1 of 22)	intron (NM_001290367, intron 1 of 22)	346	NM_001177853	65973	Mm.222206	NM_023066	ENSMUSG00000028207	Asph	2310005F16Rik|3110001L23Rik|AI848629|AW261690|AW561901|BAH|C79816|cI-37	aspartate-beta-hydroxylase	protein-coding
724	chr16	77328884	77333194	+	0	NA	intron (NR_015543, intron 1 of 4)	intron (NR_015543, intron 1 of 4)	1466	NR_015543	77994	Mm.394688	NR_015543	ENSMUSG00000090386	2810055G20Rik	D730043B02Rik	RIKEN cDNA 2810055G20 gene	ncRNA
666	chr15	91532278	91535061	+	0	NA	intron (NM_025730, intron 11 of 50)	intron (NM_025730, intron 11 of 50)	30014	NM_025730	66725	Mm.37558	NM_025730	ENSMUSG00000036273	Lrrk2	4921513O20Rik|9330188B09Rik|AW561911|D630001M17Rik|Gm927|cI-46	leucine-rich repeat kinase 2	protein-coding
432	chr13	4769638	4772115	+	0	NA	Intergenic	Intergenic	-162466	NM_018859	56043	Mm.251908	NM_018859	ENSMUSG00000045410	Akr1e1	1810061I10Rik|Akr1e2	aldo-keto reductase family 1, member E1	protein-coding
519	chr13	102088175	102089485	+	0	NA	Intergenic	MTE2b|LTR|MaLR	64556	NR_045846	71174	Mm.399537	NR_045846		4933416M06Rik	-	RIKEN cDNA 4933416M06 gene	ncRNA
1074	chr2	165447282	165449502	+	0	NA	intron (NM_001271963, intron 1 of 15)	intron (NM_001271963, intron 1 of 15)	-7453	NM_001271962	14049	Mm.282719	NM_010165	ENSMUSG00000017897	Eya2	Eab1	eyes absent 2 homolog (Drosophila)	protein-coding
860	chr18	36401294	36402927	+	0	NA	Intergenic	Intergenic	-38706	NM_008989	19290	Mm.231802	NM_008989		Pura	CAGER-1|Pur-alpha|ssCRE-BP	purine rich element binding protein A	protein-coding
1195	chr3	146183507	146185290	+	0	NA	promoter-TSS (NM_027332)	promoter-TSS (NM_027332)	-11	NM_027371	70285	Mm.28128	NM_027332	ENSMUSG00000028187	Rpf1	2210420E24Rik|2310066N05Rik|Bxdc5	ribosome production factor 1 homolog (S. cerevisiae)	protein-coding
1567	chr7	105803572	105806984	+	0	NA	promoter-TSS (NM_172280)	promoter-TSS (NM_172280)	-199	NM_172280	233545	Mm.387819	NM_172280	ENSMUSG00000035401	2210018M11Rik	2310016L09Rik|AU019521|AU019557|Emsy	RIKEN cDNA 2210018M11 gene	protein-coding
1063	chr2	147120942	147131235	+	0	NA	intron (NR_030769, intron 3 of 5)	intron (NR_030769, intron 3 of 5)	62441	NR_040330	99041	Mm.373081	NR_040330		AI646519	Aspax1|OTTMUSG00000015701	expressed sequence AI646519	ncRNA
17	chr1	42724482	42776120	+	0	NA	intron (NR_027826, intron 1 of 3)	intron (NR_027826, intron 1 of 3)	1369	NR_027826	66297	Mm.45203	NM_183252	ENSMUSG00000060424	Pantr1	2610017I09Rik|Pou3f3os|linc-Brn1a	POU domain, class 3, transcription factor 3 adjacent noncoding transcript 1	ncRNA
1776	chr9	123126664	123130497	+	0	NA	Intergenic	Intergenic	-3424	NM_133974	109332	Mm.27519	NM_133974	ENSMUSG00000035498	Cdcp1	9030022E12Rik|AA409659|E030027H19Rik	CUB domain containing protein 1	protein-coding
1327	chr5	53603448	53607755	+	0	NA	promoter-TSS (NM_172710)	promoter-TSS (NM_172710)	-910	NM_172710	231238	Mm.235020	NM_172710	ENSMUSG00000029189	Sel1l3	2310045A20Rik|AI429585|mKIAA0746	sel-1 suppressor of lin-12-like 3 (C. elegans)	protein-coding
1274	chr4	124526285	124529239	+	0	NA	promoter-TSS (NM_153566)	promoter-TSS (NM_153566)	212	NM_001142727	68920	Mm.272397	NM_001142727	ENSMUSG00000078570	1110065P20Rik	C530005M16Rik	RIKEN cDNA 1110065P20 gene	protein-coding
708	chr16	49287678	49290258	+	0	NA	Intergenic	Intergenic	231369	NM_001166210	667772	Mm.301387	NM_001166210	ENSMUSG00000092009	Myh15	EG667772	myosin, heavy chain 15	protein-coding
110	chr1	189038971	189039971	+	0	NA	promoter-TSS (NM_028848)	promoter-TSS (NM_028848)	81	NM_026367	67769	Mm.138321	NM_026367	ENSMUSG00000039210	Gpatch2	5830433G22Rik|5830436K05Rik|AI427714|AI447508|AW107440|AW491060|Gpatc2	G patch domain containing 2	protein-coding
333	chr12	4774770	4776428	+	0	NA	promoter-TSS (NM_028376)	promoter-TSS (NM_028376)	474	NM_175431	207921	Mm.184898	NM_175431	ENSMUSG00000050545	Fam228b	A830093I24Rik	family with sequence similarity 228, member B	protein-coding
1601	chr7	143484518	143486735	+	0	NA	intron (NR_102277, intron 3 of 3)	intron (NR_102277, intron 3 of 3)	25619	NR_102277	77383	Mm.227745	NR_102277		C030029H02Rik	-	RIKEN cDNA C030029H02 gene	ncRNA
710	chr16	50699677	50701728	+	0	NA	Intergenic	(CA)n|Simple_repeat|Simple_repeat	-26543	NR_105782	102466634		NR_105782	miRBase:MI0021892	Mir6363	mmu-mir-6363	microRNA mir-6363	ncRNA
1656	chr8	81031528	81035303	+	0	NA	promoter-TSS (NM_009033)	promoter-TSS (NM_009033)	188	NM_001282108	76775	Mm.334631	NM_029736	ENSMUSG00000031684	Slc10a7	2410193C02Rik|P7	solute carrier family 10 (sodium/bile acid cotransporter family), member 7	protein-coding
323	chr11	115424921	115426385	+	0	NA	promoter-TSS (NM_001002929)	promoter-TSS (NM_001002929)	-105	NM_001002929	445007	Mm.4379	NM_001002929	ENSMUSG00000020739	Nup85	Pcnt1|frount	nucleoporin 85	protein-coding
856	chr18	34490166	34491238	+	0	NA	promoter-TSS (NM_025527)	promoter-TSS (NM_025527)	-97	NM_025527	66384	Mm.29452	NM_025527	ENSMUSG00000014504	Srp19	2310020D23Rik	signal recognition particle 19	protein-coding
1834	chrX	166410802	166425359	+	0	NA	intron (NM_001290506, intron 4 of 9)	intron (NM_001290506, intron 4 of 9)	-1231	NR_029457	654820	Mm.34441	NM_001039559	ENSMUSG00000072844	G530011O06Rik	-	RIKEN cDNA G530011O06 gene	ncRNA
1664	chr8	88000633	88003027	+	0	NA	Intergenic	Intergenic	-14686	NM_173866	108682	Mm.200423	NM_173866	ENSMUSG00000031700	Gpt2	4631422C05Rik|ALT2|AU014768|AU041193|C87201	glutamic pyruvate transaminase (alanine aminotransferase) 2	protein-coding
112	chr1	195577119	195579460	+	0	NA	Intergenic	ORR1E-int|LTR|MaLR	-244565	NR_029592	387201		NR_029592	miRBase:MI0000248	Mir205	Mirn205|mmu-mir-205	microRNA 205	ncRNA
545	chr14	26042844	26049466	+	0	NA	Intergenic	MER121|Unknown|Unknown	-83428	NR_045718	75862	Mm.109191	NR_045718		4930572O13Rik	-	RIKEN cDNA 4930572O13 gene	ncRNA
191	chr10	95553658	95560412	+	0	NA	Intergenic	Intergenic	-131806	NR_110448	74881	Mm.410819	NR_110448		4930459C07Rik	-	RIKEN cDNA 4930459C07 gene	ncRNA
187	chr10	90445044	90446772	+	0	NA	Intergenic	Lx8|LINE|L1	99580	NM_001042558	11783	Mm.220289	NM_009684	ENSMUSG00000019979	Apaf1	6230400I06Rik|Apaf-1|Apaf1l|fog|mKIAA0413	apoptotic peptidase activating factor 1	protein-coding
588	chr14	93814147	93817108	+	0	NA	intron (NM_001271798, intron 2 of 3)	intron (NM_001271798, intron 2 of 3)	472480	NM_001271800	211712	Mm.37126	NM_001081377		Pcdh9	-	protocadherin 9	protein-coding
1684	chr8	114351482	114353699	+	0	NA	intron (NM_011801, intron 5 of 6)	intron (NM_011801, intron 5 of 6)	25620	NM_011801	23837	Mm.279437	NM_011801	ENSMUSG00000031954	Cfdp1	AA408409|Bcnt|Bucentaur|Cfdp|cp27	craniofacial development protein 1	protein-coding
646	chr15	72681480	72683601	+	0	NA	TTS (NM_001164642)	TTS (NM_001164642)	-41786	NR_002864	353342	Mm.440245	NR_002864		Peg13	-	paternally expressed 13	ncRNA
756	chr17	9358896	9363444	+	0	NA	promoter-TSS (NR_027881)	promoter-TSS (NR_027881)	-283	NR_027881	67791	Mm.158175	NR_027881	ENSMUSG00000097049	6530411M01Rik	-	RIKEN cDNA 6530411M01 gene	ncRNA
446	chr13	26747252	26758385	+	0	NA	Intergenic	Intergenic	109216	NM_008232	15192	Mm.7411	NM_008232	ENSMUSG00000045835	Hdgfl1	4921520N01Rik|HRP-1|Hdgfrp1|Pwwp1	hepatoma derived growth factor-like 1	protein-coding
1283	chr4	133368518	133372824	+	0	NA	Intergenic	Intergenic	59975	NM_001285506	20111	Mm.301827	NM_009097	ENSMUSG00000003644	Rps6ka1	Mapkapk-1a|Rsk|Rsk-1|Rsk1|S6K-alpha-1|p90-Rsk1|p90Rsk1|p90S6K|p90rsk	ribosomal protein S6 kinase polypeptide 1	protein-coding
262	chr11	53282330	53284815	+	0	NA	Intergenic	Intergenic	10125	NM_183173	237761	Mm.145208	NM_183173	ENSMUSG00000044352	Sowaha	A830006N08Rik|Ankrd43	sosondowah ankyrin repeat domain family member A	protein-coding
1220	chr4	45830888	45833718	+	0	NA	intron (NM_018741, intron 1 of 4)	intron (NM_018741, intron 1 of 4)	7396	NM_018741	75426	Mm.3919	NM_018741	ENSMUSG00000035551	Igfbpl1	2810011G06Rik|2810453O06Rik|IGFBPL	insulin-like growth factor binding protein-like 1	protein-coding
212	chr10	127471523	127475387	+	0	NA	5' UTR (NM_001282976, exon 2 of 8)	5' UTR (NM_001282976, exon 2 of 8)	1053	NM_001113199	17938	Mm.3746	NM_013608	ENSMUSG00000061315	Naca	AL022831|AL024382|Gm1878|mKIAA0363|skNAC	nascent polypeptide-associated complex alpha polypeptide	protein-coding
1582	chr7	120781121	120782887	+	0	NA	Intergenic	Intergenic	124656	NM_027379	67420	Mm.206919	NM_026143	ENSMUSG00000030759	Far1	2600011M19Rik|2900034E22Rik|3732409C05Rik|AI850429|Mlstd2	fatty acyl CoA reductase 1	protein-coding
1599	chr7	141740649	141750929	+	0	NA	Intergenic	Intergenic	-116581	NM_001033420	330662	Mm.436572	NM_001033420	ENSMUSG00000058325	Dock1	9130006G06Rik|AI854900|D630004B07Rik	dedicator of cytokinesis 1	protein-coding
1331	chr5	64262895	64264405	+	0	NA	intron (NM_029554, intron 1 of 3)	intron (NM_029554, intron 1 of 3)	59916	NM_029554	76261	Mm.38143	NM_029554	ENSMUSG00000060512	0610040J01Rik	AI662686	RIKEN cDNA 0610040J01 gene	protein-coding
1149	chr3	88356173	88358652	+	0	NA	promoter-TSS (NM_031248)	promoter-TSS (NM_031248)	-226	NM_033526	94232	Mm.303059	NM_033526	ENSMUSG00000008604	Ubqln4	A1Up|A1u|AI663987|CIP75|UBIN	ubiquilin 4	protein-coding
542	chr14	22640039	22652262	+	0	NA	Intergenic	MLT1F-int|LTR|MaLR	-4633	NM_011695	22334	Mm.262327	NM_011695	ENSMUSG00000021771	Vdac2	Vdac6|mVDAC2|mVDAC6	voltage-dependent anion channel 2	protein-coding
1305	chr5	20207103	20209398	+	0	NA	3' UTR (NM_001170746, exon 23 of 23)	3' UTR (NM_001170746, exon 23 of 23)	179692	NM_172992	68770	Mm.86410	NM_172992	ENSMUSG00000039987	Phtf2	1110054G21Rik|9530062N20Rik|AI447096|C77923	putative homeodomain transcription factor 2	protein-coding
961	chr19	61275503	61275811	+	0	NA	Intergenic	Intergenic	-23445	NM_001177513	633057	Mm.426097	NM_001177513	ENSMUSG00000094649	Gm7102	EG633057	predicted gene 7102	protein-coding
1662	chr8	84717151	84726086	+	0	NA	Intergenic	Intergenic	204867	NM_001254747	16168	Mm.4392	NM_008357		Il15	AI503618|IL-15	interleukin 15	protein-coding
1288	chr4	137452097	137454136	+	0	NA	intron (NM_199307, intron 1 of 19)	intron (NM_199307, intron 1 of 19)	34964	NM_199307	230857	Mm.401062	NM_199307	ENSMUSG00000057530	Ece1	AW322500|ECE-1|ECE-1a|ECE-1b|ECE-1d	endothelin converting enzyme 1	protein-coding
1087	chr2	180921404	180923242	+	0	NA	5' UTR (NM_025598, exon 2 of 5)	5' UTR (NM_025598, exon 2 of 5)	275	NM_025598	66496	Mm.213943	NM_025598	ENSMUSG00000016344	Ppdpf	0610012G23Rik|2610317A05Rik|2700038C09Rik|3110053G12Rik	pancreatic progenitor cell differentiation and proliferation factor homolog (zebrafish)RIKEN cDNA 2700038C09 gene	protein-coding
810	chr17	64596836	64598794	+	0	NA	Intergenic	Intergenic	83408	NM_144859	224938	Mm.489681	NM_144859	ENSMUSG00000024083	Pja2	AI447901|AL022700|Neurodap1|mKIAA0438	praja 2, RING-H2 motif containing	protein-coding
574	chr14	67060006	67061808	+	0	NA	Intergenic	Intergenic	97695	NM_019675	56471	Mm.35474	NM_019675	ENSMUSG00000022044	Stmn4	Lagl|R75359|RB3	stathmin-like 4	protein-coding
1238	chr4	58060463	58069304	+	0	NA	intron (NM_022814, intron 43 of 47)	ORR1E|LTR|MaLR	-42887	NM_026132	67402	Mm.87357	NM_026132	ENSMUSG00000038709	Txndc8	4930429J24Rik|Sptrx-3|Sptrx3|Trx6	thioredoxin domain containing 8	protein-coding
170	chr10	78183981	78190100	+	0	NA	Intergenic	Intergenic	-6002	NM_009809	12365	Mm.20940	NM_009809	ENSMUSG00000005355	Casp14	MICE|mini-ICE	caspase 14	protein-coding
1587	chr7	130205373	130214452	+	0	NA	Intergenic	Charlie5|DNA|MER1_type	-57487	NM_144925	233833	Mm.102305	NM_144925	ENSMUSG00000052707	Tnrc6a	2010321I05Rik|3110054G10Rik|AW557223|CAGH26|D130023A07Rik|GW182|Tnrc6	trinucleotide repeat containing 6a	protein-coding
33	chr1	62710048	62713915	+	0	NA	Intergenic	Intergenic	-37910	NM_001077406	18187	Mm.266341	NM_010939	ENSMUSG00000025969	Nrp2	1110048P06Rik|Np-2|Np2|Npn-2|Npn2	neuropilin 2	protein-coding
660	chr15	88238342	88240072	+	0	NA	Intergenic	Intergenic	93903	NR_045281	328579	Mm.146839	NR_045281		B230214G05Rik	B230214G05	RIKEN cDNA B230214G05 gene	ncRNA
1559	chr7	100132507	100159131	+	0	NA	Intergenic	Intergenic	-82570	NM_021427	58238	Mm.113787	NM_021427		Fam181b	A830059I20Rik|AB041569	family with sequence similarity 181, member B	protein-coding
1793	chrX	39783933	39787664	+	0	NA	Intergenic	Intergenic	-69987	NM_011364	20400	Mm.441197	NM_011364	ENSMUSG00000005696	Sh2d1a	Gm686|SAP	SH2 domain protein 1A	protein-coding
7	chr1	26338460	26340982	+	0	NA	Intergenic	Intergenic	404584	NM_001033764	210940	Mm.297614	NM_001033764	ENSMUSG00000073722	4931408C20Rik	-	RIKEN cDNA 4931408C20 gene	protein-coding
1701	chr9	13977324	13980572	+	0	NA	Intergenic	Intergenic	-101797	NM_030261	75747	Mm.325126	NM_030261	ENSMUSG00000032009	Sesn3	5630400E15Rik|BC003348|SEST3	sestrin 3	protein-coding
26	chr1	53769644	53771160	+	0	NA	Intergenic	Intergenic	-6774	NM_001252070	627872	Mm.184692	NM_001252070	ENSMUSG00000096141	Dnah7a	Dnahc7|Dnahc7a|Gm992	dynein, axonemal, heavy chain 7A	protein-coding
227	chr11	8040117	8050315	+	0	NA	Intergenic	Intergenic	519322	NM_001083587	319939	Mm.337820	NM_001083587	ENSMUSG00000020422	Tns3	BC023928|F830010I22Rik|TEM6|Tens1	tensin 3	protein-coding
977	chr2	23010453	23012660	+	0	NA	promoter-TSS (NM_013771)	promoter-TSS (NM_013771)	-12	NM_025979	67121	Mm.253721	NM_025979	ENSMUSG00000026779	Mastl	2700091H24Rik|C88295|GW|GWL|MAST-L|THC2	microtubule associated serine/threonine kinase-like	protein-coding
566	chr14	52815102	52818227	+	0	NA	intron (NM_033618, intron 1 of 25)	CpG	250	NM_033618	114741	Mm.21662	NM_033618	ENSMUSG00000035726	Supt16	Cdc68|Fact140|Spt16|Supt16h	suppressor of Ty 16	protein-coding
526	chr13	107625430	107627214	+	0	NA	intron (NM_029665, intron 27 of 29)	intron (NM_029665, intron 27 of 29)	100673	NM_029665	76582	Mm.132208	NM_029665	ENSMUSG00000042590	Ipo11	1700081H05Rik|2510001A17Rik|AI314624|AW555235|E330021B14Rik|Ranbp11	importin 11	protein-coding
806	chr17	55034610	55036895	+	0	NA	Intergenic	Intergenic	-526353	NR_045825	69418	Mm.391004	NR_045825		1700025K24Rik	-	RIKEN cDNA 1700025K24 gene	ncRNA
264	chr11	59475448	59479535	+	0	NA	intron (NM_012027, intron 1 of 23)	intron (NM_012027, intron 1 of 23)	1494	NM_012027	26936	Mm.2402	NM_012027	ENSMUSG00000005417	Mprip	9530046C02|AA536749|AI647711|C76423|RIP3|Rhoip3|mKIAA0864|p116Rip	myosin phosphatase Rho interacting protein	protein-coding
255	chr11	32055982	32062669	+	0	NA	Intergenic	ORR1B1-int|LTR|MaLR	40954	NM_001134458	16199	Mm.384	NM_008374	ENSMUSG00000020279	Il9r	-	interleukin 9 receptor	protein-coding
359	chr12	39504139	39520904	+	0	NA	intron (NM_001163154, intron 1 of 9)	intron (NM_001163154, intron 1 of 9)	2223	NM_001163154	14009	Mm.4866	NM_007960	ENSMUSG00000004151	Etv1	ER81|Etsrp81	ets variant 1	protein-coding
182	chr10	85410713	85420845	+	0	NA	intron (NM_145422, intron 3 of 11)	intron (NM_145422, intron 3 of 11)	4759	NM_145422	28088	Mm.9257	NM_145422	ENSMUSG00000001783	Rtcb	AI255213|AI463255|D10Wsu52e|FAAP|HSPC117	RNA 2',3'-cyclic phosphate and 5'-OH ligase	protein-coding
1229	chr4	49925951	49928316	+	0	NA	Intergenic	Intergenic	-68492	NM_001276355	242443	Mm.440095	NM_001033351	ENSMUSG00000039579	Grin3a	6430537F04|A830097C19Rik|NMDAR-L|NR3A|mKIAA1973	glutamate receptor ionotropic, NMDA3A	protein-coding
1817	chrX	103381241	103385852	+	0	NA	intron (NM_008828, intron 1 of 10)	intron (NM_008828, intron 1 of 10)	1107	NM_008828	18655	Mm.316355	NM_008828	ENSMUSG00000062070	Pgk1	Pgk-1	phosphoglycerate kinase 1	protein-coding
108	chr1	187023526	187028686	+	0	NA	Intergenic	B2_Mm2|SINE|B2	-1941	NM_001163754	98732	Mm.275841	NM_172649	ENSMUSG00000039318	Rab3gap2	1110059F07Rik|2010002H18Rik|5830469C09|AI851069|AW743433|RAB3-GAP150|mKIAA0839	RAB3 GTPase activating protein subunit 2	protein-coding
604	chr14	121230924	121232347	+	0	NA	Intergenic	Intergenic	-78781	NM_023579	70572	Mm.221452	NM_023579	ENSMUSG00000030662	Ipo5	1110011C18Rik|5730478E03Rik|AA409333|C76941|IMB3|Kpnb3|Ranbp5	importin 5	protein-coding
1001	chr2	63879654	63882414	+	0	NA	intron (NM_001267846, intron 2 of 3)	intron (NM_001267846, intron 2 of 3)	55061	NM_001267846	60344	Mm.130769	NM_021716	ENSMUSG00000075324	Fign	fi|fidget	fidgetin	protein-coding
556	chr14	35886590	35888808	+	0	NA	intron (NM_008166, intron 4 of 15)	intron (NM_008166, intron 4 of 15)	179904	NR_029774	723847		NR_029774		Mir346	Mirn346|mmu-mir-346	microRNA 346	ncRNA
717	chr16	63816109	63818251	+	0	NA	intron (NM_010140, intron 2 of 16)	intron (NM_010140, intron 2 of 16)	46803	NM_010140	13837	Mm.1977	NM_010140		Epha3	AW492086|Cek4|ETK1|End3|Hek|Hek4|Mek4|Tyro4	Eph receptor A3	protein-coding
232	chr11	11708352	11710033	+	0	NA	promoter-TSS (NM_021891)	promoter-TSS (NM_021891)	-227	NM_001163360	60530	Mm.236114	NM_021891	ENSMUSG00000035455	Fignl1	-	fidgetin-like 1	protein-coding
477	chr13	58572445	58574533	+	0	NA	Intergenic	Intergenic	-68785	NM_001301341	15387	Mm.142872	NM_025279	ENSMUSG00000021546	Hnrnpk	Hnrpk|KBBP|NOVA	heterogeneous nuclear ribonucleoprotein K	protein-coding
815	chr17	67355340	67363526	+	0	NA	intron (NM_008984, intron 7 of 30)	intron (NM_008984, intron 7 of 30)	16142	NR_049205	100885844		NR_049205		Mir5709	mmu-mir-5709	microRNA mir-5709	ncRNA
1338	chr5	68023774	68026292	+	0	NA	intron (NM_001038999, intron 33 of 36)	intron (NM_001038999, intron 33 of 36)	25911	NM_001033415	330096	Mm.442747	NM_001033415	ENSMUSG00000050010	Shisa3	D830007B15Rik	shisa homolog 3 (Xenopus laevis)	protein-coding
671	chr15	96112768	96120111	+	0	NA	Intergenic	CpG	-1514	NM_175251	77044	Mm.17166	NM_175251	ENSMUSG00000033237	Arid2	1700124K17Rik|4432409D24Rik|zipzap/p200	AT rich interactive domain 2 (ARID, RFX-like)	protein-coding
1511	chr7	25289787	25294573	+	0	NA	promoter-TSS (NM_001290461)	promoter-TSS (NM_001290461)	74	NR_110958	232969	Mm.181332	NM_146183	ENSMUSG00000064264	Zfp428	2410005H09Rik|AV271806|AW047854|Znf428	zinc finger protein 428	protein-coding
1182	chr3	132346395	132347591	+	0	NA	promoter-TSS (NM_001163455)	promoter-TSS (NM_001163455)	-115	NM_001163455	271981	Mm.257864	NM_173032	ENSMUSG00000028030	Tbck	1700120J03Rik|9430001M19|A630047E20Rik|C030007I09Rik|Tbckl	TBC1 domain containing kinase	protein-coding
225	chr11	7104071	7116125	+	0	NA	exon (NM_008343, exon 2 of 5)	exon (NM_008343, exon 2 of 5)	3828	NM_008343	16009	Mm.29254	NM_008343	ENSMUSG00000020427	Igfbp3	AI649005|IGFBP-3|IGgfbp3	insulin-like growth factor binding protein 3	protein-coding
1447	chr6	71443347	71445562	+	0	NA	5' UTR (NM_009543, exon 1 of 4)	5' UTR (NM_009543, exon 1 of 4)	566	NM_009543	22644	Mm.422969	NM_009543	ENSMUSG00000052656	Rnf103	AW146237|AW212918|Zfp103|kf-1	ring finger protein 103	protein-coding
330	chr11	119899245	119913520	+	0	NA	intron (NM_001198785, intron 1 of 13)	MIRb|SINE|MIR	2077	NM_001198785	11302	Mm.6826	NM_007377	ENSMUSG00000025375	Aatk	AATYK|aatyk1|mKIAA0641	apoptosis-associated tyrosine kinase	protein-coding
142	chr10	42220735	42223464	+	0	NA	5' UTR (NM_017472, exon 1 of 4)	5' UTR (NM_017472, exon 1 of 4)	239	NM_017472	54198	Mm.277870	NM_017472	ENSMUSG00000019804	Snx3	SDP3	sorting nexin 3	protein-coding
207	chr10	123079981	123082380	+	0	NA	intron (NR_045514, intron 2 of 5)	intron (NR_045514, intron 2 of 5)	380048	NM_001252387	268354	Mm.51939	NM_182807	ENSMUSG00000044071	Fam19a2	6330575M02|FAM19A2 TAFA-2|TAFA2|Tafa-2	family with sequence similarity 19, member A2	protein-coding
1510	chr7	25184256	25185381	+	0	NA	5' UTR (NM_028047, exon 1 of 14)	5' UTR (NM_028047, exon 1 of 14)	171	NM_028047	71997	Mm.150977	NM_028047	ENSMUSG00000002210	Smg9	1500002O20Rik|AI429693|N28092	smg-9 homolog, nonsense mediated mRNA decay factor (C. elegans)	protein-coding
167	chr10	74414899	74416952	+	0	NA	Intergenic	Intergenic	-14051	NM_010311	14687	Mm.32595	NM_010311	ENSMUSG00000040009	Gnaz	AI847979|Gz	guanine nucleotide binding protein, alpha z subunit	protein-coding
48	chr1	83902475	83904436	+	0	NA	Intergenic	Intergenic	312081	NR_105771	102465181		NR_105771		Mir6353	mmu-mir-6353	microRNA mir-6353	ncRNA
360	chr12	40646218	40649038	+	0	NA	Intergenic	Intergenic	116335	NM_007487	11861	Mm.12723	NM_007487	ENSMUSG00000047446	Arl4a	AI467555|Arl4	ADP-ribosylation factor-like 4A	protein-coding
692	chr16	30154422	30159275	+	0	NA	Intergenic	B4|SINE|B4	91405	NM_008235	15205	Mm.390859	NM_008235	ENSMUSG00000022528	Hes1	Hry|bHLHb39	hairy and enhancer of split 1 (Drosophila)	protein-coding
1605	chr7	148357861	148359454	+	0	NA	promoter-TSS (NM_001172100)	promoter-TSS (NM_001172100)	93	NM_001172100	107702	Mm.279485	NM_145135	ENSMUSG00000038650	Rnh1	AW546468|C80305|RNH	ribonuclease/angiogenin inhibitor 1	protein-coding
663	chr15	89203221	89204880	+	0	NA	TTS (NR_073376)	TTS (NR_073376)	199	NM_001111288	100126824	Mm.287977	NM_001111288	ENSMUSG00000091780	Sco2	-	SCO cytochrome oxidase deficient homolog 2 (yeast)	protein-coding
854	chr18	34380031	34383211	+	0	NA	promoter-TSS (NR_040534)	promoter-TSS (NR_040534)	-195	NR_040534	633395	Mm.414290	NR_040534	ENSMUSG00000073607	Gm10548	ENSMUSG00000073607	ribosomal protein L29 pseudogene	pseudo
969	chr2	17758701	17763881	+	0	NA	Intergenic	Intergenic	-108596	NM_028757	74103	Mm.120298	NM_028757	ENSMUSG00000053702	Nebl	1200007O21Rik|A630080F05Rik|BB140644|D830029A09Rik|Lnebl	nebulette	protein-coding
1174	chr3	115709561	115712025	+	0	NA	promoter-TSS (NM_023214)	promoter-TSS (NM_023214)	-422	NM_001163514	58193	Mm.41739	NM_021388	ENSMUSG00000027963	Extl2	3000001D04Rik|AW146439	exostoses (multiple)-like 2	protein-coding
1076	chr2	167246234	167248446	+	0	NA	intron (NM_178371, intron 1 of 15)	CpG	119	NM_178371	77031	Mm.278924	NM_148929	ENSMUSG00000039463	Slc9a8	1200006P13Rik|6430709P13Rik|AI182282|NHE8	solute carrier family 9 (sodium/hydrogen exchanger), member 8	protein-coding
766	chr17	17257609	17259041	+	0	NA	promoter-TSS (NM_011765)	promoter-TSS (NM_011765)	-22	NM_011765	22759	Mm.436633	NM_011765	ENSMUSG00000095990	Zfp97	NGD16-4	zinc finger protein 97	protein-coding
510	chr13	93897860	93900160	+	0	NA	intron (NM_023821, intron 1 of 12)	MTEa|LTR|MaLR	15669	NM_023821	76469	Mm.33857	NM_023821	ENSMUSG00000047419	Cmya5	2310076E16Rik|2310076E21Rik|AA420382|AI504003|Srfsd|Tims|sr553	cardiomyopathy associated 5	protein-coding
393	chr12	79049267	79052516	+	0	NA	Intergenic	Intergenic	-276751	NM_172952	268566	Mm.341742	NM_145965	ENSMUSG00000047454	Gphn	5730552E08Rik|AI662856|BC027112|C230040D23|GPH|GPHRYN|geph	gephyrin	protein-coding
449	chr13	28848468	28852056	+	0	NA	intron (NR_045053, intron 3 of 8)	intron (NR_045053, intron 3 of 8)	-47520	NR_105787	102466635		NR_105787	miRBase:MI0021897	Mir6368	mmu-mir-6368	microRNA mir-6368	ncRNA
1501	chr7	4690064	4693409	+	0	NA	promoter-TSS (NM_001115018)	promoter-TSS (NM_001115018)	7	NM_001115018	232811	Mm.247844	NM_146177	ENSMUSG00000059851	Suv420h2	BC024816|KMT5C|Suv4-20h2	suppressor of variegation 4-20 homolog 2 (Drosophila)	protein-coding
658	chr15	84527486	84529256	+	0	NA	intron (NM_146061, intron 4 of 7)	intron (NM_146061, intron 4 of 7)	16943	NM_146061	109270	Mm.291372	NM_146061	ENSMUSG00000036106	Prr5	AU043908|Arhgap8|C030017C09Rik|C78947|Protor-1|Protor1	proline rich 5 (renal)	protein-coding
274	chr11	68799899	68802674	+	0	NA	3' UTR (NM_001159519, exon 28 of 28)	3' UTR (NM_001159519, exon 28 of 28)	2894	NR_037222	100526545		NR_037222		Mir3062	mmu-mir-3062	microRNA 3062	ncRNA
1574	chr7	114807932	114811103	+	0	NA	intron (NM_001163557, intron 3 of 25)	(TG)n|Simple_repeat|Simple_repeat	59159	NM_001163557	19024	Mm.2817	NM_008905	ENSMUSG00000036528	Ppfibp2	Cclp1	PTPRF interacting protein, binding protein 2 (liprin beta 2)	protein-coding
1579	chr7	118265001	118266986	+	0	NA	non-coding (NR_015573, exon 1 of 3)	non-coding (NR_015573, exon 1 of 3)	196	NR_015573	75479	Mm.381620	NR_015573		1700012D14Rik	-	RIKEN cDNA 1700012D14 gene	ncRNA
549	chr14	27076861	27079653	+	0	NA	Intergenic	Intergenic	-3487	NM_001177539	100039293	Mm.429131	NM_001177539	ENSMUSG00000072672	Duxbl3	ENSMUSG00000072672|Gm10391	double homeobox B-like 3	protein-coding
877	chr18	48960296	48962081	+	0	NA	Intergenic	Intergenic	-721755	NR_033785	67321	Mm.245802	NR_033785		1700044K03Rik	-	RIKEN cDNA 1700044K03 gene	ncRNA
659	chr15	85285479	85306646	+	0	NA	Intergenic	Intergenic	37595	NM_001256072	328577	Mm.212960	NM_001256072	ENSMUSG00000096607	7530416G11Rik	-	RIKEN cDNA 7530416G11 gene	protein-coding
1508	chr7	20183696	20190402	+	0	NA	intron (NM_016680, intron 2 of 20)	intron (NM_016680, intron 2 of 20)	2768	NM_016680	53609	Mm.20913	NM_016680	ENSMUSG00000061028	Clasrp	Clasp|Sfrs16|Srsf16|Swap2	CLK4-associating serine/arginine rich protein	protein-coding
1771	chr9	114309366	114311018	+	0	NA	promoter-TSS (NM_009752)	promoter-TSS (NM_009752)	-4	NR_108101	12091	Mm.290516	NM_009752	ENSMUSG00000045594	Glb1	AW125515|Bge|Bgl|Bgl-e|Bgl-s|Bgl-t|Bgs|Bgt|C130097A14Rik	galactosidase, beta 1	protein-coding
1141	chr3	80601717	80607922	+	0	NA	intron (NM_001039195, intron 2 of 12)	intron (NM_001039195, intron 2 of 12)	1894	NM_013540	14800	Mm.220224	NM_013540	ENSMUSG00000033981	Gria2	GluA2|GluR-B|Glur-2|Glur2	glutamate receptor, ionotropic, AMPA2 (alpha 2)	protein-coding
1128	chr3	65708112	65711256	+	0	NA	Intergenic	Intergenic	52463	NM_019937	56706	Mm.175612	NM_019937	ENSMUSG00000027829	Ccnl1	2610030E23Rik|AU018493|Ccnl|ania-6a	cyclin L1	protein-coding
682	chr16	15886728	15891266	+	0	NA	TTS (NM_146068)	TTS (NM_146068)	1618	NM_007679	12609	Mm.347407	NM_007679		Cebpd	-	CCAAT/enhancer binding protein (C/EBP), delta	protein-coding
353	chr12	36984017	36987636	+	0	NA	Intergenic	Intergenic	-5841	NM_001177877	71156	Mm.250837	NM_027699	ENSMUSG00000020545	Lrrc72	1700108M19Rik|4933421E18Rik	leucine rich repeat containing 72	protein-coding
375	chr12	54345797	54362682	+	0	NA	intron (NM_013780, intron 1 of 11)	CpG	4575	NM_013780	27386	Mm.247044	NM_013780	ENSMUSG00000021010	Npas3	4930423H22Rik|bHLHe12	neuronal PAS domain protein 3	protein-coding
984	chr2	30940643	30947613	+	0	NA	intron (NM_001038700, intron 4 of 14)	intron (NM_001038700, intron 4 of 14)	7892	NM_001177650	14269	Mm.52297	NM_019406	ENSMUSG00000075415	Fnbp1	1110057E06Rik|2210010H06Rik|FBP1|Fbp17	formin binding protein 1	protein-coding
1155	chr3	93400063	93402488	+	0	NA	Intergenic	Intergenic	42236	NM_009112	20194	Mm.1	NM_009112	ENSMUSG00000041959	S100a10	42C|AA409961|AL024248|CAL12|CLP11|Cal1l|p10|p11	S100 calcium binding protein A10 (calpactin)	protein-coding
946	chr19	47141283	47143525	+	0	NA	exon (NM_177342, exon 1 of 11)	exon (NM_177342, exon 1 of 11)	166	NM_177342	226182	Mm.301522	NM_177342	ENSMUSG00000025049	Taf5	6330528C20Rik|AV117817	TAF5 RNA polymerase II, TATA box binding protein (TBP)-associated factor	protein-coding
1485	chr6	126930333	126933640	+	0	NA	Intergenic	Intergenic	-33574	NM_010204	14177	Mm.3403	NM_010204	ENSMUSG00000000183	Fgf6	Fgf-6|HSTF-2	fibroblast growth factor 6	protein-coding
788	chr17	35299766	35303281	+	0	NA	intron (NM_001199044, intron 1 of 30)	CpG	299	NM_001199044	53761	Mm.272462	NM_020027	ENSMUSG00000024393	Prrc2a	3110039B05Rik|Bat-2|Bat2|D17H6S51E|G2|Wbp12|mKIAA4178	proline-rich coiled-coil 2A	protein-coding
128	chr10	26491556	26494033	+	0	NA	intron (NM_176837, intron 1 of 14)	intron (NM_176837, intron 1 of 14)	476	NM_176837	73910	Mm.356496	NM_176837	ENSMUSG00000039031	Arhgap18	4833419J07Rik|AI314906|AI843501	Rho GTPase activating protein 18	protein-coding
1724	chr9	41725606	41728447	+	0	NA	Intergenic	Intergenic	205346	NM_011436	20660	Mm.121920	NM_011436		Sorl1	2900010L19Rik|AI596264|AW261561|LR11|SorLA|gp250|mSorLA	sortilin-related receptor, LDLR class A repeats-containing	protein-coding
1520	chr7	36018989	36020957	+	0	NA	Intergenic	Intergenic	-19609	NM_001024707	435965	Mm.333783	NM_001024707	ENSMUSG00000001802	Lrp3	-	low density lipoprotein receptor-related protein 3	protein-coding
303	chr11	99090233	99092894	+	0	NA	intron (NM_020618, intron 1 of 10)	CpG	768	NM_020618	57376	Mm.379086	NM_020618	ENSMUSG00000037935	Smarce1	2810417B20Rik|5830412H02Rik|9030408N19Rik|Baf27	SWI/SNF related, matrix associated, actin dependent regulator of chromatin, subfamily e, member 1	protein-coding
250	chr11	27928343	27931135	+	0	NA	Intergenic	L1_Rod|LINE|L1	554585	NM_001166661	216613	Mm.93759	NM_181577	ENSMUSG00000032878	Ccdc85a	-	coiled-coil domain containing 85A	protein-coding
1361	chr5	105895617	105897674	+	0	NA	intron (NM_001033550, intron 1 of 4)	intron (NM_001033550, intron 1 of 4)	-51845	NM_133897	100604	Mm.319847	NM_133897	ENSMUSG00000054720	Lrrc8c	AD158|AI326115|E430036I04Rik|fad158	leucine rich repeat containing 8 family, member C	protein-coding
614	chr15	28039093	28040864	+	0	NA	Intergenic	L1ME1|LINE|L1	-84375	NM_001081302	223435	Mm.485422	NM_001081302	ENSMUSG00000022263	Trio	6720464I07Rik|AA408740|Solo	triple functional domain (PTPRF interacting)	protein-coding
1765	chr9	96906628	96919881	+	0	NA	intron (NM_145134, intron 1 of 2)	intron (NM_145134, intron 1 of 2)	5520	NM_145134	211949	Mm.491271	NM_145134	ENSMUSG00000046997	Spsb4	D030068E18Rik|SSB-4|Ssb4	splA/ryanodine receptor domain and SOCS box containing 4	protein-coding
501	chr13	84587371	84590055	+	0	NA	Intergenic	Intergenic	226812	NM_175187	72745	Mm.295063	NM_175187	ENSMUSG00000035762	Tmem161b	2810446P07Rik|AI843389	transmembrane protein 161B	protein-coding
1313	chr5	28642863	28644968	+	0	NA	exon (NM_028234, exon 1 of 19)	exon (NM_028234, exon 1 of 19)	186	NM_028234	381626	Mm.304075	NM_028234	ENSMUSG00000048271	Rbm33	3200001K10Rik|6430512A10Rik|AA386890|Prr8	RNA binding motif protein 33	protein-coding
278	chr11	71967726	71972060	+	0	NA	intron (NM_028963, intron 18 of 18)	intron (NM_028963, intron 18 of 18)	-20502	NM_001081641	327958	Mm.351793	NM_001024927	ENSMUSG00000040543	Pitpnm3	A330068P14Rik|AI848332|Ackr6|Gm880	PITPNM family member 3	protein-coding
1617	chr8	10921491	10929504	+	0	NA	non-coding (NR_030715, exon 3 of 3)	non-coding (NR_030715, exon 3 of 3)	2960	NR_030715	665306	Mm.358758	NR_030715	ENSMUSG00000038917	3930402G23Rik	-	RIKEN cDNA 3930402G23 gene	ncRNA
490	chr13	74630927	74632556	+	0	NA	promoter-TSS (NM_146231)	promoter-TSS (NM_146231)	-343	NM_146231	235956	Mm.296909	NM_146231		Zfp825	-	zinc finger protein 825	protein-coding
130	chr10	33790158	33791964	+	0	NA	intron (NM_001162937, intron 4 of 6)	intron (NM_001162937, intron 4 of 6)	25264	NM_178908	103511	Mm.66334	NM_178908	ENSMUSG00000049872	Fam26e	BB146404	family with sequence similarity 26, member E	protein-coding
155	chr10	61911567	61913575	+	0	NA	promoter-TSS (NM_181423)	promoter-TSS (NM_181423)	-130	NM_181423	338359	Mm.235898	NM_181423	ENSMUSG00000020079	Supv3l1	6330443E10Rik	suppressor of var1, 3-like 1 (S. cerevisiae)	protein-coding
1373	chr5	123793808	123797471	+	0	NA	intron (NM_029850, intron 1 of 5)	CpG	1182	NM_029850	77045	Mm.151960	NM_029850	ENSMUSG00000029438	Bcl7a	4432415N06Rik|AI448316	B cell CLL/lymphoma 7A	protein-coding
387	chr12	73185189	73189228	+	0	NA	promoter-TSS (NM_026038)	promoter-TSS (NM_026038)	382	NM_024205	104771	Mm.258935	NM_024205	ENSMUSG00000005078	Jkamp	1200003C05Rik|2310047L11Rik|Jamp	JNK1/MAPK8-associated membrane protein	protein-coding
53	chr1	90735500	90737875	+	0	NA	Intergenic	Intergenic	85222	NR_040493	78650	Mm.243767	NR_040493	ENSMUSG00000097398	2410088K16Rik	-	RIKEN cDNA 2410088K16 gene	ncRNA
1465	chr6	97344478	97347653	+	0	NA	intron (NM_145148, intron 6 of 23)	(GGGTG)n|Simple_repeat|Simple_repeat	-143291	NM_001081157	320502	Mm.68163	NM_001081157	ENSMUSG00000044086	Lmod3	5430424A14Rik	leiomodin 3 (fetal)	protein-coding
1302	chr5	14832680	14835139	+	0	NA	intron (NM_011995, intron 22 of 24)	GA-rich|Low_complexity|Low_complexity	80980	NM_198666	381714	Mm.368256	NM_198666	ENSMUSG00000033219	Gm9758	ENSMUSG00000033219	predicted gene 9758	protein-coding
1112	chr3	37483651	37486632	+	0	NA	Intergenic	Intergenic	-53731	NM_011896	24063	Mm.330986	NM_011896	ENSMUSG00000037211	Spry1	sprouty1	sprouty homolog 1 (Drosophila)	protein-coding
626	chr15	38397917	38404580	+	0	NA	Intergenic	Intergenic	19054	NR_105916	102465574		NR_105916		Mir6951	mmu-mir-6951	microRNA mir-6951	ncRNA
1397	chr5	145171926	145174002	+	0	NA	Intergenic	Intergenic	53570	NR_102373	100579137		NR_102372		Dmr	-	Dmrt1 related	ncRNA
1294	chr4	147680000	147681658	+	0	NA	Intergenic	Intergenic	-18755	NM_001083342	242748	Mm.33873	NM_001083342		Ptchd2	G630052C06Rik|RNDEu-2	patched domain containing 2	protein-coding
941	chr19	36907429	36910618	+	0	NA	5' UTR (NM_001163635, exon 1 of 27)	5' UTR (NM_001163635, exon 1 of 27)	301	NM_001163635	74493	Mm.249310	NM_001163635	ENSMUSG00000024811	Tnks2	5430432P15Rik|AA517131|AI662480|ARTD6|TNKS-2|Tank2	tankyrase, TRF1-interacting ankyrin-related ADP-ribose polymerase 2	protein-coding
461	chr13	40017998	40019583	+	0	NA	Intergenic	Intergenic	364590	NM_172143	218165	Mm.364096	NM_172143	ENSMUSG00000047094	Ofcc1	opo	orofacial cleft 1 candidate 1	protein-coding
583	chr14	79598847	79609829	+	0	NA	Intergenic	Intergenic	42836	NM_001033215	105590	Mm.486536	NM_001033215	ENSMUSG00000071262	Zfp957	AU017455	zinc finger protein 957	protein-coding
1562	chr7	103944349	103946355	+	0	NA	intron (NR_045874, intron 2 of 3)	intron (NR_045874, intron 2 of 3)	4707	NR_045874	791381	Mm.402112	NR_045874	ENSMUSG00000053049	Gm15413	ENSMUSG00000053049|OTTMUSG00000021246	predicted gene 15413	ncRNA
1426	chr6	35237819	35240095	+	0	NA	intron (NM_172892, intron 3 of 15)	intron (NM_172892, intron 3 of 15)	19169	NM_172892	243755	Mm.23666	NM_172892	ENSMUSG00000029843	Slc13a4	9630060C05Rik|SUT-1|SUT1	solute carrier family 13 (sodium/sulfate symporters), member 4	protein-coding
257	chr11	32680068	32682466	+	0	NA	Intergenic	Intergenic	43327	NM_027050	69351	Mm.65488	NM_027050	ENSMUSG00000020270	Smim23	1700008A04Rik	small integral membrane protein 23	protein-coding
1358	chr5	104536019	104545707	+	0	NA	intron (NM_010097, intron 1 of 10)	intron (NM_010097, intron 1 of 10)	2244	NM_010097	13602	Mm.29027	NM_010097	ENSMUSG00000029309	Sparcl1	Ecm2|Sc1|hevin|mast9	SPARC-like 1	protein-coding
951	chr19	56043903	56045733	+	0	NA	Intergenic	Intergenic	75007	NM_001142924	21416	Mm.139815	NM_009333	ENSMUSG00000024985	Tcf7l2	TCF4B|TCF4E|Tcf-4|Tcf4|mTcf-4B|mTcf-4E	transcription factor 7 like 2, T cell specific, HMG box	protein-coding
782	chr17	32315981	32318198	+	0	NA	Intergenic	Intergenic	9319	NM_001033163	71932	Mm.176240	NM_001033163	ENSMUSG00000037577	Ephx3	2310063B19Rik|Abhd9	epoxide hydrolase 3	protein-coding
85	chr1	161322590	161324977	+	0	NA	Intergenic	Intergenic	53294	NR_039543	100628622		NR_039543		Mir1843b	mmu-mir-1843b	microRNA 1843b	ncRNA
1824	chrX	137819014	137821894	+	0	NA	intron (NM_053185, intron 2 of 44)	MER63B|DNA|AcHobo	88165	NM_053185	94216	Mm.155586	NM_053185	ENSMUSG00000031273	Col4a6	BB116301	collagen, type IV, alpha 6	protein-coding
809	chr17	64531726	64533710	+	0	NA	Intergenic	L1MD|LINE|L1	148505	NM_144859	224938	Mm.489681	NM_144859	ENSMUSG00000024083	Pja2	AI447901|AL022700|Neurodap1|mKIAA0438	praja 2, RING-H2 motif containing	protein-coding
1156	chr3	95020627	95036532	+	0	NA	intron (NR_108026, intron 3 of 3)	intron (NR_108026, intron 3 of 3)	-3767	NM_172395	57912	Mm.28189	NM_172395	ENSMUSG00000046722	Cdc42se1	1300002M12Rik|AW558204|Cdcse1|SCIP1|Spec1	CDC42 small effector 1	protein-coding
1557	chr7	100021800	100025816	+	0	NA	promoter-TSS (NM_028243)	promoter-TSS (NM_028243)	45	NM_028243	72461	Mm.389969	NM_028243	ENSMUSG00000061119	Prcp	2510048K03Rik|2610104A14Rik|AI451719|HUMPCP|PCP	prolylcarboxypeptidase (angiotensinase C)	protein-coding
1486	chr6	129178975	129181338	+	0	NA	Intergenic	Intergenic	7907	NR_040265	76432	Mm.261738	NR_040265	ENSMUSG00000097354	2310001H17Rik	AI646108	RIKEN cDNA 2310001H17 gene	ncRNA
425	chr12	104750934	104752672	+	0	NA	Intergenic	Intergenic	-18972	NM_028980	74521	Mm.248619	NM_028980	ENSMUSG00000021209	Ppp4r4	8430415E04Rik|mKIAA1622	protein phosphatase 4, regulatory subunit 4	protein-coding
591	chr14	100330538	100346278	+	0	NA	intron (NM_010636, intron 5 of 6)	intron (NM_010636, intron 5 of 6)	210607	NM_010636	16597	Mm.396499	NM_010636		Klf12	2700063E05Rik|AI225908|AI315654|AP-2rep|B130052C06Rik|D530033K05Rik	Kruppel-like factor 12	protein-coding
832	chr17	91849440	91852872	+	0	NA	Intergenic	Intergenic	-359014	NM_020252	18189	Mm.491332	NM_020252	ENSMUSG00000024109	Nrxn1	1700062G21Rik|9330127H16Rik|A230068P09Rik|mKIAA0578	neurexin I	protein-coding
736	chr16	91217641	91247105	+	0	NA	Intergenic	Intergenic	6578	NM_016967	50913	Mm.37289	NM_016967	ENSMUSG00000039830	Olig2	AI604895|Bhlhb1|Olg-2|Oligo2|RK17|bHLHe19	oligodendrocyte transcription factor 2	protein-coding
539	chr14	19509788	19512207	+	0	NA	intron (NM_144839, intron 3 of 5)	intron (NM_144839, intron 3 of 5)	215144	NM_144839	218793	Mm.23551	NM_144839	ENSMUSG00000058317	Ube2e2	BC016265	ubiquitin-conjugating enzyme E2E 2	protein-coding
781	chr17	31771941	31778228	+	0	NA	promoter-TSS (NM_178224)	promoter-TSS (NM_178224)	-934	NM_178224	12411	Mm.206417	NM_144855	ENSMUSG00000024039	Cbs	AI047524|AI303044|HIP4	cystathionine beta-synthase	protein-coding
828	chr17	86014054	86028993	+	0	NA	intron (NM_011381, intron 1 of 1)	intron (NM_011381, intron 1 of 1)	1349	NM_011381	20473	Mm.370208	NM_011381		Six3	E130112M24Rik|Six3a|Six3alpha|Six3b|Six3beta	sine oculis-related homeobox 3	protein-coding
276	chr11	71518731	71520230	+	0	NA	Intergenic	Intergenic	-44725	NM_177618	216881	Mm.48648	NM_177618	ENSMUSG00000020811	Wscd1	mKIAA0523	WSC domain containing 1	protein-coding
102	chr1	180246235	180269695	+	0	NA	TTS (NM_016805)	TTS (NM_016805)	8681	NM_025511	66359	Mm.489720	NM_025511	ENSMUSG00000026500	Cox20	2310005N03Rik|Fam36a	COX20 Cox2 chaperone	protein-coding
1831	chrX	162607781	162612937	+	0	NA	intron (NM_146238, intron 1 of 3)	intron (NM_146238, intron 1 of 3)	1947	NM_146238	237221	Mm.209490	NM_146238	ENSMUSG00000040621	Gemin8	B130034M20Rik|B930082C09Rik|BC023488|gemin-8	gem (nuclear organelle) associated protein 8	protein-coding
1698	chr9	7835836	7838651	+	0	NA	Intergenic	CpG	-1988	NM_007465	11797	Mm.335659	NM_007465	ENSMUSG00000057367	Birc2	AW146227|Api1|Api2|Birc3|HIAP1|HIAP2|IAP1|IAP2|MIAP1|MIAP2|MIHB|MIHC|RNF48|cIAP1|cIAP2|mcIAP1	baculoviral IAP repeat-containing 2	protein-coding
520	chr13	102568848	102584473	+	0	NA	Intergenic	Intergenic	-38488	NM_001077495	18708	Mm.259333	NM_001024955	ENSMUSG00000041417	Pik3r1	PI3K|p50alpha|p55alpha|p85alpha	phosphatidylinositol 3-kinase, regulatory subunit, polypeptide 1 (p85 alpha)	protein-coding
1218	chr4	42961985	42967952	+	0	NA	promoter-TSS (NM_019874)	promoter-TSS (NM_019874)	-998	NM_019874	56323	Mm.20437	NM_019874	ENSMUSG00000036052	Dnajb5	1110058L06Rik|AI462558|Hsc40|Hsp40-3	DnaJ (Hsp40) homolog, subfamily B, member 5	protein-coding
532	chr14	8894300	8896715	+	0	NA	Intergenic	Intergenic	-17320	NM_025938	67053	Mm.210048	NM_025938	ENSMUSG00000023156	Rpp14	2610511E03Rik|AA682089	ribonuclease P 14 subunit	protein-coding
1193	chr3	144305368	144307875	+	0	NA	Intergenic	Intergenic	73230	NM_053102	93684	Mm.29812	NM_053102	ENSMUSG00000037072	Sep15	9430015P09Rik	selenoprotein	protein-coding
1404	chr6	4346577	4349683	+	0	NA	Intergenic	Intergenic	-107567	NM_007743	12843	Mm.277792	NM_007743	ENSMUSG00000029661	Col1a2	AA960264|AI325291|Col1a-2|Cola-2|Cola2|oim	collagen, type I, alpha 2	protein-coding
55	chr1	92863724	92873915	+	0	NA	Intergenic	Intergenic	-2622	NM_008998	19329	Mm.279780	NM_008998	ENSMUSG00000026304	Rab17	AW413472	RAB17, member RAS oncogene family	protein-coding
1543	chr7	80890884	80892789	+	0	NA	intron (NM_001162532, intron 1 of 2)	intron (NM_001162532, intron 1 of 2)	6643	NM_001162532	100038347	Mm.425464	NM_001162532	ENSMUSG00000078670	Fam174b	-	family with sequence similarity 174, member B	protein-coding
1681	chr8	112507199	112508698	+	0	NA	Intergenic	Intergenic	-6388	NM_146214	234724	Mm.28110	NM_146214	ENSMUSG00000001670	Tat	-	tyrosine aminotransferase	protein-coding
57	chr1	93209331	93210840	+	0	NA	intron (NM_016717, intron 7 of 11)	intron (NM_016717, intron 7 of 11)	-8567	NM_001033292	227357	Mm.318167	NM_001033292	ENSMUSG00000049515	Espnl	Gm556	espin-like	protein-coding
259	chr11	40567421	40570450	+	0	NA	promoter-TSS (NM_009831)	promoter-TSS (NM_009831)	-147	NM_009831	12450	Mm.2103	NM_009831	ENSMUSG00000020326	Ccng1	AI314029	cyclin G1	protein-coding
424	chr12	104551549	104553875	+	0	NA	promoter-TSS (NM_001195726)	promoter-TSS (NM_001195726)	-457	NM_001195726	100504156	Mm.425749	NM_001195726	ENSMUSG00000096753	Fam181a	EG544888	family with sequence similarity 181, member A	protein-coding
872	chr18	45660945	45662758	+	0	NA	Intergenic	Intergenic	-57957	NM_080465	140492	Mm.458654	NM_080465	ENSMUSG00000054477	Kcnn2	KCa2.2|SK2|SKCA2|fri	potassium intermediate/small conductance calcium-activated channel, subfamily N, member 2	protein-coding
1625	chr8	19979892	19981066	+	0	NA	TTS (NR_028428)	TTS (NR_028428)	-21699	NM_001177408	100040599	Mm.491087	NM_001177408	ENSMUSG00000074449	Gm15319	OTTMUSG00000020118	predicted gene 15319	protein-coding
163	chr10	70684912	70686848	+	0	NA	Intergenic	Intergenic	14912	NM_009360	21780	Mm.229292	NM_009360	ENSMUSG00000003923	Tfam	AI661103|Hmgts|mtTFA|tsHMG	transcription factor A, mitochondrial	protein-coding
1402	chr5	151367909	151374473	+	0	NA	intron (NM_001081001, intron 26 of 26)	B1_Mm|SINE|Alu	25909	NM_133898	100637	Mm.279932	NM_133898	ENSMUSG00000041132	N4bp2l1	2410024N18Rik|AI428195|B230342M21Rik	NEDD4 binding protein 2-like 1	protein-coding
1106	chr3	30105919	30107582	+	0	NA	Intergenic	Intergenic	-194624	NM_007963	14013	Mm.56965	NM_007963	ENSMUSG00000027684	Mecom	D630039M04Rik|Evi-1|Evi1|Jbo|Mds|Mds1|Mds1-Evi1|Prdm3|Znfpr1b1	MDS1 and EVI1 complex locus	protein-coding
1146	chr3	86437678	86440620	+	0	NA	intron (NM_030695, intron 44 of 56)	intron (NM_030695, intron 44 of 56)	-86944	NM_011839	23937	Mm.389466	NM_011839	ENSMUSG00000057777	Mab21l2	-	mab-21-like 2 (C. elegans)	protein-coding
395	chr12	79451929	79452148	+	0	NA	intron (NM_145965, intron 2 of 22)	LSU-rRNA_Hsa|rRNA|rRNA	124396	NM_145965	268566	Mm.341742	NM_145965	ENSMUSG00000047454	Gphn	5730552E08Rik|AI662856|BC027112|C230040D23|GPH|GPHRYN|geph	gephyrin	protein-coding
89	chr1	163751458	163754227	+	0	NA	intron (NM_172645, intron 22 of 23)	intron (NM_172645, intron 22 of 23)	-34216	NM_010177	14103	Mm.3355	NM_010177	ENSMUSG00000000817	Fasl	APT1LG1|CD178|CD95-L|CD95L|Fas-L|Faslg|Tnfsf6|gld	Fas ligand (TNF superfamily, member 6)	protein-coding
175	chr10	80567971	80569054	+	0	NA	promoter-TSS (NM_023138)	promoter-TSS (NM_023138)	-180	NM_023138	26396	Mm.275436	NM_023138	ENSMUSG00000035027	Map2k2	AA589381|MEK2|MK2|Prkmk2	mitogen-activated protein kinase kinase 2	protein-coding
1531	chr7	53763545	53774616	+	0	NA	intron (NM_013789, intron 10 of 10)	intron (NM_013789, intron 10 of 10)	117242	NM_001112739	16502	Mm.249386	NM_008421	ENSMUSG00000058975	Kcnc1	C230009H10Rik|KShIIIB|KV4|Kcr2-1|Kv3.1|NGK2|Shaw	potassium voltage gated channel, Shaw-related subfamily, member 1	protein-coding
584	chr14	79986424	79988238	+	0	NA	promoter-TSS (NM_026474)	promoter-TSS (NM_026474)	-167	NM_026474	67955	Mm.18972	NM_026474	ENSMUSG00000022024	Sugt1	2410174K12Rik|SGT1	SGT1, suppressor of G2 allele of SKP1 (S. cerevisiae)	protein-coding
988	chr2	38678197	38682343	+	0	NA	intron (NM_010264, intron 3 of 10)	intron (NM_010264, intron 3 of 10)	-27985	NR_029568	387176		NR_029568	miRBase:MI0000223	Mir181a-2	Mirn181|Mirn181a|Mirn181a-2|miR-181|mir-181a	microRNA 181a-2	ncRNA
35	chr1	64233997	64249661	+	0	NA	Intergenic	Intergenic	-73866	NM_033563	93691	Mm.29466	NM_033563	ENSMUSG00000025959	Klf7	9830124P08Rik	Kruppel-like factor 7 (ubiquitous)	protein-coding
1550	chr7	88933269	88935067	+	0	NA	intron (NM_026077, intron 1 of 4)	intron (NM_026077, intron 1 of 4)	171	NM_026077	67290	Mm.248391	NM_026077	ENSMUSG00000025102	3110040N11Rik	AI851475	RIKEN cDNA 3110040N11 gene	protein-coding
1454	chr6	85467282	85469517	+	0	NA	Intergenic	Intergenic	-4863	NM_020596	13656	Mm.44137	NM_020596	ENSMUSG00000071341	Egr4	NGF1-C|NGFI-C|NGFIC|pAT133	early growth response 4	protein-coding
1421	chr6	30956379	30963789	+	0	NA	Intergenic	Intergenic	-51094	NM_001135093	619665	Mm.204671	NM_001135093	ENSMUSG00000073209	Klf14	5330411L03Rik|AL022736|BTEB5	Kruppel-like factor 14	protein-coding
347	chr12	31268719	31270104	+	0	NA	exon (NM_172049, exon 1 of 5)	exon (NM_172049, exon 1 of 5)	103	NM_172049	211986	Mm.34035	NM_172049	ENSMUSG00000043061	Tmem18	BC024093	transmembrane protein 18	protein-coding
1333	chr5	65090546	65106778	+	0	NA	Intergenic	Intergenic	-96100	NM_008453	16599	Mm.392759	NM_008453	ENSMUSG00000029178	Klf3	9930027G08Rik|AL024007|Bklf|Tef-2	Kruppel-like factor 3 (basic)	protein-coding
665	chr15	90251547	90269533	+	0	NA	Intergenic	L1MA8|LINE|L1	205749	NR_106106	102466838		NR_106106		Mir7648	mmu-mir-7648	microRNA mir-7648	ncRNA
434	chr13	11574471	11576799	+	0	NA	Intergenic	Intergenic	-38684	NR_027813	664793	Mm.410565	NR_027813		Zp4-ps	EG664793|Zp4|Zpb	zona pellucida glycoprotein 4, pseudogene	pseudo
1476	chr6	119368054	119370031	+	0	NA	Intergenic	Tigger16b|DNA|Tigger	-1541	NM_197985	68465	Mm.291826	NM_197985	ENSMUSG00000030168	Adipor2	1110001I14Rik|ADCR2|AI115388|AW554121|D6Ucla1e|Paqr2	adiponectin receptor 2	protein-coding
1184	chr3	133677227	133678788	+	0	NA	Intergenic	Intergenic	-221452	NM_001004367	319478	Mm.224814	NM_001004367	ENSMUSG00000044365	Cxxc4	9330210J02Rik|C030003J12Rik|Idax	CXXC finger 4	protein-coding
865	chr18	39260118	39261706	+	0	NA	intron (NM_175164, intron 3 of 22)	MIR3|SINE|MIR	108113	NM_175164	71302	Mm.329396	NM_175164	ENSMUSG00000036452	Arhgap26	1810044B20Rik|2610010G17Rik|4933432P15Rik|AI853435|mKIAA0621	Rho GTPase activating protein 26	protein-coding
1207	chr4	22762242	22763777	+	0	NA	Intergenic	Intergenic	-347496	NM_008899	18992	Mm.129387	NM_008899	ENSMUSG00000095139	Pou3f2	9430075J19Rik|A230098E07Rik|Brn-2|Brn2|OTF-7|Otf7|oct-7	POU domain, class 3, transcription factor 2	protein-coding
1584	chr7	122809497	122832402	+	0	NA	intron (NM_001277326, intron 4 of 15)	intron (NM_001277326, intron 4 of 15)	124174	NM_001277328	20679	Mm.323365	NM_011445	ENSMUSG00000051910	Sox6	AI987981|SOX-LZ	SRY (sex determining region Y)-box 6	protein-coding
904	chr18	75997154	75999808	+	0	NA	intron (NM_145356, intron 1 of 4)	intron (NM_145356, intron 1 of 4)	18649	NM_145356	207259	Mm.159332	NM_145356	ENSMUSG00000044646	Zbtb7c	B230208J24Rik|Kr-pok|Zbtb36	zinc finger and BTB domain containing 7C	protein-coding
930	chr19	23993513	23995337	+	0	NA	intron (NM_177034, intron 5 of 12)	MTE-int|LTR|MaLR	111084	NM_001114174	381217	Mm.426078	NM_001114174	ENSMUSG00000071604	Fam189a2	AI414343|AI666772|Gm967	family with sequence similarity 189, member A2	protein-coding
442	chr13	23597315	23689991	+	0	NA	promoter-TSS (NM_175655)	promoter-TSS (NM_175655)	-141	NM_175655	319157	Mm.442307	NM_175655		Hist1h4f	-	histone cluster 1, H4f	protein-coding
1675	chr8	98330132	98332443	+	0	NA	promoter-TSS (NM_178078)	promoter-TSS (NM_178078)	75	NM_178078	234594	Mm.259220	NM_153164	ENSMUSG00000036550	Cnot1	6030411K04Rik|AA815922|D830048B13	CCR4-NOT transcription complex, subunit 1	protein-coding
1577	chr7	117530244	117533379	+	0	NA	intron (NM_177324, intron 17 of 40)	B3|SINE|B2	166594	NM_009302	20947	Mm.334144	NM_009302	ENSMUSG00000031015	Swap70	70kDa|AV235546	SWA-70 protein	protein-coding
649	chr15	73726835	73729796	+	0	NA	Intergenic	Intergenic	-58214	NM_001033365	268816	Mm.440635	NM_001033365	ENSMUSG00000072487	Mroh5	Gm628	maestro heat-like repeat family member 5	protein-coding
1572	chr7	109116872	109121038	+	0	NA	intron (NM_133947, intron 1 of 24)	CpG	598	NM_133947	101706	Mm.27259	NM_133947	ENSMUSG00000066306	Numa1	6720401E04Rik|AA764025|AL022610|AU014979	nuclear mitotic apparatus protein 1	protein-coding
689	chr16	27384194	27391577	+	0	NA	Intergenic	Intergenic	-1157	NM_001025615	67501	Mm.258985	NM_026202	ENSMUSG00000038127	Ccdc50	C3orf6	coiled-coil domain containing 50	protein-coding
1318	chr5	33082869	33089835	+	0	NA	intron (NM_177298, intron 3 of 7)	intron (NM_177298, intron 3 of 7)	41923	NM_177298	320951	Mm.273765	NM_177298	ENSMUSG00000023452	Pisd	9030221M09Rik	phosphatidylserine decarboxylase	protein-coding
886	chr18	58901252	58902828	+	0	NA	Intergenic	Intergenic	82904	NM_025478	66307	Mm.182574	NM_025478	ENSMUSG00000024601	Isoc1	2610034N03Rik	isochorismatase domain containing 1	protein-coding
648	chr15	73031494	73034016	+	0	NA	Intergenic	Intergenic	-17378	NM_153178	239528	Mm.23095	NM_153178		Ago2	1110029L17Rik|2310051F07Rik|AI225898|AL022874|AW546247|ENSMUSG00000072493|Eif2c2|Gerp95|Gm10365|mKIAA4215	argonaute RISC catalytic subunit 2	protein-coding
642	chr15	64097313	64100335	+	0	NA	intron (NM_001276467, intron 3 of 29)	intron (NM_001276467, intron 3 of 29)	45411	NM_001276462	13196	Mm.277236	NM_010026	ENSMUSG00000022377	Asap1	AV239055|DEF-1|Ddef1|PAP|mKIAA1249|s19	ArfGAP with SH3 domain, ankyrin repeat and PH domain1	protein-coding
1116	chr3	51079429	51082711	+	0	NA	non-coding (NR_073429, exon 1 of 1)	non-coding (NR_073429, exon 1 of 1)	366	NM_001291062	69257	Mm.131038	NM_023502	ENSMUSG00000037174	Elf2	2610036A20Rik|A230104O07Rik|AW111824|BB183398|EU32|NERF|NERF-1A|NERF-1B|NERF-2	E74-like factor 2	protein-coding
1764	chr9	94382731	94384554	+	0	NA	Intergenic	(TG)n|Simple_repeat|Simple_repeat	54858	NM_001033145	68861	Mm.258746	NM_001033145	ENSMUSG00000045414	1190002N15Rik	GoPro49|HASF	RIKEN cDNA 1190002N15 gene	protein-coding
1329	chr5	58105160	58110819	+	0	NA	intron (NR_015588, intron 1 of 4)	intron (NR_015588, intron 1 of 4)	1169	NR_015588	319216	Mm.332387	NR_015588	ENSMUSG00000097216	4932441J04Rik	-	RIKEN cDNA 4932441J04 gene	ncRNA
1028	chr2	109117681	109122467	+	0	NA	promoter-TSS (NM_139303)	promoter-TSS (NM_139303)	-821	NM_139303	228421	Mm.274086	NM_139303	ENSMUSG00000027115	Kif18a	AU024633|B130001M12Rik	kinesin family member 18A	protein-coding
1725	chr9	42869200	42871299	+	0	NA	intron (NM_027144, intron 1 of 40)	intron (NM_027144, intron 1 of 40)	43552	NM_027144	69632	Mm.275266	NM_027144	ENSMUSG00000059495	Arhgef12	2310014B11Rik|AU019857|Larg|mKIAA0382	Rho guanine nucleotide exchange factor (GEF) 12	protein-coding
1589	chr7	133645052	133648051	+	0	NA	exon (NM_183020, exon 1 of 23)	exon (NM_183020, exon 1 of 23)	265	NM_183020	233871	Mm.231450	NM_183020	ENSMUSG00000032637	Atxn2l	A2D|A2LG|A2RP|A2lp|Atxnl2	ataxin 2-like	protein-coding
198	chr10	110600253	110603295	+	0	NA	promoter-TSS (NM_175489)	promoter-TSS (NM_175489)	-84	NM_001003717	237542	Mm.220204	NM_175489	ENSMUSG00000020189	Osbpl8	AA536976|AA536995|C730029P18Rik|D330025H14Rik|ORP-8	oxysterol binding protein-like 8	protein-coding
1718	chr9	36950965	36954898	+	0	NA	intron (NM_148950, intron 1 of 11)	CpG	1976	NM_148950	208076	Mm.260335	NM_148950	ENSMUSG00000035934	Pknox2	D230005H23Rik|Prep2	Pbx/knotted 1 homeobox 2	protein-coding
1098	chr3	21832986	21835517	+	0	NA	Intergenic	Intergenic	-141323	NM_030732	81004	Mm.202966	NM_030732	ENSMUSG00000027630	Tbl1xr1	8030499H02Rik|A630076E03Rik|AW539987|C21|C230089I12Rik|DC42|Ira1|TBLR1	transducin (beta)-like 1X-linked receptor 1	protein-coding
1059	chr2	145992590	145995412	+	0	NA	Intergenic	Intergenic	-53732	NM_016889	53626	Mm.379070	NM_016889	ENSMUSG00000068154	Insm1	IA-1	insulinoma-associated 1	protein-coding
727	chr16	77592526	77603456	+	0	NA	Intergenic	Intergenic	-1190	NR_029535	387229		NR_029535	miRBase:MI0000146	Mir99a	Mirn99a|mmu-mir-99a	microRNA 99a	ncRNA
939	chr19	34951833	34954558	+	0	NA	promoter-TSS (NM_023792)	promoter-TSS (NM_023792)	750	NM_001114339	75735	Mm.24742	NM_023792	ENSMUSG00000033610	Pank1	Pank|Pank1b	pantothenate kinase 1	protein-coding
320	chr11	112174260	112176952	+	0	NA	Intergenic	Intergenic	397064	NR_024085	217294	Mm.297761	NM_146031	ENSMUSG00000041674	BC006965	-	cDNA sequence BC006965	ncRNA
913	chr19	4332345	4335318	+	0	NA	intron (NM_001001984, intron 12 of 20)	intron (NM_001001984, intron 12 of 20)	-27609	NM_001290818	110355	Mm.254144	NM_130863	ENSMUSG00000024858	Adrbk1	Adrbk-1|Bark-1|GRK2|beta ARK|betaARK1	adrenergic receptor kinase, beta 1	protein-coding
811	chr17	65494779	65497365	+	0	NA	Intergenic	Intergenic	379621	NR_105051	101202683	Mm.393309	NR_105051		Dreh	-	down-regulated in hepatocellular carcinoma	ncRNA
1670	chr8	96092738	96096986	+	0	NA	Intergenic	Intergenic	-35255	NM_001003951	67935	Mm.65457	NM_001003951	ENSMUSG00000058019	Ces5a	1700081L16Rik|1700122C07Rik|BB081581|Ces7|Gm503|cauxin	carboxylesterase 5A	protein-coding
202	chr10	114818354	114823208	+	0	NA	intron (NM_025780, intron 1 of 2)	intron (NM_025780, intron 1 of 2)	710	NM_025780	66816	Mm.32314	NM_025780	ENSMUSG00000020137	Thap2	2900040O07Rik|9030625G08Rik|AI450385|AI649097	THAP domain containing, apoptosis associated protein 2	protein-coding
249	chr11	23794875	23795295	+	0	NA	5' UTR (NM_172555, exon 1 of 22)	5' UTR (NM_172555, exon 1 of 22)	185	NM_172555	216578	Mm.470599	NM_172555	ENSMUSG00000020273	Papolg	9630006B20Rik	poly(A) polymerase gamma	protein-coding
361	chr12	42827503	42829729	+	0	NA	intron (NM_053122, intron 6 of 6)	intron (NM_053122, intron 6 of 6)	-615972	NM_010733	16981	Mm.404786	NM_010733	ENSMUSG00000036295	Lrrn3	NLRR-3	leucine rich repeat protein 3, neuronal	protein-coding
465	chr13	46444740	46446539	+	0	NA	Intergenic	Intergenic	-68030	NM_001081425	666794	Mm.38269	NM_001081425	ENSMUSG00000038132	Rbm24	6330546B05Rik|AI606861	RNA binding motif protein 24	protein-coding
1612	chr8	4610903	4614055	+	0	NA	promoter-TSS (NM_145591)	promoter-TSS (NM_145591)	-691	NM_145591	233987	Mm.102799	NM_145591		Zfp958	-	zinc finger protein 958	protein-coding
184	chr10	86167010	86169968	+	0	NA	promoter-TSS (NM_011631)	promoter-TSS (NM_011631)	-67	NM_001003910	103220	Mm.440762	NM_153595	ENSMUSG00000044937	BC030307	AI449705|AU041509|Gnn	cDNA sequence BC030307	protein-coding
819	chr17	72392012	72393512	+	0	NA	intron (NM_007439, intron 5 of 28)	intron (NM_007439, intron 5 of 28)	261475	NM_030179	78785	Mm.196382	NM_030179	ENSMUSG00000024059	Clip4	1700024K14Rik|1700074B05Rik|4833417L20Rik|5830409B12Rik|Rsnl2	CAP-GLY domain containing linker protein family, member 4	protein-coding
1189	chr3	137804616	137809138	+	0	NA	promoter-TSS (NM_001163457)	promoter-TSS (NM_001163457)	375	NM_175389	108943	Mm.471692	NM_175389	ENSMUSG00000004127	Trmt10a	3110023L08Rik|AA794508|Rg9mtd2|Rnmtd2	tRNA methyltransferase 10A	protein-coding
1177	chr3	121491696	121494809	+	0	NA	intron (NM_008991, intron 4 of 22)	(GAAA)n|Simple_repeat|Simple_repeat	24881	NM_008991	19299	Mm.399042	NM_008991	ENSMUSG00000028127	Abcd3	AI313901|AU018866|AW146054|PMP68|PMP70|Pxmp1	ATP-binding cassette, sub-family D (ALD), member 3	protein-coding
1537	chr7	68981215	68983287	+	0	NA	promoter-TSS (NR_037286)	promoter-TSS (NR_037286)	37	NR_037286	100526506		NR_037286	miRBase:MI0014096	Mir344c	mmu-mir-344c	microRNA 344c	ncRNA
1127	chr3	61649968	61651442	+	0	NA	Intergenic	Intergenic	482276	NM_028712	74012	Mm.422674	NM_028712	ENSMUSG00000036894	Rap2b	4021402C18Rik|AA408554	RAP2B, member of RAS oncogene family	protein-coding
776	chr17	26560586	26563263	+	0	NA	intron (NM_001081656, intron 1 of 4)	intron (NM_001081656, intron 1 of 4)	10014	NM_001081656	240055	Mm.133211	NM_001081656	ENSMUSG00000034413	Neurl1b	C230078M08Rik|EG240055	neuralized homolog 1b (Drosophila)	protein-coding
894	chr18	68602435	68605814	+	0	NA	Intergenic	LTR33|LTR|ERVL	-15150	NM_001271716	17200	Mm.426053	NM_008560	ENSMUSG00000045569	Mc2r	ACTH-R|ACTHR|MC2-R	melanocortin 2 receptor	protein-coding
1748	chr9	67111286	67114882	+	0	NA	intron (NM_001081242, intron 45 of 57)	intron (NM_001081242, intron 45 of 57)	-28551	NR_029576	387185		NR_029576		Mir190a	Mir190|Mirn190|mir-190|mmu-mir-190|mmu-mir-190a	microRNA 190a	ncRNA
1819	chrX	114412336	114414695	+	0	NA	Intergenic	RLTR9A|LTR|ERVK	285149	NM_001102665	100039319	Mm.469831	NM_001102665	ENSMUSG00000067441	Gm14920	ENSMUSG00000067441|Gm1539|H2A.Bbd1|OTTMUSG00000018481	predicted pseudogene 14920	protein-coding
1298	chr4	155265046	155283063	+	0	NA	intron (NM_207223, intron 6 of 23)	intron (NM_207223, intron 6 of 23)	8070	NM_207223	140500	Mm.219591	NM_207223	ENSMUSG00000029033	Acap3	Centb5|Kiaa1716-hp|mKIAA1716	ArfGAP with coiled-coil, ankyrin repeat and PH domains 3	protein-coding
858	chr18	35372690	35375330	+	0	NA	intron (NM_178005, intron 1 of 1)	intron (NM_178005, intron 1 of 1)	668	NM_178005	107065	Mm.39900	NM_178005	ENSMUSG00000071862	Lrrtm2	AI851755|BB129880|C630011A14Rik|mKIAA0416	leucine rich repeat transmembrane neuronal 2	protein-coding
1459	chr6	87570601	87572461	+	0	NA	Intergenic	Intergenic	-30836	NM_021381	58182	Mm.333226	NM_021381	ENSMUSG00000049409	Prokr1	EG-VEGFR1|Gpr73|Pkr1	prokineticin receptor 1	protein-coding
140	chr10	39447661	39457834	+	0	NA	promoter-TSS (NR_038037)	promoter-TSS (NR_038037)	781	NM_011264	19714	Mm.439723	NM_011264	ENSMUSG00000019841	Rev3l	Rev|Rev3|Sez4	REV3-like, catalytic subunit of DNA polymerase zeta RAD54 like (S. cerevisiae)	protein-coding
1570	chr7	106499104	106510429	+	0	NA	Intergenic	Intergenic	-3017	NM_001111044	12406	Mm.22708	NM_009825	ENSMUSG00000070436	Serpinh1	BERF-1|Cbp1|Cbp2|Hsp47|J6|Serpinh2|gp46	serine (or cysteine) peptidase inhibitor, clade H, member 1	protein-coding
1269	chr4	116135292	116138240	+	0	NA	promoter-TSS (NM_001042743)	promoter-TSS (NM_001042743)	20	NM_001042743	17776	Mm.9287	NM_008641	ENSMUSG00000003810	Mast2	MAST205|Mtssk	microtubule associated serine/threonine kinase 2	protein-coding
181	chr10	85001553	85003791	+	0	NA	intron (NM_028709, intron 1 of 16)	intron (NM_028709, intron 1 of 16)	-58484	NM_001017525	74007	Mm.36544	NM_028709	ENSMUSG00000020042	Btbd11	6330404E16Rik	BTB (POZ) domain containing 11	protein-coding
412	chr12	90525374	90530605	+	0	NA	intron (NM_172544, intron 6 of 19)	intron (NM_172544, intron 6 of 19)	336155	NM_172544	18191	Mm.425766	NM_172544	ENSMUSG00000066392	Nrxn3	-	neurexin III	protein-coding
954	chr19	56416123	56419813	+	0	NA	intron (NM_198059, intron 28 of 40)	intron (NM_198059, intron 28 of 40)	46560	NM_198059	18175	Mm.386769	NM_008733	ENSMUSG00000049134	Nrap	-	nebulin-related anchoring protein	protein-coding
385	chr12	69949710	69952151	+	0	NA	Intergenic	Intergenic	309243	NM_009093	20090	Mm.379006	NM_009093	ENSMUSG00000034892	Rps29	-	ribosomal protein S29	protein-coding
1479	chr6	121221960	121223158	+	0	NA	Intergenic	ORR1D1|LTR|MaLR	26635	NM_011909	24110	Mm.326911	NM_011909	ENSMUSG00000030107	Usp18	1110058H21Rik|AW047653|UBP43|Ubp15	ubiquitin specific peptidase 18	protein-coding
1359	chr5	104623314	104624819	+	0	NA	Intergenic	Intergenic	-7570	NM_016779	13406	Mm.199008	NM_016779	ENSMUSG00000029307	Dmp1	AV020965|Dmp|PP	dentin matrix protein 1	protein-coding
307	chr11	102785474	102787437	+	0	NA	promoter-TSS (NM_197959)	promoter-TSS (NM_197959)	-17	NM_197959	70218	Mm.32084	NM_197959	ENSMUSG00000051378	Kif18b	3000004C01Rik	kinesin family member 18B	protein-coding
1671	chr8	96621383	96623917	+	0	NA	promoter-TSS (NM_026116)	promoter-TSS (NM_026116)	61	NM_026116	67378	Mm.292107	NM_026116	ENSMUSG00000031755	Bbs2	2410125H22Rik|AI447581	Bardet-Biedl syndrome 2 (human)	protein-coding
801	chr17	47681978	47683721	+	0	NA	intron (NM_001081635, intron 1 of 6)	intron (NM_001081635, intron 1 of 6)	40849	NM_001081635	12445	Mm.27291	NM_007632	ENSMUSG00000034165	Ccnd3	9230106B05Rik|AA682053|AL024085|AW146355|C78795	cyclin D3	protein-coding
985	chr2	31893017	31895729	+	0	NA	intron (NM_172268, intron 30 of 35)	intron (NM_172268, intron 30 of 35)	-12093	NR_106135	102466844		NR_106135		Mir7674	mmu-mir-7674	microRNA mir-7674	ncRNA
1467	chr6	103759176	103762474	+	0	NA	Intergenic	Intergenic	299955	NM_007697	12661	Mm.251288	NM_007697	ENSMUSG00000030077	Chl1	A530023M13Rik|AI465420|CALL|LICAM2	cell adhesion molecule with homology to L1CAM	protein-coding
1463	chr6	94738753	94740190	+	0	NA	Intergenic	Intergenic	-89332	NM_008377	16206	Mm.245210	NM_008377	ENSMUSG00000030029	Lrig1	D6Bwg0781e|Img|LIG-1	leucine-rich repeats and immunoglobulin-like domains 1	protein-coding
971	chr2	18394446	18395858	+	0	NA	Intergenic	RMER19B|LTR|ERVK	-80695	NM_007869	13418	Mm.246674	NM_007869	ENSMUSG00000026740	Dnajc1	4733401K02Rik|AA960110|D230036H06Rik|Dnajl1|ERdj1|ERj1p|MTJ1	DnaJ (Hsp40) homolog, subfamily C, member 1	protein-coding
830	chr17	91005286	91007570	+	0	NA	intron (NM_177284, intron 10 of 20)	AT_rich|Low_complexity|Low_complexity	-254081	NR_045463	78800	Mm.410772	NR_045463	ENSMUSG00000090160	4930480K15Rik	-	RIKEN cDNA 4930480K15 gene	ncRNA
154	chr10	60996666	60999993	+	0	NA	intron (NM_153542, intron 3 of 4)	ID_B1|SINE|B4	59748	NM_153542	216011	Mm.136116	NM_153542	ENSMUSG00000037151	Lrrc20	BC036304	leucine rich repeat containing 20	protein-coding
754	chr17	8716687	8719313	+	0	NA	Intergenic	CpG	-1666	NM_001290707	23984	Mm.87161	NM_011866	ENSMUSG00000023868	Pde10a	-	phosphodiesterase 10A	protein-coding
847	chr18	15001514	15006053	+	0	NA	intron (NM_001100449, intron 13 of 14)	(TG)n|Simple_repeat|Simple_repeat	62029	NM_001100449	72504	Mm.312233	NM_001100449	ENSMUSG00000054321	Taf4b	105kDa|2610524B04Rik|4932409F03Rik|AW987595|TAFII105|Taf2c2	TAF4B RNA polymerase II, TATA box binding protein (TBP)-associated factor	protein-coding
479	chr13	59141450	59143825	+	0	NA	intron (NM_001282961, intron 14 of 17)	intron (NM_001282961, intron 14 of 17)	233579	NM_001025074	18212	Mm.130054	NM_008745	ENSMUSG00000055254	Ntrk2	GP145-TrkB/GP95-TrkB|Tkrb|trk-B|trkB	neurotrophic tyrosine kinase, receptor, type 2	protein-coding
1166	chr3	105100541	105102311	+	0	NA	Intergenic	Intergenic	-153822	NM_001039347	56543	Mm.44530	NM_019931	ENSMUSG00000040896	Kcnd3	AW045978|Kncd3|Kv4.3	potassium voltage-gated channel, Shal-related family, member 3	protein-coding
1101	chr3	26049939	26052911	+	0	NA	intron (NM_138666, intron 2 of 7)	intron (NM_138666, intron 2 of 7)	804	NM_001163387	192167	Mm.316080	NM_138666	ENSMUSG00000063887	Nlgn1	6330415N05Rik|BB179718|NL1|Nlg1|mKIAA1070	neuroligin 1	protein-coding
704	chr16	43362287	43365687	+	0	NA	intron (NM_001285805, intron 4 of 10)	intron (NM_001285805, intron 4 of 10)	56322	NR_046026	626693	Mm.447083	NR_046026	ENSMUSG00000085499	Gm15713	OTTMUSG00000025617	predicted gene 15713	ncRNA
1563	chr7	104013087	104014617	+	0	NA	intron (NM_011858, intron 25 of 32)	intron (NM_011858, intron 25 of 32)	-63793	NR_045874	791381	Mm.402112	NR_045874	ENSMUSG00000053049	Gm15413	ENSMUSG00000053049|OTTMUSG00000021246	predicted gene 15413	ncRNA
326	chr11	116383831	116386367	+	0	NA	Intergenic	Intergenic	-8126	NM_001172475	20698	Mm.20944	NM_011451	ENSMUSG00000061878	Sphk1	1110006G24Rik|Sk1|Spk1	sphingosine kinase 1	protein-coding
1462	chr6	93855012	93865046	+	0	NA	intron (NM_001286784, intron 2 of 22)	intron (NM_001286784, intron 2 of 22)	2928	NR_104594	14924	Mm.217216	NM_010367	ENSMUSG00000045095	Magi1	AIP3|BAP1|Baiap1|Gukmi1|MAGI1c|Magi-1|TNRC19|WWP3|mKIAA4129	membrane associated guanylate kinase, WW and PDZ domain containing 1	protein-coding
1378	chr5	129524873	129527888	+	0	NA	intron (NM_009391, intron 1 of 6)	CpG	349	NM_009391	19384	Mm.297440	NM_009391	ENSMUSG00000029430	Ran	-	RAN, member RAS oncogene family	protein-coding
1165	chr3	104850271	104861982	+	0	NA	promoter-TSS (NM_030249)	promoter-TSS (NM_030249)	-62	NM_030249	80281	Mm.200327	NM_030249	ENSMUSG00000062127	Cttnbp2nl	AA552995|AA589392|AU018624|BC003236|mKIAA1433	CTTNBP2 N-terminal like	protein-coding
1003	chr2	65655744	65657194	+	0	NA	Intergenic	Intergenic	-27355	NM_001290666	77771	Mm.102025	NM_153409	ENSMUSG00000044647	Csrnp3	A330102K23Rik|CSRNP-3|Csnrp3|Mbu1|taip-2	cysteine-serine-rich nuclear protein 3	protein-coding
1054	chr2	137761752	137765913	+	0	NA	Intergenic	Lx2|LINE|L1	-318488	NM_001025431	228662	Mm.153405	NM_145534	ENSMUSG00000062098	Btbd3	mKIAA0952	BTB (POZ) domain containing 3	protein-coding
681	chr16	15722977	15724917	+	0	NA	intron (NM_011159, intron 39 of 85)	intron (NM_011159, intron 39 of 85)	85988	NM_011159	19090	Mm.71	NM_011159	ENSMUSG00000022672	Prkdc	AI326420|AU019811|DNA-PKcs|DNAPDcs|DNAPK|DNPK1|DOXNPH|HYRC1|XRCC7|dxnph|p460|scid|slip	protein kinase, DNA activated, catalytic polypeptide	protein-coding
1800	chrX	72759156	72760653	+	0	NA	intron (NM_011692, intron 1 of 5)	intron (NM_011692, intron 1 of 5)	268	NM_011692	22327	Mm.8294	NM_011692	ENSMUSG00000031197	Vbp1	-	von Hippel-Lindau binding protein 1	protein-coding
619	chr15	33836055	33838204	+	0	NA	Intergenic	Intergenic	-175345	NM_026002	67154	Mm.130883	NM_026002	ENSMUSG00000022255	Mtdh	2610103J23Rik|3D3|3D3/Lyric|AEG-1|AV353288|D8Bwg1112e|Lyric	metadherin	protein-coding
1717	chr9	35546890	35550690	+	0	NA	intron (NM_001167588, intron 1 of 2)	intron (NM_001167588, intron 1 of 2)	156	NM_001167588	100312949	Mm.475848	NM_001167588	ENSMUSG00000091174	Gm17677	Pate-n	predicted gene, 17677	protein-coding
335	chr12	8647550	8648362	+	0	NA	Intergenic	CpG	-32984	NM_001160221	80913	Mm.341243	NM_030723	ENSMUSG00000020594	Pum2	5730503J23Rik|Pumm2|mKIAA0235	pumilio RNA-binding family member 2	protein-coding
1029	chr2	110789077	110791100	+	0	NA	intron (NM_001128103, intron 1 of 26)	intron (NM_001128103, intron 1 of 26)	313	NM_001128103	228432	Mm.483325	NM_001081556	ENSMUSG00000074968	Ano3	AI838058|B230324K02Rik|Tmem16c	anoctamin 3	protein-coding
698	chr16	37682617	37685947	+	0	NA	Intergenic	GA-rich|Low_complexity|Low_complexity	-29828	NM_026610	68194	Mm.379154	NM_026610		Ndufb4	0610006N12Rik|1300010H20Rik	NADH dehydrogenase (ubiquinone) 1 beta subcomplex 4	protein-coding
5	chr1	21794369	21796492	+	0	NA	intron (NM_001160139, intron 1 of 14)	MTE2b|LTR|MaLR	156593	NM_001160139	226922	Mm.336519	NM_023872	ENSMUSG00000028033	Kcnq5	7730402H11|9230107O05Rik|AA589396|D1Mgi1	potassium voltage-gated channel, subfamily Q, member 5	protein-coding
1634	chr8	35867113	35879687	+	0	NA	intron (NM_176933, intron 1 of 3)	intron (NM_176933, intron 1 of 3)	2736	NM_176933	319520	Mm.170276	NM_176933	ENSMUSG00000031530	Dusp4	2700078F24Rik|AI844617|BB104621|E130306H24Rik|MKP2	dual specificity phosphatase 4	protein-coding
621	chr15	36720941	36725263	+	0	NA	intron (NM_001253806, intron 1 of 5)	CpG	1191	NM_011740	22631	Mm.3360	NM_011740	ENSMUSG00000022285	Ywhaz	1110013I11Rik|14-3-3zeta|AI596267|AL022924|AU020854	tyrosine 3-monooxygenase/tryptophan 5-monooxygenase activation protein, zeta polypeptide	protein-coding
524	chr13	105307521	105311534	+	0	NA	Intergenic	MER21B|LTR|ERV1	231574	NM_001081020	108154	Mm.208125	NM_175496	ENSMUSG00000046169	Adamts6	5031426K13|A930019D11Rik|ADAM-TS6|b2b1879.1Clo|b2b2029Clo|b2b2182Clo|b2b2187.1Clo|b2b2228Clo	a disintegrin-like and metallopeptidase (reprolysin type) with thrombospondin type 1 motif, 6	protein-coding
554	chr14	32827699	32831270	+	0	NA	Intergenic	MLT1B|LTR|MaLR	-12805	NM_030166	78754	Mm.40681	NM_030166		Galnt15	4631401E18Rik|Galntl2|mpp-GalNAc-T15	UDP-N-acetyl-alpha-D-galactosamine:polypeptide N-acetylgalactosaminyltransferase 15	protein-coding
552	chr14	31786638	31788521	+	0	NA	intron (NM_011849, intron 8 of 14)	intron (NM_011849, intron 8 of 14)	22905	NM_011849	23955	Mm.251494	NM_011849	ENSMUSG00000021918	Nek4	-	NIMA (never in mitosis gene a)-related expressed kinase 4	protein-coding
598	chr14	106117574	106144223	+	0	NA	Intergenic	Intergenic	-107911	NR_105814	102465207		NR_105814	miRBase:MI0021924	Mir6390	mmu-mir-6390	microRNA mir-6390	ncRNA
780	chr17	31560281	31564699	+	0	NA	intron (NM_008804, intron 4 of 18)	intron (NM_008804, intron 4 of 18)	39311	NM_001163748	18585	Mm.10812	NM_008804	ENSMUSG00000041119	Pde9a	PDE9A1	phosphodiesterase 9A	protein-coding
1623	chr8	19707097	19708001	+	0	NA	Intergenic	Intergenic	-22027	NM_001270553	100861668	Mm.491087	NM_001270553		Gm21119	-	predicted gene, 21119	protein-coding
1433	chr6	49045719	49048533	+	0	NA	intron (NM_023670, intron 10 of 14)	intron (NM_023670, intron 10 of 14)	23332	NM_029353	75593	Mm.439947	NM_029353	ENSMUSG00000029815	Malsu1	2410003K15Rik|Matsu1	mitochondrial assembly of ribosomal large subunit 1	protein-coding
74	chr1	134776627	134778848	+	0	NA	intron (NM_010732, intron 1 of 1)	intron (NM_010732, intron 1 of 1)	805	NM_010732	16980	Mm.39640	NM_010732	ENSMUSG00000026443	Lrrn2	5730406J09Rik|NLRR-2	leucine rich repeat protein 2, neuronal	protein-coding
240	chr11	18480221	18483477	+	0	NA	Intergenic	Intergenic	437123	NM_001193271	17268	Mm.356578	NM_010789	ENSMUSG00000020160	Meis1	C530044H18Rik|Evi8	Meis homeobox 1	protein-coding
1666	chr8	91830493	91836549	+	0	NA	Intergenic	Intergenic	-265460	NM_021390	58198	Mm.214361	NM_021390	ENSMUSG00000031665	Sall1	Msal-3	sal-like 1 (Drosophila)	protein-coding
890	chr18	63708504	63716374	+	0	NA	Intergenic	ORR1E|LTR|MaLR	139574	NM_016792	53382	Mm.19169	NM_016792	ENSMUSG00000024583	Txnl1	32kDa|TRP32|Txnl	thioredoxin-like 1	protein-coding
440	chr13	21869774	21883096	+	0	NA	Intergenic	Intergenic	-1169	NM_178207	319153	Mm.390558	NM_178207	ENSMUSG00000075032	Hist1h3i	H3-H	histone cluster 1, H3i	protein-coding
230	chr11	9017222	9018757	+	0	NA	promoter-TSS (NM_001159401)	promoter-TSS (NM_001159401)	-22	NM_001159401	22271	Mm.4610	NM_009477	ENSMUSG00000020407	Upp1	AI325217|UPase|UdRPase|Up|Upp	uridine phosphorylase 1	protein-coding
1289	chr4	141321741	141324407	+	0	NA	intron (NM_172338, intron 11 of 14)	MTD|LTR|MaLR	20484	NM_001081408	75986	Mm.30032	NM_001081408	ENSMUSG00000040706	Agmat	5033405N08Rik	agmatine ureohydrolase (agmatinase)	protein-coding
115	chr10	3186641	3188448	+	0	NA	intron (NM_172546, intron 2 of 12)	intron (NM_172546, intron 2 of 12)	53240	NM_172546	215748	Mm.37984	NM_172546	ENSMUSG00000015202	Cnksr3	6820402C05|BC024086|Magi1	Cnksr family member 3	protein-coding
299	chr11	94093927	94095831	+	0	NA	Intergenic	Intergenic	9014	NM_181819	278507	Mm.342216	NM_181819	ENSMUSG00000044177	Wfikkn2	2610304F08Rik|AY100450|Gasp1|WFIKKNRP	WAP, follistatin/kazal, immunoglobulin, kunitz and netrin domain containing 2	protein-coding
377	chr12	56255332	56257136	+	0	NA	promoter-TSS (NM_011899)	promoter-TSS (NM_011899)	-93	NM_011899	24067	Mm.471968	NM_011899		Srp54a	54kDa|Srp54	signal recognition particle 54A	protein-coding
1282	chr4	133304133	133314058	+	0	NA	exon (NM_001080819, exon 1 of 20)	exon (NM_001080819, exon 1 of 20)	431	NM_001080819	93760	Mm.22478	NM_001080819	ENSMUSG00000007880	Arid1a	1110030E03Rik|BAF250a|Osa1|Smarcf1	AT rich interactive domain 1A (SWI-like)	protein-coding
922	chr19	15997482	16001213	+	0	NA	promoter-TSS (NM_001205339)	promoter-TSS (NM_001205339)	202	NM_177420	107272	Mm.289936	NM_177420	ENSMUSG00000024640	Psat1	D8Ertd814e|EPIP|PSA|Psat	phosphoserine aminotransferase 1	protein-coding
602	chr14	120672286	120679426	+	0	NA	intron (NM_175341, intron 1 of 8)	intron (NM_175341, intron 1 of 8)	965	NM_175341	105559	Mm.238266	NM_175341	ENSMUSG00000022139	Mbnl2	1110002M11Rik|AI047808|AI837313|AI849185|AL118326|MBLL|R75232|mKIAA4072	muscleblind-like 2	protein-coding
1694	chr8	129184637	129193218	+	0	NA	Intergenic	Intergenic	-71591	NM_001164598	270110	Mm.334918	NM_001164598	ENSMUSG00000051495	Irf2bp2	E130305N23Rik|IRF-2BP2	interferon regulatory factor 2 binding protein 2	protein-coding
841	chr18	7608056	7609006	+	0	NA	intron (NM_001161620, intron 1 of 12)	intron (NM_001161620, intron 1 of 12)	18330	NM_001081287	75739	Mm.133293	NM_001081287	ENSMUSG00000057440	Mpp7	1110068J02Rik|2810038M04Rik|5430426E14Rik|AI415104|Gm955	membrane protein, palmitoylated 7 (MAGUK p55 subfamily member 7)	protein-coding
1311	chr5	25034843	25038746	+	0	NA	non-coding (NR_027388, exon 1 of 1)	non-coding (NR_027388, exon 1 of 1)	958	NR_027388	73571	Mm.105263	NR_027388		1700096K18Rik	-	RIKEN cDNA 1700096K18 gene	ncRNA
1044	chr2	127546799	127549415	+	0	NA	intron (NM_145532, intron 1 of 3)	intron (NM_145532, intron 1 of 3)	7526	NM_145532	228576	Mm.133036	NM_145532	ENSMUSG00000027377	Mall	BC012256|BENE	mal, T cell differentiation protein-like	protein-coding
1072	chr2	162998945	163001246	+	0	NA	Intergenic	MIRb|SINE|MIR	-51095	NM_001098799	269389	Mm.207709	NM_001098799	ENSMUSG00000074607	Tox2	AI851523|AV026525|BI987407|Gcx1|RxHMG1	TOX high mobility group box family member 2	protein-coding
1787	chrX	17166705	17168892	+	0	NA	Intergenic	Intergenic	-18375	NM_028058	72018	Mm.41558	NM_028058	ENSMUSG00000025040	Fundc1	1500005J14Rik|1810033P05Rik	FUN14 domain containing 1	protein-coding
1394	chr5	143559070	143585995	+	0	NA	intron (NM_001122730, intron 2 of 18)	L1MC4|LINE|L1	6534	NM_178242	231861	Mm.354649	NM_178242	ENSMUSG00000039477	Tnrc18	BC025631|EG381742|Zfp469	trinucleotide repeat containing 18	protein-coding
1350	chr5	90709689	90714107	+	0	NA	exon (NM_030886, exon 16 of 35)	exon (NM_030886, exon 16 of 35)	-58877	NM_001163456	231430	Mm.319697	NM_001033310	ENSMUSG00000035505	Cox18	BC038311	cytochrome c oxidase assembly protein 18	protein-coding
612	chr15	25605133	25607241	+	0	NA	intron (NM_019472, intron 2 of 40)	intron (NM_019472, intron 2 of 40)	53882	NM_019472	17909	Mm.60590	NM_019472	ENSMUSG00000022272	Myo10	AW048724|D15Ertd600e|mKIAA0799	myosin X	protein-coding
1751	chr9	70574961	70578820	+	0	NA	intron (NM_007399, intron 4 of 15)	(CTGGGG)n|Simple_repeat|Simple_repeat	50082	NM_007399	11487	Mm.3037	NM_007399	ENSMUSG00000054693	Adam10	1700031C13Rik|MADM|kuz|kuzbanian	a disintegrin and metallopeptidase domain 10	protein-coding
1391	chr5	141082757	141096790	+	0	NA	intron (NM_008494, intron 6 of 7)	ID_B1|SINE|B4	6478	NM_008494	16848	Mm.12834	NM_008494	ENSMUSG00000029570	Lfng	AW061165	LFNG O-fucosylpeptide 3-beta-N-acetylglucosaminyltransferase	protein-coding
936	chr19	29324482	29342839	+	0	NA	intron (NM_008413, intron 2 of 24)	intron (NM_008413, intron 2 of 24)	7367	NM_008413	16452	Mm.275839	NM_008413	ENSMUSG00000024789	Jak2	Fd17	Janus kinase 2	protein-coding
1277	chr4	129418071	129421107	+	0	NA	promoter-TSS (NM_011317)	promoter-TSS (NM_011317)	-42	NR_045036	20218	Mm.8256	NM_011317	ENSMUSG00000028790	Khdrbs1	Sam68|p62|p68	KH domain containing, RNA binding, signal transduction associated 1	protein-coding
91	chr1	164761388	164764099	+	0	NA	intron (NM_010231, intron 8 of 8)	intron (NM_010231, intron 8 of 8)	-20063	NM_144878	226564	Mm.155164	NM_144878	ENSMUSG00000026692	Fmo4	D1Ertd532e	flavin containing monooxygenase 4	protein-coding
1240	chr4	61868571	61870333	+	0	NA	promoter-TSS (NM_001290353)	promoter-TSS (NM_001290353)	128	NM_001290351	22696	Mm.5011	NM_009554	ENSMUSG00000028389	Zfp37	Tzn|Zfp-37	zinc finger protein 37	protein-coding
1086	chr2	180700746	180702744	+	0	NA	promoter-TSS (NM_001177710)	promoter-TSS (NM_001177710)	-185	NM_145760	228998	Mm.33765	NM_145760	ENSMUSG00000027575	Arfgap1	AI115377|Arf1gap	ADP-ribosylation factor GTPase activating protein 1	protein-coding
701	chr16	41550747	41553083	+	0	NA	intron (NM_175548, intron 1 of 5)	intron (NM_175548, intron 1 of 5)	18460	NM_175548	268890	Mm.310524	NM_175548	ENSMUSG00000061080	Lsamp	5430428I19|AW046674|B130007O04Rik|D930023J12Rik|Lam|Lamp	limbic system-associated membrane protein	protein-coding
467	chr13	46713189	46731914	+	0	NA	intron (NM_026056, intron 7 of 12)	intron (NM_026056, intron 7 of 12)	-42340	NM_001033192	97863	Mm.275934	NM_001033192	ENSMUSG00000069237	C78339	-	expressed sequence C78339	protein-coding
474	chr13	52596089	52598047	+	0	NA	Intergenic	Intergenic	29137	NM_001024474	68203	Mm.29362	NM_001024474	ENSMUSG00000047842	Diras2	2900052J15Rik|AI414999	DIRAS family, GTP-binding RAS-like 2	protein-coding
481	chr13	59870158	59873542	+	0	NA	promoter-TSS (NM_026921)	promoter-TSS (NM_026921)	523	NR_015349	13996	Mm.490435	NR_015349	ENSMUSG00000089875	Etohd2	AW491659	ethanol decreased 2	ncRNA
867	chr18	41837148	41840333	+	0	NA	Intergenic	Intergenic	272108	NM_029942	77619	Mm.30649	NM_029942	ENSMUSG00000056671	Prelid2	1700003A01Rik|C330008K14Rik	PRELI domain containing 2	protein-coding
214	chr10	127739529	127741743	+	0	NA	intron (NM_001252326, intron 1 of 25)	intron (NM_001252326, intron 1 of 25)	245	NM_001252326	103135	Mm.244183	NM_133992	ENSMUSG00000005682	Pan2	1200014O24Rik|AI047843|AW742773|Usp52|mKIAA0710	PAN2 polyA specific ribonuclease subunit homolog (S. cerevisiae)	protein-coding
564	chr14	52603823	52606636	+	0	NA	TTS (NR_045728)	TTS (NR_045728)	721	NM_198249	268739	Mm.9239	NM_198249	ENSMUSG00000004562	Arhgef40	E130112L23Rik|Gm669|Solo	Rho guanine nucleotide exchange factor (GEF) 40	protein-coding
817	chr17	71875409	71877183	+	0	NA	promoter-TSS (NM_023294)	promoter-TSS (NM_023294)	-99	NM_023294	67052	Mm.225956	NM_023294	ENSMUSG00000024056	Ndc80	2610020P18Rik|AV139730|HEC|HEC1|Kntc2	NDC80 homolog, kinetochore complex component (S. cerevisiae)	protein-coding
563	chr14	51818675	51821033	+	0	NA	Intergenic	Intergenic	-3511	NM_001017422	53877	Mm.377124	NM_001017422		Ear4	RNS2|Rnase2|mR4	eosinophil-associated, ribonuclease A family, member 4	protein-coding
1650	chr8	72239988	72241665	+	0	NA	promoter-TSS (NM_181274)	promoter-TSS (NM_181274)	-25	NM_001039965	66869	Mm.334581	NM_181274		Zfp869	1200003I07Rik	zinc finger protein 869	protein-coding
731	chr16	87127716	87130060	+	0	NA	Intergenic	Intergenic	-225542	NM_001159331	67768	Mm.296532	NM_026366	ENSMUSG00000044442	N6amt1	5830445C04Rik|Hemk2|Pred28	N-6 adenine-specific DNA methyltransferase 1 (putative)	protein-coding
657	chr15	81414896	81418457	+	0	NA	promoter-TSS (NM_177821)	promoter-TSS (NM_177821)	32	NM_177821	328572	Mm.258397	NM_177821	ENSMUSG00000055024	Ep300	A430090G16|A730011L11|KAT3B|p300|p300 HAT	E1A binding protein p300	protein-coding
229	chr11	8910110	8911620	+	0	NA	intron (NM_008316, intron 1 of 7)	intron (NM_008316, intron 1 of 7)	275	NM_008316	15574	Mm.42201	NM_008316	ENSMUSG00000020413	Hus1	mHus1	Hus1 homolog (S. pombe)	protein-coding
1783	chrX	12856694	12859997	+	0	NA	intron (NM_010028, intron 1 of 16)	CpG	197	NM_010028	13205	Mm.289662	NM_010028	ENSMUSG00000000787	Ddx3x	D1Pas1-rs2|Ddx3|Fin14	DEAD/H (Asp-Glu-Ala-Asp/His) box polypeptide 3, X-linked	protein-coding
768	chr17	21652475	21654570	+	0	NA	Intergenic	Intergenic	-18981	NM_144515	22710	Mm.296100	NM_144515		Zfp52	KRAB11|Zfp-52|Zfp76|mszf23-2|mszf24|mszf34|mszf75|zfec29	zinc finger protein 52	protein-coding
1092	chr3	8865144	8867691	+	0	NA	intron (NM_025434, intron 2 of 2)	intron (NM_025434, intron 2 of 2)	57440	NM_025434	66230	Mm.38460	NM_025434	ENSMUSG00000040269	Mrps28	1500012D08Rik|AW061224	mitochondrial ribosomal protein S28	protein-coding
673	chr15	96377735	96379231	+	0	NA	Intergenic	Intergenic	-87209	NM_028148	72193	Mm.324474	NM_028148	ENSMUSG00000033228	Scaf11	1110061H03Rik|2610510E10Rik|AI462454|CASP11|SIP1|SRRP129|Sfrs2ip|Srsf2ip|mKIAA3013	SR-related CTD-associated factor 11	protein-coding
503	chr13	85043935	85046417	+	0	NA	Intergenic	Intergenic	-283906	NM_023243	66671	Mm.18474	NM_023243	ENSMUSG00000021548	Ccnh	6330408H09Rik|AI661354|AV102684|AW538719	cyclin H	protein-coding
1756	chr9	77019119	77021538	+	0	NA	intron (NM_027150, intron 6 of 7)	intron (NM_027150, intron 6 of 7)	-126740	NM_012033	26944	Mm.23199	NM_012033	ENSMUSG00000032357	Tinag	AI452335|TIN-ag	tubulointerstitial nephritis antigen	protein-coding
1636	chr8	39465591	39468605	+	0	NA	intron (NM_145841, intron 1 of 7)	intron (NM_145841, intron 1 of 7)	-151842	NR_029884	723860		NR_029884		Mir383	Mirn383|mmu-mir-383	microRNA 383	ncRNA
68	chr1	120929756	120931417	+	0	NA	intron (NM_001081125, intron 1 of 13)	intron (NM_001081125, intron 1 of 13)	19610	NM_001081125	14633	Mm.273292	NM_001081125	ENSMUSG00000048402	Gli2	AW546128	GLI-Kruppel family member GLI2	protein-coding
1483	chr6	124777716	124780839	+	0	NA	promoter-TSS (NM_013538)	promoter-TSS (NM_013538)	188	NM_013700	22225	Mm.3571	NM_013700	ENSMUSG00000038429	Usp5	AA407472|ISOT|ISOT-1|Ucht	ubiquitin specific peptidase 5 (isopeptidase T)	protein-coding
315	chr11	108118965	108122233	+	0	NA	intron (NM_011101, intron 2 of 16)	intron (NM_011101, intron 2 of 16)	84603	NM_011101	18750	Mm.222178	NM_011101	ENSMUSG00000050965	Prkca	AI875142|Pkca	protein kinase C, alpha	protein-coding
1827	chrX	148449592	148452239	+	0	NA	promoter-TSS (NM_019710)	promoter-TSS (NM_019710)	-56	NM_019710	24061	Mm.482095	NM_019710	ENSMUSG00000041133	Smc1a	5830426I24Rik|SMC-1A|Sb1.8|Smc1|Smc1alpha|Smc1l1|Smcb|mKIAA0178	structural maintenance of chromosomes 1A	protein-coding
338	chr12	10397412	10398603	+	0	NA	exon (NM_023697, exon 1 of 2)	exon (NM_023697, exon 1 of 2)	421	NM_023697	105014	Mm.119343	NM_023697	ENSMUSG00000020621	Rdh14	3110030G19Rik|AW215439|PAN2	retinol dehydrogenase 14 (all-trans and 9-cis)	protein-coding
1347	chr5	84295250	84302368	+	0	NA	Intergenic	Intergenic	-514589	NM_153801	243078	Mm.126783	NM_153801	ENSMUSG00000049537	Tecrl	D330017N19Rik|Srd5a2l2	trans-2,3-enoyl-CoA reductase-like	protein-coding
761	chr17	10062988	10104443	+	0	NA	Intergenic	Intergenic	-114984	NR_045433	71092	Mm.243827	NR_045433		4930452A19Rik	4933424P20Rik	RIKEN cDNA 4930452A19 gene	ncRNA
576	chr14	70202339	70205996	+	0	NA	intron (NM_153514, intron 1 of 9)	intron (NM_153514, intron 1 of 9)	1185	NM_153514	246710	Mm.102367	NM_153514	ENSMUSG00000022075	Rhobtb2	Dbc2|E130206H14Rik|mKIAA0717	Rho-related BTB domain containing 2	protein-coding
222	chr11	6424490	6429598	+	0	NA	intron (NR_045893, intron 2 of 3)	RLTR1B|LTR|ERV1	1719	NR_045893	100041286	Mm.459507	NR_045893	ENSMUSG00000085156	Gm11974	OTTMUSG00000005115	predicted gene 11974	ncRNA
1504	chr7	7250555	7253028	+	0	NA	TTS (NR_049193)	TTS (NR_049193)	189	NR_049193	100885832		NR_049193	miRBase:MI0019188	Mir5620	mmu-mir-5620	microRNA mir-5620	ncRNA
25	chr1	53369806	53370985	+	0	NA	promoter-TSS (NR_104361)	promoter-TSS (NR_104361)	-73	NR_104361	72085	Mm.482256	NM_028091	ENSMUSG00000026096	Osgepl1	2610001M19Rik|AA416452	O-sialoglycoprotein endopeptidase-like 1	protein-coding
1775	chr9	121598625	121600584	+	0	NA	intron (NM_001164562, intron 3 of 6)	intron (NM_001164562, intron 3 of 6)	14543	NM_001164562	215474	Mm.31421	NM_178677	ENSMUSG00000061536	Sec22c	4932412K21|5930407I15Rik|C530046H07|Sec22l3	SEC22 vesicle trafficking protein homolog C (S. cerevisiae)	protein-coding
738	chr16	91300029	91315571	+	0	NA	Intergenic	Intergenic	37786	NM_016968	50914	Mm.39300	NM_016968	ENSMUSG00000046160	Olig1	AI836478|AW494459|Bhlhb6|Olg-1|Oligo1|bHLHe21	oligodendrocyte transcription factor 1	protein-coding
1415	chr6	21715951	21725749	+	0	NA	TTS (NM_173007)	TTS (NM_173007)	81665	NM_173007	269831	Mm.21950	NM_173007	ENSMUSG00000029669	Tspan12	9030619E17|AI426782|AI663988|AW111457|Tm4sf12	tetraspanin 12	protein-coding
484	chr13	65379313	65380922	+	0	NA	promoter-TSS (NM_178364)	promoter-TSS (NM_178364)	-45	NM_178364	170936	Mm.151546	NM_178364	ENSMUSG00000021514	Zfp369	B930030B22Rik|D230020H11Rik|NRIF2	zinc finger protein 369	protein-coding
1243	chr4	65499476	65502318	+	0	NA	intron (NM_207109, intron 10 of 22)	intron (NM_207109, intron 10 of 22)	234877	NM_001161782	69807	Mm.22786	NM_053084	ENSMUSG00000051675	Trim32	1810045E12Rik|3f3|BBS11|Zfp117	tripartite motif-containing 32	protein-coding
1078	chr2	168055485	168056407	+	0	NA	promoter-TSS (NM_001160330)	promoter-TSS (NM_001160330)	-67	NM_010072	13480	Mm.422657	NM_010072	ENSMUSG00000078919	Dpm1	AI118379|AI194292	dolichol-phosphate (beta-D) mannosyltransferase 1	protein-coding
1036	chr2	120965324	120967413	+	0	NA	promoter-TSS (NM_177846)	promoter-TSS (NM_177846)	66	NM_177846	329504	Mm.219449	NM_177846	ENSMUSG00000074890	Lcmt2	D330024M17|Tyw4	leucine carboxyl methyltransferase 2	protein-coding
305	chr11	102105269	102110713	+	0	NA	Intergenic	Intergenic	-2205	NM_153544	217216	Mm.247335	NM_153544	ENSMUSG00000034773	BC030867	-	cDNA sequence BC030867	protein-coding
1253	chr4	86220826	86222878	+	0	NA	exon (NM_178376, exon 1 of 1)	exon (NM_178376, exon 1 of 1)	275	NM_178376	68441	Mm.31178	NM_178376	ENSMUSG00000070934	Rraga	1300010C19Rik|AI255374|FIP-1|RAGA	Ras-related GTP binding A	protein-coding
928	chr19	22975904	23016298	+	0	NA	intron (NM_177341, intron 21 of 26)	intron (NM_177341, intron 21 of 26)	171006	NR_029591	387200		NR_029591		Mir204	Mirn204|mmu-mir-204	microRNA 204	ncRNA
1265	chr4	115725713	115726963	+	0	NA	exon (NM_028142, exon 1 of 6)	exon (NM_028142, exon 1 of 6)	143	NM_028142	72181	Mm.282560	NM_028142		Nsun4	2310010O12Rik|2810405F18Rik|AI507900|Shtap	NOL1/NOP2/Sun domain family, member 4	protein-coding
623	chr15	37346749	37392514	+	0	NA	intron (NM_029113, intron 3 of 3)	B1_Mur1|SINE|Alu	-7212	NR_045283	100503538	Mm.445166	NR_045283	ENSMUSG00000086992	Gm15941	OTTMUSG00000028027	predicted gene 15941	ncRNA
544	chr14	26005077	26006947	+	0	NA	Intergenic	Intergenic	-43285	NR_045718	75862	Mm.109191	NR_045718		4930572O13Rik	-	RIKEN cDNA 4930572O13 gene	ncRNA
1512	chr7	26022036	26038060	+	0	NA	exon (NM_010155, exon 4 of 4)	exon (NM_010155, exon 4 of 4)	5729	NM_010155	13875	Mm.8068	NM_010155	ENSMUSG00000040857	Erf	-	Ets2 repressor factor	protein-coding
1644	chr8	63251020	63254211	+	0	NA	Intergenic	Intergenic	-116633	NM_028299	72612	Mm.25263	NM_028299	ENSMUSG00000038005	2700029M09Rik	C230006B22Rik	RIKEN cDNA 2700029M09 gene	protein-coding
1526	chr7	51000762	51008945	+	0	NA	intron (NR_077063, intron 1 of 2)	intron (NR_077063, intron 1 of 2)	6453	NR_077063	100504720	Mm.226595	NR_077063		2310002F09Rik	-	RIKEN cDNA 2310002F09 gene	ncRNA
1196	chr3	150273072	150274705	+	0	NA	Intergenic	(CGAG)n|Simple_repeat|Simple_repeat	-826958	NM_133222	170757	Mm.317261	NM_133222	ENSMUSG00000039167	Eltd1	1110033N21Rik|ETL1|Etl	EGF, latrophilin seven transmembrane domain containing 1	protein-coding
1114	chr3	50497210	50500316	+	0	NA	Intergenic	Intergenic	-251228	NM_011990	26570	Mm.260988	NM_011990	ENSMUSG00000027737	Slc7a11	9930009M05Rik|AI451155|sut|xCT	solute carrier family 7 (cationic amino acid transporter, y+ system), member 11	protein-coding
217	chr10	129749975	129752028	+	0	NA	Intergenic	Intergenic	-8907	NM_183264	67596	Mm.131264	NM_183264	ENSMUSG00000034833	Tespa1	5830405N20Rik|A430001F24Rik|AI450549	thymocyte expressed, positive selection associated 1	protein-coding
328	chr11	117709179	117711494	+	0	NA	promoter-TSS (NM_009689)	promoter-TSS (NM_009689)	-215	NM_001012273	11799	Mm.8552	NM_009689	ENSMUSG00000017716	Birc5	AAC-11|Api4|TIAP|survivin40	baculoviral IAP repeat-containing 5	protein-coding
239	chr11	17111363	17112260	+	0	NA	promoter-TSS (NM_025443)	promoter-TSS (NM_025443)	-85	NM_178909	103784	Mm.298132	NM_178909		Wdr92	AI553587|HZGJ	WD repeat domain 92	protein-coding
122	chr10	9825940	9828106	+	0	NA	Intergenic	Intergenic	-206185	NM_001081344	78808	Mm.331751	NM_030191	ENSMUSG00000019790	Stxbp5	0710001E20Rik|4930565N16Rik|AW742610|LGL3|mKIAA1006	syntaxin binding protein 5 (tomosyn)	protein-coding
1730	chr9	52397628	52417274	+	0	NA	Intergenic	Intergenic	80091	NM_178906	330941	Mm.335160	NM_177907	ENSMUSG00000078307	AI593442	E130102D23	expressed sequence AI593442	protein-coding
1223	chr4	46150300	46152599	+	0	NA	promoter-TSS (NM_001033201)	promoter-TSS (NM_001033201)	66	NM_001033201	433702	Mm.389536	NM_001033201	ENSMUSG00000028330	Ncbp1	AU014645|AW538051|CBP80	nuclear cap binding protein subunit 1	protein-coding
878	chr18	49275026	49279292	+	0	NA	Intergenic	Intergenic	-405784	NR_033785	67321	Mm.245802	NR_033785		1700044K03Rik	-	RIKEN cDNA 1700044K03 gene	ncRNA
628	chr15	40485103	40489589	+	0	NA	intron (NM_011766, intron 1 of 7)	CpG	758	NM_011766	22762	Mm.39496	NM_011766	ENSMUSG00000022306	Zfpm2	B330005D23Rik|FOG-2|FOG2	zinc finger protein, multitype 2	protein-coding
158	chr10	62409086	62410295	+	0	NA	promoter-TSS (NM_177372)	promoter-TSS (NM_177372)	-87	NM_177372	327762	Mm.21492	NM_177372	ENSMUSG00000036875	Dna2	Dna2l|E130315B21Rik	DNA replication helicase 2 homolog (yeast)	protein-coding
269	chr11	62778175	62781845	+	0	NA	intron (NM_025496, intron 1 of 1)	intron (NM_025496, intron 1 of 1)	15315	NM_025496	66338	Mm.46166	NM_025496	ENSMUSG00000042200	Cdrt4	1700019I23Rik	CMT1A duplicated region transcript 4	protein-coding
281	chr11	74222121	74224263	+	0	NA	intron (NM_001015046, intron 14 of 24)	intron (NM_001015046, intron 14 of 24)	45019	NM_001011851	258153	Mm.376124	NM_001011851	ENSMUSG00000058275	Olfr412	MOR127-5P	olfactory receptor 412	protein-coding
363	chr12	43624911	43627439	+	0	NA	Intergenic	Intergenic	-1413531	NM_010733	16981	Mm.404786	NM_010733	ENSMUSG00000036295	Lrrn3	NLRR-3	leucine rich repeat protein 3, neuronal	protein-coding
46	chr1	82272490	82289364	+	0	NA	intron (NM_010570, intron 1 of 1)	(CA)n|Simple_repeat|Simple_repeat	7087	NM_010570	16367	Mm.4952	NM_010570	ENSMUSG00000055980	Irs1	G972R|IRS-1	insulin receptor substrate 1	protein-coding
1316	chr5	30595919	30598813	+	0	NA	3' UTR (NM_027652, exon 10 of 10)	3' UTR (NM_027652, exon 10 of 10)	-10548	NM_001033460	381738	Mm.389604	NM_001033460	ENSMUSG00000073102	Drc1	Ccdc164|Gm1060|b2b1654Clo	dynein regulatory complex subunit 1	protein-coding
733	chr16	90692377	90694199	+	0	NA	Intergenic	Intergenic	34328	NM_025642	66578	Mm.180363	NM_025642	ENSMUSG00000022978	Mis18a	2610039C10Rik|2810018N07Rik	MIS18 kinetochore protein homolog A (S. pombe)	protein-coding
1418	chr6	25421401	25422452	+	0	NA	Intergenic	Intergenic	218054	NM_010338	14763	Mm.409670	NM_010338		Gpr37	AI848630|Pael-R	G protein-coupled receptor 37	protein-coding
997	chr2	58559556	58566901	+	0	NA	intron (NM_001289660, intron 1 of 7)	RLTR14|LTR|ERV1	-44367	NM_001289659	76654	Mm.200370	NM_029692	ENSMUSG00000026839	Upp2	1700124F02Rik|AI266885|UDRPASE2|UP2|UPASE2	uridine phosphorylase 2	protein-coding
630	chr15	41414814	41452126	+	0	NA	intron (NM_001130166, intron 2 of 16)	intron (NM_001130166, intron 2 of 16)	-9931	NR_106195	102465902		NR_106195		Mir8115	mmu-mir-8115	microRNA mir-8115	ncRNA
36	chr1	66324276	66327793	+	0	NA	intron (NM_001039934, intron 3 of 14)	intron (NM_001039934, intron 3 of 14)	104131	NM_001039934	17756	Mm.256966	NM_008632	ENSMUSG00000015222	Map2	G1-397-34|MAP-2|Mtap-2|Mtap2|repro4	microtubule-associated protein 2	protein-coding
1368	chr5	117111451	117113332	+	0	NA	Intergenic	Intergenic	-70565	NM_026886	68955	Mm.146779	NM_026886	ENSMUSG00000063919	Srrm4	1500001A10Rik|B230202K19Rik|bv|mKIAA1853|nSR100	serine/arginine repetitive matrix 4	protein-coding
748	chr17	5188999	5190876	+	0	NA	intron (NM_001085355, intron 4 of 19)	CpG	194863	NM_001085355	239985	Mm.133401	NM_001085355	ENSMUSG00000069729	Arid1b	8030481M12|9330189K18Rik|AI836955|Ardi1b|B230217J03Rik|mKIAA1235	AT rich interactive domain 1B (SWI-like)	protein-coding
472	chr13	52059021	52060983	+	0	NA	Intergenic	Intergenic	117958	NM_011817	23882	Mm.281298	NM_011817	ENSMUSG00000021453	Gadd45g	AI327420|C86281|CR6|DDIT2|OIG37	growth arrest and DNA-damage-inducible 45 gamma	protein-coding
1655	chr8	80620738	80623732	+	0	NA	Intergenic	Intergenic	-115006	NM_183096	73301	Mm.61243	NM_183096	ENSMUSG00000037101	Ttc29	1700031F13Rik	tetratricopeptide repeat domain 29	protein-coding
1449	chr6	73264594	73266063	+	0	NA	Intergenic	Intergenic	66829	NM_019879	56451	Mm.29845	NM_019879	ENSMUSG00000052738	Suclg1	1500000I01Rik|Sucla1	succinate-CoA ligase, GDP-forming, alpha subunit	protein-coding
317	chr11	109614558	109617052	+	0	NA	Intergenic	Intergenic	-32235	NM_153782	208659	Mm.208662	NM_153782	ENSMUSG00000020614	Fam20a	AI606893	family with sequence similarity 20, member A	protein-coding
608	chr15	6937600	6940121	+	0	NA	Intergenic	Intergenic	-114547	NM_011019	18414	Mm.10760	NM_011019	ENSMUSG00000022146	Osmr	OSMRB	oncostatin M receptor	protein-coding
711	chr16	54263300	54264884	+	0	NA	Intergenic	Intergenic	1019258	NM_178720	239852	Mm.245045	NM_178720	ENSMUSG00000064310	Zpld1	9430016A21Rik	zona pellucida like domain containing 1	protein-coding
132	chr10	36797560	36799355	+	0	NA	Intergenic	Intergenic	60275	NM_008538	17118	Mm.30059	NM_008538	ENSMUSG00000069662	Marcks	Macs|PKCSL	myristoylated alanine rich protein kinase C substrate	protein-coding
1791	chrX	35953170	35955001	+	0	NA	intron (NM_026902, intron 1 of 5)	intron (NM_026902, intron 1 of 5)	250	NM_026902	68995	Mm.262453	NM_026902	ENSMUSG00000000355	Mcts1	1500019M23Rik|MCT-1	malignant T cell amplified sequence 1	protein-coding
1254	chr4	87293302	87297967	+	0	NA	Intergenic	Intergenic	156593	NM_001286158	70122	Mm.288898	NM_027326	ENSMUSG00000028496	Mllt3	2210011H10Rik|2610012I03Rik|3830408D16Rik|Af9|D4Ertd321e	myeloid/lymphoid or mixed-lineage leukemia (trithorax homolog, Drosophila); translocated to, 3	protein-coding
1649	chr8	72068387	72069399	+	0	NA	Intergenic	Intergenic	80181	NM_001045553	234362	Mm.458487	NM_172754	ENSMUSG00000060427	Zfp868	AI449175|AW108241|C530032E20|mszf62	zinc finger protein 868	protein-coding
1642	chr8	59989350	59992892	+	0	NA	intron (NM_008252, intron 1 of 4)	CpG	481	NM_008252	97165	Mm.276881	NM_008252	ENSMUSG00000054717	Hmgb2	C80539|HMG-2|Hmg2	high mobility group box 2	protein-coding
1234	chr4	56125793	56127695	+	0	NA	Intergenic	Intergenic	-581397	NM_010637	16600	Mm.4325	NM_010637	ENSMUSG00000003032	Klf4	EZF|Gklf|Zie	Kruppel-like factor 4 (gut)	protein-coding
892	chr18	65738945	65745069	+	0	NA	intron (NM_207255, intron 1 of 5)	intron (NM_207255, intron 1 of 5)	2123	NM_207255	328977	Mm.286232	NM_207255	ENSMUSG00000042439	Zfp532	C530030I18Rik|Znf532|mKIAA1629	zinc finger protein 532	protein-coding
1314	chr5	29577017	29581821	+	0	NA	intron (NM_020295, intron 14 of 16)	intron (NM_020295, intron 14 of 16)	56886	NM_001289757	56874	Mm.87352	NM_021470	ENSMUSG00000029130	Rnf32	1700009J01Rik|2700025B22Rik|4930542N22Rik|Lmbr2	ring finger protein 32	protein-coding
1428	chr6	38482037	38485533	+	0	NA	Intergenic	Intergenic	-1076	NM_025363	66117	Mm.158971	NM_025363	ENSMUSG00000019689	1110001J03Rik	Fmc1	RIKEN cDNA 1110001J03 gene	protein-coding
546	chr14	26527011	26589579	+	0	NA	intron (NM_001101433, intron 2 of 3)	intron (NM_001101433, intron 2 of 3)	30047	NM_001101433	71918	Mm.41904	NM_001101433	ENSMUSG00000055538	Zcchc24	2310047A01Rik	zinc finger, CCHC domain containing 24	protein-coding
537	chr14	14895187	14905517	+	0	NA	intron (NM_139227, intron 4 of 11)	intron (NM_139227, intron 4 of 11)	53066	NM_025550	66413	Mm.27591	NM_025550	ENSMUSG00000021737	Psmd6	2400006A19Rik	proteasome (prosome, macropain) 26S subunit, non-ATPase, 6	protein-coding
1798	chrX	71210542	71214138	+	0	NA	promoter-TSS (NM_008224)	promoter-TSS (NM_008224)	-644	NM_008224	15161	Mm.491126	NM_008224	ENSMUSG00000031386	Hcfc1	AW060991|HCF|HCF1	host cell factor C1	protein-coding
1474	chr6	116175646	116179431	+	0	NA	exon (NM_026585, exon 15 of 31)	exon (NM_026585, exon 15 of 31)	19487	NM_026585	28006	Mm.28524	NM_026585	ENSMUSG00000024104	Fam21	A130095H06|C530005J20Rik|D6Wsu116e	family with sequence similarity 21	protein-coding
522	chr13	104562631	104565278	+	0	NA	Intergenic	CpG	-9292	NM_172592	218543	Mm.458176	NM_172592	ENSMUSG00000032621	Srek1	8430401B01|AI450757|AI462342|SRrp508|SRrp86|Sfrs12|Srsf12	splicing regulatory glutamine/lysine-rich protein 1	protein-coding
125	chr10	20030340	20033503	+	0	NA	promoter-TSS (NM_001025393)	promoter-TSS (NM_001025393)	-354	NM_001025392	72567	Mm.294783	NM_153787	ENSMUSG00000037608	Bclaf1	2610102K23Rik|2700025J07Rik|2810454G14Rik|5730534O06Rik|AI450190|AW556225|Btf|mKIAA0164	BCL2-associated transcription factor 1	protein-coding
1632	chr8	34307624	34310410	+	0	NA	Intergenic	RMER17C|LTR|ERVK	186982	NM_001122822	22427	Mm.228805	NM_011721	ENSMUSG00000031583	Wrn	AI846146	Werner syndrome homolog (human)	protein-coding
1423	chr6	34370520	34372878	+	0	NA	intron (NM_009731, intron 9 of 9)	L2a|LINE|L2	9337	NM_009731	11997	Mm.482073	NM_009731	ENSMUSG00000052131	Akr1b7	AR|Avdp|MVDP	aldo-keto reductase family 1, member B7	protein-coding
1018	chr2	90686196	90689477	+	0	NA	intron (NM_019758, intron 1 of 12)	intron (NM_019758, intron 1 of 12)	524	NM_019758	56428	Mm.28023	NM_019758	ENSMUSG00000027282	Mtch2	2310034D24Rik|4930539J07Rik|HSPC032	mitochondrial carrier homolog 2 (C. elegans)	protein-coding
44	chr1	79576929	79579060	+	0	NA	Intergenic	Intergenic	90553	NM_183027	252903	Mm.32409	NM_183027	ENSMUSG00000054702	Ap1s3	1190009B22|Jr2|[s]3A	adaptor-related protein complex AP-1, sigma 3	protein-coding
1687	chr8	121124036	121127361	+	0	NA	intron (NM_019707, intron 2 of 13)	intron (NM_019707, intron 2 of 13)	318043	NM_019707	12554	Mm.334841	NM_019707	ENSMUSG00000031841	Cdh13	4932416G01Rik|Cdht|T-cadherin|Tcad	cadherin 13	protein-coding
1125	chr3	58379936	58382111	+	0	NA	intron (NM_001040396, intron 1 of 5)	CpG	443	NM_001040396	69227	Mm.270950	NM_001040396	ENSMUSG00000075700	Selt	2810407C02Rik|5730408P04Rik	selenoprotein T	protein-coding
1007	chr2	73474405	73477990	+	0	NA	intron (NM_175752, intron 1 of 6)	intron (NM_175752, intron 1 of 6)	-12400	NM_029716	108699	Mm.257073	NM_029716	ENSMUSG00000056486	Chn1	0610007I19Rik|0710001E19Rik|1700112L09Rik|2900046J01Rik|AI413815|ARHGAP2	chimerin 1	protein-coding
667	chr15	92634640	92638985	+	0	NA	Intergenic	L1MA4|LINE|L1	209272	NM_001164594	239618	Mm.309826	NM_001164593	ENSMUSG00000036218	Pdzrn4	1110017D07Rik|LNX4|SAMCAP3L|mKIAA3027	PDZ domain containing RING finger 4	protein-coding
1443	chr6	67051617	67053622	+	0	NA	Intergenic	Intergenic	-65218	NM_007836	13197	Mm.72235	NM_007836	ENSMUSG00000036390	Gadd45a	AA545191|Ddit1|GADD45	growth arrest and DNA-damage-inducible 45 alpha	protein-coding
741	chr16	96972172	96982003	+	0	NA	intron (NM_031174, intron 11 of 32)	intron (NM_031174, intron 11 of 32)	287874	NM_008791	18546	Mm.5023	NM_008791	ENSMUSG00000090223	Pcp4	P16Rimb19|Pcp-4|Pep19	Purkinje cell protein 4	protein-coding
1833	chrX	166388353	166389893	+	0	NA	intron (NM_001290504, intron 2 of 9)	intron (NM_001290504, intron 2 of 9)	27726	NR_029457	654820	Mm.34441	NM_001039559	ENSMUSG00000072844	G530011O06Rik	-	RIKEN cDNA G530011O06 gene	ncRNA
1188	chr3	137342617	137348644	+	0	NA	Intergenic	PB1D10|SINE|Alu	58994	NM_030143	73284	Mm.250841	NM_030143	ENSMUSG00000046818	Ddit4l	1700037B15Rik|1700108M02Rik|REDD2|RTP801L|Smhs1	DNA-damage-inducible transcript 4-like	protein-coding
1186	chr3	136271854	136274078	+	0	NA	Intergenic	Intergenic	-60064	NM_008913	19055	Mm.331389	NM_008913	ENSMUSG00000028161	Ppp3ca	2900074D19Rik|CN|Caln|Calna|CnA	protein phosphatase 3, catalytic subunit, alpha isoform	protein-coding
998	chr2	58610428	58613498	+	0	NA	intron (NM_029692, intron 1 of 6)	intron (NM_029692, intron 1 of 6)	4368	NM_029692	76654	Mm.200370	NM_029692	ENSMUSG00000026839	Upp2	1700124F02Rik|AI266885|UDRPASE2|UP2|UPASE2	uridine phosphorylase 2	protein-coding
1564	chr7	104131732	104134640	+	0	NA	intron (NM_153591, intron 5 of 13)	B4A|SINE|B4	33149	NM_153591	244141	Mm.274864	NM_153591	ENSMUSG00000018995	Nars2	AI875199	asparaginyl-tRNA synthetase 2 (mitochondrial)(putative)	protein-coding
1280	chr4	132853794	132856405	+	0	NA	intron (NM_199306, intron 12 of 15)	L2c|LINE|L2	-21394	NR_110978	52174	Mm.244748	NM_025667	ENSMUSG00000028857	Tmem222	5730406H10Rik|AA409341|D4Ertd196e	transmembrane protein 222	protein-coding
714	chr16	57391491	57391736	+	0	NA	intron (NM_001040397, intron 1 of 4)	LSU-rRNA_Hsa|rRNA|rRNA	38223	NM_001040397	78749	Mm.328360	NM_001040397	ENSMUSG00000043336	Filip1l	4631422O05Rik|Doc1	filamin A interacting protein 1-like	protein-coding
1789	chrX	22842087	22845692	+	0	NA	intron (NM_026167, intron 3 of 8)	intron (NM_026167, intron 3 of 8)	18665	NM_001290476	67455	Mm.224306	NM_026167	ENSMUSG00000036782	Klhl13	1200009K10Rik|AI451128|Bklhd2|D130072F20Rik|mKIAA1309	kelch-like 13	protein-coding
313	chr11	107272176	107285841	+	0	NA	intron (NM_145823, intron 1 of 9)	intron (NM_145823, intron 1 of 9)	53026	NM_145823	71795	Mm.397413	NM_145823	ENSMUSG00000040430	Pitpnc1	1110020B03Rik|5830436L09Rik|AI662802|AI851387|C330017I21Rik|Dnr411|RDGBB|RDGBB1|rdgB-beta	phosphatidylinositol transfer protein, cytoplasmic 1	protein-coding
529	chr13	112890181	112892413	+	0	NA	Intergenic	Intergenic	-187362	NM_001168403	77318	Mm.159895	NM_029898	ENSMUSG00000049985	Ankrd55	C030011J08Rik	ankyrin repeat domain 55	protein-coding
1545	chr7	85334899	85336785	+	0	NA	Intergenic	Intergenic	386882	NM_008746	18213	Mm.33496	NM_008746		Ntrk3	AW125844|Ntrk3_tv3|TrkC	neurotrophic tyrosine kinase, receptor, type 3	protein-coding
1773	chr9	120364552	120366475	+	0	NA	intron (NM_144557, intron 12 of 16)	intron (NM_144557, intron 12 of 16)	-36211	NM_026892	68969	Mm.28753	NM_026892	ENSMUSG00000006941	Eif1b	1500010M16Rik|3110001N14Rik|Gc20	eukaryotic translation initiation factor 1B	protein-coding
1058	chr2	145657619	145659755	+	0	NA	intron (NM_028724, intron 4 of 12)	intron (NM_028724, intron 4 of 12)	46835	NM_028724	74030	Mm.228799	NM_028724	ENSMUSG00000001768	Rin2	2010003K16Rik|4632403N06Rik|AW821980|RASSF4	Ras and Rab interactor 2	protein-coding
987	chr2	38636928	38639073	+	0	NA	intron (NM_010264, intron 3 of 10)	intron (NM_010264, intron 3 of 10)	2035	NM_001159548	14536	Mm.439703	NM_010264	ENSMUSG00000063972	Nr6a1	1700113M01Rik|Gcnf|NCNF|RTR	nuclear receptor subfamily 6, group A, member 1	protein-coding
1324	chr5	43745611	43752836	+	0	NA	Intergenic	Intergenic	-122630	NR_028417	665934	Mm.381491	NR_028417		Gm7854	EG665934|ENSMUSG00000054483	predicted gene 7854	ncRNA
397	chr12	80779151	80798477	+	0	NA	intron (NM_009014, intron 8 of 10)	intron (NM_009014, intron 8 of 10)	390476	NM_001252562	19363	Mm.341756	NM_009014	ENSMUSG00000059060	Rad51b	AI553500|R51H2|Rad51l1|mREC2	RAD51 homolog B	protein-coding
1150	chr3	88633681	88640014	+	0	NA	promoter-TSS (NR_015498)	promoter-TSS (NR_015498)	-438	NR_015498	319830	Mm.400394	NR_015498		1500004A13Rik	5430404N14Rik|BB132176	RIKEN cDNA 1500004A13 gene	ncRNA
1096	chr3	20883972	20886900	+	0	NA	Intergenic	Intergenic	-619337	NM_175086	11608	Mm.134863	NM_175086	ENSMUSG00000054988	Agtr1b	AT1B|AT2R1B|Agtr-1b|Angtr-1b	angiotensin II receptor, type 1b	protein-coding
1657	chr8	81264566	81267418	+	0	NA	Intergenic	AT_rich|Low_complexity|Low_complexity	79059	NM_001191004	78651	Mm.28694	NM_030145	ENSMUSG00000031683	Lsm6	1500031N17Rik|2410088K19Rik|AI747288	LSM6 homolog, U6 small nuclear RNA associated (S. cerevisiae)	protein-coding
1535	chr7	66096736	66100884	+	0	NA	Intergenic	Intergenic	185238	NM_009728	11982	Mm.135129	NM_009728	ENSMUSG00000025324	Atp10a	Atp10c|pfatp	ATPase, class V, type 10A	protein-coding
1335	chr5	65521473	65523409	+	0	NA	promoter-TSS (NM_175174)	promoter-TSS (NM_175174)	-29	NM_175174	71778	Mm.10281	NM_175174	ENSMUSG00000054920	Klhl5	1300013C10Rik	kelch-like 5	protein-coding
908	chr18	84757706	84760120	+	0	NA	promoter-TSS (NM_001033341)	promoter-TSS (NM_001033341)	-17	NM_001033341	240476	Mm.329575	NM_001033341	ENSMUSG00000048410	Zfp407	6430585N13Rik|Gm333|Gm334|Gm948|ZNF407	zinc finger protein 407	protein-coding
1191	chr3	143574860	143580041	+	0	NA	Intergenic	Intergenic	-202343	NR_040405	621809	Mm.360134	NR_040405		Gm6260	EG621809	predicted gene 6260	ncRNA
459	chr13	37547419	37552850	+	0	NA	Intergenic	B1_Mur1|SINE|Alu	112920	NM_010745	17084	Mm.2639	NM_010745	ENSMUSG00000021423	Ly86	MD-1|MD1	lymphocyte antigen 86	protein-coding
284	chr11	77498349	77502413	+	0	NA	intron (NM_001024205, intron 1 of 3)	intron (NM_001024205, intron 1 of 3)	740	NM_001024205	68564	Mm.428996	NM_001024205		Nufip2	1110001M19Rik|9530056D24Rik|AI256692|AI461731|PIG1|mKIAA1321	nuclear fragile X mental retardation protein interacting protein 2	protein-coding
823	chr17	80223034	80225989	+	0	NA	Intergenic	Intergenic	70952	NM_178050	56298	Mm.175403	NM_019717	ENSMUSG00000059811	Atl2	2010110I21Rik|AA407293|AV334690|Aip-2|Arl6ip2	atlastin GTPase 2	protein-coding
1340	chr5	71231806	71236035	+	0	NA	promoter-TSS (NM_010252)	promoter-TSS (NM_010252)	-64	NM_010252	14405	Mm.255292	NM_010252	ENSMUSG00000001260	Gabrg1	GabaA|GabaA/BZ	gamma-aminobutyric acid (GABA) A receptor, subunit gamma 1	protein-coding
903	chr18	75525883	75527761	+	0	NA	promoter-TSS (NM_001042660)	promoter-TSS (NM_001042660)	-197	NM_001042660	17131	Mm.34407	NM_008543	ENSMUSG00000025880	Smad7	Madh7	SMAD family member 7	protein-coding
247	chr11	23154723	23157889	+	0	NA	intron (NM_001035226, intron 1 of 25)	CpG	265	NM_134014	103573	Mm.217547	NM_134014	ENSMUSG00000020290	Xpo1	AA420417|Crm1|Exp1	exportin 1, CRM1 homolog (yeast)	protein-coding
165	chr10	72082687	72084075	+	0	NA	Intergenic	Intergenic	-34213	NM_025635	52696	Mm.62876	NM_025635	ENSMUSG00000019923	Zwint	2010007E07Rik|2600001N01Rik|D10Ertd749e|Zwint-1	ZW10 interactor	protein-coding
289	chr11	85123438	85126834	+	0	NA	exon (NM_016910, exon 1 of 6)	exon (NM_016910, exon 1 of 6)	380	NM_016910	53892	Mm.45609	NM_016910	ENSMUSG00000020525	Ppm1d	AV338790|Wip1	protein phosphatase 1D magnesium-dependent, delta isoform	protein-coding
1495	chr6	144815395	144817430	+	0	NA	Intergenic	Intergenic	180920	NM_001024468	12035	Mm.4606	NM_007532	ENSMUSG00000030268	Bcat1	BCATc|Eca39	branched chain aminotransferase 1, cytosolic	protein-coding
729	chr16	82430820	82433331	+	0	NA	Intergenic	Intergenic	1231133	NM_010954	17968	Mm.433941	NM_010954	ENSMUSG00000022762	Ncam2	Ncam-2|Ocam|RNCAM	neural cell adhesion molecule 2	protein-coding
1753	chr9	71672704	71675634	+	0	NA	Intergenic	Intergenic	-54760	NM_026599	68178	Mm.99961	NM_026599	ENSMUSG00000032232	Cgnl1	4933421H10Rik|9930020M10Rik|AI503810|Jacop	cingulin-like 1	protein-coding
771	chr17	24061004	24063065	+	0	NA	Intergenic	(CAGAGA)n|Simple_repeat|Simple_repeat	7609	NM_001077633	620253	Mm.390964	NM_001077633	ENSMUSG00000057417	Dcpp3	Dcpp-3|EG620253|SPT-3	demilune cell and parotid protein 3	protein-coding
2	chr1	7077746	7081252	+	0	NA	intron (NM_183028, intron 1 of 5)	intron (NM_183028, intron 1 of 5)	498	NM_183028	319263	Mm.21539	NM_183028	ENSMUSG00000051285	Pcmtd1	8430411F12Rik|A030012M09Rik	protein-L-isoaspartate (D-aspartate) O-methyltransferase domain containing 1	protein-coding
808	chr17	64279385	64283133	+	0	NA	intron (NM_001286415, intron 6 of 17)	Lx9|LINE|L1	-6062	NM_008000	14158	Mm.23039	NM_008000	ENSMUSG00000000127	Fert2	AV082135|C330004K01Rik|Fer|Fert	fer (fms/fps related) protein kinase, testis specific 2	protein-coding
401	chr12	83157060	83159060	+	0	NA	Intergenic	Intergenic	-112943	NM_001167983	217692	Mm.261333	NM_172579	ENSMUSG00000042700	Sipa1l1	4931426N11Rik|AW213287|Spar|mKIAA0440	signal-induced proliferation-associated 1 like 1	protein-coding
845	chr18	13129708	13133329	+	0	NA	intron (NM_008378, intron 1 of 10)	intron (NM_008378, intron 1 of 10)	757	NM_008378	16210	Mm.8154	NM_008378	ENSMUSG00000024423	Impact	E430016J11Rik	impact, RWD domain protein	protein-coding
186	chr10	86948084	86958177	+	0	NA	TTS (NM_008553)	TTS (NM_008553)	3275	NM_008553	17172	Mm.136217	NM_008553	ENSMUSG00000020052	Ascl1	AI225900|ASH1|Mash1|bHLHa46	achaete-scute complex homolog 1 (Drosophila)	protein-coding
1797	chrX	70472724	70475421	+	0	NA	exon (NM_007978, exon 1 of 1)	exon (NM_007978, exon 1 of 1)	427	NM_007978	14070	Mm.165807	NM_007978	ENSMUSG00000078317	F8a	AI852759|DXUcsf1|F8a1	factor 8-associated gene A	protein-coding
1231	chr4	55160736	55162471	+	0	NA	Intergenic	Intergenic	200786	NM_172867	242466	Mm.102904	NM_172867	ENSMUSG00000060206	Zfp462	6030417H05|9430078C22Rik|Gt4-2|Zfpip	zinc finger protein 462	protein-coding
1119	chr3	51591874	51594430	+	0	NA	intron (NM_001004176, intron 2 of 4)	intron (NM_001004176, intron 2 of 4)	128037	NM_174995	211666	Mm.24679	NM_174995	ENSMUSG00000074604	Mgst2	GST2|MGST-II	microsomal glutathione S-transferase 2	protein-coding
1249	chr4	81948171	81952231	+	0	NA	intron (NM_008687, intron 8 of 8)	intron (NM_008687, intron 8 of 8)	201482	NM_001286127	18028	Mm.317947	NM_008687	ENSMUSG00000008575	Nfib	6720429L07Rik|CTF|E030026I10Rik|NF-I/B|NF1-B|NFI-B	nuclear factor I/B	protein-coding
147	chr10	53315716	53318910	+	0	NA	intron (NM_025541, intron 1 of 3)	CpG	546	NM_025541	66403	Mm.272989	NM_025541	ENSMUSG00000019857	Asf1a	2310079C17Rik|C79052	anti-silencing function 1A histone chaperone	protein-coding
973	chr2	19474564	19477742	+	0	NA	promoter-TSS (NM_027600)	promoter-TSS (NM_027600)	-616	NM_027600	70909	Mm.158488	NM_027600	ENSMUSG00000026734	4921504E06Rik	4921522E24Rik	RIKEN cDNA 4921504E06 gene	protein-coding
1705	chr9	20594308	20601872	+	0	NA	intron (NM_016919, intron 29 of 66)	intron (NM_016919, intron 29 of 66)	21388	NM_016919	53867	Mm.334994	NM_016919	ENSMUSG00000004098	Col5a3	-	collagen, type V, alpha 3	protein-coding
1046	chr2	128973303	128977286	+	0	NA	Intergenic	B1_Mus2|SINE|Alu	19858	NM_025395	66170	Mm.40621	NM_025395	ENSMUSG00000037938	Chchd5	1110027L01Rik|AW045710	coiled-coil-helix-coiled-coil-helix domain containing 5	protein-coding
1142	chr3	80904710	80907960	+	0	NA	intron (NM_019971, intron 1 of 5)	intron (NM_019971, intron 1 of 5)	65997	NM_019971	54635	Mm.331089	NM_019971	ENSMUSG00000028019	Pdgfc	1110064L01Rik|AI647969|PDGF-C	platelet-derived growth factor, C polypeptide	protein-coding
1291	chr4	143001959	143003434	+	0	NA	5' UTR (NM_172877, exon 1 of 5)	5' UTR (NM_172877, exon 1 of 5)	367	NM_172877	242736	Mm.275953	NM_172877	ENSMUSG00000046862	Pramef8	4732496O08Rik|AU023234	PRAME family member 8	protein-coding
915	chr19	5343776	5349025	+	0	NA	3' UTR (NM_028623, exon 3 of 3)	3' UTR (NM_028623, exon 3 of 3)	3174	NM_028623	73720	Mm.36816	NM_028623	ENSMUSG00000024846	Cst6	1110017E11Rik|N28197|ichq	cystatin E/M	protein-coding
319	chr11	111676244	111683177	+	0	NA	Intergenic	Intergenic	752232	NM_008425	16518	Mm.4951	NM_008425	ENSMUSG00000041695	Kcnj2	IRK1|Kcnf1|Kir2.1	potassium inwardly-rectifying channel, subfamily J, member 2	protein-coding
1586	chr7	125675918	125677426	+	0	NA	intron (NM_009940, intron 1 of 5)	CpG	155	NM_009940	12850	Mm.20634	NM_009940	ENSMUSG00000030652	Coq7	clk-1	demethyl-Q 7	protein-coding
1456	chr6	86470764	86478278	+	0	NA	TTS (NM_011865)	TTS (NM_011865)	1638	NM_011865	23983	Mm.274146	NM_011865	ENSMUSG00000051695	Pcbp1	WBP17|[a]CP-1|alphaCP-1	poly(rC) binding protein 1	protein-coding
1179	chr3	123208582	123213181	+	0	NA	TTS (NR_028573)	TTS (NR_028573)	103	NR_028573	100306957	Mm.260791	NR_028573	ENSMUSG00000092730	Snora24	ACA24	small nucleolar RNA, H/ACA box 24	snoRNA
1052	chr2	136716296	136718364	+	0	NA	promoter-TSS (NM_001141946)	promoter-TSS (NM_001141946)	-188	NM_001286983	59030	Mm.272570	NM_021527	ENSMUSG00000027274	Mkks	1300013E18Rik|AI463362|AI957237|Bbs6	McKusick-Kaufman syndrome	protein-coding
735	chr16	91189998	91204697	+	0	NA	Intergenic	RLTR13D2|LTR|ERVK	-28448	NM_016967	50913	Mm.37289	NM_016967	ENSMUSG00000039830	Olig2	AI604895|Bhlhb1|Olg-2|Oligo2|RK17|bHLHe19	oligodendrocyte transcription factor 2	protein-coding
404	chr12	84367559	84381322	+	0	NA	intron (NM_001267625, intron 7 of 10)	intron (NM_001267625, intron 7 of 10)	-334298	NR_046045	74283	Mm.398247	NR_046045		1700085C21Rik	-	RIKEN cDNA 1700085C21 gene	ncRNA
516	chr13	100052265	100056829	+	0	NA	Intergenic	Intergenic	60086	NM_026873	68927	Mm.276502	NM_026873	ENSMUSG00000021650	Ptcd2	1190005P08Rik	pentatricopeptide repeat domain 2	protein-coding
1813	chrX	100687488	100690742	+	0	NA	intron (NR_015508, intron 1 of 2)	CpG	200	NR_015508	70252	Mm.380486	NR_015508	ENSMUSG00000097571	Jpx	2010000I03Rik|2510040I06Rik|Enox	Jpx transcript, Xist activator (non-protein coding)	ncRNA
1493	chr6	140230022	140231541	+	0	NA	Intergenic	Intergenic	-141839	NM_144920	109135	Mm.247670	NM_144920	ENSMUSG00000030231	Plekha5	2810431N21Rik|AI428202|AK129423|AMH-Cre|Ayu21-9|Gt(pU21)9Imeg|Pepp2|Tg(AMH-cre)1Flor	pleckstrin homology domain containing, family A member 5	protein-coding
1551	chr7	90961721	90964323	+	0	NA	Intergenic	Intergenic	-19673	NM_029335	75556	Mm.17649	NM_029335	ENSMUSG00000011154	1700026D08Rik	AW047638|AW551802	RIKEN cDNA 1700026D08 gene	protein-coding
974	chr2	19500378	19502054	+	0	NA	Intergenic	Intergenic	-25679	NM_027600	70909	Mm.158488	NM_027600	ENSMUSG00000026734	4921504E06Rik	4921522E24Rik	RIKEN cDNA 4921504E06 gene	protein-coding
1271	chr4	118532448	118540952	+	0	NA	Intergenic	MIRb|SINE|MIR	-4688	NM_001011856	258159	Mm.388910	NM_001011856	ENSMUSG00000073769	Olfr1331	MOR259-3P	olfactory receptor 1331	protein-coding
702	chr16	42395073	42398720	+	0	NA	Intergenic	Intergenic	-56132	NM_008083	14432	Mm.1222	NM_008083	ENSMUSG00000047261	Gap43	B-50|Basp2|GAP-43	growth associated protein 43	protein-coding
1668	chr8	93477646	93481482	+	0	NA	intron (NM_177224, intron 3 of 39)	intron (NM_177224, intron 3 of 39)	-114392	NM_001282001	19651	Mm.235580	NM_011250	ENSMUSG00000031666	Rbl2	PRB2|RBR-2|Rb2|p130	retinoblastoma-like 2	protein-coding
1715	chr9	32570462	32573238	+	0	NA	Intergenic	Intergenic	68223	NM_001038642	23871	Mm.292415	NM_011808	ENSMUSG00000032035	Ets1	AI196000|AI448617|D230050P06|Ets-1|Tpl1	E26 avian leukemia oncogene 1, 5' domain	protein-coding
344	chr12	28259872	28262231	+	0	NA	Intergenic	Intergenic	-233468	NM_009234	20666	Mm.41702	NM_009234		Sox11	1110038H03Rik|6230403H02Rik|AI836553|end1	SRY (sex determining region Y)-box 11	protein-coding
1613	chr8	4676811	4678906	+	0	NA	Intergenic	CpG	64688	NM_145591	233987	Mm.102799	NM_145591		Zfp958	-	zinc finger protein 958	protein-coding
636	chr15	56108640	56110963	+	0	NA	Intergenic	Intergenic	-371297	NM_016667	20649	Mm.309425	NM_016667	ENSMUSG00000060429	Sntb1	-	syntrophin, basic 1	protein-coding
1710	chr9	24974121	24982949	+	0	NA	Intergenic	Intergenic	-22255	NM_020586	80517	Mm.142843	NM_020586	ENSMUSG00000008429	Herpud2	5031400M07Rik|AB041580	HERPUD family member 2	protein-coding
1406	chr6	10890703	10893687	+	0	NA	Intergenic	Intergenic	32183	NR_033776	57866	Mm.4397	NR_033776		AA545190	-	EST AA545190	ncRNA
1104	chr3	27836211	27840055	+	0	NA	intron (NM_001164056, intron 1 of 26)	intron (NM_001164056, intron 1 of 26)	531	NM_001164056	18805	Mm.212039	NM_008875	ENSMUSG00000027695	Pld1	AA536939|C85393|Pld1a|Pld1b	phospholipase D1	protein-coding
561	chr14	48666233	48673772	+	0	NA	Intergenic	Intergenic	-70542	NM_033602	93834	Mm.296457	NM_033602	ENSMUSG00000021846	Peli2	AW047589|BB129927	pellino 2	protein-coding
1133	chr3	73146349	73148377	+	0	NA	intron (NR_040557, intron 2 of 4)	intron (NR_040557, intron 2 of 4)	138210	NR_040547	74693	Mm.292227	NR_040547		4930509J09Rik	-	RIKEN cDNA 4930509J09 gene	ncRNA
209	chr10	126263102	126266881	+	0	NA	Intergenic	B1_Mur1|SINE|Alu	73436	NM_026858	68876	Mm.276769	NM_026858	ENSMUSG00000025436	Xrcc6bp1	1110068E08Rik|2410012H02Rik	XRCC6 binding protein 1	protein-coding
1118	chr3	51553211	51554690	+	0	NA	intron (NM_001004176, intron 2 of 4)	intron (NM_001004176, intron 2 of 4)	88835	NM_174995	211666	Mm.24679	NM_174995	ENSMUSG00000074604	Mgst2	GST2|MGST-II	microsomal glutathione S-transferase 2	protein-coding
1575	chr7	117202134	117207270	+	0	NA	promoter-TSS (NM_009281)	promoter-TSS (NM_009281)	-514	NM_009281	20841	Mm.10815	NM_009281	ENSMUSG00000061079	Zfp143	AA959806|AU015869|D7Ertd805e|KRAB14|SBF|Staf|Zfp79|Zfp80-rs1|Znf143|pHZ-1	zinc finger protein 143	protein-coding
357	chr12	39054010	39056203	+	0	NA	intron (NM_178681, intron 19 of 24)	intron (NM_178681, intron 19 of 24)	286002	NR_045943	73867	Mm.78933	NR_045943		4930428E07Rik	-	RIKEN cDNA 4930428E07 gene	ncRNA
1307	chr5	22667226	22674889	+	0	NA	intron (NM_029990, intron 2 of 2)	intron (NM_029990, intron 2 of 2)	269114	NR_040469	269630	Mm.425231	NR_040469	ENSMUSG00000073147	5031425E22Rik	-	RIKEN cDNA 5031425E22 gene	ncRNA
117	chr10	5055957	5059344	+	0	NA	Intergenic	Intergenic	-94184	NM_001079686	64009	Mm.331626	NM_022027	ENSMUSG00000019769	Syne1	8B|A330049M09Rik|BE692247|C130039F11Rik|CPG2|Myne1|mKIAA1756	spectrin repeat containing, nuclear envelope 1	protein-coding
1812	chrX	99782754	99785922	+	0	NA	intron (NM_173021, intron 13 of 31)	intron (NM_173021, intron 13 of 31)	55247	NM_008832	18679	Mm.212889	NM_008832	ENSMUSG00000034055	Phka1	5330411D17|9830108K24Rik|Phka	phosphorylase kinase alpha 1	protein-coding
1769	chr9	108816018	108817617	+	0	NA	promoter-TSS (NM_027066)	promoter-TSS (NM_027066)	-133	NM_027066	69384	Mm.158271	NM_027066	ENSMUSG00000025652	Tmem89	1700024B07Rik	transmembrane protein 89	protein-coding
455	chr13	34965415	34968845	+	0	NA	promoter-TSS (NM_013830)	promoter-TSS (NM_013830)	-233	NM_013830	19134	Mm.10027	NM_013830	ENSMUSG00000021413	Prpf4b	2610037H07|Prp4|Prp4k|Prpk|cbp143	PRP4 pre-mRNA processing factor 4 homolog B (yeast)	protein-coding
600	chr14	106286115	106299585	+	0	NA	exon (NM_011897, exon 2 of 2)	exon (NM_011897, exon 2 of 2)	3186	NM_011897	24064	Mm.89982	NM_011897	ENSMUSG00000022114	Spry2	sprouty2	sprouty homolog 2 (Drosophila)	protein-coding
80	chr1	153082680	153084686	+	0	NA	Intergenic	Intergenic	98519	NR_038011	402734	Mm.337666	NR_038011		C730036E19Rik	-	RIKEN cDNA C730036E19 gene	ncRNA
336	chr12	9344676	9347006	+	0	NA	Intergenic	Intergenic	231550	NR_045488	69420	Mm.396193	NR_045488		1700022H16Rik	-	RIKEN cDNA 1700022H16 gene	ncRNA
1673	chr8	97505414	97526225	+	0	NA	intron (NM_018882, intron 1 of 13)	B3A|SINE|B2	7520	NM_018882	14766	Mm.290834	NM_018882	ENSMUSG00000031785	Gpr56	Cyt28|TM7LN4|TM7XN1	G protein-coupled receptor 56	protein-coding
457	chr13	36786312	36789330	+	0	NA	Intergenic	Intergenic	38525	NM_153529	68404	Mm.232930	NM_153529	ENSMUSG00000039114	Nrn1	0710008J23Rik|Cpg15|Nrn	neuritin 1	protein-coding
1301	chr5	13545792	13550031	+	0	NA	intron (NM_001243072, intron 7 of 17)	intron (NM_001243072, intron 7 of 17)	148602	NM_009152	20346	Mm.372039	NM_009152	ENSMUSG00000028883	Sema3a	Hsema-I|SEMA1|SemD|Semad|coll-1	sema domain, immunoglobulin domain (Ig), short basic domain, secreted, (semaphorin) 3A	protein-coding
821	chr17	74662925	74665596	+	0	NA	intron (NM_133771, intron 1 of 8)	intron (NM_133771, intron 1 of 8)	29943	NM_133771	76890	Mm.311874	NM_133771	ENSMUSG00000058704	Memo1	0610016J10Rik|D930048L02Rik	mediator of cell motility 1	protein-coding
696	chr16	32276990	32278728	+	0	NA	5' UTR (NM_027355, exon 1 of 6)	5' UTR (NM_027355, exon 1 of 6)	312	NM_027355	70238	Mm.228263	NM_027355	ENSMUSG00000014074	Rnf168	3110001H15Rik	ring finger protein 168	protein-coding
383	chr12	68309686	68324746	+	0	NA	intron (NM_001193266, intron 1 of 16)	intron (NM_001193266, intron 1 of 16)	6320	NM_001193266	320772	Mm.227680	NM_207010		Mdga2	6720489L24Rik|9330209L04Rik|Adp|Mamdc1	MAM domain containing glycosylphosphatidylinositol anchor 2	protein-coding
963	chr2	4801433	4805052	+	0	NA	intron (NM_175400, intron 1 of 8)	CpG	632	NM_175400	109079	Mm.34329	NM_175400	ENSMUSG00000026662	Sephs1	1110046B24Rik|AA589574|AI505014|AW111620|SELD|SPS|SPS1	selenophosphate synthetase 1	protein-coding
297	chr11	93897145	93920417	+	0	NA	intron (NM_001025430, intron 1 of 25)	RSINE1|SINE|B4	3262	NM_001025429	70834	Mm.260737	NM_027569	ENSMUSG00000020859	Spag9	3110018C07Rik|4733401I23Rik|4831406C20Rik|AW552012|JLP|JSAP2|JSAP2a|Jip4|Mapk8ip4|syd1	sperm associated antigen 9	protein-coding
1721	chr9	37589603	37591987	+	0	NA	Intergenic	RMER17A-int|LTR|ERVK	10573	NM_146749	258744	Mm.347661	NM_146749	ENSMUSG00000058628	Olfr875	MOR161-4	olfactory receptor 875	protein-coding
1431	chr6	40420849	40422263	+	0	NA	promoter-TSS (NM_001286663)	promoter-TSS (NM_001286663)	89	NM_001286663	381760	Mm.276356	NM_028358	ENSMUSG00000029911	Ssbp1	2810480P10Rik|G630031O20Rik|MtSSB|mtDBP	single-stranded DNA binding protein 1	protein-coding
92	chr1	167743995	167745536	+	0	NA	intron (NR_103716, intron 1 of 8)	intron (NR_103716, intron 1 of 8)	25953	NM_001113392	12503	Mm.217308	NM_031162	ENSMUSG00000005763	Cd247	4930549J05Rik|A430104F18Rik|AW552088|Cd3|Cd3-eta|Cd3-zeta|Cd3h|Cd3z|Cd3zeta|T3z|Tcrk|Tcrz	CD247 antigen	protein-coding
1489	chr6	136414677	136420514	+	0	NA	Intergenic	Intergenic	-49777	NM_019426	54343	Mm.173271	NM_019426	ENSMUSG00000030213	Atf7ip	2610204M12Rik|AM|Mcaf1	activating transcription factor 7 interacting protein	protein-coding
1212	chr4	32028114	32029501	+	0	NA	Intergenic	LTR88c|LTR|Genie?	-22275	NM_009316	26409	Mm.258589	NM_009316	ENSMUSG00000028284	Map3k7	B430101B05|C87327|Tak1	mitogen-activated protein kinase kinase kinase 7	protein-coding
1805	chrX	91751842	91754752	+	0	NA	Intergenic	Intergenic	34116	NM_019791	94275	Mm.27578	NM_019791	ENSMUSG00000025151	Maged1	2810433C11Rik|5430405L04Rik|DXBwg1492e|Dlixin|Dlxin-1|Dlxin1|MAGE-D1|NRAGE|mFLJ00163	melanoma antigen, family D, 1	protein-coding
1596	chr7	135692760	135695843	+	0	NA	Intergenic	MTEb|LTR|MaLR	27204	NM_013863	29810	Mm.84073	NM_013863	ENSMUSG00000030847	Bag3	AA407278|Bis|mg638	BCL2-associated athanogene 3	protein-coding
980	chr2	27394645	27396780	+	0	NA	Intergenic	Intergenic	25045	NM_080848	140858	Mm.28265	NM_080848	ENSMUSG00000026917	Wdr5	2410008O07Rik|AA408785|AA960360|Big|Big-3	WD repeat domain 5	protein-coding
10	chr1	37116900	37119188	+	0	NA	Intergenic	Intergenic	-121672	NM_018872	56030	Mm.186943	NM_018872	ENSMUSG00000026116	Tmem131	2610524E03Rik|CC28|D1Bwg0491e|Neg|RW1|YR-23|mKIAA0257	transmembrane protein 131	protein-coding
550	chr14	29314430	29325610	+	0	NA	intron (NM_009524, intron 1 of 4)	intron (NM_009524, intron 1 of 4)	1361	NM_009524	22418	Mm.287544	NM_009524	ENSMUSG00000021994	Wnt5a	8030457G12Rik|Wnt-5a	wingless-type MMTV integration site family, member 5A	protein-coding
1727	chr9	44862849	44863970	+	0	NA	intron (NM_001093749, intron 1 of 5)	CpG	145	NM_001093749	319742	Mm.49611	NM_176993	ENSMUSG00000070305	Mpzl3	5430427F17Rik|A530065I17Rik|rc	myelin protein zero-like 3	protein-coding
1477	chr6	119813688	119815393	+	0	NA	Intergenic	Intergenic	16329	NR_030776	67289	Mm.418299	NR_030776	ENSMUSG00000050604	3110021A11Rik	-	RIKEN cDNA 3110021A11 gene	ncRNA
1164	chr3	104666420	104669663	+	0	NA	promoter-TSS (NM_009797)	promoter-TSS (NM_009797)	617	NM_153091	229681	Mm.206379	NM_153091		St7l	St7r	suppression of tumorigenicity 7-like	protein-coding
1651	chr8	72298041	72299283	+	0	NA	intron (NM_177899, intron 1 of 3)	CpG	148	NM_177899	330788	Mm.41364	NM_177899		Zfp866	9830167H18Rik|AI875089|C85843|D330038O06Rik	zinc finger protein 866	protein-coding
1081	chr2	170070638	170072500	+	0	NA	Intergenic	Intergenic	-103394	NM_001159683	228913	Mm.22858	NM_001033299	ENSMUSG00000052056	Zfp217	4933431C08Rik|AW987152|Gm562|ZABC1|Znf217	zinc finger protein 217	protein-coding
505	chr13	85450261	85452055	+	0	NA	Intergenic	Intergenic	-22067	NM_145452	218397	Mm.259653	NM_145452	ENSMUSG00000021549	Rasa1	Gap|RasGAP|Rasa	RAS p21 protein activator 1	protein-coding
670	chr15	95657330	95660619	+	0	NA	intron (NM_175344, intron 1 of 19)	(TG)n|Simple_repeat|Simple_repeat	37700	NM_001253813	105722	Mm.38087	NM_175344	ENSMUSG00000064210	Ano6	2900059G15Rik|AA407480|AW554778|F730003B03Rik|Tmem16f	anoctamin 6	protein-coding
1094	chr3	9399131	9408259	+	0	NA	intron (NR_015499, intron 1 of 1)	intron (NR_015499, intron 1 of 1)	617	NR_015499	320088	Mm.212908	NR_015499	ENSMUSG00000097365	C030034L19Rik	A130044O20Rik	RIKEN cDNA C030034L19 gene	ncRNA
1736	chr9	59503067	59522678	+	0	NA	intron (NM_011099, intron 1 of 10)	intron (NM_011099, intron 1 of 10)	8697	NM_001253883	18746	Mm.326167	NM_011099	ENSMUSG00000032294	Pkm	AA414905|AL024370|AL024424|Pk-2|Pk-3|Pk3|Pkm2	pyruvate kinase, muscle	protein-coding
1569	chr7	106452491	106455885	+	0	NA	intron (NM_001043355, intron 1 of 2)	AT_rich|Low_complexity|Low_complexity	37332	NM_001043355	17760	Mm.154087	NM_010837	ENSMUSG00000055407	Map6	2810411E12Rik|Map-6|Mtap6|STOP	microtubule-associated protein 6	protein-coding
958	chr19	57649716	57653503	+	0	NA	Intergenic	Intergenic	-33915	NM_181415	226255	Mm.245340	NM_181415	ENSMUSG00000054843	Atrnl1	AI504415|AW555641|Alp|Atrnl|Atrnlp	attractin like 1	protein-coding
419	chr12	100756989	100758455	+	0	NA	Intergenic	Intergenic	-69438	NM_183186	71375	Mm.341972	NM_183186	ENSMUSG00000033713	Foxn3	5430426H20Rik|AA589593|AW556347|Ches1|Ches1l|HTLFL1	forkhead box N3	protein-coding
995	chr2	51134366	51147967	+	0	NA	intron (NR_040636, intron 1 of 2)	intron (NR_040636, intron 1 of 2)	43815	NR_040636	329404	Mm.417725	NR_040636	ENSMUSG00000086349	Gm13497	A730015I17|OTTMUSG00000012425	predicted gene 13497	ncRNA
1225	chr4	46441562	46442925	+	0	NA	Intergenic	Intergenic	-21746	NM_130889	67628	Mm.263913	NM_130889	ENSMUSG00000028333	Anp32b	2410015B15Rik|PAL31|PHAPI2a|Ssp29	acidic (leucine-rich) nuclear phosphoprotein 32 family, member B	protein-coding
837	chr18	5122577	5164574	+	0	NA	Intergenic	(CA)n|Simple_repeat|Simple_repeat	96988	NM_153153	225115	Mm.136791	NM_153153	ENSMUSG00000024236	Svil	AU024053|B430302E16Rik	supervillin	protein-coding
290	chr11	85205433	85206930	+	0	NA	intron (NM_001166643, intron 5 of 23)	intron (NM_001166643, intron 5 of 23)	39515	NM_001166643	192197	Mm.287663	NM_138681	ENSMUSG00000059439	Bcas3	1500019F07Rik|2610028P08Rik|AU021018|BC028339|K20D4|rudhira	breast carcinoma amplified sequence 3	protein-coding
625	chr15	38219660	38234437	+	0	NA	exon (NM_013692, exon 3 of 4)	exon (NM_013692, exon 3 of 4)	3418	NM_013692	21847	Mm.4292	NM_013692	ENSMUSG00000037465	Klf10	AI115143|EGR[a]|Egral|Gdnfif|TIEG-1|Tieg|Tieg1|mGIF	Kruppel-like factor 10	protein-coding
592	chr14	100680712	100686056	+	0	NA	Intergenic	Intergenic	-134369	NM_010636	16597	Mm.396499	NM_010636		Klf12	2700063E05Rik|AI225908|AI315654|AP-2rep|B130052C06Rik|D530033K05Rik	Kruppel-like factor 12	protein-coding
149	chr10	57463255	57465433	+	0	NA	Intergenic	Intergenic	-40385	NM_021272	12140	Mm.3644	NM_021272	ENSMUSG00000019874	Fabp7	B-FABP|BFABP|Blbp|MRG	fatty acid binding protein 7, brain	protein-coding
712	chr16	55549208	55557314	+	0	NA	Intergenic	(TG)n|Simple_repeat|Simple_repeat	268990	NM_001159394	80859	Mm.247272	NM_030612	ENSMUSG00000035356	Nfkbiz	AA408868|INAP|Mail	nuclear factor of kappa light polypeptide gene enhancer in B cells inhibitor, zeta	protein-coding
210	chr10	126281738	126283440	+	0	NA	Intergenic	Intergenic	55838	NM_026858	68876	Mm.276769	NM_026858	ENSMUSG00000025436	Xrcc6bp1	1110068E08Rik|2410012H02Rik	XRCC6 binding protein 1	protein-coding
406	chr12	84636052	84650204	+	0	NA	intron (NM_001267625, intron 2 of 10)	intron (NM_001267625, intron 2 of 10)	185558	NM_001267626	70127	Mm.151308	NM_058212	ENSMUSG00000021221	Dpf3	2810403B03Rik|6530402L11Rik|BAF45C|C78788|CERD4|cer-d4	D4, zinc and double PHD fingers, family 3	protein-coding
1640	chr8	49543118	49544723	+	0	NA	intron (NM_001145937, intron 2 of 26)	intron (NM_001145937, intron 2 of 26)	216124	NM_001145937	23965	Mm.42191	NM_011857	ENSMUSG00000031561	Tenm3	2610100B16Rik|Odz1|Odz3|Ten-m3|mKIAA1455	teneurin transmembrane protein 3	protein-coding
173	chr10	79446623	79449747	+	0	NA	Intergenic	Intergenic	-1110	NM_001003949	216157	Mm.29442	NM_001003949	ENSMUSG00000013858	Tmem259	AC087114.7gm2|ORF61|R32184_3|mFLJ00277	transmembrane protein 259	protein-coding
530	chr13	113368301	113368620	+	0	NA	intron (NM_139299, intron 1 of 16)	LSU-rRNA_Hsa|rRNA|rRNA	2410	NM_139299	218624	Mm.380801	NM_139299	ENSMUSG00000050377	Il31ra	CRL3|GLM-R|GPL|Glmr|NR10	interleukin 31 receptor A	protein-coding
66	chr1	108655619	108657580	+	0	NA	promoter-TSS (NM_027534)	promoter-TSS (NM_027534)	-280	NM_027534	70750	Mm.458911	NM_027534	ENSMUSG00000009905	Kdsr	6330410P18Rik|9430079B08Rik|Fvt1	3-ketodihydrosphingosine reductase	protein-coding
19	chr1	43989530	43992129	+	0	NA	promoter-TSS (NM_009418)	promoter-TSS (NM_009418)	-23	NM_009418	22019	Mm.401675	NM_009418	ENSMUSG00000041763	Tpp2	TPP-2|TppII	tripeptidyl peptidase II	protein-coding
1030	chr2	112430091	112433182	+	0	NA	intron (NM_001165935, intron 1 of 4)	intron (NM_001165935, intron 1 of 4)	31797	NM_001165935	74268	Mm.315125	NM_028844		Aven	1700013A01Rik|1700056A21Rik|mAven-L|mAven-S	apoptosis, caspase activation inhibitor	protein-coding
365	chr12	47912653	47921890	+	0	NA	intron (NM_021361, intron 2 of 4)	intron (NM_021361, intron 2 of 4)	2491	NM_021361	664883	Mm.247195	NM_021361	ENSMUSG00000021047	Nova1	9430099M15Rik|G630039L02|Nova-1	neuro-oncological ventral antigen 1	protein-coding
763	chr17	13806124	13807416	+	0	NA	Intergenic	B4A|SINE|B4	-59810	NR_045437	72578	Mm.46549	NR_045436	ENSMUSG00000038347	2700054A10Rik	-	RIKEN cDNA 2700054A10 gene	ncRNA
470	chr13	48688003	48690967	+	0	NA	intron (NM_207232, intron 2 of 9)	intron (NM_207232, intron 2 of 9)	31457	NM_207232	218232	Mm.315089	NM_207232	ENSMUSG00000038042	Ptpdc1	AI843923|AW456874|Naa-1	protein tyrosine phosphatase domain containing 1	protein-coding
1524	chr7	46772490	46773871	+	0	NA	promoter-TSS (NM_001004139)	promoter-TSS (NM_001004139)	44	NM_001004139	70227	Mm.333800	NM_001004139	ENSMUSG00000068959	Zfp619	3000002G13Rik	zinc finger protein 619	protein-coding
793	chr17	44088768	44092268	+	0	NA	intron (NM_001286654, intron 2 of 4)	intron (NM_001286654, intron 2 of 4)	378	NM_030598	53901	Mm.251242	NM_030598	ENSMUSG00000039601	Rcan2	Csp2|Dscr1l1|MCIP2|ZAKI-4	regulator of calcineurin 2	protein-coding
1287	chr4	137149150	137151385	+	0	NA	5' UTR (NM_130879, exon 1 of 28)	5' UTR (NM_130879, exon 1 of 28)	163	NM_130879	170707	Mm.218478	NM_130879	ENSMUSG00000043411	Usp48	2810449C13Rik|AI115503|BC021769|D330022K21Rik|Usp31	ubiquitin specific peptidase 48	protein-coding
1205	chr4	20267263	20274496	+	0	NA	intron (NM_001290410, intron 3 of 5)	intron (NM_001290410, intron 3 of 5)	301680	NM_010281	14590	Mm.20461	NM_010281		Ggh	gamma-GH	gamma-glutamyl hydrolase	protein-coding
1696	chr8	131176000	131179855	+	0	NA	Intergenic	Intergenic	-31627	NM_010578	16412	Mm.263396	NM_010578	ENSMUSG00000025809	Itgb1	4633401G24Rik|AA409975|AA960159|CD29|ENSMUSG00000051907|Fnrb|Gm9863|gpIIa	integrin beta 1 (fibronectin receptor beta)	protein-coding
654	chr15	78662095	78679053	+	0	NA	Intergenic	Intergenic	-2503	NM_027219	104445	Mm.307488	NM_027219	ENSMUSG00000049521	Cdc42ep1	1810058K22Rik|AA980734|Borg5|CEP1|MSE55	CDC42 effector protein (Rho GTPase binding) 1	protein-coding
570	chr14	61948991	61950857	+	0	NA	Intergenic	Intergenic	21334	NM_177337	219144	Mm.206566	NM_177337	ENSMUSG00000043157	Arl11	ARLTS1|C730007L20Rik	ADP-ribosylation factor-like 11	protein-coding
252	chr11	29326609	29330787	+	0	NA	intron (NM_176841, intron 5 of 31)	intron (NM_176841, intron 5 of 31)	54526	NM_176841	108686	Mm.338284	NM_176841	ENSMUSG00000032740	Ccdc88a	A430106J12Rik|AI848406|Ape|C130096N06Rik|C330012F17Rik|D130005J21Rik|Girdin|Giv|Grdn|Hkrp1	coiled coil domain containing 88A	protein-coding
1159	chr3	96022655	96027119	+	0	NA	promoter-TSS (NM_178214)	promoter-TSS (NM_178214)	-84	NM_175662	319176	Mm.358954	NM_175662		Hist2h2ac	H2a-613b	histone cluster 2, H2ac	protein-coding
883	chr18	54439281	54442545	+	0	NA	Intergenic	Intergenic	-141036	NR_040338	77433	Mm.159919	NR_040338		Redrum	9430076G02Rik	Redrum, erythroid developmental long intergenic non-protein coding transcript	ncRNA
156	chr10	62202161	62204325	+	0	NA	Intergenic	Intergenic	-14396	NM_001033260	216021	Mm.39821	NM_001033260	ENSMUSG00000036923	Stox1	4732470K04Rik|Gm63	storkhead box 1	protein-coding
283	chr11	77435723	77450887	+	0	NA	Intergenic	Intergenic	-21988	NM_144825	216965	Mm.340436	NM_144825	ENSMUSG00000017291	Taok1	2810468K05Rik|AU020252|D130018F14Rik|Map3k16|Markk|Psk2|mKIAA1361	TAO kinase 1	protein-coding
655	chr15	79488447	79490293	+	0	NA	promoter-TSS (NM_028634)	promoter-TSS (NM_028634)	16	NM_029407	75729	Mm.78946	NM_029407	ENSMUSG00000042564	Fam227a	4933432B09Rik	family with sequence similarity 227, member A	protein-coding
59	chr1	93332167	93334103	+	0	NA	intron (NM_011066, intron 9 of 22)	GA-rich|Low_complexity|Low_complexity	22770	NM_011066	18627	Mm.482463	NM_011066	ENSMUSG00000055866	Per2	mKIAA0347|mPer2	period circadian clock 2	protein-coding
421	chr12	101195570	101198406	+	0	NA	Intergenic	Intergenic	-5721	NM_001164426	217826	Mm.312335	NM_146037	ENSMUSG00000045404	Kcnk13	BB085247|F730021E22Rik|Gm1570|Gm1685	potassium channel, subfamily K, member 13	protein-coding
1367	chr5	114221307	114222714	+	0	NA	promoter-TSS (NM_016926)	promoter-TSS (NM_016926)	-352	NM_016926	53890	Mm.29594	NM_016926	ENSMUSG00000018974	Sart3	AU045857|mKIAA0156	squamous cell carcinoma antigen recognized by T cells 3	protein-coding
271	chr11	66694522	66697104	+	0	NA	Intergenic	Intergenic	-29680	NM_178656	193003	Mm.440256	NM_178656		Pirt	A530088H08Rik	phosphoinositide-interacting regulator of transient receptor potential channels	protein-coding
1226	chr4	48055014	48058763	+	0	NA	Intergenic	(TTTTG)n|Simple_repeat|Simple_repeat	-7232	NM_015743	18124	Mm.247261	NM_015743	ENSMUSG00000028341	Nr4a3	AI573420|CHN|CSMF|MINOR|NOR-1|Nor1|TEC	nuclear receptor subfamily 4, group A, member 3	protein-coding
1256	chr4	89151774	89153909	+	0	NA	Intergenic	Intergenic	-195900	NM_007670	12579	Mm.423094	NM_007670	ENSMUSG00000073802	Cdkn2b	AV083695|INK4b|MTS2|p15|p15(INK4b)|p15INK4b	cyclin-dependent kinase inhibitor 2B (p15, inhibits CDK4)	protein-coding
1070	chr2	158513099	158514765	+	0	NA	intron (NM_001159662, intron 1 of 10)	intron (NM_001159662, intron 1 of 10)	21061	NM_001159662	228852	Mm.150540	NM_153089	ENSMUSG00000037754	Ppp1r16b	ANKRD4|C130078N17Rik|TIMAP|Wdt4	protein phosphatase 1, regulatory (inhibitor) subunit 16B	protein-coding
1024	chr2	103635733	103641859	+	0	NA	promoter-TSS (NM_001111291)	promoter-TSS (NM_001111291)	-999	NM_016739	53872	Mm.427589	NM_016739	ENSMUSG00000027184	Caprin1	AL022980|Caprin-1|Gpiap|Gpiap1|Mmgpip137|P137|rng105	cell cycle associated protein 1	protein-coding
1744	chr9	64583643	64586346	+	0	NA	intron (NM_017382, intron 1 of 4)	GA-rich|Low_complexity|Low_complexity	569	NM_017382	53869	Mm.1387	NM_017382	ENSMUSG00000004771	Rab11a	-	RAB11A, member RAS oncogene family	protein-coding
491	chr13	74700849	74702409	+	0	NA	Intergenic	Intergenic	-70231	NM_146231	235956	Mm.296909	NM_146231		Zfp825	-	zinc finger protein 825	protein-coding
864	chr18	39120350	39123472	+	0	NA	intron (NM_001033789, intron 4 of 4)	intron (NM_001033789, intron 4 of 4)	-30888	NM_175164	71302	Mm.329396	NM_175164	ENSMUSG00000036452	Arhgap26	1810044B20Rik|2610010G17Rik|4933432P15Rik|AI853435|mKIAA0621	Rho GTPase activating protein 26	protein-coding
1016	chr2	90584538	90587751	+	0	NA	intron (NM_018828, intron 1 of 16)	CpG	617	NM_018828	55935	Mm.489638	NM_018828	ENSMUSG00000008200	Fnbp4	FBP30|Fnbp30|mKIAA1014	formin binding protein 4	protein-coding
219	chr11	3101553	3102596	+	0	NA	promoter-TSS (NM_001166549)	promoter-TSS (NM_001166549)	-282	NM_001166548	74203	Mm.255649	NM_023743	ENSMUSG00000020454	Eif4enif1	2610509L04Rik|A930019J01Rik|AA410001|AU021239|Clast4|D11Ertd166e	eukaryotic translation initiation factor 4E nuclear import factor 1	protein-coding
13	chr1	37641308	37644360	+	0	NA	Intergenic	Tigger5|DNA|MER2_type	-44973	NM_173870	269181	Mm.25861	NM_173870	ENSMUSG00000026110	Mgat4a	9530018I07Rik|GnT-IVa|glcNAc-T-IVa	mannoside acetylglucosaminyltransferase 4, isoenzyme A	protein-coding
1170	chr3	107433084	107435484	+	0	NA	intron (NM_153563, intron 1 of 20)	CpG	344	NM_153563	229707	Mm.278643	NM_153563	ENSMUSG00000014601	Strip1	6330569M22Rik|6530401O14Rik|Fam40a	striatin interacting protein 1	protein-coding
799	chr17	46464175	46466151	+	0	NA	promoter-TSS (NM_170680)	promoter-TSS (NM_170680)	-191	NM_170680	224814	Mm.76543	NM_145140	ENSMUSG00000032842	Abcc10	Mrp7|mFLJ00002	ATP-binding cassette, sub-family C (CFTR/MRP), member 10	protein-coding
105	chr1	182777548	182782206	+	0	NA	Intergenic	Intergenic	-1405	NM_145943	208768	Mm.272625	NM_145943	ENSMUSG00000038806	Sde2	-	SDE2 telomere maintenance homolog (S. pombe)	protein-coding
1514	chr7	27979502	27982619	+	0	NA	promoter-TSS (NM_001046637)	promoter-TSS (NM_001046637)	230	NM_015782	53607	Mm.386890	NM_015782	ENSMUSG00000061479	Snrpa	C430021M15Rik|Rnu1a-1|Rnu1a1|U1-A|U1A	small nuclear ribonucleoprotein polypeptide A	protein-coding
925	chr19	20908293	20912639	+	0	NA	intron (NM_028953, intron 9 of 20)	intron (NM_028953, intron 9 of 20)	-108420	NM_011921	26358	Mm.14609	NM_011921	ENSMUSG00000024747	Aldh1a7	AI987940|Ahd2-like|Aldh-pb|Aldh1a4|Aldhpb	aldehyde dehydrogenase family 1, subfamily A7	protein-coding
840	chr18	6487806	6493472	+	0	NA	promoter-TSS (NR_035446)	promoter-TSS (NR_035446)	5	NR_035446	100316773		NR_035446		Mir1893	Mirn1893|mmu-mir-1893	microRNA 1893	ncRNA
1647	chr8	70235847	70239318	+	0	NA	exon (NM_027626, exon 7 of 8)	exon (NM_027626, exon 7 of 8)	104612	NM_027626	234353	Mm.32525	NM_027626	ENSMUSG00000030465	Psd3	4931420C21Rik|AI661273|BC003498|D430018P08|EFA6D	pleckstrin and Sec7 domain containing 3	protein-coding
597	chr14	105975261	105990849	+	0	NA	Intergenic	Intergenic	-5711	NR_102319	380930	Mm.427836	NR_102319		9330188P03Rik	Gm1589|mgt-6	RIKEN cDNA 9330188P03 gene	ncRNA
390	chr12	76524218	76527013	+	0	NA	Intergenic	Intergenic	-7847	NM_175644	217674	Mm.252250	NM_175644	ENSMUSG00000048982	Gphb5	Zlut1	glycoprotein hormone beta 5	protein-coding
111	chr1	192751670	192753699	+	0	NA	intron (NR_037579, intron 1 of 7)	CpG	300	NR_037579	52477	Mm.289914	NM_021421	ENSMUSG00000026634	Angel2	2610307I21Rik|5730410O10Rik|AI845692|D1Ertd396e|D1Ertd654e	angel homolog 2 (Drosophila)	protein-coding
1686	chr8	115133203	115134902	+	0	NA	intron (NM_130457, intron 1 of 23)	intron (NM_130457, intron 1 of 23)	40109	NM_130457	170571	Mm.209232	NM_130457	ENSMUSG00000031772	Cntnap4	Caspr4|E130114F09Rik	contactin associated protein-like 4	protein-coding
1515	chr7	30690600	30696289	+	0	NA	promoter-TSS (NM_001243908)	promoter-TSS (NM_001243908)	-92	NM_001243908	73729	Mm.333743	NM_001243908		Zfp383	1110003H10Rik	zinc finger protein 383	protein-coding
1042	chr2	126275233	126279788	+	0	NA	intron (NM_001080944, intron 6 of 27)	intron (NM_001080944, intron 6 of 27)	39779	NM_001080944	241633	Mm.222235	NM_001080944	ENSMUSG00000060131	Atp8b4	A530043E15|Im	ATPase, class I, type 8B, member 4	protein-coding
1411	chr6	16161380	16164590	+	0	NA	Intergenic	Intergenic	492324	NM_175088	16543	Mm.1314	NM_175088	ENSMUSG00000041390	Mdfic	Kdt1|Mdfid	MyoD family inhibitor domain containing	protein-coding
38	chr1	67006800	67008737	+	0	NA	Intergenic	Intergenic	-16138	NM_021285	17901	Mm.1000	NM_021285	ENSMUSG00000061816	Myl1	AI325107|MLC1f|MLC3f|Mylf	myosin, light polypeptide 1	protein-coding
408	chr12	85348676	85353126	+	0	NA	exon (NM_012006, exon 1 of 3)	exon (NM_012006, exon 1 of 3)	449	NM_012006	26897	Mm.1978	NM_012006	ENSMUSG00000072949	Acot1	ACH2|CTE-1|CTE-I|Cte1|D12Ucla1	acyl-CoA thioesterase 1	protein-coding
1480	chr6	121473558	121475528	+	0	NA	Intergenic	Intergenic	-50847	NM_001289685	243621	Mm.299442	NM_001033354	ENSMUSG00000040797	Iqsec3	AK122446|BRAG3|mKIAA1110|synarfGEF	IQ motif and Sec7 domain 3	protein-coding
196	chr10	108794449	108799149	+	0	NA	Intergenic	Intergenic	-348768	NM_001252341	20979	Mm.289702	NM_009306	ENSMUSG00000035864	Syt1	AW124717|G630098F17Rik|SytI	synaptotagmin I	protein-coding
945	chr19	44480858	44483862	+	0	NA	promoter-TSS (NM_009127)	promoter-TSS (NM_009127)	-161	NM_009127	20249	Mm.267377	NM_009127	ENSMUSG00000037071	Scd1	AA589638|AI265570|Scd|Scd-1|ab	stearoyl-Coenzyme A desaturase 1	protein-coding
242	chr11	19422326	19427497	+	0	NA	Intergenic	Intergenic	-399534	NM_033523	114716	Mm.266627	NM_033523	ENSMUSG00000045671	Spred2	C79158	sprouty-related, EVH1 domain containing 2	protein-coding
1169	chr3	106524079	106525802	+	0	NA	5' UTR (NM_001286685, exon 1 of 5)	5' UTR (NM_001286685, exon 1 of 5)	340	NM_001286685	321000	Mm.259638	NM_028081	ENSMUSG00000056260	Lrif1	2010012G17Rik|4933421E11Rik|AI450568	ligand dependent nuclear receptor interacting factor 1	protein-coding
559	chr14	48013998	48016612	+	0	NA	intron (NM_144553, intron 14 of 18)	intron (NM_144553, intron 14 of 18)	21770	NM_001145953	16854	Mm.248615	NM_010705	ENSMUSG00000050335	Lgals3	GBP|L-34|Mac-2|gal3	lectin, galactose binding, soluble 3	protein-coding
1588	chr7	132587577	132589255	+	0	NA	intron (NM_029842, intron 1 of 7)	CpG	282	NM_029842	77035	Mm.307239	NM_029842	ENSMUSG00000030752	Kdm8	3110005O21Rik|Jmjd5	lysine (K)-specific demethylase 8	protein-coding
32	chr1	60881951	60883403	+	0	NA	Intergenic	Intergenic	79445	NM_007642	12487	Mm.255003	NM_007642	ENSMUSG00000026012	Cd28	-	CD28 antigen	protein-coding
118	chr10	6258564	6270859	+	0	NA	intron (NM_001170786, intron 20 of 27)	intron (NM_001170786, intron 20 of 27)	108755	NM_001170786	270685	Mm.184752	NM_172308	ENSMUSG00000040675	Mthfd1l	2410004L15Rik|AI647056|Fthfsdc1	methylenetetrahydrofolate dehydrogenase (NADP+ dependent) 1-like	protein-coding
206	chr10	120934887	120953823	+	0	NA	Intergenic	Intergenic	-31049	NM_138956	192678	Mm.41265	NM_138956	ENSMUSG00000025795	Rassf3	AW212023|AW322379	Ras association (RalGDS/AF-6) domain family member 3	protein-coding
443	chr13	23711824	23715291	+	0	NA	promoter-TSS (NM_178194)	promoter-TSS (NM_178194)	-564	NM_178194	319179	Mm.440391	NM_178194	ENSMUSG00000047246	Hist1h2be	-	histone cluster 1, H2be	protein-coding
1674	chr8	97665210	97669541	+	0	NA	promoter-TSS (NM_001145831)	promoter-TSS (NM_001145831)	-935	NM_001145831	16582	Mm.378951	NM_010631	ENSMUSG00000031788	Kifc3	AI325457|BB123200	kinesin family member C3	protein-coding
959	chr19	60864996	60867894	+	0	NA	5' UTR (NM_010123, exon 1 of 22)	5' UTR (NM_010123, exon 1 of 22)	151	NM_010123	13669	Mm.2238	NM_010123	ENSMUSG00000024991	Eif3a	A830012B05Rik|Csma|Eif3|Eif3s10|mKIAA0139	eukaryotic translation initiation factor 3, subunit A	protein-coding
1065	chr2	152986640	152987652	+	0	NA	5' UTR (NM_133847, exon 1 of 18)	5' UTR (NM_133847, exon 1 of 18)	109	NM_133847	99237	Mm.330674	NM_133847	ENSMUSG00000068040	Tm9sf4	AA986553|AU045326|B930079E06|mKIAA0255	transmembrane 9 superfamily protein member 4	protein-coding
331	chr12	3364381	3391277	+	0	NA	intron (NM_008445, intron 1 of 7)	intron (NM_008445, intron 1 of 7)	12697	NM_008445	16570	Mm.7688	NM_008445	ENSMUSG00000020668	Kif3c	mKIAA4058	kinesin family member 3C	protein-coding
358	chr12	39175508	39179064	+	0	NA	intron (NM_178681, intron 22 of 24)	intron (NM_178681, intron 22 of 24)	163822	NR_045943	73867	Mm.78933	NR_045943		4930428E07Rik	-	RIKEN cDNA 4930428E07 gene	ncRNA
1659	chr8	82084759	82087137	+	0	NA	Intergenic	Intergenic	-77627	NM_001256033	73945	Mm.34348	NM_001081164	ENSMUSG00000036990	Otud4	4930431L18Rik|AI449692|D8Ertd69e|mKIAA1046	OTU domain containing 4	protein-coding
737	chr16	91260739	91281405	+	0	NA	3' UTR (NM_016968, exon 1 of 1)	3' UTR (NM_016968, exon 1 of 1)	1058	NM_016968	50914	Mm.39300	NM_016968	ENSMUSG00000046160	Olig1	AI836478|AW494459|Bhlhb6|Olg-1|Oligo1|bHLHe21	oligodendrocyte transcription factor 1	protein-coding
1795	chrX	65897427	65899892	+	0	NA	Intergenic	Intergenic	32915	NR_033481	100038638	Mm.368431	NR_033481	ENSMUSG00000096946	Gm10474	ENSMUSG00000073146	predicted gene 10474	ncRNA
580	chr14	76551661	76553418	+	0	NA	Intergenic	Intergenic	41841	NM_013745	27275	Mm.21138	NM_013745	ENSMUSG00000022009	Nufip1	Nufip	nuclear fragile X mental retardation protein interacting protein 1	protein-coding
767	chr17	17315488	17316951	+	0	NA	Intergenic	Intergenic	57872	NM_011765	22759	Mm.436633	NM_011765	ENSMUSG00000095990	Zfp97	NGD16-4	zinc finger protein 97	protein-coding
84	chr1	160156115	160158965	+	0	NA	Intergenic	Intergenic	128851	NM_207583	240843	Mm.329579	NM_207583	ENSMUSG00000004031	Brinp2	6430517E21Rik|BB361039|Fam5b|mKIAA1747	bone morphogenic protein/retinoic acid inducible neural-specific 2	protein-coding
805	chr17	53827715	53829991	+	0	NA	promoter-TSS (NM_028232)	promoter-TSS (NM_028232)	-213	NM_028232	72415	Mm.153202	NM_028232	ENSMUSG00000023940	Sgol1	3300001M08Rik|C81037|Sgo1	shugoshin-like 1 (S. pombe)	protein-coding
1020	chr2	101467822	101469691	+	0	NA	intron (NM_009020, intron 2 of 2)	intron (NM_009020, intron 2 of 2)	387	NM_026592	68170	Mm.31263	NM_026592	ENSMUSG00000027165	B230118H07Rik	NWC	RIKEN cDNA B230118H07 gene	protein-coding
437	chr13	20397173	20399829	+	0	NA	intron (NM_080288, intron 13 of 21)	intron (NM_080288, intron 13 of 21)	-166358	NM_198093	140580	Mm.342392	NM_080288	ENSMUSG00000041112	Elmo1	6330578D22Rik|C230095H21Rik|CED-12	engulfment and cell motility 1	protein-coding
194	chr10	98722620	98734079	+	0	NA	intron (NM_026268, intron 2 of 2)	intron (NM_026268, intron 2 of 2)	2484	NM_026268	67603	Mm.1791	NM_026268	ENSMUSG00000019960	Dusp6	1300019I03Rik|MKP-3|MKP3|PYST1	dual specificity phosphatase 6	protein-coding
1768	chr9	105297330	105298501	+	0	NA	promoter-TSS (NM_172461)	promoter-TSS (NM_172461)	193	NM_025651	66595	Mm.84941	NM_025651	ENSMUSG00000032567	Aste1	1100001A21Rik|AV006403	asteroid homolog 1 (Drosophila)	protein-coding
220	chr11	4670954	4673020	+	0	NA	TTS (NM_001252251)	TTS (NM_001252251)	-25206	NM_138948	192650	Mm.207056	NM_138948		Cabp7	-	calcium binding protein 7	protein-coding
1312	chr5	25114328	25123419	+	0	NA	Intergenic	Intergenic	83037	NR_027388	73571	Mm.105263	NR_027388		1700096K18Rik	-	RIKEN cDNA 1700096K18 gene	ncRNA
1257	chr4	96246968	96259224	+	0	NA	intron (NM_028979, intron 1 of 8)	intron (NM_028979, intron 1 of 8)	5080	NM_028979	74519	Mm.458387	NM_028979	ENSMUSG00000015224	Cyp2j9	8430417E17Rik	cytochrome P450, family 2, subfamily j, polypeptide 9	protein-coding
846	chr18	14127284	14132248	+	0	NA	intron (NM_145492, intron 2 of 7)	CpG	1476	NM_145492	225207	Mm.40325	NM_145492	ENSMUSG00000024420	Zfp521	B930086A16Rik|Evi3|Znf521	zinc finger protein 521	protein-coding
1021	chr2	101841654	101844640	+	0	NA	intron (NM_178886, intron 4 of 5)	MamRep434|DNA|TcMar	116728	NM_029635	76501	Mm.330424	NM_029635	ENSMUSG00000027163	Commd9	1810029F08Rik|AA409293	COMM domain containing 9	protein-coding
31	chr1	60154038	60156265	+	0	NA	promoter-TSS (NM_139150)	promoter-TSS (NM_139150)	60	NM_139150	241066	Mm.276441	NM_139150	ENSMUSG00000026017	Carf	Als2cr8|ECBRC-FC1|ECBRC-FC2	calcium response factor	protein-coding
1263	chr4	108672091	108674886	+	0	NA	promoter-TSS (NM_146150)	promoter-TSS (NM_146150)	78	NM_146150	230598	Mm.274950	NM_146150	ENSMUSG00000053510	Nrd1	2600011I06Rik|AI875733|NRD-C	nardilysin, N-arginine dibasic convertase, NRD convertase 1	protein-coding
1689	chr8	122409148	122410435	+	0	NA	Intergenic	Intergenic	23586	NM_146219	234796	Mm.86446	NM_146219	ENSMUSG00000031828	Klhl36	-	kelch-like 36	protein-coding
934	chr19	28081788	28087249	+	0	NA	intron (NM_011265, intron 1 of 16)	intron (NM_011265, intron 1 of 16)	1138	NM_011265	19726	Mm.313321	NM_011265	ENSMUSG00000040929	Rfx3	C230093O12Rik|MRFX3	regulatory factor X, 3 (influences HLA class II expression)	protein-coding
1296	chr4	151826604	151828266	+	0	NA	intron (NM_001252654, intron 1 of 14)	intron (NM_001252654, intron 1 of 14)	-4471	NM_001252656	16498	Mm.388924	NM_010598	ENSMUSG00000028931	Kcnab2	F5|I2rf5|Kcnb3|kv-beta-2	potassium voltage-gated channel, shaker-related subfamily, beta member 2	protein-coding
1553	chr7	91259932	91265826	+	0	NA	exon (NM_133722, exon 2 of 3)	exon (NM_133722, exon 2 of 3)	-27864	NM_030728	80982	Mm.160389	NM_030728	ENSMUSG00000052353	Cemip	12H19.01.T7|6330404C01Rik|9930013L23Rik|AY007814|Kiaa1199	cell migration inducing protein, hyaluronan binding	protein-coding
948	chr19	51340415	51346782	+	0	NA	Intergenic	Intergenic	-590462	NM_001290356	58178	Mm.313672	NM_021377	ENSMUSG00000043531	Sorcs1	Sorcs|mSorCS	VPS10 domain receptor protein SORCS 1	protein-coding
1303	chr5	19732928	19736680	+	0	NA	intron (NM_001170745, intron 5 of 20)	intron (NM_001170745, intron 5 of 20)	321468	NM_015823	50791	Mm.332231	NM_015823	ENSMUSG00000040003	Magi2	AIP-1|Acvri1|Acvrinp1|Acvrip1|Magi-2|S-SCAM|mKIAA0705	membrane associated guanylate kinase, WW and PDZ domain containing 2	protein-coding
1654	chr8	77080727	77082644	+	0	NA	Intergenic	Intergenic	-315388	NM_027837	71597	Mm.158735	NM_027837	ENSMUSG00000031621	Isx	9130012O13Rik|Pix-1	intestine specific homeobox	protein-coding
572	chr14	64817940	64821195	+	0	NA	intron (NM_001253715, intron 4 of 4)	intron (NM_001253715, intron 4 of 4)	96407	NM_028525	73382	Mm.481055	NM_028525	ENSMUSG00000021966	Prss52	1700049K14Rik|Tesp3	protease, serine 52	protein-coding
968	chr2	14560877	14564366	+	0	NA	intron (NM_023116, intron 2 of 13)	intron (NM_023116, intron 2 of 13)	36688	NM_023116	12296	Mm.313930	NM_023116	ENSMUSG00000057914	Cacnb2	AW060387|CAB2|Cavbeta2|Cchb2	calcium channel, voltage-dependent, beta 2 subunit	protein-coding
675	chr15	99531923	99557345	+	0	NA	TTS (NM_031842)	TTS (NM_031842)	-3390	NM_010271	14555	Mm.252391	NM_010271	ENSMUSG00000023019	Gpd1	AI747587|Gdc-1|Gdc1|mKIAA4010	glycerol-3-phosphate dehydrogenase 1 (soluble)	protein-coding
1398	chr5	146041329	146042173	+	0	NA	Intergenic	Intergenic	-2461	NM_001081431	666311	Mm.260773	NM_001081431	ENSMUSG00000070420	Zscan25	EG666311|Zfp498	zinc finger and SCAN domain containing 25	protein-coding
226	chr11	7133666	7140012	+	0	NA	Intergenic	Intergenic	-22913	NM_008343	16009	Mm.29254	NM_008343	ENSMUSG00000020427	Igfbp3	AI649005|IGFBP-3|IGgfbp3	insulin-like growth factor binding protein 3	protein-coding
15	chr1	41661449	41663487	+	0	NA	Intergenic	Intergenic	-424371	NR_040475	74897	Mm.243822	NR_040475		4930448I06Rik	-	RIKEN cDNA 4930448I06 gene	ncRNA
1430	chr6	39268431	39270698	+	0	NA	Intergenic	Intergenic	58142	NM_028123	72144	Mm.482167	NM_028123	ENSMUSG00000029924	Slc37a3	2610507O21Rik|AU044904	solute carrier family 37 (glycerol-3-phosphate transporter), member 3	protein-coding
431	chr12	121252178	121255823	+	0	NA	intron (NM_001294146, intron 3 of 3)	intron (NM_001294146, intron 3 of 3)	69565	NM_001160385	217951	Mm.387395	NM_001160385		Tmem196	Gm528	transmembrane protein 196	protein-coding
527	chr13	111685342	111698477	+	0	NA	Intergenic	Intergenic	327730	NR_045908	73129	Mm.417826	NR_045908		3110015C05Rik	-	RIKEN cDNA 3110015C05 gene	ncRNA
1145	chr3	85730945	85733522	+	0	NA	Intergenic	Intergenic	-40793	NM_177130	320302	Mm.482978	NM_177130	ENSMUSG00000031286	Glt28d2	4732486J07Rik|Glt28d1l	glycosyltransferase 28 domain containing 2	protein-coding
382	chr12	67570941	67573050	+	0	NA	3' UTR (NM_207010, exon 16 of 16)	3' UTR (NM_207010, exon 16 of 16)	-186607	NM_001162933	238217	Mm.188575	NM_001162933	ENSMUSG00000060499	Rpl10l	EG238217	ribosomal protein L10-like	protein-coding
1448	chr6	73197750	73198918	+	0	NA	promoter-TSS (NM_019879)	promoter-TSS (NM_019879)	-165	NM_019879	56451	Mm.29845	NM_019879	ENSMUSG00000052738	Suclg1	1500000I01Rik|Sucla1	succinate-CoA ligase, GDP-forming, alpha subunit	protein-coding
1506	chr7	17223759	17225226	+	0	NA	Intergenic	Intergenic	18335	NR_003247	100038912	Mm.389813	NR_003247		Ceacam-ps1	Gm1978	carcinoembryonic antigen-related cell adhesion molecule pseudogene 1	pseudo
62	chr1	99195960	99198122	+	0	NA	Intergenic	MLT-int|LTR|MaLR	-172161	NM_028942	74441	Mm.60362	NM_028942	ENSMUSG00000026331	Slco6c1	4933404A18Rik|C79179	solute carrier organic anion transporter family, member 6c1	protein-coding
833	chr18	3279823	3282504	+	0	NA	intron (NM_013498, intron 4 of 6)	intron (NM_013498, intron 4 of 6)	582	NM_001110854	12916	Mm.5244	NM_013498	ENSMUSG00000063889	Crem	ICER|ICERI	cAMP responsive element modulator	protein-coding
139	chr10	39009125	39015985	+	0	NA	Intergenic	Intergenic	-77050	NM_001122892	14360	Mm.4848	NM_008054	ENSMUSG00000019843	Fyn	AI448320|AW552119	Fyn proto-oncogene	protein-coding
1573	chr7	109627207	109629277	+	0	NA	Intergenic	Intergenic	-1826	NM_001011782	257947	Mm.376117	NM_001011782	ENSMUSG00000044814	Olfr543	MOR42-2	olfactory receptor 543	protein-coding
1472	chr6	115072078	115077276	+	0	NA	Intergenic	MIRb|SINE|MIR	-10243	NM_013681	20965	Mm.441431	NM_013681	ENSMUSG00000009394	Syn2	2900074L19Rik|AI836018|AI841723	synapsin II	protein-coding
129	chr10	28862416	28868770	+	0	NA	intron (NM_026138, intron 1 of 6)	intron (NM_026138, intron 1 of 6)	1791	NM_026138	67412	Mm.390264	NM_026138	ENSMUSG00000038916	Soga3	6330407J23Rik	SOGA family member 3	protein-coding
548	chr14	26937209	26939661	+	0	NA	Intergenic	Intergenic	-3660	NM_001177538	100039227	Mm.428840	NM_001177538	ENSMUSG00000072675	Duxbl2	ENSMUSG00000072675|Gm10394	doubl homeobox B-like 2	protein-coding
926	chr19	22295781	22299526	+	0	NA	intron (NM_001035240, intron 1 of 25)	intron (NM_001035240, intron 1 of 25)	84046	NM_001035242	226025	Mm.131943	NM_177341	ENSMUSG00000052387	Trpm3	6330504P12Rik|9330180E14|AU018608|B930001P07Rik|LTRPC3|MLSN2	transient receptor potential cation channel, subfamily M, member 3	protein-coding
1246	chr4	70057331	70075516	+	0	NA	intron (NM_145990, intron 1 of 36)	MTC|LTR|MaLR	4978	NM_145990	214444	Mm.379344	NM_145990	ENSMUSG00000039298	Cdk5rap2	2900018K03Rik|an|mKIAA1633	CDK5 regulatory subunit associated protein 2	protein-coding
859	chr18	35757215	35759760	+	0	NA	intron (NM_026420, intron 1 of 3)	CpG	166	NM_026420	67869	Mm.126534	NM_026420	ENSMUSG00000037058	Paip2	2310050K10Rik|AU045972	polyadenylate-binding protein-interacting protein 2	protein-coding
1083	chr2	172757336	172766497	+	0	NA	intron (NM_007557, intron 1 of 6)	intron (NM_007557, intron 1 of 6)	3906	NM_007557	12162	Mm.595	NM_007557	ENSMUSG00000008999	Bmp7	OP1	bone morphogenetic protein 7	protein-coding
739	chr16	91946385	91948123	+	0	NA	Intergenic	Intergenic	-15379	NM_138597	28080	Mm.41	NM_138597	ENSMUSG00000022956	Atp5o	ATPO|D12Wsu28e|OSCP	ATP synthase, H+ transporting, mitochondrial F1 complex, O subunit	protein-coding
1293	chr4	147494571	147497333	+	0	NA	intron (NM_027426, intron 1 of 6)	intron (NM_027426, intron 1 of 6)	8855	NM_027426	70433	Mm.275288	NM_027426	ENSMUSG00000029005	Draxin	2610109H07Rik|neucrin	dorsal inhibitory axon guidance protein	protein-coding
1110	chr3	35039217	35052827	+	0	NA	Intergenic	Intergenic	-224449	NR_105799	102466155		NR_105799	miRBase:MI0021909	Mir6378	mmu-mir-6378	microRNA mir-6378	ncRNA
876	chr18	48100350	48103324	+	0	NA	intron (NR_045404, intron 2 of 3)	intron (NR_045404, intron 2 of 3)	19342	NR_045404	414127	Mm.450768	NR_045404		G630055G22Rik	-	RIKEN cDNA G630055G22 gene	ncRNA
1792	chrX	39420508	39423169	+	0	NA	intron (NM_009688, intron 2 of 7)	C-rich|Low_complexity|Low_complexity	825	NM_009688	11798	Mm.259879	NM_009688	ENSMUSG00000025860	Xiap	1110015C02Rik|Aipa|Api3|Birc4|IAP3|ILP-1|MIHA|mXIAP	X-linked inhibitor of apoptosis	protein-coding
1772	chr9	117862334	117876577	+	0	NA	Intergenic	Intergenic	-80185	NM_001286508	27215	Mm.92705	NM_013727	ENSMUSG00000039285	Azi2	AA410145|AZ2	5-azacytidine induced gene 2	protein-coding
662	chr15	89185624	89187995	+	0	NA	promoter-TSS (NM_178919)	promoter-TSS (NM_178919)	659	NM_001271601	52683	Mm.143167	NM_001115132	ENSMUSG00000008690	Ncaph2	-	non-SMC condensin II complex, subunit H2	protein-coding
418	chr12	99243344	99245210	+	0	NA	Intergenic	Intergenic	253270	NM_008079	14420	Mm.5120	NM_008079	ENSMUSG00000021003	Galc	2310068B06Rik|A930008M05Rik|AW212969|AW413532|Gacy|twi|twitcher	galactosylceramidase	protein-coding
783	chr17	33083666	33085182	+	0	NA	promoter-TSS (NM_130882)	promoter-TSS (NM_130882)	-118	NM_130882	170716	Mm.254838	NM_130882	ENSMUSG00000024055	Cyp4f13	0610030I10Rik|Cypf13	cytochrome P450, family 4, subfamily f, polypeptide 13	protein-coding
933	chr19	26919696	26920665	+	0	NA	Intergenic	Intergenic	-21783	NR_045306	70942	Mm.411548	NR_045306	ENSMUSG00000093772	4931403E22Rik	-	RIKEN cDNA 4931403E22 gene	ncRNA
1357	chr5	103588854	103591834	+	0	NA	intron (NM_001081567, intron 2 of 13)	intron (NM_001081567, intron 2 of 13)	50009	NM_001081567	26414	Mm.39253	NM_009158	ENSMUSG00000046709	Mapk10	C230008H04Rik|JNK3|JNK3B1|JNK3B2|SAPK(beta)|Serk2|p493F12|p54bSAPK	mitogen-activated protein kinase 10	protein-coding
168	chr10	74632451	74634001	+	0	NA	intron (NM_001081412, intron 16 of 22)	intron (NM_001081412, intron 16 of 22)	-41592	NM_153406	74392	Mm.27716	NM_153406	ENSMUSG00000033444	Specc1l	4930470P14Rik|4932439K10Rik|9530057A13Rik|AI317249|Cytsa|mKIAA0376	sperm antigen with calponin homology and coiled-coil domains 1-like	protein-coding
135	chr10	38026986	38031577	+	0	NA	Intergenic	Intergenic	512304	NM_001177783	215919	Mm.294313	NM_001177783	ENSMUSG00000094311	Rfpl4b	100040915|Gm3037|Gm62	ret finger protein-like 4B	protein-coding
348	chr12	32633226	32636660	+	0	NA	intron (NM_177993, intron 1 of 8)	CpG	457	NM_177993	73389	Mm.390461	NM_153198	ENSMUSG00000002996	Hbp1	1700058O05Rik|BE629963|C330012F01Rik|C86454	high mobility group box transcription factor 1	protein-coding
1518	chr7	31016555	31017964	+	0	NA	promoter-TSS (NM_025548)	promoter-TSS (NM_025548)	166	NM_027259	69920	Mm.440028	NM_027259	ENSMUSG00000019738	Polr2i	2810002B19Rik	polymerase (RNA) II (DNA directed) polypeptide I	protein-coding
1152	chr3	88753427	88755782	+	0	NA	promoter-TSS (NM_001164533)	promoter-TSS (NM_001164533)	-400	NM_001164533	65111	Mm.29028	NM_022994	ENSMUSG00000068921	Dap3	4921514D13Rik|DAP-3|MRP-S29|S29mt	death associated protein 3	protein-coding
145	chr10	46822113	46824520	+	0	NA	Intergenic	Intergenic	1295806	NR_040624	320363	Mm.123343	NR_040624		D030045P18Rik	-	RIKEN cDNA D030045P18 gene	ncRNA
49	chr1	84141211	84154664	+	0	NA	intron (NM_001003948, intron 2 of 2)	L1MA5|LINE|L1	67599	NR_105771	102465181		NR_105771		Mir6353	mmu-mir-6353	microRNA mir-6353	ncRNA
789	chr17	35370222	35381006	+	0	NA	TTS (NM_023179)	TTS (NM_023179)	2073	NM_023179	66237	Mm.396107	NM_023179	ENSMUSG00000024403	Atp6v1g2	1500002D01Rik|Atp6g2|NG38|VAG2	ATPase, H+ transporting, lysosomal V1 subunit G2	protein-coding
178	chr10	81326077	81327420	+	0	NA	promoter-TSS (NM_001243067).2	promoter-TSS (NM_001243067).2	69	NM_001243067	73610	Mm.490466	NM_001243067		Zfp433	1700123A16Rik	RIKEN cDNA 1700123A16 gene	protein-coding
1131	chr3	67940835	67945132	+	0	NA	intron (NM_001113420, intron 1 of 6)	intron (NM_001113420, intron 1 of 6)	74259	NM_001113420	30953	Mm.331064	NM_013928	ENSMUSG00000027777	Schip1	Nf2ip|Schip-1	schwannomin interacting protein 1	protein-coding
124	chr10	16243444	16245073	+	0	NA	Intergenic	Intergenic	571330	NR_038020	100504235	Mm.84044	NR_038020		Gm20125	-	predicted gene, 20125	ncRNA
772	chr17	25408874	25412087	+	0	NA	promoter-TSS (NR_027452)	promoter-TSS (NR_027452)	-104	NM_001177610	22196	Mm.240044	NM_011665		Ube2i	5830467E05Rik|F830028O17Rik|UBC9|Ubce2i|Ubce9	ubiquitin-conjugating enzyme E2I	protein-coding
1759	chr9	81330677	81336113	+	0	NA	Intergenic	Intergenic	-192142	NR_040394	319405	Mm.246494	NR_040393	ENSMUSG00000097466	D430036J16Rik	-	RIKEN cDNA D430036J16 gene	ncRNA
1090	chr3	5574359	5577132	+	0	NA	intron (NM_001163305, intron 1 of 4)	intron (NM_001163305, intron 1 of 4)	503	NM_001163301	19302	Mm.132336	NM_008994	ENSMUSG00000040374	Pex2	D3Ertd138e|PAF-1|PMP35|Pxmp3	peroxisomal biogenesis factor 2	protein-coding
627	chr15	38530923	38534133	+	0	NA	Intergenic	B1F1|SINE|Alu	-7839	NR_045757	69679	Mm.416890	NR_045757		2310043O21Rik	-	RIKEN cDNA 2310043O21 gene	ncRNA
993	chr2	45435681	45437837	+	0	NA	Intergenic	Intergenic	-115366	NR_040497	69405	Mm.396184	NR_040497	ENSMUSG00000086202	1700019E08Rik	-	RIKEN cDNA 1700019E08 gene	ncRNA
1308	chr5	23498345	23501186	+	0	NA	intron (NM_053090, intron 2 of 10)	intron (NM_053090, intron 2 of 10)	36736	NM_053090	84652	Mm.486278	NM_053090	ENSMUSG00000028995	Fam126a	AB030242|Drctnnb1a	family with sequence similarity 126, member A	protein-coding
1429	chr6	38499031	38502868	+	0	NA	promoter-TSS (NM_138680)	promoter-TSS (NM_138680)	-495	NM_138680	192196	Mm.276133	NM_138680	ENSMUSG00000029823	Luc7l2	4930471C18Rik|AA522013|AU015269|CGI59|Cgi74	LUC7-like 2 (S. cerevisiae)	protein-coding
715	chr16	59546853	59548854	+	0	NA	intron (NM_174848, intron 4 of 18)	intron (NM_174848, intron 4 of 18)	7725	NM_174848	224273	Mm.246424	NM_174848	ENSMUSG00000022723	Crybg3	5031404N19|AU022790	beta-gamma crystallin domain containing 3	protein-coding
1374	chr5	124528197	124529800	+	0	NA	intron (NM_019875, intron 6 of 11)	intron (NM_019875, intron 6 of 11)	16809	NM_019875	56325	Mm.254839	NM_019875	ENSMUSG00000029408	Abcb9	TAPL|mKIAA1520	ATP-binding cassette, sub-family B (MDR/TAP), member 9	protein-coding
1722	chr9	40591497	40594195	+	0	NA	TTS (NM_133733)	TTS (NM_133733)	-16510	NM_031165	15481	Mm.290774	NM_031165	ENSMUSG00000015656	Hspa8	2410008N15Rik|Hsc70|Hsc71|Hsc73|Hsp73|Hspa10	heat shock protein 8	protein-coding
23	chr1	46123006	46124404	+	0	NA	intron (NM_001160386, intron 1 of 65)	intron (NM_001160386, intron 1 of 65)	122	NM_001160386	227058	Mm.296880	NM_001160386	ENSMUSG00000041144	Dnah7b	Dnahc7b|Gm107	dynein, axonemal, heavy chain 7B	protein-coding
1528	chr7	52145955	52152536	+	0	NA	Intergenic	B1_Mus1|SINE|Alu	-1509	NM_029365	75613	Mm.157778	NM_029365	ENSMUSG00000002968	Med25	2610034E13Rik|2610529E18Rik|ESTM2|X83308	mediator complex subunit 25	protein-coding
364	chr12	47472361	47473866	+	0	NA	Intergenic	Intergenic	446649	NM_021361	664883	Mm.247195	NM_021361	ENSMUSG00000021047	Nova1	9430099M15Rik|G630039L02|Nova-1	neuro-oncological ventral antigen 1	protein-coding
388	chr12	73532709	73540549	+	0	NA	Intergenic	MER67C|LTR|ERV1	-6224	NM_001142728	78257	Mm.266280	NM_030070	ENSMUSG00000021090	Lrrc9	4921529O18Rik|4930432K16Rik	leucine rich repeat containing 9	protein-coding
653	chr15	77800275	77802440	+	0	NA	promoter-TSS (NM_018749)	promoter-TSS (NM_018749)	-103	NM_018749	55944	Mm.3955	NM_018749	ENSMUSG00000016554	Eif3d	66/67kDa|AA407891|Eif3s7|eIF3p66	eukaryotic translation initiation factor 3, subunit D	protein-coding
1425	chr6	35220664	35222474	+	0	NA	intron (NM_172892, intron 14 of 15)	intron (NM_172892, intron 14 of 15)	18837	NR_027875	67705	Mm.228046	NR_015608	ENSMUSG00000073155	1810058I24Rik	AI414869|AI848234	RIKEN cDNA 1810058I24 gene	ncRNA
1692	chr8	127909034	127916321	+	0	NA	Intergenic	Intergenic	103933	NM_001081337	244668	Mm.271668	NM_001081337	ENSMUSG00000001995	Sipa1l2	BC058408|mKIAA1389	signal-induced proliferation-associated 1 like 2	protein-coding
950	chr19	55258471	55261110	+	0	NA	intron (NM_009348, intron 4 of 9)	intron (NM_009348, intron 4 of 9)	4415	NM_009348	21684	Mm.42139	NM_009348	ENSMUSG00000024979	Tectb	Tctnb	tectorin beta	protein-coding
1678	chr8	111771336	111777278	+	0	NA	Intergenic	Intergenic	90501	NR_002928	384864	Mm.390083	NR_002928		Gm1943	-	WD repeat domain 70 pseudogene	pseudo
1445	chr6	70820750	70823936	+	0	NA	intron (NM_010121, intron 2 of 16)	intron (NM_010121, intron 2 of 16)	27822	NM_010121	13666	Mm.247167	NM_010121	ENSMUSG00000031668	Eif2ak3	AI427929|Pek|Perk	eukaryotic translation initiation factor 2 alpha kinase 3	protein-coding
509	chr13	93871616	93873252	+	0	NA	intron (NM_023821, intron 1 of 12)	intron (NM_023821, intron 1 of 12)	7646	NR_046182	408254	Mm.474857	NR_046182		A630019I02Rik	-	RIKEN cDNA A630019I02 gene	ncRNA
1025	chr2	104207054	104208977	+	0	NA	intron (NM_001033347, intron 1 of 20)	intron (NM_001033347, intron 1 of 20)	42476	NM_001033347	241589	Mm.358909	NM_001033347	ENSMUSG00000068373	D430041D05Rik	9630056G07Rik|G2	RIKEN cDNA D430041D05 gene	protein-coding
1015	chr2	82686963	82688761	+	0	NA	Intergenic	Intergenic	794047	NM_175513	241514	Mm.119383	NM_175513	ENSMUSG00000070866	Zfp804a	C630007C17Rik|Znf804a	zinc finger protein 804A	protein-coding
367	chr12	48375003	48379430	+	0	NA	Intergenic	Intergenic	-457454	NM_021361	664883	Mm.247195	NM_021361	ENSMUSG00000021047	Nova1	9430099M15Rik|G630039L02|Nova-1	neuro-oncological ventral antigen 1	protein-coding
976	chr2	21839090	21843031	+	0	NA	Intergenic	MLT1F2|LTR|MaLR	-308070	NM_148413	667663	Mm.330033	NM_148413	ENSMUSG00000025716	Myo3a	9030416P08Rik	myosin IIIA	protein-coding
716	chr16	59638060	59640179	+	0	NA	promoter-TSS (NM_019665)	promoter-TSS (NM_019665)	46	NM_019665	56297	Mm.392505	NM_019665	ENSMUSG00000022722	Arl6	1110018H24Rik|2210411E14Rik|BBS3	ADP-ribosylation factor-like 6	protein-coding
1821	chrX	120216089	120219118	+	0	NA	intron (NM_028426, intron 1 of 3)	RLTR1B-int|LTR|ERV1	435	NM_028426	73061	Mm.292979	NM_028426	ENSMUSG00000079450	3110007F17Rik	-	RIKEN cDNA 3110007F17 gene	protein-coding
940	chr19	36605983	36612005	+	0	NA	Intergenic	Intergenic	-20135	NM_001163471	226098	Mm.61107	NM_172637	ENSMUSG00000041180	Hectd2	4921524L07|A630025O09Rik|AW212605	HECT domain containing 2	protein-coding
1466	chr6	97995582	98000254	+	0	NA	Intergenic	Intergenic	56141	NM_008601	17342	Mm.333284	NM_008601	ENSMUSG00000035158	Mitf	BCC2|Bhlhe32|Gsfbcc2|Vitiligo|Wh|bw|mi|vit	microphthalmia-associated transcription factor	protein-coding
485	chr13	69750590	69750957	+	0	NA	promoter-TSS (NM_175283)	promoter-TSS (NM_175283)	-121	NM_145354	28114	Mm.260009	NM_145354	ENSMUSG00000021595	Nsun2	D13Wsu123e|Misu	NOL1/NOP2/Sun domain family member 2	protein-coding
685	chr16	18287633	18290412	+	0	NA	intron (NM_033324, intron 1 of 13)	CpG	239	NM_033324	94223	Mm.447352	NM_033324	ENSMUSG00000022718	Dgcr8	D16H22S1742E|D16H22S788E|D16Wis2|Gy1|N41|Vo59c07	DiGeorge syndrome critical region gene 8	protein-coding
743	chr17	3083721	3084698	+	0	NA	promoter-TSS (NR_003519)	promoter-TSS (NR_003519)	-26	NR_003519	328734	Mm.335641	NR_003519		Pisd-ps2	D030013I16Rik	phosphatidylserine decarboxylase, pseudogene 2	pseudo
778	chr17	29168215	29171847	+	0	NA	intron (NM_013663, intron 1 of 5)	intron (NM_013663, intron 1 of 5)	426	NR_036613	20383	Mm.6787	NM_013663	ENSMUSG00000071172	Srsf3	AL024116|Sfrs3|X16	serine/arginine-rich splicing factor 3	protein-coding
21	chr1	44203809	44206664	+	0	NA	intron (NM_011729, intron 1 of 14)	intron (NM_011729, intron 1 of 14)	647	NM_011729	22592	Mm.2213	NM_011729	ENSMUSG00000026048	Ercc5	Xpg	excision repair cross-complementing rodent repair deficiency, complementation group 5	protein-coding
523	chr13	105075179	105079547	+	0	NA	promoter-TSS (NM_001081020)	promoter-TSS (NM_001081020)	-590	NM_001081020	108154	Mm.208125	NM_175496	ENSMUSG00000046169	Adamts6	5031426K13|A930019D11Rik|ADAM-TS6|b2b1879.1Clo|b2b2029Clo|b2b2182Clo|b2b2187.1Clo|b2b2228Clo	a disintegrin-like and metallopeptidase (reprolysin type) with thrombospondin type 1 motif, 6	protein-coding
720	chr16	67310459	67312326	+	0	NA	intron (NM_178721, intron 1 of 9)	intron (NM_178721, intron 1 of 9)	309761	NM_001145977	239857	Mm.394300	NM_178721	ENSMUSG00000064115	Cadm2	2900078E11Rik|9330131D06|A830029E02Rik|Igdf4d|Igsf4d|NECL3|SynCAM 2|SynCAM2	cell adhesion molecule 2	protein-coding
1270	chr4	118314588	118316586	+	0	NA	Intergenic	Intergenic	16578	NR_029469	100041290	Mm.472885	NR_029469		D4Ertd617e	-	DNA segment, Chr 4, ERATO Doi 617, expressed	ncRNA
460	chr13	38970295	38971987	+	0	NA	Intergenic	Intergenic	81265	NM_001170430	108652	Mm.255506	NM_134060	ENSMUSG00000021432	Slc35b3	4921526O06Rik|AI428480|CGI-19|PABST2|PAPST2	solute carrier family 35, member B3	protein-coding
1645	chr8	63270342	63272524	+	0	NA	Intergenic	Intergenic	-97815	NM_028299	72612	Mm.25263	NM_028299	ENSMUSG00000038005	2700029M09Rik	C230006B22Rik	RIKEN cDNA 2700029M09 gene	protein-coding
1460	chr6	88953230	88960568	+	0	NA	Intergenic	L1M5|LINE|L1	-89210	NM_175017	232217	Mm.281744	NM_175017	ENSMUSG00000055403	4933427D06Rik	-	RIKEN cDNA 4933427D06 gene	protein-coding
1389	chr5	140739251	140741951	+	0	NA	intron (NM_010752, intron 9 of 17)	intron (NM_010752, intron 9 of 17)	56905	NM_010752	17120	Mm.27250	NM_010752	ENSMUSG00000029554	Mad1l1	AI173502|AW550425|Mad1	MAD1 mitotic arrest deficient 1-like 1	protein-coding
324	chr11	116027913	116030137	+	0	NA	5' UTR (NM_172571, exon 1 of 31)	5' UTR (NM_172571, exon 1 of 31)	467	NM_172571	217335	Mm.35241	NM_172571	ENSMUSG00000020776	Fbf1	1110033G01Rik|5930413D20|mKIAA1863	Fas (TNFRSF6) binding factor 1	protein-coding
453	chr13	30326431	30328371	+	0	NA	intron (NM_153546, intron 9 of 12)	intron (NM_153546, intron 9 of 12)	99042	NM_153546	218121	Mm.89682	NM_153546	ENSMUSG00000038732	Mboat1	9130215M02Rik|BC023845|LPEAT1|Moact1|Oact1	membrane bound O-acyltransferase domain containing 1	protein-coding
723	chr16	77236410	77239253	+	0	NA	Intergenic	Intergenic	-91742	NR_015543	77994	Mm.394688	NR_015543	ENSMUSG00000090386	2810055G20Rik	D730043B02Rik	RIKEN cDNA 2810055G20 gene	ncRNA
244	chr11	20376596	20378833	+	0	NA	Intergenic	Intergenic	-65542	NM_021372	58172	Mm.339676	NM_021372	ENSMUSG00000049800	Sertad2	AB041541|AU021878|Kiaa0127|SEI-2|Sei2|TRIP-Br2|mKIAA0127	SERTA domain containing 2	protein-coding
1202	chr4	11081869	11085568	+	0	NA	intron (NM_021897, intron 1 of 3)	CpG	130	NM_021897	60599	Mm.393018	NM_021897	ENSMUSG00000028211	Trp53inp1	2700057G22Rik|SIP|SIP18|SIP27|Stinp|Teap	transformation related protein 53 inducible nuclear protein 1	protein-coding
637	chr15	56446937	56448892	+	0	NA	Intergenic	Intergenic	-73585	NR_002874	594843	Mm.484850	NR_002874	ENSMUSG00000086541	Has2os	EG594843|Has2as|Hasnt	hyaluronan synthase 2, opposite strand	ncRNA
351	chr12	33794671	33797103	+	0	NA	TTS (NR_015602)	TTS (NR_015602)	-18147	NM_001024478	68764	Mm.60083	NM_001024478	ENSMUSG00000035860	Cdhr3	1110049B09Rik|BB172694|Cdh28	cadherin-related family member 3	protein-coding
1040	chr2	124545610	124547959	+	0	NA	Intergenic	Intergenic	67467	NM_199239	214968	Mm.330536	NM_172537	ENSMUSG00000027200	Sema6d	1110067B02Rik|AA409156|D330011G23|mKIAA1479	sema domain, transmembrane domain (TM), and cytoplasmic domain, (semaphorin) 6D	protein-coding
595	chr14	101451890	101457861	+	0	NA	Intergenic	Intergenic	144411	NM_029680	76627	Mm.31415	NM_029680	ENSMUSG00000042888	Prr30	1700110M21Rik	proline rich 30	protein-coding
1755	chr9	72377822	72384449	+	0	NA	intron (NM_001033536, intron 1 of 8)	intron (NM_001033536, intron 1 of 8)	1088	NM_001033536	319758	Mm.32081	NM_001033536	ENSMUSG00000037674	Rfx7	2510005N23Rik|9930116O05Rik|D130086K05Rik|Rfxdc2	regulatory factor X, 7	protein-coding
1138	chr3	78932087	78967410	+	0	NA	promoter-TSS (NM_001099624)	promoter-TSS (NM_001099624)	49	NM_001099624	76089	Mm.31220	NM_001099624	ENSMUSG00000062232	Rapgef2	5830453M24Rik|CNRasGEF|Pdzgef1|RA-GEF-1|mKIAA0313|nRapGEP	Rap guanine nucleotide exchange factor (GEF) 2	protein-coding
488	chr13	74381980	74384694	+	0	NA	intron (NM_009644, intron 4 of 10)	intron (NM_009644, intron 4 of 10)	-37189	NM_177333	211446	Mm.261859	NM_177333	ENSMUSG00000034152	Exoc3	2810050O03Rik|E430013E20Rik|Sec6|Sec6l1	exocyst complex component 3	protein-coding
752	chr17	8137399	8139719	+	0	NA	promoter-TSS (NM_025789)	promoter-TSS (NM_025789)	80	NM_025789	66832	Mm.29830	NM_025789	ENSMUSG00000073471	Rsph3a	1700012G05Rik|4930524H12Rik|R74860|Rshl2|Rshl2a	radial spoke 3A homolog (Chlamydomonas)	protein-coding
1232	chr4	55663552	55665088	+	0	NA	Intergenic	CpG	-118973	NM_010637	16600	Mm.4325	NM_010637	ENSMUSG00000003032	Klf4	EZF|Gklf|Zie	Kruppel-like factor 4 (gut)	protein-coding
1012	chr2	79822679	79824391	+	0	NA	intron (NM_016744, intron 1 of 14)	intron (NM_016744, intron 1 of 14)	-74979	NM_001009978	18573	Mm.40678	NM_016744	ENSMUSG00000059173	Pde1a	AI987702|AW125737	phosphodiesterase 1A, calmodulin-dependent	protein-coding
1498	chr6	147666175	147667746	+	0	NA	Intergenic	Intergenic	28197	NR_033636	100039727	Mm.396220	NR_033636	ENSMUSG00000085077	1700049E15Rik	Gm15761|OTTMUSG00000026044	RIKEN cDNA 1700049E15 gene	ncRNA
835	chr18	3839114	3840398	+	0	NA	Intergenic	Intergenic	-326074	NM_026092	67328	Mm.158148	NM_026092	ENSMUSG00000024233	Lyzl1	1700038F02Rik|Lyc2	lysozyme-like 1	protein-coding
1607	chr7	150234659	150256454	+	0	NA	intron (NM_133655, intron 1 of 7)	intron (NM_133655, intron 1 of 7)	-5965	NR_110354	97423	Mm.5250	NM_133790	ENSMUSG00000059277	R74862	-	expressed sequence R74862	ncRNA
1267	chr4	115994070	115996003	+	0	NA	exon (NM_001042743, exon 11 of 30)	exon (NM_001042743, exon 11 of 30)	100517	NM_181585	18710	Mm.253819	NM_181585	ENSMUSG00000028698	Pik3r3	AA414954|p55pik	phosphatidylinositol 3 kinase, regulatory subunit, polypeptide 3 (p55)	protein-coding
379	chr12	56547098	56549193	+	0	NA	Intergenic	Intergenic	45489	NM_010907	18035	Mm.170515	NM_010907	ENSMUSG00000021025	Nfkbia	AI462015|Nfkbi	nuclear factor of kappa light polypeptide gene enhancer in B cells inhibitor, alpha	protein-coding
1386	chr5	135926893	135967791	+	0	NA	intron (NM_146001, intron 1 of 30)	(TAAAA)n|Simple_repeat|Simple_repeat	73650	NM_146001	215114	Mm.280805	NM_146001	ENSMUSG00000039959	Hip1	2610109B09Rik|A930014B11Rik|E130315I21Rik|mKIAA4113	huntingtin interacting protein 1	protein-coding
1032	chr2	113687132	113690182	+	0	NA	5' UTR (NM_181416, exon 1 of 12)	5' UTR (NM_181416, exon 1 of 12)	161	NM_181416	228482	Mm.45753	NM_181416	ENSMUSG00000041219	Arhgap11a	6530401L14Rik|mKIAA0013	Rho GTPase activating protein 11A	protein-coding
1639	chr8	47723073	47725958	+	0	NA	3' UTR (NM_001284409, exon 7 of 7)	3' UTR (NM_001284409, exon 7 of 7)	21870	NM_009810	12367	Mm.34405	NM_009810		Casp3	A830040C14Rik|AC-3|Apopain|CASP-3|CC3|CPP-32|CPP32|Caspase-3|Lice|SCA-1|Yama|mldy	caspase 3	protein-coding
1536	chr7	66483035	66485881	+	0	NA	5' UTR (NM_173010, exon 1 of 9)	5' UTR (NM_173010, exon 1 of 9)	336	NM_011668	22215	Mm.9002	NM_011668	ENSMUSG00000025326	Ube3a	4732496B02|5830462N02Rik|A130086L21Rik|Hpve6a|mKIAA4216	ubiquitin protein ligase E3A	protein-coding
113	chr1	196033428	196035908	+	0	NA	Intergenic	Intergenic	14285	NR_040477	74942	Mm.60689	NR_040477		4930503O07Rik	-	RIKEN cDNA 4930503O07 gene	ncRNA
901	chr18	74021158	74028509	+	0	NA	intron (NM_027741, intron 2 of 7)	intron (NM_027741, intron 2 of 7)	5792	NM_027741	71263	Mm.126220	NM_027741	ENSMUSG00000064036	Mro	4930507C04Rik|4933435E20Rik	maestro	protein-coding
1035	chr2	120229064	120231367	+	0	NA	promoter-TSS (NM_001110497)	promoter-TSS (NM_001110497)	-363	NM_001110496	211499	Mm.260712	NM_173734	ENSMUSG00000033808	Tmem87a	A930025J12Rik	transmembrane protein 87A	protein-coding
152	chr10	58062267	58068203	+	0	NA	3' UTR (NM_010100, exon 12 of 12)	3' UTR (NM_010100, exon 12 of 12)	73209	NM_010100	13608	Mm.174523	NM_010100	ENSMUSG00000003227	Edar	ED1R|ED3|ED5|EDA-A1R|EDA3|dl	ectodysplasin-A receptor	protein-coding
342	chr12	21468255	21470429	+	0	NA	Intergenic	Intergenic	-46045	NM_011739	22630	Mm.289630	NM_011739	ENSMUSG00000076432	Ywhaq	2700028P07Rik|AA409740|AU021156|R74690	tyrosine 3-monooxygenase/tryptophan 5-monooxygenase activation protein, theta polypeptide	protein-coding
452	chr13	30075152	30078987	+	0	NA	promoter-TSS (NM_001289920)	promoter-TSS (NM_001289920)	-809	NM_001289920	13557	Mm.268356	NM_010093	ENSMUSG00000016477	E2f3	E2F3b|E2f3a	E2F transcription factor 3	protein-coding
1419	chr6	29996781	30004310	+	0	NA	intron (NM_001164230, intron 1 of 11)	B1_Mur3|SINE|Alu	2557	NM_001164226	18181	Mm.259258	NM_010938	ENSMUSG00000058440	Nrf1	C87038|D6Ertd415e	nuclear respiratory factor 1	protein-coding
862	chr18	38531079	38551190	+	0	NA	Intergenic	Intergenic	-37495	NM_022996	65113	Mm.102496	NM_022996	ENSMUSG00000024425	Ndfip1	0610010M22Rik|N4wbp5	Nedd4 family interacting protein 1	protein-coding
295	chr11	93423373	93424699	+	0	NA	intron (NM_028296, intron 4 of 8)	intron (NM_028296, intron 4 of 8)	323044	NM_001013375	217109	Mm.379350	NM_001013375	ENSMUSG00000054079	Utp18	6230425C22Rik|6430513M13|Wdr50	UTP18, small subunit (SSU) processome component, homolog (yeast)	protein-coding
579	chr14	74129632	74134750	+	0	NA	Intergenic	Intergenic	179598	NM_011506	20916	Mm.38951	NM_011506	ENSMUSG00000022110	Sucla2	4930547K18Rik	succinate-Coenzyme A ligase, ADP-forming, beta subunit	protein-coding
341	chr12	16668964	16671534	+	0	NA	Intergenic	Intergenic	9973	NM_008747	18217	Mm.281715	NM_008747	ENSMUSG00000020591	Ntsr2	NT2R|NTRL	neurotensin receptor 2	protein-coding
1056	chr2	139953244	139954901	+	0	NA	intron (NM_001081090, intron 11 of 13)	intron (NM_001081090, intron 11 of 13)	42222	NM_001081090	66580	Mm.21228	NM_001081090	ENSMUSG00000045624	Esf1	2610101J03Rik|ABTAP|AW545818|C79684	ESF1, nucleolar pre-rRNA processing protein, homolog (S. cerevisiae)	protein-coding
535	chr14	14629515	14631755	+	0	NA	Intergenic	RLTR13D5|LTR|ERVK	127245	NM_177624	218739	Mm.39919	NM_177624	ENSMUSG00000044772	Sntn	A430083B19Rik	sentan, cilia apical structure protein	protein-coding
1618	chr8	11277279	11279201	+	0	NA	intron (NM_009931, intron 1 of 51)	intron (NM_009931, intron 1 of 51)	34586	NM_009931	12826	Mm.738	NM_009931	ENSMUSG00000031502	Col4a1	Bru|Col4a-1|Del(8)44H|Raw|Svc	collagen, type IV, alpha 1	protein-coding
77	chr1	138351159	138353921	+	0	NA	Intergenic	Intergenic	-11885	NM_001287179	381293	Mm.458468	NM_001081258	ENSMUSG00000041498	Kif14	D1Ertd367e|E130203M01	kinesin family member 14	protein-coding
683	chr16	15983734	15985899	+	0	NA	intron (NM_146068, intron 8 of 19)	intron (NM_146068, intron 8 of 19)	97437	NM_007679	12609	Mm.347407	NM_007679		Cebpd	-	CCAAT/enhancer binding protein (C/EBP), delta	protein-coding
541	chr14	22364292	22368356	+	0	NA	intron (NM_017479, intron 2 of 16)	intron (NM_017479, intron 2 of 16)	47317	NM_017479	54169	Mm.248967	NM_017479	ENSMUSG00000021767	Kat6b	AI507552|B130044K16Rik|MYST-4|Morf|Myst4|mKIAA0383|qkf|querkopf	K(lysine) acetyltransferase 6B	protein-coding
1215	chr4	39780095	39782018	+	0	NA	Intergenic	Intergenic	-309242	NM_007386	11428	Mm.331547	NM_007386	ENSMUSG00000028405	Aco1	Aco-1|Irebp|Irp1	aconitase 1	protein-coding
64	chr1	107006426	107009623	+	0	NA	Intergenic	Intergenic	245263	NM_178779	320311	Mm.389162	NM_178779	ENSMUSG00000047496	Rnf152	A930029B02Rik	ring finger protein 152	protein-coding
1712	chr9	27890353	27894007	+	0	NA	intron (NM_177906, intron 1 of 7)	intron (NM_177906, intron 1 of 7)	293326	NM_177906	330908	Mm.379474	NM_177906	ENSMUSG00000062257	Opcml	2900075O15Rik|3732419F12|AI844366|B930023M13Rik|C230027C17|Gm181|Obcam	opioid binding protein/cell adhesion molecule-like	protein-coding
1473	chr6	115802417	115804368	+	0	NA	promoter-TSS (NM_031177)	promoter-TSS (NM_031177)	-33	NM_010774	17193	Mm.259308	NM_010774	ENSMUSG00000030322	Mbd4	Med1	methyl-CpG binding domain protein 4	protein-coding
765	chr17	15701094	15702053	+	0	NA	Intergenic	Intergenic	-1286	NM_144809	213389	Mm.215162	NM_144809	ENSMUSG00000051977	Prdm9	BC012016|Dsbc1|G1-419-29|Meisetz|Rcr1|repro7	PR domain containing 9	protein-coding
881	chr18	52928071	52932044	+	0	NA	intron (NM_001199154, intron 1 of 10)	intron (NM_001199154, intron 1 of 10)	2259	NM_001199154	67847	Mm.292168	NM_026408	ENSMUSG00000024534	Sncaip	2810407O15Rik|4933427B05Rik|BB104594|SYPH1	synuclein, alpha interacting protein (synphilin)	protein-coding
1628	chr8	31972312	31974783	+	0	NA	Intergenic	Intergenic	-226587	NM_025869	66959	Mm.23916	NM_025869	ENSMUSG00000039661	Dusp26	2310043K02Rik|Skrp3	dual specificity phosphatase 26 (putative)	protein-coding
312	chr11	107170749	107173071	+	0	NA	intron (NM_145823, intron 4 of 9)	intron (NM_145823, intron 4 of 9)	-121215	NM_001161329	68979	Mm.294617	NM_133702	ENSMUSG00000018433	Nol11	1500002M01Rik|AU015220|AU019874	nucleolar protein 11	protein-coding
897	chr18	69503434	69511838	+	0	NA	intron (NM_001083967, intron 2 of 19)	intron (NM_001083967, intron 2 of 19)	2261	NM_001083967	21413	Mm.4269	NM_013685	ENSMUSG00000053477	Tcf4	5730422P05Rik|ASP-I2|E2-2|E2.2|ITF-2|ITF-2b|ITF2|ME2|MITF-2A|MITF-2B|SEF-2|SEF2|SEF2-1|TFE|Tcf-4|bHLHb19	transcription factor 4	protein-coding
45	chr1	82146232	82148823	+	0	NA	Intergenic	Intergenic	19036	NR_105762	102466629		NR_105762	miRBase:MI0021872	Mir6344	mmu-mir-6344	microRNA mir-6344	ncRNA
405	chr12	84563525	84566166	+	0	NA	intron (NM_001267625, intron 2 of 10)	intron (NM_001267625, intron 2 of 10)	263841	NM_001267626	70127	Mm.151308	NM_058212	ENSMUSG00000021221	Dpf3	2810403B03Rik|6530402L11Rik|BAF45C|C78788|CERD4|cer-d4	D4, zinc and double PHD fingers, family 3	protein-coding
507	chr13	93299896	93301833	+	0	NA	promoter-TSS (NM_173392)	promoter-TSS (NM_173392)	-99	NM_173392	218441	Mm.259585	NM_173392	ENSMUSG00000021706	Zfyve16	AI035632|B130024H06Rik|B130031L15|mKIAA0305	zinc finger, FYVE domain containing 16	protein-coding
237	chr11	16526566	16529698	+	0	NA	Intergenic	Intergenic	-119645	NM_001109971	20335	Mm.325350	NM_011343	ENSMUSG00000078974	Sec61g	-	SEC61, gamma subunit	protein-coding
1002	chr2	65251649	65254048	+	0	NA	Intergenic	Intergenic	-50391	NR_105755	102466151		NR_105755	miRBase:MI0021865	Mir6337	mmu-mir-6337	microRNA mir-6337	ncRNA
1173	chr3	113331997	113333900	+	0	NA	exon (NM_026043, exon 1 of 15)	exon (NM_026043, exon 1 of 15)	119	NM_026043	67225	Mm.316928	NM_026043	ENSMUSG00000027981	Rnpc3	2810441O16Rik|AI447568|C030014B17Rik	RNA-binding region (RNP1, RRM) containing 3	protein-coding
370	chr12	52447964	52450739	+	0	NA	5' UTR (NM_001167964, exon 1 of 14)	5' UTR (NM_001167964, exon 1 of 14)	134	NM_001015099	217558	Mm.253264	NM_001015099	ENSMUSG00000035293	G2e3	6030408C04Rik|9030416F18|AW046379|D930034K21Rik|mKIAA1333	G2/M-phase specific E3 ubiquitin ligase	protein-coding
309	chr11	105995176	105997594	+	0	NA	intron (NM_011947, intron 6 of 15)	intron (NM_011947, intron 6 of 15)	25071	NM_172397	67803	Mm.21687	NM_172397	ENSMUSG00000040699	Limd2	0610025L06Rik|AI413966	LIM domain containing 2	protein-coding
1734	chr9	57314813	57318176	+	0	NA	promoter-TSS (NM_020270)	promoter-TSS (NM_020270)	-663	NM_020270	56807	Mm.102278	NM_020270	ENSMUSG00000040722	Scamp5	AI426171|AW558254|Sc5	secretory carrier membrane protein 5	protein-coding
1733	chr9	56841821	56844644	+	0	NA	5' UTR (NM_019651, exon 1 of 13)	5' UTR (NM_019651, exon 1 of 13)	457	NM_019651	56294	Mm.325643	NM_019651	ENSMUSG00000032290	Ptpn9	MEG2	protein tyrosine phosphatase, non-receptor type 9	protein-coding
567	chr14	54950950	54953728	+	0	NA	Intergenic	Intergenic	-28186	NM_026936	69089	Mm.182340	NM_026936	ENSMUSG00000000959	Oxa1l	1810020M02Rik|AI894287	oxidase assembly 1-like	protein-coding
416	chr12	93712332	93714252	+	0	NA	Intergenic	Intergenic	-625695	NM_011344	20338	Mm.250605	NM_011344	ENSMUSG00000020964	Sel1l	AW493766|Sel1h|mKIAA4137	sel-1 suppressor of lin-12-like (C. elegans)	protein-coding
100	chr1	179234340	179239544	+	0	NA	Intergenic	MIRc|SINE|MIR	-58044	NM_011785	23797	Mm.235194	NM_011785	ENSMUSG00000019699	Akt3	AI851531|D930002M15Rik|Nmf350	thymoma viral proto-oncogene 3	protein-coding
380	chr12	56564407	56568393	+	0	NA	Intergenic	Intergenic	27234	NM_010907	18035	Mm.170515	NM_010907	ENSMUSG00000021025	Nfkbia	AI462015|Nfkbi	nuclear factor of kappa light polypeptide gene enhancer in B cells inhibitor, alpha	protein-coding
914	chr19	5136215	5138027	+	0	NA	intron (NM_153129, intron 21 of 23)	intron (NM_153129, intron 21 of 23)	-18713	NM_008451	16594	Mm.271648	NM_008451	ENSMUSG00000024862	Klc2	8030455F02Rik|AW212649|KLC 2|KLC-2	kinesin light chain 2	protein-coding
1279	chr4	130798887	130801012	+	0	NA	Intergenic	Intergenic	299649	NM_010769	17180	Mm.271796	NM_010769	ENSMUSG00000040533	Matn1	CMP|Crtm|Mat1|matrilin-1	matrilin 1, cartilage matrix protein	protein-coding
1258	chr4	96857723	96861909	+	0	NA	Intergenic	Intergenic	-388818	NM_001122952	18027	Mm.31274	NM_010905	ENSMUSG00000028565	Nfia	1110047K16Rik|9430022M17Rik|CTF|NF1-A|NF1A	nuclear factor I/A	protein-coding
300	chr11	95170496	95172764	+	0	NA	promoter-TSS (NM_177619)	promoter-TSS (NM_177619)	-70	NM_001195003	217127	Mm.90213	NM_177619	ENSMUSG00000038909	Kat7	Hbo1|Hboa|Myst2	K(lysine) acetyltransferase 7	protein-coding
965	chr2	11350327	11352550	+	0	NA	Intergenic	Intergenic	-31311	NR_040615	77543	Mm.490670	NR_040615		8030442B05Rik	-	RIKEN cDNA 8030442B05 gene	ncRNA
1439	chr6	59134797	59136161	+	0	NA	Intergenic	Intergenic	-23385	NM_001081145	68140	Mm.25843	NM_001081145	ENSMUSG00000049232	Tigd2	3632410O17Rik	tigger transposable element derived 2	protein-coding
824	chr17	83944512	83947347	+	0	NA	Intergenic	Intergenic	-32256	NM_001159529	20463	Mm.30072	NM_009187	ENSMUSG00000024248	Cox7a2l	COX7AR|COX7RP|EB1|SIG-81|SIG81|Silg81	cytochrome c oxidase subunit VIIa polypeptide 2-like	protein-coding
1395	chr5	143656340	143672229	+	0	NA	TTS (NM_007393)	TTS (NM_007393)	4119	NM_007393	11461	Mm.328431	NM_007393	ENSMUSG00000029580	Actb	Actx|E430023M04Rik|beta-actin	actin, beta	protein-coding
120	chr10	7895553	7897376	+	0	NA	Intergenic	Intergenic	-220543	NM_138667	68652	Mm.193041	NM_138667	ENSMUSG00000015755	Tab2	1110030N06Rik|A530078N03Rik|Map3k7ip2|mKIAA0733	TGF-beta activated kinase 1/MAP3K7 binding protein 2	protein-coding
286	chr11	78092114	78094322	+	0	NA	exon (NM_001002004, exon 26 of 39)	exon (NM_001002004, exon 26 of 39)	-11125	NM_001287206	216976	Mm.477146	NM_001045522		BC030499	BC037104|Sgk494	cDNA sequence BC030499	protein-coding
1075	chr2	166553983	166556677	+	0	NA	Intergenic	Intergenic	-15998	NM_177782	277360	Mm.34420	NM_177782	ENSMUSG00000039621	Prex1	G630042G04|P-REX1|Setd6	phosphatidylinositol-3,4,5-trisphosphate-dependent Rac exchange factor 1	protein-coding
800	chr17	47145502	47148627	+	0	NA	intron (NM_146078, intron 1 of 46)	CpG	417	NM_146078	224826	Mm.28234	NM_146078	ENSMUSG00000023977	Ubr2	9930021A08Rik|AI462103|AW540746|E130209G04Rik|mKIAA0349	ubiquitin protein ligase E3 component n-recognin 2	protein-coding
1148	chr3	87995758	88047948	+	0	NA	Intergenic	Intergenic	2333	NR_029817	387133		NR_029817		Mir9-1	Mirn9|Mirn9-1|mmu-mir-9-1	microRNA 9-1	ncRNA
254	chr11	30619853	30621862	+	0	NA	Intergenic	Intergenic	-50918	NM_134013	103554	Mm.240066	NM_134013	ENSMUSG00000040850	Psme4	AA409398|AU041366|TEMO|mKIAA0077	proteasome (prosome, macropain) activator subunit 4	protein-coding
392	chr12	77467444	77473436	+	0	NA	promoter-TSS (NM_178744)	promoter-TSS (NM_178744)	11	NM_001172104	109929	Mm.41880	NM_028356	ENSMUSG00000056459	Zbtb25	2810462M08Rik|2900064P18Rik|AI842128|Kup|Zfp-50|Zfp50	zinc finger and BTB domain containing 25	protein-coding
1321	chr5	36959930	36966487	+	0	NA	intron (NM_001081232, intron 2 of 7)	intron (NM_001081232, intron 2 of 7)	-34333	NM_001113362	100855	Mm.486203	NM_133910	ENSMUSG00000029192	Tbc1d14	2810413P16Rik|AU043625|C86258|D5Ertd110e|mKIAA1322	TBC1 domain family, member 14	protein-coding
1365	chr5	112754769	112755298	+	0	NA	promoter-TSS (NM_018783)	promoter-TSS (NM_018783)	-356	NM_018783	54723	Mm.172947	NM_018783	ENSMUSG00000029345	Tfip11	2810002G02Rik|AF097181|AW046167|Srr1|TIP33|Tip39	tuftelin interacting protein 11	protein-coding
1407	chr6	10916886	10924344	+	0	NA	TTS (NR_033776)	TTS (NR_033776)	3763	NR_033776	57866	Mm.4397	NR_033776		AA545190	-	EST AA545190	ncRNA
496	chr13	79074940	79078362	+	0	NA	Intergenic	Intergenic	-738408	NM_010151	13865	Mm.439653	NM_010151	ENSMUSG00000069171	Nr2f1	COUP-TF1|COUP-TFI|COUPTFA|EAR3|Erbal3|SVP44|Tcfcoup1	nuclear receptor subfamily 2, group F, member 1	protein-coding
605	chr14	123911514	123913928	+	0	NA	intron (NM_177393, intron 9 of 43)	intron (NM_177393, intron 9 of 43)	113645	NM_177393	338370	Mm.255348	NM_177393	ENSMUSG00000000197	Nalcn	A530023G15Rik|AI849508|Vgcnl1	sodium leak channel, non-selective	protein-coding
1779	chrX	8777191	8781741	+	0	NA	intron (NM_173414, intron 1 of 4)	intron (NM_173414, intron 1 of 4)	2367	NM_173414	236285	Mm.245119	NM_173414	ENSMUSG00000047344	Lancl3	6030463G20Rik	LanC lantibiotic synthetase component C-like 3 (bacterial)	protein-coding
1568	chr7	106232979	106234967	+	0	NA	intron (NM_178635, intron 5 of 14)	intron (NM_178635, intron 5 of 14)	55681	NM_178635	78610	Mm.323072	NM_178635	ENSMUSG00000035354	Uvrag	9530039D02Rik|AI648770|BB124205|Uvrag1|Uvragl	UV radiation resistance associated gene	protein-coding
607	chr15	4073178	4076064	+	0	NA	intron (NM_024188, intron 13 of 16)	intron (NM_024188, intron 13 of 16)	-97215	NR_028266	414066	Mm.394461	NR_028266		BC037032	-	cDNA Sequence BC037032	ncRNA
1807	chrX	94569630	94573060	+	0	NA	intron (NM_001161432, intron 1 of 7)	intron (NM_001161432, intron 1 of 7)	1203	NM_001161432	245527	Mm.189270	NM_175540	ENSMUSG00000034457	Eda2r	9430060M22Rik|TNFRSF27|Xedar	ectodysplasin A2 receptor	protein-coding
1699	chr9	9268292	9270181	+	0	NA	Intergenic	Intergenic	-30223	NM_027823	71544	Mm.334955	NM_027823	ENSMUSG00000050730	Arhgap42	9030420J04Rik|BE136619	Rho GTPase activating protein 42	protein-coding
813	chr17	66264643	66266816	+	0	NA	Intergenic	Intergenic	-30634	NM_009067	19765	Mm.17009	NM_009067	ENSMUSG00000024096	Ralbp1	RLIP76|Rip1	ralA binding protein 1	protein-coding
42	chr1	75120569	75122308	+	0	NA	TTS (NM_194333)	TTS (NM_194333)	362	NM_029342	75570	Mm.442409	NM_029342		Nhej1	1700029B21Rik|XLF|cernunnos	nonhomologous end-joining factor 1	protein-coding
644	chr15	68436039	68437661	+	0	NA	Intergenic	Intergenic	-263999	NR_029718	387228		NR_029718	miRBase:MI0000549	Mir30d	Mirn30d|mmu-mir-30d	microRNA 30d	ncRNA
759	chr17	9944043	9972696	+	0	NA	intron (NR_045433, intron 3 of 3)	intron (NR_045433, intron 3 of 3)	10362	NR_045433	71092	Mm.243827	NR_045433		4930452A19Rik	4933424P20Rik	RIKEN cDNA 4930452A19 gene	ncRNA
851	chr18	29737805	29740133	+	0	NA	Intergenic	Intergenic	-82899	NR_045391	78058	Mm.416952	NR_045391		4930578E11Rik	-	RIKEN cDNA 4930578E11 gene	ncRNA
1820	chrX	115707459	115713289	+	0	NA	Intergenic	Intergenic	-116028	NM_001142750	100039551	Mm.272850	NM_001142750	ENSMUSG00000063242	Tgif2lx2	-	TGFB-induced factor homeobox 2-like, X-linked 2	protein-coding
399	chr12	82240443	82253741	+	0	NA	intron (NM_022316, intron 5 of 12)	intron (NM_022316, intron 5 of 12)	-20046	NR_037227	100526532		NR_037227		Mir3067	mmu-mir-3067	microRNA 3067	ncRNA
1228	chr4	49796758	49799202	+	0	NA	intron (NM_001276355, intron 2 of 8)	intron (NM_001276355, intron 2 of 8)	60661	NM_001033351	242443	Mm.440095	NM_001033351	ENSMUSG00000039579	Grin3a	6430537F04|A830097C19Rik|NMDAR-L|NR3A|mKIAA1973	glutamate receptor ionotropic, NMDA3A	protein-coding
1073	chr2	163700217	163703849	+	0	NA	intron (NM_183023, intron 2 of 5)	MIRb|SINE|MIR	22547	NM_001030292	241769	Mm.295337	NM_001030292	ENSMUSG00000035238	Kcnk15	KCNK11|KCNK14|KT3.3|TASK5	potassium channel, subfamily K, member 15	protein-coding
235	chr11	16432844	16437373	+	0	NA	Intergenic	Intergenic	-26621	NM_001109971	20335	Mm.325350	NM_011343	ENSMUSG00000078974	Sec61g	-	SEC61, gamma subunit	protein-coding
1811	chrX	99188385	99190548	+	0	NA	intron (NM_001163610, intron 1 of 7)	intron (NM_001163610, intron 1 of 7)	77180	NM_001278534	331474	Mm.23297	NM_183318	ENSMUSG00000049191	Rgag4	6430402L03Rik|Mar5|Mart5|mKIAA2001	retrotransposon gag domain containing 4	protein-coding
694	chr16	31508448	31510183	+	0	NA	Intergenic	Intergenic	80476	NM_001122683	71911	Mm.293470	NM_175177	ENSMUSG00000046598	Bdh1	2310032J20Rik|AI327223|Bdh	3-hydroxybutyrate dehydrogenase, type 1	protein-coding
436	chr13	19045410	19049729	+	0	NA	intron (NM_001289546, intron 1 of 20)	intron (NM_001289546, intron 1 of 20)	7349	NM_001289546	218038	Mm.101650	NM_175007	ENSMUSG00000021314	Amph	-	amphiphysin	protein-coding
1342	chr5	76114616	76117600	+	0	NA	Intergenic	Intergenic	145092	NM_021099	16590	Mm.247073	NM_021099	ENSMUSG00000005672	Kit	Bs|CD117|Fdc|Gsfsco1|Gsfsco5|Gsfsow3|SCO1|SCO5|SOW3|Ssm|Tr-kit|W|c-KIT	kit oncogene	protein-coding
1802	chrX	74253248	74256366	+	0	NA	Intergenic	Intergenic	-406544	NM_001201395	74987	Mm.107996	NM_001201395	ENSMUSG00000079525	4930468A15Rik	-	RIKEN cDNA 4930468A15 gene	protein-coding
94	chr1	172634431	172636529	+	0	NA	3' UTR (NM_001081304, exon 16 of 16)	3' UTR (NM_001081304, exon 16 of 16)	60817	NM_177068	320078	Mm.287131	NM_177068	ENSMUSG00000038463	Olfml2b	1110018N05Rik|4832415H08Rik|AI467542	olfactomedin-like 2B	protein-coding
213	chr10	127494926	127497292	+	0	NA	promoter-TSS (NM_019766)	promoter-TSS (NM_019766)	71	NM_019766	56351	Mm.305816	NM_019766	ENSMUSG00000071072	Ptges3	5730442A20Rik|Ptges|Tebp|cPGES|p23|sid3177	prostaglandin E synthase 3 (cytosolic)	protein-coding
816	chr17	71312920	71313228	+	0	NA	Intergenic	LSU-rRNA_Hsa|rRNA|rRNA	26782	NM_023402	67938	Mm.261329	NM_023402		Myl12b	1500001M02Rik|C77744|Mylc2b|RLC-B	myosin, light chain 12B, regulatory	protein-coding
1103	chr3	27587327	27591697	+	0	NA	intron (NM_173182, intron 1 of 25)	intron (NM_173182, intron 1 of 25)	19849	NM_173182	72007	Mm.38832	NM_173182	ENSMUSG00000039286	Fndc3b	1600019O04Rik|AW550168|Fad104|mKIAA4164	fibronectin type III domain containing 3B	protein-coding
1450	chr6	75551133	75553843	+	0	NA	Intergenic	Intergenic	-1640223	NM_028880	74342	Mm.292568	NM_028880	ENSMUSG00000060780	Lrrtm1	4632401D06Rik|AW125451	leucine rich repeat transmembrane neuronal 1	protein-coding
568	chr14	55668852	55680690	+	0	NA	Intergenic	Intergenic	-17157	NR_004444	432855	Mm.490799	NR_004444	ENSMUSG00000093452	Zfhx2os	Zfhx2as	zinc finger homeobox 2, opposite strand	ncRNA
1062	chr2	146837533	146840113	+	0	NA	promoter-TSS (NM_011917)	promoter-TSS (NM_011917)	27	NM_011917	24128	Mm.3065	NM_011917	ENSMUSG00000027433	Xrn2	-	5'-3' exoribonuclease 2	protein-coding
265	chr11	59544185	59547545	+	0	NA	intron (NR_045476, intron 3 of 5)	intron (NR_045476, intron 3 of 5)	7791	NR_045476	69320	Mm.443242	NR_045476	ENSMUSG00000086330	1700007J10Rik	4930573L17Rik	RIKEN cDNA 1700007J10 gene	ncRNA
296	chr11	93855642	93859214	+	0	NA	promoter-TSS (NM_001199203)	promoter-TSS (NM_001199203)	23	NM_027569	70834	Mm.260737	NM_027569	ENSMUSG00000020859	Spag9	3110018C07Rik|4733401I23Rik|4831406C20Rik|AW552012|JLP|JSAP2|JSAP2a|Jip4|Mapk8ip4|syd1	sperm associated antigen 9	protein-coding
1129	chr3	65777177	65780231	+	0	NA	Intergenic	CpG	-16557	NM_019937	56706	Mm.175612	NM_019937	ENSMUSG00000027829	Ccnl1	2610030E23Rik|AU018493|Ccnl|ania-6a	cyclin L1	protein-coding
791	chr17	37165005	37166482	+	0	NA	Intergenic	Intergenic	-5400	NM_010814	17441	Mm.210857	NM_010814	ENSMUSG00000076439	Mog	B230317G11Rik	myelin oligodendrocyte glycoprotein	protein-coding
171	chr10	78274473	78276270	+	0	NA	intron (NM_009200, intron 8 of 9)	L1MA9|LINE|L1	32130	NM_009200	20513	Mm.6257	NM_009200	ENSMUSG00000005357	Slc1a6	EAAT4	solute carrier family 1 (high affinity aspartate/glutamate transporter), member 6	protein-coding
1143	chr3	81812038	81820460	+	0	NA	intron (NM_021370, intron 7 of 9)	intron (NM_021370, intron 7 of 9)	15405	NM_021370	58170	Mm.88839	NM_021370	ENSMUSG00000028008	Asic5	Accn5|Blinac|Inac	acid-sensing (proton-gated) ion channel family member 5	protein-coding
1700	chr9	10267217	10273477	+	0	NA	intron (NM_001170787, intron 3 of 24)	L2|LINE|L2	375916	NR_105745	102466147		NR_105745	miRBase:MI0021584	Mir6237	mmu-mir-6237	microRNA mir-6237	ncRNA
1355	chr5	100777716	100779506	+	0	NA	Intergenic	Intergenic	66642	NM_026969	69162	Mm.18634	NM_026969	ENSMUSG00000035325	Sec31a	1810024J13Rik|ABP125|ABP130|AU042160|HSPC275|Sec31l1	Sec31 homolog A (S. cerevisiae)	protein-coding
386	chr12	72147275	72152079	+	0	NA	intron (NM_001081195, intron 11 of 23)	intron (NM_001081195, intron 11 of 23)	32723	NM_001081195	238247	Mm.241601	NM_001081195	ENSMUSG00000048118	Arid4a	A630009N03|A630067N03Rik|MmRBBP1|Rbbp1	AT rich interactive domain 4A (RBP1-like)	protein-coding
916	chr19	5786655	5824497	+	0	NA	Intergenic	Intergenic	-2905	NR_002847	72289	Mm.298256	NR_002847	ENSMUSG00000092341	Malat1	2210401K01Rik|9430072K23Rik|AI647968|Neat2	metastasis associated lung adenocarcinoma transcript 1 (non-coding RNA)	ncRNA
1457	chr6	86798264	86802891	+	0	NA	intron (NM_001040106, intron 1 of 20)	intron (NM_001040106, intron 1 of 20)	1066	NM_001040106	269774	Mm.221038	NM_177762	ENSMUSG00000057230	Aak1	5530400K14Rik|9630042K20|AU067724|AU067726|BC028270|C79663|D6Ertd245e|R75501|mKIAA1048	AP2 associated kinase 1	protein-coding
445	chr13	26661118	26686742	+	0	NA	Intergenic	L1_Mus3|LINE|L1	188104	NM_008232	15192	Mm.7411	NM_008232	ENSMUSG00000045835	Hdgfl1	4921520N01Rik|HRP-1|Hdgfrp1|Pwwp1	hepatoma derived growth factor-like 1	protein-coding
200	chr10	111036217	111038672	+	0	NA	Intergenic	Intergenic	-6115	NR_045344	71321	Mm.410785	NR_045344	ENSMUSG00000097082	4933440J02Rik	-	RIKEN cDNA 4933440J02 gene	ncRNA
1339	chr5	68556355	68558400	+	0	NA	exon (NM_001018019, exon 4 of 4)	exon (NM_001018019, exon 4 of 4)	134303	NM_001018019	433899	Mm.332422	NM_001018019	ENSMUSG00000068082	Grxcr1	Tg(Eno2-Gabrb3)0370Brll|pi|tde	glutaredoxin, cysteine rich 1	protein-coding
1261	chr4	105904043	105906567	+	0	NA	Intergenic	Intergenic	-83513	NM_183225	329908	Mm.234544	NM_183225	ENSMUSG00000028514	Usp24	2700066K03Rik|2810030C21Rik|AI414051|B130021E18|C79851	ubiquitin specific peptidase 24	protein-coding
1352	chr5	91532814	91545451	+	0	NA	Intergenic	Intergenic	-29509	NM_009704	11839	Mm.8039	NM_009704	ENSMUSG00000029378	Areg	AR|Sdgf	amphiregulin	protein-coding
329	chr11	118184519	118190052	+	0	NA	intron (NM_011594, intron 1 of 4)	intron (NM_011594, intron 1 of 4)	16563	NM_021440	58251	Mm.439815	NM_021440	ENSMUSG00000076433	BC100451	Ddc8|FS39	cDNA sequence BC100451	protein-coding
525	chr13	106038029	106047638	+	0	NA	intron (NM_027934, intron 2 of 7)	intron (NM_027934, intron 2 of 7)	40261	NM_027934	71816	Mm.317015	NM_027934		Rnf180	3110001E11Rik|Rines	ring finger protein 180	protein-coding
1621	chr8	16836240	16839940	+	0	NA	intron (NM_053171, intron 3 of 69)	URR1B|DNA|MER1_type	-669252	NR_037214	100526464		NR_037214		Mir3106	mmu-mir-3106	microRNA 3106	ncRNA
27	chr1	55215025	55220430	+	0	NA	Intergenic	Intergenic	29638	NM_025283	19070	Mm.291037	NM_025283	ENSMUSG00000025979	Mob4	2610109B12Rik|Mobkl3|Phocn|Prei3	MOB family member 4, phocein	protein-coding
787	chr17	35136522	35140344	+	0	NA	exon (NM_011690, exon 2 of 30)	exon (NM_011690, exon 2 of 30)	581	NM_011690	22321	Mm.28420	NM_011690	ENSMUSG00000007029	Vars	Bat6|D17H6S56E|G7a|Vars2	valyl-tRNA synthetase	protein-coding
1561	chr7	100207819	100244394	+	0	NA	Intergenic	Intergenic	-2283	NM_021427	58238	Mm.113787	NM_021427		Fam181b	A830059I20Rik|AB041569	family with sequence similarity 181, member B	protein-coding
161	chr10	70178897	70181990	+	0	NA	Intergenic	Intergenic	-61732	NR_045292	319646	Mm.483039	NR_045291	ENSMUSG00000037747	D630013N20Rik	-	RIKEN cDNA D630013N20 gene	ncRNA
582	chr14	79488367	79490709	+	0	NA	intron (NM_027906, intron 29 of 44)	intron (NM_027906, intron 29 of 44)	157636	NM_001033215	105590	Mm.486536	NM_001033215	ENSMUSG00000071262	Zfp957	AU017455	zinc finger protein 957	protein-coding
1310	chr5	24346789	24349927	+	0	NA	promoter-TSS (NM_053075)	promoter-TSS (NM_053075)	-179	NM_053075	19744	Mm.319175	NM_053075	ENSMUSG00000028945	Rheb	-	Ras homolog enriched in brain	protein-coding
109	chr1	188333879	188335702	+	0	NA	Intergenic	Intergenic	195081	NM_009367	21808	Mm.18213	NM_009367	ENSMUSG00000039239	Tgfb2	BB105277|Tgf-beta2|Tgfb-2	transforming growth factor, beta 2	protein-coding
557	chr14	37465781	37467979	+	0	NA	Intergenic	Intergenic	281874	NM_028407	72972	Mm.27621	NM_027045	ENSMUSG00000058690	Ccser2	1700012P13Rik|2900054P12Rik|AI035535|AW108503|Fam190b|Gcap14	coiled-coil serine rich 2	protein-coding
718	chr16	64872279	64874289	+	0	NA	Intergenic	Intergenic	21373	NM_178647	106143	Mm.10160	NM_178647	ENSMUSG00000054604	Cggbp1	AA960172|AL023996|AW045841	CGG triplet repeat binding protein 1	protein-coding
1581	chr7	120026548	120028601	+	0	NA	intron (NM_001166585, intron 8 of 10)	intron (NM_001166585, intron 8 of 10)	-69902	NM_175279	78748	Mm.349943	NM_175279	ENSMUSG00000098132	Rassf10	4632411J06Rik	Ras association (RalGDS/AF-6) domain family (N-terminal) member 10	protein-coding
1604	chr7	148209709	148213608	+	0	NA	Intergenic	B3|SINE|B2	-8867	NM_001033632	213002	Mm.276440	NM_001033632	ENSMUSG00000059108	Ifitm6	A330075D07|Dspa2f|Fgls5|fragilis5	interferon induced transmembrane protein 6	protein-coding
1507	chr7	19363397	19366624	+	0	NA	Intergenic	Intergenic	-6641	NR_024208	20958	Mm.423480	NR_024208		Sycp1-ps1	Sycp1-rs	synaptonemal complex protein 1, pseudogene 1	pseudo
1239	chr4	58088773	58094045	+	0	NA	intron (NM_022814, intron 36 of 47)	MTC|LTR|MaLR	-69413	NM_026132	67402	Mm.87357	NM_026132	ENSMUSG00000038709	Txndc8	4930429J24Rik|Sptrx-3|Sptrx3|Trx6	thioredoxin domain containing 8	protein-coding
441	chr13	22065814	22067242	+	0	NA	Intergenic	Intergenic	-6522	NM_001162928	195236	Mm.204664	NM_001162928	ENSMUSG00000016982	Pom121l2	Gm24	POM121 membrane glycoprotein-like 2 (rat)	protein-coding
868	chr18	41989882	41991728	+	0	NA	Intergenic	Intergenic	120043	NM_029942	77619	Mm.30649	NM_029942	ENSMUSG00000056671	Prelid2	1700003A01Rik|C330008K14Rik	PRELI domain containing 2	protein-coding
672	chr15	96289898	96292764	+	0	NA	promoter-TSS (NM_028148)	promoter-TSS (NM_028148)	-57	NM_028148	72193	Mm.324474	NM_028148	ENSMUSG00000033228	Scaf11	1110061H03Rik|2610510E10Rik|AI462454|CASP11|SIP1|SRRP129|Sfrs2ip|Srsf2ip|mKIAA3013	SR-related CTD-associated factor 11	protein-coding
1140	chr3	80409272	80414707	+	0	NA	Intergenic	Intergenic	194724	NM_013540	14800	Mm.220224	NM_013540	ENSMUSG00000033981	Gria2	GluA2|GluR-B|Glur-2|Glur2	glutamate receptor, ionotropic, AMPA2 (alpha 2)	protein-coding
769	chr17	21702930	21705205	+	0	NA	promoter-TSS (NM_001002008)	promoter-TSS (NM_001002008)	57	NM_001002008	381066	Mm.441097	NM_001002008	ENSMUSG00000067931	Zfp948	-	zinc finger protein 948	protein-coding
1556	chr7	98590771	98593411	+	0	NA	intron (NM_011807, intron 1 of 22)	L2b|LINE|L2	352795	NM_011807	23859	Mm.147213	NM_011807		Dlg2	A330103J02Rik|B230218P12Rik|B330007M19Rik|Dlgh2|Gm1197|PSD93	discs, large homolog 2 (Drosophila)	protein-coding
1181	chr3	129234640	129240328	+	0	NA	intron (NM_130450, intron 2 of 4)	intron (NM_130450, intron 2 of 4)	2180	NM_130450	170439	Mm.314113	NM_130450	ENSMUSG00000041220	Elovl6	C77826|FAE|LCE	ELOVL family member 6, elongation of long chain fatty acids (yeast)	protein-coding
275	chr11	69339273	69341927	+	0	NA	intron (NM_001081330, intron 4 of 85)	intron (NM_001081330, intron 4 of 85)	22010	NM_001081330	327954	Mm.247478	NM_177617	ENSMUSG00000005237	Dnah2	2900022L05Rik|4930564A01|D130094J20|D330014H01Rik|Dnahc2|Dnhd3	dynein, axonemal, heavy chain 2	protein-coding
983	chr2	30912569	30927746	+	0	NA	intron (NM_001038700, intron 6 of 14)	MMAR1|DNA|Mariner	31863	NM_001177650	14269	Mm.52297	NM_019406	ENSMUSG00000075415	Fnbp1	1110057E06Rik|2210010H06Rik|FBP1|Fbp17	formin binding protein 1	protein-coding
1809	chrX	96393590	96395746	+	0	NA	Intergenic	C-rich|Low_complexity|Low_complexity	63199	NM_010110	13641	Mm.3374	NM_010110	ENSMUSG00000031217	Efnb1	Cek5-L|EFL-3|Elk-L|Epl2|Eplg2|LERK-2|Lerk2|Stra1	ephrin B1	protein-coding
803	chr17	48546811	48550997	+	0	NA	promoter-TSS (NM_207219)	promoter-TSS (NM_207219)	241	NM_001110832	18044	Mm.4929	NM_010913	ENSMUSG00000023994	Nfya	AA407810|Cbf-b|SEZ-10|SEZ10	nuclear transcription factor-Y alpha	protein-coding
197	chr10	110445900	110449571	+	0	NA	promoter-TSS (NM_172554)	promoter-TSS (NM_172554)	-613	NM_172554	320150	Mm.339281	NM_172554	ENSMUSG00000035798	Zdhhc17	A230053P19Rik|BB187739|D130071N24Rik|Hip14	zinc finger, DHHC domain containing 17	protein-coding
1731	chr9	54502121	54512656	+	0	NA	intron (NM_053178, intron 1 of 13)	intron (NM_053178, intron 1 of 13)	2304	NM_053178	94180	Mm.20592	NM_053178	ENSMUSG00000032281	Acsbg1	BG1|Bgm|E230019G03Rik|Lpd|R75185|mKIAA0631	acyl-CoA synthetase bubblegum family member 1	protein-coding
853	chr18	32069498	32071392	+	0	NA	exon (NM_026006, exon 1 of 1)	exon (NM_026006, exon 1 of 1)	1112	NM_026006	67158	Mm.31537	NM_026006	ENSMUSG00000044982	Sft2d3	2610206C24Rik|AI847965|AW046173	SFT2 domain containing 3	protein-coding
751	chr17	7713855	7715386	+	0	NA	Intergenic	RMER5|LTR|ERV1	-124966	NM_001142539	667055	Mm.327371	NM_001142539	ENSMUSG00000056133	Gm9992	ENSMUSG00000056133	predicted gene 9992	protein-coding
1766	chr9	100542099	100546919	+	0	NA	intron (NM_009282, intron 1 of 33)	CpG	467	NM_009282	20842	Mm.42135	NM_009282	ENSMUSG00000037286	Stag1	AU045003|SA-1|Scc3	stromal antigen 1	protein-coding
1500	chr7	4609342	4612416	+	0	NA	promoter-TSS (NM_172894)	promoter-TSS (NM_172894)	-327	NM_172894	243819	Mm.258670	NM_172894	ENSMUSG00000052296	Ppp6r1	2010309P17Rik|AI836219|B430201G11Rik|D030074N20Rik|Pp6r1|Saps1|mKIAA1115	protein phosphatase 6, regulatory subunit 1	protein-coding
60	chr1	94830207	94832629	+	0	NA	non-coding (NR_015525, exon 2 of 2)	non-coding (NR_015525, exon 2 of 2)	433	NM_011796	23830	Mm.294315	NM_011796	ENSMUSG00000026270	Capn10	AW049679|Capn8|mKIAA1845	calpain 10	protein-coding
1746	chr9	66405737	66411342	+	0	NA	intron (NM_144937, intron 3 of 14)	intron (NM_144937, intron 3 of 14)	32248	NM_144937	235441	Mm.38976	NM_144937	ENSMUSG00000032376	Usp3	AA409661|BC017156	ubiquitin specific peptidase 3	protein-coding
1245	chr4	66143100	66145117	+	0	NA	Intergenic	Intergenic	-78591	NM_207109	56079	Mm.445312	NM_019514	ENSMUSG00000028373	Astn2	1d8|Astnl|bM452J22.1	astrotactin 2	protein-coding
1400	chr5	149776504	149781946	+	0	NA	Intergenic	RMER17C|LTR|ERVK	17399	NR_040686	71473	Mm.90306	NR_040686	ENSMUSG00000079069	8430423G03Rik	-	RIKEN cDNA 8430423G03 gene	ncRNA
1067	chr2	156136319	156139096	+	0	NA	promoter-TSS (NM_027585)	promoter-TSS (NM_027585)	-502	NM_027585	70873	Mm.475234	NM_027585	ENSMUSG00000038085	Cnbd2	4921517L17Rik|5430421B09Rik|Cris	cyclic nucleotide binding domain containing 2	protein-coding
691	chr16	28310647	28313188	+	0	NA	intron (NM_001276419, intron 3 of 4)	intron (NM_001276419, intron 3 of 4)	134244	NM_183064	14167	Mm.7996	NM_010199		Fgf12	AV114868|FGF-12|FHF-1|Fhf1	fibroblast growth factor 12	protein-coding
1676	chr8	110624975	110627230	+	0	NA	Intergenic	Intergenic	482475	NR_077224	109215	Mm.65282	NR_077224		3010033K07Rik	-	RIKEN cDNA 3010033K07 gene	ncRNA
1388	chr5	138403726	138409606	+	0	NA	Intergenic	B1_Mur3|SINE|Alu	-2479	NM_080450	118446	Mm.332771	NM_080450	ENSMUSG00000056966	Gjc3	Cx29|Gje1	gap junction protein, gamma 3	protein-coding
346	chr12	30376721	30393510	+	0	NA	intron (NM_001093776, intron 3 of 24)	intron (NM_001093776, intron 3 of 24)	-13805	NR_046080	328075	Mm.447832	NR_046080		C630031E19Rik	C630031E19	RIKEN cDNA C630031E19 gene	ncRNA
911	chr19	3767061	3769438	+	0	NA	5' UTR (NM_001167886, exon 2 of 11)	5' UTR (NM_001167886, exon 2 of 11)	828	NM_001167885	225888	Mm.278578	NM_144871	ENSMUSG00000045098	Suv420h1	AA117471|C630029K18Rik|KMT5B|Suv4-20h1	suppressor of variegation 4-20 homolog 1 (Drosophila)	protein-coding
1295	chr4	147757395	147759817	+	0	NA	Intergenic	Intergenic	60254	NM_027873	71707	Mm.292503	NM_027873	ENSMUSG00000047719	Ubiad1	1200002M06Rik|AI426463|AW320947|Tere1	UbiA prenyltransferase domain containing 1	protein-coding
427	chr12	107194286	107215093	+	0	NA	Intergenic	B3|SINE|B2	-43784	NM_011705	22367	Mm.2981	NM_011705	ENSMUSG00000021115	Vrk1	51PK	vaccinia related kinase 1	protein-coding
1111	chr3	35302854	35304694	+	0	NA	Intergenic	(T)n|Simple_repeat|Simple_repeat	261311	NR_040748	625963	Mm.251506	NR_040748		Gm6639	-	predicted gene 6639	ncRNA
677	chr15	100056215	100059616	+	0	NA	promoter-TSS (NM_007497)	promoter-TSS (NM_007497)	-375	NM_007497	11908	Mm.676	NM_007497	ENSMUSG00000023027	Atf1	-	activating transcription factor 1	protein-coding
907	chr18	81245377	81251240	+	0	NA	Intergenic	Intergenic	-64991	NM_178280	20689	Mm.215917	NM_178280	ENSMUSG00000024565	Sall3	B130022O04Rik|Msal|Msal-1|Sal|Salt|Spalt	sal-like 3 (Drosophila)	protein-coding
82	chr1	158543425	158548228	+	0	NA	intron (NM_009595, intron 1 of 11)	intron (NM_009595, intron 1 of 11)	56908	NM_001136104	11352	Mm.329515	NM_009595	ENSMUSG00000026596	Abl2	AA536808|Abll|Arg	v-abl Abelson murine leukemia viral oncogene 2 (arg, Abelson-related gene)	protein-coding
650	chr15	74364919	74367804	+	0	NA	intron (NM_174991, intron 2 of 30)	intron (NM_174991, intron 2 of 30)	19735	NM_174991	107831	Mm.43133	NM_174991	ENSMUSG00000034730	Bai1	B830018M07Rik|R75078|mKIAA4089	brain-specific angiogenesis inhibitor 1	protein-coding
1154	chr3	91914041	91916147	+	0	NA	Intergenic	Intergenic	12775	NM_175424	109314	Mm.440617	NM_175424	ENSMUSG00000056270	Prr9	A030004J04Rik	proline rich 9	protein-coding
1210	chr4	25207849	25209911	+	0	NA	promoter-TSS (NM_026194)	promoter-TSS (NM_026194)	88	NM_026194	67490	Mm.226295	NM_026194	ENSMUSG00000040359	Ufl1	1810074P20Rik|AI429228|Kiaa0776|Maxer|Rcad|mKIAA0776	UFM1 specific ligase 1	protein-coding
590	chr14	97986404	97988516	+	0	NA	Intergenic	Intergenic	581524	NM_001038610	13134	Mm.320593	NM_007826	ENSMUSG00000055639	Dach1	Dac|Dach	dachshund 1 (Drosophila)	protein-coding
895	chr18	68851648	68851964	+	0	NA	Intergenic	LSU-rRNA_Hsa|rRNA|rRNA	-47248	NR_105774	102465183		NR_105774	miRBase:MI0021884	Mir6356	mmu-mir-6356	microRNA mir-6356	ncRNA
1763	chr9	90007847	90010098	+	0	NA	intron (NM_001039147, intron 1 of 12)	CpG	686	NM_001039147	21761	Mm.426209	NM_024431	ENSMUSG00000062270	Morf4l1	MORFRG15|MRG15|TEG-189|Tex189|mKIAA4002	mortality factor 4 like 1	protein-coding
69	chr1	121995313	122019072	+	0	NA	Intergenic	RLTR18B|LTR|ERVK	10304	NM_001037999	13167	Mm.2785	NM_007830	ENSMUSG00000026385	Dbi	ACBD1|Acbp|EP|endozepine	diazepam binding inhibitor	protein-coding
1157	chr3	95620828	95624508	+	0	NA	exon (NM_001081293, exon 1 of 11)	exon (NM_001081293, exon 1 of 11)	208	NM_001081293	75137	Mm.196275	NM_028328	ENSMUSG00000028106	Rprd2	2810036A19Rik|4930535B03Rik|6720469I21Rik|AL022841|AL022940|AU021304|BB077382|mKIAA0460	regulation of nuclear pre-mRNA domain containing 2	protein-coding
664	chr15	89259365	89261274	+	0	NA	promoter-TSS (NM_007692)	promoter-TSS (NM_007692)	39	NR_037154	12651	Mm.485045	NM_007692	ENSMUSG00000022617	Chkb	Chetk|Chkl|Ck|Ck/Ek|Ck/Ek-beta|Ckb|Ckekb|Ek	choline kinase beta	protein-coding
1470	chr6	112727552	112729587	+	0	NA	intron (NM_080448, intron 5 of 21)	L1MB5|LINE|L1	-81905	NM_001167730	58186	Mm.103812	NM_021385	ENSMUSG00000030254	Rad18	2810024C04Rik|Rad18sc	RAD18 homolog (S. cerevisiae)	protein-coding
1790	chrX	23131981	23134664	+	0	NA	Intergenic	Intergenic	-136921	NM_175180	72404	Mm.423	NM_175180	ENSMUSG00000036769	Wdr44	2610034K17Rik|9130203L06|RAB11BP|RPH11	WD repeat domain 44	protein-coding
224	chr11	6955018	6957047	+	0	NA	Intergenic	Intergenic	-7460	NM_009622	432530	Mm.259733	NM_009622	ENSMUSG00000020431	Adcy1	AC1|D11Bwg1392e|I-AC|brl|mKIAA4070	adenylate cyclase 1	protein-coding
1690	chr8	125562238	125567456	+	0	NA	intron (NR_037865, intron 1 of 13)	intron (NR_037865, intron 1 of 13)	1337	NR_037865	77087	Mm.31567	NM_001081379	ENSMUSG00000035569	Ankrd11	2410104C19Rik|3010027A04Rik|6330578C09Rik|9530048I21Rik|AA930108|Gm176|Yod	ankyrin repeat domain 11	protein-coding
79	chr1	148688398	148693184	+	0	NA	intron (NM_153539, intron 7 of 7)	Lx8|LINE|L1	345974	NM_001145807	215378	Mm.441817	NM_153539	ENSMUSG00000035131	Brinp3	B830045N13Rik|Fam5c	bone morphogenetic protein/retinoic acid inducible neural specific 3	protein-coding
617	chr15	30200013	30218296	+	0	NA	intron (NM_008729, intron 1 of 22)	intron (NM_008729, intron 1 of 22)	106806	NM_008729	18163	Mm.321648	NM_008729	ENSMUSG00000022240	Ctnnd2	Catnd2|Nprap|neurojugin	catenin (cadherin associated protein), delta 2	protein-coding
1420	chr6	30458146	30461036	+	0	NA	promoter-TSS (NM_027073)	promoter-TSS (NM_027073)	115	NM_178625	72649	Mm.45418	NM_178625	ENSMUSG00000029782	Tmem209	2700094F01Rik|AI428435	transmembrane protein 209	protein-coding
352	chr12	35211627	35215925	+	0	NA	promoter-TSS (NM_024124)	promoter-TSS (NM_024124)	-22	NM_024124	79221	Mm.310551	NM_024124	ENSMUSG00000004698	Hdac9	AV022454|D030072B18Rik|HD7B|HD9|HDRP|Hdac7b|Mitr|mKIAA0744	histone deacetylase 9	protein-coding
1006	chr2	72816048	72819976	+	0	NA	promoter-TSS (NM_001098425)	promoter-TSS (NM_001098425)	491	NM_001018042	20687	Mm.124328	NM_011450	ENSMUSG00000027109	Sp3	D130027J01Rik	trans-acting transcription factor 3	protein-coding
126	chr10	21548043	21550209	+	0	NA	Intergenic	Intergenic	-52864	NM_001161845	20393	Mm.28405	NM_011361	ENSMUSG00000019970	Sgk1	Sgk	serum/glucocorticoid regulated kinase 1	protein-coding
1594	chr7	135109674	135112211	+	0	NA	promoter-TSS (NM_139149)	promoter-TSS (NM_139149)	-51	NM_139149	233908	Mm.277680	NM_139149	ENSMUSG00000030795	Fus	D430004D17Rik|D930039C12Rik|Fus1|Tls	fused in sarcoma	protein-coding
1034	chr2	116795934	116807044	+	0	NA	Intergenic	CpG	75601	NR_040335	320975	Mm.132509	NR_040335	ENSMUSG00000085316	D330050G23Rik	-	RIKEN cDNA D330050G23 gene	ncRNA
251	chr11	28264685	28266395	+	0	NA	Intergenic	Intergenic	218784	NM_001166661	216613	Mm.93759	NM_181577	ENSMUSG00000032878	Ccdc85a	-	coiled-coil domain containing 85A	protein-coding
426	chr12	105305168	105306405	+	0	NA	Intergenic	Intergenic	-10383	NR_002861	321018	Mm.297023	NR_002861		Serpina4-ps1	KALps|Klst	serine (or cysteine) peptidase inhibitor, clade A, member 4, pseudogene 1	pseudo
369	chr12	50475397	50503999	+	0	NA	promoter-TSS (NR_026733)	promoter-TSS (NR_026733)	-941	NR_026733	67293	Mm.185800	NR_026733	ENSMUSG00000089922	3110039M20Rik	-	RIKEN cDNA 3110039M20 gene	ncRNA
996	chr2	57033758	57034887	+	0	NA	promoter-TSS (NR_040356)	promoter-TSS (NR_040356)	80	NR_040633	75279	Mm.401987	NR_040633	ENSMUSG00000086396	4930555B11Rik	-	RIKEN cDNA 4930555B11 gene	ncRNA
1533	chr7	56735064	56737608	+	0	NA	intron (NM_175272, intron 10 of 37)	intron (NM_175272, intron 10 of 37)	155869	NM_001005232	13172	Mm.307176	NM_001005232	ENSMUSG00000030507	Dbx1	AI426026|Dbx	developing brain homeobox 1	protein-coding
1548	chr7	87278795	87280166	+	0	NA	Intergenic	Intergenic	-19244	NM_173011	269951	Mm.246432	NM_173011	ENSMUSG00000030541	Idh2	E430004F23|IDPm|Idh-2	isocitrate dehydrogenase 2 (NADP+), mitochondrial	protein-coding
1435	chr6	50547999	50549531	+	0	NA	Intergenic	Intergenic	-2176	NM_027564	70821	Mm.157323	NM_027564	ENSMUSG00000029828	4921507P07Rik	TISP74	RIKEN cDNA 4921507P07 gene	protein-coding
279	chr11	72254005	72255559	+	0	NA	promoter-TSS (NM_016776)	promoter-TSS (NM_016776)	-98	NM_016776	18432	Mm.147946	NM_016776	ENSMUSG00000040463	Mybbp1a	AL024407|AU019902|P160|p160MBP|p67MBP	MYB binding protein (P160) 1a	protein-coding
651	chr15	75444653	75447915	+	0	NA	promoter-TSS (NM_011759)	promoter-TSS (NM_011759)	-830	NM_001044718	22701	Mm.87210	NM_011759	ENSMUSG00000047003	Zfp41	CTfin92|Zfp-41	zinc finger protein 41	protein-coding
176	chr10	81058090	81069898	+	0	NA	promoter-TSS (NM_053254)	promoter-TSS (NM_053254)	-349	NM_053254	114606	Mm.206764	NM_053254	ENSMUSG00000034758	Tle6	1810057E06Rik|Grg6	transducin-like enhancer of split 6, homolog of Drosophila E(spl)	protein-coding
956	chr19	56621925	56624123	+	0	NA	promoter-TSS (NM_018831)	promoter-TSS (NM_018831)	273	NM_025811	66866	Mm.46346	NM_025811	ENSMUSG00000025078	Nhlrc2	1200003G01Rik|AI835049|AV002846|AW496455	NHL repeat containing 2	protein-coding
483	chr13	60273707	60280379	+	0	NA	3' UTR (NM_008086, exon 1 of 1)	3' UTR (NM_008086, exon 1 of 1)	1853	NM_008086	14451	Mm.22701	NM_008086	ENSMUSG00000052957	Gas1	AW554192|Gas-1	growth arrest specific 1	protein-coding
498	chr13	83031378	83033062	+	0	NA	Intergenic	Intergenic	-610813	NM_001170537	17260	Mm.24001	NM_025282	ENSMUSG00000005583	Mef2c	5430401D19Rik|9930028G15Rik|AV011172|Mef2	myocyte enhancer factor 2C	protein-coding
629	chr15	40993451	40995787	+	0	NA	Intergenic	Intergenic	-284409	NM_001130166	170719	Mm.254267	NM_130885	ENSMUSG00000022307	Oxr1	2210416C20Rik|C7|C7B	oxidation resistance 1	protein-coding
947	chr19	50944918	50949175	+	0	NA	Intergenic	Intergenic	-193910	NM_001290356	58178	Mm.313672	NM_021377	ENSMUSG00000043531	Sorcs1	Sorcs|mSorCS	VPS10 domain receptor protein SORCS 1	protein-coding
1823	chrX	122605962	122606302	+	0	NA	Intergenic	L1_Mur1|LINE|L1	744265	NM_177705	237029	Mm.60998	NM_177705	ENSMUSG00000058670	4932411N23Rik	-	RIKEN cDNA 4932411N23 gene	protein-coding
256	chr11	32166784	32168073	+	0	NA	exon (NM_181569, exon 1 of 13)	exon (NM_181569, exon 1 of 13)	279	NM_181569	17168	Mm.263161	NM_181569	ENSMUSG00000020289	Nprl3	Aag|CGTHBA|HS-26|HS-40|Mare|Phg|Prox1|m(alpha)RE	nitrogen permease regulator-like 3	protein-coding
1487	chr6	129429469	129431437	+	0	NA	Intergenic	Intergenic	-7658	NM_020008	56644	Mm.239516	NM_020008	ENSMUSG00000079293	Clec7a	BGR|Clecsf12|beta-GR	C-type lectin domain family 7, member a	protein-coding
372	chr12	53513405	53514975	+	0	NA	Intergenic	Intergenic	-102874	NM_009706	11855	Mm.35059	NM_009706	ENSMUSG00000035133	Arhgap5	p190-B|p190B	Rho GTPase activating protein 5	protein-coding
1540	chr7	75229291	75232114	+	0	NA	intron (NM_010513, intron 2 of 20)	intron (NM_010513, intron 2 of 20)	133559	NM_010513	16001	Mm.275742	NM_010513		Igf1r	A330103N21Rik|CD221|D930020L01|IGF-1R|hyft	insulin-like growth factor I receptor	protein-coding
920	chr19	10415518	10418064	+	0	NA	Intergenic	Intergenic	-37424	NM_198114	269060	Mm.329718	NM_198114	ENSMUSG00000035735	Dagla	Nsddr	diacylglycerol lipase, alpha	protein-coding
1661	chr8	83972965	83977607	+	0	NA	intron (NM_001297596, intron 1 of 24)	MTC|LTR|MaLR	108825	NM_001297593	234515	Mm.324468	NM_001024617	ENSMUSG00000037940	Inpp4b	E130107I17Rik	inositol polyphosphate-4-phosphatase, type II	protein-coding
1330	chr5	63202259	63213404	+	0	NA	intron (NM_001170705, intron 1 of 8)	intron (NM_001170705, intron 1 of 8)	2769	NM_001170705	100322896	Mm.479821	NM_001170705	ENSMUSG00000090326	Dthd1	Gm17384	death domain containing 1	protein-coding
1284	chr4	133465567	133468121	+	0	NA	Intergenic	CpG	-23132	NM_009097	20111	Mm.301827	NM_009097	ENSMUSG00000003644	Rps6ka1	Mapkapk-1a|Rsk|Rsk-1|Rsk1|S6K-alpha-1|p90-Rsk1|p90Rsk1|p90S6K|p90rsk	ribosomal protein S6 kinase polypeptide 1	protein-coding
428	chr12	111684807	111685225	+	0	NA	promoter-TSS (NM_001135001)	promoter-TSS (NM_001135001)	-373	NM_001135001	26931	Mm.240396	NM_012023	ENSMUSG00000017843	Ppp2r5c	2610043M05Rik|2700063L20Rik|AI060890|AW545884|C85228|D12Bwg0916e|mKIAA0044	protein phosphatase 2, regulatory subunit B', gamma	protein-coding
887	chr18	59540739	59542874	+	0	NA	intron (NM_001081328, intron 2 of 2)	intron (NM_001081328, intron 2 of 2)	-197478	NR_105773	102465182		NR_105773	miRBase:MI0021883	Mir6355	mmu-mir-6355	microRNA mir-6355	ncRNA
1606	chr7	148513066	148514498	+	0	NA	promoter-TSS (NM_027797)	promoter-TSS (NM_027797)	-158	NM_001282076	54006	Mm.28392	NM_016874	ENSMUSG00000058886	Deaf1	AU042387|C230009B13Rik|NUDR	deformed epidermal autoregulatory factor 1 (Drosophila)	protein-coding
1160	chr3	97310302	97311994	+	0	NA	Intergenic	Intergenic	-96046	NM_146275	258272	Mm.377406	NM_146275	ENSMUSG00000051392	Olfr1402	MOR217-1	olfactory receptor 1402	protein-coding
99	chr1	177338298	177342200	+	0	NA	intron (NM_001199003, intron 2 of 17)	intron (NM_001199003, intron 2 of 17)	82427	NM_011880	24012	Mm.7956	NM_011880		Rgs7	-	regulator of G protein signaling 7	protein-coding
72	chr1	128550913	128559976	+	0	NA	intron (NM_001081756, intron 2 of 16)	intron (NM_001081756, intron 2 of 16)	-165940	NM_172484	210356	Mm.377234	NM_172484	ENSMUSG00000049690	Nckap5	8430408F21|D130011D22Rik|E030049G20Rik|Erih1|Erih2|Gm1548|Nap5	NCK-associated protein 5	protein-coding
500	chr13	84484051	84490250	+	0	NA	Intergenic	Intergenic	125249	NM_175187	72745	Mm.295063	NM_175187	ENSMUSG00000035762	Tmem161b	2810446P07Rik|AI843389	transmembrane protein 161B	protein-coding
869	chr18	42803733	42805527	+	0	NA	TTS (NM_028392)	TTS (NM_028392)	-65324	NM_181543	240239	Mm.186779	NM_181543	ENSMUSG00000042816	Gpr151	C130082O03Rik|GalRL|PGR7|nGPCR-2037	G protein-coupled receptor 151	protein-coding
1592	chr7	134613315	134624096	+	0	NA	exon (NM_145589, exon 7 of 11)	exon (NM_145589, exon 7 of 11)	3577	NM_145589	233895	Mm.44183	NM_145589	ENSMUSG00000030822	Prr14	BC006909	proline rich 14	protein-coding
1496	chr6	144892418	144894899	+	0	NA	Intergenic	Intergenic	103674	NM_001024468	12035	Mm.4606	NM_007532	ENSMUSG00000030268	Bcat1	BCATc|Eca39	branched chain aminotransferase 1, cytosolic	protein-coding
1221	chr4	45978022	45987332	+	0	NA	intron (NM_001290475, intron 1 of 16)	intron (NM_001290475, intron 1 of 16)	-2492	NM_146142	100121	Mm.275413	NM_146142	ENSMUSG00000035517	Tdrd7	5730495N10Rik|AI447470|PCTAIRE2BP	tudor domain containing 7	protein-coding
1757	chr9	78022038	78024903	+	0	NA	promoter-TSS (NR_040401)	promoter-TSS (NR_040401)	-251	NR_040401	320295	Mm.131285	NR_040401	ENSMUSG00000097574	C920006O11Rik	-	RIKEN cDNA C920006O11 gene	ncRNA
1200	chr3	158691925	158695462	+	0	NA	Intergenic	Intergenic	-45635	NR_040750	624759	Mm.491054	NR_040750		Gm20752	-	predicted gene, 20752	ncRNA
790	chr17	35832636	35843369	+	0	NA	promoter-TSS (NM_001198833)	promoter-TSS (NM_001198833)	-467	NM_001198833	12305	Mm.5021	NM_007584	ENSMUSG00000003534	Ddr1	6030432F18|AI323681|CD167a|Cak|Nep|PTK3A	discoidin domain receptor family, member 1	protein-coding
533	chr14	8912520	8913843	+	0	NA	intron (NM_025938, intron 1 of 5)	intron (NM_025938, intron 1 of 5)	354	NM_025938	67053	Mm.210048	NM_025938	ENSMUSG00000023156	Rpp14	2610511E03Rik|AA682089	ribonuclease P 14 subunit	protein-coding
918	chr19	9910957	9911503	+	0	NA	Intergenic	Intergenic	62793	NM_016692	16319	Mm.29755	NM_016692	ENSMUSG00000024660	Incenp	2700067E22Rik|AU019509|C130081E20|C77457	inner centromere protein	protein-coding
1682	chr8	113520879	113522427	+	0	NA	promoter-TSS (NM_007916)	promoter-TSS (NM_007916)	70	NM_007916	13680	Mm.287901	NM_007916	ENSMUSG00000015023	Ddx19a	DBP5|Ddx19|Eif4a-rs1	DEAD (Asp-Glu-Ala-Asp) box polypeptide 19a	protein-coding
1413	chr6	17091763	17095376	+	0	NA	Intergenic	Intergenic	-54182	NR_102305	319682	Mm.136046	NR_102304	ENSMUSG00000085171	D830026I12Rik	-	RIKEN cDNA D830026I12 gene	ncRNA
1122	chr3	55177018	55180151	+	0	NA	intron (NM_001111053, intron 3 of 6)	intron (NM_001111053, intron 3 of 6)	-87096	NM_001195539	13175	Mm.393242	NM_019978	ENSMUSG00000027797	Dclk1	1700113D08Rik|2810480F11Rik|AI836758|Click-I|Cpg16|Dcamkl1|Dcl|Dclk|mKIAA0369	doublecortin-like kinase 1	protein-coding
1275	chr4	126753829	126755310	+	0	NA	promoter-TSS (NR_104366)	promoter-TSS (NR_104366)	-58	NM_001285885	100177	Mm.276096	NM_177462	ENSMUSG00000042408	Zmym6	9330177P20Rik|AI593204|AI661340|D4Wsu24e|Zfp258	zinc finger, MYM-type 6	protein-coding
1108	chr3	33337201	33341710	+	0	NA	Intergenic	Intergenic	-297342	NM_001163516	58869	Mm.151332	NM_021483	ENSMUSG00000027674	Pex5l	1700016J08Rik|PXR2|Pex2|TRIP8b	peroxisomal biogenesis factor 5-like	protein-coding
1697	chr9	3403097	3405301	+	0	NA	intron (NM_027545, intron 1 of 17)	intron (NM_027545, intron 1 of 17)	114	NM_027545	244672	Mm.245482	NM_027545	ENSMUSG00000025898	Cwf19l2	3230401L03Rik|9030209E10	CWF19-like 2, cell cycle control (S. pombe)	protein-coding
1598	chr7	137852646	137859988	+	0	NA	intron (NM_021314, intron 1 of 17)	intron (NM_021314, intron 1 of 17)	20247	NM_021314	57752	Mm.86322	NM_021314	ENSMUSG00000030852	Tacc2	mKIAA4180	transforming, acidic coiled-coil containing protein 2	protein-coding
1053	chr2	137257117	137261370	+	0	NA	Intergenic	Intergenic	-316987	NM_013822	16449	Mm.22398	NM_013822	ENSMUSG00000027276	Jag1	ABE2|Gsfabe2|Htu|Ozz|Ser-1	jagged 1	protein-coding
414	chr12	92192244	92194983	+	0	NA	Intergenic	Intergenic	-90675	NR_045858	71349	Mm.442093	NR_045858		5430427M07Rik	-	RIKEN cDNA 5430427M07 gene	ncRNA
462	chr13	41095106	41097051	+	0	NA	promoter-TSS (NM_026550)	promoter-TSS (NM_026550)	-301	NM_026550	68083	Mm.24789	NM_026550	ENSMUSG00000038683	Pak1ip1	5830431I15Rik|5930415H02Rik|AA419825|AI314040|AW556169|Gdpd1|PIP1	PAK1 interacting protein 1	protein-coding
1770	chr9	112110073	112112781	+	0	NA	intron (NM_001177619, intron 1 of 10)	intron (NM_001177619, intron 1 of 10)	8338	NM_001177617	74100	Mm.297444	NM_028755	ENSMUSG00000032503	Arpp21	0710001E13Rik|AI853636|ARPP-21|D9Bwg1012e|R3hdm3|Tarpp	cyclic AMP-regulated phosphoprotein, 21	protein-coding
1014	chr2	80689970	80693627	+	0	NA	Intergenic	Intergenic	212377	NM_001190179	69482	Mm.29200	NM_027091		Nup35	2310006I24Rik|35kDa|5330402E05Rik|MP44|NO44	nucleoporin 35	protein-coding
843	chr18	11951755	11954320	+	0	NA	Intergenic	Intergenic	-44746	NM_022021	63955	Mm.40717	NM_022021	ENSMUSG00000040957	Cables1	Cables|ik3-1	CDK5 and Abl enzyme substrate 1	protein-coding
1491	chr6	136751558	136757750	+	0	NA	Intergenic	ID_B1|SINE|B4	-1702	NM_175652	320332	Mm.246720	NM_175652	ENSMUSG00000096010	Hist4h4	B130044J01Rik	histone cluster 4, H4	protein-coding
1362	chr5	109125382	109127717	+	0	NA	intron (NM_001164259, intron 2 of 5)	intron (NM_001164259, intron 2 of 5)	3301	NM_054071	116701	Mm.35691	NM_054071	ENSMUSG00000008090	Fgfrl1	FGFR5|FGFR5beta|FGFR5gamma	fibroblast growth factor receptor-like 1	protein-coding
1209	chr4	24868769	24871023	+	0	NA	Intergenic	Intergenic	-30670	NM_030733	81006	Mm.160412	NM_030733	ENSMUSG00000040372	Gpr63	PSP24beta|Psp24-2	G protein-coupled receptor 63	protein-coding
1804	chrX	91422416	91424221	+	0	NA	Intergenic	Intergenic	34672	NM_012010	26905	Mm.218851	NM_012010	ENSMUSG00000035150	Eif2s3x	AA409828|AA547477|AI314668|Eif-2gx	eukaryotic translation initiation factor 2, subunit 3, structural gene X-linked	protein-coding
263	chr11	54625033	54627732	+	0	NA	Intergenic	Intergenic	-7039	NR_040284	432562	Mm.406948	NR_040284	ENSMUSG00000086789	Lyrm7os	Gm12228|OTTMUSG00000005674	LYR motif containing 7, opposite strand	ncRNA
632	chr15	44727092	44730386	+	0	NA	Intergenic	Intergenic	15799	NR_033609	239410	Mm.352401	NR_033609		A930017M01Rik	Gm305	Smg-5 homolog, nonsense mediated mRNA decay factor pseudogene	pseudo
1371	chr5	120684825	120686525	+	0	NA	Intergenic	Intergenic	-96403	NR_045793	100503427	Mm.446834	NR_045793	ENSMUSG00000097368	Gm10390	ENSMUSG00000072671	predicted gene 10390	ncRNA
394	chr12	79326331	79329500	+	0	NA	intron (NM_145965, intron 1 of 22)	CpG	273	NM_145965	268566	Mm.341742	NM_145965	ENSMUSG00000047454	Gphn	5730552E08Rik|AI662856|BC027112|C230040D23|GPH|GPHRYN|geph	gephyrin	protein-coding
991	chr2	41325639	41327945	+	0	NA	intron (NM_053011, intron 12 of 90)	intron (NM_053011, intron 12 of 90)	976296	NR_105754	102465171		NR_105754		Mir6336	mmu-mir-6336	microRNA mir-6336	ncRNA
514	chr13	98727833	98731350	+	0	NA	intron (NM_012026, intron 22 of 35)	intron (NM_012026, intron 22 of 35)	246529	NM_012026	110596	Mm.252718	NM_012026	ENSMUSG00000021662	Arhgef28	9230110L08Rik|AI323540|D13Bwg1089e|RIP2|Rgnef|RhoGEF|Rhoip2|p190RhoGEF	Rho guanine nucleotide exchange factor (GEF) 28	protein-coding
610	chr15	8764594	8767132	+	0	NA	Intergenic	Intergenic	-105056	NM_148938	20512	Mm.204834	NM_148938	ENSMUSG00000005360	Slc1a3	AI504299|B430115D02Rik|Eaat1|GLAST|GLAST-1|GLU-T|GluT-1|Gmt1|MGluT1	solute carrier family 1 (glial high affinity glutamate transporter), member 3	protein-coding
725	chr16	77417304	77423977	+	0	NA	intron (NR_015543, intron 2 of 4)	intron (NR_015543, intron 2 of 4)	91067	NR_015543	77994	Mm.394688	NR_015543	ENSMUSG00000090386	2810055G20Rik	D730043B02Rik	RIKEN cDNA 2810055G20 gene	ncRNA
931	chr19	24214904	24218618	+	0	NA	intron (NM_011597, intron 1 of 22)	intron (NM_011597, intron 1 of 22)	31869	NM_001198985	21873	Mm.104744	NM_011597	ENSMUSG00000024812	Tjp2	ZO-2	tight junction protein 2	protein-coding
513	chr13	98513900	98547950	+	0	NA	Intergenic	Intergenic	200970	NR_046157	328314	Mm.138047	NR_046157		Gm5086	B230311A21|EG328314	predicted gene 5086	ncRNA
615	chr15	29104521	29107231	+	0	NA	Intergenic	Intergenic	972355	NM_133365	110082	Mm.248464	NM_133365	ENSMUSG00000022262	Dnah5	AU022615|Dnahc5|Mdnah5|b2b1134Clo|b2b1154Clo|b2b1537Clo|b2b1565Clo|b2b601Clo|mKIAA1603	dynein, axonemal, heavy chain 5	protein-coding
50	chr1	88329509	88345013	+	0	NA	Intergenic	Intergenic	14357	NM_027966	71863	Mm.179627	NM_027966	ENSMUSG00000036574	1700019O17Rik	-	RIKEN cDNA 1700019O17 gene	protein-coding
476	chr13	56667144	56668589	+	0	NA	Intergenic	Intergenic	-17967	NM_010702	16841	Mm.16973	NM_010702	ENSMUSG00000021539	Lect2	-	leukocyte cell-derived chemotaxin 2	protein-coding
1519	chr7	31933135	31937326	+	0	NA	intron (NM_027898, intron 1 of 18)	intron (NM_027898, intron 1 of 18)	839	NM_027898	52857	Mm.27366	NM_027898	ENSMUSG00000001248	Gramd1a	1300003M23Rik|AI415002|AW547240|D7Bwg0611e	GRAM domain containing 1A	protein-coding
1198	chr3	156222167	156225767	+	0	NA	promoter-TSS (NM_001039094)	promoter-TSS (NM_001039094)	684	NR_040398	329782	Mm.183459	NR_040398	ENSMUSG00000085084	4930570G19Rik	C630015G22	RIKEN cDNA 4930570G19 gene	ncRNA
1626	chr8	23914426	23920892	+	0	NA	Intergenic	Intergenic	-1533	NM_001122820	64933	Mm.390023	NM_029505	ENSMUSG00000031539	Ap3m2	5830445E16Rik|AP-3B	adaptor-related protein complex 3, mu 2 subunit	protein-coding
1409	chr6	11983401	11985272	+	0	NA	intron (NM_001168382, intron 16 of 17)	L1_Rod|LINE|L1	75244	NR_003631	625347	Mm.389084	NM_001039041	ENSMUSG00000057223	Gm6578	EG625347	mitochondrial ribosomal protein L32 pseudogene	pseudo
797	chr17	45592354	45594832	+	0	NA	intron (NM_027649, intron 4 of 7)	intron (NM_027649, intron 4 of 7)	18294	NM_027649	71020	Mm.44257	NM_027649	ENSMUSG00000023935	Spats1	1700011H05Rik|4933400B06Rik|Daip2|Ddip|Srsp1	spermatogenesis associated, serine-rich 1	protein-coding
1077	chr2	167315759	167319246	+	0	NA	promoter-TSS (NM_030743)	promoter-TSS (NM_030743)	-643	NM_030743	81018	Mm.22225	NM_030743	ENSMUSG00000006418	Rnf114	1110008J21Rik|AI225886|AW549494|Zfp228|Zfp313|Znf228	ring finger protein 114	protein-coding
1716	chr9	34362655	34368965	+	0	NA	intron (NM_001190912, intron 1 of 15)	intron (NM_001190912, intron 1 of 15)	69494	NM_001190911	67703	Mm.220710	NM_026324		Kirrel3	1500010O20Rik|2900036G11Rik|NEPH2|SST4|mKIAA1867	kin of IRRE like 3 (Drosophila)	protein-coding
1136	chr3	77583708	77587411	+	0	NA	Intergenic	(TC)n|Simple_repeat|Simple_repeat	1364238	NM_001099624	76089	Mm.31220	NM_001099624	ENSMUSG00000062232	Rapgef2	5830453M24Rik|CNRasGEF|Pdzgef1|RA-GEF-1|mKIAA0313|nRapGEP	Rap guanine nucleotide exchange factor (GEF) 2	protein-coding
1175	chr3	116124043	116128866	+	0	NA	5' UTR (NM_001080818, exon 1 of 16)	5' UTR (NM_001080818, exon 1 of 16)	496	NM_001080818	229776	Mm.17647	NM_001080818	ENSMUSG00000033502	Cdc14a	A830059A17Rik|CDC14A2|CDC14a1|Cdc14	CDC14 cell division cycle 14A	protein-coding
293	chr11	87217348	87218531	+	0	NA	promoter-TSS (NM_031386)	promoter-TSS (NM_031386)	58	NM_053269	114714	Mm.37376	NM_053269		Rad51c	R51H3|Rad51l2	RAD51 homolog C	protein-coding
1272	chr4	119860681	119863049	+	0	NA	Intergenic	Intergenic	27836	NM_007902	13615	Mm.284855	NM_007902	ENSMUSG00000028635	Edn2	VIC	endothelin 2	protein-coding
1781	chrX	10568162	10570986	+	0	NA	Intergenic	Intergenic	275083	NM_001166635	68041	Mm.29429	NM_026524	ENSMUSG00000008035	Mid1ip1	3110038L01Rik|Mig12|S14R	Mid1 interacting protein 1 (gastrulation specific G12-like (zebrafish))	protein-coding
1299	chr5	9160474	9162656	+	0	NA	intron (NM_001110327, intron 1 of 16)	CpG	211	NM_001110327	23857	Mm.22480	NM_011806	ENSMUSG00000042508	Dmtf1	Dimp|Dmp1	cyclin D binding myb-like transcription factor 1	protein-coding
1663	chr8	87183971	87190153	+	0	NA	promoter-TSS (NM_010499)	promoter-TSS (NM_010499)	-311	NM_010499	15936	Mm.399	NM_010499	ENSMUSG00000053560	Ier2	AI317238|Ch1|Pip92	immediate early response 2	protein-coding
1236	chr4	57857161	57861649	+	0	NA	intron (NM_009649, intron 1 of 2)	intron (NM_009649, intron 1 of 2)	1285	NM_001035532	11641	Mm.467752	NM_009649	ENSMUSG00000038729	Akap2	AA959716|AI649048|Akap-2|Akap-kl|B230340M18Rik|Prka2	A kinase (PRKA) anchor protein 2	protein-coding
967	chr2	14262029	14264955	+	0	NA	Intergenic	Intergenic	-46533	NM_001012305	277468	Mm.44662	NM_001012305	ENSMUSG00000036949	Slc39a12	AW046938|Gm731	solute carrier family 39 (zinc transporter), member 12	protein-coding
1683	chr8	113707711	113711379	+	0	NA	intron (NM_009149, intron 8 of 25)	intron (NM_009149, intron 8 of 25)	-40147	NR_040364	434350	Mm.442061	NR_040363		9430091E24Rik	-	RIKEN cDNA 9430091E24 gene	ncRNA
1611	chr8	4189432	4194332	+	0	NA	intron (NM_001039578, intron 8 of 10)	ID_B1|SINE|B4	25315	NM_001039578	213027	Mm.437106	NM_153536	ENSMUSG00000011832	Evi5l	1700084G18Rik|2310039H16Rik|3110007G05Rik|B130050I23Rik	ecotropic viral integration site 5 like	protein-coding
1326	chr5	51802678	51804590	+	0	NA	Intergenic	Intergenic	141526	NR_027710	19017	Mm.259072	NM_008904	ENSMUSG00000029167	Ppargc1a	A830037N07Rik|ENSMUSG00000079510|Gm11133|PGC-1|PGC-1v|Pgc-1alpha|Pgc1|Pgco1|Ppargc1	peroxisome proliferative activated receptor, gamma, coactivator 1 alpha	protein-coding
322	chr11	114654258	114658384	+	0	NA	intron (NM_028055, intron 1 of 2)	intron (NM_028055, intron 1 of 2)	885	NM_028055	72014	Mm.38347	NM_028055		Btbd17	1500005I02Rik|Tango10a	BTB (POZ) domain containing 17	protein-coding
645	chr15	69076176	69077871	+	0	NA	Intergenic	Intergenic	318173	NM_010158	13992	Mm.17964	NM_010158	ENSMUSG00000022332	Khdrbs3	Etle|SLM-2|Salp|Slm2|T-STAR	KH domain containing, RNA binding, signal transduction associated 3	protein-coding
469	chr13	47339772	47346132	+	0	NA	3' UTR (NM_001170643, exon 8 of 8)	3' UTR (NM_001170643, exon 8 of 8)	53580	NM_001170643	218215	Mm.287609	NM_146042	ENSMUSG00000038068	Rnf144b	BC025007|E130105P19Rik|Ibrdc2|Pir2	ring finger protein 144B	protein-coding
635	chr15	51027721	51031224	+	0	NA	Intergenic	Intergenic	197684	NR_045092	100502643	Mm.131987	NR_045092		Gm19303	-	predicted gene, 19303	ncRNA
1088	chr2	180953458	180955550	+	0	NA	promoter-TSS (NM_199312)	promoter-TSS (NM_199312)	-217	NM_199312	332713	Mm.23349	NM_199312	ENSMUSG00000047841	BC051628	1700026M20Rik	cDNA sequence BC051628	protein-coding
575	chr14	69705619	69708276	+	0	NA	Intergenic	Intergenic	59601	NM_009285	20855	Mm.20911	NM_009285	ENSMUSG00000014813	Stc1	Stc	stanniocalcin 1	protein-coding
1382	chr5	131824872	131827181	+	0	NA	Intergenic	Intergenic	-42634	NM_145218	212996	Mm.299204	NM_145218		Wbscr17	AA388321|E330012B09Rik	Williams-Beuren syndrome chromosome region 17 homolog (human)	protein-coding
1452	chr6	81608650	81613402	+	0	NA	Intergenic	Intergenic	234631	NR_106091	102465711		NR_106091		Mir7232	mmu-mir-7232	microRNA mir-7232	ncRNA
1176	chr3	120993939	120995594	+	0	NA	promoter-TSS (NM_024178)	promoter-TSS (NM_024178)	31	NM_024178	66789	Mm.269881	NM_024178	ENSMUSG00000039887	Alg14	5430428G01Rik|AI854024	asparagine-linked glycosylation 14	protein-coding
1566	chr7	104726508	104730920	+	0	NA	promoter-TSS (NM_001177947)	promoter-TSS (NM_001177947)	308	NM_001081267	233532	Mm.43977	NM_001081267	ENSMUSG00000035623	Rsf1	4832420A03Rik|C030033M12Rik|Gm164|Hbxap|XAP8|p325	remodeling and spacing factor 1	protein-coding
1815	chrX	100745036	100761349	+	0	NA	Intergenic	Intergenic	12353	NR_033398	668415	Mm.483779	NR_033398		Gm9159	EG668415	predicted gene 9159	pseudo
1039	chr2	123631703	123642041	+	0	NA	Intergenic	Intergenic	-278833	NM_001290997	214968	Mm.330536	NM_172537	ENSMUSG00000027200	Sema6d	1110067B02Rik|AA409156|D330011G23|mKIAA1479	sema domain, transmembrane domain (TM), and cytoplasmic domain, (semaphorin) 6D	protein-coding
979	chr2	27053513	27056309	+	0	NA	intron (NM_138665, intron 17 of 20)	intron (NM_138665, intron 17 of 20)	33884	NM_138942	13166	Mm.167781	NM_138942	ENSMUSG00000000889	Dbh	-	dopamine beta hydroxylase	protein-coding
709	chr16	50528199	50530842	+	0	NA	intron (NR_040379, intron 1 of 5)	CpG	905	NR_040379	619312	Mm.427671	NR_040379		G730013B05Rik	-	RIKEN cDNA G730013B05 gene	ncRNA
1005	chr2	70957743	70963037	+	0	NA	intron (NM_028593, intron 1 of 3)	intron (NM_028593, intron 1 of 3)	4279	NM_028593	73649	Mm.45435	NM_028593	ENSMUSG00000027015	Cybrd1	2210407P13Rik|Dcytb	cytochrome b reductase 1	protein-coding
28	chr1	58085474	58088458	+	0	NA	intron (NM_009676, intron 1 of 34)	intron (NM_009676, intron 1 of 34)	153	NM_009676	11761	Mm.26787	NM_009676	ENSMUSG00000063558	Aox1	AI196512|AI255253|Ao|Aox-1|Aox-2|Aox2|Moro|Ro	aldehyde oxidase 1	protein-coding
40	chr1	70521057	70523572	+	0	NA	intron (NM_029160, intron 15 of 16)	intron (NM_029160, intron 15 of 16)	-249975	NM_177164	320460	Mm.360649	NM_177164	ENSMUSG00000045648	Vwc2l	A830006F12Rik|Brl	von Willebrand factor C domain-containing protein 2-like	protein-coding
310	chr11	106077085	106078995	+	0	NA	promoter-TSS (NM_028074)	promoter-TSS (NM_028074)	-200	NM_028074	72047	Mm.41367	NM_028074	ENSMUSG00000020705	Ddx42	1810047H21Rik|AW319508|AW556242|B430002H05Rik|RHELP|RNAHP|SF3b125	DEAD (Asp-Glu-Ala-Asp) box polypeptide 42	protein-coding
192	chr10	96775202	96777688	+	0	NA	Intergenic	Intergenic	-109667	NR_039547	100628616		NR_039547		Mir3966	mmu-mir-3966|mu-mir-3966	microRNA 3966	ncRNA
589	chr14	94182861	94186346	+	0	NA	intron (NM_001081377, intron 1 of 3)	intron (NM_001081377, intron 1 of 3)	103504	NM_001271800	211712	Mm.37126	NM_001081377		Pcdh9	-	protocadherin 9	protein-coding
1337	chr5	66340910	66342895	+	0	NA	Intergenic	Intergenic	-16461	NM_001081104	231252	Mm.486671	NM_001081104	ENSMUSG00000029205	Chrna9	2410015I05Rik|Acra9|EG666827|Gm8311	cholinergic receptor, nicotinic, alpha polypeptide 9	protein-coding
215	chr10	128215003	128217352	+	0	NA	Intergenic	Intergenic	-11789	NM_001164197	58223	Mm.131266	NM_021412	ENSMUSG00000025355	Mmp19	-	matrix metallopeptidase 19	protein-coding
699	chr16	38087053	38093113	+	0	NA	promoter-TSS (NR_033221)	promoter-TSS (NR_033221)	-737	NR_033221	414072	Mm.483602	NR_033221		BC031361	-	cDNA sequence BC031361	ncRNA
1115	chr3	50821832	50824413	+	0	NA	Intergenic	HAL1|LINE|L1	-205247	NM_009834	12457	Mm.86541	NM_009834	ENSMUSG00000023087	Ccrn4l	AU043840|Ccr4|nocturnin	CCR4 carbon catabolite repression 4-like (S. cerevisiae)	protein-coding
687	chr16	22581705	22584673	+	0	NA	intron (NM_138650, intron 7 of 24)	L2a|LINE|L2	-50932	NR_106170	102465887		NR_106170		Mir8095	mmu-mir-8095	microRNA mir-8095	ncRNA
960	chr19	60964504	60967222	+	0	NA	5' UTR (NM_018869, exon 1 of 16)	5' UTR (NM_018869, exon 1 of 16)	211	NM_018869	14773	Mm.279400	NM_018869	ENSMUSG00000003228	Grk5	Gprk5	G protein-coupled receptor kinase 5	protein-coding
818	chr17	72039116	72043596	+	0	NA	intron (NM_177087, intron 6 of 19)	Charlie23a|DNA|MER1_type	18755	NM_177087	320159	Mm.187372	NM_177087	ENSMUSG00000045761	Fam179a	4632412N22Rik	family with sequence similarity 179, member A	protein-coding
150	chr10	57494562	57525711	+	0	NA	Intergenic	Intergenic	-4214	NM_020561	57319	Mm.2379	NM_020561	ENSMUSG00000019872	Smpdl3a	0610010C24Rik|AI529588|ASM3A|ASML3|ASML3A	sphingomyelin phosphodiesterase, acid-like 3A	protein-coding
1038	chr2	122200647	122204463	+	0	NA	Intergenic	(TTC)n|Simple_repeat|Simple_repeat	-7901	NM_001013829	435684	Mm.458215	NM_001013829	ENSMUSG00000033256	Shf	-	Src homology 2 domain containing F	protein-coding
1707	chr9	21419243	21422141	+	0	NA	promoter-TSS (NM_001174079)	promoter-TSS (NM_001174079)	79	NM_001174078	20586	Mm.286593	NM_011417	ENSMUSG00000032187	Smarca4	Brg1|HP1-BP72|SNF2beta|SW1/SNF|b2b508.1Clo|b2b692Clo	SWI/SNF related, matrix associated, actin dependent regulator of chromatin, subfamily a, member 4	protein-coding
245	chr11	20640387	20643109	+	0	NA	promoter-TSS (NM_181411)	promoter-TSS (NM_181411)	-189	NM_181411	216549	Mm.356580	NM_181411	ENSMUSG00000049659	Aftph	-	aftiphilin	protein-coding
267	chr11	62269090	62272738	+	0	NA	promoter-TSS (NM_177229)	promoter-TSS (NM_177229)	-80	NM_177229	20185	Mm.271814	NM_011308	ENSMUSG00000018501	Ncor1	5730405M06Rik|A230020K14Rik|N-CoR|RIP13|Rxrip13|mKIAA1047	nuclear receptor co-repressor 1	protein-coding
543	chr14	25756887	25760886	+	0	NA	Intergenic	(GA)n|Simple_repeat|Simple_repeat	203841	NR_045718	75862	Mm.109191	NR_045718		4930572O13Rik	-	RIKEN cDNA 4930572O13 gene	ncRNA
1777	chr9	123293471	123295573	+	0	NA	intron (NM_153168, intron 3 of 20)	intron (NM_153168, intron 3 of 20)	18464	NM_153168	102436	Mm.276076	NM_153168	ENSMUSG00000035202	Lars2	AI035546|Kiaa0028|LEURS	leucyl-tRNA synthetase, mitochondrial	protein-coding
826	chr17	84407909	84410048	+	0	NA	Intergenic	Intergenic	-69022	NR_045458	74473	Mm.399575	NR_045458		4933433H22Rik	-	RIKEN cDNA 4933433H22 gene	ncRNA
354	chr12	37235855	37237632	+	0	NA	intron (NM_178629, intron 6 of 9)	intron (NM_178629, intron 6 of 9)	128009	NM_001289503	75847	Mm.261764	NM_178629	ENSMUSG00000043153	Ispd	4930579E17Rik|AV040780	isoprenoid synthase domain containing	protein-coding
1437	chr6	52067924	52070911	+	0	NA	Intergenic	Intergenic	16469	NR_110440	102635415	Mm.333063	NR_110440		Halr1	Gm15055|Haunt|Linchoxa1|OTTMUSG00000018881|linc-Hoxa1	Hoxa adjacent long noncoding RNA 1	ncRNA
1344	chr5	81947504	81949741	+	0	NA	intron (NM_198702, intron 9 of 27)	intron (NM_198702, intron 9 of 27)	498004	NM_198702	319387	Mm.273631	NM_198702	ENSMUSG00000037605	Lphn3	5430402I23Rik|CIRL-3|D130075K09Rik|Gm1379|LEC3|mKIAA0768	latrophilin 3	protein-coding
1064	chr2	148292932	148308038	+	0	NA	Intergenic	ORR1B2|LTR|MaLR	-31214	NM_010740	17064	Mm.681	NM_010740	ENSMUSG00000027435	Cd93	6030404G09Rik|AA145088|AA4.1|AW555904|C1qr1|C1qrp|Ly68	CD93 antigen	protein-coding
757	chr17	9819604	9838773	+	0	NA	Intergenic	Intergenic	33381	NM_001163836	67543	Mm.26987	NM_026226	ENSMUSG00000046173	Pabpc6	4932702K14Rik|AI428050|Pabpc3	poly(A) binding protein, cytoplasmic 6	protein-coding
332	chr12	3886520	3889764	+	0	NA	intron (NM_001271753, intron 6 of 22)	intron (NM_001271753, intron 6 of 22)	-3602	NM_153743	13435	Mm.5001	NM_007872	ENSMUSG00000020661	Dnmt3a	MmuIIIA	DNA methyltransferase 3A	protein-coding
9	chr1	36086750	36088144	+	0	NA	Intergenic	Intergenic	-37798	NM_015818	50785	Mm.213566	NM_015818	ENSMUSG00000045216	Hs6st1	6Ost1	heparan sulfate 6-O-sulfotransferase 1	protein-coding
1099	chr3	25742201	25753469	+	0	NA	intron (NM_001163387, intron 3 of 5)	intron (NM_001163387, intron 3 of 5)	304394	NM_001163387	192167	Mm.316080	NM_138666	ENSMUSG00000063887	Nlgn1	6330415N05Rik|BB179718|NL1|Nlg1|mKIAA1070	neuroligin 1	protein-coding
1217	chr4	40668375	40672160	+	0	NA	promoter-TSS (NR_077226)	promoter-TSS (NR_077226)	304	NM_001164672	15502	Mm.27897	NM_008298	ENSMUSG00000028410	Dnaja1	Hsj2|Nedd7	DnaJ (Hsp40) homolog, subfamily A, member 1	protein-coding
1740	chr9	61761381	61763452	+	0	NA	promoter-TSS (NM_018853)	promoter-TSS (NM_018853)	-99	NM_018853	56040	Mm.3158	NM_018853	ENSMUSG00000007892	Rplp1	2410042H16Rik|Arpp1|C430017H15Rik	ribosomal protein, large, P1	protein-coding
1600	chr7	143236790	143253766	+	0	NA	Intergenic	Intergenic	-214729	NR_102277	77383	Mm.227745	NR_102277		C030029H02Rik	-	RIKEN cDNA C030029H02 gene	ncRNA
34	chr1	63808371	63814840	+	0	NA	intron (NM_001256158, intron 2 of 2)	intron (NM_001256158, intron 2 of 2)	4236	NM_001256158	74426	Mm.159197	NM_001256158	ENSMUSG00000025961	4933402D24Rik	-	RIKEN cDNA 4933402D24 gene	protein-coding
745	chr17	3284512	3286350	+	0	NA	Intergenic	Intergenic	-41142	NM_001122998	24001	Mm.137134	NM_011878	ENSMUSG00000023800	Tiam2	3000002F19Rik|STEF|mKIAA2016	T cell lymphoma invasion and metastasis 2	protein-coding
603	chr14	120874731	120879378	+	0	NA	promoter-TSS (NM_029519)	promoter-TSS (NM_029519)	-629	NM_029519	76108	Mm.261448	NM_029519	ENSMUSG00000051615	Rap2a	5830461H18Rik	RAS related protein 2a	protein-coding
90	chr1	163929093	163931783	+	0	NA	intron (NM_172646, intron 19 of 19)	intron (NM_172646, intron 19 of 19)	-4662	NR_040562	72753	Mm.452125	NR_040562	ENSMUSG00000090260	2810442N19Rik	-	RIKEN cDNA 2810442N19 gene	ncRNA
1410	chr6	16135969	16139850	+	0	NA	Intergenic	Intergenic	467248	NM_175088	16543	Mm.1314	NM_175088	ENSMUSG00000041390	Mdfic	Kdt1|Mdfid	MyoD family inhibitor domain containing	protein-coding
565	chr14	52621627	52643801	+	0	NA	intron (NM_027248, intron 1 of 4)	intron (NM_027248, intron 1 of 4)	1519	NM_001253695	69890	Mm.475652	NM_027248	ENSMUSG00000049295	Zfp219	2010302A17Rik	zinc finger protein 219	protein-coding
620	chr15	34166806	34170059	+	0	NA	intron (NM_033521, intron 1 of 6)	CpG	651	NM_033521	114128	Mm.197518	NM_033521	ENSMUSG00000022257	Laptm4b	C330023P13Rik|LAPTM4beta	lysosomal-associated protein transmembrane 4B	protein-coding
1346	chr5	82714868	82719668	+	0	NA	Intergenic	L2a|LINE|L2	510822	NR_035415	100316803		NR_035415	miRBase:MI0006285	Mir1187	Mirn1187|mmu-mir-1187	microRNA 1187	ncRNA
1434	chr6	49186370	49186691	+	0	NA	Intergenic	LSU-rRNA_Hsa|rRNA|rRNA	-21577	NM_023670	140488	Mm.281018	NM_023670	ENSMUSG00000029814	Igf2bp3	2610101N11Rik|AA522010|AL022933|AU045931|IMP-3|IMP3|Koc13|Neilsen|mimp3	insulin-like growth factor 2 mRNA binding protein 3	protein-coding
850	chr18	25703623	25708447	+	0	NA	intron (NM_001146294, intron 2 of 12)	B4A|SINE|B4	206449	NM_133195	108013	Mm.266435	NM_133195	ENSMUSG00000024268	Celf4	A230070D14Rik|BRUNOL-4|Brul4|Brunol4|C130060B05Rik	CUGBP, Elav-like family member 4	protein-coding
1547	chr7	87168794	87173923	+	0	NA	5' UTR (NM_175433, exon 1 of 5)	5' UTR (NM_175433, exon 1 of 5)	244	NM_175433	209225	Mm.290925	NM_175433	ENSMUSG00000048897	Zfp710	5430400N05Rik|9830165K13|AI324798|Znf710	zinc finger protein 710	protein-coding
1045	chr2	128791407	128794820	+	0	NA	promoter-TSS (NM_178404)	promoter-TSS (NM_178404)	-25	NM_178404	78751	Mm.26377	NM_178404	ENSMUSG00000042851	Zc3h6	4631426G04Rik|4833425H18Rik|AU024389|AW060453|Zc3hdc6|mKIAA2035	zinc finger CCCH type containing 6	protein-coding
891	chr18	63850527	63852736	+	0	NA	intron (NM_016792, intron 1 of 7)	CpG	382	NM_016792	53382	Mm.19169	NM_016792	ENSMUSG00000024583	Txnl1	32kDa|TRP32|Txnl	thioredoxin-like 1	protein-coding
937	chr19	31188399	31190867	+	0	NA	intron (NM_001013833, intron 3 of 17)	intron (NM_001013833, intron 3 of 17)	32302	NM_031249	83410	Mm.22031	NM_031249	ENSMUSG00000053536	Cstf2t	64kDa|C77975|tCstF-64|tauCstF-64	cleavage stimulation factor, 3' pre-RNA subunit 2, tau	protein-coding
1004	chr2	69659253	69665846	+	0	NA	exon (NM_177784, exon 2 of 4)	exon (NM_177784, exon 2 of 4)	2122	NM_177784	277396	Mm.138073	NM_177784	ENSMUSG00000042155	Klhl23	C130068N17Rik	kelch-like 23	protein-coding
1619	chr8	12799420	12803232	+	0	NA	intron (NR_121603, intron 1 of 29)	PB1D9|SINE|Alu	30593	NR_045775	100504249	Mm.441494	NR_045775	ENSMUSG00000084780	Gm15350	OTTMUSG00000020611	predicted gene 15350	ncRNA
16	chr1	42594171	42598884	+	0	NA	Intergenic	Intergenic	155143	NR_027826	66297	Mm.45203	NM_183252	ENSMUSG00000060424	Pantr1	2610017I09Rik|Pou3f3os|linc-Brn1a	POU domain, class 3, transcription factor 3 adjacent noncoding transcript 1	ncRNA
730	chr16	86514309	86518134	+	0	NA	Intergenic	Intergenic	-614851	NM_011782	23794	Mm.112933	NM_011782	ENSMUSG00000022894	Adamts5	9530092O11Rik|ADAM-TS5|ADAMTS1|ADAMTS11|AI481094|ASMP-2	a disintegrin-like and metallopeptidase (reprolysin type) with thrombospondin type 1 motif, 5 (aggrecanase-2)	protein-coding
1360	chr5	104999765	105001320	+	0	NA	Intergenic	RMER13A|LTR|ERVK	45788	NR_030673	100662	Mm.319836	NR_030673	ENSMUSG00000097392	D930016D06Rik	100041172|1110004B06Rik|AI451450|Gm3179	RIKEN cDNA D930016D06 gene	ncRNA
921	chr19	15740440	15745278	+	0	NA	Intergenic	Intergenic	256253	NM_001205339	107272	Mm.289936	NM_177420	ENSMUSG00000024640	Psat1	D8Ertd814e|EPIP|PSA|Psat	phosphoserine aminotransferase 1	protein-coding
1069	chr2	157576287	157579091	+	0	NA	intron (NM_025680, intron 1 of 15)	intron (NM_025680, intron 1 of 15)	14552	NM_025680	66642	Mm.45193	NM_025680	ENSMUSG00000027649	Ctnnbl1	5730471K09Rik|NAP|NYD-SP19|P14L	catenin, beta like 1	protein-coding
233	chr11	12199093	12201373	+	0	NA	intron (NM_172496, intron 9 of 14)	intron (NM_172496, intron 9 of 14)	111910	NM_001282994	12808	Mm.22847	NM_172496	ENSMUSG00000020173	Cobl	-	cordon-bleu WH2 repeat	protein-coding
1013	chr2	80154166	80157495	+	0	NA	5' UTR (NM_024181, exon 1 of 23)	5' UTR (NM_024181, exon 1 of 23)	207	NM_024181	66861	Mm.21762	NM_024181	ENSMUSG00000027006	Dnajc10	1200006L06Rik|D2Ertd706e|ERdj5|JPDI	DnaJ (Hsp40) homolog, subfamily C, member 10	protein-coding
1490	chr6	136737252	136738764	+	0	NA	Intergenic	Intergenic	-7745	NM_001127318	14917	Mm.222729	NM_145067	ENSMUSG00000042638	Gucy2c	AI893437|GC-C|Gcc	guanylate cyclase 2c	protein-coding
1224	chr4	46401607	46403477	+	0	NA	promoter-TSS (NM_029086)	promoter-TSS (NM_029086)	-247	NM_029086	74753	Mm.45973	NM_029086	ENSMUSG00000028331	5830415F09Rik	AV014846|Nap1	RIKEN cDNA 5830415F09 gene	protein-coding
368	chr12	49321250	49325023	+	0	NA	Intergenic	Intergenic	-1160734	NM_001160112	15228	Mm.4704	NM_008241	ENSMUSG00000020950	Foxg1	2900064B05Rik|BF-1|Bf1|Hfh9|Hfhbf1	forkhead box G1	protein-coding
1693	chr8	128595791	128599004	+	0	NA	Intergenic	Intergenic	78395	NM_008430	16525	Mm.10800	NM_008430	ENSMUSG00000033998	Kcnk1	AI788889|TWIK-1	potassium channel, subfamily K, member 1	protein-coding
316	chr11	108891598	108896701	+	0	NA	Intergenic	Intergenic	111534	NR_037978	268498	Mm.227970	NM_001085512	ENSMUSG00000078605	E030025P04Rik	Gm664	RIKEN cDNA E030025P04 gene	ncRNA
1806	chrX	91784718	91790674	+	0	NA	promoter-TSS (NM_019791)	promoter-TSS (NM_019791)	-283	NM_019791	94275	Mm.27578	NM_019791	ENSMUSG00000025151	Maged1	2810433C11Rik|5430405L04Rik|DXBwg1492e|Dlixin|Dlxin-1|Dlxin1|MAGE-D1|NRAGE|mFLJ00163	melanoma antigen, family D, 1	protein-coding
994	chr2	46507763	46525780	+	0	NA	Intergenic	Intergenic	964646	NR_040497	69405	Mm.396184	NR_040497	ENSMUSG00000086202	1700019E08Rik	-	RIKEN cDNA 1700019E08 gene	ncRNA
1738	chr9	60534840	60536604	+	0	NA	promoter-TSS (NM_001146047)	promoter-TSS (NM_001146047)	219	NM_145616	102747	Mm.269413	NM_145616	ENSMUSG00000047766	Lrrc49	AI430817|AW050057|D430025H09Rik|PGs4|p79	leucine rich repeat containing 49	protein-coding
1786	chrX	14081628	14083604	+	0	NA	Intergenic	Intergenic	294342	NM_001034100	385328	Mm.275681	NM_001034100	ENSMUSG00000061065	Gm5382	EG385328	predicted gene 5382	protein-coding
611	chr15	19091314	19092775	+	0	NA	Intergenic	Intergenic	341960	NM_009865	320873	Mm.117794	NM_009865	ENSMUSG00000022321	Cdh10	A830016G23Rik|C030003B10Rik|C030011H18Rik	cadherin 10	protein-coding
1370	chr5	118743375	118745608	+	0	NA	Intergenic	Intergenic	49255	NM_001081236	76792	Mm.103428	NM_001081236		2410131K14Rik	-	RIKEN cDNA 2410131K14 gene	protein-coding
849	chr18	24178297	24185202	+	0	NA	Intergenic	(G)n|Simple_repeat|Simple_repeat	-2477	NM_021559	59057	Mm.417427	NM_021559		Zfp191	3526401F17Rik|5033419P20Rik|AI480505|AI642085|AL024422|KOX17|ZF-12|Znf191|Znf24|Znp191	zinc finger protein 191	protein-coding
11	chr1	37274865	37278150	+	0	NA	intron (NM_001282010, intron 2 of 7)	intron (NM_001282010, intron 2 of 7)	457	NM_009918	12790	Mm.214224	NM_009918	ENSMUSG00000026114	Cnga3	CNG3	cyclic nucleotide gated channel alpha 3	protein-coding
492	chr13	74754297	74756003	+	0	NA	Intergenic	Intergenic	-22170	NM_030711	80898	Mm.83526	NM_030711	ENSMUSG00000021583	Erap1	Arts1|ERAAP|PILSA|PILSAP	endoplasmic reticulum aminopeptidase 1	protein-coding
208	chr10	123684946	123687797	+	0	NA	Intergenic	Intergenic	-219759	NR_028310	75030	Mm.159403	NR_028310		4930503E24Rik	-	eukaryotic translation initiation factor 3, subunit I pseudogene	pseudo
511	chr13	93960966	93963047	+	0	NA	intron (NM_133905, intron 1 of 14)	CpG	232	NM_133905	100715	Mm.242865	NM_133905	ENSMUSG00000042167	Papd4	8030446C20Rik|AI649009|GLD-2|Gld2	PAP associated domain containing 4	protein-coding
842	chr18	7692484	7693924	+	0	NA	Intergenic	CpG	-66343	NM_001161620	75739	Mm.133293	NM_001081287	ENSMUSG00000057440	Mpp7	1110068J02Rik|2810038M04Rik|5430426E14Rik|AI415104|Gm955	membrane protein, palmitoylated 7 (MAGUK p55 subfamily member 7)	protein-coding
1523	chr7	38103493	38106052	+	0	NA	Intergenic	Intergenic	449999	NM_172385	243937	Mm.322505	NM_172385	ENSMUSG00000043456	Zfp536	9630010P11Rik|Znf536|mKIAA0390	zinc finger protein 536	protein-coding
93	chr1	168209237	168214133	+	0	NA	intron (NM_001164528, intron 3 of 9)	intron (NM_001164528, intron 3 of 9)	27415	NM_001164528	100039795	Mm.101743	NM_001164528	ENSMUSG00000040612	Ildr2	2810478N18Rik|3110063L10Rik|AI852300|D1Ertd471e|Dbsm1|ENSMUSG00000040612|Ll	immunoglobulin-like domain containing receptor 2	protein-coding
899	chr18	72384531	72392299	+	0	NA	intron (NM_007831, intron 1 of 28)	intron (NM_007831, intron 1 of 28)	122308	NM_007831	13176	Mm.167882	NM_007831		Dcc	C030036D22Rik|Igdcc1	deleted in colorectal carcinoma	protein-coding
292	chr11	86921008	86925130	+	0	NA	promoter-TSS (NM_175563)	promoter-TSS (NM_175563)	306	NM_025377	66140	Mm.45008	NM_025377		Ska2	1110001A07Rik|C78640|Fam33a	spindle and kinetochore associated complex subunit 2	protein-coding
291	chr11	86358036	86359115	+	0	NA	promoter-TSS (NM_001199046)	promoter-TSS (NM_001199046)	82	NM_001199046	56427	Mm.383207	NM_019756	ENSMUSG00000020513	Tubd1	4930550G19Rik|Tubd	tubulin, delta 1	protein-coding
374	chr12	54218664	54227403	+	0	NA	intron (NM_198111, intron 12 of 13)	L1_Mus3|LINE|L1	-126631	NM_013780	27386	Mm.247044	NM_013780	ENSMUSG00000021010	Npas3	4930423H22Rik|bHLHe12	neuronal PAS domain protein 3	protein-coding
199	chr10	110854735	110857879	+	0	NA	Intergenic	Intergenic	-53941	NM_015781	53605	Mm.290407	NM_015781	ENSMUSG00000058799	Nap1l1	AA407126|AI256722|D10Ertd68e|NAP-1	nucleosome assembly protein 1-like 1	protein-coding
114	chr1	196956258	196958626	+	0	NA	exon (NM_013499, exon 1 of 10)	exon (NM_013499, exon 1 of 10)	322	NM_013499	12946	Mm.301652	NM_013499	ENSMUSG00000016481	Cr1l	Crry|Mcp|mCRY	complement component (3b/4b) receptor 1-like	protein-coding
1306	chr5	20559130	20563095	+	0	NA	intron (NM_011203, intron 1 of 17)	CpG	503	NM_011203	19248	Mm.319117	NM_011203	ENSMUSG00000028771	Ptpn12	P19-PTP|PTP-P19|PTP-PEST|PTPG1	protein tyrosine phosphatase, non-receptor type 12	protein-coding
429	chr12	118344710	118347016	+	0	NA	intron (NM_011215, intron 12 of 22)	intron (NM_011215, intron 12 of 22)	43879	NR_033538	100038689	Mm.445351	NR_033538		Gm10421	ENSMUSG00000072792	predicted gene 10421	ncRNA
1328	chr5	55746207	55747778	+	0	NA	Intergenic	Intergenic	1005761	NR_038045	330086	Mm.254449	NM_177871		Gm10440	D130065D13|ENSMUSG00000072936	predicted gene 10440	ncRNA
1091	chr3	5860306	5860800	+	0	NA	Intergenic	LSU-rRNA_Hsa|rRNA|rRNA	-284305	NM_001163305	19302	Mm.132336	NM_008994	ENSMUSG00000040374	Pex2	D3Ertd138e|PAF-1|PMP35|Pxmp3	peroxisomal biogenesis factor 2	protein-coding
409	chr12	86959900	86962373	+	0	NA	intron (NM_030887, intron 2 of 3)	intron (NM_030887, intron 2 of 3)	20168	NM_001205053	81703	Mm.103560	NM_030887	ENSMUSG00000034271	Jdp2	Jundm2|Jundp2|TIF	Jun dimerization protein 2	protein-coding
73	chr1	133806291	133808361	+	0	NA	exon (NM_175294, exon 1 of 7)	exon (NM_175294, exon 1 of 7)	291	NM_001145804	98415	Mm.246869	NM_175294	ENSMUSG00000026434	Nucks1	2700010L10Rik|8430423A01Rik|AI647518|C78391|Nucks	nuclear casein kinase and cyclin-dependent kinase substrate 1	protein-coding
1737	chr9	60495564	60498158	+	0	NA	intron (NM_145616, intron 9 of 16)	intron (NM_145616, intron 9 of 16)	38480	NM_001146047	102747	Mm.269413	NM_145616	ENSMUSG00000047766	Lrrc49	AI430817|AW050057|D430025H09Rik|PGs4|p79	leucine rich repeat containing 49	protein-coding
67	chr1	112954592	112955433	+	0	NA	Intergenic	Intergenic	-81063	NM_001081386	227485	Mm.322070	NM_001081386	ENSMUSG00000047216	Cdh19	-	cadherin 19, type 2	protein-coding
241	chr11	18913449	18921187	+	0	NA	intron (NM_010789, intron 1 of 11)	intron (NM_010789, intron 1 of 11)	1654	NM_001193271	17268	Mm.356578	NM_010789	ENSMUSG00000020160	Meis1	C530044H18Rik|Evi8	Meis homeobox 1	protein-coding
795	chr17	44298144	44301791	+	0	NA	Intergenic	Intergenic	-25554	NM_172621	224796	Mm.37666	NM_172621	ENSMUSG00000023959	Clic5	5730531E12Rik|B330005L24|Gm322|jbg	chloride intracellular channel 5	protein-coding
812	chr17	65960740	65965050	+	0	NA	promoter-TSS (NM_013933)	promoter-TSS (NM_013933)	0	NM_013933	30960	Mm.266767	NM_013933	ENSMUSG00000024091	Vapa	33kDa|VAP33	vesicle-associated membrane protein, associated protein A	protein-coding
489	chr13	74599443	74601468	+	0	NA	Intergenic	Intergenic	30943	NM_146231	235956	Mm.296909	NM_146231		Zfp825	-	zinc finger protein 825	protein-coding
1609	chr7	152215559	152219517	+	0	NA	Intergenic	Intergenic	-91708	NM_007631	12443	Mm.273049	NM_007631	ENSMUSG00000070348	Ccnd1	AI327039|CycD1|Cyl-1|PRAD1|bcl-1|cD1	cyclin D1	protein-coding
585	chr14	81082350	81084666	+	0	NA	Intergenic	Intergenic	683399	NM_001030294	380924	Mm.26456	NM_001030294	ENSMUSG00000022026	Olfm4	GC1|GW112|Gm296|Gm913|OlfD|pPD4	olfactomedin 4	protein-coding
794	chr17	44160514	44175846	+	0	NA	intron (NM_001286653, intron 4 of 4)	intron (NM_001286653, intron 4 of 4)	-47615	NM_032003	83965	Mm.30145	NM_032003	ENSMUSG00000023960	Enpp5	AW061004|D17Abb1e|E-NPP 5|mKIAA4152	ectonucleotide pyrophosphatase/phosphodiesterase 5	protein-coding
327	chr11	117639859	117643489	+	0	NA	intron (NM_145439, intron 1 of 19)	intron (NM_145439, intron 1 of 19)	261	NM_181321	217353	Mm.286963	NM_145439	ENSMUSG00000025572	Tmc6	D11Ertd204e|EVER1	transmembrane channel-like gene family 6	protein-coding
1392	chr5	141242530	141248575	+	0	NA	intron (NM_010302, intron 2 of 3)	intron (NM_010302, intron 2 of 3)	45471	NM_173405	231842	Mm.491298	NM_173405	ENSMUSG00000050022	Amz1	5330426I05|6530401C20Rik	archaelysin family metallopeptidase 1	protein-coding
1080	chr2	168503746	168505639	+	0	NA	intron (NM_001289446, intron 9 of 27)	intron (NM_001289446, intron 9 of 27)	-38433	NR_105971	102466784		NR_105971		Mir7004	mmu-mir-7004	microRNA mir-7004	ncRNA
944	chr19	42330834	42333992	+	0	NA	intron (NM_027694, intron 1 of 4)	URR1B|DNA|MER1_type	2184	NM_027694	71146	Mm.329851	NM_027694	ENSMUSG00000042532	Golga7b	4933417O08Rik|AI839934	golgi autoantigen, golgin subfamily a, 7B	protein-coding
1780	chrX	10433805	10436257	+	0	NA	Intergenic	Intergenic	140540	NM_001166635	68041	Mm.29429	NM_026524	ENSMUSG00000008035	Mid1ip1	3110038L01Rik|Mig12|S14R	Mid1 interacting protein 1 (gastrulation specific G12-like (zebrafish))	protein-coding
1281	chr4	133283102	133288640	+	0	NA	intron (NM_001080819, intron 1 of 19)	intron (NM_001080819, intron 1 of 19)	-12848	NR_106086	102465707		NR_106086		Mir7227	mmu-mir-7227	microRNA mir-7227	ncRNA
1113	chr3	41211870	41213990	+	0	NA	Intergenic	Intergenic	84191	NR_040385	78706	Mm.366094	NR_040385		C430002E04Rik	-	RIKEN cDNA C430002E04 gene	ncRNA
674	chr15	98904441	98905945	+	0	NA	promoter-TSS (NM_001162506)	promoter-TSS (NM_001162506)	-211	NM_001162506	78733	Mm.124905	NM_030159	ENSMUSG00000032783	Troap	AW476063|E130301L11Rik|tastin	trophinin associated protein	protein-coding
732	chr16	87353899	87355452	+	0	NA	intron (NM_026366, intron 1 of 5)	CpG	245	NM_026366	67768	Mm.296532	NM_026366	ENSMUSG00000044442	N6amt1	5830445C04Rik|Hemk2|Pred28	N-6 adenine-specific DNA methyltransferase 1 (putative)	protein-coding
1317	chr5	32760568	32763022	+	0	NA	intron (NM_172707, intron 1 of 7)	CpG	452	NM_172707	19046	Mm.241931	NM_172707		Ppp1cb	1200010B19	protein phosphatase 1, catalytic subunit, beta isoform	protein-coding
280	chr11	72897204	72902643	+	0	NA	Intergenic	B1_Mus1|SINE|Alu	-4174	NM_172944	16407	Mm.96	NM_008399	ENSMUSG00000005947	Itgae	A530055J10|CD103|aM290|alpha-E1|alpha-M290	integrin alpha E, epithelial-associated	protein-coding
957	chr19	56737442	56741431	+	0	NA	Intergenic	Intergenic	-57426	NM_007419	11554	Mm.46797	NM_007419	ENSMUSG00000035283	Adrb1	Adrb-1|beta-AR	adrenergic receptor, beta 1	protein-coding
273	chr11	67957280	67965533	+	0	NA	intron (NM_018768, intron 7 of 7)	intron (NM_018768, intron 7 of 7)	-72988	NR_105833	102465219		NR_105833	miRBase:MI0021943	Mir6406	mmu-mir-6406	microRNA mir-6406	ncRNA
1603	chr7	146800817	146802681	+	0	NA	intron (NM_001243018, intron 1 of 14)	intron (NM_001243018, intron 1 of 14)	479	NM_001243018	212124	Mm.425507	NM_001243018	ENSMUSG00000070357	E030019B06Rik	Gm170	RIKEN cDNA E030019B06 gene	protein-coding
471	chr13	51659804	51677606	+	0	NA	Intergenic	Intergenic	-6252	NM_009167	20418	Mm.131870	NM_009167	ENSMUSG00000021448	Shc3	N-Shc|Rai|ShcC	src homology 2 domain-containing transforming protein C3	protein-coding
622	chr15	36895738	36898496	+	0	NA	Intergenic	Intergenic	40040	NM_026521	68036	Mm.371631	NM_026521	ENSMUSG00000062397	Zfp706	3110006P09Rik|AA793007|AW536850|C77232|Znf706	zinc finger protein 706	protein-coding
1503	chr7	6387275	6388883	+	0	NA	Intergenic	Intergenic	-4534	NM_177061	257882	Mm.479489	NM_177061	ENSMUSG00000090824	Olfr1344	4930415J05Rik|MOR124-1	olfactory receptor 1344	protein-coding
970	chr2	18313051	18315054	+	0	NA	exon (NM_001190817, exon 1 of 13)	exon (NM_001190817, exon 1 of 13)	405	NM_001190817	13418	Mm.246674	NM_007869	ENSMUSG00000026740	Dnajc1	4733401K02Rik|AA960110|D230036H06Rik|Dnajl1|ERdj1|ERj1p|MTJ1	DnaJ (Hsp40) homolog, subfamily C, member 1	protein-coding
1509	chr7	20299787	20302833	+	0	NA	promoter-TSS (NM_016871)	promoter-TSS (NM_016871)	-532	NM_016871	53333	Mm.416870	NM_016871	ENSMUSG00000002984	Tomm40	AW539759|Mom35|Tom40	translocase of outer mitochondrial membrane 40 homolog (yeast)	protein-coding
1416	chr6	22740779	22753500	+	0	NA	Intergenic	B1_Mur1|SINE|Alu	-78363	NM_001081306	19283	Mm.41639	NM_011219	ENSMUSG00000068748	Ptprz1	AI850339|DSD-1-PG|PTPbeta|PTPzeta|Ptprz|Ptpz|RPTPz|Rptpbeta	protein tyrosine phosphatase, receptor type Z, polypeptide 1	protein-coding
24	chr1	46475185	46476756	+	0	NA	Intergenic	Intergenic	352387	NM_001160386	227058	Mm.296880	NM_001160386	ENSMUSG00000041144	Dnah7b	Dnahc7b|Gm107	dynein, axonemal, heavy chain 7B	protein-coding
1658	chr8	81551557	81555868	+	0	NA	intron (NM_001294279, intron 1 of 14)	CpG	1376	NM_178267	622675	Mm.48724	NM_178267	ENSMUSG00000071064	Zfp827	2810449M09Rik|D630040G17Rik|Znf827	zinc finger protein 827	protein-coding
1325	chr5	48471071	48474167	+	0	NA	intron (NM_001291227, intron 4 of 38)	intron (NM_001291227, intron 4 of 38)	98225	NM_001291228	20563	Mm.289739	NM_178804		Slit2	Drad-1|E030015M03Rik|E130320P19Rik|Slil3|mKIAA4141|slit-2	slit homolog 2 (Drosophila)	protein-coding
104	chr1	182741758	182744961	+	0	NA	intron (NM_008210, intron 1 of 3)	CpG	375	NM_008210	15078	Mm.138832	NM_008210	ENSMUSG00000060743	H3f3a	H3.3A	H3 histone, family 3A	protein-coding
1643	chr8	60467942	60470086	+	0	NA	intron (NM_175032, intron 4 of 11)	intron (NM_175032, intron 4 of 11)	-337162	NM_144731	108150	Mm.62886	NM_144731	ENSMUSG00000031608	Galnt7	AI225872	UDP-N-acetyl-alpha-D-galactosamine: polypeptide N-acetylgalactosaminyltransferase 7	protein-coding
131	chr10	36286089	36288626	+	0	NA	intron (NM_001253355, intron 2 of 5)	intron (NM_001253355, intron 2 of 5)	60744	NM_001253356	319415	Mm.332442	NM_001081208	ENSMUSG00000044499	Hs3st5	D930005L05Rik|Gm1151|Hs3ost5	heparan sulfate (glucosamine) 3-O-sulfotransferase 5	protein-coding
1565	chr7	104392772	104396468	+	0	NA	intron (NM_010248, intron 2 of 9)	L1_Mus1|LINE|L1	79854	NM_001177412	244144	Mm.297541	NM_001177412	ENSMUSG00000035713	Usp35	Gm1088|Gm493	ubiquitin specific peptidase 35	protein-coding
1558	chr7	100080658	100083423	+	0	NA	3' UTR (NM_028243, exon 9 of 9)	3' UTR (NM_028243, exon 9 of 9)	58277	NM_028243	72461	Mm.389969	NM_028243	ENSMUSG00000061119	Prcp	2510048K03Rik|2610104A14Rik|AI451719|HUMPCP|PCP	prolylcarboxypeptidase (angiotensinase C)	protein-coding
502	chr13	84751378	84753716	+	0	NA	Intergenic	Intergenic	390646	NM_175187	72745	Mm.295063	NM_175187	ENSMUSG00000035762	Tmem161b	2810446P07Rik|AI843389	transmembrane protein 161B	protein-coding
1286	chr4	135838016	135847483	+	0	NA	intron (NM_009557, intron 1 of 2)	intron (NM_009557, intron 1 of 2)	765	NM_009557	22704	Mm.1504	NM_009557	ENSMUSG00000051351	Zfp46	AI426962|Mlz-4|Zfp-46|Znf436	zinc finger protein 46	protein-coding
314	chr11	107881565	107883384	+	0	NA	intron (NM_011101, intron 5 of 16)	intron (NM_011101, intron 5 of 16)	24312	NR_106082	102465705		NR_106082	miRBase:MI0023718	Mir7223	mmu-mir-7223	microRNA mir-7223	ncRNA
1796	chrX	69060814	69062875	+	0	NA	promoter-TSS (NM_001081356)	promoter-TSS (NM_001081356)	-253	NM_001081356	67048	Mm.41102	NM_001081356	ENSMUSG00000073131	Vma21	2610030H06Rik|AI840175	VMA21 vacuolar H+-ATPase homolog (S. cerevisiae)	protein-coding
1635	chr8	37064810	37067170	+	0	NA	Intergenic	Intergenic	-91892	NM_172911	244418	Mm.244971	NM_172911	ENSMUSG00000050271	D8Ertd82e	9830148H23|Sgk223|mFLJ00269	DNA segment, Chr 8, ERATO Doi 82, expressed	protein-coding
1237	chr4	57877671	57881081	+	0	NA	intron (NM_009649, intron 2 of 2)	intron (NM_009649, intron 2 of 2)	11942	NM_001035533	11641	Mm.467752	NM_009649	ENSMUSG00000038729	Akap2	AA959716|AI649048|Akap-2|Akap-kl|B230340M18Rik|Prka2	A kinase (PRKA) anchor protein 2	protein-coding
1513	chr7	26538529	26541747	+	0	NA	promoter-TSS (NM_178089)	promoter-TSS (NM_178089)	-399	NM_144922	232989	Mm.254223	NM_144922	ENSMUSG00000040725	Hnrnpul1	E130317O14Rik|E1B-AP5|E1BAP5|Hnrnpul|Hnrpul1	heterogeneous nuclear ribonucleoprotein U-like 1	protein-coding
1502	chr7	5849924	5852153	+	0	NA	Intergenic	ETnERV2-int|LTR|ERVK	-14894	NM_207544	404285	Mm.377929	NM_207544	ENSMUSG00000058399	Vmn1r64	V1rd11	vomeronasal 1 receptor 64	protein-coding
1264	chr4	109957252	109959890	+	0	NA	intron (NM_001163397, intron 1 of 5)	intron (NM_001163397, intron 1 of 5)	868	NM_010488	15572	Mm.3970	NM_010488	ENSMUSG00000028546	Elavl4	Elav|Hud|PNEM	ELAV (embryonic lethal, abnormal vision, Drosophila)-like 4 (Hu antigen D)	protein-coding
355	chr12	37967339	37969449	+	0	NA	5' UTR (NM_178767, exon 1 of 13)	5' UTR (NM_178767, exon 1 of 13)	168	NM_178767	319660	Mm.485540	NM_178767	ENSMUSG00000050103	Agmo	A530016O06Rik|AI790538|Tmem195	alkylglycerol monooxygenase	protein-coding
159	chr10	62590690	62591802	+	0	NA	intron (NM_182992, intron 13 of 19)	intron (NM_182992, intron 13 of 19)	28342	NM_016864	53404	Mm.228661	NM_016864	ENSMUSG00000036816	Atoh7	Math5|bHLHa13	atonal homolog 7 (Drosophila)	protein-coding
553	chr14	32472544	32485045	+	0	NA	intron (NM_025295, intron 2 of 3)	intron (NM_025295, intron 2 of 3)	24551	NM_025295	26363	Mm.282679	NM_025295	ENSMUSG00000021900	Btd	-	biotinidase	protein-coding
747	chr17	4906135	4909983	+	0	NA	Intergenic	CpG	-87015	NM_001085355	239985	Mm.133401	NM_001085355	ENSMUSG00000069729	Arid1b	8030481M12|9330189K18Rik|AI836955|Ardi1b|B230217J03Rik|mKIAA1235	AT rich interactive domain 1B (SWI-like)	protein-coding
1252	chr4	83475647	83479285	+	0	NA	intron (NM_001081012, intron 25 of 25)	intron (NM_001081012, intron 25 of 25)	306017	NM_001081012	320226	Mm.180032	NM_029117	ENSMUSG00000052407	Ccdc171	4930418J05Rik|4930473A06Rik|A330015D16Rik	coiled-coil domain containing 171	protein-coding
1633	chr8	35742602	35744312	+	0	NA	Intergenic	Intergenic	-40087	NR_040706	330734	Mm.149998	NR_040706		B930018H19Rik	B930018H19	RIKEN cDNA B930018H19 gene	ncRNA
555	chr14	35028303	35029752	+	0	NA	Intergenic	Intergenic	-4205	NM_176931	319508	Mm.228006	NM_176931	ENSMUSG00000041479	Syt15	CHR10SYT|E230025K04Rik|sytXV	synaptotagmin XV	protein-coding
1037	chr2	121781034	121783448	+	0	NA	promoter-TSS (NM_008545)	promoter-TSS (NM_008545)	-413	NM_008545	17147	Mm.389349	NM_008545		Mageb3	Mage-b3|Mage-ps1|Mage-rs3|Smage3	melanoma antigen, family B, 3	protein-coding
47	chr1	82472409	82474145	+	0	NA	intron (NM_007735, intron 37 of 47)	intron (NM_007735, intron 37 of 47)	110147	NM_007735	12829	Mm.40253	NM_007735		Col4a4	E130010M05Rik|[a]4(IV)	collagen, type IV, alpha 4	protein-coding
1427	chr6	35404963	35414218	+	0	NA	Intergenic	Intergenic	80298	NM_008098	14489	Mm.182746	NM_008098	ENSMUSG00000029840	Mtpn	5033418D15Rik|Gcdp|V1	myotrophin	protein-coding
1484	chr6	124958124	124960858	+	0	NA	promoter-TSS (NM_175557)	promoter-TSS (NM_175557)	-196	NM_175557	269800	Mm.108677	NM_175557	ENSMUSG00000038346	Zfp384	BB163993|C130073D16Rik|Ciz|NP|Nmp4	zinc finger protein 384	protein-coding
37	chr1	66355000	66375821	+	0	NA	intron (NM_001039934, intron 3 of 14)	intron (NM_001039934, intron 3 of 14)	143507	NM_001039934	17756	Mm.256966	NM_008632	ENSMUSG00000015222	Map2	G1-397-34|MAP-2|Mtap-2|Mtap2|repro4	microtubule-associated protein 2	protein-coding
1017	chr2	90618587	90624768	+	0	NA	TTS (NM_018828)	TTS (NM_018828)	-1224	NM_178755	271813	Mm.61146	NM_178755	ENSMUSG00000040812	Agbl2	4930524K04|A430081C19Rik|CCP2	ATP/GTP binding protein-like 2	protein-coding
855	chr18	34403607	34422587	+	0	NA	intron (NM_007462, intron 1 of 15)	intron (NM_007462, intron 1 of 15)	-31671	NR_040534	633395	Mm.414290	NR_040534	ENSMUSG00000073607	Gm10548	ENSMUSG00000073607	ribosomal protein L29 pseudogene	pseudo
270	chr11	64302602	64305097	+	0	NA	intron (NM_178870, intron 1 of 1)	intron (NM_178870, intron 1 of 1)	-53673	NR_028445	654805	Mm.436132	NR_028445		F930015N05Rik	-	RIKEN cDNA F930015N05 gene	ncRNA
195	chr10	107555533	107573776	+	0	NA	Intergenic	Intergenic	-34802	NM_027892	17931	Mm.422959	NM_027892	ENSMUSG00000019907	Ppp1r12a	1200015F06Rik|5730577I22Rik|AA792106|AV099298|D10Ertd625e|Mypt1	protein phosphatase 1, regulatory (inhibitor) subunit 12A	protein-coding
1057	chr2	144353168	144354006	+	0	NA	promoter-TSS (NM_172859)	promoter-TSS (NM_172859)	106	NM_029763	70408	Mm.389351	NM_029763	ENSMUSG00000027427	Polr3f	2810411G20Rik|3010019O03Rik|3110032A07Rik|RPC39|RPC6	polymerase (RNA) III (DNA directed) polypeptide F	protein-coding
1706	chr9	21313965	21315603	+	0	NA	promoter-TSS (NM_010744)	promoter-TSS (NM_010744)	-154	NM_010744	17083	Mm.196618	NM_010744	ENSMUSG00000032180	Tmed1	Il1rl1l|Ly84l|St2l	transmembrane emp24 domain containing 1	protein-coding
538	chr14	17196281	17199433	+	0	NA	5' UTR (NM_009409, exon 1 of 36)	5' UTR (NM_009409, exon 1 of 36)	137	NM_009409	21974	Mm.130362	NM_009409	ENSMUSG00000017485	Top2b	D230016L12Rik|Top-2	topoisomerase (DNA) II beta	protein-coding
1788	chrX	19734598	19739530	+	0	NA	intron (NM_177353, intron 10 of 16)	intron (NM_177353, intron 10 of 16)	100368	NM_021715	60322	Mm.44827	NM_021715	ENSMUSG00000037347	Chst7	2600013M07Rik|C6ST-2|GST5|Gn6st-4	carbohydrate (N-acetylglucosamino) sulfotransferase 7	protein-coding
679	chr16	3780036	3782037	+	0	NA	Intergenic	Intergenic	36937	NM_148924	74120	Mm.29081	NM_148924	ENSMUSG00000022529	Zfp263	1200014J04Rik|AI326880|AU020888|NT2|mFPM315	zinc finger protein 263	protein-coding
680	chr16	10411519	10412646	+	0	NA	promoter-TSS (NM_011955)	promoter-TSS (NM_011955)	51	NM_011955	26425	Mm.29037	NM_011955	ENSMUSG00000022503	Nubp1	-	nucleotide binding protein 1	protein-coding
831	chr17	91051156	91055066	+	0	NA	intron (NM_177284, intron 6 of 20)	intron (NM_177284, intron 6 of 20)	-207398	NR_045463	78800	Mm.410772	NR_045463	ENSMUSG00000090160	4930480K15Rik	-	RIKEN cDNA 4930480K15 gene	ncRNA
1602	chr7	144628803	144631074	+	0	NA	intron (NR_033611, intron 1 of 10)	MIR|SINE|MIR	581	NR_033611	620016	Mm.388932	NR_033611	ENSMUSG00000049494	Gm12669	OTTMUSG00000007920	glutaredoxin 3 pseudogene	pseudo
1147	chr3	86953272	86963559	+	0	NA	intron (NM_001170985, intron 1 of 15)	intron (NM_001170985, intron 1 of 15)	20254	NM_001170985	170643	Mm.89552	NM_130867	ENSMUSG00000041734	Kirrel	6720469N11Rik|Kirrel1|Neph1	kin of IRRE like (Drosophila)	protein-coding
521	chr13	103342338	103344518	+	0	NA	Intergenic	Intergenic	-140210	NM_008533	17079	Mm.373974	NM_008533	ENSMUSG00000021624	Cd180	F630107B15|Ly78|RP105	CD180 antigen	protein-coding
1332	chr5	64932162	64933954	+	0	NA	Intergenic	Intergenic	64811	NR_045413	77382	Mm.366742	NR_045411		C030018K13Rik	-	RIKEN cDNA C030018K13 gene	ncRNA
162	chr10	70227839	70231317	+	0	NA	Intergenic	Intergenic	-110867	NR_045292	319646	Mm.483039	NR_045291	ENSMUSG00000037747	D630013N20Rik	-	RIKEN cDNA D630013N20 gene	ncRNA
1241	chr4	63119437	63122173	+	0	NA	TTS (NM_001276371)	TTS (NM_001276371)	36220	NM_001008793	73750	Mm.300397	NM_028640	ENSMUSG00000039137	Whrn	1110035G07Rik|AW122018|AW742671|C430046P22Rik|Dfnb31|wi	whirlin	protein-coding
433	chr13	5859348	5871605	+	0	NA	intron (NM_011803, intron 2 of 3)	intron (NM_011803, intron 2 of 3)	4741	NM_011803	23849	Mm.275036	NM_011803	ENSMUSG00000000078	Klf6	AI448727|BCD1|C86813|CPBP|Copeb|FM2|FM6|Ierepo1|Ierepo3|R75280|Zf9	Kruppel-like factor 6	protein-coding
880	chr18	49914677	49916374	+	0	NA	promoter-TSS (NM_001170960)	promoter-TSS (NM_001170960)	-270	NM_001170960	68857	Mm.96010	NM_026854	ENSMUSG00000024505	Dtwd2	1190002H09Rik|8030470C17Rik|AI414673|BB115449	DTW domain containing 2	protein-coding
1441	chr6	63826214	63829196	+	0	NA	intron (NM_008167, intron 2 of 15)	(TG)n|Simple_repeat|Simple_repeat	620854	NM_008167	14804	Mm.439651	NM_008167		Grid2	B230104L07Rik|GluD2|GluRdelta2|Lc|Lc<J>|MMS10-AC|Ms10ac|cpr|ho|nmf408|tpr	glutamate receptor, ionotropic, delta 2	protein-coding
647	chr15	72920125	72921911	+	0	NA	intron (NM_053068, intron 1 of 2)	CpG	176	NM_053068	93696	Mm.23095	NM_053068	ENSMUSG00000068391	Chrac1	2410152E03Rik|2810406L04Rik|YCL1	chromatin accessibility complex 1	protein-coding
1399	chr5	147965952	147969611	+	0	NA	Intergenic	Intergenic	-32491	NM_008178	14842	Mm.4797	NM_008178	ENSMUSG00000053129	Gsx1	Gsh-1|Gsh1	GS homeobox 1	protein-coding
1206	chr4	22283779	22286235	+	0	NA	intron (NR_104380, intron 1 of 8)	CpG	317	NR_104380	269514	Mm.40708	NM_172988	ENSMUSG00000040410	Fbxl4	AI836810|FBL4|FBL5	F-box and leucine-rich repeat protein 4	protein-coding
334	chr12	8392559	8394303	+	0	NA	Intergenic	Intergenic	73192	NM_021429	58240	Mm.309954	NM_021429	ENSMUSG00000020605	Hs1bp3	-	HCLS1 binding protein 3	protein-coding
786	chr17	35117529	35119700	+	0	NA	promoter-TSS (NM_030597)	promoter-TSS (NM_030597)	-185	NM_001110101	27756	Mm.165735	NM_030597	ENSMUSG00000007050	Lsm2	D17H6S56E-2|D17H6S56E2|Dmapl|Dmpkap|G7b|Sm-X5|SmX5|snRNP	LSM2 homolog, U6 small nuclear RNA associated (S. cerevisiae)	protein-coding
986	chr2	32266556	32308193	+	0	NA	promoter-TSS (NM_001164358)	promoter-TSS (NM_001164358)	-703	NM_001164358	227731	Mm.37395	NM_146118	ENSMUSG00000026819	Slc25a25	1110030N17Rik|MCSC|mKIAA1896	solute carrier family 25 (mitochondrial carrier, phosphate carrier), member 25	protein-coding
1117	chr3	51511836	51513624	+	0	NA	intron (NM_001004176, intron 2 of 4)	intron (NM_001004176, intron 2 of 4)	47615	NM_174995	211666	Mm.24679	NM_174995	ENSMUSG00000074604	Mgst2	GST2|MGST-II	microsomal glutathione S-transferase 2	protein-coding
740	chr16	92951959	92956116	+	0	NA	Intergenic	Intergenic	-127718	NM_001111022	12394	Mm.4081	NM_009821	ENSMUSG00000022952	Runx1	AML1|CBF-alpha-2|Cbfa2|Pebp2a2|Pebpa2b	runt related transcription factor 1	protein-coding
1008	chr2	73936669	73938828	+	0	NA	Intergenic	Intergenic	-188397	NM_175015	228033	Mm.2966	NM_175015	ENSMUSG00000018770	Atp5g3	6030447M23	ATP synthase, H+ transporting, mitochondrial F0 complex, subunit C3 (subunit 9)	protein-coding
1027	chr2	108525410	108527742	+	0	NA	Intergenic	MIR3|SINE|MIR	591871	NM_029790	76894	Mm.330451	NM_029790	ENSMUSG00000057234	Mettl15	0610027B03Rik|AI303697|AW049952|Mett5d1	methyltransferase like 15	protein-coding
103	chr1	180335019	180338045	+	0	NA	intron (NM_026626, intron 1 of 6)	CpG	520	NM_026626	68226	Mm.252132	NM_026626	ENSMUSG00000026495	Efcab2	1700073K01Rik|D830011E08Rik	EF-hand calcium binding domain 2	protein-coding
201	chr10	114751250	114754197	+	0	NA	promoter-TSS (NM_024454)	promoter-TSS (NM_024454)	-76	NM_024454	216344	Mm.21936	NM_024454	ENSMUSG00000020132	Rab21	9630024B22	RAB21, member RAS oncogene family	protein-coding
871	chr18	43341761	43343902	+	0	NA	Intergenic	Intergenic	-24520	NM_178749	269019	Mm.150401	NM_178749	ENSMUSG00000039954	Stk32a	A930015B13Rik|YANK1	serine/threonine kinase 32A	protein-coding
1401	chr5	150182304	150183741	+	0	NA	Intergenic	Intergenic	-31359	NM_027519	70717	Mm.252139	NM_027519	ENSMUSG00000029659	Medag	6330406I15Rik|Awms3|MEDA-4|Meda4|mAWMS3	mesenteric estrogen dependent adipogenesis	protein-coding
1680	chr8	112443178	112445830	+	0	NA	intron (NM_001122594, intron 10 of 18)	intron (NM_001122594, intron 10 of 18)	41601	NM_212447	73608	Mm.86833	NM_028584	ENSMUSG00000001672	Marveld3	1810006A16Rik|AI642133|Marvd3|Mrvldc3	MARVEL (membrane-associating) domain containing 3	protein-coding
423	chr12	104186546	104188677	+	0	NA	5' UTR (NM_001081017, exon 1 of 49)	5' UTR (NM_001081017, exon 1 of 49)	542	NM_001081017	217843	Mm.387073	NM_177621	ENSMUSG00000021198	Unc79	9030205A07Rik|Mlca3	unc-79 homolog (C. elegans)	protein-coding
719	chr16	66136760	66139637	+	0	NA	Intergenic	Intergenic	322320	NM_028572	73569	Mm.25670	NM_028572	ENSMUSG00000091243	Vgll3	1700110N18Rik|4832416J22|C80713|Vgl-3|Vito-2	vestigial like 3 (Drosophila)	protein-coding
1139	chr3	79903034	79904975	+	0	NA	Intergenic	MLT1J|LTR|MaLR	214152	NM_133187	68659	Mm.427274	NM_133187	ENSMUSG00000027955	Fam198b	1110032E23Rik|2210419I08Rik|AV011458|Ened	family with sequence similarity 198, member B	protein-coding
1319	chr5	33720394	33722257	+	0	NA	promoter-TSS (NM_001081101)	promoter-TSS (NM_001081101)	-20	NM_001081101	71101	Mm.132178	NM_001081101	ENSMUSG00000037355	Uvssa	4933407H18Rik|D330017J19Rik|Kiaa1530|mKIAA1530	UV stimulated scaffold protein A	protein-coding
1826	chrX	146912077	146913823	+	0	NA	Intergenic	Intergenic	-19257	NM_001164683	382245	Mm.277309	NM_001164683	ENSMUSG00000041353	Tmem29	2700081K05Rik|6330540D07Rik|CXorf44-like	transmembrane protein 29	protein-coding
1529	chr7	52270843	52275109	+	0	NA	promoter-TSS (NM_009101)	promoter-TSS (NM_009101)	-401	NM_009101	20130	Mm.389894	NM_009101	ENSMUSG00000038387	Rras	AI573426	Harvey rat sarcoma oncogene, subgroup R	protein-coding
902	chr18	74506695	74508746	+	0	NA	intron (NR_029424, intron 8 of 8)	intron (NR_029424, intron 8 of 8)	64966	NM_028948	74453	Mm.182293	NM_028948	ENSMUSG00000035394	Ccdc11	4933415I03Rik	coiled-coil domain containing 11	protein-coding
1222	chr4	46039383	46042598	+	0	NA	intron (NM_146142, intron 15 of 16)	intron (NM_146142, intron 15 of 16)	-11104	NM_021883	21916	Mm.249594	NM_021883	ENSMUSG00000028328	Tmod1	E-Tmod|Tmod	tropomodulin 1	protein-coding
827	chr17	85541148	85544154	+	0	NA	intron (NM_028576, intron 3 of 10)	intron (NM_028576, intron 3 of 10)	52611	NM_028576	73582	Mm.260753	NM_028576		Camkmt	1700106N22Rik|AI480743|AV099781|CLNMT|CaM KMT	calmodulin-lysine N-methyltransferase	protein-coding
266	chr11	61220808	61223732	+	0	NA	Intergenic	Intergenic	-30693	NM_026183	67473	Mm.100741	NM_026183	ENSMUSG00000010122	Slc47a1	1300013J15Rik|AI036982|MATE1|mMATE1	solute carrier family 47, member 1	protein-coding
1747	chr9	66793095	66795418	+	0	NA	intron (NM_026467, intron 1 of 3)	CpG	331	NM_026467	67941	Mm.30120	NM_026467	ENSMUSG00000036781	Rps27l	1810034D23Rik	ribosomal protein S27-like	protein-coding
1742	chr9	62937991	62941401	+	0	NA	Intergenic	Intergenic	55091	NM_172446	207667	Mm.36349	NM_172446	ENSMUSG00000022245	Skor1	AV273001|C230094B15Rik|Corl1|Lbxcor1	SKI family transcriptional corepressor 1	protein-coding
1353	chr5	92760977	92762307	+	0	NA	intron (NM_181728, intron 1 of 9)	intron (NM_181728, intron 1 of 9)	775	NM_181728	109979	Mm.263514	NM_181728	ENSMUSG00000034842	Art3	4930569O04Rik|ARTC3	ADP-ribosyltransferase 3	protein-coding
174	chr10	80317533	80322290	+	0	NA	intron (NM_175195, intron 1 of 14)	intron (NM_175195, intron 1 of 14)	1891	NM_175195	73218	Mm.3285	NM_175195	ENSMUSG00000035206	Sppl2b	3110056O03Rik|AW550292|PSL1	signal peptide peptidase like 2B	protein-coding
820	chr17	73414961	73418848	+	0	NA	Intergenic	Intergenic	-40421	NM_001177968	225010	Mm.329194	NM_001081071	ENSMUSG00000054469	Lclat1	AI181996|Agpat8|Alcat1|Gm91|Lycat	lysocardiolipin acyltransferase 1	protein-coding
1799	chrX	72626920	72628620	+	0	NA	promoter-TSS (NM_026126)	promoter-TSS (NM_026126)	32	NM_026126	67391	Mm.126404	NM_026126		Fundc2	4833415N24Rik|DC44|HCBP6	FUN14 domain containing 2	protein-coding
1624	chr8	19853168	19853690	+	0	NA	Intergenic	Intergenic	39581	NR_030708	547150	Mm.359054	NR_030708	ENSMUSG00000071796	6820431F20Rik	-	cadherin 11 pseudogene	pseudo
1571	chr7	107854183	107856130	+	0	NA	promoter-TSS (NM_178764)	promoter-TSS (NM_178764)	-60	NM_178764	319604	Mm.260362	NM_178764	ENSMUSG00000029461	Fam168a	2610030B18Rik|B930006L02Rik|mKIAA0280	family with sequence similarity 168, member A	protein-coding
422	chr12	102320303	102323079	+	0	NA	non-coding (NR_038047, exon 1 of 4)	non-coding (NR_038047, exon 1 of 4)	221	NM_211355	68734	Mm.87077	NM_211355	ENSMUSG00000041846	Smek1	1110034C04Rik|BC064465|mKIAA2010	SMEK homolog 1, suppressor of mek1 (Dictyostelium)	protein-coding
1695	chr8	130796105	130797972	+	0	NA	Intergenic	Intergenic	5087	NR_105822	102465212		NR_105822	miRBase:MI0021932	Mir21c	mmu-mir-21c	microRNA mir-21c	ncRNA
1219	chr4	44530805	44533001	+	0	NA	Intergenic	Intergenic	-183769	NR_073462	70602	Mm.491142	NR_073462		5730488B01Rik	-	RIKEN cDNA 5730488B01 gene	ncRNA
905	chr18	76268976	76272381	+	0	NA	intron (NM_145356, intron 3 of 4)	intron (NM_145356, intron 3 of 4)	-12553	NR_045365	73009	Mm.443541	NR_045365		2900057B20Rik	-	RIKEN cDNA 2900057B20 gene	ncRNA
1552	chr7	91176651	91179247	+	0	NA	intron (NM_030728, intron 1 of 28)	intron (NM_030728, intron 1 of 28)	57066	NM_030728	80982	Mm.160389	NM_030728	ENSMUSG00000052353	Cemip	12H19.01.T7|6330404C01Rik|9930013L23Rik|AY007814|Kiaa1199	cell migration inducing protein, hyaluronan binding	protein-coding
1194	chr3	145344020	145345070	+	0	NA	Intergenic	Intergenic	-31596	NM_010516	16007	Mm.1231	NM_010516	ENSMUSG00000028195	Cyr61	AI325051|CCN1|Igfbp10	cysteine rich protein 61	protein-coding
97	chr1	174170911	174173820	+	0	NA	intron (NM_013734, intron 11 of 22)	B1_Mus1|SINE|Alu	16190	NM_013734	27222	Mm.482392	NM_013734	ENSMUSG00000007107	Atp1a4	-	ATPase, Na+/K+ transporting, alpha 4 polypeptide	protein-coding
1704	chr9	20411188	20412618	+	0	NA	promoter-TSS (NR_033729)	promoter-TSS (NR_033729)	-16	NR_033729	66662	Mm.477847	NM_175110	ENSMUSG00000062470	Fbxl12os	5730577I03Rik	F-box and leucine-rich repeat protein 12, opposite strand	pseudo
41	chr1	73686471	73690693	+	0	NA	intron (NR_045311, intron 7 of 8)	intron (NR_045311, intron 7 of 8)	213567	NR_105769	102465179		NR_105769	miRBase:MI0021879	Mir6351	mmu-mir-6351	microRNA mir-6351	ncRNA
668	chr15	93045728	93047388	+	0	NA	Intergenic	Intergenic	58957	NM_001033275	223827	Mm.22819	NM_001033275	ENSMUSG00000036197	Gxylt1	Glt8d3|Gm1228|Gm87	glucoside xylosyltransferase 1	protein-coding
52	chr1	90172788	90174682	+	0	NA	intron (NM_172505, intron 2 of 4)	intron (NM_172505, intron 2 of 4)	397	NM_172505	212427	Mm.384762	NM_172505		A730008H23Rik	mFleg1	RIKEN cDNA A730008H23 gene	protein-coding
1749	chr9	68407258	68411193	+	0	NA	Intergenic	B4|SINE|B4	-41218	NR_040737	74951	Mm.60678	NR_040737		4930502A04Rik	-	RIKEN cDNA 4930502A04 gene	ncRNA
688	chr16	22718082	22726366	+	0	NA	Intergenic	Intergenic	-64920	NM_138650	110197	Mm.194986	NM_138650	ENSMUSG00000022861	Dgkg	2900055E17Rik|90kDa|AI854428|Dagk3|E430001K23Rik|mKIAA4131	diacylglycerol kinase, gamma	protein-coding
750	chr17	7372759	7376337	+	0	NA	promoter-TSS (NM_011299)	promoter-TSS (NM_011299)	84	NM_011299	20112	Mm.268383	NM_011299	ENSMUSG00000023809	Rps6ka2	90kDa|D17Wsu134e|Rps6ka-rs1|Rsk3|p90rsk|pp90rsk	ribosomal protein S6 kinase, polypeptide 2	protein-coding
1451	chr6	80674434	80676313	+	0	NA	intron (NM_001134743, intron 2 of 2)	intron (NM_001134743, intron 2 of 2)	705736	NM_178731	243499	Mm.483425	NM_178731	ENSMUSG00000052581	Lrrtm4	7530419J18Rik|A230052N11	leucine rich repeat transmembrane neuronal 4	protein-coding
302	chr11	97744689	97746203	+	0	NA	promoter-TSS (NM_001081435)	promoter-TSS (NM_001081435)	22	NM_001081435	72973	Mm.245939	NM_001081435		Fbxo47	2900052P03Rik|Gm1562	F-box protein 47	protein-coding
1126	chr3	60853390	60855447	+	0	NA	Intergenic	Intergenic	47711	NM_001282016	18441	Mm.281452	NM_008772	ENSMUSG00000027765	P2ry1	P2Y1	purinergic receptor P2Y, G-protein coupled 1	protein-coding
774	chr17	25921876	25946782	+	0	NA	promoter-TSS (NM_133719)	promoter-TSS (NM_133719)	-339	NM_133719	70083	Mm.41925	NM_133719	ENSMUSG00000002274	Metrn	1810034B16Rik|Hyrac	meteorin, glial cell differentiation regulator	protein-coding
1453	chr6	83028288	83028827	+	0	NA	intron (NM_197992, intron 1 of 8)	CpG	173	NM_197992	69837	Mm.12261	NM_197992	ENSMUSG00000069678	Pcgf1	2010002K04Rik|AU024121|Nspc1	polycomb group ring finger 1	protein-coding
866	chr18	39648448	39651863	+	0	NA	Intergenic	CpG	-3256	NM_008173	14815	Mm.129481	NM_008173	ENSMUSG00000024431	Nr3c1	GR|Grl-1|Grl1	nuclear receptor subfamily 3, group C, member 1	protein-coding
910	chr19	3323884	3326371	+	0	NA	intron (NM_013495, intron 1 of 18)	intron (NM_013495, intron 1 of 18)	1826	NM_013495	12894	Mm.18522	NM_013495	ENSMUSG00000024900	Cpt1a	C730027G07|CPTI|Cpt1	carnitine palmitoyltransferase 1a, liver	protein-coding
1341	chr5	75109023	75118608	+	0	NA	Intergenic	RLTR24|LTR|ERV1	-14887	NM_001159577	16924	Mm.440403	NM_010727	ENSMUSG00000029228	Lnx1	Lnx	ligand of numb-protein X 1	protein-coding
693	chr16	30550022	30555101	+	0	NA	Intergenic	B1_Mus1|SINE|Alu	-1897	NM_172614	224090	Mm.241459	NM_172614		Tmem44	1700007N03Rik|9330161C17Rik|B230220N21	transmembrane protein 44	protein-coding
593	chr14	100854742	100862535	+	0	NA	Intergenic	Intergenic	-309623	NM_010636	16597	Mm.396499	NM_010636		Klf12	2700063E05Rik|AI225908|AI315654|AP-2rep|B130052C06Rik|D530033K05Rik	Kruppel-like factor 12	protein-coding
770	chr17	22931750	22934110	+	0	NA	intron (NR_030709, intron 2 of 4)	intron (NR_030709, intron 2 of 4)	21784	NR_030709	100042679	Mm.484007	NR_030709		Gm16386	EG545191|ENSMUSG00000073442|Gm21017	zinc finger protein 946 pseudogene	pseudo
188	chr10	92586111	92588008	+	0	NA	Intergenic	Intergenic	-36562	NM_146239	237459	Mm.217404	NM_146239	ENSMUSG00000020015	Cdk17	6430598J10Rik|Pctk2	cyclin-dependent kinase 17	protein-coding
402	chr12	83222700	83224693	+	0	NA	Intergenic	Intergenic	-47307	NM_001167983	217692	Mm.261333	NM_172579	ENSMUSG00000042700	Sipa1l1	4931426N11Rik|AW213287|Spar|mKIAA0440	signal-induced proliferation-associated 1 like 1	protein-coding
1534	chr7	65653094	65655253	+	0	NA	Intergenic	Intergenic	-259399	NM_009728	11982	Mm.135129	NM_009728	ENSMUSG00000025324	Atp10a	Atp10c|pfatp	ATPase, class V, type 10A	protein-coding
1097	chr3	21565476	21573034	+	0	NA	Intergenic	Intergenic	-406319	NM_030732	81004	Mm.202966	NM_030732	ENSMUSG00000027630	Tbl1xr1	8030499H02Rik|A630076E03Rik|AW539987|C21|C230089I12Rik|DC42|Ira1|TBLR1	transducin (beta)-like 1X-linked receptor 1	protein-coding
641	chr15	63171271	63172868	+	0	NA	Intergenic	Intergenic	139094	NR_045279	432958	Mm.255105	NR_045279		Gm20740	-	predicted gene, 20740	ncRNA
893	chr18	67404494	67405856	+	0	NA	5' UTR (NM_172630, exon 1 of 11)	5' UTR (NM_172630, exon 1 of 11)	309	NM_172630	225651	Mm.235792	NM_172630	ENSMUSG00000062526	Mppe1	A530095G11	metallophosphoesterase 1	protein-coding
1641	chr8	55535399	55538342	+	0	NA	Intergenic	Intergenic	78481	NM_029701	76687	Mm.86437	NM_029701	ENSMUSG00000054408	Spcs3	1810011E08Rik	signal peptidase complex subunit 3 homolog (S. cerevisiae)	protein-coding
838	chr18	5889053	5894345	+	0	NA	Intergenic	MTC|LTR|MaLR	244397	NM_029277	75415	Mm.239675	NM_029277	ENSMUSG00000041225	Arhgap12	2810011M08Rik	Rho GTPase activating protein 12	protein-coding
616	chr15	30099818	30106396	+	0	NA	intron (NM_008729, intron 1 of 22)	CpG	759	NM_008729	18163	Mm.321648	NM_008729	ENSMUSG00000022240	Ctnnd2	Catnd2|Nprap|neurojugin	catenin (cadherin associated protein), delta 2	protein-coding
640	chr15	62866288	62872942	+	0	NA	Intergenic	Intergenic	441548	NR_045279	432958	Mm.255105	NR_045279		Gm20740	-	predicted gene, 20740	ncRNA
1121	chr3	54899570	54902304	+	0	NA	Intergenic	(CA)n|Simple_repeat|Simple_repeat	-15093	NM_001144988	229285	Mm.235523	NM_144895	ENSMUSG00000036580	Spg20	AI840044|C79168|SPARTIN|TAHCCP1|mKIAA0610	spastic paraplegia 20, spartin (Troyer syndrome) homolog (human)	protein-coding
83	chr1	158966753	158970831	+	0	NA	Intergenic	Intergenic	69984	NM_028540	73435	Mm.116705	NM_028540	ENSMUSG00000026592	Tex35	1700057K13Rik	testis expressed 35	protein-coding
804	chr17	50608102	50611199	+	0	NA	Intergenic	Intergenic	-39222	NM_013880	224860	Mm.217362	NM_013880	ENSMUSG00000038910	Plcl2	PLC-L2|PRIP-2|Plce2|mKIAA1092	phospholipase C-like 2	protein-coding
870	chr18	43297422	43307164	+	0	NA	Intergenic	Intergenic	-65058	NM_178749	269019	Mm.150401	NM_178749	ENSMUSG00000039954	Stk32a	A930015B13Rik|YANK1	serine/threonine kinase 32A	protein-coding
1384	chr5	133928666	133930430	+	0	NA	Intergenic	Intergenic	-646070	NM_030719	80909	Mm.45218	NM_030719		Gatsl2	7530428J21Rik|AW742413|Gats|Gatsl1	GATS protein-like 2	protein-coding
896	chr18	69134770	69138693	+	0	NA	Intergenic	Intergenic	-25549	NR_038051	78931	Mm.160155	NR_038051		4930546C10Rik	-	RIKEN cDNA 4930546C10 gene	ncRNA
1468	chr6	104442286	104443667	+	0	NA	promoter-TSS (NM_017383)	promoter-TSS (NM_017383)	-62	NM_017383	53870	Mm.321671	NM_017383	ENSMUSG00000030092	Cntn6	NB-3	contactin 6	protein-coding
1726	chr9	44410933	44414314	+	0	NA	promoter-TSS (NM_181324)	promoter-TSS (NM_181324)	-352	NM_001110826	13209	Mm.267061	NM_007841	ENSMUSG00000032097	Ddx6	1110001P04Rik|E230023J21Rik|HLR2|mRCK/P54|p54|rck	DEAD (Asp-Glu-Ala-Asp) box polypeptide 6	protein-coding
1385	chr5	135661930	135664315	+	0	NA	promoter-TSS (NM_011714)	promoter-TSS (NM_011714)	-71	NM_011714	22385	Mm.40331	NM_011714	ENSMUSG00000002748	Baz1b	C87820|WSTF|Wbscr9	bromodomain adjacent to zinc finger domain, 1B	protein-coding
1464	chr6	96580754	96583094	+	0	NA	intron (NM_182808, intron 3 of 4)	intron (NM_182808, intron 3 of 4)	428481	NM_177233	320701	Mm.131700	NM_177233	ENSMUSG00000046500	Fam19a4	C130034I18Rik|Fam19a4 Tafa-4|Tafa-4	family with sequence similarity 19, member A4	protein-coding
1818	chrX	106289739	106292158	+	0	NA	exon (NM_019989, exon 1 of 4)	exon (NM_019989, exon 1 of 4)	202	NM_019989	56726	Mm.260760	NM_019989	ENSMUSG00000031246	Sh3bgrl	1190008F14Rik	SH3-binding domain glutamic acid-rich protein like	protein-coding
1494	chr6	142814205	142828316	+	0	NA	intron (NM_011374, intron 3 of 4)	intron (NM_011374, intron 3 of 4)	58509	NR_045707	665037	Mm.401493	NR_045707	ENSMUSG00000072683	Gm7457	EG665037|ENSMUSG00000072683	predicted gene 7457	ncRNA
962	chr2	4172827	4175790	+	0	NA	intron (NM_172475, intron 1 of 22)	intron (NM_172475, intron 1 of 22)	100399	NM_172475	209630	Mm.37932	NM_172475	ENSMUSG00000026657	Frmd4a	2700017I06Rik|5330420J21|AI594879|C230040M21Rik|Frmd4|Gm13190|OTTMUSG00000010806|mKIAA1294	FERM domain containing 4A	protein-coding
1085	chr2	172998372	173000086	+	0	NA	Intergenic	Intergenic	20655	NM_011044	18534	Mm.266867	NM_011044	ENSMUSG00000027513	Pck1	AI265463|PEPCK|Pck-1	phosphoenolpyruvate carboxykinase 1, cytosolic	protein-coding
755	chr17	9212812	9225937	+	0	NA	Intergenic	Intergenic	38176	NM_025851	66931	Mm.67591	NM_025851	ENSMUSG00000023873	1700010I14Rik	-	RIKEN cDNA 1700010I14 gene	protein-coding
1714	chr9	30983325	30985900	+	0	NA	exon (NM_001102456, exon 3 of 17)	exon (NM_001102456, exon 3 of 17)	34788	NM_001102455	11804	Mm.19133	NM_009691	ENSMUSG00000031996	Aplp2	AI790698|APLP-2	amyloid beta (A4) precursor-like protein 2	protein-coding
777	chr17	27375392	27380573	+	0	NA	Intergenic	L2c|LINE|L2	-36599	NM_146075	224640	Mm.29689	NM_146075	ENSMUSG00000044857	Lemd2	BC026588|Lem2|NET25	LEM domain containing 2	protein-coding
143	chr10	43297681	43301351	+	0	NA	intron (NM_009846, intron 1 of 1)	intron (NM_009846, intron 1 of 1)	541	NM_009846	12484	Mm.29742	NM_009846	ENSMUSG00000047139	Cd24a	Cd24|HSA|Ly-52|nectadrin	CD24a antigen	protein-coding
464	chr13	44846001	44852166	+	0	NA	intron (NM_021878, intron 2 of 18)	intron (NM_021878, intron 2 of 18)	22443	NM_001205043	16468	Mm.25059	NM_021878	ENSMUSG00000038518	Jarid2	Jmj|jumonji	jumonji, AT rich interactive domain 2	protein-coding
1403	chr6	3150896	3151642	+	0	NA	Intergenic	SSU-rRNA_Hsa|rRNA|rRNA	-87250	NR_036696	667335	Mm.380219	NR_036696		Gm8579	EG667335	spermatogenesis associated glutamate (E)-rich protein 4a pseudogene	pseudo
1672	chr8	96641748	96644071	+	0	NA	Intergenic	Intergenic	-18195	NM_008631	17752	Mm.1536	NM_008631	ENSMUSG00000031757	Mt4	MT-IV	metallothionein 4	protein-coding
1685	chr8	114791757	114794249	+	0	NA	Intergenic	Intergenic	257744	NM_020584	57321	Mm.213064	NM_020584	ENSMUSG00000033430	Terf2ip	Rap1	telomeric repeat binding factor 2, interacting protein	protein-coding
1051	chr2	136679548	136681451	+	0	NA	Intergenic	Intergenic	-36455	NM_028201	74243	Mm.330612	NM_028201	ENSMUSG00000027281	Slx4ip	2210009G21Rik|2410004I22Rik|C85661|Slxip	SLX4 interacting protein	protein-coding
6	chr1	25947527	25951111	+	0	NA	Intergenic	Intergenic	-62767	NM_175642	210933	Mm.336569	NM_175642	ENSMUSG00000033569	Bai3	A830096D10Rik	brain-specific angiogenesis inhibitor 3	protein-coding
562	chr14	51682404	51686439	+	0	NA	Intergenic	Intergenic	6696	NM_207558	404319	Mm.377276	NM_207558	ENSMUSG00000035932	Olfr750	GA_x5J8B7W5WBF-6267395-6266441|GA_x6K02T2PMLR-6808276-6807281|MOR103-18	olfactory receptor 750	protein-coding
1497	chr6	145158805	145160944	+	0	NA	promoter-TSS (NM_177222)	promoter-TSS (NM_177222)	207	NM_133688	67636	Mm.486359	NM_133688	ENSMUSG00000040370	Lyrm5	4930469P12Rik|AL022899|Ghiso	LYR motif containing 5	protein-coding
1304	chr5	19807720	19810319	+	0	NA	intron (NM_001170745, intron 5 of 20)	intron (NM_001170745, intron 5 of 20)	395683	NM_015823	50791	Mm.332231	NM_015823	ENSMUSG00000040003	Magi2	AIP-1|Acvri1|Acvrinp1|Acvrip1|Magi-2|S-SCAM|mKIAA0705	membrane associated guanylate kinase, WW and PDZ domain containing 2	protein-coding
1102	chr3	26168869	26170826	+	0	NA	intron (NM_138666, intron 1 of 7)	intron (NM_138666, intron 1 of 7)	60984	NM_138666	192167	Mm.316080	NM_138666	ENSMUSG00000063887	Nlgn1	6330415N05Rik|BB179718|NL1|Nlg1|mKIAA1070	neuroligin 1	protein-coding
497	chr13	81021501	81027324	+	0	NA	intron (NM_001042591, intron 1 of 7)	intron (NM_001042591, intron 1 of 7)	1729	NM_001042591	105171	Mm.423137	NM_001042591	ENSMUSG00000074794	Arrdc3	AI450344|mKIAA1376	arrestin domain containing 3	protein-coding
183	chr10	85837986	85839703	+	0	NA	intron (NM_001164495, intron 4 of 6)	intron (NM_001164495, intron 4 of 6)	75687	NM_011595	21859	Mm.4871	NM_011595	ENSMUSG00000020044	Timp3	Timp-3	tissue inhibitor of metalloproteinase 3	protein-coding
518	chr13	101636033	101645617	+	0	NA	Intergenic	MTC|LTR|MaLR	-37443	NM_022885	69048	Mm.402215	NM_022885	ENSMUSG00000021629	Slc30a5	1810010K08Rik|AF233321|ZNT5|ZTL1|ZnT-5|Zntl1	solute carrier family 30 (zinc transporter), member 5	protein-coding
1478	chr6	120721391	120726689	+	0	NA	intron (NM_001081048, intron 1 of 9)	intron (NM_001081048, intron 1 of 9)	254	NM_001081048	71803	Mm.425340	NM_001081048	ENSMUSG00000004902	Slc25a18	1500015I14Rik|AW125787	solute carrier family 25 (mitochondrial carrier), member 18	protein-coding
1211	chr4	25334723	25338529	+	0	NA	Intergenic	Intergenic	-127658	NM_026194	67490	Mm.226295	NM_026194	ENSMUSG00000040359	Ufl1	1810074P20Rik|AI429228|Kiaa0776|Maxer|Rcad|mKIAA0776	UFM1 specific ligase 1	protein-coding
439	chr13	20524472	20526758	+	0	NA	intron (NM_080288, intron 15 of 21)	intron (NM_080288, intron 15 of 21)	-39244	NM_198093	140580	Mm.342392	NM_080288	ENSMUSG00000041112	Elmo1	6330578D22Rik|C230095H21Rik|CED-12	engulfment and cell motility 1	protein-coding
362	chr12	43527004	43529729	+	0	NA	Intergenic	Intergenic	-1315722	NM_010733	16981	Mm.404786	NM_010733	ENSMUSG00000036295	Lrrn3	NLRR-3	leucine rich repeat protein 3, neuronal	protein-coding
1379	chr5	129960069	129971926	+	0	NA	Intergenic	Intergenic	-41109	NM_172276	231769	Mm.288714	NM_172276	ENSMUSG00000029439	Sfswap	1190005N23Rik|6330437E22Rik|AI197402|AW212079|SWAP|Sfrs8|Srsf8	splicing factor, suppressor of white-apricot homolog (Drosophila)	protein-coding
411	chr12	87896671	87899666	+	0	NA	Intergenic	ORR1E|LTR|MaLR	-121482	NM_177354	238328	Mm.216101	NM_177354		Vash1	AI834978|D930046M13Rik|G630009D10Rik	vasohibin 1	protein-coding
169	chr10	74979340	74981272	+	0	NA	promoter-TSS (NM_026095)	promoter-TSS (NM_026095)	-239	NM_175133	68778	Mm.29382	NM_175133	ENSMUSG00000033416	Gucd1	1110038D17Rik	guanylyl cyclase domain containing 1	protein-coding
1711	chr9	27534917	27538268	+	0	NA	Intergenic	Intergenic	-62262	NM_177906	330908	Mm.379474	NM_177906	ENSMUSG00000062257	Opcml	2900075O15Rik|3732419F12|AI844366|B930023M13Rik|C230027C17|Gm181|Obcam	opioid binding protein/cell adhesion molecule-like	protein-coding
1593	chr7	134984116	134986157	+	0	NA	promoter-TSS (NM_009294)	promoter-TSS (NM_009294)	-186	NM_009294	20909	Mm.24867	NM_009294	ENSMUSG00000030805	Stx4a	Stx4|Syn-4|Syn4	syntaxin 4A (placental)	protein-coding
1542	chr7	80781461	80793436	+	0	NA	Intergenic	B1_Mus2|SINE|Alu	44001	NR_033604	244061	Mm.484605	NR_033604		Gm4971	EG244061	Smad nuclear interacting protein 1 pseudogene	pseudo
705	chr16	43500660	43517445	+	0	NA	intron (NM_001285805, intron 5 of 10)	intron (NM_001285805, intron 5 of 10)	-88743	NR_046026	626693	Mm.447083	NR_046026	ENSMUSG00000085499	Gm15713	OTTMUSG00000025617	predicted gene 15713	ncRNA
478	chr13	58907837	58912577	+	0	NA	exon (NM_001025074, exon 2 of 18)	exon (NM_001025074, exon 2 of 18)	1149	NM_001025074	18212	Mm.130054	NM_008745	ENSMUSG00000055254	Ntrk2	GP145-TrkB/GP95-TrkB|Tkrb|trk-B|trkB	neurotrophic tyrosine kinase, receptor, type 2	protein-coding
398	chr12	81162624	81165874	+	0	NA	Intergenic	Intergenic	49751	NM_007564	12192	Mm.235132	NM_007564	ENSMUSG00000021127	Zfp36l1	AW742437|AW743212|Berg36|Brf1|D530020L18Rik|ERF1|TIS11b|cMG1	zinc finger protein 36, C3H type-like 1	protein-coding
384	chr12	69562197	69565738	+	0	NA	Intergenic	Intergenic	696206	NM_009093	20090	Mm.379006	NM_009093	ENSMUSG00000034892	Rps29	-	ribosomal protein S29	protein-coding
836	chr18	4334464	4338160	+	0	NA	intron (NM_007746, intron 5 of 7)	intron (NM_007746, intron 5 of 7)	16639	NM_007746	26410	Mm.3275	NM_007746	ENSMUSG00000024235	Map3k8	Cot|Cot/Tpl2|Est|Estf|Tpl-2|Tpl2|c-COT	mitogen-activated protein kinase kinase kinase 8	protein-coding
1735	chr9	57611485	57613936	+	0	NA	intron (NM_007713, intron 1 of 12)	CpG	957	NM_007713	102414	Mm.25720	NM_007713	ENSMUSG00000032316	Clk3	AI256811	CDC-like kinase 3	protein-coding
1720	chr9	37295762	37298474	+	0	NA	exon (NM_146222, exon 1 of 4)	exon (NM_146222, exon 1 of 4)	212	NM_146222	235184	Mm.127892	NM_146222	ENSMUSG00000042138	Msantd2	2810450G17Rik|9530092B10Rik	Myb/SANT-like DNA-binding domain containing 2	protein-coding
942	chr19	41875307	41877125	+	0	NA	intron (NM_027667, intron 1 of 11)	CpG	358	NM_001163495	71085	Mm.21646	NM_027667	ENSMUSG00000025154	Arhgap19	4933411B03Rik|AI120128|AW546831|mFLJ00368	Rho GTPase activating protein 19	protein-coding
955	chr19	56559432	56561431	+	0	NA	3' UTR (NM_001164263, exon 13 of 13)	3' UTR (NM_001164263, exon 13 of 13)	24304	NM_172641	226245	Mm.156742	NM_172641	ENSMUSG00000035818	Plekhs1	9930023K05Rik	pleckstrin homology domain containing, family S member 1	protein-coding
1376	chr5	124928137	124934646	+	0	NA	Intergenic	Intergenic	-1773	NM_029532	76167	Mm.156035	NM_029532	ENSMUSG00000029402	Snrnp35	6330548G22Rik	small nuclear ribonucleoprotein 35 (U11/U12)	protein-coding
407	chr12	84972343	84975341	+	0	NA	intron (NM_027349, intron 1 of 18)	CpG	658	NM_027349	67039	Mm.46005	NM_027349	ENSMUSG00000010608	Rbm25	2600011C06Rik|2610015J01Rik|A130095G20Rik|AI159652|AL023075|AU043498|RNPC7	RNA binding motif protein 25	protein-coding
18	chr1	43393729	43396359	+	0	NA	Intergenic	Intergenic	-107552	NM_010879	17974	Mm.389903	NM_010879	ENSMUSG00000066877	Nck2	4833426I10Rik|Grb4|NCKbeta|Nck-2	non-catalytic region of tyrosine kinase adaptor protein 2	protein-coding
376	chr12	54987370	54992415	+	0	NA	intron (NM_013780, intron 5 of 11)	intron (NM_013780, intron 5 of 11)	314969	NM_028133	112407	Mm.133037	NM_028133	ENSMUSG00000035105	Egln3	2610021G09Rik|AI505553|AI648162|Hif-p4h-3|Phd3|SM-20	egl-9 family hypoxia-inducible factor 3	protein-coding
912	chr19	4230976	4233012	+	0	NA	promoter-TSS (NM_027196)	promoter-TSS (NM_027196)	95	NM_027196	69745	Mm.32518	NM_027196	ENSMUSG00000024854	Pold4	2410012M21Rik|AI463381|AW060307|Polds|p12	polymerase (DNA-directed), delta 4	protein-coding
1432	chr6	47870126	47871784	+	0	NA	intron (NM_145576, intron 1 of 4)	CpG	388	NM_001145881	232784	Mm.196782	NM_145576	ENSMUSG00000052763	Zfp212	Znf212|mKIAA3011	Zinc finger protein 212	protein-coding
785	chr17	34246409	34261352	+	0	NA	exon (NM_001204973, exon 3 of 13)	exon (NM_001204973, exon 3 of 13)	2965	NR_037970	14312	Mm.3444	NM_010238	ENSMUSG00000024335	Brd2	AW228947|D17H6S113E|Frg-1|Fsrg-1|Fsrg1|Nat|Ring3|Rnf3|mKIAA4005	bromodomain containing 2	protein-coding
599	chr14	106248243	106255646	+	0	NA	Intergenic	MLT1E2|LTR|MaLR	44092	NM_011897	24064	Mm.89982	NM_011897	ENSMUSG00000022114	Spry2	sprouty2	sprouty homolog 2 (Drosophila)	protein-coding
1393	chr5	142789436	142791011	+	0	NA	Intergenic	Intergenic	-87228	NM_199068	17425	Mm.24214	NM_010812	ENSMUSG00000056493	Foxk1	A630048H08Rik|AI463295|ENSMUSG00000075577|Gm10868|Mnf	forkhead box K1	protein-coding
1167	chr3	105506050	105537923	+	0	NA	3' UTR (NM_175398, exon 2 of 2)	3' UTR (NM_175398, exon 2 of 2)	13610	NM_001163356	109050	Mm.212591	NM_175398	ENSMUSG00000048458	Fam212b	6530418L21Rik	family with sequence similarity 212, member B	protein-coding
587	chr14	93464740	93468133	+	0	NA	intron (NM_001271800, intron 2 of 2)	intron (NM_001271800, intron 2 of 2)	821671	NM_001271800	211712	Mm.37126	NM_001081377		Pcdh9	-	protocadherin 9	protein-coding
609	chr15	8391491	8397553	+	0	NA	promoter-TSS (NM_201232)	promoter-TSS (NM_201232)	-59	NM_201232	71175	Mm.240329	NM_027707	ENSMUSG00000022141	Nipbl	Idn3	Nipped-B homolog (Drosophila)	protein-coding
1595	chr7	135491057	135493269	+	0	NA	Intergenic	Intergenic	-50518	NM_145590	233913	Mm.220880	NM_145590	ENSMUSG00000030780	BC017158	-	cDNA sequence BC017158	protein-coding
1235	chr4	56655061	56658612	+	0	NA	Intergenic	Intergenic	97461	NM_025271	11471	Mm.251434	NM_025271	ENSMUSG00000070980	Actl7b	Tact1	actin-like 7b	protein-coding
190	chr10	94291814	94294099	+	0	NA	intron (NM_018797, intron 20 of 30)	intron (NM_018797, intron 20 of 30)	114256	NM_018797	54712	Mm.256712	NM_018797	ENSMUSG00000074785	Plxnc1	2510048K12Rik|AW742158|CD232|Vespr	plexin C1	protein-coding
298	chr11	94020041	94023842	+	0	NA	Intergenic	Intergenic	-50827	NM_009427	22057	Mm.259673	NM_009427	ENSMUSG00000037573	Tob1	Tob|Trob	transducer of ErbB-2.1	protein-coding
95	chr1	173340829	173343379	+	0	NA	intron (NM_009480, intron 1 of 9)	intron (NM_009480, intron 1 of 9)	292	NM_009480	22278	Mm.8	NM_009480	ENSMUSG00000026641	Usf1	bHLHb11	upstream transcription factor 1	protein-coding
1808	chrX	95574968	95576750	+	0	NA	Intergenic	Intergenic	230770	NM_013476	11835	Mm.39005	NM_013476		Ar	AW320017|Tfm	androgen receptor	protein-coding
1750	chr9	69560395	69563924	+	0	NA	Intergenic	Intergenic	46588	NM_022378	64290	Mm.440890	NM_022378	ENSMUSG00000059246	Foxb1	C43|Fkh5|Foxb1a|Foxb1b|Hfh-e5.1|Mf3|Twh	forkhead box B1	protein-coding
923	chr19	19181175	19186867	+	0	NA	intron (NM_001043354, intron 1 of 9)	intron (NM_001043354, intron 1 of 9)	1665	NM_001043354	225998	Mm.234641	NM_146095	ENSMUSG00000036192	Rorb	Nr1f2|RZR-beta|RZRB|Rorbeta	RAR-related orphan receptor beta	protein-coding
1739	chr9	60948966	60951202	+	0	NA	TTS (NR_105026)	TTS (NR_105026)	3109	NR_105026	66785	Mm.158134	NR_105026		4933433G08Rik	-	RIKEN cDNA 4933433G08 gene	ncRNA
601	chr14	118628746	118637545	+	0	NA	3' UTR (NM_177753, exon 1 of 1)	3' UTR (NM_177753, exon 1 of 1)	3107	NM_177753	223227	Mm.70950	NM_177753	ENSMUSG00000061517	Sox21	Sox25	SRY (sex determining region Y)-box 21	protein-coding
822	chr17	79534036	79537514	+	0	NA	Intergenic	Intergenic	84529	NM_027455	70536	Mm.293870	NM_027455	ENSMUSG00000024084	Qpct	5730422A13Rik	glutaminyl-peptide cyclotransferase (glutaminyl cyclase)	protein-coding
231	chr11	9339569	9342216	+	0	NA	intron (NM_178259, intron 38 of 61)	(CAAAA)n|Simple_repeat|Simple_repeat	248947	NM_178259	268379	Mm.39270	NM_178259	ENSMUSG00000004668	Abca13	9830132L24|A930002G16Rik|AI956815	ATP-binding cassette, sub-family A (ABC1), member 13	protein-coding
243	chr11	20246694	20249063	+	0	NA	Intergenic	Intergenic	-15162	NM_018861	55963	Mm.6379	NM_018861	ENSMUSG00000020142	Slc1a4	ASCT-1|ASCT1|AW045657|SATT	solute carrier family 1 (glutamate/neutral amino acid transporter), member 4	protein-coding
1610	chr7	152264529	152309158	+	0	NA	Intergenic	Intergenic	107181	NR_033626	100040049	Mm.102235	NR_033626		1810010D01Rik	Gm2572	RIKEN cDNA 1810010D01 gene	ncRNA
779	chr17	29596016	29597696	+	0	NA	Intergenic	Intergenic	-31134	NM_008842	18712	Mm.405293	NM_008842		Pim1	Pim-1	proviral integration site 1	protein-coding
551	chr14	29771049	29774881	+	0	NA	intron (NM_009785, intron 31 of 37)	intron (NM_009785, intron 31 of 37)	-58429	NM_176920	319476	Mm.95780	NM_176920	ENSMUSG00000045776	Lrtm1	A930016D02Rik	leucine-rich repeats and transmembrane domains 1	protein-coding
148	chr10	55947830	55949346	+	0	NA	promoter-TSS (NM_001033385)	promoter-TSS (NM_001033385)	-93	NM_001033385	544696	Mm.411188	NM_001033385	ENSMUSG00000038122	Tbc1d32	Bromi|D630037F22Rik|b2b2284Clo	TBC1 domain family, member 32	protein-coding
504	chr13	85426832	85430374	+	0	NA	5' UTR (NM_145452, exon 1 of 25)	5' UTR (NM_145452, exon 1 of 25)	488	NM_145452	218397	Mm.259653	NM_145452	ENSMUSG00000021549	Rasa1	Gap|RasGAP|Rasa	RAS p21 protein activator 1	protein-coding
343	chr12	26751990	26757445	+	0	NA	Intergenic	Intergenic	-141415	NR_046278	74930	Mm.398932	NR_046278		4930480M12Rik	-	RIKEN cDNA 4930480M12 gene	ncRNA
753	chr17	8531502	8566991	+	0	NA	Intergenic	Intergenic	15642	NM_178774	320111	Mm.442510	NM_178774	ENSMUSG00000055945	Prr18	9630019K15Rik	proline rich 18	protein-coding
1343	chr5	77738792	77740302	+	0	NA	promoter-TSS (NM_019836)	promoter-TSS (NM_019836)	38	NM_153798	231329	Mm.273217	NM_153798	ENSMUSG00000029250	Polr2b	Pol2rb|Rpb140|Rpb2	polymerase (RNA) II (DNA directed) polypeptide B	protein-coding
697	chr16	32802725	32804514	+	0	NA	Intergenic	Intergenic	-6098	NM_001145874	224116	Mm.153301	NM_146071	ENSMUSG00000035638	Muc20	BC026367	mucin 20	protein-coding
981	chr2	29303076	29305140	+	0	NA	intron (NM_001290489, intron 2 of 6)	intron (NM_001290489, intron 2 of 6)	26706	NR_105753	102465170		NR_105753	miRBase:MI0021863	Mir133c	mmu-mir-133c	microRNA mir-133c	ncRNA
726	chr16	77499585	77507536	+	0	NA	intron (NR_015543, intron 4 of 4)	intron (NR_015543, intron 4 of 4)	-95621	NR_029535	387229		NR_029535	miRBase:MI0000146	Mir99a	Mirn99a|mmu-mir-99a	microRNA 99a	ncRNA
857	chr18	35090199	35093222	+	0	NA	promoter-TSS (NM_144866)	promoter-TSS (NM_144866)	-53	NM_144866	225363	Mm.329353	NM_144866	ENSMUSG00000024360	Etf1	AI463371|D6Ertd109e|ERF|ERF1|SUP45L1|TB3-1	eukaryotic translation termination factor 1	protein-coding
106	chr1	182930485	182948347	+	0	NA	intron (NM_010145, intron 1 of 8)	intron (NM_010145, intron 1 of 8)	8210	NM_010145	13849	Mm.9075	NM_010145	ENSMUSG00000038776	Ephx1	AI195553|Eph-1|Eph1|mEH	epoxide hydrolase 1, microsomal	protein-coding
707	chr16	48585076	48586427	+	0	NA	intron (NM_010816, intron 18 of 26)	intron (NM_010816, intron 18 of 26)	154401	NM_010816	17450	Mm.250060	NM_010816	ENSMUSG00000022652	Morc1	Morc	microrchidia 1	protein-coding
1010	chr2	78028566	78031144	+	0	NA	intron (NR_108098, intron 6 of 6)	intron (NR_108098, intron 6 of 6)	-47849	NM_177843	329436	Mm.235448	NM_177843		Gm14461	A830093M07|OTTMUSG00000016703	predicted gene 14461	protein-coding
157	chr10	62253995	62256703	+	0	NA	promoter-TSS (NM_026201)	promoter-TSS (NM_026201)	-233	NM_026201	67500	Mm.196371	NM_026201	ENSMUSG00000020074	Ccar1	2610511G16Rik|9430036H15Rik|Carp1	cell division cycle and apoptosis regulator 1	protein-coding
964	chr2	5765246	5768346	+	0	NA	promoter-TSS (NM_133837)	promoter-TSS (NM_133837)	716	NM_016918	53893	Mm.251904	NM_016918	ENSMUSG00000025817	Nudt5	-	nudix (nucleoside diphosphate linked moiety X)-type motif 5	protein-coding
1665	chr8	88436407	88453537	+	0	NA	intron (NM_199446, intron 7 of 31)	intron (NM_199446, intron 7 of 31)	80071	NM_199446	102093	Mm.237296	NM_199446	ENSMUSG00000036879	Phkb	AI463271	phosphorylase kinase beta	protein-coding
65	chr1	108049478	108053787	+	0	NA	intron (NR_040630, intron 2 of 2)	intron (NR_040630, intron 2 of 2)	16469	NR_040630	626049	Mm.247410	NR_040630		Gm20753	-	predicted gene, 20753	ncRNA
935	chr19	29097067	29100018	+	0	NA	intron (NM_021299, intron 4 of 4)	intron (NM_021299, intron 4 of 4)	-23431	NR_028360	67329	Mm.394933	NR_028360		1700018L02Rik	-	RIKEN cDNA 1700018L02 gene	ncRNA
203	chr10	116660875	116662172	+	0	NA	promoter-TSS (NM_026570)	promoter-TSS (NM_026570)	40	NM_026570	64050	Mm.233529	NM_026570	ENSMUSG00000020171	Yeats4	4930573H17Rik|B230215M10Rik|GAS41|NuBI-1	YEATS domain containing 4	protein-coding
261	chr11	51501676	51503687	+	0	NA	promoter-TSS (NM_025319)	promoter-TSS (NM_025319)	-545	NM_025319	66050	Mm.35693	NM_025319	ENSMUSG00000007777	0610009B22Rik	-	RIKEN cDNA 0610009B22 gene	protein-coding
1782	chrX	12416437	12418317	+	0	NA	Intergenic	Intergenic	77973	NR_045852	552913	Mm.216846	NR_045852	ENSMUSG00000085891	Gm14634	OTTMUSG00000017535	predicted gene 14634	ncRNA
1213	chr4	32886767	32888281	+	0	NA	intron (NM_175364, intron 1 of 2)	intron (NM_175364, intron 1 of 2)	290	NM_175364	108755	Mm.1182	NM_175364		Lyrm2	2610208E05Rik	LYR motif containing 2	protein-coding
1093	chr3	9173074	9175174	+	0	NA	Intergenic	Intergenic	-76443	NM_177660	229055	Mm.103262	NM_177660	ENSMUSG00000069114	Zbtb10	4832414A18|AU021107|RINZF	zinc finger and BTB domain containing 10	protein-coding
81	chr1	155948980	155951369	+	0	NA	Intergenic	Intergenic	-98143	NM_001204908	100503355	Mm.484410	NM_001204908	ENSMUSG00000066797	Zfp648	ENSMUSG00000066797|Gm10178|Gm203	zinc finger protein 648	protein-coding
1023	chr2	103324389	103326309	+	0	NA	promoter-TSS (NM_009804)	promoter-TSS (NM_009804)	-39	NM_009804	12359	Mm.4215	NM_009804	ENSMUSG00000027187	Cat	2210418N07|Cas-1|Cas1|Cs-1	catalase	protein-coding
321	chr11	114328863	114330224	+	0	NA	Intergenic	Intergenic	-19369	NR_027643	319819	Mm.50754	NM_177008	ENSMUSG00000062391	4932435O22Rik	-	RIKEN cDNA 4932435O22 gene	ncRNA
1300	chr5	13525417	13529933	+	0	NA	intron (NM_001243072, intron 7 of 17)	intron (NM_001243072, intron 7 of 17)	128366	NM_009152	20346	Mm.372039	NM_009152	ENSMUSG00000028883	Sema3a	Hsema-I|SEMA1|SemD|Semad|coll-1	sema domain, immunoglobulin domain (Ig), short basic domain, secreted, (semaphorin) 3A	protein-coding
1199	chr3	157609261	157611023	+	0	NA	promoter-TSS (NM_001013806)	promoter-TSS (NM_001013806)	-288	NM_001013806	433667	Mm.265806	NM_001013806	ENSMUSG00000039988	Ankrd13c	AI505652|AU022220	ankyrin repeat domain 13c	protein-coding
86	chr1	162280703	162282922	+	0	NA	promoter-TSS (NM_001038621)	promoter-TSS (NM_001038621)	-110	NM_001038621	29809	Mm.25833	NM_013862	ENSMUSG00000026721	Rabgap1l	5830411O09Rik|8430421H08Rik|9630005B12Rik|AW049894|HHL|Hh1|mKIAA0471	RAB GTPase activating protein 1-like	protein-coding
624	chr15	37427893	37430654	+	0	NA	intron (NM_001170866, intron 4 of 6)	intron (NM_001170866, intron 4 of 6)	-40136	NM_001170868	52589	Mm.283370	NM_134094	ENSMUSG00000051359	Ncald	AI848120|D030020D09Rik|D15Ertd412e	neurocalcin delta	protein-coding
792	chr17	39980046	39985750	+	0	NA	non-coding (NR_046233, exon 1 of 1)	non-coding (NR_046233, exon 1 of 1)	2956	NR_046233	100861531		NR_046233		Rn45s	-	45S pre-ribosomal RNA	rRNA
1158	chr3	96000649	96001978	+	0	NA	intron (NM_026975, intron 1 of 1)	CpG	196	NM_026975	69168	Mm.104531	NM_026975	ENSMUSG00000015943	Bola1	1810037G04Rik	bolA-like 1 (E. coli)	protein-coding
371	chr12	53446794	53448635	+	0	NA	Intergenic	Intergenic	-169350	NM_009706	11855	Mm.35059	NM_009706	ENSMUSG00000035133	Arhgap5	p190-B|p190B	Rho GTPase activating protein 5	protein-coding
656	chr15	81228809	81231200	+	0	NA	promoter-TSS (NM_177310)	promoter-TSS (NM_177310)	120	NM_133726	70356	Mm.180337	NM_133726	ENSMUSG00000022403	St13	1110007I03Rik|3110002K08Rik|AW555194|HIP|HOP|HSPABP|HSPABP1|PRO0786|SNC6|p48	suppression of tumorigenicity 13	protein-coding
1248	chr4	80556329	80558721	+	0	NA	exon (NM_026821, exon 1 of 2)	exon (NM_026821, exon 1 of 2)	935	NM_026821	52829	Mm.273986	NM_026821		Lurap1l	1110029A09Rik|AV077978|AV175137|D4Bwg0951e|WI-13707|bM350F23.1	leucine rich adaptor protein 1-like	protein-coding
1079	chr2	168162798	168166060	+	0	NA	Intergenic	Intergenic	-69598	NM_001081134	241794	Mm.425102	NM_001081134	ENSMUSG00000074575	Kcng1	AW536275|OTTMUSG00000016048	potassium voltage-gated channel, subfamily G, member 1	protein-coding
204	chr10	118675651	118678416	+	0	NA	promoter-TSS (NM_027994)	promoter-TSS (NM_027994)	78	NM_027994	71902	Mm.203965	NM_027994	ENSMUSG00000020114	Cand1	2310038O07Rik|6330512O03Rik|AI195005|AI846556|D10Ertd516e|Tp120a|mKIAA0829	cullin associated and neddylation disassociated 1	protein-coding
1041	chr2	124744627	124746859	+	0	NA	Intergenic	Intergenic	-148120	NM_175034	317750	Mm.330538	NM_175034	ENSMUSG00000035183	Slc24a5	F630045L20Rik|JSX|NCKX5|NCX5|Oca6	solute carrier family 24, member 5	protein-coding
1590	chr7	134119552	134120591	+	0	NA	5' UTR (NM_026638, exon 1 of 6)	5' UTR (NM_026638, exon 1 of 6)	643	NM_026638	52858	Mm.28219	NM_026638	ENSMUSG00000030682	Cdipt	9530042F15Rik|D7Bwg0575e|Pis|Pis1	CDP-diacylglycerol--inositol 3-phosphatidyltransferase (phosphatidylinositol synthase)	protein-coding
435	chr13	12287915	12289657	+	0	NA	intron (NM_001081128, intron 27 of 32)	intron (NM_001081128, intron 27 of 32)	-10031	NR_045170	328186	Mm.188154	NM_183202		Gm10336	B330003H21|ENSMUSG00000071543	predicted gene 10336	ncRNA
814	chr17	67293083	67294989	+	0	NA	intron (NM_008984, intron 9 of 30)	intron (NM_008984, intron 9 of 30)	81539	NR_049205	100885844		NR_049205		Mir5709	mmu-mir-5709	microRNA mir-5709	ncRNA
1652	chr8	74658737	74661697	+	0	NA	intron (NM_001001491, intron 1 of 7)	intron (NM_001001491, intron 1 of 7)	1026	NM_001001491	326618	Mm.295124	NM_001001491	ENSMUSG00000031799	Tpm4	2610528G24Rik	tropomyosin 4	protein-coding
1516	chr7	30738079	30739693	+	0	NA	Intergenic	CpG	-1974	NM_178384	72723	Mm.371648	NM_178384	ENSMUSG00000059975	Zfp74	2810054M15Rik|KRAB8|Zfp66|Znf569|mszf21|mszf77	zinc finger protein 74	protein-coding
1482	chr6	122551823	122553329	+	0	NA	promoter-TSS (NM_001134391)	promoter-TSS (NM_001134391)	-114	NM_001134391	11810	Mm.3333	NM_031159	ENSMUSG00000040613	Apobec1	Cdar1	apolipoprotein B mRNA editing enzyme, catalytic polypeptide 1	protein-coding
924	chr19	19320319	19323295	+	0	NA	Intergenic	Intergenic	-136121	NM_001043354	225998	Mm.234641	NM_146095	ENSMUSG00000036192	Rorb	Nr1f2|RZR-beta|RZRB|Rorbeta	RAR-related orphan receptor beta	protein-coding
885	chr18	55144320	55153541	+	0	NA	intron (NM_175751, intron 1 of 9)	intron (NM_175751, intron 1 of 9)	904	NM_175751	269023	Mm.192984	NM_175751	ENSMUSG00000052713	Zfp608	4932417D18Rik|D430007A19Rik|Znf608	zinc finger protein 608	protein-coding
1412	chr6	16265821	16267466	+	0	NA	Intergenic	GA-rich|Low_complexity|Low_complexity	581798	NM_031198	21426	Mm.36217	NM_031198	ENSMUSG00000029553	Tfec	BB107417|Tcfec|bHLHe34	transcription factor EC	protein-coding
884	chr18	54770750	54773086	+	0	NA	intron (NR_045400, intron 1 of 2)	intron (NR_045400, intron 1 of 2)	520	NR_045400	328957	Mm.402781	NR_045400		9330117O12Rik	9330117O12	RIKEN cDNA 9330117O12 gene	ncRNA
1709	chr9	23211172	23218525	+	0	NA	intron (NM_028472, intron 13 of 14)	intron (NM_028472, intron 13 of 14)	187328	NM_028472	73230	Mm.335020	NM_028472	ENSMUSG00000031963	Bmper	3110056H04Rik|CV-2|Crim3|Cv2	BMP-binding endothelial regulator	protein-coding
339	chr12	12690821	12692809	+	0	NA	Intergenic	Intergenic	256827	NM_008709	18109	Mm.16469	NM_008709	ENSMUSG00000037169	Mycn	N-myc|Nmyc|Nmyc-1|Nmyc1|bHLHe37|c-nmyc	v-myc myelocytomatosis viral related oncogene, neuroblastoma derived (avian)	protein-coding
228	chr11	8396185	8397907	+	0	NA	intron (NM_001083587, intron 16 of 30)	intron (NM_001083587, intron 16 of 30)	167492	NM_001083587	319939	Mm.337820	NM_001083587	ENSMUSG00000020422	Tns3	BC023928|F830010I22Rik|TEM6|Tens1	tensin 3	protein-coding
760	chr17	10028515	10048223	+	0	NA	Intergenic	Intergenic	-69638	NR_045433	71092	Mm.243827	NR_045433		4930452A19Rik	4933424P20Rik	RIKEN cDNA 4930452A19 gene	ncRNA
863	chr18	38737030	38763803	+	0	NA	intron (NM_011898, intron 1 of 1)	intron (NM_011898, intron 1 of 1)	10506	NM_011898	24066	Mm.42038	NM_011898	ENSMUSG00000024427	Spry4	A030006O18Rik|sprouty4	sprouty homolog 4 (Drosophila)	protein-coding
749	chr17	7064430	7066853	+	0	NA	Intergenic	Intergenic	34045	NR_030465	751529		NR_030465	miRBase:MI0004660	Mir692-1	Mirn692-1	microRNA 692-1	ncRNA
268	chr11	62482182	62484414	+	0	NA	Intergenic	Intergenic	21132	NM_175002	216829	Mm.295306	NM_175002		Mmgt2	AI852046	membrane magnesium transporter 2	protein-coding
531	chr13	115627740	115631817	+	0	NA	exon (NM_008396, exon 28 of 30)	exon (NM_008396, exon 28 of 30)	21333	NM_001113374	17434	Mm.19027	NM_013826	ENSMUSG00000015536	Mocs2	AI415403	molybdenum cofactor synthesis 2	protein-coding
829	chr17	88654925	88657332	+	0	NA	Intergenic	Intergenic	131276	NM_001190356	225058	Mm.312053	NM_001190356		Gm4832	EG225058	predicted gene 4832	protein-coding
345	chr12	29144538	29147142	+	0	NA	intron (NM_001177964, intron 8 of 8)	intron (NM_001177964, intron 8 of 8)	87362	NM_001177964	68511	Mm.310284	NM_001177964		Dcdc2c	1110015M06Rik	doublecortin domain containing 2C	protein-coding
1745	chr9	65193045	65195309	+	0	NA	exon (NM_016688, exon 1 of 5)	exon (NM_016688, exon 1 of 5)	302	NM_016688	50996	Mm.29193	NM_016688	ENSMUSG00000041837	Pdcd7	C80112|ES18	programmed cell death 7	protein-coding
172	chr10	79315752	79318594	+	0	NA	promoter-TSS (NM_001077363)	promoter-TSS (NM_001077363)	-4	NM_001077363	19205	Mm.265610	NM_008956	ENSMUSG00000006498	Ptbp1	AA407203|AL033359|HNRPI|PTB-1|PTB2|PTB3|PTB4|Ptb|pPTB	polypyrimidine tract binding protein 1	protein-coding
596	chr14	101750916	101752631	+	0	NA	Intergenic	Intergenic	-152487	NM_029680	76627	Mm.31415	NM_029680	ENSMUSG00000042888	Prr30	1700110M21Rik	proline rich 30	protein-coding
1297	chr4	154974405	154976848	+	0	NA	5' UTR (NM_177186, exon 1 of 9)	5' UTR (NM_177186, exon 1 of 9)	101	NM_177186	320541	Mm.306018	NM_177186	ENSMUSG00000042202	Slc35e2	A530082C11Rik|AI957035	solute carrier family 35, member E2	protein-coding
1521	chr7	36339200	36341680	+	0	NA	exon (NM_033080, exon 1 of 3)	exon (NM_033080, exon 1 of 3)	507	NM_033080	110959	Mm.410206	NM_033080	ENSMUSG00000034875	Nudt19	D7Rp2|D7Rp2-r|D7Rp2-s|D7Rp2e|RP2-r|RP2-s	nudix (nucleoside diphosphate linked moiety X)-type motif 19	protein-coding
1366	chr5	113370051	113375506	+	0	NA	intron (NM_001285806, intron 11 of 20)	intron (NM_001285806, intron 11 of 20)	-47396	NM_028901	74376	Mm.441903	NM_028901	ENSMUSG00000072720	Myo18b	4932408L24Rik|4933411E19Rik|Gm448	myosin XVIIIb	protein-coding
223	chr11	6445672	6448806	+	0	NA	intron (NM_001190343, intron 1 of 8)	CpG	349	NM_001190343	216527	Mm.221271	NM_146014	ENSMUSG00000000378	Ccm2	BC029157	cerebral cavernous malformation 2	protein-coding
613	chr15	25681779	25705588	+	0	NA	intron (NM_019472, intron 19 of 40)	intron (NM_019472, intron 19 of 40)	-79370	NM_001034851	66270	Mm.25311	NM_025459	ENSMUSG00000022270	Fam134b	1810015C04Rik|AU015349	family with sequence similarity 134, member B	protein-coding
721	chr16	69576870	69578251	+	0	NA	Intergenic	Intergenic	286429	NM_173069	224318	Mm.212743	NM_173069	ENSMUSG00000063163	Speer2	SPEER-2	spermatogenesis associated glutamate (E)-rich protein 2	protein-coding
1255	chr4	89135645	89137810	+	0	NA	Intergenic	Intergenic	-179786	NM_007670	12579	Mm.423094	NM_007670	ENSMUSG00000073802	Cdkn2b	AV083695|INK4b|MTS2|p15|p15(INK4b)|p15INK4b	cyclin-dependent kinase inhibitor 2B (p15, inhibits CDK4)	protein-coding
1043	chr2	126498176	126502267	+	0	NA	intron (NM_001271470, intron 1 of 8)	intron (NM_001271470, intron 1 of 8)	1107	NM_001271469	14391	Mm.293266	NM_010249	ENSMUSG00000027361	Gabpb1	BABPB2|E4TF1|E4TF1-47|E4TF1-53|E4Tf1B|GABPB|GABPB-1|GABPB-2|GABPB1-1|GABPB1-2|NRF2B1|NRF2B2	GA repeat binding protein, beta 1	protein-coding
282	chr11	74564186	74566267	+	0	NA	Intergenic	Intergenic	-19139	NM_026197	67493	Mm.45748	NM_026197		Mettl16	2610100D03Rik|2810013M15Rik|A830095F14Rik|AI846133|Mett10d	methyltransferase like 16	protein-coding
669	chr15	95519414	95524375	+	0	NA	Intergenic	Intergenic	-36692	NM_207533	223843	Mm.152937	NM_207533		Dbx2	9430056A22Rik|9630005K15|AI846217|Gm1229	developing brain homeobox 2	protein-coding
1082	chr2	171529542	171531517	+	0	NA	Intergenic	Intergenic	257770	NR_040509	75655	Mm.396203	NR_040509	ENSMUSG00000086823	1700028P15Rik	-	RIKEN cDNA 1700028P15 gene	ncRNA
420	chr12	100995080	100997086	+	0	NA	intron (NM_030172, intron 5 of 5)	intron (NM_030172, intron 5 of 5)	125569	NM_030172	78767	Mm.235920	NM_030172	ENSMUSG00000021176	Efcab11	2610021K21Rik|2610110A13Rik	EF-hand calcium binding domain 11	protein-coding
1066	chr2	155366101	155367623	+	0	NA	intron (NM_019811, intron 2 of 17)	intron (NM_019811, intron 2 of 17)	15804	NR_040613	74945	Mm.401956	NR_040613	ENSMUSG00000086529	Acss2os	4930471I20Rik	acyl-CoA synthetase short-chain family member 2, opposite strand	ncRNA
121	chr10	8058784	8061063	+	0	NA	intron (NM_177387, intron 2 of 7)	intron (NM_177387, intron 2 of 7)	178700	NM_177387	338362	Mm.41163	NM_177387	ENSMUSG00000047712	Ust	D930010O20Rik|UA2OST	uronyl-2-sulfotransferase	protein-coding
639	chr15	60461516	60473829	+	0	NA	Intergenic	Intergenic	-186848	NR_030696	320469	Mm.230853	NM_177166	ENSMUSG00000097493	9930014A18Rik	-	RIKEN cDNA 9930014A18 gene	ncRNA
952	chr19	56096516	56106330	+	0	NA	Intergenic	ORR1A2-int|LTR|MaLR	131612	NM_001142924	21416	Mm.139815	NM_009333	ENSMUSG00000024985	Tcf7l2	TCF4B|TCF4E|Tcf-4|Tcf4|mTcf-4B|mTcf-4E	transcription factor 7 like 2, T cell specific, HMG box	protein-coding
989	chr2	40365096	40367403	+	0	NA	Intergenic	MTEa|LTR|MaLR	-1284391	NM_024209	67857	Mm.389242	NM_024209		Ppp6c	2310003C10Rik	protein phosphatase 6, catalytic subunit	protein-coding
1505	chr7	16972600	16993273	+	0	NA	Intergenic	PB1D10|SINE|Alu	-3609	NM_198631	330474	Mm.333594	NM_198631	ENSMUSG00000059273	Zc3h4	Bwq1|Gm768|Kiaa1064-hp|mKIAA1064	zinc finger CCCH-type containing 4	protein-coding
1071	chr2	162755927	162757826	+	0	NA	promoter-TSS (NM_026499)	promoter-TSS (NM_026499)	-368	NM_026499	67996	Mm.24042	NM_026499	ENSMUSG00000016921	Srsf6	1210001E11Rik|AI314910|AW146126|Sfrs6	serine/arginine-rich splicing factor 6	protein-coding
494	chr13	76154891	76156918	+	0	NA	5' UTR (NM_001131068, exon 1 of 4)	5' UTR (NM_001131068, exon 1 of 4)	106	NM_178916	218341	Mm.266515	NM_178916	ENSMUSG00000043190	Rfesd	AI256775|D030068K09	Rieske (Fe-S) domain containing	protein-coding
487	chr13	73582415	73585723	+	0	NA	Intergenic	Intergenic	-20762	NM_145376	210992	Mm.284649	NM_145376	ENSMUSG00000021608	Lpcat1	2900035H07Rik|Aytl2|BB137372|BC005662|C87117|LPCAT|rd11	lysophosphatidylcholine acyltransferase 1	protein-coding
1348	chr5	85667665	85671220	+	0	NA	Intergenic	Intergenic	-823035	NM_007937	13839	Mm.137991	NM_007937		Epha5	AI854630|AW125296|Cek7|Ehk1|Els1|Hek7|Rek7|bsk	Eph receptor A5	protein-coding
238	chr11	16568873	16571123	+	0	NA	Intergenic	Intergenic	-82208	NM_207655	13649	Mm.8534	NM_007912	ENSMUSG00000020122	Egfr	9030024J15Rik|AI552599|Erbb|Errb1|Errp|Wa5|wa-2|wa2	epidermal growth factor receptor	protein-coding
873	chr18	46203345	46205332	+	0	NA	intron (NR_040342, intron 1 of 3)	intron (NR_040342, intron 1 of 3)	576	NR_040342	107003	Mm.395148	NR_040342		A330093E20Rik	AU043608	RIKEN cDNA A330093E20 gene	ncRNA
1137	chr3	77632808	77638202	+	0	NA	Intergenic	Intergenic	1314292	NM_001099624	76089	Mm.31220	NM_001099624	ENSMUSG00000062232	Rapgef2	5830453M24Rik|CNRasGEF|Pdzgef1|RA-GEF-1|mKIAA0313|nRapGEP	Rap guanine nucleotide exchange factor (GEF) 2	protein-coding
577	chr14	71446402	71448387	+	0	NA	Intergenic	Intergenic	157457	NM_008115	14586	Mm.32619	NM_008115	ENSMUSG00000022103	Gfra2	-	glial cell line derived neurotrophic factor family receptor alpha 2	protein-coding
253	chr11	29736580	29741427	+	0	NA	intron (NM_146016, intron 10 of 41)	intron (NM_146016, intron 10 of 41)	-13335	NM_176829	216622	Mm.443260	NM_176829	ENSMUSG00000078157	4931440F15Rik	Fem1ab	RIKEN cDNA 4931440F15 gene	protein-coding
448	chr13	28506617	28511125	+	0	NA	Intergenic	Intergenic	274518	NM_023746	28078	Mm.155058	NM_023746	ENSMUSG00000017064	Prl5a1	1600013P04Rik|D13Wsu14e|PLP-L|Prlpl	prolactin family 5, subfamily a, member 1	protein-coding
1227	chr4	48291746	48303048	+	0	NA	intron (NM_010569, intron 2 of 16)	intron (NM_010569, intron 2 of 16)	4765	NM_001281977	16348	Mm.317706	NM_010569	ENSMUSG00000028344	Invs	Nphp2|inv	inversin	protein-coding
1417	chr6	24904081	24907707	+	0	NA	5' UTR (NM_177013, exon 1 of 1)	5' UTR (NM_177013, exon 1 of 1)	231	NM_177013	319832	Mm.127446	NM_177013	ENSMUSG00000048022	Tmem229a	6332401O19Rik	transmembrane protein 229A	protein-coding
216	chr10	129696008	129697440	+	0	NA	Intergenic	Intergenic	20572	NM_007501	11923	Mm.10695	NM_007501	ENSMUSG00000048015	Neurod4	AI846749|ATH-3|Atoh3|MATH-3|Math3|bHLHa4	neurogenic differentiation 4	protein-coding
852	chr18	30280484	30282004	+	0	NA	Intergenic	Intergenic	-151306	NM_181414	225326	Mm.194127	NM_181414	ENSMUSG00000033628	Pik3c3	5330434F23Rik|Vps34	phosphoinositide-3-kinase, class 3	protein-coding
643	chr15	67901688	67905477	+	0	NA	Intergenic	Intergenic	186836	NM_001145888	380993	Mm.309526	NM_198644	ENSMUSG00000022335	Zfat	Gm922|Zfat1|Zfp406	zinc finger and AT hook domain containing	protein-coding
63	chr1	104524792	104524993	+	0	NA	Intergenic	LSU-rRNA_Hsa|rRNA|rRNA	1472547	NR_037989	100504525	Mm.87065	NR_037989		Gm20268	-	predicted gene, 20268	ncRNA
1637	chr8	46019824	46024780	+	0	NA	Intergenic	Intergenic	-13260	NM_001081286	14107	Mm.27365	NM_001081286	ENSMUSG00000070047	Fat1	2310038E12Rik|AU023433|Fath|mFat1	FAT tumor suppressor homolog 1 (Drosophila)	protein-coding
1120	chr3	52786462	52789068	+	0	NA	intron (NM_026225, intron 18 of 18)	intron (NM_026225, intron 18 of 18)	33380	NM_026225	67542	Mm.249548	NM_026225	ENSMUSG00000027742	Cog6	4933405E16Rik|AU018618|mKIAA1134	component of oligomeric golgi complex 6	protein-coding
179	chr10	81459183	81460567	+	0	NA	Intergenic	CpG	-50997	NM_001024626	408062	Mm.391409	NM_001024626		Zfp873	-	zinc finger protein 873	protein-coding
1532	chr7	56461150	56469458	+	0	NA	intron (NM_001111016, intron 2 of 38)	intron (NM_001111016, intron 2 of 38)	-36255	NM_175272	78286	Mm.333881	NM_175272	ENSMUSG00000052512	Nav2	5330421F07Rik|AU067780|BQ960892|HELAD1|POMFIL2|RAINB1|RAINB2|Unc53H2|mKIAA3015	neuron navigator 2	protein-coding
1475	chr6	117828723	117831122	+	0	NA	Intergenic	Intergenic	16827	NM_001001792	22685	Mm.249661	NM_008616	ENSMUSG00000042097	Zfp239	Mok-2|Mok2|Znf239	zinc finger protein 239	protein-coding
1794	chrX	54943406	54947048	+	0	NA	Intergenic	Intergenic	-188293	NM_001033360	245424	Mm.336070	NM_001033360	ENSMUSG00000036357	Gpr101	GPCR6|Gm365	G protein-coupled receptor 101	protein-coding
1105	chr3	28122484	28125292	+	0	NA	Intergenic	Intergenic	-38248	NM_001163007	665113	Mm.126193	NM_026910	ENSMUSG00000027692	Tnik	1500031A17Rik|4831440I19Rik|AI451411|C530008O15Rik|C630040K21Rik	TRAF2 and NCK interacting kinase	protein-coding
1187	chr3	136808627	136819869	+	0	NA	Intergenic	Intergenic	-189794	NM_001163522	59308	Mm.27343	NM_016885	ENSMUSG00000054690	Emcn	0610012K22Rik|AI315669|Muc14	endomucin	protein-coding
713	chr16	56716515	56718731	+	0	NA	promoter-TSS (NM_001252443)	promoter-TSS (NM_001252443)	-60	NM_019678	21787	Mm.425970	NM_019678	ENSMUSG00000022757	Tfg	AI173908	Trk-fused gene	protein-coding
676	chr15	99617118	99619519	+	0	NA	intron (NM_001113545, intron 9 of 10)	intron (NM_001113545, intron 9 of 10)	-15372	NM_028015	71949	Mm.390821	NM_028015		Cers5	2310081H14Rik|AU045339|AW544927|Lass5|Trh4	ceramide synthase 5	protein-coding
1334	chr5	65193576	65208462	+	0	NA	intron (NM_008453, intron 1 of 5)	intron (NM_008453, intron 1 of 5)	6257	NM_008453	16599	Mm.392759	NM_008453	ENSMUSG00000029178	Klf3	9930027G08Rik|AL024007|Bklf|Tef-2	Kruppel-like factor 3 (basic)	protein-coding
1251	chr4	83387784	83389960	+	0	NA	exon (NM_001081012, exon 22 of 26)	exon (NM_001081012, exon 22 of 26)	217423	NM_001081012	320226	Mm.180032	NM_029117	ENSMUSG00000052407	Ccdc171	4930418J05Rik|4930473A06Rik|A330015D16Rik	coiled-coil domain containing 171	protein-coding
277	chr11	71562939	71587948	+	0	NA	intron (NM_177618, intron 2 of 8)	(ATTG)n|Simple_repeat|Simple_repeat	11238	NM_177618	216881	Mm.48648	NM_177618	ENSMUSG00000020811	Wscd1	mKIAA0523	WSC domain containing 1	protein-coding
1192	chr3	143861318	143869628	+	0	NA	promoter-TSS (NM_001161770)	promoter-TSS (NM_001161770)	-113	NM_001161769	16911	Mm.29187	NM_010723	ENSMUSG00000028266	Lmo4	A730077C12Rik|Crp3|Etohi4	LIM domain only 4	protein-coding
1784	chrX	12921366	12925119	+	0	NA	Intergenic	Intergenic	65094	NM_010028	13205	Mm.289662	NM_010028	ENSMUSG00000000787	Ddx3x	D1Pas1-rs2|Ddx3|Fin14	DEAD/H (Asp-Glu-Ala-Asp/His) box polypeptide 3, X-linked	protein-coding
879	chr18	49557513	49559667	+	0	NA	Intergenic	Intergenic	-124353	NR_033785	67321	Mm.245802	NR_033785		1700044K03Rik	-	RIKEN cDNA 1700044K03 gene	ncRNA
938	chr19	33138314	33140845	+	0	NA	Intergenic	Intergenic	307512	NM_008960	19211	Mm.245395	NM_008960	ENSMUSG00000013663	Pten	2310035O07Rik|A130070J02Rik|AI463227|B430203M17Rik|MMAC1|TEP1	phosphatase and tensin homolog	protein-coding
1679	chr8	112131824	112133586	+	0	NA	promoter-TSS (NM_020046)	promoter-TSS (NM_020046)	-132	NM_020046	56749	Mm.23894	NM_020046	ENSMUSG00000031730	Dhodh	2810417D19Rik|AI834883	dihydroorotate dehydrogenase	protein-coding
1830	chrX	158958438	158960791	+	0	NA	intron (NM_178256, intron 7 of 17)	intron (NM_178256, intron 7 of 17)	121976	NM_001290633	194590	Mm.442441	NM_178256	ENSMUSG00000040855	Reps2	POB1	RALBP1 associated Eps domain containing protein 2	protein-coding
1620	chr8	14650782	14652272	+	0	NA	intron (NM_172910, intron 4 of 15)	intron (NM_172910, intron 4 of 15)	-237009	NM_012000	26889	Mm.254027	NM_012000	ENSMUSG00000026317	Cln8	mnd	ceroid-lipofuscinosis, neuronal 8	protein-coding
1095	chr3	9749917	9753247	+	0	NA	intron (NM_001195031, intron 3 of 8)	intron (NM_001195031, intron 3 of 8)	82097	NM_053182	94212	Mm.23897	NM_053182	ENSMUSG00000027508	Pag1	Cbp|F730007C19Rik|Pag	phosphoprotein associated with glycosphingolipid microdomains 1	protein-coding
1183	chr3	132973038	132974268	+	0	NA	intron (NM_146141, intron 1 of 11)	intron (NM_146141, intron 1 of 11)	579	NM_146141	74776	Mm.210305	NM_146141	ENSMUSG00000028013	Ppa2	1110013G13Rik|Sid6306	pyrophosphatase (inorganic) 2	protein-coding
1262	chr4	107040123	107041194	+	0	NA	5' UTR (NM_028355, exon 1 of 18)	5' UTR (NM_028355, exon 1 of 18)	269	NM_028355	72787	Mm.28478	NM_028355	ENSMUSG00000028614	Ndc1	2810475A17Rik|AI450313|Tmem48	NDC1 transmembrane nucleoporin	protein-coding
1444	chr6	70722877	70725572	+	0	NA	intron (NM_009075, intron 6 of 8)	intron (NM_009075, intron 6 of 8)	17945	NM_009075	19895	Mm.17905	NM_009075	ENSMUSG00000053604	Rpia	RPI	ribose 5-phosphate isomerase A	protein-coding
1290	chr4	142867640	142871143	+	0	NA	intron (NM_001290822, intron 1 of 4)	intron (NM_001290822, intron 1 of 4)	20076	NM_010329	14726	Mm.2976	NM_010329	ENSMUSG00000028583	Pdpn	Gp38|OTS-8|RANDAM-2|T1-alpha|T1a|T1alpha	podoplanin	protein-coding
1527	chr7	51659604	51661764	+	0	NA	Intergenic	Intergenic	21188	NM_016663	20981	Mm.4824	NM_016663	ENSMUSG00000030731	Syt3	AI385753|sytIII	synaptotagmin III	protein-coding
1132	chr3	72592510	72596258	+	0	NA	Intergenic	Intergenic	176404	NM_001081137	69983	Mm.261054	NM_001081137	ENSMUSG00000027790	Sis	2010204N08Rik|SI|Si-s	sucrase isomaltase (alpha-glucosidase)	protein-coding
929	chr19	23286076	23290164	+	0	NA	intron (NM_153808, intron 21 of 23)	intron (NM_153808, intron 21 of 23)	58969	NM_001252685	226026	Mm.23267	NM_153808	ENSMUSG00000024943	Smc5	MLZ-453|SMC-5|Smc5l1|mKIAA0594|mSMC5	structural maintenance of chromosomes 5	protein-coding
133	chr10	36850578	36861758	+	0	NA	exon (NM_008538, exon 2 of 2)	exon (NM_008538, exon 2 of 2)	2564	NM_008538	17118	Mm.30059	NM_008538	ENSMUSG00000069662	Marcks	Macs|PKCSL	myristoylated alanine rich protein kinase C substrate	protein-coding
123	chr10	10999974	11002685	+	0	NA	promoter-TSS (NM_001168297)	promoter-TSS (NM_001168297)	-56	NM_001168297	71865	Mm.276229	NM_027968	ENSMUSG00000047648	Fbxo30	1700026A16Rik|MUSA1	F-box protein 30	protein-coding
304	chr11	99246653	99248551	+	0	NA	intron (NM_010660, intron 6 of 7)	intron (NM_010660, intron 6 of 7)	3076	NM_010660	16661	Mm.22662	NM_010660	ENSMUSG00000019761	Krt10	D130054E02Rik|K10|K1C1|Krt-1.10|Krt1-10	keratin 10	protein-coding
547	chr14	26797461	26800188	+	0	NA	Intergenic	Intergenic	-3667	NM_001177539	100039293	Mm.429131	NM_001177539	ENSMUSG00000072672	Duxbl3	ENSMUSG00000072672|Gm10391	double homeobox B-like 3	protein-coding
631	chr15	44532736	44539529	+	0	NA	intron (NM_178765, intron 4 of 7)	intron (NM_178765, intron 4 of 7)	1902	NM_001285842	319613	Mm.207715	NM_176998	ENSMUSG00000022340	Sybu	Golsyn	syntabulin (syntaxin-interacting)	protein-coding
1616	chr8	10129347	10132172	+	0	NA	Intergenic	Intergenic	-23164	NM_001081397	244281	Mm.422761	NM_001081397	ENSMUSG00000039057	Myo16	C230040D10Rik|Gm1105|NYAP3|mKIAA0865	myosin XVI	protein-coding
1583	chr7	121062450	121064564	+	0	NA	intron (NM_145584, intron 5 of 15)	intron (NM_145584, intron 5 of 15)	153995	NM_145584	233744	Mm.334160	NM_145584	ENSMUSG00000038156	Spon1	AI666765|AW455831|BC020531|D330035F22Rik|FSP	spondin 1, (f-spondin) extracellular matrix protein	protein-coding
1544	chr7	84276426	84279338	+	0	NA	Intergenic	Intergenic	903109	NM_001199224	244071	Mm.322829	NM_172902	ENSMUSG00000025754	Agbl1	Ccp4|D430020F16|EG244071|Nna1-l1	ATP/GTP binding protein-like 1	protein-coding
1538	chr7	69083980	69086305	+	0	NA	promoter-TSS (NR_030557)	promoter-TSS (NR_030557)	-150	NR_030557	100124439		NR_030557	miRBase:MI0005495	Mir344-2	Mirn344-2	microRNA 344-2	ncRNA
396	chr12	79878345	79880625	+	0	NA	intron (NM_019579, intron 1 of 14)	intron (NM_019579, intron 1 of 14)	29551	NM_019579	56217	Mm.425777	NM_019579	ENSMUSG00000021112	Mpp5	3830420B02Rik|AI255216|AI644496|Pals1	membrane protein, palmitoylated 5 (MAGUK p55 subfamily member 5)	protein-coding
258	chr11	40505069	40509076	+	0	NA	promoter-TSS (NM_134017)	promoter-TSS (NM_134017)	-888	NM_134017	108645	Mm.293771	NM_134017	ENSMUSG00000042032	Mat2b	1110064C04Rik|2410018D16Rik|AI182287|AU022853|MAT-II|MATIIbeta|TGR	methionine adenosyltransferase II, beta	protein-coding
1631	chr8	32908956	32912618	+	0	NA	Intergenic	RLTR11A|LTR|ERVK	117888	NM_178591	211323	Mm.153432	NM_178591	ENSMUSG00000062991	Nrg1	6030402G23Rik|ARIA|D230005F13Rik|GGF|GGFII|HRG|HRGalpha|Hgl|NDF|SMDF	neuregulin 1	protein-coding
1422	chr6	34333666	34335332	+	0	NA	intron (NM_172398, intron 1 of 9)	intron (NM_172398, intron 1 of 9)	252	NM_172398	67861	Mm.70371	NM_172398	ENSMUSG00000061758	Akr1b10	2310005E10Rik|Akr1b16	aldo-keto reductase family 1, member B10 (aldose reductase)	protein-coding
1828	chrX	149403915	149410234	+	0	NA	Intergenic	L1Md_F2|LINE|L1	-33938	NM_001137547	635253	Mm.426169	NM_001137547	ENSMUSG00000067215	Usp51	AV136873	ubiquitin specific protease 51	protein-coding
482	chr13	60026300	60030413	+	0	NA	Intergenic	(TG)n|Simple_repeat|Simple_repeat	-102716	NR_046142	328263	Mm.123405	NR_046142		A530065N20Rik	A530065N20	RIKEN cDNA A530046M15 gene	ncRNA
949	chr19	53923742	53933474	+	0	NA	intron (NM_001170847, intron 12 of 13)	MIR3|SINE|MIR	-38113	NM_011050	18569	Mm.1605	NM_011050	ENSMUSG00000024975	Pdcd4	D19Ucla1|Ma3|Tis	programmed cell death 4	protein-coding
499	chr13	83852793	83890790	+	0	NA	intron (NR_015561, intron 2 of 3)	intron (NR_015561, intron 2 of 3)	4080	NR_015561	320203	Mm.245636	NM_177100	ENSMUSG00000050334	C130071C03Rik	2810449C10Rik	RIKEN cDNA C130071C03 gene	ncRNA
56	chr1	93097081	93114759	+	0	NA	intron (NM_016894, intron 2 of 2)	intron (NM_016894, intron 2 of 2)	29521	NM_001168392	51801	Mm.3272	NM_016894	ENSMUSG00000034353	Ramp1	9130218E19Rik	receptor (calcitonin) activity modifying protein 1	protein-coding
1369	chr5	117733042	117738286	+	0	NA	intron (NM_018858, intron 3 of 3)	intron (NM_018858, intron 3 of 3)	1909	NM_018858	23980	Mm.195898	NM_018858	ENSMUSG00000032959	Pebp1	HCNP|Pbp|Pbp1|Pbpr|Rkip	phosphatidylethanolamine binding protein 1	protein-coding
1151	chr3	88717376	88718902	+	0	NA	promoter-TSS (NM_144898)	promoter-TSS (NM_144898)	-267	NM_144898	229524	Mm.440405	NM_144898	ENSMUSG00000068922	Msto1	BC008103|mst	misato homolog 1 (Drosophila)	protein-coding
54	chr1	92370448	92373225	+	0	NA	Intergenic	Intergenic	-128164	NM_133805	108679	Mm.119177	NM_133805	ENSMUSG00000034432	Cops8	9430009J09Rik|AA408242|Csn8|Sgn8	COP9 (constitutive photomorphogenic) homolog, subunit 8 (Arabidopsis thaliana)	protein-coding
306	chr11	102741591	102743139	+	0	NA	promoter-TSS (NM_011431)	promoter-TSS (NM_011431)	-76	NM_001109995	20624	Mm.873	NM_011431	ENSMUSG00000020929	Eftud2	116kDa|Snrp116|U5-116kD	elongation factor Tu GTP binding domain containing 2	protein-coding
1204	chr4	13167159	13169371	+	0	NA	Intergenic	Intergenic	334281	NM_001171801	208820	Mm.12057	NM_173746		Triqk	C130086A10|Gm11818|OTTMUSG00000004461	triple QxxK/R motif containing	protein-coding
70	chr1	127920142	127922236	+	0	NA	exon (NM_001081756, exon 12 of 17)	exon (NM_001081756, exon 12 of 17)	-112398	NM_145100	72585	Mm.490405	NM_145100		Lypd1	2700050C12Rik|AI853408|C530008O16Rik|Lynx2|Lypdc1	Ly6/Plaur domain containing 1	protein-coding
1047	chr2	129354206	129356419	+	0	NA	intron (NM_177653, intron 1 of 6)	intron (NM_177653, intron 1 of 6)	7026	NM_177653	228592	Mm.452175	NM_177653	ENSMUSG00000043727	F830045P16Rik	Sirpb3	RIKEN cDNA F830045P16 gene	protein-coding
839	chr18	5917640	5991657	+	0	NA	Intergenic	B1_Mus1|SINE|Alu	181448	NM_029277	75415	Mm.239675	NM_029277	ENSMUSG00000041225	Arhgap12	2810011M08Rik	Rho GTPase activating protein 12	protein-coding
1055	chr2	138040657	138043185	+	0	NA	Intergenic	Intergenic	-40399	NM_001025431	228662	Mm.153405	NM_145534	ENSMUSG00000062098	Btbd3	mKIAA0952	BTB (POZ) domain containing 3	protein-coding
[truncated: 52 more rows]
