# Supplementary material for: Remodeling of epigenome and transcriptome landscapes with aging in mice reveals widespread induction of inflammatory responses
Source: HighWire-hosted journal article supplement (doi:10.1101/gr.240093.118), 2019-03-11
Supplement: Supplemental_Code_Figure1_General.zip [file HOMER_Olfactory_Bulb_Diffbind_H3K27ac_pooledLane_in_SE.xls]

PeakID (cmd=annotatePeaks.pl Olfactory_Bulb_Diffbind_H3K27ac_pooledLane_in_SE-Lite_coord.bed mm9)	Chr	Start	End	Strand	Peak Score	Focus Ratio/Region Size	Annotation	Detailed Annotation	Distance to TSS	Nearest PromoterID	Entrez ID	Nearest Unigene	Nearest Refseq	Nearest Ensembl	Gene Name	Gene Alias	Gene Description	Gene Type
559	chr5	140889880	140895598	+	0	NA	Intergenic	RMER30|DNA|MER1_type	-2520	NM_133916	27979	Mm.21671	NM_133916	ENSMUSG00000056076	Eif3b	AL033316|AL033334|AL033369|AW208965|D5Wsu45e|EIF3-ETA|EIF3-P110|EIF3-P116|Eif3s9|PRT1	eukaryotic translation initiation factor 3, subunit B	protein-coding
127	chr11	87235354	87242571	+	0	NA	intron (NM_031386, intron 1 of 30)	intron (NM_031386, intron 1 of 30)	-2131	NM_001199293	83560	Mm.440758	NM_031386	ENSMUSG00000010342	Tex14	C85585	testis expressed gene 14	protein-coding
32	chr1	157819517	157821680	+	0	NA	promoter-TSS (NM_001039184)	promoter-TSS (NM_001039184)	-213	NM_001039184	74081	Mm.260247	NM_001039184	ENSMUSG00000033671	Cep350	4933409L06Rik|6430546F08Rik	centrosomal protein 350	protein-coding
443	chr3	50997515	51003368	+	0	NA	Intergenic	B2_Mm2|SINE|B2	-27928	NM_009834	12457	Mm.86541	NM_009834	ENSMUSG00000023087	Ccrn4l	AU043840|Ccr4|nocturnin	CCR4 carbon catabolite repression 4-like (S. cerevisiae)	protein-coding
206	chr13	91507949	91514508	+	0	NA	intron (NR_045161, intron 2 of 2)	intron (NR_045161, intron 2 of 2)	16462	NR_045161	320297	Mm.375866	NR_045161	ENSMUSG00000097182	A830009L08Rik	-	RIKEN cDNA A830009L08 gene	ncRNA
118	chr11	51667806	51673404	+	0	NA	intron (NM_199299, intron 1 of 11)	CpG	378	NM_199299	76901	Mm.259996	NM_199299	ENSMUSG00000020387	Jade2	1200017K05Rik|AI480685|Phf15|mKIAA0239	jade family PHD finger 2	protein-coding
71	chr10	65076229	65078217	+	0	NA	Intergenic	L1M5|LINE|L1	509589	NR_038039	69433	Mm.23366	NR_038039		1700023F02Rik	AV205046	RIKEN cDNA 1700023F02 gene	ncRNA
358	chr18	77182348	77183496	+	0	NA	promoter-TSS (NM_001039202)	promoter-TSS (NM_001039202)	68	NM_001039202	76987	Mm.236127	NM_029826	ENSMUSG00000025421	Hdhd2	0610039H12Rik|3110052N05Rik	haloacid dehalogenase-like hydrolase domain containing 2	protein-coding
331	chr17	85488847	85490356	+	0	NA	promoter-TSS (NM_001163624)	promoter-TSS (NM_001163624)	6	NM_145984	213760	Mm.259035	NM_145984	ENSMUSG00000024127	Prepl	2810457N15Rik|9530014L06Rik|D030028O16Rik|mKIAA0436	prolyl endopeptidase-like	protein-coding
737	chrX	102585760	102589288	+	0	NA	promoter-TSS (NR_015552)	promoter-TSS (NR_015552)	-431	NR_015552	100043213	Mm.388967	NR_015552	ENSMUSG00000087620	5330434G04Rik	-	RIKEN cDNA 5330434G04 gene	ncRNA
560	chr5	145991573	145993467	+	0	NA	promoter-TSS (NM_028298)	promoter-TSS (NM_028298)	-64	NM_001083958	72611	Mm.206555	NM_028298	ENSMUSG00000007812	Zfp655	2700038I16Rik|9030409O18Rik|mKIAA4222	zinc finger protein 655	protein-coding
580	chr6	79968323	79971985	+	0	NA	intron (NM_178731, intron 1 of 1)	intron (NM_178731, intron 1 of 1)	517	NM_178731	243499	Mm.483425	NM_178731	ENSMUSG00000052581	Lrrtm4	7530419J18Rik|A230052N11	leucine rich repeat transmembrane neuronal 4	protein-coding
84	chr10	83634202	83636786	+	0	NA	Intergenic	Intergenic	267722	NM_001004363	77976	Mm.25874	NM_001004363	ENSMUSG00000020032	Nuak1	AU014801|AW494241|B230104P22Rik|Omphk1	NUAK family, SNF1-like kinase, 1	protein-coding
512	chr4	138685785	138688449	+	0	NA	promoter-TSS (NM_001163006)	promoter-TSS (NM_001163006)	-89	NM_001163006	433771	Mm.305990	NM_001163006	ENSMUSG00000050608	Minos1	2310028O11Rik	mitochondrial inner membrane organizing system 1	protein-coding
437	chr3	5860266	5860817	+	0	NA	Intergenic	LSU-rRNA_Hsa|rRNA|rRNA	-284293	NM_001163305	19302	Mm.132336	NM_008994	ENSMUSG00000040374	Pex2	D3Ertd138e|PAF-1|PMP35|Pxmp3	peroxisomal biogenesis factor 2	protein-coding
463	chr3	96289690	96307464	+	0	NA	Intergenic	Intergenic	-30531	NM_027126	69585	Mm.171314	NM_027126	ENSMUSG00000038403	Hfe2	2310035L15Rik|5230400G09Rik|AI414844|AI789733|DL-M|HJV|Rgmc|hemojuvelin	hemochromatosis type 2 (juvenile) (human homolog)	protein-coding
194	chr13	70776099	70777674	+	0	NA	promoter-TSS (NM_144837)	promoter-TSS (NM_144837)	-374	NM_144837	218333	Mm.139738	NM_144837	ENSMUSG00000034525	Ice1	C77245|mKIAA0947	interactor of little elongation complex ELL subunit 1	protein-coding
517	chr4	148000195	148001674	+	0	NA	non-coding (NR_027864, exon 1 of 8)	non-coding (NR_027864, exon 1 of 8)	171	NR_027864	230908	Mm.22453	NM_145556	ENSMUSG00000041459	Tardbp	1190002A23Rik|C85084|TDP-43|Tdp43	TAR DNA binding protein	protein-coding
458	chr3	93398709	93404083	+	0	NA	Intergenic	Intergenic	42357	NM_009112	20194	Mm.1	NM_009112	ENSMUSG00000041959	S100a10	42C|AA409961|AL024248|CAL12|CLP11|Cal1l|p10|p11	S100 calcium binding protein A10 (calpactin)	protein-coding
451	chr3	86025118	86030156	+	0	NA	promoter-TSS (NM_001077687)	promoter-TSS (NM_001077687)	-975	NM_001077688	80877	Mm.439825	NM_030695	ENSMUSG00000028080	Lrba	C80285|D3Ertd775e|Lab300|Lba	LPS-responsive beige-like anchor	protein-coding
220	chr14	26650331	26653473	+	0	NA	Intergenic	Intergenic	-9739	NM_013469	11744	Mm.294083	NM_013469	ENSMUSG00000021866	Anxa11	A830099O17Rik|Anx11	annexin A11	protein-coding
454	chr3	89047416	89051132	+	0	NA	promoter-TSS (NR_121683)	promoter-TSS (NR_121683)	-153	NM_001039466	360213	Mm.331156	NM_017403	ENSMUSG00000042766	Trim46	TRIFIC	tripartite motif-containing 46	protein-coding
722	chr9	117949039	117950680	+	0	NA	5' UTR (NM_013727, exon 1 of 8)	5' UTR (NM_013727, exon 1 of 8)	219	NM_013727	27215	Mm.92705	NM_013727	ENSMUSG00000039285	Azi2	AA410145|AZ2	5-azacytidine induced gene 2	protein-coding
634	chr7	100344120	100347461	+	0	NA	Intergenic	Ricksha_c|DNA|MuDR	117401	NM_021427	58238	Mm.113787	NM_021427		Fam181b	A830059I20Rik|AB041569	family with sequence similarity 181, member B	protein-coding
31	chr1	154748920	154752795	+	0	NA	Intergenic	CpG-603	-1081	NM_001005507	226517	Mm.270775	NM_001005507	ENSMUSG00000042772	Smg7	9430023P16Rik|mKIAA0250	Smg-7 homolog, nonsense mediated mRNA decay factor (C. elegans)	protein-coding
578	chr6	51416334	51422852	+	0	NA	intron (NM_182650, intron 1 of 9)	CpG	300	NM_182650	53379	Mm.155896	NM_016806		Hnrnpa2b1	9130414A06Rik|Hnrpa2|Hnrpa2b1|hnrnp-A	heterogeneous nuclear ribonucleoprotein A2/B1	protein-coding
695	chr9	40047342	40055108	+	0	NA	Intergenic	Intergenic	-25576	NM_001083917	235281	Mm.290083	NM_153522	ENSMUSG00000049281	Scn3b	1110001K16Rik|4833414B02Rik|Scnb3	sodium channel, voltage-gated, type III, beta	protein-coding
728	chrX	12337517	12340779	+	0	NA	promoter-TSS (NM_012005)	promoter-TSS (NM_012005)	-49	NM_001048208	26896	Mm.17616	NM_012005	ENSMUSG00000064127	Med14	9930001L01Rik|AU041628|Crsp2|ENSMUSG00000073278|Gm641|ORF1|Trap170	mediator complex subunit 14	protein-coding
378	chr19	60865455	60867913	+	0	NA	promoter-TSS (NM_010123)	promoter-TSS (NM_010123)	-88	NM_010123	13669	Mm.2238	NM_010123	ENSMUSG00000024991	Eif3a	A830012B05Rik|Csma|Eif3|Eif3s10|mKIAA0139	eukaryotic translation initiation factor 3, subunit A	protein-coding
325	chr17	71312913	71313236	+	0	NA	Intergenic	LSU-rRNA_Hsa|rRNA|rRNA	26782	NM_023402	67938	Mm.261329	NM_023402		Myl12b	1500001M02Rik|C77744|Mylc2b|RLC-B	myosin, light chain 12B, regulatory	protein-coding
29	chr1	136390610	136391844	+	0	NA	promoter-TSS (NM_145510)	promoter-TSS (NM_145510)	-10	NM_145510	98710	Mm.198119	NM_145510	ENSMUSG00000042229	Rabif	AI842864|AW549708|E130318E12Rik|MSS4|RASGFR3	RAB interacting factor	protein-coding
572	chr6	35127245	35128220	+	0	NA	intron (NM_027513, intron 1 of 42)	CpG	116	NM_027513	70699	Mm.261208	NM_027513	ENSMUSG00000038759	Nup205	3830404O05Rik|AV248391|mKIAA0225	nucleoporin 205	protein-coding
350	chr18	45173802	45176577	+	0	NA	Intergenic	Intergenic	186870	NM_001163013	240255	Mm.244482	NM_001163013	ENSMUSG00000034653	Ythdc2	3010002F02Rik|BC037178	YTH domain containing 2	protein-coding
675	chr8	91518477	91572562	+	0	NA	Intergenic	Intergenic	-3115	NR_106190	102465899		NR_106190	miRBase:MI0026042	Mir8110	mmu-mir-8110	microRNA mir-8110	ncRNA
540	chr5	92511252	92513685	+	0	NA	promoter-TSS (NM_001080797)	promoter-TSS (NM_001080797)	115	NM_001080794	23881	Mm.290530	NM_011816	ENSMUSG00000029405	G3bp2	AA409541|E430034L04Rik|G3BP|mKIAA0660	GTPase activating protein (SH3 domain) binding protein 2	protein-coding
226	chr14	60096433	60099064	+	0	NA	intron (NM_026908, intron 3 of 10)	intron (NM_026908, intron 3 of 10)	37930	NM_026908	69008	Mm.179091	NM_026908	ENSMUSG00000021981	Cab39l	1500031K13Rik|2810425O13Rik|4930520C08Rik|AA589432|MO2L	calcium binding protein 39-like	protein-coding
58	chr10	36853900	36861961	+	0	NA	intron (NM_008538, intron 1 of 1)	intron (NM_008538, intron 1 of 1)	802	NM_008538	17118	Mm.30059	NM_008538	ENSMUSG00000069662	Marcks	Macs|PKCSL	myristoylated alanine rich protein kinase C substrate	protein-coding
684	chr8	124866095	124887046	+	0	NA	Intergenic	B3A|SINE|B2	8076	NM_133202	170732	Mm.154808	NM_133202	ENSMUSG00000039079	Trhr2	TRH-R2	thyrotropin releasing hormone receptor 2	protein-coding
211	chr13	105018514	105018940	+	0	NA	promoter-TSS (NM_181061)	promoter-TSS (NM_181061)	36	NR_075088	60411	Mm.281498	NM_021790	ENSMUSG00000021714	Cenpk	B130045K24Rik|BB232189|C530004N04Rik|Cenp-K|Solt|Solzt	centromere protein K	protein-coding
153	chr12	72037624	72039389	+	0	NA	promoter-TSS (NM_019785)	promoter-TSS (NM_019785)	-338	NM_019785	56444	Mm.29317	NM_019785	ENSMUSG00000021076	Actr10	Actr11|Arp11	ARP10 actin-related protein 10	protein-coding
15	chr1	55186884	55189214	+	0	NA	promoter-TSS (NM_025283)	promoter-TSS (NM_025283)	-40	NM_025283	19070	Mm.291037	NM_025283	ENSMUSG00000025979	Mob4	2610109B12Rik|Mobkl3|Phocn|Prei3	MOB family member 4, phocein	protein-coding
527	chr5	32912413	32921966	+	0	NA	intron (NM_009535, intron 1 of 11)	intron (NM_009535, intron 1 of 11)	3645	NM_009535	22612	Mm.4558	NM_009535	ENSMUSG00000014932	Yes1	Yes|p61-Yes	Yamaguchi sarcoma viral (v-yes) oncogene homolog 1	protein-coding
431	chr2	167246540	167248167	+	0	NA	intron (NM_178371, intron 1 of 15)	CpG	132	NM_178371	77031	Mm.278924	NM_148929	ENSMUSG00000039463	Slc9a8	1200006P13Rik|6430709P13Rik|AI182282|NHE8	solute carrier family 9 (sodium/hydrogen exchanger), member 8	protein-coding
382	chr2	7497759	7502196	+	0	NA	Intergenic	Intergenic	-182152	NM_001110231	14007	Mm.398543	NM_010160	ENSMUSG00000002107	Celf2	B230218O03|B230345P09Rik|C88023|CELF-2|CUG-BP2|Cugbp2|D230046B21Rik|Etr-3|Napor|Napor-2|mETR-3	CUGBP, Elav-like family member 2	protein-coding
337	chr18	7692559	7694010	+	0	NA	Intergenic	CpG	-66423	NM_001161620	75739	Mm.133293	NM_001081287	ENSMUSG00000057440	Mpp7	1110068J02Rik|2810038M04Rik|5430426E14Rik|AI415104|Gm955	membrane protein, palmitoylated 7 (MAGUK p55 subfamily member 7)	protein-coding
101	chr10	129849226	129849573	+	0	NA	Intergenic	Intergenic	17269	NM_001102602	623734	Mm.469840	NM_001102602	ENSMUSG00000092048	Vmn2r85	EG623734	vomeronasal 2, receptor 85	protein-coding
340	chr18	23193520	23201755	+	0	NA	promoter-TSS (NM_001161483)	promoter-TSS (NM_001161483)	-473	NM_001161483	319211	Mm.209896	NM_199024	ENSMUSG00000041923	Nol4	1700013J13Rik|4930568N03Rik|Gm1262	nucleolar protein 4	protein-coding
76	chr10	80755023	80768074	+	0	NA	intron (NM_008844, intron 1 of 17)	L1MB7|LINE|L1	5840	NM_001146687	18717	Mm.29836	NM_008844	ENSMUSG00000034902	Pip5k1c	AI115456|AI835305|Pip5kIgamma	phosphatidylinositol-4-phosphate 5-kinase, type 1 gamma	protein-coding
311	chr17	21703007	21704848	+	0	NA	promoter-TSS (NM_001002008)	promoter-TSS (NM_001002008)	-83	NM_001002008	381066	Mm.441097	NM_001002008	ENSMUSG00000067931	Zfp948	-	zinc finger protein 948	protein-coding
62	chr10	42220703	42223175	+	0	NA	promoter-TSS (NM_017472)	promoter-TSS (NM_017472)	79	NM_017472	54198	Mm.277870	NM_017472	ENSMUSG00000019804	Snx3	SDP3	sorting nexin 3	protein-coding
571	chr6	30249213	30255500	+	0	NA	intron (NM_001169576, intron 1 of 4)	intron (NM_001169576, intron 1 of 4)	2183	NM_009459	22214	Mm.332967	NM_009459	ENSMUSG00000039159	Ube2h	1500009C23Rik|AI181839|AI326965|AI462483|AW227540|E2-20K|Gid3|N28148|Ubc8	ubiquitin-conjugating enzyme E2H	protein-coding
139	chr12	5380074	5382976	+	0	NA	intron (NM_001164493, intron 1 of 13)	CpG	963	NM_001164493	208439	Mm.388281	NM_001164493	ENSMUSG00000020627	Klhl29	A230106N14Rik|Gm68|Kbtbd9|mKIAA1921	kelch-like 29	protein-coding
389	chr2	28495821	28497510	+	0	NA	promoter-TSS (NM_001289576)	promoter-TSS (NM_001289576)	-88	NM_001289575	64930	Mm.224354	NM_022887	ENSMUSG00000026812	Tsc1	-	tuberous sclerosis 1	protein-coding
129	chr11	93746136	93748456	+	0	NA	promoter-TSS (NM_134012)	promoter-TSS (NM_134012)	-216	NM_001013375	217109	Mm.379350	NM_001013375	ENSMUSG00000054079	Utp18	6230425C22Rik|6430513M13|Wdr50	UTP18, small subunit (SSU) processome component, homolog (yeast)	protein-coding
548	chr5	117448706	117453051	+	0	NA	Intergenic	Intergenic	115124	NM_001122666	71954	Mm.34456	NM_178622	ENSMUSG00000066900	Suds3	2400003N08Rik|2410008L21Rik|AU067672|mSds3	suppressor of defective silencing 3 homolog (S. cerevisiae)	protein-coding
495	chr4	55663066	55665394	+	0	NA	Intergenic	CpG	-118883	NM_010637	16600	Mm.4325	NM_010637	ENSMUSG00000003032	Klf4	EZF|Gklf|Zie	Kruppel-like factor 4 (gut)	protein-coding
739	chrX	132824671	132826325	+	0	NA	Intergenic	Intergenic	20706	NM_001110234	12070	Mm.90787	NM_009750	ENSMUSG00000046432	Ngfrap1	AL033356|Bex3|DXWsu67e|Gcap27|Nade	nerve growth factor receptor (TNFRSF16) associated protein 1	protein-coding
662	chr8	47771896	47773011	+	0	NA	Intergenic	Intergenic	52416	NR_045750	100503498	Mm.187358	NR_045750	ENSMUSG00000097534	Gm16675	-	predicted gene, 16675	ncRNA
418	chr2	119697732	119699538	+	0	NA	Intergenic	CpG	-24329	NM_001164274	29808	Mm.87532	NM_013720	ENSMUSG00000033943	Mga	AV312082|C130042M01Rik|C80739|D030062C11Rik|Mad5	MAX gene associated	protein-coding
236	chr14	105114899	105115210	+	0	NA	intron (NR_015593, intron 1 of 5)	LSU-rRNA_Hsa|rRNA|rRNA	76690	NR_015593	320249	Mm.320725	NR_015593		D130009I18Rik	-	RIKEN cDNA D130009I18 gene	ncRNA
706	chr9	61600396	61605534	+	0	NA	Intergenic	(TG)n|Simple_repeat|Simple_repeat	159352	NM_018853	56040	Mm.3158	NM_018853	ENSMUSG00000007892	Rplp1	2410042H16Rik|Arpp1|C430017H15Rik	ribosomal protein, large, P1	protein-coding
218	chr14	22569114	22571072	+	0	NA	intron (NM_026283, intron 1 of 5)	CpG	340	NM_026283	67630	Mm.102765	NM_026283	ENSMUSG00000021770	Samd8	1110053F04Rik|1700010P07Rik|SMSr	sterile alpha motif domain containing 8	protein-coding
168	chr12	103213198	103215146	+	0	NA	promoter-TSS (NM_016856)	promoter-TSS (NM_016856)	-12	NM_016856	51786	Mm.716	NM_016856	ENSMUSG00000041781	Cpsf2	100kDa|2610024B04Rik|AI662483|Cpsf|MCPSF|mKIAA1367	cleavage and polyadenylation specific factor 2	protein-coding
135	chr11	106077098	106078943	+	0	NA	promoter-TSS (NM_028074)	promoter-TSS (NM_028074)	-220	NM_028074	72047	Mm.41367	NM_028074	ENSMUSG00000020705	Ddx42	1810047H21Rik|AW319508|AW556242|B430002H05Rik|RHELP|RNAHP|SF3b125	DEAD (Asp-Glu-Ala-Asp) box polypeptide 42	protein-coding
14	chr1	55108330	55110503	+	0	NA	promoter-TSS (NM_026424)	promoter-TSS (NM_026424)	-198	NM_026424	67876	Mm.281019	NM_026424	ENSMUSG00000025981	Coq10b	1500041J02Rik|1700030I21Rik|9530077A17Rik|AV002237|AW742641	coenzyme Q10 homolog B (S. cerevisiae)	protein-coding
348	chr18	37376258	37378491	+	0	NA	intron (NM_001301259, intron 1 of 3)	intron (NM_001301259, intron 1 of 3)	-47278	NM_053126	93872	Mm.196703	NM_053126	ENSMUSG00000051663	Pcdhb1	PcdhbA	protocadherin beta 1	protein-coding
145	chr12	53702890	53707595	+	0	NA	Intergenic	AT_rich|Low_complexity|Low_complexity	-1933	NR_045910	73278	Mm.396209	NR_045910		1700031P21Rik	-	RIKEN cDNA 1700031P21 gene	ncRNA
49	chr1	196956684	196958915	+	0	NA	promoter-TSS (NM_013499)	promoter-TSS (NM_013499)	-35	NM_013499	12946	Mm.301652	NM_013499	ENSMUSG00000016481	Cr1l	Crry|Mcp|mCRY	complement component (3b/4b) receptor 1-like	protein-coding
178	chr13	21922891	21926787	+	0	NA	promoter-TSS (NM_175657).2	promoter-TSS (NM_175657).2	505	NM_178185	319171	Mm.250564	NM_178185		Hist1h2ap	ENSMUSG00000060262|Gm11276|OTTMUSG00000000448	histone cluster 1, H2ap	protein-coding
285	chr16	57120768	57122467	+	0	NA	promoter-TSS (NM_138599)	promoter-TSS (NM_138599)	-210	NM_138599	28185	Mm.213292	NM_138599	ENSMUSG00000022752	Tomm70a	2610044B22Rik|D16Ium22|D16Ium22e|D16Wsu109e|Tom70|mKIAA0719	translocase of outer mitochondrial membrane 70 homolog A (yeast)	protein-coding
124	chr11	77793637	77799767	+	0	NA	5' UTR (NM_174852, exon 1 of 15)	5' UTR (NM_174852, exon 1 of 15)	384	NM_174852	268448	Mm.274329	NM_174852	ENSMUSG00000037791	Phf12	2410142K10Rik|F630045O13|PF1|mKIAA1523	PHD finger protein 12	protein-coding
627	chr7	85927518	85928632	+	0	NA	promoter-TSS (NM_026498)	promoter-TSS (NM_026498)	58	NM_026498	67994	Mm.297033	NM_026498	ENSMUSG00000030611	Mrps11	0710005I03Rik|C79873	mitochondrial ribosomal protein S11	protein-coding
234	chr14	79986488	79987954	+	0	NA	promoter-TSS (NM_026474)	promoter-TSS (NM_026474)	-277	NM_026474	67955	Mm.18972	NM_026474	ENSMUSG00000022024	Sugt1	2410174K12Rik|SGT1	SGT1, suppressor of G2 allele of SKP1 (S. cerevisiae)	protein-coding
594	chr6	126798712	126799833	+	0	NA	promoter-TSS (NM_025358)	promoter-TSS (NM_025358)	-110	NM_025358	66108	Mm.29939	NM_025358	ENSMUSG00000000399	Ndufa9	1010001N11Rik	NADH dehydrogenase (ubiquinone) 1 alpha subcomplex, 9	protein-coding
715	chr9	94545351	94551955	+	0	NA	Intergenic	URR1A|DNA|MER1_type	-21658	NM_177909	331004	Mm.326125	NM_177909	ENSMUSG00000031129	Slc9a9	5730527A11Rik|9930105B05|AI854429|Nhe9	solute carrier family 9 (sodium/hydrogen exchanger), member 9	protein-coding
23	chr1	95720821	95722817	+	0	NA	promoter-TSS (NM_178882)	promoter-TSS (NM_178882)	2	NM_178882	98314	Mm.383401	NM_178882	ENSMUSG00000073609	D2hgdh	AA408776|AA408778|AI325464	D-2-hydroxyglutarate dehydrogenase	protein-coding
388	chr2	27394531	27396589	+	0	NA	Intergenic	Intergenic	24893	NM_080848	140858	Mm.28265	NM_080848	ENSMUSG00000026917	Wdr5	2410008O07Rik|AA408785|AA960360|Big|Big-3	WD repeat domain 5	protein-coding
364	chr19	4984840	5002351	+	0	NA	Intergenic	Intergenic	-3624	NM_153553	225872	Mm.287867	NM_153553	ENSMUSG00000045903	Npas4	LE-PAS|Nxf	neuronal PAS domain protein 4	protein-coding
96	chr10	124824922	124827454	+	0	NA	Intergenic	CpG	-60597	NM_011391	20503	Mm.29161	NM_011391	ENSMUSG00000020102	Slc16a7	4921534N07Rik|Mct2	solute carrier family 16 (monocarboxylic acid transporters), member 7	protein-coding
653	chr8	12213391	12217305	+	0	NA	Intergenic	Intergenic	-170423	NR_027975	434280	Mm.447484	NM_001013812		Gm5607	EG434280	predicted gene 5607	ncRNA
486	chr4	35172557	35174029	+	0	NA	promoter-TSS (NM_001081343)	promoter-TSS (NM_001081343)	-164	NM_001081343	73205	Mm.331544	NM_001081343	ENSMUSG00000028300	3110043O21Rik	AI840585	RIKEN cDNA 3110043O21 gene	protein-coding
509	chr4	133305957	133314032	+	0	NA	promoter-TSS (NM_001080819)	promoter-TSS (NM_001080819)	-468	NM_001080819	93760	Mm.22478	NM_001080819	ENSMUSG00000007880	Arid1a	1110030E03Rik|BAF250a|Osa1|Smarcf1	AT rich interactive domain 1A (SWI-like)	protein-coding
160	chr12	80272048	80274269	+	0	NA	intron (NM_016800, intron 1 of 5)	CpG	287	NM_016800	53612	Mm.265929	NM_016800	ENSMUSG00000021124	Vti1b	AU015348|GES30|MVti1b|SNARE|Vti1-rp1	vesicle transport through interaction with t-SNAREs 1B	protein-coding
569	chr6	25758533	25760639	+	0	NA	promoter-TSS (NM_133931)	promoter-TSS (NM_133931)	-360	NM_133931	101185	Mm.274589	NM_133931	ENSMUSG00000029676	Pot1a	1500031H18Rik|AI851169|Pot1	protection of telomeres 1A	protein-coding
367	chr19	11985103	11987772	+	0	NA	promoter-TSS (NM_172635)	promoter-TSS (NM_172635)	-452	NM_172635	225929	Mm.42711	NM_172635	ENSMUSG00000046139	Patl1	AV312086|D430024J04|Pat1b	protein associated with topoisomerase II homolog 1 (yeast)	protein-coding
8	chr1	24684446	24686559	+	0	NA	5' UTR (NM_026719, exon 1 of 16)	5' UTR (NM_026719, exon 1 of 16)	119	NM_026719	68421	Mm.336563	NM_026719	ENSMUSG00000073725	Lmbrd1	0910001K20Rik|AV347960	LMBR1 domain containing 1	protein-coding
716	chr9	100541535	100548621	+	0	NA	intron (NM_009282, intron 1 of 33)	intron (NM_009282, intron 1 of 33)	1036	NM_009282	20842	Mm.42135	NM_009282	ENSMUSG00000037286	Stag1	AU045003|SA-1|Scc3	stromal antigen 1	protein-coding
98	chr10	126748308	126749805	+	0	NA	promoter-TSS (NM_001171582)	promoter-TSS (NM_001171582)	-214	NM_001171582	216443	Mm.28173	NM_001003913	ENSMUSG00000040354	Mars	Metrs|Mtrns	methionine-tRNA synthetase	protein-coding
43	chr1	173340938	173342711	+	0	NA	promoter-TSS (NM_009480)	promoter-TSS (NM_009480)	12	NM_009480	22278	Mm.8	NM_009480	ENSMUSG00000026641	Usf1	bHLHb11	upstream transcription factor 1	protein-coding
686	chr9	4308923	4310738	+	0	NA	promoter-TSS (NM_026962)	promoter-TSS (NM_026962)	14	NM_026962	69149	Mm.25946	NM_026962	ENSMUSG00000025893	Kbtbd3	2200003A07Rik|Bklhd3	kelch repeat and BTB (POZ) domain containing 3	protein-coding
485	chr4	32701531	32702581	+	0	NA	promoter-TSS (NM_011997)	promoter-TSS (NM_011997)	-392	NM_001122978	26885	Mm.22279	NM_011997	ENSMUSG00000028282	Casp8ap2	AA387232|D4Ertd659e|FLASH|mKIAA1315	caspase 8 associated protein 2	protein-coding
391	chr2	30291567	30304003	+	0	NA	intron (NM_138748, intron 8 of 9)	intron (NM_138748, intron 8 of 9)	26215	NM_138748	110854	Mm.275393	NM_138748	ENSMUSG00000039515	Ppp2r4	2610042B21Rik|C77440|N28142|PR53	protein phosphatase 2A activator, regulatory subunit B	protein-coding
685	chr9	3530596	3535639	+	0	NA	intron (NM_001033322, intron 1 of 7)	intron (NM_001033322, intron 1 of 7)	768	NM_001033322	234889	Mm.91240	NM_001033322		Gucy1a2	6330407I18Rik|A230060L24Rik	guanylate cyclase 1, soluble, alpha 2	protein-coding
21	chr1	94830168	94831707	+	0	NA	promoter-TSS (NM_011796)	promoter-TSS (NM_011796)	-48	NM_011796	23830	Mm.294315	NM_011796	ENSMUSG00000026270	Capn10	AW049679|Capn8|mKIAA1845	calpain 10	protein-coding
523	chr5	25002577	25007162	+	0	NA	promoter-TSS (NR_030700)	promoter-TSS (NR_030700)	-268	NM_001081383	231051	Mm.332268	NM_001081383	ENSMUSG00000038056	Kmt2c	E330008K23Rik|HALR|Mll3|mKIAA1506	lysine (K)-specific methyltransferase 2C	protein-coding
720	chr9	107671504	107674153	+	0	NA	intron (NM_148930, intron 1 of 24)	CpG	505	NM_148930	83486	Mm.259197	NM_148930	ENSMUSG00000032580	Rbm5	D030069N10Rik	RNA binding motif protein 5	protein-coding
288	chr16	59638459	59640761	+	0	NA	promoter-TSS (NM_019665)	promoter-TSS (NM_019665)	-445	NM_019665	56297	Mm.392505	NM_019665	ENSMUSG00000022722	Arl6	1110018H24Rik|2210411E14Rik|BBS3	ADP-ribosylation factor-like 6	protein-coding
193	chr13	69750212	69751200	+	0	NA	promoter-TSS (NM_175283)	promoter-TSS (NM_175283)	-188	NM_145354	28114	Mm.260009	NM_145354	ENSMUSG00000021595	Nsun2	D13Wsu123e|Misu	NOL1/NOP2/Sun domain family member 2	protein-coding
460	chr3	94757078	94759100	+	0	NA	promoter-TSS (NM_017395)	promoter-TSS (NM_017395)	-848	NM_017395	53970	Mm.24308	NM_017395	ENSMUSG00000005774	Rfx5	-	regulatory factor X, 5 (influences HLA class II expression)	protein-coding
119	chr11	53162642	53166800	+	0	NA	intron (NM_033565, intron 1 of 20)	CpG	452	NM_033565	93736	Mm.395281	NM_033565	ENSMUSG00000049470	Aff4	AF5Q31|Alf4|Laf4l|MCEF	AF4/FMR2 family, member 4	protein-coding
723	chr9	118938754	118948275	+	0	NA	intron (NM_133710, intron 6 of 7)	intron (NM_133710, intron 6 of 7)	2600	NR_029742	387218		NR_029742		Mir26a-1	Mirn26a|Mirn26a-1|miR-26a	microRNA 26a-1	ncRNA
586	chr6	86798454	86802593	+	0	NA	intron (NM_001040106, intron 1 of 20)	intron (NM_001040106, intron 1 of 20)	1012	NM_001040106	269774	Mm.221038	NM_177762	ENSMUSG00000057230	Aak1	5530400K14Rik|9630042K20|AU067724|AU067726|BC028270|C79663|D6Ertd245e|R75501|mKIAA1048	AP2 associated kinase 1	protein-coding
453	chr3	88632972	88639541	+	0	NA	non-coding (NR_015498, exon 1 of 2)	non-coding (NR_015498, exon 1 of 2)	153	NR_015498	319830	Mm.400394	NR_015498		1500004A13Rik	5430404N14Rik|BB132176	RIKEN cDNA 1500004A13 gene	ncRNA
324	chr17	69731233	69735020	+	0	NA	promoter-TSS (NM_009547)	promoter-TSS (NM_009547)	-192	NM_009547	22666	Mm.29434	NM_009547	ENSMUSG00000049672	Zbtb14	ZF5|Zfp161|b2b1982Clo	zinc finger and BTB domain containing 14	protein-coding
180	chr13	24666417	24670155	+	0	NA	Intergenic	Intergenic	-5772	NM_001286100	193385	Mm.217319	NM_029679	ENSMUSG00000036006	Fam65b	-	family with sequence similarity 65, member B	protein-coding
244	chr15	36935591	36938805	+	0	NA	promoter-TSS (NM_026521)	promoter-TSS (NM_026521)	-41	NM_026521	68036	Mm.371631	NM_026521	ENSMUSG00000062397	Zfp706	3110006P09Rik|AA793007|AW536850|C77232|Znf706	zinc finger protein 706	protein-coding
637	chr7	117202208	117207746	+	0	NA	promoter-TSS (NM_009281)	promoter-TSS (NM_009281)	-239	NM_009281	20841	Mm.10815	NM_009281	ENSMUSG00000061079	Zfp143	AA959806|AU015869|D7Ertd805e|KRAB14|SBF|Staf|Zfp79|Zfp80-rs1|Znf143|pHZ-1	zinc finger protein 143	protein-coding
351	chr18	46251079	46253450	+	0	NA	Intergenic	Intergenic	-47350	NR_040342	107003	Mm.395148	NR_040342		A330093E20Rik	AU043608	RIKEN cDNA A330093E20 gene	ncRNA
410	chr2	90584736	90587215	+	0	NA	exon (NM_018828, exon 1 of 17)	exon (NM_018828, exon 1 of 17)	448	NM_018828	55935	Mm.489638	NM_018828	ENSMUSG00000008200	Fnbp4	FBP30|Fnbp30|mKIAA1014	formin binding protein 4	protein-coding
595	chr6	126889676	126890728	+	0	NA	promoter-TSS (NM_009013)	promoter-TSS (NM_009013)	218	NM_138594	28040	Mm.44228	NM_138594	ENSMUSG00000030347	D6Wsu163e	C12orf4	DNA segment, Chr 6, Wayne State University 163, expressed	protein-coding
246	chr15	44449373	44452540	+	0	NA	promoter-TSS (NM_019480)	promoter-TSS (NM_019480)	-231	NM_019480	55960	Mm.287896	NM_019480	ENSMUSG00000022339	Ebag9	AI835379|Rcas1	estrogen receptor-binding fragment-associated gene 9	protein-coding
690	chr9	21889321	21890488	+	0	NA	promoter-TSS (NM_001253898)	promoter-TSS (NM_001253898)	-33	NM_012029	26940	Mm.425568	NM_012029	ENSMUSG00000066839	Ecsit	Sitpec	ECSIT homolog (Drosophila)	protein-coding
488	chr4	40666530	40673708	+	0	NA	promoter-TSS (NR_077226)	promoter-TSS (NR_077226)	156	NM_001164672	15502	Mm.27897	NM_008298	ENSMUSG00000028410	Dnaja1	Hsj2|Nedd7	DnaJ (Hsp40) homolog, subfamily A, member 1	protein-coding
61	chr10	41237992	41240282	+	0	NA	promoter-TSS (NM_016898)	promoter-TSS (NM_016898)	-169	NM_016898	53599	Mm.269815	NM_016898	ENSMUSG00000019818	Cd164	A115|A24|AA589639|AW540279|MGC-24|MSSP	CD164 antigen	protein-coding
430	chr2	166730810	166732573	+	0	NA	promoter-TSS (NM_023565)	promoter-TSS (NM_023565)	95	NM_023565	110750	Mm.22417	NM_023565	ENSMUSG00000002718	Cse1l	2610100P18Rik|AA407533|Capts|Cas|Xpo2	chromosome segregation 1-like (S. cerevisiae)	protein-coding
447	chr3	65777511	65780407	+	0	NA	Intergenic	Intergenic	-16812	NM_019937	56706	Mm.175612	NM_019937	ENSMUSG00000027829	Ccnl1	2610030E23Rik|AU018493|Ccnl|ania-6a	cyclin L1	protein-coding
536	chr5	77738676	77740035	+	0	NA	promoter-TSS (NM_019836)	promoter-TSS (NM_019836)	-154	NM_153798	231329	Mm.273217	NM_153798	ENSMUSG00000029250	Polr2b	Pol2rb|Rpb140|Rpb2	polymerase (RNA) II (DNA directed) polypeptide B	protein-coding
379	chr19	61275506	61275813	+	0	NA	Intergenic	Intergenic	-23447	NM_001177513	633057	Mm.426097	NM_001177513	ENSMUSG00000094649	Gm7102	EG633057	predicted gene 7102	protein-coding
415	chr2	115501082	115525883	+	0	NA	intron (NM_207264, intron 10 of 10)	intron (NM_207264, intron 10 of 10)	49021	NR_035476	100316703		NR_035476		Mir1951	mmu-mir-1951	microRNA 1951	ncRNA
113	chr11	29447191	29449143	+	0	NA	promoter-TSS (NM_024277)	promoter-TSS (NM_024277)	-127	NM_001033865	78294	Mm.180003	NM_024277	ENSMUSG00000020460	Rps27a	0610006J14Rik|Uba52|Ubb|Ubc	ribosomal protein S27A	protein-coding
152	chr12	70637440	70641446	+	0	NA	Intergenic	Intergenic	44572	NM_001033236	207965	Mm.102487	NM_001033236	ENSMUSG00000049882	Vcpkmt	Gm71|Mettl21d|Mettl221d|VCP-KMT	valosin containing protein lysine (K) methyltransferase	protein-coding
189	chr13	58502249	58505020	+	0	NA	promoter-TSS (NM_028904)	promoter-TSS (NM_028904)	25	NR_031761	74386	Mm.85289	NM_028904	ENSMUSG00000035367	Rmi1	4932432N11Rik|C79893	RMI1, RecQ mediated genome instability 1, homolog (S. cerevisiae)	protein-coding
452	chr3	86490073	86494785	+	0	NA	intron (NM_030695, intron 47 of 56)	intron (NM_030695, intron 47 of 56)	-140224	NM_011839	23937	Mm.389466	NM_011839	ENSMUSG00000057777	Mab21l2	-	mab-21-like 2 (C. elegans)	protein-coding
342	chr18	32069653	32071967	+	0	NA	exon (NM_026006, exon 1 of 1)	exon (NM_026006, exon 1 of 1)	747	NM_026006	67158	Mm.31537	NM_026006	ENSMUSG00000044982	Sft2d3	2610206C24Rik|AI847965|AW046173	SFT2 domain containing 3	protein-coding
579	chr6	51537666	51545483	+	0	NA	TTS (NM_001127349)	TTS (NM_001127349)	47052	NM_001127348	71982	Mm.294166	NM_028035	ENSMUSG00000038301	Snx10	2410004M09Rik	sorting nexin 10	protein-coding
295	chr16	96348513	96351063	+	0	NA	promoter-TSS (NM_008251)	promoter-TSS (NM_008251)	-456	NM_008251	15312	Mm.2756	NM_008251		Hmgn1	HMG-14|Hmg14	high mobility group nucleosomal binding domain 1	protein-coding
480	chr3	157196667	157198023	+	0	NA	promoter-TSS (NM_017381)	promoter-TSS (NM_017381)	-16	NM_017381	53861	Mm.259036	NM_017381	ENSMUSG00000028180	Zranb2	AI227013|Zfp265|Zis|Znf265	zinc finger, RAN-binding domain containing 2	protein-coding
341	chr18	24178242	24185255	+	0	NA	Intergenic	(G)n|Simple_repeat|Simple_repeat	-2476	NM_021559	59057	Mm.417427	NM_021559		Zfp191	3526401F17Rik|5033419P20Rik|AI480505|AI642085|AL024422|KOX17|ZF-12|Znf191|Znf24|Znp191	zinc finger protein 191	protein-coding
438	chr3	8922986	8924530	+	0	NA	promoter-TSS (NM_025434)	promoter-TSS (NM_025434)	99	NM_025434	66230	Mm.38460	NM_025434	ENSMUSG00000040269	Mrps28	1500012D08Rik|AW061224	mitochondrial ribosomal protein S28	protein-coding
107	chr11	6191057	6193169	+	0	NA	promoter-TSS (NM_001252288)	promoter-TSS (NM_001252288)	-448	NM_001252288	18293	Mm.276348	NM_010956	ENSMUSG00000020456	Ogdh	2210403E04Rik|2210412K19Rik|AA409584|d1401|mKIAA4192	oxoglutarate (alpha-ketoglutarate) dehydrogenase (lipoamide)	protein-coding
535	chr5	74271886	74297577	+	0	NA	Intergenic	Intergenic	179705	NM_177561	69727	Mm.48795	NM_177561		Usp46	1190009E20Rik|2410018I08Rik|AI451644	ubiquitin specific peptidase 46	protein-coding
87	chr10	93262123	93264715	+	0	NA	Intergenic	Intergenic	-30881	NM_183199	327799	Mm.491598	NM_183199	ENSMUSG00000020020	Usp44	E430004F17Rik	ubiquitin specific peptidase 44	protein-coding
77	chr10	81167014	81168388	+	0	NA	intron (NM_001243067, intron 1 of 3)	CpG	131	NM_001243067	73610	Mm.490466	NM_001243067		Zfp433	1700123A16Rik	RIKEN cDNA 1700123A16 gene	protein-coding
683	chr8	124353011	124354571	+	0	NA	promoter-TSS (NM_145605)	promoter-TSS (NM_145605)	-322	NM_145605	234825	Mm.209329	NM_145605	ENSMUSG00000040263	Klhdc4	AA408426|AV352552|BC012312|G430025P05Rik	kelch domain containing 4	protein-coding
444	chr3	54611315	54612719	+	0	NA	promoter-TSS (NM_133231)	promoter-TSS (NM_133231)	-304	NM_133231	170767	Mm.185735	NM_133231	ENSMUSG00000036615	Rfxap	5730495K23Rik	regulatory factor X-associated protein	protein-coding
541	chr5	93200637	93204995	+	0	NA	intron (NM_015756, intron 1 of 10)	intron (NM_015756, intron 1 of 10)	14772	NR_035487	100316841		NR_035487	miRBase:MI0009958	Mir1961	mmu-mir-1961	microRNA 1961	ncRNA
508	chr4	131428780	131430575	+	0	NA	5' UTR (NM_020587, exon 1 of 6)	5' UTR (NM_020587, exon 1 of 6)	123	NM_020587	57317	Mm.2478	NM_020587	ENSMUSG00000028911	Srsf4	5730499P16Rik|AW550192|MNCb-2616|SRp75|Sfrs4	serine/arginine-rich splicing factor 4	protein-coding
221	chr14	32080861	32083167	+	0	NA	exon (NM_001033668, exon 60 of 78)	exon (NM_001033668, exon 60 of 78)	17339	NM_027088	104416	Mm.3779	NM_027088	ENSMUSG00000021901	Bap1	2300006C11Rik|AA989761|AW553466|mKIAA0272|uch-x4	Brca1 associated protein 1	protein-coding
39	chr1	167971143	167980170	+	0	NA	Intergenic	Intergenic	-42891	NM_011137	18986	Mm.245261	NM_011137	ENSMUSG00000026565	Pou2f1	2810482H01Rik|NF-A1|Oct-1|Oct1|Otf-1|Otf1	POU domain, class 2, transcription factor 1	protein-coding
64	chr10	55947665	55949328	+	0	NA	promoter-TSS (NM_001033385)	promoter-TSS (NM_001033385)	-1	NM_001033385	544696	Mm.411188	NM_001033385	ENSMUSG00000038122	Tbc1d32	Bromi|D630037F22Rik|b2b2284Clo	TBC1 domain family, member 32	protein-coding
558	chr5	138557547	138559094	+	0	NA	intron (NM_001044703, intron 1 of 3)	CpG	187	NM_001044705	22697	Mm.2760	NM_011757	ENSMUSG00000037017	Zscan21	AI326272|CTfin51|RU49|Zfp-38|Zfp38|Zipro1	zinc finger and SCAN domain containing 21	protein-coding
417	chr2	119302402	119304445	+	0	NA	promoter-TSS (NM_026574)	promoter-TSS (NM_026574)	-58	NM_026574	68142	Mm.330496	NM_026574	ENSMUSG00000034154	Ino80	2310079N15Rik|4632409L19Rik|Inoc1	INO80 homolog (S. cerevisiae)	protein-coding
12	chr1	43989623	43991509	+	0	NA	promoter-TSS (NM_009418)	promoter-TSS (NM_009418)	-286	NM_009418	22019	Mm.401675	NM_009418	ENSMUSG00000041763	Tpp2	TPP-2|TppII	tripeptidyl peptidase II	protein-coding
312	chr17	24299283	24308170	+	0	NA	intron (NR_037854, intron 1 of 2)	intron (NR_037854, intron 1 of 2)	2614	NR_037854	100039636	Mm.30155	NR_037854	ENSMUSG00000080242	Atp6v0c-ps2	Atp6l-ps2|Gm15487	ATPase, H+ transporting, lysosomal V0 subunit C, pseudogene 2	pseudo
45	chr1	174077492	174079688	+	0	NA	intron (NM_153555, intron 1 of 13)	CpG	444	NM_153555	98193	Mm.159915	NM_153555	ENSMUSG00000026554	Dcaf8	AA408877|AA433120|AA792214|AU018973|C76055|D1Dau35e|D1Ucla4|H326|Wdr42a	DDB1 and CUL4 associated factor 8	protein-coding
507	chr4	130911776	130913461	+	0	NA	Intergenic	Intergenic	412318	NM_010769	17180	Mm.271796	NM_010769	ENSMUSG00000040533	Matn1	CMP|Crtm|Mat1|matrilin-1	matrilin 1, cartilage matrix protein	protein-coding
405	chr2	73101095	73131739	+	0	NA	Intergenic	Intergenic	6434	NM_001005343	381373	Mm.330293	NM_001005343		Sp9	-	trans-acting transcription factor 9	protein-coding
260	chr16	11906581	11910240	+	0	NA	intron (NR_033509, intron 2 of 2)	intron (NR_033509, intron 2 of 2)	1106	NM_146067	223978	Mm.86360	NM_146067	ENSMUSG00000065979	Cpped1	C530044N13Rik	calcineurin-like phosphoesterase domain containing 1	protein-coding
573	chr6	38482166	38486153	+	0	NA	promoter-TSS (NM_025363)	promoter-TSS (NM_025363)	-702	NM_025363	66117	Mm.158971	NM_025363	ENSMUSG00000019689	1110001J03Rik	Fmc1	RIKEN cDNA 1110001J03 gene	protein-coding
237	chr14	120874626	120879575	+	0	NA	promoter-TSS (NM_029519)	promoter-TSS (NM_029519)	-583	NM_029519	76108	Mm.261448	NM_029519	ENSMUSG00000051615	Rap2a	5830461H18Rik	RAS related protein 2a	protein-coding
370	chr19	25107579	25107888	+	0	NA	intron (NM_028785, intron 1 of 47)	intron (NM_028785, intron 1 of 47)	33714	NM_028785	76088	Mm.102485	NM_028785	ENSMUSG00000052085	Dock8	1200017A24Rik|5830472H07Rik|A130095G14Rik|AI461977	dedicator of cytokinesis 8	protein-coding
309	chr17	17510697	17511813	+	0	NA	promoter-TSS (NM_025934)	promoter-TSS (NM_025934)	-41	NM_025934	67045	Mm.35117	NM_025934	ENSMUSG00000023846	Riok2	2010110K24Rik|2410085M17Rik	RIO kinase 2 (yeast)	protein-coding
638	chr7	118224916	118228422	+	0	NA	promoter-TSS (NM_013507)	promoter-TSS (NM_013507)	-125	NM_013507	13690	Mm.185453	NM_013507	ENSMUSG00000005610	Eif4g2	AA589388|DAP-5|E130105L11Rik|Nat1|Natm1|p97	eukaryotic translation initiation factor 4, gamma 2	protein-coding
734	chrX	50972280	50975338	+	0	NA	promoter-TSS (NM_001018063)	promoter-TSS (NM_001018063)	-224	NM_001018063	553127	Mm.328602	NM_001018063	ENSMUSG00000067924	Cxx1b	Mart8c	CAAX box 1B	protein-coding
567	chr6	13782451	13790301	+	0	NA	exon (NM_145066, exon 4 of 4)	exon (NM_145066, exon 4 of 4)	3472	NM_145066	64450	Mm.167625	NM_145066	ENSMUSG00000048216	Gpr85	2900026B03Rik	G protein-coupled receptor 85	protein-coding
1	chr1	9286060	9291182	+	0	NA	5' UTR (NM_001290393, exon 1 of 20)	5' UTR (NM_001290393, exon 1 of 20)	1337	NM_001290390	71096	Mm.336395	NM_027671		Sntg1	4933426D16Rik|G1SYN|SYN4	syntrophin, gamma 1	protein-coding
506	chr4	115888861	115896730	+	0	NA	Intergenic	Intergenic	-1724	NM_181585	18710	Mm.253819	NM_181585	ENSMUSG00000028698	Pik3r3	AA414954|p55pik	phosphatidylinositol 3 kinase, regulatory subunit, polypeptide 3 (p55)	protein-coding
136	chr11	115425123	115426051	+	0	NA	promoter-TSS (NM_001002929)	promoter-TSS (NM_001002929)	-171	NM_001002929	445007	Mm.4379	NM_001002929	ENSMUSG00000020739	Nup85	Pcnt1|frount	nucleoporin 85	protein-coding
116	chr11	44331794	44334972	+	0	NA	intron (NM_001166553, intron 1 of 5)	intron (NM_001166553, intron 1 of 5)	504	NM_001166553	74315	Mm.156771	NM_028862	ENSMUSG00000019189	Rnf145	3732413I11Rik|TMRF1	ring finger protein 145	protein-coding
416	chr2	117196789	117217816	+	0	NA	Intergenic	Intergenic	-38689	NM_011246	19419	Mm.42150	NM_011246	ENSMUSG00000027347	Rasgrp1	Rasgrp	RAS guanyl releasing protein 1	protein-coding
144	chr12	50473898	50506193	+	0	NA	promoter-TSS (NR_026733)	promoter-TSS (NR_026733)	-594	NR_026733	67293	Mm.185800	NR_026733	ENSMUSG00000089922	3110039M20Rik	-	RIKEN cDNA 3110039M20 gene	ncRNA
380	chr2	3248049	3250955	+	0	NA	intron (NM_001013376, intron 1 of 1)	intron (NM_001013376, intron 1 of 1)	398	NM_001013376	227522	Mm.293948	NM_001013376	ENSMUSG00000049950	Rpp38	C330006A15Rik	ribonuclease P/MRP 38 subunit	protein-coding
100	chr10	128062968	128064600	+	0	NA	promoter-TSS (NM_013765)	promoter-TSS (NM_013765)	-222	NM_013765	27370	Mm.261679	NM_013765	ENSMUSG00000025362	Rps26	-	ribosomal protein S26	protein-coding
300	chr17	5490888	5495462	+	0	NA	5' UTR (NM_146073, exon 1 of 9)	5' UTR (NM_146073, exon 1 of 9)	575	NM_146073	224454	Mm.487663	NM_146073	ENSMUSG00000034265	Zdhhc14	B530001K09Rik|New1cp	zinc finger, DHHC domain containing 14	protein-coding
661	chr8	37309260	37317202	+	0	NA	promoter-TSS (NM_001081150)	promoter-TSS (NM_001081150)	-661	NM_001081150	244421	Mm.324032	NM_001081150	ENSMUSG00000039633	Lonrf1	-	LON peptidase N-terminal domain and ring finger 1	protein-coding
286	chr16	57388161	57394213	+	0	NA	intron (NM_001040397, intron 1 of 4)	intron (NM_001040397, intron 1 of 4)	37797	NM_001040397	78749	Mm.328360	NM_001040397	ENSMUSG00000043336	Filip1l	4631422O05Rik|Doc1	filamin A interacting protein 1-like	protein-coding
120	chr11	59622187	59625698	+	0	NA	promoter-TSS (NM_001271357)	promoter-TSS (NM_001271357)	360	NR_045686	100504104	Mm.391737	NR_045686	ENSMUSG00000087249	Gm16062	ENSMUSG00000072890|OTTMUSG00000029633	predicted gene 16062	ncRNA
381	chr2	3429681	3431172	+	0	NA	promoter-TSS (NM_015765)	promoter-TSS (NM_015765)	89	NM_177647	227526	Mm.211455	NM_177647	ENSMUSG00000039496	Cdnf	9330140G23|Armetl1	cerebral dopamine neurotrophic factor	protein-coding
581	chr6	83027700	83029184	+	0	NA	promoter-TSS (NM_197992)	promoter-TSS (NM_197992)	58	NM_197992	69837	Mm.12261	NM_197992	ENSMUSG00000069678	Pcgf1	2010002K04Rik|AU024121|Nspc1	polycomb group ring finger 1	protein-coding
308	chr17	17315423	17317332	+	0	NA	Intergenic	Intergenic	58030	NM_011765	22759	Mm.436633	NM_011765	ENSMUSG00000095990	Zfp97	NGD16-4	zinc finger protein 97	protein-coding
392	chr2	33398409	33404671	+	0	NA	Intergenic	Intergenic	-77488	NM_001025594	71834	Mm.44186	NM_027947	ENSMUSG00000026788	Zbtb43	1700010E06Rik|Zfp297b|mKIAA0414	zinc finger and BTB domain containing 43	protein-coding
254	chr15	96468665	96474717	+	0	NA	5' UTR (NM_134086, exon 1 of 16)	5' UTR (NM_134086, exon 1 of 16)	702	NM_134086	105727	Mm.103568	NM_134086	ENSMUSG00000023169	Slc38a1	AA408026|AA409865|AL022800|AU015942|NAT2	solute carrier family 38, member 1	protein-coding
177	chr13	17894501	17898258	+	0	NA	exon (NM_027118, exon 1 of 14)	exon (NM_027118, exon 1 of 14)	552	NM_001081058	69562	Mm.193924	NM_027118	ENSMUSG00000041297	Cdk13	2310015O17Rik|Cdc2l5	cyclin-dependent kinase 13	protein-coding
678	chr8	96620682	96624367	+	0	NA	5' UTR (NM_026116, exon 1 of 17)	5' UTR (NM_026116, exon 1 of 17)	187	NM_026116	67378	Mm.292107	NM_026116	ENSMUSG00000031755	Bbs2	2410125H22Rik|AI447581	Bardet-Biedl syndrome 2 (human)	protein-coding
496	chr4	61868922	61870648	+	0	NA	promoter-TSS (NM_001290353)	promoter-TSS (NM_001290353)	-205	NM_001290350	22696	Mm.5011	NM_009554	ENSMUSG00000028389	Zfp37	Tzn|Zfp-37	zinc finger protein 37	protein-coding
605	chr7	16505852	16508556	+	0	NA	intron (NM_009156, intron 1 of 5)	intron (NM_009156, intron 1 of 5)	516	NM_009156	20364	Mm.42829	NM_009156	ENSMUSG00000041571	Sepw1	selW	selenoprotein W, muscle 1	protein-coding
373	chr19	34681121	34684445	+	0	NA	intron (NM_001005858, intron 1 of 1)	intron (NM_001005858, intron 1 of 1)	336	NM_001005858	667370	Mm.271850	NM_001005858	ENSMUSG00000062488	I830012O16Rik	-	RIKEN cDNA I830012O16 gene	protein-coding
607	chr7	26052091	26069514	+	0	NA	Intergenic	Intergenic	-6396	NM_001110132	71722	Mm.28833	NM_027882	ENSMUSG00000005442	Cic	1200010B10Rik|mKIAA0306	capicua homolog (Drosophila)	protein-coding
205	chr13	91362525	91364555	+	0	NA	promoter-TSS (NM_025770)	promoter-TSS (NM_025770)	52	NM_025770	66795	Mm.235385	NM_025770	ENSMUSG00000021619	Atg10	5330424L23Rik|5430428K15Rik|AI852123|APG10|Agp10|Apg10l|Apg10p|Atg10l	autophagy related 10	protein-coding
42	chr1	173080010	173082149	+	0	NA	promoter-TSS (NM_025321)	promoter-TSS (NM_025321)	235	NM_008623	17528	Mm.9986	NM_008623	ENSMUSG00000056569	Mpz	Mpp|P-zero|P0	myelin protein zero	protein-coding
22	chr1	95374157	95376817	+	0	NA	promoter-TSS (NM_133808)	promoter-TSS (NM_133808)	7	NM_133808	110611	Mm.30012	NM_133808	ENSMUSG00000034088	Hdlbp	1110005P14Rik|AA960365|AI118566|D1Ertd101e	high density lipoprotein (HDL) binding protein	protein-coding
644	chr7	135109571	135112391	+	0	NA	promoter-TSS (NM_139149)	promoter-TSS (NM_139149)	-12	NM_139149	233908	Mm.277680	NM_139149	ENSMUSG00000030795	Fus	D430004D17Rik|D930039C12Rik|Fus1|Tls	fused in sarcoma	protein-coding
399	chr2	65251409	65254485	+	0	NA	Intergenic	Intergenic	-50490	NR_105755	102466151		NR_105755	miRBase:MI0021865	Mir6337	mmu-mir-6337	microRNA mir-6337	ncRNA
235	chr14	100856126	100862612	+	0	NA	Intergenic	Intergenic	-310354	NM_010636	16597	Mm.396499	NM_010636		Klf12	2700063E05Rik|AI225908|AI315654|AP-2rep|B130052C06Rik|D530033K05Rik	Kruppel-like factor 12	protein-coding
301	chr17	7031304	7032999	+	0	NA	Intergenic	CpG	-45022	NM_009510	22350	Mm.277812	NM_009510	ENSMUSG00000052397	Ezr	AW146364|R75297|Vil2|p81	ezrin	protein-coding
694	chr9	37295684	37297435	+	0	NA	promoter-TSS (NM_146222)	promoter-TSS (NM_146222)	-347	NM_146222	235184	Mm.127892	NM_146222	ENSMUSG00000042138	Msantd2	2810450G17Rik|9530092B10Rik	Myb/SANT-like DNA-binding domain containing 2	protein-coding
436	chr2	181253583	181256098	+	0	NA	promoter-TSS (NM_001271585)	promoter-TSS (NM_001271585)	-350	NM_016775	13002	Mm.140761	NM_016775	ENSMUSG00000000826	Dnajc5	2610314I24Rik|AU018536|Csp	DnaJ (Hsp40) homolog, subfamily C, member 5	protein-coding
213	chr13	111416044	111420299	+	0	NA	Intergenic	Intergenic	232919	NM_152804	20620	Mm.380	NM_152804	ENSMUSG00000021701	Plk2	Snk	polo-like kinase 2	protein-coding
94	chr10	117438587	117444738	+	0	NA	Intergenic	Intergenic	79147	NR_045342	71067	Mm.410793	NR_045342		4933411E08Rik	-	RIKEN cDNA 4933411E08 gene	ncRNA
51	chr10	14032892	14035969	+	0	NA	Intergenic	Intergenic	230412	NM_001002268	215798	Mm.440142	NM_001002268	ENSMUSG00000039116	Gpr126	1190004A11Rik|AI449247|AW045736|DREG|Gm222	G protein-coupled receptor 126	protein-coding
456	chr3	90389416	90393546	+	0	NA	Intergenic	Intergenic	-2688	NM_001195760	628324	Mm.33816	NM_001195760	ENSMUSG00000094018	S100a2	CaN19|EG628324|S100L	S100 calcium binding protein A2	protein-coding
568	chr6	21898893	21900729	+	0	NA	intron (NM_023626, intron 1 of 11)	CpG	196	NM_023626	71777	Mm.39999	NM_023626	ENSMUSG00000029670	Ing3	1300013A07Rik|P47ING3	inhibitor of growth family, member 3	protein-coding
652	chr8	10044199	10057594	+	0	NA	Intergenic	Intergenic	44263	NM_033622	24099	Mm.28835	NM_033622		Tnfsf13b	BAFF|BLyS|D8Ertd387e|TALL-1|TALL1|THANK|TNFSF20|zTNF4	tumor necrosis factor (ligand) superfamily, member 13b	protein-coding
296	chr16	97752359	97760501	+	0	NA	Intergenic	Intergenic	-1258	NR_003508	17858	Mm.14157	NM_013606	ENSMUSG00000023341	Mx2	AI528743|Mx-2	MX dynamin-like GTPase 2	protein-coding
265	chr16	18172014	18174695	+	0	NA	Intergenic	Intergenic	-8091	NR_105785	102465189		NR_105785	miRBase:MI0021895	Mir6366	mmu-mir-6366	microRNA mir-6366	ncRNA
493	chr4	48935847	48938643	+	0	NA	Intergenic	Intergenic	-135089	NM_178756	272031	Mm.299460	NM_178756	ENSMUSG00000063446	Lppr1	E130309F12Rik|PRG-3|mKIAA4247	lipid phosphate phosphatase-related protein type 1	protein-coding
171	chr12	114311755	114313889	+	0	NA	TTS (NM_001291445)	TTS (NM_001291445)	109	NM_029381	75671	Mm.23377	NM_029381	ENSMUSG00000012211	Tex22	1700028O09Rik|AV210422|Tep22	testis expressed gene 22	protein-coding
386	chr2	22922807	22925658	+	0	NA	promoter-TSS (NM_001102437)	promoter-TSS (NM_001102437)	-360	NM_001102437	74159	Mm.181973	NM_028793	ENSMUSG00000026781	Acbd5	1300014E15Rik	acyl-Coenzyme A binding domain containing 5	protein-coding
445	chr3	61222572	61225166	+	0	NA	Intergenic	Intergenic	55440	NM_028712	74012	Mm.422674	NM_028712	ENSMUSG00000036894	Rap2b	4021402C18Rik|AA408554	RAP2B, member of RAS oncogene family	protein-coding
200	chr13	84185196	84208537	+	0	NA	Intergenic	Intergenic	-165035	NR_029418	72745	Mm.295063	NM_175187	ENSMUSG00000035762	Tmem161b	2810446P07Rik|AI843389	transmembrane protein 161B	protein-coding
366	chr19	10650951	10652486	+	0	NA	promoter-TSS (NM_001282065)	promoter-TSS (NM_001282065)	71	NM_001282067	225912	Mm.252701	NM_201351	ENSMUSG00000034445	Cyb561a3	2310004G04Rik|Cybasc3|Lcytb	cytochrome b561 family, member A3	protein-coding
329	chr17	82283674	82287873	+	0	NA	Intergenic	Intergenic	-148046	NM_011406	20541	Mm.265834	NM_011406		Slc8a1	AI852629|AV344025|D930008O12Rik|Ncx1	solute carrier family 8 (sodium/calcium exchanger), member 1	protein-coding
525	chr5	29182158	29188377	+	0	NA	Intergenic	Intergenic	-337266	NM_021470	56874	Mm.87352	NM_021470	ENSMUSG00000029130	Rnf32	1700009J01Rik|2700025B22Rik|4930542N22Rik|Lmbr2	ring finger protein 32	protein-coding
27	chr1	134086446	134109861	+	0	NA	intron (NM_001033250, intron 1 of 3)	intron (NM_001033250, intron 1 of 3)	3488	NR_029777	723818		NR_029777	miRBase:MI0000646	Mir135b	Mirn135b	microRNA 135b	ncRNA
272	chr16	27872696	27886298	+	0	NA	intron (NR_033475, intron 1 of 4)	intron (NR_033475, intron 1 of 4)	29481	NR_033475	100038623	Mm.387135	NR_033475		Gm10823	ENSMUSG00000075290	predicted gene 10823	ncRNA
161	chr12	81744407	81745543	+	0	NA	promoter-TSS (NM_007951)	promoter-TSS (NM_007951)	-127	NM_007951	13877	Mm.246551	NM_007951		Erh	Mer|Prei1	enhancer of rudimentary homolog (Drosophila)	protein-coding
582	chr6	83863787	83865440	+	0	NA	intron (NM_008717, intron 1 of 26)	CpG	266	NM_008717	18139	Mm.132392	NM_008717	ENSMUSG00000030016	Zfml	AI323587|Np220|Znf638|mNP220	zinc finger, matrin-like	protein-coding
534	chr5	71482844	71489185	+	0	NA	intron (NM_008066, intron 1 of 9)	intron (NM_008066, intron 1 of 9)	1074	NM_008066	14395	Mm.5304	NM_008066	ENSMUSG00000000560	Gabra2	C630048P16Rik|Gabra-2	gamma-aminobutyric acid (GABA) A receptor, subunit alpha 2	protein-coding
400	chr2	68620134	68621941	+	0	NA	Intergenic	Intergenic	-78577	NM_172856	241447	Mm.222222	NM_172856	ENSMUSG00000027035	Cers6	4732462C07Rik|AW544719|Lass6|T1L	ceramide synthase 6	protein-coding
20	chr1	64578231	64581408	+	0	NA	intron (NM_001037726, intron 1 of 6)	CpG	441	NM_001037726	12912	Mm.422634	NM_009952	ENSMUSG00000025958	Creb1	2310001E10Rik|3526402H21Rik|AV083133|Creb|Creb-1	cAMP responsive element binding protein 1	protein-coding
109	chr11	21467239	21472613	+	0	NA	intron (NM_008618, intron 1 of 8)	intron (NM_008618, intron 1 of 8)	2011	NM_008618	17449	Mm.212703	NM_008618	ENSMUSG00000020321	Mdh1	B230377B03Rik|D17921|MDH-s|MDHA|Mor-2|Mor2	malate dehydrogenase 1, NAD (soluble)	protein-coding
633	chr7	99709119	99710548	+	0	NA	5' UTR (NM_001162918, exon 1 of 8)	5' UTR (NM_001162918, exon 1 of 8)	174	NM_001162918	66365	Mm.21173	NM_025515	ENSMUSG00000030613	Ccdc90b	2310015N07Rik|C86558	coiled-coil domain containing 90B	protein-coding
151	chr12	70396395	70399977	+	0	NA	intron (NM_027117, intron 1 of 12)	CpG	518	NM_027117	69554	Mm.234368	NM_027117	ENSMUSG00000020978	Klhdc2	2310022K15Rik|D12Ertd522e|HCLP-1|LCP	kelch domain containing 2	protein-coding
557	chr5	136408075	136411518	+	0	NA	intron (NM_018871, intron 1 of 1)	intron (NM_018871, intron 1 of 1)	715	NM_018871	22628	Mm.233813	NM_018871	ENSMUSG00000051391	Ywhag	14-3-3gamma|D7Bwg1348e	tyrosine 3-monooxygenase/tryptophan 5-monooxygenase activation protein, gamma polypeptide	protein-coding
718	chr9	103010268	103016765	+	0	NA	promoter-TSS (NM_173781)	promoter-TSS (NM_173781)	-888	NM_173781	270192	Mm.490252	NM_173781	ENSMUSG00000032549	Rab6b	9630015C03|AI844641|C330006L04Rik|D9Bwg0185e	RAB6B, member RAS oncogene family	protein-coding
468	chr3	113332178	113333873	+	0	NA	promoter-TSS (NM_026043)	promoter-TSS (NM_026043)	42	NM_026043	67225	Mm.316928	NM_026043	ENSMUSG00000027981	Rnpc3	2810441O16Rik|AI447568|C030014B17Rik	RNA-binding region (RNP1, RRM) containing 3	protein-coding
700	chr9	56264986	56267699	+	0	NA	promoter-TSS (NM_172924)	promoter-TSS (NM_172924)	-311	NM_025812	66867	Mm.150856	NM_025812	ENSMUSG00000032329	Hmg20a	1200004E06Rik|5730490E10Rik|Hmgxb1|Ibraf	high mobility group 20A	protein-coding
287	chr16	57707902	57708161	+	0	NA	intron (NM_007739, intron 1 of 3)	intron (NM_007739, intron 1 of 3)	46819	NM_007739	12837	Mm.130388	NM_007739	ENSMUSG00000068196	Col8a1	Col8a-1	collagen, type VIII, alpha 1	protein-coding
475	chr3	136717497	136724612	+	0	NA	Intergenic	Intergenic	-282988	NM_001163522	59308	Mm.27343	NM_016885	ENSMUSG00000054690	Emcn	0610012K22Rik|AI315669|Muc14	endomucin	protein-coding
441	chr3	34512857	34571441	+	0	NA	intron (NR_015580, intron 3 of 4)	intron (NR_015580, intron 3 of 4)	4763	NR_035433	100316679		NR_035433		Mir1897	Mirn1897|mmu-mir-1897	microRNA 1897	ncRNA
78	chr10	81233146	81234746	+	0	NA	promoter-TSS (NM_199062)	promoter-TSS (NM_199062)	-59	NM_199062	331188	Mm.351497	NM_199062		Zfp781	A130081B01	zinc finger protein 781	protein-coding
413	chr2	113688510	113689875	+	0	NA	promoter-TSS (NM_181416)	promoter-TSS (NM_181416)	-374	NM_181416	228482	Mm.45753	NM_181416	ENSMUSG00000041219	Arhgap11a	6530401L14Rik|mKIAA0013	Rho GTPase activating protein 11A	protein-coding
294	chr16	96302869	96306238	+	0	NA	promoter-TSS (NM_001103179)	promoter-TSS (NM_001103179)	-518	NM_145125	93871	Mm.240871	NM_145125	ENSMUSG00000022914	Brwd1	5330419I02Rik|D530019K20Rik|G1-403-16|Wdr9|repro5	bromodomain and WD repeat domain containing 1	protein-coding
672	chr8	87823116	87824316	+	0	NA	promoter-TSS (NM_022997)	promoter-TSS (NM_022997)	185	NR_028268	56452	Mm.29709	NM_019716	ENSMUSG00000031697	Orc6	6720420I10Rik|Orc6l	origin recognition complex, subunit 6	protein-coding
349	chr18	38036018	38044242	+	0	NA	intron (NM_007858, intron 16 of 26)	intron (NM_007858, intron 16 of 26)	-25816	NR_105945	102465592		NR_105945		Mir6979	mmu-mir-6979	microRNA mir-6979	ncRNA
275	chr16	37670585	37688615	+	0	NA	Intergenic	Intergenic	-25146	NM_026610	68194	Mm.379154	NM_026610		Ndufb4	0610006N12Rik|1300010H20Rik	NADH dehydrogenase (ubiquinone) 1 beta subcomplex 4	protein-coding
515	chr4	147222107	147223376	+	0	NA	promoter-TSS (NM_198619)	promoter-TSS (NM_198619)	-257	NM_198619	242747	Mm.332053	NM_198619	ENSMUSG00000059423	Zfp933	2810408P10Rik	zinc finger protein 933	protein-coding
197	chr13	75976727	75979648	+	0	NA	intron (NM_053108, intron 1 of 2)	intron (NM_053108, intron 1 of 2)	853	NM_053108	93692	Mm.25844	NM_053108	ENSMUSG00000021591	Glrx	C86710|D13Wsu156e|Glrx1|Grx1|TTase	glutaredoxin	protein-coding
138	chr12	4233798	4235008	+	0	NA	promoter-TSS (NM_134046)	promoter-TSS (NM_134046)	-109	NM_134046	52504	Mm.70546	NM_134046	ENSMUSG00000020652	Cenpo	2810429O05Rik|8430427C03Rik|D12Ertd482e	centromere protein O	protein-coding
606	chr7	26021980	26038540	+	0	NA	exon (NM_010155, exon 4 of 4)	exon (NM_010155, exon 4 of 4)	5517	NM_010155	13875	Mm.8068	NM_010155	ENSMUSG00000040857	Erf	-	Ets2 repressor factor	protein-coding
137	chr12	3516761	3520995	+	0	NA	Intergenic	Intergenic	-53513	NM_001162465	13528	Mm.286202	NM_007886	ENSMUSG00000071454	Dtnb	-	dystrobrevin, beta	protein-coding
60	chr10	40020282	40023083	+	0	NA	5' UTR (NM_007444, exon 1 of 8)	5' UTR (NM_007444, exon 1 of 8)	310	NM_007444	100041585	Mm.476925	NM_007444	ENSMUSG00000063953	Amd2	AdoMetDC|Amd1|Amd3|ENSMUSG00000063953	S-adenosylmethionine decarboxylase 2	protein-coding
724	chr9	119803405	119804149	+	0	NA	promoter-TSS (NM_026236)	promoter-TSS (NM_026236)	-236	NM_026236	67561	Mm.104789	NM_026236	ENSMUSG00000032512	Wdr48	8430408H12Rik|Uaf1|mKIAA1449	WD repeat domain 48	protein-coding
691	chr9	26836738	26838528	+	0	NA	promoter-TSS (NM_178027)	promoter-TSS (NM_178027)	46	NM_178027	69091	Mm.218717	NM_178027	ENSMUSG00000031988	Vps26b	1810012I05Rik|2310075A12Rik|AI848392	vacuolar protein sorting 26 homolog B (yeast)	protein-coding
666	chr8	72240005	72241564	+	0	NA	promoter-TSS (NM_181274)	promoter-TSS (NM_181274)	17	NM_001039967	66869	Mm.334581	NM_181274		Zfp869	1200003I07Rik	zinc finger protein 869	protein-coding
432	chr2	168054917	168056524	+	0	NA	promoter-TSS (NM_001160330)	promoter-TSS (NM_001160330)	159	NM_010072	13480	Mm.422657	NM_010072	ENSMUSG00000078919	Dpm1	AI118379|AI194292	dolichol-phosphate (beta-D) mannosyltransferase 1	protein-coding
519	chr5	15436615	15447223	+	0	NA	intron (NM_001110844, intron 1 of 38)	intron (NM_001110844, intron 1 of 38)	1410	NM_001110846	12293	Mm.159842	NM_009784	ENSMUSG00000040118	Cacna2d1	Ca(v)alpha2delta1|Cacna2|Cchl2a	calcium channel, voltage-dependent, alpha2/delta subunit 1	protein-coding
346	chr18	34998679	35023514	+	0	NA	Intergenic	B1F2|SINE|Alu	-9765	NM_007913	13653	Mm.181959	NM_007913		Egr1	A530045N19Rik|ETR103|Egr-1|Krox-1|Krox-24|Krox24|NGF1-A|NGFI-A|NGFIA|TIS8|Zenk|Zfp-6|Zif268|egr	early growth response 1	protein-coding
17	chr1	60464055	60468055	+	0	NA	promoter-TSS (NM_198127)	promoter-TSS (NM_198127)	-408	NM_001198571	329165	Mm.212066	NM_198127	ENSMUSG00000026782	Abi2	8430425M24Rik|AI839867|C130078H13	abl-interactor 2	protein-coding
427	chr2	148577800	148578249	+	0	NA	intron (NM_177655, intron 2 of 3)	intron (NM_177655, intron 2 of 3)	1927	NM_177655	228756	Mm.189390	NM_177655	ENSMUSG00000055177	Cstl1	RCET1|RCET2|RCET3	cystatin-like 1	protein-coding
677	chr8	92976892	92979107	+	0	NA	Intergenic	Intergenic	-105848	NM_172913	244579	Mm.302755	NM_172913	ENSMUSG00000043668	Tox3	500-9|BC052044|C230068E13|CAGF9|Tnrc9	TOX high mobility group box family member 3	protein-coding
708	chr9	65192922	65194726	+	0	NA	promoter-TSS (NM_016688)	promoter-TSS (NM_016688)	-51	NM_016688	50996	Mm.29193	NM_016688	ENSMUSG00000041837	Pdcd7	C80112|ES18	programmed cell death 7	protein-coding
82	chr10	81640594	81641863	+	0	NA	Intergenic	CpG	50470	NM_001163064	216177	Mm.482395	NM_001163064		AU041133	-	expressed sequence AU041133	protein-coding
110	chr11	22967181	22968777	+	0	NA	Intergenic	CpG	54592	NM_028672	73873	Mm.252406	NM_028672	ENSMUSG00000049811	Fam161a	4930430E16Rik	family with sequence similarity 161, member A	protein-coding
650	chr7	147264728	147269533	+	0	NA	intron (NM_001190385, intron 1 of 4)	intron (NM_001190385, intron 1 of 4)	1070	NM_001190386	68566	Mm.44241	NM_026769	ENSMUSG00000025468	Caly	0710001P07Rik|1110004A22Rik|Calcyon|Drd1ip	calcyon neuron-specific vesicular protein	protein-coding
333	chr18	3279773	3282164	+	0	NA	intron (NM_013498, intron 4 of 6)	intron (NM_013498, intron 4 of 6)	777	NM_001110854	12916	Mm.5244	NM_013498	ENSMUSG00000063889	Crem	ICER|ICERI	cAMP responsive element modulator	protein-coding
710	chr9	82863765	82871747	+	0	NA	intron (NM_001081216, intron 4 of 39)	intron (NM_001081216, intron 4 of 39)	1340	NM_001081216	83946	Mm.221688	NM_031879	ENSMUSG00000032253	Phip	2810004D21Rik|4632404O06Rik|Ndrp|Wdr11	pleckstrin homology domain interacting protein	protein-coding
590	chr6	117828809	117831228	+	0	NA	Intergenic	Intergenic	16923	NM_001001792	22685	Mm.249661	NM_008616	ENSMUSG00000042097	Zfp239	Mok-2|Mok2|Znf239	zinc finger protein 239	protein-coding
323	chr17	69059133	69061887	+	0	NA	intron (NM_177278, intron 18 of 20)	intron (NM_177278, intron 18 of 20)	-125966	NM_001206661	622645	Mm.86422	NM_001206661	ENSMUSG00000095407	Tmem200c	EG622645|Gm6338	transmembrane protein 200C	protein-coding
69	chr10	61912049	61913363	+	0	NA	promoter-TSS (NM_181423)	promoter-TSS (NM_181423)	-265	NM_181423	338359	Mm.235898	NM_181423	ENSMUSG00000020079	Supv3l1	6330443E10Rik	suppressor of var1, 3-like 1 (S. cerevisiae)	protein-coding
112	chr11	26286940	26287709	+	0	NA	intron (NM_001277273, intron 1 of 13)	CpG	240	NR_102382	67030	Mm.18875	NM_025923		Fancl	2010322C19Rik|AW554273|B230118H11Rik|Phf9|Pog|gcd	Fanconi anemia, complementation group L	protein-coding
664	chr8	63966269	63967201	+	0	NA	exon (NM_145595, exon 1 of 5)	exon (NM_145595, exon 1 of 5)	204	NM_145595	234309	Mm.29059	NM_145595	ENSMUSG00000031641	Cbr4	A730083J17Rik|BC009118	carbonyl reductase 4	protein-coding
545	chr5	105288436	105289690	+	0	NA	promoter-TSS (NM_001039231)	promoter-TSS (NM_001039231)	24	NM_001039231	626391	Mm.385405	NM_001039231		Zfp951	C230055K05Rik	zinc finger protein 951	protein-coding
191	chr13	63915215	63917445	+	0	NA	promoter-TSS (NM_023507)	promoter-TSS (NM_023507)	-298	NM_001013608	76251	Mm.186610	NM_023507	ENSMUSG00000021470	Ercc6l2	0610007P08Rik|1700019D06Rik|9330134C04Rik|Rad26l|Sr278	excision repair cross-complementing rodent repair deficiency, complementation group 6 like 2	protein-coding
224	chr14	57396111	57398267	+	0	NA	promoter-TSS (NM_025682)	promoter-TSS (NM_025682)	-36	NM_025682	66645	Mm.20129	NM_025682	ENSMUSG00000021938	Pspc1	5730470C09Rik|AI327109|AI449052|PSP1	paraspeckle protein 1	protein-coding
187	chr13	54838427	54868691	+	0	NA	Intergenic	Intergenic	-2529	NM_012014	26913	Mm.41812	NM_012014	ENSMUSG00000069227	Gprin1	GRIN1|Z16	G protein-regulated inducer of neurite outgrowth 1	protein-coding
588	chr6	108607106	108619353	+	0	NA	intron (NM_011498, intron 4 of 4)	intron (NM_011498, intron 4 of 4)	-2301	NR_104577	75394	Mm.395061	NR_040757	ENSMUSG00000087341	0610040F04Rik	-	RIKEN cDNA 0610040F04 gene	ncRNA
646	chr7	140828628	140829756	+	0	NA	promoter-TSS (NM_178115)	promoter-TSS (NM_178115)	-166	NM_178115	214764	Mm.174044	NM_145995	ENSMUSG00000039990	Edrf1	2700050L05Rik|AU022667|AW558805	erythroid differentiation regulatory factor 1	protein-coding
446	chr3	65330751	65334256	+	0	NA	non-coding (NR_027955, exon 2 of 2)	non-coding (NR_027955, exon 2 of 2)	134	NM_178892	99929	Mm.246398	NM_178892	ENSMUSG00000034640	Tiparp	ARTD14|AW558171|PARP7	TCDD-inducible poly(ADP-ribose) polymerase	protein-coding
262	chr16	13779932	13781420	+	0	NA	promoter-TSS (NM_001039521)	promoter-TSS (NM_001039521)	-116	NM_001039521	106298	Mm.490362	NM_001039521	ENSMUSG00000022682	Rrn3	AL023001|E130302O19Rik|R75565|TIF-1A|Tif1a	RRN3 RNA polymerase I transcription factor homolog (yeast)	protein-coding
617	chr7	51501260	51502738	+	0	NA	promoter-TSS (NM_025880)	promoter-TSS (NM_025880)	-93	NM_025880	668661	Mm.274492	NM_025880	ENSMUSG00000045411	2410002F23Rik	-	RIKEN cDNA 2410002F23 gene	protein-coding
79	chr10	81326144	81327443	+	0	NA	intron (NM_001243067, intron 1 of 3).2	CpG	114	NM_001243067	73610	Mm.490466	NM_001243067		Zfp433	1700123A16Rik	RIKEN cDNA 1700123A16 gene	protein-coding
212	chr13	110609680	110615305	+	0	NA	intron (NM_011056, intron 7 of 16)	intron (NM_011056, intron 7 of 16)	-81525	NR_035442	100316683		NR_035442		Mir1904	Mirn1904|mmu-mir-1904	microRNA 1904	ncRNA
352	chr18	49914843	49916557	+	0	NA	promoter-TSS (NM_001170960)	promoter-TSS (NM_001170960)	-445	NM_001170960	68857	Mm.96010	NM_026854	ENSMUSG00000024505	Dtwd2	1190002H09Rik|8030470C17Rik|AI414673|BB115449	DTW domain containing 2	protein-coding
126	chr11	83084162	83086705	+	0	NA	Intergenic	B1F1|SINE|Alu	14795	NM_001166028	237890	Mm.297670	NM_001166028	ENSMUSG00000082101	Slfn14	Gm20|Slfn14-ps	schlafen 14	protein-coding
426	chr2	144351884	144353899	+	0	NA	promoter-TSS (NM_029763)	promoter-TSS (NM_029763)	243	NM_172859	241688	Mm.442156	NM_172859	ENSMUSG00000037259	Dzank1	2810039F03Rik|6330439K17Rik|6430408C01|AI851115|Ankrd64	double zinc ribbon and ankyrin repeat domains 1	protein-coding
251	chr15	81414841	81419351	+	0	NA	exon (NM_177821, exon 1 of 31)	exon (NM_177821, exon 1 of 31)	452	NM_177821	328572	Mm.258397	NM_177821	ENSMUSG00000055024	Ep300	A430090G16|A730011L11|KAT3B|p300|p300 HAT	E1A binding protein p300	protein-coding
542	chr5	98797166	98800086	+	0	NA	intron (NM_001024614, intron 2 of 5)	intron (NM_001024614, intron 2 of 5)	40303	NM_001024614	75784	Mm.443240	NM_001024614	ENSMUSG00000057816	1700007G11Rik	4930428O21Rik	RIKEN cDNA 1700007G11 gene	protein-coding
369	chr19	23199833	23245965	+	0	NA	intron (NM_010638, intron 1 of 1)	B1_Mus1|SINE|Alu	-1022	NR_035423	100316672		NR_035423		Mir1192	Mirn1192|mmu-mir-1192	microRNA 1192	ncRNA
651	chr8	4676832	4678885	+	0	NA	Intergenic	CpG	64688	NM_145591	233987	Mm.102799	NM_145591		Zfp958	-	zinc finger protein 958	protein-coding
279	chr16	40470625	40474068	+	0	NA	Intergenic	Intergenic	-1061109	NM_175548	268890	Mm.310524	NM_175548	ENSMUSG00000061080	Lsamp	5430428I19|AW046674|B130007O04Rik|D930023J12Rik|Lam|Lamp	limbic system-associated membrane protein	protein-coding
176	chr13	12460885	12462843	+	0	NA	Intergenic	Intergenic	-25778	NM_144835	217995	Mm.171186	NM_144835	ENSMUSG00000050244	Heatr1	AA517551|B130016L12Rik|BC019693	HEAT repeat containing 1	protein-coding
629	chr7	90013721	90019058	+	0	NA	exon (NM_175366, exon 1 of 2)	exon (NM_175366, exon 1 of 2)	546	NM_175366	108797	Mm.306789	NM_175366	ENSMUSG00000057706	Mex3b	4931439A04Rik|M-04814|Rkhd3|mKIAA2009	mex3 homolog B (C. elegans)	protein-coding
498	chr4	73656586	73663425	+	0	NA	intron (NM_172869, intron 1 of 13)	intron (NM_172869, intron 1 of 13)	498	NM_172869	242506	Mm.221597	NM_172869	ENSMUSG00000049122	Frmd3	4.1O|9430066I12Rik|EPB41L4O|P410	FERM domain containing 3	protein-coding
483	chr4	13666954	13681341	+	0	NA	intron (NM_001111026, intron 1 of 10)	intron (NM_001111026, intron 1 of 10)	3698	NM_001111026	12395	Mm.4909	NM_009822	ENSMUSG00000006586	Runx1t1	Cbfa2t1h|ETO|MTG8	runt-related transcription factor 1; translocated to, 1 (cyclin D-related)	protein-coding
256	chr15	98904484	98905429	+	0	NA	promoter-TSS (NM_001162506)	promoter-TSS (NM_001162506)	-448	NM_001162506	78733	Mm.124905	NM_030159	ENSMUSG00000032783	Troap	AW476063|E130301L11Rik|tastin	trophinin associated protein	protein-coding
372	chr19	31156713	31158003	+	0	NA	promoter-TSS (NM_031249)	promoter-TSS (NM_031249)	27	NM_031249	83410	Mm.22031	NM_031249	ENSMUSG00000053536	Cstf2t	64kDa|C77975|tCstF-64|tauCstF-64	cleavage stimulation factor, 3' pre-RNA subunit 2, tau	protein-coding
574	chr6	39395587	39399926	+	0	NA	Intergenic	Intergenic	-27388	NM_018810	54484	Mm.270484	NM_018810	ENSMUSG00000029922	Mkrn1	RFP	makorin, ring finger protein, 1	protein-coding
170	chr12	112276006	112277952	+	0	NA	Intergenic	CpG	-1030	NM_198023	217864	Mm.23808	NM_198023	ENSMUSG00000037896	Rcor1	5730409O11|6720480E22Rik|AU042633|D12Wsu95e|Rocr1|mKIAA0071	REST corepressor 1	protein-coding
33	chr1	159865118	159875041	+	0	NA	Intergenic	L2a|LINE|L2	413778	NM_001159986	89867	Mm.87114	NM_033354	ENSMUSG00000026589	Sec16b	Lztr2|Rgpr|Rgpr-p117	SEC16 homolog B (S. cerevisiae)	protein-coding
660	chr8	32199554	32203469	+	0	NA	intron (NM_025869, intron 2 of 4)	intron (NM_025869, intron 2 of 4)	1377	NM_025869	66959	Mm.23916	NM_025869	ENSMUSG00000039661	Dusp26	2310043K02Rik|Skrp3	dual specificity phosphatase 26 (putative)	protein-coding
428	chr2	157104571	157105658	+	0	NA	exon (NM_001039557, exon 1 of 25)	exon (NM_001039557, exon 1 of 25)	171	NM_001039557	629499	Mm.384235	NM_001039557	ENSMUSG00000074627	Mroh8	4922505G16Rik	maestro heat-like repeat family member 8	protein-coding
7	chr1	24618313	24623101	+	0	NA	Intergenic	Intergenic	-26431	NM_007733	12823	Mm.329196	NM_007733		Col19a1	-	collagen, type XIX, alpha 1	protein-coding
26	chr1	133806524	133808313	+	0	NA	intron (NM_001145804, intron 1 of 6)	CpG	383	NM_001145804	98415	Mm.246869	NM_175294	ENSMUSG00000026434	Nucks1	2700010L10Rik|8430423A01Rik|AI647518|C78391|Nucks	nuclear casein kinase and cyclin-dependent kinase substrate 1	protein-coding
227	chr14	62296776	62304147	+	0	NA	intron (NR_028264, intron 1 of 6)	CpG	749	NR_028264	668253	Mm.32886	NR_028264	ENSMUSG00000097589	Dleu2	1810047A16Rik|4932411A06Rik|7730401J12Rik|AI197277|AI788824|Alt1|Gm9069|Leu2	deleted in lymphocytic leukemia, 2	ncRNA
99	chr10	127494935	127497012	+	0	NA	promoter-TSS (NM_019766)	promoter-TSS (NM_019766)	-65	NM_019766	56351	Mm.305816	NM_019766	ENSMUSG00000071072	Ptges3	5730442A20Rik|Ptges|Tebp|cPGES|p23|sid3177	prostaglandin E synthase 3 (cytosolic)	protein-coding
566	chr6	11856992	11858412	+	0	NA	promoter-TSS (NM_010886)	promoter-TSS (NM_010886)	-256	NM_010886	17992	Mm.415865	NM_010886	ENSMUSG00000029632	Ndufa4	MLRQ	NADH dehydrogenase (ubiquinone) 1 alpha subcomplex, 4	protein-coding
526	chr5	30061513	30063215	+	0	NA	promoter-TSS (NM_001127367)	promoter-TSS (NM_001127367)	-74	NM_001037941	23950	Mm.290110	NM_011847	ENSMUSG00000029131	Dnajb6	Mrj|mDj4	DnaJ (Hsp40) homolog, subfamily B, member 6	protein-coding
72	chr10	68795463	68800677	+	0	NA	Intergenic	Intergenic	17590	NM_007659	12534	Mm.281367	NM_007659	ENSMUSG00000019942	Cdk1	Cdc2|Cdc2a|p34<CDC2>	cyclin-dependent kinase 1	protein-coding
500	chr4	88367329	88369130	+	0	NA	5' UTR (NM_172871, exon 1 of 1)	5' UTR (NM_172871, exon 1 of 1)	183	NM_172871	242521	Mm.260601	NM_172871	ENSMUSG00000070923	Klhl9	8030469P05|C530050O22Rik|ENSMUSG00000070923|mKIAA1354	kelch-like 9	protein-coding
264	chr16	16302041	16303694	+	0	NA	promoter-TSS (NR_038046)	promoter-TSS (NR_038046)	-191	NR_038046	70120	Mm.37486	NM_198246	ENSMUSG00000022792	Yars2	2210023C10Rik|tyrRS	tyrosyl-tRNA synthetase 2 (mitochondrial)	protein-coding
255	chr15	97922979	97924981	+	0	NA	promoter-TSS (NM_144851)	promoter-TSS (NM_144851)	20	NM_144851	223870	Mm.384023	NM_144851	ENSMUSG00000033075	Senp1	2310046A20Rik|D15Ertd528e|E330036L07Rik|suPr-2	SUMO1/sentrin specific peptidase 1	protein-coding
533	chr5	44198775	44199957	+	0	NA	Intergenic	CpG	-10766	NM_009763	12182	Mm.246332	NM_009763	ENSMUSG00000029082	Bst1	114/A10|A530073F09|BP-3|Bp3|Bsta1|CD157|Ly65	bone marrow stromal cell antigen 1	protein-coding
359	chr18	79304131	79307784	+	0	NA	5' UTR (NM_053099, exon 1 of 6)	5' UTR (NM_053099, exon 1 of 6)	173	NM_053099	240427	Mm.312871	NM_053099	ENSMUSG00000024548	Setbp1	C130092E12|Seb|mKIAA0437	SET binding protein 1	protein-coding
182	chr13	34965370	34968372	+	0	NA	promoter-TSS (NM_013830)	promoter-TSS (NM_013830)	-492	NM_013830	19134	Mm.10027	NM_013830	ENSMUSG00000021413	Prpf4b	2610037H07|Prp4|Prp4k|Prpk|cbp143	PRP4 pre-mRNA processing factor 4 homolog B (yeast)	protein-coding
108	chr11	16155649	16162244	+	0	NA	intron (NM_145967, intron 1 of 4)	intron (NM_145967, intron 1 of 4)	1219	NM_145967	211739	Mm.284015	NM_145967	ENSMUSG00000048834	Vstm2a	Vstm2	V-set and transmembrane domain containing 2A	protein-coding
604	chr7	13388095	13389909	+	0	NA	TTS (NM_026046)	TTS (NM_026046)	15207	NM_026046	67230	Mm.333574	NM_026046	ENSMUSG00000057894	Zfp329	2810439M05Rik|4632409L22Rik|ZNF329	zinc finger protein 329	protein-coding
556	chr5	130292044	130293693	+	0	NA	promoter-TSS (NM_009838)	promoter-TSS (NM_009838)	261	NM_133900	100678	Mm.271784	NM_133900	ENSMUSG00000029446	Psph	AI480570|PSP|PSPase	phosphoserine phosphatase	protein-coding
717	chr9	102527421	102529666	+	0	NA	promoter-TSS (NM_001081122)	promoter-TSS (NM_001081122)	-83	NM_181394	69010	Mm.2000	NM_181394	ENSMUSG00000035048	Anapc13	1810004D07Rik|APC13|SWM1	anaphase promoting complex subunit 13	protein-coding
462	chr3	96064756	96082899	+	0	NA	TTS (NM_178215)	TTS (NM_178215)	204	NM_175666	319189	Mm.297655	NM_175666		Hist2h2bb	H2b-616	histone cluster 2, H2bb	protein-coding
414	chr2	114479949	114481124	+	0	NA	intron (NM_025675, intron 1 of 8)	CpG	128	NM_025675	66632	Mm.117809	NM_025675	ENSMUSG00000057147	Dph6	5730421E18Rik|Atpbd4	diphthamine biosynthesis 6	protein-coding
232	chr14	75683321	75684494	+	0	NA	promoter-TSS (NM_026083)	promoter-TSS (NM_026083)	-273	NM_026083	67302	Mm.74704	NM_026083	ENSMUSG00000022000	Zc3h13	2600010B19Rik|3110050K21Rik|4930570G11Rik|C87618	zinc finger CCCH type containing 13	protein-coding
477	chr3	151872077	151875374	+	0	NA	promoter-TSS (NM_027287)	promoter-TSS (NM_027287)	303	NM_057172	51886	Mm.278922	NM_057172	ENSMUSG00000028034	Fubp1	9530027K12Rik|D3Ertd330e|FBP|Fubp|Fubp4	far upstream element (FUSE) binding protein 1	protein-coding
671	chr8	83261831	83264354	+	0	NA	5' UTR (NM_053124, exon 1 of 24)	5' UTR (NM_053124, exon 1 of 24)	266	NM_053124	93762	Mm.246803	NM_053124		Smarca5	4933427E24Rik|D030040M08Rik|D330027N15Rik|MommeD4|Snf2h	SWI/SNF related, matrix associated, actin dependent regulator of chromatin, subfamily a, member 5	protein-coding
225	chr14	57504079	57507445	+	0	NA	promoter-TSS (NM_029498)	promoter-TSS (NM_029498)	-870	NM_029498	76007	Mm.31417	NM_029498	ENSMUSG00000021945	Zmym2	5830413P05Rik|FIM|MYM|RAMP|SCLL|Zfp198|Znf198	zinc finger, MYM-type 2	protein-coding
330	chr17	83913172	83914633	+	0	NA	promoter-TSS (NM_001159529)	promoter-TSS (NM_001159529)	-229	NM_001159529	20463	Mm.30072	NM_009187	ENSMUSG00000024248	Cox7a2l	COX7AR|COX7RP|EB1|SIG-81|SIG81|Silg81	cytochrome c oxidase subunit VIIa polypeptide 2-like	protein-coding
142	chr12	42207473	42213893	+	0	NA	intron (NM_001271708, intron 1 of 2)	intron (NM_001271708, intron 1 of 2)	1961	NM_001271708	16981	Mm.404786	NM_010733	ENSMUSG00000036295	Lrrn3	NLRR-3	leucine rich repeat protein 3, neuronal	protein-coding
207	chr13	91598826	91603149	+	0	NA	intron (NM_024186, intron 1 of 15)	CpG	285	NM_024186	66970	Mm.343095	NM_024186	ENSMUSG00000003992	Ssbp2	1500004K09Rik|2310079I02Rik|9330163K02Rik|A830008M03Rik|AU067692|AW558684|Hspc116|SSDP2	single-stranded DNA binding protein 2	protein-coding
632	chr7	98210359	98213249	+	0	NA	Intergenic	Intergenic	-27492	NM_011807	23859	Mm.147213	NM_011807		Dlg2	A330103J02Rik|B230218P12Rik|B330007M19Rik|Dlgh2|Gm1197|PSD93	discs, large homolog 2 (Drosophila)	protein-coding
263	chr16	14448717	14454356	+	0	NA	intron (NM_008576, intron 19 of 30)	intron (NM_008576, intron 19 of 30)	89885	NM_008576	17250	Mm.196634	NM_008576	ENSMUSG00000023088	Abcc1	Abcc1a|Abcc1b|MRP|Mdrap|Mrp1	ATP-binding cassette, sub-family C (CFTR/MRP), member 1	protein-coding
394	chr2	44833380	44975585	+	0	NA	intron (NM_001289521, intron 1 of 8)	intron (NM_001289521, intron 1 of 8)	-25785	NR_039591	100628598		NR_039591		Mir5129	mmu-mir-5129|mu-mir-5129	microRNA 5129	ncRNA
167	chr12	102320578	102322908	+	0	NA	non-coding (NR_038047, exon 1 of 4)	non-coding (NR_038047, exon 1 of 4)	169	NM_211355	68734	Mm.87077	NM_211355	ENSMUSG00000041846	Smek1	1110034C04Rik|BC064465|mKIAA2010	SMEK homolog 1, suppressor of mek1 (Dictyostelium)	protein-coding
48	chr1	193399567	193400327	+	0	NA	promoter-TSS (NM_029766)	promoter-TSS (NM_029766)	334	NM_178632	77065	Mm.338175	NM_178632	ENSMUSG00000037461	Ints7	5930412E23Rik	integrator complex subunit 7	protein-coding
360	chr18	84181347	84278753	+	0	NA	intron (NM_001081300, intron 1 of 1)	intron (NM_001081300, intron 1 of 1)	25904	NM_001081300	110796	Mm.102136	NM_001081300	ENSMUSG00000046982	Tshz1	5730407I04Rik|D18Bwg1409e|Mtsh1|NY-CO-33|Sdccag33|Tsh1|mKIAA4206|teashirt1	teashirt zinc finger family member 1	protein-coding
692	chr9	29215985	29221293	+	0	NA	intron (NM_172290, intron 2 of 7)	intron (NM_172290, intron 2 of 7)	552075	NM_172290	235106	Mm.283138	NM_172290	ENSMUSG00000059974	Ntm	6230410L23Rik|B230210G24Rik|Hnt|Igdcc2|R75390	neurotrimin	protein-coding
610	chr7	36338457	36341738	+	0	NA	intron (NM_033080, intron 1 of 2)	CpG	850	NM_033080	110959	Mm.410206	NM_033080	ENSMUSG00000034875	Nudt19	D7Rp2|D7Rp2-r|D7Rp2-s|D7Rp2e|RP2-r|RP2-s	nudix (nucleoside diphosphate linked moiety X)-type motif 19	protein-coding
514	chr4	143001749	143003204	+	0	NA	5' UTR (NM_172877, exon 1 of 5)	5' UTR (NM_172877, exon 1 of 5)	147	NM_172877	242736	Mm.275953	NM_172877	ENSMUSG00000046862	Pramef8	4732496O08Rik|AU023234	PRAME family member 8	protein-coding
725	chr9	120035947	120037415	+	0	NA	promoter-TSS (NM_011029)	promoter-TSS (NM_011029)	-203	NM_011029	16785	Mm.4071	NM_011029	ENSMUSG00000032518	Rpsa	67kDa|67lr|AL022858|Lamr|Lamr1|Lamrl1|MLR|P40|P40-3|P40-8	ribosomal protein SA	protein-coding
663	chr8	50362329	50369256	+	0	NA	Intergenic	Intergenic	-605748	NM_011857	23965	Mm.42191	NM_011857	ENSMUSG00000031561	Tenm3	2610100B16Rik|Odz1|Odz3|Ten-m3|mKIAA1455	teneurin transmembrane protein 3	protein-coding
513	chr4	138907961	138908843	+	0	NA	promoter-TSS (NM_001290810)	promoter-TSS (NM_001290810)	89	NM_001290810	69902	Mm.27871	NM_023536	ENSMUSG00000028741	Mrto4	2610012O22Rik|Mg684|Mrt4	MRT4, mRNA turnover 4, homolog (S. cerevisiae)	protein-coding
615	chr7	50698107	50699853	+	0	NA	promoter-TSS (NR_075104)	promoter-TSS (NR_075104)	-462	NM_026695	110826	Mm.30200	NM_026695	ENSMUSG00000004610	Etfb	0610009I16Rik|2810441H06Rik	electron transferring flavoprotein, beta polypeptide	protein-coding
50	chr10	10999900	11002699	+	0	NA	promoter-TSS (NM_001168297)	promoter-TSS (NM_001168297)	-86	NM_001168297	71865	Mm.276229	NM_027968	ENSMUSG00000047648	Fbxo30	1700026A16Rik|MUSA1	F-box protein 30	protein-coding
476	chr3	137805187	137808001	+	0	NA	promoter-TSS (NM_175389)	promoter-TSS (NM_175389)	92	NM_175389	108943	Mm.471692	NM_175389	ENSMUSG00000004127	Trmt10a	3110023L08Rik|AA794508|Rg9mtd2|Rnmtd2	tRNA methyltransferase 10A	protein-coding
510	chr4	133521833	133527508	+	0	NA	promoter-TSS (NM_016957)	promoter-TSS (NM_016957)	-764	NM_016957	15331	Mm.319660	NM_016957	ENSMUSG00000003038	Hmgn2	HMG-17|Hmg17	high mobility group nucleosomal binding domain 2	protein-coding
393	chr2	34726045	34727427	+	0	NA	promoter-TSS (NM_080554)	promoter-TSS (NM_080554)	-254	NM_080554	66998	Mm.270632	NM_080554	ENSMUSG00000026869	Psmd5	1500032A03Rik|AW475925|S5b|W91691|mKIAA0072	proteasome (prosome, macropain) 26S subunit, non-ATPase, 5	protein-coding
449	chr3	75099564	75103572	+	0	NA	Intergenic	Intergenic	-27568	NM_026460	67931	Mm.259446	NM_026460	ENSMUSG00000034139	Serpini2	Spi14	serine (or cysteine) peptidase inhibitor, clade I, member 2	protein-coding
293	chr16	90522015	90522231	+	0	NA	Intergenic	Intergenic	135481	NM_015755	26559	Mm.125874	NM_015755	ENSMUSG00000053414	Hunk	Bstk1|Mak-v	hormonally upregulated Neu-associated kinase	protein-coding
658	chr8	26575366	26576891	+	0	NA	Intergenic	Intergenic	-53103	NM_001079909	14182	Mm.265716	NM_010206	ENSMUSG00000031565	Fgfr1	AW208770|Eask|FLG|Fgfr-1|Flt-2|Hspy|MFR|bFGF-R-1|c-fgr	fibroblast growth factor receptor 1	protein-coding
274	chr16	35981666	35984761	+	0	NA	promoter-TSS (NM_008465)	promoter-TSS (NM_008465)	-236	NM_008465	16646	Mm.6952	NM_008465	ENSMUSG00000022905	Kpna1	AW494490|IPOA5|NPI1|Rch2|mSRP1	karyopherin (importin) alpha 1	protein-coding
549	chr5	117862940	117866207	+	0	NA	5' UTR (NM_001114545, exon 1 of 20)	5' UTR (NM_001114545, exon 1 of 20)	562	NM_001114545	333050	Mm.437947	NM_001034873	ENSMUSG00000061578	Ksr2	-	kinase suppressor of ras 2	protein-coding
659	chr8	27021056	27023435	+	0	NA	intron (NM_008432, intron 20 of 26)	intron (NM_008432, intron 20 of 26)	62150	NM_008432	16532	Mm.289679	NM_008432	ENSMUSG00000031576	Kcnu1	Kcnma3|Slo3|mSlo3	potassium channel, subfamily U, member 1	protein-coding
645	chr7	137116523	137122202	+	0	NA	intron (NR_046077, intron 3 of 3)	intron (NR_046077, intron 3 of 3)	13683	NR_046077	100043150	Mm.334264	NR_046077		Gm4265	-	predicted gene 4265	ncRNA
322	chr17	65991298	65994420	+	0	NA	Intergenic	Intergenic	-1315	NM_001146002	213272	Mm.255732	NM_153519	ENSMUSG00000050612	Txndc2	AU021712|Sptrx-1|Sptrx1|Trx4	thioredoxin domain containing 2 (spermatozoa)	protein-coding
469	chr3	123088352	123090101	+	0	NA	promoter-TSS (NM_201638)	promoter-TSS (NM_201638)	-318	NM_201638	210529	Mm.260039	NM_201638	ENSMUSG00000028114	Mettl14	G430022H21Rik|mKIAA1627	methyltransferase like 14	protein-coding
682	chr8	119444781	119446249	+	0	NA	promoter-TSS (NM_028131)	promoter-TSS (NM_028131)	-125	NM_028131	72155	Mm.23185	NM_028131	ENSMUSG00000031756	Cenpn	2610510J17Rik|AI426416|AW545024	centromere protein N	protein-coding
635	chr7	105803978	105806175	+	0	NA	promoter-TSS (NM_172280)	promoter-TSS (NM_172280)	3	NM_172280	233545	Mm.387819	NM_172280	ENSMUSG00000035401	2210018M11Rik	2310016L09Rik|AU019521|AU019557|Emsy	RIKEN cDNA 2210018M11 gene	protein-coding
353	chr18	53903497	53905582	+	0	NA	promoter-TSS (NM_178686)	promoter-TSS (NM_178686)	-338	NM_178686	225523	Mm.193678	NM_178686	ENSMUSG00000048799	Cep120	A230075C01|AU016693|Ccdc100	centrosomal protein 120	protein-coding
575	chr6	43615101	43617096	+	0	NA	promoter-TSS (NM_013861)	promoter-TSS (NM_013861)	76	NM_013861	29807	Mm.320979	NM_013861	ENSMUSG00000029735	Tpk1	-	thiamine pyrophosphokinase	protein-coding
375	chr19	45004815	45006053	+	0	NA	promoter-TSS (NM_001081225)	promoter-TSS (NM_001081225)	-175	NM_001081225	226151	Mm.212609	NM_172638	ENSMUSG00000036097	Fam178a	3632432H19|6030443O07Rik|AU014917	family with sequence similarity 178, member A	protein-coding
709	chr9	67687336	67689323	+	0	NA	exon (NM_177184, exon 1 of 85)	exon (NM_177184, exon 1 of 85)	126	NM_177184	320528	Mm.241454	NM_177184	ENSMUSG00000035284	Vps13c	AI552542|AV026040|C230055H22Rik|W51662|chorein	vacuolar protein sorting 13C (yeast)	protein-coding
128	chr11	87860376	87862915	+	0	NA	intron (NM_173374, intron 1 of 3)	CpG	770	NM_173374	110809	Mm.391719	NM_173374	ENSMUSG00000018379	Srsf1	1110054N12Rik|5730507C05Rik|6330415C05Rik|AI482334|AW491331|Asf|Sf2|Sfrs1	serine/arginine-rich splicing factor 1	protein-coding
28	chr1	134373280	134374314	+	0	NA	promoter-TSS (NM_172517)	promoter-TSS (NM_172517)	-147	NM_172517	213464	Mm.132868	NM_172517	ENSMUSG00000026439	Rbbp5	4933411J24Rik|C330016J05	retinoblastoma binding protein 5	protein-coding
310	chr17	21080981	21083289	+	0	NA	promoter-TSS (NM_016891)	promoter-TSS (NM_016891)	-283	NM_016891	51792	Mm.294138	NM_016891	ENSMUSG00000007564	Ppp2r1a	6330556D22Rik|PP2A|PR65	protein phosphatase 2, regulatory subunit A, alpha	protein-coding
40	chr1	171111715	171120472	+	0	NA	Intergenic	Intergenic	345502	NM_023284	66977	Mm.151315	NM_023284	ENSMUSG00000026683	Nuf2	2410003C07Rik|AU044112|C85691|Cdca1|NUF2R	NUF2, NDC80 kinetochore complex component, homolog (S. cerevisiae)	protein-coding
589	chr6	115758010	115759144	+	0	NA	promoter-TSS (NR_028546)	promoter-TSS (NR_028546)	184	NM_172086	19951	Mm.104368	NM_172086	ENSMUSG00000057841	Rpl32	AU020185|rpL32-3A	ribosomal protein L32	protein-coding
303	chr17	8697738	8702873	+	0	NA	Intergenic	Intergenic	-19361	NM_001290707	23984	Mm.87161	NM_011866	ENSMUSG00000023868	Pde10a	-	phosphodiesterase 10A	protein-coding
192	chr13	65341498	65343308	+	0	NA	Intergenic	CpG	-35379	NM_175290	97895	Mm.315815	NM_175290	ENSMUSG00000032999	Nlrp4f	C330026N02Rik|C86045|Nalp-kappa|Nalp4f	NLR family, pyrin domain containing 4F	protein-coding
250	chr15	75444578	75447465	+	0	NA	Intergenic	Intergenic	-1093	NM_001044718	22701	Mm.87210	NM_011759	ENSMUSG00000047003	Zfp41	CTfin92|Zfp-41	zinc finger protein 41	protein-coding
614	chr7	50538257	50538945	+	0	NA	Intergenic	Intergenic	30030	NM_027264	69930	Mm.45367	NM_027264	ENSMUSG00000012640	Zfp715	2610041B18Rik|mszf15	zinc finger protein 715	protein-coding
699	chr9	56071289	56071861	+	0	NA	intron (NM_172924, intron 6 of 6)	LSU-rRNA_Hsa|rRNA|rRNA	-62698	NM_019793	56434	Mm.28484	NM_019793	ENSMUSG00000032324	Tspan3	1700055K04Rik|TM4-A|Tm4sf8	tetraspanin 3	protein-coding
501	chr4	98589039	98591058	+	0	NA	promoter-TSS (NM_146144)	promoter-TSS (NM_146144)	-453	NM_146144	230484	Mm.371692	NM_146144	ENSMUSG00000028560	Usp1	-	ubiquitin specific peptidase 1	protein-coding
215	chr13	114583991	114585307	+	0	NA	promoter-TSS (NM_172595)	promoter-TSS (NM_172595)	-67	NM_172595	218639	Mm.79837	NM_172595	ENSMUSG00000042348	Arl15	A430036I03|Arfrp2|C230032K13Rik	ADP-ribosylation factor-like 15	protein-coding
687	chr9	4375142	4376922	+	0	NA	Intergenic	Intergenic	-7505	NM_145609	78100	Mm.206549	NM_145609	ENSMUSG00000041124	Msantd4	8430410K20Rik|Mysantd4	Myb/SANT-like DNA-binding domain containing 4 with coiled-coils	protein-coding
278	chr16	38522145	38523851	+	0	NA	promoter-TSS (NM_024273)	promoter-TSS (NM_024273)	-251	NM_024273	76916	Mm.132231	NM_024273		Timmdc1	2810021C21Rik|4930455C21Rik|AV135763	translocase of inner mitochondrial membrane domain containing 1	protein-coding
490	chr4	46401678	46403114	+	0	NA	promoter-TSS (NM_029086)	promoter-TSS (NM_029086)	-101	NM_029086	74753	Mm.45973	NM_029086	ENSMUSG00000028331	5830415F09Rik	AV014846|Nap1	RIKEN cDNA 5830415F09 gene	protein-coding
150	chr12	66273605	66274539	+	0	NA	promoter-TSS (NM_172578)	promoter-TSS (NM_172578)	-505	NM_172578	217653	Mm.21144	NM_172578	ENSMUSG00000047534	Mis18bp1	6720403H11|C79407|Knl2|mKIAA1903	MIS18 binding protein 1	protein-coding
130	chr11	94066849	94078490	+	0	NA	promoter-TSS (NM_009427)	promoter-TSS (NM_009427)	-99	NM_009427	22057	Mm.259673	NM_009427	ENSMUSG00000037573	Tob1	Tob|Trob	transducer of ErbB-2.1	protein-coding
155	chr12	75007885	75010295	+	0	NA	5' UTR (NM_010431, exon 1 of 15)	5' UTR (NM_010431, exon 1 of 15)	236	NM_010431	15251	Mm.3879	NM_010431	ENSMUSG00000021109	Hif1a	AA959795|HIF1alpha|MOP1|bHLHe78	hypoxia inducible factor 1, alpha subunit	protein-coding
387	chr2	23011347	23012559	+	0	NA	promoter-TSS (NM_013771)	promoter-TSS (NM_013771)	-72	NM_013771	27377	Mm.23335	NM_013771	ENSMUSG00000026775	Yme1l1	FtsH1|Ftsh	YME1-like 1 (S. cerevisiae)	protein-coding
53	chr10	17440315	17448759	+	0	NA	exon (NM_010828, exon 2 of 2)	exon (NM_010828, exon 2 of 2)	1503	NM_010828	17684	Mm.272321	NM_010828	ENSMUSG00000039910	Cited2	AI835299|ER154-like|Mrg1|Msg2|p35srj	Cbp/p300-interacting transactivator, with Glu/Asp-rich carboxy-terminal domain, 2	protein-coding
245	chr15	38228022	38232803	+	0	NA	promoter-TSS (NM_013692)	promoter-TSS (NM_013692)	54	NM_013692	21847	Mm.4292	NM_013692	ENSMUSG00000037465	Klf10	AI115143|EGR[a]|Egral|Gdnfif|TIEG-1|Tieg|Tieg1|mGIF	Kruppel-like factor 10	protein-coding
626	chr7	85834821	85838703	+	0	NA	intron (NR_015542, intron 5 of 10)	intron (NR_015542, intron 5 of 10)	26344	NR_015542	414121	Mm.482537	NR_015542		E430016F16Rik	-	RIKEN cDNA E430016F16 gene	ncRNA
543	chr5	104524220	104545496	+	0	NA	intron (NM_010097, intron 1 of 10)	intron (NM_010097, intron 1 of 10)	8249	NM_010097	13602	Mm.29027	NM_010097	ENSMUSG00000029309	Sparcl1	Ecm2|Sc1|hevin|mast9	SPARC-like 1	protein-coding
267	chr16	20097120	20099101	+	0	NA	intron (NM_029436, intron 1 of 7)	CpG	483	NM_029436	75785	Mm.392450	NM_029436	ENSMUSG00000062901	Klhl24	1110046J11Rik|4930429H24Rik|6530402O20Rik|C85082	kelch-like 24	protein-coding
354	chr18	55851564	55858301	+	0	NA	Intergenic	Intergenic	-705098	NM_175751	269023	Mm.192984	NM_175751	ENSMUSG00000052713	Zfp608	4932417D18Rik|D430007A19Rik|Znf608	zinc finger protein 608	protein-coding
461	chr3	95621389	95624914	+	0	NA	promoter-TSS (NM_001081293)	promoter-TSS (NM_001081293)	-275	NM_001081293	75137	Mm.196275	NM_028328	ENSMUSG00000028106	Rprd2	2810036A19Rik|4930535B03Rik|6720469I21Rik|AL022841|AL022940|AU021304|BB077382|mKIAA0460	regulation of nuclear pre-mRNA domain containing 2	protein-coding
583	chr6	86387539	86389490	+	0	NA	promoter-TSS (NM_001243742)	promoter-TSS (NM_001243742)	122	NM_146170	232196	Mm.404040	NM_146170	ENSMUSG00000046679	C87436	-	expressed sequence C87436	protein-coding
257	chr15	99802454	99804676	+	0	NA	non-coding (NR_028124, exon 1 of 1)	non-coding (NR_028124, exon 1 of 1)	153	NR_028124	70281	Mm.484037	NR_028124		2310068J16Rik	-	RIKEN cDNA 2310068J16 gene	ncRNA
85	chr10	84646095	84648857	+	0	NA	5' UTR (NM_007771, exon 1 of 13)	5' UTR (NM_007771, exon 1 of 13)	323	NM_007771	12952	Mm.26237	NM_007771	ENSMUSG00000020038	Cry1	AU020726|AU021000|Phll1	cryptochrome 1 (photolyase-like)	protein-coding
332	chr17	95148617	95149404	+	0	NA	promoter-TSS (NR_024720)	promoter-TSS (NR_024720)	222	NM_176917	76781	Mm.139146	NM_176917	ENSMUSG00000055660	Mettl4	2410198H06Rik|A730091E08Rik|AV296509|HsT661	methyltransferase like 4	protein-coding
9	chr1	30929333	30931933	+	0	NA	Intergenic	CpG	-10532	NM_001081080	213109	Mm.194486	NM_025871	ENSMUSG00000048874	Phf3	2310061N19Rik|mKIAA0244	PHD finger protein 3	protein-coding
425	chr2	136713094	136718440	+	0	NA	intron (NM_001141946, intron 1 of 5)	intron (NM_001141946, intron 1 of 5)	-1187	NM_028201	74243	Mm.330612	NM_028201	ENSMUSG00000027281	Slx4ip	2210009G21Rik|2410004I22Rik|C85661|Slxip	SLX4 interacting protein	protein-coding
591	chr6	118404482	118406704	+	0	NA	promoter-TSS (NM_028335)	promoter-TSS (NM_028335)	-69	NM_028335	72720	Mm.212572	NM_028335	ENSMUSG00000030145	Zfp248	2810037F07Rik|E130106N01Rik	zinc finger protein 248	protein-coding
34	chr1	162142104	162144420	+	0	NA	promoter-TSS (NM_009786)	promoter-TSS (NM_009786)	-239	NM_009786	12301	Mm.10702	NM_009786	ENSMUSG00000014226	Cacybp	SIP	calcyclin binding protein	protein-coding
736	chrX	91457738	91459242	+	0	NA	promoter-TSS (NM_012010)	promoter-TSS (NM_012010)	-500	NM_012010	26905	Mm.218851	NM_012010	ENSMUSG00000035150	Eif2s3x	AA409828|AA547477|AI314668|Eif-2gx	eukaryotic translation initiation factor 2, subunit 3, structural gene X-linked	protein-coding
539	chr5	90037370	90044255	+	0	NA	Intergenic	Intergenic	-4649	NR_037571	631105	Mm.7732	NR_037571		Gm7056	Gm149	predicted gene 7056	ncRNA
603	chr7	7249762	7254097	+	0	NA	TTS (NR_049193)	TTS (NR_049193)	293	NM_011334	12727	Mm.297883	NM_011334	ENSMUSG00000000605	Clcn4-2	Clc4-2|Clcn4	chloride channel 4-2	protein-coding
90	chr10	113687590	113691533	+	0	NA	Intergenic	Intergenic	548865	NM_146241	237553	Mm.445550	NM_146241	ENSMUSG00000050663	Trhde	9330155P21Rik	TRH-degrading enzyme	protein-coding
276	chr16	37867322	37872384	+	0	NA	intron (NM_177093, intron 1 of 3)	intron (NM_177093, intron 1 of 3)	1367	NM_177093	320184	Mm.390882	NM_177093	ENSMUSG00000034158	Lrrc58	1810012N18Rik|C330018J07Rik	leucine rich repeat containing 58	protein-coding
620	chr7	53152252	53153863	+	0	NA	promoter-TSS (NM_021482)	promoter-TSS (NM_021482)	618	NM_144801	70209	Mm.163766	NM_144801	ENSMUSG00000002781	Tmem143	2310076O21Rik|AI481604	transmembrane protein 143	protein-coding
565	chr6	6722383	6835095	+	0	NA	intron (NR_015388, intron 1 of 1)	intron (NR_015388, intron 1 of 1)	-34595	NM_010057	13396	Mm.439763	NM_010057	ENSMUSG00000029754	Dlx6	-	distal-less homeobox 6	protein-coding
102	chr11	3022826	3026975	+	0	NA	intron (NR_003517, intron 1 of 6)	RLTR10C|LTR|ERVK	870	NR_003518	66776	Mm.247625	NR_003518		Pisd-ps3	4933439C20Rik	phosphatidylserine decarboxylase, pseudogene 3	pseudo
520	chr5	23121196	23123982	+	0	NA	promoter-TSS (NM_009274)	promoter-TSS (NM_009274)	-200	NM_009274	20817	Mm.288728	NM_009274	ENSMUSG00000062604	Srpk2	AW226533|AW492537|AW547358|Wbp6|mSRPK2	serine/arginine-rich protein specific kinase 2	protein-coding
532	chr5	40192311	40197114	+	0	NA	Intergenic	Intergenic	-158842	NM_010474	15476	Mm.12559	NM_010474	ENSMUSG00000051022	Hs3st1	3-Ost|D5Wsu110e|Hsg3ost	heparan sulfate (glucosamine) 3-O-sulfotransferase 1	protein-coding
730	chrX	20374436	20376774	+	0	NA	Intergenic	Intergenic	-50064	NM_009703	11836	Mm.220946	NM_009703	ENSMUSG00000001127	Araf	1200013E08Rik|A-Raf|AW495444|Araf1	v-raf murine sarcoma 3611 viral oncogene homolog	protein-coding
16	chr1	58479644	58481291	+	0	NA	intron (NR_027853, intron 1 of 11)	CpG	465	NR_027853	12747	Mm.1761	NM_009905	ENSMUSG00000026034	Clk1	STY	CDC-like kinase 1	protein-coding
55	chr10	20030938	20033342	+	0	NA	promoter-TSS (NM_001025393)	promoter-TSS (NM_001025393)	-135	NM_001025392	72567	Mm.294783	NM_153787	ENSMUSG00000037608	Bclaf1	2610102K23Rik|2700025J07Rik|2810454G14Rik|5730534O06Rik|AI450190|AW556225|Btf|mKIAA0164	BCL2-associated transcription factor 1	protein-coding
233	chr14	76902705	76908372	+	0	NA	intron (NM_001177751, intron 2 of 2)	intron (NM_001177751, intron 2 of 2)	1221	NM_009366	21807	Mm.153272	NM_009366	ENSMUSG00000022010	Tsc22d1	AA589566|AW105905|Egr5|TSC-22|Tgfb1i4|Tsc|Tsc22	TSC22 domain family, member 1	protein-coding
57	chr10	36693615	36695664	+	0	NA	intron (NM_008229, intron 1 of 13)	CpG	289	NM_008229	15182	Mm.19806	NM_008229	ENSMUSG00000019777	Hdac2	D10Wsu179e|YAF1|Yy1bp|mRPD3	histone deacetylase 2	protein-coding
259	chr16	5884403	5886478	+	0	NA	5' UTR (NM_021477, exon 1 of 17)	5' UTR (NM_021477, exon 1 of 17)	554	NM_021477	268859	Mm.370334	NM_021477	ENSMUSG00000008658	Rbfox1	A2bp|A2bp1|Hrnbp1|fox-1	RNA binding protein, fox-1 homolog (C. elegans) 1	protein-coding
368	chr19	21345004	21351916	+	0	NA	intron (NM_009551, intron 1 of 5)	intron (NM_009551, intron 1 of 5)	1692	NM_009551	22682	Mm.292405	NM_009551		Zfand5	2310057A04Rik|5830475F03Rik|AA415485|Za20d2|Zfp216	zinc finger, AN1-type domain 5	protein-coding
424	chr2	128791401	128794753	+	0	NA	promoter-TSS (NM_178404)	promoter-TSS (NM_178404)	-61	NM_178404	78751	Mm.26377	NM_178404	ENSMUSG00000042851	Zc3h6	4631426G04Rik|4833425H18Rik|AU024389|AW060453|Zc3hdc6|mKIAA2035	zinc finger CCCH type containing 6	protein-coding
316	chr17	41071122	41072529	+	0	NA	promoter-TSS (NM_031863)	promoter-TSS (NM_031863)	191	NM_008650	17850	Mm.259884	NM_008650	ENSMUSG00000023921	Mut	D230010K02Rik|Mcm	methylmalonyl-Coenzyme A mutase	protein-coding
163	chr12	86774833	86779024	+	0	NA	Intergenic	Intergenic	-37923	NM_010234	14281	Mm.246513	NM_010234	ENSMUSG00000021250	Fos	D12Rfj1|c-fos|cFos	FBJ osteosarcoma oncogene	protein-coding
395	chr2	48804062	48806348	+	0	NA	promoter-TSS (NM_011958)	promoter-TSS (NM_011958)	177	NM_029924	109241	Mm.440436	NM_029924	ENSMUSG00000036792	Mbd5	9430004D19Rik|AA536666|AI426407|C030040A15Rik|Gm1630|OTTMUSG00000012483	methyl-CpG binding domain protein 5	protein-coding
89	chr10	105905353	105909677	+	0	NA	5' UTR (NM_177373, exon 1 of 32)	5' UTR (NM_177373, exon 1 of 32)	149	NM_001205341	327814	Mm.391424	NM_177373	ENSMUSG00000053825	Ppfia2	5330438O12|B230207K17Rik|E130120L08Rik|mKIAA4112	protein tyrosine phosphatase, receptor type, f polypeptide (PTPRF), interacting protein (liprin), alpha 2	protein-coding
611	chr7	46910240	46911961	+	0	NA	Intergenic	Intergenic	137964	NM_001004139	70227	Mm.333800	NM_001004139	ENSMUSG00000068959	Zfp619	3000002G13Rik	zinc finger protein 619	protein-coding
175	chr13	8994963	8996327	+	0	NA	promoter-TSS (NM_027000)	promoter-TSS (NM_027000)	-387	NM_027000	69237	Mm.41800	NM_027000	ENSMUSG00000021149	Gtpbp4	2610028C09Rik|Crfg|Gtpbp3|NGB|Nog1	GTP binding protein 4	protein-coding
584	chr6	86464396	86478736	+	0	NA	Intergenic	ID_B1|SINE|B4	4593	NM_011865	23983	Mm.274146	NM_011865	ENSMUSG00000051695	Pcbp1	WBP17|[a]CP-1|alphaCP-1	poly(rC) binding protein 1	protein-coding
35	chr1	162278866	162283599	+	0	NA	intron (NM_013862, intron 18 of 20)	intron (NM_013862, intron 18 of 20)	470	NM_001038621	29809	Mm.25833	NM_013862	ENSMUSG00000026721	Rabgap1l	5830411O09Rik|8430421H08Rik|9630005B12Rik|AW049894|HHL|Hh1|mKIAA0471	RAB GTPase activating protein 1-like	protein-coding
11	chr1	38053476	38055066	+	0	NA	promoter-TSS (NM_198303)	promoter-TSS (NM_198303)	-218	NM_172054	98258	Mm.28438	NM_172054	ENSMUSG00000058407	Txndc9	AI098020|APACD	thioredoxin domain containing 9	protein-coding
492	chr4	48054131	48060556	+	0	NA	Intergenic	Intergenic	-6777	NM_015743	18124	Mm.247261	NM_015743	ENSMUSG00000028341	Nr4a3	AI573420|CHN|CSMF|MINOR|NOR-1|Nor1|TEC	nuclear receptor subfamily 4, group A, member 3	protein-coding
208	chr13	94540748	94544811	+	0	NA	intron (NM_009712, intron 1 of 7)	intron (NM_009712, intron 1 of 7)	1145	NM_009712	11881	Mm.300178	NM_009712	ENSMUSG00000042082	Arsb	1110007C02Rik|AI480648|As-1|As-1r|As-1s|As-1t|As1|As1-r|As1-s|As1-t|Asr-1|Ast-1	arylsulfatase B	protein-coding
347	chr18	35113164	35115723	+	0	NA	promoter-TSS (NM_010481)	promoter-TSS (NM_010481)	-438	NM_010481	15526	Mm.209419	NM_010481	ENSMUSG00000024359	Hspa9	74kDa|Csa|Grp75|Hsc74|Hsp74|Hsp74a|Hspa9a|Mortalin|Mot-2|Mot2|Mthsp70|Pbp74	heat shock protein 9	protein-coding
511	chr4	134407877	134410714	+	0	NA	promoter-TSS (NM_025382)	promoter-TSS (NM_025382)	-35	NM_025382	66146	Mm.99793	NM_025382	ENSMUSG00000028826	Tmem57	1110007C24Rik|9230118A01Rik|AI317300|AI606104|C61	transmembrane protein 57	protein-coding
665	chr8	72148604	72149915	+	0	NA	promoter-TSS (NM_001045553)	promoter-TSS (NM_001045553)	-185	NM_001045553	234362	Mm.458487	NM_172754	ENSMUSG00000060427	Zfp868	AI449175|AW108241|C530032E20|mszf62	zinc finger protein 868	protein-coding
434	chr2	172196068	172196958	+	0	NA	promoter-TSS (NM_024199)	promoter-TSS (NM_024199)	10	NM_024199	67337	Mm.26944	NM_024199	ENSMUSG00000027498	Cstf1	1700057K18Rik|AI788832	cleavage stimulation factor, 3' pre-RNA, subunit 1	protein-coding
93	chr10	116660963	116662151	+	0	NA	promoter-TSS (NM_026570)	promoter-TSS (NM_026570)	6	NM_026570	64050	Mm.233529	NM_026570	ENSMUSG00000020171	Yeats4	4930573H17Rik|B230215M10Rik|GAS41|NuBI-1	YEATS domain containing 4	protein-coding
292	chr16	87354079	87355168	+	0	NA	exon (NM_001159331, exon 1 of 5)	exon (NM_001159331, exon 1 of 5)	193	NM_026366	67768	Mm.296532	NM_026366	ENSMUSG00000044442	N6amt1	5830445C04Rik|Hemk2|Pred28	N-6 adenine-specific DNA methyltransferase 1 (putative)	protein-coding
291	chr16	65787504	65787818	+	0	NA	Intergenic	IAPEz-int|LTR|ERVK	-28217	NM_028572	73569	Mm.25670	NM_028572	ENSMUSG00000091243	Vgll3	1700110N18Rik|4832416J22|C80713|Vgl-3|Vito-2	vestigial like 3 (Drosophila)	protein-coding
374	chr19	37246092	37257255	+	0	NA	intron (NR_045329, intron 2 of 2)	intron (NR_045329, intron 2 of 2)	-1120	NM_001290826	208922	Mm.391176	NM_198300	ENSMUSG00000039652	Cpeb3	4831444O18Rik|CPE-BP3|mKIAA0940	cytoplasmic polyadenylation element binding protein 3	protein-coding
114	chr11	30370698	30372980	+	0	NA	promoter-TSS (NM_001100394)	promoter-TSS (NM_001100394)	-10	NM_001100394	75087	Mm.159422	NM_001100394	ENSMUSG00000040919	4930505A04Rik	-	RIKEN cDNA 4930505A04 gene	protein-coding
199	chr13	84123834	84129628	+	0	NA	Intergenic	Intergenic	95918	NR_036594	72677	Mm.245636	NR_036594		2810049E08Rik	-	RIKEN cDNA 2810049E08 gene	ncRNA
442	chr3	41544815	41547819	+	0	NA	promoter-TSS (NM_028667)	promoter-TSS (NM_028667)	119	NM_001081411	67161	Mm.331001	NM_026008	ENSMUSG00000059834	Sclt1	2610207F23Rik|4931421F20Rik	sodium channel and clathrin linker 1	protein-coding
429	chr2	165640934	165734329	+	0	NA	intron (NM_001291158, intron 2 of 23)	L2a|LINE|L2	-3958	NM_001252585	228880	Mm.227598	NM_027230	ENSMUSG00000039671	Zmynd8	1110013E22Rik|2010005I16Rik|3632413B07Rik|AI316811|AL024039|Prkcbp1|RACK7	zinc finger, MYND-type containing 8	protein-coding
649	chr7	146870038	146870680	+	0	NA	Intergenic	Intergenic	-68131	NM_001243018	212124	Mm.425507	NM_001243018	ENSMUSG00000070357	E030019B06Rik	Gm170	RIKEN cDNA E030019B06 gene	protein-coding
689	chr9	20411194	20412547	+	0	NA	promoter-TSS (NR_033729)	promoter-TSS (NR_033729)	-49	NR_033729	66662	Mm.477847	NM_175110	ENSMUSG00000062470	Fbxl12os	5730577I03Rik	F-box and leucine-rich repeat protein 12, opposite strand	pseudo
648	chr7	146311502	146351137	+	0	NA	intron (NM_001162540, intron 1 of 11)	intron (NM_001162540, intron 1 of 11)	43074	NM_021302	57740	Mm.65336	NM_021302	ENSMUSG00000015981	Stk32c	PKE|Pkek|YANK3	serine/threonine kinase 32C	protein-coding
642	chr7	134654956	134657816	+	0	NA	promoter-TSS (NR_024331)	promoter-TSS (NR_024331)	-3	NR_024331	629159	Mm.256720	NR_024331		1700008J07Rik	AW048743	RIKEN cDNA 1700008J07 gene	ncRNA
73	chr10	71759931	71760130	+	0	NA	Intergenic	L1Md_T|LINE|L1	-316592	NR_003644	108950	Mm.212793	NM_175390	ENSMUSG00000043859	1700049L16Rik	-	hematological and neurological expressed 1-like pseudogene	pseudo
409	chr2	78932422	78937734	+	0	NA	Intergenic	Intergenic	-160505	NM_010576	16401	Mm.31903	NM_010576	ENSMUSG00000027009	Itga4	CD49D|Itga4B	integrin alpha 4	protein-coding
67	chr10	61221743	61224480	+	0	NA	intron (NM_207000, intron 1 of 8)	MTB_Mm|LTR|MaLR	-14374	NR_039568	100628583		NR_039568	miRBase:MI0018017	Mir5108	mmu-mir-5108|mu-mir-5108	microRNA 5108	ncRNA
241	chr15	31019407	31023183	+	0	NA	Intergenic	Intergenic	52414	NR_045186	73784	Mm.66947	NR_045186		4930430F21Rik	-	RIKEN cDNA 4930430F21 gene	ncRNA
198	chr13	83852546	83890750	+	0	NA	intron (NR_015561, intron 2 of 3)	AT_rich|Low_complexity|Low_complexity	3937	NR_015561	320203	Mm.245636	NM_177100	ENSMUSG00000050334	C130071C03Rik	2810449C10Rik	RIKEN cDNA C130071C03 gene	ncRNA
489	chr4	41221601	41223124	+	0	NA	promoter-TSS (NM_026872)	promoter-TSS (NM_026872)	-194	NM_026872	68926	Mm.41864	NM_026872	ENSMUSG00000028433	Ubap2	1190005K07Rik|AA408600|AU045235|UBAP-2|mKIAA1491	ubiquitin-associated protein 2	protein-coding
585	chr6	86529100	86536581	+	0	NA	Intergenic	B3A|SINE|B2	-45328	NM_026414	67855	Mm.183043	NM_026414	ENSMUSG00000033508	Asprv1	2300003P22Rik|AA986851|SASP|SASPase|Taps	aspartic peptidase, retroviral-like 1	protein-coding
727	chrX	7366065	7367623	+	0	NA	promoter-TSS (NM_001290455)	promoter-TSS (NM_001290455)	-275	NM_001290455	54645	Mm.194811	NM_207670	ENSMUSG00000031153	Gripap1	AI854681|DXImx47e|GRASP-1|Sfc10|mKIAA1167	GRIP1 associated protein 1	protein-coding
327	chr17	79629245	79632308	+	0	NA	Intergenic	Intergenic	123655	NM_026514	260409	Mm.140601	NM_026514	ENSMUSG00000036533	Cdc42ep3	3200001F04Rik|AA986861|Borg2|Cep3|UB1	CDC42 effector protein (Rho GTPase binding) 3	protein-coding
320	chr17	53828706	53830057	+	0	NA	promoter-TSS (NM_028232)	promoter-TSS (NM_028232)	-741	NM_028232	72415	Mm.153202	NM_028232	ENSMUSG00000023940	Sgol1	3300001M08Rik|C81037|Sgo1	shugoshin-like 1 (S. pombe)	protein-coding
732	chrX	39501425	39506980	+	0	NA	intron (NM_021465, intron 1 of 32)	intron (NM_021465, intron 1 of 32)	324	NM_021465	20843	Mm.290422	NM_021465	ENSMUSG00000025862	Stag2	9230105L23Rik|B230112I07Rik|SA-2|SAP2	stromal antigen 2	protein-coding
674	chr8	91314337	91319407	+	0	NA	Intergenic	Intergenic	95945	NM_001128171	74256	Mm.490395	NM_173369	ENSMUSG00000036712	Cyld	2010013M14Rik|2900009M21Rik|C130039D01Rik|CDMT|CYLD1|EAC|mKIAA0849	cylindromatosis (turban tumor syndrome)	protein-coding
280	chr16	42444119	42446045	+	0	NA	Intergenic	Intergenic	-104318	NM_008083	14432	Mm.1222	NM_008083	ENSMUSG00000047261	Gap43	B-50|Basp2|GAP-43	growth associated protein 43	protein-coding
273	chr16	33342090	33346794	+	0	NA	Intergenic	Intergenic	36380	NR_045709	100502742	Mm.217880	NR_045709	ENSMUSG00000097318	1700007L15Rik	-	RIKEN cDNA 1700007L15 gene	ncRNA
471	chr3	127255422	127256350	+	0	NA	promoter-TSS (NM_197997)	promoter-TSS (NM_197997)	381	NM_138593	28036	Mm.291032	NM_138593	ENSMUSG00000027968	Larp7	C330027G06Rik|D3Wsu161e	La ribonucleoprotein domain family, member 7	protein-coding
622	chr7	66094723	66102569	+	0	NA	Intergenic	Intergenic	185074	NM_009728	11982	Mm.135129	NM_009728	ENSMUSG00000025324	Atp10a	Atp10c|pfatp	ATPase, class V, type 10A	protein-coding
202	chr13	84880224	84904099	+	0	NA	Intergenic	Intergenic	-436921	NM_023243	66671	Mm.18474	NM_023243	ENSMUSG00000021548	Ccnh	6330408H09Rik|AI661354|AV102684|AW538719	cyclin H	protein-coding
249	chr15	73294871	73301817	+	0	NA	Intergenic	Intergenic	-44646	NM_001081066	105841	Mm.322557	NM_001081066	ENSMUSG00000036661	Dennd3	AI447457|E030003N15Rik	DENN/MADD domain containing 3	protein-coding
361	chr18	84319025	84323998	+	0	NA	Intergenic	B1_Mus1|SINE|Alu	63961	NM_146090	225791	Mm.147052	NM_146090	ENSMUSG00000049090	Zadh2	C530046K17Rik|Pthr3	zinc binding alcohol dehydrogenase, domain containing 2	protein-coding
465	chr3	106524068	106526054	+	0	NA	intron (NM_028081, intron 1 of 2)	CpG	461	NM_001286685	321000	Mm.259638	NM_028081	ENSMUSG00000056260	Lrif1	2010012G17Rik|4933421E11Rik|AI450568	ligand dependent nuclear receptor interacting factor 1	protein-coding
184	chr13	43493679	43494670	+	0	NA	intron (NM_023554, intron 2 of 7)	CpG-3793	429	NM_023554	70078	Mm.439927	NM_023554	ENSMUSG00000063200	Nol7	2210008F15Rik|5730556I21Rik|NOP27|RARG-1	nucleolar protein 7	protein-coding
24	chr1	104524687	104524999	+	0	NA	Intergenic	LSU-rRNA_Hsa|rRNA|rRNA	1472498	NR_037989	100504525	Mm.87065	NR_037989		Gm20268	-	predicted gene, 20268	ncRNA
140	chr12	8647257	8648866	+	0	NA	Intergenic	ID_B1|SINE|B4	-32879	NM_001160221	80913	Mm.341243	NM_030723	ENSMUSG00000020594	Pum2	5730503J23Rik|Pumm2|mKIAA0235	pumilio RNA-binding family member 2	protein-coding
104	chr11	4603493	4605263	+	0	NA	promoter-TSS (NM_197979)	promoter-TSS (NM_197979)	-31	NM_197979	66152	Mm.269736	NM_197979	ENSMUSG00000059534	Uqcr10	1110020P15Rik|AA960494|Ucrc	ubiquinol-cytochrome c reductase, complex III subunit X	protein-coding
131	chr11	94409435	94411515	+	0	NA	promoter-TSS (NM_001013381)	promoter-TSS (NM_001013381)	46	NM_001013381	237926	Mm.342275	NM_001013381	ENSMUSG00000039096	Rsad1	B430319G23|BC056485	radical S-adenosyl methionine domain containing 1	protein-coding
181	chr13	28506388	28512920	+	0	NA	Intergenic	Intergenic	275301	NM_023746	28078	Mm.155058	NM_023746	ENSMUSG00000017064	Prl5a1	1600013P04Rik|D13Wsu14e|PLP-L|Prlpl	prolactin family 5, subfamily a, member 1	protein-coding
412	chr2	103635725	103638622	+	0	NA	promoter-TSS (NM_001111289)	promoter-TSS (NM_001111289)	62	NM_001111290	53872	Mm.427589	NM_016739	ENSMUSG00000027184	Caprin1	AL022980|Caprin-1|Gpiap|Gpiap1|Mmgpip137|P137|rng105	cell cycle associated protein 1	protein-coding
385	chr2	19197506	19198223	+	0	NA	intron (NM_001081083, intron 10 of 19)	intron (NM_001081083, intron 10 of 19)	77119	NM_001081083	70882	Mm.276696	NM_001081083	ENSMUSG00000037683	Armc3	4921513G22Rik	armadillo repeat containing 3	protein-coding
502	chr4	99495513	99497305	+	0	NA	promoter-TSS (NM_026348)	promoter-TSS (NM_026348)	218	NM_145549	230500	Mm.331727	NM_145549		Efcab7	mKIAA1799	EF-hand calcium binding domain 7	protein-coding
307	chr17	17257545	17258957	+	0	NA	promoter-TSS (NM_011765)	promoter-TSS (NM_011765)	-96	NM_011765	22759	Mm.436633	NM_011765	ENSMUSG00000095990	Zfp97	NGD16-4	zinc finger protein 97	protein-coding
314	chr17	34253903	34266662	+	0	NA	promoter-TSS (NM_001204973)	promoter-TSS (NM_001204973)	505	NM_010386	14998	Mm.16373	NM_010386	ENSMUSG00000037649	H2-DMa	H-2Ma|H2-Ma	histocompatibility 2, class II, locus DMa	protein-coding
154	chr12	72237036	72238509	+	0	NA	promoter-TSS (NM_029818)	promoter-TSS (NM_029818)	-63	NM_029818	76967	Mm.87290	NM_029818	ENSMUSG00000034601	2700049A03Rik	Talpid3|mKIAA0586	RIKEN cDNA 2700049A03 gene	protein-coding
355	chr18	64424080	64427161	+	0	NA	intron (NM_009182, intron 3 of 5)	CpG	11214	NR_045366	73588	Mm.65475	NR_045366	ENSMUSG00000086128	St8sia3os	1700091E21Rik	ST8 alpha-N-acetyl-neuraminide alpha-2,8-sialyltransferase 3, opposite strand	ncRNA
553	chr5	125862768	125894785	+	0	NA	Intergenic	CT-rich|Low_complexity|Low_complexity	-8389	NM_019639	22190	Mm.331	NM_019639	ENSMUSG00000008348	Ubc	2700054O04Rik|AI194771|Rps27a|TI-225|Uba52|Ubb	ubiquitin C	protein-coding
159	chr12	79961707	79963573	+	0	NA	promoter-TSS (NM_026114)	promoter-TSS (NM_026114)	-15	NM_023721	73834	Mm.491124	NM_023721	ENSMUSG00000021114	Atp6v1d	1110004P10Rik|Atp6m|VATD|Vma8	ATPase, H+ transporting, lysosomal V1 subunit D	protein-coding
479	chr3	154354278	154356479	+	0	NA	Intergenic	Intergenic	-18719	NM_175176	209601	Mm.331454	NM_175176	ENSMUSG00000042943	Erich3	1700013E18Rik|4922501L14Rik|5031409G23Rik|AI596448|Gm133	glutamate rich 3	protein-coding
704	chr9	59137991	59140247	+	0	NA	promoter-TSS (NM_028121)	promoter-TSS (NM_028121)	-260	NM_028121	72141	Mm.22456	NM_028121	ENSMUSG00000025236	Adpgk	2610017G09Rik|Adp-gk|C77577	ADP-dependent glucokinase	protein-coding
326	chr17	71876138	71877023	+	0	NA	promoter-TSS (NM_023294)	promoter-TSS (NM_023294)	-383	NM_023294	67052	Mm.225956	NM_023294	ENSMUSG00000024056	Ndc80	2610020P18Rik|AV139730|HEC|HEC1|Kntc2	NDC80 homolog, kinetochore complex component (S. cerevisiae)	protein-coding
555	chr5	130006281	130007544	+	0	NA	promoter-TSS (NM_172276)	promoter-TSS (NM_172276)	-194	NM_172276	231769	Mm.288714	NM_172276	ENSMUSG00000029439	Sfswap	1190005N23Rik|6330437E22Rik|AI197402|AW212079|SWAP|Sfrs8|Srsf8	splicing factor, suppressor of white-apricot homolog (Drosophila)	protein-coding
681	chr8	116158062	116160023	+	0	NA	promoter-TSS (NM_001048143)	promoter-TSS (NM_001048143)	-444	NM_001048143	270096	Mm.74689	NM_173015	ENSMUSG00000078908	Mon1b	5031407H10|5033413H12Rik	MON1 homolog b (yeast)	protein-coding
47	chr1	189038790	189039734	+	0	NA	promoter-TSS (NM_028848)	promoter-TSS (NM_028848)	63	NM_029067	74717	Mm.250430	NM_028848	ENSMUSG00000026611	Spata17	1700065F16Rik|4930504I07Rik|4930513F16Rik|MSRG-11	spermatogenesis associated 17	protein-coding
619	chr7	53086078	53086969	+	0	NA	promoter-TSS (NM_153419)	promoter-TSS (NM_153419)	-364	NM_153419	101612	Mm.274847	NM_153419	ENSMUSG00000053801	Grwd1	A301|AI504353|Grwd|Wdr28	glutamate-rich WD repeat containing 1	protein-coding
37	chr1	166651056	166653650	+	0	NA	Intergenic	Intergenic	-74510	NM_019759	56429	Mm.28935	NM_019759	ENSMUSG00000026574	Dpt	1810032B19Rik|5033416F05Rik|EQ-1|Eq1	dermatopontin	protein-coding
335	chr18	3507343	3510434	+	0	NA	intron (NM_026505, intron 1 of 2)	intron (NM_026505, intron 1 of 2)	933	NM_026505	68010	Mm.284863	NM_026505	ENSMUSG00000024232	Bambi	2610003H06Rik	BMP and activin membrane-bound inhibitor	protein-coding
270	chr16	23127470	23128957	+	0	NA	promoter-TSS (NM_145480)	promoter-TSS (NM_145480)	-410	NM_145480	106344	Mm.386835	NM_145480	ENSMUSG00000022881	Rfc4	A1|AI894123|AU040575|RFC37	replication factor C (activator 1) 4	protein-coding
698	chr9	44862850	44864035	+	0	NA	intron (NM_001093749, intron 1 of 5)	CpG	178	NM_001093749	319742	Mm.49611	NM_176993	ENSMUSG00000070305	Mpzl3	5430427F17Rik|A530065I17Rik|rc	myelin protein zero-like 3	protein-coding
5	chr1	16094026	16096503	+	0	NA	promoter-TSS (NM_133832)	promoter-TSS (NM_133832)	-699	NM_133832	98711	Mm.274376	NM_133832		Rdh10	3110069K09Rik|4921506A21Rik|AI875664|AW549993|D1Ertd762e|m366Asp	retinol dehydrogenase 10 (all-trans)	protein-coding
195	chr13	74345656	74347080	+	0	NA	promoter-TSS (NM_177333)	promoter-TSS (NM_177333)	-220	NM_177333	211446	Mm.261859	NM_177333	ENSMUSG00000034152	Exoc3	2810050O03Rik|E430013E20Rik|Sec6|Sec6l1	exocyst complex component 3	protein-coding
621	chr7	54174302	54176076	+	0	NA	intron (NM_021884, intron 1 of 9)	CpG	111	NM_021884	22088	Mm.241334	NM_021884	ENSMUSG00000014402	Tsg101	AI255943|CC2	tumor susceptibility gene 101	protein-coding
538	chr5	86601176	86603630	+	0	NA	promoter-TSS (NM_172712)	promoter-TSS (NM_172712)	-635	NM_172712	231380	Mm.34012	NM_172712	ENSMUSG00000035898	Uba6	4930542H01|5730469D23Rik|AU021846|AW124799|E1-L2|Ube1l2	ubiquitin-like modifier activating enzyme 6	protein-coding
524	chr5	28642588	28644393	+	0	NA	promoter-TSS (NM_028234)	promoter-TSS (NM_028234)	-239	NM_028234	381626	Mm.304075	NM_028234	ENSMUSG00000048271	Rbm33	3200001K10Rik|6430512A10Rik|AA386890|Prr8	RNA binding motif protein 33	protein-coding
554	chr5	129456682	129459965	+	0	NA	intron (NM_001081388, intron 1 of 21)	intron (NM_001081388, intron 1 of 21)	914	NM_001081388	231760	Mm.233996	NM_001081388	ENSMUSG00000029420	Rimbp2	A930033C01Rik|mKIAA0318	RIMS binding protein 2	protein-coding
680	chr8	113369971	113371563	+	0	NA	promoter-TSS (NM_133953)	promoter-TSS (NM_133953)	-64	NM_133953	101943	Mm.236123	NM_133953	ENSMUSG00000033732	Sf3b3	1810061H24Rik|5730409A01Rik|AA409318|D8Ertd633e|RSE1|SAP130|mKIAA0017	splicing factor 3b, subunit 3	protein-coding
679	chr8	98329969	98332091	+	0	NA	non-coding (NR_015574, exon 1 of 4)	non-coding (NR_015574, exon 1 of 4)	300	NR_015574	319960	Mm.386996	NR_015574	ENSMUSG00000074136	4930513N10Rik	-	RIKEN cDNA 4930513N10 gene	ncRNA
552	chr5	124379888	124381242	+	0	NA	promoter-TSS (NM_001134767)	promoter-TSS (NM_001134767)	-133	NM_001134767	208908	Mm.243679	NM_001134767	ENSMUSG00000061882	Ccdc62	AI661708|Gm150	coiled-coil domain containing 62	protein-coding
521	chr5	23929016	23931588	+	0	NA	promoter-TSS (NM_007668)	promoter-TSS (NM_007668)	-748	NM_009207	20535	Mm.4580	NM_009207	ENSMUSG00000028962	Slc4a2	Ae2|B3RP	solute carrier family 4 (anion exchanger), member 2	protein-coding
598	chr6	145802295	145815989	+	0	NA	3' UTR (NM_024469, exon 5 of 5)	3' UTR (NM_024469, exon 5 of 5)	4798	NM_001271768	79362	Mm.154529	NM_024469	ENSMUSG00000030256	Bhlhe41	6430520M22Rik|Bhlhb2l|Bhlhb3|DEC2|Sharp1	basic helix-loop-helix family, member e41	protein-coding
162	chr12	84972328	84974154	+	0	NA	promoter-TSS (NM_027349)	promoter-TSS (NM_027349)	57	NM_027349	67039	Mm.46005	NM_027349	ENSMUSG00000010608	Rbm25	2600011C06Rik|2610015J01Rik|A130095G20Rik|AI159652|AL023075|AU043498|RNPC7	RNA binding motif protein 25	protein-coding
433	chr2	170336554	170337483	+	0	NA	non-coding (NR_040367, exon 1 of 3)	non-coding (NR_040367, exon 1 of 3)	288	NM_001199902	109054	Mm.28808	NM_001013369	ENSMUSG00000052033	Pfdn4	0610025M10Rik|1810063B06Rik|C-1|C1|Pfd4	prefoldin 4	protein-coding
647	chr7	144601735	144603287	+	0	NA	promoter-TSS (NM_029886)	promoter-TSS (NM_029886)	-72	NM_029886	77252	Mm.29184	NM_029886	ENSMUSG00000040139	9430038I01Rik	-	RIKEN cDNA 9430038I01 gene	protein-coding
74	chr10	80083791	80088114	+	0	NA	intron (NM_134002, intron 1 of 10)	intron (NM_134002, intron 1 of 10)	427	NM_134002	103236	Mm.29873	NM_134002	ENSMUSG00000003345	Csnk1g2	2810429I12Rik|AI463719	casein kinase 1, gamma 2	protein-coding
240	chr15	30101466	30104933	+	0	NA	intron (NM_008729, intron 1 of 22)	CpG	851	NM_008729	18163	Mm.321648	NM_008729	ENSMUSG00000022240	Ctnnd2	Catnd2|Nprap|neurojugin	catenin (cadherin associated protein), delta 2	protein-coding
334	chr18	3335796	3338580	+	0	NA	intron (NR_033457, intron 1 of 1)	CpG	399	NM_001110851	12916	Mm.5244	NM_013498	ENSMUSG00000063889	Crem	ICER|ICERI	cAMP responsive element modulator	protein-coding
440	chr3	30691530	30693167	+	0	NA	intron (NM_027016, intron 1 of 7)	CpG	550	NM_027016	69276	Mm.26017	NM_027016	ENSMUSG00000027706	Sec62	3100002M17Rik|AI844545|AW545092|Dtrp1|HTP1|Tloc1	SEC62 homolog (S. cerevisiae)	protein-coding
740	chrX	146912064	146913729	+	0	NA	Intergenic	Intergenic	-19203	NM_001164683	382245	Mm.277309	NM_001164683	ENSMUSG00000041353	Tmem29	2700081K05Rik|6330540D07Rik|CXorf44-like	transmembrane protein 29	protein-coding
230	chr14	71017482	71030525	+	0	NA	intron (NM_001252664, intron 1 of 14)	intron (NM_001252664, intron 1 of 14)	2869	NM_001252662	13829	Mm.210863	NM_013514	ENSMUSG00000022099	Dmtn	AI325486|Epb4.9|Epb49|dematin	dematin actin binding protein	protein-coding
115	chr11	33062429	33064067	+	0	NA	promoter-TSS (NM_008722)	promoter-TSS (NM_008722)	-42	NM_008722	18148	Mm.485384	NM_008722	ENSMUSG00000057113	Npm1	B23|NO38|Npm	nucleophosmin 1	protein-coding
299	chr17	4905472	4910271	+	0	NA	Intergenic	CpG	-87203	NM_001085355	239985	Mm.133401	NM_001085355	ENSMUSG00000069729	Arid1b	8030481M12|9330189K18Rik|AI836955|Ardi1b|B230217J03Rik|mKIAA1235	AT rich interactive domain 1B (SWI-like)	protein-coding
377	chr19	55287748	55294655	+	0	NA	intron (NM_001081076, intron 13 of 20)	MTC|LTR|MaLR	24033	NR_106146	102465990		NR_106146		Mir6715	mmu-mir-6715	microRNA mir-6715	ncRNA
103	chr11	3101916	3102650	+	0	NA	promoter-TSS (NM_001166549)	promoter-TSS (NM_001166549)	-73	NM_001166548	74203	Mm.255649	NM_023743	ENSMUSG00000020454	Eif4enif1	2610509L04Rik|A930019J01Rik|AA410001|AU021239|Clast4|D11Ertd166e	eukaryotic translation initiation factor 4E nuclear import factor 1	protein-coding
602	chr7	6679687	6684983	+	0	NA	promoter-TSS (NM_021323)	promoter-TSS (NM_021323)	795	NM_008817	18616	Mm.389800	NM_008817		Peg3	AL022617|ASF-1|End4|Gcap4|Pw1|Zfp102|mKIAA0287	paternally expressed 3	protein-coding
201	chr13	84483234	84491155	+	0	NA	Intergenic	Intergenic	125293	NM_175187	72745	Mm.295063	NM_175187	ENSMUSG00000035762	Tmem161b	2810446P07Rik|AI843389	transmembrane protein 161B	protein-coding
423	chr2	127785634	127788905	+	0	NA	intron (NM_028765, intron 9 of 17)	intron (NM_028765, intron 9 of 17)	106905	NM_028765	74121	Mm.244835	NM_028765	ENSMUSG00000027380	Acoxl	1200014P05Rik|AV025673	acyl-Coenzyme A oxidase-like	protein-coding
719	chr9	107239964	107256130	+	0	NA	intron (NM_175486, intron 3 of 5)	intron (NM_175486, intron 3 of 5)	5076	NM_175486	235599	Mm.71039	NM_175486	ENSMUSG00000037977	6430571L13Rik	-	RIKEN cDNA 6430571L13 gene	protein-coding
612	chr7	48648429	48649438	+	0	NA	promoter-TSS (NM_001199330)	promoter-TSS (NM_001199330)	-184	NM_001199330	233168	Mm.379390	NM_183167		AI987944	-	expressed sequence AI987944	protein-coding
91	chr10	114750108	114754037	+	0	NA	intron (NM_024454, intron 1 of 6)	intron (NM_024454, intron 1 of 6)	575	NM_024454	216344	Mm.21936	NM_024454	ENSMUSG00000020132	Rab21	9630024B22	RAB21, member RAS oncogene family	protein-coding
266	chr16	18533196	18533518	+	0	NA	intron (NM_001285491, intron 2 of 7)	SSU-rRNA_Hsa|rRNA|rRNA	34393	NR_104347	13972	Mm.236139	NM_023120	ENSMUSG00000000884	Gnb1l	ESTM55|Gm16314|Me49f07|OTTMUSG00000033458|Wdr14|Wdvcf	guanine nucleotide binding protein (G protein), beta polypeptide 1-like	protein-coding
701	chr9	56919375	56925440	+	0	NA	intron (NM_001110351, intron 1 of 21)	intron (NM_001110351, intron 1 of 21)	-1776	NM_001110350	20466	Mm.15755	NM_011378	ENSMUSG00000042557	Sin3a	AW553200|Sin3|mKIAA4126|mSin3A	transcriptional regulator, SIN3A (yeast)	protein-coding
467	chr3	108681662	108689633	+	0	NA	intron (NM_177091, intron 3 of 12)	intron (NM_177091, intron 3 of 12)	7279	NM_177091	320181	Mm.244233	NM_177091	ENSMUSG00000045326	Fndc7	E230011A21Rik	fibronectin type III domain containing 7	protein-coding
174	chr12	120473279	120479138	+	0	NA	exon (NM_177290, exon 1 of 14)	exon (NM_177290, exon 1 of 14)	541	NM_177290	320910	Mm.217000	NM_177290	ENSMUSG00000025321	Itgb8	4832412O06Rik	integrin beta 8	protein-coding
474	chr3	133898162	133904747	+	0	NA	intron (NM_001004367, intron 2 of 3)	intron (NM_001004367, intron 2 of 3)	1995	NM_001004367	319478	Mm.224814	NM_001004367	ENSMUSG00000044365	Cxxc4	9330210J02Rik|C030003J12Rik|Idax	CXXC finger 4	protein-coding
481	chr3	157609491	157611081	+	0	NA	promoter-TSS (NM_001013806)	promoter-TSS (NM_001013806)	-144	NM_001013806	433667	Mm.265806	NM_001013806	ENSMUSG00000039988	Ankrd13c	AI505652|AU022220	ankyrin repeat domain 13c	protein-coding
214	chr13	113368293	113368630	+	0	NA	intron (NM_139299, intron 1 of 16)	LSU-rRNA_Hsa|rRNA|rRNA	2409	NM_139299	218624	Mm.380801	NM_139299	ENSMUSG00000050377	Il31ra	CRL3|GLM-R|GPL|Glmr|NR10	interleukin 31 receptor A	protein-coding
422	chr2	121943503	121945531	+	0	NA	promoter-TSS (NM_145531)	promoter-TSS (NM_145531)	-395	NM_145531	214585	Mm.222303	NM_145531	ENSMUSG00000033396	Spg11	6030465E24Rik|A330015I11|C530005A01Rik	spastic paraplegia 11	protein-coding
564	chr6	3150768	3151659	+	0	NA	Intergenic	SSU-rRNA_Hsa|rRNA|rRNA	-87306	NR_036696	667335	Mm.380219	NR_036696		Gm8579	EG667335	spermatogenesis associated glutamate (E)-rich protein 4a pseudogene	pseudo
563	chr5	149993752	149996967	+	0	NA	promoter-TSS (NM_001115153)	promoter-TSS (NM_001115153)	-777	NM_001115153	231915	Mm.29402	NM_001013378	ENSMUSG00000041264	Uspl1	E430026A01Rik	ubiquitin specific peptidase like 1	protein-coding
97	chr10	126724311	126731279	+	0	NA	promoter-TSS (NM_001290183)	promoter-TSS (NM_001290183)	-54	NM_007837	13198	Mm.110220	NM_007837	ENSMUSG00000025408	Ddit3	CHOP-10|CHOP10|chop|gadd153	DNA-damage inducible transcript 3	protein-coding
731	chrX	20665819	20667361	+	0	NA	promoter-TSS (NM_183185)	promoter-TSS (NM_183185)	-235	NM_183185	245368	Mm.220470	NM_183185	ENSMUSG00000031079	Zfp300	D930016N04Rik	zinc finger protein 300	protein-coding
41	chr1	171461720	171462937	+	0	NA	promoter-TSS (NM_023284)	promoter-TSS (NM_023284)	-733	NM_023284	66977	Mm.151315	NM_023284	ENSMUSG00000026683	Nuf2	2410003C07Rik|AU044112|C85691|Cdca1|NUF2R	NUF2, NDC80 kinetochore complex component, homolog (S. cerevisiae)	protein-coding
668	chr8	72566211	72567286	+	0	NA	promoter-TSS (NM_027481)	promoter-TSS (NM_027481)	36	NM_027481	70616	Mm.17665	NM_027481	ENSMUSG00000011306	Sugp1	5730496N02Rik|Sf4	SURP and G patch domain containing 1	protein-coding
52	chr10	15019223	15023117	+	0	NA	Intergenic	Intergenic	541075	NM_008703	18101	Mm.487342	NM_008703	ENSMUSG00000019865	Nmbr	BB182387	neuromedin B receptor	protein-coding
688	chr9	7836166	7838902	+	0	NA	Intergenic	Intergenic	-2279	NM_007465	11797	Mm.335659	NM_007465	ENSMUSG00000057367	Birc2	AW146227|Api1|Api2|Birc3|HIAP1|HIAP2|IAP1|IAP2|MIAP1|MIAP2|MIHB|MIHC|RNF48|cIAP1|cIAP2|mcIAP1	baculoviral IAP repeat-containing 2	protein-coding
657	chr8	26332885	26336883	+	0	NA	Intergenic	Intergenic	-22870	NM_177089	320165	Mm.308452	NM_177089	ENSMUSG00000065954	Tacc1	4833447E04Rik|AA960202|B230378H13Rik	transforming, acidic coiled-coil containing protein 1	protein-coding
302	chr17	8559357	8566069	+	0	NA	Intergenic	Intergenic	-2548	NM_001161832	21331	Mm.482744	NM_013682		T2	brachyury2	brachyury 2	protein-coding
229	chr14	67140813	67152311	+	0	NA	Intergenic	Intergenic	-107526	NM_001271759	11549	Mm.57064	NM_013461	ENSMUSG00000045875	Adra1a	Adra1c	adrenergic receptor, alpha 1a	protein-coding
693	chr9	35017842	35019361	+	0	NA	promoter-TSS (NM_026130)	promoter-TSS (NM_026130)	39	NM_172291	235169	Mm.138512	NM_172291	ENSMUSG00000039048	Foxred1	BC024806|TEG-23|Tex23	FAD-dependent oxidoreductase domain containing 1	protein-coding
673	chr8	88447464	88452003	+	0	NA	intron (NM_199446, intron 8 of 31)	intron (NM_199446, intron 8 of 31)	84832	NM_199446	102093	Mm.237296	NM_199446	ENSMUSG00000036879	Phkb	AI463271	phosphorylase kinase beta	protein-coding
503	chr4	107040275	107041079	+	0	NA	5' UTR (NM_028355, exon 1 of 18)	5' UTR (NM_028355, exon 1 of 18)	288	NM_028355	72787	Mm.28478	NM_028355	ENSMUSG00000028614	Ndc1	2810475A17Rik|AI450313|Tmem48	NDC1 transmembrane nucleoporin	protein-coding
593	chr6	124778361	124780164	+	0	NA	promoter-TSS (NM_013538)	promoter-TSS (NM_013538)	203	NM_013700	22225	Mm.3571	NM_013700	ENSMUSG00000038429	Usp5	AA407472|ISOT|ISOT-1|Ucht	ubiquitin specific peptidase 5 (isopeptidase T)	protein-coding
68	chr10	61244758	61247761	+	0	NA	intron (NM_207000, intron 1 of 8)	CpG	353	NM_207000	404634	Mm.272870	NM_207000	ENSMUSG00000020086	H2afy2	macroH2A2	H2A histone family, member Y2	protein-coding
188	chr13	58316068	58317916	+	0	NA	promoter-TSS (NM_152234)	promoter-TSS (NM_152234)	22	NM_152234	56085	Mm.182053	NM_026842	ENSMUSG00000005312	Ubqln1	1110046H03Rik|1810030E05Rik|AU019746|C77538|D13Ertd372e|Da41|Dsk2|Plic-1|Plic1|Xdrp1	ubiquilin 1	protein-coding
315	chr17	35137128	35138821	+	0	NA	5' UTR (NM_011690, exon 1 of 30)	5' UTR (NM_011690, exon 1 of 30)	122	NM_011690	22321	Mm.28420	NM_011690	ENSMUSG00000007029	Vars	Bat6|D17H6S56E|G7a|Vars2	valyl-tRNA synthetase	protein-coding
402	chr2	70389917	70434853	+	0	NA	intron (NM_008077, intron 5 of 16)	intron (NM_008077, intron 5 of 16)	-10971	NR_040496	68986	Mm.437697	NR_040496	ENSMUSG00000087264	Gad1os	1500002O10Rik	glutamate decarboxylase 1, opposite strand	ncRNA
641	chr7	133645015	133648015	+	0	NA	exon (NM_183020, exon 1 of 23)	exon (NM_183020, exon 1 of 23)	301	NM_183020	233871	Mm.231450	NM_183020	ENSMUSG00000032637	Atxn2l	A2D|A2LG|A2RP|A2lp|Atxnl2	ataxin 2-like	protein-coding
338	chr18	7868118	7870473	+	0	NA	promoter-TSS (NM_001146298)	promoter-TSS (NM_001146298)	100	NM_153085	225131	Mm.204524	NM_153085	ENSMUSG00000024283	Wac	1110067P07Rik|A230035H12Rik|AI256735|AI256776|Wwp4	WW domain containing adaptor with coiled-coil	protein-coding
576	chr6	48503183	48505962	+	0	NA	promoter-TSS (NM_177736)	promoter-TSS (NM_177736)	-226	NM_001110160	243371	Mm.290764	NM_177736	ENSMUSG00000073096	Lrrc61	BC027309	leucine rich repeat containing 61	protein-coding
616	chr7	50834444	50836076	+	0	NA	intron (NM_172482, intron 1 of 3)	intron (NM_172482, intron 1 of 3)	304	NM_172482	210105	Mm.234422	NM_172482	ENSMUSG00000030469	Zfp719	8030458J18|9430094P17Rik|C630016O21Rik|mszf6	zinc finger protein 719	protein-coding
222	chr14	33326294	33327377	+	0	NA	intron (NM_001081221, intron 1 of 20)	CpG	128	NM_001081221	319955	Mm.318310	NM_177043	ENSMUSG00000054051	Ercc6	4732403I04|C130058G22Rik|CSB	excision repair cross-complementing rodent repair deficiency, complementation group 6	protein-coding
640	chr7	125675774	125678453	+	0	NA	promoter-TSS (NM_009940)	promoter-TSS (NM_009940)	-286	NM_009940	12850	Mm.20634	NM_009940	ENSMUSG00000030652	Coq7	clk-1	demethyl-Q 7	protein-coding
25	chr1	132611765	132614617	+	0	NA	promoter-TSS (NM_008825)	promoter-TSS (NM_008825)	-713	NM_178691	226418	Mm.106553	NM_178691	ENSMUSG00000046404	Yod1	9930028C20Rik|Hshin7	YOD1 OTU deubiquitinating enzyme 1 homologue (S. cerevisiae)	protein-coding
738	chrX	132276105	132277887	+	0	NA	promoter-TSS (NM_026081)	promoter-TSS (NM_026081)	-235	NM_001004359	67298	Mm.271980	NM_026081	ENSMUSG00000043384	Gprasp1	2210415K24Rik|3110031O14Rik|C87852|GASP|GASP1	G protein-coupled receptor associated sorting protein 1	protein-coding
83	chr10	81815712	81817957	+	0	NA	Intergenic	Intergenic	-112814	NM_001105557	237411		NM_172789	ENSMUSG00000062931	Zfp938	B230315N10Rik	zinc finger protein 938	protein-coding
484	chr4	14790338	14792975	+	0	NA	intron (NM_028264, intron 1 of 6)	CpG	290	NM_028264	72519	Mm.279158	NM_028264	ENSMUSG00000028221	Tmem55a	2610319K07Rik|AI315591|AV001360	transmembrane protein 55A	protein-coding
305	chr17	9352911	9363813	+	0	NA	intron (NR_027881, intron 1 of 2)	Lx5|LINE|L1	2525	NR_027881	67791	Mm.158175	NR_027881	ENSMUSG00000097049	6530411M01Rik	-	RIKEN cDNA 6530411M01 gene	ncRNA
623	chr7	66360289	66360501	+	0	NA	Intergenic	L1Md_F2|LINE|L1	-123725	NM_173010	22215	Mm.9002	NM_011668	ENSMUSG00000025326	Ube3a	4732496B02|5830462N02Rik|A130086L21Rik|Hpve6a|mKIAA4216	ubiquitin protein ligase E3A	protein-coding
544	chr5	104999574	105001212	+	0	NA	Intergenic	RMER13A|LTR|ERVK	45639	NR_030673	100662	Mm.319836	NR_030673	ENSMUSG00000097392	D930016D06Rik	100041172|1110004B06Rik|AI451450|Gm3179	RIKEN cDNA D930016D06 gene	ncRNA
217	chr14	13653084	13657235	+	0	NA	exon (NM_001042617, exon 1 of 31)	exon (NM_001042617, exon 1 of 31)	434	NM_001042617	27062	Mm.260881	NM_012061	ENSMUSG00000054423	Cadps	AU067781|CAPS|CAPS1|mKIAA1121	Ca2+-dependent secretion activator	protein-coding
328	chr17	80604961	80607596	+	0	NA	intron (NM_001195485, intron 1 of 7)	CpG	367	NM_001195486	225027	Mm.292016	NM_146083	ENSMUSG00000024097	Srsf7	35kDa|9430065L19Rik|9G8|NX-96|Sfrs7	serine/arginine-rich splicing factor 7	protein-coding
239	chr15	12250504	12252523	+	0	NA	exon (NM_025673, exon 1 of 4)	exon (NM_025673, exon 1 of 4)	262	NM_025673	66629	Mm.157655	NM_025673	ENSMUSG00000022200	Golph3	4733401N08Rik|5730410D03Rik|AW413496	golgi phosphoprotein 3	protein-coding
122	chr11	74825299	74831776	+	0	NA	intron (NM_001002764, intron 10 of 18)	intron (NM_001002764, intron 10 of 18)	50956	NR_030454	735274		NR_030454		Mir684-1	Mirn684-1	microRNA 684-1	ncRNA
143	chr12	46537644	46545514	+	0	NA	Intergenic	Intergenic	-366109	NM_144552	217517	Mm.285400	NM_144552	ENSMUSG00000046314	Stxbp6	BC024598|C85317	syntaxin binding protein 6 (amisyn)	protein-coding
628	chr7	88667509	88668978	+	0	NA	promoter-TSS (NR_045299)	promoter-TSS (NR_045299)	-193	NR_045299	100504421	Mm.217071	NR_045299	ENSMUSG00000097277	2900076A07Rik	WI1-1616M8.2	RIKEN cDNA 2900076A07 gene	ncRNA
158	chr12	79451786	79452250	+	0	NA	intron (NM_145965, intron 2 of 22)	LSU-rRNA_Hsa|rRNA|rRNA	124376	NM_145965	268566	Mm.341742	NM_145965	ENSMUSG00000047454	Gphn	5730552E08Rik|AI662856|BC027112|C230040D23|GPH|GPHRYN|geph	gephyrin	protein-coding
269	chr16	23106747	23108789	+	0	NA	non-coding (NR_110335, exon 1 of 12)	non-coding (NR_110335, exon 1 of 12)	227	NR_110335	13682	Mm.260084	NM_013506	ENSMUSG00000022884	Eif4a2	4833432N07Rik|BM-010|Ddx2b|Eif4|eIF-4A-II|eIF4A-II	eukaryotic translation initiation factor 4A2	protein-coding
281	chr16	42717119	42719247	+	0	NA	Intergenic	Intergenic	157517	NR_040521	75722	Mm.243747	NR_040521	ENSMUSG00000075070	4932412D23Rik	ENSMUSG00000075070|Gm10809	RIKEN cDNA 4932412D23 gene	ncRNA
464	chr3	104666810	104668473	+	0	NA	promoter-TSS (NM_009797)	promoter-TSS (NM_009797)	217	NM_153091	229681	Mm.206379	NM_153091		St7l	St7r	suppression of tumorigenicity 7-like	protein-coding
363	chr19	4961762	4962664	+	0	NA	promoter-TSS (NM_025553)	promoter-TSS (NM_025553)	-93	NM_025553	66419	Mm.28494	NM_025553	ENSMUSG00000024902	Mrpl11	2410001P07Rik|L11mt	mitochondrial ribosomal protein L11	protein-coding
46	chr1	182777597	182781768	+	0	NA	Intergenic	Intergenic	-1600	NM_145943	208768	Mm.272625	NM_145943	ENSMUSG00000038806	Sde2	-	SDE2 telomere maintenance homolog (S. pombe)	protein-coding
733	chrX	45975504	45977382	+	0	NA	promoter-TSS (NM_001290703)	promoter-TSS (NM_001290703)	-312	NM_001290703	20523	Mm.34953	NM_011398	ENSMUSG00000031105	Slc25a14	BMCP1|UCP5|UCP5L|UCP5S	solute carrier family 25 (mitochondrial carrier, brain), member 14	protein-coding
6	chr1	20941061	20942720	+	0	NA	intron (NM_027974, intron 1 of 10)	CpG	183	NM_027974	71877	Mm.29178	NM_027974	ENSMUSG00000041809	Efhc1	1700029F22Rik|mRib72-1|myoclonin1	EF-hand domain (C-terminal) containing 1	protein-coding
562	chr5	149507269	149525547	+	0	NA	Intergenic	Intergenic	-37008	NR_028285	70138	Mm.417834	NR_028285	ENSMUSG00000086494	2210417A02Rik	AV081004	RIKEN cDNA 2210417A02 gene	ncRNA
630	chr7	97623167	97627815	+	0	NA	promoter-TSS (NM_026734)	promoter-TSS (NM_026734)	-986	NM_026734	68472	Mm.289791	NM_026734		Tmem126b	1110001A23Rik	transmembrane protein 126B	protein-coding
36	chr1	166361935	166407168	+	0	NA	intron (NM_009721, intron 1 of 5)	intron (NM_009721, intron 1 of 5)	3935	NM_009721	11931	Mm.4550	NM_009721	ENSMUSG00000026576	Atp1b1	Atp4b|Atpb|Atpb-1|NKbeta1	ATPase, Na+/K+ transporting, beta 1 polypeptide	protein-coding
518	chr5	4103598	4105648	+	0	NA	promoter-TSS (NM_020010)	promoter-TSS (NM_020010)	74	NM_020010	13121	Mm.140158	NM_020010	ENSMUSG00000001467	Cyp51	AI426508|CYPLI|Cyp51a1|Ldm|P450-14DM|P450LI	cytochrome P450, family 51	protein-coding
183	chr13	41344149	41346138	+	0	NA	promoter-TSS (NM_001135577)	promoter-TSS (NM_001135577)	-70	NM_001135577	108934	Mm.38578	NM_001135577	ENSMUSG00000091264	Smim13	2900036K02Rik	small integral membrane protein 13	protein-coding
497	chr4	69053140	69058554	+	0	NA	Intergenic	Intergenic	-440416	NM_019967	56710	Mm.248788	NM_019967	ENSMUSG00000028351	Brinp1	BRINP|Dbc1|Dbccr1|Fam5a	bone morphogenic protein/retinoic acid inducible neural specific 1	protein-coding
472	chr3	127539938	127541192	+	0	NA	promoter-TSS (NM_145964)	promoter-TSS (NM_145964)	-155	NM_145964	211556	Mm.403486	NM_145964	ENSMUSG00000074238	Ap1ar	AA407621|C78909|Gadkin	adaptor-related protein complex 1 associated regulatory protein	protein-coding
362	chr18	85120069	85121893	+	0	NA	promoter-TSS (NM_025969)	promoter-TSS (NM_025969)	-65	NM_025969	67105	Mm.250617	NM_025969	ENSMUSG00000024645	Timm21	1700034H14Rik|2700002I20Rik	tranlocase of inner mitochondrial membrane 21	protein-coding
439	chr3	17671795	17711909	+	0	NA	intron (NR_033490, intron 1 of 2)	intron (NR_033490, intron 1 of 2)	1931	NR_033490	70441	Mm.458192	NR_033490		2610100L16Rik	100040120|Gm2612	RIKEN cDNA 2610100L16 gene	ncRNA
317	chr17	45570102	45571420	+	0	NA	promoter-TSS (NM_152810)	promoter-TSS (NM_152810)	-105	NM_152810	71702	Mm.28270	NM_152810	ENSMUSG00000023932	Cdc5l	1200002I02Rik|AA408004|PCDC5RP	cell division cycle 5-like (S. pombe)	protein-coding
608	chr7	26443311	26444541	+	0	NA	promoter-TSS (NM_138586)	promoter-TSS (NM_138586)	-146	NM_007533	12039	Mm.25848	NM_007533	ENSMUSG00000060376	Bckdha	-	branched chain ketoacid dehydrogenase E1, alpha polypeptide	protein-coding
711	chr9	83038526	83040204	+	0	NA	intron (NM_175074, intron 1 of 5)	intron (NM_175074, intron 1 of 5)	849	NM_175074	94353	Mm.244426	NM_026122	ENSMUSG00000066456	Hmgn3	1110002A15Rik|6330514M13Rik|BB071015|TRIP7	high mobility group nucleosomal binding domain 3	protein-coding
132	chr11	94515003	94515606	+	0	NA	promoter-TSS (NM_177752)	promoter-TSS (NM_177752)	199	NM_053161	94064	Mm.34951	NM_053161	ENSMUSG00000024414	Mrpl27	A630055F16Rik|D11Moh47|D18Ertd643e	mitochondrial ribosomal protein L27	protein-coding
169	chr12	104746589	104755199	+	0	NA	Intergenic	Intergenic	-19881	NM_028980	74521	Mm.248619	NM_028980	ENSMUSG00000021209	Ppp4r4	8430415E04Rik|mKIAA1622	protein phosphatase 4, regulatory subunit 4	protein-coding
411	chr2	90686259	90689356	+	0	NA	intron (NM_019758, intron 1 of 12)	intron (NM_019758, intron 1 of 12)	495	NM_019758	56428	Mm.28023	NM_019758	ENSMUSG00000027282	Mtch2	2310034D24Rik|4930539J07Rik|HSPC032	mitochondrial carrier homolog 2 (C. elegans)	protein-coding
705	chr9	61217860	61224282	+	0	NA	5' UTR (NM_001083928, exon 1 of 20)	5' UTR (NM_001083928, exon 1 of 20)	898	NM_001083927	21887	Mm.24255	NM_009389	ENSMUSG00000032280	Tle3	2610103N05Rik|ESG|Grg3a|Grg3b|mKIAA1547	transducin-like enhancer of split 3, homolog of Drosophila E(spl)	protein-coding
478	chr3	153574956	153577852	+	0	NA	promoter-TSS (NM_001163478)	promoter-TSS (NM_001163478)	-474	NR_028094	19352	Mm.277831	NM_011231	ENSMUSG00000038975	Rabggtb	-	Rab geranylgeranyl transferase, b subunit	protein-coding
384	chr2	18313329	18315112	+	0	NA	5' UTR (NM_001190817, exon 1 of 13)	5' UTR (NM_001190817, exon 1 of 13)	237	NM_001190817	13418	Mm.246674	NM_007869	ENSMUSG00000026740	Dnajc1	4733401K02Rik|AA960110|D230036H06Rik|Dnajl1|ERdj1|ERj1p|MTJ1	DnaJ (Hsp40) homolog, subfamily C, member 1	protein-coding
398	chr2	62044650	62051004	+	0	NA	intron (NM_001242383, intron 3 of 24)	intron (NM_001242383, intron 3 of 24)	163255	NM_033552	94229	Mm.314497	NM_033552	ENSMUSG00000026904	Slc4a10	NCBE|mKIAA4136	solute carrier family 4, sodium bicarbonate cotransporter-like, member 10	protein-coding
546	chr5	107124723	107126326	+	0	NA	intron (NM_026856, intron 1 of 6)	CpG	325	NM_026856	52397	Mm.249474	NM_026856	ENSMUSG00000049606	Zfp644	1110068L01Rik|AA408882|BM-005|D5Ertd689e|Zep-2	zinc finger protein 644	protein-coding
537	chr5	84841841	84847723	+	0	NA	intron (NM_007937, intron 1 of 15)	intron (NM_007937, intron 1 of 15)	1625	NM_007937	13839	Mm.137991	NM_007937		Epha5	AI854630|AW125296|Cek7|Ehk1|Els1|Hek7|Rek7|bsk	Eph receptor A5	protein-coding
407	chr2	73705874	73706188	+	0	NA	intron (NM_001284374, intron 3 of 11)	LSU-rRNA_Hsa|rRNA|rRNA	24665	NM_001284371	11909	Mm.209903	NM_009715	ENSMUSG00000027104	Atf2	Atf-2|CRE-BP|Creb2|D130078H02Rik|D18875|Tg(Gzma-Klra1)7Wum|mXBP	activating transcription factor 2	protein-coding
18	chr1	63159391	63162752	+	0	NA	promoter-TSS (NR_045915)	promoter-TSS (NR_045915)	26	NR_045915	100380944	Mm.392955	NR_045914	ENSMUSG00000084799	Ino80dos	Gm11602|OTTMUSG00000002611	INO80 complex subunit D, opposite strand	ncRNA
376	chr19	46072332	46073472	+	0	NA	promoter-TSS (NM_198296)	promoter-TSS (NM_198296)	76	NM_198296	71617	Mm.210949	NM_198296	ENSMUSG00000039901	9130011E15Rik	AI431055|AW050122	RIKEN cDNA 9130011E15 gene	protein-coding
522	chr5	24346271	24349958	+	0	NA	promoter-TSS (NM_053075)	promoter-TSS (NM_053075)	65	NM_053075	19744	Mm.319175	NM_053075	ENSMUSG00000028945	Rheb	-	Ras homolog enriched in brain	protein-coding
125	chr11	80283983	80338105	+	0	NA	intron (NM_177390, intron 21 of 21)	intron (NM_177390, intron 21 of 21)	20496	NM_009871	12569	Mm.142275	NM_009871	ENSMUSG00000048895	Cdk5r1	Cdk5r|D11Bwg0379e|p25|p35	cyclin-dependent kinase 5, regulatory subunit 1 (p35)	protein-coding
599	chr6	146351076	146359263	+	0	NA	intron (NM_010586, intron 8 of 55)	AT_rich|Low_complexity|Low_complexity	95576	NM_010586	16439	Mm.7800	NM_010586	ENSMUSG00000030287	Itpr2	AI649341|InsP3R-2|InsP3R-5|Ip3r2|Itpr5|insP3R2	inositol 1,4,5-triphosphate receptor 2	protein-coding
44	chr1	173431868	173434694	+	0	NA	promoter-TSS (NM_019484)	promoter-TSS (NM_019484)	-328	NM_019484	56009	Mm.389208	NM_019484	ENSMUSG00000060244	Alyref2	C130042O11Rik|REF2|Refbp2	Aly/REF export factor 2	protein-coding
609	chr7	35014028	35020522	+	0	NA	Intergenic	B1_Mur4|SINE|Alu	-1920	NM_008155	14751	Mm.589	NM_008155		Gpi1	Amf|Gpi|Gpi-1|Gpi-1r|Gpi-1s|Gpi-1t|Gpi1-r|Gpi1-s|Gpi1-t|Gpi1s|MF|NK|NK/GPI|Nlk|Org|Pgi|Phi	glucose phosphate isomerase 1	protein-coding
587	chr6	91526083	91527937	+	0	NA	Intergenic	Intergenic	60981	NM_026309	67678	Mm.246693	NM_026309	ENSMUSG00000034192	Lsm3	1010001J12Rik|2610005D18Rik|6030401D18Rik|SMX4|USS2	LSM3 homolog, U6 small nuclear RNA associated (S. cerevisiae)	protein-coding
667	chr8	72298176	72299385	+	0	NA	promoter-TSS (NM_177899)	promoter-TSS (NM_177899)	30	NM_177899	330788	Mm.41364	NM_177899		Zfp866	9830167H18Rik|AI875089|C85843|D330038O06Rik	zinc finger protein 866	protein-coding
741	chrX	147954116	147956971	+	0	NA	5' UTR (NM_177201, exon 1 of 19)	5' UTR (NM_177201, exon 1 of 19)	328	NM_001113354	320595	Mm.17156	NM_177201	ENSMUSG00000041229	Phf8	9830141C09Rik|mKIAA1111	PHD finger protein 8	protein-coding
190	chr13	59869752	59874465	+	0	NA	promoter-TSS (NM_026921)	promoter-TSS (NM_026921)	781	NR_015349	13996	Mm.490435	NR_015349	ENSMUSG00000089875	Etohd2	AW491659	ethanol decreased 2	ncRNA
95	chr10	118675422	118678455	+	0	NA	5' UTR (NM_027994, exon 1 of 15)	5' UTR (NM_027994, exon 1 of 15)	173	NM_027994	71902	Mm.203965	NM_027994	ENSMUSG00000020114	Cand1	2310038O07Rik|6330512O03Rik|AI195005|AI846556|D10Ertd516e|Tp120a|mKIAA0829	cullin associated and neddylation disassociated 1	protein-coding
298	chr17	3081794	3085039	+	0	NA	intron (NR_003519, intron 1 of 7)	intron (NR_003519, intron 1 of 7)	767	NR_003519	328734	Mm.335641	NR_003519		Pisd-ps2	D030013I16Rik	phosphatidylserine decarboxylase, pseudogene 2	pseudo
714	chr9	90846467	90850034	+	0	NA	Intergenic	L1_Mus3|LINE|L1	412387	NM_009573	22771	Mm.335350	NM_009573	ENSMUSG00000032368	Zic1	ZIC|ZNF201	zinc finger protein of the cerebellum 1	protein-coding
601	chr7	4793366	4797408	+	0	NA	intron (NM_001290291, intron 1 of 4)	intron (NM_001290291, intron 1 of 4)	911	NM_001290291	232813	Mm.44666	NM_172737	ENSMUSG00000053550	Shisa7	-	shisa homolog 7 (Xenopus laevis)	protein-coding
313	chr17	25409798	25412101	+	0	NA	promoter-TSS (NR_027452)	promoter-TSS (NR_027452)	-90	NM_001177609	22196	Mm.240044	NM_011665		Ube2i	5830467E05Rik|F830028O17Rik|UBC9|Ubce2i|Ubce9	ubiquitin-conjugating enzyme E2I	protein-coding
243	chr15	36866797	36874026	+	0	NA	Intergenic	B1_Mus2|SINE|Alu	66746	NM_026521	68036	Mm.371631	NM_026521	ENSMUSG00000062397	Zfp706	3110006P09Rik|AA793007|AW536850|C77232|Znf706	zinc finger protein 706	protein-coding
231	chr14	73924196	73925497	+	0	NA	intron (NM_172527, intron 3 of 4)	CpG	14990	NM_026119	67381	Mm.282888	NM_026119	ENSMUSG00000022109	Med4	2410046H15Rik|DRIP36|HSPC126|TRAP36|Vdirp|Vdrip	mediator complex subunit 4	protein-coding
551	chr5	122659371	122715070	+	0	NA	intron (NM_028752, intron 3 of 6)	intron (NM_028752, intron 3 of 6)	26924	NM_028752	74096	Mm.28804	NM_028752	ENSMUSG00000064267	Hvcn1	0610039P13Rik|AI450555|BTS|HV1|Vsop.|mVSOP	hydrogen voltage-gated channel 1	protein-coding
529	chr5	37186557	37188427	+	0	NA	exon (NM_026242, exon 1 of 2)	exon (NM_026242, exon 1 of 2)	501	NM_026242	67568	Mm.332336	NM_026242	ENSMUSG00000055302	Mrfap1	9130413I22Rik|AL022827|Pam14	Morf4 family associated protein 1	protein-coding
148	chr12	55958785	55964965	+	0	NA	3' UTR (NM_007688, exon 4 of 4)	3' UTR (NM_007688, exon 4 of 4)	1989	NM_007688	12632	Mm.276826	NM_007688	ENSMUSG00000062929	Cfl2	-	cofilin 2, muscle	protein-coding
343	chr18	32227176	32228317	+	0	NA	intron (NM_173441, intron 1 of 13)	CpG	358	NM_173441	73473	Mm.66853	NM_173441	ENSMUSG00000024384	Iws1	1700069O15Rik|3000008H23|AL117927|AW214353	IWS1 homolog (S. cerevisiae)	protein-coding
504	chr4	108671983	108674104	+	0	NA	promoter-TSS (NM_146150)	promoter-TSS (NM_146150)	-367	NM_146150	230598	Mm.274950	NM_146150	ENSMUSG00000053510	Nrd1	2600011I06Rik|AI875733|NRD-C	nardilysin, N-arginine dibasic convertase, NRD convertase 1	protein-coding
697	chr9	44262637	44267451	+	0	NA	Intergenic	(CA)n|Simple_repeat|Simple_repeat	-2194	NM_009476	22269	Mm.4453	NM_009476	ENSMUSG00000041523	Upk2	AW491716|UPII	uroplakin 2	protein-coding
726	chr9	122714022	122715489	+	0	NA	promoter-TSS (NM_001013405)	promoter-TSS (NM_001013405)	90	NM_001013405	382117	Mm.215892	NM_001013405	ENSMUSG00000046603	Tcaim	D9Ertd402e|Gm1129|TOAG-1	T cell activation inhibitor, mitochondrial	protein-coding
397	chr2	57960372	57960715	+	0	NA	Intergenic	Intergenic	51990	NM_139200	227929	Mm.273905	NM_139200	ENSMUSG00000026832	Cytip	A130053M09Rik|AI462064|C80816|Cbp|Cybr|Pscdbp	cytohesin 1 interacting protein	protein-coding
707	chr9	63142901	63144791	+	0	NA	intron (NM_011840, intron 9 of 21)	intron (NM_011840, intron 9 of 21)	81813	NM_011840	23938	Mm.325746	NM_011840	ENSMUSG00000058444	Map2k5	AI324775|AI428457|MEK5|Mapkk5|Prkmk5	mitogen-activated protein kinase kinase 5	protein-coding
106	chr11	5661578	5663011	+	0	NA	promoter-TSS (NM_001077661)	promoter-TSS (NM_001077661)	85	NM_001077661	72046	Mm.271657	NM_178623	ENSMUSG00000049680	Urgcp	2010005J08Rik|9130001I21Rik|AW060359|Urg4|mKIAA1507	upregulator of cell proliferation	protein-coding
157	chr12	77865828	77867579	+	0	NA	intron (NM_206534, intron 1 of 3)	intron (NM_206534, intron 1 of 3)	143	NM_206534	211151	Mm.80970	NM_206534	ENSMUSG00000090258	Churc1	1700030P15Rik|My015|chch	churchill domain containing 1	protein-coding
65	chr10	57908184	57910559	+	0	NA	promoter-TSS (NM_011240)	promoter-TSS (NM_011240)	-229	NM_011240	19386	Mm.431695	NM_011240	ENSMUSG00000003226	Ranbp2	A430087B05Rik|AI256741|NUP358	RAN binding protein 2	protein-coding
203	chr13	85640804	85650781	+	0	NA	Intergenic	Intergenic	-216701	NM_145452	218397	Mm.259653	NM_145452	ENSMUSG00000021549	Rasa1	Gap|RasGAP|Rasa	RAS p21 protein activator 1	protein-coding
261	chr16	13188526	13210620	+	0	NA	Intergenic	Intergenic	-57001	NM_001122667	239719	Mm.270643	NM_153588	ENSMUSG00000009569	Mkl2	ENSMUSG00000075401|Gt4-1|MRTF-B|Mrtfb|mKIAA1243	MKL/myocardin-like 2	protein-coding
81	chr10	81459264	81460582	+	0	NA	Intergenic	CpG	-50949	NM_001024626	408062	Mm.391409	NM_001024626		Zfp873	-	zinc finger protein 873	protein-coding
321	chr17	56900951	56904947	+	0	NA	Intergenic	Intergenic	-1225	NM_144858	224907	Mm.293973	NM_144858	ENSMUSG00000007603	Dus3l	AI662135|AW557805	dihydrouridine synthase 3-like (S. cerevisiae)	protein-coding
459	chr3	94640801	94643972	+	0	NA	intron (NM_172683, intron 1 of 18)	intron (NM_172683, intron 1 of 18)	897	NM_172683	229584	Mm.274787	NM_172683	ENSMUSG00000038902	Pogz	9530006B08Rik	pogo transposable element with ZNF domain	protein-coding
624	chr7	66482585	66486960	+	0	NA	intron (NM_001033962, intron 1 of 10)	CpG	650	NM_011668	22215	Mm.9002	NM_011668	ENSMUSG00000025326	Ube3a	4732496B02|5830462N02Rik|A130086L21Rik|Hpve6a|mKIAA4216	ubiquitin protein ligase E3A	protein-coding
86	chr10	86167297	86170286	+	0	NA	promoter-TSS (NM_011631)	promoter-TSS (NM_011631)	235	NM_001003939	103220	Mm.440762	NM_153595	ENSMUSG00000044937	BC030307	AI449705|AU041509|Gnn	cDNA sequence BC030307	protein-coding
284	chr16	49854121	49859295	+	0	NA	intron (NM_010581, intron 1 of 9)	intron (NM_010581, intron 1 of 9)	941	NM_010581	16423	Mm.31752	NM_010581	ENSMUSG00000055447	Cd47	9130415E20Rik|AA407862|AI848868|AW108519|B430305P08Rik|IAP|Itgp	CD47 antigen (Rh-related antigen, integrin-associated signal transducer)	protein-coding
247	chr15	44699420	44703246	+	0	NA	Intergenic	MLT2F|LTR|ERVL	-11607	NR_033609	239410	Mm.352401	NR_033609		A930017M01Rik	Gm305	Smg-5 homolog, nonsense mediated mRNA decay factor pseudogene	pseudo
656	chr8	13785084	13786198	+	0	NA	promoter-TSS (NM_025924)	promoter-TSS (NM_025924)	26	NM_025924	67031	Mm.44858	NM_025924	ENSMUSG00000038398	Upf3a	2600001C03Rik|4930546M19Rik|RENT3A|UPF3	UPF3 regulator of nonsense transcripts homolog A (yeast)	protein-coding
371	chr19	28083069	28087329	+	0	NA	intron (NM_011265, intron 1 of 16)	intron (NM_011265, intron 1 of 16)	457	NM_011265	19726	Mm.313321	NM_011265	ENSMUSG00000040929	Rfx3	C230093O12Rik|MRFX3	regulatory factor X, 3 (influences HLA class II expression)	protein-coding
204	chr13	86185503	86186471	+	0	NA	intron (NM_007749, intron 1 of 2)	CpG	413	NM_007749	12867	Mm.378898	NM_007749		Cox7c	COXVIIc|Cox7c1	cytochrome c oxidase subunit VIIc	protein-coding
165	chr12	92820024	92829494	+	0	NA	intron (NM_175335, intron 2 of 8)	intron (NM_175335, intron 2 of 8)	3330	NM_031391	83602	Mm.275728	NM_031391	ENSMUSG00000020962	Gtf2a1	6330549H03Rik|AA536742|AA959775|AW060250|TfIIAa/b|Tfiia1	general transcription factor II A, 1	protein-coding
289	chr16	60584939	60585139	+	0	NA	intron (NM_007938, intron 1 of 17)	intron (NM_007938, intron 1 of 17)	20318	NM_007938	13840	Mm.455790	NM_007938	ENSMUSG00000055540	Epha6	Ehk2|Hek12|m-ehk2	Eph receptor A6	protein-coding
729	chrX	12856431	12859556	+	0	NA	promoter-TSS (NM_010028)	promoter-TSS (NM_010028)	-155	NM_010028	13205	Mm.289662	NM_010028	ENSMUSG00000000787	Ddx3x	D1Pas1-rs2|Ddx3|Fin14	DEAD/H (Asp-Glu-Ala-Asp/His) box polypeptide 3, X-linked	protein-coding
2	chr1	10027702	10030512	+	0	NA	promoter-TSS (NM_001277101)	promoter-TSS (NM_001277101)	808	NM_026493	211660	Mm.244046	NM_026493	ENSMUSG00000056763	Cspp1	2310020J12Rik|4930413O22Rik|AA387550|BC055915|Cspp2|Cspp3	centrosome and spindle pole associated protein 1	protein-coding
435	chr2	174422510	174430485	+	0	NA	Intergenic	Intergenic	-42538	NM_001099328	100043757	Mm.48711	NM_001099328	ENSMUSG00000050600	Zfp831	ENSMUSG00000050600|OTTMUSG00000017459	zinc finger protein 831	protein-coding
401	chr2	69927284	70011063	+	0	NA	intron (NM_177376, intron 8 of 34)	intron (NM_177376, intron 8 of 34)	91990	NM_177376	329421	Mm.99648	NM_177376	ENSMUSG00000042064	Myo3b	A430065P19Rik	myosin IIIB	protein-coding
186	chr13	53060883	53077583	+	0	NA	intron (NM_017373, intron 1 of 1)	intron (NM_017373, intron 1 of 1)	7175	NM_017373	18030	Mm.136604	NM_017373	ENSMUSG00000056749	Nfil3	AV225605|E4BP4	nuclear factor, interleukin 3, regulated	protein-coding
147	chr12	55934752	55937493	+	0	NA	Intergenic	Intergenic	27742	NM_007688	12632	Mm.276826	NM_007688	ENSMUSG00000062929	Cfl2	-	cofilin 2, muscle	protein-coding
339	chr18	13130118	13133333	+	0	NA	intron (NM_008378, intron 1 of 10)	(CTCGG)n|Simple_repeat|Simple_repeat	964	NM_008378	16210	Mm.8154	NM_008378	ENSMUSG00000024423	Impact	E430016J11Rik	impact, RWD domain protein	protein-coding
228	chr14	63377649	63381922	+	0	NA	5' UTR (NM_008715, exon 1 of 19)	5' UTR (NM_008715, exon 1 of 19)	164	NM_008715	18130	Mm.319684	NM_008715	ENSMUSG00000035161	Ints6	2900075H24Rik|AI480962|DICE1|Ddx26|HDB|Notch2l	integrator complex subunit 6	protein-coding
531	chr5	39093958	39102278	+	0	NA	intron (NM_013748, intron 18 of 18)	intron (NM_013748, intron 18 of 18)	-22053	NM_001177902	100515	Mm.38277	NM_001081144	ENSMUSG00000046572	Zfp518b	6820424L24Rik|AA410078|AI661722|Znf518b	zinc finger protein 518B	protein-coding
268	chr16	22264519	22266945	+	0	NA	intron (NM_009186, intron 1 of 8)	CpG	270	NM_009186	20462	Mm.210352	NM_009186		Tra2b	5730405G21Rik|D16Ertd266e|SIG-41|Sfrs10|Silg41|TRA2beta	transformer 2 beta homolog (Drosophila)	protein-coding
345	chr18	34918031	34920195	+	0	NA	intron (NM_175104, intron 1 of 4)	CpG	553	NM_175104	66306	Mm.29424	NM_175104	ENSMUSG00000034300	Fam53c	2810012G03Rik|Gm21179	family with sequence similarity 53, member C	protein-coding
596	chr6	133054275	133056295	+	0	NA	promoter-TSS (NM_001271583)	promoter-TSS (NM_001271583)	28	NR_073368	381820	Mm.291762	NM_001163445	ENSMUSG00000072704	2700089E24Rik	AI662692	RIKEN cDNA 2700089E24 gene	protein-coding
172	chr12	119693768	119702504	+	0	NA	Intergenic	Intergenic	70530	NR_045947	100384890	Mm.484658	NR_045947		D230030E09Rik	Npe	Riken cDNA D230030E09 gene	ncRNA
319	chr17	47747696	47748935	+	0	NA	promoter-TSS (NM_020048)	promoter-TSS (NM_020048)	126	NM_016859	53414	Mm.472101	NM_016859	ENSMUSG00000023988	Bysl	Bys|Enp1	bystin-like	protein-coding
735	chrX	71210124	71214304	+	0	NA	promoter-TSS (NM_008224)	promoter-TSS (NM_008224)	-518	NM_008224	15161	Mm.491126	NM_008224	ENSMUSG00000031386	Hcfc1	AW060991|HCF|HCF1	host cell factor C1	protein-coding
223	chr14	51681978	51686425	+	0	NA	Intergenic	Intergenic	6916	NM_207558	404319	Mm.377276	NM_207558	ENSMUSG00000035932	Olfr750	GA_x5J8B7W5WBF-6267395-6266441|GA_x6K02T2PMLR-6808276-6807281|MOR103-18	olfactory receptor 750	protein-coding
404	chr2	72814956	72820758	+	0	NA	promoter-TSS (NM_001098425)	promoter-TSS (NM_001098425)	368	NR_045269	100503849	Mm.389285	NM_183265		Sp3os	1700011J10Rik	trans-acting transcription factor 3, opposite strand	ncRNA
721	chr9	108550763	108552981	+	0	NA	promoter-TSS (NM_011790)	promoter-TSS (NM_011790)	-161	NM_011790	23807	Mm.290447	NM_011790	ENSMUSG00000064145	Arih2	AI843547|ARI2|TRIAD1|UIP48	ariadne homolog 2 (Drosophila)	protein-coding
613	chr7	48887074	48889737	+	0	NA	promoter-TSS (NM_023363)	promoter-TSS (NM_023363)	-496	NM_023363	67607	Mm.384626	NM_023363	ENSMUSG00000074165	Zfp788	2810426N06Rik|AI256342|AI605193	zinc finger protein 788	protein-coding
516	chr4	147932042	147933256	+	0	NA	TTS (NM_020009)	TTS (NM_020009)	113	NM_016699	50912	Mm.266635	NM_016699	ENSMUSG00000017264	Exosc10	PM-Scl|PM/Scl-100|Pmscl2|RRP6|p2|p3|p4	exosome component 10	protein-coding
669	chr8	81032221	81033934	+	0	NA	promoter-TSS (NM_009033)	promoter-TSS (NM_009033)	-150	NM_001282109	76775	Mm.334631	NM_029736	ENSMUSG00000031684	Slc10a7	2410193C02Rik|P7	solute carrier family 10 (sodium/bile acid cotransporter family), member 7	protein-coding
282	chr16	42873573	42878355	+	0	NA	promoter-TSS (NR_040522)	promoter-TSS (NR_040522)	-89	NR_040522	75722	Mm.243747	NR_040521	ENSMUSG00000075070	4932412D23Rik	ENSMUSG00000075070|Gm10809	RIKEN cDNA 4932412D23 gene	ncRNA
420	chr2	120965100	120967454	+	0	NA	exon (NM_177846, exon 1 of 1)	exon (NM_177846, exon 1 of 1)	113	NM_001290812	75894	Mm.384805	NM_029475	ENSMUSG00000027259	Adal	4930578F03Rik	adenosine deaminase-like	protein-coding
121	chr11	61220467	61222894	+	0	NA	Intergenic	CpG	-30103	NM_026183	67473	Mm.100741	NM_026183	ENSMUSG00000010122	Slc47a1	1300013J15Rik|AI036982|MATE1|mMATE1	solute carrier family 47, member 1	protein-coding
702	chr9	57477369	57500592	+	0	NA	intron (NM_007783, intron 1 of 12)	intron (NM_007783, intron 1 of 12)	4007	NM_007783	12988	Mm.21974	NM_007783	ENSMUSG00000032312	Csk	AW212630	c-src tyrosine kinase	protein-coding
639	chr7	118264842	118267192	+	0	NA	non-coding (NR_015573, exon 1 of 3)	non-coding (NR_015573, exon 1 of 3)	172	NR_015573	75479	Mm.381620	NR_015573		1700012D14Rik	-	RIKEN cDNA 1700012D14 gene	ncRNA
344	chr18	34783506	34784574	+	0	NA	promoter-TSS (NM_001166406)	promoter-TSS (NM_001166406)	-238	NM_001166407	19348	Mm.258846	NM_009004	ENSMUSG00000003779	Kif20a	AA415432|Rab6kifl	kinesin family member 20A	protein-coding
487	chr4	40649183	40651857	+	0	NA	promoter-TSS (NM_001025445)	promoter-TSS (NM_001025445)	-293	NM_001025445	66408	Mm.430710	NM_025545	ENSMUSG00000028411	Aptx	2410016G21Rik|AA388047|FHA-HIT	aprataxin	protein-coding
494	chr4	52450980	52452194	+	0	NA	promoter-TSS (NM_008017)	promoter-TSS (NM_008017)	249	NR_045175	72648	Mm.391869	NR_045175	ENSMUSG00000085763	Smc2os	2700081L22Rik	structural maintenance of chromosomes 2, opposite strand	ncRNA
238	chr15	3928496	3930737	+	0	NA	promoter-TSS (NM_134099)	promoter-TSS (NM_134099)	-43	NM_134099	106052	Mm.234191	NM_134099		Fbxo4	1700096C12Rik|AI851261|AW494535|Fbx4	F-box protein 4	protein-coding
636	chr7	111576510	111576708	+	0	NA	intron (NM_009099, intron 4 of 7)	intron (NM_009099, intron 4 of 7)	37098	NM_009099	20128	Mm.295578	NM_009099	ENSMUSG00000030921	Trim30a	Rpt-1|Rpt1|Trim30	tripartite motif-containing 30A	protein-coding
577	chr6	49186355	49186708	+	0	NA	Intergenic	LSU-rRNA_Hsa|rRNA|rRNA	-21578	NM_023670	140488	Mm.281018	NM_023670	ENSMUSG00000029814	Igf2bp3	2610101N11Rik|AA522010|AL022933|AU045931|IMP-3|IMP3|Koc13|Neilsen|mimp3	insulin-like growth factor 2 mRNA binding protein 3	protein-coding
253	chr15	89259883	89261281	+	0	NA	promoter-TSS (NM_007692)	promoter-TSS (NM_007692)	-224	NR_037153	12651	Mm.485045	NM_007692	ENSMUSG00000022617	Chkb	Chetk|Chkl|Ck|Ck/Ek|Ck/Ek-beta|Ckb|Ckekb|Ek	choline kinase beta	protein-coding
561	chr5	147759572	147760704	+	0	NA	promoter-TSS (NM_025652)	promoter-TSS (NM_025652)	-95	NM_025652	66596	Mm.196528	NM_025652	ENSMUSG00000016503	Gtf3a	2010015D03Rik|2610111I01Rik|5330403M05Rik	general transcription factor III A	protein-coding
448	chr3	69119545	69122675	+	0	NA	5' UTR (NM_178726, exon 1 of 4)	5' UTR (NM_178726, exon 1 of 4)	270	NM_178726	242083	Mm.40577	NM_178726		Ppm1l	3222401G13|5930404J21Rik|AI481720|AW045850|PP2C|PP2Cepsilon|Pp2ce|Ppp2ce|mKIAA4175	protein phosphatase 1 (formerly 2C)-like	protein-coding
209	chr13	101420747	101421891	+	0	NA	promoter-TSS (NM_001283011)	promoter-TSS (NM_001283011)	21	NM_027592	102216272	Mm.301148	NM_027592	ENSMUSG00000078941	Ak6	2810046E22Rik|4921516M08Rik|AK/ATPase	adenylate kinase isoenzyme 6	protein-coding
216	chr14	8912750	8913569	+	0	NA	intron (NM_025938, intron 1 of 5)	CpG	332	NM_025938	67053	Mm.210048	NM_025938	ENSMUSG00000023156	Rpp14	2610511E03Rik|AA682089	ribonuclease P 14 subunit	protein-coding
357	chr18	68851625	68851977	+	0	NA	Intergenic	LSU-rRNA_Hsa|rRNA|rRNA	-47253	NR_105774	102465183		NR_105774	miRBase:MI0021884	Mir6356	mmu-mir-6356	microRNA mir-6356	ncRNA
117	chr11	51501693	51503268	+	0	NA	promoter-TSS (NM_025319)	promoter-TSS (NM_025319)	-344	NM_025319	66050	Mm.35693	NM_025319	ENSMUSG00000007777	0610009B22Rik	-	RIKEN cDNA 0610009B22 gene	protein-coding
643	chr7	134981755	134986460	+	0	NA	Intergenic	Intergenic	-1215	NM_009294	20909	Mm.24867	NM_009294	ENSMUSG00000030805	Stx4a	Stx4|Syn-4|Syn4	syntaxin 4A (placental)	protein-coding
63	chr10	44502094	44507832	+	0	NA	Intergenic	Intergenic	-282057	NM_011156	19072	Mm.37294	NM_011156	ENSMUSG00000019849	Prep	AI047692|AI450383|D10Wsu136e|PEP|Pop	prolyl endopeptidase	protein-coding
455	chr3	89854930	89857624	+	0	NA	promoter-TSS (NM_025762)	promoter-TSS (NM_025762)	120	NM_001165983	74383	Mm.25610	NM_028475	ENSMUSG00000042520	Ubap2l	3110083O19Rik|4932431F02Rik|A430103N23Rik|C77168|Nice-4|mKIAA0144	ubiquitin-associated protein 2-like	protein-coding
600	chr6	149257348	149258803	+	0	NA	5' UTR (NM_026054, exon 1 of 5)	5' UTR (NM_026054, exon 1 of 5)	139	NM_001289662	67246	Mm.333515	NM_026054	ENSMUSG00000032712	2810474O19Rik	6720435I21Rik|AA536804|AU020969|GET|Kiaa1551	RIKEN cDNA 2810474O19 gene	protein-coding
80	chr10	81392466	81394084	+	0	NA	promoter-TSS (NM_199062).2	promoter-TSS (NM_199062).2	-50	NM_199062	331188	Mm.351497	NM_199062		Zfp781	A130081B01	zinc finger protein 781	protein-coding
336	chr18	5513040	5520671	+	0	NA	intron (NR_033552, intron 6 of 6)	intron (NR_033552, intron 6 of 6)	-75003	NM_011546	21417	Mm.3929	NM_011546	ENSMUSG00000024238	Zeb1	3110032K11Rik|AREB6|BZP|MEB1|Nil2|TCF-8|Tcf18|Tcf8|Tw|ZEB|Zfhep|Zfhx1a|Zfx1a|Zfx1ha|[delta]EF1	zinc finger E-box binding homeobox 1	protein-coding
457	chr3	91884089	91886898	+	0	NA	exon (NM_008508, exon 2 of 2)	exon (NM_008508, exon 2 of 2)	1571	NM_008508	16939	Mm.1121	NM_008508	ENSMUSG00000043165	Lor	AI036317|S77319	loricrin	protein-coding
179	chr13	23710958	23715636	+	0	NA	promoter-TSS (NM_178194)	promoter-TSS (NM_178194)	-304	NM_178194	319179	Mm.440391	NM_178194	ENSMUSG00000047246	Hist1h2be	-	histone cluster 1, H2be	protein-coding
696	chr9	42571929	42575192	+	0	NA	intron (NM_175481, intron 3 of 20)	intron (NM_175481, intron 3 of 20)	178894	NM_175481	110637	Mm.370291	NM_175481	ENSMUSG00000032017	Grik4	6330551K01Rik|GluK4|GluRgamma1|KA-1|KA1	glutamate receptor, ionotropic, kainate 4	protein-coding
383	chr2	13994351	13996700	+	0	NA	promoter-TSS (NM_011484)	promoter-TSS (NM_011484)	36	NR_038162	70957	Mm.399049	NR_038162	ENSMUSG00000086657	Stamos	4921530L18Rik	signal transducing adaptor molecule (SH3 domain and ITAM motif) 1, opposite strand	ncRNA
297	chr16	98182121	98184707	+	0	NA	intron (NM_175428, intron 1 of 2)	CpG	372	NM_001081685	114565	Mm.474489	NM_175428	ENSMUSG00000046962	Zbtb21	5430437K12Rik|B430213I24Rik|Zfp295|Znf295|mKIAA1227	zinc finger and BTB domain containing 21	protein-coding
713	chr9	88375271	88378738	+	0	NA	5' UTR (NM_019796, exon 1 of 12)	5' UTR (NM_019796, exon 1 of 12)	231	NM_019666	56403	Mm.260545	NM_019666	ENSMUSG00000032423	Syncrip	2610109K23Rik|4632417O19Rik|GRY-RBP|Nsap1|Nsap1l|pp68	synaptotagmin binding, cytoplasmic RNA interacting protein	protein-coding
676	chr8	91880789	91884245	+	0	NA	Intergenic	Intergenic	-314456	NM_021390	58198	Mm.214361	NM_021390	ENSMUSG00000031665	Sall1	Msal-3	sal-like 1 (Drosophila)	protein-coding
277	chr16	38451764	38454085	+	0	NA	promoter-TSS (NM_007414)	promoter-TSS (NM_007414)	-155	NM_007414	11544	Mm.20047	NM_007414	ENSMUSG00000002844	Adprh	Arh1	ADP-ribosylarginine hydrolase	protein-coding
92	chr10	116175169	116178480	+	0	NA	Intergenic	Intergenic	-10591	NR_045345	72286	Mm.396207	NR_045345		1700030O20Rik	-	RIKEN cDNA 1700030O20 gene	ncRNA
10	chr1	36747791	36749234	+	0	NA	exon (NM_009942, exon 1 of 4)	exon (NM_009942, exon 1 of 4)	180	NM_009942	12859	Mm.180182	NM_009942	ENSMUSG00000061518	Cox5b	-	cytochrome c oxidase subunit Vb	protein-coding
550	chr5	121995090	121996710	+	0	NA	promoter-TSS (NM_010765)	promoter-TSS (NM_010765)	1	NM_010765	17165	Mm.272206	NM_010765	ENSMUSG00000029454	Mapkapk5	MK5|PRAK	MAP kinase-activated protein kinase 5	protein-coding
505	chr4	115725715	115726985	+	0	NA	exon (NM_028142, exon 1 of 6)	exon (NM_028142, exon 1 of 6)	131	NM_028142	72181	Mm.282560	NM_028142		Nsun4	2310010O12Rik|2810405F18Rik|AI507900|Shtap	NOL1/NOP2/Sun domain family, member 4	protein-coding
670	chr8	81551483	81556433	+	0	NA	intron (NM_001294279, intron 1 of 14)	CpG	1622	NM_178267	622675	Mm.48724	NM_178267	ENSMUSG00000071064	Zfp827	2810449M09Rik|D630040G17Rik|Znf827	zinc finger protein 827	protein-coding
419	chr2	119722227	119723650	+	0	NA	promoter-TSS (NM_013720)	promoter-TSS (NM_013720)	-26	NM_001164274	29808	Mm.87532	NM_013720	ENSMUSG00000033943	Mga	AV312082|C130042M01Rik|C80739|D030062C11Rik|Mad5	MAX gene associated	protein-coding
133	chr11	101940729	101950977	+	0	NA	intron (NM_016695, intron 2 of 12)	intron (NM_016695, intron 2 of 12)	3976	NM_016695	50997	Mm.36242	NM_016695	ENSMUSG00000017314	Mpp2	D11Bwg0652e|Dlg2|Dlgh2|Pals4	membrane protein, palmitoylated 2 (MAGUK p55 subfamily member 2)	protein-coding
290	chr16	65432278	65434744	+	0	NA	Intergenic	Intergenic	-87453	NM_008849	18736	Mm.355440	NM_008849	ENSMUSG00000004842	Pou1f1	GHF-1|Hmp1|Pit-1|Pit1|Pit1-rs1|dw|dwarf	POU domain, class 1, transcription factor 1	protein-coding
625	chr7	67147636	67150864	+	0	NA	intron (NM_001082962, intron 2 of 10)	intron (NM_001082962, intron 2 of 10)	792	NM_013670	20646	Mm.274995	NM_013670	ENSMUSG00000000948	Snrpn	2410045I01Rik|HCERN3|Peg4|Pwcr1|SMN	small nuclear ribonucleoprotein N	protein-coding
592	chr6	124413364	124416335	+	0	NA	promoter-TSS (NM_153508)	promoter-TSS (NM_153508)	-47	NM_153508	232370	Mm.193701	NM_153508	ENSMUSG00000008153	Clstn3	CSTN3|Cs3|Cst-3|mKIAA0726	calsyntenin 3	protein-coding
149	chr12	56180842	56182059	+	0	NA	promoter-TSS (NM_028314)	promoter-TSS (NM_028314)	-33	NM_011899	24067	Mm.471968	NM_011899		Srp54a	54kDa|Srp54	signal recognition particle 54A	protein-coding
123	chr11	76723236	76727260	+	0	NA	intron (NM_025655, intron 3 of 5)	intron (NM_025655, intron 3 of 5)	7201	NM_025655	66601	Mm.25138	NM_025655	ENSMUSG00000020839	Tmigd1	2010002A20Rik|Tmigd	transmembrane and immunoglobulin domain containing 1	protein-coding
304	chr17	8715796	8721348	+	0	NA	Intergenic	Intergenic	-1094	NM_001290707	23984	Mm.87161	NM_011866	ENSMUSG00000023868	Pde10a	-	phosphodiesterase 10A	protein-coding
712	chr9	83727120	83728265	+	0	NA	promoter-TSS (NM_001110265)	promoter-TSS (NM_001110265)	-604	NM_009445	22137	Mm.1904	NM_009445	ENSMUSG00000038379	Ttk	AL022661|Esk1|Mps1|PYT|esk	Ttk protein kinase	protein-coding
631	chr7	98031988	98039610	+	0	NA	Intergenic	Intergenic	-203497	NM_011807	23859	Mm.147213	NM_011807		Dlg2	A330103J02Rik|B230218P12Rik|B330007M19Rik|Dlgh2|Gm1197|PSD93	discs, large homolog 2 (Drosophila)	protein-coding
547	chr5	108976130	108980077	+	0	NA	intron (NM_007756, intron 1 of 3)	intron (NM_007756, intron 1 of 3)	943	NM_007756	12889	Mm.5195	NM_007756	ENSMUSG00000033615	Cplx1	921-S	complexin 1	protein-coding
210	chr13	101662110	101664225	+	0	NA	Intergenic	Intergenic	-59785	NM_022885	69048	Mm.402215	NM_022885	ENSMUSG00000021629	Slc30a5	1810010K08Rik|AF233321|ZNT5|ZTL1|ZnT-5|Zntl1	solute carrier family 30 (zinc transporter), member 5	protein-coding
406	chr2	73490054	73499262	+	0	NA	intron (NM_175752, intron 1 of 6)	intron (NM_175752, intron 1 of 6)	3822	NM_175752	108699	Mm.257073	NM_029716	ENSMUSG00000056486	Chn1	0610007I19Rik|0710001E19Rik|1700112L09Rik|2900046J01Rik|AI413815|ARHGAP2	chimerin 1	protein-coding
258	chr15	102575630	102578292	+	0	NA	TTS (NR_104334)	TTS (NR_104334)	379	NR_104334	102216269		NR_104334		Cistr-act	Cistr	chondrogenic regulator lncRNA	ncRNA
396	chr2	49306515	49308484	+	0	NA	intron (NM_172663, intron 1 of 13)	CpG	493	NM_172663	227867	Mm.29167	NM_172663	ENSMUSG00000069495	Epc2	5830499L14|D2Ertd694e	enhancer of polycomb homolog 2 (Drosophila)	protein-coding
482	chr4	4763411	4770799	+	0	NA	Intergenic	Intergenic	-46652	NM_177730	242291	Mm.218889	NM_177730		Impad1	1110001C20Rik|AA408880|AI451589|AL022796|B230207P20|Jaws|gPAPP	inositol monophosphatase domain containing 1	protein-coding
173	chr12	120073477	120096816	+	0	NA	intron (NM_177082, intron 1 of 2)	intron (NM_177082, intron 1 of 2)	344	NM_177082	320145	Mm.51682	NM_177082	ENSMUSG00000048562	Sp8	D930049B17Rik|mBtd	trans-acting transcription factor 8	protein-coding
530	chr5	38650948	38651996	+	0	NA	promoter-TSS (NM_025480)	promoter-TSS (NM_025480)	-142	NM_025480	66309	Mm.256185	NM_025480	ENSMUSG00000067365	Tmem128	2810021O14Rik	transmembrane protein 128	protein-coding
56	chr10	28862789	28869750	+	0	NA	intron (NM_026138, intron 1 of 6)	intron (NM_026138, intron 1 of 6)	2467	NM_026138	67412	Mm.390264	NM_026138	ENSMUSG00000038916	Soga3	6330407J23Rik	SOGA family member 3	protein-coding
499	chr4	86220608	86222811	+	0	NA	5' UTR (NM_178376, exon 1 of 1)	5' UTR (NM_178376, exon 1 of 1)	132	NM_178376	68441	Mm.31178	NM_178376	ENSMUSG00000070934	Rraga	1300010C19Rik|AI255374|FIP-1|RAGA	Ras-related GTP binding A	protein-coding
66	chr10	59908426	59908629	+	0	NA	intron (NR_045556, intron 14 of 68)	intron (NR_045556, intron 14 of 68)	46053	NM_001164374	100302688	Mm.444135	NM_001164374	ENSMUSG00000090439	Gm17455	-	predicted gene, 17455	protein-coding
19	chr1	63222657	63224282	+	0	NA	promoter-TSS (NM_018796)	promoter-TSS (NM_018796)	64	NM_018796	55949	Mm.2718	NM_018796	ENSMUSG00000025967	Eef1b2	2810017J07Rik|Eef1b	eukaryotic translation elongation factor 1 beta 2	protein-coding
54	chr10	17954002	17955591	+	0	NA	promoter-TSS (NM_144820)	promoter-TSS (NM_144820)	-9	NM_144820	215814	Mm.296565	NM_144820	ENSMUSG00000059554	Ccdc28a	1700009P13Rik|AI480677	coiled-coil domain containing 28A	protein-coding
365	chr19	5405584	5410013	+	0	NA	intron (NR_027938, intron 1 of 3)	intron (NR_027938, intron 1 of 3)	983	NR_027938	74931	Mm.388511	NR_015545	ENSMUSG00000086938	4930481A15Rik	-	RIKEN cDNA 4930481A15 gene	ncRNA
306	chr17	17087771	17088880	+	0	NA	Intergenic	Intergenic	-112742	NM_001005358	449000	Mm.483718	NM_001005358	ENSMUSG00000096696	Zfp960	-	zinc finger protein 960	protein-coding
70	chr10	62705649	62707367	+	0	NA	promoter-TSS (NM_030114)	promoter-TSS (NM_030114)	-37	NM_030114	67345	Mm.234437	NM_026101	ENSMUSG00000020064	Herc4	1700056O17Rik|4921531D01Rik|9530080M15Rik|mKIAA1593	hect domain and RLD 4	protein-coding
470	chr3	124022420	124024586	+	0	NA	promoter-TSS (NM_146140)	promoter-TSS (NM_146140)	-452	NM_146140	229801	Mm.165810	NM_146140	ENSMUSG00000044528	Tram1l1	A830091N21Rik	translocation associated membrane protein 1-like 1	protein-coding
166	chr12	98299556	98300088	+	0	NA	Intergenic	Intergenic	-1014390	NR_103800	69423	Mm.46121	NM_027076	ENSMUSG00000059695	1700019M22Rik	-	NFX-like protein	pseudo
88	chr10	96774535	96778401	+	0	NA	Intergenic	Intergenic	-109644	NR_039547	100628616		NR_039547		Mir3966	mmu-mir-3966|mu-mir-3966	microRNA 3966	ncRNA
141	chr12	9036343	9038170	+	0	NA	intron (NM_029321, intron 1 of 2)	CpG	453	NM_029321	75516	Mm.37581	NM_029321	ENSMUSG00000066637	Ttc32	1700013G20Rik	tetratricopeptide repeat domain 32	protein-coding
30	chr1	152239450	152241204	+	0	NA	promoter-TSS (NM_001077237)	promoter-TSS (NM_001077237)	-142	NM_145511	226499	Mm.222093	NM_145511	ENSMUSG00000006010	BC003331	1810053E15Rik|Odr4|odr-4	cDNA sequence BC003331	protein-coding
654	chr8	12671678	12673303	+	0	NA	promoter-TSS (NM_198031)	promoter-TSS (NM_198031)	-390	NM_198031	259279	Mm.246402	NM_198031	ENSMUSG00000000759	Tubgcp3	GCP3|Spc98p	tubulin, gamma complex associated protein 3	protein-coding
570	chr6	29667591	29670125	+	0	NA	TTS (NM_146173)	TTS (NM_146173)	-16639	NM_176996	319757	Mm.29279	NM_176996	ENSMUSG00000001761	Smo	E130215L21Rik|Smoh|bnb|smoothened	smoothened homolog (Drosophila)	protein-coding
403	chr2	71311591	71386744	+	0	NA	intron (NM_025633, intron 3 of 9)	intron (NM_025633, intron 3 of 9)	-18335	NM_010053	13390	Mm.4543	NM_010053	ENSMUSG00000041911	Dlx1	Dlx|Dlx-1	distal-less homeobox 1	protein-coding
252	chr15	83742429	83742627	+	0	NA	intron (NM_001161628, intron 5 of 14)	ORR1B1|LTR|MaLR	7275	NM_001161629	77627	Mm.196288	NM_029946	ENSMUSG00000022441	Efcab6	4931407K02Rik|4932408N08Rik|bM150J22.2|mKIAA1672	EF-hand calcium binding domain 6	protein-coding
466	chr3	107433404	107435611	+	0	NA	exon (NM_153563, exon 1 of 21)	exon (NM_153563, exon 1 of 21)	121	NM_153563	229707	Mm.278643	NM_153563	ENSMUSG00000014601	Strip1	6330569M22Rik|6530401O14Rik|Fam40a	striatin interacting protein 1	protein-coding
156	chr12	75548683	75564181	+	0	NA	Intergenic	Intergenic	157971	NM_198866	386753	Mm.341686	NM_198866	ENSMUSG00000029878	Dbpht2	Spot2	DNA binding protein with his-thr domain	protein-coding
134	chr11	102326477	102329633	+	0	NA	intron (NM_010575, intron 5 of 29)	B1_Mus2|SINE|Alu	3142	NM_010575	16399	Mm.26646	NM_010575	ENSMUSG00000034664	Itga2b	AI172977|CD41|CD41B|GpIIb|alphaIIb	integrin alpha 2b	protein-coding
75	chr10	80567839	80569459	+	0	NA	promoter-TSS (NM_023138)	promoter-TSS (NM_023138)	-43	NM_023138	26396	Mm.275436	NM_023138	ENSMUSG00000035027	Map2k2	AA589381|MEK2|MK2|Prkmk2	mitogen-activated protein kinase kinase 2	protein-coding
283	chr16	44745675	44746889	+	0	NA	exon (NM_025332, exon 1 of 6)	exon (NM_025332, exon 1 of 6)	194	NM_001159329	66067	Mm.34520	NM_025332		Gtpbp8	0610037H22Rik	GTP-binding protein 8 (putative)	protein-coding
618	chr7	51660334	51661795	+	0	NA	Intergenic	Intergenic	21568	NM_016663	20981	Mm.4824	NM_016663	ENSMUSG00000030731	Syt3	AI385753|sytIII	synaptotagmin III	protein-coding
655	chr8	13104697	13106159	+	0	NA	promoter-TSS (NM_178708)	promoter-TSS (NM_178708)	-85	NM_178708	234069	Mm.103427	NM_178708	ENSMUSG00000038542	Pcid2	A730042J05Rik	PCI domain containing 2	protein-coding
59	chr10	39450640	39454168	+	0	NA	promoter-TSS (NR_038037)	promoter-TSS (NR_038037)	438	NM_011264	19714	Mm.439723	NM_011264	ENSMUSG00000019841	Rev3l	Rev|Rev3|Sez4	REV3-like, catalytic subunit of DNA polymerase zeta RAD54 like (S. cerevisiae)	protein-coding
421	chr2	121095889	121098965	+	0	NA	promoter-TSS (NM_013735)	promoter-TSS (NM_013735)	-284	NM_013735	27223	Mm.215389	NM_013735	ENSMUSG00000043909	Trp53bp1	53BP1|Tp53bp1|m53BP1|p53BP1	transformation related protein 53 binding protein 1	protein-coding
450	chr3	85046235	85051120	+	0	NA	Intergenic	Intergenic	-72764	NR_040542	73283	Mm.489084	NR_040542		1700036G14Rik	-	RIKEN cDNA 1700036G14 gene	ncRNA
271	chr16	27518855	27526932	+	0	NA	Intergenic	MIR|SINE|MIR	133851	NM_001289436	67501	Mm.258985	NM_026202	ENSMUSG00000038127	Ccdc50	C3orf6	coiled-coil domain containing 50	protein-coding
703	chr9	58389056	58408731	+	0	NA	Intergenic	RMER20B|LTR|ERVK	-10146	NM_133983	102657	Mm.5356	NM_133983	ENSMUSG00000035914	Cd276	6030411F23Rik|AU016588|B7RP-2|B7h3	CD276 antigen	protein-coding
491	chr4	47486866	47488084	+	0	NA	promoter-TSS (NM_024171)	promoter-TSS (NM_024171)	-58	NM_024171	66212	Mm.20188	NM_024171	ENSMUSG00000053317	Sec61b	1190006C12Rik|AI326121|AW122942	Sec61 beta subunit	protein-coding
219	chr14	26189270	26200724	+	0	NA	Intergenic	Intergenic	-83674	NM_183208	328365	Mm.227484	NM_183208	ENSMUSG00000007817	Zmiz1	BC065120|E330020C23|ENSMUSG00000072684|Gm10397|I920194n01|Rai17|Zimp10	zinc finger, MIZ-type containing 1	protein-coding
318	chr17	46464304	46466484	+	0	NA	promoter-TSS (NM_170680)	promoter-TSS (NM_170680)	-422	NM_170680	224814	Mm.76543	NM_145140	ENSMUSG00000032842	Abcc10	Mrp7|mFLJ00002	ATP-binding cassette, sub-family C (CFTR/MRP), member 10	protein-coding
13	chr1	45851403	45852582	+	0	NA	promoter-TSS (NM_028599)	promoter-TSS (NM_028599)	-354	NM_028599	73674	Mm.270376	NM_028599	ENSMUSG00000025995	Wdr75	1300003A18Rik|2410118I19Rik|C77608	WD repeat domain 75	protein-coding
105	chr11	5420036	5423035	+	0	NA	intron (NM_001271730, intron 1 of 5)	CpG	891	NM_001271730	22433	Mm.469937	NM_013842	ENSMUSG00000020484	Xbp1	D11Ertd39e|TREB-5|TREB5|XBP-1	X-box binding protein 1	protein-coding
473	chr3	132346557	132347415	+	0	NA	promoter-TSS (NM_001163455)	promoter-TSS (NM_001163455)	-122	NM_001163455	271981	Mm.257864	NM_173032	ENSMUSG00000028030	Tbck	1700120J03Rik|9430001M19|A630047E20Rik|C030007I09Rik|Tbckl	TBC1 domain containing kinase	protein-coding
185	chr13	52860014	52862426	+	0	NA	Intergenic	Intergenic	-8646	NR_027893	105404	Mm.184173	NR_027893		BB123696	-	expressed sequence BB123696	ncRNA
3	chr1	10706349	10712863	+	0	NA	intron (NM_001289497, intron 1 of 9)	intron (NM_001289497, intron 1 of 9)	420	NM_001289497	329093	Mm.336423	NM_177834	ENSMUSG00000042501	Cpa6	9030616D13Rik	carboxypeptidase A6	protein-coding
597	chr6	133984105	133987593	+	0	NA	5' UTR (NM_007961, exon 1 of 8)	5' UTR (NM_007961, exon 1 of 8)	124	NM_007961	14011	Mm.269995	NM_007961	ENSMUSG00000030199	Etv6	AW123102|AW557856|Tel	ets variant 6	protein-coding
248	chr15	68088105	68091368	+	0	NA	intron (NM_198644, intron 1 of 15)	intron (NM_198644, intron 1 of 15)	682	NM_001145888	380993	Mm.309526	NM_198644	ENSMUSG00000022335	Zfat	Gm922|Zfat1|Zfp406	zinc finger and AT hook domain containing	protein-coding
390	chr2	29175281	29177284	+	0	NA	Intergenic	Intergenic	-26048	NM_026896	68975	Mm.330109	NM_026896	ENSMUSG00000026799	Med27	1500015J03Rik|2310042P07Rik|AA682045|Crsp8|D2Ertd434e	mediator complex subunit 27	protein-coding
146	chr12	55350847	55355744	+	0	NA	Intergenic	Intergenic	18693	NR_108033	73592	Mm.416874	NR_108033		1700104L18Rik	-	RIKEN cDNA 1700104L18 gene	ncRNA
111	chr11	23565129	23566782	+	0	NA	promoter-TSS (NM_023651)	promoter-TSS (NM_023651)	-20	NM_023651	72129	Mm.29536	NM_023651	ENSMUSG00000020283	Pex13	2610008O20Rik	peroxisomal biogenesis factor 13	protein-coding
38	chr1	167388794	167392327	+	0	NA	promoter-TSS (NM_028759)	promoter-TSS (NM_028759)	34	NM_028759	74106	Mm.227605	NM_028759	ENSMUSG00000026571	Dcaf6	1200006M05Rik|Iqwd1|PC326	DDB1 and CUL4 associated factor 6	protein-coding
356	chr18	67404019	67405844	+	0	NA	intron (NM_172630, intron 1 of 10)	CpG	553	NM_172630	225651	Mm.235792	NM_172630	ENSMUSG00000062526	Mppe1	A530095G11	metallophosphoesterase 1	protein-coding
408	chr2	77783769	77784541	+	0	NA	intron (NM_030560, intron 1 of 20)	CpG	258	NM_001290740	80744	Mm.288151	NM_030560	ENSMUSG00000027014	Cwc22	AA684037|AI173004|AL022752|B230213M24|mKIAA1604	CWC22 spliceosome-associated protein homolog (S. cerevisiae)	protein-coding
4	chr1	12973416	12983952	+	0	NA	intron (NM_172841, intron 1 of 8)	intron (NM_172841, intron 1 of 8)	2532	NM_172841	240726	Mm.24481	NM_172841	ENSMUSG00000025938	Slco5a1	4732454B15|A630033C23Rik|AA407151	solute carrier organic anion transporter family, member 5A1	protein-coding
528	chr5	33127852	33129421	+	0	NA	promoter-TSS (NM_177298)	promoter-TSS (NM_177298)	-361	NM_177298	320951	Mm.273765	NM_177298	ENSMUSG00000023452	Pisd	9030221M09Rik	phosphatidylserine decarboxylase	protein-coding
164	chr12	88606667	88608195	+	0	NA	promoter-TSS (NM_001142581)	promoter-TSS (NM_001142581)	-195	NM_001142581	104799	Mm.208750	NM_134044	ENSMUSG00000021038	Vipas39	6720456H09Rik|9330175H22Rik|AI413782|SPE-39|Spe39|Vipar|hSPE-39	VPS33B interacting protein, apical-basolateral polarity regulator, spe-39 homolog	protein-coding
196	chr13	74599878	74601513	+	0	NA	Intergenic	Intergenic	30703	NM_146231	235956	Mm.296909	NM_146231		Zfp825	-	zinc finger protein 825	protein-coding
242	chr15	34372456	34374253	+	0	NA	promoter-TSS (NM_009083)	promoter-TSS (NM_009083)	-323	NM_001163485	19946	Mm.358632	NM_009083	ENSMUSG00000058600	Rpl30	-	ribosomal protein L30	protein-coding
