# Supplementary material for: Remodeling of epigenome and transcriptome landscapes with aging in mice reveals widespread induction of inflammatory responses
Source: HighWire-hosted journal article supplement (doi:10.1101/gr.240093.118), 2019-03-11
Supplement: Supplemental_Code_Figure1_General.zip [file STITCHED_MACS2_ENHANCERS.Heart_SampleCoverage_Combined.xls]

Peak_Name	Chr	Start	End	Nearest PromoterID	Entrez ID	Gene Name	Coverage_NUMBER_3m2_Heart_H3K27ac_COMBINED_ENHANCERS.peaks.SampleCoverage.bed	Coverage_NUMBER_3m3_Heart_H3K27ac_COMBINED_ENHANCERS.peaks.SampleCoverage.bed	Coverage_NUMBER_12m1_Heart_H3K27ac_COMBINED_ENHANCERS.peaks.SampleCoverage.bed	Coverage_NUMBER_12m3_Heart_H3K27ac_COMBINED_ENHANCERS.peaks.SampleCoverage.bed	Coverage_NUMBER_29m1_Heart_H3K27ac_COMBINED_ENHANCERS.peaks.SampleCoverage.bed	Coverage_NUMBER_29m2_Heart_H3K27ac_COMBINED_ENHANCERS.peaks.SampleCoverage.bed	Coverage_NUMBER_3m2_Heart_H3_COMBINED_ENHANCERS.peaks.SampleCoverage.bed	Coverage_NUMBER_3m3_Heart_H3_COMBINED_ENHANCERS.peaks.SampleCoverage.bed	Coverage_NUMBER_12m1_Heart_H3_COMBINED_ENHANCERS.peaks.SampleCoverage.bed	Coverage_NUMBER_12m2_Heart_H3_COMBINED_ENHANCERS.peaks.SampleCoverage.bed	Coverage_NUMBER_29m1_Heart_H3_COMBINED_ENHANCERS.peaks.SampleCoverage.bed	Coverage_NUMBER_29m2_Heart_H3_COMBINED_ENHANCERS.peaks.SampleCoverage.bed
StitchedEnhancer_1	chr1	3108830	3112000	NM_001011874	497097	Xkr4	153	75	173	89	67	61	14	10	13	10	13	13
StitchedEnhancer_10	chr1	4643589	4646217	NR_033530	27395	Mrpl15	131	112	154	110	106	78	16	8	9	20	12	6
StitchedEnhancer_100	chr1	20807079	20810366	NM_008563	17215	Mcm3	44	40	57	40	49	40	10	17	20	21	17	19
StitchedEnhancer_1000	chr1	129304984	129313101	NM_145128	107895	Mgat5	173	158	358	247	95	62	25	26	41	36	36	40
StitchedEnhancer_10000	chr17	7725676	7736422	NM_001142539	667055	Gm9992	165	80	173	126	113	105	44	43	37	60	41	39
StitchedEnhancer_10001	chr17	7764077	7771435	NM_001142539	667055	Gm9992	128	119	199	165	125	90	14	25	22	29	19	29
StitchedEnhancer_10002	chr17	7800345	7874409	NM_001081416	68655	Fndc1	616	484	1062	783	720	554	213	270	240	305	265	268
StitchedEnhancer_10003	chr17	7906001	7916795	NM_001081416	68655	Fndc1	97	71	104	92	120	112	42	39	37	46	41	38
StitchedEnhancer_10004	chr17	7942222	7942724	NM_001081416	68655	Fndc1	8	14	31	8	19	8	1	3	3	6	3	1
StitchedEnhancer_10005	chr17	7987319	7995642	NM_001081416	68655	Fndc1	46	51	77	67	81	54	33	24	22	47	21	32
StitchedEnhancer_10006	chr17	8010928	8020180	NM_001081416	68655	Fndc1	64	66	116	88	72	57	22	32	44	39	32	33
StitchedEnhancer_10007	chr17	8033298	8034046	NM_001081416	68655	Fndc1	14	18	21	13	18	11	2	1	1	4	4	3
StitchedEnhancer_10008	chr17	8061805	8070397	NM_145968	72536	Tagap	63	74	85	82	43	50	29	28	39	35	22	29
StitchedEnhancer_10009	chr17	8107529	8139425	NM_145968	72536	Tagap	621	427	663	472	465	360	127	108	133	153	99	99
StitchedEnhancer_1001	chr1	129407431	129411069	NM_028135	72160	Tmem163	111	100	161	142	154	90	12	5	13	23	6	21
StitchedEnhancer_10010	chr17	8272107	8289547	NM_001033442	381059	Gm1604b	304	354	554	347	252	194	53	57	58	88	54	67
StitchedEnhancer_10011	chr17	8315396	8360831	NM_001083938	100037283	Rnaset2a	1147	1007	1674	1234	1170	729	200	217	221	280	214	212
StitchedEnhancer_10012	chr17	8376542	8393082	NM_201230	75296	Fgfr1op	165	118	147	140	95	129	60	73	65	78	63	74
StitchedEnhancer_10013	chr17	8417537	8419271	NM_001190333	12458	Ccr6	56	56	75	75	41	58	6	7	2	9	12	7
StitchedEnhancer_10014	chr17	8463902	8479976	NM_018819	55951	Mpc1	1340	1301	1907	1303	1235	739	49	70	53	79	73	63
StitchedEnhancer_10015	chr17	8498288	8505656	NM_134114	106489	Sft2d1	382	301	455	367	293	230	29	30	44	49	31	44
StitchedEnhancer_10016	chr17	8564515	8565560	NM_001161832	21331	T2	43	28	49	33	23	25	9	8	5	5	9	6
StitchedEnhancer_10017	chr17	8608865	8610585	NM_009309	20997	T	62	71	115	82	59	26	7	2	4	7	2	5
StitchedEnhancer_10018	chr17	8698670	8701766	NM_001290707	23984	Pde10a	70	61	99	51	41	49	10	8	16	20	16	12
StitchedEnhancer_10019	chr17	8717354	8718925	NM_001290707	23984	Pde10a	29	40	40	39	27	26	6	3	5	10	6	5
StitchedEnhancer_1002	chr1	129491578	129507032	NM_028135	72160	Tmem163	93	129	237	148	127	54	41	59	57	54	53	47
StitchedEnhancer_10020	chr17	8845134	8846410	NM_001290707	23984	Pde10a	23	10	52	37	25	11	3	6	7	8	2	2
StitchedEnhancer_10021	chr17	8993441	9007880	NM_011866	23984	Pde10a	242	187	321	190	146	160	52	64	64	63	61	59
StitchedEnhancer_10022	chr17	9030878	9032615	NM_011866	23984	Pde10a	55	27	38	28	11	35	6	5	6	10	6	4
StitchedEnhancer_10023	chr17	9048840	9066299	NM_011866	23984	Pde10a	345	263	408	257	198	190	77	76	80	96	74	60
StitchedEnhancer_10024	chr17	9128568	9128882	NM_025851	66931	1700010I14Rik	8	6	13	11	5	2	2	3	1	2	2	5
StitchedEnhancer_10025	chr17	9181283	9181738	NM_025851	66931	1700010I14Rik	24	10	20	13	13	8	3	4	4	7	4	2
StitchedEnhancer_10026	chr17	9224110	9225979	NM_025851	66931	1700010I14Rik	220	180	321	200	131	99	5	7	4	16	5	12
StitchedEnhancer_10027	chr17	9948707	9970719	NR_045433	71092	4930452A19Rik	1992	1878	2843	1849	1599	1061	90	113	139	120	97	114
StitchedEnhancer_10028	chr17	9996294	9997231	NR_045433	71092	4930452A19Rik	11	15	22	17	20	10	6	3	2	1	5	4
StitchedEnhancer_10029	chr17	10029437	10039914	NR_045433	71092	4930452A19Rik	138	110	197	125	146	86	44	41	47	52	40	54
StitchedEnhancer_1003	chr1	129534445	129536286	NM_028135	72160	Tmem163	23	19	28	20	16	22	0	7	9	7	8	4
StitchedEnhancer_10030	chr17	10056706	10058028	NR_045433	71092	4930452A19Rik	20	21	27	18	25	19	3	4	3	6	8	5
StitchedEnhancer_10031	chr17	10072431	10090132	NR_045433	71092	4930452A19Rik	1086	866	1210	760	660	417	63	63	74	80	72	79
StitchedEnhancer_10032	chr17	10106080	10106972	NR_045433	71092	4930452A19Rik	31	26	30	20	26	10	3	2	2	2	6	2
StitchedEnhancer_10033	chr17	10141479	10170950	NR_045433	71092	4930452A19Rik	388	331	382	238	302	182	105	134	118	150	135	140
StitchedEnhancer_10034	chr17	10193634	10194998	NR_045433	71092	4930452A19Rik	100	64	79	57	73	39	10	8	4	14	10	7
StitchedEnhancer_10035	chr17	10229573	10256224	NM_021881	19317	Qk	1153	918	1156	727	775	577	119	125	133	169	125	112
StitchedEnhancer_10036	chr17	10271848	10295302	NM_021881	19317	Qk	1688	1199	1480	893	1006	732	98	108	105	113	115	122
StitchedEnhancer_10037	chr17	10343016	10343967	NM_021881	19317	Qk	21	20	23	23	19	7	0	3	10	3	1	2
StitchedEnhancer_10038	chr17	10400299	10400732	NM_021881	19317	Qk	16	13	12	10	19	9	2	5	2	4	2	2
StitchedEnhancer_10039	chr17	10416924	10426561	NM_021881	19317	Qk	168	63	81	93	88	87	50	43	55	68	42	42
StitchedEnhancer_1004	chr1	129556854	129574320	NM_028135	72160	Tmem163	58	87	170	157	88	56	49	47	53	61	52	61
StitchedEnhancer_10040	chr17	10477630	10611064	NR_045461	76634	1700110C19Rik	7150	5569	9411	6274	5309	3820	519	544	603	716	569	616
StitchedEnhancer_10041	chr17	10634144	10647567	NR_077239	319750	A230009B12Rik	306	246	497	309	312	219	32	52	58	54	43	60
StitchedEnhancer_10042	chr17	10665308	10704832	NR_077238	319750	A230009B12Rik	1993	1490	2848	1790	1273	884	157	169	136	194	166	177
StitchedEnhancer_10043	chr17	10910227	10911104	NM_027032	69310	Pacrg	20	16	36	32	9	3	2	5	6	5	4	3
StitchedEnhancer_10044	chr17	11032667	11034039	NM_016694	50873	Park2	133	127	218	163	135	73	5	8	6	8	4	4
StitchedEnhancer_10045	chr17	11080736	11081314	NM_016694	50873	Park2	13	13	19	23	11	5	3	3	2	4	2	2
StitchedEnhancer_10046	chr17	11137257	11137780	NM_016694	50873	Park2	17	11	10	8	11	5	1	1	1	2	5	3
StitchedEnhancer_10047	chr17	11281938	11286493	NM_016694	50873	Park2	58	39	66	50	38	27	22	17	27	19	14	18
StitchedEnhancer_10048	chr17	12287222	12288764	NM_026644	68262	Agpat4	48	45	47	37	29	27	2	7	7	7	4	8
StitchedEnhancer_10049	chr17	12311214	12312875	NM_026644	68262	Agpat4	177	175	256	175	137	124	8	9	5	11	9	5
StitchedEnhancer_1005	chr1	129669523	129671923	NM_028399	72949	Ccnt2	422	357	584	448	447	264	13	17	17	16	12	8
StitchedEnhancer_10050	chr17	12337082	12337695	NM_026644	68262	Agpat4	41	22	29	16	15	12	1	3	3	3	4	2
StitchedEnhancer_10051	chr17	12351849	12364474	NM_026644	68262	Agpat4	111	111	145	127	113	149	36	57	39	67	55	45
StitchedEnhancer_10052	chr17	12387727	12388786	NM_026644	68262	Agpat4	23	29	31	23	19	23	3	8	4	4	8	7
StitchedEnhancer_10053	chr17	12458918	12460470	NM_011948	26407	Map3k4	57	73	80	70	69	44	6	7	9	5	6	6
StitchedEnhancer_10054	chr17	12482846	12484235	NM_011948	26407	Map3k4	33	25	45	22	50	21	2	8	2	12	5	8
StitchedEnhancer_10055	chr17	12497724	12529659	NR_045290	224523	4732491K20Rik	710	549	834	574	630	365	136	152	163	183	160	141
StitchedEnhancer_10056	chr17	12595912	12623402	NM_008877	18815	Plg	353	331	610	447	247	207	90	113	107	131	87	91
StitchedEnhancer_10057	chr17	12699731	12700600	NM_011395	20519	Slc22a3	20	17	73	45	38	19	1	2	5	2	5	4
StitchedEnhancer_10058	chr17	12722518	12723726	NM_011395	20519	Slc22a3	52	48	99	63	59	24	1	2	3	9	5	4
StitchedEnhancer_10059	chr17	12763891	12765588	NM_013667	20518	Slc22a2	85	79	120	90	38	39	9	3	8	2	9	8
StitchedEnhancer_1006	chr1	129746787	129765913	NM_178690	226407	Rab3gap1	155	149	198	157	155	97	67	89	84	101	73	71
StitchedEnhancer_10060	chr17	12798831	12804625	NM_013667	20518	Slc22a2	66	51	129	73	55	41	12	16	26	24	23	17
StitchedEnhancer_10061	chr17	12824305	12825332	NM_009202	20517	Slc22a1	20	20	29	33	14	5	3	4	3	4	4	6
StitchedEnhancer_10062	chr17	12845244	12857436	NM_009202	20517	Slc22a1	63	64	102	81	68	41	43	45	49	47	43	51
StitchedEnhancer_10063	chr17	12877099	12883331	NM_009202	20517	Slc22a1	357	336	479	314	211	145	17	42	26	29	23	26
StitchedEnhancer_10064	chr17	12910521	13003684	NM_010515	16004	Igf2r	4914	4313	6740	4607	3791	2973	423	469	527	533	450	476
StitchedEnhancer_10065	chr17	13024535	13026257	NM_008552	17171	Mas1	139	161	225	157	99	62	6	9	11	10	12	5
StitchedEnhancer_10066	chr17	13059236	13080956	NM_030726	80978	Mrgprh	421	332	634	471	310	169	82	76	78	95	78	83
StitchedEnhancer_10067	chr17	13108136	13110105	NM_001290712	21454	Tcp1	462	332	519	368	298	189	12	17	13	10	13	11
StitchedEnhancer_10068	chr17	13133307	13134007	NM_153151	224530	Acat3	16	9	20	10	22	7	3	0	2	2	2	7
StitchedEnhancer_10069	chr17	13152927	13153937	NM_009338	110460	Acat2	52	60	66	74	65	33	6	10	5	8	4	4
StitchedEnhancer_1007	chr1	129855318	129856205	NM_178690	226407	Rab3gap1	14	10	22	19	11	19	4	7	2	1	1	2
StitchedEnhancer_10070	chr17	13183602	13186238	NM_001113533	60532	Wtap	873	866	1193	807	925	536	17	10	9	8	12	15
StitchedEnhancer_10071	chr17	13199723	13203404	NM_013671	20656	Sod2	434	360	535	414	458	250	16	25	24	13	18	12
StitchedEnhancer_10072	chr17	13244603	13245946	NM_001013832	436440	Gpr31b	34	44	31	27	45	41	14	8	8	7	10	2
StitchedEnhancer_10073	chr17	13299695	13300255	NR_024558	625850	Gm11166	14	5	19	10	13	5	3	1	3	4	5	1
StitchedEnhancer_10074	chr17	13405086	13405391	NR_033458	100038394	Gm10512	7	7	20	8	14	9	1	6	4	3	2	5
StitchedEnhancer_10075	chr17	13500949	13502082	NM_001167578	100041352	Tcp10c	18	35	41	28	27	19	11	11	15	9	5	10
StitchedEnhancer_10076	chr17	13538222	13539256	NM_001167578	100041352	Tcp10c	16	23	22	17	36	23	6	3	7	8	4	8
StitchedEnhancer_10077	chr17	13666640	13681983	NR_030763	272667	Smok4a	327	226	403	281	288	134	62	46	56	60	64	68
StitchedEnhancer_10078	chr17	13747588	13754488	NR_045437	72578	2700054A10Rik	273	228	398	259	240	126	34	21	25	45	33	15
StitchedEnhancer_10079	chr17	13808337	13843030	NM_010806	17356	Mllt4	2012	1744	2737	1752	1457	1219	136	139	137	183	151	156
StitchedEnhancer_1008	chr1	129872522	129872909	NM_178690	226407	Rab3gap1	14	3	11	16	10	11	1	3	1	5	1	5
StitchedEnhancer_10080	chr17	13869618	13880766	NM_010806	17356	Mllt4	180	149	258	176	106	103	49	52	41	50	52	62
StitchedEnhancer_10081	chr17	13896125	13899106	NM_010806	17356	Mllt4	369	312	522	387	340	234	19	13	23	12	19	14
StitchedEnhancer_10082	chr17	13987140	13988180	NM_022311	21646	Tcte2	23	20	30	33	18	19	3	3	10	4	7	5
StitchedEnhancer_10083	chr17	14003263	14058748	NM_001122977	635895	Gm7168	2152	1513	2663	1679	1197	1089	243	251	265	315	253	262
StitchedEnhancer_10084	chr17	14074875	14078232	NM_001122977	635895	Gm7168	288	257	590	308	229	138	15	15	20	21	21	19
StitchedEnhancer_10085	chr17	14211624	14214053	NM_001122977	635895	Gm7168	43	42	53	36	45	38	5	5	3	14	6	6
StitchedEnhancer_10086	chr17	14275832	14276742	NM_172826	240025	Dact2	20	12	19	17	22	14	1	2	0	5	2	3
StitchedEnhancer_10087	chr17	14339729	14341607	NM_172826	240025	Dact2	65	64	84	77	61	36	3	8	8	7	6	9
StitchedEnhancer_10088	chr17	14381343	14391726	NM_022315	64074	Smoc2	94	104	150	102	118	80	34	30	27	44	35	35
StitchedEnhancer_10089	chr17	14416576	14432941	NM_022315	64074	Smoc2	169	131	172	90	141	125	60	74	57	66	45	52
StitchedEnhancer_1009	chr1	129886005	129887506	NM_027678	226409	Zranb3	126	110	204	163	112	67	4	3	5	1	7	11
StitchedEnhancer_10090	chr17	14507768	14518992	NR_027986	74917	4930474M22Rik	70	55	56	47	70	36	46	37	27	44	36	23
StitchedEnhancer_10091	chr17	14642014	14655594	NR_027986	74917	4930474M22Rik	310	285	385	208	201	174	41	40	50	61	47	48
StitchedEnhancer_10092	chr17	14682587	14689348	NM_011581	21826	Thbs2	64	52	91	55	62	53	19	20	28	31	21	31
StitchedEnhancer_10093	chr17	14761480	14762010	NM_011581	21826	Thbs2	7	11	12	12	16	9	1	2	3	1	3	1
StitchedEnhancer_10094	chr17	14776752	14778320	NM_011581	21826	Thbs2	49	56	91	38	38	46	4	3	9	11	4	3
StitchedEnhancer_10095	chr17	14796670	14810967	NM_011581	21826	Thbs2	91	70	162	83	79	49	44	54	54	55	45	68
StitchedEnhancer_10096	chr17	14828500	14873234	NM_011581	21826	Thbs2	442	437	680	421	439	340	149	155	149	188	153	162
StitchedEnhancer_10097	chr17	14907703	14909251	NM_011581	21826	Thbs2	58	36	54	54	55	24	2	4	4	7	1	3
StitchedEnhancer_10098	chr17	14963483	14964408	NM_175173	71682	Wdr27	2	8	23	15	18	22	5	4	3	1	1	8
StitchedEnhancer_10099	chr17	15079467	15081068	NM_026451	67912	1600012H06Rik	152	131	201	116	103	95	2	5	7	8	5	6
StitchedEnhancer_101	chr1	20880186	20881520	NM_028829	74229	Paqr8	75	72	127	85	93	58	8	9	1	11	7	6
StitchedEnhancer_1010	chr1	129910245	129910572	NM_027678	226409	Zranb3	11	13	10	8	1	3	0	1	0	2	0	2
StitchedEnhancer_10100	chr17	15097659	15099369	NM_024250	72057	Phf10	143	168	161	163	138	77	9	11	11	16	7	9
StitchedEnhancer_10101	chr17	15114928	15131109	NM_001123370	100041574	9030025P20Rik	586	497	582	559	488	348	76	84	98	96	76	98
StitchedEnhancer_10102	chr17	15146324	15162191	NM_001123367	100041639	Gm3448	648	502	626	536	507	390	79	84	96	101	72	94
StitchedEnhancer_10103	chr17	15177642	15179116	NM_001123368	100041586	Gm3417	339	264	301	229	242	184	10	7	15	6	9	11
StitchedEnhancer_10104	chr17	15194784	15195637	NM_001034891	381062	Ermard	10	19	26	33	13	13	6	5	4	5	4	6
StitchedEnhancer_10105	chr17	15266420	15275031	NM_001034891	381062	Ermard	123	129	165	118	71	54	28	37	40	39	39	38
StitchedEnhancer_10106	chr17	15329302	15330733	NR_046164	328747	Gm5091	54	58	56	33	19	12	3	6	3	6	5	7
StitchedEnhancer_10107	chr17	15421768	15428146	NR_046164	328747	Gm5091	132	141	250	124	110	64	16	16	22	28	20	25
StitchedEnhancer_10108	chr17	15502555	15513976	NM_007865	13388	Dll1	434	360	631	406	217	206	51	43	47	57	50	52
StitchedEnhancer_10109	chr17	15532783	15533857	NM_024203	67544	Fam120b	113	77	118	97	99	71	5	8	11	9	7	8
StitchedEnhancer_1011	chr1	129965544	129978835	NM_027678	226409	Zranb3	258	113	167	122	96	102	68	54	58	79	63	43
StitchedEnhancer_10110	chr17	15556676	15567668	NM_024203	67544	Fam120b	198	185	273	163	163	78	44	45	60	57	47	40
StitchedEnhancer_10111	chr17	15596519	15600990	NM_011185	19170	Psmb1	703	611	828	530	414	269	16	13	14	21	23	14
StitchedEnhancer_10112	chr17	15634435	15637392	NM_011185	19170	Psmb1	444	430	552	398	428	278	17	16	17	35	13	19
StitchedEnhancer_10113	chr17	15663688	15665215	NM_008799	18567	Pdcd2	128	114	154	96	139	104	6	9	7	7	4	10
StitchedEnhancer_10114	chr17	15700678	15702164	NM_144809	213389	Prdm9	329	251	333	280	252	146	5	6	7	11	9	13
StitchedEnhancer_10115	chr17	15840737	15843790	NM_007690	12648	Chd1	823	744	992	804	732	472	10	12	18	12	10	18
StitchedEnhancer_10116	chr17	15879893	15880926	NM_007690	12648	Chd1	24	22	15	25	39	31	6	9	4	13	6	8
StitchedEnhancer_10117	chr17	15906112	15912179	NM_178615	68799	Rgmb	54	29	56	50	90	78	31	27	18	27	26	23
StitchedEnhancer_10118	chr17	15945311	15968602	NM_178615	68799	Rgmb	1086	928	1654	1217	866	717	98	111	110	150	99	114
StitchedEnhancer_10119	chr17	16009582	16012049	NM_178615	68799	Rgmb	49	31	61	37	20	14	10	10	15	7	9	9
StitchedEnhancer_1012	chr1	129998700	130003399	NM_181750	226412	R3hdm1	496	388	516	365	356	250	30	21	22	24	28	21
StitchedEnhancer_10120	chr17	16130828	16132044	NM_178615	68799	Rgmb	14	16	27	28	14	9	3	2	6	4	4	3
StitchedEnhancer_10121	chr17	16191382	16192310	NM_178615	68799	Rgmb	31	12	20	20	15	14	4	1	5	11	4	4
StitchedEnhancer_10122	chr17	16302958	16304627	NM_178615	68799	Rgmb	59	34	51	36	36	28	4	4	6	9	10	4
StitchedEnhancer_10123	chr17	16476688	16481551	NM_178615	68799	Rgmb	81	36	72	54	46	56	20	14	10	24	17	18
StitchedEnhancer_10124	chr17	16509106	16509997	NM_178615	68799	Rgmb	34	14	35	34	16	16	4	5	6	4	4	5
StitchedEnhancer_10125	chr17	17087798	17088971	NM_001005358	449000	Zfp960	123	112	167	127	100	67	2	5	7	9	3	6
StitchedEnhancer_10126	chr17	17141424	17142726	NM_001005358	449000	Zfp960	121	117	115	112	92	64	7	7	9	6	5	11
StitchedEnhancer_10127	chr17	17200438	17201600	NM_001005358	449000	Zfp960	106	96	143	127	140	61	4	5	9	5	5	5
StitchedEnhancer_10128	chr17	17257534	17259003	NM_011765	22759	Zfp97	234	213	338	291	271	132	6	11	8	7	4	11
StitchedEnhancer_10129	chr17	17315474	17316949	NM_011765	22759	Zfp97	252	197	376	277	236	153	9	5	11	4	6	9
StitchedEnhancer_1013	chr1	130140345	130141831	NM_026390	67812	Ubxn4	309	260	333	248	198	163	4	3	4	10	7	3
StitchedEnhancer_10130	chr17	17370852	17372477	NM_011765	22759	Zfp97	189	170	244	173	179	128	9	7	5	11	16	12
StitchedEnhancer_10131	chr17	17430534	17431894	NM_025934	67045	Riok2	143	112	168	148	139	74	7	7	6	7	6	4
StitchedEnhancer_10132	chr17	17482876	17483253	NM_025934	67045	Riok2	40	37	67	56	44	18	0	1	6	3	2	2
StitchedEnhancer_10133	chr17	17510409	17512723	NM_025934	67045	Riok2	379	290	330	251	301	230	15	8	14	8	15	19
StitchedEnhancer_10134	chr17	17585574	17586810	NM_025681	66643	Lix1	83	74	118	78	62	42	8	9	5	8	2	7
StitchedEnhancer_10135	chr17	17712564	17763540	NM_172827	240028	Lnpep	4259	3032	3442	2582	2653	2197	213	192	256	314	229	253
StitchedEnhancer_10136	chr17	17962574	17976264	NM_001162909	75202	Spaca6	2699	2095	3226	2258	1674	1265	49	54	64	80	54	69
StitchedEnhancer_10137	chr17	17992255	18015759	NM_008215	15116	Has1	249	209	169	145	227	269	83	77	90	111	77	91
StitchedEnhancer_10138	chr17	18046625	18047686	NM_008039	14289	Fpr2	26	40	54	53	69	51	3	4	6	7	2	2
StitchedEnhancer_10139	chr17	18694943	18696457	NM_001104547	433070	Vmn2r96	10	14	31	34	72	37	6	5	0	7	7	6
StitchedEnhancer_1014	chr1	130253820	130256896	NM_008567	17219	Mcm6	166	86	147	117	83	83	16	15	16	15	18	20
StitchedEnhancer_10140	chr17	21081359	21083559	NM_016891	51792	Ppp2r1a	603	541	762	555	528	358	10	8	8	12	11	15
StitchedEnhancer_10141	chr17	21101781	21104405	NM_016891	51792	Ppp2r1a	102	74	121	79	65	41	12	12	4	8	11	11
StitchedEnhancer_10142	chr17	21145388	21147659	NM_145483	224585	Zfp160	141	118	207	142	135	97	8	7	10	8	15	17
StitchedEnhancer_10143	chr17	21187952	21190168	NM_145483	224585	Zfp160	71	92	164	104	85	44	9	6	7	11	2	11
StitchedEnhancer_10144	chr17	21205892	21206915	NM_145483	224585	Zfp160	23	36	67	43	33	12	3	8	5	8	3	5
StitchedEnhancer_10145	chr17	21347482	21348720	NM_134198	171232	Vmn1r234	18	26	53	32	24	22	2	7	3	4	2	8
StitchedEnhancer_10146	chr17	21520310	21521109	NM_172486	210503	Zfp677	39	37	81	43	44	43	7	7	4	5	6	4
StitchedEnhancer_10147	chr17	21559702	21560704	NM_011760	22712	Zfp54	123	100	147	111	99	79	5	6	10	6	6	4
StitchedEnhancer_10148	chr17	21586657	21588229	NM_009558	22709	Zfp51	303	248	319	224	173	161	10	9	11	14	6	6
StitchedEnhancer_10149	chr17	21608103	21654566	NM_013843	24132	Zfp53	1640	1119	1521	1150	921	959	202	173	249	265	229	222
StitchedEnhancer_1015	chr1	130312937	130314738	NM_177445	226414	Dars	455	403	611	395	362	275	11	21	8	10	9	10
StitchedEnhancer_10150	chr17	21667689	21674627	NM_144515	22710	Zfp52	1136	1052	1459	1091	943	702	37	38	37	35	45	42
StitchedEnhancer_10151	chr17	21702835	21705418	NM_001002008	381066	Zfp948	579	403	393	355	251	274	13	18	16	11	12	14
StitchedEnhancer_10152	chr17	21786962	21788029	NM_001166497	73229	3110052M02Rik	124	119	144	101	94	85	8	2	4	12	4	2
StitchedEnhancer_10153	chr17	21815990	21817390	NR_045766	100310809	Gm10509	147	130	204	131	123	110	9	8	12	7	12	5
StitchedEnhancer_10154	chr17	21844080	21845835	NM_001008501	240034	Zfp760	158	116	162	119	93	90	14	15	10	7	8	9
StitchedEnhancer_10155	chr17	21870076	21871187	NM_001164676	381067	Zfp229	107	96	142	104	89	65	1	5	3	15	4	7
StitchedEnhancer_10156	chr17	21982472	21983159	NM_029281	75424	Zfp820	11	10	22	19	14	6	2	1	4	1	5	2
StitchedEnhancer_10157	chr17	22046395	22046976	NM_001256493	70081	2210404O09Rik	10	15	11	12	21	9	4	1	1	6	2	5
StitchedEnhancer_10158	chr17	22098919	22100134	NM_001025373	74670	Zfp943	268	251	379	263	252	188	8	11	7	7	9	5
StitchedEnhancer_10159	chr17	22217826	22218510	NM_177596	210853	Zfp947	26	10	33	24	23	16	1	2	6	0	2	2
StitchedEnhancer_1016	chr1	130336412	130370406	NM_145507	226414	Dars	559	571	950	654	534	345	137	118	123	178	119	140
StitchedEnhancer_10160	chr17	22302390	22303520	NM_177596	210853	Zfp947	51	53	63	55	65	44	5	5	5	4	6	9
StitchedEnhancer_10161	chr17	22362007	22363115	NM_001205095	240038	Gm4944	116	98	162	114	104	94	3	3	4	5	3	9
StitchedEnhancer_10162	chr17	22451225	22452443	NM_176962	319615	Zfp944	146	124	191	111	136	89	7	2	6	8	6	6
StitchedEnhancer_10163	chr17	22497779	22499063	NM_145484	224598	Zfp758	231	214	271	175	208	128	2	11	5	10	8	6
StitchedEnhancer_10164	chr17	22560343	22562384	NM_198003	74149	Zfp946	263	200	285	178	249	147	13	10	13	10	4	14
StitchedEnhancer_10165	chr17	22875962	22877506	NR_030709	100042679	Gm16386	87	63	108	74	61	52	5	8	3	8	7	9
StitchedEnhancer_10166	chr17	22954290	22955200	NR_030709	100042679	Gm16386	83	57	74	76	33	61	3	12	0	3	5	6
StitchedEnhancer_10167	chr17	23002866	23008318	NM_001110254	240041	Zfp945	320	238	423	287	239	163	13	26	31	29	16	23
StitchedEnhancer_10168	chr17	23329252	23330859	NM_009555	22700	Zfp40	59	45	63	54	60	35	3	6	3	11	11	7
StitchedEnhancer_10169	chr17	23679258	23701832	NM_001033496	449521	Zfp213	1028	877	1284	917	833	613	82	110	104	143	109	93
StitchedEnhancer_1017	chr1	130486686	130490432	NM_009911	12767	Cxcr4	246	269	439	330	234	211	18	13	20	21	15	26
StitchedEnhancer_10170	chr17	23729570	23737313	NM_011747	22654	Zfp13	445	398	489	331	313	206	37	32	39	35	37	33
StitchedEnhancer_10171	chr17	23810212	23814688	NM_001008425	386612	Thoc6	1459	1241	2148	1572	1066	669	22	20	22	21	22	21
StitchedEnhancer_10172	chr17	23836197	23837367	NM_020293	56863	Cldn9	98	64	92	84	59	24	3	3	5	5	7	8
StitchedEnhancer_10173	chr17	23862632	23893637	NM_023824	76498	Paqr4	792	613	924	607	570	426	124	127	158	174	138	128
StitchedEnhancer_10174	chr17	23907749	23909101	NM_153791	224613	Flywch1	121	123	173	126	150	81	4	4	10	7	4	8
StitchedEnhancer_10175	chr17	23926726	23966847	NM_175229	75956	Srrm2	994	889	1370	1029	917	693	230	223	211	265	224	211
StitchedEnhancer_10176	chr17	24061270	24062783	NM_001077633	620253	Dcpp3	139	120	217	126	118	69	6	12	8	11	12	13
StitchedEnhancer_10177	chr17	24103822	24117487	NM_013921	30943	Prss30	71	80	54	42	47	68	35	41	43	43	50	48
StitchedEnhancer_10178	chr17	24144200	24144557	NM_133731	70835	Prss22	10	12	14	9	6	12	1	0	0	2	2	2
StitchedEnhancer_10179	chr17	24209878	24210728	NM_027008	69259	Kctd5	89	85	121	78	69	56	8	5	13	5	4	9
StitchedEnhancer_1018	chr1	130505036	130513398	NM_009911	12767	Cxcr4	207	177	292	224	261	213	25	28	29	45	31	31
StitchedEnhancer_10180	chr17	24244783	24253616	NM_011062	18607	Pdpk1	177	126	195	118	136	91	47	53	47	37	47	49
StitchedEnhancer_10181	chr17	24277523	24279053	NM_011062	18607	Pdpk1	195	185	265	211	208	113	10	8	6	10	17	6
StitchedEnhancer_10182	chr17	24299388	24309578	NR_037854	100039636	Atp6v0c-ps2	1408	1326	1905	1344	1236	956	38	58	53	74	43	71
StitchedEnhancer_10183	chr17	24328338	24358659	NM_001163850	224617	Tbc1d24	336	326	483	376	372	226	134	128	143	148	119	133
StitchedEnhancer_10184	chr17	24388062	24389059	NM_007634	12449	Ccnf	18	21	28	28	28	19	4	3	7	7	4	7
StitchedEnhancer_10185	chr17	24488281	24493171	NM_001039581	27410	Abca3	184	183	250	217	202	139	22	31	25	35	28	19
StitchedEnhancer_10186	chr17	24510965	24512784	NM_001039581	27410	Abca3	72	84	113	91	56	39	5	7	9	16	7	6
StitchedEnhancer_10187	chr17	24550588	24569637	NM_010023	13177	Eci1	1003	958	1379	1067	948	568	89	93	83	133	93	97
StitchedEnhancer_10188	chr17	24591156	24592970	NM_007893	13560	E4f1	447	390	467	387	338	249	13	13	12	13	21	12
StitchedEnhancer_10189	chr17	24606433	24616619	NM_175682	319259	Bricd5	682	566	884	629	671	364	41	55	51	52	55	53
StitchedEnhancer_1019	chr1	130528993	130550113	NM_009911	12767	Cxcr4	143	140	178	111	115	156	78	80	76	65	70	81
StitchedEnhancer_10190	chr17	24650365	24666558	NM_153792	224619	Traf7	415	356	580	424	318	243	91	64	82	109	79	98
StitchedEnhancer_10191	chr17	24685269	24704674	NM_013630	18763	Pkd1	1837	1609	2333	1630	1582	1033	83	110	94	123	90	115
StitchedEnhancer_10192	chr17	24719952	24722851	NM_013630	18763	Pkd1	117	96	143	137	89	58	17	14	18	17	14	12
StitchedEnhancer_10193	chr17	24769095	24791511	NM_023449	65962	Slc9a3r2	4192	3732	5594	3313	2818	1900	116	130	128	174	100	117
StitchedEnhancer_10194	chr17	24805951	24809627	NM_183149	213753	Zfp598	275	261	269	229	197	166	18	14	21	31	15	21
StitchedEnhancer_10195	chr17	24832374	24874957	NM_026205	67504	Rnf151	2595	2397	3018	2240	1985	1189	186	209	232	242	183	222
StitchedEnhancer_10196	chr17	24954693	24955831	NM_029197	75178	Meiob	41	31	46	39	45	39	3	4	13	7	5	8
StitchedEnhancer_10197	chr17	24981147	24993329	NM_023480	68636	Fahd1	678	574	837	592	727	390	53	72	62	79	84	64
StitchedEnhancer_10198	chr17	25014296	25036915	NM_027141	79043	Spsb3	968	831	1193	873	878	521	108	121	125	139	106	145
StitchedEnhancer_10199	chr17	25072208	25074493	NM_001163448	30957	Mapk8ip3	218	170	228	189	189	124	15	22	12	14	16	13
StitchedEnhancer_102	chr1	20930450	20942210	NM_027974	71877	Efhc1	144	145	154	107	97	76	38	44	63	69	57	46
StitchedEnhancer_1020	chr1	130575420	130576330	NM_009911	12767	Cxcr4	16	24	26	24	28	9	2	4	3	8	3	4
StitchedEnhancer_10200	chr17	25096879	25098220	NM_198937	52009	Hn1l	68	44	64	50	39	44	5	4	5	11	4	6
StitchedEnhancer_10201	chr17	25132590	25134893	NM_020608	57354	Cramp1l	179	154	261	197	121	105	11	16	16	13	12	18
StitchedEnhancer_10202	chr17	25150296	25154248	NM_020608	57354	Cramp1l	539	463	639	495	425	310	21	20	15	22	17	16
StitchedEnhancer_10203	chr17	25180953	25222197	NM_001001183	407831	Tmem204	5472	4496	7044	4260	3568	2802	184	192	233	211	203	232
StitchedEnhancer_10204	chr17	25248441	25270837	NM_001163416	68509	Ptx4	561	625	769	608	515	402	85	121	118	141	103	146
StitchedEnhancer_10205	chr17	25320462	25326358	NM_183150	214489	BC003965	808	650	804	637	647	451	36	31	31	43	35	40
StitchedEnhancer_10206	chr17	25347355	25377522	NM_028789	74154	Unkl	435	395	463	289	416	277	116	132	150	161	118	142
StitchedEnhancer_10207	chr17	25401214	25411992	NM_001177610	22196	Ube2i	951	895	1233	895	832	582	52	59	54	68	59	60
StitchedEnhancer_10208	chr17	25541656	25552906	NM_021415	58226	Cacna1h	241	208	427	276	233	129	35	32	35	46	38	44
StitchedEnhancer_10209	chr17	25566111	25581711	NM_001163691	58226	Cacna1h	125	133	291	220	230	190	40	31	43	62	50	45
StitchedEnhancer_1021	chr1	130600939	130621855	NM_009911	12767	Cxcr4	215	205	297	220	225	246	83	81	97	91	73	66
StitchedEnhancer_10210	chr17	25599012	25617797	NM_027951	71840	Tekt4	296	327	586	409	258	155	51	48	70	77	48	61
StitchedEnhancer_10211	chr17	25667052	25678174	NM_011447	20681	Sox8	83	91	149	123	110	68	29	38	30	35	31	46
StitchedEnhancer_10212	chr17	25691873	25693650	NM_011447	20681	Sox8	79	69	111	56	55	56	10	9	5	7	5	8
StitchedEnhancer_10213	chr17	25707230	25730048	NR_045520	76483	Lmf1	317	298	376	266	334	179	73	85	95	111	95	89
StitchedEnhancer_10214	chr17	25784681	25786403	NM_022422	64337	Gng13	40	55	76	45	31	16	7	11	7	2	8	3
StitchedEnhancer_10215	chr17	25864635	25865019	NM_028009	106707	Rpusd1	20	17	28	19	18	11	1	4	3	3	4	3
StitchedEnhancer_10216	chr17	25891714	25934112	NM_026238	67563	Narfl	757	714	991	711	746	435	165	151	169	216	172	162
StitchedEnhancer_10217	chr17	25960301	25982171	NM_019719	56424	Stub1	1241	1035	1725	1248	1234	681	97	100	138	144	92	91
StitchedEnhancer_10218	chr17	25998016	26013005	NM_026633	68241	Fam195a	946	939	1500	1059	1051	509	66	81	81	108	64	89
StitchedEnhancer_10219	chr17	26047681	26063221	NM_139154	224624	Rab40c	766	809	1317	941	842	551	57	68	81	86	70	87
StitchedEnhancer_1022	chr1	130725722	130729358	NM_009911	12767	Cxcr4	50	55	100	44	48	28	18	12	8	15	17	20
StitchedEnhancer_10220	chr17	26077640	26083787	NM_001039038	621239	Nhlrc4	235	258	439	302	252	126	26	20	32	40	32	25
StitchedEnhancer_10221	chr17	26104393	26123537	NM_015830	50817	Capn15	283	275	391	261	282	202	71	99	74	118	74	103
StitchedEnhancer_10222	chr17	26144808	26159452	NM_153140	215445	Rab11fip3	361	308	412	251	225	185	60	57	75	67	60	73
StitchedEnhancer_10223	chr17	26177787	26180875	NM_153140	215445	Rab11fip3	112	99	160	111	89	70	9	20	15	20	10	18
StitchedEnhancer_10224	chr17	26201853	26207139	NM_001162868	215445	Rab11fip3	149	108	219	176	163	67	22	22	21	36	19	30
StitchedEnhancer_10225	chr17	26226664	26276342	NM_021793	60455	Tmem8	449	413	544	446	404	277	206	186	200	223	209	209
StitchedEnhancer_10226	chr17	26299313	26305842	NM_001159598	12005	Axin1	99	62	93	100	61	89	35	28	38	50	28	35
StitchedEnhancer_10227	chr17	26362068	26390801	NM_207217	106581	Itfg3	803	638	937	765	785	539	97	127	140	160	121	147
StitchedEnhancer_10228	chr17	26405469	26405964	NR_037905	66978	Luc7l	23	23	37	31	10	10	4	3	2	2	3	7
StitchedEnhancer_10229	chr17	26472143	26473475	NM_001081656	240055	Neurl1b	43	30	32	20	16	12	9	6	7	5	2	5
StitchedEnhancer_1023	chr1	130997202	130998642	NM_172485	210417	Thsd7b	68	78	102	83	37	34	9	3	11	6	7	2
StitchedEnhancer_10230	chr17	26494744	26495356	NM_001081656	240055	Neurl1b	7	8	28	10	10	4	2	5	1	0	6	7
StitchedEnhancer_10231	chr17	26517718	26535326	NM_001081656	240055	Neurl1b	1709	1492	2357	1503	1195	1003	77	88	79	97	80	85
StitchedEnhancer_10232	chr17	26551422	26854033	NM_026170	67458	Ergic1	22727	20030	27966	17471	15028	12341	1433	1481	1469	1758	1410	1538
StitchedEnhancer_10233	chr17	26914982	26934841	NM_172149	224630	Bnip1	259	259	330	239	349	202	80	100	107	133	106	89
StitchedEnhancer_10234	chr17	26971584	27054355	NM_008700	18091	Nkx2-5	2832	2998	5478	3547	3049	1598	305	304	337	408	321	310
StitchedEnhancer_10235	chr17	27069353	27091288	NM_001281491	240057	Syngap1	1024	954	1460	1078	934	618	90	97	109	104	84	98
StitchedEnhancer_10236	chr17	27109400	27132862	NM_001005916	474156	Zbtb9	380	295	484	335	277	194	84	120	106	125	116	128
StitchedEnhancer_10237	chr17	27154672	27217681	NM_080553	16440	Itpr3	1310	1313	1676	1180	1378	848	217	234	265	311	271	257
StitchedEnhancer_10238	chr17	27260425	27308013	NM_026063	67267	Uqcc2	1647	1540	2537	1493	1431	809	152	192	175	214	206	199
StitchedEnhancer_10239	chr17	27337994	27341883	NM_146075	224640	Lemd2	196	153	231	192	208	111	29	19	24	23	8	13
StitchedEnhancer_1024	chr1	131147379	131148327	NM_172485	210417	Thsd7b	20	6	28	13	20	13	2	6	6	7	5	3
StitchedEnhancer_10240	chr17	27377689	27383877	NM_146075	224640	Lemd2	116	146	233	139	151	86	12	25	22	26	24	29
StitchedEnhancer_10241	chr17	27453701	27455175	NR_106073	102465700	Mir7214	55	49	58	36	42	22	7	4	3	4	11	1
StitchedEnhancer_10242	chr17	27559361	27560662	NR_106077	102466228	Mir7218	39	54	97	44	30	12	2	4	3	2	7	4
StitchedEnhancer_10243	chr17	27617706	27617985	NM_001013385	268934	Grm4	4	12	12	6	4	3	0	1	1	1	0	2
StitchedEnhancer_10244	chr17	27683950	27780139	NM_001291046	56409	Nudt3	3970	3653	5142	3407	3458	2322	376	410	433	541	397	445
StitchedEnhancer_10245	chr17	27926672	27994704	NM_001271511	224647	D17Wsu92e	1637	1395	1825	1358	1473	1021	333	307	365	407	299	348
StitchedEnhancer_10246	chr17	28023312	28024303	NM_026836	68776	Taf11	18	14	33	28	33	11	2	3	4	3	8	4
StitchedEnhancer_10247	chr17	28044220	28048958	NM_181413	224650	Anks1	493	469	599	465	400	354	30	32	37	33	26	27
StitchedEnhancer_10248	chr17	28069748	28114786	NM_181413	224650	Anks1	2404	2121	2929	1865	1562	1085	197	243	234	310	218	266
StitchedEnhancer_10249	chr17	28132479	28180075	NM_013687	21463	Tcp11	4607	4322	5880	3551	3602	2294	212	252	252	268	241	250
StitchedEnhancer_1025	chr1	131995603	131995938	NM_007827	13137	Daf2	10	8	14	11	7	8	1	2	2	2	0	1
StitchedEnhancer_10250	chr17	28221914	28222658	NM_001085555	21463	Tcp11	61	41	62	39	42	38	5	6	6	5	3	4
StitchedEnhancer_10251	chr17	28240981	28255450	NM_001085555	21463	Tcp11	105	99	148	113	101	62	33	36	50	46	42	47
StitchedEnhancer_10252	chr17	28278647	28280463	NM_001004366	268935	Scube3	26	31	58	45	13	8	5	8	8	11	8	13
StitchedEnhancer_10253	chr17	28313697	28318185	NM_172617	224656	Zfp523	246	239	313	232	190	158	22	19	26	30	32	32
StitchedEnhancer_10254	chr17	28343772	28417946	NM_011145	19015	Ppard	2280	1995	2757	1921	1879	1385	272	337	343	409	302	343
StitchedEnhancer_10255	chr17	28430588	28451268	NR_028297	72775	Fance	338	265	399	276	291	216	82	94	83	111	104	97
StitchedEnhancer_10256	chr17	28464354	28488534	NM_001204156	21678	Tead3	1011	986	1247	963	828	579	90	80	103	110	99	97
StitchedEnhancer_10257	chr17	28544651	28566850	NM_021478	22157	Tulp1	1596	1432	1110	714	1398	772	100	114	96	150	122	108
StitchedEnhancer_10258	chr17	28583459	28605448	NM_010220	14229	Fkbp5	377	259	263	195	346	327	81	86	116	126	119	123
StitchedEnhancer_10259	chr17	28621580	28625708	NM_010220	14229	Fkbp5	497	358	204	151	388	231	23	20	31	20	11	20
StitchedEnhancer_1026	chr1	132358356	132371308	NM_010016	13136	Cd55	270	217	364	284	268	152	46	53	42	65	52	50
StitchedEnhancer_10260	chr17	28638743	28665069	NM_026290	67645	Armc12	4479	3807	3195	2032	4616	2299	112	125	129	135	104	145
StitchedEnhancer_10261	chr17	28727815	28729181	NM_026571	328789	Lhfpl5	70	54	106	75	69	30	10	4	2	6	3	15
StitchedEnhancer_10262	chr17	28758437	28759757	NM_016795	20815	Srpk1	121	108	169	104	115	60	13	9	11	12	11	6
StitchedEnhancer_10263	chr17	28826972	28854530	NM_001168513	26416	Mapk14	1223	1033	1560	1245	1112	812	127	140	149	185	135	131
StitchedEnhancer_10264	chr17	28873060	28893987	NM_011950	26415	Mapk13	197	210	270	206	224	147	89	107	89	138	91	95
StitchedEnhancer_10265	chr17	28918066	28918808	NM_011950	26415	Mapk13	16	19	23	12	17	8	4	5	5	0	5	1
StitchedEnhancer_10266	chr17	28936936	28939141	NM_001081315	268936	Brpf3	444	366	557	504	460	240	5	11	10	13	5	13
StitchedEnhancer_10267	chr17	29011423	29012824	NM_001034885	433091	Pnpla1	56	64	97	42	62	45	2	9	3	11	6	11
StitchedEnhancer_10268	chr17	29030099	29036673	NR_045457	74179	1700030A11Rik	204	156	188	135	209	118	30	24	25	45	34	45
StitchedEnhancer_10269	chr17	29057723	29069221	NM_172450	207819	4930539E08Rik	417	437	700	421	490	288	60	53	49	70	57	56
StitchedEnhancer_1027	chr1	132404556	132412550	NM_010016	13136	Cd55	186	168	328	246	158	133	25	29	36	36	45	30
StitchedEnhancer_10270	chr17	29088394	29105370	NM_025888	66989	Kctd20	609	556	810	567	684	448	99	88	98	98	89	94
StitchedEnhancer_10271	chr17	29139786	29232906	NR_036613	20383	Srsf3	4469	3682	5018	3495	4122	2837	435	421	490	496	459	461
StitchedEnhancer_10272	chr17	29272929	29273773	NM_001002786	442827	Rab44	23	23	43	20	11	11	2	3	4	3	5	4
StitchedEnhancer_10273	chr17	29308376	29317033	NM_001002786	442827	Rab44	70	62	133	72	98	41	37	38	35	42	24	45
StitchedEnhancer_10274	chr17	29373884	29412744	NM_026845	68816	Ppil1	2098	1932	3291	2067	1814	1015	162	172	150	208	151	201
StitchedEnhancer_10275	chr17	29437653	29500834	NM_023734	74116	Pi16	3349	2950	4416	2967	2903	1960	241	269	308	362	260	299
StitchedEnhancer_10276	chr17	29529617	29536076	NM_001159538	26382	Fgd2	433	448	624	431	513	520	29	36	25	36	29	35
StitchedEnhancer_10277	chr17	29552624	29640596	NM_008842	18712	Pim1	4225	4272	6683	4164	4237	3132	370	319	400	496	390	433
StitchedEnhancer_10278	chr17	29677949	29688870	NM_001162901	71138	Tmem217	186	152	205	150	118	104	46	45	55	74	71	50
StitchedEnhancer_10279	chr17	29751116	29752661	NM_021419	58230	Rnf8	154	136	197	158	131	83	3	4	14	7	9	6
StitchedEnhancer_1028	chr1	132442993	132448797	NM_009581	22789	Zp3r	191	180	308	208	200	153	28	33	31	32	27	20
StitchedEnhancer_10280	chr17	29774224	29775357	NM_028791	74157	Cmtr1	11	17	25	19	23	16	6	6	5	5	5	2
StitchedEnhancer_10281	chr17	29797067	29798567	NM_028791	74157	Cmtr1	209	190	260	185	207	136	8	8	8	11	9	13
StitchedEnhancer_10282	chr17	29815381	29817724	NM_028791	74157	Cmtr1	20	17	40	42	79	18	15	7	4	16	10	17
StitchedEnhancer_10283	chr17	29853584	29854135	NM_026782	68597	Ccdc167	9	18	33	34	20	9	6	2	2	3	0	2
StitchedEnhancer_10284	chr17	29896735	29898186	NM_001163741	68597	Ccdc167	49	23	58	39	50	24	8	9	5	3	5	3
StitchedEnhancer_10285	chr17	29924901	29927814	NM_001163741	68597	Ccdc167	174	245	288	128	125	72	10	9	8	14	16	12
StitchedEnhancer_10286	chr17	29960011	29962582	NM_001081160	74762	Mdga1	359	344	553	362	280	145	5	6	5	10	16	9
StitchedEnhancer_10287	chr17	29978772	29990626	NM_001081160	74762	Mdga1	230	244	350	189	203	115	29	39	54	56	32	56
StitchedEnhancer_10288	chr17	30010292	30011336	NM_001081160	74762	Mdga1	23	21	21	15	22	5	5	3	5	6	4	4
StitchedEnhancer_10289	chr17	30024180	30025384	NM_001081160	74762	Mdga1	20	15	21	15	23	8	2	5	4	2	6	6
StitchedEnhancer_1029	chr1	132595501	132614694	NM_001162416	18640	Pfkfb2	1302	1247	1913	1046	1094	639	75	87	93	94	80	81
StitchedEnhancer_10290	chr17	30121715	30145733	NM_148926	21769	Zfand3	1886	1532	2233	1552	1341	879	104	99	110	126	102	111
StitchedEnhancer_10291	chr17	30162480	30169616	NM_148926	21769	Zfand3	333	204	247	162	168	161	35	44	37	47	45	44
StitchedEnhancer_10292	chr17	30188102	30196435	NM_148926	21769	Zfand3	228	170	210	126	148	76	41	49	39	50	40	37
StitchedEnhancer_10293	chr17	30226745	30227953	NM_148926	21769	Zfand3	43	29	49	45	25	22	5	8	4	8	3	11
StitchedEnhancer_10294	chr17	30267939	30269409	NR_105839	102465223	Mir6412	42	31	31	18	29	20	7	11	6	8	10	4
StitchedEnhancer_10295	chr17	30282498	30286426	NR_105839	102465223	Mir6412	247	191	248	119	161	100	18	16	16	29	20	15
StitchedEnhancer_10296	chr17	30324716	30337967	NR_105839	102465223	Mir6412	423	403	534	337	411	263	63	44	75	81	38	63
StitchedEnhancer_10297	chr17	30352442	30353666	NR_105839	102465223	Mir6412	34	25	72	46	44	18	2	3	6	3	5	6
StitchedEnhancer_10298	chr17	30381618	30382689	NR_105839	102465223	Mir6412	21	14	31	22	26	8	5	2	5	8	7	3
StitchedEnhancer_10299	chr17	30480416	30481327	NR_030688	623169	Gm6402	17	12	31	19	13	13	4	4	6	0	2	3
StitchedEnhancer_103	chr1	20984311	21005785	NM_027974	71877	Efhc1	848	698	903	628	635	687	94	134	116	140	99	127
StitchedEnhancer_1030	chr1	132637036	132638542	NM_177604	212439	AA986860	49	51	61	44	48	35	6	8	4	9	11	8
StitchedEnhancer_10300	chr17	30499367	30505871	NR_030688	623169	Gm6402	118	71	185	129	75	65	26	20	30	20	35	29
StitchedEnhancer_10301	chr17	30582539	30596265	NR_030688	623169	Gm6402	86	90	106	70	80	42	59	49	46	83	47	64
StitchedEnhancer_10302	chr17	30635274	30636317	NM_172618	224671	Btbd9	47	22	41	22	18	17	3	3	6	3	4	5
StitchedEnhancer_10303	chr17	30701263	30714036	NM_172618	224671	Btbd9	603	450	706	558	379	308	55	58	68	72	62	60
StitchedEnhancer_10304	chr17	30748787	30749845	NM_025374	109801	Glo1	126	106	171	108	132	54	4	4	5	9	10	8
StitchedEnhancer_10305	chr17	31143905	31144678	NM_009593	11307	Abcg1	25	26	26	12	20	11	1	2	7	5	6	6
StitchedEnhancer_10306	chr17	31175889	31177556	NM_009593	11307	Abcg1	24	30	38	40	35	26	6	3	8	15	10	6
StitchedEnhancer_10307	chr17	31194476	31227392	NM_009593	11307	Abcg1	1676	1278	1985	1330	1153	1024	130	159	160	164	148	174
StitchedEnhancer_10308	chr17	31381974	31382788	NM_025290	22092	Rsph1	40	20	49	31	39	10	2	4	6	7	3	2
StitchedEnhancer_10309	chr17	31397325	31399744	NM_025290	22092	Rsph1	59	29	44	48	21	21	6	4	7	4	10	3
StitchedEnhancer_1031	chr1	132699288	132702142	NM_144960	64435	Fcamr	92	88	190	100	41	32	15	10	10	10	5	5
StitchedEnhancer_10310	chr17	31413882	31414533	NM_025290	22092	Rsph1	12	17	13	24	8	5	2	4	6	8	1	1
StitchedEnhancer_10311	chr17	31431806	31459323	NM_001242427	224674	Slc37a1	363	328	406	358	419	230	86	120	106	130	105	93
StitchedEnhancer_10312	chr17	31472738	31473529	NM_001242427	224674	Slc37a1	20	11	17	19	9	9	4	2	0	7	2	5
StitchedEnhancer_10313	chr17	31515137	31523966	NM_008804	18585	Pde9a	252	215	339	219	208	122	25	41	40	52	41	27
StitchedEnhancer_10314	chr17	31540831	31544014	NM_001163748	18585	Pde9a	94	70	135	69	58	62	4	11	11	11	9	11
StitchedEnhancer_10315	chr17	31569458	31594622	NM_001163748	18585	Pde9a	381	345	456	299	302	268	70	109	103	127	110	94
StitchedEnhancer_10316	chr17	31648767	31658589	NM_030087	78330	Ndufv3	349	290	407	321	331	170	48	41	43	53	53	47
StitchedEnhancer_10317	chr17	31672085	31708004	NR_027493	18771	Pknox1	977	804	1229	885	786	579	138	142	151	171	147	169
StitchedEnhancer_10318	chr17	31750052	31750344	NM_144855	12411	Cbs	9	9	7	7	8	4	1	1	1	1	3	3
StitchedEnhancer_10319	chr17	31773858	31775340	NM_178224	12411	Cbs	53	46	60	59	49	20	6	10	8	7	4	8
StitchedEnhancer_1032	chr1	132717437	132717719	NM_011082	18703	Pigr	3	5	11	9	13	9	3	1	2	2	0	2
StitchedEnhancer_10320	chr17	31794990	31796354	NM_024187	108121	U2af1	199	217	247	197	171	98	4	12	8	8	10	9
StitchedEnhancer_10321	chr17	31822561	31825969	NM_001278570	12954	Cryaa	210	217	265	144	131	130	8	22	12	17	11	18
StitchedEnhancer_10322	chr17	31839521	31841907	NM_001278570	12954	Cryaa	315	333	395	181	178	136	7	9	6	12	7	8
StitchedEnhancer_10323	chr17	31863989	31866779	NM_001278570	12954	Cryaa	86	64	66	73	63	39	10	14	9	13	18	8
StitchedEnhancer_10324	chr17	31882545	31943803	NM_010831	17691	Sik1	2086	1906	2885	1594	1817	1179	222	262	242	322	240	270
StitchedEnhancer_10325	chr17	31957410	32015432	NM_010831	17691	Sik1	3712	3359	4294	2728	2987	2312	233	241	241	299	240	267
StitchedEnhancer_10326	chr17	32028661	32081493	NM_010831	17691	Sik1	4225	3854	4094	2560	3042	2123	234	238	242	289	224	239
StitchedEnhancer_10327	chr17	32101930	32173856	NM_028902	74377	Hsf2bp	1580	1396	1793	1284	1167	913	274	325	303	412	310	319
StitchedEnhancer_10328	chr17	32199575	32200222	NM_001163734	72462	Rrp1b	9	16	19	14	8	7	1	3	4	6	2	3
StitchedEnhancer_10329	chr17	32227739	32261318	NR_027316	435518	Pdxk-ps	1495	1246	1810	1082	986	715	140	121	139	176	162	137
StitchedEnhancer_1033	chr1	132746417	132747766	NM_026976	69169	Faim3	13	17	46	38	44	13	3	2	5	5	4	5
StitchedEnhancer_10330	chr17	32280488	32281073	NM_008716	18131	Notch3	11	15	19	5	10	2	1	3	6	3	1	2
StitchedEnhancer_10331	chr17	32294992	32327521	NM_008716	18131	Notch3	1187	1131	1589	1061	851	611	100	127	103	127	91	104
StitchedEnhancer_10332	chr17	32341275	32346965	NM_001033163	71932	Ephx3	563	458	749	449	415	238	24	25	36	34	31	30
StitchedEnhancer_10333	chr17	32394255	32422474	NM_198094	57261	Brd4	1096	943	1254	996	929	640	150	136	135	170	118	137
StitchedEnhancer_10334	chr17	32456235	32459381	NM_019774	56399	Akap8	466	430	673	480	495	286	19	15	18	18	14	17
StitchedEnhancer_10335	chr17	32486093	32501949	NM_017476	54194	Akap8l	362	331	487	357	350	201	62	78	75	86	88	80
StitchedEnhancer_10336	chr17	32519801	32526846	NM_212438	22404	Wiz	201	210	387	279	207	101	42	46	22	51	28	24
StitchedEnhancer_10337	chr17	32539943	32540360	NR_029458	664702	A530088E08Rik	6	14	19	16	9	15	2	1	2	1	1	2
StitchedEnhancer_10338	chr17	32642692	32644140	NM_001101445	208285	Cyp4f17	98	88	118	93	73	50	5	14	10	11	4	12
StitchedEnhancer_10339	chr17	32665413	32674242	NM_024442	70101	Cyp4f16	84	88	111	91	125	71	41	43	37	61	37	40
StitchedEnhancer_1034	chr1	132760678	132762722	NM_026976	69169	Faim3	28	22	50	39	44	24	4	10	9	9	9	8
StitchedEnhancer_10340	chr17	32924240	32925474	NM_172458	208292	Zfp871	172	156	227	124	179	94	11	8	7	6	2	4
StitchedEnhancer_10341	chr17	32966651	32976736	NM_177359	240064	Zfp799	92	75	104	86	95	47	53	22	41	60	43	30
StitchedEnhancer_10342	chr17	33027942	33032822	NM_207245	240066	Zfp870	162	170	265	225	226	186	20	21	22	36	18	21
StitchedEnhancer_10343	chr17	33061382	33062395	NM_001204336	64385	Cyp4f14	102	108	101	85	90	58	7	6	7	13	6	13
StitchedEnhancer_10344	chr17	33083197	33085292	NM_130882	170716	Cyp4f13	559	511	465	299	429	234	9	15	11	13	12	15
StitchedEnhancer_10345	chr17	33101942	33103750	NM_153063	224691	Zfp472	119	119	132	82	99	66	6	8	9	15	10	10
StitchedEnhancer_10346	chr17	33129790	33130539	NM_001045559	240067	Zfp952	45	40	57	49	43	44	6	7	6	10	3	6
StitchedEnhancer_10347	chr17	33169748	33170459	NM_028543	73451	Zfp763	36	21	38	29	27	17	1	4	5	6	5	5
StitchedEnhancer_10348	chr17	33225849	33230247	NM_001024950	240068	Zfp563	229	187	305	216	182	139	26	14	21	28	20	25
StitchedEnhancer_10349	chr17	33391530	33392497	NM_029952	77652	Zfp955a	88	72	74	76	88	43	7	4	7	6	7	6
StitchedEnhancer_1035	chr1	132891649	132900715	NM_010548	16153	Il10	83	94	98	79	61	74	22	17	30	45	30	32
StitchedEnhancer_10350	chr17	33426024	33434744	NM_001142957	100043468	Zfp955b	100	81	110	92	120	67	37	35	38	49	33	45
StitchedEnhancer_10351	chr17	33495403	33496417	NM_207541	224694	Zfp81	76	70	86	95	54	26	4	4	5	5	6	7
StitchedEnhancer_10352	chr17	33531050	33532159	NM_009542	22643	Zfp101	127	107	181	132	99	52	4	9	6	10	8	4
StitchedEnhancer_10353	chr17	33576563	33577759	NM_183282	69481	Actl9	15	17	20	19	28	15	6	8	6	6	2	4
StitchedEnhancer_10354	chr17	33639930	33666697	NR_037707	224697	Adamts10	952	817	1076	737	649	490	99	97	98	126	109	122
StitchedEnhancer_10355	chr17	33691669	33703786	NM_053214	17916	Myo1f	217	194	311	228	235	226	42	47	42	51	55	52
StitchedEnhancer_10356	chr17	33765470	33775446	NM_026712	328801	Zfp414	349	311	464	320	345	219	28	44	52	69	45	52
StitchedEnhancer_10357	chr17	33821243	33822876	NM_001109913	76936	Hnrnpm	220	226	336	233	258	193	11	13	10	15	3	21
StitchedEnhancer_10358	chr17	33855074	33856281	NR_045522	224703	March2	94	88	181	104	101	66	7	13	11	9	9	6
StitchedEnhancer_10359	chr17	33869442	33898277	NM_008997	19326	Rab11b	1568	1308	2006	1312	978	846	117	148	160	167	118	146
StitchedEnhancer_1036	chr1	132949297	133036254	NM_008551	17164	Mapkapk2	3269	2972	4574	2921	2794	1859	407	405	446	481	384	429
StitchedEnhancer_10360	chr17	33915381	33926549	NM_020581	57875	Angptl4	895	774	1345	772	401	506	64	70	54	71	54	50
StitchedEnhancer_10361	chr17	33946954	33980771	NR_103514	66416	Ndufa7	2897	2537	3405	2119	2033	1500	193	185	223	234	205	200
StitchedEnhancer_10362	chr17	34027420	34093541	NM_009318	21356	Tapbp	3208	2944	4045	3003	2712	2081	288	338	339	399	319	348
StitchedEnhancer_10363	chr17	34114940	34119223	NR_004446	630499	H2-K2	789	811	1331	818	659	537	19	20	22	28	22	33
StitchedEnhancer_10364	chr17	34135757	34138362	NM_001001892	14972	H2-K1	408	450	573	478	384	339	12	18	10	22	14	10
StitchedEnhancer_10365	chr17	34160977	34171558	NM_013543	14979	H2-Ke6	1205	1179	1622	1170	1224	770	61	61	71	76	75	73
StitchedEnhancer_10366	chr17	34184075	34184783	NM_009926	12815	Col11a2	21	17	35	24	21	14	6	2	5	7	7	9
StitchedEnhancer_10367	chr17	34229247	34240799	NR_046183	414076	BC051537	94	132	170	169	243	156	33	49	41	48	43	61
StitchedEnhancer_10368	chr17	34254090	34290864	NM_010388	15000	H2-DMb2	5116	4832	6869	4840	4181	3202	142	148	182	206	158	160
StitchedEnhancer_10369	chr17	34307903	34308849	NM_013585	16912	Psmb9	41	30	48	57	34	46	5	6	6	2	3	7
StitchedEnhancer_1037	chr1	133049432	133050189	NM_010709	16865	Eif2d	48	57	65	57	47	41	5	7	9	9	9	8
StitchedEnhancer_10370	chr17	34323427	34356479	NM_011530	21355	Tap2	1263	1183	1834	1428	1524	1248	147	146	162	193	153	170
StitchedEnhancer_10371	chr17	34371091	34378174	NM_010389	15002	H2-Ob	381	380	641	462	456	385	43	33	33	43	29	33
StitchedEnhancer_10372	chr17	34393915	34402496	NM_207105	14961	H2-Ab1	189	284	333	363	318	314	33	41	42	50	45	48
StitchedEnhancer_10373	chr17	34422972	34449781	NM_010382	14969	H2-Eb1	602	836	972	975	977	939	85	100	130	116	85	110
StitchedEnhancer_10374	chr17	34483283	34502573	NM_079835	547431	Btnl2	220	241	341	311	241	249	49	61	70	88	82	76
StitchedEnhancer_10375	chr17	34528377	34536465	NM_001001177	407788	BC051142	127	156	233	187	178	157	40	31	44	38	31	46
StitchedEnhancer_10376	chr17	34573944	34575200	NM_030746	632126	Btnl4	39	44	43	57	66	54	6	5	8	6	2	6
StitchedEnhancer_10377	chr17	34644228	34645712	NM_030747	624681	Btnl6	33	26	61	35	35	21	12	8	9	5	5	10
StitchedEnhancer_10378	chr17	34692808	34703180	NM_010929	18132	Notch4	1289	1081	1396	900	890	611	44	52	38	54	57	51
StitchedEnhancer_10379	chr17	34722667	34839098	NM_019873	56299	Fkbpl	6547	6231	9252	6225	5283	3968	457	534	520	646	530	544
StitchedEnhancer_1038	chr1	133068507	133097228	NM_010709	16865	Eif2d	742	578	774	557	552	435	98	110	129	157	106	132
StitchedEnhancer_10380	chr17	34879733	34884569	NM_009780	12268	C4b	103	129	176	158	155	147	12	13	16	20	17	17
StitchedEnhancer_10381	chr17	34914785	34917505	NM_009995	13079	Cyp21a1	30	33	67	63	40	29	4	7	12	8	12	17
StitchedEnhancer_10382	chr17	34973375	35000007	NM_021337	108077	Skiv2l	333	297	327	281	282	249	114	103	135	134	122	129
StitchedEnhancer_10383	chr17	35016330	35037736	NM_198886	193736	Zbtb12	809	752	1241	876	760	504	71	85	83	107	91	86
StitchedEnhancer_10384	chr17	35060959	35119621	NR_015536	68763	1110038B12Rik	4000	3310	5091	3450	2285	1868	281	283	282	376	280	334
StitchedEnhancer_10385	chr17	35136044	35161737	NM_138582	27762	Vwa7	1425	1402	1903	1359	1666	1260	97	144	117	154	114	135
StitchedEnhancer_10386	chr17	35180958	35227645	NM_023463	68468	Ly6g6c	3656	3148	5041	3426	2844	2337	194	194	208	260	209	191
StitchedEnhancer_10387	chr17	35248085	35273385	NM_032460	81845	Gpank1	1403	1320	1778	1312	1347	851	84	137	135	156	124	129
StitchedEnhancer_10388	chr17	35298611	35381260	NM_001278601	21926	Tnf	4866	4508	6710	4825	4308	3527	343	391	379	481	371	460
StitchedEnhancer_10389	chr17	35394224	35402154	NM_010380	14964	H2-D1	1112	1059	1565	1109	925	791	27	33	48	38	41	38
StitchedEnhancer_1039	chr1	133134944	133150068	NM_018750	54354	Rassf5	177	144	208	177	162	102	55	53	60	66	59	52
StitchedEnhancer_10390	chr17	35438783	35439067	NM_010390	15006	H2-Q1	3	7	10	5	23	10	3	1	5	0	0	1
StitchedEnhancer_10391	chr17	35515148	35517569	NM_001143689	15015	H2-Q4	371	377	561	444	370	326	9	16	17	23	11	15
StitchedEnhancer_10392	chr17	35530357	35531661	NR_051981	15016	H2-Q5	72	78	92	114	92	112	4	6	11	9	11	10
StitchedEnhancer_10393	chr17	35561104	35562430	NM_023124	15019	H2-Q8	65	80	115	116	116	139	11	8	10	17	9	15
StitchedEnhancer_10394	chr17	35575551	35576755	NM_001201460	110558	H2-Q9	55	69	95	93	110	110	6	12	5	21	14	14
StitchedEnhancer_10395	chr17	35616244	35617290	NM_010391	15007	H2-Q10	17	10	29	11	27	14	4	1	2	5	5	8
StitchedEnhancer_10396	chr17	35653412	35655045	NM_146248	240084	Cchcr1	36	43	67	50	55	41	11	7	6	5	10	8
StitchedEnhancer_10397	chr17	35685623	35687929	NM_001008424	386463	Cdsn	171	205	306	256	198	97	8	10	8	16	9	7
StitchedEnhancer_10398	chr17	35727081	35727980	NM_175148	69542	2300002M23Rik	15	27	28	13	26	20	3	3	6	5	4	2
StitchedEnhancer_10399	chr17	35776009	35776516	NM_001033366	268949	Dpcr1	9	6	17	11	9	12	2	3	4	4	1	2
StitchedEnhancer_104	chr1	21027485	21043425	NM_177409	170829	Tram2	110	97	93	88	118	193	73	50	59	74	70	62
StitchedEnhancer_1040	chr1	133175581	133184463	NM_019777	56489	Ikbke	84	57	103	48	66	60	31	47	35	53	39	43
StitchedEnhancer_10400	chr17	35803994	35810766	NM_175137	68915	Vars2	191	157	211	167	175	103	43	38	33	39	34	32
StitchedEnhancer_10401	chr17	35834096	35842275	NM_001198833	12305	Ddr1	700	632	1042	747	628	352	29	23	38	32	31	34
StitchedEnhancer_10402	chr17	35856858	35863877	NM_172962	12305	Ddr1	122	91	146	132	101	53	25	24	26	28	24	31
StitchedEnhancer_10403	chr17	35888737	35925039	NR_045459	74601	4833427F10Rik	1258	1103	1560	1020	964	629	137	161	183	169	158	183
StitchedEnhancer_10404	chr17	35939132	35979145	NM_133662	15937	Ier3	4296	3915	5434	3471	3966	2266	197	232	204	245	196	188
StitchedEnhancer_10405	chr17	35997506	36017170	NM_175242	76448	Ppp1r18	4273	3638	4888	3134	2823	2417	81	128	104	128	98	122
StitchedEnhancer_10406	chr17	36033352	36058155	NM_001142745	73242	Atat1	2297	1994	3026	2232	1915	1358	124	139	133	175	132	136
StitchedEnhancer_10407	chr17	36106050	36118221	NM_001282012	75210	Prr3	901	784	1017	768	778	463	53	68	62	94	64	87
StitchedEnhancer_10408	chr17	36130813	36138872	NR_015618	77810	A930015D03Rik	159	154	282	222	236	243	36	37	40	48	43	42
StitchedEnhancer_10409	chr17	36154875	36181258	NM_010398	15040	H2-T23	1826	1682	2598	1780	1631	1632	121	132	152	163	155	165
StitchedEnhancer_1041	chr1	133241005	133258059	NM_019777	56489	Ikbke	363	292	614	429	303	273	96	99	104	119	78	85
StitchedEnhancer_10410	chr17	36257650	36260647	NR_046286	15024	H2-T10	181	204	327	218	189	193	28	10	19	20	19	13
StitchedEnhancer_10411	chr17	36394237	36409268	NM_178281	79263	Trim39	778	751	1069	774	743	502	66	82	101	105	85	92
StitchedEnhancer_10412	chr17	36452082	36452427	NM_013544	14985	H2-M10.1	4	6	10	11	6	3	0	0	3	1	2	2
StitchedEnhancer_10413	chr17	36561721	36562061	NM_177634	224753	H2-M10.4	6	5	15	7	10	6	1	1	2	3	3	1
StitchedEnhancer_10414	chr17	36972871	36987072	NM_001286726	22670	Trim26	592	504	678	484	459	355	71	77	94	87	67	73
StitchedEnhancer_10415	chr17	37064319	37096063	NM_001099632	386454	Rnf39	1096	987	1271	911	827	624	139	140	161	194	159	156
StitchedEnhancer_10416	chr17	37118024	37119041	NM_029747	76797	2410137M14Rik	40	47	70	38	41	32	3	5	3	1	6	3
StitchedEnhancer_10417	chr17	37139092	37140148	NM_001013745	22715	Zfp57	54	57	63	51	35	24	5	6	3	6	2	7
StitchedEnhancer_10418	chr17	37182151	37187870	NM_019439	54393	Gabbr1	144	109	187	138	125	69	33	32	27	45	32	38
StitchedEnhancer_10419	chr17	37322349	37322660	NM_023137	24108	Ubd	5	4	12	2	21	15	3	4	3	2	1	2
StitchedEnhancer_1042	chr1	133274193	133282472	NM_019777	56489	Ikbke	233	159	254	175	141	207	31	30	50	55	39	44
StitchedEnhancer_10420	chr17	37406696	37408515	NM_013819	14991	H2-M3	262	295	370	307	262	245	17	9	11	15	12	12
StitchedEnhancer_10421	chr17	39979961	39985753	NR_046233	100861531	Rn45s	5209	4420	3228	3312	3512	2387	1566	1593	1842	2388	1790	1864
StitchedEnhancer_10422	chr17	40943773	40944206	NM_011269	19743	Rhag	10	9	10	3	13	11	4	1	1	2	2	1
StitchedEnhancer_10423	chr17	41010292	41018187	NM_027834	71583	9130008F23Rik	266	215	335	203	221	179	22	34	26	37	26	37
StitchedEnhancer_10424	chr17	41041278	41042092	NM_001145060	435528	Glyatl3	12	23	26	21	22	14	3	3	1	5	5	0
StitchedEnhancer_10425	chr17	41071009	41072620	NM_008650	17850	Mut	450	400	458	352	382	238	9	11	12	12	9	13
StitchedEnhancer_10426	chr17	42713891	42714703	NM_181753	353344	Opn5	26	21	26	17	13	8	1	4	2	2	2	1
StitchedEnhancer_10427	chr17	42766694	42767692	NM_181753	353344	Opn5	41	42	37	46	27	18	5	4	5	2	3	5
StitchedEnhancer_10428	chr17	42878120	42879327	NM_001033493	435529	Gpr111	25	27	39	25	28	22	3	4	2	2	1	0
StitchedEnhancer_10429	chr17	42952517	42960251	NM_009847	12488	Cd2ap	136	74	95	87	84	55	32	21	45	63	31	44
StitchedEnhancer_1043	chr1	133324087	133329223	NM_001081011	14270	Srgap2	175	114	172	134	104	93	25	31	33	27	30	19
StitchedEnhancer_10430	chr17	43005929	43031452	NM_009847	12488	Cd2ap	1017	862	1256	900	891	617	104	97	99	132	117	105
StitchedEnhancer_10431	chr17	43063990	43076472	NM_009847	12488	Cd2ap	156	137	238	145	141	93	37	44	57	66	45	51
StitchedEnhancer_10432	chr17	43093061	43095312	NM_178589	94185	Tnfrsf21	40	41	47	36	39	27	9	9	8	8	6	9
StitchedEnhancer_10433	chr17	43153418	43155310	NM_178589	94185	Tnfrsf21	181	155	219	178	120	98	9	8	9	10	8	10
StitchedEnhancer_10434	chr17	43169673	43178616	NM_178589	94185	Tnfrsf21	104	71	97	91	69	75	31	45	35	59	26	31
StitchedEnhancer_10435	chr17	43195294	43195978	NM_178589	94185	Tnfrsf21	14	9	9	14	18	14	0	1	6	5	1	3
StitchedEnhancer_10436	chr17	43209135	43214970	NM_178589	94185	Tnfrsf21	227	131	196	153	102	123	22	23	24	30	25	22
StitchedEnhancer_10437	chr17	43274342	43279460	NR_045155	545207	E130008D07Rik	135	95	140	81	85	78	21	22	21	20	15	15
StitchedEnhancer_10438	chr17	43294848	43303512	NR_045153	545207	E130008D07Rik	75	77	107	60	59	50	32	27	22	37	29	28
StitchedEnhancer_10439	chr17	43326552	43327827	NR_045153	545207	E130008D07Rik	27	20	26	22	19	18	2	6	5	3	2	4
StitchedEnhancer_1044	chr1	133343945	133345975	NM_001081011	14270	Srgap2	75	43	51	39	42	49	9	12	8	17	11	12
StitchedEnhancer_10440	chr17	43346450	43394930	NM_133776	77596	Gpr110	1185	1014	1423	865	735	487	233	224	237	258	197	203
StitchedEnhancer_10441	chr17	43463565	43475801	NM_001081178	224792	Gpr116	519	399	504	360	319	244	48	55	55	54	41	53
StitchedEnhancer_10442	chr17	43494739	43572427	NM_001081178	224792	Gpr116	6549	4833	7052	4145	4115	3380	337	357	384	400	363	334
StitchedEnhancer_10443	chr17	43591539	43597815	NM_008585	17287	Mep1a	180	137	221	152	123	106	31	34	33	27	28	33
StitchedEnhancer_10444	chr17	43671328	43676401	NM_001254953	100043332	Ankrd66	88	69	43	46	65	60	17	17	22	17	16	18
StitchedEnhancer_10445	chr17	43693727	43719089	NM_013737	27226	Pla2g7	450	400	445	385	385	457	98	79	93	114	106	83
StitchedEnhancer_10446	chr17	43780951	43781984	NM_001161367	210510	Tdrd6	24	20	25	19	30	10	4	4	6	5	0	4
StitchedEnhancer_10447	chr17	43803727	43806660	NM_018887	56050	Cyp39a1	85	73	144	95	81	47	8	22	23	17	13	21
StitchedEnhancer_10448	chr17	43841289	43854539	NM_018887	56050	Cyp39a1	194	164	309	270	163	108	61	67	77	70	50	63
StitchedEnhancer_10449	chr17	43868077	44003355	NM_207649	53901	Rcan2	4776	3784	5862	3666	3074	2060	486	480	533	650	514	520
StitchedEnhancer_1045	chr1	133370166	133425649	NM_001081011	14270	Srgap2	1736	1330	1881	1355	1224	1052	246	251	323	331	265	302
StitchedEnhancer_10450	chr17	44035949	44042331	NM_001286654	53901	Rcan2	179	144	207	141	143	117	28	21	21	37	29	18
StitchedEnhancer_10451	chr17	44067045	44067460	NM_001286654	53901	Rcan2	13	10	8	6	9	6	2	2	0	0	2	0
StitchedEnhancer_10452	chr17	44084628	44089999	NM_001286654	53901	Rcan2	44	52	46	36	67	28	19	22	13	24	20	27
StitchedEnhancer_10453	chr17	44128047	44131265	NM_030598	53901	Rcan2	78	53	82	58	47	28	13	13	15	19	13	14
StitchedEnhancer_10454	chr17	44155146	44180620	NM_032003	83965	Enpp5	1319	1035	1074	710	618	497	85	107	112	137	100	113
StitchedEnhancer_10455	chr17	44212433	44245738	NM_001168620	83965	Enpp5	666	460	757	541	474	401	136	137	174	189	141	155
StitchedEnhancer_10456	chr17	44288446	44394548	NM_172621	224796	Clic5	7656	5889	8118	5427	5729	4000	466	523	512	585	466	489
StitchedEnhancer_10457	chr17	44510735	44511157	NM_172621	224796	Clic5	16	13	13	10	8	6	2	1	1	2	4	1
StitchedEnhancer_10458	chr17	44555646	44560777	NM_172621	224796	Clic5	62	104	197	83	80	58	17	14	16	12	16	18
StitchedEnhancer_10459	chr17	44595784	44596057	NM_172621	224796	Clic5	0	4	8	7	16	5	0	2	0	2	0	0
StitchedEnhancer_1046	chr1	133443336	133457961	NM_175382	108900	Fam72a	232	160	234	176	156	133	63	62	54	103	67	85
StitchedEnhancer_10460	chr17	44734706	44761236	NR_073425	12393	Runx2	321	254	315	258	261	241	64	106	90	107	97	94
StitchedEnhancer_10461	chr17	44800505	44801358	NR_073425	12393	Runx2	18	5	19	11	12	18	5	2	5	3	5	6
StitchedEnhancer_10462	chr17	44814493	44815212	NR_073425	12393	Runx2	20	26	30	24	37	33	4	3	3	3	2	4
StitchedEnhancer_10463	chr17	44846114	44848546	NR_073425	12393	Runx2	106	77	122	92	119	100	11	6	11	15	11	8
StitchedEnhancer_10464	chr17	44870931	44873751	NR_073425	12393	Runx2	94	113	155	103	114	123	8	10	14	14	7	19
StitchedEnhancer_10465	chr17	44913542	44915288	NM_178652	109115	Supt3	223	174	272	212	190	126	12	13	7	7	5	11
StitchedEnhancer_10466	chr17	45072579	45081341	NM_029257	75341	4930564C03Rik	64	56	78	40	56	51	33	30	32	38	36	36
StitchedEnhancer_10467	chr17	45157024	45157778	NM_029257	75341	4930564C03Rik	14	10	27	25	29	14	8	1	2	3	7	4
StitchedEnhancer_10468	chr17	45513813	45527452	NM_152810	71702	Cdc5l	105	72	110	79	82	53	52	47	62	67	57	51
StitchedEnhancer_10469	chr17	45569809	45580636	NM_152810	71702	Cdc5l	451	429	644	456	391	247	44	67	59	61	55	63
StitchedEnhancer_1047	chr1	133534596	133539211	NM_007799	13034	Ctse	25	12	29	28	70	108	6	12	19	25	16	19
StitchedEnhancer_10470	chr17	45635359	45644261	NM_198608	224805	Aars2	168	156	256	220	169	96	28	32	27	42	38	35
StitchedEnhancer_10471	chr17	45691877	45767683	NM_022880	63959	Slc29a1	5664	5436	8573	5681	4089	3136	359	330	336	432	350	361
StitchedEnhancer_10472	chr17	45817539	45839132	NM_026732	68463	Mrpl14	804	830	1578	934	961	511	83	90	101	112	79	88
StitchedEnhancer_10473	chr17	45861025	45907629	NM_028164	72240	1600014C23Rik	1121	1015	1550	986	901	651	145	162	182	207	161	190
StitchedEnhancer_10474	chr17	45948173	45954203	NM_028164	72240	1600014C23Rik	836	755	1122	682	595	364	14	18	17	25	16	28
StitchedEnhancer_10475	chr17	45984035	45987638	NM_028164	72240	1600014C23Rik	435	395	682	375	325	188	11	22	12	14	14	16
StitchedEnhancer_10476	chr17	46002835	46063489	NM_001110267	22339	Vegfa	981	1005	1745	1128	734	485	210	200	212	290	205	240
StitchedEnhancer_10477	chr17	46140774	46170886	NM_001110267	22339	Vegfa	2280	2201	3737	2263	2157	1214	107	108	119	140	95	139
StitchedEnhancer_10478	chr17	46210414	46219343	NM_026768	68565	Mrps18a	148	148	140	100	135	94	25	34	28	38	38	31
StitchedEnhancer_10479	chr17	46240703	46306238	NM_029338	75564	Rsph9	2645	2285	3308	2121	1922	1326	267	288	333	400	325	332
StitchedEnhancer_1048	chr1	133584941	133611642	NM_145509	226421	5430435G22Rik	484	468	483	352	339	344	92	99	102	139	111	112
StitchedEnhancer_10480	chr17	46339014	46340739	NM_028198	72322	Xpo5	171	177	191	115	123	82	3	14	16	8	8	5
StitchedEnhancer_10481	chr17	46384505	46385664	NM_145353	28064	Yipf3	157	123	237	149	137	83	6	5	3	11	8	5
StitchedEnhancer_10482	chr17	46398654	46425485	NM_001252475	74094	Tjap1	569	534	961	694	554	432	131	126	161	170	116	136
StitchedEnhancer_10483	chr17	46464383	46465887	NM_170680	224814	Abcc10	229	194	318	261	209	149	10	4	11	12	7	14
StitchedEnhancer_10484	chr17	46519792	46521586	NM_207671	57908	Zfp318	138	114	191	169	155	54	8	11	18	11	11	15
StitchedEnhancer_10485	chr17	46549791	46570139	NM_053250	114570	Crip3	197	189	256	180	145	102	78	85	93	105	80	87
StitchedEnhancer_10486	chr17	46599013	46599768	NM_144856	108114	Slc22a7	32	40	39	23	29	11	0	3	2	3	1	1
StitchedEnhancer_10487	chr17	46657812	46658095	NM_207161	381101	Dnph1	9	2	7	10	10	6	1	1	0	2	3	1
StitchedEnhancer_10488	chr17	46682622	46694048	NR_105942	102466778	Mir6976	1040	1017	1859	1378	1022	568	51	52	75	75	56	66
StitchedEnhancer_10489	chr17	46707357	46708785	NM_020493	20807	Srf	71	80	74	57	34	43	0	5	10	2	12	4
StitchedEnhancer_1049	chr1	133650775	133652169	NM_177243	320718	Slc26a9	53	64	75	68	67	21	2	7	9	7	11	1
StitchedEnhancer_10490	chr17	46728400	46730172	NM_020493	20807	Srf	64	40	56	38	40	37	10	5	7	9	5	2
StitchedEnhancer_10491	chr17	46746316	46818529	NM_029091	74764	Klc4	1922	1834	2725	1949	1581	1047	302	307	328	408	308	317
StitchedEnhancer_10492	chr17	46841337	46849505	NM_145488	224824	Pex6	363	328	512	365	300	207	36	55	64	67	43	51
StitchedEnhancer_10493	chr17	46886625	46889726	NM_028065	72029	Cnpy3	211	185	288	211	257	166	16	9	14	24	11	19
StitchedEnhancer_10494	chr17	46908964	46920660	NM_025433	66229	Rpl7l1	442	387	534	378	299	235	57	68	62	58	71	71
StitchedEnhancer_10495	chr17	46944320	46947694	NM_001100452	210982	Gltscr1l	179	200	224	185	89	118	20	12	13	23	22	15
StitchedEnhancer_10496	chr17	46963635	46996390	NM_001100452	210982	Gltscr1l	3304	3279	4368	3199	2649	1875	142	144	164	168	131	170
StitchedEnhancer_10497	chr17	47010375	47035189	NM_178385	72726	Tbcc	1554	1193	1624	1090	1012	777	93	117	135	143	137	119
StitchedEnhancer_10498	chr17	47096052	47098593	NM_008938	19133	Prph2	241	196	185	108	118	95	11	10	8	14	9	13
StitchedEnhancer_10499	chr17	47131628	47148366	NM_146078	224826	Ubr2	1407	1206	1451	1004	921	757	76	87	94	89	71	88
StitchedEnhancer_105	chr1	21057955	21070140	NM_177409	170829	Tram2	561	524	770	564	471	418	50	57	66	72	51	68
StitchedEnhancer_1050	chr1	133667120	133668408	NM_178079	212933	Pm20d1	59	51	85	44	63	34	3	3	3	4	9	6
StitchedEnhancer_10500	chr17	47182227	47203211	NM_001177374	224826	Ubr2	288	259	431	300	236	184	90	85	82	111	93	83
StitchedEnhancer_10501	chr17	47249632	47250378	NM_001097623	224829	Trerf1	19	18	15	18	10	5	1	4	2	3	5	1
StitchedEnhancer_10502	chr17	47272152	47295166	NM_001097623	224829	Trerf1	427	407	564	443	419	312	77	84	80	98	89	87
StitchedEnhancer_10503	chr17	47310885	47321977	NM_001097623	224829	Trerf1	205	236	271	208	139	159	44	35	47	68	35	55
StitchedEnhancer_10504	chr17	47350948	47363805	NM_172622	224829	Trerf1	226	271	285	238	176	217	39	58	46	49	45	45
StitchedEnhancer_10505	chr17	47386264	47387524	NM_172622	224829	Trerf1	26	33	32	25	26	30	7	7	5	9	5	9
StitchedEnhancer_10506	chr17	47408505	47413516	NM_172622	224829	Trerf1	84	79	89	52	30	55	20	19	9	14	11	22
StitchedEnhancer_10507	chr17	47430421	47448174	NM_001146212	64657	Mrps10	332	316	312	221	253	241	63	61	69	75	64	53
StitchedEnhancer_10508	chr17	47468435	47469644	NM_001146212	64657	Mrps10	38	29	33	17	27	26	6	8	2	4	5	4
StitchedEnhancer_10509	chr17	47505525	47506072	NM_001146212	64657	Mrps10	22	19	17	16	8	13	3	3	4	7	2	6
StitchedEnhancer_1051	chr1	133683169	133700110	NM_178079	212933	Pm20d1	173	213	348	207	186	78	59	52	60	89	69	76
StitchedEnhancer_10510	chr17	47547461	47548161	NM_001172091	75462	1700001C19Rik	24	14	17	21	10	9	3	0	1	2	4	1
StitchedEnhancer_10511	chr17	47573436	47576850	NM_029296	75462	1700001C19Rik	94	63	79	46	48	27	8	18	13	14	11	12
StitchedEnhancer_10512	chr17	47608873	47609972	NM_022015	63856	Taf8	31	26	18	17	17	14	5	3	4	5	4	6
StitchedEnhancer_10513	chr17	47638445	47665458	NM_001081635	12445	Ccnd3	3504	3394	4229	2856	2869	2035	130	164	150	176	128	150
StitchedEnhancer_10514	chr17	47678648	47683329	NM_001081635	12445	Ccnd3	94	80	103	70	72	60	16	16	23	18	16	26
StitchedEnhancer_10515	chr17	47696343	47704925	NM_007632	12445	Ccnd3	120	99	178	119	74	89	44	36	42	53	39	38
StitchedEnhancer_10516	chr17	47729492	47749008	NM_007632	12445	Ccnd3	1687	1392	2092	1523	1187	1020	124	124	104	144	120	131
StitchedEnhancer_10517	chr17	47761667	47767410	NM_198421	224836	Usp49	394	298	405	275	324	166	31	31	38	39	29	38
StitchedEnhancer_10518	chr17	47795324	47809961	NR_045945	100415787	Tomm6os	94	72	162	102	78	93	63	52	60	91	59	71
StitchedEnhancer_10519	chr17	47824374	47832553	NM_001164729	66119	Tomm6	566	441	697	500	376	246	39	35	52	54	30	41
StitchedEnhancer_1052	chr1	133723785	133770823	NM_144875	226422	Rab29	830	875	1303	878	943	586	166	189	199	268	182	193
StitchedEnhancer_10520	chr17	47873711	47911272	NM_001161723	21425	Tfeb	1914	1879	2792	1961	2169	1272	160	165	168	240	168	175
StitchedEnhancer_10521	chr17	47929628	47930515	NM_011549	21425	Tfeb	15	12	41	25	33	16	2	5	1	4	4	5
StitchedEnhancer_10522	chr17	47950217	47951414	NM_001276391	17240	Mdfi	16	19	29	27	10	13	4	6	4	4	3	2
StitchedEnhancer_10523	chr17	47968905	47988145	NM_001109973	17240	Mdfi	264	229	420	300	234	158	66	78	84	93	82	80
StitchedEnhancer_10524	chr17	48035790	48046840	NM_028767	74123	Foxp4	89	88	124	86	76	79	38	35	50	46	43	49
StitchedEnhancer_10525	chr17	48059509	48062508	NM_028767	74123	Foxp4	221	294	346	294	239	169	9	10	12	14	14	11
StitchedEnhancer_10526	chr17	48110215	48114225	NM_001110825	74123	Foxp4	591	563	966	658	652	372	17	15	19	16	18	13
StitchedEnhancer_10527	chr17	48137924	48143185	NM_029689	76651	1700122O11Rik	169	186	314	241	191	101	21	20	15	22	22	18
StitchedEnhancer_10528	chr17	48159551	48162105	NM_029689	76651	1700122O11Rik	206	206	372	244	246	85	5	9	6	11	7	6
StitchedEnhancer_10529	chr17	48176157	48179512	NM_029689	76651	1700122O11Rik	153	130	233	168	142	82	9	12	9	7	13	10
StitchedEnhancer_1053	chr1	133806498	133808434	NM_001145804	98415	Nucks1	414	363	593	456	453	303	8	11	10	16	3	16
StitchedEnhancer_10530	chr17	48194013	48194901	NM_029689	76651	1700122O11Rik	19	10	49	26	17	3	3	5	3	3	3	4
StitchedEnhancer_10531	chr17	48439268	48440147	NM_001033405	328833	Treml2	14	17	16	19	14	21	1	3	2	7	3	3
StitchedEnhancer_10532	chr17	48455318	48456110	NM_177083	320148	B430306N03Rik	11	19	20	12	23	24	0	2	3	3	1	1
StitchedEnhancer_10533	chr17	48475882	48486714	NM_031254	83433	Trem2	62	42	59	50	76	46	42	35	41	49	39	38
StitchedEnhancer_10534	chr17	48501832	48502414	NR_110338	71326	Treml1	21	13	24	16	11	5	0	6	4	1	2	3
StitchedEnhancer_10535	chr17	48547069	48577765	NM_009694	11811	Apobec2	2007	1775	2876	2083	1895	1256	155	141	154	193	130	155
StitchedEnhancer_10536	chr17	48613316	48614112	NM_152823	76589	Unc5cl	42	26	34	15	18	15	3	1	4	1	2	6
StitchedEnhancer_10537	chr17	48643585	48645480	NM_152823	76589	Unc5cl	53	37	60	50	39	26	4	10	9	10	6	7
StitchedEnhancer_10538	chr17	48954156	48957047	NM_027452	70530	Lrfn2	175	130	142	71	95	68	6	10	8	10	10	10
StitchedEnhancer_10539	chr17	49071101	49075097	NM_027452	70530	Lrfn2	100	103	106	63	54	42	10	6	10	10	12	15
StitchedEnhancer_1054	chr1	133835980	133840403	NM_001177628	212980	Slc45a3	110	93	124	95	105	58	21	22	32	17	22	20
StitchedEnhancer_10540	chr17	49099068	49100388	NM_027452	70530	Lrfn2	30	33	36	36	21	11	5	4	7	3	3	3
StitchedEnhancer_10541	chr17	49168777	49173700	NR_038141	69311	1700008K24Rik	166	126	158	113	96	96	13	18	24	16	18	18
StitchedEnhancer_10542	chr17	49293572	49293896	NR_038144	69311	1700008K24Rik	7	8	21	10	6	5	2	0	1	0	0	0
StitchedEnhancer_10543	chr17	49364966	49365597	NR_033486	100415784	Gm17830	29	15	22	20	9	7	3	4	1	2	0	4
StitchedEnhancer_10544	chr17	49567332	49572720	NM_020042	56738	Mocs1	648	530	647	397	491	323	28	23	29	29	17	33
StitchedEnhancer_10545	chr17	49611299	49612869	NM_020042	56738	Mocs1	52	36	63	40	34	22	4	3	5	6	12	7
StitchedEnhancer_10546	chr17	49628095	49675780	NM_001008231	76441	Daam2	901	855	1223	687	613	483	162	166	179	212	149	176
StitchedEnhancer_10547	chr17	49701658	49704198	NM_001008231	76441	Daam2	154	144	242	169	90	66	12	9	7	7	5	8
StitchedEnhancer_10548	chr17	49753877	49767533	NM_177052	319991	Kif6	175	138	231	163	114	67	32	50	44	64	60	50
StitchedEnhancer_10549	chr17	49781568	49783798	NM_177052	319991	Kif6	63	50	94	59	35	31	9	9	9	11	8	10
StitchedEnhancer_1055	chr1	133858847	133866116	NM_001177628	212980	Slc45a3	373	335	466	295	343	190	20	25	32	36	20	30
StitchedEnhancer_10550	chr17	49829585	49831666	NM_177052	319991	Kif6	73	55	79	59	52	41	10	3	10	9	7	2
StitchedEnhancer_10551	chr17	49862920	49880832	NM_177052	319991	Kif6	817	597	959	572	496	316	64	67	78	94	73	61
StitchedEnhancer_10552	chr17	49963614	49970673	NM_177052	319991	Kif6	74	73	93	82	104	44	19	16	15	18	23	23
StitchedEnhancer_10553	chr17	49991357	49991865	NM_177052	319991	Kif6	15	12	13	11	16	10	4	2	3	1	5	2
StitchedEnhancer_10554	chr17	50090973	50092594	NM_181397	76438	Rftn1	116	97	156	108	137	68	9	6	7	8	12	10
StitchedEnhancer_10555	chr17	50107272	50108288	NM_181397	76438	Rftn1	42	34	49	32	37	14	10	7	4	4	6	8
StitchedEnhancer_10556	chr17	50122238	50338654	NM_181397	76438	Rftn1	6668	5766	8834	5809	5986	4362	1064	1025	1097	1318	1005	1114
StitchedEnhancer_10557	chr17	50361157	50376746	NM_181397	76438	Rftn1	279	234	344	238	192	118	75	66	56	58	68	68
StitchedEnhancer_10558	chr17	50431836	50432682	NM_010021	13164	Dazl	36	29	47	28	26	14	2	4	4	5	6	4
StitchedEnhancer_10559	chr17	50470892	50471586	NM_001277863	13164	Dazl	18	16	22	13	20	7	2	4	2	5	0	8
StitchedEnhancer_1056	chr1	133885709	133910426	NM_007923	13714	Elk4	2025	1604	2399	1726	1772	1354	95	114	125	163	104	113
StitchedEnhancer_10560	chr17	50508330	50509657	NM_001277863	13164	Dazl	52	21	56	40	29	20	5	5	6	9	4	4
StitchedEnhancer_10561	chr17	50554063	50555618	NM_013880	224860	Plcl2	41	28	36	31	30	37	4	6	8	5	6	4
StitchedEnhancer_10562	chr17	50577051	50583251	NM_013880	224860	Plcl2	52	44	105	91	71	66	23	20	16	23	28	18
StitchedEnhancer_10563	chr17	50609126	50611352	NM_013880	224860	Plcl2	337	233	332	227	263	261	15	15	9	18	11	12
StitchedEnhancer_10564	chr17	50647870	50657640	NM_013880	224860	Plcl2	171	144	232	185	233	188	33	41	60	47	39	35
StitchedEnhancer_10565	chr17	50697026	50698444	NM_013880	224860	Plcl2	26	28	35	24	27	9	2	5	4	2	6	6
StitchedEnhancer_10566	chr17	50730155	50731359	NM_013880	224860	Plcl2	65	46	57	60	39	14	7	3	6	8	5	4
StitchedEnhancer_10567	chr17	50782496	50795140	NM_001297747	12228	Btg3	116	85	123	91	64	62	39	50	47	64	64	56
StitchedEnhancer_10568	chr17	50811465	50822732	NM_001297747	12228	Btg3	352	327	460	330	237	149	50	31	38	51	26	40
StitchedEnhancer_10569	chr17	50863612	50877660	NM_001297747	12228	Btg3	391	444	663	443	361	266	52	62	57	72	57	52
StitchedEnhancer_1057	chr1	133923764	133938249	NM_007923	13714	Elk4	232	187	386	281	310	195	77	68	66	74	65	83
StitchedEnhancer_10570	chr17	50890332	50903118	NM_001297747	12228	Btg3	525	434	626	429	320	203	63	53	52	68	68	64
StitchedEnhancer_10571	chr17	51132454	51134291	NM_001285993	72238	Tbc1d5	43	45	68	45	90	70	12	7	0	15	12	9
StitchedEnhancer_10572	chr17	51317013	51319291	NM_028162	72238	Tbc1d5	795	729	1026	703	790	521	16	15	8	13	9	11
StitchedEnhancer_10573	chr17	51342799	51371265	NM_001285991	72238	Tbc1d5	627	422	535	348	405	325	104	103	112	135	114	132
StitchedEnhancer_10574	chr17	51616123	51618229	NR_046166	328837	C330011F03Rik	187	111	167	124	172	115	8	10	4	11	6	12
StitchedEnhancer_10575	chr17	51686107	51686821	NR_046166	328837	C330011F03Rik	17	18	30	29	12	8	3	3	1	5	4	3
StitchedEnhancer_10576	chr17	51797158	51798440	NM_001163630	20230	Satb1	53	21	63	59	22	19	2	5	6	4	4	7
StitchedEnhancer_10577	chr17	51946577	51953207	NM_001163630	20230	Satb1	142	108	222	189	121	102	9	11	27	39	18	27
StitchedEnhancer_10578	chr17	51970883	51972461	NM_009122	20230	Satb1	24	23	50	70	18	22	8	8	10	9	3	10
StitchedEnhancer_10579	chr17	52301807	52303331	NR_045095	100504169	Gm20098	22	26	45	50	14	36	4	5	5	11	3	5
StitchedEnhancer_1058	chr1	133991871	133996298	NM_001114662	213006	Mfsd4	96	74	119	94	57	49	21	17	19	31	7	16
StitchedEnhancer_10580	chr17	53602042	53603214	NM_172497	211482	Efhb	38	39	43	47	32	17	12	8	2	4	6	3
StitchedEnhancer_10581	chr17	53617210	53619821	NM_025887	271457	Rab5a	893	743	1019	752	677	592	13	18	18	11	11	16
StitchedEnhancer_10582	chr17	53682287	53684167	NM_173449	110332	Pp2d1	108	102	131	95	66	30	5	6	5	4	11	7
StitchedEnhancer_10583	chr17	53705193	53749885	NM_001190846	18519	Kat2b	2018	1781	3025	2162	2033	1341	234	214	245	295	216	256
StitchedEnhancer_10584	chr17	53766653	53767662	NM_001190846	18519	Kat2b	29	18	36	31	33	23	7	2	5	5	2	6
StitchedEnhancer_10585	chr17	53782103	53796097	NM_028232	72415	Sgol1	356	245	321	259	238	173	68	51	59	108	65	102
StitchedEnhancer_10586	chr17	53828573	53833545	NM_028232	72415	Sgol1	391	385	538	382	407	277	27	30	27	31	21	29
StitchedEnhancer_10587	chr17	54892275	54893326	NR_045825	69418	1700025K24Rik	14	12	29	25	10	12	5	1	3	6	5	4
StitchedEnhancer_10588	chr17	55035547	55035841	NR_045825	69418	1700025K24Rik	5	5	12	9	13	4	0	2	2	1	0	2
StitchedEnhancer_10589	chr17	55851505	55861738	NM_028370	72836	Pot1b	73	45	89	55	47	67	35	34	51	54	47	38
StitchedEnhancer_1059	chr1	134021418	134050941	NM_008795	18557	Cdk18	514	538	763	460	543	340	81	111	100	119	85	94
StitchedEnhancer_10590	chr17	55893290	55894389	NM_139138	52614	Emr4	15	15	22	20	14	29	5	4	8	5	4	4
StitchedEnhancer_10591	chr17	56017200	56032380	NM_144546	104349	Zfp119a	1235	1035	1321	925	906	712	55	71	66	92	78	79
StitchedEnhancer_10592	chr17	56070889	56108222	NM_015766	50498	Ebi3	1344	1228	1616	1168	1078	857	187	222	165	225	164	203
StitchedEnhancer_10593	chr17	56144181	56180001	NM_026530	68047	Mpnd	1235	1172	1669	1172	1086	814	176	161	201	217	173	202
StitchedEnhancer_10594	chr17	56195877	56198433	NM_024432	66530	Ubxn6	69	46	138	74	45	48	13	11	12	20	6	13
StitchedEnhancer_10595	chr17	56213653	56219657	NM_024432	66530	Ubxn6	483	407	628	515	423	283	37	45	31	34	46	36
StitchedEnhancer_10596	chr17	56238492	56279816	NM_025874	66968	Plin5	4690	4446	5684	3584	4015	2252	177	199	193	234	184	196
StitchedEnhancer_10597	chr17	56301257	56326258	NM_080837	28106	D17Wsu104e	1108	974	1431	1060	701	677	99	97	123	136	98	129
StitchedEnhancer_10598	chr17	56347591	56360630	NM_172624	224897	Dpp9	1405	1103	1340	909	917	690	55	70	70	76	61	67
StitchedEnhancer_10599	chr17	56394809	56444032	NM_174989	106759	Ticam1	5573	5223	6466	4333	4315	2660	218	245	259	306	212	266
StitchedEnhancer_106	chr1	21084911	21087791	NM_177409	170829	Tram2	50	44	63	40	40	46	7	13	6	11	14	15
StitchedEnhancer_1060	chr1	134195075	134289281	NM_001195025	74137	Nuak2	5041	4375	6481	4181	3864	3124	439	436	464	556	401	468
StitchedEnhancer_10600	chr17	56464467	56477342	NM_172132	193796	Kdm4b	348	284	461	339	371	226	50	61	68	56	77	49
StitchedEnhancer_10601	chr17	56512837	56515111	NR_105943	102465590	Mir6977	142	132	164	92	93	65	8	10	13	13	8	8
StitchedEnhancer_10602	chr17	56539446	56541197	NR_105943	102465590	Mir6977	34	61	70	46	52	44	1	7	9	7	9	10
StitchedEnhancer_10603	chr17	56591828	56618584	NM_001252456	19280	Ptprs	473	464	837	649	503	306	95	110	122	132	120	116
StitchedEnhancer_10604	chr17	56646432	56647670	NM_011483	20834	Znrf4	91	84	161	151	92	59	2	8	4	7	6	3
StitchedEnhancer_10605	chr17	56722590	56726177	NM_001163300	224903	Safb	562	554	802	635	699	393	20	24	15	17	21	17
StitchedEnhancer_10606	chr17	56748190	56766864	NM_018730	54217	Rpl36	472	396	564	413	418	252	84	76	93	98	98	91
StitchedEnhancer_10607	chr17	56811774	56813532	NM_027933	71810	Ranbp3	287	282	429	296	237	183	8	10	14	7	7	11
StitchedEnhancer_10608	chr17	56839466	56880387	NM_027244	69875	Ndufa11	776	666	1118	819	883	462	127	165	190	195	155	187
StitchedEnhancer_10609	chr17	56896309	56905131	NM_144858	224907	Dus3l	632	598	969	657	592	370	39	41	56	48	37	40
StitchedEnhancer_1061	chr1	134312702	134315388	NM_172516	213452	Dstyk	381	289	465	318	281	223	9	16	15	18	7	15
StitchedEnhancer_10610	chr17	56918024	56919471	NM_001195673	100504446	Prr22	35	35	44	56	32	29	8	1	3	9	9	5
StitchedEnhancer_10611	chr17	56948927	56970912	NM_009056	19725	Rfx2	501	505	628	533	373	269	69	90	106	110	87	82
StitchedEnhancer_10612	chr17	56997929	56999380	NM_001039114	328845	Acsbg2	41	28	47	49	43	12	4	7	8	7	7	4
StitchedEnhancer_10613	chr17	57068440	57075333	NM_022328	64144	Mllt1	66	88	99	87	85	39	23	23	33	34	18	35
StitchedEnhancer_10614	chr17	57128937	57137527	NM_025538	66400	Alkbh7	301	243	503	340	293	205	45	48	52	71	34	50
StitchedEnhancer_10615	chr17	57150109	57151862	NM_133801	98053	Gtf2f1	176	168	239	182	196	111	15	12	11	10	10	14
StitchedEnhancer_10616	chr17	57170163	57172263	NM_010613	16549	Khsrp	262	198	288	244	278	129	13	13	14	12	15	11
StitchedEnhancer_10617	chr17	57197511	57200404	NM_025877	66972	Slc25a23	252	244	474	375	300	144	9	11	13	17	4	10
StitchedEnhancer_10618	chr17	57217270	57253033	NM_009451	22153	Tubb4a	309	244	361	279	271	229	109	133	117	160	110	133
StitchedEnhancer_10619	chr17	57333121	57333542	NM_019418	50930	Tnfsf14	10	10	6	8	18	7	4	0	0	1	0	0
StitchedEnhancer_1062	chr1	134330161	134335587	NM_172516	213452	Dstyk	422	323	697	409	326	300	39	25	38	38	38	19
StitchedEnhancer_10620	chr17	57365569	57372434	NM_009778	12266	C3	272	225	440	312	329	207	20	33	36	38	21	23
StitchedEnhancer_10621	chr17	57386470	57430949	NM_001163816	22324	Vav1	3661	3371	5004	3251	2696	2073	179	179	219	240	178	191
StitchedEnhancer_10622	chr17	57474427	57499402	NM_010130	13733	Emr1	308	330	539	435	349	366	68	92	88	96	99	100
StitchedEnhancer_10623	chr17	58782578	58782839	NM_027001	69239	2610034M16Rik	3	8	9	10	7	7	1	0	2	2	1	0
StitchedEnhancer_10624	chr17	59150512	59152946	NM_026497	67993	Nudt12	239	166	375	254	283	174	15	8	12	14	9	13
StitchedEnhancer_10625	chr17	59215716	59216528	NM_026497	67993	Nudt12	14	10	20	15	16	22	3	4	1	10	6	3
StitchedEnhancer_10626	chr17	61450508	61451398	NM_207654	13640	Efna5	59	19	6	2	5	21	1	3	5	3	8	4
StitchedEnhancer_10627	chr17	62482083	62483077	NM_207654	13640	Efna5	24	29	28	21	22	14	6	7	1	6	6	1
StitchedEnhancer_10628	chr17	62509480	62510225	NM_207654	13640	Efna5	43	8	11	15	13	14	3	3	5	5	2	1
StitchedEnhancer_10629	chr17	62761693	62766974	NM_207654	13640	Efna5	489	422	467	313	312	184	21	23	26	19	25	20
StitchedEnhancer_1063	chr1	134373161	134374426	NM_172517	213464	Rbbp5	272	195	226	188	160	161	7	10	13	6	6	7
StitchedEnhancer_10630	chr17	62893097	62895711	NM_207654	13640	Efna5	128	71	82	68	80	49	6	10	16	19	10	7
StitchedEnhancer_10631	chr17	62986072	63011753	NM_207654	13640	Efna5	632	467	518	358	392	262	96	87	99	109	101	98
StitchedEnhancer_10632	chr17	63032100	63037508	NM_207654	13640	Efna5	147	137	203	160	143	98	13	18	26	36	21	12
StitchedEnhancer_10633	chr17	63071972	63091038	NM_207654	13640	Efna5	207	155	192	149	144	87	72	73	77	84	67	46
StitchedEnhancer_10634	chr17	63104712	63107009	NM_207654	13640	Efna5	136	75	71	64	45	35	8	5	9	11	9	12
StitchedEnhancer_10635	chr17	63127324	63134428	NM_207654	13640	Efna5	186	184	279	194	200	115	31	15	20	30	25	23
StitchedEnhancer_10636	chr17	63211816	63212264	NM_207654	13640	Efna5	9	9	15	10	9	4	1	1	1	2	0	4
StitchedEnhancer_10637	chr17	63228862	63233652	NM_010109	13640	Efna5	359	324	451	365	297	182	11	20	14	30	15	18
StitchedEnhancer_10638	chr17	63361321	63362466	NM_010109	13640	Efna5	67	45	100	76	41	22	5	1	8	5	5	2
StitchedEnhancer_10639	chr17	63507462	63508622	NM_010109	13640	Efna5	29	18	23	20	33	15	3	5	6	8	4	4
StitchedEnhancer_1064	chr1	134521431	134527167	NM_001160316	269116	Nfasc	250	225	390	315	199	119	24	13	24	35	19	22
StitchedEnhancer_10640	chr17	63666935	63667719	NM_015794	50758	Fbxl17	18	9	30	25	14	5	4	6	5	1	6	3
StitchedEnhancer_10641	chr17	63703571	63704475	NM_015794	50758	Fbxl17	27	14	27	21	4	12	6	3	4	2	4	5
StitchedEnhancer_10642	chr17	63719183	63720911	NM_015794	50758	Fbxl17	48	20	54	39	29	39	8	4	8	14	4	10
StitchedEnhancer_10643	chr17	63751579	63754660	NM_015794	50758	Fbxl17	72	51	68	89	36	32	12	16	17	23	8	19
StitchedEnhancer_10644	chr17	63841958	63850544	NM_015794	50758	Fbxl17	770	678	912	770	680	440	46	34	59	64	40	52
StitchedEnhancer_10645	chr17	63993620	64012226	NM_015794	50758	Fbxl17	509	437	444	311	319	300	65	68	74	100	73	56
StitchedEnhancer_10646	chr17	64026530	64028744	NM_015794	50758	Fbxl17	123	96	124	113	78	95	5	7	8	18	8	8
StitchedEnhancer_10647	chr17	64198540	64199397	NM_001037997	14158	Fert2	44	36	48	42	29	27	6	3	5	2	4	7
StitchedEnhancer_10648	chr17	64212230	64214255	NM_001037997	14158	Fert2	470	372	454	314	277	238	6	14	12	9	7	18
StitchedEnhancer_10649	chr17	64228782	64229933	NM_001286415	14158	Fert2	8	18	34	15	26	14	6	7	0	7	6	5
StitchedEnhancer_1065	chr1	134682780	134684152	NM_001160317	269116	Nfasc	54	45	60	51	46	37	1	8	7	8	6	5
StitchedEnhancer_10650	chr17	64270447	64275056	NM_008000	14158	Fert2	55	49	71	40	43	45	24	15	32	23	19	16
StitchedEnhancer_10651	chr17	64448620	64450619	NM_008000	14158	Fert2	175	182	237	143	101	56	13	12	5	5	13	6
StitchedEnhancer_10652	chr17	64472889	64497858	NM_144859	224938	Pja2	593	466	646	431	300	228	104	143	129	121	117	117
StitchedEnhancer_10653	chr17	64563566	64564843	NM_144859	224938	Pja2	38	34	63	29	21	22	5	12	6	5	2	5
StitchedEnhancer_10654	chr17	64665176	64666495	NM_144859	224938	Pja2	39	32	38	29	27	20	7	5	9	8	13	4
StitchedEnhancer_10655	chr17	64680007	64682541	NM_001025309	224938	Pja2	614	520	850	645	514	311	8	11	9	12	7	10
StitchedEnhancer_10656	chr17	64746692	64747297	NR_105848	102465228	Mir6420	22	10	21	16	12	18	3	1	1	4	5	1
StitchedEnhancer_10657	chr17	64948856	64972933	NM_008549	17158	Man2a1	1868	1692	2554	1582	1733	1404	118	119	131	139	125	133
StitchedEnhancer_10658	chr17	65017896	65035797	NM_008549	17158	Man2a1	231	161	252	167	163	150	82	95	100	127	98	93
StitchedEnhancer_10659	chr17	65062956	65116629	NR_105051	101202683	Dreh	2402	1507	1859	1219	1538	1523	251	268	274	308	250	258
StitchedEnhancer_1066	chr1	134748357	134763390	NM_010732	16980	Lrrn2	194	151	262	216	205	104	53	51	35	67	50	38
StitchedEnhancer_10660	chr17	65264246	65265771	NR_105051	101202683	Dreh	44	40	84	43	38	28	8	7	2	6	8	4
StitchedEnhancer_10661	chr17	65399340	65400517	NR_105051	101202683	Dreh	36	19	47	32	23	19	3	13	3	4	6	1
StitchedEnhancer_10662	chr17	65450138	65450848	NR_105051	101202683	Dreh	49	40	92	54	40	26	5	3	0	2	5	3
StitchedEnhancer_10663	chr17	65689541	65690787	NM_001008973	381107	Tmem232	33	26	33	37	34	21	5	4	5	7	7	6
StitchedEnhancer_10664	chr17	65876508	65899235	NM_001008973	381107	Tmem232	395	350	513	312	349	220	66	71	95	114	87	66
StitchedEnhancer_10665	chr17	65912287	65922329	NM_001289486	381107	Tmem232	216	181	350	250	159	101	33	38	37	50	28	38
StitchedEnhancer_10666	chr17	65953855	65964288	NM_013933	30960	Vapa	1301	1133	1496	1124	1092	677	45	46	54	48	50	50
StitchedEnhancer_10667	chr17	65992095	65993735	NM_001146002	213272	Txndc2	36	50	58	40	44	26	4	7	4	9	5	7
StitchedEnhancer_10668	chr17	66015448	66033722	NM_001146002	213272	Txndc2	632	526	398	275	427	320	66	92	85	91	96	77
StitchedEnhancer_10669	chr17	66050544	66090461	NM_133685	106572	Rab31	970	826	1024	727	928	710	190	185	244	245	202	217
StitchedEnhancer_1067	chr1	134776675	134790997	NM_010732	16980	Lrrn2	105	96	167	115	79	53	43	37	47	60	47	50
StitchedEnhancer_10670	chr17	66116982	66152412	NR_104465	70351	Ppp4r1	1240	1044	1280	1005	1056	733	174	189	161	196	174	172
StitchedEnhancer_10671	chr17	66220426	66236471	NM_001198949	19765	Ralbp1	820	771	1168	805	737	509	78	83	80	87	86	88
StitchedEnhancer_10672	chr17	66255454	66266645	NM_009067	19765	Ralbp1	216	197	330	259	208	140	48	48	40	70	56	55
StitchedEnhancer_10673	chr17	66279379	66308634	NM_023053	65960	Twsg1	1152	959	1557	1007	978	546	123	137	141	175	125	148
StitchedEnhancer_10674	chr17	66365592	66367751	NM_001025572	106585	Ankrd12	122	131	184	126	129	97	8	11	3	7	4	7
StitchedEnhancer_10675	chr17	66425060	66427724	NM_001025572	106585	Ankrd12	442	423	628	554	521	287	13	16	13	14	13	12
StitchedEnhancer_10676	chr17	66449399	66473544	NM_001037757	68767	Wash	974	788	1192	863	822	491	113	124	128	133	143	131
StitchedEnhancer_10677	chr17	66539185	66544489	NM_001003919	320209	Ddx11	112	92	165	105	43	39	9	13	16	18	14	17
StitchedEnhancer_10678	chr17	66590641	66596484	NM_001003919	320209	Ddx11	110	102	139	80	94	75	14	13	17	28	16	25
StitchedEnhancer_10679	chr17	66619204	66626621	NM_001003919	320209	Ddx11	59	48	69	46	56	35	25	23	29	32	22	35
StitchedEnhancer_1068	chr1	134916196	134984322	NM_001099276	240752	Pik3c2b	3735	3260	5674	3808	3502	2268	283	353	364	396	293	342
StitchedEnhancer_10680	chr17	66664076	66676024	NM_172963	68617	Mtcl1	48	58	87	50	56	53	33	34	34	54	38	44
StitchedEnhancer_10681	chr17	66699437	66715228	NM_172963	68617	Mtcl1	366	298	424	231	277	251	68	71	59	80	59	72
StitchedEnhancer_10682	chr17	66798050	66799885	NM_172963	68617	Mtcl1	82	67	103	89	48	26	4	6	6	13	13	5
StitchedEnhancer_10683	chr17	66828526	66829705	NM_001114098	68617	Mtcl1	22	25	38	21	18	20	3	6	5	6	5	1
StitchedEnhancer_10684	chr17	66852772	66873445	NM_024448	19328	Rab12	1021	966	1402	909	825	472	95	81	108	124	98	102
StitchedEnhancer_10685	chr17	67060198	67070434	NM_028998	74556	Themis3	60	36	48	33	48	53	41	51	52	58	44	54
StitchedEnhancer_10686	chr17	67087827	67101757	NM_028998	74556	Themis3	98	87	103	68	97	96	54	58	69	71	50	68
StitchedEnhancer_10687	chr17	67132752	67133619	NM_028998	74556	Themis3	27	31	37	22	17	9	3	2	4	7	4	3
StitchedEnhancer_10688	chr17	67173811	67174736	NR_049205	100885844	Mir5709	27	20	49	36	19	6	3	4	3	7	4	0
StitchedEnhancer_10689	chr17	67231199	67232131	NR_049205	100885844	Mir5709	45	29	34	15	21	10	3	3	4	5	4	6
StitchedEnhancer_1069	chr1	135025583	135031997	NM_133819	108954	Ppp1r15b	958	828	1067	825	811	651	25	31	43	30	29	40
StitchedEnhancer_10690	chr17	67293522	67294511	NR_049205	100885844	Mir5709	70	33	56	35	22	17	7	4	3	6	7	8
StitchedEnhancer_10691	chr17	67322122	67339825	NR_049205	100885844	Mir5709	241	166	247	159	127	105	83	76	87	79	79	78
StitchedEnhancer_10692	chr17	67355679	67381670	NR_049205	100885844	Mir5709	557	447	598	393	368	274	107	102	122	131	102	136
StitchedEnhancer_10693	chr17	67420295	67420832	NR_049205	100885844	Mir5709	24	18	42	16	20	3	2	5	4	4	3	1
StitchedEnhancer_10694	chr17	67433498	67434374	NR_049205	100885844	Mir5709	24	19	27	14	14	2	4	3	4	5	2	2
StitchedEnhancer_10695	chr17	67472717	67486897	NR_049205	100885844	Mir5709	532	429	612	405	351	225	60	79	102	104	61	87
StitchedEnhancer_10696	chr17	67509024	67522430	NR_049205	100885844	Mir5709	325	303	443	271	265	153	68	58	70	84	61	61
StitchedEnhancer_10697	chr17	67562230	67569914	NM_008984	19274	Ptprm	87	66	95	89	71	49	41	37	34	41	33	38
StitchedEnhancer_10698	chr17	67611652	67631856	NM_008984	19274	Ptprm	408	309	466	277	276	180	93	96	103	79	91	103
StitchedEnhancer_10699	chr17	67646225	67662042	NM_008984	19274	Ptprm	704	630	1018	660	460	302	64	85	55	74	71	85
StitchedEnhancer_107	chr1	21156501	21156966	NM_001290679	75712	Tmem14a	14	10	19	17	13	11	1	5	3	2	5	2
StitchedEnhancer_1070	chr1	135077748	135174084	NM_001160268	240753	Plekha6	3619	3616	5328	3472	3596	2102	385	413	422	468	364	364
StitchedEnhancer_10700	chr17	67678613	67705113	NM_008984	19274	Ptprm	1935	1625	2507	1607	1381	1009	112	117	125	167	97	130
StitchedEnhancer_10701	chr17	67758539	67760073	NM_008984	19274	Ptprm	53	54	99	76	45	32	5	3	9	13	6	5
StitchedEnhancer_10702	chr17	67798841	67800944	NM_008984	19274	Ptprm	116	75	202	118	124	71	14	18	6	8	10	8
StitchedEnhancer_10703	chr17	67821211	67823325	NM_008984	19274	Ptprm	84	45	120	75	48	41	16	7	17	9	9	10
StitchedEnhancer_10704	chr17	67851646	67871408	NM_001033340	240131	Lrrc30	1901	1764	2880	1736	1453	1010	78	89	104	94	97	88
StitchedEnhancer_10705	chr17	67897897	67934617	NM_001033340	240131	Lrrc30	779	625	1133	738	465	434	162	194	142	194	135	141
StitchedEnhancer_10706	chr17	67951987	67952940	NM_001033340	240131	Lrrc30	17	14	54	42	29	18	5	3	2	3	8	5
StitchedEnhancer_10707	chr17	67972586	67991801	NM_001033340	240131	Lrrc30	366	338	453	331	292	207	57	83	84	95	57	86
StitchedEnhancer_10708	chr17	68214595	68240230	NM_172964	268970	Arhgap28	699	568	955	668	387	402	102	104	120	126	85	104
StitchedEnhancer_10709	chr17	68298924	68308761	NM_172964	268970	Arhgap28	185	161	287	200	116	124	38	38	38	50	39	51
StitchedEnhancer_1071	chr1	135192768	135199528	NM_026680	68338	Golt1a	45	37	74	41	66	33	21	21	28	36	31	29
StitchedEnhancer_10710	chr17	68325190	68354336	NM_172964	268970	Arhgap28	397	339	478	334	236	208	145	133	125	174	115	117
StitchedEnhancer_10711	chr17	68453037	68453504	NM_172964	268970	Arhgap28	6	13	14	13	7	2	0	2	1	0	2	3
StitchedEnhancer_10712	chr17	68512733	68515410	NM_177278	320858	L3mbtl4	64	68	90	56	48	43	7	8	8	15	9	10
StitchedEnhancer_10713	chr17	68663878	68664381	NM_177278	320858	L3mbtl4	11	13	11	11	8	9	3	0	2	4	1	4
StitchedEnhancer_10714	chr17	68685405	68686259	NM_177278	320858	L3mbtl4	15	6	32	28	30	15	7	6	8	5	5	4
StitchedEnhancer_10715	chr17	68852345	68852615	NM_177278	320858	L3mbtl4	10	11	7	6	7	4	4	0	0	1	1	2
StitchedEnhancer_10716	chr17	69097277	69097726	NM_001206661	622645	Tmem200c	5	4	17	17	3	8	1	1	3	0	1	3
StitchedEnhancer_10717	chr17	69506122	69506895	NM_013813	13823	Epb4.1l3	14	1	31	24	13	10	0	3	3	4	2	7
StitchedEnhancer_10718	chr17	69529973	69531868	NM_013813	13823	Epb4.1l3	86	75	130	97	74	88	5	8	7	8	9	10
StitchedEnhancer_10719	chr17	69616508	69626925	NR_045428	69750	2410021H03Rik	61	46	64	42	38	35	31	40	39	48	36	30
StitchedEnhancer_1072	chr1	135259060	135349920	NM_011439	20668	Sox13	3347	2932	4313	2694	2327	1724	348	358	428	494	356	380
StitchedEnhancer_10720	chr17	69731555	69746665	NM_009547	22666	Zbtb14	842	721	1097	872	880	521	52	71	69	86	89	73
StitchedEnhancer_10721	chr17	69765833	69767517	NR_026848	77533	C030034I22Rik	565	456	632	442	487	303	16	7	9	10	7	7
StitchedEnhancer_10722	chr17	70978964	70982810	NM_001128181	224997	Dlgap1	50	29	60	60	17	14	16	11	6	18	12	10
StitchedEnhancer_10723	chr17	71032843	71033279	NM_001128181	224997	Dlgap1	12	3	17	14	3	3	1	3	3	2	1	2
StitchedEnhancer_10724	chr17	71069081	71105852	NM_001164077	21815	Tgif1	1871	1621	2510	1647	1528	1208	135	159	192	188	163	174
StitchedEnhancer_10725	chr17	71130537	71144492	NM_001164077	21815	Tgif1	124	107	169	140	127	92	56	54	46	56	59	47
StitchedEnhancer_10726	chr17	71178262	71203995	NM_001164077	21815	Tgif1	2289	2199	3687	2469	1816	1696	94	100	118	148	104	97
StitchedEnhancer_10727	chr17	71273821	71275252	NM_023402	67938	Myl12b	63	63	122	86	80	56	4	8	9	10	6	6
StitchedEnhancer_10728	chr17	71314882	71390328	NM_026064	67268	Myl12a	7123	5917	8581	5783	4791	3469	329	336	411	414	333	356
StitchedEnhancer_10729	chr17	71404284	71413145	NM_001083934	17929	Myom1	95	91	97	71	80	58	34	32	46	58	45	30
StitchedEnhancer_1073	chr1	135363749	135369714	NM_011439	20668	Sox13	486	396	527	326	288	245	25	31	27	51	30	26
StitchedEnhancer_10730	chr17	71430977	71485441	NM_022882	64898	Lpin2	887	745	790	645	710	624	241	234	255	302	217	244
StitchedEnhancer_10731	chr17	71513978	71534398	NM_022882	64898	Lpin2	462	409	445	338	417	292	97	79	102	105	88	105
StitchedEnhancer_10732	chr17	71548919	71549221	NM_001164885	64898	Lpin2	9	10	7	3	10	5	1	1	1	2	1	3
StitchedEnhancer_10733	chr17	71564134	71566053	NM_001164885	64898	Lpin2	17	24	34	34	25	37	10	4	6	12	9	7
StitchedEnhancer_10734	chr17	71597990	71660914	NM_145158	246707	Emilin2	1228	1110	1521	901	1311	815	231	244	244	294	224	259
StitchedEnhancer_10735	chr17	71797453	71798709	NM_028887	74355	Smchd1	47	32	40	42	16	41	7	3	9	7	4	3
StitchedEnhancer_10736	chr17	71823826	71839623	NM_028887	74355	Smchd1	1111	975	1455	1139	841	869	67	83	89	98	74	76
StitchedEnhancer_10737	chr17	71852977	71854000	NM_023294	67052	Ndc80	40	41	59	30	28	22	7	1	4	5	3	1
StitchedEnhancer_10738	chr17	71875955	71877128	NM_023294	67052	Ndc80	213	200	272	213	164	138	7	9	13	13	9	7
StitchedEnhancer_10739	chr17	71901156	71901702	NM_029254	70891	Spdya	16	9	22	18	22	13	2	2	7	1	2	2
StitchedEnhancer_1074	chr1	135388082	135391586	NM_011439	20668	Sox13	508	421	731	398	332	231	24	17	21	33	12	17
StitchedEnhancer_10740	chr17	71947455	71948647	NR_015549	68789	Trmt61b	127	110	117	99	90	80	10	9	10	8	8	9
StitchedEnhancer_10741	chr17	71964864	71966102	NM_175639	72515	Wdr43	129	82	107	75	82	72	7	5	13	9	5	6
StitchedEnhancer_10742	chr17	72011799	72013091	NM_177087	320159	Fam179a	82	69	96	73	43	31	8	8	3	8	7	11
StitchedEnhancer_10743	chr17	72044675	72086378	NM_146082	225004	BC027072	1973	2042	2955	1679	1405	901	140	139	147	164	126	154
StitchedEnhancer_10744	chr17	72130719	72146123	NM_030179	78785	Clip4	530	460	717	433	546	320	55	50	57	85	50	59
StitchedEnhancer_10745	chr17	72159715	72163519	NM_030179	78785	Clip4	158	124	155	117	113	85	15	11	8	18	19	10
StitchedEnhancer_10746	chr17	72338045	72338975	NM_030179	78785	Clip4	13	12	23	17	9	11	0	1	3	5	3	3
StitchedEnhancer_10747	chr17	72392309	72393149	NM_030179	78785	Clip4	35	35	53	36	59	24	3	5	3	3	4	3
StitchedEnhancer_10748	chr17	73136927	73137829	NM_027166	383295	Ypel5	37	18	31	26	28	18	3	5	1	2	4	3
StitchedEnhancer_10749	chr17	73183577	73188144	NM_027166	383295	Ypel5	903	833	1182	969	912	511	13	18	28	26	21	27
StitchedEnhancer_1075	chr1	135506205	135507085	NM_009227	20643	Snrpe	126	103	145	122	86	68	4	5	5	5	4	2
StitchedEnhancer_10750	chr17	73228766	73230579	NM_029999	77889	Lbh	52	31	74	47	33	24	7	3	4	6	4	7
StitchedEnhancer_10751	chr17	73252666	73387066	NM_029999	77889	Lbh	3994	4041	6541	4600	3514	2532	523	548	641	730	556	567
StitchedEnhancer_10752	chr17	73401247	73462559	NM_001177968	225010	Lclat1	1437	1313	2521	1773	1392	947	266	277	267	328	267	279
StitchedEnhancer_10753	chr17	73475225	73476493	NM_001177967	225010	Lclat1	37	19	64	45	31	32	9	10	12	2	4	4
StitchedEnhancer_10754	chr17	73525819	73554991	NM_001177967	225010	Lclat1	470	318	490	347	386	281	110	106	139	154	102	105
StitchedEnhancer_10755	chr17	73570312	73602852	NM_001177967	225010	Lclat1	1230	994	1282	868	876	648	116	123	136	141	132	130
StitchedEnhancer_10756	chr17	73906215	73906958	NM_027864	71685	Galnt14	10	13	37	28	6	5	4	4	3	1	2	2
StitchedEnhancer_10757	chr17	74136054	74136693	NM_020578	57440	Ehd3	21	14	30	14	14	9	1	5	0	4	4	1
StitchedEnhancer_10758	chr17	74153619	74162704	NM_020578	57440	Ehd3	179	138	181	133	133	83	42	33	38	38	35	35
StitchedEnhancer_10759	chr17	74267774	74345711	NM_011723	22436	Xdh	6272	4493	6346	4078	4632	3673	412	408	433	513	385	403
StitchedEnhancer_1076	chr1	135556922	135558451	NM_001166552	667118	Zbed6	288	233	362	262	216	170	13	10	11	12	5	4
StitchedEnhancer_10760	chr17	74369064	74370038	NM_053188	94224	Srd5a2	28	12	32	24	27	27	7	6	6	5	11	5
StitchedEnhancer_10761	chr17	74594146	74596273	NM_133771	76890	Memo1	123	51	53	51	50	52	0	8	11	11	7	9
StitchedEnhancer_10762	chr17	74644242	74645802	NM_133771	76890	Memo1	80	39	55	38	45	44	8	10	10	9	8	5
StitchedEnhancer_10763	chr17	74663641	74665092	NM_133771	76890	Memo1	45	38	66	60	59	43	6	6	6	6	11	14
StitchedEnhancer_10764	chr17	74687739	74695962	NM_133771	76890	Memo1	844	662	943	784	689	429	36	35	55	37	43	49
StitchedEnhancer_10765	chr17	74715068	74716540	NM_001146223	66310	Dpy30	173	173	227	172	159	99	7	5	13	9	5	9
StitchedEnhancer_10766	chr17	74737523	74739284	NM_016962	50850	Spast	466	333	509	387	387	212	6	14	13	18	7	13
StitchedEnhancer_10767	chr17	74794420	74795557	NM_144798	210148	Slc30a6	111	90	147	113	101	67	5	13	9	7	10	10
StitchedEnhancer_10768	chr17	74830468	74832502	NM_001033367	268973	Nlrc4	43	15	51	23	28	30	4	12	7	3	12	6
StitchedEnhancer_10769	chr17	74857914	74858716	NM_001033367	268973	Nlrc4	20	21	17	23	26	21	3	3	3	2	2	4
StitchedEnhancer_1077	chr1	135581674	135593508	NM_001159649	240754	Lax1	201	177	262	210	190	211	32	53	50	76	40	46
StitchedEnhancer_10770	chr17	74888297	74890248	NM_026417	67864	Yipf4	411	350	575	437	424	257	7	3	10	12	5	10
StitchedEnhancer_10771	chr17	74905774	74907401	NM_026417	67864	Yipf4	58	46	61	47	31	23	4	8	8	9	8	9
StitchedEnhancer_10772	chr17	74926215	74929101	NM_007566	12211	Birc6	712	617	855	635	585	468	12	9	17	11	11	12
StitchedEnhancer_10773	chr17	74942237	74945004	NM_007566	12211	Birc6	181	169	322	205	138	94	16	17	11	22	14	19
StitchedEnhancer_10774	chr17	75041966	75042833	NM_152817	74196	Ttc27	18	11	16	14	14	14	1	4	5	9	4	5
StitchedEnhancer_10775	chr17	75066964	75067383	NM_152817	74196	Ttc27	11	10	9	6	12	7	1	2	2	1	2	5
StitchedEnhancer_10776	chr17	75116433	75117309	NM_152817	74196	Ttc27	76	43	71	52	55	24	7	8	8	8	3	3
StitchedEnhancer_10777	chr17	75194874	75195227	NM_152817	74196	Ttc27	11	9	12	4	4	3	1	1	3	1	1	3
StitchedEnhancer_10778	chr17	75244800	75246076	NM_152817	74196	Ttc27	35	41	56	52	29	24	5	8	4	8	4	5
StitchedEnhancer_10779	chr17	75265342	75267195	NM_019919	268977	Ltbp1	74	50	114	64	54	44	2	7	13	12	4	5
StitchedEnhancer_1078	chr1	135607075	135609655	NR_105868	102466206	Mir6903	50	46	44	48	40	22	9	13	10	13	12	13
StitchedEnhancer_10780	chr17	75393352	75474903	NM_019919	268977	Ltbp1	1577	1509	2594	1572	1352	889	339	339	360	446	355	323
StitchedEnhancer_10781	chr17	75509326	75528463	NM_206958	268977	Ltbp1	236	233	277	237	205	164	74	98	74	95	84	88
StitchedEnhancer_10782	chr17	75541955	75553244	NM_206958	268977	Ltbp1	205	200	269	187	126	81	40	52	52	55	46	48
StitchedEnhancer_10783	chr17	75576874	75580561	NM_206958	268977	Ltbp1	97	103	124	82	85	72	15	13	9	20	18	12
StitchedEnhancer_10784	chr17	75706525	75707322	NM_001166493	240168	Rasgrp3	16	25	34	30	16	4	6	2	6	4	5	0
StitchedEnhancer_10785	chr17	75727662	75728363	NM_001166493	240168	Rasgrp3	9	23	22	15	15	10	3	2	3	3	4	4
StitchedEnhancer_10786	chr17	75747989	75748921	NM_001166493	240168	Rasgrp3	18	10	21	15	15	16	5	4	3	3	4	1
StitchedEnhancer_10787	chr17	75831678	75873654	NM_207246	240168	Rasgrp3	1553	1123	2074	1317	976	984	187	188	204	232	188	196
StitchedEnhancer_10788	chr17	75916768	75926707	NM_133747	72722	Fam98a	266	207	451	299	162	190	36	38	54	59	32	57
StitchedEnhancer_10789	chr17	75950706	75951753	NM_133747	72722	Fam98a	83	70	80	95	82	35	3	10	6	7	3	4
StitchedEnhancer_1079	chr1	135637819	135642412	NM_001167949	381290	Atp2b4	171	181	277	175	116	89	19	15	16	26	23	20
StitchedEnhancer_10790	chr17	77248472	77250313	NR_033456	100043885	Gm4710	150	69	96	79	40	76	5	5	5	9	2	11
StitchedEnhancer_10791	chr17	77432230	77433751	NM_015800	50766	Crim1	62	37	69	59	10	20	12	5	10	5	10	4
StitchedEnhancer_10792	chr17	78596669	78624334	NM_015800	50766	Crim1	1248	1018	1566	1106	952	611	148	131	134	165	116	131
StitchedEnhancer_10793	chr17	78640572	78653686	NM_015800	50766	Crim1	836	618	926	626	571	498	67	65	86	71	59	69
StitchedEnhancer_10794	chr17	78667098	78695770	NM_015800	50766	Crim1	473	364	603	376	354	247	136	137	159	159	104	135
StitchedEnhancer_10795	chr17	78712502	78728759	NM_001285949	225020	Fez2	508	425	678	459	324	240	69	72	91	94	62	82
StitchedEnhancer_10796	chr17	78748326	78777191	NM_001285949	225020	Fez2	1043	751	1222	778	733	572	140	120	145	176	153	162
StitchedEnhancer_10797	chr17	78791394	78824540	NM_001285949	225020	Fez2	2612	1598	2865	1890	1498	1431	176	160	170	207	165	170
StitchedEnhancer_10798	chr17	78843291	78854213	NM_001285940	225020	Fez2	193	137	228	158	147	123	43	44	39	50	47	41
StitchedEnhancer_10799	chr17	78906388	78921703	NM_028813	74199	Vit	376	296	443	351	324	211	53	55	53	63	69	79
StitchedEnhancer_108	chr1	21208536	21235178	NM_001288617	14859	Gsta3	429	298	384	338	377	238	105	92	103	132	111	97
StitchedEnhancer_1080	chr1	135658262	135674892	NM_213616	381290	Atp2b4	204	182	277	238	167	114	77	59	79	83	64	75
StitchedEnhancer_10800	chr17	78970634	78971411	NM_028813	74199	Vit	13	19	34	18	30	13	3	4	6	6	4	2
StitchedEnhancer_10801	chr17	78986364	78988135	NM_028813	74199	Vit	48	42	67	53	27	30	6	6	11	10	6	6
StitchedEnhancer_10802	chr17	79002710	79003897	NM_028813	74199	Vit	65	31	42	32	13	16	7	11	8	8	10	4
StitchedEnhancer_10803	chr17	79073563	79089146	NM_011500	268980	Strn	219	152	281	221	200	125	64	58	69	84	78	76
StitchedEnhancer_10804	chr17	79120179	79137671	NM_011500	268980	Strn	668	570	894	632	652	406	76	92	90	121	90	95
StitchedEnhancer_10805	chr17	79165649	79170895	NM_011500	268980	Strn	446	351	545	381	199	228	17	30	27	32	27	23
StitchedEnhancer_10806	chr17	79188795	79194601	NM_001081179	320473	Heatr5b	871	621	921	665	420	357	21	22	33	34	24	29
StitchedEnhancer_10807	chr17	79234108	79235498	NM_181649	53951	Gpatch11	109	87	159	138	96	61	7	7	11	11	8	7
StitchedEnhancer_10808	chr17	79281121	79282539	NM_011163	19106	Eif2ak2	91	86	96	101	70	104	5	5	6	13	6	7
StitchedEnhancer_10809	chr17	79315273	79317082	NM_001177402	68554	Cebpzos	99	106	203	143	116	93	8	10	13	13	9	10
StitchedEnhancer_1081	chr1	135689640	135698074	NM_213616	381290	Atp2b4	318	292	597	419	276	171	23	45	40	42	42	35
StitchedEnhancer_10810	chr17	79335931	79336893	NM_001024806	12607	Cebpz	67	77	79	79	71	41	5	9	9	6	4	6
StitchedEnhancer_10811	chr17	79388379	79395261	NM_001171005	75292	Prkd3	212	151	262	239	153	147	35	31	36	37	42	28
StitchedEnhancer_10812	chr17	79418895	79420606	NM_001171004	75292	Prkd3	253	233	305	251	198	145	3	8	12	9	14	10
StitchedEnhancer_10813	chr17	79451475	79452267	NM_027455	70536	Qpct	23	18	36	19	26	14	4	6	4	6	4	1
StitchedEnhancer_10814	chr17	79467997	79469131	NM_027455	70536	Qpct	23	10	21	19	17	17	1	5	2	2	3	5
StitchedEnhancer_10815	chr17	79534747	79536512	NM_027455	70536	Qpct	72	39	55	50	26	38	8	7	11	5	5	9
StitchedEnhancer_10816	chr17	79571392	79572348	NM_027455	70536	Qpct	12	16	13	19	14	13	1	2	5	3	1	1
StitchedEnhancer_10817	chr17	79686463	79696411	NM_026514	260409	Cdc42ep3	87	84	111	110	82	78	34	36	52	45	41	47
StitchedEnhancer_10818	chr17	79730180	79756931	NM_026514	260409	Cdc42ep3	2796	2222	3238	2123	2142	1467	127	125	144	145	114	146
StitchedEnhancer_10819	chr17	79775735	79781461	NM_026514	260409	Cdc42ep3	278	172	264	188	261	211	23	37	28	34	28	36
StitchedEnhancer_1082	chr1	135750825	135761185	NM_054076	269120	Optc	174	166	335	215	137	103	29	31	31	38	33	32
StitchedEnhancer_10820	chr17	79797112	79800176	NM_026514	260409	Cdc42ep3	56	30	49	53	27	25	11	9	14	18	14	8
StitchedEnhancer_10821	chr17	79814597	79815375	NM_026514	260409	Cdc42ep3	17	6	27	24	13	17	1	6	7	4	3	4
StitchedEnhancer_10822	chr17	79850374	79854705	NR_033463	74622	4930429F11Rik	86	54	99	66	53	61	16	17	20	20	17	16
StitchedEnhancer_10823	chr17	79871231	79872372	NR_033463	74622	4930429F11Rik	57	41	92	56	57	21	3	9	4	2	5	10
StitchedEnhancer_10824	chr17	79942941	79945172	NR_033462	100038718	Gm10494	187	158	267	194	101	105	19	20	12	13	8	15
StitchedEnhancer_10825	chr17	80014001	80015159	NM_201361	381110	Rmdn2	111	122	191	130	144	47	5	7	5	13	7	11
StitchedEnhancer_10826	chr17	80095023	80186598	NM_009994	13078	Cyp1b1	1650	1329	1482	1163	1412	1210	333	353	332	405	320	332
StitchedEnhancer_10827	chr17	80220498	80235922	NM_178050	56298	Atl2	108	72	113	103	115	99	56	57	66	77	54	60
StitchedEnhancer_10828	chr17	80291327	80295917	NM_178050	56298	Atl2	638	529	726	588	559	259	24	26	24	26	18	21
StitchedEnhancer_10829	chr17	80317771	80320300	NM_001286647	56298	Atl2	73	63	104	70	62	35	11	12	11	28	9	9
StitchedEnhancer_1083	chr1	135786422	135832234	NM_001160420	269120	Optc	1950	1727	2850	1931	1532	973	168	203	178	240	191	168
StitchedEnhancer_10830	chr17	80353554	80354837	NM_001286647	56298	Atl2	22	9	24	20	30	27	6	4	4	3	3	9
StitchedEnhancer_10831	chr17	80367822	80369814	NM_001286647	56298	Atl2	47	48	61	58	34	19	9	5	12	8	9	4
StitchedEnhancer_10832	chr17	80388585	80404714	NM_144802	72692	Hnrnpll	355	307	540	350	240	148	69	47	61	77	63	65
StitchedEnhancer_10833	chr17	80418400	80418691	NM_144802	72692	Hnrnpll	3	6	10	12	16	2	0	2	0	3	2	2
StitchedEnhancer_10834	chr17	80435943	80437230	NM_144802	72692	Hnrnpll	78	66	44	36	35	30	6	7	9	10	8	1
StitchedEnhancer_10835	chr17	80453144	80462483	NM_144802	72692	Hnrnpll	753	743	1010	685	681	491	42	45	52	49	45	45
StitchedEnhancer_10836	chr17	80483787	80495856	NM_144802	72692	Hnrnpll	86	75	98	59	62	46	39	45	47	54	48	48
StitchedEnhancer_10837	chr17	80512254	80512916	NM_176963	319625	Galm	20	17	19	6	18	13	5	3	4	4	2	3
StitchedEnhancer_10838	chr17	80526322	80532231	NM_176963	319625	Galm	844	762	1014	593	655	390	30	24	17	29	19	17
StitchedEnhancer_10839	chr17	80547073	80572828	NM_176963	319625	Galm	532	520	872	641	495	350	133	120	165	142	111	137
StitchedEnhancer_1084	chr1	135849066	135859152	NM_054077	116847	Prelp	274	221	411	249	263	223	24	42	37	62	39	47
StitchedEnhancer_10840	chr17	80605366	80607187	NM_001195486	225027	Srsf7	417	380	594	452	371	231	10	12	19	12	7	10
StitchedEnhancer_10841	chr17	80623225	80624340	NM_026053	67242	Gemin6	82	71	107	89	63	45	6	8	11	6	7	2
StitchedEnhancer_10842	chr17	80651620	80656620	NM_026053	67242	Gemin6	465	408	586	393	387	266	26	27	30	33	24	33
StitchedEnhancer_10843	chr17	80683328	80690008	NM_194269	378462	Morn2	178	127	222	171	128	113	23	28	25	31	22	32
StitchedEnhancer_10844	chr17	80772159	80778262	NR_028385	791338	Gm10190	121	122	163	93	65	66	16	31	26	34	21	30
StitchedEnhancer_10845	chr17	80823832	80835384	NM_009231	20662	Sos1	1066	745	1038	714	656	666	55	67	57	76	45	64
StitchedEnhancer_10846	chr17	80878526	80882907	NM_009231	20662	Sos1	468	417	648	491	488	263	17	25	30	30	15	24
StitchedEnhancer_10847	chr17	80898280	80900092	NM_009231	20662	Sos1	5	10	7	11	100	46	6	9	10	7	8	1
StitchedEnhancer_10848	chr17	80952526	80964389	NM_001033443	381113	Cdkl4	161	203	233	167	230	170	55	53	50	74	59	47
StitchedEnhancer_10849	chr17	81061016	81066797	NM_001290345	225028	Map4k3	74	56	61	46	37	47	20	25	26	41	27	28
StitchedEnhancer_1085	chr1	135873325	135886052	NM_021355	14264	Fmod	190	197	472	297	227	129	43	49	53	65	57	44
StitchedEnhancer_10850	chr17	81082826	81129226	NM_001290345	225028	Map4k3	2075	1657	2393	1625	1769	1264	226	233	282	252	232	240
StitchedEnhancer_10851	chr17	81151292	81207950	NM_001290345	225028	Map4k3	1718	1419	1853	1256	1447	1091	223	249	274	302	255	280
StitchedEnhancer_10852	chr17	81224249	81227747	NM_001290345	225028	Map4k3	252	250	400	243	272	150	20	20	19	25	19	23
StitchedEnhancer_10853	chr17	81285633	81287848	NM_026516	68027	Tmem178	112	121	187	156	98	45	15	9	12	5	11	7
StitchedEnhancer_10854	chr17	81320695	81333992	NM_026516	68027	Tmem178	497	454	649	450	442	272	57	73	59	74	49	60
StitchedEnhancer_10855	chr17	81414360	81415259	NM_028138	72167	Thumpd2	22	17	25	18	19	22	10	7	2	6	3	3
StitchedEnhancer_10856	chr17	81461461	81464539	NM_028138	72167	Thumpd2	170	123	244	177	170	105	10	10	20	21	14	20
StitchedEnhancer_10857	chr17	81777278	81787659	NM_028138	72167	Thumpd2	107	74	134	81	107	99	46	43	51	52	40	47
StitchedEnhancer_10858	chr17	81801715	81804370	NM_001286684	20541	Slc8a1	124	107	184	118	75	61	8	12	6	10	8	5
StitchedEnhancer_10859	chr17	81819258	81833092	NM_001286684	20541	Slc8a1	135	98	148	107	115	77	68	55	70	58	54	53
StitchedEnhancer_1086	chr1	135938640	136001498	NM_007570	12227	Btg2	8945	8090	12559	8017	6569	4834	324	316	332	358	286	309
StitchedEnhancer_10860	chr17	81867376	81892664	NM_001286684	20541	Slc8a1	730	385	623	442	434	329	111	85	144	112	96	115
StitchedEnhancer_10861	chr17	81912670	81913777	NM_001286684	20541	Slc8a1	50	12	24	19	26	19	2	6	4	2	5	3
StitchedEnhancer_10862	chr17	81935698	81942338	NM_001286684	20541	Slc8a1	448	255	397	324	185	194	29	30	31	21	27	27
StitchedEnhancer_10863	chr17	81967656	81980786	NM_001286684	20541	Slc8a1	181	161	249	183	181	168	60	52	55	82	58	61
StitchedEnhancer_10864	chr17	82017684	82021211	NM_001286684	20541	Slc8a1	34	43	38	32	33	36	16	11	21	21	15	19
StitchedEnhancer_10865	chr17	82035922	82036219	NM_001286684	20541	Slc8a1	7	9	15	4	10	2	1	0	3	0	1	3
StitchedEnhancer_10866	chr17	82066139	82075970	NM_001286684	20541	Slc8a1	214	137	306	202	198	128	30	35	32	43	35	40
StitchedEnhancer_10867	chr17	82097185	82112928	NM_001286684	20541	Slc8a1	395	249	392	295	259	283	42	57	68	80	56	67
StitchedEnhancer_10868	chr17	82133766	82143043	NM_011406	20541	Slc8a1	890	497	1012	715	587	354	32	37	37	44	31	40
StitchedEnhancer_10869	chr17	82178549	82188735	NM_011406	20541	Slc8a1	233	139	348	237	215	133	39	35	48	59	35	42
StitchedEnhancer_1087	chr1	136032414	136033435	NM_027979	71884	Chit1	25	14	34	23	9	12	1	5	5	6	1	3
StitchedEnhancer_10870	chr17	82242258	82245099	NM_011406	20541	Slc8a1	89	86	156	135	71	30	11	12	14	11	9	9
StitchedEnhancer_10871	chr17	82301268	82302303	NM_011406	20541	Slc8a1	20	11	23	22	28	23	4	3	7	5	3	6
StitchedEnhancer_10872	chr17	83434262	83435090	NR_045094	100503434	Gm19689	19	19	22	28	10	10	2	4	1	4	4	3
StitchedEnhancer_10873	chr17	83468711	83470331	NR_045094	100503434	Gm19689	47	37	51	52	18	18	5	8	9	6	5	7
StitchedEnhancer_10874	chr17	83488559	83489652	NR_045094	100503434	Gm19689	24	17	27	18	13	6	3	3	2	5	6	4
StitchedEnhancer_10875	chr17	83508828	83522923	NR_045094	100503434	Gm19689	271	237	361	210	185	120	32	64	51	63	41	47
StitchedEnhancer_10876	chr17	83537531	83554973	NM_134117	106522	Pkdcc	61	64	95	66	55	70	34	30	38	45	28	40
StitchedEnhancer_10877	chr17	83575768	83622699	NM_134117	106522	Pkdcc	1437	1362	2239	1561	1289	728	190	187	195	209	185	183
StitchedEnhancer_10878	chr17	83666545	83687990	NM_134117	106522	Pkdcc	1079	1103	1592	1026	948	824	69	72	84	97	73	93
StitchedEnhancer_10879	chr17	83711076	83730834	NM_001114361	78798	Eml4	456	347	525	353	305	254	66	82	87	102	72	92
StitchedEnhancer_1088	chr1	136064029	136064937	NM_007695	12654	Chil1	27	21	34	13	16	5	5	3	3	7	8	7
StitchedEnhancer_10880	chr17	83749432	83776008	NM_001114362	78798	Eml4	471	347	497	410	359	249	122	104	128	172	117	116
StitchedEnhancer_10881	chr17	83796330	83797870	NM_001114362	78798	Eml4	69	59	80	61	64	73	8	5	4	8	4	6
StitchedEnhancer_10882	chr17	83912786	83927525	NM_001159529	20463	Cox7a2l	401	348	527	385	419	206	61	67	56	75	68	50
StitchedEnhancer_10883	chr17	83945072	83945958	NM_001159529	20463	Cox7a2l	13	17	25	14	21	17	4	1	2	3	2	1
StitchedEnhancer_10884	chr17	84103874	84109532	NM_001171052	116871	Mta3	337	331	500	412	345	240	29	23	27	37	21	25
StitchedEnhancer_10885	chr17	84130917	84132238	NM_001171052	116871	Mta3	65	54	66	51	46	58	6	5	2	9	1	7
StitchedEnhancer_10886	chr17	84199464	84231207	NM_025325	107766	Haao	164	185	188	190	217	202	116	125	133	140	126	134
StitchedEnhancer_10887	chr17	84244680	84404109	NM_025325	107766	Haao	8198	7649	11640	7902	7271	5433	663	709	773	903	680	763
StitchedEnhancer_10888	chr17	84425427	84561410	NR_045458	74473	4933433H22Rik	6384	6107	7684	5250	4714	4605	533	602	573	742	541	669
StitchedEnhancer_10889	chr17	84578975	84596211	NM_001001806	12193	Zfp36l2	2884	2846	4045	2730	2344	1853	70	83	81	83	67	74
StitchedEnhancer_1089	chr1	136091669	136102505	NM_016749	53311	Mybph	79	91	129	84	96	79	36	35	30	45	30	39
StitchedEnhancer_10890	chr17	84625826	84638745	NM_001001806	12193	Zfp36l2	303	296	470	314	320	191	54	55	50	73	47	73
StitchedEnhancer_10891	chr17	84654745	84675060	NM_001001806	12193	Zfp36l2	670	618	913	670	586	470	107	95	111	106	75	95
StitchedEnhancer_10892	chr17	84692044	84693511	NM_001001806	12193	Zfp36l2	64	46	66	61	51	41	14	7	8	9	1	4
StitchedEnhancer_10893	chr17	84719407	84733522	NM_183021	240174	Thada	185	132	170	189	123	152	50	53	66	74	69	61
StitchedEnhancer_10894	chr17	84762051	84770326	NM_183021	240174	Thada	337	275	399	298	285	166	28	32	37	43	33	36
StitchedEnhancer_10895	chr17	84798792	84805726	NM_183021	240174	Thada	193	173	158	131	179	93	34	34	35	50	26	39
StitchedEnhancer_10896	chr17	84818792	84823279	NM_183021	240174	Thada	104	89	123	103	95	95	15	25	26	21	30	23
StitchedEnhancer_10897	chr17	84865042	84866111	NM_183021	240174	Thada	64	84	144	79	102	49	5	4	9	9	9	9
StitchedEnhancer_10898	chr17	84879778	84882685	NM_183021	240174	Thada	36	35	44	51	29	19	6	7	10	10	6	11
StitchedEnhancer_10899	chr17	84897630	84912488	NM_177606	213556	Plekhh2	408	372	576	360	375	254	63	66	65	86	65	55
StitchedEnhancer_109	chr1	21261408	21262686	NR_002858	241041	Gm4956	67	64	69	50	65	38	7	6	1	4	11	4
StitchedEnhancer_1090	chr1	136117670	136143695	NM_001291928	11539	Adora1	607	578	664	424	430	186	90	85	118	105	72	94
StitchedEnhancer_10900	chr17	84928635	84935450	NM_177606	213556	Plekhh2	159	114	235	169	145	93	25	27	36	33	18	30
StitchedEnhancer_10901	chr17	84974091	84985392	NM_172256	213575	Dync2li1	385	337	557	339	187	236	43	59	33	58	47	54
StitchedEnhancer_10902	chr17	85002066	85044508	NM_172256	213575	Dync2li1	319	281	478	367	303	216	169	181	208	239	178	173
StitchedEnhancer_10903	chr17	85169128	85190975	NM_028233	72416	Lrpprc	563	510	611	425	489	287	86	89	132	108	103	94
StitchedEnhancer_10904	chr17	85264080	85278105	NM_028233	72416	Lrpprc	574	553	836	552	441	269	63	56	64	72	40	57
StitchedEnhancer_10905	chr17	85325149	85326278	NM_001159497	19043	Ppm1b	27	20	21	32	27	7	3	2	7	8	5	5
StitchedEnhancer_10906	chr17	85355369	85359747	NM_001159496	19043	Ppm1b	781	646	1062	787	693	416	21	12	23	22	29	21
StitchedEnhancer_10907	chr17	85398900	85399209	NM_001159498	19043	Ppm1b	13	10	12	9	10	4	2	3	0	2	0	0
StitchedEnhancer_10908	chr17	85466939	85467236	NM_145984	213760	Prepl	11	6	11	5	5	3	1	3	1	2	2	1
StitchedEnhancer_10909	chr17	85484106	85490700	NM_145984	213760	Prepl	1160	850	995	721	551	464	36	34	37	53	34	28
StitchedEnhancer_1091	chr1	136172563	136173310	NM_031189	17928	Myog	6	14	29	15	15	12	1	3	3	4	3	3
StitchedEnhancer_10910	chr17	85795108	85795525	NR_038084	100043902	Six3os1	13	9	20	11	21	18	0	3	2	4	2	1
StitchedEnhancer_10911	chr17	86087606	86089625	NM_011380	20472	Six2	61	67	85	60	66	41	10	10	8	10	8	9
StitchedEnhancer_10912	chr17	86374276	86375062	NM_030133	78586	Srbd1	10	7	21	23	16	9	5	7	1	7	2	2
StitchedEnhancer_10913	chr17	86394544	86395468	NM_030133	78586	Srbd1	27	20	32	25	29	15	2	1	4	4	6	3
StitchedEnhancer_10914	chr17	86431256	86437944	NM_030133	78586	Srbd1	78	42	61	38	32	35	24	28	21	30	23	30
StitchedEnhancer_10915	chr17	86543892	86545581	NM_030133	78586	Srbd1	153	152	242	174	129	105	3	9	9	11	11	10
StitchedEnhancer_10916	chr17	86564955	86569878	NM_011104	18754	Prkce	1042	1033	1560	991	956	606	15	21	11	26	24	26
StitchedEnhancer_10917	chr17	86583871	86603693	NM_011104	18754	Prkce	300	280	438	290	304	159	75	93	56	98	79	111
StitchedEnhancer_10918	chr17	86627007	86751121	NR_045435	72104	2010106C02Rik	1738	1630	2628	1639	1633	1068	535	559	634	739	543	559
StitchedEnhancer_10919	chr17	86763746	86779870	NR_045435	72104	2010106C02Rik	195	193	308	225	268	172	65	81	54	92	55	82
StitchedEnhancer_1092	chr1	136188168	136202222	NM_031189	17928	Myog	856	812	1364	902	565	475	49	87	67	99	68	58
StitchedEnhancer_10920	chr17	86796964	86812039	NR_045435	72104	2010106C02Rik	141	97	148	105	141	85	66	78	63	90	60	74
StitchedEnhancer_10921	chr17	86830438	86867623	NR_045435	72104	2010106C02Rik	1707	1681	2305	1339	1514	841	183	158	155	208	143	175
StitchedEnhancer_10922	chr17	86897870	86959703	NM_010137	13819	Epas1	2198	2014	2737	1695	1443	1034	266	288	314	364	300	331
StitchedEnhancer_10923	chr17	86987033	87001485	NM_010137	13819	Epas1	518	523	777	534	431	280	66	69	62	76	61	79
StitchedEnhancer_10924	chr17	87016570	87018532	NM_010137	13819	Epas1	165	134	206	123	78	53	7	10	11	12	9	5
StitchedEnhancer_10925	chr17	87032433	87033058	NM_010137	13819	Epas1	9	15	23	17	11	10	0	3	4	1	2	1
StitchedEnhancer_10926	chr17	87050160	87070928	NM_010137	13819	Epas1	336	310	470	282	288	238	78	100	94	112	89	90
StitchedEnhancer_10927	chr17	87103686	87216394	NM_010137	13819	Epas1	10185	8722	11659	7239	7175	5150	533	561	567	664	506	522
StitchedEnhancer_10928	chr17	87303872	87305920	NM_001277980	78469	Tmem247	124	154	216	146	114	80	8	11	14	17	13	8
StitchedEnhancer_10929	chr17	87336653	87389444	NM_145491	104215	Rhoq	2111	1927	3120	2302	2029	1276	197	233	202	264	230	265
StitchedEnhancer_1093	chr1	136229055	136239428	NM_001144855	68507	Ppfia4	65	58	100	77	63	39	36	28	37	40	34	34
StitchedEnhancer_10930	chr17	87424393	87425348	NM_019936	56724	Cript	69	58	72	54	66	37	5	9	7	4	7	10
StitchedEnhancer_10931	chr17	87453447	87463500	NM_019936	56724	Cript	156	136	243	169	146	97	48	54	51	45	39	44
StitchedEnhancer_10932	chr17	87501864	87511391	NM_019654	56468	Socs5	1121	875	1348	883	874	752	33	33	60	58	49	48
StitchedEnhancer_10933	chr17	87540961	87582106	NR_046016	399626	C330024C12Rik	1024	1117	1578	1051	1218	901	139	155	169	210	196	159
StitchedEnhancer_10934	chr17	87598115	87607042	NR_046016	399626	C330024C12Rik	351	347	454	300	250	221	32	34	41	50	32	42
StitchedEnhancer_10935	chr17	87640385	87647649	NM_176808	193813	Mcfd2	264	202	289	209	169	127	24	27	33	39	33	36
StitchedEnhancer_10936	chr17	87662356	87665776	NM_176808	193813	Mcfd2	310	298	391	262	200	176	20	18	20	20	14	16
StitchedEnhancer_10937	chr17	87680874	87683598	NM_028639	225049	Ttc7	503	492	755	526	482	336	19	9	15	16	15	14
StitchedEnhancer_10938	chr17	87697934	87812823	NM_029298	75467	1700011E24Rik	3067	2916	4404	2804	2633	1733	417	434	524	534	447	481
StitchedEnhancer_10939	chr17	87843751	87878324	NM_007589	12314	Calm2	1248	1178	1766	1334	1141	698	132	142	161	187	141	163
StitchedEnhancer_1094	chr1	136257805	136259104	NM_001042485	57439	Tmem183a	272	210	269	234	185	123	11	8	8	12	4	9
StitchedEnhancer_10940	chr17	87901186	87901786	NM_007589	12314	Calm2	15	21	11	4	9	12	4	2	3	4	3	1
StitchedEnhancer_10941	chr17	87928598	87932353	NM_007589	12314	Calm2	1002	954	1442	906	955	649	18	11	23	31	19	24
StitchedEnhancer_10942	chr17	87970643	87971164	NM_008532	17075	Epcam	19	20	24	16	39	19	4	4	4	4	2	4
StitchedEnhancer_10943	chr17	88012388	88013154	NM_008532	17075	Epcam	18	19	24	24	6	13	3	4	5	7	1	3
StitchedEnhancer_10944	chr17	88071193	88072492	NM_008628	17685	Msh2	88	90	95	87	113	50	6	5	9	9	5	5
StitchedEnhancer_10945	chr17	88276522	88277747	NM_199251	210741	Kcnk12	61	54	92	56	40	37	7	5	11	6	4	4
StitchedEnhancer_10946	chr17	88370926	88375351	NM_010830	17688	Msh6	175	157	201	163	267	120	21	18	17	27	20	30
StitchedEnhancer_10947	chr17	88441530	88466596	NM_001081034	225055	Fbxo11	1196	1122	1446	1184	1105	749	109	98	146	136	113	124
StitchedEnhancer_10948	chr17	88506023	88533294	NM_001190356	225058	Gm4832	310	259	319	288	336	372	103	97	116	126	115	127
StitchedEnhancer_10949	chr17	88611255	88614677	NM_001190356	225058	Gm4832	37	35	81	63	40	20	13	15	15	14	17	12
StitchedEnhancer_1095	chr1	136277682	136282582	NM_173771	240755	4933406M09Rik	338	257	469	330	189	169	25	14	26	25	25	29
StitchedEnhancer_10950	chr17	88654779	88681223	NM_001190356	225058	Gm4832	1460	1349	2227	1490	1217	824	109	111	121	158	119	109
StitchedEnhancer_10951	chr17	88696333	88697877	NM_180974	14236	Foxn2	49	28	54	28	33	10	11	11	8	6	4	6
StitchedEnhancer_10952	chr17	88717600	88754132	NM_180974	14236	Foxn2	618	554	818	494	333	341	115	139	132	165	149	163
StitchedEnhancer_10953	chr17	88766667	88770506	NM_180974	14236	Foxn2	47	50	59	50	31	43	19	14	18	27	9	17
StitchedEnhancer_10954	chr17	88839333	88841597	NM_180974	14236	Foxn2	435	460	490	354	403	253	4	6	10	12	14	15
StitchedEnhancer_10955	chr17	88861999	88862640	NM_180974	14236	Foxn2	21	11	19	14	12	10	4	5	4	4	3	3
StitchedEnhancer_10956	chr17	88908155	88908968	NM_028658	73825	Ppp1r21	10	21	15	8	8	9	4	3	3	9	5	3
StitchedEnhancer_10957	chr17	88927450	88930304	NM_028658	73825	Ppp1r21	142	133	138	106	98	87	17	13	18	28	16	15
StitchedEnhancer_10958	chr17	88943894	88965157	NM_028658	73825	Ppp1r21	469	413	491	354	365	404	79	75	124	96	86	104
StitchedEnhancer_10959	chr17	88979277	89040441	NM_029858	77057	Ston1	2745	2239	2907	2011	1873	1381	259	258	311	359	248	285
StitchedEnhancer_1096	chr1	136301768	136318295	NM_028320	72674	Adipor1	1172	1099	1582	1107	978	763	71	102	89	113	69	86
StitchedEnhancer_10960	chr17	89257519	89258978	NM_013582	16867	Lhcgr	25	29	49	40	10	23	6	3	4	4	2	8
StitchedEnhancer_10961	chr17	90165073	90166615	NR_045952	100043904	Gm4719	49	20	50	29	51	22	5	6	6	8	6	7
StitchedEnhancer_10962	chr17	91220332	91220596	NR_045463	78800	4930480K15Rik	10	2	7	3	10	8	0	1	3	2	3	0
StitchedEnhancer_10963	chr17	91423520	91425473	NM_177284	18189	Nrxn1	68	37	35	24	34	37	12	8	14	8	11	5
StitchedEnhancer_10964	chr17	95148254	95149738	NM_176917	76781	Mettl4	178	202	240	170	159	118	6	9	6	7	3	6
StitchedEnhancer_10965	chr17	95233443	95234712	NR_045964	100038746	Gm1976	105	106	171	113	141	85	7	6	4	20	8	10
StitchedEnhancer_10966	chr17	95263794	95264463	NM_153780	72139	2610044O15Rik8	15	13	19	17	15	14	5	4	4	3	4	4
StitchedEnhancer_10967	chr18	3130297	3132599	NM_001167539	100312476	Vmn1r238	123	47	124	89	59	63	6	8	6	13	9	10
StitchedEnhancer_10968	chr18	3274623	3282337	NM_001110854	12916	Crem	761	493	637	480	361	361	37	44	28	48	31	45
StitchedEnhancer_10969	chr18	3335780	3338792	NM_001110851	12916	Crem	1558	1318	1691	1249	1014	866	11	16	19	17	13	12
StitchedEnhancer_1097	chr1	136351571	136352513	NM_153128	240756	Klhl12	110	80	140	112	109	51	9	10	5	7	9	6
StitchedEnhancer_10970	chr18	3382693	3383865	NM_029402	71745	Cul2	229	176	365	232	174	132	4	8	8	7	8	5
StitchedEnhancer_10971	chr18	3423800	3424238	NM_029402	71745	Cul2	16	10	8	9	12	3	0	0	0	2	4	1
StitchedEnhancer_10972	chr18	3507398	3512322	NM_026505	68010	Bambi	261	202	340	250	189	120	19	23	22	42	15	20
StitchedEnhancer_10973	chr18	3627986	3628809	NM_026505	68010	Bambi	21	15	23	24	8	10	0	3	5	0	9	4
StitchedEnhancer_10974	chr18	3664907	3670061	NM_026505	68010	Bambi	199	196	315	210	176	111	16	18	16	26	27	22
StitchedEnhancer_10975	chr18	3839359	3841950	NM_026092	67328	Lyzl1	87	76	87	73	35	52	13	6	8	12	10	5
StitchedEnhancer_10976	chr18	3893928	3894278	NM_026092	67328	Lyzl1	4	7	8	12	12	9	0	6	3	2	0	3
StitchedEnhancer_10977	chr18	4140624	4141706	NM_026092	67328	Lyzl1	31	31	62	46	24	11	2	4	4	3	2	10
StitchedEnhancer_10978	chr18	4265838	4279085	NM_007746	26410	Map3k8	72	91	62	57	83	64	45	49	53	56	59	49
StitchedEnhancer_10979	chr18	4312020	4315356	NM_007746	26410	Map3k8	119	86	144	101	92	123	14	19	15	17	18	14
StitchedEnhancer_1098	chr1	136390427	136392025	NM_145510	98710	Rabif	340	285	391	333	280	186	7	7	10	19	10	11
StitchedEnhancer_10980	chr18	4333341	4356303	NM_007746	26410	Map3k8	2595	2345	3112	2246	2070	1704	105	105	117	136	123	131
StitchedEnhancer_10981	chr18	4369189	4376287	NM_026157	67440	Mtpap	319	166	267	157	153	174	33	28	39	55	44	34
StitchedEnhancer_10982	chr18	4438266	4443500	NM_026157	67440	Mtpap	533	337	623	407	322	258	25	28	24	26	19	28
StitchedEnhancer_10983	chr18	4504377	4525178	NM_001081963	240185	9430020K01Rik	2259	1830	2551	1612	1612	1208	98	114	89	107	87	91
StitchedEnhancer_10984	chr18	4602123	4603267	NM_001081963	240185	9430020K01Rik	45	40	38	30	39	26	3	4	6	13	4	9
StitchedEnhancer_10985	chr18	4631287	4716834	NM_001081963	240185	9430020K01Rik	1679	1367	2158	1433	1349	1136	311	307	313	380	295	337
StitchedEnhancer_10986	chr18	4734083	4741631	NR_045881	100038439	Gm10556	655	530	730	502	616	344	25	37	33	37	30	29
StitchedEnhancer_10987	chr18	4793953	4798387	NR_045881	100038439	Gm10556	93	81	97	98	75	48	10	16	28	21	21	13
StitchedEnhancer_10988	chr18	4817788	4818898	NR_045881	100038439	Gm10556	54	40	58	43	41	19	5	2	5	3	5	9
StitchedEnhancer_10989	chr18	4838357	4840819	NR_045881	100038439	Gm10556	145	111	180	115	88	33	13	9	10	14	10	13
StitchedEnhancer_1099	chr1	136415054	136415896	NM_145510	98710	Rabif	16	19	21	20	10	9	4	3	7	9	6	2
StitchedEnhancer_10990	chr18	4869402	4873899	NR_045881	100038439	Gm10556	123	74	115	85	96	64	16	20	14	28	14	15
StitchedEnhancer_10991	chr18	4920036	4928355	NR_045881	100038439	Gm10556	386	309	503	429	355	200	39	28	36	38	36	33
StitchedEnhancer_10992	chr18	4947076	4955689	NM_153153	225115	Svil	79	90	107	84	69	62	35	37	48	44	44	50
StitchedEnhancer_10993	chr18	4980247	5049825	NM_153153	225115	Svil	3632	2968	5675	4049	3126	1719	307	325	341	412	336	337
StitchedEnhancer_10994	chr18	5067149	5077672	NM_153153	225115	Svil	392	318	460	279	311	213	43	56	51	56	44	55
StitchedEnhancer_10995	chr18	5096670	5101327	NM_153153	225115	Svil	123	111	89	77	83	63	21	20	27	37	19	32
StitchedEnhancer_10996	chr18	5115648	5200031	NM_153153	225115	Svil	4020	3424	4547	3041	2740	2261	386	398	402	508	407	417
StitchedEnhancer_10997	chr18	5258128	5270318	NM_178722	240186	Zfp438	153	104	168	144	73	73	71	42	55	74	58	41
StitchedEnhancer_10998	chr18	5319856	5320518	NM_178722	240186	Zfp438	32	14	36	24	23	18	2	2	1	7	3	2
StitchedEnhancer_10999	chr18	5333513	5335617	NM_178722	240186	Zfp438	871	837	1136	773	705	497	6	10	9	12	8	8
StitchedEnhancer_11	chr1	4659978	4662498	NR_033530	27395	Mrpl15	179	112	157	75	131	83	10	11	11	18	8	16
StitchedEnhancer_110	chr1	21287983	21297090	NR_002858	241041	Gm4956	121	121	133	97	123	74	28	33	20	38	34	25
StitchedEnhancer_1100	chr1	136452806	136458223	NM_152895	75605	Kdm5b	355	323	473	326	279	168	27	28	31	23	34	24
StitchedEnhancer_11000	chr18	5354603	5450239	NM_178722	240186	Zfp438	2289	2034	3140	2039	2032	1449	388	350	426	538	396	401
StitchedEnhancer_11001	chr18	5509813	5537740	NM_011546	21417	Zeb1	684	445	747	512	460	461	119	105	152	154	115	123
StitchedEnhancer_11002	chr18	5586267	5610511	NR_033552	791318	Gm10125	1302	1050	1436	1174	1063	747	106	102	116	164	124	154
StitchedEnhancer_11003	chr18	5625013	5625591	NR_033552	791318	Gm10125	16	11	5	12	15	10	6	3	1	3	3	2
StitchedEnhancer_11004	chr18	5665756	5667958	NR_033552	791318	Gm10125	91	50	76	50	59	48	12	10	10	9	15	15
StitchedEnhancer_11005	chr18	5690826	5697170	NR_033552	791318	Gm10125	207	166	222	175	152	114	18	34	28	28	21	29
StitchedEnhancer_11006	chr18	5711583	5720835	NR_033552	791318	Gm10125	134	66	79	61	83	118	46	42	51	67	39	38
StitchedEnhancer_11007	chr18	5740313	5741613	NR_033552	791318	Gm10125	18	21	19	27	30	21	4	7	8	8	8	2
StitchedEnhancer_11008	chr18	5763267	5765437	NR_033552	791318	Gm10125	94	66	111	83	64	64	12	9	13	9	8	12
StitchedEnhancer_11009	chr18	5802279	5842627	NR_033552	791318	Gm10125	1930	1621	2224	1518	1375	1166	162	174	190	180	154	181
StitchedEnhancer_1101	chr1	136621454	136622288	NR_015606	329251	Ppp1r12b	18	20	19	16	23	7	2	3	4	2	2	2
StitchedEnhancer_11010	chr18	5855880	5858680	NR_033552	791318	Gm10125	123	72	121	91	72	89	7	11	8	18	18	17
StitchedEnhancer_11011	chr18	5919434	5947281	NM_029277	75415	Arhgap12	1454	1106	1659	1014	922	740	122	124	105	146	140	115
StitchedEnhancer_11012	chr18	5985989	5990690	NM_029277	75415	Arhgap12	752	585	883	615	488	420	26	31	27	32	25	27
StitchedEnhancer_11013	chr18	6017108	6030311	NM_029277	75415	Arhgap12	106	103	130	92	76	89	62	75	82	71	64	73
StitchedEnhancer_11014	chr18	6055069	6055773	NM_029277	75415	Arhgap12	48	35	55	27	42	42	5	2	5	7	7	7
StitchedEnhancer_11015	chr18	6111576	6112308	NM_029277	75415	Arhgap12	27	15	40	30	16	7	5	4	4	4	5	6
StitchedEnhancer_11016	chr18	6131846	6145858	NM_001039692	75415	Arhgap12	889	806	1299	901	747	525	83	69	71	95	74	81
StitchedEnhancer_11017	chr18	6236910	6242306	NM_008448	16573	Kif5b	630	502	799	623	463	350	28	27	36	30	14	23
StitchedEnhancer_11018	chr18	6274931	6283352	NM_008448	16573	Kif5b	384	341	484	369	396	330	31	37	34	35	34	34
StitchedEnhancer_11019	chr18	6377107	6378507	NR_035446	100316773	Mir1893	58	29	34	36	26	34	8	8	9	7	6	8
StitchedEnhancer_1102	chr1	136646468	136722124	NR_015606	329251	Ppp1r12b	2549	2164	3331	2281	1983	1450	330	337	355	423	293	327
StitchedEnhancer_11020	chr18	6447413	6492879	NR_035446	100316773	Mir1893	2384	2018	2796	1906	1925	1368	222	229	260	309	205	223
StitchedEnhancer_11021	chr18	6506321	6517250	NM_007935	13831	Epc1	1116	779	1231	886	757	611	50	45	60	52	54	44
StitchedEnhancer_11022	chr18	6530228	6532104	NM_007935	13831	Epc1	142	121	141	110	85	51	13	10	7	6	5	9
StitchedEnhancer_11023	chr18	6548122	6549490	NM_007935	13831	Epc1	166	79	157	119	77	61	3	5	7	6	7	4
StitchedEnhancer_11024	chr18	6665317	6667097	NM_027598	70901	4921524L21Rik	48	40	35	25	27	26	6	2	5	5	1	3
StitchedEnhancer_11025	chr18	6764569	6773948	NM_001278447	19330	Rab18	231	170	210	149	197	130	45	53	62	75	42	53
StitchedEnhancer_11026	chr18	7116848	7118260	NM_177595	210719	Mkx	72	59	157	90	37	31	8	5	6	7	5	3
StitchedEnhancer_11027	chr18	7234937	7235574	NM_001081393	74934	Armc4	18	9	25	18	9	7	3	1	1	4	6	3
StitchedEnhancer_11028	chr18	7604896	7611043	NM_001081287	75739	Mpp7	162	194	366	311	173	172	29	23	23	34	29	32
StitchedEnhancer_11029	chr18	7625663	7627499	NM_001081287	75739	Mpp7	132	150	245	188	159	93	6	6	12	11	7	11
StitchedEnhancer_1103	chr1	136742407	136758609	NR_015606	329251	Ppp1r12b	593	497	786	483	355	243	58	74	63	71	71	65
StitchedEnhancer_11030	chr18	7644081	7647123	NM_001161620	75739	Mpp7	273	183	268	176	125	108	18	13	20	12	11	20
StitchedEnhancer_11031	chr18	7692510	7711856	NM_001161620	75739	Mpp7	443	460	622	481	461	369	72	72	78	83	86	74
StitchedEnhancer_11032	chr18	7868010	7870814	NM_153085	225131	Wac	1025	890	1333	993	930	658	16	12	21	20	12	15
StitchedEnhancer_11033	chr18	8155332	8156116	NM_153085	225131	Wac	43	18	5	20	15	21	1	5	4	4	3	6
StitchedEnhancer_11034	chr18	8327584	8328998	NM_153085	225131	Wac	37	12	34	17	14	22	7	3	8	2	7	5
StitchedEnhancer_11035	chr18	8376311	8377718	NM_153085	225131	Wac	103	51	135	84	76	77	5	9	2	11	1	7
StitchedEnhancer_11036	chr18	8643994	8645914	NM_008058	14370	Fzd8	94	48	105	105	65	43	9	10	8	17	8	11
StitchedEnhancer_11037	chr18	8664826	8665938	NM_008058	14370	Fzd8	23	14	18	12	9	16	6	4	4	6	6	5
StitchedEnhancer_11038	chr18	8693414	8694919	NM_008058	14370	Fzd8	143	121	153	110	84	44	12	7	8	9	6	6
StitchedEnhancer_11039	chr18	8763672	8769095	NM_008058	14370	Fzd8	207	126	143	138	91	48	24	17	20	19	19	12
StitchedEnhancer_1104	chr1	136788071	136789470	NM_001081307	329251	Ppp1r12b	70	48	74	37	34	39	6	6	8	9	7	6
StitchedEnhancer_11040	chr18	9210693	9213990	NM_008058	14370	Fzd8	148	118	230	188	127	65	18	12	11	12	9	13
StitchedEnhancer_11041	chr18	9270358	9271781	NM_153086	225152	Gjd4	43	33	32	41	42	25	13	4	11	11	7	7
StitchedEnhancer_11042	chr18	9299854	9300843	NM_153086	225152	Gjd4	42	25	27	18	19	23	1	9	5	3	5	2
StitchedEnhancer_11043	chr18	9316368	9316813	NM_153086	225152	Gjd4	15	12	7	4	8	13	2	1	1	1	3	3
StitchedEnhancer_11044	chr18	9337482	9339627	NM_153086	225152	Gjd4	114	90	159	95	73	76	9	10	20	14	6	13
StitchedEnhancer_11045	chr18	9354182	9356556	NM_153086	225152	Gjd4	181	137	119	65	99	72	13	12	10	11	15	13
StitchedEnhancer_11046	chr18	9373588	9412555	NM_026484	67974	Ccny	2285	1334	1381	1092	1186	1181	193	208	216	225	215	196
StitchedEnhancer_11047	chr18	9427644	9431059	NM_026484	67974	Ccny	116	83	115	103	96	85	16	22	25	19	8	20
StitchedEnhancer_11048	chr18	9445042	9451438	NM_026484	67974	Ccny	791	621	697	501	492	420	32	32	40	44	23	38
StitchedEnhancer_11049	chr18	9707159	9709048	NM_130449	140792	Colec12	108	107	133	104	104	67	7	4	13	17	8	15
StitchedEnhancer_1105	chr1	136804776	136859579	NM_001081307	329251	Ppp1r12b	3325	2650	4459	2693	2138	1438	239	240	259	284	248	238
StitchedEnhancer_11050	chr18	9730341	9744165	NM_130449	140792	Colec12	199	157	230	165	169	180	45	60	75	73	48	43
StitchedEnhancer_11051	chr18	9767604	9768660	NM_130449	140792	Colec12	18	12	16	17	12	20	2	5	2	4	2	5
StitchedEnhancer_11052	chr18	9818639	9832851	NM_130449	140792	Colec12	116	117	193	175	121	89	52	51	58	55	34	56
StitchedEnhancer_11053	chr18	9848016	9849116	NM_153552	225160	Thoc1	33	33	54	42	29	15	0	3	2	5	3	5
StitchedEnhancer_11054	chr18	9957400	9958659	NM_153552	225160	Thoc1	210	170	226	166	182	144	3	7	12	10	9	4
StitchedEnhancer_11055	chr18	10028785	10030340	NM_021522	59025	Usp14	160	151	170	153	164	107	10	6	10	8	8	7
StitchedEnhancer_11056	chr18	10052314	10052695	NM_001038589	59025	Usp14	2	10	13	10	15	3	4	0	5	1	2	3
StitchedEnhancer_11057	chr18	10092540	10104869	NM_001038589	59025	Usp14	173	151	243	177	142	105	53	44	68	61	50	67
StitchedEnhancer_11058	chr18	10180019	10188592	NM_009071	19877	Rock1	853	743	1159	763	668	483	28	29	40	57	29	53
StitchedEnhancer_11059	chr18	10213084	10214673	NM_009071	19877	Rock1	48	54	92	41	28	17	4	3	3	7	2	4
StitchedEnhancer_1106	chr1	136888660	136915154	NM_001278115	67196	Ube2t	320	327	674	443	304	169	81	87	102	123	82	100
StitchedEnhancer_11060	chr18	10252797	10255227	NM_001083628	381157	Greb1l	55	56	120	75	51	34	9	12	6	10	13	9
StitchedEnhancer_11061	chr18	10324686	10325782	NM_001083628	381157	Greb1l	26	36	40	43	24	21	6	5	4	6	8	6
StitchedEnhancer_11062	chr18	10417503	10419051	NM_001083628	381157	Greb1l	121	59	89	61	64	53	3	6	9	4	4	5
StitchedEnhancer_11063	chr18	10531847	10533626	NM_001081222	77805	Esco1	137	131	194	96	81	95	7	11	9	16	5	11
StitchedEnhancer_11064	chr18	10598749	10618265	NM_001081222	77805	Esco1	777	613	838	582	566	396	99	100	108	124	83	102
StitchedEnhancer_11065	chr18	10706585	10707484	NR_045379	75370	4930563E18Rik	82	72	95	65	47	22	3	4	1	2	1	2
StitchedEnhancer_11066	chr18	10725134	10727318	NM_144860	225164	Mib1	476	433	509	448	438	229	7	15	9	5	14	6
StitchedEnhancer_11067	chr18	10779580	10790297	NR_035413	100316783	Mir1b	1186	637	983	774	479	460	43	30	64	64	56	47
StitchedEnhancer_11068	chr18	10838814	10850050	NR_029781	723959	Mir1a-2	107	104	130	140	112	127	45	43	48	58	46	36
StitchedEnhancer_11069	chr18	10866056	10867366	NR_029781	723959	Mir1a-2	51	50	77	43	25	24	2	7	10	6	1	8
StitchedEnhancer_1107	chr1	136979147	137002271	NM_001033409	329252	Lgr6	1058	1153	2077	1340	926	489	80	86	73	71	59	91
StitchedEnhancer_11070	chr18	11046370	11082447	NR_105023	68434	1010001N08Rik	3146	2896	5115	3305	2968	1739	124	123	145	165	130	132
StitchedEnhancer_11071	chr18	11095761	11101365	NR_105023	68434	1010001N08Rik	117	111	221	192	204	97	27	28	26	26	19	26
StitchedEnhancer_11072	chr18	11129246	11146470	NR_105023	68434	1010001N08Rik	629	574	838	537	456	283	70	78	85	92	52	61
StitchedEnhancer_11073	chr18	11204917	11244452	NR_105023	68434	1010001N08Rik	511	432	671	495	454	374	159	158	187	219	167	135
StitchedEnhancer_11074	chr18	11272337	11274251	NR_105023	68434	1010001N08Rik	66	30	38	42	32	52	11	12	14	13	9	11
StitchedEnhancer_11075	chr18	11316062	11326637	NR_105023	68434	1010001N08Rik	220	131	211	175	131	153	56	55	47	66	58	48
StitchedEnhancer_11076	chr18	11355034	11402747	NR_105023	68434	1010001N08Rik	795	712	1091	783	582	455	138	168	189	203	183	147
StitchedEnhancer_11077	chr18	11429406	11430263	NM_001252495	225182	Rbbp8	90	59	98	76	49	19	3	1	2	4	2	4
StitchedEnhancer_11078	chr18	11481278	11497242	NM_001252495	225182	Rbbp8	232	166	302	205	214	167	55	70	65	87	58	70
StitchedEnhancer_11079	chr18	11510051	11512489	NM_001252495	225182	Rbbp8	310	282	471	280	275	185	11	8	18	13	7	11
StitchedEnhancer_1108	chr1	137026732	137051899	NM_026823	68724	Arl8a	742	696	846	699	656	490	102	107	109	128	103	112
StitchedEnhancer_11080	chr18	11550587	11553275	NM_001252495	225182	Rbbp8	244	171	309	204	116	95	7	9	12	15	17	11
StitchedEnhancer_11081	chr18	11629060	11632252	NM_001252495	225182	Rbbp8	68	68	98	65	74	33	5	16	14	15	13	15
StitchedEnhancer_11082	chr18	11696286	11698307	NM_001252495	225182	Rbbp8	84	60	105	67	61	34	5	10	6	8	8	12
StitchedEnhancer_11083	chr18	11803704	11816753	NR_045526	225182	Rbbp8	458	381	620	434	314	299	57	46	71	65	57	61
StitchedEnhancer_11084	chr18	11951586	11954427	NM_022021	63955	Cables1	197	210	299	228	167	173	11	6	13	11	10	9
StitchedEnhancer_11085	chr18	11973459	11978320	NM_022021	63955	Cables1	128	106	148	122	54	46	28	26	25	14	22	21
StitchedEnhancer_11086	chr18	11996692	12022244	NR_035447	100316686	Mir1901	759	617	918	628	573	427	92	132	119	147	99	119
StitchedEnhancer_11087	chr18	12041450	12080214	NR_035447	100316686	Mir1901	1378	1131	1891	1131	1056	655	149	173	168	198	148	182
StitchedEnhancer_11088	chr18	12094187	12138217	NR_035447	100316686	Mir1901	1249	1196	1402	935	878	737	166	175	200	219	188	181
StitchedEnhancer_11089	chr18	12152821	12176051	NR_110356	338363	Tmem241	626	507	808	517	458	358	94	117	94	138	84	120
StitchedEnhancer_1109	chr1	137065830	137067361	NM_134438	171469	Gpr37l1	86	64	121	85	83	48	5	3	5	5	9	4
StitchedEnhancer_11090	chr18	12192125	12207999	NR_110356	338363	Tmem241	175	126	256	198	158	125	66	65	81	97	64	72
StitchedEnhancer_11091	chr18	12260835	12289858	NR_110356	338363	Tmem241	837	739	853	578	590	468	118	132	158	178	162	159
StitchedEnhancer_11092	chr18	12323898	12328162	NM_029623	76482	3110002H16Rik	455	455	705	420	421	259	28	25	24	35	26	23
StitchedEnhancer_11093	chr18	12343736	12357152	NM_029623	76482	3110002H16Rik	931	965	1380	762	667	415	52	48	63	70	64	65
StitchedEnhancer_11094	chr18	12382021	12395866	NM_008720	18145	Npc1	497	449	718	504	464	290	50	81	62	81	52	68
StitchedEnhancer_11095	chr18	12414688	12415471	NM_008720	18145	Npc1	18	27	39	29	21	10	2	2	2	3	4	5
StitchedEnhancer_11096	chr18	12428569	12439680	NM_001190371	225187	Ankrd29	101	92	92	63	60	42	30	56	50	52	43	49
StitchedEnhancer_11097	chr18	12452687	12464698	NM_001190371	225187	Ankrd29	912	783	847	492	698	412	59	46	69	78	47	58
StitchedEnhancer_11098	chr18	12491846	12508772	NM_010680	16774	Lama3	160	149	230	178	160	79	66	57	71	84	71	61
StitchedEnhancer_11099	chr18	12541926	12544824	NM_010680	16774	Lama3	45	66	114	68	71	23	13	13	13	7	10	15
StitchedEnhancer_111	chr1	21603952	21604498	NM_001113187	98582	Khdc1b	34	11	14	3	6	4	1	1	2	3	2	7
StitchedEnhancer_1110	chr1	137095237	137096333	NM_134438	171469	Gpr37l1	18	20	24	17	28	9	2	3	6	6	5	7
StitchedEnhancer_11100	chr18	12575060	12584608	NM_010680	16774	Lama3	138	89	151	117	90	62	25	37	38	33	42	43
StitchedEnhancer_11101	chr18	12801622	12802881	NM_028341	72747	Ttc39c	83	108	140	81	80	67	6	5	6	10	4	7
StitchedEnhancer_11102	chr18	12861587	12862834	NR_035471	100316699	Mir1948	45	44	88	66	48	26	3	6	3	7	4	5
StitchedEnhancer_11103	chr18	12899130	12900305	NM_001042419	71132	Cabyr	117	90	142	113	70	54	3	9	3	14	5	10
StitchedEnhancer_11104	chr18	12940256	12972249	NR_045524	64291	Osbpl1a	847	657	906	591	524	347	125	155	148	149	122	125
StitchedEnhancer_11105	chr18	12993004	12993341	NR_045524	64291	Osbpl1a	15	8	10	10	6	4	3	0	1	6	0	1
StitchedEnhancer_11106	chr18	13010307	13023013	NM_001252493	64291	Osbpl1a	1209	918	1153	869	873	504	55	51	51	53	67	71
StitchedEnhancer_11107	chr18	13077658	13078455	NM_207530	64291	Osbpl1a	26	10	33	22	20	16	7	2	5	2	2	3
StitchedEnhancer_11108	chr18	13099576	13114705	NM_207530	64291	Osbpl1a	331	293	401	319	305	193	72	80	84	81	79	78
StitchedEnhancer_11109	chr18	13130229	13133334	NM_008378	16210	Impact	884	830	1185	805	705	502	13	20	14	22	15	23
StitchedEnhancer_1111	chr1	137155418	137155712	NM_007921	13710	Elf3	12	7	3	9	6	2	0	6	1	0	2	2
StitchedEnhancer_11110	chr18	13147427	13149861	NM_153087	225192	Hrh4	92	55	146	72	55	68	10	17	12	11	13	8
StitchedEnhancer_11111	chr18	13190072	13191080	NM_153087	225192	Hrh4	29	15	30	22	14	11	1	6	1	5	3	2
StitchedEnhancer_11112	chr18	13505355	13507710	NM_153087	225192	Hrh4	165	95	260	147	33	41	3	5	10	14	9	10
StitchedEnhancer_11113	chr18	13654468	13658939	NM_145492	225207	Zfp521	167	132	226	142	156	83	17	16	22	20	15	6
StitchedEnhancer_11114	chr18	13685306	13694960	NM_145492	225207	Zfp521	117	61	116	81	82	48	25	28	39	45	31	34
StitchedEnhancer_11115	chr18	13718601	13719956	NM_145492	225207	Zfp521	46	39	59	35	53	26	7	1	3	4	6	3
StitchedEnhancer_11116	chr18	13758345	13761487	NM_145492	225207	Zfp521	187	132	253	129	195	88	13	15	21	16	11	14
StitchedEnhancer_11117	chr18	13818929	13824576	NM_145492	225207	Zfp521	100	83	173	112	102	78	20	16	24	22	19	28
StitchedEnhancer_11118	chr18	13882203	13883649	NM_145492	225207	Zfp521	34	31	45	33	22	28	5	1	9	9	4	5
StitchedEnhancer_11119	chr18	13910709	13920836	NM_145492	225207	Zfp521	190	94	212	183	150	89	37	34	51	49	47	45
StitchedEnhancer_1112	chr1	137177377	137183192	NM_145417	215615	Rnpep	487	402	628	434	371	317	19	43	34	34	39	29
StitchedEnhancer_11120	chr18	13944846	13946681	NM_145492	225207	Zfp521	58	52	127	84	84	57	11	9	16	9	12	8
StitchedEnhancer_11121	chr18	13961576	13986346	NM_145492	225207	Zfp521	254	201	353	258	167	136	115	95	106	135	118	106
StitchedEnhancer_11122	chr18	14006222	14014234	NM_145492	225207	Zfp521	385	300	661	443	359	284	39	35	38	45	36	38
StitchedEnhancer_11123	chr18	14037925	14080522	NM_145492	225207	Zfp521	672	483	1001	622	620	441	175	180	176	227	179	197
StitchedEnhancer_11124	chr18	14099840	14100682	NM_145492	225207	Zfp521	13	17	19	21	27	12	3	1	5	2	2	3
StitchedEnhancer_11125	chr18	14125589	14133531	NM_145492	225207	Zfp521	1022	804	1782	1207	1076	618	31	30	30	38	32	20
StitchedEnhancer_11126	chr18	14175082	14177537	NM_145492	225207	Zfp521	62	64	94	67	43	31	5	17	4	7	8	6
StitchedEnhancer_11127	chr18	14218313	14233960	NM_145492	225207	Zfp521	141	94	137	101	71	78	55	45	84	67	64	63
StitchedEnhancer_11128	chr18	14278109	14279294	NR_045373	74529	8430422H06Rik	29	18	29	28	17	16	2	4	6	7	2	4
StitchedEnhancer_11129	chr18	14360405	14368644	NR_045373	74529	8430422H06Rik	175	95	79	67	115	53	29	33	22	39	23	30
StitchedEnhancer_1113	chr1	137209593	137227899	NM_053106	93689	Lmod1	395	386	521	442	417	199	54	71	73	72	61	79
StitchedEnhancer_11130	chr18	14397994	14399332	NR_045373	74529	8430422H06Rik	37	24	19	25	21	13	1	5	6	5	5	5
StitchedEnhancer_11131	chr18	14488233	14491326	NR_045373	74529	8430422H06Rik	375	265	498	309	290	227	7	19	12	16	8	17
StitchedEnhancer_11132	chr18	14731043	14732051	NM_001161369	268996	Ss18	90	55	66	46	30	26	3	5	5	7	5	5
StitchedEnhancer_11133	chr18	14811937	14817498	NM_001161369	268996	Ss18	469	393	531	350	313	254	30	18	21	27	24	33
StitchedEnhancer_11134	chr18	14840170	14842162	NM_001161369	268996	Ss18	704	636	811	519	567	430	8	5	8	16	5	7
StitchedEnhancer_11135	chr18	14941166	14942520	NM_001100449	72504	Taf4b	153	124	163	125	108	58	9	9	9	3	11	7
StitchedEnhancer_11136	chr18	15002736	15003786	NM_001100449	72504	Taf4b	30	19	22	16	19	21	7	3	3	4	4	4
StitchedEnhancer_11137	chr18	15134192	15159933	NR_045372	74456	4933424G05Rik	152	101	201	133	141	102	86	81	94	110	86	96
StitchedEnhancer_11138	chr18	15179705	15180630	NR_045372	74456	4933424G05Rik	25	21	29	22	9	9	8	2	4	4	1	4
StitchedEnhancer_11139	chr18	15221678	15224529	NM_001142731	106931	Kctd1	83	72	169	123	116	65	16	5	17	13	12	12
StitchedEnhancer_1114	chr1	137242755	137277945	NM_175259	77552	Shisa4	1063	940	1317	1098	745	439	139	124	128	163	117	148
StitchedEnhancer_11140	chr18	16375965	16376285	NM_199055	71367	Chst9	10	11	14	8	3	6	2	0	5	1	2	4
StitchedEnhancer_11141	chr18	16435431	16436968	NM_007664	12558	Cdh2	55	50	119	96	58	52	1	6	6	5	5	3
StitchedEnhancer_11142	chr18	16461419	16464689	NM_007664	12558	Cdh2	160	66	122	113	45	39	12	17	10	16	12	17
StitchedEnhancer_11143	chr18	16746892	16747272	NM_007664	12558	Cdh2	10	8	20	18	7	5	1	0	0	1	2	2
StitchedEnhancer_11144	chr18	16792971	16793471	NM_007664	12558	Cdh2	7	11	12	15	8	6	5	2	4	3	3	0
StitchedEnhancer_11145	chr18	16822024	16833192	NM_007664	12558	Cdh2	113	68	52	55	71	51	55	40	54	63	41	33
StitchedEnhancer_11146	chr18	16848724	16949604	NM_007664	12558	Cdh2	2852	1819	2801	1902	1602	1202	368	333	407	452	360	359
StitchedEnhancer_11147	chr18	16963119	16975062	NM_007664	12558	Cdh2	681	520	961	673	591	359	37	41	44	51	36	35
StitchedEnhancer_11148	chr18	20209654	20218691	NM_013505	13506	Dsc2	625	498	704	495	443	263	31	35	39	34	28	23
StitchedEnhancer_11149	chr18	20346807	20349978	NM_181680	211924	Dsg1c	172	136	181	147	114	96	13	14	12	13	7	8
StitchedEnhancer_1115	chr1	137306971	137311182	NM_153774	226432	Ipo9	228	137	226	135	134	130	22	24	22	42	17	23
StitchedEnhancer_11150	chr18	20473344	20477664	NM_010079	13510	Dsg1a	71	59	76	75	53	41	14	16	19	12	14	17
StitchedEnhancer_11151	chr18	20710650	20725420	NM_007883	13511	Dsg2	764	644	856	609	547	370	54	50	59	55	57	48
StitchedEnhancer_11152	chr18	20746238	20753834	NM_007883	13511	Dsg2	201	167	242	178	132	98	21	32	20	24	29	17
StitchedEnhancer_11153	chr18	20828642	20830184	NM_013697	22139	Ttr	93	77	154	82	52	52	6	5	8	5	4	6
StitchedEnhancer_11154	chr18	20854627	20857698	NM_013697	22139	Ttr	69	67	95	62	63	80	8	14	14	21	10	8
StitchedEnhancer_11155	chr18	20871280	20873092	NM_019737	56386	B4galt6	54	42	73	44	43	48	10	8	5	13	8	5
StitchedEnhancer_11156	chr18	20893143	20905099	NM_019737	56386	B4galt6	483	481	615	436	514	355	37	49	41	56	51	48
StitchedEnhancer_11157	chr18	20944916	20946533	NM_019737	56386	B4galt6	25	29	31	33	31	26	10	5	9	7	5	8
StitchedEnhancer_11158	chr18	20959565	20970343	NM_019737	56386	B4galt6	120	97	137	103	127	142	23	41	29	41	29	40
StitchedEnhancer_11159	chr18	21053969	21055576	NM_029491	75964	Trappc8	181	137	221	182	172	125	8	8	7	10	13	11
StitchedEnhancer_1116	chr1	137326391	137327507	NM_153774	226432	Ipo9	93	74	119	75	62	62	3	4	9	8	6	9
StitchedEnhancer_11160	chr18	21094581	21102027	NM_026301	67664	Rnf125	390	295	450	267	228	189	35	34	29	36	37	31
StitchedEnhancer_11161	chr18	21114708	21131209	NM_026301	67664	Rnf125	1212	1005	1275	895	771	768	68	72	83	94	68	79
StitchedEnhancer_11162	chr18	21159309	21161633	NM_207623	56515	Rnf138	511	446	579	397	403	286	13	11	17	10	6	11
StitchedEnhancer_11163	chr18	21308583	21316659	NM_008586	17288	Mep1b	91	81	162	134	102	67	38	38	44	66	36	28
StitchedEnhancer_11164	chr18	21352766	21366891	NM_001033445	381126	Garem	340	291	426	319	352	182	54	58	51	70	53	53
StitchedEnhancer_11165	chr18	21382703	21459372	NM_001033445	381126	Garem	2502	1820	2684	1910	1684	1196	309	306	301	341	265	293
StitchedEnhancer_11166	chr18	21531515	21534718	NM_001033445	381126	Garem	335	218	363	291	169	141	7	12	13	20	16	14
StitchedEnhancer_11167	chr18	22294863	22295769	NM_027616	70950	Ccdc178	43	42	53	32	26	19	0	4	10	4	2	1
StitchedEnhancer_11168	chr18	22320139	22320412	NM_027616	70950	Ccdc178	9	14	14	11	7	3	3	4	2	3	0	2
StitchedEnhancer_11169	chr18	22502101	22503473	NM_001167777	211961	Asxl3	61	44	46	34	12	10	5	4	7	6	6	6
StitchedEnhancer_1117	chr1	137358068	137446212	NR_049188	100885827	Mir1231	2374	2097	3145	2012	1986	1565	389	414	424	511	390	424
StitchedEnhancer_11170	chr18	22551440	22553535	NM_001167777	211961	Asxl3	134	53	61	41	19	48	7	6	10	12	9	12
StitchedEnhancer_11171	chr18	23572379	23586434	NM_001285811	13527	Dtna	578	422	588	414	393	219	61	48	48	63	53	54
StitchedEnhancer_11172	chr18	23603840	23617617	NM_001285811	13527	Dtna	180	129	135	123	109	89	44	61	50	64	56	60
StitchedEnhancer_11173	chr18	23668588	23681010	NM_001285810	13527	Dtna	612	461	584	372	475	247	56	50	54	58	59	41
StitchedEnhancer_11174	chr18	23811235	23814094	NM_001162942	212307	Mapre2	198	179	343	211	186	94	9	10	13	11	7	15
StitchedEnhancer_11175	chr18	23864301	23870277	NM_001162942	212307	Mapre2	424	281	511	388	251	179	26	12	31	30	18	31
StitchedEnhancer_11176	chr18	23908430	23913460	NM_001162942	212307	Mapre2	359	389	761	555	449	211	18	31	19	26	23	25
StitchedEnhancer_11177	chr18	23939963	24003340	NM_153058	212307	Mapre2	1724	1380	2013	1378	1294	1028	272	262	320	348	272	266
StitchedEnhancer_11178	chr18	24017812	24061028	NM_027007	69256	Zfp397	1635	1351	1757	1030	1070	830	210	204	226	265	212	208
StitchedEnhancer_11179	chr18	24100887	24113934	NM_027007	69256	Zfp397	485	413	630	515	427	268	50	43	53	76	64	59
StitchedEnhancer_1118	chr1	137470429	137491592	NM_173437	215690	Nav1	469	462	766	475	334	279	99	95	92	102	97	94
StitchedEnhancer_11180	chr18	24145325	24156222	NM_011755	22694	Zfp35	235	221	277	209	163	169	53	54	59	85	65	57
StitchedEnhancer_11181	chr18	24170072	24181263	NM_021559	59057	Zfp191	697	634	900	600	562	398	64	62	63	72	62	72
StitchedEnhancer_11182	chr18	24210741	24217567	NM_021559	59057	Zfp191	114	103	123	90	68	67	28	29	26	34	21	32
StitchedEnhancer_11183	chr18	24243700	24281012	NM_172625	225280	Ino80c	1829	1470	2079	1440	1198	1125	168	179	171	204	215	188
StitchedEnhancer_11184	chr18	24293811	24310653	NM_172625	225280	Ino80c	237	194	303	218	170	150	67	63	70	89	69	75
StitchedEnhancer_11185	chr18	24351273	24374204	NM_013814	14423	Galnt1	687	622	752	630	572	388	105	89	104	114	94	101
StitchedEnhancer_11186	chr18	24404005	24404802	NM_001160404	14423	Galnt1	20	24	39	40	13	24	9	3	5	4	8	4
StitchedEnhancer_11187	chr18	24445899	24455976	NM_001160404	14423	Galnt1	574	498	686	447	346	298	57	46	51	71	49	51
StitchedEnhancer_11188	chr18	24488044	24499235	NR_029573	387182	Mir187	221	169	268	147	166	112	29	49	47	49	32	40
StitchedEnhancer_11189	chr18	24578631	24579177	NR_029573	387182	Mir187	7	5	19	14	7	4	0	3	2	2	2	2
StitchedEnhancer_1119	chr1	137514163	137685386	NM_007791	13007	Csrp1	5907	5170	8250	5590	4134	3930	709	790	836	974	699	865
StitchedEnhancer_11190	chr18	24599780	24601368	NR_029573	387182	Mir187	37	38	48	34	34	23	4	2	6	6	5	8
StitchedEnhancer_11191	chr18	24625373	24629878	NM_026529	68046	2700062C07Rik	130	106	195	125	114	71	25	24	38	23	24	19
StitchedEnhancer_11192	chr18	24646521	24647263	NM_026529	68046	2700062C07Rik	34	30	33	19	15	15	0	2	11	6	3	1
StitchedEnhancer_11193	chr18	24671233	24671926	NM_144861	225283	Rprd1a	22	6	29	20	21	8	4	4	5	3	7	4
StitchedEnhancer_11194	chr18	24687332	24689364	NM_144861	225283	Rprd1a	256	277	342	220	242	181	9	5	13	14	11	13
StitchedEnhancer_11195	chr18	24709522	24718817	NM_144861	225283	Rprd1a	193	149	192	105	156	110	25	24	25	32	31	26
StitchedEnhancer_11196	chr18	24761391	24762913	NM_139143	106957	Slc39a6	172	156	168	152	115	99	11	8	7	16	7	11
StitchedEnhancer_11197	chr18	24810084	24812891	NM_026779	68591	Mocos	166	137	221	140	239	114	18	18	20	14	15	12
StitchedEnhancer_11198	chr18	24866910	24875001	NM_001289655	225288	Fhod3	918	797	1465	887	602	425	27	42	33	28	30	46
StitchedEnhancer_11199	chr18	24907263	24918286	NM_001289655	225288	Fhod3	286	214	343	267	160	122	34	40	47	49	43	38
StitchedEnhancer_112	chr1	21819722	21820793	NM_001160139	226922	Kcnq5	57	35	68	42	49	17	7	4	8	9	6	10
StitchedEnhancer_1120	chr1	137726018	137760375	NM_001130176	21956	Tnnt2	1660	1662	3073	1916	1790	925	118	124	112	164	112	121
StitchedEnhancer_11200	chr18	24935185	24978920	NM_001289655	225288	Fhod3	1977	1730	2441	1642	1288	855	137	127	159	186	142	135
StitchedEnhancer_11201	chr18	24992903	25037804	NM_001289655	225288	Fhod3	3121	2520	4001	2406	1937	1322	142	158	155	181	140	160
StitchedEnhancer_11202	chr18	25096031	25114062	NM_001142697	66648	Tpgs2	243	173	295	217	187	124	74	74	61	105	64	59
StitchedEnhancer_11203	chr18	25128325	25131637	NM_001142697	66648	Tpgs2	196	177	229	149	120	64	12	14	12	17	10	11
StitchedEnhancer_11204	chr18	25196645	25211357	NM_001142697	66648	Tpgs2	323	253	303	167	165	131	39	38	49	56	41	48
StitchedEnhancer_11205	chr18	25271726	25272915	NM_001142697	66648	Tpgs2	32	15	48	24	28	12	2	3	2	3	5	3
StitchedEnhancer_11206	chr18	25318704	25327861	NM_001142697	66648	Tpgs2	217	181	277	188	246	166	50	42	52	53	38	48
StitchedEnhancer_11207	chr18	25400977	25401339	NM_001033532	225289	AW554918	7	7	10	11	5	7	0	0	0	2	2	1
StitchedEnhancer_11208	chr18	25663799	25664189	NM_133195	108013	Celf4	10	17	15	6	12	5	0	4	2	2	3	2
StitchedEnhancer_11209	chr18	25698566	25707464	NM_133195	108013	Celf4	66	64	65	53	69	60	19	25	26	30	28	21
StitchedEnhancer_1121	chr1	137914270	137915291	NM_001160146	66241	Tmem9	16	18	41	26	35	11	4	7	9	7	6	6
StitchedEnhancer_11210	chr18	25748912	25749857	NM_133195	108013	Celf4	11	12	13	11	30	14	2	2	1	4	3	4
StitchedEnhancer_11211	chr18	25765035	25766109	NM_133195	108013	Celf4	21	15	32	31	23	17	1	9	8	4	2	3
StitchedEnhancer_11212	chr18	25788306	25796809	NM_133195	108013	Celf4	276	243	412	257	283	164	26	39	33	28	30	31
StitchedEnhancer_11213	chr18	25820676	25822780	NM_133195	108013	Celf4	53	29	58	45	28	32	7	6	6	6	7	10
StitchedEnhancer_11214	chr18	25839060	25841036	NM_133195	108013	Celf4	44	33	57	42	25	33	7	8	5	6	10	3
StitchedEnhancer_11215	chr18	25911933	25914018	NM_001174074	108013	Celf4	47	57	57	46	58	45	5	8	3	17	12	7
StitchedEnhancer_11216	chr18	26039939	26042959	NM_001174074	108013	Celf4	93	66	74	62	60	58	17	17	10	16	15	10
StitchedEnhancer_11217	chr18	26056523	26070244	NM_001174074	108013	Celf4	629	302	486	365	337	379	46	53	60	77	57	50
StitchedEnhancer_11218	chr18	26142174	26143359	NM_001174074	108013	Celf4	29	28	54	51	71	63	5	11	6	11	10	3
StitchedEnhancer_11219	chr18	26159936	26167976	NM_001174074	108013	Celf4	378	300	455	263	308	272	18	20	22	27	26	21
StitchedEnhancer_1122	chr1	137986222	137987178	NM_014193	12292	Cacna1s	13	15	32	19	16	8	1	3	2	6	1	3
StitchedEnhancer_11220	chr18	28993807	28995418	NR_045398	320624	4930474G06Rik	38	16	44	29	36	39	10	6	13	9	4	3
StitchedEnhancer_11221	chr18	29008823	29011534	NR_045398	320624	4930474G06Rik	122	70	118	83	83	83	10	11	7	9	13	9
StitchedEnhancer_11222	chr18	30426687	30432786	NM_181414	225326	Pik3c3	100	44	202	93	57	22	17	24	31	24	15	23
StitchedEnhancer_11223	chr18	30511615	30515617	NM_181414	225326	Pik3c3	178	152	302	186	119	100	15	17	17	23	17	18
StitchedEnhancer_11224	chr18	30604005	30605371	NM_181414	225326	Pik3c3	53	24	31	18	26	18	1	5	4	5	2	4
StitchedEnhancer_11225	chr18	30666435	30690613	NM_181414	225326	Pik3c3	328	236	270	202	239	211	109	75	95	105	84	86
StitchedEnhancer_11226	chr18	31768417	31769835	NM_026165	67453	Slc25a46	339	238	355	254	231	172	3	12	6	9	5	7
StitchedEnhancer_11227	chr18	31793431	31795228	NM_172965	269003	Sap130	306	252	391	285	277	193	7	11	14	20	8	10
StitchedEnhancer_11228	chr18	31873221	31873948	NM_153515	225339	Ammecr1l	17	9	29	15	26	14	3	2	1	3	2	4
StitchedEnhancer_11229	chr18	31918560	31920907	NM_153515	225339	Ammecr1l	585	544	819	519	452	272	16	10	17	14	13	18
StitchedEnhancer_1123	chr1	138013649	138038842	NR_046168	329253	Gm15850	466	421	698	552	621	536	88	102	80	126	92	90
StitchedEnhancer_11230	chr18	31948212	31949150	NM_027002	69241	Polr2d	91	56	99	51	60	53	8	5	7	6	5	5
StitchedEnhancer_11231	chr18	31963212	31964952	NM_001170966	74320	Wdr33	180	150	235	163	195	111	7	5	11	8	11	10
StitchedEnhancer_11232	chr18	31979204	31979854	NM_001170966	74320	Wdr33	15	13	28	14	17	11	6	2	2	3	4	5
StitchedEnhancer_11233	chr18	32061189	32112379	NM_144862	225341	Lims2	6606	5512	7815	4621	4130	2953	264	263	253	329	222	277
StitchedEnhancer_11234	chr18	32226855	32228342	NM_173441	73473	Iws1	736	591	822	577	518	366	11	9	11	10	3	12
StitchedEnhancer_11235	chr18	32306989	32307665	NM_001042767	19123	Proc	32	26	17	22	20	16	5	0	5	6	4	4
StitchedEnhancer_11236	chr18	32321913	32323796	NM_011946	26405	Map3k2	375	295	438	306	296	220	8	16	11	15	11	10
StitchedEnhancer_11237	chr18	32399102	32400433	NM_133658	13872	Ercc3	170	146	212	156	146	133	8	5	12	8	12	11
StitchedEnhancer_11238	chr18	32499743	32519498	NM_001083334	30948	Bin1	180	136	176	171	113	158	63	74	75	87	86	65
StitchedEnhancer_11239	chr18	32536144	32592099	NR_045403	402767	A830052D11Rik	585	576	826	580	467	475	208	235	212	300	222	246
StitchedEnhancer_1124	chr1	138074390	138075256	NM_001039472	16565	Kif21b	19	25	18	5	12	11	2	3	2	7	3	2
StitchedEnhancer_11240	chr18	32657373	32658793	NM_001048207	71683	Gypc	68	33	69	71	30	51	4	7	3	8	11	10
StitchedEnhancer_11241	chr18	32683791	32684793	NM_001048207	71683	Gypc	16	16	33	21	9	11	2	7	1	10	12	3
StitchedEnhancer_11242	chr18	32697408	32724753	NM_001048207	71683	Gypc	1434	1521	2251	1452	1508	910	117	143	141	161	122	159
StitchedEnhancer_11243	chr18	32803166	32804615	NM_001048207	71683	Gypc	21	27	59	39	17	33	6	6	13	2	11	7
StitchedEnhancer_11244	chr18	32852771	32854299	NM_021367	53603	Tslp	48	19	21	32	32	46	8	8	7	6	9	5
StitchedEnhancer_11245	chr18	32868061	32879365	NM_021367	53603	Tslp	87	54	92	90	93	77	50	39	56	56	35	38
StitchedEnhancer_11246	chr18	32972366	32978579	NM_021367	53603	Tslp	139	167	255	169	135	122	30	34	24	38	23	29
StitchedEnhancer_11247	chr18	32996315	32997626	NR_045381	75795	4930455D15Rik	132	122	153	85	95	63	10	5	9	9	10	8
StitchedEnhancer_11248	chr18	33013504	33017200	NR_045381	75795	4930455D15Rik	78	48	77	56	51	62	21	13	27	17	10	18
StitchedEnhancer_11249	chr18	33340010	33340886	NM_133774	170459	Stard4	20	16	30	16	20	14	4	10	5	5	5	2
StitchedEnhancer_1125	chr1	138156716	138157103	NM_001101516	383563	Gpr25	8	7	17	6	8	1	1	0	1	1	2	1
StitchedEnhancer_11250	chr18	33361267	33374847	NM_133774	170459	Stard4	328	265	428	303	205	210	64	65	64	77	66	74
StitchedEnhancer_11251	chr18	33418669	33421924	NM_133774	170459	Stard4	358	288	547	354	201	208	12	12	5	25	14	14
StitchedEnhancer_11252	chr18	33451628	33453425	NM_133774	170459	Stard4	221	179	296	201	74	126	7	16	10	9	9	11
StitchedEnhancer_11253	chr18	33506104	33511146	NM_001267717	27528	Nrep	83	53	65	66	31	45	27	22	28	18	26	21
StitchedEnhancer_11254	chr18	33533201	33538907	NM_001267717	27528	Nrep	200	145	307	213	111	131	19	25	22	32	16	26
StitchedEnhancer_11255	chr18	33572219	33573683	NM_001267717	27528	Nrep	46	45	57	50	15	18	8	3	6	8	8	6
StitchedEnhancer_11256	chr18	33606830	33631742	NM_001267717	27528	Nrep	864	708	1171	872	373	399	123	103	127	148	108	105
StitchedEnhancer_11257	chr18	33690483	33691028	NR_045415	433171	Gm10549	14	6	21	16	9	8	2	2	1	2	3	2
StitchedEnhancer_11258	chr18	33732248	33733585	NR_045415	433171	Gm10549	47	30	42	30	36	33	1	4	9	3	8	3
StitchedEnhancer_11259	chr18	33778604	33783912	NR_045415	433171	Gm10549	279	129	132	83	89	123	11	25	18	29	17	18
StitchedEnhancer_1126	chr1	138221957	138223241	NM_001081360	67886	Camsap2	86	57	75	48	54	50	6	9	5	11	10	6
StitchedEnhancer_11260	chr18	33818792	33828014	NR_038152	69749	2410004N09Rik	154	88	141	96	60	89	34	34	29	38	32	36
StitchedEnhancer_11261	chr18	33901260	33902087	NR_038152	69749	2410004N09Rik	29	20	25	23	12	8	4	6	5	2	6	2
StitchedEnhancer_11262	chr18	33954088	33955162	NR_038151	69749	2410004N09Rik	104	114	159	110	103	58	5	3	9	10	11	8
StitchedEnhancer_11263	chr18	34001922	34010733	NR_038151	69749	2410004N09Rik	327	246	332	212	118	126	30	51	31	56	47	37
StitchedEnhancer_11264	chr18	34035362	34037140	NR_038151	69749	2410004N09Rik	123	81	134	100	28	46	9	13	8	13	7	3
StitchedEnhancer_11265	chr18	34067235	34068106	NM_013512	13824	Epb4.1l4a	33	21	41	28	12	23	0	3	2	3	6	7
StitchedEnhancer_11266	chr18	34080873	34081743	NM_013512	13824	Epb4.1l4a	22	15	29	8	18	10	3	1	3	5	1	4
StitchedEnhancer_11267	chr18	34097926	34099774	NM_013512	13824	Epb4.1l4a	123	116	211	178	141	67	6	8	5	5	9	5
StitchedEnhancer_11268	chr18	34140833	34141963	NM_013512	13824	Epb4.1l4a	19	22	19	20	10	12	5	5	3	7	9	3
StitchedEnhancer_11269	chr18	34157438	34167111	NM_013512	13824	Epb4.1l4a	243	186	330	185	141	81	41	36	63	52	44	46
StitchedEnhancer_1127	chr1	138241502	138243345	NM_001081360	67886	Camsap2	365	331	464	340	304	222	10	6	5	12	6	14
StitchedEnhancer_11270	chr18	34262544	34279395	NM_013512	13824	Epb4.1l4a	719	593	1157	714	557	512	75	68	72	93	73	81
StitchedEnhancer_11271	chr18	34380029	34383824	NR_040534	633395	Gm10548	598	545	770	503	521	388	15	16	17	23	19	18
StitchedEnhancer_11272	chr18	34396453	34408156	NR_040534	633395	Gm10548	180	128	149	122	129	100	61	54	51	81	60	51
StitchedEnhancer_11273	chr18	34490063	34499052	NM_025527	66384	Srp19	436	375	470	388	358	290	44	39	53	56	42	42
StitchedEnhancer_11274	chr18	34512514	34544599	NM_007874	13476	Reep5	1447	1514	2426	1493	1411	812	123	140	142	168	128	149
StitchedEnhancer_11275	chr18	34561696	34570982	NM_001163004	53871	Pkd2l2	335	341	560	380	271	229	36	28	50	56	37	37
StitchedEnhancer_11276	chr18	34583708	34584402	NM_016927	53871	Pkd2l2	18	14	28	10	13	6	3	3	2	6	3	4
StitchedEnhancer_11277	chr18	34616031	34618125	NM_016927	53871	Pkd2l2	131	73	140	62	84	64	8	12	12	9	3	11
StitchedEnhancer_11278	chr18	34665214	34667673	NM_146084	225358	Fam13b	640	602	742	603	593	434	18	14	15	15	17	14
StitchedEnhancer_11279	chr18	34717518	34717847	NM_009290	20890	Wnt8a	6	4	3	6	13	9	1	1	1	1	1	1
StitchedEnhancer_1128	chr1	138277416	138278552	NM_026500	67997	Ddx59	47	47	54	51	31	30	5	4	6	3	4	7
StitchedEnhancer_11280	chr18	34783207	34784733	NM_001166407	19348	Kif20a	252	242	399	298	232	177	9	10	3	8	8	8
StitchedEnhancer_11281	chr18	34810832	34811576	NM_178347	52563	Cdc23	42	47	78	60	64	21	2	7	4	12	4	6
StitchedEnhancer_11282	chr18	34917842	34920284	NM_175104	66306	Fam53c	568	548	828	619	447	338	9	11	16	20	12	12
StitchedEnhancer_11283	chr18	34936425	34944089	NM_001081256	277250	Kdm3b	413	437	656	456	469	345	35	30	47	30	43	42
StitchedEnhancer_11284	chr18	35009006	35028172	NM_007913	13653	Egr1	1317	1055	1620	1252	825	695	79	83	94	92	100	96
StitchedEnhancer_11285	chr18	35042437	35047700	NM_007913	13653	Egr1	164	137	245	177	106	76	28	30	24	27	19	29
StitchedEnhancer_11286	chr18	35086695	35092793	NM_144866	225363	Etf1	732	608	758	580	627	407	18	34	37	30	30	36
StitchedEnhancer_11287	chr18	35113120	35119318	NM_010481	15526	Hspa9	1540	1308	1743	1293	1156	842	35	27	44	47	26	43
StitchedEnhancer_11288	chr18	35148442	35149636	NM_010481	15526	Hspa9	52	42	80	54	33	28	5	7	8	9	4	3
StitchedEnhancer_11289	chr18	35181196	35214504	NM_009818	12385	Ctnna1	3559	3254	5237	3082	2475	1402	125	140	121	160	98	141
StitchedEnhancer_1129	chr1	138311201	138312762	NR_024328	320054	9230116N13Rik	572	435	615	449	374	350	10	7	10	7	7	4
StitchedEnhancer_11290	chr18	35239546	35263968	NM_009818	12385	Ctnna1	670	645	1062	660	543	342	88	126	101	135	101	111
StitchedEnhancer_11291	chr18	35277463	35300558	NM_009818	12385	Ctnna1	2091	1781	2869	1951	1717	1065	110	94	140	138	88	104
StitchedEnhancer_11292	chr18	35352048	35352392	NM_178005	107065	Lrrtm2	13	12	8	9	13	15	8	1	1	3	6	2
StitchedEnhancer_11293	chr18	35391701	35392018	NM_178005	107065	Lrrtm2	9	7	15	8	3	6	1	3	2	3	1	4
StitchedEnhancer_11294	chr18	35406666	35408841	NM_178005	107065	Lrrtm2	45	32	53	32	42	19	7	17	6	15	13	8
StitchedEnhancer_11295	chr18	35455497	35456624	NM_178005	107065	Lrrtm2	17	23	31	28	23	13	6	5	3	5	7	10
StitchedEnhancer_11296	chr18	35576338	35578472	NM_030749	81500	Sil1	90	102	155	97	75	57	7	6	11	10	15	5
StitchedEnhancer_11297	chr18	35593501	35602135	NM_030749	81500	Sil1	144	117	234	178	107	76	26	31	53	44	44	22
StitchedEnhancer_11298	chr18	35629834	35630858	NM_030749	81500	Sil1	27	13	50	33	18	21	3	5	3	5	3	5
StitchedEnhancer_11299	chr18	35657733	35659082	NM_030749	81500	Sil1	138	91	180	118	80	62	7	3	7	11	5	6
StitchedEnhancer_113	chr1	22059737	22061104	NM_023872	226922	Kcnq5	137	64	82	62	56	39	6	9	5	7	4	6
StitchedEnhancer_1130	chr1	138409005	138410364	NM_001287179	381293	Kif14	39	23	37	37	41	17	4	8	7	6	4	6
StitchedEnhancer_11300	chr18	35707951	35725063	NR_002905	436583	Snora74a	1235	955	1598	1085	932	697	96	105	110	97	98	103
StitchedEnhancer_11301	chr18	35757940	35764963	NM_026420	67869	Paip2	466	454	648	485	398	289	41	32	55	41	39	48
StitchedEnhancer_11302	chr18	35807000	35816256	NM_027222	69816	Mzb1	469	424	754	502	496	265	35	40	30	59	41	21
StitchedEnhancer_11303	chr18	35833026	35839045	NM_027733	71242	Spata24	1157	1074	1380	880	784	486	34	23	25	26	24	24
StitchedEnhancer_11304	chr18	35862408	35912259	NM_001033168	73449	1700066B19Rik	2114	1652	2531	1745	1376	1343	239	230	229	278	212	294
StitchedEnhancer_11305	chr18	35930441	35932449	NM_019912	56550	Ube2d2a	467	420	645	493	483	280	12	18	14	14	9	12
StitchedEnhancer_11306	chr18	35965494	36055729	NM_133687	67393	Cxxc5	3771	3656	6237	4385	3868	2398	370	429	439	494	400	408
StitchedEnhancer_11307	chr18	36069473	36102858	NM_028707	74002	Psd2	929	1005	1657	1141	1096	750	122	138	152	176	131	159
StitchedEnhancer_11308	chr18	36177441	36185597	NR_110349	74002	Psd2	258	223	391	283	259	142	33	26	29	41	33	33
StitchedEnhancer_11309	chr18	36203770	36208813	NR_015571	74966	4930471G03Rik	154	186	279	196	195	91	16	23	11	17	13	17
StitchedEnhancer_1131	chr1	138436942	138437738	NM_001287179	381293	Kif14	19	14	20	14	16	5	4	4	4	0	6	1
StitchedEnhancer_11310	chr18	36227667	36231351	NR_015571	74966	4930471G03Rik	53	45	95	56	49	28	6	10	12	16	14	15
StitchedEnhancer_11311	chr18	36264311	36265539	NR_015571	74966	4930471G03Rik	27	25	45	29	19	18	7	3	2	4	4	0
StitchedEnhancer_11312	chr18	36439705	36448002	NM_008989	19290	Pura	1382	1287	1850	1357	1154	814	40	29	46	38	41	41
StitchedEnhancer_11313	chr18	36478169	36489240	NM_001267796	109169	Igip	365	319	592	280	350	211	50	55	58	69	53	61
StitchedEnhancer_11314	chr18	36507883	36521245	NM_001081365	66060	Cystm1	312	201	377	247	248	122	64	52	59	69	54	69
StitchedEnhancer_11315	chr18	36535971	36581929	NM_001081365	66060	Cystm1	1188	1181	1626	1030	1101	587	218	215	213	257	214	211
StitchedEnhancer_11316	chr18	36600883	36632697	NM_026027	67199	Pfdn1	599	453	585	440	436	257	113	137	149	162	128	133
StitchedEnhancer_11317	chr18	36652088	36682027	NM_010415	15200	Hbegf	577	538	998	616	521	314	136	144	130	165	122	151
StitchedEnhancer_11318	chr18	36718850	36721915	NM_175375	108857	Ankhd1	593	547	828	586	499	345	19	14	8	12	18	16
StitchedEnhancer_11319	chr18	36823879	36839782	NR_028355	24068	Sra1	1296	1029	946	723	750	566	89	97	98	105	86	100
StitchedEnhancer_1132	chr1	138452290	138453085	NM_177643	226442	Zfp281	20	14	22	12	8	10	3	2	3	6	3	3
StitchedEnhancer_11320	chr18	36858462	36904944	NM_009841	12475	Cd14	1566	1278	1548	1176	1089	977	188	210	207	254	219	201
StitchedEnhancer_11321	chr18	36919417	36925011	NM_026464	67936	Wdr55	59	51	73	58	71	46	24	27	25	27	27	25
StitchedEnhancer_11322	chr18	36942227	36962349	NM_025594	66492	Zmat2	323	293	379	282	275	194	119	122	116	143	101	116
StitchedEnhancer_11323	chr18	37337572	37338128	NM_001003672	353237	Pcdhac2	7	13	25	10	8	9	4	0	5	5	4	4
StitchedEnhancer_11324	chr18	37637462	37637861	NM_053141	93887	Pcdhb16	10	9	8	5	18	9	1	6	5	1	4	3
StitchedEnhancer_11325	chr18	37803257	37816032	NM_175770	24074	Taf7	369	326	440	323	276	196	68	65	66	66	65	72
StitchedEnhancer_11326	chr18	37828545	37921796	NM_033590	93715	Pcdhga7	382	330	510	359	337	263	423	434	497	590	453	498
StitchedEnhancer_11327	chr18	37965477	38013203	NM_033583	93708	Pcdhgc5	1380	1364	2290	1686	1201	900	207	256	229	306	230	210
StitchedEnhancer_11328	chr18	38036213	38044076	NR_105945	102465592	Mir6979	1241	969	1379	927	825	731	50	41	68	57	32	46
StitchedEnhancer_11329	chr18	38082717	38095438	NM_007858	13367	Diap1	582	447	582	442	455	445	48	74	65	83	49	70
StitchedEnhancer_1133	chr1	138509211	138522520	NM_177643	226442	Zfp281	251	192	309	234	246	152	52	46	60	50	46	63
StitchedEnhancer_11330	chr18	38112798	38114968	NM_010411	15183	Hdac3	112	76	153	105	100	48	15	12	20	8	13	10
StitchedEnhancer_11331	chr18	38129207	38129836	NM_175684	319262	Fchsd1	22	15	42	27	20	11	2	3	8	3	3	2
StitchedEnhancer_11332	chr18	38144223	38163033	NR_105946	102466913	Mir6980	1504	1222	2061	1236	1040	728	76	97	84	94	81	86
StitchedEnhancer_11333	chr18	38184645	38189677	NM_001205336	106952	Arap3	200	139	292	176	146	149	9	25	30	27	24	20
StitchedEnhancer_11334	chr18	38284840	38372776	NM_029357	75599	Pcdh1	6491	5793	9378	5589	4768	3672	351	373	418	474	377	391
StitchedEnhancer_11335	chr18	38387951	38460242	NR_027904	73516	1700086O06Rik	3476	2890	4505	2786	2210	1849	324	345	412	448	314	380
StitchedEnhancer_11336	chr18	38497942	38510836	NM_011937	26384	Gnpda1	441	343	552	349	337	271	60	66	64	72	69	62
StitchedEnhancer_11337	chr18	38524431	38580199	NM_022996	65113	Ndfip1	1065	965	1265	936	958	704	230	246	246	284	232	237
StitchedEnhancer_11338	chr18	38592995	38594826	NM_022996	65113	Ndfip1	68	49	57	32	26	27	17	4	14	16	9	16
StitchedEnhancer_11339	chr18	38642828	38663406	NM_022996	65113	Ndfip1	413	295	509	306	271	175	78	96	81	108	68	99
StitchedEnhancer_1134	chr1	138579212	138595978	NR_037986	100503474	Gm16880	762	756	998	680	733	625	55	72	81	86	66	83
StitchedEnhancer_11340	chr18	38676930	38705770	NM_011898	24066	Spry4	1277	1079	1741	1069	987	743	104	137	125	142	119	141
StitchedEnhancer_11341	chr18	38728300	38763234	NM_011898	24066	Spry4	2328	1863	3423	2055	1997	1436	180	160	188	198	141	149
StitchedEnhancer_11342	chr18	38776409	38827683	NM_011898	24066	Spry4	1180	831	1135	679	789	510	208	228	239	269	211	252
StitchedEnhancer_11343	chr18	38844173	38844563	NM_011898	24066	Spry4	13	10	15	11	8	12	0	1	1	7	1	4
StitchedEnhancer_11344	chr18	38857506	38886950	NM_011898	24066	Spry4	292	234	379	264	249	206	120	111	98	118	103	128
StitchedEnhancer_11345	chr18	38902014	38972796	NM_001033789	545253	Gm5820	2702	2000	2189	1485	1589	1307	285	321	301	387	326	320
StitchedEnhancer_11346	chr18	38994110	39050798	NM_001033789	545253	Gm5820	2028	1605	1847	1297	1407	908	232	256	268	284	242	279
StitchedEnhancer_11347	chr18	39065346	39133801	NM_010197	14164	Fgf1	2715	2249	3373	2201	1900	1312	294	298	318	392	324	332
StitchedEnhancer_11348	chr18	39151999	39256406	NM_175164	71302	Arhgap26	6043	4968	5944	4114	4630	2908	526	511	529	620	462	533
StitchedEnhancer_11349	chr18	39278841	39359738	NM_175164	71302	Arhgap26	2913	2216	3497	2327	1844	1599	394	393	425	542	382	390
StitchedEnhancer_1135	chr1	138678268	138693888	NR_037986	100503474	Gm16880	102	90	181	121	86	83	42	53	55	88	55	54
StitchedEnhancer_11350	chr18	39374011	39413166	NM_175164	71302	Arhgap26	1687	1377	2330	1506	1002	793	200	193	211	217	184	213
StitchedEnhancer_11351	chr18	39431731	39464251	NM_008173	14815	Nr3c1	441	358	548	365	315	226	143	136	164	164	163	151
StitchedEnhancer_11352	chr18	39478356	39485744	NM_008173	14815	Nr3c1	364	239	404	285	197	185	31	36	31	50	37	21
StitchedEnhancer_11353	chr18	39512541	39541010	NM_008173	14815	Nr3c1	944	661	1255	821	644	639	154	165	157	180	119	140
StitchedEnhancer_11354	chr18	39597420	39598869	NM_008173	14815	Nr3c1	100	69	64	53	46	42	6	8	10	12	9	12
StitchedEnhancer_11355	chr18	39638460	39651736	NM_008173	14815	Nr3c1	2049	1880	2954	2038	1817	1248	55	57	60	65	46	55
StitchedEnhancer_11356	chr18	39678183	39680200	NM_008173	14815	Nr3c1	30	48	55	68	52	60	9	10	13	10	7	12
StitchedEnhancer_11357	chr18	39712298	39727322	NM_008173	14815	Nr3c1	255	197	399	284	226	181	62	56	83	67	63	62
StitchedEnhancer_11358	chr18	39741315	39754951	NM_008173	14815	Nr3c1	106	85	122	82	65	53	69	53	52	55	54	47
StitchedEnhancer_11359	chr18	39794938	39811156	NM_011033	18459	Pabpc2	496	396	593	400	307	282	65	75	71	78	56	79
StitchedEnhancer_1136	chr1	138765096	138766278	NM_001159769	26424	Nr5a2	26	13	33	27	15	10	1	3	9	9	6	6
StitchedEnhancer_11360	chr18	39859401	39865766	NM_011033	18459	Pabpc2	201	88	107	141	80	84	29	28	25	39	19	16
StitchedEnhancer_11361	chr18	39912408	39913766	NM_011033	18459	Pabpc2	47	42	62	60	50	42	7	8	9	9	10	7
StitchedEnhancer_11362	chr18	39959562	39961866	NM_011033	18459	Pabpc2	84	60	66	58	57	79	8	8	13	13	13	8
StitchedEnhancer_11363	chr18	39994670	39995949	NM_011033	18459	Pabpc2	81	45	63	36	45	33	11	9	8	7	6	5
StitchedEnhancer_11364	chr18	40302543	40303987	NM_023311	67180	Yipf5	53	34	72	46	22	33	8	6	6	5	8	6
StitchedEnhancer_11365	chr18	40319583	40321694	NM_023311	67180	Yipf5	135	62	125	92	77	114	9	5	10	11	7	8
StitchedEnhancer_11366	chr18	40342021	40343163	NM_023311	67180	Yipf5	31	18	27	26	16	17	9	8	8	5	3	3
StitchedEnhancer_11367	chr18	40378340	40379469	NM_023311	67180	Yipf5	100	64	130	91	82	57	6	12	8	6	5	9
StitchedEnhancer_11368	chr18	40511432	40512521	NM_026135	383348	Kctd16	63	28	32	35	31	28	2	2	2	7	5	1
StitchedEnhancer_11369	chr18	40598860	40600330	NM_026135	383348	Kctd16	44	34	52	38	23	41	4	3	6	8	2	9
StitchedEnhancer_1137	chr1	138811740	138816468	NM_001159769	26424	Nr5a2	81	73	118	131	74	56	23	17	26	21	23	23
StitchedEnhancer_11370	chr18	40700296	40713355	NM_026135	383348	Kctd16	124	76	123	115	68	56	47	67	36	48	41	51
StitchedEnhancer_11371	chr18	41939064	41939947	NM_029942	77619	Prelid2	48	20	54	35	25	17	1	4	4	3	0	1
StitchedEnhancer_11372	chr18	42021036	42021292	NM_029942	77619	Prelid2	4	6	6	5	9	8	0	0	0	0	2	2
StitchedEnhancer_11373	chr18	42109217	42112103	NM_029942	77619	Prelid2	144	154	221	135	134	107	14	13	18	13	8	10
StitchedEnhancer_11374	chr18	42144790	42146310	NM_001033426	332309	Grxcr2	73	66	120	63	47	28	7	8	4	5	5	3
StitchedEnhancer_11375	chr18	42211768	42221567	NM_001146299	269016	Sh3rf2	288	276	518	373	360	170	44	46	42	35	37	34
StitchedEnhancer_11376	chr18	42246432	42287270	NM_001146299	269016	Sh3rf2	1038	808	1302	903	632	457	120	150	157	167	145	145
StitchedEnhancer_11377	chr18	42318813	42330686	NM_027072	69401	Plac8l1	687	664	938	626	503	234	41	31	42	47	37	45
StitchedEnhancer_11378	chr18	42356391	42358279	NM_027072	69401	Plac8l1	78	35	55	36	39	22	10	5	5	8	7	3
StitchedEnhancer_11379	chr18	42373888	42391216	NM_027072	69401	Plac8l1	272	264	388	265	199	129	72	59	68	80	83	74
StitchedEnhancer_1138	chr1	138843820	138846095	NM_001159769	26424	Nr5a2	38	30	66	60	27	33	10	9	11	17	8	11
StitchedEnhancer_11380	chr18	42421042	42435681	NR_033452	100042757	Gm4013	288	220	285	213	253	185	62	59	64	84	70	66
StitchedEnhancer_11381	chr18	42604463	42605108	NM_138945	18998	Pou4f3	11	10	22	7	15	5	1	3	5	2	2	4
StitchedEnhancer_11382	chr18	42670611	42672006	NR_110344	56070	Tcerg1	109	82	119	68	65	60	8	7	11	8	3	8
StitchedEnhancer_11383	chr18	43138257	43139035	NR_073583	72930	Ppp2r2b	11	8	31	11	11	5	2	1	4	0	3	1
StitchedEnhancer_11384	chr18	43261838	43262504	NM_028392	72930	Ppp2r2b	20	24	27	23	20	9	2	7	1	1	1	0
StitchedEnhancer_11385	chr18	43278964	43288873	NM_028392	72930	Ppp2r2b	99	76	96	81	68	58	32	35	53	44	37	22
StitchedEnhancer_11386	chr18	43441107	43442028	NM_178749	269019	Stk32a	17	14	22	26	17	8	2	3	2	4	5	1
StitchedEnhancer_11387	chr18	43502292	43504653	NM_001136086	22240	Dpysl3	69	69	116	99	39	32	9	11	7	11	15	12
StitchedEnhancer_11388	chr18	43518637	43521353	NM_001136086	22240	Dpysl3	245	172	212	174	107	123	18	22	8	17	22	10
StitchedEnhancer_11389	chr18	43550657	43598603	NM_009468	22240	Dpysl3	1004	751	1237	933	661	775	194	194	225	255	198	193
StitchedEnhancer_1139	chr1	139342870	139343259	NM_030676	26424	Nr5a2	22	10	16	15	8	6	2	2	3	1	0	2
StitchedEnhancer_11390	chr18	43627804	43637452	NM_001291455	22240	Dpysl3	118	68	117	83	77	74	47	36	47	55	47	47
StitchedEnhancer_11391	chr18	43652749	43654157	NM_001291455	22240	Dpysl3	56	23	44	45	35	39	5	5	8	4	6	12
StitchedEnhancer_11392	chr18	44121161	44121550	NM_001081180	72432	Spink5	9	13	12	11	10	4	1	1	2	1	2	1
StitchedEnhancer_11393	chr18	44458387	44504708	NM_001033621	58916	Myot	1515	864	1249	877	794	736	140	149	190	186	149	157
StitchedEnhancer_11394	chr18	44539605	44541005	NM_027490	70640	Dcp2	120	108	142	114	96	113	7	6	9	16	10	8
StitchedEnhancer_11395	chr18	44580930	44582017	NM_027490	70640	Dcp2	28	24	26	15	20	10	8	4	3	7	2	3
StitchedEnhancer_11396	chr18	44597634	44602297	NM_027490	70640	Dcp2	81	69	159	139	99	66	19	15	25	19	23	21
StitchedEnhancer_11397	chr18	44631719	44633509	NM_027490	70640	Dcp2	77	72	97	91	59	54	7	7	6	11	11	13
StitchedEnhancer_11398	chr18	44679931	44681560	NR_026853	626275	A930012L18Rik	15	23	30	23	30	19	12	7	12	11	7	8
StitchedEnhancer_11399	chr18	44740101	44823770	NR_026853	626275	A930012L18Rik	2985	2243	4175	2430	2498	1994	369	378	367	472	352	351
StitchedEnhancer_114	chr1	22106823	22107079	NM_023872	226922	Kcnq5	15	1	13	2	2	8	2	2	3	4	0	0
StitchedEnhancer_1140	chr1	139457346	139457658	NR_029795	735252	Mir181a-1	6	9	10	3	3	5	0	1	0	0	0	2
StitchedEnhancer_11400	chr18	44917361	44919873	NM_001085373	328949	Mcc	66	51	95	82	73	81	6	11	6	9	11	8
StitchedEnhancer_11401	chr18	44987454	44989093	NM_001163013	240255	Ythdc2	354	362	486	361	317	238	9	15	10	11	4	13
StitchedEnhancer_11402	chr18	45427739	45450126	NM_080465	140492	Kcnn2	409	451	813	546	523	253	73	86	88	81	77	73
StitchedEnhancer_11403	chr18	45661996	45662243	NM_080465	140492	Kcnn2	9	2	14	9	4	2	2	0	0	3	0	1
StitchedEnhancer_11404	chr18	45718153	45719427	NM_080465	140492	Kcnn2	55	54	58	43	42	19	2	5	7	10	3	6
StitchedEnhancer_11405	chr18	45788085	45788707	NM_080465	140492	Kcnn2	26	20	38	32	27	7	0	2	3	3	5	1
StitchedEnhancer_11406	chr18	45805648	45805930	NM_080465	140492	Kcnn2	6	12	12	7	4	3	1	0	0	3	3	0
StitchedEnhancer_11407	chr18	46058124	46058755	NR_040342	107003	A330093E20Rik	43	27	76	24	21	27	2	3	1	2	2	2
StitchedEnhancer_11408	chr18	46105363	46106402	NR_040342	107003	A330093E20Rik	77	67	96	27	36	18	4	4	7	3	1	3
StitchedEnhancer_11409	chr18	46338277	46339981	NM_001170855	28105	Trim36	54	32	57	46	26	39	7	10	9	12	4	7
StitchedEnhancer_1141	chr1	139484616	139489100	NR_029795	735252	Mir181a-1	72	31	57	41	49	27	20	20	35	14	20	17
StitchedEnhancer_11410	chr18	46357831	46359123	NM_001170855	28105	Trim36	53	57	61	51	30	33	8	4	9	7	6	10
StitchedEnhancer_11411	chr18	46401551	46403314	NM_178872	28105	Trim36	85	49	106	63	26	22	7	5	8	16	9	7
StitchedEnhancer_11412	chr18	46430500	46441092	NM_172627	225467	Pggt1b	510	368	642	465	374	350	53	43	68	59	48	65
StitchedEnhancer_11413	chr18	46537210	46541247	NM_001160399	240261	Ccdc112	104	64	100	94	82	50	13	10	11	25	14	19
StitchedEnhancer_11414	chr18	46563913	46565713	NR_045438	72076	Mospd4	25	28	54	47	52	71	9	7	9	5	10	8
StitchedEnhancer_11415	chr18	46584766	46585666	NR_045438	72076	Mospd4	27	47	38	30	30	20	7	3	2	4	4	2
StitchedEnhancer_11416	chr18	46611721	46612373	NR_045438	72076	Mospd4	16	18	12	2	8	9	3	1	0	4	1	2
StitchedEnhancer_11417	chr18	46636246	46654292	NR_045438	72076	Mospd4	279	206	278	232	203	164	75	62	64	93	60	68
StitchedEnhancer_11418	chr18	46682253	46686525	NM_173423	240263	Fem1c	966	864	1214	874	912	611	22	18	20	22	16	22
StitchedEnhancer_11419	chr18	46733110	46735920	NM_173394	225471	Ticam2	99	63	70	66	69	53	14	12	9	16	8	12
StitchedEnhancer_1142	chr1	139516641	139517934	NR_029795	735252	Mir181a-1	50	26	28	23	18	21	2	4	9	4	5	7
StitchedEnhancer_11420	chr18	46756412	46758604	NM_010120	13664	Eif1a	347	341	253	226	282	187	14	18	21	17	10	9
StitchedEnhancer_11421	chr18	46771669	46797568	NM_010120	13664	Eif1a	448	357	514	429	385	255	89	129	96	121	101	100
StitchedEnhancer_11422	chr18	46834935	46836770	NM_033037	12583	Cdo1	47	31	40	58	52	25	10	10	11	10	4	12
StitchedEnhancer_11423	chr18	46885545	46903291	NM_033037	12583	Cdo1	752	577	796	645	539	374	93	80	114	125	111	92
StitchedEnhancer_11424	chr18	46946258	46981683	NM_029008	74574	4833403I15Rik	555	374	551	341	454	305	128	135	189	174	113	150
StitchedEnhancer_11425	chr18	47008317	47020420	NM_029008	74574	4833403I15Rik	304	227	354	246	227	204	30	35	45	53	38	50
StitchedEnhancer_11426	chr18	47079466	47081433	NM_001033446	381142	Arl14epl	47	42	71	47	35	51	6	5	6	13	7	6
StitchedEnhancer_11427	chr18	47118292	47119023	NM_178377	69456	Commd10	59	53	99	71	65	44	4	2	2	7	4	6
StitchedEnhancer_11428	chr18	47152711	47152985	NM_178377	69456	Commd10	15	2	7	4	7	2	0	2	4	1	3	2
StitchedEnhancer_11429	chr18	47195127	47196017	NM_178377	69456	Commd10	33	12	18	35	16	22	2	6	7	8	3	6
StitchedEnhancer_1143	chr1	139540971	139554455	NR_029795	735252	Mir181a-1	237	161	219	194	112	103	58	60	57	74	55	45
StitchedEnhancer_11430	chr18	47213624	47226063	NM_178377	69456	Commd10	132	107	127	84	71	66	52	43	41	69	66	62
StitchedEnhancer_11431	chr18	47307550	47315835	NM_178377	69456	Commd10	419	405	769	524	319	217	30	39	44	60	35	36
StitchedEnhancer_11432	chr18	47329217	47340915	NM_018744	20358	Sema6a	559	522	873	557	390	344	37	61	63	58	52	55
StitchedEnhancer_11433	chr18	47376825	47380907	NM_018744	20358	Sema6a	234	165	416	217	132	145	23	15	21	20	14	23
StitchedEnhancer_11434	chr18	47399695	47430060	NM_018744	20358	Sema6a	368	290	525	329	240	210	115	135	144	175	128	126
StitchedEnhancer_11435	chr18	47463702	47530535	NM_018744	20358	Sema6a	2381	2015	3436	2319	1902	1494	289	303	329	401	298	346
StitchedEnhancer_11436	chr18	47590237	47614255	NR_033453	77668	9130209A04Rik	515	358	657	408	299	237	98	106	98	131	109	93
StitchedEnhancer_11437	chr18	47628766	47630056	NR_033453	77668	9130209A04Rik	52	35	58	34	43	29	5	6	7	8	4	7
StitchedEnhancer_11438	chr18	47743624	47746403	NR_033454	328953	Gm5095	263	203	349	210	179	160	6	14	16	12	11	9
StitchedEnhancer_11439	chr18	47808119	47808485	NR_033454	328953	Gm5095	12	7	16	6	11	7	2	1	0	3	1	1
StitchedEnhancer_1144	chr1	139686140	139687577	NR_029795	735252	Mir181a-1	38	21	57	33	15	26	5	4	3	4	5	4
StitchedEnhancer_11440	chr18	47821632	47822158	NR_033454	328953	Gm5095	32	21	24	32	13	12	3	2	4	6	2	2
StitchedEnhancer_11441	chr18	48017392	48018708	NR_045404	414127	G630055G22Rik	30	15	28	29	19	12	11	10	3	2	6	6
StitchedEnhancer_11442	chr18	48139536	48158910	NM_001025388	433182	Eno1b	284	120	264	183	164	170	74	75	75	96	73	94
StitchedEnhancer_11443	chr18	48195969	48197646	NM_001025388	433182	Eno1b	50	32	42	41	28	29	9	7	7	11	11	5
StitchedEnhancer_11444	chr18	49529732	49531001	NR_033785	67321	1700044K03Rik	40	22	43	21	30	20	7	9	5	11	3	9
StitchedEnhancer_11445	chr18	49605168	49605460	NR_033785	67321	1700044K03Rik	11	5	12	9	13	2	1	0	2	1	0	1
StitchedEnhancer_11446	chr18	49683076	49683614	NR_033785	67321	1700044K03Rik	14	9	18	10	6	10	1	1	5	3	1	2
StitchedEnhancer_11447	chr18	49870959	49872225	NM_026854	68857	Dtwd2	104	79	65	54	41	34	3	1	7	4	3	5
StitchedEnhancer_11448	chr18	49914591	49916242	NM_001170960	68857	Dtwd2	346	305	468	328	312	206	7	7	6	7	9	9
StitchedEnhancer_11449	chr18	49930433	49931863	NM_001170960	68857	Dtwd2	32	35	64	53	34	32	8	1	7	5	7	6
StitchedEnhancer_1145	chr1	139727015	139728721	NR_029795	735252	Mir181a-1	49	17	30	41	18	23	5	4	3	6	9	3
StitchedEnhancer_11450	chr18	49991302	49994088	NM_001081371	240283	Dmxl1	282	231	375	294	233	171	7	17	16	14	14	15
StitchedEnhancer_11451	chr18	50104977	50109399	NM_001177760	106869	Tnfaip8	64	32	44	36	32	27	25	11	15	25	33	34
StitchedEnhancer_11452	chr18	50138247	50226393	NM_134131	106869	Tnfaip8	3989	3371	4560	2881	2995	2288	387	407	376	497	375	433
StitchedEnhancer_11453	chr18	50242063	50257587	NM_134131	106869	Tnfaip8	330	210	195	132	147	277	60	89	88	74	75	59
StitchedEnhancer_11454	chr18	50285550	50288649	NM_008292	15488	Hsd17b4	140	100	188	115	132	79	19	15	14	26	11	18
StitchedEnhancer_11455	chr18	50344137	50345892	NM_008292	15488	Hsd17b4	45	37	59	38	49	33	6	5	7	12	7	5
StitchedEnhancer_11456	chr18	51278196	51278833	NM_001081224	71373	Prr16	8	9	12	16	20	8	1	3	2	2	3	2
StitchedEnhancer_11457	chr18	52624954	52625732	NM_026040	67222	Srfbp1	59	38	60	53	44	15	4	5	6	5	3	7
StitchedEnhancer_11458	chr18	52687385	52690240	NM_001286181	16948	Lox	212	170	244	190	206	157	7	10	9	19	12	8
StitchedEnhancer_11459	chr18	52798846	52799223	NM_030097	78414	1700034E13Rik	18	5	9	3	4	8	1	2	2	1	0	3
StitchedEnhancer_1146	chr1	139794708	139797722	NR_029795	735252	Mir181a-1	160	163	203	159	143	109	17	20	18	21	14	17
StitchedEnhancer_11460	chr18	52823173	52827449	NM_030097	78414	1700034E13Rik	129	97	162	104	108	86	11	17	17	26	22	22
StitchedEnhancer_11461	chr18	52883304	52884051	NM_010293	14625	Gykl1	21	9	15	23	18	10	5	8	3	4	1	4
StitchedEnhancer_11462	chr18	52904628	52930202	NM_026408	67847	Sncaip	797	670	951	673	641	447	127	109	112	129	105	122
StitchedEnhancer_11463	chr18	53046813	53047827	NM_001199154	67847	Sncaip	30	18	24	11	12	13	4	4	9	8	3	3
StitchedEnhancer_11464	chr18	53066762	53070419	NM_001199154	67847	Sncaip	120	74	89	74	61	46	18	13	17	20	15	14
StitchedEnhancer_11465	chr18	53193901	53195590	NM_026386	67804	Snx2	64	39	75	71	43	26	6	6	10	9	8	3
StitchedEnhancer_11466	chr18	53303972	53304521	NM_026386	67804	Snx2	7	7	17	14	10	6	1	0	5	3	0	1
StitchedEnhancer_11467	chr18	53317727	53339911	NM_026386	67804	Snx2	366	327	393	348	324	255	87	73	93	119	73	101
StitchedEnhancer_11468	chr18	53397359	53428873	NM_029394	69226	Snx24	943	820	1277	987	857	738	130	132	141	160	121	135
StitchedEnhancer_11469	chr18	53453126	53454251	NM_029394	69226	Snx24	22	39	63	50	35	22	5	0	7	6	8	5
StitchedEnhancer_1147	chr1	139824590	139825455	NR_029795	735252	Mir181a-1	34	20	33	26	21	18	2	3	13	7	7	5
StitchedEnhancer_11470	chr18	53532419	53533557	NM_008908	19038	Ppic	18	22	34	27	16	13	7	1	5	4	7	6
StitchedEnhancer_11471	chr18	53576511	53578255	NM_008908	19038	Ppic	137	112	200	139	89	81	5	3	9	9	15	8
StitchedEnhancer_11472	chr18	53623337	53629495	NM_001033281	225518	Prdm6	68	57	95	97	40	39	17	14	18	32	22	22
StitchedEnhancer_11473	chr18	53807585	53810140	NR_040349	100502945	Gm19466	110	156	260	164	88	47	13	10	14	10	4	4
StitchedEnhancer_11474	chr18	53857199	53858645	NM_178686	225523	Cep120	19	19	26	28	19	14	4	7	5	13	11	7
StitchedEnhancer_11475	chr18	53903474	53905575	NM_178686	225523	Cep120	547	375	579	453	370	331	11	8	12	7	11	11
StitchedEnhancer_11476	chr18	53929356	53929697	NM_178686	225523	Cep120	8	5	7	6	21	7	1	5	4	2	0	3
StitchedEnhancer_11477	chr18	54021216	54046954	NM_152809	70425	Csnk1g3	556	455	551	489	494	369	88	76	104	107	84	87
StitchedEnhancer_11478	chr18	54061913	54064444	NM_152809	70425	Csnk1g3	177	133	164	118	90	124	15	10	17	13	11	14
StitchedEnhancer_11479	chr18	54080459	54081119	NM_152809	70425	Csnk1g3	24	8	8	13	9	23	2	5	5	5	3	3
StitchedEnhancer_1148	chr1	140031308	140033097	NM_001111316	19264	Ptprc	29	24	29	33	34	49	7	10	6	4	7	9
StitchedEnhancer_11480	chr18	54103449	54104313	NM_152809	70425	Csnk1g3	21	20	13	17	21	32	5	4	4	3	5	7
StitchedEnhancer_11481	chr18	54334285	54348354	NR_040338	77433	Redrum	116	70	89	59	81	72	56	40	65	51	47	58
StitchedEnhancer_11482	chr18	54409525	54411856	NR_040338	77433	Redrum	80	70	79	51	71	46	8	4	12	8	5	11
StitchedEnhancer_11483	chr18	54770672	54773386	NR_045400	328957	9330117O12Rik	92	75	160	104	82	51	9	12	12	20	16	13
StitchedEnhancer_11484	chr18	54912288	54913945	NR_045400	328957	9330117O12Rik	90	44	61	60	39	34	4	7	4	5	14	6
StitchedEnhancer_11485	chr18	55003125	55013406	NM_175751	269023	Zfp608	238	177	308	237	213	193	35	44	57	53	41	52
StitchedEnhancer_11486	chr18	55059147	55152935	NM_175751	269023	Zfp608	2889	2413	4279	3088	2341	1905	421	401	518	587	422	483
StitchedEnhancer_11487	chr18	55200318	55200598	NM_175751	269023	Zfp608	7	4	15	9	10	5	4	3	4	0	0	4
StitchedEnhancer_11488	chr18	55255009	55256835	NM_175751	269023	Zfp608	106	92	144	108	73	74	8	7	12	10	8	7
StitchedEnhancer_11489	chr18	55292573	55331469	NM_175751	269023	Zfp608	1021	787	1209	912	681	518	158	146	177	223	179	162
StitchedEnhancer_1149	chr1	140054712	140056001	NM_001111316	19264	Ptprc	28	13	13	16	19	31	4	5	3	4	7	5
StitchedEnhancer_11490	chr18	55348251	55357471	NM_175751	269023	Zfp608	256	174	302	258	108	167	43	49	43	57	35	53
StitchedEnhancer_11491	chr18	55406299	55419309	NM_175751	269023	Zfp608	389	257	382	314	217	155	55	68	74	86	43	54
StitchedEnhancer_11492	chr18	55548864	55550096	NM_175751	269023	Zfp608	28	26	55	39	21	28	8	5	1	9	3	5
StitchedEnhancer_11493	chr18	55568282	55569201	NM_175751	269023	Zfp608	32	11	19	15	6	19	5	1	4	5	6	5
StitchedEnhancer_11494	chr18	55630315	55630624	NM_175751	269023	Zfp608	3	5	5	13	9	6	1	3	1	0	1	0
StitchedEnhancer_11495	chr18	55650123	55660861	NM_175751	269023	Zfp608	93	46	99	57	40	48	55	68	63	70	52	50
StitchedEnhancer_11496	chr18	55706406	55709607	NM_175751	269023	Zfp608	206	164	314	237	121	128	13	15	18	14	10	14
StitchedEnhancer_11497	chr18	55782734	55784702	NM_175751	269023	Zfp608	133	118	134	100	80	75	7	7	6	7	8	8
StitchedEnhancer_11498	chr18	55799708	55800380	NM_175751	269023	Zfp608	32	23	20	16	24	9	1	4	1	6	4	1
StitchedEnhancer_11499	chr18	55819600	55820724	NM_175751	269023	Zfp608	36	33	43	48	33	18	5	8	3	2	3	5
StitchedEnhancer_115	chr1	23105134	23128452	NM_025746	66755	4933415F23Rik	284	243	378	269	234	199	84	107	114	123	108	103
StitchedEnhancer_1150	chr1	140068669	140072543	NM_001111316	19264	Ptprc	92	69	71	91	134	138	7	9	14	15	22	13
StitchedEnhancer_11500	chr18	55854756	55855896	NM_175751	269023	Zfp608	22	20	46	23	36	20	6	4	3	6	5	6
StitchedEnhancer_11501	chr18	55975220	55976519	NM_026240	107022	Gramd3	131	92	155	111	82	40	5	5	4	9	4	7
StitchedEnhancer_11502	chr18	56196769	56208242	NM_026240	107022	Gramd3	162	78	179	124	107	95	39	47	69	78	52	50
StitchedEnhancer_11503	chr18	56356015	56356423	NM_026240	107022	Gramd3	27	26	26	18	9	7	2	4	1	2	1	1
StitchedEnhancer_11504	chr18	56579339	56630629	NM_026240	107022	Gramd3	542	478	653	545	452	437	199	213	227	294	203	224
StitchedEnhancer_11505	chr18	56649867	56651096	NR_106160	102465790	Mir1258	22	17	19	15	21	12	6	4	6	4	3	2
StitchedEnhancer_11506	chr18	56721362	56733322	NM_001162989	56698	Phax	341	317	455	311	267	183	63	40	72	73	60	59
StitchedEnhancer_11507	chr18	56766283	56766877	NM_026099	67343	Tex43	7	10	17	11	11	2	2	7	3	1	4	3
StitchedEnhancer_11508	chr18	56866816	56884378	NM_010721	16906	Lmnb1	365	334	437	357	296	256	76	78	74	87	82	98
StitchedEnhancer_11509	chr18	56915088	56951065	NM_010721	16906	Lmnb1	1184	1101	1252	826	971	712	126	152	165	216	155	181
StitchedEnhancer_1151	chr1	140087382	140089563	NM_001268286	19264	Ptprc	58	76	93	77	72	74	6	6	5	9	7	10
StitchedEnhancer_11510	chr18	56973268	56975063	NM_010721	16906	Lmnb1	117	76	135	91	64	52	10	8	10	6	2	6
StitchedEnhancer_11511	chr18	57023363	57024371	NM_177115	320253	March3	21	21	19	19	20	14	4	4	4	6	2	1
StitchedEnhancer_11512	chr18	57081145	57086112	NM_177115	320253	March3	145	138	181	146	130	65	28	31	25	32	20	31
StitchedEnhancer_11513	chr18	57122443	57138963	NM_029909	77422	C330018D20Rik	289	180	298	214	204	216	75	51	84	95	77	74
StitchedEnhancer_11514	chr18	57218982	57219546	NM_001001979	70417	Megf10	19	17	28	22	18	14	2	3	3	3	4	4
StitchedEnhancer_11515	chr18	57292651	57293000	NM_001001979	70417	Megf10	16	17	16	10	7	2	1	2	2	0	3	3
StitchedEnhancer_11516	chr18	57404483	57405016	NM_028447	73137	Prrc1	10	4	13	17	13	5	1	1	1	1	4	6
StitchedEnhancer_11517	chr18	57430140	57443980	NM_028447	73137	Prrc1	77	69	107	88	55	63	40	40	50	61	42	50
StitchedEnhancer_11518	chr18	57505457	57516372	NM_028447	73137	Prrc1	287	237	317	225	218	148	40	38	40	67	41	45
StitchedEnhancer_11519	chr18	57631864	57642462	NM_001134697	629147	Ctxn3	252	190	216	145	179	120	30	24	27	41	31	38
StitchedEnhancer_1152	chr1	140140561	140145278	NM_177397	338375	Atp6v1g3	82	63	99	101	46	60	11	20	16	15	17	18
StitchedEnhancer_11520	chr18	57692925	57712411	NR_027945	75084	4930511M06Rik	615	400	445	252	353	253	81	71	76	109	69	71
StitchedEnhancer_11521	chr18	57730089	57731686	NR_015494	75084	4930511M06Rik	43	28	52	34	25	16	9	4	4	5	8	8
StitchedEnhancer_11522	chr18	57768875	57792284	NR_045360	70157	2210409D07Rik	258	191	313	203	198	118	115	114	101	105	82	83
StitchedEnhancer_11523	chr18	57819541	57865150	NR_045360	70157	2210409D07Rik	852	556	895	595	486	484	168	171	184	225	167	195
StitchedEnhancer_11524	chr18	57890204	57908148	NR_045360	70157	2210409D07Rik	308	251	393	241	180	181	68	58	69	93	56	85
StitchedEnhancer_11525	chr18	57996558	57997328	NM_009194	20496	Slc12a2	25	12	20	12	12	19	3	4	1	2	4	1
StitchedEnhancer_11526	chr18	58037272	58040153	NM_009194	20496	Slc12a2	341	283	384	326	302	156	12	17	24	23	9	11
StitchedEnhancer_11527	chr18	58224875	58226386	NM_010181	14119	Fbn2	58	36	60	18	17	26	2	6	3	4	5	5
StitchedEnhancer_11528	chr18	58554419	58555067	NM_001081072	225579	Slc27a6	18	8	15	16	11	6	2	2	3	3	2	2
StitchedEnhancer_11529	chr18	58632159	58633001	NM_001081072	225579	Slc27a6	19	15	36	16	18	6	6	4	3	6	4	6
StitchedEnhancer_1153	chr1	140201185	140201622	NM_177397	338375	Atp6v1g3	6	7	14	8	10	9	3	3	3	0	2	0
StitchedEnhancer_11530	chr18	58690058	58690945	NM_001081072	225579	Slc27a6	16	10	13	17	18	11	3	3	4	6	1	4
StitchedEnhancer_11531	chr18	58818687	58820044	NM_025478	66307	Isoc1	94	87	129	98	110	50	4	6	9	13	9	0
StitchedEnhancer_11532	chr18	58870966	58874226	NM_025478	66307	Isoc1	187	78	158	115	86	81	10	5	9	11	8	17
StitchedEnhancer_11533	chr18	58901463	58915002	NM_175506	240322	Adamts19	76	69	109	60	61	60	59	64	55	69	52	50
StitchedEnhancer_11534	chr18	58930216	58930794	NM_175506	240322	Adamts19	8	13	23	12	7	8	3	0	3	2	2	0
StitchedEnhancer_11535	chr18	58952431	58953061	NM_175506	240322	Adamts19	20	8	9	15	5	9	1	3	3	4	6	5
StitchedEnhancer_11536	chr18	59031937	59042508	NM_175506	240322	Adamts19	100	80	110	90	88	73	31	34	38	49	26	41
StitchedEnhancer_11537	chr18	59334298	59335669	NM_001081328	78923	Chsy3	69	57	74	66	49	40	6	8	13	9	8	6
StitchedEnhancer_11538	chr18	59478456	59478751	NM_001081328	78923	Chsy3	12	4	10	9	8	2	1	0	2	3	1	2
StitchedEnhancer_11539	chr18	60369807	60375049	NM_001033767	240327	Gm4951	203	160	173	182	222	286	17	18	21	27	20	30
StitchedEnhancer_1154	chr1	140219100	140225380	NM_177397	338375	Atp6v1g3	68	64	77	90	92	90	24	27	33	34	34	22
StitchedEnhancer_11540	chr18	60392301	60399044	NM_001033767	240327	Gm4951	98	77	54	43	129	138	18	18	26	26	15	32
StitchedEnhancer_11541	chr18	60432653	60432871	NM_001034859	225594	Gm4841	8	12	4	8	4	6	2	1	1	0	1	3
StitchedEnhancer_11542	chr18	60449952	60453526	NM_001101475	240328	F830016B08Rik	118	51	107	68	53	57	18	17	17	23	23	13
StitchedEnhancer_11543	chr18	60533007	60547225	NM_001146275	60440	Iigp1	1621	1019	1199	1019	1047	961	75	87	69	97	48	56
StitchedEnhancer_11544	chr18	60598326	60599430	NM_134133	106878	Smim3	24	16	30	34	39	33	8	5	6	2	3	2
StitchedEnhancer_11545	chr18	60617705	60622080	NM_134133	106878	Smim3	168	111	132	83	76	72	18	18	19	18	22	14
StitchedEnhancer_11546	chr18	60640348	60662059	NM_134133	106878	Smim3	906	728	913	612	552	553	114	104	92	110	81	95
StitchedEnhancer_11547	chr18	60681984	60686700	NM_026302	67665	Dctn4	683	554	720	567	454	356	18	28	27	22	33	17
StitchedEnhancer_11548	chr18	60719963	60720967	NM_025776	66810	Rbm22	148	137	180	152	134	96	7	3	7	8	4	12
StitchedEnhancer_11549	chr18	60754222	60840717	NM_177340	104027	Synpo	8199	7113	10517	6908	6690	5159	362	422	389	462	337	405
StitchedEnhancer_1155	chr1	140239191	140245718	NM_177397	338375	Atp6v1g3	334	294	493	312	321	196	32	28	25	49	24	25
StitchedEnhancer_11550	chr18	60856005	60968108	NM_020600	20044	Rps14	4273	4176	5902	4067	4002	2997	471	515	545	632	496	599
StitchedEnhancer_11551	chr18	60990072	61009098	NM_011552	21453	Tcof1	180	166	230	178	189	220	68	89	90	111	62	105
StitchedEnhancer_11552	chr18	61025108	61028014	NM_001198984	21453	Tcof1	212	211	430	285	159	141	12	9	13	23	12	15
StitchedEnhancer_11553	chr18	61047313	61051999	NM_001038499	545260	Arsi	204	191	339	248	175	192	20	15	18	33	16	26
StitchedEnhancer_11554	chr18	61068518	61073581	NM_001038499	545260	Arsi	105	106	160	113	77	83	20	33	18	22	23	25
StitchedEnhancer_11555	chr18	61091821	61092572	NM_177407	12322	Camk2a	19	17	10	10	12	10	2	1	4	3	2	6
StitchedEnhancer_11556	chr18	61106894	61107829	NR_106079	102465703	Mir7220	28	30	58	43	26	7	2	5	1	1	6	2
StitchedEnhancer_11557	chr18	61122037	61124139	NM_009792	12322	Camk2a	203	178	365	261	214	145	9	9	10	9	12	15
StitchedEnhancer_11558	chr18	61137566	61166672	NM_201353	240332	Slc6a7	520	513	1021	604	551	373	110	111	120	147	109	136
StitchedEnhancer_11559	chr18	61199422	61282642	NM_001037859	12978	Csf1r	3441	3341	4364	2901	2349	1910	245	305	299	347	286	351
StitchedEnhancer_1156	chr1	140389363	140415619	NM_021605	59125	Nek7	313	198	263	186	180	199	138	136	143	178	107	119
StitchedEnhancer_11560	chr18	61335810	61337597	NM_178277	106894	Hmgxb3	289	288	356	244	267	193	2	10	9	11	6	18
StitchedEnhancer_11561	chr18	61370697	61384424	NM_146086	225600	Pde6a	166	160	194	134	117	97	56	48	52	78	55	69
StitchedEnhancer_11562	chr18	61398342	61399151	NM_146086	225600	Pde6a	17	16	20	14	12	11	6	4	3	4	3	1
StitchedEnhancer_11563	chr18	61471648	61561537	NM_133249	170826	Ppargc1b	5424	5175	8939	5253	4140	2346	362	352	408	373	341	312
StitchedEnhancer_11564	chr18	61575676	61576831	NM_133249	170826	Ppargc1b	47	28	81	57	23	14	2	4	5	6	6	4
StitchedEnhancer_11565	chr18	61589484	61591201	NM_133249	170826	Ppargc1b	65	67	162	83	65	38	10	5	5	2	6	10
StitchedEnhancer_11566	chr18	61604743	61609596	NR_045419	442846	A530050N04Rik	878	776	1198	730	559	363	17	20	18	24	16	25
StitchedEnhancer_11567	chr18	61625439	61626585	NR_045419	442846	A530050N04Rik	53	80	107	62	53	20	5	4	7	2	1	8
StitchedEnhancer_11568	chr18	61641470	61649442	NR_045419	442846	A530050N04Rik	141	118	195	125	104	65	27	39	46	39	26	31
StitchedEnhancer_11569	chr18	61663893	61670432	NR_045419	442846	A530050N04Rik	407	420	636	453	313	162	21	32	32	45	34	25
StitchedEnhancer_1157	chr1	140432416	140476794	NM_021605	59125	Nek7	910	518	524	438	447	509	187	226	235	287	229	229
StitchedEnhancer_11570	chr18	61685737	61734137	NM_146087	93687	Csnk1a1	2939	2380	3000	2001	2240	1474	215	248	252	301	213	272
StitchedEnhancer_11571	chr18	61751766	61753224	NM_146087	93687	Csnk1a1	51	40	25	19	32	19	10	9	11	10	8	5
StitchedEnhancer_11572	chr18	61768382	61867656	NR_045402	328968	Mir143hg	7488	6888	9765	6238	5663	3780	412	424	409	537	407	434
StitchedEnhancer_11573	chr18	61883948	61886467	NM_021296	17714	Grpel2	128	93	138	121	154	82	15	10	15	13	14	11
StitchedEnhancer_11574	chr18	61905587	61950427	NM_178928	106877	Afap1l1	5191	4374	6013	3805	3430	2564	219	222	214	281	202	225
StitchedEnhancer_11575	chr18	61964723	61965671	NM_178928	106877	Afap1l1	15	15	31	22	14	15	0	5	2	3	4	5
StitchedEnhancer_11576	chr18	61985252	62023022	NM_178928	106877	Afap1l1	3391	2603	2846	1863	1756	1526	202	183	217	235	132	195
StitchedEnhancer_11577	chr18	62037979	62095706	NM_198649	319713	Ablim3	4663	3546	5126	3242	2632	2241	245	276	280	346	241	276
StitchedEnhancer_11578	chr18	62108634	62117601	NM_172628	225608	Sh3tc2	2079	1660	2378	1480	1341	964	38	33	45	56	41	32
StitchedEnhancer_11579	chr18	62197144	62228838	NM_172628	225608	Sh3tc2	674	642	743	504	432	458	125	131	141	172	123	161
StitchedEnhancer_1158	chr1	140490931	140519977	NM_021605	59125	Nek7	1688	1156	1444	1017	1045	978	138	132	158	147	130	136
StitchedEnhancer_11580	chr18	62260125	62274030	NM_007420	11555	Adrb2	237	192	282	196	152	107	46	64	62	67	60	61
StitchedEnhancer_11581	chr18	62305751	62352124	NM_007420	11555	Adrb2	1091	949	1354	990	936	724	175	178	224	223	197	222
StitchedEnhancer_11582	chr18	62384623	62385242	NM_007420	11555	Adrb2	10	10	12	19	11	8	3	4	4	4	3	3
StitchedEnhancer_11583	chr18	62707886	62708957	NM_134136	107035	Fbxo38	128	96	145	105	100	61	10	3	8	11	7	3
StitchedEnhancer_11584	chr18	62894185	62894582	NM_001168423	100038417	Spink13	13	12	13	10	7	3	2	3	2	1	4	3
StitchedEnhancer_11585	chr18	62914738	62919409	NR_037693	78449	2700046A07Rik	72	54	102	62	55	30	18	22	14	21	11	18
StitchedEnhancer_11586	chr18	62935212	62935987	NR_037693	78449	2700046A07Rik	15	12	24	7	20	8	4	4	1	2	3	4
StitchedEnhancer_11587	chr18	63007824	63014257	NM_133237	494504	Apcdd1	41	41	67	36	59	35	15	20	31	31	21	16
StitchedEnhancer_11588	chr18	63079465	63082985	NM_133237	494504	Apcdd1	75	78	125	103	88	47	10	23	14	27	15	16
StitchedEnhancer_11589	chr18	63099025	63100992	NM_133237	494504	Apcdd1	72	64	140	89	57	48	10	8	7	10	9	9
StitchedEnhancer_1159	chr1	140752669	140753664	NM_001081226	69549	2310009B15Rik	182	142	230	188	172	112	7	3	3	8	7	2
StitchedEnhancer_11590	chr18	63127495	63138185	NM_028017	108123	Napg	217	166	232	176	196	104	34	35	43	58	48	56
StitchedEnhancer_11591	chr18	63453947	63456381	NM_001039485	667742	Piezo2	116	55	124	89	73	52	9	9	6	5	7	16
StitchedEnhancer_11592	chr18	63546240	63546832	NM_001039485	667742	Piezo2	9	12	18	10	8	11	0	3	3	1	0	2
StitchedEnhancer_11593	chr18	63850526	63852810	NM_016792	53382	Txnl1	738	618	746	522	535	396	16	11	10	13	8	12
StitchedEnhancer_11594	chr18	63867927	63868770	NM_001014981	104082	Wdr7	33	22	46	37	43	23	8	5	5	7	2	5
StitchedEnhancer_11595	chr18	64275978	64276938	NM_009182	20451	St8sia3	19	12	21	5	16	15	8	4	3	4	2	4
StitchedEnhancer_11596	chr18	64540657	64542554	NM_194268	225631	Onecut2	37	28	78	52	25	19	7	7	11	8	6	11
StitchedEnhancer_11597	chr18	64648027	64656573	NM_007998	14151	Fech	245	220	334	223	223	111	35	38	47	57	41	58
StitchedEnhancer_11598	chr18	64675706	64677178	NM_001142950	70223	Nars	148	145	156	150	129	89	3	4	9	7	5	3
StitchedEnhancer_11599	chr18	64743525	64745210	NM_001142950	70223	Nars	40	35	47	52	14	38	10	5	9	10	7	7
StitchedEnhancer_116	chr1	23152841	23153289	NM_025746	66755	4933415F23Rik	14	5	13	12	13	3	0	2	1	3	1	2
StitchedEnhancer_1160	chr1	140772370	140773693	NM_001081226	69549	2310009B15Rik	45	28	37	24	34	25	4	8	4	4	4	4
StitchedEnhancer_11600	chr18	64776982	64821563	NM_001001488	54670	Atp8b1	1871	1472	2257	1677	1585	1362	197	197	217	270	204	200
StitchedEnhancer_11601	chr18	64841608	64844830	NM_001001488	54670	Atp8b1	260	222	423	291	214	179	14	15	16	16	9	23
StitchedEnhancer_11602	chr18	64859326	64860838	NM_001001488	54670	Atp8b1	50	37	57	49	73	34	5	1	7	7	5	8
StitchedEnhancer_11603	chr18	64875956	64879157	NM_001001488	54670	Atp8b1	148	103	146	93	129	103	9	11	11	17	14	16
StitchedEnhancer_11604	chr18	64910332	64919480	NM_001001488	54670	Atp8b1	273	219	315	215	205	220	44	42	41	65	32	45
StitchedEnhancer_11605	chr18	64948388	64974944	NM_001114386	83814	Nedd4l	462	383	564	368	449	301	96	115	117	159	101	105
StitchedEnhancer_11606	chr18	65002963	65006122	NM_001114386	83814	Nedd4l	114	110	175	140	111	64	11	17	25	12	20	16
StitchedEnhancer_11607	chr18	65033677	65048990	NM_001114386	83814	Nedd4l	419	332	535	350	308	250	65	60	78	90	60	72
StitchedEnhancer_11608	chr18	65087332	65100481	NM_001114386	83814	Nedd4l	169	141	203	162	113	75	63	57	72	72	52	66
StitchedEnhancer_11609	chr18	65121288	65125867	NM_031881	83814	Nedd4l	65	63	109	94	60	29	23	17	26	19	23	19
StitchedEnhancer_1161	chr1	140808244	140810256	NM_001166501	329260	Dennd1b	114	55	78	52	59	68	7	8	14	14	6	6
StitchedEnhancer_11610	chr18	65141063	65161774	NM_031881	83814	Nedd4l	653	595	740	477	407	412	98	91	117	105	84	113
StitchedEnhancer_11611	chr18	65241803	65256452	NM_031881	83814	Nedd4l	646	663	1136	673	545	308	62	56	75	69	53	62
StitchedEnhancer_11612	chr18	65279810	65295172	NM_031881	83814	Nedd4l	465	406	747	544	327	170	68	54	72	86	56	58
StitchedEnhancer_11613	chr18	65341318	65342251	NR_029600	387231	Mir122a	51	34	41	35	20	18	3	3	3	5	2	4
StitchedEnhancer_11614	chr18	65364838	65374687	NR_029600	387231	Mir122a	274	252	372	210	178	119	31	32	45	57	40	36
StitchedEnhancer_11615	chr18	65460688	65492145	NR_029600	387231	Mir122a	396	389	701	508	452	460	101	116	113	140	118	103
StitchedEnhancer_11616	chr18	65508126	65560243	NM_001037294	225638	Alpk2	2585	1836	2439	1570	1353	1054	183	180	207	205	182	184
StitchedEnhancer_11617	chr18	65573992	65576513	NM_172833	240354	Malt1	81	79	98	116	105	120	17	14	9	19	14	9
StitchedEnhancer_11618	chr18	65589571	65591487	NM_172833	240354	Malt1	279	263	304	241	250	141	12	6	11	14	11	8
StitchedEnhancer_11619	chr18	65655441	65694772	NM_207255	328977	Zfp532	909	747	1286	897	604	523	145	153	166	209	163	181
StitchedEnhancer_1162	chr1	140824848	140827559	NM_001166501	329260	Dennd1b	135	114	159	82	88	74	15	18	13	12	8	20
StitchedEnhancer_11620	chr18	65713438	65777917	NM_207255	328977	Zfp532	2917	2715	3879	2861	2264	1842	277	362	326	365	293	322
StitchedEnhancer_11621	chr18	65798983	65801864	NM_177028	319888	Oacyl	363	276	364	268	288	194	9	16	22	14	13	18
StitchedEnhancer_11622	chr18	65830413	65858538	NM_177028	319888	Oacyl	616	605	800	579	477	519	112	104	119	153	126	136
StitchedEnhancer_11623	chr18	65897088	65909593	NM_177028	319888	Oacyl	133	159	164	123	103	135	35	39	52	71	62	44
StitchedEnhancer_11624	chr18	65959698	65963137	NM_025468	66286	Sec11c	230	210	251	216	279	267	11	17	11	17	16	14
StitchedEnhancer_11625	chr18	66094675	66095030	NM_013833	19434	Rax	13	7	19	14	7	1	1	1	2	3	1	1
StitchedEnhancer_11626	chr18	66161859	66162736	NM_001172062	70361	Lman1	49	31	64	31	41	21	8	4	1	4	6	11
StitchedEnhancer_11627	chr18	66258097	66292978	NR_030467	751558	Mir694	302	210	475	402	413	230	117	118	115	143	137	122
StitchedEnhancer_11628	chr18	66325932	66330373	NR_030467	751558	Mir694	157	153	212	122	171	85	14	23	13	20	14	10
StitchedEnhancer_11629	chr18	66367246	66407093	NR_030467	751558	Mir694	587	519	746	505	564	322	137	157	163	171	142	152
StitchedEnhancer_1163	chr1	140859261	140881261	NR_108103	78229	4930596I21Rik	1218	896	1050	702	1038	807	89	88	116	137	98	99
StitchedEnhancer_11630	chr18	66442458	66452142	NM_178793	320924	Ccbe1	267	296	465	264	377	167	26	29	30	46	38	35
StitchedEnhancer_11631	chr18	66542869	66543152	NM_021451	58801	Pmaip1	10	10	8	5	14	4	2	1	1	1	2	1
StitchedEnhancer_11632	chr18	66563677	66564615	NM_021451	58801	Pmaip1	14	19	22	19	14	10	4	5	4	3	4	6
StitchedEnhancer_11633	chr18	66617822	66638371	NM_021451	58801	Pmaip1	124	171	150	151	120	190	71	68	82	88	64	79
StitchedEnhancer_11634	chr18	67362330	67365661	NM_024190	67064	Chmp1b	194	204	434	269	227	120	19	24	21	20	15	21
StitchedEnhancer_11635	chr18	67403561	67409287	NM_172630	225651	Mppe1	311	298	404	307	305	187	26	34	25	45	28	29
StitchedEnhancer_11636	chr18	67435139	67450962	NM_053261	114663	Impa2	265	254	404	259	267	141	52	59	68	87	59	56
StitchedEnhancer_11637	chr18	67467159	67472809	NM_053261	114663	Impa2	281	290	353	263	213	180	24	27	22	38	16	15
StitchedEnhancer_11638	chr18	67486228	67503945	NM_007702	12683	Cidea	798	736	1156	796	587	384	47	62	63	70	66	93
StitchedEnhancer_11639	chr18	67525101	67529984	NM_026473	67951	Tubb6	48	46	53	43	30	29	20	23	28	26	16	21
StitchedEnhancer_1164	chr1	140925668	140926673	NR_108103	78229	4930596I21Rik	45	21	41	28	22	17	9	7	4	9	9	6
StitchedEnhancer_11640	chr18	67548722	67566414	NM_026473	67951	Tubb6	510	482	491	337	334	350	71	88	84	99	75	70
StitchedEnhancer_11641	chr18	67600728	67610194	NM_027130	69597	Afg3l2	428	380	474	319	419	188	35	31	41	47	50	51
StitchedEnhancer_11642	chr18	67628973	67663782	NM_144867	225655	Slmo1	239	165	217	148	128	137	133	127	142	162	154	129
StitchedEnhancer_11643	chr18	67769826	67770983	NM_001081073	225659	Cep76	69	51	48	43	44	24	7	6	11	11	7	7
StitchedEnhancer_11644	chr18	67800364	67801737	NM_001081073	225659	Cep76	495	493	562	425	414	251	7	8	11	6	7	7
StitchedEnhancer_11645	chr18	67829067	67829520	NM_134138	107047	Psmg2	20	18	16	20	20	6	4	1	5	7	2	0
StitchedEnhancer_11646	chr18	67883146	67935928	NM_028112	72124	Seh1l	1984	1572	1859	1372	1388	1079	238	246	252	296	208	238
StitchedEnhancer_11647	chr18	67959659	67960255	NM_027556	70799	Cep192	42	18	33	24	27	18	2	5	3	5	4	5
StitchedEnhancer_11648	chr18	67975140	67986139	NM_027556	70799	Cep192	54	40	52	45	46	52	46	37	47	48	42	62
StitchedEnhancer_11649	chr18	68091624	68115070	NM_172631	52662	Ldlrad4	866	678	1090	812	579	439	105	108	120	132	99	109
StitchedEnhancer_1165	chr1	141111598	141112605	NM_133239	170788	Crb1	32	23	35	16	29	25	2	8	7	9	3	7
StitchedEnhancer_11650	chr18	68139682	68155909	NM_172631	52662	Ldlrad4	603	489	660	504	413	430	83	79	100	91	69	90
StitchedEnhancer_11651	chr18	68207359	68226781	NM_172631	52662	Ldlrad4	543	419	601	405	353	306	89	78	88	92	90	101
StitchedEnhancer_11652	chr18	68257589	68324491	NR_106078	102465702	Mir7219	1035	779	1228	897	713	684	311	294	335	397	277	294
StitchedEnhancer_11653	chr18	68338654	68357855	NR_106078	102465702	Mir7219	657	576	956	670	405	295	93	96	101	120	73	96
StitchedEnhancer_11654	chr18	68377863	68410009	NR_106078	102465702	Mir7219	587	496	688	487	404	329	150	146	160	179	127	153
StitchedEnhancer_11655	chr18	68449965	68460632	NM_153794	108654	Fam210a	495	380	477	359	359	245	47	47	50	57	52	52
StitchedEnhancer_11656	chr18	68549107	68549494	NM_001271717	17200	Mc2r	11	8	26	19	7	9	3	4	0	1	2	1
StitchedEnhancer_11657	chr18	68604693	68605482	NM_001271716	17200	Mc2r	32	19	16	6	16	2	5	4	4	7	2	4
StitchedEnhancer_11658	chr18	68634439	68634872	NM_001271716	17200	Mc2r	26	18	36	28	20	9	6	6	0	0	1	4
StitchedEnhancer_11659	chr18	68652810	68660734	NM_001271716	17200	Mc2r	1423	995	1721	1110	711	726	34	43	48	55	39	36
StitchedEnhancer_1166	chr1	141222994	141226254	NM_133239	170788	Crb1	199	119	121	106	111	83	14	14	18	19	15	12
StitchedEnhancer_11660	chr18	68687029	68688462	NM_001271716	17200	Mc2r	57	42	82	53	43	34	6	9	4	6	5	6
StitchedEnhancer_11661	chr18	68707354	68732264	NM_001271716	17200	Mc2r	619	498	888	561	251	350	94	88	97	95	100	109
StitchedEnhancer_11662	chr18	68748203	68753157	NR_105774	102465183	Mir6356	635	393	768	486	291	305	32	31	36	32	31	38
StitchedEnhancer_11663	chr18	68901783	68918108	NR_105774	102465183	Mir6356	196	97	227	180	92	106	59	68	79	70	82	61
StitchedEnhancer_11664	chr18	68953700	68954878	NR_105774	102465183	Mir6356	46	55	72	36	39	32	6	4	6	8	9	5
StitchedEnhancer_11665	chr18	68986365	68989863	NR_105774	102465183	Mir6356	114	47	83	52	34	72	22	16	17	17	10	16
StitchedEnhancer_11666	chr18	69101860	69116156	NR_038051	78931	4930546C10Rik	540	419	736	503	290	385	68	61	69	87	76	73
StitchedEnhancer_11667	chr18	69191805	69192894	NR_105780	102465187	Mir145b	19	20	15	27	11	9	4	5	3	6	3	1
StitchedEnhancer_11668	chr18	69277070	69291138	NR_105780	102465187	Mir145b	306	294	380	269	244	251	74	55	66	77	59	55
StitchedEnhancer_11669	chr18	69312680	69330892	NR_105780	102465187	Mir145b	150	125	183	133	197	152	79	69	93	73	78	66
StitchedEnhancer_1167	chr1	141317977	141319682	NM_172643	226470	Zbtb41	343	307	432	321	334	184	15	11	6	9	7	10
StitchedEnhancer_11670	chr18	69355553	69360134	NM_013685	21413	Tcf4	492	442	664	404	357	310	27	19	19	20	22	24
StitchedEnhancer_11671	chr18	69402959	69403480	NM_013685	21413	Tcf4	18	26	19	10	12	8	1	2	4	2	2	1
StitchedEnhancer_11672	chr18	69501584	69512589	NM_001083967	21413	Tcf4	1711	1215	1942	1510	1200	985	44	57	50	58	42	49
StitchedEnhancer_11673	chr18	69546757	69600689	NM_001083967	21413	Tcf4	3212	1975	2731	1961	1967	2029	267	267	326	309	243	276
StitchedEnhancer_11674	chr18	69658339	69850511	NM_001083967	21413	Tcf4	13136	9022	14238	9678	8768	8474	934	981	1085	1244	900	990
StitchedEnhancer_11675	chr18	69870321	69872791	NM_201362	381175	Ccdc68	309	148	331	211	223	183	8	13	9	15	11	12
StitchedEnhancer_11676	chr18	69939166	69967124	NM_201362	381175	Ccdc68	1051	648	1055	671	744	551	103	108	140	142	116	111
StitchedEnhancer_11677	chr18	69992344	69993874	NM_201362	381175	Ccdc68	46	33	47	40	44	31	3	6	5	6	7	5
StitchedEnhancer_11678	chr18	70058781	70059400	NM_201362	381175	Ccdc68	19	20	20	20	8	5	1	2	2	9	1	4
StitchedEnhancer_11679	chr18	70084687	70085861	NM_201362	381175	Ccdc68	56	49	62	55	46	40	5	6	5	4	10	3
StitchedEnhancer_1168	chr1	142069749	142081475	NM_009888	12628	Cfh	496	266	319	272	279	325	47	41	54	57	55	44
StitchedEnhancer_11680	chr18	70212124	70213362	NM_030554	80718	Rab27b	40	38	63	40	44	26	8	3	1	4	6	3
StitchedEnhancer_11681	chr18	70595470	70595905	NM_029019	170461	Stard6	14	11	8	11	12	16	2	0	0	0	2	4
StitchedEnhancer_11682	chr18	70631150	70632872	NM_029019	170461	Stard6	239	193	257	151	128	108	5	11	9	14	6	7
StitchedEnhancer_11683	chr18	70689040	70691433	NM_001289515	26447	Poli	188	149	128	154	122	125	13	8	14	12	12	17
StitchedEnhancer_11684	chr18	70704601	70705429	NM_001289515	26447	Poli	19	15	28	12	23	13	4	1	2	9	6	2
StitchedEnhancer_11685	chr18	70727117	70740139	NM_010773	17191	Mbd2	786	638	814	684	549	449	60	39	46	60	59	57
StitchedEnhancer_11686	chr18	70760862	70788578	NM_010773	17191	Mbd2	565	441	557	362	365	405	137	137	148	174	129	153
StitchedEnhancer_11687	chr18	70802305	70804851	NM_010773	17191	Mbd2	881	680	965	665	612	591	12	8	9	11	13	11
StitchedEnhancer_11688	chr18	70921140	70921666	NM_010773	17191	Mbd2	5	15	27	16	19	8	3	3	3	3	3	2
StitchedEnhancer_11689	chr18	70957484	70965506	NM_010773	17191	Mbd2	588	422	618	402	537	354	32	30	35	47	38	37
StitchedEnhancer_1169	chr1	142141027	142143453	NM_001081027	240776	Kcnt2	206	187	285	182	139	119	8	12	16	6	10	7
StitchedEnhancer_11690	chr18	71647984	71648284	NM_007831	13176	Dcc	14	6	3	3	3	7	1	2	0	3	4	2
StitchedEnhancer_11691	chr18	73047184	73050808	NM_007831	13176	Dcc	98	70	112	67	35	34	13	15	13	11	10	12
StitchedEnhancer_11692	chr18	73446647	73447650	NM_001039214	240396	Mex3c	22	14	30	16	21	13	5	4	2	2	3	3
StitchedEnhancer_11693	chr18	73674201	73675003	NM_001039214	240396	Mex3c	36	30	33	20	19	10	3	3	2	6	4	4
StitchedEnhancer_11694	chr18	73701122	73702236	NM_001039214	240396	Mex3c	65	58	57	51	46	55	3	4	8	6	6	6
StitchedEnhancer_11695	chr18	73730437	73734467	NM_001039214	240396	Mex3c	1069	906	1036	875	918	650	14	18	15	14	19	16
StitchedEnhancer_11696	chr18	73861580	73871478	NM_008540	17128	Smad4	361	306	381	344	340	203	42	58	59	69	52	50
StitchedEnhancer_11697	chr18	73903458	73914523	NM_053255	114615	Elac1	525	465	528	392	504	439	46	64	41	61	48	62
StitchedEnhancer_11698	chr18	73974655	73976728	NM_145494	107029	Me2	161	131	228	203	203	124	11	8	12	16	6	13
StitchedEnhancer_11699	chr18	73994474	73996047	NM_145494	107029	Me2	18	24	46	50	42	33	8	9	4	8	5	7
StitchedEnhancer_117	chr1	23179909	23211786	NR_029533	387225	Mir30a	1388	846	1238	885	1094	752	160	148	137	176	139	157
StitchedEnhancer_1170	chr1	142160804	142166959	NM_001081027	240776	Kcnt2	200	130	194	153	133	166	21	19	18	29	21	26
StitchedEnhancer_11700	chr18	74147769	74156070	NR_045390	77855	D730045A05Rik	443	422	648	373	391	191	30	29	38	34	31	24
StitchedEnhancer_11701	chr18	74170346	74183194	NR_045390	77855	D730045A05Rik	433	332	392	236	305	205	35	51	42	48	39	46
StitchedEnhancer_11702	chr18	74224007	74225328	NM_172632	225724	Mapk4	34	32	56	44	70	19	5	7	6	6	5	7
StitchedEnhancer_11703	chr18	74243930	74245289	NM_172632	225724	Mapk4	74	55	75	68	47	38	5	9	7	3	3	4
StitchedEnhancer_11704	chr18	74367572	74376940	NM_028868	74322	Cxxc1	219	202	345	244	214	156	45	43	49	69	33	43
StitchedEnhancer_11705	chr18	74426142	74428679	NM_013594	17190	Mbd1	443	380	489	362	330	233	12	7	10	13	7	9
StitchedEnhancer_11706	chr18	74506023	74509262	NM_028948	74453	Ccdc11	507	408	725	430	296	280	18	19	24	14	15	16
StitchedEnhancer_11707	chr18	74533679	74534955	NM_201600	17919	Myo5b	32	33	40	29	18	15	1	4	6	10	3	2
StitchedEnhancer_11708	chr18	74551578	74553242	NM_201600	17919	Myo5b	71	50	127	84	67	43	6	12	6	10	7	6
StitchedEnhancer_11709	chr18	74577648	74578938	NM_201600	17919	Myo5b	42	35	49	24	28	17	6	4	7	5	4	5
StitchedEnhancer_1171	chr1	142202376	142220313	NM_001081027	240776	Kcnt2	297	185	141	142	196	177	53	52	58	88	45	64
StitchedEnhancer_11710	chr18	74602114	74602459	NM_201600	17919	Myo5b	5	9	12	14	15	0	1	1	3	0	2	2
StitchedEnhancer_11711	chr18	74688972	74690335	NR_045368	73606	1700120E14Rik	66	38	83	81	46	30	5	7	2	4	3	2
StitchedEnhancer_11712	chr18	74705073	74705604	NR_045368	73606	1700120E14Rik	6	11	13	10	16	12	1	1	3	1	4	0
StitchedEnhancer_11713	chr18	74800867	74806618	NR_045368	73606	1700120E14Rik	129	147	200	148	151	123	20	17	18	23	22	26
StitchedEnhancer_11714	chr18	74862785	74864817	NR_028560	100217466	Scarna17	225	252	374	256	156	105	6	8	4	7	8	6
StitchedEnhancer_11715	chr18	74883767	74901746	NR_028560	100217466	Scarna17	224	203	451	334	188	143	66	62	62	76	63	52
StitchedEnhancer_11716	chr18	74923578	74949702	NR_028560	100217466	Scarna17	1161	992	1619	1139	860	591	106	121	117	158	108	125
StitchedEnhancer_11717	chr18	74969965	74970950	NM_177470	52538	Acaa2	41	43	57	39	15	15	2	2	5	7	3	2
StitchedEnhancer_11718	chr18	75053573	75061656	NM_010720	16891	Lipg	86	96	112	71	56	59	30	34	37	32	28	36
StitchedEnhancer_11719	chr18	75081017	75081910	NM_010720	16891	Lipg	30	20	12	18	18	20	2	5	6	4	2	0
StitchedEnhancer_1172	chr1	142235807	142239862	NM_001081027	240776	Kcnt2	111	51	77	56	75	84	16	12	15	24	16	15
StitchedEnhancer_11720	chr18	75147061	75182608	NM_001001181	407819	BC031181	922	817	1174	844	938	553	155	161	177	185	152	203
StitchedEnhancer_11721	chr18	75198499	75199786	NM_027727	69190	Dym	29	13	38	23	18	20	3	7	7	7	5	1
StitchedEnhancer_11722	chr18	75229028	75229952	NM_027727	69190	Dym	19	12	16	15	20	17	3	3	1	6	3	2
StitchedEnhancer_11723	chr18	75264686	75266592	NM_027727	69190	Dym	44	49	71	56	58	30	5	11	4	10	8	8
StitchedEnhancer_11724	chr18	75285583	75299128	NM_027727	69190	Dym	178	124	218	117	152	83	75	66	69	68	47	67
StitchedEnhancer_11725	chr18	75382044	75392463	NR_045394	100503117	2010010A06Rik	291	256	412	261	244	160	33	42	42	53	43	53
StitchedEnhancer_11726	chr18	75422081	75422446	NR_045394	100503117	2010010A06Rik	11	12	5	16	7	9	4	1	2	3	2	4
StitchedEnhancer_11727	chr18	75438131	75453724	NR_045394	100503117	2010010A06Rik	131	136	168	124	131	92	74	59	64	78	67	77
StitchedEnhancer_11728	chr18	75466364	75503389	NR_045393	100503117	2010010A06Rik	729	690	1116	811	621	425	143	163	164	182	138	157
StitchedEnhancer_11729	chr18	75522069	75575630	NM_001042660	17131	Smad7	4657	4047	7112	4484	3843	2694	209	268	234	291	234	251
StitchedEnhancer_1173	chr1	142272169	142278406	NM_001081027	240776	Kcnt2	383	185	268	236	250	187	29	25	25	29	19	25
StitchedEnhancer_11730	chr18	75593832	75762254	NR_045879	100038353	Gm10532	8080	6679	11714	6768	7860	5263	778	812	860	1029	746	855
StitchedEnhancer_11731	chr18	75812836	75815085	NM_201354	269037	Ctif	44	36	51	39	51	31	17	12	15	8	16	10
StitchedEnhancer_11732	chr18	75834980	75857811	NM_201354	269037	Ctif	532	471	758	505	363	308	110	96	103	138	94	102
StitchedEnhancer_11733	chr18	75892885	75897667	NM_201354	269037	Ctif	324	316	573	384	314	232	16	20	11	24	16	23
StitchedEnhancer_11734	chr18	75924202	75925498	NM_145356	207259	Zbtb7c	44	35	50	34	30	19	6	4	5	10	7	8
StitchedEnhancer_11735	chr18	75947860	75949221	NM_145356	207259	Zbtb7c	20	24	30	25	22	20	2	4	2	7	3	4
StitchedEnhancer_11736	chr18	75978684	76000569	NM_145356	207259	Zbtb7c	516	439	654	441	361	316	73	71	72	108	89	101
StitchedEnhancer_11737	chr18	76019656	76021540	NM_145356	207259	Zbtb7c	50	43	52	46	48	68	6	5	4	14	4	8
StitchedEnhancer_11738	chr18	76051002	76067452	NM_145356	207259	Zbtb7c	368	332	611	372	369	231	56	61	59	98	58	55
StitchedEnhancer_11739	chr18	76096078	76096621	NM_145356	207259	Zbtb7c	12	13	15	20	8	1	1	3	3	3	3	5
StitchedEnhancer_1174	chr1	142319149	142335608	NM_001081027	240776	Kcnt2	445	233	333	242	247	298	64	51	69	91	67	56
StitchedEnhancer_11740	chr18	76143599	76144492	NR_045365	73009	2900057B20Rik	29	25	25	19	14	19	4	4	6	9	4	8
StitchedEnhancer_11741	chr18	76167725	76172015	NR_045365	73009	2900057B20Rik	35	40	39	32	39	29	13	12	9	17	14	24
StitchedEnhancer_11742	chr18	76189478	76196103	NR_045365	73009	2900057B20Rik	274	196	365	207	240	174	31	41	33	36	27	23
StitchedEnhancer_11743	chr18	76212656	76285306	NR_045365	73009	2900057B20Rik	845	810	1049	798	688	594	255	206	282	329	284	278
StitchedEnhancer_11744	chr18	76320662	76333709	NR_105776	102465184	Mir6358	76	52	104	78	61	31	33	48	54	51	46	53
StitchedEnhancer_11745	chr18	76400438	76427062	NM_001252481	17126	Smad2	669	491	717	634	609	363	130	106	134	159	120	135
StitchedEnhancer_11746	chr18	76498720	76515248	NM_001252481	17126	Smad2	89	88	149	119	76	90	47	74	52	77	51	59
StitchedEnhancer_11747	chr18	77167706	77169438	NM_025409	66191	Ier3ip1	186	149	230	143	147	117	12	4	10	8	6	15
StitchedEnhancer_11748	chr18	77182403	77183893	NM_001039201	76987	Hdhd2	462	363	532	375	319	219	11	15	7	15	7	6
StitchedEnhancer_11749	chr18	77293410	77305202	NM_008602	17344	Pias2	455	387	448	336	342	266	37	41	49	62	38	50
StitchedEnhancer_1175	chr1	142388060	142388955	NR_040604	75910	4930590L20Rik	18	13	19	17	14	6	7	4	5	7	2	9
StitchedEnhancer_11750	chr18	77739787	77741118	NM_001164504	225743	Rnf165	80	84	135	87	125	80	10	11	7	7	1	2
StitchedEnhancer_11751	chr18	77798889	77800060	NM_001164504	225743	Rnf165	29	22	37	14	6	10	1	5	5	4	3	2
StitchedEnhancer_11752	chr18	77841325	77843259	NM_001164504	225743	Rnf165	52	70	66	55	121	44	4	8	5	11	6	7
StitchedEnhancer_11753	chr18	77912517	77913274	NM_178670	212163	8030462N17Rik	15	17	32	16	37	9	2	1	4	5	4	2
StitchedEnhancer_11754	chr18	77936714	77953384	NM_178670	212163	8030462N17Rik	376	318	488	409	388	232	65	70	90	85	81	94
StitchedEnhancer_11755	chr18	77970521	77982092	NR_027978	67640	4930465K10Rik	243	228	438	291	323	147	34	34	51	54	43	45
StitchedEnhancer_11756	chr18	78006318	78077103	NM_013831	19201	Pstpip2	1755	1491	2216	1646	1529	1026	272	279	326	338	294	340
StitchedEnhancer_11757	chr18	78095225	78097377	NM_001195633	100502841	Epg5	47	35	41	30	29	38	7	10	6	14	2	13
StitchedEnhancer_11758	chr18	78134677	78141871	NM_001195633	100502841	Epg5	111	113	155	124	162	86	32	21	39	33	41	30
StitchedEnhancer_11759	chr18	78163568	78164101	NM_001195633	100502841	Epg5	10	7	17	12	10	8	3	4	5	4	4	1
StitchedEnhancer_1176	chr1	142401716	142402496	NR_040604	75910	4930590L20Rik	15	15	24	20	9	24	5	5	3	5	5	3
StitchedEnhancer_11760	chr18	78338148	78339975	NM_001171011	108052	Slc14a1	37	60	61	71	40	54	4	1	2	7	10	8
StitchedEnhancer_11761	chr18	78409300	78412488	NM_001110274	27411	Slc14a2	92	94	146	112	108	45	8	14	16	17	6	21
StitchedEnhancer_11762	chr18	78431813	78457579	NM_001110274	27411	Slc14a2	465	434	847	620	484	329	94	94	99	128	95	96
StitchedEnhancer_11763	chr18	78494160	78520413	NM_001110274	27411	Slc14a2	226	203	399	284	259	162	90	105	93	127	92	92
StitchedEnhancer_11764	chr18	78627702	78629040	NM_207651	27411	Slc14a2	40	39	62	42	53	27	2	7	4	4	7	4
StitchedEnhancer_11765	chr18	78679898	78686441	NM_207651	27411	Slc14a2	92	85	182	119	147	87	21	29	22	31	29	34
StitchedEnhancer_11766	chr18	78744449	78752162	NM_207651	27411	Slc14a2	54	17	59	55	52	49	38	24	26	35	37	16
StitchedEnhancer_11767	chr18	78948620	78948906	NM_030683	27411	Slc14a2	10	4	9	7	9	3	2	1	0	1	0	1
StitchedEnhancer_11768	chr18	79014230	79014978	NM_030683	27411	Slc14a2	17	15	22	17	16	8	0	7	3	2	5	3
StitchedEnhancer_11769	chr18	79082792	79083544	NM_053099	240427	Setbp1	18	8	28	20	12	7	3	4	5	8	4	3
StitchedEnhancer_1177	chr1	142999416	143001534	NR_040604	75910	4930590L20Rik	133	47	60	39	58	70	11	11	11	6	6	5
StitchedEnhancer_11770	chr18	79134507	79135982	NM_053099	240427	Setbp1	59	49	51	37	28	27	5	13	9	10	6	6
StitchedEnhancer_11771	chr18	79169951	79171387	NM_053099	240427	Setbp1	22	20	43	31	28	9	5	14	6	8	6	8
StitchedEnhancer_11772	chr18	79192369	79233457	NM_053099	240427	Setbp1	720	522	879	618	569	336	169	174	184	197	154	183
StitchedEnhancer_11773	chr18	79282429	79283588	NM_053099	240427	Setbp1	32	27	30	19	14	26	6	8	4	6	5	5
StitchedEnhancer_11774	chr18	79302889	79307301	NM_053099	240427	Setbp1	397	292	580	457	428	208	17	27	19	15	16	19
StitchedEnhancer_11775	chr18	79341952	79342312	NM_053099	240427	Setbp1	3	6	16	8	8	6	0	0	1	0	1	1
StitchedEnhancer_11776	chr18	79453228	79471231	NM_053099	240427	Setbp1	371	244	292	247	224	233	60	54	74	73	58	64
StitchedEnhancer_11777	chr18	79489388	79497677	NM_053099	240427	Setbp1	92	70	123	88	78	94	36	43	14	43	39	33
StitchedEnhancer_11778	chr18	79663377	79664656	NM_053099	240427	Setbp1	52	22	38	31	26	33	3	6	2	4	7	8
StitchedEnhancer_11779	chr18	80040465	80041526	NM_053117	93737	Pard6g	68	41	37	26	25	26	0	3	4	4	2	5
StitchedEnhancer_1178	chr1	144791244	144792518	NM_020025	26878	B3galt2	69	20	25	21	16	19	6	1	7	7	5	5
StitchedEnhancer_11780	chr18	80238154	80244708	NM_053117	93737	Pard6g	136	111	170	115	96	77	28	36	36	33	26	48
StitchedEnhancer_11781	chr18	80265366	80287860	NM_053117	93737	Pard6g	214	205	291	196	167	122	70	74	79	101	86	96
StitchedEnhancer_11782	chr18	80305564	80309506	NM_175028	240442	Adnp2	35	45	56	24	47	33	17	17	18	17	14	15
StitchedEnhancer_11783	chr18	80334998	80349362	NM_175028	240442	Adnp2	762	622	934	675	579	450	83	67	90	100	79	79
StitchedEnhancer_11784	chr18	80365815	80376770	NM_175028	240442	Adnp2	209	214	242	160	185	161	40	48	50	60	40	47
StitchedEnhancer_11785	chr18	80392332	80404178	NM_199197	68731	Rbfa	348	352	525	378	366	226	62	52	74	67	58	52
StitchedEnhancer_11786	chr18	80433275	80437789	NM_001136181	66255	Hsbp1l1	91	124	165	99	104	57	25	21	24	32	25	34
StitchedEnhancer_11787	chr18	80451404	80571027	NM_001190373	240444	Kcng2	4500	4568	7454	4985	4227	2313	459	524	490	552	395	488
StitchedEnhancer_11788	chr18	80604860	80616085	NM_001190373	240444	Kcng2	153	141	253	162	202	97	49	45	65	43	55	55
StitchedEnhancer_11789	chr18	80646645	80647477	NM_026295	67655	Ctdp1	11	19	15	18	23	9	2	5	4	4	8	1
StitchedEnhancer_1179	chr1	145350475	145351085	NM_020025	26878	B3galt2	19	19	31	27	13	5	7	1	0	4	7	3
StitchedEnhancer_11790	chr18	80661230	80667474	NM_026295	67655	Ctdp1	685	641	792	607	566	369	25	32	23	32	28	34
StitchedEnhancer_11791	chr18	80680123	80682915	NM_026295	67655	Ctdp1	34	29	46	41	28	23	10	10	9	15	16	15
StitchedEnhancer_11792	chr18	80730646	80731657	NR_028424	100039348	Gm2176	20	19	19	13	17	14	5	3	3	6	3	7
StitchedEnhancer_11793	chr18	80750738	80767453	NR_028424	100039348	Gm2176	216	225	313	249	256	171	49	72	56	80	59	70
StitchedEnhancer_11794	chr18	80803713	80858323	NM_001164111	18018	Nfatc1	895	839	1486	1002	1023	612	234	251	274	338	257	260
StitchedEnhancer_11795	chr18	80870993	80913374	NM_001164111	18018	Nfatc1	1702	1685	2704	1963	1790	1169	183	185	233	262	212	231
StitchedEnhancer_11796	chr18	80934794	80935752	NM_001164109	18018	Nfatc1	21	17	11	17	18	20	3	3	2	3	3	5
StitchedEnhancer_11797	chr18	81003540	81004131	NM_001164109	18018	Nfatc1	19	22	25	13	22	11	0	3	6	2	1	8
[truncated: 22,789 more rows]
