# Supplementary material for: Remodeling of epigenome and transcriptome landscapes with aging in mice reveals widespread induction of inflammatory responses
Source: HighWire-hosted journal article supplement (doi:10.1101/gr.240093.118), 2019-03-11
Supplement: Supplemental_Code_Figure3_Machine_learning.zip [file HOMER_Bivalent_domains_Cerebellum.xls]

PeakID (cmd=annotatePeaks.pl Bivalent_domains_Cerebellum.bed mm9)	Chr	Start	End	Strand	Peak Score	Focus Ratio/Region Size	Annotation	Detailed Annotation	Distance to TSS	Nearest PromoterID	Entrez ID	Nearest Unigene	Nearest Refseq	Nearest Ensembl	Gene Name	Gene Alias	Gene Description	Gene Type
MACS_peak_76	chr1	172993967	173016330	+	3000	NA	Intergenic	Intergenic	-10365	NR_106103	102466998		NR_106103	miRBase:MI0024983	Mir6546	mmu-mir-6546	microRNA mir-6546	ncRNA
MACS_peak_731	chr2	22600207	22600657	+	2902	NA	Intergenic	LSU-rRNA_Hsa|rRNA|rRNA	-29415	NM_019456	54519	Mm.14255	NM_019456	ENSMUSG00000026786	Apbb1ip	9930118P07Rik|Prp48	amyloid beta (A4) precursor protein-binding, family B, member 1 interacting protein	protein-coding
MACS_peak_1173	chr6	83017322	83022272	+	2581	NA	exon (NM_009392, exon 1 of 3)	exon (NM_009392, exon 1 of 3)	422	NM_009392	21909	Mm.37	NM_009392	ENSMUSG00000068327	Tlx2	Enx|Hox11L.1|Hox11l1|NCX|Ncx1|Tlx1l1|Tlx1l2	T cell leukemia, homeobox 2	protein-coding
MACS_peak_110	chr10	42351466	42357090	+	2465	NA	Intergenic	Intergenic	-44444	NM_172416	14628	Mm.46636	NM_172416	ENSMUSG00000038280	Ostm1	1200002H13Rik|HSPC019|gl	osteopetrosis associated transmembrane protein 1	protein-coding
MACS_peak_379	chr13	95650099	95656409	+	2375	NA	exon (NM_011021, exon 3 of 3)	exon (NM_011021, exon 3 of 3)	7672	NM_011021	18420	Mm.42051	NM_011021		Otp	-	orthopedia homolog (Drosophila)	protein-coding
MACS_peak_164	chr11	21891785	21904856	+	2335	NA	intron (NM_011023, intron 4 of 4)	intron (NM_011023, intron 4 of 4)	3334	NM_011023	18423	Mm.129663	NM_011023	ENSMUSG00000005917	Otx1	A730044F23Rik|jv	orthodenticle homolog 1	protein-coding
MACS_peak_744	chr2	35957466	35962218	+	2245	NA	promoter-TSS (NM_001083126)	promoter-TSS (NM_001083126)	-262	NM_001083127	16874	Mm.12881	NM_008500	ENSMUSG00000026890	Lhx6	Lhx6.1	LIM homeobox protein 6	protein-coding
MACS_peak_872	chr3	66780200	66786964	+	2157	NA	intron (NM_013665, intron 1 of 4)	intron (NM_013665, intron 1 of 4)	2111	NM_013665	20429	Mm.39093	NM_013665		Shox2	6330543G17Rik|OG12|Og12x|Prx3|SHOT	short stature homeobox 2	protein-coding
MACS_peak_203	chr11	85643009	85658292	+	2039	NA	intron (NM_009324, intron 4 of 6)	CpG-2370	4533	NM_009324	21385	Mm.287052	NM_009324	ENSMUSG00000000093	Tbx2	-	T-box 2	protein-coding
MACS_peak_283	chr12	58641922	58652627	+	1985	NA	promoter-TSS (NM_008259)	promoter-TSS (NM_008259)	-166	NM_008259	15375	Mm.4578	NM_008259	ENSMUSG00000035451	Foxa1	Hnf-3a|Hnf3a|Tcf-3a|Tcf3a	forkhead box A1	protein-coding
MACS_peak_679	chr19	37507177	37512743	+	1985	NA	intron (NM_008245, intron 1 of 3)	CpG	629	NM_008245	15242	Mm.33896	NM_008245		Hhex	Hex|Hex1|Hhex-rs2|Prh|Prhx	hematopoietically expressed homeobox	protein-coding
MACS_peak_13	chr1	42750244	42757252	+	1935	NA	promoter-TSS (NM_008900)	promoter-TSS (NM_008900)	-243	NM_008900	18993	Mm.489878	NM_008900	ENSMUSG00000045515	Pou3f3	Brn-1|Brn1|Otf8|Skin1	POU domain, class 3, transcription factor 3	protein-coding
MACS_peak_703	chr19	45295896	45318676	+	1917	NA	TTS (NM_010691)	TTS (NM_010691)	2440	NM_010691	16814	Mm.116815	NM_010691		Lbx1	Lbx1h	ladybird homeobox homolog 1 (Drosophila)	protein-coding
MACS_peak_557	chr16	94076668	94089364	+	1890	NA	Intergenic	(TC)n|Simple_repeat|Simple_repeat	-2489	NM_011377	20465	Mm.4775	NM_011377	ENSMUSG00000062713	Sim2	bHLHe15	single-minded homolog 2 (Drosophila)	protein-coding
MACS_peak_933	chr4	21613704	21618714	+	1890	NA	Intergenic	CpG	-3099	NM_001080771	230025	Mm.208541	NM_001080771	ENSMUSG00000040478	Prdm13	-	PR domain containing 13	protein-coding
MACS_peak_811	chr2	146909354	146911875	+	1811	NA	intron (NM_023504, intron 1 of 1)	CpG	467	NM_023504	228731	Mm.315498	NM_023504	ENSMUSG00000054160	Nkx2-4	1700001P03Rik|Nkx-2.4|tinman	NK2 homeobox 4	protein-coding
MACS_peak_71	chr1	157586964	157591439	+	1786	NA	promoter-TSS (NM_010712)	promoter-TSS (NM_010712)	-44	NM_010712	16872	Mm.103624	NM_010712	ENSMUSG00000026468	Lhx4	A330062J17Rik|Gsh-4|Gsh4	LIM homeobox protein 4	protein-coding
MACS_peak_31	chr1	78188833	78201949	+	1744	NA	Intergenic	Intergenic	-1680	NM_001159520	18505	Mm.1371	NM_008781	ENSMUSG00000004872	Pax3	Pax-3|Sp|splotch	paired box 3	protein-coding
MACS_peak_966	chr4	99315384	99325046	+	1744	NA	Intergenic	CpG	-2775	NM_010425	15221	Mm.4758	NM_010425	ENSMUSG00000067261	Foxd3	CWH3|Genesis|Hfh2	forkhead box D3	protein-coding
MACS_peak_1392	chr9	87623715	87633288	+	1727	NA	Intergenic	(CCCCCA)n|Simple_repeat|Simple_repeat	-2406	NM_023814	76365	Mm.158789	NM_023814	ENSMUSG00000032419	Tbx18	2810012F10Rik|2810404D13Rik	T-box18	protein-coding
MACS_peak_24	chr1	63318557	63322435	+	1707	NA	intron (NM_001267872, intron 1 of 5)	intron (NM_001267872, intron 1 of 5)	653	NM_001267872	73884	Mm.86986	NM_028673	ENSMUSG00000027520	Zdbf2	4930431J08Rik|9330107J05Rik	zinc finger, DBF-type containing 2	protein-coding
MACS_peak_929	chr4	11311482	11317691	+	1707	NA	promoter-TSS (NM_001290383)	promoter-TSS (NM_001290383)	-656	NM_194055	207920	Mm.387719	NM_194055	ENSMUSG00000040728	Esrp1	2210008M09Rik|A630065D16|BC031468|Rbm35a	epithelial splicing regulatory protein 1	protein-coding
MACS_peak_351	chr13	48752773	48766368	+	1680	NA	intron (NM_007526, intron 1 of 3)	intron (NM_007526, intron 1 of 3)	1165	NM_007526	12022	Mm.42241	NM_007526	ENSMUSG00000021381	Barx1	-	BarH-like homeobox 1	protein-coding
MACS_peak_1288	chr8	14094953	14098099	+	1626	NA	intron (NM_001145965, intron 1 of 14)	CpG	651	NM_172910	244310	Mm.404697	NM_172910	ENSMUSG00000047495	Dlgap2	6430596N04Rik|DAP2|Sapap2	discs, large (Drosophila) homolog-associated protein 2	protein-coding
MACS_peak_724	chr2	18610036	18613049	+	1617	NA	Intergenic	CpG	-9107	NM_001001334	381350	Mm.330024	NM_001001334		BC061194	-	cDNA sequence BC061194	protein-coding
MACS_peak_1335	chr8	111225035	111229064	+	1617	NA	Intergenic	Intergenic	-11495	NM_007496	11906	Mm.416972	NM_007496	ENSMUSG00000038872	Zfhx3	A230102L03Rik|Atbf1|WBP9|mKIAA4228	zinc finger homeobox 3	protein-coding
MACS_peak_747	chr2	38206331	38215764	+	1616	NA	intron (NM_001290646, intron 3 of 4)	intron (NM_001290646, intron 3 of 4)	4219	NM_010710	16870	Mm.142856	NM_010710	ENSMUSG00000000247	Lhx2	LH2A|Lh-2|Lim2|ap|apterous	LIM homeobox protein 2	protein-coding
MACS_peak_1033	chr5	24028895	24034002	+	1614	NA	intron (NM_015739, intron 1 of 1)	intron (NM_015739, intron 1 of 1)	1218	NM_015739	231044	Mm.246596	NM_015739		Gbx1	Gbx-1	gastrulation brain homeobox 1	protein-coding
MACS_peak_385	chr13	99120115	99126232	+	1612	NA	Intergenic	Intergenic	-1027	NM_008242	15229	Mm.347441	NM_008242	ENSMUSG00000078302	Foxd1	AI385632|BF-2|FREAC4|Hfh10|Hfhbf2	forkhead box D1	protein-coding
MACS_peak_975	chr4	114572517	114583017	+	1566	NA	Intergenic	Intergenic	3736	NM_008593	17301	Mm.7997	NM_008593	ENSMUSG00000055210	Foxd2	AI426778|Mf2	forkhead box D2	protein-coding
MACS_peak_1140	chr6	49162952	49166092	+	1556	NA	5' UTR (NM_023670, exon 1 of 15)	5' UTR (NM_023670, exon 1 of 15)	431	NM_023670	140488	Mm.281018	NM_023670	ENSMUSG00000029814	Igf2bp3	2610101N11Rik|AA522010|AL022933|AU045931|IMP-3|IMP3|Koc13|Neilsen|mimp3	insulin-like growth factor 2 mRNA binding protein 3	protein-coding
MACS_peak_136	chr10	84217361	84219885	+	1556	NA	promoter-TSS (NM_001024918)	promoter-TSS (NM_001024918)	-170	NM_001024918	71137	Mm.79070	NM_027689	ENSMUSG00000020037	Rfx4	4933412G19Rik|NYD-sp10	regulatory factor X, 4 (influences HLA class II expression)	protein-coding
MACS_peak_229	chr11	98272939	98275364	+	1551	NA	intron (NM_001003817, intron 1 of 26)	CpG	353	NM_001003817	13866	Mm.290822	NM_001003817	ENSMUSG00000062312	Erbb2	Erbb-2|HER-2|HER2|Neu|c-erbB2|c-neu|mKIAA3023	v-erb-b2 erythroblastic leukemia viral oncogene homolog 2, neuro/glioblastoma derived oncogene homolog (avian)	protein-coding
MACS_peak_290	chr12	74143435	74156174	+	1548	NA	Intergenic	Intergenic	-2105	NM_009189	20471	Mm.4645	NM_009189	ENSMUSG00000051367	Six1	BB138287	sine oculis-related homeobox 1	protein-coding
MACS_peak_650	chr18	64490833	64502470	+	1540	NA	Intergenic	Intergenic	-3367	NM_194268	225631	Mm.234723	NM_194268	ENSMUSG00000045991	Onecut2	C730009D12|OC-2|Oc2	one cut domain, family member 2	protein-coding
MACS_peak_168	chr11	23976005	23981684	+	1528	NA	intron (NM_001159289, intron 1 of 4)	intron (NM_001159289, intron 1 of 4)	788	NM_001159289	14025	Mm.53687	NM_016707	ENSMUSG00000000861	Bcl11a	2810047E18Rik|BCL-11A|Ctip1|D930021L15Rik|Evi9|Evi9a|Evi9b|Evi9c|mKIAA1809	B cell CLL/lymphoma 11A (zinc finger protein)	protein-coding
MACS_peak_3	chr1	9956916	9958642	+	1528	NA	promoter-TSS (NM_001285425)	promoter-TSS (NM_001285425)	-213	NM_001285425	100039596	Mm.412928	NM_001285425	ENSMUSG00000099032	Tcf24	ENSMUSG00000073738|Gm10567|Gm2330	transcription factor 24	protein-coding
MACS_peak_486	chr15	85564852	85566611	+	1528	NA	promoter-TSS (NM_001113418)	promoter-TSS (NM_001113418)	-263	NM_001113418	19013	Mm.212789	NM_011144		Ppara	4933429D07Rik|AW742785|Nr1c1|PPAR-alpha|PPARalpha|Ppar	peroxisome proliferator activated receptor alpha	protein-coding
MACS_peak_306	chr12	105708619	105718446	+	1528	NA	Intergenic	Intergenic	-2086	NM_010351	14836	Mm.129	NM_010351	ENSMUSG00000021095	Gsc	-	goosecoid homeobox	protein-coding
MACS_peak_912	chr3	127326691	127337376	+	1528	NA	Intergenic	Intergenic	-4030	NM_009718	11924	Mm.42017	NM_009718	ENSMUSG00000027967	Neurog2	Atoh4|Math4A|bHLHa8|ngn-2|ngn2	neurogenin 2	protein-coding
MACS_peak_965	chr4	98483743	98485016	+	1498	NA	promoter-TSS (NM_172872)	promoter-TSS (NM_172872)	-151	NM_172872	242553	Mm.440211	NM_172872	ENSMUSG00000035407	Kank4	AU021071|Ankrd38|BC060737|C130031J23	KN motif and ankyrin repeat domains 4	protein-coding
MACS_peak_1239	chr7	88356864	88359693	+	1498	NA	promoter-TSS (NM_008803)	promoter-TSS (NM_008803)	-412	NM_008803	18584	Mm.371577	NM_008803		Pde8a	AI551852|Pde8	phosphodiesterase 8A	protein-coding
MACS_peak_643	chr18	53622135	53625503	+	1496	NA	promoter-TSS (NM_001033281)	promoter-TSS (NM_001033281)	-381	NM_001033281	225518	Mm.297645	NM_001033281	ENSMUSG00000069378	Prdm6	Gm92|PRISM	PR domain containing 6	protein-coding
MACS_peak_1271	chr7	144500622	144515057	+	1492	NA	Intergenic	Intergenic	-1711	NM_010096	13593	Mm.258708	NM_010096	ENSMUSG00000010476	Ebf3	3110018A08Rik|O/E-2|mKIAA4201	early B cell factor 3	protein-coding
MACS_peak_806	chr2	144155589	144159243	+	1472	NA	promoter-TSS (NM_152947)	promoter-TSS (NM_152947)	-318	NM_152947	107586	Mm.252750	NM_026924	ENSMUSG00000037279	Ovol2	1700108N11Rik|1810007D21Rik|M-OVO|M-OVO-A|M-OVO-B|MOVO|Ovo2|Zfp339|movo2	ovo-like 2 (Drosophila)	protein-coding
MACS_peak_1073	chr5	102090529	102098576	+	1443	NA	promoter-TSS (NM_144955)	promoter-TSS (NM_144955)	-822	NM_144955	18096	Mm.193072	NM_144955		Nkx6-1	NKX6A|Nkx6.1	NK6 homeobox 1	protein-coding
MACS_peak_970	chr4	107889879	107891121	+	1441	NA	promoter-TSS (NM_001167936)	promoter-TSS (NM_001167936)	27	NM_001167936	230590	Mm.301798	NM_001167936	ENSMUSG00000034645	Zyg11a	BC022150	zyg-11 family member A, cell cycle regulator	protein-coding
MACS_peak_393	chr13	104709226	104711786	+	1441	NA	5' UTR (NM_001289474, exon 1 of 24)	5' UTR (NM_001289474, exon 1 of 24)	160	NM_001289473	59079	Mm.277354	NM_021563	ENSMUSG00000021709	Erbb2ip	1700028E05Rik|Erbin|mKIAA1225	Erbb2 interacting protein	protein-coding
MACS_peak_884	chr3	91883717	91885887	+	1441	NA	exon (NM_008508, exon 2 of 2)	exon (NM_008508, exon 2 of 2)	2262	NM_008508	16939	Mm.1121	NM_008508	ENSMUSG00000043165	Lor	AI036317|S77319	loricrin	protein-coding
MACS_peak_772	chr2	74535710	74544937	+	1441	NA	Intergenic	Intergenic	-2349	NM_001290731	15437	Mm.280673	NM_008276	ENSMUSG00000027102	Hoxd8	4921540P06Rik|AI047735|Hox-4.3|Hox-5.4	homeobox D8	protein-coding
MACS_peak_1400	chr9	98872315	98877164	+	1431	NA	Intergenic	Intergenic	-12053	NM_001122851	23873	Mm.74605	NM_011810	ENSMUSG00000032463	Faim	-	Fas apoptotic inhibitory molecule	protein-coding
MACS_peak_1181	chr6	84534823	84539469	+	1420	NA	intron (NM_001177713, intron 2 of 6)	intron (NM_001177713, intron 2 of 6)	6658	NM_175475	232174	Mm.255246	NM_175475	ENSMUSG00000063415	Cyp26b1	CP26|P450RAI-2	cytochrome P450, family 26, subfamily b, polypeptide 1	protein-coding
MACS_peak_254	chr11	120520271	120522736	+	1418	NA	exon (NM_175263, exon 2 of 12)	exon (NM_175263, exon 2 of 12)	648	NM_175263	77583	Mm.32839	NM_175263	ENSMUSG00000042988	Notum	5730593N15Rik	notum pectinacetylesterase homolog (Drosophila)	protein-coding
MACS_peak_910	chr3	122321861	122322836	+	1418	NA	intron (NM_001114665, intron 1 of 15)	CpG	284	NM_001114665	214459	Mm.209491	NM_153118	ENSMUSG00000039735	Fnbp1l	2610318I01Rik|AW548221|TOCA1|toca-1	formin binding protein 1-like	protein-coding
MACS_peak_505	chr15	100559367	100560296	+	1418	NA	promoter-TSS (NM_001161767)	promoter-TSS (NM_001161767)	-24	NM_172451	207839	Mm.22969	NM_172451		Galnt6	4632410F13|AW047994|GalNAc-T6	UDP-N-acetyl-alpha-D-galactosamine:polypeptide N-acetylgalactosaminyltransferase 6	protein-coding
MACS_peak_1398	chr9	98853242	98860397	+	1408	NA	exon (NM_012020, exon 1 of 1)	exon (NM_012020, exon 1 of 1)	793	NM_012020	26927	Mm.151239	NM_012020	ENSMUSG00000050397	Foxl2	AU045128|BPES|PINTO|Pfrk	forkhead box L2	protein-coding
MACS_peak_508	chr15	100907191	100909370	+	1403	NA	Intergenic	CpG	-23450	NM_001214911	668225	Mm.385011	NM_001214911	ENSMUSG00000095440	Fignl2	EG668225	fidgetin-like 2	protein-coding
MACS_peak_905	chr3	107397663	107402159	+	1397	NA	intron (NM_007441, intron 1 of 3)	CpG	1962	NM_007441	11694	Mm.10112	NM_007441	ENSMUSG00000014603	Alx3	-	aristaless-like homeobox 3	protein-coding
MACS_peak_618	chr17	84584904	84588042	+	1397	NA	exon (NM_001001806, exon 2 of 2)	exon (NM_001001806, exon 2 of 2)	814	NM_001001806	12193	Mm.259321	NM_001001806	ENSMUSG00000045817	Zfp36l2	Brf2|ERF2|Tis11d	zinc finger protein 36, C3H type-like 2	protein-coding
MACS_peak_1063	chr5	75544305	75552835	+	1395	NA	intron (NM_011058, intron 1 of 22)	intron (NM_011058, intron 1 of 22)	254	NM_011058	18595	Mm.221403	NM_011058	ENSMUSG00000029231	Pdgfra	AI115593|CD140a|Pdgfr-2	platelet derived growth factor receptor, alpha polypeptide	protein-coding
MACS_peak_671	chr19	25679201	25691648	+	1380	NA	exon (NM_177360, exon 1 of 2)	exon (NM_177360, exon 1 of 2)	397	NM_177360	240590	Mm.62785	NM_177360	ENSMUSG00000042372	Dmrt3	-	doublesex and mab-3 related transcription factor 3	protein-coding
MACS_peak_424	chr14	55193085	55196647	+	1373	NA	intron (NM_010590, intron 1 of 7)	CpG	1632	NM_010590	16475	Mm.100253	NM_010590	ENSMUSG00000022178	Ajuba	Jub	ajuba LIM protein	protein-coding
MACS_peak_812	chr2	147008604	147013923	+	1363	NA	intron (NM_001077632, intron 1 of 2)	intron (NM_001077632, intron 1 of 2)	875	NM_001077632	18088	Mm.330639	NM_010919	ENSMUSG00000027434	Nkx2-2	Nkx-2.2|Nkx2.2|tinman	NK2 homeobox 2	protein-coding
MACS_peak_792	chr2	115886079	115896735	+	1356	NA	promoter-TSS (NM_001159568)	promoter-TSS (NM_001159568)	-613	NM_010825	17536	Mm.247566	NM_010825	ENSMUSG00000027210	Meis2	A430109D20Rik|Mrg1|Stra10	Meis homeobox 2	protein-coding
MACS_peak_617	chr17	84030451	84031836	+	1356	NA	promoter-TSS (NM_153512)	promoter-TSS (NM_153512)	92	NM_153512	225030	Mm.223506	NM_153512	ENSMUSG00000045053	Kcng3	KV6.3|Kv10.1a|Kv10.1b	potassium voltage-gated channel, subfamily G, member 3	protein-coding
MACS_peak_736	chr2	30699905	30701294	+	1356	NA	promoter-TSS (NM_009116)	promoter-TSS (NM_009116)	-288	NM_009116	20204	Mm.1802	NM_009116	ENSMUSG00000039476	Prrx2	Prx2|S8	paired related homeobox 2	protein-coding
MACS_peak_324	chr12	120085386	120089210	+	1351	NA	exon (NM_177082, exon 3 of 3)	exon (NM_177082, exon 3 of 3)	2496	NM_177082	320145	Mm.51682	NM_177082	ENSMUSG00000048562	Sp8	D930049B17Rik|mBtd	trans-acting transcription factor 8	protein-coding
MACS_peak_504	chr15	100465344	100467904	+	1333	NA	promoter-TSS (NM_001285414)	promoter-TSS (NM_001285414)	-634	NM_001285413	207818	Mm.26282	NM_174992	ENSMUSG00000053559	Smagp	-	small cell adhesion glycoprotein	protein-coding
MACS_peak_1231	chr7	73531853	73533369	+	1331	NA	intron (NM_146191, intron 1 of 33)	CpG	616	NM_146191	233328	Mm.33284	NM_146191	ENSMUSG00000015133	Lrrk1	AW319595|C230002E15Rik|D130026O16Rik|mKIAA1790	leucine-rich repeat kinase 1	protein-coding
MACS_peak_533	chr15	103196140	103198760	+	1330	NA	promoter-TSS (NM_010577)	promoter-TSS (NM_010577)	-271	NM_010577	16402	Mm.16234	NM_010577	ENSMUSG00000000555	Itga5	Cd49e|Fnra|VLA5	integrin alpha 5 (fibronectin receptor alpha)	protein-coding
MACS_peak_1137	chr6	30121875	30129215	+	1328	NA	Intergenic	Intergenic	-1078	NR_038124	100463519	Mm.361139	NR_038124		BB283400	BF465573	expressed sequence BB283400	ncRNA
MACS_peak_918	chr3	128912848	128925606	+	1326	NA	intron (NM_011098, intron 4 of 4)	intron (NM_011098, intron 4 of 4)	2377	NM_001287048	18741	Mm.246804	NM_011098	ENSMUSG00000028023	Pitx2	9430085M16Rik|Brx1|Brx1b|Munc30|Otlx2|Ptx2|Rieg	paired-like homeodomain transcription factor 2	protein-coding
MACS_peak_348	chr13	40818181	40819852	+	1325	NA	intron (NM_011547, intron 3 of 6)	intron (NM_011547, intron 3 of 6)	6796	NM_001122948	21418	Mm.85544	NM_011547	ENSMUSG00000021359	Tfap2a	AP-2|AP2alpha|Ap2|Ap2tf|Tcfap2a	transcription factor AP-2, alpha	protein-coding
MACS_peak_1380	chr9	63867949	63870421	+	1325	NA	5' UTR (NM_008542, exon 1 of 4)	5' UTR (NM_008542, exon 1 of 4)	681	NM_008542	17130	Mm.325757	NM_008542	ENSMUSG00000036867	Smad6	Madh6|b2b390Clo	SMAD family member 6	protein-coding
MACS_peak_202	chr11	83662743	83671197	+	1325	NA	intron (NM_001291269, intron 1 of 8)	intron (NM_001291269, intron 1 of 8)	508	NM_001291269	21410	Mm.7226	NM_009330	ENSMUSG00000020679	Hnf1b	HNF-1-beta|HNF-1B|HNF-1Beta|Hnf1beta|LFB3|Tcf-2|Tcf2|vHNF1	HNF1 homeobox B	protein-coding
MACS_peak_251	chr11	118902947	118910829	+	1322	NA	Intergenic	(CA)n|Simple_repeat|Simple_repeat	-4661	NM_013926	30951	Mm.99953	NM_013926	ENSMUSG00000025578	Cbx8	Pc3	chromobox 8	protein-coding
MACS_peak_82	chr1	186553232	186561099	+	1314	NA	promoter-TSS (NM_008250)	promoter-TSS (NM_008250)	-793	NM_008250	15284	Mm.1347	NM_008250	ENSMUSG00000039377	Hlx	Hlx1	H2.0-like homeobox	protein-coding
MACS_peak_959	chr4	88934037	88941708	+	1298	NA	intron (NM_009877, intron 1 of 2)	intron (NM_009877, intron 1 of 2)	2651	NM_009877	12578	Mm.4733	NM_009877	ENSMUSG00000044303	Cdkn2a	ARF-INK4a|Arf|INK4a-ARF|Ink4a/Arf|MTS1|Pctr1|p16|p16(INK4a)|p16INK4a|p19<ARF>|p19ARF	cyclin-dependent kinase inhibitor 2A	protein-coding
MACS_peak_316	chr12	109238942	109244721	+	1284	NA	promoter-TSS (NM_001286343)	promoter-TSS (NM_001286343)	-207	NM_021399	58208	Mm.392694	NM_021399	ENSMUSG00000048251	Bcl11b	9130430L19Rik|AI604821|B630002E05Rik|BCL-11B|Ctip2|Rit1	B cell leukemia/lymphoma 11B	protein-coding
MACS_peak_1182	chr6	85135410	85140830	+	1280	NA	exon (NM_010131, exon 1 of 3)	exon (NM_010131, exon 1 of 3)	195	NM_010131	13796	Mm.391473	NM_010131		Emx1	-	empty spiracles homeobox 1	protein-coding
MACS_peak_590	chr17	35575743	35576786	+	1276	NA	intron (NM_001198561, intron 1 of 4)	CpG	152	NM_001201460	110558	Mm.431282	NM_001201460		H2-Q9	H-2Q9|Ped|Qa-2|Qa-9|Qa9	histocompatibility 2, Q region locus 9	protein-coding
MACS_peak_745	chr2	38194087	38197157	+	1273	NA	intron (NM_001290646, intron 1 of 4)	intron (NM_001290646, intron 1 of 4)	821	NM_001290646	16870	Mm.142856	NM_010710	ENSMUSG00000000247	Lhx2	LH2A|Lh-2|Lim2|ap|apterous	LIM homeobox protein 2	protein-coding
MACS_peak_921	chr3	130812216	130816921	+	1273	NA	exon (NM_010703, exon 1 of 12)	exon (NM_010703, exon 1 of 12)	-1141	NM_001276403	16842	Mm.255219	NM_010703	ENSMUSG00000027985	Lef1	3000002B05|AI451430|Lef-1	lymphoid enhancer binding factor 1	protein-coding
MACS_peak_1315	chr8	92870296	92872605	+	1273	NA	intron (NM_172913, intron 1 of 6)	intron (NM_172913, intron 1 of 6)	701	NM_172913	244579	Mm.302755	NM_172913	ENSMUSG00000043668	Tox3	500-9|BC052044|C230068E13|CAGF9|Tnrc9	TOX high mobility group box family member 3	protein-coding
MACS_peak_898	chr3	99050709	99064236	+	1273	NA	promoter-TSS (NM_009323)	promoter-TSS (NM_009323)	-211	NM_009323	21384	Mm.88761	NM_009323	ENSMUSG00000027868	Tbx15	Tbx14|Tbx8|de	T-box 15	protein-coding
MACS_peak_235	chr11	102678496	102680825	+	1273	NA	intron (NM_001159383, intron 1 of 2)	intron (NM_001159383, intron 1 of 2)	813	NM_001159382	14615	Mm.390369	NM_008122	ENSMUSG00000034520	Gjc1	C130009G16Rik|Cnx45|Cx45|Gja-7|Gja7	gap junction protein, gamma 1	protein-coding
MACS_peak_956	chr4	84319798	84321890	+	1273	NA	intron (NM_172870, intron 1 of 5)	CpG	146	NM_172870	242509	Mm.190774	NM_172870		Bnc2	5031434M05Rik|8430420F16Rik	basonuclin 2	protein-coding
MACS_peak_86	chr1	191551551	191553585	+	1273	NA	intron (NM_008976, intron 1 of 18)	CpG	421	NM_008976	19250	Mm.4498	NM_008976	ENSMUSG00000026604	Ptpn14	C130080N23Rik|OTTMUSG00000022087|PTP36	protein tyrosine phosphatase, non-receptor type 14	protein-coding
MACS_peak_852	chr2	173410883	173412732	+	1273	NA	intron (NR_027957, intron 13 of 14)	CpG	-7965	NM_027303	70065	Mm.425115	NM_027303	ENSMUSG00000027517	Ankrd60	1700019A24Rik|1700030G11Rik	ankyrin repeat domain 60	protein-coding
MACS_peak_654	chr18	74599426	74603414	+	1259	NA	promoter-TSS (NM_201600)	promoter-TSS (NM_201600)	-853	NM_201600	17919	Mm.260098	NM_008661	ENSMUSG00000025885	Myo5b	AI661750|mKIAA1119	myosin VB	protein-coding
MACS_peak_338	chr13	31892018	31896552	+	1259	NA	Intergenic	(TTC)n|Simple_repeat|Simple_repeat	-4230	NM_008592	17300	Mm.12949	NM_008592	ENSMUSG00000050295	Foxc1	FREAC3|Fkh1|Mf1|Mf4|ch|fkh-1|frkhda	forkhead box C1	protein-coding
MACS_peak_1250	chr7	108965236	108971072	+	1259	NA	intron (NM_008887, intron 1 of 2)	intron (NM_008887, intron 1 of 2)	1327	NM_008887	11859	Mm.5028	NM_008887	ENSMUSG00000007946	Phox2a	Arix|Phox2|Pmx2|Pmx2a	paired-like homeobox 2a	protein-coding
MACS_peak_982	chr4	117164562	117168818	+	1257	NA	intron (NM_025739, intron 1 of 14)	intron (NM_025739, intron 1 of 14)	2830	NM_025739	66743	Mm.318331	NM_025739	ENSMUSG00000028677	Rnf220	4732477A13|4931406I20Rik|5730503K05Rik|AV302541	ring finger protein 220	protein-coding
MACS_peak_664	chr19	5559427	5561310	+	1257	NA	5' UTR (NM_019935, exon 1 of 4)	5' UTR (NM_019935, exon 1 of 4)	207	NM_019935	18426	Mm.280225	NM_019935	ENSMUSG00000024922	Ovol1	BB147136|Ovo1|movo1	OVO homolog-like 1 (Drosophila)	protein-coding
MACS_peak_1041	chr5	33771788	33777907	+	1256	NA	intron (NM_011320, intron 1 of 1)	CpG	1892	NM_011320	672284		NM_011320		Nkx1-1	Nkx-1.1|Sax2	NK1 transcription factor related, locus 1 (Drosophila)	protein-coding
MACS_peak_1378	chr9	62984626	62993430	+	1242	NA	intron (NM_172446, intron 5 of 8)	intron (NM_172446, intron 5 of 8)	5759	NM_172446	207667	Mm.36349	NM_172446	ENSMUSG00000022245	Skor1	AV273001|C230094B15Rik|Corl1|Lbxcor1	SKI family transcriptional corepressor 1	protein-coding
MACS_peak_207	chr11	89162773	89164395	+	1218	NA	5' UTR (NM_008711, exon 1 of 1)	5' UTR (NM_008711, exon 1 of 1)	289	NM_008711	18121	Mm.135266	NM_008711	ENSMUSG00000048616	Nog	-	noggin	protein-coding
MACS_peak_265	chr12	34638010	34644939	+	1218	NA	Intergenic	Intergenic	-1062	NM_011658	22160	Mm.3280	NM_011658	ENSMUSG00000035799	Twist1	AA960487|M-Twist|Pde|Ska10|Ska<m10Jus>|Twist|bHLHa38|pdt	twist basic helix-loop-helix transcription factor 1	protein-coding
MACS_peak_1349	chr9	20530377	20532198	+	1204	NA	intron (NM_173777, intron 1 of 5)	CpG	1371	NM_173777	244723	Mm.293552	NM_173777	ENSMUSG00000032172	Olfm2	A030009A06Rik	olfactomedin 2	protein-coding
MACS_peak_339	chr13	31897541	31900903	+	1204	NA	exon (NM_008592, exon 1 of 1)	exon (NM_008592, exon 1 of 1)	707	NM_008592	17300	Mm.12949	NM_008592	ENSMUSG00000050295	Foxc1	FREAC3|Fkh1|Mf1|Mf4|ch|fkh-1|frkhda	forkhead box C1	protein-coding
MACS_peak_1390	chr9	81526458	81528061	+	1204	NA	intron (NR_040396, intron 1 of 4)	intron (NR_040396, intron 1 of 4)	-1100	NM_010482	15551	Mm.445308	NM_010482	ENSMUSG00000049511	Htr1b	-	5-hydroxytryptamine (serotonin) receptor 1B	protein-coding
MACS_peak_119	chr10	45205324	45206862	+	1195	NA	Intergenic	CpG	-16086	NM_001031772	380669	Mm.440328	NM_001031772	ENSMUSG00000063804	Lin28b	2810403D23Rik|D030047M17Rik|Lin-28.2	lin-28 homolog B (C. elegans)	protein-coding
MACS_peak_430	chr14	63857285	63877156	+	1195	NA	Intergenic	Intergenic	-3123	NM_008092	14463	Mm.247669	NM_008092	ENSMUSG00000021944	Gata4	Gata-4	GATA binding protein 4	protein-coding
MACS_peak_165	chr11	22759320	22761063	+	1195	NA	promoter-TSS (NM_016888)	promoter-TSS (NM_016888)	145	NM_001169114	53625	Mm.395495	NM_016888	ENSMUSG00000051650	B3gnt2	AA408337|AA409404|AW260308|B3Galt6|B3gnt1|BGnT-1|BGnT-2|BGnT1|BGnT2|Beta3gnt	UDP-GlcNAc:betaGal beta-1,3-N-acetylglucosaminyltransferase 2	protein-coding
MACS_peak_1292	chr8	35039256	35041150	+	1191	NA	5' UTR (NM_001286168, exon 1 of 8)	5' UTR (NM_001286168, exon 1 of 8)	132	NM_019733	19663	Mm.323997	NM_019733	ENSMUSG00000031586	Rbpms	2010300K22Rik|2700019M19Rik|AU017537|RBP-MS|hermes	RNA binding protein gene with multiple splicing	protein-coding
MACS_peak_113	chr10	43720688	43726347	+	1191	NA	exon (NM_172393, exon 1 of 20)	exon (NM_172393, exon 1 of 20)	1135	NM_172393	11630	Mm.292082	NM_172393	ENSMUSG00000019866	Aim1	AI462491|AI463325	absent in melanoma 1	protein-coding
MACS_peak_255	chr12	8304645	8309624	+	1191	NA	intron (NM_013527, intron 1 of 1)	intron (NM_013527, intron 1 of 1)	1626	NM_013527	238057	Mm.271308	NM_013527	ENSMUSG00000037660	Gdf7	BMP12	growth differentiation factor 7	protein-coding
MACS_peak_151	chr10	122701181	122702822	+	1190	NA	non-coding (NR_045514, exon 1 of 6)	non-coding (NR_045514, exon 1 of 6)	869	NM_001252387	268354	Mm.51939	NM_182807	ENSMUSG00000044071	Fam19a2	6330575M02|FAM19A2 TAFA-2|TAFA2|Tafa-2	family with sequence similarity 19, member A2	protein-coding
MACS_peak_399	chr13	115245893	115250763	+	1186	NA	intron (NM_008046, intron 1 of 5)	intron (NM_008046, intron 1 of 5)	831	NM_001301373	14313	Mm.4913	NM_008046	ENSMUSG00000021765	Fst	AL033346|FS	follistatin	protein-coding
MACS_peak_307	chr12	106102834	106103346	+	1186	NA	exon (NM_001040682, exon 1 of 13)	exon (NM_001040682, exon 1 of 13)	196	NR_104436	94040	Mm.244078	NM_053155	ENSMUSG00000021097	Clmn	9330188N17Rik|AI428889|AI788815|mKIAA1188	calmin	protein-coding
MACS_peak_749	chr2	44962873	44969641	+	1185	NA	promoter-TSS (NR_110572)	promoter-TSS (NR_110572)	-401	NR_110572	433424	Mm.441408	NM_001177394		Zeb2os	Gm13476|OTTMUSG00000012358	zinc finger E-box binding homeobox 2, opposite strand	ncRNA
MACS_peak_805	chr2	136940202	136943174	+	1185	NA	intron (NM_013822, intron 1 of 25)	CpG-8606	568	NM_013822	16449	Mm.22398	NM_013822	ENSMUSG00000027276	Jag1	ABE2|Gsfabe2|Htu|Ozz|Ser-1	jagged 1	protein-coding
MACS_peak_637	chr18	35811965	35815691	+	1185	NA	exon (NM_001270646, exon 1 of 1)	exon (NM_001270646, exon 1 of 1)	1025	NM_001270646	381148	Mm.297784	NM_001270646		Prob1	Gm1614	proline rich basic protein 1	protein-coding
MACS_peak_589	chr17	35561769	35562754	+	1163	NA	exon (NM_207648, exon 2 of 5)	exon (NM_207648, exon 2 of 5)	439	NM_207648	110557	Mm.439827	NM_207648	ENSMUSG00000073409	H2-Q6	0610037M15Rik|H-2Q6|Qa-6|Qa6	histocompatibility 2, Q region locus 6	protein-coding
MACS_peak_881	chr3	89123241	89125899	+	1156	NA	intron (NM_010108, intron 1 of 4)	CpG	2231	NM_010108	13638	Mm.331159	NM_010108		Efna3	AW494418|EFL-2|Ehk1-L|Epl3|LERK-3	ephrin A3	protein-coding
MACS_peak_938	chr4	44676982	44677697	+	1154	NA	intron (NM_008782, intron 5 of 9)	CpG	-38333	NR_073462	70602	Mm.491142	NR_073462		5730488B01Rik	-	RIKEN cDNA 5730488B01 gene	ncRNA
MACS_peak_1184	chr6	88143414	88148167	+	1147	NA	Intergenic	(CAA)n|Simple_repeat|Simple_repeat	-2868	NM_008090	14461	Mm.491156	NM_008090	ENSMUSG00000015053	Gata2	Gata-2	GATA binding protein 2	protein-coding
MACS_peak_1030	chr5	3341093	3344408	+	1139	NA	Intergenic	CpG	-1562	NM_009873	12571	Mm.31672	NM_009873	ENSMUSG00000040274	Cdk6	5830411I20|AI504062|Crk2	cyclin-dependent kinase 6	protein-coding
MACS_peak_1274	chr7	147242656	147247428	+	1139	NA	Intergenic	Intergenic	-10055	NM_010836	17703	Mm.4816	NM_010836		Msx3	AI323377	msh homeobox 3	protein-coding
MACS_peak_131	chr10	68861138	68863152	+	1138	NA	Intergenic	CpG	-46485	NM_007659	12534	Mm.281367	NM_007659	ENSMUSG00000019942	Cdk1	Cdc2|Cdc2a|p34<CDC2>	cyclin-dependent kinase 1	protein-coding
MACS_peak_647	chr18	58368860	58370882	+	1138	NA	promoter-TSS (NM_010181)	promoter-TSS (NM_010181)	-291	NM_010181	14119	Mm.20271	NM_010181	ENSMUSG00000024598	Fbn2	BC063774|Fib-2|mKIAA4226|sne|sy	fibrillin 2	protein-coding
MACS_peak_706	chr19	47538633	47540734	+	1127	NA	promoter-TSS (NM_008018)	promoter-TSS (NM_008018)	-782	NM_008018	14218	Mm.127560	NM_008018	ENSMUSG00000053617	Sh3pxd2a	2310014D11Rik|AA589508|AI256723|AI413738|C230050L11|EG329070|Fish|Gm5098|Sh3md1|TSK5|Tks5	SH3 and PX domains 2A	protein-coding
MACS_peak_303	chr12	103521499	103522364	+	1127	NA	promoter-TSS (NM_001161365)	promoter-TSS (NM_001161365)	80	NM_001161365	217835	Mm.24145	NM_177620	ENSMUSG00000044456	Rin3	6430500K07|C86933	Ras and Rab interactor 3	protein-coding
MACS_peak_1409	chr9	118514713	118516484	+	1121	NA	promoter-TSS (NM_133721)	promoter-TSS (NM_133721)	-229	NM_133721	104099	Mm.335520	NM_133721	ENSMUSG00000039115	Itga9	(alpha)9|2610002H11Rik|6720458D17Rik|AI461869|D130073C02|D9Ertd428e	integrin alpha 9	protein-coding
MACS_peak_329	chr13	22085862	22100318	+	1120	NA	TTS (NM_019429)	TTS (NM_019429)	8520	NM_019429	54373	Mm.32043	NM_019429	ENSMUSG00000006179	Prss16	AI448615|TSSP	protease, serine 16 (thymus)	protein-coding
MACS_peak_676	chr19	30248163	30250696	+	1120	NA	intron (NM_138595, intron 1 of 24)	CpG	502	NM_138595	104174	Mm.274852	NM_138595	ENSMUSG00000024827	Gldc	D030049L12Rik|D19Wsu57e	glycine decarboxylase	protein-coding
MACS_peak_463	chr15	37162252	37164382	+	1120	NA	intron (NM_026496, intron 1 of 15)	CpG	526	NM_026496	252973	Mm.244612	NM_026496	ENSMUSG00000022286	Grhl2	0610015A08Rik|BOM|Tcfcp2l3	grainyhead-like 2 (Drosophila)	protein-coding
MACS_peak_1320	chr8	94879582	94884720	+	1119	NA	exon (NM_018826, exon 1 of 3)	exon (NM_018826, exon 1 of 3)	456	NM_018826	54352	Mm.101153	NM_018826	ENSMUSG00000031737	Irx5	-	Iroquois related homeobox 5 (Drosophila)	protein-coding
MACS_peak_978	chr4	114726854	114732855	+	1115	NA	promoter-TSS (NM_001287388)	promoter-TSS (NM_001287388)	-562	NM_001287388	21349	Mm.439685	NM_011527	ENSMUSG00000028717	Tal1	SCL/tal-1|Scl|bHLHa17|tal-1	T cell acute lymphocytic leukemia 1	protein-coding
MACS_peak_761	chr2	71363147	71386969	+	1113	NA	intron (NR_002854, intron 1 of 1)	intron (NR_002854, intron 1 of 1)	890	NR_002854	111970	Mm.4543	NR_002854		Dlx1as	Dlx1os	distal-less homeobox 1, antisense	ncRNA
MACS_peak_1416	chrX	58145272	58146271	+	1113	NA	exon (NM_009237, exon 1 of 1)	exon (NM_009237, exon 1 of 1)	834	NM_009237	20675	Mm.35784	NM_009237	ENSMUSG00000045179	Sox3	Sox-3	SRY (sex determining region Y)-box 3	protein-coding
MACS_peak_864	chr3	30402945	30415130	+	1113	NA	promoter-TSS (NM_021442)	promoter-TSS (NM_021442)	-628	NM_021442	14013	Mm.56965	NM_007963	ENSMUSG00000027684	Mecom	D630039M04Rik|Evi-1|Evi1|Jbo|Mds|Mds1|Mds1-Evi1|Prdm3|Znfpr1b1	MDS1 and EVI1 complex locus	protein-coding
MACS_peak_374	chr13	94827075	94828678	+	1113	NA	intron (NM_172589, intron 1 of 3)	CpG	125	NM_172589	218454	Mm.316553	NM_172589	ENSMUSG00000045312	Lhfpl2	6030465B15|AI447312|AW050335|mKIAA0206|vgim	lipoma HMGIC fusion partner-like 2	protein-coding
MACS_peak_614	chr17	75405020	75405899	+	1113	NA	exon (NM_019919, exon 1 of 34)	exon (NM_019919, exon 1 of 34)	590	NM_019919	268977	Mm.269747	NM_019919	ENSMUSG00000001870	Ltbp1	9430031G15Rik|9830146M04|Ltbp-1|Tgfb|b2b1000Clo	latent transforming growth factor beta binding protein 1	protein-coding
MACS_peak_317	chr12	109939621	109941118	+	1113	NA	intron (NM_027299, intron 1 of 2)	CpG	147	NM_001171002	70059	Mm.207605	NM_027299	ENSMUSG00000021263	Degs2	2210008A03Rik|AI852933|DES2	degenerative spermatocyte homolog 2 (Drosophila), lipid desaturase	protein-coding
MACS_peak_88	chr10	5633049	5634440	+	1113	NA	exon (NM_007956, exon 2 of 9)	exon (NM_007956, exon 2 of 9)	100751	NM_007956	13982	Mm.9213	NM_007956	ENSMUSG00000019768	Esr1	AA420328|AU041214|ER-alpha|ER[a]|ERa|ERalpha|ESR|Estr|Estra|Nr3a1	estrogen receptor 1 (alpha)	protein-coding
MACS_peak_583	chr17	32302293	32306011	+	1113	NA	promoter-TSS (NM_008716)	promoter-TSS (NM_008716)	-355	NM_008716	18131	Mm.439741	NM_008716	ENSMUSG00000038146	Notch3	AW229011|N3|hpbk	notch 3	protein-coding
MACS_peak_34	chr1	78212354	78215828	+	1113	NA	Intergenic	CpG	-20380	NM_001159520	18505	Mm.1371	NM_008781	ENSMUSG00000004872	Pax3	Pax-3|Sp|splotch	paired box 3	protein-coding
MACS_peak_258	chr12	12945657	12948678	+	1113	NA	exon (NM_008709, exon 2 of 3)	exon (NM_008709, exon 2 of 3)	1475	NM_008709	18109	Mm.16469	NM_008709	ENSMUSG00000037169	Mycn	N-myc|Nmyc|Nmyc-1|Nmyc1|bHLHe37|c-nmyc	v-myc myelocytomatosis viral related oncogene, neuroblastoma derived (avian)	protein-coding
MACS_peak_445	chr14	104862091	104867619	+	1113	NA	intron (NM_011143, intron 2 of 2)	intron (NM_011143, intron 2 of 2)	2361	NM_011143	18996	Mm.246550	NM_011143		Pou4f1	Brn-3|Brn-3.0|Brn3|Brn3.0|Brn3a|E130119J07Rik	POU domain, class 4, transcription factor 1	protein-coding
MACS_peak_1151	chr6	52107312	52122869	+	1113	NA	promoter-TSS (NM_010451)	promoter-TSS (NM_010451)	-260	NM_010451	15399	Mm.131	NM_010451		Hoxa2	AI324701|HOX1.11|Hox-1.11	homeobox A2	protein-coding
MACS_peak_473	chr15	75575680	75579270	+	1110	NA	exon (NM_194350, exon 1 of 1)	exon (NM_194350, exon 1 of 1)	877	NM_194350	378435	Mm.309589	NM_194350	ENSMUSG00000047591	Mafa	RIPE3b1	v-maf musculoaponeurotic fibrosarcoma oncogene family, protein A (avian)	protein-coding
MACS_peak_818	chr2	151873498	151876010	+	1098	NA	Intergenic	CpG	-32511	NM_001160410	545474	Mm.214317	NM_001160410	ENSMUSG00000060257	Scrt2	AW060659	scratch homolog 2, zinc finger protein (Drosophila)	protein-coding
MACS_peak_899	chr3	102007048	102008673	+	1079	NA	promoter-TSS (NM_001165951)	promoter-TSS (NM_001165951)	26	NM_001165951	229658	Mm.118004	NM_177545	ENSMUSG00000027860	Vangl1	Kitenin|Lpp2|Stb2|Stbm	vang-like 1 (van gogh, Drosophila)	protein-coding
MACS_peak_1058	chr5	67996847	68001778	+	1078	NA	5' UTR (NM_001033415, exon 1 of 2)	5' UTR (NM_001033415, exon 1 of 2)	190	NM_001033415	330096	Mm.442747	NM_001033415	ENSMUSG00000050010	Shisa3	D830007B15Rik	shisa homolog 3 (Xenopus laevis)	protein-coding
MACS_peak_61	chr1	137714452	137716870	+	1063	NA	intron (NM_133664, intron 1 of 9)	intron (NM_133664, intron 1 of 9)	486	NM_133664	16763	Mm.36726	NM_133664	ENSMUSG00000041782	Lad1	-	ladinin	protein-coding
MACS_peak_821	chr2	156665153	156667587	+	1061	NA	intron (NM_173396, intron 1 of 2)	CpG	627	NM_173396	228839	Mm.315625	NM_173396	ENSMUSG00000062175	Tgif2	4921501K24|5730599O09Rik|C80753|C81206	TGFB-induced factor homeobox 2	protein-coding
MACS_peak_89	chr10	8604563	8606570	+	1061	NA	exon (NM_175155, exon 1 of 20)	exon (NM_175155, exon 1 of 20)	302	NM_175155	70097	Mm.338275	NM_175155	ENSMUSG00000015305	Sash1	1100001C18Rik|2500002E12Rik|A330076K04Rik|mKIAA0790	SAM and SH3 domain containing 1	protein-coding
MACS_peak_1234	chr7	77503785	77508581	+	1061	NA	promoter-TSS (NM_009697)	promoter-TSS (NM_009697)	-704	NM_009697	11819	Mm.158143	NM_009697	ENSMUSG00000030551	Nr2f2	2700033K02Rik|9430015G03Rik|ARP-1|Aporp1|COUP-TF2|COUP-TFII|COUPTFB|EAR3|SVP40|Tcfcoup2	nuclear receptor subfamily 2, group F, member 2	protein-coding
MACS_peak_741	chr2	33490841	33501347	+	1057	NA	promoter-TSS (NM_010725)	promoter-TSS (NM_010725)	-63	NM_010725	16917	Mm.39825	NM_010725	ENSMUSG00000038765	Lmx1b	LMX1.1|LMX1.2	LIM homeobox transcription factor 1 beta	protein-coding
MACS_peak_1313	chr8	91565126	91571253	+	1053	NA	promoter-TSS (NM_021390)	promoter-TSS (NM_021390)	-128	NM_021390	58198	Mm.214361	NM_021390	ENSMUSG00000031665	Sall1	Msal-3	sal-like 1 (Drosophila)	protein-coding
MACS_peak_1006	chr4	135241215	135243715	+	1053	NA	promoter-TSS (NM_174851)	promoter-TSS (NM_174851)	93	NM_174851	242700	Mm.259623	NM_174851	ENSMUSG00000062157	Ifnlr1	CRF2-12|Il28ra	interferon lambda receptor 1	protein-coding
MACS_peak_261	chr12	28025635	28027883	+	1053	NA	exon (NM_009234, exon 1 of 1)	exon (NM_009234, exon 1 of 1)	824	NM_009234	20666	Mm.41702	NM_009234		Sox11	1110038H03Rik|6230403H02Rik|AI836553|end1	SRY (sex determining region Y)-box 11	protein-coding
MACS_peak_698	chr19	44907950	44913878	+	1053	NA	promoter-TSS (NR_045315)	promoter-TSS (NR_045315)	-486	NR_045315	73322	Mm.250457	NR_045315	ENSMUSG00000092369	1700039E22Rik	-	RIKEN cDNA 1700039E22 gene	ncRNA
MACS_peak_342	chr13	37917555	37920020	+	1053	NA	promoter-TSS (NM_001177868)	promoter-TSS (NM_001177868)	6	NR_033615	68750	Mm.491109	NM_026830	ENSMUSG00000039087	Rreb1	1110037N09Rik|AA414966|B930013M22Rik	ras responsive element binding protein 1	protein-coding
MACS_peak_1136	chr6	29685210	29685912	+	1053	NA	promoter-TSS (NM_176996)	promoter-TSS (NM_176996)	64	NM_176996	319757	Mm.29279	NM_176996	ENSMUSG00000001761	Smo	E130215L21Rik|Smoh|bnb|smoothened	smoothened homolog (Drosophila)	protein-coding
MACS_peak_479	chr15	79334741	79337225	+	1049	NA	promoter-TSS (NM_008427)	promoter-TSS (NM_008427)	-312	NM_008427	16520	Mm.140760	NM_008427	ENSMUSG00000044216	Kcnj4	IRK3|Kcnf2|MB-IRK3	potassium inwardly-rectifying channel, subfamily J, member 4	protein-coding
MACS_peak_1046	chr5	38207319	38224677	+	1048	NA	promoter-TSS (NM_010835)	promoter-TSS (NM_010835)	-174	NM_010835	17701	Mm.256509	NM_010835	ENSMUSG00000048450	Msx1	AA675338|AI324650|Hox-7|Hox7|Hox7.1|msh	msh homeobox 1	protein-coding
MACS_peak_865	chr3	34546864	34550336	+	1048	NA	promoter-TSS (NM_011443)	promoter-TSS (NM_011443)	-327	NM_011443	20674	Mm.65396	NM_011443	ENSMUSG00000074637	Sox2	Sox-2|lcc|ysb	SRY (sex determining region Y)-box 2	protein-coding
MACS_peak_801	chr2	131387144	131389200	+	1046	NA	promoter-TSS (NM_013460)	promoter-TSS (NM_013460)	-151	NM_013460	11550	Mm.389380	NM_013460		Adra1d	Adra-1|Adra1|Adra1a|Gpcr8|Spr8|[a]1d|alpha1D-AR	adrenergic receptor, alpha 1d	protein-coding
MACS_peak_1009	chr4	136832695	136834289	+	1046	NA	promoter-TSS (NM_009523)	promoter-TSS (NM_009523)	-58	NM_009523	22417	Mm.20355	NM_009523	ENSMUSG00000036856	Wnt4	Wnt-4	wingless-type MMTV integration site family, member 4	protein-coding
MACS_peak_1285	chr8	12384548	12396787	+	1046	NA	intron (NR_027975, intron 1 of 7)	intron (NR_027975, intron 1 of 7)	-4852	NM_009233	20664	Mm.39088	NM_009233	ENSMUSG00000096014	Sox1	BB176347|Sox-1	SRY (sex determining region Y)-box 1	protein-coding
MACS_peak_1344	chr8	123637748	123642364	+	1045	NA	promoter-TSS (NM_013519)	promoter-TSS (NM_013519)	-15	NM_013519	14234	Mm.14092	NM_013519	ENSMUSG00000046714	Foxc2	Fkh14|Hfhbf3|MFH-1|Mfh1	forkhead box C2	protein-coding
MACS_peak_158	chr11	4644828	4647543	+	1045	NA	intron (NM_138948, intron 1 of 4)	CpG	596	NM_138948	192650	Mm.207056	NM_138948		Cabp7	-	calcium binding protein 7	protein-coding
MACS_peak_418	chr14	35630904	35634617	+	1045	NA	promoter-TSS (NM_008166)	promoter-TSS (NM_008166)	-562	NM_008166	14803	Mm.121569	NM_008166	ENSMUSG00000041078	Grid1	GluD1|GluRdelta1	glutamate receptor, ionotropic, delta 1	protein-coding
MACS_peak_1213	chr7	26471690	26473161	+	1045	NA	TTS (NM_172148)	TTS (NM_172148)	404	NM_011577	21803	Mm.248380	NM_011577	ENSMUSG00000002603	Tgfb1	TGF-beta1|TGFbeta1|Tgfb|Tgfb-1	transforming growth factor, beta 1	protein-coding
MACS_peak_1391	chr9	85735634	85738915	+	1045	NA	5' UTR (NM_011627, exon 2 of 2)	5' UTR (NM_011627, exon 2 of 2)	815	NM_001164792	21983	Mm.20864	NM_011627	ENSMUSG00000035274	Tpbg	5T4|AW495680|WAIF1	trophoblast glycoprotein	protein-coding
MACS_peak_1381	chr9	65476803	65479301	+	1038	NA	promoter-TSS (NM_028030)	promoter-TSS (NM_028030)	-337	NM_028030	71973	Mm.29148	NM_028030	ENSMUSG00000032387	Rbpms2	2400008B06Rik|AI316523	RNA binding protein with multiple splicing 2	protein-coding
MACS_peak_476	chr15	78548184	78550634	+	1033	NA	promoter-TSS (NM_183141)	promoter-TSS (NM_183141)	-866	NM_183141	207393	Mm.323188	NM_183141	ENSMUSG00000043460	Elfn2	6330514E13|AW048948|BC094219|Lrrc62|Ppp1r29	leucine rich repeat and fibronectin type III, extracellular 2	protein-coding
MACS_peak_544	chr16	30063208	30070885	+	1033	NA	exon (NM_008235, exon 4 of 4)	exon (NM_008235, exon 4 of 4)	1603	NM_008235	15205	Mm.390859	NM_008235	ENSMUSG00000022528	Hes1	Hry|bHLHb39	hairy and enhancer of split 1 (Drosophila)	protein-coding
MACS_peak_305	chr12	104480270	104481872	+	1023	NA	promoter-TSS (NM_133364)	promoter-TSS (NM_133364)	-715	NM_133364	170952	Mm.217019	NM_133364	ENSMUSG00000041669	Prima1	B230212M13Rik|BB120497|PRiMA	proline rich membrane anchor 1	protein-coding
MACS_peak_824	chr2	158436135	158439493	+	1016	NA	intron (NM_009508, intron 1 of 1)	intron (NM_009508, intron 1 of 1)	1320	NM_009508	22348	Mm.143404	NM_009508	ENSMUSG00000037771	Slc32a1	R75019|VGAT|Viaat	solute carrier family 32 (GABA vesicular transporter), member 1	protein-coding
MACS_peak_1007	chr4	135801625	135805070	+	1014	NA	promoter-TSS (NM_011542)	promoter-TSS (NM_011542)	-525	NM_011542	21401	Mm.112	NM_011542	ENSMUSG00000001604	Tcea3	S-II|SII-K1	transcription elongation factor A (SII), 3	protein-coding
MACS_peak_629	chr17	88035222	88037352	+	1014	NA	intron (NM_008532, intron 2 of 9)	CpG-6687	968	NM_008532	17075	Mm.4259	NM_008532	ENSMUSG00000045394	Epcam	CD326|EGP|EGP-2|Egp314|Ep-CAM|EpCAM1|GA733-2|Ly74|TROP1|Tacsd1|Tacstd1|gp40	epithelial cell adhesion molecule	protein-coding
MACS_peak_429	chr14	62305193	62309667	+	1011	NA	Intergenic	Intergenic	-6220	NR_028264	668253	Mm.32886	NR_028264	ENSMUSG00000097589	Dleu2	1810047A16Rik|4932411A06Rik|7730401J12Rik|AI197277|AI788824|Alt1|Gm9069|Leu2	deleted in lymphocytic leukemia, 2	ncRNA
MACS_peak_1376	chr9	58670049	58671916	+	1002	NA	promoter-TSS (NM_001081192)	promoter-TSS (NM_001081192)	-337	NM_001081192	330953	Mm.151967	NM_001081192	ENSMUSG00000032338	Hcn4	Bcng3|Hcn3	hyperpolarization-activated, cyclic nucleotide-gated K+ 4	protein-coding
MACS_peak_1331	chr8	108659115	108661515	+	1002	NA	exon (NM_176838, exon 2 of 15)	exon (NM_176838, exon 2 of 15)	559	NM_176838	77411	Mm.183003	NM_176838	ENSMUSG00000084128	Esrp2	9530027K23Rik|Rbm35b	epithelial splicing regulatory protein 2	protein-coding
MACS_peak_923	chr3	146161737	146163432	+	995	NA	promoter-TSS (NM_010318)	promoter-TSS (NM_010318)	133	NM_027617	70951	Mm.383235	NM_027617	ENSMUSG00000028188	Spata1	4921536I21Rik|AV266943|SP-2	spermatogenesis associated 1	protein-coding
MACS_peak_120	chr10	50609036	50618921	+	995	NA	Intergenic	Intergenic	-1479	NM_011376	20464	Mm.4774	NM_011376	ENSMUSG00000019913	Sim1	bHLHe14|mSIM1	single-minded homolog 1 (Drosophila)	protein-coding
MACS_peak_1185	chr6	91793056	91794609	+	989	NA	Intergenic	CpG	-34215	NM_172730	232236	Mm.234879	NM_172730	ENSMUSG00000034083	Ccdc174	C130022K22Rik	coiled-coil domain containing 174	protein-coding
MACS_peak_284	chr12	71327544	71329028	+	987	NA	promoter-TSS (NR_045174)	promoter-TSS (NR_045174)	384	NM_133198	110095	Mm.256926	NM_133198	ENSMUSG00000021069	Pygl	-	liver glycogen phosphorylase	protein-coding
MACS_peak_1171	chr6	82982032	82984684	+	984	NA	promoter-TSS (NM_013586)	promoter-TSS (NM_013586)	107	NM_010070	13448	Mm.156	NM_010070	ENSMUSG00000068335	Dok1	AW557123|p62DOK	docking protein 1	protein-coding
MACS_peak_228	chr11	97489514	97490958	+	984	NA	exon (NM_175332, exon 1 of 1)	exon (NM_175332, exon 1 of 1)	794	NM_175332	103551	Mm.24506	NM_175332	ENSMUSG00000043439	E130012A19Rik	AA409164|AI413509|AW539173|E13|esPRC2p48	RIKEN cDNA E130012A19 gene	protein-coding
MACS_peak_1060	chr5	74040424	74043537	+	980	NA	promoter-TSS (NM_178387)	promoter-TSS (NM_178387)	-639	NM_178387	73472	Mm.87067	NM_178387	ENSMUSG00000029155	Spata18	1700067I02Rik	spermatogenesis associated 18	protein-coding
MACS_peak_1302	chr8	72806620	72807320	+	980	NA	promoter-TSS (NM_011984)	promoter-TSS (NM_011984)	72	NM_001146153	26558	Mm.388127	NM_011984	ENSMUSG00000003573	Homer3	AW146114	homer homolog 3 (Drosophila)	protein-coding
MACS_peak_1261	chr7	131126183	131128231	+	977	NA	exon (NM_001252072, exon 1 of 2)	exon (NM_001252072, exon 1 of 2)	512	NM_001252072	628779	Mm.40210	NM_001252072	ENSMUSG00000078591	Hs3st4	EG628779|Gm6915	heparan sulfate (glucosamine) 3-O-sulfotransferase 4	protein-coding
MACS_peak_538	chr16	17797211	17798936	+	977	NA	intron (NM_153790, intron 1 of 10)	CpG	698	NM_153790	224024	Mm.194950	NM_153790	ENSMUSG00000012017	Scarf2	AI194363|NSR1|SREC-II|SRECRP-1|Scarf1|Scatf1|Srec2|SrecII|W53987|W65560	scavenger receptor class F, member 2	protein-coding
MACS_peak_1135	chr6	29476160	29477904	+	976	NA	intron (NM_012057, intron 1 of 8)	CpG	407	NM_012057	27056	Mm.6479	NM_012057	ENSMUSG00000029771	Irf5	AW491843|mirf5	interferon regulatory factor 5	protein-coding
MACS_peak_796	chr2	119062529	119064624	+	976	NA	exon (NM_016907, exon 2 of 11)	exon (NM_016907, exon 2 of 11)	480	NM_016907	20732	Mm.104955	NM_016907	ENSMUSG00000027315	Spint1	HAI-1	serine protease inhibitor, Kunitz type 1	protein-coding
MACS_peak_1168	chr6	65622447	65623636	+	976	NA	intron (NM_172399, intron 1 of 3)	intron (NM_172399, intron 1 of 3)	1436	NM_172399	68169	Mm.52392	NM_172399	ENSMUSG00000049001	Ndnf	A930038C07Rik|epidermacan	neuron-derived neurotrophic factor	protein-coding
MACS_peak_1256	chr7	123177086	123178437	+	976	NA	intron (NM_001025559, intron 1 of 15)	intron (NM_001025559, intron 1 of 15)	-3200	NM_001025560	20679	Mm.323365	NM_011445	ENSMUSG00000051910	Sox6	AI987981|SOX-LZ	SRY (sex determining region Y)-box 6	protein-coding
MACS_peak_263	chr12	31568764	31570371	+	976	NA	5' UTR (NM_001159743, exon 1 of 5)	5' UTR (NM_001159743, exon 1 of 5)	378	NM_001159743	100294583	Mm.399726	NM_001159743	ENSMUSG00000054204	Fam150b	6230419C23Rik	family with sequence similarity 150, member B	protein-coding
MACS_peak_94	chr10	21867997	21872135	+	976	NA	promoter-TSS (NM_001254745)	promoter-TSS (NM_001254745)	-990	NM_001254745	319887	Mm.177746	NM_001254744	ENSMUSG00000055657	E030030I06Rik	-	RIKEN cDNA E030030I06 gene	protein-coding
MACS_peak_367	chr13	72776578	72779300	+	976	NA	Intergenic	Intergenic	11513	NM_010574	16372	Mm.28888	NM_010574	ENSMUSG00000001504	Irx2	IRX6	Iroquois related homeobox 2 (Drosophila)	protein-coding
MACS_peak_419	chr14	47005219	47010525	+	976	NA	intron (NM_007554, intron 1 of 3)	CpG	2402	NM_007554	12159	Mm.6813	NM_007554	ENSMUSG00000021835	Bmp4	Bmp-4|Bmp2b|Bmp2b-1|Bmp2b1	bone morphogenetic protein 4	protein-coding
MACS_peak_570	chr17	25568208	25572259	+	971	NA	intron (NM_021415, intron 1 of 34)	CpG-6093	495	NM_021415	58226	Mm.268378	NM_021415	ENSMUSG00000024112	Cacna1h	Cav3.2|MNCb-1209|alpha13.2	calcium channel, voltage-dependent, T type, alpha 1H subunit	protein-coding
MACS_peak_466	chr15	61818214	61818836	+	968	NA	intron (NM_001177353, intron 1 of 2)	CpG	1629	NM_001177352	17869	Mm.2444	NM_010849	ENSMUSG00000022346	Myc	AU016757|Myc2|Niard|Nird|bHLHe39	myelocytomatosis oncogene	protein-coding
MACS_peak_1379	chr9	62994617	62999686	+	964	NA	promoter-TSS (NM_001163758)	promoter-TSS (NM_001163758)	-383	NM_001163758	207667	Mm.36349	NM_172446	ENSMUSG00000022245	Skor1	AV273001|C230094B15Rik|Corl1|Lbxcor1	SKI family transcriptional corepressor 1	protein-coding
MACS_peak_1092	chr5	120119954	120125663	+	964	NA	intron (NM_198052, intron 2 of 7)	intron (NM_198052, intron 2 of 7)	1566	NM_011535	21386	Mm.219139	NM_011535	ENSMUSG00000018604	Tbx3	D5Ertd189e	T-box 3	protein-coding
MACS_peak_636	chr18	32098612	32099195	+	961	NA	intron (NM_144862, intron 1 of 9)	CpG	7742	NM_144862	225341	Mm.24551	NM_144862	ENSMUSG00000024395	Lims2	PINCH2	LIM and senescent cell antigen like domains 2	protein-coding
MACS_peak_750	chr2	44971261	44973970	+	961	NA	Intergenic	CpG	-3816	NM_015753	24136	Mm.440702	NM_015753	ENSMUSG00000026872	Zeb2	9130203F04Rik|D130016B08Rik|SIP1|Zfhx1b|Zfx1b|Zfxh1b	zinc finger E-box binding homeobox 2	protein-coding
MACS_peak_1154	chr6	52138979	52143188	+	961	NA	intron (NM_008265, intron 1 of 1)	CpG	619	NM_008265	15401	Mm.439647	NM_008265	ENSMUSG00000000942	Hoxa4	AV206827|Hox-1.4	homeobox A4	protein-coding
MACS_peak_543	chr16	22161901	22164630	+	961	NA	5' UTR (NM_183029, exon 1 of 16)	5' UTR (NM_183029, exon 1 of 16)	107	NM_183029	319765	Mm.489442	NM_183029	ENSMUSG00000033581	Igf2bp2	C330012H03Rik|IMP-2|Imp2|Neilsen	insulin-like growth factor 2 mRNA binding protein 2	protein-coding
MACS_peak_1241	chr7	89137056	89138025	+	961	NA	promoter-TSS (NM_007562)	promoter-TSS (NM_007562)	-355	NM_007562	12173	Mm.243802	NM_007562	ENSMUSG00000025105	Bnc1	AI047752|AW546376|Bnc	basonuclin 1	protein-coding
MACS_peak_175	chr11	49422458	49423933	+	961	NA	promoter-TSS (NM_008029)	promoter-TSS (NM_008029)	14	NM_008029	14257	Mm.3291	NM_008029	ENSMUSG00000020357	Flt4	AI323512|Chy|Flt-4|VEGFR-3|VEGFR3	FMS-like tyrosine kinase 4	protein-coding
MACS_peak_926	chr4	3863596	3865323	+	961	NA	intron (NM_019969, intron 1 of 5)	intron (NM_019969, intron 1 of 5)	1093	NM_019969	56711	Mm.331467	NM_019969	ENSMUSG00000003282	Plag1	-	pleiomorphic adenoma gene 1	protein-coding
MACS_peak_354	chr13	53557042	53559942	+	961	NA	Intergenic	Intergenic	9657	NM_013601	17702	Mm.1763	NM_013601		Msx2	BB122635|Hox-8|Hox8|Hox8.1	msh homeobox 2	protein-coding
MACS_peak_1248	chr7	108079047	108081715	+	951	NA	5' UTR (NM_001081116, exon 1 of 21)	5' UTR (NM_001081116, exon 1 of 21)	294	NM_001081116	207212	Mm.29954	NM_001081116	ENSMUSG00000032875	Arhgef17	8030463K16|AI428794|AW558066|BC035332|mKIAA0337	Rho guanine nucleotide exchange factor (GEF) 17	protein-coding
MACS_peak_697	chr19	44829219	44837017	+	950	NA	intron (NM_011037, intron 1 of 9)	intron (NM_011037, intron 1 of 9)	1234	NM_011037	18504	Mm.192158	NM_011037	ENSMUSG00000004231	Pax2	Opdc|Pax-2	paired box 2	protein-coding
MACS_peak_1156	chr6	52151256	52173003	+	949	NA	intron (NR_015611, intron 1 of 2)	intron (NR_015611, intron 1 of 2)	937	NM_010452	15400	Mm.71533	NM_010452	ENSMUSG00000079560	Hoxa3	Hox-1.5|Mo-10	homeobox A3	protein-coding
MACS_peak_668	chr19	16944408	16953513	+	942	NA	promoter-TSS (NM_008023)	promoter-TSS (NM_008023)	-640	NM_008023	14240	Mm.7971	NM_008023	ENSMUSG00000056829	Foxb2	Fkh4	forkhead box B2	protein-coding
MACS_peak_980	chr4	115608564	115613875	+	942	NA	intron (NM_001025567, intron 1 of 4)	intron (NM_001025567, intron 1 of 4)	1312	NM_001025567	140477	Mm.213206	NM_130865	ENSMUSG00000028707	Dmbx1	Atx|Cdmx|Mbx|Otx3	diencephalon/mesencephalon homeobox 1	protein-coding
MACS_peak_788	chr2	93481231	93484751	+	942	NA	exon (NM_007442, exon 1 of 4)	exon (NM_007442, exon 1 of 4)	400	NM_007442	11695	Mm.389389	NM_007442	ENSMUSG00000040310	Alx4	lst	aristaless-like homeobox 4	protein-coding
MACS_peak_196	chr11	76811061	76812635	+	935	NA	promoter-TSS (NM_010484)	promoter-TSS (NM_010484)	-251	NM_010484	15567	Mm.300318	NM_010484	ENSMUSG00000020838	Slc6a4	5-HTT|AI323329|Htt|Sert	solute carrier family 6 (neurotransmitter transporter, serotonin), member 4	protein-coding
MACS_peak_713	chr19	56947024	56949629	+	934	NA	promoter-TSS (NM_172840)	promoter-TSS (NM_172840)	-580	NM_172840	240675	Mm.129534	NM_172840	ENSMUSG00000025082	Vwa2	Amaco	von Willebrand factor A domain containing 2	protein-coding
MACS_peak_1361	chr9	31839548	31842044	+	934	NA	Intergenic	Intergenic	-82925	NM_001195632	330914	Mm.46683	NM_177379	ENSMUSG00000041444	Arhgap32	3426406O18Rik|Gc-gap|Grit|Px-rics|Rics|mKIAA0712|p200Rhogap|p250Gap	Rho GTPase activating protein 32	protein-coding
MACS_peak_797	chr2	119567466	119570570	+	934	NA	intron (NM_146125, intron 1 of 6)	CpG	945	NM_146125	228550	Mm.65337	NM_146125	ENSMUSG00000027296	Itpka	-	inositol 1,4,5-trisphosphate 3-kinase A	protein-coding
MACS_peak_871	chr3	66776269	66778522	+	934	NA	3' UTR (NM_013665, exon 5 of 5)	3' UTR (NM_013665, exon 5 of 5)	8298	NM_013665	20429	Mm.39093	NM_013665		Shox2	6330543G17Rik|OG12|Og12x|Prx3|SHOT	short stature homeobox 2	protein-coding
MACS_peak_298	chr12	87762978	87764256	+	934	NA	intron (NM_011934, intron 1 of 6)	CpG	1023	NM_011934	26380	Mm.235550	NM_011934	ENSMUSG00000021255	Esrrb	Err2|Errb|Estrrb|Nr3b2	estrogen related receptor, beta	protein-coding
MACS_peak_210	chr11	95446434	95447856	+	927	NA	intron (NM_033217, intron 1 of 5)	intron (NM_033217, intron 1 of 5)	1867	NM_033217	18053	Mm.283893	NM_033217	ENSMUSG00000000120	Ngfr	LNGFR|Tnfrsf16|p75|p75NGFR|p75NTR	nerve growth factor receptor (TNFR superfamily, member 16)	protein-coding
MACS_peak_928	chr4	9770420	9771935	+	927	NA	promoter-TSS (NM_013526)	promoter-TSS (NM_013526)	-342	NM_013526	242316	Mm.302555	NM_013526	ENSMUSG00000051279	Gdf6	BMP-13|BMP13|GDF16	growth differentiation factor 6	protein-coding
MACS_peak_1356	chr9	30938128	30939891	+	921	NA	intron (NM_011176, intron 1 of 18)	CpG	375	NM_011176	19143	Mm.243926	NM_011176	ENSMUSG00000031995	St14	Epithin|MT-SP1|Prss14|Tmprss14|mCAP3|matriptase	suppression of tumorigenicity 14 (colon carcinoma)	protein-coding
MACS_peak_506	chr15	100876766	100877952	+	921	NA	TTS (NM_011323)	TTS (NM_011323)	7471	NM_001214911	668225	Mm.385011	NM_001214911	ENSMUSG00000095440	Fignl2	EG668225	fidgetin-like 2	protein-coding
MACS_peak_1363	chr9	32347203	32354483	+	916	NA	Intergenic	Intergenic	-1806	NM_008026	14247	Mm.258908	NM_008026	ENSMUSG00000016087	Fli1	EWSR2|Fli-1|SIC-1|Sic1	Friend leukemia integration 1	protein-coding
MACS_peak_1167	chr6	64684422	64684991	+	915	NA	Intergenic	CpG	5566	NM_007500	11921	Mm.57229	NM_007500	ENSMUSG00000073043	Atoh1	Hath1|MATH-1|Math1|bHLHa14	atonal homolog 1 (Drosophila)	protein-coding
MACS_peak_1069	chr5	98364459	98364848	+	913	NA	intron (NM_133738, intron 16 of 16)	CpG	95328	NM_133738	71914	Mm.24842	NM_133738		Antxr2	2310046B19Rik|AW561899|CMG-2|CMG2|cI-35	anthrax toxin receptor 2	protein-coding
MACS_peak_16	chr1	57026026	57030796	+	913	NA	promoter-TSS (NR_024325)	promoter-TSS (NR_024325)	98	NR_024325	329160	Mm.419039	NR_024325	ENSMUSG00000087022	9130024F11Rik	B530002L08|EG329160	RIKEN cDNA 9130024F11 gene	ncRNA
MACS_peak_710	chr19	55817074	55820087	+	912	NA	intron (NM_009333, intron 3 of 12)	intron (NM_009333, intron 3 of 12)	2280	NM_001142923	21416	Mm.139815	NM_009333	ENSMUSG00000024985	Tcf7l2	TCF4B|TCF4E|Tcf-4|Tcf4|mTcf-4B|mTcf-4E	transcription factor 7 like 2, T cell specific, HMG box	protein-coding
MACS_peak_799	chr2	128524502	128524784	+	912	NA	promoter-TSS (NM_008587)	promoter-TSS (NM_008587)	-90	NM_008587	17289	Mm.239655	NM_008587	ENSMUSG00000014361	Mertk	Eyk|Mer|Nyk|nmf12	c-mer proto-oncogene tyrosine kinase	protein-coding
MACS_peak_231	chr11	98901897	98903038	+	909	NA	promoter-TSS (NM_010517)	promoter-TSS (NM_010517)	-107	NM_010517	16010	Mm.233799	NM_010517		Igfbp4	AI875747|Deb2|IGFBP-4	insulin-like growth factor binding protein 4	protein-coding
MACS_peak_349	chr13	40823168	40831396	+	909	NA	intron (NM_011547, intron 1 of 6)	intron (NM_011547, intron 1 of 6)	-1470	NM_001122948	21418	Mm.85544	NM_011547	ENSMUSG00000021359	Tfap2a	AP-2|AP2alpha|Ap2|Ap2tf|Tcfap2a	transcription factor AP-2, alpha	protein-coding
MACS_peak_230	chr11	98406307	98408550	+	909	NA	promoter-TSS (NM_011771)	promoter-TSS (NM_011771)	-83	NM_011771	22780	Mm.133367	NM_011771	ENSMUSG00000018168	Ikzf3	5830411O07Rik|Aiolos|Zfpn1a3|Znfn1a3	IKAROS family zinc finger 3	protein-coding
MACS_peak_1079	chr5	111844158	111848376	+	909	NA	promoter-TSS (NM_001081235)	promoter-TSS (NM_001081235)	-919	NM_001081235	433938	Mm.332576	NM_001081235	ENSMUSG00000070576	Mn1	AA003644|AA009236	meningioma 1	protein-coding
MACS_peak_454	chr15	7760329	7766619	+	909	NA	promoter-TSS (NM_001301333)	promoter-TSS (NM_001301333)	-253	NM_001301333	14573	Mm.4679	NM_010275	ENSMUSG00000022144	Gdnf	AI385739	glial cell line derived neurotrophic factor	protein-coding
MACS_peak_409	chr14	26587539	26589580	+	909	NA	promoter-TSS (NM_001101433)	promoter-TSS (NM_001101433)	-217	NM_001101433	71918	Mm.41904	NM_001101433	ENSMUSG00000055538	Zcchc24	2310047A01Rik	zinc finger, CCHC domain containing 24	protein-coding
MACS_peak_588	chr17	35530590	35531978	+	909	NA	intron (NR_051981, intron 1 of 2)	CpG	240	NR_051981	15016	Mm.439648	NR_051981	ENSMUSG00000055413	H2-Q5	H-2Q5|Qa-5|Qa5|Qat-5	histocompatibility 2, Q region locus 5	pseudo
MACS_peak_979	chr4	114735570	114737525	+	909	NA	intron (NM_001287388, intron 3 of 4)	intron (NM_001287388, intron 3 of 4)	6131	NM_001287388	21349	Mm.439685	NM_011527	ENSMUSG00000028717	Tal1	SCL/tal-1|Scl|bHLHa17|tal-1	T cell acute lymphocytic leukemia 1	protein-coding
MACS_peak_1065	chr5	77694200	77695423	+	909	NA	5' UTR (NM_011263, exon 1 of 4)	5' UTR (NM_011263, exon 1 of 4)	292	NM_011263	19712	Mm.28840	NM_011263	ENSMUSG00000029249	Rest	2610008J04Rik|AA407358|NRSF	RE1-silencing transcription factor	protein-coding
MACS_peak_990	chr4	124334360	124338160	+	908	NA	exon (NM_011141, exon 2 of 2)	exon (NM_011141, exon 2 of 2)	1371	NM_011141	18991	Mm.297371	NM_011141	ENSMUSG00000090125	Pou3f1	Oct-6|Oct6|Otf-6|Otf6|Scip|Test1|Tst-1|Tst1	POU domain, class 3, transcription factor 1	protein-coding
MACS_peak_659	chr18	81179545	81184354	+	908	NA	intron (NM_178280, intron 1 of 3)	intron (NM_178280, intron 1 of 3)	1368	NM_178280	20689	Mm.215917	NM_178280	ENSMUSG00000024565	Sall3	B130022O04Rik|Msal|Msal-1|Sal|Salt|Spalt	sal-like 3 (Drosophila)	protein-coding
MACS_peak_1272	chr7	146766900	146772311	+	906	NA	promoter-TSS (NM_183248)	promoter-TSS (NM_183248)	-909	NR_027857	14912	Mm.28308	NM_183248	ENSMUSG00000041309	Nkx6-2	Gtx|Nkx6.2	NK6 homeobox 2	protein-coding
MACS_peak_366	chr13	72764865	72769178	+	904	NA	intron (NM_010574, intron 1 of 4)	CpG	595	NM_010574	16372	Mm.28888	NM_010574	ENSMUSG00000001504	Irx2	IRX6	Iroquois related homeobox 2 (Drosophila)	protein-coding
MACS_peak_942	chr4	45541262	45543733	+	903	NA	exon (NM_001033306, exon 1 of 6)	exon (NM_001033306, exon 1 of 6)	1203	NM_001033306	230126	Mm.251716	NM_001033306	ENSMUSG00000044813	Shb	BC028832	src homology 2 domain-containing transforming protein B	protein-coding
MACS_peak_1111	chr5	140382953	140389546	+	896	NA	intron (NM_175522, intron 1 of 1)	intron (NM_175522, intron 1 of 1)	2352	NM_175522	243312	Mm.237102	NM_175522	ENSMUSG00000048988	Elfn1	A930017N06Rik|AI197272|Ppp1r28	leucine rich repeat and fibronectin type III, extracellular 1	protein-coding
MACS_peak_1045	chr5	36738288	36740637	+	889	NA	intron (NM_030889, intron 1 of 26)	intron (NM_030889, intron 1 of 26)	1326	NM_030889	81840	Mm.34113	NM_030889	ENSMUSG00000029093	Sorcs2	N28137|mKIAA1329	sortilin-related VPS10 domain containing receptor 2	protein-coding
MACS_peak_192	chr11	68245408	68246366	+	887	NA	intron (NM_177320, intron 1 of 18)	intron (NM_177320, intron 1 of 18)	260	NM_177320	320207	Mm.244960	NM_177320	ENSMUSG00000020901	Pik3r5	AV230647|F730038I15Rik	phosphoinositide-3-kinase, regulatory subunit 5, p101	protein-coding
MACS_peak_1	chr1	4481992	4484554	+	887	NA	exon (NM_011441, exon 4 of 5)	exon (NM_011441, exon 4 of 5)	4162	NM_001289464	20671	Mm.279103	NM_011441	ENSMUSG00000025902	Sox17	-	SRY (sex determining region Y)-box 17	protein-coding
MACS_peak_954	chr4	63155067	63157637	+	887	NA	5' UTR (NM_001008793, exon 1 of 12)	5' UTR (NM_001008793, exon 1 of 12)	673	NM_001008793	73750	Mm.300397	NM_028640	ENSMUSG00000039137	Whrn	1110035G07Rik|AW122018|AW742671|C430046P22Rik|Dfnb31|wi	whirlin	protein-coding
MACS_peak_675	chr19	28751646	28755102	+	887	NA	intron (NR_045330, intron 1 of 4)	intron (NR_045330, intron 1 of 4)	660	NR_045330	320176	Mm.406716	NR_045330	ENSMUSG00000097735	D930032P07Rik	-	RIKEN cDNA D930032P07 gene	ncRNA
MACS_peak_1305	chr8	73327935	73328522	+	887	NA	Intergenic	MIRc|SINE|MIR	-4120	NM_008353	16161	Mm.731	NM_008353	ENSMUSG00000000791	Il12rb1	CD212|IL-12R[b]	interleukin 12 receptor, beta 1	protein-coding
MACS_peak_1404	chr9	110644515	110646673	+	887	NA	promoter-TSS (NM_001083936)	promoter-TSS (NM_001083936)	-480	NM_001083936	19228	Mm.3542	NM_011199	ENSMUSG00000032492	Pth1r	PPR|Pthr|Pthr1	parathyroid hormone 1 receptor	protein-coding
MACS_peak_935	chr4	22424088	22426220	+	887	NA	Intergenic	Intergenic	-9641	NM_008899	18992	Mm.129387	NM_008899	ENSMUSG00000095139	Pou3f2	9430075J19Rik|A230098E07Rik|Brn-2|Brn2|OTF-7|Otf7|oct-7	POU domain, class 3, transcription factor 2	protein-coding
MACS_peak_598	chr17	44870537	44876253	+	878	NA	promoter-TSS (NR_073425)	promoter-TSS (NR_073425)	202	NM_001145920	12393	Mm.391013	NM_009820	ENSMUSG00000039153	Runx2	AML3|Cbf|Cbfa-1|Cbfa1|LS3|Osf2|PEBP2aA|Pebp2a1|Pebpa2a	runt related transcription factor 2	protein-coding
MACS_peak_502	chr15	99054158	99055475	+	875	NA	promoter-TSS (NM_010601)	promoter-TSS (NM_010601)	-591	NM_010601	16512	Mm.374793	NM_010601	ENSMUSG00000037579	Kcnh3	AU019351|C030044P22Rik|Elk2|Kv12.2|Melk2	potassium voltage-gated channel, subfamily H (eag-related), member 3	protein-coding
MACS_peak_248	chr11	116393593	116395342	+	875	NA	promoter-TSS (NM_025367)	promoter-TSS (NM_025367)	-85	NM_025367	20698	Mm.20944	NM_011451	ENSMUSG00000061878	Sphk1	1110006G24Rik|Sk1|Spk1	sphingosine kinase 1	protein-coding
MACS_peak_934	chr4	22413888	22417690	+	875	NA	promoter-TSS (NM_008899)	promoter-TSS (NM_008899)	-276	NM_008899	18992	Mm.129387	NM_008899	ENSMUSG00000095139	Pou3f2	9430075J19Rik|A230098E07Rik|Brn-2|Brn2|OTF-7|Otf7|oct-7	POU domain, class 3, transcription factor 2	protein-coding
MACS_peak_1042	chr5	34064026	34066749	+	875	NA	intron (NM_001163215, intron 2 of 17)	CpG	432	NM_001163217	14184	Mm.6904	NM_008010	ENSMUSG00000054252	Fgfr3	CD333|FR3|Fgfr-3|Flg-2|HBGFR|Mfr3|sam3	fibroblast growth factor receptor 3	protein-coding
MACS_peak_434	chr14	66899109	66901502	+	875	NA	promoter-TSS (NM_001162365)	promoter-TSS (NM_001162365)	-416	NM_001162365	19229	Mm.21613	NM_172498	ENSMUSG00000059456	Ptk2b	CADTK|CAKB|CAKbeta|E430023O05Rik|FADK2|FAK2|PYK2|Raftk	PTK2 protein tyrosine kinase 2 beta	protein-coding
MACS_peak_55	chr1	130487286	130492210	+	870	NA	promoter-TSS (NM_009911)	promoter-TSS (NM_009911)	-872	NM_009911	12767	Mm.1401	NM_009911	ENSMUSG00000045382	Cxcr4	CD184|Cmkar4|LESTR|PB-CKR|PBSF/SDF-1|Sdf1r|b2b220Clo	chemokine (C-X-C motif) receptor 4	protein-coding
MACS_peak_1387	chr9	74695105	74707169	+	868	NA	TTS (NR_045284)	TTS (NR_045284)	4893	NR_045284	100503019	Mm.482658	NR_045284	ENSMUSG00000066477	Gm16551	-	predicted gene 16551	ncRNA
MACS_peak_1329	chr8	106694371	106695889	+	867	NA	intron (NM_001141925, intron 1 of 4)	CpG	717	NM_001141925	65115	Mm.41849	NM_001141922	ENSMUSG00000031872	Bean1	Bean	brain expressed, associated with Nedd4, 1	protein-coding
MACS_peak_14	chr1	42770041	42771154	+	860	NA	promoter-TSS (NR_110495)	promoter-TSS (NR_110495)	-298	NR_110495	66620	Mm.383631	NR_110495		Pantr2	2610207O16Rik|Pou3f3os2|linc-Brn1b	POU domain, class 3, transcription factor 3 adjacent noncoding transcript 2	ncRNA
MACS_peak_936	chr4	43535535	43537449	+	854	NA	promoter-TSS (NM_009416)	promoter-TSS (NM_009416)	-66	NM_001277875	22004	Mm.646	NM_009416		Tpm2	Tpm-2|Trop-2	tropomyosin 2, beta	protein-coding
MACS_peak_594	chr17	36304151	36305484	+	850	NA	intron (NM_001081032, intron 2 of 7)	CpG-6353	665	NM_001081032	667977	Mm.441651	NM_001081032	ENSMUSG00000073402	Gm8909	EG667977|H2-Tw5l|H2-gs17	predicted gene 8909	protein-coding
MACS_peak_503	chr15	99420682	99421386	+	848	NA	promoter-TSS (NM_009701)	promoter-TSS (NM_009701)	-425	NM_009701	11830	Mm.45580	NM_009701	ENSMUSG00000044217	Aqp5	-	aquaporin 5	protein-coding
MACS_peak_59	chr1	135319363	135321048	+	848	NA	intron (NM_011439, intron 1 of 13)	CpG	584	NM_011439	20668	Mm.8575	NM_011439	ENSMUSG00000070643	Sox13	AA407916|AW259412|AW540933|Sox-13	SRY (sex determining region Y)-box 13	protein-coding
MACS_peak_178	chr11	52096005	52096844	+	848	NA	promoter-TSS (NM_009331)	promoter-TSS (NM_009331)	-672	NM_009331	21414	Mm.31630	NM_009331	ENSMUSG00000000782	Tcf7	AI465550|TCF-1|Tcf1	transcription factor 7, T cell specific	protein-coding
MACS_peak_669	chr19	17910130	17914126	+	844	NA	promoter-TSS (NM_001163144)	promoter-TSS (NM_001163144)	-6	NM_001190483	18552	Mm.3401	NM_001163144	ENSMUSG00000024713	Pcsk5	PC5|PC5/6A|PC5A|PC6|SPC6|b2b1549Clo|b2b585Clo	proprotein convertase subtilisin/kexin type 5	protein-coding
MACS_peak_844	chr2	169955623	169957233	+	844	NA	intron (NM_001159683, intron 2 of 6)	CpG	292	NM_001033299	228913	Mm.22858	NM_001033299	ENSMUSG00000052056	Zfp217	4933431C08Rik|AW987152|Gm562|ZABC1|Znf217	zinc finger protein 217	protein-coding
MACS_peak_962	chr4	88955800	88957284	+	844	NA	intron (NM_007670, intron 1 of 1)	CpG	399	NM_007670	12579	Mm.423094	NM_007670	ENSMUSG00000073802	Cdkn2b	AV083695|INK4b|MTS2|p15|p15(INK4b)|p15INK4b	cyclin-dependent kinase inhibitor 2B (p15, inhibits CDK4)	protein-coding
MACS_peak_875	chr3	82930404	82933613	+	844	NA	Intergenic	CpG	72548	NM_016784	53317	Mm.286349	NM_016784	ENSMUSG00000027998	Plrg1	AA958940|C80566|Tango4	pleiotropic regulator 1, PRL1 homolog (Arabidopsis)	protein-coding
MACS_peak_264	chr12	32243950	32244941	+	843	NA	intron (NM_011867, intron 1 of 20)	CpG-3114	389	NM_011867	23985	Mm.100187	NM_011867	ENSMUSG00000020651	Slc26a4	Pds|pendrin	solute carrier family 26, member 4	protein-coding
MACS_peak_343	chr13	38242550	38245364	+	843	NA	intron (NM_023842, intron 1 of 23)	intron (NM_023842, intron 1 of 23)	794	NM_023842	109620	Mm.355327	NM_023842	ENSMUSG00000054889	Dsp	2300002E22Rik|5730453H04Rik|AA407887|AA407888|AW109828|DP	desmoplakin	protein-coding
MACS_peak_480	chr15	83081059	83082653	+	843	NA	intron (NM_001004150, intron 1 of 2)	CpG	305	NM_001170954	239559	Mm.323805	NM_001004150	ENSMUSG00000047878	A4galt	-	alpha 1,4-galactosyltransferase	protein-coding
MACS_peak_464	chr15	38836769	38838614	+	843	NA	promoter-TSS (NM_001162494)	promoter-TSS (NM_001162494)	-135	NM_001162494	14368	Mm.4769	NM_008056	ENSMUSG00000022297	Fzd6	Fz6	frizzled homolog 6 (Drosophila)	protein-coding
MACS_peak_951	chr4	54957406	54959233	+	841	NA	Intergenic	Intergenic	-2498	NM_172867	242466	Mm.102904	NM_172867	ENSMUSG00000060206	Zfp462	6030417H05|9430078C22Rik|Gt4-2|Zfpip	zinc finger protein 462	protein-coding
MACS_peak_1194	chr6	122435890	122436608	+	841	NA	promoter-TSS (NM_027664)	promoter-TSS (NM_027664)	74	NM_027664	108653	Mm.277939	NM_027664	ENSMUSG00000040649	Rimklb	4931417E21Rik|4933426K21Rik|AA097693|AI325948|AU015629|Naags	ribosomal modification protein rimK-like family member B	protein-coding
MACS_peak_1190	chr6	114347004	114350134	+	841	NA	intron (NM_008285, intron 1 of 2)	intron (NM_008285, intron 1 of 2)	639	NM_008285	15465	Mm.333327	NM_008285	ENSMUSG00000053004	Hrh1	Bphs|H1R|HH1R|Hir	histamine receptor H1	protein-coding
MACS_peak_411	chr14	29317237	29318194	+	841	NA	promoter-TSS (NM_009524)	promoter-TSS (NM_009524)	-944	NM_009524	22418	Mm.287544	NM_009524	ENSMUSG00000021994	Wnt5a	8030457G12Rik|Wnt-5a	wingless-type MMTV integration site family, member 5A	protein-coding
MACS_peak_308	chr12	106247712	106248823	+	841	NA	promoter-TSS (NM_172500)	promoter-TSS (NM_172500)	-248	NM_172500	212073	Mm.212688	NM_172500	ENSMUSG00000054150	Syne3	nesprin-3	spectrin repeat containing, nuclear envelope family member 3	protein-coding
MACS_peak_1240	chr7	88598779	88599448	+	841	NA	intron (NM_001252525, intron 1 of 11)	CpG	531	NM_001252525	12877	Mm.273122	NM_007755	ENSMUSG00000025586	Cpeb1	AU024112|Cpeb|mCPEB	cytoplasmic polyadenylation element binding protein 1	protein-coding
MACS_peak_363	chr13	72098571	72103329	+	836	NA	5' UTR (NM_010573, exon 1 of 4)	5' UTR (NM_010573, exon 1 of 4)	221	NM_010573	16371	Mm.316056	NM_010573	ENSMUSG00000060969	Irx1	-	Iroquois related homeobox 1 (Drosophila)	protein-coding
MACS_peak_1201	chr7	4794603	4796149	+	836	NA	intron (NM_001290291, intron 1 of 4)	intron (NM_001290291, intron 1 of 4)	922	NM_001290291	232813	Mm.44666	NM_172737	ENSMUSG00000053550	Shisa7	-	shisa homolog 7 (Xenopus laevis)	protein-coding
MACS_peak_584	chr17	34136399	34137153	+	835	NA	exon (NM_001001892, exon 2 of 8)	exon (NM_001001892, exon 2 of 8)	502	NM_001001892	14972	Mm.422886	NM_001001892	ENSMUSG00000061232	H2-K1	H-2K|H-2K(d)|H2-K|K-f	histocompatibility 2, K1, K region	protein-coding
MACS_peak_779	chr2	74600432	74602485	+	835	NA	promoter-TSS (NR_110445)	promoter-TSS (NR_110445)	421	NM_010467	15429	Mm.4932	NM_010467	ENSMUSG00000042448	Hoxd1	Hox-4.9	homeobox D1	protein-coding
MACS_peak_48	chr1	121315555	121320327	+	832	NA	5' UTR (NM_008381, exon 1 of 2)	5' UTR (NM_008381, exon 1 of 2)	884	NM_008381	16324	Mm.3092	NM_008381	ENSMUSG00000037035	Inhbb	-	inhibin beta-B	protein-coding
MACS_peak_582	chr17	32298518	32300460	+	829	NA	intron (NM_008716, intron 2 of 32)	CpG	4308	NM_008716	18131	Mm.439741	NM_008716	ENSMUSG00000038146	Notch3	AW229011|N3|hpbk	notch 3	protein-coding
MACS_peak_903	chr3	104762855	104766496	+	829	NA	promoter-TSS (NM_009520)	promoter-TSS (NM_009520)	-48	NM_009520	22414	Mm.10740	NM_009520	ENSMUSG00000027840	Wnt2b	Wnt13	wingless-type MMTV integration site family, member 2B	protein-coding
MACS_peak_537	chr16	11982598	11985536	+	829	NA	promoter-TSS (NM_001174086)	promoter-TSS (NM_001174086)	-139	NM_028277	72555	Mm.310139	NM_028277	ENSMUSG00000022494	Shisa9	2700045P11Rik|Ckamp44	shisa homolog 9 (Xenopus laevis)	protein-coding
MACS_peak_459	chr15	31297246	31298751	+	825	NA	promoter-TSS (NM_001164441)	promoter-TSS (NM_001164441)	-484	NM_027496	67434	Mm.102470	NM_026153	ENSMUSG00000022237	Ankrd33b	0610012A05Rik|3021401C12Rik|5730557B15Rik	ankyrin repeat domain 33B	protein-coding
MACS_peak_1109	chr5	136363211	136364574	+	825	NA	5' UTR (NM_013560, exon 1 of 3)	5' UTR (NM_013560, exon 1 of 3)	103	NM_013560	15507	Mm.13849	NM_013560	ENSMUSG00000004951	Hspb1	27kDa|Hsp25	heat shock protein 1	protein-coding
MACS_peak_532	chr15	102999474	103001956	+	820	NA	Intergenic	CpG	-7000	NM_027885	71726	Mm.254820	NM_027885		Smug1	1200013B09Rik|A930006H09Rik|C85220	single-strand selective monofunctional uracil DNA glycosylase	protein-coding
MACS_peak_302	chr12	103366307	103367557	+	814	NA	promoter-TSS (NM_172152)	promoter-TSS (NM_172152)	-697	NM_172152	238384	Mm.312448	NM_172152	ENSMUSG00000041771	Slc24a4	A930002M03Rik|AW492432|NCKX4	solute carrier family 24 (sodium/potassium/calcium exchanger), member 4	protein-coding
MACS_peak_161	chr11	11585137	11586281	+	814	NA	promoter-TSS (NM_009578)	promoter-TSS (NM_009578)	-507	NM_009578	22778	Mm.103545	NM_009578	ENSMUSG00000018654	Ikzf1	5832432G11Rik|Ikaros|LyF-1|Zfpn1a1|Znfn1a1|hlk-1|mKIAA4227	IKAROS family zinc finger 1	protein-coding
MACS_peak_439	chr14	80167763	80170266	+	814	NA	exon (NM_021543, exon 1 of 3)	exon (NM_021543, exon 1 of 3)	2105	NM_001042726	18530	Mm.390715	NM_021543	ENSMUSG00000036422	Pcdh8	1700080P15Rik|Papc	protocadherin 8	protein-coding
MACS_peak_450	chr14	118633409	118636852	+	814	NA	5' UTR (NM_177753, exon 1 of 1)	5' UTR (NM_177753, exon 1 of 1)	1122	NM_177753	223227	Mm.70950	NM_177753	ENSMUSG00000061517	Sox21	Sox25	SRY (sex determining region Y)-box 21	protein-coding
MACS_peak_972	chr4	111087560	111088184	+	814	NA	exon (NM_026279, exon 1 of 6)	exon (NM_026279, exon 1 of 6)	261	NM_026279	67621	Mm.45533	NM_026279	ENSMUSG00000028545	Bend5	2310026E23Rik	BEN domain containing 5	protein-coding
MACS_peak_1130	chr6	17413372	17414539	+	814	NA	promoter-TSS (NM_008591)	promoter-TSS (NM_008591)	-2	NM_008591	17295	Mm.86844	NM_008591	ENSMUSG00000009376	Met	AI838057|HGF|HGFR|Par4|c-Met	met proto-oncogene	protein-coding
MACS_peak_451	chr15	6823549	6825581	+	814	NA	promoter-TSS (NM_011019)	promoter-TSS (NM_011019)	-252	NM_011019	18414	Mm.10760	NM_011019	ENSMUSG00000022146	Osmr	OSMRB	oncostatin M receptor	protein-coding
MACS_peak_665	chr19	5653984	5654935	+	814	NA	intron (NM_001164480, intron 9 of 16)	CpG-7246	9248	NM_001164482	20469	Mm.3072	NM_011379	ENSMUSG00000056917	Sipa1	Spa1	signal-induced proliferation associated gene 1	protein-coding
MACS_peak_709	chr19	55815162	55816188	+	814	NA	promoter-TSS (NM_001142919)	promoter-TSS (NM_001142919)	-625	NM_001142922	21416	Mm.139815	NM_009333	ENSMUSG00000024985	Tcf7l2	TCF4B|TCF4E|Tcf-4|Tcf4|mTcf-4B|mTcf-4E	transcription factor 7 like 2, T cell specific, HMG box	protein-coding
MACS_peak_162	chr11	11936425	11937031	+	814	NA	intron (NM_010345, intron 1 of 16)	CpG	695	NM_010345	14783	Mm.273117	NM_010345	ENSMUSG00000020176	Grb10	5730571D09Rik|AI325020|Meg1|mKIAA0207	growth factor receptor bound protein 10	protein-coding
MACS_peak_682	chr19	38554931	38556129	+	814	NA	Intergenic	CpG	-43157	NM_019588	74055	Mm.34031	NM_019588	ENSMUSG00000024998	Plce1	4933403A21Rik|PLCepsilon|Plce|mKIAA1516	phospholipase C, epsilon 1	protein-coding
MACS_peak_786	chr2	91762229	91763348	+	812	NA	intron (NM_007699, intron 1 of 1)	CpG	442	NM_007699	12672	Mm.330405	NM_007699	ENSMUSG00000040495	Chrm4	Chrm-4|M4	cholinergic receptor, muscarinic 4	protein-coding
MACS_peak_186	chr11	62061783	62062000	+	812	NA	promoter-TSS (NM_007413)	promoter-TSS (NM_007413)	-595	NM_007413	11541	Mm.40740	NM_007413	ENSMUSG00000018500	Adora2b	A2BAR|A2BR|A2b|AA2BR|AI480866|AI605384	adenosine A2b receptor	protein-coding
MACS_peak_1205	chr7	19679592	19681783	+	811	NA	exon (NM_011383, exon 1 of 3)	exon (NM_011383, exon 1 of 3)	794	NM_011383	20475	Mm.3410	NM_011383	ENSMUSG00000040841	Six5	Dmahp|MDMAHP|TrexBF	sine oculis-related homeobox 5	protein-coding
MACS_peak_197	chr11	78002165	78003222	+	811	NA	5' UTR (NM_033475, exon 1 of 10)	5' UTR (NM_033475, exon 1 of 10)	443	NM_033475	19376	Mm.275864	NM_033475	ENSMUSG00000002059	Rab34	AI326479|Narr|Rah|Rah1	RAB34, member RAS oncogene family	protein-coding
MACS_peak_1085	chr5	115108169	115108699	+	809	NA	promoter-TSS (NM_022017)	promoter-TSS (NM_022017)	-4	NM_022017	63873	Mm.266450	NM_022017	ENSMUSG00000014158	Trpv4	0610033B08Rik|OTRPC4|Trp12|VR-OAC|VRL-2|VROAC	transient receptor potential cation channel, subfamily V, member 4	protein-coding
MACS_peak_993	chr4	125825367	125826991	+	809	NA	intron (NM_172145, intron 1 of 2)	CpG	932	NM_172145	230752	Mm.41569	NM_172145	ENSMUSG00000050212	Eva1b	2610027C15Rik|Fam176b	eva-1 homolog B (C. elegans)	protein-coding
MACS_peak_632	chr18	11046423	11056416	+	809	NA	intron (NR_105022, intron 1 of 3)	intron (NR_105022, intron 1 of 3)	-1089	NM_010258	14465	Mm.329287	NM_010258	ENSMUSG00000005836	Gata6	AA410133|GATA-6	GATA binding protein 6	protein-coding
MACS_peak_1016	chr4	148178678	148181248	+	809	NA	intron (NM_027195, intron 1 of 15)	CpG	1462	NM_027195	69743	Mm.233879	NM_027195	ENSMUSG00000028977	Casz1	2410019P08Rik|AV096627|BC040081|Cst|D4Ertd432e	castor zinc finger 1	protein-coding
MACS_peak_1038	chr5	30431272	30432961	+	806	NA	intron (NM_001256263, intron 1 of 2)	intron (NM_001256263, intron 1 of 2)	380	NM_001167879	242915	Mm.332287	NM_001167879	ENSMUSG00000044576	Gareml	Fam59b|Gm444	GRB2 associated, regulator of MAPK1-like	protein-coding
MACS_peak_68	chr1	157091138	157092279	+	802	NA	Intergenic	CpG	85875	NM_021433	58244	Mm.66264	NM_021433	ENSMUSG00000026470	Stx6	2310039E05Rik|2410005I16Rik|AA437559|AI415714|AI845861	syntaxin 6	protein-coding
MACS_peak_171	chr11	33097877	33106112	+	802	NA	intron (NM_019916, intron 2 of 2)	CpG	1594	NM_019916	27140	Mm.25362	NM_019916	ENSMUSG00000040610	Tlx3	Hox11l2|Rnx|Tlx1l2	T cell leukemia, homeobox 3	protein-coding
MACS_peak_949	chr4	47365434	47366682	+	800	NA	promoter-TSS (NM_009370)	promoter-TSS (NM_009370)	-119	NM_009370	21812	Mm.197552	NM_009370	ENSMUSG00000007613	Tgfbr1	ALK5|AU017191|Alk-5|TbetaR-I|TbetaRI	transforming growth factor, beta receptor I	protein-coding
MACS_peak_20	chr1	61685388	61685622	+	792	NA	5' UTR (NM_001081050, exon 1 of 23)	5' UTR (NM_001081050, exon 1 of 23)	107	NM_001081050	72823	Mm.35153	NM_001081050	ENSMUSG00000052062	Pard3b	1810008K04Rik|2010002N16Rik|2810455B10Rik|Als2cr19|PAR3B|PAR3L|PAR3beta	par-3 family cell polarity regulator beta	protein-coding
MACS_peak_756	chr2	70309119	70315407	+	792	NA	promoter-TSS (NM_022435)	promoter-TSS (NM_022435)	-717	NM_022435	64406	Mm.423397	NM_022435	ENSMUSG00000075304	Sp5	-	trans-acting transcription factor 5	protein-coding
MACS_peak_1413	chr9	122480535	122482255	+	787	NA	promoter-TSS (NR_015610)	promoter-TSS (NR_015610)	-224	NR_015610	319626	Mm.186748	NR_015610	ENSMUSG00000097736	9530059O14Rik	-	RIKEN cDNA 9530059O14 gene	ncRNA
MACS_peak_952	chr4	62874913	62875510	+	786	NA	Intergenic	CpG	-1235	NM_025685	373864	Mm.194116	NM_025685	ENSMUSG00000045672	Col27a1	5730512J02Rik|AI449266|mKIAA1870	collagen, type XXVII, alpha 1	protein-coding
MACS_peak_1129	chr6	8897461	8898928	+	786	NA	Intergenic	Intergenic	-1825	NM_008751	18231	Mm.46954	NM_008751	ENSMUSG00000046178	Nxph1	C130005L03Rik	neurexophilin 1	protein-coding
MACS_peak_432	chr14	64560548	64563412	+	786	NA	promoter-TSS (NM_011446)	promoter-TSS (NM_011446)	-563	NM_011446	20680	Mm.42162	NM_011446	ENSMUSG00000063060	Sox7	-	SRY (sex determining region Y)-box 7	protein-coding
MACS_peak_344	chr13	38437573	38439018	+	780	NA	exon (NM_007556, exon 1 of 7)	exon (NM_007556, exon 1 of 7)	710	NM_007556	12161	Mm.385759	NM_007556	ENSMUSG00000039004	Bmp6	D13Wsu115e|Vgr1	bone morphogenetic protein 6	protein-coding
MACS_peak_606	chr17	67701937	67703892	+	780	NA	intron (NM_008984, intron 1 of 30)	CpG	885	NM_008984	19274	Mm.311809	NM_008984	ENSMUSG00000033278	Ptprm	RPTPmu|mKIAA4044	protein tyrosine phosphatase, receptor type, M	protein-coding
MACS_peak_832	chr2	163030242	163030936	+	780	NA	Intergenic	Intergenic	-20601	NM_001098799	269389	Mm.207709	NM_001098799	ENSMUSG00000074607	Tox2	AI851523|AV026525|BI987407|Gcx1|RxHMG1	TOX high mobility group box family member 2	protein-coding
MACS_peak_1104	chr5	129104271	129107112	+	780	NA	intron (NR_015517, intron 1 of 5)	intron (NR_015517, intron 1 of 5)	871	NR_015517	319616	Mm.387738	NR_015517	ENSMUSG00000072591	5930412G12Rik	-	RIKEN cDNA 5930412G12 gene	ncRNA
MACS_peak_739	chr2	31804923	31807409	+	780	NA	intron (NM_145144, intron 2 of 5)	intron (NM_145144, intron 2 of 5)	343	NM_145144	108897	Mm.24838	NM_145144	ENSMUSG00000001864	Aif1l	2810003C17Rik|AI043124|C87647|Iba2	allograft inflammatory factor 1-like	protein-coding
MACS_peak_1330	chr8	108488830	108490488	+	780	NA	intron (NR_045594, intron 1 of 23)	CpG	356	NM_001253804	20498	Mm.292447	NM_009195	ENSMUSG00000017765	Slc12a4	AW546649|KCC1|RBCKCC1	solute carrier family 12, member 4	protein-coding
MACS_peak_574	chr17	28278706	28279948	+	780	NA	promoter-TSS (NM_001004366)	promoter-TSS (NM_001004366)	-144	NM_001004366	268935	Mm.258491	NM_001004366	ENSMUSG00000038677	Scube3	CEGF3|D030038I21Rik	signal peptide, CUB domain, EGF-like 3	protein-coding
MACS_peak_906	chr3	108028349	108029801	+	780	NA	exon (NM_008596, exon 2 of 6)	exon (NM_008596, exon 2 of 6)	442	NM_008596	17306	Mm.316885	NM_008596	ENSMUSG00000027887	Sypl2	AI552439|Mg29	synaptophysin-like 2	protein-coding
MACS_peak_1200	chr7	4727937	4729974	+	780	NA	intron (NM_001290423, intron 1 of 4)	intron (NM_001290423, intron 1 of 4)	788	NM_008350	16156	Mm.35814	NM_008350	ENSMUSG00000004371	Il11	IL-11	interleukin 11	protein-coding
MACS_peak_757	chr2	70347305	70347587	+	780	NA	exon (NM_025744, exon 1 of 13)	exon (NM_025744, exon 1 of 13)	570	NM_025744	66748	Mm.423014	NM_025744	ENSMUSG00000075302	Erich2	4933404M02Rik	glutamate rich 2	protein-coding
MACS_peak_239	chr11	103632266	103636871	+	779	NA	promoter-TSS (NM_009521)	promoter-TSS (NM_009521)	-921	NM_009521	22415	Mm.159091	NM_009521	ENSMUSG00000000125	Wnt3	Int-4|Wnt-3	wingless-type MMTV integration site family, member 3	protein-coding
MACS_peak_199	chr11	79967467	79968145	+	778	NA	exon (NM_172133, exon 1 of 11)	exon (NM_172133, exon 1 of 11)	142	NM_172133	216991	Mm.341520	NM_172133	ENSMUSG00000020709	Adap2	Centa2	ArfGAP with dual PH domains 2	protein-coding
MACS_peak_1220	chr7	52470952	52471822	+	777	NA	intron (NM_001285498, intron 1 of 11)	CpG	264	NM_001285498	21677	Mm.3019	NM_011565	ENSMUSG00000030796	Tead2	ETF|Etdf|TEAD-2|TEF-4|TEF4	TEA domain family member 2	protein-coding
MACS_peak_1067	chr5	93031619	93032568	+	777	NA	promoter-TSS (NM_175096)	promoter-TSS (NM_175096)	16	NM_175096	52331	Mm.21965	NM_175096	ENSMUSG00000047963	Stbd1	D530019K15Rik|D5Ertd593e	starch binding domain 1	protein-coding
MACS_peak_458	chr15	26824642	26825525	+	777	NA	5' UTR (NM_176959, exon 1 of 4)	5' UTR (NM_176959, exon 1 of 4)	236	NM_176959	448987	Mm.253378	NM_176959		Fbxl7	AL023057|D230018M15Rik|FBL7|Fbl6	F-box and leucine-rich repeat protein 7	protein-coding
MACS_peak_831	chr2	163027813	163029206	+	774	NA	Intergenic	Intergenic	-22681	NM_001098799	269389	Mm.207709	NM_001098799	ENSMUSG00000074607	Tox2	AI851523|AV026525|BI987407|Gcx1|RxHMG1	TOX high mobility group box family member 2	protein-coding
MACS_peak_522	chr15	102825061	102832591	+	774	NA	Intergenic	Intergenic	7856	NM_010466	15426	Mm.6167	NM_010466	ENSMUSG00000001657	Hoxc8	D130011F21Rik|Hox-3.1	homeobox C8	protein-coding
MACS_peak_152	chr10	128026268	128027442	+	774	NA	promoter-TSS (NM_010153)	promoter-TSS (NM_010153)	-298	NM_010153	13867	Mm.373043	NM_010153		Erbb3	C76256|Erbb-3|Erbb3r|Her3	v-erb-b2 erythroblastic leukemia viral oncogene homolog 3 (avian)	protein-coding
MACS_peak_600	chr17	48058097	48061660	+	774	NA	intron (NM_001110824, intron 1 of 16)	intron (NM_001110824, intron 1 of 16)	1703	NM_028767	74123	Mm.240062	NM_028767	ENSMUSG00000023991	Foxp4	1200010K03Rik|2310007G05Rik|mFKHLA	forkhead box P4	protein-coding
MACS_peak_189	chr11	66339230	66340785	+	774	NA	promoter-TSS (NM_001034874)	promoter-TSS (NM_001034874)	-379	NM_001034874	380702	Mm.351764	NM_001034874	ENSMUSG00000053930	Shisa6	Gm879	shisa homolog 6 (Xenopus laevis)	protein-coding
MACS_peak_240	chr11	107654762	107657545	+	774	NA	promoter-TSS (NM_019431)	promoter-TSS (NM_019431)	-375	NM_019431	54377	Mm.103724	NM_019431		Cacng4	AI413107|AW491861	calcium channel, voltage-dependent, gamma subunit 4	protein-coding
MACS_peak_603	chr17	51972292	51972984	+	774	NA	promoter-TSS (NM_001163632)	promoter-TSS (NM_001163632)	-23	NM_001163632	20230	Mm.311655	NM_009122	ENSMUSG00000023927	Satb1	2610306G12Rik|AW413156	special AT-rich sequence binding protein 1	protein-coding
MACS_peak_1295	chr8	48495631	48499135	+	774	NA	Intergenic	Intergenic	-59681	NM_175162	71069	Mm.23973	NM_175162	ENSMUSG00000038143	Stox2	4933409N07Rik|AI449080|AI835114|mKIAA1392	storkhead box 2	protein-coding
MACS_peak_90	chr10	13192594	13194169	+	773	NA	intron (NM_001195065, intron 1 of 12)	intron (NM_001195065, intron 1 of 12)	821	NM_001195065	215789	Mm.283359	NM_001033257	ENSMUSG00000062866	Phactr2	AV158170|BC012871	phosphatase and actin regulator 2	protein-coding
MACS_peak_1372	chr9	49148018	49150152	+	773	NA	intron (NM_010077, intron 1 of 7)	intron (NM_010077, intron 1 of 7)	318	NM_010077	13489	Mm.41970	NM_010077	ENSMUSG00000032259	Drd2	D2R|Drd-2	dopamine receptor D2	protein-coding
MACS_peak_441	chr14	99697603	99698539	+	773	NA	5' UTR (NM_009769, exon 1 of 4)	5' UTR (NM_009769, exon 1 of 4)	161	NM_009769	12224	Mm.30262	NM_009769	ENSMUSG00000005148	Klf5	4930520J07Rik|Bteb2|CKLF|IKLF	Kruppel-like factor 5	protein-coding
MACS_peak_610	chr17	71658531	71661555	+	773	NA	intron (NM_145158, intron 1 of 7)	CpG	262	NM_145158	246707	Mm.23462	NM_145158	ENSMUSG00000024053	Emilin2	FOAP-10	elastin microfibril interfacer 2	protein-coding
MACS_peak_320	chr12	113368414	113370149	+	771	NA	TTS (NR_029590)	TTS (NR_029590)	190	NR_029590	387199		NR_029590	miRBase:MI0000246	Mir203	Mirn203|mmu-mir-203	microRNA 203	ncRNA
MACS_peak_252	chr11	118950192	118952085	+	768	NA	Intergenic	Intergenic	-3587	NM_007625	12418	Mm.268070	NM_007625	ENSMUSG00000039989	Cbx4	MPc2|PC2	chromobox 4	protein-coding
MACS_peak_1318	chr8	94322004	94330823	+	764	NA	promoter-TSS (NM_008393)	promoter-TSS (NM_008393)	-860	NM_008393	16373	Mm.238044	NM_008393	ENSMUSG00000031734	Irx3	AI894186	Iroquois related homeobox 3	protein-coding
MACS_peak_376	chr13	95471783	95475761	+	758	NA	Intergenic	Intergenic	-85126	NM_009321	21371	Mm.379025	NM_009321	ENSMUSG00000042043	Tbca	Tbca13	tubulin cofactor A	protein-coding
MACS_peak_326	chr13	3358434	3360847	+	758	NA	Intergenic	CpG	-117909	NR_015522	76937	Mm.487240	NR_015522	ENSMUSG00000097709	2810429I04Rik	AI256682	RIKEN cDNA 2810429I04 gene	ncRNA
MACS_peak_628	chr17	87150285	87153633	+	758	NA	Intergenic	Intergenic	-1245	NM_010137	13819	Mm.1415	NM_010137	ENSMUSG00000024140	Epas1	HIF-2alpha|HIF2A|HLF|HRF|MOP2|bHLHe73	endothelial PAS domain protein 1	protein-coding
MACS_peak_1196	chr6	127098597	127103507	+	758	NA	promoter-TSS (NM_009829)	promoter-TSS (NM_009829)	14	NM_009829	12444	Mm.333406	NM_009829	ENSMUSG00000000184	Ccnd2	2600016F06Rik|AI256817|BF642806|C86853|Vin-1|Vin1|cD2	cyclin D2	protein-coding
MACS_peak_1117	chr5	147996434	148003374	+	756	NA	promoter-TSS (NM_008178)	promoter-TSS (NM_008178)	-368	NM_008178	14842	Mm.4797	NM_008178	ENSMUSG00000053129	Gsx1	Gsh-1|Gsh1	GS homeobox 1	protein-coding
MACS_peak_340	chr13	31902285	31903898	+	752	NA	TTS (NM_008592)	TTS (NM_008592)	4576	NM_008592	17300	Mm.12949	NM_008592	ENSMUSG00000050295	Foxc1	FREAC3|Fkh1|Mf1|Mf4|ch|fkh-1|frkhda	forkhead box C1	protein-coding
MACS_peak_968	chr4	100449218	100449886	+	748	NA	5' UTR (NM_198037, exon 1 of 27)	5' UTR (NM_198037, exon 1 of 27)	268	NM_198037	320508	Mm.151962	NM_198037	ENSMUSG00000028532	Cachd1	1190007F10Rik|AI852726|B430218L07Rik|Vwcd1|mKIAA1573	cache domain containing 1	protein-coding
MACS_peak_1254	chr7	120097115	120098880	+	748	NA	exon (NM_175279, exon 1 of 1)	exon (NM_175279, exon 1 of 1)	521	NM_175279	78748	Mm.349943	NM_175279	ENSMUSG00000098132	Rassf10	4632411J06Rik	Ras association (RalGDS/AF-6) domain family (N-terminal) member 10	protein-coding
MACS_peak_95	chr10	21873248	21874418	+	746	NA	Intergenic	Intergenic	-4582	NM_009016	19368	Mm.458004	NM_009016		Raet1a	RAE-1alpha|Rae1alpha|Raet1	retinoic acid early transcript 1, alpha	protein-coding
MACS_peak_200	chr11	82743943	82748044	+	745	NA	intron (NM_178680, intron 13 of 19)	(CTCG)n|Simple_repeat|Simple_repeat	-19611	NM_183201	327978	Mm.42147	NM_183201	ENSMUSG00000054404	Slfn5	AI956840	schlafen 5	protein-coding
MACS_peak_729	chr2	20441118	20442489	+	745	NA	intron (NM_178059, intron 2 of 18)	intron (NM_178059, intron 2 of 18)	663	NM_001177631	208618	Mm.237935	NM_029895	ENSMUSG00000036617	Etl4	6620402G01Rik|9430077C05Rik|BC026657|E330027G05Rik|Etl-4|Skt	enhancer trap locus 4	protein-coding
MACS_peak_273	chr12	54353359	54354694	+	745	NA	intron (NM_013780, intron 1 of 11)	CpG	4362	NM_013780	27386	Mm.247044	NM_013780	ENSMUSG00000021010	Npas3	4930423H22Rik|bHLHe12	neuronal PAS domain protein 3	protein-coding
MACS_peak_448	chr14	115439617	115441039	+	745	NA	Intergenic	CpG	-2565	NR_029785	723905		NR_029785	miRBase:MI0000687	Mir17	Mirn17|mmu-mir-17	microRNA 17	ncRNA
MACS_peak_318	chr12	110289243	110293051	+	742	NA	intron (NM_001163175, intron 1 of 6)	CpG-3499	15280	NM_001163175	380785	Mm.342085	NM_001163175	ENSMUSG00000040867	Begain	BM948371|Gm897	brain-enriched guanylate kinase-associated	protein-coding
MACS_peak_1008	chr4	135979371	135981122	+	741	NA	promoter-TSS (NM_001285484)	promoter-TSS (NM_001285484)	-281	NM_001285484	15552	Mm.40573	NM_008309	ENSMUSG00000070687	Htr1d	5-HT-1D|5-HT1D|AI853647|Gpcr14|Htr1db	5-hydroxytryptamine (serotonin) receptor 1D	protein-coding
MACS_peak_752	chr2	61652634	61654118	+	741	NA	Intergenic	(CCCG)n|Simple_repeat|Simple_repeat	10866	NM_009322	21375	Mm.308525	NM_009322	ENSMUSG00000035033	Tbr1	-	T-box brain gene 1	protein-coding
MACS_peak_1027	chr4	154008802	154012022	+	739	NA	promoter-TSS (NR_045643)	promoter-TSS (NR_045643)	64	NR_045643	320939	Mm.436738	NR_045643		5930403L14Rik	-	RIKEN cDNA 5930403L14 gene	ncRNA
MACS_peak_548	chr16	90385912	90387222	+	733	NA	promoter-TSS (NM_015755)	promoter-TSS (NM_015755)	-75	NM_015755	26559	Mm.125874	NM_015755	ENSMUSG00000053414	Hunk	Bstk1|Mak-v	hormonally upregulated Neu-associated kinase	protein-coding
MACS_peak_372	chr13	73984532	73985136	+	733	NA	intron (NM_028186, intron 1 of 9)	CpG-4007	245	NM_028186	72293	Mm.45506	NM_028186	ENSMUSG00000021567	Nkd2	2210403L10Rik|AW212591	naked cuticle 2 homolog (Drosophila)	protein-coding
MACS_peak_653	chr18	67550091	67551246	+	733	NA	intron (NM_026473, intron 1 of 3)	CpG	283	NM_026473	67951	Mm.181860	NM_026473	ENSMUSG00000001473	Tubb6	2310057H16Rik|BB220206	tubulin, beta 6 class V	protein-coding
MACS_peak_973	chr4	114078504	114079907	+	733	NA	promoter-TSS (NM_001085549)	promoter-TSS (NM_001085549)	-124	NM_001085549	666048	Mm.331779	NM_001085549	ENSMUSG00000070867	Trabd2b	Gm12824|OTTMUSG00000008561	TraB domain containing 2B	protein-coding
MACS_peak_482	chr15	83553922	83556323	+	732	NA	intron (NM_022723, intron 1 of 21)	CpG	347	NM_001271472	64706	Mm.40393	NM_022723	ENSMUSG00000016763	Scube1	7330410C13Rik|A630023E24Rik	signal peptide, CUB domain, EGF-like 1	protein-coding
MACS_peak_140	chr10	93296234	93296917	+	732	NA	intron (NM_183199, intron 1 of 3)	CpG	2275	NM_001206851	327799	Mm.491598	NM_183199	ENSMUSG00000020020	Usp44	E430004F17Rik	ubiquitin specific peptidase 44	protein-coding
MACS_peak_997	chr4	129190559	129191785	+	725	NA	intron (NM_010807, intron 1 of 1)	CpG	347	NM_010807	17357	Mm.424974	NM_010807	ENSMUSG00000047945	Marcksl1	AL022768|AW215397|AW536807|D4Bc1|F52|MacMARCKS|Macs2|Macs3|Mlp|Mrp	MARCKS-like 1	protein-coding
MACS_peak_46	chr1	120947390	120951429	+	725	NA	intron (NM_001081125, intron 1 of 13)	intron (NM_001081125, intron 1 of 13)	787	NM_001081125	14633	Mm.273292	NM_001081125	ENSMUSG00000048402	Gli2	AW546128	GLI-Kruppel family member GLI2	protein-coding
MACS_peak_191	chr11	68212600	68214254	+	725	NA	Intergenic	CpG	-13099	NM_008744	18208	Mm.39095	NM_008744	ENSMUSG00000020902	Ntn1	AI561871|BC019633|Netrin-1	netrin 1	protein-coding
MACS_peak_247	chr11	115967644	115972053	+	725	NA	intron (NM_001205081, intron 1 of 5)	intron (NM_001205081, intron 1 of 5)	1701	NM_001205081	217333	Mm.347770	NM_172570	ENSMUSG00000020773	Trim47	2210023F24Rik	tripartite motif-containing 47	protein-coding
MACS_peak_809	chr2	146046362	146049789	+	725	NA	exon (NM_016889, exon 1 of 1)	exon (NM_016889, exon 1 of 1)	342	NM_016889	53626	Mm.379070	NM_016889	ENSMUSG00000068154	Insm1	IA-1	insulinoma-associated 1	protein-coding
MACS_peak_1255	chr7	123174855	123176137	+	721	NA	promoter-TSS (NM_001025560)	promoter-TSS (NM_001025560)	-935	NM_001025560	20679	Mm.323365	NM_011445	ENSMUSG00000051910	Sox6	AI987981|SOX-LZ	SRY (sex determining region Y)-box 6	protein-coding
MACS_peak_208	chr11	95001943	95007639	+	721	NA	intron (NM_007867, intron 1 of 2)	intron (NM_007867, intron 1 of 2)	-1576	NR_040279	320453	Mm.442212	NR_040279	ENSMUSG00000086552	A730090H04Rik	Dlx4as	RIKEN cDNA A730090H04 gene	ncRNA
MACS_peak_41	chr1	91836118	91838992	+	719	NA	Intergenic	Intergenic	-9804	NM_010262	14472	Mm.204730	NM_010262		Gbx2	D130058E05Rik|Gbx-2|MMoxA|Stra7	gastrulation brain homeobox 2	protein-coding
MACS_peak_1258	chr7	125590488	125592107	+	718	NA	Intergenic	CpG	-4231	NM_138649	110058	Mm.156558	NM_138649	ENSMUSG00000058420	Syt17	Bk	synaptotagmin XVII	protein-coding
MACS_peak_866	chr3	34559881	34564181	+	718	NA	intron (NR_015580, intron 4 of 4)	intron (NR_015580, intron 4 of 4)	13104	NM_011443	20674	Mm.65396	NM_011443	ENSMUSG00000074637	Sox2	Sox-2|lcc|ysb	SRY (sex determining region Y)-box 2	protein-coding
MACS_peak_1053	chr5	65361226	65361821	+	718	NA	promoter-TSS (NR_030577)	promoter-TSS (NR_030577)	-34	NR_030577	100124451		NR_030577	miRBase:MI0005518	Mir574	Mirn574|mmu-mir-574	microRNA 574	ncRNA
MACS_peak_494	chr15	97831175	97836297	+	718	NA	intron (NM_031163, intron 1 of 53)	intron (NM_031163, intron 1 of 53)	1419	NM_031163	12824	Mm.2423	NM_031163	ENSMUSG00000022483	Col2a1	Col2|Col2a|Col2a-1|Del1|Dmm|Lpk|M100856|Rgsc856	collagen, type II, alpha 1	protein-coding
MACS_peak_49	chr1	122498718	122500719	+	718	NA	exon (NM_010133, exon 1 of 2)	exon (NM_010133, exon 1 of 2)	654	NM_010133	13798	Mm.2657	NM_010133		En1	En-1|Mo-en.1	engrailed 1	protein-coding
MACS_peak_242	chr11	112640891	112646756	+	715	NA	5' UTR (NM_011448, exon 1 of 3)	5' UTR (NM_011448, exon 1 of 3)	299	NM_011448	20682	Mm.286407	NM_011448	ENSMUSG00000000567	Sox9	2010306G03Rik|AV220920|mKIAA4243	SRY (sex determining region Y)-box 9	protein-coding
MACS_peak_1235	chr7	81156825	81158424	+	713	NA	intron (NM_009181, intron 1 of 5)	CpG	944	NM_009181	20450	Mm.4954	NM_009181	ENSMUSG00000025789	St8sia2	AI323367|ST8SiaII|STX|Siat8b	ST8 alpha-N-acetyl-neuraminide alpha-2,8-sialyltransferase 2	protein-coding
MACS_peak_753	chr2	63936187	63936932	+	713	NA	promoter-TSS (NM_001267847)	promoter-TSS (NM_001267847)	-464	NM_001267847	60344	Mm.130769	NM_021716	ENSMUSG00000075324	Fign	fi|fidget	fidgetin	protein-coding
MACS_peak_730	chr2	22478081	22481884	+	713	NA	intron (NM_008078, intron 3 of 15)	intron (NM_008078, intron 3 of 15)	2135	NM_008078	14417	Mm.4784	NM_008078	ENSMUSG00000026787	Gad2	6330404F12Rik|GAD(65)|GAD65|Gad-2	glutamic acid decarboxylase 2	protein-coding
MACS_peak_599	chr17	47970178	47972165	+	713	NA	promoter-TSS (NM_001276391)	promoter-TSS (NM_001276391)	469	NM_001109973	17240	Mm.329100	NM_010783	ENSMUSG00000032717	Mdfi	I-mf|I-mfa	MyoD family inhibitor	protein-coding
MACS_peak_1278	chr7	150644916	150648533	+	713	NA	intron (NM_001161624, intron 1 of 3)	CpG-13772	231	NM_009876	12577	Mm.168789	NM_009876	ENSMUSG00000037664	Cdkn1c	AL024410|CDKI|Kip2|p57(kip2)|p57Kip2	cyclin-dependent kinase inhibitor 1C (P57)	protein-coding
MACS_peak_74	chr1	169270545	169270792	+	712	NA	Intergenic	LSU-rRNA_Hsa|rRNA|rRNA	-9454	NM_019993	56752	Mm.330055	NM_019993	ENSMUSG00000026687	Aldh9a1	AA139417|Abaldh|ESTM40|TMABA-DH|Tmabadh	aldehyde dehydrogenase 9, subfamily A1	protein-coding
MACS_peak_1039	chr5	31394442	31397608	+	712	NA	promoter-TSS (NM_011773)	promoter-TSS (NM_011773)	-125	NM_011773	22784	Mm.1396	NM_011773	ENSMUSG00000029151	Slc30a3	Znt3	solute carrier family 30 (zinc transporter), member 3	protein-coding
MACS_peak_126	chr10	56097123	56099747	+	709	NA	intron (NM_010288, intron 1 of 1)	intron (NM_010288, intron 1 of 1)	1329	NM_010288	14609	Mm.378921	NM_010288	ENSMUSG00000050953	Gja1	AU042049|AW546267|Cnx43|Cx43|Cx43alpha1|Gja-1|Npm1|connexin43	gap junction protein, alpha 1	protein-coding
MACS_peak_1212	chr7	25727813	25730252	+	709	NA	Intergenic	Intergenic	26062	NR_106013	102465633		NR_106013		Mir7046	mmu-mir-7046	microRNA mir-7046	ncRNA
MACS_peak_244	chr11	113925475	113929567	+	709	NA	promoter-TSS (NM_172800)	promoter-TSS (NM_172800)	-256	NM_172800	237979	Mm.130504	NM_172800	ENSMUSG00000041592	Sdk2	4632412F08Rik|5330435L01Rik|Sdk-2|mKIAA1514	sidekick homolog 2 (chicken)	protein-coding
MACS_peak_259	chr12	15821206	15823854	+	709	NA	5' UTR (NM_144551, exon 1 of 3)	5' UTR (NM_144551, exon 1 of 3)	1061	NM_144551	217410	Mm.491136	NM_144551	ENSMUSG00000020601	Trib2	AW319517|TRB-2|TRB2	tribbles homolog 2 (Drosophila)	protein-coding
MACS_peak_112	chr10	43296674	43300719	+	706	NA	promoter-TSS (NM_009846)	promoter-TSS (NM_009846)	-279	NM_009846	12484	Mm.29742	NM_009846	ENSMUSG00000047139	Cd24a	Cd24|HSA|Ly-52|nectadrin	CD24a antigen	protein-coding
MACS_peak_873	chr3	67318806	67319850	+	706	NA	exon (NM_001164763, exon 1 of 6)	exon (NM_001164763, exon 1 of 6)	117	NM_001164763	109222	Mm.38002	NM_001164763	ENSMUSG00000049404	Rarres1	5430417P09Rik|AI662122	retinoic acid receptor responder (tazarotene induced) 1	protein-coding
MACS_peak_868	chr3	51162697	51163237	+	705	NA	Intergenic	CpG	-18401	NM_023502	69257	Mm.131038	NM_023502	ENSMUSG00000037174	Elf2	2610036A20Rik|A230104O07Rik|AW111824|BB183398|EU32|NERF|NERF-1A|NERF-1B|NERF-2	E74-like factor 2	protein-coding
MACS_peak_468	chr15	64212232	64216636	+	705	NA	promoter-TSS (NM_010026)	promoter-TSS (NM_010026)	47	NM_001276461	13196	Mm.277236	NM_010026	ENSMUSG00000022377	Asap1	AV239055|DEF-1|Ddef1|PAP|mKIAA1249|s19	ArfGAP with SH3 domain, ankyrin repeat and PH domain1	protein-coding
MACS_peak_723	chr2	10293027	10294736	+	704	NA	promoter-TSS (NM_001198809)	promoter-TSS (NM_001198809)	-182	NM_001198809	353282	Mm.329991	NM_177386	ENSMUSG00000061186	Sfmbt2	D2Wsu23e|D330030P06Rik	Scm-like with four mbt domains 2	protein-coding
MACS_peak_550	chr16	91222493	91228205	+	703	NA	promoter-TSS (NM_016967)	promoter-TSS (NM_016967)	-446	NM_016967	50913	Mm.37289	NM_016967	ENSMUSG00000039830	Olig2	AI604895|Bhlhb1|Olg-2|Oligo2|RK17|bHLHe19	oligodendrocyte transcription factor 2	protein-coding
MACS_peak_1215	chr7	28114632	28119903	+	702	NA	intron (NM_175641, intron 4 of 32)	intron (NM_175641, intron 4 of 32)	1400	NM_001113549	108075	Mm.272251	NM_175641	ENSMUSG00000040488	Ltbp4	2310046A13Rik	latent transforming growth factor beta binding protein 4	protein-coding
MACS_peak_707	chr19	53750742	53752237	+	701	NA	promoter-TSS (NM_001170847)	promoter-TSS (NM_001170847)	-307	NM_001170847	73713	Mm.313695	NM_001170847	ENSMUSG00000043639	Rbm20	1110018J23Rik|2010003H22Rik|AI646761	RNA binding motif protein 20	protein-coding
MACS_peak_1078	chr5	109122998	109124169	+	701	NA	intron (NM_001164259, intron 1 of 5)	CpG	335	NM_054071	116701	Mm.35691	NM_054071	ENSMUSG00000008090	Fgfrl1	FGFR5|FGFR5beta|FGFR5gamma	fibroblast growth factor receptor-like 1	protein-coding
MACS_peak_1259	chr7	125634623	125635710	+	701	NA	5' UTR (NM_001033380, exon 1 of 1)	5' UTR (NM_001033380, exon 1 of 1)	323	NM_001033380	319622	Mm.323386	NM_001033380	ENSMUSG00000095115	Itpripl2	C130081G24|E030018N11Rik	inositol 1,4,5-triphosphate receptor interacting protein-like 2	protein-coding
MACS_peak_781	chr2	75541540	75543219	+	701	NA	intron (NM_010902, intron 1 of 4)	CpG	319	NM_010902	18024	Mm.1025	NM_010902	ENSMUSG00000015839	Nfe2l2	AI194320|Nrf2	nuclear factor, erythroid derived 2, like 2	protein-coding
MACS_peak_311	chr12	107412763	107413976	+	697	NA	Intergenic	Intergenic	164896	NM_001029843	22367	Mm.2981	NM_011705	ENSMUSG00000021115	Vrk1	51PK	vaccinia related kinase 1	protein-coding
MACS_peak_1224	chr7	56889149	56895918	+	691	NA	promoter-TSS (NM_001005232)	promoter-TSS (NM_001005232)	-328	NM_001005232	13172	Mm.307176	NM_001005232	ENSMUSG00000030507	Dbx1	AI426026|Dbx	developing brain homeobox 1	protein-coding
MACS_peak_1139	chr6	31512653	31514430	+	687	NA	intron (NM_013723, intron 1 of 7)	CpG	396	NM_013723	27205	Mm.89918	NM_013723	ENSMUSG00000025608	Podxl	AW121214|Ly102|PC|PCLP-1|Pclp1	podocalyxin-like	protein-coding
MACS_peak_541	chr16	18585551	18592229	+	684	NA	intron (NM_001285472, intron 1 of 8)	CpG	-1828	NM_001285476	21380	Mm.295194	NM_011532	ENSMUSG00000009097	Tbx1	-	T-box 1	protein-coding
MACS_peak_634	chr18	15221954	15223271	+	681	NA	promoter-TSS (NM_001142731)	promoter-TSS (NM_001142731)	-521	NM_001142731	106931	Mm.329299	NM_134112	ENSMUSG00000036225	Kctd1	4933402K10Rik|AI661543|AW553000	potassium channel tetramerisation domain containing 1	protein-coding
MACS_peak_380	chr13	96294326	96295190	+	678	NA	intron (NM_007974, intron 1 of 1)	CpG	437	NM_007974	14063	Mm.1614	NM_007974	ENSMUSG00000021678	F2rl1	Gpcr11|PAR-2|Par2	coagulation factor II (thrombin) receptor-like 1	protein-coding
MACS_peak_408	chr14	22804028	22806511	+	676	NA	exon (NM_145459, exon 3 of 3)	exon (NM_145459, exon 3 of 3)	3554	NM_145459	218820	Mm.292401	NM_145459	ENSMUSG00000039081	Zfp503	AI181838|B830002A16Rik|Nolz-1|Nolz1|Znf503	zinc finger protein 503	protein-coding
MACS_peak_880	chr3	87774256	87776062	+	675	NA	exon (NM_016701, exon 1 of 4)	exon (NM_016701, exon 1 of 4)	144	NM_016701	18008	Mm.331129	NM_016701	ENSMUSG00000004891	Nes	AA166324|C78523|ESTM46	nestin	protein-coding
MACS_peak_863	chr3	27836624	27837599	+	675	NA	promoter-TSS (NM_001164056)	promoter-TSS (NM_001164056)	-491	NM_001164056	18805	Mm.212039	NM_008875	ENSMUSG00000027695	Pld1	AA536939|C85393|Pld1a|Pld1b	phospholipase D1	protein-coding
MACS_peak_491	chr15	97077426	97078106	+	675	NA	promoter-TSS (NM_001164602)	promoter-TSS (NM_001164602)	-48	NM_001164602	105827	Mm.24005	NM_178114	ENSMUSG00000048218	Amigo2	AI415330|AMIGO-2|AW208913|Ali1	adhesion molecule with Ig like domain 2	protein-coding
MACS_peak_355	chr13	53567149	53568114	+	675	NA	intron (NM_013601, intron 1 of 1)	intron (NM_013601, intron 1 of 1)	518	NM_013601	17702	Mm.1763	NM_013601		Msx2	BB122635|Hox-8|Hox8|Hox8.1	msh homeobox 2	protein-coding
MACS_peak_1124	chr6	5247471	5248421	+	675	NA	intron (NM_183308, intron 1 of 8)	intron (NM_183308, intron 1 of 8)	427	NM_183308	330260	Mm.126984	NM_183308		Pon2	6330405I24Rik|AI481612	paraoxonase 2	protein-coding
MACS_peak_478	chr15	79090160	79093978	+	675	NA	intron (NM_177580, intron 8 of 13)	CpG-5084	-6891	NM_020516	57274	Mm.441697	NM_020516	ENSMUSG00000032988	Slc16a8	Mct3	solute carrier family 16 (monocarboxylic acid transporters), member 8	protein-coding
MACS_peak_646	chr18	57292885	57293345	+	675	NA	5' UTR (NM_001001979, exon 1 of 25)	5' UTR (NM_001001979, exon 1 of 25)	371	NM_001001979	70417	Mm.297863	NM_001001979	ENSMUSG00000024593	Megf10	3000002B06Rik|Gm331	multiple EGF-like-domains 10	protein-coding
MACS_peak_1354	chr9	26540789	26542142	+	675	NA	Intergenic	CpG	-17682	NM_029792	76898	Mm.218788	NM_029792	ENSMUSG00000045994	B3gat1	0710007K08Rik|AI846286|GlcAT-P|Glcatp|Hnk1	beta-1,3-glucuronyltransferase 1 (glucuronosyltransferase P)	protein-coding
MACS_peak_115	chr10	44246677	44249573	+	675	NA	Intergenic	Intergenic	-69632	NM_007548	12142	Mm.4800	NM_007548	ENSMUSG00000038151	Prdm1	Blimp-1|Blimp1|PRDI-BF1|ZNFPR1A1|b2b1765Clo	PR domain containing 1, with ZNF domain	protein-coding
MACS_peak_882	chr3	89633243	89636482	+	675	NA	promoter-TSS (NM_172530)	promoter-TSS (NM_172530)	-430	NM_172530	214547	Mm.225	NM_172530	ENSMUSG00000046280	She	9430022A14	src homology 2 domain-containing transforming protein E	protein-coding
MACS_peak_609	chr17	71197202	71203010	+	674	NA	promoter-TSS (NM_001164076)	promoter-TSS (NM_001164076)	444	NM_009372	21815	Mm.101034	NM_009372	ENSMUSG00000047407	Tgif1	AA959811|AI462167|Tgif	TGFB-induced factor homeobox 1	protein-coding
MACS_peak_612	chr17	74059686	74060251	+	673	NA	promoter-TSS (NM_027864)	promoter-TSS (NM_027864)	-177	NM_027864	71685	Mm.271953	NM_027864	ENSMUSG00000024064	Galnt14	0610033M06Rik	UDP-N-acetyl-alpha-D-galactosamine:polypeptide N-acetylgalactosaminyltransferase 14	protein-coding
MACS_peak_953	chr4	62877295	62877878	+	673	NA	intron (NM_025685, intron 1 of 60)	intron (NM_025685, intron 1 of 60)	1140	NM_025685	373864	Mm.194116	NM_025685	ENSMUSG00000045672	Col27a1	5730512J02Rik|AI449266|mKIAA1870	collagen, type XXVII, alpha 1	protein-coding
MACS_peak_92	chr10	18037586	18039058	+	673	NA	Intergenic	CpG	-83535	NM_144820	215814	Mm.296565	NM_144820	ENSMUSG00000059554	Ccdc28a	1700009P13Rik|AI480677	coiled-coil domain containing 28A	protein-coding
MACS_peak_500	chr15	98885784	98888079	+	673	NA	intron (NM_001163588, intron 3 of 7)	intron (NM_001163588, intron 3 of 7)	1326	NM_001163589	19132	Mm.2477	NM_013639	ENSMUSG00000023484	Prph	Prph1	peripherin	protein-coding
MACS_peak_535	chr16	10192484	10193917	+	673	NA	intron (NM_153123, intron 1 of 10)	CpG	201	NM_029253	75329	Mm.108729	NM_029253	ENSMUSG00000039200	Atf7ip2	4930558K11Rik|BC018510|Get-1|PSM2	activating transcription factor 7 interacting protein 2	protein-coding
MACS_peak_510	chr15	102186051	102186342	+	664	NA	Intergenic	CpG	-5006	NM_153416	223921	Mm.352946	NM_153416	ENSMUSG00000036678	Aaas	AAA|ADRACALA|D030041N15Rik|GL003	achalasia, adrenocortical insufficiency, alacrimia	protein-coding
MACS_peak_83	chr1	186705591	186708152	+	664	NA	promoter-TSS (NM_178692)	promoter-TSS (NM_178692)	44	NM_178692	226777	Mm.169542	NM_178692	ENSMUSG00000039349	C130074G19Rik	-	RIKEN cDNA C130074G19 gene	protein-coding
MACS_peak_176	chr11	50663179	50665300	+	663	NA	promoter-TSS (NM_173372)	promoter-TSS (NM_173372)	52	NM_173372	108072	Mm.134265	NM_173372	ENSMUSG00000000617	Grm6	BC021919|Gm3|Gprc1f|mGluR6|nerg1|nob2|nob3|nob4	glutamate receptor, metabotropic 6	protein-coding
MACS_peak_1350	chr9	20549344	20551517	+	657	NA	Intergenic	Intergenic	-17772	NM_173777	244723	Mm.293552	NM_173777	ENSMUSG00000032172	Olfm2	A030009A06Rik	olfactomedin 2	protein-coding
MACS_peak_721	chr2	4638757	4639971	+	657	NA	intron (NM_178663, intron 1 of 8)	CpG	487	NM_178663	209645	Mm.149539	NM_178663	ENSMUSG00000048186	Bend7	1110017O21Rik|E130319B15Rik	BEN domain containing 7	protein-coding
MACS_peak_708	chr19	54119498	54120208	+	657	NA	5' UTR (NM_007417, exon 1 of 1)	5' UTR (NM_007417, exon 1 of 1)	181	NM_007417	11551	Mm.235195	NM_007417	ENSMUSG00000033717	Adra2a	AW122659|Adra-2|Adra-2a|alpha(2A)AR|alpha2-C10|alpha2A|alpha2A-AR	adrenergic receptor, alpha 2a	protein-coding
MACS_peak_577	chr17	28906164	28907110	+	657	NA	intron (NM_011950, intron 1 of 11)	intron (NM_011950, intron 1 of 11)	375	NM_011950	26415	Mm.27970	NM_011950	ENSMUSG00000004864	Mapk13	SAPK4|Serk4	mitogen-activated protein kinase 13	protein-coding
MACS_peak_1237	chr7	86688299	86690290	+	657	NA	Intergenic	Intergenic	28973	NR_040312	101694	Mm.41661	NR_040311		AI854517	-	expressed sequence AI854517	ncRNA
MACS_peak_1122	chr5	148535362	148538180	+	657	NA	intron (NM_010228, intron 1 of 29)	CpG	793	NM_010228	14254	Mm.389712	NM_010228	ENSMUSG00000029648	Flt1	AI323757|Flt-1|VEGFR-1|VEGFR1|sFlt1	FMS-like tyrosine kinase 1	protein-coding
MACS_peak_784	chr2	84725193	84728009	+	657	NA	intron (NM_199223, intron 1 of 2)	CpG	248	NM_199223	269295	Mm.86447	NM_199223	ENSMUSG00000050896	Rtn4rl2	Ngr2|Ngrh1|Ngrl3	reticulon 4 receptor-like 2	protein-coding
MACS_peak_1070	chr5	98596093	98598989	+	657	NA	Intergenic	Intergenic	-12347	NM_029947	77630	Mm.332511	NM_029947	ENSMUSG00000035456	Prdm8	4930565F05Rik|PFM5	PR domain containing 8	protein-coding
MACS_peak_417	chr14	34133017	34134729	+	657	NA	intron (NM_153800, intron 4 of 10)	intron (NM_153800, intron 4 of 10)	103864	NM_153800	239027	Mm.318350	NM_153800	ENSMUSG00000063506	Arhgap22	B230341L19Rik|RHOGAP2|p68RacGAP	Rho GTPase activating protein 22	protein-coding
MACS_peak_101	chr10	24315077	24316635	+	657	NA	exon (NM_010217, exon 2 of 5)	exon (NM_010217, exon 2 of 5)	608	NM_010217	14219	Mm.390287	NM_010217	ENSMUSG00000019997	Ctgf	Ccn2|Fisp12|Hcs24|fisp-12	connective tissue growth factor	protein-coding
MACS_peak_333	chr13	23486363	23489667	+	657	NA	Intergenic	CpG	-26938	NM_001286155	218100	Mm.286454	NM_172586	ENSMUSG00000046351	Zfp322a	Znf322|Znf322a	zinc finger protein 322A	protein-coding
MACS_peak_485	chr15	85410435	85412444	+	657	NA	promoter-TSS (NM_001163633)	promoter-TSS (NM_001163633)	-133	NR_040433	105975	Mm.394884	NR_040433	ENSMUSG00000097209	AU022754	-	expressed sequence AU022754	ncRNA
MACS_peak_87	chr1	193008349	193010707	+	657	NA	Intergenic	Intergenic	-2316	NM_007498	11910	Mm.2706	NM_007498	ENSMUSG00000026628	Atf3	LRG-21	activating transcription factor 3	protein-coding
MACS_peak_1026	chr4	153673277	153674856	+	657	NA	promoter-TSS (NM_001112744)	promoter-TSS (NM_001112744)	-62	NM_001112744	230972	Mm.38481	NM_001112744	ENSMUSG00000029032	Arhgef16	-	Rho guanine nucleotide exchange factor (GEF) 16	protein-coding
MACS_peak_43	chr1	93076119	93076966	+	657	NA	5' UTR (NM_016894, exon 1 of 3)	5' UTR (NM_016894, exon 1 of 3)	143	NM_001168392	51801	Mm.3272	NM_016894	ENSMUSG00000034353	Ramp1	9130218E19Rik	receptor (calcitonin) activity modifying protein 1	protein-coding
MACS_peak_1144	chr6	49772242	49774069	+	657	NA	intron (NM_023456, intron 1 of 3)	intron (NM_023456, intron 1 of 3)	427	NM_023456	109648	Mm.154796	NM_023456	ENSMUSG00000029819	Npy	0710005A05Rik	neuropeptide Y	protein-coding
MACS_peak_568	chr17	15967843	15968303	+	657	NA	Intergenic	CpG	-4523	NM_178615	68799	Mm.293466	NM_178615	ENSMUSG00000048027	Rgmb	1110059F19Rik|DRAGON	repulsive guidance molecule family member B	protein-coding
MACS_peak_1293	chr8	36439179	36439813	+	651	NA	intron (NM_177741, intron 1 of 1)	intron (NM_177741, intron 1 of 1)	701	NM_177741	244416	Mm.247126	NM_177741	ENSMUSG00000046794	Ppp1r3b	6430576E21|AW821953|GL|PTG	protein phosphatase 1, regulatory (inhibitor) subunit 3B	protein-coding
MACS_peak_902	chr3	104591679	104592573	+	651	NA	intron (NM_001291859, intron 1 of 4)	intron (NM_001291859, intron 1 of 4)	174	NM_007484	11853	Mm.262	NM_007484	ENSMUSG00000002233	Rhoc	AI324259|Arh9|Arhc	ras homolog gene family, member C	protein-coding
MACS_peak_608	chr17	69185741	69186905	+	651	NA	promoter-TSS (NM_001206661)	promoter-TSS (NM_001206661)	-153	NM_001206661	622645	Mm.86422	NM_001206661	ENSMUSG00000095407	Tmem200c	EG622645|Gm6338	transmembrane protein 200C	protein-coding
MACS_peak_1040	chr5	31437768	31440658	+	651	NA	intron (NM_021447, intron 6 of 8)	intron (NM_021447, intron 6 of 8)	2055	NM_021290	22226	Mm.377116	NM_021290		Ucn	Mpv17|Ucn1	urocortin	protein-coding
MACS_peak_1174	chr6	83084973	83087484	+	651	NA	promoter-TSS (NM_009106)	promoter-TSS (NM_009106)	426	NM_001136227	20166	Mm.4139	NM_009106	ENSMUSG00000034930	Rtkn	-	rhotekin	protein-coding
MACS_peak_1025	chr4	153544405	153545826	+	651	NA	5' UTR (NM_001162977, exon 1 of 37)	5' UTR (NM_001162977, exon 1 of 37)	293	NM_001162977	230971	Mm.275216	NM_172273	ENSMUSG00000057751	Megf6	2600001P17Rik|Egfl3	multiple EGF-like-domains 6	protein-coding
MACS_peak_457	chr15	25343199	25344178	+	651	NA	promoter-TSS (NM_027395)	promoter-TSS (NM_027395)	-169	NM_027395	70350	Mm.29586	NM_027395	ENSMUSG00000045763	Basp1	2610024P12Rik|CAP-23|CAP23|Ckap3|NAP-22|NAP22	brain abundant, membrane attached signal protein 1	protein-coding
MACS_peak_381	chr13	97694908	97695542	+	651	NA	intron (NM_001166065, intron 1 of 2)	CpG	581	NM_001166065	218476	Mm.483490	NM_001166065	ENSMUSG00000091387	Gcnt4	C2gnt3|Gm279|Gm73	glucosaminyl (N-acetyl) transferase 4, core 2 (beta-1,6-N-acetylglucosaminyltransferase)	protein-coding
MACS_peak_1192	chr6	120413109	120414231	+	651	NA	intron (NM_008359, intron 1 of 12)	CpG	455	NM_008359	16172	Mm.4481	NM_008359	ENSMUSG00000002897	Il17ra	AW538159|Cdw217|Il17r|VDw217	interleukin 17 receptor A	protein-coding
MACS_peak_1112	chr5	141082305	141083966	+	645	NA	promoter-TSS (NM_008494)	promoter-TSS (NM_008494)	-160	NM_008494	16848	Mm.12834	NM_008494	ENSMUSG00000029570	Lfng	AW061165	LFNG O-fucosylpeptide 3-beta-N-acetylglucosaminyltransferase	protein-coding
MACS_peak_1284	chr8	11478305	11478692	+	645	NA	promoter-TSS (NM_011227)	promoter-TSS (NM_011227)	1	NM_011227	19332	Mm.37632	NM_011227		Rab20	AA536966|D8Ertd350e	RAB20, member RAS oncogene family	protein-coding
MACS_peak_542	chr16	19760298	19761950	+	645	NA	intron (NM_001159408, intron 2 of 4)	intron (NM_001159408, intron 2 of 4)	797	NM_001159407	108105	Mm.33935	NM_054052	ENSMUSG00000022686	B3gnt5	beta3GnT5	UDP-GlcNAc:betaGal beta-1,3-N-acetylglucosaminyltransferase 5	protein-coding
MACS_peak_1183	chr6	88139843	88141263	+	645	NA	Intergenic	CpG	-8105	NM_008090	14461	Mm.491156	NM_008090	ENSMUSG00000015053	Gata2	Gata-2	GATA binding protein 2	protein-coding
MACS_peak_1291	chr8	26211875	26213469	+	645	NA	promoter-TSS (NM_031257)	promoter-TSS (NM_031257)	-389	NM_031257	83436	Mm.261122	NM_031257	ENSMUSG00000031557	Plekha2	6430512N22Rik|AI851530|AU041791|TAPP2|W91773	pleckstrin homology domain-containing, family A (phosphoinositide binding specific) member 2	protein-coding
MACS_peak_1245	chr7	105982993	105984521	+	645	NA	5' UTR (NM_001285794, exon 1 of 6)	5' UTR (NM_001285794, exon 1 of 6)	135	NM_001285792	22411	Mm.22182	NM_009519	ENSMUSG00000015957	Wnt11	-	wingless-type MMTV integration site family, member 11	protein-coding
MACS_peak_177	chr11	51980486	51983655	+	641	NA	Intergenic	Intergenic	-10661	NR_034155	257871	Mm.253576	NR_034155		Olfr1372-ps1	GA_x5J8B7TR6JS-3-632|MOR256-54P|NP_TR6JSE50FPA	olfactory receptor 1372, pseudogene 1	pseudo
MACS_peak_407	chr14	20569718	20572347	+	641	NA	intron (NM_008695, intron 1 of 20)	L3|LINE|CR1	553	NM_008695	18074	Mm.20348	NM_008695	ENSMUSG00000021806	Nid2	AW547149|Ly111|NID-2|entactin-2|nidogen-2	nidogen 2	protein-coding
MACS_peak_969	chr4	107106438	107108570	+	641	NA	intron (NM_147221, intron 1 of 10)	CpG	180	NM_147221	230587	Mm.331757	NM_147221	ENSMUSG00000034762	Glis1	Gli5|Gli6|GliH1	GLIS family zinc finger 1	protein-coding
MACS_peak_1420	chrX	90531294	90535077	+	641	NA	intron (NM_007492, intron 1 of 4)	intron (NM_007492, intron 1 of 4)	1200	NM_007492	11878	Mm.275547	NM_007492	ENSMUSG00000035277	Arx	-	aristaless related homeobox	protein-coding
MACS_peak_837	chr2	165979639	165981091	+	641	NA	intron (NM_028072, intron 1 of 20)	CpG	420	NM_001252578	72043	Mm.1011	NM_028072	ENSMUSG00000006800	Sulf2	2010004N24Rik|AU020235|MSulf-2|mKIAA1247	sulfatase 2	protein-coding
MACS_peak_575	chr17	28486733	28488780	+	640	NA	promoter-TSS (NM_011566)	promoter-TSS (NM_011566)	-6	NM_011566	21678	Mm.6655	NM_011566	ENSMUSG00000002249	Tead3	DTEF-1|ETFR-1|TEAD-3|TEF-5|Tcf13r2	TEA domain family member 3	protein-coding
MACS_peak_299	chr12	88640910	88641632	+	639	NA	promoter-TSS (NM_001290302)	promoter-TSS (NM_001290302)	-616	NM_001290302	217738	Mm.219363	NM_001290302		Ism2	Gm264|Thsd3	isthmin 2 homolog (zebrafish)	protein-coding
MACS_peak_758	chr2	70396280	70401221	+	632	NA	intron (NR_040496, intron 1 of 2)	intron (NR_040496, intron 1 of 2)	-1471	NM_008077	14415	Mm.272120	NM_008077	ENSMUSG00000070880	Gad1	EP10|GAD25|GAD44|GAD67|Gad-1	glutamate decarboxylase 1	protein-coding
MACS_peak_272	chr12	54348690	54349942	+	629	NA	promoter-TSS (NM_013780)	promoter-TSS (NM_013780)	-348	NM_013780	27386	Mm.247044	NM_013780	ENSMUSG00000021010	Npas3	4930423H22Rik|bHLHe12	neuronal PAS domain protein 3	protein-coding
MACS_peak_181	chr11	59077576	59078242	+	624	NA	intron (NM_009522, intron 2 of 3)	CpG	26344	NM_009522	22416	Mm.1367	NM_009522	ENSMUSG00000009900	Wnt3a	Wnt-3a|vt	wingless-type MMTV integration site family, member 3A	protein-coding
MACS_peak_341	chr13	34743266	34745767	+	624	NA	promoter-TSS (NR_105041)	promoter-TSS (NR_105041)	34	NM_025831	66895	Mm.28943	NM_025831	ENSMUSG00000021411	Pxdc1	1300014I06Rik	PX domain containing 1	protein-coding
MACS_peak_8	chr1	19199058	19202058	+	624	NA	intron (NM_001286340, intron 1 of 7)	intron (NM_001286340, intron 1 of 7)	1563	NM_001286340	21419	Mm.137021	NM_009334	ENSMUSG00000025927	Tfap2b	AI606113|AP-2(beta)|E130018K07Rik|Tcfap2b	transcription factor AP-2 beta	protein-coding
MACS_peak_159	chr11	4847415	4848567	+	620	NA	promoter-TSS (NM_010904)	promoter-TSS (NM_010904)	76	NM_010904	380684	Mm.298283	NM_010904	ENSMUSG00000020396	Nefh	NF-H|NF200|Nfh|mKIAA0845	neurofilament, heavy polypeptide	protein-coding
MACS_peak_909	chr3	118136512	118138396	+	618	NA	TTS (NR_029551)	TTS (NR_029551)	679	NR_029551	387155		NR_029551		Mir137	Mirn137|mmu-mir-137	microRNA 137	ncRNA
MACS_peak_631	chr18	4634933	4635718	+	612	NA	intron (NM_001081963, intron 1 of 3)	CpG	398	NM_001081963	240185	Mm.33179	NM_001081963	ENSMUSG00000033960	9430020K01Rik	1110056P05Rik|Gm328|Jcad|mKIAA1462	RIKEN cDNA 9430020K01 gene	protein-coding
MACS_peak_27	chr1	74169980	74171408	+	612	NA	intron (NM_001289895, intron 1 of 32)	PB1D10|SINE|Alu	327	NM_027884	21961	Mm.309975	NM_027884	ENSMUSG00000055322	Tns1	1110018I21Rik|1200014E20Rik|AI648117|E030018G17Rik|E030037J05Rik|Tns	tensin 1	protein-coding
MACS_peak_67	chr1	154247015	154247414	+	612	NA	5' UTR (NM_177756, exon 1 of 12)	5' UTR (NM_177756, exon 1 of 12)	217	NM_177756	269132	Mm.23782	NM_177756	ENSMUSG00000032649	Colgalt2	AI427652|D730024P12|Glt25d2	collagen beta(1-O)galactosyltransferase 2	protein-coding
MACS_peak_322	chr12	113917032	113917866	+	609	NA	intron (NM_001100460, intron 1 of 1)	CpG	398	NM_001100460	382639	Mm.11350	NM_001100460	ENSMUSG00000037638	Zbtb42	EG382639|Gm5188|simiRP58	zinc finger and BTB domain containing 42	protein-coding
MACS_peak_1114	chr5	143723348	143724336	+	609	NA	intron (NM_007984, intron 1 of 4)	CpG	1808	NM_007984	14086	Mm.289707	NM_007984	ENSMUSG00000029581	Fscn1	AI663989|Fan1|fascin-1	fascin homolog 1, actin bundling protein (Strongylocentrotus purpuratus)	protein-coding
MACS_peak_206	chr11	89159027	89161683	+	607	NA	Intergenic	Intergenic	3518	NM_008711	18121	Mm.135266	NM_008711	ENSMUSG00000048616	Nog	-	noggin	protein-coding
MACS_peak_1246	chr7	107433656	107435136	+	607	NA	intron (NM_177161, intron 1 of 12)	CT-rich|Low_complexity|Low_complexity	366	NM_177161	320452	Mm.150294	NM_177161	ENSMUSG00000051048	P4ha3	D930031A02Rik	procollagen-proline, 2-oxoglutarate 4-dioxygenase (proline 4-hydroxylase), alpha polypeptide III	protein-coding
MACS_peak_205	chr11	87881633	87881986	+	607	NA	promoter-TSS (NM_016686)	promoter-TSS (NM_016686)	28	NM_016686	22344	Mm.46628	NM_016686	ENSMUSG00000018377	Vezf1	AI848691|AW046909|db1	vascular endothelial zinc finger 1	protein-coding
MACS_peak_695	chr19	44796592	44801517	+	607	NA	Intergenic	Intergenic	-32830	NM_011037	18504	Mm.192158	NM_011037	ENSMUSG00000004231	Pax2	Opdc|Pax-2	paired box 2	protein-coding
MACS_peak_1300	chr8	65430731	65430998	+	607	NA	intron (NM_023689, intron 2 of 11)	intron (NM_023689, intron 2 of 11)	722	NM_023689	72902	Mm.334552	NM_023689	ENSMUSG00000054162	Spock3	2900045C01Rik|AI428471|mKIAA4039	sparc/osteonectin, cwcv and kazal-like domains proteoglycan 3	protein-coding
MACS_peak_73	chr1	165238849	165245149	+	607	NA	intron (NM_001025570, intron 1 of 2)	intron (NM_001025570, intron 1 of 2)	1782	NM_011127	18933	Mm.288642	NM_011127	ENSMUSG00000026586	Prrx1	A230024N07Rik|AA755424|AI385634|AI843499|K-2|Pmx|Pmx1|Prx1|mHox	paired related homeobox 1	protein-coding
MACS_peak_927	chr4	4064934	4065872	+	607	NA	5' UTR (NM_001002927, exon 1 of 2)	5' UTR (NM_001002927, exon 1 of 2)	189	NM_001002927	18619	Mm.475097	NM_001002927	ENSMUSG00000045573	Penk	AI326464|ENK|PPA|Penk1	preproenkephalin	protein-coding
MACS_peak_25	chr1	64783605	64785125	+	606	NA	promoter-TSS (NM_001042659)	promoter-TSS (NM_001042659)	-41	NM_022721	14367	Mm.150813	NM_022721	ENSMUSG00000045005	Fzd5	5330434N09Rik|AI427138|Fz-5|Fz5|mFz5	frizzled homolog 5 (Drosophila)	protein-coding
MACS_peak_658	chr18	80907223	80910184	+	606	NA	intron (NM_001164110, intron 1 of 9)	intron (NM_001164110, intron 1 of 9)	1107	NM_198429	18018	Mm.329560	NM_016791	ENSMUSG00000033016	Nfatc1	2210017P03Rik|AI449492|AV076380|NF-ATc|NFAT2|NFATc|Nfatcb	nuclear factor of activated T cells, cytoplasmic, calcineurin dependent 1	protein-coding
MACS_peak_802	chr2	132210330	132211422	+	606	NA	intron (NM_144944, intron 1 of 2)	CpG	307	NM_144944	246313	Mm.283777	NM_144944	ENSMUSG00000050558	Prokr2	B830005M06Rik|EG-VEGRF2|Gpcr73l1|Gpr73l1|PKR2	prokineticin receptor 2	protein-coding
MACS_peak_60	chr1	137001626	137002950	+	606	NA	promoter-TSS (NM_001033409)	promoter-TSS (NM_001033409)	-435	NM_001033409	329252	Mm.279594	NM_001033409	ENSMUSG00000042793	Lgr6	A530037C04Rik|D830026M09	leucine-rich repeat-containing G protein-coupled receptor 6	protein-coding
MACS_peak_1001	chr4	133805792	133807927	+	606	NA	TTS (NM_001099296)	TTS (NM_001099296)	3162	NM_001099296	72690	Mm.100168	NM_001099296	ENSMUSG00000050105	Grrp1	2810043G13Rik|Fam110d	glycine/arginine rich protein 1	protein-coding
MACS_peak_1253	chr7	117008818	117009549	+	606	NA	promoter-TSS (NM_020052)	promoter-TSS (NM_020052)	10	NM_020052	56788	Mm.40447	NM_020052	ENSMUSG00000007279	Scube2	4932442O19Rik|Cegf1|Cegp1	signal peptide, CUB domain, EGF-like 2	protein-coding
MACS_peak_237	chr11	103509619	103511621	+	606	NA	promoter-TSS (NM_001033212)	promoter-TSS (NM_001033212)	-203	NM_001033212	104582	Mm.44618	NM_001033212	ENSMUSG00000046215	Rprml	AW049332	reprimo-like	protein-coding
MACS_peak_705	chr19	45815704	45818499	+	606	NA	intron (NM_010205, intron 1 of 4)	CpG	273	NM_001166361	14179	Mm.4012	NM_010205	ENSMUSG00000025219	Fgf8	Aigf|Fgf-8	fibroblast growth factor 8	protein-coding
MACS_peak_469	chr15	68758643	68759969	+	606	NA	intron (NM_010158, intron 1 of 8)	intron (NM_010158, intron 1 of 8)	456	NM_010158	13992	Mm.17964	NM_010158	ENSMUSG00000022332	Khdrbs3	Etle|SLM-2|Salp|Slm2|T-STAR	KH domain containing, RNA binding, signal transduction associated 3	protein-coding
MACS_peak_1103	chr5	120884477	120890550	+	600	NA	intron (NM_008499, intron 4 of 4)	(A)n|Simple_repeat|Simple_repeat	5618	NM_008499	16873	Mm.5151	NM_008499	ENSMUSG00000029595	Lhx5	Lim2	LIM homeobox protein 5	protein-coding
MACS_peak_1301	chr8	72406096	72408380	+	599	NA	exon (NM_026818, exon 7 of 8)	exon (NM_026818, exon 7 of 8)	4053	NM_026818	68709	Mm.334584	NM_026818	ENSMUSG00000044006	Cilp2	1110031K21Rik|AA407300|CLIP-2	cartilage intermediate layer protein 2	protein-coding
MACS_peak_616	chr17	83614218	83616256	+	599	NA	exon (NM_134117, exon 1 of 7)	exon (NM_134117, exon 1 of 7)	614	NM_134117	106522	Mm.311974	NM_134117	ENSMUSG00000024247	Pkdcc	AI115348|AW548124|Adtk1|ESTM17|MAd1|Sgk493|Vlk|X83346	protein kinase domain containing, cytoplasmic	protein-coding
MACS_peak_1010	chr4	138647794	138649954	+	599	NA	promoter-TSS (NM_008675)	promoter-TSS (NM_008675)	11	NM_008675	17965	Mm.9404	NM_008675	ENSMUSG00000041120	Nbl1	D4H1S1733E|DAN|Dana|NO3	neuroblastoma, suppression of tumorigenicity 1	protein-coding
MACS_peak_398	chr13	113778378	113780036	+	597	NA	exon (NM_001081062, exon 2 of 3)	exon (NM_001081062, exon 2 of 3)	1197	NM_001081062	218630	Mm.25457	NM_001081062	ENSMUSG00000042417	Ccno	C86987|Ccnu|E130318K11|Ung2	cyclin O	protein-coding
MACS_peak_1360	chr9	31822953	31826887	+	597	NA	Intergenic	Intergenic	-98801	NM_001195632	330914	Mm.46683	NM_177379	ENSMUSG00000041444	Arhgap32	3426406O18Rik|Gc-gap|Grit|Px-rics|Rics|mKIAA0712|p200Rhogap|p250Gap	Rho GTPase activating protein 32	protein-coding
MACS_peak_711	chr19	56796165	56797188	+	597	NA	promoter-TSS (NM_007419)	promoter-TSS (NM_007419)	-186	NM_007419	11554	Mm.46797	NM_007419	ENSMUSG00000035283	Adrb1	Adrb-1|beta-AR	adrenergic receptor, beta 1	protein-coding
MACS_peak_423	chr14	55050836	55052480	+	597	NA	intron (NM_008608, intron 1 of 9)	intron (NM_008608, intron 1 of 9)	1217	NM_008608	17387	Mm.280175	NM_008608	ENSMUSG00000000957	Mmp14	AI325305|MT-MMP-1|MT1-MMP|sabe	matrix metallopeptidase 14 (membrane-inserted)	protein-coding
MACS_peak_236	chr11	102806402	102808264	+	597	NA	exon (NM_011795, exon 1 of 2)	exon (NM_011795, exon 1 of 2)	442	NM_011795	23829	Mm.57154	NM_011795	ENSMUSG00000045532	C1ql1	C1qrf|CRF|CTRP14|gliacolin	complement component 1, q subcomponent-like 1	protein-coding
MACS_peak_742	chr2	34768773	34769509	+	597	NA	intron (NM_028716, intron 1 of 14)	intron (NM_028716, intron 1 of 14)	355	NM_028716	74016	Mm.65691	NM_028716	ENSMUSG00000026873	Phf19	3110009G19Rik|3321402G02Rik	PHD finger protein 19	protein-coding
MACS_peak_19	chr1	57831484	57832893	+	597	NA	intron (NM_144882, intron 1 of 13)	CpG	483	NM_144882	67198	Mm.159989	NM_144882	ENSMUSG00000038305	Spats2l	2810022L02Rik|A230104H11Rik|AA987173|AI480531|AI842453|AW413586	spermatogenesis associated, serine-rich 2-like	protein-coding
MACS_peak_361	chr13	60277108	60279060	+	591	NA	exon (NM_008086, exon 1 of 1)	exon (NM_008086, exon 1 of 1)	812	NM_008086	14451	Mm.22701	NM_008086	ENSMUSG00000052957	Gas1	AW554192|Gas-1	growth arrest specific 1	protein-coding
MACS_peak_509	chr15	100957482	100960300	+	590	NA	promoter-TSS (NM_001277259)	promoter-TSS (NM_001277259)	-62	NM_001277258	11482	Mm.279542	NM_009612	ENSMUSG00000000530	Acvrl1	AI115505|AI427544|Acvrlk1|Alk1	activin A receptor, type II-like 1	protein-coding
MACS_peak_1346	chr8	127274078	127276258	+	590	NA	intron (NM_001081120, intron 1 of 1)	CpG	541	NM_001081120	69627	Mm.271600	NM_001081120	ENSMUSG00000043068	Fam89a	2310031A18Rik	family with sequence similarity 89, member A	protein-coding
MACS_peak_1251	chr7	112935667	112936157	+	590	NA	5' UTR (NM_001162943, exon 1 of 21)	5' UTR (NM_001162943, exon 1 of 21)	152	NM_001162943	233651	Mm.334108	NM_001162943	ENSMUSG00000036862	Dchs1	3110041P15Rik|C130033F22Rik|CDH25|FIB1|Gm165|PCDH16	dachsous 1 (Drosophila)	protein-coding
MACS_peak_1187	chr6	98978375	98978678	+	590	NA	promoter-TSS (NM_001197322)	promoter-TSS (NM_001197322)	-234	NM_001197322	108655	Mm.234965	NM_053202	ENSMUSG00000030067	Foxp1	3110052D19Rik|4932443N09Rik|AI461938|AW494214	forkhead box P1	protein-coding
MACS_peak_754	chr2	65962008	65962912	+	583	NA	intron (NM_015736, intron 1 of 10)	CpG	390	NM_015736	14425	Mm.439760	NM_015736	ENSMUSG00000026994	Galnt3	-	UDP-N-acetyl-alpha-D-galactosamine:polypeptide N-acetylgalactosaminyltransferase 3	protein-coding
MACS_peak_804	chr2	133376671	133379147	+	583	NA	promoter-TSS (NM_007553)	promoter-TSS (NM_007553)	14	NM_007553	12156	Mm.103205	NM_007553	ENSMUSG00000027358	Bmp2	AI467020|Bmp2a	bone morphogenetic protein 2	protein-coding
MACS_peak_795	chr2	118526170	118530515	+	579	NA	exon (NM_001081971, exon 1 of 1)	exon (NM_001081971, exon 1 of 1)	1357	NM_001081971	383787	Mm.35758	NM_001081971	ENSMUSG00000078137	Ankrd63	Gm1337	ankyrin repeat domain 63	protein-coding
MACS_peak_1418	chrX	72478416	72479524	+	577	NA	intron (NM_001161373, intron 21 of 24)	intron (NM_001161373, intron 21 of 24)	-69880	NM_001033786	434800	Mm.460747	NM_001033786	ENSMUSG00000073094	Smim9	4930428E23Rik	small integral membrane protein 9	protein-coding
MACS_peak_1414	chrX	50409628	50410840	+	577	NA	non-coding (NR_038185, exon 1 of 4)	non-coding (NR_038185, exon 1 of 4)	133	NR_038185	72575	Mm.59516	NR_038184		C430049B03Rik	2700063P19Rik|9430052C07Rik	RIKEN cDNA C430049B03 gene	ncRNA
MACS_peak_139	chr10	92773837	92774244	+	577	NA	promoter-TSS (NM_001282967)	promoter-TSS (NM_001282967)	-136	NM_001282967	13713	Mm.4454	NM_013508	ENSMUSG00000008398	Elk3	D430049E23Rik|Erp|Etrp|Net|Sap-2	ELK3, member of ETS oncogene family	protein-coding
MACS_peak_820	chr2	152933332	152934699	+	572	NA	promoter-TSS (NM_010407)	promoter-TSS (NM_010407)	-189	NM_001172117	15162	Mm.715	NM_010407	ENSMUSG00000003283	Hck	AI849071|Bmk	hemopoietic cell kinase	protein-coding
MACS_peak_1188	chr6	99674928	99677030	+	572	NA	intron (NM_001037539, intron 1 of 2)	intron (NM_001037539, intron 1 of 2)	407	NM_001037539	50501	Mm.87365	NM_015768	ENSMUSG00000030069	Prok2	Bv8|PK2|Prok1	prokineticin 2	protein-coding
MACS_peak_477	chr15	78993432	78994909	+	572	NA	5' UTR (NM_011437, exon 2 of 4)	5' UTR (NM_011437, exon 2 of 4)	750	NM_011437	20665	Mm.276739	NM_011437	ENSMUSG00000033006	Sox10	Dom|Sox21	SRY (sex determining region Y)-box 10	protein-coding
MACS_peak_267	chr12	40762559	40762857	+	571	NA	3' UTR (NM_007487, exon 2 of 2)	3' UTR (NM_007487, exon 2 of 2)	1255	NM_007487	11861	Mm.12723	NM_007487	ENSMUSG00000047446	Arl4a	AI467555|Arl4	ADP-ribosylation factor-like 4A	protein-coding
MACS_peak_998	chr4	131476855	131478360	+	569	NA	promoter-TSS (NM_001201367)	promoter-TSS (NM_001201367)	-79	NM_001201367	623230	Mm.421179	NM_001201367	ENSMUSG00000070720	Tmem200b	EG623230	transmembrane protein 200B	protein-coding
MACS_peak_1268	chr7	141416139	141417671	+	565	NA	promoter-TSS (NM_007400)	promoter-TSS (NM_007400)	-125	NM_007400	11489	Mm.439714	NM_007400	ENSMUSG00000054555	Adam12	Mltna|mKIAA4001	a disintegrin and metallopeptidase domain 12 (meltrin alpha)	protein-coding
MACS_peak_738	chr2	31700734	31702521	+	556	NA	promoter-TSS (NM_178887)	promoter-TSS (NM_178887)	-102	NM_178887	98970	Mm.32080	NM_178887	ENSMUSG00000026841	Fibcd1	AI448887	fibrinogen C domain containing 1	protein-coding
MACS_peak_563	chr16	97578273	97579388	+	556	NA	intron (NM_019517, intron 1 of 8)	intron (NM_019517, intron 1 of 8)	495	NM_019517	56175	Mm.97885	NM_019517	ENSMUSG00000040605	Bace2	1110059C24Rik|AEPLC|AI850424|ALP56|ARP1|ASP21|BAE2|CDA13|CEAP1|DRAP	beta-site APP-cleaving enzyme 2	protein-coding
MACS_peak_1169	chr6	70905179	70907993	+	556	NA	promoter-TSS (NM_001101464)	promoter-TSS (NM_001101464)	-14	NM_001101464	232077	Mm.297656	NM_001101464	ENSMUSG00000055874	Foxi3	-	forkhead box I3	protein-coding
MACS_peak_145	chr10	118890646	118891262	+	556	NA	promoter-TSS (NM_001277293)	promoter-TSS (NM_001277293)	-136	NM_133442	74053	Mm.196692	NM_028736	ENSMUSG00000034813	Grip1	4931400F03Rik|GRIP|eb	glutamate receptor interacting protein 1	protein-coding
MACS_peak_438	chr14	70477117	70478760	+	553	NA	intron (NM_001289925, intron 2 of 2)	CpG-4627	336	NM_001289927	13655	Mm.103737	NM_018781	ENSMUSG00000033730	Egr3	Pilot	early growth response 3	protein-coding
MACS_peak_987	chr4	123018732	123020691	+	549	NA	exon (NM_001256019, exon 1 of 7)	exon (NM_001256019, exon 1 of 7)	784	NM_001256019	12163	Mm.439749	NM_007558	ENSMUSG00000032726	Bmp8a	Bmp7r1|OP-2|OP2	bone morphogenetic protein 8a	protein-coding
MACS_peak_932	chr4	21604924	21607366	+	548	NA	exon (NM_001080771, exon 4 of 4)	exon (NM_001080771, exon 4 of 4)	6965	NM_001080771	230025	Mm.208541	NM_001080771	ENSMUSG00000040478	Prdm13	-	PR domain containing 13	protein-coding
MACS_peak_539	chr16	17914948	17915753	+	547	NA	promoter-TSS (NM_029469)	promoter-TSS (NM_029469)	-198	NM_029469	195333	Mm.463003	NM_029469		Gsc2	4930568H22Rik|GSC-2|Gscl	goosecoid homebox 2	protein-coding
MACS_peak_920	chr3	129672281	129673969	+	547	NA	promoter-TSS (NM_025779)	promoter-TSS (NM_025779)	-1	NM_001293644	66815	Mm.31056	NM_025779	ENSMUSG00000027994	Ccdc109b	9030408N13Rik|MCUb	coiled-coil domain containing 109B	protein-coding
MACS_peak_638	chr18	38157668	38158619	+	541	NA	promoter-TSS (NM_139206)	promoter-TSS (NM_139206)	480	NM_001205336	106952	Mm.247642	NM_139206	ENSMUSG00000024451	Arap3	Centd3|Drag1|E030006K04Rik|cnt-d3	ArfGAP with RhoGAP domain, ankyrin repeat and PH domain 3	protein-coding
MACS_peak_1113	chr5	141715665	141718153	+	541	NA	promoter-TSS (NM_177879)	promoter-TSS (NM_177879)	-579	NM_177879	330222	Mm.151931	NM_177879	ENSMUSG00000039683	Sdk1	5330440E10|6720466O15Rik	sidekick homolog 1 (chicken)	protein-coding
MACS_peak_677	chr19	32177233	32177608	+	541	NA	intron (NM_018830, intron 1 of 23)	intron (NM_018830, intron 1 of 23)	210	NM_018830	54447	Mm.491229	NM_018830	ENSMUSG00000024887	Asah2	AI585898	N-acylsphingosine amidohydrolase 2	protein-coding
MACS_peak_1208	chr7	20407309	20410296	+	541	NA	promoter-TSS (NM_033601)	promoter-TSS (NM_033601)	-698	NM_033601	12051	Mm.439658	NM_033601	ENSMUSG00000053175	Bcl3	AI528691|Bcl-3	B cell leukemia/lymphoma 3	protein-coding
MACS_peak_546	chr16	84703062	84703982	+	541	NA	Intergenic	CpG	-10863	NR_029565	387173		NR_029565	miRBase:MI0000177	Mir155	Mirn155|mmu-mir-155	microRNA 155	ncRNA
MACS_peak_1336	chr8	111773262	111775218	+	539	NA	Intergenic	Intergenic	90568	NR_002928	384864	Mm.390083	NR_002928		Gm1943	-	WD repeat domain 70 pseudogene	pseudo
MACS_peak_885	chr3	94642068	94642289	+	539	NA	intron (NM_172683, intron 1 of 18)	CpG	689	NM_172683	229584	Mm.274787	NM_172683	ENSMUSG00000038902	Pogz	9530006B08Rik	pogo transposable element with ZNF domain	protein-coding
MACS_peak_85	chr1	189432585	189434546	+	539	NA	intron (NM_001243792, intron 1 of 7)	intron (NM_001243792, intron 1 of 7)	680	NM_001243792	26381	Mm.89989	NM_011935	ENSMUSG00000026610	Esrrg	ERR3|Errg|NR3B3|mKIAA0832	estrogen-related receptor gamma	protein-coding
MACS_peak_373	chr13	78318518	78318843	+	539	NA	Intergenic	CpG	-18598	NR_045195	320174	Mm.393122	NR_045195		A830082K12Rik	-	RIKEN cDNA A830082K12 gene	ncRNA
MACS_peak_319	chr12	110304351	110306896	+	539	NA	intron (NM_001163175, intron 1 of 6)	intron (NM_001163175, intron 1 of 6)	804	NM_001163175	380785	Mm.342085	NM_001163175	ENSMUSG00000040867	Begain	BM948371|Gm897	brain-enriched guanylate kinase-associated	protein-coding
MACS_peak_416	chr14	33669994	33670735	+	539	NA	intron (NM_178791, intron 1 of 7)	CpG	422	NM_178791	320736	Mm.187910	NM_178791	ENSMUSG00000050666	Vstm4	E130203B14Rik	V-set and transmembrane domain containing 4	protein-coding
MACS_peak_280	chr12	58297640	58298117	+	539	NA	exon (NM_172577, exon 1 of 10)	exon (NM_172577, exon 1 of 10)	581	NM_172577	217593	Mm.32835	NM_172577	ENSMUSG00000035472	Slc25a21	9930033G19Rik|A630030I10|BB158148	solute carrier family 25 (mitochondrial oxodicarboxylate carrier), member 21	protein-coding
MACS_peak_274	chr12	56699761	56701833	+	539	NA	exon (NM_020287, exon 1 of 1)	exon (NM_020287, exon 1 of 1)	893	NM_020287	56856	Mm.114886	NM_020287	ENSMUSG00000045440	Insm2	Mlt1	insulinoma-associated 2	protein-coding
MACS_peak_35	chr1	79854766	79855882	+	539	NA	promoter-TSS (NM_009255)	promoter-TSS (NM_009255)	-84	NM_009255	20720	Mm.3093	NM_009255	ENSMUSG00000026249	Serpine2	B230326M24Rik|PAI-1|PI-7|PI7|PN-1|Spi4	serine (or cysteine) peptidase inhibitor, clade E, member 2	protein-coding
MACS_peak_1147	chr6	51382344	51383968	+	539	NA	exon (NM_010903, exon 1 of 4)	exon (NM_010903, exon 1 of 4)	487	NM_010903	18025	Mm.42138	NM_010903	ENSMUSG00000029832	Nfe2l3	Nrf3	nuclear factor, erythroid derived 2, like 3	protein-coding
MACS_peak_57	chr1	133859094	133861370	+	539	NA	intron (NM_001177628, intron 1 of 4)	intron (NM_001177628, intron 1 of 4)	740	NM_001177628	212980	Mm.200307	NM_145977	ENSMUSG00000026435	Slc45a3	2210413P12Rik|AU023994|AU043764|IPCA-6|PRST|Pcanap6	solute carrier family 45, member 3	protein-coding
MACS_peak_922	chr3	142193205	142194435	+	539	NA	intron (NM_001083312, intron 1 of 10)	intron (NM_001083312, intron 1 of 10)	520	NM_145545	229900	Mm.45740	NM_145545	ENSMUSG00000040253	Gbp7	9830147J24Rik	guanylate binding protein 7	protein-coding
MACS_peak_103	chr10	25796233	25799851	+	539	NA	promoter-TSS (NR_028030)	promoter-TSS (NR_028030)	-19	NR_028030	100040851	Mm.478630	NR_028030	ENSMUSG00000039098	Gm9767	ENSMUSG00000039098	predicted gene 9767	ncRNA
MACS_peak_143	chr10	111707183	111710064	+	539	NA	intron (NM_001025581, intron 1 of 4)	intron (NM_001025581, intron 1 of 4)	444	NM_001025581	268345	Mm.336242	NM_001025581	ENSMUSG00000035681	Kcnc2	AW047325|B230117I07|KShIIIA|Kv3.2	potassium voltage gated channel, Shaw-related subfamily, member 2	protein-coding
MACS_peak_337	chr13	31717206	31719272	+	539	NA	exon (NM_010225, exon 1 of 2)	exon (NM_010225, exon 1 of 2)	554	NM_010225	14238	Mm.125548	NM_010225	ENSMUSG00000038402	Foxf2	FREAC2|Fkh20|LUN	forkhead box F2	protein-coding
MACS_peak_733	chr2	26459325	26459662	+	539	NA	intron (NM_026212, intron 1 of 5)	CpG	444	NM_026212	67512	Mm.24244	NM_026212	ENSMUSG00000026922	Agpat2	2510002J07Rik|AV000834|BSCL|BSCL1|LPAAB|LPAAT-beta	1-acylglycerol-3-phosphate O-acyltransferase 2 (lysophosphatidic acid acyltransferase, beta)	protein-coding
MACS_peak_421	chr14	49286548	49288763	+	539	NA	promoter-TSS (NM_001286481)	promoter-TSS (NM_001286481)	-336	NM_001286481	18424	Mm.134516	NM_144841	ENSMUSG00000021848	Otx2	E130306E05Rik	orthodenticle homolog 2	protein-coding
MACS_peak_260	chr12	25785118	25786127	+	536	NA	Intergenic	CpG	-4665	NM_010496	15902	Mm.34871	NM_010496	ENSMUSG00000020644	Id2	AI255428|C78922|Idb2|bHLHb26	inhibitor of DNA binding 2	protein-coding
MACS_peak_911	chr3	122431932	122434168	+	531	NA	intron (NM_153422, intron 1 of 20)	CpG	974	NM_153422	242202	Mm.134911	NM_153422	ENSMUSG00000053965	Pde5a	Cgbpde|Cn5n|Pde5|Pde5a1	phosphodiesterase 5A, cGMP-specific	protein-coding
MACS_peak_751	chr2	61649018	61650970	+	531	NA	exon (NM_009322, exon 6 of 6)	exon (NM_009322, exon 6 of 6)	7484	NM_009322	21375	Mm.308525	NM_009322	ENSMUSG00000035033	Tbr1	-	T-box brain gene 1	protein-coding
MACS_peak_1020	chr4	148326117	148327188	+	527	NA	exon (NM_001159344, exon 21 of 21)	exon (NM_001159344, exon 21 of 21)	147269	NM_019781	56273	Mm.184172	NM_019781	ENSMUSG00000028975	Pex14	Pex14p|R75137	peroxisomal biogenesis factor 14	protein-coding
MACS_peak_425	chr14	56442149	56445166	+	527	NA	promoter-TSS (NM_023699)	promoter-TSS (NM_023699)	25	NM_023699	73181	Mm.27908	NM_023699	ENSMUSG00000023411	Nfatc4	3110041H08Rik|AW107667|AW546455|Nfat3	nuclear factor of activated T cells, cytoplasmic, calcineurin dependent 4	protein-coding
MACS_peak_321	chr12	113381584	113385389	+	526	NA	promoter-TSS (NM_001097621)	promoter-TSS (NM_001097621)	-933	NM_001097621	668303	Mm.313104	NM_001097621	ENSMUSG00000021294	Kif26a	mKIAA1236	kinesin family member 26A	protein-coding
MACS_peak_930	chr4	14857417	14858075	+	523	NA	promoter-TSS (NM_001243100)	promoter-TSS (NM_001243100)	-42	NM_001243100	100038514	Mm.331495	NM_001243100		Gm11837	OTTMUSG00000004551	predicted gene 11837	protein-coding
MACS_peak_130	chr10	66997414	66998519	+	521	NA	Intergenic	Intergenic	-2651	NM_010118	13654	Mm.290421	NM_010118	ENSMUSG00000037868	Egr2	Egr-2|Krox-20|Krox20|NGF1-B|Zfp-25|Zfp-6	early growth response 2	protein-coding
MACS_peak_410	chr14	27852362	27853454	+	516	NA	intron (NM_134437, intron 1 of 12)	intron (NM_134437, intron 1 of 12)	721	NM_134437	171463	Mm.206726	NM_027265	ENSMUSG00000040717	Il17rd	2810004A10Rik|AI428510|Sef|Sef-S	interleukin 17 receptor D	protein-coding
MACS_peak_1257	chr7	123180772	123183313	+	516	NA	intron (NM_001025559, intron 1 of 15)	intron (NM_001025559, intron 1 of 15)	216	NM_001025559	20679	Mm.323365	NM_011445	ENSMUSG00000051910	Sox6	AI987981|SOX-LZ	SRY (sex determining region Y)-box 6	protein-coding
MACS_peak_1134	chr6	28083279	28083994	+	515	NA	intron (NM_008174, intron 1 of 10)	intron (NM_008174, intron 1 of 10)	733	NM_008174	14823	Mm.320732	NM_008174	ENSMUSG00000024211	Grm8	A230002O04|Gprc1h|mGluR8	glutamate receptor, metabotropic 8	protein-coding
MACS_peak_144	chr10	118305357	118306078	+	515	NA	intron (NM_001014390, intron 1 of 2)	CpG-1524	242	NM_001014390	69181	Mm.45565	NM_001014390	ENSMUSG00000028630	Dyrk2	1810038L18Rik	dual-specificity tyrosine-(Y)-phosphorylation regulated kinase 2	protein-coding
MACS_peak_562	chr16	94549632	94550357	+	515	NA	promoter-TSS (NM_133229)	promoter-TSS (NM_133229)	-35	NM_133229	170765	Mm.42604	NM_133229	ENSMUSG00000022941	Ripply3	Dscr6	ripply3 homolog (zebrafish)	protein-coding
MACS_peak_552	chr16	91269765	91271034	+	515	NA	exon (NM_016968, exon 1 of 1)	exon (NM_016968, exon 1 of 1)	385	NM_016968	50914	Mm.39300	NM_016968	ENSMUSG00000046160	Olig1	AI836478|AW494459|Bhlhb6|Olg-1|Oligo1|bHLHe21	oligodendrocyte transcription factor 1	protein-coding
MACS_peak_867	chr3	36587885	36589240	+	515	NA	intron (NM_019510, intron 1 of 11)	CpG	527	NM_019510	22065	Mm.74363	NM_019510	ENSMUSG00000027716	Trpc3	Mwk|Trcp3|Trp3|Trrp3	transient receptor potential cation channel, subfamily C, member 3	protein-coding
MACS_peak_1086	chr5	115848069	115848782	+	515	NA	Intergenic	Intergenic	-31269	NM_008629	17690	Mm.5077	NM_008629	ENSMUSG00000054256	Msi1	Msi1h|Musahi1|m-Msi-1	musashi RNA-binding protein 1	protein-coding
MACS_peak_1244	chr7	103359166	103362109	+	515	NA	intron (NM_011858, intron 1 of 32)	intron (NM_011858, intron 1 of 32)	1490	NM_011858	23966	Mm.254610	NM_011858	ENSMUSG00000048078	Tenm4	Doc4|ELM2|Odz4|R75022|Ten-m4|l(7)-3Rn|l7Rn3|mKIAA1302	teneurin transmembrane protein 4	protein-coding
MACS_peak_427	chr14	57722743	57724539	+	515	NA	promoter-TSS (NM_008125)	promoter-TSS (NM_008125)	-102	NM_008125	14619	Mm.390683	NM_008125	ENSMUSG00000046352	Gjb2	AI325222|Cnx26|Cx26|Gjb-2	gap junction protein, beta 2	protein-coding
MACS_peak_382	chr13	97841040	97841867	+	515	NA	promoter-TSS (NM_001100458)	promoter-TSS (NM_001100458)	-145	NM_001100458	320557	Mm.458280	NM_001100458	ENSMUSG00000041817	Fam169a	B230112C05Rik|SLAP75	family with sequence similarity 169, member A	protein-coding
MACS_peak_440	chr14	84844190	84846395	+	512	NA	5' UTR (NM_001013753, exon 1 of 4)	5' UTR (NM_001013753, exon 1 of 4)	1922	NM_001013753	219228	Mm.153643	NM_001013753	ENSMUSG00000035566	Pcdh17	C030033F14Rik|Gm78	protocadherin 17	protein-coding
MACS_peak_12	chr1	42742496	42743645	+	509	NA	intron (NR_027826, intron 1 of 3)	intron (NR_027826, intron 1 of 3)	8600	NR_027826	66297	Mm.45203	NM_183252	ENSMUSG00000060424	Pantr1	2610017I09Rik|Pou3f3os|linc-Brn1a	POU domain, class 3, transcription factor 3 adjacent noncoding transcript 1	ncRNA
MACS_peak_1051	chr5	48374023	48377862	+	509	NA	non-coding (NR_111900, exon 1 of 36)	non-coding (NR_111900, exon 1 of 36)	1548	NM_001291228	20563	Mm.289739	NM_178804		Slit2	Drad-1|E030015M03Rik|E130320P19Rik|Slil3|mKIAA4141|slit-2	slit homolog 2 (Drosophila)	protein-coding
MACS_peak_1247	chr7	107641364	107641864	+	502	NA	promoter-TSS (NM_011671)	promoter-TSS (NM_011671)	-240	NM_011671	22228	Mm.171378	NM_011671	ENSMUSG00000033685	Ucp2	Slc25a8	uncoupling protein 2 (mitochondrial, proton carrier)	protein-coding
MACS_peak_1355	chr9	30749122	30751926	+	502	NA	exon (NM_013906, exon 1 of 9)	exon (NM_013906, exon 1 of 9)	376	NM_013906	30806	Mm.100582	NM_013906	ENSMUSG00000031994	Adamts8	METH-2|METH2	a disintegrin-like and metallopeptidase (reprolysin type) with thrombospondin type 1 motif, 8	protein-coding
MACS_peak_1303	chr8	73015428	73017947	+	502	NA	promoter-TSS (NM_018827)	promoter-TSS (NM_018827)	-368	NM_018827	12931	Mm.335584	NM_018827	ENSMUSG00000007888	Crlf1	CLF-1|CRLM3|NR6.1	cytokine receptor-like factor 1	protein-coding
MACS_peak_135	chr10	80805739	80806270	+	491	NA	promoter-TSS (NM_148951)	promoter-TSS (NM_148951)	7	NM_148951	209047	Mm.218755	NM_148951	ENSMUSG00000034872	Gipc3	Ahl5|Rgs19ip3	GIPC PDZ domain containing family, member 3	protein-coding
MACS_peak_490	chr15	95484290	95485683	+	491	NA	exon (NM_207533, exon 1 of 4)	exon (NM_207533, exon 1 of 4)	216	NM_207533	223843	Mm.152937	NM_207533		Dbx2	9430056A22Rik|9630005K15|AI846217|Gm1229	developing brain homeobox 2	protein-coding
MACS_peak_58	chr1	135059779	135060867	+	485	NA	Intergenic	Intergenic	32580	NM_133819	108954	Mm.293628	NM_133819	ENSMUSG00000046062	Ppp1r15b	1810033K10Rik|AI606441|C530022L24Rik|CReP	protein phosphatase 1, regulatory (inhibitor) subunit 15b	protein-coding
MACS_peak_1054	chr5	66540855	66543539	+	485	NA	promoter-TSS (NM_001291226)	promoter-TSS (NM_001291226)	20	NM_001291226	245945	Mm.36863	NM_139065	ENSMUSG00000070780	Rbm47	9530077J19Rik	RNA binding motif protein 47	protein-coding
MACS_peak_963	chr4	89190017	89191800	+	480	NA	Intergenic	Intergenic	-163981	NM_175647	242523	Mm.130167	NM_175647	ENSMUSG00000043753	Dmrta1	Dmrt4	doublesex and mab-3 related transcription factor like family A1	protein-coding
MACS_peak_732	chr2	26358268	26360277	+	480	NA	promoter-TSS (NM_008714)	promoter-TSS (NM_008714)	70	NM_008714	18128	Mm.290610	NM_008714	ENSMUSG00000026923	Notch1	9930111A19Rik|Mis6|N1|Tan1|lin-12	notch 1	protein-coding
MACS_peak_262	chr12	31057559	31058543	+	480	NA	exon (NM_172951, exon 1 of 17)	exon (NM_172951, exon 1 of 17)	189	NM_172951	268534	Mm.279765	NM_172951	ENSMUSG00000020672	Sntg2	2210008K22Rik|9530013L23|BB121248	syntrophin, gamma 2	protein-coding
MACS_peak_1249	chr7	108599626	108600910	+	480	NA	intron (NM_001143848, intron 2 of 30)	intron (NM_001143848, intron 2 of 30)	502	NM_001243757	207728	Mm.247564	NM_001008548	ENSMUSG00000030653	Pde2a	CGS-PDE|cGSPDE	phosphodiesterase 2A, cGMP-stimulated	protein-coding
MACS_peak_849	chr2	172764637	172766445	+	480	NA	exon (NM_007557, exon 1 of 7)	exon (NM_007557, exon 1 of 7)	281	NM_007557	12162	Mm.595	NM_007557	ENSMUSG00000008999	Bmp7	OP1	bone morphogenetic protein 7	protein-coding
MACS_peak_1323	chr8	97056198	97057780	+	480	NA	promoter-TSS (NM_153507)	promoter-TSS (NM_153507)	61	NM_153507	234577	Mm.291815	NM_153507	ENSMUSG00000034361	Cpne2	3322401K10Rik	copine II	protein-coding
MACS_peak_1324	chr8	97219396	97222053	+	480	NA	promoter-TSS (NM_026385)	promoter-TSS (NM_026385)	-582	NM_026385	67801	Mm.279977	NM_026385	ENSMUSG00000031775	Pllp	0610010I06Rik|AV001002|Plapi|Tm4sf11	plasma membrane proteolipid	protein-coding
MACS_peak_353	chr13	52678465	52679463	+	480	NA	5' UTR (NM_001198977, exon 1 of 14)	5' UTR (NM_001198977, exon 1 of 14)	158	NM_001198977	20963	Mm.375031	NM_011518	ENSMUSG00000021457	Syk	Sykb	spleen tyrosine kinase	protein-coding
MACS_peak_1367	chr9	41388957	41392425	+	480	NA	TTS (NR_029822)	TTS (NR_029822)	682	NR_029822	387236		NR_029822	miRBase:MI0000725	Mir125b-1	Mirn125b|Mirn125b-1	microRNA 125b-1	ncRNA
MACS_peak_597	chr17	44325734	44327870	+	480	NA	intron (NM_172621, intron 1 of 5)	intron (NM_172621, intron 1 of 5)	1281	NM_172621	224796	Mm.37666	NM_172621	ENSMUSG00000023959	Clic5	5730531E12Rik|B330005L24|Gm322|jbg	chloride intracellular channel 5	protein-coding
MACS_peak_362	chr13	69137014	69138905	+	480	NA	exon (NM_153534, exon 1 of 25)	exon (NM_153534, exon 1 of 25)	460	NM_153534	210044	Mm.390617	NM_153534	ENSMUSG00000021536	Adcy2	mKIAA1060	adenylate cyclase 2	protein-coding
MACS_peak_232	chr11	100829599	100833054	+	480	NA	exon (NM_008986, exon 1 of 2)	exon (NM_008986, exon 1 of 2)	605	NM_008986	19285	Mm.21864	NM_008986	ENSMUSG00000004044	Ptrf	2310075E07Rik|AW546441|Cav-p60|Cavin	polymerase I and transcript release factor	protein-coding
MACS_peak_1396	chr9	98324679	98327266	+	480	NA	exon (NM_011254, exon 2 of 4)	exon (NM_011254, exon 2 of 4)	2592	NM_011254	19659	Mm.279741	NM_011254	ENSMUSG00000046402	Rbp1	CRBPI|Crbp|Rbp-1	retinol binding protein 1, cellular	protein-coding
MACS_peak_585	chr17	34400153	34402525	+	475	NA	intron (NM_207105, intron 1 of 5)	intron (NM_207105, intron 1 of 5)	1167	NM_207105	14961	Mm.254067	NM_207105	ENSMUSG00000073421	H2-Ab1	AI845868|Abeta|H-2Ab|H2-Ab|I-Abeta|IAb|Ia-2|Ia2|Rmcs1	histocompatibility 2, class II antigen A, beta 1	protein-coding
MACS_peak_992	chr4	125164704	125169694	+	475	NA	promoter-TSS (NM_001081097)	promoter-TSS (NM_001081097)	-876	NM_001081097	14807	Mm.40896	NM_001081097	ENSMUSG00000001985	Grik3	9630027E11|GluK3|GluR7-3|Glur-7|Glur7	glutamate receptor, ionotropic, kainate 3	protein-coding
MACS_peak_915	chr3	127492399	127493811	+	473	NA	intron (NM_145133, intron 1 of 2)	intron (NM_145133, intron 1 of 2)	274	NM_145133	211550	Mm.31852	NM_145133	ENSMUSG00000046688	Tifa	T2bp	TRAF-interacting protein with forkhead-associated domain	protein-coding
MACS_peak_484	chr15	84962046	84962390	+	463	NA	promoter-TSS (NM_026357)	promoter-TSS (NM_026357)	169	NM_080470	140557	Mm.182737	NM_080470	ENSMUSG00000022432	Smc1b	SMC-1B|SMC1beta|Smc1l2	structural maintenance of chromosomes 1B	protein-coding
MACS_peak_28	chr1	74817454	74819336	+	463	NA	promoter-TSS (NM_009526)	promoter-TSS (NM_009526)	-71	NM_009526	22420	Mm.268282	NM_009526	ENSMUSG00000033227	Wnt6	AA409270|Wnt-6	wingless-type MMTV integration site family, member 6	protein-coding
MACS_peak_1342	chr8	123602697	123609369	+	463	NA	intron (NR_045471, intron 1 of 5)	intron (NR_045471, intron 1 of 5)	899	NR_045471	68790	Mm.246916	NR_045471	ENSMUSG00000097336	Fendrr	1110050K14Rik|linc-Foxf1a	Foxf1 adjacent non-coding developmental regulatory RNA	ncRNA
MACS_peak_1170	chr6	72738335	72739499	+	456	NA	exon (NM_001079822, exon 1 of 13)	exon (NM_001079822, exon 1 of 13)	122	NM_001079822	21415	Mm.440067	NM_009332	ENSMUSG00000055799	Tcf7l1	Tcf-3|Tcf3|bHLHb21	transcription factor 7 like 1 (T cell specific, HMG box)	protein-coding
MACS_peak_1230	chr7	73006409	73009043	+	454	NA	intron (NM_001291184, intron 1 of 20)	CpG	704	NM_011048	18553	Mm.294007	NM_011048	ENSMUSG00000030513	Pcsk6	C86343|Pace4|SPC4	proprotein convertase subtilisin/kexin type 6	protein-coding
MACS_peak_1186	chr6	96065754	96067250	+	454	NA	intron (NM_182808, intron 2 of 4)	intron (NM_182808, intron 2 of 4)	3354	NM_182808	320265	Mm.489890	NM_182808	ENSMUSG00000059187	Fam19a1	C630007B19Rik|FAM19A1 TAFA-1|TAFA1|Tafa-1	family with sequence similarity 19, member A1	protein-coding
MACS_peak_605	chr17	56895550	56897357	+	453	NA	intron (NM_008738, intron 1 of 2)	CpG	500	NM_008738	18188	Mm.8074	NM_008738	ENSMUSG00000039481	Nrtn	NTN	neurturin	protein-coding
MACS_peak_190	chr11	68198298	68200883	+	449	NA	exon (NM_008744, exon 2 of 7)	exon (NM_008744, exon 2 of 7)	738	NM_008744	18208	Mm.39095	NM_008744	ENSMUSG00000020902	Ntn1	AI561871|BC019633|Netrin-1	netrin 1	protein-coding
MACS_peak_1068	chr5	96803949	96804936	+	446	NA	intron (NM_175473, intron 1 of 73)	intron (NM_175473, intron 1 of 73)	1468	NM_175473	231470	Mm.291120	NM_175473	ENSMUSG00000034687	Fras1	E130113P14Rik|bl|mKIAA1500	Fraser syndrome 1 homolog (human)	protein-coding
MACS_peak_1013	chr4	140803619	140804529	+	441	NA	intron (NM_172520, intron 7 of 16)	intron (NM_172520, intron 7 of 16)	5275	NM_172520	213649	Mm.134460	NM_172520	ENSMUSG00000028919	Arhgef19	6030432F23|6430573B13Rik|WGEF	Rho guanine nucleotide exchange factor (GEF) 19	protein-coding
MACS_peak_481	chr15	83356330	83358907	+	439	NA	intron (NM_007546, intron 1 of 4)	CpG	326	NM_007546	12124	Mm.267006	NM_007546	ENSMUSG00000016758	Bik	Biklk|Blk|Nbk	BCL2-interacting killer	protein-coding
MACS_peak_422	chr14	49292685	49293541	+	437	NA	intron (NR_029384, intron 2 of 4)	intron (NR_029384, intron 2 of 4)	4150	NR_029384	606497	Mm.165199	NR_029384	ENSMUSG00000098682	Otx2os1	-	orthodenticle homolog 2 opposite strand 1	ncRNA
MACS_peak_883	chr3	90268734	90270115	+	437	NA	exon (NM_008727, exon 1 of 22)	exon (NM_008727, exon 1 of 22)	364	NM_008727	18160	Mm.4627	NM_008727	ENSMUSG00000027931	Npr1	AI893888|GC-A|NPR-A|NPRA|Pndr	natriuretic peptide receptor 1	protein-coding
MACS_peak_1310	chr8	74843684	74844245	+	435	NA	exon (NM_008452, exon 2 of 3)	exon (NM_008452, exon 2 of 3)	1003	NM_008452	16598	Mm.26938	NM_008452	ENSMUSG00000055148	Klf2	Lklf	Kruppel-like factor 2 (lung)	protein-coding
MACS_peak_1036	chr5	28790240	28791896	+	435	NA	intron (NM_009170, intron 1 of 2)	CpG	-2456	NR_015562	654796	Mm.57202	NR_015562	ENSMUSG00000097726	9530036O11Rik	-	RIKEN cDNA 9530036O11Rik	ncRNA
MACS_peak_1191	chr6	119492658	119495366	+	435	NA	5' UTR (NM_009525, exon 1 of 5)	5' UTR (NM_009525, exon 1 of 5)	353	NM_009525	22419	Mm.321818	NM_009525	ENSMUSG00000030170	Wnt5b	AW545702|Wnt-5b	wingless-type MMTV integration site family, member 5B	protein-coding
MACS_peak_712	chr19	56798063	56799001	+	435	NA	3' UTR (NM_007419, exon 1 of 1)	3' UTR (NM_007419, exon 1 of 1)	1670	NM_007419	11554	Mm.46797	NM_007419	ENSMUSG00000035283	Adrb1	Adrb-1|beta-AR	adrenergic receptor, beta 1	protein-coding
MACS_peak_678	chr19	36131096	36132213	+	435	NA	exon (NM_008315, exon 1 of 3)	exon (NM_008315, exon 1 of 3)	196	NM_008315	15566	Mm.254266	NM_008315	ENSMUSG00000024798	Htr7	5-HT7	5-hydroxytryptamine (serotonin) receptor 7	protein-coding
MACS_peak_1052	chr5	58109819	58111716	+	426	NA	exon (NM_018764, exon 1 of 2)	exon (NM_018764, exon 1 of 2)	1507	NM_018764	54216	Mm.332387	NM_018764	ENSMUSG00000029108	Pcdh7	-	protocadherin 7	protein-coding
MACS_peak_1411	chr9	120448826	120449347	+	426	NA	intron (NM_178676, intron 1 of 10)	intron (NM_178676, intron 1 of 10)	150	NM_178676	215446	Mm.76648	NM_178676	ENSMUSG00000041608	Entpd3	Cd39l3|HB6|NTPDase-3	ectonucleoside triphosphate diphosphohydrolase 3	protein-coding
MACS_peak_1074	chr5	105948246	105948709	+	423	NA	promoter-TSS (NM_133897)	promoter-TSS (NM_133897)	-13	NM_133897	100604	Mm.319847	NM_133897	ENSMUSG00000054720	Lrrc8c	AD158|AI326115|E430036I04Rik|fad158	leucine rich repeat containing 8 family, member C	protein-coding
MACS_peak_1294	chr8	41947610	41948243	+	423	NA	intron (NM_001044740, intron 1 of 11)	CpG	205	NM_001044740	11988	Mm.4676	NM_007514	ENSMUSG00000031596	Slc7a2	20.5|AI158848|Atrc2|CAT-2|Cat2|Tea	solute carrier family 7 (cationic amino acid transporter, y+ system), member 2	protein-coding
MACS_peak_426	chr14	57483828	57484133	+	417	NA	Intergenic	CpG	-22652	NM_029498	76007	Mm.31417	NM_029498	ENSMUSG00000021945	Zmym2	5830413P05Rik|FIM|MYM|RAMP|SCLL|Zfp198|Znf198	zinc finger, MYM-type 2	protein-coding
MACS_peak_141	chr10	93977671	93979861	+	412	NA	intron (NM_172051, intron 1 of 3)	intron (NM_172051, intron 1 of 3)	1164	NM_172051	319880	Mm.23047	NM_172051	ENSMUSG00000020023	Tmcc3	AW488095|C630016B22Rik|C88213|Tmcc1	transmembrane and coiled coil domains 3	protein-coding
MACS_peak_829	chr2	160190843	160192926	+	407	NA	exon (NM_010658, exon 1 of 1)	exon (NM_010658, exon 1 of 1)	917	NM_010658	16658	Mm.330745	NM_010658	ENSMUSG00000074622	Mafb	Kreisler|Krml|Krml1|kr	v-maf musculoaponeurotic fibrosarcoma oncogene family, protein B (avian)	protein-coding
MACS_peak_116	chr10	45054787	45056057	+	407	NA	promoter-TSS (NM_024285)	promoter-TSS (NM_024285)	-146	NM_024285	23828	Mm.332793	NM_024285	ENSMUSG00000071317	Bves	Pop1|Popdc1|mBVES	blood vessel epicardial substance	protein-coding
MACS_peak_1263	chr7	137407204	137411075	+	404	NA	intron (NM_201601, intron 1 of 15)	CpG	1183	NM_010207	14183	Mm.16340	NM_010207	ENSMUSG00000030849	Fgfr2	AU043015|AW556123|Bek|Fgfr-2|Fgfr-7|Fgfr7|KGFR|KGFRTr|svs	fibroblast growth factor receptor 2	protein-coding
MACS_peak_1340	chr8	123259141	123260506	+	401	NA	promoter-TSS (NM_008320)	promoter-TSS (NM_008320)	-453	NM_008320	15900	Mm.334861	NM_008320	ENSMUSG00000041515	Irf8	AI893568|ICSBP|IRF-8|Icsbp1|Myls	interferon regulatory factor 8	protein-coding
MACS_peak_619	chr17	84910508	84911689	+	401	NA	promoter-TSS (NM_177606)	promoter-TSS (NM_177606)	-137	NM_177606	213556	Mm.215159	NM_177606	ENSMUSG00000040852	Plekhh2	AI256725|E030001K05|mKIAA2028	pleckstrin homology domain containing, family H (with MyTH4 domain) member 2	protein-coding
MACS_peak_1283	chr8	10153889	10154205	+	398	NA	5' UTR (NM_001081397, exon 1 of 36)	5' UTR (NM_001081397, exon 1 of 36)	124	NM_001081397	244281	Mm.422761	NM_001081397	ENSMUSG00000039057	Myo16	C230040D10Rik|Gm1105|NYAP3|mKIAA0865	myosin XVI	protein-coding
MACS_peak_91	chr10	14264808	14266001	+	398	NA	promoter-TSS (NM_001002268)	promoter-TSS (NM_001002268)	-562	NM_001002268	215798	Mm.440142	NM_001002268	ENSMUSG00000039116	Gpr126	1190004A11Rik|AI449247|AW045736|DREG|Gm222	G protein-coupled receptor 126	protein-coding
MACS_peak_1407	chr9	117781931	117782352	+	398	NA	Intergenic	CpG	-167499	NM_001286508	27215	Mm.92705	NM_013727	ENSMUSG00000039285	Azi2	AA410145|AZ2	5-azacytidine induced gene 2	protein-coding
MACS_peak_291	chr12	74212798	74215312	+	387	NA	exon (NM_011382, exon 1 of 3)	exon (NM_011382, exon 1 of 3)	177	NM_011382	20474	Mm.249575	NM_011382	ENSMUSG00000034460	Six4	AI047561|AREC3|TrexBF	sine oculis-related homeobox 4	protein-coding
MACS_peak_1206	chr7	20108812	20110608	+	381	NA	exon (NM_027116, exon 4 of 4)	exon (NM_027116, exon 4 of 4)	5630	NM_027116	69547	Mm.77325	NM_027116	ENSMUSG00000060621	Nkpd1	2310015G09Rik	NTPase, KAP family P-loop domain containing 1	protein-coding
MACS_peak_1308	chr8	74209741	74212055	+	380	NA	intron (NM_001190830, intron 22 of 23)	intron (NM_001190830, intron 22 of 23)	-2253	NM_013564	16336	Mm.476857	NM_013564	ENSMUSG00000079019	Insl3	Rlf|Rlnl	insulin-like 3	protein-coding
MACS_peak_1281	chr7	150925717	150926616	+	379	NA	promoter-TSS (NM_001199227)	promoter-TSS (NM_001199227)	99	NM_001199227	79196	Mm.21199	NM_024289	ENSMUSG00000037606	Osbpl5	1110006M06Rik|AI462538|ORP5|Obph1|Osbp2	oxysterol binding protein-like 5	protein-coding
MACS_peak_842	chr2	168736741	168738650	+	373	NA	Intergenic	CpG	43392	NM_009564	22722	Mm.2095	NM_009564	ENSMUSG00000027551	Zfp64	-	zinc finger protein 64	protein-coding
MACS_peak_874	chr3	72861357	72861696	+	373	NA	promoter-TSS (NM_198864)	promoter-TSS (NM_198864)	-661	NM_198864	386750	Mm.331076	NM_198864	ENSMUSG00000048304	Slitrk3	-	SLIT and NTRK-like family, member 3	protein-coding
MACS_peak_39	chr1	89160979	89163254	+	373	NA	intron (NM_028889, intron 1 of 3)	intron (NM_028889, intron 1 of 3)	1177	NM_028889	98363	Mm.247951	NM_028889	ENSMUSG00000026255	Efhd1	4931430I01Rik|AI452351|PP3051|mitocalcin	EF hand domain containing 1	protein-coding
MACS_peak_950	chr4	49857328	49858246	+	358	NA	exon (NM_001033351, exon 1 of 9)	exon (NM_001033351, exon 1 of 9)	854	NM_001033351	242443	Mm.440095	NM_001033351	ENSMUSG00000039579	Grin3a	6430537F04|A830097C19Rik|NMDAR-L|NR3A|mKIAA1973	glutamate receptor ionotropic, NMDA3A	protein-coding
MACS_peak_850	chr2	173101581	173102313	+	351	NA	promoter-TSS (NM_022995)	promoter-TSS (NM_022995)	87	NM_022995	65112	Mm.73682	NM_022995	ENSMUSG00000038400	Pmepa1	2210418I02Rik|AW455466|Erg1.2|N4wbp4|Stag1|Tmepai	prostate transmembrane protein, androgen induced 1	protein-coding
MACS_peak_822	chr2	157739713	157740663	+	351	NA	promoter-TSS (NM_198627)	promoter-TSS (NM_198627)	-201	NM_198627	277432	Mm.441156	NM_198627	ENSMUSG00000037843	Vstm2l	Gm691	V-set and transmembrane domain containing 2-like	protein-coding
MACS_peak_1325	chr8	97441253	97441993	+	337	NA	intron (NM_001033533, intron 1 of 8)	CpG	375	NM_001033533	234582	Mm.277871	NM_001033533	ENSMUSG00000063605	Ccdc102a	BC027663|Gm586	coiled-coil domain containing 102A	protein-coding
MACS_peak_615	chr17	79419727	79420592	+	322	NA	promoter-TSS (NM_029239)	promoter-TSS (NM_029239)	-3	NM_029239	75292	Mm.252776	NM_029239	ENSMUSG00000024070	Prkd3	4930557O20Rik|5730497N19Rik|PKD3|Pkcnu|Prkcn	protein kinase D3	protein-coding
MACS_peak_420	chr14	47808261	47808548	+	322	NA	intron (NM_008102, intron 1 of 5)	intron (NM_008102, intron 1 of 5)	673	NM_008102	14528	Mm.10651	NM_008102	ENSMUSG00000037580	Gch1	GTP-CH|GTPCH|Gch	GTP cyclohydrolase 1	protein-coding
MACS_peak_1369	chr9	42752204	42753203	+	322	NA	promoter-TSS (NM_175481)	promoter-TSS (NM_175481)	-249	NM_175481	110637	Mm.370291	NM_175481	ENSMUSG00000032017	Grik4	6330551K01Rik|GluK4|GluRgamma1|KA-1|KA1	glutamate receptor, ionotropic, kainate 4	protein-coding
