# Supplementary material for: Remodeling of epigenome and transcriptome landscapes with aging in mice reveals widespread induction of inflammatory responses
Source: HighWire-hosted journal article supplement (doi:10.1101/gr.240093.118), 2019-03-11
Supplement: Supplemental_Code_Figure3_Machine_learning.zip [file HOMER_Bivalent_domains_Heart.xls]

PeakID (cmd=annotatePeaks.pl Bivalent_domains_Heart.bed mm9)	Chr	Start	End	Strand	Peak Score	Focus Ratio/Region Size	Annotation	Detailed Annotation	Distance to TSS	Nearest PromoterID	Entrez ID	Nearest Unigene	Nearest Refseq	Nearest Ensembl	Gene Name	Gene Alias	Gene Description	Gene Type
MACS_peak_2603	chr17	39979896	39985790	+	46919	NA	non-coding (NR_046233, exon 1 of 1)	non-coding (NR_046233, exon 1 of 1)	2901	NR_046233	100861531		NR_046233		Rn45s	-	45S pre-ribosomal RNA	rRNA
MACS_peak_2291	chr16	11143991	11144532	+	19711	NA	intron (NR_027502, intron 19 of 22)	LSU-rRNA_Hsa|rRNA|rRNA	-9636	NM_029582	106200	Mm.291015	NM_029582	ENSMUSG00000022498	Txndc11	2810408E11Rik|AI427833|EFP1|Txdc11	thioredoxin domain containing 11	protein-coding
MACS_peak_339	chr1	172993730	173016359	+	12615	NA	Intergenic	Intergenic	-10261	NR_106103	102466998		NR_106103	miRBase:MI0024983	Mir6546	mmu-mir-6546	microRNA mir-6546	ncRNA
MACS_peak_6218	chr9	56071419	56071863	+	9510	NA	intron (NM_172924, intron 6 of 6)	LSU-rRNA_Hsa|rRNA|rRNA	-62764	NM_019793	56434	Mm.28484	NM_019793	ENSMUSG00000032324	Tspan3	1700055K04Rik|TM4-A|Tm4sf8	tetraspanin 3	protein-coding
MACS_peak_82	chr1	42750190	42756702	+	9228	NA	promoter-TSS (NM_008900)	promoter-TSS (NM_008900)	-545	NM_008900	18993	Mm.489878	NM_008900	ENSMUSG00000045515	Pou3f3	Brn-1|Brn1|Otf8|Skin1	POU domain, class 3, transcription factor 3	protein-coding
MACS_peak_2929	chr19	16942859	16954109	+	8358	NA	promoter-TSS (NM_008023)	promoter-TSS (NM_008023)	-164	NM_008023	14240	Mm.7971	NM_008023	ENSMUSG00000056829	Foxb2	Fkh4	forkhead box B2	protein-coding
MACS_peak_3975	chr4	22413186	22422816	+	8307	NA	Intergenic	(TTTC)n|Simple_repeat|Simple_repeat	-2488	NM_008899	18992	Mm.129387	NM_008899	ENSMUSG00000095139	Pou3f2	9430075J19Rik|A230098E07Rik|Brn-2|Brn2|OTF-7|Otf7|oct-7	POU domain, class 3, transcription factor 2	protein-coding
MACS_peak_1934	chr14	104862338	104867611	+	8250	NA	exon (NM_011143, exon 2 of 3)	exon (NM_011143, exon 2 of 3)	2242	NM_011143	18996	Mm.246550	NM_011143		Pou4f1	Brn-3|Brn-3.0|Brn3|Brn3.0|Brn3a|E130119J07Rik	POU domain, class 4, transcription factor 1	protein-coding
MACS_peak_3284	chr2	73099169	73113103	+	7884	NA	Intergenic	Intergenic	-3847	NM_001005343	381373	Mm.330293	NM_001005343		Sp9	-	trans-acting transcription factor 9	protein-coding
MACS_peak_6358	chr9	98849178	98868953	+	7637	NA	TTS (NM_012020)	TTS (NM_012020)	3039	NM_012020	26927	Mm.151239	NM_012020	ENSMUSG00000050397	Foxl2	AU045128|BPES|PINTO|Pfrk	forkhead box L2	protein-coding
MACS_peak_2824	chr18	64490136	64508238	+	7552	NA	promoter-TSS (NM_194268)	promoter-TSS (NM_194268)	-831	NM_194268	225631	Mm.234723	NM_194268	ENSMUSG00000045991	Onecut2	C730009D12|OC-2|Oc2	one cut domain, family member 2	protein-coding
MACS_peak_3275	chr2	70308671	70317123	+	7300	NA	promoter-TSS (NM_022435)	promoter-TSS (NM_022435)	-83	NM_022435	64406	Mm.423397	NM_022435	ENSMUSG00000075304	Sp5	-	trans-acting transcription factor 5	protein-coding
MACS_peak_5683	chr7	148476833	148481610	+	7226	NA	intron (NM_007878, intron 1 of 3)	intron (NM_007878, intron 1 of 3)	1316	NM_007878	13491	Mm.41075	NM_007878	ENSMUSG00000025496	Drd4	AW125663|D4R|Drd-4	dopamine receptor D4	protein-coding
MACS_peak_1965	chr14	122861554	122866424	+	7207	NA	exon (NM_022987, exon 1 of 2)	exon (NM_022987, exon 1 of 2)	891	NM_022987	65100	Mm.390761	NM_022987		Zic5	1700049L20Rik|Opr	zinc finger protein of the cerebellum 5	protein-coding
MACS_peak_3451	chr2	146909340	146912701	+	7203	NA	promoter-TSS (NM_023504)	promoter-TSS (NM_023504)	61	NM_023504	228731	Mm.315498	NM_023504	ENSMUSG00000054160	Nkx2-4	1700001P03Rik|Nkx-2.4|tinman	NK2 homeobox 4	protein-coding
MACS_peak_3297	chr2	74524572	74539029	+	7165	NA	intron (NM_013554, intron 1 of 1)	intron (NM_013554, intron 1 of 1)	1852	NM_013554	15430	Mm.24420	NM_013554		Hoxd10	AI385591|AI874987|Hox-4.5|Hox-5.3	homeobox D10	protein-coding
MACS_peak_6216	chr9	55384620	55395786	+	7010	NA	intron (NM_027397, intron 2 of 5)	CpG-15005	1247	NM_027397	104360	Mm.273996	NM_027397	ENSMUSG00000032318	Isl2	3110001N10Rik	insulin related protein 2 (islet 2)	protein-coding
MACS_peak_4190	chr4	124331325	124342508	+	7002	NA	3' UTR (NM_011141, exon 2 of 2)	3' UTR (NM_011141, exon 2 of 2)	2027	NM_011141	18991	Mm.297371	NM_011141	ENSMUSG00000090125	Pou3f1	Oct-6|Oct6|Otf-6|Otf6|Scip|Test1|Tst-1|Tst1	POU domain, class 3, transcription factor 1	protein-coding
MACS_peak_5017	chr6	52208327	52216929	+	6899	NA	promoter-TSS (NR_110442)	promoter-TSS (NR_110442)	-141	NR_110441	791364	Mm.97466	NR_110441		Hottip	ENSMUSG00000055408|Gm15053|OTTMUSG00000018874	Hoxa distal transcript antisense RNA	ncRNA
MACS_peak_6301	chr9	74693676	74716615	+	6872	NA	Intergenic	Intergenic	-4583	NM_008262	15379	Mm.303355	NM_008262		Onecut1	D9Ertd423e|HNF-6|Hfh12|Hnf6|Hnf6b|OC-1|Oc1	one cut domain, family member 1	protein-coding
MACS_peak_6019	chr8	123592465	123611746	+	6825	NA	intron (NR_045471, intron 1 of 5)	intron (NR_045471, intron 1 of 5)	4827	NR_045471	68790	Mm.246916	NR_045471	ENSMUSG00000097336	Fendrr	1110050K14Rik|linc-Foxf1a	Foxf1 adjacent non-coding developmental regulatory RNA	ncRNA
MACS_peak_2593	chr17	36368060	36368618	+	6775	NA	Intergenic	CpG	26452	NM_026308	67676	Mm.27131	NM_026308		Rpp21	0610037N01Rik	ribonuclease P 21 subunit	protein-coding
MACS_peak_3843	chr3	99035479	99049132	+	6681	NA	Intergenic	Intergenic	-15378	NM_009323	21384	Mm.88761	NM_009323	ENSMUSG00000027868	Tbx15	Tbx14|Tbx8|de	T-box 15	protein-coding
MACS_peak_1207	chr11	119401364	119412488	+	6652	NA	intron (NM_008730, intron 2 of 4)	intron (NM_008730, intron 2 of 4)	2208	NM_008730	18164	Mm.5142	NM_008730	ENSMUSG00000025582	Nptx1	D11Bwg1004e|Np1	neuronal pentraxin 1	protein-coding
MACS_peak_2064	chr15	76346982	76354495	+	6640	NA	intron (NM_130893, intron 1 of 1)	intron (NM_130893, intron 1 of 1)	1821	NM_130893	170729	Mm.218747	NM_130893	ENSMUSG00000048385	Scrt1	-	scratch homolog 1, zinc finger protein (Drosophila)	protein-coding
MACS_peak_189	chr1	91813742	91838855	+	6587	NA	intron (NM_010262, intron 1 of 1)	(GA)n|Simple_repeat|Simple_repeat	1453	NM_010262	14472	Mm.204730	NM_010262		Gbx2	D130058E05Rik|Gbx-2|MMoxA|Stra7	gastrulation brain homeobox 2	protein-coding
MACS_peak_2804	chr18	53619258	53625228	+	6587	NA	Intergenic	Intergenic	-1957	NM_001033281	225518	Mm.297645	NM_001033281	ENSMUSG00000069378	Prdm6	Gm92|PRISM	PR domain containing 6	protein-coding
MACS_peak_2056	chr15	75569517	75578341	+	6368	NA	Intergenic	Intergenic	4423	NM_194350	378435	Mm.309589	NM_194350	ENSMUSG00000047591	Mafa	RIPE3b1	v-maf musculoaponeurotic fibrosarcoma oncogene family, protein A (avian)	protein-coding
MACS_peak_465	chr10	23941688	23944754	+	6347	NA	promoter-TSS (NM_021509)	promoter-TSS (NM_021509)	-102	NM_021509	59012	Mm.285934	NM_021509	ENSMUSG00000020000	Moxd1	3230402N08Rik|MNCb-5203	monooxygenase, DBH-like 1	protein-coding
MACS_peak_996	chr11	95864450	95870945	+	6315	NA	promoter-TSS (NM_009951)	promoter-TSS (NM_009951)	-439	NM_009951	140486	Mm.294769	NM_009951	ENSMUSG00000013415	Igf2bp1	AL024068|AW549074|CRD-BP|Crdbp|D030026A21Rik|D11Moh40e|D11Moh45|IMP-1|Neilsen|ZBP-1|Zbp1	insulin-like growth factor 2 mRNA binding protein 1	protein-coding
MACS_peak_3748	chr3	66776194	66779242	+	6269	NA	exon (NM_013665, exon 5 of 5)	exon (NM_013665, exon 5 of 5)	7975	NM_013665	20429	Mm.39093	NM_013665		Shox2	6330543G17Rik|OG12|Og12x|Prx3|SHOT	short stature homeobox 2	protein-coding
MACS_peak_2454	chr17	8531567	8536549	+	6262	NA	exon (NM_178774, exon 2 of 2)	exon (NM_178774, exon 2 of 2)	454	NM_178774	320111	Mm.442510	NM_178774	ENSMUSG00000055945	Prr18	9630019K15Rik	proline rich 18	protein-coding
MACS_peak_3717	chr3	34553933	34566135	+	6245	NA	intron (NR_015580, intron 4 of 4)	intron (NR_015580, intron 4 of 4)	11107	NM_011443	20674	Mm.65396	NM_011443	ENSMUSG00000074637	Sox2	Sox-2|lcc|ysb	SRY (sex determining region Y)-box 2	protein-coding
MACS_peak_3220	chr2	33489964	33506552	+	6235	NA	non-coding (NR_046275, exon 3 of 3)	non-coding (NR_046275, exon 3 of 3)	1545	NR_046275	100504399	Mm.72070	NM_177842		C130021I20Rik	-	Riken cDNA C130021I20 gene	ncRNA
MACS_peak_5847	chr8	72404715	72413644	+	6141	NA	intron (NM_026818, intron 4 of 7)	intron (NM_026818, intron 4 of 7)	2112	NM_026818	68709	Mm.334584	NM_026818	ENSMUSG00000044006	Cilp2	1110031K21Rik|AA407300|CLIP-2	cartilage intermediate layer protein 2	protein-coding
MACS_peak_4963	chr6	30119211	30131928	+	6073	NA	Intergenic	Intergenic	-1054	NR_038124	100463519	Mm.361139	NR_038124		BB283400	BF465573	expressed sequence BB283400	ncRNA
MACS_peak_4124	chr4	114594793	114602022	+	6022	NA	exon (NM_015758, exon 1 of 1)	exon (NM_015758, exon 1 of 1)	211	NM_015758	30923	Mm.377122	NM_015758	ENSMUSG00000044518	Foxe3	FREAC8|dyl|rct	forkhead box E3	protein-coding
MACS_peak_3263	chr2	61646767	61651524	+	6017	NA	intron (NM_009322, intron 5 of 5)	intron (NM_009322, intron 5 of 5)	6635	NM_009322	21375	Mm.308525	NM_009322	ENSMUSG00000035033	Tbr1	-	T-box brain gene 1	protein-coding
MACS_peak_1015	chr11	96129508	96168444	+	5942	NA	intron (NM_010460, intron 1 of 1)	intron (NM_010460, intron 1 of 1)	1016	NM_010460	15415	Mm.390366	NM_010460	ENSMUSG00000038721	Hoxb7	AI325018|Hox-2.3	homeobox B7	protein-coding
MACS_peak_940	chr11	84332183	84344522	+	5825	NA	promoter-TSS (NR_038057)	promoter-TSS (NR_038057)	684	NM_008498	16869	Mm.4965	NM_008498		Lhx1	Lim1	LIM homeobox protein 1	protein-coding
MACS_peak_40	chr1	22539915	22543057	+	5823	NA	intron (NM_001012625, intron 6 of 26)	intron (NM_001012625, intron 6 of 26)	271077	NM_001012625	116837	Mm.60061	NM_053270		Rims1	C030033M19Rik|RIM1|RIM1a|RIM1alpha|Rab3ip1|Rim|Serg1|mKIAA0340	regulating synaptic membrane exocytosis 1	protein-coding
MACS_peak_1527	chr13	40822419	40841299	+	5823	NA	Intergenic	Intergenic	-2667	NM_011547	21418	Mm.85544	NM_011547	ENSMUSG00000021359	Tfap2a	AP-2|AP2alpha|Ap2|Ap2tf|Tcfap2a	transcription factor AP-2, alpha	protein-coding
MACS_peak_1280	chr12	57633203	57641706	+	5809	NA	5' UTR (NM_009385, exon 1 of 3)	5' UTR (NM_009385, exon 1 of 3)	441	NM_009385	21869	Mm.89972	NM_009385	ENSMUSG00000001496	Nkx2-1	AV026640|Nkx2.1|T/EBP|Titf1|Ttf-1	NK2 homeobox 1	protein-coding
MACS_peak_3303	chr2	74598156	74604128	+	5801	NA	promoter-TSS (NR_110445)	promoter-TSS (NR_110445)	105	NM_010467	15429	Mm.4932	NM_010467	ENSMUSG00000042448	Hoxd1	Hox-4.9	homeobox D1	protein-coding
MACS_peak_4114	chr4	109645961	109662410	+	5707	NA	intron (NM_172296, intron 2 of 2)	intron (NM_172296, intron 2 of 2)	3555	NM_172296	242620	Mm.32825	NM_172296	ENSMUSG00000047143	Dmrta2	Dmrt5	doublesex and mab-3 related transcription factor like family A2	protein-coding
MACS_peak_2582	chr17	36297935	36300481	+	5691	NA	non-coding (NR_033517, exon 4 of 4)	non-coding (NR_033517, exon 4 of 4)	6274	NM_001081032	667977	Mm.441651	NM_001081032	ENSMUSG00000073402	Gm8909	EG667977|H2-Tw5l|H2-gs17	predicted gene 8909	protein-coding
MACS_peak_2007	chr15	35221190	35234801	+	5691	NA	intron (NM_054049, intron 1 of 3)	intron (NM_054049, intron 1 of 3)	2128	NM_054049	107587	Mm.46336	NM_054049	ENSMUSG00000022330	Osr2	5430409I15Rik|Osr2A|Osr2B	odd-skipped related 2	protein-coding
MACS_peak_6038	chr8	126124318	126125597	+	5685	NA	Intergenic	(CA)n|Simple_repeat|Simple_repeat	-52872	NM_133955	69581	Mm.168257	NM_133955	ENSMUSG00000039960	Rhou	2310026M05Rik|AI182090|Arhu|CDC42L1|G28K|WRCH-1|WRCH1|mG28K	ras homolog gene family, member U	protein-coding
MACS_peak_4197	chr4	124660266	124669093	+	5626	NA	intron (NM_138683, intron 1 of 5)	intron (NM_138683, intron 1 of 5)	1005	NM_138683	192199	Mm.42202	NM_138683	ENSMUSG00000028871	Rspo1	R-spondin|Rspondin	R-spondin homolog (Xenopus laevis)	protein-coding
MACS_peak_3102	chr19	59520234	59538813	+	5619	NA	intron (NR_002863, intron 1 of 3)	intron (NR_002863, intron 1 of 3)	3602	NR_002863	329078	Mm.80382	NR_002863	ENSMUSG00000087095	Emx2os	-	Emx2 opposite strand/antisense transcript (non-protein coding)	ncRNA
MACS_peak_2180	chr15	98615995	98624588	+	5561	NA	promoter-TSS (NM_021279)	promoter-TSS (NM_021279)	3	NM_021279	22408	Mm.1123	NM_021279	ENSMUSG00000022997	Wnt1	Int-1|Wnt-1|sw|swaying	wingless-type MMTV integration site family, member 1	protein-coding
MACS_peak_4560	chr5	75461239	75483656	+	5560	NA	intron (NM_133256, intron 1 of 1)	intron (NM_133256, intron 1 of 1)	821	NM_133256	14843	Mm.218752	NM_133256	ENSMUSG00000035946	Gsx2	Gsh-2|Gsh2	GS homeobox 2	protein-coding
MACS_peak_6338	chr9	91255268	91266787	+	5487	NA	promoter-TSS (NM_009573)	promoter-TSS (NM_009573)	-390	NM_009573	22771	Mm.335350	NM_009573	ENSMUSG00000032368	Zic1	ZIC|ZNF201	zinc finger protein of the cerebellum 1	protein-coding
MACS_peak_4470	chr5	31390465	31397366	+	5426	NA	intron (NM_011773, intron 1 of 7)	intron (NM_011773, intron 1 of 7)	1985	NM_011773	22784	Mm.1396	NM_011773	ENSMUSG00000029151	Slc30a3	Znt3	solute carrier family 30 (zinc transporter), member 3	protein-coding
MACS_peak_3162	chr2	25432103	25437083	+	5424	NA	exon (NM_001005424, exon 1 of 1)	exon (NM_001005424, exon 1 of 1)	1026	NM_001005424	381353	Mm.379511	NM_001005424	ENSMUSG00000029419	Gm996	-	predicted gene 996	protein-coding
MACS_peak_1967	chr14	122870589	122878550	+	5399	NA	promoter-TSS (NM_009574)	promoter-TSS (NM_009574)	-37	NM_009574	22772	Mm.308936	NM_009574	ENSMUSG00000061524	Zic2	HPE5|Ku	zinc finger protein of the cerebellum 2	protein-coding
MACS_peak_4455	chr5	28483271	28503435	+	5395	NA	exon (NM_010134, exon 1 of 2)	exon (NM_010134, exon 1 of 2)	1117	NM_010134	13799	Mm.4298	NM_010134		En2	BB131122|En-2	engrailed 2	protein-coding
MACS_peak_303	chr1	158231399	158234350	+	5392	NA	intron (NM_001277730, intron 1 of 18)	B1_Mus2|SINE|Alu	605	NM_001134741	214575	Mm.252800	NM_001134741	ENSMUSG00000060985	Tdrd5	Gm103	tudor domain containing 5	protein-coding
MACS_peak_4923	chr6	6804235	6817357	+	5375	NA	intron (NR_015388, intron 1 of 1)	CpG	-2538	NM_010057	13396	Mm.439763	NM_010057	ENSMUSG00000029754	Dlx6	-	distal-less homeobox 6	protein-coding
MACS_peak_1455	chr12	120084670	120089191	+	5367	NA	exon (NM_177082, exon 3 of 3)	exon (NM_177082, exon 3 of 3)	2128	NM_177082	320145	Mm.51682	NM_177082	ENSMUSG00000048562	Sp8	D930049B17Rik|mBtd	trans-acting transcription factor 8	protein-coding
MACS_peak_3033	chr19	44905209	44914512	+	5365	NA	intron (NM_011037, intron 8 of 9)	intron (NM_011037, intron 8 of 9)	568	NR_045315	73322	Mm.250457	NR_045315	ENSMUSG00000092369	1700039E22Rik	-	RIKEN cDNA 1700039E22 gene	ncRNA
MACS_peak_2400	chr16	92693414	92701068	+	5336	NA	5' UTR (NM_009821, exon 1 of 5)	5' UTR (NM_009821, exon 1 of 5)	333	NM_001111023	12394	Mm.4081	NM_009821	ENSMUSG00000022952	Runx1	AML1|CBF-alpha-2|Cbfa2|Pebp2a2|Pebpa2b	runt related transcription factor 1	protein-coding
MACS_peak_3094	chr19	59237090	59248976	+	5314	NA	exon (NM_009501, exon 2 of 3)	exon (NM_009501, exon 2 of 3)	1486	NM_009501	22326	Mm.23801	NM_009501		Vax1	-	ventral anterior homeobox 1	protein-coding
MACS_peak_757	chr11	21891827	21908647	+	5304	NA	intron (NM_011023, intron 2 of 4)	intron (NM_011023, intron 2 of 4)	1417	NM_011023	18423	Mm.129663	NM_011023	ENSMUSG00000005917	Otx1	A730044F23Rik|jv	orthodenticle homolog 1	protein-coding
MACS_peak_3890	chr3	127328127	127337726	+	5292	NA	Intergenic	Intergenic	-3137	NM_009718	11924	Mm.42017	NM_009718	ENSMUSG00000027967	Neurog2	Atoh4|Math4A|bHLHa8|ngn-2|ngn2	neurogenin 2	protein-coding
MACS_peak_2205	chr15	100556500	100560321	+	5264	NA	intron (NM_172451, intron 1 of 11)	intron (NM_172451, intron 1 of 11)	1397	NM_001161767	207839	Mm.22969	NM_172451		Galnt6	4632410F13|AW047994|GalNAc-T6	UDP-N-acetyl-alpha-D-galactosamine:polypeptide N-acetylgalactosaminyltransferase 6	protein-coding
MACS_peak_3783	chr3	87997742	88024392	+	5257	NA	Intergenic	Intergenic	-8026	NR_037276	100526540		NR_037276	miRBase:MI0014086	Mir3093	mmu-mir-3093	microRNA 3093	ncRNA
MACS_peak_4987	chr6	49162263	49166036	+	5223	NA	intron (NM_023670, intron 1 of 14)	CpG	804	NM_023670	140488	Mm.281018	NM_023670	ENSMUSG00000029814	Igf2bp3	2610101N11Rik|AA522010|AL022933|AU045931|IMP-3|IMP3|Koc13|Neilsen|mimp3	insulin-like growth factor 2 mRNA binding protein 3	protein-coding
MACS_peak_3750	chr3	66782112	66786804	+	5190	NA	intron (NM_013665, intron 1 of 4)	intron (NM_013665, intron 1 of 4)	1235	NM_013665	20429	Mm.39093	NM_013665		Shox2	6330543G17Rik|OG12|Og12x|Prx3|SHOT	short stature homeobox 2	protein-coding
MACS_peak_507	chr10	45205350	45206809	+	5170	NA	Intergenic	CpG	-16072	NM_001031772	380669	Mm.440328	NM_001031772	ENSMUSG00000063804	Lin28b	2810403D23Rik|D030047M17Rik|Lin-28.2	lin-28 homolog B (C. elegans)	protein-coding
MACS_peak_1588	chr13	55922182	55942775	+	5151	NA	5' UTR (NM_011097, exon 1 of 3)	5' UTR (NM_011097, exon 1 of 3)	308	NM_011097	18740	Mm.135195	NM_011097	ENSMUSG00000021506	Pitx1	Bft|P-OTX|Potx|Ptx1	paired-like homeodomain transcription factor 1	protein-coding
MACS_peak_819	chr11	53291624	53293722	+	5054	NA	exon (NM_183173, exon 1 of 1)	exon (NM_183173, exon 1 of 1)	1024	NM_183173	237761	Mm.145208	NM_183173	ENSMUSG00000044352	Sowaha	A830006N08Rik|Ankrd43	sosondowah ankyrin repeat domain family member A	protein-coding
MACS_peak_4111	chr4	107889537	107892619	+	5051	NA	promoter-TSS (NM_001167936)	promoter-TSS (NM_001167936)	-551	NM_001167936	230590	Mm.301798	NM_001167936	ENSMUSG00000034645	Zyg11a	BC022150	zyg-11 family member A, cell cycle regulator	protein-coding
MACS_peak_3969	chr4	21604874	21608563	+	5044	NA	exon (NM_001080771, exon 4 of 4)	exon (NM_001080771, exon 4 of 4)	6392	NM_001080771	230025	Mm.208541	NM_001080771	ENSMUSG00000040478	Prdm13	-	PR domain containing 13	protein-coding
MACS_peak_3280	chr2	71362193	71374771	+	5024	NA	TTS (NR_002854)	TTS (NR_002854)	980	NM_010053	13390	Mm.4543	NM_010053	ENSMUSG00000041911	Dlx1	Dlx|Dlx-1	distal-less homeobox 1	protein-coding
MACS_peak_6456	chr9	123587090	123591238	+	5004	NA	Intergenic	Intergenic	-1214	NM_139142	102680	Mm.440867	NM_139142	ENSMUSG00000036814	Slc6a20a	A730081N20Rik|AU022428|Xt3s1|Xtrp3s1	solute carrier family 6 (neurotransmitter transporter), member 20A	protein-coding
MACS_peak_415	chr10	5632940	5634973	+	4987	NA	exon (NM_007956, exon 2 of 9)	exon (NM_007956, exon 2 of 9)	100539	NM_007956	13982	Mm.9213	NM_007956	ENSMUSG00000019768	Esr1	AA420328|AU041214|ER-alpha|ER[a]|ERa|ERalpha|ESR|Estr|Estra|Nr3a1	estrogen receptor 1 (alpha)	protein-coding
MACS_peak_3753	chr3	68672029	68675041	+	4939	NA	promoter-TSS (NM_001167996)	promoter-TSS (NM_001167996)	27	NM_001167996	68725	Mm.45741	NM_001167996	ENSMUSG00000046999	1110032F04Rik	AI115547	RIKEN cDNA 1110032F04 gene	protein-coding
MACS_peak_3460	chr2	147854850	147875605	+	4923	NA	Intergenic	Intergenic	5973	NM_001291067	15376	Mm.938	NM_010446	ENSMUSG00000037025	Foxa2	HNF3-beta|HNF3beta|Hnf-3b|Hnf3b|Tcf-3b|Tcf3b	forkhead box A2	protein-coding
MACS_peak_6266	chr9	62984346	63003638	+	4886	NA	exon (NM_001163755, exon 2 of 9)	exon (NM_001163755, exon 2 of 9)	795	NM_172446	207667	Mm.36349	NM_172446	ENSMUSG00000022245	Skor1	AV273001|C230094B15Rik|Corl1|Lbxcor1	SKI family transcriptional corepressor 1	protein-coding
MACS_peak_4089	chr4	99315105	99325046	+	4845	NA	Intergenic	CpG	-2915	NM_010425	15221	Mm.4758	NM_010425	ENSMUSG00000067261	Foxd3	CWH3|Genesis|Hfh2	forkhead box D3	protein-coding
MACS_peak_4542	chr5	67996157	68002919	+	4842	NA	5' UTR (NM_001033415, exon 1 of 2)	5' UTR (NM_001033415, exon 1 of 2)	416	NM_001033415	330096	Mm.442747	NM_001033415	ENSMUSG00000050010	Shisa3	D830007B15Rik	shisa homolog 3 (Xenopus laevis)	protein-coding
MACS_peak_3048	chr19	45296918	45321483	+	4832	NA	intron (NM_010691, intron 1 of 1)	CpG	526	NM_010691	16814	Mm.116815	NM_010691		Lbx1	Lbx1h	ladybird homeobox homolog 1 (Drosophila)	protein-coding
MACS_peak_2255	chr15	102775644	102818385	+	4832	NA	promoter-TSS (NM_010462)	promoter-TSS (NM_010462)	-213	NM_010462	209448	Mm.31665	NM_010462	ENSMUSG00000022484	Hoxc10	AI506621|Hox-3.6	homeobox C10	protein-coding
MACS_peak_5189	chr6	122433442	122439406	+	4832	NA	promoter-TSS (NM_027664)	promoter-TSS (NM_027664)	-101	NM_027664	108653	Mm.277939	NM_027664	ENSMUSG00000040649	Rimklb	4931417E21Rik|4933426K21Rik|AA097693|AI325948|AU015629|Naags	ribosomal modification protein rimK-like family member B	protein-coding
MACS_peak_2938	chr19	24969888	24979015	+	4785	NA	exon (NM_008022, exon 1 of 1)	exon (NM_008022, exon 1 of 1)	1348	NM_008022	14237	Mm.377080	NM_008022	ENSMUSG00000051490	Foxd4	FREAC5|Fkh2	forkhead box D4	protein-coding
MACS_peak_1047	chr11	97393047	97399324	+	4779	NA	exon (NM_018873, exon 8 of 20)	exon (NM_018873, exon 8 of 20)	-34531	NM_001289118	100141474	Mm.482426	NM_001289118		4933428G20Rik	-	RIKEN cDNA 4933428G20 gene	protein-coding
MACS_peak_5014	chr6	52161018	52173090	+	4756	NA	exon (NM_010455, exon 1 of 2)	exon (NM_010455, exon 1 of 2)	1518	NM_010455	15404	Mm.294826	NM_010455		Hoxa7	AV118143|Hox-1.1	homeobox A7	protein-coding
MACS_peak_593	chr10	79953193	79968993	+	4755	NA	intron (NM_139226, intron 1 of 1)	intron (NM_139226, intron 1 of 1)	3442	NM_139226	246086	Mm.250572	NM_139226	ENSMUSG00000045518	Onecut3	OC-3|Oc3	one cut domain, family member 3	protein-coding
MACS_peak_4915	chr5	151753694	151757006	+	4747	NA	exon (NM_013823, exon 1 of 5)	exon (NM_013823, exon 1 of 5)	168	NM_013823	16591	Mm.6500	NM_013823	ENSMUSG00000058488	Kl	alpha-kl	klotho	protein-coding
MACS_peak_2716	chr17	86074326	86095891	+	4744	NA	intron (NM_011380, intron 1 of 1)	intron (NM_011380, intron 1 of 1)	2486	NM_011380	20472	Mm.5039	NM_011380	ENSMUSG00000024134	Six2	-	sine oculis-related homeobox 2	protein-coding
MACS_peak_1426	chr12	112721067	112725157	+	4742	NA	3' UTR (NM_001033248, exon 1 of 1)	3' UTR (NM_001033248, exon 1 of 1)	922	NM_001033248	212539	Mm.81916	NM_001033248	ENSMUSG00000010529	Gm266	-	predicted gene 266	protein-coding
MACS_peak_6339	chr9	91271476	91285937	+	4730	NA	intron (NM_009576, intron 3 of 4)	intron (NM_009576, intron 3 of 4)	14896	NM_009576	22774	Mm.8062	NM_009576		Zic4	-	zinc finger protein of the cerebellum 4	protein-coding
MACS_peak_6309	chr9	78239853	78245134	+	4727	NA	Intergenic	L1MC|LINE|L1	-1091	NM_001191044	100048658	Mm.158166	NM_001191044	ENSMUSG00000070291	Ddx43	ENSMUSG00000070291|OTTMUSG00000019690	DEAD (Asp-Glu-Ala-Asp) box polypeptide 43	protein-coding
MACS_peak_448	chr10	21875169	21880046	+	4727	NA	promoter-TSS (NM_009016)	promoter-TSS (NM_009016)	-808	NM_009016	19368	Mm.458004	NM_009016		Raet1a	RAE-1alpha|Rae1alpha|Raet1	retinoic acid early transcript 1, alpha	protein-coding
MACS_peak_6404	chr9	111213597	111217325	+	4718	NA	intron (NM_001164659, intron 1 of 21)	intron (NM_001164659, intron 1 of 21)	1218	NM_001164659	320429	Mm.270754	NM_001164659	ENSMUSG00000062296	Trank1	A230061D21Rik|C030048J01Rik|Gm187|Lba1	tetratricopeptide repeat and ankyrin repeat containing 1	protein-coding
MACS_peak_6427	chr9	118383557	118392434	+	4718	NA	exon (NM_001164789, exon 1 of 6)	exon (NM_001164789, exon 1 of 6)	688	NM_010136	13813	Mm.200692	NM_010136	ENSMUSG00000032446	Eomes	C77258|TBR-2|Tbr2	eomesodermin homolog (Xenopus laevis)	protein-coding
MACS_peak_4643	chr5	108148120	108158030	+	4716	NA	5' UTR (NM_010278, exon 1 of 7)	5' UTR (NM_010278, exon 1 of 7)	288	NM_010278	14581	Mm.2078	NM_010278	ENSMUSG00000029275	Gfi1	AW495828|Gfi-1|Pal-1|Pal1	growth factor independent 1	protein-coding
MACS_peak_5288	chr7	20107600	20111359	+	4705	NA	exon (NM_027116, exon 4 of 4)	exon (NM_027116, exon 4 of 4)	5399	NM_027116	69547	Mm.77325	NM_027116	ENSMUSG00000060621	Nkpd1	2310015G09Rik	NTPase, KAP family P-loop domain containing 1	protein-coding
MACS_peak_5437	chr7	53649448	53656610	+	4695	NA	5' UTR (NM_008421, exon 1 of 2)	5' UTR (NM_008421, exon 1 of 2)	1191	NM_001112739	16502	Mm.249386	NM_008421	ENSMUSG00000058975	Kcnc1	C230009H10Rik|KShIIIB|KV4|Kcr2-1|Kv3.1|NGK2|Shaw	potassium voltage gated channel, Shaw-related subfamily, member 1	protein-coding
MACS_peak_3400	chr2	126376681	126379675	+	4639	NA	promoter-TSS (NM_011978)	promoter-TSS (NM_011978)	-582	NM_011978	26458	Mm.290044	NM_011978		Slc27a2	ACSVL1|FATP2|VLCS|Vlac|Vlacs	solute carrier family 27 (fatty acid transporter), member 2	protein-coding
MACS_peak_5320	chr7	26098152	26100882	+	4639	NA	intron (NM_183311, intron 13 of 14)	intron (NM_183311, intron 13 of 14)	-2666	NM_001160400	269878	Mm.38527	NM_001160400	ENSMUSG00000045039	Megf8	AW049492|Egfl4|b2b1702Clo|b2b288Clo|m687Ddg|mKIAA0817	multiple EGF-like-domains 8	protein-coding
MACS_peak_3135	chr2	18610008	18612833	+	4639	NA	Intergenic	CpG	-9229	NM_001001334	381350	Mm.330024	NM_001001334		BC061194	-	cDNA sequence BC061194	protein-coding
MACS_peak_1202	chr11	118901974	118917404	+	4634	NA	Intergenic	Intergenic	-7462	NM_013926	30951	Mm.99953	NM_013926	ENSMUSG00000025578	Cbx8	Pc3	chromobox 8	protein-coding
MACS_peak_2583	chr17	36301478	36307284	+	4624	NA	exon (NM_001081032, exon 3 of 8)	exon (NM_001081032, exon 3 of 8)	1101	NM_001081032	667977	Mm.441651	NM_001081032	ENSMUSG00000073402	Gm8909	EG667977|H2-Tw5l|H2-gs17	predicted gene 8909	protein-coding
MACS_peak_1424	chr12	112507797	112515545	+	4624	NA	intron (NM_033603, intron 3 of 11)	intron (NM_033603, intron 3 of 11)	2349	NM_033603	93835	Mm.197639	NM_033603	ENSMUSG00000021278	Amn	5033428N14Rik|AV002116	amnionless	protein-coding
MACS_peak_1260	chr12	34638849	34643804	+	4623	NA	Intergenic	Intergenic	-1210	NM_011658	22160	Mm.3280	NM_011658	ENSMUSG00000035799	Twist1	AA960487|M-Twist|Pde|Ska10|Ska<m10Jus>|Twist|bHLHa38|pdt	twist basic helix-loop-helix transcription factor 1	protein-coding
MACS_peak_4802	chr5	128110190	128115205	+	4623	NA	promoter-TSS (NM_177005)	promoter-TSS (NM_177005)	65	NM_177005	319804	Mm.237888	NM_177005	ENSMUSG00000049971	Glt1d1	5730455A04Rik	glycosyltransferase 1 domain containing 1	protein-coding
MACS_peak_5626	chr7	138679903	138702053	+	4616	NA	Intergenic	Intergenic	4501	NM_008257	15373	Mm.323562	NM_008257	ENSMUSG00000040148	Hmx3	Nkx-5.1|Nkx5-1|Nkx5.1	H6 homeobox 3	protein-coding
MACS_peak_5064	chr6	83016067	83024935	+	4616	NA	promoter-TSS (NM_009392)	promoter-TSS (NM_009392)	-282	NM_009392	21909	Mm.37	NM_009392	ENSMUSG00000068327	Tlx2	Enx|Hox11L.1|Hox11l1|NCX|Ncx1|Tlx1l1|Tlx1l2	T cell leukemia, homeobox 2	protein-coding
MACS_peak_516	chr10	51744624	51749748	+	4606	NA	intron (NM_001300957, intron 2 of 2)	intron (NM_001300957, intron 2 of 2)	4878	NM_153786	215031	Mm.87237	NM_153786	ENSMUSG00000049641	Vgll2	C130057C21Rik|VITO-1|Vito1|vgl-2	vestigial like 2 homolog (Drosophila)	protein-coding
MACS_peak_1459	chr13	3357051	3361307	+	4602	NA	Intergenic	CpG	-118370	NR_015522	76937	Mm.487240	NR_015522	ENSMUSG00000097709	2810429I04Rik	AI256682	RIKEN cDNA 2810429I04 gene	ncRNA
MACS_peak_2703	chr17	84027388	84032173	+	4596	NA	intron (NM_153512, intron 1 of 1)	intron (NM_153512, intron 1 of 1)	1455	NM_153512	225030	Mm.223506	NM_153512	ENSMUSG00000045053	Kcng3	KV6.3|Kv10.1a|Kv10.1b	potassium voltage-gated channel, subfamily G, member 3	protein-coding
MACS_peak_4295	chr4	137948358	137955976	+	4586	NA	5' UTR (NM_001081672, exon 1 of 1)	5' UTR (NM_001081672, exon 1 of 1)	206	NM_001081672	625638	Mm.379091	NM_001081672	ENSMUSG00000078235	Fam43b	OTTMUSG00000009974	family with sequence similarity 43, member B	protein-coding
MACS_peak_6041	chr8	126141194	126141694	+	4584	NA	Intergenic	(TGGA)n|Simple_repeat|Simple_repeat	-36385	NM_133955	69581	Mm.168257	NM_133955	ENSMUSG00000039960	Rhou	2310026M05Rik|AI182090|Arhu|CDC42L1|G28K|WRCH-1|WRCH1|mG28K	ras homolog gene family, member U	protein-coding
MACS_peak_3294	chr2	74504329	74509126	+	4560	NA	exon (NM_008275, exon 1 of 2)	exon (NM_008275, exon 1 of 2)	360	NM_008275	15433	Mm.57227	NM_008275	ENSMUSG00000001819	Hoxd13	Hox-4.8|spdh	homeobox D13	protein-coding
MACS_peak_3906	chr3	130806429	130811008	+	4560	NA	Intergenic	Intergenic	-4497	NM_010703	16842	Mm.255219	NM_010703	ENSMUSG00000027985	Lef1	3000002B05|AI451430|Lef-1	lymphoid enhancer binding factor 1	protein-coding
MACS_peak_5020	chr6	52253671	52279075	+	4558	NA	intron (NM_007966, intron 2 of 2)	intron (NM_007966, intron 2 of 2)	-1547	NR_038163	70593	Mm.158412	NR_038163	ENSMUSG00000086126	5730457N03Rik	Evx1as	RIKEN cDNA 5730457N03 gene	ncRNA
MACS_peak_4895	chr5	147994174	148004374	+	4551	NA	promoter-TSS (NM_008178)	promoter-TSS (NM_008178)	-998	NM_008178	14842	Mm.4797	NM_008178	ENSMUSG00000053129	Gsx1	Gsh-1|Gsh1	GS homeobox 1	protein-coding
MACS_peak_547	chr10	70060861	70063123	+	4523	NA	promoter-TSS (NM_178621)	promoter-TSS (NM_178621)	47	NM_178621	70911	Mm.19825	NM_178621	ENSMUSG00000037747	Phyhipl	4921522K17Rik|AI267048	phytanoyl-CoA hydroxylase interacting protein-like	protein-coding
MACS_peak_1057	chr11	98177602	98193201	+	4518	NA	Intergenic	Intergenic	5558	NM_010895	18013	Mm.4814	NM_010895	ENSMUSG00000038255	Neurod2	Ndrf|bHLHa1	neurogenic differentiation 2	protein-coding
MACS_peak_5751	chr8	14092780	14102894	+	4506	NA	intron (NM_001145965, intron 1 of 14)	intron (NM_001145965, intron 1 of 14)	1962	NM_172910	244310	Mm.404697	NM_172910	ENSMUSG00000047495	Dlgap2	6430596N04Rik|DAP2|Sapap2	discs, large (Drosophila) homolog-associated protein 2	protein-coding
MACS_peak_3960	chr4	11310431	11316990	+	4465	NA	5' UTR (NM_001290383, exon 1 of 16)	5' UTR (NM_001290383, exon 1 of 16)	220	NM_001290383	207920	Mm.387719	NM_194055	ENSMUSG00000040728	Esrp1	2210008M09Rik|A630065D16|BC031468|Rbm35a	epithelial splicing regulatory protein 1	protein-coding
MACS_peak_5541	chr7	105340694	105345309	+	4455	NA	exon (NM_001081167, exon 2 of 2)	exon (NM_001081167, exon 2 of 2)	4984	NM_001081167	272411	Mm.98333	NM_001081167	ENSMUSG00000074004	B3gnt6	BC039789|Core-3|Core3	UDP-GlcNAc:betaGal beta-1,3-N-acetylglucosaminyltransferase 6 (core 3 synthase)	protein-coding
MACS_peak_684	chr10	119910335	119917377	+	4455	NA	5' UTR (NM_010441, exon 1 of 5)	5' UTR (NM_010441, exon 1 of 5)	135	NM_010441	15364	Mm.157190	NM_010441	ENSMUSG00000056758	Hmga2	9430083A20Rik|HMGI-C|Hmgic|pg|pygmy	high mobility group AT-hook 2	protein-coding
MACS_peak_4500	chr5	37631579	37638051	+	4447	NA	intron (NM_001136058, intron 1 of 13)	intron (NM_001136058, intron 1 of 13)	1518	NM_001136058	12933	Mm.290995	NM_007765	ENSMUSG00000029121	Crmp1	CRMP-1|DRP-1|Dpysl1|ULIP-3|Ulip3	collapsin response mediator protein 1	protein-coding
MACS_peak_2560	chr17	34808001	34810395	+	4442	NA	exon (NM_031176, exon 2 of 33)	exon (NM_031176, exon 2 of 33)	1718	NM_031176	81877	Mm.290527	NM_031176	ENSMUSG00000033327	Tnxb	Tn-mhc|Tnx	tenascin XB	protein-coding
MACS_peak_4477	chr5	33770038	33782161	+	4438	NA	intron (NM_011320, intron 1 of 1)	CpG	640	NM_011320	672284		NM_011320		Nkx1-1	Nkx-1.1|Sax2	NK1 transcription factor related, locus 1 (Drosophila)	protein-coding
MACS_peak_3010	chr19	43683941	43698608	+	4418	NA	TTS (NM_008699)	TTS (NM_008699)	4459	NM_008699	18089	Mm.56994	NM_008699	ENSMUSG00000044220	Nkx2-3	Nkx-2.3|Nkx2.3|tinman	NK2 homeobox 3	protein-coding
MACS_peak_4988	chr6	49167425	49168751	+	4416	NA	Intergenic	CpG	-3135	NM_023670	140488	Mm.281018	NM_023670	ENSMUSG00000029814	Igf2bp3	2610101N11Rik|AA522010|AL022933|AU045931|IMP-3|IMP3|Koc13|Neilsen|mimp3	insulin-like growth factor 2 mRNA binding protein 3	protein-coding
MACS_peak_3949	chr3	157229647	157231974	+	4389	NA	intron (NM_011196, intron 1 of 2)	intron (NM_011196, intron 1 of 2)	954	NM_011196	19218	Mm.30424	NM_011196	ENSMUSG00000040016	Ptger3	EP3|Pgerep3|Ptgerep3	prostaglandin E receptor 3 (subtype EP3)	protein-coding
MACS_peak_4819	chr5	135460556	135464081	+	4386	NA	TTS (NR_026907)	TTS (NR_026907)	234	NM_009902	12739	Mm.158662	NM_009902	ENSMUSG00000070473	Cldn3	AI182374|Cpetr2|mRVP1	claudin 3	protein-coding
MACS_peak_2312	chr16	18579916	18592291	+	4375	NA	intron (NM_001285476, intron 1 of 6)	intron (NM_001285476, intron 1 of 6)	959	NM_011532	21380	Mm.295194	NM_011532	ENSMUSG00000009097	Tbx1	-	T-box 1	protein-coding
MACS_peak_3375	chr2	118198402	118200856	+	4360	NA	promoter-TSS (NM_201367)	promoter-TSS (NM_201367)	-474	NM_201367	381413	Mm.70979	NM_201367	ENSMUSG00000040133	Gpr176	Gm1012	G protein-coupled receptor 176	protein-coding
MACS_peak_3270	chr2	69420881	69426420	+	4336	NA	intron (NM_001081088, intron 1 of 78)	CpG	474	NM_001081088	14725	Mm.23847	NM_001081088	ENSMUSG00000027070	Lrp2	AI315343|AW536255|D230004K18Rik|Gp330|Megalin|b2b1625.2Clo	low density lipoprotein receptor-related protein 2	protein-coding
MACS_peak_4268	chr4	134699368	134715381	+	4319	NA	intron (NM_019732, intron 1 of 5)	intron (NM_019732, intron 1 of 5)	30814	NM_019732	12399	Mm.378894	NM_019732	ENSMUSG00000070691	Runx3	AML2|Cbfa3|Pebp2a3	runt related transcription factor 3	protein-coding
MACS_peak_1315	chr12	74645635	74647770	+	4305	NA	exon (NM_178715, exon 1 of 1)	exon (NM_178715, exon 1 of 1)	680	NM_178715	238257	Mm.251196	NM_178715	ENSMUSG00000034435	Tmem30b	9130011B11Rik	transmembrane protein 30B	protein-coding
MACS_peak_4024	chr4	46350089	46358997	+	4305	NA	Intergenic	Intergenic	-2523	NM_183298	110805	Mm.354634	NM_183298		Foxe1	Titf2	forkhead box E1	protein-coding
MACS_peak_117	chr1	72868780	72874409	+	4297	NA	intron (NM_008342, intron 1 of 3)	intron (NM_008342, intron 1 of 3)	540	NM_008342	16008	Mm.141936	NM_008342	ENSMUSG00000039323	Igfbp2	AI255832|IBP-2|Igfbp-2|mIGFBP-2	insulin-like growth factor binding protein 2	protein-coding
MACS_peak_1858	chr14	57720796	57725409	+	4297	NA	intron (NM_008125, intron 1 of 1)	CpG	437	NM_008125	14619	Mm.390683	NM_008125	ENSMUSG00000046352	Gjb2	AI325222|Cnx26|Cx26|Gjb-2	gap junction protein, beta 2	protein-coding
MACS_peak_3862	chr3	107396524	107403448	+	4292	NA	intron (NM_007441, intron 1 of 3)	CpG	2037	NM_007441	11694	Mm.10112	NM_007441	ENSMUSG00000014603	Alx3	-	aristaless-like homeobox 3	protein-coding
MACS_peak_1271	chr12	52693152	52698197	+	4288	NA	intron (NM_001198835, intron 3 of 11)	intron (NM_001198835, intron 3 of 11)	1346	NM_001198835	12810	Mm.21325	NM_007728	ENSMUSG00000020953	Coch	AW122937|Coch-5B2|D12H14S564E	coagulation factor C homolog (Limulus polyphemus)	protein-coding
MACS_peak_108	chr1	63315666	63322424	+	4266	NA	promoter-TSS (NM_028673)	promoter-TSS (NM_028673)	-798	NM_028673	73884	Mm.86986	NM_028673	ENSMUSG00000027520	Zdbf2	4930431J08Rik|9330107J05Rik	zinc finger, DBF-type containing 2	protein-coding
MACS_peak_440	chr10	19568695	19572779	+	4266	NA	exon (NM_029529, exon 1 of 2)	exon (NM_029529, exon 1 of 2)	528	NM_029529	76157	Mm.74324	NM_029529	ENSMUSG00000050473	Slc35d3	6230421J19Rik|Frcl1	solute carrier family 35, member D3	protein-coding
MACS_peak_2557	chr17	34400636	34402549	+	4266	NA	intron (NM_207105, intron 1 of 5)	CpG	1420	NM_207105	14961	Mm.254067	NM_207105	ENSMUSG00000073421	H2-Ab1	AI845868|Abeta|H-2Ab|H2-Ab|I-Abeta|IAb|Ia-2|Ia2|Rmcs1	histocompatibility 2, class II antigen A, beta 1	protein-coding
MACS_peak_5068	chr6	83641096	83675113	+	4252	NA	intron (NR_075094, intron 1 of 2)	intron (NR_075094, intron 1 of 2)	2696	NR_075094	574519	Mm.487605	NR_002871	ENSMUSG00000085794	Vax2os	Vas2os|Vax2os1|Vax2os2	ventral anterior homeobox 2, opposite strand	ncRNA
MACS_peak_1384	chr12	105708210	105715621	+	4243	NA	promoter-TSS (NM_010351)	promoter-TSS (NM_010351)	-469	NM_010351	14836	Mm.129	NM_010351	ENSMUSG00000021095	Gsc	-	goosecoid homeobox	protein-coding
MACS_peak_1686	chr13	95651029	95657033	+	4236	NA	TTS (NM_011021)	TTS (NM_011021)	8449	NM_011021	18420	Mm.42051	NM_011021		Otp	-	orthopedia homolog (Drosophila)	protein-coding
MACS_peak_4633	chr5	106875402	106890830	+	4229	NA	intron (NM_001005477, intron 2 of 2)	intron (NM_001005477, intron 2 of 2)	4069	NM_001005477	104382	Mm.271593	NM_001005477	ENSMUSG00000034384	Barhl2	E130309B19Rik|MBH1	BarH-like 2 (Drosophila)	protein-coding
MACS_peak_3791	chr3	89120579	89126622	+	4228	NA	intron (NM_010108, intron 1 of 4)	CpG	3201	NM_010108	13638	Mm.331159	NM_010108		Efna3	AW494418|EFL-2|Ehk1-L|Epl3|LERK-3	ephrin A3	protein-coding
MACS_peak_4460	chr5	29792082	29816747	+	4221	NA	exon (NM_019944, exon 1 of 3)	exon (NM_019944, exon 1 of 3)	596	NM_019944	15285	Mm.103760	NM_019944		Mnx1	HB9|Hlxb9|MNR2	motor neuron and pancreas homeobox 1	protein-coding
MACS_peak_219	chr1	122491430	122514725	+	4212	NA	intron (NM_010133, intron 1 of 1)	intron (NM_010133, intron 1 of 1)	4013	NM_010133	13798	Mm.2657	NM_010133		En1	En-1|Mo-en.1	engrailed 1	protein-coding
MACS_peak_5085	chr6	85460085	85464414	+	4208	NA	exon (NM_020596, exon 2 of 2)	exon (NM_020596, exon 2 of 2)	1287	NM_020596	13656	Mm.44137	NM_020596	ENSMUSG00000071341	Egr4	NGF1-C|NGFI-C|NGFIC|pAT133	early growth response 4	protein-coding
MACS_peak_1218	chr12	8304323	8309708	+	4208	NA	intron (NM_013527, intron 1 of 1)	intron (NM_013527, intron 1 of 1)	1745	NM_013527	238057	Mm.271308	NM_013527	ENSMUSG00000037660	Gdf7	BMP12	growth differentiation factor 7	protein-coding
MACS_peak_1742	chr13	113783522	113785686	+	4208	NA	exon (NM_001037914, exon 3 of 7)	exon (NM_001037914, exon 3 of 7)	528	NM_001037914	622408	Mm.360976	NM_001037914	ENSMUSG00000074651	Mcidas	EG622408|Gm6320|Idas|Mci|Mcin	multiciliate differentiation and DNA synthesis associated cell cycle protein	protein-coding
MACS_peak_1310	chr12	74143555	74148865	+	4208	NA	intron (NM_009189, intron 1 of 1)	CpG	1489	NM_009189	20471	Mm.4645	NM_009189	ENSMUSG00000051367	Six1	BB138287	sine oculis-related homeobox 1	protein-coding
MACS_peak_3715	chr3	34546468	34550501	+	4195	NA	promoter-TSS (NM_011443)	promoter-TSS (NM_011443)	-443	NM_011443	20674	Mm.65396	NM_011443	ENSMUSG00000074637	Sox2	Sox-2|lcc|ysb	SRY (sex determining region Y)-box 2	protein-coding
MACS_peak_3281	chr2	71375890	71385271	+	4169	NA	TTS (NM_010054)	TTS (NM_010054)	4231	NM_010054	13392	Mm.3896	NM_010054	ENSMUSG00000023391	Dlx2	AW121999|Dlx-2|Tes-1	distal-less homeobox 2	protein-coding
MACS_peak_1290	chr12	58642053	58656752	+	4136	NA	Intergenic	Intergenic	-2294	NM_008259	15375	Mm.4578	NM_008259	ENSMUSG00000035451	Foxa1	Hnf-3a|Hnf3a|Tcf-3a|Tcf3a	forkhead box A1	protein-coding
MACS_peak_6042	chr8	126142902	126144267	+	4120	NA	Intergenic	Intergenic	-34245	NM_133955	69581	Mm.168257	NM_133955	ENSMUSG00000039960	Rhou	2310026M05Rik|AI182090|Arhu|CDC42L1|G28K|WRCH-1|WRCH1|mG28K	ras homolog gene family, member U	protein-coding
MACS_peak_3444	chr2	144155433	144160248	+	4119	NA	promoter-TSS (NM_026924)	promoter-TSS (NM_026924)	-24	NM_026924	107586	Mm.252750	NM_026924	ENSMUSG00000037279	Ovol2	1700108N11Rik|1810007D21Rik|M-OVO|M-OVO-A|M-OVO-B|MOVO|Ovo2|Zfp339|movo2	ovo-like 2 (Drosophila)	protein-coding
MACS_peak_2972	chr19	37770228	37775404	+	4091	NA	exon (NM_007811, exon 2 of 7)	exon (NM_007811, exon 2 of 7)	518	NM_007811	13082	Mm.42230	NM_007811	ENSMUSG00000024987	Cyp26a1	Cyp26|P450RA|P450RAI|RAH	cytochrome P450, family 26, subfamily a, polypeptide 1	protein-coding
MACS_peak_3942	chr3	153990157	154001043	+	4091	NA	intron (NR_040387, intron 2 of 2)	intron (NR_040387, intron 2 of 2)	1815	NR_040387	99686	Mm.38082	NR_040387	ENSMUSG00000093738	AI606473	-	expressed sequence AI606473	ncRNA
MACS_peak_4836	chr5	137500384	137508712	+	4078	NA	Intergenic	(TG)n|Simple_repeat|Simple_repeat	-1617	NM_001039385	381677	Mm.389697	NM_001039385	ENSMUSG00000037428	Vgf	Gm1052	VGF nerve growth factor inducible	protein-coding
MACS_peak_5854	chr8	73007891	73020525	+	4078	NA	Intergenic	Intergenic	-2847	NM_018827	12931	Mm.335584	NM_018827	ENSMUSG00000007888	Crlf1	CLF-1|CRLM3|NR6.1	cytokine receptor-like factor 1	protein-coding
MACS_peak_2179	chr15	98606209	98610919	+	4078	NA	promoter-TSS (NM_011718)	promoter-TSS (NM_011718)	17	NM_011718	22410	Mm.4709	NM_011718	ENSMUSG00000022996	Wnt10b	Wnt12	wingless-type MMTV integration site family, member 10B	protein-coding
MACS_peak_2256	chr15	102819601	102848384	+	4073	NA	Intergenic	Intergenic	-6001	NM_010465	15425	Mm.4444	NM_010465	ENSMUSG00000001661	Hoxc6	Hox-3.3|Hox-6.1	homeobox C6	protein-coding
MACS_peak_1682	chr13	95470875	95475297	+	4073	NA	Intergenic	Intergenic	-85812	NM_009321	21371	Mm.379025	NM_009321	ENSMUSG00000042043	Tbca	Tbca13	tubulin cofactor A	protein-coding
MACS_peak_2681	chr17	71165681	71169758	+	4068	NA	3' UTR (NM_177639, exon 12 of 12)	3' UTR (NM_177639, exon 12 of 12)	28398	NM_001164077	21815	Mm.101034	NM_009372	ENSMUSG00000047407	Tgif1	AA959811|AI462167|Tgif	TGFB-induced factor homeobox 1	protein-coding
MACS_peak_3448	chr2	146046329	146049987	+	4038	NA	exon (NM_016889, exon 1 of 1)	exon (NM_016889, exon 1 of 1)	425	NM_016889	53626	Mm.379070	NM_016889	ENSMUSG00000068154	Insm1	IA-1	insulinoma-associated 1	protein-coding
MACS_peak_951	chr11	85642267	85652120	+	4022	NA	intron (NM_009324, intron 1 of 6)	intron (NM_009324, intron 1 of 6)	1076	NM_009324	21385	Mm.287052	NM_009324	ENSMUSG00000000093	Tbx2	-	T-box 2	protein-coding
MACS_peak_955	chr11	85701783	85710113	+	3990	NA	intron (NM_011536, intron 2 of 7)	intron (NM_011536, intron 2 of 7)	2383	NM_011536	21387	Mm.275336	NM_011536	ENSMUSG00000000094	Tbx4	3930401C23	T-box 4	protein-coding
MACS_peak_5733	chr8	12381058	12398853	+	3990	NA	intron (NR_027975, intron 1 of 7)	intron (NR_027975, intron 1 of 7)	4184	NR_027975	434280	Mm.447484	NM_001013812		Gm5607	EG434280	predicted gene 5607	ncRNA
MACS_peak_3861	chr3	107382717	107394422	+	3987	NA	Intergenic	Intergenic	-9380	NM_007441	11694	Mm.10112	NM_007441	ENSMUSG00000014603	Alx3	-	aristaless-like homeobox 3	protein-coding
MACS_peak_2317	chr16	20588717	20592887	+	3987	NA	5' UTR (NM_001144953, exon 4 of 23)	5' UTR (NM_001144953, exon 4 of 23)	1147	NM_001144953	328643	Mm.40539	NM_182636	ENSMUSG00000046613	Vwa5b2	BB182430|EG328644|Gm1738|Gm931	von Willebrand factor A domain containing 5B2	protein-coding
MACS_peak_5038	chr6	64677109	64682896	+	3987	NA	exon (NM_007500, exon 1 of 1)	exon (NM_007500, exon 1 of 1)	862	NM_007500	11921	Mm.57229	NM_007500	ENSMUSG00000073043	Atoh1	Hath1|MATH-1|Math1|bHLHa14	atonal homolog 1 (Drosophila)	protein-coding
MACS_peak_5670	chr7	147127984	147131741	+	3987	NA	exon (NM_009482, exon 1 of 2)	exon (NM_009482, exon 1 of 2)	107	NM_009482	22286	Mm.10205	NM_009482	ENSMUSG00000047751	Utf1	AI505934	undifferentiated embryonic cell transcription factor 1	protein-coding
MACS_peak_1212	chr11	120520713	120523839	+	3973	NA	promoter-TSS (NM_175263)	promoter-TSS (NM_175263)	-125	NM_175263	77583	Mm.32839	NM_175263	ENSMUSG00000042988	Notum	5730593N15Rik	notum pectinacetylesterase homolog (Drosophila)	protein-coding
MACS_peak_5013	chr6	52149434	52160117	+	3971	NA	promoter-TSS (NM_010453)	promoter-TSS (NM_010453)	-189	NM_010453	15402	Mm.173	NM_010453	ENSMUSG00000038253	Hoxa5	Hox-1.3	homeobox A5	protein-coding
MACS_peak_2101	chr15	82104128	82107614	+	3944	NA	intron (NM_011889, intron 1 of 9)	intron (NM_011889, intron 1 of 9)	506	NM_011889	24050	Mm.309707	NM_011889	ENSMUSG00000022456	Sept3	3110018K01Rik|AV154067|B530002E20Rik|Sep3	septin 3	protein-coding
MACS_peak_4535	chr5	67481533	67500948	+	3943	NA	promoter-TSS (NM_008888)	promoter-TSS (NM_008888)	-875	NM_008888	18935	Mm.62505	NM_008888	ENSMUSG00000012520	Phox2b	Dilp1|NBPhox|Pmx2b	paired-like homeobox 2b	protein-coding
MACS_peak_2172	chr15	97828504	97837897	+	3940	NA	intron (NM_031163, intron 1 of 53)	intron (NM_031163, intron 1 of 53)	1955	NM_031163	12824	Mm.2423	NM_031163	ENSMUSG00000022483	Col2a1	Col2|Col2a|Col2a-1|Del1|Dmm|Lpk|M100856|Rgsc856	collagen, type II, alpha 1	protein-coding
MACS_peak_4548	chr5	72968542	72974263	+	3937	NA	intron (NM_174877, intron 1 of 3)	(CAAA)n|Simple_repeat|Simple_repeat	921	NM_174877	317755	Mm.11934	NM_174877	ENSMUSG00000063935	Zar1	-	zygote arrest 1	protein-coding
MACS_peak_1718	chr13	101321224	101323289	+	3910	NA	intron (NM_008756, intron 1 of 8)	CpG	197	NM_008756	18260	Mm.4807	NM_008756	ENSMUSG00000021638	Ocln	AI503564|Ocl	occludin	protein-coding
MACS_peak_5512	chr7	86936216	86940031	+	3907	NA	exon (NM_008588, exon 1 of 2)	exon (NM_008588, exon 1 of 2)	353	NM_008588	17292	Mm.1404	NM_008588	ENSMUSG00000030544	Mesp1	bHLHc5	mesoderm posterior 1	protein-coding
MACS_peak_2948	chr19	25739848	25749590	+	3895	NA	TTS (NR_045347)	TTS (NR_045347)	2010	NR_045347	100503074	Mm.140012	NR_045347		2610016A17Rik	2610317C19Rik	RIKEN cDNA 2610016A17 gene	ncRNA
MACS_peak_4854	chr5	140381794	140394853	+	3895	NA	intron (NM_175522, intron 1 of 1)	intron (NM_175522, intron 1 of 1)	4426	NM_175522	243312	Mm.237102	NM_175522	ENSMUSG00000048988	Elfn1	A930017N06Rik|AI197272|Ppp1r28	leucine rich repeat and fibronectin type III, extracellular 1	protein-coding
MACS_peak_135	chr1	74992789	75000932	+	3891	NA	intron (NM_010544, intron 1 of 2)	intron (NM_010544, intron 1 of 2)	1365	NM_010544	16147	Mm.439736	NM_010544	ENSMUSG00000006538	Ihh	-	Indian hedgehog	protein-coding
MACS_peak_2499	chr17	24886950	24892045	+	3875	NA	promoter-TSS (NM_001012402)	promoter-TSS (NM_001012402)	-451	NM_001012402	328779	Mm.328848	NM_001012402	ENSMUSG00000039628	Hs3st6	-	heparan sulfate (glucosamine) 3-O-sulfotransferase 6	protein-coding
MACS_peak_5181	chr6	120441833	120445293	+	3860	NA	exon (NM_033567, exon 1 of 1)	exon (NM_033567, exon 1 of 1)	262	NM_033567	94047	Mm.23088	NM_033567	ENSMUSG00000094626	Cecr6	AW048664	cat eye syndrome chromosome region, candidate 6	protein-coding
MACS_peak_3423	chr2	130401013	130407619	+	3860	NA	Intergenic	Intergenic	2411	NM_011025	18429	Mm.16745	NM_011025	ENSMUSG00000027301	Oxt	OT|Oxy	oxytocin	protein-coding
MACS_peak_4147	chr4	117165760	117169787	+	3855	NA	intron (NM_025739, intron 1 of 14)	CpG	1747	NM_025739	66743	Mm.318331	NM_025739	ENSMUSG00000028677	Rnf220	4732477A13|4931406I20Rik|5730503K05Rik|AV302541	ring finger protein 220	protein-coding
MACS_peak_510	chr10	50608600	50618913	+	3854	NA	Intergenic	Intergenic	-1701	NM_011376	20464	Mm.4774	NM_011376	ENSMUSG00000019913	Sim1	bHLHe14|mSIM1	single-minded homolog 1 (Drosophila)	protein-coding
MACS_peak_4488	chr5	35724305	35750304	+	3847	NA	Intergenic	Intergenic	5538	NM_010445	15371	Mm.358606	NM_010445	ENSMUSG00000067438	Hmx1	Nkx5-3	H6 homeobox 1	protein-coding
MACS_peak_746	chr11	16157111	16158503	+	3843	NA	promoter-TSS (NM_001290539)	promoter-TSS (NM_001290539)	80	NM_145967	211739	Mm.284015	NM_145967	ENSMUSG00000048834	Vstm2a	Vstm2	V-set and transmembrane domain containing 2A	protein-coding
MACS_peak_1921	chr14	80167206	80175729	+	3820	NA	promoter-TSS (NM_021543)	promoter-TSS (NM_021543)	-348	NM_021543	18530	Mm.390715	NM_021543	ENSMUSG00000036422	Pcdh8	1700080P15Rik|Papc	protocadherin 8	protein-coding
MACS_peak_270	chr1	137712830	137717444	+	3816	NA	promoter-TSS (NM_133664)	promoter-TSS (NM_133664)	-38	NM_133664	16763	Mm.36726	NM_133664	ENSMUSG00000041782	Lad1	-	ladinin	protein-coding
MACS_peak_1944	chr14	118633059	118637168	+	3814	NA	5' UTR (NM_177753, exon 1 of 1)	5' UTR (NM_177753, exon 1 of 1)	1139	NM_177753	223227	Mm.70950	NM_177753	ENSMUSG00000061517	Sox21	Sox25	SRY (sex determining region Y)-box 21	protein-coding
MACS_peak_825	chr11	57640395	57647604	+	3803	NA	intron (NM_008213, intron 1 of 1)	intron (NM_008213, intron 1 of 1)	1650	NM_008213	15110	Mm.4746	NM_008213	ENSMUSG00000037335	Hand1	Ehand1|Hxt|Th1|Thing1|bHLHa27|eHAND	heart and neural crest derivatives expressed transcript 1	protein-coding
MACS_peak_1883	chr14	65203916	65212694	+	3803	NA	intron (NR_040709, intron 2 of 3)	intron (NR_040709, intron 2 of 3)	-1189	NR_029813	387233		NR_029813	miRBase:MI0000716	Mir124a-1	Mirn124a|Mirn124a-1	microRNA 124a-1	ncRNA
MACS_peak_6021	chr8	123638231	123646184	+	3788	NA	3' UTR (NM_013519, exon 1 of 1)	3' UTR (NM_013519, exon 1 of 1)	2136	NM_013519	14234	Mm.14092	NM_013519	ENSMUSG00000046714	Foxc2	Fkh14|Hfhbf3|MFH-1|Mfh1	forkhead box C2	protein-coding
MACS_peak_2444	chr17	6485496	6495729	+	3765	NA	Intergenic	Intergenic	-40470	NR_033520	547127	Mm.297552	NM_001045538		Tmem181b-ps	Tmem181b	transmembrane protein 181B, pseudogene	pseudo
MACS_peak_1105	chr11	103609773	103614894	+	3764	NA	Intergenic	Intergenic	-1198	NM_011719	22412	Mm.215161	NM_011719	ENSMUSG00000018486	Wnt9b	Wnt14b|Wnt15|clf|clf1|wnt-14b|wnt-15	wingless-type MMTV integration site family, member 9B	protein-coding
MACS_peak_1412	chr12	110290224	110295555	+	3764	NA	intron (NM_001163175, intron 1 of 6)	intron (NM_001163175, intron 1 of 6)	13538	NM_001163175	380785	Mm.342085	NM_001163175	ENSMUSG00000040867	Begain	BM948371|Gm897	brain-enriched guanylate kinase-associated	protein-coding
MACS_peak_1703	chr13	99123581	99126250	+	3762	NA	exon (NM_008242, exon 1 of 1)	exon (NM_008242, exon 1 of 1)	715	NM_008242	15229	Mm.347441	NM_008242	ENSMUSG00000078302	Foxd1	AI385632|BF-2|FREAC4|Hfh10|Hfhbf2	forkhead box D1	protein-coding
MACS_peak_3264	chr2	61652361	61654914	+	3753	NA	Intergenic	CpG	11127	NM_009322	21375	Mm.308525	NM_009322	ENSMUSG00000035033	Tbr1	-	T-box brain gene 1	protein-coding
MACS_peak_152	chr1	78212424	78216925	+	3753	NA	Intergenic	Intergenic	-20963	NM_001159520	18505	Mm.1371	NM_008781	ENSMUSG00000004872	Pax3	Pax-3|Sp|splotch	paired box 3	protein-coding
MACS_peak_4210	chr4	126408319	126415921	+	3746	NA	intron (NM_198960, intron 2 of 6)	intron (NM_198960, intron 2 of 6)	1393	NM_198960	332937	Mm.331881	NM_198960	ENSMUSG00000042477	Tfap2e	AI505200|AP-2e|Tcfap2e	transcription factor AP-2, epsilon	protein-coding
MACS_peak_127	chr1	74894383	74907569	+	3725	NA	promoter-TSS (NM_009872)	promoter-TSS (NM_009872)	-627	NM_009872	12570	Mm.153833	NM_009872	ENSMUSG00000090071	Cdk5r2	B230310J22Rik|p39	cyclin-dependent kinase 5, regulatory subunit 2 (p39)	protein-coding
MACS_peak_2414	chr16	94075607	94095922	+	3722	NA	5' UTR (NM_011377, exon 1 of 11)	5' UTR (NM_011377, exon 1 of 11)	259	NM_011377	20465	Mm.4775	NM_011377	ENSMUSG00000062713	Sim2	bHLHe15	single-minded homolog 2 (Drosophila)	protein-coding
MACS_peak_2934	chr19	23966453	23968348	+	3716	NA	exon (NM_177034, exon 2 of 13)	exon (NM_177034, exon 2 of 13)	134034	NM_177034	319924	Mm.22879	NM_177034	ENSMUSG00000024897	Apba1	6430513E09Rik|Lin-10|Mint|Mint1|Urop11|X11|X11alpha	amyloid beta (A4) precursor protein binding, family A, member 1	protein-coding
MACS_peak_4636	chr5	106985909	106996441	+	3716	NA	Intergenic	(TTCC)n|Simple_repeat|Simple_repeat	-103990	NM_001005477	104382	Mm.271593	NM_001005477	ENSMUSG00000034384	Barhl2	E130309B19Rik|MBH1	BarH-like 2 (Drosophila)	protein-coding
MACS_peak_3844	chr3	99050003	99064274	+	3716	NA	promoter-TSS (NM_009323)	promoter-TSS (NM_009323)	-545	NM_009323	21384	Mm.88761	NM_009323	ENSMUSG00000027868	Tbx15	Tbx14|Tbx8|de	T-box 15	protein-coding
MACS_peak_151	chr1	78191539	78211244	+	3716	NA	Intergenic	Intergenic	-7680	NM_001159520	18505	Mm.1371	NM_008781	ENSMUSG00000004872	Pax3	Pax-3|Sp|splotch	paired box 3	protein-coding
MACS_peak_3180	chr2	28763778	28773923	+	3716	NA	intron (NM_001164186, intron 2 of 3)	(TC)n|Simple_repeat|Simple_repeat	3091	NM_019446	54422	Mm.21390	NM_019446	ENSMUSG00000026805	Barhl1	Dres115|MBH2	BarH-like 1 (Drosophila)	protein-coding
MACS_peak_1336	chr12	81856080	81862761	+	3714	NA	exon (NM_001008423, exon 2 of 2)	exon (NM_001008423, exon 2 of 2)	2282	NM_001008423	380768	Mm.29367	NM_001008423		Ccdc177	Gm1568	coiled-coil domain containing 177	protein-coding
MACS_peak_2803	chr18	52687413	52689715	+	3714	NA	exon (NM_001286182, exon 2 of 8)	exon (NM_001286182, exon 2 of 8)	811	NM_001286181	16948	Mm.172	NM_010728	ENSMUSG00000024529	Lox	AI893619|TSC-160|rrg	lysyl oxidase	protein-coding
MACS_peak_5432	chr7	53087782	53090229	+	3695	NA	exon (NM_008172, exon 12 of 12)	exon (NM_008172, exon 12 of 12)	-2846	NM_153419	101612	Mm.274847	NM_153419	ENSMUSG00000053801	Grwd1	A301|AI504353|Grwd|Wdr28	glutamate-rich WD repeat containing 1	protein-coding
MACS_peak_3380	chr2	119060084	119064645	+	3689	NA	promoter-TSS (NM_016907)	promoter-TSS (NM_016907)	-732	NM_016907	20732	Mm.104955	NM_016907	ENSMUSG00000027315	Spint1	HAI-1	serine protease inhibitor, Kunitz type 1	protein-coding
MACS_peak_5172	chr6	117960893	117963256	+	3686	NA	Intergenic	Intergenic	-54329	NM_027526	70727	Mm.87660	NM_027526	ENSMUSG00000030134	Rasgef1a	6330404M18Rik|AI835194	RasGEF domain family, member 1A	protein-coding
MACS_peak_2696	chr17	80111512	80117255	+	3686	NA	promoter-TSS (NM_009994)	promoter-TSS (NM_009994)	-2	NM_009994	13078	Mm.214016	NM_009994	ENSMUSG00000024087	Cyp1b1	CP1B|P4501b1	cytochrome P450, family 1, subfamily b, polypeptide 1	protein-coding
MACS_peak_3853	chr3	104762896	104766864	+	3685	NA	promoter-TSS (NM_009520)	promoter-TSS (NM_009520)	-253	NM_009520	22414	Mm.10740	NM_009520	ENSMUSG00000027840	Wnt2b	Wnt13	wingless-type MMTV integration site family, member 2B	protein-coding
MACS_peak_5697	chr7	150630870	150632402	+	3683	NA	Intergenic	CpG	15319	NM_009876	12577	Mm.168789	NM_009876	ENSMUSG00000037664	Cdkn1c	AL024410|CDKI|Kip2|p57(kip2)|p57Kip2	cyclin-dependent kinase inhibitor 1C (P57)	protein-coding
MACS_peak_260	chr1	136541442	136545400	+	3675	NA	intron (NM_009307, intron 1 of 9)	CpG	163	NM_009307	20980	Mm.5102	NM_009307	ENSMUSG00000026452	Syt2	R74640|mKIAA4194	synaptotagmin II	protein-coding
MACS_peak_2098	chr15	82040327	82044233	+	3671	NA	intron (NM_001207021, intron 1 of 3)	intron (NM_001207021, intron 1 of 3)	965	NM_001207021	435145	Mm.41289	NM_001207021	ENSMUSG00000096883	AI848285	Orf26	expressed sequence AI848285	protein-coding
MACS_peak_5307	chr7	25726337	25740590	+	3667	NA	Intergenic	Intergenic	21631	NR_106013	102465633		NR_106013		Mir7046	mmu-mir-7046	microRNA mir-7046	ncRNA
MACS_peak_2567	chr17	35478034	35481392	+	3659	NA	exon (NM_010392, exon 2 of 7)	exon (NM_010392, exon 2 of 7)	435	NM_010392	15013	Mm.427969	NM_010392	ENSMUSG00000091705	H2-Q2	BE136769|ENSMUSG00000079507|Gm11132|H-2Q2|gs14-2	histocompatibility 2, Q region locus 2	protein-coding
MACS_peak_5583	chr7	125588685	125592141	+	3651	NA	Intergenic	Intergenic	-3347	NM_138649	110058	Mm.156558	NM_138649	ENSMUSG00000058420	Syt17	Bk	synaptotagmin XVII	protein-coding
MACS_peak_5403	chr7	51605373	51611152	+	3651	NA	exon (NM_001034115, exon 24 of 25)	exon (NM_001034115, exon 24 of 25)	22138	NM_027049	69349	Mm.358922	NM_027049	ENSMUSG00000008028	1700008O03Rik	-	RIKEN cDNA 1700008O03 gene	protein-coding
MACS_peak_5783	chr8	24518448	24522980	+	3639	NA	Intergenic	Intergenic	-1260	NM_013834	20377	Mm.281691	NM_013834	ENSMUSG00000031548	Sfrp1	2210415K03Rik|AW011917|AW107218|AW742929|sFRP-1	secreted frizzled-related protein 1	protein-coding
MACS_peak_1663	chr13	83869007	83873492	+	3636	NA	intron (NR_015561, intron 2 of 3)	(CA)n|Simple_repeat|Simple_repeat	3538	NR_015561	320203	Mm.245636	NM_177100	ENSMUSG00000050334	C130071C03Rik	2810449C10Rik	RIKEN cDNA C130071C03 gene	ncRNA
MACS_peak_1504	chr13	31703997	31725470	+	3622	NA	Intergenic	Intergenic	-2952	NM_010225	14238	Mm.125548	NM_010225	ENSMUSG00000038402	Foxf2	FREAC2|Fkh20|LUN	forkhead box F2	protein-coding
MACS_peak_6051	chr8	127313666	127320112	+	3622	NA	promoter-TSS (NM_198632)	promoter-TSS (NM_198632)	-30	NM_198632	330863	Mm.422769	NM_198632	ENSMUSG00000036913	Trim67	D130049O21Rik|TNL	tripartite motif-containing 67	protein-coding
MACS_peak_2123	chr15	83934917	83936993	+	3622	NA	exon (NM_013873, exon 1 of 7)	exon (NM_013873, exon 1 of 7)	229	NM_013873	29859	Mm.248796	NM_013873	ENSMUSG00000018865	Sult4a1	2400007A17Rik|AI853543|BR-STL-1|ST4A1|Sultx3	sulfotransferase family 4A, member 1	protein-coding
MACS_peak_5924	chr8	91561644	91575520	+	3622	NA	promoter-TSS (NM_021390)	promoter-TSS (NM_021390)	-521	NM_021390	58198	Mm.214361	NM_021390	ENSMUSG00000031665	Sall1	Msal-3	sal-like 1 (Drosophila)	protein-coding
MACS_peak_484	chr10	42289764	42314113	+	3618	NA	intron (NM_152229, intron 1 of 8)	CpG	1456	NM_152229	21907	Mm.287100	NM_152229	ENSMUSG00000019803	Nr2e1	Mtl1|Mtll|TLL|Tlx|XTLL|fierce|frc|tailless	nuclear receptor subfamily 2, group E, member 1	protein-coding
MACS_peak_2927	chr19	12574724	12576432	+	3618	NA	exon (NM_172442, exon 1 of 9)	exon (NM_172442, exon 1 of 9)	908	NM_172442	207521	Mm.247695	NM_172442	ENSMUSG00000039982	Dtx4	AI449438|BC044798|D930042H13|RNF155	deltex 4 homolog (Drosophila)	protein-coding
MACS_peak_228	chr1	129571205	129575170	+	3618	NA	intron (NM_028135, intron 1 of 7)	intron (NM_028135, intron 1 of 7)	1411	NM_028135	72160	Mm.281287	NM_028135	ENSMUSG00000026347	Tmem163	2610024A01Rik|SV31	transmembrane protein 163	protein-coding
MACS_peak_490	chr10	42344426	42357857	+	3605	NA	Intergenic	Intergenic	-47581	NM_172416	14628	Mm.46636	NM_172416	ENSMUSG00000038280	Ostm1	1200002H13Rik|HSPC019|gl	osteopetrosis associated transmembrane protein 1	protein-coding
MACS_peak_3202	chr2	31698525	31704057	+	3605	NA	exon (NM_178887, exon 1 of 7)	exon (NM_178887, exon 1 of 7)	234	NM_178887	98970	Mm.32080	NM_178887	ENSMUSG00000026841	Fibcd1	AI448887	fibrinogen C domain containing 1	protein-coding
MACS_peak_615	chr10	84215325	84223784	+	3604	NA	intron (NM_001024918, intron 1 of 17)	intron (NM_001024918, intron 1 of 17)	761	NM_001024918	71137	Mm.79070	NM_027689	ENSMUSG00000020037	Rfx4	4933412G19Rik|NYD-sp10	regulatory factor X, 4 (influences HLA class II expression)	protein-coding
MACS_peak_333	chr1	169616310	169626665	+	3591	NA	intron (NM_033652, intron 1 of 7)	intron (NM_033652, intron 1 of 7)	1798	NM_033652	110648	Mm.330081	NM_033652	ENSMUSG00000026686	Lmx1a	Lmx1.1|dr|dreher|sst	LIM homeobox transcription factor 1 alpha	protein-coding
MACS_peak_892	chr11	76381557	76386479	+	3584	NA	intron (NM_198894, intron 1 of 22)	intron (NM_198894, intron 1 of 22)	868	NM_198895	109934	Mm.258939	NM_198018	ENSMUSG00000017631	Abr	-	active BCR-related gene	protein-coding
MACS_peak_1603	chr13	56853602	56856618	+	3579	NA	Intergenic	CpG	50081	NM_001164042	17129	Mm.272920	NM_008541	ENSMUSG00000021540	Smad5	1110051M15Rik|AI451355|Dwf-C|Madh5|MusMLP	SMAD family member 5	protein-coding
MACS_peak_2578	chr17	36280891	36284190	+	3579	NA	intron (NR_033517, intron 1 of 3)	CpG	577	NR_033517	675325	Mm.75890	NR_033517	ENSMUSG00000038311	2410017I17Rik	-	RIKEN cDNA 2410017I17 gene	ncRNA
MACS_peak_4965	chr6	30906261	30909411	+	3574	NA	exon (NM_001135093, exon 1 of 1)	exon (NM_001135093, exon 1 of 1)	1154	NM_001135093	619665	Mm.204671	NM_001135093	ENSMUSG00000073209	Klf14	5330411L03Rik|AL022736|BTEB5	Kruppel-like factor 14	protein-coding
MACS_peak_3363	chr2	105506445	105533743	+	3556	NA	intron (NM_013627, intron 2 of 12)	intron (NM_013627, intron 2 of 12)	3808	NM_001244202	18508	Mm.3608	NM_013627	ENSMUSG00000027168	Pax6	1500038E17Rik|AEY11|Dey|Gsfaey11|Pax-6|Sey	paired box 6	protein-coding
MACS_peak_4549	chr5	72976329	72978888	+	3555	NA	exon (NM_001024147, exon 2 of 3)	exon (NM_001024147, exon 2 of 3)	1181	NM_001024147	545758	Mm.332426	NM_001024147	ENSMUSG00000060204	Gm5868	EG545758	predicted gene 5868	protein-coding
MACS_peak_1741	chr13	113775783	113781871	+	3552	NA	intron (NM_001081062, intron 1 of 2)	intron (NM_001081062, intron 1 of 2)	817	NM_001081062	218630	Mm.25457	NM_001081062	ENSMUSG00000042417	Ccno	C86987|Ccnu|E130318K11|Ung2	cyclin O	protein-coding
MACS_peak_3763	chr3	82679641	82680636	+	3547	NA	promoter-TSS (NR_040382)	promoter-TSS (NR_040382)	267	NM_001277170	633285	Mm.265114	NM_001146328	ENSMUSG00000033882	Rbm46	EG633285|ENSMUSG00000033882|Gm761	RNA binding motif protein 46	protein-coding
MACS_peak_980	chr11	94997686	95013762	+	3539	NA	promoter-TSS (NR_040279)	promoter-TSS (NR_040279)	-643	NR_040279	320453	Mm.442212	NR_040279	ENSMUSG00000086552	A730090H04Rik	Dlx4as	RIKEN cDNA A730090H04 gene	ncRNA
MACS_peak_4584	chr5	93472225	93475741	+	3538	NA	promoter-TSS (NM_175270)	promoter-TSS (NM_175270)	65	NM_175270	78088	Mm.245085	NM_175270	ENSMUSG00000045314	Sowahb	5730467H21Rik|Ankrd56	sosondowah ankyrin repeat domain family member B	protein-coding
MACS_peak_337	chr1	172836437	172839004	+	3534	NA	exon (NM_001029984, exon 6 of 6)	exon (NM_001029984, exon 6 of 6)	5352	NM_001029984	435653	Mm.337931	NM_001029984	ENSMUSG00000070524	Fcrlb	FREB-2|FREB2|FcRL2|Fcrlm2|Fcry|mFCRL2	Fc receptor-like B	protein-coding
MACS_peak_1092	chr11	102005899	102010725	+	3534	NA	exon (NM_145829, exon 3 of 7)	exon (NM_145829, exon 3 of 7)	1485	NM_145829	217214	Mm.31686	NM_145829	ENSMUSG00000048217	Nags	1700120E20Rik|argA	N-acetylglutamate synthase	protein-coding
MACS_peak_4098	chr4	101760065	101761436	+	3529	NA	Intergenic	CpG	101305	NM_001085520	381536	Mm.297685	NM_001085520		Gm12789	OTTMUSG00000008445	predicted gene 12789	protein-coding
MACS_peak_6319	chr9	85735588	85738706	+	3529	NA	intron (NM_001164792, intron 1 of 1)	CpG	688	NM_001164792	21983	Mm.20864	NM_011627	ENSMUSG00000035274	Tpbg	5T4|AW495680|WAIF1	trophoblast glycoprotein	protein-coding
MACS_peak_3384	chr2	119567418	119571576	+	3522	NA	intron (NM_146125, intron 1 of 6)	intron (NM_146125, intron 1 of 6)	1424	NM_146125	228550	Mm.65337	NM_146125	ENSMUSG00000027296	Itpka	-	inositol 1,4,5-trisphosphate 3-kinase A	protein-coding
MACS_peak_4554	chr5	73404481	73407464	+	3522	NA	Intergenic	Intergenic	7829	NM_173403	231290	Mm.491387	NM_173403		Slc10a4	E130304D01	solute carrier family 10 (sodium/bile acid cotransporter family), member 4	protein-coding
MACS_peak_728	chr11	4643857	4650249	+	3503	NA	promoter-TSS (NM_138948)	promoter-TSS (NM_138948)	-272	NM_138948	192650	Mm.207056	NM_138948		Cabp7	-	calcium binding protein 7	protein-coding
MACS_peak_645	chr10	94404951	94409352	+	3491	NA	promoter-TSS (NM_018797)	promoter-TSS (NM_018797)	61	NM_018797	54712	Mm.256712	NM_018797	ENSMUSG00000074785	Plxnc1	2510048K12Rik|AW742158|CD232|Vespr	plexin C1	protein-coding
MACS_peak_1545	chr13	48751330	48769891	+	3484	NA	exon (NM_007526, exon 2 of 4)	exon (NM_007526, exon 2 of 4)	2205	NM_007526	12022	Mm.42241	NM_007526	ENSMUSG00000021381	Barx1	-	BarH-like homeobox 1	protein-coding
MACS_peak_2050	chr15	75392431	75398440	+	3465	NA	3' UTR (NM_011837, exon 4 of 4)	3' UTR (NM_011837, exon 4 of 4)	1643	NM_001135689	23934	Mm.22154	NM_011837	ENSMUSG00000022577	Ly6h	-	lymphocyte antigen 6 complex, locus H	protein-coding
MACS_peak_2838	chr18	67290438	67294538	+	3460	NA	promoter-TSS (NM_010307)	promoter-TSS (NM_010307)	-726	NM_010307	14680	Mm.440746	NM_010307	ENSMUSG00000024524	Gnal	2610011C15Rik|9630020G10Rik|Galphaolf|Gna10|Golf	guanine nucleotide binding protein, alpha stimulating, olfactory type	protein-coding
MACS_peak_2955	chr19	30247671	30252694	+	3460	NA	promoter-TSS (NM_138595)	promoter-TSS (NM_138595)	-251	NM_138595	104174	Mm.274852	NM_138595	ENSMUSG00000024827	Gldc	D030049L12Rik|D19Wsu57e	glycine decarboxylase	protein-coding
MACS_peak_1480	chr13	22084889	22098938	+	3460	NA	Intergenic	Intergenic	9697	NM_019429	54373	Mm.32043	NM_019429	ENSMUSG00000006179	Prss16	AI448615|TSSP	protease, serine 16 (thymus)	protein-coding
MACS_peak_1684	chr13	95635814	95641216	+	3460	NA	Intergenic	Intergenic	-7067	NM_011021	18420	Mm.42051	NM_011021		Otp	-	orthopedia homolog (Drosophila)	protein-coding
MACS_peak_5758	chr8	15027537	15029306	+	3453	NA	exon (NM_029116, exon 2 of 2)	exon (NM_029116, exon 2 of 2)	17396	NM_029116	74901	Mm.46675	NM_029116	ENSMUSG00000055675	Kbtbd11	2900016B01Rik|4930465M17Rik|mKIAA0711	kelch repeat and BTB (POZ) domain containing 11	protein-coding
MACS_peak_5007	chr6	52112832	52123399	+	3453	NA	TTS (NM_010452)	TTS (NM_010452)	-3285	NM_010451	15399	Mm.131	NM_010451		Hoxa2	AI324701|HOX1.11|Hox-1.11	homeobox A2	protein-coding
MACS_peak_6026	chr8	124251340	124256480	+	3446	NA	promoter-TSS (NM_020605)	promoter-TSS (NM_020605)	-549	NM_020605	57340	Mm.306870	NM_020605	ENSMUSG00000025318	Jph3	JP-3|Jp3	junctophilin 3	protein-coding
MACS_peak_5700	chr7	150688028	150689874	+	3445	NA	promoter-TSS (NM_009434)	promoter-TSS (NM_009434)	-522	NM_009434	22113	Mm.334344	NM_009434	ENSMUSG00000010760	Phlda2	Ipl|Tssc3	pleckstrin homology-like domain, family A, member 2	protein-coding
MACS_peak_6385	chr9	107133624	107134703	+	3445	NA	promoter-TSS (NM_153413)	promoter-TSS (NM_153413)	77	NM_153413	208869	Mm.150259	NM_153413	ENSMUSG00000039716	Dock3	MOCA|PBP|mKIAA0299	dedicator of cyto-kinesis 3	protein-coding
MACS_peak_5503	chr7	86673570	86682361	+	3445	NA	non-coding (NR_040314, exon 3 of 3)	non-coding (NR_040314, exon 3 of 3)	17644	NR_040312	101694	Mm.41661	NR_040311		AI854517	-	expressed sequence AI854517	ncRNA
MACS_peak_443	chr10	20877796	20881976	+	3445	NA	intron (NM_010848, intron 1 of 14)	CpG	904	NM_001198914	17863	Mm.52109	NM_010848	ENSMUSG00000019982	Myb	AI550390|M16449|c-myb	myeloblastosis oncogene	protein-coding
MACS_peak_1153	chr11	114652515	114653873	+	3443	NA	exon (NM_028055, exon 3 of 3)	exon (NM_028055, exon 3 of 3)	4012	NM_028055	72014	Mm.38347	NM_028055		Btbd17	1500005I02Rik|Tango10a	BTB (POZ) domain containing 17	protein-coding
MACS_peak_3619	chr2	172367825	172380407	+	3426	NA	promoter-TSS (NM_009335)	promoter-TSS (NM_009335)	-977	NM_009335	21420	Mm.3629	NM_009335	ENSMUSG00000028640	Tfap2c	AA409384|AP2gamma|Ap-2.2|Stra2|Tcfap2c	transcription factor AP-2, gamma	protein-coding
MACS_peak_1285	chr12	57788974	57799809	+	3426	NA	Intergenic	Intergenic	-2235	NM_011041	18511	Mm.5035	NM_011041	ENSMUSG00000001497	Pax9	Pax-9	paired box 9	protein-coding
MACS_peak_4447	chr5	24028128	24035000	+	3426	NA	intron (NM_015739, intron 1 of 1)	intron (NM_015739, intron 1 of 1)	1102	NM_015739	231044	Mm.246596	NM_015739		Gbx1	Gbx-1	gastrulation brain homeobox 1	protein-coding
MACS_peak_3859	chr3	107259480	107265457	+	3426	NA	promoter-TSS (NM_145922)	promoter-TSS (NM_145922)	-652	NM_145922	99738	Mm.101976	NM_145922	ENSMUSG00000027895	Kcnc4	AI850292|KSHIIIC|Kcr2-4|Kv3.4	potassium voltage gated channel, Shaw-related subfamily, member 4	protein-coding
MACS_peak_3833	chr3	96252283	96268243	+	3426	NA	Intergenic	Intergenic	-4034	NM_001256180	329716	Mm.275223	NM_183223	ENSMUSG00000046317	BC107364	D730018G16	cDNA sequence BC107364	protein-coding
MACS_peak_5470	chr7	72670037	72673973	+	3423	NA	Intergenic	Intergenic	-117779	NM_172310	272396	Mm.35127	NM_172310	ENSMUSG00000030515	Tarsl2	A530046H20Rik	threonyl-tRNA synthetase-like 2	protein-coding
MACS_peak_4831	chr5	136343402	136346077	+	3405	NA	exon (NM_021403, exon 13 of 15)	exon (NM_021403, exon 13 of 15)	-19050	NM_013560	15507	Mm.13849	NM_013560	ENSMUSG00000004951	Hspb1	27kDa|Hsp25	heat shock protein 1	protein-coding
MACS_peak_124	chr1	74834403	74844600	+	3405	NA	intron (NM_009518, intron 1 of 3)	intron (NM_009518, intron 1 of 3)	908	NM_009518	22409	Mm.5130	NM_009518		Wnt10a	-	wingless-type MMTV integration site family, member 10A	protein-coding
MACS_peak_2723	chr17	88035025	88037437	+	3405	NA	exon (NM_008532, exon 2 of 10)	exon (NM_008532, exon 2 of 10)	912	NM_008532	17075	Mm.4259	NM_008532	ENSMUSG00000045394	Epcam	CD326|EGP|EGP-2|Egp314|Ep-CAM|EpCAM1|GA733-2|Ly74|TROP1|Tacsd1|Tacstd1|gp40	epithelial cell adhesion molecule	protein-coding
MACS_peak_5201	chr6	125329684	125332436	+	3401	NA	promoter-TSS (NM_198604)	promoter-TSS (NM_198604)	-538	NM_198604	213522	Mm.333396	NM_198604	ENSMUSG00000038167	Plekhg6	BC026778|Gm155	pleckstrin homology domain containing, family G (with RhoGef domain) member 6	protein-coding
MACS_peak_3376	chr2	118500702	118503724	+	3401	NA	promoter-TSS (NM_001145854)	promoter-TSS (NM_001145854)	-769	NM_001145854	214230	Mm.241857	NM_001033254	ENSMUSG00000074923	Pak6	4732456M09	p21 protein (Cdc42/Rac)-activated kinase 6	protein-coding
MACS_peak_2945	chr19	25679190	25693674	+	3395	NA	intron (NM_177360, intron 1 of 1)	intron (NM_177360, intron 1 of 1)	1405	NM_177360	240590	Mm.62785	NM_177360	ENSMUSG00000042372	Dmrt3	-	doublesex and mab-3 related transcription factor 3	protein-coding
MACS_peak_2216	chr15	100812863	100815955	+	3395	NA	exon (NM_011323, exon 11 of 26)	exon (NM_011323, exon 11 of 26)	47707	NM_011323	20273	Mm.385012	NM_011323	ENSMUSG00000023033	Scn8a	AI853486|C630029C19Rik|NaCh6|Nav1.6|dmu|med|mnd-2|mnd2|nmf2|nmf335|nmf58|nur14|seal	sodium channel, voltage-gated, type VIII, alpha	protein-coding
MACS_peak_1267	chr12	50482693	50486906	+	3395	NA	5' UTR (NM_001160112, exon 1 of 1)	5' UTR (NM_001160112, exon 1 of 1)	805	NM_008241	15228	Mm.4704	NM_008241	ENSMUSG00000020950	Foxg1	2900064B05Rik|BF-1|Bf1|Hfh9|Hfhbf1	forkhead box G1	protein-coding
MACS_peak_4258	chr4	133074177	133076849	+	3395	NA	intron (NM_001083916, intron 1 of 3)	intron (NM_001083916, intron 1 of 3)	635	NM_133707	69073	Mm.299081	NM_133707	ENSMUSG00000037600	Kdf1	1810019J16Rik	keratinocyte differentiation factor 1	protein-coding
MACS_peak_2904	chr19	5556650	5564187	+	3386	NA	5' UTR (NM_019935, exon 1 of 4)	5' UTR (NM_019935, exon 1 of 4)	157	NM_019935	18426	Mm.280225	NM_019935	ENSMUSG00000024922	Ovol1	BB147136|Ovo1|movo1	OVO homolog-like 1 (Drosophila)	protein-coding
MACS_peak_3501	chr2	156245526	156248578	+	3384	NA	intron (NM_013510, intron 1 of 21)	CpG	407	NM_001291123	13821	Mm.20852	NM_013510	ENSMUSG00000027624	Epb4.1l1	4.1N|Epb41l1|NBL1|mKIAA0338	erythrocyte protein band 4.1-like 1	protein-coding
MACS_peak_1598	chr13	56395471	56398661	+	3384	NA	intron (NM_019568, intron 2 of 3)	intron (NM_019568, intron 2 of 3)	846	NM_019568	57266	Mm.30211	NM_019568	ENSMUSG00000021508	Cxcl14	1110031L23Rik|1200006I23Rik|AI414372|BMAC|BRAK|KS1|Kec|MIP-2g|MIP2gamma|NJAC|Scyb14|bolekine	chemokine (C-X-C motif) ligand 14	protein-coding
MACS_peak_1501	chr13	31647553	31652095	+	3367	NA	promoter-TSS (NM_008239)	promoter-TSS (NM_008239)	-215	NM_008239	15220	Mm.44235	NM_008239	ENSMUSG00000038415	Foxq1	HFH-1|Hfh1|Hfh1l|sa	forkhead box Q1	protein-coding
MACS_peak_6036	chr8	126083037	126083622	+	3366	NA	Intergenic	Intergenic	40594	NM_018855	104346	Mm.117265	NM_018855	ENSMUSG00000040220	Gas8	Gas11	growth arrest specific 8	protein-coding
MACS_peak_6480	chrX	58142236	58152290	+	3366	NA	promoter-TSS (NM_009237)	promoter-TSS (NM_009237)	-658	NM_009237	20675	Mm.35784	NM_009237	ENSMUSG00000045179	Sox3	Sox-3	SRY (sex determining region Y)-box 3	protein-coding
MACS_peak_5524	chr7	91555660	91560299	+	3366	NA	intron (NM_007488, intron 1 of 18)	intron (NM_007488, intron 1 of 18)	569	NM_007488	11864	Mm.38594	NM_007488	ENSMUSG00000015709	Arnt2	Hif-2b|bHLHe1|mKIAA0307	aryl hydrocarbon receptor nuclear translocator 2	protein-coding
MACS_peak_717	chr10	126961770	126973713	+	3360	NA	intron (NM_183297, intron 1 of 1)	intron (NM_183297, intron 1 of 1)	3874	NM_183297	104080	Mm.437200	NM_183297	ENSMUSG00000040258	Nxph4	1110036M10Rik|AI851051	neurexophilin 4	protein-coding
MACS_peak_3197	chr2	31487732	31500981	+	3357	NA	Intergenic	Intergenic	-1201	NM_001123362	381359	Mm.379512	NM_001123362	ENSMUSG00000079466	Prdm12	Gm998	PR domain containing 12	protein-coding
MACS_peak_401	chr1	191995742	191999634	+	3357	NA	Intergenic	Intergenic	-3129	NM_008937	19130	Mm.132579	NM_008937	ENSMUSG00000010175	Prox1	A230003G05Rik	prospero homeobox 1	protein-coding
MACS_peak_3066	chr19	47326590	47329199	+	3356	NA	exon (NM_001163480, exon 4 of 6)	exon (NM_001163480, exon 4 of 6)	20185	NR_105961	102466782		NR_105961		Mir6995	mmu-mir-6995	microRNA mir-6995	ncRNA
MACS_peak_5492	chr7	81155989	81159140	+	3346	NA	intron (NM_009181, intron 1 of 5)	CpG	1004	NM_009181	20450	Mm.4954	NM_009181	ENSMUSG00000025789	St8sia2	AI323367|ST8SiaII|STX|Siat8b	ST8 alpha-N-acetyl-neuraminide alpha-2,8-sialyltransferase 2	protein-coding
MACS_peak_6030	chr8	125639677	125643308	+	3333	NA	exon (NM_170684, exon 1 of 15)	exon (NM_170684, exon 1 of 15)	218	NM_170684	102278	Mm.36434	NM_170684	ENSMUSG00000034796	Cpne7	AW047065	copine VII	protein-coding
MACS_peak_3705	chr3	31046817	31050564	+	3332	NA	promoter-TSS (NM_008770)	promoter-TSS (NM_008770)	-152	NM_008770	18417	Mm.4425	NM_008770	ENSMUSG00000037625	Cldn11	Claudin-11|Claudin11|Osp|Otm	claudin 11	protein-coding
MACS_peak_2869	chr18	81180846	81193208	+	3332	NA	Intergenic	Intergenic	-3710	NM_178280	20689	Mm.215917	NM_178280	ENSMUSG00000024565	Sall3	B130022O04Rik|Msal|Msal-1|Sal|Salt|Spalt	sal-like 3 (Drosophila)	protein-coding
MACS_peak_6292	chr9	71061678	71065246	+	3329	NA	promoter-TSS (NM_009022)	promoter-TSS (NM_009022)	-134	NM_009022	19378	Mm.42016	NM_009022	ENSMUSG00000013584	Aldh1a2	AV116159|Aldh1a7|Raldh1|Raldh2	aldehyde dehydrogenase family 1, subfamily A2	protein-coding
MACS_peak_6336	chr9	89801699	89808869	+	3319	NA	intron (NM_011245, intron 1 of 26)	CpG-15249	671	NM_001039655	19417	Mm.44561	NM_011245	ENSMUSG00000032356	Rasgrf1	AI844718|CDC25|CDC25Mm|Gnrp|Grf1|Grfbeta|P190-A|Ras-GRF1|p190|p190RhoGEF	RAS protein-specific guanine nucleotide-releasing factor 1	protein-coding
MACS_peak_6	chr1	5007169	5011306	+	3318	NA	promoter-TSS (NM_001290372)	promoter-TSS (NM_001290372)	383	NM_021374	58175	Mm.103771	NM_021374	ENSMUSG00000002459	Rgs20	2900073E09Rik|Rgsz1	regulator of G-protein signaling 20	protein-coding
MACS_peak_3257	chr2	56952506	56957529	+	3318	NA	Intergenic	CpG	12432	NM_013613	18227	Mm.3507	NM_013613	ENSMUSG00000026826	Nr4a2	HZF-3|NOT|Nurr1|RNR-1|TINOR|TINUR	nuclear receptor subfamily 4, group A, member 2	protein-coding
MACS_peak_4553	chr5	73397069	73400985	+	3316	NA	intron (NM_173403, intron 1 of 2)	intron (NM_173403, intron 1 of 2)	884	NM_173403	231290	Mm.491387	NM_173403		Slc10a4	E130304D01	solute carrier family 10 (sodium/bile acid cotransporter family), member 4	protein-coding
MACS_peak_3766	chr3	82930951	82935153	+	3315	NA	Intergenic	CpG	73592	NM_016784	53317	Mm.286349	NM_016784	ENSMUSG00000027998	Plrg1	AA958940|C80566|Tango4	pleiotropic regulator 1, PRL1 homolog (Arabidopsis)	protein-coding
MACS_peak_1123	chr11	107652491	107657556	+	3285	NA	intron (NM_019431, intron 1 of 3)	intron (NM_019431, intron 1 of 3)	755	NM_019431	54377	Mm.103724	NM_019431		Cacng4	AI413107|AW491861	calcium channel, voltage-dependent, gamma subunit 4	protein-coding
MACS_peak_831	chr11	58452959	58454422	+	3274	NA	promoter-TSS (NM_001039047)	promoter-TSS (NM_001039047)	-277	NM_001039047	216781	Mm.339507	NM_001039047	ENSMUSG00000037124	Trim58	Gm16|Gm1783	tripartite motif-containing 58	protein-coding
MACS_peak_91	chr1	57025964	57030739	+	3274	NA	promoter-TSS (NR_024325)	promoter-TSS (NR_024325)	38	NR_024325	329160	Mm.419039	NR_024325	ENSMUSG00000087022	9130024F11Rik	B530002L08|EG329160	RIKEN cDNA 9130024F11 gene	ncRNA
MACS_peak_5518	chr7	89132655	89141230	+	3270	NA	intron (NM_007562, intron 1 of 4)	CpG	243	NM_007562	12173	Mm.243802	NM_007562	ENSMUSG00000025105	Bnc1	AI047752|AW546376|Bnc	basonuclin 1	protein-coding
MACS_peak_3236	chr2	38201951	38219502	+	3270	NA	intron (NM_001290646, intron 3 of 4)	intron (NM_001290646, intron 3 of 4)	3898	NM_010710	16870	Mm.142856	NM_010710	ENSMUSG00000000247	Lhx2	LH2A|Lh-2|Lim2|ap|apterous	LIM homeobox protein 2	protein-coding
MACS_peak_5580	chr7	123450855	123453242	+	3270	NA	Intergenic	Intergenic	25656	NM_026533	68052	Mm.14798	NM_026533	ENSMUSG00000090862	Rps13	2700063M04Rik	ribosomal protein S13	protein-coding
MACS_peak_153	chr1	78304038	78307998	+	3270	NA	promoter-TSS (NM_001004173)	promoter-TSS (NM_001004173)	-903	NM_001004173	433323	Mm.276248	NM_001004173	ENSMUSG00000032908	Sgpp2	SPPase2|Spp2	sphingosine-1-phosphate phosphotase 2	protein-coding
MACS_peak_3059	chr19	45814431	45820916	+	3270	NA	promoter-TSS (NM_001166363)	promoter-TSS (NM_001166363)	-299	NM_001166362	14179	Mm.4012	NM_010205	ENSMUSG00000025219	Fgf8	Aigf|Fgf-8	fibroblast growth factor 8	protein-coding
MACS_peak_5903	chr8	89989210	89998493	+	3270	NA	3' UTR (NM_019626, exon 3 of 3)	3' UTR (NM_019626, exon 3 of 3)	2640	NM_019626	12404	Mm.4880	NM_019626	ENSMUSG00000031654	Cbln1	AI323299	cerebellin 1 precursor protein	protein-coding
MACS_peak_125	chr1	74846209	74855123	+	3267	NA	TTS (NM_009518)	TTS (NM_009518)	12073	NM_009518	22409	Mm.5130	NM_009518		Wnt10a	-	wingless-type MMTV integration site family, member 10A	protein-coding
MACS_peak_1758	chr13	118009049	118011549	+	3261	NA	intron (NM_010330, intron 1 of 8)	intron (NM_010330, intron 1 of 8)	919	NM_010330	13723	Mm.274926	NM_010330	ENSMUSG00000021728	Emb	AL022799|Gp70	embigin	protein-coding
MACS_peak_4404	chr4	153512203	153515924	+	3251	NA	5' UTR (NM_011642, exon 1 of 14)	5' UTR (NM_011642, exon 1 of 14)	254	NM_011642	22062	Mm.78015	NM_011642	ENSMUSG00000029026	Trp73	Tp73|p73	transformation related protein 73	protein-coding
MACS_peak_914	chr11	80962392	80968806	+	3239	NA	exon (NM_007384, exon 1 of 10)	exon (NM_007384, exon 1 of 10)	806	NM_007384	11418	Mm.234998	NM_007384	ENSMUSG00000020704	Asic2	ACIC2|Accn1|BNC1|BNaC1|BNaC1a|Mdeg	acid-sensing (proton-gated) ion channel 2	protein-coding
MACS_peak_1287	chr12	58297688	58299623	+	3237	NA	promoter-TSS (NM_172577)	promoter-TSS (NM_172577)	-196	NM_172577	217593	Mm.32835	NM_172577	ENSMUSG00000035472	Slc25a21	9930033G19Rik|A630030I10|BB158148	solute carrier family 25 (mitochondrial oxodicarboxylate carrier), member 21	protein-coding
MACS_peak_3456	chr2	147184333	147194432	+	3237	NA	promoter-TSS (NR_040330)	promoter-TSS (NR_040330)	-853	NR_040330	99041	Mm.373081	NR_040330		AI646519	Aspax1|OTTMUSG00000015701	expressed sequence AI646519	ncRNA
MACS_peak_1890	chr14	67528185	67531174	+	3237	NA	promoter-TSS (NM_175498)	promoter-TSS (NM_175498)	-366	NM_175498	239157	Mm.44358	NM_175498	ENSMUSG00000046204	Pnma2	A830049P17Rik|mKIAA0883	paraneoplastic antigen MA2	protein-coding
MACS_peak_1062	chr11	98406715	98408691	+	3226	NA	promoter-TSS (NM_011771)	promoter-TSS (NM_011771)	-358	NM_011771	22780	Mm.133367	NM_011771	ENSMUSG00000018168	Ikzf3	5830411O07Rik|Aiolos|Zfpn1a3|Znfn1a3	IKAROS family zinc finger 3	protein-coding
MACS_peak_4784	chr5	120874186	120891093	+	3224	NA	intron (NM_008499, intron 1 of 4)	intron (NM_008499, intron 1 of 4)	744	NM_008499	16873	Mm.5151	NM_008499	ENSMUSG00000029595	Lhx5	Lim2	LIM homeobox protein 5	protein-coding
MACS_peak_2601	chr17	37333715	37336309	+	3223	NA	promoter-TSS (NM_001011518)	promoter-TSS (NM_001011518)	-101	NM_001011518	258219	Mm.377382	NM_001011518	ENSMUSG00000043827	Olfr94	MOR256-32P	olfactory receptor 94	protein-coding
MACS_peak_5149	chr6	112438240	112440813	+	3220	NA	exon (NM_001081147, exon 1 of 2)	exon (NM_001081147, exon 1 of 2)	276	NM_001081147	18430	Mm.333310	NM_001081147	ENSMUSG00000049112	Oxtr	OTR	oxytocin receptor	protein-coding
MACS_peak_5430	chr7	53051661	53054548	+	3205	NA	intron (NR_110987, intron 12 of 15)	intron (NR_110987, intron 12 of 15)	12354	NM_001290990	381983	Mm.44928	NM_001005511	ENSMUSG00000062044	Lmtk3	BC059845|aatyk3	lemur tyrosine kinase 3	protein-coding
MACS_peak_5130	chr6	99674804	99677590	+	3203	NA	intron (NM_001037539, intron 1 of 2)	CpG	189	NM_001037539	50501	Mm.87365	NM_015768	ENSMUSG00000030069	Prok2	Bv8|PK2|Prok1	prokineticin 2	protein-coding
MACS_peak_3907	chr3	130812134	130817543	+	3183	NA	promoter-TSS (NM_001276403)	promoter-TSS (NM_001276403)	-871	NM_001276403	16842	Mm.255219	NM_010703	ENSMUSG00000027985	Lef1	3000002B05|AI451430|Lef-1	lymphoid enhancer binding factor 1	protein-coding
MACS_peak_3062	chr19	46387827	46396257	+	3183	NA	intron (NM_028627, intron 11 of 17)	intron (NM_028627, intron 11 of 17)	9604	NM_028627	73728	Mm.268532	NM_028627	ENSMUSG00000037126	Psd	1110007H17Rik|A930015K15|Efa6|Efa6a|Psdl|mKIAA2011	pleckstrin and Sec7 domain containing	protein-coding
MACS_peak_5342	chr7	29250883	29254022	+	3183	NA	exon (NM_001141921, exon 5 of 5)	exon (NM_001141921, exon 5 of 5)	15195	NM_001141921	80749	Mm.483073	NM_030562		Lrfn1	BC004018|SALM2|Semo1	leucine rich repeat and fibronectin type III domain containing 1	protein-coding
MACS_peak_1052	chr11	97487778	97493285	+	3183	NA	exon (NM_175332, exon 1 of 1)	exon (NM_175332, exon 1 of 1)	499	NM_175332	103551	Mm.24506	NM_175332	ENSMUSG00000043439	E130012A19Rik	AA409164|AI413509|AW539173|E13|esPRC2p48	RIKEN cDNA E130012A19 gene	protein-coding
MACS_peak_5391	chr7	37473796	37481054	+	3183	NA	Intergenic	Intergenic	-5712	NM_172298	243931	Mm.44141	NM_172298	ENSMUSG00000021217	Tshz3	A630038G13Rik|Tsh3|Zfp537|mKIAA1474|teashirt3	teashirt zinc finger family member 3	protein-coding
MACS_peak_1273	chr12	54344638	54350258	+	3183	NA	Intergenic	Intergenic	-2216	NM_013780	27386	Mm.247044	NM_013780	ENSMUSG00000021010	Npas3	4930423H22Rik|bHLHe12	neuronal PAS domain protein 3	protein-coding
MACS_peak_5440	chr7	54384798	54391754	+	3178	NA	promoter-TSS (NM_001163565)	promoter-TSS (NM_001163565)	-308	NM_001163565	19259	Mm.4654	NM_013643	ENSMUSG00000030854	Ptpn5	Step	protein tyrosine phosphatase, non-receptor type 5	protein-coding
MACS_peak_5443	chr7	56884843	56902548	+	3178	NA	Intergenic	Intergenic	-1490	NM_001005232	13172	Mm.307176	NM_001005232	ENSMUSG00000030507	Dbx1	AI426026|Dbx	developing brain homeobox 1	protein-coding
MACS_peak_3453	chr2	147009678	147023695	+	3176	NA	intron (NR_030769, intron 1 of 5)	intron (NR_030769, intron 1 of 5)	3526	NR_108091	78068	Mm.261511	NR_108091	ENSMUSG00000053545	6430503K07Rik	-	RIKEN cDNA 6430503K07 gene	ncRNA
MACS_peak_5633	chr7	139787888	139792169	+	3172	NA	intron (NM_009123, intron 1 of 1)	intron (NM_009123, intron 1 of 1)	1292	NM_009123	20231	Mm.334281	NM_009123		Nkx1-2	Nkx-1.1|Nkx-1.2|Sax1	NK1 transcription factor related, locus 2 (Drosophila)	protein-coding
MACS_peak_3113	chr2	5056505	5059279	+	3168	NA	promoter-TSS (NM_028804)	promoter-TSS (NM_028804)	-930	NM_028804	74186	Mm.274715	NM_028804	ENSMUSG00000026676	Ccdc3	2310045O21Rik	coiled-coil domain containing 3	protein-coding
MACS_peak_3873	chr3	115953956	115957609	+	3167	NA	intron (NM_022427, intron 1 of 1)	intron (NM_022427, intron 1 of 1)	620	NM_022427	64378	Mm.40025	NM_022427	ENSMUSG00000068696	Gpr88	AW061286|Strg	G-protein coupled receptor 88	protein-coding
MACS_peak_1317	chr12	75095965	75100520	+	3155	NA	promoter-TSS (NM_172804)	promoter-TSS (NM_172804)	-506	NM_172804	238266	Mm.311393	NM_172804	ENSMUSG00000044912	Syt16	6430703N11|Strep14|Syt14l|syt14r	synaptotagmin XVI	protein-coding
MACS_peak_3298	chr2	74541510	74554562	+	3155	NA	TTS (NR_027899)	TTS (NR_027899)	-2014	NM_010468	15434	Mm.430708	NM_010468	ENSMUSG00000079277	Hoxd3	Hox-4.1|Hox-5.5	homeobox D3	protein-coding
MACS_peak_2719	chr17	86198495	86201487	+	3148	NA	Intergenic	Intergenic	-112397	NM_011380	20472	Mm.5039	NM_011380	ENSMUSG00000024134	Six2	-	sine oculis-related homeobox 2	protein-coding
MACS_peak_1935	chr14	104868533	104874331	+	3146	NA	Intergenic	Intergenic	-4216	NM_011143	18996	Mm.246550	NM_011143		Pou4f1	Brn-3|Brn-3.0|Brn3|Brn3.0|Brn3a|E130119J07Rik	POU domain, class 4, transcription factor 1	protein-coding
MACS_peak_3412	chr2	128864634	128865404	+	3144	NA	Intergenic	CpG	-26664	NM_027192	69737	Mm.33909	NM_027192	ENSMUSG00000027394	Ttl	2410003M22Rik|2700049H19Rik|AI848570	tubulin tyrosine ligase	protein-coding
MACS_peak_4540	chr5	67612830	67626555	+	3144	NA	Intergenic	Intergenic	-32112	NM_001285452	67878	Mm.23217	NM_028975	ENSMUSG00000037720	Tmem33	1110006G02Rik|1600019D15Rik|2410089A21Rik|2700052H22Rik|5430406L04Rik|AA388285|AI314185|AI426615|db83	transmembrane protein 33	protein-coding
MACS_peak_5651	chr7	144504759	144515172	+	3134	NA	Intergenic	Intergenic	-3837	NM_010096	13593	Mm.258708	NM_010096	ENSMUSG00000010476	Ebf3	3110018A08Rik|O/E-2|mKIAA4201	early B cell factor 3	protein-coding
MACS_peak_446	chr10	21868383	21871988	+	3124	NA	Intergenic	CpG	-1109	NM_001254745	319887	Mm.177746	NM_001254744	ENSMUSG00000055657	E030030I06Rik	-	RIKEN cDNA E030030I06 gene	protein-coding
MACS_peak_4616	chr5	102090618	102097447	+	3124	NA	promoter-TSS (NM_144955)	promoter-TSS (NM_144955)	-302	NM_144955	18096	Mm.193072	NM_144955		Nkx6-1	NKX6A|Nkx6.1	NK6 homeobox 1	protein-coding
MACS_peak_2516	chr17	26973873	26974721	+	3113	NA	Intergenic	RMER30|DNA|MER1_type	4213	NM_008700	18091	Mm.41974	NM_008700	ENSMUSG00000015579	Nkx2-5	Csx|Nkx-2.5|Nkx2.5|tinman	NK2 homeobox 5	protein-coding
MACS_peak_2449	chr17	8019088	8020750	+	3112	NA	Intergenic	CpG	-22080	NM_001081416	68655	Mm.379161	NM_001081416	ENSMUSG00000071984	Fndc1	1110027O12Rik|1110051A18Rik|mKIAA1866	fibronectin type III domain containing 1	protein-coding
MACS_peak_4568	chr5	77284888	77289418	+	3112	NA	exon (NM_001163793, exon 6 of 9)	exon (NM_001163793, exon 6 of 9)	17529	NM_001163793	320827	Mm.101504	NM_001163793	ENSMUSG00000036377	C530008M17Rik	2810489J07Rik|4930529A19Rik|4931405B09Rik|Kiaa1211|mKIAA1211	RIKEN cDNA C530008M17 gene	protein-coding
MACS_peak_6436	chr9	120209363	120214976	+	3112	NA	Intergenic	Intergenic	-1022	NM_144557	245049	Mm.100936	NM_144557	ENSMUSG00000041794	Myrip	A230081N12Rik|Slac2-c|Slac2c	myosin VIIA and Rab interacting protein	protein-coding
MACS_peak_3779	chr3	87799118	87808008	+	3112	NA	intron (NM_001109758, intron 1 of 7)	intron (NM_001109758, intron 1 of 7)	715	NM_007529	12032	Mm.4598	NM_007529	ENSMUSG00000004892	Bcan	Cspg7	brevican	protein-coding
MACS_peak_1784	chr14	24821923	24825623	+	3110	NA	promoter-TSS (NM_001253375)	promoter-TSS (NM_001253375)	-346	NM_001253374	16531	Mm.343607	NM_010610	ENSMUSG00000063142	Kcnma1	5730414M22Rik|BKCa|MaxiK|Slo|Slo1|mSlo|mSlo1	potassium large conductance calcium-activated channel, subfamily M, alpha member 1	protein-coding
MACS_peak_1851	chr14	56136440	56143915	+	3098	NA	intron (NM_001271916, intron 3 of 3)	intron (NM_001271916, intron 3 of 3)	2912	NM_008736	18185	Mm.20422	NM_008736	ENSMUSG00000040632	Nrl	D14H14S46E	neural retina leucine zipper gene	protein-coding
MACS_peak_3338	chr2	93478666	93492632	+	3098	NA	intron (NM_007442, intron 1 of 3)	intron (NM_007442, intron 1 of 3)	3058	NM_007442	11695	Mm.389389	NM_007442	ENSMUSG00000040310	Alx4	lst	aristaless-like homeobox 4	protein-coding
MACS_peak_6151	chr9	42703739	42709022	+	3092	NA	intron (NM_175481, intron 1 of 20)	intron (NM_175481, intron 1 of 20)	46074	NM_175481	110637	Mm.370291	NM_175481	ENSMUSG00000032017	Grik4	6330551K01Rik|GluK4|GluRgamma1|KA-1|KA1	glutamate receptor, ionotropic, kainate 4	protein-coding
MACS_peak_4999	chr6	51381025	51383391	+	3092	NA	promoter-TSS (NM_010903)	promoter-TSS (NM_010903)	-461	NM_010903	18025	Mm.42138	NM_010903	ENSMUSG00000029832	Nfe2l3	Nrf3	nuclear factor, erythroid derived 2, like 3	protein-coding
MACS_peak_4938	chr6	22237396	22239989	+	3085	NA	intron (NM_053116, intron 1 of 3)	intron (NM_053116, intron 1 of 3)	465	NM_053116	93735	Mm.137403	NM_053116	ENSMUSG00000029671	Wnt16	E130309I19Rik	wingless-type MMTV integration site family, member 16	protein-coding
MACS_peak_3299	chr2	74555863	74567535	+	3078	NA	intron (NM_010469, intron 3 of 5)	intron (NM_010469, intron 3 of 5)	1664	NM_010469	15436	Mm.482194	NM_010469	ENSMUSG00000079277	Hoxd4	6030436D05Rik|Hox-4.2|Hox-5.1	homeobox D4	protein-coding
MACS_peak_3688	chr3	17950315	17956104	+	3076	NA	Intergenic	Intergenic	-1116	NM_021560	59058	Mm.149938	NM_021560	ENSMUSG00000025128	Bhlhe22	Beta3|Bhlhb5	basic helix-loop-helix family, member e22	protein-coding
MACS_peak_1721	chr13	105652169	105654214	+	3076	NA	intron (NM_029984, intron 1 of 2)	intron (NM_029984, intron 1 of 2)	782	NM_029984	77803	Mm.159995	NM_029984	ENSMUSG00000042655	Fam159b	A930021C24Rik	family with sequence similarity 159, member B	protein-coding
MACS_peak_2562	chr17	35094113	35095949	+	3070	NA	exon (NM_010478, exon 1 of 1)	exon (NM_010478, exon 1 of 1)	1152	NM_010478	15511	Mm.372314	NM_010478	ENSMUSG00000090877	Hspa1b	Hsp70|Hsp70-1|Hsp70.1|hsp68	heat shock protein 1B	protein-coding
MACS_peak_2633	chr17	48231910	48236832	+	3064	NA	Intergenic	Intergenic	-7043	NR_110485	320638	Mm.404482	NR_110485		A730006G06Rik	-	RIKEN cDNA A730006G06 gene	ncRNA
MACS_peak_5046	chr6	67482940	67486054	+	3052	NA	3' UTR (NM_020047, exon 1 of 1)	3' UTR (NM_020047, exon 1 of 1)	1319	NM_020047	56753	Mm.439913	NM_020047	ENSMUSG00000051397	Tacstd2	C80403|EGP-1|GA733-1|Ly97|TROP2	tumor-associated calcium signal transducer 2	protein-coding
MACS_peak_2773	chr18	36355156	36359316	+	3052	NA	promoter-TSS (NM_001167891)	promoter-TSS (NM_001167891)	-422	NM_001167891	100042150	Mm.380390	NM_001167891	ENSMUSG00000060275	Nrg2	Don1|NTAK	neuregulin 2	protein-coding
MACS_peak_3821	chr3	96128439	96145096	+	3052	NA	Intergenic	Intergenic	-38875	NM_010186	14129	Mm.150	NM_010186	ENSMUSG00000015947	Fcgr1	AI323638|AV092959|CD64|FcgammaRI|IGGHAFC	Fc receptor, IgG, high affinity I	protein-coding
MACS_peak_6411	chr9	114469090	114476219	+	3052	NA	5' UTR (NM_001042503, exon 1 of 4)	5' UTR (NM_001042503, exon 1 of 4)	833	NM_001042503	636931	Mm.17857	NM_001042503		Trim71	2610206G21Rik|AL022943|Gm1127|Lin41|Ripply2|lin-41|mLin41|mlin-41	tripartite motif-containing 71	protein-coding
MACS_peak_5813	chr8	39722171	39724796	+	3052	NA	intron (NM_145841, intron 1 of 7)	CpG	1079	NM_145841	244431	Mm.210388	NM_145841	ENSMUSG00000039539	Sgcz	C230085N17Rik	sarcoglycan zeta	protein-coding
MACS_peak_254	chr1	135058634	135062047	+	3052	NA	Intergenic	Intergenic	32597	NM_133819	108954	Mm.293628	NM_133819	ENSMUSG00000046062	Ppp1r15b	1810033K10Rik|AI606441|C530022L24Rik|CReP	protein phosphatase 1, regulatory (inhibitor) subunit 15b	protein-coding
MACS_peak_1050	chr11	97434398	97437348	+	3050	NA	intron (NM_018873, intron 1 of 19)	intron (NM_018873, intron 1 of 19)	567	NM_018873	56013	Mm.342665	NM_018873	ENSMUSG00000038453	Srcin1	P140|SNIP|mKIAA1684|p140Cap	SRC kinase signaling inhibitor 1	protein-coding
MACS_peak_3984	chr4	34007830	34013816	+	3049	NA	promoter-TSS (NM_007726)	promoter-TSS (NM_007726)	-784	NM_007726	12801	Mm.7992	NM_007726	ENSMUSG00000044288	Cnr1	CB-R|CB1|CB1R	cannabinoid receptor 1 (brain)	protein-coding
MACS_peak_1352	chr12	86215948	86218817	+	3045	NA	promoter-TSS (NM_013589)	promoter-TSS (NM_013589)	63	NM_013589	16997	Mm.3900	NM_013589	ENSMUSG00000002020	Ltbp2	AW208642	latent transforming growth factor beta binding protein 2	protein-coding
MACS_peak_2071	chr15	78542107	78550449	+	3032	NA	intron (NM_183141, intron 1 of 1)	intron (NM_183141, intron 1 of 1)	2265	NM_183141	207393	Mm.323188	NM_183141	ENSMUSG00000043460	Elfn2	6330514E13|AW048948|BC094219|Lrrc62|Ppp1r29	leucine rich repeat and fibronectin type III, extracellular 2	protein-coding
MACS_peak_5686	chr7	149132560	149139097	+	3026	NA	5' UTR (NM_001276763, exon 1 of 20)	5' UTR (NM_001276763, exon 1 of 20)	172	NM_001009929	75770	Mm.274868	NM_029426	ENSMUSG00000053046	Brsk2	4833424K13Rik|SAD-A|SADA	BR serine/threonine kinase 2	protein-coding
MACS_peak_4957	chr6	29476082	29478302	+	3018	NA	intron (NM_012057, intron 1 of 8)	intron (NM_012057, intron 1 of 8)	567	NM_012057	27056	Mm.6479	NM_012057	ENSMUSG00000029771	Irf5	AW491843|mirf5	interferon regulatory factor 5	protein-coding
MACS_peak_3357	chr2	104963048	104969143	+	3013	NA	promoter-TSS (NM_144783)	promoter-TSS (NM_144783)	572	NR_015462	329480	Mm.246679	NR_015462	ENSMUSG00000074987	Wt1os	6030498F17|AI314831|Wt1-as	Wilms tumor 1 homolog, opposite strand	ncRNA
MACS_peak_2839	chr18	67623938	67626268	+	3013	NA	intron (NM_144867, intron 1 of 6)	CpG	600	NM_144867	225655	Mm.221420	NM_144867	ENSMUSG00000024530	Slmo1	A230074A19Rik|BC019561	slowmo homolog 1 (Drosophila)	protein-coding
MACS_peak_685	chr10	119986904	119991229	+	3013	NA	Intergenic	Intergenic	-75075	NM_010441	15364	Mm.157190	NM_010441	ENSMUSG00000056758	Hmga2	9430083A20Rik|HMGI-C|Hmgic|pg|pygmy	high mobility group AT-hook 2	protein-coding
MACS_peak_6084	chr9	14662784	14666784	+	3013	NA	promoter-TSS (NM_010287)	promoter-TSS (NM_010287)	86	NM_010287	14608	Mm.4672	NM_010287	ENSMUSG00000031932	Gpr83	AW045253|Gir|Gpr72|RP105|RP39|RP82	G protein-coupled receptor 83	protein-coding
MACS_peak_4131	chr4	115568634	115574223	+	3013	NA	Intergenic	Intergenic	14423	NM_001039124	654462	Mm.388913	NM_001039124	ENSMUSG00000073774	Kncn	Kino|L5	kinocilin	protein-coding
MACS_peak_1254	chr12	32243319	32245056	+	3013	NA	exon (NM_011867, exon 2 of 21)	exon (NM_011867, exon 2 of 21)	647	NM_011867	23985	Mm.100187	NM_011867	ENSMUSG00000020651	Slc26a4	Pds|pendrin	solute carrier family 26, member 4	protein-coding
MACS_peak_3267	chr2	65961944	65963319	+	3008	NA	5' UTR (NM_015736, exon 1 of 11)	5' UTR (NM_015736, exon 1 of 11)	219	NM_015736	14425	Mm.439760	NM_015736	ENSMUSG00000026994	Galnt3	-	UDP-N-acetyl-alpha-D-galactosamine:polypeptide N-acetylgalactosaminyltransferase 3	protein-coding
MACS_peak_1264	chr12	40859735	40861232	+	3008	NA	intron (NM_001146196, intron 1 of 15)	intron (NM_001146196, intron 1 of 15)	332	NM_009132	20259	Mm.2416	NM_009132	ENSMUSG00000002565	Scin	AW545522|adseverin	scinderin	protein-coding
MACS_peak_5563	chr7	116226443	116227136	+	3008	NA	promoter-TSS (NM_178780)	promoter-TSS (NM_178780)	49	NM_001038624	320360	Mm.71007	NM_178780	ENSMUSG00000048330	Ric3	E130307J04Rik	resistance to inhibitors of cholinesterase 3 homolog (C. elegans)	protein-coding
MACS_peak_1699	chr13	97839305	97842283	+	3008	NA	promoter-TSS (NM_001100458)	promoter-TSS (NM_001100458)	-804	NM_001100458	320557	Mm.458280	NM_001100458	ENSMUSG00000041817	Fam169a	B230112C05Rik|SLAP75	family with sequence similarity 169, member A	protein-coding
MACS_peak_6491	chrX	90529728	90537880	+	3008	NA	intron (NM_007492, intron 1 of 4)	CpG	1819	NM_007492	11878	Mm.275547	NM_007492	ENSMUSG00000035277	Arx	-	aristaless related homeobox	protein-coding
MACS_peak_3004	chr19	43514565	43518315	+	3008	NA	exon (NM_031396, exon 1 of 11)	exon (NM_031396, exon 1 of 11)	1514	NM_031396	83674	Mm.329864	NM_031396	ENSMUSG00000025189	Cnnm1	AI846314|Acdp1|CLP-1	cyclin M1	protein-coding
MACS_peak_5795	chr8	28283495	28285648	+	2980	NA	intron (NM_029423, intron 1 of 4)	CpG	547	NM_029423	75767	Mm.205335	NM_029423	ENSMUSG00000031488	Rab11fip1	2010200K21Rik|4833414G05Rik|Rcp	RAB11 family interacting protein 1 (class I)	protein-coding
MACS_peak_6221	chr9	56642047	56645624	+	2963	NA	Intergenic	CpG	55935	NM_198673	382075	Mm.335177	NM_198673	ENSMUSG00000045620	Odf3l1	BC049697|Gm1116	outer dense fiber of sperm tails 3-like 1	protein-coding
MACS_peak_1020	chr11	96197271	96208183	+	2960	NA	intron (NM_001079869, intron 2 of 3)	(TC)n|Simple_repeat|Simple_repeat	-2356	NM_010458	15410	Mm.342481	NM_010458		Hoxb3	Hox-2.7	homeobox B3	protein-coding
MACS_peak_2517	chr17	26975848	26985084	+	2960	NA	Intergenic	Intergenic	-1956	NM_008700	18091	Mm.41974	NM_008700	ENSMUSG00000015579	Nkx2-5	Csx|Nkx-2.5|Nkx2.5|tinman	NK2 homeobox 5	protein-coding
MACS_peak_4444	chr5	21846431	21854448	+	2960	NA	promoter-TSS (NM_011261)	promoter-TSS (NM_011261)	84	NM_011261	19699	Mm.425236	NM_011261	ENSMUSG00000042453	Reln	reeler|rl	reelin	protein-coding
MACS_peak_1659	chr13	81771046	81772395	+	2960	NA	intron (NM_054053, intron 1 of 89)	intron (NM_054053, intron 1 of 89)	423	NM_054053	110789	Mm.288694	NM_054053	ENSMUSG00000069170	Gpr98	Frings|Mass1|Mgr1|VLGR1	G protein-coupled receptor 98	protein-coding
MACS_peak_2566	chr17	35455709	35460805	+	2953	NA	exon (NM_010390, exon 3 of 8)	exon (NM_010390, exon 3 of 8)	754	NM_010390	15006	Mm.466882	NM_010390	ENSMUSG00000079507	H2-Q1	H-2Q1|Q1|Q1b|Q1d|Q1k|Qa-1|Qa1|Qed-1	histocompatibility 2, Q region locus 1	protein-coding
MACS_peak_5861	chr8	74082011	74083406	+	2953	NA	promoter-TSS (NM_001100462)	promoter-TSS (NM_001100462)	62	NM_001100462	434325	Mm.33613	NM_001100462	ENSMUSG00000043664	Tmem221	-	transmembrane protein 221	protein-coding
MACS_peak_1900	chr14	69786986	69796327	+	2953	NA	intron (NM_010920, intron 1 of 1)	intron (NM_010920, intron 1 of 1)	-1756	NR_045931	73554	Mm.320005	NR_045931	ENSMUSG00000092499	1700092C10Rik	-	RIKEN cDNA 1700092C10 gene	ncRNA
MACS_peak_2614	chr17	45677607	45687778	+	2953	NA	exon (NM_001013749, exon 3 of 3)	exon (NM_001013749, exon 3 of 3)	3934	NM_001013749	210573	Mm.329064	NM_001013749	ENSMUSG00000096847	Tmem151b	Gm323	transmembrane protein 151B	protein-coding
MACS_peak_285	chr1	140732266	140746435	+	2953	NA	promoter-TSS (NM_001042577)	promoter-TSS (NM_001042577)	-329	NM_001042577	16876	Mm.250732	NM_010714	ENSMUSG00000019230	Lhx9	3110009O07Rik|BB104635|LH2B	LIM homeobox protein 9	protein-coding
MACS_peak_1245	chr12	28025674	28029711	+	2950	NA	promoter-TSS (NM_009234)	promoter-TSS (NM_009234)	-109	NM_009234	20666	Mm.41702	NM_009234		Sox11	1110038H03Rik|6230403H02Rik|AI836553|end1	SRY (sex determining region Y)-box 11	protein-coding
MACS_peak_4593	chr5	98607181	98615923	+	2950	NA	intron (NM_029947, intron 1 of 3)	intron (NM_029947, intron 1 of 3)	1664	NM_029947	77630	Mm.332511	NM_029947	ENSMUSG00000035456	Prdm8	4930565F05Rik|PFM5	PR domain containing 8	protein-coding
MACS_peak_3063	chr19	47087159	47091032	+	2950	NA	promoter-TSS (NM_146100)	promoter-TSS (NM_146100)	-93	NM_146100	226180	Mm.276251	NM_146100		Ina	AV028420|NF-66|NF66	internexin neuronal intermediate filament protein, alpha	protein-coding
MACS_peak_1311	chr12	74149699	74155841	+	2946	NA	Intergenic	Intergenic	-5071	NM_009189	20471	Mm.4645	NM_009189	ENSMUSG00000051367	Six1	BB138287	sine oculis-related homeobox 1	protein-coding
MACS_peak_5937	chr8	94880617	94893178	+	2931	NA	Intergenic	Intergenic	5202	NM_018826	54352	Mm.101153	NM_018826	ENSMUSG00000031737	Irx5	-	Iroquois related homeobox 5 (Drosophila)	protein-coding
MACS_peak_734	chr11	5963558	5966156	+	2928	NA	intron (NM_001174053, intron 1 of 19)	intron (NM_001174053, intron 1 of 19)	894	NM_001174054	12323	Mm.439733	NM_007595	ENSMUSG00000057897	Camk2b	Camk2d	calcium/calmodulin-dependent protein kinase II, beta	protein-coding
MACS_peak_3435	chr2	132702078	132707424	+	2928	NA	intron (NM_177303, intron 2 of 4)	MIRm|SINE|MIR	1847	NM_177303	320974	Mm.386903	NM_177303	ENSMUSG00000043110	Lrrn4	B430119L13Rik|Nlrr4	leucine rich repeat neuronal 4	protein-coding
MACS_peak_4925	chr6	6828141	6833258	+	2928	NA	intron (NM_010056, intron 1 of 2)	intron (NM_010056, intron 1 of 2)	1369	NM_198854	13395	Mm.4873	NM_010056	ENSMUSG00000029755	Dlx5	AI385752	distal-less homeobox 5	protein-coding
MACS_peak_2259	chr15	102860599	102873183	+	2925	NA	3' UTR (NM_013553, exon 2 of 2)	3' UTR (NM_013553, exon 2 of 2)	2065	NM_013553	15423	Mm.1351	NM_013553	ENSMUSG00000075394	Hoxc4	Hox-3.5	homeobox C4	protein-coding
MACS_peak_488	chr10	42332817	42336101	+	2922	NA	Intergenic	Intergenic	-31065	NM_152229	21907	Mm.287100	NM_152229	ENSMUSG00000019803	Nr2e1	Mtl1|Mtll|TLL|Tlx|XTLL|fierce|frc|tailless	nuclear receptor subfamily 2, group E, member 1	protein-coding
MACS_peak_2914	chr19	7007889	7009208	+	2922	NA	intron (NM_008431, intron 1 of 6)	CpG	457	NM_008431	16528	Mm.12894	NM_008431	ENSMUSG00000024957	Kcnk4	MLZ-622|TRAAK|TRAAKt|Tex40	potassium channel, subfamily K, member 4	protein-coding
MACS_peak_5898	chr8	87457287	87462597	+	2918	NA	intron (NM_019945, intron 1 of 25)	intron (NM_019945, intron 1 of 25)	1310	NM_019945	56527	Mm.154614	NM_019945	ENSMUSG00000053693	Mast1	9430008B02Rik|SAST|SAST170	microtubule associated serine/threonine kinase 1	protein-coding
MACS_peak_1674	chr13	93194570	93197150	+	2915	NA	promoter-TSS (NM_175455)	promoter-TSS (NM_175455)	-64	NM_175455	218440	Mm.213623	NM_175455	ENSMUSG00000045034	Ankrd34b	6430502M16Rik|DP58	ankyrin repeat domain 34B	protein-coding
MACS_peak_6131	chr9	37267210	37269787	+	2915	NA	Intergenic	Intergenic	-27738	NM_001164767	19649	Mm.212826	NM_011248	ENSMUSG00000032128	Robo3	Rbig1|Rig-1|Rig1|Robo3a|Robo3b	roundabout homolog 3 (Drosophila)	protein-coding
MACS_peak_171	chr1	87941221	87944293	+	2897	NA	exon (NM_001144993, exon 1 of 3)	exon (NM_001144993, exon 1 of 3)	319	NM_001144992	72792	Mm.54981	NM_001144992	ENSMUSG00000026227	2810459M11Rik	-	RIKEN cDNA 2810459M11 gene	protein-coding
MACS_peak_300	chr1	157582364	157590842	+	2897	NA	intron (NM_010712, intron 1 of 5)	intron (NM_010712, intron 1 of 5)	2554	NM_010712	16872	Mm.103624	NM_010712	ENSMUSG00000026468	Lhx4	A330062J17Rik|Gsh-4|Gsh4	LIM homeobox protein 4	protein-coding
MACS_peak_2133	chr15	87372241	87376835	+	2887	NA	promoter-TSS (NM_001252310)	promoter-TSS (NM_001252310)	-191	NM_001252310	106014	Mm.244319	NM_134096	ENSMUSG00000054863	Fam19a5	TAFA5|Tafa-5|Tara-5	family with sequence similarity 19, member A5	protein-coding
MACS_peak_3199	chr2	31506893	31515267	+	2885	NA	3' UTR (NM_001123362, exon 5 of 5)	3' UTR (NM_001123362, exon 5 of 5)	-15177	NM_144886	227715	Mm.150972	NM_144886	ENSMUSG00000039356	Exosc2	Rrp4	exosome component 2	protein-coding
MACS_peak_173	chr1	88564885	88568709	+	2874	NA	intron (NM_010933, intron 1 of 2)	CpG-368	351	NM_010933	18159	Mm.12802	NM_010933	ENSMUSG00000026241	Nppc	CNP|lbab	natriuretic peptide type C	protein-coding
MACS_peak_1343	chr12	82880695	82883368	+	2874	NA	5' UTR (NM_001174107, exon 1 of 11)	5' UTR (NM_001174107, exon 1 of 11)	126	NM_177395	338372	Mm.35284	NM_177395	ENSMUSG00000042724	Map3k9	E130314H24Rik|Mlk1|Prke1	mitogen-activated protein kinase kinase kinase 9	protein-coding
MACS_peak_1048	chr11	97407296	97413690	+	2874	NA	intron (NM_018873, intron 2 of 19)	intron (NM_018873, intron 2 of 19)	25947	NM_018873	56013	Mm.342665	NM_018873	ENSMUSG00000038453	Srcin1	P140|SNIP|mKIAA1684|p140Cap	SRC kinase signaling inhibitor 1	protein-coding
MACS_peak_4112	chr4	108055764	108057003	+	2869	NA	promoter-TSS (NM_001099303)	promoter-TSS (NM_001099303)	-123	NM_001099303	545667	Mm.380025	NM_001099303		Fam159a	OTTMUSG00000008243	family with sequence similarity 159, member A	protein-coding
MACS_peak_4122	chr4	114569508	114582316	+	2869	NA	Intergenic	Intergenic	5591	NM_008593	17301	Mm.7997	NM_008593	ENSMUSG00000055210	Foxd2	AI426778|Mf2	forkhead box D2	protein-coding
MACS_peak_5501	chr7	86641524	86661336	+	2869	NA	intron (NR_040313, intron 1 of 2)	intron (NR_040313, intron 1 of 2)	1280	NR_029818	723968		NR_029818	miRBase:MI0000721	Mir9-3	Mirn9-3|mmu-mir-9-3	microRNA 9-3	ncRNA
MACS_peak_4483	chr5	34628246	34632953	+	2869	NA	intron (NM_001015039, intron 1 of 12)	CpG	374	NM_001015039	231125	Mm.113388	NM_001015039	ENSMUSG00000037224	Zfyve28	9630058O20Rik|Gm146|mKIAA1643	zinc finger, FYVE domain containing 28	protein-coding
MACS_peak_1204	chr11	118947919	118952007	+	2868	NA	Intergenic	Intergenic	-2412	NM_007625	12418	Mm.268070	NM_007625	ENSMUSG00000039989	Cbx4	MPc2|PC2	chromobox 4	protein-coding
MACS_peak_6138	chr9	40678412	40689893	+	2854	NA	intron (NM_178245, intron 1 of 2)	intron (NM_178245, intron 1 of 2)	1942	NM_178245	244813	Mm.261652	NM_178245	ENSMUSG00000054360	Bsx	Bsx1a|Bsx1b	brain specific homeobox	protein-coding
MACS_peak_1872	chr14	63859140	63860557	+	2849	NA	exon (NM_008092, exon 2 of 7)	exon (NM_008092, exon 2 of 7)	4249	NM_008092	14463	Mm.247669	NM_008092	ENSMUSG00000021944	Gata4	Gata-4	GATA binding protein 4	protein-coding
MACS_peak_5826	chr8	49640215	49642174	+	2848	NA	intron (NM_001145937, intron 2 of 26)	CpG	118850	NM_001145937	23965	Mm.42191	NM_011857	ENSMUSG00000031561	Tenm3	2610100B16Rik|Odz1|Odz3|Ten-m3|mKIAA1455	teneurin transmembrane protein 3	protein-coding
MACS_peak_3649	chr2	180066416	180072141	+	2844	NA	5' UTR (NM_008093, exon 1 of 6)	5' UTR (NM_008093, exon 1 of 6)	106	NM_008093	14464	Mm.388880	NM_008093	ENSMUSG00000015627	Gata5	-	GATA binding protein 5	protein-coding
MACS_peak_5386	chr7	35969827	35973314	+	2844	NA	exon (NM_017394, exon 1 of 11)	exon (NM_017394, exon 1 of 11)	166	NM_017394	53896	Mm.35567	NM_017394	ENSMUSG00000030495	Slc7a10	AL024237|Asc-1|D7Bwg0847e	solute carrier family 7 (cationic amino acid transporter, y+ system), member 10	protein-coding
MACS_peak_3014	chr19	44583711	44590012	+	2844	NA	3' UTR (NM_011720, exon 6 of 6)	3' UTR (NM_011720, exon 6 of 6)	18899	NM_011720	22423	Mm.88365	NM_011720	ENSMUSG00000036961	Wnt8b	-	wingless-type MMTV integration site family, member 8B	protein-coding
MACS_peak_3436	chr2	132769422	132772772	+	2844	NA	5' UTR (NM_198029, exon 1 of 15)	5' UTR (NM_198029, exon 1 of 15)	675	NM_198029	241639	Mm.209784	NM_198029	ENSMUSG00000027356	Fermt1	5830467P10Rik|Kindlin-1	fermitin family homolog 1 (Drosophila)	protein-coding
MACS_peak_6100	chr9	21048293	21050943	+	2844	NA	5' UTR (NM_053190, exon 3 of 3)	5' UTR (NM_053190, exon 3 of 3)	3269	NM_053190	94226	Mm.190619	NM_053190	ENSMUSG00000045087	S1pr5	Edg8|S1P5|lpB4	sphingosine-1-phosphate receptor 5	protein-coding
MACS_peak_670	chr10	115909979	115913932	+	2835	NA	Intergenic	Intergenic	-1376	NM_021452	58802	Mm.440652	NM_021452	ENSMUSG00000054934	Kcnmb4	1700058G18Rik|2900045G12Rik	potassium large conductance calcium-activated channel, subfamily M, beta member 4	protein-coding
MACS_peak_6104	chr9	21853675	21859377	+	2831	NA	promoter-TSS (NM_010487)	promoter-TSS (NM_010487)	-59	NM_010487	15571	Mm.390167	NM_010487	ENSMUSG00000003410	Elavl3	2600009P04Rik|Huc|PLE21|mHuC	ELAV (embryonic lethal, abnormal vision, Drosophila)-like 3 (Hu antigen C)	protein-coding
MACS_peak_1103	chr11	103508359	103515031	+	2829	NA	3' UTR (NM_001033212, exon 1 of 1)	3' UTR (NM_001033212, exon 1 of 1)	872	NM_001033212	104582	Mm.44618	NM_001033212	ENSMUSG00000046215	Rprml	AW049332	reprimo-like	protein-coding
MACS_peak_933	chr11	83660898	83667226	+	2829	NA	promoter-TSS (NM_009330)	promoter-TSS (NM_009330)	-309	NM_001291268	21410	Mm.7226	NM_009330	ENSMUSG00000020679	Hnf1b	HNF-1-beta|HNF-1B|HNF-1Beta|Hnf1beta|LFB3|Tcf-2|Tcf2|vHNF1	HNF1 homeobox B	protein-coding
MACS_peak_922	chr11	82198893	82206306	+	2823	NA	exon (NM_023438, exon 1 of 10)	exon (NM_023438, exon 1 of 10)	197	NM_023438	270893	Mm.341593	NM_023438	ENSMUSG00000020701	Tmem132e	Gm644	transmembrane protein 132E	protein-coding
MACS_peak_1334	chr12	81793085	81795603	+	2823	NA	promoter-TSS (NR_037995)	promoter-TSS (NR_037995)	756	NM_001177503	217682	Mm.154541	NM_001177503	ENSMUSG00000066438	Plekhd1	3830431G21Rik	pleckstrin homology domain containing, family D (with coiled-coil domains) member 1	protein-coding
MACS_peak_1508	chr13	31897920	31901150	+	2823	NA	exon (NM_008592, exon 1 of 1)	exon (NM_008592, exon 1 of 1)	1020	NM_008592	17300	Mm.12949	NM_008592	ENSMUSG00000050295	Foxc1	FREAC3|Fkh1|Mf1|Mf4|ch|fkh-1|frkhda	forkhead box C1	protein-coding
MACS_peak_1563	chr13	53566705	53572679	+	2823	NA	Intergenic	Intergenic	-1543	NM_013601	17702	Mm.1763	NM_013601		Msx2	BB122635|Hox-8|Hox8|Hox8.1	msh homeobox 2	protein-coding
MACS_peak_4230	chr4	128797002	128804068	+	2813	NA	Intergenic	Intergenic	-1366	NM_001286081	15444	Mm.384452	NM_010471	ENSMUSG00000028785	Hpca	-	hippocalcin	protein-coding
MACS_peak_633	chr10	90289797	90295283	+	2804	NA	intron (NM_001177396, intron 3 of 11)	CpG	252948	NM_001042558	11783	Mm.220289	NM_009684	ENSMUSG00000019979	Apaf1	6230400I06Rik|Apaf-1|Apaf1l|fog|mKIAA0413	apoptotic peptidase activating factor 1	protein-coding
MACS_peak_4077	chr4	91036793	91039923	+	2804	NA	intron (NM_207685, intron 2 of 7)	CpG	388	NM_010486	15569	Mm.318042	NM_010486	ENSMUSG00000008489	Elavl2	Hub|mel-N1	ELAV (embryonic lethal, abnormal vision, Drosophila)-like 2 (Hu antigen B)	protein-coding
MACS_peak_3046	chr19	45224049	45240790	+	2801	NA	TTS (NM_021901)	TTS (NM_021901)	7214	NM_021901	21908	Mm.391203	NM_021901	ENSMUSG00000025215	Tlx1	Hox-11|Hox11	T cell leukemia, homeobox 1	protein-coding
MACS_peak_4789	chr5	121158758	121163045	+	2796	NA	5' UTR (NM_008052, exon 2 of 10)	5' UTR (NM_008052, exon 2 of 10)	777	NM_008052	14357	Mm.1645	NM_008052	ENSMUSG00000029603	Dtx1	Fxit1|mKIAA4160	deltex 1 homolog (Drosophila)	protein-coding
MACS_peak_3028	chr19	44813874	44837046	+	2793	NA	Intergenic	Intergenic	-6424	NM_011037	18504	Mm.192158	NM_011037	ENSMUSG00000004231	Pax2	Opdc|Pax-2	paired box 2	protein-coding
MACS_peak_3450	chr2	146657016	146666457	+	2793	NA	Intergenic	Intergenic	-19889	NM_001033298	228730	Mm.292352	NM_001033298	ENSMUSG00000074749	Kiz	Gm114|Ncrna00153|Plk1s1	kizuna centrosomal protein	protein-coding
MACS_peak_4739	chr5	118617642	118625699	+	2787	NA	intron (NM_007545, intron 1 of 1)	intron (NM_007545, intron 1 of 1)	1897	NM_007545	12123	Mm.384468	NM_007545	ENSMUSG00000046607	Hrk	AI838259|Bid3|DP5|harakiri	harakiri, BCL2 interacting protein (contains only BH3 domain)	protein-coding
MACS_peak_3729	chr3	45180280	45186774	+	2787	NA	exon (NM_001098172, exon 1 of 5)	exon (NM_001098172, exon 1 of 5)	1207	NM_001098171	18526	Mm.242644	NM_011043	ENSMUSG00000049100	Pcdh10	6430521D13Rik|6430703F07Rik|OL-pc|mKIAA1400	protocadherin 10	protein-coding
MACS_peak_5415	chr7	52429990	52441286	+	2787	NA	promoter-TSS (NM_001195255)	promoter-TSS (NM_001195255)	-671	NM_001195255	100039953	Mm.300663	NM_001195255	ENSMUSG00000095276	Gfy	Gm2515|Gm581|Goofy	golgi-associated olfactory signaling regulator	protein-coding
MACS_peak_3000	chr19	42504174	42510203	+	2787	NA	promoter-TSS (NM_145123)	promoter-TSS (NM_145123)	-915	NM_145123	72832	Mm.313558	NM_145123	ENSMUSG00000042401	Crtac1	2810454P21Rik|AW047536|Crtac1B|Lotus	cartilage acidic protein 1	protein-coding
MACS_peak_3139	chr2	18721283	18725523	+	2787	NA	Intergenic	Intergenic	102754	NM_001001334	381350	Mm.330024	NM_001001334		BC061194	-	cDNA sequence BC061194	protein-coding
MACS_peak_3128	chr2	12222128	12223597	+	2779	NA	promoter-TSS (NR_040353)	promoter-TSS (NR_040353)	-11	NR_040353	338535	Mm.483275	NR_040353		E030013I19Rik	-	RIKEN cDNA E030013I19 gene	ncRNA
MACS_peak_3970	chr4	21609568	21620673	+	2779	NA	Intergenic	Intergenic	-2010	NM_001080771	230025	Mm.208541	NM_001080771	ENSMUSG00000040478	Prdm13	-	PR domain containing 13	protein-coding
MACS_peak_3588	chr2	167906511	167907696	+	2779	NA	intron (NM_021409, intron 1 of 2)	intron (NM_021409, intron 1 of 2)	599	NM_021409	58220	Mm.292834	NM_021409	ENSMUSG00000044641	Pard6b	AV025615|Par6b	par-6 family cell polarity regulator beta	protein-coding
MACS_peak_397	chr1	191166354	191168112	+	2779	NA	promoter-TSS (NM_001159850)	promoter-TSS (NM_001159850)	-1	NM_001159850	16526	Mm.33304	NM_010607	ENSMUSG00000037624	Kcnk2	A430027H14Rik|AI848635|TREK-1	potassium channel, subfamily K, member 2	protein-coding
MACS_peak_4730	chr5	117862618	117865961	+	2779	NA	5' UTR (NM_001114545, exon 1 of 20)	5' UTR (NM_001114545, exon 1 of 20)	278	NM_001114545	333050	Mm.437947	NM_001034873	ENSMUSG00000061578	Ksr2	-	kinase suppressor of ras 2	protein-coding
MACS_peak_2571	chr17	35575817	35577513	+	2761	NA	exon (NM_001201460, exon 2 of 7)	exon (NM_001201460, exon 2 of 7)	553	NM_001201460	110558	Mm.431282	NM_001201460		H2-Q9	H-2Q9|Ped|Qa-2|Qa-9|Qa9	histocompatibility 2, Q region locus 9	protein-coding
MACS_peak_2609	chr17	44870578	44876909	+	2761	NA	promoter-TSS (NM_001145920)	promoter-TSS (NM_001145920)	-146	NM_001145920	12393	Mm.391013	NM_009820	ENSMUSG00000039153	Runx2	AML3|Cbf|Cbfa-1|Cbfa1|LS3|Osf2|PEBP2aA|Pebp2a1|Pebpa2a	runt related transcription factor 2	protein-coding
MACS_peak_1289	chr12	58639395	58641132	+	2761	NA	Intergenic	Intergenic	6845	NM_008259	15375	Mm.4578	NM_008259	ENSMUSG00000035451	Foxa1	Hnf-3a|Hnf3a|Tcf-3a|Tcf3a	forkhead box A1	protein-coding
MACS_peak_3152	chr2	24616068	24619631	+	2761	NA	intron (NM_001042528, intron 1 of 46)	CpG	823	NM_001042528	12287	Mm.4424	NM_007579	ENSMUSG00000004113	Cacna1b	AW050276|AW060892|AW822256|Cav2.2|Cchn1a|alpha(1B)	calcium channel, voltage-dependent, N type, alpha 1B subunit	protein-coding
MACS_peak_5197	chr6	124942837	124950775	+	2761	NA	promoter-TSS (NM_175696)	promoter-TSS (NM_175696)	68	NM_175696	319352	Mm.295327	NM_175696	ENSMUSG00000030329	Pianp	AI255183|AU067746|C530028O21Rik|Panp	PILR alpha associated neural protein	protein-coding
MACS_peak_3474	chr2	151918693	151922432	+	2761	NA	3' UTR (NM_001160410, exon 2 of 2)	3' UTR (NM_001160410, exon 2 of 2)	-10698	NM_029688	76650	Mm.218639	NM_029688	ENSMUSG00000032802	Srxn1	1700127B04Rik|AI854065|AW488194|Npn3|Srx|Srx1|TX01	sulfiredoxin 1 homolog (S. cerevisiae)	protein-coding
MACS_peak_2975	chr19	38170329	38172413	+	2760	NA	promoter-TSS (NM_181748)	promoter-TSS (NM_181748)	-198	NM_181748	107221	Mm.35288	NM_181748	ENSMUSG00000054200	Ffar4	AI552415|GT01|Gpr120|Gpr129|KPG_013|O3far1|Pgr4	free fatty acid receptor 4	protein-coding
MACS_peak_4799	chr5	127720966	127725799	+	2760	NA	intron (NM_175432, intron 1 of 8)	intron (NM_175432, intron 1 of 8)	1186	NM_175432	208213	Mm.444235	NM_175432	ENSMUSG00000034324	Tmem132c	2810482M11Rik|3230401P16|4632425D07Rik	transmembrane protein 132C	protein-coding
MACS_peak_1743	chr13	113786497	113791027	+	2760	NA	exon (NM_001037914, exon 6 of 7)	exon (NM_001037914, exon 6 of 7)	4686	NM_001037914	622408	Mm.360976	NM_001037914	ENSMUSG00000074651	Mcidas	EG622408|Gm6320|Idas|Mci|Mcin	multiciliate differentiation and DNA synthesis associated cell cycle protein	protein-coding
MACS_peak_3860	chr3	107320132	107322385	+	2759	NA	promoter-TSS (NM_172271)	promoter-TSS (NM_172271)	-322	NM_172271	229706	Mm.212867	NM_172271	ENSMUSG00000027894	Slc6a17	D130012J15Rik|Ntt4	solute carrier family 6 (neurotransmitter transporter), member 17	protein-coding
MACS_peak_3786	chr3	88056682	88061820	+	2743	NA	promoter-TSS (NM_021375)	promoter-TSS (NM_021375)	-645	NM_021375	58176	Mm.103777	NM_021375	ENSMUSG00000001417	Rhbg	-	Rhesus blood group-associated B glycoprotein	protein-coding
MACS_peak_5693	chr7	149839761	149847242	+	2743	NA	promoter-TSS (NM_001122737)	promoter-TSS (NM_001122737)	-115	NM_001122737	16002	Mm.3862	NM_010514	ENSMUSG00000048583	Igf2	AL033362|Igf-2|Igf-II|M6pr|Mpr|Peg2	insulin-like growth factor 2	protein-coding
MACS_peak_4013	chr4	44712680	44718953	+	2743	NA	non-coding (NR_073462, exon 1 of 1)	non-coding (NR_073462, exon 1 of 1)	144	NR_073462	70602	Mm.491142	NR_073462		5730488B01Rik	-	RIKEN cDNA 5730488B01 gene	ncRNA
MACS_peak_5078	chr6	85133980	85145376	+	2721	NA	intron (NM_010131, intron 1 of 2)	intron (NM_010131, intron 1 of 2)	1753	NM_010131	13796	Mm.391473	NM_010131		Emx1	-	empty spiracles homeobox 1	protein-coding
MACS_peak_4445	chr5	22251196	22254127	+	2718	NA	promoter-TSS (NR_027362)	promoter-TSS (NR_027362)	41	NR_027362	330052	Mm.459265	NR_027362		A930003O13Rik	-	RIKEN cDNA A930003O13 gene	ncRNA
MACS_peak_4496	chr5	37417540	37423312	+	2713	NA	Intergenic	CpG	-21670	NM_178394	76071	Mm.85280	NM_178394	ENSMUSG00000063646	Jakmip1	5830437M04Rik|C330021K24Rik|Gababrbp|Marlin-1	janus kinase and microtubule interacting protein 1	protein-coding
MACS_peak_5284	chr7	19863452	19865397	+	2709	NA	intron (NM_177691, intron 1 of 4)	intron (NM_177691, intron 1 of 4)	974	NM_177691	232941	Mm.134068	NM_177691	ENSMUSG00000030402	Ppm1n	A930002H20|C79127	protein phosphatase, Mg2+/Mn2+ dependent, 1N (putative)	protein-coding
MACS_peak_6324	chr9	87623977	87626284	+	2709	NA	intron (NM_023814, intron 1 of 7)	CpG	965	NM_023814	76365	Mm.158789	NM_023814	ENSMUSG00000032419	Tbx18	2810012F10Rik|2810404D13Rik	T-box18	protein-coding
MACS_peak_2270	chr15	102999114	103003003	+	2705	NA	Intergenic	Intergenic	-7343	NM_027885	71726	Mm.254820	NM_027885		Smug1	1200013B09Rik|A930006H09Rik|C85220	single-strand selective monofunctional uracil DNA glycosylase	protein-coding
MACS_peak_6210	chr9	54825842	54831159	+	2704	NA	promoter-TSS (NM_176844)	promoter-TSS (NM_176844)	-187	NM_176844	110835	Mm.103778	NM_176844	ENSMUSG00000035594	Chrna5	Acra-5|Acra5	cholinergic receptor, nicotinic, alpha polypeptide 5	protein-coding
MACS_peak_5662	chr7	146766788	146773761	+	2696	NA	Intergenic	Intergenic	-1578	NR_027857	14912	Mm.28308	NM_183248	ENSMUSG00000041309	Nkx6-2	Gtx|Nkx6.2	NK6 homeobox 2	protein-coding
MACS_peak_6022	chr8	123647060	123653419	+	2696	NA	Intergenic	Intergenic	-1346	NM_008024	14241	Mm.5111	NM_008024	ENSMUSG00000097084	Foxl1	FREAC7|Fkh6|fkh-6	forkhead box L1	protein-coding
MACS_peak_2524	chr17	27645257	27652454	+	2694	NA	Intergenic	Intergenic	-8377	NM_001291045	268934	Mm.358940	NM_001013385	ENSMUSG00000063239	Grm4	Gprc1d|mGluR4	glutamate receptor, metabotropic 4	protein-coding
MACS_peak_1437	chr12	114422787	114428093	+	2694	NA	intron (NM_153776, intron 1 of 1)	intron (NM_153776, intron 1 of 1)	1326	NM_153776	69195	Mm.313244	NM_153776	ENSMUSG00000049036	Tmem121	2410008J05Rik|Hole	transmembrane protein 121	protein-coding
MACS_peak_5514	chr7	88597215	88601815	+	2689	NA	intron (NM_001252525, intron 1 of 11)	CpG	129	NM_001252525	12877	Mm.273122	NM_007755	ENSMUSG00000025586	Cpeb1	AU024112|Cpeb|mCPEB	cytoplasmic polyadenylation element binding protein 1	protein-coding
MACS_peak_42	chr1	22811967	22813804	+	2689	NA	promoter-TSS (NM_183018)	promoter-TSS (NM_183018)	-322	NM_001012624	116837	Mm.60061	NM_053270		Rims1	C030033M19Rik|RIM1|RIM1a|RIM1alpha|Rab3ip1|Rim|Serg1|mKIAA0340	regulating synaptic membrane exocytosis 1	protein-coding
MACS_peak_1582	chr13	55253081	55255514	+	2680	NA	intron (NM_008011, intron 1 of 17)	CpG	118	NM_008011	14186	Mm.276715	NM_008011	ENSMUSG00000005320	Fgfr4	Fgfr-4	fibroblast growth factor receptor 4	protein-coding
MACS_peak_2015	chr15	39028136	39030824	+	2679	NA	promoter-TSS (NM_001256383)	promoter-TSS (NM_001256383)	-352	NM_001256382	116838	Mm.309296	NM_053271		Rims2	2810036I15Rik|AW048769|RIM2|Rab3ip2|Rim2(+40A)|Rim2(+44A)|Rim2(+4A)|Serg2|Syt3-rs|mKIAA0751	regulating synaptic membrane exocytosis 2	protein-coding
MACS_peak_3576	chr2	165057279	165060764	+	2679	NA	intron (NM_174988, intron 1 of 11)	CpG	1216	NM_174988	104010	Mm.151819	NM_174988	ENSMUSG00000053166	Cdh22	-	cadherin 22	protein-coding
MACS_peak_6451	chr9	122477616	122483724	+	2679	NA	promoter-TSS (NR_015610)	promoter-TSS (NR_015610)	-949	NR_015610	319626	Mm.186748	NR_015610	ENSMUSG00000097736	9530059O14Rik	-	RIKEN cDNA 9530059O14 gene	ncRNA
MACS_peak_2897	chr19	4710289	4715745	+	2679	NA	intron (NM_021287, intron 1 of 36)	intron (NM_021287, intron 1 of 36)	1794	NM_021287	20743	Mm.329668	NM_021287	ENSMUSG00000067889	Sptbn2	Spnb3|mKIAA0302	spectrin beta, non-erythrocytic 2	protein-coding
MACS_peak_70	chr1	39705549	39710233	+	2679	NA	5' UTR (NM_170597, exon 1 of 4)	5' UTR (NM_170597, exon 1 of 4)	136	NM_170597	263764	Mm.122091	NM_170597	ENSMUSG00000050967	Creg2	A830098L22Rik	cellular repressor of E1A-stimulated genes 2	protein-coding
MACS_peak_83	chr1	42759136	42773341	+	2679	NA	intron (NR_110495, intron 2 of 3)	intron (NR_110495, intron 2 of 3)	4061	NR_110495	66620	Mm.383631	NR_110495		Pantr2	2610207O16Rik|Pou3f3os2|linc-Brn1b	POU domain, class 3, transcription factor 3 adjacent noncoding transcript 2	ncRNA
MACS_peak_1041	chr11	96877028	96883258	+	2670	NA	intron (NM_031183, intron 1 of 1)	CpG	5260	NM_031183	83395	Mm.156282	NM_031183	ENSMUSG00000038560	Sp6	1110025J03Rik|AA591031|AI592962|Epfn|Klf14	trans-acting transcription factor 6	protein-coding
MACS_peak_3883	chr3	123149053	123151341	+	2668	NA	exon (NM_008939, exon 1 of 11)	exon (NM_008939, exon 1 of 11)	366	NM_008939	19142	Mm.9431	NM_008939	ENSMUSG00000027978	Prss12	Bssp-3|motopsin	protease, serine 12 neurotrypsin (motopsin)	protein-coding
MACS_peak_5083	chr6	85450747	85455383	+	2664	NA	promoter-TSS (NM_001289674)	promoter-TSS (NM_001289674)	-77	NM_001289675	330369	Mm.38777	NM_001001160	ENSMUSG00000047013	Fbxo41	9630017H13|D6Ertd538e	F-box protein 41	protein-coding
MACS_peak_3781	chr3	87825684	87829729	+	2661	NA	exon (NM_022031, exon 4 of 7)	exon (NM_022031, exon 4 of 7)	3727	NM_022031	73940	Mm.294467	NM_022031	ENSMUSG00000004894	Hapln2	4930401E20Rik|Bral1	hyaluronan and proteoglycan link protein 2	protein-coding
MACS_peak_5617	chr7	133990846	133992732	+	2658	NA	intron (NM_010069, intron 1 of 10)	intron (NM_010069, intron 1 of 10)	722	NM_010069	13446	Mm.266301	NM_010069	ENSMUSG00000052301	Doc2a	-	double C2, alpha	protein-coding
MACS_peak_4570	chr5	81448598	81453966	+	2652	NA	intron (NM_198702, intron 1 of 27)	intron (NM_198702, intron 1 of 27)	664	NM_198702	319387	Mm.273631	NM_198702	ENSMUSG00000037605	Lphn3	5430402I23Rik|CIRL-3|D130075K09Rik|Gm1379|LEC3|mKIAA0768	latrophilin 3	protein-coding
MACS_peak_3893	chr3	128916307	128921845	+	2652	NA	intron (NM_011098, intron 4 of 4)	CpG	2226	NM_001287048	18741	Mm.246804	NM_011098	ENSMUSG00000028023	Pitx2	9430085M16Rik|Brx1|Brx1b|Munc30|Otlx2|Ptx2|Rieg	paired-like homeodomain transcription factor 2	protein-coding
MACS_peak_4561	chr5	75542981	75552224	+	2652	NA	promoter-TSS (NM_011058)	promoter-TSS (NM_011058)	-714	NM_011058	18595	Mm.221403	NM_011058	ENSMUSG00000029231	Pdgfra	AI115593|CD140a|Pdgfr-2	platelet derived growth factor receptor, alpha polypeptide	protein-coding
MACS_peak_497	chr10	43722613	43724514	+	2652	NA	exon (NM_172393, exon 1 of 20)	exon (NM_172393, exon 1 of 20)	1089	NM_172393	11630	Mm.292082	NM_172393	ENSMUSG00000019866	Aim1	AI462491|AI463325	absent in melanoma 1	protein-coding
MACS_peak_789	chr11	35791950	35795617	+	2648	NA	promoter-TSS (NM_170779)	promoter-TSS (NM_170779)	-192	NM_170779	211652	Mm.31267	NM_170779		Wwc1	AA408228|AU017197|BC037006|Kibra|mKIAA0869	WW, C2 and coiled-coil domain containing 1	protein-coding
MACS_peak_1711	chr13	99267093	99278328	+	2647	NA	Intergenic	Intergenic	-67690	NR_045498	70090	Mm.410857	NR_045498		2310005E17Rik	-	RIKEN cDNA 2310005E17 gene	ncRNA
MACS_peak_4926	chr6	7504011	7506781	+	2647	NA	intron (NM_009311, intron 1 of 6)	intron (NM_009311, intron 1 of 6)	325	NM_009311	21333	Mm.1440	NM_009311	ENSMUSG00000061762	Tac1	4930528L02Rik|NK-1|NK1|Nkna|PPT-A|PPTA|SP	tachykinin 1	protein-coding
MACS_peak_1453	chr12	120074531	120077202	+	2647	NA	Intergenic	Intergenic	-8936	NM_177082	320145	Mm.51682	NM_177082	ENSMUSG00000048562	Sp8	D930049B17Rik|mBtd	trans-acting transcription factor 8	protein-coding
MACS_peak_3878	chr3	118136246	118138670	+	2647	NA	TTS (NR_029551)	TTS (NR_029551)	683	NR_029551	387155		NR_029551		Mir137	Mirn137|mmu-mir-137	microRNA 137	ncRNA
MACS_peak_4513	chr5	42141319	42160045	+	2647	NA	Intergenic	Intergenic	4777	NM_007524	12020	Mm.2530	NM_007524	ENSMUSG00000049691	Nkx3-2	Bapx1|NKX3.2|Nkx-3.2	NK3 homeobox 2	protein-coding
MACS_peak_1251	chr12	31566472	31571083	+	2647	NA	promoter-TSS (NM_001159743)	promoter-TSS (NM_001159743)	-412	NM_001159743	100294583	Mm.399726	NM_001159743	ENSMUSG00000054204	Fam150b	6230419C23Rik	family with sequence similarity 150, member B	protein-coding
MACS_peak_1550	chr13	49342628	49344101	+	2642	NA	intron (NM_028340, intron 1 of 4)	CpG	168	NM_025491	66329	Mm.34308	NM_025491	ENSMUSG00000021384	Susd3	1700017I11Rik|2810440J20Rik	sushi domain containing 3	protein-coding
MACS_peak_2798	chr18	46369791	46372412	+	2626	NA	intron (NM_178872, intron 1 of 9)	intron (NM_178872, intron 1 of 9)	1160	NM_178872	28105	Mm.277382	NM_178872	ENSMUSG00000033949	Trim36	D18Wsu100e|haprin	tripartite motif-containing 36	protein-coding
MACS_peak_6397	chr9	108726227	108730638	+	2624	NA	promoter-TSS (NM_080437)	promoter-TSS (NM_080437)	-219	NM_080437	107934	Mm.39945	NM_080437	ENSMUSG00000023473	Celsr3	Fmi1|flamingo|mKIAA0812	cadherin, EGF LAG seven-pass G-type receptor 3 (flamingo homolog, Drosophila)	protein-coding
MACS_peak_3327	chr2	91761577	91765723	+	2609	NA	intron (NM_007699, intron 1 of 1)	intron (NM_007699, intron 1 of 1)	1304	NM_007699	12672	Mm.330405	NM_007699	ENSMUSG00000040495	Chrm4	Chrm-4|M4	cholinergic receptor, muscarinic 4	protein-coding
MACS_peak_3065	chr19	47252423	47255054	+	2608	NA	5' UTR (NM_021360, exon 1 of 6)	5' UTR (NM_021360, exon 1 of 6)	428	NM_021360	18011	Mm.313651	NM_021360	ENSMUSG00000006435	Neurl1a	2410129E16Rik|AI450910|AI481072|Neu1|Neur1|Neurl|Neurl1|Nlz|Rnf67	neuralized homolog 1A (Drosophila)	protein-coding
MACS_peak_2293	chr16	11982552	11986325	+	2608	NA	5' UTR (NM_001174086, exon 1 of 4)	5' UTR (NM_001174086, exon 1 of 4)	232	NM_001174086	72555	Mm.310139	NM_028277	ENSMUSG00000022494	Shisa9	2700045P11Rik|Ckamp44	shisa homolog 9 (Xenopus laevis)	protein-coding
MACS_peak_5672	chr7	147241224	147251670	+	2608	NA	Intergenic	Intergenic	-11460	NM_010836	17703	Mm.4816	NM_010836		Msx3	AI323377	msh homeobox 3	protein-coding
MACS_peak_2432	chr16	97983354	97988687	+	2607	NA	promoter-TSS (NM_023663)	promoter-TSS (NM_023663)	-658	NM_023663	72388	Mm.35290	NM_023663	ENSMUSG00000005251	Ripk4	2310069J12Rik|AI552420|ANKK2|Ankrd3|DIk|PKK|RIP4	receptor-interacting serine-threonine kinase 4	protein-coding
MACS_peak_5469	chr7	72298090	72301723	+	2606	NA	intron (NM_183087, intron 1 of 9)	intron (NM_183087, intron 1 of 9)	1508	NM_183087	70638	Mm.441986	NM_183087	ENSMUSG00000030518	Fam189a1	5730507A09Rik|AW047451	family with sequence similarity 189, member A1	protein-coding
MACS_peak_3364	chr2	109513769	109518280	+	2606	NA	promoter-TSS (NM_001285418)	promoter-TSS (NM_001285418)	-30	NM_001285418	12064	Mm.1442	NM_007540	ENSMUSG00000048482	Bdnf	-	brain derived neurotrophic factor	protein-coding
MACS_peak_2197	chr15	99419299	99423809	+	2606	NA	promoter-TSS (NM_009701)	promoter-TSS (NM_009701)	95	NM_009701	11830	Mm.45580	NM_009701	ENSMUSG00000044217	Aqp5	-	aquaporin 5	protein-coding
MACS_peak_2645	chr17	51970036	51973731	+	2606	NA	promoter-TSS (NM_009122)	promoter-TSS (NM_009122)	89	NM_009122	20230	Mm.311655	NM_009122	ENSMUSG00000023927	Satb1	2610306G12Rik|AW413156	special AT-rich sequence binding protein 1	protein-coding
MACS_peak_6233	chr9	58041875	58052139	+	2604	NA	exon (NM_001161541, exon 3 of 3)	exon (NM_001161541, exon 3 of 3)	2515	NM_001161535	320563	Mm.186499	NM_177193	ENSMUSG00000051243	Islr2	B930052A04Rik|Linx|Mbu-3|mKIAA1465	immunoglobulin superfamily containing leucine-rich repeat 2	protein-coding
MACS_peak_4237	chr4	129659863	129665711	+	2600	NA	intron (NM_001199696, intron 1 of 28)	CpG	465	NM_173071	230775	Mm.262241	NM_173071	ENSMUSG00000028782	Bai2	-	brain-specific angiogenesis inhibitor 2	protein-coding
MACS_peak_5548	chr7	107152636	107156565	+	2598	NA	promoter-TSS (NM_133709)	promoter-TSS (NM_133709)	-314	NM_133709	69121	Mm.285295	NM_133709	ENSMUSG00000030732	Chrdl2	1810022C01Rik|Chl2	chordin-like 2	protein-coding
MACS_peak_1100	chr11	102804434	102808203	+	2598	NA	intron (NM_011795, intron 1 of 1)	intron (NM_011795, intron 1 of 1)	1457	NM_011795	23829	Mm.57154	NM_011795	ENSMUSG00000045532	C1ql1	C1qrf|CRF|CTRP14|gliacolin	complement component 1, q subcomponent-like 1	protein-coding
MACS_peak_2830	chr18	66094753	66101577	+	2598	NA	intron (NM_013833, intron 1 of 2)	CpG	578	NM_013833	19434	Mm.431047	NM_013833	ENSMUSG00000024518	Rax	7530406A22Rik|E130303K03Rik|Rx|ey-1|ey1	retina and anterior neural fold homeobox	protein-coding
MACS_peak_2073	chr15	78871061	78874061	+	2598	NA	exon (NM_015738, exon 1 of 2)	exon (NM_015738, exon 1 of 2)	246	NM_015738	14429	Mm.390805	NM_015738	ENSMUSG00000006378	Galr3	Galnr3	galanin receptor 3	protein-coding
MACS_peak_2569	chr17	35530912	35532815	+	2580	NA	non-coding (NR_051981, exon 3 of 3)	non-coding (NR_051981, exon 3 of 3)	819	NR_051981	15016	Mm.439648	NR_051981	ENSMUSG00000055413	H2-Q5	H-2Q5|Qa-5|Qa5|Qat-5	histocompatibility 2, Q region locus 5	pseudo
MACS_peak_3664	chr2	180621262	180633896	+	2574	NA	Intergenic	CpG	-1166	NR_029538	723951		NR_029538		Mir124a-3	Mirn124a-3|mir-124a-3	microRNA 124a-3	ncRNA
MACS_peak_654	chr10	106708520	106709809	+	2574	NA	promoter-TSS (NM_001284329)	promoter-TSS (NM_001284329)	277	NM_001033223	108030	Mm.268025	NM_001033223	ENSMUSG00000019906	Lin7a	AI848705|LIN-7A|MALS-1|TIP-33|Veli|Veli1	lin-7 homolog A (C. elegans)	protein-coding
MACS_peak_1135	chr11	112642239	112647988	+	2574	NA	intron (NM_011448, intron 1 of 2)	intron (NM_011448, intron 1 of 2)	1589	NM_011448	20682	Mm.286407	NM_011448	ENSMUSG00000000567	Sox9	2010306G03Rik|AV220920|mKIAA4243	SRY (sex determining region Y)-box 9	protein-coding
MACS_peak_4482	chr5	34338083	34341389	+	2571	NA	exon (NM_001001985, exon 1 of 3)	exon (NM_001001985, exon 1 of 3)	1103	NM_001001985	269642	Mm.274610	NM_001001985	ENSMUSG00000048142	Nat8l	1110038O08Rik|Shati	N-acetyltransferase 8-like	protein-coding
MACS_peak_2023	chr15	54402746	54404359	+	2571	NA	intron (NM_178920, intron 1 of 3)	intron (NM_178920, intron 1 of 3)	631	NM_178920	105853	Mm.410994	NM_178920	ENSMUSG00000024479	Mal2	AI461653	mal, T cell differentiation protein 2	protein-coding
MACS_peak_2910	chr19	6494571	6509348	+	2571	NA	intron (NM_001205234, intron 17 of 22)	intron (NM_001205234, intron 17 of 22)	41111	NM_009203	20521	Mm.391146	NM_009203	ENSMUSG00000061742	Slc22a12	AI987855|OAT4L|Rst|Slc22al2|URAT1	solute carrier family 22 (organic anion/cation transporter), member 12	protein-coding
MACS_peak_4239	chr4	129815865	129817381	+	2569	NA	promoter-TSS (NM_198959)	promoter-TSS (NM_198959)	-217	NM_198959	230777	Mm.246595	NM_198959	ENSMUSG00000028778	Hcrtr1	Ox1r	hypocretin (orexin) receptor 1	protein-coding
MACS_peak_130	chr1	74927295	74933942	+	2566	NA	intron (NM_153111, intron 2 of 2)	intron (NM_153111, intron 2 of 2)	1364	NM_153111	260298	Mm.150496	NM_153111	ENSMUSG00000055197	Fev	Pet-1|Pet1|mPet-1	FEV (ETS oncogene family)	protein-coding
MACS_peak_586	chr10	79818070	79821069	+	2566	NA	intron (NM_183152, intron 1 of 14)	CpG	365	NM_183152	216166	Mm.17613	NM_183152	ENSMUSG00000035486	Plk5	6330514A18Rik	polo-like kinase 5	protein-coding
MACS_peak_3487	chr2	152932841	152936117	+	2560	NA	exon (NM_010407, exon 1 of 13)	exon (NM_010407, exon 1 of 13)	275	NM_010407	15162	Mm.715	NM_010407	ENSMUSG00000003283	Hck	AI849071|Bmk	hemopoietic cell kinase	protein-coding
MACS_peak_3249	chr2	49474648	49477833	+	2558	NA	intron (NM_008449, intron 1 of 25)	intron (NM_008449, intron 1 of 25)	1406	NM_008449	16574	Mm.256342	NM_008449	ENSMUSG00000026764	Kif5c	KINN|Khc|NKHC|NKHC2	kinesin family member 5C	protein-coding
MACS_peak_2	chr1	4479924	4483716	+	2558	NA	exon (NM_011441, exon 5 of 5)	exon (NM_011441, exon 5 of 5)	5615	NM_001289464	20671	Mm.279103	NM_011441	ENSMUSG00000025902	Sox17	-	SRY (sex determining region Y)-box 17	protein-coding
MACS_peak_2876	chr18	82644011	82645821	+	2549	NA	intron (NM_001025245, intron 1 of 3)	intron (NM_001025245, intron 1 of 3)	401	NM_001025245	17196	Mm.252063	NM_010777	ENSMUSG00000041607	Mbp	C76307|Hmbpr|R75289|golli-mbp|mld|shi	myelin basic protein	protein-coding
MACS_peak_3767	chr3	83569205	83571236	+	2549	NA	promoter-TSS (NM_009144)	promoter-TSS (NM_009144)	-23	NM_009144	20319	Mm.19155	NM_009144	ENSMUSG00000027996	Sfrp2	AI851596|Sdf5	secreted frizzled-related protein 2	protein-coding
MACS_peak_3195	chr2	31314082	31316211	+	2548	NA	Intergenic	Intergenic	-10644	NM_007494	11898	Mm.3217	NM_007494	ENSMUSG00000076441	Ass1	AA408052|ASS|Ass-1|fold	argininosuccinate synthetase 1	protein-coding
MACS_peak_5019	chr6	52237060	52245231	+	2548	NA	Intergenic	Intergenic	-22347	NM_007966	14028	Mm.389754	NM_007966	ENSMUSG00000005503	Evx1	Evx-1	even skipped homeotic gene 1 homolog	protein-coding
MACS_peak_2965	chr19	36129289	36133540	+	2544	NA	exon (NM_008315, exon 1 of 3)	exon (NM_008315, exon 1 of 3)	436	NM_008315	15566	Mm.254266	NM_008315	ENSMUSG00000024798	Htr7	5-HT7	5-hydroxytryptamine (serotonin) receptor 7	protein-coding
MACS_peak_6265	chr9	62522974	62528907	+	2537	NA	intron (NM_176922, intron 1 of 29)	intron (NM_176922, intron 1 of 29)	278	NM_176922	319480	Mm.34883	NM_176922	ENSMUSG00000032243	Itga11	4732459H24Rik	integrin alpha 11	protein-coding
MACS_peak_3530	chr2	160735793	160738655	+	2535	NA	intron (NM_182840, intron 1 of 3)	intron (NM_182840, intron 1 of 3)	851	NM_001291145	280635	Mm.330747	NM_182840	ENSMUSG00000050700	Emilin3	1110013O17Rik|EMILIN-3|EMILIN-5|EMILIN-T|Emilin5	elastin microfibril interfacer 3	protein-coding
MACS_peak_3587	chr2	167874741	167877082	+	2524	NA	Intergenic	CpG	-30593	NM_021409	58220	Mm.292834	NM_021409	ENSMUSG00000044641	Pard6b	AV025615|Par6b	par-6 family cell polarity regulator beta	protein-coding
MACS_peak_4044	chr4	57002564	57004471	+	2524	NA	promoter-TSS (NM_001142965)	promoter-TSS (NM_001142965)	-254	NM_001142965	230235	Mm.207654	NM_001142965		Frrs1l	6430704M03Rik	ferric-chelate reductase 1 like	protein-coding
MACS_peak_1940	chr14	115490710	115494107	+	2516	NA	intron (NM_175500, intron 1 of 7)	intron (NM_175500, intron 1 of 7)	971	NM_175500	103978	Mm.320791	NM_175500	ENSMUSG00000022112	Gpc5	A230034F01Rik	glypican 5	protein-coding
MACS_peak_3476	chr2	151969311	151970452	+	2516	NA	intron (NM_009328, intron 1 of 1)	CpG	536	NM_009328	21407	Mm.3881	NM_009328	ENSMUSG00000068079	Tcf15	Meso1|bHLH-EC2	transcription factor 15	protein-coding
MACS_peak_244	chr1	134084247	134090470	+	2516	NA	promoter-TSS (NM_001033250)	promoter-TSS (NM_001033250)	-655	NM_001033250	213409	Mm.426321	NM_001033250	ENSMUSG00000079330	Lemd1	4930540I23Rik|6430514M23Rik|AI428128|LEMP-1	LEM domain containing 1	protein-coding
MACS_peak_3466	chr2	151456543	151458909	+	2516	NA	intron (NM_198214, intron 2 of 5)	intron (NM_198214, intron 2 of 5)	603	NM_198214	241727	Mm.39312	NM_198214	ENSMUSG00000027457	Snph	6430515A01|AW045671|AW556958|AW743098|mKIAA0374	syntaphilin	protein-coding
MACS_peak_3235	chr2	38190706	38200829	+	2516	NA	intron (NM_001290646, intron 1 of 4)	intron (NM_001290646, intron 1 of 4)	966	NM_001290646	16870	Mm.142856	NM_010710	ENSMUSG00000000247	Lhx2	LH2A|Lh-2|Lim2|ap|apterous	LIM homeobox protein 2	protein-coding
MACS_peak_214	chr1	121315895	121321613	+	2516	NA	promoter-TSS (NM_008381)	promoter-TSS (NM_008381)	71	NM_008381	16324	Mm.3092	NM_008381	ENSMUSG00000037035	Inhbb	-	inhibin beta-B	protein-coding
MACS_peak_1611	chr13	58906748	58912130	+	2515	NA	intron (NM_001025074, intron 1 of 17)	CpG	381	NM_001025074	18212	Mm.130054	NM_008745	ENSMUSG00000055254	Ntrk2	GP145-TrkB/GP95-TrkB|Tkrb|trk-B|trkB	neurotrophic tyrosine kinase, receptor, type 2	protein-coding
MACS_peak_4805	chr5	129104911	129108649	+	2514	NA	promoter-TSS (NM_175284)	promoter-TSS (NM_175284)	-201	NM_175284	93897	Mm.197628	NM_175284	ENSMUSG00000081683	Fzd10	Fz-10	frizzled homolog 10 (Drosophila)	protein-coding
MACS_peak_2498	chr17	24824254	24827176	+	2514	NA	intron (NM_011522, intron 1 of 3)	intron (NM_011522, intron 1 of 3)	1179	NM_011522	20974	Mm.26032	NM_011522	ENSMUSG00000007021	Syngr3	-	synaptogyrin 3	protein-coding
MACS_peak_102	chr1	60098641	60101337	+	2514	NA	promoter-TSS (NM_027407)	promoter-TSS (NM_027407)	-58	NM_027407	70375	Mm.17834	NM_027407	ENSMUSG00000026018	Ica1l	1700030B17Rik|Als2cr15	islet cell autoantigen 1-like	protein-coding
MACS_peak_1278	chr12	56698547	56702000	+	2514	NA	5' UTR (NM_020287, exon 1 of 1)	5' UTR (NM_020287, exon 1 of 1)	369	NM_020287	56856	Mm.114886	NM_020287	ENSMUSG00000045440	Insm2	Mlt1	insulinoma-associated 2	protein-coding
MACS_peak_965	chr11	89157799	89165629	+	2514	NA	TTS (NM_008711)	TTS (NM_008711)	2159	NM_008711	18121	Mm.135266	NM_008711	ENSMUSG00000048616	Nog	-	noggin	protein-coding
MACS_peak_2679	chr17	70318149	70320069	+	2514	NA	Intergenic	CpG	-455023	NM_177639	224997	Mm.311840	NM_027712	ENSMUSG00000003279	Dlgap1	4933422O14Rik|9630002F18|AI845682|AI848168|BB075781|D17Bwg0511e|GKAP/SAPAP|GKPA/SAPAP|Gkap|Sapap1|mKIAA4162	discs, large (Drosophila) homolog-associated protein 1	protein-coding
MACS_peak_5853	chr8	72896779	72901343	+	2508	NA	intron (NM_016685, intron 4 of 18)	CpG-14091	1614	NM_016685	12845	Mm.45071	NM_016685	ENSMUSG00000031849	Comp	TSP5	cartilage oligomeric matrix protein	protein-coding
MACS_peak_2130	chr15	85402768	85413513	+	2500	NA	5' UTR (NM_001163634, exon 1 of 4)	5' UTR (NM_001163634, exon 1 of 4)	360	NM_001163634	22422	Mm.306946	NM_009528	ENSMUSG00000022382	Wnt7b	Wnt-7b	wingless-type MMTV integration site family, member 7B	protein-coding
MACS_peak_579	chr10	79381069	79385485	+	2497	NA	intron (NM_053244, intron 2 of 4)	intron (NM_053244, intron 2 of 4)	3561	NM_053244	114229	Mm.191035	NM_053244	ENSMUSG00000035773	Kiss1r	Gpr54|KiSS-1	KISS1 receptor	protein-coding
MACS_peak_693	chr10	121078085	121079812	+	2497	NA	exon (NM_177335, exon 1 of 13)	exon (NM_177335, exon 1 of 13)	191	NM_177335	216393	Mm.119759	NM_177335		D930020B18Rik	1500017I17Rik	RIKEN cDNA D930020B18 gene	protein-coding
MACS_peak_1160	chr11	115109444	115113954	+	2492	NA	exon (NM_010350, exon 15 of 15)	exon (NM_010350, exon 15 of 15)	16858	NM_010350	14813	Mm.39090	NM_010350	ENSMUSG00000020734	Grin2c	GluN2C|NMDAR2C|NR2C	glutamate receptor, ionotropic, NMDA2C (epsilon 3)	protein-coding
MACS_peak_1765	chr14	13167488	13178942	+	2490	NA	Intergenic	MIR|SINE|MIR	5164	NM_080433	54713	Mm.34644	NM_080433	ENSMUSG00000021743	Fezf2	AI451466|AI852056|Fez|Fezl|Zfp312	Fez family zinc finger 2	protein-coding
MACS_peak_2185	chr15	98884673	98892688	+	2490	NA	intron (NM_001163588, intron 7 of 7)	B1_Mus1|SINE|Alu	3075	NM_001163589	19132	Mm.2477	NM_013639	ENSMUSG00000023484	Prph	Prph1	peripherin	protein-coding
MACS_peak_5954	chr8	109126703	109130770	+	2489	NA	intron (NM_009864, intron 2 of 15)	intron (NM_009864, intron 2 of 15)	1468	NM_009864	12550	Mm.35605	NM_009864	ENSMUSG00000000303	Cdh1	AA960649|E-cad|Ecad|L-CAM|UVO|Um	cadherin 1	protein-coding
MACS_peak_4647	chr5	110771065	110772226	+	2477	NA	exon (NM_001164834, exon 2 of 12)	exon (NM_001164834, exon 2 of 12)	409	NM_001164834	231602	Mm.55948	NM_153400	ENSMUSG00000029503	P2rx2	P2X2a|P2x2	purinergic receptor P2X, ligand-gated ion channel, 2	protein-coding
MACS_peak_5299	chr7	25395603	25398449	+	2475	NA	intron (NM_001102613, intron 1 of 14)	RSINE1|SINE|B4	679	NM_001102613	232970	Mm.333663	NM_001102613	ENSMUSG00000074277	Phldb3	EG232970|ENSMUSG00000061511|Gm10102	pleckstrin homology-like domain, family B, member 3	protein-coding
MACS_peak_4029	chr4	46612298	46615327	+	2475	NA	intron (NM_001164804, intron 1 of 11)	intron (NM_001164804, intron 1 of 11)	989	NM_001164804	107684	Mm.416311	NM_178893	ENSMUSG00000028337	Coro2a	9030208C03Rik|AI563590|IR10	coronin, actin binding protein 2A	protein-coding
MACS_peak_5207	chr6	126591911	126598100	+	2475	NA	5' UTR (NM_010595, exon 1 of 2)	5' UTR (NM_010595, exon 1 of 2)	814	NM_010595	16485	Mm.40424	NM_010595	ENSMUSG00000047976	Kcna1	AI840627|Kca1-1|Kv1.1|MBK1|Mk-1|Shak|mceph	potassium voltage-gated channel, shaker-related subfamily, member 1	protein-coding
MACS_peak_959	chr11	87573802	87580348	+	2475	NA	exon (NM_172449, exon 4 of 32)	exon (NM_172449, exon 4 of 32)	3032	NM_172449	207777	Mm.342019	NM_172449	ENSMUSG00000034156	Bzrap1	D230016K05|PRAX-1|mKIAA0612	benzodiazepine receptor associated protein 1	protein-coding
MACS_peak_278	chr1	138027731	138029761	+	2470	NA	promoter-TSS (NR_046167)	promoter-TSS (NR_046167)	768	NM_001039472	16565	Mm.276135	NM_019962	ENSMUSG00000041642	Kif21b	2610511N21Rik|mKIAA0449	kinesin family member 21B	protein-coding
MACS_peak_6445	chr9	121550340	121553534	+	2462	NA	5' UTR (NM_011703, exon 1 of 13)	5' UTR (NM_011703, exon 1 of 13)	103	NM_011703	22354	Mm.282007	NM_011703	ENSMUSG00000032528	Vipr1	AV071699|VIP-R1|VPAC1	vasoactive intestinal peptide receptor 1	protein-coding
MACS_peak_3214	chr2	33398933	33404286	+	2460	NA	Intergenic	Intergenic	-77557	NM_001025594	71834	Mm.44186	NM_027947	ENSMUSG00000026788	Zbtb43	1700010E06Rik|Zfp297b|mKIAA0414	zinc finger and BTB domain containing 43	protein-coding
MACS_peak_3377	chr2	118527222	118533178	+	2452	NA	promoter-TSS (NM_001081971)	promoter-TSS (NM_001081971)	-501	NM_001081971	383787	Mm.35758	NM_001081971	ENSMUSG00000078137	Ankrd63	Gm1337	ankyrin repeat domain 63	protein-coding
MACS_peak_4457	chr5	28535464	28539068	+	2449	NA	intron (NM_175651, intron 1 of 2)	intron (NM_175651, intron 1 of 2)	27147	NM_175651	269637	Mm.68286	NM_175651	ENSMUSG00000044681	Cnpy1	1500012D20Rik|9630008K15Rik|AI853839	canopy 1 homolog (zebrafish)	protein-coding
MACS_peak_501	chr10	44246787	44249178	+	2448	NA	Intergenic	Intergenic	-69489	NM_007548	12142	Mm.4800	NM_007548	ENSMUSG00000038151	Prdm1	Blimp-1|Blimp1|PRDI-BF1|ZNFPR1A1|b2b1765Clo	PR domain containing 1, with ZNF domain	protein-coding
MACS_peak_639	chr10	93293907	93298220	+	2448	NA	intron (NM_183199, intron 1 of 3)	intron (NM_183199, intron 1 of 3)	1763	NM_001206851	327799	Mm.491598	NM_183199	ENSMUSG00000020020	Usp44	E430004F17Rik	ubiquitin specific peptidase 44	protein-coding
MACS_peak_1791	chr14	30533455	30537037	+	2442	NA	promoter-TSS (NM_009785)	promoter-TSS (NM_009785)	-196	NM_009785	12294	Mm.386754	NM_009785	ENSMUSG00000021991	Cacna2d3	Cacnad3	calcium channel, voltage-dependent, alpha2/delta subunit 3	protein-coding
MACS_peak_6126	chr9	35363644	35366403	+	2442	NA	intron (NM_013932, intron 2 of 11)	intron (NM_013932, intron 2 of 11)	1032	NM_013932	30959	Mm.291723	NM_013932	ENSMUSG00000032101	Ddx25	AW047046|GRTH	DEAD (Asp-Glu-Ala-Asp) box polypeptide 25	protein-coding
MACS_peak_382	chr1	187278146	187280960	+	2439	NA	promoter-TSS (NR_040305)	promoter-TSS (NR_040305)	-106	NR_040305	100039138	Mm.427989	NR_040305	ENSMUSG00000097615	Gm2061	-	predicted gene 2061	ncRNA
MACS_peak_5348	chr7	29803410	29805841	+	2436	NA	exon (NM_009109, exon 91 of 106)	exon (NM_009109, exon 91 of 106)	36752	NM_008279	26411	Mm.148278	NM_008279	ENSMUSG00000037337	Map4k1	Hpk1|mHPK1	mitogen-activated protein kinase kinase kinase kinase 1	protein-coding
MACS_peak_2570	chr17	35560501	35563603	+	2436	NA	intron (NM_023124, intron 1 of 4)	CpG	230	NM_207648	110557	Mm.439827	NM_207648	ENSMUSG00000073409	H2-Q6	0610037M15Rik|H-2Q6|Qa-6|Qa6	histocompatibility 2, Q region locus 6	protein-coding
MACS_peak_1624	chr13	69877317	69878438	+	2436	NA	exon (NM_001145162, exon 1 of 2)	exon (NM_001145162, exon 1 of 2)	898	NM_001145162	76980	Mm.23960	NM_001145162	ENSMUSG00000052981	Ube2ql1	3110006E14Rik	ubiquitin-conjugating enzyme E2Q family-like 1	protein-coding
MACS_peak_6318	chr9	83697211	83700309	+	2436	NA	intron (NM_148941, intron 1 of 5)	intron (NM_148941, intron 1 of 5)	1152	NM_148941	83603	Mm.83949	NM_148941	ENSMUSG00000032262	Elovl4	-	elongation of very long chain fatty acids (FEN1/Elo2, SUR4/Elo3, yeast)-like 4	protein-coding
MACS_peak_4263	chr4	133926688	133928442	+	2436	NA	exon (NM_019578, exon 1 of 11)	exon (NM_019578, exon 1 of 11)	897	NM_019578	56219	Mm.30978	NM_019578	ENSMUSG00000028838	Extl1	D430033M16Rik	exostoses (multiple)-like 1	protein-coding
MACS_peak_4738	chr5	118477080	118480508	+	2436	NA	intron (NM_021344, intron 1 of 7)	CpG	961	NM_021344	57816	Mm.273285	NM_021344	ENSMUSG00000029359	Tesc	1010001A17Rik|2410011K10Rik|TE-1	tescalcin	protein-coding
MACS_peak_2219	chr15	100873119	100877993	+	2436	NA	3' UTR (NM_011323, exon 26 of 26)	3' UTR (NM_011323, exon 26 of 26)	9274	NM_001214911	668225	Mm.385011	NM_001214911	ENSMUSG00000095440	Fignl2	EG668225	fidgetin-like 2	protein-coding
MACS_peak_4519	chr5	52503780	52507944	+	2436	NA	Intergenic	CpG	21394	NR_105845	102466648		NR_105845	miRBase:MI0021955	Mir6417	mmu-mir-6417	microRNA mir-6417	ncRNA
MACS_peak_536	chr10	61573223	61574772	+	2434	NA	promoter-TSS (NM_027251)	promoter-TSS (NM_027251)	-236	NM_027251	69894	Mm.294126	NM_027251	ENSMUSG00000020083	2010107G23Rik	AA545165	RIKEN cDNA 2010107G23 gene	protein-coding
MACS_peak_5129	chr6	99640407	99644374	+	2426	NA	promoter-TSS (NM_008158)	promoter-TSS (NM_008158)	-283	NM_008158	14761	Mm.35009	NM_008158	ENSMUSG00000072875	Gpr27	-	G protein-coupled receptor 27	protein-coding
MACS_peak_3856	chr3	106838583	106842513	+	2426	NA	exon (NM_008418, exon 1 of 1)	exon (NM_008418, exon 1 of 1)	1468	NM_008418	16491	Mm.30640	NM_008418	ENSMUSG00000047959	Kcna3	Kca1-3|Kv1.3|Mk-3	potassium voltage-gated channel, shaker-related subfamily, member 3	protein-coding
MACS_peak_5535	chr7	103357463	103363660	+	2426	NA	intron (NM_011858, intron 1 of 32)	intron (NM_011858, intron 1 of 32)	1414	NM_011858	23966	Mm.254610	NM_011858	ENSMUSG00000048078	Tenm4	Doc4|ELM2|Odz4|R75022|Ten-m4|l(7)-3Rn|l7Rn3|mKIAA1302	teneurin transmembrane protein 4	protein-coding
MACS_peak_447	chr10	21873134	21874328	+	2426	NA	Intergenic	Intergenic	-4655	NM_001254745	319887	Mm.177746	NM_001254744	ENSMUSG00000055657	E030030I06Rik	-	RIKEN cDNA E030030I06 gene	protein-coding
MACS_peak_2724	chr17	88143542	88146940	+	2426	NA	TTS (NM_199251)	TTS (NM_199251)	52093	NM_199251	210741	Mm.312046	NM_199251	ENSMUSG00000050138	Kcnk12	mntk1	potassium channel, subfamily K, member 12	protein-coding
MACS_peak_3391	chr2	122119759	122130062	+	2426	NA	exon (NM_025777, exon 1 of 6)	exon (NM_025777, exon 1 of 6)	274	NM_025777	66811	Mm.171333	NM_025777	ENSMUSG00000027225	Duoxa2	9030623N16Rik	dual oxidase maturation factor 2	protein-coding
MACS_peak_5717	chr8	4212986	4219561	+	2426	NA	exon (NM_207203, exon 3 of 7)	exon (NM_207203, exon 3 of 7)	1039	NM_207203	73072	Mm.477379	NM_207203	ENSMUSG00000064125	BC068157	-	cDNA sequence BC068157	protein-coding
MACS_peak_2497	chr17	24794251	24796187	+	2425	NA	exon (NM_001099664, exon 1 of 2)	exon (NM_001099664, exon 1 of 2)	151	NM_001099664	381073	Mm.291772	NM_001099664	ENSMUSG00000071230	Npw	Gm935	neuropeptide W	protein-coding
MACS_peak_3768	chr3	83592737	83594276	+	2415	NA	Intergenic	Intergenic	23263	NM_009144	20319	Mm.19155	NM_009144	ENSMUSG00000027996	Sfrp2	AI851596|Sdf5	secreted frizzled-related protein 2	protein-coding
MACS_peak_43	chr1	23768206	23772247	+	2415	NA	intron (NM_172124, intron 1 of 3)	intron (NM_172124, intron 1 of 3)	1461	NM_172124	280645	Mm.471661	NM_172124		B3gat2	GlcAT-S|Glcats	beta-1,3-glucuronyltransferase 2 (glucuronosyltransferase S)	protein-coding
MACS_peak_2935	chr19	24629934	24631224	+	2415	NA	promoter-TSS (NM_008846)	promoter-TSS (NM_008846)	-262	NM_008846	18719	Mm.217214	NM_008846	ENSMUSG00000024867	Pip5k1b	PI4P5K-I[b]|PIP5K1-beta|PIP5KIbeta|Pipk5b|STM7	phosphatidylinositol-4-phosphate 5-kinase, type 1 beta	protein-coding
MACS_peak_6152	chr9	42750977	42752881	+	2415	NA	intron (NM_175481, intron 1 of 20)	intron (NM_175481, intron 1 of 20)	525	NM_175481	110637	Mm.370291	NM_175481	ENSMUSG00000032017	Grik4	6330551K01Rik|GluK4|GluRgamma1|KA-1|KA1	glutamate receptor, ionotropic, kainate 4	protein-coding
MACS_peak_1164	chr11	115181266	115185735	+	2415	NA	promoter-TSS (NM_176847)	promoter-TSS (NM_176847)	-268	NM_176847	16470	Mm.451539	NM_176847	ENSMUSG00000045288	Ush1g	Sans|js	Usher syndrome 1G	protein-coding
MACS_peak_1817	chr14	35627649	35637251	+	2414	NA	promoter-TSS (NM_008166)	promoter-TSS (NM_008166)	-872	NM_008166	14803	Mm.121569	NM_008166	ENSMUSG00000041078	Grid1	GluD1|GluRdelta1	glutamate receptor, ionotropic, delta 1	protein-coding
MACS_peak_6096	chr9	20529054	20533993	+	2413	NA	intron (NM_173777, intron 1 of 5)	intron (NM_173777, intron 1 of 5)	1135	NM_173777	244723	Mm.293552	NM_173777	ENSMUSG00000032172	Olfm2	A030009A06Rik	olfactomedin 2	protein-coding
MACS_peak_2059	chr15	75826558	75830894	+	2413	NA	intron (NM_177922, intron 11 of 13)	CpG-4982	4527	NM_177922	332110	Mm.40843	NM_177922	ENSMUSG00000063704	Mapk15	BC048082	mitogen-activated protein kinase 15	protein-coding
MACS_peak_3097	chr19	59264879	59270081	+	2411	NA	Intergenic	(A)n|Simple_repeat|Simple_repeat	-22961	NM_009501	22326	Mm.23801	NM_009501		Vax1	-	ventral anterior homeobox 1	protein-coding
MACS_peak_6037	chr8	126106472	126107504	+	2411	NA	Intergenic	Intergenic	64253	NM_018855	104346	Mm.117265	NM_018855	ENSMUSG00000040220	Gas8	Gas11	growth arrest specific 8	protein-coding
MACS_peak_1664	chr13	83876760	83879680	+	2411	NA	promoter-TSS (NR_029545)	promoter-TSS (NR_029545)	-199	NR_029545	723967		NR_029545	miRBase:MI0000157	Mir9-2	Mirn9-2|mmu-mir-9-2	microRNA 9-2	ncRNA
MACS_peak_1707	chr13	99158332	99163932	+	2411	NA	Intergenic	CpG	36932	NM_008242	15229	Mm.347441	NM_008242	ENSMUSG00000078302	Foxd1	AI385632|BF-2|FREAC4|Hfh10|Hfhbf2	forkhead box D1	protein-coding
MACS_peak_1378	chr12	102956148	102957351	+	2409	NA	promoter-TSS (NM_001082976)	promoter-TSS (NM_001082976)	-16	NM_001082976	74413	Mm.275939	NM_028924	ENSMUSG00000021187	Tc2n	4933406D09Rik|Mtac2d1|Tac2-N	tandem C2 domains, nuclear	protein-coding
MACS_peak_6361	chr9	99256218	99262097	+	2401	NA	promoter-TSS (NM_177775)	promoter-TSS (NM_177775)	-208	NM_177775	272636	Mm.490440	NM_177775	ENSMUSG00000037681	Esyt3	D930024E11|D9Ertd280e|Fam62c|mKIAA4186	extended synaptotagmin-like protein 3	protein-coding
MACS_peak_1172	chr11	116141183	116146325	+	2400	NA	intron (NM_010254, intron 1 of 1)	intron (NM_010254, intron 1 of 1)	1501	NM_010254	14428	Mm.57149	NM_010254	ENSMUSG00000020793	Galr2	mGalR	galanin receptor 2	protein-coding
MACS_peak_6347	chr9	95459367	95461213	+	2396	NA	promoter-TSS (NM_198414)	promoter-TSS (NM_198414)	54	NM_198414	75552	Mm.151485	NM_198414	ENSMUSG00000064225	Paqr9	1700020G04Rik	progestin and adipoQ receptor family member IX	protein-coding
MACS_peak_1520	chr13	38242978	38244928	+	2395	NA	intron (NM_023842, intron 1 of 23)	intron (NM_023842, intron 1 of 23)	790	NM_023842	109620	Mm.355327	NM_023842	ENSMUSG00000054889	Dsp	2300002E22Rik|5730453H04Rik|AA407887|AA407888|AW109828|DP	desmoplakin	protein-coding
MACS_peak_4385	chr4	151500155	151507608	+	2392	NA	promoter-TSS (NM_019585)	promoter-TSS (NM_019585)	-847	NM_019585	56226	Mm.264215	NM_019585	ENSMUSG00000028943	Espn	je	espin	protein-coding
MACS_peak_6307	chr9	77502899	77503687	+	2390	NA	exon (NM_172925, exon 3 of 3)	exon (NM_172925, exon 3 of 3)	18754	NM_172925	244923	Mm.138238	NM_172925	ENSMUSG00000044938	Klhl31	9830147P19Rik|D930047P17Rik|Kbtbd1	kelch-like 31	protein-coding
MACS_peak_1948	chr14	118832994	118837361	+	2389	NA	Intergenic	Intergenic	70077	NR_045624	73306	Mm.362328	NR_045624		1700044C05Rik	-	RIKEN cDNA 1700044C05 gene	ncRNA
MACS_peak_280	chr1	138153257	138158776	+	2389	NA	3' UTR (NM_001101516, exon 1 of 1)	3' UTR (NM_001101516, exon 1 of 1)	1434	NM_001101516	383563	Mm.40367	NM_001101516	ENSMUSG00000052759	Gpr25	Gm1300	G protein-coupled receptor 25	protein-coding
MACS_peak_279	chr1	138126788	138132560	+	2389	NA	intron (NM_028872, intron 1 of 9)	intron (NM_028872, intron 1 of 9)	1183	NM_028872	67313	Mm.36763	NM_028872	ENSMUSG00000041605	5730559C18Rik	1700034M08Rik|4933426C09Rik|AI586180|D1Mgi54	RIKEN cDNA 5730559C18 gene	protein-coding
MACS_peak_3123	chr2	9802545	9813560	+	2385	NA	non-coding (NR_024257, exon 5 of 5)	non-coding (NR_024257, exon 5 of 5)	3115	NR_040511	77682	Mm.488621	NR_040511	ENSMUSG00000079602	9230102O04Rik	-	RIKEN cDNA 9230102O04 gene	ncRNA
MACS_peak_4363	chr4	147502405	147506627	+	2384	NA	intron (NM_027426, intron 1 of 6)	intron (NM_027426, intron 1 of 6)	291	NM_027426	70433	Mm.275288	NM_027426	ENSMUSG00000029005	Draxin	2610109H07Rik|neucrin	dorsal inhibitory axon guidance protein	protein-coding
MACS_peak_1329	chr12	80007509	80008109	+	2381	NA	intron (NM_013738, intron 1 of 8)	CpG	116	NM_013738	27260	Mm.103380	NM_013738	ENSMUSG00000021118	Plek2	-	pleckstrin 2	protein-coding
MACS_peak_1810	chr14	34736254	34739363	+	2381	NA	intron (NM_145741, intron 1 of 2)	intron (NM_145741, intron 1 of 2)	1035	NM_145741	14560	Mm.432071	NM_145741	ENSMUSG00000021943	Gdf10	Bmp3b	growth differentiation factor 10	protein-coding
MACS_peak_4040	chr4	49856625	49858845	+	2380	NA	exon (NM_001033351, exon 1 of 9)	exon (NM_001033351, exon 1 of 9)	906	NM_001033351	242443	Mm.440095	NM_001033351	ENSMUSG00000039579	Grin3a	6430537F04|A830097C19Rik|NMDAR-L|NR3A|mKIAA1973	glutamate receptor ionotropic, NMDA3A	protein-coding
MACS_peak_6119	chr9	30938122	30943087	+	2372	NA	Intergenic	Intergenic	-1220	NM_011176	19143	Mm.243926	NM_011176	ENSMUSG00000031995	St14	Epithin|MT-SP1|Prss14|Tmprss14|mCAP3|matriptase	suppression of tumorigenicity 14 (colon carcinoma)	protein-coding
MACS_peak_1162	chr11	115126320	115129077	+	2356	NA	intron (NM_010350, intron 2 of 14)	intron (NM_010350, intron 2 of 14)	859	NM_010350	14813	Mm.39090	NM_010350	ENSMUSG00000020734	Grin2c	GluN2C|NMDAR2C|NR2C	glutamate receptor, ionotropic, NMDA2C (epsilon 3)	protein-coding
MACS_peak_3624	chr2	172551504	172558806	+	2356	NA	Intergenic	Intergenic	178664	NM_001159696	21420	Mm.3629	NM_009335	ENSMUSG00000028640	Tfap2c	AA409384|AP2gamma|Ap-2.2|Stra2|Tcfap2c	transcription factor AP-2, gamma	protein-coding
MACS_peak_4723	chr5	116179697	116183930	+	2356	NA	promoter-TSS (NM_001080808)	promoter-TSS (NM_001080808)	-245	NM_001080808	75665	Mm.233914	NM_001080808	ENSMUSG00000041609	Ccdc64	2210403N09Rik|BICDR-1	coiled-coil domain containing 64	protein-coding
MACS_peak_4886	chr5	147195022	147197269	+	2356	NA	promoter-TSS (NM_145155)	promoter-TSS (NM_145155)	-437	NM_145155	245880	Mm.472750	NM_145155		Wasf3	Scar3|Wave3	WAS protein family, member 3	protein-coding
MACS_peak_15	chr1	9956968	9959704	+	2355	NA	promoter-TSS (NM_001285425)	promoter-TSS (NM_001285425)	-770	NM_001285425	100039596	Mm.412928	NM_001285425	ENSMUSG00000099032	Tcf24	ENSMUSG00000073738|Gm10567|Gm2330	transcription factor 24	protein-coding
MACS_peak_3074	chr19	54117911	54128932	+	2355	NA	TTS (NM_007417)	TTS (NM_007417)	3749	NM_007417	11551	Mm.235195	NM_007417	ENSMUSG00000033717	Adra2a	AW122659|Adra-2|Adra-2a|alpha(2A)AR|alpha2-C10|alpha2A|alpha2A-AR	adrenergic receptor, alpha 2a	protein-coding
MACS_peak_3054	chr19	45615846	45619291	+	2355	NA	Intergenic	Intergenic	17465	NM_020032	56626	Mm.46509	NM_020032	ENSMUSG00000025218	Poll	1110003P06Rik|AV007317	polymerase (DNA directed), lambda	protein-coding
MACS_peak_3153	chr2	25096918	25099002	+	2354	NA	promoter-TSS (NM_176834)	promoter-TSS (NM_176834)	-489	NM_176834	68846	Mm.24777	NM_176834	ENSMUSG00000044628	Rnf208	1110061N23Rik	ring finger protein 208	protein-coding
MACS_peak_6536	chrX	133652360	133656791	+	2353	NA	5' UTR (NM_007957, exon 1 of 5)	5' UTR (NM_007957, exon 1 of 5)	290	NM_007957	13984	Mm.8017	NM_007957	ENSMUSG00000023443	Esx1	Spx1	extraembryonic, spermatogenesis, homeobox 1	protein-coding
MACS_peak_1461	chr13	10358545	10360639	+	2353	NA	5' UTR (NM_033269, exon 1 of 5)	5' UTR (NM_033269, exon 1 of 5)	457	NM_033269	12671	Mm.342315	NM_033269		Chrm3	Chrm-3|M3|M3R	cholinergic receptor, muscarinic 3, cardiac	protein-coding
MACS_peak_2890	chr18	89936890	89939409	+	2348	NA	intron (NM_001039173, intron 1 of 7)	intron (NM_001039173, intron 1 of 7)	379	NM_001039173	623279	Mm.447164	NM_001039173		Dok6	Dok-6	docking protein 6	protein-coding
MACS_peak_2329	chr16	28564254	28566121	+	2348	NA	promoter-TSS (NM_001276419)	promoter-TSS (NM_001276419)	-150	NM_001276419	14167	Mm.7996	NM_010199		Fgf12	AV114868|FGF-12|FHF-1|Fhf1	fibroblast growth factor 12	protein-coding
MACS_peak_3024	chr19	44797308	44802540	+	2348	NA	Intergenic	B3|SINE|B2	-31960	NM_011037	18504	Mm.192158	NM_011037	ENSMUSG00000004231	Pax2	Opdc|Pax-2	paired box 2	protein-coding
MACS_peak_2751	chr18	21808698	21812745	+	2348	NA	exon (NM_001081403, exon 1 of 8)	exon (NM_001081403, exon 1 of 8)	148	NM_001081403	225266	Mm.436836	NM_001081403	ENSMUSG00000042514	Klhl14	6330403N15Rik|AI785250|printor	kelch-like 14	protein-coding
MACS_peak_3798	chr3	90268629	90270127	+	2341	NA	exon (NM_008727, exon 1 of 22)	exon (NM_008727, exon 1 of 22)	410	NM_008727	18160	Mm.4627	NM_008727	ENSMUSG00000027931	Npr1	AI893888|GC-A|NPR-A|NPRA|Pndr	natriuretic peptide receptor 1	protein-coding
MACS_peak_1262	chr12	34651008	34653988	+	2341	NA	Intergenic	Intergenic	9962	NM_011658	22160	Mm.3280	NM_011658	ENSMUSG00000035799	Twist1	AA960487|M-Twist|Pde|Ska10|Ska<m10Jus>|Twist|bHLHa38|pdt	twist basic helix-loop-helix transcription factor 1	protein-coding
MACS_peak_5147	chr6	107479754	107481266	+	2340	NA	intron (NM_008516, intron 1 of 1)	intron (NM_008516, intron 1 of 1)	790	NM_008516	16979	Mm.428543	NM_008516	ENSMUSG00000034648	Lrrn1	2810047E21Rik|NLRR-1	leucine rich repeat protein 1, neuronal	protein-coding
MACS_peak_3681	chr3	13470727	13473661	+	2340	NA	intron (NM_001163328, intron 1 of 8)	intron (NM_001163328, intron 1 of 8)	539	NM_001163328	76897	Mm.422625	NM_178631	ENSMUSG00000039717	Ralyl	0710005M24Rik	RALY RNA binding protein-like	protein-coding
MACS_peak_2693	chr17	74058675	74061541	+	2340	NA	promoter-TSS (NM_027864)	promoter-TSS (NM_027864)	-317	NM_027864	71685	Mm.271953	NM_027864	ENSMUSG00000024064	Galnt14	0610033M06Rik	UDP-N-acetyl-alpha-D-galactosamine:polypeptide N-acetylgalactosaminyltransferase 14	protein-coding
MACS_peak_4094	chr4	101167657	101170579	+	2340	NA	promoter-TSS (NM_198412)	promoter-TSS (NM_198412)	-135	NM_198412	72685	Mm.76494	NM_198412	ENSMUSG00000028528	Dnajc6	2810027M23Rik|mKIAA0473	DnaJ (Hsp40) homolog, subfamily C, member 6	protein-coding
MACS_peak_5115	chr6	91790629	91796499	+	2327	NA	Intergenic	CpG	-34483	NM_172730	232236	Mm.234879	NM_172730	ENSMUSG00000034083	Ccdc174	C130022K22Rik	coiled-coil domain containing 174	protein-coding
MACS_peak_2305	chr16	17802065	17804618	+	2323	NA	exon (NM_153790, exon 4 of 11)	exon (NM_153790, exon 4 of 11)	5966	NM_153790	224024	Mm.194950	NM_153790	ENSMUSG00000012017	Scarf2	AI194363|NSR1|SREC-II|SRECRP-1|Scarf1|Scatf1|Srec2|SrecII|W53987|W65560	scavenger receptor class F, member 2	protein-coding
MACS_peak_3386	chr2	119580950	119585589	+	2316	NA	intron (NM_206942, intron 6 of 18)	intron (NM_206942, intron 6 of 18)	992	NM_206941	17005	Mm.1740	NM_008523	ENSMUSG00000027297	Ltk	-	leukocyte tyrosine kinase	protein-coding
MACS_peak_845	chr11	61770433	61773929	+	2315	NA	intron (NM_001281818, intron 1 of 14)	intron (NM_001281818, intron 1 of 14)	1916	NM_001281818	432572	Mm.458025	NM_001029936	ENSMUSG00000042331	Specc1	2810012G08Rik|B230396K10Rik|Cytsb	sperm antigen with calponin homology and coiled-coil domains 1	protein-coding
MACS_peak_1929	chr14	104048065	104053108	+	2315	NA	intron (NM_198014, intron 1 of 6)	intron (NM_198014, intron 1 of 6)	1126	NM_198014	105439	Mm.27548	NM_198014	ENSMUSG00000055717	Slain1	9630044O09Rik|AA675320|AW742596	SLAIN motif family, member 1	protein-coding
MACS_peak_4944	chr6	28078708	28085898	+	2315	NA	intron (NM_008174, intron 1 of 10)	intron (NM_008174, intron 1 of 10)	2066	NM_008174	14823	Mm.320732	NM_008174	ENSMUSG00000024211	Grm8	A230002O04|Gprc1h|mGluR8	glutamate receptor, metabotropic 8	protein-coding
MACS_peak_3313	chr2	79267483	79268961	+	2315	NA	intron (NM_001048176, intron 1 of 12)	intron (NM_001048176, intron 1 of 12)	923	NM_001048176	228094	Mm.440704	NM_001033295	ENSMUSG00000075256	Cerkl	Gm1958|Rp26	ceramide kinase-like	protein-coding
MACS_peak_5433	chr7	53123597	53126883	+	2315	NA	Intergenic	(CAG)n|Simple_repeat|Simple_repeat	-2970	NM_133950	68137	Mm.298433	NM_133950	ENSMUSG00000002778	Kdelr1	8030486F04Rik|AW215843|Erd2.1	KDEL (Lys-Asp-Glu-Leu) endoplasmic reticulum protein retention receptor 1	protein-coding
MACS_peak_1180	chr11	116776777	116782012	+	2312	NA	promoter-TSS (NM_172948)	promoter-TSS (NM_172948)	-783	NM_172948	268510	Mm.35141	NM_172948	ENSMUSG00000043857	Mgat5b	C330018B01|GnT-IX|mGnTVB	mannoside acetylglucosaminyltransferase 5, isoenzyme B	protein-coding
MACS_peak_750	chr11	18769645	18772396	+	2305	NA	Intergenic	Intergenic	147952	NM_001193271	17268	Mm.356578	NM_010789	ENSMUSG00000020160	Meis1	C530044H18Rik|Evi8	Meis homeobox 1	protein-coding
MACS_peak_5544	chr7	106396226	106397718	+	2305	NA	Intergenic	Intergenic	-9851	NM_177448	233549	Mm.208030	NM_177448	ENSMUSG00000052396	Mogat2	DGAT2L5|MGAT2|Mgat1l	monoacylglycerol O-acyltransferase 2	protein-coding
MACS_peak_5679	chr7	148253990	148258084	+	2297	NA	intron (NM_177897, intron 14 of 19)	intron (NM_177897, intron 14 of 19)	-8091	NM_001162924	56460	Mm.350037	NM_019762	ENSMUSG00000054065	Pkp3	2310056L12Rik	plakophilin 3	protein-coding
MACS_peak_4285	chr4	136510027	136515082	+	2293	NA	intron (NM_007939, intron 1 of 16)	GC_rich|Low_complexity|Low_complexity	177	NM_007939	13842	Mm.1390	NM_007939	ENSMUSG00000028661	Epha8	AW047546|Eek|Hek3|mKIAA1459	Eph receptor A8	protein-coding
MACS_peak_5799	chr8	32197766	32201204	+	2293	NA	promoter-TSS (NM_025869)	promoter-TSS (NM_025869)	-649	NM_025869	66959	Mm.23916	NM_025869	ENSMUSG00000039661	Dusp26	2310043K02Rik|Skrp3	dual specificity phosphatase 26 (putative)	protein-coding
MACS_peak_2779	chr18	37301310	37305002	+	2293	NA	promoter-TSS (NM_001003672)	promoter-TSS (NM_001003672)	-467	NM_001003672	353237	Mm.308500	NM_001003672	ENSMUSG00000007440	Pcdhac2	CNRc2	protocadherin alpha subfamily C, 2	protein-coding
MACS_peak_4929	chr6	8897001	8902577	+	2293	NA	promoter-TSS (NM_008751)	promoter-TSS (NM_008751)	-230	NM_008751	18231	Mm.46954	NM_008751	ENSMUSG00000046178	Nxph1	C130005L03Rik	neurexophilin 1	protein-coding
MACS_peak_1484	chr13	23375810	23380744	+	2293	NA	Intergenic	Intergenic	8058	NR_046038	74061	Mm.399501	NR_046038	ENSMUSG00000085122	4933404K08Rik	-	RIKEN cDNA 4933404K08 gene	ncRNA
MACS_peak_1862	chr14	58691813	58698068	+	2287	NA	intron (NM_013518, intron 1 of 2)	CpG	3417	NM_013518	14180	Mm.8846	NM_013518		Fgf9	Eks	fibroblast growth factor 9	protein-coding
MACS_peak_731	chr11	4845156	4854244	+	2286	NA	intron (NM_001243043, intron 1 of 22)	intron (NM_001243043, intron 1 of 22)	-1633	NM_010904	380684	Mm.298283	NM_010904	ENSMUSG00000020396	Nefh	NF-H|NF200|Nfh|mKIAA0845	neurofilament, heavy polypeptide	protein-coding
MACS_peak_2349	chr16	35659625	35661907	+	2278	NA	exon (NM_013661, exon 17 of 22)	exon (NM_013661, exon 17 of 22)	108676	NM_153550	224132	Mm.24094	NM_153550	ENSMUSG00000022848	Dirc2	RCC4	disrupted in renal carcinoma 2 (human)	protein-coding
MACS_peak_1332	chr12	80230694	80235942	+	2278	NA	intron (NM_009705, intron 2 of 7)	intron (NM_009705, intron 2 of 7)	1543	NM_009705	11847	Mm.3506	NM_009705	ENSMUSG00000021125	Arg2	AII|AU022422	arginase type II	protein-coding
MACS_peak_2000	chr15	30575520	30578877	+	2278	NA	intron (NM_008729, intron 7 of 22)	intron (NM_008729, intron 7 of 22)	-391683	NR_045186	73784	Mm.66947	NR_045186		4930430F21Rik	-	RIKEN cDNA 4930430F21 gene	ncRNA
MACS_peak_5565	chr7	116581620	116583629	+	2278	NA	promoter-TSS (NM_054103)	promoter-TSS (NM_054103)	-57	NM_054103	117229	Mm.389950	NM_054103	ENSMUSG00000031027	Stk33	4921505G21Rik|AW061264	serine/threonine kinase 33	protein-coding
MACS_peak_1173	chr11	116194534	116196587	+	2267	NA	exon (NM_008240, exon 2 of 3)	exon (NM_008240, exon 2 of 3)	1108	NM_008240	15223	Mm.378938	NM_008240	ENSMUSG00000034227	Foxj1	FKHL-13|HFH-4|Hfh4	forkhead box J1	protein-coding
MACS_peak_3667	chr2	180866159	180870486	+	2267	NA	intron (NM_001003824, intron 1 of 16)	(CA)n|Simple_repeat|Simple_repeat	1608	NM_001006679	16536	Mm.40615	NM_010611	ENSMUSG00000016346	Kcnq2	HNSPC|KQT2|Nmf134	potassium voltage-gated channel, subfamily Q, member 2	protein-coding
MACS_peak_1084	chr11	100619420	100621436	+	2259	NA	intron (NM_001081194, intron 1 of 16)	intron (NM_001081194, intron 1 of 16)	664	NM_001081194	380728	Mm.297539	NM_001081194	ENSMUSG00000035355	Kcnh4	BEC2	potassium voltage-gated channel, subfamily H (eag-related), member 4	protein-coding
MACS_peak_458	chr10	22538965	22540775	+	2257	NA	promoter-TSS (NM_011545)	promoter-TSS (NM_011545)	64	NM_011545	21412	Mm.16497	NM_011545	ENSMUSG00000045680	Tcf21	Pod-1|Pod1|bHLHa23|capsulin|epc|epicardin	transcription factor 21	protein-coding
MACS_peak_2328	chr16	28445249	28448451	+	2256	NA	promoter-TSS (NM_183064)	promoter-TSS (NM_183064)	-689	NM_001276420	14167	Mm.7996	NM_010199		Fgf12	AV114868|FGF-12|FHF-1|Fhf1	fibroblast growth factor 12	protein-coding
MACS_peak_4277	chr4	136191715	136195157	+	2255	NA	exon (NM_001243262, exon 8 of 8)	exon (NM_001243262, exon 8 of 8)	14900	NM_001243262	242707	Mm.448979	NM_001243262	ENSMUSG00000070683	Lactbl1	-	lactamase, beta-like 1	protein-coding
MACS_peak_3351	chr2	102497589	102501033	+	2255	NA	5' UTR (NM_001077514, exon 1 of 11)	5' UTR (NM_001077514, exon 1 of 11)	471	NM_001077514	20511	Mm.267547	NM_011393	ENSMUSG00000005089	Slc1a2	1700091C19Rik|2900019G14Rik|AI159670|Eaat2|GLT-1|GLT1|MGLT1	solute carrier family 1 (glial high affinity glutamate transporter), member 2	protein-coding
MACS_peak_162	chr1	84930449	84932803	+	2255	NA	promoter-TSS (NM_027921)	promoter-TSS (NM_027921)	32	NM_027921	71781	Mm.158754	NM_027921	ENSMUSG00000026220	Slc16a14	1110004H10Rik	solute carrier family 16 (monocarboxylic acid transporters), member 14	protein-coding
MACS_peak_5262	chr7	4726363	4730659	+	2255	NA	intron (NM_001290423, intron 1 of 4)	CpG	1232	NM_008350	16156	Mm.35814	NM_008350	ENSMUSG00000004371	Il11	IL-11	interleukin 11	protein-coding
MACS_peak_4212	chr4	126845259	126850593	+	2255	NA	intron (NM_198618, intron 1 of 11)	intron (NM_198618, intron 1 of 11)	1411	NM_198618	242667	Mm.331885	NM_198618	ENSMUSG00000042388	Dlgap3	BC058433|DAP-3|DAP3|Prpl8|Sapap3	discs, large (Drosophila) homolog-associated protein 3	protein-coding
MACS_peak_5561	chr7	116092163	116095400	+	2255	NA	Intergenic	Intergenic	15852	NM_025344	66085	Mm.182962	NM_025344		Eif3f	0610037M02Rik|AA409853|Eif3s5	eukaryotic translation initiation factor 3, subunit F	protein-coding
MACS_peak_6428	chr9	118394694	118399612	+	2255	NA	Intergenic	Intergenic	9846	NM_010136	13813	Mm.200692	NM_010136	ENSMUSG00000032446	Eomes	C77258|TBR-2|Tbr2	eomesodermin homolog (Xenopus laevis)	protein-coding
MACS_peak_1649	chr13	76520749	76522917	+	2255	NA	promoter-TSS (NM_030174)	promoter-TSS (NM_030174)	-576	NM_030174	78771	Mm.316249	NM_030174		Mctp1	2810465F10Rik	multiple C2 domains, transmembrane 1	protein-coding
MACS_peak_1637	chr13	72772257	72779762	+	2255	NA	Intergenic	Intergenic	9583	NM_010574	16372	Mm.28888	NM_010574	ENSMUSG00000001504	Irx2	IRX6	Iroquois related homeobox 2 (Drosophila)	protein-coding
MACS_peak_1937	chr14	112073870	112077029	+	2255	NA	intron (NM_198865, intron 1 of 1)	intron (NM_198865, intron 1 of 1)	1112	NM_198865	75409	Mm.235097	NM_029273	ENSMUSG00000033214	Slitrk5	2610019D03Rik	SLIT and NTRK-like family, member 5	protein-coding
MACS_peak_1338	chr12	82125629	82129812	+	2253	NA	promoter-TSS (NM_001146217)	promoter-TSS (NM_001146217)	-75	NM_001146217	64075	Mm.273295	NM_022316	ENSMUSG00000021136	Smoc1	2600002F22Rik|AI848508|SRG	SPARC related modular calcium binding 1	protein-coding
MACS_peak_1019	chr11	96190747	96196462	+	2252	NA	intron (NM_001079869, intron 1 of 3)	intron (NM_001079869, intron 1 of 3)	9164	NM_001079869	15410	Mm.342481	NM_010458		Hoxb3	Hox-2.7	homeobox B3	protein-coding
MACS_peak_1726	chr13	108434896	108437731	+	2247	NA	Intergenic	Intergenic	-41164	NR_045900	72257	Mm.234155	NR_045900		1700006H21Rik	-	RIKEN cDNA 1700006H21 gene	ncRNA
MACS_peak_3471	chr2	151872840	151879078	+	2246	NA	Intergenic	Intergenic	-31306	NM_001160410	545474	Mm.214317	NM_001160410	ENSMUSG00000060257	Scrt2	AW060659	scratch homolog 2, zinc finger protein (Drosophila)	protein-coding
MACS_peak_1045	chr11	96975201	96980710	+	2246	NA	Intergenic	B2_Mm1a|SINE|B2	-1310	NM_019507	57765	Mm.94519	NM_019507	ENSMUSG00000001444	Tbx21	TBT1|Tbet|Tblym	T-box 21	protein-coding
MACS_peak_5650	chr7	144500764	144503602	+	2246	NA	intron (NM_010096, intron 4 of 15)	CpG-13682	3945	NM_001113415	13593	Mm.258708	NM_010096	ENSMUSG00000010476	Ebf3	3110018A08Rik|O/E-2|mKIAA4201	early B cell factor 3	protein-coding
MACS_peak_803	chr11	50660940	50666968	+	2244	NA	promoter-TSS (NM_173372)	promoter-TSS (NM_173372)	-233	NM_173372	108072	Mm.134265	NM_173372	ENSMUSG00000000617	Grm6	BC021919|Gm3|Gprc1f|mGluR6|nerg1|nob2|nob3|nob4	glutamate receptor, metabotropic 6	protein-coding
MACS_peak_3084	chr19	56948333	56953091	+	2239	NA	intron (NM_172840, intron 1 of 13)	intron (NM_172840, intron 1 of 13)	1806	NM_172840	240675	Mm.129534	NM_172840	ENSMUSG00000025082	Vwa2	Amaco	von Willebrand factor A domain containing 2	protein-coding
MACS_peak_2530	chr17	28216819	28218714	+	2225	NA	promoter-TSS (NM_001085555)	promoter-TSS (NM_001085555)	-182	NM_001085555	21463	Mm.29758	NM_013687	ENSMUSG00000062859	Tcp11	D17Ken1|Tcp-11	t-complex protein 11	protein-coding
MACS_peak_5384	chr7	35904523	35905722	+	2222	NA	exon (NM_007678, exon 1 of 1)	exon (NM_007678, exon 1 of 1)	810	NM_007678	12606	Mm.349667	NM_007678	ENSMUSG00000034957	Cebpa	C/ebpalpha|CBF-A|Cebp	CCAAT/enhancer binding protein (C/EBP), alpha	protein-coding
MACS_peak_2346	chr16	35540542	35544442	+	2222	NA	intron (NM_013661, intron 1 of 21)	CpG	1044	NM_013661	20357	Mm.42015	NM_013661	ENSMUSG00000052133	Sema5b	AI893641|SemG|Semag|mKIAA1445	sema domain, seven thrombospondin repeats (type 1 and type 1-like), transmembrane domain (TM) and short cytoplasmic domain, (semaphorin) 5B	protein-coding
MACS_peak_5962	chr8	111218705	111224226	+	2221	NA	Intergenic	Intergenic	-17079	NM_007496	11906	Mm.416972	NM_007496	ENSMUSG00000038872	Zfhx3	A230102L03Rik|Atbf1|WBP9|mKIAA4228	zinc finger homeobox 3	protein-coding
MACS_peak_6065	chr8	128821836	128825197	+	2221	NA	intron (NM_175434, intron 1 of 6)	intron (NM_175434, intron 1 of 6)	1037	NM_175434	210027	Mm.405238	NM_175434	ENSMUSG00000057060	Slc35f3	B230375D17Rik	solute carrier family 35, member F3	protein-coding
MACS_peak_6077	chr9	8897593	8902697	+	2220	NA	5' UTR (NM_008829, exon 1 of 8)	5' UTR (NM_008829, exon 1 of 8)	312	NM_008829	18667	Mm.12798	NM_008829		Pgr	9930019P03Rik|BB114106|ENSMUSG00000074510|NR3C3|PR|PR-A|PR-B	progesterone receptor	protein-coding
MACS_peak_470	chr10	29252744	29256444	+	2220	NA	intron (NM_028351, intron 1 of 4)	intron (NM_028351, intron 1 of 4)	1079	NM_028351	72780	Mm.45191	NM_028351	ENSMUSG00000019880	Rspo3	2810459H04Rik|AW742308|Cristin1|Thsd2	R-spondin 3 homolog (Xenopus laevis)	protein-coding
MACS_peak_3978	chr4	32023773	32025149	+	2220	NA	Intergenic	Intergenic	-26621	NM_009316	26409	Mm.258589	NM_009316	ENSMUSG00000028284	Map3k7	B430101B05|C87327|Tak1	mitogen-activated protein kinase kinase kinase 7	protein-coding
MACS_peak_1683	chr13	95476866	95481056	+	2220	NA	Intergenic	Intergenic	-79937	NM_009321	21371	Mm.379025	NM_009321	ENSMUSG00000042043	Tbca	Tbca13	tubulin cofactor A	protein-coding
MACS_peak_4126	chr4	114728799	114731570	+	2218	NA	promoter-TSS (NM_001287388)	promoter-TSS (NM_001287388)	-232	NM_001287388	21349	Mm.439685	NM_011527	ENSMUSG00000028717	Tal1	SCL/tal-1|Scl|bHLHa17|tal-1	T cell acute lymphocytic leukemia 1	protein-coding
MACS_peak_3771	chr3	86350493	86352927	+	2218	NA	5' UTR (NM_011839, exon 1 of 1)	5' UTR (NM_011839, exon 1 of 1)	495	NM_011839	23937	Mm.389466	NM_011839	ENSMUSG00000057777	Mab21l2	-	mab-21-like 2 (C. elegans)	protein-coding
MACS_peak_2694	chr17	74395832	74399425	+	2208	NA	promoter-TSS (NM_053188)	promoter-TSS (NM_053188)	-372	NM_053188	94224	Mm.38933	NM_053188	ENSMUSG00000038541	Srd5a2	5ART2|S5AR 2	steroid 5 alpha-reductase 2	protein-coding
MACS_peak_3864	chr3	108027061	108031637	+	2206	NA	5' UTR (NM_008596, exon 1 of 6)	5' UTR (NM_008596, exon 1 of 6)	168	NM_008596	17306	Mm.316885	NM_008596	ENSMUSG00000027887	Sypl2	AI552439|Mg29	synaptophysin-like 2	protein-coding
MACS_peak_5184	chr6	121361664	121364429	+	2204	NA	non-coding (NR_110358, exon 3 of 14)	non-coding (NR_110358, exon 3 of 14)	60650	NM_001033354	243621	Mm.299442	NM_001033354	ENSMUSG00000040797	Iqsec3	AK122446|BRAG3|mKIAA1110|synarfGEF	IQ motif and Sec7 domain 3	protein-coding
MACS_peak_1954	chr14	119534593	119539040	+	2200	NA	promoter-TSS (NM_015820)	promoter-TSS (NM_015820)	-671	NM_015820	50787	Mm.445777	NM_015820		Hs6st3	6OST3|HS6ST-3	heparan sulfate 6-O-sulfotransferase 3	protein-coding
MACS_peak_522	chr10	59568447	59571184	+	2200	NA	intron (NM_052994, intron 1 of 10)	CpG	810	NM_052994	94214	Mm.153429	NM_052994	ENSMUSG00000058297	Spock2	AA407235|Gcap26|mKIAA0275	sparc/osteonectin, cwcv and kazal-like domains proteoglycan 2	protein-coding
MACS_peak_4387	chr4	151530612	151535833	+	2200	NA	intron (NM_008236, intron 1 of 4)	intron (NM_008236, intron 1 of 4)	246	NM_008236	15206	Mm.57038	NM_008236	ENSMUSG00000028940	Hes2	HES-2	hairy and enhancer of split 2 (Drosophila)	protein-coding
MACS_peak_5952	chr8	108859061	108860952	+	2200	NA	intron (NM_021491, intron 1 of 8)	intron (NM_021491, intron 1 of 8)	1882	NM_021491	58994	Mm.23298	NM_021491	ENSMUSG00000031906	Smpd3	4631433G07Rik|AI427456|AW537966|fro|nSMase2	sphingomyelin phosphodiesterase 3, neutral	protein-coding
MACS_peak_5011	chr6	52138290	52144793	+	2200	NA	exon (NM_008265, exon 1 of 2)	exon (NM_008265, exon 1 of 2)	161	NM_008265	15401	Mm.439647	NM_008265	ENSMUSG00000000942	Hoxa4	AV206827|Hox-1.4	homeobox A4	protein-coding
MACS_peak_3593	chr2	168098804	168109615	+	2200	NA	Intergenic	(TTCC)n|Simple_repeat|Simple_repeat	-9378	NM_001081134	241794	Mm.425102	NM_001081134	ENSMUSG00000074575	Kcng1	AW536275|OTTMUSG00000016048	potassium voltage-gated channel, subfamily G, member 1	protein-coding
MACS_peak_5429	chr7	53038916	53043113	+	2195	NA	exon (NM_001290990, exon 1 of 15)	exon (NM_001290990, exon 1 of 15)	264	NM_001290990	381983	Mm.44928	NM_001005511	ENSMUSG00000062044	Lmtk3	BC059845|aatyk3	lemur tyrosine kinase 3	protein-coding
MACS_peak_2189	chr15	98925113	98930081	+	2195	NA	Intergenic	CpG	-2318	NM_176835	72778	Mm.30544	NM_176835	ENSMUSG00000038009	Dnajc22	2810451A06Rik|AI506245	DnaJ (Hsp40) homolog, subfamily C, member 22	protein-coding
MACS_peak_2902	chr19	5084189	5086055	+	2195	NA	intron (NM_001001885, intron 1 of 1)	intron (NM_001001885, intron 1 of 1)	355	NM_001001885	381199	Mm.329663	NM_001001885	ENSMUSG00000061451	Tmem151a	AW125688|Gm961|Tmem151	transmembrane protein 151A	protein-coding
MACS_peak_904	chr11	79402594	79407393	+	2195	NA	intron (NM_175543, intron 1 of 14)	CpG	279	NM_175543	268451	Mm.130656	NM_175543	ENSMUSG00000017639	Rab11fip4	A730072L08Rik|RAB11-FIP4|mKIAA1821	RAB11 family interacting protein 4 (class II)	protein-coding
MACS_peak_3389	chr2	121631416	121635928	+	2195	NA	promoter-TSS (NM_172673)	promoter-TSS (NM_172673)	-879	NM_172673	228564	Mm.121514	NM_172673	ENSMUSG00000027238	Frmd5	1500032A09Rik|5830442F04|A930004K21Rik|R75430	FERM domain containing 5	protein-coding
MACS_peak_2844	chr18	74600113	74603819	+	2194	NA	promoter-TSS (NM_201600)	promoter-TSS (NM_201600)	-307	NM_201600	17919	Mm.260098	NM_008661	ENSMUSG00000025885	Myo5b	AI661750|mKIAA1119	myosin VB	protein-coding
MACS_peak_261	chr1	136604224	136608569	+	2192	NA	intron (NM_009307, intron 2 of 9)	intron (NM_009307, intron 2 of 9)	63138	NM_009307	20980	Mm.5102	NM_009307	ENSMUSG00000026452	Syt2	R74640|mKIAA4194	synaptotagmin II	protein-coding
MACS_peak_4514	chr5	44487837	44493118	+	2192	NA	intron (NM_008935, intron 1 of 26)	intron (NM_008935, intron 1 of 26)	2498	NM_008935	19126	Mm.6250	NM_008935	ENSMUSG00000029086	Prom1	4932416E19Rik|AC133|CD133|Prom|Prom-1|Proml1	prominin 1	protein-coding
MACS_peak_2048	chr15	74391502	74397658	+	2192	NA	intron (NM_174991, intron 18 of 30)	CpG-4956	47954	NM_174991	107831	Mm.43133	NM_174991	ENSMUSG00000034730	Bai1	B830018M07Rik|R75078|mKIAA4089	brain-specific angiogenesis inhibitor 1	protein-coding
MACS_peak_5711	chr7	152080182	152083440	+	2183	NA	promoter-TSS (NM_008003)	promoter-TSS (NM_008003)	-626	NM_008003	14170	Mm.3904	NM_008003	ENSMUSG00000031073	Fgf15	FGF19	fibroblast growth factor 15	protein-coding
MACS_peak_1600	chr13	56537168	56542478	+	2183	NA	5' UTR (NM_177809, exon 1 of 8)	5' UTR (NM_177809, exon 1 of 8)	107	NM_177809	328258	Mm.482177	NM_177809		Slc25a48	AU042651|E230025K15	solute carrier family 25, member 48	protein-coding
MACS_peak_4502	chr5	38204773	38231020	+	2182	NA	Intergenic	CpG	-2072	NM_010835	17701	Mm.256509	NM_010835	ENSMUSG00000048450	Msx1	AA675338|AI324650|Hox-7|Hox7|Hox7.1|msh	msh homeobox 1	protein-coding
MACS_peak_3558	chr2	164771913	164776802	+	2182	NA	exon (NM_013599, exon 2 of 13)	exon (NM_013599, exon 2 of 13)	638	NM_013599	17395	Mm.4406	NM_013599	ENSMUSG00000017737	Mmp9	AW743869|B/MMP9|Clg4b|MMP-9|pro-MMP-9	matrix metallopeptidase 9	protein-coding
MACS_peak_1275	chr12	55167941	55170168	+	2181	NA	exon (NM_013780, exon 12 of 12)	exon (NM_013780, exon 12 of 12)	135807	NM_028133	112407	Mm.133037	NM_028133	ENSMUSG00000035105	Egln3	2610021G09Rik|AI505553|AI648162|Hif-p4h-3|Phd3|SM-20	egl-9 family hypoxia-inducible factor 3	protein-coding
MACS_peak_575	chr10	79074739	79077101	+	2181	NA	exon (NM_198614, exon 2 of 2)	exon (NM_198614, exon 2 of 2)	843	NM_198614	237397	Mm.334207	NM_198614	ENSMUSG00000045912	C2cd4c	4932409I22Rik|Fam148c|Gm238	C2 calcium-dependent domain containing 4C	protein-coding
MACS_peak_3775	chr3	87595078	87610038	+	2174	NA	intron (NM_011832, intron 1 of 21)	intron (NM_011832, intron 1 of 21)	1685	NM_011832	23920	Mm.42041	NM_011832	ENSMUSG00000005640	Insrr	Irr	insulin receptor-related receptor	protein-coding
MACS_peak_867	chr11	68198378	68200502	+	2173	NA	exon (NM_008744, exon 2 of 7)	exon (NM_008744, exon 2 of 7)	888	NM_008744	18208	Mm.39095	NM_008744	ENSMUSG00000020902	Ntn1	AI561871|BC019633|Netrin-1	netrin 1	protein-coding
MACS_peak_3736	chr3	54859036	54860341	+	2170	NA	promoter-TSS (NM_007628)	promoter-TSS (NM_007628)	524	NR_040593	70970	Mm.251485	NR_040593		4931419H13Rik	-	RIKEN cDNA 4931419H13 gene	ncRNA
MACS_peak_5595	chr7	127739492	127742576	+	2170	NA	promoter-TSS (NR_024324)	promoter-TSS (NR_024324)	-105	NR_024324	78552	Mm.289190	NR_024324		E130201H02Rik	-	Y box protein 1 pseudogene	pseudo
MACS_peak_1572	chr13	54836683	54841707	+	2170	NA	exon (NM_012014, exon 3 of 3)	exon (NM_012014, exon 3 of 3)	11835	NM_012014	26913	Mm.41812	NM_012014	ENSMUSG00000069227	Gprin1	GRIN1|Z16	G protein-regulated inducer of neurite outgrowth 1	protein-coding
MACS_peak_4976	chr6	39820866	39825719	+	2170	NA	Intergenic	CpG	-62357	NM_001010930	14548	Mm.377071	NM_010270	ENSMUSG00000029918	Mrps33	AI841153|CGI-139|Gdap3|MRP-S33|PTD003	mitochondrial ribosomal protein S33	protein-coding
MACS_peak_4943	chr6	25637820	25640644	+	2170	NA	5' UTR (NM_010338, exon 1 of 2)	5' UTR (NM_010338, exon 1 of 2)	748	NM_010338	14763	Mm.409670	NM_010338		Gpr37	AI848630|Pael-R	G protein-coupled receptor 37	protein-coding
MACS_peak_1554	chr13	51660436	51664200	+	2170	NA	intron (NM_009167, intron 1 of 11)	intron (NM_009167, intron 1 of 11)	135	NM_009167	20418	Mm.131870	NM_009167	ENSMUSG00000021448	Shc3	N-Shc|Rai|ShcC	src homology 2 domain-containing transforming protein C3	protein-coding
MACS_peak_5594	chr7	127343915	127346383	+	2169	NA	intron (NM_016669, intron 1 of 7)	intron (NM_016669, intron 1 of 7)	353	NM_016669	12971	Mm.9114	NM_016669	ENSMUSG00000030905	Crym	-	crystallin, mu	protein-coding
MACS_peak_3956	chr4	9784308	9788191	+	2166	NA	intron (NM_013526, intron 1 of 1)	intron (NM_013526, intron 1 of 1)	14730	NM_013526	242316	Mm.302555	NM_013526	ENSMUSG00000051279	Gdf6	BMP-13|BMP13|GDF16	growth differentiation factor 6	protein-coding
MACS_peak_1729	chr13	109002330	109005363	+	2166	NA	promoter-TSS (NM_029001)	promoter-TSS (NM_029001)	-752	NM_029001	74559	Mm.286127	NM_029001	ENSMUSG00000021696	Elovl7	9130013K24Rik|AI840082	ELOVL family member 7, elongation of long chain fatty acids (yeast)	protein-coding
MACS_peak_2220	chr15	100882982	100885241	+	2165	NA	exon (NM_001214911, exon 1 of 1)	exon (NM_001214911, exon 1 of 1)	719	NM_001214911	668225	Mm.385011	NM_001214911	ENSMUSG00000095440	Fignl2	EG668225	fidgetin-like 2	protein-coding
MACS_peak_1898	chr14	68740737	68743975	+	2163	NA	exon (NM_008691, exon 1 of 3)	exon (NM_008691, exon 1 of 3)	547	NR_045897	100043072	Mm.242832	NR_045897		A230070E04Rik	Gm4210	RIKEN cDNA A230070E04 gene	ncRNA
MACS_peak_1998	chr15	30100764	30105111	+	2163	NA	intron (NM_008729, intron 1 of 22)	CpG	589	NM_008729	18163	Mm.321648	NM_008729	ENSMUSG00000022240	Ctnnd2	Catnd2|Nprap|neurojugin	catenin (cadherin associated protein), delta 2	protein-coding
MACS_peak_2144	chr15	89283508	89285725	+	2163	NA	5' UTR (NM_021921, exon 1 of 12)	5' UTR (NM_021921, exon 1 of 12)	274	NM_021921	60597	Mm.173337	NM_021921		Mapk8ip2	3230402N03Rik|AI847694|AW049958|IB2|Jip2|R75148	mitogen-activated protein kinase 8 interacting protein 2	protein-coding
MACS_peak_1371	chr12	99811636	99816591	+	2163	NA	intron (NM_029911, intron 1 of 6)	intron (NM_029911, intron 1 of 6)	2037	NM_029911	72258	Mm.196158	NM_029911	ENSMUSG00000033854	Kcnk10	1700024D23Rik|3010005K24Rik|Trek2	potassium channel, subfamily K, member 10	protein-coding
MACS_peak_3132	chr2	17651495	17653811	+	2163	NA	promoter-TSS (NM_028757)	promoter-TSS (NM_028757)	42	NM_028757	74103	Mm.120298	NM_028757	ENSMUSG00000053702	Nebl	1200007O21Rik|A630080F05Rik|BB140644|D830029A09Rik|Lnebl	nebulette	protein-coding
MACS_peak_4993	chr6	51121099	51128789	+	2163	NA	Intergenic	Intergenic	94965	NR_029719	387166		NR_029719	miRBase:MI0000550	Mir148a	Mirn148|Mirn148a	microRNA 148a	ncRNA
MACS_peak_3916	chr3	141829266	141833502	+	2163	NA	intron (NM_001277216, intron 1 of 11)	intron (NM_001277216, intron 1 of 11)	808	NM_001277217	12167	Mm.39089	NM_007560	ENSMUSG00000052430	Bmpr1b	AI385617|ALK-6|AV355320|Acvrlk6|Alk6|BMPR-1B|BMPR-IB|CFK-43a|SKR6	bone morphogenetic protein receptor, type 1B	protein-coding
MACS_peak_324	chr1	168182798	168187091	+	2163	NA	intron (NM_001164528, intron 1 of 9)	intron (NM_001164528, intron 1 of 9)	674	NM_001164528	100039795	Mm.101743	NM_001164528	ENSMUSG00000040612	Ildr2	2810478N18Rik|3110063L10Rik|AI852300|D1Ertd471e|Dbsm1|ENSMUSG00000040612|Ll	immunoglobulin-like domain containing receptor 2	protein-coding
MACS_peak_1376	chr12	102136024	102140224	+	2163	NA	promoter-TSS (NM_001177674)	promoter-TSS (NM_001177674)	-390	NM_001177674	238377	Mm.32160	NM_175493	ENSMUSG00000047415	Gpr68	BB131428|Ogr1	G protein-coupled receptor 68	protein-coding
MACS_peak_1754	chr13	117098505	117102237	+	2163	NA	promoter-TSS (NM_021459)	promoter-TSS (NM_021459)	-475	NM_021459	16392	Mm.42242	NM_021459	ENSMUSG00000042258	Isl1	-	ISL1 transcription factor, LIM/homeodomain	protein-coding
MACS_peak_2479	chr17	23669956	23675571	+	2162	NA	Intergenic	Intergenic	28430	NM_001033496	449521	Mm.268582	NM_001033496	ENSMUSG00000071256	Zfp213	BC038178|D17Ertd197e	zinc finger protein 213	protein-coding
MACS_peak_5494	chr7	82452451	82455279	+	2160	NA	promoter-TSS (NM_001109753)	promoter-TSS (NM_001109753)	277	NR_045814	68954	Mm.46960	NR_045812	ENSMUSG00000097247	1500012K07Rik	-	RIKEN cDNA 1500012K07 gene	ncRNA
MACS_peak_3250	chr2	49641470	49645125	+	2160	NA	promoter-TSS (NM_027990)	promoter-TSS (NM_027990)	91	NM_027990	71897	Mm.41381	NM_027990	ENSMUSG00000026765	Lypd6b	2310010M24Rik|AW049525	LY6/PLAUR domain containing 6B	protein-coding
MACS_peak_5975	chr8	113913969	113918658	+	2160	NA	intron (NM_178086, intron 1 of 6)	intron (NM_178086, intron 1 of 6)	1408	NM_178086	338521	Mm.41083	NM_178086	ENSMUSG00000033579	Fa2h	FAAH|Faxdc1|G630055L08Rik	fatty acid 2-hydroxylase	protein-coding
MACS_peak_5268	chr7	13628584	13630672	+	2149	NA	exon (NM_145819, exon 6 of 6)	exon (NM_145819, exon 6 of 6)	-6004	NM_001168469	22192	Mm.196580	NM_145578	ENSMUSG00000005575	Ube2m	2510040H03Rik|UBC12|Ubc-rs2	ubiquitin-conjugating enzyme E2M	protein-coding
MACS_peak_3392	chr2	122136281	122141216	+	2148	NA	5' UTR (NM_145395, exon 2 of 9)	5' UTR (NM_145395, exon 2 of 9)	718	NM_145395	213696	Mm.247121	NM_145395	ENSMUSG00000027224	Duoxa1	BC019755|Nip|Nip1	dual oxidase maturation factor 1	protein-coding
MACS_peak_3061	chr19	46210487	46212371	+	2143	NA	intron (NM_008852, intron 3 of 3)	CpG	5040	NM_007703	12686	Mm.21806	NM_007703	ENSMUSG00000038754	Elovl3	CIN-2|Cig30	elongation of very long chain fatty acids (FEN1/Elo2, SUR4/Elo3, yeast)-like 3	protein-coding
MACS_peak_3499	chr2	155597371	155604645	+	2143	NA	promoter-TSS (NM_010808)	promoter-TSS (NM_010808)	-72	NM_010808	17391	Mm.330707	NM_010808	ENSMUSG00000027612	Mmp24	AU040325|MT5-MMP|MT5MMP|MTMMP5	matrix metallopeptidase 24	protein-coding
MACS_peak_6353	chr9	97932227	97935061	+	2139	NA	promoter-TSS (NM_022319)	promoter-TSS (NM_022319)	-58	NM_022319	64085	Mm.440903	NM_022319	ENSMUSG00000032452	Clstn2	2900042C18Rik|AI448973|CSTN2|Cs2|Cst-2|mKIAA4134	calsyntenin 2	protein-coding
MACS_peak_3126	chr2	10291104	10298152	+	2139	NA	intron (NM_177386, intron 1 of 22)	CpG	565	NM_177386	353282	Mm.329991	NM_177386	ENSMUSG00000061186	Sfmbt2	D2Wsu23e|D330030P06Rik	Scm-like with four mbt domains 2	protein-coding
MACS_peak_795	chr11	45979413	45980089	+	2139	NA	exon (NM_172524, exon 1 of 6)	exon (NM_172524, exon 1 of 6)	110	NM_172524	214112	Mm.225253	NM_172524	ENSMUSG00000020411	Nipal4	9530066K23Rik	NIPA-like domain containing 4	protein-coding
MACS_peak_4459	chr5	28784383	28796693	+	2137	NA	intron (NM_009170, intron 1 of 2)	intron (NM_009170, intron 1 of 2)	-2986	NR_015562	654796	Mm.57202	NR_015562	ENSMUSG00000097726	9530036O11Rik	-	RIKEN cDNA 9530036O11Rik	ncRNA
MACS_peak_5339	chr7	29073825	29082733	+	2136	NA	TTS (NM_007866)	TTS (NM_007866)	-2126	NM_175033	280621	Mm.212777	NM_175033	ENSMUSG00000046750	BC089491	Selv	cDNA sequence BC089491	protein-coding
MACS_peak_1294	chr12	62621768	62626319	+	2126	NA	Intergenic	CpG	-1236	NR_045049	100504101	Mm.235026	NR_045049		Gm20063	-	predicted gene, 20063	ncRNA
MACS_peak_4095	chr4	101180125	101183123	+	2126	NA	intron (NM_001164584, intron 1 of 18)	CpG	1043	NM_001164584	72685	Mm.76494	NM_198412	ENSMUSG00000028528	Dnajc6	2810027M23Rik|mKIAA0473	DnaJ (Hsp40) homolog, subfamily C, member 6	protein-coding
MACS_peak_2355	chr16	37915862	37917265	+	2126	NA	promoter-TSS (NM_153394)	promoter-TSS (NM_153394)	-19	NM_153394	239845	Mm.228018	NM_153394	ENSMUSG00000046961	Gpr156	Gababl	G protein-coupled receptor 156	protein-coding
MACS_peak_5217	chr6	131383592	131384699	+	2126	NA	Intergenic	Lx5|LINE|L1	-45677	NM_011733	56449	Mm.458000	NM_011733	ENSMUSG00000030189	Ybx3	Csda|Dpba|MSY3|MSY4|Yb2|dbpA|oxyR	Y box protein 3	protein-coding
MACS_peak_2319	chr16	20628945	20630506	+	2122	NA	promoter-TSS (NM_177942)	promoter-TSS (NM_177942)	-199	NM_177942	107522	Mm.263319	NM_025462	ENSMUSG00000022842	Ece2	1810009K13Rik|6330509A19Rik|9630025D12Rik|BB127715	endothelin converting enzyme 2	protein-coding
MACS_peak_180	chr1	89154083	89163498	+	2122	NA	Intergenic	RMER15|LTR|ERVL	-2149	NM_028889	98363	Mm.247951	NM_028889	ENSMUSG00000026255	Efhd1	4931430I01Rik|AI452351|PP3051|mitocalcin	EF hand domain containing 1	protein-coding
MACS_peak_2164	chr15	96471746	96473818	+	2122	NA	promoter-TSS (NM_134086)	promoter-TSS (NM_134086)	-8	NM_001166456	105727	Mm.103568	NM_134086	ENSMUSG00000023169	Slc38a1	AA408026|AA409865|AL022800|AU015942|NAT2	solute carrier family 38, member 1	protein-coding
MACS_peak_3328	chr2	91815226	91816597	+	2122	NA	Intergenic	CpG	-12191	NM_138306	104418	Mm.314923	NM_138306	ENSMUSG00000040479	Dgkz	E130307B02Rik|ENSMUSG00000075035|F730209L11Rik|mDGK[z]	diacylglycerol kinase zeta	protein-coding
MACS_peak_4992	chr6	49770493	49774156	+	2122	NA	promoter-TSS (NM_023456)	promoter-TSS (NM_023456)	-404	NM_023456	109648	Mm.154796	NM_023456	ENSMUSG00000029819	Npy	0710005A05Rik	neuropeptide Y	protein-coding
MACS_peak_4137	chr4	115631900	115638223	+	2121	NA	Intergenic	Intergenic	-22530	NM_130865	140477	Mm.213206	NM_130865	ENSMUSG00000028707	Dmbx1	Atx|Cdmx|Mbx|Otx3	diencephalon/mesencephalon homeobox 1	protein-coding
MACS_peak_662	chr10	114237444	114240212	+	2121	NA	promoter-TSS (NM_146241)	promoter-TSS (NM_146241)	-402	NM_146241	237553	Mm.445550	NM_146241	ENSMUSG00000050663	Trhde	9330155P21Rik	TRH-degrading enzyme	protein-coding
MACS_peak_5324	chr7	26600820	26602050	+	2115	NA	exon (NM_028775, exon 1 of 9)	exon (NM_028775, exon 1 of 9)	114	NM_028775	74134	Mm.275188	NM_028775	ENSMUSG00000040703	Cyp2s1	1200011C15Rik|AU041727|C79779	cytochrome P450, family 2, subfamily s, polypeptide 1	protein-coding
MACS_peak_3939	chr3	153635321	153639200	+	2115	NA	intron (NM_001081263, intron 1 of 21)	intron (NM_001081263, intron 1 of 21)	860	NM_001081263	242259	Mm.239962	NM_001081263	ENSMUSG00000028360	Slc44a5	AA117069|Gm422	solute carrier family 44, member 5	protein-coding
MACS_peak_3697	chr3	28980443	28983847	+	2115	NA	intron (NM_029412, intron 1 of 14)	intron (NM_029412, intron 1 of 14)	646	NM_029412	75740	Mm.330948	NM_029412	ENSMUSG00000063600	Egfem1	6130401L20Rik|Efcab11	EGF-like and EMI domain containing 1	protein-coding
MACS_peak_5035	chr6	63205890	63208134	+	2115	NA	intron (NM_008167, intron 1 of 15)	CpG	161	NM_008167	14804	Mm.439651	NM_008167		Grid2	B230104L07Rik|GluD2|GluRdelta2|Lc|Lc<J>|MMS10-AC|Ms10ac|cpr|ho|nmf408|tpr	glutamate receptor, ionotropic, delta 2	protein-coding
MACS_peak_1017	chr11	96178931	96183926	+	2115	NA	exon (NM_010459, exon 2 of 2)	exon (NM_010459, exon 2 of 2)	1847	NM_010459	15412	Mm.3546	NM_010459		Hoxb4	Hox-2.6	homeobox B4	protein-coding
MACS_peak_5179	chr6	120242922	120245198	+	2115	NA	intron (NM_198884, intron 1 of 19)	CpG	517	NM_198884	330406	Mm.321840	NM_198884	ENSMUSG00000041372	B4galnt3	AB114826|B4GalNAcT3|C330047A21	beta-1,4-N-acetyl-galactosaminyl transferase 3	protein-coding
MACS_peak_3535	chr2	163028890	163031668	+	2112	NA	Intergenic	CpG	-20911	NM_001098799	269389	Mm.207709	NM_001098799	ENSMUSG00000074607	Tox2	AI851523|AV026525|BI987407|Gcx1|RxHMG1	TOX high mobility group box family member 2	protein-coding
MACS_peak_4015	chr4	44721889	44727604	+	2111	NA	Intergenic	Intergenic	-1434	NM_008782	18507	Mm.439659	NM_008782	ENSMUSG00000014030	Pax5	BSAP|EBB-1|KLP|Pax-5	paired box 5	protein-coding
MACS_peak_663	chr10	115022090	115025524	+	2111	NA	intron (NM_010195, intron 1 of 17)	intron (NM_010195, intron 1 of 17)	1029	NM_010195	14160	Mm.42103	NM_010195	ENSMUSG00000020140	Lgr5	FEX|Gpr49	leucine rich repeat containing G protein coupled receptor 5	protein-coding
MACS_peak_5301	chr7	25421122	25426076	+	2105	NA	exon (NM_133743, exon 3 of 5)	exon (NM_133743, exon 3 of 5)	2010	NM_133743	72434	Mm.281093	NM_133743	ENSMUSG00000057454	Lypd3	2310061G07Rik|C4.4a	Ly6/Plaur domain containing 3	protein-coding
MACS_peak_123	chr1	74826907	74831977	+	2105	NA	exon (NM_009526, exon 3 of 4)	exon (NM_009526, exon 3 of 4)	-9151	NM_009518	22409	Mm.5130	NM_009518		Wnt10a	-	wingless-type MMTV integration site family, member 10A	protein-coding
MACS_peak_1223	chr12	9586011	9589911	+	2102	NA	3' UTR (NM_011859, exon 3 of 3)	3' UTR (NM_011859, exon 3 of 3)	6713	NM_011859	23967	Mm.45055	NM_011859	ENSMUSG00000048387	Osr1	Odd1|Osr	odd-skipped related 1 (Drosophila)	protein-coding
MACS_peak_3670	chr2	181404424	181406385	+	2089	NA	exon (NM_009236, exon 2 of 2)	exon (NM_009236, exon 2 of 2)	941	NM_009236	20672	Mm.264904	NM_009236	ENSMUSG00000046470	Sox18	AI385749|Ra|Ragl	SRY (sex determining region Y)-box 18	protein-coding
MACS_peak_3320	chr2	84678693	84679767	+	2088	NA	promoter-TSS (NM_001081349)	promoter-TSS (NM_001081349)	-335	NM_001081349	72401	Mm.22716	NM_024497	ENSMUSG00000027075	Slc43a1	2610016F07Rik|AA986141|Lat3|PB39|Pov1|R00504	solute carrier family 43, member 1	protein-coding
MACS_peak_6099	chr9	20837506	20843337	+	2087	NA	intron (NM_008319, intron 6 of 10)	intron (NM_008319, intron 6 of 10)	-3649	NR_035438	100316681		NR_035438	miRBase:MI0008319	Mir1900	Mirn1900|mmu-mir-1900	microRNA 1900	ncRNA
MACS_peak_1666	chr13	84482948	84488480	+	2087	NA	Intergenic	Intergenic	123813	NM_175187	72745	Mm.295063	NM_175187	ENSMUSG00000035762	Tmem161b	2810446P07Rik|AI843389	transmembrane protein 161B	protein-coding
MACS_peak_863	chr11	66335525	66342168	+	2087	NA	exon (NM_001034874, exon 1 of 5)	exon (NM_001034874, exon 1 of 5)	782	NM_001034874	380702	Mm.351764	NM_001034874	ENSMUSG00000053930	Shisa6	Gm879	shisa homolog 6 (Xenopus laevis)	protein-coding
MACS_peak_63	chr1	38683273	38684792	+	2087	NA	promoter-TSS (NM_001290814)	promoter-TSS (NM_001290814)	57	NM_001290814	16764	Mm.336679	NM_010678	ENSMUSG00000037138	Aff3	3222402O04Rik|A730046J16|LAF-4|Laf4	AF4/FMR2 family, member 3	protein-coding
MACS_peak_2795	chr18	44971397	44972868	+	2087	NA	promoter-TSS (NM_001085373)	promoter-TSS (NM_001085373)	-296	NM_001085373	328949	Mm.312511	NM_001033406	ENSMUSG00000071856	Mcc	D18Ertd451e|E330037C19	mutated in colorectal cancers	protein-coding
MACS_peak_251	chr1	134633864	134639392	+	2085	NA	intron (NM_182716, intron 1 of 29)	intron (NM_182716, intron 1 of 29)	1746	NM_182716	269116	Mm.326702	NM_182716	ENSMUSG00000026442	Nfasc	AA387016|D430023G06Rik|NF|mKIAA0756	neurofascin	protein-coding
MACS_peak_1363	chr12	88639868	88642418	+	2081	NA	promoter-TSS (NM_001290302)	promoter-TSS (NM_001290302)	-488	NM_001290302	217738	Mm.219363	NM_001290302		Ism2	Gm264|Thsd3	isthmin 2 homolog (zebrafish)	protein-coding
MACS_peak_3555	chr2	164387562	164389446	+	2080	NA	intron (NM_026323, intron 1 of 4)	intron (NM_026323, intron 1 of 4)	288	NM_026323	67701	Mm.27289	NM_026323	ENSMUSG00000017723	Wfdc2	1600023A02Rik|HE4|WAP5	WAP four-disulfide core domain 2	protein-coding
MACS_peak_3317	chr2	83652669	83654501	+	2075	NA	intron (NM_175514, intron 1 of 7)	intron (NM_175514, intron 1 of 7)	700	NM_175514	241520	Mm.330351	NM_175514	ENSMUSG00000048388	Fam171b	D430039N05Rik	family with sequence similarity 171, member B	protein-coding
MACS_peak_5909	chr8	90972708	90980425	+	2074	NA	Intergenic	Intergenic	-68677	NM_027280	93960	Mm.30219	NM_027280	ENSMUSG00000031661	Nkd1	2810434J10Rik|9030215G15Rik|Nkd	naked cuticle 1 homolog (Drosophila)	protein-coding
MACS_peak_4972	chr6	37247415	37251867	+	2072	NA	exon (NM_001081206, exon 1 of 34)	exon (NM_001081206, exon 1 of 34)	335	NM_001081206	320127	Mm.119469	NM_001081206	ENSMUSG00000038665	Dgki	C130010K08Rik	diacylglycerol kinase, iota	protein-coding
MACS_peak_6476	chrX	55281328	55286892	+	2072	NA	5' UTR (NM_009575, exon 1 of 3)	5' UTR (NM_009575, exon 1 of 3)	305	NM_009575	22773	Mm.255890	NM_009575	ENSMUSG00000067860	Zic3	Bn|Ka	zinc finger protein of the cerebellum 3	protein-coding
MACS_peak_2886	chr18	86562669	86566121	+	2072	NA	promoter-TSS (NM_144946)	promoter-TSS (NM_144946)	51	NM_144946	246317	Mm.329578	NM_144946	ENSMUSG00000050321	Neto1	AI851453|Btcl1|C130005O10Rik	neuropilin (NRP) and tolloid (TLL)-like 1	protein-coding
MACS_peak_3354	chr2	104249662	104251831	+	2072	NA	promoter-TSS (NM_001033347)	promoter-TSS (NM_001033347)	-255	NM_001033347	241589	Mm.358909	NM_001033347	ENSMUSG00000068373	D430041D05Rik	9630056G07Rik|G2	RIKEN cDNA D430041D05 gene	protein-coding
MACS_peak_2309	chr16	17913141	17916897	+	2072	NA	exon (NM_029469, exon 1 of 3)	exon (NM_029469, exon 1 of 3)	133	NM_029469	195333	Mm.463003	NM_029469		Gsc2	4930568H22Rik|GSC-2|Gscl	goosecoid homebox 2	protein-coding
MACS_peak_573	chr10	78215065	78215879	+	2072	NA	exon (NM_027630, exon 1 of 7)	exon (NM_027630, exon 1 of 7)	340	NM_027630	70976	Mm.188505	NM_027630	ENSMUSG00000078442	Ccdc105	4931413A09Rik	coiled-coil domain containing 105	protein-coding
MACS_peak_3194	chr2	31168487	31173334	+	2068	NA	Intergenic	Intergenic	69467	NM_019681	14299	Mm.249318	NM_019681	ENSMUSG00000062661	Ncs1	9430075O15Rik|A730032G13Rik|AI836659|Freq|Mfreq|NCS-1	neuronal calcium sensor 1	protein-coding
MACS_peak_1304	chr12	74018245	74019195	+	2068	NA	promoter-TSS (NM_029444)	promoter-TSS (NM_029444)	32	NM_029444	75801	Mm.242892	NM_029444	ENSMUSG00000021098	4930447C04Rik	4921504I02Rik|A930035O15Rik|Six6OS|Six6as|Six6os1	RIKEN cDNA 4930447C04 gene	protein-coding
MACS_peak_2673	chr17	69188923	69191606	+	2068	NA	exon (NM_001206661, exon 2 of 2)	exon (NM_001206661, exon 2 of 2)	3788	NM_001206661	622645	Mm.86422	NM_001206661	ENSMUSG00000095407	Tmem200c	EG622645|Gm6338	transmembrane protein 200C	protein-coding
MACS_peak_5914	chr8	91044359	91047440	+	2068	NA	intron (NM_027280, intron 2 of 9)	intron (NM_027280, intron 2 of 9)	656	NM_027280	93960	Mm.30219	NM_027280	ENSMUSG00000031661	Nkd1	2810434J10Rik|9030215G15Rik|Nkd	naked cuticle 1 homolog (Drosophila)	protein-coding
MACS_peak_2081	chr15	79632561	79635468	+	2065	NA	intron (NM_001013360, intron 4 of 7)	intron (NM_001013360, intron 4 of 7)	1125	NM_030689	73340	Mm.38438	NM_030689	ENSMUSG00000022421	Nptxr	1200009K17Rik|1700036C17Rik|5730406O18Rik|AI452369|AI785356|D15Bwg0580e|NPR|Npcd	neuronal pentraxin receptor	protein-coding
MACS_peak_2921	chr19	10528852	10537383	+	2065	NA	Intergenic	Intergenic	-1180	NM_001111140	278795	Mm.490638	NM_001111140	ENSMUSG00000090291	Lrrc10b	Gm705|SerdinR	leucine rich repeat containing 10B	protein-coding
MACS_peak_2084	chr15	79921294	79922144	+	2062	NA	promoter-TSS (NM_009303)	promoter-TSS (NM_009303)	-45	NM_009303	20972	Mm.230301	NM_009303	ENSMUSG00000022415	Syngr1	R75468|Syngr1b|p29	synaptogyrin 1	protein-coding
MACS_peak_4032	chr4	47001473	47005854	+	2059	NA	intron (NM_001081141, intron 1 of 18)	intron (NM_001081141, intron 1 of 18)	923	NM_001081141	242425	Mm.101909	NM_001081141		Gabbr2	GABABR2|Gb2|Gm425|Gpr51	gamma-aminobutyric acid (GABA) B receptor, 2	protein-coding
MACS_peak_2737	chr18	6999964	7006304	+	2057	NA	intron (NM_177595, intron 1 of 6)	intron (NM_177595, intron 1 of 6)	1643	NM_177595	210719	Mm.257186	NM_177595	ENSMUSG00000061013	Mkx	9430023B20Rik|Irxl1	mohawk homeobox	protein-coding
MACS_peak_5075	chr6	84535201	84538217	+	2053	NA	intron (NM_001177713, intron 2 of 6)	intron (NM_001177713, intron 2 of 6)	7095	NM_175475	232174	Mm.255246	NM_175475	ENSMUSG00000063415	Cyp26b1	CP26|P450RAI-2	cytochrome P450, family 26, subfamily b, polypeptide 1	protein-coding
MACS_peak_3156	chr2	25156979	25161209	+	2051	NA	intron (NM_001177657, intron 8 of 18)	intron (NM_001177657, intron 8 of 18)	12354	NM_001242940	320354	Mm.445875	NM_001242940		Grin1os	E130003G02Rik	glutamate receptor, ionotropic, NMDA1 (zeta 1), opposite strand	protein-coding
MACS_peak_2509	chr17	25707004	25708454	+	2051	NA	promoter-TSS (NM_011447)	promoter-TSS (NM_011447)	-27	NR_045176	72834	Mm.33042	NR_045176	ENSMUSG00000091475	2810468N07Rik	-	RIKEN cDNA 2810468N07 gene	ncRNA
MACS_peak_5893	chr8	87081992	87083720	+	2049	NA	intron (NM_007578, intron 18 of 46)	intron (NM_007578, intron 18 of 46)	103895	NM_010499	15936	Mm.399	NM_010499	ENSMUSG00000053560	Ier2	AI317238|Ch1|Pip92	immediate early response 2	protein-coding
MACS_peak_1630	chr13	72099363	72104094	+	2048	NA	promoter-TSS (NM_010573)	promoter-TSS (NM_010573)	-557	NM_010573	16371	Mm.316056	NM_010573	ENSMUSG00000060969	Irx1	-	Iroquois related homeobox 1 (Drosophila)	protein-coding
MACS_peak_4792	chr5	122499814	122500895	+	2048	NA	Intergenic	CpG	-2520	NM_007804	13048	Mm.156172	NM_007804	ENSMUSG00000042589	Cux2	1700051K22Rik|Cutl2|Cux-2|ENSMUSG00000072641	cut-like homeobox 2	protein-coding
MACS_peak_3480	chr2	152767620	152771473	+	2047	NA	intron (NM_001159376, intron 6 of 6)	intron (NM_001159376, intron 6 of 6)	7595	NM_145744	252864	Mm.330671	NM_145744	ENSMUSG00000042662	Dusp15	AI851682|LMW-DSP10|T-DSP10	dual specificity phosphatase-like 15	protein-coding
MACS_peak_1516	chr13	36813782	36824403	+	2047	NA	intron (NM_153529, intron 2 of 2)	intron (NM_153529, intron 2 of 2)	7254	NM_153529	68404	Mm.232930	NM_153529	ENSMUSG00000039114	Nrn1	0710008J23Rik|Cpg15|Nrn	neuritin 1	protein-coding
MACS_peak_1517	chr13	36825516	36831164	+	2047	NA	Intergenic	Intergenic	-1994	NM_153529	68404	Mm.232930	NM_153529	ENSMUSG00000039114	Nrn1	0710008J23Rik|Cpg15|Nrn	neuritin 1	protein-coding
MACS_peak_4978	chr6	42272998	42275292	+	2041	NA	intron (NM_001286584, intron 1 of 6)	CpG	494	NM_001286584	76156	Mm.234314	NM_029528	ENSMUSG00000029861	Fam131b	6330503C03Rik|6530406I18Rik|AV277466	family with sequence similarity 131, member B	protein-coding
MACS_peak_5858	chr8	73385326	73388052	+	2037	NA	Intergenic	Intergenic	-5782	NM_032397	84036	Mm.32074	NM_032397	ENSMUSG00000002908	Kcnn1	AI854248|KCa2.1|SK1	potassium intermediate/small conductance calcium-activated channel, subfamily N, member 1	protein-coding
MACS_peak_6112	chr9	26539914	26541973	+	2036	NA	Intergenic	Intergenic	-18204	NM_029792	76898	Mm.218788	NM_029792	ENSMUSG00000045994	B3gat1	0710007K08Rik|AI846286|GlcAT-P|Glcatp|Hnk1	beta-1,3-glucuronyltransferase 1 (glucuronosyltransferase P)	protein-coding
MACS_peak_5899	chr8	87467138	87471457	+	2036	NA	Intergenic	Intergenic	-1593	NM_144929	234542	Mm.461701	NM_144929	ENSMUSG00000048617	Rtbdn	A330096I21Rik|BC022744|Rtbnd	retbindin	protein-coding
MACS_peak_1216	chr12	5380279	5383325	+	2033	NA	intron (NM_001164493, intron 1 of 13)	CpG	686	NM_001164493	208439	Mm.388281	NM_001164493	ENSMUSG00000020627	Klhl29	A230106N14Rik|Gm68|Kbtbd9|mKIAA1921	kelch-like 29	protein-coding
MACS_peak_297	chr1	156729941	156733907	+	2033	NA	Intergenic	Intergenic	-158874	NM_009782	12290	Mm.267517	NM_009782	ENSMUSG00000004110	Cacna1e	A430040I15|BII|Cach6|Cacnl1a6|Cav2.3|Cchra1|alpha1E	calcium channel, voltage-dependent, R type, alpha 1E subunit	protein-coding
MACS_peak_713	chr10	126602303	126603557	+	2032	NA	promoter-TSS (NM_001244618)	promoter-TSS (NM_001244618)	43	NM_001244618	14421	Mm.386762	NM_008080	ENSMUSG00000006731	B4galnt1	4933429D13Rik|Gal-NAc-T|GalNAc-T|GalNAcT|Galgt1|Ggm-2|Ggm2	beta-1,4-N-acetyl-galactosaminyl transferase 1	protein-coding
MACS_peak_2753	chr18	23196886	23200635	+	2032	NA	5' UTR (NM_199024, exon 1 of 10)	5' UTR (NM_199024, exon 1 of 10)	1394	NM_199024	319211	Mm.209896	NM_199024	ENSMUSG00000041923	Nol4	1700013J13Rik|4930568N03Rik|Gm1262	nucleolar protein 4	protein-coding
MACS_peak_2067	chr15	77785787	77787225	+	2030	NA	exon (NM_001168260, exon 2 of 9)	exon (NM_001168260, exon 2 of 9)	646	NM_001168260	239554	Mm.295605	NM_001017983	ENSMUSG00000016552	Foxred2	A430097D04Rik|D15Bwg0759e|Gm304	FAD-dependent oxidoreductase domain containing 2	protein-coding
MACS_peak_5953	chr8	109032511	109036029	+	2030	NA	promoter-TSS (NM_001037809)	promoter-TSS (NM_001037809)	-482	NM_007665	12560	Mm.4658	NM_007665	ENSMUSG00000061048	Cdh3	AI385538|Cadp|Cdhp|P-cadherin|Pcad	cadherin 3	protein-coding
MACS_peak_5265	chr7	4784675	4789849	+	2027	NA	intron (NM_001290291, intron 2 of 4)	B1_Mus1|SINE|Alu	9036	NM_001290291	232813	Mm.44666	NM_172737	ENSMUSG00000053550	Shisa7	-	shisa homolog 7 (Xenopus laevis)	protein-coding
MACS_peak_6486	chrX	71124574	71126575	+	2027	NA	intron (NM_008478, intron 1 of 28)	intron (NM_008478, intron 1 of 28)	599	NM_008478	16728	Mm.260568	NM_008478	ENSMUSG00000031391	L1cam	CD171|L1|N-CAM-L1|NCAM-L1	L1 cell adhesion molecule	protein-coding
MACS_peak_1167	chr11	115719358	115722383	+	2015	NA	Intergenic	CpG	35498	NM_001252532	217325	Mm.290450	NM_145438	ENSMUSG00000020782	Llgl2	9130006H11Rik|Llglh2	lethal giant larvae homolog 2 (Drosophila)	protein-coding
MACS_peak_1715	chr13	99464815	99465260	+	2008	NA	promoter-TSS (NM_001025606)	promoter-TSS (NM_001025606)	-251	NM_001025606	380863	Mm.28264	NM_001025606	ENSMUSG00000052485	Tmem171	Gm905	transmembrane protein 171	protein-coding
MACS_peak_203	chr1	94996831	95001166	+	2008	NA	promoter-TSS (NM_001110315)	promoter-TSS (NM_001110315)	-547	NM_001110315	16560	Mm.276408	NM_008440	ENSMUSG00000014602	Kif1a	ATSV|C630002N23Rik|Gm1626|Kns1	kinesin family member 1A	protein-coding
MACS_peak_6281	chr9	66894872	66897693	+	2008	NA	intron (NM_001164249, intron 1 of 8)	CpG-15134	738	NM_001164255	22003	Mm.121878	NM_024427	ENSMUSG00000032366	Tpm1	AA986836|AI854628|TM2|Tm3|Tmpa|Tpm-1|alpha-TM	tropomyosin 1, alpha	protein-coding
MACS_peak_6387	chr9	107277240	107281597	+	2008	NA	Intergenic	PB1D7|SINE|Alu	-22793	NM_001174049	56808	Mm.273084	NM_020263	ENSMUSG00000010066	Cacna2d2	Cacna2d|a2d2|du|mKIAA0558|td|torpid	calcium channel, voltage-dependent, alpha 2/delta subunit 2	protein-coding
MACS_peak_2274	chr15	103367444	103369439	+	2005	NA	promoter-TSS (NM_021391)	promoter-TSS (NM_021391)	-18	NM_021391	58200	Mm.143788	NM_021391	ENSMUSG00000022490	Ppp1r1a	0610038N18Rik|I-1	protein phosphatase 1, regulatory (inhibitor) subunit 1A	protein-coding
MACS_peak_1891	chr14	67845052	67858342	+	2005	NA	promoter-TSS (NM_001276387)	promoter-TSS (NM_001276387)	-432	NM_010095	13592	Mm.319947	NM_010095	ENSMUSG00000022053	Ebf2	D14Ggc1e|EBF-2|Mmot1|O/E-3|OE-3	early B cell factor 2	protein-coding
MACS_peak_6188	chr9	47338752	47341642	+	2005	NA	intron (NM_001025600, intron 1 of 8)	intron (NM_001025600, intron 1 of 8)	1762	NM_018770	54725	Mm.234832	NM_018770	ENSMUSG00000032076	Cadm1	2900073G06Rik|3100001I08Rik|AI987920|Bl2|Igsf4|Igsf4a|Necl2|RA175|RA175A|RA175B|RA175C|RA175N|ST17|SgIGSF|SynCam|Tslc1	cell adhesion molecule 1	protein-coding
MACS_peak_6035	chr8	126073022	126073369	+	2005	NA	Intergenic	Intergenic	30460	NM_018855	104346	Mm.117265	NM_018855	ENSMUSG00000040220	Gas8	Gas11	growth arrest specific 8	protein-coding
MACS_peak_4113	chr4	108551614	108552589	+	2005	NA	intron (NM_023537, intron 1 of 4)	intron (NM_023537, intron 1 of 4)	426	NM_023537	69908	Mm.41580	NM_023537	ENSMUSG00000003411	Rab3b	2610528C18Rik	RAB3B, member RAS oncogene family	protein-coding
MACS_peak_2399	chr16	92605729	92607706	+	2005	NA	intron (NM_001111022, intron 6 of 6)	intron (NM_001111022, intron 6 of 6)	90857	NM_001111023	12394	Mm.4081	NM_009821	ENSMUSG00000022952	Runx1	AML1|CBF-alpha-2|Cbfa2|Pebp2a2|Pebpa2b	runt related transcription factor 1	protein-coding
MACS_peak_1	chr1	3660557	3662728	+	2005	NA	promoter-TSS (NM_001011874)	promoter-TSS (NM_001011874)	-63	NM_001011874	497097	Mm.454496	NM_001011874	ENSMUSG00000051951	Xkr4	AY534250|Gm210|XRG4|mKIAA1889	X Kell blood group precursor related family member 4	protein-coding
MACS_peak_6076	chr9	8543929	8544922	+	2005	NA	5' UTR (NM_001282086, exon 1 of 12)	5' UTR (NM_001282086, exon 1 of 12)	283	NM_001282087	22068	Mm.325086	NM_013838	ENSMUSG00000031997	Trpc6	AV025995|LLHWJM002|LLHWJM003|LLHWJM004|TRP-6|Trrp6|mtrp6	transient receptor potential cation channel, subfamily C, member 6	protein-coding
MACS_peak_1634	chr13	72758738	72763367	+	2005	NA	non-coding (NR_030701, exon 1 of 1)	non-coding (NR_030701, exon 1 of 1)	4960	NR_030701	328287	Mm.235072	NR_030701		Gm20554	D430050G20	predicted gene, 20554	ncRNA
MACS_peak_2336	chr16	31427138	31429434	+	2005	NA	promoter-TSS (NM_001122683)	promoter-TSS (NM_001122683)	-553	NM_001122683	71911	Mm.293470	NM_175177	ENSMUSG00000046598	Bdh1	2310032J20Rik|AI327223|Bdh	3-hydroxybutyrate dehydrogenase, type 1	protein-coding
MACS_peak_54	chr1	34804235	34809613	+	2004	NA	Intergenic	Intergenic	-51643	NM_183019	226970	Mm.41604	NM_183019	ENSMUSG00000037509	Arhgef4	9330140K16Rik|Asef|ENSMUSG00000070955	Rho guanine nucleotide exchange factor (GEF) 4	protein-coding
MACS_peak_3173	chr2	28061442	28062474	+	2002	NA	intron (NM_001038612, intron 1 of 3)	MIR|SINE|MIR	749	NM_019498	56177	Mm.43278	NM_019498	ENSMUSG00000026833	Olfm1	AMY|AW742568|Noe1|OlfA|Pancortin|Pancortin3	olfactomedin 1	protein-coding
MACS_peak_2060	chr15	75831752	75836751	+	2002	NA	exon (NM_134087, exon 5 of 5)	exon (NM_134087, exon 5 of 5)	5677	NM_001168253	105732	Mm.267178	NM_134087	ENSMUSG00000046761	Fam83h	AA409316	family with sequence similarity 83, member H	protein-coding
MACS_peak_5811	chr8	36828199	36831176	+	1998	NA	Intergenic	Intergenic	59926	NM_027998	71908	Mm.37817	NM_027998	ENSMUSG00000055976	Cldn23	2310014B08Rik	claudin 23	protein-coding
MACS_peak_6124	chr9	34293148	34294752	+	1996	NA	Intergenic	Intergenic	-2366	NM_026324	67703	Mm.220710	NM_026324		Kirrel3	1500010O20Rik|2900036G11Rik|NEPH2|SST4|mKIAA1867	kin of IRRE like 3 (Drosophila)	protein-coding
MACS_peak_2139	chr15	88887866	88891546	+	1991	NA	promoter-TSS (NM_001002005)	promoter-TSS (NM_001002005)	-450	NM_001002005	406218	Mm.483059	NM_001002005	ENSMUSG00000058441	Panx2	-	pannexin 2	protein-coding
MACS_peak_3892	chr3	128897284	128914020	+	1991	NA	intron (NM_011098, intron 1 of 4)	intron (NM_011098, intron 1 of 4)	2856	NM_001042504	18741	Mm.246804	NM_011098	ENSMUSG00000028023	Pitx2	9430085M16Rik|Brx1|Brx1b|Munc30|Otlx2|Ptx2|Rieg	paired-like homeodomain transcription factor 2	protein-coding
MACS_peak_2325	chr16	22654700	22657523	+	1989	NA	intron (NM_138650, intron 1 of 24)	intron (NM_138650, intron 1 of 24)	1193	NM_138650	110197	Mm.194986	NM_138650	ENSMUSG00000022861	Dgkg	2900055E17Rik|90kDa|AI854428|Dagk3|E430001K23Rik|mKIAA4131	diacylglycerol kinase, gamma	protein-coding
MACS_peak_2762	chr18	25834991	25842317	+	1989	NA	intron (NM_001146295, intron 1 of 1)	intron (NM_001146295, intron 1 of 1)	73830	NM_133195	108013	Mm.266435	NM_133195	ENSMUSG00000024268	Celf4	A230070D14Rik|BRUNOL-4|Brul4|Brunol4|C130060B05Rik	CUGBP, Elav-like family member 4	protein-coding
MACS_peak_6350	chr9	95743546	95746328	+	1987	NA	intron (NM_001033210, intron 1 of 15)	intron (NM_001033210, intron 1 of 15)	761	NM_001033210	102502	Mm.11869	NM_001033210	ENSMUSG00000049493	Pls1	AI427122	plastin 1 (I-isoform)	protein-coding
MACS_peak_212	chr1	120944560	120950915	+	1987	NA	intron (NM_001081125, intron 1 of 13)	intron (NM_001081125, intron 1 of 13)	2459	NM_001081125	14633	Mm.273292	NM_001081125	ENSMUSG00000048402	Gli2	AW546128	GLI-Kruppel family member GLI2	protein-coding
MACS_peak_3330	chr2	92208740	92212224	+	1985	NA	intron (NM_172670, intron 3 of 14)	intron (NM_172670, intron 3 of 14)	732	NM_001290774	228366	Mm.31158	NM_172670	ENSMUSG00000040434	Gyltl1b	5730485C17Rik|AI891893|Large2|Largel|mKIAA4105	glycosyltransferase-like 1B	protein-coding
MACS_peak_4888	chr5	147394545	147398620	+	1982	NA	promoter-TSS (NM_008151)	promoter-TSS (NM_008151)	233	NM_001010941	14738	Mm.153539	NM_008151	ENSMUSG00000041468	Gpr12	Gpcr01|Gpcr12|Gpcr20|Gpcr21	G-protein coupled receptor 12	protein-coding
MACS_peak_763	chr11	23973449	23982070	+	1982	NA	promoter-TSS (NM_016707)	promoter-TSS (NM_016707)	-297	NM_016707	14025	Mm.53687	NM_016707	ENSMUSG00000000861	Bcl11a	2810047E18Rik|BCL-11A|Ctip1|D930021L15Rik|Evi9|Evi9a|Evi9b|Evi9c|mKIAA1809	B cell CLL/lymphoma 11A (zinc finger protein)	protein-coding
MACS_peak_5995	chr8	121969693	121972734	+	1980	NA	intron (NM_054095, intron 1 of 12)	CpG	594	NM_054095	117148	Mm.356184	NM_054095	ENSMUSG00000031837	Necab2	Efcbp2	N-terminal EF-hand calcium binding protein 2	protein-coding
MACS_peak_2373	chr16	67617515	67621742	+	1980	NA	intron (NM_178721, intron 1 of 9)	intron (NM_178721, intron 1 of 9)	1525	NM_001145977	239857	Mm.394300	NM_178721	ENSMUSG00000064115	Cadm2	2900078E11Rik|9330131D06|A830029E02Rik|Igdf4d|Igsf4d|NECL3|SynCAM 2|SynCAM2	cell adhesion molecule 2	protein-coding
MACS_peak_2045	chr15	74345858	74350704	+	1980	NA	intron (NM_174991, intron 1 of 30)	CpG	1655	NM_174991	107831	Mm.43133	NM_174991	ENSMUSG00000034730	Bai1	B830018M07Rik|R75078|mKIAA4089	brain-specific angiogenesis inhibitor 1	protein-coding
MACS_peak_3851	chr3	103375644	103383243	+	1980	NA	promoter-TSS (NM_001276681)	promoter-TSS (NM_001276681)	238	NM_001276676	54524	Mm.88818	NM_018800	ENSMUSG00000027849	Syt6	3110037A08Rik|AW048930|sytVI	synaptotagmin VI	protein-coding
MACS_peak_1982	chr15	7758393	7767545	+	1980	NA	promoter-TSS (NM_001301333)	promoter-TSS (NM_001301333)	-758	NM_001301333	14573	Mm.4679	NM_010275	ENSMUSG00000022144	Gdnf	AI385739	glial cell line derived neurotrophic factor	protein-coding
MACS_peak_6405	chr9	111340853	111343192	+	1977	NA	intron (NM_172928, intron 1 of 4)	intron (NM_172928, intron 1 of 4)	437	NM_172928	245038	Mm.26361	NM_172928	ENSMUSG00000032500	Dclk3	BC056929|C730036H08|Dcamkl3	doublecortin-like kinase 3	protein-coding
MACS_peak_2725	chr17	88194307	88199300	+	1977	NA	5' UTR (NM_199251, exon 1 of 2)	5' UTR (NM_199251, exon 1 of 2)	531	NM_199251	210741	Mm.312046	NM_199251	ENSMUSG00000050138	Kcnk12	mntk1	potassium channel, subfamily K, member 12	protein-coding
MACS_peak_4835	chr5	137357411	137360213	+	1976	NA	exon (NM_024474, exon 1 of 13)	exon (NM_024474, exon 1 of 13)	165	NM_024474	140709	Mm.295020	NM_024474	ENSMUSG00000004415	Col26a1	9430032K24Rik|BC002218|Col26a|Emid2|Emu2	collagen, type XXVI, alpha 1	protein-coding
MACS_peak_4080	chr4	95633695	95634415	+	1976	NA	promoter-TSS (NM_030014)	promoter-TSS (NM_030014)	-15	NM_030014	77963	Mm.49994	NM_030014		Hook1	A930033L17Rik|azh	hook homolog 1 (Drosophila)	protein-coding
MACS_peak_5140	chr6	100652254	100656979	+	1976	NA	promoter-TSS (NM_198612)	promoter-TSS (NM_198612)	-112	NM_198612	232313	Mm.272037	NM_198612	ENSMUSG00000030074	Gxylt2	Glt8d4|Gm152	glucoside xylosyltransferase 2	protein-coding
MACS_peak_5780	chr8	24083214	24087301	+	1976	NA	promoter-TSS (NM_001277280)	promoter-TSS (NM_001277280)	-51	NM_001110783	11733	Mm.334444	NM_031158	ENSMUSG00000031543	Ank1	Ank-1|nb|pale	ankyrin 1, erythroid	protein-coding
MACS_peak_4279	chr4	136390619	136393669	+	1973	NA	promoter-TSS (NM_001290753)	promoter-TSS (NM_001290753)	-218	NM_010142	13844	Mm.250981	NM_010142	ENSMUSG00000028664	Ephb2	Cek5|Drt|ETECK|Erk|Hek5|Nuk|Prkm5|Qek5|Sek3|Tyro5	Eph receptor B2	protein-coding
MACS_peak_3099	chr19	59334434	59336440	+	1972	NA	promoter-TSS (NM_172523)	promoter-TSS (NM_172523)	69	NM_172523	214084	Mm.268797	NM_172523	ENSMUSG00000025094	Slc18a2	1110037L13Rik|9330105E13|Vmat2	solute carrier family 18 (vesicular monoamine), member 2	protein-coding
MACS_peak_6304	chr9	75457946	75459129	+	1971	NA	intron (NM_016711, intron 1 of 9)	intron (NM_016711, intron 1 of 9)	595	NM_016711	50876	Mm.291880	NM_016711	ENSMUSG00000032186	Tmod2	N-Tmod|NTMOD	tropomodulin 2	protein-coding
MACS_peak_2200	chr15	99499165	99504555	+	1971	NA	intron (NM_009597, intron 1 of 11)	intron (NM_009597, intron 1 of 11)	711	NM_009597	11419	Mm.440107	NM_009597	ENSMUSG00000023017	Asic1	AI843610|ASIC|ASIC1a|Accn2|B530003N02Rik|BNaC2	acid-sensing (proton-gated) ion channel 1	protein-coding
MACS_peak_5241	chr6	144995152	144998587	+	1971	NA	intron (NM_007532, intron 1 of 10)	intron (NM_007532, intron 1 of 10)	463	NM_001024468	12035	Mm.4606	NM_007532	ENSMUSG00000030268	Bcat1	BCATc|Eca39	branched chain aminotransferase 1, cytosolic	protein-coding
MACS_peak_5210	chr6	127029951	127031801	+	1971	NA	3' UTR (NM_022657, exon 3 of 3)	3' UTR (NM_022657, exon 3 of 3)	7956	NM_022657	64654	Mm.347933	NM_022657		Fgf23	-	fibroblast growth factor 23	protein-coding
MACS_peak_2997	chr19	42274260	42276735	+	1971	NA	intron (NM_018780, intron 1 of 2)	intron (NM_018780, intron 1 of 2)	1245	NM_018780	54612	Mm.470071	NM_018780	ENSMUSG00000018822	Sfrp5	AI605071|SARP3	secreted frizzled-related sequence protein 5	protein-coding
MACS_peak_515	chr10	51740341	51743284	+	1971	NA	promoter-TSS (NM_001300957)	promoter-TSS (NM_001300957)	-496	NM_001300957	215031	Mm.87237	NM_153786	ENSMUSG00000049641	Vgll2	C130057C21Rik|VITO-1|Vito1|vgl-2	vestigial like 2 homolog (Drosophila)	protein-coding
MACS_peak_4973	chr6	38585514	38587484	+	1971	NA	exon (NM_001033171, exon 1 of 5)	exon (NM_001033171, exon 1 of 5)	740	NM_001033171	74253	Mm.121859	NM_001033171	ENSMUSG00000071537	Klrg2	2310020F24Rik	killer cell lectin-like receptor subfamily G, member 2	protein-coding
MACS_peak_2192	chr15	99054235	99062051	+	1962	NA	intron (NM_010601, intron 3 of 14)	intron (NM_010601, intron 3 of 14)	2736	NM_010601	16512	Mm.374793	NM_010601	ENSMUSG00000037579	Kcnh3	AU019351|C030044P22Rik|Elk2|Kv12.2|Melk2	potassium voltage-gated channel, subfamily H (eag-related), member 3	protein-coding
MACS_peak_6237	chr9	58335535	58338048	+	1956	NA	5' UTR (NM_176921, exon 1 of 3)	5' UTR (NM_176921, exon 1 of 3)	381	NM_176921	319477	Mm.153674	NM_176921	ENSMUSG00000066607	6030419C18Rik	-	RIKEN cDNA 6030419C18 gene	protein-coding
MACS_peak_1398	chr12	107410507	107416254	+	1956	NA	Intergenic	Intergenic	164907	NM_001029843	22367	Mm.2981	NM_011705	ENSMUSG00000021115	Vrk1	51PK	vaccinia related kinase 1	protein-coding
MACS_peak_360	chr1	182624566	182627732	+	1953	NA	intron (NM_013729, intron 1 of 1)	PB1D10|SINE|Alu	1016	NM_013729	27217	Mm.103647	NM_013729	ENSMUSG00000026497	Mixl1	Mm1|Mml	Mix1 homeobox-like 1 (Xenopus laevis)	protein-coding
MACS_peak_4846	chr5	139294902	139299721	+	1953	NA	exon (NM_001195128, exon 3 of 3)	exon (NM_001195128, exon 3 of 3)	1277	NM_001195128	384244	Mm.485002	NM_001195128	ENSMUSG00000094504	Gm5294	EG384244	predicted gene 5294	protein-coding
MACS_peak_182	chr1	89404375	89408133	+	1953	NA	intron (NM_001111314, intron 3 of 14)	CpG	683	NM_019867	53972	Mm.435439	NM_019867	ENSMUSG00000026259	Ngef	Tims2|ephexin	neuronal guanine nucleotide exchange factor	protein-coding
MACS_peak_5330	chr7	28178380	28183526	+	1953	NA	intron (NM_032610, intron 18 of 35)	intron (NM_032610, intron 18 of 35)	264	NM_001199234	80297	Mm.459123	NM_032610	ENSMUSG00000011751	Sptbn4	1700022P15Rik|5830426A08Rik|ROSA62|SpbIV|Spnb4|dyn|lnd|nmf261|nmf379|qv	spectrin beta, non-erythrocytic 4	protein-coding
MACS_peak_5797	chr8	28336708	28341301	+	1953	NA	5' UTR (NM_013462, exon 2 of 4)	5' UTR (NM_013462, exon 2 of 4)	1056	NM_013462	11556	Mm.278475	NM_013462	ENSMUSG00000031489	Adrb3	Adrb-3	adrenergic receptor, beta 3	protein-coding
MACS_peak_5567	chr7	117008891	117010282	+	1951	NA	promoter-TSS (NM_020052)	promoter-TSS (NM_020052)	-393	NM_020052	56788	Mm.40447	NM_020052	ENSMUSG00000007279	Scube2	4932442O19Rik|Cegf1|Cegp1	signal peptide, CUB domain, EGF-like 2	protein-coding
MACS_peak_2086	chr15	80115649	80120557	+	1950	NA	5' UTR (NM_001044308, exon 1 of 37)	5' UTR (NM_001044308, exon 1 of 37)	435	NM_001044308	239556	Mm.291058	NM_001044308	ENSMUSG00000022416	Cacna1i	Ca(V)3.3	calcium channel, voltage-dependent, alpha 1I subunit	protein-coding
MACS_peak_4469	chr5	31013563	31017372	+	1947	NA	intron (NM_023047, intron 1 of 12)	intron (NM_023047, intron 1 of 12)	1199	NM_023047	65254	Mm.27732	NM_023047	ENSMUSG00000029168	Dpysl5	CRAM|CRMP-5|Crmp5	dihydropyrimidinase-like 5	protein-coding
MACS_peak_875	chr11	69777645	69781178	+	1947	NA	5' UTR (NM_016887, exon 1 of 4)	5' UTR (NM_016887, exon 1 of 4)	488	NM_016887	53624	Mm.281896	NM_016887	ENSMUSG00000018569	Cldn7	-	claudin 7	protein-coding
MACS_peak_3403	chr2	127188172	127191735	+	1943	NA	exon (NM_009633, exon 1 of 1)	exon (NM_009633, exon 1 of 1)	931	NM_009633	11552	Mm.347390	NM_009633	ENSMUSG00000058620	Adra2b	Adra-2b|[a]2B|alpha2-C2|alpha2B	adrenergic receptor, alpha 2b	protein-coding
MACS_peak_2813	chr18	61171183	61174602	+	1942	NA	intron (NM_201353, intron 1 of 13)	intron (NM_201353, intron 1 of 13)	961	NM_201353	240332	Mm.39846	NM_201353	ENSMUSG00000052026	Slc6a7	AW455934|PROT	solute carrier family 6 (neurotransmitter transporter, L-proline), member 7	protein-coding
MACS_peak_3953	chr4	4064529	4066955	+	1941	NA	promoter-TSS (NM_001002927)	promoter-TSS (NM_001002927)	-150	NM_001002927	18619	Mm.475097	NM_001002927	ENSMUSG00000045573	Penk	AI326464|ENK|PPA|Penk1	preproenkephalin	protein-coding
MACS_peak_2423	chr16	95806250	95808221	+	1936	NA	Intergenic	CpG	-55263	NM_133659	13876	Mm.164531	NM_133659	ENSMUSG00000040732	Erg	D030036I24Rik	avian erythroblastosis virus E-26 (v-ets) oncogene related	protein-coding
MACS_peak_2771	chr18	36123895	36125832	+	1933	NA	non-coding (NR_110349, exon 1 of 15)	non-coding (NR_110349, exon 1 of 15)	379	NR_110349	74002	Mm.196944	NM_028707	ENSMUSG00000024347	Psd2	6330404E20Rik|AW125584|EFA6C	pleckstrin and Sec7 domain containing 2	protein-coding
MACS_peak_5482	chr7	77424574	77429141	+	1931	NA	Intergenic	Intergenic	78622	NM_009697	11819	Mm.158143	NM_009697	ENSMUSG00000030551	Nr2f2	2700033K02Rik|9430015G03Rik|ARP-1|Aporp1|COUP-TF2|COUP-TFII|COUPTFB|EAR3|SVP40|Tcfcoup2	nuclear receptor subfamily 2, group F, member 2	protein-coding
MACS_peak_5316	chr7	25957123	25969687	+	1931	NA	Intergenic	Intergenic	23317	NR_045848	434147	Mm.59171	NM_001033781	ENSMUSG00000074274	D930028M14Rik	EG434147	RIKEN cDNA D930028M14 gene	ncRNA
MACS_peak_3381	chr2	119095975	119096918	+	1931	NA	exon (NM_145530, exon 2 of 3)	exon (NM_145530, exon 2 of 3)	516	NM_145530	228543	Mm.120274	NM_145530	ENSMUSG00000034226	Rhov	A030005A06Rik|Arhv	ras homolog gene family, member V	protein-coding
MACS_peak_2488	chr17	23878424	23883578	+	1930	NA	intron (NM_028416, intron 3 of 9)	(TTTTG)n|Simple_repeat|Simple_repeat	1795	NM_028416	73016	Mm.221319	NM_028416	ENSMUSG00000040680	Kremen2	2900054E04Rik|Krm2	kringle containing transmembrane protein 2	protein-coding
MACS_peak_1528	chr13	41173104	41176073	+	1922	NA	intron (NM_001145803, intron 1 of 14)	intron (NM_001145803, intron 1 of 14)	487	NM_001145803	17152	Mm.8149	NM_008547	ENSMUSG00000021363	Mak	A930010O05Rik	male germ cell-associated kinase	protein-coding
MACS_peak_4454	chr5	28442833	28455772	+	1922	NA	Intergenic	Intergenic	-42934	NM_010134	13799	Mm.4298	NM_010134		En2	BB131122|En-2	engrailed 2	protein-coding
MACS_peak_3955	chr4	9770393	9779247	+	1922	NA	intron (NM_013526, intron 1 of 1)	intron (NM_013526, intron 1 of 1)	3301	NM_013526	242316	Mm.302555	NM_013526	ENSMUSG00000051279	Gdf6	BMP-13|BMP13|GDF16	growth differentiation factor 6	protein-coding
MACS_peak_1618	chr13	64375220	64376923	+	1922	NA	5' UTR (NM_172587, exon 1 of 14)	5' UTR (NM_172587, exon 1 of 14)	225	NM_172587	218294	Mm.25335	NM_172587	ENSMUSG00000033102	Cdc14b	2810432N10Rik|A530086E13Rik|AA472821|CDC14B3|Cdc14B1	CDC14 cell division cycle 14B	protein-coding
MACS_peak_1441	chr12	117723823	117726183	+	1922	NA	intron (NM_011215, intron 1 of 22)	intron (NM_011215, intron 1 of 22)	810	NM_011215	19276	Mm.206054	NM_011215	ENSMUSG00000056553	Ptprn2	4930425H11Rik|IA2beta|PTP-NP|Phol|mKIAA0387|phogrin	protein tyrosine phosphatase, receptor type, N polypeptide 2	protein-coding
MACS_peak_2538	chr17	28905463	28908165	+	1922	NA	intron (NM_011950, intron 1 of 11)	(TC)n|Simple_repeat|Simple_repeat	552	NM_011950	26415	Mm.27970	NM_011950	ENSMUSG00000004864	Mapk13	SAPK4|Serk4	mitogen-activated protein kinase 13	protein-coding
MACS_peak_5285	chr7	19987842	19989693	+	1922	NA	intron (NM_001286039, intron 1 of 12)	intron (NM_001286039, intron 1 of 12)	686	NM_001286039	232943	Mm.213403	NM_146182	ENSMUSG00000040714	Klc3	BC017147|Klct	kinesin light chain 3	protein-coding
MACS_peak_1655	chr13	78334084	78335727	+	1920	NA	exon (NM_010151, exon 2 of 3)	exon (NM_010151, exon 2 of 3)	-2373	NR_045195	320174	Mm.393122	NR_045195		A830082K12Rik	-	RIKEN cDNA A830082K12 gene	ncRNA
MACS_peak_6098	chr9	20548043	20551525	+	1920	NA	Intergenic	Intergenic	-17126	NM_173777	244723	Mm.293552	NM_173777	ENSMUSG00000032172	Olfm2	A030009A06Rik	olfactomedin 2	protein-coding
MACS_peak_4420	chr4	154730628	154739907	+	1918	NA	exon (NM_008860, exon 1 of 18)	exon (NM_008860, exon 1 of 18)	270	NM_008860	18762	Mm.28561	NM_008860	ENSMUSG00000029053	Prkcz	AI098070|C80388|Pkcz|R74924|aPKCzeta|nPKC-zeta|zetaPKC	protein kinase C, zeta	protein-coding
MACS_peak_4666	chr5	112819923	112825953	+	1913	NA	Intergenic	Intergenic	-1705	NM_028386	72898	Mm.151745	NM_028386	ENSMUSG00000029348	Asphd2	2900006N09Rik|9230106G13Rik	aspartate beta-hydroxylase domain containing 2	protein-coding
MACS_peak_4097	chr4	101388067	101390726	+	1910	NA	promoter-TSS (NM_010704)	promoter-TSS (NM_010704)	-616	NM_001122899	16847	Mm.259282	NM_010704	ENSMUSG00000057722	Lepr	LEPROT|Leprb|Modb1|OB-RGRP|Obr|db|diabetes|obese-like|obl	leptin receptor	protein-coding
MACS_peak_601	chr10	80719155	80723724	+	1910	NA	intron (NM_001285855, intron 2 of 12)	intron (NM_001285855, intron 2 of 12)	1395	NM_001285853	17179	Mm.2918	NM_010768	ENSMUSG00000004933	Matk	CHK|HYL|Ntk	megakaryocyte-associated tyrosine kinase	protein-coding
MACS_peak_1826	chr14	45608220	45610460	+	1910	NA	exon (NM_008964, exon 1 of 2)	exon (NM_008964, exon 1 of 2)	1554	NM_008964	19217	Mm.4630	NM_008964	ENSMUSG00000037759	Ptger2	EP2|Ptgerep2	prostaglandin E receptor 2 (subtype EP2)	protein-coding
MACS_peak_6206	chr9	54132745	54135232	+	1901	NA	promoter-TSS (NM_177350)	promoter-TSS (NM_177350)	-305	NM_177350	235379	Mm.123549	NM_177350	ENSMUSG00000046167	Gldn	CRG-L2|Clom|Colm|Crgl2|Crlg2	gliomedin	protein-coding
MACS_peak_4767	chr5	120243640	120249058	+	1897	NA	Intergenic	Intergenic	-38323	NM_011537	21388	Mm.103636	NM_011537	ENSMUSG00000018263	Tbx5	-	T-box 5	protein-coding
MACS_peak_2968	chr19	37307410	37310721	+	1897	NA	Intergenic	Intergenic	27030	NM_001164336	69104	Mm.175989	NM_027314	ENSMUSG00000023307	March5	1810015H18Rik|2310008I22Rik|2700055A20Rik|5730499H23Rik|E130202O05Rik|MARCH-V|MITOL|Marchv|Rnf153	membrane-associated ring finger (C3HC4) 5	protein-coding
MACS_peak_90	chr1	55419035	55420846	+	1897	NA	promoter-TSS (NM_001113367)	promoter-TSS (NM_001113367)	373	NM_029267	75388	Mm.483408	NM_029267	ENSMUSG00000025977	Boll	4930554P13Rik|4930597B14Rik	bol, boule-like (Drosophila)	protein-coding
MACS_peak_4679	chr5	113000092	113009263	+	1897	NA	intron (NM_001253916, intron 1 of 16)	intron (NM_001253916, intron 1 of 16)	1541	NM_001253917	56747	Mm.143742	NM_019982	ENSMUSG00000058153	Sez6l	AI843918|AIG1|AW539724|Acig1|BSRP-B|mKIAA0927	seizure related 6 homolog like	protein-coding
MACS_peak_4905	chr5	148210339	148213004	+	1897	NA	intron (NM_010229, intron 1 of 23)	CpG	394	NM_010229	14255	Mm.194	NM_010229	ENSMUSG00000042817	Flt3	B230315G04|CD135|Flk-2|Flk2|Flt-3|Ly72|wmfl	FMS-like tyrosine kinase 3	protein-coding
MACS_peak_25	chr1	15881139	15883572	+	1897	NA	intron (NM_001033288, intron 1 of 4)	intron (NM_001033288, intron 1 of 4)	448	NM_001033288	226866	Mm.131665	NM_001033288	ENSMUSG00000032719	Sbspon	Gm106|Rpesp	somatomedin B and thrombospondin, type 1 domain containing	protein-coding
MACS_peak_6121	chr9	31718698	31724991	+	1897	NA	promoter-TSS (NM_013800)	promoter-TSS (NM_013800)	-974	NM_013800	12023	Mm.261044	NM_013800	ENSMUSG00000032033	Barx2	2310006E12Rik|Barx2b	BarH-like homeobox 2	protein-coding
MACS_peak_5809	chr8	35867980	35869090	+	1897	NA	Intergenic	Intergenic	-2129	NM_176933	319520	Mm.170276	NM_176933	ENSMUSG00000031530	Dusp4	2700078F24Rik|AI844617|BB104621|E130306H24Rik|MKP2	dual specificity phosphatase 4	protein-coding
MACS_peak_4364	chr4	147533776	147541193	+	1897	NA	intron (NM_176848, intron 1 of 5)	MIR|SINE|MIR	2707	NM_176848	230904	Mm.262287	NM_176848	ENSMUSG00000041556	Fbxo2	FBG1|FBX2|Fbs1|Fbs2|NFB42|Prpl4	F-box protein 2	protein-coding
MACS_peak_5001	chr6	51955990	51957900	+	1885	NA	intron (NM_018773, intron 1 of 12)	intron (NM_018773, intron 1 of 12)	5603	NM_018773	54353	Mm.221479	NM_018773	ENSMUSG00000059182	Skap2	2610021A10Rik|AA960083|BB137539|RA70|SKAP-HOM|Saps|Scap2|mSKAP55R	src family associated phosphoprotein 2	protein-coding
MACS_peak_3951	chr3	158223920	158225775	+	1885	NA	5' UTR (NM_001081358, exon 1 of 28)	5' UTR (NM_001081358, exon 1 of 28)	338	NM_001291453	242274	Mm.132162	NM_001081358	ENSMUSG00000028176	Lrrc7	AK122498|densin|mKIAA1365	leucine rich repeat containing 7	protein-coding
MACS_peak_6223	chr9	57349660	57352767	+	1882	NA	promoter-TSS (NM_133982)	promoter-TSS (NM_133982)	-696	NM_133982	102614	Mm.274421	NM_133982	ENSMUSG00000062309	Rpp25	AI851155	ribonuclease P/MRP 25 subunit	protein-coding
MACS_peak_2913	chr19	6999434	7002983	+	1882	NA	intron (NM_008431, intron 6 of 6)	MER53|DNA|hAT	-1338	NM_001039494	67077	Mm.251306	NM_001039494	ENSMUSG00000050623	Tex40	1700019N12Rik|A430107B04Rik|MLZ-622	testis expressed 40	protein-coding
MACS_peak_3699	chr3	30403309	30408380	+	1882	NA	intron (NM_021442, intron 1 of 2)	intron (NM_021442, intron 1 of 2)	2565	NM_021442	14013	Mm.56965	NM_007963	ENSMUSG00000027684	Mecom	D630039M04Rik|Evi-1|Evi1|Jbo|Mds|Mds1|Mds1-Evi1|Prdm3|Znfpr1b1	MDS1 and EVI1 complex locus	protein-coding
MACS_peak_3650	chr2	180190710	180191572	+	1882	NA	Intergenic	CpG	-4542	NM_148933	108115	Mm.133687	NM_148933	ENSMUSG00000038963	Slco4a1	OATP-E|Slc21a12	solute carrier organic anion transporter family, member 4a1	protein-coding
MACS_peak_2954	chr19	28908682	28910736	+	1882	NA	promoter-TSS (NM_009199)	promoter-TSS (NM_009199)	53	NM_009199	20510	Mm.246670	NM_009199	ENSMUSG00000024935	Slc1a1	D130048G10Rik|EAAC1|EAAC2|EAAT3|MEAAC1	solute carrier family 1 (neuronal/epithelial high affinity glutamate transporter, system Xag), member 1	protein-coding
MACS_peak_4412	chr4	154325028	154336265	+	1876	NA	Intergenic	RLTR25B|LTR|ERVK	-4386	NM_010419	15208	Mm.137268	NM_010419	ENSMUSG00000048001	Hes5	bHLHb38	hairy and enhancer of split 5 (Drosophila)	protein-coding
MACS_peak_1827	chr14	47007134	47010351	+	1874	NA	intron (NM_007554, intron 1 of 3)	CpG	1532	NM_007554	12159	Mm.6813	NM_007554	ENSMUSG00000021835	Bmp4	Bmp-4|Bmp2b|Bmp2b-1|Bmp2b1	bone morphogenetic protein 4	protein-coding
MACS_peak_1037	chr11	96788950	96791295	+	1871	NA	promoter-TSS (NM_146026)	promoter-TSS (NM_146026)	-516	NM_146026	217138	Mm.342551	NM_146026		Prr15l	Atad4|BC022765|E230006A12Rik	proline rich 15-like	protein-coding
MACS_peak_2769	chr18	35812342	35814956	+	1870	NA	exon (NM_001270646, exon 1 of 1)	exon (NM_001270646, exon 1 of 1)	1204	NM_001270646	381148	Mm.297784	NM_001270646		Prob1	Gm1614	proline rich basic protein 1	protein-coding
MACS_peak_5401	chr7	51564892	51568174	+	1867	NA	intron (NM_001034115, intron 1 of 24)	intron (NM_001034115, intron 1 of 24)	899	NM_001034115	243961	Mm.360368	NM_001034115	ENSMUSG00000038738	Shank1	-	SH3/ankyrin domain gene 1	protein-coding
MACS_peak_903	chr11	78307201	78313890	+	1866	NA	exon (NM_001168521, exon 1 of 9)	exon (NM_001168521, exon 1 of 9)	711	NM_001168521	237868	Mm.210332	NM_172795	ENSMUSG00000050132	Sarm1	A830091I15Rik|C78606|MyD885|Sarm	sterile alpha and HEAT/Armadillo motif containing 1	protein-coding
MACS_peak_2468	chr17	14339485	14343629	+	1864	NA	promoter-TSS (NM_172826)	promoter-TSS (NM_172826)	-719	NM_172826	240025	Mm.79993	NM_172826	ENSMUSG00000048826	Dact2	2900084M21Rik|A630024E20|Dpr2|Frd2|dapper2	dapper homolog 2, antagonist of beta-catenin (xenopus)	protein-coding
MACS_peak_2581	chr17	36294730	36296387	+	1855	NA	intron (NR_033517, intron 2 of 3)	intron (NR_033517, intron 2 of 3)	9924	NM_001081032	667977	Mm.441651	NM_001081032	ENSMUSG00000073402	Gm8909	EG667977|H2-Tw5l|H2-gs17	predicted gene 8909	protein-coding
MACS_peak_1665	chr13	83883158	83885189	+	1853	NA	Intergenic	Intergenic	5754	NR_029545	723967		NR_029545	miRBase:MI0000157	Mir9-2	Mirn9-2|mmu-mir-9-2	microRNA 9-2	ncRNA
MACS_peak_5214	chr6	127717259	127720679	+	1853	NA	5' UTR (NM_201371, exon 1 of 10)	5' UTR (NM_201371, exon 1 of 10)	208	NM_201371	381813	Mm.39750	NM_201371	ENSMUSG00000030350	Prmt8	Hrmt1l3|Hrmt1l4	protein arginine N-methyltransferase 8	protein-coding
MACS_peak_1110	chr11	103669466	103673620	+	1852	NA	intron (NM_009521, intron 2 of 4)	CpG	36054	NM_009521	22415	Mm.159091	NM_009521	ENSMUSG00000000125	Wnt3	Int-4|Wnt-3	wingless-type MMTV integration site family, member 3	protein-coding
MACS_peak_4871	chr5	144054173	144056420	+	1852	NA	Intergenic	CpG	21743	NM_172726	231868	Mm.440105	NM_172726	ENSMUSG00000039244	E130309D02Rik	A630028N22	RIKEN cDNA E130309D02 gene	protein-coding
MACS_peak_4100	chr4	104039259	104042909	+	1851	NA	intron (NM_177259, intron 1 of 14)	intron (NM_177259, intron 1 of 14)	941	NM_177259	13131	Mm.289682	NM_010014	ENSMUSG00000028519	Dab1	AI956902|C630028C02Rik|scm|scr|scrambler|yot	disabled 1	protein-coding
MACS_peak_456	chr10	22531581	22532520	+	1851	NA	Intergenic	Intergenic	7884	NM_011545	21412	Mm.16497	NM_011545	ENSMUSG00000045680	Tcf21	Pod-1|Pod1|bHLHa23|capsulin|epc|epicardin	transcription factor 21	protein-coding
MACS_peak_2475	chr17	15672572	15673935	+	1851	NA	Intergenic	Intergenic	-8988	NM_008799	18567	Mm.323	NM_008799	ENSMUSG00000014771	Pdcd2	AI528543|Pcd2|RP-8	programmed cell death 2	protein-coding
MACS_peak_4596	chr5	99282676	99285895	+	1851	NA	exon (NM_173404, exon 1 of 3)	exon (NM_173404, exon 1 of 3)	827	NM_173404	110075	Mm.209571	NM_173404	ENSMUSG00000029335	Bmp3	9130206H07|9530029I04Rik	bone morphogenetic protein 3	protein-coding
MACS_peak_6040	chr8	126134091	126134431	+	1851	NA	Intergenic	Intergenic	-43568	NM_133955	69581	Mm.168257	NM_133955	ENSMUSG00000039960	Rhou	2310026M05Rik|AI182090|Arhu|CDC42L1|G28K|WRCH-1|WRCH1|mG28K	ras homolog gene family, member U	protein-coding
MACS_peak_747	chr11	16159889	16161562	+	1851	NA	intron (NM_145967, intron 2 of 4)	intron (NM_145967, intron 2 of 4)	2998	NM_145967	211739	Mm.284015	NM_145967	ENSMUSG00000048834	Vstm2a	Vstm2	V-set and transmembrane domain containing 2A	protein-coding
MACS_peak_5491	chr7	80885348	80885864	+	1849	NA	exon (NM_001162532, exon 1 of 3)	exon (NM_001162532, exon 1 of 3)	413	NM_001162532	100038347	Mm.425464	NM_001162532	ENSMUSG00000078670	Fam174b	-	family with sequence similarity 174, member B	protein-coding
MACS_peak_2393	chr16	91267540	91272042	+	1845	NA	promoter-TSS (NM_016968)	promoter-TSS (NM_016968)	-223	NM_016968	50914	Mm.39300	NM_016968	ENSMUSG00000046160	Olig1	AI836478|AW494459|Bhlhb6|Olg-1|Oligo1|bHLHe21	oligodendrocyte transcription factor 1	protein-coding
MACS_peak_5397	chr7	48152358	48158301	+	1844	NA	intron (NM_021387, intron 1 of 4)	CpG	681	NM_021387	58188	Mm.150675	NM_021387	ENSMUSG00000039257	Vstm2b	2900093B09Rik|AB030198	V-set and transmembrane domain containing 2B	protein-coding
MACS_peak_4289	chr4	136831607	136837336	+	1844	NA	intron (NM_009523, intron 1 of 4)	intron (NM_009523, intron 1 of 4)	921	NM_009523	22417	Mm.20355	NM_009523	ENSMUSG00000036856	Wnt4	Wnt-4	wingless-type MMTV integration site family, member 4	protein-coding
MACS_peak_861	chr11	65980356	65982111	+	1842	NA	intron (NM_001099633, intron 1 of 68)	intron (NM_001099633, intron 1 of 68)	820	NM_001099633	237806	Mm.264210	NM_001099633	ENSMUSG00000056752	Dnah9	9030022M04|A230091C01|C230051G16|D11Ertd686e|Dnahc9|mKIAA0357	dynein, axonemal, heavy chain 9	protein-coding
MACS_peak_3424	chr2	130459514	130461815	+	1842	NA	exon (NM_001291028, exon 5 of 5)	exon (NM_001291028, exon 5 of 5)	-4890	NM_001255994	140629	Mm.486003	NM_080562	ENSMUSG00000027300	Ubox5	1500010O06Rik|C330018L13Rik|Rnf37|UIP5|Ubce7ip5|Ube7ip5	U box domain containing 5	protein-coding
MACS_peak_4448	chr5	24235155	24237777	+	1842	NA	promoter-TSS (NM_001081441)	promoter-TSS (NM_001081441)	32	NM_001081441	269633	Mm.392539	NM_026621		Wdr86	2810046M22Rik|BC059069	WD repeat domain 86	protein-coding
MACS_peak_3770	chr3	84282020	84284460	+	1842	NA	intron (NM_001033301, intron 1 of 11)	CpG	173	NM_001205355	229474	Mm.331107	NM_001033301		Fhdc1	6330505N24Rik|Gm126	FH2 domain containing 1	protein-coding
MACS_peak_821	chr11	54116791	54118404	+	1842	NA	promoter-TSS (NM_001033597)	promoter-TSS (NM_001033597)	-109	NM_144823	216739	Mm.267478	NM_144823	ENSMUSG00000020333	Acsl6	A330035H04Rik|AW050338|Facl6|LACS|Lacsl|mKIAA0837	acyl-CoA synthetase long-chain family member 6	protein-coding
MACS_peak_572	chr10	77949586	77950700	+	1842	NA	Intergenic	Intergenic	-22450	NM_172134	216134	Mm.206159	NM_172134	ENSMUSG00000032788	Pdxk	2310036D04Rik|AA119688|C77999	pyridoxal (pyridoxine, vitamin B6) kinase	protein-coding
MACS_peak_5553	chr7	108965636	108970252	+	1841	NA	intron (NM_008887, intron 1 of 2)	intron (NM_008887, intron 1 of 2)	1117	NM_008887	11859	Mm.5028	NM_008887	ENSMUSG00000007946	Phox2a	Arix|Phox2|Pmx2|Pmx2a	paired-like homeobox 2a	protein-coding
MACS_peak_2079	chr15	79332778	79338526	+	1841	NA	promoter-TSS (NM_008427)	promoter-TSS (NM_008427)	19	NM_008427	16520	Mm.140760	NM_008427	ENSMUSG00000044216	Kcnj4	IRK3|Kcnf2|MB-IRK3	potassium inwardly-rectifying channel, subfamily J, member 4	protein-coding
MACS_peak_5194	chr6	124718516	124720056	+	1841	NA	TTS (NM_013588)	TTS (NM_013588)	241	NM_013509	13807	Mm.3913	NM_013509	ENSMUSG00000004267	Eno2	AI837106|D6Ertd375e|Eno-2|NSE	enolase 2, gamma neuronal	protein-coding
MACS_peak_1375	chr12	101201310	101206117	+	1841	NA	5' UTR (NM_146037, exon 2 of 3)	5' UTR (NM_146037, exon 2 of 3)	1004	NM_001164427	217826	Mm.312335	NM_146037	ENSMUSG00000045404	Kcnk13	BB085247|F730021E22Rik|Gm1570|Gm1685	potassium channel, subfamily K, member 13	protein-coding
MACS_peak_3143	chr2	19829447	19833445	+	1837	NA	Intergenic	CpG	251757	NM_027715	71198	Mm.83981	NM_027715	ENSMUSG00000043415	Otud1	4933428L19Rik	OTU domain containing 1	protein-coding
MACS_peak_5311	chr7	25794103	25797371	+	1837	NA	exon (NM_008168, exon 20 of 20)	exon (NM_008168, exon 20 of 20)	-4781	NM_001290469	232975	Mm.44101	NM_144921	ENSMUSG00000040907	Atp1a3	Atpa-2	ATPase, Na+/K+ transporting, alpha 3 polypeptide	protein-coding
MACS_peak_3122	chr2	9798460	9799835	+	1836	NA	exon (NM_008091, exon 2 of 6)	exon (NM_008091, exon 2 of 6)	1080	NM_008091	14462	Mm.313866	NM_008091	ENSMUSG00000015619	Gata3	Gata-3|jal	GATA binding protein 3	protein-coding
MACS_peak_2474	chr17	15516558	15518619	+	1823	NA	Intergenic	Intergenic	-4801	NM_007865	13388	Mm.4875	NM_007865	ENSMUSG00000014773	Dll1	Delta1	delta-like 1 (Drosophila)	protein-coding
MACS_peak_4290	chr4	137219418	137223253	+	1823	NA	intron (NM_029563, intron 1 of 23)	intron (NM_029563, intron 1 of 23)	694	NM_029563	110351	Mm.180763	NM_029563	ENSMUSG00000041351	Rap1gap	1300019I11Rik|2310004O14Rik|AI427470|ARPP-90|Rap1GAP1|Rap1ga1	Rap1 GTPase-activating protein	protein-coding
MACS_peak_1372	chr12	100138803	100139675	+	1823	NA	5' UTR (NM_001081191, exon 1 of 44)	5' UTR (NM_001081191, exon 1 of 44)	455	NM_001081191	319670	Mm.390484	NM_001081191	ENSMUSG00000051166	Eml5	BC027154|C130068M19Rik	echinoderm microtubule associated protein like 5	protein-coding
MACS_peak_2996	chr19	42160491	42161003	+	1823	NA	5' UTR (NM_198108, exon 1 of 5)	5' UTR (NM_198108, exon 1 of 5)	113	NM_198108	226123	Mm.259441	NM_198108	ENSMUSG00000049670	Morn4	-	MORN repeat containing 4	protein-coding
MACS_peak_4070	chr4	88927773	88929142	+	1819	NA	promoter-TSS (NM_001040654)	promoter-TSS (NM_001040654)	-361	NM_001040654	12578	Mm.4733	NM_009877	ENSMUSG00000044303	Cdkn2a	ARF-INK4a|Arf|INK4a-ARF|Ink4a/Arf|MTS1|Pctr1|p16|p16(INK4a)|p16INK4a|p19<ARF>|p19ARF	cyclin-dependent kinase inhibitor 2A	protein-coding
MACS_peak_5657	chr7	146127710	146134120	+	1819	NA	Intergenic	Intergenic	-1498	NM_028708	74004	Mm.334298	NM_028708		Jakmip3	6330417G02Rik|AI593226|mKIAA4091	janus kinase and microtubule interacting protein 3	protein-coding
MACS_peak_5757	chr8	15010809	15013010	+	1819	NA	intron (NM_029116, intron 1 of 1)	CpG	884	NM_029116	74901	Mm.46675	NM_029116	ENSMUSG00000055675	Kbtbd11	2900016B01Rik|4930465M17Rik|mKIAA0711	kelch repeat and BTB (POZ) domain containing 11	protein-coding
MACS_peak_2431	chr16	97830755	97834980	+	1818	NA	promoter-TSS (NM_015775)	promoter-TSS (NM_015775)	-65	NM_015775	50528	Mm.276145	NM_015775	ENSMUSG00000000385	Tmprss2	D16Ertd61e	transmembrane protease, serine 2	protein-coding
MACS_peak_1696	chr13	96900761	96903533	+	1818	NA	intron (NM_029210, intron 1 of 12)	intron (NM_029210, intron 1 of 12)	385	NM_029210	75209	Mm.40436	NM_029210	ENSMUSG00000051111	Sv2c	4930527L09Rik|AI841971	synaptic vesicle glycoprotein 2c	protein-coding
MACS_peak_5151	chr6	113143896	113147069	+	1818	NA	promoter-TSS (NM_177763)	promoter-TSS (NM_177763)	-104	NM_177763	269788	Mm.37943	NM_177763	ENSMUSG00000042873	Lhfpl4	1190004M23Rik|AI604880|B230384L07|mKIAA4027	lipoma HMGIC fusion partner-like protein 4	protein-coding
MACS_peak_1714	chr13	99356001	99360277	+	1818	NA	Intergenic	Intergenic	49226	NM_026685	68344	Mm.28766	NM_026685	ENSMUSG00000046082	Tmem174	0610009B10Rik|AA986094	transmembrane protein 174	protein-coding
MACS_peak_5060	chr6	82888173	82891132	+	1818	NA	promoter-TSS (NM_001113481)	promoter-TSS (NM_001113481)	92	NM_011350	20355	Mm.270543	NM_011350	ENSMUSG00000000627	Sema4f	-	sema domain, immunoglobulin domain (Ig), TM domain, and short cytoplasmic domain	protein-coding
MACS_peak_3867	chr3	108339486	108339998	+	1818	NA	promoter-TSS (NM_029314)	promoter-TSS (NM_029314)	-302	NM_001033304	229722	Mm.316890	NM_001033304	ENSMUSG00000040412	5330417C22Rik	BB183350|Kiaa1324|mKIAA1324	RIKEN cDNA 5330417C22 gene	protein-coding
MACS_peak_5896	chr8	87436319	87437313	+	1818	NA	promoter-TSS (NR_103491)	promoter-TSS (NR_103491)	-418	NR_103491	100503676	Mm.437155	NR_103491	ENSMUSG00000003812	LOC100503676	-	uncharacterized LOC100503676	ncRNA
MACS_peak_5549	chr7	107326665	107328862	+	1817	NA	intron (NM_001190950, intron 1 of 1)	intron (NM_001190950, intron 1 of 1)	570	NM_001190871	57442	Mm.282386	NM_020574	ENSMUSG00000035165	Kcne3	2210017H05Rik|MiRP2	potassium voltage-gated channel, Isk-related subfamily, gene 3	protein-coding
MACS_peak_4795	chr5	126010254	126017319	+	1817	NA	intron (NM_001190352, intron 1 of 8)	intron (NM_001190352, intron 1 of 8)	998	NM_001190352	208151	Mm.40397	NM_001190352	ENSMUSG00000070498	Tmem132b	AK220418|mKIAA1786	transmembrane protein 132B	protein-coding
MACS_peak_3349	chr2	102289895	102292604	+	1811	NA	exon (NM_010218, exon 1 of 1)	exon (NM_010218, exon 1 of 1)	700	NM_010218	14221	Mm.29730	NM_010218	ENSMUSG00000075012	Fjx1	-	four jointed box 1 (Drosophila)	protein-coding
MACS_peak_1096	chr11	102465778	102467749	+	1798	NA	exon (NM_020510, exon 1 of 1)	exon (NM_020510, exon 1 of 1)	1018	NM_020510	57265	Mm.36416	NM_020510	ENSMUSG00000050288	Fzd2	AL033370|AW456835|Fz10|Fzd10|Mfz10|Mfz10a	frizzled homolog 2 (Drosophila)	protein-coding
MACS_peak_352	chr1	178203567	178207480	+	1798	NA	promoter-TSS (NM_176916)	promoter-TSS (NM_176916)	-80	NM_176916	319455	Mm.338001	NM_176916	ENSMUSG00000055214	Pld5	B230365F16Rik	phospholipase D family, member 5	protein-coding
MACS_peak_1713	chr13	99340897	99344364	+	1798	NA	Intergenic	CpG	64735	NM_026685	68344	Mm.28766	NM_026685	ENSMUSG00000046082	Tmem174	0610009B10Rik|AA986094	transmembrane protein 174	protein-coding
MACS_peak_349	chr1	176431740	176435093	+	1794	NA	exon (NM_019445, exon 1 of 18)	exon (NM_019445, exon 1 of 18)	1460	NM_019445	54418	Mm.330620	NM_019445	ENSMUSG00000028354	Fmn2	AU024104	formin 2	protein-coding
MACS_peak_2745	chr18	15307211	15311048	+	1794	NA	intron (NM_134112, intron 1 of 4)	CpG	826	NM_134112	106931	Mm.329299	NM_134112	ENSMUSG00000036225	Kctd1	4933402K10Rik|AI661543|AW553000	potassium channel tetramerisation domain containing 1	protein-coding
MACS_peak_4066	chr4	84319327	84322084	+	1794	NA	intron (NM_172870, intron 1 of 5)	CpG	285	NM_172870	242509	Mm.190774	NM_172870		Bnc2	5031434M05Rik|8430420F16Rik	basonuclin 2	protein-coding
MACS_peak_6321	chr9	86910128	86912952	+	1788	NA	intron (NM_001037907, intron 3 of 3)	intron (NM_001037907, intron 3 of 3)	1168	NM_001037907	382089	Mm.92244	NM_001037907	ENSMUSG00000047897	Ripply2	C030002E08Rik|Gm1122	ripply2 homolog (zebrafish)	protein-coding
MACS_peak_2963	chr19	34820790	34822779	+	1788	NA	promoter-TSS (NM_172838)	promoter-TSS (NM_172838)	-183	NM_172838	240638	Mm.74636	NM_172838	ENSMUSG00000009378	Slc16a12	3230401A21|AW210596	solute carrier family 16 (monocarboxylic acid transporters), member 12	protein-coding
MACS_peak_979	chr11	94979657	94989891	+	1780	NA	exon (NM_010055, exon 3 of 3)	exon (NM_010055, exon 3 of 3)	3343	NM_010055	13393	Mm.5194	NM_010055	ENSMUSG00000001510	Dlx3	AV237891|Dlx-3	distal-less homeobox 3	protein-coding
MACS_peak_5267	chr7	5004408	5009805	+	1779	NA	promoter-TSS (NM_001290429)	promoter-TSS (NM_001290429)	-648	NM_001290429	232821	Mm.482157	NM_146178	ENSMUSG00000035228	Ccdc106	BC018462	coiled-coil domain containing 106	protein-coding
MACS_peak_1559	chr13	53380344	53381771	+	1779	NA	intron (NM_013846, intron 1 of 8)	CpG	421	NM_013846	26564	Mm.342774	NM_013846	ENSMUSG00000021464	Ror2	Ntrkr2|mRor2	receptor tyrosine kinase-like orphan receptor 2	protein-coding
MACS_peak_1790	chr14	29315998	29318074	+	1779	NA	Intergenic	Intergenic	-1623	NM_009524	22418	Mm.287544	NM_009524	ENSMUSG00000021994	Wnt5a	8030457G12Rik|Wnt-5a	wingless-type MMTV integration site family, member 5A	protein-coding
MACS_peak_520	chr10	58273522	58277586	+	1779	NA	promoter-TSS (NM_172788)	promoter-TSS (NM_172788)	-553	NM_172788	237353	Mm.333078	NM_172788	ENSMUSG00000037990	Sh3rf3	4831416G18Rik|Igfbp5-ip|Sh3md4|Sh3rf31	SH3 domain containing ring finger 3	protein-coding
MACS_peak_4520	chr5	52956222	52959443	+	1779	NA	promoter-TSS (NM_144945)	promoter-TSS (NM_144945)	-313	NM_144945	246316	Mm.44721	NM_144945	ENSMUSG00000039252	Lgi2	mKIAA1916	leucine-rich repeat LGI family, member 2	protein-coding
MACS_peak_1088	chr11	101823538	101826794	+	1777	NA	exon (NM_024449, exon 2 of 2)	exon (NM_024449, exon 2 of 2)	3163	NM_024449	74499	Mm.265602	NM_024449	ENSMUSG00000001494	Sost	5430411E23Rik	sclerostin	protein-coding
MACS_peak_2335	chr16	30308506	30309953	+	1773	NA	exon (NM_008148, exon 2 of 2)	exon (NM_008148, exon 2 of 2)	1638	NM_008148	14729	Mm.3519	NM_008148	ENSMUSG00000047953	Gp5	GPV	glycoprotein 5 (platelet)	protein-coding
MACS_peak_1054	chr11	97911771	97914655	+	1773	NA	intron (NM_146028, intron 1 of 10)	intron (NM_146028, intron 1 of 10)	1563	NM_146028	217154	Mm.181008	NM_146028	ENSMUSG00000017400	Stac2	24b2|24b2/STAC2|AW240854	SH3 and cysteine rich domain 2	protein-coding
MACS_peak_3473	chr2	151899919	151909167	+	1773	NA	Intergenic	MTE2a|LTR|MaLR	-2722	NM_001160410	545474	Mm.214317	NM_001160410	ENSMUSG00000060257	Scrt2	AW060659	scratch homolog 2, zinc finger protein (Drosophila)	protein-coding
MACS_peak_5485	chr7	77472912	77487170	+	1773	NA	Intergenic	Intergenic	25438	NM_009697	11819	Mm.158143	NM_009697	ENSMUSG00000030551	Nr2f2	2700033K02Rik|9430015G03Rik|ARP-1|Aporp1|COUP-TF2|COUP-TFII|COUPTFB|EAR3|SVP40|Tcfcoup2	nuclear receptor subfamily 2, group F, member 2	protein-coding
MACS_peak_1919	chr14	77555426	77558263	+	1768	NA	5' UTR (NM_001253759, exon 1 of 20)	5' UTR (NM_001253759, exon 1 of 20)	274	NM_172813	239188	Mm.441158	NM_172813	ENSMUSG00000022012	Enox1	B230207J08|D230005D02Rik	ecto-NOX disulfide-thiol exchanger 1	protein-coding
MACS_peak_5631	chr7	139345779	139346873	+	1768	NA	promoter-TSS (NM_018867)	promoter-TSS (NM_018867)	98	NM_018867	55987	Mm.471654	NM_018867	ENSMUSG00000030862	Cpxm2	4632435C11Rik|CPX-2|Cpx2	carboxypeptidase X 2 (M14 family)	protein-coding
MACS_peak_1430	chr12	113384297	113385680	+	1767	NA	exon (NM_001097621, exon 2 of 16)	exon (NM_001097621, exon 2 of 16)	569	NM_001097621	668303	Mm.313104	NM_001097621	ENSMUSG00000021294	Kif26a	mKIAA1236	kinesin family member 26A	protein-coding
MACS_peak_1566	chr13	54150349	54152709	+	1767	NA	promoter-TSS (NM_010076)	promoter-TSS (NM_010076)	-502	NM_010076	13488	Mm.54161	NM_010076	ENSMUSG00000021478	Drd1a	C030036C15Rik|Drd-1|Drd1|Gpcr15	dopamine receptor D1A	protein-coding
MACS_peak_2276	chr16	5131666	5133047	+	1767	NA	intron (NM_008909, intron 1 of 21)	intron (NM_008909, intron 1 of 21)	218	NM_008909	19041	Mm.266875	NM_008909	ENSMUSG00000039457	Ppl	AW553870	periplakin	protein-coding
MACS_peak_1295	chr12	68321769	68324711	+	1763	NA	5' UTR (NM_207010, exon 1 of 16)	5' UTR (NM_207010, exon 1 of 16)	296	NM_001193266	320772	Mm.227680	NM_207010		Mdga2	6720489L24Rik|9330209L04Rik|Adp|Mamdc1	MAM domain containing glycosylphosphatidylinositol anchor 2	protein-coding
MACS_peak_2340	chr16	31935092	31935997	+	1763	NA	intron (NM_172822, intron 1 of 2)	intron (NM_172822, intron 1 of 2)	1607	NM_172822	239827	Mm.440388	NM_172822	ENSMUSG00000045625	Pigz	F630022B06Rik	phosphatidylinositol glycan anchor biosynthesis, class Z	protein-coding
MACS_peak_5283	chr7	19761176	19765010	+	1762	NA	Intergenic	Intergenic	-3426	NM_001162996	72205	Mm.154121	NM_028153	ENSMUSG00000040811	Eml2	1600029N02Rik	echinoderm microtubule associated protein like 2	protein-coding
MACS_peak_2459	chr17	8990542	8996634	+	1762	NA	intron (NM_001290707, intron 2 of 22)	intron (NM_001290707, intron 2 of 22)	-1022	NM_011866	23984	Mm.87161	NM_011866	ENSMUSG00000023868	Pde10a	-	phosphodiesterase 10A	protein-coding
MACS_peak_3314	chr2	79294128	79300976	+	1762	NA	promoter-TSS (NM_010894)	promoter-TSS (NM_010894)	-759	NM_010894	18012	Mm.4636	NM_010894	ENSMUSG00000034701	Neurod1	BETA2|BHF-1|Neurod|bHLHa3	neurogenic differentiation 1	protein-coding
MACS_peak_1487	chr13	23486247	23494261	+	1762	NA	Intergenic	Intergenic	25481	NM_013924	30946	Mm.292094	NM_013924		Abt1	-	activator of basal transcription 1	protein-coding
MACS_peak_2243	chr15	102516940	102527707	+	1762	NA	Intergenic	Intergenic	-20026	NR_030460	751542		NR_030460	miRBase:MI0004653	Mir688	Mirn688|mmu-mir-688	microRNA 688	ncRNA
MACS_peak_5822	chr8	47376513	47380564	+	1762	NA	exon (NM_173789, exon 3 of 4)	exon (NM_173789, exon 3 of 4)	1487	NM_173789	234219	Mm.145631	NM_173789	ENSMUSG00000047171	Helt	A830086M02|Hesl|Mgn|megane	helt bHLH transcription factor	protein-coding
MACS_peak_5892	chr8	86935621	86941838	+	1762	NA	promoter-TSS (NM_001252059)	promoter-TSS (NM_001252059)	-534	NM_001252060	12286	Mm.334658	NM_007578	ENSMUSG00000034656	Cacna1a	APCA|BI|Caca1a|Cacnl1a4|Cav2.1|Ccha1a|EA2|FHM|HPCA|MHP|MHP1|SCA6|alpha1A|la|nmf352|rkr|tg	calcium channel, voltage-dependent, P/Q type, alpha 1A subunit	protein-coding
MACS_peak_4076	chr4	89352969	89356257	+	1762	NA	promoter-TSS (NM_175647)	promoter-TSS (NM_175647)	-276	NM_175647	242523	Mm.130167	NM_175647	ENSMUSG00000043753	Dmrta1	Dmrt4	doublesex and mab-3 related transcription factor like family A1	protein-coding
MACS_peak_1390	chr12	106574242	106577437	+	1762	NA	intron (NR_045047, intron 2 of 2)	intron (NR_045047, intron 2 of 2)	636	NR_125773	69952	Mm.158311	NR_045047	ENSMUSG00000097929	Tunar	2810011L19Rik|Tuna	Tcl1 upstream neural differentiation associated RNA	ncRNA
MACS_peak_5812	chr8	36888389	36890249	+	1762	NA	exon (NM_027998, exon 1 of 1)	exon (NM_027998, exon 1 of 1)	294	NM_027998	71908	Mm.37817	NM_027998	ENSMUSG00000055976	Cldn23	2310014B08Rik	claudin 23	protein-coding
MACS_peak_2526	chr17	27791807	27793462	+	1762	NA	promoter-TSS (NM_011861)	promoter-TSS (NM_011861)	98	NM_001286743	23969	Mm.4926	NM_011861	ENSMUSG00000040276	Pacsin1	A830061D09Rik|H74|mKIAA1379|syndapin	protein kinase C and casein kinase substrate in neurons 1	protein-coding
MACS_peak_3675	chr3	5218249	5222420	+	1762	NA	intron (NM_030708, intron 1 of 10)	(TTCCC)n|Simple_repeat|Simple_repeat	489	NR_045905	72608	Mm.384359	NR_045905		2700069I18Rik	-	RIKEN cDNA 2700069I18 gene	ncRNA
MACS_peak_32	chr1	18047141	18049746	+	1762	NA	Intergenic	CpG	78689	NM_030033	78081	Mm.319913	NM_030033	ENSMUSG00000025774	Crisp4	9230112K08Rik	cysteine-rich secretory protein 4	protein-coding
MACS_peak_6499	chrX	100262065	100263227	+	1762	NA	Intergenic	Intergenic	119357	NM_008671	17954	Mm.388694	NM_008671	ENSMUSG00000082229	Nap1l2	Bpx	nucleosome assembly protein 1-like 2	protein-coding
MACS_peak_695	chr10	121884908	121887001	+	1762	NA	exon (NM_016847, exon 1 of 2)	exon (NM_016847, exon 1 of 2)	399	NM_016847	54140	Mm.4351	NM_016847	ENSMUSG00000020123	Avpr1a	AVPR|Avpr1|V1a|V1aR	arginine vasopressin receptor 1A	protein-coding
MACS_peak_1270	chr12	50500905	50503166	+	1762	NA	intron (NR_026733, intron 2 of 2)	intron (NR_026733, intron 2 of 2)	11396	NR_026733	67293	Mm.185800	NR_026733	ENSMUSG00000089922	3110039M20Rik	-	RIKEN cDNA 3110039M20 gene	ncRNA
MACS_peak_6163	chr9	43850459	43852974	+	1760	NA	intron (NM_009382, intron 1 of 3)	CpG	249	NM_009382	21838	Mm.3951	NM_009382	ENSMUSG00000032011	Thy1	CD90|T25|Thy-1|Thy-1.2|Thy1.1|Thy1.2	thymus cell antigen 1, theta	protein-coding
MACS_peak_1210	chr11	119907696	119909745	+	1757	NA	promoter-TSS (NM_007377)	promoter-TSS (NM_007377)	-261	NM_007377	11302	Mm.6826	NM_007377	ENSMUSG00000025375	Aatk	AATYK|aatyk1|mKIAA0641	apoptosis-associated tyrosine kinase	protein-coding
MACS_peak_1405	chr12	109239458	109244933	+	1756	NA	promoter-TSS (NM_001286343)	promoter-TSS (NM_001286343)	-571	NM_021399	58208	Mm.392694	NM_021399	ENSMUSG00000048251	Bcl11b	9130430L19Rik|AI604821|B630002E05Rik|BCL-11B|Ctip2|Rit1	B cell leukemia/lymphoma 11B	protein-coding
MACS_peak_5570	chr7	120098027	120099150	+	1755	NA	exon (NM_175279, exon 1 of 1)	exon (NM_175279, exon 1 of 1)	1112	NM_175279	78748	Mm.349943	NM_175279	ENSMUSG00000098132	Rassf10	4632411J06Rik	Ras association (RalGDS/AF-6) domain family (N-terminal) member 10	protein-coding
MACS_peak_2796	chr18	45717741	45721869	+	1750	NA	promoter-TSS (NM_080465)	promoter-TSS (NM_080465)	-3	NM_080465	140492	Mm.458654	NM_080465	ENSMUSG00000054477	Kcnn2	KCa2.2|SK2|SKCA2|fri	potassium intermediate/small conductance calcium-activated channel, subfamily N, member 2	protein-coding
MACS_peak_2531	chr17	28277301	28283702	+	1750	NA	intron (NM_001004366, intron 1 of 21)	intron (NM_001004366, intron 1 of 21)	1030	NM_001004366	268935	Mm.258491	NM_001004366	ENSMUSG00000038677	Scube3	CEGF3|D030038I21Rik	signal peptide, CUB domain, EGF-like 3	protein-coding
MACS_peak_5495	chr7	85720177	85725176	+	1750	NA	promoter-TSS (NM_008746)	promoter-TSS (NM_008746)	48	NM_008746	18213	Mm.33496	NM_008746		Ntrk3	AW125844|Ntrk3_tv3|TrkC	neurotrophic tyrosine kinase, receptor, type 3	protein-coding
MACS_peak_5345	chr7	29478149	29480608	+	1750	NA	intron (NM_207238, intron 2 of 5)	B3|SINE|B2	1215	NM_001163702	233040	Mm.116116	NM_207238	ENSMUSG00000037463	Fbxo27	E130008B10Rik|FBG5|Gm161	F-box protein 27	protein-coding
MACS_peak_602	chr10	80746375	80748496	+	1750	NA	intron (NM_001282095, intron 1 of 20)	intron (NM_001282095, intron 1 of 20)	1091	NM_001282096	27375	Mm.27984	NM_013769	ENSMUSG00000034917	Tjp3	-	tight junction protein 3	protein-coding
MACS_peak_5906	chr8	90183334	90187260	+	1750	NA	TTS (NM_033327)	TTS (NM_033327)	97491	NM_177901	330820	Mm.212913	NM_177901		4933402J07Rik	-	RIKEN cDNA 4933402J07 gene	protein-coding
MACS_peak_6168	chr9	44844920	44853145	+	1745	NA	Intergenic	Intergenic	-1395	NM_007962	14012	Mm.33240	NM_007962	ENSMUSG00000032092	Mpzl2	Eva|Eva1	myelin protein zero-like 2	protein-coding
MACS_peak_866	chr11	67266114	67270261	+	1741	NA	Intergenic	Intergenic	-78313	NM_008088	14457	Mm.40338	NM_008088	ENSMUSG00000033066	Gas7	AW124766|B230343A10Rik|Gas7-cb	growth arrest specific 7	protein-coding
MACS_peak_39	chr1	21950964	21953473	+	1738	NA	promoter-TSS (NM_023872)	promoter-TSS (NM_023872)	-195	NM_023872	226922	Mm.336519	NM_023872	ENSMUSG00000028033	Kcnq5	7730402H11|9230107O05Rik|AA589396|D1Mgi1	potassium voltage-gated channel, subfamily Q, member 5	protein-coding
MACS_peak_767	chr11	28482862	28483981	+	1738	NA	exon (NM_181577, exon 1 of 5)	exon (NM_181577, exon 1 of 5)	903	NM_001166661	216613	Mm.93759	NM_181577	ENSMUSG00000032878	Ccdc85a	-	coiled-coil domain containing 85A	protein-coding
MACS_peak_5695	chr7	150153067	150158505	+	1738	NA	promoter-TSS (NM_008554)	promoter-TSS (NM_008554)	-617	NM_008554	17173	Mm.196417	NM_008554	ENSMUSG00000009248	Ascl2	2410083I15Rik|Mash2|bHLHa45	achaete-scute complex homolog 2 (Drosophila)	protein-coding
MACS_peak_5099	chr6	88137827	88142334	+	1738	NA	Intergenic	CpG	-8578	NM_008090	14461	Mm.491156	NM_008090	ENSMUSG00000015053	Gata2	Gata-2	GATA binding protein 2	protein-coding
MACS_peak_2232	chr15	101673674	101678683	+	1736	NA	3' UTR (NM_008473, exon 9 of 9)	3' UTR (NM_008473, exon 9 of 9)	5039	NM_008473	16678	Mm.183137	NM_008473	ENSMUSG00000046834	Krt1	Krt-2.1|Krt2-1|Krt86	keratin 1	protein-coding
MACS_peak_290	chr1	154799266	154805540	+	1736	NA	intron (NM_175460, intron 1 of 10)	CpG	172	NM_175460	226518	Mm.40548	NM_175460	ENSMUSG00000042751	Nmnat2	AI843915|D030041I09Rik|PNAT1|PNAT2	nicotinamide nucleotide adenylyltransferase 2	protein-coding
MACS_peak_4175	chr4	122856864	122863195	+	1736	NA	promoter-TSS (NM_174998)	promoter-TSS (NM_174998)	-718	NM_174998	170638	Mm.270641	NM_174998	ENSMUSG00000046093	Hpcal4	AI846570|NVP-2	hippocalcin-like 4	protein-coding
MACS_peak_3796	chr3	89633863	89637199	+	1731	NA	exon (NM_172530, exon 1 of 6)	exon (NM_172530, exon 1 of 6)	239	NM_172530	214547	Mm.225	NM_172530	ENSMUSG00000046280	She	9430022A14	src homology 2 domain-containing transforming protein E	protein-coding
MACS_peak_873	chr11	69047847	69050684	+	1728	NA	exon (NM_008192, exon 3 of 19)	exon (NM_008192, exon 3 of 19)	1259	NM_008192	14919	Mm.291816	NM_008192	ENSMUSG00000020890	Gucy2e	GC-E|GC1|ROS-GC1	guanylate cyclase 2e	protein-coding
MACS_peak_5944	chr8	97217071	97221238	+	1728	NA	intron (NM_026385, intron 1 of 3)	intron (NM_026385, intron 1 of 3)	988	NM_026385	67801	Mm.279977	NM_026385	ENSMUSG00000031775	Pllp	0610010I06Rik|AV001002|Plapi|Tm4sf11	plasma membrane proteolipid	protein-coding
MACS_peak_2320	chr16	20732700	20736312	+	1728	NA	promoter-TSS (NM_009379)	promoter-TSS (NM_009379)	78	NM_009379	21832	Mm.3943	NM_009379	ENSMUSG00000022847	Thpo	Mgdf|Ml|Mpllg|Tpo	thrombopoietin	protein-coding
MACS_peak_1479	chr13	22072412	22077430	+	1722	NA	exon (NM_001162928, exon 1 of 1)	exon (NM_001162928, exon 1 of 1)	1858	NM_001162929	195236	Mm.204664	NM_001162928	ENSMUSG00000016982	Pom121l2	Gm24	POM121 membrane glycoprotein-like 2 (rat)	protein-coding
MACS_peak_1642	chr13	73672877	73676313	+	1721	NA	intron (NM_010020, intron 1 of 14)	intron (NM_010020, intron 1 of 14)	400	NM_010020	13162	Mm.41993	NM_010020	ENSMUSG00000021609	Slc6a3	DAT|Dat1	solute carrier family 6 (neurotransmitter transporter, dopamine), member 3	protein-coding
MACS_peak_4592	chr5	98595064	98602547	+	1721	NA	Intergenic	Intergenic	-11083	NM_029947	77630	Mm.332511	NM_029947	ENSMUSG00000035456	Prdm8	4930565F05Rik|PFM5	PR domain containing 8	protein-coding
MACS_peak_199	chr1	93697439	93699687	+	1721	NA	exon (NM_007855, exon 1 of 2)	exon (NM_007855, exon 1 of 2)	509	NM_007855	13345	Mm.9474	NM_007855	ENSMUSG00000007805	Twist2	Dermo1|bHLHa39	twist basic helix-loop-helix transcription factor 2	protein-coding
MACS_peak_3910	chr3	131152015	131153973	+	1720	NA	Intergenic	CpG	-74738	NM_001289479	23971	Mm.244912	NM_011863	ENSMUSG00000028032	Papss1	AI325286|Asapk|SK1	3'-phosphoadenosine 5'-phosphosulfate synthase 1	protein-coding
MACS_peak_1865	chr14	60996024	60999156	+	1720	NA	exon (NM_001164705, exon 1 of 2)	exon (NM_001164705, exon 1 of 2)	467	NM_001164705	72125	Mm.275499	NM_028113	ENSMUSG00000021986	Amer2	2600011E07Rik|Fam123a	APC membrane recruitment 2	protein-coding
MACS_peak_3186	chr2	29050249	29051232	+	1719	NA	intron (NM_133500, intron 6 of 6)	intron (NM_133500, intron 6 of 6)	52820	NM_133501	171171	Mm.442448	NM_133500	ENSMUSG00000035513	Ntng2	2610016D08Rik|Lmnt2	netrin G2	protein-coding
MACS_peak_4256	chr4	133052332	133058658	+	1711	NA	Intergenic	Intergenic	-1030	NM_001081156	69539	Mm.151594	NM_001081156	ENSMUSG00000056596	Trnp1	2300002D11Rik|Trnp	TMF1-regulated nuclear protein 1	protein-coding
MACS_peak_6276	chr9	65916904	65918165	+	1711	NA	promoter-TSS (NM_001025612)	promoter-TSS (NM_001025612)	4	NM_001025612	382083	Mm.477103	NM_001025612	ENSMUSG00000039452	Snx22	Gm1120	sorting nexin 22	protein-coding
MACS_peak_2013	chr15	37162334	37164185	+	1707	NA	intron (NM_026496, intron 1 of 15)	CpG	468	NM_026496	252973	Mm.244612	NM_026496	ENSMUSG00000022286	Grhl2	0610015A08Rik|BOM|Tcfcp2l3	grainyhead-like 2 (Drosophila)	protein-coding
MACS_peak_226	chr1	127806811	127811439	+	1704	NA	promoter-TSS (NM_145100)	promoter-TSS (NM_145100)	-334	NM_145100	72585	Mm.490405	NM_145100		Lypd1	2700050C12Rik|AI853408|C530008O16Rik|Lynx2|Lypdc1	Ly6/Plaur domain containing 1	protein-coding
MACS_peak_1938	chr14	112078278	112081542	+	1704	NA	exon (NM_198865, exon 2 of 2)	exon (NM_198865, exon 2 of 2)	5573	NM_198865	75409	Mm.235097	NM_029273	ENSMUSG00000033214	Slitrk5	2610019D03Rik	SLIT and NTRK-like family, member 5	protein-coding
MACS_peak_3875	chr3	117276935	117279236	+	1704	NA	promoter-TSS (NM_029425)	promoter-TSS (NM_029425)	-294	NM_029425	75769	Mm.72187	NM_029425	ENSMUSG00000033342	Lppr5	4833424O15Rik|PRG-5|Pap2d	lipid phosphate phosphatase-related protein type 5	protein-coding
MACS_peak_1333	chr12	81617311	81620913	+	1704	NA	promoter-TSS (NM_001081421)	promoter-TSS (NM_001081421)	-865	NM_001081421	108760	Mm.308296	NM_001081421	ENSMUSG00000021130	Galnt16	5730405L21Rik|AI415388|Galntl1|mpp-GalNAc-T16	UDP-N-acetyl-alpha-D-galactosamine:polypeptide N-acetylgalactosaminyltransferase 16	protein-coding
MACS_peak_1093	chr11	102137616	102138186	+	1704	NA	exon (NM_148953, exon 3 of 5)	exon (NM_148953, exon 3 of 5)	7764	NM_148953	217217	Mm.216432	NM_148953		Asb16	-	ankyrin repeat and SOCS box-containing 16	protein-coding
MACS_peak_6043	chr8	126146007	126146680	+	1704	NA	Intergenic	Intergenic	-31486	NM_133955	69581	Mm.168257	NM_133955	ENSMUSG00000039960	Rhou	2310026M05Rik|AI182090|Arhu|CDC42L1|G28K|WRCH-1|WRCH1|mG28K	ras homolog gene family, member U	protein-coding
MACS_peak_4509	chr5	38550021	38551634	+	1704	NA	promoter-TSS (NM_010942)	promoter-TSS (NM_010942)	-121	NM_010942	18196	Mm.7414	NM_010942	ENSMUSG00000029126	Nsg1	Neep21|m234|p21	neuron specific gene family member 1	protein-coding
MACS_peak_3799	chr3	91883890	91885879	+	1704	NA	exon (NM_008508, exon 2 of 2)	exon (NM_008508, exon 2 of 2)	2180	NM_008508	16939	Mm.1121	NM_008508	ENSMUSG00000043165	Lor	AI036317|S77319	loricrin	protein-coding
MACS_peak_4860	chr5	141715748	141720049	+	1704	NA	exon (NM_177879, exon 1 of 45)	exon (NM_177879, exon 1 of 45)	410	NM_177879	330222	Mm.151931	NM_177879	ENSMUSG00000039683	Sdk1	5330440E10|6720466O15Rik	sidekick homolog 1 (chicken)	protein-coding
MACS_peak_1543	chr13	48357327	48358415	+	1704	NA	non-coding (NR_102303, exon 1 of 3)	non-coding (NR_102303, exon 1 of 3)	121	NR_102303	320614	Mm.173009	NR_102303	ENSMUSG00000097622	A330033J07Rik	-	RIKEN cDNA A330033J07 gene	ncRNA
MACS_peak_5156	chr6	113991071	113993194	+	1704	NA	promoter-TSS (NM_009723)	promoter-TSS (NM_009723)	-58	NM_009723	11941	Mm.321755	NM_009723	ENSMUSG00000030302	Atp2b2	D6Abb2e|Gena300|PMCA2|Tmy|dfw|jog|wms|wri	ATPase, Ca++ transporting, plasma membrane 2	protein-coding
MACS_peak_2137	chr15	88783760	88785904	+	1704	NA	promoter-TSS (NM_172818)	promoter-TSS (NM_172818)	16	NM_172818	239591	Mm.86807	NM_172818	ENSMUSG00000022388	Ttll8	1700019P01Rik|4933401B17	tubulin tyrosine ligase-like family, member 8	protein-coding
MACS_peak_23	chr1	14744671	14747466	+	1704	NA	promoter-TSS (NM_010827)	promoter-TSS (NM_010827)	-21	NM_010827	17681	Mm.5820	NM_010827	ENSMUSG00000025930	Msc	MyoR|bHLHa22	musculin	protein-coding
MACS_peak_1757	chr13	117499677	117501403	+	1704	NA	Intergenic	Intergenic	313783	NM_001081009	52552	Mm.274466	NM_027272	ENSMUSG00000021725	Parp8	2810430O08Rik|ARTD16|D13Ertd275e	poly (ADP-ribose) polymerase family, member 8	protein-coding
MACS_peak_4276	chr4	135978810	135981644	+	1704	NA	promoter-TSS (NM_001285484)	promoter-TSS (NM_001285484)	-300	NM_001285484	15552	Mm.40573	NM_008309	ENSMUSG00000070687	Htr1d	5-HT-1D|5-HT1D|AI853647|Gpcr14|Htr1db	5-hydroxytryptamine (serotonin) receptor 1D	protein-coding
MACS_peak_3503	chr2	156437345	156441296	+	1702	NA	promoter-TSS (NM_001277186)	promoter-TSS (NM_001277186)	-113	NM_146128	228836	Mm.22094	NM_146128	ENSMUSG00000061689	Dlgap4	AI225853|BC024558|DAP-4|DAP4|SAPAP-4|Sapap4|WBP16	discs, large homolog-associated protein 4 (Drosophila)	protein-coding
MACS_peak_195	chr1	92811400	92811639	+	1697	NA	promoter-TSS (NM_053015)	promoter-TSS (NM_053015)	-158	NM_053015	171531	Mm.105208	NM_053015	ENSMUSG00000026303	Mlph	2210418F23Rik|5031433I09Rik|AW228792|D1Wsu84e|Slac-2a|l(1)-3Rk|l1Rk3|ln	melanophilin	protein-coding
MACS_peak_1201	chr11	118895800	118899310	+	1692	NA	Intergenic	Intergenic	4672	NM_013926	30951	Mm.99953	NM_013926	ENSMUSG00000025578	Cbx8	Pc3	chromobox 8	protein-coding
MACS_peak_494	chr10	43297596	43301391	+	1689	NA	intron (NM_009846, intron 1 of 1)	intron (NM_009846, intron 1 of 1)	518	NM_009846	12484	Mm.29742	NM_009846	ENSMUSG00000047139	Cd24a	Cd24|HSA|Ly-52|nectadrin	CD24a antigen	protein-coding
MACS_peak_457	chr10	22533551	22537828	+	1689	NA	Intergenic	Intergenic	4245	NM_011545	21412	Mm.16497	NM_011545	ENSMUSG00000045680	Tcf21	Pod-1|Pod1|bHLHa23|capsulin|epc|epicardin	transcription factor 21	protein-coding
MACS_peak_4406	chr4	153673822	153675493	+	1689	NA	promoter-TSS (NM_001112744)	promoter-TSS (NM_001112744)	-653	NM_001112744	230972	Mm.38481	NM_001112744	ENSMUSG00000029032	Arhgef16	-	Rho guanine nucleotide exchange factor (GEF) 16	protein-coding
MACS_peak_30	chr1	17087043	17088160	+	1689	NA	exon (NM_020604, exon 1 of 5)	exon (NM_020604, exon 1 of 5)	369	NM_020604	57339	Mm.143761	NM_020604	ENSMUSG00000042686	Jph1	ENSMUSG00000054314|JP-1|Jp1	junctophilin 1	protein-coding
MACS_peak_3858	chr3	106903621	106907720	+	1688	NA	intron (NM_008417, intron 1 of 2)	intron (NM_008417, intron 1 of 2)	1185	NM_008417	16490	Mm.39285	NM_008417		Kcna2	Akr6a4|ENSMUSG00000074335|Gm10672|Kca1-2|Kv1.2|Mk-2	potassium voltage-gated channel, shaker-related subfamily, member 2	protein-coding
MACS_peak_6164	chr9	44093846	44097540	+	1687	NA	intron (NM_138955, intron 1 of 14)	CpG	634	NM_138955	192663	Mm.101876	NM_138955	ENSMUSG00000032131	Abcg4	6430517O04Rik	ATP-binding cassette, sub-family G (WHITE), member 4	protein-coding
MACS_peak_6530	chrX	133200732	133202176	+	1684	NA	intron (NM_001029978, intron 1 of 2)	intron (NM_001029978, intron 1 of 2)	540	NM_001029978	594844	Mm.260515	NM_001029978	ENSMUSG00000044550	Tceal3	1100001D19Rik	transcription elongation factor A (SII)-like 3	protein-coding
MACS_peak_5395	chr7	38553535	38555791	+	1684	NA	5' UTR (NM_172385, exon 1 of 6)	5' UTR (NM_172385, exon 1 of 6)	108	NM_172385	243937	Mm.322505	NM_172385	ENSMUSG00000043456	Zfp536	9630010P11Rik|Znf536|mKIAA0390	zinc finger protein 536	protein-coding
MACS_peak_743	chr11	11584099	11587872	+	1684	NA	promoter-TSS (NM_009578)	promoter-TSS (NM_009578)	-231	NM_009578	22778	Mm.103545	NM_009578	ENSMUSG00000018654	Ikzf1	5832432G11Rik|Ikaros|LyF-1|Zfpn1a1|Znfn1a1|hlk-1|mKIAA4227	IKAROS family zinc finger 1	protein-coding
MACS_peak_1635	chr13	72764281	72767060	+	1684	NA	promoter-TSS (NM_010574)	promoter-TSS (NM_010574)	342	NR_030701	328287	Mm.235072	NR_030701		Gm20554	D430050G20	predicted gene, 20554	ncRNA
MACS_peak_6134	chr9	40492717	40496299	+	1684	NA	intron (NM_133733, intron 1 of 6)	CpG	461	NM_133733	71566	Mm.280560	NM_133733	ENSMUSG00000032024	Clmp	9030425E11Rik|ACAM|ASP5|AW557819	CXADR-like membrane protein	protein-coding
MACS_peak_3533	chr2	162485119	162487679	+	1684	NA	promoter-TSS (NR_033569)	promoter-TSS (NR_033569)	484	NM_001291151	19281	Mm.235807	NM_021464	ENSMUSG00000053141	Ptprt	R-PTP-T|RPTP-rfo|RPTP-rho|RPTPmam4|RPTPrho|mKIAA0283|mRPTPrho	protein tyrosine phosphatase, receptor type, T	protein-coding
MACS_peak_1963	chr14	122846112	122854639	+	1684	NA	promoter-TSS (NR_033325)	promoter-TSS (NR_033325)	-7	NR_033326	328479	Mm.86095	NR_033325	ENSMUSG00000064052	Gm5089	6530402A20|C030005G22Rik|EG328479	predicted gene 5089	ncRNA
MACS_peak_2245	chr15	102573528	102578915	+	1684	NA	TTS (NR_104334)	TTS (NR_104334)	1119	NR_104334	102216269		NR_104334		Cistr-act	Cistr	chondrogenic regulator lncRNA	ncRNA
MACS_peak_3368	chr2	115679968	115682384	+	1684	NA	Intergenic	Intergenic	209181	NM_001159569	17536	Mm.247566	NM_010825	ENSMUSG00000027210	Meis2	A430109D20Rik|Mrg1|Stra10	Meis homeobox 2	protein-coding
MACS_peak_65	chr1	38954849	38955751	+	1684	NA	promoter-TSS (NM_145142)	promoter-TSS (NM_145142)	-295	NM_145142	98388	Mm.260054	NM_145142	ENSMUSG00000026080	Chst10	AI507003|AU041319|Hnk-1st|ST	carbohydrate sulfotransferase 10	protein-coding
MACS_peak_5234	chr6	142911334	142913551	+	1678	NA	5' UTR (NM_011374, exon 1 of 5)	5' UTR (NM_011374, exon 1 of 5)	530	NM_011374	20449	Mm.260838	NM_011374	ENSMUSG00000030283	St8sia1	9330109E03Rik|GD3S|Sia-T|Siat8|Siat8a	ST8 alpha-N-acetyl-neuraminide alpha-2,8-sialyltransferase 1	protein-coding
MACS_peak_3551	chr2	164225139	164231756	+	1678	NA	promoter-TSS (NM_009036)	promoter-TSS (NM_009036)	-247	NM_009036	19668	Mm.473794	NM_009036	ENSMUSG00000017007	Rbpjl	RBP-L|Rbpsuhl	recombination signal binding protein for immunoglobulin kappa J region-like	protein-coding
MACS_peak_2669	chr17	68046331	68049332	+	1678	NA	intron (NM_008480, intron 1 of 62)	intron (NM_008480, intron 1 of 62)	1226	NM_008480	16772	Mm.303386	NM_008480	ENSMUSG00000032796	Lama1	AA408497|Lama	laminin, alpha 1	protein-coding
MACS_peak_3404	chr2	127305677	127310255	+	1678	NA	5' UTR (NM_001111331, exon 1 of 8)	5' UTR (NM_001111331, exon 1 of 8)	269	NM_001111331	56461	Mm.315292	NM_019789	ENSMUSG00000079056	Kcnip3	4933407H12Rik|AI413860|Csen|DREAM|KChIP3|R74849	Kv channel interacting protein 3, calsenilin	protein-coding
MACS_peak_5298	chr7	25370056	25372796	+	1678	NA	intron (NM_001033205, intron 3 of 3)	intron (NM_001033205, intron 3 of 3)	-1136	NM_023154	66071	Mm.29553	NM_023154	ENSMUSG00000064254	Ethe1	0610025L15Rik|Hsco	ethylmalonic encephalopathy 1	protein-coding
MACS_peak_4935	chr6	17979561	17981298	+	1674	NA	promoter-TSS (NM_023653)	promoter-TSS (NM_023653)	16	NM_023653	22413	Mm.33653	NM_023653	ENSMUSG00000010797	Wnt2	2610510E18Rik|Int1l1|Irp|Mirp|Wnt-2|Wnt2a	wingless-type MMTV integration site family, member 2	protein-coding
MACS_peak_539	chr10	62562258	62563365	+	1674	NA	promoter-TSS (NM_016864)	promoter-TSS (NM_016864)	-93	NM_016864	53404	Mm.228661	NM_016864	ENSMUSG00000036816	Atoh7	Math5|bHLHa13	atonal homolog 7 (Drosophila)	protein-coding
MACS_peak_1775	chr14	22804044	22806954	+	1674	NA	exon (NM_145459, exon 3 of 3)	exon (NM_145459, exon 3 of 3)	3324	NM_145459	218820	Mm.292401	NM_145459	ENSMUSG00000039081	Zfp503	AI181838|B830002A16Rik|Nolz-1|Nolz1|Znf503	zinc finger protein 503	protein-coding
MACS_peak_2584	chr17	36313468	36317744	+	1674	NA	promoter-TSS (NR_033619)	promoter-TSS (NR_033619)	-116	NR_033619	625785	Mm.390996	NR_033619		Gm6623	EG625785	akirin 1 pseudogene	pseudo
MACS_peak_6058	chr8	128516080	128522028	+	1673	NA	promoter-TSS (NM_008430)	promoter-TSS (NM_008430)	52	NM_008430	16525	Mm.10800	NM_008430	ENSMUSG00000033998	Kcnk1	AI788889|TWIK-1	potassium channel, subfamily K, member 1	protein-coding
MACS_peak_4103	chr4	107105281	107109506	+	1673	NA	promoter-TSS (NM_147221)	promoter-TSS (NM_147221)	69	NM_147221	230587	Mm.331757	NM_147221	ENSMUSG00000034762	Glis1	Gli5|Gli6|GliH1	GLIS family zinc finger 1	protein-coding
MACS_peak_5409	chr7	51839756	51849337	+	1669	NA	Intergenic	CpG	-1710	NM_008422	16504	Mm.40312	NM_008422	ENSMUSG00000062785	Kcnc3	KShIIID|Kcr2-3|Kv3.3	potassium voltage gated channel, Shaw-related subfamily, member 3	protein-coding
MACS_peak_659	chr10	111706335	111710606	+	1667	NA	intron (NM_001025581, intron 1 of 4)	intron (NM_001025581, intron 1 of 4)	291	NM_001025581	268345	Mm.336242	NM_001025581	ENSMUSG00000035681	Kcnc2	AW047325|B230117I07|KShIIIA|Kv3.2	potassium voltage gated channel, Shaw-related subfamily, member 2	protein-coding
MACS_peak_411	chr1	194978493	194980974	+	1667	NA	intron (NM_016851, intron 1 of 7)	intron (NM_016851, intron 1 of 7)	427	NM_016851	54139	Mm.273695	NM_016851	ENSMUSG00000026638	Irf6	AI876454|E230028I05Rik|mirf6	interferon regulatory factor 6	protein-coding
MACS_peak_1021	chr11	96212363	96216482	+	1667	NA	exon (NM_134032, exon 2 of 2)	exon (NM_134032, exon 2 of 2)	1476	NM_134032	103889	Mm.281153	NM_134032	ENSMUSG00000075588	Hoxb2	AI894218|Hox-2.8|Hoxbes2	homeobox B2	protein-coding
MACS_peak_3835	chr3	96330411	96332631	+	1664	NA	intron (NM_027126, intron 3 of 3)	intron (NM_027126, intron 3 of 3)	2413	NM_027126	69585	Mm.171314	NM_027126	ENSMUSG00000038403	Hfe2	2310035L15Rik|5230400G09Rik|AI414844|AI789733|DL-M|HJV|Rgmc|hemojuvelin	hemochromatosis type 2 (juvenile) (human homolog)	protein-coding
MACS_peak_1326	chr12	77810318	77812730	+	1664	NA	promoter-TSS (NM_013675)	promoter-TSS (NM_013675)	10	NM_013675	20741	Mm.32881	NM_013675	ENSMUSG00000021061	Sptb	AI842465|D330027P03Rik|Gm1301|Spnb-1|Spnb1|ja|jaundiced|mKIAA4219	spectrin beta, erythrocytic	protein-coding
MACS_peak_5802	chr8	34627445	34628827	+	1664	NA	Intergenic	Intergenic	33353	NR_033589	628431	Mm.376526	NR_033589		Hmgb1-rs17	Hmg1-rs17	high mobility group box 1, related sequence 17	pseudo
MACS_peak_4485	chr5	35619903	35624838	+	1657	NA	5' UTR (NM_007418, exon 1 of 1)	5' UTR (NM_007418, exon 1 of 1)	1155	NM_007418	11553	Mm.57205	NM_007418	ENSMUSG00000045318	Adra2c	Adra-2c|[a]2C|alpha2-C4|alpha2C	adrenergic receptor, alpha 2c	protein-coding
MACS_peak_5182	chr6	121162633	121163021	+	1656	NA	intron (NM_017379, intron 1 of 4)	(TG)n|Simple_repeat|Simple_repeat	2039	NM_017379	53857	Mm.32884	NM_017379		Tuba8	-	tubulin, alpha 8	protein-coding
MACS_peak_3088	chr19	58527151	58531536	+	1654	NA	promoter-TSS (NM_001285457)	promoter-TSS (NM_001285457)	-259	NM_001285457	14585	Mm.88367	NM_010279	ENSMUSG00000025089	Gfra1	AU042498	glial cell line derived neurotrophic factor family receptor alpha 1	protein-coding
MACS_peak_3365	chr2	113056393	113057661	+	1654	NA	Intergenic	(CCCCG)n|Simple_repeat|Simple_repeat	-68862	NM_029232	75275	Mm.159484	NM_029232	ENSMUSG00000041255	Tmco5b	4930563P21Rik	transmembrane and coiled-coil domains 5B	protein-coding
MACS_peak_5310	chr7	25787911	25793286	+	1654	NA	intron (NM_001290469, intron 1 of 22)	CpG	358	NM_001290469	232975	Mm.44101	NM_144921	ENSMUSG00000040907	Atp1a3	Atpa-2	ATPase, Na+/K+ transporting, alpha 3 polypeptide	protein-coding
MACS_peak_5798	chr8	30325902	30331037	+	1654	NA	intron (NM_153135, intron 1 of 17)	intron (NM_153135, intron 1 of 17)	1639	NM_153135	210801	Mm.248433	NM_153135	ENSMUSG00000063626	Unc5d	D930029E11Rik|Unc5h4|mKIAA1777	unc-5 homolog D (C. elegans)	protein-coding
MACS_peak_1922	chr14	84842425	84848433	+	1650	NA	5' UTR (NM_001013753, exon 1 of 4)	5' UTR (NM_001013753, exon 1 of 4)	2059	NM_001013753	219228	Mm.153643	NM_001013753	ENSMUSG00000035566	Pcdh17	C030033F14Rik|Gm78	protocadherin 17	protein-coding
MACS_peak_3854	chr3	105255152	105257547	+	1645	NA	promoter-TSS (NR_040759)	promoter-TSS (NR_040759)	-476	NR_040759	78635	Mm.381306	NR_040759	ENSMUSG00000074346	Kcnd3os	1700095B22Rik	potassium voltage-gated channel, Shal-related family, member 3, opposite strand	ncRNA
MACS_peak_1719	chr13	104121841	104125626	+	1645	NA	intron (NM_175171, intron 1 of 28)	intron (NM_175171, intron 1 of 28)	839	NM_175171	328329	Mm.202606	NM_175171	ENSMUSG00000034751	Mast4	4930420O11Rik|AI642422|mKIAA0303	microtubule associated serine/threonine kinase family member 4	protein-coding
MACS_peak_1549	chr13	49240596	49243695	+	1645	NA	exon (NM_001290311, exon 2 of 29)	exon (NM_001290311, exon 2 of 29)	1552	NM_029361	75607	Mm.342723	NM_029361	ENSMUSG00000037989	Wnk2	1810073P09Rik|AW122246|ESTM15|X83337|mKIAA1760	WNK lysine deficient protein kinase 2	protein-coding
MACS_peak_6275	chr9	65238697	65239332	+	1645	NA	exon (NM_028974, exon 1 of 1)	exon (NM_028974, exon 1 of 1)	445	NM_028974	74492	Mm.159223	NM_028974	ENSMUSG00000054978	Kbtbd13	5430433E21Rik	kelch repeat and BTB (POZ) domain containing 13	protein-coding
MACS_peak_3339	chr2	93795190	93797441	+	1639	NA	3' UTR (NM_001145034, exon 1 of 1)	3' UTR (NM_001145034, exon 1 of 1)	942	NM_001145034	620695	Mm.482106	NM_001145034		Gm13889	Ag2|OTTMUSG00000014994	predicted gene 13889	protein-coding
MACS_peak_5827	chr8	49927755	49929204	+	1639	NA	Intergenic	CpG	-168435	NM_011857	23965	Mm.42191	NM_011857	ENSMUSG00000031561	Tenm3	2610100B16Rik|Odz1|Odz3|Ten-m3|mKIAA1455	teneurin transmembrane protein 3	protein-coding
MACS_peak_3971	chr4	21857545	21859632	+	1633	NA	5' UTR (NM_175234, exon 1 of 6)	5' UTR (NM_175234, exon 1 of 6)	115	NM_175234	76132	Mm.159689	NM_175234		Faxc	6230409E13Rik|AW742931	failed axon connections homolog (Drosophila)	protein-coding
MACS_peak_6198	chr9	52485246	52487847	+	1633	NA	5' UTR (NM_001286641, exon 2 of 2)	5' UTR (NM_001286641, exon 2 of 2)	996	NM_178906	330941	Mm.335160	NM_177907	ENSMUSG00000078307	AI593442	E130102D23	expressed sequence AI593442	protein-coding
MACS_peak_2409	chr16	93683252	93684711	+	1631	NA	intron (NM_173047, intron 1 of 2)	CpG	517	NM_173047	109857	Mm.4512	NM_173047	ENSMUSG00000022947	Cbr3	1110001J05Rik|C81353	carbonyl reductase 3	protein-coding
MACS_peak_2563	chr17	35107012	35108479	+	1631	NA	exon (NM_010479, exon 1 of 1)	exon (NM_010479, exon 1 of 1)	1356	NM_010479	193740	Mm.6388	NM_010479	ENSMUSG00000091971	Hspa1a	Hsp70-3|Hsp70.3|Hsp72|hsp68|hsp70A1	heat shock protein 1A	protein-coding
MACS_peak_1439	chr12	114662492	114663551	+	1631	NA	Intergenic	(CAGCT)n|Simple_repeat|Simple_repeat	-64755	NM_001009545	238405	Mm.442216	NM_001009545	ENSMUSG00000051804	Adam6b	4930523C11Rik	a disintegrin and metallopeptidase domain 6B	protein-coding
MACS_peak_5750	chr8	13974154	13974724	+	1630	NA	intron (NM_173744, intron 1 of 2)	CpG	338	NM_173744	72148	Mm.5727	NM_173744	ENSMUSG00000050052	Tdrp	2610019F03Rik	testis development related protein	protein-coding
MACS_peak_1299	chr12	72410708	72412035	+	1628	NA	intron (NM_001190466, intron 1 of 3)	CpG	500	NM_001190466	59036	Mm.46662	NM_021532	ENSMUSG00000044548	Dact1	4921528D17Rik|AI115603|DAPPER|DAPPER1|FRODO|Frd1|Frodo1|MDpr1|MTNG3|THYEX3	dapper homolog 1, antagonist of beta-catenin (xenopus)	protein-coding
MACS_peak_4306	chr4	138629968	138632966	+	1628	NA	promoter-TSS (NM_021358)	promoter-TSS (NM_021358)	-763	NM_021358	15565	Mm.291096	NM_021358	ENSMUSG00000028747	Htr6	5-HT6	5-hydroxytryptamine (serotonin) receptor 6	protein-coding
MACS_peak_5660	chr7	146373321	146376096	+	1628	NA	promoter-TSS (NM_021302)	promoter-TSS (NM_021302)	-315	NM_021302	57740	Mm.65336	NM_021302	ENSMUSG00000015981	Stk32c	PKE|Pkek|YANK3	serine/threonine kinase 32C	protein-coding
MACS_peak_5678	chr7	148244778	148247702	+	1626	NA	promoter-TSS (NM_177897)	promoter-TSS (NM_177897)	-933	NM_177897	330671	Mm.133741	NM_177897	ENSMUSG00000055629	B4galnt4	BC038881|Gm1095|beta4GalNAcT4	beta-1,4-N-acetyl-galactosaminyl transferase 4	protein-coding
MACS_peak_5539	chr7	104936554	104939127	+	1626	NA	Intergenic	CpG	-51083	NM_175105	66333	Mm.29756	NM_175105	ENSMUSG00000042797	Aqp11	1700015P13Rik|AI648923|sjds	aquaporin 11	protein-coding
MACS_peak_6280	chr9	66653737	66654050	+	1617	NA	Intergenic	CpG	-10663	NM_177583	208117	Mm.41291	NM_177583	ENSMUSG00000032375	Aph1b	2310057K14Rik|Aph1c	anterior pharynx defective 1b homolog (C. elegans)	protein-coding
MACS_peak_1274	chr12	54351297	54356224	+	1617	NA	intron (NM_013780, intron 1 of 11)	CpG	4096	NM_013780	27386	Mm.247044	NM_013780	ENSMUSG00000021010	Npas3	4930423H22Rik|bHLHe12	neuronal PAS domain protein 3	protein-coding
MACS_peak_2032	chr15	64751690	64753696	+	1617	NA	5' UTR (NM_009623, exon 1 of 18)	5' UTR (NM_009623, exon 1 of 18)	1165	NM_001291903	11514	Mm.1425	NM_009623	ENSMUSG00000022376	Adcy8	AC8|AW060868	adenylate cyclase 8	protein-coding
MACS_peak_374	chr1	186538705	186551979	+	1611	NA	Intergenic	Intergenic	8966	NR_040627	74971	Mm.410816	NR_040627	ENSMUSG00000092578	4930488B22Rik	-	RIKEN cDNA 4930488B22 gene	ncRNA
MACS_peak_4033	chr4	47104438	47106387	+	1606	NA	intron (NM_172693, intron 1 of 9)	intron (NM_172693, intron 1 of 9)	587	NM_172693	230145	Mm.132246	NM_172693	ENSMUSG00000039774	Galnt12	9130206E10|A630062B03Rik	UDP-N-acetyl-alpha-D-galactosamine:polypeptide N-acetylgalactosaminyltransferase 12	protein-coding
MACS_peak_2971	chr19	37766595	37767886	+	1606	NA	intron (NM_001105201, intron 5 of 5)	intron (NM_001105201, intron 5 of 5)	-5058	NM_007811	13082	Mm.42230	NM_007811	ENSMUSG00000024987	Cyp26a1	Cyp26|P450RA|P450RAI|RAH	cytochrome P450, family 26, subfamily a, polypeptide 1	protein-coding
MACS_peak_5488	chr7	77510263	77516179	+	1606	NA	intron (NR_045850, intron 1 of 10)	intron (NR_045850, intron 1 of 10)	-1589	NM_183261	11819	Mm.158143	NM_009697	ENSMUSG00000030551	Nr2f2	2700033K02Rik|9430015G03Rik|ARP-1|Aporp1|COUP-TF2|COUP-TFII|COUPTFB|EAR3|SVP40|Tcfcoup2	nuclear receptor subfamily 2, group F, member 2	protein-coding
MACS_peak_678	chr10	118889797	118892636	+	1606	NA	5' UTR (NM_001277293, exon 1 of 25)	5' UTR (NM_001277293, exon 1 of 25)	126	NM_001277293	74053	Mm.196692	NM_028736	ENSMUSG00000034813	Grip1	4931400F03Rik|GRIP|eb	glutamate receptor interacting protein 1	protein-coding
MACS_peak_5167	chr6	115084291	115087103	+	1606	NA	intron (NM_013681, intron 1 of 10)	Lx8|LINE|L1	777	NM_001111015	20965	Mm.441431	NM_013681	ENSMUSG00000009394	Syn2	2900074L19Rik|AI836018|AI841723	synapsin II	protein-coding
MACS_peak_1440	chr12	117314368	117318133	+	1606	NA	promoter-TSS (NM_009511)	promoter-TSS (NM_009511)	54	NM_009511	22355	Mm.395245	NM_009511	ENSMUSG00000011171	Vipr2	VPAC2|VPAC2R|Vip2	vasoactive intestinal peptide receptor 2	protein-coding
MACS_peak_6125	chr9	34295606	34299961	+	1606	NA	intron (NM_001190912, intron 1 of 15)	intron (NM_001190912, intron 1 of 15)	1467	NM_001190911	67703	Mm.220710	NM_026324		Kirrel3	1500010O20Rik|2900036G11Rik|NEPH2|SST4|mKIAA1867	kin of IRRE like 3 (Drosophila)	protein-coding
MACS_peak_5888	chr8	86397387	86400483	+	1606	NA	Intergenic	CpG	-25062	NM_181039	330814	Mm.260733	NM_181039	ENSMUSG00000013033	Lphn1	2900070I05Rik|AI182398|CLIBA|Lec2|mKIAA0821	latrophilin 1	protein-coding
MACS_peak_1896	chr14	68701752	68704606	+	1606	NA	intron (NM_010910, intron 1 of 3)	intron (NM_010910, intron 1 of 3)	1238	NM_010910	18039	Mm.1956	NM_010910		Nefl	AI847934|CMT2E|NF-L|NF68|Nfl	neurofilament, light polypeptide	protein-coding
MACS_peak_3321	chr2	84705943	84707422	+	1606	NA	Intergenic	CpG	20167	NM_199223	269295	Mm.86447	NM_199223	ENSMUSG00000050896	Rtn4rl2	Ngr2|Ngrh1|Ngrl3	reticulon 4 receptor-like 2	protein-coding
MACS_peak_2212	chr15	100698795	100704060	+	1601	NA	intron (NM_001077499, intron 1 of 26)	CpG	351	NM_001077499	20273	Mm.385012	NM_011323	ENSMUSG00000023033	Scn8a	AI853486|C630029C19Rik|NaCh6|Nav1.6|dmu|med|mnd-2|mnd2|nmf2|nmf335|nmf58|nur14|seal	sodium channel, voltage-gated, type VIII, alpha	protein-coding
MACS_peak_2622	chr17	46589662	46593884	+	1601	NA	intron (NM_001162864, intron 13 of 14)	intron (NM_001162864, intron 13 of 14)	-16347	NM_144856	108114	Mm.387538	NM_144856	ENSMUSG00000067144	Slc22a7	NLT|OAT2	solute carrier family 22 (organic anion transporter), member 7	protein-coding
MACS_peak_674	chr10	117064182	117067876	+	1601	NA	promoter-TSS (NM_027468)	promoter-TSS (NM_027468)	-527	NM_027468	70574	Mm.339332	NM_027468	ENSMUSG00000020183	Cpm	1110060I01Rik|5730456K23Rik|AA589379|E030045M14Rik	carboxypeptidase M	protein-coding
MACS_peak_4524	chr5	58108227	58113358	+	1597	NA	exon (NM_018764, exon 1 of 2)	exon (NM_018764, exon 1 of 2)	1532	NM_018764	54216	Mm.332387	NM_018764	ENSMUSG00000029108	Pcdh7	-	protocadherin 7	protein-coding
MACS_peak_5945	chr8	98200635	98204813	+	1597	NA	Intergenic	Intergenic	-24213	NM_001195006	234593	Mm.29846	NM_145602	ENSMUSG00000036564	Ndrg4	D8Bwg1337e|Ndr1-rs|Ndr4|R74996|SMAP-8	N-myc downstream regulated gene 4	protein-coding
MACS_peak_2008	chr15	35256228	35256583	+	1588	NA	intron (NR_045280, intron 1 of 2)	CpG	1885	NR_045280	100126269	Mm.247402	NR_045280		BC048602	-	cDNA sequence BC048602	ncRNA
MACS_peak_1183	chr11	117060082	117062641	+	1588	NA	intron (NM_001113486, intron 1 of 11)	intron (NM_001113486, intron 1 of 11)	386	NM_001113486	53860	Mm.38450	NM_017380	ENSMUSG00000059248	Sept9	MSF1|Msf|PNUTL4|Sint1	septin 9	protein-coding
MACS_peak_2018	chr15	43000689	43002204	+	1588	NA	5' UTR (NM_172815, exon 2 of 6)	5' UTR (NM_172815, exon 2 of 6)	918	NM_172815	239405	Mm.193274	NM_172815	ENSMUSG00000051920	Rspo2	2610028F08Rik|AA673245|D430027K22|ftls	R-spondin 2 homolog (Xenopus laevis)	protein-coding
MACS_peak_3165	chr2	25717913	25721284	+	1588	NA	intron (NM_001145403, intron 1 of 31)	CpG	224	NM_001145403	227632	Mm.119462	NM_175462	ENSMUSG00000058740	Kcnt1	C030030G16Rik|Slack|mKIAA1422|slo2	potassium channel, subfamily T, member 1	protein-coding
MACS_peak_2157	chr15	95356740	95359407	+	1586	NA	intron (NM_001289653, intron 2 of 20)	intron (NM_001289653, intron 2 of 20)	610	NM_001289653	54003	Mm.3959	NM_016743	ENSMUSG00000022454	Nell2	A330108N19Rik|R75516|mel91	NEL-like 2	protein-coding
MACS_peak_6283	chr9	67676923	67679662	+	1586	NA	TTS (NM_001163143)	TTS (NM_001163143)	1845	NM_001163143	244911	Mm.325849	NM_001163143	ENSMUSG00000047990	C2cd4a	EG244911|Fam148a	C2 calcium-dependent domain containing 4A	protein-coding
MACS_peak_1622	chr13	69137560	69138712	+	1586	NA	exon (NM_153534, exon 1 of 25)	exon (NM_153534, exon 1 of 25)	283	NM_153534	210044	Mm.390617	NM_153534	ENSMUSG00000021536	Adcy2	mKIAA1060	adenylate cyclase 2	protein-coding
MACS_peak_2832	chr18	66616632	66619669	+	1582	NA	promoter-TSS (NM_021451)	promoter-TSS (NM_021451)	-108	NM_021451	58801	Mm.271878	NM_021451	ENSMUSG00000024521	Pmaip1	Noxa	phorbol-12-myristate-13-acetate-induced protein 1	protein-coding
MACS_peak_1902	chr14	70474890	70480174	+	1582	NA	promoter-TSS (NM_001289927)	promoter-TSS (NM_001289927)	-70	NM_001289927	13655	Mm.103737	NM_018781	ENSMUSG00000033730	Egr3	Pilot	early growth response 3	protein-coding
MACS_peak_2308	chr16	17830507	17835842	+	1579	NA	promoter-TSS (NR_027959)	promoter-TSS (NR_027959)	-38	NR_027959	433004	Mm.310200	NM_001002790		B830017H08Rik	-	RIKEN cDNA B830017H08 gene	ncRNA
MACS_peak_5677	chr7	148106531	148112121	+	1576	NA	exon (NM_133946, exon 4 of 8)	exon (NM_133946, exon 4 of 8)	2525	NM_133946	101613	Mm.386833	NM_133946	ENSMUSG00000038745	Nlrp6	AI504961|Avr|Nalp6|Navr|Navr/Avr|Pypaf5	NLR family, pyrin domain containing 6	protein-coding
MACS_peak_1452	chr12	119436092	119438529	+	1573	NA	5' UTR (NM_010060, exon 1 of 82)	5' UTR (NM_010060, exon 1 of 82)	206	NM_010060	13411	Mm.390540	NM_010060	ENSMUSG00000018581	Dnah11	Dnahc11|b2b1203Clo|b2b1279Clo|b2b1289Clo|b2b1727Clo|b2b598Clo|iv|lrd	dynein, axonemal, heavy chain 11	protein-coding
MACS_peak_2511	chr17	25945581	25947201	+	1573	NA	intron (NM_001164225, intron 1 of 5)	CpG	361	NM_001164225	214931	Mm.152289	NM_001164225	ENSMUSG00000025738	Fbxl16	BC042620|Scirr1	F-box and leucine-rich repeat protein 16	protein-coding
MACS_peak_1340	chr12	82430540	82435858	+	1573	NA	intron (NM_001167920, intron 1 of 6)	intron (NM_001167920, intron 1 of 6)	968	NM_001167920	110893	Mm.443748	NM_080440	ENSMUSG00000079055	Slc8a3	AW742262|Ncx3	solute carrier family 8 (sodium/calcium exchanger), member 3	protein-coding
MACS_peak_4953	chr6	29119723	29122907	+	1573	NA	exon (NM_001101443, exon 5 of 5)	exon (NM_001101443, exon 5 of 5)	-6591	NM_133925	68272	Mm.40802	NM_026650	ENSMUSG00000029701	Rbm28	2810480G15Rik|AI503051	RNA binding motif protein 28	protein-coding
MACS_peak_4567	chr5	77086446	77087336	+	1573	NA	Intergenic	CpG	66152	NM_199032	381644	Mm.332452	NM_199032	ENSMUSG00000036403	Cep135	BC062951|Cep4|Gm1044	centrosomal protein 135	protein-coding
MACS_peak_1561	chr13	53557211	53558758	+	1571	NA	Intergenic	CpG	10165	NM_013601	17702	Mm.1763	NM_013601		Msx2	BB122635|Hox-8|Hox8|Hox8.1	msh homeobox 2	protein-coding
MACS_peak_1225	chr12	11154144	11158268	+	1571	NA	intron (NM_001168564, intron 1 of 2)	intron (NM_001168564, intron 1 of 2)	973	NM_173417	238076	Mm.113278	NM_173417	ENSMUSG00000043673	Kcns3	-	potassium voltage-gated channel, delayed-rectifier, subfamily S, member 3	protein-coding
MACS_peak_545	chr10	68858902	68863352	+	1571	NA	Intergenic	Intergenic	-45467	NM_007659	12534	Mm.281367	NM_007659	ENSMUSG00000019942	Cdk1	Cdc2|Cdc2a|p34<CDC2>	cyclin-dependent kinase 1	protein-coding
MACS_peak_5749	chr8	13200242	13200556	+	1571	NA	intron (NM_025768, intron 1 of 7)	CpG	225	NM_025768	66790	Mm.34901	NM_025768	ENSMUSG00000038515	Grtp1	5430401C05Rik|C81211|Tbc1d6	GH regulated TBC protein 1	protein-coding
MACS_peak_691	chr10	120746460	120747975	+	1570	NA	intron (NM_029057, intron 1 of 11)	intron (NM_029057, intron 1 of 11)	1028	NM_029057	74694	Mm.233833	NM_029057	ENSMUSG00000052302	Tbc1d30	4930505D03Rik	TBC1 domain family, member 30	protein-coding
MACS_peak_1507	chr13	31892457	31896736	+	1569	NA	Intergenic	Intergenic	-3919	NM_008592	17300	Mm.12949	NM_008592	ENSMUSG00000050295	Foxc1	FREAC3|Fkh1|Mf1|Mf4|ch|fkh-1|frkhda	forkhead box C1	protein-coding
MACS_peak_1419	chr12	111515408	111520071	+	1568	NA	exon (NM_172119, exon 1 of 1)	exon (NM_172119, exon 1 of 1)	299	NM_172119	107585	Mm.154427	NM_172119	ENSMUSG00000075707	Dio3	-	deiodinase, iodothyronine type III	protein-coding
MACS_peak_4462	chr5	30431596	30435013	+	1566	NA	promoter-TSS (NM_001256263)	promoter-TSS (NM_001256263)	-678	NM_001256263	433868	Mm.450696	NM_001256263		3110082J24Rik	ENSMUSG00000073106	RIKEN cDNA 3110082J24 gene	protein-coding
MACS_peak_144	chr1	75454566	75459337	+	1564	NA	intron (NM_183022, intron 1 of 9)	MIRb|SINE|MIR	9866	NM_183022	241118	Mm.110790	NM_183022	ENSMUSG00000033007	Asic4	Accn4|BNAC4	acid-sensing (proton-gated) ion channel family member 4	protein-coding
MACS_peak_5010	chr6	52133159	52137467	+	1562	NA	intron (NM_010452, intron 2 of 4)	intron (NM_010452, intron 2 of 4)	6389	NM_008265	15401	Mm.439647	NM_008265	ENSMUSG00000000942	Hoxa4	AV206827|Hox-1.4	homeobox A4	protein-coding
MACS_peak_5921	chr8	91529029	91532958	+	1562	NA	Intergenic	Intergenic	-17641	NR_106190	102465899		NR_106190	miRBase:MI0026042	Mir8110	mmu-mir-8110	microRNA mir-8110	ncRNA
MACS_peak_4466	chr5	30924635	30925226	+	1562	NA	exon (NM_010608, exon 2 of 2)	exon (NM_010608, exon 2 of 2)	-25379	NR_049199	100885838		NR_049199	miRBase:MI0019194	Mir5625	mmu-mir-5625	microRNA mir-5625	ncRNA
MACS_peak_5707	chr7	151922928	151925083	+	1559	NA	intron (NM_178642, intron 1 of 25)	intron (NM_178642, intron 1 of 25)	492	NM_178642	101772	Mm.26700	NM_178642	ENSMUSG00000031075	Ano1	Tmem16a	anoctamin 1, calcium activated chloride channel	protein-coding
MACS_peak_5894	chr8	87124265	87126101	+	1559	NA	intron (NM_007578, intron 31 of 46)	intron (NM_007578, intron 31 of 46)	61568	NM_010499	15936	Mm.399	NM_010499	ENSMUSG00000053560	Ier2	AI317238|Ch1|Pip92	immediate early response 2	protein-coding
MACS_peak_5848	chr8	72606660	72609113	+	1558	NA	intron (NM_177900, intron 1 of 4)	(TCTCTG)n|Simple_repeat|Simple_repeat	458	NM_177900	330790	Mm.152048	NM_177900	ENSMUSG00000007594	Hapln4	9330174O11|Bral2|Lpr4	hyaluronan and proteoglycan link protein 4	protein-coding
MACS_peak_4949	chr6	28929111	28934019	+	1551	NA	Intergenic	CpG	-41054	NR_029567	387237		NR_029567	miRBase:MI0000222	Mir129-1	Mirn129-1|Mirn129b|miR-129b	microRNA 129-1	ncRNA
MACS_peak_1747	chr13	114082990	114083926	+	1550	NA	Intergenic	CpG	83591	NM_023612	71690	Mm.38929	NM_023612	ENSMUSG00000042379	Esm1	0610042H23Rik|AV004503|ESM-1	endothelial cell-specific molecule 1	protein-coding
MACS_peak_4162	chr4	120525308	120529306	+	1550	NA	Intergenic	Intergenic	-23123	NM_001048168	18046	Mm.435590	NM_008692	ENSMUSG00000032897	Nfyc	-	nuclear transcription factor-Y gamma	protein-coding
MACS_peak_3967	chr4	20705063	20706424	+	1550	NA	promoter-TSS (NM_172987)	promoter-TSS (NM_172987)	72	NM_001290410	269513	Mm.317473	NM_172987	ENSMUSG00000055761	Nkain3	C530048M05|E130310K16Rik	Na+/K+ transporting ATPase interacting 3	protein-coding
MACS_peak_3594	chr2	168589265	168592677	+	1550	NA	intron (NM_175303, intron 1 of 3)	intron (NM_175303, intron 1 of 3)	1730	NM_201395	99377	Mm.434054	NM_175303	ENSMUSG00000027547	Sall4	5730441M18Rik|AA407717|AL022809|AW536104|C330011P20Rik|C78083|C78563|Tex20	sal-like 4 (Drosophila)	protein-coding
MACS_peak_3725	chr3	36587095	36589682	+	1550	NA	intron (NM_019510, intron 1 of 11)	intron (NM_019510, intron 1 of 11)	701	NM_019510	22065	Mm.74363	NM_019510	ENSMUSG00000027716	Trpc3	Mwk|Trcp3|Trp3|Trrp3	transient receptor potential cation channel, subfamily C, member 3	protein-coding
MACS_peak_3738	chr3	58808829	58811449	+	1550	NA	promoter-TSS (NM_177855)	promoter-TSS (NM_177855)	-761	NM_177855	329650	Mm.240059	NM_177855	ENSMUSG00000056476	Med12l	A130035F20|A630079M02|AU044581|TRALPUSH	mediator complex subunit 12-like	protein-coding
MACS_peak_799	chr11	47800354	47803049	+	1550	NA	Intergenic	Intergenic	-608897	NM_011891	24052	Mm.338890	NM_011891	ENSMUSG00000020354	Sgcd	35kDa|delta-SG	sarcoglycan, delta (dystrophin-associated glycoprotein)	protein-coding
MACS_peak_5388	chr7	36367863	36370418	+	1546	NA	3' UTR (NM_145840, exon 1 of 1)	3' UTR (NM_145840, exon 1 of 1)	1461	NM_145840	243923	Mm.222680	NM_145840	ENSMUSG00000056043	Rgs9bp	R9AP|Rgs9-1bp	regulator of G-protein signalling 9 binding protein	protein-coding
MACS_peak_836	chr11	59076397	59080637	+	1546	NA	intron (NM_009522, intron 2 of 3)	intron (NM_009522, intron 2 of 3)	25736	NM_009522	22416	Mm.1367	NM_009522	ENSMUSG00000009900	Wnt3a	Wnt-3a|vt	wingless-type MMTV integration site family, member 3A	protein-coding
MACS_peak_5709	chr7	152024389	152028318	+	1546	NA	intron (NM_008007, intron 1 of 2)	intron (NM_008007, intron 1 of 2)	1836	NM_008007	14174	Mm.4947	NM_008007		Fgf3	Fgf-3|Int-2|Int-P	fibroblast growth factor 3	protein-coding
MACS_peak_4392	chr4	151711563	151716466	+	1545	NA	intron (NM_029216, intron 1 of 40)	intron (NM_029216, intron 1 of 40)	1254	NM_001081376	269610	Mm.40192	NM_029216	ENSMUSG00000005045	Chd5	4930532L22Rik|AW060752|B230399N07Rik|CHD-5	chromodomain helicase DNA binding protein 5	protein-coding
MACS_peak_1395	chr12	106799083	106803654	+	1545	NA	promoter-TSS (NM_009747)	promoter-TSS (NM_009747)	-14	NM_009747	12062	Mm.390475	NM_009747	ENSMUSG00000021070	Bdkrb2	B(2)|B2|B2R|BK-2|BK2|BK2R|BKR2|BRB2	bradykinin receptor, beta 2	protein-coding
MACS_peak_5390	chr7	37463639	37467378	+	1537	NA	Intergenic	Lx8|LINE|L1	-17629	NM_172298	243931	Mm.44141	NM_172298	ENSMUSG00000021217	Tshz3	A630038G13Rik|Tsh3|Zfp537|mKIAA1474|teashirt3	teashirt zinc finger family member 3	protein-coding
MACS_peak_1211	chr11	120390259	120393695	+	1535	NA	promoter-TSS (NM_008101)	promoter-TSS (NM_008101)	-64	NM_008101	14527	Mm.22329	NM_008101	ENSMUSG00000025127	Gcgr	GR	glucagon receptor	protein-coding
MACS_peak_4597	chr5	99464877	99467165	+	1535	NA	promoter-TSS (NM_008926)	promoter-TSS (NM_008926)	77	NM_008926	19092	Mm.263002	NM_008926	ENSMUSG00000029334	Prkg2	AW212535|CGKII|Prkgr2|cGK-II	protein kinase, cGMP-dependent, type II	protein-coding
MACS_peak_3322	chr2	84711808	84714155	+	1535	NA	intron (NM_199223, intron 2 of 2)	intron (NM_199223, intron 2 of 2)	13868	NM_199223	269295	Mm.86447	NM_199223	ENSMUSG00000050896	Rtn4rl2	Ngr2|Ngrh1|Ngrl3	reticulon 4 receptor-like 2	protein-coding
MACS_peak_6273	chr9	65009346	65012264	+	1535	NA	intron (NM_008988, intron 2 of 13)	CpG	21809	NM_008988	19289	Mm.41529	NM_008988	ENSMUSG00000032394	Igdcc3	2810401C09Rik|AI851425|Punc|WI-14920	immunoglobulin superfamily, DCC subclass, member 3	protein-coding
MACS_peak_5223	chr6	136609861	136610341	+	1535	NA	exon (NM_025806, exon 1 of 11)	exon (NM_025806, exon 1 of 11)	313	NM_025806	66857	Mm.3311	NM_025806	ENSMUSG00000030214	Plbd1	1100001H23Rik	phospholipase B domain containing 1	protein-coding
MACS_peak_4522	chr5	53603455	53605346	+	1535	NA	exon (NM_172710, exon 1 of 24)	exon (NM_172710, exon 1 of 24)	291	NM_172710	231238	Mm.235020	NM_172710	ENSMUSG00000029189	Sel1l3	2310045A20Rik|AI429585|mKIAA0746	sel-1 suppressor of lin-12-like 3 (C. elegans)	protein-coding
MACS_peak_3648	chr2	179833318	179840323	+	1535	NA	intron (NM_133849, intron 2 of 2)	intron (NM_133849, intron 2 of 2)	2292	NR_102309	99296	Mm.285360	NM_133849	ENSMUSG00000039059	Hrh3	AW049250|H3R|HH3R	histamine receptor H3	protein-coding
MACS_peak_4084	chr4	98483657	98484383	+	1535	NA	intron (NM_172872, intron 1 of 9)	CpG	208	NM_172872	242553	Mm.440211	NM_172872	ENSMUSG00000035407	Kank4	AU021071|Ankrd38|BC060737|C130031J23	KN motif and ankyrin repeat domains 4	protein-coding
MACS_peak_5564	chr7	116312395	116314076	+	1535	NA	intron (NM_057173, intron 1 of 3)	CpG	587	NM_057173	109594	Mm.360145	NM_057173	ENSMUSG00000036111	Lmo1	Rbtn-1|Rbtn1|Ttg1	LIM domain only 1	protein-coding
MACS_peak_313	chr1	163072782	163073068	+	1530	NA	promoter-TSS (NM_028664)	promoter-TSS (NM_028664)	82	NM_028664	73844	Mm.38830	NM_028664		Ankrd45	4933409K03Rik	ankyrin repeat domain 45	protein-coding
MACS_peak_348	chr1	175295863	175301038	+	1530	NA	promoter-TSS (NM_053199)	promoter-TSS (NM_053199)	-624	NM_053199	94332	Mm.330524	NM_053199	ENSMUSG00000005338	Cadm3	BIgR|Igsf4b|Necl-1|Necl1|SynCAM3|Tsll1	cell adhesion molecule 3	protein-coding
MACS_peak_1536	chr13	43711144	43712340	+	1530	NA	intron (NM_183204, intron 1 of 1)	intron (NM_183204, intron 1 of 1)	576	NM_183204	328234	Mm.40588	NM_183204	ENSMUSG00000044164	Rnf182	C630023L15Rik	ring finger protein 182	protein-coding
MACS_peak_4207	chr4	125961383	125965522	+	1529	NA	promoter-TSS (NM_199473)	promoter-TSS (NM_199473)	-586	NM_199473	329941	Mm.296327	NM_199473	ENSMUSG00000056174	Col8a2	AI429819	collagen, type VIII, alpha 2	protein-coding
MACS_peak_476	chr10	36225845	36229455	+	1529	NA	intron (NM_001081208, intron 1 of 3)	intron (NM_001081208, intron 1 of 3)	1037	NM_001253356	319415	Mm.332442	NM_001081208	ENSMUSG00000044499	Hs3st5	D930005L05Rik|Gm1151|Hs3ost5	heparan sulfate (glucosamine) 3-O-sulfotransferase 5	protein-coding
MACS_peak_1253	chr12	31758336	31760616	+	1529	NA	exon (NM_027828, exon 1 of 2)	exon (NM_027828, exon 1 of 2)	643	NM_027828	104943	Mm.248938	NM_027828	ENSMUSG00000036136	Fam110c	9030611O19Rik|AU019489	family with sequence similarity 110, member C	protein-coding
MACS_peak_3462	chr2	149655732	149658493	+	1529	NA	intron (NM_001085521, intron 1 of 3)	intron (NM_001085521, intron 1 of 3)	593	NM_001085521	433485	Mm.330649	NM_001085521	ENSMUSG00000074736	Syndig1	AW123113|DSPC2|Gm14134|H2C20orf39|OTTMUSG00000015750|Tmem90b	synapse differentiation inducing 1	protein-coding
MACS_peak_344	chr1	174269351	174272127	+	1529	NA	promoter-TSS (NM_001039484)	promoter-TSS (NM_001039484)	-602	NM_001039484	16513	Mm.254563	NM_020269	ENSMUSG00000044708	Kcnj10	BIR10|BIRK-1|Kir1.2|Kir4.1	potassium inwardly-rectifying channel, subfamily J, member 10	protein-coding
MACS_peak_3464	chr2	150513469	150517774	+	1529	NA	promoter-TSS (NM_054068)	promoter-TSS (NM_054068)	-748	NM_054068	114889	Mm.207061	NM_054068	ENSMUSG00000033080	Vsx1	CHX10-like	visual system homeobox 1 homolog (zebrafish)	protein-coding
MACS_peak_1849	chr14	55731916	55736343	+	1528	NA	5' UTR (NM_177049, exon 2 of 6)	5' UTR (NM_177049, exon 2 of 6)	1643	NM_177049	319984	Mm.19047	NM_177049	ENSMUSG00000022208	Jph4	9330157P13Rik|JP-4|JPHL1	junctophilin 4	protein-coding
MACS_peak_5984	chr8	118229478	118231438	+	1526	NA	exon (NM_001025577, exon 1 of 1)	exon (NM_001025577, exon 1 of 1)	336	NM_001025577	17132	Mm.275549	NM_001025577		Maf	2810401A20Rik|A230108G15Rik|AW047063|c-maf	avian musculoaponeurotic fibrosarcoma (v-maf) AS42 oncogene homolog	protein-coding
MACS_peak_3996	chr4	41670956	41678842	+	1526	NA	intron (NM_001017362, intron 3 of 7)	intron (NM_001017362, intron 3 of 7)	3275	NM_001017362	550619	Mm.425179	NM_001017362	ENSMUSG00000066224	Arid3c	OTTMUSG00000006683	AT rich interactive domain 3C (BRIGHT-like)	protein-coding
MACS_peak_3529	chr2	160193877	160196832	+	1524	NA	Intergenic	Intergenic	-2553	NM_010658	16658	Mm.330745	NM_010658	ENSMUSG00000074622	Mafb	Kreisler|Krml|Krml1|kr	v-maf musculoaponeurotic fibrosarcoma oncogene family, protein B (avian)	protein-coding
MACS_peak_4493	chr5	37253027	37263927	+	1522	NA	Intergenic	Intergenic	-1332	NM_172994	269643	Mm.41694	NM_172994	ENSMUSG00000029120	Ppp2r2c	6330548O06Rik|IMYPNO|IMYPNO1|PR52	protein phosphatase 2, regulatory subunit B, gamma	protein-coding
MACS_peak_5681	chr7	148274062	148275415	+	1521	NA	exon (NM_019762, exon 9 of 13)	exon (NM_019762, exon 9 of 13)	9070	NM_019762	56460	Mm.350037	NM_019762	ENSMUSG00000054065	Pkp3	2310056L12Rik	plakophilin 3	protein-coding
MACS_peak_1058	chr11	98194679	98200182	+	1521	NA	Intergenic	Intergenic	-6471	NM_010895	18013	Mm.4814	NM_010895	ENSMUSG00000038255	Neurod2	Ndrf|bHLHa1	neurogenic differentiation 2	protein-coding
MACS_peak_5418	chr7	52532688	52532959	+	1520	NA	Intergenic	CpG	-5420	NM_001033176	76713	Mm.425445	NM_001033176	ENSMUSG00000070568	1700039E15Rik	Gm19188	RIKEN cDNA 1700039E15 gene	protein-coding
MACS_peak_1814	chr14	35315066	35316459	+	1520	NA	promoter-TSS (NM_009758)	promoter-TSS (NM_009758)	-30	NM_009758	12166	Mm.237825	NM_009758	ENSMUSG00000021796	Bmpr1a	1110037I22Rik|ALK3|AU045487|BMPR-IA|Bmpr	bone morphogenetic protein receptor, type 1A	protein-coding
MACS_peak_2154	chr15	94458408	94460281	+	1520	NA	promoter-TSS (NM_178789)	promoter-TSS (NM_178789)	-272	NM_178789	320709	Mm.74873	NM_178789	ENSMUSG00000063296	Tmem117	B930062P21Rik	transmembrane protein 117	protein-coding
MACS_peak_3666	chr2	180770887	180775908	+	1519	NA	intron (NM_015730, intron 1 of 5)	intron (NM_015730, intron 1 of 5)	485	NM_015730	11438	Mm.252369	NM_015730	ENSMUSG00000027577	Chrna4	Acra-4|Acra4|EBN1|ENFL1	cholinergic receptor, nicotinic, alpha polypeptide 4	protein-coding
MACS_peak_4067	chr4	84849607	84852125	+	1515	NA	promoter-TSS (NM_019535)	promoter-TSS (NM_019535)	-494	NM_019535	20404	Mm.143603	NM_019535	ENSMUSG00000028488	Sh3gl2	9530001L19Rik|AI120490|AW555077|B930049H17Rik|EEN-B1|SH3PA|Sh3d2a	SH3-domain GRB2-like 2	protein-coding
MACS_peak_2766	chr18	33098166	33100684	+	1515	NA	intron (NM_009793, intron 1 of 10)	intron (NM_009793, intron 1 of 10)	730	NM_009793	12326	Mm.222329	NM_009793	ENSMUSG00000038128	Camk4	A430110E23Rik|AI666733|CaMKIV|CaMKIV/Gr|D18Bwg0362e	calcium/calmodulin-dependent protein kinase IV	protein-coding
MACS_peak_2677	chr17	69505886	69507634	+	1513	NA	intron (NM_013813, intron 1 of 21)	CpG	610	NM_013813	13823	Mm.131135	NM_013813	ENSMUSG00000024044	Epb4.1l3	4.1B|DAL1P|Dal1|Epb41l3|NBL3	erythrocyte protein band 4.1-like 3	protein-coding
MACS_peak_5585	chr7	125727918	125728202	+	1512	NA	intron (NM_172476, intron 1 of 15)	CpG	140	NM_172476	209760	Mm.69380	NM_172476	ENSMUSG00000042246	Tmc7	1700030H01Rik|C230064B05|C630024K23Rik	transmembrane channel-like gene family 7	protein-coding
MACS_peak_122	chr1	74815353	74821330	+	1512	NA	promoter-TSS (NM_009526)	promoter-TSS (NM_009526)	-125	NM_009526	22420	Mm.268282	NM_009526	ENSMUSG00000033227	Wnt6	AA409270|Wnt-6	wingless-type MMTV integration site family, member 6	protein-coding
MACS_peak_2903	chr19	5447432	5449764	+	1511	NA	intron (NM_010235, intron 1 of 3)	CpG	900	NM_010235	14283	Mm.6215	NM_010235	ENSMUSG00000024912	Fosl1	AW538199|Fra1|fra-1	fos-like antigen 1	protein-coding
MACS_peak_4056	chr4	62873152	62875728	+	1511	NA	Intergenic	Intergenic	-2006	NM_025685	373864	Mm.194116	NM_025685	ENSMUSG00000045672	Col27a1	5730512J02Rik|AI449266|mKIAA1870	collagen, type XXVII, alpha 1	protein-coding
MACS_peak_846	chr11	62061815	62063506	+	1511	NA	exon (NM_007413, exon 1 of 2)	exon (NM_007413, exon 1 of 2)	174	NM_007413	11541	Mm.40740	NM_007413	ENSMUSG00000018500	Adora2b	A2BAR|A2BR|A2b|AA2BR|AI480866|AI605384	adenosine A2b receptor	protein-coding
MACS_peak_190	chr1	91865081	91865395	+	1511	NA	exon (NM_139152, exon 4 of 6)	exon (NM_139152, exon 4 of 6)	-37487	NM_010262	14472	Mm.204730	NM_010262		Gbx2	D130058E05Rik|Gbx-2|MMoxA|Stra7	gastrulation brain homeobox 2	protein-coding
MACS_peak_1643	chr13	73984388	73984969	+	1508	NA	intron (NM_028186, intron 2 of 9)	CpG-4007	401	NM_028186	72293	Mm.45506	NM_028186	ENSMUSG00000021567	Nkd2	2210403L10Rik|AW212591	naked cuticle 2 homolog (Drosophila)	protein-coding
MACS_peak_2076	chr15	79091441	79093296	+	1508	NA	exon (NM_177580, exon 8 of 14)	exon (NM_177580, exon 8 of 14)	-7190	NM_020516	57274	Mm.441697	NM_020516	ENSMUSG00000032988	Slc16a8	Mct3	solute carrier family 16 (monocarboxylic acid transporters), member 8	protein-coding
MACS_peak_4039	chr4	49072329	49073816	+	1508	NA	intron (NM_178756, intron 1 of 7)	intron (NM_178756, intron 1 of 7)	738	NM_178756	272031	Mm.299460	NM_178756	ENSMUSG00000063446	Lppr1	E130309F12Rik|PRG-3|mKIAA4247	lipid phosphate phosphatase-related protein type 1	protein-coding
MACS_peak_3585	chr2	167065705	167066347	+	1508	NA	promoter-TSS (NM_008968)	promoter-TSS (NM_008968)	11	NM_008968	19223	Mm.2339	NM_008968	ENSMUSG00000017969	Ptgis	Cyp8|Cyp8a1|Pgis	prostaglandin I2 (prostacyclin) synthase	protein-coding
MACS_peak_1746	chr13	113824326	113825721	+	1508	NA	promoter-TSS (NM_001281487)	promoter-TSS (NM_001281487)	-564	NM_001281487	238896		NM_001281487	ENSMUSG00000078926	Cdc20b	EG238896|EG622422	cell division cycle 20B	protein-coding
MACS_peak_1656	chr13	78337014	78338833	+	1507	NA	5' UTR (NM_010151, exon 1 of 3)	5' UTR (NM_010151, exon 1 of 3)	320	NM_010151	13865	Mm.439653	NM_010151	ENSMUSG00000069171	Nr2f1	COUP-TF1|COUP-TFI|COUPTFA|EAR3|Erbal3|SVP44|Tcfcoup1	nuclear receptor subfamily 2, group F, member 1	protein-coding
MACS_peak_851	chr11	63732750	63738886	+	1505	NA	promoter-TSS (NM_018805)	promoter-TSS (NM_018805)	-32	NM_018805	54710	Mm.274426	NM_018805	ENSMUSG00000070407	Hs3st3b1	3-OST-3B|3OST3B1|3Ost3b|AU041882|AW536289|Hs3st3b|m3-OST-3B	heparan sulfate (glucosamine) 3-O-sulfotransferase 3B1	protein-coding
MACS_peak_5480	chr7	75419895	75422221	+	1500	NA	intron (NR_040340, intron 1 of 3)	intron (NR_040340, intron 1 of 3)	422	NR_040340	100504026	Mm.426764	NR_040340	ENSMUSG00000086628	Gm16157	OTTMUSG00000031023	predicted gene 16157	ncRNA
MACS_peak_412	chr10	4423105	4425438	+	1500	NA	5' UTR (NM_001161822, exon 1 of 6)	5' UTR (NM_001161822, exon 1 of 6)	130	NM_019958	56533	Mm.44606	NM_019958	ENSMUSG00000019775	Rgs17	6430507P11Rik|Rgsz2	regulator of G-protein signaling 17	protein-coding
MACS_peak_1101	chr11	102809202	102810257	+	1499	NA	Intergenic	Intergenic	-1954	NM_011795	23829	Mm.57154	NM_011795	ENSMUSG00000045532	C1ql1	C1qrf|CRF|CTRP14|gliacolin	complement component 1, q subcomponent-like 1	protein-coding
MACS_peak_5724	chr8	10153183	10154394	+	1499	NA	promoter-TSS (NM_001081397)	promoter-TSS (NM_001081397)	-135	NM_001081397	244281	Mm.422761	NM_001081397	ENSMUSG00000039057	Myo16	C230040D10Rik|Gm1105|NYAP3|mKIAA0865	myosin XVI	protein-coding
MACS_peak_2568	chr17	35494217	35496829	+	1499	NA	Intergenic	MTD|LTR|MaLR	16245	NM_010392	15013	Mm.427969	NM_010392	ENSMUSG00000091705	H2-Q2	BE136769|ENSMUSG00000079507|Gm11132|H-2Q2|gs14-2	histocompatibility 2, Q region locus 2	protein-coding
MACS_peak_1733	chr13	111070186	111071715	+	1494	NA	promoter-TSS (NM_023852)	promoter-TSS (NM_023852)	-536	NM_023852	67295	Mm.151600	NM_023852	ENSMUSG00000021700	Rab3c	2700062I01Rik|3110015B08Rik|3110037E15Rik|AI850886	RAB3C, member RAS oncogene family	protein-coding
MACS_peak_1671	chr13	89880509	89882702	+	1494	NA	intron (NM_172955, intron 1 of 5)	intron (NM_172955, intron 1 of 5)	512	NM_001081249	13003	Mm.158700	NM_019389	ENSMUSG00000021614	Vcan	5430420N07Rik|9430051N09|Cspg2|DPEAAE|NG2|PG-M|PG-M(V0)|PG-M(V1)|hdf	versican	protein-coding
MACS_peak_3208	chr2	32206984	32208796	+	1490	NA	intron (NM_010065, intron 1 of 20)	intron (NM_010065, intron 1 of 20)	934	NM_010065	13429	Mm.44736	NM_010065	ENSMUSG00000026825	Dnm1	AI838169|Dnm|Ftfl|mKIAA4093	dynamin 1	protein-coding
MACS_peak_5094	chr6	87679577	87682926	+	1485	NA	exon (NM_001159697, exon 1 of 8)	exon (NM_001159697, exon 1 of 8)	388	NM_001159697	58229	Mm.333229	NM_021418	ENSMUSG00000068263	Efcc1	Ccdc48	EF hand and coiled-coil domain containing 1	protein-coding
MACS_peak_1540	chr13	46514181	46515371	+	1485	NA	intron (NM_001081425, intron 1 of 3)	intron (NM_001081425, intron 1 of 3)	1107	NM_001081425	666794	Mm.38269	NM_001081425	ENSMUSG00000038132	Rbm24	6330546B05Rik|AI606861	RNA binding motif protein 24	protein-coding
MACS_peak_5314	chr7	25916360	25917932	+	1485	NA	intron (NM_011138, intron 1 of 13)	(CAAA)n|Simple_repeat|Simple_repeat	333	NM_011138	18987	Mm.76683	NM_011138		Pou2f2	Oct-2|Oct2a|Oct2b|Otf-2|Otf2	POU domain, class 2, transcription factor 2	protein-coding
MACS_peak_5969	chr8	112484692	112486775	+	1475	NA	exon (NM_028584, exon 1 of 3)	exon (NM_028584, exon 1 of 3)	372	NM_212447	73608	Mm.86833	NM_028584	ENSMUSG00000001672	Marveld3	1810006A16Rik|AI642133|Marvd3|Mrvldc3	MARVEL (membrane-associating) domain containing 3	protein-coding
MACS_peak_852	chr11	64247104	64250268	+	1475	NA	promoter-TSS (NM_178870)	promoter-TSS (NM_178870)	-148	NM_178870	15478	Mm.340214	NM_178870	ENSMUSG00000047759	Hs3st3a1	3Ost3a|Hs3st3a	heparan sulfate (glucosamine) 3-O-sulfotransferase 3A1	protein-coding
MACS_peak_5242	chr6	145023173	145025207	+	1475	NA	intron (NM_007532, intron 1 of 10)	CpG	487	NM_007532	12035	Mm.4606	NM_007532	ENSMUSG00000030268	Bcat1	BCATc|Eca39	branched chain aminotransferase 1, cytosolic	protein-coding
MACS_peak_5109	chr6	90935278	90938669	+	1475	NA	Intergenic	Intergenic	129847	NM_018815	54563	Mm.28162	NM_018815	ENSMUSG00000030091	Nup210	9830001L10|AI836801|Pom210|gp190|gp210	nucleoporin 210	protein-coding
MACS_peak_2546	chr17	32298305	32304880	+	1475	NA	intron (NM_008716, intron 1 of 32)	intron (NM_008716, intron 1 of 32)	2205	NM_008716	18131	Mm.439741	NM_008716	ENSMUSG00000038146	Notch3	AW229011|N3|hpbk	notch 3	protein-coding
MACS_peak_5529	chr7	98409958	98411624	+	1466	NA	intron (NM_011807, intron 1 of 22)	intron (NM_011807, intron 1 of 22)	171495	NM_011807	23859	Mm.147213	NM_011807		Dlg2	A330103J02Rik|B230218P12Rik|B330007M19Rik|Dlgh2|Gm1197|PSD93	discs, large homolog 2 (Drosophila)	protein-coding
MACS_peak_2020	chr15	48619340	48623605	+	1466	NA	intron (NM_001081391, intron 1 of 70)	CpG	2063	NM_001081391	239420	Mm.309363	NM_001081391	ENSMUSG00000022311	Csmd3	4930500N14Rik|mKIAA1894	CUB and Sushi multiple domains 3	protein-coding
MACS_peak_282	chr1	138847846	138850363	+	1466	NA	intron (NM_030676, intron 1 of 8)	intron (NM_030676, intron 1 of 8)	1103	NM_001159769	26424	Mm.16794	NM_030676	ENSMUSG00000026398	Nr5a2	AU020803|D1Ertd308e|Ftf|LRH-1|UF2-H3B	nuclear receptor subfamily 5, group A, member 2	protein-coding
MACS_peak_2589	chr17	36341511	36344835	+	1466	NA	Intergenic	Intergenic	-16077	NM_008208	15043	Mm.426002	NM_008208	ENSMUSG00000054128	H2-T3	H-2T3|H2-Tw3|TL	histocompatibility 2, T region locus 3	protein-coding
MACS_peak_6122	chr9	32152118	32152616	+	1466	NA	promoter-TSS (NM_010605)	promoter-TSS (NM_010605)	-545	NM_010605	16521	Mm.69472	NM_010605	ENSMUSG00000032034	Kcnj5	GIRK4|Kir3.4	potassium inwardly-rectifying channel, subfamily J, member 5	protein-coding
MACS_peak_652	chr10	102830087	102831592	+	1466	NA	intron (NM_001252330, intron 1 of 11)	intron (NM_001252330, intron 1 of 11)	397	NM_175328	103098	Mm.458408	NM_175328	ENSMUSG00000019894	Slc6a15	AA536730|AI326450|AI326451|v7-3	solute carrier family 6 (neurotransmitter transporter), member 15	protein-coding
MACS_peak_2758	chr18	25643923	25646669	+	1466	NA	3' UTR (NM_001174074, exon 11 of 12)	3' UTR (NM_001174074, exon 11 of 12)	267188	NM_133195	108013	Mm.266435	NM_133195	ENSMUSG00000024268	Celf4	A230070D14Rik|BRUNOL-4|Brul4|Brunol4|C130060B05Rik	CUGBP, Elav-like family member 4	protein-coding
MACS_peak_5623	chr7	137407172	137409069	+	1466	NA	intron (NM_201601, intron 1 of 15)	intron (NM_201601, intron 1 of 15)	2202	NM_010207	14183	Mm.16340	NM_010207	ENSMUSG00000030849	Fgfr2	AU043015|AW556123|Bek|Fgfr-2|Fgfr-7|Fgfr7|KGFR|KGFRTr|svs	fibroblast growth factor receptor 2	protein-coding
MACS_peak_1574	chr13	54848744	54851377	+	1466	NA	intron (NM_012014, intron 1 of 2)	intron (NM_012014, intron 1 of 2)	970	NM_012014	26913	Mm.41812	NM_012014	ENSMUSG00000069227	Gprin1	GRIN1|Z16	G protein-regulated inducer of neurite outgrowth 1	protein-coding
MACS_peak_5112	chr6	91356054	91363299	+	1465	NA	intron (NM_009527, intron 1 of 3)	intron (NM_009527, intron 1 of 3)	1687	NM_009527	22421	Mm.56964	NM_009527	ENSMUSG00000030093	Wnt7a	AI849442|Wnt-7a|px|tw	wingless-type MMTV integration site family, member 7A	protein-coding
MACS_peak_4868	chr5	144014636	144017212	+	1465	NA	exon (NM_017467, exon 7 of 7)	exon (NM_017467, exon 7 of 7)	15777	NM_017467	54201	Mm.6666	NM_017467	ENSMUSG00000046658	Zfp316	Emzf1|Mzf3|Znf316	zinc finger protein 316	protein-coding
MACS_peak_2207	chr15	100591963	100593916	+	1461	NA	intron (NM_021530, intron 1 of 24)	intron (NM_021530, intron 1 of 24)	761	NM_021530	59033	Mm.209856	NM_021530	ENSMUSG00000023032	Slc4a8	AW493845|C230026C11|NDCBE|kNBC-3	solute carrier family 4 (anion exchanger), member 8	protein-coding
MACS_peak_3279	chr2	70955588	70956710	+	1459	NA	promoter-TSS (NM_028593)	promoter-TSS (NM_028593)	38	NM_028593	73649	Mm.45435	NM_028593	ENSMUSG00000027015	Cybrd1	2210407P13Rik|Dcytb	cytochrome b reductase 1	protein-coding
MACS_peak_1118	chr11	105153348	105154394	+	1459	NA	promoter-TSS (NM_008626)	promoter-TSS (NM_008626)	-89	NM_008626	17534	Mm.235616	NM_008626	ENSMUSG00000020695	Mrc2	Endo180|mKIAA0709|uPARAP	mannose receptor, C type 2	protein-coding
MACS_peak_6269	chr9	64231895	64238011	+	1455	NA	intron (NM_172522, intron 1 of 22)	CpG	1520	NM_001134399	214058	Mm.127721	NM_172522	ENSMUSG00000036466	Megf11	2410080H04Rik|D130061K05	multiple EGF-like-domains 11	protein-coding
MACS_peak_5258	chr7	4068570	4071456	+	1455	NA	intron (NR_033568, intron 2 of 8)	HAL1-2a_MD|LINE|L1	-1122	NM_001109765	57776	Mm.29729	NM_021324	ENSMUSG00000030428	Ttyh1	4930459B04Rik|6330408P11Rik|tty	tweety homolog 1 (Drosophila)	protein-coding
MACS_peak_5942	chr8	95377958	95380693	+	1452	NA	promoter-TSS (NM_173014)	promoter-TSS (NM_173014)	76	NM_173014	270084	Mm.21463	NM_173014	ENSMUSG00000033192	Lpcat2	A330042H22|Aytl1|Aytl1a|lpafat1	lysophosphatidylcholine acyltransferase 2	protein-coding
MACS_peak_751	chr11	18774127	18777386	+	1452	NA	Intergenic	Intergenic	143216	NM_001193271	17268	Mm.356578	NM_010789	ENSMUSG00000020160	Meis1	C530044H18Rik|Evi8	Meis homeobox 1	protein-coding
MACS_peak_3758	chr3	72859377	72862602	+	1452	NA	promoter-TSS (NM_198864)	promoter-TSS (NM_198864)	-124	NM_198864	386750	Mm.331076	NM_198864	ENSMUSG00000048304	Slitrk3	-	SLIT and NTRK-like family, member 3	protein-coding
MACS_peak_5542	chr7	105982608	105984930	+	1452	NA	5' UTR (NM_001285794, exon 1 of 6)	5' UTR (NM_001285794, exon 1 of 6)	147	NM_001285792	22411	Mm.22182	NM_009519	ENSMUSG00000015957	Wnt11	-	wingless-type MMTV integration site family, member 11	protein-coding
MACS_peak_3438	chr2	133377679	133380824	+	1452	NA	intron (NM_007553, intron 1 of 2)	intron (NM_007553, intron 1 of 2)	1356	NM_007553	12156	Mm.103205	NM_007553	ENSMUSG00000027358	Bmp2	AI467020|Bmp2a	bone morphogenetic protein 2	protein-coding
MACS_peak_6062	chr8	128662379	128664297	+	1452	NA	Intergenic	CpG	144336	NM_008430	16525	Mm.10800	NM_008430	ENSMUSG00000033998	Kcnk1	AI788889|TWIK-1	potassium channel, subfamily K, member 1	protein-coding
MACS_peak_461	chr10	23067873	23070555	+	1452	NA	intron (NM_010167, intron 1 of 18)	intron (NM_010167, intron 1 of 18)	495	NM_010167	14051	Mm.332128	NM_010167	ENSMUSG00000010461	Eya4	B130023L16Rik	eyes absent 4 homolog (Drosophila)	protein-coding
MACS_peak_4465	chr5	30890698	30891582	+	1452	NA	promoter-TSS (NR_040427)	promoter-TSS (NR_040427)	-148	NR_040427	100502829	Mm.39944	NR_040427		Gm9899	ENSMUSG00000053214	predicted gene 9899	ncRNA
MACS_peak_5155	chr6	113839091	113842855	+	1452	NA	intron (NM_009723, intron 3 of 21)	intron (NM_009723, intron 3 of 21)	397	NM_001036684	11941	Mm.321755	NM_009723	ENSMUSG00000030302	Atp2b2	D6Abb2e|Gena300|PMCA2|Tmy|dfw|jog|wms|wri	ATPase, Ca++ transporting, plasma membrane 2	protein-coding
MACS_peak_2234	chr15	101689546	101692270	+	1452	NA	intron (NM_001003667, intron 8 of 8)	intron (NM_001003667, intron 8 of 8)	9141	NM_001003667	406220	Mm.292992	NM_001003667		Krt77	4732484G22Rik|K1emb|Krt239|mK1b	keratin 77	protein-coding
MACS_peak_2916	chr19	7237900	7241434	+	1452	NA	intron (NM_134147, intron 3 of 10)	CpG	41107	NM_134150	107260	Mm.203921	NM_134150	ENSMUSG00000024767	Otub1	AI850305	OTU domain, ubiquitin aldehyde binding 1	protein-coding
MACS_peak_2801	chr18	47526196	47528517	+	1452	NA	intron (NM_018744, intron 1 of 18)	intron (NM_018744, intron 1 of 18)	1166	NM_018744	20358	Mm.40909	NM_018744	ENSMUSG00000019647	Sema6a	9330158E07|A730020P05Rik|AI851735|Sema6A-1|Semaq|VIa|b2b997Clo	sema domain, transmembrane domain (TM), and cytoplasmic domain, (semaphorin) 6A	protein-coding
MACS_peak_5252	chr7	3303648	3304259	+	1452	NA	exon (NM_011102, exon 1 of 18)	exon (NM_011102, exon 1 of 18)	295	NM_011102	18752	Mm.7980	NM_011102	ENSMUSG00000078816	Prkcg	PKCgamma|Pkcc|Prkcc	protein kinase C, gamma	protein-coding
MACS_peak_2505	chr17	25390439	25393749	+	1446	NA	intron (NM_001163270, intron 1 of 33)	intron (NM_001163270, intron 1 of 33)	1215	NM_001163270	545192	Mm.328859	NM_001163270	ENSMUSG00000047507	Baiap3	Bap3|Gm937	BAI1-associated protein 3	protein-coding
MACS_peak_6549	chrX	156426202	156426882	+	1444	NA	exon (NM_001163085, exon 1 of 29)	exon (NM_001163085, exon 1 of 29)	177	NM_001163085	270672	Mm.386889	NM_001163085	ENSMUSG00000031303	Map3k15	BC031147|MEKK15	mitogen-activated protein kinase kinase kinase 15	protein-coding
MACS_peak_4870	chr5	144049391	144051220	+	1444	NA	Intergenic	Intergenic	-18604	NM_017467	54201	Mm.6666	NM_017467	ENSMUSG00000046658	Zfp316	Emzf1|Mzf3|Znf316	zinc finger protein 316	protein-coding
MACS_peak_6498	chrX	100207872	100209595	+	1444	NA	Intergenic	(CGG)n|Simple_repeat|Simple_repeat	-79171	NR_026596	331480	Mm.145294	NR_026596		Gm5126	EG331480	predicted pseudogene 5126	ncRNA
MACS_peak_776	chr11	32247892	32248172	+	1444	NA	intron (NM_177364, intron 1 of 12)	CpG	221	NM_177364	268396	Mm.227616	NM_177364	ENSMUSG00000040711	Sh3pxd2b	G431001E03Rik|TSK4|fad49	SH3 and PX domains 2B	protein-coding
MACS_peak_2398	chr16	92497799	92500082	+	1443	NA	exon (NM_172469, exon 1 of 6)	exon (NM_172469, exon 1 of 6)	548	NM_172469	209195	Mm.44747	NM_172469	ENSMUSG00000022949	Clic6	5730466J16Rik|AL022908|AW045520|CLIC1L	chloride intracellular channel 6	protein-coding
MACS_peak_6314	chr9	81525647	81528042	+	1443	NA	promoter-TSS (NM_010482)	promoter-TSS (NM_010482)	-685	NM_010482	15551	Mm.445308	NM_010482	ENSMUSG00000049511	Htr1b	-	5-hydroxytryptamine (serotonin) receptor 1B	protein-coding
MACS_peak_4382	chr4	150481738	150485143	+	1443	NA	intron (NM_001081557, intron 11 of 23)	intron (NM_001081557, intron 11 of 23)	-51378	NM_009498	22319	Mm.273930	NM_009498	ENSMUSG00000028955	Vamp3	D130027G05Rik|VAMP-3|ceb	vesicle-associated membrane protein 3	protein-coding
MACS_peak_3834	chr3	96278062	96279311	+	1443	NA	Intergenic	PB1D9|SINE|Alu	-22457	NM_001256180	329716	Mm.275223	NM_183223	ENSMUSG00000046317	BC107364	D730018G16	cDNA sequence BC107364	protein-coding
MACS_peak_4446	chr5	23336852	23337404	+	1443	NA	Intergenic	CpG	12835	NM_025394	66169	Mm.291868	NM_025394	ENSMUSG00000028998	Tomm7	1110020J08Rik|AW047273|Tom7	translocase of outer mitochondrial membrane 7 homolog (yeast)	protein-coding
MACS_peak_1522	chr13	38437310	38438700	+	1442	NA	exon (NM_007556, exon 1 of 7)	exon (NM_007556, exon 1 of 7)	420	NM_007556	12161	Mm.385759	NM_007556	ENSMUSG00000039004	Bmp6	D13Wsu115e|Vgr1	bone morphogenetic protein 6	protein-coding
MACS_peak_1351	chr12	86037865	86043839	+	1442	NA	Intergenic	Intergenic	-1095	NM_001033334	627191	Mm.152484	NM_001033334	ENSMUSG00000071234	Syndig1l	DSPC1|Gm261|Tmem90a	synapse differentiation inducing 1 like	protein-coding
MACS_peak_1434	chr12	114040167	114040966	+	1441	NA	Intergenic	CpG	-6620	NM_145450	217887	Mm.186678	NM_145450	ENSMUSG00000037594	BC022687	AW050009|C130001I08Rik|Flj20080	cDNA sequence BC022687	protein-coding
MACS_peak_3912	chr3	132611357	132613634	+	1441	NA	intron (NM_001287101, intron 1 of 13)	CpG	283	NM_001287103	114249	Mm.279310	NM_033525	ENSMUSG00000040998	Npnt	1110009H02Rik|AA682063|AI314031|Nctn|POEM	nephronectin	protein-coding
MACS_peak_3669	chr2	180946934	180947474	+	1441	NA	exon (NM_011481, exon 1 of 8)	exon (NM_011481, exon 1 of 8)	672	NM_011481	20811	Mm.4752	NM_011481	ENSMUSG00000027579	Srms	A230069J08Rik|srm	src-related kinase lacking C-terminal regulatory tyrosine and N-terminal myristylation sites	protein-coding
MACS_peak_3399	chr2	125548771	125550543	+	1441	NA	5' UTR (NM_199022, exon 1 of 12)	5' UTR (NM_199022, exon 1 of 12)	227	NM_199022	271849	Mm.425101	NM_199022	ENSMUSG00000035109	Shc4	6230417E10Rik|9930029B02Rik|Gm685|RaLP	SHC (Src homology 2 domain containing) family, member 4	protein-coding
MACS_peak_4557	chr5	74040542	74043524	+	1440	NA	promoter-TSS (NM_178387)	promoter-TSS (NM_178387)	-586	NM_178387	73472	Mm.87067	NM_178387	ENSMUSG00000029155	Spata18	1700067I02Rik	spermatogenesis associated 18	protein-coding
MACS_peak_4271	chr4	134759763	134762343	+	1440	NA	Intergenic	B1_Mus1|SINE|Alu	67622	NM_013885	29876	Mm.257765	NM_013885	ENSMUSG00000037242	Clic4	D0Jmb3|TU-74|mc3s5|mtCLIC	chloride intracellular channel 4 (mitochondrial)	protein-coding
MACS_peak_844	chr11	61497234	61499311	+	1440	NA	exon (NM_178618, exon 1 of 5)	exon (NM_178618, exon 1 of 5)	360	NM_178618	69640	Mm.458559	NM_178618	ENSMUSG00000042377	Fam83g	2310040C09Rik|AI506990|wly	family with sequence similarity 83, member G	protein-coding
MACS_peak_6142	chr9	42328581	42331304	+	1438	NA	intron (NM_175481, intron 20 of 20)	intron (NM_175481, intron 20 of 20)	-49633	NM_173038	272589	Mm.34483	NM_173038	ENSMUSG00000037287	Tbcel	D330014K23|E130107N23Rik|Lrrc35	tubulin folding cofactor E-like	protein-coding
MACS_peak_3310	chr2	76243441	76245398	+	1438	NA	promoter-TSS (NM_145525)	promoter-TSS (NM_145525)	-146	NM_145525	99031	Mm.240435	NM_145525	ENSMUSG00000042359	Osbpl6	1110062M20Rik|AI596402|ORP-6|mKIAA4128	oxysterol binding protein-like 6	protein-coding
MACS_peak_5879	chr8	82579700	82582360	+	1438	NA	intron (NM_020259, intron 1 of 12)	intron (NM_020259, intron 1 of 12)	877	NM_020259	15245	Mm.254493	NM_020259		Hhip	Hhip1	Hedgehog-interacting protein	protein-coding
MACS_peak_6034	chr8	126038091	126040179	+	1438	NA	exon (NM_028146, exon 1 of 4)	exon (NM_028146, exon 1 of 4)	220	NM_001170975	72185	Mm.27925	NM_028146	ENSMUSG00000031970	Dbndd1	2810427I04Rik|D8Ertd590e	dysbindin (dystrobrevin binding protein 1) domain containing 1	protein-coding
MACS_peak_4794	chr5	125483683	125485065	+	1437	NA	intron (NM_028443, intron 1 of 2)	intron (NM_028443, intron 1 of 2)	529	NM_028443	73121	Mm.296138	NM_028443	ENSMUSG00000037962	Fam101a	3110032G18Rik|cfm|cfm2	family with sequence similarity 101, member A	protein-coding
MACS_peak_6410	chr9	113964372	113968867	+	1435	NA	5' UTR (NM_001101510, exon 1 of 5)	5' UTR (NM_001101510, exon 1 of 5)	147	NM_001101510	382111	Mm.376140	NM_001101510	ENSMUSG00000086596	Susd5	Gm1126	sushi domain containing 5	protein-coding
MACS_peak_4719	chr5	115876890	115881057	+	1435	NA	promoter-TSS (NM_008629)	promoter-TSS (NM_008629)	-721	NM_008629	17690	Mm.5077	NM_008629	ENSMUSG00000054256	Msi1	Msi1h|Musahi1|m-Msi-1	musashi RNA-binding protein 1	protein-coding
MACS_peak_5405	chr7	51682278	51686550	+	1430	NA	Intergenic	CpG	-13443	NM_198250	272381	Mm.44173	NM_198250	ENSMUSG00000047085	Lrrc4b	A830007M12|Lrig4	leucine rich repeat containing 4B	protein-coding
MACS_peak_1973	chr14	124025565	124026419	+	1426	NA	intron (NM_177393, intron 1 of 43)	CpG	374	NM_177393	338370	Mm.255348	NM_177393	ENSMUSG00000000197	Nalcn	A530023G15Rik|AI849508|Vgcnl1	sodium leak channel, non-selective	protein-coding
MACS_peak_6213	chr9	54895145	54897130	+	1426	NA	intron (NM_148944, intron 1 of 5)	intron (NM_148944, intron 1 of 5)	214	NM_148944	108015	Mm.32694	NM_148944	ENSMUSG00000035200	Chrnb4	Acrb-4|Acrb4	cholinergic receptor, nicotinic, beta polypeptide 4	protein-coding
MACS_peak_5377	chr7	31757796	31758890	+	1426	NA	promoter-TSS (NR_038860)	promoter-TSS (NR_038860)	145	NM_001164185	54135	Mm.4067	NM_017405	ENSMUSG00000001247	Lsr	ILDR3|Lisch7	lipolysis stimulated lipoprotein receptor	protein-coding
MACS_peak_4612	chr5	101147719	101148678	+	1426	NA	intron (NM_152803, intron 1 of 11)	intron (NM_152803, intron 1 of 11)	504	NM_152803	15442	Mm.265786	NM_152803	ENSMUSG00000035273	Hpse	HSE1|Hpa|Hpr1	heparanase	protein-coding
MACS_peak_4353	chr4	146206782	146207456	+	1416	NA	Intergenic	CpG	82028	NM_001177545	667666	Mm.459230	NM_001177545	ENSMUSG00000066007	Zfp600	Gm13164|OTTMUSG00000010694	zinc finger protein 600	protein-coding
MACS_peak_833	chr11	58947122	58949949	+	1416	NA	intron (NM_199152, intron 1 of 89)	CpG-1988	1342	NM_001171512	380698	Mm.339542	NM_199152	ENSMUSG00000061462	Obscn	BC046431|Gm878|OTTMUSG00000005786|UNC89	obscurin, cytoskeletal calmodulin and titin-interacting RhoGEF	protein-coding
MACS_peak_6470	chrX	50097011	50098968	+	1416	NA	promoter-TSS (NR_003188)	promoter-TSS (NR_003188)	-219	NR_003188	751866	Mm.381916	NR_003188		Kis2	Kis2-T1|Kis2-T2|Kis2-T3|Kis2-T4|Kis2-T5|Xpcl1	Kaplan integration site 2	ncRNA
MACS_peak_721	chr10	129907441	129907767	+	1416	NA	Intergenic	CpG	-14654	NM_001103365	625109	Mm.469845	NM_001103365	ENSMUSG00000092162	Vmn2r86	EG625109	vomeronasal 2, receptor 86	protein-coding
MACS_peak_6547	chrX	154479820	154481824	+	1416	NA	5' UTR (NM_177751, exon 1 of 22)	5' UTR (NM_177751, exon 1 of 22)	220	NM_177751	245684	Mm.197074	NM_177751	ENSMUSG00000025658	Cnksr2	C030004A01|Cnk2|Ksr2|mKIAA0902	connector enhancer of kinase suppressor of Ras 2	protein-coding
MACS_peak_4571	chr5	84844353	84846471	+	1416	NA	exon (NM_007937, exon 1 of 16)	exon (NM_007937, exon 1 of 16)	995	NM_007937	13839	Mm.137991	NM_007937		Epha5	AI854630|AW125296|Cek7|Ehk1|Els1|Hek7|Rek7|bsk	Eph receptor A5	protein-coding
MACS_peak_78	chr1	40734446	40740399	+	1416	NA	Intergenic	Intergenic	-1135	NM_001033289	226999	Mm.256414	NM_001033289	ENSMUSG00000026062	Slc9a2	2210416H12Rik|4932415O19Rik|AV333884|NHE2	solute carrier family 9 (sodium/hydrogen exchanger), member 2	protein-coding
MACS_peak_434	chr10	18564681	18565351	+	1416	NA	exon (NM_022032, exon 1 of 3)	exon (NM_022032, exon 1 of 3)	139	NM_022032	64058	Mm.28209	NM_022032	ENSMUSG00000019851	Perp	1110017A08Rik|KCP1|KRTCAP1|PIGPC1|THW	PERP, TP53 apoptosis effector	protein-coding
MACS_peak_2754	chr18	23468359	23469704	+	1416	NA	intron (NM_001285813, intron 1 of 21)	CpG	510	NM_001285813	13527	Mm.94371	NM_010087	ENSMUSG00000024302	Dtna	2210407P21Rik|DTN-A|Dtn|Gm19389|a-DB-1|adbn	dystrobrevin alpha	protein-coding
MACS_peak_6092	chr9	16304538	16307160	+	1414	NA	Intergenic	Intergenic	-123174	NM_001080814	270120	Mm.195010	NM_001080814	ENSMUSG00000074505	Fat3	9430076A06Rik|D430038H04Rik|Gm1132|Gm510|MFAT3F	FAT tumor suppressor homolog 3 (Drosophila)	protein-coding
MACS_peak_3432	chr2	132209977	132212255	+	1414	NA	promoter-TSS (NM_144944)	promoter-TSS (NM_144944)	67	NM_144944	246313	Mm.283777	NM_144944	ENSMUSG00000050558	Prokr2	B830005M06Rik|EG-VEGRF2|Gpcr73l1|Gpr73l1|PKR2	prokineticin receptor 2	protein-coding
MACS_peak_2619	chr17	46433737	46435511	+	1414	NA	promoter-TSS (NM_001286013)	promoter-TSS (NM_001286013)	192	NM_001286028	106565	Mm.23633	NM_134120	ENSMUSG00000047428	Dlk2	AI413481|DLK-2|Egfl9	delta-like 2 homolog (Drosophila)	protein-coding
MACS_peak_170	chr1	87913355	87916450	+	1412	NA	Intergenic	CpG	-3615	NM_001122732	70060	Mm.196313	NM_027029	ENSMUSG00000026226	Spata3	1700011N12Rik|1700029H01Rik|4930424D10Rik|Mtsarg1|Tsarg1	spermatogenesis associated 3	protein-coding
MACS_peak_4405	chr4	153542662	153546521	+	1405	NA	promoter-TSS (NM_001162977)	promoter-TSS (NM_001162977)	-231	NM_001162977	230971	Mm.275216	NM_172273	ENSMUSG00000057751	Megf6	2600001P17Rik|Egfl3	multiple EGF-like-domains 6	protein-coding
MACS_peak_2124	chr15	84275719	84277703	+	1405	NA	intron (NM_001163145, intron 1 of 4)	CpG	816	NM_001163145	72301	Mm.275387	NM_001163145	ENSMUSG00000062760	1810041L15Rik	Kiaa1644	RIKEN cDNA 1810041L15 gene	protein-coding
MACS_peak_3417	chr2	130120558	130122707	+	1405	NA	promoter-TSS (NM_001110513)	promoter-TSS (NM_001110513)	-43	NM_001110513	228598	Mm.32582	NM_152993	ENSMUSG00000053552	Ebf4	Ebf3|O/E-4|Olf-1	early B cell factor 4	protein-coding
MACS_peak_4785	chr5	121097731	121100351	+	1399	NA	promoter-TSS (NM_001281999)	promoter-TSS (NM_001281999)	-156	NM_001281999	19415	Mm.41209	NM_013832	ENSMUSG00000029602	Rasal1	MRASAL	RAS protein activator like 1 (GAP1 like)	protein-coding
MACS_peak_4240	chr4	129951189	129954146	+	1399	NA	promoter-TSS (NM_001253386)	promoter-TSS (NM_001253386)	163	NM_172702	230779	Mm.45132	NM_172702	ENSMUSG00000023232	Serinc2	2310004K20Rik|AW121759|FKSG84|TDE2|Tde2l	serine incorporator 2	protein-coding
MACS_peak_2678	chr17	69786927	69791441	+	1397	NA	intron (NM_001145192, intron 1 of 1)	CpG	518	NM_001145192	320722	Mm.400254	NM_001145192	ENSMUSG00000091636	A330050F15Rik	-	RIKEN cDNA A330050F15 gene	protein-coding
MACS_peak_2906	chr19	6418680	6420737	+	1397	NA	intron (NM_001205234, intron 1 of 22)	intron (NM_001205234, intron 1 of 22)	970	NM_001205234	18190	Mm.329616	NM_020253	ENSMUSG00000033768	Nrxn2	6430591O13Rik|mKIAA0921	neurexin II	protein-coding
MACS_peak_4109	chr4	107703579	107704447	+	1397	NA	promoter-TSS (NM_001285956)	promoter-TSS (NM_001285956)	-422	NM_001285956	242608	Mm.74710	NM_172874	ENSMUSG00000028600	Podn	9430070G18|Pcan|SLRR5A	podocan	protein-coding
MACS_peak_6118	chr9	30749293	30751797	+	1397	NA	exon (NM_013906, exon 1 of 9)	exon (NM_013906, exon 1 of 9)	397	NM_013906	30806	Mm.100582	NM_013906	ENSMUSG00000031994	Adamts8	METH-2|METH2	a disintegrin-like and metallopeptidase (reprolysin type) with thrombospondin type 1 motif, 8	protein-coding
MACS_peak_4577	chr5	91188302	91188894	+	1397	NA	intron (NM_009141, intron 1 of 3)	intron (NM_009141, intron 1 of 3)	274	NM_009141	20311	Mm.4660	NM_009141	ENSMUSG00000029371	Cxcl5	AMCF-II|ENA-78|GCP-2|LIX|Scyb5|Scyb6	chemokine (C-X-C motif) ligand 5	protein-coding
MACS_peak_2273	chr15	103333386	103335183	+	1397	NA	intron (NM_008800, intron 2 of 15)	intron (NM_008800, intron 2 of 15)	819	NM_008800	18574	Mm.390792	NM_008800	ENSMUSG00000022489	Pde1b	Pde1b1	phosphodiesterase 1B, Ca2+-calmodulin dependent	protein-coding
MACS_peak_4407	chr4	154007106	154013481	+	1397	NA	non-coding (NR_045643, exon 1 of 1)	non-coding (NR_045643, exon 1 of 1)	183	NR_045643	320939	Mm.436738	NR_045643		5930403L14Rik	-	RIKEN cDNA 5930403L14 gene	ncRNA
MACS_peak_5562	chr7	116150865	116156998	+	1397	NA	promoter-TSS (NM_021885)	promoter-TSS (NM_021885)	-463	NM_021885	22141	Mm.439722	NM_021885	ENSMUSG00000031028	Tub	rd5|tub	tubby candidate gene	protein-coding
MACS_peak_6400	chr9	110147620	110149181	+	1397	NA	intron (NM_001166273, intron 1 of 4)	intron (NM_001166273, intron 1 of 4)	2113	NM_001166273	29873	Mm.38496	NM_013884	ENSMUSG00000032482	Cspg5	Caleb|Ngc	chondroitin sulfate proteoglycan 5	protein-coding
MACS_peak_542	chr10	66996083	66998769	+	1397	NA	Intergenic	Intergenic	-3191	NM_010118	13654	Mm.290421	NM_010118	ENSMUSG00000037868	Egr2	Egr-2|Krox-20|Krox20|NGF1-B|Zfp-25|Zfp-6	early growth response 2	protein-coding
MACS_peak_2339	chr16	31933252	31934265	+	1397	NA	promoter-TSS (NM_172822)	promoter-TSS (NM_172822)	-179	NM_172822	239827	Mm.440388	NM_172822	ENSMUSG00000045625	Pigz	F630022B06Rik	phosphatidylinositol glycan anchor biosynthesis, class Z	protein-coding
MACS_peak_2385	chr16	90385150	90387497	+	1397	NA	promoter-TSS (NM_015755)	promoter-TSS (NM_015755)	-319	NM_015755	26559	Mm.125874	NM_015755	ENSMUSG00000053414	Hunk	Bstk1|Mak-v	hormonally upregulated Neu-associated kinase	protein-coding
MACS_peak_2821	chr18	63545480	63548394	+	1397	NA	promoter-TSS (NM_001039485)	promoter-TSS (NM_001039485)	-100	NM_001039485	667742	Mm.158720	NM_172629	ENSMUSG00000041482	Piezo2	5930434P17|9030411M15Rik|9430028L06Rik|Fam38b|Fam38b2	piezo-type mechanosensitive ion channel component 2	protein-coding
MACS_peak_4018	chr4	45195352	45198540	+	1396	NA	promoter-TSS (NM_001081172)	promoter-TSS (NM_001081172)	-832	NM_001081172	666060	Mm.24783	NM_001081172	ENSMUSG00000035615	Frmpd1	BC031840|mKIAA0967	FERM and PDZ domain containing 1	protein-coding
MACS_peak_4125	chr4	114723885	114727837	+	1396	NA	Intergenic	Intergenic	-3170	NM_011527	21349	Mm.439685	NM_011527	ENSMUSG00000028717	Tal1	SCL/tal-1|Scl|bHLHa17|tal-1	T cell acute lymphocytic leukemia 1	protein-coding
MACS_peak_6312	chr9	79565155	79567786	+	1396	NA	promoter-TSS (NM_001290308)	promoter-TSS (NM_001290308)	59	NM_001290308	12816	Mm.3819	NM_007730	ENSMUSG00000032332	Col12a1	-	collagen, type XII, alpha 1	protein-coding
MACS_peak_4601	chr5	100156884	100158786	+	1396	NA	non-coding (NR_030692, exon 1 of 4)	non-coding (NR_030692, exon 1 of 4)	244	NR_030692	319818	Mm.295233	NR_030692	ENSMUSG00000089809	A930011G23Rik	-	RIKEN cDNA A930011G23 gene	ncRNA
MACS_peak_1962	chr14	122805703	122807600	+	1396	NA	intron (NR_033326, intron 1 of 3)	intron (NR_033326, intron 1 of 3)	43686	NR_033325	328479	Mm.86095	NR_033325	ENSMUSG00000064052	Gm5089	6530402A20|C030005G22Rik|EG328479	predicted gene 5089	ncRNA
MACS_peak_1776	chr14	22808126	22811957	+	1395	NA	Intergenic	Intergenic	-1218	NM_145459	218820	Mm.292401	NM_145459	ENSMUSG00000039081	Zfp503	AI181838|B830002A16Rik|Nolz-1|Nolz1|Znf503	zinc finger protein 503	protein-coding
MACS_peak_5361	chr7	30088885	30095035	+	1390	NA	intron (NM_013874, intron 1 of 11)	intron (NM_013874, intron 1 of 11)	2936	NM_013874	29861	Mm.101885	NM_013874	ENSMUSG00000030584	Dpf1	Neud4	D4, zinc and double PHD fingers family 1	protein-coding
MACS_peak_4425	chr5	5693529	5694656	+	1390	NA	promoter-TSS (NM_001103157)	promoter-TSS (NM_001103157)	-3	NM_001103157	74051	Mm.274956	NM_028734	ENSMUSG00000015653	Steap2	4921538B17Rik|AI930049|AW045895|IPCA-1|IPCA1|PCANAP1|STAMP1|STMP	six transmembrane epithelial antigen of prostate 2	protein-coding
MACS_peak_6398	chr9	108733428	108736315	+	1387	NA	intron (NM_080437, intron 2 of 34)	CpG	6220	NM_080437	107934	Mm.39945	NM_080437	ENSMUSG00000023473	Celsr3	Fmi1|flamingo|mKIAA0812	cadherin, EGF LAG seven-pass G-type receptor 3 (flamingo homolog, Drosophila)	protein-coding
MACS_peak_5671	chr7	147232300	147239216	+	1387	NA	promoter-TSS (NM_010836)	promoter-TSS (NM_010836)	-771	NM_010836	17703	Mm.4816	NM_010836		Msx3	AI323377	msh homeobox 3	protein-coding
MACS_peak_1301	chr12	73931845	73934027	+	1386	NA	Intergenic	Intergenic	70738	NM_008910	19042	Mm.261045	NM_008910	ENSMUSG00000021096	Ppm1a	2310003C21Rik|2900017D14Rik|AI427932|AU017636|MMPa-2|MPPa-1	protein phosphatase 1A, magnesium dependent, alpha isoform	protein-coding
MACS_peak_467	chr10	25796946	25799064	+	1385	NA	promoter-TSS (NR_028030)	promoter-TSS (NR_028030)	-56	NR_028030	100040851	Mm.478630	NR_028030	ENSMUSG00000039098	Gm9767	ENSMUSG00000039098	predicted gene 9767	ncRNA
MACS_peak_2352	chr16	36692897	36695406	+	1385	NA	promoter-TSS (NM_134109)	promoter-TSS (NM_134109)	87	NM_001285791	106347	Mm.17807	NM_134109	ENSMUSG00000022900	Ildr1	AU041483|AU044638	immunoglobulin-like domain containing receptor 1	protein-coding
MACS_peak_5706	chr7	151863764	151864765	+	1382	NA	intron (NM_001242349, intron 2 of 24)	intron (NM_001242349, intron 2 of 24)	60233	NM_178642	101772	Mm.26700	NM_178642	ENSMUSG00000031075	Ano1	Tmem16a	anoctamin 1, calcium activated chloride channel	protein-coding
MACS_peak_358	chr1	182411592	182414302	+	1382	NA	intron (NM_001081227, intron 1 of 3)	intron (NM_001081227, intron 1 of 3)	688	NM_001081227	381310	Mm.44791	NM_001081227	ENSMUSG00000053963	6330403A02Rik	ENSMUSG00000056615|Gm10001|R75555	RIKEN cDNA 6330403A02 gene	protein-coding
MACS_peak_2845	chr18	75117640	75122478	+	1381	NA	intron (NM_010720, intron 1 of 9)	intron (NM_010720, intron 1 of 9)	858	NM_010720	16891	Mm.299647	NM_010720	ENSMUSG00000053846	Lipg	3110013K01Rik|EL|lipase|mEDL	lipase, endothelial	protein-coding
MACS_peak_6345	chr9	95305267	95308418	+	1381	NA	5' UTR (NM_018763, exon 2 of 2)	5' UTR (NM_018763, exon 2 of 2)	847	NM_018763	54371	Mm.212446	NM_018763	ENSMUSG00000033350	Chst2	AI428561|AW121776|C130041E03Rik|Chts2|GST-2|GlcNAc6ST|Gn6st	carbohydrate sulfotransferase 2	protein-coding
MACS_peak_880	chr11	71564065	71565593	+	1379	NA	intron (NM_177618, intron 1 of 8)	CpG	624	NM_177618	216881	Mm.48648	NM_177618	ENSMUSG00000020811	Wscd1	mKIAA0523	WSC domain containing 1	protein-coding
MACS_peak_5278	chr7	19477816	19479661	+	1379	NA	intron (NM_001033314, intron 7 of 13)	intron (NM_001033314, intron 7 of 13)	8699	NM_009402	21946	Mm.21855	NM_009402	ENSMUSG00000030413	Pglyrp1	PGRP|PGRP-S|Pglyrp|Tag7|Tasg7|Tnfsf3l	peptidoglycan recognition protein 1	protein-coding
MACS_peak_3411	chr2	128689390	128691418	+	1379	NA	intron (NM_024237, intron 1 of 7)	CT-rich|Low_complexity|Low_complexity	736	NM_024237	70370	Mm.5107	NM_024237	ENSMUSG00000027386	Fbln7	1600015H20Rik|AI464334|TM14	fibulin 7	protein-coding
MACS_peak_1203	chr11	118918952	118920562	+	1379	NA	Intergenic	CpG	-17530	NM_013926	30951	Mm.99953	NM_013926	ENSMUSG00000025578	Cbx8	Pc3	chromobox 8	protein-coding
MACS_peak_5475	chr7	73570247	73573861	+	1379	NA	intron (NM_053080, intron 1 of 12)	intron (NM_053080, intron 1 of 12)	309	NM_053080	56847	Mm.140988	NM_053080	ENSMUSG00000015134	Aldh1a3	ALDH6|RALDH3|V1	aldehyde dehydrogenase family 1, subfamily A3	protein-coding
MACS_peak_5360	chr7	30066266	30066707	+	1379	NA	intron (NM_011464, intron 1 of 6)	CpG	510	NM_001082548	20733	Mm.295230	NM_011464	ENSMUSG00000074227	Spint2	AL024025|C76321|HAI-2	serine protease inhibitor, Kunitz type 2	protein-coding
MACS_peak_3350	chr2	102389770	102392285	+	1379	NA	intron (NM_173749, intron 1 of 10)	intron (NM_173749, intron 1 of 10)	849	NM_173749	210622	Mm.28649	NM_173749	ENSMUSG00000027188	Pamr1	5930437L24|E430002G05Rik|Ramp	peptidase domain containing associated with muscle regeneration 1	protein-coding
MACS_peak_6409	chr9	113934417	113936541	+	1379	NA	intron (NM_178624, intron 1 of 14)	intron (NM_178624, intron 1 of 14)	390	NM_178624	72179	Mm.386808	NM_178624	ENSMUSG00000032507	Fbxl2	2810423A21Rik|Fbl3	F-box and leucine-rich repeat protein 2	protein-coding
MACS_peak_451	chr10	21993211	21994668	+	1379	NA	intron (NM_001177775, intron 1 of 5)	CpG	659	NM_001177775	667281	Mm.484254	NM_001177775	ENSMUSG00000075297	H60b	EG667281	histocompatibility 60b	protein-coding
MACS_peak_362	chr1	182864838	182866859	+	1379	NA	intron (NM_010094, intron 1 of 3)	intron (NM_010094, intron 1 of 3)	678	NM_010094	13590	Mm.378911	NM_010094	ENSMUSG00000038793	Lefty1	AI450052|Ebaf|Leftb|Stra3|Tgfb4|lefty|lefty-1	left right determination factor 1	protein-coding
MACS_peak_4768	chr5	120251985	120257544	+	1379	NA	Intergenic	CpG	-29908	NM_011537	21388	Mm.103636	NM_011537	ENSMUSG00000018263	Tbx5	-	T-box 5	protein-coding
MACS_peak_6297	chr9	72772576	72773868	+	1379	NA	promoter-TSS (NM_028116)	promoter-TSS (NM_028116)	-235	NM_028116	72135	Mm.273605	NM_028116		Pygo1	2600014C22Rik	pygopus 1	protein-coding
MACS_peak_4167	chr4	122637133	122641399	+	1379	NA	promoter-TSS (NM_029662)	promoter-TSS (NM_029662)	-835	NM_029662	76574	Mm.331842	NM_029662	ENSMUSG00000028655	Mfsd2a	1700018O18Rik|Mfsd2|NLS1	major facilitator superfamily domain containing 2A	protein-coding
MACS_peak_1509	chr13	31902870	31903810	+	1379	NA	TTS (NM_008592)	TTS (NM_008592)	4825	NM_008592	17300	Mm.12949	NM_008592	ENSMUSG00000050295	Foxc1	FREAC3|Fkh1|Mf1|Mf4|ch|fkh-1|frkhda	forkhead box C1	protein-coding
MACS_peak_5164	chr6	114347047	114352064	+	1379	NA	intron (NM_008285, intron 1 of 2)	intron (NM_008285, intron 1 of 2)	1625	NM_008285	15465	Mm.333327	NM_008285	ENSMUSG00000053004	Hrh1	Bphs|H1R|HH1R|Hir	histamine receptor H1	protein-coding
MACS_peak_5106	chr6	88824122	88825458	+	1379	NA	promoter-TSS (NM_176973)	promoter-TSS (NM_176973)	-752	NM_176973	319655	Mm.302613	NM_176973	ENSMUSG00000033152	Podxl2	D130074J02Rik|PODLX2	podocalyxin-like 2	protein-coding
MACS_peak_886	chr11	72774667	72775123	+	1378	NA	exon (NM_016745, exon 1 of 22)	exon (NM_016745, exon 1 of 22)	224	NM_001163337	53313	Mm.6306	NM_016745	ENSMUSG00000020788	Atp2a3	SERCA3b|Serca3	ATPase, Ca++ transporting, ubiquitous	protein-coding
MACS_peak_3638	chr2	174121103	174125848	+	1370	NA	exon (NM_010309, exon 1 of 12)	exon (NM_010309, exon 1 of 12)	115	NM_201618	14683	Mm.125770	NM_010309	ENSMUSG00000027523	Gnas	5530400H20Rik|A930027G11Rik|C130027O20Rik|GPSA|GSP|Galphas|Gnas1|Gnasxl|Gsa|Nesp|Nespl|Oed-Sml|Oedsml|P1|P2|P3|PHP1A|PHP1B|POH	GNAS (guanine nucleotide binding protein, alpha stimulating) complex locus	protein-coding
MACS_peak_4160	chr4	120320168	120324704	+	1367	NA	Intergenic	CpG	-16732	NM_019563	56222	Mm.272646	NM_019563	ENSMUSG00000070803	Cited4	MRG-2|Mrg2	Cbp/p300-interacting transactivator, with Glu/Asp-rich carboxy-terminal domain, 4	protein-coding
MACS_peak_1581	chr13	55049758	55053230	+	1367	NA	intron (NM_153131, intron 1 of 15)	intron (NM_153131, intron 1 of 15)	701	NM_153131	107448	Mm.23573	NM_153131	ENSMUSG00000025876	Unc5a	Unc5h1|mKIAA1976	unc-5 homolog A (C. elegans)	protein-coding
MACS_peak_4261	chr4	133805806	133808324	+	1366	NA	TTS (NM_001099296)	TTS (NM_001099296)	2956	NM_001099296	72690	Mm.100168	NM_001099296	ENSMUSG00000050105	Grrp1	2810043G13Rik|Fam110d	glycine/arginine rich protein 1	protein-coding
MACS_peak_1829	chr14	47993284	47994431	+	1365	NA	intron (NM_001145953, intron 1 of 5)	CpG	322	NM_001145953	16854	Mm.248615	NM_010705	ENSMUSG00000050335	Lgals3	GBP|L-34|Mac-2|gal3	lectin, galactose binding, soluble 3	protein-coding
MACS_peak_4579	chr5	91502031	91505267	+	1365	NA	promoter-TSS (NM_007950)	promoter-TSS (NM_007950)	6	NM_007950	13874	Mm.4791	NM_007950	ENSMUSG00000029377	Ereg	EPR	epiregulin	protein-coding
MACS_peak_3481	chr2	152775700	152780661	+	1365	NA	promoter-TSS (NM_001159376)	promoter-TSS (NM_001159376)	-862	NM_001159376	252864	Mm.330671	NM_145744	ENSMUSG00000042662	Dusp15	AI851682|LMW-DSP10|T-DSP10	dual specificity phosphatase-like 15	protein-coding
MACS_peak_5800	chr8	33117591	33119477	+	1365	NA	Intergenic	Intergenic	-89859	NM_178591	211323	Mm.153432	NM_178591	ENSMUSG00000062991	Nrg1	6030402G23Rik|ARIA|D230005F13Rik|GGF|GGFII|HRG|HRGalpha|Hgl|NDF|SMDF	neuregulin 1	protein-coding
MACS_peak_1379	chr12	103365808	103369860	+	1365	NA	intron (NM_172152, intron 1 of 16)	intron (NM_172152, intron 1 of 16)	205	NM_172152	238384	Mm.312448	NM_172152	ENSMUSG00000041771	Slc24a4	A930002M03Rik|AW492432|NCKX4	solute carrier family 24 (sodium/potassium/calcium exchanger), member 4	protein-coding
MACS_peak_44	chr1	24592866	24595443	+	1361	NA	intron (NM_007733, intron 1 of 50)	intron (NM_007733, intron 1 of 50)	122	NM_007733	12823	Mm.329196	NM_007733		Col19a1	-	collagen, type XIX, alpha 1	protein-coding
MACS_peak_3885	chr3	125639803	125641937	+	1361	NA	intron (NM_011674, intron 1 of 5)	CpG	598	NM_011674	22239	Mm.306021	NM_011674	ENSMUSG00000032854	Ugt8a	AI850488|AW455908|Cgt|Ugt8|mCerGT	UDP galactosyltransferase 8A	protein-coding
MACS_peak_5190	chr6	122440451	122441957	+	1361	NA	Intergenic	Intergenic	-4881	NM_027664	108653	Mm.277939	NM_027664	ENSMUSG00000040649	Rimklb	4931417E21Rik|4933426K21Rik|AA097693|AI325948|AU015629|Naags	ribosomal modification protein rimK-like family member B	protein-coding
MACS_peak_5609	chr7	131124824	131128212	+	1361	NA	promoter-TSS (NM_001252072)	promoter-TSS (NM_001252072)	-177	NM_001252072	628779	Mm.40210	NM_001252072	ENSMUSG00000078591	Hs3st4	EG628779|Gm6915	heparan sulfate (glucosamine) 3-O-sulfotransferase 4	protein-coding
MACS_peak_2748	chr18	20716325	20717072	+	1361	NA	promoter-TSS (NM_007883)	promoter-TSS (NM_007883)	81	NM_007883	13511	Mm.345891	NM_007883	ENSMUSG00000044393	Dsg2	AA408168|D18Ertd293e	desmoglein 2	protein-coding
MACS_peak_431	chr10	14264016	14266154	+	1361	NA	promoter-TSS (NM_001002268)	promoter-TSS (NM_001002268)	-243	NM_001002268	215798	Mm.440142	NM_001002268	ENSMUSG00000039116	Gpr126	1190004A11Rik|AI449247|AW045736|DREG|Gm222	G protein-coupled receptor 126	protein-coding
MACS_peak_3682	chr3	14861843	14864435	+	1361	NA	promoter-TSS (NM_007606)	promoter-TSS (NM_007606)	-399	NM_007606	12350	Mm.300	NM_007606	ENSMUSG00000027559	Car3	BB219044|Ca3|Car-3	carbonic anhydrase 3	protein-coding
MACS_peak_1769	chr14	13653812	13655611	+	1361	NA	intron (NM_012061, intron 1 of 28)	CpG	882	NM_001042617	27062	Mm.260881	NM_012061	ENSMUSG00000054423	Cadps	AU067781|CAPS|CAPS1|mKIAA1121	Ca2+-dependent secretion activator	protein-coding
MACS_peak_6298	chr9	72949990	72951897	+	1359	NA	intron (NM_025890, intron 2 of 2)	intron (NM_025890, intron 2 of 2)	738	NM_025890	66991	Mm.471745	NM_025890	ENSMUSG00000092622	Khdc3	2410004A20Rik|AI467128|FILIA|OEEP48	KH domain containing 3, subcortical maternal complex member	protein-coding
MACS_peak_5593	chr7	126882313	126883800	+	1359	NA	Intergenic	L1MA4|LINE|L1	-18744	NM_145585	233802	Mm.26392	NM_145585	ENSMUSG00000030942	Thumpd1	6330575P11Rik	THUMP domain containing 1	protein-coding
MACS_peak_4932	chr6	14847966	14852002	+	1359	NA	Intergenic	Intergenic	-1365	NM_053242	114142	Mm.332919	NM_053242	ENSMUSG00000029563	Foxp2	2810043D05Rik|AI449000|CAG-16|D0Kist7	forkhead box P2	protein-coding
MACS_peak_2518	chr17	26986517	26988346	+	1354	NA	Intergenic	CpG	-8921	NM_008700	18091	Mm.41974	NM_008700	ENSMUSG00000015579	Nkx2-5	Csx|Nkx-2.5|Nkx2.5|tinman	NK2 homeobox 5	protein-coding
MACS_peak_891	chr11	75606531	75612097	+	1350	NA	exon (NM_007873, exon 1 of 9)	exon (NM_007873, exon 1 of 9)	245	NM_007873	13447	Mm.5137	NM_007873	ENSMUSG00000020848	Doc2b	-	double C2, beta	protein-coding
MACS_peak_4607	chr5	100586329	100588629	+	1348	NA	intron (NM_182841, intron 1 of 7)	intron (NM_182841, intron 1 of 7)	1348	NM_182841	231503	Mm.99790	NM_182841	ENSMUSG00000050640	Tmem150c	-	transmembrane protein 150C	protein-coding
MACS_peak_2506	chr17	25568577	25572349	+	1345	NA	5' UTR (NM_001163691, exon 1 of 35)	5' UTR (NM_001163691, exon 1 of 35)	265	NM_021415	58226	Mm.268378	NM_021415	ENSMUSG00000024112	Cacna1h	Cav3.2|MNCb-1209|alpha13.2	calcium channel, voltage-dependent, T type, alpha 1H subunit	protein-coding
MACS_peak_543	chr10	67001067	67004298	+	1343	NA	exon (NM_010118, exon 2 of 2)	exon (NM_010118, exon 2 of 2)	2065	NM_010118	13654	Mm.290421	NM_010118	ENSMUSG00000037868	Egr2	Egr-2|Krox-20|Krox20|NGF1-B|Zfp-25|Zfp-6	early growth response 2	protein-coding
MACS_peak_1848	chr14	55544207	55545886	+	1343	NA	5' UTR (NM_010112, exon 1 of 6)	5' UTR (NM_010112, exon 1 of 6)	579	NM_010112	13644	Mm.236438	NM_010112	ENSMUSG00000022203	Efs	-	embryonal Fyn-associated substrate	protein-coding
MACS_peak_6359	chr9	98869926	98874316	+	1343	NA	Intergenic	Intergenic	-14671	NM_001122851	23873	Mm.74605	NM_011810	ENSMUSG00000032463	Faim	-	Fas apoptotic inhibitory molecule	protein-coding
MACS_peak_5463	chr7	70901289	70904960	+	1343	NA	exon (NM_130880, exon 14 of 14)	exon (NM_130880, exon 14 of 14)	-158619	NM_001256311	381994	Mm.425466	NM_001256311	ENSMUSG00000095061	E030018B13Rik	Gm1697	RIKEN cDNA E030018B13 gene	protein-coding
MACS_peak_5546	chr7	106772663	106778089	+	1343	NA	5' UTR (NM_001195529, exon 1 of 1)	5' UTR (NM_001195529, exon 1 of 1)	237	NM_001195529	100503386	Mm.180719	NM_001195529	ENSMUSG00000096606	Gm4980	6430704N06|EG245190|Tpbgl	predicted gene 4980	protein-coding
MACS_peak_6054	chr8	128434064	128435414	+	1343	NA	exon (NM_145608, exon 1 of 10)	exon (NM_145608, exon 1 of 10)	389	NM_145608	234878	Mm.216458	NM_145608	ENSMUSG00000031853	BC021891	Mlk4|mKIAA1804	cDNA sequence BC021891	protein-coding
MACS_peak_2072	chr15	78744837	78745752	+	1342	NA	intron (NM_020271, intron 1 of 1)	intron (NM_020271, intron 1 of 1)	945	NM_020271	57028	Mm.263169	NM_020271	ENSMUSG00000068221	Pdxp	1600027H05Rik|AB041662|PLPP	pyridoxal (pyridoxine, vitamin B6) phosphatase	protein-coding
MACS_peak_2969	chr19	37505374	37510497	+	1339	NA	Intergenic	Intergenic	-1396	NM_008245	15242	Mm.33896	NM_008245		Hhex	Hex|Hex1|Hhex-rs2|Prh|Prhx	hematopoietically expressed homeobox	protein-coding
MACS_peak_3255	chr2	53936051	53938958	+	1339	NA	exon (NM_023396, exon 1 of 1)	exon (NM_023396, exon 1 of 1)	459	NM_023396	67874	Mm.27086	NM_023396	ENSMUSG00000075334	Rprm	2410012A13Rik|Reprimo	reprimo, TP53 dependent G2 arrest mediator candidate	protein-coding
MACS_peak_4426	chr5	5748080	5749544	+	1339	NA	intron (NM_027399, intron 1 of 4)	intron (NM_027399, intron 1 of 4)	505	NM_027399	70358	Mm.85429	NM_027399	ENSMUSG00000015652	Steap1	2410007B19Rik|Prss24|Steap	six transmembrane epithelial antigen of the prostate 1	protein-coding
MACS_peak_6195	chr9	50911099	50912930	+	1339	NA	promoter-TSS (NR_029655)	promoter-TSS (NR_029655)	-264	NR_029655	723849		NR_029655	miRBase:MI0000404	Mir34b	Mirn34b|mmu-mir-34b	microRNA 34b	ncRNA
MACS_peak_4352	chr4	146034547	146035321	+	1339	NA	promoter-TSS (NR_030771)	promoter-TSS (NR_030771)	9	NR_030771	627585	Mm.424988	NM_001039233	ENSMUSG00000082195	Gm13034	OTTMUSG00000010105	SWI/SNF related, matrix associated, actin dependent regulator of chromatin, subfamily a, member 5 pseudogene	pseudo
MACS_peak_6469	chrX	49965475	49967995	+	1339	NA	intron (NR_045367, intron 4 of 4)	CpG	416	NM_016697	14734	Mm.22515	NM_016697	ENSMUSG00000055653	Gpc3	OCI-5	glypican 3	protein-coding
MACS_peak_1168	chr11	115835529	115839333	+	1338	NA	intron (NM_001005608, intron 1 of 39)	Charlie8|DNA|MER1_type	1392	NM_133663	192897	Mm.213873	NM_133663	ENSMUSG00000020758	Itgb4	AA407042|C230078O20|CD104	integrin beta 4	protein-coding
MACS_peak_3881	chr3	121426933	121427794	+	1337	NA	intron (NM_010171, intron 1 of 5)	intron (NM_010171, intron 1 of 5)	908	NM_010171	14066	Mm.273188	NM_010171	ENSMUSG00000028128	F3	AA409063|CD142|Cf-3|Cf3|TF	coagulation factor III	protein-coding
MACS_peak_1949	chr14	119253604	119254626	+	1337	NA	promoter-TSS (NM_001160099)	promoter-TSS (NM_001160099)	-57	NM_021386	58187	Mm.390755	NM_021386	ENSMUSG00000022132	Cldn10	6720456I16Rik|Cldn10a|Cldn10b|D14Ertd728e	claudin 10	protein-coding
MACS_peak_469	chr10	28866089	28868265	+	1333	NA	exon (NM_026138, exon 2 of 7)	exon (NM_026138, exon 2 of 7)	3375	NM_026138	67412	Mm.390264	NM_026138	ENSMUSG00000038916	Soga3	6330407J23Rik	SOGA family member 3	protein-coding
MACS_peak_4971	chr6	36758601	36761267	+	1333	NA	5' UTR (NM_008973, exon 1 of 5)	5' UTR (NM_008973, exon 1 of 5)	1427	NM_008973	19242	Mm.279690	NM_008973	ENSMUSG00000029838	Ptn	HARP|HB-GAM|HBBN|HBGF-8|HBNF|OSF|Osf-1|Osf1	pleiotrophin	protein-coding
MACS_peak_5148	chr6	110595423	110597693	+	1333	NA	intron (NM_177328, intron 1 of 9)	intron (NM_177328, intron 1 of 9)	966	NM_177328	108073	Mm.240881	NM_177328	ENSMUSG00000056755	Grm7	6330570A01Rik|BB176677|C030018L03|E130018M02Rik|Gpr1g|Gprc1g|mGluR7	glutamate receptor, metabotropic 7	protein-coding
MACS_peak_5559	chr7	114512529	114517267	+	1333	NA	intron (NM_021889, intron 1 of 6)	CpG	594	NM_021889	60510	Mm.302793	NM_021889	ENSMUSG00000062542	Syt9	-	synaptotagmin IX	protein-coding
MACS_peak_10	chr1	6372725	6373294	+	1333	NA	intron (NM_001195732, intron 1 of 4)	CpG	23597	NM_001195732	620393	Mm.388992	NM_001195732	ENSMUSG00000087247	Fam150a	EG620393	family with sequence similarity 150, member A	protein-coding
MACS_peak_4491	chr5	36020526	36022748	+	1330	NA	exon (NM_030127, exon 1 of 9)	exon (NM_030127, exon 1 of 9)	792	NM_001042615	78558	Mm.274255	NM_030127	ENSMUSG00000029096	Htra3	2210021K23Rik|9530081K03Rik|Prsp|Tasp	HtrA serine peptidase 3	protein-coding
MACS_peak_2313	chr16	18619349	18627641	+	1330	NA	promoter-TSS (NM_010327)	promoter-TSS (NM_010327)	-999	NM_010327	14724	Mm.475622	NM_010327	ENSMUSG00000050761	Gp1bb	-	glycoprotein Ib, beta polypeptide	protein-coding
MACS_peak_6050	chr8	126956537	126958054	+	1330	NA	intron (NM_171824, intron 1 of 6)	intron (NM_171824, intron 1 of 6)	541	NM_171824	209966	Mm.234233	NM_171824	ENSMUSG00000050751	Pgbd5	2900019M05Rik|AI854313	piggyBac transposable element derived 5	protein-coding
MACS_peak_6160	chr9	43552202	43554976	+	1330	NA	intron (NM_021424, intron 1 of 5)	CpG	930	NM_021424	58235	Mm.335096	NM_021424	ENSMUSG00000032012	Pvrl1	AI835281|AW549174|Cd111|HIgR|HveC|PRR|PRR1|nectin-1	poliovirus receptor-related 1	protein-coding
MACS_peak_1690	chr13	96017657	96020516	+	1330	NA	intron (NM_172263, intron 1 of 19)	intron (NM_172263, intron 1 of 19)	1173	NM_172263	218461	Mm.100167	NM_172263	ENSMUSG00000021684	Pde8b	B230331L10Rik|C030047E14Rik	phosphodiesterase 8B	protein-coding
MACS_peak_5423	chr7	52661749	52662308	+	1330	NA	exon (NM_010596, exon 1 of 2)	exon (NM_010596, exon 1 of 2)	698	NM_010596	16495	Mm.12955	NM_010596	ENSMUSG00000038201	Kcna7	Kv1.7	potassium voltage-gated channel, shaker-related subfamily, member 7	protein-coding
MACS_peak_5271	chr7	16715799	16716999	+	1329	NA	intron (NM_148946, intron 1 of 9)	intron (NM_148946, intron 1 of 9)	750	NM_148946	110891	Mm.241147	NM_148946	ENSMUSG00000030376	Slc8a2	Ncx2	solute carrier family 8 (sodium/calcium exchanger), member 2	protein-coding
MACS_peak_2199	chr15	99493907	99497217	+	1329	NA	Intergenic	Intergenic	-5587	NM_009597	11419	Mm.440107	NM_009597	ENSMUSG00000023017	Asic1	AI843610|ASIC|ASIC1a|Accn2|B530003N02Rik|BNaC2	acid-sensing (proton-gated) ion channel 1	protein-coding
MACS_peak_4526	chr5	64202386	64205687	+	1326	NA	intron (NM_029554, intron 1 of 3)	intron (NM_029554, intron 1 of 3)	302	NM_029554	76261	Mm.38143	NM_029554	ENSMUSG00000060512	0610040J01Rik	AI662686	RIKEN cDNA 0610040J01 gene	protein-coding
MACS_peak_6032	chr8	125931770	125938366	+	1326	NA	promoter-TSS (NM_023279)	promoter-TSS (NM_023279)	-396	NM_023279	22152	Mm.40068	NM_023279	ENSMUSG00000062380	Tubb3	3200002H15Rik|M(beta)3|M(beta)6	tubulin, beta 3 class III	protein-coding
MACS_peak_5948	chr8	107064596	107066185	+	1326	NA	intron (NM_001301165, intron 1 of 6)	intron (NM_001301165, intron 1 of 6)	181	NM_001301165	12354	Mm.129265	NM_053070	ENSMUSG00000031883	Car7	AV343731|Ca7	carbonic anhydrase 7	protein-coding
MACS_peak_86	chr1	50981805	50985150	+	1325	NA	promoter-TSS (NM_019790)	promoter-TSS (NM_019790)	-890	NM_019790	56363	Mm.245154	NM_019790	ENSMUSG00000026109	Tmeff2	4832418D20Rik|7630402F16Rik|TR-2	transmembrane protein with EGF-like and two follistatin-like domains 2	protein-coding
MACS_peak_4020	chr4	45835720	45839977	+	1322	NA	intron (NM_018741, intron 1 of 4)	intron (NM_018741, intron 1 of 4)	1851	NM_018741	75426	Mm.3919	NM_018741	ENSMUSG00000035551	Igfbpl1	2810011G06Rik|2810453O06Rik|IGFBPL	insulin-like growth factor binding protein-like 1	protein-coding
MACS_peak_722	chr11	3528809	3529755	+	1322	NA	Intergenic	CpG	18257	NR_110490	544752	Mm.390314	NR_002321	ENSMUSG00000056579	Tug1	AI316828	taurine upregulated gene 1	ncRNA
MACS_peak_5698	chr7	150645303	150646815	+	1322	NA	exon (NM_001161624, exon 2 of 4)	exon (NM_001161624, exon 2 of 4)	896	NM_009876	12577	Mm.168789	NM_009876	ENSMUSG00000037664	Cdkn1c	AL024410|CDKI|Kip2|p57(kip2)|p57Kip2	cyclin-dependent kinase inhibitor 1C (P57)	protein-coding
MACS_peak_641	chr10	93772036	93775528	+	1322	NA	Intergenic	Intergenic	-12334	NR_033209	215472	Mm.255656	NM_174999	ENSMUSG00000053420	Gm4792	E130012K09|EG215472	predicted gene 4792	ncRNA
MACS_peak_4641	chr5	107830695	107833179	+	1320	NA	promoter-TSS (NM_001001804)	promoter-TSS (NM_001001804)	-595	NM_001001804	384214	Mm.489863	NM_001001804	ENSMUSG00000033805	Ephx4	Abhd7|Ephxrp|Gm1382	epoxide hydrolase 4	protein-coding
MACS_peak_3397	chr2	123915548	123917826	+	1320	NA	intron (NM_001290997, intron 1 of 20)	intron (NM_001290997, intron 1 of 20)	982	NM_001290997	214968	Mm.330536	NM_172537	ENSMUSG00000027200	Sema6d	1110067B02Rik|AA409156|D330011G23|mKIAA1479	sema domain, transmembrane domain (TM), and cytoplasmic domain, (semaphorin) 6D	protein-coding
MACS_peak_4	chr1	4486633	4488554	+	1320	NA	promoter-TSS (NM_011441)	promoter-TSS (NM_011441)	-158	NM_001289465	20671	Mm.279103	NM_011441	ENSMUSG00000025902	Sox17	-	SRY (sex determining region Y)-box 17	protein-coding
MACS_peak_2033	chr15	66116264	66119425	+	1320	NA	promoter-TSS (NM_152923)	promoter-TSS (NM_152923)	-58	NM_152923	110862	Mm.255585	NM_152923		Kcnq3	-	potassium voltage-gated channel, subfamily Q, member 3	protein-coding
MACS_peak_5951	chr8	108659112	108660829	+	1319	NA	intron (NR_040344, intron 1 of 4)	CpG	670	NR_040346	69771	Mm.393274	NR_040344		1810019D21Rik	-	RIKEN cDNA 1810019D21 gene	ncRNA
MACS_peak_5938	chr8	95197186	95201362	+	1319	NA	intron (NM_022428, intron 1 of 5)	intron (NM_022428, intron 1 of 5)	1086	NM_001301137	64379	Mm.137247	NM_022428		Irx6	-	Iroquois related homeobox 6 (Drosophila)	protein-coding
MACS_peak_580	chr10	79433419	79434824	+	1318	NA	intron (NM_130455, intron 1 of 8)	intron (NM_130455, intron 1 of 8)	652	NM_130455	170483	Mm.391566	NM_130455	ENSMUSG00000035745	Grin3b	GluN3B|NR3B	glutamate receptor, ionotropic, NMDA3B	protein-coding
MACS_peak_291	chr1	155032139	155034069	+	1317	NA	exon (NM_008485, exon 2 of 24)	exon (NM_008485, exon 2 of 24)	473	NM_008485	16782	Mm.329272	NM_008485	ENSMUSG00000026479	Lamc2	AA589349	laminin, gamma 2	protein-coding
MACS_peak_4251	chr4	131392375	131393845	+	1316	NA	intron (NM_001083119, intron 1 of 30)	CpG	1083	NM_011214	19273	Mm.4860	NM_011214	ENSMUSG00000028909	Ptpru	Ftp-1|PCP-2|PTP|PTP-lambda|PTPlambda|Pcp2|Ptpf|Ptprl|R-PTP-U|R-PTP-psi|RPTPlambda	protein tyrosine phosphatase, receptor type, U	protein-coding
MACS_peak_5424	chr7	52668768	52670201	+	1316	NA	intron (NM_198190, intron 1 of 2)	intron (NM_198190, intron 1 of 2)	419	NM_198190	78405	Mm.20344	NM_198190	ENSMUSG00000074121	Ntf5	2900040K06Rik|AI462899|NT-4|NT4|NT4/5|Ntf-5|Ntf4	neurotrophin 5	protein-coding
MACS_peak_1816	chr14	35582482	35583156	+	1316	NA	Intergenic	CpG	-50503	NM_008166	14803	Mm.121569	NM_008166	ENSMUSG00000041078	Grid1	GluD1|GluRdelta1	glutamate receptor, ionotropic, delta 1	protein-coding
MACS_peak_2837	chr18	67246628	67249651	+	1316	NA	5' UTR (NM_177137, exon 1 of 12)	5' UTR (NM_177137, exon 1 of 12)	187	NM_177137	14680	Mm.440746	NM_010307	ENSMUSG00000024524	Gnal	2610011C15Rik|9630020G10Rik|Galphaolf|Gna10|Golf	guanine nucleotide binding protein, alpha stimulating, olfactory type	protein-coding
MACS_peak_2358	chr16	41532710	41533766	+	1316	NA	promoter-TSS (NM_175548)	promoter-TSS (NM_175548)	-217	NM_175548	268890	Mm.310524	NM_175548	ENSMUSG00000061080	Lsamp	5430428I19|AW046674|B130007O04Rik|D930023J12Rik|Lam|Lamp	limbic system-associated membrane protein	protein-coding
MACS_peak_4140	chr4	115687165	115690448	+	1316	NA	intron (NM_010173, intron 1 of 14)	intron (NM_010173, intron 1 of 14)	1701	NM_010173	14073	Mm.256025	NM_010173	ENSMUSG00000034171	Faah	AW412498	fatty acid amide hydrolase	protein-coding
MACS_peak_3425	chr2	130866708	130868040	+	1315	NA	exon (NM_001136063, exon 2 of 6)	exon (NM_001136063, exon 2 of 6)	1044	NM_001271002	14588	Mm.198399	NM_020014	ENSMUSG00000027316	Gfra4	AW060733|G630015H18Rik	glial cell line derived neurotrophic factor family receptor alpha 4	protein-coding
MACS_peak_528	chr10	60145884	60150622	+	1312	NA	intron (NR_045556, intron 2 of 68)	intron (NR_045556, intron 2 of 68)	10985	NM_001252635	22295	Mm.440327	NM_023370	ENSMUSG00000012819	Cdh23	4930542A03Rik|USH1D|ahl|ahl1|bob|bus|mdfw|nmf112|nmf181|nmf252|sals|v	cadherin 23 (otocadherin)	protein-coding
MACS_peak_818	chr11	53276309	53277443	+	1312	NA	exon (NM_027917, exon 2 of 8)	exon (NM_027917, exon 2 of 8)	6169	NM_027917	71774	Mm.274370	NM_027917	ENSMUSG00000018387	Shroom1	Apx|Shrm1	shroom family member 1	protein-coding
MACS_peak_634	chr10	90431988	90433006	+	1312	NA	3' UTR (NM_001177397, exon 12 of 12)	3' UTR (NM_001177397, exon 12 of 12)	112991	NM_001042558	11783	Mm.220289	NM_009684	ENSMUSG00000019979	Apaf1	6230400I06Rik|Apaf-1|Apaf1l|fog|mKIAA0413	apoptotic peptidase activating factor 1	protein-coding
MACS_peak_5487	chr7	77507184	77507775	+	1305	NA	intron (NM_183261, intron 1 of 2)	intron (NM_183261, intron 1 of 2)	-2000	NM_009697	11819	Mm.158143	NM_009697	ENSMUSG00000030551	Nr2f2	2700033K02Rik|9430015G03Rik|ARP-1|Aporp1|COUP-TF2|COUP-TFII|COUPTFB|EAR3|SVP40|Tcfcoup2	nuclear receptor subfamily 2, group F, member 2	protein-coding
MACS_peak_1474	chr13	21345026	21347159	+	1305	NA	Intergenic	tRNA-Ala-GCG|tRNA|tRNA	38463	NM_010343	14780	Mm.1332	NM_010343	ENSMUSG00000004344	Gpx5	AV379049|Arep	glutathione peroxidase 5	protein-coding
MACS_peak_5946	chr8	105307140	105311925	+	1305	NA	promoter-TSS (NM_009866)	promoter-TSS (NM_009866)	-521	NM_009866	12552	Mm.1571	NM_009866	ENSMUSG00000031673	Cdh11	Cad11	cadherin 11	protein-coding
MACS_peak_1657	chr13	78348090	78352210	+	1305	NA	intron (NR_045195, intron 1 of 2)	intron (NR_045195, intron 1 of 2)	-11907	NM_010151	13865	Mm.439653	NM_010151	ENSMUSG00000069171	Nr2f1	COUP-TF1|COUP-TFI|COUPTFA|EAR3|Erbal3|SVP44|Tcfcoup1	nuclear receptor subfamily 2, group F, member 1	protein-coding
MACS_peak_172	chr1	88199409	88200875	+	1305	NA	intron (NM_145222, intron 1 of 1)	CpG	346	NM_145222	227327	Mm.86467	NM_145222	ENSMUSG00000079445	B3gnt7	C330001H22Rik|beta-3GnT7	UDP-GlcNAc:betaGal beta-1,3-N-acetylglucosaminyltransferase 7	protein-coding
MACS_peak_2747	chr18	15917776	15919074	+	1305	NA	Intergenic	CpG	-41870	NM_199055	71367	Mm.329304	NM_199055	ENSMUSG00000047161	Chst9	5430438D01Rik	carbohydrate (N-acetylgalactosamine 4-0) sulfotransferase 9	protein-coding
MACS_peak_3704	chr3	30754904	30755502	+	1305	NA	intron (NM_001286994, intron 1 of 3)	CpG	331	NM_001286994	71862	Mm.272019	NM_027965	ENSMUSG00000037661	Gpr160	1700025D19Rik|GPCR150	G protein-coupled receptor 160	protein-coding
MACS_peak_5511	chr7	86854882	86855495	+	1305	NA	exon (NM_001291222, exon 4 of 18)	exon (NM_001291222, exon 4 of 18)	3884	NM_010626	16576	Mm.101633	NM_010626	ENSMUSG00000050382	Kif7	-	kinesin family member 7	protein-coding
MACS_peak_2811	chr18	58995654	58997798	+	1305	NA	intron (NM_175506, intron 1 of 22)	CpG	308	NM_175506	240322	Mm.71963	NM_175506	ENSMUSG00000053441	Adamts19	4831407I23Rik|AU015154|D230034E10Rik	a disintegrin-like and metallopeptidase (reprolysin type) with thrombospondin type 1 motif, 19	protein-coding
MACS_peak_6117	chr9	29768943	29770741	+	1305	NA	intron (NM_172290, intron 1 of 7)	intron (NM_172290, intron 1 of 7)	872	NM_172290	235106	Mm.283138	NM_172290	ENSMUSG00000059974	Ntm	6230410L23Rik|B230210G24Rik|Hnt|Igdcc2|R75390	neurotrimin	protein-coding
MACS_peak_5533	chr7	100228404	100229874	+	1305	NA	exon (NM_021427, exon 1 of 2)	exon (NM_021427, exon 1 of 2)	750	NM_021427	58238	Mm.113787	NM_021427		Fam181b	A830059I20Rik|AB041569	family with sequence similarity 181, member B	protein-coding
MACS_peak_1429	chr12	113381063	113383196	+	1304	NA	Intergenic	Intergenic	-2290	NM_001097621	668303	Mm.313104	NM_001097621	ENSMUSG00000021294	Kif26a	mKIAA1236	kinesin family member 26A	protein-coding
MACS_peak_3421	chr2	130190926	130192101	+	1297	NA	intron (NM_001110513, intron 15 of 16)	intron (NM_001110513, intron 15 of 16)	31852	NM_019696	56264	Mm.112701	NM_019696	ENSMUSG00000027408	Cpxm1	AA986902|Cpx-1|Cpx1|Cpxm	carboxypeptidase X 1 (M14 family)	protein-coding
MACS_peak_4045	chr4	57154329	57155857	+	1294	NA	intron (NM_019427, intron 1 of 15)	intron (NM_019427, intron 1 of 15)	935	NM_019427	54357	Mm.28217	NM_019427	ENSMUSG00000028434	Epb4.1l4b	6430543G08Rik|AA589614|AU021054|BB007528|D4Ertd346e|Ehm2|Epb41l4b|Lulu2	erythrocyte protein band 4.1-like 4b	protein-coding
MACS_peak_5807	chr8	35751434	35752780	+	1294	NA	Intergenic	Intergenic	-48737	NR_040706	330734	Mm.149998	NR_040706		B930018H19Rik	B930018H19	RIKEN cDNA B930018H19 gene	ncRNA
MACS_peak_1300	chr12	73508122	73510686	+	1294	NA	exon (NM_001286448, exon 1 of 7)	exon (NM_001286448, exon 1 of 7)	637	NM_001286448	104001	Mm.221275	NM_153457	ENSMUSG00000021087	Rtn1	Nsp	reticulon 1	protein-coding
MACS_peak_3583	chr2	165418314	165422034	+	1294	NA	promoter-TSS (NM_001271963)	promoter-TSS (NM_001271963)	-354	NM_001271963	14049	Mm.282719	NM_010165	ENSMUSG00000017897	Eya2	Eab1	eyes absent 2 homolog (Drosophila)	protein-coding
MACS_peak_1670	chr13	89678692	89679298	+	1294	NA	Intergenic	Intergenic	-1246	NM_013500	12950	Mm.266790	NM_013500	ENSMUSG00000021613	Hapln1	BB099155|CLP|Crtl1|Crtl1l|LP|LP-1	hyaluronan and proteoglycan link protein 1	protein-coding
MACS_peak_744	chr11	11937157	11938249	+	1294	NA	promoter-TSS (NM_010345)	promoter-TSS (NM_010345)	-280	NM_010345	14783	Mm.273117	NM_010345	ENSMUSG00000020176	Grb10	5730571D09Rik|AI325020|Meg1|mKIAA0207	growth factor receptor bound protein 10	protein-coding
MACS_peak_1903	chr14	70575940	70577577	+	1288	NA	promoter-TSS (NM_001253736)	promoter-TSS (NM_001253736)	-136	NM_001253736	213019	Mm.283968	NM_145978	ENSMUSG00000022090	Pdlim2	4732462F18Rik|Slim	PDZ and LIM domain 2	protein-coding
MACS_peak_355	chr1	180457516	180461384	+	1284	NA	5' UTR (NM_001161665, exon 1 of 15)	5' UTR (NM_001161665, exon 1 of 15)	194	NM_001161665	269152	Mm.129727	NM_177724	ENSMUSG00000026494	Kif26b	4832420M10|BC056349|D230039L06Rik	kinesin family member 26B	protein-coding
MACS_peak_3536	chr2	163263410	163265090	+	1283	NA	promoter-TSS (NM_144891)	promoter-TSS (NM_144891)	47	NM_144891	228858	Mm.102080	NM_144891	ENSMUSG00000017943	Gdap1l1	Gdap1l	ganglioside-induced differentiation-associated protein 1-like 1	protein-coding
MACS_peak_2269	chr15	102975462	102978405	+	1283	NA	non-coding (NR_045743, exon 1 of 7)	non-coding (NR_045743, exon 1 of 7)	326	NR_045743	432989	Mm.383979	NR_045743	ENSMUSG00000097003	D930007P13Rik	-	Riken cDNA D930007P13 gene	ncRNA
MACS_peak_6044	chr8	126147590	126148556	+	1281	NA	Intergenic	Intergenic	-29756	NM_133955	69581	Mm.168257	NM_133955	ENSMUSG00000039960	Rhou	2310026M05Rik|AI182090|Arhu|CDC42L1|G28K|WRCH-1|WRCH1|mG28K	ras homolog gene family, member U	protein-coding
MACS_peak_4347	chr4	145334857	145336226	+	1281	NA	Intergenic	CpG	74941	NM_001103158	100041379	Mm.276881	NM_001103158	ENSMUSG00000058186	Gm13242	OTTMUSG00000011070	predicted gene 13242	protein-coding
MACS_peak_2353	chr16	37383658	37385180	+	1281	NA	intron (NM_001114613, intron 1 of 26)	CpG	625	NM_001114613	207227	Mm.80170	NM_172440		Stxbp5l	9430094L02|A830015P08Rik|LLGL4|T2dm1|t2md1|tomosyn-2	syntaxin binding protein 5-like	protein-coding
MACS_peak_1166	chr11	115228312	115228952	+	1281	NA	intron (NM_175454, intron 1 of 18)	CpG	401	NM_175454	217310	Mm.205707	NM_175454	ENSMUSG00000034586	Hid1	C630004H02Rik	HID1 domain containing	protein-coding
MACS_peak_6170	chr9	44945872	44948302	+	1278	NA	promoter-TSS (NM_001013390)	promoter-TSS (NM_001013390)	-38	NM_001013390	399548	Mm.335112	NM_001013390	ENSMUSG00000046480	Scn4b	Gm1471	sodium channel, type IV, beta	protein-coding
MACS_peak_6496	chrX	99044658	99046158	+	1277	NA	intron (NM_001163610, intron 1 of 7)	CpG	684	NM_001163610	100042480	Mm.232	NM_001163610	ENSMUSG00000079481	Nhsl2	1110062M06Rik|6430511F03|AI225852|AW488865|EG621083|ENSMUSG00000073037|Gm10456	NHS-like 2	protein-coding
MACS_peak_335	chr1	169730240	169735503	+	1277	NA	intron (NM_033652, intron 3 of 7)	intron (NM_033652, intron 3 of 7)	113182	NM_033652	110648	Mm.330081	NM_033652	ENSMUSG00000026686	Lmx1a	Lmx1.1|dr|dreher|sst	LIM homeobox transcription factor 1 alpha	protein-coding
MACS_peak_5169	chr6	116410699	116412801	+	1276	NA	promoter-TSS (NM_009662)	promoter-TSS (NM_009662)	-554	NM_009662	11689	Mm.41072	NM_009662	ENSMUSG00000025701	Alox5	5-LO|5-LOX|5LO|5LX|AI850497|F730011J02	arachidonate 5-lipoxygenase	protein-coding
MACS_peak_889	chr11	74422325	74425742	+	1276	NA	Intergenic	Intergenic	-9074	NM_001013784	432582	Mm.274369	NM_001013784	ENSMUSG00000069814	E130309D14Rik	-	RIKEN cDNA E130309D14 gene	protein-coding
MACS_peak_4427	chr5	8367162	8368314	+	1276	NA	intron (NM_001007220, intron 1 of 28)	intron (NM_001007220, intron 1 of 28)	343	NM_001007221	11496	Mm.275895	NM_001007220	ENSMUSG00000040537	Adam22	2900022I03Rik|AI854032|MDC2	a disintegrin and metallopeptidase domain 22	protein-coding
MACS_peak_5393	chr7	38127777	38128498	+	1273	NA	Intergenic	Intergenic	426634	NM_172385	243937	Mm.322505	NM_172385	ENSMUSG00000043456	Zfp536	9630010P11Rik|Znf536|mKIAA0390	zinc finger protein 536	protein-coding
MACS_peak_2752	chr18	22502228	22502469	+	1270	NA	Intergenic	CpG	-1242	NM_001167777	211961	Mm.392310	NM_001167777	ENSMUSG00000045215	Asxl3	C230079D11Rik|D430002O22Rik|D930044O18Rik|Gm329|Gm945	additional sex combs like 3 (Drosophila)	protein-coding
MACS_peak_574	chr10	78242622	78243964	+	1269	NA	promoter-TSS (NM_009200)	promoter-TSS (NM_009200)	52	NM_009200	20513	Mm.6257	NM_009200	ENSMUSG00000005357	Slc1a6	EAAT4	solute carrier family 1 (high affinity aspartate/glutamate transporter), member 6	protein-coding
MACS_peak_518	chr10	53469574	53471827	+	1269	NA	promoter-TSS (NM_001081428)	promoter-TSS (NM_001081428)	15	NM_001081428	75906	Mm.436785	NM_001081428	ENSMUSG00000019856	Fam184a	3110012E06Rik|4930438C08Rik|4930589M24Rik	family with sequence similarity 184, member A	protein-coding
MACS_peak_2510	chr17	25852754	25855849	+	1268	NA	intron (NM_022422, intron 1 of 2)	intron (NM_022422, intron 1 of 2)	184	NM_022422	64337	Mm.171123	NM_022422	ENSMUSG00000025739	Gng13	1500031D04Rik|AB030194|Ggamma13	guanine nucleotide binding protein (G protein), gamma 13	protein-coding
MACS_peak_238	chr1	133140612	133142181	+	1263	NA	exon (NM_018750, exon 1 of 6)	exon (NM_018750, exon 1 of 6)	359	NM_018750	54354	Mm.248291	NM_018750	ENSMUSG00000026430	Rassf5	1300019G20Rik|AU042887|Maxp1|Nore1|Nore1A|Nore1B|Rapl	Ras association (RalGDS/AF-6) domain family member 5	protein-coding
MACS_peak_4177	chr4	123017565	123020889	+	1263	NA	intron (NM_007558, intron 1 of 6)	intron (NM_007558, intron 1 of 6)	1268	NM_001256019	12163	Mm.439749	NM_007558	ENSMUSG00000032726	Bmp8a	Bmp7r1|OP-2|OP2	bone morphogenetic protein 8a	protein-coding
MACS_peak_3668	chr2	180889898	180891976	+	1263	NA	intron (NM_007906, intron 1 of 7)	intron (NM_007906, intron 1 of 7)	783	NM_007906	13628	Mm.2645	NM_007906	ENSMUSG00000016349	Eef1a2	Eef1a|S1|wasted|wst	eukaryotic translation elongation factor 1 alpha 2	protein-coding
MACS_peak_5810	chr8	35870874	35873352	+	1263	NA	intron (NM_176933, intron 1 of 3)	CpG-13954	1449	NM_176933	319520	Mm.170276	NM_176933	ENSMUSG00000031530	Dusp4	2700078F24Rik|AI844617|BB104621|E130306H24Rik|MKP2	dual specificity phosphatase 4	protein-coding
MACS_peak_5024	chr6	53988985	53990669	+	1263	NA	promoter-TSS (NM_001163640)	promoter-TSS (NM_001163640)	-99	NM_001163640	69993	Mm.321147	NM_023543	ENSMUSG00000004633	Chn2	1700026N20Rik|4930557O16Rik|ARHGAP3|Bch	chimerin 2	protein-coding
MACS_peak_1464	chr13	13876085	13879509	+	1263	NA	intron (NM_010317, intron 1 of 3)	intron (NM_010317, intron 1 of 3)	991	NM_010317	14706	Mm.215394	NM_010317	ENSMUSG00000021303	Gng4	-	guanine nucleotide binding protein (G protein), gamma 4	protein-coding
MACS_peak_1470	chr13	19040268	19041020	+	1263	NA	intron (NM_001289546, intron 1 of 20)	CpG	424	NM_001289546	218038	Mm.101650	NM_175007	ENSMUSG00000021314	Amph	-	amphiphysin	protein-coding
MACS_peak_3647	chr2	179177431	179179958	+	1263	NA	intron (NM_009867, intron 1 of 15)	(CA)n|Simple_repeat|Simple_repeat	1511	NM_009867	12561	Mm.184711	NM_009867	ENSMUSG00000000305	Cdh4	AW120700|R-Cadh|R-cadherin|Rcad	cadherin 4	protein-coding
MACS_peak_4252	chr4	131699644	131700718	+	1263	NA	exon (NM_013622, exon 1 of 3)	exon (NM_013622, exon 1 of 3)	220	NM_013622	18386	Mm.5243	NM_013622	ENSMUSG00000050511	Oprd1	DOR|DOR-1|Nbor|mDOR	opioid receptor, delta 1	protein-coding
MACS_peak_46	chr1	25886160	25888228	+	1263	NA	promoter-TSS (NM_175642)	promoter-TSS (NM_175642)	-642	NM_175642	210933	Mm.336569	NM_175642	ENSMUSG00000033569	Bai3	A830096D10Rik	brain-specific angiogenesis inhibitor 3	protein-coding
MACS_peak_5655	chr7	145588201	145592601	+	1263	NA	promoter-TSS (NM_183289)	promoter-TSS (NM_183289)	-988	NM_183289	70571	Mm.334297	NM_183289	ENSMUSG00000091002	Tcerg1l	5730476P14Rik	transcription elongation regulator 1-like	protein-coding
MACS_peak_5569	chr7	119300111	119303155	+	1263	NA	intron (NM_015814, intron 2 of 7)	intron (NM_015814, intron 2 of 7)	938	NM_015814	50781	Mm.55143	NM_015814	ENSMUSG00000030772	Dkk3	AW061014|C87148	dickkopf homolog 3 (Xenopus laevis)	protein-coding
MACS_peak_2107	chr15	82816585	82817912	+	1263	NA	Intergenic	Intergenic	36320	NM_028728	74039	Mm.32584	NM_028728		Nfam1	4921501M20Rik|Cnaip	Nfat activating molecule with ITAM motif 1	protein-coding
MACS_peak_1913	chr14	71285769	71292512	+	1263	NA	promoter-TSS (NM_008115)	promoter-TSS (NM_008115)	-797	NM_008115	14586	Mm.32619	NM_008115	ENSMUSG00000022103	Gfra2	-	glial cell line derived neurotrophic factor family receptor alpha 2	protein-coding
MACS_peak_6429	chr9	119065282	119066281	+	1262	NA	exon (NM_146230, exon 2 of 12)	exon (NM_146230, exon 2 of 12)	430	NM_146230	235674	Mm.379402	NM_146230	ENSMUSG00000010651	Acaa1b	-	acetyl-Coenzyme A acyltransferase 1B	protein-coding
MACS_peak_4563	chr5	75970632	75971993	+	1262	NA	intron (NM_001122733, intron 1 of 20)	CpG	296	NM_021099	16590	Mm.247073	NM_021099	ENSMUSG00000005672	Kit	Bs|CD117|Fdc|Gsfsco1|Gsfsco5|Gsfsow3|SCO1|SCO5|SOW3|Ssm|Tr-kit|W|c-KIT	kit oncogene	protein-coding
MACS_peak_4422	chr4	155026623	155029187	+	1261	NA	promoter-TSS (NM_011985)	promoter-TSS (NM_011985)	-412	NM_011985	26561	Mm.29373	NM_011985	ENSMUSG00000029061	Mmp23	CA-MMP	matrix metallopeptidase 23	protein-coding
MACS_peak_1059	chr11	98206597	98211128	+	1260	NA	Intergenic	Intergenic	-1190	NM_144828	19049	Mm.45372	NM_144828	ENSMUSG00000061718	Ppp1r1b	AU040756|DARPP-32|Darpp32	protein phosphatase 1, regulatory (inhibitor) subunit 1B	protein-coding
MACS_peak_2239	chr15	101858367	101859003	+	1260	NA	promoter-TSS (NM_010664)	promoter-TSS (NM_010664)	38	NM_010664	16668	Mm.22479	NM_010664	ENSMUSG00000023043	Krt18	CK18|K18|Krt1-18	keratin 18	protein-coding
MACS_peak_4693	chr5	113750876	113754123	+	1260	NA	Intergenic	Intergenic	1066	NR_106088	102465709		NR_106088		Mir7229	mmu-mir-7229	microRNA mir-7229	ncRNA
MACS_peak_1357	chr12	87762002	87764834	+	1260	NA	intron (NM_011934, intron 1 of 6)	CpG	824	NM_011934	26380	Mm.235550	NM_011934	ENSMUSG00000021255	Esrrb	Err2|Errb|Estrrb|Nr3b2	estrogen related receptor, beta	protein-coding
MACS_peak_1745	chr13	113814070	113823476	+	1260	NA	Intergenic	Intergenic	-6814	NM_001281487	238896		NM_001281487	ENSMUSG00000078926	Cdc20b	EG238896|EG622422	cell division cycle 20B	protein-coding
MACS_peak_4906	chr5	148536568	148538108	+	1256	NA	5' UTR (NM_010228, exon 1 of 30)	5' UTR (NM_010228, exon 1 of 30)	226	NM_010228	14254	Mm.389712	NM_010228	ENSMUSG00000029648	Flt1	AI323757|Flt-1|VEGFR-1|VEGFR1|sFlt1	FMS-like tyrosine kinase 1	protein-coding
MACS_peak_2429	chr16	97391272	97394777	+	1256	NA	promoter-TSS (NM_031174)	promoter-TSS (NM_031174)	-682	NM_031174	13508	Mm.328737	NM_031174	ENSMUSG00000050272	Dscam	4932410A21Rik	Down syndrome cell adhesion molecule	protein-coding
MACS_peak_4908	chr5	148767354	148770349	+	1255	NA	promoter-TSS (NM_029920)	promoter-TSS (NM_029920)	-45	NM_029920	77521	Mm.244177	NM_029920	ENSMUSG00000029651	Mtus2	5730592G18Rik|A730013O20Rik|AU067634|C130038G02Rik|Cazip|Gm763|mKIAA0774	microtubule associated tumor suppressor candidate 2	protein-coding
MACS_peak_3803	chr3	93247090	93251972	+	1255	NA	exon (NM_001163098, exon 2 of 2)	exon (NM_001163098, exon 2 of 2)	3279	NM_001163098	99681	Mm.316671	NM_001163098	ENSMUSG00000052415	Tchh	AHF|AI597080|Thh	trichohyalin	protein-coding
MACS_peak_4008	chr4	44675503	44679763	+	1254	NA	intron (NM_008782, intron 5 of 9)	intron (NM_008782, intron 5 of 9)	-38039	NR_073462	70602	Mm.491142	NR_073462		5730488B01Rik	-	RIKEN cDNA 5730488B01 gene	ncRNA
MACS_peak_3171	chr2	27741952	27744138	+	1254	NA	intron (NM_015734, intron 1 of 65)	intron (NM_015734, intron 1 of 65)	1100	NM_015734	12831	Mm.7281	NM_015734	ENSMUSG00000026837	Col5a1	AI413331	collagen, type V, alpha 1	protein-coding
MACS_peak_2492	chr17	24343598	24343975	+	1254	NA	exon (NM_010947, exon 6 of 6)	exon (NM_010947, exon 6 of 6)	-1279	NM_001163850	224617	Mm.301585	NM_173186	ENSMUSG00000036473	Tbc1d24	9630033P11|C530046L02Rik|mKIAA1171	TBC1 domain family, member 24	protein-coding
MACS_peak_6089	chr9	15042443	15043784	+	1254	NA	promoter-TSS (NM_026955)	promoter-TSS (NM_026955)	-376	NM_026955	69137	Mm.41396	NM_026955	ENSMUSG00000031937	Vstm5	2200002K05Rik	V-set and transmembrane domain containing 5	protein-coding
MACS_peak_3383	chr2	119149742	119152897	+	1254	NA	promoter-TSS (NM_019454)	promoter-TSS (NM_019454)	-201	NM_019454	54485	Mm.143719	NM_019454	ENSMUSG00000027314	Dll4	Delta4	delta-like 4 (Drosophila)	protein-coding
MACS_peak_2647	chr17	52740372	52742430	+	1252	NA	promoter-TSS (NM_001031811)	promoter-TSS (NM_001031811)	-633	NM_001031811	211468	Mm.399068	NM_001031811	ENSMUSG00000035580	Kcnh8	C130090D05Rik|ELK|ELK1|ELK3|Kv12.1	potassium voltage-gated channel, subfamily H (eag-related), member 8	protein-coding
MACS_peak_665	chr10	115455026	115456592	+	1252	NA	5' UTR (NM_011217, exon 1 of 14)	5' UTR (NM_011217, exon 1 of 14)	390	NM_011217	19279	Mm.336316	NM_011217	ENSMUSG00000020151	Ptprr	Gmcp1|PTP-SL|PTPBR7|RPTPRR|mPTP213	protein tyrosine phosphatase, receptor type, R	protein-coding
MACS_peak_1759	chr13	118390944	118392666	+	1252	NA	exon (NM_010408, exon 1 of 8)	exon (NM_010408, exon 1 of 8)	678	NM_010408	15165	Mm.343429	NM_010408		Hcn1	Bcng1|C630013B14Rik|HAC2	hyperpolarization-activated, cyclic nucleotide-gated K+ 1	protein-coding
MACS_peak_2802	chr18	51276232	51278876	+	1252	NA	promoter-TSS (NM_001081224)	promoter-TSS (NM_001081224)	2	NM_001081224	71373	Mm.63546	NM_001081224	ENSMUSG00000073565	Prr16	5430406M13Rik|AI607429	proline rich 16	protein-coding
MACS_peak_1787	chr14	28435286	28439706	+	1252	NA	intron (NM_177814, intron 1 of 15)	intron (NM_177814, intron 1 of 15)	1868	NM_177814	238988	Mm.318004	NM_177814	ENSMUSG00000040640	Erc2	6430531D06|CAST|CAST1/ERC2|D14Ertd171e|ELKS2alpha	ELKS/RAB6-interacting/CAST family member 2	protein-coding
MACS_peak_1669	chr13	88960411	88963456	+	1252	NA	intron (NM_010103, intron 1 of 9)	intron (NM_010103, intron 1 of 9)	856	NM_001037987	13612	Mm.125580	NM_010103	ENSMUSG00000034488	Edil3	Del-1|Del1	EGF-like repeats and discoidin I-like domains 3	protein-coding
MACS_peak_2323	chr16	22162549	22163785	+	1252	NA	5' UTR (NM_183029, exon 1 of 16)	5' UTR (NM_183029, exon 1 of 16)	205	NM_183029	319765	Mm.489442	NM_183029	ENSMUSG00000033581	Igf2bp2	C330012H03Rik|IMP-2|Imp2|Neilsen	insulin-like growth factor 2 mRNA binding protein 2	protein-coding
MACS_peak_113	chr1	66514362	66515519	+	1252	NA	promoter-TSS (NM_175510)	promoter-TSS (NM_175510)	-81	NM_175510	329178	Mm.44798	NM_175510	ENSMUSG00000055567	Unc80	C030018G13Rik|C230061B10Rik|UNC-80	unc-80 homolog (C. elegans)	protein-coding
MACS_peak_2700	chr17	81343881	81346061	+	1252	NA	intron (NM_026516, intron 1 of 3)	intron (NM_026516, intron 1 of 3)	999	NM_026516	68027	Mm.357108	NM_026516	ENSMUSG00000024245	Tmem178	2810417M05Rik|Tmem178a	transmembrane protein 178	protein-coding
MACS_peak_3515	chr2	158199943	158202837	+	1251	NA	promoter-TSS (NM_175692)	promoter-TSS (NM_175692)	16	NM_175692	319317	Mm.294494	NM_175692	ENSMUSG00000044349	Snhg11	A930034L06Rik|AI854265|AL022637|AW319638|E130013N09Rik	small nucleolar RNA host gene 11	protein-coding
MACS_peak_1410	chr12	109938121	109942634	+	1247	NA	exon (NM_001171002, exon 1 of 3)	exon (NM_001171002, exon 1 of 3)	139	NM_001171002	70059	Mm.207605	NM_027299	ENSMUSG00000021263	Degs2	2210008A03Rik|AI852933|DES2	degenerative spermatocyte homolog 2 (Drosophila), lipid desaturase	protein-coding
MACS_peak_1925	chr14	99697518	99698583	+	1247	NA	5' UTR (NM_009769, exon 1 of 4)	5' UTR (NM_009769, exon 1 of 4)	140	NM_009769	12224	Mm.30262	NM_009769	ENSMUSG00000005148	Klf5	4930520J07Rik|Bteb2|CKLF|IKLF	Kruppel-like factor 5	protein-coding
MACS_peak_2793	chr18	43057472	43060287	+	1247	NA	non-coding (NR_073583, exon 1 of 9)	non-coding (NR_073583, exon 1 of 9)	281	NR_073583	72930	Mm.26134	NM_027531	ENSMUSG00000024500	Ppp2r2b	2900026H06Rik|6330404L05Rik|E130009M08Rik|PP2A-PR55B|PR55-BETA|SCA12	protein phosphatase 2, regulatory subunit B, beta	protein-coding
MACS_peak_5907	chr8	90482342	90486650	+	1247	NA	Intergenic	CpG-14334	-1002	NM_033327	94187	Mm.23452	NM_033327	ENSMUSG00000045333	Zfp423	Ebfaz|Roaz|Zfp104|Znf423|ataxia1|mKIAA0760|nur12	zinc finger protein 423	protein-coding
MACS_peak_1992	chr15	25341240	25344922	+	1247	NA	promoter-TSS (NR_027376)	promoter-TSS (NR_027376)	438	NM_027395	70350	Mm.29586	NM_027395	ENSMUSG00000045763	Basp1	2610024P12Rik|CAP-23|CAP23|Ckap3|NAP-22|NAP22	brain abundant, membrane attached signal protein 1	protein-coding
MACS_peak_5095	chr6	87930350	87932111	+	1247	NA	promoter-TSS (NR_026990)	promoter-TSS (NR_026990)	246	NM_198622	243529	Mm.33796	NM_198622	ENSMUSG00000044927	H1fx	Gm461|H1X	H1 histone family, member X	protein-coding
MACS_peak_3230	chr2	35955923	35963677	+	1245	NA	promoter-TSS (NM_001083126)	promoter-TSS (NM_001083126)	-220	NM_001083127	16874	Mm.12881	NM_008500	ENSMUSG00000026890	Lhx6	Lhx6.1	LIM homeobox protein 6	protein-coding
MACS_peak_6378	chr9	104310199	104312102	+	1244	NA	Intergenic	LTR31|LTR|ERV1	-17293	NR_035516	100316725		NR_035516	miRBase:MI0010749	Mir2136	mmu-mir-2136	microRNA 2136	ncRNA
MACS_peak_658	chr10	110181983	110184128	+	1240	NA	intron (NM_178609, intron 1 of 12)	intron (NM_178609, intron 1 of 12)	534	NM_178609	52679	Mm.11747	NM_178609	ENSMUSG00000020185	E2f7	A630014C11Rik|D10Ertd739e	E2F transcription factor 7	protein-coding
MACS_peak_5289	chr7	20162557	20163572	+	1239	NA	intron (NM_022409, intron 1 of 2)	intron (NM_022409, intron 1 of 2)	428	NM_022409	63872	Mm.23310	NM_022409	ENSMUSG00000011267	Zfp296	2210018A16Rik	zinc finger protein 296	protein-coding
MACS_peak_403	chr1	192801422	192802809	+	1234	NA	exon (NM_144879, exon 2 of 8)	exon (NM_144879, exon 2 of 8)	762	NM_144879	226841	Mm.22856	NM_144879	ENSMUSG00000037568	Vash2	B130052G07Rik	vasohibin 2	protein-coding
MACS_peak_1255	chr12	32744532	32746353	+	1233	NA	intron (NM_011158, intron 1 of 10)	intron (NM_011158, intron 1 of 10)	702	NM_011158	19088	Mm.25594	NM_011158	ENSMUSG00000002997	Prkar2b	AI451071|AW061005|PKARIIbeta|Pkarb2|RII(beta)	protein kinase, cAMP dependent regulatory, type II beta	protein-coding
MACS_peak_4640	chr5	107354251	107355155	+	1233	NA	intron (NM_001252516, intron 1 of 9)	PB1D7|SINE|Alu	206	NM_177873	330149	Mm.121664	NM_177873	ENSMUSG00000043410	Hfm1	A330009G12Rik|Gm1046|Mer3|Sec63d1	HFM1, ATP-dependent DNA helicase homolog (S. cerevisiae)	protein-coding
MACS_peak_1672	chr13	91600860	91602176	+	1233	NA	intron (NM_024186, intron 1 of 15)	CpG	816	NM_024186	66970	Mm.343095	NM_024186	ENSMUSG00000003992	Ssbp2	1500004K09Rik|2310079I02Rik|9330163K02Rik|A830008M03Rik|AU067692|AW558684|Hspc116|SSDP2	single-stranded DNA binding protein 2	protein-coding
MACS_peak_2989	chr19	41459056	41459988	+	1233	NA	promoter-TSS (NM_031376)	promoter-TSS (NM_031376)	38	NM_031376	83490	Mm.222266	NM_031376	ENSMUSG00000025017	Pik3ap1	1810044J04Rik|BCAP	phosphoinositide-3-kinase adaptor protein 1	protein-coding
MACS_peak_656	chr10	108446893	108449006	+	1233	NA	promoter-TSS (NM_001252342)	promoter-TSS (NM_001252342)	82	NM_009306	20979	Mm.289702	NM_009306	ENSMUSG00000035864	Syt1	AW124717|G630098F17Rik|SytI	synaptotagmin I	protein-coding
MACS_peak_544	chr10	67373687	67375543	+	1233	NA	intron (NM_178679, intron 1 of 4)	intron (NM_178679, intron 1 of 4)	795	NM_178679	216049	Mm.268346	NM_178679	ENSMUSG00000037855	Zfp365	AI839779|AV340892|DBZ|Su48|Znf365|talanin	zinc finger protein 365	protein-coding
MACS_peak_1368	chr12	93017187	93017901	+	1233	NA	intron (NM_175367, intron 1 of 6)	CpG	7332	NM_175367	108800	Mm.23125	NM_175367		Ston2	4933401N24Rik|AI425999|AW544599	stonin 2	protein-coding
MACS_peak_2744	chr18	15220730	15225624	+	1233	NA	intron (NM_134112, intron 1 of 4)	CpG	-1086	NM_001142731	106931	Mm.329299	NM_134112	ENSMUSG00000036225	Kctd1	4933402K10Rik|AI661543|AW553000	potassium channel tetramerisation domain containing 1	protein-coding
MACS_peak_1994	chr15	26237872	26239608	+	1233	NA	promoter-TSS (NM_177597)	promoter-TSS (NM_177597)	-87	NM_177597	211147	Mm.54257	NM_177597	ENSMUSG00000022269	March11	9630025C22	membrane-associated ring finger (C3HC4) 11	protein-coding
MACS_peak_801	chr11	49607481	49608002	+	1233	NA	promoter-TSS (NM_013529)	promoter-TSS (NM_013529)	84	NM_013529	14584	Mm.24402	NM_013529	ENSMUSG00000020363	Gfpt2	AI480523|GFAT2	glutamine fructose-6-phosphate transaminase 2	protein-coding
MACS_peak_4411	chr4	154228060	154230164	+	1233	NA	Intergenic	Intergenic	-1197	NM_172878	242800	Mm.72944	NM_172878	ENSMUSG00000046637	Ttc34	4932418L02|B230396O12Rik	tetratricopeptide repeat domain 34	protein-coding
MACS_peak_4847	chr5	139605003	139606779	+	1233	NA	promoter-TSS (NM_008923)	promoter-TSS (NM_008923)	-185	NM_008923	19085	Mm.306163	NM_008923	ENSMUSG00000025855	Prkar1b	AI385716|RIbeta	protein kinase, cAMP dependent regulatory, type I beta	protein-coding
MACS_peak_5101	chr6	88153504	88155627	+	1229	NA	intron (NM_008090, intron 4 of 5)	intron (NM_008090, intron 4 of 5)	5907	NM_008090	14461	Mm.491156	NM_008090	ENSMUSG00000015053	Gata2	Gata-2	GATA binding protein 2	protein-coding
MACS_peak_1555	chr13	51690279	51690576	+	1229	NA	Intergenic	CpG	-27974	NM_009167	20418	Mm.131870	NM_009167	ENSMUSG00000021448	Shc3	N-Shc|Rai|ShcC	src homology 2 domain-containing transforming protein C3	protein-coding
MACS_peak_802	chr11	49714287	49716943	+	1229	NA	intron (NM_029004, intron 1 of 13)	CpG	278	NM_029004	74563	Mm.258798	NM_029004	ENSMUSG00000020374	Rasgef1c	9130006A14Rik	RasGEF domain family, member 1C	protein-coding
MACS_peak_1482	chr13	22103427	22107647	+	1226	NA	Intergenic	Intergenic	-3927	NM_019429	54373	Mm.32043	NM_019429	ENSMUSG00000006179	Prss16	AI448615|TSSP	protease, serine 16 (thymus)	protein-coding
MACS_peak_2639	chr17	49311030	49313073	+	1224	NA	Intergenic	Intergenic	-59193	NR_038144	69311	Mm.46140	NR_038141		1700008K24Rik	-	RIKEN cDNA 1700008K24 gene	ncRNA
MACS_peak_4627	chr5	104083863	104085551	+	1223	NA	promoter-TSS (NM_001163550)	promoter-TSS (NM_001163550)	36	NM_028824	74218	Mm.159141	NM_028824	ENSMUSG00000029320	1700016H13Rik	-	RIKEN cDNA 1700016H13 gene	protein-coding
MACS_peak_4193	chr4	124537976	124540254	+	1223	NA	exon (NM_001007573, exon 1 of 4)	exon (NM_001007573, exon 1 of 4)	300	NM_001007573	215090	Mm.472762	NM_001007573	ENSMUSG00000042763	Maneal	Gm50	mannosidase, endo-alpha-like	protein-coding
MACS_peak_5327	chr7	28121281	28124740	+	1223	NA	promoter-TSS (NM_175641)	promoter-TSS (NM_175641)	-379	NM_175641	108075	Mm.272251	NM_175641	ENSMUSG00000040488	Ltbp4	2310046A13Rik	latent transforming growth factor beta binding protein 4	protein-coding
MACS_peak_2976	chr19	38197267	38199649	+	1215	NA	intron (NM_001159487, intron 4 of 5)	intron (NM_001159487, intron 4 of 5)	843	NM_011255	19662	Mm.2605	NM_011255	ENSMUSG00000024990	Rbp4	Rbp-4	retinol binding protein 4, plasma	protein-coding
MACS_peak_3254	chr2	52530311	52532088	+	1215	NA	intron (NM_001037099, intron 2 of 13)	CpG	179	NM_001285428	12298	Mm.330223	NM_146123	ENSMUSG00000017412	Cacnb4	3110038O15Rik|Cchb4|lh	calcium channel, voltage-dependent, beta 4 subunit	protein-coding
MACS_peak_4253	chr4	132350078	132351310	+	1215	NA	intron (NM_001033308, intron 1 of 5)	intron (NM_001033308, intron 1 of 5)	1585	NM_001033308	230787	Mm.290912	NM_001033308	ENSMUSG00000037731	Themis2	ICB-1	thymocyte selection associated family member 2	protein-coding
MACS_peak_4397	chr4	152853212	152858629	+	1207	NA	intron (NM_001099299, intron 1 of 5)	CpG	1019	NM_001099299	230959	Mm.318874	NM_001099299	ENSMUSG00000039546	Ajap1	Gm573	adherens junction associated protein 1	protein-coding
MACS_peak_3871	chr3	109945176	109948696	+	1207	NA	promoter-TSS (NM_001163348)	promoter-TSS (NM_001163348)	-546	NM_030699	80883	Mm.39262	NM_030699	ENSMUSG00000059857	Ntng1	A930010C08Rik|AI853992|Lmnt1	netrin G1	protein-coding
MACS_peak_1997	chr15	27609111	27611768	+	1206	NA	intron (NM_001242423, intron 1 of 7)	intron (NM_001242423, intron 1 of 7)	858	NM_001242424	223433	Mm.266485	NM_198301	ENSMUSG00000056069	Fam105a	9830126M18	family with sequence similarity 105, member A	protein-coding
MACS_peak_3130	chr2	13714390	13715663	+	1206	NA	exon (NM_145838, exon 1 of 8)	exon (NM_145838, exon 1 of 8)	121	NM_145838	241230	Mm.330004	NM_145838	ENSMUSG00000003418	St8sia6	1700007J08Rik|AI314453|AI875066|ST8SiaVI|Siat8f	ST8 alpha-N-acetyl-neuraminide alpha-2,8-sialyltransferase 6	protein-coding
MACS_peak_3489	chr2	153353501	153357226	+	1205	NA	exon (NM_001134300, exon 1 of 11)	exon (NM_001134300, exon 1 of 11)	344	NM_001134300	329540	Mm.50600	NM_001001986	ENSMUSG00000061411	Nol4l	4931410H15|8430427H17Rik|AI429157|Gm1636	nucleolar protein 4-like	protein-coding
MACS_peak_509	chr10	49508235	49509109	+	1204	NA	promoter-TSS (NM_001111268)	promoter-TSS (NM_001111268)	-112	NM_001111268	14806	Mm.332838	NM_010349	ENSMUSG00000056073	Grik2	AW124492|GluK2|Glur-6|Glur6|Glurbeta2	glutamate receptor, ionotropic, kainate 2 (beta 2)	protein-coding
MACS_peak_2343	chr16	34572952	34573241	+	1204	NA	Intergenic	CpG	-58983	NM_177357	545156	Mm.82274	NM_177357	ENSMUSG00000061751	Kalrn	2210407G14Rik|AV235988|DUET|E530005C20Rik|Gm539|Hapip|TRAD	kalirin, RhoGEF kinase	protein-coding
MACS_peak_2707	chr17	85852863	85858780	+	1204	NA	intron (NM_028576, intron 10 of 10)	intron (NM_028576, intron 10 of 10)	161915	NR_038084	100043902	Mm.150838	NR_015385	ENSMUSG00000093460	Six3os1	D17Mgi26|E130112H22Rik|Rncr1|Six3os	SIX homeobox 3, opposite strand 1	ncRNA
MACS_peak_376	chr1	186555382	186556207	+	1202	NA	exon (NM_008250, exon 1 of 4)	exon (NM_008250, exon 1 of 4)	578	NM_008250	15284	Mm.1347	NM_008250	ENSMUSG00000039377	Hlx	Hlx1	H2.0-like homeobox	protein-coding
MACS_peak_2495	chr17	24624921	24626396	+	1202	NA	promoter-TSS (NM_027937)	promoter-TSS (NM_027937)	-70	NM_027937	268932	Mm.70989	NM_027937	ENSMUSG00000033597	Caskin1	3300002N10Rik|C130061I24|C630036E02Rik|mKIAA1306	CASK interacting protein 1	protein-coding
MACS_peak_4419	chr4	154716710	154720597	+	1202	NA	intron (NM_008860, intron 4 of 17)	intron (NM_008860, intron 4 of 17)	1245	NM_001039079	18762	Mm.28561	NM_008860	ENSMUSG00000029053	Prkcz	AI098070|C80388|Pkcz|R74924|aPKCzeta|nPKC-zeta|zetaPKC	protein kinase C, zeta	protein-coding
MACS_peak_1909	chr14	71026963	71027821	+	1200	NA	promoter-TSS (NM_001252662)	promoter-TSS (NM_001252662)	-520	NM_001252663	13829	Mm.210863	NM_013514	ENSMUSG00000022099	Dmtn	AI325486|Epb4.9|Epb49|dematin	dematin actin binding protein	protein-coding
MACS_peak_2918	chr19	7686057	7687246	+	1198	NA	promoter-TSS (NM_025731)	promoter-TSS (NM_025731)	-408	NM_025731	66727	Mm.116803	NM_025731	ENSMUSG00000024973	Hrasls5	1700055A14Rik|1700086E08Rik|4921526K24Rik|HRSL5|iNAT	HRAS-like suppressor family, member 5	protein-coding
MACS_peak_6401	chr9	110644030	110646810	+	1198	NA	promoter-TSS (NM_001083936)	promoter-TSS (NM_001083936)	-306	NM_001083936	19228	Mm.3542	NM_011199	ENSMUSG00000032492	Pth1r	PPR|Pthr|Pthr1	parathyroid hormone 1 receptor	protein-coding
MACS_peak_5604	chr7	129364281	129365395	+	1198	NA	intron (NM_027363, intron 5 of 6)	intron (NM_027363, intron 5 of 6)	1828	NM_027363	70261	Mm.96997	NM_027363	ENSMUSG00000030865	Chp2	2010110P09Rik|Cbhp2	calcineurin-like EF hand protein 2	protein-coding
MACS_peak_1847	chr14	55530836	55531473	+	1198	NA	5' UTR (NM_021551, exon 2 of 9)	5' UTR (NM_021551, exon 2 of 9)	815	NM_021551	59049	Mm.27435	NM_021551	ENSMUSG00000022199	Slc22a17	1700094C23Rik|24p3R|AU041908|AW555662|BOIT|Boct|mBOCT	solute carrier family 22 (organic cation transporter), member 17	protein-coding
MACS_peak_1609	chr13	58553883	58556087	+	1198	NA	Intergenic	(CA)n|Simple_repeat|Simple_repeat	-50281	NM_001301341	15387	Mm.142872	NM_025279	ENSMUSG00000021546	Hnrnpk	Hnrpk|KBBP|NOVA	heterogeneous nuclear ribonucleoprotein K	protein-coding
MACS_peak_3118	chr2	6792417	6793963	+	1198	NA	intron (NM_001110231, intron 4 of 15)	(CCCCG)n|Simple_repeat|Simple_repeat	12852	NM_010160	14007	Mm.398543	NM_010160	ENSMUSG00000002107	Celf2	B230218O03|B230345P09Rik|C88023|CELF-2|CUG-BP2|Cugbp2|D230046B21Rik|Etr-3|Napor|Napor-2|mETR-3	CUGBP, Elav-like family member 2	protein-coding
MACS_peak_6406	chr9	111591325	111594200	+	1198	NA	promoter-TSS (NM_016853)	promoter-TSS (NM_016853)	-42	NM_016853	20840	Mm.1414	NM_016853	ENSMUSG00000032502	Stac	-	src homology three (SH3) and cysteine rich domain	protein-coding
MACS_peak_4169	chr4	122671610	122679388	+	1197	NA	intron (NM_008506, intron 1 of 1)	intron (NM_008506, intron 1 of 1)	2157	NM_008506	16918	Mm.1055	NM_008506	ENSMUSG00000028654	Mycl	AW536278|L-myc|Lmyc-1|Lmyc1|Mycl1|bHLHe38	v-myc myelocytomatosis viral oncogene homolog, lung carcinoma derived (avian)	protein-coding
MACS_peak_5615	chr7	133679447	133681481	+	1196	NA	Intergenic	Intergenic	29416	NM_146200	56347	Mm.22776	NM_146200	ENSMUSG00000030738	Eif3c	110kDa|3230401O13Rik|Eif3s8|NIPIL(A3)|NipilA3|Xs|Xsl	eukaryotic translation initiation factor 3, subunit C	protein-coding
MACS_peak_379	chr1	186822831	186825515	+	1196	NA	promoter-TSS (NM_145515)	promoter-TSS (NM_145515)	-745	NM_145515	226778	Mm.7445	NM_145515	ENSMUSG00000026620	Mark1	AW491150|B930025N23Rik|Emk3|Par-1c|mKIAA1477|mPar-1c	MAP/microtubule affinity-regulating kinase 1	protein-coding
MACS_peak_4354	chr4	146475840	146476640	+	1196	NA	Intergenic	CpG	-29962	NM_001083918	666532	Mm.392861	NM_001083918	ENSMUSG00000067916	Gm13139	OTTMUSG00000010657	predicted gene 13139	protein-coding
MACS_peak_4595	chr5	98681722	98685425	+	1196	NA	exon (NM_010203, exon 1 of 3)	exon (NM_010203, exon 1 of 3)	370	NM_010203	14176	Mm.5055	NM_010203	ENSMUSG00000029337	Fgf5	Fgf-5|HBGF-5|angora|go	fibroblast growth factor 5	protein-coding
MACS_peak_3741	chr3	63098460	63099979	+	1196	NA	promoter-TSS (NM_008604)	promoter-TSS (NM_008604)	-138	NM_001289462	17380	Mm.296022	NM_008604	ENSMUSG00000027820	Mme	6030454K05Rik|C85356|CALLA|CD10|NEP|SFE	membrane metallo endopeptidase	protein-coding
MACS_peak_6538	chrX	136595980	136597567	+	1196	NA	promoter-TSS (NM_177921)	promoter-TSS (NM_177921)	334	NM_001081668	279706	Mm.102590	NM_001081668	ENSMUSG00000072944	Nup62cl	Gm719	nucleoporin 62 C-terminal like	protein-coding
MACS_peak_5441	chr7	56137297	56137711	+	1195	NA	Intergenic	Intergenic	-1093	NM_001013368	108961	Mm.240566	NM_001013368	ENSMUSG00000046179	E2f8	4432406C08Rik|AA410048	E2F transcription factor 8	protein-coding
MACS_peak_2359	chr16	44330829	44333341	+	1195	NA	intron (NM_198034, intron 1 of 24)	intron (NM_198034, intron 1 of 24)	866	NM_198034	320007	Mm.242144	NM_198034	ENSMUSG00000022696	Sidt1	AW045928|B830021E24Rik	SID1 transmembrane family, member 1	protein-coding
MACS_peak_1229	chr12	14156586	14157394	+	1195	NA	exon (NM_029007, exon 2 of 2)	exon (NM_029007, exon 2 of 2)	1854	NM_029007	105005	Mm.227253	NM_029007	ENSMUSG00000020607	Fam84a	2310003N02Rik|4731402F03Rik|AW125753|Nse1	family with sequence similarity 84, member A	protein-coding
MACS_peak_4646	chr5	110529280	110531286	+	1195	NA	intron (NM_207279, intron 3 of 7)	intron (NM_207279, intron 3 of 7)	705	NM_001281812	403178	Mm.297057	NM_207279	ENSMUSG00000064247	Plcxd1	A330045H12Rik|Gm576	phosphatidylinositol-specific phospholipase C, X domain containing 1	protein-coding
MACS_peak_4046	chr4	58217640	58220128	+	1195	NA	exon (NM_022814, exon 1 of 48)	exon (NM_022814, exon 1 of 48)	584	NM_022814	64817	Mm.261024	NM_022814	ENSMUSG00000028369	Svep1	1110021D17Rik|4833413O10Rik|AA387071|D430029O09Rik|Polydom	sushi, von Willebrand factor type A, EGF and pentraxin domain containing 1	protein-coding
MACS_peak_2911	chr19	6531355	6532513	+	1194	NA	exon (NM_020253, exon 23 of 23)	exon (NM_020253, exon 23 of 23)	11136	NM_009203	20521	Mm.391146	NM_009203	ENSMUSG00000061742	Slc22a12	AI987855|OAT4L|Rst|Slc22al2|URAT1	solute carrier family 22 (organic anion/cation transporter), member 12	protein-coding
MACS_peak_1312	chr12	74211310	74215657	+	1194	NA	exon (NM_011382, exon 1 of 3)	exon (NM_011382, exon 1 of 3)	749	NM_011382	20474	Mm.249575	NM_011382	ENSMUSG00000034460	Six4	AI047561|AREC3|TrexBF	sine oculis-related homeobox 4	protein-coding
MACS_peak_4844	chr5	138085802	138087647	+	1194	NA	exon (NM_010571, exon 1 of 2)	exon (NM_010571, exon 1 of 2)	218	NM_010571	16369	Mm.24486	NM_010571	ENSMUSG00000047182	Irs3	AA408304	insulin receptor substrate 3	protein-coding
MACS_peak_5332	chr7	28190983	28194126	+	1194	NA	intron (NM_032610, intron 14 of 35)	ID_B1|SINE|B4	-10982	NM_001199236	80297	Mm.459123	NM_032610	ENSMUSG00000011751	Sptbn4	1700022P15Rik|5830426A08Rik|ROSA62|SpbIV|Spnb4|dyn|lnd|nmf261|nmf379|qv	spectrin beta, non-erythrocytic 4	protein-coding
MACS_peak_2627	chr17	47531569	47534159	+	1194	NA	intron (NM_008189, intron 1 of 3)	intron (NM_008189, intron 1 of 3)	4669	NM_008189	14913	Mm.16224	NM_008189	ENSMUSG00000023982	Guca1a	GC-A|Gcap1|Guca1|mGCAP1	guanylate cyclase activator 1a (retina)	protein-coding
MACS_peak_5566	chr7	116924075	116926588	+	1194	NA	promoter-TSS (NM_020610)	promoter-TSS (NM_020610)	-272	NM_020610	78593	Mm.275374	NM_020610	ENSMUSG00000034825	Nrip3	A330103B05Rik|D7H11orf14|ICRFP703B1614Q5.2	nuclear receptor interacting protein 3	protein-coding
MACS_peak_2634	chr17	49070273	49073278	+	1194	NA	promoter-TSS (NM_027452)	promoter-TSS (NM_027452)	-132	NM_027452	70530	Mm.133607	NM_027452	ENSMUSG00000040490	Lrfn2	5730420O05Rik|SALM1|mKIAA1246	leucine rich repeat and fibronectin type III domain containing 2	protein-coding
MACS_peak_3378	chr2	118536684	118537813	+	1194	NA	exon (NM_001290790, exon 25 of 31)	exon (NM_001290790, exon 25 of 31)	-7549	NM_001081971	383787	Mm.35758	NM_001081971	ENSMUSG00000078137	Ankrd63	Gm1337	ankyrin repeat domain 63	protein-coding
MACS_peak_6389	chr9	107428150	107430161	+	1193	NA	intron (NM_001174048, intron 35 of 37)	CpG-15370	-7121	NM_019704	56395	Mm.260153	NM_019704	ENSMUSG00000010045	Tmem115	C78915|Pl6|Pp6	transmembrane protein 115	protein-coding
MACS_peak_3069	chr19	47911221	47915854	+	1193	NA	Intergenic	RMER21B|LTR|ERV1	-1686	NM_027559	100048534	Mm.29457	NM_027559	ENSMUSG00000044948	Cfap43	4632415N18Rik|4930428C11Rik|4930463G05Rik|AI429486|D19Ertd652e|Wdr96	cilia and flagella associated protein 43	protein-coding
MACS_peak_4942	chr6	24903905	24907176	+	1193	NA	exon (NM_177013, exon 1 of 1)	exon (NM_177013, exon 1 of 1)	585	NM_177013	319832	Mm.127446	NM_177013	ENSMUSG00000048022	Tmem229a	6332401O19Rik	transmembrane protein 229A	protein-coding
MACS_peak_3430	chr2	131371603	131374322	+	1193	NA	intron (NM_013460, intron 1 of 1)	intron (NM_013460, intron 1 of 1)	15059	NM_013460	11550	Mm.389380	NM_013460		Adra1d	Adra-1|Adra1|Adra1a|Gpcr8|Spr8|[a]1d|alpha1D-AR	adrenergic receptor, alpha 1d	protein-coding
MACS_peak_5578	chr7	123180732	123182342	+	1193	NA	intron (NM_001025559, intron 1 of 15)	intron (NM_001025559, intron 1 of 15)	721	NM_001025559	20679	Mm.323365	NM_011445	ENSMUSG00000051910	Sox6	AI987981|SOX-LZ	SRY (sex determining region Y)-box 6	protein-coding
MACS_peak_4472	chr5	31597861	31598557	+	1192	NA	promoter-TSS (NM_022424)	promoter-TSS (NM_022424)	41	NM_022424	64339	Mm.292544	NM_022424	ENSMUSG00000038552	Fndc4	2810430J06Rik|6330410H20Rik|AB030187|AI838506|AW487863|FRCP1|Fnmp1	fibronectin type III domain containing 4	protein-coding
MACS_peak_441	chr10	19868262	19869029	+	1188	NA	promoter-TSS (NM_001198635)	promoter-TSS (NM_001198635)	-81	NM_008635	17761	Mm.20928	NM_008635	ENSMUSG00000019996	Map7	E-MAP-115|MAP-7|Mtap7|R75000|mshi|mste|ste	microtubule-associated protein 7	protein-coding
MACS_peak_2371	chr16	65814066	65816760	+	1188	NA	promoter-TSS (NM_028572)	promoter-TSS (NM_028572)	-465	NM_028572	73569	Mm.25670	NM_028572	ENSMUSG00000091243	Vgll3	1700110N18Rik|4832416J22|C80713|Vgl-3|Vito-2	vestigial like 3 (Drosophila)	protein-coding
MACS_peak_3309	chr2	76176757	76177152	+	1188	NA	promoter-TSS (NM_001081033)	promoter-TSS (NM_001081033)	-244	NM_001081033	241489	Mm.246613	NM_001081033		Pde11a	6330414F14Rik|A630086N24Rik|Gm350|PDE11A1	phosphodiesterase 11A	protein-coding
MACS_peak_2882	chr18	84888645	84892583	+	1188	NA	intron (NM_173770, intron 1 of 4)	intron (NM_173770, intron 1 of 4)	980	NM_173770	240479	Mm.472378	NM_173770	ENSMUSG00000047992	Fam69c	B230399E16Rik	family with sequence similarity 69, member C	protein-coding
MACS_peak_1222	chr12	9576942	9583436	+	1187	NA	Intergenic	Intergenic	-1059	NM_011859	23967	Mm.45055	NM_011859	ENSMUSG00000048387	Osr1	Odd1|Osr	odd-skipped related 1 (Drosophila)	protein-coding
MACS_peak_1145	chr11	113925372	113929742	+	1185	NA	promoter-TSS (NM_172800)	promoter-TSS (NM_172800)	-292	NM_172800	237979	Mm.130504	NM_172800	ENSMUSG00000041592	Sdk2	4632412F08Rik|5330435L01Rik|Sdk-2|mKIAA1514	sidekick homolog 2 (chicken)	protein-coding
MACS_peak_937	chr11	83879496	83883475	+	1182	NA	intron (NM_019819, intron 1 of 2)	intron (NM_019819, intron 1 of 2)	374	NM_019819	56405	Mm.240885	NM_019819	ENSMUSG00000018648	Dusp14	1110014C10Rik|2310042C07Rik|D11Ertd395e|MKP-L|Mkp6	dual specificity phosphatase 14	protein-coding
MACS_peak_987	chr11	95443583	95449006	+	1181	NA	intron (NM_033217, intron 1 of 5)	intron (NM_033217, intron 1 of 5)	2718	NM_033217	18053	Mm.283893	NM_033217	ENSMUSG00000000120	Ngfr	LNGFR|Tnfrsf16|p75|p75NGFR|p75NTR	nerve growth factor receptor (TNFR superfamily, member 16)	protein-coding
MACS_peak_5616	chr7	133846608	133848373	+	1175	NA	5' UTR (NM_001301374, exon 1 of 11)	5' UTR (NM_001301374, exon 1 of 11)	244	NM_001301374	12721	Mm.290482	NM_009898	ENSMUSG00000030707	Coro1a	Clabp|Lmb3|TACO|p57	coronin, actin binding protein 1A	protein-coding
MACS_peak_726	chr11	3897001	3899594	+	1175	NA	exon (NM_001177691, exon 3 of 3)	exon (NM_001177691, exon 3 of 3)	8361	NM_001177691	53897	Mm.103414	NM_016922	ENSMUSG00000049721	Gal3st1	Cst|Gcst	galactose-3-O-sulfotransferase 1	protein-coding
MACS_peak_3319	chr2	84573822	84578001	+	1175	NA	intron (NM_001005342, intron 1 of 4)	intron (NM_001005342, intron 1 of 4)	1550	NM_001005342	241525	Mm.486398	NM_001005342		Ypel4	-	yippee-like 4 (Drosophila)	protein-coding
MACS_peak_3442	chr2	143370459	143375104	+	1174	NA	non-coding (NR_040354, exon 1 of 3)	non-coding (NR_040354, exon 1 of 3)	792	NR_040354	378776	Mm.381216	NR_040354	ENSMUSG00000086171	Pcsk2os1	C630020P19Rik	proprotein convertase subtilisin/kexin type 2, opposite strand 1	ncRNA
MACS_peak_3678	chr3	8509221	8511382	+	1174	NA	intron (NM_025285, intron 1 of 4)	intron (NM_025285, intron 1 of 4)	774	NM_025285	20257	Mm.29580	NM_025285	ENSMUSG00000027500	Stmn2	AI159727|SCG10|Scgn10|Stmb2	stathmin-like 2	protein-coding
MACS_peak_302	chr1	158132194	158137217	+	1174	NA	intron (NM_177838, intron 1 of 4)	intron (NM_177838, intron 1 of 4)	451	NM_177838	329274	Mm.150857	NM_177838	ENSMUSG00000015484	Fam163a	A230106N23Rik	family with sequence similarity 163, member A	protein-coding
MACS_peak_1886	chr14	66897459	66900341	+	1174	NA	intron (NM_172498, intron 1 of 29)	intron (NM_172498, intron 1 of 29)	989	NM_172498	19229	Mm.21613	NM_172498	ENSMUSG00000059456	Ptk2b	CADTK|CAKB|CAKbeta|E430023O05Rik|FADK2|FAK2|PYK2|Raftk	PTK2 protein tyrosine kinase 2 beta	protein-coding
MACS_peak_4041	chr4	53792210	53792929	+	1174	NA	promoter-TSS (NM_009317)	promoter-TSS (NM_009317)	-8	NM_009317	21350	Mm.56955	NM_009317		Tal2	bHLHa19	T cell acute lymphocytic leukemia 2	protein-coding
MACS_peak_4544	chr5	71486679	71487933	+	1171	NA	promoter-TSS (NM_008066)	promoter-TSS (NM_008066)	-218	NM_008066	14395	Mm.5304	NM_008066	ENSMUSG00000000560	Gabra2	C630048P16Rik|Gabra-2	gamma-aminobutyric acid (GABA) A receptor, subunit alpha 2	protein-coding
MACS_peak_6103	chr9	21792321	21796596	+	1171	NA	promoter-TSS (NM_023622)	promoter-TSS (NM_023622)	-561	NM_023622	71746	Mm.110594	NM_023622	ENSMUSG00000040146	Rgl3	1300003D20Rik|mFLJ00153	ral guanine nucleotide dissociation stimulator-like 3	protein-coding
MACS_peak_6225	chr9	57788117	57790651	+	1168	NA	intron (NM_011352, intron 1 of 13)	intron (NM_011352, intron 1 of 13)	1442	NM_011352	20361	Mm.335187	NM_011352	ENSMUSG00000038264	Sema7a	2900057C09Rik|CDw108|H-Sema-L|M-Sema-L|Semal	sema domain, immunoglobulin domain (Ig), and GPI membrane anchor, (semaphorin) 7A	protein-coding
MACS_peak_4845	chr5	139060711	139060943	+	1165	NA	intron (NM_001163797, intron 1 of 5)	CpG	144	NM_013844	24135	Mm.27575	NM_013844		Zfp68	KRAB3|KRAZ2|Zfp70|mszf22|mszf49	zinc finger protein 68	protein-coding
MACS_peak_5513	chr7	86955775	86956481	+	1164	NA	exon (NM_008589, exon 1 of 2)	exon (NM_008589, exon 1 of 2)	515	NM_008589	17293	Mm.31472	NM_008589	ENSMUSG00000030543	Mesp2	bHLHc6	mesoderm posterior 2	protein-coding
[truncated: 900 more rows]
