# Supplementary material for: Remodeling of epigenome and transcriptome landscapes with aging in mice reveals widespread induction of inflammatory responses
Source: HighWire-hosted journal article supplement (doi:10.1101/gr.240093.118), 2019-03-11
Supplement: Supplemental_Code_Figure3_Machine_learning.zip [file HOMER_Bivalent_domains_Liver.xls]

PeakID (cmd=annotatePeaks.pl Bivalent_domains_Liver.bed mm9)	Chr	Start	End	Strand	Peak Score	Focus Ratio/Region Size	Annotation	Detailed Annotation	Distance to TSS	Nearest PromoterID	Entrez ID	Nearest Unigene	Nearest Refseq	Nearest Ensembl	Gene Name	Gene Alias	Gene Description	Gene Type
MACS_peak_473	chr1	172993680	173016343	+	10077	NA	Intergenic	Intergenic	-10228	NR_106103	102466998		NR_106103	miRBase:MI0024983	Mir6546	mmu-mir-6546	microRNA mir-6546	ncRNA
MACS_peak_6261	chr6	30905789	30909465	+	6919	NA	3' UTR (NM_001135093, exon 1 of 1)	3' UTR (NM_001135093, exon 1 of 1)	1363	NM_001135093	619665	Mm.204671	NM_001135093	ENSMUSG00000073209	Klf14	5330411L03Rik|AL022736|BTEB5	Kruppel-like factor 14	protein-coding
MACS_peak_95	chr1	42750368	42756479	+	6526	NA	promoter-TSS (NM_008900)	promoter-TSS (NM_008900)	-568	NM_008900	18993	Mm.489878	NM_008900	ENSMUSG00000045515	Pou3f3	Brn-1|Brn1|Otf8|Skin1	POU domain, class 3, transcription factor 3	protein-coding
MACS_peak_4359	chr2	146909341	146911806	+	5425	NA	intron (NM_023504, intron 1 of 1)	CpG	508	NM_023504	228731	Mm.315498	NM_023504	ENSMUSG00000054160	Nkx2-4	1700001P03Rik|Nkx-2.4|tinman	NK2 homeobox 4	protein-coding
MACS_peak_2624	chr15	75569786	75578352	+	5259	NA	Intergenic	Intergenic	4283	NM_194350	378435	Mm.309589	NM_194350	ENSMUSG00000047591	Mafa	RIPE3b1	v-maf musculoaponeurotic fibrosarcoma oncogene family, protein A (avian)	protein-coding
MACS_peak_2177	chr13	99123523	99133241	+	4897	NA	Intergenic	Intergenic	4182	NM_008242	15229	Mm.347441	NM_008242	ENSMUSG00000078302	Foxd1	AI385632|BF-2|FREAC4|Hfh10|Hfhbf2	forkhead box D1	protein-coding
MACS_peak_920	chr11	21891828	21905034	+	4744	NA	exon (NM_011023, exon 4 of 5)	exon (NM_011023, exon 4 of 5)	3223	NM_011023	18423	Mm.129663	NM_011023	ENSMUSG00000005917	Otx1	A730044F23Rik|jv	orthodenticle homolog 1	protein-coding
MACS_peak_2460	chr14	104862440	104867678	+	4715	NA	exon (NM_011143, exon 2 of 3)	exon (NM_011143, exon 2 of 3)	2157	NM_011143	18996	Mm.246550	NM_011143		Pou4f1	Brn-3|Brn-3.0|Brn3|Brn3.0|Brn3a|E130119J07Rik	POU domain, class 4, transcription factor 1	protein-coding
MACS_peak_3216	chr17	39980982	39983195	+	4682	NA	non-coding (NR_046233, exon 1 of 1)	non-coding (NR_046233, exon 1 of 1)	2146	NR_046233	100861531		NR_046233		Rn45s	-	45S pre-ribosomal RNA	rRNA
MACS_peak_4677	chr3	82679750	82681133	+	4607	NA	promoter-TSS (NR_040382)	promoter-TSS (NR_040382)	-36	NM_001277170	633285	Mm.265114	NM_001146328	ENSMUSG00000033882	Rbm46	EG633285|ENSMUSG00000033882|Gm761	RNA binding motif protein 46	protein-coding
MACS_peak_4786	chr3	104762840	104768325	+	4566	NA	promoter-TSS (NM_009520)	promoter-TSS (NM_009520)	-955	NM_009520	22414	Mm.10740	NM_009520	ENSMUSG00000027840	Wnt2b	Wnt13	wingless-type MMTV integration site family, member 2B	protein-coding
MACS_peak_7958	chr9	55384565	55395077	+	4539	NA	intron (NM_027397, intron 1 of 5)	CpG	865	NM_027397	104360	Mm.273996	NM_027397	ENSMUSG00000032318	Isl2	3110001N10Rik	insulin related protein 2 (islet 2)	protein-coding
MACS_peak_5133	chr4	101167670	101171876	+	4482	NA	intron (NM_198412, intron 1 of 19)	intron (NM_198412, intron 1 of 19)	520	NM_198412	72685	Mm.76494	NM_198412	ENSMUSG00000028528	Dnajc6	2810027M23Rik|mKIAA0473	DnaJ (Hsp40) homolog, subfamily C, member 6	protein-coding
MACS_peak_429	chr1	158231429	158234314	+	4395	NA	intron (NM_001277730, intron 1 of 18)	B1_Mus2|SINE|Alu	608	NM_001134741	214575	Mm.252800	NM_001134741	ENSMUSG00000060985	Tdrd5	Gm103	tudor domain containing 5	protein-coding
MACS_peak_8177	chr9	98849071	98866418	+	4387	NA	3' UTR (NM_012020, exon 1 of 1)	3' UTR (NM_012020, exon 1 of 1)	1718	NM_012020	26927	Mm.151239	NM_012020	ENSMUSG00000050397	Foxl2	AU045128|BPES|PINTO|Pfrk	forkhead box L2	protein-coding
MACS_peak_7476	chr8	72403166	72413621	+	4297	NA	exon (NM_026818, exon 5 of 8)	exon (NM_026818, exon 5 of 8)	2898	NM_026818	68709	Mm.334584	NM_026818	ENSMUSG00000044006	Cilp2	1110031K21Rik|AA407300|CLIP-2	cartilage intermediate layer protein 2	protein-coding
MACS_peak_7196	chr7	144500175	144521381	+	4214	NA	Intergenic	Intergenic	-4650	NM_010096	13593	Mm.258708	NM_010096	ENSMUSG00000010476	Ebf3	3110018A08Rik|O/E-2|mKIAA4201	early B cell factor 3	protein-coding
MACS_peak_3780	chr19	43514630	43518491	+	4027	NA	intron (NM_031396, intron 1 of 10)	intron (NM_031396, intron 1 of 10)	1634	NM_031396	83674	Mm.329864	NM_031396	ENSMUSG00000025189	Cnnm1	AI846314|Acdp1|CLP-1	cyclin M1	protein-coding
MACS_peak_3864	chr19	47251904	47255196	+	3914	NA	5' UTR (NM_021360, exon 1 of 6)	5' UTR (NM_021360, exon 1 of 6)	240	NM_021360	18011	Mm.313651	NM_021360	ENSMUSG00000006435	Neurl1a	2410129E16Rik|AI450910|AI481072|Neu1|Neur1|Neurl|Neurl1|Nlz|Rnf67	neuralized homolog 1A (Drosophila)	protein-coding
MACS_peak_137	chr1	63319315	63322489	+	3914	NA	intron (NM_001267872, intron 1 of 5)	intron (NM_001267872, intron 1 of 5)	1059	NM_001267872	73884	Mm.86986	NM_028673	ENSMUSG00000027520	Zdbf2	4930431J08Rik|9330107J05Rik	zinc finger, DBF-type containing 2	protein-coding
MACS_peak_5734	chr5	72970123	72974179	+	3914	NA	TTS (NM_001024147)	TTS (NM_001024147)	172	NM_174877	317755	Mm.11934	NM_174877	ENSMUSG00000063935	Zar1	-	zygote arrest 1	protein-coding
MACS_peak_4218	chr2	102289811	102293036	+	3816	NA	exon (NM_010218, exon 1 of 1)	exon (NM_010218, exon 1 of 1)	526	NM_010218	14221	Mm.29730	NM_010218	ENSMUSG00000075012	Fjx1	-	four jointed box 1 (Drosophila)	protein-coding
MACS_peak_4259	chr2	118525551	118531563	+	3768	NA	exon (NM_001081971, exon 1 of 1)	exon (NM_001081971, exon 1 of 1)	1142	NM_001081971	383787	Mm.35758	NM_001081971	ENSMUSG00000078137	Ankrd63	Gm1337	ankyrin repeat domain 63	protein-coding
MACS_peak_8120	chr9	91258441	91260868	+	3743	NA	exon (NM_009573, exon 1 of 3)	exon (NM_009573, exon 1 of 3)	983	NM_009573	22771	Mm.335350	NM_009573	ENSMUSG00000032368	Zic1	ZIC|ZNF201	zinc finger protein of the cerebellum 1	protein-coding
MACS_peak_5157	chr4	109646349	109661331	+	3693	NA	intron (NM_172296, intron 2 of 2)	intron (NM_172296, intron 2 of 2)	3210	NM_172296	242620	Mm.32825	NM_172296	ENSMUSG00000047143	Dmrta2	Dmrt5	doublesex and mab-3 related transcription factor like family A2	protein-coding
MACS_peak_1604	chr12	52692671	52695315	+	3622	NA	promoter-TSS (NM_007728)	promoter-TSS (NM_007728)	-335	NM_007728	12810	Mm.21325	NM_007728	ENSMUSG00000020953	Coch	AW122937|Coch-5B2|D12H14S564E	coagulation factor C homolog (Limulus polyphemus)	protein-coding
MACS_peak_4108	chr2	61652405	61654469	+	3596	NA	Intergenic	CpG	10927	NM_009322	21375	Mm.308525	NM_009322	ENSMUSG00000035033	Tbr1	-	T-box brain gene 1	protein-coding
MACS_peak_5243	chr4	124330500	124341550	+	3563	NA	exon (NM_011141, exon 1 of 2)	exon (NM_011141, exon 1 of 2)	1136	NM_011141	18991	Mm.297371	NM_011141	ENSMUSG00000090125	Pou3f1	Oct-6|Oct6|Otf-6|Otf6|Scip|Test1|Tst-1|Tst1	POU domain, class 3, transcription factor 1	protein-coding
MACS_peak_3368	chr17	88035185	88037905	+	3529	NA	intron (NM_008532, intron 2 of 9)	CpG-6687	1226	NM_008532	17075	Mm.4259	NM_008532	ENSMUSG00000045394	Epcam	CD326|EGP|EGP-2|Egp314|Ep-CAM|EpCAM1|GA733-2|Ly74|TROP1|Tacsd1|Tacstd1|gp40	epithelial cell adhesion molecule	protein-coding
MACS_peak_586	chr10	21869177	21871783	+	3494	NA	Intergenic	CpG	-1404	NM_001254745	319887	Mm.177746	NM_001254744	ENSMUSG00000055657	E030030I06Rik	-	RIKEN cDNA E030030I06 gene	protein-coding
MACS_peak_5010	chr4	46349355	46358842	+	3480	NA	Intergenic	Intergenic	-2968	NM_183298	110805	Mm.354634	NM_183298		Foxe1	Titf2	forkhead box E1	protein-coding
MACS_peak_5648	chr5	36738296	36740815	+	3472	NA	intron (NM_030889, intron 1 of 26)	intron (NM_030889, intron 1 of 26)	1233	NM_030889	81840	Mm.34113	NM_030889	ENSMUSG00000029093	Sorcs2	N28137|mKIAA1329	sortilin-related VPS10 domain containing receptor 2	protein-coding
MACS_peak_1808	chr12	114165034	114170708	+	3465	NA	promoter-TSS (NM_010588)	promoter-TSS (NM_010588)	-165	NM_010588	16450	Mm.186146	NM_010588	ENSMUSG00000002799	Jag2	D12Ggc2e|Serh|mJagged2-1|sm	jagged 2	protein-coding
MACS_peak_8036	chr9	64987796	64990451	+	3463	NA	5' UTR (NM_008988, exon 1 of 14)	5' UTR (NM_008988, exon 1 of 14)	127	NM_008988	19289	Mm.41529	NM_008988	ENSMUSG00000032394	Igdcc3	2810401C09Rik|AI851425|Punc|WI-14920	immunoglobulin superfamily, DCC subclass, member 3	protein-coding
MACS_peak_7711	chr8	123637648	123647254	+	3449	NA	3' UTR (NM_013519, exon 1 of 1)	3' UTR (NM_013519, exon 1 of 1)	2380	NM_013519	14234	Mm.14092	NM_013519	ENSMUSG00000046714	Foxc2	Fkh14|Hfhbf3|MFH-1|Mfh1	forkhead box C2	protein-coding
MACS_peak_6695	chr7	26097818	26101120	+	3445	NA	intron (NM_183311, intron 13 of 14)	intron (NM_183311, intron 13 of 14)	-2714	NM_001160400	269878	Mm.38527	NM_001160400	ENSMUSG00000045039	Megf8	AW049492|Egfl4|b2b1702Clo|b2b288Clo|m687Ddg|mKIAA0817	multiple EGF-like-domains 8	protein-coding
MACS_peak_3340	chr17	84028782	84032697	+	3445	NA	exon (NM_153512, exon 1 of 2)	exon (NM_153512, exon 1 of 2)	496	NM_153512	225030	Mm.223506	NM_153512	ENSMUSG00000045053	Kcng3	KV6.3|Kv10.1a|Kv10.1b	potassium voltage-gated channel, subfamily G, member 3	protein-coding
MACS_peak_2628	chr15	76347153	76354782	+	3445	NA	intron (NM_130893, intron 1 of 1)	intron (NM_130893, intron 1 of 1)	1592	NM_130893	170729	Mm.218747	NM_130893	ENSMUSG00000048385	Scrt1	-	scratch homolog 1, zinc finger protein (Drosophila)	protein-coding
MACS_peak_1873	chr13	29042562	29045126	+	3439	NA	exon (NM_009238, exon 1 of 1)	exon (NM_009238, exon 1 of 1)	1707	NM_009238	20677	Mm.240627	NM_009238		Sox4	AA682046|Sox-4	SRY (sex determining region Y)-box 4	protein-coding
MACS_peak_4107	chr2	61646776	61651483	+	3420	NA	intron (NM_009322, intron 5 of 5)	intron (NM_009322, intron 5 of 5)	6619	NM_009322	21375	Mm.308525	NM_009322	ENSMUSG00000035033	Tbr1	-	T-box brain gene 1	protein-coding
MACS_peak_4613	chr3	34554467	34573776	+	3389	NA	intron (NR_015580, intron 4 of 4)	intron (NR_015580, intron 4 of 4)	15194	NM_011443	20674	Mm.65396	NM_011443	ENSMUSG00000074637	Sox2	Sox-2|lcc|ysb	SRY (sex determining region Y)-box 2	protein-coding
MACS_peak_164	chr1	74896543	74907433	+	3372	NA	exon (NM_009872, exon 1 of 1)	exon (NM_009872, exon 1 of 1)	385	NM_009872	12570	Mm.153833	NM_009872	ENSMUSG00000090071	Cdk5r2	B230310J22Rik|p39	cyclin-dependent kinase 5, regulatory subunit 2 (p39)	protein-coding
MACS_peak_4914	chr4	11310397	11316863	+	3367	NA	5' UTR (NM_001290383, exon 1 of 16)	5' UTR (NM_001290383, exon 1 of 16)	300	NM_001290383	207920	Mm.387719	NM_194055	ENSMUSG00000040728	Esrp1	2210008M09Rik|A630065D16|BC031468|Rbm35a	epithelial splicing regulatory protein 1	protein-coding
MACS_peak_6461	chr6	99639748	99644380	+	3367	NA	promoter-TSS (NM_008158)	promoter-TSS (NM_008158)	-609	NM_008158	14761	Mm.35009	NM_008158	ENSMUSG00000072875	Gpr27	-	G protein-coupled receptor 27	protein-coding
MACS_peak_8212	chr9	107133559	107136458	+	3333	NA	promoter-TSS (NM_153413)	promoter-TSS (NM_153413)	-768	NM_153413	208869	Mm.150259	NM_153413	ENSMUSG00000039716	Dock3	MOCA|PBP|mKIAA0299	dedicator of cyto-kinesis 3	protein-coding
MACS_peak_4332	chr2	133376224	133381684	+	3323	NA	5' UTR (NM_007553, exon 1 of 3)	5' UTR (NM_007553, exon 1 of 3)	1059	NM_007553	12156	Mm.103205	NM_007553	ENSMUSG00000027358	Bmp2	AI467020|Bmp2a	bone morphogenetic protein 2	protein-coding
MACS_peak_3951	chr2	9798660	9800284	+	3313	NA	5' UTR (NM_008091, exon 2 of 6)	5' UTR (NM_008091, exon 2 of 6)	755	NM_008091	14462	Mm.313866	NM_008091	ENSMUSG00000015619	Gata3	Gata-3|jal	GATA binding protein 3	protein-coding
MACS_peak_2554	chr15	35220799	35235133	+	3309	NA	intron (NM_054049, intron 1 of 3)	intron (NM_054049, intron 1 of 3)	2099	NM_054049	107587	Mm.46336	NM_054049	ENSMUSG00000022330	Osr2	5430409I15Rik|Osr2A|Osr2B	odd-skipped related 2	protein-coding
MACS_peak_5269	chr4	126408686	126417834	+	3266	NA	5' UTR (NM_198960, exon 1 of 7)	5' UTR (NM_198960, exon 1 of 7)	253	NM_198960	332937	Mm.331881	NM_198960	ENSMUSG00000042477	Tfap2e	AI505200|AP-2e|Tcfap2e	transcription factor AP-2, epsilon	protein-coding
MACS_peak_1317	chr11	98406307	98409196	+	3261	NA	promoter-TSS (NM_011771)	promoter-TSS (NM_011771)	-406	NM_011771	22780	Mm.133367	NM_011771	ENSMUSG00000018168	Ikzf3	5830411O07Rik|Aiolos|Zfpn1a3|Znfn1a3	IKAROS family zinc finger 3	protein-coding
MACS_peak_1375	chr11	102464390	102468800	+	3261	NA	exon (NM_020510, exon 1 of 1)	exon (NM_020510, exon 1 of 1)	850	NM_020510	57265	Mm.36416	NM_020510	ENSMUSG00000050288	Fzd2	AL033370|AW456835|Fz10|Fzd10|Mfz10|Mfz10a	frizzled homolog 2 (Drosophila)	protein-coding
MACS_peak_6647	chr7	17469876	17473175	+	3252	NA	exon (NM_001081655, exon 4 of 4)	exon (NM_001081655, exon 4 of 4)	-5610	NM_010320	14709	Mm.103770	NM_010320	ENSMUSG00000063594	Gng8	G(y)8	guanine nucleotide binding protein (G protein), gamma 8	protein-coding
MACS_peak_4750	chr3	96252138	96268345	+	3240	NA	Intergenic	Intergenic	-4012	NM_001256180	329716	Mm.275223	NM_183223	ENSMUSG00000046317	BC107364	D730018G16	cDNA sequence BC107364	protein-coding
MACS_peak_7600	chr8	94321943	94325248	+	3204	NA	exon (NM_008393, exon 2 of 4)	exon (NM_008393, exon 2 of 4)	1958	NM_001253822	16373	Mm.238044	NM_008393	ENSMUSG00000031734	Irx3	AI894186	Iroquois related homeobox 3	protein-coding
MACS_peak_4948	chr4	22413132	22419354	+	3185	NA	promoter-TSS (NM_008899)	promoter-TSS (NM_008899)	-730	NM_008899	18992	Mm.129387	NM_008899	ENSMUSG00000095139	Pou3f2	9430075J19Rik|A230098E07Rik|Brn-2|Brn2|OTF-7|Otf7|oct-7	POU domain, class 3, transcription factor 2	protein-coding
MACS_peak_2821	chr15	102800600	102815126	+	3184	NA	intron (NM_008272, intron 1 of 2)	intron (NM_008272, intron 1 of 2)	400	NM_008272	15427	Mm.4765	NM_008272		Hoxc9	Hox-3.2	homeobox C9	protein-coding
MACS_peak_644	chr10	42738178	42743211	+	3155	NA	intron (NM_175407, intron 6 of 6)	intron (NM_175407, intron 6 of 6)	153642	NM_175407	109205	Mm.153750	NM_175407	ENSMUSG00000038248	Sobp	2900009C16Rik|5330439J01Rik|JXC1|jc	sine oculis-binding protein homolog (Drosophila)	protein-coding
MACS_peak_814	chr10	93292672	93297112	+	3147	NA	intron (NM_183199, intron 1 of 3)	intron (NM_183199, intron 1 of 3)	592	NM_001206851	327799	Mm.491598	NM_183199	ENSMUSG00000020020	Usp44	E430004F17Rik	ubiquitin specific peptidase 44	protein-coding
MACS_peak_4262	chr2	119062325	119066062	+	3130	NA	intron (NM_016907, intron 2 of 10)	intron (NM_016907, intron 2 of 10)	1097	NM_016907	20732	Mm.104955	NM_016907	ENSMUSG00000027315	Spint1	HAI-1	serine protease inhibitor, Kunitz type 1	protein-coding
MACS_peak_3968	chr2	18608619	18612816	+	3113	NA	Intergenic	CpG	-9932	NM_001001334	381350	Mm.330024	NM_001001334		BC061194	-	cDNA sequence BC061194	protein-coding
MACS_peak_5625	chr5	31394127	31395772	+	3109	NA	intron (NR_105788, intron 5 of 7)	CpG	951	NM_011773	22784	Mm.1396	NM_011773	ENSMUSG00000029151	Slc30a3	Znt3	solute carrier family 30 (zinc transporter), member 3	protein-coding
MACS_peak_674	chr10	59568215	59575333	+	3085	NA	intron (NM_052994, intron 1 of 10)	intron (NM_052994, intron 1 of 10)	2769	NM_052994	94214	Mm.153429	NM_052994	ENSMUSG00000058297	Spock2	AA407235|Gcap26|mKIAA0275	sparc/osteonectin, cwcv and kazal-like domains proteoglycan 2	protein-coding
MACS_peak_580	chr10	19568735	19572786	+	3082	NA	exon (NM_029529, exon 1 of 2)	exon (NM_029529, exon 1 of 2)	505	NM_029529	76157	Mm.74324	NM_029529	ENSMUSG00000050473	Slc35d3	6230421J19Rik|Frcl1	solute carrier family 35, member D3	protein-coding
MACS_peak_5847	chr5	108146146	108158139	+	3055	NA	intron (NM_010278, intron 2 of 6)	intron (NM_010278, intron 2 of 6)	1221	NM_010278	14581	Mm.2078	NM_010278	ENSMUSG00000029275	Gfi1	AW495828|Gfi-1|Pal-1|Pal1	growth factor independent 1	protein-coding
MACS_peak_1885	chr13	31897394	31900759	+	3052	NA	5' UTR (NM_008592, exon 1 of 1)	5' UTR (NM_008592, exon 1 of 1)	561	NM_008592	17300	Mm.12949	NM_008592	ENSMUSG00000050295	Foxc1	FREAC3|Fkh1|Mf1|Mf4|ch|fkh-1|frkhda	forkhead box C1	protein-coding
MACS_peak_5176	chr4	114594858	114602317	+	3049	NA	promoter-TSS (NM_015758)	promoter-TSS (NM_015758)	31	NM_015758	30923	Mm.377122	NM_015758	ENSMUSG00000044518	Foxe3	FREAC8|dyl|rct	forkhead box E3	protein-coding
MACS_peak_4356	chr2	146046273	146049923	+	3049	NA	exon (NM_016889, exon 1 of 1)	exon (NM_016889, exon 1 of 1)	365	NM_016889	53626	Mm.379070	NM_016889	ENSMUSG00000068154	Insm1	IA-1	insulinoma-associated 1	protein-coding
MACS_peak_1300	chr11	97393925	97399398	+	3034	NA	intron (NM_018873, intron 7 of 19)	intron (NM_018873, intron 7 of 19)	-35007	NM_001289118	100141474	Mm.482426	NM_001289118		4933428G20Rik	-	RIKEN cDNA 4933428G20 gene	protein-coding
MACS_peak_3230	chr17	44870568	44876755	+	3008	NA	promoter-TSS (NM_001145920)	promoter-TSS (NM_001145920)	-64	NM_001145920	12393	Mm.391013	NM_009820	ENSMUSG00000039153	Runx2	AML3|Cbf|Cbfa-1|Cbfa1|LS3|Osf2|PEBP2aA|Pebp2a1|Pebpa2a	runt related transcription factor 2	protein-coding
MACS_peak_8072	chr9	74917242	74920451	+	2997	NA	promoter-TSS (NM_010864)	promoter-TSS (NM_010864)	-167	NM_010864	17918	Mm.3645	NM_010864	ENSMUSG00000034593	Myo5a	9630007J19Rik|AI413174|AI661011|Dbv|MVa|Myo5|MyoVA|Sev-1|d|d-120J|flail|flr	myosin VA	protein-coding
MACS_peak_1706	chr12	82880908	82883316	+	2994	NA	promoter-TSS (NM_001174107)	promoter-TSS (NM_001174107)	45	NM_177395	338372	Mm.35284	NM_177395	ENSMUSG00000042724	Map3k9	E130314H24Rik|Mlk1|Prke1	mitogen-activated protein kinase kinase kinase 9	protein-coding
MACS_peak_2870	chr16	17797100	17809444	+	2991	NA	exon (NM_153790, exon 4 of 11)	exon (NM_153790, exon 4 of 11)	5897	NM_153790	224024	Mm.194950	NM_153790	ENSMUSG00000012017	Scarf2	AI194363|NSR1|SREC-II|SRECRP-1|Scarf1|Scatf1|Srec2|SrecII|W53987|W65560	scavenger receptor class F, member 2	protein-coding
MACS_peak_6489	chr6	115084571	115086385	+	2986	NA	exon (NM_001111015, exon 1 of 13)	exon (NM_001111015, exon 1 of 13)	558	NM_001111015	20965	Mm.441431	NM_013681	ENSMUSG00000009394	Syn2	2900074L19Rik|AI836018|AI841723	synapsin II	protein-coding
MACS_peak_4125	chr2	70308723	70315105	+	2959	NA	Intergenic	Intergenic	-1066	NM_022435	64406	Mm.423397	NM_022435	ENSMUSG00000075304	Sp5	-	trans-acting transcription factor 5	protein-coding
MACS_peak_7795	chr9	24578097	24580229	+	2946	NA	promoter-TSS (NM_001205085)	promoter-TSS (NM_001205085)	-416	NM_001205085	57246	Mm.31452	NM_020496	ENSMUSG00000031965	Tbx20	9430010M06Rik|AL022859|Tbx12	T-box 20	protein-coding
MACS_peak_4066	chr2	38190898	38199776	+	2946	NA	intron (NM_001290646, intron 1 of 4)	CpG	536	NM_001290646	16870	Mm.142856	NM_010710	ENSMUSG00000000247	Lhx2	LH2A|Lh-2|Lim2|ap|apterous	LIM homeobox protein 2	protein-coding
MACS_peak_4965	chr4	36896724	36900380	+	2944	NA	5' UTR (NM_001165999, exon 1 of 8)	5' UTR (NM_001165999, exon 1 of 8)	225	NM_001165999	242384	Mm.132507	NM_175516	ENSMUSG00000045083	Lingo2	B230217C06Rik|Lern3|Lrrn6c	leucine rich repeat and Ig domain containing 2	protein-coding
MACS_peak_1829	chr12	120084729	120089187	+	2905	NA	exon (NM_177082, exon 3 of 3)	exon (NM_177082, exon 3 of 3)	2156	NM_177082	320145	Mm.51682	NM_177082	ENSMUSG00000048562	Sp8	D930049B17Rik|mBtd	trans-acting transcription factor 8	protein-coding
MACS_peak_6517	chr6	122435587	122439305	+	2905	NA	Intergenic	Intergenic	-1123	NM_027664	108653	Mm.277939	NM_027664	ENSMUSG00000040649	Rimklb	4931417E21Rik|4933426K21Rik|AA097693|AI325948|AU015629|Naags	ribosomal modification protein rimK-like family member B	protein-coding
MACS_peak_7250	chr7	149830123	149847360	+	2889	NA	3' UTR (NM_001122736, exon 4 of 4)	3' UTR (NM_001122736, exon 4 of 4)	2160	NR_030251	723874		NR_030251		Mir483	Mirn483|mir-483|mmu-mir-483	microRNA 483	ncRNA
MACS_peak_449	chr1	165237781	165243912	+	2889	NA	intron (NM_001025570, intron 1 of 2)	intron (NM_001025570, intron 1 of 2)	2935	NM_011127	18933	Mm.288642	NM_011127	ENSMUSG00000026586	Prrx1	A230024N07Rik|AA755424|AI385634|AI843499|K-2|Pmx|Pmx1|Prx1|mHox	paired related homeobox 1	protein-coding
MACS_peak_6291	chr6	49162776	49166001	+	2850	NA	exon (NM_023670, exon 1 of 15)	exon (NM_023670, exon 1 of 15)	565	NM_023670	140488	Mm.281018	NM_023670	ENSMUSG00000029814	Igf2bp3	2610101N11Rik|AA522010|AL022933|AU045931|IMP-3|IMP3|Koc13|Neilsen|mimp3	insulin-like growth factor 2 mRNA binding protein 3	protein-coding
MACS_peak_5802	chr5	102187497	102198965	+	2844	NA	promoter-TSS (NM_173370)	promoter-TSS (NM_173370)	-918	NM_173370	74596	Mm.46764	NM_173370	ENSMUSG00000029330	Cds1	4833409J18Rik|AI314024|AW125888	CDP-diacylglycerol synthase 1	protein-coding
MACS_peak_6865	chr7	64845880	64847917	+	2843	NA	exon (NM_001038701, exon 2 of 9)	exon (NM_001038701, exon 2 of 9)	355	NM_008071	14402	Mm.8004	NM_008071	ENSMUSG00000033676	Gabrb3	A230092K12Rik|AW049585|Cp1|Gabrb-3|beta3	gamma-aminobutyric acid (GABA) A receptor, subunit beta 3	protein-coding
MACS_peak_2172	chr13	97839355	97842306	+	2843	NA	promoter-TSS (NM_001100458)	promoter-TSS (NM_001100458)	-768	NM_001100458	320557	Mm.458280	NM_001100458	ENSMUSG00000041817	Fam169a	B230112C05Rik|SLAP75	family with sequence similarity 169, member A	protein-coding
MACS_peak_1988	chr13	48752867	48772033	+	2843	NA	TTS (NM_007526)	TTS (NM_007526)	4045	NM_007526	12022	Mm.42241	NM_007526	ENSMUSG00000021381	Barx1	-	BarH-like homeobox 1	protein-coding
MACS_peak_6182	chr5	147996339	148005785	+	2840	NA	intron (NM_008178, intron 1 of 1)	intron (NM_008178, intron 1 of 1)	790	NM_008178	14842	Mm.4797	NM_008178	ENSMUSG00000053129	Gsx1	Gsh-1|Gsh1	GS homeobox 1	protein-coding
MACS_peak_5175	chr4	114569510	114583901	+	2835	NA	Intergenic	Intergenic	4798	NM_008593	17301	Mm.7997	NM_008593	ENSMUSG00000055210	Foxd2	AI426778|Mf2	forkhead box D2	protein-coding
MACS_peak_5311	chr4	133803239	133811103	+	2828	NA	3' UTR (NM_001099296, exon 2 of 2)	3' UTR (NM_001099296, exon 2 of 2)	2850	NM_001099296	72690	Mm.100168	NM_001099296	ENSMUSG00000050105	Grrp1	2810043G13Rik|Fam110d	glycine/arginine rich protein 1	protein-coding
MACS_peak_3898	chr19	56795003	56798322	+	2819	NA	promoter-TSS (NM_007419)	promoter-TSS (NM_007419)	-200	NM_007419	11554	Mm.46797	NM_007419	ENSMUSG00000035283	Adrb1	Adrb-1|beta-AR	adrenergic receptor, beta 1	protein-coding
MACS_peak_1383	chr11	102804124	102813722	+	2819	NA	Intergenic	Intergenic	-1148	NM_011795	23829	Mm.57154	NM_011795	ENSMUSG00000045532	C1ql1	C1qrf|CRF|CTRP14|gliacolin	complement component 1, q subcomponent-like 1	protein-coding
MACS_peak_4576	chr3	17950614	17955921	+	2816	NA	Intergenic	Intergenic	-1058	NM_021560	59058	Mm.149938	NM_021560	ENSMUSG00000025128	Bhlhe22	Beta3|Bhlhb5	basic helix-loop-helix family, member e22	protein-coding
MACS_peak_5833	chr5	106886069	106900097	+	2813	NA	Intergenic	Intergenic	-5898	NM_001005477	104382	Mm.271593	NM_001005477	ENSMUSG00000034384	Barhl2	E130309B19Rik|MBH1	BarH-like 2 (Drosophila)	protein-coding
MACS_peak_6406	chr6	83645611	83674292	+	2811	NA	intron (NR_075094, intron 1 of 2)	intron (NR_075094, intron 1 of 2)	849	NR_075094	574519	Mm.487605	NR_002871	ENSMUSG00000085794	Vax2os	Vas2os|Vax2os1|Vax2os2	ventral anterior homeobox 2, opposite strand	ncRNA
MACS_peak_7982	chr9	59423746	59428998	+	2803	NA	exon (NM_175235, exon 1 of 12)	exon (NM_175235, exon 1 of 12)	228	NM_175235	76183	Mm.265415	NM_175235	ENSMUSG00000032297	Celf6	6330569O16Rik|Brunol6	CUGBP, Elav-like family member 6	protein-coding
MACS_peak_5922	chr5	117863344	117866849	+	2803	NA	intron (NM_001114545, intron 1 of 19)	intron (NM_001114545, intron 1 of 19)	1085	NM_001114545	333050	Mm.437947	NM_001034873	ENSMUSG00000061578	Ksr2	-	kinase suppressor of ras 2	protein-coding
MACS_peak_7824	chr9	35365206	35366374	+	2803	NA	intron (NM_013932, intron 1 of 11)	intron (NM_013932, intron 1 of 11)	265	NM_013932	30959	Mm.291723	NM_013932	ENSMUSG00000032101	Ddx25	AW047046|GRTH	DEAD (Asp-Glu-Ala-Asp) box polypeptide 25	protein-coding
MACS_peak_4934	chr4	21609675	21618787	+	2803	NA	Intergenic	Intergenic	-1121	NM_001080771	230025	Mm.208541	NM_001080771	ENSMUSG00000040478	Prdm13	-	PR domain containing 13	protein-coding
MACS_peak_4349	chr2	144155559	144159401	+	2797	NA	promoter-TSS (NM_152947)	promoter-TSS (NM_152947)	336	NM_026924	107586	Mm.252750	NM_026924	ENSMUSG00000037279	Ovol2	1700108N11Rik|1810007D21Rik|M-OVO|M-OVO-A|M-OVO-B|MOVO|Ovo2|Zfp339|movo2	ovo-like 2 (Drosophila)	protein-coding
MACS_peak_2478	chr14	118633087	118636805	+	2797	NA	5' UTR (NM_177753, exon 1 of 1)	5' UTR (NM_177753, exon 1 of 1)	1306	NM_177753	223227	Mm.70950	NM_177753	ENSMUSG00000061517	Sox21	Sox25	SRY (sex determining region Y)-box 21	protein-coding
MACS_peak_2156	chr13	95637617	95641163	+	2797	NA	Intergenic	GA-rich|Low_complexity|Low_complexity	-6192	NM_011021	18420	Mm.42051	NM_011021		Otp	-	orthopedia homolog (Drosophila)	protein-coding
MACS_peak_5184	chr4	115634160	115643077	+	2797	NA	Intergenic	RSINE1|SINE|B4	-26087	NM_130865	140477	Mm.213206	NM_130865	ENSMUSG00000028707	Dmbx1	Atx|Cdmx|Mbx|Otx3	diencephalon/mesencephalon homeobox 1	protein-coding
MACS_peak_4653	chr3	66780869	66786906	+	2785	NA	intron (NM_013665, intron 1 of 4)	intron (NM_013665, intron 1 of 4)	1806	NM_013665	20429	Mm.39093	NM_013665		Shox2	6330543G17Rik|OG12|Og12x|Prx3|SHOT	short stature homeobox 2	protein-coding
MACS_peak_2500	chr14	122870668	122878344	+	2758	NA	promoter-TSS (NM_009574)	promoter-TSS (NM_009574)	-85	NR_045046	69248	Mm.235369	NR_045046	ENSMUSG00000085555	2610035F20Rik	-	RIKEN cDNA 2610035F20 gene	ncRNA
MACS_peak_97	chr1	42767936	42772291	+	2744	NA	intron (NR_110495, intron 1 of 3)	intron (NR_110495, intron 1 of 3)	186	NR_110495	66620	Mm.383631	NR_110495		Pantr2	2610207O16Rik|Pou3f3os2|linc-Brn1b	POU domain, class 3, transcription factor 3 adjacent noncoding transcript 2	ncRNA
MACS_peak_6307	chr6	51117098	51128883	+	2741	NA	Intergenic	Intergenic	96919	NR_029719	387166		NR_029719	miRBase:MI0000550	Mir148a	Mirn148|Mirn148a	microRNA 148a	ncRNA
MACS_peak_6378	chr6	64677621	64683026	+	2741	NA	exon (NM_007500, exon 1 of 1)	exon (NM_007500, exon 1 of 1)	1183	NM_007500	11921	Mm.57229	NM_007500	ENSMUSG00000073043	Atoh1	Hath1|MATH-1|Math1|bHLHa14	atonal homolog 1 (Drosophila)	protein-coding
MACS_peak_4256	chr2	118198426	118200645	+	2730	NA	promoter-TSS (NM_201367)	promoter-TSS (NM_201367)	-380	NM_201367	381413	Mm.70979	NM_201367	ENSMUSG00000040133	Gpr176	Gm1012	G protein-coupled receptor 176	protein-coding
MACS_peak_104	chr1	50981778	50985179	+	2727	NA	promoter-TSS (NM_019790)	promoter-TSS (NM_019790)	-889	NM_019790	56363	Mm.245154	NM_019790	ENSMUSG00000026109	Tmeff2	4832418D20Rik|7630402F16Rik|TR-2	transmembrane protein with EGF-like and two follistatin-like domains 2	protein-coding
MACS_peak_6193	chr5	148536566	148538714	+	2704	NA	promoter-TSS (NM_010228)	promoter-TSS (NM_010228)	-76	NM_010228	14254	Mm.389712	NM_010228	ENSMUSG00000029648	Flt1	AI323757|Flt-1|VEGFR-1|VEGFR1|sFlt1	FMS-like tyrosine kinase 1	protein-coding
MACS_peak_4933	chr4	21604944	21608522	+	2704	NA	exon (NM_001080771, exon 4 of 4)	exon (NM_001080771, exon 4 of 4)	6377	NM_001080771	230025	Mm.208541	NM_001080771	ENSMUSG00000040478	Prdm13	-	PR domain containing 13	protein-coding
MACS_peak_4063	chr2	35952894	35965350	+	2704	NA	intron (NM_001083125, intron 2 of 8)	CpG	458	NM_001083126	16874	Mm.12881	NM_008500	ENSMUSG00000026890	Lhx6	Lhx6.1	LIM homeobox protein 6	protein-coding
MACS_peak_2793	chr15	101673650	101678991	+	2703	NA	3' UTR (NM_008473, exon 9 of 9)	3' UTR (NM_008473, exon 9 of 9)	4897	NM_008473	16678	Mm.183137	NM_008473	ENSMUSG00000046834	Krt1	Krt-2.1|Krt2-1|Krt86	keratin 1	protein-coding
MACS_peak_6257	chr6	30121428	30131672	+	2703	NA	promoter-TSS (NR_038124)	promoter-TSS (NR_038124)	-73	NR_038124	100463519	Mm.361139	NR_038124		BB283400	BF465573	expressed sequence BB283400	ncRNA
MACS_peak_1089	chr11	69418089	69420161	+	2698	NA	5' UTR (NM_013415, exon 1 of 7)	5' UTR (NM_013415, exon 1 of 7)	337	NM_013415	11932	Mm.235204	NM_013415	ENSMUSG00000041329	Atp1b2	Amog|Atpb-2	ATPase, Na+/K+ transporting, beta 2 polypeptide	protein-coding
MACS_peak_2339	chr14	55530114	55532434	+	2698	NA	5' UTR (NM_021551, exon 2 of 9)	5' UTR (NM_021551, exon 2 of 9)	695	NM_021551	59049	Mm.27435	NM_021551	ENSMUSG00000022199	Slc22a17	1700094C23Rik|24p3R|AU041908|AW555662|BOIT|Boct|mBOCT	solute carrier family 22 (organic cation transporter), member 17	protein-coding
MACS_peak_602	chr10	23940924	23944869	+	2695	NA	promoter-TSS (NM_021509)	promoter-TSS (NM_021509)	-427	NM_021509	59012	Mm.285934	NM_021509	ENSMUSG00000020000	Moxd1	3230402N08Rik|MNCb-5203	monooxygenase, DBH-like 1	protein-coding
MACS_peak_7258	chr7	150644845	150646947	+	2667	NA	exon (NM_001161624, exon 2 of 4)	exon (NM_001161624, exon 2 of 4)	1059	NM_009876	12577	Mm.168789	NM_009876	ENSMUSG00000037664	Cdkn1c	AL024410|CDKI|Kip2|p57(kip2)|p57Kip2	cyclin-dependent kinase inhibitor 1C (P57)	protein-coding
MACS_peak_1673	chr12	74143609	74149453	+	2649	NA	intron (NM_009189, intron 1 of 1)	CpG	1168	NM_009189	20471	Mm.4645	NM_009189	ENSMUSG00000051367	Six1	BB138287	sine oculis-related homeobox 1	protein-coding
MACS_peak_5635	chr5	34336942	34342208	+	2649	NA	exon (NM_001001985, exon 1 of 3)	exon (NM_001001985, exon 1 of 3)	942	NM_001001985	269642	Mm.274610	NM_001001985	ENSMUSG00000048142	Nat8l	1110038O08Rik|Shati	N-acetyltransferase 8-like	protein-coding
MACS_peak_1910	chr13	40822435	40835596	+	2647	NA	intron (NM_011547, intron 1 of 6)	CpG	177	NM_011547	21418	Mm.85544	NM_011547	ENSMUSG00000021359	Tfap2a	AP-2|AP2alpha|Ap2|Ap2tf|Tcfap2a	transcription factor AP-2, alpha	protein-coding
MACS_peak_427	chr1	157582350	157590806	+	2641	NA	intron (NM_010712, intron 1 of 5)	intron (NM_010712, intron 1 of 5)	2579	NM_010712	16872	Mm.103624	NM_010712	ENSMUSG00000026468	Lhx4	A330062J17Rik|Gsh-4|Gsh4	LIM homeobox protein 4	protein-coding
MACS_peak_2471	chr14	112073963	112077294	+	2641	NA	intron (NM_198865, intron 1 of 1)	intron (NM_198865, intron 1 of 1)	1291	NM_198865	75409	Mm.235097	NM_029273	ENSMUSG00000033214	Slitrk5	2610019D03Rik	SLIT and NTRK-like family, member 5	protein-coding
MACS_peak_3470	chr18	37921010	37923736	+	2639	NA	exon (NM_033580, exon 1 of 4)	exon (NM_033580, exon 1 of 4)	918	NM_033580	93705	Mm.247203	NM_033580		Pcdhgb8	-	protocadherin gamma subfamily B, 8	protein-coding
MACS_peak_5416	chr4	145425892	145427735	+	2634	NA	promoter-TSS (NR_033612)	promoter-TSS (NR_033612)	-309	NR_033612	236069	Mm.276881	NR_033612	ENSMUSG00000096233	Gm13238	OTTMUSG00000011065	carnitine deficiency-associated gene expressed in ventricle 3 pseudogene	pseudo
MACS_peak_3267	chr17	56278612	56282071	+	2629	NA	promoter-TSS (NM_001130456)	promoter-TSS (NM_001130456)	-575	NM_001130456	20359	Mm.8029	NM_013662	ENSMUSG00000001227	Sema6b	Sema|Seman|VIb|semaZ	sema domain, transmembrane domain (TM), and cytoplasmic domain, (semaphorin) 6B	protein-coding
MACS_peak_2135	chr13	92900708	92902875	+	2612	NA	promoter-TSS (NM_009027)	promoter-TSS (NM_009027)	-342	NM_009027	19418	Mm.248630	NM_009027		Rasgrf2	6330417G04Rik|AW048350|Grf2|Ras-GRF2	RAS protein-specific guanine nucleotide-releasing factor 2	protein-coding
MACS_peak_5691	chr5	52503462	52507915	+	2612	NA	Intergenic	CpG	21568	NR_105845	102466648		NR_105845	miRBase:MI0021955	Mir6417	mmu-mir-6417	microRNA mir-6417	ncRNA
MACS_peak_4386	chr2	151967763	151971695	+	2604	NA	exon (NM_009328, exon 1 of 2)	exon (NM_009328, exon 1 of 2)	384	NM_009328	21407	Mm.3881	NM_009328	ENSMUSG00000068079	Tcf15	Meso1|bHLH-EC2	transcription factor 15	protein-coding
MACS_peak_7553	chr8	89985179	89998601	+	2578	NA	TTS (NM_019626)	TTS (NM_019626)	4601	NM_019626	12404	Mm.4880	NM_019626	ENSMUSG00000031654	Cbln1	AI323299	cerebellin 1 precursor protein	protein-coding
MACS_peak_2391	chr14	65203889	65213363	+	2573	NA	promoter-TSS (NR_029813)	promoter-TSS (NR_029813)	-868	NR_029813	387233		NR_029813	miRBase:MI0000716	Mir124a-1	Mirn124a|Mirn124a-1	microRNA 124a-1	ncRNA
MACS_peak_2647	chr15	79630767	79635671	+	2572	NA	intron (NM_001013360, intron 4 of 7)	intron (NM_001013360, intron 4 of 7)	1920	NM_030689	73340	Mm.38438	NM_030689	ENSMUSG00000022421	Nptxr	1200009K17Rik|1700036C17Rik|5730406O18Rik|AI452369|AI785356|D15Bwg0580e|NPR|Npcd	neuronal pentraxin receptor	protein-coding
MACS_peak_6814	chr7	52429761	52445464	+	2562	NA	TTS (NM_053256)	TTS (NM_053256)	1247	NM_053256	114640	Mm.207078	NM_053256	ENSMUSG00000038300	Pth2	Tifp39|Tip39	parathyroid hormone 2	protein-coding
MACS_peak_4624	chr3	45179605	45185947	+	2559	NA	promoter-TSS (NR_045172)	promoter-TSS (NR_045172)	456	NM_001098171	18526	Mm.242644	NM_011043	ENSMUSG00000049100	Pcdh10	6430521D13Rik|6430703F07Rik|OL-pc|mKIAA1400	protocadherin 10	protein-coding
MACS_peak_6358	chr6	53765776	53773415	+	2552	NA	exon (NM_025817, exon 1 of 1)	exon (NM_025817, exon 1 of 1)	1224	NM_025817	66873	Mm.422727	NM_025817	ENSMUSG00000043496	Tril	1200009O22Rik|AI316813|mKIAA0644	TLR4 interactor with leucine-rich repeats	protein-coding
MACS_peak_2342	chr14	55732315	55736582	+	2552	NA	intron (NM_177049, intron 1 of 5)	intron (NM_177049, intron 1 of 5)	1324	NM_177049	319984	Mm.19047	NM_177049	ENSMUSG00000022208	Jph4	9330157P13Rik|JP-4|JPHL1	junctophilin 4	protein-coding
MACS_peak_1110	chr11	72773124	72775571	+	2549	NA	promoter-TSS (NM_016745)	promoter-TSS (NM_016745)	-324	NM_016745	53313	Mm.6306	NM_016745	ENSMUSG00000020788	Atp2a3	SERCA3b|Serca3	ATPase, Ca++ transporting, ubiquitous	protein-coding
MACS_peak_3712	chr19	24628328	24632471	+	2542	NA	promoter-TSS (NM_008846)	promoter-TSS (NM_008846)	-82	NM_008846	18719	Mm.217214	NM_008846	ENSMUSG00000024867	Pip5k1b	PI4P5K-I[b]|PIP5K1-beta|PIP5KIbeta|Pipk5b|STM7	phosphatidylinositol-4-phosphate 5-kinase, type 1 beta	protein-coding
MACS_peak_8130	chr9	95304288	95309236	+	2542	NA	5' UTR (NM_018763, exon 2 of 2)	5' UTR (NM_018763, exon 2 of 2)	927	NM_018763	54371	Mm.212446	NM_018763	ENSMUSG00000033350	Chst2	AI428561|AW121776|C130041E03Rik|Chts2|GST-2|GlcNAc6ST|Gn6st	carbohydrate sulfotransferase 2	protein-coding
MACS_peak_4839	chr3	128916244	128925866	+	2542	NA	intron (NM_011098, intron 4 of 4)	intron (NM_011098, intron 4 of 4)	4205	NM_001287048	18741	Mm.246804	NM_011098	ENSMUSG00000028023	Pitx2	9430085M16Rik|Brx1|Brx1b|Munc30|Otlx2|Ptx2|Rieg	paired-like homeodomain transcription factor 2	protein-coding
MACS_peak_2175	chr13	98974509	98976770	+	2542	NA	intron (NM_012026, intron 1 of 35)	intron (NM_012026, intron 1 of 35)	481	NM_012026	110596	Mm.252718	NM_012026	ENSMUSG00000021662	Arhgef28	9230110L08Rik|AI323540|D13Bwg1089e|RIP2|Rgnef|RhoGEF|Rhoip2|p190RhoGEF	Rho guanine nucleotide exchange factor (GEF) 28	protein-coding
MACS_peak_4765	chr3	99048561	99059058	+	2537	NA	Intergenic	Intergenic	-3874	NM_009323	21384	Mm.88761	NM_009323	ENSMUSG00000027868	Tbx15	Tbx14|Tbx8|de	T-box 15	protein-coding
MACS_peak_886	chr11	4845101	4850274	+	2534	NA	exon (NM_010904, exon 1 of 4)	exon (NM_010904, exon 1 of 4)	163	NM_001243043	11764	Mm.274816	NM_007454	ENSMUSG00000009090	Ap1b1	Adtb1|b2b1660Clo	adaptor protein complex AP-1, beta 1 subunit	protein-coding
MACS_peak_2415	chr14	70474919	70481378	+	2524	NA	intron (NM_001289925, intron 2 of 2)	CpG-4627	546	NM_001289927	13655	Mm.103737	NM_018781	ENSMUSG00000033730	Egr3	Pilot	early growth response 3	protein-coding
MACS_peak_2150	chr13	94827158	94829940	+	2522	NA	intron (NM_172589, intron 1 of 3)	intron (NM_172589, intron 1 of 3)	798	NM_172589	218454	Mm.316553	NM_172589	ENSMUSG00000045312	Lhfpl2	6030465B15|AI447312|AW050335|mKIAA0206|vgim	lipoma HMGIC fusion partner-like 2	protein-coding
MACS_peak_1751	chr12	101201332	101206265	+	2522	NA	5' UTR (NM_146037, exon 2 of 3)	5' UTR (NM_146037, exon 2 of 3)	1089	NM_001164427	217826	Mm.312335	NM_146037	ENSMUSG00000045404	Kcnk13	BB085247|F730021E22Rik|Gm1570|Gm1685	potassium channel, subfamily K, member 13	protein-coding
MACS_peak_5838	chr5	106989286	106990790	+	2522	NA	Intergenic	Intergenic	-102853	NM_001005477	104382	Mm.271593	NM_001005477	ENSMUSG00000034384	Barhl2	E130309B19Rik|MBH1	BarH-like 2 (Drosophila)	protein-coding
MACS_peak_4030	chr2	31489455	31503331	+	2514	NA	intron (NM_001123362, intron 1 of 4)	intron (NM_001123362, intron 1 of 4)	836	NM_001123362	381359	Mm.379512	NM_001123362	ENSMUSG00000079466	Prdm12	Gm998	PR domain containing 12	protein-coding
MACS_peak_923	chr11	23975894	23982626	+	2506	NA	intron (NM_001159289, intron 1 of 4)	CpG	1204	NM_001159289	14025	Mm.53687	NM_016707	ENSMUSG00000000861	Bcl11a	2810047E18Rik|BCL-11A|Ctip1|D930021L15Rik|Evi9|Evi9a|Evi9b|Evi9c|mKIAA1809	B cell CLL/lymphoma 11A (zinc finger protein)	protein-coding
MACS_peak_2559	chr15	37160334	37164702	+	2506	NA	promoter-TSS (NM_026496)	promoter-TSS (NM_026496)	-273	NM_026496	252973	Mm.244612	NM_026496	ENSMUSG00000022286	Grhl2	0610015A08Rik|BOM|Tcfcp2l3	grainyhead-like 2 (Drosophila)	protein-coding
MACS_peak_1827	chr12	120074372	120076840	+	2506	NA	Intergenic	CpG	-9196	NM_177082	320145	Mm.51682	NM_177082	ENSMUSG00000048562	Sp8	D930049B17Rik|mBtd	trans-acting transcription factor 8	protein-coding
MACS_peak_6946	chr7	86805438	86806404	+	2482	NA	intron (NM_029835, intron 1 of 21)	intron (NM_029835, intron 1 of 21)	839	NM_029835	77011	Mm.28132	NM_029835	ENSMUSG00000046591	Ticrr	5730590G19Rik|BC028450|Lrrk1	TOPBP1-interacting checkpoint and replication regulator	protein-coding
MACS_peak_6736	chr7	28148300	28163474	+	2466	NA	intron (NM_001199236, intron 7 of 18)	B1_Mus2|SINE|Alu	-14860	NM_138676	192192	Mm.21297	NM_138676	ENSMUSG00000089832	Shkbp1	B930062H15Rik|Sb1	Sh3kbp1 binding protein 1	protein-coding
MACS_peak_5977	chr5	120878913	120890580	+	2466	NA	intron (NM_008499, intron 2 of 4)	intron (NM_008499, intron 2 of 4)	2851	NM_008499	16873	Mm.5151	NM_008499	ENSMUSG00000029595	Lhx5	Lim2	LIM homeobox protein 5	protein-coding
MACS_peak_4700	chr3	87825736	87828970	+	2465	NA	intron (NM_022031, intron 5 of 6)	CpG-9283	4080	NM_022031	73940	Mm.294467	NM_022031	ENSMUSG00000004894	Hapln2	4930401E20Rik|Bral1	hyaluronan and proteoglycan link protein 2	protein-coding
MACS_peak_1191	chr11	87171292	87173821	+	2455	NA	promoter-TSS (NM_177167)	promoter-TSS (NM_177167)	-60	NM_177167	320472	Mm.341988	NM_177167	ENSMUSG00000046442	Ppm1e	AW049266|B930008A12Rik|POPX1|PP2CH|mKIAA1072	protein phosphatase 1E (PP2C domain containing)	protein-coding
MACS_peak_5993	chr5	122498699	122501016	+	2453	NA	Intergenic	(CGG)n|Simple_repeat|Simple_repeat	-2023	NM_007804	13048	Mm.156172	NM_007804	ENSMUSG00000042589	Cux2	1700051K22Rik|Cutl2|Cux-2|ENSMUSG00000072641	cut-like homeobox 2	protein-coding
MACS_peak_351	chr1	134085215	134089036	+	2452	NA	promoter-TSS (NM_001033250)	promoter-TSS (NM_001033250)	-888	NM_001033250	213409	Mm.426321	NM_001033250	ENSMUSG00000079330	Lemd1	4930540I23Rik|6430514M23Rik|AI428128|LEMP-1	LEM domain containing 1	protein-coding
MACS_peak_531	chr1	191166497	191168448	+	2445	NA	promoter-TSS (NM_001159850)	promoter-TSS (NM_001159850)	114	NM_010607	16526	Mm.33304	NM_010607	ENSMUSG00000037624	Kcnk2	A430027H14Rik|AI848635|TREK-1	potassium channel, subfamily K, member 2	protein-coding
MACS_peak_511	chr1	186821490	186825301	+	2445	NA	promoter-TSS (NM_145515)	promoter-TSS (NM_145515)	33	NM_145515	226778	Mm.7445	NM_145515	ENSMUSG00000026620	Mark1	AW491150|B930025N23Rik|Emk3|Par-1c|mKIAA1477|mPar-1c	MAP/microtubule affinity-regulating kinase 1	protein-coding
MACS_peak_8333	chrX	90529869	90536386	+	2445	NA	intron (NM_007492, intron 1 of 4)	intron (NM_007492, intron 1 of 4)	1142	NM_007492	11878	Mm.275547	NM_007492	ENSMUSG00000035277	Arx	-	aristaless related homeobox	protein-coding
MACS_peak_4847	chr3	130812357	130815770	+	2445	NA	5' UTR (NM_010703, exon 1 of 12)	5' UTR (NM_010703, exon 1 of 12)	848	NM_001276402	16842	Mm.255219	NM_010703	ENSMUSG00000027985	Lef1	3000002B05|AI451430|Lef-1	lymphoid enhancer binding factor 1	protein-coding
MACS_peak_652	chr10	45205362	45207605	+	2445	NA	Intergenic	CpG	-16476	NM_001031772	380669	Mm.440328	NM_001031772	ENSMUSG00000063804	Lin28b	2810403D23Rik|D030047M17Rik|Lin-28.2	lin-28 homolog B (C. elegans)	protein-coding
MACS_peak_4345	chr2	139502747	139505289	+	2445	NA	5' UTR (NM_001276489, exon 1 of 6)	5' UTR (NM_001276489, exon 1 of 6)	104	NM_001276489	319909	Mm.41113	NM_001126490	ENSMUSG00000074766	Ism1	5430433G21Rik|Ism	isthmin 1 homolog (zebrafish)	protein-coding
MACS_peak_2392	chr14	65879799	65884055	+	2445	NA	promoter-TSS (NM_021458)	promoter-TSS (NM_021458)	-627	NM_021458	14365	Mm.214687	NM_021458		Fzd3	AU020229|D930050A07Rik|Fz3	frizzled homolog 3 (Drosophila)	protein-coding
MACS_peak_6738	chr7	28189154	28195304	+	2439	NA	exon (NM_032610, exon 15 of 36)	exon (NM_032610, exon 15 of 36)	-10657	NM_001199236	80297	Mm.459123	NM_032610	ENSMUSG00000011751	Sptbn4	1700022P15Rik|5830426A08Rik|ROSA62|SpbIV|Spnb4|dyn|lnd|nmf261|nmf379|qv	spectrin beta, non-erythrocytic 4	protein-coding
MACS_peak_6312	chr6	51383033	51384427	+	2437	NA	intron (NM_010903, intron 1 of 3)	intron (NM_010903, intron 1 of 3)	1061	NM_010903	18025	Mm.42138	NM_010903	ENSMUSG00000029832	Nfe2l3	Nrf3	nuclear factor, erythroid derived 2, like 3	protein-coding
MACS_peak_8259	chr9	119485671	119489443	+	2432	NA	intron (NM_021544, intron 1 of 27)	intron (NM_021544, intron 1 of 27)	577	NM_021544	20271	Mm.103584	NM_021544	ENSMUSG00000032511	Scn5a	Nav1.5|Nav1.5c|SkM1|SkM2|mH1	sodium channel, voltage-gated, type V, alpha	protein-coding
MACS_peak_2644	chr15	79334590	79338408	+	2432	NA	promoter-TSS (NM_008427)	promoter-TSS (NM_008427)	-828	NM_008427	16520	Mm.140760	NM_008427	ENSMUSG00000044216	Kcnj4	IRK3|Kcnf2|MB-IRK3	potassium inwardly-rectifying channel, subfamily J, member 4	protein-coding
MACS_peak_1882	chr13	31704840	31722595	+	2432	NA	Intergenic	Intergenic	-3968	NM_010225	14238	Mm.125548	NM_010225	ENSMUSG00000038402	Foxf2	FREAC2|Fkh20|LUN	forkhead box F2	protein-coding
MACS_peak_4701	chr3	88003881	88024259	+	2432	NA	Intergenic	Intergenic	-5023	NR_037276	100526540		NR_037276	miRBase:MI0014086	Mir3093	mmu-mir-3093	microRNA 3093	ncRNA
MACS_peak_4158	chr2	74527267	74539174	+	2432	NA	TTS (NM_013554)	TTS (NM_013554)	-2600	NM_013555	15438	Mm.26544	NM_013555	ENSMUSG00000043342	Hoxd9	Hox-4.4|Hox-5.2	homeobox D9	protein-coding
MACS_peak_4832	chr3	127333141	127337823	+	2432	NA	promoter-TSS (NM_009718)	promoter-TSS (NM_009718)	-581	NM_009718	11924	Mm.42017	NM_009718	ENSMUSG00000027967	Neurog2	Atoh4|Math4A|bHLHa8|ngn-2|ngn2	neurogenin 2	protein-coding
MACS_peak_6071	chr5	137504592	137508599	+	2431	NA	intron (NM_001039385, intron 1 of 1)	CpG	430	NM_001039385	381677	Mm.389697	NM_001039385	ENSMUSG00000037428	Vgf	Gm1052	VGF nerve growth factor inducible	protein-coding
MACS_peak_4889	chr3	153386289	153388220	+	2418	NA	intron (NM_011372, intron 1 of 4)	intron (NM_011372, intron 1 of 4)	843	NM_011372	20447	Mm.440929	NM_011372		St6galnac3	Siat7c	ST6 (alpha-N-acetyl-neuraminyl-2,3-beta-galactosyl-1,3)-N-acetylgalactosaminide alpha-2,6-sialyltransferase 3	protein-coding
MACS_peak_4731	chr3	94975820	94978265	+	2418	NA	exon (NM_011351, exon 17 of 17)	exon (NM_011351, exon 17 of 17)	8781	NM_011351	20360	Mm.23662	NM_011351	ENSMUSG00000038777	Sema6c	Semay|mKIAA1869	sema domain, transmembrane domain (TM), and cytoplasmic domain, (semaphorin) 6C	protein-coding
MACS_peak_7845	chr9	40679265	40686987	+	2413	NA	intron (NM_178245, intron 1 of 2)	intron (NM_178245, intron 1 of 2)	916	NM_178245	244813	Mm.261652	NM_178245	ENSMUSG00000054360	Bsx	Bsx1a|Bsx1b	brain specific homeobox	protein-coding
MACS_peak_3687	chr19	10529009	10537324	+	2409	NA	Intergenic	Intergenic	-1229	NM_001111140	278795	Mm.490638	NM_001111140	ENSMUSG00000090291	Lrrc10b	Gm705|SerdinR	leucine rich repeat containing 10B	protein-coding
MACS_peak_4013	chr2	28301586	28303987	+	2409	NA	promoter-TSS (NM_001005420)	promoter-TSS (NM_001005420)	-675	NM_001005420	241289	Mm.330095	NM_001005420	ENSMUSG00000035829	Ppp1r26	Gm347|Kiaa0649|mKIAA0649	protein phosphatase 1, regulatory subunit 26	protein-coding
MACS_peak_1314	chr11	98207521	98211694	+	2404	NA	promoter-TSS (NM_144828)	promoter-TSS (NM_144828)	-445	NM_144828	19049	Mm.45372	NM_144828	ENSMUSG00000061718	Ppp1r1b	AU040756|DARPP-32|Darpp32	protein phosphatase 1, regulatory (inhibitor) subunit 1B	protein-coding
MACS_peak_3564	chr18	67624005	67625106	+	2403	NA	promoter-TSS (NM_144867)	promoter-TSS (NM_144867)	52	NM_144867	225655	Mm.221420	NM_144867	ENSMUSG00000024530	Slmo1	A230074A19Rik|BC019561	slowmo homolog 1 (Drosophila)	protein-coding
MACS_peak_8054	chr9	67677108	67681004	+	2400	NA	exon (NM_001163143, exon 2 of 2)	exon (NM_001163143, exon 2 of 2)	1081	NM_001163143	244911	Mm.325849	NM_001163143	ENSMUSG00000047990	C2cd4a	EG244911|Fam148a	C2 calcium-dependent domain containing 4A	protein-coding
MACS_peak_2998	chr16	91215607	91235372	+	2400	NA	promoter-TSS (NM_016967)	promoter-TSS (NM_016967)	-306	NM_016967	50913	Mm.37289	NM_016967	ENSMUSG00000039830	Olig2	AI604895|Bhlhb1|Olg-2|Oligo2|RK17|bHLHe19	oligodendrocyte transcription factor 2	protein-coding
MACS_peak_5235	chr4	123017541	123021454	+	2400	NA	intron (NM_007558, intron 1 of 6)	intron (NM_007558, intron 1 of 6)	998	NM_001256019	12163	Mm.439749	NM_007558	ENSMUSG00000032726	Bmp8a	Bmp7r1|OP-2|OP2	bone morphogenetic protein 8a	protein-coding
MACS_peak_6506	chr6	120441689	120446080	+	2387	NA	promoter-TSS (NM_033567)	promoter-TSS (NM_033567)	-59	NM_033567	94047	Mm.23088	NM_033567	ENSMUSG00000094626	Cecr6	AW048664	cat eye syndrome chromosome region, candidate 6	protein-coding
MACS_peak_5485	chr4	151524888	151526489	+	2385	NA	intron (NM_207687, intron 1 of 15)	intron (NM_207687, intron 1 of 15)	628	NM_207687	56226	Mm.264215	NM_019585	ENSMUSG00000028943	Espn	je	espin	protein-coding
MACS_peak_5714	chr5	67998085	68000721	+	2376	NA	5' UTR (NM_001033415, exon 1 of 2)	5' UTR (NM_001033415, exon 1 of 2)	281	NM_001033415	330096	Mm.442747	NM_001033415	ENSMUSG00000050010	Shisa3	D830007B15Rik	shisa homolog 3 (Xenopus laevis)	protein-coding
MACS_peak_1002	chr11	54116703	54120854	+	2376	NA	intron (NM_144823, intron 1 of 20)	intron (NM_144823, intron 1 of 20)	1072	NM_001033597	216739	Mm.267478	NM_144823	ENSMUSG00000020333	Acsl6	A330035H04Rik|AW050338|Facl6|LACS|Lacsl|mKIAA0837	acyl-CoA synthetase long-chain family member 6	protein-coding
MACS_peak_493	chr1	180457594	180462681	+	2376	NA	intron (NM_001161665, intron 1 of 14)	CpG-756	881	NM_001161665	269152	Mm.129727	NM_177724	ENSMUSG00000026494	Kif26b	4832420M10|BC056349|D230039L06Rik	kinesin family member 26B	protein-coding
MACS_peak_3332	chr17	80111553	80117959	+	2370	NA	promoter-TSS (NM_009994)	promoter-TSS (NM_009994)	-375	NM_009994	13078	Mm.214016	NM_009994	ENSMUSG00000024087	Cyp1b1	CP1B|P4501b1	cytochrome P450, family 1, subfamily b, polypeptide 1	protein-coding
MACS_peak_7070	chr7	125590184	125592329	+	2363	NA	Intergenic	CpG	-4190	NM_138649	110058	Mm.156558	NM_138649	ENSMUSG00000058420	Syt17	Bk	synaptotagmin XVII	protein-coding
MACS_peak_3123	chr17	25568091	25572198	+	2355	NA	intron (NM_021415, intron 1 of 34)	CpG-6093	584	NM_021415	58226	Mm.268378	NM_021415	ENSMUSG00000024112	Cacna1h	Cav3.2|MNCb-1209|alpha13.2	calcium channel, voltage-dependent, T type, alpha 1H subunit	protein-coding
MACS_peak_2159	chr13	95651150	95656029	+	2347	NA	TTS (NM_011021)	TTS (NM_011021)	8007	NM_011021	18420	Mm.42051	NM_011021		Otp	-	orthopedia homolog (Drosophila)	protein-coding
MACS_peak_3960	chr2	13714348	13716504	+	2347	NA	promoter-TSS (NM_145838)	promoter-TSS (NM_145838)	-279	NM_145838	241230	Mm.330004	NM_145838	ENSMUSG00000003418	St8sia6	1700007J08Rik|AI314453|AI875066|ST8SiaVI|Siat8f	ST8 alpha-N-acetyl-neuraminide alpha-2,8-sialyltransferase 6	protein-coding
MACS_peak_4234	chr2	104962548	104975497	+	2347	NA	intron (NM_144783, intron 1 of 9)	intron (NM_144783, intron 1 of 9)	2336	NM_144783	22431	Mm.389339	NM_144783	ENSMUSG00000016458	Wt1	D630046I19Rik|Wt-1	Wilms tumor 1 homolog	protein-coding
MACS_peak_7807	chr9	30938061	30941539	+	2344	NA	promoter-TSS (NM_011176)	promoter-TSS (NM_011176)	-416	NM_011176	19143	Mm.243926	NM_011176	ENSMUSG00000031995	St14	Epithin|MT-SP1|Prss14|Tmprss14|mCAP3|matriptase	suppression of tumorigenicity 14 (colon carcinoma)	protein-coding
MACS_peak_4023	chr2	30654269	30657976	+	2344	NA	intron (NR_028486, intron 3 of 6)	RSINE1|SINE|B4	1135	NM_198000	73598	Mm.34166	NM_198000	ENSMUSG00000044320	1700001O22Rik	1700113K14Rik|4930549G18Rik	RIKEN cDNA 1700001O22 gene	protein-coding
MACS_peak_214	chr1	78191551	78194788	+	2344	NA	intron (NM_001159520, intron 1 of 8)	intron (NM_001159520, intron 1 of 8)	542	NM_008781	18505	Mm.1371	NM_008781	ENSMUSG00000004872	Pax3	Pax-3|Sp|splotch	paired box 3	protein-coding
MACS_peak_4721	chr3	90267799	90270217	+	2321	NA	exon (NM_008727, exon 1 of 22)	exon (NM_008727, exon 1 of 22)	780	NM_008727	18160	Mm.4627	NM_008727	ENSMUSG00000027931	Npr1	AI893888|GC-A|NPR-A|NPRA|Pndr	natriuretic peptide receptor 1	protein-coding
MACS_peak_1301	chr11	97407319	97413814	+	2319	NA	intron (NM_018873, intron 2 of 19)	intron (NM_018873, intron 2 of 19)	25874	NM_018873	56013	Mm.342665	NM_018873	ENSMUSG00000038453	Srcin1	P140|SNIP|mKIAA1684|p140Cap	SRC kinase signaling inhibitor 1	protein-coding
MACS_peak_8141	chr9	96019597	96023315	+	2319	NA	intron (NM_177352, intron 1 of 16)	intron (NM_177352, intron 1 of 16)	1608	NM_177352	235533	Mm.213651	NM_177352	ENSMUSG00000041440	Gk5	AV095337|C330018K18Rik|G630067D24Rik	glycerol kinase 5 (putative)	protein-coding
MACS_peak_2555	chr15	35255179	35256729	+	2316	NA	intron (NR_045280, intron 1 of 2)	intron (NR_045280, intron 1 of 2)	2336	NR_045280	100126269	Mm.247402	NR_045280		BC048602	-	cDNA sequence BC048602	ncRNA
MACS_peak_3747	chr19	36130562	36132868	+	2313	NA	exon (NM_008315, exon 1 of 3)	exon (NM_008315, exon 1 of 3)	135	NM_008315	15566	Mm.254266	NM_008315	ENSMUSG00000024798	Htr7	5-HT7	5-hydroxytryptamine (serotonin) receptor 7	protein-coding
MACS_peak_3884	chr19	53749226	53752784	+	2313	NA	promoter-TSS (NM_001170847)	promoter-TSS (NM_001170847)	-791	NM_001170847	73713	Mm.313695	NM_001170847	ENSMUSG00000043639	Rbm20	1110018J23Rik|2010003H22Rik|AI646761	RNA binding motif protein 20	protein-coding
MACS_peak_6108	chr5	143721944	143725434	+	2313	NA	intron (NM_007984, intron 1 of 4)	CpG	1655	NM_007984	14086	Mm.289707	NM_007984	ENSMUSG00000029581	Fscn1	AI663989|Fan1|fascin-1	fascin homolog 1, actin bundling protein (Strongylocentrotus purpuratus)	protein-coding
MACS_peak_996	chr11	53290885	53293854	+	2304	NA	exon (NM_183173, exon 1 of 1)	exon (NM_183173, exon 1 of 1)	1328	NM_183173	237761	Mm.145208	NM_183173	ENSMUSG00000044352	Sowaha	A830006N08Rik|Ankrd43	sosondowah ankyrin repeat domain family member A	protein-coding
MACS_peak_5643	chr5	35723316	35737189	+	2303	NA	Intergenic	Intergenic	-1514	NM_010445	15371	Mm.358606	NM_010445	ENSMUSG00000067438	Hmx1	Nkx5-3	H6 homeobox 1	protein-coding
MACS_peak_7978	chr9	58665074	58672049	+	2295	NA	Intergenic	Intergenic	-2758	NM_001081192	330953	Mm.151967	NM_001081192	ENSMUSG00000032338	Hcn4	Bcng3|Hcn3	hyperpolarization-activated, cyclic nucleotide-gated K+ 4	protein-coding
MACS_peak_5177	chr4	114723829	114741409	+	2291	NA	intron (NM_001287388, intron 2 of 4)	intron (NM_001287388, intron 2 of 4)	2203	NM_001287388	21349	Mm.439685	NM_011527	ENSMUSG00000028717	Tal1	SCL/tal-1|Scl|bHLHa17|tal-1	T cell acute lymphocytic leukemia 1	protein-coding
MACS_peak_3825	chr19	44811153	44825351	+	2286	NA	Intergenic	Intergenic	-13632	NM_011037	18504	Mm.192158	NM_011037	ENSMUSG00000004231	Pax2	Opdc|Pax-2	paired box 2	protein-coding
MACS_peak_1119	chr11	75607864	75610619	+	2283	NA	exon (NM_007873, exon 1 of 9)	exon (NM_007873, exon 1 of 9)	318	NM_007873	13447	Mm.5137	NM_007873	ENSMUSG00000020848	Doc2b	-	double C2, beta	protein-coding
MACS_peak_1455	chr11	115178549	115186153	+	2281	NA	intron (NM_176847, intron 1 of 2)	intron (NM_176847, intron 1 of 2)	881	NM_176847	16470	Mm.451539	NM_176847	ENSMUSG00000045288	Ush1g	Sans|js	Usher syndrome 1G	protein-coding
MACS_peak_4811	chr3	115953935	115956996	+	2280	NA	exon (NM_022427, exon 2 of 2)	exon (NM_022427, exon 2 of 2)	937	NM_022427	64378	Mm.40025	NM_022427	ENSMUSG00000068696	Gpr88	AW061286|Strg	G-protein coupled receptor 88	protein-coding
MACS_peak_3200	chr17	36303380	36307300	+	2280	NA	intron (NM_001081032, intron 1 of 7)	CpG-6353	142	NM_001081032	667977	Mm.441651	NM_001081032	ENSMUSG00000073402	Gm8909	EG667977|H2-Tw5l|H2-gs17	predicted gene 8909	protein-coding
MACS_peak_1579	chr12	32243304	32245194	+	2271	NA	5' UTR (NM_011867, exon 2 of 21)	5' UTR (NM_011867, exon 2 of 21)	585	NM_011867	23985	Mm.100187	NM_011867	ENSMUSG00000020651	Slc26a4	Pds|pendrin	solute carrier family 26, member 4	protein-coding
MACS_peak_215	chr1	78195699	78206924	+	2271	NA	Intergenic	Intergenic	-7600	NM_001159520	18505	Mm.1371	NM_008781	ENSMUSG00000004872	Pax3	Pax-3|Sp|splotch	paired box 3	protein-coding
MACS_peak_3272	chr17	56649669	56652754	+	2270	NA	exon (NM_011483, exon 1 of 1)	exon (NM_011483, exon 1 of 1)	695	NM_011483	20834	Mm.76862	NM_011483	ENSMUSG00000044526	Znrf4	1700094M01Rik|Ssrzf1|spzn	zinc and ring finger 4	protein-coding
MACS_peak_804	chr10	90431563	90433535	+	2267	NA	exon (NM_001128086, exon 25 of 25)	exon (NM_001128086, exon 25 of 25)	112939	NM_001042558	11783	Mm.220289	NM_009684	ENSMUSG00000019979	Apaf1	6230400I06Rik|Apaf-1|Apaf1l|fog|mKIAA0413	apoptotic peptidase activating factor 1	protein-coding
MACS_peak_8051	chr9	67605721	67609156	+	2267	NA	intron (NM_001081314, intron 1 of 1)	intron (NM_001081314, intron 1 of 1)	194	NM_001081314	75697	Mm.105353	NM_001081314	ENSMUSG00000091956	C2cd4b	3300001A09Rik|Fam148b	C2 calcium-dependent domain containing 4B	protein-coding
MACS_peak_2762	chr15	100558217	100561773	+	2263	NA	promoter-TSS (NM_001161767)	promoter-TSS (NM_001161767)	-188	NM_172451	207839	Mm.22969	NM_172451		Galnt6	4632410F13|AW047994|GalNAc-T6	UDP-N-acetyl-alpha-D-galactosamine:polypeptide N-acetylgalactosaminyltransferase 6	protein-coding
MACS_peak_3713	chr19	24935833	24936634	+	2255	NA	promoter-TSS (NM_175013)	promoter-TSS (NM_175013)	99	NM_175013	226041	Mm.105222	NM_175013		Pgm5	4833423B07|9530034F03Rik|D830025G17|aciculin	phosphoglucomutase 5	protein-coding
MACS_peak_2340	chr14	55543539	55547673	+	2255	NA	promoter-TSS (NM_010112)	promoter-TSS (NM_010112)	19	NM_010112	13644	Mm.236438	NM_010112	ENSMUSG00000022203	Efs	-	embryonal Fyn-associated substrate	protein-coding
MACS_peak_1970	chr13	45480802	45487152	+	2255	NA	Intergenic	Intergenic	-1134	NM_153789	218203	Mm.212855	NM_153789	ENSMUSG00000038175	Mylip	9430057C20Rik|Mir	myosin regulatory light chain interacting protein	protein-coding
MACS_peak_3242	chr17	45675486	45688572	+	2255	NA	exon (NM_001013749, exon 3 of 3)	exon (NM_001013749, exon 3 of 3)	4597	NM_001013749	210573	Mm.329064	NM_001013749	ENSMUSG00000096847	Tmem151b	Gm323	transmembrane protein 151B	protein-coding
MACS_peak_4618	chr3	37245604	37248851	+	2252	NA	promoter-TSS (NM_008006)	promoter-TSS (NM_008006)	-348	NM_008006	14173	Mm.473689	NM_008006	ENSMUSG00000037225	Fgf2	Fgf-2|Fgfb|bFGF	fibroblast growth factor 2	protein-coding
MACS_peak_4159	chr2	74541901	74547738	+	2252	NA	exon (NM_001290730, exon 2 of 2)	exon (NM_001290730, exon 2 of 2)	1273	NM_008276	15437	Mm.280673	NM_008276	ENSMUSG00000027102	Hoxd8	4921540P06Rik|AI047735|Hox-4.3|Hox-5.4	homeobox D8	protein-coding
MACS_peak_1761	chr12	105708721	105715586	+	2252	NA	promoter-TSS (NM_010351)	promoter-TSS (NM_010351)	-707	NM_010351	14836	Mm.129	NM_010351	ENSMUSG00000021095	Gsc	-	goosecoid homeobox	protein-coding
MACS_peak_4148	chr2	73612819	73613769	+	2252	NA	5' UTR (NM_001166603, exon 1 of 12)	5' UTR (NM_001166603, exon 1 of 12)	109	NM_001166603	108699	Mm.257073	NM_029716	ENSMUSG00000056486	Chn1	0610007I19Rik|0710001E19Rik|1700112L09Rik|2900046J01Rik|AI413815|ARHGAP2	chimerin 1	protein-coding
MACS_peak_2105	chr13	76520643	76522902	+	2252	NA	promoter-TSS (NM_030174)	promoter-TSS (NM_030174)	-637	NM_030174	78771	Mm.316249	NM_030174		Mctp1	2810465F10Rik	multiple C2 domains, transmembrane 1	protein-coding
MACS_peak_1123	chr11	76381874	76385253	+	2252	NA	intron (NM_198894, intron 1 of 22)	intron (NM_198894, intron 1 of 22)	1323	NM_198895	109934	Mm.258939	NM_198018	ENSMUSG00000017631	Abr	-	active BCR-related gene	protein-coding
MACS_peak_5533	chr5	8367119	8369311	+	2252	NA	promoter-TSS (NM_001098225)	promoter-TSS (NM_001098225)	-134	NM_001098225	11496	Mm.275895	NM_001007220	ENSMUSG00000040537	Adam22	2900022I03Rik|AI854032|MDC2	a disintegrin and metallopeptidase domain 22	protein-coding
MACS_peak_2362	chr14	58691091	58698530	+	2241	NA	intron (NM_013518, intron 1 of 2)	CpG	3287	NM_013518	14180	Mm.8846	NM_013518		Fgf9	Eks	fibroblast growth factor 9	protein-coding
MACS_peak_7007	chr7	105980735	105988090	+	2240	NA	intron (NM_001285794, intron 1 of 5)	intron (NM_001285794, intron 1 of 5)	790	NM_001285792	22411	Mm.22182	NM_009519	ENSMUSG00000015957	Wnt11	-	wingless-type MMTV integration site family, member 11	protein-coding
MACS_peak_751	chr10	80719880	80723573	+	2238	NA	intron (NM_001285855, intron 2 of 12)	PB1D10|SINE|Alu	1682	NM_001285853	17179	Mm.2918	NM_010768	ENSMUSG00000004933	Matk	CHK|HYL|Ntk	megakaryocyte-associated tyrosine kinase	protein-coding
MACS_peak_4095	chr2	56961061	56970285	+	2238	NA	intron (NM_001139509, intron 1 of 7)	intron (NM_001139509, intron 1 of 7)	1776	NM_013613	18227	Mm.3507	NM_013613	ENSMUSG00000026826	Nr4a2	HZF-3|NOT|Nurr1|RNR-1|TINOR|TINUR	nuclear receptor subfamily 4, group A, member 2	protein-coding
MACS_peak_851	chr10	119911322	119917329	+	2230	NA	promoter-TSS (NM_010441)	promoter-TSS (NM_010441)	-334	NM_010441	15364	Mm.157190	NM_010441	ENSMUSG00000056758	Hmga2	9430083A20Rik|HMGI-C|Hmgic|pg|pygmy	high mobility group AT-hook 2	protein-coding
MACS_peak_1406	chr11	104092802	104095480	+	2230	NA	intron (NM_001038609, intron 1 of 11)	CpG	1391	NM_001285454	17762	Mm.1287	NM_010838	ENSMUSG00000018411	Mapt	AI413597|AW045860|Mtapt|Tau	microtubule-associated protein tau	protein-coding
MACS_peak_6821	chr7	52661052	52665198	+	2224	NA	intron (NM_010596, intron 1 of 1)	intron (NM_010596, intron 1 of 1)	1795	NM_010596	16495	Mm.12955	NM_010596	ENSMUSG00000038201	Kcna7	Kv1.7	potassium voltage-gated channel, shaker-related subfamily, member 7	protein-coding
MACS_peak_3269	chr17	56563392	56565475	+	2221	NA	intron (NM_001252456, intron 10 of 28)	intron (NM_001252456, intron 10 of 28)	-6101	NR_105943	102465590		NR_105943		Mir6977	mmu-mir-6977	microRNA mir-6977	ncRNA
MACS_peak_6383	chr6	65728251	65729528	+	2218	NA	promoter-TSS (NM_027547)	promoter-TSS (NM_027547)	-67	NM_027547	70779	Mm.263355	NM_027547	ENSMUSG00000029913	Prdm5	4432417F03Rik|6530401I24Rik|AI197291|E130112L17Rik|PFM2	PR domain containing 5	protein-coding
MACS_peak_6226	chr6	8897425	8901741	+	2218	NA	promoter-TSS (NM_008751)	promoter-TSS (NM_008751)	-436	NM_008751	18231	Mm.46954	NM_008751	ENSMUSG00000046178	Nxph1	C130005L03Rik	neurexophilin 1	protein-coding
MACS_peak_2545	chr15	30101663	30104427	+	2218	NA	intron (NM_008729, intron 1 of 22)	CpG	697	NM_008729	18163	Mm.321648	NM_008729	ENSMUSG00000022240	Ctnnd2	Catnd2|Nprap|neurojugin	catenin (cadherin associated protein), delta 2	protein-coding
MACS_peak_4390	chr2	152774630	152778103	+	2218	NA	exon (NM_001159376, exon 2 of 7)	exon (NM_001159376, exon 2 of 7)	775	NM_145744	252864	Mm.330671	NM_145744	ENSMUSG00000042662	Dusp15	AI851682|LMW-DSP10|T-DSP10	dual specificity phosphatase-like 15	protein-coding
MACS_peak_7486	chr8	72895694	72901169	+	2213	NA	intron (NM_016685, intron 3 of 18)	CpG	984	NM_016685	12845	Mm.45071	NM_016685	ENSMUSG00000031849	Comp	TSP5	cartilage oligomeric matrix protein	protein-coding
MACS_peak_6605	chr7	5003486	5006653	+	2211	NA	3' UTR (NM_026900, exon 2 of 2)	3' UTR (NM_026900, exon 2 of 2)	1935	NM_026900	68992	Mm.41484	NM_026900	ENSMUSG00000055633	Zfp580	1500015O20Rik|AI838225|Znf580	zinc finger protein 580	protein-coding
MACS_peak_7488	chr8	73009959	73021433	+	2211	NA	Intergenic	MIR|SINE|MIR	-1359	NM_018827	12931	Mm.335584	NM_018827	ENSMUSG00000007888	Crlf1	CLF-1|CRLM3|NR6.1	cytokine receptor-like factor 1	protein-coding
MACS_peak_5508	chr4	154008797	154013452	+	2209	NA	promoter-TSS (NM_001177995)	promoter-TSS (NM_001177995)	-142	NM_027504	70673	Mm.257785	NM_027504	ENSMUSG00000039410	Prdm16	5730557K01Rik|csp1|mel1	PR domain containing 16	protein-coding
MACS_peak_5848	chr5	108793618	108800911	+	2208	NA	Intergenic	Intergenic	-20128	NM_008806	18587	Mm.1372	NM_008806	ENSMUSG00000029491	Pde6b	Pdeb|r|rd|rd-1|rd1|rd10	phosphodiesterase 6B, cGMP, rod receptor, beta polypeptide	protein-coding
MACS_peak_280	chr1	94994959	95000028	+	2208	NA	intron (NM_008440, intron 1 of 47)	intron (NM_008440, intron 1 of 47)	958	NM_001294149	16560	Mm.276408	NM_008440	ENSMUSG00000014602	Kif1a	ATSV|C630002N23Rik|Gm1626|Kns1	kinesin family member 1A	protein-coding
MACS_peak_219	chr1	78306566	78309136	+	2208	NA	intron (NM_001004173, intron 1 of 4)	intron (NM_001004173, intron 1 of 4)	930	NM_001004173	433323	Mm.276248	NM_001004173	ENSMUSG00000032908	Sgpp2	SPPase2|Spp2	sphingosine-1-phosphate phosphotase 2	protein-coding
MACS_peak_1265	chr11	96135324	96146968	+	2204	NA	Intergenic	Intergenic	-2073	NM_010461	15416	Mm.4822	NM_010461	ENSMUSG00000056648	Hoxb8	Hox-2.4	homeobox B8	protein-coding
MACS_peak_2049	chr13	56396210	56398906	+	2190	NA	5' UTR (NM_019568, exon 1 of 4)	5' UTR (NM_019568, exon 1 of 4)	354	NM_019568	57266	Mm.30211	NM_019568	ENSMUSG00000021508	Cxcl14	1110031L23Rik|1200006I23Rik|AI414372|BMAC|BRAK|KS1|Kec|MIP-2g|MIP2gamma|NJAC|Scyb14|bolekine	chemokine (C-X-C motif) ligand 14	protein-coding
MACS_peak_2200	chr13	104122339	104125684	+	2188	NA	exon (NM_175171, exon 1 of 29)	exon (NM_175171, exon 1 of 29)	561	NM_175171	328329	Mm.202606	NM_175171	ENSMUSG00000034751	Mast4	4930420O11Rik|AI642422|mKIAA0303	microtubule associated serine/threonine kinase family member 4	protein-coding
MACS_peak_370	chr1	136541306	136546109	+	2188	NA	intron (NM_009307, intron 1 of 9)	CpG	449	NM_009307	20980	Mm.5102	NM_009307	ENSMUSG00000026452	Syt2	R74640|mKIAA4194	synaptotagmin II	protein-coding
MACS_peak_6533	chr6	124944091	124952604	+	2188	NA	promoter-TSS (NM_001145927)	promoter-TSS (NM_001145927)	-108	NM_001145927	319352	Mm.295327	NM_175696	ENSMUSG00000030329	Pianp	AI255183|AU067746|C530028O21Rik|Panp	PILR alpha associated neural protein	protein-coding
MACS_peak_4955	chr4	28740800	28742966	+	2175	NA	intron (NM_001290434, intron 1 of 16)	CpG	1588	NM_001122889	13841	Mm.257266	NM_010141	ENSMUSG00000028289	Epha7	Cek11|Ebk|Ehk3|Hek11|Mdk1	Eph receptor A7	protein-coding
MACS_peak_844	chr10	115908899	115914388	+	2175	NA	Intergenic	Intergenic	-1064	NM_021452	58802	Mm.440652	NM_021452	ENSMUSG00000054934	Kcnmb4	1700058G18Rik|2900045G12Rik	potassium large conductance calcium-activated channel, subfamily M, beta member 4	protein-coding
MACS_peak_4683	chr3	83591829	83594252	+	2172	NA	Intergenic	Intergenic	22797	NM_009144	20319	Mm.19155	NM_009144	ENSMUSG00000027996	Sfrp2	AI851596|Sdf5	secreted frizzled-related protein 2	protein-coding
MACS_peak_7050	chr7	120096463	120099249	+	2171	NA	exon (NM_175279, exon 1 of 1)	exon (NM_175279, exon 1 of 1)	380	NM_175279	78748	Mm.349943	NM_175279	ENSMUSG00000098132	Rassf10	4632411J06Rik	Ras association (RalGDS/AF-6) domain family (N-terminal) member 10	protein-coding
MACS_peak_5092	chr4	84850455	84852859	+	2169	NA	intron (NM_019535, intron 1 of 8)	CpG	297	NM_019535	20404	Mm.143603	NM_019535	ENSMUSG00000028488	Sh3gl2	9530001L19Rik|AI120490|AW555077|B930049H17Rik|EEN-B1|SH3PA|Sh3d2a	SH3-domain GRB2-like 2	protein-coding
MACS_peak_1797	chr12	112721162	112726752	+	2169	NA	promoter-TSS (NM_001033248)	promoter-TSS (NM_001033248)	77	NM_001033248	212539	Mm.81916	NM_001033248	ENSMUSG00000010529	Gm266	-	predicted gene 266	protein-coding
MACS_peak_2266	chr14	22804079	22812014	+	2169	NA	intron (NM_145459, intron 1 of 2)	GA-rich|Low_complexity|Low_complexity	777	NM_145459	218820	Mm.292401	NM_145459	ENSMUSG00000039081	Zfp503	AI181838|B830002A16Rik|Nolz-1|Nolz1|Znf503	zinc finger protein 503	protein-coding
MACS_peak_2403	chr14	67843163	67861005	+	2169	NA	promoter-TSS (NM_001276387)	promoter-TSS (NM_001276387)	-45	NM_010095	13592	Mm.319947	NM_010095	ENSMUSG00000022053	Ebf2	D14Ggc1e|EBF-2|Mmot1|O/E-3|OE-3	early B cell factor 2	protein-coding
MACS_peak_691	chr10	62562260	62563697	+	2169	NA	promoter-TSS (NM_016864)	promoter-TSS (NM_016864)	74	NM_016864	53404	Mm.228661	NM_016864	ENSMUSG00000036816	Atoh7	Math5|bHLHa13	atonal homolog 7 (Drosophila)	protein-coding
MACS_peak_3262	chr17	51970437	51973528	+	2169	NA	promoter-TSS (NM_009122)	promoter-TSS (NM_009122)	-10	NM_009122	20230	Mm.311655	NM_009122	ENSMUSG00000023927	Satb1	2610306G12Rik|AW413156	special AT-rich sequence binding protein 1	protein-coding
MACS_peak_6660	chr7	19863241	19865435	+	2165	NA	intron (NM_177691, intron 1 of 4)	intron (NM_177691, intron 1 of 4)	1060	NM_177691	232941	Mm.134068	NM_177691	ENSMUSG00000030402	Ppm1n	A930002H20|C79127	protein phosphatase, Mg2+/Mn2+ dependent, 1N (putative)	protein-coding
MACS_peak_222	chr1	79854487	79856821	+	2157	NA	promoter-TSS (NM_009255)	promoter-TSS (NM_009255)	-414	NM_009255	20720	Mm.3093	NM_009255	ENSMUSG00000026249	Serpine2	B230326M24Rik|PAI-1|PI-7|PI7|PN-1|Spi4	serine (or cysteine) peptidase inhibitor, clade E, member 2	protein-coding
MACS_peak_710	chr10	70060853	70063059	+	2157	NA	promoter-TSS (NM_178621)	promoter-TSS (NM_178621)	83	NM_178621	70911	Mm.19825	NM_178621	ENSMUSG00000037747	Phyhipl	4921522K17Rik|AI267048	phytanoyl-CoA hydroxylase interacting protein-like	protein-coding
MACS_peak_7069	chr7	124524002	124526633	+	2157	NA	intron (NM_175645, intron 1 of 11)	intron (NM_175645, intron 1 of 11)	824	NM_175645	233781	Mm.461427	NM_175645	ENSMUSG00000030657	Xylt1	8030490L12	xylosyltransferase 1	protein-coding
MACS_peak_7883	chr9	44094575	44097357	+	2157	NA	intron (NM_138955, intron 1 of 14)	CpG	361	NM_138955	192663	Mm.101876	NM_138955	ENSMUSG00000032131	Abcg4	6430517O04Rik	ATP-binding cassette, sub-family G (WHITE), member 4	protein-coding
MACS_peak_63	chr1	37596238	37599371	+	2157	NA	promoter-TSS (NM_173870)	promoter-TSS (NM_173870)	57	NM_173870	269181	Mm.25861	NM_173870	ENSMUSG00000026110	Mgat4a	9530018I07Rik|GnT-IVa|glcNAc-T-IVa	mannoside acetylglucosaminyltransferase 4, isoenzyme A	protein-coding
MACS_peak_3511	chr18	52687736	52690371	+	2157	NA	5' UTR (NM_010728, exon 1 of 7)	5' UTR (NM_010728, exon 1 of 7)	322	NM_001286181	16948	Mm.172	NM_010728	ENSMUSG00000024529	Lox	AI893619|TSC-160|rrg	lysyl oxidase	protein-coding
MACS_peak_4294	chr2	127479407	127483220	+	2157	NA	intron (NM_010762, intron 1 of 3)	intron (NM_010762, intron 1 of 3)	1118	NM_010762	17153	Mm.39040	NM_010762	ENSMUSG00000027375	Mal	Mpv17|Vip17	myelin and lymphocyte protein, T cell differentiation protein	protein-coding
MACS_peak_868	chr10	126762802	126765096	+	2153	NA	exon (NM_146011, exon 8 of 15)	exon (NM_146011, exon 8 of 15)	3166	NM_146011	216445	Mm.227198	NM_146011	ENSMUSG00000040345	Arhgap9	AU043488	Rho GTPase activating protein 9	protein-coding
MACS_peak_2034	chr13	55049145	55052370	+	2150	NA	promoter-TSS (NM_153131)	promoter-TSS (NM_153131)	-36	NM_153131	107448	Mm.23573	NM_153131	ENSMUSG00000025876	Unc5a	Unc5h1|mKIAA1976	unc-5 homolog A (C. elegans)	protein-coding
MACS_peak_5779	chr5	100156258	100158865	+	2146	NA	intron (NR_030692, intron 1 of 3)	intron (NR_030692, intron 1 of 3)	518	NR_030692	319818	Mm.295233	NR_030692	ENSMUSG00000089809	A930011G23Rik	-	RIKEN cDNA A930011G23 gene	ncRNA
MACS_peak_2408	chr14	68740797	68743746	+	2146	NA	exon (NM_008691, exon 1 of 3)	exon (NM_008691, exon 1 of 3)	462	NR_045897	100043072	Mm.242832	NR_045897		A230070E04Rik	Gm4210	RIKEN cDNA A230070E04 gene	ncRNA
MACS_peak_6850	chr7	56885374	56893843	+	2146	NA	intron (NM_001005232, intron 2 of 3)	intron (NM_001005232, intron 2 of 3)	2597	NM_001005232	13172	Mm.307176	NM_001005232	ENSMUSG00000030507	Dbx1	AI426026|Dbx	developing brain homeobox 1	protein-coding
MACS_peak_8265	chr9	120210226	120214080	+	2140	NA	Intergenic	Intergenic	-1038	NM_144557	245049	Mm.100936	NM_144557	ENSMUSG00000041794	Myrip	A230081N12Rik|Slac2-c|Slac2c	myosin VIIA and Rab interacting protein	protein-coding
MACS_peak_7975	chr9	58330971	58340609	+	2138	NA	promoter-TSS (NM_176921)	promoter-TSS (NM_176921)	-620	NM_176921	319477	Mm.153674	NM_176921	ENSMUSG00000066607	6030419C18Rik	-	RIKEN cDNA 6030419C18 gene	protein-coding
MACS_peak_4711	chr3	89122269	89127378	+	2135	NA	intron (NM_010108, intron 1 of 4)	CpG	1978	NM_010108	13638	Mm.331159	NM_010108		Efna3	AW494418|EFL-2|Ehk1-L|Epl3|LERK-3	ephrin A3	protein-coding
MACS_peak_4482	chr2	167064128	167068024	+	2124	NA	promoter-TSS (NM_008968)	promoter-TSS (NM_008968)	-39	NM_008968	19223	Mm.2339	NM_008968	ENSMUSG00000017969	Ptgis	Cyp8|Cyp8a1|Pgis	prostaglandin I2 (prostacyclin) synthase	protein-coding
MACS_peak_4248	chr2	115676450	115681868	+	2124	NA	Intergenic	Intergenic	211198	NM_001159569	17536	Mm.247566	NM_010825	ENSMUSG00000027210	Meis2	A430109D20Rik|Mrg1|Stra10	Meis homeobox 2	protein-coding
MACS_peak_1380	chr11	102679841	102682178	+	2124	NA	promoter-TSS (NM_001159382)	promoter-TSS (NM_001159382)	-9	NM_001159383	14615	Mm.390369	NM_008122	ENSMUSG00000034520	Gjc1	C130009G16Rik|Cnx45|Cx45|Gja-7|Gja7	gap junction protein, gamma 1	protein-coding
MACS_peak_1501	chr11	118912007	118918364	+	2114	NA	Intergenic	(TG)n|Simple_repeat|Simple_repeat	-12958	NM_013926	30951	Mm.99953	NM_013926	ENSMUSG00000025578	Cbx8	Pc3	chromobox 8	protein-coding
MACS_peak_7648	chr8	108691684	108693923	+	2114	NA	promoter-TSS (NM_178798)	promoter-TSS (NM_178798)	28	NM_178798	330836	Mm.46749	NM_178798	ENSMUSG00000031904	Slc7a6	AI643885|LAT-2|LAT3	solute carrier family 7 (cationic amino acid transporter, y+ system), member 6	protein-coding
MACS_peak_4288	chr2	127188413	127191405	+	2113	NA	exon (NM_009633, exon 1 of 1)	exon (NM_009633, exon 1 of 1)	887	NM_009633	11552	Mm.347390	NM_009633	ENSMUSG00000058620	Adra2b	Adra-2b|[a]2B|alpha2-C2|alpha2B	adrenergic receptor, alpha 2b	protein-coding
MACS_peak_2537	chr15	25341326	25344886	+	2111	NA	promoter-TSS (NR_027376)	promoter-TSS (NR_027376)	413	NM_027395	70350	Mm.29586	NM_027395	ENSMUSG00000045763	Basp1	2610024P12Rik|CAP-23|CAP23|Ckap3|NAP-22|NAP22	brain abundant, membrane attached signal protein 1	protein-coding
MACS_peak_1091	chr11	69748033	69752002	+	2103	NA	intron (NM_016875, intron 1 of 8)	intron (NM_016875, intron 1 of 8)	616	NM_016875	53422	Mm.29286	NM_016875	ENSMUSG00000018554	Ybx2	Msy2	Y box protein 2	protein-coding
MACS_peak_1077	chr11	68196715	68202247	+	2097	NA	exon (NM_008744, exon 2 of 7)	exon (NM_008744, exon 2 of 7)	847	NM_008744	18208	Mm.39095	NM_008744	ENSMUSG00000020902	Ntn1	AI561871|BC019633|Netrin-1	netrin 1	protein-coding
MACS_peak_1643	chr12	57786687	57799054	+	2092	NA	Intergenic	Intergenic	-3756	NM_011041	18511	Mm.5035	NM_011041	ENSMUSG00000001497	Pax9	Pax-9	paired box 9	protein-coding
MACS_peak_4080	chr2	49474672	49476608	+	2092	NA	intron (NM_008449, intron 1 of 25)	intron (NM_008449, intron 1 of 25)	806	NM_008449	16574	Mm.256342	NM_008449	ENSMUSG00000026764	Kif5c	KINN|Khc|NKHC|NKHC2	kinesin family member 5C	protein-coding
MACS_peak_3063	chr17	8990664	8996533	+	2087	NA	intron (NM_001290707, intron 2 of 22)	intron (NM_001290707, intron 2 of 22)	-1012	NM_011866	23984	Mm.87161	NM_011866	ENSMUSG00000023868	Pde10a	-	phosphodiesterase 10A	protein-coding
MACS_peak_6323	chr6	52161063	52173094	+	2084	NA	exon (NM_010455, exon 1 of 2)	exon (NM_010455, exon 1 of 2)	1494	NM_010455	15404	Mm.294826	NM_010455		Hoxa7	AV118143|Hox-1.1	homeobox A7	protein-coding
MACS_peak_3467	chr18	37901831	37905105	+	2083	NA	exon (NM_033578, exon 1 of 4)	exon (NM_033578, exon 1 of 4)	1720	NM_033578	93703	Mm.247203	NM_033578	ENSMUSG00000023036	Pcdhgb6	-	protocadherin gamma subfamily B, 6	protein-coding
MACS_peak_4903	chr3	157229626	157231961	+	2083	NA	exon (NM_011196, exon 1 of 3)	exon (NM_011196, exon 1 of 3)	937	NM_011196	19218	Mm.30424	NM_011196	ENSMUSG00000040016	Ptger3	EP3|Pgerep3|Ptgerep3	prostaglandin E receptor 3 (subtype EP3)	protein-coding
MACS_peak_5861	chr5	111408098	111408722	+	2083	NA	intron (NM_001267622, intron 2 of 23)	CpG	-24753	NR_030482	735278		NR_030482		Mir701	Mirn701|mmu-mir-701	microRNA 701	ncRNA
MACS_peak_2208	chr13	109003713	109006656	+	2083	NA	intron (NM_029001, intron 1 of 7)	CpG	586	NM_029001	74559	Mm.286127	NM_029001	ENSMUSG00000021696	Elovl7	9130013K24Rik|AI840082	ELOVL family member 7, elongation of long chain fatty acids (yeast)	protein-coding
MACS_peak_4051	chr2	33494174	33501316	+	2083	NA	non-coding (NR_046275, exon 3 of 3)	non-coding (NR_046275, exon 3 of 3)	1032	NR_046275	100504399	Mm.72070	NM_177842		C130021I20Rik	-	Riken cDNA C130021I20 gene	ncRNA
MACS_peak_8231	chr9	110642615	110647513	+	2083	NA	promoter-TSS (NM_001083936)	promoter-TSS (NM_001083936)	50	NM_001083936	19228	Mm.3542	NM_011199	ENSMUSG00000032492	Pth1r	PPR|Pthr|Pthr1	parathyroid hormone 1 receptor	protein-coding
MACS_peak_7234	chr7	149130451	149139223	+	2083	NA	promoter-TSS (NM_001276763)	promoter-TSS (NM_001276763)	-819	NM_001009930	75770	Mm.274868	NM_029426	ENSMUSG00000053046	Brsk2	4833424K13Rik|SAD-A|SADA	BR serine/threonine kinase 2	protein-coding
MACS_peak_5194	chr4	117165619	117172517	+	2083	NA	intron (NM_025739, intron 1 of 14)	CpG	452	NM_025739	66743	Mm.318331	NM_025739	ENSMUSG00000028677	Rnf220	4732477A13|4931406I20Rik|5730503K05Rik|AV302541	ring finger protein 220	protein-coding
MACS_peak_872	chr10	126961923	126972018	+	2079	NA	intron (NM_183297, intron 1 of 1)	intron (NM_183297, intron 1 of 1)	4645	NM_183297	104080	Mm.437200	NM_183297	ENSMUSG00000040258	Nxph4	1110036M10Rik|AI851051	neurexophilin 4	protein-coding
MACS_peak_5505	chr4	153512574	153515886	+	2079	NA	promoter-TSS (NM_011642)	promoter-TSS (NM_011642)	87	NM_011642	22062	Mm.78015	NM_011642	ENSMUSG00000029026	Trp73	Tp73|p73	transformation related protein 73	protein-coding
MACS_peak_5753	chr5	77834745	77837835	+	2079	NA	intron (NM_001159518, intron 1 of 5)	intron (NM_001159518, intron 1 of 5)	780	NM_001159518	29817	Mm.233470	NM_008048	ENSMUSG00000036256	Igfbp7	AGM|Fstl2|Mac25	insulin-like growth factor binding protein 7	protein-coding
MACS_peak_8082	chr9	78243075	78246294	+	2079	NA	intron (NM_001191044, intron 1 of 16)	ID4_|SINE|ID	1100	NM_001191044	100048658	Mm.158166	NM_001191044	ENSMUSG00000070291	Ddx43	ENSMUSG00000070291|OTTMUSG00000019690	DEAD (Asp-Glu-Ala-Asp) box polypeptide 43	protein-coding
MACS_peak_6772	chr7	31228306	31232377	+	2071	NA	exon (NM_007467, exon 1 of 17)	exon (NM_007467, exon 1 of 17)	260	NM_007467	11803	Mm.2381	NM_007467	ENSMUSG00000006651	Aplp1	-	amyloid beta (A4) precursor-like protein 1	protein-coding
MACS_peak_291	chr1	120944520	120951660	+	2068	NA	intron (NM_001081125, intron 1 of 13)	intron (NM_001081125, intron 1 of 13)	2106	NM_001081125	14633	Mm.273292	NM_001081125	ENSMUSG00000048402	Gli2	AW546128	GLI-Kruppel family member GLI2	protein-coding
MACS_peak_4652	chr3	66776232	66779154	+	2068	NA	exon (NM_013665, exon 5 of 5)	exon (NM_013665, exon 5 of 5)	8000	NM_013665	20429	Mm.39093	NM_013665		Shox2	6330543G17Rik|OG12|Og12x|Prx3|SHOT	short stature homeobox 2	protein-coding
MACS_peak_6252	chr6	29127329	29131804	+	2068	NA	promoter-TSS (NM_001101443)	promoter-TSS (NM_001101443)	18	NM_001101443	101359	Mm.22818	NM_001101443	ENSMUSG00000079654	Prrt4	AW455481|D330027H18Rik	proline-rich transmembrane protein 4	protein-coding
MACS_peak_7367	chr8	15026802	15029298	+	2065	NA	exon (NM_029116, exon 2 of 2)	exon (NM_029116, exon 2 of 2)	17025	NM_029116	74901	Mm.46675	NM_029116	ENSMUSG00000055675	Kbtbd11	2900016B01Rik|4930465M17Rik|mKIAA0711	kelch repeat and BTB (POZ) domain containing 11	protein-coding
MACS_peak_852	chr10	119987937	119991247	+	2063	NA	Intergenic	CpG	-75601	NM_010441	15364	Mm.157190	NM_010441	ENSMUSG00000056758	Hmga2	9430083A20Rik|HMGI-C|Hmgic|pg|pygmy	high mobility group AT-hook 2	protein-coding
MACS_peak_1266	chr11	96147781	96167405	+	2063	NA	Intergenic	Intergenic	-2892	NM_008269	15414	Mm.215	NM_008269	ENSMUSG00000000690	Hoxb6	Hox-2.2	homeobox B6	protein-coding
MACS_peak_898	chr11	11584894	11586456	+	2063	NA	promoter-TSS (NM_009578)	promoter-TSS (NM_009578)	-541	NM_009578	22778	Mm.103545	NM_009578	ENSMUSG00000018654	Ikzf1	5832432G11Rik|Ikaros|LyF-1|Zfpn1a1|Znfn1a1|hlk-1|mKIAA4227	IKAROS family zinc finger 1	protein-coding
MACS_peak_2651	chr15	79841429	79845242	+	2053	NA	intron (NM_011057, intron 1 of 6)	CpG	1903	NM_011057	18591	Mm.144089	NM_011057	ENSMUSG00000000489	Pdgfb	PDGF-B|Sis	platelet derived growth factor, B polypeptide	protein-coding
MACS_peak_7019	chr7	108078752	108081746	+	2051	NA	exon (NM_001081116, exon 1 of 21)	exon (NM_001081116, exon 1 of 21)	426	NM_001081116	207212	Mm.29954	NM_001081116	ENSMUSG00000032875	Arhgef17	8030463K16|AI428794|AW558066|BC035332|mKIAA0337	Rho guanine nucleotide exchange factor (GEF) 17	protein-coding
MACS_peak_5624	chr5	31014583	31016326	+	2046	NA	intron (NM_023047, intron 1 of 12)	intron (NM_023047, intron 1 of 12)	1186	NM_023047	65254	Mm.27732	NM_023047	ENSMUSG00000029168	Dpysl5	CRAM|CRMP-5|Crmp5	dihydropyrimidinase-like 5	protein-coding
MACS_peak_4471	chr2	165058093	165061702	+	2043	NA	intron (NM_174988, intron 1 of 11)	CpG	340	NM_174988	104010	Mm.151819	NM_174988	ENSMUSG00000053166	Cdh22	-	cadherin 22	protein-coding
MACS_peak_4263	chr2	119095721	119097098	+	2043	NA	intron (NM_145530, intron 2 of 2)	intron (NM_145530, intron 2 of 2)	553	NM_145530	228543	Mm.120274	NM_145530	ENSMUSG00000034226	Rhov	A030005A06Rik|Arhv	ras homolog gene family, member V	protein-coding
MACS_peak_1834	chr13	3357254	3360750	+	2043	NA	Intergenic	CpG	-118547	NR_015522	76937	Mm.487240	NR_015522	ENSMUSG00000097709	2810429I04Rik	AI256682	RIKEN cDNA 2810429I04 gene	ncRNA
MACS_peak_3256	chr17	49754049	49755361	+	2043	NA	intron (NM_177052, intron 1 of 22)	CpG	208	NM_177052	319991	Mm.441340	NM_177052	ENSMUSG00000023999	Kif6	D130004B10Rik|D130084M03Rik	kinesin family member 6	protein-coding
MACS_peak_785	chr10	84849869	84852414	+	2043	NA	exon (NM_028709, exon 1 of 17)	exon (NM_028709, exon 1 of 17)	1582	NM_028709	74007	Mm.36544	NM_028709	ENSMUSG00000020042	Btbd11	6330404E16Rik	BTB (POZ) domain containing 11	protein-coding
MACS_peak_7524	chr8	85386524	85389750	+	2043	NA	exon (NM_177378, exon 1 of 7)	exon (NM_177378, exon 1 of 7)	882	NM_177378	330812	Mm.491438	NM_177378	ENSMUSG00000047747	Rnf150	A630007N06Rik|C030044C12Rik|Greul5|mKIAA1214	ring finger protein 150	protein-coding
MACS_peak_2498	chr14	122861038	122865600	+	2037	NA	exon (NM_022987, exon 1 of 2)	exon (NM_022987, exon 1 of 2)	1561	NM_022987	65100	Mm.390761	NM_022987		Zic5	1700049L20Rik|Opr	zinc finger protein of the cerebellum 5	protein-coding
MACS_peak_6818	chr7	52615400	52619593	+	2034	NA	intron (NM_029741, intron 1 of 29)	intron (NM_029741, intron 1 of 29)	-4037	NR_015480	50994	Mm.389897	NM_016664	ENSMUSG00000049661	Mtag2	MAG	metastasis associated gene 2	ncRNA
MACS_peak_5122	chr4	98482202	98485175	+	2032	NA	intron (NM_172872, intron 1 of 9)	intron (NM_172872, intron 1 of 9)	540	NM_172872	242553	Mm.440211	NM_172872	ENSMUSG00000035407	Kank4	AU021071|Ankrd38|BC060737|C130031J23	KN motif and ankyrin repeat domains 4	protein-coding
MACS_peak_7442	chr8	48497793	48499553	+	2023	NA	Intergenic	CpG	-60971	NM_175162	71069	Mm.23973	NM_175162	ENSMUSG00000038143	Stox2	4933409N07Rik|AI449080|AI835114|mKIAA1392	storkhead box 2	protein-coding
MACS_peak_4846	chr3	130808789	130811046	+	2013	NA	Intergenic	Intergenic	-3298	NM_010703	16842	Mm.255219	NM_010703	ENSMUSG00000027985	Lef1	3000002B05|AI451430|Lef-1	lymphoid enhancer binding factor 1	protein-coding
MACS_peak_7148	chr7	140312012	140316466	+	2007	NA	intron (NM_009980, intron 1 of 10)	CpG	927	NM_009980	13017	Mm.246240	NM_009980	ENSMUSG00000030970	Ctbp2	AA407280|D7Ertd45e|Gtrgeo6|Ribeye	C-terminal binding protein 2	protein-coding
MACS_peak_753	chr10	80805660	80806745	+	2007	NA	promoter-TSS (NM_148951)	promoter-TSS (NM_148951)	-191	NM_148951	209047	Mm.218755	NM_148951	ENSMUSG00000034872	Gipc3	Ahl5|Rgs19ip3	GIPC PDZ domain containing family, member 3	protein-coding
MACS_peak_5912	chr5	116179846	116183014	+	2000	NA	exon (NM_001080808, exon 1 of 9)	exon (NM_001080808, exon 1 of 9)	138	NM_001080808	75665	Mm.233914	NM_001080808	ENSMUSG00000041609	Ccdc64	2210403N09Rik|BICDR-1	coiled-coil domain containing 64	protein-coding
MACS_peak_6098	chr5	140381166	140391873	+	2000	NA	intron (NM_175522, intron 1 of 1)	intron (NM_175522, intron 1 of 1)	2622	NM_175522	243312	Mm.237102	NM_175522	ENSMUSG00000048988	Elfn1	A930017N06Rik|AI197272|Ppp1r28	leucine rich repeat and fibronectin type III, extracellular 1	protein-coding
MACS_peak_3142	chr17	27646960	27652610	+	1999	NA	Intergenic	CpG	-9307	NM_001291045	268934	Mm.358940	NM_001013385	ENSMUSG00000063239	Grm4	Gprc1d|mGluR4	glutamate receptor, metabotropic 4	protein-coding
MACS_peak_2919	chr16	37384422	37384910	+	1999	NA	intron (NM_001114613, intron 1 of 26)	CpG	378	NM_001114613	207227	Mm.80170	NM_172440		Stxbp5l	9430094L02|A830015P08Rik|LLGL4|T2dm1|t2md1|tomosyn-2	syntaxin binding protein 5-like	protein-coding
MACS_peak_1373	chr11	102306281	102310154	+	1999	NA	intron (NM_199200, intron 1 of 7)	intron (NM_199200, intron 1 of 7)	760	NM_199200	217219	Mm.259924	NM_199200	ENSMUSG00000034685	Fam171a2	-	family with sequence similarity 171, member A2	protein-coding
MACS_peak_6317	chr6	52112979	52118990	+	1999	NA	Intergenic	Intergenic	-1154	NM_010451	15399	Mm.131	NM_010451		Hoxa2	AI324701|HOX1.11|Hox-1.11	homeobox A2	protein-coding
MACS_peak_2727	chr15	94459180	94463021	+	1999	NA	intron (NM_178789, intron 1 of 7)	intron (NM_178789, intron 1 of 7)	1484	NM_178789	320709	Mm.74873	NM_178789	ENSMUSG00000063296	Tmem117	B930062P21Rik	transmembrane protein 117	protein-coding
MACS_peak_8122	chr9	91271440	91283279	+	1999	NA	intron (NM_009576, intron 3 of 4)	intron (NM_009576, intron 3 of 4)	13549	NM_009576	22774	Mm.8062	NM_009576		Zic4	-	zinc finger protein of the cerebellum 4	protein-coding
MACS_peak_502	chr1	183948616	183950796	+	1999	NA	5' UTR (NM_008680, exon 1 of 15)	5' UTR (NM_008680, exon 1 of 15)	405	NM_008680	13800	Mm.87759	NM_008680	ENSMUSG00000022995	Enah	Mena|NDPP-1|Ndpp1|WBP8	enabled homolog (Drosophila)	protein-coding
MACS_peak_5022	chr4	48597283	48599564	+	1999	NA	exon (NM_021436, exon 1 of 10)	exon (NM_021436, exon 1 of 10)	358	NM_021436	230157	Mm.422686	NM_021436	ENSMUSG00000028347	Tmeff1	A830033E11|M7365|Tr1	transmembrane protein with EGF-like and two follistatin-like domains 1	protein-coding
MACS_peak_5769	chr5	98607941	98619031	+	1999	NA	exon (NM_029947, exon 3 of 4)	exon (NM_029947, exon 3 of 4)	3598	NM_029947	77630	Mm.332511	NM_029947	ENSMUSG00000035456	Prdm8	4930565F05Rik|PFM5	PR domain containing 8	protein-coding
MACS_peak_3648	chr19	5080705	5085367	+	1988	NA	exon (NM_001001885, exon 2 of 2)	exon (NM_001001885, exon 2 of 2)	2441	NM_001001885	381199	Mm.329663	NM_001001885	ENSMUSG00000061451	Tmem151a	AW125688|Gm961|Tmem151	transmembrane protein 151A	protein-coding
MACS_peak_3270	chr17	56610738	56616204	+	1983	NA	intron (NM_001252455, intron 1 of 27)	CpG	2432	NM_001252455	19280	Mm.258771	NM_011218	ENSMUSG00000013236	Ptprs	AL022616|PTP|PTP-NU3|PTPNU-3|PTPsigma|Ptpt9|R-PTP-S|RPTPsigma	protein tyrosine phosphatase, receptor type, S	protein-coding
MACS_peak_4310	chr2	130521584	130524896	+	1978	NA	promoter-TSS (NM_001081162)	promoter-TSS (NM_001081162)	15	NM_001081162	269356	Mm.441391	NM_001081162	ENSMUSG00000074796	Slc4a11	AI503023|BTR1|NaBC1	solute carrier family 4, sodium bicarbonate transporter-like, member 11	protein-coding
MACS_peak_7954	chr9	54825646	54831758	+	1978	NA	promoter-TSS (NM_176844)	promoter-TSS (NM_176844)	15	NM_176844	110835	Mm.103778	NM_176844	ENSMUSG00000035594	Chrna5	Acra-5|Acra5	cholinergic receptor, nicotinic, alpha polypeptide 5	protein-coding
MACS_peak_166	chr1	74927948	74934245	+	1978	NA	intron (NM_153111, intron 1 of 2)	CpG-298	886	NM_153111	260298	Mm.150496	NM_153111	ENSMUSG00000055197	Fev	Pet-1|Pet1|mPet-1	FEV (ETS oncogene family)	protein-coding
MACS_peak_4130	chr2	71363927	71373587	+	1977	NA	TTS (NR_002854)	TTS (NR_002854)	1255	NM_010053	13390	Mm.4543	NM_010053	ENSMUSG00000041911	Dlx1	Dlx|Dlx-1	distal-less homeobox 1	protein-coding
MACS_peak_2	chr1	4479945	4485099	+	1976	NA	exon (NM_011441, exon 5 of 5)	exon (NM_011441, exon 5 of 5)	4913	NM_001289464	20671	Mm.279103	NM_011441	ENSMUSG00000025902	Sox17	-	SRY (sex determining region Y)-box 17	protein-coding
MACS_peak_3775	chr19	42503840	42507289	+	1970	NA	intron (NM_145123, intron 1 of 14)	intron (NM_145123, intron 1 of 14)	709	NM_145123	72832	Mm.313558	NM_145123	ENSMUSG00000042401	Crtac1	2810454P21Rik|AW047536|Crtac1B|Lotus	cartilage acidic protein 1	protein-coding
MACS_peak_6916	chr7	77424228	77429075	+	1970	NA	Intergenic	Intergenic	78828	NM_009697	11819	Mm.158143	NM_009697	ENSMUSG00000030551	Nr2f2	2700033K02Rik|9430015G03Rik|ARP-1|Aporp1|COUP-TF2|COUP-TFII|COUPTFB|EAR3|SVP40|Tcfcoup2	nuclear receptor subfamily 2, group F, member 2	protein-coding
MACS_peak_2768	chr15	100698473	100703970	+	1970	NA	intron (NM_001077499, intron 1 of 26)	(CGGG)n|Simple_repeat|Simple_repeat	145	NM_001077499	20273	Mm.385012	NM_011323	ENSMUSG00000023033	Scn8a	AI853486|C630029C19Rik|NaCh6|Nav1.6|dmu|med|mnd-2|mnd2|nmf2|nmf335|nmf58|nur14|seal	sodium channel, voltage-gated, type VIII, alpha	protein-coding
MACS_peak_6431	chr6	87929971	87932309	+	1970	NA	promoter-TSS (NR_026990)	promoter-TSS (NR_026990)	336	NM_198622	243529	Mm.33796	NM_198622	ENSMUSG00000044927	H1fx	Gm461|H1X	H1 histone family, member X	protein-coding
MACS_peak_5658	chr5	37631543	37639513	+	1970	NA	intron (NM_001136058, intron 1 of 13)	intron (NM_001136058, intron 1 of 13)	-1475	NM_007765	12933	Mm.290995	NM_007765	ENSMUSG00000029121	Crmp1	CRMP-1|DRP-1|Dpysl1|ULIP-3|Ulip3	collapsin response mediator protein 1	protein-coding
MACS_peak_7547	chr8	88223173	88226182	+	1970	NA	promoter-TSS (NR_106189)	promoter-TSS (NR_106189)	-127	NR_106189	102465898		NR_106189	miRBase:MI0026041	Mir8109	mmu-mir-8109	microRNA mir-8109	ncRNA
MACS_peak_6559	chr6	131383523	131384858	+	1970	NA	Intergenic	Lx5|LINE|L1	-45722	NM_011733	56449	Mm.458000	NM_011733	ENSMUSG00000030189	Ybx3	Csda|Dpba|MSY3|MSY4|Yb2|dbpA|oxyR	Y box protein 3	protein-coding
MACS_peak_4603	chr3	32716308	32716982	+	1970	NA	promoter-TSS (NM_001013024)	promoter-TSS (NM_001013024)	97	NM_001013024	72607	Mm.316153	NM_001013024		Usp13	2700071E21Rik|AI848077|ISOT3|IsoT-3	ubiquitin specific peptidase 13 (isopeptidase T-3)	protein-coding
MACS_peak_7869	chr9	42750573	42753119	+	1969	NA	intron (NM_175481, intron 1 of 20)	intron (NM_175481, intron 1 of 20)	608	NM_175481	110637	Mm.370291	NM_175481	ENSMUSG00000032017	Grik4	6330551K01Rik|GluK4|GluRgamma1|KA-1|KA1	glutamate receptor, ionotropic, kainate 4	protein-coding
MACS_peak_7637	chr8	98197398	98206908	+	1964	NA	Intergenic	CpG	-24784	NM_001195006	234593	Mm.29846	NM_145602	ENSMUSG00000036564	Ndrg4	D8Bwg1337e|Ndr1-rs|Ndr4|R74996|SMAP-8	N-myc downstream regulated gene 4	protein-coding
MACS_peak_7228	chr7	148245985	148247839	+	1959	NA	promoter-TSS (NM_177897)	promoter-TSS (NM_177897)	-261	NM_177897	330671	Mm.133741	NM_177897	ENSMUSG00000055629	B4galnt4	BC038881|Gm1095|beta4GalNAcT4	beta-1,4-N-acetyl-galactosaminyl transferase 4	protein-coding
MACS_peak_2733	chr15	96470376	96475089	+	1953	NA	promoter-TSS (NM_134086)	promoter-TSS (NM_134086)	42	NM_001166456	105727	Mm.103568	NM_134086	ENSMUSG00000023169	Slc38a1	AA408026|AA409865|AL022800|AU015942|NAT2	solute carrier family 38, member 1	protein-coding
MACS_peak_6326	chr6	52208968	52216872	+	1949	NA	non-coding (NR_110441, exon 1 of 2)	non-coding (NR_110441, exon 1 of 2)	151	NR_110442	791364	Mm.97466	NR_110441		Hottip	ENSMUSG00000055408|Gm15053|OTTMUSG00000018874	Hoxa distal transcript antisense RNA	ncRNA
MACS_peak_3217	chr17	39985313	39985750	+	1949	NA	non-coding (NR_046233, exon 1 of 1)	non-coding (NR_046233, exon 1 of 1)	5589	NR_046233	100861531		NR_046233		Rn45s	-	45S pre-ribosomal RNA	rRNA
MACS_peak_4640	chr3	55986250	55988198	+	1947	NA	5' UTR (NM_030595, exon 1 of 58)	5' UTR (NM_030595, exon 1 of 58)	399	NM_030595	26422	Mm.384353	NM_030595	ENSMUSG00000027799	Nbea	Lyst2|mKIAA1544	neurobeachin	protein-coding
MACS_peak_854	chr10	121077380	121081409	+	1947	NA	intron (NM_177335, intron 1 of 12)	intron (NM_177335, intron 1 of 12)	637	NM_177335	216393	Mm.119759	NM_177335		D930020B18Rik	1500017I17Rik	RIKEN cDNA D930020B18 gene	protein-coding
MACS_peak_5684	chr5	44490021	44494228	+	1947	NA	intron (NM_008935, intron 1 of 26)	CpG	851	NM_008935	19126	Mm.6250	NM_008935	ENSMUSG00000029086	Prom1	4932416E19Rik|AC133|CD133|Prom|Prom-1|Proml1	prominin 1	protein-coding
MACS_peak_8067	chr9	71061460	71064981	+	1947	NA	promoter-TSS (NM_009022)	promoter-TSS (NM_009022)	-27	NR_110518	100041660	Mm.487231	NR_110518		Gm3458	-	predicted gene 3458	ncRNA
MACS_peak_3734	chr19	28753414	28755448	+	1947	NA	5' UTR (NM_175459, exon 1 of 11)	5' UTR (NM_175459, exon 1 of 11)	136	NM_175459	226075	Mm.223508	NM_175459		Glis3	4833409N03Rik|E230012L24|E330013K21Rik	GLIS family zinc finger 3	protein-coding
MACS_peak_4658	chr3	68672637	68675008	+	1947	NA	exon (NM_001167996, exon 1 of 1)	exon (NM_001167996, exon 1 of 1)	314	NM_001167996	68725	Mm.45741	NM_001167996	ENSMUSG00000046999	1110032F04Rik	AI115547	RIKEN cDNA 1110032F04 gene	protein-coding
MACS_peak_5558	chr5	17865435	17867049	+	1940	NA	promoter-TSS (NM_010305)	promoter-TSS (NM_010305)	-11	NM_010305	14677	Mm.254629	NM_010305	ENSMUSG00000057614	Gnai1	AU046200|Gialpha1|Gnai-1	guanine nucleotide binding protein (G protein), alpha inhibiting 1	protein-coding
MACS_peak_945	chr11	33045331	33048372	+	1940	NA	intron (NR_102395, intron 2 of 4)	CpG	549	NM_008005	14172	Mm.339812	NM_008005		Fgf18	D130055P09Rik|FGF-18	fibroblast growth factor 18	protein-coding
MACS_peak_5477	chr4	150480771	150485910	+	1940	NA	intron (NM_001081557, intron 11 of 23)	intron (NM_001081557, intron 11 of 23)	-51278	NM_009498	22319	Mm.273930	NM_009498	ENSMUSG00000028955	Vamp3	D130027G05Rik|VAMP-3|ceb	vesicle-associated membrane protein 3	protein-coding
MACS_peak_6403	chr6	83018606	83022957	+	1938	NA	promoter-TSS (NM_009392)	promoter-TSS (NM_009392)	-562	NM_009392	21909	Mm.37	NM_009392	ENSMUSG00000068327	Tlx2	Enx|Hox11L.1|Hox11l1|NCX|Ncx1|Tlx1l1|Tlx1l2	T cell leukemia, homeobox 2	protein-coding
MACS_peak_1298	chr11	96974984	96979481	+	1938	NA	promoter-TSS (NM_019507)	promoter-TSS (NM_019507)	-587	NM_019507	57765	Mm.94519	NM_019507	ENSMUSG00000001444	Tbx21	TBT1|Tbet|Tblym	T-box 21	protein-coding
MACS_peak_158	chr1	74815506	74824170	+	1930	NA	intron (NM_009526, intron 1 of 3)	intron (NM_009526, intron 1 of 3)	1372	NM_009526	22420	Mm.268282	NM_009526	ENSMUSG00000033227	Wnt6	AA409270|Wnt-6	wingless-type MMTV integration site family, member 6	protein-coding
MACS_peak_6691	chr7	25958931	25967428	+	1929	NA	Intergenic	GA-rich|Low_complexity|Low_complexity	23091	NR_045848	434147	Mm.59171	NM_001033781	ENSMUSG00000074274	D930028M14Rik	EG434147	RIKEN cDNA D930028M14 gene	ncRNA
MACS_peak_4595	chr3	30402918	30416034	+	1926	NA	Intergenic	Intergenic	-1067	NM_021442	14013	Mm.56965	NM_007963	ENSMUSG00000027684	Mecom	D630039M04Rik|Evi-1|Evi1|Jbo|Mds|Mds1|Mds1-Evi1|Prdm3|Znfpr1b1	MDS1 and EVI1 complex locus	protein-coding
MACS_peak_2067	chr13	63673439	63675758	+	1923	NA	Intergenic	CT-rich|Low_complexity|Low_complexity	-7770	NM_008957	19206	Mm.228798	NM_008957	ENSMUSG00000021466	Ptch1	A230106A15Rik|Ptc|Ptc1|Ptch|mes	patched homolog 1	protein-coding
MACS_peak_6437	chr6	88821942	88826142	+	1923	NA	promoter-TSS (NM_176973)	promoter-TSS (NM_176973)	-4	NM_176973	319655	Mm.302613	NM_176973	ENSMUSG00000033152	Podxl2	D130074J02Rik|PODLX2	podocalyxin-like 2	protein-coding
MACS_peak_1735	chr12	88018777	88021124	+	1923	NA	5' UTR (NM_177354, exon 1 of 7)	5' UTR (NM_177354, exon 1 of 7)	300	NM_177354	238328	Mm.216101	NM_177354		Vash1	AI834978|D930046M13Rik|G630009D10Rik	vasohibin 1	protein-coding
MACS_peak_8229	chr9	108940607	108941649	+	1923	NA	promoter-TSS (NM_025858)	promoter-TSS (NM_025858)	47	NM_001284332	66940	Mm.196533	NM_025858	ENSMUSG00000025647	Shisa5	2310008D10Rik|6430628I05Rik|Scotin|mShisa5	shisa homolog 5 (Xenopus laevis)	protein-coding
MACS_peak_4281	chr2	122436436	122437036	+	1923	NA	intron (NM_025961, intron 1 of 8)	intron (NM_025961, intron 1 of 8)	277	NM_025961	67092	Mm.29975	NM_025961	ENSMUSG00000027199	Gatm	1810003P21Rik|AI314789|AT	glycine amidinotransferase (L-arginine:glycine amidinotransferase)	protein-coding
MACS_peak_3664	chr19	6497293	6505338	+	1915	NA	intron (NM_001205234, intron 17 of 22)	intron (NM_001205234, intron 17 of 22)	41755	NM_009203	20521	Mm.391146	NM_009203	ENSMUSG00000061742	Slc22a12	AI987855|OAT4L|Rst|Slc22al2|URAT1	solute carrier family 22 (organic anion/cation transporter), member 12	protein-coding
MACS_peak_1124	chr11	76433978	76438254	+	1915	NA	Intergenic	CpG	-44875	NM_198894	109934	Mm.258939	NM_198018	ENSMUSG00000017631	Abr	-	active BCR-related gene	protein-coding
MACS_peak_7515	chr8	81551278	81555102	+	1915	NA	intron (NM_001294279, intron 1 of 14)	intron (NM_001294279, intron 1 of 14)	854	NM_178267	622675	Mm.48724	NM_178267	ENSMUSG00000071064	Zfp827	2810449M09Rik|D630040G17Rik|Znf827	zinc finger protein 827	protein-coding
MACS_peak_6478	chr6	113142840	113145934	+	1915	NA	intron (NM_177763, intron 1 of 3)	intron (NM_177763, intron 1 of 3)	991	NM_177763	269788	Mm.37943	NM_177763	ENSMUSG00000042873	Lhfpl4	1190004M23Rik|AI604880|B230384L07|mKIAA4027	lipoma HMGIC fusion partner-like protein 4	protein-coding
MACS_peak_7885	chr9	44945985	44948602	+	1915	NA	intron (NM_001013390, intron 1 of 4)	intron (NM_001013390, intron 1 of 4)	168	NM_001013390	399548	Mm.335112	NM_001013390	ENSMUSG00000046480	Scn4b	Gm1471	sodium channel, type IV, beta	protein-coding
MACS_peak_2882	chr16	20240776	20242663	+	1915	NA	promoter-TSS (NM_198599)	promoter-TSS (NM_198599)	-288	NM_198599	208158	Mm.326383	NM_198599	ENSMUSG00000041205	Map6d1	A330066I15Rik	MAP6 domain containing 1	protein-coding
MACS_peak_7490	chr8	73386037	73388870	+	1909	NA	Intergenic	Intergenic	-6546	NM_032397	84036	Mm.32074	NM_032397	ENSMUSG00000002908	Kcnn1	AI854248|KCa2.1|SK1	potassium intermediate/small conductance calcium-activated channel, subfamily N, member 1	protein-coding
MACS_peak_1993	chr13	49240696	49244254	+	1907	NA	exon (NM_001290311, exon 2 of 29)	exon (NM_001290311, exon 2 of 29)	1222	NM_029361	75607	Mm.342723	NM_029361	ENSMUSG00000037989	Wnk2	1810073P09Rik|AW122246|ESTM15|X83337|mKIAA1760	WNK lysine deficient protein kinase 2	protein-coding
MACS_peak_4120	chr2	69422204	69427050	+	1906	NA	promoter-TSS (NM_001081088)	promoter-TSS (NM_001081088)	-503	NM_001081088	14725	Mm.23847	NM_001081088	ENSMUSG00000027070	Lrp2	AI315343|AW536255|D230004K18Rik|Gp330|Megalin|b2b1625.2Clo	low density lipoprotein receptor-related protein 2	protein-coding
MACS_peak_2378	chr14	63865715	63874070	+	1903	NA	Intergenic	RLTR25B|LTR|ERVK	-5795	NM_008092	14463	Mm.247669	NM_008092	ENSMUSG00000021944	Gata4	Gata-4	GATA binding protein 4	protein-coding
MACS_peak_4187	chr2	84725786	84728568	+	1901	NA	promoter-TSS (NM_199223)	promoter-TSS (NM_199223)	-328	NM_199223	269295	Mm.86447	NM_199223	ENSMUSG00000050896	Rtn4rl2	Ngr2|Ngrh1|Ngrl3	reticulon 4 receptor-like 2	protein-coding
MACS_peak_4264	chr2	119145271	119154545	+	1900	NA	intron (NR_030683, intron 3 of 3)	intron (NR_030683, intron 3 of 3)	-1612	NM_019454	54485	Mm.143719	NM_019454	ENSMUSG00000027314	Dll4	Delta4	delta-like 4 (Drosophila)	protein-coding
MACS_peak_3620	chr18	81180862	81186480	+	1897	NA	promoter-TSS (NM_178280)	promoter-TSS (NM_178280)	-354	NM_178280	20689	Mm.215917	NM_178280	ENSMUSG00000024565	Sall3	B130022O04Rik|Msal|Msal-1|Sal|Salt|Spalt	sal-like 3 (Drosophila)	protein-coding
MACS_peak_3516	chr18	53616203	53625239	+	1897	NA	Intergenic	Intergenic	-3479	NM_001033281	225518	Mm.297645	NM_001033281	ENSMUSG00000069378	Prdm6	Gm92|PRISM	PR domain containing 6	protein-coding
MACS_peak_8254	chr9	118383553	118391532	+	1897	NA	5' UTR (NM_001164789, exon 1 of 6)	5' UTR (NM_001164789, exon 1 of 6)	235	NM_010136	13813	Mm.200692	NM_010136	ENSMUSG00000032446	Eomes	C77258|TBR-2|Tbr2	eomesodermin homolog (Xenopus laevis)	protein-coding
MACS_peak_1503	chr11	119401319	119411494	+	1897	NA	intron (NM_008730, intron 2 of 4)	intron (NM_008730, intron 2 of 4)	2728	NM_008730	18164	Mm.5142	NM_008730	ENSMUSG00000025582	Nptx1	D11Bwg1004e|Np1	neuronal pentraxin 1	protein-coding
MACS_peak_2936	chr16	44330814	44333345	+	1896	NA	intron (NM_198034, intron 1 of 24)	intron (NM_198034, intron 1 of 24)	872	NM_198034	320007	Mm.242144	NM_198034	ENSMUSG00000022696	Sidt1	AW045928|B830021E24Rik	SID1 transmembrane family, member 1	protein-coding
MACS_peak_3137	chr17	26984930	26992061	+	1895	NA	Intergenic	(TTTC)n|Simple_repeat|Simple_repeat	-9985	NM_008700	18091	Mm.41974	NM_008700	ENSMUSG00000015579	Nkx2-5	Csx|Nkx-2.5|Nkx2.5|tinman	NK2 homeobox 5	protein-coding
MACS_peak_5609	chr5	28491621	28505965	+	1895	NA	TTS (NM_010134)	TTS (NM_010134)	6557	NM_010134	13799	Mm.4298	NM_010134		En2	BB131122|En-2	engrailed 2	protein-coding
MACS_peak_7969	chr9	57787319	57791140	+	1895	NA	intron (NM_011352, intron 1 of 13)	intron (NM_011352, intron 1 of 13)	1287	NM_011352	20361	Mm.335187	NM_011352	ENSMUSG00000038264	Sema7a	2900057C09Rik|CDw108|H-Sema-L|M-Sema-L|Semal	sema domain, immunoglobulin domain (Ig), and GPI membrane anchor, (semaphorin) 7A	protein-coding
MACS_peak_649	chr10	45054442	45057453	+	1880	NA	intron (NM_024285, intron 1 of 7)	CpG	379	NM_024285	23828	Mm.332793	NM_024285	ENSMUSG00000071317	Bves	Pop1|Popdc1|mBVES	blood vessel epicardial substance	protein-coding
MACS_peak_7572	chr8	91041432	91047549	+	1880	NA	promoter-TSS (NM_027280)	promoter-TSS (NM_027280)	-753	NM_027280	93960	Mm.30219	NM_027280	ENSMUSG00000031661	Nkd1	2810434J10Rik|9030215G15Rik|Nkd	naked cuticle 1 homolog (Drosophila)	protein-coding
MACS_peak_1877	chr13	30228014	30229626	+	1880	NA	intron (NM_153546, intron 1 of 12)	intron (NM_153546, intron 1 of 12)	461	NM_153546	218121	Mm.89682	NM_153546	ENSMUSG00000038732	Mboat1	9130215M02Rik|BC023845|LPEAT1|Moact1|Oact1	membrane bound O-acyltransferase domain containing 1	protein-coding
MACS_peak_1783	chr12	109791228	109793870	+	1880	NA	promoter-TSS (NM_007965)	promoter-TSS (NM_007965)	-381	NM_001163394	14026	Mm.238841	NM_007965	ENSMUSG00000021262	Evl	AI528774	Ena-vasodilator stimulated phosphoprotein	protein-coding
MACS_peak_2123	chr13	83869066	83873536	+	1880	NA	intron (NR_015561, intron 2 of 3)	intron (NR_015561, intron 2 of 3)	3590	NR_015561	320203	Mm.245636	NM_177100	ENSMUSG00000050334	C130071C03Rik	2810449C10Rik	RIKEN cDNA C130071C03 gene	ncRNA
MACS_peak_4962	chr4	34009666	34012360	+	1880	NA	promoter-TSS (NM_007726)	promoter-TSS (NM_007726)	-594	NM_007726	12801	Mm.7992	NM_007726	ENSMUSG00000044288	Cnr1	CB-R|CB1|CB1R	cannabinoid receptor 1 (brain)	protein-coding
MACS_peak_4602	chr3	32515042	32516959	+	1880	NA	promoter-TSS (NM_013531)	promoter-TSS (NM_013531)	-543	NM_013531	14696	Mm.139192	NM_013531	ENSMUSG00000027669	Gnb4	6720453A21Rik|G(beta)4	guanine nucleotide binding protein (G protein), beta 4	protein-coding
MACS_peak_6268	chr6	32536298	32542160	+	1880	NA	Intergenic	Intergenic	-1037	NM_175750	243743	Mm.444029	NM_175750	ENSMUSG00000029765	Plxna4	9330117B14|Plxa4|mKIAA1550	plexin A4	protein-coding
MACS_peak_2533	chr15	13100898	13106063	+	1878	NA	promoter-TSS (NM_007666)	promoter-TSS (NM_007666)	-86	NM_007666	12563	Mm.57048	NM_007666	ENSMUSG00000039385	Cdh6	K-cadherin|cad6|cadherin-6	cadherin 6	protein-coding
MACS_peak_4674	chr3	81876904	81878896	+	1878	NA	intron (NM_001161796, intron 2 of 13)	CpG	733	NM_017469	54195	Mm.9445	NM_017469	ENSMUSG00000028005	Gucy1b3	GC-S-beta-1|GCbeta1	guanylate cyclase 1, soluble, beta 3	protein-coding
MACS_peak_6756	chr7	29803590	29805521	+	1878	NA	exon (NM_009109, exon 91 of 106)	exon (NM_009109, exon 91 of 106)	36682	NM_008279	26411	Mm.148278	NM_008279	ENSMUSG00000037337	Map4k1	Hpk1|mHPK1	mitogen-activated protein kinase kinase kinase kinase 1	protein-coding
MACS_peak_2760	chr15	99500411	99503517	+	1874	NA	intron (NM_009597, intron 1 of 11)	intron (NM_009597, intron 1 of 11)	815	NM_009597	11419	Mm.440107	NM_009597	ENSMUSG00000023017	Asic1	AI843610|ASIC|ASIC1a|Accn2|B530003N02Rik|BNaC2	acid-sensing (proton-gated) ion channel 1	protein-coding
MACS_peak_3244	chr17	46431567	46435941	+	1868	NA	promoter-TSS (NM_001286028)	promoter-TSS (NM_001286028)	-678	NM_001286028	106565	Mm.23633	NM_134120	ENSMUSG00000047428	Dlk2	AI413481|DLK-2|Egfl9	delta-like 2 homolog (Drosophila)	protein-coding
MACS_peak_4155	chr2	74509942	74515653	+	1857	NA	promoter-TSS (NM_008274)	promoter-TSS (NM_008274)	-273	NM_008274	15432	Mm.57124	NM_008274	ENSMUSG00000001823	Hoxd12	Hox-4.7|Hox-5.6	homeobox D12	protein-coding
MACS_peak_5518	chr4	154782712	154783918	+	1853	NA	promoter-TSS (NM_001166029)	promoter-TSS (NM_001166029)	16	NM_001166029	544678	Mm.472798	NM_177674	ENSMUSG00000042233	2010015L04Rik	A530045M11	RIKEN cDNA 2010015L04 gene	protein-coding
MACS_peak_6753	chr7	29477817	29479747	+	1853	NA	intron (NM_207238, intron 2 of 5)	intron (NM_207238, intron 2 of 5)	619	NM_001163702	233040	Mm.116116	NM_207238	ENSMUSG00000037463	Fbxo27	E130008B10Rik|FBG5|Gm161	F-box protein 27	protein-coding
MACS_peak_4635	chr3	54857858	54860602	+	1850	NA	promoter-TSS (NM_007628)	promoter-TSS (NM_007628)	66	NR_040593	70970	Mm.251485	NR_040593		4931419H13Rik	-	RIKEN cDNA 4931419H13 gene	ncRNA
MACS_peak_4679	chr3	82929718	82935180	+	1850	NA	Intergenic	CpG	72989	NM_016784	53317	Mm.286349	NM_016784	ENSMUSG00000027998	Plrg1	AA958940|C80566|Tango4	pleiotropic regulator 1, PRL1 homolog (Arabidopsis)	protein-coding
MACS_peak_5757	chr5	81448673	81452136	+	1850	NA	promoter-TSS (NM_198702)	promoter-TSS (NM_198702)	-214	NM_198702	319387	Mm.273631	NM_198702	ENSMUSG00000037605	Lphn3	5430402I23Rik|CIRL-3|D130075K09Rik|Gm1379|LEC3|mKIAA0768	latrophilin 3	protein-coding
MACS_peak_7440	chr8	48370963	48375328	+	1850	NA	intron (NM_175162, intron 1 of 4)	intron (NM_175162, intron 1 of 4)	1611	NM_001286376	71069	Mm.23973	NM_175162	ENSMUSG00000038143	Stox2	4933409N07Rik|AI449080|AI835114|mKIAA1392	storkhead box 2	protein-coding
MACS_peak_3946	chr2	5058489	5060137	+	1847	NA	exon (NM_028804, exon 1 of 3)	exon (NM_028804, exon 1 of 3)	491	NM_028804	74186	Mm.274715	NM_028804	ENSMUSG00000026676	Ccdc3	2310045O21Rik	coiled-coil domain containing 3	protein-coding
MACS_peak_1452	chr11	115110961	115114172	+	1847	NA	intron (NM_010350, intron 13 of 14)	intron (NM_010350, intron 13 of 14)	15991	NM_010350	14813	Mm.39090	NM_010350	ENSMUSG00000020734	Grin2c	GluN2C|NMDAR2C|NR2C	glutamate receptor, ionotropic, NMDA2C (epsilon 3)	protein-coding
MACS_peak_6104	chr5	141714773	141719403	+	1847	NA	promoter-TSS (NM_177879)	promoter-TSS (NM_177879)	-400	NM_177879	330222	Mm.151931	NM_177879	ENSMUSG00000039683	Sdk1	5330440E10|6720466O15Rik	sidekick homolog 1 (chicken)	protein-coding
MACS_peak_4958	chr4	33034555	33038852	+	1847	NA	intron (NM_001012451, intron 1 of 15)	intron (NM_001012451, intron 1 of 15)	1098	NM_001012451	140577	Mm.214766	NM_080471	ENSMUSG00000040183	Ankrd6	-	ankyrin repeat domain 6	protein-coding
MACS_peak_702	chr10	67373753	67376193	+	1847	NA	intron (NM_178679, intron 1 of 4)	CpG	437	NM_178679	216049	Mm.268346	NM_178679	ENSMUSG00000037855	Zfp365	AI839779|AV340892|DBZ|Su48|Znf365|talanin	zinc finger protein 365	protein-coding
MACS_peak_7366	chr8	15009620	15012952	+	1847	NA	5' UTR (NM_029116, exon 1 of 2)	5' UTR (NM_029116, exon 1 of 2)	261	NM_029116	74901	Mm.46675	NM_029116	ENSMUSG00000055675	Kbtbd11	2900016B01Rik|4930465M17Rik|mKIAA0711	kelch repeat and BTB (POZ) domain containing 11	protein-coding
MACS_peak_1064	chr11	64248781	64250249	+	1847	NA	non-coding (NR_028445, exon 1 of 1)	non-coding (NR_028445, exon 1 of 1)	661	NR_028445	654805	Mm.436132	NR_028445		F930015N05Rik	-	RIKEN cDNA F930015N05 gene	ncRNA
MACS_peak_2154	chr13	95471725	95474194	+	1847	NA	Intergenic	CpG	-85939	NM_009321	21371	Mm.379025	NM_009321	ENSMUSG00000042043	Tbca	Tbca13	tubulin cofactor A	protein-coding
MACS_peak_5013	chr4	46613384	46614670	+	1839	NA	intron (NM_001164804, intron 1 of 11)	intron (NM_001164804, intron 1 of 11)	774	NM_001164804	107684	Mm.416311	NM_178893	ENSMUSG00000028337	Coro2a	9030208C03Rik|AI563590|IR10	coronin, actin binding protein 2A	protein-coding
MACS_peak_6653	chr7	19508580	19513337	+	1837	NA	promoter-TSS (NM_001029877)	promoter-TSS (NM_001029877)	-279	NM_001029877	384569	Mm.262724	NM_001029877	ENSMUSG00000030411	Nova2	Gm1424	neuro-oncological ventral antigen 2	protein-coding
MACS_peak_3471	chr18	37925886	37929021	+	1833	NA	exon (NM_033595, exon 1 of 4)	exon (NM_033595, exon 1 of 4)	2219	NM_033595	93724	Mm.247203	NM_033595	ENSMUSG00000023036	Pcdhga12	Pcdh13|pc2c	protocadherin gamma subfamily A, 12	protein-coding
MACS_peak_6401	chr6	82887037	82890007	+	1833	NA	intron (NM_011350, intron 1 of 13)	intron (NM_011350, intron 1 of 13)	1222	NM_011350	20355	Mm.270543	NM_011350	ENSMUSG00000000627	Sema4f	-	sema domain, immunoglobulin domain (Ig), TM domain, and short cytoplasmic domain	protein-coding
MACS_peak_3116	chr17	24625078	24626834	+	1833	NA	exon (NM_027937, exon 1 of 20)	exon (NM_027937, exon 1 of 20)	228	NM_027937	268932	Mm.70989	NM_027937	ENSMUSG00000033597	Caskin1	3300002N10Rik|C130061I24|C630036E02Rik|mKIAA1306	CASK interacting protein 1	protein-coding
MACS_peak_4162	chr2	74559034	74567112	+	1833	NA	intron (NM_010469, intron 3 of 5)	intron (NM_010469, intron 3 of 5)	-1054	NR_029566	387144		NR_029566	miRBase:MI0000221	Mir10b	Mirn10b|mir-10b|mmu-mir-10b	microRNA 10b	ncRNA
MACS_peak_5927	chr5	118618783	118625677	+	1833	NA	intron (NM_007545, intron 1 of 1)	intron (NM_007545, intron 1 of 1)	2457	NM_007545	12123	Mm.384468	NM_007545	ENSMUSG00000046607	Hrk	AI838259|Bid3|DP5|harakiri	harakiri, BCL2 interacting protein (contains only BH3 domain)	protein-coding
MACS_peak_5362	chr4	136831529	136838180	+	1833	NA	intron (NM_009523, intron 1 of 4)	intron (NM_009523, intron 1 of 4)	1304	NM_009523	22417	Mm.20355	NM_009523	ENSMUSG00000036856	Wnt4	Wnt-4	wingless-type MMTV integration site family, member 4	protein-coding
MACS_peak_7776	chr9	20530343	20532355	+	1833	NA	intron (NM_173777, intron 1 of 5)	CpG	1309	NM_173777	244723	Mm.293552	NM_173777	ENSMUSG00000032172	Olfm2	A030009A06Rik	olfactomedin 2	protein-coding
MACS_peak_3007	chr16	92693403	92697964	+	1830	NA	intron (NM_001111022, intron 3 of 6)	intron (NM_001111022, intron 3 of 6)	1891	NM_001111023	12394	Mm.4081	NM_009821	ENSMUSG00000022952	Runx1	AML1|CBF-alpha-2|Cbfa2|Pebp2a2|Pebpa2b	runt related transcription factor 1	protein-coding
MACS_peak_5743	chr5	75543186	75547861	+	1826	NA	Intergenic	Intergenic	-2793	NM_011058	18595	Mm.221403	NM_011058	ENSMUSG00000029231	Pdgfra	AI115593|CD140a|Pdgfr-2	platelet derived growth factor receptor, alpha polypeptide	protein-coding
MACS_peak_6492	chr6	115943005	115944765	+	1826	NA	exon (NM_026376, exon 1 of 36)	exon (NM_026376, exon 1 of 36)	1138	NM_026376	67784	Mm.3085	NM_026376	ENSMUSG00000030123	Plxnd1	6230425C21Rik|b2b1863Clo|b2b553Clo	plexin D1	protein-coding
MACS_peak_1231	chr11	95002433	95007819	+	1826	NA	intron (NM_007867, intron 1 of 2)	intron (NM_007867, intron 1 of 2)	-1241	NR_040279	320453	Mm.442212	NR_040279	ENSMUSG00000086552	A730090H04Rik	Dlx4as	RIKEN cDNA A730090H04 gene	ncRNA
MACS_peak_7537	chr8	86935259	86941812	+	1826	NA	promoter-TSS (NM_001252059)	promoter-TSS (NM_001252059)	-728	NM_001252060	12286	Mm.334658	NM_007578	ENSMUSG00000034656	Cacna1a	APCA|BI|Caca1a|Cacnl1a4|Cav2.1|Ccha1a|EA2|FHM|HPCA|MHP|MHP1|SCA6|alpha1A|la|nmf352|rkr|tg	calcium channel, voltage-dependent, P/Q type, alpha 1A subunit	protein-coding
MACS_peak_3128	chr17	25945284	25949964	+	1823	NA	intron (NM_001164225, intron 1 of 5)	intron (NM_001164225, intron 1 of 5)	1594	NM_001164225	214931	Mm.152289	NM_001164225	ENSMUSG00000025738	Fbxl16	BC042620|Scirr1	F-box and leucine-rich repeat protein 16	protein-coding
MACS_peak_1742	chr12	89592479	89593157	+	1818	NA	Intergenic	Intergenic	-6140	NM_001277296	72113	Mm.181387	NM_028105	ENSMUSG00000021044	Adck1	2610005A10Rik	aarF domain containing kinase 1	protein-coding
MACS_peak_7030	chr7	112628880	112630974	+	1818	NA	intron (NM_028444, intron 1 of 1)	intron (NM_028444, intron 1 of 1)	784	NM_028444	109042	Mm.3124	NM_028444	ENSMUSG00000037060	Prkcdbp	3110015B12Rik|6330514M23Rik|SRBC	protein kinase C, delta binding protein	protein-coding
MACS_peak_8242	chr9	114467639	114474092	+	1818	NA	intron (NM_001042503, intron 1 of 3)	intron (NM_001042503, intron 1 of 3)	2622	NM_001042503	636931	Mm.17857	NM_001042503		Trim71	2610206G21Rik|AL022943|Gm1127|Lin41|Ripply2|lin-41|mLin41|mlin-41	tripartite motif-containing 71	protein-coding
MACS_peak_1780	chr12	109565462	109568252	+	1816	NA	TTS (NM_001044380)	TTS (NM_001044380)	-5734	NM_010010	13116	Mm.41911	NM_010010	ENSMUSG00000021259	Cyp46a1	Cyp46	cytochrome P450, family 46, subfamily a, polypeptide 1	protein-coding
MACS_peak_6749	chr7	29250213	29253998	+	1816	NA	exon (NM_001141921, exon 5 of 5)	exon (NM_001141921, exon 5 of 5)	14848	NM_001141921	80749	Mm.483073	NM_030562		Lrfn1	BC004018|SALM2|Semo1	leucine rich repeat and fibronectin type III domain containing 1	protein-coding
MACS_peak_2653	chr15	80000911	80004815	+	1815	NA	Intergenic	Intergenic	-1288	NM_010795	17309	Mm.299693	NM_010795	ENSMUSG00000042428	Mgat3	1110038J12Rik|AI848272|GnT-III	mannoside acetylglucosaminyltransferase 3	protein-coding
MACS_peak_510	chr1	186553480	186558504	+	1815	NA	exon (NM_008250, exon 1 of 4)	exon (NM_008250, exon 1 of 4)	380	NM_008250	15284	Mm.1347	NM_008250	ENSMUSG00000039377	Hlx	Hlx1	H2.0-like homeobox	protein-coding
MACS_peak_6113	chr5	144014612	144016890	+	1814	NA	exon (NM_017467, exon 7 of 7)	exon (NM_017467, exon 7 of 7)	15950	NM_017467	54201	Mm.6666	NM_017467	ENSMUSG00000046658	Zfp316	Emzf1|Mzf3|Znf316	zinc finger protein 316	protein-coding
MACS_peak_2696	chr15	85405043	85413154	+	1812	NA	promoter-TSS (NM_001163634)	promoter-TSS (NM_001163634)	-598	NM_001163634	22422	Mm.306946	NM_009528	ENSMUSG00000022382	Wnt7b	Wnt-7b	wingless-type MMTV integration site family, member 7B	protein-coding
MACS_peak_7264	chr7	151923093	151925332	+	1807	NA	intron (NM_178642, intron 1 of 25)	intron (NM_178642, intron 1 of 25)	285	NM_178642	101772	Mm.26700	NM_178642	ENSMUSG00000031075	Ano1	Tmem16a	anoctamin 1, calcium activated chloride channel	protein-coding
MACS_peak_4437	chr2	163028549	163032353	+	1807	NA	Intergenic	Intergenic	-20739	NM_001098799	269389	Mm.207709	NM_001098799	ENSMUSG00000074607	Tox2	AI851523|AV026525|BI987407|Gcx1|RxHMG1	TOX high mobility group box family member 2	protein-coding
MACS_peak_2876	chr16	18578895	18592311	+	1803	NA	intron (NM_001285476, intron 1 of 6)	intron (NM_001285476, intron 1 of 6)	1459	NM_011532	21380	Mm.295194	NM_011532	ENSMUSG00000009097	Tbx1	-	T-box 1	protein-coding
MACS_peak_3148	chr17	28276208	28281672	+	1803	NA	promoter-TSS (NM_001004366)	promoter-TSS (NM_001004366)	-531	NM_001004366	268935	Mm.258491	NM_001004366	ENSMUSG00000038677	Scube3	CEGF3|D030038I21Rik	signal peptide, CUB domain, EGF-like 3	protein-coding
MACS_peak_4060	chr2	35516658	35517974	+	1803	NA	intron (NM_001290637, intron 3 of 16)	CpG-8052	-30198	NM_001001602	69601	Mm.29629	NM_001001602	ENSMUSG00000026883	Dab2ip	2310011D08Rik|AI480459|Aip1|mKIAA1743	disabled 2 interacting protein	protein-coding
MACS_peak_4036	chr2	31803947	31806602	+	1802	NA	promoter-TSS (NM_145144)	promoter-TSS (NM_145144)	-549	NM_145144	108897	Mm.24838	NM_145144	ENSMUSG00000001864	Aif1l	2810003C17Rik|AI043124|C87647|Iba2	allograft inflammatory factor 1-like	protein-coding
MACS_peak_3966	chr2	18529590	18531618	+	1802	NA	Intergenic	Intergenic	-63485	NM_147778	12238	Mm.249586	NM_147778	ENSMUSG00000051154	Commd3	AW550818|Bup|D2Ertd542e	COMM domain containing 3	protein-coding
MACS_peak_1305	chr11	97487619	97493584	+	1802	NA	5' UTR (NM_175332, exon 1 of 1)	5' UTR (NM_175332, exon 1 of 1)	429	NM_175332	103551	Mm.24506	NM_175332	ENSMUSG00000043439	E130012A19Rik	AA409164|AI413509|AW539173|E13|esPRC2p48	RIKEN cDNA E130012A19 gene	protein-coding
MACS_peak_8227	chr9	108726274	108731730	+	1798	NA	exon (NM_080437, exon 1 of 35)	exon (NM_080437, exon 1 of 35)	351	NM_080437	107934	Mm.39945	NM_080437	ENSMUSG00000023473	Celsr3	Fmi1|flamingo|mKIAA0812	cadherin, EGF LAG seven-pass G-type receptor 3 (flamingo homolog, Drosophila)	protein-coding
MACS_peak_2912	chr16	35152897	35157683	+	1795	NA	promoter-TSS (NM_001012765)	promoter-TSS (NM_001012765)	-432	NM_001012765	224129	Mm.41137	NM_001012765		Adcy5	AW121902|Ac5	adenylate cyclase 5	protein-coding
MACS_peak_3963	chr2	17650765	17653129	+	1791	NA	intron (NM_028757, intron 1 of 6)	intron (NM_028757, intron 1 of 6)	748	NM_028757	74103	Mm.120298	NM_028757	ENSMUSG00000053702	Nebl	1200007O21Rik|A630080F05Rik|BB140644|D830029A09Rik|Lnebl	nebulette	protein-coding
MACS_peak_683	chr10	61245364	61247884	+	1791	NA	promoter-TSS (NM_207000)	promoter-TSS (NM_207000)	-12	NM_207000	404634	Mm.272870	NM_207000	ENSMUSG00000020086	H2afy2	macroH2A2	H2A histone family, member Y2	protein-coding
MACS_peak_7383	chr8	24084512	24089371	+	1791	NA	intron (NM_001110783, intron 1 of 43)	intron (NM_001110783, intron 1 of 43)	1633	NM_001277280	11733	Mm.334444	NM_031158	ENSMUSG00000031543	Ank1	Ank-1|nb|pale	ankyrin 1, erythroid	protein-coding
MACS_peak_6553	chr6	128246856	128252821	+	1791	NA	intron (NM_001080979, intron 1 of 10)	intron (NM_001080979, intron 1 of 10)	993	NM_001080979	21679	Mm.14774	NM_011567	ENSMUSG00000030353	Tead4	ETFR-2|Etfr2|FR-19|Rtef1|TEAD-4|TEF-3|Tcf13r1|Tef3|Tefr|Tefr1|Tefr1a	TEA domain family member 4	protein-coding
MACS_peak_2090	chr13	72760538	72771414	+	1790	NA	promoter-TSS (NR_030701)	promoter-TSS (NR_030701)	36	NR_030701	328287	Mm.235072	NR_030701		Gm20554	D430050G20	predicted gene, 20554	ncRNA
MACS_peak_3429	chr18	36087933	36094656	+	1790	NA	Intergenic	Intergenic	-33190	NM_028707	74002	Mm.196944	NM_028707	ENSMUSG00000024347	Psd2	6330404E20Rik|AW125584|EFA6C	pleckstrin and Sec7 domain containing 2	protein-coding
MACS_peak_2547	chr15	30575385	30577619	+	1790	NA	intron (NM_008729, intron 6 of 22)	CpG	-392379	NR_045186	73784	Mm.66947	NR_045186		4930430F21Rik	-	RIKEN cDNA 4930430F21 gene	ncRNA
MACS_peak_4790	chr3	105254066	105260323	+	1790	NA	intron (NM_001039347, intron 1 of 6)	intron (NM_001039347, intron 1 of 6)	-1321	NR_040759	78635	Mm.381306	NR_040759	ENSMUSG00000074346	Kcnd3os	1700095B22Rik	potassium voltage-gated channel, Shal-related family, member 3, opposite strand	ncRNA
MACS_peak_3260	chr17	51951503	51953204	+	1790	NA	promoter-TSS (NM_001163630)	promoter-TSS (NM_001163630)	-974	NM_001163630	20230	Mm.311655	NM_009122	ENSMUSG00000023927	Satb1	2610306G12Rik|AW413156	special AT-rich sequence binding protein 1	protein-coding
MACS_peak_5136	chr4	101759702	101761392	+	1790	NA	Intergenic	CpG	101102	NM_001085520	381536	Mm.297685	NM_001085520		Gm12789	OTTMUSG00000008445	predicted gene 12789	protein-coding
MACS_peak_5091	chr4	84318246	84322189	+	1790	NA	intron (NM_172870, intron 1 of 5)	intron (NM_172870, intron 1 of 5)	773	NM_172870	242509	Mm.190774	NM_172870		Bnc2	5031434M05Rik|8430420F16Rik	basonuclin 2	protein-coding
MACS_peak_173	chr1	75355778	75357921	+	1784	NA	promoter-TSS (NM_010043)	promoter-TSS (NM_010043)	-18	NM_010043	13346	Mm.6712	NM_010043		Des	-	desmin	protein-coding
MACS_peak_1709	chr12	83717448	83719750	+	1780	NA	intron (NM_001282061, intron 1 of 16)	CpG	113	NM_001282061	50779	Mm.153013	NM_015812	ENSMUSG00000021219	Rgs6	-	regulator of G-protein signaling 6	protein-coding
MACS_peak_5697	chr5	58105197	58113494	+	1780	NA	promoter-TSS (NM_018764)	promoter-TSS (NM_018764)	85	NM_018764	54216	Mm.332387	NM_018764	ENSMUSG00000029108	Pcdh7	-	protocadherin 7	protein-coding
MACS_peak_5982	chr5	121160039	121165121	+	1778	NA	promoter-TSS (NM_008052)	promoter-TSS (NM_008052)	-902	NM_008052	14357	Mm.1645	NM_008052	ENSMUSG00000029603	Dtx1	Fxit1|mKIAA4160	deltex 1 homolog (Drosophila)	protein-coding
MACS_peak_4271	chr2	121114296	121117651	+	1772	NA	intron (NM_032393, intron 1 of 6)	intron (NM_032393, intron 1 of 6)	635	NM_032393	17754	Mm.36501	NM_032393	ENSMUSG00000027254	Map1a	6330416M19Rik|AI853608|Mtap-1|Mtap1|Mtap1a|moth1	microtubule-associated protein 1 A	protein-coding
MACS_peak_643	chr10	42347808	42357437	+	1772	NA	Intergenic	Intergenic	-46100	NM_172416	14628	Mm.46636	NM_172416	ENSMUSG00000038280	Ostm1	1200002H13Rik|HSPC019|gl	osteopetrosis associated transmembrane protein 1	protein-coding
MACS_peak_1398	chr11	103609760	103611652	+	1772	NA	intron (NM_011719, intron 1 of 3)	CpG	429	NM_011719	22412	Mm.215161	NM_011719	ENSMUSG00000018486	Wnt9b	Wnt14b|Wnt15|clf|clf1|wnt-14b|wnt-15	wingless-type MMTV integration site family, member 9B	protein-coding
MACS_peak_4303	chr2	130119092	130122270	+	1772	NA	promoter-TSS (NM_001110513)	promoter-TSS (NM_001110513)	-994	NM_001110513	228598	Mm.32582	NM_152993	ENSMUSG00000053552	Ebf4	Ebf3|O/E-4|Olf-1	early B cell factor 4	protein-coding
MACS_peak_5264	chr4	125959249	125965953	+	1771	NA	Intergenic	B1_Mus2|SINE|Alu	-1437	NM_199473	329941	Mm.296327	NM_199473	ENSMUSG00000056174	Col8a2	AI429819	collagen, type VIII, alpha 2	protein-coding
MACS_peak_4237	chr2	105498793	105524242	+	1770	NA	intron (NM_001244201, intron 1 of 11)	intron (NM_001244201, intron 1 of 11)	-1030	NR_002867	402728	Mm.444553	NR_002867	ENSMUSG00000086029	Pax6os1	4831410G09Rik|Pax6os	paired box 6 opposite strand 1	ncRNA
MACS_peak_1582	chr12	34638519	34643849	+	1767	NA	Intergenic	Intergenic	-1352	NM_011658	22160	Mm.3280	NM_011658	ENSMUSG00000035799	Twist1	AA960487|M-Twist|Pde|Ska10|Ska<m10Jus>|Twist|bHLHa38|pdt	twist basic helix-loop-helix transcription factor 1	protein-coding
MACS_peak_2641	chr15	79088793	79094201	+	1762	NA	intron (NM_177580, intron 10 of 13)	intron (NM_177580, intron 10 of 13)	-6319	NM_020516	57274	Mm.441697	NM_020516	ENSMUSG00000032988	Slc16a8	Mct3	solute carrier family 16 (monocarboxylic acid transporters), member 8	protein-coding
MACS_peak_2561	chr15	37720928	37723769	+	1762	NA	promoter-TSS (NM_134094)	promoter-TSS (NM_134094)	-165	NM_134094	52589	Mm.283370	NM_134094	ENSMUSG00000051359	Ncald	AI848120|D030020D09Rik|D15Ertd412e	neurocalcin delta	protein-coding
MACS_peak_6985	chr7	100227550	100229878	+	1762	NA	exon (NM_021427, exon 1 of 2)	exon (NM_021427, exon 1 of 2)	325	NM_021427	58238	Mm.113787	NM_021427		Fam181b	A830059I20Rik|AB041569	family with sequence similarity 181, member B	protein-coding
MACS_peak_462	chr1	168930302	168932590	+	1762	NA	promoter-TSS (NM_175461)	promoter-TSS (NM_175461)	-102	NM_175461	226610	Mm.389217	NM_175461	ENSMUSG00000060568	Fam78b	C030014K22Rik|C030020L09Rik	family with sequence similarity 78, member B	protein-coding
MACS_peak_3450	chr18	37302965	37306047	+	1762	NA	exon (NM_001003672, exon 1 of 4)	exon (NM_001003672, exon 1 of 4)	883	NM_001003672	353237	Mm.308500	NM_001003672	ENSMUSG00000007440	Pcdhac2	CNRc2	protocadherin alpha subfamily C, 2	protein-coding
MACS_peak_2711	chr15	88975969	88980582	+	1760	NA	intron (NM_011161, intron 1 of 11)	intron (NM_011161, intron 1 of 11)	1761	NM_011161	19094	Mm.91969	NM_011161	ENSMUSG00000053137	Mapk11	P38b|Prkm11|Sapk2|Sapk2b|p38-2|p38beta|p38beta2	mitogen-activated protein kinase 11	protein-coding
MACS_peak_2890	chr16	22161397	22164932	+	1752	NA	5' UTR (NM_183029, exon 1 of 16)	5' UTR (NM_183029, exon 1 of 16)	208	NM_183029	319765	Mm.489442	NM_183029	ENSMUSG00000033581	Igf2bp2	C330012H03Rik|IMP-2|Imp2|Neilsen	insulin-like growth factor 2 mRNA binding protein 2	protein-coding
MACS_peak_6593	chr7	3302933	3304700	+	1752	NA	5' UTR (NM_011102, exon 1 of 18)	5' UTR (NM_011102, exon 1 of 18)	158	NM_011102	18752	Mm.7980	NM_011102	ENSMUSG00000078816	Prkcg	PKCgamma|Pkcc|Prkcc	protein kinase C, gamma	protein-coding
MACS_peak_7212	chr7	147129512	147132217	+	1752	NA	exon (NM_009482, exon 2 of 2)	exon (NM_009482, exon 2 of 2)	1109	NM_009482	22286	Mm.10205	NM_009482	ENSMUSG00000047751	Utf1	AI505934	undifferentiated embryonic cell transcription factor 1	protein-coding
MACS_peak_5703	chr5	67066505	67069495	+	1752	NA	promoter-TSS (NR_102714)	promoter-TSS (NR_102714)	-264	NR_102714	101202684	Mm.381468	NR_102714	ENSMUSG00000087601	Uchl1os	Gm16832|Uchl1as	ubiquitin carboxy-terminal hydrolase L1, opposite strand	ncRNA
MACS_peak_3428	chr18	36076688	36081236	+	1752	NA	Intergenic	Intergenic	-45522	NM_028707	74002	Mm.196944	NM_028707	ENSMUSG00000024347	Psd2	6330404E20Rik|AW125584|EFA6C	pleckstrin and Sec7 domain containing 2	protein-coding
MACS_peak_4738	chr3	96134141	96138957	+	1752	NA	Intergenic	Intergenic	-38657	NM_010186	14129	Mm.150	NM_010186	ENSMUSG00000015947	Fcgr1	AI323638|AV092959|CD64|FcgammaRI|IGGHAFC	Fc receptor, IgG, high affinity I	protein-coding
MACS_peak_6276	chr6	38585958	38588032	+	1752	NA	exon (NM_001033171, exon 1 of 5)	exon (NM_001033171, exon 1 of 5)	244	NM_001033171	74253	Mm.121859	NM_001033171	ENSMUSG00000071537	Klrg2	2310020F24Rik	killer cell lectin-like receptor subfamily G, member 2	protein-coding
MACS_peak_7389	chr8	24520361	24522955	+	1752	NA	promoter-TSS (NM_013834)	promoter-TSS (NM_013834)	-316	NM_013834	20377	Mm.281691	NM_013834	ENSMUSG00000031548	Sfrp1	2210415K03Rik|AW011917|AW107218|AW742929|sFRP-1	secreted frizzled-related protein 1	protein-coding
MACS_peak_5443	chr4	147112629	147113285	+	1752	NA	Intergenic	CpG	-36217	NM_001127188	100503584	Mm.276881	NM_001127188		Zfp534	Gm13159|OTTMUSG00000010681	zinc finger protein 534	protein-coding
MACS_peak_3440	chr18	36355175	36359622	+	1752	NA	promoter-TSS (NM_001167891)	promoter-TSS (NM_001167891)	-584	NM_001167891	100042150	Mm.380390	NM_001167891	ENSMUSG00000060275	Nrg2	Don1|NTAK	neuregulin 2	protein-coding
MACS_peak_6779	chr7	31911299	31912620	+	1748	NA	promoter-TSS (NM_011322)	promoter-TSS (NM_011322)	5	NM_011322	20266	Mm.1418	NM_011322	ENSMUSG00000019194	Scn1b	-	sodium channel, voltage-gated, type I, beta	protein-coding
MACS_peak_5308	chr4	133052284	133057742	+	1747	NA	promoter-TSS (NM_001081156)	promoter-TSS (NM_001081156)	-548	NM_001081156	69539	Mm.151594	NM_001081156	ENSMUSG00000056596	Trnp1	2300002D11Rik|Trnp	TMF1-regulated nuclear protein 1	protein-coding
MACS_peak_584	chr10	20877790	20881696	+	1732	NA	intron (NM_010848, intron 1 of 14)	CpG	1047	NM_001198914	17863	Mm.52109	NM_010848	ENSMUSG00000019982	Myb	AI550390|M16449|c-myb	myeloblastosis oncogene	protein-coding
MACS_peak_5741	chr5	75461694	75482217	+	1732	NA	exon (NM_133256, exon 1 of 2)	exon (NM_133256, exon 1 of 2)	329	NM_133256	14843	Mm.218752	NM_133256	ENSMUSG00000035946	Gsx2	Gsh-2|Gsh2	GS homeobox 2	protein-coding
MACS_peak_186	chr1	75499404	75506406	+	1732	NA	promoter-TSS (NM_010564)	promoter-TSS (NM_010564)	122	NM_178884	98733	Mm.236454	NM_178884	ENSMUSG00000026211	Obsl1	AW822216	obscurin-like 1	protein-coding
MACS_peak_7529	chr8	86424111	86426187	+	1731	NA	intron (NM_181039, intron 1 of 22)	intron (NM_181039, intron 1 of 22)	1152	NM_181039	330814	Mm.260733	NM_181039	ENSMUSG00000013033	Lphn1	2900070I05Rik|AI182398|CLIBA|Lec2|mKIAA0821	latrophilin 1	protein-coding
MACS_peak_5316	chr4	134258688	134260711	+	1728	NA	5' UTR (NM_207237, exon 1 of 12)	5' UTR (NM_207237, exon 1 of 12)	506	NM_207237	230815	Mm.18905	NM_207237	ENSMUSG00000037306	Man1c1	AI593348	mannosidase, alpha, class 1C, member 1	protein-coding
MACS_peak_3860	chr19	46388707	46397436	+	1723	NA	intron (NM_028627, intron 11 of 17)	intron (NM_028627, intron 11 of 17)	8575	NM_028627	73728	Mm.268532	NM_028627	ENSMUSG00000037126	Psd	1110007H17Rik|A930015K15|Efa6|Efa6a|Psdl|mKIAA2011	pleckstrin and Sec7 domain containing	protein-coding
MACS_peak_5926	chr5	118475928	118481328	+	1723	NA	intron (NM_021344, intron 1 of 7)	CpG	795	NM_021344	57816	Mm.273285	NM_021344	ENSMUSG00000029359	Tesc	1010001A17Rik|2410011K10Rik|TE-1	tescalcin	protein-coding
MACS_peak_2874	chr16	17913538	17915880	+	1723	NA	exon (NM_029469, exon 2 of 3)	exon (NM_029469, exon 2 of 3)	443	NM_029469	195333	Mm.463003	NM_029469		Gsc2	4930568H22Rik|GSC-2|Gscl	goosecoid homebox 2	protein-coding
MACS_peak_1370	chr11	101823385	101828401	+	1723	NA	intron (NM_024449, intron 1 of 1)	intron (NM_024449, intron 1 of 1)	2436	NM_024449	74499	Mm.265602	NM_024449	ENSMUSG00000001494	Sost	5430411E23Rik	sclerostin	protein-coding
MACS_peak_703	chr10	68860999	68863259	+	1723	NA	Intergenic	CpG	-46469	NM_007659	12534	Mm.281367	NM_007659	ENSMUSG00000019942	Cdk1	Cdc2|Cdc2a|p34<CDC2>	cyclin-dependent kinase 1	protein-coding
MACS_peak_6229	chr6	13786058	13789463	+	1723	NA	intron (NM_145066, intron 3 of 3)	intron (NM_145066, intron 3 of 3)	2088	NM_145066	64450	Mm.167625	NM_145066	ENSMUSG00000048216	Gpr85	2900026B03Rik	G protein-coupled receptor 85	protein-coding
MACS_peak_1853	chr13	22084752	22102453	+	1718	NA	TTS (NM_019429)	TTS (NM_019429)	8008	NM_019429	54373	Mm.32043	NM_019429	ENSMUSG00000006179	Prss16	AI448615|TSSP	protease, serine 16 (thymus)	protein-coding
MACS_peak_46	chr1	23767823	23773150	+	1710	NA	intron (NM_172124, intron 1 of 3)	intron (NM_172124, intron 1 of 3)	1721	NM_172124	280645	Mm.471661	NM_172124		B3gat2	GlcAT-S|Glcats	beta-1,3-glucuronyltransferase 2 (glucuronosyltransferase S)	protein-coding
MACS_peak_813	chr10	92771099	92775733	+	1707	NA	intron (NM_013508, intron 1 of 4)	A-rich|Low_complexity|Low_complexity	488	NM_013508	13713	Mm.4454	NM_013508	ENSMUSG00000008398	Elk3	D430049E23Rik|Erp|Etrp|Net|Sap-2	ELK3, member of ETS oncogene family	protein-coding
MACS_peak_1475	chr11	116777838	116783898	+	1707	NA	intron (NM_172948, intron 1 of 16)	intron (NM_172948, intron 1 of 16)	691	NM_172948	268510	Mm.35141	NM_172948	ENSMUSG00000043857	Mgat5b	C330018B01|GnT-IX|mGnTVB	mannoside acetylglucosaminyltransferase 5, isoenzyme B	protein-coding
MACS_peak_4330	chr2	132770568	132773365	+	1704	NA	promoter-TSS (NM_198029)	promoter-TSS (NM_198029)	-194	NM_198029	241639	Mm.209784	NM_198029	ENSMUSG00000027356	Fermt1	5830467P10Rik|Kindlin-1	fermitin family homolog 1 (Drosophila)	protein-coding
MACS_peak_2536	chr15	25293524	25294856	+	1701	NA	exon (NM_027395, exon 2 of 2)	exon (NM_027395, exon 2 of 2)	49329	NM_027395	70350	Mm.29586	NM_027395	ENSMUSG00000045763	Basp1	2610024P12Rik|CAP-23|CAP23|Ckap3|NAP-22|NAP22	brain abundant, membrane attached signal protein 1	protein-coding
MACS_peak_2244	chr13	118389862	118392994	+	1701	NA	5' UTR (NM_010408, exon 1 of 8)	5' UTR (NM_010408, exon 1 of 8)	301	NM_010408	15165	Mm.343429	NM_010408		Hcn1	Bcng1|C630013B14Rik|HAC2	hyperpolarization-activated, cyclic nucleotide-gated K+ 1	protein-coding
MACS_peak_7758	chr9	4259230	4260759	+	1701	NA	Intergenic	Intergenic	49500	NM_026276	67618	Mm.33970	NM_026276	ENSMUSG00000025894	Aasdhppt	2010309J24Rik|2810407B07Rik|AASD-PPT|CGI-80|LYS2|LYS5	aminoadipate-semialdehyde dehydrogenase-phosphopantetheinyl transferase	protein-coding
MACS_peak_7762	chr9	8898520	8903347	+	1701	NA	exon (NM_008829, exon 1 of 8)	exon (NM_008829, exon 1 of 8)	1100	NM_008829	18667	Mm.12798	NM_008829		Pgr	9930019P03Rik|BB114106|ENSMUSG00000074510|NR3C3|PR|PR-A|PR-B	progesterone receptor	protein-coding
MACS_peak_4866	chr3	142350513	142351390	+	1701	NA	Intergenic	RLTR1B-int|LTR|ERV1	-13061	NM_173763	229905	Mm.289643	NM_173763	ENSMUSG00000040213	Ccbl2	KATIII|Kat3	cysteine conjugate-beta lyase 2	protein-coding
MACS_peak_2242	chr13	118008716	118013163	+	1701	NA	intron (NM_010330, intron 1 of 8)	CT-rich|Low_complexity|Low_complexity	1559	NM_010330	13723	Mm.274926	NM_010330	ENSMUSG00000021728	Emb	AL022799|Gp70	embigin	protein-coding
MACS_peak_4530	chr2	179959748	179960462	+	1699	NA	intron (NM_001081171, intron 1 of 78)	CpG	459	NM_001081171	16776	Mm.4339	NM_001081171	ENSMUSG00000015647	Lama5	AA408760|AA408762|AI853660|[a]5|laminin-511|mKIAA0533	laminin, alpha 5	protein-coding
MACS_peak_1137	chr11	79786650	79788169	+	1699	NA	Intergenic	Intergenic	-11520	NM_144826	216987	Mm.274961	NM_144826	ENSMUSG00000035575	Utp6	4732497O03Rik|HCA66	UTP6, small subunit (SSU) processome component, homolog (yeast)	protein-coding
MACS_peak_3199	chr17	36297992	36300416	+	1699	NA	non-coding (NR_033517, exon 4 of 4)	non-coding (NR_033517, exon 4 of 4)	6278	NM_001081032	667977	Mm.441651	NM_001081032	ENSMUSG00000073402	Gm8909	EG667977|H2-Tw5l|H2-gs17	predicted gene 8909	protein-coding
MACS_peak_5744	chr5	75548803	75552229	+	1699	NA	intron (NM_011058, intron 1 of 22)	intron (NM_011058, intron 1 of 22)	-1675	NM_001083316	18595	Mm.221403	NM_011058	ENSMUSG00000029231	Pdgfra	AI115593|CD140a|Pdgfr-2	platelet derived growth factor receptor, alpha polypeptide	protein-coding
MACS_peak_7129	chr7	138074065	138082734	+	1699	NA	Intergenic	Intergenic	-1318	NM_019564	56213	Mm.30156	NM_019564	ENSMUSG00000006205	Htra1	AI429470|HTRA|L56|Prss11|RSPP11	HtrA serine peptidase 1	protein-coding
MACS_peak_6320	chr6	52138432	52143276	+	1699	NA	intron (NM_008265, intron 1 of 1)	intron (NM_008265, intron 1 of 1)	848	NM_008265	15401	Mm.439647	NM_008265	ENSMUSG00000000942	Hoxa4	AV206827|Hox-1.4	homeobox A4	protein-coding
MACS_peak_7616	chr8	94877533	94893129	+	1699	NA	TTS (NM_018826)	TTS (NM_018826)	3636	NM_018826	54352	Mm.101153	NM_018826	ENSMUSG00000031737	Irx5	-	Iroquois related homeobox 5 (Drosophila)	protein-coding
MACS_peak_6413	chr6	84530962	84538109	+	1698	NA	intron (NM_001177713, intron 2 of 6)	CpG-12225	9269	NM_175475	232174	Mm.255246	NM_175475	ENSMUSG00000063415	Cyp26b1	CP26|P450RAI-2	cytochrome P450, family 26, subfamily b, polypeptide 1	protein-coding
MACS_peak_1909	chr13	40818535	40819152	+	1691	NA	intron (NM_011547, intron 3 of 6)	intron (NM_011547, intron 3 of 6)	6969	NM_001122948	21418	Mm.85544	NM_011547	ENSMUSG00000021359	Tfap2a	AP-2|AP2alpha|Ap2|Ap2tf|Tcfap2a	transcription factor AP-2, alpha	protein-coding
MACS_peak_7535	chr8	86706484	86709319	+	1691	NA	Intergenic	CpG	-5041	NR_029821	723819		NR_029821		Mir181c	Mirn181c	microRNA 181c	ncRNA
MACS_peak_6504	chr6	119492240	119494995	+	1688	NA	intron (NM_009525, intron 1 of 4)	CpG	748	NM_009525	22419	Mm.321818	NM_009525	ENSMUSG00000030170	Wnt5b	AW545702|Wnt-5b	wingless-type MMTV integration site family, member 5B	protein-coding
MACS_peak_5641	chr5	35617932	35623697	+	1688	NA	promoter-TSS (NM_007418)	promoter-TSS (NM_007418)	-401	NM_007418	11553	Mm.57205	NM_007418	ENSMUSG00000045318	Adra2c	Adra-2c|[a]2C|alpha2-C4|alpha2C	adrenergic receptor, alpha 2c	protein-coding
MACS_peak_7800	chr9	26961857	26963059	+	1688	NA	intron (NM_023277, intron 1 of 8)	intron (NM_023277, intron 1 of 8)	548	NM_023277	83964	Mm.28770	NM_023277	ENSMUSG00000031990	Jam3	1110002N23Rik|JAM-3|JAM-C|Jcam3	junction adhesion molecule 3	protein-coding
MACS_peak_7962	chr9	56481324	56486765	+	1687	NA	intron (NM_181074, intron 3 of 3)	(CA)n|Simple_repeat|Simple_repeat	49016	NM_181074	235402	Mm.246605	NM_181074	ENSMUSG00000049556	Lingo1	4930471K13Rik|AV148400|LERN1|LINGO-1|Lrrn6a|UNQ201	leucine rich repeat and Ig domain containing 1	protein-coding
MACS_peak_646	chr10	43296749	43301361	+	1687	NA	promoter-TSS (NM_009846)	promoter-TSS (NM_009846)	80	NM_009846	12484	Mm.29742	NM_009846	ENSMUSG00000047139	Cd24a	Cd24|HSA|Ly-52|nectadrin	CD24a antigen	protein-coding
MACS_peak_1109	chr11	72300651	72304104	+	1687	NA	intron (NM_153060, intron 1 of 12)	CpG	1045	NM_153060	216892	Mm.212812	NM_153060	ENSMUSG00000040447	Spns2	-	spinster homolog 2	protein-coding
MACS_peak_1236	chr11	95373322	95377644	+	1686	NA	exon (NM_130858, exon 1 of 2)	exon (NM_130858, exon 1 of 2)	396	NM_130858	104079	Mm.22970	NM_130858	ENSMUSG00000046719	Nxph3	-	neurexophilin 3	protein-coding
MACS_peak_3258	chr17	50329337	50330346	+	1686	NA	promoter-TSS (NM_181397)	promoter-TSS (NM_181397)	-19	NM_181397	76438	Mm.41854	NM_181397		Rftn1	2310015N21Rik|AI853526	raftlin lipid raft linker 1	protein-coding
MACS_peak_4935	chr4	21856776	21860301	+	1674	NA	promoter-TSS (NM_175234)	promoter-TSS (NM_175234)	65	NM_175234	76132	Mm.159689	NM_175234		Faxc	6230409E13Rik|AW742931	failed axon connections homolog (Drosophila)	protein-coding
MACS_peak_4082	chr2	49920853	49922597	+	1674	NA	promoter-TSS (NM_177139)	promoter-TSS (NM_177139)	-224	NR_033304	320343	Mm.130607	NM_177139	ENSMUSG00000050447	Lypd6	E130115E03Rik	LY6/PLAUR domain containing 6	protein-coding
MACS_peak_1597	chr12	47919079	47921084	+	1674	NA	promoter-TSS (NM_021361)	promoter-TSS (NM_021361)	-319	NM_021361	664883	Mm.247195	NM_021361	ENSMUSG00000021047	Nova1	9430099M15Rik|G630039L02|Nova-1	neuro-oncological ventral antigen 1	protein-coding
MACS_peak_1871	chr13	28975251	28980372	+	1674	NA	promoter-TSS (NR_045054)	promoter-TSS (NR_045054)	-520	NR_045053	72518	Mm.37454	NR_045053		2610307P16Rik	AI666457	RIKEN cDNA 2610307P16 gene	ncRNA
MACS_peak_5428	chr4	146206788	146207480	+	1674	NA	Intergenic	CpG	82043	NM_001177545	667666	Mm.459230	NM_001177545	ENSMUSG00000066007	Zfp600	Gm13164|OTTMUSG00000010694	zinc finger protein 600	protein-coding
MACS_peak_4617	chr3	36586700	36589336	+	1674	NA	intron (NM_019510, intron 1 of 11)	intron (NM_019510, intron 1 of 11)	1071	NM_019510	22065	Mm.74363	NM_019510	ENSMUSG00000027716	Trpc3	Mwk|Trcp3|Trp3|Trrp3	transient receptor potential cation channel, subfamily C, member 3	protein-coding
MACS_peak_5117	chr4	91041074	91043388	+	1674	NA	intron (NM_207685, intron 2 of 7)	intron (NM_207685, intron 2 of 7)	956	NM_001177883	15569	Mm.318042	NM_010486	ENSMUSG00000008489	Elavl2	Hub|mel-N1	ELAV (embryonic lethal, abnormal vision, Drosophila)-like 2 (Hu antigen B)	protein-coding
MACS_peak_609	chr10	28865322	28868328	+	1674	NA	exon (NM_026138, exon 2 of 7)	exon (NM_026138, exon 2 of 7)	3023	NM_026138	67412	Mm.390264	NM_026138	ENSMUSG00000038916	Soga3	6330407J23Rik	SOGA family member 3	protein-coding
MACS_peak_6198	chr5	149074823	149079172	+	1674	NA	intron (NM_029920, intron 7 of 14)	intron (NM_029920, intron 7 of 14)	134483	NM_007513	11987	Mm.275489	NM_007513	ENSMUSG00000041313	Slc7a1	4831426K01Rik|AI447493|Atrc-1|Atrc1|Cat1|Rec-1|Rev-1|mCAT-1	solute carrier family 7 (cationic amino acid transporter, y+ system), member 1	protein-coding
MACS_peak_2191	chr13	100283112	100286935	+	1674	NA	intron (NM_008634, intron 1 of 6)	CpG	1534	NM_008634	17755	Mm.4173	NM_008634	ENSMUSG00000052727	Map1b	A230055D22|AI843217|LC1|MAP5|Mtap-5|Mtap1b|Mtap5	microtubule-associated protein 1B	protein-coding
MACS_peak_8075	chr9	75456247	75459912	+	1674	NA	intron (NM_016711, intron 1 of 9)	intron (NM_016711, intron 1 of 9)	1053	NM_016711	50876	Mm.291880	NM_016711	ENSMUSG00000032186	Tmod2	N-Tmod|NTMOD	tropomodulin 2	protein-coding
MACS_peak_613	chr10	30560409	30564556	+	1671	NA	5' UTR (NM_013904, exon 1 of 5)	5' UTR (NM_013904, exon 1 of 5)	107	NM_013904	15214	Mm.103573	NM_013904	ENSMUSG00000019789	Hey2	CHF1|Herp1|Hrt2|bHLHb32|hesr2	hairy/enhancer-of-split related with YRPW motif 2	protein-coding
MACS_peak_5694	chr5	52956132	52959442	+	1671	NA	promoter-TSS (NM_144945)	promoter-TSS (NM_144945)	-268	NM_144945	246316	Mm.44721	NM_144945	ENSMUSG00000039252	Lgi2	mKIAA1916	leucine-rich repeat LGI family, member 2	protein-coding
MACS_peak_3491	chr18	43551315	43553748	+	1671	NA	intron (NM_001291455, intron 1 of 13)	CpG	500	NM_009468	22240	Mm.8180	NM_009468	ENSMUSG00000024501	Dpysl3	CRMP-4|DRP-3|TUC4|ULIP-1|Ulip|Ulip1	dihydropyrimidinase-like 3	protein-coding
MACS_peak_1513	chr12	5380336	5383153	+	1671	NA	intron (NM_001164493, intron 1 of 13)	CpG	744	NM_001164493	208439	Mm.388281	NM_001164493	ENSMUSG00000020627	Klhl29	A230106N14Rik|Gm68|Kbtbd9|mKIAA1921	kelch-like 29	protein-coding
MACS_peak_2645	chr15	79340448	79348476	+	1671	NA	Intergenic	MIR3|SINE|MIR	-2376	NM_134090	105785	Mm.298199	NM_134090	ENSMUSG00000010830	Kdelr3	AI173274	KDEL (Lys-Asp-Glu-Leu) endoplasmic reticulum protein retention receptor 3	protein-coding
MACS_peak_7651	chr8	109034352	109036130	+	1671	NA	exon (NM_001037809, exon 2 of 16)	exon (NM_001037809, exon 2 of 16)	489	NM_001037809	12560	Mm.4658	NM_007665	ENSMUSG00000061048	Cdh3	AI385538|Cadp|Cdhp|P-cadherin|Pcad	cadherin 3	protein-coding
MACS_peak_3464	chr18	37879993	37882926	+	1671	NA	exon (NM_033576, exon 1 of 4)	exon (NM_033576, exon 1 of 4)	1251	NM_033576	93701	Mm.247203	NM_033576		Pcdhgb4	-	protocadherin gamma subfamily B, 4	protein-coding
MACS_peak_8225	chr9	108091919	108094219	+	1667	NA	promoter-TSS (NM_007567)	promoter-TSS (NM_007567)	-355	NM_007567	12217	Mm.20425	NM_007567	ENSMUSG00000032589	Bsn	-	bassoon	protein-coding
MACS_peak_5901	chr5	115638545	115645241	+	1657	NA	Intergenic	Intergenic	-5763	NM_013879	29867	Mm.38551	NM_013879	ENSMUSG00000029544	Cabp1	caldendrin	calcium binding protein 1	protein-coding
MACS_peak_5739	chr5	74036684	74044591	+	1657	NA	Intergenic	B3|SINE|B2	-1667	NM_011890	24051	Mm.89310	NM_011890	ENSMUSG00000029156	Sgcb	43kDa|AI747103|AI844814|beta-SG	sarcoglycan, beta (dystrophin-associated glycoprotein)	protein-coding
MACS_peak_1220	chr11	94332864	94337975	+	1657	NA	promoter-TSS (NM_009783)	promoter-TSS (NM_009783)	93	NM_001177888	12291	Mm.29585	NM_009783	ENSMUSG00000020866	Cacna1g	Cav3.1d|[a]1G|a1G|alpha-1G|mKIAA1123	calcium channel, voltage-dependent, T type, alpha 1G subunit	protein-coding
MACS_peak_4311	chr2	130865225	130868885	+	1657	NA	promoter-TSS (NR_105969)	promoter-TSS (NR_105969)	-921	NR_105969	102465606		NR_105969		Mir6973b	mmu-mir-6973b	microRNA mir-6973b	ncRNA
MACS_peak_7022	chr7	108965602	108970563	+	1656	NA	intron (NM_008887, intron 1 of 2)	intron (NM_008887, intron 1 of 2)	1255	NM_008887	11859	Mm.5028	NM_008887	ENSMUSG00000007946	Phox2a	Arix|Phox2|Pmx2|Pmx2a	paired-like homeobox 2a	protein-coding
MACS_peak_6873	chr7	70899494	70904616	+	1653	NA	intron (NM_130880, intron 13 of 13)	intron (NM_130880, intron 13 of 13)	-159688	NM_001256311	381994	Mm.425466	NM_001256311	ENSMUSG00000095061	E030018B13Rik	Gm1697	RIKEN cDNA E030018B13 gene	protein-coding
MACS_peak_2576	chr15	51871702	51873124	+	1647	NA	intron (NM_175503, intron 1 of 1)	intron (NM_175503, intron 1 of 1)	760	NM_175503	239435	Mm.24204	NM_175503	ENSMUSG00000068522	Aard	A5D3|AV328152	alanine and arginine rich domain containing protein	protein-coding
MACS_peak_800	chr10	89334968	89337114	+	1647	NA	promoter-TSS (NM_001128086)	promoter-TSS (NM_001128086)	-213	NM_001128086	77531	Mm.440605	NM_181398	ENSMUSG00000058589	Anks1b	AIDA-1b|C030032C09Rik|E530015N03Rik|ENSMUSG00000078431|Gm10937|Gm1555	ankyrin repeat and sterile alpha motif domain containing 1B	protein-coding
MACS_peak_1505	chr11	120809769	120810833	+	1647	NA	promoter-TSS (NM_001038653)	promoter-TSS (NM_001038653)	-80	NM_001038653	80879	Mm.28632	NM_030696	ENSMUSG00000025161	Slc16a3	Mct3|Mct4	solute carrier family 16 (monocarboxylic acid transporters), member 3	protein-coding
MACS_peak_4267	chr2	119583431	119586165	+	1646	NA	promoter-TSS (NM_206941)	promoter-TSS (NM_206941)	-537	NM_008523	17005	Mm.1740	NM_008523	ENSMUSG00000027297	Ltk	-	leukocyte tyrosine kinase	protein-coding
MACS_peak_2638	chr15	78871110	78874464	+	1646	NA	3' UTR (NM_001161712, exon 9 of 9)	3' UTR (NM_001161712, exon 9 of 9)	472	NM_015738	14429	Mm.390805	NM_015738	ENSMUSG00000006378	Galr3	Galnr3	galanin receptor 3	protein-coding
MACS_peak_6822	chr7	52666604	52672260	+	1646	NA	intron (NM_198190, intron 1 of 2)	intron (NM_198190, intron 1 of 2)	367	NM_198190	78405	Mm.20344	NM_198190	ENSMUSG00000074121	Ntf5	2900040K06Rik|AI462899|NT-4|NT4|NT4/5|Ntf-5|Ntf4	neurotrophin 5	protein-coding
MACS_peak_2755	chr15	99050146	99059967	+	1639	NA	promoter-TSS (NM_010601)	promoter-TSS (NM_010601)	-351	NM_010601	16512	Mm.374793	NM_010601	ENSMUSG00000037579	Kcnh3	AU019351|C030044P22Rik|Elk2|Kv12.2|Melk2	potassium voltage-gated channel, subfamily H (eag-related), member 3	protein-coding
MACS_peak_8119	chr9	91254210	91257510	+	1638	NA	3' UTR (NM_009573, exon 3 of 3)	3' UTR (NM_009573, exon 3 of 3)	4777	NM_009573	22771	Mm.335350	NM_009573	ENSMUSG00000032368	Zic1	ZIC|ZNF201	zinc finger protein of the cerebellum 1	protein-coding
MACS_peak_3248	chr17	47546389	47548285	+	1637	NA	Intergenic	CpG	4323	NM_001172091	75462	Mm.46129	NM_029296	ENSMUSG00000047150	1700001C19Rik	-	RIKEN cDNA 1700001C19 gene	protein-coding
MACS_peak_5014	chr4	47103874	47107000	+	1637	NA	intron (NM_172693, intron 1 of 9)	intron (NM_172693, intron 1 of 9)	612	NM_172693	230145	Mm.132246	NM_172693	ENSMUSG00000039774	Galnt12	9130206E10|A630062B03Rik	UDP-N-acetyl-alpha-D-galactosamine:polypeptide N-acetylgalactosaminyltransferase 12	protein-coding
MACS_peak_3562	chr18	67292731	67294489	+	1637	NA	exon (NM_010307, exon 1 of 12)	exon (NM_010307, exon 1 of 12)	396	NM_010307	14680	Mm.440746	NM_010307	ENSMUSG00000024524	Gnal	2610011C15Rik|9630020G10Rik|Galphaolf|Gna10|Golf	guanine nucleotide binding protein, alpha stimulating, olfactory type	protein-coding
MACS_peak_1462	chr11	115834768	115837935	+	1637	NA	5' UTR (NM_133663, exon 1 of 39)	5' UTR (NM_133663, exon 1 of 39)	312	NM_133663	192897	Mm.213873	NM_133663	ENSMUSG00000020758	Itgb4	AA407042|C230078O20|CD104	integrin beta 4	protein-coding
MACS_peak_1046	chr11	61770419	61774178	+	1632	NA	intron (NM_001281818, intron 1 of 14)	intron (NM_001281818, intron 1 of 14)	2033	NM_001281818	432572	Mm.458025	NM_001029936	ENSMUSG00000042331	Specc1	2810012G08Rik|B230396K10Rik|Cytsb	sperm antigen with calponin homology and coiled-coil domains 1	protein-coding
MACS_peak_2777	chr15	100874317	100878549	+	1628	NA	TTS (NM_011323)	TTS (NM_011323)	8397	NM_001214911	668225	Mm.385011	NM_001214911	ENSMUSG00000095440	Fignl2	EG668225	fidgetin-like 2	protein-coding
MACS_peak_7032	chr7	112934907	112937582	+	1625	NA	promoter-TSS (NM_001162943)	promoter-TSS (NM_001162943)	-180	NM_001162943	233651	Mm.334108	NM_001162943	ENSMUSG00000036862	Dchs1	3110041P15Rik|C130033F22Rik|CDH25|FIB1|Gm165|PCDH16	dachsous 1 (Drosophila)	protein-coding
MACS_peak_7974	chr9	58159319	58162086	+	1625	NA	5' UTR (NM_010729, exon 1 of 7)	5' UTR (NM_010729, exon 1 of 7)	317	NM_010729	16949	Mm.250492	NM_010729	ENSMUSG00000032334	Loxl1	Loxl	lysyl oxidase-like 1	protein-coding
MACS_peak_2774	chr15	100813724	100815544	+	1625	NA	intron (NM_001077499, intron 12 of 26)	intron (NM_001077499, intron 12 of 26)	47932	NM_011323	20273	Mm.385012	NM_011323	ENSMUSG00000023033	Scn8a	AI853486|C630029C19Rik|NaCh6|Nav1.6|dmu|med|mnd-2|mnd2|nmf2|nmf335|nmf58|nur14|seal	sodium channel, voltage-gated, type VIII, alpha	protein-coding
MACS_peak_2448	chr14	99696837	99698866	+	1625	NA	promoter-TSS (NM_009769)	promoter-TSS (NM_009769)	-59	NM_009769	12224	Mm.30262	NM_009769	ENSMUSG00000005148	Klf5	4930520J07Rik|Bteb2|CKLF|IKLF	Kruppel-like factor 5	protein-coding
MACS_peak_277	chr1	93697158	93699458	+	1625	NA	exon (NM_007855, exon 1 of 2)	exon (NM_007855, exon 1 of 2)	254	NM_007855	13345	Mm.9474	NM_007855	ENSMUSG00000007805	Twist2	Dermo1|bHLHa39	twist basic helix-loop-helix transcription factor 2	protein-coding
MACS_peak_5842	chr5	107831434	107833619	+	1625	NA	promoter-TSS (NM_001001804)	promoter-TSS (NM_001001804)	-6	NM_001001804	384214	Mm.489863	NM_001001804	ENSMUSG00000033805	Ephx4	Abhd7|Ephxrp|Gm1382	epoxide hydrolase 4	protein-coding
MACS_peak_4737	chr3	96129442	96133246	+	1625	NA	Intergenic	B1_Mur3|SINE|Alu	-33452	NM_010186	14129	Mm.150	NM_010186	ENSMUSG00000015947	Fcgr1	AI323638|AV092959|CD64|FcgammaRI|IGGHAFC	Fc receptor, IgG, high affinity I	protein-coding
MACS_peak_594	chr10	22537338	22540003	+	1617	NA	intron (NM_011545, intron 1 of 1)	intron (NM_011545, intron 1 of 1)	1264	NM_011545	21412	Mm.16497	NM_011545	ENSMUSG00000045680	Tcf21	Pod-1|Pod1|bHLHa23|capsulin|epc|epicardin	transcription factor 21	protein-coding
MACS_peak_3957	chr2	12223096	12224182	+	1617	NA	promoter-TSS (NM_001001309)	promoter-TSS (NM_001001309)	-92	NM_001001309	241226	Mm.329997	NM_001001309	ENSMUSG00000026768	Itga8	AI447669	integrin alpha 8	protein-coding
MACS_peak_377	chr1	136883919	136885376	+	1617	NA	exon (NM_001033409, exon 18 of 18)	exon (NM_001033409, exon 18 of 18)	25505	NM_001278115	67196	Mm.284587	NM_026024	ENSMUSG00000026429	Ube2t	2700084L22Rik|C80607	ubiquitin-conjugating enzyme E2T (putative)	protein-coding
MACS_peak_3181	chr17	35094111	35095911	+	1617	NA	exon (NM_010478, exon 1 of 1)	exon (NM_010478, exon 1 of 1)	1172	NM_010478	15511	Mm.372314	NM_010478	ENSMUSG00000090877	Hspa1b	Hsp70|Hsp70-1|Hsp70.1|hsp68	heat shock protein 1B	protein-coding
MACS_peak_2620	chr15	75534693	75536246	+	1617	NA	intron (NM_001163465, intron 1 of 14)	intron (NM_001163465, intron 1 of 14)	751	NM_008164	14787	Mm.57052	NM_008164	ENSMUSG00000022580	Rhpn1	BB023497|Grbp|Rhophilin|mKIAA1929	rhophilin, Rho GTPase binding protein 1	protein-coding
MACS_peak_3850	chr19	45371436	45377755	+	1617	NA	Intergenic	Intergenic	-63629	NM_001286466	12234	Mm.119717	NM_009771	ENSMUSG00000025217	Btrc	Beta-Trcp1|E3RS-IkappaB|E3RSIkappaB|FWD1|Fbw1a|HOS|Slimb|b-TrCP|beta-TrCP	beta-transducin repeat containing protein	protein-coding
MACS_peak_4669	chr3	78770617	78772337	+	1614	NA	Intergenic	Intergenic	178320	NM_001099624	76089	Mm.31220	NM_001099624	ENSMUSG00000062232	Rapgef2	5830453M24Rik|CNRasGEF|Pdzgef1|RA-GEF-1|mKIAA0313|nRapGEP	Rap guanine nucleotide exchange factor (GEF) 2	protein-coding
MACS_peak_3854	chr19	45749006	45751722	+	1614	NA	Intergenic	Intergenic	-15681	NM_013907	30838	Mm.254739	NM_013907	ENSMUSG00000040913	Fbxw4	Dac|Fbw4|SHFM3|SHSF3|dactylin|dactylyn	F-box and WD-40 domain protein 4	protein-coding
MACS_peak_2551	chr15	34607668	34608694	+	1614	NA	intron (NR_045883, intron 3 of 3)	CpG	280	NM_145469	223473	Mm.258402	NM_145469	ENSMUSG00000038879	Nipal2	9330161F08Rik|Npal2	NIPA-like domain containing 2	protein-coding
MACS_peak_6569	chr6	137596818	137598291	+	1614	NA	intron (NM_007945, intron 1 of 21)	CpG	252	NM_001271588	13860	Mm.235346	NM_007945	ENSMUSG00000015766	Eps8	AW261790	epidermal growth factor receptor pathway substrate 8	protein-coding
MACS_peak_6228	chr6	12697176	12699712	+	1614	NA	intron (NM_001164805, intron 1 of 26)	intron (NM_001164805, intron 1 of 26)	809	NM_001164805	330267	Mm.11989	NM_001164805	ENSMUSG00000032625	Thsd7a	Gm837	thrombospondin, type I, domain containing 7A	protein-coding
MACS_peak_2667	chr15	82788837	82793857	+	1614	NA	Intergenic	Intergenic	-48783	NM_001114140	21411	Mm.252156	NM_013836	ENSMUSG00000041852	Tcf20	2810438H08Rik|SPBP|mKIAA0292	transcription factor 20	protein-coding
MACS_peak_3608	chr18	79302750	79307856	+	1614	NA	intron (NM_053099, intron 1 of 5)	intron (NM_053099, intron 1 of 5)	827	NM_053099	240427	Mm.312871	NM_053099	ENSMUSG00000024548	Setbp1	C130092E12|Seb|mKIAA0437	SET binding protein 1	protein-coding
MACS_peak_1212	chr11	89162677	89165915	+	1614	NA	promoter-TSS (NM_008711)	promoter-TSS (NM_008711)	-423	NM_008711	18121	Mm.135266	NM_008711	ENSMUSG00000048616	Nog	-	noggin	protein-coding
MACS_peak_6597	chr7	4069688	4072973	+	1614	NA	exon (NM_001109765, exon 1 of 14)	exon (NM_001109765, exon 1 of 14)	195	NM_001001454	57776	Mm.29729	NM_021324	ENSMUSG00000030428	Ttyh1	4930459B04Rik|6330408P11Rik|tty	tweety homolog 1 (Drosophila)	protein-coding
MACS_peak_7034	chr7	114512587	114515089	+	1614	NA	promoter-TSS (NM_021889)	promoter-TSS (NM_021889)	-466	NM_021889	60510	Mm.302793	NM_021889	ENSMUSG00000062542	Syt9	-	synaptotagmin IX	protein-coding
MACS_peak_2354	chr14	57483132	57485372	+	1614	NA	Intergenic	Intergenic	-22380	NM_029498	76007	Mm.31417	NM_029498	ENSMUSG00000021945	Zmym2	5830413P05Rik|FIM|MYM|RAMP|SCLL|Zfp198|Znf198	zinc finger, MYM-type 2	protein-coding
MACS_peak_4178	chr2	79267520	79269215	+	1614	NA	intron (NM_001048176, intron 1 of 12)	intron (NM_001048176, intron 1 of 12)	778	NM_001048176	228094	Mm.440704	NM_001033295	ENSMUSG00000075256	Cerkl	Gm1958|Rp26	ceramide kinase-like	protein-coding
MACS_peak_6319	chr6	52126359	52137465	+	1614	NA	intron (NM_010452, intron 3 of 4)	intron (NM_010452, intron 3 of 4)	9790	NM_008265	15401	Mm.439647	NM_008265	ENSMUSG00000000942	Hoxa4	AV206827|Hox-1.4	homeobox A4	protein-coding
MACS_peak_6964	chr7	91556990	91560303	+	1614	NA	promoter-TSS (NM_007488)	promoter-TSS (NM_007488)	-98	NM_007488	11864	Mm.38594	NM_007488	ENSMUSG00000015709	Arnt2	Hif-2b|bHLHe1|mKIAA0307	aryl hydrocarbon receptor nuclear translocator 2	protein-coding
MACS_peak_7806	chr9	30749074	30752549	+	1614	NA	exon (NM_013906, exon 1 of 9)	exon (NM_013906, exon 1 of 9)	663	NM_013906	30806	Mm.100582	NM_013906	ENSMUSG00000031994	Adamts8	METH-2|METH2	a disintegrin-like and metallopeptidase (reprolysin type) with thrombospondin type 1 motif, 8	protein-coding
MACS_peak_2337	chr14	55098003	55098741	+	1611	NA	exon (NM_080726, exon 5 of 5)	exon (NM_080726, exon 5 of 5)	3435	NM_080726	140743	Mm.274727	NM_080726	ENSMUSG00000022176	Rem2	AW411893	rad and gem related GTP binding protein 2	protein-coding
MACS_peak_383	chr1	137479651	137483389	+	1607	NA	exon (NM_173437, exon 1 of 29)	exon (NM_173437, exon 1 of 29)	412	NM_173437	215690	Mm.34977	NM_173437	ENSMUSG00000009418	Nav1	9530089B19|9930003A20Rik|C230080M11Rik|Pomfil3|Unc53h1|mKIAA1151|steerin-1	neuron navigator 1	protein-coding
MACS_peak_8034	chr9	64946718	64952058	+	1607	NA	promoter-TSS (NM_001290315)	promoter-TSS (NM_001290315)	95	NM_020043	56741	Mm.209041	NM_020043	ENSMUSG00000032816	Igdcc4	DDM36|Nope	immunoglobulin superfamily, DCC subclass, member 4	protein-coding
MACS_peak_6831	chr7	53087940	53090124	+	1604	NA	exon (NM_008172, exon 12 of 12)	exon (NM_008172, exon 12 of 12)	-2873	NM_153419	101612	Mm.274847	NM_153419	ENSMUSG00000053801	Grwd1	A301|AI504353|Grwd|Wdr28	glutamate-rich WD repeat containing 1	protein-coding
MACS_peak_7105	chr7	133225331	133227823	+	1599	NA	promoter-TSS (NM_001101488)	promoter-TSS (NM_001101488)	-652	NM_001101488	269994	Mm.39599	NM_001101488	ENSMUSG00000046182	Gsg1l	AI852434|C230098I05Rik|G630023A01Rik|Gm637|g1l	GSG1-like	protein-coding
MACS_peak_7495	chr8	74081883	74083406	+	1595	NA	exon (NM_001100462, exon 1 of 4)	exon (NM_001100462, exon 1 of 4)	126	NM_001100462	434325	Mm.33613	NM_001100462	ENSMUSG00000043664	Tmem221	-	transmembrane protein 221	protein-coding
MACS_peak_7563	chr8	90795846	90797845	+	1592	NA	intron (NM_007406, intron 1 of 27)	intron (NM_007406, intron 1 of 27)	543	NM_007406	11513	Mm.288206	NM_007406	ENSMUSG00000031659	Adcy7	AA407758	adenylate cyclase 7	protein-coding
MACS_peak_5689	chr5	48374228	48377786	+	1592	NA	non-coding (NR_111900, exon 1 of 36)	non-coding (NR_111900, exon 1 of 36)	1613	NM_001291228	20563	Mm.289739	NM_178804		Slit2	Drad-1|E030015M03Rik|E130320P19Rik|Slil3|mKIAA4141|slit-2	slit homolog 2 (Drosophila)	protein-coding
MACS_peak_4067	chr2	38201962	38217800	+	1592	NA	intron (NM_001290646, intron 2 of 4)	intron (NM_001290646, intron 2 of 4)	3053	NM_010710	16870	Mm.142856	NM_010710	ENSMUSG00000000247	Lhx2	LH2A|Lh-2|Lim2|ap|apterous	LIM homeobox protein 2	protein-coding
MACS_peak_4037	chr2	31938751	31946016	+	1592	NA	Intergenic	Intergenic	-3158	NM_175511	241303	Mm.250441	NM_175511	ENSMUSG00000050592	Fam78a	A130092J06Rik	family with sequence similarity 78, member A	protein-coding
MACS_peak_2795	chr15	101687157	101692333	+	1592	NA	TTS (NM_001003667)	TTS (NM_001003667)	-8528	NM_008473	16678	Mm.183137	NM_008473	ENSMUSG00000046834	Krt1	Krt-2.1|Krt2-1|Krt86	keratin 1	protein-coding
MACS_peak_5419	chr4	145615581	145617967	+	1592	NA	Intergenic	B2_Mm1a|SINE|B2	-34392	NR_045468	67524	Mm.444300	NR_045468	ENSMUSG00000086046	1700095A21Rik	-	RIKEN cDNA 1700095A21 gene	ncRNA
MACS_peak_8343	chrX	100262072	100264247	+	1588	NA	Intergenic	C-rich|Low_complexity|Low_complexity	118844	NM_008671	17954	Mm.388694	NM_008671	ENSMUSG00000082229	Nap1l2	Bpx	nucleosome assembly protein 1-like 2	protein-coding
MACS_peak_3201	chr17	36313533	36317664	+	1588	NA	promoter-TSS (NR_033619)	promoter-TSS (NR_033619)	-124	NR_033619	625785	Mm.390996	NR_033619		Gm6623	EG625785	akirin 1 pseudogene	pseudo
MACS_peak_1823	chr12	118772056	118775148	+	1588	NA	intron (NM_175930, intron 3 of 27)	intron (NM_175930, intron 3 of 27)	18650	NM_175930	217944	Mm.227642	NM_175930	ENSMUSG00000041992	Rapgef5	4932413M22|C86120|D030051B22Rik|GFR|Mrgef|mKIAA0277|mmr-gef	Rap guanine nucleotide exchange factor (GEF) 5	protein-coding
MACS_peak_729	chr10	79099947	79101770	+	1580	NA	promoter-TSS (NM_001024539)	promoter-TSS (NM_001024539)	-195	NM_001024539	216148	Mm.39424	NM_001024539	ENSMUSG00000020312	Shc2	6720466E06|SCK|ShcB|Sli	SHC (Src homology 2 domain containing) transforming protein 2	protein-coding
MACS_peak_1470	chr11	116391817	116395524	+	1580	NA	promoter-TSS (NM_025367)	promoter-TSS (NM_025367)	-88	NM_001172472	20698	Mm.20944	NM_011451	ENSMUSG00000061878	Sphk1	1110006G24Rik|Sk1|Spk1	sphingosine kinase 1	protein-coding
MACS_peak_2575	chr15	50720253	50722095	+	1580	NA	promoter-TSS (NR_035444)	promoter-TSS (NR_035444)	413	NM_032000	83925	Mm.30466	NM_032000	ENSMUSG00000038679	Trps1	AI115454|AI447310|D15Ertd586e	trichorhinophalangeal syndrome I (human)	protein-coding
MACS_peak_7083	chr7	128125025	128125338	+	1580	NA	promoter-TSS (NM_028955)	promoter-TSS (NM_028955)	645	NM_007672	12585	Mm.1640	NM_007672	ENSMUSG00000030878	Cdr2	AA617262	cerebellar degeneration-related 2	protein-coding
MACS_peak_8041	chr9	65435366	65437967	+	1580	NA	intron (NM_172453, intron 1 of 11)	intron (NM_172453, intron 1 of 11)	1654	NM_172453	208084	Mm.211032	NM_172453	ENSMUSG00000041064	Pif1	4631410M14|AI449441	PIF1 5'-to-3' DNA helicase homolog (S. cerevisiae)	protein-coding
MACS_peak_5322	chr4	134702495	134710189	+	1579	NA	intron (NM_019732, intron 1 of 5)	intron (NM_019732, intron 1 of 5)	29782	NM_019732	12399	Mm.378894	NM_019732	ENSMUSG00000070691	Runx3	AML2|Cbfa3|Pebp2a3	runt related transcription factor 3	protein-coding
MACS_peak_1186	chr11	85642247	85652239	+	1572	NA	intron (NM_009324, intron 1 of 6)	intron (NM_009324, intron 1 of 6)	1126	NM_009324	21385	Mm.287052	NM_009324	ENSMUSG00000000093	Tbx2	-	T-box 2	protein-coding
MACS_peak_5144	chr4	107106551	107108574	+	1572	NA	intron (NM_147221, intron 1 of 10)	CpG	238	NM_147221	230587	Mm.331757	NM_147221	ENSMUSG00000034762	Glis1	Gli5|Gli6|GliH1	GLIS family zinc finger 1	protein-coding
MACS_peak_494	chr1	182261043	182262880	+	1571	NA	intron (NM_001081175, intron 1 of 7)	CpG	-1281	NR_003623	277333	Mm.389223	NM_199472		Gm5069	EG277333	glyceraldehyde-3-phosphate dehydrogenase pseudogene	pseudo
MACS_peak_3253	chr17	49070117	49073262	+	1571	NA	promoter-TSS (NM_027452)	promoter-TSS (NM_027452)	-218	NM_027452	70530	Mm.133607	NM_027452	ENSMUSG00000040490	Lrfn2	5730420O05Rik|SALM1|mKIAA1246	leucine rich repeat and fibronectin type III domain containing 2	protein-coding
MACS_peak_301	chr1	121312626	121321467	+	1571	NA	intron (NM_008381, intron 1 of 1)	CpG	1779	NM_008381	16324	Mm.3092	NM_008381	ENSMUSG00000037035	Inhbb	-	inhibin beta-B	protein-coding
MACS_peak_437	chr1	158404039	158405267	+	1571	NA	promoter-TSS (NM_009230)	promoter-TSS (NM_009230)	-194	NM_009230	20652	Mm.28099	NM_009230	ENSMUSG00000026600	Soat1	8430426K15Rik|ACAT-1|AW550831|Acact|ald|hid	sterol O-acyltransferase 1	protein-coding
MACS_peak_884	chr11	3812286	3813298	+	1569	NA	exon (NM_153142, exon 1 of 2)	exon (NM_153142, exon 1 of 2)	1875	NM_153142	103710	Mm.171514	NM_153142	ENSMUSG00000048807	Slc35e4	A330108F03Rik|AI414849|AI536442	solute carrier family 35, member E4	protein-coding
MACS_peak_6833	chr7	53121602	53127426	+	1564	NA	Intergenic	(CA)n|Simple_repeat|Simple_repeat	-2463	NM_008172	14814	Mm.322594	NM_008172	ENSMUSG00000002771	Grin2d	GluN2D|NMDAR2D|NR2D	glutamate receptor, ionotropic, NMDA2D (epsilon 4)	protein-coding
MACS_peak_188	chr1	75537984	75549761	+	1563	NA	exon (NM_009208, exon 3 of 23)	exon (NM_009208, exon 3 of 23)	1031	NM_009208	20536	Mm.5053	NM_009208		Slc4a3	A930038D23Rik|Ae3	solute carrier family 4 (anion exchanger), member 3	protein-coding
MACS_peak_4719	chr3	89632194	89637379	+	1563	NA	promoter-TSS (NM_172530)	promoter-TSS (NM_172530)	-506	NM_172530	214547	Mm.225	NM_172530	ENSMUSG00000046280	She	9430022A14	src homology 2 domain-containing transforming protein E	protein-coding
MACS_peak_7001	chr7	104936569	104939029	+	1563	NA	Intergenic	CpG	-51042	NM_175105	66333	Mm.29756	NM_175105	ENSMUSG00000042797	Aqp11	1700015P13Rik|AI648923|sjds	aquaporin 11	protein-coding
MACS_peak_7037	chr7	116312896	116319820	+	1563	NA	Intergenic	Intergenic	-2536	NM_057173	109594	Mm.360145	NM_057173	ENSMUSG00000036111	Lmo1	Rbtn-1|Rbtn1|Ttg1	LIM domain only 1	protein-coding
MACS_peak_6052	chr5	135724946	135727098	+	1558	NA	exon (NM_010246, exon 1 of 1)	exon (NM_010246, exon 1 of 1)	895	NM_010246	14371	Mm.6256	NM_010246	ENSMUSG00000049551	Fzd9	mfz9	frizzled homolog 9 (Drosophila)	protein-coding
MACS_peak_7410	chr8	28195813	28199129	+	1558	NA	intron (NM_054044, intron 1 of 18)	intron (NM_054044, intron 1 of 18)	1158	NM_054044	78560	Mm.87046	NM_054044	ENSMUSG00000031486	Gpr124	8430414O08Rik|9530074E10Rik|Tem5|mKIAA1531	G protein-coupled receptor 124	protein-coding
MACS_peak_1753	chr12	102136029	102139004	+	1558	NA	5' UTR (NM_001177674, exon 1 of 3)	5' UTR (NM_001177674, exon 1 of 3)	218	NM_001177674	238377	Mm.32160	NM_175493	ENSMUSG00000047415	Gpr68	BB131428|Ogr1	G protein-coupled receptor 68	protein-coding
MACS_peak_893	chr11	7112223	7114845	+	1558	NA	exon (NM_008343, exon 1 of 5)	exon (NM_008343, exon 1 of 5)	392	NM_008343	16009	Mm.29254	NM_008343	ENSMUSG00000020427	Igfbp3	AI649005|IGFBP-3|IGgfbp3	insulin-like growth factor binding protein 3	protein-coding
MACS_peak_8161	chr9	97011036	97011705	+	1555	NA	promoter-TSS (NM_138756)	promoter-TSS (NM_138756)	90	NM_138756	192287	Mm.228067	NM_138756	ENSMUSG00000032449	Slc25a36	C330005L02Rik	solute carrier family 25, member 36	protein-coding
MACS_peak_4314	chr2	131371650	131374107	+	1553	NA	intron (NM_013460, intron 1 of 1)	Charlie4a|DNA|MER1_type	15143	NM_013460	11550	Mm.389380	NM_013460		Adra1d	Adra-1|Adra1|Adra1a|Gpcr8|Spr8|[a]1d|alpha1D-AR	adrenergic receptor, alpha 1d	protein-coding
MACS_peak_5586	chr5	23854057	23861796	+	1553	NA	promoter-TSS (NM_013569)	promoter-TSS (NM_013569)	-504	NM_013569	16511	Mm.6539	NM_013569	ENSMUSG00000038319	Kcnh2	AI326795|ERG1|LQT|Lqt2|M-erg|Merg1|merg1a|merg1b	potassium voltage-gated channel, subfamily H (eag-related), member 2	protein-coding
MACS_peak_1676	chr12	74211248	74215536	+	1553	NA	exon (NM_011382, exon 1 of 3)	exon (NM_011382, exon 1 of 3)	840	NM_011382	20474	Mm.249575	NM_011382	ENSMUSG00000034460	Six4	AI047561|AREC3|TrexBF	sine oculis-related homeobox 4	protein-coding
MACS_peak_6322	chr6	52149987	52160027	+	1553	NA	promoter-TSS (NM_010453)	promoter-TSS (NM_010453)	-421	NM_010453	15402	Mm.173	NM_010453	ENSMUSG00000038253	Hoxa5	Hox-1.3	homeobox A5	protein-coding
MACS_peak_3767	chr19	42160269	42160873	+	1553	NA	intron (NM_198108, intron 1 of 4)	intron (NM_198108, intron 1 of 4)	289	NM_198108	226123	Mm.259441	NM_198108	ENSMUSG00000049670	Morn4	-	MORN repeat containing 4	protein-coding
MACS_peak_66	chr1	37775302	37777448	+	1553	NA	intron (NM_028096, intron 1 of 9)	CpG	281	NM_028096	72097	Mm.142607	NM_028096	ENSMUSG00000026090	2010300C02Rik	-	RIKEN cDNA 2010300C02 gene	protein-coding
MACS_peak_4011	chr2	28060501	28062553	+	1553	NA	exon (NM_019498, exon 1 of 6)	exon (NM_019498, exon 1 of 6)	318	NM_019498	56177	Mm.43278	NM_019498	ENSMUSG00000026833	Olfm1	AMY|AW742568|Noe1|OlfA|Pancortin|Pancortin3	olfactomedin 1	protein-coding
MACS_peak_3019	chr16	93683408	93684750	+	1553	NA	intron (NM_173047, intron 1 of 2)	intron (NM_173047, intron 1 of 2)	615	NM_173047	109857	Mm.4512	NM_173047	ENSMUSG00000022947	Cbr3	1110001J05Rik|C81353	carbonyl reductase 3	protein-coding
MACS_peak_7525	chr8	85689404	85690185	+	1550	NA	5' UTR (NM_001111304, exon 1 of 21)	5' UTR (NM_001111304, exon 1 of 21)	543	NM_027758	71310	Mm.24031	NM_027758	ENSMUSG00000031709	Tbc1d9	4933431N12Rik|AI847101|AW490653|C76116	TBC1 domain family, member 9	protein-coding
MACS_peak_4843	chr3	129670981	129674344	+	1550	NA	intron (NM_001293644, intron 1 of 6)	CpG	462	NM_025779	66815	Mm.31056	NM_025779	ENSMUSG00000027994	Ccdc109b	9030408N13Rik|MCUb	coiled-coil domain containing 109B	protein-coding
MACS_peak_7947	chr9	53619571	53620401	+	1549	NA	intron (NM_028060, intron 1 of 7)	intron (NM_028060, intron 1 of 7)	644	NM_028060	72022	Mm.26159	NM_028060	ENSMUSG00000042195	Slc35f2	1500009K05Rik|AU019213	solute carrier family 35, member F2	protein-coding
MACS_peak_5529	chr5	5378700	5380867	+	1543	NA	intron (NM_011074, intron 1 of 14)	intron (NM_011074, intron 1 of 14)	468	NM_011074	18647	Mm.389061	NM_011074	ENSMUSG00000028926	Cdk14	Pftk1|mKIAA0834	cyclin-dependent kinase 14	protein-coding
MACS_peak_7829	chr9	37191919	37193986	+	1543	NA	3' UTR (NM_175189, exon 7 of 7)	3' UTR (NM_175189, exon 7 of 7)	-16679	NM_028783	74144	Mm.485070	NM_028783	ENSMUSG00000032125	Robo4	1200012D01Rik|AI593217	roundabout homolog 4 (Drosophila)	protein-coding
MACS_peak_527	chr1	189428779	189434874	+	1543	NA	Intergenic	Intergenic	-1059	NM_001243792	26381	Mm.89989	NM_011935	ENSMUSG00000026610	Esrrg	ERR3|Errg|NR3B3|mKIAA0832	estrogen-related receptor gamma	protein-coding
MACS_peak_2155	chr13	95476700	95481051	+	1543	NA	Intergenic	Intergenic	-80023	NM_009321	21371	Mm.379025	NM_009321	ENSMUSG00000042043	Tbca	Tbca13	tubulin cofactor A	protein-coding
MACS_peak_2265	chr14	22799396	22802818	+	1543	NA	Intergenic	Intergenic	7716	NM_145459	218820	Mm.292401	NM_145459	ENSMUSG00000039081	Zfp503	AI181838|B830002A16Rik|Nolz-1|Nolz1|Znf503	zinc finger protein 503	protein-coding
MACS_peak_4910	chr4	9769035	9775097	+	1543	NA	intron (NM_013526, intron 1 of 1)	intron (NM_013526, intron 1 of 1)	547	NM_013526	242316	Mm.302555	NM_013526	ENSMUSG00000051279	Gdf6	BMP-13|BMP13|GDF16	growth differentiation factor 6	protein-coding
MACS_peak_671	chr10	57350494	57352942	+	1543	NA	promoter-TSS (NM_008863)	promoter-TSS (NM_008863)	-69	NM_008863	18768	Mm.262135	NM_008863	ENSMUSG00000019876	Pkib	Pkibeta|Prkacn2	protein kinase inhibitor beta, cAMP dependent, testis specific	protein-coding
MACS_peak_3404	chr18	22501980	22503589	+	1543	NA	promoter-TSS (NM_001167777)	promoter-TSS (NM_001167777)	-806	NM_001167777	211961	Mm.392310	NM_001167777	ENSMUSG00000045215	Asxl3	C230079D11Rik|D430002O22Rik|D930044O18Rik|Gm329|Gm945	additional sex combs like 3 (Drosophila)	protein-coding
MACS_peak_6830	chr7	53051779	53054101	+	1531	NA	intron (NR_110987, intron 12 of 15)	MIR|SINE|MIR	12190	NM_001290990	381983	Mm.44928	NM_001005511	ENSMUSG00000062044	Lmtk3	BC059845|aatyk3	lemur tyrosine kinase 3	protein-coding
MACS_peak_5198	chr4	117599123	117600639	+	1531	NA	exon (NM_001284191, exon 5 of 6)	exon (NM_001284191, exon 5 of 6)	2487	NM_001284191	11876	Mm.56897	NM_009711	ENSMUSG00000028539	Artn	neublastin	artemin	protein-coding
MACS_peak_5203	chr4	119486229	119487633	+	1528	NA	promoter-TSS (NM_010657)	promoter-TSS (NM_010657)	-352	NM_010657	16656	Mm.302758	NM_010657	ENSMUSG00000028634	Hivep3	2900056N03Rik|A130075N07|AI848000|E030045D18Rik|KBP-1|KBP1|Krc|Rc|Schnurri-3|Shn3|Zas3	human immunodeficiency virus type I enhancer binding protein 3	protein-coding
MACS_peak_1657	chr12	73921713	73923323	+	1528	NA	Intergenic	Intergenic	60320	NM_008910	19042	Mm.261045	NM_008910	ENSMUSG00000021096	Ppm1a	2310003C21Rik|2900017D14Rik|AI427932|AU017636|MMPa-2|MPPa-1	protein phosphatase 1A, magnesium dependent, alpha isoform	protein-coding
MACS_peak_597	chr10	23067906	23070708	+	1528	NA	intron (NM_010167, intron 1 of 18)	intron (NM_010167, intron 1 of 18)	402	NM_010167	14051	Mm.332128	NM_010167	ENSMUSG00000010461	Eya4	B130023L16Rik	eyes absent 4 homolog (Drosophila)	protein-coding
MACS_peak_7097	chr7	129432155	129434546	+	1528	NA	intron (NM_008855, intron 1 of 16)	CpG	711	NM_008855	18751	Mm.207496	NM_008855	ENSMUSG00000052889	Prkcb	A130082F03Rik|PKC-Beta|Pkcb|Prkcb1|Prkcb2	protein kinase C, beta	protein-coding
MACS_peak_3393	chr18	14128496	14131344	+	1528	NA	intron (NM_145492, intron 1 of 7)	CpG-6761	1322	NM_145492	225207	Mm.40325	NM_145492	ENSMUSG00000024420	Zfp521	B930086A16Rik|Evi3|Znf521	zinc finger protein 521	protein-coding
MACS_peak_490	chr1	179187224	179190048	+	1528	NA	Intergenic	CpG	-9738	NM_011785	23797	Mm.235194	NM_011785	ENSMUSG00000019699	Akt3	AI851531|D930002M15Rik|Nmf350	thymoma viral proto-oncogene 3	protein-coding
MACS_peak_8096	chr9	85735566	85738993	+	1528	NA	5' UTR (NM_011627, exon 2 of 2)	5' UTR (NM_011627, exon 2 of 2)	820	NM_001164792	21983	Mm.20864	NM_011627	ENSMUSG00000035274	Tpbg	5T4|AW495680|WAIF1	trophoblast glycoprotein	protein-coding
MACS_peak_2923	chr16	37914327	37917672	+	1528	NA	promoter-TSS (NM_153394)	promoter-TSS (NM_153394)	-583	NM_153394	239845	Mm.228018	NM_153394	ENSMUSG00000046961	Gpr156	Gababl	G protein-coupled receptor 156	protein-coding
MACS_peak_4136	chr2	71818223	71819555	+	1528	NA	promoter-TSS (NM_001204167)	promoter-TSS (NM_001204167)	-383	NM_001204167	56508	Mm.196153	NM_019688	ENSMUSG00000049044	Rapgef4	1300003D15Rik|5730402K07Rik|6330581N18Rik|EPAC 2|Epac-2|Epac2|mKIAA4040	Rap guanine nucleotide exchange factor (GEF) 4	protein-coding
MACS_peak_1717	chr12	86038075	86041302	+	1528	NA	promoter-TSS (NM_001033334)	promoter-TSS (NM_001033334)	69	NM_001033334	627191	Mm.152484	NM_001033334	ENSMUSG00000071234	Syndig1l	DSPC1|Gm261|Tmem90a	synapse differentiation inducing 1 like	protein-coding
MACS_peak_2229	chr13	114081920	114084563	+	1528	NA	Intergenic	Intergenic	83374	NM_023612	71690	Mm.38929	NM_023612	ENSMUSG00000042379	Esm1	0610042H23Rik|AV004503|ESM-1	endothelial cell-specific molecule 1	protein-coding
MACS_peak_2088	chr13	72099517	72106618	+	1528	NA	Intergenic	Intergenic	-1896	NM_010573	16371	Mm.316056	NM_010573	ENSMUSG00000060969	Irx1	-	Iroquois related homeobox 1 (Drosophila)	protein-coding
MACS_peak_5520	chr4	155067978	155069178	+	1527	NA	5' UTR (NM_178699, exon 1 of 1)	5' UTR (NM_178699, exon 1 of 1)	127	NM_178699	230991	Mm.29083	NM_178699	ENSMUSG00000074738	B930041F14Rik	MNCb-3966	RIKEN cDNA B930041F14 gene	protein-coding
MACS_peak_1028	chr11	59074052	59080700	+	1527	NA	intron (NM_009522, intron 2 of 3)	intron (NM_009522, intron 2 of 3)	26877	NM_009522	22416	Mm.1367	NM_009522	ENSMUSG00000009900	Wnt3a	Wnt-3a|vt	wingless-type MMTV integration site family, member 3A	protein-coding
MACS_peak_2805	chr15	102520976	102529625	+	1527	NA	Intergenic	Intergenic	-23003	NR_030460	751542		NR_030460	miRBase:MI0004653	Mir688	Mirn688|mmu-mir-688	microRNA 688	ncRNA
MACS_peak_8172	chr9	97931602	97935085	+	1527	NA	exon (NM_022319, exon 1 of 18)	exon (NM_022319, exon 1 of 18)	243	NM_022319	64085	Mm.440903	NM_022319	ENSMUSG00000032452	Clstn2	2900042C18Rik|AI448973|CSTN2|Cs2|Cst-2|mKIAA4134	calsyntenin 2	protein-coding
MACS_peak_1896	chr13	38437323	38439617	+	1527	NA	intron (NM_007556, intron 1 of 6)	CpG	885	NM_007556	12161	Mm.385759	NM_007556	ENSMUSG00000039004	Bmp6	D13Wsu115e|Vgr1	bone morphogenetic protein 6	protein-coding
MACS_peak_2835	chr15	102998669	103002738	+	1524	NA	Intergenic	CpG	-6988	NM_027885	71726	Mm.254820	NM_027885		Smug1	1200013B09Rik|A930006H09Rik|C85220	single-strand selective monofunctional uracil DNA glycosylase	protein-coding
MACS_peak_6505	chr6	120242923	120245564	+	1514	NA	intron (NM_198884, intron 1 of 19)	CpG	334	NM_198884	330406	Mm.321840	NM_198884	ENSMUSG00000041372	B4galnt3	AB114826|B4GalNAcT3|C330047A21	beta-1,4-N-acetyl-galactosaminyl transferase 3	protein-coding
MACS_peak_3288	chr17	66796357	66801151	+	1514	NA	5' UTR (NM_172963, exon 1 of 14)	5' UTR (NM_172963, exon 1 of 14)	336	NM_172963	68617	Mm.33421	NM_172963	ENSMUSG00000052105	Mtcl1	1110012J17Rik|Ccdc165|D130071O13|Kiaa0802|Soga2|mKIAA0802|t8219b25	microtubule crosslinking factor 1	protein-coding
MACS_peak_6938	chr7	86639812	86651135	+	1514	NA	intron (NR_040313, intron 1 of 2)	intron (NR_040313, intron 1 of 2)	561	NR_040313	101694	Mm.41661	NR_040311		AI854517	-	expressed sequence AI854517	ncRNA
MACS_peak_2564	chr15	39028220	39030864	+	1514	NA	promoter-TSS (NM_001256383)	promoter-TSS (NM_001256383)	-290	NM_001256382	116838	Mm.309296	NM_053271		Rims2	2810036I15Rik|AW048769|RIM2|Rab3ip2|Rim2(+40A)|Rim2(+44A)|Rim2(+4A)|Serg2|Syt3-rs|mKIAA0751	regulating synaptic membrane exocytosis 2	protein-coding
MACS_peak_5748	chr5	76372338	76374390	+	1514	NA	intron (NM_010612, intron 1 of 29)	(GGGAA)n|Simple_repeat|Simple_repeat	1089	NM_010612	16542	Mm.285	NM_010612	ENSMUSG00000062960	Kdr	6130401C07|Flk-1|Flk1|Krd-1|Ly73|VEGFR-2|VEGFR2|sVEGFR-2	kinase insert domain protein receptor	protein-coding
MACS_peak_2829	chr15	102863213	102866584	+	1514	NA	promoter-TSS (NM_013553)	promoter-TSS (NM_013553)	72	NM_013553	15423	Mm.1351	NM_013553	ENSMUSG00000075394	Hoxc4	Hox-3.5	homeobox C4	protein-coding
MACS_peak_3948	chr2	6793195	6794030	+	1514	NA	intron (NM_001110231, intron 4 of 15)	CpG	12430	NM_010160	14007	Mm.398543	NM_010160	ENSMUSG00000002107	Celf2	B230218O03|B230345P09Rik|C88023|CELF-2|CUG-BP2|Cugbp2|D230046B21Rik|Etr-3|Napor|Napor-2|mETR-3	CUGBP, Elav-like family member 2	protein-coding
MACS_peak_1702	chr12	81856043	81861620	+	1514	NA	exon (NM_001008423, exon 2 of 2)	exon (NM_001008423, exon 2 of 2)	2871	NM_001008423	380768	Mm.29367	NM_001008423		Ccdc177	Gm1568	coiled-coil domain containing 177	protein-coding
MACS_peak_3109	chr17	23796580	23798975	+	1514	NA	intron (NM_153784, intron 1 of 9)	intron (NM_153784, intron 1 of 9)	287	NM_153784	212733	Mm.59997	NM_153784	ENSMUSG00000043782	Ccdc64b	BICDR-2	coiled-coil domain containing 64B	protein-coding
MACS_peak_4394	chr2	153353652	153357159	+	1514	NA	exon (NM_001134300, exon 1 of 11)	exon (NM_001134300, exon 1 of 11)	302	NM_001134300	329540	Mm.50600	NM_001001986	ENSMUSG00000061411	Nol4l	4931410H15|8430427H17Rik|AI429157|Gm1636	nucleolar protein 4-like	protein-coding
MACS_peak_5554	chr5	15438918	15441482	+	1514	NA	promoter-TSS (NM_001110843)	promoter-TSS (NM_001110843)	-309	NM_001110843	12293	Mm.159842	NM_009784	ENSMUSG00000040118	Cacna2d1	Ca(v)alpha2delta1|Cacna2|Cchl2a	calcium channel, voltage-dependent, alpha2/delta subunit 1	protein-coding
MACS_peak_6189	chr5	148211436	148212961	+	1514	NA	promoter-TSS (NM_010229)	promoter-TSS (NM_010229)	-133	NM_010229	14255	Mm.194	NM_010229	ENSMUSG00000042817	Flt3	B230315G04|CD135|Flk-2|Flk2|Flt-3|Ly72|wmfl	FMS-like tyrosine kinase 3	protein-coding
MACS_peak_2695	chr15	85035484	85036968	+	1512	NA	promoter-TSS (NM_010180)	promoter-TSS (NM_010180)	-212	NM_010180	14114	Mm.297992	NM_010180	ENSMUSG00000006369	Fbln1	-	fibulin 1	protein-coding
MACS_peak_6260	chr6	30687296	30689715	+	1512	NA	intron (NM_008590, intron 1 of 11)	intron (NM_008590, intron 1 of 11)	452	NM_001252292	17294	Mm.335639	NM_008590	ENSMUSG00000051855	Mest	AA408879|AI256745|Peg1	mesoderm specific transcript	protein-coding
MACS_peak_3679	chr19	8325755	8327569	+	1506	NA	Intergenic	LSU-rRNA_Hsa|rRNA|rRNA	-33333	NM_172776	236293	Mm.440581	NM_172776	ENSMUSG00000075044	Slc22a29	D630002G06Rik	solute carrier family 22. member 29	protein-coding
MACS_peak_1514	chr12	8304009	8310635	+	1504	NA	intron (NM_013527, intron 1 of 1)	intron (NM_013527, intron 1 of 1)	1438	NM_013527	238057	Mm.271308	NM_013527	ENSMUSG00000037660	Gdf7	BMP12	growth differentiation factor 7	protein-coding
MACS_peak_1316	chr11	98271464	98276069	+	1504	NA	promoter-TSS (NM_001003817)	promoter-TSS (NM_001003817)	-32	NM_001003817	13866	Mm.290822	NM_001003817	ENSMUSG00000062312	Erbb2	Erbb-2|HER-2|HER2|Neu|c-erbB2|c-neu|mKIAA3023	v-erb-b2 erythroblastic leukemia viral oncogene homolog 2, neuro/glioblastoma derived oncogene homolog (avian)	protein-coding
MACS_peak_3726	chr19	27289392	27292711	+	1504	NA	promoter-TSS (NM_001161420)	promoter-TSS (NM_001161420)	-459	NM_013703	22359	Mm.4141	NM_013703	ENSMUSG00000024924	Vldlr	AA408956|AI451093|AW047288	very low density lipoprotein receptor	protein-coding
MACS_peak_3653	chr19	5447157	5449149	+	1504	NA	intron (NM_010235, intron 1 of 3)	CpG	455	NM_010235	14283	Mm.6215	NM_010235	ENSMUSG00000024912	Fosl1	AW538199|Fra1|fra-1	fos-like antigen 1	protein-coding
MACS_peak_7643	chr8	107872560	107874446	+	1504	NA	intron (NM_001081332, intron 1 of 15)	CpG	1345	NM_001081332	277973	Mm.334766	NM_001081332	ENSMUSG00000014786	Slc9a5	Gm696	solute carrier family 9 (sodium/hydrogen exchanger), member 5	protein-coding
MACS_peak_6376	chr6	61128899	61131437	+	1502	NA	promoter-TSS (NM_001164316)	promoter-TSS (NM_001164316)	-151	NM_001164316	232035	Mm.150324	NM_183310	ENSMUSG00000039578	Ccser1	6230405M12Rik|C130092O11Rik|Fam190a	coiled-coil serine rich 1	protein-coding
MACS_peak_98	chr1	43009493	43011537	+	1502	NA	intron (NM_053107, intron 1 of 1)	intron (NM_053107, intron 1 of 1)	798	NM_053107	93690	Mm.444976	NM_053107	ENSMUSG00000041907	Gpr45	9230112G11Rik|AW046772	G protein-coupled receptor 45	protein-coding
MACS_peak_1928	chr13	43710260	43715255	+	1502	NA	intron (NM_183204, intron 1 of 1)	intron (NM_183204, intron 1 of 1)	1591	NM_183204	328234	Mm.40588	NM_183204	ENSMUSG00000044164	Rnf182	C630023L15Rik	ring finger protein 182	protein-coding
MACS_peak_5140	chr4	104038001	104044216	+	1502	NA	intron (NM_177259, intron 1 of 14)	intron (NM_177259, intron 1 of 14)	965	NM_177259	13131	Mm.289682	NM_010014	ENSMUSG00000028519	Dab1	AI956902|C630028C02Rik|scm|scr|scrambler|yot	disabled 1	protein-coding
MACS_peak_3710	chr19	24104307	24106046	+	1502	NA	exon (NM_001114174, exon 1 of 11)	exon (NM_001114174, exon 1 of 11)	333	NM_001114174	381217	Mm.426078	NM_001114174	ENSMUSG00000071604	Fam189a2	AI414343|AI666772|Gm967	family with sequence similarity 189, member A2	protein-coding
MACS_peak_799	chr10	88807123	88809599	+	1502	NA	Intergenic	Intergenic	-87826	NR_102339	320091	Mm.236464	NM_178773	ENSMUSG00000035189	Ano4	A330096O15Rik|Gm65|Tmem16d	anoctamin 4	protein-coding
MACS_peak_2964	chr16	74411772	74413323	+	1502	NA	Intergenic	Intergenic	-1390	NM_175549	268902	Mm.171736	NM_175549	ENSMUSG00000052516	Robo2	2600013A04Rik|9430089E08Rik|BB097918|D230004I22Rik|mKIAA1568	roundabout homolog 2 (Drosophila)	protein-coding
MACS_peak_1757	chr12	104185687	104189000	+	1502	NA	5' UTR (NM_001081017, exon 1 of 49)	5' UTR (NM_001081017, exon 1 of 49)	274	NM_001081017	217843	Mm.387073	NM_177621	ENSMUSG00000021198	Unc79	9030205A07Rik|Mlca3	unc-79 homolog (C. elegans)	protein-coding
MACS_peak_5773	chr5	99463520	99468499	+	1502	NA	promoter-TSS (NM_008926)	promoter-TSS (NM_008926)	89	NM_008926	19092	Mm.263002	NM_008926	ENSMUSG00000029334	Prkg2	AW212535|CGKII|Prkgr2|cGK-II	protein kinase, cGMP-dependent, type II	protein-coding
MACS_peak_2913	chr16	35540738	35544295	+	1495	NA	intron (NM_013661, intron 1 of 21)	CpG	1068	NM_013661	20357	Mm.42015	NM_013661	ENSMUSG00000052133	Sema5b	AI893641|SemG|Semag|mKIAA1445	sema domain, seven thrombospondin repeats (type 1 and type 1-like), transmembrane domain (TM) and short cytoplasmic domain, (semaphorin) 5B	protein-coding
MACS_peak_1129	chr11	77744025	77749235	+	1495	NA	intron (NM_001291225, intron 1 of 15)	intron (NM_001291225, intron 1 of 15)	2289	NM_021286	20370	Mm.229330	NM_021286	ENSMUSG00000000632	Sez6	BSRP-C|D11Bhm177e|sez-6	seizure related gene 6	protein-coding
MACS_peak_159	chr1	74827630	74831732	+	1495	NA	intron (NM_009526, intron 3 of 3)	intron (NM_009526, intron 3 of 3)	-8912	NM_009518	22409	Mm.5130	NM_009518		Wnt10a	-	wingless-type MMTV integration site family, member 10A	protein-coding
MACS_peak_3102	chr17	22217967	22218521	+	1495	NA	Intergenic	CpG	84700	NM_177596	210853	Mm.441622	NM_177596	ENSMUSG00000063383	Zfp947	6720451E15|EG210853|Gm4769	zinc finger protein 947	protein-coding
MACS_peak_2697	chr15	85860982	85865677	+	1491	NA	exon (NM_009886, exon 1 of 35)	exon (NM_009886, exon 1 of 35)	878	NM_009886	12614	Mm.22680	NM_009886	ENSMUSG00000016028	Celsr1	Crsh|Scy|crash	cadherin, EGF LAG seven-pass G-type receptor 1 (flamingo homolog, Drosophila)	protein-coding
MACS_peak_93	chr1	40734863	40739890	+	1491	NA	Intergenic	Intergenic	-1181	NM_001033289	226999	Mm.256414	NM_001033289	ENSMUSG00000026062	Slc9a2	2210416H12Rik|4932415O19Rik|AV333884|NHE2	solute carrier family 9 (sodium/hydrogen exchanger), member 2	protein-coding
MACS_peak_2752	chr15	98724413	98730042	+	1489	NA	intron (NM_007857, intron 1 of 2)	(GA)n|Simple_repeat|Simple_repeat	1744	NM_007857	13363	Mm.324688	NM_007857	ENSMUSG00000023000	Dhh	C78960	desert hedgehog	protein-coding
MACS_peak_569	chr10	13192529	13194400	+	1489	NA	intron (NM_001195065, intron 1 of 12)	intron (NM_001195065, intron 1 of 12)	738	NM_001195065	215789	Mm.283359	NM_001033257	ENSMUSG00000062866	Phactr2	AV158170|BC012871	phosphatase and actin regulator 2	protein-coding
MACS_peak_4960	chr4	33070250	33073347	+	1487	NA	intron (NM_027491, intron 1 of 6)	intron (NM_027491, intron 1 of 6)	1825	NM_027491	52187	Mm.300814	NM_027491	ENSMUSG00000028278	Rragd	5730543C08Rik|AI467523|C030003H22Rik|D4Ertd174e	Ras-related GTP binding D	protein-coding
MACS_peak_8045	chr9	66894808	66899023	+	1487	NA	exon (NM_001164255, exon 1 of 9)	exon (NM_001164255, exon 1 of 9)	105	NM_001164255	22003	Mm.121878	NM_024427	ENSMUSG00000032366	Tpm1	AA986836|AI854628|TM2|Tm3|Tmpa|Tpm-1|alpha-TM	tropomyosin 1, alpha	protein-coding
MACS_peak_4573	chr3	17685134	17689092	+	1485	NA	Intergenic	Intergenic	-2808	NR_033490	70441	Mm.458192	NR_033490		2610100L16Rik	100040120|Gm2612	RIKEN cDNA 2610100L16 gene	ncRNA
MACS_peak_7254	chr7	150152339	150155532	+	1485	NA	exon (NM_008554, exon 2 of 3)	exon (NM_008554, exon 2 of 3)	1234	NM_008554	17173	Mm.196417	NM_008554	ENSMUSG00000009248	Ascl2	2410083I15Rik|Mash2|bHLHa45	achaete-scute complex homolog 2 (Drosophila)	protein-coding
MACS_peak_3211	chr17	37181821	37184698	+	1485	NA	intron (NM_019439, intron 1 of 22)	CpG	348	NM_019439	54393	Mm.32191	NM_019439	ENSMUSG00000024462	Gabbr1	GABAB1|GABAbR1|bM573K1.1	gamma-aminobutyric acid (GABA) B receptor, 1	protein-coding
MACS_peak_5458	chr4	148116748	148118480	+	1485	NA	Intergenic	Intergenic	-60887	NM_001159344	69743	Mm.233879	NM_027195	ENSMUSG00000028977	Casz1	2410019P08Rik|AV096627|BC040081|Cst|D4Ertd432e	castor zinc finger 1	protein-coding
MACS_peak_2709	chr15	88887964	88892409	+	1484	NA	promoter-TSS (NM_001002005)	promoter-TSS (NM_001002005)	30	NM_001002005	406218	Mm.483059	NM_001002005	ENSMUSG00000058441	Panx2	-	pannexin 2	protein-coding
MACS_peak_2263	chr14	21655268	21657142	+	1483	NA	intron (NM_008873, intron 1 of 10)	intron (NM_008873, intron 1 of 10)	321	NM_008873	18792	Mm.4183	NM_008873	ENSMUSG00000021822	Plau	u-PA|uPA	plasminogen activator, urokinase	protein-coding
MACS_peak_5108	chr4	88927095	88929190	+	1483	NA	promoter-TSS (NM_001040654)	promoter-TSS (NM_001040654)	-46	NM_001040654	12578	Mm.4733	NM_009877	ENSMUSG00000044303	Cdkn2a	ARF-INK4a|Arf|INK4a-ARF|Ink4a/Arf|MTS1|Pctr1|p16|p16(INK4a)|p16INK4a|p19<ARF>|p19ARF	cyclin-dependent kinase inhibitor 2A	protein-coding
MACS_peak_4265	chr2	119568352	119569832	+	1483	NA	intron (NM_146125, intron 1 of 6)	CpG	1019	NM_146125	228550	Mm.65337	NM_146125	ENSMUSG00000027296	Itpka	-	inositol 1,4,5-trisphosphate 3-kinase A	protein-coding
MACS_peak_3472	chr18	37967945	37969774	+	1483	NA	intron (NM_033581, intron 1 of 3)	intron (NM_033581, intron 1 of 3)	2795	NM_033581	93706	Mm.247203	NM_033581	ENSMUSG00000023036	Pcdhgc3	PC43|Pcdh2	protocadherin gamma subfamily C, 3	protein-coding
MACS_peak_916	chr11	18926045	18927943	+	1483	NA	Intergenic	Intergenic	-8022	NM_010789	17268	Mm.356578	NM_010789	ENSMUSG00000020160	Meis1	C530044H18Rik|Evi8	Meis homeobox 1	protein-coding
MACS_peak_4408	chr2	156438122	156442908	+	1483	NA	intron (NM_001277187, intron 1 of 11)	intron (NM_001277187, intron 1 of 11)	1082	NM_001277186	228836	Mm.22094	NM_146128	ENSMUSG00000061689	Dlgap4	AI225853|BC024558|DAP-4|DAP4|SAPAP-4|Sapap4|WBP16	discs, large homolog-associated protein 4 (Drosophila)	protein-coding
MACS_peak_4799	chr3	108028727	108030297	+	1483	NA	promoter-TSS (NM_008596)	promoter-TSS (NM_008596)	5	NM_008596	17306	Mm.316885	NM_008596	ENSMUSG00000027887	Sypl2	AI552439|Mg29	synaptophysin-like 2	protein-coding
MACS_peak_7387	chr8	24266934	24270234	+	1483	NA	3' UTR (NM_029002, exon 3 of 3)	3' UTR (NM_029002, exon 3 of 3)	4841	NM_029002	74561	Mm.290028	NM_029002	ENSMUSG00000063672	Nkx6-3	9130417I07Rik|Nkx6.3	NK6 homeobox 3	protein-coding
MACS_peak_1273	chr11	96204757	96210064	+	1483	NA	exon (NM_010458, exon 2 of 2)	exon (NM_010458, exon 2 of 2)	2327	NM_010458	15410	Mm.342481	NM_010458		Hoxb3	Hox-2.7	homeobox B3	protein-coding
MACS_peak_6961	chr7	90016903	90018690	+	1483	NA	exon (NM_175366, exon 2 of 2)	exon (NM_175366, exon 2 of 2)	1953	NM_175366	108797	Mm.306789	NM_175366	ENSMUSG00000057706	Mex3b	4931439A04Rik|M-04814|Rkhd3|mKIAA2009	mex3 homolog B (C. elegans)	protein-coding
MACS_peak_2474	chr14	115489998	115494141	+	1481	NA	intron (NM_175500, intron 1 of 7)	CpG	632	NM_175500	103978	Mm.320791	NM_175500	ENSMUSG00000022112	Gpc5	A230034F01Rik	glypican 5	protein-coding
MACS_peak_8039	chr9	65238492	65239476	+	1481	NA	exon (NM_028974, exon 1 of 1)	exon (NM_028974, exon 1 of 1)	475	NM_028974	74492	Mm.159223	NM_028974	ENSMUSG00000054978	Kbtbd13	5430433E21Rik	kelch repeat and BTB (POZ) domain containing 13	protein-coding
MACS_peak_8239	chr9	113934223	113937641	+	1481	NA	promoter-TSS (NM_178624)	promoter-TSS (NM_178624)	-63	NM_178624	72179	Mm.386808	NM_178624	ENSMUSG00000032507	Fbxl2	2810423A21Rik|Fbl3	F-box and leucine-rich repeat protein 2	protein-coding
MACS_peak_2078	chr13	69876169	69878495	+	1481	NA	intron (NM_001145162, intron 1 of 1)	intron (NM_001145162, intron 1 of 1)	1443	NM_001145162	76980	Mm.23960	NM_001145162	ENSMUSG00000052981	Ube2ql1	3110006E14Rik	ubiquitin-conjugating enzyme E2Q family-like 1	protein-coding
MACS_peak_2104	chr13	76191267	76194168	+	1481	NA	3' UTR (NM_175495, exon 1 of 1)	3' UTR (NM_175495, exon 1 of 1)	1727	NM_175495	238725	Mm.167172	NM_175495	ENSMUSG00000045509	Gpr150	C030001A19Rik|PGR11	G protein-coupled receptor 150	protein-coding
MACS_peak_5654	chr5	37418352	37422239	+	1481	NA	Intergenic	CpG	-21801	NM_178394	76071	Mm.85280	NM_178394	ENSMUSG00000063646	Jakmip1	5830437M04Rik|C330021K24Rik|Gababrbp|Marlin-1	janus kinase and microtubule interacting protein 1	protein-coding
MACS_peak_7114	chr7	135558805	135564752	+	1481	NA	promoter-TSS (NM_026418)	promoter-TSS (NM_026418)	-92	NM_026418	67865	Mm.18635	NM_026418	ENSMUSG00000030844	Rgs10	2310010N19Rik	regulator of G-protein signalling 10	protein-coding
MACS_peak_4393	chr2	152932345	152935610	+	1471	NA	promoter-TSS (NM_010407)	promoter-TSS (NM_010407)	-227	NM_001172117	15162	Mm.715	NM_010407	ENSMUSG00000003283	Hck	AI849071|Bmk	hemopoietic cell kinase	protein-coding
MACS_peak_476	chr1	174255725	174259925	+	1462	NA	intron (NM_008429, intron 2 of 3)	intron (NM_008429, intron 2 of 3)	1569	NM_008429	16524	Mm.261168	NM_008429	ENSMUSG00000038026	Kcnj9	1700085N21Rik|Girk3|Kir3.3|mbGIRK3	potassium inwardly-rectifying channel, subfamily J, member 9	protein-coding
MACS_peak_3307	chr17	71659573	71661592	+	1462	NA	promoter-TSS (NM_145158)	promoter-TSS (NM_145158)	-277	NM_145158	246707	Mm.23462	NM_145158	ENSMUSG00000024053	Emilin2	FOAP-10	elastin microfibril interfacer 2	protein-coding
MACS_peak_3401	chr18	20903970	20905980	+	1462	NA	promoter-TSS (NM_019737)	promoter-TSS (NM_019737)	-70	NM_019737	56386	Mm.393827	NM_019737	ENSMUSG00000056124	B4galt6	AA536803|AU022389	UDP-Gal:betaGlcNAc beta 1,4-galactosyltransferase, polypeptide 6	protein-coding
MACS_peak_5483	chr4	151499930	151502460	+	1458	NA	intron (NM_207691, intron 7 of 9)	(C)n|Simple_repeat|Simple_repeat	1839	NM_019585	56226	Mm.264215	NM_019585	ENSMUSG00000028943	Espn	je	espin	protein-coding
MACS_peak_6734	chr7	28113924	28120349	+	1457	NA	intron (NM_175641, intron 4 of 32)	intron (NM_175641, intron 4 of 32)	1531	NM_001113549	108075	Mm.272251	NM_175641	ENSMUSG00000040488	Ltbp4	2310046A13Rik	latent transforming growth factor beta binding protein 4	protein-coding
MACS_peak_5466	chr4	148959367	148962249	+	1449	NA	exon (NM_001290989, exon 1 of 18)	exon (NM_001290989, exon 1 of 18)	231	NM_023051	65945	Mm.38993	NM_023051	ENSMUSG00000039953	Clstn1	1810034E21Rik|Cst-1|Cstn1	calsyntenin 1	protein-coding
MACS_peak_2834	chr15	102975273	102977713	+	1448	NA	intron (NR_045743, intron 1 of 6)	L2|LINE|L2	766	NR_045743	432989	Mm.383979	NR_045743	ENSMUSG00000097003	D930007P13Rik	-	Riken cDNA D930007P13 gene	ncRNA
MACS_peak_4793	chr3	106902614	106908839	+	1448	NA	intron (NM_008417, intron 1 of 2)	intron (NM_008417, intron 1 of 2)	1241	NM_008417	16490	Mm.39285	NM_008417		Kcna2	Akr6a4|ENSMUSG00000074335|Gm10672|Kca1-2|Kv1.2|Mk-2	potassium voltage-gated channel, shaker-related subfamily, member 2	protein-coding
MACS_peak_7653	chr8	109394045	109396103	+	1448	NA	intron (NM_008217, intron 1 of 3)	intron (NM_008217, intron 1 of 3)	932	NM_008217	15118	Mm.56986	NM_008217	ENSMUSG00000031910	Has3	-	hyaluronan synthase 3	protein-coding
MACS_peak_1852	chr13	22072562	22076085	+	1448	NA	exon (NM_001162928, exon 1 of 1)	exon (NM_001162928, exon 1 of 1)	1260	NM_001162929	195236	Mm.204664	NM_001162928	ENSMUSG00000016982	Pom121l2	Gm24	POM121 membrane glycoprotein-like 2 (rat)	protein-coding
MACS_peak_1296	chr11	96876925	96883227	+	1448	NA	intron (NM_031183, intron 1 of 1)	CpG	5193	NM_031183	83395	Mm.156282	NM_031183	ENSMUSG00000038560	Sp6	1110025J03Rik|AA591031|AI592962|Epfn|Klf14	trans-acting transcription factor 6	protein-coding
MACS_peak_2716	chr15	89327827	89331741	+	1445	NA	promoter-TSS (NM_021423)	promoter-TSS (NM_021423)	-504	NM_021423	58234	Mm.146855	NM_021423	ENSMUSG00000022623	Shank3	AI841104|SHANK3c-3|SHANK3c-4|Shank3b	SH3/ankyrin domain gene 3	protein-coding
MACS_peak_124	chr1	60099212	60101344	+	1442	NA	promoter-TSS (NM_027407)	promoter-TSS (NM_027407)	-347	NM_027407	70375	Mm.17834	NM_027407	ENSMUSG00000026018	Ica1l	1700030B17Rik|Als2cr15	islet cell autoantigen 1-like	protein-coding
MACS_peak_2978	chr16	84774189	84774992	+	1442	NA	5' UTR (NM_023844, exon 1 of 10)	5' UTR (NM_023844, exon 1 of 10)	222	NM_023844	67374	Mm.41758	NM_023844	ENSMUSG00000053062	Jam2	1110002N23Rik|2410030G21Rik|2410167M24Rik|JAM-2|JAM-B|Jcam2|VE-JAM	junction adhesion molecule 2	protein-coding
MACS_peak_859	chr10	122701536	122703829	+	1442	NA	intron (NR_045514, intron 1 of 5)	CpG	1550	NM_001252387	268354	Mm.51939	NM_182807	ENSMUSG00000044071	Fam19a2	6330575M02|FAM19A2 TAFA-2|TAFA2|Tafa-2	family with sequence similarity 19, member A2	protein-coding
MACS_peak_570	chr10	14264540	14266089	+	1442	NA	promoter-TSS (NM_001002268)	promoter-TSS (NM_001002268)	-472	NM_001002268	215798	Mm.440142	NM_001002268	ENSMUSG00000039116	Gpr126	1190004A11Rik|AI449247|AW045736|DREG|Gm222	G protein-coupled receptor 126	protein-coding
MACS_peak_3300	chr17	69505212	69507119	+	1442	NA	promoter-TSS (NM_013813)	promoter-TSS (NM_013813)	15	NM_013813	13823	Mm.131135	NM_013813	ENSMUSG00000024044	Epb4.1l3	4.1B|DAL1P|Dal1|Epb41l3|NBL3	erythrocyte protein band 4.1-like 3	protein-coding
MACS_peak_8247	chr9	117780503	117782702	+	1442	NA	Intergenic	CpG	-168038	NM_001286508	27215	Mm.92705	NM_013727	ENSMUSG00000039285	Azi2	AA410145|AZ2	5-azacytidine induced gene 2	protein-coding
MACS_peak_4183	chr2	83652609	83655457	+	1442	NA	intron (NM_175514, intron 1 of 7)	intron (NM_175514, intron 1 of 7)	1148	NM_175514	241520	Mm.330351	NM_175514	ENSMUSG00000048388	Fam171b	D430039N05Rik	family with sequence similarity 171, member B	protein-coding
MACS_peak_2513	chr15	7348031	7350321	+	1442	NA	promoter-TSS (NM_001289498)	promoter-TSS (NM_001289498)	-781	NM_001289498	268780	Mm.203208	NM_178748	ENSMUSG00000042961	Egflam	5930412K08|AU040377	EGF-like, fibronectin type III and laminin G domains	protein-coding
MACS_peak_2227	chr13	113824449	113825709	+	1442	NA	promoter-TSS (NM_001281487)	promoter-TSS (NM_001281487)	-508	NM_001281487	238896		NM_001281487	ENSMUSG00000078926	Cdc20b	EG238896|EG622422	cell division cycle 20B	protein-coding
MACS_peak_4638	chr3	55589706	55591670	+	1442	NA	intron (NM_030595, intron 40 of 57)	intron (NM_030595, intron 40 of 57)	4256	NM_010750	17116	Mm.440209	NM_010750	ENSMUSG00000056947	Mab21l1	AW047968	mab-21-like 1 (C. elegans)	protein-coding
MACS_peak_1299	chr11	97010602	97013050	+	1442	NA	promoter-TSS (NM_198100)	promoter-TSS (NM_198100)	-800	NM_198100	73174	Mm.27882	NM_198100	ENSMUSG00000038517	Tbkbp1	3110043L15Rik|ProSAPiP2|SINTBAD	TBK1 binding protein 1	protein-coding
MACS_peak_5440	chr4	146823413	146825160	+	1442	NA	intron (NM_001039209, intron 1 of 2)	LTRIS2|LTR|ERV1	-103100	NM_001014397	433804	Mm.332047	NM_001014397	ENSMUSG00000065999	Gm13154	OTTMUSG00000010673	predicted gene 13154	protein-coding
MACS_peak_109	chr1	54248939	54252738	+	1442	NA	intron (NM_001001883, intron 1 of 28)	intron (NM_001001883, intron 1 of 28)	1040	NM_001001883	329152	Mm.132150	NM_172655	ENSMUSG00000042807	Hecw2	A730039N16Rik|D030049F17Rik|Gm971|Nedl2|mKIAA1301	HECT, C2 and WW domain containing E3 ubiquitin protein ligase 2	protein-coding
MACS_peak_4113	chr2	65961988	65963413	+	1442	NA	5' UTR (NM_015736, exon 1 of 11)	5' UTR (NM_015736, exon 1 of 11)	150	NM_015736	14425	Mm.439760	NM_015736	ENSMUSG00000026994	Galnt3	-	UDP-N-acetyl-alpha-D-galactosamine:polypeptide N-acetylgalactosaminyltransferase 3	protein-coding
MACS_peak_614	chr10	32609540	32610689	+	1442	NA	promoter-TSS (NM_001025286)	promoter-TSS (NM_001025286)	-393	NM_001025286	432450	Mm.49665	NM_001013411		Nkain2	6330571D19Rik|AW455467|Tcba1	Na+/K+ transporting ATPase interacting 2	protein-coding
MACS_peak_2588	chr15	64751713	64754670	+	1442	NA	5' UTR (NM_009623, exon 1 of 18)	5' UTR (NM_009623, exon 1 of 18)	667	NM_001291903	11514	Mm.1425	NM_009623	ENSMUSG00000022376	Adcy8	AC8|AW060868	adenylate cyclase 8	protein-coding
MACS_peak_3954	chr2	10291440	10297778	+	1438	NA	intron (NM_177386, intron 1 of 22)	CpG	546	NM_177386	353282	Mm.329991	NM_177386	ENSMUSG00000061186	Sfmbt2	D2Wsu23e|D330030P06Rik	Scm-like with four mbt domains 2	protein-coding
MACS_peak_3615	chr18	80557246	80562197	+	1438	NA	intron (NM_001190373, intron 1 of 3)	CpG	1272	NM_001190373	240444	Mm.279568	NM_001190373	ENSMUSG00000059852	Kcng2	AA591524	potassium voltage-gated channel, subfamily G, member 2	protein-coding
MACS_peak_6744	chr7	29051878	29054626	+	1438	NA	exon (NM_198425, exon 1 of 1)	exon (NM_198425, exon 1 of 1)	352	NM_198425	386655	Mm.258201	NM_198425	ENSMUSG00000046058	Eid2	Cri2|EID-2	EP300 interacting inhibitor of differentiation 2	protein-coding
MACS_peak_4630	chr3	53458380	53462426	+	1438	NA	exon (NM_172862, exon 1 of 24)	exon (NM_172862, exon 1 of 24)	874	NM_172862	242022	Mm.38378	NM_172862	ENSMUSG00000037016	Frem2	6030440P17Rik|8430406N05Rik|Gm409|b2b1562Clo|my|ne|nv1	Fras1 related extracellular matrix protein 2	protein-coding
MACS_peak_3920	chr19	59334116	59336824	+	1438	NA	5' UTR (NM_172523, exon 1 of 16)	5' UTR (NM_172523, exon 1 of 16)	102	NM_172523	214084	Mm.268797	NM_172523	ENSMUSG00000025094	Slc18a2	1110037L13Rik|9330105E13|Vmat2	solute carrier family 18 (vesicular monoamine), member 2	protein-coding
MACS_peak_5768	chr5	98595021	98602769	+	1438	NA	Intergenic	Intergenic	-10993	NM_029947	77630	Mm.332511	NM_029947	ENSMUSG00000035456	Prdm8	4930565F05Rik|PFM5	PR domain containing 8	protein-coding
MACS_peak_7884	chr9	44541728	44542659	+	1433	NA	intron (NM_153537, intron 1 of 21)	CpG	1088	NM_153537	102693	Mm.28639	NM_153537	ENSMUSG00000048537	Phldb1	AU041016|D330037A14Rik|Ll5a	pleckstrin homology-like domain, family B, member 1	protein-coding
MACS_peak_5636	chr5	34628292	34631492	+	1432	NA	intron (NM_001015039, intron 1 of 12)	CpG	1081	NM_001015039	231125	Mm.113388	NM_001015039	ENSMUSG00000037224	Zfyve28	9630058O20Rik|Gm146|mKIAA1643	zinc finger, FYVE domain containing 28	protein-coding
MACS_peak_2652	chr15	79921770	79922223	+	1429	NA	intron (NM_207708, intron 1 of 3)	CpG	232	NM_207708	20972	Mm.230301	NM_009303	ENSMUSG00000022415	Syngr1	R75468|Syngr1b|p29	synaptogyrin 1	protein-coding
MACS_peak_1812	chr12	117314436	117317916	+	1429	NA	promoter-TSS (NM_009511)	promoter-TSS (NM_009511)	-20	NM_009511	22355	Mm.395245	NM_009511	ENSMUSG00000011171	Vipr2	VPAC2|VPAC2R|Vip2	vasoactive intestinal peptide receptor 2	protein-coding
MACS_peak_2663	chr15	82104438	82108644	+	1429	NA	intron (NM_011889, intron 1 of 9)	intron (NM_011889, intron 1 of 9)	1176	NM_011889	24050	Mm.309707	NM_011889	ENSMUSG00000022456	Sept3	3110018K01Rik|AV154067|B530002E20Rik|Sep3	septin 3	protein-coding
MACS_peak_4997	chr4	45195988	45199756	+	1429	NA	promoter-TSS (NM_001081172)	promoter-TSS (NM_001081172)	94	NM_001081172	666060	Mm.24783	NM_001081172	ENSMUSG00000035615	Frmpd1	BC031840|mKIAA0967	FERM and PDZ domain containing 1	protein-coding
MACS_peak_392	chr1	138027976	138029730	+	1427	NA	intron (NM_001039472, intron 1 of 34)	intron (NM_001039472, intron 1 of 34)	875	NM_001039472	16565	Mm.276135	NM_019962	ENSMUSG00000041642	Kif21b	2610511N21Rik|mKIAA0449	kinesin family member 21B	protein-coding
MACS_peak_5237	chr4	123363976	123364322	+	1422	NA	Intergenic	CpG	-2546	NM_001199136	11426	Mm.402299	NM_009600	ENSMUSG00000028649	Macf1	ABP620|Acf7|Aclp7|MACF|R74989|mKIAA0465	microtubule-actin crosslinking factor 1	protein-coding
MACS_peak_7523	chr8	83864833	83866963	+	1422	NA	promoter-TSS (NM_001024617)	promoter-TSS (NM_001024617)	-563	NM_001024617	234515	Mm.324468	NM_001024617	ENSMUSG00000037940	Inpp4b	E130107I17Rik	inositol polyphosphate-4-phosphatase, type II	protein-coding
MACS_peak_4258	chr2	118500232	118504118	+	1422	NA	promoter-TSS (NM_001145854)	promoter-TSS (NM_001145854)	-807	NM_001145854	214230	Mm.241857	NM_001033254	ENSMUSG00000074923	Pak6	4732456M09	p21 protein (Cdc42/Rac)-activated kinase 6	protein-coding
MACS_peak_4813	chr3	117277383	117279683	+	1422	NA	5' UTR (NM_029425, exon 1 of 6)	5' UTR (NM_029425, exon 1 of 6)	154	NM_029425	75769	Mm.72187	NM_029425	ENSMUSG00000033342	Lppr5	4833424O15Rik|PRG-5|Pap2d	lipid phosphate phosphatase-related protein type 5	protein-coding
MACS_peak_1366	chr11	101107265	101108752	+	1422	NA	intron (NM_019444, intron 1 of 3)	intron (NM_019444, intron 1 of 3)	360	NM_019444	54409	Mm.260698	NM_019444		Ramp2	-	receptor (calcitonin) activity modifying protein 2	protein-coding
MACS_peak_2631	chr15	77785885	77787244	+	1420	NA	intron (NM_001017983, intron 1 of 8)	CpG	588	NM_001168260	239554	Mm.295605	NM_001017983	ENSMUSG00000016552	Foxred2	A430097D04Rik|D15Bwg0759e|Gm304	FAD-dependent oxidoreductase domain containing 2	protein-coding
MACS_peak_1092	chr11	69778382	69781298	+	1420	NA	intron (NM_001193619, intron 2 of 4)	CpG	917	NM_016887	53624	Mm.281896	NM_016887	ENSMUSG00000018569	Cldn7	-	claudin 7	protein-coding
MACS_peak_2977	chr16	84702924	84703852	+	1418	NA	Intergenic	CpG	-10997	NR_029565	387173		NR_029565	miRBase:MI0000177	Mir155	Mirn155|mmu-mir-155	microRNA 155	ncRNA
MACS_peak_3823	chr19	44797198	44802401	+	1418	NA	Intergenic	Intergenic	-32085	NM_011037	18504	Mm.192158	NM_011037	ENSMUSG00000004231	Pax2	Opdc|Pax-2	paired box 2	protein-coding
MACS_peak_3610	chr18	80243756	80245628	+	1418	NA	intron (NM_053117, intron 1 of 2)	CpG	1058	NM_053117	93737	Mm.24678	NM_053117	ENSMUSG00000056214	Pard6g	2410049N21Rik|Par6a	par-6 family cell polarity regulator gamma	protein-coding
MACS_peak_5622	chr5	30889155	30893556	+	1418	NA	promoter-TSS (NR_040427)	promoter-TSS (NR_040427)	-363	NR_040427	100502829	Mm.39944	NR_040427		Gm9899	ENSMUSG00000053214	predicted gene 9899	ncRNA
MACS_peak_4283	chr2	123915553	123917290	+	1418	NA	intron (NM_001290997, intron 1 of 20)	CpG	716	NM_001290997	214968	Mm.330536	NM_172537	ENSMUSG00000027200	Sema6d	1110067B02Rik|AA409156|D330011G23|mKIAA1479	sema domain, transmembrane domain (TM), and cytoplasmic domain, (semaphorin) 6D	protein-coding
MACS_peak_2510	chr15	5192146	5194791	+	1418	NA	intron (NM_008965, intron 1 of 2)	intron (NM_008965, intron 1 of 2)	719	NM_001136079	19219	Mm.18509	NM_008965	ENSMUSG00000039942	Ptger4	EP4|Ptgerep4	prostaglandin E receptor 4 (subtype EP4)	protein-coding
MACS_peak_49	chr1	33962946	33966483	+	1418	NA	promoter-TSS (NM_177235)	promoter-TSS (NM_177235)	-248	NM_177235	320705	Mm.336619	NM_177235	ENSMUSG00000042182	Bend6	B230209C24Rik	BEN domain containing 6	protein-coding
MACS_peak_3382	chr18	7000513	7005483	+	1416	NA	intron (NM_177595, intron 1 of 6)	intron (NM_177595, intron 1 of 6)	1779	NM_177595	210719	Mm.257186	NM_177595	ENSMUSG00000061013	Mkx	9430023B20Rik|Irxl1	mohawk homeobox	protein-coding
MACS_peak_3616	chr18	80908681	80914794	+	1414	NA	Intergenic	(CGGGG)n|Simple_repeat|Simple_repeat	-1927	NM_001164109	18018	Mm.329560	NM_016791	ENSMUSG00000033016	Nfatc1	2210017P03Rik|AI449492|AV076380|NF-ATc|NFAT2|NFATc|Nfatcb	nuclear factor of activated T cells, cytoplasmic, calcineurin dependent 1	protein-coding
MACS_peak_959	chr11	43341834	43343859	+	1414	NA	intron (NM_001045530, intron 1 of 5)	CpG	595	NM_001045530	380694	Mm.247595	NM_001045530	ENSMUSG00000044707	Ccnjl	Gm877	cyclin J-like	protein-coding
MACS_peak_4026	chr2	31100477	31104473	+	1414	NA	intron (NM_019681, intron 1 of 7)	intron (NM_019681, intron 1 of 7)	1032	NM_019681	14299	Mm.249318	NM_019681	ENSMUSG00000062661	Ncs1	9430075O15Rik|A730032G13Rik|AI836659|Freq|Mfreq|NCS-1	neuronal calcium sensor 1	protein-coding
MACS_peak_2662	chr15	82053305	82055467	+	1412	NA	intron (NM_028075, intron 1 of 2)	intron (NM_028075, intron 1 of 2)	380	NM_028075	72049	Mm.240047	NM_028075	ENSMUSG00000068105	Tnfrsf13c	2010006P15Rik|BAFF-R|Baffr|Bcmd|Bcmd-1|Bcmd1|Lvis22	tumor necrosis factor receptor superfamily, member 13c	protein-coding
MACS_peak_6530	chr6	124717570	124719579	+	1412	NA	intron (NM_013509, intron 1 of 11)	intron (NM_013509, intron 1 of 11)	953	NM_013509	13807	Mm.3913	NM_013509	ENSMUSG00000004267	Eno2	AI837106|D6Ertd375e|Eno-2|NSE	enolase 2, gamma neuronal	protein-coding
MACS_peak_5163	chr4	112651077	112652501	+	1412	NA	intron (NM_001103199, intron 25 of 48)	intron (NM_001103199, intron 25 of 48)	-204323	NM_177668	230613	Mm.122553	NM_177668		Skint10	A030001H23Rik|Gm570	selection and upkeep of intraepithelial T cells 10	protein-coding
MACS_peak_3665	chr19	6530607	6532447	+	1412	NA	exon (NM_001205234, exon 23 of 23)	exon (NM_001205234, exon 23 of 23)	11543	NM_009203	20521	Mm.391146	NM_009203	ENSMUSG00000061742	Slc22a12	AI987855|OAT4L|Rst|Slc22al2|URAT1	solute carrier family 22 (organic anion/cation transporter), member 12	protein-coding
MACS_peak_6300	chr6	50403459	50407347	+	1412	NA	intron (NM_001163645, intron 1 of 21)	intron (NM_001163645, intron 1 of 21)	766	NM_001163645	71720	Mm.44153	NM_027881	ENSMUSG00000029822	Osbpl3	1200014M06Rik|6720421I08Rik|A530055M08|ORP3|OSBP3	oxysterol binding protein-like 3	protein-coding
MACS_peak_5151	chr4	107473526	107478523	+	1412	NA	intron (NR_033496, intron 2 of 20)	CpG-10126	1160	NM_001080926	16975	Mm.442134	NM_053073		Lrp8	4932703M08Rik|AA921429|AI848122|ApoER2|Lr8b	low density lipoprotein receptor-related protein 8, apolipoprotein e receptor	protein-coding
MACS_peak_5025	chr4	49609737	49611199	+	1412	NA	intron (NM_025944, intron 1 of 1)	CpG	274	NM_025944	67063	Mm.490285	NM_025944	ENSMUSG00000039611	Tmem246	2810432L12Rik|9330170P15Rik|AI835809	transmembrane protein 246	protein-coding
MACS_peak_3852	chr19	45614512	45620286	+	1412	NA	Intergenic	Intergenic	17634	NM_020032	56626	Mm.46509	NM_020032	ENSMUSG00000025218	Poll	1110003P06Rik|AV007317	polymerase (DNA directed), lambda	protein-coding
MACS_peak_4191	chr2	91815284	91818160	+	1412	NA	Intergenic	Intergenic	-13002	NM_138306	104418	Mm.314923	NM_138306	ENSMUSG00000040479	Dgkz	E130307B02Rik|ENSMUSG00000075035|F730209L11Rik|mDGK[z]	diacylglycerol kinase zeta	protein-coding
MACS_peak_6494	chr6	116410745	116412551	+	1412	NA	promoter-TSS (NM_009662)	promoter-TSS (NM_009662)	-452	NM_009662	11689	Mm.41072	NM_009662	ENSMUSG00000025701	Alox5	5-LO|5-LOX|5LO|5LX|AI850497|F730011J02	arachidonate 5-lipoxygenase	protein-coding
MACS_peak_4821	chr3	123148318	123151335	+	1412	NA	promoter-TSS (NM_008939)	promoter-TSS (NM_008939)	-5	NM_008939	19142	Mm.9431	NM_008939	ENSMUSG00000027978	Prss12	Bssp-3|motopsin	protease, serine 12 neurotrypsin (motopsin)	protein-coding
MACS_peak_5289	chr4	129659075	129665665	+	1412	NA	promoter-TSS (NM_173071)	promoter-TSS (NM_173071)	48	NM_173071	230775	Mm.262241	NM_173071	ENSMUSG00000028782	Bai2	-	brain-specific angiogenesis inhibitor 2	protein-coding
MACS_peak_7915	chr9	49603321	49607240	+	1412	NA	intron (NM_010875, intron 1 of 15)	CpG	1894	NM_001081445	17967	Mm.4974	NM_010875		Ncam1	CD56|E-NCAM|NCAM-1|Ncam	neural cell adhesion molecule 1	protein-coding
MACS_peak_4410	chr2	156665220	156669255	+	1406	NA	intron (NM_173396, intron 1 of 2)	intron (NM_173396, intron 1 of 2)	1494	NM_173396	228839	Mm.315625	NM_173396	ENSMUSG00000062175	Tgif2	4921501K24|5730599O09Rik|C80753|C81206	TGFB-induced factor homeobox 2	protein-coding
MACS_peak_2637	chr15	78744349	78745312	+	1405	NA	exon (NM_020271, exon 1 of 2)	exon (NM_020271, exon 1 of 2)	481	NM_020271	57028	Mm.263169	NM_020271	ENSMUSG00000068221	Pdxp	1600027H05Rik|AB041662|PLPP	pyridoxal (pyridoxine, vitamin B6) phosphatase	protein-coding
MACS_peak_1674	chr12	74150550	74156662	+	1405	NA	Intergenic	Intergenic	-5907	NM_009189	20471	Mm.4645	NM_009189	ENSMUSG00000051367	Six1	BB138287	sine oculis-related homeobox 1	protein-coding
MACS_peak_881	chr11	3661340	3664130	+	1400	NA	intron (NM_152818, intron 2 of 13)	L2|LINE|L2	101171	NM_152818	74309	Mm.61022	NM_152818	ENSMUSG00000020435	Osbp2	1700095P05Rik|C630001G20Rik|Gm244|ORP-4|OSBPL1	oxysterol binding protein 2	protein-coding
MACS_peak_3341	chr17	84910598	84912109	+	1400	NA	intron (NM_177606, intron 1 of 29)	CpG	118	NM_177606	213556	Mm.215159	NM_177606	ENSMUSG00000040852	Plekhh2	AI256725|E030001K05|mKIAA2028	pleckstrin homology domain containing, family H (with MyTH4 domain) member 2	protein-coding
MACS_peak_4806	chr3	109944547	109947952	+	1400	NA	5' UTR (NM_001163348, exon 1 of 7)	5' UTR (NM_001163348, exon 1 of 7)	141	NM_001163348	80883	Mm.39262	NM_030699	ENSMUSG00000059857	Ntng1	A930010C08Rik|AI853992|Lmnt1	netrin G1	protein-coding
MACS_peak_4205	chr2	93026515	93028757	+	1396	NA	promoter-TSS (NM_001025246)	promoter-TSS (NM_001025246)	-105	NM_001025246	277414	Mm.41033	NM_001025246	ENSMUSG00000068735	Trp53i11	Tp53i11	transformation related protein 53 inducible protein 11	protein-coding
MACS_peak_2050	chr13	56709886	56711805	+	1385	NA	promoter-TSS (NM_009369)	promoter-TSS (NM_009369)	-119	NM_009369	21810	Mm.14455	NM_009369	ENSMUSG00000035493	Tgfbi	68kDa|AI181842|AI747162|Beta-ig|big-h3	transforming growth factor, beta induced	protein-coding
MACS_peak_7044	chr7	117006821	117011368	+	1382	NA	promoter-TSS (NM_020052)	promoter-TSS (NM_020052)	99	NM_020052	56788	Mm.40447	NM_020052	ENSMUSG00000007279	Scube2	4932442O19Rik|Cegf1|Cegp1	signal peptide, CUB domain, EGF-like 2	protein-coding
MACS_peak_4084	chr2	52530330	52533139	+	1382	NA	promoter-TSS (NM_001285428)	promoter-TSS (NM_001285428)	-72	NM_001285426	12298	Mm.330223	NM_146123	ENSMUSG00000017412	Cacnb4	3110038O15Rik|Cchb4|lh	calcium channel, voltage-dependent, beta 4 subunit	protein-coding
MACS_peak_5506	chr4	153543373	153546442	+	1379	NA	promoter-TSS (NM_001162977)	promoter-TSS (NM_001162977)	85	NM_001162977	230971	Mm.275216	NM_172273	ENSMUSG00000057751	Megf6	2600001P17Rik|Egfl3	multiple EGF-like-domains 6	protein-coding
MACS_peak_1140	chr11	80112349	80116340	+	1378	NA	promoter-TSS (NM_139228)	promoter-TSS (NM_139228)	-70	NM_139228	246104	Mm.194148	NM_139228	ENSMUSG00000017692	Rhbdl3	AI847581|Rhbdl4|Rhomr1|Vrho	rhomboid, veinlet-like 3 (Drosophila)	protein-coding
MACS_peak_5662	chr5	38207301	38226148	+	1369	NA	promoter-TSS (NM_010835)	promoter-TSS (NM_010835)	-900	NM_010835	17701	Mm.256509	NM_010835	ENSMUSG00000048450	Msx1	AA675338|AI324650|Hox-7|Hox7|Hox7.1|msh	msh homeobox 1	protein-coding
MACS_peak_7699	chr8	122514531	122519124	+	1364	NA	intron (NM_030209, intron 1 of 14)	MIRb|SINE|MIR	457	NM_030209	78892	Mm.264680	NM_030209	ENSMUSG00000031825	Crispld2	1810049K24Rik|Lcrisp2|Lgl1|coffeecrisp	cysteine-rich secretory protein LCCL domain containing 2	protein-coding
MACS_peak_5522	chr4	155610472	155610844	+	1362	NA	Intergenic	CpG	-1692	NM_198305	231003	Mm.423038	NM_198305	ENSMUSG00000078484	Klhl17	AL022703|BC058738	kelch-like 17	protein-coding
MACS_peak_7002	chr7	105340731	105343247	+	1361	NA	3' UTR (NM_001081167, exon 2 of 2)	3' UTR (NM_001081167, exon 2 of 2)	5996	NM_001081167	272411	Mm.98333	NM_001081167	ENSMUSG00000074004	B3gnt6	BC039789|Core-3|Core3	UDP-GlcNAc:betaGal beta-1,3-N-acetylglucosaminyltransferase 6 (core 3 synthase)	protein-coding
MACS_peak_4307	chr2	130221680	130224210	+	1361	NA	intron (NM_019696, intron 1 of 13)	intron (NM_019696, intron 1 of 13)	420	NM_019696	56264	Mm.112701	NM_019696	ENSMUSG00000027408	Cpxm1	AA986902|Cpx-1|Cpx1|Cpxm	carboxypeptidase X 1 (M14 family)	protein-coding
MACS_peak_7073	chr7	126136907	126139158	+	1360	NA	intron (NM_022420, intron 1 of 3)	intron (NM_022420, intron 1 of 3)	693	NM_022420	64297	Mm.103439	NM_022420	ENSMUSG00000008734	Gprc5b	AW125761|Raig2	G protein-coupled receptor, family C, group 5, member B	protein-coding
MACS_peak_8095	chr9	83697237	83700276	+	1360	NA	intron (NM_148941, intron 1 of 5)	intron (NM_148941, intron 1 of 5)	1156	NM_148941	83603	Mm.83949	NM_148941	ENSMUSG00000032262	Elovl4	-	elongation of very long chain fatty acids (FEN1/Elo2, SUR4/Elo3, yeast)-like 4	protein-coding
MACS_peak_4553	chr2	181404800	181408262	+	1360	NA	promoter-TSS (NM_009236)	promoter-TSS (NM_009236)	-186	NM_009236	20672	Mm.264904	NM_009236	ENSMUSG00000046470	Sox18	AI385749|Ra|Ragl	SRY (sex determining region Y)-box 18	protein-coding
MACS_peak_655	chr10	50611574	50616341	+	1360	NA	Intergenic	Intergenic	-1500	NM_011376	20464	Mm.4774	NM_011376	ENSMUSG00000019913	Sim1	bHLHe14|mSIM1	single-minded homolog 1 (Drosophila)	protein-coding
MACS_peak_3419	chr18	34163805	34167955	+	1360	NA	5' UTR (NM_013512, exon 2 of 24)	5' UTR (NM_013512, exon 2 of 24)	980	NM_013512	13824	Mm.3465	NM_013512	ENSMUSG00000024376	Epb4.1l4a	Epb4.1l4|Epb41l4a|NBL4	erythrocyte protein band 4.1-like 4a	protein-coding
MACS_peak_6923	chr7	80518062	80522928	+	1360	NA	promoter-TSS (NM_177740)	promoter-TSS (NM_177740)	89	NM_177740	244058	Mm.333943	NM_177740	ENSMUSG00000070509	Rgma	BC059072|C230063O06	repulsive guidance molecule family member A	protein-coding
MACS_peak_4924	chr4	13669925	13671743	+	1360	NA	5' UTR (NM_001111026, exon 1 of 11)	5' UTR (NM_001111026, exon 1 of 11)	385	NM_001111026	12395	Mm.4909	NM_009822	ENSMUSG00000006586	Runx1t1	Cbfa2t1h|ETO|MTG8	runt-related transcription factor 1; translocated to, 1 (cyclin D-related)	protein-coding
MACS_peak_8284	chr9	122812263	122812660	+	1360	NA	Intergenic	CpG	14872	NM_001177505	382118	Mm.483265	NM_001177505	ENSMUSG00000063488	Zkscan7	BC042569|Zfp167	zinc finger with KRAB and SCAN domains 7	protein-coding
MACS_peak_3725	chr19	25744548	25749362	+	1360	NA	promoter-TSS (NR_045347)	promoter-TSS (NR_045347)	54	NM_145831	226049	Mm.275572	NM_145831	ENSMUSG00000048138	Dmrt2	Terra	doublesex and mab-3 related transcription factor 2	protein-coding
MACS_peak_7412	chr8	28337585	28339666	+	1360	NA	exon (NM_013462, exon 2 of 4)	exon (NM_013462, exon 2 of 4)	1435	NM_013462	11556	Mm.278475	NM_013462	ENSMUSG00000031489	Adrb3	Adrb-3	adrenergic receptor, beta 3	protein-coding
MACS_peak_1	chr1	3660412	3662272	+	1360	NA	exon (NM_001011874, exon 1 of 3)	exon (NM_001011874, exon 1 of 3)	237	NM_001011874	497097	Mm.454496	NM_001011874	ENSMUSG00000051951	Xkr4	AY534250|Gm210|XRG4|mKIAA1889	X Kell blood group precursor related family member 4	protein-coding
MACS_peak_395	chr1	140727953	140729575	+	1360	NA	intron (NM_001042577, intron 4 of 4)	intron (NM_001042577, intron 4 of 4)	10257	NM_001025565	16876	Mm.250732	NM_010714	ENSMUSG00000019230	Lhx9	3110009O07Rik|BB104635|LH2B	LIM homeobox protein 9	protein-coding
MACS_peak_3154	chr17	28906004	28908104	+	1360	NA	exon (NM_011950, exon 2 of 12)	exon (NM_011950, exon 2 of 12)	792	NM_011950	26415	Mm.27970	NM_011950	ENSMUSG00000004864	Mapk13	SAPK4|Serk4	mitogen-activated protein kinase 13	protein-coding
MACS_peak_560	chr10	6978817	6980797	+	1360	NA	exon (NM_133485, exon 1 of 4)	exon (NM_133485, exon 1 of 4)	584	NM_133485	76142	Mm.308126	NM_133485	ENSMUSG00000040653	Ppp1r14c	6330514J04Rik|KEPI	protein phosphatase 1, regulatory (inhibitor) subunit 14c	protein-coding
MACS_peak_2490	chr14	119251068	119256995	+	1360	NA	promoter-TSS (NM_001160099)	promoter-TSS (NM_001160099)	-141	NM_021386	58187	Mm.390755	NM_021386	ENSMUSG00000022132	Cldn10	6720456I16Rik|Cldn10a|Cldn10b|D14Ertd728e	claudin 10	protein-coding
MACS_peak_5427	chr4	146034217	146035359	+	1359	NA	promoter-TSS (NR_030771)	promoter-TSS (NR_030771)	-137	NR_030771	627585	Mm.424988	NM_001039233	ENSMUSG00000082195	Gm13034	OTTMUSG00000010105	SWI/SNF related, matrix associated, actin dependent regulator of chromatin, subfamily a, member 5 pseudogene	pseudo
MACS_peak_2878	chr16	18625022	18626988	+	1359	NA	intron (NM_213614, intron 2 of 11)	intron (NM_213614, intron 2 of 11)	-3509	NM_010327	14724	Mm.475622	NM_010327	ENSMUSG00000050761	Gp1bb	-	glycoprotein Ib, beta polypeptide	protein-coding
MACS_peak_733	chr10	79380847	79385509	+	1359	NA	intron (NM_053244, intron 2 of 4)	intron (NM_053244, intron 2 of 4)	3462	NM_053244	114229	Mm.191035	NM_053244	ENSMUSG00000035773	Kiss1r	Gpr54|KiSS-1	KISS1 receptor	protein-coding
MACS_peak_7216	chr7	147338807	147340700	+	1359	NA	intron (NM_183147, intron 1 of 1)	intron (NM_183147, intron 1 of 1)	805	NM_183147	212518	Mm.246858	NM_183147	ENSMUSG00000045733	Sprn	C630041J07	shadow of prion protein	protein-coding
MACS_peak_6336	chr6	53233711	53240934	+	1359	NA	promoter-TSS (NR_015553)	promoter-TSS (NR_015553)	33	NR_015553	320189	Mm.227444	NR_015553		9430076C15Rik	-	RIKEN cDNA 9430076C15 gene	ncRNA
MACS_peak_8321	chrX	58142814	58150084	+	1359	NA	exon (NM_009237, exon 1 of 1)	exon (NM_009237, exon 1 of 1)	156	NM_009237	20675	Mm.35784	NM_009237	ENSMUSG00000045179	Sox3	Sox-3	SRY (sex determining region Y)-box 3	protein-coding
MACS_peak_2493	chr14	119535689	119539146	+	1359	NA	promoter-TSS (NM_015820)	promoter-TSS (NM_015820)	-70	NM_015820	50787	Mm.445777	NM_015820		Hs6st3	6OST3|HS6ST-3	heparan sulfate 6-O-sulfotransferase 3	protein-coding
MACS_peak_139	chr1	63491794	63493990	+	1359	NA	exon (NM_011780, exon 1 of 26)	exon (NM_011780, exon 1 of 26)	414	NM_011780	23792	Mm.124892	NM_011780	ENSMUSG00000025964	Adam23	AW046396|MDC3	a disintegrin and metallopeptidase domain 23	protein-coding
MACS_peak_4829	chr3	127201172	127203143	+	1359	NA	Intergenic	CpG	-45989	NR_030403	723948		NR_030403	miRBase:MI0003716	Mir302b	Mirn302b	microRNA 302b	ncRNA
MACS_peak_2397	chr14	66915357	66917880	+	1359	NA	promoter-TSS (NR_038077)	promoter-TSS (NR_038077)	-652	NR_038077	69303	Mm.352258	NR_038077	ENSMUSG00000085984	1700001G11Rik	-	RIKEN cDNA 1700001G11 gene	ncRNA
MACS_peak_2134	chr13	91600795	91601907	+	1359	NA	intron (NM_024186, intron 1 of 15)	CpG	649	NM_024186	66970	Mm.343095	NM_024186	ENSMUSG00000003992	Ssbp2	1500004K09Rik|2310079I02Rik|9330163K02Rik|A830008M03Rik|AU067692|AW558684|Hspc116|SSDP2	single-stranded DNA binding protein 2	protein-coding
MACS_peak_5614	chr5	29794115	29796559	+	1359	NA	Intergenic	Intergenic	9673	NM_019944	15285	Mm.103760	NM_019944		Mnx1	HB9|Hlxb9|MNR2	motor neuron and pancreas homeobox 1	protein-coding
MACS_peak_2205	chr13	106083446	106084911	+	1359	NA	Intergenic	CpG	-1084	NM_027934	71816	Mm.317015	NM_027934		Rnf180	3110001E11Rik|Rines	ring finger protein 180	protein-coding
MACS_peak_848	chr10	118890453	118892491	+	1359	NA	exon (NM_001277293, exon 1 of 25)	exon (NM_001277293, exon 1 of 25)	382	NM_001277293	74053	Mm.196692	NM_028736	ENSMUSG00000034813	Grip1	4931400F03Rik|GRIP|eb	glutamate receptor interacting protein 1	protein-coding
MACS_peak_5682	chr5	42156902	42159237	+	1358	NA	Intergenic	Intergenic	-2610	NM_007524	12020	Mm.2530	NM_007524	ENSMUSG00000049691	Nkx3-2	Bapx1|NKX3.2|Nkx-3.2	NK3 homeobox 2	protein-coding
MACS_peak_3053	chr17	8533568	8534792	+	1355	NA	exon (NM_178774, exon 2 of 2)	exon (NM_178774, exon 2 of 2)	576	NM_178774	320111	Mm.442510	NM_178774	ENSMUSG00000055945	Prr18	9630019K15Rik	proline rich 18	protein-coding
MACS_peak_5271	chr4	126844111	126848274	+	1355	NA	promoter-TSS (NM_198618)	promoter-TSS (NM_198618)	-323	NM_198618	242667	Mm.331885	NM_198618	ENSMUSG00000042388	Dlgap3	BC058433|DAP-3|DAP3|Prpl8|Sapap3	discs, large (Drosophila) homolog-associated protein 3	protein-coding
MACS_peak_465	chr1	169617549	169624026	+	1355	NA	intron (NM_033652, intron 1 of 7)	intron (NM_033652, intron 1 of 7)	1098	NM_033652	110648	Mm.330081	NM_033652	ENSMUSG00000026686	Lmx1a	Lmx1.1|dr|dreher|sst	LIM homeobox transcription factor 1 alpha	protein-coding
MACS_peak_4785	chr3	104581598	104585611	+	1354	NA	promoter-TSS (NM_027982)	promoter-TSS (NM_027982)	-370	NM_027982	71887	Mm.379204	NM_027982	ENSMUSG00000002228	Ppm1j	2310008J22Rik|PP2Czeta|Ppp2cz	protein phosphatase 1J	protein-coding
MACS_peak_8069	chr9	72770423	72775238	+	1351	NA	promoter-TSS (NM_028116)	promoter-TSS (NM_028116)	-627	NM_028116	72135	Mm.273605	NM_028116		Pygo1	2600014C22Rik	pygopus 1	protein-coding
MACS_peak_6952	chr7	88638246	88638982	+	1350	NA	TTS (NM_183143)	TTS (NM_183143)	197	NM_021492	11775	Mm.322894	NM_021492	ENSMUSG00000062444	Ap3b2	AI549966|AU042881|Naptb|[b]-NAP|beta-NAP|beta3B	adaptor-related protein complex 3, beta 2 subunit	protein-coding
MACS_peak_4690	chr3	87597731	87602507	+	1350	NA	promoter-TSS (NM_011832)	promoter-TSS (NM_011832)	-754	NM_011832	23920	Mm.42041	NM_011832	ENSMUSG00000005640	Insrr	Irr	insulin receptor-related receptor	protein-coding
MACS_peak_551	chr1	194860789	194862607	+	1350	NA	intron (NM_181546, intron 1 of 7)	CpG	271	NM_001301370	329324	Mm.76710	NM_181546	ENSMUSG00000016200	Syt14	B230320I09Rik|sytXIV	synaptotagmin XIV	protein-coding
MACS_peak_4276	chr2	121631380	121634201	+	1348	NA	promoter-TSS (NM_172673)	promoter-TSS (NM_172673)	3	NM_172673	228564	Mm.121514	NM_172673	ENSMUSG00000027238	Frmd5	1500032A09Rik|5830442F04|A930004K21Rik|R75430	FERM domain containing 5	protein-coding
MACS_peak_8288	chr9	123585915	123588568	+	1347	NA	intron (NM_139142, intron 1 of 10)	intron (NM_139142, intron 1 of 10)	709	NM_139142	102680	Mm.440867	NM_139142	ENSMUSG00000036814	Slc6a20a	A730081N20Rik|AU022428|Xt3s1|Xtrp3s1	solute carrier family 6 (neurotransmitter transporter), member 20A	protein-coding
MACS_peak_7062	chr7	123180662	123183302	+	1347	NA	intron (NM_001025559, intron 1 of 15)	intron (NM_001025559, intron 1 of 15)	276	NM_001025559	20679	Mm.323365	NM_011445	ENSMUSG00000051910	Sox6	AI987981|SOX-LZ	SRY (sex determining region Y)-box 6	protein-coding
MACS_peak_664	chr10	52410556	52411932	+	1347	NA	intron (NM_178675, intron 1 of 7)	CpG	937	NM_178675	215085	Mm.338690	NM_178675	ENSMUSG00000038602	Slc35f1	Duf6|E130016L02	solute carrier family 35, member F1	protein-coding
MACS_peak_5998	chr5	123956333	123959101	+	1347	NA	intron (NM_001033461, intron 11 of 11)	Lx4B|LINE|L1	-2752	NM_198611	231727	Mm.484068	NM_198611	ENSMUSG00000029431	B3gnt4	1010001G17Rik|BGnT-4	UDP-GlcNAc:betaGal beta-1,3-N-acetylglucosaminyltransferase 4	protein-coding
MACS_peak_7011	chr7	106773185	106775819	+	1346	NA	exon (NM_001195529, exon 1 of 1)	exon (NM_001195529, exon 1 of 1)	1111	NM_001195529	100503386	Mm.180719	NM_001195529	ENSMUSG00000096606	Gm4980	6430704N06|EG245190|Tpbgl	predicted gene 4980	protein-coding
MACS_peak_7147	chr7	139787655	139791983	+	1346	NA	intron (NM_009123, intron 1 of 1)	intron (NM_009123, intron 1 of 1)	1501	NM_009123	20231	Mm.334281	NM_009123		Nkx1-2	Nkx-1.1|Nkx-1.2|Sax1	NK1 transcription factor related, locus 2 (Drosophila)	protein-coding
MACS_peak_3159	chr17	30020631	30027992	+	1346	NA	intron (NM_001081160, intron 1 of 15)	CpG	516	NM_001081160	74762	Mm.40901	NM_001081160	ENSMUSG00000043557	Mdga1	1200011I03Rik|GPIM|Mamdc3	MAM domain containing glycosylphosphatidylinositol anchor 1	protein-coding
MACS_peak_4675	chr3	81948550	81949850	+	1344	NA	intron (NM_021896, intron 1 of 8)	intron (NM_021896, intron 1 of 8)	599	NM_021896	60596	Mm.143831	NM_021896	ENSMUSG00000033910	Gucy1a3	1200016O07Rik|sGC-alpha1	guanylate cyclase 1, soluble, alpha 3	protein-coding
MACS_peak_3034	chr17	3325244	3329141	+	1344	NA	intron (NM_001122998, intron 1 of 26)	CpG	619	NM_001122998	24001	Mm.137134	NM_011878	ENSMUSG00000023800	Tiam2	3000002F19Rik|STEF|mKIAA2016	T cell lymphoma invasion and metastasis 2	protein-coding
MACS_peak_4531	chr2	180066967	180070914	+	1344	NA	exon (NM_008093, exon 1 of 6)	exon (NM_008093, exon 1 of 6)	444	NM_008093	14464	Mm.388880	NM_008093	ENSMUSG00000015627	Gata5	-	GATA binding protein 5	protein-coding
MACS_peak_3641	chr19	4213951	4215467	+	1344	NA	intron (NM_019952, intron 1 of 2)	CpG	317	NM_019952	56708	Mm.347919	NM_019952		Clcf1	Bsf3|CLC	cardiotrophin-like cytokine factor 1	protein-coding
MACS_peak_6764	chr7	30088398	30091437	+	1344	NA	intron (NM_013874, intron 1 of 11)	CpG	893	NM_013874	29861	Mm.101885	NM_013874	ENSMUSG00000030584	Dpf1	Neud4	D4, zinc and double PHD fingers family 1	protein-coding
MACS_peak_3147	chr17	28216216	28217989	+	1344	NA	exon (NM_013687, exon 2 of 10)	exon (NM_013687, exon 2 of 10)	427	NM_013687	21463	Mm.29758	NM_013687	ENSMUSG00000062859	Tcp11	D17Ken1|Tcp-11	t-complex protein 11	protein-coding
MACS_peak_7010	chr7	106616574	106617756	+	1344	NA	exon (NM_028145, exon 2 of 7)	exon (NM_028145, exon 2 of 7)	2651	NM_028145	72184	Mm.153585	NM_028145	ENSMUSG00000035298	Klhl35	2810406K13Rik	kelch-like 35	protein-coding
MACS_peak_679	chr10	60146042	60150979	+	1344	NA	intron (NR_045556, intron 2 of 68)	intron (NR_045556, intron 2 of 68)	10728	NM_001252635	22295	Mm.440327	NM_023370	ENSMUSG00000012819	Cdh23	4930542A03Rik|USH1D|ahl|ahl1|bob|bus|mdfw|nmf112|nmf181|nmf252|sals|v	cadherin 23 (otocadherin)	protein-coding
MACS_peak_6578	chr6	142911005	142913884	+	1344	NA	5' UTR (NM_011374, exon 1 of 5)	5' UTR (NM_011374, exon 1 of 5)	528	NM_011374	20449	Mm.260838	NM_011374	ENSMUSG00000030283	St8sia1	9330109E03Rik|GD3S|Sia-T|Siat8|Siat8a	ST8 alpha-N-acetyl-neuraminide alpha-2,8-sialyltransferase 1	protein-coding
MACS_peak_2303	chr14	35012894	35014675	+	1344	NA	intron (NM_183209, intron 1 of 1)	intron (NM_183209, intron 1 of 1)	1035	NM_183209	432839	Mm.294643	NM_183209	ENSMUSG00000071531	Gprin2	C130040D06Rik|C230073P13|Gm286|mKIAA0514	G protein regulated inducer of neurite outgrowth 2	protein-coding
MACS_peak_865	chr10	126615231	126618566	+	1344	NA	intron (NM_177615, intron 1 of 16)	intron (NM_177615, intron 1 of 16)	803	NM_177615	216441	Mm.248373	NM_177615	ENSMUSG00000040441	Slc26a10	C78409|D630010I07	solute carrier family 26, member 10	protein-coding
MACS_peak_3973	chr2	18919019	18920423	+	1344	NA	promoter-TSS (NM_008845)	promoter-TSS (NM_008845)	27	NM_008845	18718	Mm.313977	NM_008845	ENSMUSG00000026737	Pip4k2a	AW742916|Pip5k2a	phosphatidylinositol-5-phosphate 4-kinase, type II, alpha	protein-coding
MACS_peak_4078	chr2	44970239	44973847	+	1344	NA	Intergenic	Intergenic	-3244	NM_015753	24136	Mm.440702	NM_015753	ENSMUSG00000026872	Zeb2	9130203F04Rik|D130016B08Rik|SIP1|Zfhx1b|Zfx1b|Zfxh1b	zinc finger E-box binding homeobox 2	protein-coding
MACS_peak_7938	chr9	51572752	51576829	+	1344	NA	intron (NM_175535, intron 1 of 14)	intron (NM_175535, intron 1 of 14)	1333	NM_175535	244867	Mm.400352	NM_175535	ENSMUSG00000053199	Arhgap20	6530403F17Rik|A530023E23Rik|mKIAA1391	Rho GTPase activating protein 20	protein-coding
MACS_peak_7347	chr8	12757009	12757734	+	1340	NA	intron (NR_121603, intron 1 of 29)	CpG	355	NM_001293667	50770	Mm.257837	NM_015804	ENSMUSG00000031441	Atp11a	4930558F19Rik|AU040868|Atpc1h|Ih	ATPase, class VI, type 11A	protein-coding
MACS_peak_1090	chr11	69613695	69616446	+	1340	NA	exon (NM_001291104, exon 1 of 6)	exon (NM_001291104, exon 1 of 6)	148	NM_001291104	14166	Mm.269011	NM_010198		Fgf11	Fgf-11|Fhf-3|Fhf3	fibroblast growth factor 11	protein-coding
MACS_peak_866	chr10	126624099	126627260	+	1338	NA	intron (NM_001166413, intron 2 of 15)	CpG	1200	NM_001166413	52666	Mm.272230	NM_028027	ENSMUSG00000019467	Arhgef25	2410008H17Rik|D10Ertd610e|GEFT	Rho guanine nucleotide exchange factor (GEF) 25	protein-coding
MACS_peak_2360	chr14	58143460	58145402	+	1336	NA	exon (NM_145837, exon 2 of 3)	exon (NM_145837, exon 2 of 3)	765	NM_145837	239114	Mm.390726	NM_145837	ENSMUSG00000050222	Il17d	AI462269|IL-17D|Il27a	interleukin 17D	protein-coding
MACS_peak_7794	chr9	24574105	24576223	+	1336	NA	exon (NM_001205085, exon 2 of 7)	exon (NM_001205085, exon 2 of 7)	3583	NM_020496	57246	Mm.31452	NM_020496	ENSMUSG00000031965	Tbx20	9430010M06Rik|AL022859|Tbx12	T-box 20	protein-coding
MACS_peak_904	chr11	11936522	11940989	+	1336	NA	Intergenic	Intergenic	-1332	NM_010345	14783	Mm.273117	NM_010345	ENSMUSG00000020176	Grb10	5730571D09Rik|AI325020|Meg1|mKIAA0207	growth factor receptor bound protein 10	protein-coding
MACS_peak_623	chr10	36855862	36859956	+	1329	NA	intron (NM_008538, intron 1 of 1)	intron (NM_008538, intron 1 of 1)	823	NM_008538	17118	Mm.30059	NM_008538	ENSMUSG00000069662	Marcks	Macs|PKCSL	myristoylated alanine rich protein kinase C substrate	protein-coding
MACS_peak_2603	chr15	73668397	73673237	+	1324	NA	promoter-TSS (NM_001033365)	promoter-TSS (NM_001033365)	-716	NM_001033365	268816	Mm.440635	NM_001033365	ENSMUSG00000072487	Mroh5	Gm628	maestro heat-like repeat family member 5	protein-coding
MACS_peak_7708	chr8	123599731	123609322	+	1324	NA	intron (NR_045471, intron 1 of 5)	intron (NR_045471, intron 1 of 5)	2406	NR_045471	68790	Mm.246916	NR_045471	ENSMUSG00000097336	Fendrr	1110050K14Rik|linc-Foxf1a	Foxf1 adjacent non-coding developmental regulatory RNA	ncRNA
MACS_peak_4399	chr2	154375080	154376484	+	1324	NA	TTS (NM_029305)	TTS (NM_029305)	1142	NM_029305	75480	Mm.440434	NM_029305	ENSMUSG00000038523	1700003F12Rik	-	RIKEN cDNA 1700003F12 gene	protein-coding
MACS_peak_4732	chr3	95160783	95161056	+	1321	NA	intron (NM_018877, intron 1 of 21)	CpG	205	NM_001163641	84505	Mm.490259	NM_018877	ENSMUSG00000015697	Setdb1	AU022152|ESET|KMT1E|mKIAA0067	SET domain, bifurcated 1	protein-coding
MACS_peak_2369	chr14	60243394	60245778	+	1319	NA	5' UTR (NM_145463, exon 1 of 2)	5' UTR (NM_145463, exon 1 of 2)	468	NM_145463	219134	Mm.275409	NM_145463	ENSMUSG00000044461	Shisa2	9430059P22Rik|MAd2|Tmem46|mShisa|shisa	shisa homolog 2 (Xenopus laevis)	protein-coding
MACS_peak_8	chr1	6372779	6373293	+	1319	NA	intron (NM_001195732, intron 1 of 4)	CpG	23624	NM_001195732	620393	Mm.388992	NM_001195732	ENSMUSG00000087247	Fam150a	EG620393	family with sequence similarity 150, member A	protein-coding
MACS_peak_8008	chr9	60559071	60562929	+	1319	NA	promoter-TSS (NM_026235)	promoter-TSS (NM_026235)	72	NM_026235	67557	Mm.44546	NM_026235	ENSMUSG00000034839	Larp6	5430431G03Rik|AI552438|Achn	La ribonucleoprotein domain family, member 6	protein-coding
MACS_peak_3989	chr2	24327796	24331861	+	1319	NA	intron (NM_011040, intron 2 of 11)	CpG	1291	NM_011040	18510	Mm.2533	NM_011040	ENSMUSG00000026976	Pax8	Pax-8	paired box 8	protein-coding
MACS_peak_4565	chr3	8664736	8666923	+	1316	NA	intron (NM_010423, intron 4 of 4)	intron (NM_010423, intron 4 of 4)	1209	NM_010423	15213	Mm.29581	NM_010423	ENSMUSG00000040289	Hey1	AI316788|AI414254|CHF2|HRT1|Herp2|Hesr1|bHLHb31|hesr-1	hairy/enhancer-of-split related with YRPW motif 1	protein-coding
MACS_peak_4024	chr2	30699434	30702959	+	1314	NA	exon (NM_009116, exon 1 of 4)	exon (NM_009116, exon 1 of 4)	309	NM_009116	20204	Mm.1802	NM_009116	ENSMUSG00000039476	Prrx2	Prx2|S8	paired related homeobox 2	protein-coding
MACS_peak_259	chr1	91476842	91478425	+	1314	NA	intron (NM_001037136, intron 1 of 16)	CpG	102834	NR_015540	74403	Mm.444291	NR_015540		4933400F21Rik	1700091C04Rik|4930565K10Rik	RIKEN cDNA 4933400F21 gene	ncRNA
MACS_peak_5018	chr4	48058056	48066092	+	1307	NA	Intergenic	Intergenic	-2046	NM_015743	18124	Mm.247261	NM_015743	ENSMUSG00000028341	Nr4a3	AI573420|CHN|CSMF|MINOR|NOR-1|Nor1|TEC	nuclear receptor subfamily 4, group A, member 3	protein-coding
MACS_peak_3469	chr18	37911310	37917967	+	1307	NA	promoter-TSS (NM_033594)	promoter-TSS (NM_033594)	-789	NM_033594	93723	Mm.247203	NM_033594	ENSMUSG00000023036	Pcdhga11	-	protocadherin gamma subfamily A, 11	protein-coding
MACS_peak_7054	chr7	120655907	120658307	+	1307	NA	promoter-TSS (NM_027379)	promoter-TSS (NM_027379)	-241	NM_001285831	67420	Mm.206919	NM_026143	ENSMUSG00000030759	Far1	2600011M19Rik|2900034E22Rik|3732409C05Rik|AI850429|Mlstd2	fatty acyl CoA reductase 1	protein-coding
MACS_peak_4475	chr2	165298365	165300024	+	1305	NA	promoter-TSS (NM_054055)	promoter-TSS (NM_054055)	-497	NM_054055	114644	Mm.250738	NM_054055	ENSMUSG00000018459	Slc13a3	NaDC-3|NaDC3|SDCT2	solute carrier family 13 (sodium-dependent dicarboxylate transporter), member 3	protein-coding
MACS_peak_5617	chr5	30440533	30441628	+	1296	NA	exon (NM_001167879, exon 4 of 6)	exon (NM_001167879, exon 4 of 6)	-8454	NM_001256263	433868	Mm.450696	NM_001256263		3110082J24Rik	ENSMUSG00000073106	RIKEN cDNA 3110082J24 gene	protein-coding
MACS_peak_7724	chr8	125639821	125642656	+	1295	NA	promoter-TSS (NM_170684)	promoter-TSS (NM_170684)	-36	NM_170684	102278	Mm.36434	NM_170684	ENSMUSG00000034796	Cpne7	AW047065	copine VII	protein-coding
MACS_peak_44	chr1	22810975	22813811	+	1294	NA	intron (NM_001012625, intron 1 of 26)	intron (NM_001012625, intron 1 of 26)	170	NM_001012625	116837	Mm.60061	NM_053270		Rims1	C030033M19Rik|RIM1|RIM1a|RIM1alpha|Rab3ip1|Rim|Serg1|mKIAA0340	regulating synaptic membrane exocytosis 1	protein-coding
MACS_peak_2021	chr13	54396583	54398808	+	1294	NA	Intergenic	Intergenic	-75018	NM_009946	12890	Mm.268902	NM_009946	ENSMUSG00000025867	Cplx2	921-L|AI413745|AW492120	complexin 2	protein-coding
MACS_peak_2430	chr14	76813684	76817140	+	1294	NA	promoter-TSS (NM_207652)	promoter-TSS (NM_207652)	-216	NM_207652	21807	Mm.153272	NM_009366	ENSMUSG00000022010	Tsc22d1	AA589566|AW105905|Egr5|TSC-22|Tgfb1i4|Tsc|Tsc22	TSC22 domain family, member 1	protein-coding
MACS_peak_2979	chr16	85899406	85902933	+	1294	NA	5' UTR (NM_011782, exon 1 of 8)	5' UTR (NM_011782, exon 1 of 8)	201	NM_011782	23794	Mm.112933	NM_011782	ENSMUSG00000022894	Adamts5	9530092O11Rik|ADAM-TS5|ADAMTS1|ADAMTS11|AI481094|ASMP-2	a disintegrin-like and metallopeptidase (reprolysin type) with thrombospondin type 1 motif, 5 (aggrecanase-2)	protein-coding
MACS_peak_992	chr11	52576796	52579714	+	1294	NA	promoter-TSS (NM_177059)	promoter-TSS (NM_177059)	47	NM_177059	320027	Mm.44518	NM_177059		Fstl4	B230374F23Rik|SPIG1|mKIAA1061	follistatin-like 4	protein-coding
MACS_peak_5910	chr5	115877044	115882008	+	1290	NA	promoter-TSS (NM_008629)	promoter-TSS (NM_008629)	-168	NM_008629	17690	Mm.5077	NM_008629	ENSMUSG00000054256	Msi1	Msi1h|Musahi1|m-Msi-1	musashi RNA-binding protein 1	protein-coding
MACS_peak_1733	chr12	87760124	87765793	+	1288	NA	intron (NM_011934, intron 1 of 6)	CpG	364	NM_011934	26380	Mm.235550	NM_011934	ENSMUSG00000021255	Esrrb	Err2|Errb|Estrrb|Nr3b2	estrogen related receptor, beta	protein-coding
MACS_peak_2223	chr13	113778537	113780940	+	1288	NA	intron (NM_001081062, intron 2 of 2)	intron (NM_001081062, intron 2 of 2)	1728	NM_001081062	218630	Mm.25457	NM_001081062	ENSMUSG00000042417	Ccno	C86987|Ccnu|E130318K11|Ung2	cyclin O	protein-coding
MACS_peak_3647	chr19	5067089	5071952	+	1288	NA	exon (NM_054042, exon 1 of 1)	exon (NM_054042, exon 1 of 1)	1442	NM_054042	70445	Mm.29597	NM_054042	ENSMUSG00000056481	Cd248	2610111G01Rik|AI842296|Cd164l1|Tem1	CD248 antigen, endosialin	protein-coding
MACS_peak_1087	chr11	69049209	69050738	+	1288	NA	exon (NM_008192, exon 2 of 19)	exon (NM_008192, exon 2 of 19)	551	NM_008192	14919	Mm.291816	NM_008192	ENSMUSG00000020890	Gucy2e	GC-E|GC1|ROS-GC1	guanylate cyclase 2e	protein-coding
MACS_peak_6424	chr6	85451942	85455111	+	1286	NA	promoter-TSS (NM_001289674)	promoter-TSS (NM_001289674)	-538	NM_001289675	330369	Mm.38777	NM_001001160	ENSMUSG00000047013	Fbxo41	9630017H13|D6Ertd538e	F-box protein 41	protein-coding
MACS_peak_1609	chr12	54351432	54355202	+	1286	NA	intron (NM_013780, intron 1 of 11)	intron (NM_013780, intron 1 of 11)	3653	NM_013780	27386	Mm.247044	NM_013780	ENSMUSG00000021010	Npas3	4930423H22Rik|bHLHe12	neuronal PAS domain protein 3	protein-coding
MACS_peak_3330	chr17	79752213	79755627	+	1286	NA	intron (NM_026514, intron 1 of 1)	CpG	511	NM_026514	260409	Mm.140601	NM_026514	ENSMUSG00000036533	Cdc42ep3	3200001F04Rik|AA986861|Borg2|Cep3|UB1	CDC42 effector protein (Rho GTPase binding) 3	protein-coding
MACS_peak_4378	chr2	151527094	151529735	+	1286	NA	intron (NM_001160363, intron 1 of 1)	CpG	670	NM_001160363	108832	Mm.103494	NM_001160363	ENSMUSG00000044364	Tmem74b	5430405G05Rik	transmembrane protein 74B	protein-coding
MACS_peak_1472	chr11	116555107	116556337	+	1286	NA	intron (NM_009180, intron 1 of 8)	CpG	252	NM_009180	20446	Mm.3947	NM_009180		St6galnac2	II|ST6GalNAc|Siat7|Siat7b	ST6 (alpha-N-acetyl-neuraminyl-2,3-beta-galactosyl-1,3)-N-acetylgalactosaminide alpha-2,6-sialyltransferase 2	protein-coding
MACS_peak_4792	chr3	106838478	106841074	+	1286	NA	exon (NM_008418, exon 1 of 1)	exon (NM_008418, exon 1 of 1)	696	NM_008418	16491	Mm.30640	NM_008418	ENSMUSG00000047959	Kcna3	Kca1-3|Kv1.3|Mk-3	potassium voltage-gated channel, shaker-related subfamily, member 3	protein-coding
MACS_peak_815	chr10	93773163	93776988	+	1286	NA	Intergenic	CpG	-13627	NR_033209	215472	Mm.255656	NM_174999	ENSMUSG00000053420	Gm4792	E130012K09|EG215472	predicted gene 4792	ncRNA
MACS_peak_7425	chr8	34627158	34628893	+	1286	NA	Intergenic	Intergenic	33242	NR_033589	628431	Mm.376526	NR_033589		Hmgb1-rs17	Hmg1-rs17	high mobility group box 1, related sequence 17	pseudo
MACS_peak_6106	chr5	143026276	143027448	+	1285	NA	intron (NM_178702, intron 1 of 14)	CpG	190	NM_178702	231858	Mm.33766	NM_178702	ENSMUSG00000029576	Radil	AI536456|D930005D10Rik	Ras association and DIL domains	protein-coding
MACS_peak_1367	chr11	101645362	101648302	+	1282	NA	promoter-TSS (NM_008815)	promoter-TSS (NM_008815)	-208	NM_008815	18612	Mm.5025	NM_008815	ENSMUSG00000017724	Etv4	AW414408|Pea-3|Pea3	ets variant 4	protein-coding
MACS_peak_6251	chr6	29119777	29121225	+	1282	NA	exon (NM_001101443, exon 5 of 5)	exon (NM_001101443, exon 5 of 5)	-5777	NM_133925	68272	Mm.40802	NM_026650	ENSMUSG00000029701	Rbm28	2810480G15Rik|AI503051	RNA binding motif protein 28	protein-coding
MACS_peak_1689	chr12	77921218	77926814	+	1281	NA	promoter-TSS (NM_134050)	promoter-TSS (NM_134050)	-505	NM_134050	104886	Mm.172847	NM_134050	ENSMUSG00000021062	Rab15	2310012G06Rik|AI840042	RAB15, member RAS oncogene family	protein-coding
MACS_peak_8196	chr9	103012447	103016534	+	1281	NA	promoter-TSS (NM_173781)	promoter-TSS (NM_173781)	86	NM_173781	270192	Mm.490252	NM_173781	ENSMUSG00000032549	Rab6b	9630015C03|AI844641|C330006L04Rik|D9Bwg0185e	RAB6B, member RAS oncogene family	protein-coding
MACS_peak_7747	chr8	128515461	128519938	+	1281	NA	Intergenic	Intergenic	-1303	NM_008430	16525	Mm.10800	NM_008430	ENSMUSG00000033998	Kcnk1	AI788889|TWIK-1	potassium channel, subfamily K, member 1	protein-coding
MACS_peak_4085	chr2	53936205	53938645	+	1281	NA	exon (NM_023396, exon 1 of 1)	exon (NM_023396, exon 1 of 1)	538	NM_023396	67874	Mm.27086	NM_023396	ENSMUSG00000075334	Rprm	2410012A13Rik|Reprimo	reprimo, TP53 dependent G2 arrest mediator candidate	protein-coding
MACS_peak_4509	chr2	172553663	172557697	+	1281	NA	Intergenic	Intergenic	179189	NM_001159696	21420	Mm.3629	NM_009335	ENSMUSG00000028640	Tfap2c	AA409384|AP2gamma|Ap-2.2|Stra2|Tcfap2c	transcription factor AP-2, gamma	protein-coding
MACS_peak_4688	chr3	86723345	86725669	+	1278	NA	5' UTR (NM_027539, exon 1 of 16)	5' UTR (NM_027539, exon 1 of 16)	299	NM_001195496	70762	Mm.44490	NM_027539	ENSMUSG00000028078	Dclk2	6330415M09Rik|AU044875|CL2|CLICK2|Click-II|Dcamkl2	doublecortin-like kinase 2	protein-coding
MACS_peak_2435	chr14	79699189	79702966	+	1278	NA	intron (NM_025427, intron 1 of 4)	CpG	365	NM_025427	66214	Mm.29811	NM_025427	ENSMUSG00000022018	Rgcc	1190002H23Rik|Rgc-32|Rgc32	regulator of cell cycle	protein-coding
MACS_peak_3972	chr2	18721276	18723705	+	1278	NA	Intergenic	Intergenic	101841	NM_001001334	381350	Mm.330024	NM_001001334		BC061194	-	cDNA sequence BC061194	protein-coding
MACS_peak_2285	chr14	33133140	33135678	+	1278	NA	promoter-TSS (NM_001081130)	promoter-TSS (NM_001081130)	-796	NM_001081130	239017	Mm.318302	NM_001081130	ENSMUSG00000021913	Ogdhl	-	oxoglutarate dehydrogenase-like	protein-coding
MACS_peak_5557	chr5	17079909	17081216	+	1278	NA	promoter-TSS (NM_013657)	promoter-TSS (NM_013657)	-72	NM_013657	20348	Mm.5071	NM_013657	ENSMUSG00000028780	Sema3c	1110036B02Rik|SemE|Semae	sema domain, immunoglobulin domain (Ig), short basic domain, secreted, (semaphorin) 3C	protein-coding
MACS_peak_2164	chr13	95991844	95993592	+	1278	NA	exon (NM_001170669, exon 1 of 19)	exon (NM_001170669, exon 1 of 19)	287	NM_001170669	218461	Mm.100167	NM_172263	ENSMUSG00000021684	Pde8b	B230331L10Rik|C030047E14Rik	phosphodiesterase 8B	protein-coding
MACS_peak_1585	chr12	35590688	35592885	+	1278	NA	intron (NM_001271386, intron 2 of 27)	CpG	9981	NM_001271386	79221	Mm.310551	NM_024124	ENSMUSG00000004698	Hdac9	AV022454|D030072B18Rik|HD7B|HD9|HDRP|Hdac7b|Mitr|mKIAA0744	histone deacetylase 9	protein-coding
MACS_peak_2461	chr14	104868648	104873573	+	1278	NA	Intergenic	Intergenic	-3894	NM_011143	18996	Mm.246550	NM_011143		Pou4f1	Brn-3|Brn-3.0|Brn3|Brn3.0|Brn3a|E130119J07Rik	POU domain, class 4, transcription factor 1	protein-coding
MACS_peak_2492	chr14	119320118	119325340	+	1278	NA	promoter-TSS (NM_025943)	promoter-TSS (NM_025943)	-340	NM_025943	66573	Mm.87456	NM_025943	ENSMUSG00000042156	Dzip1	2510025K24Rik|2810422M04Rik|mKIAA0996	DAZ interacting protein 1	protein-coding
MACS_peak_6781	chr7	34917459	34918828	+	1278	NA	5' UTR (NM_207212, exon 1 of 8)	5' UTR (NM_207212, exon 1 of 8)	144	NM_207212	101543	Mm.422738	NM_207212	ENSMUSG00000036459	Wtip	-	WT1-interacting protein	protein-coding
MACS_peak_2133	chr13	89879928	89882727	+	1278	NA	intron (NM_172955, intron 1 of 5)	intron (NM_172955, intron 1 of 5)	790	NM_001081249	13003	Mm.158700	NM_019389	ENSMUSG00000021614	Vcan	5430420N07Rik|9430051N09|Cspg2|DPEAAE|NG2|PG-M|PG-M(V0)|PG-M(V1)|hdf	versican	protein-coding
MACS_peak_3735	chr19	28909462	28910783	+	1278	NA	intron (NM_009199, intron 1 of 11)	intron (NM_009199, intron 1 of 11)	466	NM_009199	20510	Mm.246670	NM_009199	ENSMUSG00000024935	Slc1a1	D130048G10Rik|EAAC1|EAAC2|EAAT3|MEAAC1	solute carrier family 1 (neuronal/epithelial high affinity glutamate transporter, system Xag), member 1	protein-coding
MACS_peak_2837	chr15	103332637	103334957	+	1278	NA	5' UTR (NM_008800, exon 1 of 16)	5' UTR (NM_008800, exon 1 of 16)	332	NM_008800	18574	Mm.390792	NM_008800	ENSMUSG00000022489	Pde1b	Pde1b1	phosphodiesterase 1B, Ca2+-calmodulin dependent	protein-coding
MACS_peak_3418	chr18	33098289	33100579	+	1278	NA	intron (NM_009793, intron 1 of 10)	intron (NM_009793, intron 1 of 10)	739	NM_009793	12326	Mm.222329	NM_009793	ENSMUSG00000038128	Camk4	A430110E23Rik|AI666733|CaMKIV|CaMKIV/Gr|D18Bwg0362e	calcium/calmodulin-dependent protein kinase IV	protein-coding
MACS_peak_875	chr10	128346781	128347947	+	1278	NA	intron (NM_007653, intron 1 of 7)	CpG	442	NM_007653	12512	Mm.371552	NM_007653	ENSMUSG00000025351	Cd63	C75951|ME491|Tspan30	CD63 antigen	protein-coding
MACS_peak_1282	chr11	96322779	96328001	+	1278	NA	promoter-TSS (NM_001177899)	promoter-TSS (NM_001177899)	471	NR_033524	100038600	Mm.483549	NR_033524		Gm11529	OTTMUSG00000001775	predicted gene 11529	ncRNA
MACS_peak_630	chr10	39088280	39090282	+	1278	NA	promoter-TSS (NM_008054)	promoter-TSS (NM_008054)	-324	NM_001122892	14360	Mm.4848	NM_008054	ENSMUSG00000019843	Fyn	AI448320|AW552119	Fyn proto-oncogene	protein-coding
MACS_peak_2338	chr14	55399197	55400112	+	1278	NA	intron (NM_016972, intron 1 of 10)	intron (NM_016972, intron 1 of 10)	1069	NM_016972	50934	Mm.276831	NM_016972	ENSMUSG00000022180	Slc7a8	AA408822|LAT2	solute carrier family 7 (cationic amino acid transporter, y+ system), member 8	protein-coding
MACS_peak_4654	chr3	67178170	67178856	+	1278	NA	intron (NM_001039543, intron 1 of 7)	intron (NM_001039543, intron 1 of 7)	494	NM_001039543	17349	Mm.10414	NM_010801	ENSMUSG00000048416	Mlf1	HLS7	myeloid leukemia factor 1	protein-coding
MACS_peak_5164	chr4	114078897	114080011	+	1278	NA	exon (NM_001085549, exon 1 of 7)	exon (NM_001085549, exon 1 of 7)	125	NM_001085549	666048	Mm.331779	NM_001085549	ENSMUSG00000070867	Trabd2b	Gm12824|OTTMUSG00000008561	TraB domain containing 2B	protein-coding
MACS_peak_343	chr1	130486216	130488870	+	1277	NA	intron (NM_009911, intron 1 of 1)	CpG	1333	NM_009911	12767	Mm.1401	NM_009911	ENSMUSG00000045382	Cxcr4	CD184|Cmkar4|LESTR|PB-CKR|PBSF/SDF-1|Sdf1r|b2b220Clo	chemokine (C-X-C motif) receptor 4	protein-coding
MACS_peak_5822	chr5	105947640	105949249	+	1277	NA	promoter-TSS (NM_133897)	promoter-TSS (NM_133897)	-46	NM_133897	100604	Mm.319847	NM_133897	ENSMUSG00000054720	Lrrc8c	AD158|AI326115|E430036I04Rik|fad158	leucine rich repeat containing 8 family, member C	protein-coding
MACS_peak_3871	chr19	47990860	47994016	+	1277	NA	intron (NM_001001738, intron 1 of 1)	intron (NM_001001738, intron 1 of 1)	1351	NM_001001738	414801	Mm.29457	NM_001001738	ENSMUSG00000079254	Itprip	4833424O12Rik|DANGER|mKIAA1754	inositol 1,4,5-triphosphate receptor interacting protein	protein-coding
MACS_peak_4660	chr3	69402252	69403392	+	1277	NA	promoter-TSS (NM_020026)	promoter-TSS (NM_020026)	60	NM_020026	26879	Mm.153710	NM_020026	ENSMUSG00000043300	B3galnt1	B3galt3|b3GT3	UDP-GalNAc:betaGlcNAc beta 1,3-galactosaminyltransferase, polypeptide 1	protein-coding
MACS_peak_6074	chr5	137727989	137731686	+	1276	NA	intron (NM_009599, intron 1 of 4)	intron (NM_009599, intron 1 of 4)	355	NM_001290010	11423	Mm.255464	NM_009599	ENSMUSG00000023328	Ache	-	acetylcholinesterase	protein-coding
MACS_peak_6278	chr6	39206323	39207373	+	1276	NA	Intergenic	CpG	-50076	NM_001033430	338523	Mm.293175	NM_001033430	ENSMUSG00000042599	Kdm7a	A630082K20Rik|BB041802|ENSMUSG00000073143|Jhdm1d|mKIAA1718	lysine (K)-specific demethylase 7A	protein-coding
MACS_peak_6885	chr7	74994075	74995645	+	1276	NA	Intergenic	Intergenic	-46478	NR_045954	73904	Mm.70992	NR_045954	ENSMUSG00000097697	4833412C05Rik	-	RIKEN cDNA 4833412C05 gene	ncRNA
MACS_peak_3096	chr17	15964534	15968490	+	1276	NA	Intergenic	Intergenic	-2962	NM_178615	68799	Mm.293466	NM_178615	ENSMUSG00000048027	Rgmb	1110059F19Rik|DRAGON	repulsive guidance molecule family member B	protein-coding
MACS_peak_6881	chr7	74903613	74904229	+	1276	NA	exon (NM_183312, exon 1 of 4)	exon (NM_183312, exon 1 of 4)	707	NM_183312	233335	Mm.60526	NM_183312	ENSMUSG00000030554	Synm	4930412K21Rik|AI852401|Dmn|E130104F11|Syn|Synemin	synemin, intermediate filament protein	protein-coding
MACS_peak_7040	chr7	116581938	116583571	+	1276	NA	promoter-TSS (NM_054103)	promoter-TSS (NM_054103)	-187	NM_054103	117229	Mm.389950	NM_054103	ENSMUSG00000031027	Stk33	4921505G21Rik|AW061264	serine/threonine kinase 33	protein-coding
MACS_peak_3212	chr17	37186523	37188532	+	1276	NA	intron (NM_019439, intron 5 of 22)	intron (NM_019439, intron 5 of 22)	4616	NM_019439	54393	Mm.32191	NM_019439	ENSMUSG00000024462	Gabbr1	GABAB1|GABAbR1|bM573K1.1	gamma-aminobutyric acid (GABA) B receptor, 1	protein-coding
MACS_peak_3872	chr19	48011957	48014677	+	1276	NA	intron (NM_001163267, intron 1 of 17)	intron (NM_001163267, intron 1 of 17)	1115	NM_001163267	381229	Mm.300553	NM_001163267	ENSMUSG00000046585	Cfap58	Ccdc147|Gm969	cilia and flagella associated protein 58	protein-coding
MACS_peak_5700	chr5	64549762	64552657	+	1276	NA	promoter-TSS (NM_019636)	promoter-TSS (NM_019636)	-290	NM_019636	57915	Mm.286353	NM_019636	ENSMUSG00000029174	Tbc1d1	1110062G02Rik|AI385682|AW555803|Tbc1|mKIAA1108	TBC1 domain family, member 1	protein-coding
MACS_peak_2720	chr15	91402687	91403970	+	1276	NA	exon (NM_001033633, exon 1 of 10)	exon (NM_001033633, exon 1 of 10)	364	NM_001033633	239606	Mm.360596	NM_001033633	ENSMUSG00000036298	Slc2a13	6530403A04|A630029G22Rik|AI505012|Gm308	solute carrier family 2 (facilitated glucose transporter), member 13	protein-coding
MACS_peak_6746	chr7	29078942	29080063	+	1276	NA	exon (NM_007866, exon 7 of 9)	exon (NM_007866, exon 7 of 9)	-3349	NM_175033	280621	Mm.212777	NM_175033	ENSMUSG00000046750	BC089491	Selv	cDNA sequence BC089491	protein-coding
MACS_peak_6981	chr7	97450065	97452673	+	1276	NA	intron (NM_031394, intron 1 of 18)	intron (NM_031394, intron 1 of 18)	504	NR_110348	83671	Mm.26751	NM_031394	ENSMUSG00000030616	Sytl2	AI266830|Slp2|mKIAA1597	synaptotagmin-like 2	protein-coding
MACS_peak_6527	chr6	122750713	122753532	+	1276	NA	Intergenic	Intergenic	-18080	NM_021899	60611	Mm.87142	NM_021899	ENSMUSG00000003154	Foxj2	Fhx	forkhead box J2	protein-coding
MACS_peak_341	chr1	129571180	129575137	+	1276	NA	intron (NM_028135, intron 1 of 7)	intron (NM_028135, intron 1 of 7)	1440	NM_028135	72160	Mm.281287	NM_028135	ENSMUSG00000026347	Tmem163	2610024A01Rik|SV31	transmembrane protein 163	protein-coding
MACS_peak_3391	chr18	12491097	12494152	+	1276	NA	promoter-TSS (NM_010680)	promoter-TSS (NM_010680)	91	NM_010680	16774	Mm.42012	NM_010680	ENSMUSG00000024421	Lama3	Lama3B|[a]3B	laminin, alpha 3	protein-coding
MACS_peak_3186	chr17	35477450	35480274	+	1276	NA	promoter-TSS (NM_010392)	promoter-TSS (NM_010392)	-416	NM_010392	15013	Mm.427969	NM_010392	ENSMUSG00000091705	H2-Q2	BE136769|ENSMUSG00000079507|Gm11132|H-2Q2|gs14-2	histocompatibility 2, Q region locus 2	protein-coding
MACS_peak_7778	chr9	20838141	20843294	+	1276	NA	exon (NM_008319, exon 7 of 11)	exon (NM_008319, exon 7 of 11)	-3945	NR_035438	100316681		NR_035438	miRBase:MI0008319	Mir1900	Mirn1900|mmu-mir-1900	microRNA 1900	ncRNA
MACS_peak_7880	chr9	43849743	43852830	+	1273	NA	promoter-TSS (NM_009382)	promoter-TSS (NM_009382)	-181	NM_009382	21838	Mm.3951	NM_009382	ENSMUSG00000032011	Thy1	CD90|T25|Thy-1|Thy-1.2|Thy1.1|Thy1.2	thymus cell antigen 1, theta	protein-coding
MACS_peak_3502	chr18	47526189	47528445	+	1273	NA	intron (NM_018744, intron 1 of 18)	intron (NM_018744, intron 1 of 18)	1205	NM_018744	20358	Mm.40909	NM_018744	ENSMUSG00000019647	Sema6a	9330158E07|A730020P05Rik|AI851735|Sema6A-1|Semaq|VIa|b2b997Clo	sema domain, transmembrane domain (TM), and cytoplasmic domain, (semaphorin) 6A	protein-coding
MACS_peak_5305	chr4	131391227	131394087	+	1270	NA	intron (NM_001083119, intron 1 of 30)	CpG	1536	NM_011214	19273	Mm.4860	NM_011214	ENSMUSG00000028909	Ptpru	Ftp-1|PCP-2|PTP|PTP-lambda|PTPlambda|Pcp2|Ptpf|Ptprl|R-PTP-U|R-PTP-psi|RPTPlambda	protein tyrosine phosphatase, receptor type, U	protein-coding
MACS_peak_3247	chr17	47274596	47279605	+	1270	NA	promoter-TSS (NM_001097623)	promoter-TSS (NM_001097623)	-791	NM_001097623	224829	Mm.260989	NM_172622	ENSMUSG00000064043	Trerf1	9430096I18Rik|AI429294|B830015H24|RAPA|Trep-132|Trep132	transcriptional regulating factor 1	protein-coding
MACS_peak_4529	chr2	179834220	179840053	+	1268	NA	intron (NM_133849, intron 2 of 2)	intron (NM_133849, intron 2 of 2)	1976	NR_102309	99296	Mm.285360	NM_133849	ENSMUSG00000039059	Hrh3	AW049250|H3R|HH3R	histamine receptor H3	protein-coding
MACS_peak_1098	chr11	71563290	71565446	+	1266	NA	intron (NM_177618, intron 1 of 8)	CpG	163	NM_177618	216881	Mm.48648	NM_177618	ENSMUSG00000020811	Wscd1	mKIAA0523	WSC domain containing 1	protein-coding
MACS_peak_3995	chr2	25095955	25099462	+	1264	NA	promoter-TSS (NM_176834)	promoter-TSS (NM_176834)	-741	NM_176834	68846	Mm.24777	NM_176834	ENSMUSG00000044628	Rnf208	1110061N23Rik	ring finger protein 208	protein-coding
MACS_peak_248	chr1	88566632	88568425	+	1263	NA	promoter-TSS (NM_010933)	promoter-TSS (NM_010933)	-380	NM_010933	18159	Mm.12802	NM_010933	ENSMUSG00000026241	Nppc	CNP|lbab	natriuretic peptide type C	protein-coding
MACS_peak_4015	chr2	29048931	29051391	+	1263	NA	TTS (NM_133501)	TTS (NM_133501)	53399	NM_133501	171171	Mm.442448	NM_133500	ENSMUSG00000035513	Ntng2	2610016D08Rik|Lmnt2	netrin G2	protein-coding
MACS_peak_2441	chr14	84842418	84848475	+	1263	NA	5' UTR (NM_001013753, exon 1 of 4)	5' UTR (NM_001013753, exon 1 of 4)	2076	NM_001013753	219228	Mm.153643	NM_001013753	ENSMUSG00000035566	Pcdh17	C030033F14Rik|Gm78	protocadherin 17	protein-coding
MACS_peak_2306	chr14	35629323	35634140	+	1263	NA	Intergenic	Intergenic	-1591	NM_008166	14803	Mm.121569	NM_008166	ENSMUSG00000041078	Grid1	GluD1|GluRdelta1	glutamate receptor, ionotropic, delta 1	protein-coding
MACS_peak_5329	chr4	135126316	135130256	+	1259	NA	intron (NM_001013756, intron 1 of 15)	intron (NM_001013756, intron 1 of 15)	1249	NM_001013756	230824	Mm.331972	NM_001013756	ENSMUSG00000037188	Grhl3	AI561912|Get1|Som|Tfcp2l4|ct	grainyhead-like 3 (Drosophila)	protein-coding
MACS_peak_8304	chrX	35604718	35605841	+	1256	NA	intron (NM_172930, intron 1 of 9)	intron (NM_172930, intron 1 of 9)	379	NM_001289727	245386	Mm.72979	NM_172930	ENSMUSG00000036502	Tmem255a	4933417N17|6430550H21Rik|Fam70a	transmembrane protein 255A	protein-coding
MACS_peak_1847	chr13	19711055	19711636	+	1256	NA	exon (NM_134065, exon 1 of 3)	exon (NM_134065, exon 1 of 3)	354	NM_134065	105298	Mm.275054	NM_134065	ENSMUSG00000002808	Epdr1	AU040950|AV006210|Epdm2|Epdr2|MERP-1|MERP-2|MERP2|Ucc1	ependymin related protein 1 (zebrafish)	protein-coding
MACS_peak_4856	chr3	141127222	141130961	+	1256	NA	intron (NM_009472, intron 1 of 15)	intron (NM_009472, intron 1 of 15)	563	NM_001293561	22253	Mm.24430	NM_009472	ENSMUSG00000059921	Unc5c	B130051O18Rik|Unc5h3|rcm	unc-5 homolog C (C. elegans)	protein-coding
MACS_peak_7261	chr7	151863546	151867075	+	1256	NA	intron (NM_178642, intron 1 of 25)	intron (NM_178642, intron 1 of 25)	59187	NM_178642	101772	Mm.26700	NM_178642	ENSMUSG00000031075	Ano1	Tmem16a	anoctamin 1, calcium activated chloride channel	protein-coding
MACS_peak_571	chr10	18463221	18463739	+	1256	NA	promoter-TSS (NM_001033258)	promoter-TSS (NM_001033258)	84	NM_001033258	215821	Mm.40491	NM_001033258	ENSMUSG00000019852	D10Bwg1379e	9630004D11|Arfgef3|B930094H20Rik|mKIAA1244	DNA segment, Chr 10, Brigham & Women's Genetics 1379 expressed	protein-coding
MACS_peak_3563	chr18	67501739	67506658	+	1256	NA	promoter-TSS (NR_033214)	promoter-TSS (NR_033214)	-441	NR_033214	338360	Mm.441590	NR_033214	ENSMUSG00000046415	B430212C06Rik	-	RIKEN cDNA B430212C06 gene	ncRNA
MACS_peak_1134	chr11	78737334	78739262	+	1254	NA	intron (NM_010927, intron 2 of 26)	intron (NM_010927, intron 2 of 26)	3937	NM_010927	18126	Mm.2893	NM_010927	ENSMUSG00000020826	Nos2	NOS-II|Nos-2|Nos2a|i-NOS|iNOS	nitric oxide synthase 2, inducible	protein-coding
MACS_peak_4457	chr2	164772683	164778826	+	1254	NA	intron (NM_013599, intron 5 of 12)	intron (NM_013599, intron 5 of 12)	2035	NM_013599	17395	Mm.4406	NM_013599	ENSMUSG00000017737	Mmp9	AW743869|B/MMP9|Clg4b|MMP-9|pro-MMP-9	matrix metallopeptidase 9	protein-coding
MACS_peak_106	chr1	52289082	52289609	+	1246	NA	intron (NM_001081081, intron 1 of 17)	CpG	731	NM_001081081	14660	Mm.398608	NM_001081081	ENSMUSG00000026103	Gls	6330442B14|AI314027|B230365M23Rik	glutaminase	protein-coding
MACS_peak_152	chr1	72920321	72921703	+	1244	NA	5' UTR (NM_010518, exon 1 of 4)	5' UTR (NM_010518, exon 1 of 4)	427	NM_010518	16011	Mm.405761	NM_010518	ENSMUSG00000026185	Igfbp5	AI256729|AW208790|IGFBP-5|IGFBP-5P	insulin-like growth factor binding protein 5	protein-coding
MACS_peak_7414	chr8	30329063	30331297	+	1240	NA	promoter-TSS (NM_153135)	promoter-TSS (NM_153135)	-72	NM_153135	210801	Mm.248433	NM_153135	ENSMUSG00000063626	Unc5d	D930029E11Rik|Unc5h4|mKIAA1777	unc-5 homolog D (C. elegans)	protein-coding
MACS_peak_4133	chr2	71418841	71420181	+	1240	NA	Intergenic	Intergenic	-34700	NM_010054	13392	Mm.3896	NM_010054	ENSMUSG00000023391	Dlx2	AW121999|Dlx-2|Tes-1	distal-less homeobox 2	protein-coding
MACS_peak_1047	chr11	62061800	62064616	+	1236	NA	intron (NM_007413, intron 1 of 1)	intron (NM_007413, intron 1 of 1)	722	NM_007413	11541	Mm.40740	NM_007413	ENSMUSG00000018500	Adora2b	A2BAR|A2BR|A2b|AA2BR|AI480866|AI605384	adenosine A2b receptor	protein-coding
MACS_peak_4801	chr3	108217627	108220664	+	1234	NA	promoter-TSS (NM_017392)	promoter-TSS (NM_017392)	-733	NM_001004177	53883	Mm.39728	NM_017392	ENSMUSG00000068740	Celsr2	EGFL2|Flamingo1|flamingo|mKIAA0279|mfmi1	cadherin, EGF LAG seven-pass G-type receptor 2 (flamingo homolog, Drosophila)	protein-coding
MACS_peak_2744	chr15	98458159	98467195	+	1233	NA	promoter-TSS (NM_001044741)	promoter-TSS (NM_001044741)	-82	NM_001044741	12297	Mm.3544	NM_007581	ENSMUSG00000003352	Cacnb3	Beta3|CAB3|Ca(v)beta3|Cchb3	calcium channel, voltage-dependent, beta 3 subunit	protein-coding
MACS_peak_2857	chr16	11983333	11985726	+	1230	NA	5' UTR (NM_001174086, exon 1 of 4)	5' UTR (NM_001174086, exon 1 of 4)	323	NM_001174086	72555	Mm.310139	NM_028277	ENSMUSG00000022494	Shisa9	2700045P11Rik|Ckamp44	shisa homolog 9 (Xenopus laevis)	protein-coding
MACS_peak_6889	chr7	75095322	75098687	+	1228	NA	promoter-TSS (NM_010513)	promoter-TSS (NM_010513)	-139	NM_010513	16001	Mm.275742	NM_010513		Igf1r	A330103N21Rik|CD221|D930020L01|IGF-1R|hyft	insulin-like growth factor I receptor	protein-coding
MACS_peak_8007	chr9	60368324	60370739	+	1228	NA	Intergenic	HAL1-3A_ME|LINE|L1	-10689	NM_001040426	207596	Mm.28791	NM_172444	ENSMUSG00000032289	Thsd4	ADAMTSL-6|ADAMTSL6|AI585901|Adamtsl4|B230114P05Rik	thrombospondin, type I, domain containing 4	protein-coding
MACS_peak_5530	chr5	5663202	5665230	+	1228	NA	promoter-TSS (NM_172447)	promoter-TSS (NM_172447)	16	NM_172447	207686	Mm.319007	NM_172447		Cfap69	4921525K03|A330021E22Rik|AI427898	cilia and flagella associated protein 69	protein-coding
MACS_peak_6486	chr6	114347321	114350419	+	1228	NA	intron (NM_008285, intron 1 of 2)	intron (NM_008285, intron 1 of 2)	940	NM_008285	15465	Mm.333327	NM_008285	ENSMUSG00000053004	Hrh1	Bphs|H1R|HH1R|Hir	histamine receptor H1	protein-coding
MACS_peak_6692	chr7	26090344	26092694	+	1228	NA	intron (NM_183311, intron 1 of 14)	intron (NM_183311, intron 1 of 14)	392	NM_183311	330485	Mm.260740	NM_183311	ENSMUSG00000043843	Tmem145	B930076A02Rik	transmembrane protein 145	protein-coding
MACS_peak_6434	chr6	88142911	88152617	+	1228	NA	promoter-TSS (NM_008090)	promoter-TSS (NM_008090)	-894	NM_008090	14461	Mm.491156	NM_008090	ENSMUSG00000015053	Gata2	Gata-2	GATA binding protein 2	protein-coding
MACS_peak_2754	chr15	98917540	98918866	+	1228	NA	promoter-TSS (NM_001024702)	promoter-TSS (NM_001024702)	-44	NM_001024702	239659	Mm.309917	NM_001024702	ENSMUSG00000001076	C1ql4	C1qtnf11|CTRP11	complement component 1, q subcomponent-like 4	protein-coding
MACS_peak_6285	chr6	42270958	42275013	+	1226	NA	intron (NM_001286584, intron 1 of 6)	intron (NM_001286584, intron 1 of 6)	1654	NM_001286584	76156	Mm.234314	NM_029528	ENSMUSG00000029861	Fam131b	6330503C03Rik|6530406I18Rik|AV277466	family with sequence similarity 131, member B	protein-coding
MACS_peak_5078	chr4	63155760	63156879	+	1226	NA	5' UTR (NM_001008793, exon 1 of 12)	5' UTR (NM_001008793, exon 1 of 12)	706	NM_001008793	73750	Mm.300397	NM_028640	ENSMUSG00000039137	Whrn	1110035G07Rik|AW122018|AW742671|C430046P22Rik|Dfnb31|wi	whirlin	protein-coding
MACS_peak_2076	chr13	69135616	69138646	+	1226	NA	intron (NM_153534, intron 1 of 24)	intron (NM_153534, intron 1 of 24)	1288	NM_153534	210044	Mm.390617	NM_153534	ENSMUSG00000021536	Adcy2	mKIAA1060	adenylate cyclase 2	protein-coding
MACS_peak_6256	chr6	29381715	29386235	+	1226	NA	intron (NM_001081185, intron 1 of 47)	intron (NM_001081185, intron 1 of 47)	822	NM_001081185	68794	Mm.39046	NM_001081185	ENSMUSG00000068699	Flnc	1110055E19Rik|ABP-280|ABPL|Fln2	filamin C, gamma	protein-coding
MACS_peak_6848	chr7	56500977	56504431	+	1226	NA	intron (NM_175272, intron 1 of 37)	intron (NM_175272, intron 1 of 37)	1145	NM_175272	78286	Mm.333881	NM_175272	ENSMUSG00000052512	Nav2	5330421F07Rik|AU067780|BQ960892|HELAD1|POMFIL2|RAINB1|RAINB2|Unc53H2|mKIAA3015	neuron navigator 2	protein-coding
MACS_peak_991	chr11	51977462	51984214	+	1226	NA	Intergenic	Intergenic	-9429	NR_034155	257871	Mm.253576	NR_034155		Olfr1372-ps1	GA_x5J8B7TR6JS-3-632|MOR256-54P|NP_TR6JSE50FPA	olfactory receptor 1372, pseudogene 1	pseudo
MACS_peak_5295	chr4	130125357	130127605	+	1226	NA	intron (NM_025998, intron 1 of 6)	intron (NM_025998, intron 1 of 6)	776	NM_025998	67149	Mm.423029	NM_025998		Nkain1	2610200G18Rik|2810426C15Rik	Na+/K+ transporting ATPase interacting 1	protein-coding
MACS_peak_5128	chr4	100741402	100743592	+	1226	NA	intron (NM_183024, intron 1 of 11)	intron (NM_183024, intron 1 of 11)	854	NM_183024	242570	Mm.185636	NM_183024	ENSMUSG00000035275	Raver2	A430091O22Rik	ribonucleoprotein, PTB-binding 2	protein-coding
MACS_peak_5156	chr4	108551283	108552532	+	1226	NA	intron (NM_023537, intron 1 of 4)	CpG	232	NM_023537	69908	Mm.41580	NM_023537	ENSMUSG00000003411	Rab3b	2610528C18Rik	RAB3B, member RAS oncogene family	protein-coding
MACS_peak_7736	chr8	126955963	126958109	+	1226	NA	intron (NM_171824, intron 1 of 6)	intron (NM_171824, intron 1 of 6)	800	NM_171824	209966	Mm.234233	NM_171824	ENSMUSG00000050751	Pgbd5	2900019M05Rik|AI854313	piggyBac transposable element derived 5	protein-coding
MACS_peak_6904	chr7	75272553	75274180	+	1224	NA	intron (NM_010513, intron 2 of 20)	intron (NM_010513, intron 2 of 20)	135753	NM_030101	78444	Mm.425468	NM_030101	ENSMUSG00000030553	Pgpep1l	C330024D12Rik	pyroglutamyl-peptidase I-like	protein-coding
MACS_peak_7561	chr8	90483963	90486631	+	1220	NA	Intergenic	CpG-14334	-1803	NM_033327	94187	Mm.23452	NM_033327	ENSMUSG00000045333	Zfp423	Ebfaz|Roaz|Zfp104|Znf423|ataxia1|mKIAA0760|nur12	zinc finger protein 423	protein-coding
MACS_peak_7256	chr7	150622550	150625367	+	1219	NA	Intergenic	CpG	22997	NM_009876	12577	Mm.168789	NM_009876	ENSMUSG00000037664	Cdkn1c	AL024410|CDKI|Kip2|p57(kip2)|p57Kip2	cyclin-dependent kinase inhibitor 1C (P57)	protein-coding
MACS_peak_6103	chr5	141210768	141213845	+	1219	NA	intron (NM_173405, intron 2 of 7)	intron (NM_173405, intron 2 of 7)	12225	NM_173405	231842	Mm.491298	NM_173405	ENSMUSG00000050022	Amz1	5330426I05|6530401C20Rik	archaelysin family metallopeptidase 1	protein-coding
MACS_peak_355	chr1	134285375	134289814	+	1219	NA	exon (NM_178874, exon 1 of 5)	exon (NM_178874, exon 1 of 5)	264	NM_178874	68875	Mm.273785	NM_178874	ENSMUSG00000042066	Tmcc2	1110063G11Rik	transmembrane and coiled-coil domains 2	protein-coding
MACS_peak_2910	chr16	34572276	34573317	+	1219	NA	Intergenic	CpG	-58683	NM_177357	545156	Mm.82274	NM_177357	ENSMUSG00000061751	Kalrn	2210407G14Rik|AV235988|DUET|E530005C20Rik|Gm539|Hapip|TRAD	kalirin, RhoGEF kinase	protein-coding
MACS_peak_3671	chr19	7494696	7497854	+	1216	NA	promoter-TSS (NR_105957)	promoter-TSS (NR_105957)	-788	NR_105957	102466781		NR_105957		Mir6991	mmu-mir-6991	microRNA mir-6991	ncRNA
MACS_peak_1798	chr12	112908985	112910804	+	1216	NA	intron (NM_021273, intron 2 of 7)	CpG-3536	655	NM_021273	12709	Mm.16831	NM_021273	ENSMUSG00000001270	Ckb	B-CK|Bck|Ck-3|Ck3|Ckbb	creatine kinase, brain	protein-coding
MACS_peak_3749	chr19	37307365	37310565	+	1216	NA	Intergenic	Intergenic	26930	NM_001164336	69104	Mm.175989	NM_027314	ENSMUSG00000023307	March5	1810015H18Rik|2310008I22Rik|2700055A20Rik|5730499H23Rik|E130202O05Rik|MARCH-V|MITOL|Marchv|Rnf153	membrane-associated ring finger (C3HC4) 5	protein-coding
MACS_peak_1418	chr11	105828206	105830432	+	1213	NA	promoter-TSS (NM_207624)	promoter-TSS (NM_207624)	60	NM_207624	11421	Mm.754	NM_009598	ENSMUSG00000020681	Ace	AW208573|CD143	angiotensin I converting enzyme (peptidyl-dipeptidase A) 1	protein-coding
MACS_peak_1402	chr11	103669332	103677620	+	1212	NA	intron (NM_009521, intron 3 of 4)	intron (NM_009521, intron 3 of 4)	37987	NM_009521	22415	Mm.159091	NM_009521	ENSMUSG00000000125	Wnt3	Int-4|Wnt-3	wingless-type MMTV integration site family, member 3	protein-coding
MACS_peak_4862	chr3	142157668	142160738	+	1212	NA	promoter-TSS (NM_153564)	promoter-TSS (NM_153564)	-695	NM_153564	229898	Mm.459245	NM_153564	ENSMUSG00000040264	Gbp5	5330409J06Rik|Gbp5a	guanylate binding protein 5	protein-coding
MACS_peak_6045	chr5	133016218	133020832	+	1212	NA	promoter-TSS (NM_177047)	promoter-TSS (NM_177047)	-312	NM_177047	319974	Mm.409595	NM_177047		Auts2	2700063G02Rik|A730011F23Rik|D830032G16Rik	autism susceptibility candidate 2	protein-coding
MACS_peak_7686	chr8	120021355	120023363	+	1212	NA	intron (NM_172285, intron 1 of 32)	CpG	168	NM_172285	234779	Mm.192699	NM_172285	ENSMUSG00000034330	Plcg2	PLCgamma2|Plcg-2	phospholipase C, gamma 2	protein-coding
MACS_peak_7797	chr9	24584595	24587454	+	1212	NA	Intergenic	MIRm|SINE|MIR	-7277	NM_001205085	57246	Mm.31452	NM_020496	ENSMUSG00000031965	Tbx20	9430010M06Rik|AL022859|Tbx12	T-box 20	protein-coding
MACS_peak_286	chr1	107676698	107678467	+	1212	NA	intron (NM_009399, intron 1 of 9)	intron (NM_009399, intron 1 of 9)	282	NM_009399	21934	Mm.6251	NM_009399	ENSMUSG00000026321	Tnfrsf11a	Ly109|ODFR|OFE|Rank|TRANCE-R|mRANK	tumor necrosis factor receptor superfamily, member 11a, NFKB activator	protein-coding
MACS_peak_6797	chr7	50743987	50748466	+	1212	NA	promoter-TSS (NM_001164518)	promoter-TSS (NM_001164518)	-833	NM_001164518	210094	Mm.228087	NM_001164518	ENSMUSG00000013367	Iglon5	A230106M20Rik|Gm1431	IgLON family member 5	protein-coding
MACS_peak_6107	chr5	143176248	143180415	+	1212	NA	intron (NM_146257, intron 1 of 10)	CpG	276	NM_146257	243328	Mm.125942	NM_146257	ENSMUSG00000050822	Slc29a4	ENT4|mPMAT	solute carrier family 29 (nucleoside transporters), member 4	protein-coding
MACS_peak_1545	chr12	25515501	25518060	+	1212	NA	intron (NM_026037, intron 1 of 12)	CpG	316	NM_001083341	67216	Mm.167671	NM_026037	ENSMUSG00000020646	Mboat2	2810049G06Rik|AU022889|AW547221|LPCAT4|Moact2|Oact2	membrane bound O-acyltransferase domain containing 2	protein-coding
MACS_peak_4376	chr2	151457145	151459426	+	1212	NA	promoter-TSS (NM_001291077)	promoter-TSS (NM_001291077)	44	NM_198214	241727	Mm.39312	NM_198214	ENSMUSG00000027457	Snph	6430515A01|AW045671|AW556958|AW743098|mKIAA0374	syntaphilin	protein-coding
MACS_peak_2114	chr13	78336733	78340113	+	1212	NA	promoter-TSS (NM_010151)	promoter-TSS (NM_010151)	-180	NM_010151	13865	Mm.439653	NM_010151	ENSMUSG00000069171	Nr2f1	COUP-TF1|COUP-TFI|COUPTFA|EAR3|Erbal3|SVP44|Tcfcoup1	nuclear receptor subfamily 2, group F, member 1	protein-coding
MACS_peak_4058	chr2	35316044	35320189	+	1212	NA	Intergenic	CpG	-1171	NM_001145821	14594	Mm.281124	NM_010283	ENSMUSG00000035778	Ggta1	AW108479|GALT|Gal|Ggta|Ggta-1|alpha3GalT	glycoprotein galactosyltransferase alpha 1, 3	protein-coding
MACS_peak_99	chr1	43220162	43221711	+	1212	NA	promoter-TSS (NM_010212)	promoter-TSS (NM_010212)	-130	NM_010212	14200	Mm.6799	NM_010212	ENSMUSG00000008136	Fhl2	FHL-2|SLIM-3|SLIM3	four and a half LIM domains 2	protein-coding
MACS_peak_3094	chr17	15672467	15674707	+	1212	NA	Intergenic	CpG	-9322	NM_008799	18567	Mm.323	NM_008799	ENSMUSG00000014771	Pdcd2	AI528543|Pcd2|RP-8	programmed cell death 2	protein-coding
MACS_peak_1912	chr13	41174037	41174979	+	1211	NA	intron (NM_001145803, intron 1 of 14)	intron (NM_001145803, intron 1 of 14)	567	NM_001145803	17152	Mm.8149	NM_008547	ENSMUSG00000021363	Mak	A930010O05Rik	male germ cell-associated kinase	protein-coding
MACS_peak_6	chr1	5007831	5013901	+	1209	NA	exon (NM_001177795, exon 2 of 6)	exon (NM_001177795, exon 2 of 6)	-1246	NM_021374	58175	Mm.103771	NM_021374	ENSMUSG00000002459	Rgs20	2900073E09Rik|Rgsz1	regulator of G-protein signaling 20	protein-coding
MACS_peak_8048	chr9	67480155	67480738	+	1209	NA	Intergenic	Intergenic	-72936	NM_001081242	70549	Mm.33645	NM_027458	ENSMUSG00000052698	Tln2	5730421P04Rik|AI507121|AI787438|AL118320|mKIAA0320	talin 2	protein-coding
MACS_peak_367	chr1	136194500	136196945	+	1209	NA	intron (NM_001144855, intron 27 of 28)	CpG-536	9141	NM_031189	17928	Mm.16528	NM_031189	ENSMUSG00000026459	Myog	MYF4|bHLHc3|myo	myogenin	protein-coding
MACS_peak_1312	chr11	98194543	98200133	+	1209	NA	Intergenic	Intergenic	-6379	NM_010895	18013	Mm.4814	NM_010895	ENSMUSG00000038255	Neurod2	Ndrf|bHLHa1	neurogenic differentiation 2	protein-coding
MACS_peak_5731	chr5	72047143	72049671	+	1209	NA	intron (NM_010251, intron 2 of 8)	intron (NM_010251, intron 2 of 8)	1140	NM_010251	14397	Mm.248731	NM_010251	ENSMUSG00000029211	Gabra4	Gabra-4	gamma-aminobutyric acid (GABA) A receptor, subunit alpha 4	protein-coding
MACS_peak_3759	chr19	40733188	40735244	+	1209	NA	promoter-TSS (NM_009848)	promoter-TSS (NM_009848)	-68	NM_009848	12495	Mm.2824	NM_009848	ENSMUSG00000048120	Entpd1	2610206B08Rik|AA408691|Cd39|NTPDase-1	ectonucleoside triphosphate diphosphohydrolase 1	protein-coding
MACS_peak_6575	chr6	141197890	141199140	+	1209	NA	exon (NM_018779, exon 1 of 16)	exon (NM_018779, exon 1 of 16)	725	NM_018779	54611	Mm.103728	NM_018779	ENSMUSG00000041741	Pde3a	A930022O17Rik|C87899	phosphodiesterase 3A, cGMP inhibited	protein-coding
MACS_peak_838	chr10	114237920	114239572	+	1209	NA	promoter-TSS (NM_146241)	promoter-TSS (NM_146241)	-320	NM_146241	237553	Mm.445550	NM_146241	ENSMUSG00000050663	Trhde	9330155P21Rik	TRH-degrading enzyme	protein-coding
MACS_peak_1741	chr12	88639998	88641764	+	1209	NA	promoter-TSS (NM_001290302)	promoter-TSS (NM_001290302)	-226	NM_001290302	217738	Mm.219363	NM_001290302		Ism2	Gm264|Thsd3	isthmin 2 homolog (zebrafish)	protein-coding
MACS_peak_1194	chr11	87590954	87592718	+	1209	NA	exon (NM_172449, exon 22 of 32)	exon (NM_172449, exon 22 of 32)	-15450	NM_010824	17523	Mm.4668	NM_010824	ENSMUSG00000009350	Mpo	mKIAA4033	myeloperoxidase	protein-coding
MACS_peak_7043	chr7	116924106	116927183	+	1209	NA	promoter-TSS (NM_020610)	promoter-TSS (NM_020610)	-585	NM_020610	78593	Mm.275374	NM_020610	ENSMUSG00000034825	Nrip3	A330103B05Rik|D7H11orf14|ICRFP703B1614Q5.2	nuclear receptor interacting protein 3	protein-coding
MACS_peak_8273	chr9	121550235	121553193	+	1209	NA	promoter-TSS (NM_011703)	promoter-TSS (NM_011703)	-120	NM_011703	22354	Mm.282007	NM_011703	ENSMUSG00000032528	Vipr1	AV071699|VIP-R1|VPAC1	vasoactive intestinal peptide receptor 1	protein-coding
MACS_peak_4420	chr2	157769309	157770588	+	1209	NA	3' UTR (NM_198627, exon 4 of 4)	3' UTR (NM_198627, exon 4 of 4)	29559	NM_198627	277432	Mm.441156	NM_198627	ENSMUSG00000037843	Vstm2l	Gm691	V-set and transmembrane domain containing 2-like	protein-coding
MACS_peak_645	chr10	42892214	42896008	+	1208	NA	promoter-TSS (NR_102361)	promoter-TSS (NR_102361)	225	NM_175407	109205	Mm.153750	NM_175407	ENSMUSG00000038248	Sobp	2900009C16Rik|5330439J01Rik|JXC1|jc	sine oculis-binding protein homolog (Drosophila)	protein-coding
MACS_peak_1393	chr11	103221828	103224663	+	1208	NA	intron (NM_001205236, intron 2 of 17)	intron (NM_001205236, intron 2 of 17)	1761	NM_183288	544817	Mm.259113	NM_133715	ENSMUSG00000034255	Arhgap27	2310069I04Rik|5730442P18Rik|Gm21552|Sh3d20	Rho GTPase activating protein 27	protein-coding
MACS_peak_7784	chr9	21764945	21768089	+	1208	NA	intron (NM_010149, intron 2 of 7)	intron (NM_010149, intron 2 of 7)	1503	NM_010149	13857	Mm.2653	NM_010149	ENSMUSG00000006235	Epor	-	erythropoietin receptor	protein-coding
MACS_peak_1580	chr12	32744179	32746077	+	1208	NA	intron (NM_011158, intron 1 of 10)	intron (NM_011158, intron 1 of 10)	1016	NM_011158	19088	Mm.25594	NM_011158	ENSMUSG00000002997	Prkar2b	AI451071|AW061005|PKARIIbeta|Pkarb2|RII(beta)	protein kinase, cAMP dependent regulatory, type II beta	protein-coding
MACS_peak_1390	chr11	103057884	103061155	+	1208	NA	TTS (NM_001254724)	TTS (NM_001254724)	10343	NM_001254724	69441	Mm.380648	NM_027082	ENSMUSG00000020940	1700023F06Rik	-	RIKEN cDNA 1700023F06 gene	protein-coding
MACS_peak_6924	chr7	80533903	80537658	+	1208	NA	intron (NM_177740, intron 1 of 3)	intron (NM_177740, intron 1 of 3)	-15120	NR_040324	319783	Mm.349813	NR_040324	ENSMUSG00000097756	A730056A06Rik	C76391	RIKEN cDNA A730056A06 gene	ncRNA
MACS_peak_386	chr1	137662112	137664018	+	1208	NA	exon (NM_013750, exon 1 of 2)	exon (NM_013750, exon 1 of 2)	403	NM_013750	27280	Mm.34346	NM_013750	ENSMUSG00000041801	Phlda3	Tih1	pleckstrin homology-like domain, family A, member 3	protein-coding
MACS_peak_5418	chr4	145593557	145594212	+	1208	NA	Intergenic	CpG	-57282	NR_045468	67524	Mm.444300	NR_045468	ENSMUSG00000086046	1700095A21Rik	-	RIKEN cDNA 1700095A21 gene	ncRNA
MACS_peak_7213	chr7	147230321	147237861	+	1208	NA	intron (NM_010836, intron 1 of 1)	CpG	896	NM_010836	17703	Mm.4816	NM_010836		Msx3	AI323377	msh homeobox 3	protein-coding
MACS_peak_6056	chr5	136310113	136313014	+	1208	NA	intron (NM_021403, intron 2 of 14)	intron (NM_021403, intron 2 of 14)	17587	NM_021403	58212	Mm.271230	NM_021403	ENSMUSG00000039860	Srrm3	2900083I11Rik|AB041661|SRm300-like|Srrm2l	serine/arginine repetitive matrix 3	protein-coding
MACS_peak_1784	chr12	109939476	109941063	+	1208	NA	intron (NM_027299, intron 1 of 2)	CpG	247	NM_001171002	70059	Mm.207605	NM_027299	ENSMUSG00000021263	Degs2	2210008A03Rik|AI852933|DES2	degenerative spermatocyte homolog 2 (Drosophila), lipid desaturase	protein-coding
MACS_peak_5979	chr5	121098040	121100162	+	1208	NA	promoter-TSS (NM_001281999)	promoter-TSS (NM_001281999)	-96	NM_001281999	19415	Mm.41209	NM_013832	ENSMUSG00000029602	Rasal1	MRASAL	RAS protein activator like 1 (GAP1 like)	protein-coding
MACS_peak_1586	chr12	36767668	36769357	+	1207	NA	intron (NM_025359, intron 1 of 5)	intron (NM_025359, intron 1 of 5)	553	NM_025359	66109	Mm.254663	NM_025359	ENSMUSG00000020577	Tspan13	1100001I23Rik|NET-6|Tm4sf13	tetraspanin 13	protein-coding
MACS_peak_1074	chr11	67268125	67269862	+	1207	NA	Intergenic	CpG	-77507	NM_008088	14457	Mm.40338	NM_008088	ENSMUSG00000033066	Gas7	AW124766|B230343A10Rik|Gas7-cb	growth arrest specific 7	protein-coding
MACS_peak_936	chr11	30166847	30168551	+	1207	NA	Intergenic	CpG	-47927	NM_175836	20742	Mm.123110	NM_009260	ENSMUSG00000020315	Sptbn1	9930031C03Rik|AL033301|SPTB2|Spnb-2|Spnb2|elf1|elf3|mKIAA4049	spectrin beta, non-erythrocytic 1	protein-coding
MACS_peak_1048	chr11	62544908	62546306	+	1207	NA	Intergenic	Intergenic	-3012	NM_133208	170740	Mm.339982	NM_133208		Zfp287	B230333C16Rik|SKAT-2|Skat2|Znf287|mszf16|mszf74	zinc finger protein 287	protein-coding
MACS_peak_1154	chr11	82198325	82203562	+	1204	NA	Intergenic	CpG	-1459	NM_023438	270893	Mm.341593	NM_023438	ENSMUSG00000020701	Tmem132e	Gm644	transmembrane protein 132E	protein-coding
MACS_peak_1603	chr12	51747730	51750691	+	1203	NA	intron (NM_008858, intron 1 of 18)	intron (NM_008858, intron 1 of 18)	1000	NM_008858	18760	Mm.133719	NM_008858	ENSMUSG00000002688	Prkd1	PKD|PKD1|Pkcm|Prkcm	protein kinase D1	protein-coding
MACS_peak_409	chr1	153936395	153938642	+	1198	NA	promoter-TSS (NM_197990)	promoter-TSS (NM_197990)	-68	NM_197990	69399	Mm.278031	NM_197990	ENSMUSG00000032666	1700025G04Rik	2610510E02Rik|2900042O04Rik|ENSMUSG00000073540	RIKEN cDNA 1700025G04 gene	protein-coding
MACS_peak_3396	chr18	15307296	15311052	+	1198	NA	intron (NM_134112, intron 1 of 4)	CpG	781	NM_134112	106931	Mm.329299	NM_134112	ENSMUSG00000036225	Kctd1	4933402K10Rik|AI661543|AW553000	potassium channel tetramerisation domain containing 1	protein-coding
MACS_peak_27	chr1	14299719	14300178	+	1198	NA	5' UTR (NM_010164, exon 1 of 18)	5' UTR (NM_010164, exon 1 of 18)	332	NM_001252192	14048	Mm.250185	NM_010164	ENSMUSG00000025932	Eya1	bor	eyes absent 1 homolog (Drosophila)	protein-coding
MACS_peak_5158	chr4	111086989	111088719	+	1198	NA	exon (NM_026279, exon 1 of 6)	exon (NM_026279, exon 1 of 6)	243	NM_026279	67621	Mm.45533	NM_026279	ENSMUSG00000028545	Bend5	2310026E23Rik	BEN domain containing 5	protein-coding
MACS_peak_7640	chr8	106693073	106697655	+	1198	NA	intron (NM_001141925, intron 1 of 4)	intron (NM_001141925, intron 1 of 4)	951	NM_001141925	65115	Mm.41849	NM_001141922	ENSMUSG00000031872	Bean1	Bean	brain expressed, associated with Nedd4, 1	protein-coding
MACS_peak_1748	chr12	99811801	99817172	+	1198	NA	intron (NM_029911, intron 1 of 6)	intron (NM_029911, intron 1 of 6)	1664	NM_029911	72258	Mm.196158	NM_029911	ENSMUSG00000033854	Kcnk10	1700024D23Rik|3010005K24Rik|Trek2	potassium channel, subfamily K, member 10	protein-coding
MACS_peak_1361	chr11	100005215	100007537	+	1198	NA	intron (NM_008471, intron 1 of 5)	intron (NM_008471, intron 1 of 5)	857	NM_008471	16669	Mm.439699	NM_008471	ENSMUSG00000020911	Krt19	AI663979|EndoC|K19|Krt-1.19|Krt1-19	keratin 19	protein-coding
MACS_peak_3335	chr17	81343004	81346047	+	1198	NA	intron (NM_026516, intron 1 of 3)	CpG	553	NM_026516	68027	Mm.357108	NM_026516	ENSMUSG00000024245	Tmem178	2810417M05Rik|Tmem178a	transmembrane protein 178	protein-coding
MACS_peak_7868	chr9	42702650	42706544	+	1198	NA	intron (NM_175481, intron 1 of 20)	intron (NM_175481, intron 1 of 20)	47857	NM_175481	110637	Mm.370291	NM_175481	ENSMUSG00000032017	Grik4	6330551K01Rik|GluK4|GluRgamma1|KA-1|KA1	glutamate receptor, ionotropic, kainate 4	protein-coding
MACS_peak_67	chr1	38683273	38686315	+	1198	NA	promoter-TSS (NM_001290814)	promoter-TSS (NM_001290814)	-705	NM_001290814	16764	Mm.336679	NM_010678	ENSMUSG00000037138	Aff3	3222402O04Rik|A730046J16|LAF-4|Laf4	AF4/FMR2 family, member 3	protein-coding
MACS_peak_8329	chrX	71125357	71126218	+	1198	NA	intron (NM_008478, intron 1 of 28)	intron (NM_008478, intron 1 of 28)	386	NM_008478	16728	Mm.260568	NM_008478	ENSMUSG00000031391	L1cam	CD171|L1|N-CAM-L1|NCAM-L1	L1 cell adhesion molecule	protein-coding
MACS_peak_7629	chr8	96333734	96337709	+	1198	NA	non-coding (NR_026888, exon 1 of 1)	non-coding (NR_026888, exon 1 of 1)	983	NM_001113384	14681	Mm.251445	NM_010308	ENSMUSG00000031748	Gnao1	AW050213|Galphao|Gnao|alphaO	guanine nucleotide binding protein, alpha O	protein-coding
MACS_peak_7452	chr8	59798047	59802650	+	1198	NA	promoter-TSS (NR_110474)	promoter-TSS (NR_110474)	568	NM_010402	15111	Mm.430844	NM_010402	ENSMUSG00000038193	Hand2	AI225906|AI661148|Ehand2|Hed|Th2|Thing2|bHLHa26|dHAND	heart and neural crest derivatives expressed transcript 2	protein-coding
MACS_peak_6282	chr6	39821420	39825488	+	1198	NA	Intergenic	CpG	-62519	NM_001010930	14548	Mm.377071	NM_010270	ENSMUSG00000029918	Mrps33	AI841153|CGI-139|Gdap3|MRP-S33|PTD003	mitochondrial ribosomal protein S33	protein-coding
MACS_peak_223	chr1	80754026	80755513	+	1198	NA	intron (NM_175291, intron 1 of 55)	CpG	359	NM_175291	210293	Mm.133473	NM_175291	ENSMUSG00000038608	Dock10	9330153B10Rik|A630054M16Rik|Jr4|Jr5|R75174|ZIZ3|Zizimin3|mKIAA0694	dedicator of cytokinesis 10	protein-coding
MACS_peak_7621	chr8	95351167	95351696	+	1198	NA	5' UTR (NM_008610, exon 1 of 13)	5' UTR (NM_008610, exon 1 of 13)	204	NM_008610	17390	Mm.29564	NM_008610	ENSMUSG00000031740	Mmp2	Clg4a|GelA|MMP-2	matrix metallopeptidase 2	protein-coding
MACS_peak_8339	chrX	99044732	99046249	+	1198	NA	intron (NM_001163610, intron 1 of 7)	CpG	766	NM_001163610	100042480	Mm.232	NM_001163610	ENSMUSG00000079481	Nhsl2	1110062M06Rik|6430511F03|AI225852|AW488865|EG621083|ENSMUSG00000073037|Gm10456	NHS-like 2	protein-coding
MACS_peak_8344	chrX	100642746	100643996	+	1198	NA	intron (NR_002844, intron 2 of 3)	intron (NR_002844, intron 2 of 3)	16515	NR_002844	22097	Mm.472939	NR_002844	ENSMUSG00000085715	Tsix	-	X (inactive)-specific transcript, opposite strand	ncRNA
MACS_peak_321	chr1	128389118	128389526	+	1198	NA	5' UTR (NM_172484, exon 1 of 15)	5' UTR (NM_172484, exon 1 of 15)	182	NM_172484	210356	Mm.377234	NM_172484	ENSMUSG00000049690	Nckap5	8430408F21|D130011D22Rik|E030049G20Rik|Erih1|Erih2|Gm1548|Nap5	NCK-associated protein 5	protein-coding
MACS_peak_492	chr1	180205956	180206881	+	1198	NA	Intergenic	CpG	-42866	NM_025511	66359	Mm.489720	NM_025511	ENSMUSG00000026500	Cox20	2310005N03Rik|Fam36a	COX20 Cox2 chaperone	protein-coding
MACS_peak_1517	chr12	9577617	9584908	+	1198	NA	promoter-TSS (NM_011859)	promoter-TSS (NM_011859)	14	NM_011859	23967	Mm.45055	NM_011859	ENSMUSG00000048387	Osr1	Odd1|Osr	odd-skipped related 1 (Drosophila)	protein-coding
MACS_peak_7787	chr9	22082067	22083679	+	1198	NA	exon (NM_145612, exon 8 of 8)	exon (NM_145612, exon 8 of 8)	-18534	NM_181419	235048	Mm.292381	NM_181419	ENSMUSG00000062794	Zfp599	6720416P20	zinc finger protein 599	protein-coding
MACS_peak_6531	chr6	124807213	124808448	+	1197	NA	promoter-TSS (NM_013534)	promoter-TSS (NM_013534)	-125	NM_013534	14789	Mm.35708	NM_013534	ENSMUSG00000023191	Leprel2	BC016431|Grcb|P3h3	leprecan-like 2	protein-coding
MACS_peak_1532	chr12	17017590	17019165	+	1197	NA	5' UTR (NM_001201333, exon 1 of 4)	5' UTR (NM_001201333, exon 1 of 4)	156	NM_001201332	73667	Mm.159048	NM_001201332	ENSMUSG00000071398	2410004P03Rik	-	RIKEN cDNA 2410004P03 gene	protein-coding
MACS_peak_8228	chr9	108733462	108735638	+	1194	NA	exon (NM_080437, exon 2 of 35)	exon (NM_080437, exon 2 of 35)	5899	NM_080437	107934	Mm.39945	NM_080437	ENSMUSG00000023473	Celsr3	Fmi1|flamingo|mKIAA0812	cadherin, EGF LAG seven-pass G-type receptor 3 (flamingo homolog, Drosophila)	protein-coding
MACS_peak_80	chr1	39705712	39709176	+	1194	NA	exon (NM_170597, exon 1 of 4)	exon (NM_170597, exon 1 of 4)	583	NM_170597	263764	Mm.122091	NM_170597	ENSMUSG00000050967	Creg2	A830098L22Rik	cellular repressor of E1A-stimulated genes 2	protein-coding
MACS_peak_873	chr10	128327609	128330286	+	1194	NA	promoter-TSS (NM_010272)	promoter-TSS (NM_010272)	-173	NM_010272	14561	Mm.299218	NM_010272		Gdf11	BMP-11|Bmp11	growth differentiation factor 11	protein-coding
MACS_peak_3684	chr19	10461859	10465435	+	1189	NA	promoter-TSS (NM_173068)	promoter-TSS (NM_173068)	67	NM_173068	54525	Mm.182654	NM_018801	ENSMUSG00000024743	Syt7	AI851541|B230112P13Rik	synaptotagmin VII	protein-coding
MACS_peak_4175	chr2	76243713	76246249	+	1188	NA	intron (NM_001290734, intron 1 of 24)	CpG	416	NM_001290733	99031	Mm.240435	NM_145525	ENSMUSG00000042359	Osbpl6	1110062M20Rik|AI596402|ORP-6|mKIAA4128	oxysterol binding protein-like 6	protein-coding
MACS_peak_611	chr10	29252845	29256468	+	1175	NA	intron (NM_028351, intron 1 of 4)	intron (NM_028351, intron 1 of 4)	1017	NM_028351	72780	Mm.45191	NM_028351	ENSMUSG00000019880	Rspo3	2810459H04Rik|AW742308|Cristin1|Thsd2	R-spondin 3 homolog (Xenopus laevis)	protein-coding
MACS_peak_3639	chr18	89937429	89939481	+	1175	NA	promoter-TSS (NM_001039173)	promoter-TSS (NM_001039173)	73	NM_001039173	623279	Mm.447164	NM_001039173		Dok6	Dok-6	docking protein 6	protein-coding
MACS_peak_4020	chr2	30327890	30330307	+	1173	NA	exon (NM_030244, exon 1 of 1)	exon (NM_030244, exon 1 of 1)	621	NM_030244	72500	Mm.295464	NM_030244	ENSMUSG00000089762	Ier5l	2610524G09Rik	immediate early response 5-like	protein-coding
MACS_peak_6083	chr5	139800012	139801291	+	1173	NA	intron (NM_172723, intron 1 of 10)	intron (NM_172723, intron 1 of 10)	767	NM_172723	231821	Mm.297819	NM_172723	ENSMUSG00000056413	Adap1	4930431P11Rik|Centa1|GC1L|p42IP4	ArfGAP with dual PH domains 1	protein-coding
MACS_peak_2674	chr15	83553675	83556575	+	1173	NA	intron (NM_022723, intron 1 of 21)	CpG	344	NM_001271472	64706	Mm.40393	NM_022723	ENSMUSG00000016763	Scube1	7330410C13Rik|A630023E24Rik	signal peptide, CUB domain, EGF-like 1	protein-coding
MACS_peak_1225	chr11	94852505	94854476	+	1173	NA	exon (NM_172261, exon 1 of 10)	exon (NM_172261, exon 1 of 10)	964	NM_172261	217124	Mm.229087	NM_172261	ENSMUSG00000038976	Ppp1r9b	SPL|Spn	protein phosphatase 1, regulatory subunit 9B	protein-coding
MACS_peak_3837	chr19	45152582	45155748	+	1173	NA	TTS (NM_178929)	TTS (NM_178929)	3536	NM_178929	107250	Mm.24417	NM_178929	ENSMUSG00000025213	Kazald1	AI842353|Bono1|IGFBP-rP10	Kazal-type serine peptidase inhibitor domain 1	protein-coding
MACS_peak_1107	chr11	71947799	71950834	+	1166	NA	promoter-TSS (NM_001024927)	promoter-TSS (NM_001024927)	75	NM_001024927	327958	Mm.351793	NM_001024927	ENSMUSG00000040543	Pitpnm3	A330068P14Rik|AI848332|Ackr6|Gm880	PITPNM family member 3	protein-coding
MACS_peak_3475	chr18	38157483	38159137	+	1165	NA	intron (NM_001205336, intron 1 of 32)	intron (NM_001205336, intron 1 of 32)	313	NM_001205336	106952	Mm.247642	NM_139206	ENSMUSG00000024451	Arap3	Centd3|Drag1|E030006K04Rik|cnt-d3	ArfGAP with RhoGAP domain, ankyrin repeat and PH domain 3	protein-coding
MACS_peak_3967	chr2	18598841	18602164	+	1165	NA	intron (NM_007552, intron 1 of 9)	intron (NM_007552, intron 1 of 9)	1857	NM_007552	12151	Mm.289584	NM_007552	ENSMUSG00000026739	Bmi1	AW546694|Bmi-1|Pcgf4	Bmi1 polycomb ring finger oncogene	protein-coding
MACS_peak_8219	chr9	107609228	107614512	+	1165	NA	intron (NM_011349, intron 1 of 17)	CpG	936	NM_011349	20350	Mm.12903	NM_011349	ENSMUSG00000034684	Sema3f	Sema4|Semak	sema domain, immunoglobulin domain (Ig), short basic domain, secreted, (semaphorin) 3F	protein-coding
MACS_peak_6817	chr7	52590165	52595481	+	1165	NA	intron (NM_010473, intron 1 of 5)	intron (NM_010473, intron 1 of 5)	2184	NM_010473	15464	Mm.39968	NM_010473	ENSMUSG00000038239	Hrc	-	histidine rich calcium binding protein	protein-coding
MACS_peak_6880	chr7	73985011	73986728	+	1163	NA	intron (NM_001033877, intron 2 of 22)	intron (NM_001033877, intron 2 of 22)	1248	NM_001033877	233332	Mm.445763	NM_001033877	ENSMUSG00000058145	Adamts17	AU023434	a disintegrin-like and metallopeptidase (reprolysin type) with thrombospondin type 1 motif, 17	protein-coding
MACS_peak_7489	chr8	73131924	73132235	+	1163	NA	exon (NM_133772, exon 1 of 17)	exon (NM_133772, exon 1 of 17)	134	NM_133772	76900	Mm.6667	NM_133772	ENSMUSG00000070003	Ssbp4	1210002E11Rik|AW743380|Sspb4	single stranded DNA binding protein 4	protein-coding
MACS_peak_5493	chr4	151850678	151852645	+	1162	NA	promoter-TSS (NM_010598)	promoter-TSS (NM_010598)	-3	NM_010598	16498	Mm.388924	NM_010598	ENSMUSG00000028931	Kcnab2	F5|I2rf5|Kcnb3|kv-beta-2	potassium voltage-gated channel, shaker-related subfamily, beta member 2	protein-coding
MACS_peak_8285	chr9	122831412	122833255	+	1162	NA	5' UTR (NM_009544, exon 1 of 4)	5' UTR (NM_009544, exon 1 of 4)	137	NM_009544	22646	Mm.290595	NM_009544	ENSMUSG00000057895	Zfp105	AW557864	zinc finger protein 105	protein-coding
MACS_peak_3030	chr16	96380193	96381678	+	1162	NA	exon (NM_001001492, exon 11 of 11)	exon (NM_001001492, exon 11 of 11)	13909	NM_207301	71446	Mm.255063	NM_207301	ENSMUSG00000023147	Wrb	5530402J05Rik|C030018G21Rik|Chd5	tryptophan rich basic protein	protein-coding
MACS_peak_2419	chr14	70952034	70956554	+	1162	NA	intron (NM_021877, intron 1 of 19)	CpG	431	NM_021877	15460	Mm.7598	NM_021877	ENSMUSG00000022096	Hr	ALUNC|AU|N|ba|bldy|hr|rh|rh-bmh|rhino	hairless	protein-coding
MACS_peak_7434	chr8	41506702	41510086	+	1162	NA	promoter-TSS (NM_178395)	promoter-TSS (NM_178395)	-775	NM_178395	70546	Mm.34326	NM_178395		Zdhhc2	5730415P04Rik|6430583A19Rik	zinc finger, DHHC domain containing 2	protein-coding
MACS_peak_4875	chr3	145883432	145886619	+	1162	NA	intron (NM_022983, intron 1 of 2)	intron (NM_022983, intron 1 of 2)	1100	NM_022983	65086	Mm.155520	NM_022983	ENSMUSG00000036832	Lpar3	Edg7|lpA3	lysophosphatidic acid receptor 3	protein-coding
MACS_peak_7477	chr8	72608089	72609035	+	1154	NA	intron (NM_177900, intron 2 of 4)	CpG-14075	1134	NM_177900	330790	Mm.152048	NM_177900	ENSMUSG00000007594	Hapln4	9330174O11|Bral2|Lpr4	hyaluronan and proteoglycan link protein 4	protein-coding
MACS_peak_5281	chr4	128724094	128729440	+	1154	NA	Intergenic	Intergenic	-8748	NM_029219	75234	Mm.259672	NM_029219	ENSMUSG00000028793	Rnf19b	4930534K13Rik|4930555L03Rik|Ibrdc3	ring finger protein 19B	protein-coding
MACS_peak_4657	chr3	68297199	68299599	+	1153	NA	intron (NM_001282044, intron 1 of 7)	CpG	296	NM_001282044	30953	Mm.331064	NM_013928	ENSMUSG00000027777	Schip1	Nf2ip|Schip-1	schwannomin interacting protein 1	protein-coding
MACS_peak_550	chr1	194680160	194682392	+	1153	NA	intron (NM_198247, intron 1 of 3)	CpG	670	NM_198247	214791	Mm.22806	NM_198247	ENSMUSG00000016262	Sertad4	4833404A09|C130018M11Rik	SERTA domain containing 4	protein-coding
MACS_peak_8255	chr9	118395646	118398368	+	1153	NA	Intergenic	Intergenic	9700	NM_010136	13813	Mm.200692	NM_010136	ENSMUSG00000032446	Eomes	C77258|TBR-2|Tbr2	eomesodermin homolog (Xenopus laevis)	protein-coding
MACS_peak_835	chr10	110181916	110182923	+	1153	NA	promoter-TSS (NM_178609)	promoter-TSS (NM_178609)	-102	NM_178609	52679	Mm.11747	NM_178609	ENSMUSG00000020185	E2f7	A630014C11Rik|D10Ertd739e	E2F transcription factor 7	protein-coding
MACS_peak_2688	chr15	84385747	84388815	+	1148	NA	exon (NM_177630, exon 1 of 1)	exon (NM_177630, exon 1 of 1)	972	NM_177630	223732	Mm.6471	NM_177630	ENSMUSG00000055745	Ldoc1l	BC058638|Mar6|Mart6	leucine zipper, down-regulated in cancer 1-like	protein-coding
MACS_peak_6526	chr6	122713044	122715328	+	1148	NA	Intergenic	Intergenic	-21423	NM_011401	20527	Mm.395108	NM_011401	ENSMUSG00000003153	Slc2a3	AA408729|AL023014|AL024341|AU040424|C78366|Glut-3|Glut3	solute carrier family 2 (facilitated glucose transporter), member 3	protein-coding
MACS_peak_3468	chr18	37906674	37909607	+	1147	NA	exon (NM_033593, exon 1 of 4)	exon (NM_033593, exon 1 of 4)	1298	NM_033593	93722	Mm.247203	NM_033593		Pcdhga10	-	protocadherin gamma subfamily A, 10	protein-coding
MACS_peak_6834	chr7	53354097	53356183	+	1145	NA	exon (NM_010602, exon 1 of 1)	exon (NM_010602, exon 1 of 1)	467	NM_010602	16514	Mm.333863	NM_010602		Kcnj11	Kir6.2|mBIR	potassium inwardly rectifying channel, subfamily J, member 11	protein-coding
MACS_peak_5515	chr4	154330969	154336550	+	1145	NA	Intergenic	Intergenic	-1273	NM_010419	15208	Mm.137268	NM_010419	ENSMUSG00000048001	Hes5	bHLHb38	hairy and enhancer of split 5 (Drosophila)	protein-coding
MACS_peak_8243	chr9	114886891	114890174	+	1145	NA	Intergenic	Intergenic	-45427	NM_175380	333433	Mm.38198	NM_175380	ENSMUSG00000050627	Gpd1l	2210409H23Rik|D9Ertd660e	glycerol-3-phosphate dehydrogenase 1-like	protein-coding
MACS_peak_878	chr11	3230547	3233625	+	1144	NA	intron (NM_178149, intron 2 of 5)	CpG-1647	1352	NM_178149	216505	Mm.390323	NM_178149	ENSMUSG00000034614	Pik3ip1	1500004A08Rik|5830455E04Rik|Crkd|Hgfl	phosphoinositide-3-kinase interacting protein 1	protein-coding
MACS_peak_457	chr1	167774510	167776444	+	1144	NA	intron (NR_103716, intron 1 of 8)	intron (NR_103716, intron 1 of 8)	56665	NM_001113392	12503	Mm.217308	NM_031162	ENSMUSG00000005763	Cd247	4930549J05Rik|A430104F18Rik|AW552088|Cd3|Cd3-eta|Cd3-zeta|Cd3h|Cd3z|Cd3zeta|T3z|Tcrk|Tcrz	CD247 antigen	protein-coding
MACS_peak_1504	chr11	119907307	119910537	+	1144	NA	promoter-TSS (NM_007377)	promoter-TSS (NM_007377)	-463	NM_007377	11302	Mm.6826	NM_007377	ENSMUSG00000025375	Aatk	AATYK|aatyk1|mKIAA0641	apoptosis-associated tyrosine kinase	protein-coding
MACS_peak_5468	chr4	149047680	149052212	+	1144	NA	intron (NM_001029837, intron 1 of 23)	intron (NM_001029837, intron 1 of 23)	252	NM_001164051	18707	Mm.229108	NM_008840	ENSMUSG00000039936	Pik3cd	2410099E07Rik|2610208K16Rik|AW545373|p110delta	phosphatidylinositol 3-kinase catalytic delta polypeptide	protein-coding
MACS_peak_3112	chr17	23876394	23884001	+	1144	NA	exon (NM_028416, exon 6 of 10)	exon (NM_028416, exon 6 of 10)	2599	NM_028416	73016	Mm.221319	NM_028416	ENSMUSG00000040680	Kremen2	2900054E04Rik|Krm2	kringle containing transmembrane protein 2	protein-coding
MACS_peak_3597	chr18	77802028	77804993	+	1144	NA	intron (NM_001164504, intron 1 of 7)	AT_rich|Low_complexity|Low_complexity	365	NM_001164504	225743	Mm.23293	NM_001164504	ENSMUSG00000025427	Rnf165	2900024M11Rik|AI427432|Ark2c|G630064H08Rik|Gm96	ring finger protein 165	protein-coding
MACS_peak_3642	chr19	4476409	4477450	+	1141	NA	intron (NM_134164, intron 1 of 7)	CpG	214	NM_134164	171180	Mm.262270	NM_134164	ENSMUSG00000049303	Syt12	-	synaptotagmin XII	protein-coding
MACS_peak_969	chr11	44429301	44430826	+	1141	NA	Intergenic	Intergenic	-1539	NM_001290711	13591	Mm.439662	NM_007897		Ebf1	Ebf|O/E-1|OE-1|Olf-1|Olf1	early B cell factor 1	protein-coding
MACS_peak_4214	chr2	94113375	94116627	+	1141	NA	Intergenic	Intergenic	-13445	NR_030431	735259		NR_030431	miRBase:MI0004295	Mir670	Mirn670|mmu-mir-670	microRNA 670	ncRNA
MACS_peak_1696	chr12	80231356	80236371	+	1141	NA	intron (NM_009705, intron 2 of 7)	intron (NM_009705, intron 2 of 7)	2088	NM_009705	11847	Mm.3506	NM_009705	ENSMUSG00000021125	Arg2	AII|AU022422	arginase type II	protein-coding
MACS_peak_5591	chr5	24128210	24130499	+	1141	NA	Intergenic	Intergenic	-21534	NM_025891	66993	Mm.436539	NM_025891	ENSMUSG00000028949	Smarcd3	1500001J14Rik|2210409C08Rik|BAF60C	SWI/SNF related, matrix associated, actin dependent regulator of chromatin, subfamily d, member 3	protein-coding
MACS_peak_7403	chr8	26627952	26630311	+	1141	NA	promoter-TSS (NM_001079909)	promoter-TSS (NM_001079909)	-100	NM_001079909	14182	Mm.265716	NM_010206	ENSMUSG00000031565	Fgfr1	AW208770|Eask|FLG|Fgfr-1|Flt-2|Hspy|MFR|bFGF-R-1|c-fgr	fibroblast growth factor receptor 1	protein-coding
MACS_peak_7432	chr8	39723189	39724720	+	1141	NA	5' UTR (NM_145841, exon 1 of 8)	5' UTR (NM_145841, exon 1 of 8)	608	NM_145841	244431	Mm.210388	NM_145841	ENSMUSG00000039539	Sgcz	C230085N17Rik	sarcoglycan zeta	protein-coding
MACS_peak_7077	chr7	126883425	126883788	+	1141	NA	Intergenic	Intergenic	-19294	NM_145585	233802	Mm.26392	NM_145585	ENSMUSG00000030942	Thumpd1	6330575P11Rik	THUMP domain containing 1	protein-coding
MACS_peak_6230	chr6	14847929	14851841	+	1141	NA	Intergenic	Intergenic	-1464	NM_053242	114142	Mm.332919	NM_053242	ENSMUSG00000029563	Foxp2	2810043D05Rik|AI449000|CAG-16|D0Kist7	forkhead box P2	protein-coding
MACS_peak_4279	chr2	122136163	122139763	+	1141	NA	intron (NM_145395, intron 2 of 8)	intron (NM_145395, intron 2 of 8)	1503	NM_145395	213696	Mm.247121	NM_145395	ENSMUSG00000027224	Duoxa1	BC019755|Nip|Nip1	dual oxidase maturation factor 1	protein-coding
MACS_peak_6954	chr7	89078125	89080831	+	1141	NA	promoter-TSS (NM_013886)	promoter-TSS (NM_013886)	-133	NM_013886	29877	Mm.392934	NM_013886	ENSMUSG00000025104	Hdgfrp3	2700022B06Rik|HRP-3	hepatoma-derived growth factor, related protein 3	protein-coding
MACS_peak_688	chr10	62187839	62189276	+	1141	NA	exon (NM_001033260, exon 1 of 4)	exon (NM_001033260, exon 1 of 4)	290	NM_001033260	216021	Mm.39821	NM_001033260	ENSMUSG00000036923	Stox1	4732470K04Rik|Gm63	storkhead box 1	protein-coding
MACS_peak_6689	chr7	25916374	25921381	+	1141	NA	Intergenic	Intergenic	-1398	NM_001163554	18987	Mm.76683	NM_011138		Pou2f2	Oct-2|Oct2a|Oct2b|Otf-2|Otf2	POU domain, class 2, transcription factor 2	protein-coding
MACS_peak_1645	chr12	59312607	59314991	+	1141	NA	exon (NM_009216, exon 2 of 2)	exon (NM_009216, exon 2 of 2)	1008	NM_009216	20605	Mm.278336	NM_009216		Sstr1	SRIF-2|SS-1-R|SS1-R|SS1R|Smstr-1|Smstr1|sst1	somatostatin receptor 1	protein-coding
MACS_peak_4099	chr2	58209465	58210707	+	1141	NA	promoter-TSS (NM_001111030)	promoter-TSS (NM_001111030)	83	NM_001111030	269275	Mm.77751	NM_001033369	ENSMUSG00000026834	Acvr1c	ACVRLK7|ALK7|Alk-7|C230097P10	activin A receptor, type IC	protein-coding
MACS_peak_8257	chr9	119000675	119003695	+	1141	NA	intron (NR_121571, intron 1 of 14)	intron (NR_121571, intron 1 of 14)	435	NR_121571	18799	Mm.23963	NM_019676	ENSMUSG00000010660	Plcd1	AW212592|C79986	phospholipase C, delta 1	protein-coding
MACS_peak_7850	chr9	40964688	40967610	+	1141	NA	promoter-TSS (NM_176860)	promoter-TSS (NM_176860)	-572	NM_176860	72828	Mm.133615	NM_176860	ENSMUSG00000032020	Ubash3b	2810457I06Rik|BB125008|TULA-2|p70	ubiquitin associated and SH3 domain containing, B	protein-coding
MACS_peak_6430	chr6	87680350	87683111	+	1141	NA	intron (NM_001159697, intron 1 of 7)	intron (NM_001159697, intron 1 of 7)	867	NM_001159697	58229	Mm.333229	NM_021418	ENSMUSG00000068263	Efcc1	Ccdc48	EF hand and coiled-coil domain containing 1	protein-coding
MACS_peak_4287	chr2	127160837	127162499	+	1141	NA	promoter-TSS (NM_010090)	promoter-TSS (NM_010090)	-227	NM_010090	13537	Mm.4729	NM_010090	ENSMUSG00000027368	Dusp2	PAC1	dual specificity phosphatase 2	protein-coding
MACS_peak_7419	chr8	33117726	33119603	+	1141	NA	Intergenic	Intergenic	-89989	NM_178591	211323	Mm.153432	NM_178591	ENSMUSG00000062991	Nrg1	6030402G23Rik|ARIA|D230005F13Rik|GGF|GGFII|HRG|HRGalpha|Hgl|NDF|SMDF	neuregulin 1	protein-coding
MACS_peak_5512	chr4	154228598	154232256	+	1141	NA	5' UTR (NM_172878, exon 1 of 7)	5' UTR (NM_172878, exon 1 of 7)	118	NM_172878	242800	Mm.72944	NM_172878	ENSMUSG00000046637	Ttc34	4932418L02|B230396O12Rik	tetratricopeptide repeat domain 34	protein-coding
MACS_peak_8031	chr9	62522947	62526737	+	1141	NA	promoter-TSS (NM_176922)	promoter-TSS (NM_176922)	-820	NM_176922	319480	Mm.34883	NM_176922	ENSMUSG00000032243	Itga11	4732459H24Rik	integrin alpha 11	protein-coding
MACS_peak_175	chr1	75376448	75379855	+	1141	NA	promoter-TSS (NM_001085371)	promoter-TSS (NM_001085371)	-538	NM_001085371	11790	Mm.275397	NM_007463	ENSMUSG00000026207	Speg	AW125581|Apeg1|BPEG|D1Bwg1450e|SPEGalpha|SPEGbeta|mKIAA1297	SPEG complex locus	protein-coding
MACS_peak_4269	chr2	119625006	119627472	+	1140	NA	intron (NM_019392, intron 1 of 18)	intron (NM_019392, intron 1 of 18)	989	NM_019392	22174	Mm.2901	NM_019392	ENSMUSG00000027298	Tyro3	AI323366|Brt|Dtk|Etk-2|Rse|Sky|TK19-2|Tif|etk2/tyro3	TYRO3 protein tyrosine kinase 3	protein-coding
MACS_peak_3369	chr17	88143784	88146940	+	1140	NA	exon (NM_199251, exon 2 of 2)	exon (NM_199251, exon 2 of 2)	51972	NM_199251	210741	Mm.312046	NM_199251	ENSMUSG00000050138	Kcnk12	mntk1	potassium channel, subfamily K, member 12	protein-coding
MACS_peak_1467	chr11	116272901	116274982	+	1140	NA	intron (NM_027258, intron 1 of 18)	CpG	405	NM_027258	217340	Mm.426344	NM_027258	ENSMUSG00000052949	Rnf157	2610036E23Rik|A130073L17Rik|mKIAA1917	ring finger protein 157	protein-coding
MACS_peak_284	chr1	99873375	99874091	+	1140	NA	5' UTR (NM_013626, exon 2 of 26)	5' UTR (NM_013626, exon 2 of 26)	70637	NR_037993	78603	Mm.442597	NR_037993		B230216N24Rik	-	RIKEN cDNA B230216N24 gene	ncRNA
MACS_peak_4534	chr2	180191533	180196896	+	1140	NA	Intergenic	Intergenic	-1469	NM_148933	108115	Mm.133687	NM_148933	ENSMUSG00000038963	Slco4a1	OATP-E|Slc21a12	solute carrier organic anion transporter family, member 4a1	protein-coding
MACS_peak_4780	chr3	102273841	102277103	+	1140	NA	intron (NM_001112698, intron 1 of 2)	intron (NM_001112698, intron 1 of 2)	1630	NM_013609	18049	Mm.1259	NM_013609	ENSMUSG00000027859	Ngf	Ngfb	nerve growth factor	protein-coding
MACS_peak_7828	chr9	36951354	36955216	+	1139	NA	intron (NM_148950, intron 1 of 11)	CpG	1622	NM_148950	208076	Mm.260335	NM_148950	ENSMUSG00000035934	Pknox2	D230005H23Rik|Prep2	Pbx/knotted 1 homeobox 2	protein-coding
MACS_peak_7923	chr9	50535652	50536595	+	1139	NA	promoter-TSS (NM_178118)	promoter-TSS (NM_178118)	-34	NM_178118	330938	Mm.82598	NM_178118	ENSMUSG00000032064	Dixdc1	4930563F16Rik|BC048182|Ccd1|Ccd1Aalpha1L|Ccd1Abeta1L|Ccd1BalphaL|Ccd1BbetaL|Ccd1CL|mKIAA1735	DIX domain containing 1	protein-coding
MACS_peak_1459	chr11	115227868	115229812	+	1139	NA	intron (NM_175454, intron 1 of 18)	CpG	193	NM_175454	217310	Mm.205707	NM_175454	ENSMUSG00000034586	Hid1	C630004H02Rik	HID1 domain containing	protein-coding
MACS_peak_3168	chr17	32302263	32304337	+	1139	NA	intron (NM_008716, intron 1 of 32)	intron (NM_008716, intron 1 of 32)	497	NM_008716	18131	Mm.439741	NM_008716	ENSMUSG00000038146	Notch3	AW229011|N3|hpbk	notch 3	protein-coding
MACS_peak_3043	chr17	6475697	6476764	+	1139	NA	Intergenic	CpG	-26088	NR_033520	547127	Mm.297552	NM_001045538		Tmem181b-ps	Tmem181b	transmembrane protein 181B, pseudogene	pseudo
MACS_peak_5592	chr5	24234590	24238308	+	1139	NA	promoter-TSS (NM_001081441)	promoter-TSS (NM_001081441)	49	NM_001081441	269633	Mm.392539	NM_026621		Wdr86	2810046M22Rik|BC059069	WD repeat domain 86	protein-coding
MACS_peak_4257	chr2	118488351	118490321	+	1137	NA	promoter-TSS (NM_001033254)	promoter-TSS (NM_001033254)	23	NM_001033254	214230	Mm.241857	NM_001033254	ENSMUSG00000074923	Pak6	4732456M09	p21 protein (Cdc42/Rac)-activated kinase 6	protein-coding
MACS_peak_3659	chr19	6418585	6420437	+	1128	NA	intron (NM_001205234, intron 1 of 22)	intron (NM_001205234, intron 1 of 22)	773	NM_001205234	18190	Mm.329616	NM_020253	ENSMUSG00000033768	Nrxn2	6430591O13Rik|mKIAA0921	neurexin II	protein-coding
MACS_peak_5482	chr4	151493060	151496296	+	1125	NA	TTS (NM_207688)	TTS (NM_207688)	4226	NM_033042	85030	Mm.101198	NM_033042	ENSMUSG00000024793	Tnfrsf25	APO-3|DDR3|DR3|LARD|TR3|TRAMP|Tnfrsf12|WSL-1|WSL-LR|Wsl	tumor necrosis factor receptor superfamily, member 25	protein-coding
MACS_peak_5519	chr4	155026509	155029587	+	1120	NA	promoter-TSS (NM_011985)	promoter-TSS (NM_011985)	-555	NM_011985	26561	Mm.29373	NM_011985	ENSMUSG00000029061	Mmp23	CA-MMP	matrix metallopeptidase 23	protein-coding
MACS_peak_5024	chr4	49071656	49074650	+	1120	NA	intron (NM_178756, intron 1 of 7)	intron (NM_178756, intron 1 of 7)	819	NM_178756	272031	Mm.299460	NM_178756	ENSMUSG00000063446	Lppr1	E130309F12Rik|PRG-3|mKIAA4247	lipid phosphate phosphatase-related protein type 1	protein-coding
MACS_peak_7008	chr7	106415202	106419564	+	1120	NA	exon (NM_010837, exon 1 of 4)	exon (NM_010837, exon 1 of 4)	527	NM_001043355	17760	Mm.154087	NM_010837	ENSMUSG00000055407	Map6	2810411E12Rik|Map-6|Mtap6|STOP	microtubule-associated protein 6	protein-coding
MACS_peak_3557	chr18	66448576	66452581	+	1120	NA	intron (NM_178793, intron 2 of 10)	intron (NM_178793, intron 2 of 10)	914	NM_178793	320924	Mm.442049	NM_178793	ENSMUSG00000046318	Ccbe1	4933426F18Rik|9430093N24Rik|mKIAA1983	collagen and calcium binding EGF domains 1	protein-coding
MACS_peak_2059	chr13	58907296	58910343	+	1120	NA	promoter-TSS (NM_001025074)	promoter-TSS (NM_001025074)	-239	NM_001025074	18212	Mm.130054	NM_008745	ENSMUSG00000055254	Ntrk2	GP145-TrkB/GP95-TrkB|Tkrb|trk-B|trkB	neurotrophic tyrosine kinase, receptor, type 2	protein-coding
MACS_peak_4298	chr2	128687623	128691490	+	1119	NA	promoter-TSS (NM_024237)	promoter-TSS (NM_024237)	-112	NM_024237	70370	Mm.5107	NM_024237	ENSMUSG00000027386	Fbln7	1600015H20Rik|AI464334|TM14	fibulin 7	protein-coding
MACS_peak_101	chr1	44608470	44609633	+	1119	NA	intron (NM_028450, intron 1 of 10)	CpG	535	NM_028450	70676	Mm.133132	NM_027506	ENSMUSG00000056870	Gulp1	3110030A04Rik|5730529O06Rik|CED-6|Ced6|GULP|Gulp-2	GULP, engulfment adaptor PTB domain containing 1	protein-coding
MACS_peak_1269	chr11	96178821	96182199	+	1119	NA	exon (NM_010459, exon 1 of 2)	exon (NM_010459, exon 1 of 2)	929	NM_010459	15412	Mm.3546	NM_010459		Hoxb4	Hox-2.6	homeobox B4	protein-coding
MACS_peak_712	chr10	72559355	72562952	+	1119	NA	Intergenic	Intergenic	-11700	NR_040646	327768	Mm.417745	NR_040646		A330049N07Rik	-	RIKEN cDNA A330049N07 gene	ncRNA
MACS_peak_666	chr10	53468771	53471790	+	1119	NA	intron (NM_001081428, intron 1 of 17)	intron (NM_001081428, intron 1 of 17)	435	NM_001081428	75906	Mm.436785	NM_001081428	ENSMUSG00000019856	Fam184a	3110012E06Rik|4930438C08Rik|4930589M24Rik	family with sequence similarity 184, member A	protein-coding
MACS_peak_467	chr1	169730289	169733380	+	1119	NA	intron (NM_033652, intron 3 of 7)	intron (NM_033652, intron 3 of 7)	112145	NM_033652	110648	Mm.330081	NM_033652	ENSMUSG00000026686	Lmx1a	Lmx1.1|dr|dreher|sst	LIM homeobox transcription factor 1 alpha	protein-coding
MACS_peak_6209	chr6	4454567	4456007	+	1119	NA	promoter-TSS (NM_007743)	promoter-TSS (NM_007743)	-410	NM_007743	12843	Mm.277792	NM_007743	ENSMUSG00000029661	Col1a2	AA960264|AI325291|Col1a-2|Cola-2|Cola2|oim	collagen, type I, alpha 2	protein-coding
MACS_peak_590	chr10	21992887	21994828	+	1119	NA	intron (NM_001177775, intron 1 of 5)	CpG	577	NM_001177775	667281	Mm.484254	NM_001177775	ENSMUSG00000075297	H60b	EG667281	histocompatibility 60b	protein-coding
MACS_peak_73	chr1	38953972	38955826	+	1119	NA	5' UTR (NM_145142, exon 1 of 7)	5' UTR (NM_145142, exon 1 of 7)	106	NM_145142	98388	Mm.260054	NM_145142	ENSMUSG00000026080	Chst10	AI507003|AU041319|Hnk-1st|ST	carbohydrate sulfotransferase 10	protein-coding
MACS_peak_5085	chr4	64783638	64787724	+	1119	NA	exon (NM_021362, exon 1 of 22)	exon (NM_021362, exon 1 of 22)	473	NM_021362	18491	Mm.317854	NM_021362	ENSMUSG00000028370	Pappa	8430414N03Rik|IGFBP-4ase|PAG1|PAPP-A	pregnancy-associated plasma protein A	protein-coding
MACS_peak_6872	chr7	70589416	70590817	+	1119	NA	intron (NM_130880, intron 1 of 13)	CpG	458	NM_130880	170711	Mm.156872	NM_130880	ENSMUSG00000033510	Otud7a	AJ430384|Otud7	OTU domain containing 7A	protein-coding
MACS_peak_4824	chr3	125640467	125641963	+	1119	NA	intron (NM_011674, intron 1 of 5)	CpG	253	NM_011674	22239	Mm.306021	NM_011674	ENSMUSG00000032854	Ugt8a	AI850488|AW455908|Cgt|Ugt8|mCerGT	UDP galactosyltransferase 8A	protein-coding
MACS_peak_6518	chr6	122440513	122447470	+	1119	NA	Intergenic	Intergenic	-7668	NM_027664	108653	Mm.277939	NM_027664	ENSMUSG00000040649	Rimklb	4931417E21Rik|4933426K21Rik|AA097693|AI325948|AU015629|Naags	ribosomal modification protein rimK-like family member B	protein-coding
MACS_peak_5086	chr4	66063735	66065936	+	1119	NA	intron (NM_207109, intron 1 of 22)	CpG	682	NM_019514	56079	Mm.445312	NM_019514	ENSMUSG00000028373	Astn2	1d8|Astnl|bM452J22.1	astrotactin 2	protein-coding
MACS_peak_3072	chr17	12699582	12705166	+	1119	NA	Intergenic	Intergenic	-1804	NM_011395	20519	Mm.99252	NM_011395	ENSMUSG00000023828	Slc22a3	EMT|Oct3|Orct3|Slca22a3	solute carrier family 22 (organic cation transporter), member 3	protein-coding
MACS_peak_4931	chr4	20704752	20706324	+	1119	NA	5' UTR (NM_172987, exon 1 of 5)	5' UTR (NM_172987, exon 1 of 5)	277	NM_001290410	269513	Mm.317473	NM_172987	ENSMUSG00000055761	Nkain3	C530048M05|E130310K16Rik	Na+/K+ transporting ATPase interacting 3	protein-coding
MACS_peak_5713	chr5	67817707	67820331	+	1119	NA	promoter-TSS (NM_001164806)	promoter-TSS (NM_001164806)	19	NM_001164806	666938	Mm.101339	NM_001164806	ENSMUSG00000092060	Bend4	D330027G24Rik|EG666938	BEN domain containing 4	protein-coding
MACS_peak_2240	chr13	117813052	117814855	+	1119	NA	intron (NM_001081009, intron 2 of 26)	CpG	370	NM_001081009	52552	Mm.274466	NM_027272	ENSMUSG00000021725	Parp8	2810430O08Rik|ARTD16|D13Ertd275e	poly (ADP-ribose) polymerase family, member 8	protein-coding
MACS_peak_3395	chr18	15219408	15225163	+	1118	NA	promoter-TSS (NM_001142731)	promoter-TSS (NM_001142731)	-194	NM_001142731	106931	Mm.329299	NM_134112	ENSMUSG00000036225	Kctd1	4933402K10Rik|AI661543|AW553000	potassium channel tetramerisation domain containing 1	protein-coding
MACS_peak_3994	chr2	25035833	25038531	+	1113	NA	3' UTR (NM_025980, exon 1 of 1)	3' UTR (NM_025980, exon 1 of 1)	904	NM_025980	67122	Mm.46539	NM_025980	ENSMUSG00000078202	Nrarp	2700054M22Rik	Notch-regulated ankyrin repeat protein	protein-coding
MACS_peak_168	chr1	74945561	74947482	+	1108	NA	TTS (NR_029876)	TTS (NR_029876)	774	NR_029876	723900		NR_029876	miRBase:MI0000792	Mir375	Mirn375|mmu-mir-375	microRNA 375	ncRNA
MACS_peak_8197	chr9	103661737	103664672	+	1106	NA	intron (NM_178638, intron 1 of 5)	intron (NM_178638, intron 1 of 5)	963	NM_178638	81907	Mm.384704	NM_178638	ENSMUSG00000042757	Tmem108	AI462967|B130017P16Rik|R74726	transmembrane protein 108	protein-coding
MACS_peak_711	chr10	70621212	70624714	+	1105	NA	promoter-TSS (NM_031397)	promoter-TSS (NM_031397)	-581	NM_031397	83675	Mm.286834	NM_031397	ENSMUSG00000014329	Bicc1	Bic-C|bpk|jcpk	bicaudal C homolog 1 (Drosophila)	protein-coding
MACS_peak_680	chr10	60289260	60293089	+	1105	NA	intron (NM_029770, intron 1 of 16)	intron (NM_029770, intron 1 of 16)	3155	NM_029770	107449	Mm.290433	NM_029770	ENSMUSG00000020099	Unc5b	6330415E02Rik|A630020F16|D10Bwg0792e|Unc5h2	unc-5 homolog B (C. elegans)	protein-coding
MACS_peak_6554	chr6	128304012	128306033	+	1105	NA	intron (NM_011657, intron 1 of 10)	intron (NM_011657, intron 1 of 10)	847	NM_011657	22158	Mm.291783	NM_011657	ENSMUSG00000001521	Tulp3	2310022L06Rik|AI316887	tubby-like protein 3	protein-coding
MACS_peak_1754	chr12	102144751	102151519	+	1105	NA	Intergenic	Intergenic	-1727	NM_001177673	238377	Mm.32160	NM_175493	ENSMUSG00000047415	Gpr68	BB131428|Ogr1	G protein-coupled receptor 68	protein-coding
MACS_peak_6874	chr7	71646636	71648591	+	1104	NA	intron (NM_001291166, intron 1 of 14)	intron (NM_001291166, intron 1 of 14)	589	NM_001291167	11784	Mm.4657	NM_007461	ENSMUSG00000030519	Apba2	X11-like|X11L|XllL|mXllL	amyloid beta (A4) precursor protein-binding, family A, member 2	protein-coding
MACS_peak_255	chr1	89161007	89163514	+	1098	NA	intron (NM_028889, intron 1 of 3)	PB1D9|SINE|Alu	1321	NM_028889	98363	Mm.247951	NM_028889	ENSMUSG00000026255	Efhd1	4931430I01Rik|AI452351|PP3051|mitocalcin	EF hand domain containing 1	protein-coding
MACS_peak_7842	chr9	40493873	40495481	+	1097	NA	intron (NM_133733, intron 1 of 6)	CpG	630	NM_133733	71566	Mm.280560	NM_133733	ENSMUSG00000032024	Clmp	9030425E11Rik|ACAM|ASP5|AW557819	CXADR-like membrane protein	protein-coding
MACS_peak_2457	chr14	104048999	104051581	+	1097	NA	intron (NM_198014, intron 1 of 6)	intron (NM_198014, intron 1 of 6)	830	NM_198014	105439	Mm.27548	NM_198014	ENSMUSG00000055717	Slain1	9630044O09Rik|AA675320|AW742596	SLAIN motif family, member 1	protein-coding
MACS_peak_4121	chr2	69659864	69661555	+	1097	NA	intron (NM_177784, intron 1 of 3)	CpG	282	NM_177784	277396	Mm.138073	NM_177784	ENSMUSG00000042155	Klhl23	C130068N17Rik	kelch-like 23	protein-coding
MACS_peak_4527	chr2	179174937	179179512	+	1097	NA	promoter-TSS (NM_009867)	promoter-TSS (NM_009867)	41	NM_009867	12561	Mm.184711	NM_009867	ENSMUSG00000000305	Cdh4	AW120700|R-Cadh|R-cadherin|Rcad	cadherin 4	protein-coding
MACS_peak_6585	chr6	147211273	147213118	+	1097	NA	5' UTR (NM_008970, exon 1 of 4)	5' UTR (NM_008970, exon 1 of 4)	412	NM_008970	19227	Mm.28440	NM_008970	ENSMUSG00000048776	Pthlh	PTH-like|Pthrp	parathyroid hormone-like peptide	protein-coding
MACS_peak_5365	chr4	137806450	137806882	+	1091	NA	intron (NM_001099631, intron 1 of 9)	CpG	340	NM_001099631	230863	Mm.482408	NM_001099631	ENSMUSG00000045349	Sh2d5	BC036961	SH2 domain containing 5	protein-coding
MACS_peak_780	chr10	83995924	83997714	+	1091	NA	promoter-TSS (NM_175451)	promoter-TSS (NM_175451)	-186	NM_175451	216197	Mm.334999	NM_175451	ENSMUSG00000046841	Ckap4	5630400A09Rik|CLIMP-63|P63	cytoskeleton-associated protein 4	protein-coding
MACS_peak_4272	chr2	121119804	121122775	+	1089	NA	promoter-TSS (NM_001173506)	promoter-TSS (NM_001173506)	99	NM_001173506	17754	Mm.36501	NM_032393	ENSMUSG00000027254	Map1a	6330416M19Rik|AI853608|Mtap-1|Mtap1|Mtap1a|moth1	microtubule-associated protein 1 A	protein-coding
MACS_peak_3131	chr17	26336963	26342173	+	1089	NA	promoter-TSS (NM_001081069)	promoter-TSS (NM_001081069)	-339	NM_001081069	50782	Mm.109840	NM_001081069	ENSMUSG00000024186	Rgs11	C78048	regulator of G-protein signaling 11	protein-coding
MACS_peak_5244	chr4	124377942	124378413	+	1089	NA	intron (NM_010213, intron 1 of 5)	CpG	234	NM_010213	14201	Mm.331856	NM_010213	ENSMUSG00000032643	Fhl3	SLIM2	four and a half LIM domains 3	protein-coding
MACS_peak_6748	chr7	29236719	29238859	+	1087	NA	intron (NM_001141921, intron 1 of 4)	intron (NM_001141921, intron 1 of 4)	532	NM_001141921	80749	Mm.483073	NM_030562		Lrfn1	BC004018|SALM2|Semo1	leucine rich repeat and fibronectin type III domain containing 1	protein-coding
MACS_peak_2926	chr16	38482619	38484324	+	1087	NA	intron (NM_009855, intron 4 of 4)	CpG	24458	NM_009855	12519	Mm.89474	NM_009855	ENSMUSG00000075122	Cd80	B71|Cd28l|Ly-53|Ly53|MIC17|TSA1	CD80 antigen	protein-coding
MACS_peak_4202	chr2	92854557	92855453	+	1087	NA	intron (NM_001177536, intron 1 of 6)	CpG	-14500	NR_110333	433456	Mm.235231	NM_001002794		4631405J19Rik	-	RIKEN cDNA 4631405J19 gene	ncRNA
MACS_peak_5192	chr4	117157104	117163102	+	1087	NA	intron (NM_025739, intron 2 of 14)	intron (NM_025739, intron 2 of 14)	9417	NM_025739	66743	Mm.318331	NM_025739	ENSMUSG00000028677	Rnf220	4732477A13|4931406I20Rik|5730503K05Rik|AV302541	ring finger protein 220	protein-coding
MACS_peak_4387	chr2	152238045	152242154	+	1087	NA	exon (NM_175126, exon 1 of 1)	exon (NM_175126, exon 1 of 1)	681	NM_175126	67917	Mm.391810	NM_175126	ENSMUSG00000074682	Zcchc3	2810406K24Rik	zinc finger, CCHC domain containing 3	protein-coding
MACS_peak_7404	chr8	26631360	26631657	+	1087	NA	intron (NM_001079908, intron 1 of 17)	intron (NM_001079908, intron 1 of 17)	2277	NM_001079908	14182	Mm.265716	NM_010206	ENSMUSG00000031565	Fgfr1	AW208770|Eask|FLG|Fgfr-1|Flt-2|Hspy|MFR|bFGF-R-1|c-fgr	fibroblast growth factor receptor 1	protein-coding
MACS_peak_8068	chr9	72654678	72656331	+	1087	NA	intron (NM_175485, intron 1 of 19)	CpG	423	NM_175485	235472	Mm.31696	NM_175485	ENSMUSG00000036030	Prtg	A230098A12Rik|Igdcc5	protogenin homolog (Gallus gallus)	protein-coding
MACS_peak_1832	chr12	120475939	120478048	+	1087	NA	promoter-TSS (NM_177290)	promoter-TSS (NM_177290)	-244	NM_177290	320910	Mm.217000	NM_177290	ENSMUSG00000025321	Itgb8	4832412O06Rik	integrin beta 8	protein-coding
MACS_peak_632	chr10	40402027	40404538	+	1086	NA	exon (NM_177793, exon 1 of 5)	exon (NM_177793, exon 1 of 5)	194	NM_177793	327747	Mm.80407	NM_177793	ENSMUSG00000045555	Mettl24	9030224M15Rik	methyltransferase like 24	protein-coding
MACS_peak_7780	chr9	21048296	21050054	+	1086	NA	exon (NM_053190, exon 3 of 3)	exon (NM_053190, exon 3 of 3)	3712	NM_053190	94226	Mm.190619	NM_053190	ENSMUSG00000045087	S1pr5	Edg8|S1P5|lpB4	sphingosine-1-phosphate receptor 5	protein-coding
MACS_peak_6828	chr7	53039396	53043042	+	1086	NA	intron (NR_110987, intron 2 of 15)	CpG	469	NM_001290990	381983	Mm.44928	NM_001005511	ENSMUSG00000062044	Lmtk3	BC059845|aatyk3	lemur tyrosine kinase 3	protein-coding
MACS_peak_3688	chr19	11892895	11893311	+	1086	NA	intron (NM_001025307, intron 1 of 10)	CpG	790	NM_001286543	20908	Mm.272264	NM_011502	ENSMUSG00000041488	Stx3	Syn-3	syntaxin 3	protein-coding
MACS_peak_1111	chr11	72832054	72834114	+	1083	NA	intron (NM_018883, intron 1 of 15)	CpG	574	NM_018883	55984	Mm.9998	NM_018883	ENSMUSG00000020785	Camkk1	AI846603|CaMKKalpha|Camkk	calcium/calmodulin-dependent protein kinase kinase 1, alpha	protein-coding
MACS_peak_1460	chr11	115243622	115244737	+	1081	NA	intron (NM_001080929, intron 1 of 4)	intron (NM_001080929, intron 1 of 4)	949	NM_001080929	237988	Mm.102872	NM_001080929	ENSMUSG00000050910	Cdr2l	D030068L24Rik|Gm21	cerebellar degeneration-related protein 2-like	protein-coding
MACS_peak_3523	chr18	57291554	57295799	+	1081	NA	intron (NM_001001979, intron 1 of 24)	intron (NM_001001979, intron 1 of 24)	932	NM_001001979	70417	Mm.297863	NM_001001979	ENSMUSG00000024593	Megf10	3000002B06Rik|Gm331	multiple EGF-like-domains 10	protein-coding
MACS_peak_1792	chr12	111515551	111518568	+	1081	NA	promoter-TSS (NR_002866)	promoter-TSS (NR_002866)	-381	NM_172119	107585	Mm.154427	NM_172119	ENSMUSG00000075707	Dio3	-	deiodinase, iodothyronine type III	protein-coding
MACS_peak_4717	chr3	89518682	89520007	+	1081	NA	intron (NM_001038587, intron 1 of 14)	CpG	400	NM_001038587	56417	Mm.316628	NM_019655	ENSMUSG00000027951	Adar	AV242451|Adar1|Adar1p110|Adar1p150|mZaADAR	adenosine deaminase, RNA-specific	protein-coding
MACS_peak_6649	chr7	17529048	17533048	+	1081	NA	exon (NM_001099636, exon 1 of 1)	exon (NM_001099636, exon 1 of 1)	1017	NM_001099636	434128	Mm.483018	NM_001099636	ENSMUSG00000070802	Pnmal2	EG434128	PNMA-like 2	protein-coding
MACS_peak_6265	chr6	31511874	31516130	+	1081	NA	promoter-TSS (NM_013723)	promoter-TSS (NM_013723)	-65	NM_013723	27205	Mm.89918	NM_013723	ENSMUSG00000025608	Podxl	AW121214|Ly102|PC|PCLP-1|Pclp1	podocalyxin-like	protein-coding
MACS_peak_3970	chr2	18616190	18617551	+	1079	NA	Intergenic	Intergenic	-3779	NM_001001334	381350	Mm.330024	NM_001001334		BC061194	-	cDNA sequence BC061194	protein-coding
MACS_peak_5459	chr4	148177918	148181819	+	1078	NA	intron (NM_027195, intron 1 of 15)	CpG	1367	NM_027195	69743	Mm.233879	NM_027195	ENSMUSG00000028977	Casz1	2410019P08Rik|AV096627|BC040081|Cst|D4Ertd432e	castor zinc finger 1	protein-coding
MACS_peak_4678	chr3	82706997	82708671	+	1078	NA	promoter-TSS (NM_023624)	promoter-TSS (NM_023624)	62	NM_023624	79235	Mm.33921	NM_023624	ENSMUSG00000028003	Lrat	1300010A18Rik|AI449251	lecithin-retinol acyltransferase (phosphatidylcholine-retinol-O-acyltransferase)	protein-coding
MACS_peak_6928	chr7	81699073	81700103	+	1078	NA	promoter-TSS (NM_023908)	promoter-TSS (NM_023908)	78	NM_023908	108116	Mm.425467	NM_023908	ENSMUSG00000025790	Slco3a1	5830414C08Rik|Anr1|MJAM|OATP-D|R75096|Slc21a11	solute carrier organic anion transporter family, member 3a1	protein-coding
MACS_peak_7946	chr9	53513493	53516005	+	1078	NA	promoter-TSS (NM_175562)	promoter-TSS (NM_175562)	-412	NM_175562	270160	Mm.290285	NM_175562	ENSMUSG00000055069	Rab39	C230094F14Rik|Rab39a	RAB39, member RAS oncogene family	protein-coding
MACS_peak_5376	chr4	138646478	138650075	+	1078	NA	intron (NM_008675, intron 1 of 3)	intron (NM_008675, intron 1 of 3)	609	NM_008675	17965	Mm.9404	NM_008675	ENSMUSG00000041120	Nbl1	D4H1S1733E|DAN|Dana|NO3	neuroblastoma, suppression of tumorigenicity 1	protein-coding
MACS_peak_1649	chr12	71446220	71449100	+	1078	NA	exon (NM_001110203, exon 1 of 9)	exon (NM_001110203, exon 1 of 9)	941	NM_001286386	94090	Mm.184012	NM_053167	ENSMUSG00000021071	Trim9	-	tripartite motif-containing 9	protein-coding
MACS_peak_6115	chr5	144054392	144055863	+	1077	NA	Intergenic	CpG	21912	NM_172726	231868	Mm.440105	NM_172726	ENSMUSG00000039244	E130309D02Rik	A630028N22	RIKEN cDNA E130309D02 gene	protein-coding
MACS_peak_4261	chr2	118720542	118724091	+	1077	NA	Intergenic	Intergenic	-5035	NM_001045523	228536	Mm.330487	NM_001045523	ENSMUSG00000040007	Bahd1	AL022997|AW541238|Gm117|mKIAA0945	bromo adjacent homology domain containing 1	protein-coding
MACS_peak_1239	chr11	95444152	95450824	+	1077	NA	intron (NM_033217, intron 1 of 5)	intron (NM_033217, intron 1 of 5)	1524	NM_033217	18053	Mm.283893	NM_033217	ENSMUSG00000000120	Ngfr	LNGFR|Tnfrsf16|p75|p75NGFR|p75NTR	nerve growth factor receptor (TNFR superfamily, member 16)	protein-coding
MACS_peak_4427	chr2	158491374	158495872	+	1077	NA	intron (NM_001159662, intron 1 of 10)	CpG	752	NM_001159662	228852	Mm.150540	NM_153089	ENSMUSG00000037754	Ppp1r16b	ANKRD4|C130078N17Rik|TIMAP|Wdt4	protein phosphatase 1, regulatory (inhibitor) subunit 16B	protein-coding
MACS_peak_7760	chr9	8134051	8134445	+	1077	NA	promoter-TSS (NM_001045524)	promoter-TSS (NM_001045524)	46	NM_001045524	234915	Mm.101341	NM_001045524	ENSMUSG00000040729	AK129341	Kiaa1377|mKIAA1377	cDNA sequence AK129341	protein-coding
MACS_peak_6382	chr6	65621322	65623378	+	1077	NA	intron (NM_172399, intron 1 of 3)	CpG	745	NM_172399	68169	Mm.52392	NM_172399	ENSMUSG00000049001	Ndnf	A930038C07Rik|epidermacan	neuron-derived neurotrophic factor	protein-coding
MACS_peak_534	chr1	192800667	192805564	+	1077	NA	promoter-TSS (NM_144879)	promoter-TSS (NM_144879)	60	NR_027352	226841	Mm.22856	NM_144879	ENSMUSG00000037568	Vash2	B130052G07Rik	vasohibin 2	protein-coding
MACS_peak_7813	chr9	32214966	32216981	+	1077	NA	Intergenic	Intergenic	14403	NM_001168354	56379	Mm.390168	NM_019659	ENSMUSG00000041248	Kcnj1	Kir1.1|ROMK|Romk2	potassium inwardly-rectifying channel, subfamily J, member 1	protein-coding
MACS_peak_6271	chr6	36337598	36340035	+	1077	NA	promoter-TSS (NR_015589)	promoter-TSS (NR_015589)	-582	NR_015589	319472	Mm.226434	NR_015589	ENSMUSG00000073154	9330158H04Rik	-	RIKEN cDNA 9330158H04 gene	ncRNA
MACS_peak_7924	chr9	50908438	50913311	+	1077	NA	promoter-TSS (NM_177702)	promoter-TSS (NM_177702)	341	NR_029654	723932		NR_029654	miRBase:MI0000403	Mir34c	Mirn34c|mmu-mir-34c	microRNA 34c	ncRNA
MACS_peak_6686	chr7	25736088	25742229	+	1074	NA	Intergenic	Intergenic	15936	NR_106013	102465633		NR_106013		Mir7046	mmu-mir-7046	microRNA mir-7046	ncRNA
MACS_peak_2885	chr16	21203706	21206904	+	1074	NA	exon (NM_010143, exon 1 of 16)	exon (NM_010143, exon 1 of 16)	437	NM_010143	13845	Mm.6972	NM_010143	ENSMUSG00000005958	Ephb3	AW456895|Cek10|Etk2|HEK2|MDK5|Sek4|Tyro6	Eph receptor B3	protein-coding
MACS_peak_8226	chr9	108499415	108500058	+	1074	NA	exon (NM_028944, exon 1 of 9)	exon (NM_028944, exon 1 of 9)	195	NM_028944	74443	Mm.226534	NM_028944	ENSMUSG00000006675	P4htm	4933406E20Rik|AI853847|BB128974|Ph-4	prolyl 4-hydroxylase, transmembrane (endoplasmic reticulum)	protein-coding
MACS_peak_1846	chr13	19039244	19042435	+	1074	NA	intron (NM_001289546, intron 1 of 20)	CpG	619	NM_001289546	218038	Mm.101650	NM_175007	ENSMUSG00000021314	Amph	-	amphiphysin	protein-coding
MACS_peak_6577	chr6	142649278	142651406	+	1074	NA	5' UTR (NM_011511, exon 2 of 40)	5' UTR (NM_011511, exon 2 of 40)	452	NM_021041	20928	Mm.35670	NM_011511	ENSMUSG00000030249	Abcc9	AI414027|AI449286|SUR2A|SUR2B|Sur2	ATP-binding cassette, sub-family C (CFTR/MRP), member 9	protein-coding
MACS_peak_1755	chr12	103365631	103370950	+	1071	NA	intron (NM_172152, intron 1 of 16)	intron (NM_172152, intron 1 of 16)	661	NM_172152	238384	Mm.312448	NM_172152	ENSMUSG00000041771	Slc24a4	A930002M03Rik|AW492432|NCKX4	solute carrier family 24 (sodium/potassium/calcium exchanger), member 4	protein-coding
MACS_peak_2824	chr15	102824929	102833947	+	1071	NA	Intergenic	Intergenic	8468	NM_010466	15426	Mm.6167	NM_010466	ENSMUSG00000001657	Hoxc8	D130011F21Rik|Hox-3.1	homeobox C8	protein-coding
MACS_peak_6214	chr6	5955956	5956736	+	1071	NA	exon (NM_001191025, exon 14 of 16)	exon (NM_001191025, exon 14 of 16)	-28953	NR_040255	72249	Mm.443268	NR_040255	ENSMUSG00000085416	1700019G24Rik	-	RIKEN cDNA 1700019G24 gene	ncRNA
MACS_peak_6363	chr6	54514414	54516932	+	1071	NA	intron (NM_027268, intron 1 of 7)	intron (NM_027268, intron 1 of 7)	703	NM_027268	69938	Mm.41557	NM_027268		Scrn1	2810019K23Rik|6330535A03Rik|AI852905|SES1|mKIAA0193	secernin 1	protein-coding
MACS_peak_4804	chr3	108926060	108926381	+	1071	NA	exon (NM_172685, exon 1 of 10)	exon (NM_172685, exon 1 of 10)	153	NM_172685	229731	Mm.33574	NM_172685	ENSMUSG00000040322	Slc25a24	2610016M12Rik	solute carrier family 25 (mitochondrial carrier, phosphate carrier), member 24	protein-coding
MACS_peak_3705	chr19	23831635	23835025	+	1071	NA	promoter-TSS (NM_177034)	promoter-TSS (NM_177034)	-36	NM_177034	319924	Mm.22879	NM_177034	ENSMUSG00000024897	Apba1	6430513E09Rik|Lin-10|Mint|Mint1|Urop11|X11|X11alpha	amyloid beta (A4) precursor protein binding, family A, member 1	protein-coding
MACS_peak_1530	chr12	14155797	14158345	+	1071	NA	exon (NM_029007, exon 2 of 2)	exon (NM_029007, exon 2 of 2)	1773	NM_029007	105005	Mm.227253	NM_029007	ENSMUSG00000020607	Fam84a	2310003N02Rik|4731402F03Rik|AW125753|Nse1	family with sequence similarity 84, member A	protein-coding
MACS_peak_2886	chr16	21207944	21212747	+	1071	NA	intron (NM_010143, intron 1 of 15)	intron (NM_010143, intron 1 of 15)	5477	NM_010143	13845	Mm.6972	NM_010143	ENSMUSG00000005958	Ephb3	AW456895|Cek10|Etk2|HEK2|MDK5|Sek4|Tyro6	Eph receptor B3	protein-coding
MACS_peak_1162	chr11	82744355	82751313	+	1071	NA	intron (NM_178680, intron 14 of 19)	intron (NM_178680, intron 14 of 19)	-17770	NM_183201	327978	Mm.42147	NM_183201	ENSMUSG00000054404	Slfn5	AI956840	schlafen 5	protein-coding
MACS_peak_6590	chr6	148390049	148393128	+	1071	NA	intron (NM_198967, intron 1 of 19)	intron (NM_198967, intron 1 of 19)	1286	NM_198967	387314	Mm.137858	NM_198967	ENSMUSG00000030306	Tmtc1	Arg99|BC023818	transmembrane and tetratricopeptide repeat containing 1	protein-coding
MACS_peak_3489	chr18	43058194	43060275	+	1071	NA	promoter-TSS (NR_073583)	promoter-TSS (NR_073583)	-74	NR_073583	72930	Mm.26134	NM_027531	ENSMUSG00000024500	Ppp2r2b	2900026H06Rik|6330404L05Rik|E130009M08Rik|PP2A-PR55B|PR55-BETA|SCA12	protein phosphatase 2, regulatory subunit B, beta	protein-coding
MACS_peak_3108	chr17	23780236	23784243	+	1071	NA	promoter-TSS (NM_001033339)	promoter-TSS (NM_001033339)	-3	NM_001033339	240047	Mm.235343	NM_001033339	ENSMUSG00000023903	Mmp25	F730048C11Rik|Leukolysin|MMP20|MT6-MMP	matrix metallopeptidase 25	protein-coding
MACS_peak_6316	chr6	52110603	52112136	+	1071	NA	Intergenic	Intergenic	-3053	NM_010449	15394	Mm.197	NM_010449	ENSMUSG00000029844	Hoxa1	ERA1|Hox-1.6	homeobox A1	protein-coding
MACS_peak_1522	chr12	11152335	11163281	+	1071	NA	promoter-TSS (NM_173417)	promoter-TSS (NM_173417)	-160	NM_001168564	238076	Mm.113278	NM_173417	ENSMUSG00000043673	Kcns3	-	potassium voltage-gated channel, delayed-rectifier, subfamily S, member 3	protein-coding
MACS_peak_2026	chr13	54848604	54852998	+	1071	NA	intron (NM_012014, intron 1 of 2)	CpG	229	NM_012014	26913	Mm.41812	NM_012014	ENSMUSG00000069227	Gprin1	GRIN1|Z16	G protein-regulated inducer of neurite outgrowth 1	protein-coding
MACS_peak_4179	chr2	79294032	79295835	+	1071	NA	exon (NM_010894, exon 2 of 2)	exon (NM_010894, exon 2 of 2)	1860	NM_010894	18012	Mm.4636	NM_010894	ENSMUSG00000034701	Neurod1	BETA2|BHF-1|Neurod|bHLHa3	neurogenic differentiation 1	protein-coding
MACS_peak_5028	chr4	54957710	54963242	+	1071	NA	promoter-TSS (NM_172867)	promoter-TSS (NM_172867)	-341	NM_172867	242466	Mm.102904	NM_172867	ENSMUSG00000060206	Zfp462	6030417H05|9430078C22Rik|Gt4-2|Zfpip	zinc finger protein 462	protein-coding
MACS_peak_3280	chr17	63228810	63232933	+	1071	NA	promoter-TSS (NM_207654)	promoter-TSS (NM_207654)	-205	NM_010109	13640	Mm.7978	NM_010109		Efna5	AL-1|AV158822|EFL-5|Ephrin-A5|Epl7|LERK-7|RAGS	ephrin A5	protein-coding
MACS_peak_7386	chr8	24260027	24263955	+	1071	NA	Intergenic	Intergenic	-1752	NM_029002	74561	Mm.290028	NM_029002	ENSMUSG00000063672	Nkx6-3	9130417I07Rik|Nkx6.3	NK6 homeobox 3	protein-coding
MACS_peak_1694	chr12	80106622	80109199	+	1071	NA	intron (NM_178745, intron 1 of 2)	CpG	354	NM_178745	268567	Mm.341747	NM_178745	ENSMUSG00000046157	Tmem229b	6330442E10Rik|9830138K24|AU019070	transmembrane protein 229B	protein-coding
MACS_peak_2893	chr16	22655390	22658110	+	1071	NA	intron (NM_138650, intron 1 of 24)	intron (NM_138650, intron 1 of 24)	554	NM_138650	110197	Mm.194986	NM_138650	ENSMUSG00000022861	Dgkg	2900055E17Rik|90kDa|AI854428|Dagk3|E430001K23Rik|mKIAA4131	diacylglycerol kinase, gamma	protein-coding
MACS_peak_970	chr11	44431708	44435764	+	1071	NA	intron (NM_001290710, intron 1 of 14)	intron (NM_001290710, intron 1 of 14)	2134	NM_001290710	13591	Mm.439662	NM_007897		Ebf1	Ebf|O/E-1|OE-1|Olf-1|Olf1	early B cell factor 1	protein-coding
MACS_peak_3324	chr17	75402917	75407206	+	1071	NA	5' UTR (NM_019919, exon 1 of 34)	5' UTR (NM_019919, exon 1 of 34)	192	NM_019919	268977	Mm.269747	NM_019919	ENSMUSG00000001870	Ltbp1	9430031G15Rik|9830146M04|Ltbp-1|Tgfb|b2b1000Clo	latent transforming growth factor beta binding protein 1	protein-coding
MACS_peak_1441	chr11	113925334	113929000	+	1071	NA	promoter-TSS (NM_172800)	promoter-TSS (NM_172800)	98	NM_172800	237979	Mm.130504	NM_172800	ENSMUSG00000041592	Sdk2	4632412F08Rik|5330435L01Rik|Sdk-2|mKIAA1514	sidekick homolog 2 (chicken)	protein-coding
MACS_peak_3121	chr17	25389846	25393498	+	1071	NA	intron (NM_001163270, intron 1 of 33)	intron (NM_001163270, intron 1 of 33)	1637	NM_001163270	545192	Mm.328859	NM_001163270	ENSMUSG00000047507	Baiap3	Bap3|Gm937	BAI1-associated protein 3	protein-coding
MACS_peak_7738	chr8	127577093	127579877	+	1071	NA	intron (NM_174854, intron 1 of 12)	CpG	390	NM_174854	244667	Mm.233504	NM_170596	ENSMUSG00000043051	Disc1	-	disrupted in schizophrenia 1	protein-coding
MACS_peak_3740	chr19	31836963	31839644	+	1071	NA	intron (NM_001013833, intron 1 of 17)	intron (NM_001013833, intron 1 of 17)	1220	NM_001013833	19091	Mm.381170	NM_011160		Prkg1	AW125416|CGKI|Gm19690|Prkg1b|Prkgr1b	protein kinase, cGMP-dependent, type I	protein-coding
MACS_peak_4001	chr2	25257944	25259465	+	1071	NA	5' UTR (NM_008721, exon 1 of 9)	5' UTR (NM_008721, exon 1 of 9)	134	NM_008721	18146	Mm.1131	NM_008721	ENSMUSG00000015094	Npdc1	AI314472|NPDC-1	neural proliferation, differentiation and control 1	protein-coding
MACS_peak_3494	chr18	44971162	44972817	+	1071	NA	promoter-TSS (NM_001085373)	promoter-TSS (NM_001085373)	-153	NM_001085373	328949	Mm.312511	NM_001033406	ENSMUSG00000071856	Mcc	D18Ertd451e|E330037C19	mutated in colorectal cancers	protein-coding
MACS_peak_727	chr10	78215031	78215896	+	1071	NA	exon (NM_027630, exon 1 of 7)	exon (NM_027630, exon 1 of 7)	349	NM_027630	70976	Mm.188505	NM_027630	ENSMUSG00000078442	Ccdc105	4931413A09Rik	coiled-coil domain containing 105	protein-coding
MACS_peak_2937	chr16	44556219	44561246	+	1071	NA	promoter-TSS (NR_037242)	promoter-TSS (NR_037242)	251	NM_172506	117606	Mm.41561	NM_172506	ENSMUSG00000022687	Boc	4732455C11|mFLJ00376	biregional cell adhesion molecule-related/down-regulated by oncogenes (Cdon) binding protein	protein-coding
MACS_peak_549	chr1	194660020	194661892	+	1071	NA	Intergenic	CpG	-6943	NR_040468	73455	Mm.414869	NR_040468		1700065J18Rik	-	RIKEN cDNA 1700065J18 gene	ncRNA
MACS_peak_2038	chr13	55571824	55575583	+	1068	NA	exon (NM_001030296, exon 2 of 3)	exon (NM_001030296, exon 2 of 3)	5434	NR_105909	102465569		NR_105909		Mir6944	mmu-mir-6944	microRNA mir-6944	ncRNA
MACS_peak_3317	chr17	74057635	74060217	+	1063	NA	intron (NM_027864, intron 1 of 14)	intron (NM_027864, intron 1 of 14)	865	NM_027864	71685	Mm.271953	NM_027864	ENSMUSG00000024064	Galnt14	0610033M06Rik	UDP-N-acetyl-alpha-D-galactosamine:polypeptide N-acetylgalactosaminyltransferase 14	protein-coding
MACS_peak_4975	chr4	42928246	42931702	+	1063	NA	promoter-TSS (NM_172690)	promoter-TSS (NM_172690)	-149	NM_172690	230085	Mm.240965	NM_172690	ENSMUSG00000036062	N28178	A230025O18|Kiaa1045|mKIAA1045	expressed sequence N28178	protein-coding
MACS_peak_6613	chr7	13628655	13630039	+	1062	NA	exon (NM_145819, exon 6 of 6)	exon (NM_145819, exon 6 of 6)	-5723	NM_001168469	22192	Mm.196580	NM_145578	ENSMUSG00000005575	Ube2m	2510040H03Rik|UBC12|Ubc-rs2	ubiquitin-conjugating enzyme E2M	protein-coding
MACS_peak_1306	chr11	97847407	97847900	+	1054	NA	5' UTR (NM_001163608, exon 1 of 14)	5' UTR (NM_001163608, exon 1 of 14)	107	NM_028199	72324	Mm.39617	NM_028199	ENSMUSG00000017417	Plxdc1	2410003I07Rik|AI848450|Tem7	plexin domain containing 1	protein-coding
MACS_peak_7645	chr8	107937002	107937944	+	1053	NA	promoter-TSS (NM_001301173)	promoter-TSS (NM_001301173)	-49	NM_001170788	270091	Mm.212709	NM_001033371	ENSMUSG00000054320	Lrrc36	BC036564	leucine rich repeat containing 36	protein-coding
MACS_peak_7966	chr9	57349795	57353956	+	1052	NA	promoter-TSS (NM_133982)	promoter-TSS (NM_133982)	-34	NM_133982	102614	Mm.274421	NM_133982	ENSMUSG00000062309	Rpp25	AI851155	ribonuclease P/MRP 25 subunit	protein-coding
MACS_peak_6687	chr7	25789757	25797453	+	1052	NA	Intergenic	Intergenic	-2649	NM_001290469	232975	Mm.44101	NM_144921	ENSMUSG00000040907	Atp1a3	Atpa-2	ATPase, Na+/K+ transporting, alpha 3 polypeptide	protein-coding
MACS_peak_1294	chr11	96857659	96859071	+	1048	NA	Intergenic	Intergenic	-16518	NM_031183	83395	Mm.156282	NM_031183	ENSMUSG00000038560	Sp6	1110025J03Rik|AA591031|AI592962|Epfn|Klf14	trans-acting transcription factor 6	protein-coding
MACS_peak_3912	chr19	57081339	57084190	+	1048	NA	5' UTR (NM_146102, exon 1 of 21)	5' UTR (NM_146102, exon 1 of 21)	301	NM_146102	226250	Mm.226284	NM_146102	ENSMUSG00000025083	Afap1l2	AU041783|C86904|mKIAA1914	actin filament associated protein 1-like 2	protein-coding
MACS_peak_3220	chr17	43153633	43154685	+	1045	NA	intron (NM_178589, intron 1 of 5)	CpG	655	NM_178589	94185	Mm.200792	NM_178589	ENSMUSG00000023915	Tnfrsf21	AA959878|DR6|R74815|TR7	tumor necrosis factor receptor superfamily, member 21	protein-coding
MACS_peak_4207	chr2	93479738	93490641	+	1045	NA	intron (NM_007442, intron 1 of 3)	intron (NM_007442, intron 1 of 3)	2598	NM_007442	11695	Mm.389389	NM_007442	ENSMUSG00000040310	Alx4	lst	aristaless-like homeobox 4	protein-coding
MACS_peak_7567	chr8	90977675	90980310	+	1045	NA	Intergenic	Intergenic	-66251	NM_027280	93960	Mm.30219	NM_027280	ENSMUSG00000031661	Nkd1	2810434J10Rik|9030215G15Rik|Nkd	naked cuticle 1 homolog (Drosophila)	protein-coding
MACS_peak_2960	chr16	65815108	65816785	+	1045	NA	promoter-TSS (NM_028572)	promoter-TSS (NM_028572)	68	NM_028572	73569	Mm.25670	NM_028572	ENSMUSG00000091243	Vgll3	1700110N18Rik|4832416J22|C80713|Vgl-3|Vito-2	vestigial like 3 (Drosophila)	protein-coding
MACS_peak_2100	chr13	73982457	73985167	+	1045	NA	intron (NM_028186, intron 3 of 9)	intron (NM_028186, intron 3 of 9)	1267	NM_028186	72293	Mm.45506	NM_028186	ENSMUSG00000021567	Nkd2	2210403L10Rik|AW212591	naked cuticle 2 homolog (Drosophila)	protein-coding
MACS_peak_14	chr1	9957272	9958003	+	1045	NA	promoter-TSS (NM_001285425)	promoter-TSS (NM_001285425)	-71	NM_001285425	100039596	Mm.412928	NM_001285425	ENSMUSG00000099032	Tcf24	ENSMUSG00000073738|Gm10567|Gm2330	transcription factor 24	protein-coding
MACS_peak_819	chr10	94404314	94408690	+	1045	NA	exon (NM_018797, exon 1 of 31)	exon (NM_018797, exon 1 of 31)	710	NM_018797	54712	Mm.256712	NM_018797	ENSMUSG00000074785	Plxnc1	2510048K12Rik|AW742158|CD232|Vespr	plexin C1	protein-coding
MACS_peak_2751	chr15	98634908	98641448	+	1045	NA	exon (NM_001013741, exon 1 of 2)	exon (NM_001013741, exon 1 of 2)	178	NM_001013741	13199	Mm.390810	NM_001013741	ENSMUSG00000059213	Ddn	Gm748	dendrin	protein-coding
MACS_peak_1104	chr11	71854544	71856756	+	1042	NA	promoter-TSS (NM_144526)	promoter-TSS (NM_144526)	-354	NM_144526	109212	Mm.33118	NM_144526	ENSMUSG00000020808	Fam64a	2610008F03Rik|6720460F02Rik|AI115087|CATS	family with sequence similarity 64, member A	protein-coding
MACS_peak_3412	chr18	25837141	25838411	+	1041	NA	3' UTR (NM_001146295, exon 2 of 2)	3' UTR (NM_001146295, exon 2 of 2)	74708	NM_133195	108013	Mm.266435	NM_133195	ENSMUSG00000024268	Celf4	A230070D14Rik|BRUNOL-4|Brul4|Brunol4|C130060B05Rik	CUGBP, Elav-like family member 4	protein-coding
MACS_peak_2232	chr13	115721180	115722532	+	1041	NA	intron (NM_008396, intron 1 of 29)	(TG)n|Simple_repeat|Simple_repeat	393	NM_008396	16398	Mm.5007	NM_008396	ENSMUSG00000015533	Itga2	CD49B|DX5	integrin alpha 2	protein-coding
MACS_peak_1939	chr13	45169769	45176923	+	1041	NA	Intergenic	Intergenic	-75881	NM_025772	94245	Mm.352311	NM_025772	ENSMUSG00000057531	Dtnbp1	5430437B18Rik|AW048963|Bloc1s8|dysbindin|sdy	dystrobrevin binding protein 1	protein-coding
MACS_peak_6565	chr6	136122211	136124623	+	1041	NA	intron (NM_008171, intron 1 of 14)	intron (NM_008171, intron 1 of 14)	112	NM_008171	14812	Mm.436649	NM_008171	ENSMUSG00000030209	Grin2b	AW490526|GluN2B|NR2B|Nmdar2b	glutamate receptor, ionotropic, NMDA2B (epsilon 2)	protein-coding
MACS_peak_3304	chr17	70318844	70320136	+	1041	NA	Intergenic	Intergenic	-454642	NM_177639	224997	Mm.311840	NM_027712	ENSMUSG00000003279	Dlgap1	4933422O14Rik|9630002F18|AI845682|AI848168|BB075781|D17Bwg0511e|GKAP/SAPAP|GKPA/SAPAP|Gkap|Sapap1|mKIAA4162	discs, large (Drosophila) homolog-associated protein 1	protein-coding
MACS_peak_2986	chr16	89959299	89963318	+	1041	NA	promoter-TSS (NM_009384)	promoter-TSS (NM_009384)	-236	NM_009384	21844	Mm.310902	NM_009384	ENSMUSG00000002489	Tiam1	AI847750|D16Ium10|D16Ium10e	T cell lymphoma invasion and metastasis 1	protein-coding
MACS_peak_499	chr1	183281282	183284599	+	1041	NA	5' UTR (NM_001160212, exon 1 of 5)	5' UTR (NM_001160212, exon 1 of 5)	181	NM_001160211	72978	Mm.338083	NM_028408	ENSMUSG00000026514	Cnih3	2900075G08Rik|CNIH-3	cornichon homolog 3 (Drosophila)	protein-coding
MACS_peak_697	chr10	66995312	66998781	+	1041	NA	Intergenic	(TC)n|Simple_repeat|Simple_repeat	-3571	NM_010118	13654	Mm.290421	NM_010118	ENSMUSG00000037868	Egr2	Egr-2|Krox-20|Krox20|NGF1-B|Zfp-25|Zfp-6	early growth response 2	protein-coding
MACS_peak_6459	chr6	97565843	97567781	+	1041	NA	intron (NM_145148, intron 1 of 23)	intron (NM_145148, intron 1 of 23)	839	NM_145148	232288	Mm.27789	NM_145148	ENSMUSG00000030064	Frmd4b	6030440G05Rik|C87375|GOBLIN|GRSP1|R74720|mKIAA1013	FERM domain containing 4B	protein-coding
MACS_peak_8305	chrX	45806646	45807853	+	1041	NA	intron (NM_019680, intron 1 of 8)	CpG	9060	NM_019680	56501	Mm.36808	NM_019680	ENSMUSG00000031103	Elf4	AV314029|BC042423|ENSMUSG00000053512|Gm9907|Mef	E74-like factor 4 (ets domain transcription factor)	protein-coding
MACS_peak_5432	chr4	146498887	146499547	+	1041	NA	Intergenic	CpG	-6985	NM_001083918	666532	Mm.392861	NM_001083918	ENSMUSG00000067916	Gm13139	OTTMUSG00000010657	predicted gene 13139	protein-coding
MACS_peak_937	chr11	31268357	31271989	+	1041	NA	promoter-TSS (NM_011491)	promoter-TSS (NM_011491)	-112	NM_011491	20856	Mm.32506	NM_011491		Stc2	AW125853|Stc2l|mustc2	stanniocalcin 2	protein-coding
MACS_peak_7455	chr8	59818938	59823467	+	1041	NA	Intergenic	Intergenic	21422	NM_010402	15111	Mm.430844	NM_010402	ENSMUSG00000038193	Hand2	AI225906|AI661148|Ehand2|Hed|Th2|Thing2|bHLHa26|dHAND	heart and neural crest derivatives expressed transcript 2	protein-coding
MACS_peak_5294	chr4	129984108	129988619	+	1038	NA	intron (NM_010174, intron 1 of 3)	intron (NM_010174, intron 1 of 3)	341	NM_010174	14077	Mm.388886	NM_010174		Fabp3	Fabph-1|Fabph-4|Fabph1|Fabph4|H-FABP|Mdgi	fatty acid binding protein 3, muscle and heart	protein-coding
MACS_peak_6963	chr7	91233465	91235071	+	1038	NA	intron (NM_030728, intron 1 of 28)	intron (NM_030728, intron 1 of 28)	747	NM_030728	80982	Mm.160389	NM_030728	ENSMUSG00000052353	Cemip	12H19.01.T7|6330404C01Rik|9930013L23Rik|AY007814|Kiaa1199	cell migration inducing protein, hyaluronan binding	protein-coding
MACS_peak_1226	chr11	94869928	94873999	+	1038	NA	intron (NM_146025, intron 1 of 9)	intron (NM_146025, intron 1 of 9)	770	NM_146025	217125	Mm.297199	NM_146025	ENSMUSG00000047181	Samd14	AI839049|AI854782|BC034054	sterile alpha motif domain containing 14	protein-coding
MACS_peak_7460	chr8	63111206	63113201	+	1038	NA	intron (NM_001293769, intron 1 of 1)	CpG	581	NM_001293769	71306	Mm.23242	NM_027756	ENSMUSG00000031647	Mfap3l	4933428A15Rik|5430405D20Rik|AI461995|AW125052|NYD-sp9|mKIAA0626	microfibrillar-associated protein 3-like	protein-coding
MACS_peak_6370	chr6	56518485	56519120	+	1038	NA	Intergenic	CpG	135891	NM_025520	66373	Mm.25642	NM_025520	ENSMUSG00000091625	Lsm5	2010208O10Rik|2310034K10Rik	LSM5 homolog, U6 small nuclear RNA associated (S. cerevisiae)	protein-coding
MACS_peak_4446	chr2	163743382	163746388	+	1038	NA	promoter-TSS (NM_183023)	promoter-TSS (NM_183023)	-466	NM_183023	241770	Mm.330760	NM_183023	ENSMUSG00000035226	Rims4	6530406L02|Rim4	regulating synaptic membrane exocytosis 4	protein-coding
MACS_peak_4694	chr3	87774333	87776931	+	1032	NA	exon (NM_016701, exon 1 of 4)	exon (NM_016701, exon 1 of 4)	617	NM_016701	18008	Mm.331129	NM_016701	ENSMUSG00000004891	Nes	AA166324|C78523|ESTM46	nestin	protein-coding
MACS_peak_4190	chr2	91761200	91764297	+	1032	NA	intron (NM_007699, intron 1 of 1)	intron (NM_007699, intron 1 of 1)	402	NM_007699	12672	Mm.330405	NM_007699	ENSMUSG00000040495	Chrm4	Chrm-4|M4	cholinergic receptor, muscarinic 4	protein-coding
MACS_peak_730	chr10	79177905	79180856	+	1031	NA	promoter-TSS (NM_008226)	promoter-TSS (NM_008226)	1	NM_008226	15166	Mm.12956	NM_008226	ENSMUSG00000020331	Hcn2	BCNG2|HAC1|trls	hyperpolarization-activated, cyclic nucleotide-gated K+ 2	protein-coding
MACS_peak_5594	chr5	25265224	25266450	+	1031	NA	promoter-TSS (NM_001004365)	promoter-TSS (NM_001004365)	-7	NM_001004365	242894	Mm.150319	NM_001004365	ENSMUSG00000056367	Actr3b	9630005C02|ARP11|AW047569|Arp3b|Arp3beta	ARP3 actin-related protein 3B	protein-coding
MACS_peak_1127	chr11	76810041	76813918	+	1031	NA	promoter-TSS (NM_010484)	promoter-TSS (NM_010484)	-120	NM_010484	15567	Mm.300318	NM_010484	ENSMUSG00000020838	Slc6a4	5-HTT|AI323329|Htt|Sert	solute carrier family 6 (neurotransmitter transporter, serotonin), member 4	protein-coding
MACS_peak_184	chr1	75480688	75484626	+	1030	NA	TTS (NM_177056)	TTS (NM_177056)	6550	NM_177056	319998	Mm.44401	NM_177056	ENSMUSG00000051703	Tmem198	A230078I05Rik|Tmem198-1|Tmem198a	transmembrane protein 198	protein-coding
MACS_peak_3959	chr2	13496031	13496981	+	1030	NA	exon (NM_011701, exon 1 of 9)	exon (NM_011701, exon 1 of 9)	568	NM_011701	22352	Mm.268000	NM_011701	ENSMUSG00000026728	Vim	-	vimentin	protein-coding
MACS_peak_6277	chr6	38612178	38615557	+	1029	NA	intron (NM_001101507, intron 1 of 4)	intron (NM_001101507, intron 1 of 4)	798	NM_001101507	665180	Mm.349066	NM_001101507	ENSMUSG00000079598	Clec2l	AI414054|AW122724|Gm1064	C-type lectin domain family 2, member L	protein-coding
MACS_peak_1489	chr11	118215406	118217939	+	1029	NA	promoter-TSS (NM_011594)	promoter-TSS (NM_011594)	53	NM_011594	21858	Mm.206505	NM_011594	ENSMUSG00000017466	Timp2	D11Bwg1104e|Timp-2	tissue inhibitor of metalloproteinase 2	protein-coding
MACS_peak_6443	chr6	90934437	90939792	+	1025	NA	Intergenic	Intergenic	129706	NM_018815	54563	Mm.28162	NM_018815	ENSMUSG00000030091	Nup210	9830001L10|AI836801|Pom210|gp190|gp210	nucleoporin 210	protein-coding
MACS_peak_6000	chr5	125341775	125342752	+	1025	NA	promoter-TSS (NM_001081750)	promoter-TSS (NM_001081750)	328	NM_144819	215707	Mm.389693	NM_144819	ENSMUSG00000037979	Ccdc92	AW050178|D5Bwg0834e	coiled-coil domain containing 92	protein-coding
MACS_peak_7510	chr8	77736190	77738193	+	1025	NA	promoter-TSS (NM_029182)	promoter-TSS (NM_029182)	-652	NM_029182	75141	Mm.179267	NM_029182	ENSMUSG00000034472	Rasd2	4930526B11Rik|AU045414|Rhes|TEM-2|TEM2	RASD family, member 2	protein-coding
MACS_peak_6502	chr6	119055532	119058568	+	1023	NA	intron (NM_001255998, intron 1 of 47)	intron (NM_001255998, intron 1 of 47)	1463	NM_001159534	12288	Mm.41628	NM_009781	ENSMUSG00000051331	Cacna1c	Cav1.2|Cchl1a1|D930026N18Rik|MBC|MELC-CC	calcium channel, voltage-dependent, L type, alpha 1C subunit	protein-coding
MACS_peak_170	chr1	74997857	74998627	+	1021	NA	promoter-TSS (NM_010544)	promoter-TSS (NM_010544)	-17	NM_010544	16147	Mm.439736	NM_010544	ENSMUSG00000006538	Ihh	-	Indian hedgehog	protein-coding
MACS_peak_987	chr11	50414174	50419247	+	1021	NA	intron (NM_175643, intron 1 of 21)	CpG	1123	NM_175643	216725	Mm.110597	NM_175643	ENSMUSG00000036545	Adamts2	ADAM-TS2|ADAMTS-2|ADAMTS-3|PCINP|hPCPNI|mKIAA4060|pNPI	a disintegrin-like and metallopeptidase (reprolysin type) with thrombospondin type 1 motif, 2	protein-coding
MACS_peak_6787	chr7	37480628	37484320	+	1021	NA	promoter-TSS (NM_172298)	promoter-TSS (NM_172298)	-663	NM_172298	243931	Mm.44141	NM_172298	ENSMUSG00000021217	Tshz3	A630038G13Rik|Tsh3|Zfp537|mKIAA1474|teashirt3	teashirt zinc finger family member 3	protein-coding
MACS_peak_6234	chr6	18463607	18465969	+	1021	NA	promoter-TSS (NM_080285)	promoter-TSS (NM_080285)	37	NM_080285	30785	Mm.224189	NM_080285	ENSMUSG00000000416	Cttnbp2	3010022N24Rik|4732477G22Rik|6430526E05|9130022E09Rik|AU040881|Cortbp2|ORF4|mKIAA1758	cortactin binding protein 2	protein-coding
MACS_peak_6525	chr6	122690211	122695132	+	1018	NA	promoter-TSS (NM_011401)	promoter-TSS (NM_011401)	92	NM_011401	20527	Mm.395108	NM_011401	ENSMUSG00000003153	Slc2a3	AA408729|AL023014|AL024341|AU040424|C78366|Glut-3|Glut3	solute carrier family 2 (facilitated glucose transporter), member 3	protein-coding
MACS_peak_978	chr11	46124956	46125818	+	1018	NA	intron (NM_001252459, intron 1 of 30)	CpG	473	NM_001252460	76884	Mm.154358	NM_133769	ENSMUSG00000020340	Cyfip2	1500004I01Rik|6430511D02Rik|AA930218|AU022376|Pir121|mKIAA1168	cytoplasmic FMR1 interacting protein 2	protein-coding
MACS_peak_1881	chr13	31651325	31652064	+	1015	NA	exon (NM_008239, exon 1 of 1)	exon (NM_008239, exon 1 of 1)	1655	NM_008239	15220	Mm.44235	NM_008239	ENSMUSG00000038415	Foxq1	HFH-1|Hfh1|Hfh1l|sa	forkhead box Q1	protein-coding
MACS_peak_6642	chr7	16754887	16761541	+	1013	NA	Intergenic	Intergenic	-2460	NM_001277988	17537	Mm.360516	NM_008627	ENSMUSG00000041420	Meis3	AI573393|Mrg2	Meis homeobox 3	protein-coding
MACS_peak_6698	chr7	26472428	26474497	+	1013	NA	intron (NM_011577, intron 1 of 6)	intron (NM_011577, intron 1 of 6)	1441	NM_011577	21803	Mm.248380	NM_011577	ENSMUSG00000002603	Tgfb1	TGF-beta1|TGFbeta1|Tgfb|Tgfb-1	transforming growth factor, beta 1	protein-coding
MACS_peak_6825	chr7	52898613	52900647	+	1013	NA	exon (NM_172418, exon 8 of 10)	exon (NM_172418, exon 8 of 10)	4283	NM_172418	74490	Mm.107442	NM_172418		Mamstr	2810022D01Rik|5430432N15Rik|AW743872|Mastr	MEF2 activating motif and SAP domain containing transcriptional regulator	protein-coding
MACS_peak_6246	chr6	28347706	28350004	+	1013	NA	Intergenic	B3|SINE|B2	22869	NM_028900	74375	Mm.332950	NM_028900	ENSMUSG00000029708	Gcc1	4932417P04Rik	golgi coiled coil 1	protein-coding
MACS_peak_5693	chr5	52759585	52759932	+	1013	NA	exon (NM_011435, exon 2 of 2)	exon (NM_011435, exon 2 of 2)	4715	NM_011435	20657	Mm.2407	NM_011435		Sod3	AI314465|EC-SOD	superoxide dismutase 3, extracellular	protein-coding
MACS_peak_1747	chr12	96933365	96935094	+	1013	NA	intron (NM_201518, intron 1 of 1)	intron (NM_201518, intron 1 of 1)	3793	NM_201518	399558	Mm.341948	NM_201518	ENSMUSG00000047414	Flrt2	-	fibronectin leucine rich transmembrane protein 2	protein-coding
MACS_peak_2528	chr15	11832223	11835390	+	1013	NA	intron (NM_001286395, intron 2 of 8)	CpG	1623	NM_008728	18162	Mm.25259	NM_008728	ENSMUSG00000022206	Npr3	ANP-C|ANPR-C|EF-2|NPR-C|lgj|stri	natriuretic peptide receptor 3	protein-coding
MACS_peak_7203	chr7	146270484	146274136	+	1013	NA	intron (NM_011993, intron 1 of 13)	CpG	410	NM_011993	26757	Mm.250414	NM_011993	ENSMUSG00000025478	Dpysl4	AI173505|CRMP-3|Crmp3|DPY4|Drp-4|Ulip4	dihydropyrimidinase-like 4	protein-coding
MACS_peak_4771	chr3	101179635	101181747	+	1013	NA	promoter-TSS (NM_207205)	promoter-TSS (NM_207205)	-357	NM_207205	78908	Mm.257997	NM_207205	ENSMUSG00000042035	Igsf3	1700016K10Rik|2810035F16Rik|4833439O17Rik|mKIAA0466	immunoglobulin superfamily, member 3	protein-coding
MACS_peak_488	chr1	177421795	177423257	+	1013	NA	5' UTR (NM_011880, exon 1 of 17)	5' UTR (NM_011880, exon 1 of 17)	150	NM_011880	24012	Mm.7956	NM_011880		Rgs7	-	regulator of G protein signaling 7	protein-coding
MACS_peak_7844	chr9	40538823	40539480	+	1013	NA	intron (NM_133733, intron 1 of 6)	intron (NM_133733, intron 1 of 6)	45104	NM_133733	71566	Mm.280560	NM_133733	ENSMUSG00000032024	Clmp	9030425E11Rik|ACAM|ASP5|AW557819	CXADR-like membrane protein	protein-coding
MACS_peak_559	chr10	6078128	6080932	+	1013	NA	intron (NM_031185, intron 1 of 3)	intron (NM_031185, intron 1 of 3)	682	NM_031185	83397	Mm.27481	NM_031185	ENSMUSG00000038587	Akap12	AI317366|SSeCKS|Srcs5|Tsga12	A kinase (PRKA) anchor protein (gravin) 12	protein-coding
MACS_peak_6798	chr7	50862522	50863494	+	1013	NA	intron (NM_028913, intron 1 of 4)	intron (NM_028913, intron 1 of 4)	469	NM_028913	74400	Mm.159188	NM_028913	ENSMUSG00000055102	Zfp819	4930427I11Rik|4933405K07Rik	zinc finger protein 819	protein-coding
MACS_peak_3572	chr18	73786320	73788177	+	1013	NA	Intergenic	Intergenic	54889	NM_001039214	240396	Mm.24131	NM_001039214	ENSMUSG00000037253	Mex3c	A130001D14Rik|BC035207|BM-013|Rkhd2	mex3 homolog C (C. elegans)	protein-coding
MACS_peak_6603	chr7	4874722	4876999	+	1013	NA	exon (NM_201355, exon 3 of 3)	exon (NM_201355, exon 3 of 3)	-1586	NM_173008	269855	Mm.44190	NM_173008	ENSMUSG00000035279	Ssc5d	A430110N23Rik|S5D-SRCRB	scavenger receptor cysteine rich family, 5 domains	protein-coding
MACS_peak_113	chr1	57025953	57029155	+	1013	NA	promoter-TSS (NR_024325)	promoter-TSS (NR_024325)	624	NM_139146	212712	Mm.145599	NM_139146	ENSMUSG00000038331	Satb2	mKIAA1034	special AT-rich sequence binding protein 2	protein-coding
MACS_peak_1746	chr12	96929214	96932516	+	1013	NA	intron (NM_201518, intron 1 of 1)	intron (NM_201518, intron 1 of 1)	429	NM_201518	399558	Mm.341948	NM_201518	ENSMUSG00000047414	Flrt2	-	fibronectin leucine rich transmembrane protein 2	protein-coding
MACS_peak_3461	chr18	37849034	37852325	+	1013	NA	exon (NM_033575, exon 1 of 4)	exon (NM_033575, exon 1 of 4)	1166	NM_033575	93700	Mm.247203	NM_033575		Pcdhgb2	-	protocadherin gamma subfamily B, 2	protein-coding
MACS_peak_5052	chr4	57445092	57448658	+	1013	NA	Intergenic	CpG	-69711	NR_038178	73349	Mm.393774	NR_038178		1700042G15Rik	-	RIKEN cDNA 1700042G15 gene	ncRNA
MACS_peak_6279	chr6	39506296	39508465	+	1013	NA	intron (NM_172477, intron 1 of 18)	CpG	453	NM_172477	209773	Mm.440021	NM_172477	ENSMUSG00000038456	Dennd2a	B930096L08Rik|C130031G22|mKIAA1277	DENN/MADD domain containing 2A	protein-coding
MACS_peak_3796	chr19	44320179	44325396	+	1013	NA	Intergenic	CpG	45009	NM_024450	30049	Mm.480594	NM_024450	ENSMUSG00000025202	Scd3	4930513N16Rik	stearoyl-coenzyme A desaturase 3	protein-coding
MACS_peak_6455	chr6	92653087	92656416	+	1013	NA	intron (NM_001081146, intron 2 of 8)	intron (NM_001081146, intron 2 of 8)	1427	NM_001081146	243548	Mm.248820	NM_001081146	ENSMUSG00000030020	Prickle2	6230400G14Rik|6720451F06Rik|mpk2	prickle homolog 2 (Drosophila)	protein-coding
MACS_peak_5143	chr4	106294243	106296227	+	1011	NA	exon (NM_177667, exon 1 of 7)	exon (NM_177667, exon 1 of 7)	181	NM_177667	230576	Mm.41945	NM_177667	ENSMUSG00000034919	Ttc22	4732467L16Rik	tetratricopeptide repeat domain 22	protein-coding
MACS_peak_3292	chr17	67699936	67705641	+	1009	NA	intron (NM_008984, intron 1 of 30)	CpG	1011	NM_008984	19274	Mm.311809	NM_008984	ENSMUSG00000033278	Ptprm	RPTPmu|mKIAA4044	protein tyrosine phosphatase, receptor type, M	protein-coding
MACS_peak_206	chr1	77509011	77511046	+	1009	NA	intron (NM_007936, intron 1 of 17)	intron (NM_007936, intron 1 of 17)	1635	NM_007936	13838	Mm.400747	NM_007936	ENSMUSG00000026235	Epha4	2900005C20Rik|AI385584|Cek8|Hek8|Sek|Sek1|Tyro1|rb	Eph receptor A4	protein-coding
MACS_peak_7107	chr7	133846415	133849812	+	1007	NA	promoter-TSS (NM_001301374)	promoter-TSS (NM_001301374)	217	NM_009898	12721	Mm.290482	NM_009898	ENSMUSG00000030707	Coro1a	Clabp|Lmb3|TACO|p57	coronin, actin binding protein 1A	protein-coding
MACS_peak_4227	chr2	103810436	103811606	+	1006	NA	intron (NM_001142337, intron 2 of 3)	CpG	577	NM_001142335	16909	Mm.29266	NM_008505	ENSMUSG00000032698	Lmo2	Rbtn-2|Rbtn2|Rhom-2|Ttg2	LIM domain only 2	protein-coding
MACS_peak_5001	chr4	46051728	46053829	+	1006	NA	intron (NM_021883, intron 1 of 9)	intron (NM_021883, intron 1 of 9)	684	NM_021883	21916	Mm.249594	NM_021883	ENSMUSG00000028328	Tmod1	E-Tmod|Tmod	tropomodulin 1	protein-coding
MACS_peak_2957	chr16	63862525	63865406	+	1006	NA	promoter-TSS (NM_010140)	promoter-TSS (NM_010140)	18	NM_010140	13837	Mm.1977	NM_010140		Epha3	AW492086|Cek4|ETK1|End3|Hek|Hek4|Mek4|Tyro4	Eph receptor A3	protein-coding
MACS_peak_42	chr1	21950377	21951991	+	1006	NA	intron (NM_001160139, intron 1 of 14)	CpG	839	NM_001160139	226922	Mm.336519	NM_023872	ENSMUSG00000028033	Kcnq5	7730402H11|9230107O05Rik|AA589396|D1Mgi1	potassium voltage-gated channel, subfamily Q, member 5	protein-coding
MACS_peak_5746	chr5	75970795	75972042	+	1004	NA	intron (NM_001122733, intron 1 of 20)	CpG	402	NM_021099	16590	Mm.247073	NM_021099	ENSMUSG00000005672	Kit	Bs|CD117|Fdc|Gsfsco1|Gsfsco5|Gsfsow3|SCO1|SCO5|SOW3|Ssm|Tr-kit|W|c-KIT	kit oncogene	protein-coding
MACS_peak_5231	chr4	122859247	122862990	+	1004	NA	intron (NM_174998, intron 2 of 4)	intron (NM_174998, intron 2 of 4)	371	NM_174998	170638	Mm.270641	NM_174998	ENSMUSG00000046093	Hpcal4	AI846570|NVP-2	hippocalcin-like 4	protein-coding
MACS_peak_648	chr10	45008281	45009757	+	1004	NA	promoter-TSS (NM_024286)	promoter-TSS (NM_024286)	-92	NM_024286	78977	Mm.24748	NM_024286	ENSMUSG00000019848	Popdc3	AA682104|Pop3	popeye domain containing 3	protein-coding
MACS_peak_2116	chr13	78346422	78353301	+	1004	NA	intron (NR_045195, intron 1 of 2)	intron (NR_045195, intron 1 of 2)	-11618	NM_010151	13865	Mm.439653	NM_010151	ENSMUSG00000069171	Nr2f1	COUP-TF1|COUP-TFI|COUPTFA|EAR3|Erbal3|SVP44|Tcfcoup1	nuclear receptor subfamily 2, group F, member 1	protein-coding
MACS_peak_7520	chr8	82579632	82582751	+	1004	NA	exon (NM_020259, exon 1 of 13)	exon (NM_020259, exon 1 of 13)	716	NM_020259	15245	Mm.254493	NM_020259		Hhip	Hhip1	Hedgehog-interacting protein	protein-coding
MACS_peak_4352	chr2	144991978	144995494	+	1004	NA	Intergenic	CpG	-74611	NM_053195	94249	Mm.217171	NM_053195	ENSMUSG00000063873	Slc24a3	NCKX3	solute carrier family 24 (sodium/potassium/calcium exchanger), member 3	protein-coding
MACS_peak_2610	chr15	74316432	74319357	+	1004	NA	Intergenic	CpG	-28732	NM_174991	107831	Mm.43133	NM_174991	ENSMUSG00000034730	Bai1	B830018M07Rik|R75078|mKIAA4089	brain-specific angiogenesis inhibitor 1	protein-coding
MACS_peak_2305	chr14	35316123	35316379	+	1003	NA	promoter-TSS (NM_009758)	promoter-TSS (NM_009758)	-519	NM_009758	12166	Mm.237825	NM_009758	ENSMUSG00000021796	Bmpr1a	1110037I22Rik|ALK3|AU045487|BMPR-IA|Bmpr	bone morphogenetic protein receptor, type 1A	protein-coding
MACS_peak_3503	chr18	47530111	47531347	+	1003	NA	Intergenic	Intergenic	-2207	NM_018744	20358	Mm.40909	NM_018744	ENSMUSG00000019647	Sema6a	9330158E07|A730020P05Rik|AI851735|Sema6A-1|Semaq|VIa|b2b997Clo	sema domain, transmembrane domain (TM), and cytoplasmic domain, (semaphorin) 6A	protein-coding
MACS_peak_2568	chr15	42507797	42508617	+	1003	NA	5' UTR (NM_001286062, exon 1 of 9)	5' UTR (NM_001286062, exon 1 of 9)	316	NM_001286062	11600	Mm.309336	NM_009640	ENSMUSG00000022309	Angpt1	1110046O21Rik|Ang-1|Ang1	angiopoietin 1	protein-coding
MACS_peak_447	chr1	164406299	164407936	+	1003	NA	intron (NM_172646, intron 1 of 19)	intron (NM_172646, intron 1 of 19)	1044	NM_001038619	103967	Mm.441620	NM_172646	ENSMUSG00000040265	Dnm3	9630020E24Rik|AW061159|B230343F03Rik|C530045C17|mKIAA0820	dynamin 3	protein-coding
MACS_peak_2447	chr14	98567179	98569158	+	1003	NA	exon (NM_007826, exon 1 of 12)	exon (NM_007826, exon 1 of 12)	816	NM_001038610	13134	Mm.320593	NM_007826	ENSMUSG00000055639	Dach1	Dac|Dach	dachshund 1 (Drosophila)	protein-coding
MACS_peak_6249	chr6	28929309	28932552	+	1003	NA	Intergenic	CpG	-41689	NR_029567	387237		NR_029567	miRBase:MI0000222	Mir129-1	Mirn129-1|Mirn129b|miR-129b	microRNA 129-1	ncRNA
MACS_peak_443	chr1	160285880	160286540	+	1003	NA	5' UTR (NM_207583, exon 1 of 8)	5' UTR (NM_207583, exon 1 of 8)	181	NM_207583	240843	Mm.329579	NM_207583	ENSMUSG00000004031	Brinp2	6430517E21Rik|BB361039|Fam5b|mKIAA1747	bone morphogenic protein/retinoic acid inducible neural-specific 2	protein-coding
MACS_peak_7709	chr8	123610141	123611678	+	1003	NA	3' UTR (NM_010426, exon 2 of 2)	3' UTR (NM_010426, exon 2 of 2)	2623	NM_010426	15227	Mm.33897	NM_010426	ENSMUSG00000042812	Foxf1	AI450827|FREAC1|Foxf1a|Freac-1|HFH-8|Hfh8	forkhead box F1	protein-coding
MACS_peak_272	chr1	92895124	92897243	+	1002	NA	intron (NM_001111312, intron 1 of 12)	intron (NM_001111312, intron 1 of 12)	879	NM_001111312	16978	Mm.45039	NM_008515	ENSMUSG00000026305	Lrrfip1	AU024550|Fliiap1	leucine rich repeat (in FLII) interacting protein 1	protein-coding
MACS_peak_870	chr10	126776579	126778703	+	1002	NA	intron (NM_010296, intron 2 of 12)	intron (NM_010296, intron 2 of 12)	994	NM_010296	14632	Mm.391450	NM_010296	ENSMUSG00000025407	Gli1	AV235269|Zfp-5|Zfp5	GLI-Kruppel family member GLI1	protein-coding
MACS_peak_2008	chr13	52677933	52678950	+	1002	NA	promoter-TSS (NM_001198977)	promoter-TSS (NM_001198977)	-365	NM_001198977	20963	Mm.375031	NM_011518	ENSMUSG00000021457	Syk	Sykb	spleen tyrosine kinase	protein-coding
MACS_peak_2735	chr15	97736817	97739862	+	1002	NA	intron (NM_009504, intron 1 of 9)	intron (NM_009504, intron 1 of 9)	388	NM_009504	22337	Mm.245084	NM_009504	ENSMUSG00000022479	Vdr	Nr1i1	vitamin D receptor	protein-coding
MACS_peak_5605	chr5	28442936	28449149	+	1002	NA	Intergenic	Intergenic	-46194	NM_010134	13799	Mm.4298	NM_010134		En2	BB131122|En-2	engrailed 2	protein-coding
MACS_peak_6254	chr6	29343886	29349596	+	1002	NA	Intergenic	Intergenic	-2185	NM_145574	232664	Mm.251303	NM_145574	ENSMUSG00000029769	Ccdc136	4921511K06Rik|BC006583	coiled-coil domain containing 136	protein-coding
MACS_peak_2693	chr15	84683616	84685915	+	1002	NA	intron (NM_001081166, intron 2 of 12)	CpG	1794	NM_001081166	271305	Mm.101022	NM_001081166	ENSMUSG00000016624	Phf21b	A730032D07Rik	PHD finger protein 21B	protein-coding
MACS_peak_4407	chr2	156245387	156248513	+	1002	NA	5' UTR (NM_001291122, exon 1 of 21)	5' UTR (NM_001291122, exon 1 of 21)	305	NM_001291123	13821	Mm.20852	NM_013510	ENSMUSG00000027624	Epb4.1l1	4.1N|Epb41l1|NBL1|mKIAA0338	erythrocyte protein band 4.1-like 1	protein-coding
MACS_peak_4075	chr2	44412157	44412773	+	1002	NA	Intergenic	CpG	304677	NM_172662	227835	Mm.314312	NM_172662	ENSMUSG00000036890	Gtdc1	E330008O22Rik	glycosyltransferase-like domain containing 1	protein-coding
MACS_peak_3222	chr17	43705224	43707224	+	1002	NA	intron (NM_013737, intron 1 of 11)	intron (NM_013737, intron 1 of 11)	824	NM_013737	27226	Mm.9277	NM_013737	ENSMUSG00000023913	Pla2g7	R75400	phospholipase A2, group VII (platelet-activating factor acetylhydrolase, plasma)	protein-coding
MACS_peak_274	chr1	93076444	93078512	+	1002	NA	intron (NM_178401, intron 1 of 2)	intron (NM_178401, intron 1 of 2)	1079	NM_001168392	51801	Mm.3272	NM_016894	ENSMUSG00000034353	Ramp1	9130218E19Rik	receptor (calcitonin) activity modifying protein 1	protein-coding
MACS_peak_1274	chr11	96213344	96216527	+	1002	NA	exon (NM_134032, exon 2 of 2)	exon (NM_134032, exon 2 of 2)	1989	NM_134032	103889	Mm.281153	NM_134032	ENSMUSG00000075588	Hoxb2	AI894218|Hox-2.8|Hoxbes2	homeobox B2	protein-coding
MACS_peak_6778	chr7	31693215	31694427	+	1002	NA	intron (NM_010758, intron 6 of 12)	intron (NM_010758, intron 6 of 12)	6030	NM_010758	17136	Mm.241355	NM_010758	ENSMUSG00000036634	Mag	Gma|siglec-4a	myelin-associated glycoprotein	protein-coding
MACS_peak_8256	chr9	118515748	118518099	+	1002	NA	intron (NM_133721, intron 1 of 27)	intron (NM_133721, intron 1 of 27)	1096	NM_133721	104099	Mm.335520	NM_133721	ENSMUSG00000039115	Itga9	(alpha)9|2610002H11Rik|6720458D17Rik|AI461869|D130073C02|D9Ertd428e	integrin alpha 9	protein-coding
MACS_peak_5328	chr4	134952208	134954720	+	1002	NA	intron (NM_145555, intron 1 of 4)	intron (NM_145555, intron 1 of 4)	678	NM_001243306	230822	Mm.35548	NM_145555	ENSMUSG00000043924	Ncmap	A330049M08Rik|AA545175|Mp11	noncompact myelin associated protein	protein-coding
MACS_peak_7820	chr9	34295461	34297527	+	1002	NA	5' UTR (NM_001190911, exon 1 of 17)	5' UTR (NM_001190911, exon 1 of 17)	178	NM_001190911	67703	Mm.220710	NM_026324		Kirrel3	1500010O20Rik|2900036G11Rik|NEPH2|SST4|mKIAA1867	kin of IRRE like 3 (Drosophila)	protein-coding
MACS_peak_4591	chr3	28980539	28982425	+	1002	NA	promoter-TSS (NM_001167748)	promoter-TSS (NM_001167748)	-17	NM_001167748	75740	Mm.330948	NM_029412	ENSMUSG00000063600	Egfem1	6130401L20Rik|Efcab11	EGF-like and EMI domain containing 1	protein-coding
MACS_peak_568	chr10	12810142	12811607	+	1002	NA	intron (NM_009538, intron 1 of 5)	CpG	280	NM_009538	22634	Mm.287857	NM_009538	ENSMUSG00000019817	Plagl1	Lot1|Zac1	pleiomorphic adenoma gene-like 1	protein-coding
MACS_peak_8296	chrX	8776756	8777915	+	1002	NA	5' UTR (NM_173414, exon 1 of 5)	5' UTR (NM_173414, exon 1 of 5)	236	NM_173414	236285	Mm.245119	NM_173414	ENSMUSG00000047344	Lancl3	6030463G20Rik	LanC lantibiotic synthetase component C-like 3 (bacterial)	protein-coding
MACS_peak_1713	chr12	85408892	85413602	+	1002	NA	intron (NM_145444, intron 1 of 2)	intron (NM_145444, intron 1 of 2)	972	NM_145444	217698	Mm.484019	NM_145444	ENSMUSG00000042540	Acot5	BC016076|PTE-Ic	acyl-CoA thioesterase 5	protein-coding
MACS_peak_2396	chr14	66570925	66572872	+	1002	NA	intron (NM_172604, intron 1 of 5)	intron (NM_172604, intron 1 of 5)	683	NM_172604	219151	Mm.344095	NM_172604	ENSMUSG00000034463	Scara3	APC7|C130058N24Rik|CSR|CSR1|MSLR1|MSRL1	scavenger receptor class A, member 3	protein-coding
MACS_peak_6367	chr6	55401631	55403286	+	1002	NA	intron (NM_001025372, intron 1 of 15)	CpG	486	NM_007407	11517	Mm.44245	NM_007407	ENSMUSG00000029778	Adcyap1r1	2900024I10Rik|AI846590|PAC1|PAC1R|PACAP1-R	adenylate cyclase activating polypeptide 1 receptor 1	protein-coding
MACS_peak_1799	chr12	113381743	113386670	+	1001	NA	promoter-TSS (NM_001097621)	promoter-TSS (NM_001097621)	-213	NM_001097621	668303	Mm.313104	NM_001097621	ENSMUSG00000021294	Kif26a	mKIAA1236	kinesin family member 26A	protein-coding
MACS_peak_4404	chr2	155598448	155603291	+	997	NA	promoter-TSS (NM_010808)	promoter-TSS (NM_010808)	-211	NM_010808	17391	Mm.330707	NM_010808	ENSMUSG00000027612	Mmp24	AU040325|MT5-MMP|MT5MMP|MTMMP5	matrix metallopeptidase 24	protein-coding
MACS_peak_5327	chr4	134761231	134762302	+	996	NA	Intergenic	Intergenic	66909	NM_013885	29876	Mm.257765	NM_013885	ENSMUSG00000037242	Clic4	D0Jmb3|TU-74|mc3s5|mtCLIC	chloride intracellular channel 4 (mitochondrial)	protein-coding
MACS_peak_2779	chr15	100958057	100960719	+	988	NA	5' UTR (NM_001277259, exon 2 of 12)	5' UTR (NM_001277259, exon 2 of 12)	435	NM_001277257	11482	Mm.279542	NM_009612	ENSMUSG00000000530	Acvrl1	AI115505|AI427544|Acvrlk1|Alk1	activin A receptor, type II-like 1	protein-coding
MACS_peak_1862	chr13	24726486	24731306	+	987	NA	intron (NM_178658, intron 1 of 13)	MLT1E1|LTR|MaLR	-1621	NM_001080381	193385	Mm.217319	NM_029679	ENSMUSG00000036006	Fam65b	-	family with sequence similarity 65, member B	protein-coding
MACS_peak_5634	chr5	34325370	34327483	+	987	NA	exon (NM_001033458, exon 2 of 4)	exon (NM_001033458, exon 2 of 4)	303	NM_001033458	381633	Mm.4923	NM_001033458	ENSMUSG00000070858	Gm1673	-	predicted gene 1673	protein-coding
MACS_peak_7427	chr8	36886387	36889212	+	987	NA	TTS (NM_027998)	TTS (NM_027998)	1814	NM_027998	71908	Mm.37817	NM_027998	ENSMUSG00000055976	Cldn23	2310014B08Rik	claudin 23	protein-coding
MACS_peak_3558	chr18	66616845	66621649	+	987	NA	intron (NM_021451, intron 1 of 2)	intron (NM_021451, intron 1 of 2)	989	NM_021451	58801	Mm.271878	NM_021451	ENSMUSG00000024521	Pmaip1	Noxa	phorbol-12-myristate-13-acetate-induced protein 1	protein-coding
MACS_peak_6645	chr7	17367311	17367605	+	987	NA	exon (NM_009201, exon 1 of 9)	exon (NM_009201, exon 1 of 9)	763	NM_009201	20514	Mm.1056	NM_009201	ENSMUSG00000001918	Slc1a5	AAAT|ASCT2|ATBO|M7V1|M7VS1|R16|RDRC|Slc1a7	solute carrier family 1 (neutral amino acid transporter), member 5	protein-coding
MACS_peak_178	chr1	75442632	75444323	+	984	NA	Intergenic	Intergenic	-3608	NM_183022	241118	Mm.110790	NM_183022	ENSMUSG00000033007	Asic4	Accn4|BNAC4	acid-sensing (proton-gated) ion channel family member 4	protein-coding
MACS_peak_2764	chr15	100592022	100595257	+	979	NA	intron (NM_021530, intron 1 of 24)	ID2|SINE|ID	1461	NM_021530	59033	Mm.209856	NM_021530	ENSMUSG00000023032	Slc4a8	AW493845|C230026C11|NDCBE|kNBC-3	solute carrier family 4 (anion exchanger), member 8	protein-coding
MACS_peak_6414	chr6	84538976	84539982	+	979	NA	intron (NM_175475, intron 1 of 6)	intron (NM_175475, intron 1 of 6)	4325	NM_175475	232174	Mm.255246	NM_175475	ENSMUSG00000063415	Cyp26b1	CP26|P450RAI-2	cytochrome P450, family 26, subfamily b, polypeptide 1	protein-coding
MACS_peak_2204	chr13	105843002	105846147	+	978	NA	5' UTR (NM_029879, exon 1 of 6)	5' UTR (NM_029879, exon 1 of 6)	436	NM_029879	52882	Mm.100348	NM_029879	ENSMUSG00000021719	Rgs7bp	A930030I01Rik|AI842293|D13Bwg1146e|R7bp	regulator of G-protein signalling 7 binding protein	protein-coding
MACS_peak_1813	chr12	117722342	117726985	+	977	NA	intron (NM_011215, intron 1 of 22)	CpG	470	NM_011215	19276	Mm.206054	NM_011215	ENSMUSG00000056553	Ptprn2	4930425H11Rik|IA2beta|PTP-NP|Phol|mKIAA0387|phogrin	protein tyrosine phosphatase, receptor type, N polypeptide 2	protein-coding
MACS_peak_535	chr1	192921111	192923635	+	977	NA	promoter-TSS (NM_030060)	promoter-TSS (NM_030060)	80	NM_030060	381319	Mm.6922	NM_030060	ENSMUSG00000026630	Batf3	9130211I03Rik|Snft	basic leucine zipper transcription factor, ATF-like 3	protein-coding
MACS_peak_4286	chr2	125547236	125549875	+	970	NA	exon (NM_199022, exon 1 of 12)	exon (NM_199022, exon 1 of 12)	1329	NM_199022	271849	Mm.425101	NM_199022	ENSMUSG00000035109	Shc4	6230417E10Rik|9930029B02Rik|Gm685|RaLP	SHC (Src homology 2 domain containing) family, member 4	protein-coding
MACS_peak_4186	chr2	84711754	84716287	+	966	NA	intron (NM_199223, intron 2 of 2)	intron (NM_199223, intron 2 of 2)	12829	NM_199223	269295	Mm.86447	NM_199223	ENSMUSG00000050896	Rtn4rl2	Ngr2|Ngrh1|Ngrl3	reticulon 4 receptor-like 2	protein-coding
MACS_peak_5429	chr4	146230625	146231404	+	965	NA	Intergenic	CpG	105923	NM_001177545	667666	Mm.459230	NM_001177545	ENSMUSG00000066007	Zfp600	Gm13164|OTTMUSG00000010694	zinc finger protein 600	protein-coding
MACS_peak_855	chr10	121200074	121200573	+	965	NA	Intergenic	(C)n|Simple_repeat|Simple_repeat	23330	NM_173022	270802	Mm.209172	NM_173022	ENSMUSG00000053684	BC048403	E030027L10	cDNA sequence BC048403	protein-coding
MACS_peak_6081	chr5	138897110	138897369	+	965	NA	exon (NM_028130, exon 5 of 5)	exon (NM_028130, exon 5 of 5)	14535	NM_028130	72154	Mm.20263	NM_028130	ENSMUSG00000036898	Zfp157	2610020C11Rik|A630094N24Rik|AI327407|mszf12|mszf23-1	zinc finger protein 157	protein-coding
MACS_peak_5127	chr4	100448193	100453655	+	965	NA	intron (NM_198037, intron 1 of 26)	intron (NM_198037, intron 1 of 26)	1640	NM_198037	320508	Mm.151962	NM_198037	ENSMUSG00000028532	Cachd1	1190007F10Rik|AI852726|B430218L07Rik|Vwcd1|mKIAA1573	cache domain containing 1	protein-coding
MACS_peak_1471	chr11	116514896	116516065	+	965	NA	5' UTR (NM_030206, exon 1 of 4)	5' UTR (NM_030206, exon 1 of 4)	147	NM_030206	114886	Mm.34598	NM_030206	ENSMUSG00000020810	Cygb	3110001K20Rik|HGb|Staap	cytoglobin	protein-coding
MACS_peak_8348	chrX	109714292	109715254	+	965	NA	intron (NM_177747, intron 1 of 8)	CpG	638	NM_177747	245595	Mm.259846	NM_177747	ENSMUSG00000025529	Zfp711	2810409C01Rik|A230078I01Rik|Znf711	zinc finger protein 711	protein-coding
MACS_peak_4590	chr3	28680508	28681585	+	965	NA	exon (NM_177586, exon 2 of 5)	exon (NM_177586, exon 2 of 5)	813	NM_177586	208691	Mm.193670	NM_177586	ENSMUSG00000050192	Eif5a2	9630038B20|eIF5AII	eukaryotic translation initiation factor 5A2	protein-coding
MACS_peak_4192	chr2	92228869	92229885	+	965	NA	exon (NM_011162, exon 3 of 12)	exon (NM_011162, exon 3 of 12)	-1774	NR_105966	102466783		NR_105966		Mir7000	mmu-mir-7000	microRNA mir-7000	ncRNA
MACS_peak_3473	chr18	37972192	37980073	+	965	NA	exon (NM_033582, exon 1 of 4)	exon (NM_033582, exon 1 of 4)	1399	NM_033582	93707	Mm.247203	NM_033582	ENSMUSG00000023036	Pcdhgc4	-	protocadherin gamma subfamily C, 4	protein-coding
MACS_peak_779	chr10	83184803	83186779	+	965	NA	intron (NM_001145198, intron 1 of 5)	CpG	181	NM_001145198	69784	Mm.271188	NM_001145198	ENSMUSG00000087651	1500009L16Rik	2700050C19Rik|OCC-1	RIKEN cDNA 1500009L16 gene	protein-coding
MACS_peak_5578	chr5	23396890	23401013	+	965	NA	Intergenic	B2_Mm1t|SINE|B2	40900	NR_028536	100217436		NR_028536		Snord93	Gm22397|MBII-336	small nucleolar RNA, C/D box 93	snoRNA
MACS_peak_1655	chr12	73508191	73510452	+	965	NA	exon (NM_001286448, exon 1 of 7)	exon (NM_001286448, exon 1 of 7)	720	NM_001286448	104001	Mm.221275	NM_153457	ENSMUSG00000021087	Rtn1	Nsp	reticulon 1	protein-coding
MACS_peak_4342	chr2	135484249	135485889	+	965	NA	Intergenic	CpG	-76113	NR_015544	320684	Mm.421433	NR_015544	ENSMUSG00000085631	9630028H03Rik	-	RIKEN cDNA 9630028H03 gene	ncRNA
MACS_peak_7370	chr8	18950092	18951577	+	965	NA	promoter-TSS (NM_001286469)	promoter-TSS (NM_001286469)	37	NM_001286469	319581	Mm.111354	NM_176951	ENSMUSG00000039814	Xkr5	5430438H03Rik|XRG5	X Kell blood group precursor-related family, member 5	protein-coding
MACS_peak_1068	chr11	66338743	66342142	+	965	NA	promoter-TSS (NM_001034874)	promoter-TSS (NM_001034874)	-814	NM_001034874	380702	Mm.351764	NM_001034874	ENSMUSG00000053930	Shisa6	Gm879	shisa homolog 6 (Xenopus laevis)	protein-coding
MACS_peak_408	chr1	153417996	153419059	+	965	NA	promoter-TSS (NM_022018)	promoter-TSS (NM_022018)	24	NM_022018	63913	Mm.157700	NM_022018		Fam129a	AI256368|AU019833|Niban	family with sequence similarity 129, member A	protein-coding
MACS_peak_3961	chr2	14525574	14527558	+	965	NA	intron (NM_023116, intron 1 of 13)	CpG	633	NM_023116	12296	Mm.313930	NM_023116	ENSMUSG00000057914	Cacnb2	AW060387|CAB2|Cavbeta2|Cchb2	calcium channel, voltage-dependent, beta 2 subunit	protein-coding
MACS_peak_7450	chr8	59790018	59794841	+	965	NA	intron (NR_110474, intron 2 of 4)	intron (NR_110474, intron 2 of 4)	7227	NR_110474	102636514		NR_110474		LOC102636514	-	uncharacterized LOC102636514	ncRNA
MACS_peak_3459	chr18	37844409	37845787	+	965	NA	promoter-TSS (NM_033587)	promoter-TSS (NM_033587)	44	NM_033587	93712	Mm.247203	NM_033587		Pcdhga4	-	protocadherin gamma subfamily A, 4	protein-coding
MACS_peak_5426	chr4	145953535	145954021	+	965	NA	Intergenic	CpG	-81147	NR_030771	627585	Mm.424988	NM_001039233	ENSMUSG00000082195	Gm13034	OTTMUSG00000010105	SWI/SNF related, matrix associated, actin dependent regulator of chromatin, subfamily a, member 5 pseudogene	pseudo
MACS_peak_4016	chr2	29104733	29109348	+	964	NA	intron (NR_029460, intron 1 of 1)	CpG	1473	NR_029460	76220	Mm.330108	NR_029460		6530402F18Rik	mKIAA1857	RIKEN cDNA 6530402F18 gene	ncRNA
MACS_peak_2297	chr14	33669990	33672479	+	962	NA	intron (NM_178791, intron 1 of 7)	MIR|SINE|MIR	1292	NM_178791	320736	Mm.187910	NM_178791	ENSMUSG00000050666	Vstm4	E130203B14Rik	V-set and transmembrane domain containing 4	protein-coding
MACS_peak_3274	chr17	56890689	56896862	+	960	NA	intron (NM_008738, intron 1 of 2)	intron (NM_008738, intron 1 of 2)	3178	NM_008738	18188	Mm.8074	NM_008738	ENSMUSG00000039481	Nrtn	NTN	neurturin	protein-coding
MACS_peak_5296	chr4	130347495	130349269	+	957	NA	promoter-TSS (NM_011520)	promoter-TSS (NM_011520)	-70	NM_011520	20970	Mm.206536	NM_011520	ENSMUSG00000025743	Sdc3	Synd3|mKIAA0468|syn-3	syndecan 3	protein-coding
MACS_peak_6884	chr7	74945507	74949386	+	957	NA	intron (NR_045954, intron 1 of 2)	L1M5|LINE|L1	936	NR_045954	73904	Mm.70992	NR_045954	ENSMUSG00000097697	4833412C05Rik	-	RIKEN cDNA 4833412C05 gene	ncRNA
MACS_peak_561	chr10	9393393	9396772	+	957	NA	promoter-TSS (NM_177271)	promoter-TSS (NM_177271)	-76	NM_177271	320825	Mm.101115	NM_177271	ENSMUSG00000060487	Samd5	E130306M17Rik	sterile alpha motif domain containing 5	protein-coding
MACS_peak_3996	chr2	25146164	25148249	+	957	NA	TTS (NM_146117)	TTS (NM_146117)	466	NM_001242940	320354	Mm.445875	NM_001242940		Grin1os	E130003G02Rik	glutamate receptor, ionotropic, NMDA1 (zeta 1), opposite strand	protein-coding
MACS_peak_8029	chr9	61794029	61794423	+	955	NA	intron (NM_024245, intron 1 of 22)	CpG	380	NM_024245	71819	Mm.259374	NM_024245	ENSMUSG00000032254	Kif23	3110001D19Rik|C87313|CHO1|Knsl5|MKLP-1|MKLP1	kinesin family member 23	protein-coding
MACS_peak_2887	chr16	21245647	21250854	+	951	NA	non-coding (NR_046162, exon 5 of 5)	non-coding (NR_046162, exon 5 of 5)	7889	NR_106145	102465781		NR_106145	miRBase:MI0025025	Mir7680	mmu-mir-7680	microRNA mir-7680	ncRNA
MACS_peak_1304	chr11	97434689	97436790	+	951	NA	intron (NM_018873, intron 1 of 19)	intron (NM_018873, intron 1 of 19)	701	NM_018873	56013	Mm.342665	NM_018873	ENSMUSG00000038453	Srcin1	P140|SNIP|mKIAA1684|p140Cap	SRC kinase signaling inhibitor 1	protein-coding
MACS_peak_2906	chr16	31932361	31936925	+	951	NA	intron (NM_172822, intron 1 of 2)	intron (NM_172822, intron 1 of 2)	706	NM_172822	239827	Mm.440388	NM_172822	ENSMUSG00000045625	Pigz	F630022B06Rik	phosphatidylinositol glycan anchor biosynthesis, class Z	protein-coding
MACS_peak_715	chr10	75021982	75024050	+	951	NA	promoter-TSS (NM_198860)	promoter-TSS (NM_198860)	59	NM_198860	192734	Mm.259320	NM_198860	ENSMUSG00000046807	Lrrc75b	AI646023|Fam211b	leucine rich repeat containing 75B	protein-coding
MACS_peak_7894	chr9	46136917	46139498	+	951	NA	Intergenic	(TGGGGG)n|Simple_repeat|Simple_repeat	-10138	NM_183104	74361	Mm.159169	NM_183104	ENSMUSG00000056617	4931429L15Rik	-	RIKEN cDNA 4931429L15 gene	protein-coding
MACS_peak_7721	chr8	124750073	124755764	+	951	NA	Intergenic	Intergenic	-53123	NM_009569	22761	Mm.3105	NM_009569	ENSMUSG00000049577	Zfpm1	FOG|Fog1	zinc finger protein, multitype 1	protein-coding
MACS_peak_3441	chr18	36479340	36481935	+	951	NA	Intergenic	Intergenic	20882	NM_001267796	109169	Mm.426423	NM_001267796		Igip	6330403M23Rik	IgA inducing protein	protein-coding
MACS_peak_4755	chr3	98231356	98233521	+	948	NA	exon (NM_172863, exon 3 of 3)	exon (NM_172863, exon 3 of 3)	46034	NM_172863	242109	Mm.358911	NM_172863	ENSMUSG00000050064	Zfp697	9430053K19|AI467503|Znf697	zinc finger protein 697	protein-coding
MACS_peak_3246	chr17	46623837	46625065	+	947	NA	5' UTR (NM_001162864, exon 1 of 15)	5' UTR (NM_001162864, exon 1 of 15)	173	NM_001162864	106763	Mm.297613	NM_175351	ENSMUSG00000015599	Ttbk1	AU017937|AW048023|C330008L01Rik	tau tubulin kinase 1	protein-coding
MACS_peak_453	chr1	167211437	167214087	+	946	NA	Intergenic	Intergenic	-13135	NM_001081126	240888	Mm.329929	NM_001081126		Gpr161	Gm208|Gm208Gpr|vl	G protein-coupled receptor 161	protein-coding
MACS_peak_3390	chr18	12463884	12464849	+	946	NA	promoter-TSS (NM_001190371)	promoter-TSS (NM_001190371)	-137	NM_001190371	225187	Mm.53865	NM_001190371	ENSMUSG00000057766	Ankrd29	G630054C21|G630054C21Rik|Gm95	ankyrin repeat domain 29	protein-coding
MACS_peak_8375	chrX	158595787	158597683	+	946	NA	intron (NM_001290526, intron 1 of 8)	intron (NM_001290526, intron 1 of 8)	638	NM_001081052	195727	Mm.336313	NM_001081052	ENSMUSG00000059493	Nhs	Gm389|Gm48|Nhs1|Xcat	Nance-Horan syndrome (human)	protein-coding
MACS_peak_2433	chr14	78706363	78708885	+	946	NA	exon (NM_011613, exon 1 of 5)	exon (NM_011613, exon 1 of 5)	226	NM_011613	21943	Mm.249221	NM_011613	ENSMUSG00000022015	Tnfsf11	Ly109l|ODF|OPG|OPGL|RANKL|Trance	tumor necrosis factor (ligand) superfamily, member 11	protein-coding
MACS_peak_2867	chr16	17207842	17208992	+	945	NA	5' UTR (NM_001033338, exon 1 of 1)	5' UTR (NM_001033338, exon 1 of 1)	189	NM_001033338	239731	Mm.86671	NM_001033338	ENSMUSG00000071636	Rimbp3	Gm1759|Gm603|RIM-BP3|mKIAA1666	RIMS binding protein 3	protein-coding
MACS_peak_477	chr1	174269449	174271690	+	941	NA	promoter-TSS (NM_001039484)	promoter-TSS (NM_001039484)	-772	NM_001039484	16513	Mm.254563	NM_020269	ENSMUSG00000044708	Kcnj10	BIR10|BIRK-1|Kir1.2|Kir4.1	potassium inwardly-rectifying channel, subfamily J, member 10	protein-coding
MACS_peak_3427	chr18	36047259	36050247	+	941	NA	Intergenic	CpG	59281	NM_133687	67393	Mm.94560	NM_133687	ENSMUSG00000046668	Cxxc5	4930415K17Rik	CXXC finger 5	protein-coding
MACS_peak_5115	chr4	89354029	89356138	+	941	NA	exon (NM_175647, exon 1 of 2)	exon (NM_175647, exon 1 of 2)	194	NM_175647	242523	Mm.130167	NM_175647	ENSMUSG00000043753	Dmrta1	Dmrt4	doublesex and mab-3 related transcription factor like family A1	protein-coding
MACS_peak_4483	chr2	167874792	167877618	+	941	NA	Intergenic	Intergenic	-30299	NM_021409	58220	Mm.292834	NM_021409	ENSMUSG00000044641	Pard6b	AV025615|Par6b	par-6 family cell polarity regulator beta	protein-coding
MACS_peak_5413	chr4	145230731	145231114	+	940	NA	Intergenic	CpG	23873	NM_001205101	433801	Mm.276881	NM_001013808		Gm13212	OTTMUSG00000010965	predicted gene 13212	protein-coding
MACS_peak_3554	chr18	63545658	63547054	+	940	NA	5' UTR (NM_001039485, exon 1 of 54)	5' UTR (NM_001039485, exon 1 of 54)	481	NM_001039485	667742	Mm.158720	NM_172629	ENSMUSG00000041482	Piezo2	5930434P17|9030411M15Rik|9430028L06Rik|Fam38b|Fam38b2	piezo-type mechanosensitive ion channel component 2	protein-coding
MACS_peak_2864	chr16	14361288	14363517	+	940	NA	intron (NM_008576, intron 1 of 30)	intron (NM_008576, intron 1 of 30)	751	NM_008576	17250	Mm.196634	NM_008576	ENSMUSG00000023088	Abcc1	Abcc1a|Abcc1b|MRP|Mdrap|Mrp1	ATP-binding cassette, sub-family C (CFTR/MRP), member 1	protein-coding
MACS_peak_8340	chrX	99266131	99266612	+	940	NA	5' UTR (NM_001278534, exon 1 of 2)	5' UTR (NM_001278534, exon 1 of 2)	275	NM_001278534	331474	Mm.23297	NM_183318	ENSMUSG00000049191	Rgag4	6430402L03Rik|Mar5|Mart5|mKIAA2001	retrotransposon gag domain containing 4	protein-coding
MACS_peak_4059	chr2	35436911	35439359	+	938	NA	promoter-TSS (NM_001290637)	promoter-TSS (NM_001290637)	-225	NM_001290637	69601	Mm.29629	NM_001001602	ENSMUSG00000026883	Dab2ip	2310011D08Rik|AI480459|Aip1|mKIAA1743	disabled 2 interacting protein	protein-coding
MACS_peak_251	chr1	89078995	89083653	+	938	NA	intron (NM_027084, intron 3 of 12)	intron (NM_027084, intron 3 of 12)	1256	NM_027084	69453	Mm.84618	NM_027084	ENSMUSG00000036480	Prss56	1700027L20Rik	protease, serine 56	protein-coding
MACS_peak_2004	chr13	51887629	51889061	+	938	NA	intron (NM_001281880, intron 1 of 16)	CpG	771	NM_001281880	20354	Mm.33903	NM_013660	ENSMUSG00000021451	Sema4d	CD100|Semacl2|Semaj|Semcl2|coll-4	sema domain, immunoglobulin domain (Ig), transmembrane domain (TM) and short cytoplasmic domain, (semaphorin) 4D	protein-coding
MACS_peak_1309	chr11	97912890	97915109	+	938	NA	intron (NM_146028, intron 1 of 10)	CpG	777	NM_146028	217154	Mm.181008	NM_146028	ENSMUSG00000017400	Stac2	24b2|24b2/STAC2|AW240854	SH3 and cysteine rich domain 2	protein-coding
MACS_peak_4513	chr2	172763494	172765469	+	938	NA	intron (NM_007557, intron 1 of 6)	CpG	1341	NM_007557	12162	Mm.595	NM_007557	ENSMUSG00000008999	Bmp7	OP1	bone morphogenetic protein 7	protein-coding
MACS_peak_2953	chr16	58522157	58523845	+	938	NA	intron (NM_018784, intron 1 of 10)	intron (NM_018784, intron 1 of 10)	424	NM_018784	54613	Mm.212742	NM_018784	ENSMUSG00000022747	St3gal6	1700023B24Rik|AI930218|AW552396|Siat10|St3galVI	ST3 beta-galactoside alpha-2,3-sialyltransferase 6	protein-coding
MACS_peak_647	chr10	44246845	44248488	+	936	NA	Intergenic	Intergenic	-69173	NM_007548	12142	Mm.4800	NM_007548	ENSMUSG00000038151	Prdm1	Blimp-1|Blimp1|PRDI-BF1|ZNFPR1A1|b2b1765Clo	PR domain containing 1, with ZNF domain	protein-coding
MACS_peak_122	chr1	59970201	59970538	+	936	NA	exon (NM_001037725, exon 1 of 8)	exon (NM_001037725, exon 1 of 8)	519	NM_001037725	72750	Mm.258250	NM_001037725	ENSMUSG00000041040	Fam117b	2810425F24Rik|6330416D14Rik|Als2cr13	family with sequence similarity 117, member B	protein-coding
MACS_peak_3515	chr18	53576837	53578809	+	935	NA	promoter-TSS (NM_008908)	promoter-TSS (NM_008908)	-162	NM_008908	19038	Mm.4587	NM_008908	ENSMUSG00000024538	Ppic	CyP-20c	peptidylprolyl isomerase C	protein-coding
MACS_peak_5839	chr5	107354320	107355457	+	935	NA	promoter-TSS (NM_177873)	promoter-TSS (NM_177873)	21	NM_177873	330149	Mm.121664	NM_177873	ENSMUSG00000043410	Hfm1	A330009G12Rik|Gm1046|Mer3|Sec63d1	HFM1, ATP-dependent DNA helicase homolog (S. cerevisiae)	protein-coding
MACS_peak_2115	chr13	78341183	78345030	+	935	NA	intron (NR_045195, intron 1 of 2)	intron (NR_045195, intron 1 of 2)	-4863	NM_010151	13865	Mm.439653	NM_010151	ENSMUSG00000069171	Nr2f1	COUP-TF1|COUP-TFI|COUPTFA|EAR3|Erbal3|SVP44|Tcfcoup1	nuclear receptor subfamily 2, group F, member 1	protein-coding
MACS_peak_6926	chr7	80884916	80886975	+	935	NA	intron (NM_001162532, intron 1 of 2)	intron (NM_001162532, intron 1 of 2)	752	NM_001162532	100038347	Mm.425464	NM_001162532	ENSMUSG00000078670	Fam174b	-	family with sequence similarity 174, member B	protein-coding
MACS_peak_3084	chr17	14414403	14417774	+	935	NA	promoter-TSS (NM_022315)	promoter-TSS (NM_022315)	-425	NM_022315	64074	Mm.30162	NM_022315	ENSMUSG00000023886	Smoc2	1700056C05Rik|5430426J21Rik|Smoc2l	SPARC related modular calcium binding 2	protein-coding
MACS_peak_1654	chr12	73337550	73339779	+	935	NA	promoter-TSS (NM_001007596)	promoter-TSS (NM_001007596)	-950	NM_001007596	104001	Mm.221275	NM_153457	ENSMUSG00000021087	Rtn1	Nsp	reticulon 1	protein-coding
MACS_peak_2323	chr14	47993167	47994260	+	935	NA	intron (NM_001145953, intron 1 of 5)	CpG	178	NM_001145953	16854	Mm.248615	NM_010705	ENSMUSG00000050335	Lgals3	GBP|L-34|Mac-2|gal3	lectin, galactose binding, soluble 3	protein-coding
MACS_peak_8042	chr9	66560004	66564574	+	934	NA	intron (NM_178396, intron 1 of 10)	intron (NM_178396, intron 1 of 10)	796	NM_178396	76459	Mm.277921	NM_178396	ENSMUSG00000032373	Car12	2310047E01Rik|AI314958|Ca12	carbonic anyhydrase 12	protein-coding
MACS_peak_3858	chr19	46221308	46223925	+	930	NA	intron (NM_008852, intron 1 of 3)	intron (NM_008852, intron 1 of 3)	199	NM_008852	18742	Mm.6255	NM_008852	ENSMUSG00000025229	Pitx3	Ptx3|ak	paired-like homeodomain transcription factor 3	protein-coding
MACS_peak_5040	chr4	55650820	55664359	+	930	NA	Intergenic	Intergenic	-112242	NM_010637	16600	Mm.4325	NM_010637	ENSMUSG00000003032	Klf4	EZF|Gklf|Zie	Kruppel-like factor 4 (gut)	protein-coding
MACS_peak_3835	chr19	45119063	45121121	+	930	NA	exon (NM_001195265, exon 1 of 16)	exon (NM_001195265, exon 1 of 16)	170	NM_001195265	100503041	Mm.329877	NM_177605	ENSMUSG00000074818	Pdzd7	9130207N01|EG435601|Pdzk7	PDZ domain containing 7	protein-coding
MACS_peak_856	chr10	121483054	121485213	+	930	NA	intron (NM_001242411, intron 1 of 21)	intron (NM_001242411, intron 1 of 21)	238	NM_001242411	117600	Mm.288698	NM_001081037	ENSMUSG00000020121	Srgap1	4930572H05Rik|Arhgap13	SLIT-ROBO Rho GTPase activating protein 1	protein-coding
MACS_peak_1193	chr11	87576017	87578995	+	930	NA	intron (NM_172449, intron 4 of 31)	intron (NM_172449, intron 4 of 31)	3463	NM_172449	207777	Mm.342019	NM_172449	ENSMUSG00000034156	Bzrap1	D230016K05|PRAX-1|mKIAA0612	benzodiazepine receptor associated protein 1	protein-coding
MACS_peak_1122	chr11	76209638	76212595	+	930	NA	intron (NM_008750, intron 1 of 7)	intron (NM_008750, intron 1 of 7)	1527	NM_008750	18230	Mm.27915	NM_008750	ENSMUSG00000020844	Nxn	l11Jus13	nucleoredoxin	protein-coding
MACS_peak_5631	chr5	33445893	33447451	+	930	NA	promoter-TSS (NM_019810)	promoter-TSS (NM_019810)	-196	NM_019810	20537	Mm.25237	NM_019810	ENSMUSG00000011034	Slc5a1	Sglt1	solute carrier family 5 (sodium/glucose cotransporter), member 1	protein-coding
MACS_peak_5784	chr5	100587346	100588526	+	930	NA	intron (NM_182841, intron 1 of 7)	CpG	891	NM_182841	231503	Mm.99790	NM_182841	ENSMUSG00000050640	Tmem150c	-	transmembrane protein 150C	protein-coding
MACS_peak_1888	chr13	34219302	34227315	+	928	NA	Intergenic	Intergenic	-1085	NM_023716	73710	Mm.379227	NM_023716	ENSMUSG00000045136	Tubb2b	2410129E14Rik|brdp	tubulin, beta 2B class IIB	protein-coding
MACS_peak_2747	chr15	98601588	98604965	+	927	NA	exon (NM_011718, exon 5 of 5)	exon (NM_011718, exon 5 of 5)	5305	NM_011718	22410	Mm.4709	NM_011718	ENSMUSG00000022996	Wnt10b	Wnt12	wingless-type MMTV integration site family, member 10B	protein-coding
MACS_peak_4181	chr2	80286792	80288810	+	927	NA	promoter-TSS (NM_011356)	promoter-TSS (NM_011356)	-248	NM_011356	20378	Mm.427436	NM_011356	ENSMUSG00000027004	Frzb	Frp|Sfrp3|frezzled|fritz|frzb-1	frizzled-related protein	protein-coding
MACS_peak_3119	chr17	24824350	24827218	+	926	NA	intron (NM_011522, intron 1 of 3)	intron (NM_011522, intron 1 of 3)	1110	NM_011522	20974	Mm.26032	NM_011522	ENSMUSG00000007021	Syngr3	-	synaptogyrin 3	protein-coding
MACS_peak_2627	chr15	76003448	76013514	+	926	NA	exon (NM_201390, exon 32 of 32)	exon (NM_201390, exon 32 of 32)	17659	NM_201394	18810	Mm.234912	NM_011117	ENSMUSG00000022565	Plec	AA591047|AU042537|EBS1|PCN|PLTN|Plec1	plectin	protein-coding
MACS_peak_2349	chr14	56385108	56387301	+	925	NA	exon (NM_008519, exon 2 of 2)	exon (NM_008519, exon 2 of 2)	1405	NM_008519	16995	Mm.20853	NM_008519	ENSMUSG00000046908	Ltb4r1	BLT1|BLTR|Ltb4r|mBLTR	leukotriene B4 receptor 1	protein-coding
MACS_peak_6501	chr6	118542093	118543814	+	925	NA	3' UTR (NM_001255999, exon 47 of 47)	3' UTR (NM_001255999, exon 47 of 47)	-30679	NM_001081112	232339	Mm.276116	NM_001081112	ENSMUSG00000007827	Ankrd26	5730521P14Rik|BC008111|mKIAA1074	ankyrin repeat domain 26	protein-coding
MACS_peak_7071	chr7	125633923	125635651	+	924	NA	exon (NM_001033380, exon 1 of 1)	exon (NM_001033380, exon 1 of 1)	702	NM_001033380	319622	Mm.323386	NM_001033380	ENSMUSG00000095115	Itpripl2	C130081G24|E030018N11Rik	inositol 1,4,5-triphosphate receptor interacting protein-like 2	protein-coding
MACS_peak_935	chr11	29924383	29925097	+	924	NA	5' UTR (NM_146016, exon 2 of 42)	5' UTR (NM_146016, exon 2 of 42)	1293	NM_146016	237711	Mm.445271	NM_146016	ENSMUSG00000044072	Eml6	2900083P10Rik|C230094A16Rik|EMAP-6	echinoderm microtubule associated protein like 6	protein-coding
MACS_peak_2780	chr15	101053682	101055771	+	924	NA	promoter-TSS (NM_019518)	promoter-TSS (NM_019518)	88	NM_019518	56149	Mm.276573	NM_019518	ENSMUSG00000000531	Grasp	tamalin	GRP1 (general receptor for phosphoinositides 1)-associated scaffold protein	protein-coding
MACS_peak_4117	chr2	67403002	67405611	+	924	NA	Intergenic	CpG	-109208	NR_106083	102465706		NR_106083	miRBase:MI0023719	Mir7224	mmu-mir-7224	microRNA mir-7224	ncRNA
MACS_peak_2875	chr16	18126226	18129916	+	921	NA	intron (NM_022982, intron 1 of 1)	CpG	272	NM_022982	65079	Mm.40149	NM_022982	ENSMUSG00000043811	Rtn4r	NOGOR|NgR|NgR1	reticulon 4 receptor	protein-coding
MACS_peak_1118	chr11	74985459	74986643	+	921	NA	promoter-TSS (NR_029794)	promoter-TSS (NR_029794)	-839	NR_029794	387208		NR_029794	miRBase:MI0000696	Mir212	Mirn212|mmu-mir-212	microRNA 212	ncRNA
MACS_peak_698	chr10	67001033	67003843	+	914	NA	intron (NM_010118, intron 1 of 1)	intron (NM_010118, intron 1 of 1)	1821	NM_010118	13654	Mm.290421	NM_010118	ENSMUSG00000037868	Egr2	Egr-2|Krox-20|Krox20|NGF1-B|Zfp-25|Zfp-6	early growth response 2	protein-coding
MACS_peak_6827	chr7	52954857	52955832	+	913	NA	promoter-TSS (NM_009800)	promoter-TSS (NM_009800)	7	NM_009800	12348	Mm.27736	NM_009800	ENSMUSG00000003273	Car11	Ca11	carbonic anhydrase 11	protein-coding
MACS_peak_976	chr11	45868791	45871775	+	912	NA	intron (NM_009616, intron 1 of 22)	intron (NM_009616, intron 1 of 22)	797	NM_001291891	11492	Mm.89940	NM_009616	ENSMUSG00000011256	Adam19	AL024287|Mltnb	a disintegrin and metallopeptidase domain 19 (meltrin beta)	protein-coding
MACS_peak_3266	chr17	56109598	56111286	+	912	NA	intron (NM_001159523, intron 1 of 6)	intron (NM_001159523, intron 1 of 6)	537	NM_009168	20420	Mm.20908	NM_009168	ENSMUSG00000039154	Shd	AI413439	src homology 2 domain-containing transforming protein D	protein-coding
MACS_peak_6318	chr6	52120004	52123447	+	912	NA	intron (NM_010452, intron 4 of 4)	intron (NM_010452, intron 4 of 4)	-6895	NM_010451	15399	Mm.131	NM_010451		Hoxa2	AI324701|HOX1.11|Hox-1.11	homeobox A2	protein-coding
MACS_peak_6784	chr7	35595761	35598869	+	912	NA	intron (NM_175140, intron 1 of 3)	CpG	415	NM_175140	68947	Mm.29380	NM_175140	ENSMUSG00000060402	Chst8	1500011J21Rik|AI426009	carbohydrate (N-acetylgalactosamine 4-0) sulfotransferase 8	protein-coding
MACS_peak_4686	chr3	84280991	84284774	+	912	NA	intron (NM_001033301, intron 1 of 11)	intron (NM_001033301, intron 1 of 11)	531	NM_001205355	229474	Mm.331107	NM_001033301		Fhdc1	6330505N24Rik|Gm126	FH2 domain containing 1	protein-coding
MACS_peak_6350	chr6	53523853	53525661	+	910	NA	intron (NM_172728, intron 1 of 6)	intron (NM_172728, intron 1 of 6)	1389	NM_172728	231991	Mm.321138	NM_172728	ENSMUSG00000053007	Creb5	Crebpa|D430026C09Rik	cAMP responsive element binding protein 5	protein-coding
MACS_peak_7573	chr8	91150892	91152457	+	906	NA	exon (NM_027840, exon 4 of 4)	exon (NM_027840, exon 4 of 4)	8353	NM_027840	71607	Mm.270607	NM_027840	ENSMUSG00000031662	Snx20	9130017C17Rik	sorting nexin 20	protein-coding
MACS_peak_3167	chr17	32298381	32299855	+	903	NA	intron (NM_008716, intron 2 of 32)	intron (NM_008716, intron 2 of 32)	4679	NM_008716	18131	Mm.439741	NM_008716	ENSMUSG00000038146	Notch3	AW229011|N3|hpbk	notch 3	protein-coding
MACS_peak_4277	chr2	121692132	121694422	+	903	NA	promoter-TSS (NM_001205371)	promoter-TSS (NM_001205371)	-164	NM_001205371	319996	Mm.292109	NM_177054	ENSMUSG00000060227	Casc4	D130060C09Rik|VGFG2573	cancer susceptibility candidate 4	protein-coding
MACS_peak_1825	chr12	119081311	119082540	+	903	NA	promoter-TSS (NM_146040)	promoter-TSS (NM_146040)	-409	NM_146040	217946	Mm.281149	NM_146040	ENSMUSG00000021175	Cdca7l	BC006933|JPO2	cell division cycle associated 7 like	protein-coding
MACS_peak_8083	chr9	78288133	78290827	+	903	NA	intron (NR_125721, intron 1 of 4)	RMER10B|LTR|ERVL	1564	NR_125721	214763	Mm.101559	NM_173386	ENSMUSG00000032344	Mb21d1	E330016A19Rik|cGAS	Mab-21 domain containing 1	protein-coding
MACS_peak_536	chr1	193008536	193012104	+	901	NA	Intergenic	Intergenic	-3108	NM_007498	11910	Mm.2706	NM_007498	ENSMUSG00000026628	Atf3	LRG-21	activating transcription factor 3	protein-coding
MACS_peak_2416	chr14	70574969	70578174	+	901	NA	promoter-TSS (NM_001253736)	promoter-TSS (NM_001253736)	51	NM_001253736	213019	Mm.283968	NM_145978	ENSMUSG00000022090	Pdlim2	4732462F18Rik|Slim	PDZ and LIM domain 2	protein-coding
MACS_peak_2961	chr16	67617123	67621448	+	901	NA	intron (NM_178721, intron 1 of 9)	intron (NM_178721, intron 1 of 9)	1868	NM_001145977	239857	Mm.394300	NM_178721	ENSMUSG00000064115	Cadm2	2900078E11Rik|9330131D06|A830029E02Rik|Igdf4d|Igsf4d|NECL3|SynCAM 2|SynCAM2	cell adhesion molecule 2	protein-coding
MACS_peak_2879	chr16	18776423	18777716	+	901	NA	5' UTR (NM_013805, exon 1 of 1)	5' UTR (NM_013805, exon 1 of 1)	129	NM_013805	12741	Mm.22768	NM_013805	ENSMUSG00000041378	Cldn5	AI854493|MBEC1|Tmvcf	claudin 5	protein-coding
MACS_peak_728	chr10	79074261	79076894	+	900	NA	exon (NM_198614, exon 2 of 2)	exon (NM_198614, exon 2 of 2)	1186	NM_198614	237397	Mm.334207	NM_198614	ENSMUSG00000045912	C2cd4c	4932409I22Rik|Fam148c|Gm238	C2 calcium-dependent domain containing 4C	protein-coding
MACS_peak_7641	chr8	107064741	107066502	+	895	NA	intron (NM_001301165, intron 1 of 6)	intron (NM_001301165, intron 1 of 6)	412	NM_001301165	12354	Mm.129265	NM_053070	ENSMUSG00000031883	Car7	AV343731|Ca7	carbonic anhydrase 7	protein-coding
MACS_peak_787	chr10	85391283	85391557	+	895	NA	exon (NM_001163614, exon 1 of 1)	exon (NM_001163614, exon 1 of 1)	184	NM_001163614	67341	Mm.382315	NM_001163614	ENSMUSG00000085111	Ascl4	1700054F16Rik|bHLHa44	achaete-scute complex homolog 4 (Drosophila)	protein-coding
MACS_peak_5659	chr5	37727137	37728794	+	895	NA	exon (NM_021292, exon 1 of 21)	exon (NM_021292, exon 1 of 21)	155	NM_021292	59056	Mm.479678	NM_021292	ENSMUSG00000029122	Evc	-	Ellis van Creveld gene syndrome	protein-coding
MACS_peak_879	chr11	3414944	3417830	+	895	NA	intron (NM_053267, intron 2 of 4)	intron (NM_053267, intron 2 of 4)	1682	NM_053267	114679	Mm.34046	NM_053267	ENSMUSG00000075702	Selm	1500040L08Rik|A230103K18|Sepm	selenoprotein M	protein-coding
MACS_peak_2039	chr13	55587858	55590649	+	895	NA	exon (NM_001177372, exon 1 of 14)	exon (NM_001177372, exon 1 of 14)	184	NM_001177371	56320	Mm.19016	NM_019813	ENSMUSG00000034675	Dbn1	-	drebrin 1	protein-coding
MACS_peak_436	chr1	158399359	158403233	+	891	NA	intron (NM_009230, intron 1 of 15)	intron (NM_009230, intron 1 of 15)	3163	NM_009230	20652	Mm.28099	NM_009230	ENSMUSG00000026600	Soat1	8430426K15Rik|ACAT-1|AW550831|Acact|ald|hid	sterol O-acyltransferase 1	protein-coding
MACS_peak_5563	chr5	20878428	20879116	+	891	NA	exon (NM_008013, exon 1 of 2)	exon (NM_008013, exon 1 of 2)	281	NM_008013	14190	Mm.292100	NM_008013	ENSMUSG00000039899	Fgl2	AI385601|musfiblp	fibrinogen-like protein 2	protein-coding
MACS_peak_7036	chr7	116226428	116227224	+	891	NA	promoter-TSS (NM_178780)	promoter-TSS (NM_178780)	12	NM_001038624	320360	Mm.71007	NM_178780	ENSMUSG00000048330	Ric3	E130307J04Rik	resistance to inhibitors of cholinesterase 3 homolog (C. elegans)	protein-coding
MACS_peak_6172	chr5	147395509	147397634	+	891	NA	promoter-TSS (NM_008151)	promoter-TSS (NM_008151)	244	NM_001010941	14738	Mm.153539	NM_008151	ENSMUSG00000041468	Gpr12	Gpcr01|Gpcr12|Gpcr20|Gpcr21	G-protein coupled receptor 12	protein-coding
MACS_peak_5116	chr4	91037600	91039793	+	891	NA	promoter-TSS (NM_010486)	promoter-TSS (NM_010486)	50	NM_010486	15569	Mm.318042	NM_010486	ENSMUSG00000008489	Elavl2	Hub|mel-N1	ELAV (embryonic lethal, abnormal vision, Drosophila)-like 2 (Hu antigen B)	protein-coding
MACS_peak_5532	chr5	7344116	7345374	+	891	NA	promoter-TSS (NM_001163223)	promoter-TSS (NM_001163223)	-367	NM_001163223	207618	Mm.478808	NM_001163223	ENSMUSG00000092094	Zfp804b	Gm441	zinc finger protein 804B	protein-coding
MACS_peak_724	chr10	78051418	78058384	+	891	NA	promoter-TSS (NM_027875)	promoter-TSS (NM_027875)	-192	NM_027875	71709	Mm.86439	NM_027875	ENSMUSG00000032714	Syde1	1200008N06Rik|BB043000|mSYD1A	synapse defective 1, Rho GTPase, homolog 1 (C. elegans)	protein-coding
MACS_peak_8307	chrX	48558643	48559207	+	891	NA	promoter-TSS (NM_134163)	promoter-TSS (NM_134163)	84	NM_134163	171170	Mm.295324	NM_134163		Mbnl3	A530038J18Rik|AI661274|CHCR|E430034C16Rik|MBLX|MBLX39|MBXL	muscleblind-like 3 (Drosophila)	protein-coding
MACS_peak_8298	chrX	19636626	19638203	+	891	NA	exon (NM_021715, exon 1 of 2)	exon (NM_021715, exon 1 of 2)	718	NM_021715	60322	Mm.44827	NM_021715	ENSMUSG00000037347	Chst7	2600013M07Rik|C6ST-2|GST5|Gn6st-4	carbohydrate (N-acetylglucosamino) sulfotransferase 7	protein-coding
MACS_peak_4622	chr3	38786197	38787336	+	891	NA	exon (NM_183221, exon 1 of 17)	exon (NM_183221, exon 1 of 17)	904	NM_183221	329628	Mm.316210	NM_183221	ENSMUSG00000046743	Fat4	6030410K14Rik|9430004M15	FAT tumor suppressor homolog 4 (Drosophila)	protein-coding
MACS_peak_2496	chr14	122849315	122853985	+	891	NA	Intergenic	(A)n|Simple_repeat|Simple_repeat	-1282	NR_033326	328479	Mm.86095	NR_033325	ENSMUSG00000064052	Gm5089	6530402A20|C030005G22Rik|EG328479	predicted gene 5089	ncRNA
MACS_peak_7454	chr8	59810664	59812987	+	891	NA	Intergenic	Intergenic	12045	NM_010402	15111	Mm.430844	NM_010402	ENSMUSG00000038193	Hand2	AI225906|AI661148|Ehand2|Hed|Th2|Thing2|bHLHa26|dHAND	heart and neural crest derivatives expressed transcript 2	protein-coding
MACS_peak_2000	chr13	51297381	51299024	+	891	NA	Intergenic	CpG	31808	NM_029173	75124	Mm.179243	NM_029173	ENSMUSG00000021396	Nxnl2	4930519N16Rik|Rdcvf2	nucleoredoxin-like 2	protein-coding
MACS_peak_483	chr1	175294385	175298230	+	891	NA	intron (NM_053199, intron 1 of 8)	intron (NM_053199, intron 1 of 8)	1519	NM_053199	94332	Mm.330524	NM_053199	ENSMUSG00000005338	Cadm3	BIgR|Igsf4b|Necl-1|Necl1|SynCAM3|Tsll1	cell adhesion molecule 3	protein-coding
MACS_peak_2897	chr16	28444150	28447075	+	891	NA	5' UTR (NM_183064, exon 1 of 5)	5' UTR (NM_183064, exon 1 of 5)	549	NM_183064	14167	Mm.7996	NM_010199		Fgf12	AV114868|FGF-12|FHF-1|Fhf1	fibroblast growth factor 12	protein-coding
MACS_peak_5202	chr4	119163481	119167328	+	891	NA	promoter-TSS (NM_177572)	promoter-TSS (NM_177572)	-201	NM_177572	194237	Mm.206201	NM_177572	ENSMUSG00000048899	Rimkla	B930030J24|NAAGS|NAAGS-II|Rimk	ribosomal modification protein rimK-like family member A	protein-coding
MACS_peak_3339	chr17	82068391	82072258	+	891	NA	intron (NR_104580, intron 1 of 8)	intron (NR_104580, intron 1 of 8)	67403	NM_001286684	20541	Mm.265834	NM_011406		Slc8a1	AI852629|AV344025|D930008O12Rik|Ncx1	solute carrier family 8 (sodium/calcium exchanger), member 1	protein-coding
MACS_peak_3303	chr17	69785397	69791499	+	891	NA	promoter-TSS (NM_001145192)	promoter-TSS (NM_001145192)	-218	NM_001145192	320722	Mm.400254	NM_001145192	ENSMUSG00000091636	A330050F15Rik	-	RIKEN cDNA A330050F15 gene	protein-coding
MACS_peak_8086	chr9	78669336	78670084	+	891	NA	Intergenic	CpG	206357	NM_153098	235505	Mm.32955	NM_153098	ENSMUSG00000046186	Cd109	9930012E15Rik|AI480638|GARP	CD109 antigen	protein-coding
MACS_peak_5058	chr4	58218508	58220160	+	891	NA	5' UTR (NM_022814, exon 1 of 48)	5' UTR (NM_022814, exon 1 of 48)	134	NM_022814	64817	Mm.261024	NM_022814	ENSMUSG00000028369	Svep1	1110021D17Rik|4833413O10Rik|AA387071|D430029O09Rik|Polydom	sushi, von Willebrand factor type A, EGF and pentraxin domain containing 1	protein-coding
MACS_peak_2269	chr14	24822113	24824731	+	891	NA	promoter-TSS (NM_001253375)	promoter-TSS (NM_001253375)	5	NM_001253375	16531	Mm.343607	NM_010610	ENSMUSG00000063142	Kcnma1	5730414M22Rik|BKCa|MaxiK|Slo|Slo1|mSlo|mSlo1	potassium large conductance calcium-activated channel, subfamily M, alpha member 1	protein-coding
MACS_peak_6960	chr7	89482833	89485050	+	891	NA	promoter-TSS (NM_001190374)	promoter-TSS (NM_001190374)	-263	NM_001190374	269959	Mm.65306	NM_001190374	ENSMUSG00000070469	Adamtsl3	9230119C12Rik|C130057K09|mKIAA1233	ADAMTS-like 3	protein-coding
MACS_peak_3183	chr17	35331187	35333386	+	891	NA	TTS (NR_105939)	TTS (NR_105939)	369	NR_105939	102465588		NR_105939		Mir6973a	mmu-mir-6973a	microRNA mir-6973a	ncRNA
MACS_peak_3402	chr18	21807798	21813437	+	891	NA	exon (NM_001081403, exon 1 of 8)	exon (NM_001081403, exon 1 of 8)	252	NM_001081403	225266	Mm.436836	NM_001081403	ENSMUSG00000042514	Klhl14	6330403N15Rik|AI785250|printor	kelch-like 14	protein-coding
MACS_peak_1683	chr12	76408993	76410115	+	891	NA	5' UTR (NM_023275, exon 1 of 5)	5' UTR (NM_023275, exon 1 of 5)	254	NM_023275	80837	Mm.27467	NM_023275	ENSMUSG00000046768	Rhoj	1110005O19Rik|AW210585|Arhj|TC10L|TCL	ras homolog gene family, member J	protein-coding
MACS_peak_7862	chr9	41697743	41698948	+	891	NA	Intergenic	Intergenic	234027	NM_011436	20660	Mm.121920	NM_011436		Sorl1	2900010L19Rik|AI596264|AW261561|LR11|SorLA|gp250|mSorLA	sortilin-related receptor, LDLR class A repeats-containing	protein-coding
MACS_peak_3885	chr19	54119124	54122302	+	890	NA	exon (NM_007417, exon 1 of 1)	exon (NM_007417, exon 1 of 1)	1041	NM_007417	11551	Mm.235195	NM_007417	ENSMUSG00000033717	Adra2a	AW122659|Adra-2|Adra-2a|alpha(2A)AR|alpha2-C10|alpha2A|alpha2A-AR	adrenergic receptor, alpha 2a	protein-coding
MACS_peak_772	chr10	82445738	82450152	+	890	NA	promoter-TSS (NM_021439)	promoter-TSS (NM_021439)	-297	NM_021439	58250	Mm.360747	NM_021439	ENSMUSG00000034612	Chst11	1110020P09Rik|C4ST|C4ST-1|C4ST1|C4s	carbohydrate sulfotransferase 11	protein-coding
MACS_peak_6371	chr6	56602178	56602680	+	890	NA	Intergenic	CpG	52264	NM_025520	66373	Mm.25642	NM_025520	ENSMUSG00000091625	Lsm5	2010208O10Rik|2310034K10Rik	LSM5 homolog, U6 small nuclear RNA associated (S. cerevisiae)	protein-coding
MACS_peak_3182	chr17	35107047	35108762	+	890	NA	exon (NM_010479, exon 1 of 1)	exon (NM_010479, exon 1 of 1)	1197	NM_010479	193740	Mm.6388	NM_010479	ENSMUSG00000091971	Hspa1a	Hsp70-3|Hsp70.3|Hsp72|hsp68|hsp70A1	heat shock protein 1A	protein-coding
MACS_peak_2806	chr15	102573644	102578608	+	890	NA	TTS (NR_104334)	TTS (NR_104334)	1214	NR_104334	102216269		NR_104334		Cistr-act	Cistr	chondrogenic regulator lncRNA	ncRNA
MACS_peak_1525	chr12	12946408	12948034	+	890	NA	5' UTR (NM_008709, exon 2 of 3)	5' UTR (NM_008709, exon 2 of 3)	1421	NM_008709	18109	Mm.16469	NM_008709	ENSMUSG00000037169	Mycn	N-myc|Nmyc|Nmyc-1|Nmyc1|bHLHe37|c-nmyc	v-myc myelocytomatosis viral related oncogene, neuroblastoma derived (avian)	protein-coding
MACS_peak_7838	chr9	40262351	40264502	+	890	NA	promoter-TSS (NM_172768)	promoter-TSS (NM_172768)	-77	NM_172768	235283	Mm.138434	NM_172768	ENSMUSG00000040111	Gramd1b	3222402H23|A930008A22Rik|AI593249|mKIAA1201	GRAM domain containing 1B	protein-coding
MACS_peak_4523	chr2	178148393	178149425	+	890	NA	promoter-TSS (NM_001081289)	promoter-TSS (NM_001081289)	259	NM_001085501	228966	Mm.472736	NM_001085501	ENSMUSG00000049999	Ppp1r3d	2610024M03Rik|Gm359	protein phosphatase 1, regulatory subunit 3D	protein-coding
MACS_peak_2380	chr14	63885769	63891000	+	890	NA	Intergenic	Intergenic	-24287	NM_008092	14463	Mm.247669	NM_008092	ENSMUSG00000021944	Gata4	Gata-4	GATA binding protein 4	protein-coding
MACS_peak_5285	chr4	129190856	129192132	+	890	NA	intron (NM_010807, intron 1 of 1)	CpG	669	NM_010807	17357	Mm.424974	NM_010807	ENSMUSG00000047945	Marcksl1	AL022768|AW215397|AW536807|D4Bc1|F52|MacMARCKS|Macs2|Macs3|Mlp|Mrp	MARCKS-like 1	protein-coding
MACS_peak_4720	chr3	89765556	89768798	+	889	NA	promoter-TSS (NM_001081182)	promoter-TSS (NM_001081182)	77	NM_001081182	54667	Mm.30455	NM_001081182	ENSMUSG00000060671	Atp8b2	Id	ATPase, class I, type 8B, member 2	protein-coding
MACS_peak_7889	chr9	45178009	45180064	+	889	NA	intron (NM_022004, intron 1 of 7)	intron (NM_022004, intron 1 of 7)	768	NM_022004	59095	Mm.208287	NM_022004	ENSMUSG00000066705	Fxyd6	0610030I18Rik|Php	FXYD domain-containing ion transport regulator 6	protein-coding
MACS_peak_3314	chr17	73265308	73269252	+	884	NA	promoter-TSS (NM_029999)	promoter-TSS (NM_029999)	-365	NM_029999	77889	Mm.154109	NM_029999	ENSMUSG00000024063	Lbh	1810009F10Rik|6720416L16Rik	limb-bud and heart	protein-coding
MACS_peak_2226	chr13	113818820	113823492	+	884	NA	Intergenic	Intergenic	-4431	NM_001281487	238896		NM_001281487	ENSMUSG00000078926	Cdc20b	EG238896|EG622422	cell division cycle 20B	protein-coding
MACS_peak_4481	chr2	167013830	167017270	+	884	NA	Intergenic	CpG	-1232	NM_008420	16500	Mm.205341	NM_008420		Kcnb1	Kcr1-1|Kv2.1|Shab	potassium voltage gated channel, Shab-related subfamily, member 1	protein-coding
MACS_peak_4852	chr3	132610763	132614064	+	884	NA	intron (NM_001287101, intron 1 of 13)	intron (NM_001287101, intron 1 of 13)	365	NM_001287103	114249	Mm.279310	NM_033525	ENSMUSG00000040998	Npnt	1110009H02Rik|AA682063|AI314031|Nctn|POEM	nephronectin	protein-coding
MACS_peak_4429	chr2	160193947	160196219	+	882	NA	Intergenic	Intergenic	-2282	NM_010658	16658	Mm.330745	NM_010658	ENSMUSG00000074622	Mafb	Kreisler|Krml|Krml1|kr	v-maf musculoaponeurotic fibrosarcoma oncogene family, protein B (avian)	protein-coding
MACS_peak_3746	chr19	34547995	34550256	+	880	NA	exon (NM_009890, exon 1 of 1)	exon (NM_009890, exon 1 of 1)	500	NM_009890	12642	Mm.30824	NM_009890	ENSMUSG00000050370	Ch25h	AI462618|m25OH	cholesterol 25-hydroxylase	protein-coding
MACS_peak_5647	chr5	36021603	36022965	+	878	NA	5' UTR (NM_030127, exon 1 of 9)	5' UTR (NM_030127, exon 1 of 9)	145	NM_001042615	78558	Mm.274255	NM_030127	ENSMUSG00000029096	Htra3	2210021K23Rik|9530081K03Rik|Prsp|Tasp	HtrA serine peptidase 3	protein-coding
MACS_peak_7642	chr8	107154366	107156614	+	878	NA	promoter-TSS (NM_019662)	promoter-TSS (NM_019662)	-269	NM_019662	56437	Mm.29467	NM_019662	ENSMUSG00000031880	Rrad	REM3|Rad	Ras-related associated with diabetes	protein-coding
MACS_peak_7444	chr8	49928201	49929563	+	878	NA	Intergenic	CpG	-168838	NM_011857	23965	Mm.42191	NM_011857	ENSMUSG00000031561	Tenm3	2610100B16Rik|Odz1|Odz3|Ten-m3|mKIAA1455	teneurin transmembrane protein 3	protein-coding
MACS_peak_7241	chr7	149557976	149558856	+	878	NA	promoter-TSS (NM_177265)	promoter-TSS (NM_177265)	-252	NM_177265	320802	Mm.154486	NM_177265	ENSMUSG00000045777	Ifitm10	6330512M04Rik|AI848576|DSPA3	interferon induced transmembrane protein 10	protein-coding
MACS_peak_4787	chr3	104769869	104771914	+	878	NA	Intergenic	CpG	-6264	NM_009520	22414	Mm.10740	NM_009520	ENSMUSG00000027840	Wnt2b	Wnt13	wingless-type MMTV integration site family, member 2B	protein-coding
MACS_peak_3567	chr18	69356801	69358409	+	878	NA	Intergenic	Intergenic	-146541	NM_013685	21413	Mm.4269	NM_013685	ENSMUSG00000053477	Tcf4	5730422P05Rik|ASP-I2|E2-2|E2.2|ITF-2|ITF-2b|ITF2|ME2|MITF-2A|MITF-2B|SEF-2|SEF2|SEF2-1|TFE|Tcf-4|bHLHb19	transcription factor 4	protein-coding
MACS_peak_3462	chr18	37853964	37856051	+	878	NA	exon (NM_033588, exon 1 of 4)	exon (NM_033588, exon 1 of 4)	852	NM_033588	93713	Mm.247203	NM_033588		Pcdhga5	-	protocadherin gamma subfamily A, 5	protein-coding
MACS_peak_8131	chr9	95649820	95650652	+	874	NA	exon (NM_011643, exon 1 of 13)	exon (NM_011643, exon 1 of 13)	541	NM_011643	22063	Mm.149633	NM_011643	ENSMUSG00000032839	Trpc1	Mtrp1|Trp1|Trrp1	transient receptor potential cation channel, subfamily C, member 1	protein-coding
MACS_peak_6497	chr6	118014486	118018594	+	873	NA	intron (NM_027526, intron 1 of 12)	intron (NM_027526, intron 1 of 12)	137	NM_027526	70727	Mm.87660	NM_027526	ENSMUSG00000030134	Rasgef1a	6330404M18Rik|AI835194	RasGEF domain family, member 1A	protein-coding
MACS_peak_7596	chr8	92870391	92872100	+	873	NA	intron (NM_172913, intron 1 of 6)	intron (NM_172913, intron 1 of 6)	906	NM_172913	244579	Mm.302755	NM_172913	ENSMUSG00000043668	Tox3	500-9|BC052044|C230068E13|CAGF9|Tnrc9	TOX high mobility group box family member 3	protein-coding
MACS_peak_2509	chr15	4325522	4326095	+	873	NA	exon (NM_177355, exon 1 of 3)	exon (NM_177355, exon 1 of 3)	317	NM_177355	239318	Mm.308996	NM_177355	ENSMUSG00000049148	Plcxd3	B130016O10Rik	phosphatidylinositol-specific phospholipase C, X domain containing 3	protein-coding
MACS_peak_6646	chr7	17460878	17461284	+	872	NA	intron (NM_001081655, intron 1 of 3)	(TCCG)n|Simple_repeat|Simple_repeat	415	NM_001081655	629378	Mm.491123	NM_001081655	ENSMUSG00000078794	Dact3	EG666671|naa-3	dapper homolog 3, antagonist of beta-catenin (xenopus)	protein-coding
MACS_peak_3333	chr17	80460903	80461187	+	872	NA	exon (NM_144802, exon 1 of 13)	exon (NM_144802, exon 1 of 13)	563	NM_144802	72692	Mm.64579	NM_144802	ENSMUSG00000024095	Hnrnpll	2510028H02Rik|2810036L13Rik|AI256697|AI852082|Hnrpll	heterogeneous nuclear ribonucleoprotein L-like	protein-coding
MACS_peak_603	chr10	24315352	24317202	+	872	NA	exon (NM_010217, exon 3 of 5)	exon (NM_010217, exon 3 of 5)	1029	NM_010217	14219	Mm.390287	NM_010217	ENSMUSG00000019997	Ctgf	Ccn2|Fisp12|Hcs24|fisp-12	connective tissue growth factor	protein-coding
MACS_peak_4034	chr2	31742584	31744902	+	872	NA	intron (NM_011836, intron 1 of 27)	intron (NM_011836, intron 1 of 27)	942	NM_011836	23928	Mm.302362	NM_011836	ENSMUSG00000026840	Lamc3	AI562206|AW240805	laminin gamma 3	protein-coding
MACS_peak_5206	chr4	119957432	119960169	+	872	NA	intron (NM_194060, intron 1 of 1)	intron (NM_194060, intron 1 of 1)	1066	NM_194060	329934	Mm.277090	NM_194060	ENSMUSG00000052135	Foxo6	-	forkhead box O6	protein-coding
MACS_peak_6662	chr7	19987880	19989589	+	872	NA	intron (NM_001286039, intron 1 of 12)	PB1D9|SINE|Alu	719	NM_001286039	232943	Mm.213403	NM_146182	ENSMUSG00000040714	Klc3	BC017147|Klct	kinesin light chain 3	protein-coding
MACS_peak_2566	chr15	40485308	40488521	+	871	NA	5' UTR (NM_011766, exon 1 of 8)	5' UTR (NM_011766, exon 1 of 8)	326	NM_011766	22762	Mm.39496	NM_011766	ENSMUSG00000022306	Zfpm2	B330005D23Rik|FOG-2|FOG2	zinc finger protein, multitype 2	protein-coding
MACS_peak_4251	chr2	115900437	115903792	+	871	NA	promoter-TSS (NR_033447)	promoter-TSS (NR_033447)	-282	NR_033447	69974	Mm.440293	NR_033447		2810405F15Rik	-	RIKEN cDNA 2810405F15 gene	ncRNA
MACS_peak_5915	chr5	116356378	116358513	+	871	NA	intron (NM_007708, intron 8 of 46)	intron (NM_007708, intron 8 of 46)	61780	NM_007708	12704	Mm.8321	NM_007708	ENSMUSG00000029516	Cit	C030025P15Rik|CRIK|CRIK-SK|Cit-k	citron	protein-coding
MACS_peak_8183	chr9	99256728	99259120	+	871	NA	intron (NM_177775, intron 1 of 22)	intron (NM_177775, intron 1 of 22)	1025	NM_177775	272636	Mm.490440	NM_177775	ENSMUSG00000037681	Esyt3	D930024E11|D9Ertd280e|Fam62c|mKIAA4186	extended synaptotagmin-like protein 3	protein-coding
MACS_peak_5104	chr4	87677504	87678689	+	871	NA	intron (NM_027326, intron 1 of 10)	CpG	1215	NM_027326	70122	Mm.288898	NM_027326	ENSMUSG00000028496	Mllt3	2210011H10Rik|2610012I03Rik|3830408D16Rik|Af9|D4Ertd321e	myeloid/lymphoid or mixed-lineage leukemia (trithorax homolog, Drosophila); translocated to, 3	protein-coding
MACS_peak_2190	chr13	99355091	99360460	+	871	NA	Intergenic	Intergenic	49590	NM_026685	68344	Mm.28766	NM_026685	ENSMUSG00000046082	Tmem174	0610009B10Rik|AA986094	transmembrane protein 174	protein-coding
MACS_peak_7111	chr7	134093056	134095645	+	871	NA	5' UTR (NM_144926, exon 1 of 18)	5' UTR (NM_144926, exon 1 of 18)	301	NM_001252566	233878	Mm.283926	NM_144926	ENSMUSG00000030683	Sez6l2	AI835913|AW121566|BSRP-A|Psk1	seizure related 6 homolog like 2	protein-coding
MACS_peak_2616	chr15	74501410	74502596	+	870	NA	exon (NM_001276684, exon 1 of 3)	exon (NM_001276684, exon 1 of 3)	997	NM_001276684	11838	Mm.491310	NM_018790	ENSMUSG00000022602	Arc	Arc3.1|C86064|arg3.1|mArc	activity regulated cytoskeletal-associated protein	protein-coding
MACS_peak_1464	chr11	116083061	116085451	+	870	NA	exon (NM_025276, exon 22 of 22)	exon (NM_025276, exon 22 of 22)	6940	NR_004853	69681	Mm.33677	NR_004853	ENSMUSG00000092300	Cdk3-ps	2310050O10Rik|Cdk3	cyclin-dependent kinase 3, pseudogene	pseudo
MACS_peak_5153	chr4	107703688	107705618	+	870	NA	promoter-TSS (NM_172874)	promoter-TSS (NM_172874)	42	NM_001285958	242608	Mm.74710	NM_172874	ENSMUSG00000028600	Podn	9430070G18|Pcan|SLRR5A	podocan	protein-coding
MACS_peak_3742	chr19	34265372	34267488	+	870	NA	promoter-TSS (NM_029682)	promoter-TSS (NM_029682)	-330	NM_029682	76630	Mm.130952	NM_029682	ENSMUSG00000024776	Stambpl1	1700095N21Rik|8230401J17Rik|ALMalpha|AMSH-FP	STAM binding protein like 1	protein-coding
MACS_peak_2414	chr14	70008994	70010132	+	869	NA	intron (NM_033325, intron 1 of 13)	intron (NM_033325, intron 1 of 13)	280	NM_033325	94352	Mm.116714	NM_033325	ENSMUSG00000034205	Loxl2	1110004B06Rik|4930526G11Rik|9430067E15Rik	lysyl oxidase-like 2	protein-coding
MACS_peak_1272	chr11	96199564	96203627	+	869	NA	intron (NM_001079869, intron 1 of 3)	intron (NM_001079869, intron 1 of 3)	-3488	NM_010458	15410	Mm.342481	NM_010458		Hoxb3	Hox-2.7	homeobox B3	protein-coding
[truncated: 640 more rows]
