# Supplementary material for: Remodeling of epigenome and transcriptome landscapes with aging in mice reveals widespread induction of inflammatory responses
Source: HighWire-hosted journal article supplement (doi:10.1101/gr.240093.118), 2019-03-11
Supplement: Supplemental_Code_Figure3_Machine_learning.zip [file HOMER_Bivalent_domains_OB_vs_WholeBrain.xls]

PeakID (cmd=annotatePeaks.pl Bivalent_domains_OB_vs_WholeBrain.bed mm9)	Chr	Start	End	Strand	Peak Score	Focus Ratio/Region Size	Annotation	Detailed Annotation	Distance to TSS	Nearest PromoterID	Entrez ID	Nearest Unigene	Nearest Refseq	Nearest Ensembl	Gene Name	Gene Alias	Gene Description	Gene Type
MACS_peak_6781	chr3	5860554	5860873	+	32748	NA	Intergenic	LSU-rRNA_Hsa|rRNA|rRNA	-284465	NM_001163305	19302	Mm.132336	NM_008994	ENSMUSG00000040374	Pex2	D3Ertd138e|PAF-1|PMP35|Pxmp3	peroxisomal biogenesis factor 2	protein-coding
MACS_peak_11776	chr9	123370868	123371368	+	30805	NA	3' UTR (NM_153168, exon 21 of 21)	3' UTR (NM_153168, exon 21 of 21)	-16701	NM_013860	29806	Mm.10987	NM_013860	ENSMUSG00000025239	Limd1	AW822033|D9Ertd192e	LIM domains containing 1	protein-coding
MACS_peak_4169	chr16	11144026	11144456	+	19894	NA	intron (NR_027502, intron 19 of 22)	LSU-rRNA_Hsa|rRNA|rRNA	-9616	NM_029582	106200	Mm.291015	NM_029582	ENSMUSG00000022498	Txndc11	2810408E11Rik|AI427833|EFP1|Txdc11	thioredoxin domain containing 11	protein-coding
MACS_peak_11399	chr9	56070530	56071755	+	18367	NA	intron (NM_172924, intron 6 of 6)	MLT-int|LTR|MaLR	-62265	NM_019793	56434	Mm.28484	NM_019793	ENSMUSG00000032324	Tspan3	1700055K04Rik|TM4-A|Tm4sf8	tetraspanin 3	protein-coding
MACS_peak_5779	chr19	61275126	61275781	+	17521	NA	Intergenic	Intergenic	-23241	NM_001177513	633057	Mm.426097	NM_001177513	ENSMUSG00000094649	Gm7102	EG633057	predicted gene 7102	protein-coding
MACS_peak_629	chr1	172993770	173016717	+	11967	NA	Intergenic	G-rich|Low_complexity|Low_complexity	-10460	NR_106103	102466998		NR_106103	miRBase:MI0024983	Mir6546	mmu-mir-6546	microRNA mir-6546	ncRNA
MACS_peak_9031	chr6	3150790	3151584	+	11121	NA	Intergenic	SSU-rRNA_Hsa|rRNA|rRNA	-87332	NR_036696	667335	Mm.380219	NR_036696		Gm8579	EG667335	spermatogenesis associated glutamate (E)-rich protein 4a pseudogene	pseudo
MACS_peak_3202	chr13	120276293	120279912	+	10794	NA	promoter-TSS (NR_027974)	promoter-TSS (NR_027974)	435	NM_001177666	633640	Mm.46679	NM_001039244	ENSMUSG00000074634	Gm7120	EG633640	predicted gene 7120	protein-coding
MACS_peak_5262	chr18	68851694	68852150	+	9196	NA	Intergenic	LSU-rRNA_Hsa|rRNA|rRNA	-47132	NR_105774	102465183		NR_105774	miRBase:MI0021884	Mir6356	mmu-mir-6356	microRNA mir-6356	ncRNA
MACS_peak_9124	chr6	30905598	30912816	+	9066	NA	promoter-TSS (NM_001135093)	promoter-TSS (NM_001135093)	-217	NM_001135093	619665	Mm.204671	NM_001135093	ENSMUSG00000073209	Klf14	5330411L03Rik|AL022736|BTEB5	Kruppel-like factor 14	protein-coding
MACS_peak_4044	chr15	99413300	99423724	+	8861	NA	Intergenic	Intergenic	-2947	NM_009701	11830	Mm.45580	NM_009701	ENSMUSG00000044217	Aqp5	-	aquaporin 5	protein-coding
MACS_peak_9158	chr6	39067482	39069549	+	8558	NA	promoter-TSS (NR_045813)	promoter-TSS (NR_045813)	43	NR_045813	75379	Mm.348014	NR_045813	ENSMUSG00000073144	4930599N23Rik	-	RIKEN cDNA 4930599N23 gene	ncRNA
MACS_peak_531	chr1	138841199	138847501	+	8528	NA	intron (NM_001159769, intron 3 of 8)	intron (NM_001159769, intron 3 of 8)	5857	NM_001159769	26424	Mm.16794	NM_030676	ENSMUSG00000026398	Nr5a2	AU020803|D1Ertd308e|Ftf|LRH-1|UF2-H3B	nuclear receptor subfamily 5, group A, member 2	protein-coding
MACS_peak_7191	chr3	107394614	107403782	+	8391	NA	intron (NM_007441, intron 1 of 3)	CpG	1249	NM_007441	11694	Mm.10112	NM_007441	ENSMUSG00000014603	Alx3	-	aristaless-like homeobox 3	protein-coding
MACS_peak_4747	chr17	39979959	39985775	+	8300	NA	non-coding (NR_046233, exon 1 of 1)	non-coding (NR_046233, exon 1 of 1)	2925	NR_046233	100861531		NR_046233		Rn45s	-	45S pre-ribosomal RNA	rRNA
MACS_peak_7059	chr3	90266926	90270708	+	8224	NA	exon (NM_008727, exon 1 of 22)	exon (NM_008727, exon 1 of 22)	971	NM_008727	18160	Mm.4627	NM_008727	ENSMUSG00000027931	Npr1	AI893888|GC-A|NPR-A|NPRA|Pndr	natriuretic peptide receptor 1	protein-coding
MACS_peak_5826	chr2	18598434	18600346	+	8224	NA	intron (NM_007552, intron 1 of 9)	intron (NM_007552, intron 1 of 9)	745	NM_007552	12151	Mm.289584	NM_007552	ENSMUSG00000026739	Bmi1	AW546694|Bmi-1|Pcgf4	Bmi1 polycomb ring finger oncogene	protein-coding
MACS_peak_2613	chr12	112507899	112515656	+	8224	NA	intron (NM_033603, intron 3 of 11)	intron (NM_033603, intron 3 of 11)	2455	NM_033603	93835	Mm.197639	NM_033603	ENSMUSG00000021278	Amn	5033428N14Rik|AV002116	amnionless	protein-coding
MACS_peak_10068	chr7	88354874	88360518	+	8198	NA	promoter-TSS (NM_008803)	promoter-TSS (NM_008803)	-994	NM_008803	18584	Mm.371577	NM_008803		Pde8a	AI551852|Pde8	phosphodiesterase 8A	protein-coding
MACS_peak_4734	chr17	36368148	36368789	+	8198	NA	Intergenic	CpG	26323	NM_026308	67676	Mm.27131	NM_026308		Rpp21	0610037N01Rik	ribonuclease P 21 subunit	protein-coding
MACS_peak_7561	chr4	88933423	88944648	+	8059	NA	intron (NM_009877, intron 1 of 2)	B1_Mus2|SINE|Alu	1488	NM_009877	12578	Mm.4733	NM_009877	ENSMUSG00000044303	Cdkn2a	ARF-INK4a|Arf|INK4a-ARF|Ink4a/Arf|MTS1|Pctr1|p16|p16(INK4a)|p16INK4a|p19<ARF>|p19ARF	cyclin-dependent kinase inhibitor 2A	protein-coding
MACS_peak_11546	chr9	78241615	78245478	+	8057	NA	promoter-TSS (NM_001191044)	promoter-TSS (NM_001191044)	-38	NM_001191044	100048658	Mm.158166	NM_001191044	ENSMUSG00000070291	Ddx43	ENSMUSG00000070291|OTTMUSG00000019690	DEAD (Asp-Glu-Ala-Asp) box polypeptide 43	protein-coding
MACS_peak_4889	chr17	71312963	71313227	+	8035	NA	Intergenic	LSU-rRNA_Hsa|rRNA|rRNA	26761	NM_023402	67938	Mm.261329	NM_023402		Myl12b	1500001M02Rik|C77744|Mylc2b|RLC-B	myosin, light chain 12B, regulatory	protein-coding
MACS_peak_3114	chr13	99127496	99142193	+	7893	NA	Intergenic	Intergenic	10644	NM_008242	15229	Mm.347441	NM_008242	ENSMUSG00000078302	Foxd1	AI385632|BF-2|FREAC4|Hfh10|Hfhbf2	forkhead box D1	protein-coding
MACS_peak_5076	chr18	35810641	35816590	+	7893	NA	exon (NM_001270646, exon 1 of 1)	exon (NM_001270646, exon 1 of 1)	1238	NM_001270646	381148	Mm.297784	NM_001270646		Prob1	Gm1614	proline rich basic protein 1	protein-coding
MACS_peak_8492	chr5	74038282	74044182	+	7567	NA	Intergenic	Intergenic	-1387	NM_178387	73472	Mm.87067	NM_178387	ENSMUSG00000029155	Spata18	1700067I02Rik	spermatogenesis associated 18	protein-coding
MACS_peak_9907	chr7	56881513	56898068	+	7406	NA	intron (NM_001005232, intron 2 of 3)	intron (NM_001005232, intron 2 of 3)	2415	NM_001005232	13172	Mm.307176	NM_001005232	ENSMUSG00000030507	Dbx1	AI426026|Dbx	developing brain homeobox 1	protein-coding
MACS_peak_11509	chr9	71061106	71068462	+	7406	NA	intron (NM_009022, intron 1 of 13)	intron (NM_009022, intron 1 of 13)	1188	NM_009022	19378	Mm.42016	NM_009022	ENSMUSG00000013584	Aldh1a2	AV116159|Aldh1a7|Raldh1|Raldh2	aldehyde dehydrogenase family 1, subfamily A2	protein-coding
MACS_peak_18	chr1	9956314	9960325	+	7406	NA	promoter-TSS (NM_001285425)	promoter-TSS (NM_001285425)	-753	NM_001285425	100039596	Mm.412928	NM_001285425	ENSMUSG00000099032	Tcf24	ENSMUSG00000073738|Gm10567|Gm2330	transcription factor 24	protein-coding
MACS_peak_7602	chr4	99316393	99331752	+	7392	NA	exon (NM_010425, exon 1 of 1)	exon (NM_010425, exon 1 of 1)	1082	NM_010425	15221	Mm.4758	NM_010425	ENSMUSG00000067261	Foxd3	CWH3|Genesis|Hfh2	forkhead box D3	protein-coding
MACS_peak_3446	chr14	63856710	63876886	+	7246	NA	Intergenic	Intergenic	-2701	NM_008092	14463	Mm.247669	NM_008092	ENSMUSG00000021944	Gata4	Gata-4	GATA binding protein 4	protein-coding
MACS_peak_6206	chr2	91814557	91817546	+	7246	NA	Intergenic	CpG	-12331	NM_138306	104418	Mm.314923	NM_138306	ENSMUSG00000040479	Dgkz	E130307B02Rik|ENSMUSG00000075035|F730209L11Rik|mDGK[z]	diacylglycerol kinase zeta	protein-coding
MACS_peak_6222	chr2	93476877	93489231	+	7246	NA	exon (NM_007442, exon 1 of 4)	exon (NM_007442, exon 1 of 4)	463	NM_007442	11695	Mm.389389	NM_007442	ENSMUSG00000040310	Alx4	lst	aristaless-like homeobox 4	protein-coding
MACS_peak_5829	chr2	18607354	18622636	+	7246	NA	Intergenic	Intergenic	-5654	NM_001001334	381350	Mm.330024	NM_001001334		BC061194	-	cDNA sequence BC061194	protein-coding
MACS_peak_11779	chr9	123586793	123589145	+	7246	NA	promoter-TSS (NM_139142)	promoter-TSS (NM_139142)	-19	NM_139142	102680	Mm.440867	NM_139142	ENSMUSG00000036814	Slc6a20a	A730081N20Rik|AU022428|Xt3s1|Xtrp3s1	solute carrier family 6 (neurotransmitter transporter), member 20A	protein-coding
MACS_peak_7019	chr3	87825156	87828968	+	7234	NA	intron (NM_022031, intron 6 of 6)	CpG	4371	NM_022031	73940	Mm.294467	NM_022031	ENSMUSG00000004894	Hapln2	4930401E20Rik|Bral1	hyaluronan and proteoglycan link protein 2	protein-coding
MACS_peak_4756	chr17	44870584	44876696	+	7234	NA	promoter-TSS (NM_001145920)	promoter-TSS (NM_001145920)	-43	NM_001145920	12393	Mm.391013	NM_009820	ENSMUSG00000039153	Runx2	AML3|Cbf|Cbfa-1|Cbfa1|LS3|Osf2|PEBP2aA|Pebp2a1|Pebpa2a	runt related transcription factor 2	protein-coding
MACS_peak_9217	chr6	51955055	51963179	+	7234	NA	intron (NM_018773, intron 1 of 12)	intron (NM_018773, intron 1 of 12)	3431	NM_018773	54353	Mm.221479	NM_018773	ENSMUSG00000059182	Skap2	2610021A10Rik|AA960083|BB137539|RA70|SKAP-HOM|Saps|Scap2|mSKAP55R	src family associated phosphoprotein 2	protein-coding
MACS_peak_877	chr10	43721408	43727090	+	7234	NA	5' UTR (NM_172393, exon 1 of 20)	5' UTR (NM_172393, exon 1 of 20)	403	NM_172393	11630	Mm.292082	NM_172393	ENSMUSG00000019866	Aim1	AI462491|AI463325	absent in melanoma 1	protein-coding
MACS_peak_3807	chr15	75569147	75579923	+	7172	NA	Intergenic	Intergenic	3817	NM_194350	378435	Mm.309589	NM_194350	ENSMUSG00000047591	Mafa	RIPE3b1	v-maf musculoaponeurotic fibrosarcoma oncogene family, protein A (avian)	protein-coding
MACS_peak_2522	chr12	87760949	87767877	+	7086	NA	intron (NM_011934, intron 1 of 6)	intron (NM_011934, intron 1 of 6)	1819	NM_011934	26380	Mm.235550	NM_011934	ENSMUSG00000021255	Esrrb	Err2|Errb|Estrrb|Nr3b2	estrogen related receptor, beta	protein-coding
MACS_peak_9230	chr6	52255315	52271361	+	7086	NA	promoter-TSS (NM_007966)	promoter-TSS (NM_007966)	-154	NM_007966	14028	Mm.389754	NM_007966	ENSMUSG00000005503	Evx1	Evx-1	even skipped homeotic gene 1 homolog	protein-coding
MACS_peak_2440	chr12	74138212	74156815	+	7086	NA	5' UTR (NM_009189, exon 1 of 2)	5' UTR (NM_009189, exon 1 of 2)	186	NM_009189	20471	Mm.4645	NM_009189	ENSMUSG00000051367	Six1	BB138287	sine oculis-related homeobox 1	protein-coding
MACS_peak_1	chr1	4477739	4489456	+	7086	NA	intron (NM_001289464, intron 2 of 3)	CpG-4	3838	NM_001289464	20671	Mm.279103	NM_011441	ENSMUSG00000025902	Sox17	-	SRY (sex determining region Y)-box 17	protein-coding
MACS_peak_9006	chr5	148535065	148541115	+	7078	NA	promoter-TSS (NM_010228)	promoter-TSS (NM_010228)	-526	NM_010228	14254	Mm.389712	NM_010228	ENSMUSG00000029648	Flt1	AI323757|Flt-1|VEGFR-1|VEGFR1|sFlt1	FMS-like tyrosine kinase 1	protein-coding
MACS_peak_11073	chr8	123637526	123648861	+	7078	NA	TTS (NM_013519)	TTS (NM_013519)	3122	NM_013519	14234	Mm.14092	NM_013519	ENSMUSG00000046714	Foxc2	Fkh14|Hfhbf3|MFH-1|Mfh1	forkhead box C2	protein-coding
MACS_peak_9329	chr6	84530452	84540648	+	7027	NA	intron (NM_001177713, intron 2 of 6)	CpG-12225	8254	NM_175475	232174	Mm.255246	NM_175475	ENSMUSG00000063415	Cyp26b1	CP26|P450RAI-2	cytochrome P450, family 26, subfamily b, polypeptide 1	protein-coding
MACS_peak_4320	chr16	35981641	35981912	+	6963	NA	Intergenic	LSU-rRNA_Hsa|rRNA|rRNA	-1673	NM_008465	16646	Mm.6952	NM_008465	ENSMUSG00000022905	Kpna1	AW494490|IPOA5|NPI1|Rch2|mSRP1	karyopherin (importin) alpha 1	protein-coding
MACS_peak_12045	chrX	166426512	166428382	+	6963	NA	3' UTR (NM_001290512, exon 10 of 10)	3' UTR (NM_001290512, exon 10 of 10)	-10598	NR_029457	654820	Mm.34441	NM_001039559	ENSMUSG00000072844	G530011O06Rik	-	RIKEN cDNA G530011O06 gene	ncRNA
MACS_peak_8093	chr4	148176783	148187997	+	6929	NA	intron (NM_027195, intron 1 of 15)	intron (NM_027195, intron 1 of 15)	3889	NM_027195	69743	Mm.233879	NM_027195	ENSMUSG00000028977	Casz1	2410019P08Rik|AV096627|BC040081|Cst|D4Ertd432e	castor zinc finger 1	protein-coding
MACS_peak_1768	chr11	79522484	79528035	+	6929	NA	promoter-TSS (NR_029579)	promoter-TSS (NR_029579)	-212	NR_029579	387188		NR_029579	miRBase:MI0000235	Mir193a	Mir193|Mirn193|mmu-mir-193|mmu-mir-193a	microRNA 193a	ncRNA
MACS_peak_4197	chr16	17795841	17805057	+	6929	NA	intron (NM_153790, intron 1 of 10)	RSINE1|SINE|B4	3074	NM_153790	224024	Mm.194950	NM_153790	ENSMUSG00000012017	Scarf2	AI194363|NSR1|SREC-II|SRECRP-1|Scarf1|Scatf1|Srec2|SrecII|W53987|W65560	scavenger receptor class F, member 2	protein-coding
MACS_peak_2304	chr12	34637839	34655636	+	6929	NA	Intergenic	Intergenic	4201	NM_011658	22160	Mm.3280	NM_011658	ENSMUSG00000035799	Twist1	AA960487|M-Twist|Pde|Ska10|Ska<m10Jus>|Twist|bHLHa38|pdt	twist basic helix-loop-helix transcription factor 1	protein-coding
MACS_peak_2459	chr12	77503578	77508893	+	6922	NA	exon (NM_008301, exon 1 of 1)	exon (NM_008301, exon 1 of 1)	878	NM_008301	15512	Mm.296181	NM_008301	ENSMUSG00000059970	Hspa2	70kDa|HSP70.2|HSP70A2|Hsp70-2	heat shock protein 2	protein-coding
MACS_peak_1836	chr11	85642044	85659012	+	6922	NA	intron (NM_009324, intron 3 of 6)	CpG	4411	NM_009324	21385	Mm.287052	NM_009324	ENSMUSG00000000093	Tbx2	-	T-box 2	protein-coding
MACS_peak_5407	chr19	6997431	7004008	+	6922	NA	promoter-TSS (NM_001039494)	promoter-TSS (NM_001039494)	-849	NM_001039494	67077	Mm.251306	NM_001039494	ENSMUSG00000050623	Tex40	1700019N12Rik|A430107B04Rik|MLZ-622	testis expressed 40	protein-coding
MACS_peak_2205	chr11	118949615	118952644	+	6881	NA	Intergenic	Intergenic	-3578	NM_007625	12418	Mm.268070	NM_007625	ENSMUSG00000039989	Cbx4	MPc2|PC2	chromobox 4	protein-coding
MACS_peak_11708	chr9	111211223	111217577	+	6771	NA	exon (NM_001164659, exon 1 of 22)	exon (NM_001164659, exon 1 of 22)	157	NM_001164659	320429	Mm.270754	NM_001164659	ENSMUSG00000062296	Trank1	A230061D21Rik|C030048J01Rik|Gm187|Lba1	tetratricopeptide repeat and ankyrin repeat containing 1	protein-coding
MACS_peak_2929	chr13	56852350	56857380	+	6771	NA	Intergenic	CpG	49836	NM_001164042	17129	Mm.272920	NM_008541	ENSMUSG00000021540	Smad5	1110051M15Rik|AI451355|Dwf-C|Madh5|MusMLP	SMAD family member 5	protein-coding
MACS_peak_3443	chr14	62301773	62310515	+	6771	NA	Intergenic	Intergenic	-4934	NR_028264	668253	Mm.32886	NR_028264	ENSMUSG00000097589	Dleu2	1810047A16Rik|4932411A06Rik|7730401J12Rik|AI197277|AI788824|Alt1|Gm9069|Leu2	deleted in lymphocytic leukemia, 2	ncRNA
MACS_peak_817	chr10	21868058	21874432	+	6767	NA	Intergenic	CpG	-2169	NM_001254745	319887	Mm.177746	NM_001254744	ENSMUSG00000055657	E030030I06Rik	-	RIKEN cDNA E030030I06 gene	protein-coding
MACS_peak_6312	chr2	118525531	118532812	+	6767	NA	exon (NM_001081971, exon 1 of 1)	exon (NM_001081971, exon 1 of 1)	528	NM_001081971	383787	Mm.35758	NM_001081971	ENSMUSG00000078137	Ankrd63	Gm1337	ankyrin repeat domain 63	protein-coding
MACS_peak_9835	chr7	51606336	51612882	+	6614	NA	exon (NM_001034115, exon 24 of 25)	exon (NM_001034115, exon 24 of 25)	20791	NM_027049	69349	Mm.358922	NM_027049	ENSMUSG00000008028	1700008O03Rik	-	RIKEN cDNA 1700008O03 gene	protein-coding
MACS_peak_2197	chr11	118895401	118901316	+	6614	NA	Intergenic	Intergenic	3869	NM_013926	30951	Mm.99953	NM_013926	ENSMUSG00000025578	Cbx8	Pc3	chromobox 8	protein-coding
MACS_peak_6981	chr3	82928801	82934747	+	6614	NA	Intergenic	CpG	72314	NM_016784	53317	Mm.286349	NM_016784	ENSMUSG00000027998	Plrg1	AA958940|C80566|Tango4	pleiotropic regulator 1, PRL1 homolog (Arabidopsis)	protein-coding
MACS_peak_5247	chr18	66616791	66622318	+	6614	NA	intron (NM_021451, intron 1 of 2)	intron (NM_021451, intron 1 of 2)	1296	NM_021451	58801	Mm.271878	NM_021451	ENSMUSG00000024521	Pmaip1	Noxa	phorbol-12-myristate-13-acetate-induced protein 1	protein-coding
MACS_peak_7352	chr4	9769107	9788944	+	6614	NA	intron (NM_013526, intron 1 of 1)	intron (NM_013526, intron 1 of 1)	7506	NM_013526	242316	Mm.302555	NM_013526	ENSMUSG00000051279	Gdf6	BMP-13|BMP13|GDF16	growth differentiation factor 6	protein-coding
MACS_peak_4038	chr15	98922735	98930208	+	6614	NA	Intergenic	Intergenic	-3444	NM_176835	72778	Mm.30544	NM_176835	ENSMUSG00000038009	Dnajc22	2810451A06Rik|AI506245	DnaJ (Hsp40) homolog, subfamily C, member 22	protein-coding
MACS_peak_10483	chr8	12379374	12394866	+	6613	NA	intron (NR_027975, intron 1 of 7)	intron (NR_027975, intron 1 of 7)	1349	NR_027975	434280	Mm.447484	NM_001013812		Gm5607	EG434280	predicted gene 5607	ncRNA
MACS_peak_8767	chr5	120106014	120142626	+	6613	NA	intron (NM_198052, intron 3 of 7)	intron (NM_198052, intron 3 of 7)	3078	NM_011535	21386	Mm.219139	NM_011535	ENSMUSG00000018604	Tbx3	D5Ertd189e	T-box 3	protein-coding
MACS_peak_2778	chr13	31890542	31906575	+	6613	NA	promoter-TSS (NM_008592)	promoter-TSS (NM_008592)	43	NM_008592	17300	Mm.12949	NM_008592	ENSMUSG00000050295	Foxc1	FREAC3|Fkh1|Mf1|Mf4|ch|fkh-1|frkhda	forkhead box C1	protein-coding
MACS_peak_1957	chr11	97487808	97493609	+	6613	NA	5' UTR (NM_175332, exon 1 of 1)	5' UTR (NM_175332, exon 1 of 1)	322	NM_175332	103551	Mm.24506	NM_175332	ENSMUSG00000043439	E130012A19Rik	AA409164|AI413509|AW539173|E13|esPRC2p48	RIKEN cDNA E130012A19 gene	protein-coding
MACS_peak_5218	chr18	64489014	64505853	+	6459	NA	Intergenic	AT_rich|Low_complexity|Low_complexity	-2585	NM_194268	225631	Mm.234723	NM_194268	ENSMUSG00000045991	Onecut2	C730009D12|OC-2|Oc2	one cut domain, family member 2	protein-coding
MACS_peak_689	chr1	186548457	186561879	+	6459	NA	intron (NM_008250, intron 1 of 3)	intron (NM_008250, intron 1 of 3)	1204	NM_008250	15284	Mm.1347	NM_008250	ENSMUSG00000039377	Hlx	Hlx1	H2.0-like homeobox	protein-coding
MACS_peak_2040	chr11	102804013	102812109	+	6459	NA	promoter-TSS (NM_011795)	promoter-TSS (NM_011795)	-286	NM_011795	23829	Mm.57154	NM_011795	ENSMUSG00000045532	C1ql1	C1qrf|CRF|CTRP14|gliacolin	complement component 1, q subcomponent-like 1	protein-coding
MACS_peak_8637	chr5	106875597	106904124	+	6459	NA	Intergenic	Intergenic	-2675	NM_001005477	104382	Mm.271593	NM_001005477	ENSMUSG00000034384	Barhl2	E130309B19Rik|MBH1	BarH-like 2 (Drosophila)	protein-coding
MACS_peak_4957	chr17	86078052	86094342	+	6459	NA	intron (NM_011380, intron 1 of 1)	intron (NM_011380, intron 1 of 1)	1397	NM_011380	20472	Mm.5039	NM_011380	ENSMUSG00000024134	Six2	-	sine oculis-related homeobox 2	protein-coding
MACS_peak_10340	chr7	144500813	144517188	+	6459	NA	Intergenic	Intergenic	-2872	NM_010096	13593	Mm.258708	NM_010096	ENSMUSG00000010476	Ebf3	3110018A08Rik|O/E-2|mKIAA4201	early B cell factor 3	protein-coding
MACS_peak_519	chr1	137714330	137718134	+	6459	NA	intron (NM_133664, intron 1 of 9)	intron (NM_133664, intron 1 of 9)	1057	NM_133664	16763	Mm.36726	NM_133664	ENSMUSG00000041782	Lad1	-	ladinin	protein-coding
MACS_peak_7875	chr4	131470213	131480372	+	6459	NA	intron (NR_102394, intron 1 of 2)	intron (NR_102394, intron 1 of 2)	652	NR_102394	545681	Mm.2478	NR_102393	ENSMUSG00000085667	Gm12992	OTTMUSG00000009742	predicted gene 12992	ncRNA
MACS_peak_6121	chr2	71377098	71385565	+	6459	NA	TTS (NM_010054)	TTS (NM_010054)	3480	NM_010054	13392	Mm.3896	NM_010054	ENSMUSG00000023391	Dlx2	AW121999|Dlx-2|Tes-1	distal-less homeobox 2	protein-coding
MACS_peak_4455	chr16	94548643	94551211	+	6459	NA	promoter-TSS (NM_133229)	promoter-TSS (NM_133229)	-102	NM_133229	170765	Mm.42604	NM_133229	ENSMUSG00000022941	Ripply3	Dscr6	ripply3 homolog (zebrafish)	protein-coding
MACS_peak_7664	chr4	114570367	114590365	+	6459	NA	exon (NM_008593, exon 1 of 1)	exon (NM_008593, exon 1 of 1)	1137	NM_008593	17301	Mm.7997	NM_008593	ENSMUSG00000055210	Foxd2	AI426778|Mf2	forkhead box D2	protein-coding
MACS_peak_4964	chr17	87151686	87156344	+	6459	NA	intron (NM_010137, intron 1 of 15)	CpG	811	NM_010137	13819	Mm.1415	NM_010137	ENSMUSG00000024140	Epas1	HIF-2alpha|HIF2A|HLF|HRF|MOP2|bHLHe73	endothelial PAS domain protein 1	protein-coding
MACS_peak_11240	chr9	30937944	30942004	+	6459	NA	promoter-TSS (NM_011176)	promoter-TSS (NM_011176)	-590	NM_011176	19143	Mm.243926	NM_011176	ENSMUSG00000031995	St14	Epithin|MT-SP1|Prss14|Tmprss14|mCAP3|matriptase	suppression of tumorigenicity 14 (colon carcinoma)	protein-coding
MACS_peak_8364	chr5	33769935	33781341	+	6459	NA	intron (NM_011320, intron 1 of 1)	CpG	1101	NM_011320	672284		NM_011320		Nkx1-1	Nkx-1.1|Sax2	NK1 transcription factor related, locus 1 (Drosophila)	protein-coding
MACS_peak_2560	chr12	105707854	105717126	+	6304	NA	Intergenic	Intergenic	-1044	NM_010351	14836	Mm.129	NM_010351	ENSMUSG00000021095	Gsc	-	goosecoid homeobox	protein-coding
MACS_peak_6059	chr2	56959820	56969676	+	6304	NA	exon (NM_013613, exon 3 of 8)	exon (NM_013613, exon 3 of 8)	2701	NM_013613	18227	Mm.3507	NM_013613	ENSMUSG00000026826	Nr4a2	HZF-3|NOT|Nurr1|RNR-1|TINOR|TINUR	nuclear receptor subfamily 4, group A, member 2	protein-coding
MACS_peak_3875	chr15	79841579	79846931	+	6304	NA	intron (NM_011057, intron 1 of 6)	CpG	983	NM_011057	18591	Mm.144089	NM_011057	ENSMUSG00000000489	Pdgfb	PDGF-B|Sis	platelet derived growth factor, B polypeptide	protein-coding
MACS_peak_236	chr1	74927641	74933688	+	6304	NA	intron (NM_153111, intron 2 of 2)	intron (NM_153111, intron 2 of 2)	1318	NM_153111	260298	Mm.150496	NM_153111	ENSMUSG00000055197	Fev	Pet-1|Pet1|mPet-1	FEV (ETS oncogene family)	protein-coding
MACS_peak_7937	chr4	135241771	135244477	+	6304	NA	intron (NM_174851, intron 1 of 6)	intron (NM_174851, intron 1 of 6)	752	NM_174851	242700	Mm.259623	NM_174851	ENSMUSG00000062157	Ifnlr1	CRF2-12|Il28ra	interferon lambda receptor 1	protein-coding
MACS_peak_11625	chr9	98849773	98866525	+	6304	NA	3' UTR (NM_012020, exon 1 of 1)	3' UTR (NM_012020, exon 1 of 1)	2123	NM_012020	26927	Mm.151239	NM_012020	ENSMUSG00000050397	Foxl2	AU045128|BPES|PINTO|Pfrk	forkhead box L2	protein-coding
MACS_peak_9223	chr6	52149413	52181120	+	6304	NA	promoter-TSS (NR_045199)	promoter-TSS (NR_045199)	21	NR_045199	100736249	Mm.294826	NR_045199		Mira	-	mistral long non-coding RNA	ncRNA
MACS_peak_7133	chr3	99036268	99062563	+	6304	NA	Intergenic	MIR|SINE|MIR	-8268	NM_009323	21384	Mm.88761	NM_009323	ENSMUSG00000027868	Tbx15	Tbx14|Tbx8|de	T-box 15	protein-coding
MACS_peak_10126	chr7	105980136	105989236	+	6304	NA	5' UTR (NM_001285792, exon 2 of 7)	5' UTR (NM_001285792, exon 2 of 7)	1064	NM_001285792	22411	Mm.22182	NM_009519	ENSMUSG00000015957	Wnt11	-	wingless-type MMTV integration site family, member 11	protein-coding
MACS_peak_1940	chr11	96878962	96887701	+	6304	NA	exon (NM_031183, exon 2 of 2)	exon (NM_031183, exon 2 of 2)	-7935	NM_146027	217140	Mm.46189	NM_146027	ENSMUSG00000020877	Scrn2	AV001119|D11Moh48|SES2	secernin 2	protein-coding
MACS_peak_11252	chr9	32346303	32354484	+	6304	NA	Intergenic	Intergenic	-1356	NM_008026	14247	Mm.258908	NM_008026	ENSMUSG00000016087	Fli1	EWSR2|Fli-1|SIC-1|Sic1	Friend leukemia integration 1	protein-coding
MACS_peak_8897	chr5	137500703	137509503	+	6304	NA	Intergenic	Intergenic	-1062	NM_001039385	381677	Mm.389697	NM_001039385	ENSMUSG00000037428	Vgf	Gm1052	VGF nerve growth factor inducible	protein-coding
MACS_peak_8745	chr5	118475399	118479674	+	6304	NA	promoter-TSS (NM_021344)	promoter-TSS (NM_021344)	-297	NM_021344	57816	Mm.273285	NM_021344	ENSMUSG00000029359	Tesc	1010001A17Rik|2410011K10Rik|TE-1	tescalcin	protein-coding
MACS_peak_10610	chr8	35036255	35042204	+	6152	NA	intron (NM_001042674, intron 1 of 7)	intron (NM_001042674, intron 1 of 7)	1106	NM_019733	19663	Mm.323997	NM_019733	ENSMUSG00000031586	Rbpms	2010300K22Rik|2700019M19Rik|AU017537|RBP-MS|hermes	RNA binding protein gene with multiple splicing	protein-coding
MACS_peak_3657	chr15	7758186	7770043	+	6152	NA	intron (NM_001301333, intron 1 of 2)	intron (NM_001301333, intron 1 of 2)	387	NM_001301333	14573	Mm.4679	NM_010275	ENSMUSG00000022144	Gdnf	AI385739	glial cell line derived neurotrophic factor	protein-coding
MACS_peak_4471	chr16	97983376	97987837	+	6152	NA	promoter-TSS (NM_023663)	promoter-TSS (NM_023663)	-244	NM_023663	72388	Mm.35290	NM_023663	ENSMUSG00000005251	Ripk4	2310069J12Rik|AI552420|ANKK2|Ankrd3|DIk|PKK|RIP4	receptor-interacting serine-threonine kinase 4	protein-coding
MACS_peak_6140	chr2	73105112	73113175	+	6152	NA	promoter-TSS (NM_001005343)	promoter-TSS (NM_001005343)	-840	NM_001005343	381373	Mm.330293	NM_001005343		Sp9	-	trans-acting transcription factor 9	protein-coding
MACS_peak_9043	chr6	6803109	6819537	+	6152	NA	intron (NR_015388, intron 1 of 1)	intron (NR_015388, intron 1 of 1)	-2011	NM_010057	13396	Mm.439763	NM_010057	ENSMUSG00000029754	Dlx6	-	distal-less homeobox 6	protein-coding
MACS_peak_2347	chr12	56698270	56702273	+	6152	NA	5' UTR (NM_020287, exon 1 of 1)	5' UTR (NM_020287, exon 1 of 1)	367	NM_020287	56856	Mm.114886	NM_020287	ENSMUSG00000045440	Insm2	Mlt1	insulinoma-associated 2	protein-coding
MACS_peak_7253	chr3	128897099	128931881	+	6152	NA	intron (NM_011098, intron 3 of 4)	intron (NM_011098, intron 3 of 4)	-2360	NM_001042502	18741	Mm.246804	NM_011098	ENSMUSG00000028023	Pitx2	9430085M16Rik|Brx1|Brx1b|Munc30|Otlx2|Ptx2|Rieg	paired-like homeodomain transcription factor 2	protein-coding
MACS_peak_6265	chr2	105498481	105524601	+	6152	NA	intron (NM_001244201, intron 1 of 11)	intron (NM_001244201, intron 1 of 11)	-1054	NR_002867	402728	Mm.444553	NR_002867	ENSMUSG00000086029	Pax6os1	4831410G09Rik|Pax6os	paired box 6 opposite strand 1	ncRNA
MACS_peak_5736	chr19	56793770	56801979	+	6152	NA	exon (NM_007419, exon 1 of 1)	exon (NM_007419, exon 1 of 1)	1012	NM_007419	11554	Mm.46797	NM_007419	ENSMUSG00000035283	Adrb1	Adrb-1|beta-AR	adrenergic receptor, beta 1	protein-coding
MACS_peak_3194	chr13	117091288	117106596	+	6152	NA	intron (NM_021459, intron 1 of 5)	intron (NM_021459, intron 1 of 5)	954	NM_021459	16392	Mm.42242	NM_021459	ENSMUSG00000042258	Isl1	-	ISL1 transcription factor, LIM/homeodomain	protein-coding
MACS_peak_7669	chr4	114723853	114739383	+	6152	NA	intron (NM_001287388, intron 1 of 4)	intron (NM_001287388, intron 1 of 4)	1202	NM_001287388	21349	Mm.439685	NM_011527	ENSMUSG00000028717	Tal1	SCL/tal-1|Scl|bHLHa17|tal-1	T cell acute lymphocytic leukemia 1	protein-coding
MACS_peak_6412	chr2	131371291	131374701	+	6152	NA	intron (NM_013460, intron 1 of 1)	intron (NM_013460, intron 1 of 1)	15025	NM_013460	11550	Mm.389380	NM_013460		Adra1d	Adra-1|Adra1|Adra1a|Gpcr8|Spr8|[a]1d|alpha1D-AR	adrenergic receptor, alpha 1d	protein-coding
MACS_peak_6445	chr2	144154961	144160808	+	6152	NA	promoter-TSS (NM_026924)	promoter-TSS (NM_026924)	-68	NM_026924	107586	Mm.252750	NM_026924	ENSMUSG00000037279	Ovol2	1700108N11Rik|1810007D21Rik|M-OVO|M-OVO-A|M-OVO-B|MOVO|Ovo2|Zfp339|movo2	ovo-like 2 (Drosophila)	protein-coding
MACS_peak_4727	chr17	36303316	36307463	+	6152	NA	promoter-TSS (NM_001081032)	promoter-TSS (NM_001081032)	93	NM_001081032	667977	Mm.441651	NM_001081032	ENSMUSG00000073402	Gm8909	EG667977|H2-Tw5l|H2-gs17	predicted gene 8909	protein-coding
MACS_peak_6470	chr2	147002822	147022706	+	6152	NA	promoter-TSS (NM_010919)	promoter-TSS (NM_010919)	-396	NR_108091	78068	Mm.261511	NR_108091	ENSMUSG00000053545	6430503K07Rik	-	RIKEN cDNA 6430503K07 gene	ncRNA
MACS_peak_2776	chr13	31703922	31724573	+	6152	NA	Intergenic	Intergenic	-3438	NM_010225	14238	Mm.125548	NM_010225	ENSMUSG00000038402	Foxf2	FREAC2|Fkh20|LUN	forkhead box F2	protein-coding
MACS_peak_4032	chr15	98723042	98731025	+	6152	NA	intron (NM_007857, intron 1 of 2)	intron (NM_007857, intron 1 of 2)	1938	NM_007857	13363	Mm.324688	NM_007857	ENSMUSG00000023000	Dhh	C78960	desert hedgehog	protein-coding
MACS_peak_8747	chr5	118615574	118626080	+	6152	NA	intron (NM_007545, intron 1 of 1)	intron (NM_007545, intron 1 of 1)	1054	NM_007545	12123	Mm.384468	NM_007545	ENSMUSG00000046607	Hrk	AI838259|Bid3|DP5|harakiri	harakiri, BCL2 interacting protein (contains only BH3 domain)	protein-coding
MACS_peak_6976	chr3	82679326	82681111	+	6152	NA	promoter-TSS (NR_040382)	promoter-TSS (NR_040382)	187	NM_001277170	633285	Mm.265114	NM_001146328	ENSMUSG00000033882	Rbm46	EG633285|ENSMUSG00000033882|Gm761	RNA binding motif protein 46	protein-coding
MACS_peak_11446	chr9	62981449	63004041	+	6152	NA	exon (NM_001163755, exon 2 of 9)	exon (NM_001163755, exon 2 of 9)	2042	NM_172446	207667	Mm.36349	NM_172446	ENSMUSG00000022245	Skor1	AV273001|C230094B15Rik|Corl1|Lbxcor1	SKI family transcriptional corepressor 1	protein-coding
MACS_peak_10706	chr8	72403919	72413992	+	6039	NA	intron (NM_026818, intron 4 of 7)	intron (NM_026818, intron 4 of 7)	2336	NM_026818	68709	Mm.334584	NM_026818	ENSMUSG00000044006	Cilp2	1110031K21Rik|AA407300|CLIP-2	cartilage intermediate layer protein 2	protein-coding
MACS_peak_8308	chr5	24027182	24034566	+	6039	NA	intron (NM_015739, intron 1 of 1)	intron (NM_015739, intron 1 of 1)	1792	NM_015739	231044	Mm.246596	NM_015739		Gbx1	Gbx-1	gastrulation brain homeobox 1	protein-coding
MACS_peak_6058	chr2	56953553	56959191	+	6000	NA	Intergenic	Intergenic	11077	NM_013613	18227	Mm.3507	NM_013613	ENSMUSG00000026826	Nr4a2	HZF-3|NOT|Nurr1|RNR-1|TINOR|TINUR	nuclear receptor subfamily 4, group A, member 2	protein-coding
MACS_peak_7667	chr4	114595473	114602122	+	6000	NA	promoter-TSS (NM_015758)	promoter-TSS (NM_015758)	-179	NM_015758	30923	Mm.377122	NM_015758	ENSMUSG00000044518	Foxe3	FREAC8|dyl|rct	forkhead box E3	protein-coding
MACS_peak_10591	chr8	28194795	28200624	+	6000	NA	intron (NM_054044, intron 1 of 18)	intron (NM_054044, intron 1 of 18)	1396	NM_054044	78560	Mm.87046	NM_054044	ENSMUSG00000031486	Gpr124	8430414O08Rik|9530074E10Rik|Tem5|mKIAA1531	G protein-coupled receptor 124	protein-coding
MACS_peak_10205	chr7	120096463	120100727	+	6000	NA	exon (NM_175279, exon 1 of 1)	exon (NM_175279, exon 1 of 1)	1119	NM_175279	78748	Mm.349943	NM_175279	ENSMUSG00000098132	Rassf10	4632411J06Rik	Ras association (RalGDS/AF-6) domain family (N-terminal) member 10	protein-coding
MACS_peak_3113	chr13	99120078	99126871	+	6000	NA	promoter-TSS (NM_008242)	promoter-TSS (NM_008242)	-726	NM_008242	15229	Mm.347441	NM_008242	ENSMUSG00000078302	Foxd1	AI385632|BF-2|FREAC4|Hfh10|Hfhbf2	forkhead box D1	protein-coding
MACS_peak_6142	chr2	73116809	73120470	+	6000	NA	Intergenic	Intergenic	8656	NM_001005343	381373	Mm.330293	NM_001005343		Sp9	-	trans-acting transcription factor 9	protein-coding
MACS_peak_1977	chr11	98405424	98409827	+	5999	NA	promoter-TSS (NM_011771)	promoter-TSS (NM_011771)	-280	NM_011771	22780	Mm.133367	NM_011771	ENSMUSG00000018168	Ikzf3	5830411O07Rik|Aiolos|Zfpn1a3|Znfn1a3	IKAROS family zinc finger 3	protein-coding
MACS_peak_5362	chr19	4211672	4217740	+	5999	NA	intron (NM_019952, intron 1 of 2)	CpG	314	NM_019952	56708	Mm.347919	NM_019952		Clcf1	Bsf3|CLC	cardiotrophin-like cytokine factor 1	protein-coding
MACS_peak_7455	chr4	46050147	46054494	+	5999	NA	intron (NM_021883, intron 1 of 9)	CpG	226	NM_021883	21916	Mm.249594	NM_021883	ENSMUSG00000028328	Tmod1	E-Tmod|Tmod	tropomodulin 1	protein-coding
MACS_peak_11197	chr9	21763856	21768290	+	5999	NA	intron (NM_010149, intron 3 of 7)	CpG	1947	NM_010149	13857	Mm.2653	NM_010149	ENSMUSG00000006235	Epor	-	erythropoietin receptor	protein-coding
MACS_peak_1211	chr10	119636968	119639248	+	5999	NA	intron (NM_028679, intron 1 of 11)	intron (NM_028679, intron 1 of 11)	485	NM_028679	73914	Mm.146194	NM_028679	ENSMUSG00000020227	Irak3	4833428C18Rik|AI563835|IRAK-M	interleukin-1 receptor-associated kinase 3	protein-coding
MACS_peak_230	chr1	74815031	74823725	+	5999	NA	intron (NM_009526, intron 1 of 3)	intron (NM_009526, intron 1 of 3)	912	NM_009526	22420	Mm.268282	NM_009526	ENSMUSG00000033227	Wnt6	AA409270|Wnt-6	wingless-type MMTV integration site family, member 6	protein-coding
MACS_peak_8578	chr5	98681085	98686191	+	5999	NA	exon (NM_010203, exon 1 of 3)	exon (NM_010203, exon 1 of 3)	435	NM_010203	14176	Mm.5055	NM_010203	ENSMUSG00000029337	Fgf5	Fgf-5|HBGF-5|angora|go	fibroblast growth factor 5	protein-coding
MACS_peak_5542	chr19	37506539	37513150	+	5999	NA	intron (NM_008245, intron 1 of 3)	CpG	513	NM_008245	15242	Mm.33896	NM_008245		Hhex	Hex|Hex1|Hhex-rs2|Prh|Prhx	hematopoietically expressed homeobox	protein-coding
MACS_peak_8136	chr4	151492735	151503010	+	5999	NA	exon (NM_207688, exon 9 of 11)	exon (NM_207688, exon 9 of 11)	5162	NM_019585	56226	Mm.264215	NM_019585	ENSMUSG00000028943	Espn	je	espin	protein-coding
MACS_peak_1337	chr11	4956110	4959917	+	5901	NA	promoter-TSS (NM_145216)	promoter-TSS (NM_145216)	-118	NM_145216	75668	Mm.374836	NM_145216	ENSMUSG00000034209	Rasl10a	2210403B10Rik|AI852688	RAS-like, family 10, member A	protein-coding
MACS_peak_4706	chr17	35559968	35563161	+	5901	NA	promoter-TSS (NM_207648)	promoter-TSS (NM_207648)	-228	NM_023124	15019	Mm.486287	NM_023124		H2-Q8	H-2Q8|MMS10-T|Ms10t|Qa-2|Qa-8|Qa8	histocompatibility 2, Q region locus 8	protein-coding
MACS_peak_4690	chr17	35105117	35109885	+	5851	NA	exon (NM_010479, exon 1 of 1)	exon (NM_010479, exon 1 of 1)	1600	NM_010479	193740	Mm.6388	NM_010479	ENSMUSG00000091971	Hspa1a	Hsp70-3|Hsp70.3|Hsp72|hsp68|hsp70A1	heat shock protein 1A	protein-coding
MACS_peak_4997	chr18	7000345	7007081	+	5851	NA	intron (NM_177595, intron 1 of 6)	(GA)n|Simple_repeat|Simple_repeat	1064	NM_177595	210719	Mm.257186	NM_177595	ENSMUSG00000061013	Mkx	9430023B20Rik|Irxl1	mohawk homeobox	protein-coding
MACS_peak_884	chr10	44245970	44249226	+	5851	NA	Intergenic	Intergenic	-69105	NM_007548	12142	Mm.4800	NM_007548	ENSMUSG00000038151	Prdm1	Blimp-1|Blimp1|PRDI-BF1|ZNFPR1A1|b2b1765Clo	PR domain containing 1, with ZNF domain	protein-coding
MACS_peak_9357	chr6	88139913	88157338	+	5851	NA	promoter-TSS (NM_008090)	promoter-TSS (NM_008090)	-33	NM_008090	14461	Mm.491156	NM_008090	ENSMUSG00000015053	Gata2	Gata-2	GATA binding protein 2	protein-coding
MACS_peak_6106	chr2	70308380	70317617	+	5851	NA	promoter-TSS (NM_022435)	promoter-TSS (NM_022435)	18	NM_022435	64406	Mm.423397	NM_022435	ENSMUSG00000075304	Sp5	-	trans-acting transcription factor 5	protein-coding
MACS_peak_5408	chr19	7004657	7011009	+	5851	NA	intron (NM_008431, intron 1 of 6)	intron (NM_008431, intron 1 of 6)	1172	NM_008431	16528	Mm.12894	NM_008431	ENSMUSG00000024957	Kcnk4	MLZ-622|TRAAK|TRAAKt|Tex40	potassium channel, subfamily K, member 4	protein-coding
MACS_peak_5273	chr18	74598833	74605445	+	5851	NA	promoter-TSS (NM_201600)	promoter-TSS (NM_201600)	-134	NM_201600	17919	Mm.260098	NM_008661	ENSMUSG00000025885	Myo5b	AI661750|mKIAA1119	myosin VB	protein-coding
MACS_peak_5546	chr19	37764051	37777266	+	5847	NA	Intergenic	Intergenic	-1640	NM_007811	13082	Mm.42230	NM_007811	ENSMUSG00000024987	Cyp26a1	Cyp26|P450RA|P450RAI|RAH	cytochrome P450, family 26, subfamily a, polypeptide 1	protein-coding
MACS_peak_4969	chr17	88033620	88038427	+	5847	NA	5' UTR (NM_008532, exon 2 of 10)	5' UTR (NM_008532, exon 2 of 10)	704	NM_008532	17075	Mm.4259	NM_008532	ENSMUSG00000045394	Epcam	CD326|EGP|EGP-2|Egp314|Ep-CAM|EpCAM1|GA733-2|Ly74|TROP1|Tacsd1|Tacstd1|gp40	epithelial cell adhesion molecule	protein-coding
MACS_peak_7166	chr3	104578866	104587994	+	5847	NA	promoter-TSS (NM_027982)	promoter-TSS (NM_027982)	-544	NM_027982	71887	Mm.379204	NM_027982	ENSMUSG00000002228	Ppm1j	2310008J22Rik|PP2Czeta|Ppp2cz	protein phosphatase 1J	protein-coding
MACS_peak_238	chr1	74935988	74951372	+	5847	NA	Intergenic	Intergenic	3615	NR_029876	723900		NR_029876	miRBase:MI0000792	Mir375	Mirn375|mmu-mir-375	microRNA 375	ncRNA
MACS_peak_11137	chr8	128432011	128436427	+	5847	NA	promoter-TSS (NM_145608)	promoter-TSS (NM_145608)	-131	NM_145608	234878	Mm.216458	NM_145608	ENSMUSG00000031853	BC021891	Mlk4|mKIAA1804	cDNA sequence BC021891	protein-coding
MACS_peak_7337	chr3	157229600	157232016	+	5847	NA	exon (NM_011196, exon 1 of 3)	exon (NM_011196, exon 1 of 3)	952	NM_011196	19218	Mm.30424	NM_011196	ENSMUSG00000040016	Ptger3	EP3|Pgerep3|Ptgerep3	prostaglandin E receptor 3 (subtype EP3)	protein-coding
MACS_peak_10719	chr8	73007898	73028191	+	5847	NA	intron (NM_018827, intron 1 of 8)	CpG	989	NM_018827	12931	Mm.335584	NM_018827	ENSMUSG00000007888	Crlf1	CLF-1|CRLM3|NR6.1	cytokine receptor-like factor 1	protein-coding
MACS_peak_7371	chr4	21599998	21618787	+	5847	NA	intron (NM_001080771, intron 3 of 3)	intron (NM_001080771, intron 3 of 3)	3718	NM_001080771	230025	Mm.208541	NM_001080771	ENSMUSG00000040478	Prdm13	-	PR domain containing 13	protein-coding
MACS_peak_7067	chr3	93246001	93254149	+	5847	NA	exon (NM_001163098, exon 2 of 2)	exon (NM_001163098, exon 2 of 2)	3823	NM_001163098	99681	Mm.316671	NM_001163098	ENSMUSG00000052415	Tchh	AHF|AI597080|Thh	trichohyalin	protein-coding
MACS_peak_8427	chr5	42149672	42159607	+	5765	NA	intron (NM_007524, intron 1 of 1)	CpG	820	NM_007524	12020	Mm.2530	NM_007524	ENSMUSG00000049691	Nkx3-2	Bapx1|NKX3.2|Nkx-3.2	NK3 homeobox 2	protein-coding
MACS_peak_5009	chr18	11045486	11057758	+	5765	NA	promoter-TSS (NM_010258)	promoter-TSS (NM_010258)	-886	NM_010258	14465	Mm.329287	NM_010258	ENSMUSG00000005836	Gata6	AA410133|GATA-6	GATA binding protein 6	protein-coding
MACS_peak_10071	chr7	88597948	88602251	+	5702	NA	promoter-TSS (NM_001252526)	promoter-TSS (NM_001252526)	-455	NM_001252526	12877	Mm.273122	NM_007755	ENSMUSG00000025586	Cpeb1	AU024112|Cpeb|mCPEB	cytoplasmic polyadenylation element binding protein 1	protein-coding
MACS_peak_8335	chr5	29792605	29817217	+	5702	NA	promoter-TSS (NM_019944)	promoter-TSS (NM_019944)	99	NM_019944	15285	Mm.103760	NM_019944		Mnx1	HB9|Hlxb9|MNR2	motor neuron and pancreas homeobox 1	protein-coding
MACS_peak_6228	chr2	94078624	94082627	+	5702	NA	promoter-TSS (NR_106139)	promoter-TSS (NR_106139)	-910	NR_106139	102465777		NR_106139		Mir129b	mmu-mir-129b	microRNA mir-129b	ncRNA
MACS_peak_10309	chr7	139787250	139794638	+	5702	NA	intron (NM_009123, intron 1 of 1)	(CA)n|Simple_repeat|Simple_repeat	376	NM_009123	20231	Mm.334281	NM_009123		Nkx1-2	Nkx-1.1|Nkx-1.2|Sax1	NK1 transcription factor related, locus 2 (Drosophila)	protein-coding
MACS_peak_9242	chr6	53767747	53772749	+	5702	NA	5' UTR (NM_025817, exon 1 of 1)	5' UTR (NM_025817, exon 1 of 1)	571	NM_025817	66873	Mm.422727	NM_025817	ENSMUSG00000043496	Tril	1200009O22Rik|AI316813|mKIAA0644	TLR4 interactor with leucine-rich repeats	protein-coding
MACS_peak_2824	chr13	40823060	40842030	+	5702	NA	Intergenic	Intergenic	-3353	NM_011547	21418	Mm.85544	NM_011547	ENSMUSG00000021359	Tfap2a	AP-2|AP2alpha|Ap2|Ap2tf|Tcfap2a	transcription factor AP-2, alpha	protein-coding
MACS_peak_6141	chr2	73113859	73116387	+	5702	NA	Intergenic	Intergenic	5140	NM_001005343	381373	Mm.330293	NM_001005343		Sp9	-	trans-acting transcription factor 9	protein-coding
MACS_peak_11187	chr9	20836100	20844442	+	5702	NA	intron (NM_008319, intron 6 of 10)	intron (NM_008319, intron 6 of 10)	-3499	NR_035438	100316681		NR_035438	miRBase:MI0008319	Mir1900	Mirn1900|mmu-mir-1900	microRNA 1900	ncRNA
MACS_peak_6954	chr3	66773714	66788243	+	5697	NA	intron (NM_013665, intron 2 of 4)	intron (NM_013665, intron 2 of 4)	4715	NM_013665	20429	Mm.39093	NM_013665		Shox2	6330543G17Rik|OG12|Og12x|Prx3|SHOT	short stature homeobox 2	protein-coding
MACS_peak_1890	chr11	95001022	95014351	+	5697	NA	promoter-TSS (NM_007867)	promoter-TSS (NM_007867)	-571	NM_007867	13394	Mm.439766	NM_007867		Dlx4	Dlx-4|Dlx7	distal-less homeobox 4	protein-coding
MACS_peak_10360	chr7	146765094	146774741	+	5697	NA	Intergenic	Intergenic	-1221	NR_027857	14912	Mm.28308	NM_183248	ENSMUSG00000041309	Nkx6-2	Gtx|Nkx6.2	NK6 homeobox 2	protein-coding
MACS_peak_5786	chr2	5057732	5061282	+	5697	NA	intron (NM_028804, intron 1 of 2)	intron (NM_028804, intron 1 of 2)	685	NM_028804	74186	Mm.274715	NM_028804	ENSMUSG00000026676	Ccdc3	2310045O21Rik	coiled-coil domain containing 3	protein-coding
MACS_peak_45	chr1	19199014	19207729	+	5697	NA	intron (NM_001025305, intron 1 of 6)	intron (NM_001025305, intron 1 of 6)	1236	NM_001025305	21419	Mm.137021	NM_009334	ENSMUSG00000025927	Tfap2b	AI606113|AP-2(beta)|E130018K07Rik|Tcfap2b	transcription factor AP-2 beta	protein-coding
MACS_peak_10056	chr7	86935894	86939974	+	5697	NA	exon (NM_008588, exon 1 of 2)	exon (NM_008588, exon 1 of 2)	542	NM_008588	17292	Mm.1404	NM_008588	ENSMUSG00000030544	Mesp1	bHLHc5	mesoderm posterior 1	protein-coding
MACS_peak_2745	chr13	23485945	23489958	+	5697	NA	Intergenic	CpG	-26874	NM_001286155	218100	Mm.286454	NM_172586	ENSMUSG00000046351	Zfp322a	Znf322|Znf322a	zinc finger protein 322A	protein-coding
MACS_peak_8161	chr4	153510801	153516384	+	5630	NA	intron (NM_011642, intron 1 of 13)	intron (NM_011642, intron 1 of 13)	725	NM_011642	22062	Mm.78015	NM_011642	ENSMUSG00000029026	Trp73	Tp73|p73	transformation related protein 73	protein-coding
MACS_peak_979	chr10	74778702	74781441	+	5630	NA	intron (NM_009630, intron 1 of 2)	CpG	449	NM_009630	11540	Mm.333734	NM_009630	ENSMUSG00000020178	Adora2a	A2AAR|A2aR|AA2AR	adenosine A2a receptor	protein-coding
MACS_peak_701	chr1	189427785	189436439	+	5555	NA	promoter-TSS (NM_001243792)	promoter-TSS (NM_001243792)	-773	NM_001243792	26381	Mm.89989	NM_011935	ENSMUSG00000026610	Esrrg	ERR3|Errg|NR3B3|mKIAA0832	estrogen-related receptor gamma	protein-coding
MACS_peak_5145	chr18	42553670	42562816	+	5555	NA	Intergenic	Intergenic	3992	NM_138945	18998	Mm.488204	NM_138945		Pou4f3	Brn3.1|Brn3c|ddl|dreidel	POU domain, class 4, transcription factor 3	protein-coding
MACS_peak_285	chr1	78191175	78203083	+	5555	NA	Intergenic	Intergenic	-3418	NM_001159520	18505	Mm.1371	NM_008781	ENSMUSG00000004872	Pax3	Pax-3|Sp|splotch	paired box 3	protein-coding
MACS_peak_3458	chr14	64558717	64565753	+	5555	NA	promoter-TSS (NM_011446)	promoter-TSS (NM_011446)	-308	NM_011446	20680	Mm.42162	NM_011446	ENSMUSG00000063060	Sox7	-	SRY (sex determining region Y)-box 7	protein-coding
MACS_peak_11487	chr9	66894262	66899047	+	5547	NA	intron (NM_001164249, intron 1 of 8)	CpG-15134	366	NM_001164255	22003	Mm.121878	NM_024427	ENSMUSG00000032366	Tpm1	AA986836|AI854628|TM2|Tm3|Tmpa|Tpm-1|alpha-TM	tropomyosin 1, alpha	protein-coding
MACS_peak_2885	chr13	53556501	53573345	+	5547	NA	intron (NM_013601, intron 1 of 1)	intron (NM_013601, intron 1 of 1)	3226	NM_013601	17702	Mm.1763	NM_013601		Msx2	BB122635|Hox-8|Hox8|Hox8.1	msh homeobox 2	protein-coding
MACS_peak_4789	chr17	47873907	47877899	+	5547	NA	intron (NM_001161723, intron 1 of 8)	intron (NM_001161723, intron 1 of 8)	1023	NM_001161723	21425	Mm.2305	NM_011549	ENSMUSG00000023990	Tfeb	Tcfeb|bHLHe35	transcription factor EB	protein-coding
MACS_peak_7565	chr4	88951299	88958841	+	5547	NA	intron (NM_007670, intron 1 of 1)	intron (NM_007670, intron 1 of 1)	1871	NM_007670	12579	Mm.423094	NM_007670	ENSMUSG00000073802	Cdkn2b	AV083695|INK4b|MTS2|p15|p15(INK4b)|p15INK4b	cyclin-dependent kinase inhibitor 2B (p15, inhibits CDK4)	protein-coding
MACS_peak_1963	chr11	97910653	97915918	+	5547	NA	intron (NM_146028, intron 1 of 10)	intron (NM_146028, intron 1 of 10)	1491	NM_146028	217154	Mm.181008	NM_146028	ENSMUSG00000017400	Stac2	24b2|24b2/STAC2|AW240854	SH3 and cysteine rich domain 2	protein-coding
MACS_peak_9571	chr6	142516750	142521657	+	5547	NA	intron (NM_008428, intron 1 of 2)	intron (NM_008428, intron 1 of 2)	673	NM_008428	16523	Mm.1482	NM_008428	ENSMUSG00000030247	Kcnj8	AI448900|Kir6.1|gnite|slmbr|sltr	potassium inwardly-rectifying channel, subfamily J, member 8	protein-coding
MACS_peak_4932	chr17	84028060	84033977	+	5547	NA	5' UTR (NM_153512, exon 1 of 2)	5' UTR (NM_153512, exon 1 of 2)	217	NM_153512	225030	Mm.223506	NM_153512	ENSMUSG00000045053	Kcng3	KV6.3|Kv10.1a|Kv10.1b	potassium voltage-gated channel, subfamily G, member 3	protein-coding
MACS_peak_824	chr10	23941974	23945179	+	5547	NA	exon (NM_021509, exon 1 of 12)	exon (NM_021509, exon 1 of 12)	253	NM_021509	59012	Mm.285934	NM_021509	ENSMUSG00000020000	Moxd1	3230402N08Rik|MNCb-5203	monooxygenase, DBH-like 1	protein-coding
MACS_peak_10806	chr8	87224879	87233246	+	5547	NA	TTS (NM_008535)	TTS (NM_008535)	3706	NM_008535	17095	Mm.4925	NM_008535	ENSMUSG00000034041	Lyl1	Lyl-1|bHLHa18	lymphoblastomic leukemia 1	protein-coding
MACS_peak_10939	chr8	107063241	107068002	+	5547	NA	intron (NM_001301165, intron 1 of 6)	intron (NM_001301165, intron 1 of 6)	412	NM_001301165	12354	Mm.129265	NM_053070	ENSMUSG00000031883	Car7	AV343731|Ca7	carbonic anhydrase 7	protein-coding
MACS_peak_3910	chr15	83080187	83083667	+	5547	NA	intron (NM_001004150, intron 1 of 2)	CpG	234	NM_001170954	239559	Mm.323805	NM_001004150	ENSMUSG00000047878	A4galt	-	alpha 1,4-galactosyltransferase	protein-coding
MACS_peak_6083	chr2	61646651	61654439	+	5547	NA	3' UTR (NM_009322, exon 6 of 6)	3' UTR (NM_009322, exon 6 of 6)	8035	NM_009322	21375	Mm.308525	NM_009322	ENSMUSG00000035033	Tbr1	-	T-box brain gene 1	protein-coding
MACS_peak_10242	chr7	128534015	128538840	+	5547	NA	exon (NM_001081327, exon 1 of 2)	exon (NM_001081327, exon 1 of 2)	617	NM_001081327	195646	Mm.247449	NM_177575	ENSMUSG00000046321	Hs3st2	6430516N12Rik|A830061E14Rik|AW491345	heparan sulfate (glucosamine) 3-O-sulfotransferase 2	protein-coding
MACS_peak_7635	chr4	107104849	107112380	+	5547	NA	intron (NM_147221, intron 2 of 10)	intron (NM_147221, intron 2 of 10)	1290	NM_147221	230587	Mm.331757	NM_147221	ENSMUSG00000034762	Glis1	Gli5|Gli6|GliH1	GLIS family zinc finger 1	protein-coding
MACS_peak_9044	chr6	6820016	6831828	+	5495	NA	Intergenic	Intergenic	6146	NM_198854	13395	Mm.4873	NM_010056	ENSMUSG00000029755	Dlx5	AI385752	distal-less homeobox 5	protein-coding
MACS_peak_10957	chr8	108658827	108663498	+	5495	NA	promoter-TSS (NM_176838)	promoter-TSS (NM_176838)	-288	NM_176838	77411	Mm.183003	NM_176838	ENSMUSG00000084128	Esrp2	9530027K23Rik|Rbm35b	epithelial splicing regulatory protein 2	protein-coding
MACS_peak_5051	chr18	24810700	24813604	+	5408	NA	promoter-TSS (NM_026779)	promoter-TSS (NM_026779)	-40	NM_026779	68591	Mm.28252	NM_026779	ENSMUSG00000039616	Mocos	1110018O12Rik|HMCS|MCS|MOS	molybdenum cofactor sulfurase	protein-coding
MACS_peak_7204	chr3	115953171	115955699	+	5408	NA	exon (NM_022427, exon 2 of 2)	exon (NM_022427, exon 2 of 2)	1967	NM_022427	64378	Mm.40025	NM_022427	ENSMUSG00000068696	Gpr88	AW061286|Strg	G-protein coupled receptor 88	protein-coding
MACS_peak_226	chr1	74439747	74444971	+	5408	NA	3' UTR (NM_153088, exon 7 of 7)	3' UTR (NM_153088, exon 7 of 7)	1475	NR_029743	387219		NR_029743		Mir26b	Mirn26b|mmu-mir-26b	microRNA 26b	ncRNA
MACS_peak_9333	chr6	85134560	85145501	+	5408	NA	intron (NM_010131, intron 1 of 2)	CpG	2105	NM_010131	13796	Mm.391473	NM_010131		Emx1	-	empty spiracles homeobox 1	protein-coding
MACS_peak_5738	chr19	56946535	56950009	+	5408	NA	promoter-TSS (NM_172840)	promoter-TSS (NM_172840)	-634	NM_172840	240675	Mm.129534	NM_172840	ENSMUSG00000025082	Vwa2	Amaco	von Willebrand factor A domain containing 2	protein-coding
MACS_peak_8410	chr5	38211909	38227378	+	5408	NA	Intergenic	Intergenic	-3819	NM_010835	17701	Mm.256509	NM_010835	ENSMUSG00000048450	Msx1	AA675338|AI324650|Hox-7|Hox7|Hox7.1|msh	msh homeobox 1	protein-coding
MACS_peak_5643	chr19	45149533	45157018	+	5408	NA	intron (NM_178929, intron 4 of 4)	intron (NM_178929, intron 4 of 4)	2646	NM_178929	107250	Mm.24417	NM_178929	ENSMUSG00000025213	Kazald1	AI842353|Bono1|IGFBP-rP10	Kazal-type serine peptidase inhibitor domain 1	protein-coding
MACS_peak_11735	chr9	118383565	118391584	+	5408	NA	5' UTR (NM_001164789, exon 1 of 6)	5' UTR (NM_001164789, exon 1 of 6)	267	NM_010136	13813	Mm.200692	NM_010136	ENSMUSG00000032446	Eomes	C77258|TBR-2|Tbr2	eomesodermin homolog (Xenopus laevis)	protein-coding
MACS_peak_6350	chr2	122119079	122128914	+	5408	NA	promoter-TSS (NM_025777)	promoter-TSS (NM_025777)	-95	NM_177610	214593	Mm.358846	NM_177610	ENSMUSG00000068452	Duox2	A430065P05Rik|LNOX2|NOXEF2|P138-TOX|THOX2	dual oxidase 2	protein-coding
MACS_peak_3175	chr13	113782601	113791221	+	5408	NA	intron (NM_001037914, intron 3 of 6)	intron (NM_001037914, intron 3 of 6)	2835	NM_001037914	622408	Mm.360976	NM_001037914	ENSMUSG00000074651	Mcidas	EG622408|Gm6320|Idas|Mci|Mcin	multiciliate differentiation and DNA synthesis associated cell cycle protein	protein-coding
MACS_peak_5796	chr2	9792269	9816185	+	5408	NA	TTS (NR_040511)	TTS (NR_040511)	1354	NR_024257	381347	Mm.441450	NR_024257		4930412O13Rik	ENSMUSG00000075535|Gm10853	RIKEN cDNA 4930412O13 gene	ncRNA
MACS_peak_11547	chr9	78287471	78291759	+	5408	NA	intron (NR_125721, intron 1 of 4)	RMER10B|LTR|ERVL	1429	NR_125721	214763	Mm.101559	NM_173386	ENSMUSG00000032344	Mb21d1	E330016A19Rik|cGAS	Mab-21 domain containing 1	protein-coding
MACS_peak_1706	chr11	74976913	74988073	+	5408	NA	promoter-TSS (NM_001098203)	promoter-TSS (NM_001098203)	-839	NM_001098203	15248	Mm.57250	NM_010430	ENSMUSG00000043099	Hic1	AA408311|HIC-1	hypermethylated in cancer 1	protein-coding
MACS_peak_7425	chr4	43535319	43539008	+	5408	NA	promoter-TSS (NM_009416)	promoter-TSS (NM_009416)	-737	NM_001277875	22004	Mm.646	NM_009416		Tpm2	Tpm-2|Trop-2	tropomyosin 2, beta	protein-coding
MACS_peak_10603	chr8	33992418	33995976	+	5398	NA	Intergenic	CpG	66301	NM_001177589	100042715	Mm.291093	NM_001177589		Gm3985	-	predicted gene 3985	protein-coding
MACS_peak_10366	chr7	147230942	147238257	+	5398	NA	intron (NM_010836, intron 1 of 1)	CpG	388	NM_010836	17703	Mm.4816	NM_010836		Msx3	AI323377	msh homeobox 3	protein-coding
MACS_peak_1736	chr11	76809888	76815308	+	5398	NA	intron (NM_010484, intron 1 of 13)	intron (NM_010484, intron 1 of 13)	499	NM_010484	15567	Mm.300318	NM_010484	ENSMUSG00000020838	Slc6a4	5-HTT|AI323329|Htt|Sert	solute carrier family 6 (neurotransmitter transporter, serotonin), member 4	protein-coding
MACS_peak_11569	chr9	87621419	87626619	+	5398	NA	intron (NM_023814, intron 2 of 7)	intron (NM_023814, intron 2 of 7)	2076	NM_023814	76365	Mm.158789	NM_023814	ENSMUSG00000032419	Tbx18	2810012F10Rik|2810404D13Rik	T-box18	protein-coding
MACS_peak_1872	chr11	92958466	92962623	+	5398	NA	promoter-TSS (NM_028296)	promoter-TSS (NM_028296)	-60	NM_028296	72605	Mm.342160	NM_028296	ENSMUSG00000056158	Car10	2700029L05Rik|BB085816|Ca10	carbonic anhydrase 10	protein-coding
MACS_peak_11087	chr8	124858817	124862512	+	5398	NA	exon (NM_009569, exon 10 of 10)	exon (NM_009569, exon 10 of 10)	23982	NM_133202	170732	Mm.154808	NM_133202	ENSMUSG00000039079	Trhr2	TRH-R2	thyrotropin releasing hormone receptor 2	protein-coding
MACS_peak_2478	chr12	81792048	81794813	+	5398	NA	promoter-TSS (NM_001177503)	promoter-TSS (NM_001177503)	23	NR_037995	68354	Mm.46194	NR_037995		Plekhd1os	0610009B14Rik	pleckstrin homology domain containing, family D (with coiled-coil domains) member 1, opposite strand	ncRNA
MACS_peak_2001	chr11	100827639	100834818	+	5398	NA	intron (NM_008986, intron 1 of 1)	CpG	703	NM_008986	19285	Mm.21864	NM_008986	ENSMUSG00000004044	Ptrf	2310075E07Rik|AW546441|Cav-p60|Cavin	polymerase I and transcript release factor	protein-coding
MACS_peak_2594	chr12	110288950	110294298	+	5398	NA	intron (NM_001163175, intron 1 of 6)	CpG-3499	14803	NM_001163175	380785	Mm.342085	NM_001163175	ENSMUSG00000040867	Begain	BM948371|Gm897	brain-enriched guanylate kinase-associated	protein-coding
MACS_peak_444	chr1	122233440	122242152	+	5398	NA	exon (NM_207233, exon 1 of 2)	exon (NM_207233, exon 1 of 2)	637	NM_207233	226359	Mm.337409	NM_207233	ENSMUSG00000036907	C1ql2	BC040774|CTRP10	complement component 1, q subcomponent-like 2	protein-coding
MACS_peak_1575	chr11	59117361	59123148	+	5398	NA	promoter-TSS (NM_139298)	promoter-TSS (NM_139298)	-178	NM_139298	216795	Mm.218794	NM_139298	ENSMUSG00000000126	Wnt9a	Wnt14	wingless-type MMTV integration site family, member 9A	protein-coding
MACS_peak_2247	chr12	9576916	9590409	+	5398	NA	intron (NM_011859, intron 1 of 2)	intron (NM_011859, intron 1 of 2)	2414	NM_011859	23967	Mm.45055	NM_011859	ENSMUSG00000048387	Osr1	Odd1|Osr	odd-skipped related 1 (Drosophila)	protein-coding
MACS_peak_10916	chr8	97217031	97221379	+	5398	NA	intron (NM_026385, intron 1 of 3)	intron (NM_026385, intron 1 of 3)	937	NM_026385	67801	Mm.279977	NM_026385	ENSMUSG00000031775	Pllp	0610010I06Rik|AV001002|Plapi|Tm4sf11	plasma membrane proteolipid	protein-coding
MACS_peak_9112	chr6	29475330	29479469	+	5398	NA	intron (NM_012057, intron 1 of 8)	intron (NM_012057, intron 1 of 8)	774	NM_012057	27056	Mm.6479	NM_012057	ENSMUSG00000029771	Irf5	AW491843|mirf5	interferon regulatory factor 5	protein-coding
MACS_peak_2059	chr11	103627907	103636611	+	5398	NA	Intergenic	Intergenic	-3230	NM_009521	22415	Mm.159091	NM_009521	ENSMUSG00000000125	Wnt3	Int-4|Wnt-3	wingless-type MMTV integration site family, member 3	protein-coding
MACS_peak_4209	chr16	18579401	18593150	+	5398	NA	intron (NM_001285476, intron 1 of 6)	intron (NM_001285476, intron 1 of 6)	787	NM_011532	21380	Mm.295194	NM_011532	ENSMUSG00000009097	Tbx1	-	T-box 1	protein-coding
MACS_peak_1661	chr11	70026851	70030286	+	5361	NA	exon (NM_153081, exon 3 of 5)	exon (NM_153081, exon 3 of 5)	1156	NM_153081	216867	Mm.289238	NM_153081	ENSMUSG00000040938	Slc16a11	AB041591|MNCb-2717	solute carrier family 16 (monocarboxylic acid transporters), member 11	protein-coding
MACS_peak_8349	chr5	31393768	31401335	+	5361	NA	intron (NR_105788, intron 5 of 7)	CpG	-1651	NM_011773	22784	Mm.1396	NM_011773	ENSMUSG00000029151	Slc30a3	Znt3	solute carrier family 30 (zinc transporter), member 3	protein-coding
MACS_peak_6329	chr2	119582961	119586629	+	5361	NA	promoter-TSS (NM_206941)	promoter-TSS (NM_206941)	-534	NM_008523	17005	Mm.1740	NM_008523	ENSMUSG00000027297	Ltk	-	leukocyte tyrosine kinase	protein-coding
MACS_peak_9189	chr6	49186420	49186626	+	5314	NA	Intergenic	LSU-rRNA_Hsa|rRNA|rRNA	-21570	NM_023670	140488	Mm.281018	NM_023670	ENSMUSG00000029814	Igf2bp3	2610101N11Rik|AA522010|AL022933|AU045931|IMP-3|IMP3|Koc13|Neilsen|mimp3	insulin-like growth factor 2 mRNA binding protein 3	protein-coding
MACS_peak_10080	chr7	89135881	89139015	+	5261	NA	promoter-TSS (NM_007562)	promoter-TSS (NM_007562)	-263	NM_007562	12173	Mm.243802	NM_007562	ENSMUSG00000025105	Bnc1	AI047752|AW546376|Bnc	basonuclin 1	protein-coding
MACS_peak_9711	chr7	25726631	25742625	+	5261	NA	Intergenic	L2|LINE|L2	20466	NR_106013	102465633		NR_106013		Mir7046	mmu-mir-7046	microRNA mir-7046	ncRNA
MACS_peak_9042	chr6	6799855	6802564	+	5261	NA	intron (NR_015388, intron 1 of 1)	intron (NR_015388, intron 1 of 1)	-12125	NM_010057	13396	Mm.439763	NM_010057	ENSMUSG00000029754	Dlx6	-	distal-less homeobox 6	protein-coding
MACS_peak_7911	chr4	133805803	133810499	+	5261	NA	5' UTR (NM_001099296, exon 2 of 2)	5' UTR (NM_001099296, exon 2 of 2)	1870	NM_001099296	72690	Mm.100168	NM_001099296	ENSMUSG00000050105	Grrp1	2810043G13Rik|Fam110d	glycine/arginine rich protein 1	protein-coding
MACS_peak_2155	chr11	115967247	115972435	+	5261	NA	intron (NM_001205081, intron 1 of 5)	intron (NM_001205081, intron 1 of 5)	1708	NM_001205081	217333	Mm.347770	NM_172570	ENSMUSG00000020773	Trim47	2210023F24Rik	tripartite motif-containing 47	protein-coding
MACS_peak_11585	chr9	89801462	89808435	+	5261	NA	exon (NM_011245, exon 1 of 27)	exon (NM_011245, exon 1 of 27)	335	NM_001039655	19417	Mm.44561	NM_011245	ENSMUSG00000032356	Rasgrf1	AI844718|CDC25|CDC25Mm|Gnrp|Grf1|Grfbeta|P190-A|Ras-GRF1|p190|p190RhoGEF	RAS protein-specific guanine nucleotide-releasing factor 1	protein-coding
MACS_peak_748	chr10	5632544	5635448	+	5250	NA	exon (NM_007956, exon 2 of 9)	exon (NM_007956, exon 2 of 9)	100499	NM_007956	13982	Mm.9213	NM_007956	ENSMUSG00000019768	Esr1	AA420328|AU041214|ER-alpha|ER[a]|ERa|ERalpha|ESR|Estr|Estra|Nr3a1	estrogen receptor 1 (alpha)	protein-coding
MACS_peak_6120	chr2	71362783	71376589	+	5250	NA	non-coding (NR_002854, exon 2 of 2)	non-coding (NR_002854, exon 2 of 2)	2184	NM_010053	13390	Mm.4543	NM_010053	ENSMUSG00000041911	Dlx1	Dlx|Dlx-1	distal-less homeobox 1	protein-coding
MACS_peak_147	chr1	57025955	57042941	+	5250	NA	Intergenic	Intergenic	6135	NR_024325	329160	Mm.419039	NR_024325	ENSMUSG00000087022	9130024F11Rik	B530002L08|EG329160	RIKEN cDNA 9130024F11 gene	ncRNA
MACS_peak_10761	chr8	77736078	77740402	+	5250	NA	intron (NM_029182, intron 1 of 2)	intron (NM_029182, intron 1 of 2)	397	NM_029182	75141	Mm.179267	NM_029182	ENSMUSG00000034472	Rasd2	4930526B11Rik|AU045414|Rhes|TEM-2|TEM2	RASD family, member 2	protein-coding
MACS_peak_286	chr1	78204212	78218564	+	5250	NA	Intergenic	Intergenic	-17677	NM_001159520	18505	Mm.1371	NM_008781	ENSMUSG00000004872	Pax3	Pax-3|Sp|splotch	paired box 3	protein-coding
MACS_peak_6205	chr2	91759913	91765270	+	5250	NA	intron (NM_007699, intron 1 of 1)	intron (NM_007699, intron 1 of 1)	245	NM_007699	12672	Mm.330405	NM_007699	ENSMUSG00000040495	Chrm4	Chrm-4|M4	cholinergic receptor, muscarinic 4	protein-coding
MACS_peak_1829	chr11	84769329	84774545	+	5250	NA	intron (NM_007607, intron 1 of 7)	intron (NM_007607, intron 1 of 7)	681	NM_007607	12351	Mm.1641	NM_007607	ENSMUSG00000000805	Car4	AW456718|Ca4	carbonic anhydrase 4	protein-coding
MACS_peak_1207	chr10	117064610	117069258	+	5250	NA	exon (NM_027468, exon 2 of 9)	exon (NM_027468, exon 2 of 9)	378	NM_027468	70574	Mm.339332	NM_027468	ENSMUSG00000020183	Cpm	1110060I01Rik|5730456K23Rik|AA589379|E030045M14Rik	carboxypeptidase M	protein-coding
MACS_peak_10835	chr8	89990953	89998953	+	5250	NA	intron (NM_019626, intron 2 of 2)	CpG	1538	NM_019626	12404	Mm.4880	NM_019626	ENSMUSG00000031654	Cbln1	AI323299	cerebellin 1 precursor protein	protein-coding
MACS_peak_1058	chr10	80595669	80599941	+	5250	NA	Intergenic	Intergenic	-1211	NM_010731	16969	Mm.20920	NM_010731	ENSMUSG00000035011	Zbtb7a	9030619K07Rik|9130006G12Rik|AI452336|FBI-1|Lrf|Pokemon|Zbtb7	zinc finger and BTB domain containing 7a	protein-coding
MACS_peak_7648	chr4	109327348	109334189	+	5250	NA	Intergenic	Intergenic	7209	NM_007671	12580	Mm.1912	NM_007671	ENSMUSG00000028551	Cdkn2c	C77269|INK4c|p18|p18-INK4c|p18-INK6|p18INK4c	cyclin-dependent kinase inhibitor 2C (p18, inhibits CDK4)	protein-coding
MACS_peak_10756	chr8	74842523	74846723	+	5229	NA	intron (NM_008452, intron 2 of 2)	intron (NM_008452, intron 2 of 2)	1662	NM_008452	16598	Mm.26938	NM_008452	ENSMUSG00000055148	Klf2	Lklf	Kruppel-like factor 2 (lung)	protein-coding
MACS_peak_5230	chr18	66089231	66101525	+	5229	NA	intron (NM_013833, intron 2 of 2)	intron (NM_013833, intron 2 of 2)	3365	NM_013833	19434	Mm.431047	NM_013833	ENSMUSG00000024518	Rax	7530406A22Rik|E130303K03Rik|Rx|ey-1|ey1	retina and anterior neural fold homeobox	protein-coding
MACS_peak_10793	chr8	86533742	86537881	+	5229	NA	promoter-TSS (NR_035431)	promoter-TSS (NR_035431)	-192	NM_001291292	70134	Mm.41017	NM_001291292		2210011C24Rik	-	RIKEN cDNA 2210011C24 gene	protein-coding
MACS_peak_7915	chr4	133925278	133928463	+	5229	NA	intron (NM_019578, intron 1 of 10)	intron (NM_019578, intron 1 of 10)	1592	NM_019578	56219	Mm.30978	NM_019578	ENSMUSG00000028838	Extl1	D430033M16Rik	exostoses (multiple)-like 1	protein-coding
MACS_peak_9103	chr6	29118545	29121119	+	5116	NA	exon (NM_001101443, exon 5 of 5)	exon (NM_001101443, exon 5 of 5)	-5108	NM_133925	68272	Mm.40802	NM_026650	ENSMUSG00000029701	Rbm28	2810480G15Rik|AI503051	RNA binding motif protein 28	protein-coding
MACS_peak_8330	chr5	28783056	28792833	+	5116	NA	exon (NM_009170, exon 2 of 3)	exon (NM_009170, exon 2 of 3)	-5580	NR_015562	654796	Mm.57202	NR_015562	ENSMUSG00000097726	9530036O11Rik	-	RIKEN cDNA 9530036O11Rik	ncRNA
MACS_peak_4438	chr16	92695521	92701597	+	5116	NA	promoter-TSS (NM_009821)	promoter-TSS (NM_009821)	-985	NM_009821	12394	Mm.4081	NM_009821	ENSMUSG00000022952	Runx1	AML1|CBF-alpha-2|Cbfa2|Pebp2a2|Pebpa2b	runt related transcription factor 1	protein-coding
MACS_peak_11284	chr9	37334737	37339768	+	5116	NA	intron (NM_027102, intron 1 of 6)	intron (NM_027102, intron 1 of 6)	1578	NM_027102	69524	Mm.41751	NM_027102	ENSMUSG00000001946	Esam	2310008D05Rik|Esam1|W117m	endothelial cell-specific adhesion molecule	protein-coding
MACS_peak_9682	chr7	20103820	20111386	+	5116	NA	intron (NM_027116, intron 3 of 3)	intron (NM_027116, intron 3 of 3)	3523	NM_027116	69547	Mm.77325	NM_027116	ENSMUSG00000060621	Nkpd1	2310015G09Rik	NTPase, KAP family P-loop domain containing 1	protein-coding
MACS_peak_10272	chr7	135558148	135564023	+	5116	NA	intron (NM_026418, intron 1 of 4)	intron (NM_026418, intron 1 of 4)	601	NM_026418	67865	Mm.18635	NM_026418	ENSMUSG00000030844	Rgs10	2310010N19Rik	regulator of G-protein signalling 10	protein-coding
MACS_peak_2065	chr11	103993332	103997749	+	5116	NA	intron (NM_007762, intron 1 of 12)	intron (NM_007762, intron 1 of 12)	1344	NM_007762	12921	Mm.1892	NM_007762	ENSMUSG00000018634	Crhr1	CRFR1|Crhr	corticotropin releasing hormone receptor 1	protein-coding
MACS_peak_4028	chr15	98629850	98640715	+	5116	NA	3' UTR (NM_001013741, exon 2 of 2)	3' UTR (NM_001013741, exon 2 of 2)	3074	NM_001013741	13199	Mm.390810	NM_001013741	ENSMUSG00000059213	Ddn	Gm748	dendrin	protein-coding
MACS_peak_3696	chr15	31293523	31299688	+	5103	NA	intron (NM_027496, intron 1 of 3)	intron (NM_027496, intron 1 of 3)	909	NM_001164441	67434	Mm.102470	NM_026153	ENSMUSG00000022237	Ankrd33b	0610012A05Rik|3021401C12Rik|5730557B15Rik	ankyrin repeat domain 33B	protein-coding
MACS_peak_5223	chr18	64818610	64823027	+	5103	NA	promoter-TSS (NM_001001488)	promoter-TSS (NM_001001488)	-164	NM_001001488	54670	Mm.270043	NM_001001488	ENSMUSG00000039529	Atp8b1	AI451886|FIC1|Ic	ATPase, class I, type 8B, member 1	protein-coding
MACS_peak_9684	chr7	20160963	20164656	+	5103	NA	exon (NM_022409, exon 1 of 3)	exon (NM_022409, exon 1 of 3)	173	NM_022409	63872	Mm.23310	NM_022409	ENSMUSG00000011267	Zfp296	2210018A16Rik	zinc finger protein 296	protein-coding
MACS_peak_3244	chr14	22799610	22812079	+	5103	NA	intron (NM_145459, intron 2 of 2)	CpG	2979	NM_145459	218820	Mm.292401	NM_145459	ENSMUSG00000039081	Zfp503	AI181838|B830002A16Rik|Nolz-1|Nolz1|Znf503	zinc finger protein 503	protein-coding
MACS_peak_9269	chr6	64676136	64686628	+	5103	NA	TTS (NM_007500)	TTS (NM_007500)	2242	NM_007500	11921	Mm.57229	NM_007500	ENSMUSG00000073043	Atoh1	Hath1|MATH-1|Math1|bHLHa14	atonal homolog 1 (Drosophila)	protein-coding
MACS_peak_6316	chr2	118719549	118727543	+	5103	NA	Intergenic	Intergenic	-3805	NM_001045523	228536	Mm.330487	NM_001045523	ENSMUSG00000040007	Bahd1	AL022997|AW541238|Gm117|mKIAA0945	bromo adjacent homology domain containing 1	protein-coding
MACS_peak_10384	chr7	148646505	148651767	+	5103	NA	intron (NM_001025103, intron 1 of 9)	intron (NM_001025103, intron 1 of 9)	2143	NM_001025103	213573	Mm.386851	NM_001025103	ENSMUSG00000048200	Cracr2b	6330520A15Rik|BC026645|Cracr2a|Efcab4|Efcab4a	calcium release activated channel regulator 2B	protein-coding
MACS_peak_5712	chr19	54119077	54124610	+	5103	NA	exon (NM_007417, exon 1 of 1)	exon (NM_007417, exon 1 of 1)	2171	NM_007417	11551	Mm.235195	NM_007417	ENSMUSG00000033717	Adra2a	AW122659|Adra-2|Adra-2a|alpha(2A)AR|alpha2-C10|alpha2A|alpha2A-AR	adrenergic receptor, alpha 2a	protein-coding
MACS_peak_9807	chr7	35968745	35972132	+	5103	NA	promoter-TSS (NM_017394)	promoter-TSS (NM_017394)	-966	NM_017394	53896	Mm.35567	NM_017394	ENSMUSG00000030495	Slc7a10	AL024237|Asc-1|D7Bwg0847e	solute carrier family 7 (cationic amino acid transporter, y+ system), member 10	protein-coding
MACS_peak_11915	chrX	102957935	102962283	+	5103	NA	exon (NM_030614, exon 1 of 3)	exon (NM_030614, exon 1 of 3)	293	NM_030614	80903	Mm.154768	NM_030614		Fgf16	-	fibroblast growth factor 16	protein-coding
MACS_peak_10748	chr8	74215671	74219617	+	5103	NA	exon (NM_028189, exon 2 of 3)	exon (NM_028189, exon 2 of 3)	4493	NM_013564	16336	Mm.476857	NM_013564	ENSMUSG00000079019	Insl3	Rlf|Rlnl	insulin-like 3	protein-coding
MACS_peak_5313	chr18	80557541	80562448	+	5103	NA	intron (NM_001190373, intron 1 of 3)	CpG	999	NM_001190373	240444	Mm.279568	NM_001190373	ENSMUSG00000059852	Kcng2	AA591524	potassium voltage-gated channel, subfamily G, member 2	protein-coding
MACS_peak_801	chr10	19568439	19573184	+	5103	NA	exon (NM_029529, exon 1 of 2)	exon (NM_029529, exon 1 of 2)	454	NM_029529	76157	Mm.74324	NM_029529	ENSMUSG00000050473	Slc35d3	6230421J19Rik|Frcl1	solute carrier family 35, member D3	protein-coding
MACS_peak_7547	chr4	84317770	84322091	+	5103	NA	intron (NM_172870, intron 1 of 5)	intron (NM_172870, intron 1 of 5)	1060	NM_172870	242509	Mm.190774	NM_172870		Bnc2	5031434M05Rik|8430420F16Rik	basonuclin 2	protein-coding
MACS_peak_5625	chr19	44743264	44756659	+	5103	NA	Intergenic	Intergenic	-81923	NM_011037	18504	Mm.192158	NM_011037	ENSMUSG00000004231	Pax2	Opdc|Pax-2	paired box 2	protein-coding
MACS_peak_5315	chr18	80902639	80913637	+	5103	NA	intron (NM_001164110, intron 1 of 9)	intron (NM_001164110, intron 1 of 9)	1672	NM_198429	18018	Mm.329560	NM_016791	ENSMUSG00000033016	Nfatc1	2210017P03Rik|AI449492|AV076380|NF-ATc|NFAT2|NFATc|Nfatcb	nuclear factor of activated T cells, cytoplasmic, calcineurin dependent 1	protein-coding
MACS_peak_6562	chr2	160183818	160192675	+	5096	NA	Intergenic	Intergenic	4555	NM_010658	16658	Mm.330745	NM_010658	ENSMUSG00000074622	Mafb	Kreisler|Krml|Krml1|kr	v-maf musculoaponeurotic fibrosarcoma oncogene family, protein B (avian)	protein-coding
MACS_peak_9340	chr6	85460736	85466407	+	5096	NA	promoter-TSS (NM_020596)	promoter-TSS (NM_020596)	-35	NM_020596	13656	Mm.44137	NM_020596	ENSMUSG00000071341	Egr4	NGF1-C|NGFI-C|NGFIC|pAT133	early growth response 4	protein-coding
MACS_peak_2461	chr12	77632205	77636505	+	4973	NA	promoter-TSS (NR_039597)	promoter-TSS (NR_039597)	-156	NR_039597	100628604		NR_039597	miRBase:MI0018047	Mir5135	mmu-mir-5135|mu-mir-5135	microRNA 5135	ncRNA
MACS_peak_5304	chr18	78031874	78035879	+	4973	NA	intron (NM_013831, intron 1 of 14)	intron (NM_013831, intron 1 of 14)	587	NM_013831	19201	Mm.57174	NM_013831		Pstpip2	MAYP|cmo	proline-serine-threonine phosphatase-interacting protein 2	protein-coding
MACS_peak_9806	chr7	35904054	35908341	+	4973	NA	3' UTR (NM_007678, exon 1 of 1)	3' UTR (NM_007678, exon 1 of 1)	1885	NM_007678	12606	Mm.349667	NM_007678	ENSMUSG00000034957	Cebpa	C/ebpalpha|CBF-A|Cebp	CCAAT/enhancer binding protein (C/EBP), alpha	protein-coding
MACS_peak_7720	chr4	117164265	117169398	+	4973	NA	intron (NM_025739, intron 1 of 14)	intron (NM_025739, intron 1 of 14)	2689	NM_025739	66743	Mm.318331	NM_025739	ENSMUSG00000028677	Rnf220	4732477A13|4931406I20Rik|5730503K05Rik|AV302541	ring finger protein 220	protein-coding
MACS_peak_11769	chr9	122475928	122484825	+	4973	NA	Intergenic	Intergenic	-1243	NR_015610	319626	Mm.186748	NR_015610	ENSMUSG00000097736	9530059O14Rik	-	RIKEN cDNA 9530059O14 gene	ncRNA
MACS_peak_2053	chr11	103219769	103226594	+	4973	NA	intron (NM_001205236, intron 2 of 17)	(TG)n|Simple_repeat|Simple_repeat	1825	NM_183288	544817	Mm.259113	NM_133715	ENSMUSG00000034255	Arhgap27	2310069I04Rik|5730442P18Rik|Gm21552|Sh3d20	Rho GTPase activating protein 27	protein-coding
MACS_peak_5928	chr2	30656279	30658045	+	4973	NA	promoter-TSS (NM_198000)	promoter-TSS (NM_198000)	95	NM_198000	73598	Mm.34166	NM_198000	ENSMUSG00000044320	1700001O22Rik	1700113K14Rik|4930549G18Rik	RIKEN cDNA 1700001O22 gene	protein-coding
MACS_peak_7018	chr3	87797244	87806318	+	4973	NA	intron (NM_001109758, intron 1 of 7)	intron (NM_001109758, intron 1 of 7)	2497	NM_007529	12032	Mm.4598	NM_007529	ENSMUSG00000004892	Bcan	Cspg7	brevican	protein-coding
MACS_peak_9461	chr6	115941262	115945067	+	4973	NA	intron (NM_026376, intron 1 of 35)	intron (NM_026376, intron 1 of 35)	1859	NM_026376	67784	Mm.3085	NM_026376	ENSMUSG00000030123	Plxnd1	6230425C21Rik|b2b1863Clo|b2b553Clo	plexin D1	protein-coding
MACS_peak_7651	chr4	109645572	109663191	+	4973	NA	exon (NM_172296, exon 3 of 3)	exon (NM_172296, exon 3 of 3)	3751	NM_172296	242620	Mm.32825	NM_172296	ENSMUSG00000047143	Dmrta2	Dmrt5	doublesex and mab-3 related transcription factor like family A2	protein-coding
MACS_peak_9726	chr7	26471417	26475123	+	4973	NA	intron (NM_011577, intron 1 of 6)	CpG	1249	NM_011577	21803	Mm.248380	NM_011577	ENSMUSG00000002603	Tgfb1	TGF-beta1|TGFbeta1|Tgfb|Tgfb-1	transforming growth factor, beta 1	protein-coding
MACS_peak_1969	chr11	98206882	98213421	+	4973	NA	promoter-TSS (NM_144828)	promoter-TSS (NM_144828)	99	NM_144828	19049	Mm.45372	NM_144828	ENSMUSG00000061718	Ppp1r1b	AU040756|DARPP-32|Darpp32	protein phosphatase 1, regulatory (inhibitor) subunit 1B	protein-coding
MACS_peak_10134	chr7	106774710	106777432	+	4973	NA	promoter-TSS (NM_001195529)	promoter-TSS (NM_001195529)	-458	NM_001195529	100503386	Mm.180719	NM_001195529	ENSMUSG00000096606	Gm4980	6430704N06|EG245190|Tpbgl	predicted gene 4980	protein-coding
MACS_peak_5801	chr2	10291011	10298141	+	4973	NA	intron (NM_177386, intron 1 of 22)	CpG	513	NM_177386	353282	Mm.329991	NM_177386	ENSMUSG00000061186	Sfmbt2	D2Wsu23e|D330030P06Rik	Scm-like with four mbt domains 2	protein-coding
MACS_peak_5129	chr18	38758662	38761031	+	4960	NA	intron (NM_011898, intron 1 of 1)	intron (NM_011898, intron 1 of 1)	1076	NM_011898	24066	Mm.42038	NM_011898	ENSMUSG00000024427	Spry4	A030006O18Rik|sprouty4	sprouty homolog 4 (Drosophila)	protein-coding
MACS_peak_8992	chr5	147994583	148005758	+	4958	NA	promoter-TSS (NM_008178)	promoter-TSS (NM_008178)	-102	NM_008178	14842	Mm.4797	NM_008178	ENSMUSG00000053129	Gsx1	Gsh-1|Gsh1	GS homeobox 1	protein-coding
MACS_peak_10572	chr8	26208675	26214697	+	4958	NA	intron (NM_031257, intron 1 of 11)	intron (NM_031257, intron 1 of 11)	597	NM_031257	83436	Mm.261122	NM_031257	ENSMUSG00000031557	Plekha2	6430512N22Rik|AI851530|AU041791|TAPP2|W91773	pleckstrin homology domain-containing, family A (phosphoinositide binding specific) member 2	protein-coding
MACS_peak_4723	chr17	36279952	36284089	+	4958	NA	promoter-TSS (NR_033517)	promoter-TSS (NR_033517)	57	NR_033517	675325	Mm.75890	NR_033517	ENSMUSG00000038311	2410017I17Rik	-	RIKEN cDNA 2410017I17 gene	ncRNA
MACS_peak_1533	chr11	53270009	53272119	+	4958	NA	intron (NM_001290789, intron 1 of 6)	intron (NM_001290789, intron 1 of 6)	357	NM_027917	71774	Mm.274370	NM_027917	ENSMUSG00000018387	Shroom1	Apx|Shrm1	shroom family member 1	protein-coding
MACS_peak_11868	chrX	72478221	72480737	+	4958	NA	intron (NM_001161373, intron 21 of 24)	intron (NM_001161373, intron 21 of 24)	-70389	NM_001033786	434800	Mm.460747	NM_001033786	ENSMUSG00000073094	Smim9	4930428E23Rik	small integral membrane protein 9	protein-coding
MACS_peak_2736	chr13	22087101	22103868	+	4958	NA	intron (NM_019429, intron 9 of 11)	L2b|LINE|L2	6126	NM_019429	54373	Mm.32043	NM_019429	ENSMUSG00000006179	Prss16	AI448615|TSSP	protease, serine 16 (thymus)	protein-coding
MACS_peak_4025	chr15	98606035	98613110	+	4958	NA	promoter-TSS (NM_011718)	promoter-TSS (NM_011718)	-991	NM_011718	22410	Mm.4709	NM_011718	ENSMUSG00000022996	Wnt10b	Wnt12	wingless-type MMTV integration site family, member 10B	protein-coding
MACS_peak_8488	chr5	73402840	73407559	+	4958	NA	Intergenic	CpG	7056	NM_173403	231290	Mm.491387	NM_173403		Slc10a4	E130304D01	solute carrier family 10 (sodium/bile acid cotransporter family), member 4	protein-coding
MACS_peak_4058	chr15	100874913	100879310	+	4958	NA	TTS (NM_011323)	TTS (NM_011323)	7719	NM_001214911	668225	Mm.385011	NM_001214911	ENSMUSG00000095440	Fignl2	EG668225	fidgetin-like 2	protein-coding
MACS_peak_7194	chr3	108026765	108030799	+	4958	NA	intron (NM_008596, intron 2 of 5)	CpG	735	NM_008596	17306	Mm.316885	NM_008596	ENSMUSG00000027887	Sypl2	AI552439|Mg29	synaptophysin-like 2	protein-coding
MACS_peak_11412	chr9	57347569	57355329	+	4958	NA	promoter-TSS (NM_133982)	promoter-TSS (NM_133982)	-460	NM_133982	102614	Mm.274421	NM_133982	ENSMUSG00000062309	Rpp25	AI851155	ribonuclease P/MRP 25 subunit	protein-coding
MACS_peak_1308	chr11	3091078	3095120	+	4954	NA	intron (NM_030207, intron 1 of 32)	CpG	367	NM_030207	78887	Mm.485866	NM_030207	ENSMUSG00000023764	Sfi1	-	Sfi1 homolog, spindle assembly associated (yeast)	protein-coding
MACS_peak_10747	chr8	74207099	74214969	+	4830	NA	intron (NM_001190830, intron 22 of 23)	intron (NM_001190830, intron 22 of 23)	-2117	NM_013564	16336	Mm.476857	NM_013564	ENSMUSG00000079019	Insl3	Rlf|Rlnl	insulin-like 3	protein-coding
MACS_peak_6512	chr2	152451480	152454922	+	4830	NA	intron (NM_009047, intron 1 of 4)	CpG	457	NM_009047	19700	Mm.8752	NM_009047	ENSMUSG00000000359	Rem1	E030011C07Rik|Rem	rad and gem related GTP binding protein 1	protein-coding
MACS_peak_11466	chr9	64231279	64235816	+	4830	NA	5' UTR (NM_001134399, exon 1 of 25)	5' UTR (NM_001134399, exon 1 of 25)	114	NM_001134399	214058	Mm.127721	NM_172522	ENSMUSG00000036466	Megf11	2410080H04Rik|D130061K05	multiple EGF-like-domains 11	protein-coding
MACS_peak_1052	chr10	80392944	80397307	+	4830	NA	TTS (NM_008655)	TTS (NM_008655)	2289	NM_008655	17873	Mm.1360	NM_008655	ENSMUSG00000015312	Gadd45b	AI323528|Myd118	growth arrest and DNA-damage-inducible 45 beta	protein-coding
MACS_peak_4211	chr16	18618264	18629010	+	4830	NA	intron (NM_213614, intron 8 of 11)	intron (NM_213614, intron 8 of 11)	-1141	NM_010327	14724	Mm.475622	NM_010327	ENSMUSG00000050761	Gp1bb	-	glycoprotein Ib, beta polypeptide	protein-coding
MACS_peak_2165	chr11	116392076	116396726	+	4830	NA	promoter-TSS (NM_025367)	promoter-TSS (NM_025367)	-151	NM_025367	20698	Mm.20944	NM_011451	ENSMUSG00000061878	Sphk1	1110006G24Rik|Sk1|Spk1	sphingosine kinase 1	protein-coding
MACS_peak_2221	chr11	120519052	120523525	+	4830	NA	intron (NM_175263, intron 2 of 11)	CpG	863	NM_175263	77583	Mm.32839	NM_175263	ENSMUSG00000042988	Notum	5730593N15Rik	notum pectinacetylesterase homolog (Drosophila)	protein-coding
MACS_peak_5380	chr19	5081214	5086651	+	4830	NA	intron (NM_001001885, intron 1 of 1)	intron (NM_001001885, intron 1 of 1)	1545	NM_001001885	381199	Mm.329663	NM_001001885	ENSMUSG00000061451	Tmem151a	AW125688|Gm961|Tmem151	transmembrane protein 151A	protein-coding
MACS_peak_4083	chr15	102086634	102088499	+	4830	NA	intron (NM_011244, intron 1 of 9)	intron (NM_011244, intron 1 of 9)	387	NM_011244	19411	Mm.1273	NM_011244	ENSMUSG00000001288	Rarg	Nr1b3|RAR-gamma|RARD|RARgamma2	retinoic acid receptor, gamma	protein-coding
MACS_peak_2009	chr11	101121013	101128083	+	4830	NA	intron (NM_175638, intron 2 of 18)	intron (NM_175638, intron 2 of 18)	2667	NM_175638	69847	Mm.23656	NM_175638	ENSMUSG00000035112	Wnk4	2010002J11Rik|Pha2b|Prkwnk4	WNK lysine deficient protein kinase 4	protein-coding
MACS_peak_2863	chr13	49341880	49344573	+	4830	NA	intron (NM_028340, intron 1 of 4)	CpG	306	NM_025491	66329	Mm.34308	NM_025491	ENSMUSG00000021384	Susd3	1700017I11Rik|2810440J20Rik	sushi domain containing 3	protein-coding
MACS_peak_3961	chr15	89207154	89210261	+	4830	NA	intron (NM_001013022, intron 3 of 4)	intron (NM_001013022, intron 3 of 4)	978	NM_001013022	70113	Mm.247273	NM_001013022	ENSMUSG00000047394	Odf3b	2010001J22Rik	outer dense fiber of sperm tails 3B	protein-coding
MACS_peak_9407	chr6	99674883	99678226	+	4830	NA	promoter-TSS (NM_015768)	promoter-TSS (NM_015768)	-168	NM_001170419	50501	Mm.87365	NM_015768	ENSMUSG00000030069	Prok2	Bv8|PK2|Prok1	prokineticin 2	protein-coding
MACS_peak_3650	chr15	5191891	5195304	+	4830	NA	intron (NM_008965, intron 1 of 2)	intron (NM_008965, intron 1 of 2)	590	NM_001136079	19219	Mm.18509	NM_008965	ENSMUSG00000039942	Ptger4	EP4|Ptgerep4	prostaglandin E receptor 4 (subtype EP4)	protein-coding
MACS_peak_6159	chr2	74598176	74603443	+	4830	NA	promoter-TSS (NM_010467)	promoter-TSS (NM_010467)	144	NR_110445	102634678	Mm.177058	NR_110445		Haglr	6720416L17Rik|Hoxd-as1|Mdgt	Hoxd antisense growth associated long non-coding RNA	ncRNA
MACS_peak_9051	chr6	8896328	8908965	+	4813	NA	intron (NM_008751, intron 1 of 1)	intron (NM_008751, intron 1 of 1)	2627	NM_008751	18231	Mm.46954	NM_008751	ENSMUSG00000046178	Nxph1	C130005L03Rik	neurexophilin 1	protein-coding
MACS_peak_4213	chr16	18774977	18779522	+	4813	NA	exon (NM_013805, exon 1 of 1)	exon (NM_013805, exon 1 of 1)	309	NM_013805	12741	Mm.22768	NM_013805	ENSMUSG00000041378	Cldn5	AI854493|MBEC1|Tmvcf	claudin 5	protein-coding
MACS_peak_7805	chr4	125158720	125176653	+	4813	NA	promoter-TSS (NM_001081097)	promoter-TSS (NM_001081097)	-389	NM_001081097	14807	Mm.40896	NM_001081097	ENSMUSG00000001985	Grik3	9630027E11|GluK3|GluR7-3|Glur-7|Glur7	glutamate receptor, ionotropic, kainate 3	protein-coding
MACS_peak_3861	chr15	79081453	79085135	+	4813	NA	exon (NM_020516, exon 4 of 6)	exon (NM_020516, exon 4 of 6)	1884	NM_020516	57274	Mm.441697	NM_020516	ENSMUSG00000032988	Slc16a8	Mct3	solute carrier family 16 (monocarboxylic acid transporters), member 8	protein-coding
MACS_peak_2669	chr12	120074332	120079526	+	4813	NA	Intergenic	Intergenic	-7873	NM_177082	320145	Mm.51682	NM_177082	ENSMUSG00000048562	Sp8	D930049B17Rik|mBtd	trans-acting transcription factor 8	protein-coding
MACS_peak_11598	chr9	91271585	91283766	+	4813	NA	intron (NM_009576, intron 3 of 4)	intron (NM_009576, intron 3 of 4)	13865	NM_009576	22774	Mm.8062	NM_009576		Zic4	-	zinc finger protein of the cerebellum 4	protein-coding
MACS_peak_5680	chr19	46219518	46225790	+	4813	NA	intron (NM_008852, intron 1 of 3)	intron (NM_008852, intron 1 of 3)	161	NM_008852	18742	Mm.6255	NM_008852	ENSMUSG00000025229	Pitx3	Ptx3|ak	paired-like homeodomain transcription factor 3	protein-coding
MACS_peak_5504	chr19	28751162	28755577	+	4813	NA	intron (NR_045330, intron 1 of 4)	intron (NR_045330, intron 1 of 4)	655	NR_045330	320176	Mm.406716	NR_045330	ENSMUSG00000097735	D930032P07Rik	-	RIKEN cDNA D930032P07 gene	ncRNA
MACS_peak_2286	chr12	31567419	31571167	+	4813	NA	5' UTR (NM_001159743, exon 1 of 5)	5' UTR (NM_001159743, exon 1 of 5)	104	NM_001159743	100294583	Mm.399726	NM_001159743	ENSMUSG00000054204	Fam150b	6230419C23Rik	family with sequence similarity 150, member B	protein-coding
MACS_peak_7964	chr4	136831466	136835924	+	4813	NA	intron (NM_009523, intron 1 of 4)	CpG	145	NM_009523	22417	Mm.20355	NM_009523	ENSMUSG00000036856	Wnt4	Wnt-4	wingless-type MMTV integration site family, member 4	protein-coding
MACS_peak_8514	chr5	76372258	76377696	+	4813	NA	promoter-TSS (NM_010612)	promoter-TSS (NM_010612)	-524	NM_010612	16542	Mm.285	NM_010612	ENSMUSG00000062960	Kdr	6130401C07|Flk-1|Flk1|Krd-1|Ly73|VEGFR-2|VEGFR2|sVEGFR-2	kinase insert domain protein receptor	protein-coding
MACS_peak_3761	chr15	55137802	55141697	+	4813	NA	intron (NM_181277, intron 1 of 47)	intron (NM_181277, intron 1 of 47)	444	NM_181277	12818	Mm.297859	NM_181277	ENSMUSG00000022371	Col14a1	5730412L22Rik|AW108078	collagen, type XIV, alpha 1	protein-coding
MACS_peak_4221	chr16	20588114	20594216	+	4813	NA	intron (NM_182636, intron 4 of 14)	intron (NM_182636, intron 4 of 14)	1510	NM_001144953	328643	Mm.40539	NM_182636	ENSMUSG00000046613	Vwa5b2	BB182430|EG328644|Gm1738|Gm931	von Willebrand factor A domain containing 5B2	protein-coding
MACS_peak_4040	chr15	99051741	99058563	+	4772	NA	promoter-TSS (NM_010601)	promoter-TSS (NM_010601)	-255	NM_010601	16512	Mm.374793	NM_010601	ENSMUSG00000037579	Kcnh3	AU019351|C030044P22Rik|Elk2|Kv12.2|Melk2	potassium voltage-gated channel, subfamily H (eag-related), member 3	protein-coding
MACS_peak_1537	chr11	53290956	53294444	+	4700	NA	exon (NM_183173, exon 1 of 1)	exon (NM_183173, exon 1 of 1)	997	NM_183173	237761	Mm.145208	NM_183173	ENSMUSG00000044352	Sowaha	A830006N08Rik|Ankrd43	sosondowah ankyrin repeat domain family member A	protein-coding
MACS_peak_10465	chr8	11475108	11480055	+	4698	NA	intron (NM_011227, intron 1 of 1)	B1_Mus1|SINE|Alu	918	NM_011227	19332	Mm.37632	NM_011227		Rab20	AA536966|D8Ertd350e	RAB20, member RAS oncogene family	protein-coding
MACS_peak_11072	chr8	123602476	123615345	+	4698	NA	exon (NM_010426, exon 1 of 2)	exon (NM_010426, exon 1 of 2)	624	NM_010426	15227	Mm.33897	NM_010426	ENSMUSG00000042812	Foxf1	AI450827|FREAC1|Foxf1a|Freac-1|HFH-8|Hfh8	forkhead box F1	protein-coding
MACS_peak_11332	chr9	44942141	44949431	+	4688	NA	Intergenic	Intergenic	-1339	NM_001013390	399548	Mm.335112	NM_001013390	ENSMUSG00000046480	Scn4b	Gm1471	sodium channel, type IV, beta	protein-coding
MACS_peak_6188	chr2	84709816	84713416	+	4688	NA	TTS (NM_199223)	TTS (NM_199223)	15233	NM_199223	269295	Mm.86447	NM_199223	ENSMUSG00000050896	Rtn4rl2	Ngr2|Ngrh1|Ngrl3	reticulon 4 receptor-like 2	protein-coding
MACS_peak_5088	chr18	36440404	36443201	+	4688	NA	intron (NM_008989, intron 1 of 1)	intron (NM_008989, intron 1 of 1)	986	NM_008989	19290	Mm.231802	NM_008989		Pura	CAGER-1|Pur-alpha|ssCRE-BP	purine rich element binding protein A	protein-coding
MACS_peak_8310	chr5	24235008	24238270	+	4688	NA	promoter-TSS (NM_001081441)	promoter-TSS (NM_001081441)	-141	NM_001081441	269633	Mm.392539	NM_026621		Wdr86	2810046M22Rik|BC059069	WD repeat domain 86	protein-coding
MACS_peak_896	chr10	51739572	51750254	+	4688	NA	exon (NM_001300957, exon 2 of 3)	exon (NM_001300957, exon 2 of 3)	2605	NM_153786	215031	Mm.87237	NM_153786	ENSMUSG00000049641	Vgll2	C130057C21Rik|VITO-1|Vito1|vgl-2	vestigial like 2 homolog (Drosophila)	protein-coding
MACS_peak_3133	chr13	101320482	101323606	+	4688	NA	intron (NM_008756, intron 1 of 8)	CpG	409	NM_008756	18260	Mm.4807	NM_008756	ENSMUSG00000021638	Ocln	AI503564|Ocl	occludin	protein-coding
MACS_peak_7862	chr4	129816061	129819009	+	4688	NA	Intergenic	Intergenic	-1129	NM_198959	230777	Mm.246595	NM_198959	ENSMUSG00000028778	Hcrtr1	Ox1r	hypocretin (orexin) receptor 1	protein-coding
MACS_peak_10514	chr8	14094891	14098626	+	4688	NA	intron (NM_001145965, intron 1 of 14)	CpG	883	NM_172910	244310	Mm.404697	NM_172910	ENSMUSG00000047495	Dlgap2	6430596N04Rik|DAP2|Sapap2	discs, large (Drosophila) homolog-associated protein 2	protein-coding
MACS_peak_7190	chr3	107382644	107389947	+	4669	NA	Intergenic	Intergenic	-11654	NM_007441	11694	Mm.10112	NM_007441	ENSMUSG00000014603	Alx3	-	aristaless-like homeobox 3	protein-coding
MACS_peak_9202	chr6	51381622	51385170	+	4669	NA	exon (NM_010903, exon 1 of 4)	exon (NM_010903, exon 1 of 4)	727	NM_010903	18025	Mm.42138	NM_010903	ENSMUSG00000029832	Nfe2l3	Nrf3	nuclear factor, erythroid derived 2, like 3	protein-coding
MACS_peak_6989	chr3	84280987	84285333	+	4669	NA	intron (NM_001033301, intron 1 of 11)	intron (NM_001033301, intron 1 of 11)	253	NM_001205355	229474	Mm.331107	NM_001033301		Fhdc1	6330505N24Rik|Gm126	FH2 domain containing 1	protein-coding
MACS_peak_719	chr1	191991657	192000194	+	4669	NA	Intergenic	Intergenic	-1366	NM_008937	19130	Mm.132579	NM_008937	ENSMUSG00000010175	Prox1	A230003G05Rik	prospero homeobox 1	protein-coding
MACS_peak_8110	chr4	148322692	148328345	+	4669	NA	intron (NM_001159344, intron 20 of 20)	intron (NM_001159344, intron 20 of 20)	147017	NM_027195	69743	Mm.233879	NM_027195	ENSMUSG00000028977	Casz1	2410019P08Rik|AV096627|BC040081|Cst|D4Ertd432e	castor zinc finger 1	protein-coding
MACS_peak_937	chr10	61438482	61442932	+	4669	NA	intron (NM_007731, intron 1 of 40)	intron (NM_007731, intron 1 of 40)	1149	NM_007731	12817	Mm.300931	NM_007731	ENSMUSG00000058806	Col13a1	-	collagen, type XIII, alpha 1	protein-coding
MACS_peak_7249	chr3	127489867	127495319	+	4669	NA	promoter-TSS (NM_145133)	promoter-TSS (NM_145133)	-238	NM_145133	211550	Mm.31852	NM_145133	ENSMUSG00000046688	Tifa	T2bp	TRAF-interacting protein with forkhead-associated domain	protein-coding
MACS_peak_8612	chr5	102192673	102197283	+	4669	NA	intron (NM_173370, intron 1 of 12)	intron (NM_173370, intron 1 of 12)	829	NM_173370	74596	Mm.46764	NM_173370	ENSMUSG00000029330	Cds1	4833409J18Rik|AI314024|AW125888	CDP-diacylglycerol synthase 1	protein-coding
MACS_peak_5041	chr18	21808736	21813925	+	4669	NA	promoter-TSS (NM_001081403)	promoter-TSS (NM_001081403)	-461	NM_001081403	225266	Mm.436836	NM_001081403	ENSMUSG00000042514	Klhl14	6330403N15Rik|AI785250|printor	kelch-like 14	protein-coding
MACS_peak_8120	chr4	149402257	149410052	+	4669	NA	Intergenic	(T)n|Simple_repeat|Simple_repeat	-23022	NM_173371	100198	Mm.22183	NM_173371	ENSMUSG00000028980	H6pd	AI785303|G6pd1|Gpd-1|Gpd1	hexose-6-phosphate dehydrogenase (glucose 1-dehydrogenase)	protein-coding
MACS_peak_6763	chr2	181403883	181408667	+	4669	NA	promoter-TSS (NM_009236)	promoter-TSS (NM_009236)	70	NM_009236	20672	Mm.264904	NM_009236	ENSMUSG00000046470	Sox18	AI385749|Ra|Ragl	SRY (sex determining region Y)-box 18	protein-coding
MACS_peak_11553	chr9	79565112	79569315	+	4669	NA	promoter-TSS (NM_001290308)	promoter-TSS (NM_001290308)	-684	NM_001290308	12816	Mm.3819	NM_007730	ENSMUSG00000032332	Col12a1	-	collagen, type XII, alpha 1	protein-coding
MACS_peak_3893	chr15	82039128	82044618	+	4669	NA	intron (NM_001207021, intron 1 of 3)	intron (NM_001207021, intron 1 of 3)	1372	NM_001207021	435145	Mm.41289	NM_001207021	ENSMUSG00000096883	AI848285	Orf26	expressed sequence AI848285	protein-coding
MACS_peak_2531	chr12	88639197	88642132	+	4669	NA	promoter-TSS (NM_001290302)	promoter-TSS (NM_001290302)	-9	NM_001290302	217738	Mm.219363	NM_001290302		Ism2	Gm264|Thsd3	isthmin 2 homolog (zebrafish)	protein-coding
MACS_peak_5921	chr2	29103389	29111350	+	4669	NA	intron (NR_029460, intron 1 of 1)	CpG	1144	NR_029460	76220	Mm.330108	NR_029460		6530402F18Rik	mKIAA1857	RIKEN cDNA 6530402F18 gene	ncRNA
MACS_peak_7905	chr4	133154056	133158487	+	4669	NA	TTS (NM_018754)	TTS (NM_018754)	1812	NM_018754	55948	Mm.44482	NM_018754	ENSMUSG00000047281	Sfn	Er|Mme1|Ywhas	stratifin	protein-coding
MACS_peak_6108	chr2	70396650	70409889	+	4669	NA	intron (NM_008077, intron 2 of 16)	intron (NM_008077, intron 2 of 16)	-1855	NR_040496	68986	Mm.437697	NR_040496	ENSMUSG00000087264	Gad1os	1500002O10Rik	glutamate decarboxylase 1, opposite strand	ncRNA
MACS_peak_7489	chr4	55541862	55548039	+	4669	NA	5' UTR (NM_010637, exon 1 of 5)	5' UTR (NM_010637, exon 1 of 5)	397	NM_010637	16600	Mm.4325	NM_010637	ENSMUSG00000003032	Klf4	EZF|Gklf|Zie	Kruppel-like factor 4 (gut)	protein-coding
MACS_peak_5524	chr19	32669247	32671008	+	4669	NA	promoter-TSS (NM_001201470)	promoter-TSS (NM_001201470)	-78	NM_001201470	23972	Mm.203916	NM_011864	ENSMUSG00000024899	Papss2	1810018P12Rik|AI159688|AtpsU2|Atpsk2|Sk2|bm	3'-phosphoadenosine 5'-phosphosulfate synthase 2	protein-coding
MACS_peak_9191	chr6	49770444	49773839	+	4580	NA	promoter-TSS (NM_023456)	promoter-TSS (NM_023456)	-587	NM_023456	109648	Mm.154796	NM_023456	ENSMUSG00000029819	Npy	0710005A05Rik	neuropeptide Y	protein-coding
MACS_peak_7459	chr4	46355894	46364135	+	4580	NA	Intergenic	Intergenic	2948	NM_183298	110805	Mm.354634	NM_183298		Foxe1	Titf2	forkhead box E1	protein-coding
MACS_peak_1069	chr10	80804573	80806846	+	4570	NA	intron (NM_148951, intron 1 of 5)	intron (NM_148951, intron 1 of 5)	302	NM_148951	209047	Mm.218755	NM_148951	ENSMUSG00000034872	Gipc3	Ahl5|Rgs19ip3	GIPC PDZ domain containing family, member 3	protein-coding
MACS_peak_1636	chr11	68766331	68769357	+	4547	NA	intron (NM_177566, intron 2 of 15)	intron (NM_177566, intron 2 of 15)	2516	NM_177566	442801	Mm.376147	NM_177566	ENSMUSG00000052921	Arhgef15	D130071N09|D530030K12Rik|E5	Rho guanine nucleotide exchange factor (GEF) 15	protein-coding
MACS_peak_8326	chr5	28487746	28506186	+	4547	NA	exon (NM_010134, exon 2 of 2)	exon (NM_010134, exon 2 of 2)	4730	NM_010134	13799	Mm.4298	NM_010134		En2	BB131122|En-2	engrailed 2	protein-coding
MACS_peak_5254	chr18	67290496	67293995	+	4547	NA	promoter-TSS (NM_010307)	promoter-TSS (NM_010307)	-969	NM_010307	14680	Mm.440746	NM_010307	ENSMUSG00000024524	Gnal	2610011C15Rik|9630020G10Rik|Galphaolf|Gna10|Golf	guanine nucleotide binding protein, alpha stimulating, olfactory type	protein-coding
MACS_peak_3420	chr14	57750817	57752721	+	4547	NA	intron (NM_001271663, intron 1 of 2)	CpG	679	NM_001271663	14623	Mm.25652	NM_008128	ENSMUSG00000040055	Gjb6	AA958971|Cx30|D14Bwg0506e	gap junction protein, beta 6	protein-coding
MACS_peak_8484	chr5	72969908	72973676	+	4547	NA	exon (NM_174877, exon 1 of 4)	exon (NM_174877, exon 1 of 4)	531	NM_174877	317755	Mm.11934	NM_174877	ENSMUSG00000063935	Zar1	-	zygote arrest 1	protein-coding
MACS_peak_4080	chr15	101973111	101976780	+	4547	NA	5' UTR (NM_008344, exon 1 of 4)	5' UTR (NM_008344, exon 1 of 4)	328	NM_008344	16012	Mm.358609	NM_008344	ENSMUSG00000023046	Igfbp6	IGFBP-6	insulin-like growth factor binding protein 6	protein-coding
MACS_peak_2288	chr12	31756918	31761114	+	4547	NA	exon (NM_027828, exon 1 of 2)	exon (NM_027828, exon 1 of 2)	183	NM_027828	104943	Mm.248938	NM_027828	ENSMUSG00000036136	Fam110c	9030611O19Rik|AU019489	family with sequence similarity 110, member C	protein-coding
MACS_peak_4417	chr16	91266264	91277844	+	4547	NA	3' UTR (NM_016968, exon 1 of 1)	3' UTR (NM_016968, exon 1 of 1)	2040	NM_016968	50914	Mm.39300	NM_016968	ENSMUSG00000046160	Olig1	AI836478|AW494459|Bhlhb6|Olg-1|Oligo1|bHLHe21	oligodendrocyte transcription factor 1	protein-coding
MACS_peak_2994	chr13	72774799	72779648	+	4547	NA	Intergenic	Intergenic	10797	NM_010574	16372	Mm.28888	NM_010574	ENSMUSG00000001504	Irx2	IRX6	Iroquois related homeobox 2 (Drosophila)	protein-coding
MACS_peak_2542	chr12	101203065	101206100	+	4540	NA	intron (NM_001164426, intron 2 of 2)	intron (NM_001164426, intron 2 of 2)	1873	NM_001164427	217826	Mm.312335	NM_146037	ENSMUSG00000045404	Kcnk13	BB085247|F730021E22Rik|Gm1570|Gm1685	potassium channel, subfamily K, member 13	protein-coding
MACS_peak_1500	chr11	49421199	49427567	+	4526	NA	intron (NM_008029, intron 1 of 29)	intron (NM_008029, intron 1 of 29)	1202	NM_008029	14257	Mm.3291	NM_008029	ENSMUSG00000020357	Flt4	AI323512|Chy|Flt-4|VEGFR-3|VEGFR3	FMS-like tyrosine kinase 4	protein-coding
MACS_peak_804	chr10	19867317	19871045	+	4526	NA	intron (NM_008635, intron 1 of 17)	intron (NM_008635, intron 1 of 17)	455	NM_001198635	17761	Mm.20928	NM_008635	ENSMUSG00000019996	Map7	E-MAP-115|MAP-7|Mtap7|R75000|mshi|mste|ste	microtubule-associated protein 7	protein-coding
MACS_peak_3176	chr13	113820285	113826637	+	4526	NA	Intergenic	Intergenic	-2126	NM_001281487	238896		NM_001281487	ENSMUSG00000078926	Cdc20b	EG238896|EG622422	cell division cycle 20B	protein-coding
MACS_peak_11165	chr9	8899070	8903671	+	4526	NA	exon (NM_008829, exon 1 of 8)	exon (NM_008829, exon 1 of 8)	1537	NM_008829	18667	Mm.12798	NM_008829		Pgr	9930019P03Rik|BB114106|ENSMUSG00000074510|NR3C3|PR|PR-A|PR-B	progesterone receptor	protein-coding
MACS_peak_235	chr1	74900945	74905926	+	4526	NA	3' UTR (NM_009872, exon 1 of 1)	3' UTR (NM_009872, exon 1 of 1)	1832	NM_009872	12570	Mm.153833	NM_009872	ENSMUSG00000090071	Cdk5r2	B230310J22Rik|p39	cyclin-dependent kinase 5, regulatory subunit 2 (p39)	protein-coding
MACS_peak_5246	chr18	66448732	66453433	+	4526	NA	intron (NM_178793, intron 1 of 10)	CpG	410	NM_178793	320924	Mm.442049	NM_178793	ENSMUSG00000046318	Ccbe1	4933426F18Rik|9430093N24Rik|mKIAA1983	collagen and calcium binding EGF domains 1	protein-coding
MACS_peak_571	chr1	158132857	158137129	+	4526	NA	5' UTR (NM_177838, exon 1 of 5)	5' UTR (NM_177838, exon 1 of 5)	163	NM_177838	329274	Mm.150857	NM_177838	ENSMUSG00000015484	Fam163a	A230106N23Rik	family with sequence similarity 163, member A	protein-coding
MACS_peak_8187	chr4	154733040	154737426	+	4526	NA	intron (NM_008860, intron 1 of 17)	CpG	304	NM_008860	18762	Mm.28561	NM_008860	ENSMUSG00000029053	Prkcz	AI098070|C80388|Pkcz|R74924|aPKCzeta|nPKC-zeta|zetaPKC	protein kinase C, zeta	protein-coding
MACS_peak_10867	chr8	94319685	94334285	+	4526	NA	Intergenic	Intergenic	-1432	NM_008393	16373	Mm.238044	NM_008393	ENSMUSG00000031734	Irx3	AI894186	Iroquois related homeobox 3	protein-coding
MACS_peak_9046	chr6	7504130	7506871	+	4526	NA	intron (NM_009311, intron 1 of 6)	intron (NM_009311, intron 1 of 6)	429	NM_009311	21333	Mm.1440	NM_009311	ENSMUSG00000061762	Tac1	4930528L02Rik|NK-1|NK1|Nkna|PPT-A|PPTA|SP	tachykinin 1	protein-coding
MACS_peak_1530	chr11	52576201	52580067	+	4526	NA	promoter-TSS (NM_177059)	promoter-TSS (NM_177059)	-74	NM_177059	320027	Mm.44518	NM_177059		Fstl4	B230374F23Rik|SPIG1|mKIAA1061	follistatin-like 4	protein-coding
MACS_peak_2142	chr11	115181316	115186136	+	4526	NA	promoter-TSS (NM_176847)	promoter-TSS (NM_176847)	-494	NM_176847	16470	Mm.451539	NM_176847	ENSMUSG00000045288	Ush1g	Sans|js	Usher syndrome 1G	protein-coding
MACS_peak_6311	chr2	118499720	118504249	+	4526	NA	promoter-TSS (NM_001145854)	promoter-TSS (NM_001145854)	-998	NM_001145854	214230	Mm.241857	NM_001033254	ENSMUSG00000074923	Pak6	4732456M09	p21 protein (Cdc42/Rac)-activated kinase 6	protein-coding
MACS_peak_362	chr1	89046998	89055672	+	4526	NA	exon (NM_021306, exon 2 of 18)	exon (NM_021306, exon 2 of 18)	1376	NM_001277925	13599	Mm.140765	NM_021306	ENSMUSG00000026247	Ecel1	DINE|xce	endothelin converting enzyme-like 1	protein-coding
MACS_peak_6025	chr2	38201659	38216751	+	4526	NA	intron (NM_001290646, intron 2 of 4)	intron (NM_001290646, intron 2 of 4)	2377	NM_010710	16870	Mm.142856	NM_010710	ENSMUSG00000000247	Lhx2	LH2A|Lh-2|Lim2|ap|apterous	LIM homeobox protein 2	protein-coding
MACS_peak_5890	chr2	27351724	27354023	+	4460	NA	Intergenic	MURVY-int|LTR|ERV1	-17794	NM_080848	140858	Mm.28265	NM_080848	ENSMUSG00000026917	Wdr5	2410008O07Rik|AA408785|AA960360|Big|Big-3	WD repeat domain 5	protein-coding
MACS_peak_11474	chr9	65476386	65479384	+	4441	NA	promoter-TSS (NM_028030)	promoter-TSS (NM_028030)	-504	NM_028030	71973	Mm.29148	NM_028030	ENSMUSG00000032387	Rbpms2	2400008B06Rik|AI316523	RNA binding protein with multiple splicing 2	protein-coding
MACS_peak_5974	chr2	33399399	33401838	+	4441	NA	Intergenic	Intergenic	-76566	NM_001025594	71834	Mm.44186	NM_027947	ENSMUSG00000026788	Zbtb43	1700010E06Rik|Zfp297b|mKIAA0414	zinc finger and BTB domain containing 43	protein-coding
MACS_peak_232	chr1	74826728	74841958	+	4441	NA	Intergenic	Intergenic	-4250	NM_009518	22409	Mm.5130	NM_009518		Wnt10a	-	wingless-type MMTV integration site family, member 10A	protein-coding
MACS_peak_4441	chr16	93681165	93685450	+	4441	NA	promoter-TSS (NM_173047)	promoter-TSS (NM_173047)	-157	NM_173047	109857	Mm.4512	NM_173047	ENSMUSG00000022947	Cbr3	1110001J05Rik|C81353	carbonyl reductase 3	protein-coding
MACS_peak_2878	chr13	52677830	52679583	+	4407	NA	promoter-TSS (NM_001198977)	promoter-TSS (NM_001198977)	-100	NM_001198977	20963	Mm.375031	NM_011518	ENSMUSG00000021457	Syk	Sykb	spleen tyrosine kinase	protein-coding
MACS_peak_1227	chr10	120787186	120789989	+	4407	NA	Intergenic	CpG	-13559	NM_029364	75612	Mm.207683	NM_029364	ENSMUSG00000034707	Gns	2610016K11Rik|AU042285|C87209|G6S|N28088	glucosamine (N-acetyl)-6-sulfatase	protein-coding
MACS_peak_7567	chr4	89353881	89356416	+	4407	NA	exon (NM_175647, exon 1 of 2)	exon (NM_175647, exon 1 of 2)	259	NM_175647	242523	Mm.130167	NM_175647	ENSMUSG00000043753	Dmrta1	Dmrt4	doublesex and mab-3 related transcription factor like family A1	protein-coding
MACS_peak_233	chr1	74845618	74854518	+	4407	NA	exon (NM_009518, exon 4 of 4)	exon (NM_009518, exon 4 of 4)	11475	NM_009518	22409	Mm.5130	NM_009518		Wnt10a	-	wingless-type MMTV integration site family, member 10A	protein-coding
MACS_peak_10225	chr7	125632958	125636430	+	4407	NA	exon (NM_001033380, exon 1 of 1)	exon (NM_001033380, exon 1 of 1)	795	NM_001033380	319622	Mm.323386	NM_001033380	ENSMUSG00000095115	Itpripl2	C130081G24|E030018N11Rik	inositol 1,4,5-triphosphate receptor interacting protein-like 2	protein-coding
MACS_peak_3856	chr15	78871679	78875285	+	4407	NA	TTS (NM_001161712)	TTS (NM_001161712)	1167	NM_015738	14429	Mm.390805	NM_015738	ENSMUSG00000006378	Galr3	Galnr3	galanin receptor 3	protein-coding
MACS_peak_2791	chr13	36825555	36829189	+	4407	NA	Intergenic	Intergenic	-1026	NM_153529	68404	Mm.232930	NM_153529	ENSMUSG00000039114	Nrn1	0710008J23Rik|Cpg15|Nrn	neuritin 1	protein-coding
MACS_peak_1665	chr11	70067358	70068991	+	4407	NA	intron (NM_007440, intron 1 of 13)	intron (NM_007440, intron 1 of 13)	669	NM_007440	11684	Mm.12286	NM_007440	ENSMUSG00000000320	Alox12	9930022G08Rik|Alox12p|P-12LO	arachidonate 12-lipoxygenase	protein-coding
MACS_peak_7739	chr4	119938661	119944829	+	4383	NA	exon (NM_194060, exon 2 of 2)	exon (NM_194060, exon 2 of 2)	18121	NM_194060	329934	Mm.277090	NM_194060	ENSMUSG00000052135	Foxo6	-	forkhead box O6	protein-coding
MACS_peak_1249	chr10	126600763	126604273	+	4383	NA	promoter-TSS (NM_001244618)	promoter-TSS (NM_001244618)	306	NM_001244617	14421	Mm.386762	NM_008080	ENSMUSG00000006731	B4galnt1	4933429D13Rik|Gal-NAc-T|GalNAc-T|GalNAcT|Galgt1|Ggm-2|Ggm2	beta-1,4-N-acetyl-galactosaminyl transferase 1	protein-coding
MACS_peak_4295	chr16	30306576	30311495	+	4383	NA	exon (NM_008148, exon 2 of 2)	exon (NM_008148, exon 2 of 2)	1832	NM_008148	14729	Mm.3519	NM_008148	ENSMUSG00000047953	Gp5	GPV	glycoprotein 5 (platelet)	protein-coding
MACS_peak_9859	chr7	52429315	52440538	+	4383	NA	promoter-TSS (NM_001195255)	promoter-TSS (NM_001195255)	41	NM_001195255	100039953	Mm.300663	NM_001195255	ENSMUSG00000095276	Gfy	Gm2515|Gm581|Goofy	golgi-associated olfactory signaling regulator	protein-coding
MACS_peak_10343	chr7	146130688	146135398	+	4383	NA	intron (NM_028708, intron 1 of 14)	(CCG)n|Simple_repeat|Simple_repeat	630	NM_028708	74004	Mm.334298	NM_028708		Jakmip3	6330417G02Rik|AI593226|mKIAA4091	janus kinase and microtubule interacting protein 3	protein-coding
MACS_peak_3517	chr14	72930319	72933739	+	4383	NA	Intergenic	CpG	177781	NM_207636	319448	Mm.205421	NM_207636	ENSMUSG00000033487	Fndc3a	1700094E19Rik|D14Ertd453e|F730017H24Rik|Fndc3|sys	fibronectin type III domain containing 3A	protein-coding
MACS_peak_9788	chr7	31237469	31247802	+	4383	NA	promoter-TSS (NM_172898)	promoter-TSS (NM_172898)	-101	NM_172898	243911	Mm.113908	NM_172898	ENSMUSG00000036915	Kirrel2	C330019F22Rik|NEPH3|NLG1	kin of IRRE like 2 (Drosophila)	protein-coding
MACS_peak_9815	chr7	37474860	37484669	+	4383	NA	Intergenic	Intergenic	-3373	NM_172298	243931	Mm.44141	NM_172298	ENSMUSG00000021217	Tshz3	A630038G13Rik|Tsh3|Zfp537|mKIAA1474|teashirt3	teashirt zinc finger family member 3	protein-coding
MACS_peak_7511	chr4	63154599	63157204	+	4383	NA	exon (NM_001008793, exon 1 of 12)	exon (NM_001008793, exon 1 of 12)	1124	NM_001008793	73750	Mm.300397	NM_028640	ENSMUSG00000039137	Whrn	1110035G07Rik|AW122018|AW742671|C430046P22Rik|Dfnb31|wi	whirlin	protein-coding
MACS_peak_6413	chr2	131386016	131390081	+	4341	NA	promoter-TSS (NM_013460)	promoter-TSS (NM_013460)	-27	NM_013460	11550	Mm.389380	NM_013460		Adra1d	Adra-1|Adra1|Adra1a|Gpcr8|Spr8|[a]1d|alpha1D-AR	adrenergic receptor, alpha 1d	protein-coding
MACS_peak_746	chr1	197067790	197068054	+	4331	NA	Intergenic	CpG	-65013	NM_007758	12902	Mm.235387	NM_007758	ENSMUSG00000026616	Cr2	C3DR|CD21|CD35|Cr-1|Cr-2|Cr1	complement receptor 2	protein-coding
MACS_peak_4914	chr17	80111684	80115720	+	4313	NA	intron (NM_009994, intron 1 of 2)	intron (NM_009994, intron 1 of 2)	679	NM_009994	13078	Mm.214016	NM_009994	ENSMUSG00000024087	Cyp1b1	CP1B|P4501b1	cytochrome P450, family 1, subfamily b, polypeptide 1	protein-coding
MACS_peak_958	chr10	66996474	66999138	+	4313	NA	Intergenic	Intergenic	-2811	NM_010118	13654	Mm.290421	NM_010118	ENSMUSG00000037868	Egr2	Egr-2|Krox-20|Krox20|NGF1-B|Zfp-25|Zfp-6	early growth response 2	protein-coding
MACS_peak_2785	chr13	34743173	34746194	+	4313	NA	promoter-TSS (NR_105041)	promoter-TSS (NR_105041)	-109	NR_105041	101056149	Mm.421309	NR_105041	ENSMUSG00000086786	LOC101056149	-	uncharacterized LOC101056149	ncRNA
MACS_peak_1790	chr11	82741185	82747972	+	4313	NA	intron (NM_178680, intron 13 of 19)	(CTCG)n|Simple_repeat|Simple_repeat	19823	NM_178680	217012	Mm.295205	NM_178680	ENSMUSG00000018845	Unc45b	AA445617|Cmya4|D230041A13Rik|Unc45	unc-45 homolog B (C. elegans)	protein-coding
MACS_peak_2807	chr13	38435776	38440021	+	4313	NA	exon (NM_007556, exon 1 of 7)	exon (NM_007556, exon 1 of 7)	313	NM_007556	12161	Mm.385759	NM_007556	ENSMUSG00000039004	Bmp6	D13Wsu115e|Vgr1	bone morphogenetic protein 6	protein-coding
MACS_peak_7608	chr4	100964627	100967020	+	4313	NA	Intergenic	CpG	-27936	NM_146145	16451	Mm.289657	NM_146145	ENSMUSG00000028530	Jak1	AA960307|C130039L05Rik	Janus kinase 1	protein-coding
MACS_peak_11783	chrM	12191	13116	+	4285	NA	NA	Intergenic	NA	NA
MACS_peak_7491	chr4	57151960	57156492	+	4267	NA	intron (NM_019427, intron 1 of 15)	intron (NM_019427, intron 1 of 15)	1802	NM_019427	54357	Mm.28217	NM_019427	ENSMUSG00000028434	Epb4.1l4b	6430543G08Rik|AA589614|AU021054|BB007528|D4Ertd346e|Ehm2|Epb41l4b|Lulu2	erythrocyte protein band 4.1-like 4b	protein-coding
MACS_peak_3431	chr14	58691922	58697138	+	4267	NA	intron (NM_013518, intron 1 of 2)	CpG	3007	NM_013518	14180	Mm.8846	NM_013518		Fgf9	Eks	fibroblast growth factor 9	protein-coding
MACS_peak_5743	chr19	58527428	58531658	+	4267	NA	promoter-TSS (NM_001285457)	promoter-TSS (NM_001285457)	345	NR_104342	14585	Mm.88367	NM_010279	ENSMUSG00000025089	Gfra1	AU042498	glial cell line derived neurotrophic factor family receptor alpha 1	protein-coding
MACS_peak_8657	chr5	108793358	108799701	+	4267	NA	Intergenic	CpG	-20863	NM_008806	18587	Mm.1372	NM_008806	ENSMUSG00000029491	Pde6b	Pdeb|r|rd|rd-1|rd1|rd10	phosphodiesterase 6B, cGMP, rod receptor, beta polypeptide	protein-coding
MACS_peak_6805	chr3	17949865	17956366	+	4267	NA	Intergenic	Intergenic	-1210	NM_021560	59058	Mm.149938	NM_021560	ENSMUSG00000025128	Bhlhe22	Beta3|Bhlhb5	basic helix-loop-helix family, member e22	protein-coding
MACS_peak_3618	chr14	119536405	119539482	+	4267	NA	exon (NM_015820, exon 1 of 2)	exon (NM_015820, exon 1 of 2)	456	NM_015820	50787	Mm.445777	NM_015820		Hs6st3	6OST3|HS6ST-3	heparan sulfate 6-O-sulfotransferase 3	protein-coding
MACS_peak_10571	chr8	26146667	26151077	+	4267	NA	TTS (NM_031257)	TTS (NM_031257)	562	NM_001081187	330723	Mm.334452	NM_001081187		Htra4	B430206E18Rik	HtrA serine peptidase 4	protein-coding
MACS_peak_3174	chr13	113775816	113782022	+	4267	NA	intron (NM_001081062, intron 1 of 2)	CpG	909	NM_001081062	218630	Mm.25457	NM_001081062	ENSMUSG00000042417	Ccno	C86987|Ccnu|E130318K11|Ung2	cyclin O	protein-coding
MACS_peak_10166	chr7	116093091	116097116	+	4267	NA	Intergenic	Intergenic	17174	NM_025344	66085	Mm.182962	NM_025344		Eif3f	0610037M02Rik|AA409853|Eif3s5	eukaryotic translation initiation factor 3, subunit F	protein-coding
MACS_peak_3866	chr15	79332579	79338380	+	4267	NA	intron (NM_008427, intron 1 of 1)	intron (NM_008427, intron 1 of 1)	192	NM_008427	16520	Mm.140760	NM_008427	ENSMUSG00000044216	Kcnj4	IRK3|Kcnf2|MB-IRK3	potassium inwardly-rectifying channel, subfamily J, member 4	protein-coding
MACS_peak_4759	chr17	45679618	45686770	+	4267	NA	intron (NM_001013749, intron 2 of 2)	MIRb|SINE|MIR	3432	NM_001013749	210573	Mm.329064	NM_001013749	ENSMUSG00000096847	Tmem151b	Gm323	transmembrane protein 151B	protein-coding
MACS_peak_6569	chr2	160736473	160739640	+	4242	NA	promoter-TSS (NM_001291145)	promoter-TSS (NM_001291145)	19	NM_001291145	280635	Mm.330747	NM_182840	ENSMUSG00000050700	Emilin3	1110013O17Rik|EMILIN-3|EMILIN-5|EMILIN-T|Emilin5	elastin microfibril interfacer 3	protein-coding
MACS_peak_4676	chr17	34321829	34326693	+	4242	NA	promoter-TSS (NM_013683)	promoter-TSS (NM_013683)	14	NM_013585	16912	Mm.390983	NM_013585		Psmb9	Lmp-2|Lmp2	proteasome (prosome, macropain) subunit, beta type 9 (large multifunctional peptidase 2)	protein-coding
MACS_peak_9254	chr6	55065024	55069430	+	4242	NA	intron (NM_001288619, intron 2 of 11)	intron (NM_001288619, intron 2 of 11)	680	NM_001288619	12922	Mm.236081	NM_009953	ENSMUSG00000003476	Crhr2	CRF-R2|CRFR2alpha|CRFR2beta|Crfr2	corticotropin releasing hormone receptor 2	protein-coding
MACS_peak_6919	chr3	55583959	55588913	+	4242	NA	promoter-TSS (NM_010750)	promoter-TSS (NM_010750)	4	NM_010750	17116	Mm.440209	NM_010750	ENSMUSG00000056947	Mab21l1	AW047968	mab-21-like 1 (C. elegans)	protein-coding
MACS_peak_2657	chr12	119435786	119438584	+	4242	NA	exon (NM_010060, exon 1 of 82)	exon (NM_010060, exon 1 of 82)	331	NM_010060	13411	Mm.390540	NM_010060	ENSMUSG00000018581	Dnah11	Dnahc11|b2b1203Clo|b2b1279Clo|b2b1289Clo|b2b1727Clo|b2b598Clo|iv|lrd	dynein, axonemal, heavy chain 11	protein-coding
MACS_peak_7846	chr4	128924610	128929279	+	4242	NA	intron (NM_001285867, intron 1 of 6)	intron (NM_001285867, intron 1 of 6)	-1257	NM_001033189	97130	Mm.331907	NM_001033189	ENSMUSG00000050390	C77080	Kiaa1522|mKIAA1522	expressed sequence C77080	protein-coding
MACS_peak_6377	chr2	127947357	127954003	+	4242	NA	Intergenic	Intergenic	-1094	NM_207681	12125	Mm.141083	NM_009754	ENSMUSG00000027381	Bcl2l11	1500006F24Rik|Bim|Bod|bcl2-L-11	BCL2-like 11 (apoptosis facilitator)	protein-coding
MACS_peak_4158	chr16	8423041	8426285	+	4242	NA	exon (NM_029070, exon 1 of 4)	exon (NM_029070, exon 1 of 4)	566	NM_029070	74720	Mm.159318	NM_029070	ENSMUSG00000022715	Cldn26	4930511J11Rik|Tmem114	claudin 26	protein-coding
MACS_peak_3794	chr15	74345058	74350495	+	4242	NA	intron (NM_174991, intron 1 of 30)	CpG	1150	NM_174991	107831	Mm.43133	NM_174991	ENSMUSG00000034730	Bai1	B830018M07Rik|R75078|mKIAA4089	brain-specific angiogenesis inhibitor 1	protein-coding
MACS_peak_4318	chr16	35869948	35873418	+	4242	NA	promoter-TSS (NM_001039530)	promoter-TSS (NM_001039530)	-215	NM_001039530	547253	Mm.244406	NM_001039530	ENSMUSG00000034422	Parp14	1600029O10Rik|ARTD8|BC021340|CoaSt6|mKIAA1268	poly (ADP-ribose) polymerase family, member 14	protein-coding
MACS_peak_2677	chr13	3356877	3361329	+	4242	NA	Intergenic	CpG	-118446	NR_015522	76937	Mm.487240	NR_015522	ENSMUSG00000097709	2810429I04Rik	AI256682	RIKEN cDNA 2810429I04 gene	ncRNA
MACS_peak_5096	chr18	36883429	36887245	+	4242	NA	exon (NM_009841, exon 2 of 2)	exon (NM_009841, exon 2 of 2)	1132	NM_009841	12475	Mm.3460	NM_009841	ENSMUSG00000051439	Cd14	-	CD14 antigen	protein-coding
MACS_peak_3505	chr14	70686850	70689856	+	4242	NA	intron (NM_008915, intron 1 of 13)	intron (NM_008915, intron 1 of 13)	903	NM_008915	19057	Mm.439683	NM_008915	ENSMUSG00000022092	Ppp3cc	Calnc	protein phosphatase 3, catalytic subunit, gamma isoform	protein-coding
MACS_peak_1037	chr10	79817208	79821718	+	4242	NA	intron (NM_183152, intron 1 of 14)	CpG	259	NM_183152	216166	Mm.17613	NM_183152	ENSMUSG00000035486	Plk5	6330514A18Rik	polo-like kinase 5	protein-coding
MACS_peak_8549	chr5	91187830	91189130	+	4242	NA	exon (NM_009141, exon 1 of 4)	exon (NM_009141, exon 1 of 4)	156	NM_009141	20311	Mm.4660	NM_009141	ENSMUSG00000029371	Cxcl5	AMCF-II|ENA-78|GCP-2|LIX|Scyb5|Scyb6	chemokine (C-X-C motif) ligand 5	protein-coding
MACS_peak_11335	chr9	45236816	45240094	+	4242	NA	promoter-TSS (NM_001081270)	promoter-TSS (NM_001081270)	79	NM_001081270	114873	Mm.325499	NM_001081270	ENSMUSG00000032087	Dscaml1	4921507G06Rik|4930435C18Rik|BB239540|mKIAA1132	Down syndrome cell adhesion molecule like 1	protein-coding
MACS_peak_7185	chr3	107259913	107265419	+	4223	NA	promoter-TSS (NM_145922)	promoter-TSS (NM_145922)	-850	NM_145922	99738	Mm.101976	NM_145922	ENSMUSG00000027895	Kcnc4	AI850292|KSHIIIC|Kcr2-4|Kv3.4	potassium voltage gated channel, Shaw-related subfamily, member 4	protein-coding
MACS_peak_2240	chr12	8303528	8311345	+	4223	NA	intron (NM_013527, intron 1 of 1)	intron (NM_013527, intron 1 of 1)	1324	NM_013527	238057	Mm.271308	NM_013527	ENSMUSG00000037660	Gdf7	BMP12	growth differentiation factor 7	protein-coding
MACS_peak_10655	chr8	48494081	48499151	+	4223	NA	Intergenic	Intergenic	-58914	NM_175162	71069	Mm.23973	NM_175162	ENSMUSG00000038143	Stox2	4933409N07Rik|AI449080|AI835114|mKIAA1392	storkhead box 2	protein-coding
MACS_peak_2198	chr11	118902070	118907879	+	4200	NA	Intergenic	Intergenic	-2747	NM_013926	30951	Mm.99953	NM_013926	ENSMUSG00000025578	Cbx8	Pc3	chromobox 8	protein-coding
MACS_peak_8474	chr5	67998018	68002896	+	4200	NA	intron (NM_001033415, intron 1 of 1)	intron (NM_001033415, intron 1 of 1)	1335	NM_001033415	330096	Mm.442747	NM_001033415	ENSMUSG00000050010	Shisa3	D830007B15Rik	shisa homolog 3 (Xenopus laevis)	protein-coding
MACS_peak_1230	chr10	121078098	121080795	+	4187	NA	intron (NM_177335, intron 1 of 12)	intron (NM_177335, intron 1 of 12)	689	NM_177335	216393	Mm.119759	NM_177335		D930020B18Rik	1500017I17Rik	RIKEN cDNA D930020B18 gene	protein-coding
MACS_peak_1334	chr11	4845571	4850930	+	4187	NA	promoter-TSS (NM_010904)	promoter-TSS (NM_010904)	-183	NM_010904	380684	Mm.298283	NM_010904	ENSMUSG00000020396	Nefh	NF-H|NF200|Nfh|mKIAA0845	neurofilament, heavy polypeptide	protein-coding
MACS_peak_6563	chr2	160193595	160202779	+	4187	NA	Intergenic	Intergenic	-5386	NM_010658	16658	Mm.330745	NM_010658	ENSMUSG00000074622	Mafb	Kreisler|Krml|Krml1|kr	v-maf musculoaponeurotic fibrosarcoma oncogene family, protein B (avian)	protein-coding
MACS_peak_931	chr10	60879813	60882585	+	4187	NA	exon (NM_013611, exon 1 of 3)	exon (NM_013611, exon 1 of 3)	479	NM_013611	18119	Mm.57195	NM_013611	ENSMUSG00000037171	Nodal	Tg.413d	nodal	protein-coding
MACS_peak_11718	chr9	114467861	114474072	+	4187	NA	intron (NM_001042503, intron 1 of 3)	intron (NM_001042503, intron 1 of 3)	2521	NM_001042503	636931	Mm.17857	NM_001042503		Trim71	2610206G21Rik|AL022943|Gm1127|Lin41|Ripply2|lin-41|mLin41|mlin-41	tripartite motif-containing 71	protein-coding
MACS_peak_2263	chr12	17329825	17332214	+	4187	NA	intron (NM_133699, intron 1 of 13)	intron (NM_133699, intron 1 of 13)	517	NM_133699	68775	Mm.178798	NM_133699	ENSMUSG00000020566	Atp6v1c2	1110038G14Rik	ATPase, H+ transporting, lysosomal V1 subunit C2	protein-coding
MACS_peak_10964	chr8	109126547	109128734	+	4187	NA	intron (NM_009864, intron 1 of 15)	CpG	372	NM_009864	12550	Mm.35605	NM_009864	ENSMUSG00000000303	Cdh1	AA960649|E-cad|Ecad|L-CAM|UVO|Um	cadherin 1	protein-coding
MACS_peak_10285	chr7	138076439	138081887	+	4187	NA	promoter-TSS (NM_019564)	promoter-TSS (NM_019564)	-554	NM_019564	56213	Mm.30156	NM_019564	ENSMUSG00000006205	Htra1	AI429470|HTRA|L56|Prss11|RSPP11	HtrA serine peptidase 1	protein-coding
MACS_peak_4573	chr17	24887447	24892473	+	4187	NA	promoter-TSS (NM_001012402)	promoter-TSS (NM_001012402)	12	NM_001012402	328779	Mm.328848	NM_001012402	ENSMUSG00000039628	Hs3st6	-	heparan sulfate (glucosamine) 3-O-sulfotransferase 6	protein-coding
MACS_peak_959	chr10	67000139	67004628	+	4187	NA	intron (NM_010118, intron 1 of 1)	(TG)n|Simple_repeat|Simple_repeat	1766	NM_010118	13654	Mm.290421	NM_010118	ENSMUSG00000037868	Egr2	Egr-2|Krox-20|Krox20|NGF1-B|Zfp-25|Zfp-6	early growth response 2	protein-coding
MACS_peak_11629	chr9	99257483	99259693	+	4187	NA	exon (NM_177775, exon 1 of 23)	exon (NM_177775, exon 1 of 23)	361	NM_177775	272636	Mm.490440	NM_177775	ENSMUSG00000037681	Esyt3	D930024E11|D9Ertd280e|Fam62c|mKIAA4186	extended synaptotagmin-like protein 3	protein-coding
MACS_peak_3991	chr15	95483465	95486328	+	4128	NA	exon (NM_207533, exon 1 of 4)	exon (NM_207533, exon 1 of 4)	306	NM_207533	223843	Mm.152937	NM_207533		Dbx2	9430056A22Rik|9630005K15|AI846217|Gm1229	developing brain homeobox 2	protein-coding
MACS_peak_11444	chr9	62524252	62527660	+	4128	NA	intron (NM_176922, intron 1 of 29)	intron (NM_176922, intron 1 of 29)	294	NM_176922	319480	Mm.34883	NM_176922	ENSMUSG00000032243	Itga11	4732459H24Rik	integrin alpha 11	protein-coding
MACS_peak_3054	chr13	93195606	93198575	+	4128	NA	5' UTR (NM_175455, exon 2 of 5)	5' UTR (NM_175455, exon 2 of 5)	1166	NM_175455	218440	Mm.213623	NM_175455	ENSMUSG00000045034	Ankrd34b	6430502M16Rik|DP58	ankyrin repeat domain 34B	protein-coding
MACS_peak_9716	chr7	25965011	25968432	+	4128	NA	Intergenic	Intergenic	26633	NR_045848	434147	Mm.59171	NM_001033781	ENSMUSG00000074274	D930028M14Rik	EG434147	RIKEN cDNA D930028M14 gene	ncRNA
MACS_peak_367	chr1	89405143	89406889	+	4128	NA	intron (NM_001111314, intron 3 of 14)	intron (NM_001111314, intron 3 of 14)	921	NM_019867	53972	Mm.435439	NM_019867	ENSMUSG00000026259	Ngef	Tims2|ephexin	neuronal guanine nucleotide exchange factor	protein-coding
MACS_peak_5950	chr2	31506861	31513068	+	4128	NA	exon (NM_001123362, exon 5 of 5)	exon (NM_001123362, exon 5 of 5)	14407	NM_001123362	381359	Mm.379512	NM_001123362	ENSMUSG00000079466	Prdm12	Gm998	PR domain containing 12	protein-coding
MACS_peak_1524	chr11	51979114	51983684	+	4128	NA	Intergenic	CpG	-9990	NR_034155	257871	Mm.253576	NR_034155		Olfr1372-ps1	GA_x5J8B7TR6JS-3-632|MOR256-54P|NP_TR6JSE50FPA	olfactory receptor 1372, pseudogene 1	pseudo
MACS_peak_6274	chr2	109512772	109518605	+	4128	NA	promoter-TSS (NM_001285418)	promoter-TSS (NM_001285418)	-366	NM_001285418	12064	Mm.1442	NM_007540	ENSMUSG00000048482	Bdnf	-	brain derived neurotrophic factor	protein-coding
MACS_peak_9635	chr7	13628496	13631140	+	4128	NA	exon (NM_145819, exon 6 of 6)	exon (NM_145819, exon 6 of 6)	-6194	NM_001168469	22192	Mm.196580	NM_145578	ENSMUSG00000005575	Ube2m	2510040H03Rik|UBC12|Ubc-rs2	ubiquitin-conjugating enzyme E2M	protein-coding
MACS_peak_1252	chr10	126613291	126618447	+	4128	NA	exon (NM_177615, exon 3 of 17)	exon (NM_177615, exon 3 of 17)	1832	NM_177615	216441	Mm.248373	NM_177615	ENSMUSG00000040441	Slc26a10	C78409|D630010I07	solute carrier family 26, member 10	protein-coding
MACS_peak_4087	chr15	102520359	102529874	+	4102	NA	Intergenic	Intergenic	-22819	NR_030460	751542		NR_030460	miRBase:MI0004653	Mir688	Mirn688|mmu-mir-688	microRNA 688	ncRNA
MACS_peak_192	chr1	64779274	64786056	+	4102	NA	exon (NM_001042659, exon 2 of 2)	exon (NM_001042659, exon 2 of 2)	1659	NM_001042659	14367	Mm.150813	NM_022721	ENSMUSG00000045005	Fzd5	5330434N09Rik|AI427138|Fz-5|Fz5|mFz5	frizzled homolog 5 (Drosophila)	protein-coding
MACS_peak_7726	chr4	117597227	117603375	+	4102	NA	5' UTR (NM_001284191, exon 4 of 6)	5' UTR (NM_001284191, exon 4 of 6)	2067	NM_001284191	11876	Mm.56897	NM_009711	ENSMUSG00000028539	Artn	neublastin	artemin	protein-coding
MACS_peak_11099	chr8	125640037	125641893	+	4102	NA	promoter-TSS (NM_170684)	promoter-TSS (NM_170684)	-309	NM_170684	102278	Mm.36434	NM_170684	ENSMUSG00000034796	Cpne7	AW047065	copine VII	protein-coding
MACS_peak_1146	chr10	94726753	94728995	+	4102	NA	intron (NM_009950, intron 2 of 2)	intron (NM_009950, intron 2 of 2)	58857	NM_009950	12905	Mm.473739	NM_009950	ENSMUSG00000045867	Cradd	RAIDD	CASP2 and RIPK1 domain containing adaptor with death domain	protein-coding
MACS_peak_104	chr1	39248648	39254457	+	4102	NA	5' UTR (NM_008719, exon 1 of 21)	5' UTR (NM_008719, exon 1 of 21)	435	NM_008719	18143	Mm.2380	NM_008719	ENSMUSG00000026077	Npas2	MOP4|bHLHe9	neuronal PAS domain protein 2	protein-coding
MACS_peak_11141	chr8	128661992	128664420	+	4102	NA	Intergenic	CpG	144204	NM_008430	16525	Mm.10800	NM_008430	ENSMUSG00000033998	Kcnk1	AI788889|TWIK-1	potassium channel, subfamily K, member 1	protein-coding
MACS_peak_4186	chr16	16212977	16216246	+	4102	NA	intron (NM_026163, intron 1 of 12)	intron (NM_026163, intron 1 of 12)	1173	NM_026163	67451	Mm.2252	NM_026163	ENSMUSG00000041957	Pkp2	1200008D14Rik|1200012P04Rik|AA516617|Pkp2l	plakophilin 2	protein-coding
MACS_peak_10946	chr8	107799573	107804264	+	4102	NA	intron (NM_030152, intron 1 of 3)	intron (NM_030152, intron 1 of 3)	1571	NM_030152	78688	Mm.475715	NM_030152	ENSMUSG00000014776	Nol3	ARC|B430311C09Rik|MYC|NOP|Nop30	nucleolar protein 3 (apoptosis repressor with CARD domain)	protein-coding
MACS_peak_7851	chr4	129167926	129170179	+	4102	NA	3' UTR (NM_001085491, exon 3 of 3)	3' UTR (NM_001085491, exon 3 of 3)	618	NM_001085491	68233	Mm.424983	NM_001085491	ENSMUSG00000078554	Fam229a	1700125D06Rik	family with sequence similarity 229, member A	protein-coding
MACS_peak_5257	chr18	67548176	67552572	+	4102	NA	promoter-TSS (NM_026473)	promoter-TSS (NM_026473)	-11	NM_026473	67951	Mm.181860	NM_026473	ENSMUSG00000001473	Tubb6	2310057H16Rik|BB220206	tubulin, beta 6 class V	protein-coding
MACS_peak_8576	chr5	98611382	98620066	+	4102	NA	3' UTR (NM_029947, exon 4 of 4)	3' UTR (NM_029947, exon 4 of 4)	5836	NM_029947	77630	Mm.332511	NM_029947	ENSMUSG00000035456	Prdm8	4930565F05Rik|PFM5	PR domain containing 8	protein-coding
MACS_peak_6370	chr2	127186693	127192772	+	4102	NA	exon (NM_009633, exon 1 of 1)	exon (NM_009633, exon 1 of 1)	710	NM_009633	11552	Mm.347390	NM_009633	ENSMUSG00000058620	Adra2b	Adra-2b|[a]2B|alpha2-C2|alpha2B	adrenergic receptor, alpha 2b	protein-coding
MACS_peak_4063	chr15	100957555	100961012	+	4102	NA	intron (NM_001277258, intron 1 of 10)	intron (NM_001277258, intron 1 of 10)	330	NM_001277257	11482	Mm.279542	NM_009612	ENSMUSG00000000530	Acvrl1	AI115505|AI427544|Acvrlk1|Alk1	activin A receptor, type II-like 1	protein-coding
MACS_peak_9434	chr6	112436901	112442129	+	4102	NA	exon (NM_001081147, exon 1 of 2)	exon (NM_001081147, exon 1 of 2)	287	NM_001081147	18430	Mm.333310	NM_001081147	ENSMUSG00000049112	Oxtr	OTR	oxytocin receptor	protein-coding
MACS_peak_4447	chr16	94343942	94349379	+	4102	NA	intron (NM_011377, intron 10 of 10)	intron (NM_011377, intron 10 of 10)	162803	NM_139145	110948	Mm.30921	NM_139145	ENSMUSG00000040820	Hlcs	410I21.SP6|D16Jhu34	holocarboxylase synthetase (biotin- [propriony-Coenzyme A-carboxylase (ATP-hydrolysing)] ligase)	protein-coding
MACS_peak_2622	chr12	113367713	113370297	+	4102	NA	promoter-TSS (NR_029590)	promoter-TSS (NR_029590)	-86	NR_029590	387199		NR_029590	miRBase:MI0000246	Mir203	Mirn203|mmu-mir-203	microRNA 203	ncRNA
MACS_peak_11193	chr9	21047812	21051084	+	4102	NA	exon (NM_053190, exon 3 of 3)	exon (NM_053190, exon 3 of 3)	3439	NM_053190	94226	Mm.190619	NM_053190	ENSMUSG00000045087	S1pr5	Edg8|S1P5|lpB4	sphingosine-1-phosphate receptor 5	protein-coding
MACS_peak_728	chr1	193005531	193011150	+	4061	NA	Intergenic	Intergenic	-1128	NM_007498	11910	Mm.2706	NM_007498	ENSMUSG00000026628	Atf3	LRG-21	activating transcription factor 3	protein-coding
MACS_peak_366	chr1	89160614	89163528	+	4061	NA	intron (NM_028889, intron 1 of 3)	intron (NM_028889, intron 1 of 3)	1132	NM_028889	98363	Mm.247951	NM_028889	ENSMUSG00000026255	Efhd1	4931430I01Rik|AI452351|PP3051|mitocalcin	EF hand domain containing 1	protein-coding
MACS_peak_7612	chr4	101167885	101171333	+	4061	NA	intron (NM_198412, intron 1 of 19)	intron (NM_198412, intron 1 of 19)	356	NM_198412	72685	Mm.76494	NM_198412	ENSMUSG00000028528	Dnajc6	2810027M23Rik|mKIAA0473	DnaJ (Hsp40) homolog, subfamily C, member 6	protein-coding
MACS_peak_9369	chr6	90411129	90413852	+	4061	NA	promoter-TSS (NM_023184)	promoter-TSS (NM_023184)	-130	NM_023184	66277	Mm.41389	NM_023184	ENSMUSG00000030087	Klf15	1810013I09Rik|AV048136|AW494632|CKLF|KKLF	Kruppel-like factor 15	protein-coding
MACS_peak_10722	chr8	73265874	73269503	+	4061	NA	intron (NM_201607, intron 3 of 16)	intron (NM_201607, intron 3 of 16)	-10890	NM_009001	19339	Mm.5083	NM_009001	ENSMUSG00000031840	Rab3a	-	RAB3A, member RAS oncogene family	protein-coding
MACS_peak_5487	chr19	25072590	25077121	+	3991	NA	intron (NM_028785, intron 1 of 47)	intron (NM_028785, intron 1 of 47)	836	NM_028785	76088	Mm.102485	NM_028785	ENSMUSG00000052085	Dock8	1200017A24Rik|5830472H07Rik|A130095G14Rik|AI461977	dedicator of cytokinesis 8	protein-coding
MACS_peak_11198	chr9	21791304	21796339	+	3991	NA	promoter-TSS (NM_023622)	promoter-TSS (NM_023622)	76	NM_023622	71746	Mm.110594	NM_023622	ENSMUSG00000040146	Rgl3	1300003D20Rik|mFLJ00153	ral guanine nucleotide dissociation stimulator-like 3	protein-coding
MACS_peak_11185	chr9	20819572	20822276	+	3991	NA	intron (NM_010493, intron 1 of 6)	PB1D10|SINE|Alu	520	NM_010493	15894	Mm.435508	NM_010493	ENSMUSG00000037405	Icam1	CD54|Icam-1|Ly-47|MALA-2	intercellular adhesion molecule 1	protein-coding
MACS_peak_7464	chr4	46545536	46550919	+	3991	NA	intron (NM_029077, intron 1 of 5)	intron (NM_029077, intron 1 of 5)	786	NM_029077	74735	Mm.240252	NM_029077	ENSMUSG00000039853	Trim14	5830400N10Rik|pub	tripartite motif-containing 14	protein-coding
MACS_peak_8008	chr4	140800418	140805651	+	3991	NA	exon (NM_172520, exon 4 of 17)	exon (NM_172520, exon 4 of 17)	4235	NM_172520	213649	Mm.134460	NM_172520	ENSMUSG00000028919	Arhgef19	6030432F23|6430573B13Rik|WGEF	Rho guanine nucleotide exchange factor (GEF) 19	protein-coding
MACS_peak_3784	chr15	72374542	72379957	+	3991	NA	promoter-TSS (NM_001033876)	promoter-TSS (NM_001033876)	-540	NM_001033876	223604	Mm.386856	NM_001033876	ENSMUSG00000036760	Kcnk9	Task3	potassium channel, subfamily K, member 9	protein-coding
MACS_peak_9771	chr7	29955073	29959047	+	3991	NA	exon (NM_182694, exon 2 of 3)	exon (NM_182694, exon 2 of 3)	1651	NM_182696	243897	Mm.389886	NM_182694	ENSMUSG00000031493	Ggn	AI593290	gametogenetin	protein-coding
MACS_peak_2670	chr12	120080007	120089207	+	3991	NA	promoter-TSS (NM_177082)	promoter-TSS (NM_177082)	-195	NM_177082	320145	Mm.51682	NM_177082	ENSMUSG00000048562	Sp8	D930049B17Rik|mBtd	trans-acting transcription factor 8	protein-coding
MACS_peak_9971	chr7	73570052	73574726	+	3991	NA	promoter-TSS (NM_053080)	promoter-TSS (NM_053080)	-26	NM_053080	56847	Mm.140988	NM_053080	ENSMUSG00000015134	Aldh1a3	ALDH6|RALDH3|V1	aldehyde dehydrogenase family 1, subfamily A3	protein-coding
MACS_peak_2489	chr12	83716653	83720140	+	3991	NA	promoter-TSS (NM_001282061)	promoter-TSS (NM_001282061)	-90	NM_001282061	50779	Mm.153013	NM_015812	ENSMUSG00000021219	Rgs6	-	regulator of G-protein signaling 6	protein-coding
MACS_peak_11477	chr9	65915629	65918049	+	3991	NA	intron (NM_001025612, intron 2 of 6)	intron (NM_001025612, intron 2 of 6)	699	NM_001025612	382083	Mm.477103	NM_001025612	ENSMUSG00000039452	Snx22	Gm1120	sorting nexin 22	protein-coding
MACS_peak_5757	chr19	59234763	59249106	+	3984	NA	intron (NM_009501, intron 2 of 2)	intron (NM_009501, intron 2 of 2)	2585	NM_009501	22326	Mm.23801	NM_009501		Vax1	-	ventral anterior homeobox 1	protein-coding
MACS_peak_5174	chr18	53619316	53625495	+	3975	NA	Intergenic	Intergenic	-1795	NM_001033281	225518	Mm.297645	NM_001033281	ENSMUSG00000069378	Prdm6	Gm92|PRISM	PR domain containing 6	protein-coding
MACS_peak_5874	chr2	25430936	25436293	+	3975	NA	exon (NM_001005424, exon 1 of 1)	exon (NM_001005424, exon 1 of 1)	2005	NM_001005424	381353	Mm.379511	NM_001005424	ENSMUSG00000029419	Gm996	-	predicted gene 996	protein-coding
MACS_peak_9797	chr7	31834319	31839404	+	3962	NA	promoter-TSS (NM_022007)	promoter-TSS (NM_022007)	-388	NM_022007	57780	Mm.41770	NM_022007	ENSMUSG00000036578	Fxyd7	1110035I01Rik	FXYD domain-containing ion transport regulator 7	protein-coding
MACS_peak_3874	chr15	79761706	79766416	+	3962	NA	promoter-TSS (NM_144811)	promoter-TSS (NM_144811)	-985	NM_144811	52609	Mm.323442	NM_144811	ENSMUSG00000053411	Cbx7	1600014J01Rik|AI851678|D15Ertd417e	chromobox 7	protein-coding
MACS_peak_4112	chr15	102932035	102933552	+	3962	NA	Intergenic	CpG	44466	NR_045743	432989	Mm.383979	NR_045743	ENSMUSG00000097003	D930007P13Rik	-	Riken cDNA D930007P13 gene	ncRNA
MACS_peak_3559	chr14	99696849	99701016	+	3962	NA	intron (NM_009769, intron 1 of 3)	intron (NM_009769, intron 1 of 3)	1022	NM_009769	12224	Mm.30262	NM_009769	ENSMUSG00000005148	Klf5	4930520J07Rik|Bteb2|CKLF|IKLF	Kruppel-like factor 5	protein-coding
MACS_peak_9739	chr7	28178983	28183641	+	3962	NA	promoter-TSS (NM_001199234)	promoter-TSS (NM_001199234)	-95	NM_001199234	80297	Mm.459123	NM_032610	ENSMUSG00000011751	Sptbn4	1700022P15Rik|5830426A08Rik|ROSA62|SpbIV|Spnb4|dyn|lnd|nmf261|nmf379|qv	spectrin beta, non-erythrocytic 4	protein-coding
MACS_peak_8198	chr4	155407670	155410891	+	3962	NA	exon (NM_029264, exon 15 of 15)	exon (NM_029264, exon 15 of 15)	8829	NM_021985	21936	Mm.3180	NM_009400	ENSMUSG00000041954	Tnfrsf18	AITR|Gitr	tumor necrosis factor receptor superfamily, member 18	protein-coding
MACS_peak_5886	chr2	26457469	26461106	+	3962	NA	intron (NM_026212, intron 1 of 5)	intron (NM_026212, intron 1 of 5)	650	NM_026212	67512	Mm.24244	NM_026212	ENSMUSG00000026922	Agpat2	2510002J07Rik|AV000834|BSCL|BSCL1|LPAAB|LPAAT-beta	1-acylglycerol-3-phosphate O-acyltransferase 2 (lysophosphatidic acid acyltransferase, beta)	protein-coding
MACS_peak_3500	chr14	70575072	70578828	+	3962	NA	promoter-TSS (NM_001253736)	promoter-TSS (NM_001253736)	-328	NM_001253736	213019	Mm.283968	NM_145978	ENSMUSG00000022090	Pdlim2	4732462F18Rik|Slim	PDZ and LIM domain 2	protein-coding
MACS_peak_6372	chr2	127305963	127311611	+	3962	NA	promoter-TSS (NM_001111331)	promoter-TSS (NM_001111331)	-552	NM_001111331	56461	Mm.315292	NM_019789	ENSMUSG00000079056	Kcnip3	4933407H12Rik|AI413860|Csen|DREAM|KChIP3|R74849	Kv channel interacting protein 3, calsenilin	protein-coding
MACS_peak_3418	chr14	57674668	57678496	+	3962	NA	promoter-TSS (NM_001271623)	promoter-TSS (NM_001271623)	-22	NM_001271623	14611	Mm.57207	NM_016975		Gja3	Cnx46|Cx43|Cx46|Gja-3	gap junction protein, alpha 3	protein-coding
MACS_peak_5533	chr19	36130049	36132130	+	3962	NA	intron (NM_008315, intron 1 of 2)	intron (NM_008315, intron 1 of 2)	761	NM_008315	15566	Mm.254266	NM_008315	ENSMUSG00000024798	Htr7	5-HT7	5-hydroxytryptamine (serotonin) receptor 7	protein-coding
MACS_peak_10373	chr7	148106382	148110221	+	3962	NA	intron (NM_133946, intron 3 of 7)	CpG	1500	NM_133946	101613	Mm.386833	NM_133946	ENSMUSG00000038745	Nlrp6	AI504961|Avr|Nalp6|Navr|Navr/Avr|Pypaf5	NLR family, pyrin domain containing 6	protein-coding
MACS_peak_823	chr10	23065688	23070620	+	3962	NA	intron (NM_010167, intron 1 of 18)	intron (NM_010167, intron 1 of 18)	1555	NM_010167	14051	Mm.332128	NM_010167	ENSMUSG00000010461	Eya4	B130023L16Rik	eyes absent 4 homolog (Drosophila)	protein-coding
MACS_peak_4845	chr17	57200528	57203167	+	3962	NA	intron (NM_177638, intron 1 of 3)	CpG	147	NM_177638	224912	Mm.391027	NM_177638	ENSMUSG00000044279	Crb3	5730439B18|AU015179|AU041752	crumbs homolog 3 (Drosophila)	protein-coding
MACS_peak_8142	chr4	151655643	151669064	+	3962	NA	intron (NM_008237, intron 2 of 4)	intron (NM_008237, intron 2 of 4)	3418	NM_008237	15207	Mm.3516	NM_008237	ENSMUSG00000028946	Hes3	Hes-3|bHLHb43	hairy and enhancer of split 3 (Drosophila)	protein-coding
MACS_peak_9111	chr6	29455619	29458433	+	3962	NA	intron (NM_001029985, intron 1 of 37)	intron (NM_001029985, intron 1 of 37)	926	NM_001029985	333088	Mm.332961	NM_001029985	ENSMUSG00000059022	Kcp	AW060220|CRIM-2|Crim2|Gm793|KCP-1	kielin/chordin-like protein	protein-coding
MACS_peak_6190	chr2	84721976	84731567	+	3962	NA	promoter-TSS (NM_199223)	promoter-TSS (NM_199223)	78	NM_199223	269295	Mm.86447	NM_199223	ENSMUSG00000050896	Rtn4rl2	Ngr2|Ngrh1|Ngrl3	reticulon 4 receptor-like 2	protein-coding
MACS_peak_5522	chr19	31836221	31840409	+	3962	NA	intron (NM_001013833, intron 1 of 17)	intron (NM_001013833, intron 1 of 17)	1208	NM_001013833	19091	Mm.381170	NM_011160		Prkg1	AW125416|CGKI|Gm19690|Prkg1b|Prkgr1b	protein kinase, cGMP-dependent, type I	protein-coding
MACS_peak_9833	chr7	51051345	51053667	+	3962	NA	promoter-TSS (NM_008940)	promoter-TSS (NM_008940)	-441	NM_008940	259277	Mm.458023	NM_008940	ENSMUSG00000064023	Klk8	BSP1|Nrpn|Prss19	kallikrein related-peptidase 8	protein-coding
MACS_peak_11420	chr9	58043633	58053011	+	3962	NA	intron (NM_001161536, intron 2 of 3)	intron (NM_001161536, intron 2 of 3)	1200	NM_001161535	320563	Mm.186499	NM_177193	ENSMUSG00000051243	Islr2	B930052A04Rik|Linx|Mbu-3|mKIAA1465	immunoglobulin superfamily containing leucine-rich repeat 2	protein-coding
MACS_peak_8801	chr5	122284403	122289907	+	3962	NA	promoter-TSS (NM_008507)	promoter-TSS (NM_008507)	-345	NM_008507	16923	Mm.65493	NM_008507	ENSMUSG00000042594	Sh2b3	AI429800|Lnk	SH2B adaptor protein 3	protein-coding
MACS_peak_3130	chr13	100667957	100671387	+	3962	NA	intron (NM_013732, intron 2 of 2)	intron (NM_013732, intron 2 of 2)	966	NM_013732	27220	Mm.75498	NM_013732	ENSMUSG00000021647	Cartpt	Cart	CART prepropeptide	protein-coding
MACS_peak_9669	chr7	19889105	19892023	+	3936	NA	exon (NM_008036, exon 4 of 4)	exon (NM_008036, exon 4 of 4)	4830	NM_008036	14282	Mm.248335	NM_008036	ENSMUSG00000003545	Fosb	-	FBJ osteosarcoma oncogene B	protein-coding
MACS_peak_526	chr1	138154317	138158000	+	3936	NA	3' UTR (NM_001101516, exon 1 of 1)	3' UTR (NM_001101516, exon 1 of 1)	1292	NM_001101516	383563	Mm.40367	NM_001101516	ENSMUSG00000052759	Gpr25	Gm1300	G protein-coupled receptor 25	protein-coding
MACS_peak_4739	chr17	37078422	37081575	+	3936	NA	promoter-TSS (NM_001099632)	promoter-TSS (NM_001099632)	2	NM_001099632	386454	Mm.105324	NM_001099632	ENSMUSG00000036492	Rnf39	BC038661|Gm1786|Gm1787|Gm320|LIRF	ring finger protein 39	protein-coding
MACS_peak_5765	chr19	59522635	59543157	+	3936	NA	promoter-TSS (NM_010132)	promoter-TSS (NM_010132)	229	NR_002863	329078	Mm.80382	NR_002863	ENSMUSG00000087095	Emx2os	-	Emx2 opposite strand/antisense transcript (non-protein coding)	ncRNA
MACS_peak_4050	chr15	100464924	100468601	+	3900	NA	promoter-TSS (NM_001285414)	promoter-TSS (NM_001285414)	609	NR_104338	207818	Mm.26282	NM_174992	ENSMUSG00000053559	Smagp	-	small cell adhesion glycoprotein	protein-coding
MACS_peak_4027	chr15	98619793	98629174	+	3866	NA	TTS (NM_021279)	TTS (NM_021279)	4195	NM_021279	22408	Mm.1123	NM_021279	ENSMUSG00000022997	Wnt1	Int-1|Wnt-1|sw|swaying	wingless-type MMTV integration site family, member 1	protein-coding
MACS_peak_1952	chr11	97394439	97399591	+	3866	NA	intron (NM_018873, intron 7 of 19)	intron (NM_018873, intron 7 of 19)	-35361	NM_001289118	100141474	Mm.482426	NM_001289118		4933428G20Rik	-	RIKEN cDNA 4933428G20 gene	protein-coding
MACS_peak_3497	chr14	70474875	70481695	+	3863	NA	intron (NM_001289925, intron 2 of 2)	CpG-4627	683	NM_001289927	13655	Mm.103737	NM_018781	ENSMUSG00000033730	Egr3	Pilot	early growth response 3	protein-coding
MACS_peak_2507	chr12	86215425	86218448	+	3863	NA	exon (NM_013589, exon 1 of 35)	exon (NM_013589, exon 1 of 35)	184	NR_028577	100303738	Mm.479389	NR_028577		D030025P21Rik	-	RIKEN cDNA D030025P21 gene	ncRNA
MACS_peak_6460	chr2	146657876	146666512	+	3863	NA	Intergenic	Intergenic	-19431	NM_001033298	228730	Mm.292352	NM_001033298	ENSMUSG00000074749	Kiz	Gm114|Ncrna00153|Plk1s1	kizuna centrosomal protein	protein-coding
MACS_peak_4436	chr16	92605584	92607995	+	3854	NA	intron (NM_001111022, intron 6 of 6)	intron (NM_001111022, intron 6 of 6)	90785	NM_001111023	12394	Mm.4081	NM_009821	ENSMUSG00000022952	Runx1	AML1|CBF-alpha-2|Cbfa2|Pebp2a2|Pebpa2b	runt related transcription factor 1	protein-coding
MACS_peak_2057	chr11	103607495	103613676	+	3854	NA	intron (NM_011719, intron 1 of 3)	intron (NM_011719, intron 1 of 3)	550	NM_011719	22412	Mm.215161	NM_011719	ENSMUSG00000018486	Wnt9b	Wnt14b|Wnt15|clf|clf1|wnt-14b|wnt-15	wingless-type MMTV integration site family, member 9B	protein-coding
MACS_peak_5454	chr19	16509221	16512638	+	3854	NA	5' UTR (NM_008137, exon 1 of 7)	5' UTR (NM_008137, exon 1 of 7)	772	NM_008137	14675	Mm.313181	NM_008137	ENSMUSG00000024697	Gna14	AU023208	guanine nucleotide binding protein, alpha 14	protein-coding
MACS_peak_8378	chr5	34628039	34631404	+	3854	NA	intron (NM_001015039, intron 1 of 12)	intron (NM_001015039, intron 1 of 12)	1252	NM_001015039	231125	Mm.113388	NM_001015039	ENSMUSG00000037224	Zfyve28	9630058O20Rik|Gm146|mKIAA1643	zinc finger, FYVE domain containing 28	protein-coding
MACS_peak_5922	chr2	29601596	29604342	+	3854	NA	Intergenic	CpG	-14079	NM_001177392	433416	Mm.330112	NM_001034887	ENSMUSG00000075425	Gm13547	OTTMUSG00000012686	predicted gene 13547	protein-coding
MACS_peak_11251	chr9	32214803	32219271	+	3854	NA	Intergenic	CpG	15467	NM_001168354	56379	Mm.390168	NM_019659	ENSMUSG00000041248	Kcnj1	Kir1.1|ROMK|Romk2	potassium inwardly-rectifying channel, subfamily J, member 1	protein-coding
MACS_peak_8027	chr4	142938383	142942435	+	3854	NA	exon (NM_001162983, exon 1 of 2)	exon (NM_001162983, exon 1 of 2)	756	NM_001162983	242735	Mm.94020	NM_001162983	ENSMUSG00000028584	Lrrc38	A230053A07Rik	leucine rich repeat containing 38	protein-coding
MACS_peak_864	chr10	42289599	42313346	+	3854	NA	intron (NM_152229, intron 1 of 8)	(TTTC)n|Simple_repeat|Simple_repeat	1922	NM_152229	21907	Mm.287100	NM_152229	ENSMUSG00000019803	Nr2e1	Mtl1|Mtll|TLL|Tlx|XTLL|fierce|frc|tailless	nuclear receptor subfamily 2, group E, member 1	protein-coding
MACS_peak_355	chr1	87941104	87945565	+	3854	NA	intron (NM_001144993, intron 1 of 2)	intron (NM_001144993, intron 1 of 2)	896	NM_001144992	72792	Mm.54981	NM_001144992	ENSMUSG00000026227	2810459M11Rik	-	RIKEN cDNA 2810459M11 gene	protein-coding
MACS_peak_1901	chr11	95438927	95449124	+	3854	NA	intron (NM_033217, intron 1 of 5)	intron (NM_033217, intron 1 of 5)	4987	NM_033217	18053	Mm.283893	NM_033217	ENSMUSG00000000120	Ngfr	LNGFR|Tnfrsf16|p75|p75NGFR|p75NTR	nerve growth factor receptor (TNFR superfamily, member 16)	protein-coding
MACS_peak_4700	chr17	35477966	35480901	+	3854	NA	intron (NM_010392, intron 1 of 6)	CpG	155	NM_010392	15013	Mm.427969	NM_010392	ENSMUSG00000091705	H2-Q2	BE136769|ENSMUSG00000079507|Gm11132|H-2Q2|gs14-2	histocompatibility 2, Q region locus 2	protein-coding
MACS_peak_4981	chr17	93597766	93604465	+	3854	NA	intron (NM_009625, intron 2 of 4)	intron (NM_009625, intron 2 of 4)	2353	NM_009625	11516	Mm.3407	NM_009625	ENSMUSG00000024256	Adcyap1	PACAP	adenylate cyclase activating polypeptide 1	protein-coding
MACS_peak_2003	chr11	101023617	101030281	+	3854	NA	exon (NM_146030, exon 8 of 13)	exon (NM_146030, exon 8 of 13)	5667	NM_146030	217198	Mm.273254	NM_146030	ENSMUSG00000035172	Plekhh3	BC020025	pleckstrin homology domain containing, family H (with MyTH4 domain) member 3	protein-coding
MACS_peak_1186	chr10	114236545	114238844	+	3854	NA	exon (NM_146241, exon 1 of 19)	exon (NM_146241, exon 1 of 19)	732	NM_146241	237553	Mm.445550	NM_146241	ENSMUSG00000050663	Trhde	9330155P21Rik	TRH-degrading enzyme	protein-coding
MACS_peak_10207	chr7	120351571	120354708	+	3854	NA	intron (NM_007489, intron 1 of 19)	MIR3|SINE|MIR	2160	NM_007489	11865	Mm.440371	NM_007489	ENSMUSG00000055116	Arntl	Arnt3|BMAL1b|Bmal1|MOP3|bHLHe5|bmal1b'	aryl hydrocarbon receptor nuclear translocator-like	protein-coding
MACS_peak_10963	chr8	109034066	109036678	+	3854	NA	intron (NM_007665, intron 2 of 15)	CpG	620	NM_001037809	12560	Mm.4658	NM_007665	ENSMUSG00000061048	Cdh3	AI385538|Cadp|Cdhp|P-cadherin|Pcad	cadherin 3	protein-coding
MACS_peak_1650	chr11	69614395	69620552	+	3854	NA	non-coding (NR_027913, exon 1 of 1)	non-coding (NR_027913, exon 1 of 1)	302	NR_027913	74341	Mm.280165	NR_027913		G630025P09Rik	4632403M07Rik	RIKEN cDNA G630025P09 gene	ncRNA
MACS_peak_9071	chr6	21934975	21937806	+	3823	NA	5' UTR (NM_001081351, exon 1 of 22)	5' UTR (NM_001081351, exon 1 of 22)	480	NM_001081351	214642	Mm.221404	NM_001081351	ENSMUSG00000062980	Cped1	6720481P07|A430107O13Rik|AI552584	cadherin-like and PC-esterase domain containing 1	protein-coding
MACS_peak_6023	chr2	38190335	38198186	+	3823	NA	promoter-TSS (NM_001290646)	promoter-TSS (NM_001290646)	-541	NM_001290646	16870	Mm.142856	NM_010710	ENSMUSG00000000247	Lhx2	LH2A|Lh-2|Lim2|ap|apterous	LIM homeobox protein 2	protein-coding
MACS_peak_811	chr10	20877836	20880797	+	3823	NA	intron (NM_010848, intron 1 of 14)	CpG	1474	NM_001198914	17863	Mm.52109	NM_010848	ENSMUSG00000019982	Myb	AI550390|M16449|c-myb	myeloblastosis oncogene	protein-coding
MACS_peak_523	chr1	137946077	137948149	+	3823	NA	promoter-TSS (NM_001270609)	promoter-TSS (NM_001270609)	-268	NM_001270609	226439	Mm.491831	NM_001270609	ENSMUSG00000097918	Ascl5	Ascl5-ps|Gm197|bHLHa47	achaete-scute complex homolog 5 (Drosophila)	protein-coding
MACS_peak_9169	chr6	43214730	43216910	+	3823	NA	intron (NM_133674, intron 1 of 14)	intron (NM_133674, intron 1 of 14)	177	NM_133674	54324	Mm.320978	NM_133674	ENSMUSG00000033542	Arhgef5	2210412D05Rik|AA717842|AW495314|Tim1	Rho guanine nucleotide exchange factor (GEF) 5	protein-coding
MACS_peak_10219	chr7	123176921	123184242	+	3823	NA	intron (NM_001025559, intron 1 of 15)	intron (NM_001025559, intron 1 of 15)	1677	NM_001025559	20679	Mm.323365	NM_011445	ENSMUSG00000051910	Sox6	AI987981|SOX-LZ	SRY (sex determining region Y)-box 6	protein-coding
MACS_peak_5028	chr18	15220454	15227140	+	3823	NA	intron (NM_134112, intron 1 of 4)	intron (NM_134112, intron 1 of 4)	-1706	NM_001142731	106931	Mm.329299	NM_134112	ENSMUSG00000036225	Kctd1	4933402K10Rik|AI661543|AW553000	potassium channel tetramerisation domain containing 1	protein-coding
MACS_peak_9155	chr6	38583992	38590454	+	3823	NA	promoter-TSS (NM_001033171)	promoter-TSS (NM_001033171)	16	NM_001033171	74253	Mm.121859	NM_001033171	ENSMUSG00000071537	Klrg2	2310020F24Rik	killer cell lectin-like receptor subfamily G, member 2	protein-coding
MACS_peak_9489	chr6	120242641	120246298	+	3823	NA	exon (NM_198884, exon 1 of 20)	exon (NM_198884, exon 1 of 20)	108	NM_198884	330406	Mm.321840	NM_198884	ENSMUSG00000041372	B4galnt3	AB114826|B4GalNAcT3|C330047A21	beta-1,4-N-acetyl-galactosaminyl transferase 3	protein-coding
MACS_peak_3331	chr14	35628015	35637725	+	3823	NA	promoter-TSS (NM_008166)	promoter-TSS (NM_008166)	-452	NM_008166	14803	Mm.121569	NM_008166	ENSMUSG00000041078	Grid1	GluD1|GluRdelta1	glutamate receptor, ionotropic, delta 1	protein-coding
MACS_peak_6374	chr2	127479791	127483608	+	3823	NA	intron (NM_010762, intron 1 of 3)	intron (NM_010762, intron 1 of 3)	732	NM_010762	17153	Mm.39040	NM_010762	ENSMUSG00000027375	Mal	Mpv17|Vip17	myelin and lymphocyte protein, T cell differentiation protein	protein-coding
MACS_peak_1691	chr11	72772621	72775720	+	3823	NA	promoter-TSS (NM_016745)	promoter-TSS (NM_016745)	-501	NM_016745	53313	Mm.6306	NM_016745	ENSMUSG00000020788	Atp2a3	SERCA3b|Serca3	ATPase, Ca++ transporting, ubiquitous	protein-coding
MACS_peak_645	chr1	174429111	174432897	+	3823	NA	intron (NM_178598, intron 1 of 4)	intron (NM_178598, intron 1 of 4)	627	NM_178598	21346	Mm.271711	NM_178598	ENSMUSG00000026547	Tagln2	2700094C18Rik|SM22beta|Sm22B|Sm22a	transgelin 2	protein-coding
MACS_peak_11423	chr9	58159419	58161229	+	3823	NA	exon (NM_010729, exon 1 of 7)	exon (NM_010729, exon 1 of 7)	695	NM_010729	16949	Mm.250492	NM_010729	ENSMUSG00000032334	Loxl1	Loxl	lysyl oxidase-like 1	protein-coding
MACS_peak_7690	chr4	115687582	115692854	+	3823	NA	exon (NM_010173, exon 1 of 15)	exon (NM_010173, exon 1 of 15)	289	NM_010173	14073	Mm.256025	NM_010173	ENSMUSG00000034171	Faah	AW412498	fatty acid amide hydrolase	protein-coding
MACS_peak_3643	chr14	122869640	122887431	+	3823	NA	3' UTR (NM_009574, exon 3 of 3)	3' UTR (NM_009574, exon 3 of 3)	3929	NM_009574	22772	Mm.308936	NM_009574	ENSMUSG00000061524	Zic2	HPE5|Ku	zinc finger protein of the cerebellum 2	protein-coding
MACS_peak_9929	chr7	57228296	57233364	+	3823	NA	intron (NM_001037906, intron 1 of 19)	CpG	110	NM_001037906	338352	Mm.383528	NM_001037906	ENSMUSG00000055409	Nell1	B230343H07Rik|l7R6	NEL-like 1	protein-coding
MACS_peak_8590	chr5	101270785	101277760	+	3823	NA	promoter-TSS (NM_172715)	promoter-TSS (NM_172715)	-976	NM_172715	231510	Mm.271911	NM_172715	ENSMUSG00000029314	Agpat9	1-AGPAT|1-AGPAT 9|4933407I02Rik|4933408F15|9|A230097K15Rik|GPAT-3|mGPAT3	1-acylglycerol-3-phosphate O-acyltransferase 9	protein-coding
MACS_peak_5678	chr19	46204982	46213701	+	3823	NA	TTS (NM_008852)	TTS (NM_008852)	2952	NM_007703	12686	Mm.21806	NM_007703	ENSMUSG00000038754	Elovl3	CIN-2|Cig30	elongation of very long chain fatty acids (FEN1/Elo2, SUR4/Elo3, yeast)-like 3	protein-coding
MACS_peak_10595	chr8	28334265	28340573	+	3823	NA	intron (NM_013462, intron 2 of 3)	intron (NM_013462, intron 2 of 3)	2641	NM_013462	11556	Mm.278475	NM_013462	ENSMUSG00000031489	Adrb3	Adrb-3	adrenergic receptor, beta 3	protein-coding
MACS_peak_10399	chr7	150151829	150156462	+	3823	NA	exon (NM_008554, exon 2 of 3)	exon (NM_008554, exon 2 of 3)	1024	NM_008554	17173	Mm.196417	NM_008554	ENSMUSG00000009248	Ascl2	2410083I15Rik|Mash2|bHLHa45	achaete-scute complex homolog 2 (Drosophila)	protein-coding
MACS_peak_109	chr1	40381136	40385167	+	3823	NA	intron (NM_133193, intron 1 of 10)	intron (NM_133193, intron 1 of 10)	1679	NM_133193	107527	Mm.155583	NM_133193	ENSMUSG00000070942	Il1rl2	AI481289|AW551444|IL-1Rrp2	interleukin 1 receptor-like 2	protein-coding
MACS_peak_7657	chr4	114337273	114341762	+	3823	NA	Intergenic	Intergenic	-154808	NR_033617	433746	Mm.388908	NR_033617	ENSMUSG00000055198	Gm12830	OTTMUSG00000008584	predicted gene 12830	ncRNA
MACS_peak_3819	chr15	75919114	75922810	+	3823	NA	promoter-TSS (NM_144847)	promoter-TSS (NM_144847)	-519	NM_144847	223649	Mm.101946	NM_144847	ENSMUSG00000075590	Nrbp2	BC011468	nuclear receptor binding protein 2	protein-coding
MACS_peak_10929	chr8	98201332	98203405	+	3823	NA	Intergenic	CpG	-24569	NM_001195006	234593	Mm.29846	NM_145602	ENSMUSG00000036564	Ndrg4	D8Bwg1337e|Ndr1-rs|Ndr4|R74996|SMAP-8	N-myc downstream regulated gene 4	protein-coding
MACS_peak_4554	chr17	23669483	23679486	+	3823	NA	Intergenic	Intergenic	26709	NM_001033496	449521	Mm.268582	NM_001033496	ENSMUSG00000071256	Zfp213	BC038178|D17Ertd197e	zinc finger protein 213	protein-coding
MACS_peak_10954	chr8	108488576	108491390	+	3823	NA	promoter-TSS (NM_001253804)	promoter-TSS (NM_001253804)	32	NM_001253804	20498	Mm.292447	NM_009195	ENSMUSG00000017765	Slc12a4	AW546649|KCC1|RBCKCC1	solute carrier family 12, member 4	protein-coding
MACS_peak_2619	chr12	112722004	112725908	+	3812	NA	promoter-TSS (NM_001033248)	promoter-TSS (NM_001033248)	78	NM_001033248	212539	Mm.81916	NM_001033248	ENSMUSG00000010529	Gm266	-	predicted gene 266	protein-coding
MACS_peak_6325	chr2	119146134	119154560	+	3812	NA	intron (NR_030683, intron 3 of 3)	intron (NR_030683, intron 3 of 3)	-1173	NM_019454	54485	Mm.143719	NM_019454	ENSMUSG00000027314	Dll4	Delta4	delta-like 4 (Drosophila)	protein-coding
MACS_peak_9490	chr6	120411224	120414558	+	3812	NA	promoter-TSS (NM_008359)	promoter-TSS (NM_008359)	-324	NM_008359	16172	Mm.4481	NM_008359	ENSMUSG00000002897	Il17ra	AW538159|Cdw217|Il17r|VDw217	interleukin 17 receptor A	protein-coding
MACS_peak_4036	chr15	98885279	98889383	+	3812	NA	exon (NM_001163589, exon 4 of 9)	exon (NM_001163589, exon 4 of 9)	1726	NM_001163589	19132	Mm.2477	NM_013639	ENSMUSG00000023484	Prph	Prph1	peripherin	protein-coding
MACS_peak_2790	chr13	36814734	36825147	+	3812	NA	intron (NM_153529, intron 2 of 2)	(TC)n|Simple_repeat|Simple_repeat	6406	NM_153529	68404	Mm.232930	NM_153529	ENSMUSG00000039114	Nrn1	0710008J23Rik|Cpg15|Nrn	neuritin 1	protein-coding
MACS_peak_4247	chr16	23979213	23982423	+	3812	NA	intron (NM_009744, intron 1 of 9)	intron (NM_009744, intron 1 of 9)	7880	NM_009744	12053	Mm.347398	NM_009744	ENSMUSG00000022508	Bcl6	Bcl5	B cell leukemia/lymphoma 6	protein-coding
MACS_peak_8922	chr5	139467439	139470825	+	3812	NA	intron (NM_008808, intron 2 of 5)	CpG	1775	NM_008808	18590	Mm.2675	NM_008808	ENSMUSG00000025856	Pdgfa	-	platelet derived growth factor, alpha	protein-coding
MACS_peak_10413	chr7	150686399	150690733	+	3812	NA	promoter-TSS (NM_009434)	promoter-TSS (NM_009434)	-137	NM_009434	22113	Mm.334344	NM_009434	ENSMUSG00000010760	Phlda2	Ipl|Tssc3	pleckstrin homology-like domain, family A, member 2	protein-coding
MACS_peak_508	chr1	136541895	136545436	+	3754	NA	intron (NM_009307, intron 1 of 9)	CpG	407	NM_009307	20980	Mm.5102	NM_009307	ENSMUSG00000026452	Syt2	R74640|mKIAA4194	synaptotagmin II	protein-coding
MACS_peak_4689	chr17	35093939	35095505	+	3751	NA	exon (NM_010478, exon 1 of 1)	exon (NM_010478, exon 1 of 1)	1461	NM_010478	15511	Mm.372314	NM_010478	ENSMUSG00000090877	Hspa1b	Hsp70|Hsp70-1|Hsp70.1|hsp68	heat shock protein 1B	protein-coding
MACS_peak_926	chr10	60148040	60151205	+	3751	NA	intron (NR_045556, intron 2 of 68)	CpG	9616	NM_001252635	22295	Mm.440327	NM_023370	ENSMUSG00000012819	Cdh23	4930542A03Rik|USH1D|ahl|ahl1|bob|bus|mdfw|nmf112|nmf181|nmf252|sals|v	cadherin 23 (otocadherin)	protein-coding
MACS_peak_8508	chr5	75542442	75552957	+	3751	NA	promoter-TSS (NM_011058)	promoter-TSS (NM_011058)	-617	NM_011058	18595	Mm.221403	NM_011058	ENSMUSG00000029231	Pdgfra	AI115593|CD140a|Pdgfr-2	platelet derived growth factor receptor, alpha polypeptide	protein-coding
MACS_peak_7169	chr3	104762647	104765655	+	3751	NA	intron (NM_009520, intron 1 of 4)	intron (NM_009520, intron 1 of 4)	476	NM_009520	22414	Mm.10740	NM_009520	ENSMUSG00000027840	Wnt2b	Wnt13	wingless-type MMTV integration site family, member 2B	protein-coding
MACS_peak_5823	chr2	18528450	18532256	+	3718	NA	Intergenic	Intergenic	-63736	NM_147778	12238	Mm.249586	NM_147778	ENSMUSG00000051154	Commd3	AW550818|Bup|D2Ertd542e	COMM domain containing 3	protein-coding
MACS_peak_1019	chr10	79380083	79387171	+	3718	NA	intron (NM_053244, intron 3 of 4)	intron (NM_053244, intron 3 of 4)	3911	NM_053244	114229	Mm.191035	NM_053244	ENSMUSG00000035773	Kiss1r	Gpr54|KiSS-1	KISS1 receptor	protein-coding
MACS_peak_9814	chr7	36367388	36370404	+	3718	NA	3' UTR (NM_145840, exon 1 of 1)	3' UTR (NM_145840, exon 1 of 1)	1705	NM_145840	243923	Mm.222680	NM_145840	ENSMUSG00000056043	Rgs9bp	R9AP|Rgs9-1bp	regulator of G-protein signalling 9 binding protein	protein-coding
MACS_peak_4967	chr17	87680504	87684174	+	3718	NA	promoter-TSS (NR_015506)	promoter-TSS (NR_015506)	113	NM_028639	225049	Mm.77396	NM_028639	ENSMUSG00000036918	Ttc7	1110035E02Rik|1700007L07Rik|Ttc7a|fsn|hea	tetratricopeptide repeat domain 7	protein-coding
MACS_peak_2869	chr13	51661819	51663570	+	3718	NA	promoter-TSS (NM_009167)	promoter-TSS (NM_009167)	-241	NM_009167	20418	Mm.131870	NM_009167	ENSMUSG00000021448	Shc3	N-Shc|Rai|ShcC	src homology 2 domain-containing transforming protein C3	protein-coding
MACS_peak_7958	chr4	136510461	136515389	+	3718	NA	promoter-TSS (NM_007939)	promoter-TSS (NM_007939)	-194	NM_007939	13842	Mm.1390	NM_007939	ENSMUSG00000028661	Epha8	AW047546|Eek|Hek3|mKIAA1459	Eph receptor A8	protein-coding
MACS_peak_10008	chr7	77466432	77483929	+	3718	NA	Intergenic	Intergenic	30299	NM_009697	11819	Mm.158143	NM_009697	ENSMUSG00000030551	Nr2f2	2700033K02Rik|9430015G03Rik|ARP-1|Aporp1|COUP-TF2|COUP-TFII|COUPTFB|EAR3|SVP40|Tcfcoup2	nuclear receptor subfamily 2, group F, member 2	protein-coding
MACS_peak_11590	chr9	91245135	91252429	+	3718	NA	Intergenic	Intergenic	11855	NM_009573	22771	Mm.335350	NM_009573	ENSMUSG00000032368	Zic1	ZIC|ZNF201	zinc finger protein of the cerebellum 1	protein-coding
MACS_peak_3516	chr14	71286879	71293182	+	3718	NA	promoter-TSS (NM_008115)	promoter-TSS (NM_008115)	93	NM_008115	14586	Mm.32619	NM_008115	ENSMUSG00000022103	Gfra2	-	glial cell line derived neurotrophic factor family receptor alpha 2	protein-coding
MACS_peak_5938	chr2	31324084	31328234	+	3718	NA	intron (NM_007494, intron 1 of 15)	intron (NM_007494, intron 1 of 15)	369	NM_007494	11898	Mm.3217	NM_007494	ENSMUSG00000076441	Ass1	AA408052|ASS|Ass-1|fold	argininosuccinate synthetase 1	protein-coding
MACS_peak_11490	chr9	67677019	67681425	+	3718	NA	exon (NM_001163143, exon 2 of 2)	exon (NM_001163143, exon 2 of 2)	915	NM_001163143	244911	Mm.325849	NM_001163143	ENSMUSG00000047990	C2cd4a	EG244911|Fam148a	C2 calcium-dependent domain containing 4A	protein-coding
MACS_peak_5477	chr19	23216318	23218085	+	3718	NA	intron (NM_010638, intron 1 of 1)	intron (NM_010638, intron 1 of 1)	1485	NM_010638	16601	Mm.291595	NM_010638	ENSMUSG00000033863	Klf9	2310051E17Rik|AA589643|BTEB-1|Bteb1|ENSMUSG00000055440|Gm9971	Kruppel-like factor 9	protein-coding
MACS_peak_1277	chr10	128024848	128028185	+	3718	NA	promoter-TSS (NM_010153)	promoter-TSS (NM_010153)	41	NM_010153	13867	Mm.373043	NM_010153		Erbb3	C76256|Erbb-3|Erbb3r|Her3	v-erb-b2 erythroblastic leukemia viral oncogene homolog 3 (avian)	protein-coding
MACS_peak_5790	chr2	6049264	6051301	+	3686	NA	intron (NM_144883, intron 1 of 3)	intron (NM_144883, intron 1 of 3)	949	NM_144883	227545	Mm.133542	NM_144883		Proser2	5430407P10Rik|AU067770	proline and serine rich 2	protein-coding
MACS_peak_9933	chr7	58877055	58884013	+	3686	NA	intron (NM_080853, intron 1 of 11)	intron (NM_080853, intron 1 of 11)	3334	NM_080853	140919	Mm.256618	NM_080853	ENSMUSG00000030500	Slc17a6	2900073D12Rik|DNPI|VGLUT2	solute carrier family 17 (sodium-dependent inorganic phosphate cotransporter), member 6	protein-coding
MACS_peak_4783	chr17	47572977	47577531	+	3686	NA	promoter-TSS (NM_029296)	promoter-TSS (NM_029296)	-930	NM_029296	75462	Mm.46129	NM_029296	ENSMUSG00000047150	1700001C19Rik	-	RIKEN cDNA 1700001C19 gene	protein-coding
MACS_peak_7974	chr4	137948222	137955244	+	3686	NA	exon (NM_001081672, exon 1 of 1)	exon (NM_001081672, exon 1 of 1)	640	NM_001081672	625638	Mm.379091	NM_001081672	ENSMUSG00000078235	Fam43b	OTTMUSG00000009974	family with sequence similarity 43, member B	protein-coding
MACS_peak_11494	chr9	69136490	69140001	+	3686	NA	intron (NM_001289916, intron 1 of 9)	CpG	597	NM_001289916	19883	Mm.378450	NM_013646	ENSMUSG00000032238	Rora	9530021D13Rik|Nr1f1|ROR1|ROR2|ROR3|nmf267|sg|staggerer|tmgc26	RAR-related orphan receptor alpha	protein-coding
MACS_peak_1383	chr11	18773650	18778193	+	3686	NA	Intergenic	Intergenic	143051	NM_001193271	17268	Mm.356578	NM_010789	ENSMUSG00000020160	Meis1	C530044H18Rik|Evi8	Meis homeobox 1	protein-coding
MACS_peak_895	chr10	51396218	51399098	+	3686	NA	promoter-TSS (NM_001159389)	promoter-TSS (NM_001159389)	92	NM_001159389	320995	Mm.109190	NM_177306	ENSMUSG00000019900	Rfx6	4930572O07Rik|Rfxdc1	regulatory factor X, 6	protein-coding
MACS_peak_184	chr1	63318806	63321141	+	3686	NA	5' UTR (NM_028673, exon 1 of 7)	5' UTR (NM_028673, exon 1 of 7)	130	NM_001267872	73884	Mm.86986	NM_028673	ENSMUSG00000027520	Zdbf2	4930431J08Rik|9330107J05Rik	zinc finger, DBF-type containing 2	protein-coding
MACS_peak_3821	chr15	76058333	76064568	+	3686	NA	intron (NM_001163542, intron 1 of 33)	intron (NM_001163542, intron 1 of 33)	358	NM_001163542	18810	Mm.234912	NM_011117	ENSMUSG00000022565	Plec	AA591047|AU042537|EBS1|PCN|PLTN|Plec1	plectin	protein-coding
MACS_peak_1232	chr10	121884173	121887186	+	3686	NA	5' UTR (NM_016847, exon 1 of 2)	5' UTR (NM_016847, exon 1 of 2)	124	NM_016847	54140	Mm.4351	NM_016847	ENSMUSG00000020123	Avpr1a	AVPR|Avpr1|V1a|V1aR	arginine vasopressin receptor 1A	protein-coding
MACS_peak_6667	chr2	168735972	168739376	+	3686	NA	Intergenic	Intergenic	43413	NM_009564	22722	Mm.2095	NM_009564	ENSMUSG00000027551	Zfp64	-	zinc finger protein 64	protein-coding
MACS_peak_1129	chr10	90431120	90433528	+	3686	NA	3' UTR (NM_001177397, exon 12 of 12)	3' UTR (NM_001177397, exon 12 of 12)	113164	NM_001042558	11783	Mm.220289	NM_009684	ENSMUSG00000019979	Apaf1	6230400I06Rik|Apaf-1|Apaf1l|fog|mKIAA0413	apoptotic peptidase activating factor 1	protein-coding
MACS_peak_4516	chr17	8581114	8582695	+	3686	NA	non-coding (NR_045795, exon 1 of 3)	non-coding (NR_045795, exon 1 of 3)	429	NR_045795	100504601	Mm.365131	NR_045795	ENSMUSG00000097796	Gm16702	AU016609	predicted gene, 16702	ncRNA
MACS_peak_9880	chr7	53121073	53127901	+	3686	NA	Intergenic	Intergenic	-2436	NM_008172	14814	Mm.322594	NM_008172	ENSMUSG00000002771	Grin2d	GluN2D|NMDAR2D|NR2D	glutamate receptor, ionotropic, NMDA2D (epsilon 4)	protein-coding
MACS_peak_3290	chr14	29321030	29325133	+	3686	NA	intron (NM_009524, intron 1 of 4)	(TG)n|Simple_repeat|Simple_repeat	-1510	NM_001256224	22418	Mm.287544	NM_009524	ENSMUSG00000021994	Wnt5a	8030457G12Rik|Wnt-5a	wingless-type MMTV integration site family, member 5A	protein-coding
MACS_peak_1669	chr11	70272174	70274506	+	3686	NA	5' UTR (NM_023158, exon 1 of 5)	5' UTR (NM_023158, exon 1 of 5)	146	NM_023158	66102	Mm.425692	NM_023158	ENSMUSG00000018920	Cxcl16	0910001K24Rik|AV290116|BB024863|CXCL16v1|CXCL16v2|SR-PSOX|Zmynd15|b2b498Clo	chemokine (C-X-C motif) ligand 16	protein-coding
MACS_peak_3151	chr13	106232816	106237462	+	3686	NA	exon (NM_008308, exon 1 of 1)	exon (NM_008308, exon 1 of 1)	1366	NM_008308	15550	Mm.4716	NM_008308	ENSMUSG00000021721	Htr1a	Gpcr18	5-hydroxytryptamine (serotonin) receptor 1A	protein-coding
MACS_peak_11998	chrX	136594906	136597617	+	3686	NA	intron (NM_001081668, intron 1 of 8)	CpG	846	NM_001081668	279706	Mm.102590	NM_001081668	ENSMUSG00000072944	Nup62cl	Gm719	nucleoporin 62 C-terminal like	protein-coding
MACS_peak_10749	chr8	74223395	74227148	+	3686	NA	intron (NM_028189, intron 1 of 2)	intron (NM_028189, intron 1 of 2)	428	NM_028189	72297	Mm.290837	NM_028189	ENSMUSG00000031803	B3gnt3	2210008L19Rik	UDP-GlcNAc:betaGal beta-1,3-N-acetylglucosaminyltransferase 3	protein-coding
MACS_peak_2157	chr11	116082343	116086353	+	3686	NA	exon (NM_025276, exon 22 of 22)	exon (NM_025276, exon 22 of 22)	7032	NR_004853	69681	Mm.33677	NR_004853	ENSMUSG00000092300	Cdk3-ps	2310050O10Rik|Cdk3	cyclin-dependent kinase 3, pseudogene	pseudo
MACS_peak_7259	chr3	130808485	130813379	+	3686	NA	Intergenic	Intergenic	-2283	NM_010703	16842	Mm.255219	NM_010703	ENSMUSG00000027985	Lef1	3000002B05|AI451430|Lef-1	lymphoid enhancer binding factor 1	protein-coding
MACS_peak_4521	chr17	8991349	8995890	+	3686	NA	promoter-TSS (NM_011866)	promoter-TSS (NM_011866)	-991	NM_011866	23984	Mm.87161	NM_011866	ENSMUSG00000023868	Pde10a	-	phosphodiesterase 10A	protein-coding
MACS_peak_6590	chr2	163991810	163998469	+	3686	NA	intron (NM_008435, intron 1 of 3)	intron (NM_008435, intron 1 of 3)	1710	NM_008435	16538	Mm.6217	NM_008435	ENSMUSG00000040164	Kcns1	Kv9.1	K+ voltage-gated channel, subfamily S, 1	protein-coding
MACS_peak_8317	chr5	26333346	26334779	+	3686	NA	Intergenic	Intergenic	-2795	NM_001281519	100038949		NM_001281519	ENSMUSG00000091049	Gm1979	-	predicted gene 1979	protein-coding
MACS_peak_9505	chr6	124943688	124948692	+	3686	NA	promoter-TSS (NM_175696)	promoter-TSS (NM_175696)	-548	NM_175696	319352	Mm.295327	NM_175696	ENSMUSG00000030329	Pianp	AI255183|AU067746|C530028O21Rik|Panp	PILR alpha associated neural protein	protein-coding
MACS_peak_9536	chr6	128247825	128252641	+	3686	NA	intron (NM_001080979, intron 1 of 10)	CpG	598	NM_001080979	21679	Mm.14774	NM_011567	ENSMUSG00000030353	Tead4	ETFR-2|Etfr2|FR-19|Rtef1|TEAD-4|TEF-3|Tcf13r1|Tef3|Tefr|Tefr1|Tefr1a	TEA domain family member 4	protein-coding
MACS_peak_5769	chr19	60220287	60221034	+	3686	NA	promoter-TSS (NR_026942)	promoter-TSS (NR_026942)	82	NR_026942	107376	Mm.245813	NR_026942	ENSMUSG00000053117	E330013P04Rik	9930018I18Rik|AW492152	RIKEN cDNA E330013P04 gene	ncRNA
MACS_peak_7028	chr3	88056587	88058984	+	3686	NA	intron (NM_021375, intron 1 of 9)	intron (NM_021375, intron 1 of 9)	821	NM_021375	58176	Mm.103777	NM_021375	ENSMUSG00000001417	Rhbg	-	Rhesus blood group-associated B glycoprotein	protein-coding
MACS_peak_10942	chr8	107781772	107785092	+	3686	NA	exon (NM_001033161, exon 4 of 5)	exon (NM_001033161, exon 4 of 5)	-4379	NM_178879	97440	Mm.489600	NM_178879	ENSMUSG00000069920	B3gnt9	3-Gn-T9|B3gnt9-ps|BGnT-9|C76565|C76566|beta-1|beta3Gn-T9	UDP-GlcNAc:betaGal beta-1,3-N-acetylglucosaminyltransferase 9	protein-coding
MACS_peak_3413	chr14	56982181	56986145	+	3686	NA	intron (NM_138652, intron 1 of 22)	CpG	258	NM_138652	192113	Mm.273271	NM_138652	ENSMUSG00000022229	Atp12a	Atp1al1|HKalpha2|cHKA	ATPase, H+/K+ transporting, nongastric, alpha polypeptide	protein-coding
MACS_peak_1363	chr11	11584348	11587322	+	3686	NA	promoter-TSS (NM_009578)	promoter-TSS (NM_009578)	-381	NM_009578	22778	Mm.103545	NM_009578	ENSMUSG00000018654	Ikzf1	5832432G11Rik|Ikaros|LyF-1|Zfpn1a1|Znfn1a1|hlk-1|mKIAA4227	IKAROS family zinc finger 1	protein-coding
MACS_peak_1644	chr11	69048945	69051667	+	3686	NA	intron (NM_008192, intron 1 of 18)	intron (NM_008192, intron 1 of 18)	218	NM_008192	14919	Mm.291816	NM_008192	ENSMUSG00000020890	Gucy2e	GC-E|GC1|ROS-GC1	guanylate cyclase 2e	protein-coding
MACS_peak_10189	chr7	117768211	117773777	+	3645	NA	promoter-TSS (NM_009627)	promoter-TSS (NM_009627)	-189	NM_009627	11535	Mm.1408	NM_009627	ENSMUSG00000030790	Adm	AM	adrenomedullin	protein-coding
MACS_peak_554	chr1	155032150	155034436	+	3635	NA	intron (NM_008485, intron 1 of 23)	CpG	284	NM_008485	16782	Mm.329272	NM_008485	ENSMUSG00000026479	Lamc2	AA589349	laminin, gamma 2	protein-coding
MACS_peak_7922	chr4	134258116	134259796	+	3635	NA	exon (NM_207237, exon 1 of 12)	exon (NM_207237, exon 1 of 12)	1249	NM_207237	230815	Mm.18905	NM_207237	ENSMUSG00000037306	Man1c1	AI593348	mannosidase, alpha, class 1C, member 1	protein-coding
MACS_peak_6327	chr2	119567581	119571578	+	3635	NA	intron (NM_146125, intron 1 of 6)	CpG	1506	NM_146125	228550	Mm.65337	NM_146125	ENSMUSG00000027296	Itpka	-	inositol 1,4,5-trisphosphate 3-kinase A	protein-coding
MACS_peak_4410	chr16	91218320	91235441	+	3635	NA	exon (NM_016967, exon 2 of 2)	exon (NM_016967, exon 2 of 2)	1085	NM_016967	50913	Mm.37289	NM_016967	ENSMUSG00000039830	Olig2	AI604895|Bhlhb1|Olg-2|Oligo2|RK17|bHLHe19	oligodendrocyte transcription factor 2	protein-coding
MACS_peak_927	chr10	60288644	60295755	+	3583	NA	intron (NM_029770, intron 1 of 16)	intron (NM_029770, intron 1 of 16)	2130	NM_029770	107449	Mm.290433	NM_029770	ENSMUSG00000020099	Unc5b	6330415E02Rik|A630020F16|D10Bwg0792e|Unc5h2	unc-5 homolog B (C. elegans)	protein-coding
MACS_peak_439	chr1	121313813	121321504	+	3583	NA	exon (NM_008381, exon 1 of 2)	exon (NM_008381, exon 1 of 2)	1167	NM_008381	16324	Mm.3092	NM_008381	ENSMUSG00000037035	Inhbb	-	inhibin beta-B	protein-coding
MACS_peak_7051	chr3	89633733	89638163	+	3583	NA	exon (NM_172530, exon 1 of 6)	exon (NM_172530, exon 1 of 6)	656	NM_172530	214547	Mm.225	NM_172530	ENSMUSG00000046280	She	9430022A14	src homology 2 domain-containing transforming protein E	protein-coding
MACS_peak_1534	chr11	53275377	53280153	+	3583	NA	intron (NM_001290789, intron 2 of 6)	intron (NM_001290789, intron 2 of 6)	7058	NM_027917	71774	Mm.274370	NM_027917	ENSMUSG00000018387	Shroom1	Apx|Shrm1	shroom family member 1	protein-coding
MACS_peak_10968	chr8	109393011	109396979	+	3583	NA	intron (NM_008217, intron 1 of 3)	intron (NM_008217, intron 1 of 3)	853	NM_008217	15118	Mm.56986	NM_008217	ENSMUSG00000031910	Has3	-	hyaluronan synthase 3	protein-coding
MACS_peak_11282	chr9	37236303	37243654	+	3583	NA	intron (NM_001164767, intron 1 of 27)	intron (NM_001164767, intron 1 of 27)	782	NM_001164767	19649	Mm.212826	NM_011248	ENSMUSG00000032128	Robo3	Rbig1|Rig-1|Rig1|Robo3a|Robo3b	roundabout homolog 3 (Drosophila)	protein-coding
MACS_peak_3419	chr14	57721992	57726150	+	3583	NA	promoter-TSS (NM_008125)	promoter-TSS (NM_008125)	-532	NM_008125	14619	Mm.390683	NM_008125	ENSMUSG00000046352	Gjb2	AI325222|Cnx26|Cx26|Gjb-2	gap junction protein, beta 2	protein-coding
MACS_peak_8386	chr5	35623134	35625279	+	3583	NA	3' UTR (NM_007418, exon 1 of 1)	3' UTR (NM_007418, exon 1 of 1)	2991	NM_007418	11553	Mm.57205	NM_007418	ENSMUSG00000045318	Adra2c	Adra-2c|[a]2C|alpha2-C4|alpha2C	adrenergic receptor, alpha 2c	protein-coding
MACS_peak_6094	chr2	65961853	65963841	+	3583	NA	promoter-TSS (NM_015736)	promoter-TSS (NM_015736)	3	NM_015736	14425	Mm.439760	NM_015736	ENSMUSG00000026994	Galnt3	-	UDP-N-acetyl-alpha-D-galactosamine:polypeptide N-acetylgalactosaminyltransferase 3	protein-coding
MACS_peak_7220	chr3	121655830	121657658	+	3583	NA	intron (NM_172525, intron 1 of 22)	intron (NM_172525, intron 1 of 22)	500	NM_172525	214137	Mm.229287	NM_172525	ENSMUSG00000039831	Arhgap29	6720461J18Rik|A830014I19|AU040217|B130017I01Rik|C76601|Parg1	Rho GTPase activating protein 29	protein-coding
MACS_peak_6488	chr2	148231602	148234513	+	3583	NA	exon (NM_009378, exon 1 of 1)	exon (NM_009378, exon 1 of 1)	867	NM_009378	21824	Mm.24096	NM_009378	ENSMUSG00000074743	Thbd	AI385582|CD141|TM	thrombomodulin	protein-coding
MACS_peak_4434	chr16	92496901	92501387	+	3583	NA	exon (NM_172469, exon 1 of 6)	exon (NM_172469, exon 1 of 6)	752	NM_172469	209195	Mm.44747	NM_172469	ENSMUSG00000022949	Clic6	5730466J16Rik|AL022908|AW045520|CLIC1L	chloride intracellular channel 6	protein-coding
MACS_peak_2291	chr12	32243338	32245785	+	3583	NA	intron (NM_011867, intron 1 of 20)	CpG-3114	273	NM_011867	23985	Mm.100187	NM_011867	ENSMUSG00000020651	Slc26a4	Pds|pendrin	solute carrier family 26, member 4	protein-coding
MACS_peak_1543	chr11	53791912	53793757	+	3583	NA	intron (NM_019723, intron 1 of 9)	intron (NM_019723, intron 1 of 9)	695	NM_019723	56517	Mm.154284	NM_019723	ENSMUSG00000063652	Slc22a21	Octn3|Slc22a9	solute carrier family 22 (organic cation transporter), member 21	protein-coding
MACS_peak_4395	chr16	90829170	90833660	+	3583	NA	5' UTR (NM_027627, exon 1 of 7)	5' UTR (NM_027627, exon 1 of 7)	311	NM_001199210	70967	Mm.253077	NM_027627		Eva1c	1700092M14Rik|4931408A02Rik|Fam176c	eva-1 homolog C (C. elegans)	protein-coding
MACS_peak_9878	chr7	53087282	53092507	+	3562	NA	intron (NM_008172, intron 10 of 11)	intron (NM_008172, intron 10 of 11)	-3735	NM_153419	101612	Mm.274847	NM_153419	ENSMUSG00000053801	Grwd1	A301|AI504353|Grwd|Wdr28	glutamate-rich WD repeat containing 1	protein-coding
MACS_peak_1698	chr11	74423552	74425936	+	3562	NA	Intergenic	Intergenic	-8363	NM_001013784	432582	Mm.274369	NM_001013784	ENSMUSG00000069814	E130309D14Rik	-	RIKEN cDNA E130309D14 gene	protein-coding
MACS_peak_4227	chr16	21245730	21250138	+	3562	NA	non-coding (NR_046162, exon 5 of 5)	non-coding (NR_046162, exon 5 of 5)	8205	NR_106145	102465781		NR_106145	miRBase:MI0025025	Mir7680	mmu-mir-7680	microRNA mir-7680	ncRNA
MACS_peak_8012	chr4	140856952	140858739	+	3562	NA	intron (NM_010139, intron 1 of 16)	intron (NM_010139, intron 1 of 16)	709	NM_010139	13836	Mm.2581	NM_010139	ENSMUSG00000006445	Epha2	AW545284|Eck|Myk2|Sek-2|Sek2	Eph receptor A2	protein-coding
MACS_peak_3125	chr13	99352520	99360391	+	3549	NA	Intergenic	Intergenic	50910	NM_026685	68344	Mm.28766	NM_026685	ENSMUSG00000046082	Tmem174	0610009B10Rik|AA986094	transmembrane protein 174	protein-coding
MACS_peak_3544	chr14	80167839	80171785	+	3549	NA	exon (NM_021543, exon 1 of 3)	exon (NM_021543, exon 1 of 3)	1307	NM_001042726	18530	Mm.390715	NM_021543	ENSMUSG00000036422	Pcdh8	1700080P15Rik|Papc	protocadherin 8	protein-coding
MACS_peak_4556	chr17	23780824	23783235	+	3549	NA	5' UTR (NM_001033339, exon 1 of 10)	5' UTR (NM_001033339, exon 1 of 10)	207	NM_001033339	240047	Mm.235343	NM_001033339	ENSMUSG00000023903	Mmp25	F730048C11Rik|Leukolysin|MMP20|MT6-MMP	matrix metallopeptidase 25	protein-coding
MACS_peak_61	chr1	24592634	24595873	+	3549	NA	promoter-TSS (NM_007733)	promoter-TSS (NM_007733)	23	NM_007733	12823	Mm.329196	NM_007733		Col19a1	-	collagen, type XIX, alpha 1	protein-coding
MACS_peak_6418	chr2	132209982	132212144	+	3549	NA	5' UTR (NM_144944, exon 1 of 3)	5' UTR (NM_144944, exon 1 of 3)	120	NM_144944	246313	Mm.283777	NM_144944	ENSMUSG00000050558	Prokr2	B830005M06Rik|EG-VEGRF2|Gpcr73l1|Gpr73l1|PKR2	prokineticin receptor 2	protein-coding
MACS_peak_3079	chr13	95470674	95474219	+	3549	NA	Intergenic	Intergenic	-86452	NM_009321	21371	Mm.379025	NM_009321	ENSMUSG00000042043	Tbca	Tbca13	tubulin cofactor A	protein-coding
MACS_peak_9239	chr6	53234436	53240915	+	3549	NA	intron (NR_015553, intron 1 of 4)	CpG	386	NR_015553	320189	Mm.227444	NR_015553		9430076C15Rik	-	RIKEN cDNA 9430076C15 gene	ncRNA
MACS_peak_4489	chr17	3081549	3083088	+	3549	NA	intron (NR_003519, intron 1 of 7)	intron (NR_003519, intron 1 of 7)	1865	NR_003519	328734	Mm.335641	NR_003519		Pisd-ps2	D030013I16Rik	phosphatidylserine decarboxylase, pseudogene 2	pseudo
MACS_peak_356	chr1	88197740	88201360	+	3549	NA	promoter-TSS (NM_145222)	promoter-TSS (NM_145222)	-246	NM_145222	227327	Mm.86467	NM_145222	ENSMUSG00000079445	B3gnt7	C330001H22Rik|beta-3GnT7	UDP-GlcNAc:betaGal beta-1,3-N-acetylglucosaminyltransferase 7	protein-coding
MACS_peak_5930	chr2	30699496	30702685	+	3549	NA	exon (NM_009116, exon 1 of 4)	exon (NM_009116, exon 1 of 4)	203	NM_009116	20204	Mm.1802	NM_009116	ENSMUSG00000039476	Prrx2	Prx2|S8	paired related homeobox 2	protein-coding
MACS_peak_11760	chr9	121401508	121405472	+	3549	NA	exon (NM_001284508, exon 2 of 4)	exon (NM_001284508, exon 2 of 4)	1322	NM_001284508	12424	Mm.2619	NM_031161	ENSMUSG00000032532	Cck	-	cholecystokinin	protein-coding
MACS_peak_4698	chr17	35399264	35401966	+	3549	NA	intron (NM_001267808, intron 6 of 10)	CpG-6319	547	NM_001267808	14980	Mm.439675	NM_001267808		H2-L	H-2L	histocompatibility 2, D region locus L	protein-coding
MACS_peak_10420	chr7	151161370	151166214	+	3549	NA	Intergenic	CpG	44772	NR_105830	102465217		NR_105830	miRBase:MI0021940	Mir6404	mmu-mir-6404	microRNA mir-6404	ncRNA
MACS_peak_3409	chr14	56399459	56408583	+	3549	NA	3' UTR (NM_001164108, exon 10 of 10)	3' UTR (NM_001164108, exon 10 of 10)	-1165	NM_080435	104110	Mm.287010	NM_080435	ENSMUSG00000022220	Adcy4	mKIAA4004	adenylate cyclase 4	protein-coding
MACS_peak_6758	chr2	180946265	180949130	+	3549	NA	5' UTR (NM_011481, exon 1 of 8)	5' UTR (NM_011481, exon 1 of 8)	179	NM_011481	20811	Mm.4752	NM_011481	ENSMUSG00000027579	Srms	A230069J08Rik|srm	src-related kinase lacking C-terminal regulatory tyrosine and N-terminal myristylation sites	protein-coding
MACS_peak_7403	chr4	36896641	36901015	+	3549	NA	promoter-TSS (NM_001165999)	promoter-TSS (NM_001165999)	-51	NM_001165999	242384	Mm.132507	NM_175516	ENSMUSG00000045083	Lingo2	B230217C06Rik|Lern3|Lrrn6c	leucine rich repeat and Ig domain containing 2	protein-coding
MACS_peak_8203	chr5	3340430	3345408	+	3549	NA	Intergenic	CpG	-1393	NM_009873	12571	Mm.31672	NM_009873	ENSMUSG00000040274	Cdk6	5830411I20|AI504062|Crk2	cyclin-dependent kinase 6	protein-coding
MACS_peak_5739	chr19	57081284	57084243	+	3549	NA	5' UTR (NM_146102, exon 1 of 21)	5' UTR (NM_146102, exon 1 of 21)	302	NM_146102	226250	Mm.226284	NM_146102	ENSMUSG00000025083	Afap1l2	AU041783|C86904|mKIAA1914	actin filament associated protein 1-like 2	protein-coding
MACS_peak_7762	chr4	122877386	122880263	+	3549	NA	promoter-TSS (NM_001085502)	promoter-TSS (NM_001085502)	28	NM_001085502	230718	Mm.354635	NM_001085502	ENSMUSG00000054958	Nt5c1a	Cn1a|Gm49	5'-nucleotidase, cytosolic IA	protein-coding
MACS_peak_7240	chr3	127333114	127349766	+	3549	NA	Intergenic	B4A|SINE|B4	5377	NM_009718	11924	Mm.42017	NM_009718	ENSMUSG00000027967	Neurog2	Atoh4|Math4A|bHLHa8|ngn-2|ngn2	neurogenin 2	protein-coding
MACS_peak_6594	chr2	164229469	164232280	+	3522	NA	promoter-TSS (NM_013592)	promoter-TSS (NM_013592)	-214	NM_001252563	17183	Mm.29428	NM_013592	ENSMUSG00000016995	Matn4	matrilin-4	matrilin 4	protein-coding
MACS_peak_11093	chr8	125072735	125075876	+	3522	NA	intron (NM_001037298, intron 1 of 50)	intron (NM_001037298, intron 1 of 50)	924	NM_001037298	234839	Mm.37324	NM_001037298	ENSMUSG00000014444	Piezo1	9630020g22|Fam38a|mKIAA0233	piezo-type mechanosensitive ion channel component 1	protein-coding
MACS_peak_4666	chr17	34136233	34137721	+	3522	NA	intron (NM_001001892, intron 1 of 7)	CpG-6273	301	NM_001001892	14972	Mm.422886	NM_001001892	ENSMUSG00000061232	H2-K1	H-2K|H-2K(d)|H2-K|K-f	histocompatibility 2, K1, K region	protein-coding
MACS_peak_9108	chr6	29382784	29385492	+	3522	NA	intron (NM_001081185, intron 1 of 47)	intron (NM_001081185, intron 1 of 47)	985	NM_001081185	68794	Mm.39046	NM_001081185	ENSMUSG00000068699	Flnc	1110055E19Rik|ABP-280|ABPL|Fln2	filamin C, gamma	protein-coding
MACS_peak_1042	chr10	79953762	79962045	+	3522	NA	exon (NM_139226, exon 1 of 2)	exon (NM_139226, exon 1 of 2)	252	NM_139226	246086	Mm.250572	NM_139226	ENSMUSG00000045518	Onecut3	OC-3|Oc3	one cut domain, family member 3	protein-coding
MACS_peak_2201	chr11	118918378	118920854	+	3480	NA	Intergenic	CpG	-17389	NM_013926	30951	Mm.99953	NM_013926	ENSMUSG00000025578	Cbx8	Pc3	chromobox 8	protein-coding
MACS_peak_880	chr10	44175604	44179361	+	3449	NA	intron (NM_007548, intron 1 of 6)	intron (NM_007548, intron 1 of 6)	1011	NM_007548	12142	Mm.4800	NM_007548	ENSMUSG00000038151	Prdm1	Blimp-1|Blimp1|PRDI-BF1|ZNFPR1A1|b2b1765Clo	PR domain containing 1, with ZNF domain	protein-coding
MACS_peak_3093	chr13	96212654	96215687	+	3449	NA	exon (NM_198408, exon 2 of 7)	exon (NM_198408, exon 2 of 7)	616	NM_198408	12919	Mm.316614	NM_198408	ENSMUSG00000021680	Crhbp	CRH-BP	corticotropin releasing hormone binding protein	protein-coding
MACS_peak_4730	chr17	36342152	36344815	+	3449	NA	Intergenic	Intergenic	-16387	NM_008208	15043	Mm.426002	NM_008208	ENSMUSG00000054128	H2-T3	H-2T3|H2-Tw3|TL	histocompatibility 2, T region locus 3	protein-coding
MACS_peak_7796	chr4	124570364	124573952	+	3449	NA	promoter-TSS (NR_040651)	promoter-TSS (NR_040651)	-132	NR_040651	73628	Mm.398337	NR_040651	ENSMUSG00000085263	1700125G02Rik	-	RIKEN cDNA 1700125G02 gene	ncRNA
MACS_peak_6822	chr3	27268201	27272486	+	3449	NA	promoter-TSS (NM_177330)	promoter-TSS (NM_177330)	70	NM_177330	208188	Mm.194721	NM_177330	ENSMUSG00000051136	Ghsr	C530020I22Rik	growth hormone secretagogue receptor	protein-coding
MACS_peak_11189	chr9	20966979	20971276	+	3449	NA	Intergenic	Intergenic	-1031	NM_183408	18577	Mm.191749	NM_019798	ENSMUSG00000032177	Pde4a	D9Ertd60e|Dpde2	phosphodiesterase 4A, cAMP specific	protein-coding
MACS_peak_8081	chr4	147536262	147541441	+	3449	NA	intron (NM_176848, intron 2 of 5)	intron (NM_176848, intron 2 of 5)	4074	NM_176848	230904	Mm.262287	NM_176848	ENSMUSG00000041556	Fbxo2	FBG1|FBX2|Fbs1|Fbs2|NFB42|Prpl4	F-box protein 2	protein-coding
MACS_peak_2135	chr11	115108303	115113561	+	3449	NA	exon (NM_010350, exon 15 of 15)	exon (NM_010350, exon 15 of 15)	17625	NM_010350	14813	Mm.39090	NM_010350	ENSMUSG00000020734	Grin2c	GluN2C|NMDAR2C|NR2C	glutamate receptor, ionotropic, NMDA2C (epsilon 3)	protein-coding
MACS_peak_10940	chr8	107153836	107155184	+	3449	NA	exon (NM_019662, exon 2 of 5)	exon (NM_019662, exon 2 of 5)	711	NM_019662	56437	Mm.29467	NM_019662	ENSMUSG00000031880	Rrad	REM3|Rad	Ras-related associated with diabetes	protein-coding
MACS_peak_8121	chr4	149421490	149424994	+	3449	NA	Intergenic	Intergenic	-19321	NR_029751	723848		NR_029751	miRBase:MI0000584	Mir34a	Mirn34a|mmu-mir-34a	microRNA 34a	ncRNA
MACS_peak_171	chr1	62748040	62756391	+	3449	NA	intron (NM_001077403, intron 1 of 16)	intron (NM_001077403, intron 1 of 16)	2324	NM_001077405	18187	Mm.266341	NM_010939	ENSMUSG00000025969	Nrp2	1110048P06Rik|Np-2|Np2|Npn-2|Npn2	neuropilin 2	protein-coding
MACS_peak_5320	chr18	81180458	81189007	+	3449	NA	Intergenic	Intergenic	-1415	NM_178280	20689	Mm.215917	NM_178280	ENSMUSG00000024565	Sall3	B130022O04Rik|Msal|Msal-1|Sal|Salt|Spalt	sal-like 3 (Drosophila)	protein-coding
MACS_peak_5275	chr18	75118273	75123208	+	3449	NA	5' UTR (NM_010720, exon 1 of 10)	5' UTR (NM_010720, exon 1 of 10)	177	NM_010720	16891	Mm.299647	NM_010720	ENSMUSG00000053846	Lipg	3110013K01Rik|EL|lipase|mEDL	lipase, endothelial	protein-coding
MACS_peak_986	chr10	75295982	75297899	+	3449	NA	exon (NM_010361, exon 1 of 5)	exon (NM_010361, exon 1 of 5)	686	NM_010361	14872	Mm.24118	NM_010361	ENSMUSG00000033318	Gstt2	AI266894|Yrs|mGSTT2	glutathione S-transferase, theta 2	protein-coding
MACS_peak_6434	chr2	135883253	135887126	+	3449	NA	intron (NM_029530, intron 2 of 5)	intron (NM_029530, intron 2 of 5)	1526	NM_029530	76161	Mm.41638	NM_029530	ENSMUSG00000027270	Lamp5	3110035N03Rik|6330527O06Rik|BAD-LAMP|LAMP-5	lysosomal-associated membrane protein family, member 5	protein-coding
MACS_peak_4437	chr16	92692525	92695076	+	3449	NA	intron (NM_001111022, intron 3 of 6)	intron (NM_001111022, intron 3 of 6)	3774	NM_001111023	12394	Mm.4081	NM_009821	ENSMUSG00000022952	Runx1	AML1|CBF-alpha-2|Cbfa2|Pebp2a2|Pebpa2b	runt related transcription factor 1	protein-coding
MACS_peak_469	chr1	129572761	129576564	+	3440	NA	promoter-TSS (NM_028135)	promoter-TSS (NM_028135)	-64	NM_028135	72160	Mm.281287	NM_028135	ENSMUSG00000026347	Tmem163	2610024A01Rik|SV31	transmembrane protein 163	protein-coding
MACS_peak_11246	chr9	31717903	31725104	+	3440	NA	promoter-TSS (NM_013800)	promoter-TSS (NM_013800)	-633	NM_013800	12023	Mm.261044	NM_013800	ENSMUSG00000032033	Barx2	2310006E12Rik|Barx2b	BarH-like homeobox 2	protein-coding
MACS_peak_7903	chr4	133051285	133056358	+	3440	NA	exon (NM_001081156, exon 1 of 2)	exon (NM_001081156, exon 1 of 2)	644	NM_001081156	69539	Mm.151594	NM_001081156	ENSMUSG00000056596	Trnp1	2300002D11Rik|Trnp	TMF1-regulated nuclear protein 1	protein-coding
MACS_peak_8923	chr5	139471771	139475814	+	3440	NA	Intergenic	Intergenic	-2885	NM_008808	18590	Mm.2675	NM_008808	ENSMUSG00000025856	Pdgfa	-	platelet derived growth factor, alpha	protein-coding
MACS_peak_3573	chr14	104862305	104868027	+	3440	NA	exon (NM_011143, exon 2 of 3)	exon (NM_011143, exon 2 of 3)	2050	NM_011143	18996	Mm.246550	NM_011143		Pou4f1	Brn-3|Brn-3.0|Brn3|Brn3.0|Brn3a|E130119J07Rik	POU domain, class 4, transcription factor 1	protein-coding
MACS_peak_10120	chr7	105339843	105344430	+	3440	NA	exon (NM_001081167, exon 2 of 2)	exon (NM_001081167, exon 2 of 2)	5849	NM_001081167	272411	Mm.98333	NM_001081167	ENSMUSG00000074004	B3gnt6	BC039789|Core-3|Core3	UDP-GlcNAc:betaGal beta-1,3-N-acetylglucosaminyltransferase 6 (core 3 synthase)	protein-coding
MACS_peak_8855	chr5	131781444	131783714	+	3413	NA	5' UTR (NM_145218, exon 1 of 11)	5' UTR (NM_145218, exon 1 of 11)	813	NM_145218	212996	Mm.299204	NM_145218		Wbscr17	AA388321|E330012B09Rik	Williams-Beuren syndrome chromosome region 17 homolog (human)	protein-coding
MACS_peak_11601	chr9	91293690	91302168	+	3413	NA	Intergenic	Intergenic	34119	NM_009576	22774	Mm.8062	NM_009576		Zic4	-	zinc finger protein of the cerebellum 4	protein-coding
MACS_peak_364	chr1	89079817	89084695	+	3413	NA	intron (NM_027084, intron 6 of 12)	intron (NM_027084, intron 6 of 12)	2188	NM_027084	69453	Mm.84618	NM_027084	ENSMUSG00000036480	Prss56	1700027L20Rik	protease, serine 56	protein-coding
MACS_peak_3317	chr14	34732576	34738349	+	3413	NA	Intergenic	Charlie4a|DNA|MER1_type	-1311	NM_145741	14560	Mm.432071	NM_145741	ENSMUSG00000021943	Gdf10	Bmp3b	growth differentiation factor 10	protein-coding
MACS_peak_934	chr10	61086287	61089530	+	3413	NA	intron (NM_001177511, intron 3 of 3)	intron (NM_001177511, intron 3 of 3)	-23461	NM_026438	67895	Mm.28897	NM_026438	ENSMUSG00000020089	Ppa1	2010317E03Rik|Pyp	pyrophosphatase (inorganic) 1	protein-coding
MACS_peak_4184	chr16	15886351	15889233	+	3413	NA	exon (NM_007679, exon 1 of 1)	exon (NM_007679, exon 1 of 1)	413	NM_007679	12609	Mm.347407	NM_007679		Cebpd	-	CCAAT/enhancer binding protein (C/EBP), delta	protein-coding
MACS_peak_6359	chr2	123914843	123917304	+	3413	NA	intron (NM_001290997, intron 1 of 20)	CpG	368	NM_001290997	214968	Mm.330536	NM_172537	ENSMUSG00000027200	Sema6d	1110067B02Rik|AA409156|D330011G23|mKIAA1479	sema domain, transmembrane domain (TM), and cytoplasmic domain, (semaphorin) 6D	protein-coding
MACS_peak_8295	chr5	21848381	21853116	+	3413	NA	promoter-TSS (NM_011261)	promoter-TSS (NM_011261)	-225	NM_011261	19699	Mm.425236	NM_011261	ENSMUSG00000042453	Reln	reeler|rl	reelin	protein-coding
MACS_peak_1370	chr11	11936404	11942071	+	3413	NA	Intergenic	Intergenic	-1814	NM_010345	14783	Mm.273117	NM_010345	ENSMUSG00000020176	Grb10	5730571D09Rik|AI325020|Meg1|mKIAA0207	growth factor receptor bound protein 10	protein-coding
MACS_peak_592	chr1	165237108	165246577	+	3413	NA	intron (NM_001025570, intron 1 of 2)	intron (NM_001025570, intron 1 of 2)	1939	NM_011127	18933	Mm.288642	NM_011127	ENSMUSG00000026586	Prrx1	A230024N07Rik|AA755424|AI385634|AI843499|K-2|Pmx|Pmx1|Prx1|mHox	paired related homeobox 1	protein-coding
MACS_peak_4678	chr17	34331406	34336597	+	3413	NA	3' UTR (NM_013683, exon 11 of 11)	3' UTR (NM_013683, exon 11 of 11)	-1139	NM_010724	16913	Mm.180191	NM_010724		Psmb8	Lmp-7|Lmp7	proteasome (prosome, macropain) subunit, beta type 8 (large multifunctional peptidase 7)	protein-coding
MACS_peak_9094	chr6	28081837	28084891	+	3413	NA	intron (NM_008174, intron 1 of 10)	intron (NM_008174, intron 1 of 10)	1005	NM_008174	14823	Mm.320732	NM_008174	ENSMUSG00000024211	Grm8	A230002O04|Gprc1h|mGluR8	glutamate receptor, metabotropic 8	protein-coding
MACS_peak_825	chr10	24430118	24432946	+	3413	NA	intron (NM_008813, intron 1 of 24)	CpG	376	NM_008813	18605	Mm.27254	NM_008813	ENSMUSG00000037370	Enpp1	4833416E15Rik|AI428932|C76301|CD203c|E-NPP1|Ly-41|M6S1|NPP1|Npps|PC-1|Pca|Pca-1|Pdnp1|ttw|twy	ectonucleotide pyrophosphatase/phosphodiesterase 1	protein-coding
MACS_peak_9858	chr7	52417625	52424123	+	3413	NA	intron (NM_182993, intron 1 of 11)	intron (NM_182993, intron 1 of 11)	1583	NM_182993	72961	Mm.255631	NM_182993	ENSMUSG00000070570	Slc17a7	2900052E22Rik|AI851913|Vglut1	solute carrier family 17 (sodium-dependent inorganic phosphate cotransporter), member 7	protein-coding
MACS_peak_3513	chr14	71034264	71037969	+	3413	NA	promoter-TSS (NM_001252664)	promoter-TSS (NM_001252664)	-261	NM_001252664	13829	Mm.210863	NM_013514	ENSMUSG00000022099	Dmtn	AI325486|Epb4.9|Epb49|dematin	dematin actin binding protein	protein-coding
MACS_peak_6035	chr2	38779919	38782382	+	3413	NA	intron (NM_010264, intron 1 of 10)	CpG	831	NM_010264	14536	Mm.439703	NM_010264	ENSMUSG00000063972	Nr6a1	1700113M01Rik|Gcnf|NCNF|RTR	nuclear receptor subfamily 6, group A, member 1	protein-coding
MACS_peak_673	chr1	182870855	182873961	+	3413	NA	promoter-TSS (NM_144794)	promoter-TSS (NM_144794)	-241	NM_144794	208795	Mm.185518	NM_144794	ENSMUSG00000026519	Tmem63a	BC014795|Tmem64a	transmembrane protein 63a	protein-coding
MACS_peak_10594	chr8	28283455	28286634	+	3413	NA	promoter-TSS (NM_001080813)	promoter-TSS (NM_001080813)	74	NM_029423	75767	Mm.205335	NM_029423	ENSMUSG00000031488	Rab11fip1	2010200K21Rik|4833414G05Rik|Rcp	RAB11 family interacting protein 1 (class I)	protein-coding
MACS_peak_3667	chr15	10964585	10968283	+	3413	NA	exon (NM_178717, exon 1 of 1)	exon (NM_178717, exon 1 of 1)	1289	NM_178717	239336	Mm.209312	NM_178717	ENSMUSG00000060735	Rxfp3	BC053073|GPCR135|Rln3r1|Salpr	relaxin family peptide receptor 3	protein-coding
MACS_peak_6538	chr2	155452779	155459598	+	3413	NA	intron (NM_001085378, intron 30 of 41)	intron (NM_001085378, intron 30 of 41)	7572	NR_030757	735275		NR_030757		Mir499	Mirn499|mmu-mir-499	microRNA 499	ncRNA
MACS_peak_3911	chr15	83355737	83358895	+	3413	NA	promoter-TSS (NM_007546)	promoter-TSS (NM_007546)	24	NM_007546	12124	Mm.267006	NM_007546	ENSMUSG00000016758	Bik	Biklk|Blk|Nbk	BCL2-interacting killer	protein-coding
MACS_peak_9709	chr7	25420628	25425809	+	3413	NA	intron (NM_133743, intron 2 of 4)	intron (NM_133743, intron 2 of 4)	1629	NM_133743	72434	Mm.281093	NM_133743	ENSMUSG00000057454	Lypd3	2310061G07Rik|C4.4a	Ly6/Plaur domain containing 3	protein-coding
MACS_peak_2311	chr12	37833255	37837066	+	3413	NA	promoter-TSS (NM_008584)	promoter-TSS (NM_008584)	27	NM_008584	17286	Mm.341398	NM_008584		Meox2	AI528662|Gax|Mox-2|Mox2	mesenchyme homeobox 2	protein-coding
MACS_peak_3343	chr14	47007584	47010431	+	3319	NA	intron (NM_007554, intron 1 of 3)	intron (NM_007554, intron 1 of 3)	1267	NM_007554	12159	Mm.6813	NM_007554	ENSMUSG00000021835	Bmp4	Bmp-4|Bmp2b|Bmp2b-1|Bmp2b1	bone morphogenetic protein 4	protein-coding
MACS_peak_10945	chr8	107792180	107799089	+	3319	NA	intron (NR_045689, intron 6 of 12)	intron (NR_045689, intron 6 of 12)	1933	NM_001256044	26386	Mm.89204	NM_011939	ENSMUSG00000033249	Hsf4	HSF 4|HSTF 4|HSTF4|ldis1|mHSF4	heat shock transcription factor 4	protein-coding
MACS_peak_4051	chr15	100559315	100560288	+	3319	NA	promoter-TSS (NM_001161767)	promoter-TSS (NM_001161767)	6	NM_001161767	207839	Mm.22969	NM_172451		Galnt6	4632410F13|AW047994|GalNAc-T6	UDP-N-acetyl-alpha-D-galactosamine:polypeptide N-acetylgalactosaminyltransferase 6	protein-coding
MACS_peak_3503	chr14	70604686	70606490	+	3317	NA	5' UTR (NM_001271407, exon 1 of 21)	5' UTR (NM_001271407, exon 1 of 21)	241	NM_001271407	20410	Mm.5068	NM_011366	ENSMUSG00000022091	Sorbs3	SCAM-1|SH3P3|Sh3d4|vinexin-g	sorbin and SH3 domain containing 3	protein-coding
MACS_peak_9659	chr7	19577132	19578571	+	3317	NA	exon (NM_145579, exon 2 of 3)	exon (NM_145579, exon 2 of 3)	1257	NM_145579	232934	Mm.440069	NM_145579	ENSMUSG00000048481	Mypop	Myodysa|P42pop	Myb-related transcription factor, partner of profilin	protein-coding
MACS_peak_1395	chr11	21891112	21907753	+	3317	NA	exon (NM_011023, exon 3 of 5)	exon (NM_011023, exon 3 of 5)	2222	NM_011023	18423	Mm.129663	NM_011023	ENSMUSG00000005917	Otx1	A730044F23Rik|jv	orthodenticle homolog 1	protein-coding
MACS_peak_10181	chr7	116924074	116925723	+	3317	NA	exon (NM_020610, exon 1 of 7)	exon (NM_020610, exon 1 of 7)	161	NM_020610	78593	Mm.275374	NM_020610	ENSMUSG00000034825	Nrip3	A330103B05Rik|D7H11orf14|ICRFP703B1614Q5.2	nuclear receptor interacting protein 3	protein-coding
MACS_peak_2322	chr12	50482779	50487773	+	3316	NA	5' UTR (NM_001160112, exon 1 of 1)	5' UTR (NM_001160112, exon 1 of 1)	1282	NM_008241	15228	Mm.4704	NM_008241	ENSMUSG00000020950	Foxg1	2900064B05Rik|BF-1|Bf1|Hfh9|Hfhbf1	forkhead box G1	protein-coding
MACS_peak_9386	chr6	92889795	92895336	+	3316	NA	intron (NR_015530, intron 1 of 2)	intron (NR_015530, intron 1 of 2)	1989	NR_015530	330385	Mm.483472	NR_015530	ENSMUSG00000097462	9530026P05Rik	B430306B02	RIKEN cDNA 9530026P05 gene	ncRNA
MACS_peak_3430	chr14	58687347	58691152	+	3316	NA	Intergenic	Intergenic	-2274	NM_013518	14180	Mm.8846	NM_013518		Fgf9	Eks	fibroblast growth factor 9	protein-coding
MACS_peak_5089	chr18	36443970	36447642	+	3316	NA	intron (NM_008989, intron 1 of 1)	intron (NM_008989, intron 1 of 1)	4990	NM_008989	19290	Mm.231802	NM_008989		Pura	CAGER-1|Pur-alpha|ssCRE-BP	purine rich element binding protein A	protein-coding
MACS_peak_9458	chr6	115310016	115312527	+	3316	NA	promoter-TSS (NM_001127330)	promoter-TSS (NM_001127330)	32	NM_001127330	19016	Mm.3020	NM_011146	ENSMUSG00000000440	Pparg	Nr1c3|PPAR-gamma|PPAR-gamma2|PPARgamma|PPARgamma2	peroxisome proliferator activated receptor gamma	protein-coding
MACS_peak_8306	chr5	23977931	23981605	+	3316	NA	intron (NM_001256431, intron 1 of 8)	intron (NM_001256431, intron 1 of 8)	21773	NM_001256431	213990	Mm.250703	NM_139153	ENSMUSG00000023353	Agap3	AGAP-3|AV028425|Centg3|Crag|Crag.|MRIP-1|cnt-g3	ArfGAP with GTPase domain, ankyrin repeat and PH domain 3	protein-coding
MACS_peak_4198	chr16	17805618	17809057	+	3316	NA	exon (NM_153790, exon 11 of 11)	exon (NM_153790, exon 11 of 11)	9962	NM_153790	224024	Mm.194950	NM_153790	ENSMUSG00000012017	Scarf2	AI194363|NSR1|SREC-II|SRECRP-1|Scarf1|Scatf1|Srec2|SrecII|W53987|W65560	scavenger receptor class F, member 2	protein-coding
MACS_peak_11736	chr9	118393018	118399135	+	3316	NA	TTS (NM_001164789)	TTS (NM_001164789)	8769	NM_010136	13813	Mm.200692	NM_010136	ENSMUSG00000032446	Eomes	C77258|TBR-2|Tbr2	eomesodermin homolog (Xenopus laevis)	protein-coding
MACS_peak_11473	chr9	65238586	65241143	+	3316	NA	promoter-TSS (NM_028974)	promoter-TSS (NM_028974)	-405	NM_028974	74492	Mm.159223	NM_028974	ENSMUSG00000054978	Kbtbd13	5430433E21Rik	kelch repeat and BTB (POZ) domain containing 13	protein-coding
MACS_peak_4048	chr15	100253095	100256100	+	3316	NA	non-coding (NR_040351, exon 1 of 3)	non-coding (NR_040351, exon 1 of 3)	973	NR_040351	432982	Mm.234608	NM_001034883	ENSMUSG00000087444	Gm5475	EG432982	predicted gene 5475	ncRNA
MACS_peak_2525	chr12	88329734	88331908	+	3316	NA	Intergenic	Intergenic	-1195	NM_001080943	238331	Mm.185890	NM_001080943	ENSMUSG00000048483	Zdhhc22	Gm262	zinc finger, DHHC-type containing 22	protein-coding
MACS_peak_8219	chr5	12383336	12385415	+	3316	NA	intron (NM_028882, intron 1 of 17)	intron (NM_028882, intron 1 of 17)	1209	NM_028882	108151	Mm.89313	NM_028882	ENSMUSG00000040254	Sema3d	4631426B19Rik	sema domain, immunoglobulin domain (Ig), short basic domain, secreted, (semaphorin) 3D	protein-coding
MACS_peak_5282	chr18	76216986	76220452	+	3316	NA	intron (NM_145356, intron 3 of 4)	intron (NM_145356, intron 3 of 4)	39406	NR_045365	73009	Mm.443541	NR_045365		2900057B20Rik	-	RIKEN cDNA 2900057B20 gene	ncRNA
MACS_peak_9805	chr7	35900795	35903642	+	3316	NA	Intergenic	Intergenic	-2094	NM_001287521	12606	Mm.349667	NM_007678	ENSMUSG00000034957	Cebpa	C/ebpalpha|CBF-A|Cebp	CCAAT/enhancer binding protein (C/EBP), alpha	protein-coding
MACS_peak_8976	chr5	145306390	145309992	+	3293	NA	intron (NM_016789, intron 1 of 4)	intron (NM_016789, intron 1 of 4)	1435	NM_016789	53324	Mm.10099	NM_016789	ENSMUSG00000059991	Nptx2	Narp|np2	neuronal pentraxin 2	protein-coding
MACS_peak_512	chr1	136999860	137002557	+	3293	NA	intron (NM_001033409, intron 1 of 17)	(CA)n|Simple_repeat|Simple_repeat	645	NM_001033409	329252	Mm.279594	NM_001033409	ENSMUSG00000042793	Lgr6	A530037C04Rik|D830026M09	leucine-rich repeat-containing G protein-coupled receptor 6	protein-coding
MACS_peak_11083	chr8	124752945	124756413	+	3293	NA	Intergenic	CpG	-51362	NM_009569	22761	Mm.3105	NM_009569	ENSMUSG00000049577	Zfpm1	FOG|Fog1	zinc finger protein, multitype 1	protein-coding
MACS_peak_791	chr10	18563754	18566623	+	3279	NA	exon (NM_022032, exon 1 of 3)	exon (NM_022032, exon 1 of 3)	311	NM_022032	64058	Mm.28209	NM_022032	ENSMUSG00000019851	Perp	1110017A08Rik|KCP1|KRTCAP1|PIGPC1|THW	PERP, TP53 apoptosis effector	protein-coding
MACS_peak_8882	chr5	136342292	136346390	+	3279	NA	exon (NM_021403, exon 12 of 15)	exon (NM_021403, exon 12 of 15)	-19448	NM_013560	15507	Mm.13849	NM_013560	ENSMUSG00000004951	Hspb1	27kDa|Hsp25	heat shock protein 1	protein-coding
MACS_peak_7159	chr3	103375873	103382345	+	3279	NA	promoter-TSS (NM_018800)	promoter-TSS (NM_018800)	-96	NM_001276679	54524	Mm.88818	NM_018800	ENSMUSG00000027849	Syt6	3110037A08Rik|AW048930|sytVI	synaptotagmin VI	protein-coding
MACS_peak_9445	chr6	114079993	114082683	+	3279	NA	exon (NM_172890, exon 1 of 14)	exon (NM_172890, exon 1 of 14)	103	NM_172890	243616	Mm.44683	NM_172890	ENSMUSG00000030307	Slc6a11	D930045G19Rik|E130202I16Rik|GAT4|Gabt4|Gat3	solute carrier family 6 (neurotransmitter transporter, GABA), member 11	protein-coding
MACS_peak_6299	chr2	115896710	115901974	+	3279	NA	TTS (NR_033447)	TTS (NR_033447)	2490	NR_033447	69974	Mm.440293	NR_033447		2810405F15Rik	-	RIKEN cDNA 2810405F15 gene	ncRNA
MACS_peak_6520	chr2	152766767	152771764	+	3279	NA	intron (NM_001159376, intron 6 of 6)	intron (NM_001159376, intron 6 of 6)	7876	NM_145744	252864	Mm.330671	NM_145744	ENSMUSG00000042662	Dusp15	AI851682|LMW-DSP10|T-DSP10	dual specificity phosphatase-like 15	protein-coding
MACS_peak_6920	chr3	55589346	55594498	+	3279	NA	intron (NM_030595, intron 40 of 57)	(CCCG)n|Simple_repeat|Simple_repeat	5490	NM_010750	17116	Mm.440209	NM_010750	ENSMUSG00000056947	Mab21l1	AW047968	mab-21-like 1 (C. elegans)	protein-coding
MACS_peak_1732	chr11	76477111	76482187	+	3279	NA	Intergenic	tRNA-Ala-GCY_|tRNA|tRNA	-6323	NM_177182	320522	Mm.131585	NM_177182	ENSMUSG00000044243	Bhlha9	A830053O21Rik	basic helix-loop-helix family, member a9	protein-coding
MACS_peak_766	chr10	10799765	10802156	+	3279	NA	intron (NM_001114333, intron 1 of 9)	intron (NM_001114333, intron 1 of 9)	1169	NM_001114333	14816	Mm.391904	NM_016976	ENSMUSG00000019828	Grm1	4930455H15Rik|ENSMUSG00000075319|Gm10828|Gprc1a|mGluR1|nmf373|rcw|wobl	glutamate receptor, metabotropic 1	protein-coding
MACS_peak_4936	chr17	84584380	84588380	+	3279	NA	exon (NM_001001806, exon 2 of 2)	exon (NM_001001806, exon 2 of 2)	907	NM_001001806	12193	Mm.259321	NM_001001806	ENSMUSG00000045817	Zfp36l2	Brf2|ERF2|Tis11d	zinc finger protein 36, C3H type-like 2	protein-coding
MACS_peak_11309	chr9	43045621	43048937	+	3279	NA	intron (NM_178644, intron 1 of 3)	CpG	620	NM_178644	102644	Mm.246479	NM_178644	ENSMUSG00000032014	Oaf	AL024221|D130038B21Rik|D9Ucla1	OAF homolog (Drosophila)	protein-coding
MACS_peak_7539	chr4	82180775	82186593	+	3279	NA	Intergenic	Intergenic	-32001	NM_008687	18028	Mm.317947	NM_008687	ENSMUSG00000008575	Nfib	6720429L07Rik|CTF|E030026I10Rik|NF-I/B|NF1-B|NFI-B	nuclear factor I/B	protein-coding
MACS_peak_5090	chr18	36478377	36482367	+	3279	NA	Intergenic	Intergenic	20617	NM_001267796	109169	Mm.426423	NM_001267796		Igip	6330403M23Rik	IgA inducing protein	protein-coding
MACS_peak_9474	chr6	118144060	118149415	+	3279	NA	intron (NM_001080780, intron 1 of 18)	CpG	1025	NM_009050	19713	Mm.57199	NM_009050	ENSMUSG00000030110	Ret	PTC|RET51|RET9|c-Ret	ret proto-oncogene	protein-coding
MACS_peak_11497	chr9	69300857	69303549	+	3279	NA	intron (NM_007585, intron 1 of 12)	intron (NM_007585, intron 1 of 12)	713	NM_007585	12306	Mm.238343	NM_007585	ENSMUSG00000032231	Anxa2	AW215814|Cal1h	annexin A2	protein-coding
MACS_peak_2324	chr12	50490626	50496544	+	3279	NA	intron (NR_026733, intron 2 of 2)	intron (NR_026733, intron 2 of 2)	2946	NR_026733	67293	Mm.185800	NR_026733	ENSMUSG00000089922	3110039M20Rik	-	RIKEN cDNA 3110039M20 gene	ncRNA
MACS_peak_7649	chr4	109335081	109340315	+	3279	NA	exon (NM_007671, exon 1 of 2)	exon (NM_007671, exon 1 of 2)	279	NM_007671	12580	Mm.1912	NM_007671	ENSMUSG00000028551	Cdkn2c	C77269|INK4c|p18|p18-INK4c|p18-INK6|p18INK4c	cyclin-dependent kinase inhibitor 2C (p18, inhibits CDK4)	protein-coding
MACS_peak_11007	chr8	113914738	113917988	+	3279	NA	intron (NM_178086, intron 1 of 6)	intron (NM_178086, intron 1 of 6)	1358	NM_178086	338521	Mm.41083	NM_178086	ENSMUSG00000033579	Fa2h	FAAH|Faxdc1|G630055L08Rik	fatty acid 2-hydroxylase	protein-coding
MACS_peak_2882	chr13	53379796	53382515	+	3279	NA	exon (NM_013846, exon 1 of 9)	exon (NM_013846, exon 1 of 9)	323	NM_013846	26564	Mm.342774	NM_013846	ENSMUSG00000021464	Ror2	Ntrkr2|mRor2	receptor tyrosine kinase-like orphan receptor 2	protein-coding
MACS_peak_4728	chr17	36315162	36316714	+	3197	NA	non-coding (NR_033619, exon 1 of 1)	non-coding (NR_033619, exon 1 of 1)	216	NR_033619	625785	Mm.390996	NR_033619		Gm6623	EG625785	akirin 1 pseudogene	pseudo
MACS_peak_10910	chr8	96702108	96704799	+	3197	NA	intron (NM_013602, intron 1 of 2)	CpG	464	NM_013602	17748	Mm.192991	NM_013602	ENSMUSG00000031765	Mt1	MT-I|Mt-1	metallothionein 1	protein-coding
MACS_peak_11384	chr9	54611179	54615351	+	3197	NA	intron (NM_001284507, intron 1 of 2)	intron (NM_001284507, intron 1 of 2)	710	NM_013496	12903	Mm.34797	NM_013496	ENSMUSG00000032291	Crabp1	AI326249|CRABP-I|Crabp-1|CrabpI|Rbp-5	cellular retinoic acid binding protein I	protein-coding
MACS_peak_1184	chr10	111707339	111710623	+	3197	NA	exon (NM_001025581, exon 2 of 5)	exon (NM_001025581, exon 2 of 5)	802	NM_001025581	268345	Mm.336242	NM_001025581	ENSMUSG00000035681	Kcnc2	AW047325|B230117I07|KShIIIA|Kv3.2	potassium voltage gated channel, Shaw-related subfamily, member 2	protein-coding
MACS_peak_4081	chr15	102073753	102078191	+	3197	NA	intron (NM_011244, intron 3 of 9)	intron (NM_011244, intron 3 of 9)	959	NM_001042727	19411	Mm.1273	NM_011244	ENSMUSG00000001288	Rarg	Nr1b3|RAR-gamma|RARD|RARgamma2	retinoic acid receptor, gamma	protein-coding
MACS_peak_6558	chr2	158433581	158444980	+	3197	NA	intron (NM_009508, intron 1 of 1)	intron (NM_009508, intron 1 of 1)	2786	NM_009508	22348	Mm.143404	NM_009508	ENSMUSG00000037771	Slc32a1	R75019|VGAT|Viaat	solute carrier family 32 (GABA vesicular transporter), member 1	protein-coding
MACS_peak_1262	chr10	126961348	126973108	+	3197	NA	intron (NM_183297, intron 1 of 1)	intron (NM_183297, intron 1 of 1)	4387	NM_183297	104080	Mm.437200	NM_183297	ENSMUSG00000040258	Nxph4	1110036M10Rik|AI851051	neurexophilin 4	protein-coding
MACS_peak_10692	chr8	69220479	69223021	+	3185	NA	intron (NM_010934, intron 1 of 2)	intron (NM_010934, intron 1 of 2)	429	NM_010934	18166	Mm.5112	NM_010934	ENSMUSG00000036437	Npy1r	Npyr|Y1-R	neuropeptide Y receptor Y1	protein-coding
MACS_peak_1483	chr11	44432574	44435170	+	3185	NA	intron (NM_001290710, intron 1 of 14)	CpG	2270	NM_001290710	13591	Mm.439662	NM_007897		Ebf1	Ebf|O/E-1|OE-1|Olf-1|Olf1	early B cell factor 1	protein-coding
MACS_peak_6830	chr3	29909762	29912654	+	3185	NA	intron (NM_007963, intron 1 of 14)	intron (NM_007963, intron 1 of 14)	918	NM_007963	14013	Mm.56965	NM_007963	ENSMUSG00000027684	Mecom	D630039M04Rik|Evi-1|Evi1|Jbo|Mds|Mds1|Mds1-Evi1|Prdm3|Znfpr1b1	MDS1 and EVI1 complex locus	protein-coding
MACS_peak_656	chr1	180457533	180460807	+	3185	NA	promoter-TSS (NM_001161665)	promoter-TSS (NM_001161665)	-86	NM_001161665	269152	Mm.129727	NM_177724	ENSMUSG00000026494	Kif26b	4832420M10|BC056349|D230039L06Rik	kinesin family member 26B	protein-coding
MACS_peak_6101	chr2	69422298	69426368	+	3185	NA	promoter-TSS (NM_001081088)	promoter-TSS (NM_001081088)	-209	NM_001081088	14725	Mm.23847	NM_001081088	ENSMUSG00000027070	Lrp2	AI315343|AW536255|D230004K18Rik|Gp330|Megalin|b2b1625.2Clo	low density lipoprotein receptor-related protein 2	protein-coding
MACS_peak_6737	chr2	179838060	179839962	+	3185	NA	non-coding (NR_102309, exon 1 of 3)	non-coding (NR_102309, exon 1 of 3)	101	NR_102309	99296	Mm.285360	NM_133849	ENSMUSG00000039059	Hrh3	AW049250|H3R|HH3R	histamine receptor H3	protein-coding
MACS_peak_9521	chr6	126592610	126597701	+	3185	NA	5' UTR (NM_010595, exon 1 of 2)	5' UTR (NM_010595, exon 1 of 2)	664	NM_010595	16485	Mm.40424	NM_010595	ENSMUSG00000047976	Kcna1	AI840627|Kca1-1|Kv1.1|MBK1|Mk-1|Shak|mceph	potassium voltage-gated channel, shaker-related subfamily, member 1	protein-coding
MACS_peak_1345	chr11	5963609	5969194	+	3185	NA	promoter-TSS (NM_007595)	promoter-TSS (NM_007595)	-650	NM_007595	12323	Mm.439733	NM_007595	ENSMUSG00000057897	Camk2b	Camk2d	calcium/calmodulin-dependent protein kinase II, beta	protein-coding
MACS_peak_10811	chr8	87293070	87299649	+	3185	NA	intron (NM_010906, intron 1 of 8)	intron (NM_010906, intron 1 of 8)	1909	NM_001081981	18032	Mm.9394	NM_010906	ENSMUSG00000001911	Nfix	CTF|NF-I/X|NF1-X|NFI-X	nuclear factor I/X	protein-coding
MACS_peak_3639	chr14	122847362	122855101	+	3185	NA	promoter-TSS (NR_033325)	promoter-TSS (NR_033325)	-863	NR_033326	328479	Mm.86095	NR_033325	ENSMUSG00000064052	Gm5089	6530402A20|C030005G22Rik|EG328479	predicted gene 5089	ncRNA
MACS_peak_1387	chr11	18912218	18917040	+	3185	NA	intron (NM_010789, intron 2 of 11)	intron (NM_010789, intron 2 of 11)	4343	NM_001193271	17268	Mm.356578	NM_010789	ENSMUSG00000020160	Meis1	C530044H18Rik|Evi8	Meis homeobox 1	protein-coding
MACS_peak_10504	chr8	13199880	13203196	+	3185	NA	promoter-TSS (NM_025768)	promoter-TSS (NM_025768)	-914	NM_025768	66790	Mm.34901	NM_025768	ENSMUSG00000038515	Grtp1	5430401C05Rik|C81211|Tbc1d6	GH regulated TBC protein 1	protein-coding
MACS_peak_11194	chr9	21051698	21054797	+	3185	NA	promoter-TSS (NM_053190)	promoter-TSS (NM_053190)	-360	NM_053190	94226	Mm.190619	NM_053190	ENSMUSG00000045087	S1pr5	Edg8|S1P5|lpB4	sphingosine-1-phosphate receptor 5	protein-coding
MACS_peak_1328	chr11	4165248	4168572	+	3185	NA	5' UTR (NM_001039537, exon 1 of 3)	5' UTR (NM_001039537, exon 1 of 3)	111	NM_001039537	16878	Mm.4964	NM_008501	ENSMUSG00000034394	Lif	-	leukemia inhibitory factor	protein-coding
MACS_peak_5123	chr18	38369044	38373154	+	3185	NA	Intergenic	CpG	-1683	NM_029357	75599	Mm.36560	NM_029357	ENSMUSG00000051375	Pcdh1	2010005A06Rik|AI585920	protocadherin 1	protein-coding
MACS_peak_3774	chr15	64750397	64753916	+	3185	NA	exon (NM_009623, exon 1 of 18)	exon (NM_009623, exon 1 of 18)	1702	NM_001291903	11514	Mm.1425	NM_009623	ENSMUSG00000022376	Adcy8	AC8|AW060868	adenylate cyclase 8	protein-coding
MACS_peak_8403	chr5	37552922	37555762	+	3185	NA	Intergenic	CpG	-78955	NM_001136058	12933	Mm.290995	NM_007765	ENSMUSG00000029121	Crmp1	CRMP-1|DRP-1|Dpysl1|ULIP-3|Ulip3	collapsin response mediator protein 1	protein-coding
MACS_peak_1237	chr10	122700973	122704440	+	3185	NA	intron (NR_045514, intron 1 of 5)	CpG	1574	NM_001252387	268354	Mm.51939	NM_182807	ENSMUSG00000044071	Fam19a2	6330575M02|FAM19A2 TAFA-2|TAFA2|Tafa-2	family with sequence similarity 19, member A2	protein-coding
MACS_peak_4226	chr16	20733714	20735621	+	3185	NA	promoter-TSS (NM_009379)	promoter-TSS (NM_009379)	-83	NM_009379	21832	Mm.3943	NM_009379	ENSMUSG00000022847	Thpo	Mgdf|Ml|Mpllg|Tpo	thrombopoietin	protein-coding
MACS_peak_10896	chr8	94880456	94884805	+	3182	NA	intron (NM_018826, intron 1 of 2)	CpG	935	NM_018826	54352	Mm.101153	NM_018826	ENSMUSG00000031737	Irx5	-	Iroquois related homeobox 5 (Drosophila)	protein-coding
MACS_peak_11086	chr8	124806430	124809686	+	3182	NA	intron (NM_009569, intron 1 of 9)	intron (NM_009569, intron 1 of 9)	2017	NM_009569	22761	Mm.3105	NM_009569	ENSMUSG00000049577	Zfpm1	FOG|Fog1	zinc finger protein, multitype 1	protein-coding
MACS_peak_5384	chr19	5447271	5450270	+	3175	NA	intron (NM_010235, intron 1 of 3)	CpG	1072	NM_010235	14283	Mm.6215	NM_010235	ENSMUSG00000024912	Fosl1	AW538199|Fra1|fra-1	fos-like antigen 1	protein-coding
MACS_peak_2774	chr13	31649236	31652452	+	3161	NA	exon (NM_008239, exon 1 of 1)	exon (NM_008239, exon 1 of 1)	805	NM_008239	15220	Mm.44235	NM_008239	ENSMUSG00000038415	Foxq1	HFH-1|Hfh1|Hfh1l|sa	forkhead box Q1	protein-coding
MACS_peak_8472	chr5	67816668	67820127	+	3144	NA	exon (NM_001164806, exon 1 of 5)	exon (NM_001164806, exon 1 of 5)	641	NM_001164806	666938	Mm.101339	NM_001164806	ENSMUSG00000092060	Bend4	D330027G24Rik|EG666938	BEN domain containing 4	protein-coding
MACS_peak_4805	chr17	49070378	49073423	+	3144	NA	promoter-TSS (NM_027452)	promoter-TSS (NM_027452)	-7	NM_027452	70530	Mm.133607	NM_027452	ENSMUSG00000040490	Lrfn2	5730420O05Rik|SALM1|mKIAA1246	leucine rich repeat and fibronectin type III domain containing 2	protein-coding
MACS_peak_2391	chr12	58297290	58298697	+	3144	NA	5' UTR (NM_172577, exon 1 of 10)	5' UTR (NM_172577, exon 1 of 10)	466	NM_172577	217593	Mm.32835	NM_172577	ENSMUSG00000035472	Slc25a21	9930033G19Rik|A630030I10|BB158148	solute carrier family 25 (mitochondrial oxodicarboxylate carrier), member 21	protein-coding
MACS_peak_6573	chr2	162484398	162487334	+	3144	NA	intron (NM_001291149, intron 1 of 30)	intron (NM_001291149, intron 1 of 30)	1017	NM_001291151	19281	Mm.235807	NM_021464	ENSMUSG00000053141	Ptprt	R-PTP-T|RPTP-rfo|RPTP-rho|RPTPmam4|RPTPrho|mKIAA0283|mRPTPrho	protein tyrosine phosphatase, receptor type, T	protein-coding
MACS_peak_6174	chr2	79294140	79301216	+	3144	NA	promoter-TSS (NM_010894)	promoter-TSS (NM_010894)	-885	NM_010894	18012	Mm.4636	NM_010894	ENSMUSG00000034701	Neurod1	BETA2|BHF-1|Neurod|bHLHa3	neurogenic differentiation 1	protein-coding
MACS_peak_2747	chr13	23502630	23505399	+	3144	NA	Intergenic	tRNA-Val-GTG|tRNA|tRNA	11721	NM_013924	30946	Mm.292094	NM_013924		Abt1	-	activator of basal transcription 1	protein-coding
MACS_peak_6745	chr2	180232868	180237099	+	3144	NA	5' UTR (NM_018766, exon 1 of 4)	5' UTR (NM_018766, exon 1 of 4)	302	NM_018766	18216	Mm.301712	NM_018766	ENSMUSG00000027568	Ntsr1	NT-1R|NTR-1|NTR1	neurotensin receptor 1	protein-coding
MACS_peak_2548	chr12	103364682	103370512	+	3144	NA	promoter-TSS (NM_172152)	promoter-TSS (NM_172152)	-32	NM_172152	238384	Mm.312448	NM_172152	ENSMUSG00000041771	Slc24a4	A930002M03Rik|AW492432|NCKX4	solute carrier family 24 (sodium/potassium/calcium exchanger), member 4	protein-coding
MACS_peak_11761	chr9	121548341	121553521	+	3144	NA	promoter-TSS (NM_026915)	promoter-TSS (NM_026915)	-247	NM_026915	69032	Mm.33351	NM_026915	ENSMUSG00000032530	Lyzl4	1810009N24Rik|AI504271|Lyc4	lysozyme-like 4	protein-coding
MACS_peak_10379	chr7	148285351	148287800	+	3144	NA	promoter-TSS (NM_023059)	promoter-TSS (NM_023059)	-130	NM_023059	24058	Mm.38017	NM_023059	ENSMUSG00000025494	Sigirr	AI256711|TIR8	single immunoglobulin and toll-interleukin 1 receptor (TIR) domain	protein-coding
MACS_peak_8315	chr5	24604734	24607974	+	3144	NA	promoter-TSS (NR_027851)	promoter-TSS (NR_027851)	106	NM_145401	108099	Mm.33649	NM_145401	ENSMUSG00000028944	Prkag2	2410051C13Rik|AAKG|AAKG2|AI854673|H91620p|WPWS	protein kinase, AMP-activated, gamma 2 non-catalytic subunit	protein-coding
MACS_peak_3862	chr15	79089817	79094109	+	3144	NA	exon (NM_177580, exon 9 of 14)	exon (NM_177580, exon 9 of 14)	-6785	NM_020516	57274	Mm.441697	NM_020516	ENSMUSG00000032988	Slc16a8	Mct3	solute carrier family 16 (monocarboxylic acid transporters), member 8	protein-coding
MACS_peak_11359	chr9	49147005	49150461	+	3144	NA	promoter-TSS (NM_010077)	promoter-TSS (NM_010077)	-34	NM_010077	13489	Mm.41970	NM_010077	ENSMUSG00000032259	Drd2	D2R|Drd-2	dopamine receptor D2	protein-coding
MACS_peak_7748	chr4	120418547	120423725	+	3144	NA	Intergenic	Intergenic	-1355	NM_001081142	60613	Mm.249977	NM_001081142	ENSMUSG00000028631	Kcnq4	-	potassium voltage-gated channel, subfamily Q, member 4	protein-coding
MACS_peak_11371	chr9	52484809	52488577	+	3144	NA	intron (NM_001286641, intron 1 of 1)	intron (NM_001286641, intron 1 of 1)	849	NM_178906	330941	Mm.335160	NM_177907	ENSMUSG00000078307	AI593442	E130102D23	expressed sequence AI593442	protein-coding
MACS_peak_7478	chr4	49856568	49859268	+	3144	NA	exon (NM_001033351, exon 1 of 9)	exon (NM_001033351, exon 1 of 9)	723	NM_001033351	242443	Mm.440095	NM_001033351	ENSMUSG00000039579	Grin3a	6430537F04|A830097C19Rik|NMDAR-L|NR3A|mKIAA1973	glutamate receptor ionotropic, NMDA3A	protein-coding
MACS_peak_5630	chr19	44796394	44801388	+	3144	NA	Intergenic	Intergenic	-32993	NM_011037	18504	Mm.192158	NM_011037	ENSMUSG00000004231	Pax2	Opdc|Pax-2	paired box 2	protein-coding
MACS_peak_11566	chr9	87038608	87041531	+	3144	NA	intron (NM_001177731, intron 2 of 4)	intron (NM_001177731, intron 2 of 4)	928	NM_001101482	244958	Mm.335337	NM_001101482	ENSMUSG00000042761	Mrap2	BB633055	melanocortin 2 receptor accessory protein 2	protein-coding
MACS_peak_1733	chr11	76484523	76488581	+	3144	NA	exon (NM_177182, exon 1 of 1)	exon (NM_177182, exon 1 of 1)	580	NM_177182	320522	Mm.131585	NM_177182	ENSMUSG00000044243	Bhlha9	A830053O21Rik	basic helix-loop-helix family, member a9	protein-coding
MACS_peak_6365	chr2	126376722	126380609	+	3144	NA	promoter-TSS (NM_011978)	promoter-TSS (NM_011978)	-95	NM_011978	26458	Mm.290044	NM_011978		Slc27a2	ACSVL1|FATP2|VLCS|Vlac|Vlacs	solute carrier family 27 (fatty acid transporter), member 2	protein-coding
MACS_peak_2759	chr13	25146158	25149050	+	3144	NA	promoter-TSS (NM_177577)	promoter-TSS (NM_177577)	-269	NM_001195617	195208	Mm.284719	NM_177577	ENSMUSG00000035910	Dcdc2a	AW492955|Dcdc2|RU2	doublecortin domain containing 2a	protein-coding
MACS_peak_6842	chr3	30753356	30755971	+	3144	NA	promoter-TSS (NM_001134386)	promoter-TSS (NM_001134386)	-209	NM_001134385	71862	Mm.272019	NM_027965	ENSMUSG00000037661	Gpr160	1700025D19Rik|GPCR150	G protein-coupled receptor 160	protein-coding
MACS_peak_2048	chr11	103051814	103056643	+	3144	NA	intron (NM_001077698, intron 13 of 25)	intron (NM_001077698, intron 13 of 25)	15634	NM_001254724	69441	Mm.380648	NM_027082	ENSMUSG00000020940	1700023F06Rik	-	RIKEN cDNA 1700023F06 gene	protein-coding
MACS_peak_7052	chr3	89714929	89719336	+	3144	NA	promoter-TSS (NM_010559)	promoter-TSS (NM_010559)	-48	NM_010559	16194	Mm.2856	NM_010559	ENSMUSG00000027947	Il6ra	CD126|IL-6R|Il6r	interleukin 6 receptor, alpha	protein-coding
MACS_peak_7023	chr3	88002162	88008460	+	3144	NA	Intergenic	T-rich|Low_complexity|Low_complexity	-13782	NR_037276	100526540		NR_037276	miRBase:MI0014086	Mir3093	mmu-mir-3093	microRNA 3093	ncRNA
MACS_peak_4560	chr17	23835075	23837812	+	3144	NA	Intergenic	Intergenic	-15450	NM_020293	56863	Mm.491368	NM_020293	ENSMUSG00000066720	Cldn9	nmf329	claudin 9	protein-coding
MACS_peak_7815	chr4	125824738	125828739	+	3144	NA	exon (NM_172145, exon 3 of 3)	exon (NM_172145, exon 3 of 3)	1491	NM_172145	230752	Mm.41569	NM_172145	ENSMUSG00000050212	Eva1b	2610027C15Rik|Fam176b	eva-1 homolog B (C. elegans)	protein-coding
MACS_peak_4703	chr17	35530020	35532430	+	3122	NA	intron (NR_051981, intron 1 of 2)	CpG	181	NR_051981	15016	Mm.439648	NR_051981	ENSMUSG00000055413	H2-Q5	H-2Q5|Qa-5|Qa5|Qat-5	histocompatibility 2, Q region locus 5	pseudo
MACS_peak_1611	chr11	63736100	63739899	+	3122	NA	Intergenic	CpG	-2213	NM_018805	54710	Mm.274426	NM_018805	ENSMUSG00000070407	Hs3st3b1	3-OST-3B|3OST3B1|3Ost3b|AU041882|AW536289|Hs3st3b|m3-OST-3B	heparan sulfate (glucosamine) 3-O-sulfotransferase 3B1	protein-coding
MACS_peak_10908	chr8	96694859	96697323	+	3108	NA	promoter-TSS (NM_008630)	promoter-TSS (NM_008630)	-427	NM_008630	17750	Mm.147226	NM_008630	ENSMUSG00000031762	Mt2	AA409533|MT-II|Mt-2	metallothionein 2	protein-coding
MACS_peak_2149	chr11	115685109	115687110	+	3108	NA	intron (NM_001252532, intron 1 of 25)	intron (NM_001252532, intron 1 of 25)	737	NM_001252532	217325	Mm.290450	NM_145438	ENSMUSG00000020782	Llgl2	9130006H11Rik|Llglh2	lethal giant larvae homolog 2 (Drosophila)	protein-coding
MACS_peak_633	chr1	173126106	173126597	+	3078	NA	promoter-TSS (NM_025557)	promoter-TSS (NM_025557)	48	NM_025557	66425	Mm.482117	NM_025557	ENSMUSG00000038370	Pcp4l1	1500036F01Rik	Purkinje cell protein 4-like 1	protein-coding
MACS_peak_1886	chr11	94935470	94940402	+	3078	NA	promoter-TSS (NM_013565)	promoter-TSS (NM_013565)	92	NM_013565	16400	Mm.57035	NM_013565	ENSMUSG00000001507	Itga3	AA407068|CD49C|GAPB3	integrin alpha 3	protein-coding
MACS_peak_1707	chr11	75006511	75012602	+	3078	NA	intron (NM_177708, intron 1 of 1)	intron (NM_177708, intron 1 of 1)	2061	NM_177708	237847	Mm.82661	NM_177708	ENSMUSG00000045287	Rtn4rl1	Ngr3|Ngrh2|Ngrl2	reticulon 4 receptor-like 1	protein-coding
MACS_peak_9693	chr7	20405936	20409572	+	3078	NA	intron (NM_033601, intron 1 of 8)	intron (NM_033601, intron 1 of 8)	350	NM_033601	12051	Mm.439658	NM_033601	ENSMUSG00000053175	Bcl3	AI528691|Bcl-3	B cell leukemia/lymphoma 3	protein-coding
MACS_peak_6420	chr2	132702835	132705967	+	3078	NA	intron (NM_177303, intron 2 of 4)	intron (NM_177303, intron 2 of 4)	2197	NM_177303	320974	Mm.386903	NM_177303	ENSMUSG00000043110	Lrrn4	B430119L13Rik|Nlrr4	leucine rich repeat neuronal 4	protein-coding
MACS_peak_2047	chr11	103031098	103033294	+	3078	NA	promoter-TSS (NM_019679)	promoter-TSS (NM_019679)	-256	NM_001077698	57778	Mm.138913	NM_019679	ENSMUSG00000055805	Fmnl1	8030453N10Rik|AI553564|Fmnl|Fnrl|Frls	formin-like 1	protein-coding
MACS_peak_3100	chr13	97693316	97695826	+	3078	NA	promoter-TSS (NM_001166065)	promoter-TSS (NM_001166065)	-73	NM_001166065	218476	Mm.483490	NM_001166065	ENSMUSG00000091387	Gcnt4	C2gnt3|Gm279|Gm73	glucosaminyl (N-acetyl) transferase 4, core 2 (beta-1,6-N-acetylglucosaminyltransferase)	protein-coding
MACS_peak_1338	chr11	4960755	4963057	+	3078	NA	intron (NM_001190408, intron 5 of 5)	CpG	3424	NM_144560	78926	Mm.44591	NM_030228	ENSMUSG00000034201	Gas2l1	4930500E24Rik|D0Jmb1|Gar22|TU-71.1	growth arrest-specific 2 like 1	protein-coding
MACS_peak_6618	chr2	165058582	165061246	+	3078	NA	intron (NM_174988, intron 1 of 11)	CpG	323	NM_174988	104010	Mm.151819	NM_174988	ENSMUSG00000053166	Cdh22	-	cadherin 22	protein-coding
MACS_peak_3730	chr15	38836718	38839083	+	3078	NA	promoter-TSS (NM_001162494)	promoter-TSS (NM_001162494)	21	NM_008056	14368	Mm.4769	NM_008056	ENSMUSG00000022297	Fzd6	Fz6	frizzled homolog 6 (Drosophila)	protein-coding
MACS_peak_1514	chr11	50661113	50666010	+	3069	NA	promoter-TSS (NM_173372)	promoter-TSS (NM_173372)	-626	NM_173372	108072	Mm.134265	NM_173372	ENSMUSG00000000617	Grm6	BC021919|Gm3|Gprc1f|mGluR6|nerg1|nob2|nob3|nob4	glutamate receptor, metabotropic 6	protein-coding
MACS_peak_2138	chr11	115125256	115129478	+	3069	NA	intron (NM_010350, intron 3 of 14)	intron (NM_010350, intron 3 of 14)	1190	NM_010350	14813	Mm.39090	NM_010350	ENSMUSG00000020734	Grin2c	GluN2C|NMDAR2C|NR2C	glutamate receptor, ionotropic, NMDA2C (epsilon 3)	protein-coding
MACS_peak_1841	chr11	85738293	85741237	+	3069	NA	Intergenic	Intergenic	29498	NM_172798	21387	Mm.275336	NM_011536	ENSMUSG00000000094	Tbx4	3930401C23	T-box 4	protein-coding
MACS_peak_1943	chr11	96975378	96978359	+	3069	NA	promoter-TSS (NM_019507)	promoter-TSS (NM_019507)	-223	NM_019507	57765	Mm.94519	NM_019507	ENSMUSG00000001444	Tbx21	TBT1|Tbet|Tblym	T-box 21	protein-coding
MACS_peak_1628	chr11	68198096	68206588	+	3069	NA	Intergenic	MIR|SINE|MIR	-2014	NM_008744	18208	Mm.39095	NM_008744	ENSMUSG00000020902	Ntn1	AI561871|BC019633|Netrin-1	netrin 1	protein-coding
MACS_peak_9526	chr6	127101350	127106065	+	3069	NA	intron (NR_040275, intron 1 of 1)	intron (NR_040275, intron 1 of 1)	-2641	NM_009829	12444	Mm.333406	NM_009829	ENSMUSG00000000184	Ccnd2	2600016F06Rik|AI256817|BF642806|C86853|Vin-1|Vin1|cD2	cyclin D2	protein-coding
MACS_peak_8146	chr4	151686365	151690590	+	3069	NA	intron (NM_001033489, intron 7 of 16)	B4A|SINE|B4	4257	NM_001033489	433809	Mm.156205	NM_001033489	ENSMUSG00000058498	Rnf207	D330010C22Rik|Gm143	ring finger protein 207	protein-coding
MACS_peak_2209	chr11	119407572	119412249	+	3069	NA	promoter-TSS (NR_045099)	promoter-TSS (NR_045099)	-34	NR_045099	100503830	Mm.428077	NR_045099	ENSMUSG00000087675	Gm11762	OTTMUSG00000004029	predicted gene 11762	ncRNA
MACS_peak_1949	chr11	97301184	97302896	+	3069	NA	Intergenic	Intergenic	-9434	NM_021493	58996	Mm.394118	NM_021493	ENSMUSG00000049807	Arhgap23	A330041B18Rik	Rho GTPase activating protein 23	protein-coding
MACS_peak_7585	chr4	98482208	98485559	+	3053	NA	intron (NM_172872, intron 1 of 9)	CpG	345	NM_172872	242553	Mm.440211	NM_172872	ENSMUSG00000035407	Kank4	AU021071|Ankrd38|BC060737|C130031J23	KN motif and ankyrin repeat domains 4	protein-coding
MACS_peak_1128	chr10	90290181	90294974	+	3053	NA	intron (NM_001177396, intron 3 of 11)	CpG	252911	NM_001042558	11783	Mm.220289	NM_009684	ENSMUSG00000019979	Apaf1	6230400I06Rik|Apaf-1|Apaf1l|fog|mKIAA0413	apoptotic peptidase activating factor 1	protein-coding
MACS_peak_5135	chr18	39645852	39649498	+	3053	NA	promoter-TSS (NM_008173)	promoter-TSS (NM_008173)	-776	NM_008173	14815	Mm.129481	NM_008173	ENSMUSG00000024431	Nr3c1	GR|Grl-1|Grl1	nuclear receptor subfamily 3, group C, member 1	protein-coding
MACS_peak_8832	chr5	126013113	126015893	+	3053	NA	intron (NM_001190352, intron 1 of 8)	intron (NM_001190352, intron 1 of 8)	1715	NM_001190352	208151	Mm.40397	NM_001190352	ENSMUSG00000070498	Tmem132b	AK220418|mKIAA1786	transmembrane protein 132B	protein-coding
MACS_peak_8385	chr5	35619268	35622500	+	3053	NA	promoter-TSS (NM_007418)	promoter-TSS (NM_007418)	-331	NM_007418	11553	Mm.57205	NM_007418	ENSMUSG00000045318	Adra2c	Adra-2c|[a]2C|alpha2-C4|alpha2C	adrenergic receptor, alpha 2c	protein-coding
MACS_peak_6198	chr2	90728562	90731142	+	3053	NA	exon (NM_026161, exon 2 of 2)	exon (NM_026161, exon 2 of 2)	3909	NM_026161	67445	Mm.258993	NM_026161	ENSMUSG00000040794	C1qtnf4	0710001E10Rik|9430004J15Rik|CTRP4	C1q and tumor necrosis factor related protein 4	protein-coding
MACS_peak_4588	chr17	25706514	25709283	+	3053	NA	promoter-TSS (NM_011447)	promoter-TSS (NM_011447)	142	NR_045176	72834	Mm.33042	NR_045176	ENSMUSG00000091475	2810468N07Rik	-	RIKEN cDNA 2810468N07 gene	ncRNA
MACS_peak_1715	chr11	75464086	75468353	+	3053	NA	intron (NM_001080774, intron 1 of 31)	intron (NM_001080774, intron 1 of 31)	567	NM_001080774	17913	Mm.234502	NM_008659	ENSMUSG00000017774	Myo1c	C80397|MMIb|MYO1E|NMI|mm1beta|myr2	myosin IC	protein-coding
MACS_peak_5256	chr18	67502491	67505205	+	3053	NA	promoter-TSS (NR_033214)	promoter-TSS (NR_033214)	-91	NR_033214	338360	Mm.441590	NR_033214	ENSMUSG00000046415	B430212C06Rik	-	RIKEN cDNA B430212C06 gene	ncRNA
MACS_peak_636	chr1	173366563	173369927	+	3053	NA	intron (NM_172647, intron 1 of 9)	intron (NM_172647, intron 1 of 9)	553	NM_172647	16456	Mm.294882	NM_172647	ENSMUSG00000038235	F11r	9130004G24|AA638916|ESTM33|JAM|JAM-1|JAM-A|Jcam|Jcam1|Ly106	F11 receptor	protein-coding
MACS_peak_7663	chr4	114515172	114517328	+	3053	NA	intron (NR_033617, intron 2 of 3)	CpG	21925	NR_033617	433746	Mm.388908	NR_033617	ENSMUSG00000055198	Gm12830	OTTMUSG00000008584	predicted gene 12830	ncRNA
MACS_peak_5038	chr18	21118413	21121532	+	3053	NA	intron (NM_026301, intron 1 of 5)	CpG	16846	NM_026301	67664	Mm.45980	NM_026301	ENSMUSG00000033107	Rnf125	4930553F04Rik	ring finger protein 125	protein-coding
MACS_peak_8212	chr5	5748005	5749583	+	3053	NA	intron (NM_027399, intron 1 of 4)	intron (NM_027399, intron 1 of 4)	523	NM_027399	70358	Mm.85429	NM_027399	ENSMUSG00000015652	Steap1	2410007B19Rik|Prss24|Steap	six transmembrane epithelial antigen of the prostate 1	protein-coding
MACS_peak_9065	chr6	17980206	17982945	+	3053	NA	Intergenic	Intergenic	-1130	NM_023653	22413	Mm.33653	NM_023653	ENSMUSG00000010797	Wnt2	2610510E18Rik|Int1l1|Irp|Mirp|Wnt-2|Wnt2a	wingless-type MMTV integration site family, member 2	protein-coding
MACS_peak_2230	chr11	121563301	121566104	+	3053	NA	intron (NM_144797, intron 1 of 3)	CpG	961	NM_144797	210029	Mm.153566	NM_144797		Metrnl	9430048M07Rik|BC019776	meteorin, glial cell differentiation regulator-like	protein-coding
MACS_peak_480	chr1	133859848	133861727	+	3053	NA	intron (NM_001177628, intron 1 of 4)	intron (NM_001177628, intron 1 of 4)	1295	NM_001177628	212980	Mm.200307	NM_145977	ENSMUSG00000026435	Slc45a3	2210413P12Rik|AU023994|AU043764|IPCA-6|PRST|Pcanap6	solute carrier family 45, member 3	protein-coding
MACS_peak_3848	chr15	78631728	78633793	+	3034	NA	intron (NM_130859, intron 2 of 20)	intron (NM_130859, intron 2 of 20)	712	NM_130859	105844	Mm.17629	NM_130859	ENSMUSG00000033170	Card10	AI449026|Bimp1|Carma3	caspase recruitment domain family, member 10	protein-coding
MACS_peak_11782	chrM	1912	2036	+	3029	NA	NA	Intergenic	NA	NA
MACS_peak_1620	chr11	66336162	66341366	+	3012	NA	intron (NM_001034874, intron 1 of 4)	CpG	864	NM_001034874	380702	Mm.351764	NM_001034874	ENSMUSG00000053930	Shisa6	Gm879	shisa homolog 6 (Xenopus laevis)	protein-coding
MACS_peak_409	chr1	93695979	93699767	+	3012	NA	promoter-TSS (NM_007855)	promoter-TSS (NM_007855)	-181	NM_007855	13345	Mm.9474	NM_007855	ENSMUSG00000007805	Twist2	Dermo1|bHLHa39	twist basic helix-loop-helix transcription factor 2	protein-coding
MACS_peak_9345	chr6	86742140	86744912	+	3012	NA	promoter-TSS (NM_013471)	promoter-TSS (NM_013471)	52	NM_013471	11746	Mm.259702	NM_013471	ENSMUSG00000029994	Anxa4	AI265406|AIV|AW106930|Anx4|Xanx-4	annexin A4	protein-coding
MACS_peak_6502	chr2	151821869	151823551	+	3012	NA	intron (NM_027172, intron 1 of 4)	PB1D10|SINE|Alu	463	NM_027172	69698	Mm.258262	NM_027172	ENSMUSG00000027463	Slc52a3	2310046K01Rik|RFT2	solute carrier protein family 52, member 3	protein-coding
MACS_peak_54	chr1	21949775	21953916	+	3012	NA	5' UTR (NM_023872, exon 1 of 14)	5' UTR (NM_023872, exon 1 of 14)	178	NM_001160139	226922	Mm.336519	NM_023872	ENSMUSG00000028033	Kcnq5	7730402H11|9230107O05Rik|AA589396|D1Mgi1	potassium voltage-gated channel, subfamily Q, member 5	protein-coding
MACS_peak_4911	chr17	79752768	79756009	+	3012	NA	promoter-TSS (NM_026514)	promoter-TSS (NM_026514)	43	NM_026514	260409	Mm.140601	NM_026514	ENSMUSG00000036533	Cdc42ep3	3200001F04Rik|AA986861|Borg2|Cep3|UB1	CDC42 effector protein (Rho GTPase binding) 3	protein-coding
MACS_peak_10511	chr8	13972945	13975929	+	3012	NA	intron (NM_173744, intron 1 of 2)	CpG	340	NM_173744	72148	Mm.5727	NM_173744	ENSMUSG00000050052	Tdrp	2610019F03Rik	testis development related protein	protein-coding
MACS_peak_4337	chr16	44330660	44334301	+	3012	NA	exon (NM_001159419, exon 1 of 25)	exon (NM_001159419, exon 1 of 25)	471	NM_198034	320007	Mm.242144	NM_198034	ENSMUSG00000022696	Sidt1	AW045928|B830021E24Rik	SID1 transmembrane family, member 1	protein-coding
MACS_peak_9502	chr6	122750605	122753623	+	3012	NA	Intergenic	Intergenic	-18088	NM_021899	60611	Mm.87142	NM_021899	ENSMUSG00000003154	Foxj2	Fhx	forkhead box J2	protein-coding
MACS_peak_10011	chr7	77487719	77497750	+	3012	NA	Intergenic	Intergenic	12745	NM_009697	11819	Mm.158143	NM_009697	ENSMUSG00000030551	Nr2f2	2700033K02Rik|9430015G03Rik|ARP-1|Aporp1|COUP-TF2|COUP-TFII|COUPTFB|EAR3|SVP40|Tcfcoup2	nuclear receptor subfamily 2, group F, member 2	protein-coding
MACS_peak_4684	chr17	34765360	34769793	+	3012	NA	intron (NM_030890, intron 1 of 3)	intron (NM_030890, intron 1 of 3)	945	NM_030890	260297	Mm.390965	NM_030890		Prrt1	Bat-4|Bat4|D17H6S54E|DSPD1|G5b|NG5|ORF31	proline-rich transmembrane protein 1	protein-coding
MACS_peak_3940	chr15	85487354	85493979	+	3012	NA	Intergenic	Intergenic	-43537	NR_110483	102800312	Mm.33117	NR_110483		Mirlet7bhg	linc-Ppara	MIRLET7B host gene (non-protein coding)	ncRNA
MACS_peak_1613	chr11	64247827	64250628	+	3012	NA	non-coding (NR_028445, exon 1 of 1)	non-coding (NR_028445, exon 1 of 1)	393	NM_178870	15478	Mm.340214	NM_178870	ENSMUSG00000047759	Hs3st3a1	3Ost3a|Hs3st3a	heparan sulfate (glucosamine) 3-O-sulfotransferase 3A1	protein-coding
MACS_peak_7299	chr3	145651184	145652600	+	3012	NA	exon (NM_001166064, exon 1 of 7)	exon (NM_001166064, exon 1 of 7)	1058	NM_001166064	214804	Mm.268854	NM_001166064	ENSMUSG00000036863	Syde2	C430017H16Rik	synapse defective 1, Rho GTPase, homolog 2 (C. elegans)	protein-coding
MACS_peak_5073	chr18	35020701	35024235	+	3012	NA	exon (NM_007913, exon 2 of 2)	exon (NM_007913, exon 2 of 2)	1607	NM_007913	13653	Mm.181959	NM_007913		Egr1	A530045N19Rik|ETR103|Egr-1|Krox-1|Krox-24|Krox24|NGF1-A|NGFI-A|NGFIA|TIS8|Zenk|Zfp-6|Zif268|egr	early growth response 1	protein-coding
MACS_peak_11383	chr9	54546620	54549451	+	3012	NA	intron (NM_021422, intron 1 of 6)	intron (NM_021422, intron 1 of 6)	669	NM_021422	58233	Mm.489676	NM_021422	ENSMUSG00000032285	Dnaja4	1110021L12Rik|AV358213|Dj4|Hsj4|mmDjA4	DnaJ (Hsp40) homolog, subfamily A, member 4	protein-coding
MACS_peak_9745	chr7	29075388	29077705	+	3012	NA	promoter-TSS (NM_175033)	promoter-TSS (NM_175033)	-393	NM_175033	280621	Mm.212777	NM_175033	ENSMUSG00000046750	BC089491	Selv	cDNA sequence BC089491	protein-coding
MACS_peak_3013	chr13	76191373	76196034	+	3012	NA	exon (NM_175495, exon 1 of 1)	exon (NM_175495, exon 1 of 1)	741	NM_175495	238725	Mm.167172	NM_175495	ENSMUSG00000045509	Gpr150	C030001A19Rik|PGR11	G protein-coupled receptor 150	protein-coding
MACS_peak_10028	chr7	79450031	79453125	+	3012	NA	promoter-TSS (NM_001024703)	promoter-TSS (NM_001024703)	-97	NM_001024703	244049	Mm.217412	NM_001024703	ENSMUSG00000032776	Mctp2	Gm489	multiple C2 domains, transmembrane 2	protein-coding
MACS_peak_1687	chr11	72078224	72081534	+	3012	NA	promoter-TSS (NR_045922)	promoter-TSS (NR_045922)	227	NM_001004148	237831	Mm.340778	NM_001004148	ENSMUSG00000020805	Slc13a5	Indy|NaC2/NaCT|Nact|mINDY	solute carrier family 13 (sodium-dependent citrate transporter), member 5	protein-coding
MACS_peak_4315	chr16	35151689	35157778	+	3012	NA	promoter-TSS (NM_001012765)	promoter-TSS (NM_001012765)	-989	NM_001012765	224129	Mm.41137	NM_001012765		Adcy5	AW121902|Ac5	adenylate cyclase 5	protein-coding
MACS_peak_1111	chr10	87818588	87820690	+	3012	NA	exon (NM_027878, exon 1 of 7)	exon (NM_027878, exon 1 of 7)	181	NM_027878	71712	Mm.35450	NM_027878	ENSMUSG00000020057	Dram1	1200002N14Rik|Dram	DNA-damage regulated autophagy modulator 1	protein-coding
MACS_peak_3218	chr14	13170118	13180280	+	3003	NA	exon (NM_080433, exon 5 of 5)	exon (NM_080433, exon 5 of 5)	3180	NM_080433	54713	Mm.34644	NM_080433	ENSMUSG00000021743	Fezf2	AI451466|AI852056|Fez|Fezl|Zfp312	Fez family zinc finger 2	protein-coding
MACS_peak_1332	chr11	4643152	4648237	+	2960	NA	intron (NM_138948, intron 1 of 4)	intron (NM_138948, intron 1 of 4)	1087	NM_138948	192650	Mm.207056	NM_138948		Cabp7	-	calcium binding protein 7	protein-coding
MACS_peak_3668	chr15	11832206	11838243	+	2960	NA	exon (NM_008728, exon 1 of 8)	exon (NM_008728, exon 1 of 8)	205	NM_008728	18162	Mm.25259	NM_008728	ENSMUSG00000022206	Npr3	ANP-C|ANPR-C|EF-2|NPR-C|lgj|stri	natriuretic peptide receptor 3	protein-coding
MACS_peak_5541	chr19	37308153	37309209	+	2960	NA	Intergenic	CpG	26646	NM_001164336	69104	Mm.175989	NM_027314	ENSMUSG00000023307	March5	1810015H18Rik|2310008I22Rik|2700055A20Rik|5730499H23Rik|E130202O05Rik|MARCH-V|MITOL|Marchv|Rnf153	membrane-associated ring finger (C3HC4) 5	protein-coding
MACS_peak_10042	chr7	86195519	86199511	+	2960	NA	promoter-TSS (NM_007424)	promoter-TSS (NM_007424)	-854	NM_007424	11595	Mm.358571	NM_007424	ENSMUSG00000030607	Acan	Agc|Agc1|Cspg1|b2b183Clo|cmd	aggrecan	protein-coding
MACS_peak_497	chr1	135059233	135063416	+	2960	NA	Intergenic	Intergenic	33581	NM_133819	108954	Mm.293628	NM_133819	ENSMUSG00000046062	Ppp1r15b	1810033K10Rik|AI606441|C530022L24Rik|CReP	protein phosphatase 1, regulatory (inhibitor) subunit 15b	protein-coding
MACS_peak_10625	chr8	36888372	36890759	+	2960	NA	promoter-TSS (NM_027998)	promoter-TSS (NM_027998)	48	NM_027998	71908	Mm.37817	NM_027998	ENSMUSG00000055976	Cldn23	2310014B08Rik	claudin 23	protein-coding
MACS_peak_10464	chr8	11310640	11314205	+	2960	NA	promoter-TSS (NM_009932)	promoter-TSS (NM_009932)	404	NM_009931	12826	Mm.738	NM_009931	ENSMUSG00000031502	Col4a1	Bru|Col4a-1|Del(8)44H|Raw|Svc	collagen, type IV, alpha 1	protein-coding
MACS_peak_7475	chr4	48058722	48065492	+	2960	NA	Intergenic	Intergenic	-2013	NM_015743	18124	Mm.247261	NM_015743	ENSMUSG00000028341	Nr4a3	AI573420|CHN|CSMF|MINOR|NOR-1|Nor1|TEC	nuclear receptor subfamily 4, group A, member 3	protein-coding
MACS_peak_11129	chr8	127576990	127579899	+	2960	NA	intron (NM_174854, intron 1 of 12)	CpG	349	NM_174854	244667	Mm.233504	NM_170596	ENSMUSG00000043051	Disc1	-	disrupted in schizophrenia 1	protein-coding
MACS_peak_7761	chr4	122858931	122862071	+	2960	NA	promoter-TSS (NM_174998)	promoter-TSS (NM_174998)	-246	NM_174998	170638	Mm.270641	NM_174998	ENSMUSG00000046093	Hpcal4	AI846570|NVP-2	hippocalcin-like 4	protein-coding
MACS_peak_1526	chr11	52094748	52098892	+	2960	NA	Intergenic	CpG	-1068	NM_009331	21414	Mm.31630	NM_009331	ENSMUSG00000000782	Tcf7	AI465550|TCF-1|Tcf1	transcription factor 7, T cell specific	protein-coding
MACS_peak_2771	chr13	30840308	30844669	+	2960	NA	exon (NM_013674, exon 2 of 9)	exon (NM_013674, exon 2 of 9)	1361	NM_013674	16364	Mm.4677	NM_013674	ENSMUSG00000021356	Irf4	AI385587|IRF-4|LSIRF|Spip	interferon regulatory factor 4	protein-coding
MACS_peak_7510	chr4	62874028	62877192	+	2960	NA	promoter-TSS (NM_025685)	promoter-TSS (NM_025685)	-836	NM_025685	373864	Mm.194116	NM_025685	ENSMUSG00000045672	Col27a1	5730512J02Rik|AI449266|mKIAA1870	collagen, type XXVII, alpha 1	protein-coding
MACS_peak_9153	chr6	38301396	38306302	+	2959	NA	intron (NM_028421, intron 1 of 11)	CpG	754	NM_028864	78781	Mm.25243	NM_028421	ENSMUSG00000029826	Zc3hav1	1200014N16Rik|2900058M19Rik|9130009D18Rik|9830115L13Rik|ARTD13|D6Bwg1452e|ZAP	zinc finger CCCH type, antiviral 1	protein-coding
MACS_peak_7766	chr4	123018121	123021368	+	2959	NA	exon (NM_001256019, exon 1 of 7)	exon (NM_001256019, exon 1 of 7)	751	NM_001256019	12163	Mm.439749	NM_007558	ENSMUSG00000032726	Bmp8a	Bmp7r1|OP-2|OP2	bone morphogenetic protein 8a	protein-coding
MACS_peak_1035	chr10	79809510	79813746	+	2959	NA	promoter-TSS (NR_104340)	promoter-TSS (NR_104340)	-435	NR_104340	66548	Mm.71891	NM_025629		Adamtsl5	2010109H09Rik|Thsd6	ADAMTS-like 5	protein-coding
MACS_peak_3652	chr15	6823296	6825024	+	2959	NA	intron (NM_011019, intron 1 of 17)	CpG	153	NM_011019	18414	Mm.10760	NM_011019	ENSMUSG00000022146	Osmr	OSMRB	oncostatin M receptor	protein-coding
MACS_peak_11119	chr8	126414743	126417146	+	2959	NA	exon (NM_009606, exon 7 of 7)	exon (NM_009606, exon 7 of 7)	2731	NM_001272041	11459	Mm.214950	NM_009606	ENSMUSG00000031972	Acta1	AA959943|Acta-2|Acts|Actsk-1	actin, alpha 1, skeletal muscle	protein-coding
MACS_peak_783	chr10	14263970	14266276	+	2923	NA	promoter-TSS (NM_001002268)	promoter-TSS (NM_001002268)	-281	NM_001002268	215798	Mm.440142	NM_001002268	ENSMUSG00000039116	Gpr126	1190004A11Rik|AI449247|AW045736|DREG|Gm222	G protein-coupled receptor 126	protein-coding
MACS_peak_710	chr1	191551268	191554432	+	2923	NA	intron (NM_008976, intron 1 of 18)	intron (NM_008976, intron 1 of 18)	703	NM_008976	19250	Mm.4498	NM_008976	ENSMUSG00000026604	Ptpn14	C130080N23Rik|OTTMUSG00000022087|PTP36	protein tyrosine phosphatase, non-receptor type 14	protein-coding
MACS_peak_1899	chr11	95374203	95377542	+	2923	NA	promoter-TSS (NM_130858)	promoter-TSS (NM_130858)	7	NM_130858	104079	Mm.22970	NM_130858	ENSMUSG00000046719	Nxph3	-	neurexophilin 3	protein-coding
MACS_peak_11463	chr9	63930598	63934630	+	2923	NA	intron (NR_040743, intron 1 of 2)	CpG	4046	NR_040743	76814	Mm.243771	NR_040743		Scarletltr	2600006L11Rik	Scarletltr, erythroid developmental long intergenic non-protein coding transcript	ncRNA
MACS_peak_11056	chr8	122752826	122757173	+	2923	NA	Intergenic	Intergenic	-2869	NR_110496	434353	Mm.411793	NR_110496		A330074K22Rik	-	RIKEN cDNA A330074K22 gene	ncRNA
MACS_peak_3034	chr13	78348538	78350843	+	2923	NA	intron (NR_045195, intron 1 of 2)	intron (NR_045195, intron 1 of 2)	-11447	NM_010151	13865	Mm.439653	NM_010151	ENSMUSG00000069171	Nr2f1	COUP-TF1|COUP-TFI|COUPTFA|EAR3|Erbal3|SVP44|Tcfcoup1	nuclear receptor subfamily 2, group F, member 1	protein-coding
MACS_peak_833	chr10	29252812	29255514	+	2923	NA	intron (NM_028351, intron 1 of 4)	intron (NM_028351, intron 1 of 4)	1510	NM_028351	72780	Mm.45191	NM_028351	ENSMUSG00000019880	Rspo3	2810459H04Rik|AW742308|Cristin1|Thsd2	R-spondin 3 homolog (Xenopus laevis)	protein-coding
MACS_peak_3015	chr13	76520626	76523322	+	2923	NA	promoter-TSS (NM_030174)	promoter-TSS (NM_030174)	-435	NM_030174	78771	Mm.316249	NM_030174		Mctp1	2810465F10Rik	multiple C2 domains, transmembrane 1	protein-coding
MACS_peak_7900	chr4	133035655	133037316	+	2923	NA	intron (NM_175307, intron 1 of 1)	intron (NM_175307, intron 1 of 1)	437	NM_175307	100342	Mm.204656	NM_175307	ENSMUSG00000046694	Fam46b	4732473B16Rik|AU045678|AU046069	family with sequence similarity 46, member B	protein-coding
MACS_peak_4575	chr17	24940497	24943172	+	2881	NA	intron (NM_029197, intron 1 of 13)	B1_Mus2|SINE|Alu	507	NM_029197	75178	Mm.52592	NM_029197	ENSMUSG00000024155	Meiob	4930528F23Rik|MLZ-675	meiosis specific with OB domains	protein-coding
MACS_peak_814	chr10	21711064	21715701	+	2881	NA	promoter-TSS (NM_001161850)	promoter-TSS (NM_001161850)	-314	NM_001161850	20393	Mm.28405	NM_011361	ENSMUSG00000019970	Sgk1	Sgk	serum/glucocorticoid regulated kinase 1	protein-coding
MACS_peak_11673	chr9	107452646	107456794	+	2881	NA	intron (NM_001243748, intron 1 of 5)	intron (NM_001243748, intron 1 of 5)	834	NM_001243748	56289	Mm.12091	NM_019713	ENSMUSG00000010067	Rassf1	123F2|AA536941|AU044980|NORE2A|RDA32|REH3P21|Rassf1A|Rassf1B|Rassf1C	Ras association (RalGDS/AF-6) domain family member 1	protein-coding
MACS_peak_8279	chr5	15438753	15442562	+	2881	NA	5' UTR (NM_001110843, exon 1 of 39)	5' UTR (NM_001110843, exon 1 of 39)	148	NM_001110846	12293	Mm.159842	NM_009784	ENSMUSG00000040118	Cacna2d1	Ca(v)alpha2delta1|Cacna2|Cchl2a	calcium channel, voltage-dependent, alpha2/delta subunit 1	protein-coding
MACS_peak_7895	chr4	132795861	132799791	+	2881	NA	intron (NM_016693, intron 1 of 28)	intron (NM_016693, intron 1 of 28)	1093	NM_016693	53608	Mm.36640	NM_016693	ENSMUSG00000028862	Map3k6	Ask2|MAPKKK6|MEKK6	mitogen-activated protein kinase kinase kinase 6	protein-coding
MACS_peak_2249	chr12	11155149	11159230	+	2881	NA	promoter-TSS (NM_173417)	promoter-TSS (NM_173417)	-10	NM_173417	238076	Mm.113278	NM_173417	ENSMUSG00000043673	Kcns3	-	potassium voltage-gated channel, delayed-rectifier, subfamily S, member 3	protein-coding
MACS_peak_2623	chr12	113380887	113383473	+	2881	NA	Intergenic	CpG	-2239	NM_001097621	668303	Mm.313104	NM_001097621	ENSMUSG00000021294	Kif26a	mKIAA1236	kinesin family member 26A	protein-coding
MACS_peak_1094	chr10	84215624	84223780	+	2881	NA	intron (NM_001024918, intron 1 of 17)	intron (NM_001024918, intron 1 of 17)	909	NM_001024918	71137	Mm.79070	NM_027689	ENSMUSG00000020037	Rfx4	4933412G19Rik|NYD-sp10	regulatory factor X, 4 (influences HLA class II expression)	protein-coding
MACS_peak_5479	chr19	23965603	23968159	+	2881	NA	intron (NM_177034, intron 1 of 12)	intron (NM_177034, intron 1 of 12)	133515	NM_177034	319924	Mm.22879	NM_177034	ENSMUSG00000024897	Apba1	6430513E09Rik|Lin-10|Mint|Mint1|Urop11|X11|X11alpha	amyloid beta (A4) precursor protein binding, family A, member 1	protein-coding
MACS_peak_6680	chr2	171865932	171869963	+	2881	NA	5' UTR (NM_175631, exon 1 of 3)	5' UTR (NM_175631, exon 1 of 3)	1019	NM_175631	228942	Mm.40555	NM_175631	ENSMUSG00000067578	Cbln4	AI848962	cerebellin 4 precursor protein	protein-coding
MACS_peak_1415	chr11	29924019	29925347	+	2881	NA	5' UTR (NM_146016, exon 2 of 42)	5' UTR (NM_146016, exon 2 of 42)	1350	NM_146016	237711	Mm.445271	NM_146016	ENSMUSG00000044072	Eml6	2900083P10Rik|C230094A16Rik|EMAP-6	echinoderm microtubule associated protein like 6	protein-coding
MACS_peak_2472	chr12	80230706	80234472	+	2881	NA	intron (NM_009705, intron 1 of 7)	intron (NM_009705, intron 1 of 7)	814	NM_009705	11847	Mm.3506	NM_009705	ENSMUSG00000021125	Arg2	AII|AU022422	arginase type II	protein-coding
MACS_peak_8711	chr5	115106047	115109413	+	2881	NA	intron (NM_022017, intron 1 of 15)	intron (NM_022017, intron 1 of 15)	700	NM_022017	63873	Mm.266450	NM_022017	ENSMUSG00000014158	Trpv4	0610033B08Rik|OTRPC4|Trp12|VR-OAC|VRL-2|VROAC	transient receptor potential cation channel, subfamily V, member 4	protein-coding
MACS_peak_5924	chr2	29699549	29703350	+	2881	NA	promoter-TSS (NR_029838)	promoter-TSS (NR_029838)	-202	NR_029838	723904		NR_029838	miRBase:MI0000741	Mir219a-2	Mir219-2|Mirn219-2|mmu-mir-219a-2	microRNA 219a-2	ncRNA
MACS_peak_10248	chr7	131124337	131131053	+	2881	NA	intron (NM_001252072, intron 1 of 1)	intron (NM_001252072, intron 1 of 1)	1000	NM_001252072	628779	Mm.40210	NM_001252072	ENSMUSG00000078591	Hs3st4	EG628779|Gm6915	heparan sulfate (glucosamine) 3-O-sulfotransferase 4	protein-coding
MACS_peak_4682	chr17	34400099	34402740	+	2881	NA	intron (NM_207105, intron 1 of 5)	intron (NM_207105, intron 1 of 5)	1247	NM_207105	14961	Mm.254067	NM_207105	ENSMUSG00000073421	H2-Ab1	AI845868|Abeta|H-2Ab|H2-Ab|I-Abeta|IAb|Ia-2|Ia2|Rmcs1	histocompatibility 2, class II antigen A, beta 1	protein-coding
MACS_peak_1049	chr10	80270949	80273545	+	2881	NA	intron (NM_028001, intron 5 of 6)	PB1D7|SINE|Alu	3996	NM_028001	71912	Mm.45137	NM_028001	ENSMUSG00000020216	Jsrp1	2300003C06Rik|2310032K21Rik|JP-45|JP45	junctional sarcoplasmic reticulum protein 1	protein-coding
MACS_peak_2610	chr12	112081445	112084958	+	2881	NA	Intergenic	CpG	-4052	NM_011973	26448	Mm.140948	NM_011973	ENSMUSG00000056458	Mok	RAGE1|Rage|Stk30	MOK protein kinase	protein-coding
MACS_peak_1115	chr10	88347761	88350474	+	2881	NA	exon (NM_145423, exon 1 of 15)	exon (NM_145423, exon 1 of 15)	380	NM_145423	216225	Mm.77381	NM_145423	ENSMUSG00000020062	Slc5a8	Ait|SMCT	solute carrier family 5 (iodide transporter), member 8	protein-coding
MACS_peak_1769	chr11	79786588	79789059	+	2881	NA	Intergenic	CpG	-11934	NM_144826	216987	Mm.274961	NM_144826	ENSMUSG00000035575	Utp6	4732497O03Rik|HCA66	UTP6, small subunit (SSU) processome component, homolog (yeast)	protein-coding
MACS_peak_3407	chr14	56379469	56384183	+	2881	NA	exon (NM_020490, exon 2 of 2)	exon (NM_020490, exon 2 of 2)	1561	NM_020490	57260	Mm.159670	NM_020490	ENSMUSG00000040432	Ltb4r2	5830462O07Rik|BLT2|LTB4-R 2|LTB4-R-2|LTB4-R2	leukotriene B4 receptor 2	protein-coding
MACS_peak_5880	chr2	25976146	25978534	+	2881	NA	intron (NM_026495, intron 1 of 5)	intron (NM_026495, intron 1 of 5)	991	NM_026495	67991	Mm.131074	NM_026495	ENSMUSG00000026932	Nacc2	0610020I02Rik|AI448087|Btbd14a|C030048H19Rik	nucleus accumbens associated 2, BEN and BTB (POZ) domain containing	protein-coding
MACS_peak_8556	chr5	91946322	91947923	+	2881	NA	intron (NM_145562, intron 1 of 3)	intron (NM_145562, intron 1 of 3)	396	NM_145562	231440	Mm.5002	NM_145562		Parm1	2210012L08Rik|9130213B05Rik|W91666	prostate androgen-regulated mucin-like protein 1	protein-coding
MACS_peak_7344	chr4	3604178	3606081	+	2881	NA	promoter-TSS (NM_010747)	promoter-TSS (NM_010747)	-139	NM_001111096	17096	Mm.317331	NM_010747	ENSMUSG00000042228	Lyn	AA407514|Hck-2|p53Lyn|p56Lyn	Yamaguchi sarcoma viral (v-yes-1) oncogene homolog	protein-coding
MACS_peak_4895	chr17	72951452	72954979	+	2881	NA	5' UTR (NM_007439, exon 1 of 29)	5' UTR (NM_007439, exon 1 of 29)	432	NM_007439	11682	Mm.311854	NM_007439	ENSMUSG00000055471	Alk	CD246|Tcrz	anaplastic lymphoma kinase	protein-coding
MACS_peak_8925	chr5	139799684	139802524	+	2881	NA	intron (NM_172723, intron 1 of 10)	CpG	314	NM_172723	231821	Mm.297819	NM_172723	ENSMUSG00000056413	Adap1	4930431P11Rik|Centa1|GC1L|p42IP4	ArfGAP with dual PH domains 1	protein-coding
MACS_peak_1072	chr10	80886860	80891865	+	2881	NA	intron (NM_026756, intron 1 of 8)	intron (NM_026756, intron 1 of 8)	556	NM_008688	18029	Mm.426936	NM_008688	ENSMUSG00000055053	Nfic	1110019L22Rik|1500041O16Rik|AA589446|AI746521|NF1-C	nuclear factor I/C	protein-coding
MACS_peak_2195	chr11	118428833	118434478	+	2881	NA	intron (NM_001285436, intron 3 of 13)	CpG	93381	NM_172573	217364	Mm.473963	NM_172573	ENSMUSG00000033857	Engase	C130099A03|D230014K01Rik	endo-beta-N-acetylglucosaminidase	protein-coding
MACS_peak_3762	chr15	55736399	55739674	+	2881	NA	exon (NM_016667, exon 1 of 7)	exon (NM_016667, exon 1 of 7)	468	NM_016667	20649	Mm.309425	NM_016667	ENSMUSG00000060429	Sntb1	-	syntrophin, basic 1	protein-coding
MACS_peak_9772	chr7	30015152	30018392	+	2881	NA	intron (NM_001033525, intron 1 of 2)	intron (NM_001033525, intron 1 of 2)	769	NM_001033525	52150	Mm.24877	NM_001033525	ENSMUSG00000046410	Kcnk6	D7Ertd764e|Toss|Twik2	potassium inwardly-rectifying channel, subfamily K, member 6	protein-coding
MACS_peak_4641	chr17	30026274	30028804	+	2881	NA	Intergenic	Intergenic	-2712	NM_001081160	74762	Mm.40901	NM_001081160	ENSMUSG00000043557	Mdga1	1200011I03Rik|GPIM|Mamdc3	MAM domain containing glycosylphosphatidylinositol anchor 1	protein-coding
MACS_peak_2939	chr13	58572112	58574560	+	2881	NA	Intergenic	Intergenic	-68632	NM_001301341	15387	Mm.142872	NM_025279	ENSMUSG00000021546	Hnrnpk	Hnrpk|KBBP|NOVA	heterogeneous nuclear ribonucleoprotein K	protein-coding
MACS_peak_10099	chr7	96551623	96554560	+	2881	NA	5' UTR (NM_008055, exon 1 of 2)	5' UTR (NM_008055, exon 1 of 2)	215	NM_008055	14366	Mm.86755	NM_008055	ENSMUSG00000049791	Fzd4	Fz4	frizzled homolog 4 (Drosophila)	protein-coding
MACS_peak_6600	chr2	164681209	164685248	+	2881	NA	promoter-TSS (NM_011125)	promoter-TSS (NM_011125)	-20	NM_011125	18830	Mm.6105	NM_011125	ENSMUSG00000017754	Pltp	Bpife|OD107	phospholipid transfer protein	protein-coding
MACS_peak_7923	chr4	134321570	134325395	+	2881	NA	intron (NM_145554, intron 1 of 8)	CpG	437	NM_145554	100017	Mm.482148	NM_145554		Ldlrap1	AA691260|ARH2|Arh|Arh1|FHCB1|FHCB2	low density lipoprotein receptor adaptor protein 1	protein-coding
MACS_peak_8841	chr5	129104296	129110957	+	2881	NA	exon (NM_175284, exon 1 of 1)	exon (NM_175284, exon 1 of 1)	645	NM_175284	93897	Mm.197628	NM_175284	ENSMUSG00000081683	Fzd10	Fz-10	frizzled homolog 10 (Drosophila)	protein-coding
MACS_peak_2732	chr13	22072066	22075775	+	2881	NA	exon (NM_001162928, exon 1 of 1)	exon (NM_001162928, exon 1 of 1)	857	NM_001162929	195236	Mm.204664	NM_001162928	ENSMUSG00000016982	Pom121l2	Gm24	POM121 membrane glycoprotein-like 2 (rat)	protein-coding
MACS_peak_4745	chr17	37332585	37335511	+	2881	NA	exon (NM_001011518, exon 1 of 1)	exon (NM_001011518, exon 1 of 1)	863	NM_001011518	258219	Mm.377382	NM_001011518	ENSMUSG00000043827	Olfr94	MOR256-32P	olfactory receptor 94	protein-coding
MACS_peak_836	chr10	30561876	30566671	+	2881	NA	Intergenic	Intergenic	-1684	NM_013904	15214	Mm.103573	NM_013904	ENSMUSG00000019789	Hey2	CHF1|Herp1|Hrt2|bHLHb32|hesr2	hairy/enhancer-of-split related with YRPW motif 2	protein-coding
MACS_peak_10137	chr7	107152612	107158676	+	2881	NA	intron (NM_133709, intron 1 of 10)	intron (NM_133709, intron 1 of 10)	730	NM_133709	69121	Mm.285295	NM_133709	ENSMUSG00000030732	Chrdl2	1810022C01Rik|Chl2	chordin-like 2	protein-coding
MACS_peak_110	chr1	40736657	40738978	+	2876	NA	promoter-TSS (NM_001033289)	promoter-TSS (NM_001033289)	-740	NM_001033289	226999	Mm.256414	NM_001033289	ENSMUSG00000026062	Slc9a2	2210416H12Rik|4932415O19Rik|AV333884|NHE2	solute carrier family 9 (sodium/hydrogen exchanger), member 2	protein-coding
MACS_peak_8566	chr5	93471990	93476087	+	2862	NA	promoter-TSS (NM_175270)	promoter-TSS (NM_175270)	10	NM_175270	78088	Mm.245085	NM_175270	ENSMUSG00000045314	Sowahb	5730467H21Rik|Ankrd56	sosondowah ankyrin repeat domain family member B	protein-coding
MACS_peak_6875	chr3	37247268	37248825	+	2848	NA	intron (NM_008006, intron 1 of 2)	intron (NM_008006, intron 1 of 2)	471	NM_008006	14173	Mm.473689	NM_008006	ENSMUSG00000037225	Fgf2	Fgf-2|Fgfb|bFGF	fibroblast growth factor 2	protein-coding
MACS_peak_4561	chr17	23875826	23883572	+	2848	NA	exon (NM_028416, exon 7 of 10)	exon (NM_028416, exon 7 of 10)	-2402	NM_023824	76498	Mm.491253	NM_023824	ENSMUSG00000023909	Paqr4	1500004C10Rik	progestin and adipoQ receptor family member IV	protein-coding
MACS_peak_2116	chr11	113925928	113927993	+	2848	NA	intron (NM_172800, intron 1 of 44)	intron (NM_172800, intron 1 of 44)	305	NM_172800	237979	Mm.130504	NM_172800	ENSMUSG00000041592	Sdk2	4632412F08Rik|5330435L01Rik|Sdk-2|mKIAA1514	sidekick homolog 2 (chicken)	protein-coding
MACS_peak_6082	chr2	61640842	61645736	+	2848	NA	exon (NM_009322, exon 1 of 6)	exon (NM_009322, exon 1 of 6)	779	NM_009322	21375	Mm.308525	NM_009322	ENSMUSG00000035033	Tbr1	-	T-box brain gene 1	protein-coding
MACS_peak_6835	chr3	30402867	30416150	+	2848	NA	Intergenic	Intergenic	-1099	NM_021442	14013	Mm.56965	NM_007963	ENSMUSG00000027684	Mecom	D630039M04Rik|Evi-1|Evi1|Jbo|Mds|Mds1|Mds1-Evi1|Prdm3|Znfpr1b1	MDS1 and EVI1 complex locus	protein-coding
MACS_peak_1663	chr11	70042021	70044627	+	2848	NA	promoter-TSS (NM_007528)	promoter-TSS (NM_007528)	-24	NM_007528	12029	Mm.12930	NM_007528	ENSMUSG00000000317	Bcl6b	Bazf	B cell CLL/lymphoma 6, member B	protein-coding
MACS_peak_7465	chr4	46613419	46615302	+	2848	NA	intron (NM_001164804, intron 1 of 11)	CpG	441	NM_001164804	107684	Mm.416311	NM_178893	ENSMUSG00000028337	Coro2a	9030208C03Rik|AI563590|IR10	coronin, actin binding protein 2A	protein-coding
MACS_peak_8835	chr5	127720942	127723511	+	2843	NA	promoter-TSS (NM_175432)	promoter-TSS (NM_175432)	30	NM_175432	208213	Mm.444235	NM_175432	ENSMUSG00000034324	Tmem132c	2810482M11Rik|3230401P16|4632425D07Rik	transmembrane protein 132C	protein-coding
MACS_peak_1284	chr10	128368658	128373136	+	2843	NA	promoter-TSS (NM_008398)	promoter-TSS (NM_008398)	28	NM_008398	16404	Mm.179747	NM_008398	ENSMUSG00000025348	Itga7	[a]7|alpha7	integrin alpha 7	protein-coding
MACS_peak_8487	chr5	73397967	73400286	+	2843	NA	intron (NM_173403, intron 1 of 2)	intron (NM_173403, intron 1 of 2)	983	NM_173403	231290	Mm.491387	NM_173403		Slc10a4	E130304D01	solute carrier family 10 (sodium/bile acid cotransporter family), member 4	protein-coding
MACS_peak_8941	chr5	140382913	140390677	+	2843	NA	intron (NM_175522, intron 1 of 1)	intron (NM_175522, intron 1 of 1)	2898	NM_175522	243312	Mm.237102	NM_175522	ENSMUSG00000048988	Elfn1	A930017N06Rik|AI197272|Ppp1r28	leucine rich repeat and fibronectin type III, extracellular 1	protein-coding
MACS_peak_3537	chr14	78706381	78708125	+	2843	NA	intron (NM_011613, intron 1 of 4)	intron (NM_011613, intron 1 of 4)	597	NM_011613	21943	Mm.249221	NM_011613	ENSMUSG00000022015	Tnfsf11	Ly109l|ODF|OPG|OPGL|RANKL|Trance	tumor necrosis factor (ligand) superfamily, member 11	protein-coding
MACS_peak_3184	chr13	115245859	115248952	+	2843	NA	intron (NM_008046, intron 1 of 5)	intron (NM_008046, intron 1 of 5)	1754	NM_001301373	14313	Mm.4913	NM_008046	ENSMUSG00000021765	Fst	AL033346|FS	follistatin	protein-coding
MACS_peak_7987	chr4	138629049	138632942	+	2843	NA	promoter-TSS (NM_021358)	promoter-TSS (NM_021358)	-291	NM_021358	15565	Mm.291096	NM_021358	ENSMUSG00000028747	Htr6	5-HT6	5-hydroxytryptamine (serotonin) receptor 6	protein-coding
MACS_peak_5683	chr19	46390063	46394126	+	2843	NA	intron (NM_028627, intron 11 of 17)	CpG	9552	NM_028627	73728	Mm.268532	NM_028627	ENSMUSG00000037126	Psd	1110007H17Rik|A930015K15|Efa6|Efa6a|Psdl|mKIAA2011	pleckstrin and Sec7 domain containing	protein-coding
MACS_peak_10641	chr8	42218065	42219865	+	2843	NA	5' UTR (NM_001005863, exon 1 of 14)	5' UTR (NM_001005863, exon 1 of 14)	115	NM_001005863	102103	Mm.149438	NM_001005863	ENSMUSG00000045636	Mtus1	AI481402|ATBP135|Atip1|B430010I23Rik|B430305I03Rik|C85752|Cctsg1-440|MD44|MTSG1|mKIAA1288	mitochondrial tumor suppressor 1	protein-coding
MACS_peak_1197	chr10	115020828	115025573	+	2795	NA	intron (NM_010195, intron 1 of 17)	intron (NM_010195, intron 1 of 17)	1636	NM_010195	14160	Mm.42103	NM_010195	ENSMUSG00000020140	Lgr5	FEX|Gpr49	leucine rich repeat containing G protein coupled receptor 5	protein-coding
MACS_peak_4651	chr17	31772938	31774896	+	2795	NA	intron (NM_144855, intron 1 of 16)	CpG	233	NM_144855	12411	Mm.206417	NM_144855	ENSMUSG00000024039	Cbs	AI047524|AI303044|HIP4	cystathionine beta-synthase	protein-coding
MACS_peak_10034	chr7	82452627	82454016	+	2795	NA	promoter-TSS (NR_045814)	promoter-TSS (NR_045814)	-49	NM_001109753	64176	Mm.273082	NM_153579	ENSMUSG00000053025	Sv2b	A830038F04Rik|AI850768|mKIAA0735	synaptic vesicle glycoprotein 2 b	protein-coding
MACS_peak_5253	chr18	67248039	67249606	+	2795	NA	intron (NM_177137, intron 1 of 11)	intron (NM_177137, intron 1 of 11)	870	NM_177137	14680	Mm.440746	NM_010307	ENSMUSG00000024524	Gnal	2610011C15Rik|9630020G10Rik|Galphaolf|Gna10|Golf	guanine nucleotide binding protein, alpha stimulating, olfactory type	protein-coding
MACS_peak_6306	chr2	118198540	118200092	+	2795	NA	promoter-TSS (NM_201367)	promoter-TSS (NM_201367)	-161	NM_201367	381413	Mm.70979	NM_201367	ENSMUSG00000040133	Gpr176	Gm1012	G protein-coupled receptor 176	protein-coding
MACS_peak_2565	chr12	106245507	106249336	+	2795	NA	intron (NM_172500, intron 1 of 16)	intron (NM_172500, intron 1 of 16)	598	NM_172500	212073	Mm.212688	NM_172500	ENSMUSG00000054150	Syne3	nesprin-3	spectrin repeat containing, nuclear envelope family member 3	protein-coding
MACS_peak_2933	chr13	58008366	58009644	+	2795	NA	intron (NM_001166464, intron 1 of 10)	CpG	688	NM_009262	20745	Mm.379020	NM_009262		Spock1	Spock|Ticn1|testican	sparc/osteonectin, cwcv and kazal-like domains proteoglycan 1	protein-coding
MACS_peak_1717	chr11	75606978	75611054	+	2795	NA	intron (NM_007873, intron 1 of 8)	CpG	543	NM_007873	13447	Mm.5137	NM_007873	ENSMUSG00000020848	Doc2b	-	double C2, beta	protein-coding
MACS_peak_7132	chr3	98231727	98233588	+	2795	NA	3' UTR (NM_172863, exon 3 of 3)	3' UTR (NM_172863, exon 3 of 3)	46253	NM_172863	242109	Mm.358911	NM_172863	ENSMUSG00000050064	Zfp697	9430053K19|AI467503|Znf697	zinc finger protein 697	protein-coding
MACS_peak_6229	chr2	94083550	94087851	+	2795	NA	Intergenic	Intergenic	-4090	NR_029752	723953		NR_029752	miRBase:MI0000585	Mir129-2	Mirn129-2	microRNA 129-2	ncRNA
MACS_peak_2204	chr11	118947885	118949149	+	2795	NA	promoter-TSS (NM_007625)	promoter-TSS (NM_007625)	-966	NM_007625	12418	Mm.268070	NM_007625	ENSMUSG00000039989	Cbx4	MPc2|PC2	chromobox 4	protein-coding
MACS_peak_1672	chr11	70352745	70355103	+	2795	NA	5' UTR (NM_008876, exon 1 of 25)	5' UTR (NM_008876, exon 1 of 25)	258	NM_008876	18806	Mm.260177	NM_008876	ENSMUSG00000020828	Pld2	-	phospholipase D2	protein-coding
MACS_peak_2203	chr11	118941894	118945121	+	2795	NA	exon (NM_007625, exon 5 of 5)	exon (NM_007625, exon 5 of 5)	4044	NM_007625	12418	Mm.268070	NM_007625	ENSMUSG00000039989	Cbx4	MPc2|PC2	chromobox 4	protein-coding
MACS_peak_11727	chr9	116083520	116086324	+	2795	NA	promoter-TSS (NM_009371)	promoter-TSS (NM_009371)	-441	NM_009371	21813	Mm.172346	NM_009371	ENSMUSG00000032440	Tgfbr2	1110020H15Rik|AU042018|DNIIR|RIIDN|TBR-II|TbetaR-II|TbetaRII	transforming growth factor, beta receptor II	protein-coding
MACS_peak_1326	chr11	4116971	4119612	+	2795	NA	promoter-TSS (NM_028022)	promoter-TSS (NM_028022)	37	NM_028022	71962	Mm.7852	NM_028022	ENSMUSG00000020424	Gatsl3	2410008K03Rik	GATS protein-like 3	protein-coding
MACS_peak_11661	chr9	106556540	106558848	+	2795	NA	intron (NM_001160353, intron 1 of 5)	intron (NM_001160353, intron 1 of 5)	746	NM_001160353	108068	Mm.410822	NM_001160353	ENSMUSG00000023192	Grm2	4930441L02Rik|Gprc1b|mGluR2|mGluR7	glutamate receptor, metabotropic 2	protein-coding
MACS_peak_6895	chr3	51161244	51164247	+	2795	NA	Intergenic	CpG	-18179	NM_023502	69257	Mm.131038	NM_023502	ENSMUSG00000037174	Elf2	2610036A20Rik|A230104O07Rik|AW111824|BB183398|EU32|NERF|NERF-1A|NERF-1B|NERF-2	E74-like factor 2	protein-coding
MACS_peak_3247	chr14	22838229	22840423	+	2795	NA	intron (NM_028275, intron 1 of 6)	intron (NM_028275, intron 1 of 6)	392	NM_028275	76633	Mm.489898	NM_028275	ENSMUSG00000063458	1700112E06Rik	2700009F18Rik|Oca7	RIKEN cDNA 1700112E06 gene	protein-coding
MACS_peak_430	chr1	107676085	107678839	+	2795	NA	intron (NM_009399, intron 1 of 9)	intron (NM_009399, intron 1 of 9)	162	NM_009399	21934	Mm.6251	NM_009399	ENSMUSG00000026321	Tnfrsf11a	Ly109|ODFR|OFE|Rank|TRANCE-R|mRANK	tumor necrosis factor receptor superfamily, member 11a, NFKB activator	protein-coding
MACS_peak_7472	chr4	47218963	47222560	+	2795	NA	promoter-TSS (NM_009928)	promoter-TSS (NM_009928)	-123	NM_009928	12819	Mm.233547	NM_009928	ENSMUSG00000028339	Col15a1	-	collagen, type XV, alpha 1	protein-coding
MACS_peak_5037	chr18	20715887	20718031	+	2795	NA	intron (NM_007883, intron 1 of 14)	CpG	342	NM_007883	13511	Mm.345891	NM_007883	ENSMUSG00000044393	Dsg2	AA408168|D18Ertd293e	desmoglein 2	protein-coding
MACS_peak_8883	chr5	136363026	136366282	+	2795	NA	intron (NM_013560, intron 1 of 2)	intron (NM_013560, intron 1 of 2)	865	NM_013560	15507	Mm.13849	NM_013560	ENSMUSG00000004951	Hspb1	27kDa|Hsp25	heat shock protein 1	protein-coding
MACS_peak_4490	chr17	3083670	3084576	+	2778	NA	promoter-TSS (NR_003519)	promoter-TSS (NR_003519)	60	NR_003519	328734	Mm.335641	NR_003519		Pisd-ps2	D030013I16Rik	phosphatidylserine decarboxylase, pseudogene 2	pseudo
MACS_peak_6358	chr2	122590118	122591636	+	2750	NA	promoter-TSS (NM_001162503)	promoter-TSS (NM_001162503)	-218	NM_001162503	59010	Mm.28986	NM_021507	ENSMUSG00000005803	Sqrdl	0610039J17Rik|4930557M22Rik	sulfide quinone reductase-like (yeast)	protein-coding
MACS_peak_6	chr1	5905502	5908110	+	2750	NA	exon (NM_010342, exon 1 of 1)	exon (NM_010342, exon 1 of 1)	673	NM_010342	226304	Mm.291110	NM_010342	ENSMUSG00000033774	Npbwr1	Gpr7|Nbpwr1	neuropeptides B/W receptor 1	protein-coding
MACS_peak_12001	chrX	137132274	137135958	+	2750	NA	intron (NM_001077364, intron 1 of 3)	CpG	945	NM_001077364	14605	Mm.22216	NM_010286	ENSMUSG00000031431	Tsc22d3	DIP|Dsip1|Gilz|TSC-22R|Tilz3	TSC22 domain family, member 3	protein-coding
MACS_peak_10244	chr7	128876519	128878744	+	2750	NA	promoter-TSS (NM_011326)	promoter-TSS (NM_011326)	-390	NM_011326	20278	Mm.35247	NM_011326	ENSMUSG00000000216	Scnn1g	[g]ENaC	sodium channel, nonvoltage-gated 1 gamma	protein-coding
MACS_peak_6266	chr2	105525033	105533059	+	2750	NA	intron (NM_013627, intron 7 of 12)	intron (NM_013627, intron 7 of 12)	12760	NM_001244202	18508	Mm.3608	NM_013627	ENSMUSG00000027168	Pax6	1500038E17Rik|AEY11|Dey|Gsfaey11|Pax-6|Sey	paired box 6	protein-coding
MACS_peak_8007	chr4	140793995	140799916	+	2750	NA	Intergenic	Intergenic	-1844	NM_172520	213649	Mm.134460	NM_172520	ENSMUSG00000028919	Arhgef19	6030432F23|6430573B13Rik|WGEF	Rho guanine nucleotide exchange factor (GEF) 19	protein-coding
MACS_peak_1371	chr11	12363745	12366005	+	2750	NA	promoter-TSS (NM_001282993)	promoter-TSS (NM_001282993)	88	NM_172496	12808	Mm.22847	NM_172496	ENSMUSG00000020173	Cobl	-	cordon-bleu WH2 repeat	protein-coding
MACS_peak_6859	chr3	34538074	34543529	+	2750	NA	intron (NR_015580, intron 3 of 4)	intron (NR_015580, intron 3 of 4)	3415	NR_035433	100316679		NR_035433		Mir1897	Mirn1897|mmu-mir-1897	microRNA 1897	ncRNA
MACS_peak_6936	chr3	63099235	63101221	+	2750	NA	5' UTR (NM_001289463, exon 1 of 23)	5' UTR (NM_001289463, exon 1 of 23)	211	NM_001289463	17380	Mm.296022	NM_008604	ENSMUSG00000027820	Mme	6030454K05Rik|C85356|CALLA|CD10|NEP|SFE	membrane metallo endopeptidase	protein-coding
MACS_peak_4500	chr17	5939546	5942891	+	2750	NA	promoter-TSS (NM_001113353)	promoter-TSS (NM_001113353)	-62	NM_001113353	20975	Mm.236068	NM_011523	ENSMUSG00000023805	Synj2	AI481647|SJ2|mKIAA0348	synaptojanin 2	protein-coding
MACS_peak_5319	chr18	81177140	81179958	+	2750	NA	intron (NM_178280, intron 1 of 3)	intron (NM_178280, intron 1 of 3)	4768	NM_178280	20689	Mm.215917	NM_178280	ENSMUSG00000024565	Sall3	B130022O04Rik|Msal|Msal-1|Sal|Salt|Spalt	sal-like 3 (Drosophila)	protein-coding
MACS_peak_86	chr1	34805479	34809518	+	2750	NA	Intergenic	CpG	-51069	NM_183019	226970	Mm.41604	NM_183019	ENSMUSG00000037509	Arhgef4	9330140K16Rik|Asef|ENSMUSG00000070955	Rho guanine nucleotide exchange factor (GEF) 4	protein-coding
MACS_peak_11238	chr9	30728499	30731002	+	2750	NA	exon (NM_001024139, exon 1 of 8)	exon (NM_001024139, exon 1 of 8)	287	NM_001024139	235130	Mm.65867	NM_001024139	ENSMUSG00000033453	Adamts15	-	a disintegrin-like and metallopeptidase (reprolysin type) with thrombospondin type 1 motif, 15	protein-coding
MACS_peak_2956	chr13	63670770	63676132	+	2750	NA	Intergenic	Intergenic	-6623	NM_008957	19206	Mm.228798	NM_008957	ENSMUSG00000021466	Ptch1	A230106A15Rik|Ptc|Ptc1|Ptch|mes	patched homolog 1	protein-coding
MACS_peak_6490	chr2	149654984	149658999	+	2750	NA	intron (NM_001085521, intron 1 of 3)	CpG	472	NM_001085521	433485	Mm.330649	NM_001085521	ENSMUSG00000074736	Syndig1	AW123113|DSPC2|Gm14134|H2C20orf39|OTTMUSG00000015750|Tmem90b	synapse differentiation inducing 1	protein-coding
MACS_peak_3279	chr14	28147081	28150848	+	2750	NA	promoter-TSS (NM_001289687)	promoter-TSS (NM_001289687)	-259	NM_001289687	71704	Mm.248606	NM_027871	ENSMUSG00000021895	Arhgef3	1200004I24Rik|9830169H03Rik|C76747|Xpln	Rho guanine nucleotide exchange factor (GEF) 3	protein-coding
MACS_peak_8532	chr5	77834230	77837847	+	2750	NA	intron (NM_001159518, intron 1 of 5)	intron (NM_001159518, intron 1 of 5)	1032	NM_001159518	29817	Mm.233470	NM_008048	ENSMUSG00000036256	Igfbp7	AGM|Fstl2|Mac25	insulin-like growth factor binding protein 7	protein-coding
MACS_peak_6992	chr3	85690100	85692879	+	2750	NA	promoter-TSS (NM_177130)	promoter-TSS (NM_177130)	-49	NM_177130	320302	Mm.482978	NM_177130	ENSMUSG00000031286	Glt28d2	4732486J07Rik|Glt28d1l	glycosyltransferase 28 domain containing 2	protein-coding
MACS_peak_1359	chr11	9017519	9020530	+	2750	NA	intron (NM_001159402, intron 1 of 8)	intron (NM_001159402, intron 1 of 8)	514	NM_001159402	22271	Mm.4610	NM_009477	ENSMUSG00000020407	Upp1	AI325217|UPase|UdRPase|Up|Upp	uridine phosphorylase 1	protein-coding
MACS_peak_33	chr1	14743621	14748357	+	2750	NA	promoter-TSS (NM_010827)	promoter-TSS (NM_010827)	58	NM_010827	17681	Mm.5820	NM_010827	ENSMUSG00000025930	Msc	MyoR|bHLHa22	musculin	protein-coding
MACS_peak_5810	chr2	12930635	12934181	+	2750	NA	promoter-TSS (NM_153155)	promoter-TSS (NM_153155)	83	NM_153155	227580	Mm.229322	NM_153155		C1ql3	1110065A22Rik|AI661623|C1ql|C1qtnf13|CTRP13|K100	C1q-like 3	protein-coding
MACS_peak_4013	chr15	97997879	98000685	+	2750	NA	exon (NM_177716, exon 1 of 1)	exon (NM_177716, exon 1 of 1)	1045	NM_177716	239650	Mm.54140	NM_177716	ENSMUSG00000029875	Ccdc184	5630400A08|AI836003	coiled-coil domain containing 184	protein-coding
MACS_peak_6440	chr2	143370900	143375246	+	2750	NA	non-coding (NR_040354, exon 1 of 3)	non-coding (NR_040354, exon 1 of 3)	500	NR_040354	378776	Mm.381216	NR_040354	ENSMUSG00000086171	Pcsk2os1	C630020P19Rik	proprotein convertase subtilisin/kexin type 2, opposite strand 1	ncRNA
MACS_peak_6210	chr2	91898371	91901783	+	2750	NA	Intergenic	CpG	-35750	NM_011957	26427	Mm.10353	NM_011957	ENSMUSG00000027230	Creb3l1	Oasis	cAMP responsive element binding protein 3-like 1	protein-coding
MACS_peak_2464	chr12	77809210	77814377	+	2750	NA	promoter-TSS (NM_013675)	promoter-TSS (NM_013675)	-259	NM_013675	20741	Mm.32881	NM_013675	ENSMUSG00000021061	Sptb	AI842465|D330027P03Rik|Gm1301|Spnb-1|Spnb1|ja|jaundiced|mKIAA4219	spectrin beta, erythrocytic	protein-coding
MACS_peak_8794	chr5	121097939	121101404	+	2750	NA	intron (NM_001281999, intron 1 of 20)	intron (NM_001281999, intron 1 of 20)	474	NM_001281999	19415	Mm.41209	NM_013832	ENSMUSG00000029602	Rasal1	MRASAL	RAS protein activator like 1 (GAP1 like)	protein-coding
MACS_peak_8950	chr5	141717950	141720822	+	2750	NA	intron (NM_177879, intron 1 of 44)	intron (NM_177879, intron 1 of 44)	1898	NM_177879	330222	Mm.151931	NM_177879	ENSMUSG00000039683	Sdk1	5330440E10|6720466O15Rik	sidekick homolog 1 (chicken)	protein-coding
MACS_peak_3395	chr14	55191587	55197371	+	2750	NA	intron (NM_010590, intron 1 of 7)	intron (NM_010590, intron 1 of 7)	2019	NM_010590	16475	Mm.100253	NM_010590	ENSMUSG00000022178	Ajuba	Jub	ajuba LIM protein	protein-coding
MACS_peak_5582	chr19	42054837	42058391	+	2750	NA	promoter-TSS (NM_028152)	promoter-TSS (NM_028152)	361	NM_145500	226122	Mm.22948	NM_145500	ENSMUSG00000025171	Ubtd1	BC016129	ubiquitin domain containing 1	protein-coding
MACS_peak_3613	chr14	119253645	119257284	+	2750	NA	intron (NM_021386, intron 1 of 4)	intron (NM_021386, intron 1 of 4)	1292	NM_001160099	58187	Mm.390755	NM_021386	ENSMUSG00000022132	Cldn10	6720456I16Rik|Cldn10a|Cldn10b|D14Ertd728e	claudin 10	protein-coding
MACS_peak_1587	chr11	60835723	60838425	+	2750	NA	intron (NM_001267593, intron 1 of 1)	intron (NM_001267593, intron 1 of 1)	1008	NM_001267593	16515	Mm.4970	NM_010603		Kcnj12	IRK-2|IRK2|Kir2.2|MB-IRK2	potassium inwardly-rectifying channel, subfamily J, member 12	protein-coding
MACS_peak_3315	chr14	34131098	34135345	+	2750	NA	intron (NM_153800, intron 4 of 10)	CpG	103212	NM_153800	239027	Mm.318350	NM_153800	ENSMUSG00000063506	Arhgap22	B230341L19Rik|RHOGAP2|p68RacGAP	Rho GTPase activating protein 22	protein-coding
MACS_peak_6703	chr2	172763138	172767843	+	2741	NA	exon (NM_007557, exon 1 of 7)	exon (NM_007557, exon 1 of 7)	332	NM_007557	12162	Mm.595	NM_007557	ENSMUSG00000008999	Bmp7	OP1	bone morphogenetic protein 7	protein-coding
MACS_peak_3859	chr15	78993024	78995760	+	2741	NA	intron (NM_011437, intron 1 of 3)	intron (NM_011437, intron 1 of 3)	528	NM_011437	20665	Mm.276739	NM_011437	ENSMUSG00000033006	Sox10	Dom|Sox21	SRY (sex determining region Y)-box 10	protein-coding
MACS_peak_4507	chr17	6488332	6490104	+	2741	NA	Intergenic	Intergenic	-39076	NR_033520	547127	Mm.297552	NM_001045538		Tmem181b-ps	Tmem181b	transmembrane protein 181B, pseudogene	pseudo
MACS_peak_8328	chr5	28530676	28537593	+	2741	NA	intron (NM_175651, intron 2 of 2)	intron (NM_175651, intron 2 of 2)	30279	NM_175651	269637	Mm.68286	NM_175651	ENSMUSG00000044681	Cnpy1	1500012D20Rik|9630008K15Rik|AI853839	canopy 1 homolog (zebrafish)	protein-coding
MACS_peak_6428	chr2	133378120	133380890	+	2741	NA	intron (NM_007553, intron 1 of 2)	intron (NM_007553, intron 1 of 2)	1610	NM_007553	12156	Mm.103205	NM_007553	ENSMUSG00000027358	Bmp2	AI467020|Bmp2a	bone morphogenetic protein 2	protein-coding
MACS_peak_3159	chr13	109003430	109005894	+	2727	NA	promoter-TSS (NM_029001)	promoter-TSS (NM_029001)	64	NM_029001	74559	Mm.286127	NM_029001	ENSMUSG00000021696	Elovl7	9130013K24Rik|AI840082	ELOVL family member 7, elongation of long chain fatty acids (yeast)	protein-coding
MACS_peak_5049	chr18	24624320	24626295	+	2727	NA	Intergenic	Intergenic	-4065	NM_026529	68046	Mm.276574	NM_026529	ENSMUSG00000024273	2700062C07Rik	AI195775|C87515	RIKEN cDNA 2700062C07 gene	protein-coding
MACS_peak_6178	chr2	80284649	80287898	+	2727	NA	intron (NM_011356, intron 1 of 5)	intron (NM_011356, intron 1 of 5)	1280	NM_011356	20378	Mm.427436	NM_011356	ENSMUSG00000027004	Frzb	Frp|Sfrp3|frezzled|fritz|frzb-1	frizzled-related protein	protein-coding
MACS_peak_2966	chr13	64374601	64377714	+	2727	NA	5' UTR (NM_172587, exon 1 of 14)	5' UTR (NM_172587, exon 1 of 14)	139	NM_172587	218294	Mm.25335	NM_172587	ENSMUSG00000033102	Cdc14b	2810432N10Rik|A530086E13Rik|AA472821|CDC14B3|Cdc14B1	CDC14 cell division cycle 14B	protein-coding
MACS_peak_7865	chr4	129984527	129988037	+	2727	NA	intron (NM_010174, intron 1 of 3)	intron (NM_010174, intron 1 of 3)	260	NM_010174	14077	Mm.388886	NM_010174		Fabp3	Fabph-1|Fabph-4|Fabph1|Fabph4|H-FABP|Mdgi	fatty acid binding protein 3, muscle and heart	protein-coding
MACS_peak_7506	chr4	62140977	62142131	+	2727	NA	intron (NM_138653, intron 1 of 6)	intron (NM_138653, intron 1 of 6)	453	NM_138653	192120	Mm.29808	NM_138653	ENSMUSG00000028392	Bspry	-	B-box and SPRY domain containing	protein-coding
MACS_peak_11460	chr9	63863991	63869653	+	2727	NA	intron (NM_008542, intron 1 of 3)	intron (NM_008542, intron 1 of 3)	3044	NM_008542	17130	Mm.325757	NM_008542	ENSMUSG00000036867	Smad6	Madh6|b2b390Clo	SMAD family member 6	protein-coding
MACS_peak_10380	chr7	148477019	148481637	+	2727	NA	intron (NM_007878, intron 1 of 3)	intron (NM_007878, intron 1 of 3)	1423	NM_007878	13491	Mm.41075	NM_007878	ENSMUSG00000025496	Drd4	AW125663|D4R|Drd-4	dopamine receptor D4	protein-coding
MACS_peak_8715	chr5	115639906	115645071	+	2727	NA	Intergenic	Intergenic	-6358	NM_013879	29867	Mm.38551	NM_013879	ENSMUSG00000029544	Cabp1	caldendrin	calcium binding protein 1	protein-coding
MACS_peak_10143	chr7	108159408	108162294	+	2727	NA	promoter-TSS (NM_008773)	promoter-TSS (NM_008773)	-346	NM_008773	18442	Mm.3000	NM_008773	ENSMUSG00000032860	P2ry2	P2U1|P2Y2	purinergic receptor P2Y, G-protein coupled 2	protein-coding
MACS_peak_3598	chr14	118632803	118637348	+	2727	NA	5' UTR (NM_177753, exon 1 of 1)	5' UTR (NM_177753, exon 1 of 1)	1177	NM_177753	223227	Mm.70950	NM_177753	ENSMUSG00000061517	Sox21	Sox25	SRY (sex determining region Y)-box 21	protein-coding
MACS_peak_3888	chr15	81523103	81525740	+	2693	NA	exon (NM_001164320, exon 3 of 6)	exon (NM_001164320, exon 3 of 6)	3296	NM_001164320	214685	Mm.393287	NM_001164320	ENSMUSG00000063765	Chadl	AY100452|D930017K21Rik	chondroadherin-like	protein-coding
MACS_peak_3328	chr14	35473880	35475741	+	2693	NA	Intergenic	Intergenic	-12304	NM_001004436	218914	Mm.27957	NM_001004436	ENSMUSG00000041408	Wapal	A530089A20Rik|BC037674|DIF-2|FOE|WAPL	wings apart-like homolog (Drosophila)	protein-coding
MACS_peak_6507	chr2	151968426	151970952	+	2693	NA	exon (NM_009328, exon 1 of 2)	exon (NM_009328, exon 1 of 2)	344	NM_009328	21407	Mm.3881	NM_009328	ENSMUSG00000068079	Tcf15	Meso1|bHLH-EC2	transcription factor 15	protein-coding
MACS_peak_2200	chr11	118915865	118917882	+	2678	NA	Intergenic	Intergenic	-14646	NM_013926	30951	Mm.99953	NM_013926	ENSMUSG00000025578	Cbx8	Pc3	chromobox 8	protein-coding
MACS_peak_6112	chr2	70955199	70957558	+	2667	NA	intron (NM_028593, intron 1 of 3)	CpG	267	NM_028593	73649	Mm.45435	NM_028593	ENSMUSG00000027015	Cybrd1	2210407P13Rik|Dcytb	cytochrome b reductase 1	protein-coding
MACS_peak_5007	chr18	10705251	10706497	+	2667	NA	promoter-TSS (NR_045379)	promoter-TSS (NR_045379)	820	NM_134130	106861	Mm.273108	NM_134130	ENSMUSG00000002475	Abhd3	AA675331|LABH3	abhydrolase domain containing 3	protein-coding
MACS_peak_4086	chr15	102186046	102190466	+	2667	NA	3' UTR (NM_130458, exon 2 of 2)	3' UTR (NM_130458, exon 2 of 2)	-7066	NM_153416	223921	Mm.352946	NM_153416	ENSMUSG00000036678	Aaas	AAA|ADRACALA|D030041N15Rik|GL003	achalasia, adrenocortical insufficiency, alacrimia	protein-coding
MACS_peak_1791	chr11	82763885	82767034	+	2667	NA	promoter-TSS (NM_183201)	promoter-TSS (NM_183201)	-145	NM_183201	327978	Mm.42147	NM_183201	ENSMUSG00000054404	Slfn5	AI956840	schlafen 5	protein-coding
MACS_peak_8188	chr4	154770545	154772573	+	2667	NA	intron (NM_008072, intron 1 of 8)	intron (NM_008072, intron 1 of 8)	619	NM_008072	14403	Mm.388925	NM_008072	ENSMUSG00000029054	Gabrd	AI853201	gamma-aminobutyric acid (GABA) A receptor, subunit delta	protein-coding
MACS_peak_8854	chr5	130924988	130927285	+	2667	NA	intron (NM_021371, intron 1 of 5)	intron (NM_021371, intron 1 of 5)	1474	NM_021371	140904	Mm.40875	NM_021371	ENSMUSG00000060371	Caln1	9630012C17Rik|Cabp8	calneuron 1	protein-coding
MACS_peak_4877	chr17	69787782	69791404	+	2667	NA	intron (NM_001145192, intron 1 of 1)	(TC)n|Simple_repeat|Simple_repeat	927	NM_001145192	320722	Mm.400254	NM_001145192	ENSMUSG00000091636	A330050F15Rik	-	RIKEN cDNA A330050F15 gene	protein-coding
MACS_peak_3002	chr13	73672647	73675594	+	2667	NA	promoter-TSS (NM_010020)	promoter-TSS (NM_010020)	-75	NM_010020	13162	Mm.41993	NM_010020	ENSMUSG00000021609	Slc6a3	DAT|Dat1	solute carrier family 6 (neurotransmitter transporter, dopamine), member 3	protein-coding
MACS_peak_414	chr1	95131075	95133399	+	2667	NA	promoter-TSS (NM_172463)	promoter-TSS (NM_172463)	-237	NM_172463	208777	Mm.271897	NM_172463	ENSMUSG00000047793	Sned1	6720455I24Rik|AI197264|AI642697|D430044C15Rik|SST3|Snep	sushi, nidogen and EGF-like domains 1	protein-coding
MACS_peak_10623	chr8	36827058	36829832	+	2667	NA	Intergenic	Intergenic	61168	NM_027998	71908	Mm.37817	NM_027998	ENSMUSG00000055976	Cldn23	2310014B08Rik	claudin 23	protein-coding
MACS_peak_4608	chr17	27647157	27653605	+	2667	NA	Intergenic	CpG	-9903	NM_001291045	268934	Mm.358940	NM_001013385	ENSMUSG00000063239	Grm4	Gprc1d|mGluR4	glutamate receptor, metabotropic 4	protein-coding
MACS_peak_10084	chr7	89482652	89486600	+	2667	NA	intron (NM_001190374, intron 1 of 29)	CpG	422	NM_001190374	269959	Mm.65306	NM_001190374	ENSMUSG00000070469	Adamtsl3	9230119C12Rik|C130057K09|mKIAA1233	ADAMTS-like 3	protein-coding
MACS_peak_5355	chr19	3321766	3325460	+	2667	NA	intron (NM_013495, intron 1 of 18)	CpG	312	NM_013495	12894	Mm.18522	NM_013495	ENSMUSG00000024900	Cpt1a	C730027G07|CPTI|Cpt1	carnitine palmitoyltransferase 1a, liver	protein-coding
MACS_peak_1685	chr11	71946070	71951334	+	2667	NA	intron (NM_001081641, intron 1 of 18)	intron (NM_001081641, intron 1 of 18)	689	NM_001024927	327958	Mm.351793	NM_001024927	ENSMUSG00000040543	Pitpnm3	A330068P14Rik|AI848332|Ackr6|Gm880	PITPNM family member 3	protein-coding
MACS_peak_2978	chr13	69875876	69877725	+	2667	NA	intron (NM_001145162, intron 1 of 1)	intron (NM_001145162, intron 1 of 1)	1975	NM_001145162	76980	Mm.23960	NM_001145162	ENSMUSG00000052981	Ube2ql1	3110006E14Rik	ubiquitin-conjugating enzyme E2Q family-like 1	protein-coding
MACS_peak_10491	chr8	12427103	12431659	+	2667	NA	intron (NR_027975, intron 4 of 7)	intron (NR_027975, intron 4 of 7)	33862	NM_009233	20664	Mm.39088	NM_009233	ENSMUSG00000096014	Sox1	BB176347|Sox-1	SRY (sex determining region Y)-box 1	protein-coding
MACS_peak_8374	chr5	34063504	34066995	+	2667	NA	intron (NM_001163215, intron 2 of 17)	CpG	294	NM_001163217	14184	Mm.6904	NM_008010	ENSMUSG00000054252	Fgfr3	CD333|FR3|Fgfr-3|Flg-2|HBGFR|Mfr3|sam3	fibroblast growth factor receptor 3	protein-coding
MACS_peak_9666	chr7	19761798	19767205	+	2667	NA	Intergenic	(TCCCG)n|Simple_repeat|Simple_repeat	-2018	NM_001162996	72205	Mm.154121	NM_028153	ENSMUSG00000040811	Eml2	1600029N02Rik	echinoderm microtubule associated protein like 2	protein-coding
MACS_peak_3473	chr14	67253945	67257734	+	2667	NA	5' UTR (NM_013461, exon 2 of 4)	5' UTR (NM_013461, exon 2 of 4)	1751	NM_001271760	11549	Mm.57064	NM_013461	ENSMUSG00000045875	Adra1a	Adra1c	adrenergic receptor, alpha 1a	protein-coding
MACS_peak_2740	chr13	23376921	23380500	+	2667	NA	Intergenic	Intergenic	8491	NR_046038	74061	Mm.399501	NR_046038	ENSMUSG00000085122	4933404K08Rik	-	RIKEN cDNA 4933404K08 gene	ncRNA
MACS_peak_5812	chr2	13713816	13716513	+	2667	NA	promoter-TSS (NM_145838)	promoter-TSS (NM_145838)	-17	NM_145838	241230	Mm.330004	NM_145838	ENSMUSG00000003418	St8sia6	1700007J08Rik|AI314453|AI875066|ST8SiaVI|Siat8f	ST8 alpha-N-acetyl-neuraminide alpha-2,8-sialyltransferase 6	protein-coding
MACS_peak_9245	chr6	54275009	54279491	+	2667	NA	5' UTR (NM_030024, exon 1 of 2)	5' UTR (NM_030024, exon 1 of 2)	244	NM_030024	78004	Mm.41984	NM_030024	ENSMUSG00000045725	Prr15	E130201N16Rik|G90	proline rich 15	protein-coding
MACS_peak_5310	chr18	80491570	80493193	+	2667	NA	exon (NM_001190373, exon 4 of 4)	exon (NM_001190373, exon 4 of 4)	39336	NM_001164423	66943	Mm.29247	NM_025861	ENSMUSG00000034006	Pqlc1	2310009N05Rik|4933425L21Rik|5730564E11Rik|C78974	PQ loop repeat containing 1	protein-coding
MACS_peak_214	chr1	72917480	72923584	+	2667	NA	exon (NM_010518, exon 1 of 4)	exon (NM_010518, exon 1 of 4)	907	NM_010518	16011	Mm.405761	NM_010518	ENSMUSG00000026185	Igfbp5	AI256729|AW208790|IGFBP-5|IGFBP-5P	insulin-like growth factor binding protein 5	protein-coding
MACS_peak_1966	chr11	98178839	98191702	+	2631	NA	Intergenic	Intergenic	5689	NM_010895	18013	Mm.4814	NM_010895	ENSMUSG00000038255	Neurod2	Ndrf|bHLHa1	neurogenic differentiation 2	protein-coding
MACS_peak_8393	chr5	36100609	36102728	+	2631	NA	intron (NM_001177700, intron 1 of 16)	intron (NM_001177700, intron 1 of 16)	1139	NM_177678	231148	Mm.254446	NM_177678	ENSMUSG00000029095	Ablim2	AI606905|C230091L11	actin-binding LIM protein 2	protein-coding
MACS_peak_9126	chr6	31166049	31169117	+	2631	NA	intron (NR_110469, intron 1 of 3)	C-rich|Low_complexity|Low_complexity	891	NR_110470	232685	Mm.443019	NM_144555		Lincpint	MNCb-1768|Pint|linc-Pint	long intergenic non-protein coding RNA, Trp53 induced transcript	ncRNA
MACS_peak_8873	chr5	135582410	135585126	+	2631	NA	intron (NM_021455, intron 1 of 16)	intron (NM_021455, intron 1 of 16)	1007	NM_021455	58805	Mm.34213	NM_021455	ENSMUSG00000005373	Mlxipl	ChREBP|WS-bHLH|Wbscr14|bHLHd14	MLX interacting protein-like	protein-coding
MACS_peak_11676	chr9	107578125	107580131	+	2631	NA	intron (NM_008140, intron 5 of 8)	intron (NM_008140, intron 5 of 8)	2795	NM_008140	14685	Mm.284853	NM_008140	ENSMUSG00000034837	Gnat1	Gnat-1|Ird1|Ird2|Tralpha|irdc|irdr|transducin	guanine nucleotide binding protein, alpha transducing 1	protein-coding
MACS_peak_11714	chr9	113965622	113967975	+	2631	NA	intron (NM_001101510, intron 1 of 4)	CpG	326	NM_001101510	382111	Mm.376140	NM_001101510	ENSMUSG00000086596	Susd5	Gm1126	sushi domain containing 5	protein-coding
MACS_peak_1396	chr11	22757402	22760998	+	2631	NA	intron (NM_001169114, intron 1 of 1)	CpG	535	NM_016888	53625	Mm.395495	NM_016888	ENSMUSG00000051650	B3gnt2	AA408337|AA409404|AW260308|B3Galt6|B3gnt1|BGnT-1|BGnT-2|BGnT1|BGnT2|Beta3gnt	UDP-GlcNAc:betaGal beta-1,3-N-acetylglucosaminyltransferase 2	protein-coding
MACS_peak_10596	chr8	28370793	28372727	+	2621	NA	intron (NM_007918, intron 1 of 2)	intron (NM_007918, intron 1 of 2)	961	NM_007918	13685	Mm.6700	NM_007918	ENSMUSG00000031490	Eif4ebp1	4e-bp1|AA959816|PHAS-I	eukaryotic translation initiation factor 4E binding protein 1	protein-coding
MACS_peak_3179	chr13	114082502	114084552	+	2621	NA	Intergenic	CpG	83660	NM_023612	71690	Mm.38929	NM_023612	ENSMUSG00000042379	Esm1	0610042H23Rik|AV004503|ESM-1	endothelial cell-specific molecule 1	protein-coding
MACS_peak_4298	chr16	30600097	30602314	+	2621	NA	exon (NM_177632, exon 1 of 1)	exon (NM_177632, exon 1 of 1)	1396	NM_177632	224093	Mm.28244	NM_177632	ENSMUSG00000046546	Fam43a	Tuf1	family with sequence similarity 43, member A	protein-coding
MACS_peak_4003	chr15	97596687	97599499	+	2621	NA	promoter-TSS (NM_144850)	promoter-TSS (NM_144850)	4	NM_001177810	223864	Mm.24028	NM_144850	ENSMUSG00000022469	Rapgef3	2310016P22Rik|9330170P05Rik|Epac|Epac1	Rap guanine nucleotide exchange factor (GEF) 3	protein-coding
MACS_peak_5531	chr19	34547946	34550943	+	2621	NA	exon (NM_009890, exon 1 of 1)	exon (NM_009890, exon 1 of 1)	181	NM_009890	12642	Mm.30824	NM_009890	ENSMUSG00000050370	Ch25h	AI462618|m25OH	cholesterol 25-hydroxylase	protein-coding
MACS_peak_2273	chr12	25255367	25259867	+	2621	NA	intron (NM_001161406, intron 1 of 15)	intron (NM_001161406, intron 1 of 15)	465	NM_001161406	195733	Mm.263068	NM_145890	ENSMUSG00000020656	Grhl1	LBP-32|MGR|Tcfcp2l2	grainyhead-like 1 (Drosophila)	protein-coding
MACS_peak_5977	chr2	33433570	33440442	+	2621	NA	intron (NM_010725, intron 2 of 7)	intron (NM_010725, intron 2 of 7)	59025	NM_010725	16917	Mm.39825	NM_010725	ENSMUSG00000038765	Lmx1b	LMX1.1|LMX1.2	LIM homeobox transcription factor 1 beta	protein-coding
MACS_peak_1786	chr11	82199200	82204552	+	2621	NA	promoter-TSS (NM_023438)	promoter-TSS (NM_023438)	-526	NM_023438	270893	Mm.341593	NM_023438	ENSMUSG00000020701	Tmem132e	Gm644	transmembrane protein 132E	protein-coding
MACS_peak_7566	chr4	89190068	89191887	+	2621	NA	Intergenic	Intergenic	-163912	NM_175647	242523	Mm.130167	NM_175647	ENSMUSG00000043753	Dmrta1	Dmrt4	doublesex and mab-3 related transcription factor like family A1	protein-coding
MACS_peak_3229	chr14	18491705	18496332	+	2621	NA	intron (NM_001113417, intron 1 of 9)	intron (NM_001113417, intron 1 of 9)	544	NM_001113417	21834	Mm.32563	NM_009380	ENSMUSG00000021779	Thrb	Nr1a2|T3R[b]|T3Rbeta|Thrb1|Thrb2|c-erbAbeta	thyroid hormone receptor beta	protein-coding
MACS_peak_2045	chr11	102972346	102975857	+	2621	NA	TTS (NM_025988)	TTS (NM_025988)	-3538	NM_138753	192231	Mm.8763	NM_138753	ENSMUSG00000048878	Hexim1	7330426E13Rik|CLP-1|Clp1|HIS1	hexamethylene bis-acetamide inducible 1	protein-coding
MACS_peak_3417	chr14	57482668	57484453	+	2621	NA	Intergenic	Intergenic	-23072	NM_029498	76007	Mm.31417	NM_029498	ENSMUSG00000021945	Zmym2	5830413P05Rik|FIM|MYM|RAMP|SCLL|Zfp198|Znf198	zinc finger, MYM-type 2	protein-coding
MACS_peak_3728	chr15	38398595	38403400	+	2621	NA	Intergenic	Intergenic	19305	NR_105916	102465574		NR_105916		Mir6951	mmu-mir-6951	microRNA mir-6951	ncRNA
MACS_peak_2055	chr11	103508249	103515779	+	2621	NA	TTS (NM_001033212)	TTS (NM_001033212)	1191	NM_001033212	104582	Mm.44618	NM_001033212	ENSMUSG00000046215	Rprml	AW049332	reprimo-like	protein-coding
MACS_peak_11264	chr9	32497009	32505347	+	2621	NA	Intergenic	Intergenic	-2449	NM_011808	23871	Mm.292415	NM_011808	ENSMUSG00000032035	Ets1	AI196000|AI448617|D230050P06|Ets-1|Tpl1	E26 avian leukemia oncogene 1, 5' domain	protein-coding
MACS_peak_5003	chr18	9707263	9709728	+	2621	NA	intron (NM_130449, intron 1 of 9)	intron (NM_130449, intron 1 of 9)	849	NM_130449	140792	Mm.218571	NM_130449	ENSMUSG00000036103	Colec12	CL-P1|SRCL|Scara4	collectin sub-family member 12	protein-coding
MACS_peak_3734	chr15	39687959	39690041	+	2621	NA	promoter-TSS (NM_022722)	promoter-TSS (NM_022722)	16	NM_001164466	64705	Mm.275974	NM_022722	ENSMUSG00000022304	Dpys	1200017I10Rik|1300004I01Rik|DHP|DHPase	dihydropyrimidinase	protein-coding
MACS_peak_1376	chr11	16651010	16654394	+	2621	NA	intron (NM_007912, intron 1 of 15)	CpG	496	NM_007912	13649	Mm.8534	NM_007912	ENSMUSG00000020122	Egfr	9030024J15Rik|AI552599|Erbb|Errb1|Errp|Wa5|wa-2|wa2	epidermal growth factor receptor	protein-coding
MACS_peak_11576	chr9	89516015	89518322	+	2621	NA	intron (NM_153509, intron 1 of 3)	(CA)n|Simple_repeat|Simple_repeat	656	NM_153509	209743	Mm.242899	NM_153509	ENSMUSG00000039313	AF529169	DD1|Kiaa1024	cDNA sequence AF529169	protein-coding
MACS_peak_6255	chr2	104688446	104690128	+	2621	NA	exon (NM_178695, exon 2 of 6)	exon (NM_178695, exon 2 of 6)	720	NM_178695	228413	Mm.259609	NM_178695	ENSMUSG00000027171	Prrg4	9930111I18Rik|TMG4	proline rich Gla (G-carboxyglutamic acid) 4 (transmembrane)	protein-coding
MACS_peak_9382	chr6	91927381	91930800	+	2621	NA	Intergenic	CpG	-8014	NM_172731	232237	Mm.295740	NM_172731	ENSMUSG00000034037	Fgd5	C330025N11Rik|ZFYVE23|mFLJ00274	FYVE, RhoGEF and PH domain containing 5	protein-coding
MACS_peak_2702	chr13	13875099	13878803	+	2621	NA	intron (NM_010317, intron 1 of 3)	CpG	145	NM_010317	14706	Mm.215394	NM_010317	ENSMUSG00000021303	Gng4	-	guanine nucleotide binding protein (G protein), gamma 4	protein-coding
MACS_peak_6908	chr3	53458339	53462714	+	2621	NA	exon (NM_172862, exon 1 of 24)	exon (NM_172862, exon 1 of 24)	751	NM_172862	242022	Mm.38378	NM_172862	ENSMUSG00000037016	Frem2	6030440P17Rik|8430406N05Rik|Gm409|b2b1562Clo|my|ne|nv1	Fras1 related extracellular matrix protein 2	protein-coding
MACS_peak_6002	chr2	35137280	35139618	+	2621	NA	intron (NM_146120, intron 1 of 16)	intron (NM_146120, intron 1 of 16)	549	NM_146120	227753	Mm.21109	NM_146120	ENSMUSG00000026879	Gsn	ADF	gelsolin	protein-coding
MACS_peak_11712	chr9	112135604	112138851	+	2621	NA	5' UTR (NM_001177619, exon 1 of 11)	5' UTR (NM_001177619, exon 1 of 11)	118	NM_001177619	74100	Mm.297444	NM_028755	ENSMUSG00000032503	Arpp21	0710001E13Rik|AI853636|ARPP-21|D9Bwg1012e|R3hdm3|Tarpp	cyclic AMP-regulated phosphoprotein, 21	protein-coding
MACS_peak_8641	chr5	107001756	107004567	+	2621	NA	Intergenic	Intergenic	-115976	NM_001005477	104382	Mm.271593	NM_001005477	ENSMUSG00000034384	Barhl2	E130309B19Rik|MBH1	BarH-like 2 (Drosophila)	protein-coding
MACS_peak_11414	chr9	57543530	57545547	+	2621	NA	promoter-TSS (NM_001136059)	promoter-TSS (NM_001136059)	-882	NM_001136059	13076	Mm.14089	NM_009992	ENSMUSG00000032315	Cyp1a1	AHH|AHRR|CP11|Cyp1a2|P450-1	cytochrome P450, family 1, subfamily a, polypeptide 1	protein-coding
MACS_peak_3756	chr15	54401688	54404661	+	2621	NA	exon (NM_178920, exon 1 of 4)	exon (NM_178920, exon 1 of 4)	253	NM_178920	105853	Mm.410994	NM_178920	ENSMUSG00000024479	Mal2	AI461653	mal, T cell differentiation protein 2	protein-coding
MACS_peak_1116	chr10	88806139	88809628	+	2621	NA	Intergenic	Intergenic	-87348	NR_102339	320091	Mm.236464	NM_178773	ENSMUSG00000035189	Ano4	A330096O15Rik|Gm65|Tmem16d	anoctamin 4	protein-coding
MACS_peak_9563	chr6	137116536	137118340	+	2621	NA	intron (NM_181988, intron 1 of 4)	intron (NM_181988, intron 1 of 4)	801	NM_001164214	232441	Mm.46233	NM_181988	ENSMUSG00000030222	Rerg	-	RAS-like, estrogen-regulated, growth-inhibitor	protein-coding
MACS_peak_7753	chr4	120710808	120713120	+	2621	NA	promoter-TSS (NM_007741)	promoter-TSS (NM_007741)	-207	NM_007741	12840	Mm.269384	NM_007741	ENSMUSG00000028626	Col9a2	AI427499|Col9a-2	collagen, type IX, alpha 2	protein-coding
MACS_peak_3931	chr15	84549178	84551512	+	2621	NA	promoter-TSS (NM_028455)	promoter-TSS (NM_028455)	-137	NM_001164628	73167	Mm.128411	NM_028455	ENSMUSG00000078954	Arhgap8	3110043J09Rik	Rho GTPase activating protein 8	protein-coding
MACS_peak_3235	chr14	20569665	20572789	+	2621	NA	intron (NM_008695, intron 1 of 20)	intron (NM_008695, intron 1 of 20)	748	NM_008695	18074	Mm.20348	NM_008695	ENSMUSG00000021806	Nid2	AW547149|Ly111|NID-2|entactin-2|nidogen-2	nidogen 2	protein-coding
MACS_peak_3741	chr15	43000010	43002893	+	2621	NA	5' UTR (NM_172815, exon 2 of 6)	5' UTR (NM_172815, exon 2 of 6)	913	NM_172815	239405	Mm.193274	NM_172815	ENSMUSG00000051920	Rspo2	2610028F08Rik|AA673245|D430027K22|ftls	R-spondin 2 homolog (Xenopus laevis)	protein-coding
MACS_peak_5833	chr2	18721234	18724631	+	2621	NA	Intergenic	Intergenic	102283	NM_001001334	381350	Mm.330024	NM_001001334		BC061194	-	cDNA sequence BC061194	protein-coding
MACS_peak_5721	chr19	55815186	55820104	+	2621	NA	exon (NM_001142919, exon 3 of 14)	exon (NM_001142919, exon 3 of 14)	1345	NM_001142923	21416	Mm.139815	NM_009333	ENSMUSG00000024985	Tcf7l2	TCF4B|TCF4E|Tcf-4|Tcf4|mTcf-4B|mTcf-4E	transcription factor 7 like 2, T cell specific, HMG box	protein-coding
MACS_peak_9383	chr6	92193868	92196044	+	2621	NA	promoter-TSS (NM_009426)	promoter-TSS (NM_009426)	-312	NM_009426	22044	Mm.1363	NM_009426	ENSMUSG00000005892	Trh	Pro-TRH|Trf	thyrotropin releasing hormone	protein-coding
MACS_peak_2128	chr11	114952580	114953794	+	2621	NA	exon (NM_001163753, exon 1 of 9)	exon (NM_001163753, exon 1 of 9)	442	NM_001163753	58222	Mm.143789	NM_021411	ENSMUSG00000020732	Rab37	B230331O03Rik|B230354I04Rik	RAB37, member RAS oncogene family	protein-coding
MACS_peak_11709	chr9	111340878	111343429	+	2621	NA	intron (NM_172928, intron 1 of 4)	intron (NM_172928, intron 1 of 4)	568	NM_172928	245038	Mm.26361	NM_172928	ENSMUSG00000032500	Dclk3	BC056929|C730036H08|Dcamkl3	doublecortin-like kinase 3	protein-coding
MACS_peak_6005	chr2	35435953	35438621	+	2611	NA	intron (NM_001114125, intron 1 of 16)	CpG	-1073	NM_001290637	69601	Mm.29629	NM_001001602	ENSMUSG00000026883	Dab2ip	2310011D08Rik|AI480459|Aip1|mKIAA1743	disabled 2 interacting protein	protein-coding
MACS_peak_4679	chr17	34341502	34343240	+	2611	NA	exon (NM_011530, exon 2 of 12)	exon (NM_011530, exon 2 of 12)	947	NM_011530	21355	Mm.14814	NM_011530		Tap2	ABC18|AI462429|APT2|Abcb3|Ham-2|Ham2|MTP2|PSF2|RING11|Tap-2|Y1|jas	transporter 2, ATP-binding cassette, sub-family B (MDR/TAP)	protein-coding
MACS_peak_7470	chr4	47002200	47007868	+	2611	NA	promoter-TSS (NM_001081141)	promoter-TSS (NM_001081141)	-448	NM_001081141	242425	Mm.101909	NM_001081141		Gabbr2	GABABR2|Gb2|Gm425|Gpr51	gamma-aminobutyric acid (GABA) B receptor, 2	protein-coding
MACS_peak_3822	chr15	76122053	76127461	+	2611	NA	promoter-TSS (NM_001195537)	promoter-TSS (NM_001195537)	-107	NM_001195537	100503915	Mm.393455	NM_001195537	ENSMUSG00000071724	Smpd5	ENSMUSG00000071724|Gm10345|MA-nSMase	sphingomyelin phosphodiesterase 5	protein-coding
MACS_peak_11405	chr9	56641404	56643877	+	2611	NA	Intergenic	Intergenic	57130	NM_198673	382075	Mm.335177	NM_198673	ENSMUSG00000045620	Odf3l1	BC049697|Gm1116	outer dense fiber of sperm tails 3-like 1	protein-coding
MACS_peak_1999	chr11	100720564	100722226	+	2611	NA	promoter-TSS (NM_001164062)	promoter-TSS (NM_001164062)	-403	NM_001164062	20850	Mm.277403	NM_011488	ENSMUSG00000004043	Stat5a	AA959963|STAT5	signal transducer and activator of transcription 5A	protein-coding
MACS_peak_5599	chr19	43458620	43463373	+	2611	NA	intron (NM_001081257, intron 1 of 11)	CpG	1849	NM_001081257	545291	Mm.442200	NM_001081257	ENSMUSG00000074852	Hpse2	Gm968|Hpa2	heparanase 2	protein-coding
MACS_peak_7514	chr4	64784963	64786517	+	2611	NA	exon (NM_021362, exon 1 of 22)	exon (NM_021362, exon 1 of 22)	532	NM_021362	18491	Mm.317854	NM_021362	ENSMUSG00000028370	Pappa	8430414N03Rik|IGFBP-4ase|PAG1|PAPP-A	pregnancy-associated plasma protein A	protein-coding
MACS_peak_4823	chr17	56145228	56145355	+	2611	NA	promoter-TSS (NR_102313)	promoter-TSS (NR_102313)	-262	NR_102313	106766	Mm.204991	NM_145934	ENSMUSG00000038781	Stap2	AW049765|STAP-2	signal transducing adaptor family member 2	protein-coding
MACS_peak_2227	chr11	121017139	121018539	+	2611	NA	Intergenic	CpG	-3746	NM_145440	217369	Mm.20122	NM_145440	ENSMUSG00000039321	Uts2r	Gpr14|UR-2-R|UTR|UTR2	urotensin 2 receptor	protein-coding
MACS_peak_3293	chr14	30531949	30534950	+	2611	NA	intron (NM_009785, intron 2 of 37)	intron (NM_009785, intron 2 of 37)	1601	NM_009785	12294	Mm.386754	NM_009785	ENSMUSG00000021991	Cacna2d3	Cacnad3	calcium channel, voltage-dependent, alpha2/delta subunit 3	protein-coding
MACS_peak_11285	chr9	37350917	37354366	+	2611	NA	TTS (NM_020518)	TTS (NM_020518)	5801	NM_020518	57276	Mm.27478	NM_020518	ENSMUSG00000001943	Vsig2	1190004B15Rik|2210413P10Rik|AU040484|CTX|Ctm	V-set and immunoglobulin domain containing 2	protein-coding
MACS_peak_7950	chr4	135979658	135982461	+	2611	NA	intron (NM_001285484, intron 1 of 1)	CpG	532	NM_001285484	15552	Mm.40573	NM_008309	ENSMUSG00000070687	Htr1d	5-HT-1D|5-HT1D|AI853647|Gpcr14|Htr1db	5-hydroxytryptamine (serotonin) receptor 1D	protein-coding
MACS_peak_8490	chr5	73796992	73798336	+	2611	NA	intron (NM_181323, intron 1 of 15)	CpG	347	NM_181323	231293	Mm.280211	NM_181323	ENSMUSG00000029154	Cwh43	C130090K23Rik|imds-60	cell wall biogenesis 43 C-terminal homolog (S. cerevisiae)	protein-coding
MACS_peak_3779	chr15	66799825	66803028	+	2611	NA	promoter-TSS (NM_008681)	promoter-TSS (NM_008681)	-223	NM_008681	17988	Mm.30837	NM_008681	ENSMUSG00000005125	Ndrg1	CAP43|CMT4D|DRG1|HMSNL|NMSL|Ndr1|Ndrl|PROXY1|RTP|TDD5	N-myc downstream regulated gene 1	protein-coding
MACS_peak_2629	chr12	113915035	113919472	+	2607	NA	intron (NM_001100460, intron 1 of 1)	CpG	202	NM_001100460	382639	Mm.11350	NM_001100460	ENSMUSG00000037638	Zbtb42	EG382639|Gm5188|simiRP58	zinc finger and BTB domain containing 42	protein-coding
MACS_peak_9221	chr6	52141084	52145664	+	2592	NA	intron (NM_010452, intron 2 of 4)	intron (NM_010452, intron 2 of 4)	-1672	NM_008265	15401	Mm.439647	NM_008265	ENSMUSG00000000942	Hoxa4	AV206827|Hox-1.4	homeobox A4	protein-coding
MACS_peak_6654	chr2	167514068	167516599	+	2592	NA	promoter-TSS (NR_110334)	promoter-TSS (NR_110334)	918	NM_001287738	12608	Mm.439656	NM_009883	ENSMUSG00000056501	Cebpb	C/EBPbeta|CRP2|IL-6DBP|LAP|LIP|NF-IL6|NF-M|Nfil6	CCAAT/enhancer binding protein (C/EBP), beta	protein-coding
MACS_peak_7314	chr3	151827252	151829296	+	2540	NA	intron (NM_016867, intron 1 of 5)	intron (NM_016867, intron 1 of 5)	590	NM_016867	54120	Mm.97	NM_016867		Gipc2	2200002N01Rik|AU021850|Semcap2	GIPC PDZ domain containing family, member 2	protein-coding
MACS_peak_11186	chr9	20832972	20835254	+	2540	NA	TTS (NM_010493)	TTS (NM_010493)	296	NM_023892	78369	Mm.30220	NM_023892	ENSMUSG00000001014	Icam4	1810015M19Rik|Cd242|ICAM-4	intercellular adhesion molecule 4, Landsteiner-Wiener blood group	protein-coding
MACS_peak_11821	chrX	45805080	45808349	+	2540	NA	intron (NM_019680, intron 1 of 8)	CpG	9595	NM_019680	56501	Mm.36808	NM_019680	ENSMUSG00000031103	Elf4	AV314029|BC042423|ENSMUSG00000053512|Gm9907|Mef	E74-like factor 4 (ets domain transcription factor)	protein-coding
MACS_peak_3289	chr14	29318718	29320197	+	2540	NA	intron (NM_009524, intron 1 of 4)	CpG	798	NM_009524	22418	Mm.287544	NM_009524	ENSMUSG00000021994	Wnt5a	8030457G12Rik|Wnt-5a	wingless-type MMTV integration site family, member 5A	protein-coding
MACS_peak_2544	chr12	102136041	102138712	+	2540	NA	intron (NM_001177673, intron 1 of 2)	CpG	358	NM_001177674	238377	Mm.32160	NM_175493	ENSMUSG00000047415	Gpr68	BB131428|Ogr1	G protein-coupled receptor 68	protein-coding
MACS_peak_4604	chr17	27192526	27196753	+	2540	NA	intron (NM_080553, intron 1 of 57)	intron (NM_080553, intron 1 of 57)	390	NM_080553	16440	Mm.458106	NM_080553	ENSMUSG00000042644	Itpr3	Ip3r3|Itpr-3	inositol 1,4,5-triphosphate receptor 3	protein-coding
MACS_peak_7316	chr3	151927458	151931292	+	2540	NA	promoter-TSS (NM_199465)	promoter-TSS (NM_199465)	-91	NM_199465	68810	Mm.200188	NM_199465	ENSMUSG00000039103	Nexn	1110046H09Rik|AA553326|NELIN	nexilin	protein-coding
MACS_peak_98	chr1	37775902	37778689	+	2540	NA	promoter-TSS (NM_028096)	promoter-TSS (NM_028096)	-639	NM_028096	72097	Mm.142607	NM_028096	ENSMUSG00000026090	2010300C02Rik	-	RIKEN cDNA 2010300C02 gene	protein-coding
MACS_peak_7844	chr4	128812248	128815265	+	2540	NA	promoter-TSS (NM_027402)	promoter-TSS (NM_027402)	-548	NM_027402	384061	Mm.44075	NM_027402	ENSMUSG00000001334	Fndc5	1500001L03Rik|AI836596|C87088|PeP|Pxp	fibronectin type III domain containing 5	protein-coding
MACS_peak_2529	chr12	88441872	88444339	+	2540	NA	intron (NM_001294308, intron 1 of 3)	CpG	384	NM_022414	64242	Mm.41395	NM_022414	ENSMUSG00000021032	Ngb	-	neuroglobin	protein-coding
MACS_peak_5209	chr18	63543772	63546372	+	2540	NA	intron (NM_001039485, intron 1 of 53)	intron (NM_001039485, intron 1 of 53)	1765	NM_001039485	667742	Mm.158720	NM_172629	ENSMUSG00000041482	Piezo2	5930434P17|9030411M15Rik|9430028L06Rik|Fam38b|Fam38b2	piezo-type mechanosensitive ion channel component 2	protein-coding
MACS_peak_2787	chr13	35829628	35833723	+	2540	NA	intron (NM_009881, intron 3 of 9)	intron (NM_009881, intron 3 of 9)	-1596	NM_001123386	12593	Mm.29002	NM_009881	ENSMUSG00000059288	Cdyl	AI325931	chromodomain protein, Y chromosome-like	protein-coding
MACS_peak_1629	chr11	68209374	68214589	+	2540	NA	Intergenic	Intergenic	-11653	NM_008744	18208	Mm.39095	NM_008744	ENSMUSG00000020902	Ntn1	AI561871|BC019633|Netrin-1	netrin 1	protein-coding
MACS_peak_44	chr1	19195854	19197954	+	2540	NA	Intergenic	Intergenic	-2091	NM_009334	21419	Mm.137021	NM_009334	ENSMUSG00000025927	Tfap2b	AI606113|AP-2(beta)|E130018K07Rik|Tcfap2b	transcription factor AP-2 beta	protein-coding
MACS_peak_1953	chr11	97407966	97413845	+	2540	NA	intron (NM_018873, intron 2 of 19)	intron (NM_018873, intron 2 of 19)	25535	NM_018873	56013	Mm.342665	NM_018873	ENSMUSG00000038453	Srcin1	P140|SNIP|mKIAA1684|p140Cap	SRC kinase signaling inhibitor 1	protein-coding
MACS_peak_3299	chr14	31437946	31440297	+	2540	NA	intron (NM_011103, intron 1 of 17)	CpG	273	NM_011103	18753	Mm.2314	NM_011103	ENSMUSG00000021948	Prkcd	AI385711|D14Ertd420e|PKC[d]|PKCdelta|Pkcd	protein kinase C, delta	protein-coding
MACS_peak_889	chr10	45054149	45057164	+	2540	NA	promoter-TSS (NM_024285)	promoter-TSS (NM_024285)	88	NM_024285	23828	Mm.332793	NM_024285	ENSMUSG00000071317	Bves	Pop1|Popdc1|mBVES	blood vessel epicardial substance	protein-coding
MACS_peak_2334	chr12	52692638	52696998	+	2540	NA	intron (NM_001198835, intron 3 of 11)	CpG-3151	490	NM_001198835	12810	Mm.21325	NM_007728	ENSMUSG00000020953	Coch	AW122937|Coch-5B2|D12H14S564E	coagulation factor C homolog (Limulus polyphemus)	protein-coding
MACS_peak_394	chr1	91863858	91867557	+	2540	NA	intron (NM_139152, intron 3 of 5)	intron (NM_139152, intron 3 of 5)	-37956	NM_010262	14472	Mm.204730	NM_010262		Gbx2	D130058E05Rik|Gbx-2|MMoxA|Stra7	gastrulation brain homeobox 2	protein-coding
MACS_peak_10735	chr8	74029979	74034157	+	2540	NA	exon (NM_032398, exon 3 of 6)	exon (NM_032398, exon 3 of 6)	3600	NM_032398	84094	Mm.260768	NM_032398	ENSMUSG00000034845	Plvap	MECA32|Pv1	plasmalemma vesicle associated protein	protein-coding
MACS_peak_8083	chr4	147546974	147550668	+	2540	NA	Intergenic	MT2A|LTR|ERVL	14044	NM_176848	230904	Mm.262287	NM_176848	ENSMUSG00000041556	Fbxo2	FBG1|FBX2|Fbs1|Fbs2|NFB42|Prpl4	F-box protein 2	protein-coding
MACS_peak_7942	chr4	135698492	135704317	+	2540	NA	TTS (NM_008321)	TTS (NM_008321)	1667	NM_008321	15903	Mm.110	NM_008321		Id3	Hlh462|Idb3|bHLHb25	inhibitor of DNA binding 3	protein-coding
MACS_peak_9804	chr7	35594164	35598544	+	2540	NA	intron (NM_175140, intron 1 of 3)	intron (NM_175140, intron 1 of 3)	1376	NM_175140	68947	Mm.29380	NM_175140	ENSMUSG00000060402	Chst8	1500011J21Rik|AI426009	carbohydrate (N-acetylgalactosamine 4-0) sulfotransferase 8	protein-coding
MACS_peak_9176	chr6	47728143	47728664	+	2540	NA	Intergenic	CpG	25248	NR_030485	735289		NR_030485		Mir704	Mirn704|mmu-mir-704	microRNA 704	ncRNA
MACS_peak_9740	chr7	28187151	28194389	+	2525	NA	intron (NM_032610, intron 15 of 35)	intron (NM_032610, intron 15 of 35)	-9198	NM_001199236	80297	Mm.459123	NM_032610	ENSMUSG00000011751	Sptbn4	1700022P15Rik|5830426A08Rik|ROSA62|SpbIV|Spnb4|dyn|lnd|nmf261|nmf379|qv	spectrin beta, non-erythrocytic 4	protein-coding
MACS_peak_8456	chr5	66540308	66544929	+	2525	NA	promoter-TSS (NM_001291226)	promoter-TSS (NM_001291226)	-401	NM_178446	245945	Mm.36863	NM_139065	ENSMUSG00000070780	Rbm47	9530077J19Rik	RNA binding motif protein 47	protein-coding
MACS_peak_292	chr1	79854349	79855400	+	2525	NA	intron (NM_009255, intron 1 of 8)	CpG	366	NM_009255	20720	Mm.3093	NM_009255	ENSMUSG00000026249	Serpine2	B230326M24Rik|PAI-1|PI-7|PI7|PN-1|Spi4	serine (or cysteine) peptidase inhibitor, clade E, member 2	protein-coding
MACS_peak_7641	chr4	107703453	107705508	+	2525	NA	promoter-TSS (NM_001285956)	promoter-TSS (NM_001285956)	215	NM_001285958	242608	Mm.74710	NM_172874	ENSMUSG00000028600	Podn	9430070G18|Pcan|SLRR5A	podocan	protein-coding
MACS_peak_8900	chr5	137728634	137732141	+	2525	NA	intron (NM_009599, intron 1 of 4)	CpG	905	NM_001290010	11423	Mm.255464	NM_009599	ENSMUSG00000023328	Ache	-	acetylcholinesterase	protein-coding
MACS_peak_7702	chr4	116976428	116977694	+	2525	NA	intron (NM_025739, intron 3 of 14)	CpG	52116	NM_029589	68777	Mm.331805	NM_026837	ENSMUSG00000048772	Tmem53	1110038M16Rik|1500001P22Rik|1700012A05Rik	transmembrane protein 53	protein-coding
MACS_peak_4665	chr17	34114145	34116687	+	2525	NA	non-coding (NR_004446, exon 2 of 6)	non-coding (NR_004446, exon 2 of 6)	320	NR_004446	630499	Mm.440940	NM_001081015		H2-K2	EG630499|Gm7035|H-2K1|H-2K1K|H-2K2|H2-K1	histocompatibility 2, K region locus 2	pseudo
MACS_peak_5385	chr19	5557942	5561632	+	2522	NA	intron (NM_019935, intron 1 of 3)	intron (NM_019935, intron 1 of 3)	788	NM_019935	18426	Mm.280225	NM_019935	ENSMUSG00000024922	Ovol1	BB147136|Ovo1|movo1	OVO homolog-like 1 (Drosophila)	protein-coding
MACS_peak_9733	chr7	28114012	28116627	+	2498	NA	exon (NM_001113549, exon 2 of 30)	exon (NM_001113549, exon 2 of 30)	3348	NM_001113549	108075	Mm.272251	NM_175641	ENSMUSG00000040488	Ltbp4	2310046A13Rik	latent transforming growth factor beta binding protein 4	protein-coding
MACS_peak_9380	chr6	91791547	91795098	+	2494	NA	Intergenic	Intergenic	-34725	NM_172730	232236	Mm.234879	NM_172730	ENSMUSG00000034083	Ccdc174	C130022K22Rik	coiled-coil domain containing 174	protein-coding
MACS_peak_564	chr1	157090309	157093034	+	2494	NA	Intergenic	CpG	85838	NM_021433	58244	Mm.66264	NM_021433	ENSMUSG00000026470	Stx6	2310039E05Rik|2410005I16Rik|AA437559|AI415714|AI845861	syntaxin 6	protein-coding
MACS_peak_4254	chr16	28443471	28447514	+	2494	NA	5' UTR (NM_183064, exon 1 of 5)	5' UTR (NM_183064, exon 1 of 5)	669	NM_183064	14167	Mm.7996	NM_010199		Fgf12	AV114868|FGF-12|FHF-1|Fhf1	fibroblast growth factor 12	protein-coding
MACS_peak_4010	chr15	97829513	97836680	+	2494	NA	intron (NM_031163, intron 1 of 53)	intron (NM_031163, intron 1 of 53)	2059	NM_031163	12824	Mm.2423	NM_031163	ENSMUSG00000022483	Col2a1	Col2|Col2a|Col2a-1|Del1|Dmm|Lpk|M100856|Rgsc856	collagen, type II, alpha 1	protein-coding
MACS_peak_1552	chr11	54890792	54892871	+	2494	NA	promoter-TSS (NM_177471)	promoter-TSS (NM_177471)	-198	NM_177471	52570	Mm.22361	NM_177471	ENSMUSG00000049588	Ccdc69	2210021E03Rik|D11Ertd461e	coiled-coil domain containing 69	protein-coding
MACS_peak_5657	chr19	45375198	45381900	+	2494	NA	Intergenic	Intergenic	-59675	NM_001286466	12234	Mm.119717	NM_009771	ENSMUSG00000025217	Btrc	Beta-Trcp1|E3RS-IkappaB|E3RSIkappaB|FWD1|Fbw1a|HOS|Slimb|b-TrCP|beta-TrCP	beta-transducin repeat containing protein	protein-coding
MACS_peak_5918	chr2	28908977	28910820	+	2494	NA	intron (NM_001166705, intron 1 of 5)	intron (NM_001166705, intron 1 of 5)	688	NM_001166705	329375	Mm.425079	NM_001085514	ENSMUSG00000079502	1700101E01Rik	Gm823	RIKEN cDNA 1700101E01 gene	protein-coding
MACS_peak_891	chr10	45205596	45207707	+	2494	NA	Intergenic	CpG	-16644	NM_001031772	380669	Mm.440328	NM_001031772	ENSMUSG00000063804	Lin28b	2810403D23Rik|D030047M17Rik|Lin-28.2	lin-28 homolog B (C. elegans)	protein-coding
MACS_peak_11867	chrX	70881986	70886623	+	2494	NA	promoter-TSS (NM_029352)	promoter-TSS (NM_029352)	-476	NM_029352	75590	Mm.16479	NM_029352	ENSMUSG00000031383	Dusp9	Dusp4|Mpk4|Pyst3	dual specificity phosphatase 9	protein-coding
MACS_peak_1729	chr11	76434254	76438668	+	2494	NA	Intergenic	CpG	-45220	NM_198894	109934	Mm.258939	NM_198018	ENSMUSG00000017631	Abr	-	active BCR-related gene	protein-coding
MACS_peak_10911	chr8	96705289	96708241	+	2494	NA	Intergenic	Intergenic	3776	NM_013602	17748	Mm.192991	NM_013602	ENSMUSG00000031765	Mt1	MT-I|Mt-1	metallothionein 1	protein-coding
MACS_peak_6047	chr2	49642161	49645295	+	2494	NA	intron (NM_027990, intron 1 of 9)	intron (NM_027990, intron 1 of 9)	522	NM_027990	71897	Mm.41381	NM_027990	ENSMUSG00000026765	Lypd6b	2310010M24Rik|AW049525	LY6/PLAUR domain containing 6B	protein-coding
MACS_peak_10014	chr7	77501104	77508474	+	2494	NA	exon (NM_009697, exon 1 of 3)	exon (NM_009697, exon 1 of 3)	690	NM_009697	11819	Mm.158143	NM_009697	ENSMUSG00000030551	Nr2f2	2700033K02Rik|9430015G03Rik|ARP-1|Aporp1|COUP-TF2|COUP-TFII|COUPTFB|EAR3|SVP40|Tcfcoup2	nuclear receptor subfamily 2, group F, member 2	protein-coding
MACS_peak_7026	chr3	88013697	88021831	+	2494	NA	Intergenic	Intergenic	-1329	NR_037276	100526540		NR_037276	miRBase:MI0014086	Mir3093	mmu-mir-3093	microRNA 3093	ncRNA
MACS_peak_9688	chr7	20353837	20356516	+	2494	NA	intron (NM_020486, intron 1 of 14)	intron (NM_020486, intron 1 of 14)	705	NM_020486	57278	Mm.29236	NM_020486	ENSMUSG00000002980	Bcam	1200005K12Rik|B-CAM|Gplu|Lu	basal cell adhesion molecule	protein-coding
MACS_peak_6643	chr2	167013466	167017518	+	2494	NA	Intergenic	CpG	-1174	NM_008420	16500	Mm.205341	NM_008420		Kcnb1	Kcr1-1|Kv2.1|Shab	potassium voltage gated channel, Shab-related subfamily, member 1	protein-coding
MACS_peak_10416	chr7	150871095	150871836	+	2494	NA	intron (NM_024290, intron 1 of 5)	intron (NM_024290, intron 1 of 5)	312	NM_024290	79201	Mm.290780	NM_024290		Tnfrsf23	Dctrailr1|Tnfrh1|Tnfrsf1al1|mDcTrailr1|mSOB	tumor necrosis factor receptor superfamily, member 23	protein-coding
MACS_peak_2325	chr12	50498530	50503738	+	2494	NA	intron (NR_026733, intron 2 of 2)	intron (NR_026733, intron 2 of 2)	10495	NR_026733	67293	Mm.185800	NR_026733	ENSMUSG00000089922	3110039M20Rik	-	RIKEN cDNA 3110039M20 gene	ncRNA
MACS_peak_7293	chr3	145310127	145317579	+	2494	NA	promoter-TSS (NM_010516)	promoter-TSS (NM_010516)	-904	NM_010516	16007	Mm.1231	NM_010516	ENSMUSG00000028195	Cyr61	AI325051|CCN1|Igfbp10	cysteine rich protein 61	protein-coding
MACS_peak_10797	chr8	86565766	86569307	+	2494	NA	intron (NM_173184, intron 1 of 1)	intron (NM_173184, intron 1 of 1)	-1062	NM_016671	50931	Mm.38386	NM_016671	ENSMUSG00000005465	Il27ra	CRL1|IL-27R|Tccr|WSX-1|Wsx1|zcytor1	interleukin 27 receptor, alpha	protein-coding
MACS_peak_3264	chr14	24821236	24825492	+	2494	NA	promoter-TSS (NM_001253375)	promoter-TSS (NM_001253375)	63	NM_001253375	16531	Mm.343607	NM_010610	ENSMUSG00000063142	Kcnma1	5730414M22Rik|BKCa|MaxiK|Slo|Slo1|mSlo|mSlo1	potassium large conductance calcium-activated channel, subfamily M, alpha member 1	protein-coding
MACS_peak_11301	chr9	40770268	40773175	+	2494	NA	intron (NM_001081121, intron 1 of 8)	intron (NM_001081121, intron 1 of 8)	474	NM_001081121	70989	Mm.335087	NM_001081121	ENSMUSG00000032023	4931429I11Rik	BB239335|jhy	RIKEN cDNA 4931429I11 gene	protein-coding
MACS_peak_9589	chr6	146449100	146452383	+	2494	NA	promoter-TSS (NM_019923)	promoter-TSS (NM_019923)	4	NM_010586	16439	Mm.7800	NM_010586	ENSMUSG00000030287	Itpr2	AI649341|InsP3R-2|InsP3R-5|Ip3r2|Itpr5|insP3R2	inositol 1,4,5-triphosphate receptor 2	protein-coding
MACS_peak_4468	chr16	97577109	97581094	+	2494	NA	intron (NM_019517, intron 1 of 8)	intron (NM_019517, intron 1 of 8)	766	NM_019517	56175	Mm.97885	NM_019517	ENSMUSG00000040605	Bace2	1110059C24Rik|AEPLC|AI850424|ALP56|ARP1|ASP21|BAE2|CDA13|CEAP1|DRAP	beta-site APP-cleaving enzyme 2	protein-coding
MACS_peak_9260	chr6	56602014	56603410	+	2494	NA	Intergenic	Intergenic	51981	NM_025520	66373	Mm.25642	NM_025520	ENSMUSG00000091625	Lsm5	2010208O10Rik|2310034K10Rik	LSM5 homolog, U6 small nuclear RNA associated (S. cerevisiae)	protein-coding
MACS_peak_5353	chr18	86880252	86883775	+	2494	NA	promoter-TSS (NM_172633)	promoter-TSS (NM_172633)	-427	NM_172633	12405	Mm.70775	NM_172633	ENSMUSG00000024647	Cbln2	6330593N19Rik|A730004O05	cerebellin 2 precursor protein	protein-coding
MACS_peak_648	chr1	174491973	174493467	+	2494	NA	intron (NR_027644, intron 5 of 5)	intron (NR_027644, intron 5 of 5)	2683	NR_027644	240916	Mm.71940	NM_177723	ENSMUSG00000049598	Vsig8	A030011M19|EG240916	V-set and immunoglobulin domain containing 8	protein-coding
MACS_peak_5161	chr18	46623930	46626668	+	2494	NA	non-coding (NR_045438, exon 1 of 1)	non-coding (NR_045438, exon 1 of 1)	171	NR_045438	72076	Mm.82766	NM_028086	ENSMUSG00000046487	Mospd4	2010013H21Rik	motile sperm domain containing 4	pseudo
MACS_peak_11091	chr8	124983530	124987823	+	2494	NA	Intergenic	Intergenic	-1084	NM_013914	30927	Mm.103673	NM_013914	ENSMUSG00000006587	Snai3	AI643946|Smuc|Zfp293	snail family zinc finger 3	protein-coding
MACS_peak_220	chr1	74170027	74172079	+	2494	NA	promoter-TSS (NM_027884)	promoter-TSS (NM_027884)	-30	NM_001289895	21961	Mm.309975	NM_027884	ENSMUSG00000055322	Tns1	1110018I21Rik|1200014E20Rik|AI648117|E030018G17Rik|E030037J05Rik|Tns	tensin 1	protein-coding
MACS_peak_6180	chr2	81892330	81895163	+	2494	NA	promoter-TSS (NM_175513)	promoter-TSS (NM_175513)	-69	NM_175513	241514	Mm.119383	NM_175513	ENSMUSG00000070866	Zfp804a	C630007C17Rik|Znf804a	zinc finger protein 804A	protein-coding
MACS_peak_3565	chr14	103379786	103382151	+	2494	NA	TTS (NR_039592)	TTS (NR_039592)	881	NR_039592	100628599		NR_039592	miRBase:MI0018042	Mir5130	mmu-mir-5130|mu-mir-5130	microRNA 5130	ncRNA
MACS_peak_10209	chr7	120908110	120911824	+	2494	NA	exon (NM_145584, exon 1 of 16)	exon (NM_145584, exon 1 of 16)	455	NM_145584	233744	Mm.334160	NM_145584	ENSMUSG00000038156	Spon1	AI666765|AW455831|BC020531|D330035F22Rik|FSP	spondin 1, (f-spondin) extracellular matrix protein	protein-coding
MACS_peak_6090	chr2	65075189	65077872	+	2494	NA	5' UTR (NM_177025, exon 1 of 14)	5' UTR (NM_177025, exon 1 of 14)	153	NM_177025	319876	Mm.34159	NM_027225	ENSMUSG00000034903	Cobll1	1810047P18Rik|Coblr1|D430044D16Rik	Cobl-like 1	protein-coding
MACS_peak_6288	chr2	113596035	113599947	+	2494	NA	intron (NM_011824, intron 1 of 1)	CpG	814	NM_011824	23892	Mm.166318	NM_011824		Grem1	Cktsf1b1|Drm|Grem|ld	gremlin 1	protein-coding
MACS_peak_4567	chr17	24487101	24489869	+	2494	NA	promoter-TSS (NM_013855)	promoter-TSS (NM_013855)	-483	NM_013855	27410	Mm.239470	NM_013855	ENSMUSG00000024130	Abca3	1810036E22Rik|ABC-C|Abc3	ATP-binding cassette, sub-family A (ABC1), member 3	protein-coding
MACS_peak_6398	chr2	130520991	130524483	+	2494	NA	intron (NM_001081162, intron 1 of 20)	CpG	518	NM_001081162	269356	Mm.441391	NM_001081162	ENSMUSG00000074796	Slc4a11	AI503023|BTR1|NaBC1	solute carrier family 4, sodium bicarbonate transporter-like, member 11	protein-coding
MACS_peak_5366	chr19	4438440	4441447	+	2494	NA	promoter-TSS (NM_007485)	promoter-TSS (NM_007485)	384	NR_045989	319314	Mm.393810	NR_045989	ENSMUSG00000087132	A930001C03Rik	-	RIKEN cDNA A930001C03 gene	ncRNA
MACS_peak_9602	chr7	3301252	3304953	+	2494	NA	promoter-TSS (NM_011102)	promoter-TSS (NM_011102)	-556	NM_001291434	18752	Mm.7980	NM_011102	ENSMUSG00000078816	Prkcg	PKCgamma|Pkcc|Prkcc	protein kinase C, gamma	protein-coding
MACS_peak_10103	chr7	97450082	97452465	+	2494	NA	intron (NM_031394, intron 1 of 18)	intron (NM_031394, intron 1 of 18)	408	NR_110348	83671	Mm.26751	NM_031394	ENSMUSG00000030616	Sytl2	AI266830|Slp2|mKIAA1597	synaptotagmin-like 2	protein-coding
MACS_peak_664	chr1	182411623	182413930	+	2494	NA	intron (NM_001081227, intron 1 of 3)	intron (NM_001081227, intron 1 of 3)	859	NM_001081227	381310	Mm.44791	NM_001081227	ENSMUSG00000053963	6330403A02Rik	ENSMUSG00000056615|Gm10001|R75555	RIKEN cDNA 6330403A02 gene	protein-coding
MACS_peak_7988	chr4	138647150	138650343	+	2492	NA	5' UTR (NM_008675, exon 1 of 4)	5' UTR (NM_008675, exon 1 of 4)	139	NM_008675	17965	Mm.9404	NM_008675	ENSMUSG00000041120	Nbl1	D4H1S1733E|DAN|Dana|NO3	neuroblastoma, suppression of tumorigenicity 1	protein-coding
MACS_peak_242	chr1	75214496	75218370	+	2492	NA	promoter-TSS (NM_009447)	promoter-TSS (NM_009447)	-605	NM_009447	22145	Mm.1155	NM_009447	ENSMUSG00000026202	Tuba4a	M[a]4|Tuba4	tubulin, alpha 4A	protein-coding
MACS_peak_9952	chr7	70898868	70905123	+	2486	NA	intron (NM_130880, intron 13 of 13)	intron (NM_130880, intron 13 of 13)	-159748	NM_001256311	381994	Mm.425466	NM_001256311	ENSMUSG00000095061	E030018B13Rik	Gm1697	RIKEN cDNA E030018B13 gene	protein-coding
MACS_peak_5958	chr2	31938268	31940170	+	2486	NA	promoter-TSS (NM_175511)	promoter-TSS (NM_175511)	6	NM_175511	241303	Mm.250441	NM_175511	ENSMUSG00000050592	Fam78a	A130092J06Rik	family with sequence similarity 78, member A	protein-coding
MACS_peak_2616	chr12	112666154	112669242	+	2418	NA	exon (NM_028807, exon 12 of 13)	exon (NM_028807, exon 12 of 13)	12042	NM_001289488	74190	Mm.248640	NM_028807	ENSMUSG00000021280	Exoc3l4	1200009I06Rik|1600013K19Rik	exocyst complex component 3-like 4	protein-coding
MACS_peak_8446	chr5	58110887	58112729	+	2418	NA	exon (NM_018764, exon 1 of 2)	exon (NM_018764, exon 1 of 2)	2548	NM_018764	54216	Mm.332387	NM_018764	ENSMUSG00000029108	Pcdh7	-	protocadherin 7	protein-coding
MACS_peak_8891	chr5	137043824	137045263	+	2418	NA	Intergenic	CpG-11659	-1183	NM_001291238	13047	Mm.320317	NM_009986	ENSMUSG00000029705	Cux1	CDP|Cutl1|Cux|Cux-1	cut-like homeobox 1	protein-coding
MACS_peak_1018	chr10	79177782	79181371	+	2418	NA	exon (NM_008226, exon 1 of 8)	exon (NM_008226, exon 1 of 8)	197	NM_008226	15166	Mm.12956	NM_008226	ENSMUSG00000020331	Hcn2	BCNG2|HAC1|trls	hyperpolarization-activated, cyclic nucleotide-gated K+ 2	protein-coding
MACS_peak_287	chr1	78305417	78308390	+	2418	NA	promoter-TSS (NM_001004173)	promoter-TSS (NM_001004173)	-18	NM_001004173	433323	Mm.276248	NM_001004173	ENSMUSG00000032908	Sgpp2	SPPase2|Spp2	sphingosine-1-phosphate phosphotase 2	protein-coding
MACS_peak_1023	chr10	79449646	79453048	+	2418	NA	promoter-TSS (NM_007725)	promoter-TSS (NM_007725)	2	NM_007725	12798	Mm.157770	NM_007725		Cnn2	AA408047|AI324678|Calpo2	calponin 2	protein-coding
MACS_peak_6051	chr2	52530334	52531873	+	2418	NA	intron (NM_001037099, intron 2 of 13)	intron (NM_001037099, intron 2 of 13)	275	NM_001285428	12298	Mm.330223	NM_146123	ENSMUSG00000017412	Cacnb4	3110038O15Rik|Cchb4|lh	calcium channel, voltage-dependent, beta 4 subunit	protein-coding
MACS_peak_7677	chr4	115569824	115571644	+	2418	NA	Intergenic	CpG	13729	NM_001039124	654462	Mm.388913	NM_001039124	ENSMUSG00000073774	Kncn	Kino|L5	kinocilin	protein-coding
MACS_peak_10561	chr8	24085328	24088456	+	2418	NA	intron (NM_001110783, intron 1 of 43)	intron (NM_001110783, intron 1 of 43)	1584	NM_001277280	11733	Mm.334444	NM_031158	ENSMUSG00000031543	Ank1	Ank-1|nb|pale	ankyrin 1, erythroid	protein-coding
MACS_peak_11319	chr9	43851685	43854134	+	2415	NA	intron (NM_009382, intron 1 of 3)	intron (NM_009382, intron 1 of 3)	1442	NM_009382	21838	Mm.3951	NM_009382	ENSMUSG00000032011	Thy1	CD90|T25|Thy-1|Thy-1.2|Thy1.1|Thy1.2	thymus cell antigen 1, theta	protein-coding
MACS_peak_11322	chr9	43939549	43943213	+	2415	NA	Intergenic	Intergenic	-1360	NM_023061	84004	Mm.275003	NM_023061	ENSMUSG00000032135	Mcam	1-gicerin|AV025631|CD146|CD149|Muc18|s-endo|s-gicerin	melanoma cell adhesion molecule	protein-coding
MACS_peak_2799	chr13	37916447	37917311	+	2415	NA	Intergenic	Intergenic	-1028	NM_026830	68750	Mm.491109	NM_026830	ENSMUSG00000039087	Rreb1	1110037N09Rik|AA414966|B930013M22Rik	ras responsive element binding protein 1	protein-coding
MACS_peak_9968	chr7	73005514	73008947	+	2415	NA	exon (NM_011048, exon 1 of 22)	exon (NM_011048, exon 1 of 22)	208	NM_011048	18553	Mm.294007	NM_011048	ENSMUSG00000030513	Pcsk6	C86343|Pace4|SPC4	proprotein convertase subtilisin/kexin type 6	protein-coding
MACS_peak_9350	chr6	87679450	87682282	+	2415	NA	promoter-TSS (NM_001159697)	promoter-TSS (NM_001159697)	3	NM_001159697	58229	Mm.333229	NM_021418	ENSMUSG00000068263	Efcc1	Ccdc48	EF hand and coiled-coil domain containing 1	protein-coding
MACS_peak_9397	chr6	97436852	97439036	+	2415	NA	intron (NM_145148, intron 2 of 23)	CpG	129707	NM_145148	232288	Mm.27789	NM_145148	ENSMUSG00000030064	Frmd4b	6030440G05Rik|C87375|GOBLIN|GRSP1|R74720|mKIAA1013	FERM domain containing 4B	protein-coding
MACS_peak_4768	chr17	46431240	46436967	+	2415	NA	promoter-TSS (NM_001286028)	promoter-TSS (NM_001286028)	-329	NM_001286028	106565	Mm.23633	NM_134120	ENSMUSG00000047428	Dlk2	AI413481|DLK-2|Egfl9	delta-like 2 homolog (Drosophila)	protein-coding
MACS_peak_243	chr1	75258212	75261827	+	2415	NA	intron (NM_008985, intron 1 of 22)	intron (NM_008985, intron 1 of 22)	764	NM_008985	19275	Mm.2902	NM_008985	ENSMUSG00000026204	Ptprn	IA-2|mIA-A|mKIAA4064	protein tyrosine phosphatase, receptor type, N	protein-coding
MACS_peak_5255	chr18	67447481	67450767	+	2415	NA	exon (NM_053261, exon 1 of 8)	exon (NM_053261, exon 1 of 8)	247	NM_053261	114663	Mm.34079	NM_053261	ENSMUSG00000024525	Impa2	2210415D20Rik|AI326924|AW259601	inositol (myo)-1(or 4)-monophosphatase 2	protein-coding
MACS_peak_890	chr10	45192118	45193744	+	2415	NA	Intergenic	Intergenic	-2924	NM_001031772	380669	Mm.440328	NM_001031772	ENSMUSG00000063804	Lin28b	2810403D23Rik|D030047M17Rik|Lin-28.2	lin-28 homolog B (C. elegans)	protein-coding
MACS_peak_1974	chr11	98319369	98320802	+	2415	NA	Intergenic	Intergenic	11937	NM_010346	14786	Mm.276702	NM_010346	ENSMUSG00000019312	Grb7	mKIAA4028	growth factor receptor bound protein 7	protein-coding
MACS_peak_4165	chr16	10782958	10785045	+	2415	NA	TTS (NM_001271603)	TTS (NM_001271603)	1628	NM_009896	12703	Mm.130	NM_009896	ENSMUSG00000038037	Socs1	Cish1|Cish7|JAB|SOCS-1|SSI-1	suppressor of cytokine signaling 1	protein-coding
MACS_peak_7346	chr4	4064576	4067475	+	2415	NA	promoter-TSS (NM_001002927)	promoter-TSS (NM_001002927)	-433	NM_001002927	18619	Mm.475097	NM_001002927	ENSMUSG00000045573	Penk	AI326464|ENK|PPA|Penk1	preproenkephalin	protein-coding
MACS_peak_7320	chr3	152329902	152332113	+	2415	NA	promoter-TSS (NM_001081277)	promoter-TSS (NM_001081277)	97	NM_001081277	229949	Mm.207057	NM_001081277	ENSMUSG00000039058	Ak5	-	adenylate kinase 5	protein-coding
MACS_peak_9063	chr6	17412466	17416704	+	2415	NA	intron (NM_008591, intron 1 of 21)	intron (NM_008591, intron 1 of 21)	628	NM_008591	17295	Mm.86844	NM_008591	ENSMUSG00000009376	Met	AI838057|HGF|HGFR|Par4|c-Met	met proto-oncogene	protein-coding
MACS_peak_637	chr1	173982632	173985074	+	2415	NA	3' UTR (NM_010916, exon 2 of 2)	3' UTR (NM_010916, exon 2 of 2)	3874	NM_010916	18071	Mm.2474	NM_010916	ENSMUSG00000051251	Nhlh1	Hen1|Nscl|Tal2|bHLHa35	nescient helix loop helix 1	protein-coding
MACS_peak_3811	chr15	75722962	75725200	+	2415	NA	intron (NM_172607, intron 2 of 12)	intron (NM_172607, intron 2 of 12)	830	NM_172607	223646	Mm.288368	NM_172607	ENSMUSG00000022574	Naprt	9130210N20Rik|Naprt1	nicotinate phosphoribosyltransferase	protein-coding
MACS_peak_552	chr1	154800970	154803270	+	2415	NA	promoter-TSS (NM_175460)	promoter-TSS (NM_175460)	-111	NM_175460	226518	Mm.40548	NM_175460	ENSMUSG00000042751	Nmnat2	AI843915|D030041I09Rik|PNAT1|PNAT2	nicotinamide nucleotide adenylyltransferase 2	protein-coding
MACS_peak_8651	chr5	107831196	107833679	+	2415	NA	promoter-TSS (NM_001001804)	promoter-TSS (NM_001001804)	-95	NM_001001804	384214	Mm.489863	NM_001001804	ENSMUSG00000033805	Ephx4	Abhd7|Ephxrp|Gm1382	epoxide hydrolase 4	protein-coding
MACS_peak_10824	chr8	87500960	87503342	+	2390	NA	exon (NM_008416, exon 1 of 1)	exon (NM_008416, exon 1 of 1)	496	NM_008416	16477	Mm.1167	NM_008416	ENSMUSG00000052837	Junb	-	jun B proto-oncogene	protein-coding
MACS_peak_4971	chr17	88195246	88199754	+	2390	NA	promoter-TSS (NM_199251)	promoter-TSS (NM_199251)	-166	NM_199251	210741	Mm.312046	NM_199251	ENSMUSG00000050138	Kcnk12	mntk1	potassium channel, subfamily K, member 12	protein-coding
MACS_peak_7437	chr4	44675403	44678303	+	2381	NA	intron (NM_008782, intron 5 of 9)	intron (NM_008782, intron 5 of 9)	-38819	NR_073462	70602	Mm.491142	NR_073462		5730488B01Rik	-	RIKEN cDNA 5730488B01 gene	ncRNA
MACS_peak_4840	chr17	56893723	56896904	+	2381	NA	intron (NM_008738, intron 1 of 2)	intron (NM_008738, intron 1 of 2)	1640	NM_008738	18188	Mm.8074	NM_008738	ENSMUSG00000039481	Nrtn	NTN	neurturin	protein-coding
MACS_peak_2445	chr12	74684418	74687563	+	2381	NA	promoter-TSS (NM_008856)	promoter-TSS (NM_008856)	-38	NM_008856	18755	Mm.341677	NM_008856	ENSMUSG00000021108	Prkch	Pkch	protein kinase C, eta	protein-coding
MACS_peak_3623	chr14	122194906	122198011	+	2381	NA	intron (NM_134074, intron 1 of 52)	intron (NM_134074, intron 1 of 52)	498	NM_134074	105445	Mm.441054	NM_134074	ENSMUSG00000025558	Dock9	AA959601|AW538057|B230309H04Rik|D14Wsu89e|Zizimin1|mKIAA1058	dedicator of cytokinesis 9	protein-coding
MACS_peak_11055	chr8	122638227	122640260	+	2381	NA	intron (NM_172286, intron 1 of 12)	intron (NM_172286, intron 1 of 12)	1191	NM_001163761	234797	Mm.101958	NM_172286	ENSMUSG00000031824	6430548M08Rik	AW049007|Kiaa0513|mKIAA0513	RIKEN cDNA 6430548M08 gene	protein-coding
MACS_peak_10048	chr7	86682385	86690332	+	2381	NA	Intergenic	Intergenic	26037	NR_040312	101694	Mm.41661	NR_040311		AI854517	-	expressed sequence AI854517	ncRNA
MACS_peak_2672	chr12	120091810	120093320	+	2381	NA	Intergenic	Intergenic	7763	NM_177082	320145	Mm.51682	NM_177082	ENSMUSG00000048562	Sp8	D930049B17Rik|mBtd	trans-acting transcription factor 8	protein-coding
MACS_peak_4534	chr17	14339456	14342038	+	2381	NA	promoter-TSS (NM_172826)	promoter-TSS (NM_172826)	91	NM_172826	240025	Mm.79993	NM_172826	ENSMUSG00000048826	Dact2	2900084M21Rik|A630024E20|Dpr2|Frd2|dapper2	dapper homolog 2, antagonist of beta-catenin (xenopus)	protein-coding
MACS_peak_11609	chr9	95458631	95461522	+	2381	NA	promoter-TSS (NM_198414)	promoter-TSS (NM_198414)	-160	NM_198414	75552	Mm.151485	NM_198414	ENSMUSG00000064225	Paqr9	1700020G04Rik	progestin and adipoQ receptor family member IX	protein-coding
MACS_peak_8398	chr5	37257391	37263160	+	2381	NA	intron (NM_172994, intron 1 of 8)	CpG	466	NM_172994	269643	Mm.41694	NM_172994	ENSMUSG00000029120	Ppp2r2c	6330548O06Rik|IMYPNO|IMYPNO1|PR52	protein phosphatase 2, regulatory subunit B, gamma	protein-coding
MACS_peak_10274	chr7	135666814	135667958	+	2381	NA	exon (NM_013863, exon 1 of 4)	exon (NM_013863, exon 1 of 4)	289	NM_013863	29810	Mm.84073	NM_013863	ENSMUSG00000030847	Bag3	AA407278|Bis|mg638	BCL2-associated athanogene 3	protein-coding
MACS_peak_10508	chr8	13492099	13494487	+	2381	NA	intron (NM_019521, intron 2 of 14)	intron (NM_019521, intron 2 of 14)	1242	NM_019521	14456	Mm.3982	NM_019521	ENSMUSG00000031451	Gas6	Gas-6	growth arrest specific 6	protein-coding
MACS_peak_1171	chr10	107767309	107770965	+	2367	NA	promoter-TSS (NM_054056)	promoter-TSS (NM_054056)	-108	NM_054056	114774	Mm.391419	NM_054056	ENSMUSG00000035873	Pawr	2310001G03Rik|PAR4|Par-4	PRKC, apoptosis, WT1, regulator	protein-coding
MACS_peak_39	chr1	17086651	17087816	+	2367	NA	intron (NM_020604, intron 1 of 4)	CpG	737	NM_020604	57339	Mm.143761	NM_020604	ENSMUSG00000042686	Jph1	ENSMUSG00000054314|JP-1|Jp1	junctophilin 1	protein-coding
MACS_peak_6861	chr3	34546866	34550975	+	2367	NA	promoter-TSS (NM_011443)	promoter-TSS (NM_011443)	-7	NM_011443	20674	Mm.65396	NM_011443	ENSMUSG00000074637	Sox2	Sox-2|lcc|ysb	SRY (sex determining region Y)-box 2	protein-coding
MACS_peak_9545	chr6	134580767	134582965	+	2367	NA	intron (NM_026345, intron 1 of 3)	intron (NM_026345, intron 1 of 3)	640	NM_026345	67729	Mm.57648	NM_026345	ENSMUSG00000032718	Mansc1	9130403P13Rik	MANSC domain containing 1	protein-coding
MACS_peak_3588	chr14	115490515	115493760	+	2367	NA	intron (NM_175500, intron 1 of 7)	CpG	700	NM_175500	103978	Mm.320791	NM_175500	ENSMUSG00000022112	Gpc5	A230034F01Rik	glypican 5	protein-coding
MACS_peak_990	chr10	75398286	75400346	+	2367	NA	intron (NM_175329, intron 2 of 3)	intron (NM_175329, intron 2 of 3)	998	NM_175329	103172	Mm.333849	NM_175329	ENSMUSG00000049422	Chchd10	1620401E04Rik|AI267078|Ndg2	coiled-coil-helix-coiled-coil-helix domain containing 10	protein-coding
MACS_peak_7880	chr4	131698666	131702850	+	2367	NA	promoter-TSS (NM_013622)	promoter-TSS (NM_013622)	-357	NM_013622	18386	Mm.5243	NM_013622	ENSMUSG00000050511	Oprd1	DOR|DOR-1|Nbor|mDOR	opioid receptor, delta 1	protein-coding
MACS_peak_11080	chr8	124253575	124256981	+	2367	NA	intron (NM_020605, intron 1 of 4)	intron (NM_020605, intron 1 of 4)	819	NM_020605	57340	Mm.306870	NM_020605	ENSMUSG00000025318	Jph3	JP-3|Jp3	junctophilin 3	protein-coding
MACS_peak_2189	chr11	117791417	117794133	+	2367	NA	Intergenic	(TTCA)n|Simple_repeat|Simple_repeat	37905	NM_007707	12702	Mm.3468	NM_007707	ENSMUSG00000053113	Socs3	Cis3|Cish3|EF-10|Ef10|SSI-3|Ssi3	suppressor of cytokine signaling 3	protein-coding
MACS_peak_4991	chr18	4352751	4354682	+	2367	NA	promoter-TSS (NM_007746)	promoter-TSS (NM_007746)	171	NR_040328	73915	Mm.482777	NR_040328		4833419F23Rik	-	RIKEN cDNA 4833419F23 gene	ncRNA
MACS_peak_9939	chr7	64762666	64766489	+	2367	NA	intron (NM_176942, intron 1 of 9)	CpG	802	NM_176942	110886	Mm.273114	NM_176942	ENSMUSG00000055078	Gabra5	A230018I05Rik	gamma-aminobutyric acid (GABA) A receptor, subunit alpha 5	protein-coding
MACS_peak_9027	chr5	152035311	152036580	+	2367	NA	Intergenic	Intergenic	-43177	NM_146258	243362	Mm.209272	NM_146258	ENSMUSG00000016128	Stard13	DLC2|GT650	StAR-related lipid transfer (START) domain containing 13	protein-coding
MACS_peak_10558	chr8	23336714	23339121	+	2367	NA	intron (NM_001205253, intron 1 of 3)	CpG	142	NM_001293688	56229	Mm.32067	NM_019576	ENSMUSG00000031480	Thsd1	4833423O18Rik|Tmtsp	thrombospondin, type I, domain 1	protein-coding
MACS_peak_10138	chr7	107325878	107328390	+	2367	NA	promoter-TSS (NM_001190871)	promoter-TSS (NM_001190871)	-59	NM_001190870	57442	Mm.282386	NM_020574	ENSMUSG00000035165	Kcne3	2210017H05Rik|MiRP2	potassium voltage-gated channel, Isk-related subfamily, gene 3	protein-coding
MACS_peak_642	chr1	174254643	174257165	+	2367	NA	exon (NM_008429, exon 3 of 4)	exon (NM_008429, exon 3 of 4)	3490	NM_008429	16524	Mm.261168	NM_008429	ENSMUSG00000038026	Kcnj9	1700085N21Rik|Girk3|Kir3.3|mbGIRK3	potassium inwardly-rectifying channel, subfamily J, member 9	protein-coding
MACS_peak_2546	chr12	102956059	102957296	+	2367	NA	promoter-TSS (NM_001082976)	promoter-TSS (NM_001082976)	56	NM_001082976	74413	Mm.275939	NM_028924	ENSMUSG00000021187	Tc2n	4933406D09Rik|Mtac2d1|Tac2-N	tandem C2 domains, nuclear	protein-coding
MACS_peak_436	chr1	120523337	120525454	+	2367	NA	promoter-TSS (NM_023755)	promoter-TSS (NM_023755)	-127	NM_023755	81879	Mm.24621	NM_023755	ENSMUSG00000026380	Tfcp2l1	1810030F05Rik|4932442M07Rik|AA575098|Cp2l1|Crtr-1|D930018N21Rik|LBP-9|Tcfcp2l1	transcription factor CP2-like 1	protein-coding
MACS_peak_5690	chr19	47087053	47091651	+	2367	NA	exon (NM_146100, exon 1 of 3)	exon (NM_146100, exon 1 of 3)	164	NM_146100	226180	Mm.276251	NM_146100		Ina	AV028420|NF-66|NF66	internexin neuronal intermediate filament protein, alpha	protein-coding
MACS_peak_2592	chr12	109939564	109942201	+	2367	NA	promoter-TSS (NM_001171002)	promoter-TSS (NM_001171002)	-366	NM_027299	70059	Mm.207605	NM_027299	ENSMUSG00000021263	Degs2	2210008A03Rik|AI852933|DES2	degenerative spermatocyte homolog 2 (Drosophila), lipid desaturase	protein-coding
MACS_peak_4122	chr15	103169072	103171249	+	2367	NA	intron (NM_013866, intron 1 of 7)	intron (NM_013866, intron 1 of 7)	357	NM_013866	29813	Mm.14099	NM_013866	ENSMUSG00000000552	Zfp385a	Hzf|Zfp385|Znf385a	zinc finger protein 385A	protein-coding
MACS_peak_8449	chr5	64039273	64042190	+	2367	NA	5' UTR (NM_177006, exon 1 of 7)	5' UTR (NM_177006, exon 1 of 7)	389	NM_177006	319807	Mm.319487	NM_028470	ENSMUSG00000090061	Nwd2	3110047P20Rik|B830017A01Rik|Hn1-ps2|mKIAA1239	NACHT and WD repeat domain containing 2	protein-coding
MACS_peak_994	chr10	76628403	76629951	+	2367	NA	promoter-TSS (NM_009929)	promoter-TSS (NM_009929)	98	NM_009929	12822	Mm.4352	NM_009929	ENSMUSG00000001435	Col18a1	-	collagen, type XVIII, alpha 1	protein-coding
MACS_peak_7181	chr3	106903331	106906641	+	2367	NA	intron (NM_008417, intron 1 of 2)	CpG	501	NM_008417	16490	Mm.39285	NM_008417		Kcna2	Akr6a4|ENSMUSG00000074335|Gm10672|Kca1-2|Kv1.2|Mk-2	potassium voltage-gated channel, shaker-related subfamily, member 2	protein-coding
MACS_peak_5842	chr2	21289234	21291656	+	2367	NA	exon (NM_001004761, exon 1 of 11)	exon (NM_001004761, exon 1 of 11)	1251	NM_001004761	241263	Mm.166647	NM_175706	ENSMUSG00000045967	Gpr158	5330427M13Rik|mKIAA1136	G protein-coupled receptor 158	protein-coding
MACS_peak_5138	chr18	40416613	40417484	+	2367	NA	promoter-TSS (NM_026135)	promoter-TSS (NM_026135)	432	NR_045177	73001	Mm.428647	NR_045177		2900055J20Rik	-	RIKEN cDNA 2900055J20 gene	ncRNA
MACS_peak_2075	chr11	105828224	105830318	+	2367	NA	promoter-TSS (NM_207624)	promoter-TSS (NM_207624)	12	NM_207624	11421	Mm.754	NM_009598	ENSMUSG00000020681	Ace	AW208573|CD143	angiotensin I converting enzyme (peptidyl-dipeptidase A) 1	protein-coding
MACS_peak_546	chr1	153418326	153419599	+	2367	NA	intron (NM_022018, intron 1 of 13)	intron (NM_022018, intron 1 of 13)	459	NM_022018	63913	Mm.157700	NM_022018		Fam129a	AI256368|AU019833|Niban	family with sequence similarity 129, member A	protein-coding
MACS_peak_10777	chr8	82579385	82582762	+	2367	NA	intron (NM_020259, intron 1 of 12)	intron (NM_020259, intron 1 of 12)	834	NM_020259	15245	Mm.254493	NM_020259		Hhip	Hhip1	Hedgehog-interacting protein	protein-coding
MACS_peak_9607	chr7	3423812	3426204	+	2367	NA	promoter-TSS (NM_133183)	promoter-TSS (NM_133183)	-415	NM_133183	54378	Mm.424047	NM_133183		Cacng6	2310033H20Rik|AW050150	calcium channel, voltage-dependent, gamma subunit 6	protein-coding
MACS_peak_12054	chrX	166445670	166446757	+	2351	NA	Intergenic	Intergenic	-29364	NR_029457	654820	Mm.34441	NM_001039559	ENSMUSG00000072844	G530011O06Rik	-	RIKEN cDNA G530011O06 gene	ncRNA
MACS_peak_7046	chr3	89122313	89125812	+	2314	NA	intron (NM_010108, intron 1 of 4)	CpG	2739	NM_010108	13638	Mm.331159	NM_010108		Efna3	AW494418|EFL-2|Ehk1-L|Epl3|LERK-3	ephrin A3	protein-coding
MACS_peak_4171	chr16	11980834	11985722	+	2314	NA	promoter-TSS (NM_001174086)	promoter-TSS (NM_001174086)	-928	NM_028277	72555	Mm.310139	NM_028277	ENSMUSG00000022494	Shisa9	2700045P11Rik|Ckamp44	shisa homolog 9 (Xenopus laevis)	protein-coding
MACS_peak_2395	chr12	59311921	59315761	+	2314	NA	exon (NM_009216, exon 2 of 2)	exon (NM_009216, exon 2 of 2)	1050	NM_009216	20605	Mm.278336	NM_009216		Sstr1	SRIF-2|SS-1-R|SS1-R|SS1R|Smstr-1|Smstr1|sst1	somatostatin receptor 1	protein-coding
MACS_peak_7744	chr4	120338911	120340791	+	2314	NA	exon (NM_019563, exon 1 of 1)	exon (NM_019563, exon 1 of 1)	683	NM_019563	56222	Mm.272646	NM_019563	ENSMUSG00000070803	Cited4	MRG-2|Mrg2	Cbp/p300-interacting transactivator, with Glu/Asp-rich carboxy-terminal domain, 4	protein-coding
MACS_peak_730	chr1	193219598	193220263	+	2314	NA	intron (NM_144880, intron 1 of 12)	intron (NM_144880, intron 1 of 12)	990	NM_144880	226849	Mm.205569	NM_144880	ENSMUSG00000026626	Ppp2r5a	PR61alpha	protein phosphatase 2, regulatory subunit B', alpha	protein-coding
MACS_peak_8165	chr4	153673171	153675828	+	2314	NA	promoter-TSS (NM_001112744)	promoter-TSS (NM_001112744)	-495	NM_001112744	230972	Mm.38481	NM_001112744	ENSMUSG00000029032	Arhgef16	-	Rho guanine nucleotide exchange factor (GEF) 16	protein-coding
MACS_peak_3562	chr14	102127702	102130000	+	2314	NA	promoter-TSS (NM_201529)	promoter-TSS (NM_201529)	-294	NM_201529	380928	Mm.218981	NM_201529	ENSMUSG00000033060	Lmo7	C78582|FBXO20|Gm914|mKIAA0858	LIM domain only 7	protein-coding
MACS_peak_5847	chr2	22476234	22477536	+	2295	NA	promoter-TSS (NM_008078)	promoter-TSS (NM_008078)	-962	NM_008078	14417	Mm.4784	NM_008078	ENSMUSG00000026787	Gad2	6330404F12Rik|GAD(65)|GAD65|Gad-2	glutamic acid decarboxylase 2	protein-coding
MACS_peak_1283	chr10	128179838	128182067	+	2291	NA	5' UTR (NM_016811, exon 1 of 24)	5' UTR (NM_016811, exon 1 of 24)	160	NM_016811	13139	Mm.291235	NM_016811	ENSMUSG00000025357	Dgka	80kDa|AW146112|Dagk1	diacylglycerol kinase, alpha	protein-coding
MACS_peak_969	chr10	69706557	69709338	+	2291	NA	promoter-TSS (NM_025807)	promoter-TSS (NM_025807)	-77	NM_025807	66859	Mm.19325	NM_025807	ENSMUSG00000037762	Slc16a9	1200003C15Rik|4930425B13Rik|AI552636	solute carrier family 16 (monocarboxylic acid transporters), member 9	protein-coding
MACS_peak_9293	chr6	72329945	72330727	+	2291	NA	intron (NM_016872, intron 1 of 2)	CpG	126	NM_016872	53620	Mm.440321	NM_016872	ENSMUSG00000073002	Vamp5	AF119384|Camp	vesicle-associated membrane protein 5	protein-coding
MACS_peak_108	chr1	39707396	39709547	+	2291	NA	promoter-TSS (NM_170597)	promoter-TSS (NM_170597)	-444	NM_170597	263764	Mm.122091	NM_170597	ENSMUSG00000050967	Creg2	A830098L22Rik	cellular repressor of E1A-stimulated genes 2	protein-coding
MACS_peak_1603	chr11	62944182	62947510	+	2291	NA	intron (NM_008885, intron 1 of 4)	intron (NM_008885, intron 1 of 4)	834	NM_008885	18858	Mm.1237	NM_008885	ENSMUSG00000018217	Pmp22	22kDa|Gas-3|HNPP|Tr|trembler	peripheral myelin protein 22	protein-coding
MACS_peak_4580	chr17	25390615	25393735	+	2291	NA	intron (NM_001163270, intron 1 of 33)	intron (NM_001163270, intron 1 of 33)	1134	NM_001163270	545192	Mm.328859	NM_001163270	ENSMUSG00000047507	Baiap3	Bap3|Gm937	BAI1-associated protein 3	protein-coding
MACS_peak_5280	chr18	75978514	75982085	+	2291	NA	intron (NM_145356, intron 1 of 4)	CpG	467	NM_145356	207259	Mm.159332	NM_145356	ENSMUSG00000044646	Zbtb7c	B230208J24Rik|Kr-pok|Zbtb36	zinc finger and BTB domain containing 7C	protein-coding
MACS_peak_963	chr10	67374385	67375684	+	2291	NA	intron (NM_178679, intron 1 of 4)	CpG	376	NM_178679	216049	Mm.268346	NM_178679	ENSMUSG00000037855	Zfp365	AI839779|AV340892|DBZ|Su48|Znf365|talanin	zinc finger protein 365	protein-coding
MACS_peak_11889	chrX	91610836	91611684	+	2291	NA	Intergenic	Intergenic	-1189	NM_026673	68316	Mm.379156	NM_026673	ENSMUSG00000079508	Apoo	0610008C08Rik|1110019O03Rik	apolipoprotein O	protein-coding
MACS_peak_482	chr1	133963936	133966281	+	2291	NA	promoter-TSS (NM_172510)	promoter-TSS (NM_172510)	-469	NM_001114662	213006	Mm.208445	NM_172510	ENSMUSG00000059149	Mfsd4	A230072B04|A930031D07Rik|AI850289	major facilitator superfamily domain containing 4	protein-coding
MACS_peak_6452	chr2	146046236	146054579	+	2291	NA	3' UTR (NM_016889, exon 1 of 1)	3' UTR (NM_016889, exon 1 of 1)	2674	NM_016889	53626	Mm.379070	NM_016889	ENSMUSG00000068154	Insm1	IA-1	insulinoma-associated 1	protein-coding
MACS_peak_7760	chr4	122792793	122794646	+	2291	NA	exon (NM_181859, exon 1 of 1)	exon (NM_181859, exon 1 of 1)	228	NM_181859	353371	Mm.189660	NM_181859	ENSMUSG00000076438	Oxct2b	Scot-t2	3-oxoacid CoA transferase 2B	protein-coding
MACS_peak_6202	chr2	91094601	91097144	+	2291	NA	promoter-TSS (NM_001289677)	promoter-TSS (NM_001289677)	-450	NM_001289677	80708	Mm.236650	NM_028733	ENSMUSG00000027257	Pacsin3	4921507A02Rik|6330413E15Rik|AW413130	protein kinase C and casein kinase substrate in neurons 3	protein-coding
MACS_peak_3892	chr15	82036845	82038666	+	2291	NA	exon (NM_001207021, exon 4 of 4)	exon (NM_001207021, exon 4 of 4)	5490	NM_001207021	435145	Mm.41289	NM_001207021	ENSMUSG00000096883	AI848285	Orf26	expressed sequence AI848285	protein-coding
MACS_peak_2690	chr13	10358055	10359759	+	2291	NA	intron (NM_033269, intron 1 of 4)	intron (NM_033269, intron 1 of 4)	1142	NM_033269	12671	Mm.342315	NM_033269		Chrm3	Chrm-3|M3|M3R	cholinergic receptor, muscarinic 3, cardiac	protein-coding
MACS_peak_3638	chr14	122803759	122807893	+	2291	NA	intron (NR_033326, intron 1 of 3)	CpG	44511	NR_033325	328479	Mm.86095	NR_033325	ENSMUSG00000064052	Gm5089	6530402A20|C030005G22Rik|EG328479	predicted gene 5089	ncRNA
MACS_peak_9624	chr7	5003518	5010565	+	2291	NA	promoter-TSS (NM_001290429)	promoter-TSS (NM_001290429)	-713	NM_001290429	232821	Mm.482157	NM_146178	ENSMUSG00000035228	Ccdc106	BC018462	coiled-coil domain containing 106	protein-coding
MACS_peak_505	chr1	136409076	136411609	+	2291	NA	Intergenic	Intergenic	19105	NM_145510	98710	Mm.198119	NM_145510	ENSMUSG00000042229	Rabif	AI842864|AW549708|E130318E12Rik|MSS4|RASGFR3	RAB interacting factor	protein-coding
MACS_peak_6294	chr2	115681566	115686870	+	2291	NA	Intergenic	Intergenic	206139	NM_001159569	17536	Mm.247566	NM_010825	ENSMUSG00000027210	Meis2	A430109D20Rik|Mrg1|Stra10	Meis homeobox 2	protein-coding
MACS_peak_6081	chr2	60717666	60721273	+	2291	NA	promoter-TSS (NM_001141931)	promoter-TSS (NM_001141931)	26	NM_001141932	56878	Mm.259667	NM_020296	ENSMUSG00000026970	Rbms1	2600014B10Rik|AI255215|MSSP-1|MSSP-2|MSSP-3|YC1	RNA binding motif, single stranded interacting protein 1	protein-coding
MACS_peak_9025	chr5	151753599	151756587	+	2291	NA	promoter-TSS (NM_013823)	promoter-TSS (NM_013823)	-89	NM_013823	16591	Mm.6500	NM_013823	ENSMUSG00000058488	Kl	alpha-kl	klotho	protein-coding
MACS_peak_6062	chr2	58208642	58211457	+	2291	NA	exon (NM_001111030, exon 1 of 9)	exon (NM_001111030, exon 1 of 9)	120	NM_001111030	269275	Mm.77751	NM_001033369	ENSMUSG00000026834	Acvr1c	ACVRLK7|ALK7|Alk-7|C230097P10	activin A receptor, type IC	protein-coding
MACS_peak_9300	chr6	81990575	81994373	+	2291	NA	intron (NM_145570, intron 1 of 2)	intron (NM_145570, intron 1 of 2)	852	NM_145570	232146	Mm.489683	NM_145570	ENSMUSG00000035104	Eva1a	BC014699|Fam176a|Tmem166	eva-1 homolog A (C. elegans)	protein-coding
MACS_peak_2255	chr12	14155661	14159116	+	2291	NA	exon (NM_029007, exon 2 of 2)	exon (NM_029007, exon 2 of 2)	1456	NM_029007	105005	Mm.227253	NM_029007	ENSMUSG00000020607	Fam84a	2310003N02Rik|4731402F03Rik|AW125753|Nse1	family with sequence similarity 84, member A	protein-coding
MACS_peak_8341	chr5	30890595	30893573	+	2291	NA	intron (NM_010608, intron 1 of 1)	intron (NM_010608, intron 1 of 1)	-1092	NR_040427	100502829	Mm.39944	NR_040427		Gm9899	ENSMUSG00000053214	predicted gene 9899	ncRNA
MACS_peak_5692	chr19	47252194	47256164	+	2291	NA	intron (NM_021360, intron 1 of 5)	intron (NM_021360, intron 1 of 5)	869	NM_021360	18011	Mm.313651	NM_021360	ENSMUSG00000006435	Neurl1a	2410129E16Rik|AI450910|AI481072|Neu1|Neur1|Neurl|Neurl1|Nlz|Rnf67	neuralized homolog 1A (Drosophila)	protein-coding
MACS_peak_3538	chr14	79124255	79126660	+	2291	NA	promoter-TSS (NM_001081336)	promoter-TSS (NM_001081336)	-561	NM_001081336	380921	Mm.89591	NM_001081336	ENSMUSG00000034731	Dgkh	5930402B05Rik|D130015C16	diacylglycerol kinase, eta	protein-coding
MACS_peak_1770	chr11	79967212	79968483	+	2291	NA	intron (NM_172133, intron 1 of 10)	CpG	183	NM_172133	216991	Mm.341520	NM_172133	ENSMUSG00000020709	Adap2	Centa2	ArfGAP with dual PH domains 2	protein-coding
MACS_peak_9970	chr7	73532345	73533502	+	2291	NA	intron (NM_146191, intron 1 of 33)	CpG	304	NM_146191	233328	Mm.33284	NM_146191	ENSMUSG00000015133	Lrrk1	AW319595|C230002E15Rik|D130026O16Rik|mKIAA1790	leucine-rich repeat kinase 1	protein-coding
MACS_peak_2800	chr13	37918312	37921508	+	2291	NA	intron (NM_001039188, intron 1 of 9)	intron (NM_001039188, intron 1 of 9)	648	NM_001039188	68750	Mm.491109	NM_026830	ENSMUSG00000039087	Rreb1	1110037N09Rik|AA414966|B930013M22Rik	ras responsive element binding protein 1	protein-coding
MACS_peak_8401	chr5	37417761	37422119	+	2291	NA	Intergenic	CpG	-22156	NM_178394	76071	Mm.85280	NM_178394	ENSMUSG00000063646	Jakmip1	5830437M04Rik|C330021K24Rik|Gababrbp|Marlin-1	janus kinase and microtubule interacting protein 1	protein-coding
MACS_peak_11388	chr9	54827476	54831134	+	2291	NA	intron (NM_176844, intron 1 of 5)	CpG	618	NM_176844	110835	Mm.103778	NM_176844	ENSMUSG00000035594	Chrna5	Acra-5|Acra5	cholinergic receptor, nicotinic, alpha polypeptide 5	protein-coding
MACS_peak_7743	chr4	120321229	120323797	+	2291	NA	Intergenic	CpG	-16655	NM_019563	56222	Mm.272646	NM_019563	ENSMUSG00000070803	Cited4	MRG-2|Mrg2	Cbp/p300-interacting transactivator, with Glu/Asp-rich carboxy-terminal domain, 4	protein-coding
MACS_peak_9062	chr6	17255590	17258218	+	2291	NA	promoter-TSS (NM_001243064)	promoter-TSS (NM_001243064)	569	NM_007616	12389	Mm.28278	NM_007616	ENSMUSG00000007655	Cav1	Cav|Cav-1	caveolin 1, caveolae protein	protein-coding
MACS_peak_11529	chr9	74708118	74712555	+	2275	NA	exon (NM_008262, exon 1 of 2)	exon (NM_008262, exon 1 of 2)	608	NM_008262	15379	Mm.303355	NM_008262		Onecut1	D9Ertd423e|HNF-6|Hfh12|Hnf6|Hnf6b|OC-1|Oc1	one cut domain, family member 1	protein-coding
MACS_peak_965	chr10	68860883	68864191	+	2275	NA	Intergenic	Intergenic	-46877	NM_007659	12534	Mm.281367	NM_007659	ENSMUSG00000019942	Cdk1	Cdc2|Cdc2a|p34<CDC2>	cyclin-dependent kinase 1	protein-coding
MACS_peak_6840	chr3	30548288	30551456	+	2270	NA	exon (NM_001290510, exon 2 of 6)	exon (NM_001290510, exon 2 of 6)	3064	NM_001290510	68307	Mm.389425	NM_026668	ENSMUSG00000027703	Lrriq4	4930558O21Rik	leucine-rich repeats and IQ motif containing 4	protein-coding
MACS_peak_6186	chr2	84679325	84681538	+	2270	NA	promoter-TSS (NM_001083809)	promoter-TSS (NM_001083809)	-49	NM_024497	72401	Mm.22716	NM_024497	ENSMUSG00000027075	Slc43a1	2610016F07Rik|AA986141|Lat3|PB39|Pov1|R00504	solute carrier family 43, member 1	protein-coding
MACS_peak_40	chr1	18046979	18048031	+	2270	NA	Intergenic	Intergenic	79627	NM_030033	78081	Mm.319913	NM_030033	ENSMUSG00000025774	Crisp4	9230112K08Rik	cysteine-rich secretory protein 4	protein-coding
MACS_peak_5387	chr19	5653905	5655814	+	2270	NA	exon (NM_001164568, exon 8 of 16)	exon (NM_001164568, exon 8 of 16)	8848	NM_001164482	20469	Mm.3072	NM_011379	ENSMUSG00000056917	Sipa1	Spa1	signal-induced proliferation associated gene 1	protein-coding
MACS_peak_1739	chr11	77275410	77276757	+	2270	NA	Intergenic	CpG	-1332	NM_139129	216961	Mm.33477	NM_139128	ENSMUSG00000020836	Coro6	-	coronin 6	protein-coding
MACS_peak_1968	chr11	98197764	98202172	+	2270	NA	Intergenic	CpG	-9009	NM_010895	18013	Mm.4814	NM_010895	ENSMUSG00000038255	Neurod2	Ndrf|bHLHa1	neurogenic differentiation 2	protein-coding
MACS_peak_4248	chr16	23983686	23985875	+	2270	NA	intron (NM_009744, intron 1 of 9)	GA-rich|Low_complexity|Low_complexity	3918	NM_009744	12053	Mm.347398	NM_009744	ENSMUSG00000022508	Bcl6	Bcl5	B cell leukemia/lymphoma 6	protein-coding
MACS_peak_2320	chr12	50473761	50475855	+	2270	NA	Intergenic	GA-rich|Low_complexity|Low_complexity	-9062	NM_001160112	15228	Mm.4704	NM_008241	ENSMUSG00000020950	Foxg1	2900064B05Rik|BF-1|Bf1|Hfh9|Hfhbf1	forkhead box G1	protein-coding
MACS_peak_887	chr10	45008299	45009814	+	2270	NA	promoter-TSS (NM_024286)	promoter-TSS (NM_024286)	-55	NM_024286	78977	Mm.24748	NM_024286	ENSMUSG00000019848	Popdc3	AA682104|Pop3	popeye domain containing 3	protein-coding
MACS_peak_10629	chr8	37674557	37676442	+	2270	NA	intron (NM_001194940, intron 5 of 17)	intron (NM_001194940, intron 5 of 17)	1498	NM_015802	50768	Mm.125155	NM_015802	ENSMUSG00000031523	Dlc1	A730069N07Rik|Arhgap7|HP|STARD12|dlc-1	deleted in liver cancer 1	protein-coding
MACS_peak_1385	chr11	18907311	18909044	+	2270	NA	intron (NM_010789, intron 6 of 11)	intron (NM_010789, intron 6 of 11)	10795	NM_001193271	17268	Mm.356578	NM_010789	ENSMUSG00000020160	Meis1	C530044H18Rik|Evi8	Meis homeobox 1	protein-coding
MACS_peak_3123	chr13	99342051	99346125	+	2270	NA	Intergenic	CpG	63277	NM_026685	68344	Mm.28766	NM_026685	ENSMUSG00000046082	Tmem174	0610009B10Rik|AA986094	transmembrane protein 174	protein-coding
MACS_peak_3278	chr14	27926630	27928477	+	2270	NA	Intergenic	Intergenic	-29626	NM_001289686	71704	Mm.248606	NM_027871	ENSMUSG00000021895	Arhgef3	1200004I24Rik|9830169H03Rik|C76747|Xpln	Rho guanine nucleotide exchange factor (GEF) 3	protein-coding
MACS_peak_11406	chr9	56644480	56647063	+	2270	NA	Intergenic	Intergenic	53999	NM_198673	382075	Mm.335177	NM_198673	ENSMUSG00000045620	Odf3l1	BC049697|Gm1116	outer dense fiber of sperm tails 3-like 1	protein-coding
MACS_peak_11756	chr9	120212179	120215729	+	2270	NA	intron (NM_144557, intron 1 of 16)	intron (NM_144557, intron 1 of 16)	763	NM_144557	245049	Mm.100936	NM_144557	ENSMUSG00000041794	Myrip	A230081N12Rik|Slac2-c|Slac2c	myosin VIIA and Rab interacting protein	protein-coding
MACS_peak_11892	chrX	95343433	95347521	+	2241	NA	exon (NM_013476, exon 1 of 8)	exon (NM_013476, exon 1 of 8)	388	NM_013476	11835	Mm.39005	NM_013476		Ar	AW320017|Tfm	androgen receptor	protein-coding
MACS_peak_9023	chr5	151394953	151398475	+	2241	NA	intron (NM_133898, intron 1 of 4)	CpG	386	NM_133898	100637	Mm.279932	NM_133898	ENSMUSG00000041132	N4bp2l1	2410024N18Rik|AI428195|B230342M21Rik	NEDD4 binding protein 2-like 1	protein-coding
MACS_peak_4353	chr16	57549089	57550042	+	2241	NA	intron (NM_001177871, intron 1 of 1)	CpG	210	NM_001177871	78749	Mm.328360	NM_001040397	ENSMUSG00000043336	Filip1l	4631422O05Rik|Doc1	filamin A interacting protein 1-like	protein-coding
MACS_peak_8477	chr5	69731085	69733115	+	2241	NA	exon (NM_175519, exon 1 of 2)	exon (NM_175519, exon 1 of 2)	848	NM_175519	243043	Mm.234821	NM_175519	ENSMUSG00000037653	Kctd8	A730087N02Rik	potassium channel tetramerisation domain containing 8	protein-coding
MACS_peak_3408	chr14	56384680	56387503	+	2241	NA	exon (NM_008519, exon 2 of 2)	exon (NM_008519, exon 2 of 2)	1292	NM_008519	16995	Mm.20853	NM_008519	ENSMUSG00000046908	Ltb4r1	BLT1|BLTR|Ltb4r|mBLTR	leukotriene B4 receptor 1	protein-coding
MACS_peak_3685	chr15	25550889	25554200	+	2241	NA	5' UTR (NM_019472, exon 1 of 41)	5' UTR (NM_019472, exon 1 of 41)	239	NM_019472	17909	Mm.60590	NM_019472	ENSMUSG00000022272	Myo10	AW048724|D15Ertd600e|mKIAA0799	myosin X	protein-coding
MACS_peak_1805	chr11	83879194	83882862	+	2241	NA	intron (NM_019819, intron 1 of 2)	intron (NM_019819, intron 1 of 2)	831	NM_019819	56405	Mm.240885	NM_019819	ENSMUSG00000018648	Dusp14	1110014C10Rik|2310042C07Rik|D11Ertd395e|MKP-L|Mkp6	dual specificity phosphatase 14	protein-coding
MACS_peak_7260	chr3	130813846	130816529	+	2241	NA	promoter-TSS (NM_001276403)	promoter-TSS (NM_001276403)	-522	NM_001276403	16842	Mm.255219	NM_010703	ENSMUSG00000027985	Lef1	3000002B05|AI451430|Lef-1	lymphoid enhancer binding factor 1	protein-coding
MACS_peak_5418	chr19	8326674	8327163	+	2241	NA	Intergenic	LSU-rRNA_Hsa|rRNA|rRNA	-33589	NM_172776	236293	Mm.440581	NM_172776	ENSMUSG00000075044	Slc22a29	D630002G06Rik	solute carrier family 22. member 29	protein-coding
MACS_peak_10431	chr7	152080171	152084921	+	2241	NA	5' UTR (NM_008003, exon 1 of 3)	5' UTR (NM_008003, exon 1 of 3)	109	NM_008003	14170	Mm.3904	NM_008003	ENSMUSG00000031073	Fgf15	FGF19	fibroblast growth factor 15	protein-coding
MACS_peak_7229	chr3	123148142	123150699	+	2241	NA	promoter-TSS (NM_008939)	promoter-TSS (NM_008939)	-411	NM_008939	19142	Mm.9431	NM_008939	ENSMUSG00000027978	Prss12	Bssp-3|motopsin	protease, serine 12 neurotrypsin (motopsin)	protein-coding
MACS_peak_4200	chr16	17830442	17837429	+	2241	NA	intron (NR_027959, intron 1 of 1)	CpG	723	NR_027959	433004	Mm.310200	NM_001002790		B830017H08Rik	-	RIKEN cDNA B830017H08 gene	ncRNA
MACS_peak_11882	chrX	90529364	90538381	+	2241	NA	intron (NM_007492, intron 1 of 4)	CpG	1887	NM_007492	11878	Mm.275547	NM_007492	ENSMUSG00000035277	Arx	-	aristaless related homeobox	protein-coding
MACS_peak_5397	chr19	6399444	6402867	+	2241	NA	intron (NM_011242, intron 1 of 16)	intron (NM_011242, intron 1 of 16)	572	NM_011242	19395	Mm.77017	NM_011242	ENSMUSG00000032946	Rasgrp2	CDC25L|Caldaggef1	RAS, guanyl releasing protein 2	protein-coding
MACS_peak_3703	chr15	34765378	34769495	+	2241	NA	promoter-TSS (NM_001271704)	promoter-TSS (NM_001271704)	326	NM_181317	16539	Mm.71045	NM_181317		Kcns2	E130006J24Rik|Kv9.2	K+ voltage-gated channel, subfamily S, 2	protein-coding
MACS_peak_2474	chr12	81210654	81217445	+	2241	NA	promoter-TSS (NM_007564)	promoter-TSS (NM_007564)	-49	NM_007564	12192	Mm.235132	NM_007564	ENSMUSG00000021127	Zfp36l1	AW742437|AW743212|Berg36|Brf1|D530020L18Rik|ERF1|TIS11b|cMG1	zinc finger protein 36, C3H type-like 1	protein-coding
MACS_peak_3479	chr14	68549672	68552468	+	2241	NA	intron (NM_177780, intron 1 of 51)	intron (NM_177780, intron 1 of 51)	559	NM_177780	68813	Mm.258155	NM_177780	ENSMUSG00000044447	Dock5	1110060D06Rik|AI666732|AI956923|BC016533|E130320D18|lr2|rlc	dedicator of cytokinesis 5	protein-coding
MACS_peak_5532	chr19	34819381	34822524	+	2241	NA	intron (NM_172838, intron 1 of 6)	intron (NM_172838, intron 1 of 6)	649	NM_172838	240638	Mm.74636	NM_172838	ENSMUSG00000009378	Slc16a12	3230401A21|AW210596	solute carrier family 16 (monocarboxylic acid transporters), member 12	protein-coding
MACS_peak_4070	chr15	101688830	101691476	+	2241	NA	TTS (NM_001003667)	TTS (NM_001003667)	-8936	NM_008473	16678	Mm.183137	NM_008473	ENSMUSG00000046834	Krt1	Krt-2.1|Krt2-1|Krt86	keratin 1	protein-coding
MACS_peak_8000	chr4	140253481	140258357	+	2241	NA	Intergenic	Intergenic	-1469	NM_173867	108911	Mm.253	NM_173867	ENSMUSG00000040945	Rcc2	2610510H01Rik|2610529N02Rik|AA536646|AA675016|Td60|mKIAA1470	regulator of chromosome condensation 2	protein-coding
MACS_peak_7417	chr4	42928210	42930935	+	2241	NA	promoter-TSS (NM_172690)	promoter-TSS (NM_172690)	-551	NM_172690	230085	Mm.240965	NM_172690	ENSMUSG00000036062	N28178	A230025O18|Kiaa1045|mKIAA1045	expressed sequence N28178	protein-coding
MACS_peak_5190	chr18	58995238	58998316	+	2241	NA	intron (NM_175506, intron 1 of 22)	CpG	359	NM_175506	240322	Mm.71963	NM_175506	ENSMUSG00000053441	Adamts19	4831407I23Rik|AU015154|D230034E10Rik	a disintegrin-like and metallopeptidase (reprolysin type) with thrombospondin type 1 motif, 19	protein-coding
MACS_peak_11792	chrX	6354695	6358658	+	2241	NA	exon (NM_177914, exon 1 of 28)	exon (NM_177914, exon 1 of 28)	244	NM_177914	331374	Mm.392752	NM_177914	ENSMUSG00000062393	Dgkk	Gm360	diacylglycerol kinase kappa	protein-coding
MACS_peak_7155	chr3	102272299	102275369	+	2241	NA	promoter-TSS (NM_013609)	promoter-TSS (NM_013609)	-8	NM_001112698	18049	Mm.1259	NM_013609	ENSMUSG00000027859	Ngf	Ngfb	nerve growth factor	protein-coding
MACS_peak_1317	chr11	3529181	3529772	+	2241	NA	Intergenic	CpG	18063	NR_110490	544752	Mm.390314	NR_002321	ENSMUSG00000056579	Tug1	AI316828	taurine upregulated gene 1	ncRNA
MACS_peak_4879	chr17	70318229	70320208	+	2241	NA	Intergenic	CpG	-454914	NM_177639	224997	Mm.311840	NM_027712	ENSMUSG00000003279	Dlgap1	4933422O14Rik|9630002F18|AI845682|AI848168|BB075781|D17Bwg0511e|GKAP/SAPAP|GKPA/SAPAP|Gkap|Sapap1|mKIAA4162	discs, large (Drosophila) homolog-associated protein 1	protein-coding
MACS_peak_2709	chr13	16109289	16110833	+	2241	NA	intron (NM_008380, intron 2 of 2)	intron (NM_008380, intron 2 of 2)	3753	NM_008380	16323	Mm.8042	NM_008380	ENSMUSG00000041324	Inhba	-	inhibin beta-A	protein-coding
MACS_peak_2049	chr11	103058278	103062880	+	2241	NA	TTS (NM_019679)	TTS (NM_019679)	9283	NM_001254724	69441	Mm.380648	NM_027082	ENSMUSG00000020940	1700023F06Rik	-	RIKEN cDNA 1700023F06 gene	protein-coding
MACS_peak_4509	chr17	6985831	6988514	+	2241	NA	promoter-TSS (NM_009510)	promoter-TSS (NM_009510)	-43	NM_009510	22350	Mm.277812	NM_009510	ENSMUSG00000052397	Ezr	AW146364|R75297|Vil2|p81	ezrin	protein-coding
MACS_peak_9406	chr6	99640956	99644353	+	2241	NA	promoter-TSS (NM_008158)	promoter-TSS (NM_008158)	-19	NM_008158	14761	Mm.35009	NM_008158	ENSMUSG00000072875	Gpr27	-	G protein-coupled receptor 27	protein-coding
MACS_peak_5827	chr2	18600753	18604402	+	2241	NA	intron (NM_007552, intron 1 of 9)	CpG	3932	NM_007552	12151	Mm.289584	NM_007552	ENSMUSG00000026739	Bmi1	AW546694|Bmi-1|Pcgf4	Bmi1 polycomb ring finger oncogene	protein-coding
MACS_peak_11621	chr9	97931513	97935073	+	2241	NA	exon (NM_022319, exon 1 of 18)	exon (NM_022319, exon 1 of 18)	293	NM_022319	64085	Mm.440903	NM_022319	ENSMUSG00000032452	Clstn2	2900042C18Rik|AI448973|CSTN2|Cs2|Cst-2|mKIAA4134	calsyntenin 2	protein-coding
MACS_peak_254	chr1	75481066	75485939	+	2241	NA	intron (NM_178884, intron 18 of 19)	CpG	7395	NM_177056	319998	Mm.44401	NM_177056	ENSMUSG00000051703	Tmem198	A230078I05Rik|Tmem198-1|Tmem198a	transmembrane protein 198	protein-coding
MACS_peak_9565	chr6	137595758	137598315	+	2241	NA	intron (NM_007945, intron 1 of 21)	intron (NM_007945, intron 1 of 21)	770	NM_001271588	13860	Mm.235346	NM_007945	ENSMUSG00000015766	Eps8	AW261790	epidermal growth factor receptor pathway substrate 8	protein-coding
MACS_peak_7736	chr4	119703821	119707185	+	2241	NA	intron (NM_010657, intron 2 of 8)	CpG	-128526	NM_007902	13615	Mm.284855	NM_007902	ENSMUSG00000028635	Edn2	VIC	endothelin 2	protein-coding
MACS_peak_2019	chr11	101822999	101826791	+	2229	NA	3' UTR (NM_024449, exon 2 of 2)	3' UTR (NM_024449, exon 2 of 2)	3434	NM_024449	74499	Mm.265602	NM_024449	ENSMUSG00000001494	Sost	5430411E23Rik	sclerostin	protein-coding
MACS_peak_1264	chr10	127098950	127105552	+	2210	NA	intron (NM_001122895, intron 1 of 5)	intron (NM_001122895, intron 1 of 5)	1508	NM_001122895	17937	Mm.336898	NM_008668	ENSMUSG00000025402	Nab2	AI451907	Ngfi-A binding protein 2	protein-coding
MACS_peak_7740	chr4	119957769	119960207	+	2210	NA	intron (NM_194060, intron 1 of 1)	intron (NM_194060, intron 1 of 1)	878	NM_194060	329934	Mm.277090	NM_194060	ENSMUSG00000052135	Foxo6	-	forkhead box O6	protein-coding
MACS_peak_2005	chr11	101035727	101039101	+	2210	NA	promoter-TSS (NM_007721)	promoter-TSS (NM_007721)	-17	NM_016782	53321	Mm.474527	NM_016782	ENSMUSG00000017167	Cntnap1	AI841080|Caspr|NCP1|Nrxn4|p190|shm	contactin associated protein-like 1	protein-coding
MACS_peak_6402	chr2	130877945	130882017	+	2210	NA	intron (NM_033615, intron 13 of 20)	intron (NM_033615, intron 13 of 20)	9569	NM_033615	110751	Mm.108550	NM_033615	ENSMUSG00000027318	Adam33	Adaml	a disintegrin and metallopeptidase domain 33	protein-coding
MACS_peak_8157	chr4	152852666	152858293	+	2210	NA	intron (NM_001099299, intron 1 of 5)	intron (NM_001099299, intron 1 of 5)	1460	NM_001099299	230959	Mm.318874	NM_001099299	ENSMUSG00000039546	Ajap1	Gm573	adherens junction associated protein 1	protein-coding
MACS_peak_5848	chr2	22478204	22480373	+	2202	NA	exon (NM_008078, exon 3 of 16)	exon (NM_008078, exon 3 of 16)	1441	NM_008078	14417	Mm.4784	NM_008078	ENSMUSG00000026787	Gad2	6330404F12Rik|GAD(65)|GAD65|Gad-2	glutamic acid decarboxylase 2	protein-coding
MACS_peak_3849	chr15	78672519	78674600	+	2194	NA	intron (NM_027219, intron 1 of 2)	CpG	482	NM_027219	104445	Mm.307488	NM_027219	ENSMUSG00000049521	Cdc42ep1	1810058K22Rik|AA980734|Borg5|CEP1|MSE55	CDC42 effector protein (Rho GTPase binding) 1	protein-coding
MACS_peak_2831	chr13	42395896	42399356	+	2194	NA	intron (NM_010104, intron 1 of 4)	intron (NM_010104, intron 1 of 4)	987	NM_010104	13614	Mm.14543	NM_010104	ENSMUSG00000021367	Edn1	ET-1|preproET	endothelin 1	protein-coding
MACS_peak_6369	chr2	127160895	127163389	+	2193	NA	exon (NM_010090, exon 1 of 4)	exon (NM_010090, exon 1 of 4)	247	NM_010090	13537	Mm.4729	NM_010090	ENSMUSG00000027368	Dusp2	PAC1	dual specificity phosphatase 2	protein-coding
MACS_peak_2044	chr11	102961476	102964645	+	2193	NA	promoter-TSS (NM_152813)	promoter-TSS (NM_152813)	58	NM_025988	67131	Mm.390367	NM_025988	ENSMUSG00000056938	Acbd4	2010009P05Rik|2010015A21Rik|AI849317	acyl-Coenzyme A binding domain containing 4	protein-coding
MACS_peak_2125	chr11	114710881	114714364	+	2193	NA	promoter-TSS (NM_147217)	promoter-TSS (NM_147217)	-224	NM_001110337	70355	Mm.242413	NM_147217	ENSMUSG00000051043	Gprc5c	1110028I06Rik|3200002M13Rik|Raig3	G protein-coupled receptor, family C, group 5, member C	protein-coding
MACS_peak_5754	chr19	59148484	59150502	+	2168	NA	intron (NM_175172, intron 1 of 14)	intron (NM_175172, intron 1 of 14)	1066	NM_175172	71653	Mm.37338	NM_175172	ENSMUSG00000041362	4930506M07Rik	Kiaa1598|Shootin1|mKIAA1598	RIKEN cDNA 4930506M07 gene	protein-coding
MACS_peak_6173	chr2	79267915	79270065	+	2168	NA	exon (NM_001048176, exon 1 of 13)	exon (NM_001048176, exon 1 of 13)	155	NM_001048176	228094	Mm.440704	NM_001033295	ENSMUSG00000075256	Cerkl	Gm1958|Rp26	ceramide kinase-like	protein-coding
MACS_peak_6313	chr2	118534791	118538796	+	2168	NA	intron (NM_177568, intron 27 of 31)	intron (NM_177568, intron 27 of 31)	-7094	NM_001081971	383787	Mm.35758	NM_001081971	ENSMUSG00000078137	Ankrd63	Gm1337	ankyrin repeat domain 63	protein-coding
MACS_peak_6851	chr3	33040940	33042101	+	2168	NA	intron (NM_001163516, intron 1 of 12)	intron (NM_001163516, intron 1 of 12)	593	NM_001163516	58869	Mm.151332	NM_021483	ENSMUSG00000027674	Pex5l	1700016J08Rik|PXR2|Pex2|TRIP8b	peroxisomal biogenesis factor 5-like	protein-coding
MACS_peak_4702	chr17	35516382	35517415	+	2168	NA	exon (NM_001143689, exon 2 of 6)	exon (NM_001143689, exon 2 of 6)	336	NM_001143689	15015	Mm.464284	NM_001143689	ENSMUSG00000035929	H2-Q4	H-2Q4|H2-Gs10|Qa-4|Qa4|Qat-4|Qb-1|Qb1	histocompatibility 2, Q region locus 4	protein-coding
MACS_peak_2424	chr12	73930034	73934354	+	2168	NA	Intergenic	B1_Mm|SINE|Alu	69996	NM_008910	19042	Mm.261045	NM_008910	ENSMUSG00000021096	Ppm1a	2310003C21Rik|2900017D14Rik|AI427932|AU017636|MMPa-2|MPPa-1	protein phosphatase 1A, magnesium dependent, alpha isoform	protein-coding
MACS_peak_6909	chr3	53959223	53961935	+	2168	NA	intron (NR_046161, intron 1 of 10)	intron (NR_046161, intron 1 of 10)	600	NM_001253682	22066	Mm.10100	NM_016984	ENSMUSG00000027748	Trpc4	CCE1|STRPC4|Trp4|Trrp4	transient receptor potential cation channel, subfamily C, member 4	protein-coding
MACS_peak_6660	chr2	168414762	168416938	+	2168	NA	promoter-TSS (NM_010899)	promoter-TSS (NM_010899)	15	NM_001291178	18019	Mm.116802	NM_010899	ENSMUSG00000027544	Nfatc2	AI607462|NF-ATc2|NF-ATp|NFAT1|NFAT1-D|Nfatp	nuclear factor of activated T cells, cytoplasmic, calcineurin dependent 2	protein-coding
MACS_peak_5409	chr19	7043012	7045744	+	2168	NA	promoter-TSS (NM_001290349)	promoter-TSS (NM_001290349)	-74	NM_001290349	18797	Mm.273204	NM_008874	ENSMUSG00000024960	Plcb3	mKIAA4098	phospholipase C, beta 3	protein-coding
MACS_peak_11740	chr9	119001747	119003490	+	2168	NA	promoter-TSS (NM_019676)	promoter-TSS (NM_019676)	2	NR_121571	18799	Mm.23963	NM_019676	ENSMUSG00000010660	Plcd1	AW212592|C79986	phospholipase C, delta 1	protein-coding
MACS_peak_11622	chr9	98324576	98325802	+	2168	NA	5' UTR (NM_011254, exon 1 of 4)	5' UTR (NM_011254, exon 1 of 4)	1809	NM_011254	19659	Mm.279741	NM_011254	ENSMUSG00000046402	Rbp1	CRBPI|Crbp|Rbp-1	retinol binding protein 1, cellular	protein-coding
MACS_peak_9186	chr6	48691044	48693527	+	2168	NA	intron (NM_175860, intron 2 of 2)	intron (NM_175860, intron 2 of 2)	3239	NM_008376	16205	Mm.252599	NM_008376	ENSMUSG00000090019	Gimap1	IAP38|Imap38|imap	GTPase, IMAP family member 1	protein-coding
MACS_peak_5816	chr2	17651514	17654587	+	2168	NA	promoter-TSS (NM_028757)	promoter-TSS (NM_028757)	-355	NM_028757	74103	Mm.120298	NM_028757	ENSMUSG00000053702	Nebl	1200007O21Rik|A630080F05Rik|BB140644|D830029A09Rik|Lnebl	nebulette	protein-coding
MACS_peak_5555	chr19	38198547	38200055	+	2168	NA	promoter-TSS (NM_011255)	promoter-TSS (NM_011255)	0	NM_011255	19662	Mm.2605	NM_011255	ENSMUSG00000024990	Rbp4	Rbp-4	retinol binding protein 4, plasma	protein-coding
MACS_peak_4817	chr17	51969985	51974251	+	2168	NA	promoter-TSS (NM_009122)	promoter-TSS (NM_009122)	-146	NM_009122	20230	Mm.311655	NM_009122	ENSMUSG00000023927	Satb1	2610306G12Rik|AW413156	special AT-rich sequence binding protein 1	protein-coding
MACS_peak_1319	chr11	3661432	3662966	+	2168	NA	intron (NM_152818, intron 2 of 13)	CpG	101707	NM_152818	74309	Mm.61022	NM_152818	ENSMUSG00000020435	Osbp2	1700095P05Rik|C630001G20Rik|Gm244|ORP-4|OSBPL1	oxysterol binding protein 2	protein-coding
MACS_peak_2570	chr12	106799183	106803751	+	2168	NA	promoter-TSS (NM_009747)	promoter-TSS (NM_009747)	85	NM_009747	12062	Mm.390475	NM_009747	ENSMUSG00000021070	Bdkrb2	B(2)|B2|B2R|BK-2|BK2|BK2R|BKR2|BRB2	bradykinin receptor, beta 2	protein-coding
MACS_peak_4218	chr16	20496697	20497722	+	2168	NA	Intergenic	Intergenic	-1681	NM_172265	224045	Mm.233855	NM_172265	ENSMUSG00000003235	Eif2b5	C81315	eukaryotic translation initiation factor 2B, subunit 5 epsilon	protein-coding
MACS_peak_8621	chr5	104121180	104124203	+	2168	NA	Intergenic	Intergenic	-37940	NM_001163550	74218	Mm.159141	NM_028824	ENSMUSG00000029320	1700016H13Rik	-	RIKEN cDNA 1700016H13 gene	protein-coding
MACS_peak_8331	chr5	28793561	28797518	+	2168	NA	intron (NR_015562, intron 1 of 6)	intron (NR_015562, intron 1 of 6)	-1898	NM_009170	20423	Mm.57202	NM_009170	ENSMUSG00000002633	Shh	9530036O11Rik|Dsh|Hhg1|Hx|Hxl3|M100081	sonic hedgehog	protein-coding
MACS_peak_2193	chr11	117828547	117830489	+	2168	NA	exon (NM_007707, exon 2 of 2)	exon (NM_007707, exon 2 of 2)	1162	NM_007707	12702	Mm.3468	NM_007707	ENSMUSG00000053113	Socs3	Cis3|Cish3|EF-10|Ef10|SSI-3|Ssi3	suppressor of cytokine signaling 3	protein-coding
MACS_peak_4300	chr16	31427855	31429761	+	2168	NA	promoter-TSS (NM_001122683)	promoter-TSS (NM_001122683)	-31	NM_001122683	71911	Mm.293470	NM_175177	ENSMUSG00000046598	Bdh1	2310032J20Rik|AI327223|Bdh	3-hydroxybutyrate dehydrogenase, type 1	protein-coding
MACS_peak_7502	chr4	59449344	59452137	+	2168	NA	intron (NM_001163288, intron 1 of 16)	intron (NM_001163288, intron 1 of 16)	765	NM_001163288	634731	Mm.483589	NM_001163288	ENSMUSG00000038578	Susd1	A530080P10|Gm12528|OTTMUSG00000007332	sushi domain containing 1	protein-coding
MACS_peak_4808	chr17	50328150	50331202	+	2168	NA	5' UTR (NM_181397, exon 1 of 10)	5' UTR (NM_181397, exon 1 of 10)	146	NM_181397	76438	Mm.41854	NM_181397		Rftn1	2310015N21Rik|AI853526	raftlin lipid raft linker 1	protein-coding
MACS_peak_7799	chr4	124803524	124806621	+	2168	NA	promoter-TSS (NM_153159)	promoter-TSS (NM_153159)	53	NM_153159	230738	Mm.402	NM_153159	ENSMUSG00000042677	Zc3h12a	BC036563|MCPIP|Mcpip1	zinc finger CCCH type containing 12A	protein-coding
MACS_peak_1481	chr11	44424856	44427611	+	2159	NA	Intergenic	Intergenic	-5369	NM_001290711	13591	Mm.439662	NM_007897		Ebf1	Ebf|O/E-1|OE-1|Olf-1|Olf1	early B cell factor 1	protein-coding
MACS_peak_8354	chr5	32433439	32437086	+	2159	NA	Intergenic	Intergenic	-3583	NM_008037	14284	Mm.24684	NM_008037	ENSMUSG00000029135	Fosl2	Fra-2	fos-like antigen 2	protein-coding
MACS_peak_4782	chr17	47546229	47549770	+	2159	NA	Intergenic	Intergenic	3661	NM_001172091	75462	Mm.46129	NM_029296	ENSMUSG00000047150	1700001C19Rik	-	RIKEN cDNA 1700001C19 gene	protein-coding
MACS_peak_1696	chr11	74334432	74337982	+	2159	NA	intron (NM_001015046, intron 2 of 24)	CpG	67453	NM_001015046	380711	Mm.425690	NM_001015046	ENSMUSG00000038807	Rap1gap2	AU067654|Garnl4|Gm1561|mKIAA1039	RAP1 GTPase activating protein 2	protein-coding
MACS_peak_4841	chr17	56968381	56970236	+	2159	NA	intron (NM_027787, intron 1 of 17)	CpG	1123	NM_009056	19725	Mm.102	NM_009056	ENSMUSG00000024206	Rfx2	5430432H19Rik	regulatory factor X, 2 (influences HLA class II expression)	protein-coding
MACS_peak_7998	chr4	139798541	139803938	+	2159	NA	intron (NM_198610, intron 1 of 9)	intron (NM_198610, intron 1 of 9)	1487	NM_198610	230868	Mm.298731	NM_198610	ENSMUSG00000040972	Igsf21	BC055811|Gm141	immunoglobulin superfamily, member 21	protein-coding
MACS_peak_9900	chr7	56501922	56504125	+	2159	NA	intron (NM_175272, intron 1 of 37)	intron (NM_175272, intron 1 of 37)	1464	NM_175272	78286	Mm.333881	NM_175272	ENSMUSG00000052512	Nav2	5330421F07Rik|AU067780|BQ960892|HELAD1|POMFIL2|RAINB1|RAINB2|Unc53H2|mKIAA3015	neuron navigator 2	protein-coding
MACS_peak_4249	chr16	23987000	23988292	+	2159	NA	intron (NM_009744, intron 1 of 9)	CpG	1052	NM_009744	12053	Mm.347398	NM_009744	ENSMUSG00000022508	Bcl6	Bcl5	B cell leukemia/lymphoma 6	protein-coding
MACS_peak_7795	chr4	124559151	124561707	+	2159	NA	intron (NM_001256432, intron 1 of 16)	intron (NM_001256432, intron 1 of 16)	1400	NM_177671	230735	Mm.171490	NM_177671	ENSMUSG00000028876	Epha10	A330090H18	Eph receptor A10	protein-coding
MACS_peak_2788	chr13	36059278	36062608	+	2159	NA	exon (NM_029628, exon 2 of 2)	exon (NM_029628, exon 2 of 2)	1168	NM_029628	76487	Mm.44745	NM_029628	ENSMUSG00000050423	Ppp1r3g	1600032L17Rik	protein phosphatase 1, regulatory (inhibitor) subunit 3G	protein-coding
MACS_peak_7953	chr4	136192516	136195234	+	2159	NA	exon (NM_001243262, exon 8 of 8)	exon (NM_001243262, exon 8 of 8)	15339	NM_001243262	242707	Mm.448979	NM_001243262	ENSMUSG00000070683	Lactbl1	-	lactamase, beta-like 1	protein-coding
MACS_peak_3274	chr14	27852243	27854772	+	2159	NA	intron (NM_134437, intron 1 of 12)	intron (NM_134437, intron 1 of 12)	1320	NM_134437	171463	Mm.206726	NM_027265	ENSMUSG00000040717	Il17rd	2810004A10Rik|AI428510|Sef|Sef-S	interleukin 17 receptor D	protein-coding
MACS_peak_11515	chr9	71617151	71619837	+	2159	NA	intron (NM_026599, intron 1 of 18)	intron (NM_026599, intron 1 of 18)	915	NM_026599	68178	Mm.99961	NM_026599	ENSMUSG00000032232	Cgnl1	4933421H10Rik|9930020M10Rik|AI503810|Jacop	cingulin-like 1	protein-coding
MACS_peak_7431	chr4	44437850	44440144	+	2159	NA	Intergenic	Intergenic	125208	NM_010790	17279	Mm.268668	NM_010790	ENSMUSG00000035683	Melk	AI327312|MPK38|mKIAA0175	maternal embryonic leucine zipper kinase	protein-coding
MACS_peak_9774	chr7	30066162	30067577	+	2159	NA	5' UTR (NM_011464, exon 1 of 7)	5' UTR (NM_011464, exon 1 of 7)	127	NM_001082548	20733	Mm.295230	NM_011464	ENSMUSG00000074227	Spint2	AL024025|C76321|HAI-2	serine protease inhibitor, Kunitz type 2	protein-coding
MACS_peak_2067	chr11	104093595	104097503	+	2159	NA	intron (NM_001038609, intron 1 of 11)	intron (NM_001038609, intron 1 of 11)	2799	NM_001285454	17762	Mm.1287	NM_010838	ENSMUSG00000018411	Mapt	AI413597|AW045860|Mtapt|Tau	microtubule-associated protein tau	protein-coding
MACS_peak_5839	chr2	19579704	19581314	+	2159	NA	promoter-TSS (NR_033642)	promoter-TSS (NR_033642)	820	NM_027715	71198	Mm.83981	NM_027715	ENSMUSG00000043415	Otud1	4933428L19Rik	OTU domain containing 1	protein-coding
MACS_peak_1316	chr11	3416897	3417265	+	2159	NA	TTS (NM_001159284)	TTS (NM_001159284)	2376	NM_053267	114679	Mm.34046	NM_053267	ENSMUSG00000075702	Selm	1500040L08Rik|A230103K18|Sepm	selenoprotein M	protein-coding
MACS_peak_290	chr1	79667555	79670210	+	2159	NA	promoter-TSS (NM_183027)	promoter-TSS (NM_183027)	-335	NM_183027	252903	Mm.32409	NM_183027	ENSMUSG00000054702	Ap1s3	1190009B22|Jr2|[s]3A	adaptor-related protein complex AP-1, sigma 3	protein-coding
MACS_peak_2196	chr11	118768759	118772101	+	2159	NA	intron (NM_001285437, intron 1 of 13)	CpG	456	NM_001024931	52897	Mm.341103	NM_001024931	ENSMUSG00000025576	Rbfox3	Fox-3|Hrnbp3|NeuN|Neuna60	RNA binding protein, fox-1 homolog (C. elegans) 3	protein-coding
MACS_peak_8114	chr4	149048412	149050665	+	2117	NA	intron (NM_001029837, intron 1 of 23)	intron (NM_001029837, intron 1 of 23)	660	NM_001164051	18707	Mm.229108	NM_008840	ENSMUSG00000039936	Pik3cd	2410099E07Rik|2610208K16Rik|AW545373|p110delta	phosphatidylinositol 3-kinase catalytic delta polypeptide	protein-coding
MACS_peak_2636	chr12	114166610	114169929	+	2117	NA	promoter-TSS (NM_010588)	promoter-TSS (NM_010588)	-563	NM_010588	16450	Mm.186146	NM_010588	ENSMUSG00000002799	Jag2	D12Ggc2e|Serh|mJagged2-1|sm	jagged 2	protein-coding
MACS_peak_9306	chr6	82979269	82985130	+	2117	NA	intron (NM_001291799, intron 4 of 4)	intron (NM_001291799, intron 4 of 4)	1266	NM_010070	13448	Mm.156	NM_010070	ENSMUSG00000068335	Dok1	AW557123|p62DOK	docking protein 1	protein-coding
MACS_peak_4336	chr16	43978968	43981234	+	2117	NA	promoter-TSS (NM_001007460)	promoter-TSS (NM_001007460)	-938	NM_001007460	332175	Mm.327852	NM_001007460	ENSMUSG00000036304	Zdhhc23	Gm1751|Gm779|nidd	zinc finger, DHHC domain containing 23	protein-coding
MACS_peak_10253	chr7	133678967	133680830	+	2117	NA	Intergenic	Intergenic	29982	NM_146200	56347	Mm.22776	NM_146200	ENSMUSG00000030738	Eif3c	110kDa|3230401O13Rik|Eif3s8|NIPIL(A3)|NipilA3|Xs|Xsl	eukaryotic translation initiation factor 3, subunit C	protein-coding
MACS_peak_7619	chr4	102650265	102651916	+	2117	NA	intron (NR_040444, intron 2 of 3)	intron (NR_040444, intron 2 of 3)	-7894	NM_001163767	67344	Mm.111346	NM_026100	ENSMUSG00000028523	Tctex1d1	1700055O19Rik	Tctex1 domain containing 1	protein-coding
MACS_peak_474	chr1	133139600	133142818	+	2117	NA	intron (NM_018750, intron 1 of 5)	intron (NM_018750, intron 1 of 5)	546	NM_018750	54354	Mm.248291	NM_018750	ENSMUSG00000026430	Rassf5	1300019G20Rik|AU042887|Maxp1|Nore1|Nore1A|Nore1B|Rapl	Ras association (RalGDS/AF-6) domain family member 5	protein-coding
MACS_peak_10688	chr8	66682625	66686520	+	2117	NA	5' UTR (NM_009390, exon 1 of 21)	5' UTR (NM_009390, exon 1 of 21)	218	NM_009390	21892	Mm.418367	NM_009390	ENSMUSG00000053626	Tll1	Tll|Tll-1	tolloid-like	protein-coding
MACS_peak_3624	chr14	122623029	122627493	+	2117	NA	intron (NM_029556, intron 1 of 7)	intron (NM_029556, intron 1 of 7)	7599	NR_015532	68245	Mm.443285	NR_015532		1700108J01Rik	-	RIKEN cDNA 1700108J01 gene	ncRNA
MACS_peak_1434	chr11	33043461	33048757	+	2117	NA	intron (NR_102395, intron 2 of 4)	intron (NR_102395, intron 2 of 4)	1291	NM_008005	14172	Mm.339812	NM_008005		Fgf18	D130055P09Rik|FGF-18	fibroblast growth factor 18	protein-coding
MACS_peak_4035	chr15	98859087	98861627	+	2117	NA	promoter-TSS (NM_009448)	promoter-TSS (NM_009448)	35	NM_009448	22146	Mm.88212	NM_009448	ENSMUSG00000043091	Tuba1c	M[a]6|Tuba6	tubulin, alpha 1C	protein-coding
MACS_peak_5059	chr18	32090267	32091519	+	2117	NA	promoter-TSS (NM_144862)	promoter-TSS (NM_144862)	-268	NM_144862	225341	Mm.24551	NM_144862	ENSMUSG00000024395	Lims2	PINCH2	LIM and senescent cell antigen like domains 2	protein-coding
MACS_peak_7276	chr3	141127867	141131462	+	2117	NA	intron (NM_009472, intron 1 of 15)	intron (NM_009472, intron 1 of 15)	1136	NM_001293561	22253	Mm.24430	NM_009472	ENSMUSG00000059921	Unc5c	B130051O18Rik|Unc5h3|rcm	unc-5 homolog C (C. elegans)	protein-coding
MACS_peak_9480	chr6	119055205	119059642	+	2117	NA	intron (NM_001255998, intron 1 of 47)	CpG	1090	NM_001159534	12288	Mm.41628	NM_009781	ENSMUSG00000051331	Cacna1c	Cav1.2|Cchl1a1|D930026N18Rik|MBC|MELC-CC	calcium channel, voltage-dependent, L type, alpha 1C subunit	protein-coding
MACS_peak_8113	chr4	148960375	148963383	+	2117	NA	intron (NM_023051, intron 1 of 18)	intron (NM_023051, intron 1 of 18)	1302	NM_023051	65945	Mm.38993	NM_023051	ENSMUSG00000039953	Clstn1	1810034E21Rik|Cst-1|Cstn1	calsyntenin 1	protein-coding
MACS_peak_1742	chr11	77325908	77330153	+	2117	NA	promoter-TSS (NM_026185)	promoter-TSS (NM_026185)	-589	NM_026185	67477	Mm.432526	NM_026185	ENSMUSG00000000686	Abhd15	1300007F04Rik	abhydrolase domain containing 15	protein-coding
MACS_peak_11367	chr9	51086056	51088526	+	2117	NA	promoter-TSS (NM_001195681)	promoter-TSS (NM_001195681)	-632	NM_001195681	100502940	Mm.235705	NM_001195681	ENSMUSG00000079559	Gm684	-	predicted gene 684	protein-coding
MACS_peak_8421	chr5	38709551	38711271	+	2117	NA	promoter-TSS (NM_013503)	promoter-TSS (NM_013503)	-337	NM_013503	13492	Mm.167154	NM_013503	ENSMUSG00000039358	Drd5	D5R|Drd-5|Drd1b|Gpcr1	dopamine receptor D5	protein-coding
MACS_peak_9854	chr7	52205079	52209502	+	2117	NA	exon (NM_011651, exon 5 of 11)	exon (NM_011651, exon 5 of 11)	8680	NM_011651	22116	Mm.84502	NM_011651	ENSMUSG00000059891	Tsks	Stk22s1|Tssks1	testis-specific serine kinase substrate	protein-coding
MACS_peak_3969	chr15	89671272	89673665	+	2117	NA	promoter-TSS (NM_018803)	promoter-TSS (NM_018803)	-177	NM_018803	54526	Mm.261601	NM_018803	ENSMUSG00000063260	Syt10	-	synaptotagmin X	protein-coding
MACS_peak_6912	chr3	54717992	54720938	+	2117	NA	intron (NM_177854, intron 1 of 2)	intron (NM_177854, intron 1 of 2)	344	NM_177854	329641	Mm.51187	NM_177854	ENSMUSG00000056306	Sertm1	6030405A18Rik	serine rich and transmembrane domain containing 1	protein-coding
MACS_peak_3645	chr14	123310776	123313086	+	2117	NA	intron (NM_145466, intron 1 of 2)	intron (NM_145466, intron 1 of 2)	456	NM_145466	223267	Mm.379358	NM_145466	ENSMUSG00000041625	Ggact	A2ld1	gamma-glutamylamine cyclotransferase	protein-coding
MACS_peak_2465	chr12	77921297	77924333	+	2117	NA	intron (NM_134050, intron 1 of 6)	intron (NM_134050, intron 1 of 6)	696	NM_134050	104886	Mm.172847	NM_134050	ENSMUSG00000021062	Rab15	2310012G06Rik|AI840042	RAB15, member RAS oncogene family	protein-coding
MACS_peak_7153	chr3	102005201	102009813	+	2117	NA	intron (NM_177545, intron 1 of 7)	intron (NM_177545, intron 1 of 7)	379	NM_001165951	229658	Mm.118004	NM_177545	ENSMUSG00000027860	Vangl1	Kitenin|Lpp2|Stb2|Stbm	vang-like 1 (van gogh, Drosophila)	protein-coding
MACS_peak_11182	chr9	20671777	20675250	+	2117	NA	intron (NM_175687, intron 1 of 7)	intron (NM_175687, intron 1 of 7)	427	NM_175687	319278	Mm.249932	NM_175687	ENSMUSG00000038884	A230050P20Rik	-	RIKEN cDNA A230050P20 gene	protein-coding
MACS_peak_198	chr1	65356804	65358483	+	2117	NA	promoter-TSS (NM_139270)	promoter-TSS (NM_139270)	-188	NM_139270	213527	Mm.294225	NM_139270	ENSMUSG00000025946	Pth2r	Pthr2	parathyroid hormone 2 receptor	protein-coding
MACS_peak_2867	chr13	51264873	51268087	+	2117	NA	promoter-TSS (NM_029173)	promoter-TSS (NM_029173)	86	NM_029173	75124	Mm.179243	NM_029173	ENSMUSG00000021396	Nxnl2	4930519N16Rik|Rdcvf2	nucleoredoxin-like 2	protein-coding
MACS_peak_8442	chr5	53603272	53605819	+	2117	NA	exon (NM_172710, exon 1 of 24)	exon (NM_172710, exon 1 of 24)	146	NM_172710	231238	Mm.235020	NM_172710	ENSMUSG00000029189	Sel1l3	2310045A20Rik|AI429585|mKIAA0746	sel-1 suppressor of lin-12-like 3 (C. elegans)	protein-coding
MACS_peak_1997	chr11	100619857	100623800	+	2117	NA	promoter-TSS (NM_001081194)	promoter-TSS (NM_001081194)	-736	NM_001081194	380728	Mm.297539	NM_001081194	ENSMUSG00000035355	Kcnh4	BEC2	potassium voltage-gated channel, subfamily H (eag-related), member 4	protein-coding
MACS_peak_5883	chr2	26357028	26360619	+	2117	NA	intron (NM_008714, intron 1 of 33)	CpG	519	NM_008714	18128	Mm.290610	NM_008714	ENSMUSG00000026923	Notch1	9930111A19Rik|Mis6|N1|Tan1|lin-12	notch 1	protein-coding
MACS_peak_4255	chr16	28563878	28566714	+	2117	NA	promoter-TSS (NM_001276419)	promoter-TSS (NM_001276419)	-259	NM_001276419	14167	Mm.7996	NM_010199		Fgf12	AV114868|FGF-12|FHF-1|Fhf1	fibroblast growth factor 12	protein-coding
MACS_peak_1352	chr11	6961058	6966400	+	2117	NA	exon (NM_009622, exon 1 of 20)	exon (NM_009622, exon 1 of 20)	237	NM_009622	432530	Mm.259733	NM_009622	ENSMUSG00000020431	Adcy1	AC1|D11Bwg1392e|I-AC|brl|mKIAA4070	adenylate cyclase 1	protein-coding
MACS_peak_9553	chr6	135015469	135016545	+	2117	NA	intron (NM_181444, intron 1 of 3)	intron (NM_181444, intron 1 of 3)	327	NM_181444	232431	Mm.23575	NM_181444	ENSMUSG00000046733	Gprc5a	Rai3|Raig1	G protein-coupled receptor, family C, group 5, member A	protein-coding
MACS_peak_11849	chrX	54755720	54757871	+	2117	NA	5' UTR (NM_001033360, exon 1 of 2)	5' UTR (NM_001033360, exon 1 of 2)	139	NM_001033360	245424	Mm.336070	NM_001033360	ENSMUSG00000036357	Gpr101	GPCR6|Gm365	G protein-coupled receptor 101	protein-coding
MACS_peak_627	chr1	172836287	172839621	+	2117	NA	intron (NM_001029984, intron 5 of 5)	CpG	5118	NM_001029984	435653	Mm.337931	NM_001029984	ENSMUSG00000070524	Fcrlb	FREB-2|FREB2|FcRL2|Fcrlm2|Fcry|mFCRL2	Fc receptor-like B	protein-coding
MACS_peak_5864	chr2	25117921	25120081	+	2117	NA	exon (NM_175286, exon 1 of 4)	exon (NM_175286, exon 1 of 4)	883	NM_175286	97031	Mm.308539	NM_175286	ENSMUSG00000048707	Tprn	C430004E15Rik|C87750	taperin	protein-coding
MACS_peak_8404	chr5	37631452	37638331	+	2117	NA	intron (NM_001136058, intron 1 of 13)	intron (NM_001136058, intron 1 of 13)	1594	NM_001136058	12933	Mm.290995	NM_007765	ENSMUSG00000029121	Crmp1	CRMP-1|DRP-1|Dpysl1|ULIP-3|Ulip3	collapsin response mediator protein 1	protein-coding
MACS_peak_4512	chr17	8018156	8021497	+	2117	NA	Intergenic	Intergenic	-21987	NM_001081416	68655	Mm.379161	NM_001081416	ENSMUSG00000071984	Fndc1	1110027O12Rik|1110051A18Rik|mKIAA1866	fibronectin type III domain containing 1	protein-coding
MACS_peak_9041	chr6	6796930	6799439	+	2117	NA	intron (NR_015388, intron 1 of 1)	intron (NR_015388, intron 1 of 1)	-15150	NM_010057	13396	Mm.439763	NM_010057	ENSMUSG00000029754	Dlx6	-	distal-less homeobox 6	protein-coding
MACS_peak_5206	chr18	62338422	62340235	+	2117	NA	exon (NM_007420, exon 1 of 1)	exon (NM_007420, exon 1 of 1)	307	NM_007420	11555	Mm.5598	NM_007420	ENSMUSG00000045730	Adrb2	Adrb-2|Badm|Gpcr7	adrenergic receptor, beta 2	protein-coding
MACS_peak_1830	chr11	85337860	85341430	+	2117	NA	intron (NM_001166643, intron 15 of 23)	intron (NM_001166643, intron 15 of 23)	172979	NM_001166643	192197	Mm.287663	NM_138681	ENSMUSG00000059439	Bcas3	1500019F07Rik|2610028P08Rik|AU021018|BC028339|K20D4|rudhira	breast carcinoma amplified sequence 3	protein-coding
MACS_peak_7616	chr4	101758979	101761877	+	2117	NA	Intergenic	CpG	100983	NM_001085520	381536	Mm.297685	NM_001085520		Gm12789	OTTMUSG00000008445	predicted gene 12789	protein-coding
MACS_peak_249	chr1	75383017	75386776	+	2116	NA	exon (NM_001085371, exon 5 of 11)	exon (NM_001085371, exon 5 of 11)	2711	NM_001085370	11790	Mm.275397	NM_007463	ENSMUSG00000026207	Speg	AW125581|Apeg1|BPEG|D1Bwg1450e|SPEGalpha|SPEGbeta|mKIAA1297	SPEG complex locus	protein-coding
MACS_peak_8870	chr5	135463052	135464115	+	2111	NA	TTS (NM_009902)	TTS (NM_009902)	1499	NM_009902	12739	Mm.158662	NM_009902	ENSMUSG00000070473	Cldn3	AI182374|Cpetr2|mRVP1	claudin 3	protein-coding
MACS_peak_1465	chr11	35610112	35611999	+	2111	NA	exon (NM_001004147, exon 1 of 1)	exon (NM_001004147, exon 1 of 1)	1331	NM_001004147	237730	Mm.189222	NM_001004147	ENSMUSG00000051062	Fbll1	AI595406	fibrillarin-like 1	protein-coding
MACS_peak_11703	chr9	110645255	110647190	+	2111	NA	promoter-TSS (NM_001083935)	promoter-TSS (NM_001083935)	-32	NM_001083935	19228	Mm.3542	NM_011199	ENSMUSG00000032492	Pth1r	PPR|Pthr|Pthr1	parathyroid hormone 1 receptor	protein-coding
MACS_peak_9844	chr7	51846468	51848839	+	2111	NA	intron (NM_001290682, intron 1 of 4)	intron (NM_001290682, intron 1 of 4)	1397	NM_001290682	16504	Mm.40312	NM_008422	ENSMUSG00000062785	Kcnc3	KShIIID|Kcr2-3|Kv3.3	potassium voltage gated channel, Shaw-related subfamily, member 3	protein-coding
MACS_peak_9596	chr6	148390445	148393666	+	2108	NA	intron (NM_198967, intron 1 of 19)	intron (NM_198967, intron 1 of 19)	819	NM_198967	387314	Mm.137858	NM_198967	ENSMUSG00000030306	Tmtc1	Arg99|BC023818	transmembrane and tetratricopeptide repeat containing 1	protein-coding
MACS_peak_1382	chr11	18769363	18771998	+	2108	NA	Intergenic	Intergenic	148292	NM_001193271	17268	Mm.356578	NM_010789	ENSMUSG00000020160	Meis1	C530044H18Rik|Evi8	Meis homeobox 1	protein-coding
MACS_peak_4707	chr17	35575129	35577797	+	2108	NA	exon (NM_001201460, exon 2 of 7)	exon (NM_001201460, exon 2 of 7)	351	NM_001201460	110558	Mm.431282	NM_001201460		H2-Q9	H-2Q9|Ped|Qa-2|Qa-9|Qa9	histocompatibility 2, Q region locus 9	protein-coding
MACS_peak_4663	chr17	33947482	33948272	+	2108	NA	intron (NM_030697, intron 1 of 10)	intron (NM_030697, intron 1 of 10)	409	NM_030697	80880	Mm.196330	NM_030697	ENSMUSG00000042099	Kank3	0610013D04Rik|Ankrd47|D17Ertd288e|NG28	KN motif and ankyrin repeat domains 3	protein-coding
MACS_peak_6903	chr3	52070456	52071781	+	2108	NA	Intergenic	Intergenic	-1141	NM_019739	56458	Mm.29891	NM_019739	ENSMUSG00000044167	Foxo1	AI876417|Afxh|FKHR|Fkhr1|Foxo1a	forkhead box O1	protein-coding
MACS_peak_2162	chr11	116195400	116196634	+	2108	NA	5' UTR (NM_008240, exon 2 of 3)	5' UTR (NM_008240, exon 2 of 3)	651	NM_008240	15223	Mm.378938	NM_008240	ENSMUSG00000034227	Foxj1	FKHL-13|HFH-4|Hfh4	forkhead box J1	protein-coding
MACS_peak_6545	chr2	156437965	156443783	+	2047	NA	intron (NM_001277187, intron 1 of 11)	intron (NM_001277187, intron 1 of 11)	1441	NM_001277186	228836	Mm.22094	NM_146128	ENSMUSG00000061689	Dlgap4	AI225853|BC024558|DAP-4|DAP4|SAPAP-4|Sapap4|WBP16	discs, large homolog-associated protein 4 (Drosophila)	protein-coding
MACS_peak_10487	chr8	12400383	12402379	+	2047	NA	intron (NR_027975, intron 1 of 7)	intron (NR_027975, intron 1 of 7)	5862	NM_009233	20664	Mm.39088	NM_009233	ENSMUSG00000096014	Sox1	BB176347|Sox-1	SRY (sex determining region Y)-box 1	protein-coding
MACS_peak_11239	chr9	30748028	30752343	+	2047	NA	promoter-TSS (NM_013906)	promoter-TSS (NM_013906)	37	NM_013906	30806	Mm.100582	NM_013906	ENSMUSG00000031994	Adamts8	METH-2|METH2	a disintegrin-like and metallopeptidase (reprolysin type) with thrombospondin type 1 motif, 8	protein-coding
MACS_peak_10015	chr7	77509727	77512102	+	2047	NA	intron (NR_045850, intron 1 of 10)	intron (NR_045850, intron 1 of 10)	645	NR_045850	434198	Mm.389911	NR_045850		B130024G19Rik	-	RIKEN cDNA B130024G19 gene	ncRNA
MACS_peak_5134	chr18	39151963	39153651	+	2047	NA	promoter-TSS (NM_175164)	promoter-TSS (NM_175164)	8	NM_175164	71302	Mm.329396	NM_175164	ENSMUSG00000036452	Arhgap26	1810044B20Rik|2610010G17Rik|4933432P15Rik|AI853435|mKIAA0621	Rho GTPase activating protein 26	protein-coding
MACS_peak_1958	chr11	97521939	97523727	+	2047	NA	Intergenic	Intergenic	-1893	NM_139311	246198	Mm.23685	NM_139311	ENSMUSG00000038437	Mllt6	AI315037|Af17	myeloid/lymphoid or mixed-lineage leukemia (trithorax homolog, Drosophila); translocated to, 6	protein-coding
MACS_peak_803	chr10	19653292	19655438	+	2047	NA	promoter-TSS (NM_008580)	promoter-TSS (NM_008580)	33	NM_008580	26408	Mm.6595	NM_008580	ENSMUSG00000071369	Map3k5	7420452D20Rik|ASK|ASK1|MAPKKK5|Mekk5	mitogen-activated protein kinase kinase kinase 5	protein-coding
MACS_peak_6004	chr2	35316745	35319948	+	2047	NA	Intergenic	Intergenic	-1401	NM_001145821	14594	Mm.281124	NM_010283	ENSMUSG00000035778	Ggta1	AW108479|GALT|Gal|Ggta|Ggta-1|alpha3GalT	glycoprotein galactosyltransferase alpha 1, 3	protein-coding
MACS_peak_7545	chr4	84191118	84192346	+	2047	NA	intron (NM_172870, intron 2 of 5)	intron (NM_172870, intron 2 of 5)	129258	NM_172870	242509	Mm.190774	NM_172870		Bnc2	5031434M05Rik|8430420F16Rik	basonuclin 2	protein-coding
MACS_peak_3949	chr15	85651084	85652442	+	2047	NA	exon (NM_011105, exon 1 of 1)	exon (NM_011105, exon 1 of 1)	400	NM_011105	18766	Mm.89965	NM_011105	ENSMUSG00000052496	Pkdrej	-	polycystic kidney disease (polycystin) and REJ (sperm receptor for egg jelly homolog, sea urchin)	protein-coding
MACS_peak_8970	chr5	144133688	144136260	+	2047	NA	intron (NM_133355, intron 2 of 20)	intron (NM_133355, intron 2 of 20)	9387	NM_133355	170935	Mm.197460	NM_133355	ENSMUSG00000010825	Grid2ip	-	glutamate receptor, ionotropic, delta 2 (Grid2) interacting protein 1	protein-coding
MACS_peak_2152	chr11	115835172	115836969	+	2047	NA	promoter-TSS (NM_133663)	promoter-TSS (NM_133663)	31	NM_133663	192897	Mm.213873	NM_133663	ENSMUSG00000020758	Itgb4	AA407042|C230078O20|CD104	integrin beta 4	protein-coding
MACS_peak_4652	chr17	32249904	32251712	+	2047	NA	Intergenic	CpG	-22440	NR_027316	435518	Mm.328944	NR_027316	ENSMUSG00000002791	Pdxk-ps	ENSMUSG00000002791|Gm9743	pyridoxal (pyridoxine, vitamin B6) kinase, pseudogene	pseudo
MACS_peak_461	chr1	123423759	123425224	+	2047	NA	exon (NM_010483, exon 1 of 2)	exon (NM_010483, exon 1 of 2)	551	NM_010483	15564	Mm.4833	NM_010483	ENSMUSG00000050534	Htr5b	5-Ht5b	5-hydroxytryptamine (serotonin) receptor 5B	protein-coding
MACS_peak_10764	chr8	79424173	79425698	+	2047	NA	promoter-TSS (NR_028579)	promoter-TSS (NR_028579)	-863	NR_028579	100039211	Mm.367571	NR_028579	ENSMUSG00000074235	Gm10649	ENSMUSG00000074235	predicted gene 10649	ncRNA
MACS_peak_9885	chr7	53433609	53435705	+	2047	NA	intron (NM_011510, intron 1 of 38)	intron (NM_011510, intron 1 of 38)	746	NM_011510	20927	Mm.259076	NM_011510	ENSMUSG00000040136	Abcc8	D930031B21Rik|SUR1|Sur	ATP-binding cassette, sub-family C (CFTR/MRP), member 8	protein-coding
MACS_peak_1787	chr11	82245954	82249446	+	2047	NA	intron (NM_023438, intron 1 of 9)	intron (NM_023438, intron 1 of 9)	45298	NM_023438	270893	Mm.341593	NM_023438	ENSMUSG00000020701	Tmem132e	Gm644	transmembrane protein 132E	protein-coding
MACS_peak_4281	chr16	30067378	30069122	+	2047	NA	TTS (NM_008235)	TTS (NM_008235)	2807	NM_008235	15205	Mm.390859	NM_008235	ENSMUSG00000022528	Hes1	Hry|bHLHb39	hairy and enhancer of split 1 (Drosophila)	protein-coding
MACS_peak_10937	chr8	106693387	106695990	+	2047	NA	5' UTR (NM_001141922, exon 1 of 7)	5' UTR (NM_001141922, exon 1 of 7)	275	NM_001141925	65115	Mm.41849	NM_001141922	ENSMUSG00000031872	Bean1	Bean	brain expressed, associated with Nedd4, 1	protein-coding
MACS_peak_1641	chr11	68932625	68936555	+	2047	NA	intron (NM_033041, intron 1 of 3)	intron (NM_033041, intron 1 of 3)	635	NM_033041	84653	Mm.98505	NM_033041		Hes7	bHLHb37	hairy and enhancer of split 7 (Drosophila)	protein-coding
MACS_peak_9491	chr6	120441067	120444388	+	2047	NA	exon (NM_033567, exon 1 of 1)	exon (NM_033567, exon 1 of 1)	1098	NM_033567	94047	Mm.23088	NM_033567	ENSMUSG00000094626	Cecr6	AW048664	cat eye syndrome chromosome region, candidate 6	protein-coding
MACS_peak_9963	chr7	72299516	72303737	+	2047	NA	promoter-TSS (NM_183087)	promoter-TSS (NM_183087)	-212	NM_183087	70638	Mm.441986	NM_183087	ENSMUSG00000030518	Fam189a1	5730507A09Rik|AW047451	family with sequence similarity 189, member A1	protein-coding
MACS_peak_5698	chr19	47911125	47912264	+	2047	NA	intron (NM_027559, intron 1 of 37)	CpG	157	NM_027559	100048534	Mm.29457	NM_027559	ENSMUSG00000044948	Cfap43	4632415N18Rik|4930428C11Rik|4930463G05Rik|AI429486|D19Ertd652e|Wdr96	cilia and flagella associated protein 43	protein-coding
MACS_peak_6649	chr2	167363695	167367220	+	2047	NA	intron (NM_011427, intron 2 of 2)	intron (NM_011427, intron 2 of 2)	1730	NM_011427	20613	Mm.2093	NM_011427	ENSMUSG00000042821	Snai1	AI194338|Sna|Sna1|Snail|Snail1	snail family zinc finger 1	protein-coding
MACS_peak_7062	chr3	90317136	90319773	+	2047	NA	promoter-TSS (NM_011309)	promoter-TSS (NM_011309)	97	NM_009113	20196	Mm.6523	NM_009113	ENSMUSG00000042312	S100a13	-	S100 calcium binding protein A13	protein-coding
MACS_peak_11378	chr9	53914800	53917138	+	2047	NA	intron (NM_001033535, intron 1 of 1)	intron (NM_001033535, intron 1 of 1)	249	NM_001033535	244882	Mm.325589	NM_001033535	ENSMUSG00000074345	Tnfaip8l3	9930029P06Rik|Gm517	tumor necrosis factor, alpha-induced protein 8-like 3	protein-coding
MACS_peak_9593	chr6	147210157	147213297	+	2047	NA	intron (NM_008970, intron 2 of 3)	intron (NM_008970, intron 2 of 3)	880	NM_008970	19227	Mm.28440	NM_008970	ENSMUSG00000048776	Pthlh	PTH-like|Pthrp	parathyroid hormone-like peptide	protein-coding
MACS_peak_9609	chr7	4101841	4103929	+	2047	NA	TTS (NM_021454)	TTS (NM_021454)	-1411	NM_175529	243813	Mm.347643	NM_175529	ENSMUSG00000043432	Leng9	9530024C23Rik|F630035L11Rik	leukocyte receptor cluster (LRC) member 9	protein-coding
MACS_peak_1972	chr11	98273623	98274846	+	2047	NA	intron (NM_001003817, intron 1 of 26)	CpG	436	NM_001003817	13866	Mm.290822	NM_001003817	ENSMUSG00000062312	Erbb2	Erbb-2|HER-2|HER2|Neu|c-erbB2|c-neu|mKIAA3023	v-erb-b2 erythroblastic leukemia viral oncogene homolog 2, neuro/glioblastoma derived oncogene homolog (avian)	protein-coding
MACS_peak_1063	chr10	80719095	80721160	+	2047	NA	promoter-TSS (NM_001285854)	promoter-TSS (NM_001285854)	83	NM_001285853	17179	Mm.2918	NM_010768	ENSMUSG00000004933	Matk	CHK|HYL|Ntk	megakaryocyte-associated tyrosine kinase	protein-coding
MACS_peak_8650	chr5	107716707	107719679	+	2047	NA	intron (NM_011578, intron 1 of 16)	CpG	421	NM_011578	21814	Mm.200775	NM_011578	ENSMUSG00000029287	Tgfbr3	1110036H20Rik|AU015626|AW215636|TBRIII	transforming growth factor, beta receptor III	protein-coding
MACS_peak_3297	chr14	31165308	31168346	+	2047	NA	promoter-TSS (NM_001083616)	promoter-TSS (NM_001083616)	-155	NM_001083616	12289	Mm.9772	NM_028981	ENSMUSG00000015968	Cacna1d	8430418G19Rik|C79217|Cacnl1a2|Cchl1a|Cchl1a2|D-LTCC	calcium channel, voltage-dependent, L type, alpha 1D subunit	protein-coding
MACS_peak_11268	chr9	34296687	34299020	+	2047	NA	intron (NM_001190912, intron 1 of 15)	intron (NM_001190912, intron 1 of 15)	1537	NM_001190911	67703	Mm.220710	NM_026324		Kirrel3	1500010O20Rik|2900036G11Rik|NEPH2|SST4|mKIAA1867	kin of IRRE like 3 (Drosophila)	protein-coding
MACS_peak_10841	chr8	90796151	90797526	+	2047	NA	intron (NM_007406, intron 1 of 27)	intron (NM_007406, intron 1 of 27)	536	NM_007406	11513	Mm.288206	NM_007406	ENSMUSG00000031659	Adcy7	AA407758	adenylate cyclase 7	protein-coding
MACS_peak_3472	chr14	66897063	66901593	+	2047	NA	intron (NM_172498, intron 1 of 29)	intron (NM_172498, intron 1 of 29)	561	NM_172498	19229	Mm.21613	NM_172498	ENSMUSG00000059456	Ptk2b	CADTK|CAKB|CAKbeta|E430023O05Rik|FADK2|FAK2|PYK2|Raftk	PTK2 protein tyrosine kinase 2 beta	protein-coding
MACS_peak_981	chr10	75020893	75024756	+	2047	NA	exon (NM_198860, exon 1 of 4)	exon (NM_198860, exon 1 of 4)	251	NM_198860	192734	Mm.259320	NM_198860	ENSMUSG00000046807	Lrrc75b	AI646023|Fam211b	leucine rich repeat containing 75B	protein-coding
MACS_peak_2416	chr12	73170042	73172516	+	2047	NA	exon (NM_181752, exon 1 of 1)	exon (NM_181752, exon 1 of 1)	699	NM_181752	238252	Mm.390508	NM_181752	ENSMUSG00000043398	Gpr135	PAFR	G protein-coupled receptor 135	protein-coding
MACS_peak_1556	chr11	55421948	55423007	+	2047	NA	promoter-TSS (NM_020492)	promoter-TSS (NM_020492)	-777	NM_020492	14654	Mm.89320	NM_020492		Glra1	nmf11|oscillator|ot|spasmodic|spd	glycine receptor, alpha 1 subunit	protein-coding
MACS_peak_6001	chr2	35110977	35113123	+	2047	NA	intron (NM_001206368, intron 1 of 16)	CpG	171	NM_001206368	227753	Mm.21109	NM_146120	ENSMUSG00000026879	Gsn	ADF	gelsolin	protein-coding
MACS_peak_8826	chr5	125482578	125485316	+	2047	NA	exon (NM_028443, exon 1 of 3)	exon (NM_028443, exon 1 of 3)	102	NM_028443	73121	Mm.296138	NM_028443	ENSMUSG00000037962	Fam101a	3110032G18Rik|cfm|cfm2	family with sequence similarity 101, member A	protein-coding
MACS_peak_6897	chr3	51199424	51201483	+	2047	NA	promoter-TSS (NM_026358)	promoter-TSS (NM_026358)	16	NM_026358	67749	Mm.273339	NM_026358	ENSMUSG00000037161	Mgarp	4930583H14Rik|AI195347|CESP-1|HUMMR|Osap|Qsap	mitochondria localized glutamic acid rich protein	protein-coding
MACS_peak_559	chr1	156569928	156575789	+	2047	NA	exon (NM_009782, exon 1 of 47)	exon (NM_009782, exon 1 of 47)	192	NM_009782	12290	Mm.267517	NM_009782	ENSMUSG00000004110	Cacna1e	A430040I15|BII|Cach6|Cacnl1a6|Cav2.3|Cchra1|alpha1E	calcium channel, voltage-dependent, R type, alpha 1E subunit	protein-coding
MACS_peak_4887	chr17	71200990	71201336	+	2047	NA	promoter-TSS (NM_001164075)	promoter-TSS (NM_001164075)	-89	NM_001164075	21815	Mm.101034	NM_009372	ENSMUSG00000047407	Tgif1	AA959811|AI462167|Tgif	TGFB-induced factor homeobox 1	protein-coding
MACS_peak_4874	chr17	69425912	69428388	+	2047	NA	Intergenic	Intergenic	-79000	NM_013813	13823	Mm.131135	NM_013813	ENSMUSG00000024044	Epb4.1l3	4.1B|DAL1P|Dal1|Epb41l3|NBL3	erythrocyte protein band 4.1-like 3	protein-coding
MACS_peak_8874	chr5	135608299	135610379	+	2047	NA	intron (NM_021455, intron 11 of 16)	intron (NM_021455, intron 11 of 16)	-16242	NM_013763	27368	Mm.36746	NM_013763		Tbl2	C76179|WS-bTRP	transducin (beta)-like 2	protein-coding
MACS_peak_6276	chr2	109533908	109536023	+	2047	NA	intron (NM_001285417, intron 1 of 1)	intron (NM_001285417, intron 1 of 1)	399	NM_001285417	12064	Mm.1442	NM_007540	ENSMUSG00000048482	Bdnf	-	brain derived neurotrophic factor	protein-coding
MACS_peak_9525	chr6	127098711	127100202	+	2047	NA	promoter-TSS (NR_040275)	promoter-TSS (NR_040275)	49	NR_040274	77558	Mm.358918	NR_040273	ENSMUSG00000097166	9330179D12Rik	-	RIKEN cDNA 9330179D12 gene	ncRNA
MACS_peak_7646	chr4	108952367	108953962	+	2047	NA	intron (NM_007943, intron 1 of 24)	CpG	284	NM_007943	13858	Mm.318250	NM_007943	ENSMUSG00000028552	Eps15	2410112D09Rik	epidermal growth factor receptor pathway substrate 15	protein-coding
MACS_peak_6085	chr2	62249212	62250834	+	2047	NA	5' UTR (NM_010074, exon 1 of 26)	5' UTR (NM_010074, exon 1 of 26)	265	NM_010074	13482	Mm.1151	NM_010074	ENSMUSG00000035000	Dpp4	Cd26|Dpp-4|THAM	dipeptidylpeptidase 4	protein-coding
MACS_peak_3482	chr14	68699146	68703419	+	2047	NA	promoter-TSS (NM_010910)	promoter-TSS (NM_010910)	-659	NM_010910	18039	Mm.1956	NM_010910		Nefl	AI847934|CMT2E|NF-L|NF68|Nfl	neurofilament, light polypeptide	protein-coding
MACS_peak_7556	chr4	88583025	88584881	+	2047	NA	Intergenic	Intergenic	-27387	NR_029747	723895		NR_029747	miRBase:MI0000579	Mir31	Mirn31|miR-31|mmu-mir-31	microRNA 31	ncRNA
MACS_peak_7785	chr4	124335072	124336736	+	2035	NA	exon (NM_011141, exon 1 of 2)	exon (NM_011141, exon 1 of 2)	1015	NM_011141	18991	Mm.297371	NM_011141	ENSMUSG00000090125	Pou3f1	Oct-6|Oct6|Otf-6|Otf6|Scip|Test1|Tst-1|Tst1	POU domain, class 3, transcription factor 1	protein-coding
MACS_peak_10711	chr8	72606721	72612631	+	2035	NA	intron (NM_177900, intron 3 of 4)	intron (NM_177900, intron 3 of 4)	2248	NM_177900	330790	Mm.152048	NM_177900	ENSMUSG00000007594	Hapln4	9330174O11|Bral2|Lpr4	hyaluronan and proteoglycan link protein 4	protein-coding
MACS_peak_6904	chr3	52072392	52074642	+	2018	NA	intron (NM_019739, intron 1 of 2)	CpG	1258	NM_019739	56458	Mm.29891	NM_019739	ENSMUSG00000044167	Foxo1	AI876417|Afxh|FKHR|Fkhr1|Foxo1a	forkhead box O1	protein-coding
MACS_peak_4379	chr16	84702736	84704266	+	2004	NA	Intergenic	CpG	-10884	NR_029565	387173		NR_029565	miRBase:MI0000177	Mir155	Mirn155|mmu-mir-155	microRNA 155	ncRNA
MACS_peak_2078	chr11	105928057	105928216	+	2004	NA	intron (NM_027346, intron 1 of 4)	intron (NM_027346, intron 1 of 4)	715	NM_027346	70207	Mm.343857	NM_027346	ENSMUSG00000001983	Taco1	2310066I18Rik|Ccdc44	translational activator of mitochondrially encoded cytochrome c oxidase I	protein-coding
MACS_peak_3879	chr15	80116462	80119037	+	2004	NA	promoter-TSS (NM_001044308)	promoter-TSS (NM_001044308)	81	NM_001044308	239556	Mm.291058	NM_001044308	ENSMUSG00000022416	Cacna1i	Ca(V)3.3	calcium channel, voltage-dependent, alpha 1I subunit	protein-coding
MACS_peak_11037	chr8	120021981	120023486	+	2004	NA	intron (NM_172285, intron 1 of 32)	CpG	542	NM_172285	234779	Mm.192699	NM_172285	ENSMUSG00000034330	Plcg2	PLCgamma2|Plcg-2	phospholipase C, gamma 2	protein-coding
MACS_peak_5482	chr19	24297731	24300618	+	1999	NA	intron (NM_011597, intron 1 of 22)	CpG	342	NM_011597	21873	Mm.104744	NM_011597	ENSMUSG00000024812	Tjp2	ZO-2	tight junction protein 2	protein-coding
MACS_peak_1418	chr11	30654795	30656023	+	1994	NA	Intergenic	CpG	-16366	NM_134013	103554	Mm.240066	NM_134013	ENSMUSG00000040850	Psme4	AA409398|AU041366|TEMO|mKIAA0077	proteasome (prosome, macropain) activator subunit 4	protein-coding
MACS_peak_6947	chr3	66023544	66025950	+	1994	NA	exon (NM_008987, exon 2 of 3)	exon (NM_008987, exon 2 of 3)	938	NM_008987	19288	Mm.276776	NM_008987	ENSMUSG00000027832	Ptx3	AI607804|TSG-14	pentraxin related gene	protein-coding
MACS_peak_8486	chr5	73257696	73259878	+	1994	NA	intron (NM_013689, intron 1 of 17)	intron (NM_013689, intron 1 of 17)	900	NM_001113461	21682	Mm.319581	NM_013689	ENSMUSG00000029217	Tec	-	tec protein tyrosine kinase	protein-coding
MACS_peak_5696	chr19	47416175	47419722	+	1994	NA	exon (NM_008018, exon 6 of 15)	exon (NM_008018, exon 6 of 15)	-69869	NR_105961	102466782		NR_105961		Mir6995	mmu-mir-6995	microRNA mir-6995	ncRNA
MACS_peak_1521	chr11	51668744	51673190	+	1994	NA	promoter-TSS (NM_199299)	promoter-TSS (NM_199299)	16	NM_199299	76901	Mm.259996	NM_199299	ENSMUSG00000020387	Jade2	1200017K05Rik|AI480685|Phf15|mKIAA0239	jade family PHD finger 2	protein-coding
MACS_peak_5734	chr19	56470693	56472162	+	1994	NA	promoter-TSS (NM_007611)	promoter-TSS (NM_007611)	-192	NM_007611	12369	Mm.35687	NM_007611	ENSMUSG00000025076	Casp7	AI314680|CMH-1|ICE-IAP3|Mch3|caspase-7|mCASP-7	caspase 7	protein-coding
MACS_peak_6070	chr2	60120871	60124251	+	1994	NA	promoter-TSS (NM_001290660)	promoter-TSS (NM_001290660)	-20	NM_001290660	66205	Mm.227281	NM_025422	ENSMUSG00000060703	Cd302	1110055L24Rik|AI159627	CD302 antigen	protein-coding
MACS_peak_4089	chr15	102576454	102579738	+	1994	NA	promoter-TSS (NR_104334)	promoter-TSS (NR_104334)	-756	NR_104334	102216269		NR_104334		Cistr-act	Cistr	chondrogenic regulator lncRNA	ncRNA
MACS_peak_9325	chr6	83958324	83959229	+	1994	NA	5' UTR (NM_001077694, exon 1 of 55)	5' UTR (NM_001077694, exon 1 of 55)	184	NM_001077694	26903	Mm.220982	NM_021469	ENSMUSG00000033788	Dysf	2310004N10Rik|AI604795|D6Pas3	dysferlin	protein-coding
MACS_peak_11993	chrX	134104144	134106828	+	1994	NA	promoter-TSS (NM_030688)	promoter-TSS (NM_030688)	-602	NM_030688	60367	Mm.328321	NM_030688	ENSMUSG00000059203	Il1rapl2	-	interleukin 1 receptor accessory protein-like 2	protein-coding
MACS_peak_3351	chr14	47807142	47809418	+	1994	NA	intron (NM_008102, intron 1 of 5)	intron (NM_008102, intron 1 of 5)	797	NM_008102	14528	Mm.10651	NM_008102	ENSMUSG00000037580	Gch1	GTP-CH|GTPCH|Gch	GTP cyclohydrolase 1	protein-coding
MACS_peak_7850	chr4	129116862	129119724	+	1994	NA	promoter-TSS (NM_153541)	promoter-TSS (NM_153541)	-231	NM_153541	215627	Mm.428660	NM_153541	ENSMUSG00000048485	Zbtb8b	AV220464|BC023839|BOZF1|Zbtb8	zinc finger and BTB domain containing 8b	protein-coding
MACS_peak_1655	chr11	69747705	69751593	+	1994	NA	exon (NM_016875, exon 1 of 9)	exon (NM_016875, exon 1 of 9)	248	NM_016875	53422	Mm.29286	NM_016875	ENSMUSG00000018554	Ybx2	Msy2	Y box protein 2	protein-coding
MACS_peak_4609	chr17	27791861	27794209	+	1994	NA	intron (NM_001286744, intron 1 of 9)	intron (NM_001286744, intron 1 of 9)	499	NM_001286743	23969	Mm.4926	NM_011861	ENSMUSG00000040276	Pacsin1	A830061D09Rik|H74|mKIAA1379|syndapin	protein kinase C and casein kinase substrate in neurons 1	protein-coding
MACS_peak_4527	chr17	12698598	12702228	+	1994	NA	5' UTR (NM_011395, exon 1 of 11)	5' UTR (NM_011395, exon 1 of 11)	157	NM_011395	20519	Mm.99252	NM_011395	ENSMUSG00000023828	Slc22a3	EMT|Oct3|Orct3|Slca22a3	solute carrier family 22 (organic cation transporter), member 3	protein-coding
MACS_peak_11283	chr9	37263261	37270684	+	1994	NA	Intergenic	Intergenic	-26212	NM_001164767	19649	Mm.212826	NM_011248	ENSMUSG00000032128	Robo3	Rbig1|Rig-1|Rig1|Robo3a|Robo3b	roundabout homolog 3 (Drosophila)	protein-coding
MACS_peak_2096	chr11	109333311	109335357	+	1994	NA	promoter-TSS (NM_028710)	promoter-TSS (NM_028710)	209	NM_134038	104681	Mm.265874	NM_134038	ENSMUSG00000041920	Slc16a6	AW743111|ESTM12|MCT 6|MCT 7|MCT6	solute carrier family 16 (monocarboxylic acid transporters), member 6	protein-coding
MACS_peak_3201	chr13	119501776	119505757	+	1994	NA	5' UTR (NM_008002, exon 1 of 3)	5' UTR (NM_008002, exon 1 of 3)	260	NM_008002	14165	Mm.317323	NM_008002	ENSMUSG00000021732	Fgf10	AEY17|BB213776|Fgf-10|Gsfaey17	fibroblast growth factor 10	protein-coding
MACS_peak_10013	chr7	77499567	77500022	+	1994	NA	exon (NM_183261, exon 3 of 3)	exon (NM_183261, exon 3 of 3)	5685	NM_009697	11819	Mm.158143	NM_009697	ENSMUSG00000030551	Nr2f2	2700033K02Rik|9430015G03Rik|ARP-1|Aporp1|COUP-TF2|COUP-TFII|COUPTFB|EAR3|SVP40|Tcfcoup2	nuclear receptor subfamily 2, group F, member 2	protein-coding
MACS_peak_1720	chr11	75839718	75842078	+	1994	NA	intron (NM_029658, intron 1 of 2)	CpG	386	NM_029658	76566	Mm.34131	NM_029658	ENSMUSG00000020846	Fam101b	1500005K14Rik|RefilinB|cfm	family with sequence similarity 101, member B	protein-coding
MACS_peak_3841	chr15	77948296	77952212	+	1994	NA	promoter-TSS (NM_007583)	promoter-TSS (NM_007583)	-544	NM_007583	12300	Mm.277338	NM_007583		Cacng2	AW060990|B230105C07Rik|B930041E13Rik|stargazer|stargazin|stg|wag|waggler	calcium channel, voltage-dependent, gamma subunit 2	protein-coding
MACS_peak_11897	chrX	98578763	98581644	+	1994	NA	exon (NM_008124, exon 2 of 2)	exon (NM_008124, exon 2 of 2)	7527	NM_008124	14618	Mm.21198	NM_008124	ENSMUSG00000047797	Gjb1	AI118175|Cnx32|Cx32|Gjb-1	gap junction protein, beta 1	protein-coding
MACS_peak_7350	chr4	8574600	8576171	+	1994	NA	Intergenic	Intergenic	-42168	NM_001277149	320790	Mm.138792	NM_001033395	ENSMUSG00000041235	Chd7	A730019I05Rik|Cycn|Cyn|Dz|Edy|Flo|GENA 47|GENA 60|Gena 52|Lda|Mt|Obt|Todo|WBE1|Whi|metis	chromodomain helicase DNA binding protein 7	protein-coding
MACS_peak_7466	chr4	46661777	46664598	+	1994	NA	promoter-TSS (NM_198664)	promoter-TSS (NM_198664)	-116	NM_198664	381605	Mm.331595	NM_198664	ENSMUSG00000039813	Tbc1d2	A630005A06Rik|BC022630|Gm1037|PARIS-1|PARIS1	TBC1 domain family, member 2	protein-coding
MACS_peak_11885	chrX	90543727	90546794	+	1994	NA	Intergenic	Intergenic	13275	NM_007492	11878	Mm.275547	NM_007492	ENSMUSG00000035277	Arx	-	aristaless related homeobox	protein-coding
MACS_peak_2430	chr12	74017885	74019280	+	1994	NA	intron (NM_029444, intron 1 of 17)	CpG	170	NM_029444	75801	Mm.242892	NM_029444	ENSMUSG00000021098	4930447C04Rik	4921504I02Rik|A930035O15Rik|Six6OS|Six6as|Six6os1	RIKEN cDNA 4930447C04 gene	protein-coding
MACS_peak_4962	chr17	86566700	86569358	+	1994	NA	exon (NM_011104, exon 1 of 15)	exon (NM_011104, exon 1 of 15)	904	NM_011104	18754	Mm.24614	NM_011104	ENSMUSG00000045038	Prkce	5830406C15Rik|PKC[e]|PKCepsilon|Pkce|R75156	protein kinase C, epsilon	protein-coding
MACS_peak_1090	chr10	82797411	82799480	+	1994	NA	intron (NM_177388, intron 1 of 10)	intron (NM_177388, intron 1 of 10)	2117	NM_177388	338365	Mm.67073	NM_177388	ENSMUSG00000034591	Slc41a2	A230035L05Rik|SLC41A1-L1	solute carrier family 41, member 2	protein-coding
MACS_peak_8589	chr5	101147389	101149719	+	1994	NA	exon (NM_152803, exon 1 of 12)	exon (NM_152803, exon 1 of 12)	148	NM_152803	15442	Mm.265786	NM_152803	ENSMUSG00000035273	Hpse	HSE1|Hpa|Hpr1	heparanase	protein-coding
MACS_peak_503	chr1	136129785	136133727	+	1994	NA	promoter-TSS (NM_001291928)	promoter-TSS (NM_001291928)	278	NM_001291930	11539	Mm.298908	NM_009629	ENSMUSG00000042429	Adora1	A1-AR|A1AR|A1R|AA1R|AI848715|BB176431|Ri	adenosine A1 receptor	protein-coding
MACS_peak_2628	chr12	113857251	113859805	+	1994	NA	intron (NM_007421, intron 1 of 12)	CpG	270	NM_007421	11565	Mm.3440	NM_007421	ENSMUSG00000011148	Adssl1	AI528595|Adss|Adss1	adenylosuccinate synthetase like 1	protein-coding
MACS_peak_3391	chr14	55049978	55052248	+	1994	NA	intron (NM_008608, intron 1 of 9)	CpG	672	NM_008608	17387	Mm.280175	NM_008608	ENSMUSG00000000957	Mmp14	AI325305|MT-MMP-1|MT1-MMP|sabe	matrix metallopeptidase 14 (membrane-inserted)	protein-coding
MACS_peak_2828	chr13	41173522	41176469	+	1994	NA	promoter-TSS (NM_001145802)	promoter-TSS (NM_001145802)	80	NM_001145803	17152	Mm.8149	NM_008547	ENSMUSG00000021363	Mak	A930010O05Rik	male germ cell-associated kinase	protein-coding
MACS_peak_228	chr1	74759383	74760772	+	1994	NA	promoter-TSS (NM_024264)	promoter-TSS (NM_024264)	-71	NM_024264	104086	Mm.85083	NM_024264	ENSMUSG00000026170	Cyp27a1	1300013A03Rik|Cyp27	cytochrome P450, family 27, subfamily a, polypeptide 1	protein-coding
MACS_peak_6321	chr2	119061858	119064842	+	1956	NA	intron (NM_016907, intron 1 of 10)	CpG	254	NM_016907	20732	Mm.104955	NM_016907	ENSMUSG00000027315	Spint1	HAI-1	serine protease inhibitor, Kunitz type 1	protein-coding
MACS_peak_3185	chr13	115249381	115250734	+	1939	NA	promoter-TSS (NM_001301373)	promoter-TSS (NM_001301373)	-898	NM_008046	14313	Mm.4913	NM_008046	ENSMUSG00000021765	Fst	AL033346|FS	follistatin	protein-coding
MACS_peak_6604	chr2	164792643	164796300	+	1939	NA	intron (NM_020333, intron 1 of 25)	intron (NM_020333, intron 1 of 25)	983	NM_020333	57138	Mm.252987	NM_020333	ENSMUSG00000017740	Slc12a5	KCC2|mKIAA1176	solute carrier family 12, member 5	protein-coding
MACS_peak_8184	chr4	154417146	154418356	+	1939	NA	Intergenic	Intergenic	-23388	NM_001042407	668173	Mm.133114	NM_001042407	ENSMUSG00000029047	Pex10	AV128229|Gm142	peroxisomal biogenesis factor 10	protein-coding
MACS_peak_7695	chr4	116493094	116494424	+	1939	NA	exon (NM_146256, exon 1 of 1)	exon (NM_146256, exon 1 of 1)	354	NM_146256	242642	Mm.279897	NM_146256	ENSMUSG00000043155	Hpdl	A830048M07Rik|BC034099|Gloxd1	4-hydroxyphenylpyruvate dioxygenase-like	protein-coding
MACS_peak_1490	chr11	45979354	45980109	+	1939	NA	intron (NM_172524, intron 1 of 5)	CpG	130	NM_172524	214112	Mm.225253	NM_172524	ENSMUSG00000020411	Nipal4	9530066K23Rik	NIPA-like domain containing 4	protein-coding
MACS_peak_2539	chr12	96930828	96932639	+	1939	NA	intron (NM_201518, intron 1 of 1)	intron (NM_201518, intron 1 of 1)	1297	NM_201518	399558	Mm.341948	NM_201518	ENSMUSG00000047414	Flrt2	-	fibronectin leucine rich transmembrane protein 2	protein-coding
MACS_peak_7765	chr4	122999443	123001540	+	1939	NA	exon (NM_022033, exon 1 of 1)	exon (NM_022033, exon 1 of 1)	431	NM_022033	64059	Mm.270287	NM_022033	ENSMUSG00000076436	Oxct2a	Oxct|Oxct2|Scot|Scot-t1	3-oxoacid CoA transferase 2A	protein-coding
MACS_peak_4796	chr17	48110323	48112183	+	1939	NA	Intergenic	CpG	-49672	NM_001110825	74123	Mm.240062	NM_028767	ENSMUSG00000023991	Foxp4	1200010K03Rik|2310007G05Rik|mFKHLA	forkhead box P4	protein-coding
MACS_peak_853	chr10	39645742	39647822	+	1939	NA	promoter-TSS (NM_001163503)	promoter-TSS (NM_001163503)	-53	NM_001163503	72045	Mm.235981	NM_001163503	ENSMUSG00000039339	2010001E11Rik	Naglt1b	RIKEN cDNA 2010001E11 gene	protein-coding
MACS_peak_5763	chr19	59334844	59336960	+	1939	NA	exon (NM_172523, exon 2 of 16)	exon (NM_172523, exon 2 of 16)	534	NM_172523	214084	Mm.268797	NM_172523	ENSMUSG00000025094	Slc18a2	1110037L13Rik|9330105E13|Vmat2	solute carrier family 18 (vesicular monoamine), member 2	protein-coding
MACS_peak_10434	chr7	152123900	152129502	+	1939	NA	promoter-TSS (NM_007631)	promoter-TSS (NM_007631)	-871	NM_007631	12443	Mm.273049	NM_007631	ENSMUSG00000070348	Ccnd1	AI327039|CycD1|Cyl-1|PRAD1|bcl-1|cD1	cyclin D1	protein-coding
MACS_peak_11442	chr9	61873991	61875026	+	1939	NA	promoter-TSS (NM_028748)	promoter-TSS (NM_028748)	89	NM_028748	74090	Mm.273267	NM_028748	ENSMUSG00000032278	Paqr5	0610010I15Rik|AV002411|BB115488|mPRg	progestin and adipoQ receptor family member V	protein-coding
MACS_peak_2321	chr12	50476542	50479940	+	1939	NA	Intergenic	Intergenic	-5629	NM_001160112	15228	Mm.4704	NM_008241	ENSMUSG00000020950	Foxg1	2900064B05Rik|BF-1|Bf1|Hfh9|Hfhbf1	forkhead box G1	protein-coding
MACS_peak_10822	chr8	87468189	87471437	+	1939	NA	Intergenic	CpG	-1077	NM_144929	234542	Mm.461701	NM_144929	ENSMUSG00000048617	Rtbdn	A330096I21Rik|BC022744|Rtbnd	retbindin	protein-coding
MACS_peak_3470	chr14	66571797	66573142	+	1939	NA	5' UTR (NM_172604, exon 1 of 6)	5' UTR (NM_172604, exon 1 of 6)	112	NM_172604	219151	Mm.344095	NM_172604	ENSMUSG00000034463	Scara3	APC7|C130058N24Rik|CSR|CSR1|MSLR1|MSRL1	scavenger receptor class A, member 3	protein-coding
MACS_peak_4583	chr17	25567076	25570440	+	1939	NA	intron (NM_021415, intron 2 of 34)	intron (NM_021415, intron 2 of 34)	1970	NM_021415	58226	Mm.268378	NM_021415	ENSMUSG00000024112	Cacna1h	Cav3.2|MNCb-1209|alpha13.2	calcium channel, voltage-dependent, T type, alpha 1H subunit	protein-coding
MACS_peak_9147	chr6	36337419	36339975	+	1939	NA	promoter-TSS (NR_015589)	promoter-TSS (NR_015589)	-463	NR_015589	319472	Mm.226434	NR_015589	ENSMUSG00000073154	9330158H04Rik	-	RIKEN cDNA 9330158H04 gene	ncRNA
MACS_peak_10763	chr8	79422419	79423172	+	1939	NA	intron (NR_028579, intron 1 of 1)	intron (NR_028579, intron 1 of 1)	1277	NR_028579	100039211	Mm.367571	NR_028579	ENSMUSG00000074235	Gm10649	ENSMUSG00000074235	predicted gene 10649	ncRNA
MACS_peak_3947	chr15	85564155	85565813	+	1939	NA	Intergenic	Intergenic	-1010	NM_001113418	19013	Mm.212789	NM_011144		Ppara	4933429D07Rik|AW742785|Nr1c1|PPAR-alpha|PPARalpha|Ppar	peroxisome proliferator activated receptor alpha	protein-coding
MACS_peak_10837	chr8	90485083	90486683	+	1927	NA	Intergenic	CpG-14334	-2389	NM_033327	94187	Mm.23452	NM_033327	ENSMUSG00000045333	Zfp423	Ebfaz|Roaz|Zfp104|Znf423|ataxia1|mKIAA0760|nur12	zinc finger protein 423	protein-coding
MACS_peak_6589	chr2	163742011	163746956	+	1927	NA	promoter-TSS (NM_183023)	promoter-TSS (NM_183023)	-64	NM_183023	241770	Mm.330760	NM_183023	ENSMUSG00000035226	Rims4	6530406L02|Rim4	regulating synaptic membrane exocytosis 4	protein-coding
MACS_peak_7025	chr3	88011225	88012950	+	1927	NA	Intergenic	Intergenic	-7006	NR_037276	100526540		NR_037276	miRBase:MI0014086	Mir3093	mmu-mir-3093	microRNA 3093	ncRNA
MACS_peak_4161	chr16	9992294	9997112	+	1927	NA	Intergenic	Intergenic	-2077	NM_008170	14811	Mm.2953	NM_008170	ENSMUSG00000059003	Grin2a	GluN2A|NMDAR2A|NR2A	glutamate receptor, ionotropic, NMDA2A (epsilon 1)	protein-coding
MACS_peak_11140	chr8	128517769	128520617	+	1927	NA	5' UTR (NM_008430, exon 1 of 3)	5' UTR (NM_008430, exon 1 of 3)	191	NM_008430	16525	Mm.10800	NM_008430	ENSMUSG00000033998	Kcnk1	AI788889|TWIK-1	potassium channel, subfamily K, member 1	protein-coding
MACS_peak_1066	chr10	80746804	80748381	+	1927	NA	intron (NM_001282095, intron 1 of 20)	intron (NM_001282095, intron 1 of 20)	934	NM_001282096	27375	Mm.27984	NM_013769	ENSMUSG00000034917	Tjp3	-	tight junction protein 3	protein-coding
MACS_peak_5084	chr18	36227515	36230528	+	1927	NA	intron (NM_001167891, intron 1 of 9)	intron (NM_001167891, intron 1 of 9)	-36836	NR_015571	74966	Mm.379238	NM_030089		4930471G03Rik	1700007N01Rik	RIKEN cDNA 4930471G03 gene	ncRNA
MACS_peak_5158	chr18	46357775	46359838	+	1927	NA	promoter-TSS (NM_001170855)	promoter-TSS (NM_001170855)	-334	NM_001170855	28105	Mm.277382	NM_178872	ENSMUSG00000033949	Trim36	D18Wsu100e|haprin	tripartite motif-containing 36	protein-coding
MACS_peak_499	chr1	135260214	135262345	+	1927	NA	intron (NM_175443, intron 1 of 7)	intron (NM_175443, intron 1 of 7)	1130	NM_175443	214253	Mm.52111	NM_175443	ENSMUSG00000070644	Etnk2	4933417N20Rik|AI197444|EKI 2|Eki2|Tuc1	ethanolamine kinase 2	protein-coding
MACS_peak_3820	chr15	76026938	76030481	+	1927	NA	promoter-TSS (NM_201393)	promoter-TSS (NM_201393)	-70	NM_201393	18810	Mm.234912	NM_011117	ENSMUSG00000022565	Plec	AA591047|AU042537|EBS1|PCN|PLTN|Plec1	plectin	protein-coding
MACS_peak_3135	chr13	101385995	101387925	+	1927	NA	promoter-TSS (NM_178410)	promoter-TSS (NM_178410)	-34	NM_001038602	218518	Mm.25300	NM_178410	ENSMUSG00000021636	Marveld2	BC003296|MARVD2|Mrvldc2|Tric|Trica|Tricb|Tricc	MARVEL (membrane-associating) domain containing 2	protein-coding
MACS_peak_1982	chr11	98820465	98822721	+	1927	NA	promoter-TSS (NM_001176528)	promoter-TSS (NM_001176528)	-192	NM_001176528	19401	Mm.439744	NM_009024	ENSMUSG00000037992	Rara	Nr1b1|RAR|RARalpha1	retinoic acid receptor, alpha	protein-coding
MACS_peak_3383	chr14	51977686	51978810	+	1927	NA	Intergenic	CpG	-13084	NR_045736	75377	Mm.402100	NR_045736		4930597G03Rik	-	RIKEN cDNA 4930597G03 gene	ncRNA
MACS_peak_1268	chr10	127631710	127633322	+	1927	NA	intron (NM_001285779, intron 1 of 17)	intron (NM_001285779, intron 1 of 17)	825	NM_001285779	216456	Mm.30102	NM_001033264	ENSMUSG00000044005	Gls2	A330074B06Rik|AI195532|GA|GLS|Lga	glutaminase 2 (liver, mitochondrial)	protein-coding
MACS_peak_7847	chr4	128962892	128965131	+	1927	NA	promoter-TSS (NM_023485)	promoter-TSS (NM_023485)	-854	NM_023485	68828	Mm.132243	NM_023485	ENSMUSG00000001333	Sync	1110057H03Rik|SNIP4	syncoilin	protein-coding
MACS_peak_5961	chr2	32216464	32219434	+	1927	NA	promoter-TSS (NM_001252538)	promoter-TSS (NM_001252538)	-581	NM_001252538	68379	Mm.170508	NM_028412	ENSMUSG00000039205	Ciz1	0610038H21Rik|2900056O04Rik|LSFR1|ZNF356	CDKN1A interacting zinc finger protein 1	protein-coding
MACS_peak_2881	chr13	53076598	53078500	+	1927	NA	Intergenic	Intergenic	-1141	NM_017373	18030	Mm.136604	NM_017373	ENSMUSG00000056749	Nfil3	AV225605|E4BP4	nuclear factor, interleukin 3, regulated	protein-coding
MACS_peak_4173	chr16	13448297	13450065	+	1927	NA	promoter-TSS (NR_030549)	promoter-TSS (NR_030549)	-435	NR_030549	100124432		NR_030549	miRBase:MI0005484	Mir193b	Mir193|Mirn193b	microRNA 193b	ncRNA
MACS_peak_442	chr1	121969556	121971047	+	1927	NA	promoter-TSS (NM_019432)	promoter-TSS (NM_019432)	56	NM_019432	170706	Mm.24750	NM_019432		Tmem37	AI173373|AW540203|Pr|Pr1	transmembrane protein 37	protein-coding
MACS_peak_6550	chr2	157738810	157740806	+	1927	NA	promoter-TSS (NM_198627)	promoter-TSS (NM_198627)	-581	NM_198627	277432	Mm.441156	NM_198627	ENSMUSG00000037843	Vstm2l	Gm691	V-set and transmembrane domain containing 2-like	protein-coding
MACS_peak_1017	chr10	79074850	79076480	+	1927	NA	exon (NM_198614, exon 2 of 2)	exon (NM_198614, exon 2 of 2)	1098	NM_198614	237397	Mm.334207	NM_198614	ENSMUSG00000045912	C2cd4c	4932409I22Rik|Fam148c|Gm238	C2 calcium-dependent domain containing 4C	protein-coding
MACS_peak_7684	chr4	115634803	115638556	+	1927	NA	Intergenic	Intergenic	-24148	NM_130865	140477	Mm.213206	NM_130865	ENSMUSG00000028707	Dmbx1	Atx|Cdmx|Mbx|Otx3	diencephalon/mesencephalon homeobox 1	protein-coding
MACS_peak_9151	chr6	37249592	37250805	+	1927	NA	promoter-TSS (NM_001081206)	promoter-TSS (NM_001081206)	-222	NM_001081206	320127	Mm.119469	NM_001081206	ENSMUSG00000038665	Dgki	C130010K08Rik	diacylglycerol kinase, iota	protein-coding
MACS_peak_5559	chr19	38552893	38557244	+	1927	NA	Intergenic	Intergenic	-43619	NM_019588	74055	Mm.34031	NM_019588	ENSMUSG00000024998	Plce1	4933403A21Rik|PLCepsilon|Plce|mKIAA1516	phospholipase C, epsilon 1	protein-coding
MACS_peak_9494	chr6	121160684	121162238	+	1906	NA	intron (NM_017379, intron 1 of 4)	intron (NM_017379, intron 1 of 4)	673	NM_017379	53857	Mm.32884	NM_017379		Tuba8	-	tubulin, alpha 8	protein-coding
MACS_peak_4491	chr17	3326503	3328228	+	1906	NA	intron (NM_001122998, intron 1 of 26)	intron (NM_001122998, intron 1 of 26)	792	NM_001122998	24001	Mm.137134	NM_011878	ENSMUSG00000023800	Tiam2	3000002F19Rik|STEF|mKIAA2016	T cell lymphoma invasion and metastasis 2	protein-coding
MACS_peak_8174	chr4	154006717	154014181	+	1905	NA	promoter-TSS (NR_045643)	promoter-TSS (NR_045643)	27	NR_045643	320939	Mm.436738	NR_045643		5930403L14Rik	-	RIKEN cDNA 5930403L14 gene	ncRNA
MACS_peak_11101	chr8	125759554	125760975	+	1905	NA	promoter-TSS (NM_030176)	promoter-TSS (NM_030176)	-155	NM_030176	78779	Mm.41459	NM_030176	ENSMUSG00000033594	Spata2l	2610039E05Rik|AI648233|mKIAA4138	spermatogenesis associated 2-like	protein-coding
MACS_peak_10140	chr7	108079347	108080899	+	1905	NA	exon (NM_001081116, exon 1 of 21)	exon (NM_001081116, exon 1 of 21)	552	NM_001081116	207212	Mm.29954	NM_001081116	ENSMUSG00000032875	Arhgef17	8030463K16|AI428794|AW558066|BC035332|mKIAA0337	Rho guanine nucleotide exchange factor (GEF) 17	protein-coding
MACS_peak_6170	chr2	77653670	77656326	+	1905	NA	promoter-TSS (NM_178723)	promoter-TSS (NM_178723)	-125	NM_178723	241494	Mm.490320	NM_178723	ENSMUSG00000027016	Zfp385b	B830010L13Rik|C130013B13Rik|Zfp533|Znf385b	zinc finger protein 385B	protein-coding
MACS_peak_2471	chr12	80010993	80014150	+	1905	NA	Intergenic	Intergenic	-4646	NM_013738	27260	Mm.103380	NM_013738	ENSMUSG00000021118	Plek2	-	pleckstrin 2	protein-coding
MACS_peak_1869	chr11	90248927	90251604	+	1905	NA	intron (NM_172563, intron 1 of 3)	intron (NM_172563, intron 1 of 3)	1966	NM_172563	217082	Mm.158903	NM_172563	ENSMUSG00000003949	Hlf	E230015K02Rik	hepatic leukemia factor	protein-coding
MACS_peak_3144	chr13	104122516	104123986	+	1905	NA	intron (NM_175171, intron 1 of 28)	intron (NM_175171, intron 1 of 28)	1321	NM_175171	328329	Mm.202606	NM_175171	ENSMUSG00000034751	Mast4	4930420O11Rik|AI642422|mKIAA0303	microtubule associated serine/threonine kinase family member 4	protein-coding
MACS_peak_10090	chr7	91233503	91235133	+	1905	NA	intron (NM_030728, intron 1 of 28)	intron (NM_030728, intron 1 of 28)	697	NM_030728	80982	Mm.160389	NM_030728	ENSMUSG00000052353	Cemip	12H19.01.T7|6330404C01Rik|9930013L23Rik|AY007814|Kiaa1199	cell migration inducing protein, hyaluronan binding	protein-coding
MACS_peak_10184	chr7	117202963	117203379	+	1878	NA	Intergenic	LSU-rRNA_Hsa|rRNA|rRNA	-2045	NM_009281	20841	Mm.10815	NM_009281	ENSMUSG00000061079	Zfp143	AA959806|AU015869|D7Ertd805e|KRAB14|SBF|Staf|Zfp79|Zfp80-rs1|Znf143|pHZ-1	zinc finger protein 143	protein-coding
MACS_peak_10136	chr7	107064802	107066783	+	1873	NA	intron (NM_001164258, intron 18 of 18)	intron (NM_001164258, intron 18 of 18)	58064	NM_001164258	446101	Mm.440757	NM_001164258	ENSMUSG00000035211	Xrra1	AI449753	X-ray radiation resistance associated 1	protein-coding
[truncated: 5,052 more rows]
