# Supplementary material for: Remodeling of epigenome and transcriptome landscapes with aging in mice reveals widespread induction of inflammatory responses
Source: HighWire-hosted journal article supplement (doi:10.1101/gr.240093.118), 2019-03-11
Supplement: Supplemental_Code_Figure3_Machine_learning.zip [file HOMER_cerebellum_8weeks_Pol2_peaks.xls]

PeakID (cmd=annotatePeaks.pl cerebellum_8weeks_Pol2_peaks.bed mm9)	Chr	Start	End	Strand	Peak Score	Focus Ratio/Region Size	Annotation	Detailed Annotation	Distance to TSS	Nearest PromoterID	Entrez ID	Nearest Unigene	Nearest Refseq	Nearest Ensembl	Gene Name	Gene Alias	Gene Description	Gene Type
MACS_peak_3897	chr11	115885522	115886016	+	571.44	NA	promoter-TSS (NM_008211)	promoter-TSS (NM_008211)	49	NM_008211	15081	Mm.18516	NM_008211	ENSMUSG00000016559	H3f3b	9430068D06Rik|H3.3B	H3 histone, family 3B	protein-coding
MACS_peak_9683	chr19	5802446	5802868	+	568.13	NA	promoter-TSS (NR_002847)	promoter-TSS (NR_002847)	14	NR_002847	72289	Mm.298256	NR_002847	ENSMUSG00000092341	Malat1	2210401K01Rik|9430072K23Rik|AI647968|Neat2	metastasis associated lung adenocarcinoma transcript 1 (non-coding RNA)	ncRNA
MACS_peak_4944	chr13	23673276	23673655	+	558.76	NA	promoter-TSS (NM_175654)	promoter-TSS (NM_175654)	-6	NM_175654	319156	Mm.260530	NM_175654		Hist1h4d	-	histone cluster 1, H4d	protein-coding
MACS_peak_1746	chr10	80392567	80393073	+	526.51	NA	promoter-TSS (NM_008655)	promoter-TSS (NM_008655)	-16	NM_008655	17873	Mm.1360	NM_008655	ENSMUSG00000015312	Gadd45b	AI323528|Myd118	growth arrest and DNA-damage-inducible 45 beta	protein-coding
MACS_peak_13805	chr4	131825931	131826550	+	525.18	NA	promoter-TSS (NR_002865)	promoter-TSS (NR_002865)	-139	NR_002865	353373	Mm.424675	NR_002865		Rnu11	MBII-407|Mirn801|mir-801|mmu-mir-801	U11 small nuclear RNA	snRNA
MACS_peak_4952	chr13	23790184	23790518	+	513.39	NA	promoter-TSS (NM_178208)	promoter-TSS (NM_178208)	-24	NM_178208	319155	Mm.261662	NM_178208		Hist1h4c	-	histone cluster 1, H4c	protein-coding
MACS_peak_18193	chr8	11557771	11558156	+	512.46	NA	intron (NM_011919, intron 1 of 1)	CpG	1897	NM_011919	26356	Mm.25709	NM_011919	ENSMUSG00000045969	Ing1	2610028J21Rik|AA407184|AI875420|mING1h|p33Ing1|p37Ing1b	inhibitor of growth family, member 1	protein-coding
MACS_peak_11809	chr2	166888446	166888950	+	510.85	NA	promoter-TSS (NM_001033196)	promoter-TSS (NM_001033196)	-183	NM_001033196	98999	Mm.297074	NM_001033196	ENSMUSG00000039501	Znfx1	AI481105	zinc finger, NFX1-type containing 1	protein-coding
MACS_peak_2830	chr11	62415973	62416687	+	498.71	NA	promoter-TSS (NR_028550)	promoter-TSS (NR_028550)	-49	NR_030738	69221	Mm.270874	NR_030738	ENSMUSG00000086841	2410006H16Rik	-	RIKEN cDNA 2410006H16 gene	ncRNA
MACS_peak_19514	chr9	40609190	40609577	+	497.26	NA	promoter-TSS (NM_031165)	promoter-TSS (NM_031165)	27	NM_031165	15481	Mm.290774	NM_031165	ENSMUSG00000015656	Hspa8	2410008N15Rik|Hsc70|Hsc71|Hsc73|Hsp73|Hspa10	heat shock protein 8	protein-coding
MACS_peak_396	chr1	75215547	75216200	+	489.90	NA	promoter-TSS (NM_009447)	promoter-TSS (NM_009447)	-45	NM_009447	22145	Mm.1155	NM_009447	ENSMUSG00000026202	Tuba4a	M[a]4|Tuba4	tubulin, alpha 4A	protein-coding
MACS_peak_2942	chr11	69571541	69572499	+	486.37	NA	5' UTR (NM_001291068, exon 1 of 29)	5' UTR (NM_001291068, exon 1 of 29)	115	NM_001291068	20020	Mm.16533	NM_009089	ENSMUSG00000005198	Polr2a	220kDa|Rpb1|Rpo2-1	polymerase (RNA) II (DNA directed) polypeptide A	protein-coding
MACS_peak_1443	chr10	59414298	59415494	+	481.50	NA	promoter-TSS (NM_029083)	promoter-TSS (NM_029083)	-378	NM_029083	74747	Mm.21697	NM_029083	ENSMUSG00000020108	Ddit4	5830413E08Rik|AA415483|REDD1|Rtp801|dig2	DNA-damage-inducible transcript 4	protein-coding
MACS_peak_12527	chr3	96073323	96073877	+	481.48	NA	promoter-TSS (NM_175666)	promoter-TSS (NM_175666)	-23	NM_175666	319189	Mm.297655	NM_175666		Hist2h2bb	H2b-616	histone cluster 2, H2bb	protein-coding
MACS_peak_15391	chr5	143667736	143668559	+	476.63	NA	intron (NM_007393, intron 1 of 5)	CpG	256	NM_007393	11461	Mm.328431	NM_007393	ENSMUSG00000029580	Actb	Actx|E430023M04Rik|beta-actin	actin, beta	protein-coding
MACS_peak_12689	chr3	108374307	108374889	+	476.26	NA	promoter-TSS (NM_025444)	promoter-TSS (NM_025444)	-19	NM_025444	99730	Mm.24431	NM_025444		Taf13	1810004N01Rik|2010309N11Rik|AI847295|TAFII18	TAF13 RNA polymerase II, TATA box binding protein (TBP)-associated factor	protein-coding
MACS_peak_16326	chr6	125115398	125115954	+	474.26	NA	5' UTR (NM_008084, exon 1 of 7)	5' UTR (NM_008084, exon 1 of 7)	115	NM_008084	14433	Mm.304088	NM_008084	ENSMUSG00000057666	Gapdh	Gapd	glyceraldehyde-3-phosphate dehydrogenase	protein-coding
MACS_peak_826	chr1	162965153	162965550	+	465.26	NA	promoter-TSS (NM_173424)	promoter-TSS (NM_173424)	54	NR_002840	14455	Mm.270065	NR_002840	ENSMUSG00000053332	Gas5	Gas-5|Mir5117	growth arrest specific 5	ncRNA
MACS_peak_6802	chr15	79913542	79914316	+	457.01	NA	promoter-TSS (NR_028281)	promoter-TSS (NR_028281)	-93	NM_013762	27367	Mm.290771	NM_013762	ENSMUSG00000060036	Rpl3	F2|J1	ribosomal protein L3	protein-coding
MACS_peak_8811	chr17	80606413	80606984	+	455.08	NA	promoter-TSS (NM_146083)	promoter-TSS (NM_146083)	-53	NM_001195485	225027	Mm.292016	NM_146083	ENSMUSG00000024097	Srsf7	35kDa|9430065L19Rik|9G8|NX-96|Sfrs7	serine/arginine-rich splicing factor 7	protein-coding
MACS_peak_2827	chr11	62364821	62365239	+	445.10	NA	promoter-TSS (NM_011664)	promoter-TSS (NM_011664)	24	NM_011664	22187	Mm.282093	NM_011664		Ubb	AL033289|Rps27a|Uba52|Ubb2|Ubc	ubiquitin B	protein-coding
MACS_peak_8522	chr17	46169126	46169418	+	444.37	NA	promoter-TSS (NM_001287057)	promoter-TSS (NM_001287057)	54	NM_001287058	22339	Mm.282184	NM_009505	ENSMUSG00000023951	Vegfa	Vegf|Vpf	vascular endothelial growth factor A	protein-coding
MACS_peak_3683	chr11	102977369	102977856	+	442.53	NA	promoter-TSS (NM_138753)	promoter-TSS (NM_138753)	-27	NM_138753	192231	Mm.8763	NM_138753	ENSMUSG00000048878	Hexim1	7330426E13Rik|CLP-1|Clp1|HIS1	hexamethylene bis-acetamide inducible 1	protein-coding
MACS_peak_3348	chr11	94072651	94072949	+	441.16	NA	promoter-TSS (NM_009427)	promoter-TSS (NM_009427)	32	NM_009427	22057	Mm.259673	NM_009427	ENSMUSG00000037573	Tob1	Tob|Trob	transducer of ErbB-2.1	protein-coding
MACS_peak_3927	chr11	116714176	116715314	+	439.43	NA	promoter-TSS (NM_011358)	promoter-TSS (NM_011358)	-337	NM_011358	20382	Mm.21841	NM_011358	ENSMUSG00000034120	Srsf2	D11Wsu175e|MRF-1|Pr264|SC35|Sfrs10|Sfrs2	serine/arginine-rich splicing factor 2	protein-coding
MACS_peak_8874	chr17	87846031	87846303	+	437.46	NA	5' UTR (NM_007589, exon 1 of 6)	5' UTR (NM_007589, exon 1 of 6)	108	NM_007589	12314	Mm.329243	NM_007589	ENSMUSG00000036438	Calm2	1500001E21Rik|AL024017	calmodulin 2	protein-coding
MACS_peak_4917	chr13	21842268	21842530	+	433.65	NA	promoter-TSS (NM_178211)	promoter-TSS (NM_178211)	23	NM_178211	319160	Mm.255646	NM_178211	ENSMUSG00000064288	Hist1h4k	-	histone cluster 1, H4k	protein-coding
MACS_peak_10938	chr2	79296569	79296931	+	432.95	NA	promoter-TSS (NM_010894)	promoter-TSS (NM_010894)	43	NM_010894	18012	Mm.4636	NM_010894	ENSMUSG00000034701	Neurod1	BETA2|BHF-1|Neurod|bHLHa3	neurogenic differentiation 1	protein-coding
MACS_peak_13529	chr4	115894138	115894476	+	431.19	NA	promoter-TSS (NM_181585)	promoter-TSS (NM_181585)	-212	NM_181585	18710	Mm.253819	NM_181585	ENSMUSG00000028698	Pik3r3	AA414954|p55pik	phosphatidylinositol 3 kinase, regulatory subunit, polypeptide 3 (p55)	protein-coding
MACS_peak_14386	chr5	28117815	28118505	+	428.38	NA	promoter-TSS (NM_018878)	promoter-TSS (NM_018878)	-70	NM_018878	55982	Mm.277190	NM_018878	ENSMUSG00000002221	Paxip1	D5Ertd149e|PTIP	PAX interacting (with transcription-activation domain) protein 1	protein-coding
MACS_peak_9119	chr18	34918834	34919416	+	425.65	NA	intron (NM_175104, intron 1 of 4)	CpG	565	NM_175104	66306	Mm.29424	NM_175104	ENSMUSG00000034300	Fam53c	2810012G03Rik|Gm21179	family with sequence similarity 53, member C	protein-coding
MACS_peak_788	chr1	156946531	156946896	+	424.28	NA	promoter-TSS (NM_010500)	promoter-TSS (NM_010500)	53	NM_010500	15939	Mm.12246	NM_010500	ENSMUSG00000056708	Ier5	-	immediate early response 5	protein-coding
MACS_peak_18184	chr8	11008743	11009338	+	423.62	NA	promoter-TSS (NM_001081212)	promoter-TSS (NM_001081212)	-610	NM_001081212	384783	Mm.407207	NM_001081212	ENSMUSG00000038894	Irs2	Irs-2	insulin receptor substrate 2	protein-coding
MACS_peak_3761	chr11	106649581	106650816	+	417.79	NA	promoter-TSS (NM_001166685)	promoter-TSS (NM_001166685)	-368	NM_177088	320162	Mm.30524	NM_177088	ENSMUSG00000018372	Cep95	4732496G21Rik|AI118346|AI448335|Ccdc45|D330027A14Rik|F630025I20Rik	centrosomal protein 95	protein-coding
MACS_peak_12365	chr3	88636172	88636710	+	417.77	NA	promoter-TSS (NR_015498)	promoter-TSS (NR_015498)	-32	NR_015498	319830	Mm.400394	NR_015498		1500004A13Rik	5430404N14Rik|BB132176	RIKEN cDNA 1500004A13 gene	ncRNA
MACS_peak_2720	chr11	58762045	58762867	+	417.74	NA	promoter-TSS (NM_030082)	promoter-TSS (NM_030082)	43	NM_030082	78303	Mm.28022	NM_030082	ENSMUSG00000056895	Hist3h2ba	1500011O09Rik|AI413321	histone cluster 3, H2ba	protein-coding
MACS_peak_1240	chr10	17442617	17443375	+	416.80	NA	promoter-TSS (NM_010828)	promoter-TSS (NM_010828)	-38	NM_010828	17684	Mm.272321	NM_010828	ENSMUSG00000039910	Cited2	AI835299|ER154-like|Mrg1|Msg2|p35srj	Cbp/p300-interacting transactivator, with Glu/Asp-rich carboxy-terminal domain, 2	protein-coding
MACS_peak_3119	chr11	77499277	77499833	+	413.21	NA	promoter-TSS (NM_001024205)	promoter-TSS (NM_001024205)	-86	NM_001024205	68564	Mm.428996	NM_001024205		Nufip2	1110001M19Rik|9530056D24Rik|AI256692|AI461731|PIG1|mKIAA1321	nuclear fragile X mental retardation protein interacting protein 2	protein-coding
MACS_peak_12902	chr3	156223544	156224170	+	412.54	NA	promoter-TSS (NM_001039094)	promoter-TSS (NM_001039094)	794	NR_040398	329782	Mm.183459	NR_040398	ENSMUSG00000085084	4930570G19Rik	C630015G22	RIKEN cDNA 4930570G19 gene	ncRNA
MACS_peak_8680	chr17	57150565	57151150	+	410.21	NA	promoter-TSS (NM_133801)	promoter-TSS (NM_133801)	-146	NM_133801	98053	Mm.24632	NM_133801	ENSMUSG00000002658	Gtf2f1	2810405L04Rik|C76800|RAP74	general transcription factor IIF, polypeptide 1	protein-coding
MACS_peak_4626	chr12	92826581	92827094	+	409.21	NA	intron (NM_175335, intron 1 of 8)	CpG	1252	NM_031391	83602	Mm.275728	NM_031391	ENSMUSG00000020962	Gtf2a1	6330549H03Rik|AA536742|AA959775|AW060250|TfIIAa/b|Tfiia1	general transcription factor II A, 1	protein-coding
MACS_peak_4001	chr11	119408757	119409354	+	408.41	NA	promoter-TSS (NR_045099)	promoter-TSS (NR_045099)	79	NM_008730	18164	Mm.5142	NM_008730	ENSMUSG00000025582	Nptx1	D11Bwg1004e|Np1	neuronal pentraxin 1	protein-coding
MACS_peak_4846	chr13	5860237	5860574	+	407.87	NA	promoter-TSS (NM_011803)	promoter-TSS (NM_011803)	-330	NM_011803	23849	Mm.275036	NM_011803	ENSMUSG00000000078	Klf6	AI448727|BCD1|C86813|CPBP|Copeb|FM2|FM6|Ierepo1|Ierepo3|R75280|Zf9	Kruppel-like factor 6	protein-coding
MACS_peak_18405	chr8	47084943	47085834	+	407.37	NA	promoter-TSS (NM_001039562)	promoter-TSS (NM_001039562)	-184	NM_001039562	654824	Mm.334517	NM_001039562	ENSMUSG00000050914	Ankrd37	-	ankyrin repeat domain 37	protein-coding
MACS_peak_3614	chr11	101526572	101527086	+	404.06	NA	promoter-TSS (NM_025404)	promoter-TSS (NM_025404)	-26	NM_025404	80981	Mm.266840	NM_025404	ENSMUSG00000034936	Arl4d	1110036H21Rik|ARL6|AW456149|Arf4l|Arfl4|Arl5	ADP-ribosylation factor-like 4D	protein-coding
MACS_peak_18556	chr8	73222151	73223069	+	403.95	NA	5' UTR (NM_001286944, exon 1 of 1)	5' UTR (NM_001286944, exon 1 of 1)	972	NM_001286944	16478	Mm.419851	NM_010592	ENSMUSG00000071076	Jund	Jund1	jun D proto-oncogene	protein-coding
MACS_peak_12686	chr3	108357476	108357874	+	401.58	NA	promoter-TSS (NR_028538)	promoter-TSS (NR_028538)	-355	NR_028538	100217438		NR_028538		Scarna2	MBII-382	small Cajal body-specific RNA 2	ncRNA
MACS_peak_10706	chr2	34627059	34627820	+	398.13	NA	promoter-TSS (NM_001163434)	promoter-TSS (NM_001163434)	-171	NM_001163434	14828	Mm.330160	NM_022310	ENSMUSG00000026864	Hspa5	AL022860|AU019543|Bip|D2Wsu141e|D2Wsu17e|Grp78|Hsce70|SEZ-7|Sez7|baffled|mBiP	heat shock protein 5	protein-coding
MACS_peak_12521	chr3	96044024	96044583	+	397.88	NA	promoter-TSS (NM_178212)	promoter-TSS (NM_178212)	-6	NM_178212	319192	Mm.5220	NM_178212	ENSMUSG00000064220	Hist2h2aa2	H2a-614|H2a-615	histone cluster 2, H2aa2	protein-coding
MACS_peak_678	chr1	135975450	135976129	+	397.67	NA	promoter-TSS (NM_007570)	promoter-TSS (NM_007570)	-57	NM_007570	12227	Mm.392646	NM_007570	ENSMUSG00000020423	Btg2	AA959598|APRO1|Pc3|TIS21	B cell translocation gene 2, anti-proliferative	protein-coding
MACS_peak_7485	chr16	30599624	30600007	+	397.67	NA	promoter-TSS (NM_177632)	promoter-TSS (NM_177632)	6	NM_177632	224093	Mm.28244	NM_177632	ENSMUSG00000046546	Fam43a	Tuf1	family with sequence similarity 43, member A	protein-coding
MACS_peak_11608	chr2	154876282	154876627	+	396.50	NA	exon (NM_015770, exon 4 of 4)	exon (NM_015770, exon 4 of 4)	23779	NM_016661	269378	Mm.330692	NM_016661	ENSMUSG00000027597	Ahcy	AA987153|AL024110|CuBP|SAHH	S-adenosylhomocysteine hydrolase	protein-coding
MACS_peak_9313	chr18	60685516	60686094	+	396.35	NA	promoter-TSS (NM_026302)	promoter-TSS (NM_026302)	-70	NM_026302	67665	Mm.272801	NM_026302	ENSMUSG00000024603	Dctn4	1110001K06Rik|4930547K17Rik|C130039E17Rik|p62	dynactin 4	protein-coding
MACS_peak_215	chr1	52289844	52290526	+	396.18	NA	promoter-TSS (NM_001113383)	promoter-TSS (NM_001113383)	-109	NM_001113383	14660	Mm.398608	NM_001081081	ENSMUSG00000026103	Gls	6330442B14|AI314027|B230365M23Rik	glutaminase	protein-coding
MACS_peak_7098	chr15	98783667	98784340	+	396.00	NA	promoter-TSS (NM_011653)	promoter-TSS (NM_011653)	-71	NM_011653	22142	Mm.405359	NM_011653	ENSMUSG00000072235	Tuba1a	Tuba-1|Tuba1	tubulin, alpha 1A	protein-coding
MACS_peak_6180	chr14	76903902	76904535	+	395.55	NA	promoter-TSS (NM_009366)	promoter-TSS (NM_009366)	-99	NM_009366	21807	Mm.153272	NM_009366	ENSMUSG00000022010	Tsc22d1	AA589566|AW105905|Egr5|TSC-22|Tgfb1i4|Tsc|Tsc22	TSC22 domain family, member 1	protein-coding
MACS_peak_4010	chr11	119804321	119804615	+	395.13	NA	promoter-TSS (NM_001037754)	promoter-TSS (NM_001037754)	62	NM_130862	108100	Mm.197534	NM_130862	ENSMUSG00000025372	Baiap2	IRSp53|R75030	brain-specific angiogenesis inhibitor 1-associated protein 2	protein-coding
MACS_peak_13370	chr4	94718667	94719068	+	394.28	NA	promoter-TSS (NM_010591)	promoter-TSS (NM_010591)	46	NM_010591	16476	Mm.275071	NM_010591	ENSMUSG00000052684	Jun	AP-1|Junc|c-jun	jun proto-oncogene	protein-coding
MACS_peak_4935	chr13	23622679	23623117	+	393.02	NA	promoter-TSS (NM_153173)	promoter-TSS (NM_153173)	-15	NM_153173	69386	Mm.158272	NM_153173	ENSMUSG00000060981	Hist1h4h	1700024H08Rik	histone cluster 1, H4h	protein-coding
MACS_peak_1658	chr10	79515916	79516248	+	391.86	NA	promoter-TSS (NM_008162)	promoter-TSS (NM_008162)	-151	NM_008162	625249	Mm.332810	NM_008162	ENSMUSG00000075706	Gpx4	GPx-4|GSHPx-4|PHGPx|mtPHGPx|snGPx	glutathione peroxidase 4	protein-coding
MACS_peak_1681	chr10	79630442	79631161	+	391.21	NA	intron (NM_007705, intron 1 of 6)	CpG	215	NM_007705	12696	Mm.17898	NM_007705	ENSMUSG00000045193	Cirbp	Cirp|R74941	cold inducible RNA binding protein	protein-coding
MACS_peak_1431	chr10	58785714	58786309	+	390.88	NA	promoter-TSS (NM_011030)	promoter-TSS (NM_011030)	-33	NM_011030	18451	Mm.2212	NM_011030	ENSMUSG00000019916	P4ha1	AL022634|P4ha	procollagen-proline, 2-oxoglutarate 4-dioxygenase (proline 4-hydroxylase), alpha 1 polypeptide	protein-coding
MACS_peak_17827	chr7	133792765	133793372	+	389.60	NA	intron (NM_029339, intron 1 of 9)	CpG	245	NM_029339	75565	Mm.45686	NM_029339	ENSMUSG00000030714	Ccdc101	1700023O11Rik|9530025I05Rik	coiled-coil domain containing 101	protein-coding
MACS_peak_20564	chrX	12857412	12858372	+	388.79	NA	promoter-TSS (NM_010028)	promoter-TSS (NM_010028)	-256	NM_010028	13205	Mm.289662	NM_010028	ENSMUSG00000000787	Ddx3x	D1Pas1-rs2|Ddx3|Fin14	DEAD/H (Asp-Glu-Ala-Asp/His) box polypeptide 3, X-linked	protein-coding
MACS_peak_19096	chr8	119445082	119445421	+	387.44	NA	promoter-TSS (NM_028131)	promoter-TSS (NM_028131)	85	NM_026844	66531	Mm.4011	NM_026844	ENSMUSG00000014633	Cmc2	1110046L09Rik|2310061C15Rik|DC13	COX assembly mitochondrial protein 2	protein-coding
MACS_peak_19997	chr9	78329299	78329597	+	387.08	NA	promoter-TSS (NM_010106)	promoter-TSS (NM_010106)	83	NM_010106	13627	Mm.138471	NM_010106	ENSMUSG00000037742	Eef1a1	-	eukaryotic translation elongation factor 1 alpha 1	protein-coding
MACS_peak_8157	chr17	26644838	26645505	+	386.23	NA	exon (NM_013642, exon 1 of 4)	exon (NM_013642, exon 1 of 4)	246	NM_013642	19252	Mm.239041	NM_013642	ENSMUSG00000024190	Dusp1	3CH134|MKP1|Ptpn16|U19515|erp|mkp-1	dual specificity phosphatase 1	protein-coding
MACS_peak_15100	chr5	123590875	123591787	+	384.27	NA	promoter-TSS (NM_001040398)	promoter-TSS (NM_001040398)	-871	NM_001040398	208043	Mm.250391	NM_177581	ENSMUSG00000038384	Setd1b	AA516740|BC035291|KMT2G|mKIAA1076	SET domain containing 1B	protein-coding
MACS_peak_2973	chr11	70034332	70034986	+	384.05	NA	promoter-TSS (NM_172371)	promoter-TSS (NM_172371)	-163	NM_172371	69309	Mm.93266	NM_172371	ENSMUSG00000044367	Slc16a13	1700007D07Rik	solute carrier family 16 (monocarboxylic acid transporters), member 13	protein-coding
MACS_peak_356	chr1	74282667	74283220	+	383.88	NA	promoter-TSS (NM_029711)	promoter-TSS (NM_029711)	-181	NM_029711	76709	Mm.337038	NM_029711	ENSMUSG00000006304	Arpc2	2210023N03Rik|34kDa|p34-Arc	actin related protein 2/3 complex, subunit 2	protein-coding
MACS_peak_18336	chr8	32279022	32279585	+	383.73	NA	promoter-TSS (NM_026453)	promoter-TSS (NM_026453)	-107	NM_026453	67920	Mm.289818	NM_026453	ENSMUSG00000031578	Mak16	2600016B03Rik|AI314911|Rbm13	MAK16 homolog (S. cerevisiae)	protein-coding
MACS_peak_13807	chr4	131864417	131864929	+	382.89	NA	promoter-TSS (NR_029412)	promoter-TSS (NR_029412)	80	NR_029468	100039864	Mm.258912	NR_029468	ENSMUSG00000086290	Snhg12	2310005L22Rik	small nucleolar RNA host gene 12	ncRNA
MACS_peak_11886	chr2	179711482	179711949	+	381.40	NA	promoter-TSS (NM_001081092)	promoter-TSS (NM_001081092)	157	NR_033782	66730	Mm.31773	NR_033782	ENSMUSG00000085704	4921531C22Rik	-	RIKEN cDNA 4921531C22 gene	ncRNA
MACS_peak_9889	chr19	21345991	21346987	+	380.38	NA	promoter-TSS (NM_009551)	promoter-TSS (NM_009551)	-279	NM_009551	22682	Mm.292405	NM_009551		Zfand5	2310057A04Rik|5830475F03Rik|AA415485|Za20d2|Zfp216	zinc finger, AN1-type domain 5	protein-coding
MACS_peak_5563	chr13	111184990	111185467	+	380.26	NA	promoter-TSS (NM_152804)	promoter-TSS (NM_152804)	-24	NM_152804	20620	Mm.380	NM_152804	ENSMUSG00000021701	Plk2	Snk	polo-like kinase 2	protein-coding
MACS_peak_7150	chr15	100325501	100325968	+	380.22	NA	promoter-TSS (NM_153407)	promoter-TSS (NM_153407)	-64	NM_153407	207785	Mm.294969	NM_153407	ENSMUSG00000044636	Csrnp2	CSRNP-2|Csnrp2|taip-12	cysteine-serine-rich nuclear protein 2	protein-coding
MACS_peak_17384	chr7	74789908	74790545	+	378.66	NA	promoter-TSS (NM_027413)	promoter-TSS (NM_027413)	-104	NR_028143	67867	Mm.31247	NM_027413	ENSMUSG00000030556	Lrrc28	1300004K21Rik|2210012C09Rik|2310058O11Rik	leucine rich repeat containing 28	protein-coding
MACS_peak_3951	chr11	118151702	118152025	+	378.46	NA	promoter-TSS (NM_001033528)	promoter-TSS (NM_001033528)	-305	NM_001033528	72344	Mm.232293	NM_001033528	ENSMUSG00000033909	Usp36	2700002L06Rik|mKIAA1453	ubiquitin specific peptidase 36	protein-coding
MACS_peak_19196	chr8	125935127	125935622	+	377.61	NA	promoter-TSS (NM_023279)	promoter-TSS (NM_023279)	-90	NM_023279	22152	Mm.40068	NM_023279	ENSMUSG00000062380	Tubb3	3200002H15Rik|M(beta)3|M(beta)6	tubulin, beta 3 class III	protein-coding
MACS_peak_10270	chr19	59017609	59018451	+	376.94	NA	exon (NM_178689, exon 1 of 14)	exon (NM_178689, exon 1 of 14)	115	NM_178689	226265	Mm.103154	NM_178689	ENSMUSG00000048029	Eno4	6430537H07Rik	enolase 4	protein-coding
MACS_peak_7082	chr15	98507676	98508076	+	376.79	NA	promoter-TSS (NM_172612)	promoter-TSS (NM_172612)	16	NM_172612	223881	Mm.274010	NM_172612	ENSMUSG00000054855	Rnd1	A830014L09Rik|Arhs	Rho family GTPase 1	protein-coding
MACS_peak_3809	chr11	113062883	113063290	+	376.14	NA	promoter-TSS (NR_015556)	promoter-TSS (NR_015556)	66	NR_015556	72386	Mm.266961	NR_015556	ENSMUSG00000087259	2610035D17Rik	-	RIKEN cDNA 2610035D17 gene	ncRNA
MACS_peak_6029	chr14	63379775	63380185	+	375.42	NA	promoter-TSS (NM_008715)	promoter-TSS (NM_008715)	-31	NM_008715	18130	Mm.319684	NM_008715	ENSMUSG00000035161	Ints6	2900075H24Rik|AI480962|DICE1|Ddx26|HDB|Notch2l	integrator complex subunit 6	protein-coding
MACS_peak_17946	chr7	135110865	135111244	+	373.26	NA	promoter-TSS (NM_139149)	promoter-TSS (NM_139149)	61	NM_139149	233908	Mm.277680	NM_139149	ENSMUSG00000030795	Fus	D430004D17Rik|D930039C12Rik|Fus1|Tls	fused in sarcoma	protein-coding
MACS_peak_1934	chr10	96079117	96079836	+	370.69	NA	promoter-TSS (NM_007569)	promoter-TSS (NM_007569)	-159	NM_007569	12226	Mm.23811	NM_007569	ENSMUSG00000036478	Btg1	AI426953|AW546738	B cell translocation gene 1, anti-proliferative	protein-coding
MACS_peak_16285	chr6	124763990	124764469	+	370.35	NA	promoter-TSS (NM_009415)	promoter-TSS (NM_009415)	85	NM_009415	21991	Mm.4222	NM_009415	ENSMUSG00000023456	Tpi1	AI255506|Tpi|Tpi-1	triosephosphate isomerase 1	protein-coding
MACS_peak_10225	chr19	53603294	53603982	+	368.64	NA	promoter-TSS (NM_001085390)	promoter-TSS (NM_001085390)	-170	NM_001085390	240672	Mm.482424	NM_001085390		Dusp5	Gm337	dual specificity phosphatase 5	protein-coding
MACS_peak_4297	chr12	55797426	55797999	+	367.80	NA	promoter-TSS (NM_025456)	promoter-TSS (NM_025456)	-860	NM_025456	66266	Mm.156440	NM_025456	ENSMUSG00000054302	Eapp	1810011O16Rik	E2F-associated phosphoprotein	protein-coding
MACS_peak_7453	chr16	23988945	23989304	+	366.27	NA	promoter-TSS (NM_009744)	promoter-TSS (NM_009744)	-426	NM_009744	12053	Mm.347398	NM_009744	ENSMUSG00000022508	Bcl6	Bcl5	B cell leukemia/lymphoma 6	protein-coding
MACS_peak_14106	chr4	150228831	150229410	+	366.23	NA	promoter-TSS (NR_040649)	promoter-TSS (NR_040649)	-62	NR_040649	73348	Mm.396218	NR_040649	ENSMUSG00000078492	1700045H11Rik	-	RIKEN cDNA 1700045H11 gene	ncRNA
MACS_peak_253	chr1	58480643	58481064	+	366.12	NA	promoter-TSS (NM_001042634)	promoter-TSS (NM_001042634)	79	NR_027853	12747	Mm.1761	NM_009905	ENSMUSG00000026034	Clk1	STY	CDC-like kinase 1	protein-coding
MACS_peak_13848	chr4	132925534	132925918	+	364.50	NA	promoter-TSS (NR_039582)	promoter-TSS (NR_039582)	35	NR_039582	100628620		NR_039582	miRBase:MI0018031	Mir5122	mmu-mir-5122|mu-mir-5122	microRNA 5122	ncRNA
MACS_peak_3754	chr11	106362023	106362454	+	363.72	NA	promoter-TSS (NR_030703)	promoter-TSS (NR_030703)	-67	NR_030703	100216537		NR_030703	ENSMUSG00000065126	Snord104	-	small nucleolar RNA, C/D box 104	snoRNA
MACS_peak_9595	chr19	4811058	4811976	+	361.89	NA	5' UTR (NM_019869, exon 1 of 3)	5' UTR (NM_019869, exon 1 of 3)	117	NM_001290127	102902673	Mm.426069	NM_001290127		Rbm14-rbm4	-	Rbm14-Rbm4 readthrough	protein-coding
MACS_peak_7962	chr17	17963597	17963991	+	361.06	NA	Intergenic	Intergenic	-3358	NR_029536	387230		NR_029536		Mir99b	Mirn99b|mmu-mir-99b	microRNA 99b	ncRNA
MACS_peak_12586	chr3	101408455	101408923	+	359.35	NA	promoter-TSS (NM_144900)	promoter-TSS (NM_144900)	-59	NM_144900	11928	Mm.280103	NM_144900	ENSMUSG00000033161	Atp1a1	Atpa-1|BC010319	ATPase, Na+/K+ transporting, alpha 1 polypeptide	protein-coding
MACS_peak_14786	chr5	103640137	103640509	+	358.81	NA	promoter-TSS (NM_009158)	promoter-TSS (NM_009158)	30	NM_001081567	26414	Mm.39253	NM_009158	ENSMUSG00000046709	Mapk10	C230008H04Rik|JNK3|JNK3B1|JNK3B2|SAPK(beta)|Serk2|p493F12|p54bSAPK	mitogen-activated protein kinase 10	protein-coding
MACS_peak_12190	chr3	55586163	55586684	+	358.27	NA	promoter-TSS (NM_010750)	promoter-TSS (NM_010750)	-9	NM_010750	17116	Mm.440209	NM_010750	ENSMUSG00000056947	Mab21l1	AW047968	mab-21-like 1 (C. elegans)	protein-coding
MACS_peak_18736	chr8	87186498	87186923	+	357.63	NA	promoter-TSS (NM_010499)	promoter-TSS (NM_010499)	41	NM_010499	15936	Mm.399	NM_010499	ENSMUSG00000053560	Ier2	AI317238|Ch1|Pip92	immediate early response 2	protein-coding
MACS_peak_12362	chr3	88576245	88576762	+	357.42	NA	promoter-TSS (NM_018804)	promoter-TSS (NM_018804)	18	NM_018804	229521	Mm.379376	NM_018804	ENSMUSG00000068923	Syt11	1500004A13Rik|3632445O20Rik|5430404N14Rik|6530420C11Rik|AI851970	synaptotagmin XI	protein-coding
MACS_peak_4776	chr12	112910282	112910908	+	357.42	NA	promoter-TSS (NM_021273)	promoter-TSS (NM_021273)	-46	NM_021273	12709	Mm.16831	NM_021273	ENSMUSG00000001270	Ckb	B-CK|Bck|Ck-3|Ck3|Ckbb	creatine kinase, brain	protein-coding
MACS_peak_1755	chr10	80568363	80568863	+	357.34	NA	promoter-TSS (NM_023138)	promoter-TSS (NM_023138)	-79	NM_023138	26396	Mm.275436	NM_023138	ENSMUSG00000035027	Map2k2	AA589381|MEK2|MK2|Prkmk2	mitogen-activated protein kinase kinase 2	protein-coding
MACS_peak_211	chr1	51534992	51535678	+	357.04	NA	promoter-TSS (NM_028696)	promoter-TSS (NM_028696)	-92	NM_028696	109019	Mm.196290	NM_028696	ENSMUSG00000026107	Nabp1	4930434H03Rik|4930442A21Rik|4930488J04Rik|4933440J18Rik|5830411E10Rik|AI852561|Nbp1|Obfc2a|Ssb2	nucleic acid binding protein 1	protein-coding
MACS_peak_19190	chr8	125748430	125748997	+	356.98	NA	promoter-TSS (NM_194446)	promoter-TSS (NM_194446)	-28	NM_194446	234854	Mm.190984	NM_194444	ENSMUSG00000033862	Cdk10	BC017131	cyclin-dependent kinase 10	protein-coding
MACS_peak_13892	chr4	134024215	134024504	+	356.86	NA	intron (NM_019641, intron 1 of 4)	CpG	124	NM_019641	16765	Mm.378957	NM_019641	ENSMUSG00000028832	Stmn1	19k|Lag|Lap18|Op18|P18|P19|Pig|Pp17|Pp18|Pp19|Pr22|Smn	stathmin 1	protein-coding
MACS_peak_12288	chr3	84755963	84756546	+	356.69	NA	5' UTR (NM_080428, exon 1 of 11)	5' UTR (NM_080428, exon 1 of 11)	121	NM_080428	50754	Mm.196475	NM_080428	ENSMUSG00000028086	Fbxw7	1110001A17Rik|AGO|Cdc4|Fbw7|Fbwd6|Fbx30|Fbxo30|Fbxw6|SEL-10	F-box and WD-40 domain protein 7	protein-coding
MACS_peak_12799	chr3	130432973	130433636	+	356.41	NA	promoter-TSS (NM_026724)	promoter-TSS (NM_026724)	12	NM_001005859	68436	Mm.140568	NM_026724	ENSMUSG00000062006	Rpl34	1100001I22Rik	ribosomal protein L34	protein-coding
MACS_peak_20348	chr9	110207390	110208134	+	356.39	NA	promoter-TSS (NM_001081381)	promoter-TSS (NM_001081381)	66	NM_001081381	72341	Mm.374250	NM_001081381	ENSMUSG00000054836	Elp6	2610001P13Rik|2610002I17Rik|AV159994|Tmem103	elongator acetyltransferase complex subunit 6	protein-coding
MACS_peak_5580	chr13	114584322	114584949	+	355.33	NA	promoter-TSS (NM_172595)	promoter-TSS (NM_172595)	-81	NM_172595	218639	Mm.79837	NM_172595	ENSMUSG00000042348	Arl15	A430036I03|Arfrp2|C230032K13Rik	ADP-ribosylation factor-like 15	protein-coding
MACS_peak_2813	chr11	61668359	61668905	+	354.37	NA	promoter-TSS (NM_013881)	promoter-TSS (NM_013881)	-38	NM_013881	29869	Mm.162025	NM_013881	ENSMUSG00000004798	Ulk2	A830085I22Rik|AU015340|Unc51.2|mKIAA0623	unc-51 like kinase 2	protein-coding
MACS_peak_13057	chr4	34011153	34011864	+	354.35	NA	promoter-TSS (NM_007726)	promoter-TSS (NM_007726)	-99	NM_007726	12801	Mm.7992	NM_007726	ENSMUSG00000044288	Cnr1	CB-R|CB1|CB1R	cannabinoid receptor 1 (brain)	protein-coding
MACS_peak_306	chr1	64168156	64169161	+	353.42	NA	promoter-TSS (NM_033563)	promoter-TSS (NM_033563)	-695	NM_033563	93691	Mm.29466	NM_033563	ENSMUSG00000025959	Klf7	9830124P08Rik	Kruppel-like factor 7 (ubiquitous)	protein-coding
MACS_peak_6814	chr15	80085640	80086361	+	351.95	NA	5' UTR (NM_009716, exon 1 of 3)	5' UTR (NM_009716, exon 1 of 3)	386	NM_009716	11911	Mm.641	NM_009716	ENSMUSG00000042406	Atf4	Atf-4|C/ATF|CREB2|TAXREB67	activating transcription factor 4	protein-coding
MACS_peak_855	chr1	166387916	166388847	+	351.78	NA	5' UTR (NM_009721, exon 1 of 6)	5' UTR (NM_009721, exon 1 of 6)	105	NM_009721	11931	Mm.4550	NM_009721	ENSMUSG00000026576	Atp1b1	Atp4b|Atpb|Atpb-1|NKbeta1	ATPase, Na+/K+ transporting, beta 1 polypeptide	protein-coding
MACS_peak_13912	chr4	134479216	134479788	+	351.19	NA	promoter-TSS (NM_023665)	promoter-TSS (NM_023665)	-38	NM_023665	27981	Mm.331964	NM_023665	ENSMUSG00000037266	Rsrp1	2700043I21Rik|D4Ucla2|D4Wsu53e	arginine/serine rich protein 1	protein-coding
MACS_peak_12480	chr3	95462321	95462885	+	350.79	NA	promoter-TSS (NM_008562)	promoter-TSS (NM_008562)	-40	NM_008562	17210	Mm.1639	NM_008562	ENSMUSG00000038612	Mcl1	AW556805|Mcl-1	myeloid cell leukemia sequence 1	protein-coding
MACS_peak_1723	chr10	80139379	80139752	+	349.30	NA	Intergenic	CpG	-4844	NM_021462	17347	Mm.42126	NM_021462	ENSMUSG00000020190	Mknk2	2010016G11Rik|Gprk7|Mnk2	MAP kinase-interacting serine/threonine kinase 2	protein-coding
MACS_peak_10401	chr2	25079896	25080333	+	349.30	NA	5' UTR (NM_146116, exon 1 of 4)	5' UTR (NM_146116, exon 1 of 4)	108	NM_146116	227613	Mm.227260	NM_146116	ENSMUSG00000036752	Tubb4b	4930542G03Rik|Tubb2c|Tubb2c1	tubulin, beta 4B class IVB	protein-coding
MACS_peak_3468	chr11	97643519	97644070	+	349.30	NA	promoter-TSS (NM_022891)	promoter-TSS (NM_022891)	-41	NM_022891	65019	Mm.140380	NM_022891	ENSMUSG00000071415	Rpl23	2810009A01Rik	ribosomal protein L23	protein-coding
MACS_peak_17299	chr7	54175134	54175599	+	346.99	NA	promoter-TSS (NM_021884)	promoter-TSS (NM_021884)	-66	NM_021884	22088	Mm.241334	NM_021884	ENSMUSG00000014402	Tsg101	AI255943|CC2	tumor susceptibility gene 101	protein-coding
MACS_peak_12760	chr3	123211019	123211888	+	345.68	NA	promoter-TSS (NR_028573)	promoter-TSS (NR_028573)	-199	NR_028574	69895	Mm.260791	NR_028574		Snhg8	1110065M07Rik|2010109N14Rik	small nucleolar RNA host gene 8	ncRNA
MACS_peak_5525	chr13	102462123	102462704	+	343.94	NA	5' UTR (NM_001024955, exon 1 of 10)	5' UTR (NM_001024955, exon 1 of 10)	172	NM_001024955	18708	Mm.259333	NM_001024955	ENSMUSG00000041417	Pik3r1	PI3K|p50alpha|p55alpha|p85alpha	phosphatidylinositol 3-kinase, regulatory subunit, polypeptide 1 (p85 alpha)	protein-coding
MACS_peak_11468	chr2	138104064	138104495	+	343.45	NA	promoter-TSS (NM_145534)	promoter-TSS (NM_145534)	50	NM_145534	228662	Mm.153405	NM_145534	ENSMUSG00000062098	Btbd3	mKIAA0952	BTB (POZ) domain containing 3	protein-coding
MACS_peak_210	chr1	50983618	50984598	+	343.17	NA	promoter-TSS (NM_019790)	promoter-TSS (NM_019790)	-259	NM_019790	56363	Mm.245154	NM_019790	ENSMUSG00000026109	Tmeff2	4832418D20Rik|7630402F16Rik|TR-2	transmembrane protein with EGF-like and two follistatin-like domains 2	protein-coding
MACS_peak_12525	chr3	96066936	96067411	+	342.85	NA	promoter-TSS (NM_033596)	promoter-TSS (NM_033596)	67	NM_033596	97122	Mm.227295	NM_033596		Hist2h4	H4|X04652	histone cluster 2, H4	protein-coding
MACS_peak_8626	chr17	56148337	56149059	+	342.36	NA	promoter-TSS (NM_026530)	promoter-TSS (NM_026530)	74	NM_026530	68047	Mm.358710	NM_026530	ENSMUSG00000003199	Mpnd	E130307M08Rik	MPN domain containing	protein-coding
MACS_peak_917	chr1	173200129	173200662	+	342.14	NA	promoter-TSS (NM_020579)	promoter-TSS (NM_020579)	-64	NM_020579	57370	Mm.274011	NM_020579	ENSMUSG00000052423	B4galt3	9530061M23Rik|AA104562|AW125175|ESTM26|ESTM6|R74981	UDP-Gal:betaGlcNAc beta 1,4-galactosyltransferase, polypeptide 3	protein-coding
MACS_peak_7197	chr15	102348057	102348469	+	340.81	NA	promoter-TSS (NM_009319)	promoter-TSS (NM_009319)	-360	NM_001253795	21357	Mm.291485	NM_009319	ENSMUSG00000023051	Tarbp2	Prbp|TRBP	TAR (HIV) RNA binding protein 2	protein-coding
MACS_peak_3264	chr11	87235963	87236634	+	340.77	NA	intron (NM_031386, intron 1 of 30)	intron (NM_031386, intron 1 of 30)	-4795	NM_001199293	83560	Mm.440758	NM_031386	ENSMUSG00000010342	Tex14	C85585	testis expressed gene 14	protein-coding
MACS_peak_11292	chr2	121853891	121854175	+	340.31	NA	promoter-TSS (NM_001256055)	promoter-TSS (NM_001256055)	-283	NM_144545	78655	Mm.458184	NM_144545		Eif3j1	1810016I04Rik|2700079K05Rik|AA409117|AA409446|C78575|Eif3j|Eif3j-1|Eif3j-2|Eif3j2|Eif3s1|eIF-3-alpha-A|eIF-3-alpha-B|eIF3-alpha|eIF3-p35|eIF3j-A|eIF3j-B	eukaryotic translation initiation factor 3, subunit J1	protein-coding
MACS_peak_15446	chr5	147759920	147760421	+	340.09	NA	promoter-TSS (NM_025652)	promoter-TSS (NM_025652)	-63	NM_025652	66596	Mm.196528	NM_025652	ENSMUSG00000016503	Gtf3a	2010015D03Rik|2610111I01Rik|5330403M05Rik	general transcription factor III A	protein-coding
MACS_peak_3138	chr11	77996829	77997307	+	338.56	NA	promoter-TSS (NM_207523)	promoter-TSS (NM_207523)	18	NM_207523	268449	Mm.22723	NM_207523	ENSMUSG00000058546	Rpl23a	BC029892|MDA20	ribosomal protein L23A	protein-coding
MACS_peak_17884	chr7	134417427	134417828	+	338.56	NA	promoter-TSS (NM_009266)	promoter-TSS (NM_009266)	-54	NM_009266	20768	Mm.20294	NM_009266		Sephs2	Sps2|Ysg3	selenophosphate synthetase 2	protein-coding
MACS_peak_6373	chr15	11925583	11926015	+	338.56	NA	promoter-TSS (NM_011294)	promoter-TSS (NM_011294)	-37	NM_011294	20024	Mm.41746	NM_011294	ENSMUSG00000022205	Sub1	AI842364|P15|P9|Pc4|Rpo2tc1	SUB1 homolog (S. cerevisiae)	protein-coding
MACS_peak_15840	chr6	66987182	66987645	+	338.25	NA	promoter-TSS (NM_007836)	promoter-TSS (NM_007836)	-12	NM_007836	13197	Mm.72235	NM_007836	ENSMUSG00000036390	Gadd45a	AA545191|Ddit1|GADD45	growth arrest and DNA-damage-inducible 45 alpha	protein-coding
MACS_peak_1064	chr1	182743553	182743791	+	337.06	NA	promoter-TSS (NM_008210)	promoter-TSS (NM_008210)	62	NM_008210	15078	Mm.138832	NM_008210	ENSMUSG00000060743	H3f3a	H3.3A	H3 histone, family 3A	protein-coding
MACS_peak_10390	chr2	24774956	24775509	+	336.97	NA	promoter-TSS (NM_001109687)	promoter-TSS (NM_001109687)	-103	NM_001109686	77683	Mm.24176	NM_172545	ENSMUSG00000036893	Ehmt1	9230102N17Rik|D330003E03|Eu-HMTase1|GLP|GLP1|KMT1D|mKIAA1876	euchromatic histone methyltransferase 1	protein-coding
MACS_peak_3263	chr11	87217580	87218325	+	336.61	NA	promoter-TSS (NM_031386)	promoter-TSS (NM_031386)	45	NM_053269	114714	Mm.37376	NM_053269		Rad51c	R51H3|Rad51l2	RAD51 homolog C	protein-coding
MACS_peak_16036	chr6	91390671	91391188	+	334.47	NA	promoter-TSS (NR_045980)	promoter-TSS (NR_045980)	-52	NR_038153	69798	Mm.229265	NR_038153		1810044D09Rik	-	RIKEN cDNA 1810044D09 gene	ncRNA
MACS_peak_16497	chr7	3655290	3656095	+	333.44	NA	promoter-TSS (NM_029767)	promoter-TSS (NM_029767)	49	NM_029767	76846	Mm.13944	NM_029767	ENSMUSG00000006333	Rps9	3010033P07Rik|AL022771|AL022885	ribosomal protein S9	protein-coding
MACS_peak_4125	chr12	8506612	8507192	+	333.00	NA	promoter-TSS (NM_007483)	promoter-TSS (NM_007483)	-111	NM_007483	11852	Mm.687	NM_007483	ENSMUSG00000054364	Rhob	AA017882|Arh6|Arhb	ras homolog gene family, member B	protein-coding
MACS_peak_3523	chr11	98636234	98636679	+	332.20	NA	5' UTR (NM_145434, exon 1 of 8)	5' UTR (NM_145434, exon 1 of 8)	235	NM_145434	217166	Mm.390397	NM_145434	ENSMUSG00000020889	Nr1d1	A530070C09Rik|R75201	nuclear receptor subfamily 1, group D, member 1	protein-coding
MACS_peak_14470	chr5	32760957	32761275	+	331.17	NA	promoter-TSS (NM_172707)	promoter-TSS (NM_172707)	-227	NM_172707	19046	Mm.241931	NM_172707		Ppp1cb	1200010B19	protein phosphatase 1, catalytic subunit, beta isoform	protein-coding
MACS_peak_20041	chr9	88417509	88417982	+	331.17	NA	promoter-TSS (NR_040721)	promoter-TSS (NR_040721)	-10	NR_040721	72655	Mm.21798	NR_040721	ENSMUSG00000097195	Snhg5	2810026P18Rik|4933428I09Rik|mU50HG-b	small nucleolar RNA host gene 5	ncRNA
MACS_peak_4929	chr13	22133095	22133370	+	331.17	NA	promoter-TSS (NM_175656)	promoter-TSS (NM_175656)	-1	NM_175656	319158	Mm.14775	NM_175656	ENSMUSG00000060639	Hist1h4i	-	histone cluster 1, H4i	protein-coding
MACS_peak_9352	chr18	63851892	63852405	+	329.58	NA	promoter-TSS (NM_016792)	promoter-TSS (NM_016792)	-135	NM_016792	53382	Mm.19169	NM_016792	ENSMUSG00000024583	Txnl1	32kDa|TRP32|Txnl	thioredoxin-like 1	protein-coding
MACS_peak_5218	chr13	55794176	55794601	+	327.03	NA	promoter-TSS (NM_181278)	promoter-TSS (NM_181278)	-97	NM_181278	78521	Mm.28449	NM_181278	ENSMUSG00000045767	B230219D22Rik	AA119856|D530037I19Rik	RIKEN cDNA B230219D22 gene	protein-coding
MACS_peak_14940	chr5	115460773	115461254	+	326.81	NA	promoter-TSS (NM_029012)	promoter-TSS (NM_029012)	-520	NM_029012	74585	Mm.355894	NM_029012	ENSMUSG00000029550	Sppl3	4833416I09Rik|Psl4|Usmg3	signal peptide peptidase 3	protein-coding
MACS_peak_17127	chr7	51846170	51846452	+	326.14	NA	promoter-TSS (NM_008422)	promoter-TSS (NM_008422)	55	NM_001290682	16504	Mm.40312	NM_008422	ENSMUSG00000062785	Kcnc3	KShIIID|Kcr2-3|Kv3.3	potassium voltage gated channel, Shaw-related subfamily, member 3	protein-coding
MACS_peak_18410	chr8	47295850	47296874	+	323.32	NA	promoter-TSS (NM_007450)	promoter-TSS (NM_007450)	1	NM_007450	11739	Mm.16228	NM_007450		Slc25a4	AU019225|Ant1	solute carrier family 25 (mitochondrial carrier, adenine nucleotide translocator), member 4	protein-coding
MACS_peak_20425	chr9	120842497	120842772	+	323.25	NA	promoter-TSS (NM_001165902)	promoter-TSS (NM_001165902)	-62	NM_001165902	12387	Mm.291928	NM_007614	ENSMUSG00000006932	Ctnnb1	Bfc|Catnb|Mesc	catenin (cadherin associated protein), beta 1	protein-coding
MACS_peak_14388	chr5	28397798	28398104	+	323.18	NA	promoter-TSS (NM_153526)	promoter-TSS (NM_153526)	-1	NM_153526	231070	Mm.30221	NM_153526	ENSMUSG00000045294	Insig1	1810013C12Rik|Insig-1	insulin induced gene 1	protein-coding
MACS_peak_4618	chr12	91050530	91051177	+	323.18	NA	promoter-TSS (NM_001252074)	promoter-TSS (NM_001252074)	-70	NM_001252074	18191	Mm.425766	NM_172544	ENSMUSG00000066392	Nrxn3	-	neurexin III	protein-coding
MACS_peak_15125	chr5	124777372	124777946	+	323.10	NA	promoter-TSS (NM_028310)	promoter-TSS (NM_028310)	322	NR_102690	269702	Mm.60224	NM_001081323	ENSMUSG00000038126	Mphosph9	4930548D04Rik|9630025B04Rik|AW413446|AW547060|B930097C17Rik|C87456|MPP-9|MPP9	M-phase phosphoprotein 9	protein-coding
MACS_peak_8481	chr17	37187270	37187751	+	322.66	NA	intron (NM_019439, intron 5 of 22)	intron (NM_019439, intron 5 of 22)	4599	NM_019439	54393	Mm.32191	NM_019439	ENSMUSG00000024462	Gabbr1	GABAB1|GABAbR1|bM573K1.1	gamma-aminobutyric acid (GABA) B receptor, 1	protein-coding
MACS_peak_15981	chr6	86992257	86993084	+	322.28	NA	promoter-TSS (NM_013528)	promoter-TSS (NM_013528)	-170	NM_013528	14583	Mm.19893	NM_013528	ENSMUSG00000029992	Gfpt1	2810423A18Rik|AI324119|AI449986|GFA|GFAT|GFAT1|GFAT1m|Gfpt	glutamine fructose-6-phosphate transaminase 1	protein-coding
MACS_peak_14650	chr5	67697858	67698379	+	322.27	NA	promoter-TSS (NM_178651)	promoter-TSS (NM_178651)	-78	NM_178651	109108	Mm.234455	NM_178651		Slc30a9	2310024J23Rik|AL024256|GAC63|HUEL	solute carrier family 30 (zinc transporter), member 9	protein-coding
MACS_peak_7261	chr16	5233596	5233973	+	321.96	NA	promoter-TSS (NM_145362)	promoter-TSS (NM_145362)	70	NM_145362	208211	Mm.34581	NM_145362	ENSMUSG00000039427	Alg1	HMAT1|HMT1	asparagine-linked glycosylation 1 (beta-1,4-mannosyltransferase)	protein-coding
MACS_peak_19067	chr8	114534993	114535540	+	321.81	NA	promoter-TSS (NM_001130868)	promoter-TSS (NM_001130868)	7	NM_020584	57321	Mm.213064	NM_020584	ENSMUSG00000033430	Terf2ip	Rap1	telomeric repeat binding factor 2, interacting protein	protein-coding
MACS_peak_4671	chr12	101437204	101437983	+	321.28	NA	promoter-TSS (NM_009790)	promoter-TSS (NM_009790)	-158	NM_009790	12313	Mm.285993	NM_009790	ENSMUSG00000001175	Calm1	AI256814|AI327027|AI461935|AL024000|CaM|Calm	calmodulin 1	protein-coding
MACS_peak_10095	chr19	44368421	44368889	+	320.95	NA	5' UTR (NM_009128, exon 1 of 6)	5' UTR (NM_009128, exon 1 of 6)	489	NM_009128	20250	Mm.487021	NM_009128	ENSMUSG00000025203	Scd2	Scd-2|swty	stearoyl-Coenzyme A desaturase 2	protein-coding
MACS_peak_13367	chr4	94645583	94646067	+	320.34	NA	promoter-TSS (NM_177239)	promoter-TSS (NM_177239)	-34	NM_177239	320713	Mm.208868	NM_177239	ENSMUSG00000062627	Mysm1	C130067A03Rik|C530050H10Rik	myb-like, SWIRM and MPN domains 1	protein-coding
MACS_peak_18930	chr8	107748740	107749241	+	320.26	NA	promoter-TSS (NM_145604)	promoter-TSS (NM_145604)	-98	NM_145604	234678	Mm.27186	NM_145604	ENSMUSG00000031889	D230025D16Rik	BC006874|Lin10	RIKEN cDNA D230025D16 gene	protein-coding
MACS_peak_17852	chr7	134041511	134042066	+	320.22	NA	promoter-TSS (NM_028389)	promoter-TSS (NM_028389)	4	NM_026827	68742	Mm.248646	NM_026827	ENSMUSG00000060538	Tmem219	1110032O16Rik|2900045G02Rik|IGFBP-3R	transmembrane protein 219	protein-coding
MACS_peak_2928	chr11	69419207	69419553	+	319.73	NA	promoter-TSS (NM_013415)	promoter-TSS (NM_013415)	82	NM_013415	11932	Mm.235204	NM_013415	ENSMUSG00000041329	Atp1b2	Amog|Atpb-2	ATPase, Na+/K+ transporting, beta 2 polypeptide	protein-coding
MACS_peak_123	chr1	36364512	36364815	+	319.43	NA	promoter-TSS (NM_001290726)	promoter-TSS (NM_001290726)	85	NM_001172205	214855	Mm.34316	NM_145996	ENSMUSG00000037447	Arid5a	D430024K22Rik|Mrf1	AT rich interactive domain 5A (MRF1-like)	protein-coding
MACS_peak_17578	chr7	106331048	106331425	+	319.23	NA	promoter-TSS (NM_026384)	promoter-TSS (NM_026384)	-13	NM_026384	67800	Mm.180189	NM_026384	ENSMUSG00000030747	Dgat2	0610010B06Rik|ARAT|DGAT-2	diacylglycerol O-acyltransferase 2	protein-coding
MACS_peak_19567	chr9	44142604	44143064	+	319.12	NA	promoter-TSS (NM_010436)	promoter-TSS (NM_010436)	36	NM_010436	15270	Mm.245931	NM_010436	ENSMUSG00000049932	H2afx	AW228881|H2A.X|H2ax|Hist5-2ax|gammaH2ax	H2A histone family, member X	protein-coding
MACS_peak_11055	chr2	92268009	92268474	+	318.21	NA	intron (NM_009963, intron 1 of 11)	intron (NM_009963, intron 1 of 11)	5985	NM_009963	12953	Mm.254181	NM_009963	ENSMUSG00000068742	Cry2	AV006279|D130054K12Rik	cryptochrome 2 (photolyase-like)	protein-coding
MACS_peak_5392	chr13	81022465	81022843	+	318.17	NA	promoter-TSS (NM_001042591)	promoter-TSS (NM_001042591)	-29	NM_001042591	105171	Mm.423137	NM_001042591	ENSMUSG00000074794	Arrdc3	AI450344|mKIAA1376	arrestin domain containing 3	protein-coding
MACS_peak_2789	chr11	61080444	61081114	+	317.99	NA	promoter-TSS (NM_007437)	promoter-TSS (NM_007437)	-150	NM_007437	11671	Mm.398221	NM_007437	ENSMUSG00000010025	Aldh3a2	AI194803|Ahd-3|Ahd-3r|Ahd3|Ahd3-r|Aldh4|Aldh4-r|FALDH	aldehyde dehydrogenase family 3, subfamily A2	protein-coding
MACS_peak_8351	chr17	34256076	34256757	+	317.65	NA	non-coding (NR_037970, exon 1 of 13)	non-coding (NR_037970, exon 1 of 13)	429	NR_037970	14312	Mm.3444	NM_010238	ENSMUSG00000024335	Brd2	AW228947|D17H6S113E|Frg-1|Fsrg-1|Fsrg1|Nat|Ring3|Rnf3|mKIAA4005	bromodomain containing 2	protein-coding
MACS_peak_4926	chr13	21903466	21903780	+	317.36	NA	promoter-TSS (NM_175657)	promoter-TSS (NM_175657)	8	NM_001195421	100041230	Mm.442307	NM_001195421	ENSMUSG00000069306	Hist1h4m	Gm11275|OTTMUSG00000000446	histone cluster 1, H4m	protein-coding
MACS_peak_4749	chr12	111934342	111934622	+	317.06	NA	5' UTR (NM_010480, exon 1 of 11)	5' UTR (NM_010480, exon 1 of 11)	123	NM_010480	15519	Mm.1843	NM_010480	ENSMUSG00000021270	Hsp90aa1	86kDa|89kDa|AL024080|AL024147|Hsp86-1|Hsp89|Hsp90|Hspca|hsp4	heat shock protein 90, alpha (cytosolic), class A member 1	protein-coding
MACS_peak_17323	chr7	65654332	65654665	+	316.64	NA	Intergenic	Intergenic	-259074	NM_009728	11982	Mm.135129	NM_009728	ENSMUSG00000025324	Atp10a	Atp10c|pfatp	ATPase, class V, type 10A	protein-coding
MACS_peak_14169	chr4	154393296	154393693	+	316.30	NA	Intergenic	(CTAG)n|Simple_repeat|Simple_repeat	-8401	NM_001113360	269615	Mm.379458	NM_175556	ENSMUSG00000029055	Plch2	A930027K05Rik|PLCeta2|Plc-eta2|Plcl4	phospholipase C, eta 2	protein-coding
MACS_peak_15399	chr5	144031534	144031976	+	316.12	NA	promoter-TSS (NM_017467)	promoter-TSS (NM_017467)	-54	NM_017467	54201	Mm.6666	NM_017467	ENSMUSG00000046658	Zfp316	Emzf1|Mzf3|Znf316	zinc finger protein 316	protein-coding
MACS_peak_2047	chr10	116813874	116814320	+	316.12	NA	promoter-TSS (NM_001013391)	promoter-TSS (NM_001013391)	-68	NM_001013391	432508	Mm.478881	NM_001013391	ENSMUSG00000055531	Cpsf6	4733401N12Rik|AI256641|CFIM|CFIM68|HPBRII-4|HPBRII-7	cleavage and polyadenylation specific factor 6	protein-coding
MACS_peak_4927	chr13	21923924	21924197	+	315.68	NA	promoter-TSS (NM_175657).2	promoter-TSS (NM_175657).2	-33	NM_175657	319161	Mm.261664	NM_175657		Hist1h4n	-	histone cluster 1, H4n	protein-coding
MACS_peak_19161	chr8	124967466	124967844	+	315.68	NA	promoter-TSS (NR_028354)	promoter-TSS (NR_028354)	99	NR_045696	100689703	Mm.271989	NR_045696		9330133O14Rik	-	RIKEN cDNA 9330133O14 gene	ncRNA
MACS_peak_9546	chr19	3851737	3852063	+	314.82	NA	non-coding (NR_073190, exon 1 of 13)	non-coding (NR_073190, exon 1 of 13)	127	NR_073190	12660	Mm.225505	NM_013490	ENSMUSG00000024843	Chka	CK|CK/EK-alpha|Chetk-alpha|Chk|ChoK|EK|EtnK-alpha	choline kinase alpha	protein-coding
MACS_peak_5067	chr13	45484994	45485302	+	314.60	NA	promoter-TSS (NM_153789)	promoter-TSS (NM_153789)	37	NM_153789	218203	Mm.212855	NM_153789	ENSMUSG00000038175	Mylip	9430057C20Rik|Mir	myosin regulatory light chain interacting protein	protein-coding
MACS_peak_4740	chr12	110778848	110779429	+	313.95	NA	promoter-TSS (NR_027651)	promoter-TSS (NR_027651)	-68	NR_027652	17263	Mm.289645	NM_144513	ENSMUSG00000021268	Meg3	2900016C05Rik|3110050O07Rik|6330408G06Rik|AI425946|AW108224|D12Bwg1266e|Gtl2|R74756|R75394	maternally expressed 3	ncRNA
MACS_peak_12629	chr3	104855988	104856255	+	313.16	NA	promoter-TSS (NM_030249)	promoter-TSS (NM_030249)	-57	NM_030249	80281	Mm.200327	NM_030249	ENSMUSG00000062127	Cttnbp2nl	AA552995|AA589392|AU018624|BC003236|mKIAA1433	CTTNBP2 N-terminal like	protein-coding
MACS_peak_19525	chr9	40792370	40792754	+	311.95	NA	intron (NM_019465, intron 5 of 9)	intron (NM_019465, intron 5 of 9)	20149	NM_001281954	54698	Mm.42791	NM_019465	ENSMUSG00000032021	Crtam	-	cytotoxic and regulatory T cell molecule	protein-coding
MACS_peak_9812	chr19	8994570	8995116	+	310.01	NA	promoter-TSS (NM_024256)	promoter-TSS (NM_024256)	-40	NM_024256	72727	Mm.259	NM_024256	ENSMUSG00000071649	B3gat3	2810405M13Rik	beta-1,3-glucuronyltransferase 3 (glucuronosyltransferase I)	protein-coding
MACS_peak_2598	chr11	51420148	51420787	+	309.42	NA	promoter-TSS (NM_010448)	promoter-TSS (NM_010448)	-84	NM_010448	15384	Mm.256875	NM_010448	ENSMUSG00000020358	Hnrnpab	3010025C11Rik|CBF-A|Cgbfa|Hnrpab	heterogeneous nuclear ribonucleoprotein A/B	protein-coding
MACS_peak_1360	chr10	41606903	41607577	+	309.30	NA	promoter-TSS (NM_001013370)	promoter-TSS (NM_001013370)	-5	NM_001013370	140742	Mm.139418	NM_001013370	ENSMUSG00000038332	Sesn1	1110002G11Rik|AU044290|Pa26|Sest1	sestrin 1	protein-coding
MACS_peak_12805	chr3	131227337	131227635	+	308.96	NA	promoter-TSS (NM_011863)	promoter-TSS (NM_011863)	-246	NM_001289479	23971	Mm.244912	NM_011863	ENSMUSG00000028032	Papss1	AI325286|Asapk|SK1	3'-phosphoadenosine 5'-phosphosulfate synthase 1	protein-coding
MACS_peak_4265	chr12	45310785	45311545	+	308.65	NA	promoter-TSS (NM_013760)	promoter-TSS (NM_013760)	-110	NM_013760	27362	Mm.27432	NM_013760	ENSMUSG00000014905	Dnajb9	AA408011|AA673251|AA673481|AW556981|ERdj4|Mdg1|mDj7	DnaJ (Hsp40) homolog, subfamily B, member 9	protein-coding
MACS_peak_4492	chr12	82046260	82046780	+	308.55	NA	promoter-TSS (NM_009159)	promoter-TSS (NM_009159)	29	NM_009159	20384	Mm.43331	NM_009159	ENSMUSG00000021134	Srsf5	Sfrs5	serine/arginine-rich splicing factor 5	protein-coding
MACS_peak_2322	chr11	6174636	6175091	+	308.35	NA	promoter-TSS (NM_134020)	promoter-TSS (NM_134020)	-23	NM_134020	103694	Mm.254495	NM_134020	ENSMUSG00000004394	Tmed4	1110014L17Rik|AI326346	transmembrane emp24 protein transport domain containing 4	protein-coding
MACS_peak_9128	chr18	35020640	35021028	+	307.98	NA	promoter-TSS (NM_007913)	promoter-TSS (NM_007913)	-27	NM_007913	13653	Mm.181959	NM_007913		Egr1	A530045N19Rik|ETR103|Egr-1|Krox-1|Krox-24|Krox24|NGF1-A|NGFI-A|NGFIA|TIS8|Zenk|Zfp-6|Zif268|egr	early growth response 1	protein-coding
MACS_peak_15409	chr5	144493387	144493720	+	306.19	NA	promoter-TSS (NM_029749)	promoter-TSS (NM_029749)	-404	NM_029749	76800	Mm.259620	NM_029749	ENSMUSG00000051306	Usp42	2410140K03Rik|3110031A07Rik|A630018G05Rik|D5Ertd591e	ubiquitin specific peptidase 42	protein-coding
MACS_peak_4379	chr12	71553750	71554326	+	305.55	NA	promoter-TSS (NM_028339)	promoter-TSS (NM_028339)	-103	NM_028339	72736	Mm.204670	NM_028339	ENSMUSG00000021072	Tmx1	2810425A04Rik|AI465319|Txndc1	thioredoxin-related transmembrane protein 1	protein-coding
MACS_peak_469	chr1	88383708	88384066	+	305.07	NA	Intergenic	CpG	-39424	NM_008972	19231	Mm.19187	NM_008972	ENSMUSG00000026238	Ptma	Thym	prothymosin alpha	protein-coding
MACS_peak_12336	chr3	88306958	88307393	+	305.07	NA	promoter-TSS (NM_001111102)	promoter-TSS (NM_001111102)	99	NM_001111102	16905	Mm.243014	NM_019390	ENSMUSG00000028063	Lmna	Dhe	lamin A	protein-coding
MACS_peak_4797	chr12	113931551	113932141	+	304.89	NA	Intergenic	CpG	14795	NM_001100460	382639	Mm.11350	NM_001100460	ENSMUSG00000037638	Zbtb42	EG382639|Gm5188|simiRP58	zinc finger and BTB domain containing 42	protein-coding
MACS_peak_6113	chr14	70843123	70843521	+	304.50	NA	promoter-TSS (NR_029802)	promoter-TSS (NR_029802)	5	NR_029802	723838		NR_029802	miRBase:MI0000704	Mir320	Mirn320|mmu-mir-320	microRNA 320	ncRNA
MACS_peak_14969	chr5	115939257	115939645	+	304.47	NA	Intergenic	Intergenic	-4958	NM_133760	75387	Mm.332616	NM_133760	ENSMUSG00000029524	Sirt4	4930596O17Rik	sirtuin 4	protein-coding
MACS_peak_3492	chr11	98190810	98191065	+	304.17	NA	promoter-TSS (NM_010895)	promoter-TSS (NM_010895)	22	NM_010895	18013	Mm.4814	NM_010895	ENSMUSG00000038255	Neurod2	Ndrf|bHLHa1	neurogenic differentiation 2	protein-coding
MACS_peak_18752	chr8	87370534	87370952	+	302.79	NA	promoter-TSS (NM_007591)	promoter-TSS (NM_007591)	87	NM_007591	12317	Mm.1971	NM_007591	ENSMUSG00000003814	Calr	CRT|Calregulin	calreticulin	protein-coding
MACS_peak_622	chr1	133423707	133424249	+	302.70	NA	promoter-TSS (NM_175382)	promoter-TSS (NM_175382)	-40	NM_001081011	14270	Mm.276259	NM_019520	ENSMUSG00000026425	Srgap2	9930124L22Rik|AI448945|FBP2|Fnbp2|srGAP3	SLIT-ROBO Rho GTPase activating protein 2	protein-coding
MACS_peak_9062	chr18	31606706	31607270	+	302.64	NA	promoter-TSS (NM_009308)	promoter-TSS (NM_009308)	81	NM_009308	20983	Mm.233846	NM_009308	ENSMUSG00000024261	Syt4	SytIV	synaptotagmin IV	protein-coding
MACS_peak_19315	chr9	15161999	15162570	+	301.89	NA	promoter-TSS (NM_176976)	promoter-TSS (NM_176976)	-52	NM_176976	319675	Mm.218317	NM_176976	ENSMUSG00000046111	5830418K08Rik	5832426L23Rik|Gm1131|Kiaa1731	RIKEN cDNA 5830418K08 gene	protein-coding
MACS_peak_20275	chr9	107904379	107905087	+	301.89	NA	promoter-TSS (NM_013785)	promoter-TSS (NM_013785)	-246	NM_013785	27399	Mm.276155	NM_013785	ENSMUSG00000032594	Ip6k1	1200016D08Rik|AU022776|Ihpk1|InsP6|InsP6k1|Itpk6	inositol hexaphosphate kinase 1	protein-coding
MACS_peak_12522	chr3	96048987	96049642	+	301.77	NA	promoter-TSS (NM_178212).2	promoter-TSS (NM_178212).2	-66	NM_178212	319192	Mm.5220	NM_178212	ENSMUSG00000064220	Hist2h2aa2	H2a-614|H2a-615	histone cluster 2, H2aa2	protein-coding
MACS_peak_14288	chr5	9161521	9162080	+	301.58	NA	promoter-TSS (NM_011806)	promoter-TSS (NM_011806)	-24	NM_011806	23857	Mm.22480	NM_011806	ENSMUSG00000042508	Dmtf1	Dimp|Dmp1	cyclin D binding myb-like transcription factor 1	protein-coding
MACS_peak_5096	chr13	48973828	48974428	+	300.44	NA	TTS (NM_001033268)	TTS (NM_001033268)	-7874	NM_011078	18676	Mm.486213	NM_011078	ENSMUSG00000038025	Phf2	GRC5	PHD finger protein 2	protein-coding
MACS_peak_1766	chr10	80639115	80639597	+	300.21	NA	promoter-TSS (NM_007907)	promoter-TSS (NM_007907)	-20	NM_007907	13629	Mm.326799	NM_007907	ENSMUSG00000034994	Eef2	Ef-2	eukaryotic translation elongation factor 2	protein-coding
MACS_peak_8244	chr17	29169178	29169830	+	299.84	NA	promoter-TSS (NR_036613)	promoter-TSS (NR_036613)	-101	NM_013663	20383	Mm.6787	NM_013663	ENSMUSG00000071172	Srsf3	AL024116|Sfrs3|X16	serine/arginine-rich splicing factor 3	protein-coding
MACS_peak_13791	chr4	131429106	131429430	+	299.61	NA	promoter-TSS (NM_020587)	promoter-TSS (NM_020587)	-286	NM_020587	57317	Mm.2478	NM_020587	ENSMUSG00000028911	Srsf4	5730499P16Rik|AW550192|MNCb-2616|SRp75|Sfrs4	serine/arginine-rich splicing factor 4	protein-coding
MACS_peak_18766	chr8	87502424	87502910	+	299.61	NA	promoter-TSS (NM_008416)	promoter-TSS (NM_008416)	-20	NM_008416	16477	Mm.1167	NM_008416	ENSMUSG00000052837	Junb	-	jun B proto-oncogene	protein-coding
MACS_peak_14511	chr5	34678639	34678943	+	299.54	NA	promoter-TSS (NM_011278)	promoter-TSS (NM_011278)	-248	NM_011278	19822	Mm.21281	NM_011278	ENSMUSG00000029110	Rnf4	AU018689|Gtrgeo8	ring finger protein 4	protein-coding
MACS_peak_15247	chr5	136254377	136254759	+	298.92	NA	promoter-TSS (NM_008617)	promoter-TSS (NM_008617)	49	NM_008617	17448	Mm.297096	NM_008617	ENSMUSG00000019179	Mdh2	MDH|Mdh-2|Mor-1|Mor1	malate dehydrogenase 2, NAD (mitochondrial)	protein-coding
MACS_peak_15087	chr5	123300115	123300406	+	298.71	NA	promoter-TSS (NM_030564)	promoter-TSS (NM_030564)	63	NM_030564	80751	Mm.388529	NM_030564	ENSMUSG00000029474	Rnf34	AW061037|AW536122|BC004042|C88279|RIFF	ring finger protein 34	protein-coding
MACS_peak_5455	chr13	94073383	94073954	+	298.61	NA	promoter-TSS (NM_011982)	promoter-TSS (NM_011982)	-782	NM_147176	26556	Mm.37533	NM_011982		Homer1	PSD-Zip45|SYN47|Ves-1|homer-1|vesl-1	homer homolog 1 (Drosophila)	protein-coding
MACS_peak_20168	chr9	100934768	100935605	+	298.52	NA	exon (NM_025835, exon 1 of 15)	exon (NM_025835, exon 1 of 15)	108	NM_025835	66904	Mm.335385	NM_025835	ENSMUSG00000032527	Pccb	1300012P06Rik|AI314687|R74805	propionyl Coenzyme A carboxylase, beta polypeptide	protein-coding
MACS_peak_2381	chr11	18918773	18919260	+	297.48	NA	promoter-TSS (NM_001193271)	promoter-TSS (NM_001193271)	-44	NM_010789	17268	Mm.356578	NM_010789	ENSMUSG00000020160	Meis1	C530044H18Rik|Evi8	Meis homeobox 1	protein-coding
MACS_peak_15196	chr5	130647315	130647847	+	297.48	NA	promoter-TSS (NM_001199059)	promoter-TSS (NM_001199059)	-108	NM_001199059	56715	Mm.288639	NM_019983	ENSMUSG00000025340	Rabgef1	Rab5ef|Rabex5|Rin2	RAB guanine nucleotide exchange factor (GEF) 1	protein-coding
MACS_peak_8451	chr17	36053808	36054506	+	296.84	NA	promoter-TSS (NM_001163818)	promoter-TSS (NM_001163818)	16	NM_001163818	52040	Mm.29385	NM_175934	ENSMUSG00000039220	Ppp1r10	2610025H06Rik|Cat53|D17Ertd808e|Fb19|Pnuts	protein phosphatase 1, regulatory subunit 10	protein-coding
MACS_peak_4415	chr12	75008887	75009176	+	296.81	NA	5' UTR (NM_010431, exon 1 of 15)	5' UTR (NM_010431, exon 1 of 15)	177	NM_010431	15251	Mm.3879	NM_010431	ENSMUSG00000021109	Hif1a	AA959795|HIF1alpha|MOP1|bHLHe78	hypoxia inducible factor 1, alpha subunit	protein-coding
MACS_peak_13533	chr4	116179849	116180462	+	296.81	NA	promoter-TSS (NM_008389)	promoter-TSS (NM_008389)	1	NM_008389	16351	Mm.1350	NM_008389	ENSMUSG00000028696	Ipp	D4Jhu8|Mipp	IAP promoted placental gene	protein-coding
MACS_peak_19548	chr9	43892748	43893248	+	295.81	NA	promoter-TSS (NM_198091)	promoter-TSS (NM_198091)	-5	NM_198091	53376	Mm.272770	NM_016808	ENSMUSG00000032010	Usp2	B930035K21Rik|Ubp41	ubiquitin specific peptidase 2	protein-coding
MACS_peak_3172	chr11	79955409	79956037	+	295.01	NA	promoter-TSS (NM_183275)	promoter-TSS (NM_183275)	-68	NM_183275	68550	Mm.18466	NM_183275	ENSMUSG00000046909	Tefm	1110002N22Rik	transcription elongation factor, mitochondrial	protein-coding
MACS_peak_16348	chr6	126594573	126594998	+	293.84	NA	5' UTR (NM_010595, exon 1 of 2)	5' UTR (NM_010595, exon 1 of 2)	1034	NM_010595	16485	Mm.40424	NM_010595	ENSMUSG00000047976	Kcna1	AI840627|Kca1-1|Kv1.1|MBK1|Mk-1|Shak|mceph	potassium voltage-gated channel, shaker-related subfamily, member 1	protein-coding
MACS_peak_16573	chr7	6682899	6683396	+	293.84	NA	promoter-TSS (NM_021323)	promoter-TSS (NM_021323)	-17	NM_008817	18616	Mm.389800	NM_008817		Peg3	AL022617|ASF-1|End4|Gcap4|Pw1|Zfp102|mKIAA0287	paternally expressed 3	protein-coding
MACS_peak_1498	chr10	62801612	62802125	+	293.78	NA	promoter-TSS (NM_019812)	promoter-TSS (NM_019812)	-85	NM_001159589	93759	Mm.351459	NM_019812	ENSMUSG00000020063	Sirt1	AA673258|SIR2L1|Sir2|Sir2a|Sir2alpha	sirtuin 1	protein-coding
MACS_peak_8614	chr17	56017683	56018602	+	293.59	NA	promoter-TSS (NM_144546)	promoter-TSS (NM_144546)	76	NM_144546	104349	Mm.460659	NM_144546		Zfp119a	AL024077|Mzf13|Zfp119	zinc finger protein 119a	protein-coding
MACS_peak_2594	chr11	51076237	51076856	+	293.51	NA	promoter-TSS (NM_007714)	promoter-TSS (NM_007714)	-93	NM_177567	193286	Mm.80975	NM_177567	ENSMUSG00000045942	BC049762	4930503F14	cDNA sequence BC049762	protein-coding
MACS_peak_5974	chr14	58190147	58190621	+	293.38	NA	promoter-TSS (NM_026526)	promoter-TSS (NM_026526)	22	NM_026526	68043	Mm.45225	NM_026526	ENSMUSG00000021951	N6amt2	2510005D08Rik|AW045965|Ayu21-96|Gt(pU21)96Imeg|GtAyu21-96	N-6 adenine-specific DNA methyltransferase 2 (putative)	protein-coding
MACS_peak_10232	chr19	53674330	53674637	+	293.38	NA	promoter-TSS (NM_007790)	promoter-TSS (NM_007790)	-403	NM_007790	13006	Mm.14910	NM_007790	ENSMUSG00000024974	Smc3	Bamacan|Cspg6|HCAP|Mmip1|SMC-3|SmcD	structural maintenance of chromosomes 3	protein-coding
MACS_peak_3941	chr11	117515317	117515983	+	291.96	NA	promoter-TSS (NM_198022)	promoter-TSS (NM_198022)	47	NM_198022	217351	Mm.40272	NM_198022	ENSMUSG00000025571	Tnrc6c	9930033H14Rik|mKIAA1582	trinucleotide repeat containing 6C	protein-coding
MACS_peak_19463	chr9	35075161	35075644	+	291.92	NA	promoter-TSS (NM_175411)	promoter-TSS (NM_175411)	-12	NM_001286604	109229	Mm.24197	NM_175411	ENSMUSG00000050471	Fam118b	2310022O21Rik|2700018L24Rik|C030004A17Rik|Ppp4r1l	family with sequence similarity 118, member B	protein-coding
MACS_peak_5123	chr13	51941799	51942250	+	291.52	NA	promoter-TSS (NM_011817)	promoter-TSS (NM_011817)	-20	NM_011817	23882	Mm.281298	NM_011817	ENSMUSG00000021453	Gadd45g	AI327420|C86281|CR6|DDIT2|OIG37	growth arrest and DNA-damage-inducible 45 gamma	protein-coding
MACS_peak_19636	chr9	47338310	47338563	+	291.52	NA	promoter-TSS (NM_207676)	promoter-TSS (NM_207676)	1	NM_018770	54725	Mm.234832	NM_018770	ENSMUSG00000032076	Cadm1	2900073G06Rik|3100001I08Rik|AI987920|Bl2|Igsf4|Igsf4a|Necl2|RA175|RA175A|RA175B|RA175C|RA175N|ST17|SgIGSF|SynCam|Tslc1	cell adhesion molecule 1	protein-coding
MACS_peak_13626	chr4	122563386	122564030	+	291.47	NA	promoter-TSS (NM_001301067)	promoter-TSS (NM_001301067)	-408	NM_001301067	12331	Mm.8687	NM_007598	ENSMUSG00000028656	Cap1	-	CAP, adenylate cyclase-associated protein 1 (yeast)	protein-coding
MACS_peak_1148	chr1	194999353	195000008	+	291.16	NA	promoter-TSS (NM_001160360)	promoter-TSS (NM_001160360)	17	NM_001160360	319266	Mm.482460	NM_181048	ENSMUSG00000079144	A130010J15Rik	-	RIKEN cDNA A130010J15 gene	protein-coding
MACS_peak_10278	chr19	60866360	60867054	+	291.14	NA	promoter-TSS (NM_010123)	promoter-TSS (NM_010123)	-111	NM_010123	13669	Mm.2238	NM_010123	ENSMUSG00000024991	Eif3a	A830012B05Rik|Csma|Eif3|Eif3s10|mKIAA0139	eukaryotic translation initiation factor 3, subunit A	protein-coding
MACS_peak_14932	chr5	115203378	115203864	+	290.28	NA	intron (NM_001077359, intron 7 of 18)	intron (NM_001077359, intron 7 of 18)	19879	NM_019834	26431	Mm.195632	NM_019834	ENSMUSG00000041890	Git2	1500036H07Rik|5830420E16Rik|6430510B20Rik|9630056M03Rik|B230104M05Rik|CAT2|mKIAA0148	G protein-coupled receptor kinase-interactor 2	protein-coding
MACS_peak_11491	chr2	143371806	143372076	+	290.27	NA	promoter-TSS (NM_008792)	promoter-TSS (NM_008792)	72	NM_008792	18549	Mm.294493	NM_008792	ENSMUSG00000027419	Pcsk2	6330411F23Rik|AI839700|Nec-2|Nec2|PC2|Phpp-2|SPC2	proprotein convertase subtilisin/kexin type 2	protein-coding
MACS_peak_9782	chr19	7557506	7557848	+	289.69	NA	5' UTR (NM_001271487, exon 1 of 8)	5' UTR (NM_001271487, exon 1 of 8)	104	NM_001271486	20168	Mm.246990	NM_053076	ENSMUSG00000024758	Rtn3	RTN3-A1	reticulon 3	protein-coding
MACS_peak_15603	chr6	30254346	30254630	+	289.69	NA	promoter-TSS (NM_009459)	promoter-TSS (NM_009459)	51	NM_009459	22214	Mm.332967	NM_009459	ENSMUSG00000039159	Ube2h	1500009C23Rik|AI181839|AI326965|AI462483|AW227540|E2-20K|Gid3|N28148|Ubc8	ubiquitin-conjugating enzyme E2H	protein-coding
MACS_peak_14571	chr5	40035678	40036153	+	287.91	NA	promoter-TSS (NM_010474)	promoter-TSS (NM_010474)	-45	NM_010474	15476	Mm.12559	NM_010474	ENSMUSG00000051022	Hs3st1	3-Ost|D5Wsu110e|Hsg3ost	heparan sulfate (glucosamine) 3-O-sulfotransferase 1	protein-coding
MACS_peak_2578	chr11	50139295	50139755	+	287.85	NA	promoter-TSS (NM_007597)	promoter-TSS (NM_007597)	-350	NM_001110500	12330	Mm.248827	NM_007597	ENSMUSG00000020368	Canx	1110069N15Rik|AI988026|Cnx|D11Ertd153e	calnexin	protein-coding
MACS_peak_7797	chr16	96212276	96212848	+	287.68	NA	promoter-TSS (NM_019537)	promoter-TSS (NM_019537)	-52	NM_019537	56088	Mm.396248	NM_019537	ENSMUSG00000022913	Psmg1	AW552102|Dscr2	proteasome (prosome, macropain) assembly chaperone 1	protein-coding
MACS_peak_8201	chr17	27650219	27650532	+	287.55	NA	Intergenic	CpG	-9897	NM_001291045	268934	Mm.358940	NM_001013385	ENSMUSG00000063239	Grm4	Gprc1d|mGluR4	glutamate receptor, metabotropic 4	protein-coding
MACS_peak_21099	chrX	163646919	163647216	+	287.32	NA	promoter-TSS (NM_021278)	promoter-TSS (NM_021278)	83	NM_021278	19241	Mm.142729	NM_021278	ENSMUSG00000049775	Tmsb4x	Ptmb4|Tb4	thymosin, beta 4, X chromosome	protein-coding
MACS_peak_15617	chr6	30687878	30688235	+	286.98	NA	promoter-TSS (NM_008590)	promoter-TSS (NM_008590)	3	NM_001252292	17294	Mm.335639	NM_008590	ENSMUSG00000051855	Mest	AA408879|AI256745|Peg1	mesoderm specific transcript	protein-coding
MACS_peak_15893	chr6	72566519	72567112	+	286.17	NA	promoter-TSS (NM_009444)	promoter-TSS (NM_009444)	-73	NM_009444	22135	Mm.246563	NM_009444		Tgoln2	TGN38B|TGN41|TGN46|Ttgn2	trans-golgi network protein 2	protein-coding
MACS_peak_16405	chr6	134847763	134848715	+	286.12	NA	promoter-TSS (NM_001167696)	promoter-TSS (NM_001167696)	260	NR_029441	72813	Mm.409034	NR_029441		2810454H06Rik	-	RIKEN cDNA 2810454H06 gene	ncRNA
MACS_peak_2582	chr11	50190788	50191499	+	286.12	NA	promoter-TSS (NM_021510)	promoter-TSS (NM_021510)	-78	NM_021510	59013	Mm.21740	NM_021510	ENSMUSG00000007850	Hnrnph1	AI642080|E430005G16Rik|Hnrnph|Hnrph1	heterogeneous nuclear ribonucleoprotein H1	protein-coding
MACS_peak_19749	chr9	57315672	57316193	+	286.12	NA	promoter-TSS (NM_020270)	promoter-TSS (NM_020270)	-101	NM_020270	56807	Mm.102278	NM_020270	ENSMUSG00000040722	Scamp5	AI426171|AW558254|Sc5	secretory carrier membrane protein 5	protein-coding
MACS_peak_3870	chr11	115375458	115375930	+	286.12	NA	promoter-TSS (NM_008258)	promoter-TSS (NM_008258)	-10	NM_008258	15374	Mm.1775	NM_008258	ENSMUSG00000020737	Hn1	-	hematological and neurological expressed sequence 1	protein-coding
MACS_peak_5829	chr14	51564058	51564375	+	285.96	NA	5' UTR (NM_013632, exon 1 of 6)	5' UTR (NM_013632, exon 1 of 6)	238	NM_013632	18950	Mm.17932	NM_013632	ENSMUSG00000021871	Pnp	AL024301|AU015798|Np|Np-1|Np-2|Pnp1	purine-nucleoside phosphorylase	protein-coding
MACS_peak_8644	chr17	56381054	56381412	+	285.19	NA	Intergenic	Intergenic	-1178	NR_029827	723883		NR_029827	miRBase:MI0000730	Mir7b	Mirn7b|mmu-mir-7b	microRNA 7b	ncRNA
MACS_peak_18869	chr8	96622010	96622756	+	284.82	NA	5' UTR (NM_026116, exon 1 of 17)	5' UTR (NM_026116, exon 1 of 17)	328	NM_026116	67378	Mm.292107	NM_026116	ENSMUSG00000031755	Bbs2	2410125H22Rik|AI447581	Bardet-Biedl syndrome 2 (human)	protein-coding
MACS_peak_16867	chr7	28271633	28272139	+	284.49	NA	promoter-TSS (NM_018820)	promoter-TSS (NM_018820)	-86	NM_018820	55942	Mm.153684	NM_018820	ENSMUSG00000008384	Sertad1	1110032C13Rik|AV000455|AW456625|Sei-1|Sei1|TRIP-Br1	SERTA domain containing 1	protein-coding
MACS_peak_17840	chr7	133942443	133942917	+	284.35	NA	promoter-TSS (NM_001177307)	promoter-TSS (NM_001177307)	12	NM_001177307	11674	Mm.275831	NM_007438	ENSMUSG00000030695	Aldoa	Aldo-1|Aldo1	aldolase A, fructose-bisphosphate	protein-coding
MACS_peak_2866	chr11	68666345	68666988	+	284.17	NA	promoter-TSS (NM_023668)	promoter-TSS (NM_023668)	-33	NM_023668	83431	Mm.31979	NM_023668	ENSMUSG00000018736	Ndel1	2600006O07Rik|MITAP1|NUDEL|mNudel	nuclear distribution gene E-like homolog 1 (A. nidulans)	protein-coding
MACS_peak_1496	chr10	62706233	62706823	+	283.70	NA	promoter-TSS (NM_030114)	promoter-TSS (NM_030114)	-17	NM_030114	67345	Mm.234437	NM_026101	ENSMUSG00000020064	Herc4	1700056O17Rik|4921531D01Rik|9530080M15Rik|mKIAA1593	hect domain and RLD 4	protein-coding
MACS_peak_9823	chr19	10056769	10057514	+	283.68	NA	promoter-TSS (NM_010239)	promoter-TSS (NM_010239)	5	NM_010239	14319	Mm.1776	NM_010239	ENSMUSG00000024661	Fth1	FHC|Fth|HFt|MFH	ferritin heavy chain 1	protein-coding
MACS_peak_17679	chr7	116662298	116662945	+	283.61	NA	promoter-TSS (NM_011975)	promoter-TSS (NM_011975)	-88	NM_011975	26451	Mm.305750	NM_011975	ENSMUSG00000046364	Rpl27a	L27'|L27A|L29	ribosomal protein L27A	protein-coding
MACS_peak_6857	chr15	81688459	81689186	+	283.02	NA	promoter-TSS (NM_020507)	promoter-TSS (NM_020507)	-66	NM_020507	57259	Mm.323595	NM_020507	ENSMUSG00000048546	Tob2	2900090N22Rik|4930545K18Rik|AV071822|mKIAA1663	transducer of ERBB2, 2	protein-coding
MACS_peak_17100	chr7	51560014	51560478	+	282.96	NA	exon (NM_009131, exon 4 of 4)	exon (NM_009131, exon 4 of 4)	2083	NM_009131	20256	Mm.20428	NM_009131	ENSMUSG00000004473	Clec11a	AW457320|Clecsf3|Scgf	C-type lectin domain family 11, member a	protein-coding
MACS_peak_15637	chr6	34425878	34426545	+	282.57	NA	promoter-TSS (NM_007563)	promoter-TSS (NM_007563)	-145	NM_007563	12183	Mm.282863	NM_007563	ENSMUSG00000038871	Bpgm	AI323730|AL022789|C86192	2,3-bisphosphoglycerate mutase	protein-coding
MACS_peak_783	chr1	155746727	155747372	+	282.51	NA	promoter-TSS (NM_008131)	promoter-TSS (NM_008131)	-7	NR_106194	102466257		NR_106194		Mir8114	mmu-mir-8114	microRNA mir-8114	ncRNA
MACS_peak_15249	chr5	136379318	136379962	+	282.17	NA	Intergenic	CpG	15851	NM_013560	15507	Mm.13849	NM_013560	ENSMUSG00000004951	Hspb1	27kDa|Hsp25	heat shock protein 1	protein-coding
MACS_peak_20076	chr9	91260435	91260729	+	280.80	NA	promoter-TSS (NM_009573)	promoter-TSS (NM_009573)	55	NM_009573	22771	Mm.335350	NM_009573	ENSMUSG00000032368	Zic1	ZIC|ZNF201	zinc finger protein of the cerebellum 1	protein-coding
MACS_peak_2277	chr11	3996474	3997060	+	280.78	NA	TTS (NM_144520)	TTS (NM_144520)	-1333	NM_026443	67900	Mm.41719	NM_026443	ENSMUSG00000004748	Mtfp1	1700020C11Rik|2610507A21Rik|AV005788|Mtp18	mitochondrial fission process 1	protein-coding
MACS_peak_13759	chr4	129301433	129302018	+	280.50	NA	promoter-TSS (NM_025455)	promoter-TSS (NM_025455)	-573	NM_025455	66264	Mm.383215	NM_025455	ENSMUSG00000028795	Ccdc28b	1110002E08Rik|1810010N17Rik	coiled coil domain containing 28B	protein-coding
MACS_peak_12958	chr4	9596015	9596724	+	280.41	NA	promoter-TSS (NM_001177856)	promoter-TSS (NM_001177856)	-60	NM_001177849	65973	Mm.222206	NM_023066	ENSMUSG00000028207	Asph	2310005F16Rik|3110001L23Rik|AI848629|AW261690|AW561901|BAH|C79816|cI-37	aspartate-beta-hydroxylase	protein-coding
MACS_peak_2865	chr11	68504684	68505715	+	280.16	NA	promoter-TSS (NM_175260)	promoter-TSS (NM_175260)	-218	NM_175260	77579	Mm.218233	NM_175260	ENSMUSG00000020900	Myh10	5730504C04Rik|9330167F11Rik|Fltn|Myhn-2|Myhn2|NMHC II-B|NMHC-B|NMHCII-B|NMMHC II-b|NMMHC-B|NMMHC-IIB|SMemb|mKIAA3005	myosin, heavy polypeptide 10, non-muscle	protein-coding
MACS_peak_1893	chr10	90586536	90587099	+	279.13	NA	promoter-TSS (NM_133668)	promoter-TSS (NM_133668)	-109	NM_133668	18674	Mm.298	NM_133668	ENSMUSG00000061904	Slc25a3	5730556H19Rik|PTP|Phc	solute carrier family 25 (mitochondrial carrier, phosphate carrier), member 3	protein-coding
MACS_peak_6783	chr15	79518087	79518609	+	279.06	NA	promoter-TSS (NM_028792)	promoter-TSS (NM_028792)	-46	NM_028792	74158	Mm.323393	NM_028792	ENSMUSG00000022426	Josd1	1300006C06Rik|mKIAA0063	Josephin domain containing 1	protein-coding
MACS_peak_12416	chr3	90017337	90017862	+	279.03	NA	promoter-TSS (NM_001190258)	promoter-TSS (NM_001190258)	-29	NM_027015	57294	Mm.270283	NM_027015		Rps27	3200001M24Rik	ribosomal protein S27	protein-coding
MACS_peak_17395	chr7	80703125	80703427	+	278.66	NA	promoter-TSS (NR_037569)	promoter-TSS (NR_037569)	5	NR_037569	69170	Mm.34539	NR_037569		1810026B05Rik	-	RIKEN cDNA 1810026B05 gene	ncRNA
MACS_peak_3770	chr11	106860936	106861220	+	278.54	NA	promoter-TSS (NM_010655)	promoter-TSS (NM_010655)	-239	NM_010655	16647	Mm.12508	NM_010655	ENSMUSG00000018362	Kpna2	2410044B12Rik|IPOA1|PTAC58|Rch1	karyopherin (importin) alpha 2	protein-coding
MACS_peak_13347	chr4	86503078	86503821	+	278.49	NA	promoter-TSS (NM_009096)	promoter-TSS (NM_009096)	-178	NM_009096	20104	Mm.379007	NM_009096		Rps6	S6R	ribosomal protein S6	protein-coding
MACS_peak_460	chr1	88255661	88256064	+	278.11	NA	promoter-TSS (NR_015507)	promoter-TSS (NR_015507)	168	NM_010880	17975	Mm.154378	NM_010880	ENSMUSG00000026234	Ncl	B530004O11Rik|C23|D0Nds28|D1Nds28|Nucl	nucleolin	protein-coding
MACS_peak_9016	chr18	21458463	21458729	+	277.89	NA	promoter-TSS (NM_001033445)	promoter-TSS (NM_001033445)	44	NM_001033445	381126	Mm.312276	NM_001033445	ENSMUSG00000042680	Garem	C86169|Fam59a|Gm944|mKIAA4238	GRB2 associated, regulator of MAPK1	protein-coding
MACS_peak_4264	chr12	42212353	42212716	+	277.74	NA	5' UTR (NM_010733, exon 1 of 2)	5' UTR (NM_010733, exon 1 of 2)	110	NM_001271708	16981	Mm.404786	NM_010733	ENSMUSG00000036295	Lrrn3	NLRR-3	leucine rich repeat protein 3, neuronal	protein-coding
MACS_peak_11388	chr2	130099802	130100523	+	277.14	NA	promoter-TSS (NM_024193)	promoter-TSS (NM_024193)	14	NM_024193	67134	Mm.29363	NM_024193	ENSMUSG00000027405	Nop56	2310044F10Rik|Nol5a	NOP56 ribonucleoprotein	protein-coding
MACS_peak_4889	chr13	17896973	17897556	+	277.14	NA	promoter-TSS (NM_027118)	promoter-TSS (NM_027118)	-333	NM_027118	69562	Mm.193924	NM_027118	ENSMUSG00000041297	Cdk13	2310015O17Rik|Cdc2l5	cyclin-dependent kinase 13	protein-coding
MACS_peak_11341	chr2	126532679	126533280	+	276.84	NA	promoter-TSS (NM_001252580)	promoter-TSS (NM_001252580)	-85	NM_001252580	84092	Mm.272629	NM_019729	ENSMUSG00000027363	Usp8	AI574262|AW557536|Ubpy|mKIAA0055	ubiquitin specific peptidase 8	protein-coding
MACS_peak_1216	chr10	11000590	11001301	+	276.81	NA	promoter-TSS (NM_027968)	promoter-TSS (NM_027968)	-183	NM_027968	71865	Mm.276229	NM_027968	ENSMUSG00000047648	Fbxo30	1700026A16Rik|MUSA1	F-box protein 30	protein-coding
MACS_peak_425	chr1	78654317	78654684	+	276.80	NA	promoter-TSS (NM_001136226)	promoter-TSS (NM_001136226)	100	NM_001001981	195434	Mm.276016	NM_001001981	ENSMUSG00000079470	Utp14b	4932411L21Rik|jsd	UTP14, U3 small nucleolar ribonucleoprotein, homolog B (yeast)	protein-coding
MACS_peak_6436	chr15	36538608	36538890	+	276.79	NA	promoter-TSS (NM_008774)	promoter-TSS (NM_008774)	-21	NM_008774	18458	Mm.371570	NM_008774	ENSMUSG00000022283	Pabpc1	PABP|Pabp1|PabpI|Pabpl1|ePAB	poly(A) binding protein, cytoplasmic 1	protein-coding
MACS_peak_5446	chr13	91947087	91947541	+	276.68	NA	promoter-TSS (NM_145453)	promoter-TSS (NM_145453)	-13	NM_145453	69085	Mm.52356	NM_145453	ENSMUSG00000021621	Zcchc9	1810019C21Rik	zinc finger, CCHC domain containing 9	protein-coding
MACS_peak_19442	chr9	31019219	31019548	+	276.64	NA	promoter-TSS (NM_001102456)	promoter-TSS (NM_001102456)	17	NM_001102455	11804	Mm.19133	NM_009691	ENSMUSG00000031996	Aplp2	AI790698|APLP-2	amyloid beta (A4) precursor-like protein 2	protein-coding
MACS_peak_8666	chr17	56812252	56812563	+	276.62	NA	promoter-TSS (NM_001252467)	promoter-TSS (NM_001252467)	-241	NM_001252466	71810	Mm.29608	NM_027933	ENSMUSG00000002372	Ranbp3	2610024N24Rik|AA408221	RAN binding protein 3	protein-coding
MACS_peak_7439	chr16	22265841	22266346	+	276.33	NA	promoter-TSS (NM_009186)	promoter-TSS (NM_009186)	-91	NM_009186	20462	Mm.210352	NM_009186		Tra2b	5730405G21Rik|D16Ertd266e|SIG-41|Sfrs10|Silg41|TRA2beta	transformer 2 beta homolog (Drosophila)	protein-coding
MACS_peak_11738	chr2	163470619	163471129	+	276.31	NA	promoter-TSS (NM_012032)	promoter-TSS (NM_012032)	5	NM_012032	26943	Mm.218473	NM_012032	ENSMUSG00000017707	Serinc3	AA959945|AA960047|AIGP1|DIFF33|TMS-1|Tde1	serine incorporator 3	protein-coding
MACS_peak_16656	chr7	16899174	16899665	+	275.55	NA	intron (NM_133234, intron 3 of 3)	CpG	4487	NM_133234	170770	Mm.7660	NM_133234	ENSMUSG00000002083	Bbc3	PUMA|PUMA/JFY1	BCL2 binding component 3	protein-coding
MACS_peak_11294	chr2	121943835	121944456	+	275.55	NA	promoter-TSS (NM_145531)	promoter-TSS (NM_145531)	-23	NM_145531	214585	Mm.222303	NM_145531	ENSMUSG00000033396	Spg11	6030465E24Rik|A330015I11|C530005A01Rik	spastic paraplegia 11	protein-coding
MACS_peak_6576	chr15	68090431	68090786	+	275.01	NA	promoter-TSS (NM_001145888)	promoter-TSS (NM_001145888)	-190	NM_198644	380993	Mm.309526	NM_198644	ENSMUSG00000022335	Zfat	Gm922|Zfat1|Zfp406	zinc finger and AT hook domain containing	protein-coding
MACS_peak_7433	chr16	21794119	21794630	+	275.01	NA	promoter-TSS (NR_037958)	promoter-TSS (NR_037958)	-46	NR_037958	100043489	Mm.326535	NR_037957	ENSMUSG00000097290	1300002E11Rik	1500026P21Rik	RIKEN cDNA 1300002E11 gene	ncRNA
MACS_peak_15708	chr6	47738360	47738677	+	275.01	NA	Intergenic	Intergenic	15133	NR_030485	735289		NR_030485		Mir704	Mirn704|mmu-mir-704	microRNA 704	ncRNA
MACS_peak_1453	chr10	59740145	59740912	+	275.01	NA	exon (NM_001146122, exon 1 of 14)	exon (NM_001146122, exon 1 of 14)	152	NM_001146121	19156	Mm.277498	NM_011179	ENSMUSG00000004207	Psap	AI037048|SGP-1	prosaposin	protein-coding
MACS_peak_7151	chr15	100382026	100382833	+	275.01	NA	promoter-TSS (NM_001289603)	promoter-TSS (NM_001289603)	10	NM_033476	21422	Mm.219040	NM_033476	ENSMUSG00000009733	Tfcp2	CP-2|CP2|D230015P20Rik|LBP-1c|LBP-1d|LBP1|LSF|Tcfcp2|UBP-1	transcription factor CP2	protein-coding
MACS_peak_14480	chr5	33360914	33361387	+	275.01	NA	promoter-TSS (NM_011738)	promoter-TSS (NM_011738)	-315	NM_011738	22629	Mm.332314	NM_011738	ENSMUSG00000018965	Ywhah	-	tyrosine 3-monooxygenase/tryptophan 5-monooxygenase activation protein, eta polypeptide	protein-coding
MACS_peak_397	chr1	75232624	75233701	+	274.73	NA	promoter-TSS (NM_001159885)	promoter-TSS (NM_001159885)	-115	NM_001159885	56812	Mm.489660	NM_020266		Dnajb2	2700059H22Rik|Dnajb10|Hsj1|mDj8	DnaJ (Hsp40) homolog, subfamily B, member 2	protein-coding
MACS_peak_18409	chr8	47248663	47249262	+	274.73	NA	Intergenic	CpG	-5948	NM_025747	66756	Mm.133623	NM_025747	ENSMUSG00000031631	Cfap97	1110068E21Rik|4933411K20Rik|AW049273|Kiaa1430|mKIAA1430	cilia and flagella associated protein 97	protein-coding
MACS_peak_1339	chr10	40021901	40022370	+	273.92	NA	promoter-TSS (NM_007444)	promoter-TSS (NM_007444)	-141	NM_009665	11702	Mm.253533	NM_009665	ENSMUSG00000075232	Amd1	1|AdoMetDC|Amd-1|SAMDC|SAMDC 1|adoMetDC1	S-adenosylmethionine decarboxylase 1	protein-coding
MACS_peak_14986	chr5	117041646	117042157	+	273.72	NA	promoter-TSS (NM_026886)	promoter-TSS (NM_026886)	-75	NM_026886	68955	Mm.146779	NM_026886	ENSMUSG00000063919	Srrm4	1500001A10Rik|B230202K19Rik|bv|mKIAA1853|nSR100	serine/arginine repetitive matrix 4	protein-coding
MACS_peak_4254	chr12	40949514	40949926	+	273.47	NA	promoter-TSS (NR_035459)	promoter-TSS (NR_035459)	56	NM_013562	15982	Mm.168	NM_013562		Ifrd1	Ifnl|PC4|Tis7	interferon-related developmental regulator 1	protein-coding
MACS_peak_16919	chr7	29526571	29527526	+	273.19	NA	promoter-TSS (NM_011885)	promoter-TSS (NM_011885)	61	NM_023637	71984	Mm.333725	NM_023637	ENSMUSG00000070699	Sars2	2410015F05Rik|D7Ertd353e|SerRS|SerRSmt	seryl-aminoacyl-tRNA synthetase 2	protein-coding
MACS_peak_3265	chr11	87239873	87240462	+	273.19	NA	promoter-TSS (NM_001199293)	promoter-TSS (NM_001199293)	-926	NM_001199293	83560	Mm.440758	NM_031386	ENSMUSG00000010342	Tex14	C85585	testis expressed gene 14	protein-coding
MACS_peak_14974	chr5	116081528	116082106	+	272.83	NA	promoter-TSS (NM_198163)	promoter-TSS (NM_198163)	8	NR_027810	66123	Mm.133063	NM_021417		1110006O24Rik	-	RIKEN cDNA 1110006O24 gene	ncRNA
MACS_peak_8696	chr17	57226701	57227249	+	272.24	NA	5' UTR (NM_009451, exon 1 of 4)	5' UTR (NM_009451, exon 1 of 4)	230	NM_009451	22153	Mm.7420	NM_009451	ENSMUSG00000062591	Tubb4a	AI325297|M(beta)4|Tubb|Tubb4	tubulin, beta 4A class IVA	protein-coding
MACS_peak_7636	chr16	46010357	46010878	+	272.21	NA	promoter-TSS (NM_001134480)	promoter-TSS (NM_001134480)	-91	NM_001134480	433022	Mm.380993	NM_001134480	ENSMUSG00000087141	Plcxd2	AW494639|EG433022	phosphatidylinositol-specific phospholipase C, X domain containing 2	protein-coding
MACS_peak_6475	chr15	38448835	38449530	+	271.96	NA	promoter-TSS (NM_018745)	promoter-TSS (NM_018745)	-161	NM_018745	54375	Mm.250214	NM_018745	ENSMUSG00000037458	Azin1	1700085L02Rik|AI414949|Oazi|Oazin	antizyme inhibitor 1	protein-coding
MACS_peak_7638	chr16	46497400	46497866	+	271.93	NA	promoter-TSS (NM_021496)	promoter-TSS (NM_021496)	-553	NM_021497	58998	Mm.328072	NM_021495	ENSMUSG00000022656	Pvrl3	2610301B19Rik|3000002N23Rik|4921513D19Rik|AA407785|AU016832|AW538082|CD113	poliovirus receptor-related 3	protein-coding
MACS_peak_20777	chrX	71515367	71516344	+	271.71	NA	promoter-TSS (NM_052835)	promoter-TSS (NM_052835)	-300	NM_052835	110954	Mm.100113	NM_052835	ENSMUSG00000008682	Rpl10	D0HXS648|DXHXS648|DXHXS648E|QM|QM16	ribosomal protein L10	protein-coding
MACS_peak_7758	chr16	91646983	91647604	+	271.32	NA	promoter-TSS (NM_010256)	promoter-TSS (NM_010256)	-76	NM_010256	14450	Mm.4505	NM_010256	ENSMUSG00000022962	Gart	Gaps|Prgs	phosphoribosylglycinamide formyltransferase	protein-coding
MACS_peak_10562	chr2	29821070	29821395	+	270.94	NA	5' UTR (NM_001177667, exon 1 of 57)	5' UTR (NM_001177667, exon 1 of 57)	152	NM_001076554	20740	Mm.204969	NM_001076554	ENSMUSG00000057738	Sptan1	2610027H02Rik|Spna-2|Spna2	spectrin alpha, non-erythrocytic 1	protein-coding
MACS_peak_14020	chr4	141101992	141102646	+	270.76	NA	non-coding (NR_030695, exon 1 of 1)	non-coding (NR_030695, exon 1 of 1)	242	NR_030695	320456	Mm.32859	NM_177163		B330016D10Rik	-	RIKEN cDNA B330016D10 gene	ncRNA
MACS_peak_700	chr1	136456594	136456945	+	270.50	NA	promoter-TSS (NM_152895)	promoter-TSS (NM_152895)	14	NM_152895	75605	Mm.28995	NM_152895	ENSMUSG00000042207	Kdm5b	2010009J12Rik|2210016I17Rik|AW556288|D1Ertd202e|Jarid1b|PLU-1|PUT1|Plu1|RBBP2H1A|Rb-Bp2|mKIAA4034	lysine (K)-specific demethylase 5B	protein-coding
MACS_peak_17851	chr7	134027996	134028697	+	270.44	NA	5' UTR (NM_001163774, exon 1 of 19)	5' UTR (NM_001163774, exon 1 of 19)	135	NM_001163775	381921	Mm.259634	NM_001163774	ENSMUSG00000059981	Taok2	1110033K02Rik|B230344N16|MAP3K17|PSK|PSK1|TAO1|TAO2|mKIAA0881	TAO kinase 2	protein-coding
MACS_peak_13612	chr4	120339072	120339329	+	270.37	NA	promoter-TSS (NM_019563)	promoter-TSS (NM_019563)	32	NM_019563	56222	Mm.272646	NM_019563	ENSMUSG00000070803	Cited4	MRG-2|Mrg2	Cbp/p300-interacting transactivator, with Glu/Asp-rich carboxy-terminal domain, 4	protein-coding
MACS_peak_16981	chr7	31076413	31076999	+	270.37	NA	promoter-TSS (NM_001081114)	promoter-TSS (NM_001081114)	-66	NM_001081114	76686	Mm.159258	NM_001081114	ENSMUSG00000013921	Clip3	1500005P14Rik|AI844915|Clipr-59	CAP-GLY domain containing linker protein 3	protein-coding
MACS_peak_15043	chr5	121902195	121902861	+	270.03	NA	promoter-TSS (NM_029912)	promoter-TSS (NM_029912)	-45	NM_026129	67397	Mm.154570	NM_026129		Erp29	1200015M03Rik|2810446M09Rik|AW209030|Erp28|Erp31|PDI-Db	endoplasmic reticulum protein 29	protein-coding
MACS_peak_7059	chr15	96529981	96530396	+	269.73	NA	promoter-TSS (NM_175121)	promoter-TSS (NM_175121)	-59	NM_175121	67760	Mm.46754	NM_175121	ENSMUSG00000022462	Slc38a2	5033402L14Rik|AI316867|ATA2|SAT2|mKIAA1382	solute carrier family 38, member 2	protein-coding
MACS_peak_17188	chr7	52459941	52460268	+	269.61	NA	5' UTR (NM_201374, exon 1 of 20)	5' UTR (NM_201374, exon 1 of 20)	158	NM_201374	384619	Mm.214931	NM_201374	ENSMUSG00000038292	Ccdc155	Gm1434|KASH5	coiled-coil domain containing 155	protein-coding
MACS_peak_6466	chr15	38230274	38230792	+	268.79	NA	promoter-TSS (NM_013692)	promoter-TSS (NM_013692)	-67	NM_001289471	21847	Mm.4292	NM_013692	ENSMUSG00000037465	Klf10	AI115143|EGR[a]|Egral|Gdnfif|TIEG-1|Tieg|Tieg1|mGIF	Kruppel-like factor 10	protein-coding
MACS_peak_2603	chr11	51501934	51502246	+	268.52	NA	promoter-TSS (NM_025319)	promoter-TSS (NM_025319)	46	NM_025319	66050	Mm.35693	NM_025319	ENSMUSG00000007777	0610009B22Rik	-	RIKEN cDNA 0610009B22 gene	protein-coding
MACS_peak_3477	chr11	97887765	97888075	+	268.52	NA	promoter-TSS (NM_009078)	promoter-TSS (NM_009078)	-104	NM_001159483	19921	Mm.10247	NM_009078	ENSMUSG00000017404	Rpl19	-	ribosomal protein L19	protein-coding
MACS_peak_17556	chr7	104565485	104566391	+	268.47	NA	promoter-TSS (NM_009381)	promoter-TSS (NM_009381)	82	NM_009381	21835	Mm.28585	NM_009381	ENSMUSG00000035686	Thrsp	S14	thyroid hormone responsive	protein-coding
MACS_peak_12518	chr3	96024627	96025412	+	268.46	NA	promoter-TSS (NM_178214)	promoter-TSS (NM_178214)	-25	NM_178214	319190	Mm.439791	NM_178214	ENSMUSG00000068854	Hist2h2be	AV127319|H2b-613|T25626	histone cluster 2, H2be	protein-coding
MACS_peak_2133	chr10	126727719	126728052	+	268.46	NA	promoter-TSS (NM_001290183)	promoter-TSS (NM_001290183)	36	NM_001290183	13198	Mm.110220	NM_007837	ENSMUSG00000025408	Ddit3	CHOP-10|CHOP10|chop|gadd153	DNA-damage inducible transcript 3	protein-coding
MACS_peak_16331	chr6	125165462	125165854	+	268.11	NA	promoter-TSS (NM_001080557)	promoter-TSS (NM_001080557)	59	NM_001080557	22317	Mm.32321	NM_009496	ENSMUSG00000030337	Vamp1	Syb-1|Syb1|VAMP-1|lew	vesicle-associated membrane protein 1	protein-coding
MACS_peak_1696	chr10	79761555	79762057	+	267.65	NA	Intergenic	Intergenic	-2759	NM_011789	23805	Mm.57247	NM_011789	ENSMUSG00000020135	Apc2	AI852447|APCL|R75424	adenomatosis polyposis coli 2	protein-coding
MACS_peak_9364	chr18	64675991	64676594	+	267.24	NA	promoter-TSS (NM_027350)	promoter-TSS (NM_027350)	-81	NM_001142950	70223	Mm.29192	NM_027350	ENSMUSG00000024587	Nars	3010001M15Rik|AA960128|ASNRS|C78150	asparaginyl-tRNA synthetase	protein-coding
MACS_peak_8296	chr17	32487236	32487639	+	267.24	NA	promoter-TSS (NM_017476)	promoter-TSS (NM_017476)	85	NM_017476	54194	Mm.281005	NM_017476	ENSMUSG00000002625	Akap8l	HAP95|Nakap95	A kinase (PRKA) anchor protein 8-like	protein-coding
MACS_peak_2014	chr10	114752472	114752903	+	267.16	NA	promoter-TSS (NM_024454)	promoter-TSS (NM_024454)	-40	NM_024454	216344	Mm.21936	NM_024454	ENSMUSG00000020132	Rab21	9630024B22	RAB21, member RAS oncogene family	protein-coding
MACS_peak_13806	chr4	131829994	131830598	+	266.57	NA	promoter-TSS (NM_025579)	promoter-TSS (NM_025579)	6	NM_025579	66464	Mm.331926	NM_025579		Taf12	20kDa|2810422D08Rik|AW557038|Taf2J	TAF12 RNA polymerase II, TATA box binding protein (TBP)-associated factor	protein-coding
MACS_peak_7767	chr16	92058001	92058271	+	265.99	NA	promoter-TSS (NM_080456)	promoter-TSS (NM_080456)	-431	NM_017391	53881	Mm.217354	NM_017391	ENSMUSG00000089774	Slc5a3	AA623876|BF642829|Smit1	solute carrier family 5 (inositol transporters), member 3	protein-coding
MACS_peak_15187	chr5	130362958	130363504	+	265.92	NA	5' UTR (NM_024166, exon 1 of 4)	5' UTR (NM_024166, exon 1 of 4)	109	NM_024166	14004	Mm.30133	NM_024166	ENSMUSG00000070493	Chchd2	AL033347|Etohi6	coiled-coil-helix-coiled-coil-helix domain containing 2	protein-coding
MACS_peak_8073	chr17	24861089	24861534	+	265.92	NA	promoter-TSS (NM_026684)	promoter-TSS (NM_026684)	22	NM_026684	68342	Mm.1129	NM_026684	ENSMUSG00000040048	Ndufb10	0610011B04Rik|22kDa|PDSW	NADH dehydrogenase (ubiquinone) 1 beta subcomplex, 10	protein-coding
MACS_peak_15378	chr5	143579392	143579979	+	265.75	NA	promoter-TSS (NM_178242)	promoter-TSS (NM_178242)	-619	NM_001122730	231861	Mm.354649	NM_178242	ENSMUSG00000039477	Tnrc18	BC025631|EG381742|Zfp469	trinucleotide repeat containing 18	protein-coding
MACS_peak_693	chr1	136258362	136258879	+	265.73	NA	promoter-TSS (NM_020588)	promoter-TSS (NM_020588)	-44	NM_020588	57439	Mm.393140	NM_020588	ENSMUSG00000042305	Tmem183a	1300007B12Rik|1700020N19Rik|Tmem183	transmembrane protein 183A	protein-coding
MACS_peak_3574	chr11	100870505	100871028	+	265.72	NA	promoter-TSS (NM_016920)	promoter-TSS (NM_016920)	0	NM_016920	11975	Mm.340818	NM_016920	ENSMUSG00000019302	Atp6v0a1	AA959968|ATP6a1|Atp6n1|Atp6n1a|Atpv0a1|Vpp-1|Vpp1	ATPase, H+ transporting, lysosomal V0 subunit A1	protein-coding
MACS_peak_113	chr1	34899700	34900187	+	265.72	NA	promoter-TSS (NM_001160236)	promoter-TSS (NM_001160236)	-48	NM_174997	214469	Mm.120151	NM_174997	ENSMUSG00000037503	Fam168b	mKIAA4042	family with sequence similarity 168, member B	protein-coding
MACS_peak_15609	chr6	30459460	30459995	+	265.37	NA	promoter-TSS (NM_178625)	promoter-TSS (NM_178625)	-21	NM_178625	72649	Mm.45418	NM_178625	ENSMUSG00000029782	Tmem209	2700094F01Rik|AI428435	transmembrane protein 209	protein-coding
MACS_peak_8032	chr17	24306000	24306458	+	265.37	NA	exon (NM_009729, exon 1 of 3)	exon (NM_009729, exon 1 of 3)	111	NR_037854	100039636	Mm.30155	NR_037854	ENSMUSG00000080242	Atp6v0c-ps2	Atp6l-ps2|Gm15487	ATPase, H+ transporting, lysosomal V0 subunit C, pseudogene 2	pseudo
MACS_peak_17104	chr7	51615247	51616194	+	265.35	NA	exon (NM_027049, exon 6 of 6)	exon (NM_027049, exon 6 of 6)	14680	NM_027049	69349	Mm.358922	NM_027049	ENSMUSG00000008028	1700008O03Rik	-	RIKEN cDNA 1700008O03 gene	protein-coding
MACS_peak_13677	chr4	125933669	125934069	+	265.28	NA	promoter-TSS (NM_144941)	promoter-TSS (NM_144941)	-306	NM_001145970	245877	Mm.266716	NM_144941	ENSMUSG00000028849	Map7d1	AV028413|BC019977|Mtap7d1|Parcc1|Rprc1|mKIAA1187	MAP7 domain containing 1	protein-coding
MACS_peak_10119	chr19	45149412	45149947	+	265.28	NA	promoter-TSS (NM_178929)	promoter-TSS (NM_178929)	-950	NM_178929	107250	Mm.24417	NM_178929	ENSMUSG00000025213	Kazald1	AI842353|Bono1|IGFBP-rP10	Kazal-type serine peptidase inhibitor domain 1	protein-coding
MACS_peak_6826	chr15	80628823	80629157	+	264.95	NA	promoter-TSS (NM_177124)	promoter-TSS (NM_177124)	-50	NM_177124	213988	Mm.131328	NM_144812	ENSMUSG00000047888	Tnrc6b	2700090M07Rik|A730065C02Rik|AI848765|D230019K20Rik	trinucleotide repeat containing 6b	protein-coding
MACS_peak_8557	chr17	46919384	46919819	+	264.76	NA	promoter-TSS (NM_025433)	promoter-TSS (NM_025433)	4	NM_025433	66229	Mm.218533	NM_025433	ENSMUSG00000063888	Rpl7l1	1500016H10Rik	ribosomal protein L7-like 1	protein-coding
MACS_peak_6262	chr14	118531714	118532283	+	264.64	NA	promoter-TSS (NM_029578)	promoter-TSS (NM_029578)	-11	NM_029578	76355	Mm.251537	NM_029578	ENSMUSG00000022130	Tgds	2610017J16Rik|2610025M23Rik|AI648925	TDP-glucose 4,6-dehydratase	protein-coding
MACS_peak_2287	chr11	4604067	4604445	+	264.11	NA	promoter-TSS (NM_197979)	promoter-TSS (NM_197979)	91	NM_197979	66152	Mm.269736	NM_197979	ENSMUSG00000059534	Uqcr10	1110020P15Rik|AA960494|Ucrc	ubiquinol-cytochrome c reductase, complex III subunit X	protein-coding
MACS_peak_11590	chr2	154198215	154198572	+	263.77	NA	promoter-TSS (NM_025876)	promoter-TSS (NM_025876)	62	NM_025876	66971	Mm.289427	NM_025876	ENSMUSG00000027487	Cdk5rap1	2310066P17Rik	CDK5 regulatory subunit associated protein 1	protein-coding
MACS_peak_1708	chr10	79869333	79869850	+	263.68	NA	promoter-TSS (NM_025650)	promoter-TSS (NM_025650)	-25	NM_025650	66594	Mm.379119	NM_025650	ENSMUSG00000020163	Uqcr11	0710008D09Rik|AL022707|Uqcr	ubiquinol-cytochrome c reductase, complex III subunit XI	protein-coding
MACS_peak_14312	chr5	21207049	21207822	+	263.19	NA	promoter-TSS (NM_178728)	promoter-TSS (NM_178728)	-272	NM_178728	242864	Mm.153292	NM_178728	ENSMUSG00000044968	Napepld	A530089G06|Mbldc1|NAPE-PLD	N-acyl phosphatidylethanolamine phospholipase D	protein-coding
MACS_peak_20255	chr9	107456584	107457244	+	263.19	NA	promoter-TSS (NM_019713)	promoter-TSS (NM_019713)	0	NM_019713	56289	Mm.12091	NM_019713	ENSMUSG00000010067	Rassf1	123F2|AA536941|AU044980|NORE2A|RDA32|REH3P21|Rassf1A|Rassf1B|Rassf1C	Ras association (RalGDS/AF-6) domain family member 1	protein-coding
MACS_peak_16419	chr6	136752420	136753112	+	263.19	NA	exon (NM_175652, exon 1 of 1)	exon (NM_175652, exon 1 of 1)	186	NM_175652	320332	Mm.246720	NM_175652	ENSMUSG00000096010	Hist4h4	B130044J01Rik	histone cluster 4, H4	protein-coding
MACS_peak_1722	chr10	80138954	80139220	+	262.96	NA	Intergenic	CpG	-4366	NM_021462	17347	Mm.42126	NM_021462	ENSMUSG00000020190	Mknk2	2010016G11Rik|Gprk7|Mnk2	MAP kinase-interacting serine/threonine kinase 2	protein-coding
MACS_peak_10395	chr2	24830361	24831029	+	262.92	NA	promoter-TSS (NM_001031808)	promoter-TSS (NM_001031808)	-77	NM_001031808	107733	Mm.23010	NM_001031808		Mrpl41	MRP-L27|Rpml27	mitochondrial ribosomal protein L41	protein-coding
MACS_peak_4694	chr12	103792907	103793370	+	262.77	NA	promoter-TSS (NM_007693)	promoter-TSS (NM_007693)	-41	NM_007693	12652	Mm.4137	NM_007693	ENSMUSG00000021194	Chga	ChrA	chromogranin A	protein-coding
MACS_peak_11358	chr2	127346887	127347380	+	262.44	NA	promoter-TSS (NM_019789)	promoter-TSS (NM_019789)	-5	NM_019789	56461	Mm.315292	NM_019789	ENSMUSG00000079056	Kcnip3	4933407H12Rik|AI413860|Csen|DREAM|KChIP3|R74849	Kv channel interacting protein 3, calsenilin	protein-coding
MACS_peak_15444	chr5	147644622	147644947	+	262.03	NA	intron (NM_019647, intron 1 of 5)	CpG	318	NM_019647	19933	Mm.316592	NM_019647	ENSMUSG00000041453	Rpl21	8430440E03Rik|L21	ribosomal protein L21	protein-coding
MACS_peak_2486	chr11	33062884	33063618	+	261.97	NA	promoter-TSS (NM_008722)	promoter-TSS (NM_008722)	-45	NM_008722	18148	Mm.485384	NM_008722	ENSMUSG00000057113	Npm1	B23|NO38|Npm	nucleophosmin 1	protein-coding
MACS_peak_18298	chr8	26629111	26629493	+	261.78	NA	promoter-TSS (NM_001079909)	promoter-TSS (NM_001079909)	71	NM_001079908	14182	Mm.265716	NM_010206	ENSMUSG00000031565	Fgfr1	AW208770|Eask|FLG|Fgfr-1|Flt-2|Hspy|MFR|bFGF-R-1|c-fgr	fibroblast growth factor receptor 1	protein-coding
MACS_peak_17074	chr7	39056200	39056657	+	261.50	NA	promoter-TSS (NM_025390)	promoter-TSS (NM_025390)	-61	NM_025390	66161	Mm.22284	NM_025390	ENSMUSG00000030423	Pop4	1110023P21Rik|Rpp29	processing of precursor 4, ribonuclease P/MRP family, (S. cerevisiae)	protein-coding
MACS_peak_4284	chr12	53107267	53107737	+	261.00	NA	promoter-TSS (NM_029545)	promoter-TSS (NM_029545)	-14	NM_029545	328092	Mm.2821	NM_029545	ENSMUSG00000020956	Dtd2	4930578F06Rik|6530401N04Rik|B830049N13Rik	D-tyrosyl-tRNA deacylase 2	protein-coding
MACS_peak_9315	chr18	60720124	60720560	+	260.95	NA	promoter-TSS (NM_025776)	promoter-TSS (NM_025776)	-98	NM_025776	66810	Mm.275106	NM_025776	ENSMUSG00000024604	Rbm22	8430430L24Rik	RNA binding motif protein 22	protein-coding
MACS_peak_4994	chr13	34169686	34170155	+	260.50	NA	promoter-TSS (NM_009450)	promoter-TSS (NM_009450)	-43	NM_009450	22151	Mm.422827	NM_009450	ENSMUSG00000058672	Tubb2a	M(beta)2|Tubb2	tubulin, beta 2A class IIA	protein-coding
MACS_peak_19461	chr9	35018269	35018670	+	260.28	NA	promoter-TSS (NM_026130)	promoter-TSS (NM_026130)	171	NM_172291	235169	Mm.138512	NM_172291	ENSMUSG00000039048	Foxred1	BC024806|TEG-23|Tex23	FAD-dependent oxidoreductase domain containing 1	protein-coding
MACS_peak_9983	chr19	32786652	32787493	+	260.19	NA	promoter-TSS (NM_026487)	promoter-TSS (NM_026487)	-284	NM_026487	67979	Mm.27123	NM_026487	ENSMUSG00000013662	Atad1	4921525H23Rik|AW107648|Thorase	ATPase family, AAA domain containing 1	protein-coding
MACS_peak_14394	chr5	28491845	28492389	+	260.19	NA	promoter-TSS (NM_010134)	promoter-TSS (NM_010134)	-119	NM_010134	13799	Mm.4298	NM_010134		En2	BB131122|En-2	engrailed 2	protein-coding
MACS_peak_19141	chr8	124109134	124109505	+	259.81	NA	Intergenic	CpG	-5049	NM_026160	67443	Mm.28357	NM_026160		Map1lc3b	1010001C15Rik|Atg8|LC3b|Map1lc3	microtubule-associated protein 1 light chain 3 beta	protein-coding
MACS_peak_4103	chr12	3959794	3960366	+	259.74	NA	exon (NM_008895, exon 3 of 3)	exon (NM_008895, exon 3 of 3)	5135	NM_001278583	18976	Mm.277996	NM_008895	ENSMUSG00000020660	Pomc	ACTH|BE|Beta-LPH|Clip|Gamma-LPH|Npp|Pomc-1|Pomc1|alpha-MSH|alphaMSH|beta-MSH|gamma-MSH	pro-opiomelanocortin-alpha	protein-coding
MACS_peak_15363	chr5	142843077	142843464	+	259.70	NA	Intergenic	CpG	-34181	NM_199068	17425	Mm.24214	NM_010812	ENSMUSG00000056493	Foxk1	A630048H08Rik|AI463295|ENSMUSG00000075577|Gm10868|Mnf	forkhead box K1	protein-coding
MACS_peak_1484	chr10	62064916	62065351	+	259.70	NA	promoter-TSS (NM_019553)	promoter-TSS (NM_019553)	-87	NM_019553	56200	Mm.413275	NM_019553	ENSMUSG00000020075	Ddx21	AI255159|AL022742|D10Ertd645e|D10Wsu42e	DEAD (Asp-Glu-Ala-Asp) box polypeptide 21	protein-coding
MACS_peak_9699	chr19	5912585	5913182	+	259.68	NA	promoter-TSS (NM_001291078)	promoter-TSS (NM_001291078)	-12	NM_001291078	19708	Mm.2651	NM_011262	ENSMUSG00000024826	Dpf2	2210010M07Rik|BAF45D|Req|ubi-d4	D4, zinc and double PHD fingers family 2	protein-coding
MACS_peak_16089	chr6	107479675	107479918	+	259.20	NA	promoter-TSS (NM_008516)	promoter-TSS (NM_008516)	76	NM_008516	16979	Mm.428543	NM_008516	ENSMUSG00000034648	Lrrn1	2810047E21Rik|NLRR-1	leucine rich repeat protein 1, neuronal	protein-coding
MACS_peak_625	chr1	133724140	133724852	+	259.11	NA	promoter-TSS (NM_173865)	promoter-TSS (NM_173865)	-93	NM_173865	98396	Mm.389181	NM_173865	ENSMUSG00000013275	Slc41a1	AI573938|B230315F01Rik	solute carrier family 41, member 1	protein-coding
MACS_peak_5884	chr14	55400537	55400886	+	259.01	NA	promoter-TSS (NM_016972)	promoter-TSS (NM_016972)	12	NM_016972	50934	Mm.276831	NM_016972	ENSMUSG00000022180	Slc7a8	AA408822|LAT2	solute carrier family 7 (cationic amino acid transporter, y+ system), member 8	protein-coding
MACS_peak_19154	chr8	124431444	124431694	+	259.01	NA	promoter-TSS (NM_001033485)	promoter-TSS (NM_001033485)	17	NM_011404	20539	Mm.27943	NM_011404	ENSMUSG00000040010	Slc7a5	4F2LC|D0H16S474E|LAT1|TA1	solute carrier family 7 (cationic amino acid transporter, y+ system), member 5	protein-coding
MACS_peak_10657	chr2	32286462	32287047	+	258.68	NA	promoter-TSS (NM_001164358)	promoter-TSS (NM_001164358)	-83	NM_001164358	227731	Mm.37395	NM_146118	ENSMUSG00000026819	Slc25a25	1110030N17Rik|MCSC|mKIAA1896	solute carrier family 25 (mitochondrial carrier, phosphate carrier), member 25	protein-coding
MACS_peak_1548	chr10	74674463	74675428	+	257.96	NA	promoter-TSS (NM_001145826)	promoter-TSS (NM_001145826)	127	NM_153406	74392	Mm.27716	NM_153406	ENSMUSG00000033444	Specc1l	4930470P14Rik|4932439K10Rik|9530057A13Rik|AI317249|Cytsa|mKIAA0376	sperm antigen with calponin homology and coiled-coil domains 1-like	protein-coding
MACS_peak_11393	chr2	130275806	130276473	+	257.84	NA	5' UTR (NM_001163688, exon 1 of 21)	5' UTR (NM_001163688, exon 1 of 21)	125	NM_001163688	19262	Mm.224246	NM_008980	ENSMUSG00000027303	Ptpra	Ptpa|Ptpalpha|Rptpalpha|Rptra|Rptralpha	protein tyrosine phosphatase, receptor type, A	protein-coding
MACS_peak_14453	chr5	31522833	31523367	+	257.75	NA	promoter-TSS (NM_008014)	promoter-TSS (NM_008014)	-182	NM_008014	14208	Mm.14501	NM_008014	ENSMUSG00000029147	Ppm1g	AI385652|Fin13	protein phosphatase 1G (formerly 2C), magnesium-dependent, gamma isoform	protein-coding
MACS_peak_15857	chr6	71443484	71444068	+	257.66	NA	promoter-TSS (NM_009543)	promoter-TSS (NM_009543)	-112	NM_009543	22644	Mm.422969	NM_009543	ENSMUSG00000052656	Rnf103	AW146237|AW212918|Zfp103|kf-1	ring finger protein 103	protein-coding
MACS_peak_18506	chr8	72273398	72274184	+	257.43	NA	promoter-TSS (NM_001200023)	promoter-TSS (NM_001200023)	70	NM_001200023	620419	Mm.460423	NM_001200023	ENSMUSG00000092260	Zfp963	-	zinc finger protein 963	protein-coding
MACS_peak_17477	chr7	88668085	88668605	+	256.89	NA	promoter-TSS (NR_045299)	promoter-TSS (NR_045299)	-91	NR_045299	100504421	Mm.217071	NR_045299	ENSMUSG00000097277	2900076A07Rik	WI1-1616M8.2	RIKEN cDNA 2900076A07 gene	ncRNA
MACS_peak_8649	chr17	56408625	56409065	+	256.89	NA	TTS (NM_174989)	TTS (NM_174989)	7345	NM_174989	106759	Mm.203952	NM_174989	ENSMUSG00000047123	Ticam1	AW046014|AW547018|TICAM-1|TRIF	toll-like receptor adaptor molecule 1	protein-coding
MACS_peak_20613	chrX	34137907	34138431	+	256.85	NA	promoter-TSS (NM_016783)	promoter-TSS (NM_016783)	-51	NM_016783	53328	Mm.9052	NM_016783	ENSMUSG00000006373	Pgrmc1	AA415812|HPR6.6|PPMR|Vema	progesterone receptor membrane component 1	protein-coding
MACS_peak_6314	chr14	122874560	122874767	+	255.88	NA	promoter-TSS (NM_009574)	promoter-TSS (NM_009574)	57	NM_009574	22772	Mm.308936	NM_009574	ENSMUSG00000061524	Zic2	HPE5|Ku	zinc finger protein of the cerebellum 2	protein-coding
MACS_peak_19396	chr9	21921444	21921950	+	255.88	NA	Intergenic	CpG	-3084	NM_170777	66126	Mm.29801	NM_170777	ENSMUSG00000013822	Elof1	1110011K10Rik	elongation factor 1 homolog (ELF1, S. cerevisiae)	protein-coding
MACS_peak_4965	chr13	24892924	24893274	+	255.88	NA	promoter-TSS (NM_024473)	promoter-TSS (NM_024473)	-427	NM_024473	79555	Mm.266668	NM_024473		BC005537	8030460C05Rik|C78201	cDNA sequence BC005537	protein-coding
MACS_peak_14109	chr4	150288360	150288920	+	255.73	NA	Intergenic	CpG	-4610	NM_020569	57320	Mm.277349	NM_020569	ENSMUSG00000028964	Park7	DJ-1|Dj1	Parkinson disease (autosomal recessive, early onset) 7	protein-coding
MACS_peak_9165	chr18	36092614	36092880	+	255.68	NA	Intergenic	Intergenic	-31737	NM_028707	74002	Mm.196944	NM_028707	ENSMUSG00000024347	Psd2	6330404E20Rik|AW125584|EFA6C	pleckstrin and Sec7 domain containing 2	protein-coding
MACS_peak_15494	chr5	152170836	152171138	+	255.45	NA	promoter-TSS (NR_045699)	promoter-TSS (NR_045699)	-263	NR_045700	625175	Mm.443286	NR_045699	ENSMUSG00000097321	1700028E10Rik	A630054D14|Gm6561	RIKEN cDNA 1700028E10 gene	ncRNA
MACS_peak_18495	chr8	71612273	71612863	+	255.35	NA	promoter-TSS (NM_007509)	promoter-TSS (NM_007509)	-67	NM_007509	11966	Mm.249096	NM_007509	ENSMUSG00000006273	Atp6v1b2	AI194269|AI790362|Atp6b2|HO57|R74844	ATPase, H+ transporting, lysosomal V1 subunit B2	protein-coding
MACS_peak_12604	chr3	103083134	103083759	+	254.46	NA	5' UTR (NM_053170, exon 1 of 20)	5' UTR (NM_053170, exon 1 of 20)	230	NM_001079830	94093	Mm.195036	NM_053170	ENSMUSG00000033014	Trim33	8030451N04Rik|AI413936|Ecto|Tif1g	tripartite motif-containing 33	protein-coding
MACS_peak_13129	chr4	43506142	43506466	+	254.46	NA	promoter-TSS (NR_001460)	promoter-TSS (NR_001460)	67	NM_001037913	622404	Mm.289109	NM_001037913	ENSMUSG00000028461	Ccdc107	-	coiled-coil domain containing 107	protein-coding
MACS_peak_15252	chr5	136410260	136410738	+	254.44	NA	promoter-TSS (NM_018871)	promoter-TSS (NM_018871)	12	NM_018871	22628	Mm.233813	NM_018871	ENSMUSG00000051391	Ywhag	14-3-3gamma|D7Bwg1348e	tyrosine 3-monooxygenase/tryptophan 5-monooxygenase activation protein, gamma polypeptide	protein-coding
MACS_peak_1312	chr10	34017089	34017503	+	254.06	NA	promoter-TSS (NM_030203)	promoter-TSS (NM_030203)	69	NM_030203	72480	Mm.21485	NM_030203	ENSMUSG00000039485	Tspyl4	2610102M01Rik|B230210I21Rik|D10Bwg0791e	TSPY-like 4	protein-coding
MACS_peak_12254	chr3	75361062	75361686	+	253.59	NA	promoter-TSS (NM_019745)	promoter-TSS (NM_019745)	-81	NM_009250	20713	Mm.41560	NM_009250		Serpini1	AI837402|Ns|PI-12|PI12|Spi17	serine (or cysteine) peptidase inhibitor, clade I, member 1	protein-coding
MACS_peak_2564	chr11	49838241	49838987	+	253.31	NA	promoter-TSS (NM_021540)	promoter-TSS (NM_021540)	-219	NM_021540	59044	Mm.359004	NM_021540	ENSMUSG00000020376	Rnf130	G1RZFP|G1rp|GOLIATH|GP	ring finger protein 130	protein-coding
MACS_peak_3148	chr11	78311084	78311626	+	253.28	NA	promoter-TSS (NM_001168521)	promoter-TSS (NM_001168521)	-99	NM_172795	237868	Mm.210332	NM_172795	ENSMUSG00000050132	Sarm1	A830091I15Rik|C78606|MyD885|Sarm	sterile alpha and HEAT/Armadillo motif containing 1	protein-coding
MACS_peak_4916	chr13	21826788	21827078	+	253.28	NA	promoter-TSS (NM_178210)	promoter-TSS (NM_178210)	-32	NM_178210	319159	Mm.486099	NM_178210		Hist1h4j	-	histone cluster 1, H4j	protein-coding
MACS_peak_6613	chr15	74583043	74583646	+	253.28	NA	promoter-TSS (NM_011838)	promoter-TSS (NM_011838)	65	NM_011838	23936	Mm.257067	NM_011838	ENSMUSG00000022594	Lynx1	AI838844|SLURP-2	Ly6/neurotoxin 1	protein-coding
MACS_peak_3217	chr11	84338844	84339360	+	253.28	NA	promoter-TSS (NR_038057)	promoter-TSS (NR_038057)	-60	NR_038057	78365	Mm.260345	NR_038057	ENSMUSG00000087211	Lhx1os	1500016L03Rik|Lhx1as	LIM homeobox 1, opposite strand	ncRNA
MACS_peak_14691	chr5	77334277	77334876	+	252.83	NA	promoter-TSS (NM_173765)	promoter-TSS (NM_173765)	-37	NM_173765	231326	Mm.39271	NM_173765	ENSMUSG00000055923	Aasdh	A230062G08Rik|A830035E16|Acsf4|U26	aminoadipate-semialdehyde dehydrogenase	protein-coding
MACS_peak_2874	chr11	68825684	68826118	+	252.83	NA	Intergenic	RLTR16|LTR|ERVK	-3512	NM_001281465	68964	Mm.285785	NM_001013256	ENSMUSG00000020898	Ctc1	1500010J02Rik|AAF-132|AAF132	CTS telomere maintenance complex component 1	protein-coding
MACS_peak_10717	chr2	35056645	35056957	+	252.83	NA	promoter-TSS (NM_026697)	promoter-TSS (NM_026697)	-161	NM_026697	68365	Mm.198264	NM_026697	ENSMUSG00000026878	Rab14	0610030G24Rik|2810475J17Rik|A830021G03Rik|AI314285|AI649155|D030017L14Rik	RAB14, member RAS oncogene family	protein-coding
MACS_peak_15153	chr5	125869902	125870604	+	252.83	NA	intron (NM_019639, intron 1 of 1)	CpG	134	NM_019639	22190	Mm.331	NM_019639	ENSMUSG00000008348	Ubc	2700054O04Rik|AI194771|Rps27a|TI-225|Uba52|Ubb	ubiquitin C	protein-coding
MACS_peak_15986	chr6	87800788	87801427	+	252.16	NA	promoter-TSS (NM_001109745)	promoter-TSS (NM_001109745)	-7	NM_001109745	12785	Mm.290251	NM_013493	ENSMUSG00000030057	Cnbp	AA408710|Cnbp1|Znf9	cellular nucleic acid binding protein	protein-coding
MACS_peak_738	chr1	145851085	145851689	+	252.13	NA	promoter-TSS (NM_009061)	promoter-TSS (NM_009061)	-108	NM_009061	19735	Mm.28262	NM_009061	ENSMUSG00000026360	Rgs2	GOS8	regulator of G-protein signaling 2	protein-coding
MACS_peak_11483	chr2	140496986	140497342	+	252.13	NA	promoter-TSS (NM_001172160)	promoter-TSS (NM_001172160)	48	NM_001172160	71436	Mm.426781	NM_178382	ENSMUSG00000051379	Flrt3	5530600M07Rik|C430047I10Rik|mKIAA1469	fibronectin leucine rich transmembrane protein 3	protein-coding
MACS_peak_17703	chr7	118226229	118227074	+	252.04	NA	promoter-TSS (NM_013507)	promoter-TSS (NM_013507)	-107	NM_013507	13690	Mm.185453	NM_013507	ENSMUSG00000005610	Eif4g2	AA589388|DAP-5|E130105L11Rik|Nat1|Natm1|p97	eukaryotic translation initiation factor 4, gamma 2	protein-coding
MACS_peak_8507	chr17	45710010	45710526	+	251.98	NA	promoter-TSS (NM_008302)	promoter-TSS (NM_008302)	-58	NM_008302	15516	Mm.2180	NM_008302	ENSMUSG00000023944	Hsp90ab1	90kDa|AL022974|C81438|Hsp84|Hsp84-1|Hsp90|Hspcb	heat shock protein 90 alpha (cytosolic), class B member 1	protein-coding
MACS_peak_10523	chr2	27395870	27396179	+	251.95	NA	Intergenic	CpG	25357	NM_080848	140858	Mm.28265	NM_080848	ENSMUSG00000026917	Wdr5	2410008O07Rik|AA408785|AA960360|Big|Big-3	WD repeat domain 5	protein-coding
MACS_peak_2904	chr11	69137110	69137731	+	251.74	NA	promoter-TSS (NM_001024206)	promoter-TSS (NM_001024206)	-45	NM_172560	216846	Mm.28774	NM_172560	ENSMUSG00000032782	Cntrob	9830165K03Rik|Lip8	centrobin, centrosomal BRCA2 interacting protein	protein-coding
MACS_peak_8361	chr17	34724283	34724813	+	251.54	NA	exon (NM_010929, exon 30 of 30)	exon (NM_010929, exon 30 of 30)	-2203	NM_134116	106512	Mm.26584	NM_134116	ENSMUSG00000034786	Gpsm3	AA960287|AGS4	G-protein signalling modulator 3 (AGS3-like, C. elegans)	protein-coding
MACS_peak_10379	chr2	21127286	21127710	+	251.42	NA	promoter-TSS (NM_027728)	promoter-TSS (NM_027728)	147	NM_177588	208967	Mm.268841	NM_177588	ENSMUSG00000048550	Thnsl1	AW413632	threonine synthase-like 1 (bacterial)	protein-coding
MACS_peak_2304	chr11	5661854	5662657	+	251.24	NA	5' UTR (NM_001077661, exon 1 of 6)	5' UTR (NM_001077661, exon 1 of 6)	102	NR_015577	76508	Mm.260203	NR_015577	ENSMUSG00000083844	2210015D19Rik	1600028I17Rik|AI596465	RIKEN cDNA 2210015D19 gene	ncRNA
MACS_peak_7843	chr17	6079522	6080145	+	250.99	NA	promoter-TSS (NM_001111017)	promoter-TSS (NM_001111017)	5	NM_181392	66467	Mm.303441	NM_181392	ENSMUSG00000034345	Gtf2h5	2700017P07Rik|2810432H05Rik|D17Wsu155e	general transcription factor IIH, polypeptide 5	protein-coding
MACS_peak_8054	chr17	24665046	24665414	+	250.31	NA	promoter-TSS (NM_001172114)	promoter-TSS (NM_001172114)	34	NR_045289	75614	Mm.440235	NR_045289	ENSMUSG00000093565	Rab26os	2610019E17Rik	RAB26, member RAS oncogene family, opposite strand	ncRNA
MACS_peak_11424	chr2	132078744	132079256	+	250.13	NA	promoter-TSS (NM_011045)	promoter-TSS (NM_011045)	-84	NM_011045	18538	Mm.7141	NM_011045	ENSMUSG00000027342	Pcna	-	proliferating cell nuclear antigen	protein-coding
MACS_peak_16134	chr6	113369099	113369577	+	249.90	NA	promoter-TSS (NM_001033204)	promoter-TSS (NM_001033204)	-4	NM_001033204	101122	Mm.31204	NM_001033204	ENSMUSG00000051169	Rpusd3	AI527266	RNA pseudouridylate synthase domain containing 3	protein-coding
MACS_peak_12179	chr3	54915948	54916231	+	249.73	NA	promoter-TSS (NM_001144988)	promoter-TSS (NM_001144988)	1	NM_001144987	229285	Mm.235523	NM_144895	ENSMUSG00000036580	Spg20	AI840044|C79168|SPARTIN|TAHCCP1|mKIAA0610	spastic paraplegia 20, spartin (Troyer syndrome) homolog (human)	protein-coding
MACS_peak_1113	chr1	192849947	192850489	+	249.27	NA	promoter-TSS (NM_001081259)	promoter-TSS (NM_001081259)	-149	NM_001081259	226844	Mm.134053	NM_001081259	ENSMUSG00000066595	Mfsd7b	9630055N22Rik|FLVCR|Flvcr1	major facilitator superfamily domain containing 7B	protein-coding
MACS_peak_16988	chr7	31092912	31093994	+	248.67	NA	promoter-TSS (NM_198027)	promoter-TSS (NM_198027)	-319	NM_198027	233065	Mm.276277	NM_198027	ENSMUSG00000042831	Alkbh6	AI839550|Abh6|C130099A02	alkB, alkylation repair homolog 6 (E. coli)	protein-coding
MACS_peak_20216	chr9	106149980	106150478	+	248.66	NA	promoter-TSS (NM_020559)	promoter-TSS (NM_020559)	56	NM_020559	11655	Mm.290578	NM_020559	ENSMUSG00000032786	Alas1	ALAS|ALAS-N|Alas-1|Alas-h	aminolevulinic acid synthase 1	protein-coding
MACS_peak_1495	chr10	62562233	62563321	+	248.40	NA	promoter-TSS (NM_016864)	promoter-TSS (NM_016864)	-127	NM_016864	53404	Mm.228661	NM_016864	ENSMUSG00000036816	Atoh7	Math5|bHLHa13	atonal homolog 7 (Drosophila)	protein-coding
MACS_peak_7330	chr16	16983142	16983690	+	248.40	NA	promoter-TSS (NM_001038663)	promoter-TSS (NM_001038663)	-59	NM_011949	26413	Mm.196581	NM_011949	ENSMUSG00000063358	Mapk1	9030612K14Rik|AA407128|AU018647|C78273|ERK|Erk2|MAPK2|PRKM2|Prkm1|p41mapk|p42mapk	mitogen-activated protein kinase 1	protein-coding
MACS_peak_19914	chr9	69836969	69837491	+	248.40	NA	promoter-TSS (NM_016787)	promoter-TSS (NM_016787)	-43	NM_016787	12175	Mm.159777	NM_016787		Bnip2	5730523P12Rik|BNIP2beta|Nip21	BCL2/adenovirus E1B interacting protein 2	protein-coding
MACS_peak_5198	chr13	55206587	55206872	+	248.40	NA	promoter-TSS (NM_012017)	promoter-TSS (NM_012017)	59	NM_012017	26919	Mm.22795	NM_012017	ENSMUSG00000021481	Zfp346	Jaz|Znf346	zinc finger protein 346	protein-coding
MACS_peak_14100	chr4	149610779	149611619	+	248.40	NA	promoter-TSS (NM_023119)	promoter-TSS (NM_023119)	-107	NM_023119	13806	Mm.70666	NM_023119	ENSMUSG00000063524	Eno1	0610008I15|AL022784|Eno-1|MBP-1	enolase 1, alpha non-neuron	protein-coding
MACS_peak_4939	chr13	23643353	23643674	+	248.31	NA	promoter-TSS (NM_175655)	promoter-TSS (NM_175655)	-1	NM_175655	319157	Mm.442307	NM_175655		Hist1h4f	-	histone cluster 1, H4f	protein-coding
MACS_peak_89	chr1	33726482	33726899	+	248.10	NA	promoter-TSS (NR_033199)	promoter-TSS (NR_033199)	21	NR_033199	67503	Mm.87069	NM_026204	ENSMUSG00000044744	1700001G17Rik	-	RIKEN cDNA 1700001G17 gene	ncRNA
MACS_peak_16095	chr6	108162800	108163328	+	248.02	NA	promoter-TSS (NM_010585)	promoter-TSS (NM_010585)	-26	NM_010585	16438	Mm.227912	NM_010585	ENSMUSG00000030102	Itpr1	D6Pas2|ENSMUSG00000072853|Gm10429|IP3R1|InsP3R|Ip3r|Itpr-1|P400|Pcp-1|Pcp1|opt	inositol 1,4,5-trisphosphate receptor 1	protein-coding
MACS_peak_4128	chr12	8680633	8681305	+	248.01	NA	promoter-TSS (NM_001160219)	promoter-TSS (NM_001160219)	29	NM_001160222	80913	Mm.341243	NM_030723	ENSMUSG00000020594	Pum2	5730503J23Rik|Pumm2|mKIAA0235	pumilio RNA-binding family member 2	protein-coding
MACS_peak_15887	chr6	72389259	72389665	+	247.93	NA	promoter-TSS (NM_145569)	promoter-TSS (NM_145569)	90	NM_145569	232087	Mm.29815	NM_145569	ENSMUSG00000053907	Mat2a	D630045P18Rik	methionine adenosyltransferase II, alpha	protein-coding
MACS_peak_2732	chr11	59021574	59022149	+	247.91	NA	promoter-TSS (NM_024210)	promoter-TSS (NM_024210)	-2	NM_024210	67862	Mm.358708	NM_024210	ENSMUSG00000020441	2310033P09Rik	Mmtag2	RIKEN cDNA 2310033P09 gene	protein-coding
MACS_peak_12458	chr3	94846307	94846744	+	247.91	NA	promoter-TSS (NM_001282017)	promoter-TSS (NM_001282017)	11	NM_001282017	19185	Mm.2261	NM_008951	ENSMUSG00000005625	Psmd4	Af1|Mcb1|angiocidin	proteasome (prosome, macropain) 26S subunit, non-ATPase, 4	protein-coding
MACS_peak_2662	chr11	54673858	54674517	+	247.54	NA	promoter-TSS (NM_029327)	promoter-TSS (NM_029327)	-94	NM_029327	75530	Mm.83578	NM_029327		Lyrm7	1700024C24Rik|9330147L21Rik	LYR motif containing 7	protein-coding
MACS_peak_5495	chr13	100286289	100286787	+	247.54	NA	promoter-TSS (NM_008634)	promoter-TSS (NM_008634)	19	NM_008634	17755	Mm.4173	NM_008634	ENSMUSG00000052727	Map1b	A230055D22|AI843217|LC1|MAP5|Mtap-5|Mtap1b|Mtap5	microtubule-associated protein 1B	protein-coding
MACS_peak_14972	chr5	116009387	116009668	+	247.54	NA	promoter-TSS (NM_007475)	promoter-TSS (NM_007475)	51	NM_007475	11837	Mm.5286	NM_007475	ENSMUSG00000067274	Rplp0	36B4|Arbp|L10E	ribosomal protein, large, P0	protein-coding
MACS_peak_2663	chr11	54679619	54680458	+	247.04	NA	promoter-TSS (NM_008248)	promoter-TSS (NM_008248)	98	NM_008248	15254	Mm.425	NM_008248	ENSMUSG00000020267	Hint1	AA673479|Hint|Ipk1|PKCI-1|PRKCNH1	histidine triad nucleotide binding protein 1	protein-coding
MACS_peak_605	chr1	129765132	129765639	+	246.53	NA	promoter-TSS (NM_178690)	promoter-TSS (NM_178690)	35	NM_178690	226407	Mm.489713	NM_178690	ENSMUSG00000036104	Rab3gap1	1700003B17Rik|4732493F09Rik|AL117896|Rab3gap|p130	RAB3 GTPase activating protein subunit 1	protein-coding
MACS_peak_12866	chr3	144233533	144233876	+	246.36	NA	promoter-TSS (NM_011828)	promoter-TSS (NM_011828)	313	NM_053102	93684	Mm.29812	NM_053102	ENSMUSG00000037072	Sep15	9430015P09Rik	selenoprotein	protein-coding
MACS_peak_894	chr1	171461675	171461968	+	246.12	NA	promoter-TSS (NM_023284)	promoter-TSS (NM_023284)	-226	NM_023284	66977	Mm.151315	NM_023284	ENSMUSG00000026683	Nuf2	2410003C07Rik|AU044112|C85691|Cdca1|NUF2R	NUF2, NDC80 kinetochore complex component, homolog (S. cerevisiae)	protein-coding
MACS_peak_12063	chr3	30691706	30692421	+	246.06	NA	5' UTR (NM_027016, exon 1 of 8)	5' UTR (NM_027016, exon 1 of 8)	265	NM_027016	69276	Mm.26017	NM_027016	ENSMUSG00000027706	Sec62	3100002M17Rik|AI844545|AW545092|Dtrp1|HTP1|Tloc1	SEC62 homolog (S. cerevisiae)	protein-coding
MACS_peak_2724	chr11	58767489	58768803	+	245.81	NA	promoter-TSS (NM_178218)	promoter-TSS (NM_178218)	-41	NM_178218	319162	Mm.212549	NM_178218	ENSMUSG00000078851	Hist3h2a	-	histone cluster 3, H2a	protein-coding
MACS_peak_14886	chr5	111759381	111759973	+	245.40	NA	promoter-TSS (NM_019640)	promoter-TSS (NM_019640)	-106	NM_019640	56305	Mm.200516	NM_019640	ENSMUSG00000050017	Pitpnb	AI256223|AU040890	phosphatidylinositol transfer protein, beta	protein-coding
MACS_peak_7551	chr16	36071406	36072322	+	245.40	NA	promoter-TSS (NM_027342)	promoter-TSS (NM_027342)	118	NM_001159421	381045	Mm.310434	NM_198645	ENSMUSG00000075229	Ccdc58	A930007B11Rik|AI413631	coiled-coil domain containing 58	protein-coding
MACS_peak_8432	chr17	35804264	35804825	+	245.11	NA	promoter-TSS (NM_175137)	promoter-TSS (NM_175137)	-7	NM_175137	68915	Mm.32002	NM_175137	ENSMUSG00000038838	Vars2	1190004I24Rik|Vars2l|mKIAA1885	valyl-tRNA synthetase 2, mitochondrial (putative)	protein-coding
MACS_peak_13603	chr4	119405946	119406551	+	244.67	NA	Intergenic	CpG	-74698	NM_008191	14916	Mm.278	NM_008191	ENSMUSG00000032978	Guca2b	AV066530|Gcap2|Ugn	guanylate cyclase activator 2b (retina)	protein-coding
MACS_peak_17331	chr7	67149804	67150189	+	244.45	NA	promoter-TSS (NM_013670)	promoter-TSS (NM_013670)	46	NM_013670	20646	Mm.274995	NM_013670	ENSMUSG00000000948	Snrpn	2410045I01Rik|HCERN3|Peg4|Pwcr1|SMN	small nuclear ribonucleoprotein N	protein-coding
MACS_peak_7360	chr16	17921848	17922402	+	244.34	NA	Intergenic	CpG	6187	NM_153150	13358	Mm.229291	NM_153150	ENSMUSG00000003528	Slc25a1	1300019P08Rik|2610100G11Rik|AI194714|Ctp|Dgsj|Slc20a3	solute carrier family 25 (mitochondrial carrier, citrate transporter), member 1	protein-coding
MACS_peak_4966	chr13	24923164	24923807	+	244.21	NA	promoter-TSS (NM_019551)	promoter-TSS (NM_019551)	-43	NM_019551	56196	Mm.427162	NM_019551	ENSMUSG00000035958	Tdp2	D13Ertd656e|Ttrap	tyrosyl-DNA phosphodiesterase 2	protein-coding
MACS_peak_9788	chr19	8797394	8798175	+	244.09	NA	promoter-TSS (NR_002896)	promoter-TSS (NR_002896)	75	NM_001161413	17254	Mm.4114	NM_008577	ENSMUSG00000010095	Slc3a2	4F2|4F2HC|AI314110|Cd98|Ly-10|Ly-m10|Ly10|Mdu1|Mgp-2hc|NACAE	solute carrier family 3 (activators of dibasic and neutral amino acid transport), member 2	protein-coding
MACS_peak_8618	chr17	56084143	56085039	+	243.76	NA	promoter-TSS (NM_146249)	promoter-TSS (NM_146249)	91	NM_146249	240120	Mm.441018	NM_146249		Zfp119b	-	zinc finger protein 119b	protein-coding
MACS_peak_4811	chr12	114252222	114252581	+	243.74	NA	promoter-TSS (NM_001291445)	promoter-TSS (NM_001291445)	-318	NM_001291445	217893	Mm.35754	NM_198165	ENSMUSG00000021143	Pacs2	6720425G15Rik|AW208651|AW489976|E230011J22|Pacs1l|mKIAA0602	phosphofurin acidic cluster sorting protein 2	protein-coding
MACS_peak_9500	chr18	80666761	80667100	+	243.62	NA	promoter-TSS (NM_026295)	promoter-TSS (NM_026295)	-524	NM_026295	67655	Mm.312893	NM_026295	ENSMUSG00000033323	Ctdp1	4930563P03Rik|AW553592	CTD (carboxy-terminal domain, RNA polymerase II, polypeptide A) phosphatase, subunit 1	protein-coding
MACS_peak_14490	chr5	33994761	33995079	+	243.43	NA	TTS (NM_026698)	TTS (NM_026698)	303	NM_001289724	20492	Mm.4172	NM_009193	ENSMUSG00000004642	Slbp	-	stem-loop binding protein	protein-coding
MACS_peak_6694	chr15	76545530	76546425	+	243.33	NA	TTS (NM_145471)	TTS (NM_145471)	4807	NM_145471	223664	Mm.277582	NM_145471	ENSMUSG00000033728	Lrrc14	E130306I01Rik|mKIAA0014	leucine rich repeat containing 14	protein-coding
MACS_peak_15985	chr6	87788561	87789177	+	243.31	NA	promoter-TSS (NM_133934)	promoter-TSS (NM_133934)	-116	NM_133934	57905	Mm.241546	NM_133934	ENSMUSG00000030056	Isy1	5830446M03Rik|AI181014|AU020769	ISY1 splicing factor homolog (S. cerevisiae)	protein-coding
MACS_peak_8816	chr17	80882091	80882699	+	243.14	NA	Intergenic	CpG	-2602	NM_009231	20662	Mm.60975	NM_009231	ENSMUSG00000024241	Sos1	4430401P03Rik|9630010N06|AI449023	son of sevenless homolog 1 (Drosophila)	protein-coding
MACS_peak_19339	chr9	20756953	20757666	+	243.00	NA	promoter-TSS (NM_001199433)	promoter-TSS (NM_001199433)	114	NM_010066	13433	Mm.128580	NM_010066	ENSMUSG00000004099	Dnmt1	Cxxc9|Dnmt|Dnmt1o|MCMT|MTase|Met-1|Met1|MommeD2|m.MmuI	DNA methyltransferase (cytosine-5) 1	protein-coding
MACS_peak_811	chr1	161161859	161162530	+	242.36	NA	promoter-TSS (NM_011931)	promoter-TSS (NM_011931)	-263	NM_011931	26374	Mm.328135	NM_011931	ENSMUSG00000040782	Rfwd2	AI316802|C80879|Cop1	ring finger and WD repeat domain 2	protein-coding
MACS_peak_19389	chr9	21856220	21856693	+	242.14	NA	promoter-TSS (NM_010487)	promoter-TSS (NM_010487)	11	NM_010487	15571	Mm.390167	NM_010487	ENSMUSG00000003410	Elavl3	2600009P04Rik|Huc|PLE21|mHuC	ELAV (embryonic lethal, abnormal vision, Drosophila)-like 3 (Hu antigen C)	protein-coding
MACS_peak_17745	chr7	125272872	125273185	+	242.07	NA	5' UTR (NM_019419, exon 1 of 6)	5' UTR (NM_019419, exon 1 of 6)	111	NM_019419	54208	Mm.29924	NM_019419	ENSMUSG00000030654	Arl6ip1	AIP-6|AL022945|ARMER|AU042858|Aip-1|Arl6ip|C85138|mKIAA0069	ADP-ribosylation factor-like 6 interacting protein 1	protein-coding
MACS_peak_11520	chr2	148557954	148558259	+	241.79	NA	promoter-TSS (NM_019632)	promoter-TSS (NM_019632)	50	NM_019632	17957	Mm.274308	NM_019632	ENSMUSG00000027438	Napb	Brp14|E161|I47|SNARE|b-SNAP	N-ethylmaleimide sensitive fusion protein attachment protein beta	protein-coding
MACS_peak_14970	chr5	115939780	115940421	+	241.75	NA	Intergenic	CpG	-5607	NM_133760	75387	Mm.332616	NM_133760	ENSMUSG00000029524	Sirt4	4930596O17Rik	sirtuin 4	protein-coding
MACS_peak_16875	chr7	28337844	28338136	+	241.75	NA	promoter-TSS (NM_175107)	promoter-TSS (NM_175107)	141	NM_011116	18807	Mm.6483	NM_011116	ENSMUSG00000003363	Pld3	Sam-9	phospholipase D family, member 3	protein-coding
MACS_peak_20042	chr9	88442811	88443121	+	240.95	NA	5' UTR (NM_001142943, exon 1 of 6)	5' UTR (NM_001142943, exon 1 of 6)	108	NM_001163061	71640	Mm.259988	NM_001142943	ENSMUSG00000032425	Zfp949	4930422I07Rik	zinc finger protein 949	protein-coding
MACS_peak_20298	chr9	108241357	108241780	+	240.95	NA	5' UTR (NM_008160, exon 1 of 2)	5' UTR (NM_008160, exon 1 of 2)	157	NM_008160	14775	Mm.1090	NM_008160	ENSMUSG00000063856	Gpx1	AI195024|AL033363|CGPx|GPx-1|GSHPx-1|Gpx	glutathione peroxidase 1	protein-coding
MACS_peak_16465	chr6	146525746	146526679	+	240.87	NA	promoter-TSS (NM_026218)	promoter-TSS (NM_026218)	145	NM_138757	71177	Mm.271774	NM_138757	ENSMUSG00000040250	Asun	4933424B01Rik|Spata30	asunder, spermatogenesis regulator	protein-coding
MACS_peak_3210	chr11	84326838	84327391	+	240.77	NA	promoter-TSS (NM_019816)	promoter-TSS (NM_019816)	-111	NM_019816	56321	Mm.257482	NM_019816	ENSMUSG00000018697	Aatf	4933415H02Rik|5830465M17Rik|Che-1|Trb	apoptosis antagonizing transcription factor	protein-coding
MACS_peak_12854	chr3	138738316	138738677	+	240.77	NA	promoter-TSS (NM_001040690)	promoter-TSS (NM_001040690)	-331	NM_001040690	229877	Mm.28893	NM_145544	ENSMUSG00000028149	Rap1gds1	BC011279|GDS1	RAP1, GTP-GDP dissociation stimulator 1	protein-coding
MACS_peak_19783	chr9	59334344	59334957	+	240.77	NA	promoter-TSS (NM_019927)	promoter-TSS (NM_019927)	-469	NM_019927	23806	Mm.305925	NM_019927	ENSMUSG00000025234	Arih1	AU021774|Ari|Ari1|Hari|Hhari|Ubch7bp|Uip77	ariadne ubiquitin-conjugating enzyme E2 binding protein homolog 1 (Drosophila)	protein-coding
MACS_peak_3608	chr11	101502527	101503134	+	240.63	NA	Intergenic	CpG	13567	NM_025654	66599	Mm.41449	NM_025654	ENSMUSG00000010362	Rdm1	2410008M22Rik|AW212028|Rad52b	RAD52 motif 1	protein-coding
MACS_peak_3612	chr11	101519053	101519625	+	240.63	NA	Intergenic	CpG	-7516	NM_025404	80981	Mm.266840	NM_025404	ENSMUSG00000034936	Arl4d	1110036H21Rik|ARL6|AW456149|Arf4l|Arfl4|Arl5	ADP-ribosylation factor-like 4D	protein-coding
MACS_peak_3472	chr11	97702187	97702852	+	240.63	NA	intron (NM_001080935, intron 1 of 2)	intron (NM_001080935, intron 1 of 2)	425	NM_001080935	68127	Mm.110270	NM_001080935	ENSMUSG00000089676	B230217C12Rik	AI840637	RIKEN cDNA B230217C12 gene	protein-coding
MACS_peak_4628	chr12	92828168	92828505	+	240.52	NA	promoter-TSS (NM_031391)	promoter-TSS (NM_031391)	-247	NM_031391	83602	Mm.275728	NM_031391	ENSMUSG00000020962	Gtf2a1	6330549H03Rik|AA536742|AA959775|AW060250|TfIIAa/b|Tfiia1	general transcription factor II A, 1	protein-coding
MACS_peak_16467	chr6	146590728	146591306	+	240.31	NA	promoter-TSS (NM_025315)	promoter-TSS (NM_025315)	-84	NM_025315	108098	Mm.26212	NM_025315	ENSMUSG00000030291	Med21	0610007L03Rik|AI449604|D19234|D6Ertd782e|Srb7|Surb7	mediator complex subunit 21	protein-coding
MACS_peak_13028	chr4	28740188	28740472	+	240.22	NA	promoter-TSS (NM_001122889)	promoter-TSS (NM_001122889)	35	NM_001122889	13841	Mm.257266	NM_010141	ENSMUSG00000028289	Epha7	Cek11|Ebk|Ehk3|Hek11|Mdk1	Eph receptor A7	protein-coding
MACS_peak_2302	chr11	5607478	5607865	+	240.19	NA	promoter-TSS (NM_026080)	promoter-TSS (NM_026080)	31	NM_026080	64660	Mm.7328	NM_026080	ENSMUSG00000020477	Mrps24	3110030K20Rik|AI414579|Rpms24	mitochondrial ribosomal protein S24	protein-coding
MACS_peak_15073	chr5	122952397	122952955	+	240.09	NA	promoter-TSS (NR_027838)	promoter-TSS (NR_027838)	-442	NR_027838	11938	Mm.227583	NM_009722	ENSMUSG00000029467	Atp2a2	9530097L16Rik|D5Wsu150e|SERCA2|SERCA2B|mKIAA4195	ATPase, Ca++ transporting, cardiac muscle, slow twitch 2	protein-coding
MACS_peak_6286	chr14	122196736	122197885	+	240.07	NA	promoter-TSS (NM_134074)	promoter-TSS (NM_134074)	-354	NM_134074	105445	Mm.441054	NM_134074	ENSMUSG00000025558	Dock9	AA959601|AW538057|B230309H04Rik|D14Wsu89e|Zizimin1|mKIAA1058	dedicator of cytokinesis 9	protein-coding
MACS_peak_15797	chr6	54942597	54942977	+	239.98	NA	promoter-TSS (NM_026637)	promoter-TSS (NM_026637)	74	NM_026637	110175	Mm.294708	NM_026637		Ggct	A030007L17Rik|AA673177|Gctg|Ggc	gamma-glutamyl cyclotransferase	protein-coding
MACS_peak_7917	chr17	13153077	13153905	+	239.44	NA	promoter-TSS (NM_009338)	promoter-TSS (NM_009338)	100	NM_009338	110460	Mm.439711	NM_009338	ENSMUSG00000023832	Acat2	AW742799|Tcp-1x|Tcp1-rs1	acetyl-Coenzyme A acetyltransferase 2	protein-coding
MACS_peak_3401	chr11	95936733	95937074	+	239.43	NA	promoter-TSS (NM_001161419)	promoter-TSS (NM_001161419)	42	NM_001161419	11951	Mm.258	NM_007506		Atp5g1	-	ATP synthase, H+ transporting, mitochondrial F0 complex, subunit C1 (subunit 9)	protein-coding
MACS_peak_10427	chr2	25174324	25174984	+	239.25	NA	promoter-TSS (NM_008169)	promoter-TSS (NM_008169)	53	NM_008169	14810	Mm.278672	NM_008169	ENSMUSG00000026959	Grin1	GluN1|GluRdelta1|GluRzeta1|M100174|NMD-R1|NMDAR1|NR1|Nmdar|Rgsc174	glutamate receptor, ionotropic, NMDA1 (zeta 1)	protein-coding
MACS_peak_12895	chr3	153575715	153576353	+	239.04	NA	promoter-TSS (NM_001163478)	promoter-TSS (NM_001163478)	-104	NR_028094	19352	Mm.277831	NM_011231	ENSMUSG00000038975	Rabggtb	-	Rab geranylgeranyl transferase, b subunit	protein-coding
MACS_peak_5292	chr13	64471425	64472047	+	238.99	NA	promoter-TSS (NM_009984)	promoter-TSS (NM_009984)	-122	NM_009984	13039	Mm.930	NM_009984	ENSMUSG00000021477	Ctsl	1190035F06Rik|Ctsl1|MEP|fs|nkt	cathepsin L	protein-coding
MACS_peak_835	chr1	164478536	164479010	+	238.99	NA	promoter-TSS (NM_144877)	promoter-TSS (NM_144877)	-297	NM_144877	71449	Mm.270569	NM_144877		Mettl13	5630401D24Rik	methyltransferase like 13	protein-coding
MACS_peak_10240	chr19	55173775	55174258	+	238.87	NA	promoter-TSS (NM_008149)	promoter-TSS (NM_008149)	-79	NM_008149	14732	Mm.210196	NM_008149	ENSMUSG00000024978	Gpam	GPAT|GPAT1	glycerol-3-phosphate acyltransferase, mitochondrial	protein-coding
MACS_peak_14160	chr4	154272956	154273506	+	238.87	NA	promoter-TSS (NM_025582)	promoter-TSS (NM_025582)	-79	NM_025582	66469	Mm.41868	NM_025582	ENSMUSG00000029059	Fam213b	2810405K02Rik|AI836168|PM/PGFS	family with sequence similarity 213, member B	protein-coding
MACS_peak_19767	chr9	57787701	57788302	+	238.54	NA	promoter-TSS (NM_011352)	promoter-TSS (NM_011352)	59	NM_011352	20361	Mm.335187	NM_011352	ENSMUSG00000038264	Sema7a	2900057C09Rik|CDw108|H-Sema-L|M-Sema-L|Semal	sema domain, immunoglobulin domain (Ig), and GPI membrane anchor, (semaphorin) 7A	protein-coding
MACS_peak_2470	chr11	31770817	31771046	+	238.42	NA	promoter-TSS (NM_001290676)	promoter-TSS (NM_001290676)	-9	NM_001290676	67579	Mm.339792	NM_026252	ENSMUSG00000020300	Cpeb4	Cpe-bp4|Cpeb-4|mCPEB-4	cytoplasmic polyadenylation element binding protein 4	protein-coding
MACS_peak_6452	chr15	36936874	36937499	+	238.16	NA	promoter-TSS (NM_026521)	promoter-TSS (NM_026521)	-29	NM_026521	68036	Mm.371631	NM_026521	ENSMUSG00000062397	Zfp706	3110006P09Rik|AA793007|AW536850|C77232|Znf706	zinc finger protein 706	protein-coding
MACS_peak_3553	chr11	100258884	100259179	+	237.92	NA	promoter-TSS (NM_010593)	promoter-TSS (NM_010593)	73	NM_010593	16480	Mm.299774	NM_010593	ENSMUSG00000001552	Jup	Ctnng|D930025P04Rik|PG	junction plakoglobin	protein-coding
MACS_peak_13725	chr4	128735039	128735517	+	237.77	NA	promoter-TSS (NM_029219)	promoter-TSS (NM_029219)	-237	NM_029219	75234	Mm.259672	NM_029219	ENSMUSG00000028793	Rnf19b	4930534K13Rik|4930555L03Rik|Ibrdc3	ring finger protein 19B	protein-coding
MACS_peak_1659	chr10	79516304	79516624	+	237.33	NA	promoter-TSS (NM_001037741)	promoter-TSS (NM_001037741)	231	NM_008162	625249	Mm.332810	NM_008162	ENSMUSG00000075706	Gpx4	GPx-4|GSHPx-4|PHGPx|mtPHGPx|snGPx	glutathione peroxidase 4	protein-coding
MACS_peak_19842	chr9	64021095	64021396	+	237.24	NA	promoter-TSS (NM_026507)	promoter-TSS (NM_026507)	51	NM_024212	67891	Mm.280083	NM_024212	ENSMUSG00000032399	Rpl4	2010004J23Rik	ribosomal protein L4	protein-coding
MACS_peak_13986	chr4	138866421	138866919	+	237.23	NA	promoter-TSS (NM_145384)	promoter-TSS (NM_145384)	11	NM_025337	110198	Mm.482154	NM_025337		Akr7a5	0610025K21Rik|Afar|Afar1|Akr7a2	aldo-keto reductase family 7, member A5 (aflatoxin aldehyde reductase)	protein-coding
MACS_peak_13751	chr4	129296011	129296695	+	237.23	NA	promoter-TSS (NM_198026)	promoter-TSS (NM_198026)	-16	NM_198026	230767	Mm.441132	NM_198026	ENSMUSG00000040795	Iqcc	BC026978	IQ motif containing C	protein-coding
MACS_peak_1571	chr10	75398298	75398912	+	237.20	NA	5' UTR (NM_175329, exon 1 of 4)	5' UTR (NM_175329, exon 1 of 4)	287	NM_175329	103172	Mm.333849	NM_175329	ENSMUSG00000049422	Chchd10	1620401E04Rik|AI267078|Ndg2	coiled-coil-helix-coiled-coil-helix domain containing 10	protein-coding
MACS_peak_12332	chr3	88228560	88229130	+	237.20	NA	5' UTR (NM_001281795, exon 1 of 4)	5' UTR (NM_001281795, exon 1 of 4)	211	NM_001281795	229517	Mm.301740	NM_178696	ENSMUSG00000050144	Slc25a44	6720482A19|B430110G05Rik	solute carrier family 25, member 44	protein-coding
MACS_peak_4026	chr11	120094120	120094419	+	237.02	NA	promoter-TSS (NM_198423)	promoter-TSS (NM_198423)	8	NM_198423	268515	Mm.309498	NM_198423	ENSMUSG00000039741	Bahcc1	B930044J06|BC060615	BAH domain and coiled-coil containing 1	protein-coding
MACS_peak_6605	chr15	74502812	74503157	+	236.84	NA	promoter-TSS (NM_001276684)	promoter-TSS (NM_001276684)	16	NM_001276684	11838	Mm.491310	NM_018790	ENSMUSG00000022602	Arc	Arc3.1|C86064|arg3.1|mArc	activity regulated cytoskeletal-associated protein	protein-coding
MACS_peak_4949	chr13	23714164	23714591	+	236.29	NA	promoter-TSS (NM_015787)	promoter-TSS (NM_015787)	50	NM_015787	50709	Mm.170587	NM_015787		Hist1h1e	H1-4|H1e|H1f4|H1s-4|H1var2	histone cluster 1, H1e	protein-coding
MACS_peak_11408	chr2	130985622	130986176	+	235.82	NA	promoter-TSS (NM_026091)	promoter-TSS (NM_026091)	-143	NM_026091	67326	Mm.27711	NM_026091	ENSMUSG00000027327	1700037H04Rik	-	RIKEN cDNA 1700037H04 gene	protein-coding
MACS_peak_4958	chr13	23852922	23853194	+	235.75	NA	promoter-TSS (NM_178192)	promoter-TSS (NM_178192)	60	NM_178192	326619	Mm.228709	NM_178192		Hist1h4a	-	histone cluster 1, H4a	protein-coding
MACS_peak_8549	chr17	46841732	46842386	+	235.62	NA	promoter-TSS (NM_009358)	promoter-TSS (NM_009358)	-108	NM_009358	21770	Mm.295009	NM_009358	ENSMUSG00000059409	Ppp2r5d	B'delta|TEG-271|Tex271	protein phosphatase 2, regulatory subunit B', delta	protein-coding
MACS_peak_8615	chr17	56031155	56032016	+	235.48	NA	promoter-TSS (NM_145490)	promoter-TSS (NM_145490)	69	NM_145490	224893	Mm.294853	NM_145490		Zfp959	-	zinc finger protein 959	protein-coding
MACS_peak_7777	chr16	94511748	94512234	+	235.44	NA	Intergenic	Intergenic	-2528	NM_139145	110948	Mm.30921	NM_139145	ENSMUSG00000040820	Hlcs	410I21.SP6|D16Jhu34	holocarboxylase synthetase (biotin- [propriony-Coenzyme A-carboxylase (ATP-hydrolysing)] ligase)	protein-coding
MACS_peak_15259	chr5	136592317	136592792	+	235.44	NA	promoter-TSS (NM_011293)	promoter-TSS (NM_011293)	-7	NM_011293	20022	Mm.4896	NM_011293	ENSMUSG00000039771	Polr2j	14.5kDa|Polr2i|Rpb11a|Rpo2-4	polymerase (RNA) II (DNA directed) polypeptide J	protein-coding
MACS_peak_14008	chr4	140634035	140634337	+	235.40	NA	promoter-TSS (NM_025383)	promoter-TSS (NM_025383)	74	NM_025383	66147	Mm.21187	NM_025383	ENSMUSG00000028923	Necap2	1110005F07Rik|AA409105|C78898	NECAP endocytosis associated 2	protein-coding
MACS_peak_834	chr1	164407872	164408332	+	235.28	NA	promoter-TSS (NM_001038619)	promoter-TSS (NM_001038619)	59	NM_001038619	103967	Mm.441620	NM_172646	ENSMUSG00000040265	Dnm3	9630020E24Rik|AW061159|B230343F03Rik|C530045C17|mKIAA0820	dynamin 3	protein-coding
MACS_peak_18347	chr8	35171146	35171882	+	235.23	NA	promoter-TSS (NM_001293758)	promoter-TSS (NM_001293758)	252	NM_001293759	22428	Mm.150373	NM_011722	ENSMUSG00000031516	Dctn6	AU044699|WS-3|p27	dynactin 6	protein-coding
MACS_peak_14555	chr5	37632812	37633440	+	235.18	NA	promoter-TSS (NM_001136058)	promoter-TSS (NM_001136058)	-171	NM_001136058	12933	Mm.290995	NM_007765	ENSMUSG00000029121	Crmp1	CRMP-1|DRP-1|Dpysl1|ULIP-3|Ulip3	collapsin response mediator protein 1	protein-coding
MACS_peak_17297	chr7	54101006	54101405	+	234.83	NA	promoter-TSS (NM_010699)	promoter-TSS (NM_010699)	31	NR_102727	16828	Mm.29324	NM_010699	ENSMUSG00000063229	Ldha	Ldh1|Ldhm|l7R2	lactate dehydrogenase A	protein-coding
MACS_peak_4382	chr12	72038513	72039039	+	234.70	NA	promoter-TSS (NM_019785)	promoter-TSS (NM_019785)	-68	NM_019785	56444	Mm.29317	NM_019785	ENSMUSG00000021076	Actr10	Actr11|Arp11	ARP10 actin-related protein 10	protein-coding
MACS_peak_9848	chr19	10944043	10944419	+	234.56	NA	promoter-TSS (NM_133804)	promoter-TSS (NM_133804)	38	NM_133804	98170	Mm.490254	NM_133804	ENSMUSG00000024736	Tmem132a	6720481D13Rik|Hspa5bp1|Orai1|R74613	transmembrane protein 132A	protein-coding
MACS_peak_7447	chr16	23107197	23108551	+	234.33	NA	non-coding (NR_110335, exon 1 of 12)	non-coding (NR_110335, exon 1 of 12)	333	NR_110335	13682	Mm.260084	NM_013506	ENSMUSG00000022884	Eif4a2	4833432N07Rik|BM-010|Ddx2b|Eif4|eIF-4A-II|eIF4A-II	eukaryotic translation initiation factor 4A2	protein-coding
MACS_peak_544	chr1	95721543	95722310	+	234.33	NA	intron (NM_178882, intron 1 of 9)	intron (NM_178882, intron 1 of 9)	109	NM_178882	98314	Mm.383401	NM_178882	ENSMUSG00000073609	D2hgdh	AA408776|AA408778|AI325464	D-2-hydroxyglutarate dehydrogenase	protein-coding
MACS_peak_1873	chr10	86241659	86241926	+	234.06	NA	promoter-TSS (NM_175331)	promoter-TSS (NM_175331)	42	NM_175331	103466	Mm.200446	NM_175331	ENSMUSG00000054027	Nt5dc3	AU040402|AW540062|C630002B14Rik|TU12B1-TY	5'-nucleotidase domain containing 3	protein-coding
MACS_peak_7739	chr16	90727639	90727980	+	233.77	NA	promoter-TSS (NM_025642)	promoter-TSS (NM_025642)	-193	NM_025642	66578	Mm.180363	NM_025642	ENSMUSG00000022978	Mis18a	2610039C10Rik|2810018N07Rik	MIS18 kinetochore protein homolog A (S. pombe)	protein-coding
MACS_peak_19421	chr9	27106487	27107081	+	233.77	NA	promoter-TSS (NM_001033323)	promoter-TSS (NM_001033323)	-29	NM_001033323	235086	Mm.335029	NM_001033323	ENSMUSG00000034275	Igsf9b	Gm508|mKIAA1030	immunoglobulin superfamily, member 9B	protein-coding
MACS_peak_997	chr1	179374643	179374982	+	233.73	NA	promoter-TSS (NM_001012330)	promoter-TSS (NM_001012330)	20	NM_001012330	30928	Mm.330700	NM_013915	ENSMUSG00000063659	Zbtb18	RP58|Zfp238|Znf238	zinc finger and BTB domain containing 18	protein-coding
MACS_peak_7664	chr16	56029675	56030184	+	233.70	NA	promoter-TSS (NM_001024622)	promoter-TSS (NM_001024622)	-99	NM_001024622	76302	Mm.310642	NM_001024622	ENSMUSG00000071533	Pcnp	1110018D06Rik|AI647035	PEST proteolytic signal containing nuclear protein	protein-coding
MACS_peak_2710	chr11	58136353	58137236	+	233.70	NA	promoter-TSS (NM_001256518)	promoter-TSS (NM_001256518)	73	NM_001256517	319475	Mm.72124	NM_178761	ENSMUSG00000049755	Zfp672	4930488P06Rik|4930511N19Rik|Znf672	zinc finger protein 672	protein-coding
MACS_peak_9286	chr18	49915298	49915725	+	233.67	NA	promoter-TSS (NM_001170960)	promoter-TSS (NM_001170960)	-256	NM_001170960	68857	Mm.96010	NM_026854	ENSMUSG00000024505	Dtwd2	1190002H09Rik|8030470C17Rik|AI414673|BB115449	DTW domain containing 2	protein-coding
MACS_peak_17036	chr7	35174413	35175051	+	233.67	NA	promoter-TSS (NM_025948)	promoter-TSS (NM_025948)	-173	NM_025948	67070	Mm.276503	NM_025948	ENSMUSG00000066568	Lsm14a	2700023B17Rik|AA407828|AU017544|Tral	LSM14 homolog A (SCD6, S. cerevisiae)	protein-coding
MACS_peak_7142	chr15	100057898	100058562	+	233.55	NA	promoter-TSS (NM_007497)	promoter-TSS (NM_007497)	-60	NM_007497	11908	Mm.676	NM_007497	ENSMUSG00000023027	Atf1	-	activating transcription factor 1	protein-coding
MACS_peak_10782	chr2	52280262	52280728	+	233.55	NA	promoter-TSS (NM_182994)	promoter-TSS (NM_182994)	-101	NM_182994	75423	Mm.314378	NM_182994	ENSMUSG00000036093	Arl5a	2410015N24Rik|2810410P22Rik|AA408731|AW610751|Arl5|T25534	ADP-ribosylation factor-like 5A	protein-coding
MACS_peak_15186	chr5	130322773	130323105	+	233.42	NA	promoter-TSS (NM_026445)	promoter-TSS (NM_026445)	73	NM_026445	67902	Mm.103546	NM_026445	ENSMUSG00000025538	Sumf2	2610040F05Rik	sulfatase modifying factor 2	protein-coding
MACS_peak_2425	chr11	22967501	22968148	+	232.81	NA	Intergenic	CpG	54437	NM_028672	73873	Mm.252406	NM_028672	ENSMUSG00000049811	Fam161a	4930430E16Rik	family with sequence similarity 161, member A	protein-coding
MACS_peak_888	chr1	169238511	169239040	+	232.53	NA	promoter-TSS (NM_001039483)	promoter-TSS (NM_001039483)	-26	NM_001039483	68944	Mm.330045	NM_026881	ENSMUSG00000052428	Tmco1	1190006A08Rik|4930403O06Rik|AA109065|AU022572|ESTM39	transmembrane and coiled-coil domains 1	protein-coding
MACS_peak_4311	chr12	56300199	56300718	+	232.10	NA	promoter-TSS (NM_001100116).2	promoter-TSS (NM_001100116).2	-121	NM_001100116	100101807	Mm.439875	NM_001100116		1700047I17Rik2	-	RIKEN cDNA 1700047I17 gene 2	protein-coding
MACS_peak_15244	chr5	136164969	136165255	+	231.89	NA	promoter-TSS (NM_008898)	promoter-TSS (NM_008898)	28	NM_008898	18984	Mm.3863	NM_008898	ENSMUSG00000005514	Por	4933424M13Rik|CPR|CYPOR	P450 (cytochrome) oxidoreductase	protein-coding
MACS_peak_1738	chr10	80288801	80289084	+	231.89	NA	promoter-TSS (NR_027656)	promoter-TSS (NR_027656)	-459	NM_001301034	18245	Mm.398119	NM_008753	ENSMUSG00000035242	Oaz1	AZ-1|AZ1|Antizyme|ODC-Az|Oaz	ornithine decarboxylase antizyme 1	protein-coding
MACS_peak_14419	chr5	30559115	30559376	+	231.89	NA	promoter-TSS (NM_027652)	promoter-TSS (NM_027652)	87	NM_027652	28042	Mm.168854	NM_027652	ENSMUSG00000075703	Ept1	4933402G07Rik|AI448296|AI452230|C79563|D5Wsu178e|SELI|mKIAA1724	ethanolaminephosphotransferase 1 (CDP-ethanolamine-specific)	protein-coding
MACS_peak_1467	chr10	61142682	61143216	+	231.89	NA	promoter-TSS (NM_009120)	promoter-TSS (NM_009120)	-120	NM_009120	20224	Mm.391794	NM_009120	ENSMUSG00000020088	Sar1a	1600019H17Rik|Sara|Sara1	SAR1 gene homolog A (S. cerevisiae)	protein-coding
MACS_peak_149	chr1	37922070	37922412	+	231.89	NA	promoter-TSS (NM_207228)	promoter-TSS (NM_207228)	-98	NM_001290720	211484	Mm.332756	NM_207228	ENSMUSG00000060771	Tsga10	4933432N21Rik|AI843383|Gm217|Mtsga10	testis specific 10	protein-coding
MACS_peak_1505	chr10	63552804	63553188	+	231.76	NA	promoter-TSS (NM_178678)	promoter-TSS (NM_178678)	7	NM_178678	216028	Mm.431318	NM_178678	ENSMUSG00000042846	Lrrtm3	9630044H04Rik	leucine rich repeat transmembrane neuronal 3	protein-coding
MACS_peak_10573	chr2	30026816	30027619	+	231.69	NA	exon (NM_007931, exon 1 of 3)	exon (NM_007931, exon 1 of 3)	173	NM_007931	13804	Mm.474473	NM_007931	ENSMUSG00000015337	Endog	-	endonuclease G	protein-coding
MACS_peak_8329	chr17	33961224	33961755	+	231.16	NA	promoter-TSS (NM_016844)	promoter-TSS (NM_016844)	-28	NR_103515	66416	Mm.29513	NM_023202	ENSMUSG00000041881	Ndufa7	14.5kDa|2400007M02Rik|CI-B14.5a	NADH dehydrogenase (ubiquinone) 1 alpha subcomplex, 7 (B14.5a)	protein-coding
MACS_peak_10173	chr19	47088830	47089338	+	230.65	NA	promoter-TSS (NM_146100)	promoter-TSS (NM_146100)	-104	NM_146100	226180	Mm.276251	NM_146100		Ina	AV028420|NF-66|NF66	internexin neuronal intermediate filament protein, alpha	protein-coding
MACS_peak_1707	chr10	79862484	79862797	+	230.54	NA	promoter-TSS (NM_013595)	promoter-TSS (NM_013595)	-416	NM_013595	17192	Mm.7142	NM_013595	ENSMUSG00000035478	Mbd3	AI181826|AU019209	methyl-CpG binding domain protein 3	protein-coding
MACS_peak_16681	chr7	17529790	17530259	+	230.47	NA	promoter-TSS (NM_001099636)	promoter-TSS (NM_001099636)	-7	NM_001099636	434128	Mm.483018	NM_001099636	ENSMUSG00000070802	Pnmal2	EG434128	PNMA-like 2	protein-coding
MACS_peak_3771	chr11	106873776	106874128	+	230.24	NA	Intergenic	CpG	-13113	NM_010655	16647	Mm.12508	NM_010655	ENSMUSG00000018362	Kpna2	2410044B12Rik|IPOA1|PTAC58|Rch1	karyopherin (importin) alpha 2	protein-coding
MACS_peak_14546	chr5	37187588	37188303	+	230.18	NA	promoter-TSS (NM_026242)	promoter-TSS (NM_026242)	48	NM_026242	67568	Mm.332336	NM_026242	ENSMUSG00000055302	Mrfap1	9130413I22Rik|AL022827|Pam14	Morf4 family associated protein 1	protein-coding
MACS_peak_15262	chr5	136674634	136675140	+	230.12	NA	promoter-TSS (NM_025774)	promoter-TSS (NM_025774)	-63	NM_025774	66801	Mm.425295	NM_025774		Prkrip1	8430424D23Rik|C114	Prkr interacting protein 1 (IL11 inducible)	protein-coding
MACS_peak_13970	chr4	137549017	137549553	+	230.12	NA	promoter-TSS (NM_001256195)	promoter-TSS (NM_001256195)	-86	NM_001256198	230861	Mm.268903	NM_172703	ENSMUSG00000028760	Eif4g3	1500002J22Rik|4833436O05|4930523M17Rik|G1-419-52|eIF4GII|repro8	eukaryotic translation initiation factor 4 gamma, 3	protein-coding
MACS_peak_10737	chr2	37278332	37278869	+	229.95	NA	promoter-TSS (NM_001290642)	promoter-TSS (NM_001290642)	-177	NM_001290642	319817	Mm.288785	NM_001100591	ENSMUSG00000075376	Rc3h2	2900024N03Rik|9430019J22Rik|D930043C02Rik|Mnab|Rnf164	ring finger and CCCH-type zinc finger domains 2	protein-coding
MACS_peak_9104	chr18	33954399	33954727	+	229.87	NA	promoter-TSS (NR_038151)	promoter-TSS (NR_038151)	17	NR_038151	69749	Mm.248787	NR_038151	ENSMUSG00000087590	2410004N09Rik	-	RIKEN cDNA 2410004N09 gene	ncRNA
MACS_peak_14956	chr5	115722720	115723181	+	229.87	NA	promoter-TSS (NM_016698)	promoter-TSS (NM_016698)	-46	NM_016698	50849	Mm.30051	NM_016698	ENSMUSG00000041740	Rnf10	AA675014|RIE2|mKIAA0262	ring finger protein 10	protein-coding
MACS_peak_6644	chr15	76076882	76077415	+	229.25	NA	promoter-TSS (NM_023168)	promoter-TSS (NM_023168)	-89	NM_023168	66168	Mm.41665	NM_023168	ENSMUSG00000022564	Grina	1110025J15Rik|Lag|Tmbim3	glutamate receptor, ionotropic, N-methyl D-aspartate-associated protein 1 (glutamate binding)	protein-coding
MACS_peak_18902	chr8	98226588	98227178	+	229.24	NA	promoter-TSS (NM_145602)	promoter-TSS (NM_145602)	-54	NM_001195006	234593	Mm.29846	NM_145602	ENSMUSG00000036564	Ndrg4	D8Bwg1337e|Ndr1-rs|Ndr4|R74996|SMAP-8	N-myc downstream regulated gene 4	protein-coding
MACS_peak_18306	chr8	27087006	27087422	+	228.91	NA	promoter-TSS (NM_029884)	promoter-TSS (NM_029884)	2	NM_029884	52120	Mm.28326	NM_029884	ENSMUSG00000037260	Hgsnat	9430010M12Rik|AW208455|D8Ertd354e|Tmem76	heparan-alpha-glucosaminide N-acetyltransferase	protein-coding
MACS_peak_3026	chr11	72503354	72503692	+	228.70	NA	promoter-TSS (NM_009671)	promoter-TSS (NM_009671)	19	NM_009671	11736	Mm.10313	NM_009671	ENSMUSG00000020790	Ankfy1	Ankhzn|ZFYVE14|mKIAA1255	ankyrin repeat and FYVE domain containing 1	protein-coding
MACS_peak_16522	chr7	4763804	4764160	+	228.64	NA	promoter-TSS (NM_133777)	promoter-TSS (NM_133777)	-40	NM_133777	77891	Mm.389787	NM_133777	ENSMUSG00000060860	Ube2s	0910001J09Rik|6720465F12Rik|AA409170|E2-EPF	ubiquitin-conjugating enzyme E2S	protein-coding
MACS_peak_14837	chr5	108494373	108494986	+	228.54	NA	promoter-TSS (NM_001253877)	promoter-TSS (NM_001253877)	-14	NM_001253880	17765	Mm.257149	NM_013827	ENSMUSG00000029267	Mtf2	9230112N11Rik|AA537621|C76717|M96|Pcl2	metal response element binding transcription factor 2	protein-coding
MACS_peak_15315	chr5	138696597	138697588	+	228.45	NA	intron (NM_001081108, intron 1 of 3)	intron (NM_001081108, intron 1 of 3)	382	NM_001081108	66096	Mm.206901	NM_001081108	ENSMUSG00000050552	Lamtor4	0910001L09Rik|AV006840	late endosomal/lysosomal adaptor, MAPK and MTOR activator 4	protein-coding
MACS_peak_11360	chr2	127410175	127410729	+	228.45	NA	promoter-TSS (NM_028141)	promoter-TSS (NM_028141)	-39	NM_028141	72180	Mm.46715	NM_028141	ENSMUSG00000034800	Zfp661	2810405K07Rik|A1-5|Znf2	zinc finger protein 661	protein-coding
MACS_peak_15958	chr6	86321169	86321725	+	228.45	NA	promoter-TSS (NM_026506)	promoter-TSS (NM_026506)	-87	NM_026506	68011	Mm.276802	NM_026506	ENSMUSG00000057278	Snrpg	2810024K17Rik|AL022803|SMG|sm-G|snRNP-G	small nuclear ribonucleoprotein polypeptide G	protein-coding
MACS_peak_11761	chr2	164630117	164630815	+	228.45	NA	promoter-TSS (NM_133240)	promoter-TSS (NM_133240)	-85	NM_133240	170789	Mm.277878	NM_133240	ENSMUSG00000017307	Acot8	PTE-2|Pte1	acyl-CoA thioesterase 8	protein-coding
MACS_peak_4745	chr12	111829294	111830215	+	228.32	NA	non-coding (NR_033340, exon 1 of 1)	non-coding (NR_033340, exon 1 of 1)	170	NR_033340	319786	Mm.129691	NR_033340		B930059L03Rik	-	RIKEN cDNA B930059L03 gene	ncRNA
MACS_peak_5663	chr14	21748536	21748854	+	228.03	NA	promoter-TSS (NM_009502)	promoter-TSS (NM_009502)	40	NM_009502	22330	Mm.279361	NM_009502	ENSMUSG00000021823	Vcl	9430097D22|AA571387|AI462105|AW545629	vinculin	protein-coding
MACS_peak_9053	chr18	25912654	25913125	+	228.03	NA	promoter-TSS (NM_001174074)	promoter-TSS (NM_001174074)	-405	NM_001174074	108013	Mm.266435	NM_133195	ENSMUSG00000024268	Celf4	A230070D14Rik|BRUNOL-4|Brul4|Brunol4|C130060B05Rik	CUGBP, Elav-like family member 4	protein-coding
MACS_peak_18883	chr8	96909938	96910543	+	227.88	NA	promoter-TSS (NM_022331)	promoter-TSS (NM_022331)	-160	NM_022331	64209	Mm.29151	NM_022331	ENSMUSG00000031770	Herpud1	Herp|Mifl|SUP	homocysteine-inducible, endoplasmic reticulum stress-inducible, ubiquitin-like domain member 1	protein-coding
MACS_peak_9706	chr19	6057505	6058079	+	227.39	NA	promoter-TSS (NM_001160239)	promoter-TSS (NM_001160239)	-41	NM_026246	18120	Mm.181290	NM_026246	ENSMUSG00000007338	Mrpl49	4833419D18Rik|Nof1	mitochondrial ribosomal protein L49	protein-coding
MACS_peak_17217	chr7	52781422	52781882	+	227.39	NA	promoter-TSS (NM_148927)	promoter-TSS (NM_148927)	-14	NM_008654	17872	Mm.4048	NM_008654	ENSMUSG00000040435	Ppp1r15a	9630030H21|Gadd34|Myd116	protein phosphatase 1, regulatory (inhibitor) subunit 15A	protein-coding
MACS_peak_11606	chr2	154617005	154617380	+	226.98	NA	5' UTR (NM_001139513, exon 1 of 9)	5' UTR (NM_001139513, exon 1 of 9)	346	NM_001139511	19383	Mm.221440	NM_023130	ENSMUSG00000027593	Raly	AI663842|Merc	hnRNP-associated with lethal yellow	protein-coding
MACS_peak_18530	chr8	72877097	72877639	+	226.98	NA	promoter-TSS (NM_001122829)	promoter-TSS (NM_001122829)	-196	NM_001122829	19704	Mm.390048	NM_030680	ENSMUSG00000058301	Upf1	B430202H16Rik|NORF1|PNORF-1|Rent1|Upflp	UPF1 regulator of nonsense transcripts homolog (yeast)	protein-coding
MACS_peak_5862	chr14	54873360	54873644	+	226.84	NA	promoter-TSS (NM_001205181)	promoter-TSS (NM_001205181)	102	NM_001113358	13135	Mm.319038	NM_010015	ENSMUSG00000022174	Dad1	AI323713	defender against cell death 1	protein-coding
MACS_peak_18266	chr8	23867942	23868456	+	226.84	NA	promoter-TSS (NM_008872)	promoter-TSS (NM_008872)	-17	NM_008872	18791	Mm.154660	NM_008872	ENSMUSG00000031538	Plat	AU020998|AW212668|D8Ertd2e|tPA	plasminogen activator, tissue	protein-coding
MACS_peak_12864	chr3	144232998	144233223	+	226.82	NA	promoter-TSS (NM_053102)	promoter-TSS (NM_053102)	70	NM_011828	23908	Mm.12863	NM_011828	ENSMUSG00000040151	Hs2st1	AW214369|Hs2st|mKIAA0448	heparan sulfate 2-O-sulfotransferase 1	protein-coding
MACS_peak_4591	chr12	88225542	88225856	+	226.80	NA	promoter-TSS (NM_145836)	promoter-TSS (NM_145836)	65	NM_145836	238330	Mm.248358	NM_145836	ENSMUSG00000034168	Irf2bpl	6430527G18Rik|Eap1	interferon regulatory factor 2 binding protein-like	protein-coding
MACS_peak_14207	chr4	154975200	154976182	+	226.72	NA	5' UTR (NM_177186, exon 1 of 9)	5' UTR (NM_177186, exon 1 of 9)	166	NM_177186	320541	Mm.306018	NM_177186	ENSMUSG00000042202	Slc35e2	A530082C11Rik|AI957035	solute carrier family 35, member E2	protein-coding
MACS_peak_13375	chr4	95633509	95633790	+	226.60	NA	promoter-TSS (NM_030014)	promoter-TSS (NM_030014)	77	NR_045777	319247	Mm.473527	NM_175680	ENSMUSG00000044125	9530080O11Rik	-	RIKEN cDNA 9530080O11 gene	ncRNA
MACS_peak_12479	chr3	95428456	95429211	+	226.60	NA	promoter-TSS (NM_019561)	promoter-TSS (NM_019561)	-69	NM_019561	56205	Mm.241365	NM_019561	ENSMUSG00000038619	Ensa	1700020C18Rik|2610007F17Rik|AI451924	endosulfine alpha	protein-coding
MACS_peak_6823	chr15	80540932	80541555	+	226.60	NA	promoter-TSS (NM_144812)	promoter-TSS (NM_144812)	-500	NM_144812	213988	Mm.131328	NM_144812	ENSMUSG00000047888	Tnrc6b	2700090M07Rik|A730065C02Rik|AI848765|D230019K20Rik	trinucleotide repeat containing 6b	protein-coding
MACS_peak_1500	chr10	62845297	62845664	+	226.20	NA	intron (NM_001253685, intron 1 of 4)	intron (NM_001253685, intron 1 of 4)	289	NM_001253685	30045	Mm.32550	NM_013888	ENSMUSG00000036764	Dnajc12	Jdp1|mJDP1	DnaJ (Hsp40) homolog, subfamily C, member 12	protein-coding
MACS_peak_17210	chr7	52715033	52715516	+	225.94	NA	promoter-TSS (NM_010240)	promoter-TSS (NM_010240)	-18	NM_010240	14325	Mm.30357	NM_010240	ENSMUSG00000050708	Ftl1	Ftl|Ftl-1|L-ferritin	ferritin light chain 1	protein-coding
MACS_peak_16616	chr7	16507501	16507850	+	225.94	NA	promoter-TSS (NM_009156)	promoter-TSS (NM_009156)	45	NM_009156	20364	Mm.42829	NM_009156	ENSMUSG00000041571	Sepw1	selW	selenoprotein W, muscle 1	protein-coding
MACS_peak_16961	chr7	30768561	30769169	+	225.94	NA	promoter-TSS (NM_001167873)	promoter-TSS (NM_001167873)	-109	NM_001167873	243905	Mm.322432	NM_001033355	ENSMUSG00000074221	Zfp568	C80731|Gm1691|chato	zinc finger protein 568	protein-coding
MACS_peak_8071	chr17	24856654	24857236	+	225.82	NA	promoter-TSS (NR_028515)	promoter-TSS (NR_028515)	-35	NR_027900	73474	Mm.443320	NR_027900	ENSMUSG00000090101	Snhg9	1700072N11Rik	small nucleolar RNA host gene 9	ncRNA
MACS_peak_15113	chr5	124380404	124380968	+	225.65	NA	promoter-TSS (NM_001134767)	promoter-TSS (NM_001134767)	-12	NM_001134767	208908	Mm.243679	NM_001134767	ENSMUSG00000061882	Ccdc62	AI661708|Gm150	coiled-coil domain containing 62	protein-coding
MACS_peak_8003	chr17	23729447	23730072	+	225.31	NA	intron (NM_011747, intron 1 of 5)	CpG	6695	NM_011747	22654	Mm.40326	NM_011747	ENSMUSG00000062012	Zfp13	4933429B21|AI835008|Krox-8|Rhit|Zfp-13	zinc finger protein 13	protein-coding
MACS_peak_14635	chr5	65826938	65827520	+	225.24	NA	promoter-TSS (NM_009466)	promoter-TSS (NM_009466)	-148	NM_009466	22235	Mm.344831	NM_009466	ENSMUSG00000029201	Ugdh	Udpgdh	UDP-glucose dehydrogenase	protein-coding
MACS_peak_13697	chr4	126698444	126698752	+	225.15	NA	promoter-TSS (NM_023603)	promoter-TSS (NM_023603)	53	NM_023603	71514	Mm.257276	NM_023603	ENSMUSG00000028820	Sfpq	1110004P21Rik|2810416M14Rik|5730453G22Rik|9030402K04Rik|AU021830|D4Ertd314e|Gm12940|OTTMUSG00000009329|PSF|REP1	splicing factor proline/glutamine rich (polypyrimidine tract binding protein associated)	protein-coding
MACS_peak_7802	chr16	96349555	96350017	+	224.84	NA	promoter-TSS (NM_008251)	promoter-TSS (NM_008251)	-454	NM_008251	15312	Mm.2756	NM_008251		Hmgn1	HMG-14|Hmg14	high mobility group nucleosomal binding domain 1	protein-coding
MACS_peak_10966	chr2	84573929	84574438	+	224.84	NA	promoter-TSS (NM_001005342)	promoter-TSS (NM_001005342)	-178	NM_001005342	241525	Mm.486398	NM_001005342		Ypel4	-	yippee-like 4 (Drosophila)	protein-coding
MACS_peak_12172	chr3	54538892	54539357	+	224.84	NA	promoter-TSS (NM_025442)	promoter-TSS (NM_025442)	162	NM_027148	69639	Mm.29253	NM_027148	ENSMUSG00000027752	Exosc8	2310032N20Rik|CIP3|mKIAA4013	exosome component 8	protein-coding
MACS_peak_5242	chr13	58503358	58504148	+	224.48	NA	promoter-TSS (NM_028904)	promoter-TSS (NM_028904)	120	NM_001301345	15387	Mm.142872	NM_025279	ENSMUSG00000021546	Hnrnpk	Hnrpk|KBBP|NOVA	heterogeneous nuclear ribonucleoprotein K	protein-coding
MACS_peak_10708	chr2	34657788	34658061	+	224.36	NA	Intergenic	CpG	-2492	NM_145522	227746	Mm.158705	NM_145522	ENSMUSG00000070953	Rabepk	8430412M01Rik|9530020D24Rik|AV073337|C87311|Rab9p40	Rab9 effector protein with kelch motifs	protein-coding
MACS_peak_8178	chr17	27109780	27110368	+	224.36	NA	promoter-TSS (NM_001005916)	promoter-TSS (NM_001005916)	-50	NM_001005916	474156	Mm.328890	NM_001005916	ENSMUSG00000079605	Zbtb9	3930402F13Rik	zinc finger and BTB domain containing 9	protein-coding
MACS_peak_13556	chr4	116828487	116828949	+	224.36	NA	promoter-TSS (NM_009098)	promoter-TSS (NM_009098)	19	NM_009098	20116	Mm.260904	NM_009098	ENSMUSG00000047675	Rps8	-	ribosomal protein S8	protein-coding
MACS_peak_12494	chr3	95754684	95755439	+	223.94	NA	Intergenic	CpG	21881	NM_023210	66471	Mm.218657	NM_023210	ENSMUSG00000015749	Anp32e	2810018A15Rik|AI047746|AI326868|CPD1|LANP-L|LANPL|mLANP-L	acidic (leucine-rich) nuclear phosphoprotein 32 family, member E	protein-coding
MACS_peak_11080	chr2	94081770	94082193	+	223.54	NA	promoter-TSS (NR_029752)	promoter-TSS (NR_029752)	-371	NR_029752	723953		NR_029752	miRBase:MI0000585	Mir129-2	Mirn129-2	microRNA 129-2	ncRNA
MACS_peak_9188	chr18	36894328	36895255	+	223.54	NA	promoter-TSS (NM_028036)	promoter-TSS (NM_028036)	67	NM_028036	71983	Mm.135188	NM_028036	ENSMUSG00000006850	Tmco6	2410015B03Rik	transmembrane and coiled-coil domains 6	protein-coding
MACS_peak_911	chr1	173080504	173081021	+	223.50	NA	promoter-TSS (NM_025321)	promoter-TSS (NM_025321)	-28	NM_025321	66052	Mm.198138	NM_025321		Sdhc	0610010E03Rik|AI316496|AU019277	succinate dehydrogenase complex, subunit C, integral membrane protein	protein-coding
MACS_peak_12057	chr3	28704226	28704633	+	223.19	NA	promoter-TSS (NM_026517)	promoter-TSS (NM_026517)	-4	NM_026517	68028	Mm.371630	NM_026517	ENSMUSG00000039221	Rpl22l1	3110001N18Rik|AU041196	ribosomal protein L22 like 1	protein-coding
MACS_peak_17555	chr7	104548423	104548897	+	223.19	NA	5' UTR (NM_024220, exon 1 of 3)	5' UTR (NM_024220, exon 1 of 3)	147	NM_024220	68197	Mm.334031	NM_024220	ENSMUSG00000030647	Ndufc2	1810004I06Rik|2010300P09Rik|G1|R75094	NADH dehydrogenase (ubiquinone) 1, subcomplex unknown, 2	protein-coding
MACS_peak_1694	chr10	79755076	79755368	+	223.08	NA	promoter-TSS (NM_009091)	promoter-TSS (NM_009091)	46	NM_009091	20054	Mm.643	NM_009091	ENSMUSG00000063457	Rps15	rig	ribosomal protein S15	protein-coding
MACS_peak_16932	chr7	29747087	29747660	+	223.07	NA	promoter-TSS (NM_021895)	promoter-TSS (NM_021895)	-74	NM_021895	60595	Mm.81144	NM_021895	ENSMUSG00000054808	Actn4	C77391	actinin alpha 4	protein-coding
MACS_peak_14583	chr5	44173142	44173869	+	223.03	NA	promoter-TSS (NM_001159963)	promoter-TSS (NM_001159963)	-117	NM_178729	242960	Mm.25794	NM_178729	ENSMUSG00000039753	Fbxl5	Fbl4|Fir4	F-box and leucine-rich repeat protein 5	protein-coding
MACS_peak_16849	chr7	28013538	28013922	+	222.97	NA	promoter-TSS (NM_181593)	promoter-TSS (NM_181593)	-114	NM_181593	233011	Mm.30963	NM_181593	ENSMUSG00000003752	Itpkc	9130023N17Rik	inositol 1,4,5-trisphosphate 3-kinase C	protein-coding
MACS_peak_15256	chr5	136438363	136438965	+	222.82	NA	intron (NM_001160366, intron 9 of 10)	CpG	11682	NM_001160366	109267	Mm.332750	NM_001160366	ENSMUSG00000029699	Ssc4d	C330016E03Rik|S4D-SRCRB|SRCRB-S4D|Srcrb4d	scavenger receptor cysteine rich family, 4 domains	protein-coding
MACS_peak_1372	chr10	41996360	41996848	+	222.74	NA	promoter-TSS (NM_019740)	promoter-TSS (NM_019740)	-56	NM_019740	56484	Mm.338613	NM_019740	ENSMUSG00000048756	Foxo3	1110048B16Rik|2010203A17Rik|C76856|FKHRL1|Fkhr2|Foxo3a	forkhead box O3	protein-coding
MACS_peak_10958	chr2	84490652	84490995	+	222.74	NA	promoter-TSS (NM_001085453)	promoter-TSS (NM_001085453)	74	NM_001085449	12388	Mm.35738	NM_007615	ENSMUSG00000034101	Ctnnd1	AA409437|AU019353|Catns|Ctnnd|P120|mKIAA0384	catenin (cadherin associated protein), delta 1	protein-coding
MACS_peak_11493	chr2	143741054	143741478	+	222.73	NA	5' UTR (NM_019771, exon 1 of 4)	5' UTR (NM_019771, exon 1 of 4)	199	NM_019771	56431	Mm.28919	NM_019771	ENSMUSG00000015932	Dstn	2610043P17Rik|ADF|AU042046|Dsn|corn1|sid23p	destrin	protein-coding
MACS_peak_5711	chr14	28149078	28149443	+	222.73	NA	promoter-TSS (NM_001289687)	promoter-TSS (NM_001289687)	37	NM_001289687	71704	Mm.248606	NM_027871	ENSMUSG00000021895	Arhgef3	1200004I24Rik|9830169H03Rik|C76747|Xpln	Rho guanine nucleotide exchange factor (GEF) 3	protein-coding
MACS_peak_12512	chr3	95976052	95976683	+	222.71	NA	promoter-TSS (NM_153053)	promoter-TSS (NM_153053)	-106	NM_153053	107701	Mm.219671	NM_153053	ENSMUSG00000068856	Sf3b4	49kDa|SF3b49|SF3b50|Sap49	splicing factor 3b, subunit 4	protein-coding
MACS_peak_17480	chr7	88933961	88934619	+	222.24	NA	promoter-TSS (NM_026077)	promoter-TSS (NM_026077)	49	NM_026077	67290	Mm.248391	NM_026077	ENSMUSG00000025102	3110040N11Rik	AI851475	RIKEN cDNA 3110040N11 gene	protein-coding
MACS_peak_7757	chr16	91619034	91619363	+	222.21	NA	promoter-TSS (NM_001099738)	promoter-TSS (NM_001099738)	46	NM_001099738	246738	Mm.101927	NM_138664	ENSMUSG00000039763	Dnajc28	BC020175|ORF28	DnaJ (Hsp40) homolog, subfamily C, member 28	protein-coding
MACS_peak_4085	chr11	121534219	121534871	+	221.83	NA	promoter-TSS (NM_178664)	promoter-TSS (NM_178664)	-80	NM_178664	210004	Mm.386847	NM_178664	ENSMUSG00000046605	B3gntl1	6030413G23Rik	UDP-GlcNAc:betaGal beta-1,3-N-acetylglucosaminyltransferase-like 1	protein-coding
MACS_peak_5848	chr14	52723476	52723788	+	221.46	NA	promoter-TSS (NM_001170981)	promoter-TSS (NM_001170981)	71	NM_001170982	15381	Mm.427321	NM_016884	ENSMUSG00000060373	Hnrnpc	AL022939|D14Wsu171e|Hnrpc|Hnrpc1|Hnrpc2|hnRNPC1|hnRNPC2|hnrnp-C	heterogeneous nuclear ribonucleoprotein C	protein-coding
MACS_peak_7324	chr16	16302714	16303205	+	221.35	NA	promoter-TSS (NR_038046)	promoter-TSS (NR_038046)	-99	NR_038046	70120	Mm.37486	NM_198246	ENSMUSG00000022792	Yars2	2210023C10Rik|tyrRS	tyrosyl-tRNA synthetase 2 (mitochondrial)	protein-coding
MACS_peak_19699	chr9	54582128	54582535	+	221.32	NA	promoter-TSS (NM_001025375)	promoter-TSS (NM_001025375)	25	NM_023191	66317	Mm.28437	NM_023191	ENSMUSG00000061559	Wdr61	2700038L12Rik|2810418I05Rik|REC14	WD repeat domain 61	protein-coding
MACS_peak_11458	chr2	136538887	136539525	+	221.32	NA	promoter-TSS (NM_011428)	promoter-TSS (NM_011428)	20	NM_001291056	20614	Mm.45953	NM_011428	ENSMUSG00000027273	Snap25	Bdr|GENA70|SNAP-25|SUP|sp	synaptosomal-associated protein 25	protein-coding
MACS_peak_13539	chr4	116357908	116358413	+	221.19	NA	promoter-TSS (NM_011034)	promoter-TSS (NM_011034)	-44	NM_011034	18477	Mm.30929	NM_011034		Prdx1	MSP23|NkefA|OSF-3|OSF3|PAG|Paga|PrdxI|PrxI|TDX2|TPxA|Tdpx2|prx1	peroxiredoxin 1	protein-coding
MACS_peak_17226	chr7	52893906	52894191	+	221.07	NA	intron (NM_028544, intron 11 of 11)	intron (NM_028544, intron 11 of 11)	-1299	NM_172418	74490	Mm.107442	NM_172418		Mamstr	2810022D01Rik|5430432N15Rik|AW743872|Mastr	MEF2 activating motif and SAP domain containing transcriptional regulator	protein-coding
MACS_peak_8493	chr17	45570278	45570930	+	220.91	NA	promoter-TSS (NM_152810)	promoter-TSS (NM_152810)	52	NM_152810	71702	Mm.28270	NM_152810	ENSMUSG00000023932	Cdc5l	1200002I02Rik|AA408004|PCDC5RP	cell division cycle 5-like (S. pombe)	protein-coding
MACS_peak_11310	chr2	122194764	122195276	+	220.71	NA	promoter-TSS (NM_001013829)	promoter-TSS (NM_001013829)	-366	NM_001013829	435684	Mm.458215	NM_001013829	ENSMUSG00000033256	Shf	-	Src homology 2 domain containing F	protein-coding
MACS_peak_8882	chr17	88071506	88072049	+	220.71	NA	promoter-TSS (NM_008628)	promoter-TSS (NM_008628)	-120	NM_008628	17685	Mm.4619	NM_008628	ENSMUSG00000024151	Msh2	AI788990	mutS homolog 2 (E. coli)	protein-coding
MACS_peak_12516	chr3	96001034	96001614	+	220.51	NA	intron (NM_026975, intron 1 of 1)	CpG	185	NM_026975	69168	Mm.104531	NM_026975	ENSMUSG00000015943	Bola1	1810037G04Rik	bolA-like 1 (E. coli)	protein-coding
MACS_peak_4794	chr12	113882991	113883368	+	220.49	NA	exon (NM_013929, exon 1 of 4)	exon (NM_013929, exon 1 of 4)	140	NM_013929	30954	Mm.289812	NM_013929	ENSMUSG00000064326	Siva1	CD27bp|Siva	SIVA1, apoptosis-inducing factor	protein-coding
MACS_peak_17854	chr7	134093153	134094231	+	220.35	NA	promoter-TSS (NM_001039645)	promoter-TSS (NM_001039645)	-357	NM_144926	233878	Mm.283926	NM_144926	ENSMUSG00000030683	Sez6l2	AI835913|AW121566|BSRP-A|Psk1	seizure related 6 homolog like 2	protein-coding
MACS_peak_3252	chr11	86571278	86571926	+	220.20	NA	promoter-TSS (NM_001003908)	promoter-TSS (NM_001003908)	-608	NM_001003908	67300	Mm.254588	NM_001003908	ENSMUSG00000047126	Cltc	3110065L21Rik|CHC|R74732	clathrin, heavy polypeptide (Hc)	protein-coding
MACS_peak_18087	chr7	148620976	148621310	+	220.20	NA	promoter-TSS (NM_001177576)	promoter-TSS (NM_001177576)	-650	NM_001177576	68267	Mm.33729	NM_026646	ENSMUSG00000019082	Slc25a22	1300006L01Rik|AI060884|Gc1	solute carrier family 25 (mitochondrial carrier, glutamate), member 22	protein-coding
MACS_peak_18670	chr8	83538974	83539344	+	220.15	NA	promoter-TSS (NM_027554)	promoter-TSS (NM_027554)	-354	NM_027554	74841	Mm.246018	NM_027554	ENSMUSG00000038250	Usp38	4631402N15Rik|4833420O05Rik|AA536967|AU044701|AW544820|mKIAA1891	ubiquitin specific peptidase 38	protein-coding
MACS_peak_15341	chr5	139960517	139960833	+	220.15	NA	promoter-TSS (NM_133349)	promoter-TSS (NM_133349)	-230	NM_001159908	100494	Mm.24521	NM_133349	ENSMUSG00000053581	Zfand2a	AA407930|AU016206|Airap	zinc finger, AN1-type domain 2A	protein-coding
MACS_peak_7919	chr17	13185287	13185765	+	220.15	NA	promoter-TSS (NM_001113533)	promoter-TSS (NM_001113533)	-121	NM_175394	60532	Mm.275521	NM_175394	ENSMUSG00000060475	Wtap	2810408K05Rik|9430038B09Rik	Wilms tumour 1-associating protein	protein-coding
MACS_peak_20022	chr9	83699546	83700189	+	219.58	NA	promoter-TSS (NM_148941)	promoter-TSS (NM_148941)	45	NM_148941	83603	Mm.83949	NM_148941	ENSMUSG00000032262	Elovl4	-	elongation of very long chain fatty acids (FEN1/Elo2, SUR4/Elo3, yeast)-like 4	protein-coding
MACS_peak_8396	chr17	35118542	35119010	+	219.58	NA	promoter-TSS (NM_030597)	promoter-TSS (NM_030597)	-23	NM_001110101	27756	Mm.165735	NM_030597	ENSMUSG00000007050	Lsm2	D17H6S56E-2|D17H6S56E2|Dmapl|Dmpkap|G7b|Sm-X5|SmX5|snRNP	LSM2 homolog, U6 small nuclear RNA associated (S. cerevisiae)	protein-coding
MACS_peak_19103	chr8	120325652	120325915	+	219.58	NA	promoter-TSS (NM_026758)	promoter-TSS (NM_026758)	46	NM_026758	68533	Mm.181836	NM_026758	ENSMUSG00000031843	Mphosph6	1110001M01Rik|AA536809|C86426	M phase phosphoprotein 6	protein-coding
MACS_peak_14560	chr5	38651403	38651816	+	219.41	NA	promoter-TSS (NM_025480)	promoter-TSS (NM_025480)	-5	NM_025480	66309	Mm.256185	NM_025480	ENSMUSG00000067365	Tmem128	2810021O14Rik	transmembrane protein 128	protein-coding
MACS_peak_2168	chr10	127519838	127520166	+	219.39	NA	promoter-TSS (NM_016774)	promoter-TSS (NM_016774)	-361	NM_016774	11947	Mm.238973	NM_016774	ENSMUSG00000025393	Atp5b	-	ATP synthase, H+ transporting mitochondrial F1 complex, beta subunit	protein-coding
MACS_peak_18319	chr8	28087246	28087706	+	219.39	NA	promoter-TSS (NM_001110508)	promoter-TSS (NM_001110508)	-332	NM_001101502	353310	Mm.212469	NM_001101502	ENSMUSG00000085795	Zfp703	1110032O19Rik|AI430822|AL022941|Csmn1|End2|Zeppo1|Znf703|Zpo1	zinc finger protein 703	protein-coding
MACS_peak_6617	chr15	75446614	75446991	+	219.26	NA	promoter-TSS (NM_011759)	promoter-TSS (NM_011759)	-312	NM_001044718	22701	Mm.87210	NM_011759	ENSMUSG00000047003	Zfp41	CTfin92|Zfp-41	zinc finger protein 41	protein-coding
MACS_peak_12451	chr3	94690712	94691113	+	219.26	NA	promoter-TSS (NM_008945)	promoter-TSS (NM_008945)	-32	NM_008945	19172	Mm.368	NM_008945	ENSMUSG00000005779	Psmb4	Pros-27	proteasome (prosome, macropain) subunit, beta type 4	protein-coding
MACS_peak_10620	chr2	30997282	30997681	+	219.26	NA	promoter-TSS (NM_001177648)	promoter-TSS (NM_001177648)	47	NM_001177649	14269	Mm.52297	NM_019406	ENSMUSG00000075415	Fnbp1	1110057E06Rik|2210010H06Rik|FBP1|Fbp17	formin binding protein 1	protein-coding
MACS_peak_9276	chr18	46901029	46901442	+	218.96	NA	promoter-TSS (NM_026217)	promoter-TSS (NM_026217)	-2	NM_026217	67526	Mm.9852	NM_026217	ENSMUSG00000032905	Atg12	4931423H11Rik|A330058M13Rik|Apg12l|Atg12l	autophagy related 12	protein-coding
MACS_peak_19781	chr9	59139008	59139568	+	218.89	NA	promoter-TSS (NM_028121)	promoter-TSS (NM_028121)	-91	NM_028121	72141	Mm.22456	NM_028121	ENSMUSG00000025236	Adpgk	2610017G09Rik|Adp-gk|C77577	ADP-dependent glucokinase	protein-coding
MACS_peak_12388	chr3	89070359	89070733	+	218.88	NA	intron (NM_026767, intron 1 of 1)	CpG	163	NM_026767	68563	Mm.272927	NM_026767	ENSMUSG00000042737	Dpm3	1110001H19Rik|AV117483	dolichyl-phosphate mannosyltransferase polypeptide 3	protein-coding
MACS_peak_797	chr1	157887808	157888213	+	218.56	NA	promoter-TSS (NM_001160181)	promoter-TSS (NM_001160181)	19	NM_022329	240832	Mm.253335	NM_022329	ENSMUSG00000050565	Tor1aip2	1110020D10Rik|15kDa|A130072J07|AA103493|AW060462|AW610675|C77739|Ifrg15|Lull1	torsin A interacting protein 2	protein-coding
MACS_peak_2177	chr10	127669327	127669610	+	218.14	NA	TTS (NM_008600)	TTS (NM_008600)	349	NM_001136082	21853	Mm.6458	NM_011589	ENSMUSG00000039994	Timeless	C77407|Debt69|tim	timeless circadian clock 1	protein-coding
MACS_peak_15998	chr6	88468659	88469257	+	218.13	NA	promoter-TSS (NM_016906)	promoter-TSS (NM_016906)	-164	NM_016906	53421	Mm.28375	NM_016906	ENSMUSG00000030082	Sec61a1	AA408394|AA410007|Sec61a	Sec61 alpha 1 subunit (S. cerevisiae)	protein-coding
MACS_peak_8132	chr17	26012302	26012753	+	218.00	NA	promoter-TSS (NM_026686)	promoter-TSS (NM_026686)	82	NM_026686	68347	Mm.35098	NM_026686	ENSMUSG00000025731	0610011F06Rik	-	RIKEN cDNA 0610011F06 gene	protein-coding
MACS_peak_2622	chr11	52045045	52045685	+	217.94	NA	promoter-TSS (NM_011543)	promoter-TSS (NM_011543)	-132	NM_011543	21402	Mm.42944	NM_011543	ENSMUSG00000036309	Skp1a	15kDa|2610043E24Rik|2610206H23Rik|EMC19|OCP-II|OCP2|SKP1|Tceb1l|p19A|p19Skp1	S-phase kinase-associated protein 1A	protein-coding
MACS_peak_20342	chr9	110034231	110034710	+	217.83	NA	promoter-TSS (NM_009211)	promoter-TSS (NM_009211)	-58	NM_009211	20588	Mm.85410	NM_009211	ENSMUSG00000032481	Smarcc1	AI115498|BAF155|Rsc8|SRG3	SWI/SNF related, matrix associated, actin dependent regulator of chromatin, subfamily c, member 1	protein-coding
MACS_peak_11171	chr2	112101995	112102361	+	217.83	NA	promoter-TSS (NM_025403)	promoter-TSS (NM_025403)	95	NM_025403	66181	Mm.272346	NM_025403		Nop10	1110036B12Rik|NOP10P|Nola3	NOP10 ribonucleoprotein	protein-coding
MACS_peak_18101	chr7	148725497	148726119	+	217.83	NA	promoter-TSS (NM_001142681)	promoter-TSS (NM_001142681)	-52	NM_001142681	68038	Mm.245355	NM_026522	ENSMUSG00000025512	Chid1	3110023E09Rik|AI841869	chitinase domain containing 1	protein-coding
MACS_peak_17565	chr7	104991287	104991731	+	217.83	NA	promoter-TSS (NM_011035)	promoter-TSS (NM_011035)	60	NM_011035	18479	Mm.260227	NM_011035	ENSMUSG00000030774	Pak1	AW045634|PAK-1|Paka	p21 protein (Cdc42/Rac)-activated kinase 1	protein-coding
MACS_peak_19569	chr9	44169537	44169994	+	217.83	NA	promoter-TSS (NM_027889)	promoter-TSS (NM_027889)	-12	NM_027889	71732	Mm.295013	NM_027889	ENSMUSG00000032127	Vps11	1200011A11Rik	vacuolar protein sorting 11 (yeast)	protein-coding
MACS_peak_9942	chr19	26678993	26679830	+	217.35	NA	promoter-TSS (NM_011416)	promoter-TSS (NM_011416)	-239	NM_011416	67155	Mm.491146	NM_011416	ENSMUSG00000024921	Smarca2	2610209L14Rik|SNF2alpha|Snf2l2|brahma|brm	SWI/SNF related, matrix associated, actin dependent regulator of chromatin, subfamily a, member 2	protein-coding
MACS_peak_13828	chr4	132567346	132567858	+	217.35	NA	intron (NM_146155, intron 1 of 6)	CpG	181	NM_146155	230793	Mm.31816	NM_146155	ENSMUSG00000037692	Ahdc1	D030015G18Rik	AT hook, DNA binding motif, containing 1	protein-coding
MACS_peak_476	chr1	88423045	88423492	+	217.30	NA	promoter-TSS (NM_008972)	promoter-TSS (NM_008972)	-43	NM_008972	19231	Mm.19187	NM_008972	ENSMUSG00000026238	Ptma	Thym	prothymosin alpha	protein-coding
MACS_peak_14327	chr5	23122167	23122470	+	217.05	NA	promoter-TSS (NM_009274)	promoter-TSS (NM_009274)	71	NM_009274	20817	Mm.288728	NM_009274	ENSMUSG00000062604	Srpk2	AW226533|AW492537|AW547358|Wbp6|mSRPK2	serine/arginine-rich protein specific kinase 2	protein-coding
MACS_peak_1566	chr10	75322760	75323266	+	217.05	NA	promoter-TSS (NM_010798)	promoter-TSS (NM_010798)	-18	NM_010798	17319	Mm.2326	NM_010798	ENSMUSG00000033307	Mif	GIF|Glif	macrophage migration inhibitory factor	protein-coding
MACS_peak_19945	chr9	72510092	72510446	+	216.99	NA	5' UTR (NM_010890, exon 1 of 29)	5' UTR (NM_010890, exon 1 of 29)	115	NM_010890	17999	Mm.279923	NM_010890	ENSMUSG00000032216	Nedd4	AA959633|AL023035|AU019897|E430025J12Rik|Nedd4-1|Nedd4a|mKIAA0093	neural precursor cell expressed, developmentally down-regulated 4	protein-coding
MACS_peak_13609	chr4	120242712	120243249	+	216.93	NA	promoter-TSS (NM_016748)	promoter-TSS (NM_016748)	-99	NM_016748	51797	Mm.1815	NM_016748	ENSMUSG00000028633	Ctps	Ctps1	cytidine 5'-triphosphate synthase	protein-coding
MACS_peak_9480	chr18	78012636	78012929	+	216.33	NA	5' UTR (NM_007505, exon 1 of 12)	5' UTR (NM_007505, exon 1 of 12)	275	NM_007505	11946	Mm.276137	NM_007505	ENSMUSG00000025428	Atp5a1	AI035633|AL022851|AL023067|Atpm|D18Ertd206e|Mom2	ATP synthase, H+ transporting, mitochondrial F1 complex, alpha subunit 1	protein-coding
MACS_peak_3555	chr11	100302192	100302564	+	216.33	NA	promoter-TSS (NM_026561)	promoter-TSS (NM_026561)	25	NM_026561	68106	Mm.28738	NM_026561	ENSMUSG00000017176	Nt5c3b	2610037D24Rik|AI841843|C330027I04Rik|Nt5c3l	5'-nucleotidase, cytosolic IIIB	protein-coding
MACS_peak_14534	chr5	36807759	36808051	+	216.17	NA	promoter-TSS (NM_024478)	promoter-TSS (NM_024478)	71	NM_024478	17713	Mm.21535	NM_024478	ENSMUSG00000029198	Grpel1	AA408748|mt-GrpE#1|mt-Grpel1	GrpE-like 1, mitochondrial	protein-coding
MACS_peak_11412	chr2	131035731	131036395	+	216.17	NA	promoter-TSS (NM_001291031)	promoter-TSS (NM_001291031)	-33	NM_001291032	69596	Mm.2937	NM_027129	ENSMUSG00000068264	Ap5s1	0610038L13Rik|2310035K24Rik|AW060727|sigma5	adaptor-related protein 5 complex, sigma 1 subunit	protein-coding
MACS_peak_10176	chr19	47141967	47142397	+	216.08	NA	promoter-TSS (NM_177342)	promoter-TSS (NM_177342)	-56	NM_177342	226182	Mm.301522	NM_177342	ENSMUSG00000025049	Taf5	6330528C20Rik|AV117817	TAF5 RNA polymerase II, TATA box binding protein (TBP)-associated factor	protein-coding
MACS_peak_19137	chr8	123191705	123192043	+	216.08	NA	promoter-TSS (NM_009941)	promoter-TSS (NM_009941)	138	NM_010926	18117	Mm.2136	NM_010926	ENSMUSG00000031819	Emc8	Cox4nb|Fam158b|Noc4	ER membrane protein complex subunit 8	protein-coding
MACS_peak_8930	chr18	5334113	5334844	+	216.08	NA	promoter-TSS (NM_178722)	promoter-TSS (NM_178722)	-41	NM_178722	240186	Mm.118257	NM_178722	ENSMUSG00000050945	Zfp438	9430031G09|9430091M14Rik|B830013J05Rik	zinc finger protein 438	protein-coding
MACS_peak_20159	chr9	100446307	100446963	+	216.08	NA	promoter-TSS (NM_010878)	promoter-TSS (NM_010878)	-163	NM_010878	17973	Mm.181485	NM_010878	ENSMUSG00000032475	Nck1	6330586M15Rik|D230010O13Rik|Nck|Nck-1	non-catalytic region of tyrosine kinase adaptor protein 1	protein-coding
MACS_peak_20750	chrX	70918197	70918617	+	215.82	NA	promoter-TSS (NM_001142809)	promoter-TSS (NM_001142809)	-65	NM_001142810	102857	Mm.274553	NM_133987	ENSMUSG00000019558	Slc6a8	AA589632|CRT|CRTR|CT1|CTR5|Creat	solute carrier family 6 (neurotransmitter transporter, creatine), member 8	protein-coding
MACS_peak_3229	chr11	84771089	84771755	+	215.79	NA	exon (NM_007607, exon 1 of 8)	exon (NM_007607, exon 1 of 8)	166	NM_007607	12351	Mm.1641	NM_007607	ENSMUSG00000000805	Car4	AW456718|Ca4	carbonic anhydrase 4	protein-coding
MACS_peak_8175	chr17	27076664	27077003	+	215.51	NA	promoter-TSS (NM_026307)	promoter-TSS (NM_026307)	-350	NM_026307	67675	Mm.439919	NM_026307	ENSMUSG00000024194	Cuta	0610039D01Rik|1810022E02Rik|1810060C03Rik|2700094G22Rik|AI326454	cutA divalent cation tolerance homolog (E. coli)	protein-coding
MACS_peak_20612	chrX	33868270	33868600	+	215.46	NA	promoter-TSS (NM_028894)	promoter-TSS (NM_028894)	31	NM_028894	74365	Mm.327654	NM_028894		Lonrf3	4932412G04Rik|5730439E01Rik|A830039N02Rik|AU023707|Rnf127	LON peptidase N-terminal domain and ring finger 3	protein-coding
MACS_peak_16422	chr6	136776859	136777145	+	215.29	NA	promoter-TSS (NM_178776)	promoter-TSS (NM_178776)	-265	NM_021714	60321	Mm.141197	NM_021714	ENSMUSG00000030216	Wbp11	2510026P17Rik|D6Wsu113e|Npwbp|SIPP1	WW domain binding protein 11	protein-coding
MACS_peak_6431	chr15	36103471	36104002	+	215.24	NA	promoter-TSS (NM_001039368)	promoter-TSS (NM_001039368)	-29	NM_023127	17749	Mm.27375	NM_023127	ENSMUSG00000045996	Polr2k	ABC10-alpha|MafY|Mt1a|RPABC4|RPB10alpha|RPB12|RPB7.0	polymerase (RNA) II (DNA directed) polypeptide K	protein-coding
MACS_peak_4764	chr12	112615958	112616307	+	215.24	NA	promoter-TSS (NM_183016)	promoter-TSS (NM_183016)	-203	NM_183016	217866	Mm.27397	NM_183016	ENSMUSG00000021279	Cdc42bpb	MRCKb	CDC42 binding protein kinase beta	protein-coding
MACS_peak_2186	chr10	127805357	127806470	+	215.23	NA	5' UTR (NM_001081040, exon 1 of 5)	5' UTR (NM_001081040, exon 1 of 5)	1180	NM_001081040	210582	Mm.296876	NM_001081040	ENSMUSG00000039914	Coq10a	Gm1	coenzyme Q10 homolog A (yeast)	protein-coding
MACS_peak_16704	chr7	19575797	19576540	+	215.09	NA	promoter-TSS (NM_145579)	promoter-TSS (NM_145579)	-426	NM_145579	232934	Mm.440069	NM_145579	ENSMUSG00000048481	Mypop	Myodysa|P42pop	Myb-related transcription factor, partner of profilin	protein-coding
MACS_peak_8875	chr17	87846515	87846808	+	215.09	NA	promoter-TSS (NM_007589)	promoter-TSS (NM_007589)	-386	NM_007589	12314	Mm.329243	NM_007589	ENSMUSG00000036438	Calm2	1500001E21Rik|AL024017	calmodulin 2	protein-coding
MACS_peak_2742	chr11	59623109	59623611	+	215.09	NA	promoter-TSS (NM_001271357)	promoter-TSS (NM_001271357)	181	NM_001271356	216805	Mm.339640	NM_146018	ENSMUSG00000032633	Flcn	AU014660|B430214A04Rik|Bhd|FLCL	folliculin	protein-coding
MACS_peak_15049	chr5	122161286	122161544	+	215.07	NA	promoter-TSS (NM_009125)	promoter-TSS (NM_009125)	-203	NM_009125	20239	Mm.260900	NM_009125	ENSMUSG00000042605	Atxn2	9630045M23Rik|ATX2|AW544490|Sca2	ataxin 2	protein-coding
MACS_peak_2196	chr10	127930514	127931307	+	214.88	NA	promoter-TSS (NM_010860)	promoter-TSS (NM_010860)	-29	NM_010860	17904	Mm.337074	NM_010860	ENSMUSG00000090841	Myl6	ESMLC|LC17|LC17-GI|LC17-NM|LC17A|LC17B|MLC-3|MLC1SM|MLC3SM|MLC3nm|Myln	myosin, light polypeptide 6, alkali, smooth muscle and non-muscle	protein-coding
MACS_peak_2364	chr11	16407977	16408500	+	213.65	NA	5' UTR (NM_001109972, exon 1 of 4)	5' UTR (NM_001109972, exon 1 of 4)	249	NM_011343	20335	Mm.325350	NM_011343	ENSMUSG00000078974	Sec61g	-	SEC61, gamma subunit	protein-coding
MACS_peak_19335	chr9	20682342	20683184	+	213.65	NA	exon (NM_145154, exon 2 of 6)	exon (NM_145154, exon 2 of 6)	1391	NM_145154	70726	Mm.34019	NM_145154	ENSMUSG00000038742	Angptl6	6330404E11Rik|AGF|ARP3|Arp5	angiopoietin-like 6	protein-coding
MACS_peak_9077	chr18	32399670	32400161	+	213.65	NA	promoter-TSS (NM_133658)	promoter-TSS (NM_133658)	-70	NM_133658	13872	Mm.282335	NM_133658	ENSMUSG00000024382	Ercc3	BTF2 p89|Ercc-3|XPB	excision repair cross-complementing rodent repair deficiency, complementation group 3	protein-coding
MACS_peak_15475	chr5	149995467	149995910	+	213.65	NA	promoter-TSS (NM_001115153)	promoter-TSS (NM_001115153)	-448	NM_001115153	231915	Mm.29402	NM_001013378	ENSMUSG00000041264	Uspl1	E430026A01Rik	ubiquitin specific peptidase like 1	protein-coding
MACS_peak_14523	chr5	35448134	35448438	+	213.65	NA	promoter-TSS (NM_013587)	promoter-TSS (NM_013587)	60	NM_013587	16976	Mm.277661	NM_013587	ENSMUSG00000029103	Lrpap1	AA617339|AI790446|AU042172|C77774|HBP44|RAP	low density lipoprotein receptor-related protein associated protein 1	protein-coding
MACS_peak_12236	chr3	68376194	68376664	+	213.64	NA	5' UTR (NM_013928, exon 1 of 7)	5' UTR (NM_013928, exon 1 of 7)	139	NM_013928	30953	Mm.331064	NM_013928	ENSMUSG00000027777	Schip1	Nf2ip|Schip-1	schwannomin interacting protein 1	protein-coding
MACS_peak_14501	chr5	34338307	34339435	+	213.59	NA	5' UTR (NM_001001985, exon 1 of 3)	5' UTR (NM_001001985, exon 1 of 3)	238	NM_001001985	269642	Mm.274610	NM_001001985	ENSMUSG00000048142	Nat8l	1110038O08Rik|Shati	N-acetyltransferase 8-like	protein-coding
MACS_peak_4938	chr13	23636216	23636475	+	213.43	NA	5' UTR (NM_013548, exon 1 of 1)	5' UTR (NM_013548, exon 1 of 1)	424	NM_013548	260423	Mm.221389	NM_013548	ENSMUSG00000059309	Hist1h3f	H3.2-221|Hist1	histone cluster 1, H3f	protein-coding
MACS_peak_4309	chr12	56225148	56225647	+	213.42	NA	promoter-TSS (NM_001100116)	promoter-TSS (NM_001100116)	-118	NM_001100116	100101807	Mm.439875	NM_001100116		1700047I17Rik2	-	RIKEN cDNA 1700047I17 gene 2	protein-coding
MACS_peak_15524	chr6	11857257	11857554	+	213.40	NA	promoter-TSS (NM_010886)	promoter-TSS (NM_010886)	41	NM_010886	17992	Mm.415865	NM_010886	ENSMUSG00000029632	Ndufa4	MLRQ	NADH dehydrogenase (ubiquinone) 1 alpha subcomplex, 4	protein-coding
MACS_peak_4719	chr12	109417932	109418205	+	213.40	NA	promoter-TSS (NM_028262)	promoter-TSS (NM_028262)	120	NM_009832	12454	Mm.474441	NM_009832	ENSMUSG00000021258	Ccnk	AW123198|AW413594|CPR4|CycK	cyclin K	protein-coding
MACS_peak_2814	chr11	61743618	61744133	+	213.40	NA	promoter-TSS (NM_019921)	promoter-TSS (NM_019921)	-116	NM_019921	56697	Mm.274404	NM_019921	ENSMUSG00000047804	Akap10	1500031L16Rik|B130049N18Rik|D-AKAP-2|D-AKAP2|PRKA10	A kinase (PRKA) anchor protein 10	protein-coding
MACS_peak_3791	chr11	109287220	109287497	+	213.40	NA	promoter-TSS (NM_001252193)	promoter-TSS (NM_001252193)	98	NM_025275	13929	Mm.211850	NM_025275	ENSMUSG00000020610	Amz2	AA408420|ESTM12|X83328	archaelysin family metallopeptidase 2	protein-coding
MACS_peak_16257	chr6	124414547	124415226	+	213.15	NA	promoter-TSS (NM_153508)	promoter-TSS (NM_153508)	-84	NM_153508	232370	Mm.193701	NM_153508	ENSMUSG00000008153	Clstn3	CSTN3|Cs3|Cst-3|mKIAA0726	calsyntenin 3	protein-coding
MACS_peak_6938	chr15	85641690	85642394	+	213.15	NA	promoter-TSS (NM_197998)	promoter-TSS (NM_197998)	85	NM_001164626	72355	Mm.33706	NM_197998	ENSMUSG00000064284	Cdpf1	2210021J22Rik	cysteine rich, DPF motif domain containing 1	protein-coding
MACS_peak_19158	chr8	124900163	124900421	+	212.93	NA	promoter-TSS (NM_001029993)	promoter-TSS (NM_001029993)	-224	NM_001029994	76014	Mm.241489	NM_001029993	ENSMUSG00000017478	Zc3h18	1190001B23Rik|5830416A07Rik|Nhn1	zinc finger CCCH-type containing 18	protein-coding
MACS_peak_12623	chr3	104442274	104442795	+	212.65	NA	promoter-TSS (NM_009196)	promoter-TSS (NM_009196)	-53	NM_009196	20501	Mm.9086	NM_009196	ENSMUSG00000032902	Slc16a1	AL022710|Mct1	solute carrier family 16 (monocarboxylic acid transporters), member 1	protein-coding
MACS_peak_17366	chr7	71518727	71519086	+	212.60	NA	promoter-TSS (NM_177893)	promoter-TSS (NM_177893)	75	NM_177893	330554	Mm.236510	NM_177893	ENSMUSG00000033458	Fan1	6030441H18Rik|Mtmr15	FANCD2/FANCI-associated nuclease 1	protein-coding
MACS_peak_1386	chr10	42940767	42941503	+	212.51	NA	promoter-TSS (NM_001168289)	promoter-TSS (NM_001168289)	-157	NM_027772	71365	Mm.490430	NM_027772	ENSMUSG00000038240	Pdss2	5430420P03Rik|Gm60|Plmp|kd|mDLP1	prenyl (solanesyl) diphosphate synthase, subunit 2	protein-coding
MACS_peak_6165	chr14	75683831	75684330	+	212.15	NA	promoter-TSS (NM_026083)	promoter-TSS (NM_026083)	-100	NM_026083	67302	Mm.74704	NM_026083	ENSMUSG00000022000	Zc3h13	2600010B19Rik|3110050K21Rik|4930570G11Rik|C87618	zinc finger CCCH type containing 13	protein-coding
MACS_peak_10748	chr2	38863324	38863824	+	212.14	NA	promoter-TSS (NM_028809)	promoter-TSS (NM_028809)	-85	NM_028809	74192	Mm.38155	NM_028809	ENSMUSG00000026755	Arpc5l	2010015J01Rik|AI852867|ARC16-2|AW555592|AW742746	actin related protein 2/3 complex, subunit 5-like	protein-coding
MACS_peak_4288	chr12	53703907	53704567	+	211.96	NA	promoter-TSS (NR_045910)	promoter-TSS (NR_045910)	-928	NR_045910	73278	Mm.396209	NR_045910		1700031P21Rik	-	RIKEN cDNA 1700031P21 gene	ncRNA
MACS_peak_6114	chr14	70857153	70857594	+	211.72	NA	promoter-TSS (NM_145981)	promoter-TSS (NM_145981)	49	NM_145981	105653	Mm.192598	NM_145981	ENSMUSG00000003469	Phyhip	AW049870|C630010D02Rik|Lnap1ip|PAHX-AP#1|PAHX-AP1	phytanoyl-CoA hydroxylase interacting protein	protein-coding
MACS_peak_1570	chr10	75383766	75384606	+	211.72	NA	5' UTR (NM_011418, exon 1 of 9)	5' UTR (NM_011418, exon 1 of 9)	173	NM_011418	20587	Mm.279751	NM_011418	ENSMUSG00000000902	Smarcb1	AU020204|Baf47|Ini1|SNF5/INI1|Snf5	SWI/SNF related, matrix associated, actin dependent regulator of chromatin, subfamily b, member 1	protein-coding
MACS_peak_1678	chr10	79627642	79627991	+	211.68	NA	Intergenic	Intergenic	-2770	NM_007705	12696	Mm.17898	NM_007705	ENSMUSG00000045193	Cirbp	Cirp|R74941	cold inducible RNA binding protein	protein-coding
MACS_peak_19835	chr9	62980541	62980872	+	211.61	NA	Intergenic	Intergenic	14081	NM_172446	207667	Mm.36349	NM_172446	ENSMUSG00000022245	Skor1	AV273001|C230094B15Rik|Corl1|Lbxcor1	SKI family transcriptional corepressor 1	protein-coding
MACS_peak_5552	chr13	108954113	108954395	+	211.61	NA	intron (NM_028042, intron 2 of 11)	intron (NM_028042, intron 2 of 11)	5322	NM_028042	71991	Mm.212208	NM_028042	ENSMUSG00000021694	Ercc8	2410022P04Rik|2810431L23Rik|4631412O06Rik|B130065P18Rik|Ckn1|Csa	excision repaiross-complementing rodent repair deficiency, complementation group 8	protein-coding
MACS_peak_11281	chr2	121275012	121275338	+	211.61	NA	exon (NM_001290837, exon 1 of 3)	exon (NM_001290837, exon 1 of 3)	241	NR_110986	378702	Mm.262252	NM_011354	ENSMUSG00000074884	Serf2	C80083|Msmac1l|m4F5rel	small EDRK-rich factor 2	protein-coding
MACS_peak_5441	chr13	91363372	91363976	+	211.61	NA	promoter-TSS (NM_025770)	promoter-TSS (NM_025770)	-82	NM_025770	66795	Mm.235385	NM_025770	ENSMUSG00000021619	Atg10	5330424L23Rik|5430428K15Rik|AI852123|APG10|Agp10|Apg10l|Apg10p|Atg10l	autophagy related 10	protein-coding
MACS_peak_20695	chrX	53707859	53708242	+	211.61	NA	promoter-TSS (NM_172779)	promoter-TSS (NM_172779)	34	NM_172779	236790	Mm.474772	NM_172779	ENSMUSG00000035967	Ddx26b	4930535D10Rik|6330505F04Rik|D130066O12	DEAD/H (Asp-Glu-Ala-Asp/His) box polypeptide 26B	protein-coding
MACS_peak_15942	chr6	85282862	85283972	+	211.61	NA	promoter-TSS (NM_178639)	promoter-TSS (NM_178639)	-1	NM_178639	94282	Mm.121485	NM_178639	ENSMUSG00000033720	Sfxn5	C230001H08Rik	sideroflexin 5	protein-coding
MACS_peak_14017	chr4	141094634	141094995	+	211.61	NA	promoter-TSS (NM_019763)	promoter-TSS (NM_019763)	-302	NM_019763	56381	Mm.299906	NM_019763	ENSMUSG00000040761	Spen	Mint|mKIAA0929	SPEN homolog, transcriptional regulator (Drosophila)	protein-coding
MACS_peak_11283	chr2	121299539	121299966	+	211.61	NA	promoter-TSS (NM_001081975)	promoter-TSS (NM_001081975)	7	NM_001081975	100034361	Mm.270393	NM_001081975		Mfap1b	-	microfibrillar-associated protein 1B	protein-coding
MACS_peak_8217	chr17	27957549	27958017	+	210.99	NA	promoter-TSS (NM_001271511)	promoter-TSS (NM_001271511)	-296	NM_001271511	224647	Mm.196577	NM_001033279	ENSMUSG00000056692	D17Wsu92e	AU020189|C030010A15|C80239	DNA segment, Chr 17, Wayne State University 92, expressed	protein-coding
MACS_peak_11419	chr2	131735341	131735927	+	210.86	NA	promoter-TSS (NM_001278259)	promoter-TSS (NM_001278259)	-30	NM_011170	19122	Mm.648	NM_011170	ENSMUSG00000079037	Prnp	AA960666|AI325101|CD230|PrP|PrP<C>|PrPC|PrPSc|Prn-i|Prn-p|Sinc|prP27-30|prP33-35C	prion protein	protein-coding
MACS_peak_11380	chr2	129123017	129123467	+	210.86	NA	promoter-TSS (NM_181589)	promoter-TSS (NM_181589)	136	NR_040371	100503468	Mm.446943	NR_040371	ENSMUSG00000085498	Gm14023	OTTMUSG00000015408	predicted gene 14023	ncRNA
MACS_peak_17592	chr7	107007221	107007485	+	210.86	NA	promoter-TSS (NM_001164258)	promoter-TSS (NM_001164258)	40	NM_025668	66624	Mm.30043	NM_025668	ENSMUSG00000035227	Spcs2	5730406I15Rik|AA408713|mKIAA0102	signal peptidase complex subunit 2 homolog (S. cerevisiae)	protein-coding
MACS_peak_7079	chr15	98398318	98398632	+	210.46	NA	promoter-TSS (NM_009833)	promoter-TSS (NM_009833)	-408	NM_009833	12455	Mm.29941	NM_009833	ENSMUSG00000011960	Ccnt1	2810478G24Rik|AI115585|CycT1	cyclin T1	protein-coding
MACS_peak_13824	chr4	132398887	132399399	+	210.39	NA	promoter-TSS (NM_146154)	promoter-TSS (NM_146154)	-59	NM_146154	100336	Mm.105230	NM_146154	ENSMUSG00000028882	Ppp1r8	6330548N22Rik|AU044684|NIPP1	protein phosphatase 1, regulatory (inhibitor) subunit 8	protein-coding
MACS_peak_18741	chr8	87293282	87293609	+	210.25	NA	intron (NM_001297601, intron 2 of 8)	intron (NM_001297601, intron 2 of 8)	4823	NM_001081981	18032	Mm.9394	NM_010906	ENSMUSG00000001911	Nfix	CTF|NF-I/X|NF1-X|NFI-X	nuclear factor I/X	protein-coding
MACS_peak_14887	chr5	112705192	112705506	+	210.22	NA	promoter-TSS (NM_009419)	promoter-TSS (NM_009419)	-378	NM_009419	22022	Mm.250631	NM_009419	ENSMUSG00000029344	Tpst2	AI448750|D5Ucla3|Tango13b|grm|grt	protein-tyrosine sulfotransferase 2	protein-coding
MACS_peak_14928	chr5	115017323	115017568	+	210.14	NA	promoter-TSS (NM_001004180)	promoter-TSS (NM_001004180)	-815	NM_001004180	433940	Mm.194212	NM_001004180	ENSMUSG00000041930	Fam222a	-	family with sequence similarity 222, member A	protein-coding
MACS_peak_17964	chr7	135888087	135888679	+	210.14	NA	promoter-TSS (NM_001029982)	promoter-TSS (NM_001029982)	-1	NM_001029982	207352	Mm.297105	NM_001029982	ENSMUSG00000055319	Sec23ip	D7Ertd373e|p125	Sec23 interacting protein	protein-coding
MACS_peak_19117	chr8	122637533	122637890	+	210.04	NA	promoter-TSS (NM_001163762)	promoter-TSS (NM_001163762)	-341	NM_001163762	234797	Mm.101958	NM_172286	ENSMUSG00000031824	6430548M08Rik	AW049007|Kiaa0513|mKIAA0513	RIKEN cDNA 6430548M08 gene	protein-coding
MACS_peak_13877	chr4	133556568	133557176	+	210.04	NA	promoter-TSS (NM_026144)	promoter-TSS (NM_026144)	-93	NM_026144	67422	Mm.100290	NM_026144	ENSMUSG00000012117	Dhdds	3222401G21Rik|CIT|DS|HDS|W91638	dehydrodolichyl diphosphate synthase	protein-coding
MACS_peak_170	chr1	39634092	39634557	+	210.04	NA	promoter-TSS (NM_001033135)	promoter-TSS (NM_001033135)	-132	NM_001033135	67702	Mm.28614	NM_001033135	ENSMUSG00000048234	Rnf149	1600023E10Rik|AV037261|C76763|Gm15832|Greul4|OTTMUSG00000026591	ring finger protein 149	protein-coding
MACS_peak_18686	chr8	86117945	86118458	+	209.98	NA	intron (NM_027179, intron 1 of 11)	intron (NM_027179, intron 1 of 11)	189	NM_027179	106529	Mm.352239	NM_027179	ENSMUSG00000031708	Tecr	2410016D23Rik|A230102P12Rik|AI173355|D17Ertd178e|Gpsn2|SC2	trans-2,3-enoyl-CoA reductase	protein-coding
MACS_peak_4079	chr11	121215501	121216110	+	209.84	NA	promoter-TSS (NM_025793)	promoter-TSS (NM_025793)	-44	NM_025793	66840	Mm.103986	NM_025793	ENSMUSG00000025173	Wdr45b	0610008N23Rik|AA408735|D16Bwg0193e|WIPI-3|Wdr45l	WD repeat domain 45B	protein-coding
MACS_peak_3307	chr11	88725780	88726336	+	209.80	NA	promoter-TSS (NM_001042541)	promoter-TSS (NM_001042541)	-158	NM_001042541	11640	Mm.2969	NM_009648	ENSMUSG00000018428	Akap1	AKAP121|AKAP84|Akap|C76494|C81186|DAKAP1|S-AKAP84	A kinase (PRKA) anchor protein 1	protein-coding
MACS_peak_8243	chr17	29144652	29145253	+	209.80	NA	promoter-TSS (NM_134115)	promoter-TSS (NM_134115)	-70	NM_134115	106504	Mm.439986	NM_134115	ENSMUSG00000024006	Stk38	5830476G13Rik|9530097A09Rik|AA617404|Ndr1	serine/threonine kinase 38	protein-coding
MACS_peak_14576	chr5	43624244	43624698	+	209.80	NA	promoter-TSS (NM_001177379)	promoter-TSS (NM_001177379)	-231	NM_175937	231207	Mm.7233	NM_175937	ENSMUSG00000039782	Cpeb2	A630055H10Rik|Cpe-bp2	cytoplasmic polyadenylation element binding protein 2	protein-coding
MACS_peak_7679	chr16	62786455	62787074	+	209.80	NA	promoter-TSS (NM_178925)	promoter-TSS (NM_178925)	-222	NM_178925	106338	Mm.26321	NM_178925		Nsun3	6720484A09Rik|AU022521	NOL1/NOP2/Sun domain family member 3	protein-coding
MACS_peak_12858	chr3	142427981	142428386	+	209.80	NA	promoter-TSS (NM_145546)	promoter-TSS (NM_145546)	-28	NM_145546	229906	Mm.271756	NM_145546	ENSMUSG00000028271	Gtf2b	-	general transcription factor IIB	protein-coding
MACS_peak_1179	chr10	5151554	5152045	+	209.55	NA	promoter-TSS (NM_001079686)	promoter-TSS (NM_001079686)	-35	NM_001079686	64009	Mm.331626	NM_022027	ENSMUSG00000019769	Syne1	8B|A330049M09Rik|BE692247|C130039F11Rik|CPG2|Myne1|mKIAA1756	spectrin repeat containing, nuclear envelope 1	protein-coding
MACS_peak_9495	chr18	80403240	80403791	+	209.47	NA	promoter-TSS (NM_025299)	promoter-TSS (NM_025299)	-22	NM_025299	27366	Mm.172411	NM_025299		Txnl4a	D18Wsu98e|Dim1|ENSMUSG00000057130|Txnl4|U5-15kD|U5-15kDa	thioredoxin-like 4A	protein-coding
MACS_peak_15959	chr6	86346447	86347335	+	209.39	NA	intron (NM_025823, intron 1 of 5)	CpG	253	NM_025823	66881	Mm.30849	NM_025823	ENSMUSG00000029998	Pcyox1	1200015P13Rik|AI115532|AI448340|PCL1|Pcly	prenylcysteine oxidase 1	protein-coding
MACS_peak_7093	chr15	98764173	98765312	+	209.34	NA	promoter-TSS (NM_011654)	promoter-TSS (NM_011654)	79	NM_011654	22143	Mm.392113	NM_011654	ENSMUSG00000023004	Tuba1b	Tuba2	tubulin, alpha 1B	protein-coding
MACS_peak_17248	chr7	52973122	52973648	+	209.18	NA	promoter-TSS (NM_203280)	promoter-TSS (NM_203280)	-13	NM_001172561	56632	Mm.24222	NM_020011	ENSMUSG00000057342	Sphk2	C76851	sphingosine kinase 2	protein-coding
MACS_peak_15937	chr6	83781556	83781806	+	209.18	NA	promoter-TSS (NM_146169)	promoter-TSS (NM_146169)	54	NM_146169	232164	Mm.404420	NM_146169	ENSMUSG00000045896	Paip2b	-	poly(A) binding protein interacting protein 2B	protein-coding
MACS_peak_8862	chr17	87424521	87425137	+	209.18	NA	promoter-TSS (NM_019936)	promoter-TSS (NM_019936)	-72	NM_019936	56724	Mm.109329	NM_019936	ENSMUSG00000024146	Cript	1200020A08Rik|AA589469	cysteine-rich PDZ-binding protein	protein-coding
MACS_peak_11278	chr2	121184140	121184636	+	209.12	NA	promoter-TSS (NM_009897)	promoter-TSS (NM_009897)	11	NM_009897	12716	Mm.252145	NM_009897	ENSMUSG00000000308	Ckmt1	Mt-CK|ScCKmit|UbCKmit|mi-CK	creatine kinase, mitochondrial 1, ubiquitous	protein-coding
MACS_peak_1199	chr10	7512368	7512892	+	209.12	NA	promoter-TSS (NM_026141)	promoter-TSS (NM_026141)	-62	NM_026141	67418	Mm.38927	NM_026141	ENSMUSG00000015757	Ppil4	3732410E19Rik|3830425H19Rik|AI788954|AW146233|PPIase	peptidylprolyl isomerase (cyclophilin)-like 4	protein-coding
MACS_peak_12139	chr3	51212659	51213002	+	209.12	NA	promoter-TSS (NM_025523)	promoter-TSS (NM_025523)	47	NM_025523	66377	Mm.331007	NM_025523		Ndufc1	2310016K22Rik|KFYI	NADH dehydrogenase (ubiquinone) 1, subcomplex unknown, 1	protein-coding
MACS_peak_2920	chr11	69231036	69231994	+	209.12	NA	Intergenic	CpG	-4338	NM_001017426	216850	Mm.261201	NM_001017426	ENSMUSG00000018476	Kdm6b	1700064E03Rik|BC038313|Jmjd3|mKIAA0346	KDM1 lysine (K)-specific demethylase 6B	protein-coding
MACS_peak_9636	chr19	5457231	5457874	+	209.03	NA	promoter-TSS (NM_001243307)	promoter-TSS (NM_001243307)	11	NM_198616	240514	Mm.329657	NM_198616		Ccdc85b	AI842788|BB115872	coiled-coil domain containing 85B	protein-coding
MACS_peak_17573	chr7	105851204	105851775	+	208.68	NA	promoter-TSS (NM_028410)	promoter-TSS (NM_028410)	-384	NM_028410	72981	Mm.4428	NM_028410	ENSMUSG00000030753	Prkrir	2900052B10Rik|Dap4|Rpkrir	protein-kinase, interferon-inducible double stranded RNA dependent inhibitor, repressor of (P58 repressor)	protein-coding
MACS_peak_16580	chr7	7250943	7251738	+	208.50	NA	promoter-TSS (NR_049193)	promoter-TSS (NR_049193)	-262	NR_049193	100885832		NR_049193	miRBase:MI0019188	Mir5620	mmu-mir-5620	microRNA mir-5620	ncRNA
MACS_peak_17705	chr7	118265976	118266607	+	208.37	NA	promoter-TSS (NR_015573)	promoter-TSS (NR_015573)	-102	NR_015573	75479	Mm.381620	NR_015573		1700012D14Rik	-	RIKEN cDNA 1700012D14 gene	ncRNA
MACS_peak_11619	chr2	155207240	155208172	+	208.10	NA	5' UTR (NM_178111, exon 1 of 4)	5' UTR (NM_178111, exon 1 of 4)	114	NM_178111	68728	Mm.293605	NM_178111	ENSMUSG00000038375	Trp53inp2	1110029F20Rik|Tp53inp2	transformation related protein 53 inducible nuclear protein 2	protein-coding
MACS_peak_8966	chr18	10725454	10725771	+	208.03	NA	promoter-TSS (NM_144860)	promoter-TSS (NM_144860)	-11	NM_144860	225164	Mm.21500	NM_144860	ENSMUSG00000024294	Mib1	DIP-1|E430019M12Rik|Mib|mKIAA1323	mindbomb homolog 1 (Drosophila)	protein-coding
MACS_peak_1364	chr10	41738229	41738544	+	207.99	NA	promoter-TSS (NM_001034858)	promoter-TSS (NM_001034858)	-198	NM_001034858	213402	Mm.211320	NM_001034858	ENSMUSG00000071324	Armc2	2610018I05Rik	armadillo repeat containing 2	protein-coding
MACS_peak_9180	chr18	36508035	36508561	+	207.99	NA	promoter-TSS (NM_001081365)	promoter-TSS (NM_001081365)	20	NM_001081365	66060	Mm.272527	NM_001081365		Cystm1	0610010O12Rik	cysteine-rich transmembrane module containing 1	protein-coding
MACS_peak_3839	chr11	115024511	115024892	+	207.95	NA	promoter-TSS (NM_012030)	promoter-TSS (NM_012030)	46	NM_012030	26941	Mm.27842	NM_012030	ENSMUSG00000020733	Slc9a3r1	EBP-50|NHE-RF|NHERF-1|NHERF1	solute carrier family 9 (sodium/hydrogen exchanger), member 3 regulator 1	protein-coding
MACS_peak_4047	chr11	120434661	120435003	+	207.93	NA	promoter-TSS (NM_011032)	promoter-TSS (NM_011032)	-582	NM_011032	18453	Mm.16660	NM_011032	ENSMUSG00000025130	P4hb	ERp59|PDI|Pdia1|Thbp	prolyl 4-hydroxylase, beta polypeptide	protein-coding
MACS_peak_7303	chr16	13780449	13781044	+	207.93	NA	promoter-TSS (NM_001039521)	promoter-TSS (NM_001039521)	-46	NM_001039521	106298	Mm.490362	NM_001039521	ENSMUSG00000022682	Rrn3	AL023001|E130302O19Rik|R75565|TIF-1A|Tif1a	RRN3 RNA polymerase I transcription factor homolog (yeast)	protein-coding
MACS_peak_15583	chr6	29114474	29114752	+	207.90	NA	5' UTR (NM_133925, exon 1 of 19)	5' UTR (NM_133925, exon 1 of 19)	111	NM_133925	68272	Mm.40802	NM_026650	ENSMUSG00000029701	Rbm28	2810480G15Rik|AI503051	RNA binding motif protein 28	protein-coding
MACS_peak_17752	chr7	125676406	125677142	+	207.90	NA	promoter-TSS (NM_009940)	promoter-TSS (NM_009940)	53	NM_009940	12850	Mm.20634	NM_009940	ENSMUSG00000030652	Coq7	clk-1	demethyl-Q 7	protein-coding
MACS_peak_2257	chr11	3414655	3415133	+	207.81	NA	5' UTR (NM_053267, exon 1 of 5)	5' UTR (NM_053267, exon 1 of 5)	189	NM_053267	114679	Mm.34046	NM_053267	ENSMUSG00000075702	Selm	1500040L08Rik|A230103K18|Sepm	selenoprotein M	protein-coding
MACS_peak_17550	chr7	104099739	104100284	+	207.70	NA	promoter-TSS (NM_153591)	promoter-TSS (NM_153591)	-26	NM_153591	244141	Mm.274864	NM_153591	ENSMUSG00000018995	Nars2	AI875199	asparaginyl-tRNA synthetase 2 (mitochondrial)(putative)	protein-coding
MACS_peak_4168	chr12	21423178	21423512	+	207.38	NA	promoter-TSS (NM_011739)	promoter-TSS (NM_011739)	-48	NM_011739	22630	Mm.289630	NM_011739	ENSMUSG00000076432	Ywhaq	2700028P07Rik|AA409740|AU021156|R74690	tyrosine 3-monooxygenase/tryptophan 5-monooxygenase activation protein, theta polypeptide	protein-coding
MACS_peak_17436	chr7	86649511	86650027	+	207.38	NA	promoter-TSS (NR_029818)	promoter-TSS (NR_029818)	-381	NR_029818	723968		NR_029818	miRBase:MI0000721	Mir9-3	Mirn9-3|mmu-mir-9-3	microRNA 9-3	ncRNA
MACS_peak_14406	chr5	28643136	28643823	+	207.38	NA	promoter-TSS (NM_028234)	promoter-TSS (NM_028234)	-250	NM_028234	381626	Mm.304075	NM_028234	ENSMUSG00000048271	Rbm33	3200001K10Rik|6430512A10Rik|AA386890|Prr8	RNA binding motif protein 33	protein-coding
MACS_peak_7452	chr16	23988545	23988853	+	207.34	NA	promoter-TSS (NM_009744)	promoter-TSS (NM_009744)	-1	NM_009744	12053	Mm.347398	NM_009744	ENSMUSG00000022508	Bcl6	Bcl5	B cell leukemia/lymphoma 6	protein-coding
MACS_peak_7312	chr16	14159610	14159927	+	207.23	NA	promoter-TSS (NM_001081154)	promoter-TSS (NM_001081154)	49	NR_030252	723916		NR_030252	miRBase:MI0003491	Mir484	Mirn484|mmu-mir-484	microRNA 484	ncRNA
MACS_peak_1026	chr1	180267676	180268246	+	207.15	NA	promoter-TSS (NM_016805)	promoter-TSS (NM_016805)	-46	NM_016805	51810	Mm.86589	NM_016805	ENSMUSG00000039630	Hnrnpu	AA408410|AI256620|AL024194|AL024437|AW557595|C86794|Hnrpu|SAFA|Sp120|hnRNP U	heterogeneous nuclear ribonucleoprotein U	protein-coding
MACS_peak_3235	chr11	85048435	85048866	+	207.15	NA	promoter-TSS (NM_025825)	promoter-TSS (NM_025825)	-18	NR_028329	654810	Mm.209580	NR_028329	ENSMUSG00000085628	D630032N06Rik	-	RIKEN cDNA D630032N06 gene	ncRNA
MACS_peak_8270	chr17	30713082	30713743	+	207.15	NA	promoter-TSS (NM_027060)	promoter-TSS (NM_027060)	-180	NM_027060	224671	Mm.41220	NM_027060	ENSMUSG00000062202	Btbd9	1700023F20Rik|4930402L05|AI464421	BTB (POZ) domain containing 9	protein-coding
MACS_peak_1050	chr1	182186183	182186765	+	207.15	NA	promoter-TSS (NM_001128605)	promoter-TSS (NM_001128605)	-43	NM_001128605	19165	Mm.330850	NM_011183	ENSMUSG00000010609	Psen2	ALG-3|Ad4h|Alg3|PS-2|PS2|Psnl2|STM2	presenilin 2	protein-coding
MACS_peak_9528	chr18	85120823	85121605	+	207.14	NA	promoter-TSS (NM_025969)	promoter-TSS (NM_025969)	-298	NM_025969	67105	Mm.250617	NM_025969	ENSMUSG00000024645	Timm21	1700034H14Rik|2700002I20Rik	tranlocase of inner mitochondrial membrane 21	protein-coding
MACS_peak_12075	chr3	32295562	32296111	+	206.81	NA	Intergenic	CpG	-31249	NM_009517	22401	Mm.35705	NM_009517	ENSMUSG00000027663	Zmat3	Wig1	zinc finger matrin type 3	protein-coding
MACS_peak_12526	chr3	96072466	96072713	+	206.69	NA	promoter-TSS (NM_178215)	promoter-TSS (NM_178215)	12	NM_178215	319154	Mm.383293	NM_178215	ENSMUSG00000074403	Hist2h3b	H3-615|H3-616	histone cluster 2, H3b	protein-coding
MACS_peak_9800	chr19	8894009	8894923	+	206.69	NA	promoter-TSS (NM_027412)	promoter-TSS (NM_027412)	575	NM_001081196	68693	Mm.476519	NM_001081196	ENSMUSG00000071659	Hnrnpul2	1110031M08Rik|AI465155|Hnrpul2	heterogeneous nuclear ribonucleoprotein U-like 2	protein-coding
MACS_peak_10987	chr2	90686968	90687717	+	206.69	NA	promoter-TSS (NM_019758)	promoter-TSS (NM_019758)	30	NM_019758	56428	Mm.28023	NM_019758	ENSMUSG00000027282	Mtch2	2310034D24Rik|4930539J07Rik|HSPC032	mitochondrial carrier homolog 2 (C. elegans)	protein-coding
MACS_peak_8778	chr17	74715584	74716041	+	206.69	NA	promoter-TSS (NM_001146224)	promoter-TSS (NM_001146224)	-39	NM_001146223	66310	Mm.28536	NM_024428	ENSMUSG00000024067	Dpy30	2810410M20Rik|C87842	dpy-30 homolog (C. elegans)	protein-coding
MACS_peak_2235	chr11	3166183	3166749	+	206.69	NA	promoter-TSS (NM_007879)	promoter-TSS (NM_007879)	-77	NM_007879	13494	Mm.3250	NM_007879	ENSMUSG00000020457	Drg1	AA408859|AI132520|Nedd3	developmentally regulated GTP binding protein 1	protein-coding
MACS_peak_13301	chr4	73897450	73898017	+	206.66	NA	promoter-TSS (NM_144787)	promoter-TSS (NM_144787)	-50	NM_144787	76804	Mm.209059	NM_144787	ENSMUSG00000028397	Kdm4c	2410141F18Rik|AA517467|Gasc1|Jmjd2c	lysine (K)-specific demethylase 4C	protein-coding
MACS_peak_10626	chr2	31526153	31526476	+	206.35	NA	promoter-TSS (NM_144886)	promoter-TSS (NM_144886)	57	NM_144886	227715	Mm.150972	NM_144886	ENSMUSG00000039356	Exosc2	Rrp4	exosome component 2	protein-coding
MACS_peak_6155	chr14	73784487	73785135	+	206.27	NA	intron (NM_008410, intron 1 of 5)	CpG	267	NM_008410	16432	Mm.4266	NM_008410	ENSMUSG00000022108	Itm2b	AI256040|Bri|Bri2|Bricd2b|D14Sel6|E25BMM|imBRI2	integral membrane protein 2B	protein-coding
MACS_peak_2448	chr11	29448156	29448501	+	206.19	NA	promoter-TSS (NM_024277)	promoter-TSS (NM_024277)	-288	NM_001033865	78294	Mm.180003	NM_024277	ENSMUSG00000020460	Rps27a	0610006J14Rik|Uba52|Ubb|Ubc	ribosomal protein S27A	protein-coding
MACS_peak_4063	chr11	120685192	120685547	+	206.19	NA	5' UTR (NM_007988, exon 1 of 43)	5' UTR (NM_007988, exon 1 of 43)	492	NM_007988	14104	Mm.236443	NM_007988	ENSMUSG00000025153	Fasn	A630082H08Rik|FAS	fatty acid synthase	protein-coding
MACS_peak_18303	chr8	26864612	26865254	+	206.19	NA	promoter-TSS (NM_028102)	promoter-TSS (NM_028102)	-181	NM_028102	72108	Mm.246875	NM_028102	ENSMUSG00000061313	Ddhd2	2010305K11Rik|SAMWD1|mKIAA0725	DDHD domain containing 2	protein-coding
MACS_peak_17176	chr7	52409434	52409945	+	206.19	NA	promoter-TSS (NM_029406)	promoter-TSS (NM_029406)	16	NM_001278207	68845	Mm.181689	NM_029406	ENSMUSG00000003423	Pih1d1	1110061L23Rik|4933413A04Rik|Nop17	PIH1 domain containing 1	protein-coding
MACS_peak_1181	chr10	5914120	5914514	+	206.19	NA	promoter-TSS (NM_024261)	promoter-TSS (NM_024261)	128	NM_025343	66084	Mm.153111	NM_025343		Rmnd1	0610042C05Rik|AA408137|AI462664|AW536662	required for meiotic nuclear division 1 homolog (S. cerevisiae)	protein-coding
MACS_peak_5785	chr14	45839305	45839558	+	205.88	NA	promoter-TSS (NM_027518)	promoter-TSS (NM_027518)	39	NM_027518	70713	Mm.343793	NM_027518	ENSMUSG00000049092	Gpr137c	6330416L11Rik|Gm908|TM7SF1L2	G protein-coupled receptor 137C	protein-coding
MACS_peak_9028	chr18	23962257	23963176	+	205.59	NA	exon (NM_153058, exon 1 of 7)	exon (NM_153058, exon 1 of 7)	245	NM_153058	212307	Mm.132237	NM_153058	ENSMUSG00000024277	Mapre2	AI314113|C820009F03Rik|D18Abb1e|EB1|EB2|RP1	microtubule-associated protein, RP/EB family, member 2	protein-coding
MACS_peak_18767	chr8	87509895	87510349	+	205.59	NA	Intergenic	CpG	-4372	NM_133255	170833	Mm.247775	NM_133255	ENSMUSG00000052566	Hook2	A630054I03Rik	hook homolog 2 (Drosophila)	protein-coding
MACS_peak_16426	chr6	137683327	137683818	+	205.59	NA	promoter-TSS (NM_011499)	promoter-TSS (NM_011499)	-31	NM_011499	20901	Mm.22584	NM_011499	ENSMUSG00000030224	Strap	AW557906|C78091|C79202|Unrip	serine/threonine kinase receptor associated protein	protein-coding
MACS_peak_3043	chr11	74537265	74538240	+	205.54	NA	promoter-TSS (NR_037610)	promoter-TSS (NR_037610)	134	NM_013625	18472	Mm.397111	NM_013625	ENSMUSG00000020745	Pafah1b1	LIS-1|Lis1|MMS10-U|Mdsh|Ms10u|Pafaha	platelet-activating factor acetylhydrolase, isoform 1b, subunit 1	protein-coding
MACS_peak_11939	chr2	180891318	180891966	+	205.52	NA	promoter-TSS (NM_007906)	promoter-TSS (NM_007906)	78	NM_007906	13628	Mm.2645	NM_007906	ENSMUSG00000016349	Eef1a2	Eef1a|S1|wasted|wst	eukaryotic translation elongation factor 1 alpha 2	protein-coding
MACS_peak_9539	chr19	3707978	3708579	+	205.52	NA	promoter-TSS (NM_028077)	promoter-TSS (NM_028077)	-55	NM_028077	72056	Mm.23780	NM_028077	ENSMUSG00000035372	1810055G02Rik	AI256204	RIKEN cDNA 1810055G02 gene	protein-coding
MACS_peak_19858	chr9	64869259	64869817	+	205.23	NA	promoter-TSS (NM_021345)	promoter-TSS (NM_021345)	-14	NM_021345	57874	Mm.308180	NM_021345	ENSMUSG00000033629	Ptplad1	4930523M17Rik|AW742319|B-ind1|HACD3|Hspc121	protein tyrosine phosphatase-like A domain containing 1	protein-coding
MACS_peak_3036	chr11	73012322	73013133	+	205.05	NA	promoter-TSS (NM_031251)	promoter-TSS (NM_031251)	-206	NM_031251	83429	Mm.259852	NM_031251	ENSMUSG00000005949	Ctns	AI195360|AW049661	cystinosis, nephropathic	protein-coding
MACS_peak_12641	chr3	105761964	105762554	+	205.02	NA	promoter-TSS (NM_027432)	promoter-TSS (NM_027432)	-157	NM_027432	70465	Mm.5110	NM_027432	ENSMUSG00000000561	Wdr77	2610003I18Rik|2610312E17Rik|C79984|p44/MEP50	WD repeat domain 77	protein-coding
MACS_peak_9873	chr19	16059296	16059788	+	205.02	NA	promoter-TSS (NM_198019)	promoter-TSS (NM_198019)	-23	NR_045355	100502653	Mm.149980	NR_045355	ENSMUSG00000097557	C130060C02Rik	-	RIKEN cDNA C130060C02 gene	ncRNA
MACS_peak_15443	chr5	147644238	147644521	+	204.94	NA	promoter-TSS (NM_019647)	promoter-TSS (NM_019647)	-87	NM_019647	19933	Mm.316592	NM_019647	ENSMUSG00000041453	Rpl21	8430440E03Rik|L21	ribosomal protein L21	protein-coding
MACS_peak_5188	chr13	54867731	54868161	+	204.94	NA	promoter-TSS (NM_033610)	promoter-TSS (NM_033610)	-145	NM_033610	104069	Mm.200843	NM_033610	ENSMUSG00000034891	Sncb	AI838531|betaSYN	synuclein, beta	protein-coding
MACS_peak_6770	chr15	78971656	78971972	+	204.89	NA	promoter-TSS (NM_138581)	promoter-TSS (NM_138581)	17	NM_027231	69833	Mm.279861	NM_027231	ENSMUSG00000033020	Polr2f	1810060D16Rik	polymerase (RNA) II (DNA directed) polypeptide F	protein-coding
MACS_peak_19833	chr9	62828428	62828771	+	204.86	NA	promoter-TSS (NM_019663)	promoter-TSS (NM_019663)	87	NM_019663	56469	Mm.431253	NM_019663	ENSMUSG00000032405	Pias1	2900068C24Rik|Ddxbp1|GBP	protein inhibitor of activated STAT 1	protein-coding
MACS_peak_13852	chr4	133054316	133054671	+	204.75	NA	promoter-TSS (NM_001081156)	promoter-TSS (NM_001081156)	-28	NM_001081156	69539	Mm.151594	NM_001081156	ENSMUSG00000056596	Trnp1	2300002D11Rik|Trnp	TMF1-regulated nuclear protein 1	protein-coding
MACS_peak_9111	chr18	34568874	34569299	+	204.74	NA	promoter-TSS (NM_016927)	promoter-TSS (NM_016927)	9	NM_016927	53871	Mm.445792	NM_016927	ENSMUSG00000014503	Pkd2l2	TRPP5	polycystic kidney disease 2-like 2	protein-coding
MACS_peak_18063	chr7	148246487	148247087	+	204.31	NA	promoter-TSS (NM_177897)	promoter-TSS (NM_177897)	-386	NM_177897	330671	Mm.133741	NM_177897	ENSMUSG00000055629	B4galnt4	BC038881|Gm1095|beta4GalNAcT4	beta-1,4-N-acetyl-galactosaminyl transferase 4	protein-coding
MACS_peak_5741	chr14	32149483	32150128	+	204.17	NA	promoter-TSS (NM_009796)	promoter-TSS (NM_009796)	-105	NM_009796	12339	Mm.201535	NM_009796	ENSMUSG00000021893	Capn7	AU022319|PalBH	calpain 7	protein-coding
MACS_peak_20387	chr9	114597550	114598092	+	204.05	NA	promoter-TSS (NM_146229)	promoter-TSS (NM_146229)	-128	NM_146229	235661	Mm.128627	NM_146229		Dync1li1	1110053F02Rik|Dnclic1|LIC-1	dynein cytoplasmic 1 light intermediate chain 1	protein-coding
MACS_peak_2659	chr11	54335965	54336585	+	203.93	NA	promoter-TSS (NM_001252496)	promoter-TSS (NM_001252496)	-72	NM_001252494	192786	Mm.254404	NM_175258	ENSMUSG00000037533	Rapgef6	A530068K01|AI844632|BB085664|C030018K18Rik|PDZ-GEF2|Pdzgef2|RA-GEF-2|Ragef2|mKIAA4052	Rap guanine nucleotide exchange factor (GEF) 6	protein-coding
MACS_peak_11953	chr2	181048771	181049283	+	203.93	NA	5' UTR (NM_009133, exon 1 of 5)	5' UTR (NM_009133, exon 1 of 5)	178	NM_009133	20262	Mm.2319	NM_009133	ENSMUSG00000027581	Stmn3	9330161A03Rik|AI604839|R75323|Sclip	stathmin-like 3	protein-coding
MACS_peak_9264	chr18	44987843	44988303	+	203.93	NA	promoter-TSS (NM_001163013)	promoter-TSS (NM_001163013)	-246	NM_001163013	240255	Mm.244482	NM_001163013	ENSMUSG00000034653	Ythdc2	3010002F02Rik|BC037178	YTH domain containing 2	protein-coding
MACS_peak_19210	chr8	126415823	126416326	+	203.93	NA	intron (NM_001272041, intron 7 of 7)	CpG	2601	NM_001272041	11459	Mm.214950	NM_009606	ENSMUSG00000031972	Acta1	AA959943|Acta-2|Acts|Actsk-1	actin, alpha 1, skeletal muscle	protein-coding
MACS_peak_8141	chr17	26206288	26206752	+	203.90	NA	promoter-TSS (NM_001162869)	promoter-TSS (NM_001162869)	-398	NM_001162869	215445	Mm.41191	NM_153140	ENSMUSG00000037098	Rab11fip3	Cart1|D030060O14Rik|Rab11-FIP3|mKIAA0665	RAB11 family interacting protein 3 (class II)	protein-coding
MACS_peak_16596	chr7	13507038	13507499	+	203.90	NA	promoter-TSS (NM_009095)	promoter-TSS (NM_009095)	-392	NM_009095	20103	Mm.5291	NM_009095	ENSMUSG00000012848	Rps5	AA617411	ribosomal protein S5	protein-coding
MACS_peak_8443	chr17	35974969	35975248	+	203.64	NA	5' UTR (NM_011655, exon 1 of 4)	5' UTR (NM_011655, exon 1 of 4)	138	NM_011655	22154	Mm.273538	NM_011655	ENSMUSG00000001525	Tubb5	AA408537|AI596182|B130022C14Rik|M(beta)5	tubulin, beta 5 class I	protein-coding
MACS_peak_11479	chr2	139892275	139892819	+	203.48	NA	promoter-TSS (NM_175225)	promoter-TSS (NM_175225)	-6	NR_110351	75812	Mm.293449	NM_175225	ENSMUSG00000039033	Tasp1	4930485D02Rik|AW986064	taspase, threonine aspartase 1	protein-coding
MACS_peak_8097	chr17	25321174	25321719	+	203.43	NA	promoter-TSS (NM_183150)	promoter-TSS (NM_183150)	-60	NM_183150	214489	Mm.274433	NM_183150	ENSMUSG00000067722	BC003965	Ccsmst1	cDNA sequence BC003965	protein-coding
MACS_peak_19984	chr9	77602266	77602483	+	203.11	NA	promoter-TSS (NM_010295)	promoter-TSS (NM_010295)	32	NM_010295	14629	Mm.89888	NM_010295	ENSMUSG00000032350	Gclc	D9Wsu168e|GLCL-H|Ggcs-hs|Glclc	glutamate-cysteine ligase, catalytic subunit	protein-coding
MACS_peak_19621	chr9	45646501	45646825	+	202.92	NA	promoter-TSS (NM_011792)	promoter-TSS (NM_011792)	51	NM_011792	23821	Mm.24044	NM_011792	ENSMUSG00000032086	Bace1	C76936	beta-site APP cleaving enzyme 1	protein-coding
MACS_peak_3785	chr11	109173516	109173856	+	202.84	NA	Intergenic	Intergenic	-14191	NM_011268	19739	Mm.38548	NM_011268	ENSMUSG00000020599	Rgs9	RGS9-1|Rgs9-2	regulator of G-protein signaling 9	protein-coding
MACS_peak_2332	chr11	6375982	6376429	+	202.59	NA	promoter-TSS (NM_011221)	promoter-TSS (NM_011221)	-126	NM_011221	19291	Mm.390332	NM_011221	ENSMUSG00000094483	Purb	2310015K15Rik|AA114818|Cager-2|D11Bwg0414e	purine rich element binding protein B	protein-coding
MACS_peak_14955	chr5	115687740	115688278	+	202.51	NA	5' UTR (NM_026398, exon 2 of 6)	5' UTR (NM_026398, exon 2 of 6)	2149	NM_026398	117109	Mm.24636	NM_026398	ENSMUSG00000060152	Pop5	1500019J17Rik|2700077E03Rik|AW049989|Rnasep3	processing of precursor 5, ribonuclease P/MRP family (S. cerevisiae)	protein-coding
MACS_peak_19367	chr9	21396862	21397577	+	202.39	NA	promoter-TSS (NM_178619)	promoter-TSS (NM_178619)	53	NM_178619	69773	Mm.39704	NM_178619	ENSMUSG00000048429	1810026J23Rik	-	RIKEN cDNA 1810026J23 gene	protein-coding
MACS_peak_271	chr1	59538916	59539160	+	202.34	NA	promoter-TSS (NM_008057)	promoter-TSS (NM_008057)	47	NM_008057	14369	Mm.297906	NM_008057	ENSMUSG00000041075	Fzd7	Fz7	frizzled homolog 7 (Drosophila)	protein-coding
MACS_peak_20315	chr9	108551550	108552016	+	202.34	NA	promoter-TSS (NM_011790)	promoter-TSS (NM_011790)	-72	NM_011790	23807	Mm.290447	NM_011790	ENSMUSG00000064145	Arih2	AI843547|ARI2|TRIAD1|UIP48	ariadne homolog 2 (Drosophila)	protein-coding
MACS_peak_6894	chr15	83385982	83386374	+	202.34	NA	promoter-TSS (NM_001030014)	promoter-TSS (NM_001030014)	-37	NM_001030014	223722	Mm.37560	NM_001030014	ENSMUSG00000048755	Mcat	AI225907|BC025519	malonyl CoA:ACP acyltransferase (mitochondrial)	protein-coding
MACS_peak_8782	chr17	74927165	74927513	+	202.31	NA	promoter-TSS (NM_007566)	promoter-TSS (NM_007566)	-296	NM_007566	12211	Mm.442564	NM_007566	ENSMUSG00000024073	Birc6	A430032G04Rik|A430040A19Rik|AA501170|Bruce|D630005A10Rik|mKIAA1289	baculoviral IAP repeat-containing 6	protein-coding
MACS_peak_5137	chr13	52625699	52626290	+	202.28	NA	5' UTR (NM_001024474, exon 1 of 2)	5' UTR (NM_001024474, exon 1 of 2)	211	NM_001024474	68203	Mm.29362	NM_001024474	ENSMUSG00000047842	Diras2	2900052J15Rik|AI414999	DIRAS family, GTP-binding RAS-like 2	protein-coding
MACS_peak_15543	chr6	17699043	17699412	+	202.20	NA	promoter-TSS (NM_001083315)	promoter-TSS (NM_001083315)	57	NM_022332	64213	Mm.12051	NM_022332	ENSMUSG00000029534	St7	9430001H04Rik|Fam4a2|HELG|RAY1|SEN4|TSG7	suppression of tumorigenicity 7	protein-coding
MACS_peak_19750	chr9	57368769	57369227	+	202.20	NA	promoter-TSS (NM_007747)	promoter-TSS (NM_007747)	-41	NM_007747	12858	Mm.273403	NM_007747	ENSMUSG00000000088	Cox5a	AA959768|CcOX	cytochrome c oxidase subunit Va	protein-coding
MACS_peak_12297	chr3	87369937	87370444	+	202.20	NA	Intergenic	Intergenic	40690	NM_012051	27049	Mm.219460	NM_012051	ENSMUSG00000003382	Etv3	AI414410|METS|Pe1	ets variant 3	protein-coding
MACS_peak_5217	chr13	55736307	55736571	+	202.09	NA	promoter-TSS (NM_001282055)	promoter-TSS (NM_001282055)	79	NM_001282055	212880	Mm.202725	NM_145975	ENSMUSG00000021500	Ddx46	2200005K02Rik|8430438J23Rik|AI325430|AI957095|mKIAA0801	DEAD (Asp-Glu-Ala-Asp) box polypeptide 46	protein-coding
MACS_peak_7582	chr16	38562605	38563159	+	202.09	NA	promoter-TSS (NM_026407)	promoter-TSS (NM_026407)	-45	NM_001205287	67846	Mm.310476	NM_026407	ENSMUSG00000002845	Tmem39a	2610033C09Rik	transmembrane protein 39a	protein-coding
MACS_peak_15817	chr6	57652798	57653596	+	202.09	NA	exon (NM_133737, exon 1 of 9)	exon (NM_133737, exon 1 of 9)	748	NM_133737	71835	Mm.274904	NM_133737		Lancl2	1700003F10Rik	LanC (bacterial lantibiotic synthetase component C)-like 2	protein-coding
MACS_peak_10670	chr2	32480794	32481212	+	201.94	NA	promoter-TSS (NM_001198791)	promoter-TSS (NM_001198791)	46	NM_001198791	11636	Mm.29189	NM_021515	ENSMUSG00000026817	Ak1	Ak-1|B430205N08Rik	adenylate kinase 1	protein-coding
MACS_peak_776	chr1	155334583	155335049	+	201.94	NA	promoter-TSS (NM_007842)	promoter-TSS (NM_007842)	-26	NM_007842	13211	Mm.20000	NM_007842	ENSMUSG00000042699	Dhx9	AI326842|Ddx9|HEL-5|NDHII|RHA|mHEL-5	DEAH (Asp-Glu-Ala-His) box polypeptide 9	protein-coding
MACS_peak_11184	chr2	114026957	114027329	+	201.85	NA	promoter-TSS (NM_175466)	promoter-TSS (NM_175466)	25	NM_175466	228491	Mm.132523	NM_175466	ENSMUSG00000040321	Zfp770	6430601A21Rik|Znf770	zinc finger protein 770	protein-coding
MACS_peak_7101	chr15	98815801	98816488	+	201.81	NA	promoter-TSS (NR_045991)	promoter-TSS (NR_045991)	-252	NR_045991	75951	Mm.441657	NR_045991	ENSMUSG00000097587	4930578M01Rik	3010001K12Rik	RIKEN cDNA 4930578M01 gene	ncRNA
MACS_peak_11981	chr3	8509127	8509726	+	201.79	NA	promoter-TSS (NM_025285)	promoter-TSS (NM_025285)	-101	NM_025285	20257	Mm.29580	NM_025285	ENSMUSG00000027500	Stmn2	AI159727|SCG10|Scgn10|Stmb2	stathmin-like 2	protein-coding
MACS_peak_13294	chr4	68615180	68615799	+	201.76	NA	promoter-TSS (NM_019967)	promoter-TSS (NM_019967)	-58	NM_019967	56710	Mm.248788	NM_019967	ENSMUSG00000028351	Brinp1	BRINP|Dbc1|Dbccr1|Fam5a	bone morphogenic protein/retinoic acid inducible neural specific 1	protein-coding
MACS_peak_20970	chrX	133275570	133275929	+	201.75	NA	promoter-TSS (NM_001168225)	promoter-TSS (NM_001168225)	-55	NM_001168225	56397	Mm.27218	NM_019768	ENSMUSG00000031422	Morf4l2	2410017O14Rik|Mrgx|Sid393p|mKIAA0026	mortality factor 4 like 2	protein-coding
MACS_peak_1096	chr1	187155757	187156261	+	201.69	NA	promoter-TSS (NM_011794)	promoter-TSS (NM_011794)	-29	NM_011794	23827	Mm.227549	NM_011794	ENSMUSG00000026617	Bpnt1	BPntase	bisphosphate 3'-nucleotidase 1	protein-coding
MACS_peak_13381	chr4	97438682	97439274	+	201.46	NA	intron (NM_001122952, intron 1 of 10)	CpG	-5339	NM_001122953	18027	Mm.31274	NM_010905	ENSMUSG00000028565	Nfia	1110047K16Rik|9430022M17Rik|CTF|NF1-A|NF1A	nuclear factor I/A	protein-coding
MACS_peak_17979	chr7	138703807	138704127	+	200.92	NA	promoter-TSS (NM_009774)	promoter-TSS (NM_009774)	62	NM_009774	12237	Mm.927	NM_009774	ENSMUSG00000066979	Bub3	AU019800|AU021329|AU043350|AW146323|C78067	budding uninhibited by benzimidazoles 3 homolog (S. cerevisiae)	protein-coding
MACS_peak_5352	chr13	74345938	74346434	+	200.92	NA	promoter-TSS (NM_177333)	promoter-TSS (NM_177333)	-38	NM_177333	211446	Mm.261859	NM_177333	ENSMUSG00000034152	Exoc3	2810050O03Rik|E430013E20Rik|Sec6|Sec6l1	exocyst complex component 3	protein-coding
MACS_peak_1628	chr10	79166922	79167450	+	200.92	NA	promoter-TSS (NM_009768)	promoter-TSS (NM_009768)	83	NM_009768	12215	Mm.726	NM_009768	ENSMUSG00000023175	Bsg	AI115436|AI325119|CD147|EMMPRIN|HT-7	basigin	protein-coding
MACS_peak_9105	chr18	34380249	34380811	+	200.79	NA	promoter-TSS (NM_007462)	promoter-TSS (NM_007462)	-108	NM_007462	11789	Mm.384171	NM_007462	ENSMUSG00000005871	Apc	AI047805|AU020952|AW124434|CC1|Min|mAPC	adenomatosis polyposis coli	protein-coding
MACS_peak_5886	chr14	55495241	55496482	+	200.79	NA	exon (NM_001167908, exon 1 of 2)	exon (NM_001167908, exon 1 of 2)	514	NM_001167908	105651	Mm.297365	NM_001167908	ENSMUSG00000072494	Ppp1r3e	A630071A11Rik|AW049239|Gm1211	protein phosphatase 1, regulatory (inhibitor) subunit 3E	protein-coding
MACS_peak_8229	chr17	28465226	28465743	+	200.73	NA	promoter-TSS (NM_011287)	promoter-TSS (NM_011287)	68	NM_011287	19896	Mm.336955	NM_011287	ENSMUSG00000037805	Rpl10a	CsA-19|Nedd6	ribosomal protein L10A	protein-coding
MACS_peak_3467	chr11	97627682	97628167	+	200.67	NA	promoter-TSS (NM_026186)	promoter-TSS (NM_026186)	3	NM_026186	67480	Mm.33206	NM_026186	ENSMUSG00000018541	Cwc25	1300013D05Rik|AA473636|Ccdc49|R75228	CWC25 spliceosome-associated protein homolog (S. cerevisiae)	protein-coding
MACS_peak_5575	chr13	113590950	113591245	+	200.67	NA	5' UTR (NM_008903, exon 1 of 6)	5' UTR (NM_008903, exon 1 of 6)	112	NM_008247	19012	Mm.317186	NM_008247	ENSMUSG00000021759	Ppap2a	Hic53|Hpic53|LPP-1|LPP1|PAP-2a|PAP2-alpha|PAP2a|mPAP	phosphatidic acid phosphatase type 2A	protein-coding
MACS_peak_15178	chr5	130175716	130176169	+	200.48	NA	promoter-TSS (NM_172462)	promoter-TSS (NM_172462)	21	NM_172462	22648	Mm.135067	NM_172462	ENSMUSG00000051034	Zfp11	6720465D24|Krox-6|Zfp-11	zinc finger protein 11	protein-coding
MACS_peak_3429	chr11	97141956	97142273	+	200.48	NA	promoter-TSS (NM_008942)	promoter-TSS (NM_008942)	-224	NM_008942	19155	Mm.29824	NM_008942	ENSMUSG00000001441	Npepps	AAP-S|MP100|Psa|R74825|goku	aminopeptidase puromycin sensitive	protein-coding
MACS_peak_4210	chr12	32398530	32398880	+	200.48	NA	promoter-TSS (NM_175191)	promoter-TSS (NM_175191)	86	NM_175191	73010	Mm.441517	NM_175191	ENSMUSG00000044067	Gpr22	2900068K05Rik|AW061316	G protein-coupled receptor 22	protein-coding
MACS_peak_15404	chr5	144225151	144225658	+	200.48	NA	promoter-TSS (NM_144915)	promoter-TSS (NM_144915)	43	NM_144915	231871	Mm.469963	NM_144915	ENSMUSG00000039206	Daglb	E330036I19Rik	diacylglycerol lipase, beta	protein-coding
MACS_peak_17987	chr7	139767861	139768358	+	200.03	NA	promoter-TSS (NM_016978)	promoter-TSS (NM_016978)	-28	NM_016978	18242	Mm.13694	NM_016978	ENSMUSG00000030934	Oat	AI194874	ornithine aminotransferase	protein-coding
MACS_peak_5226	chr13	56804049	56804820	+	199.86	NA	promoter-TSS (NM_008541)	promoter-TSS (NM_008541)	21	NM_001164041	17129	Mm.272920	NM_008541	ENSMUSG00000021540	Smad5	1110051M15Rik|AI451355|Dwf-C|Madh5|MusMLP	SMAD family member 5	protein-coding
MACS_peak_10637	chr2	32091835	32092287	+	199.80	NA	promoter-TSS (NM_145145)	promoter-TSS (NM_145145)	-142	NM_145145	99011	Mm.31192	NM_145145	ENSMUSG00000039254	Pomt1	AI505244	protein-O-mannosyltransferase 1	protein-coding
MACS_peak_6636	chr15	75910862	75911677	+	199.06	NA	promoter-TSS (NM_001164600)	promoter-TSS (NM_001164600)	31	NM_001164600	67959	Mm.29965	NM_028364	ENSMUSG00000002524	Puf60	2410104I19Rik|2810454F19Rik|SIAHBP1	poly-U binding splicing factor 60	protein-coding
MACS_peak_4814	chr12	114312474	114312913	+	199.05	NA	promoter-TSS (NM_029381)	promoter-TSS (NM_029381)	-20	NM_029381	75671	Mm.23377	NM_029381	ENSMUSG00000012211	Tex22	1700028O09Rik|AV210422|Tep22	testis expressed gene 22	protein-coding
MACS_peak_2179	chr10	127707242	127707802	+	199.05	NA	promoter-TSS (NM_019963)	promoter-TSS (NM_019963)	-110	NM_019963	20847	Mm.293120	NM_019963	ENSMUSG00000040033	Stat2	1600010G07Rik|AW496480	signal transducer and activator of transcription 2	protein-coding
MACS_peak_15318	chr5	139060760	139061118	+	199.05	NA	promoter-TSS (NM_013844)	promoter-TSS (NM_013844)	32	NM_013844	24135	Mm.27575	NM_013844		Zfp68	KRAB3|KRAZ2|Zfp70|mszf22|mszf49	zinc finger protein 68	protein-coding
MACS_peak_3154	chr11	78364358	78364657	+	199.00	NA	promoter-TSS (NM_133706)	promoter-TSS (NM_133706)	-270	NM_133706	69071	Mm.29431	NM_133706	ENSMUSG00000037278	Tmem97	1810014L12Rik|AI115531|AL022956|D11Bhm182e	transmembrane protein 97	protein-coding
MACS_peak_3611	chr11	101507175	101507735	+	198.76	NA	Intergenic	CpG	18192	NM_025654	66599	Mm.41449	NM_025654	ENSMUSG00000010362	Rdm1	2410008M22Rik|AW212028|Rad52b	RAD52 motif 1	protein-coding
MACS_peak_13676	chr4	125933407	125933630	+	198.76	NA	promoter-TSS (NM_144941)	promoter-TSS (NM_144941)	45	NM_144941	245877	Mm.266716	NM_144941	ENSMUSG00000028849	Map7d1	AV028413|BC019977|Mtap7d1|Parcc1|Rprc1|mKIAA1187	MAP7 domain containing 1	protein-coding
MACS_peak_9917	chr19	23215275	23215910	+	198.74	NA	promoter-TSS (NM_010638)	promoter-TSS (NM_010638)	-124	NM_010638	16601	Mm.291595	NM_010638	ENSMUSG00000033863	Klf9	2310051E17Rik|AA589643|BTEB-1|Bteb1|ENSMUSG00000055440|Gm9971	Kruppel-like factor 9	protein-coding
MACS_peak_18961	chr8	108282350	108282846	+	198.60	NA	promoter-TSS (NM_027469)	promoter-TSS (NM_027469)	-91	NM_027469	70575	Mm.40954	NM_027469		Gfod2	5730466C23Rik	glucose-fructose oxidoreductase domain containing 2	protein-coding
MACS_peak_14769	chr5	100858234	100859025	+	198.58	NA	promoter-TSS (NR_034038)	promoter-TSS (NR_034038)	-75	NR_034038	100503199	Mm.392282	NR_034038	ENSMUSG00000097772	5430416N02Rik	100041797|Adapt33|Gm3514	RIKEN cDNA 5430416N02 gene	ncRNA
MACS_peak_11379	chr2	129023984	129024935	+	198.53	NA	promoter-TSS (NM_001159593)	promoter-TSS (NM_001159593)	-50	NM_015747	20515	Mm.272675	NM_015747	ENSMUSG00000027397	Slc20a1	AI607883|Glvr-1|Glvr1	solute carrier family 20, member 1	protein-coding
MACS_peak_19481	chr9	37155818	37156278	+	198.37	NA	promoter-TSS (NM_001081429)	promoter-TSS (NM_001081429)	-71	NM_001081429	245902	Mm.390150	NM_001081429	ENSMUSG00000034303	Ccdc15	A630039F14Rik|D030074L19	coiled-coil domain containing 15	protein-coding
MACS_peak_18490	chr8	70341917	70342352	+	197.97	NA	promoter-TSS (NM_027626)	promoter-TSS (NM_027626)	60	NM_027626	234353	Mm.32525	NM_027626	ENSMUSG00000030465	Psd3	4931420C21Rik|AI661273|BC003498|D430018P08|EFA6D	pleckstrin and Sec7 domain containing 3	protein-coding
MACS_peak_16513	chr7	4691677	4691881	+	197.93	NA	promoter-TSS (NM_001115018)	promoter-TSS (NM_001115018)	50	NM_001115018	232811	Mm.247844	NM_146177	ENSMUSG00000059851	Suv420h2	BC024816|KMT5C|Suv4-20h2	suppressor of variegation 4-20 homolog 2 (Drosophila)	protein-coding
MACS_peak_15433	chr5	145992304	145992789	+	197.91	NA	promoter-TSS (NM_028298)	promoter-TSS (NM_028298)	-38	NM_001083958	72611	Mm.206555	NM_028298	ENSMUSG00000007812	Zfp655	2700038I16Rik|9030409O18Rik|mKIAA4222	zinc finger protein 655	protein-coding
MACS_peak_19113	chr8	122364183	122364838	+	197.68	NA	promoter-TSS (NM_028071)	promoter-TSS (NM_028071)	-31	NM_028071	72042	Mm.393405	NM_028071	ENSMUSG00000031827	Cotl1	1810074P22Rik|2010004C08Rik|Clp	coactosin-like 1 (Dictyostelium)	protein-coding
MACS_peak_13219	chr4	53643999	53644489	+	197.68	NA	promoter-TSS (NM_176966)	promoter-TSS (NM_176966)	-99	NM_176966	319636	Mm.103464	NM_176966	ENSMUSG00000054752	Fsd1l	A230072O16Rik|Ccdc10|Csdufd1|Fsd1nl|OTTMUSG00000007002	fibronectin type III and SPRY domain containing 1-like	protein-coding
MACS_peak_2003	chr10	112365860	112366349	+	197.51	NA	promoter-TSS (NM_001033474)	promoter-TSS (NM_001033474)	-22	NM_001033474	382423	Mm.431239	NM_001033474	ENSMUSG00000074748	Atxn7l3b	4921506J03Rik|6230409E21Rik|AI315132|ENSMUSG00000074747	ataxin 7-like 3B	protein-coding
MACS_peak_20191	chr9	103207198	103207574	+	197.45	NA	promoter-TSS (NM_176979)	promoter-TSS (NM_176979)	-271	NM_176979	235559	Mm.259893	NM_176979	ENSMUSG00000032555	Topbp1	1110031N14Rik|2810429C13Rik|AI256758|D430026L04Rik|mKIAA0259	topoisomerase (DNA) II binding protein 1	protein-coding
MACS_peak_17536	chr7	99818251	99818954	+	197.45	NA	promoter-TSS (NM_029078)	promoter-TSS (NM_029078)	-180	NM_029078	74737	Mm.288645	NM_029078	ENSMUSG00000041328	Pcf11	2500001H09Rik|5730417B17Rik|C77803	cleavage and polyadenylation factor subunit homolog (S. cerevisiae)	protein-coding
MACS_peak_15047	chr5	122068643	122069317	+	197.45	NA	promoter-TSS (NM_178799)	promoter-TSS (NM_178799)	-33	NM_178799	338350	Mm.482918	NM_178799	ENSMUSG00000042647	Acad12	9330129D05Rik	acyl-Coenzyme A dehydrogenase family, member 12	protein-coding
MACS_peak_8942	chr18	6515920	6516586	+	197.37	NA	promoter-TSS (NM_007935)	promoter-TSS (NM_007935)	-147	NM_007935	13831	Mm.312133	NM_007935	ENSMUSG00000024240	Epc1	2400007E14Rik|5730566F07Rik|A930032N02Rik	enhancer of polycomb homolog 1 (Drosophila)	protein-coding
MACS_peak_11256	chr2	120796217	120796752	+	197.21	NA	promoter-TSS (NM_009461)	promoter-TSS (NM_009461)	-33	NM_009461	22222	Mm.389330	NM_009461	ENSMUSG00000027272	Ubr1	AI504731	ubiquitin protein ligase E3 component n-recognin 1	protein-coding
MACS_peak_17761	chr7	126138578	126139016	+	197.21	NA	promoter-TSS (NM_001195774)	promoter-TSS (NM_001195774)	-72	NM_001195774	64297	Mm.103439	NM_022420	ENSMUSG00000008734	Gprc5b	AW125761|Raig2	G protein-coupled receptor, family C, group 5, member B	protein-coding
MACS_peak_8602	chr17	51318404	51319056	+	197.21	NA	promoter-TSS (NM_028162)	promoter-TSS (NM_028162)	-53	NM_001285991	72238	Mm.120650	NM_028162	ENSMUSG00000023923	Tbc1d5	1600014N05Rik	TBC1 domain family, member 5	protein-coding
MACS_peak_14337	chr5	23606096	23606631	+	197.21	NA	promoter-TSS (NM_001161800)	promoter-TSS (NM_001161800)	-45	NM_001161800	52323	Mm.273768	NM_026448	ENSMUSG00000028986	Klhl7	2700038B03Rik|D5Ertd363e|SBBI26	kelch-like 7	protein-coding
MACS_peak_10710	chr2	34726218	34726788	+	197.15	NA	promoter-TSS (NM_080554)	promoter-TSS (NM_080554)	-21	NM_080554	66998	Mm.270632	NM_080554	ENSMUSG00000026869	Psmd5	1500032A03Rik|AW475925|S5b|W91691|mKIAA0072	proteasome (prosome, macropain) 26S subunit, non-ATPase, 5	protein-coding
MACS_peak_7931	chr17	15146868	15147472	+	197.05	NA	promoter-TSS (NM_001123367).2	promoter-TSS (NM_001123367).2	-22	NM_001123367	100041639	Mm.440445	NM_001123367	ENSMUSG00000079710	Gm3448	-	predicted gene 3448	protein-coding
MACS_peak_20023	chr9	83727774	83728247	+	197.04	NA	promoter-TSS (NM_001110265)	promoter-TSS (NM_001110265)	-286	NM_009445	22137	Mm.1904	NM_009445	ENSMUSG00000038379	Ttk	AL022661|Esk1|Mps1|PYT|esk	Ttk protein kinase	protein-coding
MACS_peak_21	chr1	9934009	9934383	+	197.04	NA	promoter-TSS (NR_024067)	promoter-TSS (NR_024067)	3	NR_024067	73824	Mm.28311	NR_024067	ENSMUSG00000098234	Snhg6	1110008H02Rik	small nucleolar RNA host gene 6	ncRNA
MACS_peak_10633	chr2	31993178	31993587	+	197.04	NA	Intergenic	Intergenic	-13286	NM_172661	227723	Mm.25504	NM_172661	ENSMUSG00000039262	Prrc2b	5830434P21Rik|AI173903|Bat2l|Bat2l1|D430039P21|mKIAA0515	proline-rich coiled-coil 2B	protein-coding
MACS_peak_8461	chr17	36131375	36131619	+	196.81	NA	promoter-TSS (NR_015618)	promoter-TSS (NR_015618)	48	NR_015618	77810	Mm.483143	NR_015618		A930015D03Rik	-	RIKEN cDNA A930015D03 gene	ncRNA
MACS_peak_338	chr1	72330714	72331161	+	196.81	NA	promoter-TSS (NM_023523)	promoter-TSS (NM_023523)	-10	NM_175564	271711	Mm.80318	NM_175564	ENSMUSG00000026188	Tmem169	A830020B06Rik	transmembrane protein 169	protein-coding
MACS_peak_10389	chr2	24618538	24618986	+	196.81	NA	promoter-TSS (NM_007579)	promoter-TSS (NM_007579)	-90	NM_007579	12287	Mm.4424	NM_007579	ENSMUSG00000004113	Cacna1b	AW050276|AW060892|AW822256|Cav2.2|Cchn1a|alpha(1B)	calcium channel, voltage-dependent, N type, alpha 1B subunit	protein-coding
MACS_peak_14558	chr5	38550511	38551063	+	196.76	NA	promoter-TSS (NM_010942)	promoter-TSS (NM_010942)	-81	NM_010942	18196	Mm.7414	NM_010942	ENSMUSG00000029126	Nsg1	Neep21|m234|p21	neuron specific gene family member 1	protein-coding
MACS_peak_16263	chr6	124690936	124691514	+	196.72	NA	promoter-TSS (NM_013535)	promoter-TSS (NM_013535)	-128	NM_013535	14790	Mm.439877	NM_013535		Grcc10	2310033H05Rik|C10	gene rich cluster, C10 gene	protein-coding
MACS_peak_16239	chr6	122711161	122711439	+	196.71	NA	Intergenic	Intergenic	-18537	NM_011401	20527	Mm.395108	NM_011401	ENSMUSG00000003153	Slc2a3	AA408729|AL023014|AL024341|AU040424|C78366|Glut-3|Glut3	solute carrier family 2 (facilitated glucose transporter), member 3	protein-coding
MACS_peak_18624	chr8	74684521	74684891	+	196.71	NA	promoter-TSS (NM_023126)	promoter-TSS (NM_023126)	-393	NM_023126	17274	Mm.162811	NM_023126		Rab8a	AA409338|Mel	RAB8A, member RAS oncogene family	protein-coding
MACS_peak_15976	chr6	86682791	86683659	+	196.71	NA	5' UTR (NM_011818, exon 1 of 14)	5' UTR (NM_011818, exon 1 of 14)	147	NM_011818	23885	Mm.321452	NM_011818	ENSMUSG00000001157	Gmcl1	2810049L19Rik|Gcl|mglc-1	germ cell-less homolog 1 (Drosophila)	protein-coding
MACS_peak_5015	chr13	36827791	36828196	+	196.71	NA	Intergenic	CpG	-1647	NM_153529	68404	Mm.232930	NM_153529	ENSMUSG00000039114	Nrn1	0710008J23Rik|Cpg15|Nrn	neuritin 1	protein-coding
MACS_peak_4031	chr11	120177197	120177985	+	196.71	NA	Intergenic	Intergenic	31136	NR_105900	102465564		NR_105900		Mir6935	mmu-mir-6935	microRNA mir-6935	ncRNA
MACS_peak_5631	chr14	17197365	17197858	+	196.67	NA	promoter-TSS (NM_009409)	promoter-TSS (NM_009409)	-109	NM_009409	21974	Mm.130362	NM_009409	ENSMUSG00000017485	Top2b	D230016L12Rik|Top-2	topoisomerase (DNA) II beta	protein-coding
MACS_peak_7921	chr17	13200713	13201031	+	196.40	NA	5' UTR (NM_013671, exon 1 of 5)	5' UTR (NM_013671, exon 1 of 5)	167	NM_013671	20656	Mm.290876	NM_013671	ENSMUSG00000006818	Sod2	MnSOD|Sod-2	superoxide dismutase 2, mitochondrial	protein-coding
MACS_peak_726	chr1	139794826	139795382	+	196.39	NA	Intergenic	Intergenic	-67928	NR_029795	735252		NR_029795	miRBase:MI0000697	Mir181a-1	Mirn181a-1|Mirn213|miR-213|mmu-mir-213	microRNA 181a-1	ncRNA
MACS_peak_7518	chr16	32608744	32609236	+	196.39	NA	promoter-TSS (NM_011638)	promoter-TSS (NM_011638)	8	NM_011638	22042	Mm.28683	NM_011638	ENSMUSG00000022797	Tfrc	2610028K12Rik|AI195355|AI426448|AU015758|CD71|E430033M20Rik|Mtvr-1|Mtvr1|TFR|TFR1|TR|Trfr|p90	transferrin receptor	protein-coding
MACS_peak_14442	chr5	31350695	31351245	+	196.39	NA	promoter-TSS (NM_027855)	promoter-TSS (NM_027855)	-35	NM_001177621	330064	Mm.205463	NM_177870	ENSMUSG00000006641	Slc5a6	E430023I20	solute carrier family 5 (sodium-dependent vitamin transporter), member 6	protein-coding
MACS_peak_7173	chr15	101114653	101115005	+	195.91	NA	promoter-TSS (NM_026566)	promoter-TSS (NM_026566)	97	NM_026566	68118	Mm.482360	NM_026566	ENSMUSG00000037204	Atg101	9430023L20Rik|AA407441|AU022967	autophagy related 101	protein-coding
MACS_peak_16977	chr7	31016915	31017597	+	195.84	NA	promoter-TSS (NM_025548)	promoter-TSS (NM_025548)	163	NM_027259	69920	Mm.440028	NM_027259	ENSMUSG00000019738	Polr2i	2810002B19Rik	polymerase (RNA) II (DNA directed) polypeptide I	protein-coding
MACS_peak_18255	chr8	23171115	23171418	+	195.81	NA	promoter-TSS (NM_183142)	promoter-TSS (NM_183142)	73	NM_183142	207958	Mm.267439	NM_183142	ENSMUSG00000063362	Alg11	AI849156|AW492253|B230397C21|Mmat-4(5)	asparagine-linked glycosylation 11 (alpha-1,2-mannosyltransferase)	protein-coding
MACS_peak_2204	chr10	127985948	127986321	+	195.81	NA	promoter-TSS (NM_018860)	promoter-TSS (NM_018860)	90	NM_018860	67945	Mm.290786	NM_018860	ENSMUSG00000093674	Rpl41	1810055P16Rik|2210411K19Rik	ribosomal protein L41	protein-coding
MACS_peak_3159	chr11	79067984	79068405	+	195.42	NA	promoter-TSS (NM_019653)	promoter-TSS (NM_019653)	3	NM_019653	78889	Mm.307022	NM_019653	ENSMUSG00000017677	Wsb1	1110056B13Rik|2700038M07Rik	WD repeat and SOCS box-containing 1	protein-coding
MACS_peak_1464	chr10	60915420	60915632	+	195.42	NA	promoter-TSS (NM_010124)	promoter-TSS (NM_010124)	-109	NM_010124	13688	Mm.259516	NM_010124	ENSMUSG00000020091	Eif4ebp2	2810011I19Rik|4E-BP2|AA792569|BC010348|PHAS-II	eukaryotic translation initiation factor 4E binding protein 2	protein-coding
MACS_peak_17526	chr7	97624622	97625286	+	195.33	NA	promoter-TSS (NM_026734)	promoter-TSS (NM_026734)	-449	NM_026734	68472	Mm.289791	NM_026734		Tmem126b	1110001A23Rik	transmembrane protein 126B	protein-coding
MACS_peak_7888	chr17	8503649	8504179	+	195.33	NA	promoter-TSS (NM_134114)	promoter-TSS (NM_134114)	-54	NM_134114	106489	Mm.311080	NM_134114	ENSMUSG00000073468	Sft2d1	5630401J11Rik|AA409698	SFT2 domain containing 1	protein-coding
MACS_peak_3187	chr11	82577588	82578054	+	195.06	NA	promoter-TSS (NM_009839)	promoter-TSS (NM_009839)	2	NM_009839	12467	Mm.4126	NM_009839	ENSMUSG00000020698	Cct6b	CCT-zeta-2|CCTzeta-2|Cctz-2|TCP-1-zeta-2	chaperonin containing Tcp1, subunit 6b (zeta)	protein-coding
MACS_peak_19015	chr8	112691976	112692210	+	195.05	NA	promoter-TSS (NM_007586)	promoter-TSS (NM_007586)	13	NM_007586	12308	Mm.2755	NM_007586	ENSMUSG00000003657	Calb2	CR	calbindin 2	protein-coding
MACS_peak_13333	chr4	83170863	83171348	+	194.87	NA	promoter-TSS (NM_001081012)	promoter-TSS (NM_001081012)	-344	NM_001081012	320226	Mm.180032	NM_029117	ENSMUSG00000052407	Ccdc171	4930418J05Rik|4930473A06Rik|A330015D16Rik	coiled-coil domain containing 171	protein-coding
MACS_peak_9978	chr19	31157400	31157731	+	194.52	NA	exon (NM_031249, exon 1 of 1)	exon (NM_031249, exon 1 of 1)	234	NM_031249	83410	Mm.22031	NM_031249	ENSMUSG00000053536	Cstf2t	64kDa|C77975|tCstF-64|tauCstF-64	cleavage stimulation factor, 3' pre-RNA subunit 2, tau	protein-coding
MACS_peak_585	chr1	122017414	122018035	+	194.25	NA	promoter-TSS (NM_007830)	promoter-TSS (NM_007830)	-40	NM_028439	73103	Mm.271602	NM_028439	ENSMUSG00000026388	3110009E18Rik	-	RIKEN cDNA 3110009E18 gene	protein-coding
MACS_peak_1067	chr1	182780616	182781117	+	194.25	NA	promoter-TSS (NM_145943)	promoter-TSS (NM_145943)	-416	NM_145943	208768	Mm.272625	NM_145943	ENSMUSG00000038806	Sde2	-	SDE2 telomere maintenance homolog (S. pombe)	protein-coding
MACS_peak_5816	chr14	50402664	50403292	+	194.24	NA	promoter-TSS (NM_026142)	promoter-TSS (NM_026142)	64	NM_026142	67419	Mm.318710	NM_026142	ENSMUSG00000036242	3632451O06Rik	AU067705	RIKEN cDNA 3632451O06 gene	protein-coding
MACS_peak_3020	chr11	72254574	72255041	+	194.24	NA	promoter-TSS (NM_016776)	promoter-TSS (NM_016776)	-73	NM_016776	18432	Mm.147946	NM_016776	ENSMUSG00000040463	Mybbp1a	AL024407|AU019902|P160|p160MBP|p67MBP	MYB binding protein (P160) 1a	protein-coding
MACS_peak_14936	chr5	115263733	115264022	+	194.21	NA	non-coding (NR_027818, exon 1 of 2)	non-coding (NR_027818, exon 1 of 2)	108	NR_027818	66236	Mm.268546	NR_027817	ENSMUSG00000072694	1500011B03Rik	AI415201|AV141149|AW556386	RIKEN cDNA 1500011B03 gene	ncRNA
MACS_peak_9437	chr18	74122873	74123429	+	194.21	NA	intron (NM_172632, intron 2 of 5)	intron (NM_172632, intron 2 of 5)	-54410	NR_045390	77855	Mm.410760	NR_045390	ENSMUSG00000090263	D730045A05Rik	-	RIKEN cDNA D730045A05 gene	ncRNA
MACS_peak_10504	chr2	26820075	26820370	+	194.06	NA	promoter-TSS (NM_207234)	promoter-TSS (NM_207234)	-316	NM_207234	227656	Mm.291874	NM_207234	ENSMUSG00000052406	Rexo4	Gm111|Xpmc2h	REX4, RNA exonuclease 4 homolog (S. cerevisiae)	protein-coding
MACS_peak_15072	chr5	122952071	122952334	+	193.88	NA	promoter-TSS (NR_027838)	promoter-TSS (NR_027838)	32	NM_001110140	11938	Mm.227583	NM_009722	ENSMUSG00000029467	Atp2a2	9530097L16Rik|D5Wsu150e|SERCA2|SERCA2B|mKIAA4195	ATPase, Ca++ transporting, cardiac muscle, slow twitch 2	protein-coding
MACS_peak_11261	chr2	120965806	120966640	+	193.63	NA	promoter-TSS (NM_001290811)	promoter-TSS (NM_001290811)	59	NM_001290812	75894	Mm.384805	NM_029475	ENSMUSG00000027259	Adal	4930578F03Rik	adenosine deaminase-like	protein-coding
MACS_peak_16318	chr6	125081608	125082087	+	193.63	NA	promoter-TSS (NM_138747)	promoter-TSS (NM_138747)	-54	NM_138747	110109	Mm.29203	NM_138747	ENSMUSG00000038279	Nop2	120kDa|A530002O17|Nol1	NOP2 nucleolar protein	protein-coding
MACS_peak_15415	chr5	144861108	144861445	+	193.62	NA	promoter-TSS (NM_001081109)	promoter-TSS (NM_001081109)	-29	NM_001081109	231876	Mm.288726	NM_001081109	ENSMUSG00000038970	Lmtk2	2900041G10Rik|A330101P12Rik|BREK|KPI-2|KPI2|aatyk2|cprk	lemur tyrosine kinase 2	protein-coding
MACS_peak_9031	chr18	24112893	24113540	+	193.59	NA	promoter-TSS (NM_027007)	promoter-TSS (NM_027007)	27	NM_027007	69256	Mm.218343	NM_027007	ENSMUSG00000024276	Zfp397	2810411K16Rik|6720480F11Rik|AI461664	zinc finger protein 397	protein-coding
MACS_peak_4074	chr11	121098443	121098764	+	193.50	NA	promoter-TSS (NM_026272)	promoter-TSS (NM_026272)	53	NM_026272	67608	Mm.291832	NM_026272	ENSMUSG00000000056	Narf	4430402O11Rik	nuclear prelamin A recognition factor	protein-coding
MACS_peak_18687	chr8	86118524	86118816	+	193.49	NA	promoter-TSS (NM_134118)	promoter-TSS (NM_134118)	-280	NM_134118	106529	Mm.352239	NM_027179	ENSMUSG00000031708	Tecr	2410016D23Rik|A230102P12Rik|AI173355|D17Ertd178e|Gpsn2|SC2	trans-2,3-enoyl-CoA reductase	protein-coding
MACS_peak_9954	chr19	27504492	27504821	+	193.41	NA	promoter-TSS (NM_177474)	promoter-TSS (NM_177474)	129	NR_027987	107372	Mm.17942	NM_175354		C030016D13Rik	AW413347	RIKEN cDNA C030016D13 gene	ncRNA
MACS_peak_17977	chr7	138514558	138514951	+	193.41	NA	promoter-TSS (NM_001039534)	promoter-TSS (NM_001039534)	94	NM_001039534	214580	Mm.272948	NM_177609	ENSMUSG00000063179	Pstk	5430423O14Rik|5730458D16Rik|Gm1099|R75284	phosphoseryl-tRNA kinase	protein-coding
MACS_peak_18507	chr8	72298424	72299120	+	193.34	NA	promoter-TSS (NM_177899)	promoter-TSS (NM_177899)	38	NM_177899	330788	Mm.41364	NM_177899		Zfp866	9830167H18Rik|AI875089|C85843|D330038O06Rik	zinc finger protein 866	protein-coding
MACS_peak_20719	chrX	65931512	65931900	+	193.23	NA	promoter-TSS (NM_001290424)	promoter-TSS (NM_001290424)	-10	NM_008031	14265	Mm.3451	NM_008031	ENSMUSG00000000838	Fmr1	FMRP|Fmr-1	fragile X mental retardation syndrome 1	protein-coding
MACS_peak_18046	chr7	147266624	147267129	+	192.85	NA	intron (NM_001190385, intron 1 of 4)	intron (NM_001190385, intron 1 of 4)	1324	NM_001190386	68566	Mm.44241	NM_026769	ENSMUSG00000025468	Caly	0710001P07Rik|1110004A22Rik|Calcyon|Drd1ip	calcyon neuron-specific vesicular protein	protein-coding
MACS_peak_14437	chr5	31223852	31224335	+	192.83	NA	promoter-TSS (NM_008439)	promoter-TSS (NM_008439)	-175	NM_008439	16548	Mm.22451	NM_008439	ENSMUSG00000029162	Khk	-	ketohexokinase	protein-coding
MACS_peak_13689	chr4	126354592	126355102	+	192.69	NA	promoter-TSS (NM_011970)	promoter-TSS (NM_011970)	-40	NM_011970	26445	Mm.22233	NM_011970	ENSMUSG00000028837	Psmb2	AU045357|AW108089|C7-I|D4Wsu33e|HC7-I	proteasome (prosome, macropain) subunit, beta type 2	protein-coding
MACS_peak_10572	chr2	29989003	29989497	+	192.64	NA	promoter-TSS (NM_146252)	promoter-TSS (NM_146252)	-141	NM_146252	70296	Mm.19172	NM_146252	ENSMUSG00000039678	Tbc1d13	2600014A06Rik|BC025586	TBC1 domain family, member 13	protein-coding
MACS_peak_15139	chr5	125028887	125029377	+	192.64	NA	promoter-TSS (NM_145371)	promoter-TSS (NM_145371)	-25	NM_181410	209357	Mm.185467	NM_181410	ENSMUSG00000029387	Gtf2h3	34kDa|5033417D07Rik|BTF2|BTF2 p34|C730029A10|D5Ertd679e|TFIIH	general transcription factor IIH, polypeptide 3	protein-coding
MACS_peak_11749	chr2	163899789	163900107	+	192.64	NA	promoter-TSS (NM_021420)	promoter-TSS (NM_021420)	34	NM_021420	58231	Mm.234472	NM_021420	ENSMUSG00000018209	Stk4	AI447339|AU020804|Kas-2|Mst1|Ysk3	serine/threonine kinase 4	protein-coding
MACS_peak_18719	chr8	86773394	86773779	+	192.34	NA	promoter-TSS (NM_001007571)	promoter-TSS (NM_001007571)	74	NM_001007571	101966	Mm.200723	NM_001007571	ENSMUSG00000019362	D8Ertd738e	AA589584	DNA segment, Chr 8, ERATO Doi 738, expressed	protein-coding
MACS_peak_17685	chr7	117103826	117104291	+	192.34	NA	promoter-TSS (NM_021494)	promoter-TSS (NM_021494)	-122	NM_021494	19347	Mm.21904	NM_021494	ENSMUSG00000035901	Dennd5a	1500012B19Rik|AJ245569|AW496491|ORF37|Rab6ip1|mKIAA1091	DENN/MADD domain containing 5A	protein-coding
MACS_peak_18260	chr8	23509124	23509357	+	192.34	NA	promoter-TSS (NM_181325)	promoter-TSS (NM_181325)	47	NR_045473	69108	Mm.46108	NR_045473		1810012K16Rik	-	RIKEN cDNA 1810012K16 gene	ncRNA
MACS_peak_8147	chr17	26260307	26260686	+	192.10	NA	promoter-TSS (NM_024227)	promoter-TSS (NM_024227)	48	NM_024227	68611	Mm.273102	NM_024227	ENSMUSG00000024181	Mrpl28	1110015G04Rik|L28mt|MAAT1|MRP-L28|p15	mitochondrial ribosomal protein L28	protein-coding
MACS_peak_13048	chr4	33335311	33335792	+	191.91	NA	5' UTR (NM_001033225, exon 1 of 2)	5' UTR (NM_001033225, exon 1 of 2)	211	NM_001033225	108767	Mm.27769	NM_001033225	ENSMUSG00000040128	Pnrc1	5730463C12Rik|B4-2|PRR2|Prol2	proline-rich nuclear receptor coactivator 1	protein-coding
MACS_peak_15737	chr6	48504400	48505374	+	191.86	NA	promoter-TSS (NM_177736)	promoter-TSS (NM_177736)	89	NM_177736	243371	Mm.290764	NM_177736	ENSMUSG00000073096	Lrrc61	BC027309	leucine rich repeat containing 61	protein-coding
MACS_peak_9794	chr19	8848658	8849396	+	191.86	NA	promoter-TSS (NR_015538)	promoter-TSS (NR_015538)	52	NR_015538	100039957	Mm.220886	NR_015538		Gm2518	D630022E15Rik	interferon induced transmembrane protein 2 pseudogene	pseudo
MACS_peak_18069	chr7	148358114	148358927	+	191.82	NA	intron (NM_001172100, intron 1 of 9)	CpG	230	NM_001172100	107702	Mm.279485	NM_145135	ENSMUSG00000038650	Rnh1	AW546468|C80305|RNH	ribonuclease/angiogenin inhibitor 1	protein-coding
MACS_peak_7284	chr16	11134519	11135177	+	191.76	NA	promoter-TSS (NM_029582)	promoter-TSS (NM_029582)	-223	NM_029582	106200	Mm.291015	NM_029582	ENSMUSG00000022498	Txndc11	2810408E11Rik|AI427833|EFP1|Txdc11	thioredoxin domain containing 11	protein-coding
MACS_peak_14810	chr5	106887637	106887925	+	191.76	NA	promoter-TSS (NM_001005477)	promoter-TSS (NM_001005477)	-596	NM_001005477	104382	Mm.271593	NM_001005477	ENSMUSG00000034384	Barhl2	E130309B19Rik|MBH1	BarH-like 2 (Drosophila)	protein-coding
MACS_peak_2784	chr11	60988384	60988621	+	191.76	NA	promoter-TSS (NM_001004143)	promoter-TSS (NM_001004143)	59	NM_001004143	216825	Mm.30602	NM_001004143	ENSMUSG00000042506	Usp22	AI427806	ubiquitin specific peptidase 22	protein-coding
MACS_peak_5283	chr13	63916134	63916956	+	191.54	NA	promoter-TSS (NM_023507)	promoter-TSS (NM_023507)	-83	NM_001013608	76251	Mm.186610	NM_023507	ENSMUSG00000021470	Ercc6l2	0610007P08Rik|1700019D06Rik|9330134C04Rik|Rad26l|Sr278	excision repair cross-complementing rodent repair deficiency, complementation group 6 like 2	protein-coding
MACS_peak_14324	chr5	22938376	22940204	+	191.54	NA	promoter-TSS (NM_026984)	promoter-TSS (NM_026984)	881	NR_040469	269630	Mm.425231	NR_040469	ENSMUSG00000073147	5031425E22Rik	-	RIKEN cDNA 5031425E22 gene	ncRNA
MACS_peak_8088	chr17	25073737	25074242	+	191.13	NA	promoter-TSS (NM_001163448)	promoter-TSS (NM_001163448)	-67	NM_013931	30957	Mm.43081	NM_013931	ENSMUSG00000024163	Mapk8ip3	BB120594|D17Wsu15e|JIP-3|JSAP1|JSAP1a|JSAP1b|JSAP1c|JSAP1d|Jip3|Syd2|mKIAA1066	mitogen-activated protein kinase 8 interacting protein 3	protein-coding
MACS_peak_11181	chr2	113668811	113669467	+	191.04	NA	intron (NM_009162, intron 1 of 5)	intron (NM_009162, intron 1 of 5)	109	NM_009162	20394	Mm.4836	NM_009162	ENSMUSG00000023236	Scg5	7B2|AI325031|Sgne-1|Sgne1	secretogranin V	protein-coding
MACS_peak_12141	chr3	51287579	51288392	+	190.97	NA	promoter-TSS (NM_016858)	promoter-TSS (NM_016858)	97	NM_016858	19338	Mm.1664	NM_016858	ENSMUSG00000027739	Rab33b	-	RAB33B, member RAS oncogene family	protein-coding
MACS_peak_7525	chr16	32914041	32914382	+	190.92	NA	promoter-TSS (NM_001081255)	promoter-TSS (NM_001081255)	25	NM_001081255	70144	Mm.491178	NM_001081255	ENSMUSG00000022801	Lrch3	2210409B11Rik|AW215594|Gm1742	leucine-rich repeats and calponin homology (CH) domain containing 3	protein-coding
MACS_peak_971	chr1	175297069	175297869	+	190.89	NA	intron (NM_053199, intron 1 of 8)	CpG	357	NM_053199	94332	Mm.330524	NM_053199	ENSMUSG00000005338	Cadm3	BIgR|Igsf4b|Necl-1|Necl1|SynCAM3|Tsll1	cell adhesion molecule 3	protein-coding
MACS_peak_11251	chr2	120434840	120435375	+	190.80	NA	promoter-TSS (NM_025657)	promoter-TSS (NM_025657)	-11	NM_001290808	66296	Mm.221900	NM_025475		Haus2	1700101G24Rik|2410007P03Rik|AU020217|Cep27	HAUS augmin-like complex, subunit 2	protein-coding
MACS_peak_16967	chr7	30906687	30907100	+	190.46	NA	promoter-TSS (NM_001081007)	promoter-TSS (NM_001081007)	-74	NM_001081007	233060	Mm.443484	NM_001081007	ENSMUSG00000074220	Zfp382	5930415A09Rik|Znf382	zinc finger protein 382	protein-coding
MACS_peak_16224	chr6	120313616	120314600	+	190.31	NA	promoter-TSS (NM_145997)	promoter-TSS (NM_145997)	-9	NM_145997	214899	Mm.404761	NM_145997	ENSMUSG00000030180	Kdm5a	AA409370|C76986|Jarid1a|RBP2|Rbbp2	lysine (K)-specific demethylase 5A	protein-coding
MACS_peak_9144	chr18	35721536	35722093	+	190.20	NA	promoter-TSS (NM_010771)	promoter-TSS (NM_010771)	2	NM_010771	17184	Mm.215034	NM_010771	ENSMUSG00000037236	Matr3	1110061A14Rik|2810017I02Rik|AI841759|AW555618|D030046F20Rik|mKIAA0723	matrin 3	protein-coding
MACS_peak_18196	chr8	11635575	11636094	+	190.20	NA	promoter-TSS (NM_001167967)	promoter-TSS (NM_001167967)	-77	NM_001281974	102334	Mm.12459	NM_133971	ENSMUSG00000031508	Ankrd10	4833425P12Rik|AW549277	ankyrin repeat domain 10	protein-coding
MACS_peak_13112	chr4	42962253	42962539	+	190.20	NA	Intergenic	Intergenic	-3570	NM_019874	56323	Mm.20437	NM_019874	ENSMUSG00000036052	Dnajb5	1110058L06Rik|AI462558|Hsc40|Hsp40-3	DnaJ (Hsp40) homolog, subfamily B, member 5	protein-coding
MACS_peak_6521	chr15	53177603	53178025	+	190.20	NA	promoter-TSS (NM_010162)	promoter-TSS (NM_010162)	-76	NM_010162	14042	Mm.309395	NM_010162		Ext1	AA409028	exostoses (multiple) 1	protein-coding
MACS_peak_1829	chr10	82321634	82322123	+	190.20	NA	promoter-TSS (NM_001042513)	promoter-TSS (NM_001042513)	-73	NM_001042513	50493	Mm.210155	NM_015762	ENSMUSG00000020250	Txnrd1	TR|TR1|TrxR1	thioredoxin reductase 1	protein-coding
MACS_peak_15107	chr5	123973968	123974234	+	190.11	NA	promoter-TSS (NM_023232)	promoter-TSS (NM_023232)	72	NM_023232	66593	Mm.46716	NM_023232	ENSMUSG00000029433	Diablo	0610041G12Rik|1700006L01Rik|AU040403|Smac	diablo homolog (Drosophila)	protein-coding
MACS_peak_12891	chr3	152009164	152009620	+	190.08	NA	promoter-TSS (NM_001076676)	promoter-TSS (NM_001076676)	-50	NM_133247	170822	Mm.258320	NM_133247	ENSMUSG00000025437	Usp33	9830169D19Rik|AA409780|Vdu1	ubiquitin specific peptidase 33	protein-coding
MACS_peak_12997	chr4	15940709	15941439	+	190.08	NA	promoter-TSS (NM_145950)	promoter-TSS (NM_145950)	-50	NM_145950	209212	Mm.46455	NM_145950	ENSMUSG00000041153	Osgin2	BC010311|C230027H09Rik	oxidative stress induced growth inhibitor family member 2	protein-coding
MACS_peak_2693	chr11	55283117	55283367	+	189.59	NA	promoter-TSS (NM_013716)	promoter-TSS (NM_013716)	-12	NM_013716	27041	Mm.39631	NM_013716		G3bp1	AI849976|B430204O07|C87777|G3bp|mKIAA4115	GTPase activating protein (SH3 domain) binding protein 1	protein-coding
MACS_peak_11312	chr2	122203229	122203454	+	189.58	NA	Intergenic	Intergenic	-8687	NM_001013829	435684	Mm.458215	NM_001013829	ENSMUSG00000033256	Shf	-	Src homology 2 domain containing F	protein-coding
MACS_peak_4397	chr12	72931994	72932290	+	189.58	NA	promoter-TSS (NM_172464)	promoter-TSS (NM_172464)	87	NM_172464	208846	Mm.87417	NM_026102	ENSMUSG00000034574	Daam1	-	dishevelled associated activator of morphogenesis 1	protein-coding
MACS_peak_20309	chr9	108469658	108470047	+	189.58	NA	promoter-TSS (NR_029577)	promoter-TSS (NR_029577)	-179	NM_023247	66706	Mm.29471	NM_023247	ENSMUSG00000070283	Ndufaf3	4733401H18Rik	NADH dehydrogenase (ubiquinone) 1 alpha subcomplex, assembly factor 3	protein-coding
MACS_peak_19294	chr9	7836815	7837468	+	189.50	NA	Intergenic	CpG	-1886	NM_007465	11797	Mm.335659	NM_007465	ENSMUSG00000057367	Birc2	AW146227|Api1|Api2|Birc3|HIAP1|HIAP2|IAP1|IAP2|MIAP1|MIAP2|MIHB|MIHC|RNF48|cIAP1|cIAP2|mcIAP1	baculoviral IAP repeat-containing 2	protein-coding
MACS_peak_9761	chr19	7054762	7055395	+	189.45	NA	promoter-TSS (NM_001166368)	promoter-TSS (NM_001166368)	-127	NM_001166368	14227	Mm.4234	NM_008020	ENSMUSG00000056629	Fkbp2	13kDa|FKBP-2|mFKBP13|mFKBP2	FK506 binding protein 2	protein-coding
MACS_peak_19792	chr9	59598255	59598549	+	189.41	NA	promoter-TSS (NM_173018)	promoter-TSS (NM_173018)	54	NM_001172069	71599	Mm.279070	NM_027838	ENSMUSG00000051705	Senp8	9130010J17Rik|AU020827|Den1|Nedp1|Prsc2	SUMO/sentrin specific peptidase 8	protein-coding
MACS_peak_15750	chr6	50516327	50517047	+	189.11	NA	promoter-TSS (NM_007808)	promoter-TSS (NM_007808)	45	NR_027892	73183	Mm.430720	NR_015581	ENSMUSG00000085776	5430402O13Rik	3110047M22Rik	RIKEN cDNA 5430402O13 gene	ncRNA
MACS_peak_1591	chr10	76721974	76722289	+	189.10	NA	promoter-TSS (NM_030262)	promoter-TSS (NM_030262)	86	NM_030262	80294	Mm.203556	NM_030262	ENSMUSG00000020260	Pofut2	2310011G23Rik|AI256847|BC003494|C21orf80|FUT13	protein O-fucosyltransferase 2	protein-coding
MACS_peak_5682	chr14	25309668	25310094	+	188.55	NA	promoter-TSS (NM_207634)	promoter-TSS (NM_207634)	-22	NM_207635	20088	Mm.16775	NM_011297	ENSMUSG00000025290	Rps24	-	ribosomal protein S24	protein-coding
MACS_peak_7810	chr16	98183247	98184102	+	188.50	NA	5' UTR (NM_001081685, exon 1 of 4)	5' UTR (NM_001081685, exon 1 of 4)	112	NM_001081685	114565	Mm.474489	NM_175428	ENSMUSG00000046962	Zbtb21	5430437K12Rik|B430213I24Rik|Zfp295|Znf295|mKIAA1227	zinc finger and BTB domain containing 21	protein-coding
MACS_peak_17452	chr7	87484842	87485471	+	188.50	NA	promoter-TSS (NM_133952)	promoter-TSS (NM_133952)	-51	NM_133952	101869	Mm.243024	NM_133952	ENSMUSG00000030533	Unc45a	AW538196	unc-45 homolog A (C. elegans)	protein-coding
MACS_peak_20172	chr9	102256793	102257106	+	188.50	NA	promoter-TSS (NM_001168296)	promoter-TSS (NM_001168296)	74	NM_001168296	270190	Mm.22897	NM_173447	ENSMUSG00000032537	Ephb1	9330129L11|AW488255|C130099E04Rik|Cek6|ENSMUSG00000074119|Elk|Elkh|Hek6|Net	Eph receptor B1	protein-coding
MACS_peak_6957	chr15	88692197	88693125	+	188.46	NA	promoter-TSS (NM_145478)	promoter-TSS (NM_145478)	37	NM_145478	223775	Mm.400129	NM_145478	ENSMUSG00000035828	Pim3	BC026639|Kid1	proviral integration site 3	protein-coding
MACS_peak_3983	chr11	119161205	119161750	+	188.46	NA	promoter-TSS (NM_138669)	promoter-TSS (NM_138669)	-120	NM_138669	192170	Mm.197555	NM_138669	ENSMUSG00000025580	Eif4a3	2400003O03Rik|Ddx48|eIF4A-III|mKIAA0111	eukaryotic translation initiation factor 4A3	protein-coding
MACS_peak_16199	chr6	118369225	118370021	+	188.46	NA	promoter-TSS (NM_194339)	promoter-TSS (NM_194339)	-188	NM_194339	213895	Mm.25269	NM_194339	ENSMUSG00000030138	Bms1	AA408648|AU020092|AU043373|BB007109|BC030906|Bms1l|mKIAA0187	BMS1 homolog, ribosome assembly protein (yeast)	protein-coding
MACS_peak_18025	chr7	146271732	146272164	+	188.46	NA	promoter-TSS (NM_011993)	promoter-TSS (NM_011993)	48	NM_011993	26757	Mm.250414	NM_011993	ENSMUSG00000025478	Dpysl4	AI173505|CRMP-3|Crmp3|DPY4|Drp-4|Ulip4	dihydropyrimidinase-like 4	protein-coding
MACS_peak_13172	chr4	46208888	46209454	+	188.46	NA	promoter-TSS (NM_011728)	promoter-TSS (NM_011728)	12	NM_011728	22590	Mm.247036	NM_011728	ENSMUSG00000028329	Xpa	AI573865|Xpac	xeroderma pigmentosum, complementation group A	protein-coding
MACS_peak_5642	chr14	20901907	20902676	+	188.46	NA	exon (NM_026209, exon 1 of 2)	exon (NM_026209, exon 1 of 2)	103	NM_026209	67509	Mm.292423	NM_026209	ENSMUSG00000045107	Saysd1	1810063B07Rik|4930488P03Rik	SAYSVFN motif domain containing 1	protein-coding
MACS_peak_1835	chr10	83006411	83006907	+	188.39	NA	promoter-TSS (NM_001033375)	promoter-TSS (NM_001033375)	-27	NM_001033375	319277	Mm.491194	NM_001033375	ENSMUSG00000034560	A230046K03Rik	AA589518|Kiaa1033|mKIAA1033	RIKEN cDNA A230046K03 gene	protein-coding
MACS_peak_3337	chr11	93856902	93857289	+	188.31	NA	promoter-TSS (NM_001199203)	promoter-TSS (NM_001199203)	-310	NM_001199203	70834	Mm.260737	NM_027569	ENSMUSG00000020859	Spag9	3110018C07Rik|4733401I23Rik|4831406C20Rik|AW552012|JLP|JSAP2|JSAP2a|Jip4|Mapk8ip4|syd1	sperm associated antigen 9	protein-coding
MACS_peak_13535	chr4	116229443	116230475	+	188.31	NA	promoter-TSS (NM_029868)	promoter-TSS (NM_029868)	-373	NM_029868	77110	Mm.41715	NM_029868	ENSMUSG00000034042	Gpbp1l1	5330440M15Rik|BC002292	GC-rich promoter binding protein 1-like 1	protein-coding
MACS_peak_14289	chr5	9265874	9266344	+	188.31	NA	promoter-TSS (NM_172706)	promoter-TSS (NM_172706)	-84	NM_172706	231014	Mm.130063	NM_172706	ENSMUSG00000056004	9330182L06Rik	Eig121l	RIKEN cDNA 9330182L06 gene	protein-coding
MACS_peak_19013	chr8	112603356	112603852	+	188.19	NA	promoter-TSS (NM_175480)	promoter-TSS (NM_175480)	-30	NM_175480	234725	Mm.87487	NM_175480		Zfp612	B230354B21Rik	zinc finger protein 612	protein-coding
MACS_peak_1351	chr10	41169893	41170363	+	188.14	NA	promoter-TSS (NM_001277229)	promoter-TSS (NM_001277229)	-36	NM_001277229	268294	Mm.258475	NM_153398	ENSMUSG00000019826	Zbtb24	BC055367|Bif1|Bsg1|ZNF450	zinc finger and BTB domain containing 24	protein-coding
MACS_peak_11551	chr2	152495097	152495430	+	188.03	NA	promoter-TSS (NM_001159551)	promoter-TSS (NM_001159551)	66	NM_001159552	14950	Mm.277327	NM_010376	ENSMUSG00000019188	H13	1200006O09Rik|4930443L17Rik|5031424B04Rik|AV020344|H-13|Hm13|PSL3|Spp	histocompatibility 13	protein-coding
MACS_peak_10049	chr19	41986076	41986376	+	188.02	NA	promoter-TSS (NM_023418)	promoter-TSS (NM_023418)	-135	NM_023418	18648	Mm.391589	NM_023418	ENSMUSG00000011752	Pgam1	2310050F24Rik|Pgam-1	phosphoglycerate mutase 1	protein-coding
MACS_peak_19439	chr9	30837676	30838130	+	187.96	NA	promoter-TSS (NM_001115130)	promoter-TSS (NM_001115130)	-326	NM_001115130	235132	Mm.239355	NM_172765	ENSMUSG00000047412	Zbtb44	6030404E16Rik|Btbd15|E230011F09	zinc finger and BTB domain containing 44	protein-coding
MACS_peak_1988	chr10	108447836	108448331	+	187.83	NA	promoter-TSS (NM_001252342)	promoter-TSS (NM_001252342)	-52	NM_001252341	20979	Mm.289702	NM_009306	ENSMUSG00000035864	Syt1	AW124717|G630098F17Rik|SytI	synaptotagmin I	protein-coding
MACS_peak_1769	chr10	80693331	80693636	+	187.83	NA	promoter-TSS (NM_178662)	promoter-TSS (NM_178662)	41	NM_178662	16467	Mm.127681	NM_178662	ENSMUSG00000034958	Atcay	3322401A10Rik|BB077577|BNIP-H|CLAC|hes|ji	ataxia, cerebellar, Cayman type homolog (human)	protein-coding
MACS_peak_4329	chr12	60167462	60168121	+	187.60	NA	promoter-TSS (NM_008891)	promoter-TSS (NM_008891)	-115	NM_008891	18949	Mm.22347	NM_008891	ENSMUSG00000020994	Pnn	AU045199|D12Ertd512e	pinin	protein-coding
MACS_peak_1261	chr10	20031693	20032843	+	187.40	NA	promoter-TSS (NM_001025393)	promoter-TSS (NM_001025393)	-7	NM_001025392	72567	Mm.294783	NM_153787	ENSMUSG00000037608	Bclaf1	2610102K23Rik|2700025J07Rik|2810454G14Rik|5730534O06Rik|AI450190|AW556225|Btf|mKIAA0164	BCL2-associated transcription factor 1	protein-coding
MACS_peak_11165	chr2	109730742	109731148	+	187.38	NA	promoter-TSS (NM_011699)	promoter-TSS (NM_011699)	-90	NM_011699	22343	Mm.235300	NM_011699	ENSMUSG00000027162	Lin7c	9130007B12Rik|AI303698|AU019331|AW125731|D2Ertd520e|LIN-7-C|LIN-7C|MALS-3|Veli3	lin-7 homolog C (C. elegans)	protein-coding
MACS_peak_1701	chr10	79818906	79819475	+	187.30	NA	promoter-TSS (NM_183152)	promoter-TSS (NM_183152)	-14	NM_183152	216166	Mm.17613	NM_183152	ENSMUSG00000035486	Plk5	6330514A18Rik	polo-like kinase 5	protein-coding
MACS_peak_1559	chr10	75226913	75227411	+	187.27	NA	promoter-TSS (NM_172549)	promoter-TSS (NM_172549)	-60	NM_172549	104248	Mm.257404	NM_172549	ENSMUSG00000020196	Cabin1	A330070M20Rik|Cain|Ppp3in	calcineurin binding protein 1	protein-coding
MACS_peak_8727	chr17	66450622	66451310	+	187.25	NA	promoter-TSS (NM_028388)	promoter-TSS (NM_028388)	-67	NM_028388	72900	Mm.2206	NM_028388	ENSMUSG00000024099	Ndufv2	2900010C23Rik	NADH dehydrogenase (ubiquinone) flavoprotein 2	protein-coding
MACS_peak_4878	chr13	14046439	14046724	+	187.17	NA	promoter-TSS (NM_178640)	promoter-TSS (NM_178640)	-360	NM_178640	97884	Mm.21686	NM_178640	ENSMUSG00000039242	B3galnt2	A930105D20Rik|C80633|D230016N13Rik	UDP-GalNAc:betaGlcNAc beta 1,3-galactosaminyltransferase, polypeptide 2	protein-coding
MACS_peak_11733	chr2	163245441	163245751	+	186.82	NA	promoter-TSS (NM_025699)	promoter-TSS (NM_025699)	-390	NM_025699	66680	Mm.25119	NM_025699	ENSMUSG00000035399	Oser1	3230401D17Rik|AI256769|Perit1	oxidative stress responsive serine rich 1	protein-coding
MACS_peak_9629	chr19	5388541	5389063	+	186.80	NA	promoter-TSS (NM_016882)	promoter-TSS (NM_016882)	-99	NM_016882	20227	Mm.34562	NM_016882	ENSMUSG00000039148	Sart1	U5-110K	squamous cell carcinoma antigen recognized by T cells 1	protein-coding
MACS_peak_12018	chr3	16082879	16083413	+	186.80	NA	promoter-TSS (NM_172677)	promoter-TSS (NM_172677)	-37	NR_027375	229096	Mm.23834	NM_172677	ENSMUSG00000047213	Ythdf3	9130022A11Rik	YTH domain family 3	protein-coding
MACS_peak_8007	chr17	23814277	23814612	+	186.72	NA	promoter-TSS (NM_013749)	promoter-TSS (NM_013749)	-28	NM_013749	27279	Mm.28518	NM_013749	ENSMUSG00000023905	Tnfrsf12a	AI255180|C87282|Fn14|HPIP|TWEAK-R|TweakR	tumor necrosis factor receptor superfamily, member 12a	protein-coding
MACS_peak_14668	chr5	73683955	73684239	+	186.72	NA	promoter-TSS (NM_001159887)	promoter-TSS (NM_001159887)	64	NM_001159888	68095	Mm.247039	NM_023429	ENSMUSG00000029152	Ociad1	6030432N09Rik|AI481327|AW557942|Asrij|B230209J16Rik|BB021357|Emi2|Imi2|OCIA|TPA018	OCIA domain containing 1	protein-coding
MACS_peak_9419	chr18	69735892	69736340	+	186.53	NA	intron (NM_001083967, intron 8 of 19)	intron (NM_001083967, intron 8 of 19)	230741	NM_001083967	21413	Mm.4269	NM_013685	ENSMUSG00000053477	Tcf4	5730422P05Rik|ASP-I2|E2-2|E2.2|ITF-2|ITF-2b|ITF2|ME2|MITF-2A|MITF-2B|SEF-2|SEF2|SEF2-1|TFE|Tcf-4|bHLHb19	transcription factor 4	protein-coding
MACS_peak_7490	chr16	31201069	31201369	+	186.53	NA	5' UTR (NM_030138, exon 1 of 23)	5' UTR (NM_030138, exon 1 of 23)	105	NM_030138	78618	Mm.274646	NM_030138	ENSMUSG00000049076	Acap2	4832442G16|9530039J15Rik|CNT-B2|Centb2|mKIAA0041	ArfGAP with coiled-coil, ankyrin repeat and PH domains 2	protein-coding
MACS_peak_2999	chr11	70513459	70514072	+	186.53	NA	promoter-TSS (NM_153103)	promoter-TSS (NM_153103)	-108	NM_001252485	103844	Mm.101581	NM_213729	ENSMUSG00000057054	Inca1	AI842396	inhibitor of CDK, cyclin A1 interacting protein 1	protein-coding
MACS_peak_20142	chr9	98501912	98502198	+	186.48	NA	promoter-TSS (NM_025485)	promoter-TSS (NM_025485)	43	NM_025485	64655	Mm.17949	NM_025485	ENSMUSG00000032459	Mrps22	3100002P07Rik|Rpms22	mitochondrial ribosomal protein S22	protein-coding
MACS_peak_5738	chr14	32019745	32020258	+	186.48	NA	promoter-TSS (NM_022656)	promoter-TSS (NM_022656)	11	NM_022656	64652	Mm.298728	NM_022656	ENSMUSG00000021910	Nisch	1200007D05Rik|3202002H23Rik|AW494485|I-1	nischarin	protein-coding
MACS_peak_9808	chr19	8963061	8963674	+	186.33	NA	promoter-TSS (NR_039598)	promoter-TSS (NR_039598)	-6	NM_025463	66276	Mm.27503	NM_025463	ENSMUSG00000071653	1810009A15Rik	-	RIKEN cDNA 1810009A15 gene	protein-coding
MACS_peak_7653	chr16	55822062	55822559	+	186.32	NA	promoter-TSS (NM_001159394)	promoter-TSS (NM_001159394)	-59	NM_001159394	80859	Mm.247272	NM_030612	ENSMUSG00000035356	Nfkbiz	AA408868|INAP|Mail	nuclear factor of kappa light polypeptide gene enhancer in B cells inhibitor, zeta	protein-coding
MACS_peak_13930	chr4	135502176	135502602	+	186.26	NA	promoter-TSS (NM_008254)	promoter-TSS (NM_008254)	21	NM_008254	15356	Mm.482102	NM_008254	ENSMUSG00000028672	Hmgcl	AW476067|HL	3-hydroxy-3-methylglutaryl-Coenzyme A lyase	protein-coding
MACS_peak_15294	chr5	138069648	138069992	+	186.26	NA	promoter-TSS (NM_001168652)	promoter-TSS (NM_001168652)	-531	NM_146164	231798	Mm.200763	NM_146164	ENSMUSG00000093445	Lrch4	2810008P14Rik|2900069C24Rik|AI558103|LRN|LRRN4|SAP25|mFLJ00248	leucine-rich repeats and calponin homology (CH) domain containing 4	protein-coding
MACS_peak_14487	chr5	33972026	33972325	+	186.06	NA	5' UTR (NM_178390, exon 1 of 6)	5' UTR (NM_178390, exon 1 of 6)	109	NM_178390	74504	Mm.294695	NM_178390	ENSMUSG00000037339	Fam53a	2410018C17Rik|5430419M09Rik|Dntnp	family with sequence similarity 53, member A	protein-coding
MACS_peak_255	chr1	58561658	58562223	+	185.99	NA	promoter-TSS (NM_001271526)	promoter-TSS (NM_001271526)	13	NM_001271526	18393	Mm.3411	NM_008765	ENSMUSG00000026037	Orc2	AU041563|Orc2l	origin recognition complex, subunit 2	protein-coding
MACS_peak_8796	chr17	79234480	79234764	+	185.86	NA	promoter-TSS (NM_001081179)	promoter-TSS (NM_001081179)	99	NM_001081179	320473	Mm.46309	NM_028084	ENSMUSG00000039414	Heatr5b	2010013B10Rik|A230048G03Rik|AV071430|D330050P16Rik|mKIAA1414	HEAT repeat containing 5B	protein-coding
MACS_peak_2453	chr11	29925681	29926064	+	185.71	NA	intron (NM_146016, intron 1 of 41)	CpG	161	NM_146016	237711	Mm.445271	NM_146016	ENSMUSG00000044072	Eml6	2900083P10Rik|C230094A16Rik|EMAP-6	echinoderm microtubule associated protein like 6	protein-coding
MACS_peak_16665	chr7	17200048	17200565	+	185.71	NA	promoter-TSS (NM_172739)	promoter-TSS (NM_172739)	36	NM_172739	232906	Mm.28646	NM_172739	ENSMUSG00000058230	Arhgap35	6430596G11Rik|AI841135|Grlf1|mKIAA1722|p190A|p190RhoGAP	Rho GTPase activating protein 35	protein-coding
MACS_peak_19803	chr9	61762133	61762730	+	185.71	NA	promoter-TSS (NM_018853)	promoter-TSS (NM_018853)	-114	NM_018853	56040	Mm.3158	NM_018853	ENSMUSG00000007892	Rplp1	2410042H16Rik|Arpp1|C430017H15Rik	ribosomal protein, large, P1	protein-coding
MACS_peak_11	chr1	6204443	6204906	+	185.69	NA	promoter-TSS (NM_009826)	promoter-TSS (NM_009826)	-69	NM_009826	12421	Mm.293811	NM_009826	ENSMUSG00000025907	Rb1cc1	2900055E04Rik|5930404L04Rik|Cc1|FIP200|LaXp180	RB1-inducible coiled-coil 1	protein-coding
MACS_peak_13972	chr4	137805874	137806235	+	185.54	NA	promoter-TSS (NM_001099631)	promoter-TSS (NM_001099631)	-272	NM_001099631	230863	Mm.482408	NM_001099631	ENSMUSG00000045349	Sh2d5	BC036961	SH2 domain containing 5	protein-coding
MACS_peak_13193	chr4	48057640	48058224	+	185.18	NA	Intergenic	CpG	-6188	NM_015743	18124	Mm.247261	NM_015743	ENSMUSG00000028341	Nr4a3	AI573420|CHN|CSMF|MINOR|NOR-1|Nor1|TEC	nuclear receptor subfamily 4, group A, member 3	protein-coding
MACS_peak_16592	chr7	13466163	13466698	+	185.18	NA	promoter-TSS (NM_153802)	promoter-TSS (NM_153802)	-97	NM_153802	243833	Mm.293823	NM_153802	ENSMUSG00000060397	Zfp128	9630016P15Rik|Znf8|mZnf8	zinc finger protein 128	protein-coding
MACS_peak_12203	chr3	58380357	58380789	+	185.18	NA	promoter-TSS (NM_001040396)	promoter-TSS (NM_001040396)	-7	NM_001040396	69227	Mm.270950	NM_001040396	ENSMUSG00000075700	Selt	2810407C02Rik|5730408P04Rik	selenoprotein T	protein-coding
MACS_peak_6553	chr15	58765079	58765561	+	185.18	NA	promoter-TSS (NM_023172)	promoter-TSS (NM_023172)	-35	NM_175151	69694	Mm.383230	NM_175151	ENSMUSG00000050891	Tatdn1	2310079P03Rik|CDA11	TatD DNase domain containing 1	protein-coding
MACS_peak_5891	chr14	55531769	55532175	+	185.18	NA	promoter-TSS (NM_021551)	promoter-TSS (NM_021551)	-3	NM_021551	59049	Mm.27435	NM_021551	ENSMUSG00000022199	Slc22a17	1700094C23Rik|24p3R|AU041908|AW555662|BOIT|Boct|mBOCT	solute carrier family 22 (organic cation transporter), member 17	protein-coding
MACS_peak_286	chr1	60236932	60237283	+	185.11	NA	promoter-TSS (NM_173444)	promoter-TSS (NM_173444)	-336	NM_173444	269198	Mm.205224	NM_173444	ENSMUSG00000073664	Nbeal1	2310076G13Rik|A530050O19Rik|A530083I02Rik|AI662228|ALS2CR17	neurobeachin like 1	protein-coding
MACS_peak_7217	chr15	103070025	103071381	+	185.11	NA	promoter-TSS (NR_002885)	promoter-TSS (NR_002885)	-125	NR_104427	15382	Mm.237064	NM_010447	ENSMUSG00000046434	Hnrnpa1	HDP-1|Hdp|Hnrpa1|hnRNP A1|hnrnp-A1	heterogeneous nuclear ribonucleoprotein A1	protein-coding
MACS_peak_18870	chr8	96676344	96676876	+	185.11	NA	5' UTR (NM_013603, exon 1 of 3)	5' UTR (NM_013603, exon 1 of 3)	103	NM_013603	17751	Mm.2064	NM_013603	ENSMUSG00000031760	Mt3	Mt-3	metallothionein 3	protein-coding
MACS_peak_14234	chr4	155148546	155148930	+	185.11	NA	promoter-TSS (NM_147776)	promoter-TSS (NM_147776)	-68	NM_147776	246228	Mm.26515	NM_147776	ENSMUSG00000042116	Vwa1	4932416A11Rik|WARP	von Willebrand factor A domain containing 1	protein-coding
MACS_peak_13496	chr4	109339403	109339659	+	185.11	NA	promoter-TSS (NM_001301368)	promoter-TSS (NM_001301368)	-170	NM_001301368	12580	Mm.1912	NM_007671	ENSMUSG00000028551	Cdkn2c	C77269|INK4c|p18|p18-INK4c|p18-INK6|p18INK4c	cyclin-dependent kinase inhibitor 2C (p18, inhibits CDK4)	protein-coding
MACS_peak_1978	chr10	106708580	106709152	+	185.11	NA	promoter-TSS (NM_001033223)	promoter-TSS (NM_001033223)	-21	NM_001039354	108030	Mm.268025	NM_001033223	ENSMUSG00000019906	Lin7a	AI848705|LIN-7A|MALS-1|TIP-33|Veli|Veli1	lin-7 homolog A (C. elegans)	protein-coding
MACS_peak_17739	chr7	123236464	123237104	+	185.00	NA	promoter-TSS (NM_019772)	promoter-TSS (NM_019772)	-110	NM_019772	56372	Mm.24231	NM_019772	ENSMUSG00000030663	1110004F10Rik	Smacp|Smap|sid2057|sid2057p	RIKEN cDNA 1110004F10 gene	protein-coding
MACS_peak_18786	chr8	87956521	87956790	+	184.86	NA	promoter-TSS (NM_025722)	promoter-TSS (NM_025722)	85	NR_033144	66714	Mm.272748	NM_025722	ENSMUSG00000036934	4921524J17Rik	-	RIKEN cDNA 4921524J17 gene	protein-coding
MACS_peak_16120	chr6	113026926	113027483	+	184.86	NA	promoter-TSS (NM_028385)	promoter-TSS (NM_028385)	34	NR_027010	14910	Mm.280950	NR_027008	ENSMUSG00000086429	Gt(ROSA)26Sor	AV258896|Gtrgeo26|Gtrosa26|R26|ROSA26	gene trap ROSA 26, Philippe Soriano	ncRNA
MACS_peak_1460	chr10	60294118	60294544	+	184.76	NA	promoter-TSS (NM_029770)	promoter-TSS (NM_029770)	-2	NM_029770	107449	Mm.290433	NM_029770	ENSMUSG00000020099	Unc5b	6330415E02Rik|A630020F16|D10Bwg0792e|Unc5h2	unc-5 homolog B (C. elegans)	protein-coding
MACS_peak_4364	chr12	70825619	70826172	+	184.76	NA	promoter-TSS (NM_026536)	promoter-TSS (NM_026536)	-34	NM_145443	217666	Mm.103362	NM_145443	ENSMUSG00000020988	L2hgdh	BC016226	L-2-hydroxyglutarate dehydrogenase	protein-coding
MACS_peak_11174	chr2	112207965	112208398	+	184.76	NA	promoter-TSS (NM_026519)	promoter-TSS (NM_026519)	3	NM_026519	68032	Mm.220942	NM_026519	ENSMUSG00000027131	Emc4	2610318K02Rik|Tmem85	ER membrane protein complex subunit 4	protein-coding
MACS_peak_14407	chr5	29522097	29522453	+	184.67	NA	promoter-TSS (NM_001289757)	promoter-TSS (NM_001289757)	-258	NM_021470	56874	Mm.87352	NM_021470	ENSMUSG00000029130	Rnf32	1700009J01Rik|2700025B22Rik|4930542N22Rik|Lmbr2	ring finger protein 32	protein-coding
MACS_peak_6147	chr14	73002732	73003127	+	184.67	NA	intron (NM_207636, intron 3 of 25)	intron (NM_207636, intron 3 of 25)	106881	NM_207636	319448	Mm.205421	NM_207636	ENSMUSG00000033487	Fndc3a	1700094E19Rik|D14Ertd453e|F730017H24Rik|Fndc3|sys	fibronectin type III domain containing 3A	protein-coding
MACS_peak_15885	chr6	72364005	72364544	+	184.66	NA	promoter-TSS (NM_019802)	promoter-TSS (NM_019802)	-28	NM_019802	56316	Mm.19937	NM_019802	ENSMUSG00000053460	Ggcx	-	gamma-glutamyl carboxylase	protein-coding
MACS_peak_19057	chr8	114378005	114378324	+	184.25	NA	promoter-TSS (NM_011801)	promoter-TSS (NM_011801)	46	NM_011801	23837	Mm.279437	NM_011801	ENSMUSG00000031954	Cfdp1	AA408409|Bcnt|Bucentaur|Cfdp|cp27	craniofacial development protein 1	protein-coding
MACS_peak_2743	chr11	59623710	59623975	+	184.22	NA	promoter-TSS (NM_001271357)	promoter-TSS (NM_001271357)	260	NR_045686	100504104	Mm.391737	NR_045686	ENSMUSG00000087249	Gm16062	ENSMUSG00000072890|OTTMUSG00000029633	predicted gene 16062	ncRNA
MACS_peak_19398	chr9	21961247	21961738	+	184.12	NA	intron (NM_001082532, intron 1 of 1)	CpG	202	NM_001082532	66268	Mm.28924	NM_025457	ENSMUSG00000010607	Pigyl	1810008A14Rik|PIG-Y|Pigy	phosphatidylinositol glycan anchor biosynthesis, class Y-like	protein-coding
MACS_peak_2882	chr11	68884013	68884718	+	184.07	NA	promoter-TSS (NM_025838)	promoter-TSS (NM_025838)	54	NM_028336	66910	Mm.33964	NM_025838	ENSMUSG00000020895	Tmem107	1110004B13Rik|2810049P21Rik	transmembrane protein 107	protein-coding
MACS_peak_18539	chr8	73011071	73011489	+	184.04	NA	promoter-TSS (NM_182991)	promoter-TSS (NM_182991)	-23	NM_182991	67937	Mm.23002	NM_182991	ENSMUSG00000035964	Tmem59l	5330410G16Rik	transmembrane protein 59-like	protein-coding
MACS_peak_15809	chr6	56747322	56748061	+	183.69	NA	5' UTR (NM_145958, exon 1 of 4)	5' UTR (NM_145958, exon 1 of 4)	116	NM_145958	210973	Mm.57295	NM_145958	ENSMUSG00000059486	Kbtbd2	BC022962|Bklhd1|mKIAA1489	kelch repeat and BTB (POZ) domain containing 2	protein-coding
MACS_peak_11564	chr2	152840921	152841175	+	183.55	NA	promoter-TSS (NM_178939)	promoter-TSS (NM_178939)	71	NM_178939	68559	Mm.12746	NM_178939	ENSMUSG00000027472	Pdrg1	1110004D19Rik|AU020945|AV006589|Pdrg	p53 and DNA damage regulated 1	protein-coding
MACS_peak_5235	chr13	58230221	58230614	+	183.41	NA	promoter-TSS (NM_029872)	promoter-TSS (NM_029872)	-500	NM_029872	77134	Mm.490274	NM_029872	ENSMUSG00000007836	Hnrnpa0	1110055B05Rik|3010025E17Rik|Hnrpa0|hnRNP A0	heterogeneous nuclear ribonucleoprotein A0	protein-coding
MACS_peak_18764	chr8	87493300	87493764	+	183.41	NA	promoter-TSS (NM_011563)	promoter-TSS (NM_011563)	-15	NM_011563	21672	Mm.347009	NM_011563		Prdx2	AL022839|Band-8|NkefB|PRP|PrxII|TDX1|TPx|TPx-B|TR|TSA|Tdpx1|Torin	peroxiredoxin 2	protein-coding
MACS_peak_578	chr1	120355574	120356023	+	183.41	NA	promoter-TSS (NR_027901)	promoter-TSS (NR_027901)	44	NR_027901	68204	Mm.443536	NR_027901		2900060B14Rik	-	RIKEN cDNA 2900060B14 gene	ncRNA
MACS_peak_9194	chr18	36961153	36961448	+	183.41	NA	promoter-TSS (NR_027885)	promoter-TSS (NR_027885)	-117	NR_027885	378472	Mm.482379	NR_027885		Vaultrc5	Gm22653|Mvg1	vault RNA component 5	ncRNA
MACS_peak_867	chr1	167564454	167565031	+	183.41	NA	promoter-TSS (NM_001001880)	promoter-TSS (NM_001001880)	-70	NM_001083897	68481	Mm.46438	NM_001001880	ENSMUSG00000026566	Mpzl1	1110007A10Rik|PZR	myelin protein zero-like 1	protein-coding
MACS_peak_12486	chr3	95623254	95623935	+	183.39	NA	promoter-TSS (NM_001081293)	promoter-TSS (NM_001081293)	-718	NM_001081293	75137	Mm.196275	NM_028328	ENSMUSG00000028106	Rprd2	2810036A19Rik|4930535B03Rik|6720469I21Rik|AL022841|AL022940|AU021304|BB077382|mKIAA0460	regulation of nuclear pre-mRNA domain containing 2	protein-coding
MACS_peak_11265	chr2	121114748	121115521	+	183.30	NA	promoter-TSS (NM_032393)	promoter-TSS (NM_032393)	-204	NM_032393	17754	Mm.36501	NM_032393	ENSMUSG00000027254	Map1a	6330416M19Rik|AI853608|Mtap-1|Mtap1|Mtap1a|moth1	microtubule-associated protein 1 A	protein-coding
MACS_peak_4747	chr12	111839621	111839994	+	183.29	NA	5' UTR (NM_030238, exon 1 of 77)	5' UTR (NM_030238, exon 1 of 77)	202	NM_030238	13424	Mm.181430	NM_030238	ENSMUSG00000018707	Dync1h1	9930018I23Rik|AI894280|DHC1|DHC1a|DNCL|Dnchc1|Dnec1|Dnecl|Loa|MAP1C|P22|Swl|mKIAA0325	dynein cytoplasmic 1 heavy chain 1	protein-coding
MACS_peak_11914	chr2	180627531	180628165	+	183.28	NA	promoter-TSS (NR_029538)	promoter-TSS (NR_029538)	-897	NR_029538	723951		NR_029538		Mir124a-3	Mirn124a-3|mir-124a-3	microRNA 124a-3	ncRNA
MACS_peak_311	chr1	64663476	64664092	+	183.08	NA	promoter-TSS (NM_025964)	promoter-TSS (NM_025964)	-42	NM_025964	67099	Mm.46394	NM_025964	ENSMUSG00000025956	Mettl21a	2310038H17Rik|AI464204|Fam119a	methyltransferase like 21A	protein-coding
MACS_peak_8946	chr18	7627066	7627334	+	183.08	NA	promoter-TSS (NM_001081287)	promoter-TSS (NM_001081287)	-339	NM_001161620	75739	Mm.133293	NM_001081287	ENSMUSG00000057440	Mpp7	1110068J02Rik|2810038M04Rik|5430426E14Rik|AI415104|Gm955	membrane protein, palmitoylated 7 (MAGUK p55 subfamily member 7)	protein-coding
MACS_peak_13105	chr4	41670002	41670271	+	182.99	NA	promoter-TSS (NM_001159565)	promoter-TSS (NM_001159565)	59	NM_001159565	53598	Mm.29025	NM_016890	ENSMUSG00000028447	Dctn3	p24	dynactin 3	protein-coding
MACS_peak_5256	chr13	59686263	59686577	+	182.99	NA	promoter-TSS (NM_030153)	promoter-TSS (NM_030153)	164	NR_045633	319469	Mm.437992	NR_045633	ENSMUSG00000021557	A230056J06Rik	-	RIKEN cDNA A230056J06 gene	ncRNA
MACS_peak_19265	chr8	129117766	129118936	+	182.99	NA	Intergenic	CpG-14682	-1015	NM_001164598	270110	Mm.334918	NM_001164598	ENSMUSG00000051495	Irf2bp2	E130305N23Rik|IRF-2BP2	interferon regulatory factor 2 binding protein 2	protein-coding
MACS_peak_9433	chr18	73863311	73863782	+	182.99	NA	promoter-TSS (NM_008540)	promoter-TSS (NM_008540)	-151	NM_008540	17128	Mm.100399	NM_008540	ENSMUSG00000024515	Smad4	AW743858|D18Wsu70e|DPC4|Madh4	SMAD family member 4	protein-coding
MACS_peak_69	chr1	24012249	24012700	+	182.90	NA	promoter-TSS (NM_026503)	promoter-TSS (NM_026503)	5	NM_026503	68002	Mm.250424	NM_026503	ENSMUSG00000026154	1110058L19Rik	1700001E18Rik|C6orf57	RIKEN cDNA 1110058L19 gene	protein-coding
MACS_peak_15417	chr5	144984252	144984848	+	182.83	NA	promoter-TSS (NM_027410)	promoter-TSS (NM_027410)	-103	NM_027410	70381	Mm.239412	NM_027410	ENSMUSG00000066621	Tecpr1	2210010N04Rik|mKIAA1358	tectonin beta-propeller repeat containing 1	protein-coding
MACS_peak_14846	chr5	108978827	108979226	+	182.53	NA	promoter-TSS (NM_007756)	promoter-TSS (NM_007756)	20	NM_007756	12889	Mm.5195	NM_007756	ENSMUSG00000033615	Cplx1	921-S	complexin 1	protein-coding
MACS_peak_9956	chr19	28085756	28086896	+	181.92	NA	promoter-TSS (NM_011265)	promoter-TSS (NM_011265)	-670	NM_011265	19726	Mm.313321	NM_011265	ENSMUSG00000040929	Rfx3	C230093O12Rik|MRFX3	regulatory factor X, 3 (influences HLA class II expression)	protein-coding
MACS_peak_13985	chr4	138748315	138748674	+	181.92	NA	promoter-TSS (NM_009798)	promoter-TSS (NM_009798)	-320	NM_009798	12345	Mm.2945	NM_009798	ENSMUSG00000028745	Capzb	1700120C01Rik|AI325129|CPB1|CPB2|CPbeat2|CPbeta1|CPbeta2|Cappb1	capping protein (actin filament) muscle Z-line, beta	protein-coding
MACS_peak_15561	chr6	24614809	24615493	+	181.92	NA	promoter-TSS (NM_028459)	promoter-TSS (NM_028459)	-156	NM_028459	73178	Mm.1574	NM_028459	ENSMUSG00000029684	Wasl	2900021I12Rik|3110031I02Rik|N-WASP	Wiskott-Aldrich syndrome-like (human)	protein-coding
MACS_peak_19696	chr9	54434227	54434432	+	181.72	NA	promoter-TSS (NM_029573)	promoter-TSS (NM_029573)	11	NM_029573	67834	Mm.279195	NM_029573	ENSMUSG00000032279	Idh3a	1110003P10Rik|1500012E04Rik|AA407078|AI316514	isocitrate dehydrogenase 3 (NAD+) alpha	protein-coding
MACS_peak_4190	chr12	29975703	29975998	+	181.72	NA	Intergenic	Intergenic	-237399	NM_001093775	17933	Mm.253067	NM_008666	ENSMUSG00000061911	Myt1l	2900046C06Rik|2900093J19Rik|C630034G21Rik|Nztf1|Pmng1|Png-1|mKIAA1106	myelin transcription factor 1-like	protein-coding
MACS_peak_3082	chr11	75444071	75444708	+	181.72	NA	promoter-TSS (NM_008916)	promoter-TSS (NM_008916)	-133	NM_008916	19062	Mm.1458	NM_008916	ENSMUSG00000006127	Inpp5k	C62|Pps|SKIP	inositol polyphosphate 5-phosphatase K	protein-coding
MACS_peak_10963	chr2	84555533	84555915	+	181.72	NA	promoter-TSS (NM_144887)	promoter-TSS (NM_144887)	-403	NM_144887	228136	Mm.288508	NM_144887	ENSMUSG00000034075	Zdhhc5	1110032A17Rik|AI451382|Zisp	zinc finger, DHHC domain containing 5	protein-coding
MACS_peak_17569	chr7	105457817	105458102	+	181.72	NA	promoter-TSS (NM_025408)	promoter-TSS (NM_025408)	78	NM_025408	66190	Mm.334041	NM_025408	ENSMUSG00000030760	Acer3	1110057L18Rik|5430429L08Rik|AV015045|Phca	alkaline ceramidase 3	protein-coding
MACS_peak_12324	chr3	88018290	88018600	+	181.69	NA	promoter-TSS (NR_037276)	promoter-TSS (NR_037276)	-648	NR_037276	100526540		NR_037276	miRBase:MI0014086	Mir3093	mmu-mir-3093	microRNA 3093	ncRNA
MACS_peak_3706	chr11	103815122	103815643	+	181.55	NA	promoter-TSS (NM_008740)	promoter-TSS (NM_008740)	-12	NM_008740	18195	Mm.260117	NM_008740	ENSMUSG00000034187	Nsf	AI316878|AU020090|AU067812|SKD2	N-ethylmaleimide sensitive fusion protein	protein-coding
MACS_peak_18301	chr8	26711774	26712875	+	181.50	NA	promoter-TSS (NM_001001735)	promoter-TSS (NM_001001735)	-454	NM_001001735	234135	Mm.217337	NM_001001735	ENSMUSG00000054823	Whsc1l1	6720429E03|A530023P05|AI528490|NSD3|WHISTLE	Wolf-Hirschhorn syndrome candidate 1-like 1 (human)	protein-coding
MACS_peak_14975	chr5	116102743	116103102	+	181.31	NA	intron (NM_001080808, intron 7 of 8)	intron (NM_001080808, intron 7 of 8)	7340	NR_105997	102465623		NR_105997		Mir7030	mmu-mir-7030	microRNA mir-7030	ncRNA
MACS_peak_17002	chr7	31337388	31337744	+	181.30	NA	promoter-TSS (NM_183321)	promoter-TSS (NM_183321)	-275	NM_183321	333193	Mm.389863	NM_183321	ENSMUSG00000036864	Proser3	-	proline and serine rich 3	protein-coding
MACS_peak_15048	chr5	122110242	122110688	+	181.24	NA	promoter-TSS (NM_028227)	promoter-TSS (NM_028227)	54	NM_028037	71985	Mm.45423	NM_028037	ENSMUSG00000029456	Acad10	2410021P16Rik	acyl-Coenzyme A dehydrogenase family, member 10	protein-coding
MACS_peak_19643	chr9	48792890	48793203	+	181.24	NA	promoter-TSS (NM_175482)	promoter-TSS (NM_175482)	-444	NM_175482	235323	Mm.21630	NM_175482	ENSMUSG00000032267	Usp28	9830148O20Rik|AU022237|mKIAA1515	ubiquitin specific peptidase 28	protein-coding
MACS_peak_2484	chr11	32542115	32542496	+	181.24	NA	promoter-TSS (NM_001271348)	promoter-TSS (NM_001271348)	-250	NM_001271348	103583	Mm.28017	NM_134015	ENSMUSG00000020271	Fbxw11	2310065A07Rik|AA536858|BTRC2|BTRCP2|Fbxw1b|HOS	F-box and WD-40 domain protein 11	protein-coding
MACS_peak_17453	chr7	87487874	87488225	+	181.23	NA	promoter-TSS (NM_026812)	promoter-TSS (NM_026812)	26	NM_026812	68695	Mm.21171	NM_026812	ENSMUSG00000030532	Hddc3	1110033O09Rik|C86475|MESH1	HD domain containing 3	protein-coding
MACS_peak_9446	chr18	75159999	75160338	+	181.23	NA	promoter-TSS (NR_028552).2	promoter-TSS (NR_028552).2	37	NM_001002239	319195	Mm.276337	NM_001002239	ENSMUSG00000062328	Rpl17	-	ribosomal protein L17	protein-coding
MACS_peak_3689	chr11	102994554	102994872	+	181.23	NA	promoter-TSS (NM_001130516)	promoter-TSS (NM_001130516)	40	NM_027658	71059	Mm.273871	NM_027658	ENSMUSG00000043372	Hexim2	4933402L21Rik	hexamethylene bis-acetamide inducible 2	protein-coding
MACS_peak_11545	chr2	152157909	152158681	+	181.20	NA	promoter-TSS (NM_001083921)	promoter-TSS (NM_001083921)	80	NM_019705	24105	Mm.182145	NM_019705	ENSMUSG00000027466	Rbck1	AL033326|HOIL-1|HOIL-1L|UIP28|Ubce7ip3	RanBP-type and C3HC4-type zinc finger containing 1	protein-coding
MACS_peak_20011	chr9	82869334	82869723	+	181.14	NA	promoter-TSS (NM_001081216)	promoter-TSS (NM_001081216)	-432	NM_001081216	83946	Mm.221688	NM_031879	ENSMUSG00000032253	Phip	2810004D21Rik|4632404O06Rik|Ndrp|Wdr11	pleckstrin homology domain interacting protein	protein-coding
MACS_peak_20712	chrX	58369445	58369743	+	181.14	NA	promoter-TSS (NR_030706)	promoter-TSS (NR_030706)	41	NR_030706	331424	Mm.127263	NM_177916	ENSMUSG00000071753	C230004F18Rik	-	RIKEN cDNA C230004F18 gene	ncRNA
MACS_peak_18471	chr8	63471941	63472191	+	181.13	NA	promoter-TSS (NM_001293637)	promoter-TSS (NM_001293637)	76	NM_175089	18004	Mm.486881	NM_175089	ENSMUSG00000031644	Nek1	D8Ertd790e|kat	NIMA (never in mitosis gene a)-related expressed kinase 1	protein-coding
MACS_peak_8033	chr17	24306581	24306912	+	181.13	NA	promoter-TSS (NM_009729)	promoter-TSS (NM_009729)	-372	NM_009729	11984	Mm.30155	NM_009729	ENSMUSG00000024121	Atp6v0c	Atp6c|Atp6c2|Atp6l|Atpl|Atpl-rs1|PL16|VATL|Vma3	ATPase, H+ transporting, lysosomal V0 subunit C	protein-coding
MACS_peak_2595	chr11	51397941	51398530	+	181.11	NA	promoter-TSS (NM_028398)	promoter-TSS (NM_028398)	-24	NM_028398	72947	Mm.256875	NM_028398		Phykpl	2900006B13Rik|Agxt2l2	5-phosphohydroxy-L-lysine phospholyase	protein-coding
MACS_peak_19340	chr9	20807058	20807577	+	181.11	NA	5' UTR (NM_023167, exon 1 of 9)	5' UTR (NM_023167, exon 1 of 9)	136	NM_023167	66163	Mm.427576	NM_023167	ENSMUSG00000003299	Mrpl4	1110017G11Rik	mitochondrial ribosomal protein L4	protein-coding
MACS_peak_3072	chr11	75275076	75275322	+	180.81	NA	non-coding (NR_030711, exon 1 of 3)	non-coding (NR_030711, exon 1 of 3)	158	NR_030711	100042498	Mm.482242	NR_030711	ENSMUSG00000085148	Mir22hg	2210403K04Rik	Mir22 host gene (non-protein coding)	ncRNA
MACS_peak_7927	chr17	15115490	15116108	+	180.80	NA	promoter-TSS (NM_001123367)	promoter-TSS (NM_001123367)	-23	NM_001123367	100041639	Mm.440445	NM_001123367	ENSMUSG00000079710	Gm3448	-	predicted gene 3448	protein-coding
MACS_peak_5548	chr13	108680176	108680392	+	180.65	NA	promoter-TSS (NM_145456)	promoter-TSS (NM_145456)	-26	NM_145456	67263	Mm.490418	NM_145456	ENSMUSG00000032846	Zswim6	2900036G02Rik|mKIAA1577	zinc finger SWIM-type containing 6	protein-coding
MACS_peak_16589	chr7	13403974	13404434	+	180.41	NA	promoter-TSS (NM_026046)	promoter-TSS (NM_026046)	5	NM_026046	67230	Mm.333574	NM_026046	ENSMUSG00000057894	Zfp329	2810439M05Rik|4632409L22Rik|ZNF329	zinc finger protein 329	protein-coding
MACS_peak_4178	chr12	25780737	25781303	+	180.28	NA	promoter-TSS (NM_010496)	promoter-TSS (NM_010496)	-63	NM_010496	15902	Mm.34871	NM_010496	ENSMUSG00000020644	Id2	AI255428|C78922|Idb2|bHLHb26	inhibitor of DNA binding 2	protein-coding
MACS_peak_9341	chr18	61885823	61886251	+	180.28	NA	promoter-TSS (NM_021296)	promoter-TSS (NM_021296)	-7	NR_029432	68982	Mm.441992	NR_029432	ENSMUSG00000098702	1500015A07Rik	-	RIKEN cDNA 1500015A07 gene	ncRNA
MACS_peak_12228	chr3	65762011	65762457	+	180.28	NA	promoter-TSS (NM_019937)	promoter-TSS (NM_019937)	-87	NM_019937	56706	Mm.175612	NM_019937	ENSMUSG00000027829	Ccnl1	2610030E23Rik|AU018493|Ccnl|ania-6a	cyclin L1	protein-coding
MACS_peak_6313	chr14	122873962	122874505	+	180.28	NA	promoter-TSS (NM_009574)	promoter-TSS (NM_009574)	188	NR_045046	69248	Mm.235369	NR_045046	ENSMUSG00000085555	2610035F20Rik	-	RIKEN cDNA 2610035F20 gene	ncRNA
MACS_peak_9398	chr18	67883744	67884301	+	180.19	NA	intron (NM_001127177, intron 1 of 8)	CpG	253	NM_001127177	19255	Mm.260433	NM_008977	ENSMUSG00000024539	Ptpn2	AI325124|Ptpt|TC-PTP	protein tyrosine phosphatase, non-receptor type 2	protein-coding
MACS_peak_7386	chr16	18876407	18877039	+	180.03	NA	promoter-TSS (NM_010922)	promoter-TSS (NM_010922)	7	NM_010922	18100	Mm.20918	NM_010922	ENSMUSG00000022706	Mrpl40	Nlvcf	mitochondrial ribosomal protein L40	protein-coding
MACS_peak_5994	chr14	60216581	60217042	+	180.03	NA	promoter-TSS (NM_027986)	promoter-TSS (NM_027986)	-15	NM_001168536	71891	Mm.439850	NM_027986	ENSMUSG00000021982	Cdadc1	2310010M10Rik|AI449174|AI463398|BB130816|NYD-SP15	cytidine and dCMP deaminase domain containing 1	protein-coding
MACS_peak_6277	chr14	120877057	120877808	+	180.03	NA	promoter-TSS (NM_029519)	promoter-TSS (NM_029519)	-251	NM_029519	76108	Mm.261448	NM_029519	ENSMUSG00000051615	Rap2a	5830461H18Rik	RAS related protein 2a	protein-coding
MACS_peak_7471	chr16	28753141	28753816	+	180.03	NA	promoter-TSS (NM_010199)	promoter-TSS (NM_010199)	-149	NM_010199	14167	Mm.7996	NM_010199		Fgf12	AV114868|FGF-12|FHF-1|Fhf1	fibroblast growth factor 12	protein-coding
MACS_peak_9738	chr19	6418529	6418948	+	179.95	NA	promoter-TSS (NM_020253)	promoter-TSS (NM_020253)	0	NM_001205235	18190	Mm.329616	NM_020253	ENSMUSG00000033768	Nrxn2	6430591O13Rik|mKIAA0921	neurexin II	protein-coding
MACS_peak_13187	chr4	47486864	47487288	+	179.92	NA	promoter-TSS (NM_024171)	promoter-TSS (NM_024171)	163	NM_019998	56737	Mm.22218	NM_019998	ENSMUSG00000039740	Alg2	1110018A23Rik|1300013N08Rik|ALPG2|CDGIi|MNCb-5081	asparagine-linked glycosylation 2 (alpha-1,3-mannosyltransferase)	protein-coding
MACS_peak_4452	chr12	78339441	78340182	+	179.81	NA	promoter-TSS (NR_045554)	promoter-TSS (NR_045554)	85	NR_045554	53618	Mm.35628	NM_016893	ENSMUSG00000021065	Fut8	-	fucosyltransferase 8	protein-coding
MACS_peak_10476	chr2	25995880	25996432	+	179.75	NA	promoter-TSS (NM_001256521)	promoter-TSS (NM_001256521)	-130	NM_001256521	109299	Mm.389259	NM_001256521		C330006A16Rik	AI551216	RIKEN cDNA C330006A16 gene	protein-coding
MACS_peak_18404	chr8	47060796	47061104	+	179.60	NA	promoter-TSS (NM_138668)	promoter-TSS (NM_138668)	68	NM_138668	192169	Mm.210882	NM_138668	ENSMUSG00000031634	Ufsp2	1810047C23Rik	UFM1-specific peptidase 2	protein-coding
MACS_peak_11039	chr2	91899597	91900471	+	179.51	NA	Intergenic	CpG	-35707	NM_011957	26427	Mm.10353	NM_011957	ENSMUSG00000027230	Creb3l1	Oasis	cAMP responsive element binding protein 3-like 1	protein-coding
MACS_peak_1272	chr10	21714157	21714685	+	179.47	NA	promoter-TSS (NM_011361)	promoter-TSS (NM_011361)	-51	NM_011361	20393	Mm.28405	NM_011361	ENSMUSG00000019970	Sgk1	Sgk	serum/glucocorticoid regulated kinase 1	protein-coding
MACS_peak_19353	chr9	21069395	21069979	+	179.47	NA	promoter-TSS (NM_153583)	promoter-TSS (NM_153583)	-42	NM_153583	235040	Mm.440165	NM_153583	ENSMUSG00000002820	Atg4d	9830134P12Rik|APG4-D|Apg4d|Atg4dl|Autl4	autophagy related 4D, cysteine peptidase	protein-coding
MACS_peak_11041	chr2	92023760	92024147	+	179.47	NA	promoter-TSS (NM_138755)	promoter-TSS (NM_138755)	-386	NM_138755	192285	Mm.330408	NM_138755	ENSMUSG00000058318	Phf21a	80kDa|Bhc|Bhc80|D030065N23Rik|PFTF1	PHD finger protein 21A	protein-coding
MACS_peak_11233	chr2	119500510	119501035	+	179.47	NA	promoter-TSS (NM_030112)	promoter-TSS (NM_030112)	-32	NM_030112	76246	Mm.33437	NM_030112	ENSMUSG00000027304	Rtf1	2900005O08Rik|6530416A09Rik|AI853581|AU043144|AW553985|Gtl7|cbp82	Rtf1, Paf1/RNA polymerase II complex component, homolog (S. cerevisiae)	protein-coding
MACS_peak_6239	chr14	104049359	104049625	+	179.47	NA	promoter-TSS (NM_198014)	promoter-TSS (NM_198014)	32	NM_198014	105439	Mm.27548	NM_198014	ENSMUSG00000055717	Slain1	9630044O09Rik|AA675320|AW742596	SLAIN motif family, member 1	protein-coding
MACS_peak_124	chr1	36425856	36426088	+	179.47	NA	promoter-TSS (NM_172652)	promoter-TSS (NM_172652)	54	NM_172652	226976	Mm.24734	NM_172652	ENSMUSG00000010453	Kansl3	4632411B12Rik|4932435K23|AI431067|AI647574|C85723|Kiaa1310|mKIAA1310	KAT8 regulatory NSL complex subunit 3	protein-coding
MACS_peak_12296	chr3	87329218	87329702	+	179.47	NA	promoter-TSS (NM_012051)	promoter-TSS (NM_012051)	-40	NM_001083318	27049	Mm.219460	NM_012051	ENSMUSG00000003382	Etv3	AI414410|METS|Pe1	ets variant 3	protein-coding
MACS_peak_5740	chr14	32064191	32064837	+	179.41	NA	promoter-TSS (NM_027088)	promoter-TSS (NM_027088)	-110	NM_027949	71838	Mm.5348	NM_027949	ENSMUSG00000021902	Phf7	1700006H01Rik|1700010P14Rik|AI427892|AW555949	PHD finger protein 7	protein-coding
MACS_peak_9497	chr18	80452290	80453196	+	178.97	NA	promoter-TSS (NM_025861)	promoter-TSS (NM_025861)	-222	NM_001164424	66943	Mm.29247	NM_025861	ENSMUSG00000034006	Pqlc1	2310009N05Rik|4933425L21Rik|5730564E11Rik|C78974	PQ loop repeat containing 1	protein-coding
MACS_peak_5961	chr14	57396933	57397453	+	178.77	NA	promoter-TSS (NM_025682)	promoter-TSS (NM_025682)	-40	NM_025682	66645	Mm.20129	NM_025682	ENSMUSG00000021938	Pspc1	5730470C09Rik|AI327109|AI449052|PSP1	paraspeckle protein 1	protein-coding
MACS_peak_17102	chr7	51590718	51591032	+	178.77	NA	intron (NM_001034115, intron 15 of 24)	intron (NM_001034115, intron 15 of 24)	25241	NM_001034115	243961	Mm.360368	NM_001034115	ENSMUSG00000038738	Shank1	-	SH3/ankyrin domain gene 1	protein-coding
MACS_peak_19139	chr8	123632035	123632564	+	178.70	NA	promoter-TSS (NM_172761)	promoter-TSS (NM_172761)	-20	NM_001166482	234814	Mm.31690	NM_172761	ENSMUSG00000031816	Mthfsd	AW049977|BC052066|C920004D05	methenyltetrahydrofolate synthetase domain containing	protein-coding
MACS_peak_2906	chr11	69145537	69145966	+	178.66	NA	3' UTR (NM_010599, exon 14 of 14)	3' UTR (NM_010599, exon 14 of 14)	5991	NM_010599	16499	Mm.232472	NM_010599	ENSMUSG00000018470	Kcnab3	C330022D06Rik|Kcnab4|mKv(beta)4	potassium voltage-gated channel, shaker-related subfamily, beta member 3	protein-coding
MACS_peak_1080	chr1	184271651	184272020	+	178.66	NA	promoter-TSS (NM_175127)	promoter-TSS (NM_175127)	-98	NM_175127	67948	Mm.30737	NM_175127	ENSMUSG00000047539	Fbxo28	4833428J17Rik|5730505P19Rik|D1Ertd578e|Fbx28|mKIAA0483	F-box protein 28	protein-coding
MACS_peak_12643	chr3	106350487	106350962	+	178.59	NA	promoter-TSS (NM_133869)	promoter-TSS (NM_133869)	-4	NM_133869	99712	Mm.486418	NM_133869	ENSMUSG00000040774	Cept1	9930118K05Rik|mCEPT1	choline/ethanolaminephosphotransferase 1	protein-coding
MACS_peak_8421	chr17	35302043	35302391	+	178.52	NA	promoter-TSS (NM_020027)	promoter-TSS (NM_020027)	-395	NM_020027	53761	Mm.272462	NM_020027	ENSMUSG00000024393	Prrc2a	3110039B05Rik|Bat-2|Bat2|D17H6S51E|G2|Wbp12|mKIAA4178	proline-rich coiled-coil 2A	protein-coding
MACS_peak_10498	chr2	26765954	26766524	+	178.49	NA	promoter-TSS (NM_001033908)	promoter-TSS (NM_001033908)	-77	NM_001033908	20933	Mm.397932	NM_011513	ENSMUSG00000015776	Med22	AW212655|AW558812|Surf-5|Surf5	mediator complex subunit 22	protein-coding
MACS_peak_5451	chr13	93300573	93301108	+	178.49	NA	promoter-TSS (NM_173392)	promoter-TSS (NM_173392)	-75	NM_173392	218441	Mm.259585	NM_173392	ENSMUSG00000021706	Zfyve16	AI035632|B130024H06Rik|B130031L15|mKIAA0305	zinc finger, FYVE domain containing 16	protein-coding
MACS_peak_6276	chr14	120876360	120876770	+	178.39	NA	Intergenic	Intergenic	-1118	NM_029519	76108	Mm.261448	NM_029519	ENSMUSG00000051615	Rap2a	5830461H18Rik	RAS related protein 2a	protein-coding
MACS_peak_15848	chr6	70794433	70794676	+	178.35	NA	promoter-TSS (NM_010121)	promoter-TSS (NM_010121)	33	NM_010121	13666	Mm.247167	NM_010121	ENSMUSG00000031668	Eif2ak3	AI427929|Pek|Perk	eukaryotic translation initiation factor 2 alpha kinase 3	protein-coding
MACS_peak_6896	chr15	83935925	83936350	+	178.35	NA	promoter-TSS (NM_013873)	promoter-TSS (NM_013873)	47	NM_013873	29859	Mm.248796	NM_013873	ENSMUSG00000018865	Sult4a1	2400007A17Rik|AI853543|BR-STL-1|ST4A1|Sultx3	sulfotransferase family 4A, member 1	protein-coding
MACS_peak_20320	chr9	108726947	108727557	+	178.35	NA	Intergenic	Intergenic	-1399	NM_080437	107934	Mm.39945	NM_080437	ENSMUSG00000023473	Celsr3	Fmi1|flamingo|mKIAA0812	cadherin, EGF LAG seven-pass G-type receptor 3 (flamingo homolog, Drosophila)	protein-coding
MACS_peak_20297	chr9	108208083	108208896	+	178.25	NA	promoter-TSS (NM_016802)	promoter-TSS (NM_016802)	-47	NM_016802	11848	Mm.757	NM_016802	ENSMUSG00000007815	Rhoa	Arha|Arha1|Arha2	ras homolog gene family, member A	protein-coding
MACS_peak_5143	chr13	53472536	53473051	+	178.25	NA	promoter-TSS (NM_009269)	promoter-TSS (NM_009269)	-63	NM_009269	268656	Mm.240336	NM_009269	ENSMUSG00000021468	Sptlc1	AW552086|C77762|E030036H05|Lcb1	serine palmitoyltransferase, long chain base subunit 1	protein-coding
MACS_peak_6103	chr14	70132529	70132824	+	178.00	NA	promoter-TSS (NM_134078)	promoter-TSS (NM_134078)	-299	NM_134078	105513	Mm.159637	NM_134078	ENSMUSG00000034190	Chmp7	4930596K11Rik|6330407G04Rik|AI450338|AW550775	charged multivesicular body protein 7	protein-coding
MACS_peak_2447	chr11	29447670	29447949	+	177.94	NA	promoter-TSS (NM_001163521)	promoter-TSS (NM_001163521)	-141	NM_028504	73324	Mm.69388	NM_028504	ENSMUSG00000020461	1700034F02Rik	Clhc1	RIKEN cDNA 1700034F02 gene	protein-coding
MACS_peak_3402	chr11	95937355	95937623	+	177.85	NA	promoter-TSS (NM_001161419)	promoter-TSS (NM_001161419)	-481	NM_007506	11951	Mm.258	NM_007506		Atp5g1	-	ATP synthase, H+ transporting, mitochondrial F0 complex, subunit C1 (subunit 9)	protein-coding
MACS_peak_14622	chr5	54389317	54389887	+	177.71	NA	promoter-TSS (NM_001081103)	promoter-TSS (NM_001081103)	-160	NM_001081103	116873	Mm.265985	NM_054083	ENSMUSG00000039156	Stim2	-	stromal interaction molecule 2	protein-coding
MACS_peak_9974	chr19	29887199	29887785	+	177.71	NA	promoter-TSS (NM_177721)	promoter-TSS (NM_177721)	-28	NM_177721	240614	Mm.125503	NM_177721	ENSMUSG00000074909	Ranbp6	C630001B19	RAN binding protein 6	protein-coding
MACS_peak_16478	chr6	148844561	148845062	+	177.71	NA	promoter-TSS (NM_001301351)	promoter-TSS (NM_001301351)	-52	NM_181541	232560	Mm.150568	NM_181541	ENSMUSG00000030309	Caprin2	C1qdc1|Eeg1|rng140	caprin family member 2	protein-coding
MACS_peak_13967	chr4	137418133	137418406	+	177.71	NA	5' UTR (NM_199307, exon 1 of 20)	5' UTR (NM_199307, exon 1 of 20)	117	NM_199307	230857	Mm.401062	NM_199307	ENSMUSG00000057530	Ece1	AW322500|ECE-1|ECE-1a|ECE-1b|ECE-1d	endothelin converting enzyme 1	protein-coding
MACS_peak_16449	chr6	143115669	143115883	+	177.67	NA	promoter-TSS (NM_029250)	promoter-TSS (NM_029250)	26	NM_029250	75320	Mm.272548	NM_029250	ENSMUSG00000030275	Etnk1	1110061E11Rik|4930555L11Rik|AI195356|AI841245|C80956|D6Ertd3e|EKI1	ethanolamine kinase 1	protein-coding
MACS_peak_3768	chr11	106782121	106782480	+	177.63	NA	promoter-TSS (NM_025481)	promoter-TSS (NM_025481)	-271	NM_025481	66313	Mm.340955	NM_025481	ENSMUSG00000018363	Smurf2	2810411E22Rik|AI558114|AI649275	SMAD specific E3 ubiquitin protein ligase 2	protein-coding
MACS_peak_16525	chr7	4817606	4818189	+	177.25	NA	promoter-TSS (NM_026158)	promoter-TSS (NM_026158)	-116	NM_026158	67441	Mm.41385	NM_026158	ENSMUSG00000052605	Isoc2b	0610042E07Rik|AI553388|Isoc2	isochorismatase domain containing 2b	protein-coding
MACS_peak_10385	chr2	22924315	22925022	+	177.23	NA	promoter-TSS (NM_001102437)	promoter-TSS (NM_001102437)	76	NM_001102438	74159	Mm.181973	NM_028793	ENSMUSG00000026781	Acbd5	1300014E15Rik	acyl-Coenzyme A binding domain containing 5	protein-coding
MACS_peak_6175	chr14	76552247	76552553	+	177.23	NA	Intergenic	Intergenic	41702	NM_013745	27275	Mm.21138	NM_013745	ENSMUSG00000022009	Nufip1	Nufip	nuclear fragile X mental retardation protein interacting protein 1	protein-coding
MACS_peak_1688	chr10	79712138	79712421	+	177.23	NA	promoter-TSS (NM_029272)	promoter-TSS (NM_029272)	82	NM_029272	75406	Mm.28712	NM_029272	ENSMUSG00000020153	Ndufs7	1010001M04Rik	NADH dehydrogenase (ubiquinone) Fe-S protein 7	protein-coding
MACS_peak_267	chr1	59293858	59294415	+	177.21	NA	promoter-TSS (NM_028717)	promoter-TSS (NM_028717)	-61	NM_146109	74018	Mm.272078	NM_028717	ENSMUSG00000026024	Als2	3222402C23Rik|9430073A21Rik|Als2cr6|Alsin|mKIAA1563	amyotrophic lateral sclerosis 2 (juvenile)	protein-coding
MACS_peak_7246	chr16	4726123	4726581	+	177.09	NA	promoter-TSS (NM_001136066)	promoter-TSS (NM_001136066)	-9	NM_001136066	15369	Mm.272866	NM_010443	ENSMUSG00000004070	Hmox2	HO-2|HO2	heme oxygenase (decycling) 2	protein-coding
MACS_peak_6898	chr15	83997972	83998469	+	177.09	NA	promoter-TSS (NM_054088)	promoter-TSS (NM_054088)	-26	NM_054088	116939	Mm.390817	NM_054088	ENSMUSG00000041653	Pnpla3	Adpn	patatin-like phospholipase domain containing 3	protein-coding
MACS_peak_15373	chr5	143105099	143105714	+	177.09	NA	promoter-TSS (NM_178398)	promoter-TSS (NM_178398)	-132	NM_178398	74781	Mm.29432	NM_178398		Wipi2	1110018O08Rik|2510001I10Rik	WD repeat domain, phosphoinositide interacting 2	protein-coding
MACS_peak_11372	chr2	128769543	128770079	+	177.09	NA	promoter-TSS (NM_020594)	promoter-TSS (NM_020594)	-55	NM_020594	57432	Mm.11675	NM_020594	ENSMUSG00000027387	Zc3h8	AU020882|E130108N08Rik|Fliz1|Zc3hdc8	zinc finger CCCH type containing 8	protein-coding
MACS_peak_16927	chr7	29595306	29595633	+	177.04	NA	promoter-TSS (NM_177301)	promoter-TSS (NM_177301)	-440	NM_177301	15388	Mm.9043	NM_177301	ENSMUSG00000015165	Hnrnpl	C79783|D830027H13Rik|Hnrpl	heterogeneous nuclear ribonucleoprotein L	protein-coding
MACS_peak_7796	chr16	95923475	95924186	+	177.04	NA	promoter-TSS (NM_011809)	promoter-TSS (NM_011809)	-184	NM_011809	23872	Mm.290207	NM_011809	ENSMUSG00000022895	Ets2	AU022856|Ets-2	E26 avian leukemia oncogene 2, 3' domain	protein-coding
MACS_peak_5355	chr13	74487490	74487968	+	177.04	NA	promoter-TSS (NM_024201)	promoter-TSS (NM_024201)	-36	NM_001168659	67433	Mm.101586	NM_024201		Ccdc127	0610011N22Rik|5430420E17Rik|A430066A18|AI256405|AW050060|C130002N06	coiled-coil domain containing 127	protein-coding
MACS_peak_9304	chr18	57085000	57085270	+	176.92	NA	promoter-TSS (NM_177115)	promoter-TSS (NM_177115)	67	NM_177115	320253	Mm.312623	NM_177115	ENSMUSG00000032656	March3	6330411I15Rik|A530081L18Rik|AI843639|MARCH-III	membrane-associated ring finger (C3HC4) 3	protein-coding
MACS_peak_16117	chr6	112995906	112996574	+	176.88	NA	promoter-TSS (NM_008188)	promoter-TSS (NM_008188)	-81	NM_008188	14911	Mm.781	NM_008188	ENSMUSG00000030264	Thumpd3	AW556087|Gt(ROSA)26asSor|Gtrosa26as	THUMP domain containing 3	protein-coding
MACS_peak_13159	chr4	45120778	45121047	+	176.88	NA	promoter-TSS (NM_001099675)	promoter-TSS (NM_001099675)	73	NM_001134646	68512	Mm.282081	NM_001099675	ENSMUSG00000078713	Tomm5	1110019J04Rik|Tom5	translocase of outer mitochondrial membrane 5 homolog (yeast)	protein-coding
MACS_peak_2169	chr10	127520256	127520558	+	176.78	NA	promoter-TSS (NM_016774)	promoter-TSS (NM_016774)	44	NM_016774	11947	Mm.238973	NM_016774	ENSMUSG00000025393	Atp5b	-	ATP synthase, H+ transporting mitochondrial F1 complex, beta subunit	protein-coding
MACS_peak_7301	chr16	13671726	13672222	+	176.77	NA	promoter-TSS (NM_025653)	promoter-TSS (NM_025653)	23	NM_001177552	67118	Mm.223689	NM_025976	ENSMUSG00000022684	Bfar	3010001A07Rik|AI666707|AW107665|Bar|Rnf47	bifunctional apoptosis regulator	protein-coding
MACS_peak_18191	chr8	11555968	11556201	+	176.77	NA	promoter-TSS (NM_011919)	promoter-TSS (NM_011919)	18	NM_011919	26356	Mm.25709	NM_011919	ENSMUSG00000045969	Ing1	2610028J21Rik|AA407184|AI875420|mING1h|p33Ing1|p37Ing1b	inhibitor of growth family, member 1	protein-coding
MACS_peak_14446	chr5	31482127	31482955	+	176.77	NA	promoter-TSS (NM_027901)	promoter-TSS (NM_027901)	-24	NM_027901	71752	Mm.271923	NM_027901	ENSMUSG00000029144	Gtf3c2	1300004C11Rik|2610510G03Rik|AI225816|AU041069|TFIIIC110|mKIAA0011	general transcription factor IIIC, polypeptide 2, beta	protein-coding
MACS_peak_16451	chr6	145159620	145159931	+	176.70	NA	promoter-TSS (NM_177222)	promoter-TSS (NM_177222)	108	NM_133688	67636	Mm.486359	NM_133688	ENSMUSG00000040370	Lyrm5	4930469P12Rik|AL022899|Ghiso	LYR motif containing 5	protein-coding
MACS_peak_8339	chr17	34092399	34092686	+	176.66	NA	promoter-TSS (NM_011296)	promoter-TSS (NM_011296)	44	NM_011296	20084	Mm.298745	NM_011296	ENSMUSG00000008668	Rps18	H-2Ke3|H2-Ke3|Ke-3|ke3	ribosomal protein S18	protein-coding
MACS_peak_6588	chr15	72640259	72640965	+	176.66	NA	non-coding (NR_002864, exon 1 of 1)	non-coding (NR_002864, exon 1 of 1)	142	NR_002864	353342	Mm.440245	NR_002864		Peg13	-	paternally expressed 13	ncRNA
MACS_peak_8043	chr17	24563354	24563942	+	176.43	NA	promoter-TSS (NM_010023)	promoter-TSS (NM_010023)	20	NM_010023	13177	Mm.291743	NM_010023	ENSMUSG00000024132	Eci1	Dci|eci	enoyl-Coenzyme A delta isomerase 1	protein-coding
MACS_peak_17224	chr7	52884030	52884336	+	176.33	NA	exon (NM_028544, exon 3 of 12)	exon (NM_028544, exon 3 of 12)	1276	NM_028544	69903	Mm.181396	NM_028544	ENSMUSG00000044562	Rasip1	1110025D03Rik|2610025P08Rik|AI853551|Rain	Ras interacting protein 1	protein-coding
MACS_peak_18123	chr7	151008507	151008798	+	176.32	NA	promoter-TSS (NM_007856)	promoter-TSS (NM_007856)	94	NM_030221	78914	Mm.35104	NM_030221	ENSMUSG00000031090	Nadsyn1	9130012B15Rik	NAD synthetase 1	protein-coding
MACS_peak_1164	chr10	3134022	3134476	+	176.16	NA	promoter-TSS (NM_172546)	promoter-TSS (NM_172546)	-55	NM_172546	215748	Mm.37984	NM_172546	ENSMUSG00000015202	Cnksr3	6820402C05|BC024086|Magi1	Cnksr family member 3	protein-coding
MACS_peak_863	chr1	167166857	167167469	+	176.16	NA	promoter-TSS (NM_145513)	promoter-TSS (NM_145513)	-74	NM_145513	226591	Mm.21520	NM_145513	ENSMUSG00000040843	Tiprl	1810011K17Rik	TIP41, TOR signalling pathway regulator-like (S. cerevisiae)	protein-coding
MACS_peak_14291	chr5	14514918	14515138	+	176.01	NA	5' UTR (NM_001110796, exon 1 of 20)	5' UTR (NM_001110796, exon 1 of 20)	110	NM_001110796	26875	Mm.146275	NM_011995	ENSMUSG00000061601	Pclo	Acz|Pico	piccolo (presynaptic cytomatrix protein)	protein-coding
MACS_peak_13958	chr4	136913444	136913869	+	176.00	NA	promoter-TSS (NM_001243769)	promoter-TSS (NM_001243769)	18	NM_009861	12540	Mm.1022	NM_009861	ENSMUSG00000006699	Cdc42	AI747189|AU018915	cell division cycle 42	protein-coding
MACS_peak_11926	chr2	180701647	180702114	+	175.96	NA	promoter-TSS (NM_001177710)	promoter-TSS (NM_001177710)	-50	NM_145760	228998	Mm.33765	NM_145760	ENSMUSG00000027575	Arfgap1	AI115377|Arf1gap	ADP-ribosylation factor GTPase activating protein 1	protein-coding
MACS_peak_15351	chr5	140807622	140807943	+	175.96	NA	promoter-TSS (NM_026510)	promoter-TSS (NM_026510)	70	NM_026510	68017	Mm.38894	NM_026510	ENSMUSG00000029557	Ftsj2	2310037B18Rik	FtsJ homolog 2 (E. coli)	protein-coding
MACS_peak_4777	chr12	112916043	112916445	+	175.96	NA	promoter-TSS (NM_177374)	promoter-TSS (NM_177374)	-72	NM_001099792	328162	Mm.425747	NM_177374	ENSMUSG00000060950	Trmt61a	6720458F09Rik|AI606093|Gcd14|Trm61	tRNA methyltransferase 61A	protein-coding
MACS_peak_4345	chr12	70284850	70285359	+	175.89	NA	promoter-TSS (NM_025589)	promoter-TSS (NM_025589)	-41	NM_146035	217664	Mm.206642	NM_146035	ENSMUSG00000043998	Mgat2	AA407964|CDGS2|GLCNACTII|GNT-II|GNT2	mannoside acetylglucosaminyltransferase 2	protein-coding
MACS_peak_9211	chr18	38036810	38037082	+	175.84	NA	intron (NM_007858, intron 16 of 26)	intron (NM_007858, intron 16 of 26)	-22632	NR_105945	102465592		NR_105945		Mir6979	mmu-mir-6979	microRNA mir-6979	ncRNA
MACS_peak_9272	chr18	46685866	46686188	+	175.81	NA	promoter-TSS (NM_173423)	promoter-TSS (NM_173423)	-402	NM_173423	240263	Mm.38249	NM_173423		Fem1c	2610312A07Rik|3632443A22Rik|AI646567	fem-1 homolog c (C.elegans)	protein-coding
MACS_peak_15744	chr6	49023558	49023991	+	175.79	NA	promoter-TSS (NM_029353)	promoter-TSS (NM_029353)	-20	NM_029353	75593	Mm.439947	NM_029353	ENSMUSG00000029815	Malsu1	2410003K15Rik|Matsu1	mitochondrial assembly of ribosomal large subunit 1	protein-coding
MACS_peak_9550	chr19	4012477	4012780	+	175.71	NA	5' UTR (NM_133666, exon 1 of 10)	5' UTR (NM_133666, exon 1 of 10)	127	NM_133666	17995	Mm.29842	NM_133666	ENSMUSG00000037916	Ndufv1	CI-51kD	NADH dehydrogenase (ubiquinone) flavoprotein 1	protein-coding
MACS_peak_14362	chr5	24348715	24349043	+	175.71	NA	promoter-TSS (NM_053075)	promoter-TSS (NM_053075)	-700	NM_053075	19744	Mm.319175	NM_053075	ENSMUSG00000028945	Rheb	-	Ras homolog enriched in brain	protein-coding
MACS_peak_6434	chr15	36212734	36213275	+	175.59	NA	promoter-TSS (NM_013923)	promoter-TSS (NM_013923)	-102	NM_013923	30945	Mm.5181	NM_013923	ENSMUSG00000022280	Rnf19a	AA032313|Dorfin|Rnf19|UIP117|Ubce7ip2|XYbp	ring finger protein 19A	protein-coding
MACS_peak_20339	chr9	109954388	109954766	+	175.59	NA	intron (NM_001205332, intron 8 of 17)	intron (NM_001205332, intron 8 of 17)	49014	NM_001252683	72831	Mm.276305	NM_133347	ENSMUSG00000032480	Dhx30	2810477H02Rik|C130058C04Rik|Ddx30|HELG|Ret-CoR	DEAH (Asp-Glu-Ala-His) box polypeptide 30	protein-coding
MACS_peak_15824	chr6	58856850	58857288	+	175.59	NA	promoter-TSS (NM_021432)	promoter-TSS (NM_021432)	51	NM_021432	58243	Mm.389747	NM_021432	ENSMUSG00000055430	Nap1l5	1110020M21Rik	nucleosome assembly protein 1-like 5	protein-coding
MACS_peak_558	chr1	107560397	107560696	+	175.51	NA	promoter-TSS (NM_013784)	promoter-TSS (NM_013784)	108	NM_173187	227446	Mm.337339	NM_029349	ENSMUSG00000026319	2310035C23Rik	6430401N10|Kiaa1468|mKIAA1468	RIKEN cDNA 2310035C23 gene	protein-coding
MACS_peak_17629	chr7	109054037	109054640	+	175.49	NA	promoter-TSS (NM_025605)	promoter-TSS (NM_025605)	-13	NM_025605	66508	Mm.30003	NM_025605	ENSMUSG00000030842	Lamtor1	2400001E08Rik|Pdro|p18	late endosomal/lysosomal adaptor, MAPK and MTOR activator 1	protein-coding
MACS_peak_14414	chr5	30062118	30062738	+	175.42	NA	promoter-TSS (NM_001127367)	promoter-TSS (NM_001127367)	-10	NM_001037941	23950	Mm.290110	NM_011847	ENSMUSG00000029131	Dnajb6	Mrj|mDj4	DnaJ (Hsp40) homolog, subfamily B, member 6	protein-coding
MACS_peak_13353	chr4	87740206	87740782	+	175.42	NA	promoter-TSS (NM_001081184)	promoter-TSS (NM_001081184)	-40	NM_001081184	230393	Mm.287210	NM_001081184	ENSMUSG00000038368	Focad	Kiaa1797|mKIAA1797	focadhesin	protein-coding
MACS_peak_18891	chr8	97362026	97362517	+	175.42	NA	promoter-TSS (NM_026452)	promoter-TSS (NM_026452)	-31	NM_134141	109006	Mm.27582	NM_134141	ENSMUSG00000031781	Ciapin1	2810413N20Rik|AA617265|AU021794|anamorsin	cytokine induced apoptosis inhibitor 1	protein-coding
MACS_peak_8233	chr17	28659438	28659840	+	175.26	NA	Intergenic	Intergenic	-8167	NM_026290	67645	Mm.46170	NM_026290	ENSMUSG00000024223	Armc12	4930511I11Rik|AV041658	armadillo repeat containing 12	protein-coding
MACS_peak_3581	chr11	100980935	100981759	+	175.20	NA	promoter-TSS (NM_028933)	promoter-TSS (NM_028933)	-98	NM_134024	103733	Mm.479145	NM_134024	ENSMUSG00000035198	Tubg1	1500010O08Rik|AI451582|AI503389|Tubg	tubulin, gamma 1	protein-coding
MACS_peak_4610	chr12	88607422	88607873	+	175.17	NA	promoter-TSS (NM_001142581)	promoter-TSS (NM_001142581)	-31	NM_146036	217737	Mm.22626	NM_146036	ENSMUSG00000021037	Ahsa1	BC023857|p38	AHA1, activator of heat shock protein ATPase 1	protein-coding
MACS_peak_15112	chr5	124357196	124357434	+	175.12	NA	promoter-TSS (NM_026603)	promoter-TSS (NM_026603)	31	NM_026603	68184	Mm.28549	NM_026603	ENSMUSG00000023106	Denr	1500003K04Rik	density-regulated protein	protein-coding
MACS_peak_17610	chr7	107855126	107855394	+	175.12	NA	promoter-TSS (NM_178764)	promoter-TSS (NM_178764)	44	NM_178764	319604	Mm.260362	NM_178764	ENSMUSG00000029461	Fam168a	2610030B18Rik|B930006L02Rik|mKIAA0280	family with sequence similarity 168, member A	protein-coding
MACS_peak_16608	chr7	13619718	13620412	+	175.05	NA	promoter-TSS (NM_026885)	promoter-TSS (NM_026885)	61	NM_026885	68953	Mm.295670	NM_026885	ENSMUSG00000033916	Chmp2a	1500016L11Rik	charged multivesicular body protein 2A	protein-coding
MACS_peak_15179	chr5	130221178	130221637	+	174.93	NA	promoter-TSS (NM_025450)	promoter-TSS (NM_025450)	4	NM_025450	66258	Mm.249809	NM_025450	ENSMUSG00000034211	Mrps17	1810006P02Rik|Mprs17	mitochondrial ribosomal protein S17	protein-coding
MACS_peak_7009	chr15	90054349	90054849	+	174.74	NA	promoter-TSS (NM_001033441)	promoter-TSS (NM_001033441)	-143	NM_001033441	380959	Mm.17853	NM_001033441	ENSMUSG00000075470	Alg10b	AA469671|AU045404|AW123895|C85569|Gm917	asparagine-linked glycosylation 10B (alpha-1,2-glucosyltransferase)	protein-coding
MACS_peak_14841	chr5	108741511	108742041	+	174.52	NA	promoter-TSS (NM_001081234)	promoter-TSS (NM_001081234)	-168	NM_001081234	433931	Mm.319881	NM_001081234	ENSMUSG00000029263	Pigg	Gpi7	phosphatidylinositol glycan anchor biosynthesis, class G	protein-coding
MACS_peak_7855	chr17	6429241	6429493	+	174.50	NA	exon (NM_009342, exon 1 of 5)	exon (NM_009342, exon 1 of 5)	107	NM_009342	21648	Mm.1948	NM_009342	ENSMUSG00000096255	Dynlt1b	AGS2|Dynlt1|Tctex-1|Tctex1	dynein light chain Tctex-type 1B	protein-coding
MACS_peak_6344	chr15	3945424	3945812	+	174.25	NA	promoter-TSS (NR_045740)	promoter-TSS (NR_045740)	134	NM_145930	106064	Mm.21299	NM_145930	ENSMUSG00000041935	AW549877	AI195826	expressed sequence AW549877	protein-coding
MACS_peak_6702	chr15	76730024	76730557	+	174.21	NA	promoter-TSS (NM_025536)	promoter-TSS (NM_025536)	-81	NM_025536	66398	Mm.291716	NM_025536	ENSMUSG00000055041	Commd5	2310065H03Rik|AI854466|D15Ertd81e|Hcarg	COMM domain containing 5	protein-coding
MACS_peak_18156	chr8	3621152	3621386	+	174.21	NA	promoter-TSS (NM_001195244)	promoter-TSS (NM_001195244)	27	NM_026156	67439	Mm.23739	NM_026156	ENSMUSG00000019470	Xab2	0610041O14Rik|AV025587	XPA binding protein 2	protein-coding
MACS_peak_4266	chr12	45369815	45370351	+	174.21	NA	promoter-TSS (NM_026164)	promoter-TSS (NM_026164)	-58	NM_026164	67452	Mm.54126	NM_026164	ENSMUSG00000036257	Pnpla8	1200006O19Rik|AI467579|Ipla2(gamma)	patatin-like phospholipase domain containing 8	protein-coding
MACS_peak_3023	chr11	72420370	72420941	+	174.21	NA	promoter-TSS (NM_025985)	promoter-TSS (NM_025985)	-108	NM_025985	67128	Mm.458052	NM_025985	ENSMUSG00000020794	Ube2g1	2700059C12Rik|AI256795|AU014992|AW552068|D130023C12Rik	ubiquitin-conjugating enzyme E2G 1	protein-coding
MACS_peak_10613	chr2	30808367	30808663	+	174.18	NA	promoter-TSS (NM_133673)	promoter-TSS (NM_133673)	-6	NM_133673	30934	Mm.249164	NM_133673	ENSMUSG00000026848	Tor1b	2610016F05Rik|DQ1|torsinB	torsin family 1, member B	protein-coding
MACS_peak_6703	chr15	76734405	76734705	+	174.18	NA	promoter-TSS (NM_012053)	promoter-TSS (NM_012053)	54	NM_012053	26961	Mm.30066	NM_012053	ENSMUSG00000003970	Rpl8	-	ribosomal protein L8	protein-coding
MACS_peak_5700	chr14	27398854	27399488	+	174.03	NA	exon (NM_001134465, exon 1 of 20)	exon (NM_001134465, exon 1 of 20)	135	NM_145969	211922	Mm.260512	NM_145969	ENSMUSG00000040818	Dennd6a	Fam116a	DENN/MADD domain containing 6A	protein-coding
MACS_peak_17606	chr7	107755608	107755934	+	173.76	NA	promoter-TSS (NM_024287)	promoter-TSS (NM_024287)	-329	NM_024287	19346	Mm.28650	NM_024287	ENSMUSG00000030704	Rab6a	2610028L11Rik|AA419671|Rab6	RAB6A, member RAS oncogene family	protein-coding
MACS_peak_16842	chr7	27951579	27952196	+	173.74	NA	promoter-TSS (NM_053208)	promoter-TSS (NM_053208)	-66	NM_053208	112406	Mm.29978	NM_053208	ENSMUSG00000058709	Egln2	0610011A13Rik|C85656|Hif-p4h-1|Ier4|Phd1|SM-20	egl-9 family hypoxia-inducible factor 2	protein-coding
MACS_peak_13880	chr4	133742640	133743051	+	173.67	NA	intron (NM_144527, intron 1 of 13)	CpG	155	NM_144527	70012	Mm.26542	NM_144527	ENSMUSG00000037443	Cep85	2410030J07Rik|AI173272|AI173504|Ccdc21	centrosomal protein 85	protein-coding
MACS_peak_16624	chr7	16683879	16684145	+	173.63	NA	promoter-TSS (NM_025898)	promoter-TSS (NM_025898)	20	NM_025898	108124	Mm.104540	NM_025898	ENSMUSG00000006024	Napa	1500039N14Rik|AW209189|RA81|SNAPA|SNARE|a-SNAP|hyh	N-ethylmaleimide sensitive fusion protein attachment protein alpha	protein-coding
MACS_peak_8678	chr17	57129483	57129992	+	173.63	NA	promoter-TSS (NM_017393)	promoter-TSS (NM_017393)	50	NM_017393	53895	Mm.287892	NM_017393	ENSMUSG00000002660	Clpp	AU019820|D17Wsu160e	caseinolytic mitochondrial matrix peptidase proteolytic subunit	protein-coding
MACS_peak_4895	chr13	19487276	19488028	+	173.44	NA	promoter-TSS (NM_024270)	promoter-TSS (NM_024270)	-31	NM_024270	76205	Mm.41940	NM_024270	ENSMUSG00000003062	Stard3nl	0610035N01Rik|6530409L22Rik|AW124774|MENTHO	STARD3 N-terminal like	protein-coding
MACS_peak_20030	chr9	86465231	86465772	+	173.36	NA	promoter-TSS (NM_001145968)	promoter-TSS (NM_001145968)	-52	NM_028352	109785	Mm.390201	NM_028352	ENSMUSG00000056131	Pgm3	2810473H05Rik|Agm1|BB187688|C77933|PAGM|Pgm-3	phosphoglucomutase 3	protein-coding
MACS_peak_1192	chr10	7309372	7309798	+	173.30	NA	promoter-TSS (NM_172784)	promoter-TSS (NM_172784)	-13	NM_172784	237253	Mm.206759	NM_172784	ENSMUSG00000019796	Lrp11	1700034J19Rik|6330533B21|9830160H19Rik	low density lipoprotein receptor-related protein 11	protein-coding
MACS_peak_1276	chr10	23506831	23507163	+	173.30	NA	promoter-TSS (NM_011295)	promoter-TSS (NM_011295)	18	NM_011295	20042	Mm.371846	NM_011295	ENSMUSG00000061983	Rps12	-	ribosomal protein S12	protein-coding
MACS_peak_17585	chr7	106631959	106632251	+	173.30	NA	promoter-TSS (NR_002172)	promoter-TSS (NR_002172)	114	NM_012052	27050	Mm.236868	NM_012052	ENSMUSG00000030744	Rps3	D7Ertd795e|Rs_3	ribosomal protein S3	protein-coding
MACS_peak_1592	chr10	76880854	76881293	+	173.30	NA	promoter-TSS (NM_130895)	promoter-TSS (NM_130895)	-48	NR_027377	100045653	Mm.363175	NR_027377		Gm17769	-	predicted gene, 17769	ncRNA
MACS_peak_6053	chr14	65034564	65034871	+	173.20	NA	intron (NM_001253715, intron 1 of 4)	intron (NM_001253715, intron 1 of 4)	1076	NM_001253716	110265	Mm.26713	NM_026322	ENSMUSG00000054733	Msra	2310045J23Rik|6530413P12Rik|MSR-A	methionine sulfoxide reductase A	protein-coding
MACS_peak_3484	chr11	98063787	98064259	+	172.92	NA	promoter-TSS (NM_026952)	promoter-TSS (NM_026952)	-596	NM_001109628	69131	Mm.260516	NM_026952	ENSMUSG00000003119	Cdk12	1810022J16Rik|AI646528|Crk7|Crkrs|D11Ertd752e|Pksc	cyclin-dependent kinase 12	protein-coding
MACS_peak_13104	chr4	41660349	41660795	+	172.92	NA	promoter-TSS (NM_027278)	promoter-TSS (NM_027278)	-23	NM_027278	69961	Mm.425182	NM_027278	ENSMUSG00000036114	Rpp25l	2810432D09Rik|AW987258|Rppl25	ribonuclease P/MRP 25 subunit-like	protein-coding
MACS_peak_1123	chr1	193221177	193221818	+	172.84	NA	promoter-TSS (NM_144880)	promoter-TSS (NM_144880)	-577	NM_144880	226849	Mm.205569	NM_144880	ENSMUSG00000026626	Ppp2r5a	PR61alpha	protein phosphatase 2, regulatory subunit B', alpha	protein-coding
MACS_peak_18722	chr8	86794042	86794344	+	172.80	NA	intron (NM_026350, intron 1 of 9)	CpG	108	NM_001294281	67736	Mm.30095	NM_026350	ENSMUSG00000004994	Ccdc130	4930527D15Rik|C77430	coiled-coil domain containing 130	protein-coding
MACS_peak_12547	chr3	96433542	96434081	+	172.65	NA	promoter-TSS (NR_003619)	promoter-TSS (NR_003619)	-40	NM_025875	60365	Mm.261972	NM_025875	ENSMUSG00000038374	Rbm8a	2310057C03Rik|AA673428|Rbm8	RNA binding motif protein 8a	protein-coding
MACS_peak_1595	chr10	77044109	77044697	+	172.65	NA	promoter-TSS (NM_145925)	promoter-TSS (NM_145925)	-109	NM_145925	108705	Mm.28853	NM_145925	ENSMUSG00000009291	Pttg1ip	1810010L20Rik|AI314311|AU018448|C79540	pituitary tumor-transforming 1 interacting protein	protein-coding
MACS_peak_102	chr1	34496659	34496945	+	172.34	NA	promoter-TSS (NM_027159)	promoter-TSS (NM_027159)	128	NM_178601	27993	Mm.289667	NM_178601	ENSMUSG00000026127	Imp4	AA409888|AV031295|D1Wsu40e	IMP4, U3 small nucleolar ribonucleoprotein, homolog (yeast)	protein-coding
MACS_peak_4882	chr13	14155196	14155778	+	172.28	NA	promoter-TSS (NM_198122)	promoter-TSS (NM_198122)	181	NM_010282	14593	Mm.148039	NM_010282	ENSMUSG00000021302	Ggps1	1810026C22Rik|9530089B04Rik|AI843169|C79210	geranylgeranyl diphosphate synthase 1	protein-coding
MACS_peak_4885	chr13	14705099	14705713	+	172.18	NA	promoter-TSS (NM_008944)	promoter-TSS (NM_008944)	-102	NM_029271	75398	Mm.36511	NM_029271	ENSMUSG00000015672	Mrpl32	0610033O15Rik	mitochondrial ribosomal protein L32	protein-coding
MACS_peak_1739	chr10	80289293	80289760	+	172.18	NA	promoter-TSS (NR_027656)	promoter-TSS (NR_027656)	85	NR_027656	100041965	Mm.328806	NR_027656		Oaz1-ps	ENSMUSG00000043801|Gm1823|Gm9786|Oaz-ps	ornithine decarboxylase antizyme 1, pseudogene	pseudo
MACS_peak_16203	chr6	118512081	118512574	+	172.18	NA	promoter-TSS (NM_001081112)	promoter-TSS (NM_001081112)	-53	NM_001081112	232339	Mm.276116	NM_001081112	ENSMUSG00000007827	Ankrd26	5730521P14Rik|BC008111|mKIAA1074	ankyrin repeat domain 26	protein-coding
MACS_peak_1668	chr10	79604722	79605258	+	172.18	NA	promoter-TSS (NM_025313)	promoter-TSS (NM_025313)	-70	NM_025313	66043	Mm.278560	NM_025313	ENSMUSG00000003072	Atp5d	0610008F14Rik|1500000I11Rik|AA960090|AI876556|AU020773|C85518	ATP synthase, H+ transporting, mitochondrial F1 complex, delta subunit	protein-coding
MACS_peak_3035	chr11	72990287	72990821	+	172.18	NA	promoter-TSS (NM_029564)	promoter-TSS (NM_029564)	-10	NM_025318	66048	Mm.73608	NM_025318	ENSMUSG00000047260	Emc6	0610009E20Rik|0610025L18Rik|Tmem93	ER membrane protein complex subunit 6	protein-coding
MACS_peak_11285	chr2	121332188	121332502	+	172.18	NA	promoter-TSS (NM_026220)	promoter-TSS (NM_026220)	47	NM_026220	67532	Mm.440764	NM_026220	ENSMUSG00000068479	Mfap1a	4432409M24Rik|Mfap1	microfibrillar-associated protein 1A	protein-coding
MACS_peak_17472	chr7	88045965	88046414	+	172.18	NA	promoter-TSS (NM_028026)	promoter-TSS (NM_028026)	-34	NR_027976	71968	Mm.274226	NM_028026	ENSMUSG00000025722	Wdr73	1200011I23Rik|2410008B13Rik|AI848574|C85352	WD repeat domain 73	protein-coding
MACS_peak_11613	chr2	155062012	155062459	+	172.18	NA	promoter-TSS (NR_111890)	promoter-TSS (NR_111890)	-34	NR_111891	67068	Mm.23693	NM_025947	ENSMUSG00000047459	Dynlrb1	2010012N15Rik|2010320M17Rik|9430076K19Rik|AV124457|DNLC2A|Dncl2a|km23-1	dynein light chain roadblock-type 1	protein-coding
MACS_peak_17744	chr7	125259523	125260030	+	172.18	NA	promoter-TSS (NM_170669)	promoter-TSS (NM_170669)	-115	NM_170669	267019	Mm.288212	NM_170669	ENSMUSG00000008683	Rps15a	A630031B11Rik	ribosomal protein S15A	protein-coding
MACS_peak_14708	chr5	89012326	89012666	+	172.07	NA	promoter-TSS (NM_001289776)	promoter-TSS (NM_001289776)	-42	NM_001289777	52822	Mm.270469	NM_027530	ENSMUSG00000029291	Rufy3	2810428M05Rik|6330416M07Rik|AW455998|AW538594|D5Bwg0860e|Ripx|Rpipx	RUN and FYVE domain containing 3	protein-coding
MACS_peak_15588	chr6	29297719	29298382	+	172.06	NA	promoter-TSS (NM_184053)	promoter-TSS (NM_184053)	-56	NM_007594	12321	Mm.392075	NM_007594	ENSMUSG00000029767	Calu	9530075H20Rik	calumenin	protein-coding
MACS_peak_458	chr1	88051027	88051493	+	172.06	NA	promoter-TSS (NM_027456)	promoter-TSS (NM_027456)	-95	NM_030184	78795	Mm.379264	NM_027456	ENSMUSG00000062590	Armc9	3830422A13Rik|4831423D23Rik|4930438O05Rik|5730415N24Rik	armadillo repeat containing 9	protein-coding
MACS_peak_5791	chr14	46008321	46008912	+	172.01	NA	promoter-TSS (NM_019425)	promoter-TSS (NM_019425)	-145	NM_019425	54342	Mm.312945	NM_019425	ENSMUSG00000037722	Gnpnat1	AU017428|AU040593|EMeg32|Gpnat1|Gsnpat	glucosamine-phosphate N-acetyltransferase 1	protein-coding
MACS_peak_2818	chr11	62094726	62095132	+	171.97	NA	promoter-TSS (NM_027198)	promoter-TSS (NM_027198)	-32	NM_027198	69747	Mm.141150	NM_027198	ENSMUSG00000014243	Zswim7	2410012H22Rik	zinc finger SWIM-type containing 7	protein-coding
MACS_peak_7746	chr16	91011326	91011903	+	171.96	NA	promoter-TSS (NM_001164483)	promoter-TSS (NM_001164483)	-61	NM_001164483	104015	Mm.187079	NM_001045515	ENSMUSG00000022973	Synj1	A930006D20Rik|AA675315|mKIAA0910	synaptojanin 1	protein-coding
MACS_peak_11695	chr2	157030485	157030791	+	171.96	NA	promoter-TSS (NM_011249)	promoter-TSS (NM_011249)	-368	NM_001139516	19650	Mm.244671	NM_011249	ENSMUSG00000027641	Rbl1	AW547426|PRB1|p107	retinoblastoma-like 1 (p107)	protein-coding
MACS_peak_13364	chr4	94223270	94223652	+	171.90	NA	promoter-TSS (NM_026368)	promoter-TSS (NM_026368)	26	NM_026368	67770	Mm.35170	NM_026368	ENSMUSG00000028578	Caap1	5830433M19Rik|AI536248|CAAP	caspase activity and apoptosis inhibitor 1	protein-coding
MACS_peak_7279	chr16	10542987	10543274	+	171.90	NA	promoter-TSS (NM_021428)	promoter-TSS (NM_021428)	17	NM_021428	58239	Mm.353006	NM_021428	ENSMUSG00000038055	Dexi	1810029J14Rik|AI836170|AW413143|D16Bwg0586e|Myle	dexamethasone-induced transcript	protein-coding
MACS_peak_14812	chr5	106899505	106900056	+	171.90	NA	Intergenic	Intergenic	-12595	NM_001005477	104382	Mm.271593	NM_001005477	ENSMUSG00000034384	Barhl2	E130309B19Rik|MBH1	BarH-like 2 (Drosophila)	protein-coding
MACS_peak_12225	chr3	65331678	65332523	+	171.90	NA	promoter-TSS (NM_178892)	promoter-TSS (NM_178892)	-269	NM_178892	99929	Mm.246398	NM_178892	ENSMUSG00000034640	Tiparp	ARTD14|AW558171|PARP7	TCDD-inducible poly(ADP-ribose) polymerase	protein-coding
MACS_peak_4942	chr13	23654163	23654397	+	171.90	NA	promoter-TSS (NM_178205)	promoter-TSS (NM_178205)	-46	NM_178205	319151	Mm.261658	NM_178205		Hist1h3e	H3-f|H3.1	histone cluster 1, H3e	protein-coding
MACS_peak_2868	chr11	68753079	68753624	+	171.90	NA	Intergenic	RLTR20B3|LTR|ERVK	-12768	NM_145746	252868	Mm.76826	NM_145746	ENSMUSG00000032921	Odf4	Oppo1	outer dense fiber of sperm tails 4	protein-coding
MACS_peak_7354	chr16	17759428	17759922	+	171.90	NA	promoter-TSS (NM_145479)	promoter-TSS (NM_145479)	-39	NM_145479	224023	Mm.282807	NM_145479	ENSMUSG00000022750	Klhl22	2610318I18Rik|Kelchl	kelch-like 22	protein-coding
MACS_peak_7232	chr16	4003573	4004142	+	171.83	NA	Intergenic	CpG	-2179	NM_177472	52864	Mm.29935	NM_177472	ENSMUSG00000039738	Slx4	AI256635|AI426760|Btbd12|D16Bwg1016e	SLX4 structure-specific endonuclease subunit homolog (S. cerevisiae)	protein-coding
MACS_peak_14840	chr5	108697545	108698164	+	171.65	NA	promoter-TSS (NM_026106)	promoter-TSS (NM_026106)	-62	NM_026106	13486	Mm.303534	NM_026106	ENSMUSG00000029265	Dr1	1700121L09Rik|Dr1l|NC2|NC2beta	down-regulator of transcription 1	protein-coding
MACS_peak_18300	chr8	26707753	26708296	+	171.64	NA	promoter-TSS (NM_173012)	promoter-TSS (NM_173012)	-65	NM_173012	270035	Mm.268349	NM_173012	ENSMUSG00000037363	Letm2	6030453H13|D030041N04Rik	leucine zipper-EF-hand containing transmembrane protein 2	protein-coding
MACS_peak_515	chr1	94077145	94077753	+	171.64	NA	Intergenic	CpG	-32479	NM_207225	208727	Mm.318567	NM_207225	ENSMUSG00000026313	Hdac4	4932408F19Rik|AI047285	histone deacetylase 4	protein-coding
MACS_peak_4134	chr12	9036777	9037281	+	171.64	NA	intron (NM_029321, intron 1 of 2)	CpG	226	NM_029321	75516	Mm.37581	NM_029321	ENSMUSG00000066637	Ttc32	1700013G20Rik	tetratricopeptide repeat domain 32	protein-coding
MACS_peak_3802	chr11	110198700	110199039	+	171.64	NA	5' UTR (NM_147219, exon 1 of 39)	5' UTR (NM_147219, exon 1 of 39)	161	NM_147219	217265	Mm.41942	NM_147219	ENSMUSG00000018800	Abca5	ABC13|B930033A02Rik|mKIAA1888	ATP-binding cassette, sub-family A (ABC1), member 5	protein-coding
MACS_peak_17807	chr7	133393975	133394399	+	171.64	NA	Intergenic	Intergenic	-21946	NM_145587	104175	Mm.29660	NM_145587	ENSMUSG00000042978	Sbk1	Sbk	SH3-binding kinase 1	protein-coding
MACS_peak_7886	chr17	8476243	8476913	+	171.37	NA	promoter-TSS (NM_018819)	promoter-TSS (NM_018819)	-100	NM_018819	55951	Mm.288510	NM_018819	ENSMUSG00000023861	Mpc1	0610006G08Rik|3830411I18Rik|Brp44l	mitochondrial pyruvate carrier 1	protein-coding
MACS_peak_8107	chr17	25864604	25864890	+	171.14	NA	promoter-TSS (NM_028009)	promoter-TSS (NM_028009)	51	NM_028009	106707	Mm.24603	NM_028009	ENSMUSG00000041199	Rpusd1	2310051D06Rik|AU019540|Rlucl	RNA pseudouridylate synthase domain containing 1	protein-coding
MACS_peak_9665	chr19	5731528	5731802	+	171.13	NA	promoter-TSS (NM_020491)	promoter-TSS (NM_020491)	67	NM_020491	56390	Mm.455818	NM_020491	ENSMUSG00000079478	Sssca1	1500016H19Rik|C184L	Sjogren's syndrome/scleroderma autoantigen 1 homolog (human)	protein-coding
MACS_peak_18632	chr8	74945200	74945562	+	171.10	NA	promoter-TSS (NM_007944)	promoter-TSS (NM_007944)	-8	NM_001289859	13859	Mm.288894	NM_007944	ENSMUSG00000006276	Eps15l1	9830147J04Rik|AI593686|Eps15-rs|Eps15R	epidermal growth factor receptor pathway substrate 15-like 1	protein-coding
MACS_peak_15644	chr6	35083461	35083774	+	170.87	NA	5' UTR (NM_001164414, exon 1 of 11)	5' UTR (NM_001164414, exon 1 of 11)	120	NM_001164412	53621	Mm.214525	NM_016877	ENSMUSG00000038784	Cnot4	Not4|Not4h|Not4hp	CCR4-NOT transcription complex, subunit 4	protein-coding
MACS_peak_3930	chr11	116975957	116976731	+	170.83	NA	promoter-TSS (NM_028777)	promoter-TSS (NM_028777)	-142	NR_029459	74136	Mm.272312	NM_028777	ENSMUSG00000020823	Sec14l1	1200017E04Rik|2810012L19Rik|Naa-35	SEC14-like 1 (S. cerevisiae)	protein-coding
MACS_peak_16529	chr7	4866534	4866877	+	170.72	NA	promoter-TSS (NM_170759)	promoter-TSS (NM_170759)	-114	NM_170759	232816	Mm.27442	NM_170759	ENSMUSG00000074406	Zfp628	Zec|Znf628	zinc finger protein 628	protein-coding
MACS_peak_4201	chr12	31269240	31269502	+	170.72	NA	promoter-TSS (NM_172049)	promoter-TSS (NM_172049)	63	NM_172049	211986	Mm.34035	NM_172049	ENSMUSG00000043061	Tmem18	BC024093	transmembrane protein 18	protein-coding
MACS_peak_4034	chr11	120209618	120209886	+	170.65	NA	promoter-TSS (NM_009609)	promoter-TSS (NM_009609)	46	NM_009609	11465	Mm.196173	NM_009609	ENSMUSG00000062825	Actg1	AL023024|Actg|Actl|E51	actin, gamma, cytoplasmic 1	protein-coding
MACS_peak_19170	chr8	125135469	125135625	+	170.65	NA	promoter-TSS (NM_021502)	promoter-TSS (NM_021502)	21	NM_021502	59005	Mm.38746	NM_021502	ENSMUSG00000015013	Trappc2l	1810017G16Rik|AB030200|Hspc176|Tca17	trafficking protein particle complex 2-like	protein-coding
MACS_peak_2327	chr11	6315347	6316153	+	170.65	NA	promoter-TSS (NM_008907)	promoter-TSS (NM_008907)	-123	NM_008907	268373	Mm.5246	NM_008907		Ppia	2700098C05|Cphn|CyP-18|CypA	peptidylprolyl isomerase A	protein-coding
MACS_peak_8359	chr17	34535611	34536249	+	170.56	NA	intron (NM_001001177, intron 1 of 19)	RMER21A|LTR|ERV1	165	NM_001163855	407788	Mm.73205	NM_001001177	ENSMUSG00000057246	BC051142	NG8|TSBP|Tesb|Tesbp	cDNA sequence BC051142	protein-coding
MACS_peak_12603	chr3	102975452	102975831	+	170.56	NA	promoter-TSS (NM_026602)	promoter-TSS (NM_026602)	7	NM_026602	68183	Mm.104919	NM_026602	ENSMUSG00000005687	Bcas2	6430539P16Rik|AI132645|C76366|C80030	breast carcinoma amplified sequence 2	protein-coding
MACS_peak_12412	chr3	89802416	89802869	+	170.56	NA	promoter-TSS (NM_011826)	promoter-TSS (NM_011826)	-4	NM_001282032	23897	Mm.256035	NM_011826	ENSMUSG00000027944	Hax1	HAX-1|HSP1BP-1|Hs1bp1|SIG-111|Silg111|mHAX-1s	HCLS1 associated X-1	protein-coding
MACS_peak_12832	chr3	136332659	136333261	+	170.28	NA	promoter-TSS (NM_001293622)	promoter-TSS (NM_001293622)	-70	NM_008913	19055	Mm.331389	NM_008913	ENSMUSG00000028161	Ppp3ca	2900074D19Rik|CN|Caln|Calna|CnA	protein phosphatase 3, catalytic subunit, alpha isoform	protein-coding
MACS_peak_9541	chr19	3767346	3768389	+	170.28	NA	intron (NM_001167884, intron 1 of 13)	CpG	446	NM_001167885	225888	Mm.278578	NM_144871	ENSMUSG00000045098	Suv420h1	AA117471|C630029K18Rik|KMT5B|Suv4-20h1	suppressor of variegation 4-20 homolog 1 (Drosophila)	protein-coding
MACS_peak_15896	chr6	72908085	72908625	+	170.13	NA	promoter-TSS (NM_001039392)	promoter-TSS (NM_001039392)	122	NM_025284	19240	Mm.3532	NM_025284	ENSMUSG00000079523	Tmsb10	Ptmb10|Tb10	thymosin, beta 10	protein-coding
MACS_peak_18386	chr8	42127044	42127448	+	170.13	NA	promoter-TSS (NM_001005865)	promoter-TSS (NM_001005865)	39	NM_001005865	102103	Mm.149438	NM_001005863	ENSMUSG00000045636	Mtus1	AI481402|ATBP135|Atip1|B430010I23Rik|B430305I03Rik|C85752|Cctsg1-440|MD44|MTSG1|mKIAA1288	mitochondrial tumor suppressor 1	protein-coding
MACS_peak_13298	chr4	70195818	70196356	+	170.06	NA	promoter-TSS (NM_172694)	promoter-TSS (NM_172694)	-125	NM_172694	230316	Mm.251188	NM_172694		Megf9	4933405H16Rik|9630025C07|Egfl5|mKIAA0818	multiple EGF-like-domains 9	protein-coding
MACS_peak_824	chr1	162836258	162836713	+	170.06	NA	promoter-TSS (NM_001024952)	promoter-TSS (NM_001024952)	-57	NM_001024952	381305	Mm.329667	NM_001024952	ENSMUSG00000040423	Rc3h1	5730557L09Rik|Gm551|N28103|mKIAA2025	RING CCCH (C3H) domains 1	protein-coding
MACS_peak_19870	chr9	65524047	65524580	+	170.06	NA	promoter-TSS (NM_010952)	promoter-TSS (NM_010952)	-42	NM_010952	18247	Mm.116749	NM_010952	ENSMUSG00000040652	Oaz2	AZ-2|AZ2|Oaz2-ps|Sez15	ornithine decarboxylase antizyme 2	protein-coding
MACS_peak_16305	chr6	124881160	124881704	+	170.06	NA	promoter-TSS (NM_001170341)	promoter-TSS (NM_001170341)	26	NM_001170341	30853	Mm.490270	NM_145385	ENSMUSG00000030120	Mlf2	AI256856|AU018944|C77284	myeloid leukemia factor 2	protein-coding
MACS_peak_8240	chr17	28938414	28938808	+	170.06	NA	intron (NM_001081315, intron 1 of 12)	CpG	540	NM_001081315	268936	Mm.291877	NM_199061	ENSMUSG00000063952	Brpf3	AI413466|AW493400|mKIAA1286	bromodomain and PHD finger containing, 3	protein-coding
MACS_peak_6230	chr14	103468963	103469751	+	169.97	NA	promoter-TSS (NM_001033242)	promoter-TSS (NM_001033242)	-76	NM_001033242	211286	Mm.295289	NM_001033242	ENSMUSG00000022125	Cln5	A730075N08Rik	ceroid-lipofuscinosis, neuronal 5	protein-coding
MACS_peak_16162	chr6	115262825	115263102	+	169.97	NA	Intergenic	Intergenic	-48276	NM_001127330	19016	Mm.3020	NM_011146	ENSMUSG00000000440	Pparg	Nr1c3|PPAR-gamma|PPAR-gamma2|PPARgamma|PPARgamma2	peroxisome proliferator activated receptor gamma	protein-coding
MACS_peak_7362	chr16	18066206	18066664	+	169.97	NA	promoter-TSS (NM_001289814)	promoter-TSS (NM_001289814)	-61	NR_110380	13353	Mm.27155	NM_010047	ENSMUSG00000003531	Dgcr6	-	DiGeorge syndrome critical region gene 6	protein-coding
MACS_peak_375	chr1	74647764	74648104	+	169.61	NA	promoter-TSS (NM_175031)	promoter-TSS (NM_175031)	37	NM_021313	57751	Mm.280920	NM_021313	ENSMUSG00000026171	Rnf25	0610009H16Rik|AO7	ring finger protein 25	protein-coding
MACS_peak_7759	chr16	91647776	91648315	+	169.61	NA	promoter-TSS (NM_010256)	promoter-TSS (NM_010256)	-24	NM_019973	20658	Mm.46401	NM_019973	ENSMUSG00000022961	Son	2900011L12Rik|AA409051|AU067731|C81487|mKIAA1019|nrebp	Son DNA binding protein	protein-coding
MACS_peak_13127	chr4	43455038	43455348	+	169.45	NA	promoter-TSS (NM_011571)	promoter-TSS (NM_011571)	44	NM_011571	21754	Mm.485441	NM_011571	ENSMUSG00000028458	Tesk1	AI326901	testis specific protein kinase 1	protein-coding
MACS_peak_12677	chr3	108013216	108014151	+	169.45	NA	promoter-TSS (NM_001289545)	promoter-TSS (NM_001289545)	-238	NM_175183	72522	Mm.187326	NM_175183	ENSMUSG00000048997	Atxn7l2	2610528J18Rik	ataxin 7-like 2	protein-coding
MACS_peak_2341	chr11	6525767	6526339	+	169.45	NA	promoter-TSS (NM_134011)	promoter-TSS (NM_134011)	17	NM_001130457	21379	Mm.247761	NM_134011	ENSMUSG00000000384	Tbrg4	2310042P22Rik|AA120735|AA408001|AI527316|Cpr2|R74877|Tb-12|mKIAA0948	transforming growth factor beta regulated gene 4	protein-coding
MACS_peak_15539	chr6	13821273	13821753	+	169.31	NA	promoter-TSS (NR_045995)	promoter-TSS (NR_045995)	-30	NR_024619	66520	Mm.29615	NM_183258		2610001J05Rik	C79299	RIKEN cDNA 2610001J05 gene	ncRNA
MACS_peak_886	chr1	169214918	169215303	+	169.29	NA	5' UTR (NM_030724, exon 1 of 7)	5' UTR (NM_030724, exon 1 of 7)	148	NM_030724	80914	Mm.280895	NM_030724	ENSMUSG00000026558	Uck2	AA407809|AI481316|AU018180|AU020720|TSA903|UK|UMK|Umpk	uridine-cytidine kinase 2	protein-coding
MACS_peak_4158	chr12	17354976	17355399	+	169.04	NA	promoter-TSS (NM_001008421)	promoter-TSS (NM_001008421)	-112	NM_001008421	217431	Mm.27536	NM_001008421	ENSMUSG00000061458	Nol10	Gm67	nucleolar protein 10	protein-coding
MACS_peak_13185	chr4	47070046	47070521	+	168.97	NA	promoter-TSS (NM_001024136)	promoter-TSS (NM_001024136)	-105	NM_001024136	75691	Mm.86866	NM_001024136	ENSMUSG00000066191	Anks6	2210417J20Rik|Ankrd14|Gm635|SamCystin|Samd6|b2b1801.1Clo	ankyrin repeat and sterile alpha motif domain containing 6	protein-coding
MACS_peak_10136	chr19	46119469	46120183	+	168.97	NA	promoter-TSS (NM_001113408)	promoter-TSS (NM_001113408)	-125	NM_001113408	16825	Mm.327442	NM_010697	ENSMUSG00000025223	Ldb1	CLIM2|NLI	LIM domain binding 1	protein-coding
MACS_peak_13460	chr4	107562196	107563012	+	168.97	NA	promoter-TSS (NM_028754)	promoter-TSS (NM_028754)	100	NM_028754	74098	Mm.274853	NM_028754	ENSMUSG00000028608	0610037L13Rik	1110008H16Rik	RIKEN cDNA 0610037L13 gene	protein-coding
MACS_peak_3312	chr11	88921934	88922155	+	168.96	NA	promoter-TSS (NM_019505)	promoter-TSS (NM_019505)	18	NM_019505	56077	Mm.153695	NM_019505	ENSMUSG00000000276	Dgke	C87606|DAGK6|DGK	diacylglycerol kinase, epsilon	protein-coding
MACS_peak_12275	chr3	80717359	80717841	+	168.65	NA	promoter-TSS (NM_010298)	promoter-TSS (NM_010298)	-18	NM_010298	14658	Mm.275639	NM_010298	ENSMUSG00000028020	Glrb	AI853901|Glyrb|spa|spastic	glycine receptor, beta subunit	protein-coding
MACS_peak_4852	chr13	6647782	6648239	+	168.64	NA	promoter-TSS (NM_019703)	promoter-TSS (NM_019703)	7	NM_019703	56421	Mm.273874	NM_019703	ENSMUSG00000021196	Pfkp	1200015H23Rik|9330125N24Rik|ATP-PFK|PFK-C|PFK-P	phosphofructokinase, platelet	protein-coding
MACS_peak_10378	chr2	20890976	20891550	+	168.64	NA	non-coding (NR_033225, exon 2 of 2)	non-coding (NR_033225, exon 2 of 2)	762	NR_033225	433408	Mm.386941	NR_033225		Gm13375	OTTMUSG00000011664	predicted gene 13375	ncRNA
MACS_peak_2831	chr11	62544874	62545580	+	168.39	NA	Intergenic	CpG	-2632	NM_133208	170740	Mm.339982	NM_133208		Zfp287	B230333C16Rik|SKAT-2|Skat2|Znf287|mszf16|mszf74	zinc finger protein 287	protein-coding
MACS_peak_5819	chr14	51427186	51427780	+	168.39	NA	promoter-TSS (NM_009632)	promoter-TSS (NM_009632)	-37	NR_002142	85029		NR_002142	ENSMUSG00000092837	Rpph1	Gm24821|H1RNA|Rmrp5|Rpr	ribonuclease P RNA component H1	ncRNA
MACS_peak_6677	chr15	76456310	76456815	+	168.30	NA	promoter-TSS (NM_025842)	promoter-TSS (NM_025842)	-105	NM_025842	66914	Mm.30028	NM_025842	ENSMUSG00000062381	Vps28	1110014J03Rik|AI847241|D730005C08Rik	vacuolar protein sorting 28 (yeast)	protein-coding
MACS_peak_10688	chr2	32816916	32817389	+	168.30	NA	promoter-TSS (NM_009076)	promoter-TSS (NM_009076)	-80	NM_009076	269261	Mm.250030	NM_009076		Rpl12	E430018F03	ribosomal protein L12	protein-coding
MACS_peak_4854	chr13	8870063	8870762	+	168.30	NA	promoter-TSS (NM_001039389)	promoter-TSS (NM_001039389)	-122	NM_172445	207615	Mm.284654	NM_172445	ENSMUSG00000021147	Wdr37	-	WD repeat domain 37	protein-coding
MACS_peak_16803	chr7	26004678	26005242	+	168.30	NA	promoter-TSS (NM_207677)	promoter-TSS (NM_207677)	-82	NM_207677	67379	Mm.280594	NM_026117	ENSMUSG00000054499	Dedd2	2410050E11Rik|FLAME-3	death effector domain-containing DNA binding protein 2	protein-coding
MACS_peak_19789	chr9	59504295	59504632	+	168.30	NA	intron (NM_011099, intron 1 of 10)	CpG	288	NM_001253883	18746	Mm.326167	NM_011099	ENSMUSG00000032294	Pkm	AA414905|AL024370|AL024424|Pk-2|Pk-3|Pk3|Pkm2	pyruvate kinase, muscle	protein-coding
MACS_peak_19324	chr9	20296956	20297482	+	168.30	NA	promoter-TSS (NM_001110309)	promoter-TSS (NM_001110309)	-29	NM_001110309	235028	Mm.297660	NM_146221	ENSMUSG00000059475	Zfp426	2900057C04Rik|KRAB1|Zfo61|Zfp68-rs1|Znf426|mKIAA4237	zinc finger protein 426	protein-coding
MACS_peak_20422	chr9	120480331	120480912	+	168.21	NA	promoter-TSS (NM_025974)	promoter-TSS (NM_025974)	-13	NM_025974	67115	Mm.289810	NM_025974	ENSMUSG00000025794	Rpl14	3100001N19Rik|AA407502|AL022816|CAG-ISL-7|CTG-B33|L14	ribosomal protein L14	protein-coding
MACS_peak_8034	chr17	24342286	24342850	+	168.16	NA	promoter-TSS (NM_001163851)	promoter-TSS (NM_001163851)	-61	NM_001163850	224617	Mm.301585	NM_173186	ENSMUSG00000036473	Tbc1d24	9630033P11|C530046L02Rik|mKIAA1171	TBC1 domain family, member 24	protein-coding
MACS_peak_16226	chr6	120481116	120481677	+	168.12	NA	promoter-TSS (NM_144815)	promoter-TSS (NM_144815)	-79	NM_144815	214932	Mm.255322	NM_144815	ENSMUSG00000058979	Cecr5	A930002G03Rik	cat eye syndrome chromosome region, candidate 5	protein-coding
MACS_peak_18535	chr8	72963599	72963906	+	168.09	NA	promoter-TSS (NM_001004062)	promoter-TSS (NM_001004062)	-280	NM_001004062	382056	Mm.227767	NM_001004062	ENSMUSG00000003575	Crtc1	AI413414|Mect1|R74955|TORC1|mKIAA0616	CREB regulated transcription coactivator 1	protein-coding
MACS_peak_3150	chr11	78325458	78325991	+	168.09	NA	promoter-TSS (NM_026389)	promoter-TSS (NM_026389)	-54	NM_199199	195040	Mm.383431	NM_199199	ENSMUSG00000051232	Tmem199	AI316787|AI848469|R74819	transmembrane protein 199	protein-coding
MACS_peak_7205	chr15	102501221	102501601	+	168.09	NA	promoter-TSS (NM_026468)	promoter-TSS (NM_026468)	67	NM_026468	67942	Mm.10314	NM_026468		Atp5g2	1810041M08Rik	ATP synthase, H+ transporting, mitochondrial F0 complex, subunit C2 (subunit 9)	protein-coding
MACS_peak_11901	chr2	179991671	179992273	+	168.09	NA	promoter-TSS (NM_025587)	promoter-TSS (NM_025587)	-112	NM_025587	66481	Mm.289669	NM_025587	ENSMUSG00000039001	Rps21	1810049N11Rik|2410030A14Rik	ribosomal protein S21	protein-coding
MACS_peak_2884	chr11	68886581	68887186	+	168.07	NA	TTS (NM_025838)	TTS (NM_025838)	2572	NM_028336	66910	Mm.33964	NM_025838	ENSMUSG00000020895	Tmem107	1110004B13Rik|2810049P21Rik	transmembrane protein 107	protein-coding
MACS_peak_20622	chrX	34443239	34443774	+	168.06	NA	promoter-TSS (NM_029891)	promoter-TSS (NM_029891)	-612	NM_029891	77286	Mm.21649	NM_029891	ENSMUSG00000044149	Nkrf	9430034D17Rik|AW124770|C80287	NF-kappaB repressing factor	protein-coding
MACS_peak_14515	chr5	34915878	34916609	+	168.00	NA	promoter-TSS (NM_013457)	promoter-TSS (NM_013457)	-120	NM_013457	11518	Mm.289106	NM_013457	ENSMUSG00000029106	Add1	AI256389	adducin 1 (alpha)	protein-coding
MACS_peak_191	chr1	43990496	43991014	+	167.95	NA	promoter-TSS (NM_009418)	promoter-TSS (NM_009418)	-97	NM_009418	22019	Mm.401675	NM_009418	ENSMUSG00000041763	Tpp2	TPP-2|TppII	tripeptidyl peptidase II	protein-coding
MACS_peak_16481	chr6	149137015	149137550	+	167.94	NA	promoter-TSS (NM_001113424)	promoter-TSS (NM_001113424)	-48	NM_001113424	232566	Mm.209147	NM_001113424	ENSMUSG00000068250	Amn1	5830467E07Rik|A230083D09|C730024G19Rik	antagonist of mitotic exit network 1	protein-coding
MACS_peak_19875	chr9	65907934	65908237	+	167.84	NA	exon (NM_011149, exon 1 of 5)	exon (NM_011149, exon 1 of 5)	109	NM_011149	19035	Mm.335249	NM_011149	ENSMUSG00000032383	Ppib	AA408962|AA553318|AI844835|Cphn-2|Cphn2|CyP-20b	peptidylprolyl isomerase B	protein-coding
MACS_peak_14882	chr5	111238921	111239188	+	167.49	NA	promoter-TSS (NM_009469)	promoter-TSS (NM_009469)	46	NM_009469	22241	Mm.271898	NM_009469	ENSMUSG00000029512	Ulk1	AU041434|Unc51.1|mKIAA0722	unc-51 like kinase 1	protein-coding
MACS_peak_16730	chr7	19944621	19944867	+	167.49	NA	promoter-TSS (NM_145822)	promoter-TSS (NM_145822)	88	NM_145822	70333	Mm.171370	NM_145822		Cd3eap	1190028F09|2610103M17Rik|ASE-1|Ase1|CAST|PAF49	CD3E antigen, epsilon polypeptide associated protein	protein-coding
MACS_peak_13078	chr4	40650023	40650572	+	167.39	NA	promoter-TSS (NM_001025445)	promoter-TSS (NM_001025445)	-70	NM_001025445	66408	Mm.430710	NM_025545	ENSMUSG00000028411	Aptx	2410016G21Rik|AA388047|FHA-HIT	aprataxin	protein-coding
MACS_peak_3779	chr11	107331883	107332303	+	167.38	NA	promoter-TSS (NM_145823)	promoter-TSS (NM_145823)	-59	NM_145823	71795	Mm.397413	NM_145823	ENSMUSG00000040430	Pitpnc1	1110020B03Rik|5830436L09Rik|AI662802|AI851387|C330017I21Rik|Dnr411|RDGBB|RDGBB1|rdgB-beta	phosphatidylinositol transfer protein, cytoplasmic 1	protein-coding
MACS_peak_16483	chr6	149357214	149357756	+	167.38	NA	promoter-TSS (NM_009753)	promoter-TSS (NM_009753)	-21	NM_001112796	12121	Mm.177181	NM_009753	ENSMUSG00000003452	Bicd1	B830009D06Rik	bicaudal D homolog 1 (Drosophila)	protein-coding
MACS_peak_13811	chr4	131909353	131909711	+	167.35	NA	promoter-TSS (NR_003270)	promoter-TSS (NR_003270)	69	NR_003270	399101	Mm.486919	NR_002904	ENSMUSG00000085241	Snhg3	Rnu17d|U17HG	small nucleolar RNA host gene 3	ncRNA
MACS_peak_3193	chr11	83112168	83112750	+	167.35	NA	promoter-TSS (NM_134025)	promoter-TSS (NM_134025)	20	NM_134025	103737	Mm.102205	NM_134025	ENSMUSG00000018733	Pex12	AI451906	peroxisomal biogenesis factor 12	protein-coding
MACS_peak_7572	chr16	38088641	38088953	+	167.35	NA	promoter-TSS (NM_019827)	promoter-TSS (NM_019827)	-290	NM_019827	56637	Mm.394930	NM_019827	ENSMUSG00000022812	Gsk3b	7330414F15Rik|8430431H08Rik|C86142|GSK-3|GSK-3beta|GSK3	glycogen synthase kinase 3 beta	protein-coding
MACS_peak_4750	chr12	111934714	111935031	+	167.34	NA	promoter-TSS (NM_010480)	promoter-TSS (NM_010480)	-267	NM_010480	15519	Mm.1843	NM_010480	ENSMUSG00000021270	Hsp90aa1	86kDa|89kDa|AL024080|AL024147|Hsp86-1|Hsp89|Hsp90|Hspca|hsp4	heat shock protein 90, alpha (cytosolic), class A member 1	protein-coding
MACS_peak_12229	chr3	65778181	65779084	+	167.31	NA	Intergenic	CpG	-16485	NM_019937	56706	Mm.175612	NM_019937	ENSMUSG00000027829	Ccnl1	2610030E23Rik|AU018493|Ccnl|ania-6a	cyclin L1	protein-coding
MACS_peak_20964	chrX	132779553	132779869	+	167.28	NA	promoter-TSS (NM_011712)	promoter-TSS (NM_011712)	92	NM_011712	22381	Mm.512	NM_011712	ENSMUSG00000042712	Wbp5	AL024233	WW domain binding protein 5	protein-coding
MACS_peak_3399	chr11	95926462	95927103	+	167.28	NA	promoter-TSS (NM_172300)	promoter-TSS (NM_172300)	-104	NM_172300	268470	Mm.38802	NM_172300	ENSMUSG00000014349	Ube2z	AW049199|C030047H17Rik|D11Moh35	ubiquitin-conjugating enzyme E2Z (putative)	protein-coding
MACS_peak_21043	chrX	149932685	149933007	+	167.28	NA	promoter-TSS (NM_018798)	promoter-TSS (NM_018798)	71	NM_018798	54609	Mm.430772	NM_018798	ENSMUSG00000050148	Ubqln2	Chap1|Dsk2|HRIHFB2157|Plic-2|Plic2	ubiquilin 2	protein-coding
MACS_peak_9109	chr18	34490467	34490994	+	167.25	NA	promoter-TSS (NM_025527)	promoter-TSS (NM_025527)	-69	NM_025527	66384	Mm.29452	NM_025527	ENSMUSG00000014504	Srp19	2310020D23Rik	signal recognition particle 19	protein-coding
MACS_peak_13818	chr4	132089318	132089835	+	167.24	NA	promoter-TSS (NM_007512)	promoter-TSS (NM_007512)	-2	NM_007512	11983	Mm.2171	NM_007512	ENSMUSG00000054428	Atpif1	Atpi|If1	ATPase inhibitory factor 1	protein-coding
MACS_peak_3204	chr11	83881681	83882103	+	167.24	NA	promoter-TSS (NM_019819)	promoter-TSS (NM_019819)	-33	NM_019819	56405	Mm.240885	NM_019819	ENSMUSG00000018648	Dusp14	1110014C10Rik|2310042C07Rik|D11Ertd395e|MKP-L|Mkp6	dual specificity phosphatase 14	protein-coding
MACS_peak_3978	chr11	118947444	118947840	+	166.88	NA	promoter-TSS (NM_007625)	promoter-TSS (NM_007625)	-91	NM_007625	12418	Mm.268070	NM_007625	ENSMUSG00000039989	Cbx4	MPc2|PC2	chromobox 4	protein-coding
MACS_peak_4042	chr11	120328927	120329186	+	166.87	NA	promoter-TSS (NM_197995)	promoter-TSS (NM_197995)	107	NM_001159328	15239	Mm.7919	NM_008244	ENSMUSG00000025793	Hgs	Hgr|Hrs|ZFYVE8	HGF-regulated tyrosine kinase substrate	protein-coding
MACS_peak_18271	chr8	23969618	23969798	+	166.66	NA	promoter-TSS (NM_001081149)	promoter-TSS (NM_001081149)	-303	NM_001081149	244349	Mm.182776	NM_001081149	ENSMUSG00000031540	Kat6a	1500036M03|9930021N24Rik|MOZ|Myst3|Zfp220	K(lysine) acetyltransferase 6A	protein-coding
MACS_peak_20243	chr9	107134008	107134533	+	166.63	NA	promoter-TSS (NM_153413)	promoter-TSS (NM_153413)	-30	NM_153413	208869	Mm.150259	NM_153413	ENSMUSG00000039716	Dock3	MOCA|PBP|mKIAA0299	dedicator of cyto-kinesis 3	protein-coding
MACS_peak_11212	chr2	118687618	118687908	+	166.63	NA	promoter-TSS (NM_019826)	promoter-TSS (NM_019826)	27	NM_019826	56357	Mm.6635	NM_019826	ENSMUSG00000027332	Ivd	1300016K07Rik|6720455E18Rik|AI463340	isovaleryl coenzyme A dehydrogenase	protein-coding
MACS_peak_8785	chr17	75951011	75951286	+	166.63	NA	5' UTR (NM_133747, exon 1 of 8)	5' UTR (NM_133747, exon 1 of 8)	138	NM_133747	72722	Mm.24641	NM_133747	ENSMUSG00000002017	Fam98a	2810405J04Rik|AL024114	family with sequence similarity 98, member A	protein-coding
MACS_peak_12029	chr3	19062851	19063140	+	166.61	NA	promoter-TSS (NM_028840)	promoter-TSS (NM_028840)	70	NM_028840	74252	Mm.200383	NM_028840	ENSMUSG00000027599	Armc1	2310016N05Rik|2900046P06Rik|3110009G21Rik|AA409258|AW048872|Arcp|C330014L16Rik	armadillo repeat containing 1	protein-coding
MACS_peak_19959	chr9	74823715	74824190	+	166.58	NA	promoter-TSS (NM_153584)	promoter-TSS (NM_153584)	34	NM_153584	235493	Mm.208955	NM_153584	ENSMUSG00000034858	Fam214a	6330415I01Rik|AI553555|C130047D21Rik|Kiaa1370|mKIAA1370	family with sequence similarity 214, member A	protein-coding
MACS_peak_6525	chr15	54903497	54903969	+	166.40	NA	promoter-TSS (NM_001081288)	promoter-TSS (NM_001081288)	-26	NM_001081288	319944	Mm.380957	NM_001081288	ENSMUSG00000037343	Taf2	150kDa|4732460C16Rik|AI425886|CIF150|TAF2B|TAFII-150|TAFII150	TAF2 RNA polymerase II, TATA box binding protein (TBP)-associated factor	protein-coding
MACS_peak_642	chr1	134288212	134288676	+	166.38	NA	promoter-TSS (NM_178874)	promoter-TSS (NM_178874)	-586	NM_178874	68875	Mm.273785	NM_178874	ENSMUSG00000042066	Tmcc2	1110063G11Rik	transmembrane and coiled-coil domains 2	protein-coding
MACS_peak_8057	chr17	24686875	24687191	+	166.36	NA	5' UTR (NM_013630, exon 1 of 46)	5' UTR (NM_013630, exon 1 of 46)	138	NM_013630	18763	Mm.30435	NM_013630	ENSMUSG00000032855	Pkd1	PC1|mFLJ00285	polycystic kidney disease 1 homolog	protein-coding
MACS_peak_1094	chr1	187027653	187028185	+	166.36	NA	promoter-TSS (NM_001163754)	promoter-TSS (NM_001163754)	-128	NM_001163754	98732	Mm.275841	NM_172649	ENSMUSG00000039318	Rab3gap2	1110059F07Rik|2010002H18Rik|5830469C09|AI851069|AW743433|RAB3-GAP150|mKIAA0839	RAB3 GTPase activating protein subunit 2	protein-coding
MACS_peak_16200	chr6	118404987	118405756	+	166.34	NA	intron (NM_028335, intron 1 of 5)	CpG	153	NM_028335	72720	Mm.212572	NM_028335	ENSMUSG00000030145	Zfp248	2810037F07Rik|E130106N01Rik	zinc finger protein 248	protein-coding
MACS_peak_19528	chr9	40965672	40965878	+	166.33	NA	promoter-TSS (NM_176860)	promoter-TSS (NM_176860)	-198	NM_176860	72828	Mm.133615	NM_176860	ENSMUSG00000032020	Ubash3b	2810457I06Rik|BB125008|TULA-2|p70	ubiquitin associated and SH3 domain containing, B	protein-coding
MACS_peak_3463	chr11	97564656	97564927	+	166.25	NA	promoter-TSS (NM_011971)	promoter-TSS (NM_011971)	43	NM_011971	26446	Mm.21874	NM_011971	ENSMUSG00000069744	Psmb3	AL033320|C10-II	proteasome (prosome, macropain) subunit, beta type 3	protein-coding
MACS_peak_8613	chr17	53828706	53829106	+	166.23	NA	promoter-TSS (NM_028232)	promoter-TSS (NM_028232)	-266	NM_028232	72415	Mm.153202	NM_028232	ENSMUSG00000023940	Sgol1	3300001M08Rik|C81037|Sgo1	shugoshin-like 1 (S. pombe)	protein-coding
MACS_peak_18190	chr8	11555069	11555901	+	166.21	NA	promoter-TSS (NM_011919)	promoter-TSS (NM_011919)	-581	NM_011919	26356	Mm.25709	NM_011919	ENSMUSG00000045969	Ing1	2610028J21Rik|AA407184|AI875420|mING1h|p33Ing1|p37Ing1b	inhibitor of growth family, member 1	protein-coding
MACS_peak_17741	chr7	123586757	123587187	+	165.98	NA	promoter-TSS (NM_011083)	promoter-TSS (NM_011083)	0	NM_011083	18704	Mm.3810	NM_011083	ENSMUSG00000030660	Pik3c2a	Cpk-m|PI3KC2	phosphatidylinositol 3-kinase, C2 domain containing, alpha polypeptide	protein-coding
MACS_peak_16617	chr7	16507913	16508229	+	165.98	NA	promoter-TSS (NM_009156)	promoter-TSS (NM_009156)	-351	NM_009156	20364	Mm.42829	NM_009156	ENSMUSG00000041571	Sepw1	selW	selenoprotein W, muscle 1	protein-coding
MACS_peak_17841	chr7	133942956	133943368	+	165.98	NA	promoter-TSS (NM_001177307)	promoter-TSS (NM_001177307)	-394	NM_007438	11674	Mm.275831	NM_007438	ENSMUSG00000030695	Aldoa	Aldo-1|Aldo1	aldolase A, fructose-bisphosphate	protein-coding
MACS_peak_15950	chr6	85537534	85537904	+	165.83	NA	exon (NM_145223, exon 1 of 23)	exon (NM_145223, exon 1 of 23)	194	NM_145223	236266	Mm.246967	NM_145223	ENSMUSG00000063810	Alms1	bbb	Alstrom syndrome 1	protein-coding
MACS_peak_7748	chr16	91044847	91045246	+	165.83	NA	promoter-TSS (NM_026110)	promoter-TSS (NM_026110)	-422	NM_026110	67367	Mm.347	NM_026110	ENSMUSG00000022974	Paxbp1	1810007M14Rik|C21orf66|Gcfc|Gcfc1|Pax3/7bp	PAX3 and PAX7 binding protein 1	protein-coding
MACS_peak_13483	chr4	108672704	108673135	+	165.75	NA	promoter-TSS (NM_146150)	promoter-TSS (NM_146150)	-491	NM_146150	230598	Mm.274950	NM_146150	ENSMUSG00000053510	Nrd1	2600011I06Rik|AI875733|NRD-C	nardilysin, N-arginine dibasic convertase, NRD convertase 1	protein-coding
MACS_peak_212	chr1	52170408	52170636	+	165.75	NA	Intergenic	Intergenic	-5760	NM_009283	20846	Mm.277406	NM_009283	ENSMUSG00000026104	Stat1	2010005J02Rik|AA408197	signal transducer and activator of transcription 1	protein-coding
MACS_peak_16377	chr6	128374487	128375107	+	165.70	NA	exon (NM_133927, exon 1 of 12)	exon (NM_133927, exon 1 of 12)	131	NM_133927	101142	Mm.31345	NM_133927	ENSMUSG00000001518	Itfg2	2700050P07Rik|AI646725	integrin alpha FG-GAP repeat containing 2	protein-coding
MACS_peak_7376	chr16	18347923	18348479	+	165.69	NA	promoter-TSS (NM_033474)	promoter-TSS (NM_033474)	-74	NM_033474	11877	Mm.293599	NM_033474	ENSMUSG00000000325	Arvcf	-	armadillo repeat gene deleted in velo-cardio-facial syndrome	protein-coding
MACS_peak_18854	chr8	93658084	93658454	+	165.63	NA	5' UTR (NM_010241, exon 2 of 11)	5' UTR (NM_010241, exon 2 of 11)	1126	NM_010241	14339	Mm.324588	NM_010241	ENSMUSG00000031667	Aktip	AL023020|Fif|Ft|Ft1|Fts	thymoma viral proto-oncogene 1 interacting protein	protein-coding
MACS_peak_12919	chr4	3762580	3763105	+	165.58	NA	promoter-TSS (NM_026147)	promoter-TSS (NM_026147)	-95	NM_026147	67427	Mm.21938	NM_026147		Rps20	4632426K06Rik|Dsk4	ribosomal protein S20	protein-coding
MACS_peak_10785	chr2	52413911	52414338	+	165.58	NA	promoter-TSS (NM_146123)	promoter-TSS (NM_146123)	7	NM_146123	12298	Mm.330223	NM_146123	ENSMUSG00000017412	Cacnb4	3110038O15Rik|Cchb4|lh	calcium channel, voltage-dependent, beta 4 subunit	protein-coding
MACS_peak_9986	chr19	32832005	32832243	+	165.51	NA	promoter-TSS (NM_008960)	promoter-TSS (NM_008960)	57	NM_008960	19211	Mm.245395	NM_008960	ENSMUSG00000013663	Pten	2310035O07Rik|A130070J02Rik|AI463227|B430203M17Rik|MMAC1|TEP1	phosphatase and tensin homolog	protein-coding
MACS_peak_518	chr1	94727612	94727886	+	165.51	NA	promoter-TSS (NM_016696)	promoter-TSS (NM_016696)	-514	NM_016696	14733	Mm.297976	NM_016696	ENSMUSG00000034220	Gpc1	AI462976	glypican 1	protein-coding
MACS_peak_17314	chr7	63049265	63049727	+	165.51	NA	promoter-TSS (NM_146190)	promoter-TSS (NM_146190)	-22	NM_146190	233276	Mm.284306	NM_146190	ENSMUSG00000033790	Tubgcp5	B130010C12Rik|GCP5|mKIAA1899	tubulin, gamma complex associated protein 5	protein-coding
MACS_peak_18981	chr8	108734650	108735201	+	165.23	NA	promoter-TSS (NM_001007567)	promoter-TSS (NM_001007567)	-29	NM_145404	214572	Mm.251804	NM_145404		Prmt7	4933402B05Rik|BC006705	protein arginine N-methyltransferase 7	protein-coding
MACS_peak_9151	chr18	35930775	35931025	+	165.23	NA	promoter-TSS (NM_019912)	promoter-TSS (NM_019912)	-313	NM_019912	56550	Mm.180052	NM_019912	ENSMUSG00000091896	Ube2d2a	1500034D03Rik|Ubc2e|Ube2d2|ubc4	ubiquitin-conjugating enzyme E2D 2A	protein-coding
MACS_peak_8973	chr18	12326880	12327447	+	165.08	NA	promoter-TSS (NM_029623)	promoter-TSS (NM_029623)	-76	NM_029623	76482	Mm.196596	NM_029623	ENSMUSG00000024410	3110002H16Rik	2400010D15Rik|Mic-1|Mic1	RIKEN cDNA 3110002H16 gene	protein-coding
MACS_peak_11532	chr2	150612313	150612729	+	165.07	NA	promoter-TSS (NM_153781)	promoter-TSS (NM_153781)	-11	NM_153781	110078	Mm.222584	NM_153781	ENSMUSG00000033059	Pygb	-	brain glycogen phosphorylase	protein-coding
MACS_peak_2099	chr10	126415339	126415614	+	165.07	NA	promoter-TSS (NM_001113470)	promoter-TSS (NM_001113470)	-297	NM_001113470	52468	Mm.29490	NM_146012	ENSMUSG00000078429	Ctdsp2	AI586070|D10Ertd73e|OS-4|OS4|SCP2	CTD (carboxy-terminal domain, RNA polymerase II, polypeptide A) small phosphatase 2	protein-coding
MACS_peak_17030	chr7	34953418	34953808	+	164.98	NA	promoter-TSS (NM_016682)	promoter-TSS (NM_016682)	-65	NM_016682	50995	Mm.27560	NM_016682	ENSMUSG00000052997	Uba2	AA986091|Arx|Sae2|UBA1|Ubl1a2|Uble1b	ubiquitin-like modifier activating enzyme 2	protein-coding
MACS_peak_1607	chr10	77647951	77648200	+	164.98	NA	promoter-TSS (NM_029546)	promoter-TSS (NM_029546)	-181	NM_029546	110816	Mm.103522	NM_029546	ENSMUSG00000032834	Pwp2	6530411D08Rik|Pwp2h|wdp103	PWP2 periodic tryptophan protein homolog (yeast)	protein-coding
MACS_peak_13423	chr4	102432627	102433165	+	164.98	NA	5' UTR (NM_144906, exon 1 of 24)	5' UTR (NM_144906, exon 1 of 24)	156	NM_001285859	73094	Mm.54201	NM_144906	ENSMUSG00000028524	Sgip1	3110007P09Rik|SGIP1alpha|gag	SH3-domain GRB2-like (endophilin) interacting protein 1	protein-coding
MACS_peak_11220	chr2	118982504	118982984	+	164.98	NA	promoter-TSS (NM_001033136)	promoter-TSS (NM_001033136)	26	NM_001033136	67809	Mm.475909	NM_001033136	ENSMUSG00000070730	Rmdn3	1200015F23Rik|AI131757|Fam82a2|Ptpip51|RMD-3|Rmd3	regulator of microtubule dynamics 3	protein-coding
MACS_peak_11837	chr2	168055684	168056230	+	164.98	NA	promoter-TSS (NM_001160330)	promoter-TSS (NM_001160330)	-78	NM_010072	13480	Mm.422657	NM_010072	ENSMUSG00000078919	Dpm1	AI118379|AI194292	dolichol-phosphate (beta-D) mannosyltransferase 1	protein-coding
MACS_peak_4489	chr12	81891458	81891760	+	164.98	NA	promoter-TSS (NM_178682)	promoter-TSS (NM_178682)	90	NM_001242419	217684	Mm.341776	NM_178682	ENSMUSG00000021133	4933426M11Rik	mKIAA0247	RIKEN cDNA 4933426M11 gene	protein-coding
MACS_peak_12663	chr3	107434484	107434979	+	164.98	NA	promoter-TSS (NM_153563)	promoter-TSS (NM_153563)	-103	NM_153563	229707	Mm.278643	NM_153563	ENSMUSG00000014601	Strip1	6330569M22Rik|6530401O14Rik|Fam40a	striatin interacting protein 1	protein-coding
MACS_peak_14752	chr5	96638889	96639369	+	164.88	NA	promoter-TSS (NM_001039084)	promoter-TSS (NM_001039084)	-5	NM_001039084	94061	Mm.295499	NM_053158	ENSMUSG00000029486	Mrpl1	2410002L03Rik|5830418D04Rik|AI462572|L1mt	mitochondrial ribosomal protein L1	protein-coding
MACS_peak_8241	chr17	29089068	29089785	+	164.57	NA	promoter-TSS (NM_025888)	promoter-TSS (NM_025888)	-735	NM_025888	66989	Mm.435	NM_025888	ENSMUSG00000005936	Kctd20	2410004N11Rik|AI451943|AW541186|D17Ertd562e	potassium channel tetramerisation domain containing 20	protein-coding
MACS_peak_13079	chr4	40668988	40670037	+	164.57	NA	promoter-TSS (NM_008298)	promoter-TSS (NM_008298)	11	NM_008298	15502	Mm.27897	NM_008298	ENSMUSG00000028410	Dnaja1	Hsj2|Nedd7	DnaJ (Hsp40) homolog, subfamily A, member 1	protein-coding
MACS_peak_7379	chr16	18498597	18499119	+	164.56	NA	promoter-TSS (NR_104347)	promoter-TSS (NR_104347)	52	NM_001285491	13972	Mm.236139	NM_023120	ENSMUSG00000000884	Gnb1l	ESTM55|Gm16314|Me49f07|OTTMUSG00000033458|Wdr14|Wdvcf	guanine nucleotide binding protein (G protein), beta polypeptide 1-like	protein-coding
MACS_peak_18999	chr8	109948763	109949008	+	164.56	NA	promoter-TSS (NM_026277)	promoter-TSS (NM_026277)	53	NM_026277	67619	Mm.334793	NM_026277	ENSMUSG00000003848	Nob1	1700021I09Rik|ART-4|Nob1p|Psmd8bp1	NIN1/RPN12 binding protein 1 homolog (S. cerevisiae)	protein-coding
MACS_peak_9622	chr19	5295566	5295835	+	164.51	NA	promoter-TSS (NM_030109)	promoter-TSS (NM_030109)	-245	NM_030109	319322	Mm.196532	NM_030109	ENSMUSG00000024853	Sf3b2	145kDa|2610311M13Rik|2810441F20Rik|B230398H18Rik|SAP145|SF3b1|SF3b145|SF3b150	splicing factor 3b, subunit 2	protein-coding
MACS_peak_745	chr1	153191145	153191879	+	164.51	NA	promoter-TSS (NM_054102)	promoter-TSS (NM_054102)	-116	NM_001039512	117198	Mm.33764	NM_028582	ENSMUSG00000023150	Ivns1abp	1190004M08Rik|1700126I16Rik|AA960440|HSPC068|ND1|NS-1|NS1-BP|Nd1-L|Nd1-S|mKIAA0850	influenza virus NS1A binding protein	protein-coding
MACS_peak_1018	chr1	180117274	180117986	+	164.51	NA	promoter-TSS (NM_024282)	promoter-TSS (NM_024282)	82	NM_024282	78825	Mm.440132	NM_024282	ENSMUSG00000026502	Desi2	5830417C01Rik|DeSI-2|Fam152a|Pppde1	desumoylating isopeptidase 2	protein-coding
MACS_peak_16938	chr7	30022959	30023544	+	164.15	NA	promoter-TSS (NM_001110201)	promoter-TSS (NM_001110201)	-91	NM_001110201	77254	Mm.36699	NM_029887	ENSMUSG00000030588	Yif1b	9430029K10Rik|Yip1b	Yip1 interacting factor homolog B (S. cerevisiae)	protein-coding
MACS_peak_18512	chr8	72427208	72427510	+	164.15	NA	promoter-TSS (NM_023312)	promoter-TSS (NM_023312)	-902	NM_023312	67184	Mm.21162	NM_023312	ENSMUSG00000036199	Ndufa13	2700054G14Rik|AU022060|CDA016|CGI-39|GRIM-19|Grim19	NADH dehydrogenase (ubiquinone) 1 alpha subcomplex, 13	protein-coding
MACS_peak_8720	chr17	66234390	66234997	+	164.04	NA	promoter-TSS (NM_001198949)	promoter-TSS (NM_001198949)	402	NM_009067	19765	Mm.17009	NM_009067	ENSMUSG00000024096	Ralbp1	RLIP76|Rip1	ralA binding protein 1	protein-coding
MACS_peak_19863	chr9	65142064	65142296	+	163.95	NA	5' UTR (NM_001044389, exon 1 of 13)	5' UTR (NM_001044389, exon 1 of 13)	113	NM_011802	270166	Mm.30088	NM_011802	ENSMUSG00000015357	Clpx	AU014732|E330029I21	caseinolytic mitochondrial matrix peptidase chaperone subunit	protein-coding
MACS_peak_3080	chr11	75401304	75401765	+	163.82	NA	promoter-TSS (NM_008850)	promoter-TSS (NM_008850)	-76	NM_008850	18738	Mm.3128	NM_008850	ENSMUSG00000017781	Pitpna	Pitpn|vb|vibrator	phosphatidylinositol transfer protein, alpha	protein-coding
MACS_peak_20291	chr9	108092593	108093002	+	163.82	NA	promoter-TSS (NM_007567)	promoter-TSS (NM_007567)	-83	NM_007567	12217	Mm.20425	NM_007567	ENSMUSG00000032589	Bsn	-	bassoon	protein-coding
MACS_peak_17361	chr7	71084037	71084508	+	163.78	NA	promoter-TSS (NM_021366)	promoter-TSS (NM_021366)	-471	NM_021366	50794	Mm.240473	NM_021366	ENSMUSG00000052040	Klf13	0610043C13Rik|9430029L20Rik|Bteb3|FKLF-2|FKLF2|NSLP1|RFLAT-1|RFLAT1	Kruppel-like factor 13	protein-coding
MACS_peak_8236	chr17	28827948	28828582	+	163.78	NA	promoter-TSS (NM_011951)	promoter-TSS (NM_011951)	-22	NM_001168508	26416	Mm.311337	NM_011951	ENSMUSG00000053436	Mapk14	CSBP2|Crk1|Csbp1|Mxi2|PRKM14|PRKM15|p38|p38-alpha|p38MAPK|p38a|p38alpha	mitogen-activated protein kinase 14	protein-coding
MACS_peak_7779	chr16	94534159	94534726	+	163.78	NA	Intergenic	Intergenic	-15587	NM_133229	170765	Mm.42604	NM_133229	ENSMUSG00000022941	Ripply3	Dscr6	ripply3 homolog (zebrafish)	protein-coding
MACS_peak_18651	chr8	79425789	79426064	+	163.78	NA	promoter-TSS (NM_001083906)	promoter-TSS (NM_001083906)	-481	NM_001083906	110784	Mm.324393	NM_001083906	ENSMUSG00000031618	Nr3c2	MR|Mlr	nuclear receptor subfamily 3, group C, member 2	protein-coding
MACS_peak_19043	chr8	113782927	113783418	+	163.69	NA	promoter-TSS (NM_009149)	promoter-TSS (NM_009149)	-70	NM_009149	20340	Mm.276271	NM_009149	ENSMUSG00000003316	Glg1	AI593353|AW537898|CFR|CFR-1|ESL-1|MG-160|MG160|Selel	golgi apparatus protein 1	protein-coding
MACS_peak_15760	chr6	51419630	51419975	+	163.41	NA	promoter-TSS (NM_007624)	promoter-TSS (NM_007624)	91	NM_182650	53379	Mm.155896	NM_016806		Hnrnpa2b1	9130414A06Rik|Hnrpa2|Hnrpa2b1|hnrnp-A	heterogeneous nuclear ribonucleoprotein A2/B1	protein-coding
MACS_peak_5596	chr14	8835304	8835655	+	163.41	NA	promoter-TSS (NM_025341)	promoter-TSS (NM_025341)	63	NM_025341	66082	Mm.181473	NM_025341	ENSMUSG00000025277	Abhd6	0610041D24Rik|AA673485|AV065425	abhydrolase domain containing 6	protein-coding
MACS_peak_14695	chr5	77738920	77739691	+	163.41	NA	promoter-TSS (NM_019836)	promoter-TSS (NM_019836)	-194	NM_019836	56412	Mm.129136	NM_019836	ENSMUSG00000036285	Noa1	2610024G14Rik|AU022345|AtNOS1|mAtNOS1	nitric oxide associated 1	protein-coding
MACS_peak_384	chr1	75139032	75139723	+	163.35	NA	promoter-TSS (NM_170755)	promoter-TSS (NM_170755)	17	NM_170755	227298	Mm.273062	NM_170755	ENSMUSG00000049339	Fam134a	-	family with sequence similarity 134, member A	protein-coding
MACS_peak_2509	chr11	40568488	40569121	+	163.32	NA	promoter-TSS (NM_009831)	promoter-TSS (NM_009831)	-16	NM_009831	12450	Mm.2103	NM_009831	ENSMUSG00000020326	Ccng1	AI314029	cyclin G1	protein-coding
MACS_peak_14241	chr4	155221136	155221649	+	163.32	NA	promoter-TSS (NM_010091)	promoter-TSS (NM_010091)	-129	NM_010091	13542	Mm.3400	NM_010091	ENSMUSG00000029071	Dvl1	Dvl|mKIAA4029	dishevelled, dsh homolog 1 (Drosophila)	protein-coding
MACS_peak_17713	chr7	119369132	119369571	+	163.32	NA	promoter-TSS (NM_001193305)	promoter-TSS (NM_001193305)	1	NM_001193305	320878	Mm.52312	NM_177282	ENSMUSG00000038244	Mical2	5330438E18Rik|9530064J02|MICAL-2|mKIAA0750	microtubule associated monooxygenase, calponin and LIM domain containing 2	protein-coding
MACS_peak_10191	chr19	47806169	47806473	+	163.08	NA	promoter-TSS (NM_026377)	promoter-TSS (NM_026377)	75	NM_026377	67788	Mm.181610	NM_026377	ENSMUSG00000025066	Sfr1	6330577E15Rik|Meir5	SWI5 dependent recombination repair 1	protein-coding
MACS_peak_3607	chr11	101488199	101488740	+	162.96	NA	promoter-TSS (NM_025654)	promoter-TSS (NM_025654)	-794	NM_025654	66599	Mm.41449	NM_025654	ENSMUSG00000010362	Rdm1	2410008M22Rik|AW212028|Rad52b	RAD52 motif 1	protein-coding
MACS_peak_3556	chr11	100333895	100334225	+	162.88	NA	promoter-TSS (NM_172565)	promoter-TSS (NM_172565)	36	NM_172565	217194	Mm.183320	NM_172565	ENSMUSG00000048732	Klhl11	BC011167	kelch-like 11	protein-coding
MACS_peak_10030	chr19	40588110	40588396	+	162.79	NA	promoter-TSS (NM_178362)	promoter-TSS (NM_178362)	-27	NM_178362	20411	Mm.210815	NM_009166		Sorbs1	2310065E01Rik|9530001P15Rik|CAP|SH3P12|Sh3d5|mKIAA1296	sorbin and SH3 domain containing 1	protein-coding
MACS_peak_978	chr1	177555575	177555957	+	162.72	NA	promoter-TSS (NM_010209)	promoter-TSS (NM_010209)	0	NM_010209	14194	Mm.41502	NM_010209		Fh1	Fh|Fh-1	fumarate hydratase 1	protein-coding
MACS_peak_18350	chr8	35217420	35217817	+	162.72	NA	promoter-TSS (NM_026432)	promoter-TSS (NM_026432)	1	NM_026432	67887	Mm.290353	NM_026432	ENSMUSG00000031532	Saraf	1810045K07Rik|Tmem66	store-operated calcium entry-associated regulatory factor	protein-coding
MACS_peak_12580	chr3	99966130	99966602	+	162.72	NA	promoter-TSS (NR_104341)	promoter-TSS (NR_104341)	-20	NM_010269	14547	Mm.279228	NM_010269	ENSMUSG00000027865	Gdap2	C77050|D3Ertd801e	ganglioside-induced differentiation-associated-protein 2	protein-coding
MACS_peak_9287	chr18	49992019	49992496	+	162.72	NA	promoter-TSS (NM_001081371)	promoter-TSS (NM_001081371)	-394	NM_001081371	240283	Mm.257790	NM_001081371	ENSMUSG00000037416	Dmxl1	C630007L23Rik|D030030C22	Dmx-like 1	protein-coding
MACS_peak_11140	chr2	105515313	105515948	+	162.66	NA	promoter-TSS (NM_001244200)	promoter-TSS (NM_001244200)	-40	NM_001244200	18508	Mm.3608	NM_013627	ENSMUSG00000027168	Pax6	1500038E17Rik|AEY11|Dey|Gsfaey11|Pax-6|Sey	paired box 6	protein-coding
MACS_peak_2665	chr11	54769352	54769903	+	162.55	NA	5' UTR (NM_001199275, exon 2 of 19)	5' UTR (NM_001199275, exon 2 of 19)	6815	NM_021327	57783	Mm.259671	NM_021327	ENSMUSG00000020400	Tnip1	ABIN|ABIN-1|ABIN1|AU018810|Naf1|Nef|VAN	TNFAIP3 interacting protein 1	protein-coding
MACS_peak_15427	chr5	145927718	145928012	+	162.55	NA	promoter-TSS (NM_001291249)	promoter-TSS (NM_001291249)	108	NM_133735	71799	Mm.277413	NM_133735	ENSMUSG00000029624	Ptcd1	1110069M14Rik	pentatricopeptide repeat domain 1	protein-coding
MACS_peak_9882	chr19	17468480	17468736	+	162.55	NA	promoter-TSS (NM_019437)	promoter-TSS (NM_019437)	75	NM_019437	54391	Mm.7013	NM_019437	ENSMUSG00000024712	Rfk	0610038L10Rik|AF031381|KOI-4	riboflavin kinase	protein-coding
MACS_peak_18335	chr8	32260239	32260924	+	162.55	NA	promoter-TSS (NM_001199988)	promoter-TSS (NM_001199988)	-207	NM_144927	234138	Mm.349800	NM_144927	ENSMUSG00000031577	Tti2	-	TELO2 interacting protein 2	protein-coding
MACS_peak_1098	chr1	187940967	187941357	+	162.55	NA	promoter-TSS (NM_146106)	promoter-TSS (NM_146106)	27	NM_146106	226791	Mm.257116	NM_146106	ENSMUSG00000039246	Lyplal1	BC027340|Q96AVO	lysophospholipase-like 1	protein-coding
MACS_peak_6312	chr14	122873197	122873856	+	162.55	NA	intron (NR_045046, intron 2 of 4)	CpG	895	NR_045046	69248	Mm.235369	NR_045046	ENSMUSG00000085555	2610035F20Rik	-	RIKEN cDNA 2610035F20 gene	ncRNA
MACS_peak_2733	chr11	59041546	59042192	+	162.09	NA	promoter-TSS (NM_001130408)	promoter-TSS (NM_001130408)	-100	NM_007476	11840	Mm.371546	NM_007476	ENSMUSG00000048076	Arf1	-	ADP-ribosylation factor 1	protein-coding
MACS_peak_11728	chr2	162756787	162757646	+	162.09	NA	promoter-TSS (NM_026499)	promoter-TSS (NM_026499)	-28	NM_026499	67996	Mm.24042	NM_026499	ENSMUSG00000016921	Srsf6	1210001E11Rik|AI314910|AW146126|Sfrs6	serine/arginine-rich splicing factor 6	protein-coding
MACS_peak_15954	chr6	85911400	85912045	+	162.06	NA	promoter-TSS (NM_028099)	promoter-TSS (NM_028099)	-61	NM_028099	72102	Mm.24007	NM_028099	ENSMUSG00000030002	Dusp11	2010300F21Rik|AI481497	dual specificity phosphatase 11 (RNA/RNP complex 1-interacting)	protein-coding
MACS_peak_8525	chr17	46290238	46290621	+	162.05	NA	promoter-TSS (NM_025649)	promoter-TSS (NM_025649)	71	NM_025649	66591	Mm.272024	NM_025649	ENSMUSG00000034509	Mad2l1bp	0610009D16Rik|2510031P20Rik|AU018945|AW550977|C76045|CMT2A|CMT2B|Mad2lbp|mKIAA0110	MAD2L1 binding protein	protein-coding
MACS_peak_18264	chr8	23763775	23764190	+	162.05	NA	promoter-TSS (NM_011130)	promoter-TSS (NM_011130)	-73	NM_011130	18970	Mm.123211	NM_011130	ENSMUSG00000031536	Polb	A430088C08Rik	polymerase (DNA directed), beta	protein-coding
MACS_peak_14869	chr5	110659696	110660211	+	162.05	NA	promoter-TSS (NM_027922)	promoter-TSS (NM_027922)	-70	NM_001253814	71782	Mm.288442	NM_027922	ENSMUSG00000029501	Ankle2	1110001J12Rik|AI661024|D5Ertd585e	ankyrin repeat and LEM domain containing 2	protein-coding
MACS_peak_3191	chr11	83084512	83085045	+	162.05	NA	Intergenic	Intergenic	15450	NM_001166028	237890	Mm.297670	NM_001166028	ENSMUSG00000082101	Slfn14	Gm20|Slfn14-ps	schlafen 14	protein-coding
MACS_peak_3970	chr11	118902002	118902293	+	162.05	NA	promoter-TSS (NM_013926)	promoter-TSS (NM_013926)	80	NM_013926	30951	Mm.99953	NM_013926	ENSMUSG00000025578	Cbx8	Pc3	chromobox 8	protein-coding
MACS_peak_2016	chr10	114799033	114799338	+	162.05	NA	5' UTR (NM_133683, exon 1 of 7)	5' UTR (NM_133683, exon 1 of 7)	133	NM_133683	67226	Mm.29647	NM_133683	ENSMUSG00000069520	Tmem19	2810428F02Rik|AW125171	transmembrane protein 19	protein-coding
MACS_peak_4801	chr12	114046856	114047218	+	162.05	NA	promoter-TSS (NM_145450)	promoter-TSS (NM_145450)	-149	NM_145450	217887	Mm.186678	NM_145450	ENSMUSG00000037594	BC022687	AW050009|C130001I08Rik|Flj20080	cDNA sequence BC022687	protein-coding
MACS_peak_8162	chr17	26800061	26800357	+	162.05	NA	Intergenic	Intergenic	-13132	NM_025272	11974	Mm.22602	NM_025272	ENSMUSG00000015575	Atp6v0e	Atp6k|Atp6v0e1|M9.2	ATPase, H+ transporting, lysosomal V0 subunit E	protein-coding
MACS_peak_17559	chr7	104727755	104728214	+	162.05	NA	promoter-TSS (NM_001081267)	promoter-TSS (NM_001081267)	23	NM_001177945	66273	Mm.41583	NM_183251	ENSMUSG00000035642	Aamdc	1810020D17Rik|1810037D19Rik|LI2	adipogenesis associated Mth938 domain containing	protein-coding
MACS_peak_19186	chr8	125588989	125589535	+	162.05	NA	promoter-TSS (NM_153176)	promoter-TSS (NM_153176)	-146	NM_153176	234847	Mm.292075	NM_153176	ENSMUSG00000000738	Spg7	AI452278|AU015315|Cmar|PGN	spastic paraplegia 7 homolog (human)	protein-coding
MACS_peak_6291	chr14	122505944	122506546	+	161.94	NA	promoter-TSS (NM_080556)	promoter-TSS (NM_080556)	-49	NR_015586	319727	Mm.215552	NR_015586		A330035P11Rik	-	RIKEN cDNA A330035P11 gene	ncRNA
MACS_peak_17098	chr7	51501951	51502341	+	161.84	NA	promoter-TSS (NM_025880)	promoter-TSS (NM_025880)	54	NM_025880	668661	Mm.274492	NM_025880	ENSMUSG00000045411	2410002F23Rik	-	RIKEN cDNA 2410002F23 gene	protein-coding
MACS_peak_13629	chr4	122816972	122817404	+	161.82	NA	promoter-TSS (NM_019489)	promoter-TSS (NM_019489)	-4	NM_019489	56031	Mm.126873	NM_019489	ENSMUSG00000028651	Ppie	2010010D16Rik|Cyp33	peptidylprolyl isomerase E (cyclophilin E)	protein-coding
MACS_peak_19786	chr9	59464610	59465384	+	161.82	NA	promoter-TSS (NM_001205239)	promoter-TSS (NM_001205239)	-94	NR_038075	67287	Mm.439943	NM_029922	ENSMUSG00000025237	Parp6	1700119G14Rik|2310028P13Rik|3110038K10Rik|ARTD17|C030013N01Rik|PARP-6	poly (ADP-ribose) polymerase family, member 6	protein-coding
MACS_peak_17320	chr7	63305412	63305855	+	161.74	NA	5' UTR (NM_010418, exon 1 of 93)	5' UTR (NM_010418, exon 1 of 93)	108	NM_010418	15204	Mm.20929	NM_010418	ENSMUSG00000030451	Herc2	D15F32S1h|D7H15F32S1|D7H15F37S1|jdf2|mKIAA0393|rjs	hect (homologous to the E6-AP (UBE3A) carboxyl terminus) domain and RCC1 (CHC1)-like domain (RLD) 2	protein-coding
MACS_peak_13769	chr4	129576142	129576306	+	161.68	NA	Intergenic	(TG)n|Simple_repeat|Simple_repeat	-7246	NR_045190	319894	Mm.59196	NR_045190	ENSMUSG00000086369	E330017L17Rik	-	RIKEN cDNA E330017L17 gene	ncRNA
MACS_peak_2982	chr11	70053081	70053371	+	161.66	NA	exon (NM_173742, exon 1 of 3)	exon (NM_173742, exon 1 of 3)	128	NM_173742	52898	Mm.29852	NM_173742	ENSMUSG00000093989	Rnasek	2310033H11Rik|AA571397|D11Bwg0434e	ribonuclease, RNase K	protein-coding
MACS_peak_7781	chr16	94591630	94592729	+	161.66	NA	promoter-TSS (NM_001159618)	promoter-TSS (NM_001159618)	-22	NM_001159618	56176	Mm.474449	NM_019543	ENSMUSG00000022940	Pigp	Dcrc|Dscr5	phosphatidylinositol glycan anchor biosynthesis, class P	protein-coding
MACS_peak_870	chr1	167693806	167694050	+	161.66	NA	promoter-TSS (NM_011804)	promoter-TSS (NM_011804)	17	NM_011804	433375	Mm.294885	NM_011804	ENSMUSG00000040713	Creg1	AA755314|Creg	cellular repressor of E1A-stimulated genes 1	protein-coding
MACS_peak_3242	chr11	85166619	85166912	+	161.66	NA	promoter-TSS (NM_138681)	promoter-TSS (NM_138681)	99	NM_001166643	192197	Mm.287663	NM_138681	ENSMUSG00000059439	Bcas3	1500019F07Rik|2610028P08Rik|AU021018|BC028339|K20D4|rudhira	breast carcinoma amplified sequence 3	protein-coding
MACS_peak_13329	chr4	83063180	83063832	+	161.63	NA	promoter-TSS (NM_029949)	promoter-TSS (NM_029949)	-142	NM_029949	77634	Mm.271985	NM_029949	ENSMUSG00000028483	Snapc3	1810020H02Rik|4930558A07Rik|5031401C21Rik|AI414457|E030018J20Rik	small nuclear RNA activating complex, polypeptide 3	protein-coding
MACS_peak_17596	chr7	107375777	107376366	+	161.63	NA	promoter-TSS (NM_027629)	promoter-TSS (NM_027629)	-46	NM_027629	70974	Mm.440524	NM_027629		Pgm2l1	4931406N15Rik|AI553438|BM32A	phosphoglucomutase 2-like 1	protein-coding
MACS_peak_7278	chr16	10447272	10447744	+	161.56	NA	promoter-TSS (NM_001013778)	promoter-TSS (NM_001013778)	-65	NM_001013778	383103	Mm.325732	NM_001013778	ENSMUSG00000050908	Tvp23a	Fam18a	trans-golgi network vesicle protein 23A	protein-coding
MACS_peak_87	chr1	31006516	31006924	+	161.56	NA	promoter-TSS (NR_002688)	promoter-TSS (NR_002688)	-120	NM_011200	19243	Mm.491181	NM_011200	ENSMUSG00000026064	Ptp4a1	AA415290|AU019864|C130021B01|Prl-1	protein tyrosine phosphatase 4a1	protein-coding
MACS_peak_19918	chr9	70351325	70351865	+	161.56	NA	promoter-TSS (NM_033604)	promoter-TSS (NM_033604)	-63	NM_033604	93836	Mm.29783	NM_033604	ENSMUSG00000032217	Rnf111	ARK|Arkadia	ring finger 111	protein-coding
MACS_peak_18505	chr8	72240221	72240862	+	161.55	NA	promoter-TSS (NM_181274)	promoter-TSS (NM_181274)	-156	NM_181274	66869	Mm.334581	NM_181274		Zfp869	1200003I07Rik	zinc finger protein 869	protein-coding
MACS_peak_14179	chr4	154597072	154597240	+	161.40	NA	promoter-TSS (NM_011385)	promoter-TSS (NM_011385)	-512	NM_011385	20481	Mm.28520	NM_011385	ENSMUSG00000029050	Ski	2310012I02Rik|2610001A11Rik|AA062172|AA589460|BC004088	ski sarcoma viral oncogene homolog (avian)	protein-coding
MACS_peak_13825	chr4	132440186	132440615	+	161.34	NA	promoter-TSS (NM_133887)	promoter-TSS (NM_133887)	-27	NM_133887	100226	Mm.28237	NM_133887		Stx12	AI850350|AU041521|Stx13	syntaxin 12	protein-coding
MACS_peak_8218	chr17	27976830	27977274	+	161.34	NA	promoter-TSS (NM_011432)	promoter-TSS (NM_011432)	20	NM_011432	20630	Mm.103949	NM_011432	ENSMUSG00000024217	Snrpc	Snrp1c|U1-C|U1C	U1 small nuclear ribonucleoprotein C	protein-coding
MACS_peak_9191	chr18	36919614	36920065	+	161.32	NA	promoter-TSS (NM_026464)	promoter-TSS (NM_026464)	-54	NM_026464	67936	Mm.271719	NM_026464	ENSMUSG00000042660	Wdr55	2410080P20Rik|C80692	WD repeat domain 55	protein-coding
MACS_peak_1246	chr10	17954541	17954982	+	161.27	NA	promoter-TSS (NM_144820)	promoter-TSS (NM_144820)	26	NM_144820	215814	Mm.296565	NM_144820	ENSMUSG00000059554	Ccdc28a	1700009P13Rik|AI480677	coiled-coil domain containing 28A	protein-coding
MACS_peak_7251	chr16	4880616	4880931	+	161.20	NA	promoter-TSS (NM_145359)	promoter-TSS (NM_145359)	-922	NM_145359	207740	Mm.268895	NM_145359		Ubald1	1500031H01Rik|BC013706|Fam100a	UBA-like domain containing 1	protein-coding
MACS_peak_10587	chr2	30270744	30271827	+	161.20	NA	promoter-TSS (NM_138748)	promoter-TSS (NM_138748)	-17	NM_007760	12908	Mm.20396	NM_007760	ENSMUSG00000026853	Crat	AW107812|CARAT	carnitine acetyltransferase	protein-coding
MACS_peak_10948	chr2	80457124	80457595	+	161.18	NA	promoter-TSS (NM_024438)	promoter-TSS (NM_024438)	-12	NM_024438	68082	Mm.306818	NM_024438	ENSMUSG00000027001	Dusp19	5930436K22Rik|C79103|SKRP1|TS-DSP1	dual specificity phosphatase 19	protein-coding
MACS_peak_8395	chr17	35108934	35109286	+	161.18	NA	promoter-TSS (NM_013558)	promoter-TSS (NM_013558)	-9	NM_010479	193740	Mm.6388	NM_010479	ENSMUSG00000091971	Hspa1a	Hsp70-3|Hsp70.3|Hsp72|hsp68|hsp70A1	heat shock protein 1A	protein-coding
MACS_peak_13926	chr4	135429543	135429826	+	161.18	NA	promoter-TSS (NM_026383)	promoter-TSS (NM_026383)	77	NM_026383	52830	Mm.29159	NM_026383	ENSMUSG00000028675	Pnrc2	0610011E17Rik|D4Bwg0593e	proline-rich nuclear receptor coactivator 2	protein-coding
MACS_peak_16187	chr6	117829091	117830203	+	161.18	NA	Intergenic	CpG	16552	NM_001001792	22685	Mm.249661	NM_008616	ENSMUSG00000042097	Zfp239	Mok-2|Mok2|Znf239	zinc finger protein 239	protein-coding
MACS_peak_9113	chr18	34666357	34666842	+	161.13	NA	promoter-TSS (NM_146084)	promoter-TSS (NM_146084)	-122	NM_146084	225358	Mm.226899	NM_146084	ENSMUSG00000036501	Fam13b	2610024E20Rik|AW060714|AW546153	family with sequence similarity 13, member B	protein-coding
MACS_peak_4326	chr12	60114282	60114652	+	161.13	NA	promoter-TSS (NM_025656)	promoter-TSS (NM_025656)	87	NM_025656	66603	Mm.35353	NM_025656		Gemin2	1700012N19Rik|Sip1	gem (nuclear organelle) associated protein 2	protein-coding
MACS_peak_8665	chr17	56766174	56766484	+	160.96	NA	promoter-TSS (NM_028782)	promoter-TSS (NM_028782)	-3	NM_028782	74142	Mm.329136	NM_028782	ENSMUSG00000041168	Lonp1	1200017E13Rik|LON|Prss15	lon peptidase 1, mitochondrial	protein-coding
MACS_peak_7943	chr17	15701114	15701794	+	160.96	NA	Intergenic	CpG	-1167	NM_144809	213389	Mm.215162	NM_144809	ENSMUSG00000051977	Prdm9	BC012016|Dsbc1|G1-419-29|Meisetz|Rcr1|repro7	PR domain containing 9	protein-coding
MACS_peak_4913	chr13	21808083	21808357	+	160.96	NA	promoter-TSS (NM_178182)	promoter-TSS (NM_178182)	-61	NM_178182	319191	Mm.14767	NM_178182		Hist1h2ai	H2a-291A	histone cluster 1, H2ai	protein-coding
MACS_peak_11354	chr2	127095658	127096634	+	160.96	NA	5' UTR (NM_139308, exon 1 of 8)	5' UTR (NM_139308, exon 1 of 8)	181	NM_139308	99138	Mm.41271	NM_139308	ENSMUSG00000027367	Stard7	AI852671|AL022671|AW544915	START domain containing 7	protein-coding
MACS_peak_20418	chr9	120036513	120037134	+	160.93	NA	promoter-TSS (NM_011029)	promoter-TSS (NM_011029)	-61	NM_011029	16785	Mm.4071	NM_011029	ENSMUSG00000032518	Rpsa	67kDa|67lr|AL022858|Lamr|Lamr1|Lamrl1|MLR|P40|P40-3|P40-8	ribosomal protein SA	protein-coding
MACS_peak_1917	chr10	94151123	94151587	+	160.93	NA	promoter-TSS (NM_029852)	promoter-TSS (NM_029852)	3	NR_015524	67723	Mm.116284	NR_015524	ENSMUSG00000097164	Cep83os	4932415G12Rik|Ccdc41os1	centrosomal protein 83, opposite strand	ncRNA
MACS_peak_4024	chr11	120051372	120051717	+	160.93	NA	promoter-TSS (NR_030682)	promoter-TSS (NR_030682)	-374	NR_030682	100042332	Mm.269766	NR_030682		2810410L24Rik	-	RIKEN cDNA 2810410L24 gene	ncRNA
MACS_peak_8173	chr17	27069688	27069966	+	160.87	NA	promoter-TSS (NM_009343)	promoter-TSS (NM_009343)	-245	NM_009343	21652	Mm.258953	NM_009343	ENSMUSG00000024193	Phf1	AW557215|D17Ertd455e|PHF2|Tctex-3|Tctex3|mPcl1	PHD finger protein 1	protein-coding
MACS_peak_6949	chr15	86044492	86044962	+	160.55	NA	promoter-TSS (NM_145476)	promoter-TSS (NM_145476)	-162	NM_145476	223754	Mm.28904	NM_145476	ENSMUSG00000051864	Tbc1d22a	BC023106|D15Ertd781e	TBC1 domain family, member 22a	protein-coding
MACS_peak_17597	chr7	107520151	107520536	+	160.55	NA	promoter-TSS (NM_001017985)	promoter-TSS (NM_001017985)	63	NM_028292	72590	Mm.177502	NM_028292	ENSMUSG00000030718	Ppme1	1110069N17Rik|2700017M01Rik|PME-1|Pme1	protein phosphatase methylesterase 1	protein-coding
MACS_peak_20331	chr9	108976437	108976919	+	160.47	NA	promoter-TSS (NM_172774)	promoter-TSS (NM_172774)	-40	NM_172774	235610	Mm.100622	NM_172774	ENSMUSG00000025646	Atrip	6620401K05Rik	ATR interacting protein	protein-coding
MACS_peak_12836	chr3	137526956	137527691	+	160.47	NA	promoter-TSS (NM_016750)	promoter-TSS (NM_016750)	-128	NM_016750	51788	Mm.117541	NM_016750	ENSMUSG00000037894	H2afz	H2A.Z|H2a.z-1	H2A histone family, member Z	protein-coding
MACS_peak_3430	chr11	97176783	97177041	+	160.37	NA	promoter-TSS (NM_025927)	promoter-TSS (NM_025927)	-118	NM_025927	67036	Mm.5381	NM_025927	ENSMUSG00000018882	Mrpl45	2600005P05Rik|AU043542|R75241	mitochondrial ribosomal protein L45	protein-coding
MACS_peak_5726	chr14	31467338	31467773	+	160.33	NA	promoter-TSS (NM_177815)	promoter-TSS (NM_177815)	-6	NM_177815	328370	Mm.259657	NM_177815	ENSMUSG00000052395	Rft1	D930025H04	RFT1 homolog (S. cerevisiae)	protein-coding
MACS_peak_15361	chr5	141180918	141181207	+	160.24	NA	promoter-TSS (NM_181066)	promoter-TSS (NM_181066)	42	NM_001276287	231841	Mm.271932	NM_172724	ENSMUSG00000000148	Brat1	AA881470|Baat1	BRCA1-associated ATM activator 1	protein-coding
MACS_peak_748	chr1	153275658	153276002	+	160.07	NA	promoter-TSS (NM_025819)	promoter-TSS (NM_025819)	52	NM_026876	98685	Mm.289373	NM_026876	ENSMUSG00000053286	Trmt1l	1190005F20Rik|AW226554|C1orf25|Trm1-like|Trm1l	tRNA methyltransferase 1 like	protein-coding
MACS_peak_18922	chr8	107058327	107058746	+	160.01	NA	promoter-TSS (NM_144931)	promoter-TSS (NM_144931)	1	NM_144931	234664	Mm.237670	NM_144931	ENSMUSG00000031878	Nae1	59kDa|Appbp1	NEDD8 activating enzyme E1 subunit 1	protein-coding
MACS_peak_4030	chr11	120172056	120172460	+	160.01	NA	Intergenic	CpG	36469	NR_105900	102465564		NR_105900		Mir6935	mmu-mir-6935	microRNA mir-6935	ncRNA
MACS_peak_2586	chr11	50641121	50641521	+	160.01	NA	promoter-TSS (NM_013922)	promoter-TSS (NM_013922)	-88	NM_013922	30944	Mm.103674	NM_013922	ENSMUSG00000044807	Zfp354c	5330421P20Rik|AJ18|AW743325|Kid3|Tcf17l2|Znf354c|mKIAA4218	zinc finger protein 354C	protein-coding
MACS_peak_1550	chr10	74980275	74980955	+	160.01	NA	promoter-TSS (NM_026095)	promoter-TSS (NM_026095)	-172	NM_026095	67332	Mm.45151	NM_026095	ENSMUSG00000020180	Snrpd3	1700043E15Rik|2310009E13Rik|AW046420|SMD3	small nuclear ribonucleoprotein D3	protein-coding
MACS_peak_13991	chr4	139130493	139130765	+	160.01	NA	promoter-TSS (NM_001205173)	promoter-TSS (NM_001205173)	-6	NM_001205173	212632	Mm.30464	NM_183148	ENSMUSG00000041025	Iffo2	C79267	intermediate filament family orphan 2	protein-coding
MACS_peak_15691	chr6	42299967	42300197	+	159.91	NA	5' UTR (NM_011777, exon 1 of 10)	5' UTR (NM_011777, exon 1 of 10)	255	NM_001289619	22793	Mm.282303	NM_011777	ENSMUSG00000029860	Zyx	9530098H06Rik|R75157	zyxin	protein-coding
MACS_peak_20486	chrX	7215722	7215950	+	159.79	NA	exon (NM_009305, exon 1 of 7)	exon (NM_009305, exon 1 of 7)	130	NM_009305	20977	Mm.223674	NM_009305	ENSMUSG00000031144	Syp	A230093K24Rik|AI848995|Syn|p38	synaptophysin	protein-coding
MACS_peak_437	chr1	82279581	82280314	+	159.76	NA	intron (NM_010570, intron 1 of 1)	CpG	8067	NM_010570	16367	Mm.4952	NM_010570	ENSMUSG00000055980	Irs1	G972R|IRS-1	insulin receptor substrate 1	protein-coding
MACS_peak_6548	chr15	58654937	58655512	+	159.76	NA	promoter-TSS (NM_175212)	promoter-TSS (NM_175212)	-242	NM_175212	74868	Mm.293754	NM_175212	ENSMUSG00000062373	Tmem65	2610029O13Rik|4930438D12Rik	transmembrane protein 65	protein-coding
MACS_peak_5637	chr14	19103301	19103976	+	159.70	NA	promoter-TSS (NM_025586)	promoter-TSS (NM_025586)	-18	NM_023526	69721	Mm.25648	NM_023526	ENSMUSG00000021772	Nkiras1	2400004O09Rik|KBRAS1|kappaB-Ras1	NFKB inhibitor interacting Ras-like protein 1	protein-coding
MACS_peak_3916	chr11	116351906	116352208	+	159.65	NA	promoter-TSS (NM_026364)	promoter-TSS (NM_026364)	-397	NM_026364	67763	Mm.25125	NM_026364	ENSMUSG00000015869	Prpsap1	5730409F23Rik|PAP39	phosphoribosyl pyrophosphate synthetase-associated protein 1	protein-coding
MACS_peak_13406	chr4	101029405	101029714	+	159.64	NA	promoter-TSS (NR_040708)	promoter-TSS (NR_040708)	-706	NR_040708	77866	Mm.137053	NR_040708	ENSMUSG00000086782	E130102H24Rik	-	RIKEN cDNA E130102H24 gene	ncRNA
MACS_peak_19393	chr9	21875444	21876140	+	159.64	NA	promoter-TSS (NM_177318)	promoter-TSS (NM_177318)	-3	NM_177318	319601	Mm.347707	NM_177318	ENSMUSG00000038895	Zfp653	E430039K05Rik|Znf653	zinc finger protein 653	protein-coding
MACS_peak_19625	chr9	45792785	45793186	+	159.64	NA	promoter-TSS (NM_008775)	promoter-TSS (NM_008775)	-31	NM_008775	18475	Mm.200859	NM_008775	ENSMUSG00000003131	Pafah1b2	AI747451|AU021353|Pafahb|mus[b]	platelet-activating factor acetylhydrolase, isoform 1b, subunit 2	protein-coding
MACS_peak_2956	chr11	69714472	69715413	+	159.64	NA	promoter-TSS (NM_001013414)	promoter-TSS (NM_001013414)	-376	NM_001291118	216860	Mm.268347	NM_001013414	ENSMUSG00000047284	Neurl4	-	neuralized homolog 4 (Drosophila)	protein-coding
MACS_peak_13978	chr4	137990238	137990816	+	159.64	NA	promoter-TSS (NM_026689)	promoter-TSS (NM_026689)	-60	NM_026689	68350	Mm.103413	NM_026689	ENSMUSG00000041241	Mul1	0610009K11Rik|AV000801|Gide	mitochondrial ubiquitin ligase activator of NFKB 1	protein-coding
MACS_peak_3276	chr11	87405083	87405407	+	159.64	NA	promoter-TSS (NM_133215)	promoter-TSS (NM_133215)	-474	NM_133215	170749	Mm.399376	NM_133215	ENSMUSG00000018401	Mtmr4	AA596759|ESTM44|FYVE-DSP2|ZFYVE11|mKIAA0647	myotubularin related protein 4	protein-coding
MACS_peak_16042	chr6	91827783	91828231	+	159.64	NA	promoter-TSS (NM_172730)	promoter-TSS (NM_172730)	-40	NM_172730	232236	Mm.234879	NM_172730	ENSMUSG00000034083	Ccdc174	C130022K22Rik	coiled-coil domain containing 174	protein-coding
MACS_peak_9572	chr19	4231623	4232119	+	159.64	NA	promoter-TSS (NM_027196)	promoter-TSS (NM_027196)	-28	NM_027196	69745	Mm.32518	NM_027196	ENSMUSG00000024854	Pold4	2410012M21Rik|AI463381|AW060307|Polds|p12	polymerase (DNA-directed), delta 4	protein-coding
MACS_peak_15912	chr6	83058698	83059243	+	159.58	NA	promoter-TSS (NM_026744)	promoter-TSS (NM_026744)	-132	NM_026744	68499	Mm.333183	NM_026744	ENSMUSG00000030037	Mrpl53	1110007K17Rik	mitochondrial ribosomal protein L53	protein-coding
MACS_peak_38	chr1	16609504	16609757	+	159.56	NA	promoter-TSS (NM_025773)	promoter-TSS (NM_025773)	-211	NM_001271017	66799	Mm.122430	NM_025773	ENSMUSG00000025939	Ube2w	6130401J04Rik	ubiquitin-conjugating enzyme E2W (putative)	protein-coding
MACS_peak_15939	chr6	83864284	83864564	+	159.54	NA	promoter-TSS (NM_008717)	promoter-TSS (NM_008717)	77	NM_008717	18139	Mm.132392	NM_008717	ENSMUSG00000030016	Zfml	AI323587|Np220|Znf638|mNP220	zinc finger, matrin-like	protein-coding
MACS_peak_9820	chr19	9209900	9210230	+	159.51	NA	promoter-TSS (NM_025610)	promoter-TSS (NM_025610)	-9	NM_025610	66514	Mm.272847	NM_025610		Asrgl1	2410004D18Rik|ALP|ALP1|AU040643|AW060375	asparaginase like 1	protein-coding
MACS_peak_13174	chr4	46401879	46402541	+	159.49	NA	promoter-TSS (NM_029086)	promoter-TSS (NM_029086)	85	NM_029086	74753	Mm.45973	NM_029086	ENSMUSG00000028331	5830415F09Rik	AV014846|Nap1	RIKEN cDNA 5830415F09 gene	protein-coding
MACS_peak_15605	chr6	30351309	30351744	+	159.37	NA	promoter-TSS (NM_029742)	promoter-TSS (NM_029742)	-383	NM_029742	76788	Mm.277308	NM_029742	ENSMUSG00000029775	Klhdc10	2410127E18Rik|AI593221|mKIAA0265	kelch domain containing 10	protein-coding
MACS_peak_14958	chr5	115750773	115751045	+	159.37	NA	promoter-TSS (NM_019682)	promoter-TSS (NM_019682)	90	NM_019682	56455	Mm.256858	NM_019682	ENSMUSG00000009013	Dynll1	Dlc8|Dnclc1|Pin	dynein light chain LC8-type 1	protein-coding
MACS_peak_16211	chr6	119338483	119339137	+	159.37	NA	intron (NM_197985, intron 1 of 7)	CpG	28691	NM_197985	68465	Mm.291826	NM_197985	ENSMUSG00000030168	Adipor2	1110001I14Rik|ADCR2|AI115388|AW554121|D6Ucla1e|Paqr2	adiponectin receptor 2	protein-coding
MACS_peak_3910	chr11	116059916	116060764	+	159.15	NA	promoter-TSS (NM_001271898)	promoter-TSS (NM_001271898)	19	NM_001271898	11430	Mm.356689	NM_015729	ENSMUSG00000020777	Acox1	AOX|Acox|D130055E20Rik|Paox	acyl-Coenzyme A oxidase 1, palmitoyl	protein-coding
MACS_peak_12581	chr3	100489243	100489573	+	159.11	NA	promoter-TSS (NM_010763)	promoter-TSS (NM_010763)	-12	NM_010763	17156	Mm.271617	NM_010763	ENSMUSG00000008763	Man1a2	AI428775|AI528764|AI854422|Man1b|PCR2	mannosidase, alpha, class 1A, member 2	protein-coding
MACS_peak_15680	chr6	40385906	40386514	+	159.09	NA	promoter-TSS (NM_175528)	promoter-TSS (NM_175528)	-78	NM_175528	243780	Mm.333006	NM_175528	ENSMUSG00000037172	E330009J07Rik	AI841796|Lchn|mKIAA1147	RIKEN cDNA E330009J07 gene	protein-coding
MACS_peak_13515	chr4	115747463	115747730	+	159.04	NA	promoter-TSS (NM_025641)	promoter-TSS (NM_025641)	79	NM_025641	66576	Mm.181721	NM_025641	ENSMUSG00000063882	Uqcrh	2210416J04Rik|2310021J10Rik|2610041P16Rik	ubiquinol-cytochrome c reductase hinge protein	protein-coding
MACS_peak_20325	chr9	108838638	108838930	+	159.04	NA	exon (NM_025407, exon 1 of 13)	exon (NM_025407, exon 1 of 13)	123	NM_025407	22273	Mm.335460	NM_025407	ENSMUSG00000025651	Uqcrc1	1110032G10Rik	ubiquinol-cytochrome c reductase core protein 1	protein-coding
MACS_peak_17200	chr7	52650851	52651183	+	159.01	NA	promoter-TSS (NM_009224)	promoter-TSS (NM_009224)	0	NM_009224	20637	Mm.216386	NM_009224	ENSMUSG00000063511	Snrnp70	2700022N21Rik|3200002N22Rik|70kDa|AI325098|R74807|Rnulp70|Snrp70|Srnp70|U1-70|U1-70K	small nuclear ribonucleoprotein 70 (U1)	protein-coding
MACS_peak_13140	chr4	43669136	43669404	+	158.95	NA	promoter-TSS (NM_026871)	promoter-TSS (NM_026871)	47	NM_026871	68917	Mm.25285	NM_026871	ENSMUSG00000028470	Hint2	1190005L05Rik	histidine triad nucleotide binding protein 2	protein-coding
MACS_peak_11974	chr2	181598692	181599316	+	158.67	NA	promoter-TSS (NM_025901)	promoter-TSS (NM_025901)	-61	NM_025901	67005	Mm.271986	NM_025901	ENSMUSG00000038628	Polr3k	12.3kDa|1500004O14Rik|AI196849|AU014893|C11|RPC10|RPC11	polymerase (RNA) III (DNA directed) polypeptide K	protein-coding
MACS_peak_4081	chr11	121295833	121296473	+	158.60	NA	promoter-TSS (NM_022014)	promoter-TSS (NM_022014)	-114	NM_001038699	63828	Mm.266448	NM_022014	ENSMUSG00000025175	Fn3k	2310074G21Rik	fructosamine 3 kinase	protein-coding
MACS_peak_9099	chr18	33622835	33623494	+	158.60	NA	promoter-TSS (NR_045415)	promoter-TSS (NR_045415)	124	NM_001267717	27528	Mm.407415	NM_053078	ENSMUSG00000042834	Nrep	AI325076|D0H4S114|Harp|P311|PTZ17|SEZ17	neuronal regeneration related protein	protein-coding
MACS_peak_15002	chr5	117863427	117864652	+	158.60	NA	promoter-TSS (NM_001114545)	promoter-TSS (NM_001114545)	28	NM_001114545	333050	Mm.437947	NM_001034873	ENSMUSG00000061578	Ksr2	-	kinase suppressor of ras 2	protein-coding
MACS_peak_9011	chr18	20904673	20905173	+	158.60	NA	promoter-TSS (NM_019737)	promoter-TSS (NM_019737)	-18	NM_019737	56386	Mm.393827	NM_019737	ENSMUSG00000056124	B4galt6	AA536803|AU022389	UDP-Gal:betaGlcNAc beta 1,4-galactosyltransferase, polypeptide 6	protein-coding
MACS_peak_11544	chr2	152119340	152119795	+	158.60	NA	promoter-TSS (NM_024196)	promoter-TSS (NM_024196)	-41	NM_024196	67231	Mm.288733	NM_024196		Tbc1d20	1110028I04Rik|2810442O16Rik|AI414693	TBC1 domain family, member 20	protein-coding
MACS_peak_12856	chr3	141127599	141128768	+	158.52	NA	promoter-TSS (NM_001293561)	promoter-TSS (NM_001293561)	-345	NM_009472	22253	Mm.24430	NM_009472	ENSMUSG00000059921	Unc5c	B130051O18Rik|Unc5h3|rcm	unc-5 homolog C (C. elegans)	protein-coding
MACS_peak_12913	chr3	157609682	157610336	+	158.52	NA	promoter-TSS (NM_001013806)	promoter-TSS (NM_001013806)	-421	NM_001013806	433667	Mm.265806	NM_001013806	ENSMUSG00000039988	Ankrd13c	AI505652|AU022220	ankyrin repeat domain 13c	protein-coding
MACS_peak_8271	chr17	30749287	30749652	+	158.52	NA	exon (NM_001113560, exon 1 of 7)	exon (NM_001113560, exon 1 of 7)	135	NM_025374	109801	Mm.261984	NM_025374	ENSMUSG00000024026	Glo1	0610009E22Rik|1110008E19Rik|2510049H23Rik|AW550643|GLY1|Glo-1|Glo-1r|Glo-1s|Glo1-r|Glo1-s|Qglo	glyoxalase 1	protein-coding
MACS_peak_13042	chr4	33118077	33118593	+	158.49	NA	promoter-TSS (NM_019586)	promoter-TSS (NM_019586)	-37	NR_036602	100504166	Mm.426309	NR_036602	ENSMUSG00000085037	4933421O10Rik	-	RIKEN cDNA 4933421O10 gene	ncRNA
MACS_peak_16	chr1	7078527	7079407	+	158.37	NA	promoter-TSS (NM_183028)	promoter-TSS (NM_183028)	-34	NM_183028	319263	Mm.21539	NM_183028	ENSMUSG00000051285	Pcmtd1	8430411F12Rik|A030012M09Rik	protein-L-isoaspartate (D-aspartate) O-methyltransferase domain containing 1	protein-coding
MACS_peak_14680	chr5	75073543	75074197	+	158.37	NA	promoter-TSS (NM_001159580)	promoter-TSS (NM_001159580)	27	NM_010727	16924	Mm.440403	NM_010727	ENSMUSG00000029228	Lnx1	Lnx	ligand of numb-protein X 1	protein-coding
MACS_peak_4547	chr12	85791702	85792030	+	158.37	NA	promoter-TSS (NM_173756)	promoter-TSS (NM_173756)	34	NM_134042	104776	Mm.247510	NM_134042	ENSMUSG00000021238	Aldh6a1	1110038I05Rik|AI314632|Mmsdh	aldehyde dehydrogenase family 6, subfamily A1	protein-coding
MACS_peak_14983	chr5	116474313	116474704	+	158.37	NA	promoter-TSS (NM_031869)	promoter-TSS (NM_031869)	-71	NM_031869	19079	Mm.458152	NM_031869	ENSMUSG00000029513	Prkab1	1300015D22Rik|AU021155|E430008F22	protein kinase, AMP-activated, beta 1 non-catalytic subunit	protein-coding
MACS_peak_10861	chr2	69723510	69723884	+	158.37	NA	promoter-TSS (NR_110977)	promoter-TSS (NR_110977)	-25	NR_110977	75422	Mm.10508	NM_029280	ENSMUSG00000051730	Mettl5	2810410A08Rik	methyltransferase like 5	protein-coding
MACS_peak_4789	chr12	113205009	113205328	+	158.23	NA	promoter-TSS (NM_027360)	promoter-TSS (NM_027360)	20	NM_027360	70257	Mm.318	NM_027360	ENSMUSG00000021290	2010107E04Rik	9430003J03Rik|AU043134|AV124504|Mp68	RIKEN cDNA 2010107E04 gene	protein-coding
MACS_peak_7076	chr15	98364427	98364821	+	158.10	NA	promoter-TSS (NM_001289439)	promoter-TSS (NM_001289439)	76	NM_001289438	69612	Mm.296240	NM_133714	ENSMUSG00000022992	Kansl2	2310037I24Rik|B930009D17	KAT8 regulatory NSL complex subunit 2	protein-coding
MACS_peak_8294	chr17	32457871	32458170	+	158.10	NA	promoter-TSS (NM_019774)	promoter-TSS (NM_019774)	78	NM_019774	56399	Mm.328945	NM_019774	ENSMUSG00000024045	Akap8	1200016A02Rik|AA673585|AKAP95|AU015639	A kinase (PRKA) anchor protein 8	protein-coding
MACS_peak_5701	chr14	27457188	27457477	+	158.10	NA	promoter-TSS (NM_007479)	promoter-TSS (NM_007479)	-351	NM_007479	11843	Mm.297768	NM_007479	ENSMUSG00000021877	Arf4	AA407803	ADP-ribosylation factor 4	protein-coding
MACS_peak_14426	chr5	30968870	30969218	+	157.99	NA	promoter-TSS (NM_007681)	promoter-TSS (NM_007681)	-231	NM_007681	12615	Mm.290563	NM_007681	ENSMUSG00000029177	Cenpa	Cenp-A	centromere protein A	protein-coding
MACS_peak_14107	chr4	150283721	150284033	+	157.99	NA	intron (NM_020569, intron 1 of 6)	CpG	153	NM_020569	57320	Mm.277349	NM_020569	ENSMUSG00000028964	Park7	DJ-1|Dj1	Parkinson disease (autosomal recessive, early onset) 7	protein-coding
MACS_peak_14833	chr5	108329487	108329766	+	157.95	NA	promoter-TSS (NM_016980)	promoter-TSS (NM_016980)	79	NM_016980	100503670	Mm.277897	NM_016980	ENSMUSG00000058558	Rpl5	U21RNA	ribosomal protein L5	protein-coding
MACS_peak_2983	chr11	70053432	70053844	+	157.95	NA	promoter-TSS (NM_173742)	promoter-TSS (NM_173742)	-284	NM_173742	52898	Mm.29852	NM_173742	ENSMUSG00000093989	Rnasek	2310033H11Rik|AA571397|D11Bwg0434e	ribonuclease, RNase K	protein-coding
MACS_peak_4907	chr13	21560163	21560609	+	157.80	NA	promoter-TSS (NM_025719)	promoter-TSS (NM_025719)	-16	NM_025719	66707	Mm.116869	NM_025719	ENSMUSG00000059395	Nkapl	4921504I05Rik	NFKB activating protein-like	protein-coding
MACS_peak_10515	chr2	26883289	26883810	+	157.77	NA	promoter-TSS (NM_001177627)	promoter-TSS (NM_001177627)	-31	NM_001177627	227659	Mm.41203	NM_172659	ENSMUSG00000036067	Slc2a6	A330096C23|F630103L12Rik|Glut6|Glut9	solute carrier family 2 (facilitated glucose transporter), member 6	protein-coding
MACS_peak_2206	chr10	128063337	128063639	+	157.69	NA	promoter-TSS (NM_013765)	promoter-TSS (NM_013765)	74	NM_013765	27370	Mm.261679	NM_013765	ENSMUSG00000025362	Rps26	-	ribosomal protein S26	protein-coding
MACS_peak_4392	chr12	72410797	72410994	+	157.66	NA	promoter-TSS (NM_021532)	promoter-TSS (NM_021532)	24	NM_001190466	59036	Mm.46662	NM_021532	ENSMUSG00000044548	Dact1	4921528D17Rik|AI115603|DAPPER|DAPPER1|FRODO|Frd1|Frodo1|MDpr1|MTNG3|THYEX3	dapper homolog 1, antagonist of beta-catenin (xenopus)	protein-coding
MACS_peak_8532	chr17	46464690	46465521	+	157.55	NA	promoter-TSS (NM_170680)	promoter-TSS (NM_170680)	-133	NM_170680	224814	Mm.76543	NM_145140	ENSMUSG00000032842	Abcc10	Mrp7|mFLJ00002	ATP-binding cassette, sub-family C (CFTR/MRP), member 10	protein-coding
MACS_peak_7385	chr16	18836533	18836911	+	157.55	NA	promoter-TSS (NM_001033164)	promoter-TSS (NM_001033164)	49	NM_001033164	72307	Mm.36907	NM_001033164	ENSMUSG00000071632	2510002D24Rik	2410043I01Rik|AA163535|AA409624|DXMgi27	RIKEN cDNA 2510002D24 gene	protein-coding
MACS_peak_10328	chr2	10001834	10002384	+	157.55	NA	promoter-TSS (NM_020615)	promoter-TSS (NM_020615)	28	NM_020615	11949	Mm.12677	NM_020615	ENSMUSG00000025781	Atp5c1	1700094F02Rik	ATP synthase, H+ transporting, mitochondrial F1 complex, gamma polypeptide 1	protein-coding
MACS_peak_7791	chr16	94945708	94946306	+	157.55	NA	Intergenic	Intergenic	132290	NM_001025590	16522	Mm.328720	NM_010606	ENSMUSG00000043301	Kcnj6	BIR1|GIRK2|KATP2|KCNJ7|Kir3.2|weaver|wv	potassium inwardly-rectifying channel, subfamily J, member 6	protein-coding
MACS_peak_5957	chr14	56518851	56519409	+	157.40	NA	promoter-TSS (NM_001082975)	promoter-TSS (NM_001082975)	-61	NM_001082975	654795	Mm.486218	NM_001082975	ENSMUSG00000022223	Sdr39u1	2310014G06Rik	short chain dehydrogenase/reductase family 39U, member 1	protein-coding
MACS_peak_959	chr1	174259224	174259769	+	157.30	NA	promoter-TSS (NM_008429)	promoter-TSS (NM_008429)	-102	NM_008429	16524	Mm.261168	NM_008429	ENSMUSG00000038026	Kcnj9	1700085N21Rik|Girk3|Kir3.3|mbGIRK3	potassium inwardly-rectifying channel, subfamily J, member 9	protein-coding
MACS_peak_4286	chr12	53604254	53604735	+	157.28	NA	Intergenic	CpG	-12570	NM_009706	11855	Mm.35059	NM_009706	ENSMUSG00000035133	Arhgap5	p190-B|p190B	Rho GTPase activating protein 5	protein-coding
MACS_peak_8739	chr17	66798845	66799599	+	157.15	NA	promoter-TSS (NM_172963)	promoter-TSS (NM_172963)	-132	NM_001114098	68617	Mm.33421	NM_172963	ENSMUSG00000052105	Mtcl1	1110012J17Rik|Ccdc165|D130071O13|Kiaa0802|Soga2|mKIAA0802|t8219b25	microtubule crosslinking factor 1	protein-coding
MACS_peak_204	chr1	46910122	46910395	+	157.12	NA	promoter-TSS (NM_172653)	promoter-TSS (NM_172653)	96	NM_172653	227059	Mm.233889	NM_172653	ENSMUSG00000025986	Slc39a10	2900042E17Rik|5430433I10|mKIAA1265	solute carrier family 39 (zinc transporter), member 10	protein-coding
MACS_peak_3659	chr11	102558854	102559378	+	157.08	NA	promoter-TSS (NM_025918)	promoter-TSS (NM_025918)	-77	NM_025918	52715	Mm.277638	NM_025918	ENSMUSG00000020925	Ccdc43	2610001E01Rik|D11Ertd707e	coiled-coil domain containing 43	protein-coding
MACS_peak_11202	chr2	118305219	118305737	+	156.91	NA	promoter-TSS (NM_009273)	promoter-TSS (NM_009273)	-46	NM_009273	20813	Mm.363404	NM_009273	ENSMUSG00000009549	Srp14	14kDa|AW536328	signal recognition particle 14	protein-coding
MACS_peak_15344	chr5	140019580	140020033	+	156.90	NA	promoter-TSS (NM_013702)	promoter-TSS (NM_013702)	-46	NM_013702	22255	Mm.42190	NM_013702	ENSMUSG00000029546	Uncx	Chx4|Uncx4.1	UNC homeobox	protein-coding
MACS_peak_8995	chr18	14130929	14131292	+	156.90	NA	5' UTR (NM_145492, exon 1 of 8)	5' UTR (NM_145492, exon 1 of 8)	132	NM_145492	225207	Mm.40325	NM_145492	ENSMUSG00000024420	Zfp521	B930086A16Rik|Evi3|Znf521	zinc finger protein 521	protein-coding
MACS_peak_2449	chr11	29592841	29593199	+	156.90	NA	promoter-TSS (NM_194051)	promoter-TSS (NM_194051)	122	NM_194052	68585	Mm.192580	NM_024226	ENSMUSG00000020458	Rtn4	1110020G17Rik|AA407876|AA409940|AA960376|ASY|C130026I10Rik|NOGO|NSP-CL|NgA|Nogo-A|Nogo-B|Nogo-C|mKIAA0886|mKIAA4153	reticulon 4	protein-coding
MACS_peak_4117	chr12	4923926	4924342	+	156.90	NA	promoter-TSS (NM_001099628)	promoter-TSS (NM_001099628)	-25	NM_001099628	320817	Mm.210966	NM_001099628		Atad2b	1110014E10Rik|BC032887|C79189|D530031C13Rik	ATPase family, AAA domain containing 2B	protein-coding
MACS_peak_4930	chr13	22134979	22135267	+	156.90	NA	promoter-TSS (NM_178186)	promoter-TSS (NM_178186)	24	NM_178198	319183	Mm.371766	NM_178198	ENSMUSG00000069300	Hist1h2bj	-	histone cluster 1, H2bj	protein-coding
MACS_peak_18377	chr8	41393093	41393573	+	156.90	NA	promoter-TSS (NM_030110)	promoter-TSS (NM_030110)	-50	NR_106126	102466237		NR_106126	miRBase:MI0025006	Mir7666	mmu-mir-7666	microRNA mir-7666	ncRNA
MACS_peak_3946	chr11	117847870	117848277	+	156.78	NA	promoter-TSS (NM_133757)	promoter-TSS (NM_133757)	-98	NM_133757	74451	Mm.28864	NM_133757	ENSMUSG00000017715	Pgs1	2610019F11Rik|4933424M23Rik|SAF	phosphatidylglycerophosphate synthase 1	protein-coding
MACS_peak_18018	chr7	146100944	146101237	+	156.74	NA	promoter-TSS (NM_009760)	promoter-TSS (NM_009760)	99	NM_009760	12176	Mm.378890	NM_009760	ENSMUSG00000078566	Bnip3	Nip3	BCL2/adenovirus E1B interacting protein 3	protein-coding
MACS_peak_14308	chr5	20457435	20457997	+	156.74	NA	promoter-TSS (NM_001080977)	promoter-TSS (NM_001080977)	-76	NM_001080977	242860	Mm.254286	NM_001080977	ENSMUSG00000039968	Rsbn1l	8430412F05Rik|AI447441|C330002G24Rik	round spermatid basic protein 1-like	protein-coding
MACS_peak_19846	chr9	64129321	64129606	+	156.72	NA	promoter-TSS (NM_025372)	promoter-TSS (NM_025372)	49	NM_025372	66131	Mm.196219	NM_025372	ENSMUSG00000032397	Tipin	1110005A05Rik|1110018P21Rik	timeless interacting protein	protein-coding
MACS_peak_12440	chr3	94247075	94247447	+	156.72	NA	promoter-TSS (NM_030116)	promoter-TSS (NM_030116)	3	NM_030116	78523	Mm.218515	NM_030116	ENSMUSG00000028140	Mrpl9	8030480E20Rik|AA409733|C330013D18Rik|L9mt	mitochondrial ribosomal protein L9	protein-coding
MACS_peak_12426	chr3	90237223	90237933	+	156.72	NA	promoter-TSS (NM_145540)	promoter-TSS (NM_145540)	-20	NM_178876	229543	Mm.268564	NM_145540	ENSMUSG00000027933	Ints3	C77668	integrator complex subunit 3	protein-coding
MACS_peak_10079	chr19	43763812	43764484	+	156.72	NA	promoter-TSS (NM_053103)	promoter-TSS (NM_053103)	-31	NM_053103	93685	Mm.248237	NM_053103	ENSMUSG00000025192	Entpd7	1810012B13Rik|1810020C02Rik|2810003F23Rik|LALP1|Lysal2	ectonucleoside triphosphate diphosphohydrolase 7	protein-coding
MACS_peak_12557	chr3	96709032	96709412	+	156.72	NA	promoter-TSS (NM_026229)	promoter-TSS (NM_026229)	-1	NM_026229	67549	Mm.46722	NM_026229		Gpr89	4933412D19Rik|Gpr89a|SH120	G protein-coupled receptor 89	protein-coding
MACS_peak_12287	chr3	84618130	84618705	+	156.72	NA	Intergenic	CpG	-1082	NM_001177773	50754	Mm.196475	NM_080428	ENSMUSG00000028086	Fbxw7	1110001A17Rik|AGO|Cdc4|Fbw7|Fbwd6|Fbx30|Fbxo30|Fbxw6|SEL-10	F-box and WD-40 domain protein 7	protein-coding
MACS_peak_14439	chr5	31262466	31262875	+	156.61	NA	promoter-TSS (NM_001294302)	promoter-TSS (NM_001294302)	30	NM_016703	50907	Mm.272414	NM_016703	ENSMUSG00000045302	Preb	C85705	prolactin regulatory element binding	protein-coding
MACS_peak_18016	chr7	146037717	146038130	+	156.56	NA	promoter-TSS (NM_026391)	promoter-TSS (NM_026391)	27	NM_001045483	69546	Mm.31598	NM_027115	ENSMUSG00000041775	Mapk1ip1	2310009E07Rik|AU043776|MISS	mitogen-activated protein kinase 1 interacting protein 1	protein-coding
MACS_peak_3281	chr11	87550590	87550853	+	156.56	NA	promoter-TSS (NM_009296)	promoter-TSS (NM_009296)	-346	NM_009296	20922	Mm.622	NM_009296	ENSMUSG00000020485	Supt4a	AL022777|Supt4h|Supt4h1|Supt4h1a	suppressor of Ty 4A	protein-coding
MACS_peak_18940	chr8	107850004	107850463	+	156.56	NA	promoter-TSS (NM_177449)	promoter-TSS (NM_177449)	-31	NM_025486	66320	Mm.29990	NM_025486	ENSMUSG00000014856	Tmem208	1700006C06Rik|2610030K20Rik|Hspc171	transmembrane protein 208	protein-coding
MACS_peak_1097	chr1	187186521	187187138	+	156.56	NA	promoter-TSS (NM_029735)	promoter-TSS (NM_029735)	-145	NM_029735	107508	Mm.154511	NM_029735	ENSMUSG00000026615	Eprs	2410081F06Rik|3010002K18Rik|C79379|Qprs	glutamyl-prolyl-tRNA synthetase	protein-coding
MACS_peak_10665	chr2	32426292	32426595	+	156.25	NA	promoter-TSS (NM_010073)	promoter-TSS (NM_010073)	65	NM_010073	13481	Mm.22001	NM_010073	ENSMUSG00000026810	Dpm2	AW557993|R75484	dolichol-phosphate (beta-D) mannosyltransferase 2	protein-coding
MACS_peak_8289	chr17	32173090	32173539	+	156.25	NA	5' UTR (NM_028244, exon 1 of 16)	5' UTR (NM_028244, exon 1 of 16)	207	NM_028244	72462	Mm.102761	NM_028244	ENSMUSG00000058392	Rrp1b	2600005C20Rik|D030064A17|Kiaa0179|mKIAA0179	ribosomal RNA processing 1 homolog B (S. cerevisiae)	protein-coding
MACS_peak_12466	chr3	95032025	95032930	+	156.25	NA	promoter-TSS (NM_001038708)	promoter-TSS (NM_001038708)	122	NM_019914	56772	Mm.331208	NM_019914		Mllt11	AI839562|Af1q|Zfp692	myeloid/lymphoid or mixed-lineage leukemia (trithorax homolog, Drosophila); translocated to, 11	protein-coding
MACS_peak_18076	chr7	148599756	148600107	+	156.19	NA	promoter-TSS (NM_172116)	promoter-TSS (NM_172116)	93	NM_172116	213350	Mm.290953	NM_172116	ENSMUSG00000051007	Pddc1	BC023835|D230016J19Rik	Parkinson disease 7 domain containing 1	protein-coding
MACS_peak_16909	chr7	29177880	29178150	+	156.19	NA	promoter-TSS (NM_026042)	promoter-TSS (NM_026042)	0	NM_019458	54624	Mm.7916	NM_019458	ENSMUSG00000003437	Paf1	5730511K23Rik|AA675045	Paf1, RNA polymerase II associated factor, homolog (S. cerevisiae)	protein-coding
MACS_peak_229	chr1	53353591	53354163	+	156.19	NA	promoter-TSS (NM_153556)	promoter-TSS (NM_153556)	-37	NM_153556	227099	Mm.60499	NM_153556	ENSMUSG00000026098	Pms1	-	postmeiotic segregation increased 1 (S. cerevisiae)	protein-coding
MACS_peak_13596	chr4	118992919	118993439	+	156.10	NA	promoter-TSS (NM_028677)	promoter-TSS (NM_028677)	-51	NM_001110130	66101	Mm.304080	NM_028677	ENSMUSG00000060288	Ppih	1100001J08Rik|2010111B15Rik|4833408F11Rik|AI464484|CYP-20|CYPH|D4Wsu43e	peptidyl prolyl isomerase H	protein-coding
MACS_peak_5461	chr13	94541896	94542411	+	156.10	NA	intron (NM_009712, intron 1 of 7)	intron (NM_009712, intron 1 of 7)	519	NM_009712	11881	Mm.300178	NM_009712	ENSMUSG00000042082	Arsb	1110007C02Rik|AI480648|As-1|As-1r|As-1s|As-1t|As1|As1-r|As1-s|As1-t|Asr-1|Ast-1	arylsulfatase B	protein-coding
MACS_peak_6659	chr15	76342155	76342657	+	156.07	NA	promoter-TSS (NM_010046)	promoter-TSS (NM_010046)	-158	NM_010046	13350	Mm.22633	NM_010046	ENSMUSG00000022555	Dgat1	ARAT|C75990|D15Ertd23e|Dgat	diacylglycerol O-acyltransferase 1	protein-coding
MACS_peak_9926	chr19	23761636	23762147	+	156.04	NA	promoter-TSS (NM_028208)	promoter-TSS (NM_028208)	1	NM_028208	72351	Mm.474795	NM_028208	ENSMUSG00000074925	Ptar1	1700084D09Rik|2010013L17Rik|4930428J16Rik|AI449677	protein prenyltransferase alpha subunit repeat containing 1	protein-coding
MACS_peak_13883	chr4	133842984	133843486	+	155.89	NA	promoter-TSS (NM_001163794)	promoter-TSS (NM_001163794)	-67	NM_001163794	230809	Mm.22778	NM_146156	ENSMUSG00000050890	Pdik1l	BC027088|stk35l2	PDLIM1 interacting kinase 1 like	protein-coding
MACS_peak_18104	chr7	149088137	149088745	+	155.88	NA	promoter-TSS (NM_023764)	promoter-TSS (NM_023764)	-130	NM_023764	54473	Mm.103551	NM_023764	ENSMUSG00000025139	Tollip	4930403G24Rik|4931428G15Rik	toll interacting protein	protein-coding
MACS_peak_15108	chr5	124022827	124023132	+	155.88	NA	promoter-TSS (NM_029929)	promoter-TSS (NM_029929)	45	NM_029929	77573	Mm.41372	NM_029929	ENSMUSG00000029434	Vps33a	3830421M04Rik|AI503300|AW048546|AW554476|bf	vacuolar protein sorting 33A (yeast)	protein-coding
MACS_peak_9767	chr19	7114844	7115155	+	155.78	NA	promoter-TSS (NM_016737)	promoter-TSS (NM_016737)	-483	NM_016737	20867	Mm.258633	NM_016737	ENSMUSG00000024966	Stip1	Hop|Sti1|p60	stress-induced phosphoprotein 1	protein-coding
MACS_peak_9750	chr19	6983906	6984796	+	155.76	NA	promoter-TSS (NM_012021)	promoter-TSS (NM_012021)	163	NM_026306	67674	Mm.318804	NM_026306	ENSMUSG00000038812	Trmt112	0610038D11Rik|Trm112p	tRNA methyltransferase 11-2	protein-coding
MACS_peak_17660	chr7	112789034	112789264	+	155.76	NA	promoter-TSS (NM_019502)	promoter-TSS (NM_019502)	95	NM_019502	14356	Mm.220330	NM_019502		Timm10b	Fxc1|Tim10b|Tim9b	translocase of inner mitochondrial membrane 10B	protein-coding
MACS_peak_1078	chr1	184054848	184055485	+	155.76	NA	intron (NM_012058, intron 1 of 2)	CpG	298	NM_012058	27058	Mm.303071	NM_012058	ENSMUSG00000026511	Srp9	9kDa	signal recognition particle 9	protein-coding
MACS_peak_9229	chr18	38409623	38410317	+	155.64	NA	promoter-TSS (NM_024179)	promoter-TSS (NM_024179)	67	NM_024179	66839	Mm.281086	NM_024179	ENSMUSG00000024442	0610009O20Rik	2700004E22Rik|Dele|Kiaa0141	RIKEN cDNA 0610009O20 gene	protein-coding
MACS_peak_19071	chr8	116158621	116159068	+	155.64	NA	promoter-TSS (NM_001048143)	promoter-TSS (NM_001048143)	-642	NM_001048143	270096	Mm.74689	NM_173015	ENSMUSG00000078908	Mon1b	5031407H10|5033413H12Rik	MON1 homolog b (yeast)	protein-coding
MACS_peak_10902	chr2	75496729	75497092	+	155.56	NA	promoter-TSS (NM_146130)	promoter-TSS (NM_146130)	-406	NM_146130	229279	Mm.316306	NM_053263	ENSMUSG00000059005	Hnrnpa3	2410013L13Rik|2610209F03Rik|2610510D13Rik|Hnrpa3	heterogeneous nuclear ribonucleoprotein A3	protein-coding
MACS_peak_3782	chr11	108205110	108205499	+	155.50	NA	promoter-TSS (NM_011101)	promoter-TSS (NM_011101)	-102	NM_011101	18750	Mm.222178	NM_011101	ENSMUSG00000050965	Prkca	AI875142|Pkca	protein kinase C, alpha	protein-coding
MACS_peak_12670	chr3	107948819	107949329	+	155.50	NA	promoter-TSS (NM_010306)	promoter-TSS (NM_010306)	-4	NM_010306	14679	Mm.271703	NM_010306	ENSMUSG00000000001	Gnai3	AI158965|AW537698|Galphai3|Gnai-3	guanine nucleotide binding protein (G protein), alpha inhibiting 3	protein-coding
MACS_peak_20941	chrX	131252310	131252709	+	155.44	NA	promoter-TSS (NM_001166377)	promoter-TSS (NM_001166377)	32	NM_001166379	78248	Mm.458522	NM_030066	ENSMUSG00000033460	Armcx1	3010033I09Rik|ALEX1	armadillo repeat containing, X-linked 1	protein-coding
MACS_peak_1295	chr10	29033050	29033517	+	155.29	NA	promoter-TSS (NM_025855)	promoter-TSS (NM_025855)	-23	NM_025855	52665	Mm.28930	NM_025855	ENSMUSG00000019883	Echdc1	1700028A24Rik|AI314462|AI930038|D10Ertd667e|MMCD	enoyl Coenzyme A hydratase domain containing 1	protein-coding
MACS_peak_5874	chr14	55221943	55222580	+	155.29	NA	intron (NM_028890, intron 1 of 6)	CpG	2484	NM_028890	74359	Mm.79815	NM_028890	ENSMUSG00000022179	4931414P19Rik	-	RIKEN cDNA 4931414P19 gene	protein-coding
MACS_peak_13586	chr4	118781180	118781731	+	155.29	NA	5' UTR (NM_011400, exon 1 of 10)	5' UTR (NM_011400, exon 1 of 10)	105	NM_011400	20525	Mm.21002	NM_011400	ENSMUSG00000028645	Slc2a1	Glut-1|Glut1	solute carrier family 2 (facilitated glucose transporter), member 1	protein-coding
MACS_peak_1819	chr10	81640828	81641652	+	155.25	NA	Intergenic	CpG	50482	NM_001163064	216177	Mm.482395	NM_001163064		AU041133	-	expressed sequence AU041133	protein-coding
MACS_peak_16606	chr7	13609280	13610033	+	155.25	NA	5' UTR (NM_011588, exon 1 of 17)	5' UTR (NM_011588, exon 1 of 17)	155	NM_011588	21849	Mm.15701	NM_011588	ENSMUSG00000005566	Trim28	AA408787|KAP-1|KRIP-1|MommeD9|Tif1b|Tif1beta	tripartite motif-containing 28	protein-coding
MACS_peak_5958	chr14	57190626	57190993	+	155.18	NA	promoter-TSS (NM_001014996)	promoter-TSS (NM_001014996)	-126	NM_001014996	219103	Mm.212525	NM_001014996	ENSMUSG00000064128	Cenpj	4932437H03Rik|CPAP|Gm81|LAP|LIP1	centromere protein J	protein-coding
MACS_peak_3355	chr11	94189022	94189435	+	155.18	NA	promoter-TSS (NM_027799)	promoter-TSS (NM_027799)	-87	NM_027799	71452	Mm.141054	NM_027799	ENSMUSG00000020864	Ankrd40	1110011C06Rik|5530600A18Rik|Gcap15	ankyrin repeat domain 40	protein-coding
[truncated: 19,501 more rows]
