# Supplementary material for: Remodeling of epigenome and transcriptome landscapes with aging in mice reveals widespread induction of inflammatory responses
Source: HighWire-hosted journal article supplement (doi:10.1101/gr.240093.118), 2019-03-11
Supplement: Supplemental_Code_Figure3_Machine_learning.zip [file HOMER_dposREF_Cerebellum_DiNUP_DANPOS_GAINED.xls]

PeakID (cmd=annotatePeaks.pl dposREF_Cerebellum_DiNUP_DANPOS_GAINED.bed mm9)	Chr	Start	End	Strand	Peak Score	Focus Ratio/Region Size	Annotation	Detailed Annotation	Distance to TSS	Nearest PromoterID	Entrez ID	Nearest Unigene	Nearest Refseq	Nearest Ensembl	Gene Name	Gene Alias	Gene Description	Gene Type
Diff_Nuc40285	chr4	64188132	64188271	+	0	NA	Intergenic	Intergenic	-480152	NM_011607	21923	Mm.980	NM_011607	ENSMUSG00000028364	Tnc	AI528729|C130033P17Rik|Hxb|TN|TN-C|Ten|cytotactin|tenascin-C	tenascin C	protein-coding
Diff_Nuc56487	chr9	13994732	13994871	+	0	NA	Intergenic	MLT2B1|LTR|ERVL	-85944	NM_030261	75747	Mm.325126	NM_030261	ENSMUSG00000032009	Sesn3	5630400E15Rik|BC003348|SEST3	sestrin 3	protein-coding
Diff_Nuc6139	chr12	112831322	112831461	+	0	NA	intron (NM_022801, intron 2 of 15)	intron (NM_022801, intron 2 of 15)	18670	NM_022801	17169	Mm.260504	NM_021516	ENSMUSG00000007411	Mark3	1600015G02Rik|A430080F22Rik|C-TAK1|ETK-1|ETK1|Emk2|MPK10	MAP/microtubule affinity regulating kinase 3	protein-coding
Diff_Nuc35397	chr5	26594982	26595121	+	0	NA	Intergenic	L1Md_F2|LINE|L1	10749	NM_001281527	664837		NM_001281527	ENSMUSG00000059645	Gm7361	-	predicted gene 7361	protein-coding
Diff_Nuc40763	chr4	84897222	84897361	+	0	NA	intron (NM_019535, intron 1 of 8)	intron (NM_019535, intron 1 of 8)	45931	NM_019535	20404	Mm.143603	NM_019535	ENSMUSG00000028488	Sh3gl2	9530001L19Rik|AI120490|AW555077|B930049H17Rik|EEN-B1|SH3PA|Sh3d2a	SH3-domain GRB2-like 2	protein-coding
Diff_Nuc38354	chr5	135108592	135108731	+	0	NA	intron (NM_033561, intron 1 of 6)	intron (NM_033561, intron 1 of 6)	6618	NM_001312867	22384	Mm.27955	NM_033561	ENSMUSG00000040731	Eif4h	AU018978|D5Ertd355e|E430026L18Rik|Ef4h|Wbscr1|Wscr1|eIF-4H	eukaryotic translation initiation factor 4H	protein-coding
Diff_Nuc22479	chr14	66601162	66601301	+	0	NA	TTS (NM_013492)	TTS (NM_013492)	13911	NM_013492	12759	Mm.200608	NM_013492	ENSMUSG00000022037	Clu	AI893575|ApoJ|Cli|D14Ucla3|SP-40|Sgp-2|Sgp2|Sugp-2	clusterin	protein-coding
Diff_Nuc26842	chr18	61741162	61741301	+	0	NA	intron (NM_146087, intron 9 of 9)	B1_Mur2|SINE|Alu	25995	NM_146087	93687	Mm.26908	NM_146087	ENSMUSG00000024576	Csnk1a1	2610208K14Rik|4632404G05Rik|5430427P18Rik|CK1a|Csnk1a	casein kinase 1, alpha 1	protein-coding
Diff_Nuc33988	chr6	115267832	115267971	+	0	NA	Intergenic	Intergenic	-43068	NM_001127330	19016	Mm.3020	NM_011146	ENSMUSG00000000440	Pparg	Nr1c3|PPAR-gamma|PPAR-gamma2|PPARgamma|PPARgamma2	peroxisome proliferator activated receptor gamma	protein-coding
Diff_Nuc52054	chr1	25515892	25516031	+	0	NA	intron (NM_175642, intron 11 of 30)	intron (NM_175642, intron 11 of 30)	-181162	NM_001204913	100504323	Mm.484176	NM_001204913		Gm20172	-	predicted gene, 20172	protein-coding
Diff_Nuc47408	chr2	32307872	32308011	+	0	NA	promoter-TSS (NM_001164357)	promoter-TSS (NM_001164357)	-951	NM_146118	227731	Mm.37395	NM_146118	ENSMUSG00000026819	Slc25a25	1110030N17Rik|MCSC|mKIAA1896	solute carrier family 25 (mitochondrial carrier, phosphate carrier), member 25	protein-coding
Diff_Nuc43359	chr3	24068442	24068581	+	0	NA	intron (NM_001326288, intron 9 of 13)	intron (NM_001326288, intron 9 of 13)	614417	NM_001326288	635702	Mm.448351	NM_001326288	ENSMUSG00000102758	Naaladl2	2810043G22Rik|EG635702|Gm1021	N-acetylated alpha-linked acidic dipeptidase-like 2	protein-coding
Diff_Nuc32143	chr6	43329162	43329301	+	0	NA	intron (NM_013861, intron 8 of 8)	(CAAAC)n|Simple_repeat|Simple_repeat	-63197	NR_045988	319812	Mm.446393	NR_045988		9430018G01Rik	-	RIKEN cDNA 9430018G01 gene	ncRNA
Diff_Nuc35754	chr5	35208542	35208681	+	0	NA	intron (NM_010414, intron 39 of 66)	L1Md_F2|LINE|L1	-49953	NM_207277	403174	Mm.291225	NM_207277	ENSMUSG00000051246	Msantd1	A930005I04Rik|Gm144	Myb/SANT-like DNA-binding domain containing 1	protein-coding
Diff_Nuc53838	chr1	98160202	98160341	+	0	NA	Intergenic	RLTR11A|LTR|ERVK	-241936	NR_040467	73454	Mm.396229	NR_040467	ENSMUSG00000100062	1700063A18Rik	-	RIKEN cDNA 1700063A18 gene	ncRNA
Diff_Nuc43516	chr3	30964182	30964321	+	0	NA	Intergenic	ORR1A2|LTR|MaLR	26363	NR_105975	102465610		NR_105975	ENSMUSG00000098890	Mir7008	Gm27752|mmu-mir-7008	microRNA 7008	ncRNA
Diff_Nuc41442	chr4	108948932	108949071	+	0	NA	Intergenic	B1_Mus1|SINE|Alu	-3879	NM_007943	13858	Mm.318250	NM_007943	ENSMUSG00000028552	Eps15	2410112D09Rik	epidermal growth factor receptor pathway substrate 15	protein-coding
Diff_Nuc19424	chr15	44271162	44271301	+	0	NA	Intergenic	ID4|SINE|ID	-11378	NM_026149	67429	Mm.490404	NM_026149	ENSMUSG00000038736	Nudcd1	4921532K09Rik|AA407246|AW260430|AW556235|CML66-L|Cml66	NudC domain containing 1	protein-coding
Diff_Nuc58520	chr9	82845912	82846051	+	0	NA	intron (NM_001081216, intron 6 of 39)	ORR1C2-int|LTR|MaLR	23115	NM_001081216	83946	Mm.221688	NM_031879	ENSMUSG00000032253	Phip	2810004D21Rik|4632404O06Rik|Ndrp|Wdr11	pleckstrin homology domain interacting protein	protein-coding
Diff_Nuc34837	chr5	3872802	3872941	+	0	NA	Intergenic	L1_Mus3|LINE|L1	21062	NM_001013023	545725	Mm.99593	NM_172135	ENSMUSG00000040429	Mterf1a	4931431L11Rik|9230106K09Rik|Mterf|Mterf1|mTERF1b	mitochondrial transcription termination factor 1a	protein-coding
Diff_Nuc22159	chr14	57355492	57355631	+	0	NA	intron (NM_025682, intron 6 of 8)	B2_Mm1t|SINE|B2	-35724	NR_046210	100503823	Mm.474486	NR_046209		Gm16973	-	predicted gene, 16973	ncRNA
Diff_Nuc13563	chr17	9039622	9039761	+	0	NA	intron (NM_011866, intron 1 of 21)	intron (NM_011866, intron 1 of 21)	-3159	NM_001347321	23984	Mm.87161	NM_011866	ENSMUSG00000023868	Pde10a	-	phosphodiesterase 10A	protein-coding
Diff_Nuc22030	chr14	52715032	52715171	+	0	NA	intron (NM_001170982, intron 1 of 7)	intron (NM_001170982, intron 1 of 7)	8602	NM_001170982	15381	Mm.427321	NM_016884	ENSMUSG00000060373	Hnrnpc	AL022939|D14Wsu171e|Hnrpc|Hnrpc1|Hnrpc2|hnRNPC1|hnRNPC2|hnrnp-C	heterogeneous nuclear ribonucleoprotein C	protein-coding
Diff_Nuc23391	chr14	113015682	113015821	+	0	NA	Intergenic	Intergenic	941414	NM_198865	75409	Mm.235097	NM_029273	ENSMUSG00000033214	Slitrk5	2610019D03Rik	SLIT and NTRK-like family, member 5	protein-coding
Diff_Nuc26809	chr18	60843032	60843171	+	0	NA	Intergenic	Intergenic	20037	NR_045401	328963	Mm.417203	NR_045401		G630071F17Rik	G630071F17	RIKEN cDNA G630071F17 gene	ncRNA
Diff_Nuc49202	chr2	101500047	101500186	+	0	NA	Intergenic	L1M2|LINE|L1	-10427	NM_009019	19373	Mm.828	NM_009019	ENSMUSG00000061311	Rag1	Rag-1	recombination activating gene 1	protein-coding
Diff_Nuc13509	chr17	7194192	7194331	+	0	NA	intron (NM_026611, intron 5 of 8)	intron (NM_026611, intron 5 of 8)	11052	NM_026611	68195	Mm.181237	NM_026611	ENSMUSG00000094724	Rnaset2b	0610007O07Rik|4833423A10Rik|4930532K22Rik|C79750|RNASE6PL|Rnaset2	ribonuclease T2B	protein-coding
Diff_Nuc26198	chr18	36303852	36303991	+	0	NA	intron (NM_001167891, intron 1 of 9)	intron (NM_001167891, intron 1 of 9)	38064	NR_015571	74966	Mm.379238	NM_030089		4930471G03Rik	1700007N01Rik	RIKEN cDNA 4930471G03 gene	ncRNA
Diff_Nuc57240	chr9	42852632	42852771	+	0	NA	intron (NM_027144, intron 1 of 40)	intron (NM_027144, intron 1 of 40)	61100	NM_027144	69632	Mm.275266	NM_027144	ENSMUSG00000059495	Arhgef12	2310014B11Rik|AU019857|Larg|mKIAA0382	Rho guanine nucleotide exchange factor (GEF) 12	protein-coding
Diff_Nuc30164	chr7	119297492	119297631	+	0	NA	intron (NM_015814, intron 2 of 7)	intron (NM_015814, intron 2 of 7)	5010	NM_015814	50781	Mm.55143	NM_015814	ENSMUSG00000030772	Dkk3	AW061014|C87148	dickkopf WNT signaling pathway inhibitor 3	protein-coding
Diff_Nuc20255	chr15	79965102	79965241	+	0	NA	intron (NM_025609, intron 1 of 10)	intron (NM_025609, intron 1 of 10)	1587	NM_025609	66513	Mm.288245	NM_025609	ENSMUSG00000022414	Tab1	2310012M03Rik|Map3k7ip1|b2b449Clo	TGF-beta activated kinase 1/MAP3K7 binding protein 1	protein-coding
Diff_Nuc16337	chr16	17191322	17191461	+	0	NA	intron (NM_009456, intron 1 of 3)	intron (NM_009456, intron 1 of 3)	10194	NM_009456	22195	Mm.3074	NM_009456	ENSMUSG00000038965	Ube2l3	C79827|UbcM4|Ubce7	ubiquitin-conjugating enzyme E2L 3	protein-coding
Diff_Nuc4887	chr12	70667242	70667381	+	0	NA	Intergenic	Intergenic	16704	NM_001033236	207965	Mm.102487	NM_001033236	ENSMUSG00000049882	Vcpkmt	Gm71|Mettl21d|Mettl221d|VCP-KMT	valosin containing protein lysine (K) methyltransferase	protein-coding
Diff_Nuc6381	chr11	3809012	3809151	+	0	NA	intron (NM_153142, intron 1 of 1)	intron (NM_153142, intron 1 of 1)	5586	NM_153142	103710	Mm.171514	NM_153142	ENSMUSG00000048807	Slc35e4	A330108F03Rik|AI414849|AI536442	solute carrier family 35, member E4	protein-coding
Diff_Nuc11959	chr10	78274842	78274981	+	0	NA	intron (NM_009200, intron 8 of 9)	intron (NM_009200, intron 8 of 9)	31670	NM_009200	20513	Mm.6257	NM_009200	ENSMUSG00000005357	Slc1a6	EAAT4	solute carrier family 1 (high affinity aspartate/glutamate transporter), member 6	protein-coding
Diff_Nuc62533	chr8	124567122	124567261	+	0	NA	Intergenic	Intergenic	65267	NR_106096	102466915		NR_106096	ENSMUSG00000099140	Mir7237	Gm27482|mmu-mir-7237	microRNA 7237	ncRNA
Diff_Nuc40221	chr4	61308652	61308791	+	0	NA	Intergenic	MMERVK10C-int|LTR|ERVK	26407	NM_001199333	100048884	Mm.335875	NM_001199333	ENSMUSG00000078674	Mup18	100039228|Gm12561|Mup16|Mup6|Mup9|OTTMUSG00000007486	major urinary protein 18	protein-coding
Diff_Nuc13443	chr17	5191702	5191841	+	0	NA	intron (NM_001085355, intron 4 of 19)	intron (NM_001085355, intron 4 of 19)	196697	NM_001085355	239985	Mm.133401	NM_001085355	ENSMUSG00000069729	Arid1b	8030481M12|9330189K18Rik|AI836955|Ardi1b|B230217J03Rik|mKIAA1235	AT rich interactive domain 1B (SWI-like)	protein-coding
Diff_Nuc42088	chr4	130566292	130566431	+	0	NA	promoter-TSS (NR_130167)	promoter-TSS (NR_130167)	28	NR_130167	77835	Mm.348412	NR_130167	ENSMUSG00000086262	A930031H19Rik	A930004I12Rik	RIKEN cDNA A930031H19 gene	ncRNA
Diff_Nuc59447	chr9	114406582	114406721	+	0	NA	promoter-TSS (NM_009916)	promoter-TSS (NM_009916)	-989	NM_009916	12773	Mm.1337	NM_009916	ENSMUSG00000047898	Ccr4	C-C CKR-4|CHEMR1|Cmkbr4|LESTR|Sdf1r	chemokine (C-C motif) receptor 4	protein-coding
Diff_Nuc55054	chr1	157003712	157003851	+	0	NA	Intergenic	Intergenic	-2052	NM_021433	58244	Mm.66264	NM_021433	ENSMUSG00000026470	Stx6	2310039E05Rik|2410005I16Rik|AA437559|AI415714|AI845861	syntaxin 6	protein-coding
Diff_Nuc41652	chr4	116854302	116854441	+	0	NA	intron (NM_134471, intron 1 of 19)	intron (NM_134471, intron 1 of 19)	858	NM_134471	73804	Mm.247651	NM_134471	ENSMUSG00000028678	Kif2c	4930402F02Rik|ESTM5|Knsl6|MCAK|X83316	kinesin family member 2C	protein-coding
Diff_Nuc55436	chr1	170331432	170331571	+	0	NA	intron (NM_183355, intron 2 of 8)	B3|SINE|B2	30799	NM_001291508	18514	Mm.43358	NM_008783	ENSMUSG00000052534	Pbx1	2310056B04Rik|D230003C07Rik|Pbx-1	pre B cell leukemia homeobox 1	protein-coding
Diff_Nuc25889	chr18	26781752	26781891	+	0	NA	Intergenic	Intergenic	-869337	NM_001174074	108013	Mm.266435	NM_133195	ENSMUSG00000024268	Celf4	A230070D14Rik|BRUNOL-4|Brul4|Brunol4|C130060B05Rik	CUGBP, Elav-like family member 4	protein-coding
Diff_Nuc50425	chr2	142539452	142539591	+	0	NA	intron (NM_001081133, intron 18 of 25)	intron (NM_001081133, intron 18 of 25)	187679	NM_001081133	16558	Mm.251934	NM_001081133	ENSMUSG00000038844	Kif16b	8430434E15Rik|AA623607|AI789011|C80253|C80902|mKIAA1590	kinesin family member 16B	protein-coding
Diff_Nuc13938	chr17	22952572	22952711	+	0	NA	intron (NR_030709, intron 2 of 4)	intron (NR_030709, intron 2 of 4)	2073	NR_030709	100042679	Mm.484007	NR_030709		Gm16386	EG545191|ENSMUSG00000073442|Gm21017	zinc finger protein 946 pseudogene	pseudo
Diff_Nuc13555	chr17	8875252	8875391	+	0	NA	intron (NM_001290707, intron 1 of 22)	RMER1B|Other|Other	-119289	NM_011866	23984	Mm.87161	NM_011866	ENSMUSG00000023868	Pde10a	-	phosphodiesterase 10A	protein-coding
Diff_Nuc36679	chr5	75775432	75775571	+	0	NA	Intergenic	Intergenic	-195511	NM_001122733	16590	Mm.247073	NM_021099	ENSMUSG00000005672	Kit	Bs|CD117|Fdc|Gsfsco1|Gsfsco5|Gsfsow3|SCO1|SCO5|SOW3|Ssm|Tr-kit|W|c-KIT	KIT proto-oncogene receptor tyrosine kinase	protein-coding
Diff_Nuc18723	chr15	18906852	18906991	+	0	NA	intron (NM_009865, intron 5 of 11)	intron (NM_009865, intron 5 of 11)	156837	NM_009865	320873	Mm.117794	NM_009865	ENSMUSG00000022321	Cdh10	A830016G23Rik|C030003B10Rik|C030011H18Rik	cadherin 10	protein-coding
Diff_Nuc908	chr13	20600332	20600471	+	0	NA	intron (NM_198093, intron 1 of 6)	intron (NM_198093, intron 1 of 6)	35542	NM_198093	140580	Mm.342392	NM_080288	ENSMUSG00000041112	Elmo1	6330578D22Rik|C230095H21Rik|CED-12	engulfment and cell motility 1	protein-coding
Diff_Nuc28479	chr7	53655452	53655591	+	0	NA	intron (NM_001112739, intron 1 of 3)	intron (NM_001112739, intron 1 of 3)	3683	NM_001112739	16502	Mm.249386	NM_008421	ENSMUSG00000058975	Kcnc1	C230009H10Rik|KShIIIB|KV4|Kcr2-1|Kv3.1|NGK2|Shaw	potassium voltage gated channel, Shaw-related subfamily, member 1	protein-coding
Diff_Nuc39803	chr4	44246052	44246191	+	0	NA	Intergenic	MIR|SINE|MIR	-11982	NR_039565	100628618		NR_039565	ENSMUSG00000092677	Mir5106	mir-5106|mmu-mir-5106|mu-mir-5106	microRNA 5106	ncRNA
Diff_Nuc46620	chr2	3611162	3611301	+	0	NA	Intergenic	RMER3D-int|LTR|ERVK	-19499	NM_025626	66540	Mm.277864	NM_025626	ENSMUSG00000026655	Fam107b	3110001A13Rik|AA589595|AA959793|AI132312	family with sequence similarity 107, member B	protein-coding
Diff_Nuc34897	chr5	6918272	6918411	+	0	NA	intron (NM_001163223, intron 1 of 3)	intron (NM_001163223, intron 1 of 3)	-385823	NM_027603	70920	Mm.158494	NM_027603	ENSMUSG00000040514	4921511H03Rik	-	RIKEN cDNA 4921511H03 gene	protein-coding
Diff_Nuc36128	chr5	51825772	51825911	+	0	NA	Intergenic	Intergenic	119319	NR_027710	19017	Mm.259072	NM_008904	ENSMUSG00000029167	Ppargc1a	A830037N07Rik|ENSMUSG00000079510|Gm11133|PGC-1|PPARGC-1-alpha|Pgc-1alpha|Pgc1|Pgco1|Ppargc1	peroxisome proliferative activated receptor, gamma, coactivator 1 alpha	protein-coding
Diff_Nuc12907	chr10	111052452	111052591	+	0	NA	Intergenic	Intergenic	-21192	NR_045344	71321	Mm.410785	NR_045344	ENSMUSG00000097082	4933440J02Rik	-	RIKEN cDNA 4933440J02 gene	ncRNA
Diff_Nuc10964	chr10	40739172	40739311	+	0	NA	Intergenic	Intergenic	52149	NM_199058	140741	Mm.290693	NM_199058	ENSMUSG00000046922	Gpr6	AI852874|Gm233	G protein-coupled receptor 6	protein-coding
Diff_Nuc54429	chr1	130282992	130283131	+	0	NA	intron (NM_177445, intron 7 of 15)	intron (NM_177445, intron 7 of 15)	-26779	NM_001313695	17219	Mm.4933	NM_008567	ENSMUSG00000026355	Mcm6	ASP-l1|D1Wsu22e|Mcmd6	minichromosome maintenance complex component 6	protein-coding
Diff_Nuc29622	chr7	99793452	99793591	+	0	NA	intron (NM_029078, intron 15 of 15)	intron (NM_029078, intron 15 of 15)	-7869	NM_028665	73845	Mm.73248	NM_028665	ENSMUSG00000041343	Ankrd42	4931426M20|4933417L02Rik|Ikbn	ankyrin repeat domain 42	protein-coding
Diff_Nuc27958	chr7	26648052	26648191	+	0	NA	Intergenic	RLTR9A|LTR|ERVK	-34556	NM_009999	13088	Mm.218749	NM_009999	ENSMUSG00000030483	Cyp2b10	Cyp2b|Cyp2b20|p16	cytochrome P450, family 2, subfamily b, polypeptide 10	protein-coding
Diff_Nuc24781	chr19	41902642	41902781	+	0	NA	Intergenic	7SLRNA|srpRNA|srpRNA	-1749	NM_008043	14296	Mm.4573	NM_008043	ENSMUSG00000067199	Frat1	AW060382	frequently rearranged in advanced T cell lymphomas	protein-coding
Diff_Nuc53400	chr1	80338402	80338541	+	0	NA	Intergenic	B1_Mus1|SINE|Alu	-1206	NM_016716	26554	Mm.12665	NM_016716	ENSMUSG00000004364	Cul3	KIAA0617	cullin 3	protein-coding
Diff_Nuc42171	chr4	132729592	132729731	+	0	NA	intron (NM_153423, intron 1 of 8)	B1_Mur3|SINE|Alu	-21909	NR_105984	102466215		NR_105984	ENSMUSG00000099202	Mir7017	Gm27945|mmu-mir-7017	microRNA 7017	ncRNA
Diff_Nuc47158	chr2	25847042	25847181	+	0	NA	Intergenic	B1_Mus1|SINE|Alu	-8309	NM_001276361	227634	Mm.36834	NM_001115076	ENSMUSG00000026933	Camsap1	9530003A05Rik|C77823|PRO2405	calmodulin regulated spectrin-associated protein 1	protein-coding
Diff_Nuc34043	chr6	116790332	116790471	+	0	NA	Intergenic	Lx4B|LINE|L1	-123625	NM_178768	319776	Mm.133120	NM_178768	ENSMUSG00000048108	Tmem72	C230095G01Rik	transmembrane protein 72	protein-coding
Diff_Nuc7982	chr11	65387322	65387461	+	0	NA	Intergenic	LTR40a|LTR|ERVL	160943	NR_030417	791070		NR_030417	ENSMUSG00000076460	Mir744	Mirn744|mir-744|mmu-mir-744	microRNA 744	ncRNA
Diff_Nuc4457	chr12	47951312	47951451	+	0	NA	Intergenic	L1Md_A|LINE|L1	-31619	NM_021361	664883	Mm.247195	NM_021361	ENSMUSG00000021047	Nova1	9430099M15Rik|G630039L02|Nova-1	neuro-oncological ventral antigen 1	protein-coding
Diff_Nuc42317	chr4	136088572	136088711	+	0	NA	intron (NM_024452, intron 2 of 4)	B1_Mus1|SINE|Alu	62965	NM_024452	269593	Mm.485824	NM_024452	ENSMUSG00000001089	Luzp1	2700072H04Rik|AI266952|Luzp|mFLJ00226	leucine zipper protein 1	protein-coding
Diff_Nuc10130	chr10	7382182	7382321	+	0	NA	promoter-TSS (NR_030698)	promoter-TSS (NR_030698)	-918	NR_030698	320642	Mm.398806	NR_030698		A630066F11Rik	-	RIKEN cDNA A630066F11 gene	ncRNA
Diff_Nuc37811	chr5	119038492	119038631	+	0	NA	intron (NM_001347445, intron 1 of 30)	intron (NM_001347445, intron 1 of 30)	27833	NM_172424	76199	Mm.206238	NM_172424	ENSMUSG00000018076	Med13l	2210413I17Rik|6330591G05Rik|9030618F05Rik|Thrap2|Trap240L|mKIAA1025	mediator complex subunit 13-like	protein-coding
Diff_Nuc60341	chr8	34396202	34396341	+	0	NA	intron (NM_011721, intron 20 of 33)	intron (NM_011721, intron 20 of 33)	99728	NM_001122822	22427	Mm.228805	NM_011721	ENSMUSG00000031583	Wrn	AI846146	Werner syndrome homolog (human)	protein-coding
Diff_Nuc11071	chr10	44373252	44373391	+	0	NA	Intergenic	Intergenic	-194767	NM_007548	12142	Mm.4800	NM_007548	ENSMUSG00000038151	Prdm1	Blimp-1|Blimp1|PRDI-BF1|ZNFPR1A1|b2b1765Clo	PR domain containing 1, with ZNF domain	protein-coding
Diff_Nuc41199	chr4	102173882	102174021	+	0	NA	intron (NM_019840, intron 4 of 14)	intron (NM_019840, intron 4 of 14)	-68714	NM_001177980	18578	Mm.20181	NM_019840	ENSMUSG00000028525	Pde4b	Dpde4|R74983|dunce	phosphodiesterase 4B, cAMP specific	protein-coding
Diff_Nuc21525	chr14	30437172	30437311	+	0	NA	intron (NM_009785, intron 2 of 37)	intron (NM_009785, intron 2 of 37)	97809	NM_009785	12294	Mm.386754	NM_009785	ENSMUSG00000021991	Cacna2d3	Cacnad3|alapha2delta3	calcium channel, voltage-dependent, alpha2/delta subunit 3	protein-coding
Diff_Nuc757	chr13	14476742	14476881	+	0	NA	intron (NM_001081348, intron 2 of 28)	L1_Mus1|LINE|L1	138682	NM_001081348	94253	Mm.125298	NM_153130	ENSMUSG00000021301	Hecw1	9330116H24Rik|AV273951|E130207I19Rik|Nedl1	HECT, C2 and WW domain containing E3 ubiquitin protein ligase 1	protein-coding
Diff_Nuc14044	chr17	25932602	25932741	+	0	NA	intron (NM_133719, intron 2 of 3)	intron (NM_133719, intron 2 of 3)	1319	NM_133719	70083	Mm.41925	NM_133719	ENSMUSG00000002274	Metrn	1810034B16Rik|Hyrac	meteorin, glial cell differentiation regulator	protein-coding
Diff_Nuc50413	chr2	142186762	142186901	+	0	NA	intron (NM_001013802, intron 16 of 18)	intron (NM_001013802, intron 16 of 18)	540369	NM_001081133	16558	Mm.251934	NM_001081133	ENSMUSG00000038844	Kif16b	8430434E15Rik|AA623607|AI789011|C80253|C80902|mKIAA1590	kinesin family member 16B	protein-coding
Diff_Nuc19566	chr15	52862212	52862351	+	0	NA	Intergenic	L2a|LINE|L2	315457	NM_010162	14042	Mm.309395	NM_010162	ENSMUSG00000061731	Ext1	AA409028	exostoses (multiple) 1	protein-coding
Diff_Nuc59523	chr9	118101472	118101611	+	0	NA	Intergenic	Intergenic	-42227	NM_026442	67899	Mm.9953	NM_026442	ENSMUSG00000039163	Cmc1	2010110K16Rik|2010312P05Rik|AI596001	COX assembly mitochondrial protein 1	protein-coding
Diff_Nuc44503	chr3	75980232	75980371	+	0	NA	intron (NM_001253719, intron 2 of 15)	L1_Rod|LINE|L1	100796	NM_001253719	213262	Mm.379337	NM_178673	ENSMUSG00000034098	Fstl5	9130207J01Rik	follistatin-like 5	protein-coding
Diff_Nuc34475	chr6	134159452	134159591	+	0	NA	intron (NM_007961, intron 2 of 7)	intron (NM_007961, intron 2 of 7)	173803	NM_007961	14011	Mm.269995	NM_007961	ENSMUSG00000030199	Etv6	AW123102|AW557856|Tel	ets variant 6	protein-coding
Diff_Nuc993	chr13	23416532	23416671	+	0	NA	intron (NR_131052, intron 2 of 3)	RLTRETN_Mm|LTR|ERVK	11207	NR_131052	75887	Mm.416957	NR_131052	ENSMUSG00000087097	4930586N03Rik	-	RIKEN cDNA 4930586N03 gene	ncRNA
Diff_Nuc40404	chr4	67762212	67762351	+	0	NA	Intergenic	ORR1B1-int|LTR|MaLR	853150	NM_019967	56710	Mm.248788	NM_019967	ENSMUSG00000028351	Brinp1	BRINP|Dbc1|Dbccr1|Fam5a	bone morphogenic protein/retinoic acid inducible neural specific 1	protein-coding
Diff_Nuc25817	chr18	24680902	24681041	+	0	NA	intron (NM_144861, intron 1 of 6)	RLTR31_Mm|LTR|ERVK	7734	NM_144861	225283	Mm.28427	NM_144861	ENSMUSG00000040446	Rprd1a	C77387|mKIAA4077	regulation of nuclear pre-mRNA domain containing 1A	protein-coding
Diff_Nuc25778	chr18	23755392	23755531	+	0	NA	intron (NM_001285817, intron 8 of 19)	B2_Mm2|SINE|B2	99478	NM_001285810	13527	Mm.94371	NM_010087	ENSMUSG00000024302	Dtna	2210407P21Rik|DTN-A|Dtn|Gm19389|a-DB-1|adbn	dystrobrevin alpha	protein-coding
Diff_Nuc13746	chr17	15189122	15189261	+	0	NA	promoter-TSS (NM_001034891)	promoter-TSS (NM_001034891)	-832	NM_001034891	381062	Mm.393767	NM_183133	ENSMUSG00000036552	Ermard	2210404J11Rik|2410011O22Rik|AI448938	ER membrane associated RNA degradation	protein-coding
Diff_Nuc42617	chr4	146686322	146686461	+	0	NA	intron (NM_001039209, intron 1 of 2)	intron (NM_001039209, intron 1 of 2)	136416	NM_001039209	195531	Mm.270762	NM_001039209	ENSMUSG00000078496	Zfp982	Gm13152|OTTMUSG00000010671	zinc finger protein 982	protein-coding
Diff_Nuc18984	chr15	30179262	30179401	+	0	NA	intron (NM_008729, intron 1 of 22)	B3A|SINE|B2	76983	NM_008729	18163	Mm.321648	NM_008729	ENSMUSG00000022240	Ctnnd2	Catnd2|Nprap|neurojugin	catenin (cadherin associated protein), delta 2	protein-coding
Diff_Nuc15067	chr17	64335372	64335511	+	0	NA	intron (NM_008000, intron 6 of 13)	L1Md_F2|LINE|L1	48120	NM_008000	14158	Mm.23039	NM_008000	ENSMUSG00000000127	Fer	AV082135|C330004K01Rik|Fert|Fert2	fer (fms/fps related) protein kinase	protein-coding
Diff_Nuc41571	chr4	114563472	114563611	+	0	NA	Intergenic	Intergenic	17962	NM_008593	17301	Mm.7997	NM_008593	ENSMUSG00000055210	Foxd2	AI426778|Mf2	forkhead box D2	protein-coding
Diff_Nuc17485	chr16	57119472	57119611	+	0	NA	Intergenic	L1_Rod|LINE|L1	-2286	NM_138599	28185	Mm.196933	NM_138599	ENSMUSG00000022752	Tomm70a	2610044B22Rik|D16Ium22|D16Ium22e|D16Wsu109e|Tom70|Tomm70|mKIAA0719	translocase of outer mitochondrial membrane 70 homolog A (yeast)	protein-coding
Diff_Nuc58210	chr9	72305112	72305251	+	0	NA	TTS (NM_009359)	TTS (NM_009359)	18845	NM_008613	17427	Mm.387671	NM_008613	ENSMUSG00000032221	Mns1	AW546487	meiosis-specific nuclear structural protein 1	protein-coding
Diff_Nuc59414	chr9	113180922	113181061	+	0	NA	Intergenic	MLT1H|LTR|MaLR	315279	NR_040760	102688	Mm.394901	NR_040760	ENSMUSG00000109890	AU023762	-	expressed sequence AU023762	ncRNA
Diff_Nuc13223	chr10	124373272	124373411	+	0	NA	Intergenic	Intergenic	392250	NM_011391	20503	Mm.29161	NM_011391	ENSMUSG00000020102	Slc16a7	4921534N07Rik|Mct2	solute carrier family 16 (monocarboxylic acid transporters), member 7	protein-coding
Diff_Nuc62143	chr8	111141592	111141731	+	0	NA	Intergenic	ID_B1|SINE|B4	-33084	NR_077224	109215	Mm.65282	NR_077224	ENSMUSG00000110613	Lncbate1	3010033K07Rik|Lnc-BATE1	brown adipose tissue enriched long non-coding RNA 1	ncRNA
Diff_Nuc17594	chr16	63121722	63121861	+	0	NA	Intergenic	Lx|LINE|L1	267658	NM_011173	19128	Mm.127156	NM_011173	ENSMUSG00000022912	Pros1	AW214361	protein S (alpha)	protein-coding
Diff_Nuc43950	chr3	51398112	51398251	+	0	NA	Intergenic	ORR1A4-int|LTR|MaLR	-33436	NM_080793	73251	Mm.192111	NM_080793	ENSMUSG00000037111	Setd7	1600028F23Rik|H3K4MT|KMT7|Set7|Set7/9|mKIAA1717	SET domain containing (lysine methyltransferase) 7	protein-coding
Diff_Nuc17499	chr16	57537452	57537591	+	0	NA	intron (NM_001040397, intron 4 of 4)	intron (NM_001040397, intron 4 of 4)	-11834	NM_001177871	78749	Mm.328360	NM_001040397	ENSMUSG00000043336	Filip1l	4631422O05Rik|Doc1	filamin A interacting protein 1-like	protein-coding
Diff_Nuc22571	chr14	70976222	70976361	+	0	NA	Intergenic	Intergenic	-1363	NM_153136	213484	Mm.34191	NM_153136	ENSMUSG00000045211	Nudt18	BC036718	nudix (nucleoside diphosphate linked moiety X)-type motif 18	protein-coding
Diff_Nuc28213	chr7	35850702	35850841	+	0	NA	Intergenic	Intergenic	-9186	NM_009884	12611	Mm.273090	NM_009884	ENSMUSG00000056216	Cebpg	C/EBP[g]|C/EBPgamma|GPE1-BP|Gpe1bp|Ig/EBP	CCAAT/enhancer binding protein (C/EBP), gamma	protein-coding
Diff_Nuc4	chrY	2780462	2780601	+	0	NA	Intergenic	Intergenic	393273	NM_001270512	100041505	Mm.491824	NM_001270512	ENSMUSG00000096520	Gm3376	Rbmy1b	predicted gene 3376	protein-coding
Diff_Nuc29781	chr7	106122612	106122751	+	0	NA	intron (NM_178635, intron 12 of 14)	L1MB5|LINE|L1	135326	NM_001285795	22411	Mm.22182	NM_009519	ENSMUSG00000015957	Wnt11	-	wingless-type MMTV integration site family, member 11	protein-coding
Diff_Nuc40886	chr4	90018492	90018631	+	0	NA	Intergenic	RLTR11A|LTR|ERVK	9444	NR_033610	619842	Mm.484218	NR_033610	ENSMUSG00000080756	Gm12633	OTTMUSG00000007790	zinc finger protein 352 pseudogene	pseudo
Diff_Nuc27132	chr18	71517662	71517801	+	0	NA	intron (NM_007831, intron 21 of 28)	intron (NM_007831, intron 21 of 28)	789785	NM_010773	17191	Mm.322	NM_010773	ENSMUSG00000024513	Mbd2	MBD2a	methyl-CpG binding domain protein 2	protein-coding
Diff_Nuc58053	chr9	66408942	66409081	+	0	NA	intron (NM_001302122, intron 1 of 12)	B2_Mm2|SINE|B2	31911	NM_144937	235441	Mm.32465	NM_144937	ENSMUSG00000032376	Usp3	AA409661|BC017156	ubiquitin specific peptidase 3	protein-coding
Diff_Nuc10692	chr10	29056052	29056191	+	0	NA	intron (NM_025855, intron 5 of 5)	intron (NM_025855, intron 5 of 5)	21398	NM_001284279	68031	Mm.28930	NM_026518	ENSMUSG00000038876	Rnf146	2610509H23Rik|Iduna	ring finger protein 146	protein-coding
Diff_Nuc56506	chr9	14602082	14602221	+	0	NA	intron (NM_001310728, intron 6 of 18)	intron (NM_001310728, intron 6 of 18)	13053	NM_018736	17535	Mm.149071	NM_018736	ENSMUSG00000031928	Mre11a	Mre11|Mre11b	MRE11A homolog A, double strand break repair nuclease	protein-coding
Diff_Nuc51831	chr1	17055692	17055831	+	0	NA	intron (NM_020604, intron 2 of 4)	L1_Mus1|LINE|L1	32209	NM_020604	57339	Mm.143761	NM_020604	ENSMUSG00000042686	Jph1	ENSMUSG00000054314|JP-1|Jp1	junctophilin 1	protein-coding
Diff_Nuc23613	chr14	123106842	123106981	+	0	NA	intron (NM_144844, intron 17 of 23)	L1Md_F3|LINE|L1	173361	NM_144844	110821	Mm.23876	NM_144844	ENSMUSG00000041650	Pcca	C79630	propionyl-Coenzyme A carboxylase, alpha polypeptide	protein-coding
Diff_Nuc11198	chr10	49670522	49670661	+	0	NA	Intergenic	RMER17D2|LTR|ERVK	-162031	NM_001111268	14806	Mm.332838	NM_010349	ENSMUSG00000056073	Grik2	AW124492|GluK2|Glur-6|Glur6|Glurbeta2	glutamate receptor, ionotropic, kainate 2 (beta 2)	protein-coding
Diff_Nuc29123	chr7	82300732	82300871	+	0	NA	intron (NM_153579, intron 4 of 12)	intron (NM_153579, intron 4 of 12)	125704	NR_131122	75205	Mm.399304	NR_131122	ENSMUSG00000108803	4930533N22Rik	-	RIKEN cDNA 4930533N22 gene	ncRNA
Diff_Nuc18591	chr15	11095912	11096051	+	0	NA	intron (NM_175501, intron 3 of 23)	intron (NM_175501, intron 3 of 23)	101453	NM_175501	239337	Mm.224825	NM_175501	ENSMUSG00000047497	Adamts12	ADAMTS-12|AI605170	a disintegrin-like and metallopeptidase (reprolysin type) with thrombospondin type 1 motif, 12	protein-coding
Diff_Nuc5988	chr12	107328112	107328251	+	0	NA	Intergenic	Intergenic	79708	NM_001029843	22367	Mm.2981	NM_011705	ENSMUSG00000021115	Vrk1	51PK	vaccinia related kinase 1	protein-coding
Diff_Nuc23972	chr19	9976512	9976651	+	0	NA	Intergenic	Lx7|LINE|L1	-2558	NM_016692	16319	Mm.29755	NM_016692	ENSMUSG00000024660	Incenp	2700067E22Rik|AU019509|C130081E20|C77457	inner centromere protein	protein-coding
Diff_Nuc16095	chr16	8553362	8553501	+	0	NA	intron (NM_172961, intron 1 of 15)	RMER6A|LTR|ERVK	39909	NM_172961	268860	Mm.259315	NM_172961	ENSMUSG00000057880	Abat	9630038C02Rik|AI255750|ENSMUSG00000051226|Gabaat|Gabat|Gm9851|I54|Laibat|X61497	4-aminobutyrate aminotransferase	protein-coding
Diff_Nuc3248	chr13	110832582	110832721	+	0	NA	Intergenic	MT2_Mm|LTR|ERVL	138634	NR_035442	100316683		NR_035442	ENSMUSG00000084651	Mir1904	Mirn1904|mmu-mir-1904	microRNA 1904	ncRNA
Diff_Nuc8122	chr11	70340662	70340801	+	0	NA	exon (NM_008946, exon 5 of 6)	exon (NM_008946, exon 5 of 6)	1872	NM_008946	19175	Mm.98	NM_008946	ENSMUSG00000018286	Psmb6	Lmp19|Mpnd	proteasome (prosome, macropain) subunit, beta type 6	protein-coding
Diff_Nuc32872	chr6	70838312	70838451	+	0	NA	intron (NM_010121, intron 10 of 16)	intron (NM_010121, intron 10 of 16)	30535	NM_028825	74221	Mm.273326	NM_028825	ENSMUSG00000051896	Tex37	1700011F03Rik	testis expressed 37	protein-coding
Diff_Nuc22801	chr14	79956232	79956371	+	0	NA	intron (NM_001286412, intron 2 of 7)	Lx9|LINE|L1	-31197	NM_026474	67955	Mm.18972	NM_026474	ENSMUSG00000022024	Sugt1	2410174K12Rik|SGT1	SGT1, suppressor of G2 allele of SKP1 (S. cerevisiae)	protein-coding
Diff_Nuc18945	chr15	28607027	28607166	+	0	NA	Intergenic	Intergenic	473575	NM_133365	110082	Mm.248464	NM_133365	ENSMUSG00000022262	Dnah5	AU022615|Dnahc5|Mdnah5|b2b1134Clo|b2b1154Clo|b2b1537Clo|b2b1565Clo|b2b601Clo|mKIAA1603	dynein, axonemal, heavy chain 5	protein-coding
Diff_Nuc37595	chr5	111787082	111787221	+	0	NA	intron (NM_001301644, intron 7 of 11)	L1MB5|LINE|L1	27434	NM_001301666	56305	Mm.200516	NM_019640	ENSMUSG00000050017	Pitpnb	PI-TP-beta	phosphatidylinositol transfer protein, beta	protein-coding
Diff_Nuc38673	chr5	146068592	146068731	+	0	NA	Intergenic	RLTR9D|LTR|ERVK	24449	NM_001081431	666311	Mm.260773	NM_001081431	ENSMUSG00000070420	Zscan25	EG666311|Zfp498	zinc finger and SCAN domain containing 25	protein-coding
Diff_Nuc12732	chr10	105415822	105415961	+	0	NA	Intergenic	Intergenic	137356	NM_025602	52713	Mm.339224	NM_025602	ENSMUSG00000019897	Ccdc59	2300004H16Rik|D10Ertd718e	coiled-coil domain containing 59	protein-coding
Diff_Nuc49542	chr2	114168232	114168371	+	0	NA	Intergenic	L1_Mur2|LINE|L1	-141133	NM_175466	228491	Mm.132523	NM_175466	ENSMUSG00000040321	Zfp770	6430601A21Rik|Znf770	zinc finger protein 770	protein-coding
Diff_Nuc12133	chr10	82215882	82216021	+	0	NA	intron (NM_010914, intron 4 of 7)	B3|SINE|B2	10935	NM_010914	18045	Mm.245998	NM_010914	ENSMUSG00000020248	Nfyb	AA985999|Cbf-A	nuclear transcription factor-Y beta	protein-coding
Diff_Nuc28740	chr7	65009012	65009151	+	0	NA	intron (NM_001038701, intron 3 of 8)	L1_Mm|LINE|L1	162538	NM_008071	14402	Mm.8004	NM_008071	ENSMUSG00000033676	Gabrb3	A230092K12Rik|AW049585|Cp1|Gabrb-3|beta3	gamma-aminobutyric acid (GABA) A receptor, subunit beta 3	protein-coding
Diff_Nuc17020	chr16	38448392	38448531	+	0	NA	intron (NM_007414, intron 2 of 3)	intron (NM_007414, intron 2 of 3)	4308	NM_007414	11544	Mm.20047	NM_007414	ENSMUSG00000002844	Adprh	Arh1	ADP-ribosylarginine hydrolase	protein-coding
Diff_Nuc50121	chr2	132688562	132688701	+	0	NA	intron (NM_025646, intron 5 of 6)	intron (NM_025646, intron 5 of 6)	15161	NM_025646	66586	Mm.357342	NM_025646	ENSMUSG00000027357	Crls1	0610009I22Rik|4930557M15Rik|5730490M08Rik	cardiolipin synthase 1	protein-coding
Diff_Nuc59979	chr8	15864192	15864331	+	0	NA	Intergenic	Intergenic	304577	NR_037214	100526464		NR_037214	ENSMUSG00000093142	Mir3106	mir-3106|mmu-mir-3106	microRNA 3106	ncRNA
Diff_Nuc44707	chr3	85237582	85237721	+	0	NA	Intergenic	Intergenic	-33648	NR_130326	100316670		NR_130326	ENSMUSG00000080424	Mir466k	Mirn466k|mmu-mir-466k	microRNA 466k	ncRNA
Diff_Nuc5581	chr12	91198662	91198801	+	0	NA	intron (NM_001252074, intron 1 of 6)	intron (NM_001252074, intron 1 of 6)	147808	NM_001252074	18191	Mm.425766	NM_172544	ENSMUSG00000066392	Nrxn3	-	neurexin III	protein-coding
Diff_Nuc40448	chr4	68972822	68972961	+	0	NA	Intergenic	L1Md_T|LINE|L1	-357460	NM_019967	56710	Mm.248788	NM_019967	ENSMUSG00000028351	Brinp1	BRINP|Dbc1|Dbccr1|Fam5a	bone morphogenic protein/retinoic acid inducible neural specific 1	protein-coding
Diff_Nuc41516	chr4	111672902	111673041	+	0	NA	Intergenic	Lx4A|LINE|L1	-5903	NM_001102662	639781	Mm.398873	NM_001102662	ENSMUSG00000089773	Skint1	OTTMUSG00000008542|Skint-1	selection and upkeep of intraepithelial T cells 1	protein-coding
Diff_Nuc9033	chr11	96649422	96649561	+	0	NA	promoter-TSS (NM_007622)	promoter-TSS (NM_007622)	-959	NM_007622	12412	Mm.29055	NM_007622	ENSMUSG00000018666	Cbx1	Cbx|Cbx-rs2|E430007M08Rik|HP1B|Hp1beta|M31|MOD1	chromobox 1	protein-coding
Diff_Nuc57547	chr9	52099212	52099351	+	0	NA	Intergenic	Intergenic	-123065	NM_001162921	244871	Mm.295686	NM_001162921	ENSMUSG00000035164	Zc3h12c	A230108E06|C230027N18Rik|mKIAA1726	zinc finger CCCH type containing 12C	protein-coding
Diff_Nuc58993	chr9	100753212	100753351	+	0	NA	intron (NM_009282, intron 12 of 33)	intron (NM_009282, intron 12 of 33)	182022	NM_001311149	66904	Mm.335385	NM_025835	ENSMUSG00000032527	Pccb	1300012P06Rik|AI314687|R74805	propionyl Coenzyme A carboxylase, beta polypeptide	protein-coding
Diff_Nuc29737	chr7	104893082	104893221	+	0	NA	Intergenic	RLTR9B|LTR|ERVK	-6394	NM_175105	66333	Mm.29756	NM_175105	ENSMUSG00000042797	Aqp11	1700015P13Rik|AI648923|sjds	aquaporin 11	protein-coding
Diff_Nuc39007	chr4	9038062	9038201	+	0	NA	Intergenic	ID_B1|SINE|B4	-158333	NM_028940	74438	Mm.473368	NM_028940	ENSMUSG00000041216	Clvs1	4933402J24Rik|Clvl1|Rlbp1l1	clavesin 1	protein-coding
Diff_Nuc1306	chr13	34382532	34382671	+	0	NA	intron (NM_001033167, intron 3 of 10)	intron (NM_001033167, intron 3 of 10)	54450	NM_001033167	73102	Mm.23932	NM_001033167	ENSMUSG00000038267	Slc22a23	3110004L20Rik	solute carrier family 22, member 23	protein-coding
Diff_Nuc7252	chr11	39798152	39798291	+	0	NA	Intergenic	L1Md_F2|LINE|L1	-594494	NR_126439	75315	Mm.461295	NR_126439		4930553C11Rik	-	RIKEN cDNA 4930553C11 gene	ncRNA
Diff_Nuc62517	chr8	124220682	124220821	+	0	NA	Intergenic	B3|SINE|B2	-33708	NM_020605	57340	Mm.306870	NM_020605	ENSMUSG00000025318	Jph3	JP-3|Jp3	junctophilin 3	protein-coding
Diff_Nuc52897	chr1	59913572	59913711	+	0	NA	intron (NM_007561, intron 9 of 12)	B4|SINE|B4	-56209	NM_001037725	72750	Mm.258250	NM_001037725	ENSMUSG00000041040	Fam117b	2810425F24Rik|6330416D14Rik|Als2cr13	family with sequence similarity 117, member B	protein-coding
Diff_Nuc5171	chr12	79381952	79382091	+	0	NA	intron (NM_172952, intron 1 of 23)	Lx2|LINE|L1	54379	NM_145965	268566	Mm.341742	NM_145965	ENSMUSG00000047454	Gphn	5730552E08Rik|AI662856|BC027112|C230040D23|GPH|GPHRYN|geph	gephyrin	protein-coding
Diff_Nuc21780	chr14	40142842	40142981	+	0	NA	intron (NM_008734, intron 1 of 9)	RMER17D2|LTR|ERVK	-142806	NR_131973	432842	Mm.352566	NR_131973		LOC432842	-	uncharacterized LOC432842	ncRNA
Diff_Nuc61412	chr8	82544882	82545021	+	0	NA	intron (NM_020259, intron 4 of 12)	intron (NM_020259, intron 4 of 12)	36956	NM_020259	15245	Mm.254493	NM_020259	ENSMUSG00000064325	Hhip	Hhip1	Hedgehog-interacting protein	protein-coding
Diff_Nuc15568	chr17	84178752	84178891	+	0	NA	intron (NM_054082, intron 9 of 16)	RLTR20B1|LTR|ERVK	67309	NM_025325	107766	Mm.30100	NM_025325	ENSMUSG00000000673	Haao	0610007K21Rik|0610012J07Rik|3-HAO|3-HAOxase|3HAO	3-hydroxyanthranilate 3,4-dioxygenase	protein-coding
Diff_Nuc39108	chr4	12334742	12334881	+	0	NA	Intergenic	Intergenic	-235649	NM_026558	68099	Mm.25340	NM_026558	ENSMUSG00000028218	Fam92a	6720467C03Rik|Fam92a1	family with sequence similarity 92, member A	protein-coding
Diff_Nuc16105	chr16	8733532	8733671	+	0	NA	intron (NM_001003918, intron 1 of 30)	B2_Mm1a|SINE|B2	4834	NM_001003918	252870	Mm.295330	NM_001003918	ENSMUSG00000022710	Usp7	2210010O09Rik|AA409944|AA617399|AU019296|AW548146|C80752|Hausp	ubiquitin specific peptidase 7	protein-coding
Diff_Nuc49805	chr2	121972352	121972491	+	0	NA	intron (NM_026251, intron 2 of 17)	intron (NM_026251, intron 2 of 17)	-1002	NM_009735	12010	Mm.163	NM_009735	ENSMUSG00000060802	B2m	Ly-m11|beta2-m|beta2m	beta-2 microglobulin	protein-coding
Diff_Nuc13701	chr17	13405412	13405551	+	0	NA	Intergenic	Intergenic	7573	NR_033458	100038394	Mm.401677	NR_033458		Gm10512	ENSMUSG00000073459	predicted gene 10512	ncRNA
Diff_Nuc54518	chr1	134107282	134107421	+	0	NA	intron (NM_001311104, intron 1 of 4)	L2c|LINE|L2	12686	NR_029777	723818		NR_029777	ENSMUSG00000065435	Mir135b	Mirn135b|mir-135b	microRNA 135b	ncRNA
Diff_Nuc32315	chr6	47970062	47970201	+	0	NA	Intergenic	Intergenic	27662	NM_001347139	72306	Mm.381553	NM_001081382	ENSMUSG00000071477	Zfp777	2500002G23Rik	zinc finger protein 777	protein-coding
Diff_Nuc31459	chr6	19661982	19662121	+	0	NA	Intergenic	ORR1E-int|LTR|MaLR	156709	NR_105789	102465192		NR_105789	ENSMUSG00000099149	Mir6370	Gm27480|mmu-mir-6370	microRNA 6370	ncRNA
Diff_Nuc47023	chr2	21614562	21614701	+	0	NA	intron (NM_001004761, intron 5 of 10)	intron (NM_001004761, intron 5 of 10)	325437	NM_001004761	241263	Mm.166647	NM_175706	ENSMUSG00000045967	Gpr158	5330427M13Rik|mKIAA1136	G protein-coupled receptor 158	protein-coding
Diff_Nuc28962	chr7	74387522	74387661	+	0	NA	intron (NM_001291196, intron 9 of 11)	L1_Mus1|LINE|L1	20089	NM_001191051	75099	Mm.121691	NM_175215	ENSMUSG00000043831	Lysmd4	4930506D23Rik	LysM, putative peptidoglycan-binding, domain containing 4	protein-coding
Diff_Nuc11347	chr10	57166882	57167021	+	0	NA	Intergenic	Intergenic	39208	NR_045353	74928	Mm.416643	NR_045353	ENSMUSG00000097370	4930467K11Rik	-	RIKEN cDNA 4930467K11 gene	ncRNA
Diff_Nuc7788	chr11	58787722	58787861	+	0	NA	Intergenic	RLTR23|LTR|ERV1	-3804	NM_001290988	94091	Mm.248049	NM_053168	ENSMUSG00000020455	Trim11	-	tripartite motif-containing 11	protein-coding
Diff_Nuc55007	chr1	155443232	155443371	+	0	NA	Intergenic	ORR1A4|LTR|MaLR	-46457	NM_028749	74091	Mm.24887	NM_028749	ENSMUSG00000042684	Npl	0610033B02Rik	N-acetylneuraminate pyruvate lyase	protein-coding
Diff_Nuc59888	chr8	12616692	12616831	+	0	NA	intron (NM_198031, intron 20 of 21)	intron (NM_198031, intron 20 of 21)	43712	NM_024279	78634	Mm.116871	NM_024279	ENSMUSG00000010435	Spaca7	1700094C09Rik	sperm acrosome associated 7	protein-coding
Diff_Nuc56974	chr9	32756002	32756141	+	0	NA	Intergenic	Intergenic	-19520	NR_131058	330917	Mm.488283	NR_131058		Gm27162	A430016B06	predicted gene 27162	ncRNA
Diff_Nuc13254	chr10	126296442	126296581	+	0	NA	Intergenic	Intergenic	41916	NM_026858	68876	Mm.276769	NM_026858	ENSMUSG00000025436	Xrcc6bp1	1110068E08Rik|2410012H02Rik|Atp23	XRCC6 binding protein 1	protein-coding
Diff_Nuc39644	chr4	36927172	36927311	+	0	NA	Intergenic	Lx3C|LINE|L1	-28464	NM_001165999	242384	Mm.132507	NM_175516	ENSMUSG00000045083	Lingo2	B230217C06Rik|Lern3|Lrrn6c	leucine rich repeat and Ig domain containing 2	protein-coding
Diff_Nuc17933	chr16	80360422	80360561	+	0	NA	Intergenic	MLT1C|LTR|MaLR	-840451	NM_001113208	17968	Mm.433941	NM_010954	ENSMUSG00000022762	Ncam2	Ncam-2|Ocam|RNCAM	neural cell adhesion molecule 2	protein-coding
Diff_Nuc10811	chr10	35057712	35057851	+	0	NA	Intergenic	Intergenic	854575	NM_010237	14302	Mm.332432	NM_010237	ENSMUSG00000019779	Frk	BSK|BSK/IYK|C85044|GTK|RAK	fyn-related kinase	protein-coding
Diff_Nuc9456	chr11	106457402	106457541	+	0	NA	intron (NM_198292, intron 1 of 11)	intron (NM_198292, intron 1 of 11)	16773	NM_198292	21763	Mm.102407	NM_198292	ENSMUSG00000040548	Tex2	4930568E07Rik|AI553404|Def-5|Taz4	testis expressed gene 2	protein-coding
Diff_Nuc26136	chr18	35039812	35039951	+	0	NA	Intergenic	ID_B1|SINE|B4	19020	NM_007913	13653	Mm.181959	NM_007913	ENSMUSG00000038418	Egr1	A530045N19Rik|ETR103|Egr-1|Krox-1|Krox-24|Krox24|NGF1-A|NGFI-A|NGFIA|TIS8|Zenk|Zfp-6|Zif268|egr	early growth response 1	protein-coding
Diff_Nuc14960	chr17	58383192	58383331	+	0	NA	intron (NM_001081653, intron 13 of 23)	Lx2A|LINE|L1	474268	NM_001081653	620292	Mm.391030	NM_001081653	ENSMUSG00000038048	Cntnap5c	Caspr5-3|EG620292|Gm325	contactin associated protein-like 5C	protein-coding
Diff_Nuc55894	chr1	186090492	186090631	+	0	NA	Intergenic	Intergenic	232221	NM_022019	63953	Mm.404024	NM_022019	ENSMUSG00000039384	Dusp10	2610306G15Rik|AI158871|MKP-5|MKP5	dual specificity phosphatase 10	protein-coding
Diff_Nuc41846	chr4	123191052	123191191	+	0	NA	exon (NM_001199136, exon 6 of 98)	exon (NM_001199136, exon 6 of 98)	-101967	NM_001167918	442834	Mm.483803	NM_001167918		D830031N03Rik	Kiaa0754|mKIAA0754	RIKEN cDNA D830031N03 gene	protein-coding
Diff_Nuc25272	chr19	60486422	60486561	+	0	NA	Intergenic	(TAGA)n|Simple_repeat|Simple_repeat	57716	NM_201615	226278	Mm.377241	NM_201615	ENSMUSG00000045052	Prlhr	Gm339|Gpr10|Gr3|Prrpr	prolactin releasing hormone receptor	protein-coding
Diff_Nuc18230	chr16	92048592	92048731	+	0	NA	Intergenic	Intergenic	-9906	NM_017391	53881	Mm.217354	NM_017391	ENSMUSG00000089774	Slc5a3	AA623876|BF642829|Smit1	solute carrier family 5 (inositol transporters), member 3	protein-coding
Diff_Nuc62726	chr8	129459832	129459971	+	0	NA	intron (NM_024214, intron 4 of 4)	intron (NM_024214, intron 4 of 4)	9920	NM_024214	67952	Mm.6932	NM_024214	ENSMUSG00000093904	Tomm20	1810060K07Rik|BB284719|Gm19268|MAS20|MOM19|TOM20|mKIAA0016	translocase of outer mitochondrial membrane 20 homolog (yeast)	protein-coding
Diff_Nuc35393	chr5	26379292	26379431	+	0	NA	intron (NM_001281516, intron 4 of 4)	intron (NM_001281516, intron 4 of 4)	-13316	NM_029376	75657	Mm.374273	NM_029376	ENSMUSG00000073119	Speer4a	1700027N01Rik|SPEER-4A	spermatogenesis associated glutamate (E)-rich protein 4A	protein-coding
Diff_Nuc11301	chr10	54782332	54782471	+	0	NA	Intergenic	Lx3A|LINE|L1	986673	NR_038016	100502920	Mm.403982	NR_038016	ENSMUSG00000097069	Gm16998	-	predicted gene, 16998	ncRNA
Diff_Nuc62231	chr8	114104342	114104481	+	0	NA	intron (NM_001168623, intron 1 of 4)	RMER6A|LTR|ERVK	42168	NM_001168623	170737	Mm.271578	NM_133206	ENSMUSG00000033545	Znrf1	B830022L21Rik|Rnf42|Zrfp1|nin283	zinc and ring finger 1	protein-coding
Diff_Nuc44360	chr3	67971292	67971431	+	0	NA	intron (NM_001113420, intron 1 of 6)	L1Md_F2|LINE|L1	102637	NM_001113420	30953	Mm.331064	NM_013928	ENSMUSG00000027777	Schip1	Nf2ip|Schip-1	schwannomin interacting protein 1	protein-coding
Diff_Nuc53780	chr1	95131372	95131511	+	0	NA	Intergenic	Intergenic	-1033	NM_172463	208777	Mm.271897	NM_172463	ENSMUSG00000047793	Sned1	6720455I24Rik|AI197264|AI642697|D430044C15Rik|SST3|Snep	sushi, nidogen and EGF-like domains 1	protein-coding
Diff_Nuc31202	chr6	8288952	8289091	+	0	NA	intron (NM_001302354, intron 2 of 3)	L1_Mus4|LINE|L1	79733	NM_001302353	100036521	Mm.446106	NM_001302353	ENSMUSG00000089862	Umad1	Gm16039|OTTMUSG00000029336	UMAP1-MVP12 associated (UMA) domain containing 1	protein-coding
Diff_Nuc19008	chr15	30865182	30865321	+	0	NA	intron (NM_008729, intron 17 of 22)	intron (NM_008729, intron 17 of 22)	-103630	NR_045186	73784	Mm.66947	NR_045186		4930430F21Rik	-	RIKEN cDNA 4930430F21 gene	ncRNA
Diff_Nuc10599	chr10	24749342	24749481	+	0	NA	Intergenic	Intergenic	-102135	NM_007482	11846	Mm.154144	NM_007482	ENSMUSG00000019987	Arg1	AI|AI256583|Arg-1|PGIF	arginase, liver	protein-coding
Diff_Nuc54135	chr1	114870202	114870341	+	0	NA	Intergenic	Intergenic	-1108776	NM_001081316	319901	Mm.103468	NM_001081316	ENSMUSG00000038702	Dsel	9330132E09Rik|DS-epi2	dermatan sulfate epimerase-like	protein-coding
Diff_Nuc37704	chr5	115533602	115533741	+	0	NA	intron (NM_029012, intron 5 of 10)	intron (NM_029012, intron 5 of 10)	24300	NM_001271591	100502825	Mm.361657	NM_001271590		Rpl37rt	Gm13826|OTTMUSG00000014624	ribosomal protein L37, retrotransposed	protein-coding
Diff_Nuc24051	chr19	13204992	13205131	+	0	NA	Intergenic	L1_Mur1|LINE|L1	16086	NM_146689	258684	Mm.377638	NM_146689	ENSMUSG00000057503	Olfr1459	MOR202-17	olfactory receptor 1459	protein-coding
Diff_Nuc9590	chr11	111490582	111490721	+	0	NA	Intergenic	B4|SINE|B4	563173	NM_008425	16518	Mm.4951	NM_008425	ENSMUSG00000041695	Kcnj2	IRK1|Kcnf1|Kir2.1	potassium inwardly-rectifying channel, subfamily J, member 2	protein-coding
Diff_Nuc51437	chr2	181032262	181032401	+	0	NA	Intergenic	L1Md_F3|LINE|L1	-9660	NM_198169	229004	Mm.220423	NM_198169	ENSMUSG00000038705	Gmeb2	AI839884	glucocorticoid modulatory element binding protein 2	protein-coding
Diff_Nuc59326	chr9	110508662	110508801	+	0	NA	intron (NM_001081340, intron 18 of 20)	intron (NM_001081340, intron 18 of 20)	18166	NM_026012	67169	Mm.46680	NM_026012	ENSMUSG00000032491	Nradd	2610311B09Rik|BB104149|NRDD|NRH2|PLAIDD	neurotrophin receptor associated death domain	protein-coding
Diff_Nuc51378	chr2	179291782	179291921	+	0	NA	intron (NM_001316723, intron 2 of 5)	intron (NM_001316723, intron 2 of 5)	114715	NM_009867	12561	Mm.184711	NM_009867	ENSMUSG00000000305	Cdh4	AW120700|R-CAD|R-Cadh|Rcad	cadherin 4	protein-coding
Diff_Nuc58811	chr9	94601932	94602071	+	0	NA	intron (NM_177909, intron 2 of 15)	intron (NM_177909, intron 2 of 15)	31690	NM_177909	331004	Mm.326125	NM_177909	ENSMUSG00000031129	Slc9a9	5730527A11Rik|9930105B05|AI854429|Nhe9	solute carrier family 9 (sodium/hydrogen exchanger), member 9	protein-coding
Diff_Nuc33034	chr6	77232372	77232511	+	0	NA	intron (NM_009819, intron 7 of 18)	Lx8|LINE|L1	39730	NM_028880	74342	Mm.292568	NM_028880	ENSMUSG00000060780	Lrrtm1	4632401D06Rik|AW125451	leucine rich repeat transmembrane neuronal 1	protein-coding
Diff_Nuc49960	chr2	127583712	127583851	+	0	NA	intron (NM_016902, intron 13 of 19)	intron (NM_016902, intron 13 of 19)	-28148	NM_145532	228576	Mm.133036	NM_145532	ENSMUSG00000027377	Mall	BC012256|BENE	mal, T cell differentiation protein-like	protein-coding
Diff_Nuc14160	chr17	28162867	28163006	+	0	NA	intron (NM_181413, intron 12 of 24)	intron (NM_181413, intron 12 of 24)	54593	NM_013687	21463	Mm.29758	NM_013687	ENSMUSG00000062859	Tcp11	D17Ken1|Tcp-11	t-complex protein 11	protein-coding
Diff_Nuc6689	chr11	17536752	17536891	+	0	NA	Intergenic	RLTR15|LTR|ERVK	317057	NM_026576	68145	Mm.178684	NM_026576	ENSMUSG00000016984	Etaa1	5730466H23Rik|AA672646	Ewing tumor-associated antigen 1	protein-coding
Diff_Nuc18432	chr15	4598732	4598871	+	0	NA	Intergenic	Intergenic	-78409	NM_016704	12274	Mm.20247	NM_016704	ENSMUSG00000022181	C6	AW111623	complement component 6	protein-coding
Diff_Nuc821	chr13	17490262	17490401	+	0	NA	intron (NM_138654, intron 9 of 13)	L1Md_F2|LINE|L1	296268	NM_138654	192136	Mm.364180	NM_138654	ENSMUSG00000055137	Sugct	5033411D12Rik|D17907	succinyl-CoA glutarate-CoA transferase	protein-coding
Diff_Nuc62310	chr8	116778092	116778231	+	0	NA	intron (NM_173016, intron 3 of 8)	intron (NM_173016, intron 3 of 8)	48621	NM_173016	270097	Mm.334825	NM_173016	ENSMUSG00000046844	Vat1l	9430073I07|AI427515|mKIAA1576	vesicle amine transport protein 1 like	protein-coding
Diff_Nuc49317	chr2	105253792	105253931	+	0	NA	Intergenic	Intergenic	-14385	NM_009037	19672	Mm.4876	NM_009037	ENSMUSG00000005973	Rcn1	Rcn	reticulocalbin 1	protein-coding
Diff_Nuc24472	chr19	29956912	29957051	+	0	NA	Intergenic	Intergenic	-42623	NM_133775	77125	Mm.182359	NM_133775	ENSMUSG00000024810	Il33	9230117N10Rik|Il-33|Il1f11|NF-HEV	interleukin 33	protein-coding
Diff_Nuc9605	chr11	112656452	112656591	+	0	NA	intron (NR_126071, intron 1 of 1)	intron (NR_126071, intron 1 of 1)	3801	NR_126070	100038732	Mm.65345	NR_126070	ENSMUSG00000075437	Gm11681	-	predicted gene 11681	ncRNA
Diff_Nuc59717	chr8	4975052	4975191	+	0	NA	Intergenic	L1Md_F2|LINE|L1	130166	NM_011388	20494	Mm.3500	NM_011388	ENSMUSG00000023073	Slc10a2	9130221J18Rik|AI605518|ASBT|IBAT|ISBT	solute carrier family 10, member 2	protein-coding
Diff_Nuc5882	chr12	103138082	103138221	+	0	NA	intron (NM_028446, intron 3 of 20)	intron (NM_028446, intron 3 of 20)	13230	NM_028446	109181	Mm.208618	NM_028446	ENSMUSG00000021188	Trip11	2610511G22Rik|3110031G15Rik|6030460N08Rik|AI450776|GMAP-210|TRIP230	thyroid hormone receptor interactor 11	protein-coding
Diff_Nuc21610	chr14	32440892	32441031	+	0	NA	intron (NM_019975, intron 7 of 16)	intron (NM_019975, intron 7 of 16)	13190	NM_019975	56794	Mm.38887	NM_019975	ENSMUSG00000021884	Hacl1	1600020H07Rik|Hpcl|Phyh2	2-hydroxyacyl-CoA lyase 1	protein-coding
Diff_Nuc51982	chr1	24022942	24023081	+	0	NA	intron (NM_026604, intron 19 of 20)	intron (NM_026604, intron 19 of 20)	-10532	NM_026503	68002	Mm.250424	NM_026503	ENSMUSG00000026154	Sdhaf4	1110058L19Rik|1700001E18Rik|C6orf57	succinate dehydrogenase complex assembly factor 4	protein-coding
Diff_Nuc62302	chr8	116631792	116631931	+	0	NA	Intergenic	Intergenic	-25613	NM_024446	67528	Mm.27889	NM_024437	ENSMUSG00000031767	Nudt7	1300007B24Rik|2210404C19Rik	nudix (nucleoside diphosphate linked moiety X)-type motif 7	protein-coding
Diff_Nuc54580	chr1	136153142	136153281	+	0	NA	Intergenic	RLTR1D|LTR|ERV1	-21177	NM_001008533	11539	Mm.298908	NM_009629	ENSMUSG00000042429	Adora1	A1-AR|A1AR|A1R|AA1R|AI848715|BB176431|Ri	adenosine A1 receptor	protein-coding
Diff_Nuc31183	chr6	7633302	7633441	+	0	NA	intron (NM_012055, intron 3 of 11)	intron (NM_012055, intron 3 of 11)	9811	NM_012055	27053	Mm.2942	NM_012055	ENSMUSG00000029752	Asns	-	asparagine synthetase	protein-coding
Diff_Nuc16506	chr16	21882032	21882171	+	0	NA	Intergenic	Intergenic	-9941	NM_172821	71751	Mm.420837	NM_172821	ENSMUSG00000033618	Map3k13	C130026N12Rik|LZK	mitogen-activated protein kinase kinase kinase 13	protein-coding
Diff_Nuc33272	chr6	86351112	86351251	+	0	NA	Intergenic	Intergenic	-3032	NM_001164079	21841	Mm.333219	NM_011585	ENSMUSG00000071337	Tia1	2310050N03Rik|AI256674|TIA-1|mTIA-1	cytotoxic granule-associated RNA binding protein 1	protein-coding
Diff_Nuc1857	chr13	54742742	54742881	+	0	NA	exon (NM_178397, exon 3 of 11)	exon (NM_178397, exon 3 of 11)	19666	NM_178397	76577	Mm.194459	NM_178397	ENSMUSG00000025873	Faf2	2210404D11Rik|AI462440|Ubxd8|mKIAA0887	Fas associated factor family member 2	protein-coding
Diff_Nuc41598	chr4	115521392	115521531	+	0	NA	intron (NM_001285488, intron 3 of 13)	intron (NM_001285488, intron 3 of 13)	9658	NM_001285487	17346	Mm.209327	NM_021461	ENSMUSG00000028708	Mknk1	2410048M24Rik|Mnk1	MAP kinase-interacting serine/threonine kinase 1	protein-coding
Diff_Nuc14610	chr17	45108482	45108621	+	0	NA	intron (NM_178652, intron 3 of 11)	intron (NM_178652, intron 3 of 11)	-90717	NM_029257	75341	Mm.386821	NM_029257		4930564C03Rik	-	RIKEN cDNA 4930564C03 gene	protein-coding
Diff_Nuc22143	chr14	56793712	56793851	+	0	NA	promoter-TSS (NM_001305808)	promoter-TSS (NM_001305808)	-345	NM_153052	245839	Mm.207063	NM_153052	ENSMUSG00000015443	Gzmn	GrN	granzyme N	protein-coding
Diff_Nuc56581	chr9	19593752	19593891	+	0	NA	Intergenic	Lx2B|LINE|L1	9094	NM_011001	18358	Mm.248950	NM_011001	ENSMUSG00000058659	Olfr58	IG6|MOR146-3|MOR146-7P	olfactory receptor 58	protein-coding
Diff_Nuc50254	chr2	137298182	137298321	+	0	NA	Intergenic	L1_Mus3|LINE|L1	-355995	NM_013822	16449	Mm.22398	NM_013822	ENSMUSG00000027276	Jag1	ABE2|Gsfabe2|Htu|Ozz|Ser-1	jagged 1	protein-coding
Diff_Nuc11642	chr10	66489012	66489151	+	0	NA	intron (NR_110511, intron 2 of 6)	intron (NR_110511, intron 2 of 6)	21258	NR_110511	102634101	Mm.445258	NR_110511		Gm31763	-	predicted gene, 31763	ncRNA
Diff_Nuc41454	chr4	109141052	109141191	+	0	NA	intron (NM_013876, intron 1 of 2)	intron (NM_013876, intron 1 of 2)	7989	NM_013876	29864	Mm.392580	NM_013876	ENSMUSG00000028557	Rnf11	-	ring finger protein 11	protein-coding
Diff_Nuc4157	chr12	35181562	35181701	+	0	NA	intron (NM_024124, intron 2 of 11)	intron (NM_024124, intron 2 of 11)	32123	NM_024124	79221	Mm.310551	NM_024124	ENSMUSG00000004698	Hdac9	AV022454|D030072B18Rik|HD7B|HD9|HDRP|Hdac7b|Mitr|mKIAA0744	histone deacetylase 9	protein-coding
Diff_Nuc2616	chr13	85523322	85523461	+	0	NA	Intergenic	L1Md_F2|LINE|L1	-94300	NM_145452	218397	Mm.259653	NM_145452	ENSMUSG00000021549	Rasa1	Gap|RasGAP|Rasa	RAS p21 protein activator 1	protein-coding
Diff_Nuc53716	chr1	92180912	92181051	+	0	NA	Intergenic	Intergenic	80426	NM_007722	12778	Mm.6522	NM_007722	ENSMUSG00000044337	Ackr3	AW541270|CXC-R7|CXCR-7|Cmkor1|Cxcr7|RDC-1|Rdc1	atypical chemokine receptor 3	protein-coding
Diff_Nuc19999	chr15	72554682	72554821	+	0	NA	intron (NM_180662, intron 18 of 21)	intron (NM_180662, intron 18 of 21)	86003	NR_002864	353342	Mm.440245	NR_002864	ENSMUSG00000106847	Peg13	-	paternally expressed 13	ncRNA
Diff_Nuc20232	chr15	79236482	79236621	+	0	NA	Intergenic	MTB_Mm|LTR|MaLR	-2818	NM_172608	223693	Mm.323358	NM_172608	ENSMUSG00000009035	Tmem184b	2610507A11|4732495E13Rik	transmembrane protein 184b	protein-coding
Diff_Nuc8265	chr11	74955412	74955551	+	0	NA	intron (NM_001002764, intron 14 of 18)	intron (NM_001002764, intron 14 of 18)	26173	NM_001098203	15248	Mm.57250	NM_010430	ENSMUSG00000043099	Hic1	AA408311|HIC-1	hypermethylated in cancer 1	protein-coding
Diff_Nuc22515	chr14	68788392	68788531	+	0	NA	Intergenic	B4A|SINE|B4	-45400	NM_008691	18040	Mm.242832	NM_008691	ENSMUSG00000022054	Nefm	NF-M|NF160|NF165|Nef3|Nfm	neurofilament, medium polypeptide	protein-coding
Diff_Nuc48819	chr2	89219102	89219241	+	0	NA	Intergenic	Intergenic	-15587	NM_146973	258975	Mm.223366	NM_146973	ENSMUSG00000075090	Olfr1234	MOR231-2	olfactory receptor 1234	protein-coding
Diff_Nuc13477	chr17	6010662	6010801	+	0	NA	exon (NM_001290698, exon 5 of 20)	exon (NM_001290698, exon 5 of 20)	3151	NM_001290698	20975	Mm.236068	NM_011523	ENSMUSG00000023805	Synj2	AI481647|SJ2|mKIAA0348	synaptojanin 2	protein-coding
Diff_Nuc10781	chr10	33602092	33602231	+	0	NA	Intergenic	Intergenic	-22756	NM_001162957	212892	Mm.131949	NM_001162957	ENSMUSG00000039552	Rsph4a	A230081C05|Rshl3	radial spoke head 4 homolog A (Chlamydomonas)	protein-coding
Diff_Nuc7863	chr11	60834712	60834851	+	0	NA	Intergenic	Intergenic	-1285	NM_001267593	16515	Mm.4970	NM_010603	ENSMUSG00000042529	Kcnj12	IRK-2|IRK2|Kir2.2|MB-IRK2	potassium inwardly-rectifying channel, subfamily J, member 12	protein-coding
Diff_Nuc6090	chr12	111839132	111839271	+	0	NA	promoter-TSS (NM_030238)	promoter-TSS (NM_030238)	-404	NM_030238	13424	Mm.181430	NM_030238	ENSMUSG00000018707	Dync1h1	9930018I23Rik|AI894280|DHC1|DHC1a|DNCL|Dnchc1|Dnec1|Dnecl|Loa|MAP1C|P22|Swl|mKIAA0325	dynein cytoplasmic 1 heavy chain 1	protein-coding
Diff_Nuc60789	chr8	53880852	53880991	+	0	NA	Intergenic	RMER19C|LTR|ERVK	-716135	NM_001205054	11593	Mm.334535	NM_001005847	ENSMUSG00000031521	Aga	AW060726	aspartylglucosaminidase	protein-coding
Diff_Nuc57610	chr9	54533942	54534081	+	0	NA	Intergenic	Intergenic	-13355	NM_021422	58233	Mm.489676	NM_021422	ENSMUSG00000032285	Dnaja4	1110021L12Rik|AV358213|Dj4|Hsj4|mmDjA4	DnaJ heat shock protein family (Hsp40) member A4	protein-coding
Diff_Nuc46944	chr2	18769242	18769381	+	0	NA	intron (NM_008845, intron 7 of 9)	intron (NM_008845, intron 7 of 9)	-45866	NR_131254	66774	Mm.87075	NR_131254	ENSMUSG00000097638	Carlr	4933439G12Rik|Carl	cardiac and apoptosis-related long non-coding RNA	ncRNA
Diff_Nuc57049	chr9	35044802	35044941	+	0	NA	intron (NM_194257, intron 2 of 7)	intron (NM_194257, intron 2 of 7)	26083	NM_026130	67398	Mm.284688	NM_026130	ENSMUSG00000032042	Srpr	1300011P19Rik|D11Mgi27|Srpra	signal recognition particle receptor ('docking protein')	protein-coding
Diff_Nuc53942	chr1	105857722	105857861	+	0	NA	Intergenic	L1_Mur2|LINE|L1	-807605	NM_011800	23836	Mm.103640	NM_011800	ENSMUSG00000050840	Cdh20	Cdh7	cadherin 20	protein-coding
Diff_Nuc40110	chr4	56117702	56117841	+	0	NA	Intergenic	L2c|LINE|L2	-572424	NM_010637	16600	Mm.4325	NM_010637	ENSMUSG00000003032	Klf4	EZF|Gklf|Zie	Kruppel-like factor 4 (gut)	protein-coding
Diff_Nuc34058	chr6	117764162	117764301	+	0	NA	Intergenic	L1Md_F2|LINE|L1	-26968	NM_177684	232337	Mm.290847	NM_177684	ENSMUSG00000059689	Zfp637	AI646709|BC021601|Znf32	zinc finger protein 637	protein-coding
Diff_Nuc46357	chr3	148058272	148058411	+	0	NA	Intergenic	Intergenic	559258	NM_001081298	99633	Mm.9776	NM_001081298	ENSMUSG00000028184	Adgrl2	AI450192|CIRL-2|Gm619|Lec1|Lphh1|Lphn2|mKIAA0786	adhesion G protein-coupled receptor L2	protein-coding
Diff_Nuc33467	chr6	92602722	92602861	+	0	NA	intron (NM_001081146, intron 2 of 8)	L1Md_F3|LINE|L1	53387	NM_001081146	243548	Mm.248820	NM_001081146	ENSMUSG00000030020	Prickle2	6230400G14Rik|6720451F06Rik|mpk2	prickle planar cell polarity protein 2	protein-coding
Diff_Nuc2518	chr13	81024942	81025081	+	0	NA	intron (NM_001042591, intron 1 of 7)	CpG	2328	NM_001042591	105171	Mm.423137	NM_001042591	ENSMUSG00000074794	Arrdc3	AI450344|mKIAA1376	arrestin domain containing 3	protein-coding
Diff_Nuc38794	chr5	150432302	150432441	+	0	NA	exon (NM_013559, exon 7 of 18)	exon (NM_013559, exon 7 of 18)	6519	NM_013559	15505	Mm.270681	NM_013559	ENSMUSG00000029657	Hsph1	105kDa|AI790491|Hsp105|Hsp110|hsp-E7I|hsp110/105	heat shock 105kDa/110kDa protein 1	protein-coding
Diff_Nuc32869	chr6	70727762	70727901	+	0	NA	intron (NM_009075, intron 3 of 8)	ID4|SINE|ID	14338	NM_009075	19895	Mm.17905	NM_009075	ENSMUSG00000053604	Rpia	RPI	ribose 5-phosphate isomerase A	protein-coding
Diff_Nuc44760	chr3	86795962	86796101	+	0	NA	Intergenic	Intergenic	5523	NR_038188	12480	Mm.389465	NM_007640	ENSMUSG00000041750	Cd1d2	CD1.2|Cd1b|Ly-38	CD1d2 antigen	protein-coding
Diff_Nuc43770	chr3	41394482	41394621	+	0	NA	intron (NM_001130186, intron 3 of 10)	intron (NM_001130186, intron 3 of 10)	25749	NM_001130186	269424	Mm.286285	NM_172303	ENSMUSG00000025764	Jade1	AU041499|D530048A03Rik|Phf17|mKIAA1807	jade family PHD finger 1	protein-coding
Diff_Nuc2584	chr13	84361232	84361371	+	0	NA	promoter-TSS (NM_175187)	promoter-TSS (NM_175187)	479	NR_138587	320919	Mm.131386	NR_138587	ENSMUSG00000097292	A230107N01Rik	-	RIKEN cDNA A230107N01 gene	ncRNA
Diff_Nuc26200	chr18	36325952	36326091	+	0	NA	intron (NM_001167891, intron 1 of 9)	intron (NM_001167891, intron 1 of 9)	30793	NM_001167891	100042150	Mm.380390	NM_001167891	ENSMUSG00000060275	Nrg2	Don1|NTAK	neuregulin 2	protein-coding
Diff_Nuc21080	chr14	13379702	13379841	+	0	NA	intron (NM_001042617, intron 7 of 30)	intron (NM_001042617, intron 7 of 30)	-201392	NM_080433	54713	Mm.34644	NM_080433	ENSMUSG00000021743	Fezf2	AI451466|AI852056|Fez|Fezl|Zfp312	Fez family zinc finger 2	protein-coding
Diff_Nuc22481	chr14	66656152	66656291	+	0	NA	intron (NM_009618, intron 16 of 20)	intron (NM_009618, intron 16 of 20)	-28174	NM_178747	268756	Mm.26207	NM_178747	ENSMUSG00000034450	Gulo	5730581M22|AU018375|BC028822|GLO|LGO|sfx|unh|unhip	gulonolactone (L-) oxidase	protein-coding
Diff_Nuc53454	chr1	82257922	82258061	+	0	NA	intron (NM_010570, intron 1 of 1)	intron (NM_010570, intron 1 of 1)	30023	NM_010570	16367	Mm.4952	NM_010570	ENSMUSG00000055980	Irs1	G972R|IRS-1	insulin receptor substrate 1	protein-coding
Diff_Nuc32917	chr6	72043892	72044031	+	0	NA	Intergenic	Intergenic	-3641	NM_001035228	20454	Mm.38248	NM_011375	ENSMUSG00000056091	St3gal5	3S-T|Siat9|[a]2	ST3 beta-galactoside alpha-2,3-sialyltransferase 5	protein-coding
Diff_Nuc27851	chr7	20298332	20298471	+	0	NA	intron (NM_016871, intron 4 of 9)	intron (NM_016871, intron 4 of 9)	2377	NM_001109748	53333	Mm.61682	NM_016871	ENSMUSG00000002984	Tomm40	AW539759|Mom35|Tom40	translocase of outer mitochondrial membrane 40 homolog (yeast)	protein-coding
Diff_Nuc48320	chr2	67670132	67670271	+	0	NA	Intergenic	Lx4A|LINE|L1	51101	NR_105752	102466627		NR_105752	ENSMUSG00000098734	Mir6335	Gm27836|mmu-mir-6335	microRNA 6335	ncRNA
Diff_Nuc6567	chr11	11089952	11090091	+	0	NA	intron (NM_177033, intron 3 of 3)	L1VL4|LINE|L1	76002	NM_177033	319922	Mm.337851	NM_177033	ENSMUSG00000050830	Vwc2	A930041G11Rik|G11|PSST739|UNQ739|cradin	von Willebrand factor C domain containing 2	protein-coding
Diff_Nuc2045	chr13	60087222	60087361	+	0	NA	Intergenic	Intergenic	-43781	NR_046142	328263	Mm.123405	NR_046142		A530065N20Rik	A530065N20	RIKEN cDNA A530046M15 gene	ncRNA
Diff_Nuc26147	chr18	35223472	35223611	+	0	NA	Intergenic	Intergenic	-55025	NM_009818	12385	Mm.18962	NM_009818	ENSMUSG00000037815	Ctnna1	2010010M04Rik|AA517462|AI988031|Catna1	catenin (cadherin associated protein), alpha 1	protein-coding
Diff_Nuc3736	chr12	12341102	12341241	+	0	NA	intron (NM_029758, intron 3 of 12)	intron (NM_029758, intron 3 of 12)	58110	NR_045829	70858	Mm.410838	NR_045829		4921511I17Rik	-	RIKEN cDNA 4921511I17 gene	ncRNA
Diff_Nuc31358	chr6	16693662	16693801	+	0	NA	Intergenic	Intergenic	154710	NM_031198	21426	Mm.36217	NM_031198	ENSMUSG00000029553	Tfec	BB107417|Tcfec|bHLHe34	transcription factor EC	protein-coding
Diff_Nuc4710	chr12	60072682	60072821	+	0	NA	intron (NM_009147, intron 16 of 19)	intron (NM_009147, intron 16 of 19)	40253	NM_009147	20334	Mm.491137	NM_009147	ENSMUSG00000020986	Sec23a	Msec23|Sec23r	SEC23 homolog A, COPII coat complex component	protein-coding
Diff_Nuc4211	chr12	37265872	37266011	+	0	NA	intron (NM_001289503, intron 8 of 9)	intron (NM_001289503, intron 8 of 9)	157207	NM_001289503	75847	Mm.261764	NM_178629	ENSMUSG00000043153	Ispd	4930579E17Rik|AV040780	isoprenoid synthase domain containing	protein-coding
Diff_Nuc1736	chr13	49430992	49431131	+	0	NA	Intergenic	B4A|SINE|B4	-5857	NM_001039179	76895	Mm.197387	NM_029791	ENSMUSG00000037933	Bicd2	-	bicaudal D homolog 2 (Drosophila)	protein-coding
Diff_Nuc35569	chr5	31085182	31085321	+	0	NA	intron (NM_023047, intron 6 of 12)	intron (NM_023047, intron 6 of 12)	-31763	NM_133350	100732	Mm.332295	NM_133350	ENSMUSG00000029166	Mapre3	AI790651|EB2|EB3|EBF3|RP3	microtubule-associated protein, RP/EB family, member 3	protein-coding
Diff_Nuc57308	chr9	45017412	45017551	+	0	NA	intron (NM_001198971, intron 1 of 4)	MTC|LTR|MaLR	-5323	NM_145403	214523	Mm.436756	NM_145403	ENSMUSG00000032091	Tmprss4	mCAP2	transmembrane protease, serine 4	protein-coding
Diff_Nuc8141	chr11	70670322	70670461	+	0	NA	intron (NM_001291143, intron 2 of 18)	L1M2|LINE|L1	12128	NM_001291142	54189	Mm.7087	NM_019400	ENSMUSG00000020817	Rabep1	Rab5ep|rabaptin-5|rabaptin-5alpha	rabaptin, RAB GTPase binding effector protein 1	protein-coding
Diff_Nuc49324	chr2	105598982	105599121	+	0	NA	intron (NM_023876, intron 9 of 9)	intron (NM_023876, intron 9 of 9)	76431	NM_001310145	18508	Mm.3608	NM_013627	ENSMUSG00000027168	Pax6	1500038E17Rik|AEY11|Dey|Gsfaey11|Pax-6|Sey	paired box 6	protein-coding
Diff_Nuc33837	chr6	109633842	109633981	+	0	NA	Intergenic	Intergenic	855276	NM_138677	192193	Mm.21596	NM_138677	ENSMUSG00000030104	Edem1	A130059K23Rik|EDEM|mKIAA0212	ER degradation enhancer, mannosidase alpha-like 1	protein-coding
Diff_Nuc24078	chr19	14636602	14636741	+	0	NA	intron (NM_011600, intron 5 of 19)	intron (NM_011600, intron 5 of 19)	35032	NM_001302951	21888	Mm.103638	NM_011600	ENSMUSG00000024642	Tle4	5730411M05Rik|AA792082|Bce-1|Bce1|ESTM13|ESTM14|Grg4|X83332|X83333|grg-4	transducin-like enhancer of split 4	protein-coding
Diff_Nuc38103	chr5	127770002	127770141	+	0	NA	intron (NM_175432, intron 1 of 8)	intron (NM_175432, intron 1 of 8)	-8078	NR_038128	67351	Mm.320172	NR_038127	ENSMUSG00000087104	Tmem132cos	1700085B03Rik	transmembrane protein 132C, opposite strand	ncRNA
Diff_Nuc12220	chr10	84694222	84694361	+	0	NA	Intergenic	Intergenic	-46492	NM_007771	12952	Mm.26237	NM_007771	ENSMUSG00000020038	Cry1	AU020726|AU021000|Phll1	cryptochrome 1 (photolyase-like)	protein-coding
Diff_Nuc46423	chr3	152218502	152218641	+	0	NA	intron (NM_001081277, intron 6 of 13)	(CA)n|Simple_repeat|Simple_repeat	-111306	NR_040386	99542	Mm.394921	NR_040386	ENSMUSG00000097745	AI115009	-	expressed sequence AI115009	ncRNA
Diff_Nuc22179	chr14	57581202	57581341	+	0	NA	3' UTR (NM_029498, exon 24 of 24)	3' UTR (NM_029498, exon 24 of 24)	-52700	NM_001256060	432860	Mm.390718	NM_001256060	ENSMUSG00000096144	B020004C17Rik	-	RIKEN cDNA B020004C17 gene	protein-coding
Diff_Nuc24019	chr19	11467942	11468081	+	0	NA	TTS (NM_001310331)	TTS (NM_001310331)	-14140	NM_029499	64380	Mm.440715	NM_029499	ENSMUSG00000024675	Ms4a4c	5830413L19Rik|AI449185|Ms4a9	membrane-spanning 4-domains, subfamily A, member 4C	protein-coding
Diff_Nuc18797	chr15	23013632	23013771	+	0	NA	intron (NM_001081299, intron 1 of 11)	intron (NM_001081299, intron 1 of 11)	47483	NM_001081299	320865	Mm.241965	NM_001081299	ENSMUSG00000040420	Cdh18	B230220E17Rik|Cdh14l	cadherin 18	protein-coding
Diff_Nuc48092	chr2	57927272	57927411	+	0	NA	Intergenic	Lx4B|LINE|L1	-22178	NM_029972	77767	Mm.91712	NM_029972	ENSMUSG00000026830	Ermn	A330104H05Rik|AI854460|ermin|mKIAA1189	ermin, ERM-like protein	protein-coding
Diff_Nuc43828	chr3	45051112	45051251	+	0	NA	Intergenic	L1Md_F2|LINE|L1	131001	NR_045172	72511	Mm.140700	NR_045172	ENSMUSG00000097040	2610316D01Rik	-	RIKEN cDNA 2610316D01 gene	ncRNA
Diff_Nuc36005	chr5	46229282	46229421	+	0	NA	intron (NM_178142, intron 1 of 6)	Lx5|LINE|L1	18440	NM_172153	209707	Mm.71498	NM_172153	ENSMUSG00000015882	Lcorl	Mlr1	ligand dependent nuclear receptor corepressor-like	protein-coding
Diff_Nuc47436	chr2	32816042	32816181	+	0	NA	intron (NM_199302, intron 1 of 24)	MIRb|SINE|MIR	664	NM_199302	227738	Mm.248037	NM_199302	ENSMUSG00000026792	Lrsam1	-	leucine rich repeat and sterile alpha motif containing 1	protein-coding
Diff_Nuc39607	chr4	34775902	34776041	+	0	NA	intron (NM_013889, intron 4 of 7)	intron (NM_013889, intron 4 of 7)	-50356	NM_025471	66291	Mm.28071	NM_025471	ENSMUSG00000028295	Smim8	1810030N24Rik|2810406B13Rik	small integral membrane protein 8	protein-coding
Diff_Nuc42187	chr4	133058467	133058606	+	0	NA	Intergenic	RLTR9A|LTR|ERVK	-4071	NM_001081156	69539	Mm.151594	NM_001081156	ENSMUSG00000056596	Trnp1	2300002D11Rik|Trnp	TMF1-regulated nuclear protein 1	protein-coding
Diff_Nuc26865	chr18	62467982	62468121	+	0	NA	Intergenic	Intergenic	-15807	NM_008313	15562	Mm.20440	NM_008313	ENSMUSG00000026322	Htr4	5-HT-4|5-HT4|5-HT<4L>|5HTR4	5 hydroxytryptamine (serotonin) receptor 4	protein-coding
Diff_Nuc60633	chr8	46730862	46731001	+	0	NA	intron (NM_001310707, intron 1 of 23)	A-rich|Low_complexity|Low_complexity	-16416	NM_001310708	234214	Mm.211096	NM_172752	ENSMUSG00000031626	Sorbs2	2010203O03Rik|9430041O17Rik|A530071H08|Argbp2|mKIAA0777|nArgBP2	sorbin and SH3 domain containing 2	protein-coding
Diff_Nuc10137	chr10	7526032	7526171	+	0	NA	intron (NM_026141, intron 9 of 12)	intron (NM_026141, intron 9 of 12)	13409	NM_026141	67418	Mm.38927	NM_026141	ENSMUSG00000015757	Ppil4	3732410E19Rik|3830425H19Rik|AI788954|AW146233|PPIase	peptidylprolyl isomerase (cyclophilin)-like 4	protein-coding
Diff_Nuc39207	chr4	16103602	16103741	+	0	NA	intron (NR_045765, intron 2 of 6)	Lx7|LINE|L1	12414	NR_045765	100415915	Mm.387180	NR_045765	ENSMUSG00000085112	A530072M11Rik	-	RIKEN cDNA gene A530072M11	ncRNA
Diff_Nuc24692	chr19	38467162	38467301	+	0	NA	Intergenic	Intergenic	-3239	NM_175507	240660	Mm.262085	NM_175507	ENSMUSG00000044026	Slc35g1	AA590464|D330039I19Rik|Tmem20	solute carrier family 35, member G1	protein-coding
Diff_Nuc50748	chr2	153437052	153437191	+	0	NA	Intergenic	Intergenic	21396	NM_001195390	99311	Mm.294478	NM_133850	ENSMUSG00000056941	Commd7	2310010I22Rik|AW060956|mU3	COMM domain containing 7	protein-coding
Diff_Nuc42915	chr4	155210792	155210931	+	0	NA	Intergenic	B1_Mus2|SINE|Alu	-2928	NM_024263	74761	Mm.159028	NM_024263	ENSMUSG00000029070	Mxra8	1200013A08Rik|1700095D18Rik|AI131686|Asp3|Dicam	matrix-remodelling associated 8	protein-coding
Diff_Nuc23345	chr14	109521082	109521221	+	0	NA	Intergenic	Intergenic	-207695	NM_199065	76965	Mm.257268	NM_199065	ENSMUSG00000075478	Slitrk1	3200001I04Rik	SLIT and NTRK-like family, member 1	protein-coding
Diff_Nuc56355	chr9	7776832	7776971	+	0	NA	intron (NM_133739, intron 2 of 4)	ORR1B2-int|LTR|MaLR	-7489	NR_049191	100885830		NR_049191	ENSMUSG00000093615	Mir5618	Gm23685|mmu-mir-5618	microRNA 5618	ncRNA
Diff_Nuc40319	chr4	65301182	65301321	+	0	NA	intron (NM_207109, intron 16 of 22)	RLTR25A|LTR|ERVK	35231	NM_001161782	69807	Mm.22786	NM_053084	ENSMUSG00000051675	Trim32	1810045E12Rik|3f3|BBS11|Zfp117	tripartite motif-containing 32	protein-coding
Diff_Nuc40652	chr4	80340882	80341021	+	0	NA	Intergenic	Lx4A|LINE|L1	-139166	NM_031202	22178	Mm.30438	NM_031202	ENSMUSG00000005994	Tyrp1	Oca3|TRP-1|TRP1|Tyrp|b|brown|isa	tyrosinase-related protein 1	protein-coding
Diff_Nuc26529	chr18	47138662	47138801	+	0	NA	intron (NM_178377, intron 4 of 6)	MTD|LTR|MaLR	20201	NM_178377	69456	Mm.210734	NM_178377	ENSMUSG00000042705	Commd10	2310003A05Rik|AU019438|DRWMS2	COMM domain containing 10	protein-coding
Diff_Nuc8045	chr11	68454112	68454251	+	0	NA	Intergenic	Intergenic	-51236	NM_175260	77579	Mm.218233	NM_175260	ENSMUSG00000020900	Myh10	5730504C04Rik|9330167F11Rik|Fltn|Myhn-2|Myhn2|NMHC II-B|NMHC-B|NMHCII-B|NMMHC II-b|NMMHC-B|NMMHC-IIB|SMemb|mKIAA3005	myosin, heavy polypeptide 10, non-muscle	protein-coding
Diff_Nuc5927	chr12	104189672	104189811	+	0	NA	intron (NM_001081017, intron 1 of 48)	intron (NM_001081017, intron 1 of 48)	2672	NM_001081017	217843	Mm.387073	NM_177621	ENSMUSG00000021198	Unc79	9030205A07Rik|Mlca3	unc-79 homolog (C. elegans)	protein-coding
Diff_Nuc969	chr13	22026722	22026861	+	0	NA	Intergenic	Intergenic	-10172	NM_183014	193452	Mm.187446	NM_183014	ENSMUSG00000006720	Zfp184	4930500C15Rik	zinc finger protein 184 (Kruppel-like)	protein-coding
Diff_Nuc13987	chr17	24676952	24677091	+	0	NA	Intergenic	B2_Mm2|SINE|B2	-6329	NM_177375	328778	Mm.266033	NM_177375	ENSMUSG00000079657	Rab26	A830020M03Rik	RAB26, member RAS oncogene family	protein-coding
Diff_Nuc12314	chr10	89205362	89205501	+	0	NA	Intergenic	ORR1A1|LTR|MaLR	-2305	NM_029166	75089	Mm.268922	NM_029166	ENSMUSG00000019951	Uhrf1bp1l	2010319N22Rik|4930506D01Rik|AA589495|C80672|E030041M21Rik|mKIAA0701	UHRF1 (ICBP90) binding protein 1-like	protein-coding
Diff_Nuc46027	chr3	135238572	135238711	+	0	NA	Intergenic	Intergenic	90066	NM_027288	110173	Mm.280536	NM_027288	ENSMUSG00000028164	Manba	2410030O07Rik|B930014J03Rik|Bmn	mannosidase, beta A, lysosomal	protein-coding
Diff_Nuc47163	chr2	25979322	25979461	+	0	NA	Intergenic	Intergenic	-1060	NM_026495	67991	Mm.131074	NM_026495	ENSMUSG00000026932	Nacc2	0610020I02Rik|AI448087|Btbd14a|C030048H19Rik	nucleus accumbens associated 2, BEN and BTB (POZ) domain containing	protein-coding
Diff_Nuc58946	chr9	99332452	99332591	+	0	NA	intron (NM_008624, intron 1 of 5)	RSINE1|SINE|B4	4610	NM_008624	17532	Mm.2045	NM_008624	ENSMUSG00000032470	Mras	2900078C09Rik|AI326250	muscle and microspikes RAS	protein-coding
Diff_Nuc9618	chr11	113109012	113109151	+	0	NA	exon (NM_001166503, exon 9 of 10)	exon (NM_001166503, exon 9 of 10)	-38098	NR_040276	319871	Mm.383743	NR_040276	ENSMUSG00000085421	4732490B19Rik	-	RIKEN cDNA 4732490B19 gene	ncRNA
Diff_Nuc48730	chr2	83846792	83846931	+	0	NA	Intergenic	MLT1A1|LTR|MaLR	-65478	NM_027964	71861	Mm.116957	NM_027964	ENSMUSG00000034552	Zswim2	1700025P14Rik|4933437F18Rik|MEX	zinc finger SWIM-type containing 2	protein-coding
Diff_Nuc49253	chr2	103401702	103401841	+	0	NA	Intergenic	B4A|SINE|B4	-4696	NM_178890	99382	Mm.35850	NM_178890	ENSMUSG00000032724	Abtb2	AW539457|BPOZ-2	ankyrin repeat and BTB (POZ) domain containing 2	protein-coding
Diff_Nuc9086	chr11	97738022	97738161	+	0	NA	intron (NM_001081435, intron 3 of 10)	intron (NM_001081435, intron 3 of 10)	7377	NM_001081435	72973	Mm.245939	NM_001081435	ENSMUSG00000070336	Fbxo47	2900052P03Rik|Gm1562	F-box protein 47	protein-coding
Diff_Nuc24916	chr19	45938442	45938581	+	0	NA	intron (NM_198296, intron 23 of 25)	intron (NM_198296, intron 23 of 25)	-47958	NM_145703	80906	Mm.213204	NM_030716	ENSMUSG00000025221	Kcnip2	KChIP2	Kv channel-interacting protein 2	protein-coding
Diff_Nuc13822	chr17	18006812	18006951	+	0	NA	Intergenic	Intergenic	14022	NM_013521	14293	Mm.56951	NM_013521	ENSMUSG00000045551	Fpr1	FPR|LXA4R|fMLF-R	formyl peptide receptor 1	protein-coding
Diff_Nuc6413	chr11	4702562	4702701	+	0	NA	intron (NM_010898, intron 7 of 15)	B2_Mm1t|SINE|B2	30507	NM_001252253	18016	Mm.297109	NM_010898	ENSMUSG00000009073	Nf2	merlin	neurofibromin 2	protein-coding
Diff_Nuc50294	chr2	138679602	138679741	+	0	NA	Intergenic	Intergenic	34006	NR_035477	100316816		NR_035477	ENSMUSG00000088983	Mir1952	mmu-mir-1952	microRNA 1952	ncRNA
Diff_Nuc26371	chr18	39648452	39648591	+	0	NA	Intergenic	Intergenic	-1622	NM_008173	14815	Mm.129481	NM_008173	ENSMUSG00000024431	Nr3c1	GR|Grl-1|Grl1	nuclear receptor subfamily 3, group C, member 1	protein-coding
Diff_Nuc9759	chr11	116744692	116744831	+	0	NA	Intergenic	Intergenic	29432	NM_178620	69900	Mm.348004	NM_178620	ENSMUSG00000020818	Mfsd11	2600014M03Rik	major facilitator superfamily domain containing 11	protein-coding
Diff_Nuc61751	chr8	93538002	93538141	+	0	NA	intron (NM_001310530, intron 21 of 37)	intron (NM_001310530, intron 21 of 37)	-55885	NM_001282001	19651	Mm.235580	NM_011250	ENSMUSG00000031666	Rbl2	PRB2|RBR-2|Rb2|p130	retinoblastoma-like 2	protein-coding
Diff_Nuc22393	chr14	64010862	64011001	+	0	NA	intron (NM_007549, intron 1 of 12)	MTC|LTR|MaLR	25093	NM_007549	12143	Mm.3962	NM_007549	ENSMUSG00000014453	Blk	-	B lymphoid kinase	protein-coding
Diff_Nuc41910	chr4	126020422	126020561	+	0	NA	3' UTR (NM_153402, exon 19 of 19)	3' UTR (NM_153402, exon 19 of 19)	-18048	NM_011902	24084	Mm.23895	NM_011902	ENSMUSG00000028845	Tekt2	AU014974|tektin-t	tektin 2	protein-coding
Diff_Nuc2089	chr13	62931962	62932101	+	0	NA	Intergenic	RMER17B|LTR|ERVK	27699	NM_007994	14120	Mm.391871	NM_007994	ENSMUSG00000021456	Fbp2	Fbp-1|Fbp1|Rae-30	fructose bisphosphatase 2	protein-coding
Diff_Nuc27485	chr18	88689422	88689561	+	0	NA	Intergenic	Lx9|LINE|L1	374108	NM_018821	54607	Mm.91920	NM_018821	ENSMUSG00000056153	Socs6	1500012M23Rik|5830401B18Rik|AI447482|Cis4|Cish4|HSPC060|SOCS-4|SOCS-6|SSI4|STAI4|STATI4|Socs4	suppressor of cytokine signaling 6	protein-coding
Diff_Nuc33896	chr6	113006802	113006941	+	0	NA	intron (NM_008188, intron 4 of 9)	intron (NM_008188, intron 4 of 9)	10550	NM_008188	14911	Mm.781	NM_008188	ENSMUSG00000030264	Thumpd3	AW556087|Gt(ROSA)26asSor|Gtrosa26as	THUMP domain containing 3	protein-coding
Diff_Nuc29871	chr7	108065792	108065931	+	0	NA	intron (NM_001081116, intron 1 of 20)	ID4|SINE|ID	14814	NM_001081116	207212	Mm.29954	NM_001081116	ENSMUSG00000032875	Arhgef17	8030463K16|AI428794|AW558066|BC035332|mKIAA0337	Rho guanine nucleotide exchange factor (GEF) 17	protein-coding
Diff_Nuc890	chr13	19686122	19686261	+	0	NA	intron (NM_134065, intron 2 of 2)	intron (NM_134065, intron 2 of 2)	25508	NM_134065	105298	Mm.275054	NM_134065	ENSMUSG00000002808	Epdr1	AU040950|AV006210|Epdm2|Epdr2|MERP-1|MERP-2|MERP2|Ucc1	ependymin related protein 1 (zebrafish)	protein-coding
Diff_Nuc51366	chr2	178389552	178389691	+	0	NA	Intergenic	L1M2|LINE|L1	224401	NM_198656	381409	Mm.330860	NM_198656	ENSMUSG00000039155	Cdh26	Gm1010	cadherin-like 26	protein-coding
Diff_Nuc59176	chr9	106914962	106915101	+	0	NA	intron (NM_153413, intron 12 of 52)	Lx5|LINE|L1	-120762	NM_029103	74840	Mm.29778	NM_029103	ENSMUSG00000032575	Manf	3230402M22Rik|AA407711|AA408789|AA673178|Armet|D17914|D18Mgi17	mesencephalic astrocyte-derived neurotrophic factor	protein-coding
Diff_Nuc33115	chr6	80922342	80922481	+	0	NA	Intergenic	Lx6|LINE|L1	923246	NR_106091	102465711		NR_106091	ENSMUSG00000106154	Mir7232	mmu-mir-7232	microRNA 7232	ncRNA
Diff_Nuc13483	chr17	6122172	6122311	+	0	NA	intron (NM_001103181, intron 1 of 13)	ORR1A2|LTR|MaLR	15411	NM_001103181	68842	Mm.449307	NM_054040	ENSMUSG00000034377	Tulp4	1110057P05Rik|2210038L17Rik|Tusp	tubby like protein 4	protein-coding
Diff_Nuc25384	chr18	6780972	6781111	+	0	NA	intron (NM_181070, intron 3 of 6)	intron (NM_181070, intron 3 of 6)	15876	NM_001278447	19330	Mm.132802	NM_181070	ENSMUSG00000073639	Rab18	AA959686	RAB18, member RAS oncogene family	protein-coding
Diff_Nuc59609	chr9	121784172	121784311	+	0	NA	Intergenic	Lx7|LINE|L1	-17123	NM_019814	56295	Mm.347915	NM_019814	ENSMUSG00000038412	Higd1a	2210020B17Rik|7420700H20Rik|AI303276|AW049839|HIMP1|Hig1	HIG1 domain family, member 1A	protein-coding
Diff_Nuc52505	chr1	43537732	43537871	+	0	NA	intron (NM_010879, intron 1 of 4)	intron (NM_010879, intron 1 of 4)	35205	NM_010879	17974	Mm.389903	NM_010879	ENSMUSG00000066877	Nck2	4833426I10Rik|Grb4|NCKbeta|Nck-2	non-catalytic region of tyrosine kinase adaptor protein 2	protein-coding
Diff_Nuc36379	chr5	65597322	65597461	+	0	NA	intron (NM_153391, intron 3 of 36)	MTC-int|LTR|MaLR	6456	NM_153391	213081	Mm.127550	NM_153391	ENSMUSG00000037890	Wdr19	C330027H04Rik|D330023L08Rik|DYF2|Ift144|PWDMP|mKIAA1638	WD repeat domain 19	protein-coding
Diff_Nuc23119	chr14	98539412	98539551	+	0	NA	intron (NM_007826, intron 1 of 11)	intron (NM_007826, intron 1 of 11)	29503	NM_001038610	13134	Mm.320593	NM_007826	ENSMUSG00000055639	Dach1	Dac|Dach	dachshund 1 (Drosophila)	protein-coding
Diff_Nuc36010	chr5	46453242	46453381	+	0	NA	Intergenic	MTA_Mm|LTR|MaLR	-129663	NR_110478	78106	Mm.243807	NR_110478	ENSMUSG00000106602	4930405L22Rik	-	RIKEN cDNA 4930405L22 gene	ncRNA
Diff_Nuc9263	chr11	102073282	102073421	+	0	NA	intron (NM_010412, intron 3 of 26)	intron (NM_010412, intron 3 of 26)	18113	NR_106179	102465892		NR_106179	ENSMUSG00000098863	Mir8101	Gm27705|mmu-mir-8101	microRNA 8101	ncRNA
Diff_Nuc42607	chr4	146403132	146403271	+	0	NA	intron (NM_001177767, intron 2 of 4).2	RMER6A|LTR|ERVK	7242	NM_001177767	100043034	Mm.422606	NM_001177767	ENSMUSG00000067919	Rex2	Gm13138|OTTMUSG00000010655	reduced expression 2	protein-coding
Diff_Nuc11966	chr10	78414482	78414621	+	0	NA	Intergenic	Intergenic	-3401	NM_207201	18372	Mm.391567	NM_207201	ENSMUSG00000094080	Olfr8	GA_x5J8B7TNKDU-1250-1574|MOR139-5P	olfactory receptor 8	protein-coding
Diff_Nuc35495	chr5	28939882	28940021	+	0	NA	intron (NR_015562, intron 2 of 6)	intron (NR_015562, intron 2 of 6)	-146310	NM_009170	20423	Mm.57202	NM_009170	ENSMUSG00000002633	Shh	9530036O11Rik|Dsh|Hhg1|Hx|Hxl3|M100081	sonic hedgehog	protein-coding
Diff_Nuc15383	chr17	77239342	77239481	+	0	NA	Intergenic	Intergenic	979048	NR_033456	100043885	Mm.127562	NR_033456		Gm4710	-	predicted gene 4710	ncRNA
Diff_Nuc61253	chr8	75507932	75508071	+	0	NA	intron (NM_010687, intron 6 of 14)	intron (NM_010687, intron 6 of 14)	-32410	NR_039551	100628574		NR_039551	ENSMUSG00000093140	Mir28b	mmu-mir-28b	microRNA 28b	ncRNA
Diff_Nuc50198	chr2	135834382	135834521	+	0	NA	intron (NM_013829, intron 36 of 36)	intron (NM_013829, intron 36 of 36)	-49212	NM_029530	76161	Mm.41638	NM_029530	ENSMUSG00000027270	Lamp5	3110035N03Rik|6330527O06Rik|BAD-LAMP|LAMP-5	lysosomal-associated membrane protein family, member 5	protein-coding
Diff_Nuc7828	chr11	60064142	60064281	+	0	NA	intron (NM_001039092, intron 7 of 13)	intron (NM_001039092, intron 7 of 13)	-30082	NM_001313979	20787	Mm.278701	NM_011480	ENSMUSG00000020538	Srebf1	ADD1|SREBP-1a|SREBP1|SREBP1c|bHLHd1	sterol regulatory element binding transcription factor 1	protein-coding
Diff_Nuc55556	chr1	175309562	175309701	+	0	NA	Intergenic	L1ME4a|LINE|L1	-11805	NM_053199	94332	Mm.330524	NM_053199	ENSMUSG00000005338	Cadm3	BIgR|Igsf4b|Necl-1|Necl1|SynCAM3|Tsll1	cell adhesion molecule 3	protein-coding
Diff_Nuc60496	chr8	40386232	40386371	+	0	NA	intron (NR_044988, intron 1 of 3)	RMER1A|Other|Other	2967	NR_044988	621335	Mm.208080	NR_044988	ENSMUSG00000109827	Gm6213	EG621335	predicted gene 6213	ncRNA
Diff_Nuc25644	chr18	16797742	16797881	+	0	NA	intron (NM_007664, intron 7 of 15)	intron (NM_007664, intron 7 of 15)	169944	NM_007664	12558	Mm.257437	NM_007664	ENSMUSG00000024304	Cdh2	CDHN|N-CAD|Ncad	cadherin 2	protein-coding
Diff_Nuc48873	chr2	90940712	90940851	+	0	NA	intron (NM_011355, intron 2 of 4)	intron (NM_011355, intron 2 of 4)	3946	NM_011355	20375	Mm.1302	NM_011355	ENSMUSG00000002111	Spi1	Dis-1|Dis1|PU.1|Sfpi-1|Sfpi1|Spi-1|Tcfpu1|Tfpu.1	spleen focus forming virus (SFFV) proviral integration oncogene	protein-coding
Diff_Nuc45055	chr3	95848542	95848681	+	0	NA	intron (NM_013841, intron 7 of 14)	intron (NM_013841, intron 7 of 14)	13767	NM_013841	22365	Mm.263185	NM_013841	ENSMUSG00000015747	Vps45	AI462172|AW554165|mVps45	vacuolar protein sorting 45	protein-coding
Diff_Nuc28383	chr7	50814832	50814971	+	0	NA	Intergenic	Intergenic	-2839	NM_001008549	210104	Mm.333821	NM_001008549	ENSMUSG00000056592	Zfp658	-	zinc finger protein 658	protein-coding
Diff_Nuc18050	chr16	86887322	86887461	+	0	NA	Intergenic	Intergenic	-467039	NM_001159331	67768	Mm.296532	NM_026366	ENSMUSG00000044442	N6amt1	5830445C04Rik|Hemk2|Pred28	N-6 adenine-specific DNA methyltransferase 1 (putative)	protein-coding
Diff_Nuc50565	chr2	146924682	146924821	+	0	NA	Intergenic	MTEa-int|LTR|MaLR	-13670	NM_023504	228731	Mm.315498	NM_023504	ENSMUSG00000054160	Nkx2-4	1700001P03Rik|Nkx-2.4|tinman	NK2 homeobox 4	protein-coding
Diff_Nuc35066	chr5	14961812	14961951	+	0	NA	intron (NR_001584, intron 2 of 3)	RMER6D|LTR|ERVK	16587	NR_001584	74062	Mm.394766	NR_001584		Speer8-ps1	4933405L09Rik|SPEER-8|Speer8-ps	spermatogenesis associated glutamate (E)-rich protein 8, pseudogene 1	pseudo
Diff_Nuc10230	chr10	10738512	10738651	+	0	NA	intron (NM_001114333, intron 2 of 9)	B1F|SINE|Alu	63548	NM_001114333	14816	Mm.391904	NM_016976	ENSMUSG00000019828	Grm1	4930455H15Rik|ENSMUSG00000075319|Gm10828|Gprc1a|mGluR1|nmf373|rcw|wobl	glutamate receptor, metabotropic 1	protein-coding
Diff_Nuc9465	chr11	106636032	106636171	+	0	NA	intron (NM_015810, intron 4 of 7)	B3|SINE|B2	4728	NR_027785	50776	Mm.859	NM_015810	ENSMUSG00000020718	Polg2	-	polymerase (DNA directed), gamma 2, accessory subunit	protein-coding
Diff_Nuc51935	chr1	22678452	22678591	+	0	NA	intron (NM_183018, intron 2 of 30)	intron (NM_183018, intron 2 of 30)	134042	NM_001012625	116837	Mm.60061	NM_053270	ENSMUSG00000041670	Rims1	C030033M19Rik|RIM1|RIM1a|RIM1alpha|Rab3ip1|Rim|Serg1|mKIAA0340	regulating synaptic membrane exocytosis 1	protein-coding
Diff_Nuc43458	chr3	28534392	28534531	+	0	NA	intron (NM_001163008, intron 20 of 30)	intron (NM_001163008, intron 20 of 30)	-62364	NM_031197	20526	Mm.18443	NM_031197	ENSMUSG00000027690	Slc2a2	AI266973|Glut-2|Glut2	solute carrier family 2 (facilitated glucose transporter), member 2	protein-coding
Diff_Nuc20926	chr15	102243292	102243431	+	0	NA	intron (NM_013672, intron 3 of 5)	intron (NM_013672, intron 3 of 5)	6614	NM_013672	20683	Mm.4618	NM_013672	ENSMUSG00000001280	Sp1	1110003E12Rik|AA450830|AI845540|Sp1-1	trans-acting transcription factor 1	protein-coding
Diff_Nuc15531	chr17	82053542	82053681	+	0	NA	intron (NR_104580, intron 1 of 8)	intron (NR_104580, intron 1 of 8)	84116	NM_001286684	20541	Mm.265834	NM_011406	ENSMUSG00000054640	Slc8a1	AI852629|AV344025|D930008O12Rik|Ncx1	solute carrier family 8 (sodium/calcium exchanger), member 1	protein-coding
Diff_Nuc9424	chr11	105905902	105906041	+	0	NA	intron (NM_027946, intron 1 of 6)	MIRc|SINE|MIR	7785	NM_027946	71833	Mm.307455	NM_027946	ENSMUSG00000049354	Dcaf7	1700012F10Rik|2610037L01Rik|C86529|HAN11|Wdr68	DDB1 and CUL4 associated factor 7	protein-coding
Diff_Nuc55189	chr1	161744132	161744271	+	0	NA	intron (NM_022312, intron 2 of 22)	intron (NM_022312, intron 2 of 22)	-230310	NR_028111	67647	Mm.171518	NM_001024470	ENSMUSG00000090394	4930523C07Rik	-	RIKEN cDNA 4930523C07 gene	protein-coding
Diff_Nuc16461	chr16	20491612	20491751	+	0	NA	Intergenic	RMER6A|LTR|ERVK	-7209	NM_172265	224045	Mm.233855	NM_172265	ENSMUSG00000003235	Eif2b5	C81315	eukaryotic translation initiation factor 2B, subunit 5 epsilon	protein-coding
Diff_Nuc34388	chr6	129324142	129324281	+	0	NA	Intergenic	Intergenic	11310	NM_027709	71183	Mm.79402	NM_027709	ENSMUSG00000030158	Clec12b	4933425B16Rik	C-type lectin domain family 12, member B	protein-coding
Diff_Nuc18655	chr15	14703682	14703821	+	0	NA	Intergenic	Intergenic	-1600321	NM_007666	12563	Mm.57048	NM_007666	ENSMUSG00000039385	Cdh6	cad6	cadherin 6	protein-coding
Diff_Nuc44907	chr3	90361652	90361791	+	0	NA	Intergenic	RLTR14|LTR|ERV1	16576	NM_026416	67860	Mm.331185	NM_026416	ENSMUSG00000074457	S100a16	2300002L21Rik|AI325039|AI663996|DT1P1A7|S100F	S100 calcium binding protein A16	protein-coding
Diff_Nuc13683	chr17	12951262	12951401	+	0	NA	intron (NM_010515, intron 1 of 47)	(CATA)n|Simple_repeat|Simple_repeat	11241	NM_010515	16004	Mm.26553	NM_010515	ENSMUSG00000023830	Igf2r	AI661837|CD222|CI-MPR|M6P/IGF2R|Mpr300	insulin-like growth factor 2 receptor	protein-coding
Diff_Nuc32492	chr6	53987732	53987871	+	0	NA	Intergenic	Intergenic	-2125	NM_001163640	69993	Mm.321147	NM_023543	ENSMUSG00000004633	Chn2	1700026N20Rik|4930557O16Rik|ARHGAP3|Bch	chimerin 2	protein-coding
Diff_Nuc15165	chr17	67549512	67549651	+	0	NA	intron (NM_008984, intron 1 of 30)	intron (NM_008984, intron 1 of 30)	154218	NM_008984	19274	Mm.311809	NM_008984	ENSMUSG00000033278	Ptprm	RPTPmu|mKIAA4044	protein tyrosine phosphatase, receptor type, M	protein-coding
Diff_Nuc41702	chr4	119069862	119070001	+	0	NA	intron (NM_001270435, intron 4 of 14)	B1_Mus2|SINE|Alu	-13492	NM_028857	73332	Mm.425204	NM_028506	ENSMUSG00000028637	Ccdc30	1700001O02Rik|1700041C02Rik|1700111D19Rik|4930445I03Rik	coiled-coil domain containing 30	protein-coding
Diff_Nuc10120	chr10	7096212	7096351	+	0	NA	Intergenic	ETnERV3-int|LTR|ERVK	17511	NM_001204916	670558	Mm.398582	NM_001204916	ENSMUSG00000091618	H60c	4632413I24Rik|Gm9491	histocompatibility 60c	protein-coding
Diff_Nuc14446	chr17	36017162	36017301	+	0	NA	intron (NM_026987, intron 1 of 19)	intron (NM_026987, intron 1 of 19)	508	NM_026987	69192	Mm.390986	NM_026987	ENSMUSG00000024422	Dhx16	2410006N22Rik|DBP2|Ddx16|mKIAA0577	DEAH (Asp-Glu-Ala-His) box polypeptide 16	protein-coding
Diff_Nuc47787	chr2	47256922	47257061	+	0	NA	Intergenic	RLTR26|LTR|ERVK	-1412638	NM_007396	11480	Mm.314338	NM_007396	ENSMUSG00000052155	Acvr2a	ActrIIa|Acvr2|TactrII	activin receptor IIA	protein-coding
Diff_Nuc62085	chr8	109278632	109278771	+	0	NA	intron (NM_173037, intron 14 of 17)	L1_Mus1|LINE|L1	71733	NM_173037	272538	Mm.87151	NM_173037	ENSMUSG00000041949	Tango6	AW413431|E330010G16|Tmco7	transport and golgi organization 6	protein-coding
Diff_Nuc15026	chr17	63546512	63546651	+	0	NA	intron (NM_015794, intron 7 of 8)	intron (NM_015794, intron 7 of 8)	115741	NR_130176	414079	Mm.444282	NR_130176	ENSMUSG00000090565	4930405O22Rik	-	RIKEN cDNA 4930405O22 gene	ncRNA
Diff_Nuc10768	chr10	32269632	32269771	+	0	NA	intron (NM_001025286, intron 1 of 3)	Lx3A|LINE|L1	340020	NM_001013411	432450	Mm.49665	NM_001013411	ENSMUSG00000069670	Nkain2	6330571D19Rik|AW455467|Tcba1	Na+/K+ transporting ATPase interacting 2	protein-coding
Diff_Nuc40228	chr4	61507382	61507521	+	0	NA	Intergenic	MTD|LTR|MaLR	-11237	NM_008649	17844	Mm.445286	NM_008649	ENSMUSG00000058523	Mup5	Mup18	major urinary protein 5	protein-coding
Diff_Nuc17941	chr16	80803992	80804131	+	0	NA	Intergenic	Intergenic	-396881	NM_001113208	17968	Mm.433941	NM_010954	ENSMUSG00000022762	Ncam2	Ncam-2|Ocam|RNCAM	neural cell adhesion molecule 2	protein-coding
Diff_Nuc2505	chr13	80252742	80252881	+	0	NA	Intergenic	Lx4B|LINE|L1	-769872	NM_001042591	105171	Mm.423137	NM_001042591	ENSMUSG00000074794	Arrdc3	AI450344|mKIAA1376	arrestin domain containing 3	protein-coding
Diff_Nuc8998	chr11	95342872	95343011	+	0	NA	intron (NM_025287, intron 6 of 10)	intron (NM_025287, intron 6 of 10)	32938	NM_130858	104079	Mm.22970	NM_130858	ENSMUSG00000046719	Nxph3	-	neurexophilin 3	protein-coding
Diff_Nuc41002	chr4	96015742	96015881	+	0	NA	promoter-TSS (NM_001004141)	promoter-TSS (NM_001004141)	-440	NM_001004141	100066	Mm.26915	NM_001004141	ENSMUSG00000066097	Cyp2j11	AI314783|Cyp2j11-ps	cytochrome P450, family 2, subfamily j, polypeptide 11	protein-coding
Diff_Nuc31075	chr6	3056462	3056601	+	0	NA	Intergenic	Intergenic	-181988	NR_036696	667335	Mm.380219	NR_036696	ENSMUSG00000106779	Gm8579	EG667335	spermatogenesis associated glutamate (E)-rich protein 4a pseudogene	pseudo
Diff_Nuc7245	chr11	39235047	39235186	+	0	NA	Intergenic	Intergenic	-31389	NR_126439	75315	Mm.461295	NR_126439		4930553C11Rik	-	RIKEN cDNA 4930553C11 gene	ncRNA
Diff_Nuc4834	chr12	67909922	67910061	+	0	NA	intron (NM_207010, intron 2 of 15)	Lx4B|LINE|L1	413545	NM_001193266	320772	Mm.227680	NM_207010	ENSMUSG00000034912	Mdga2	6720489L24Rik|9330209L04Rik|Adp|Mamdc1	MAM domain containing glycosylphosphatidylinositol anchor 2	protein-coding
Diff_Nuc2393	chr13	76015782	76015921	+	0	NA	intron (NM_028493, intron 9 of 11)	intron (NM_028493, intron 9 of 11)	38517	NM_053108	93692	Mm.25844	NM_053108	ENSMUSG00000021591	Glrx	C86710|D13Wsu156e|Glrx1|Grx1|TTase	glutaredoxin	protein-coding
Diff_Nuc55986	chr1	190827052	190827191	+	0	NA	intron (NM_172650, intron 1 of 17)	intron (NM_172650, intron 1 of 17)	4598	NM_172650	226823	Mm.209880	NM_172650	ENSMUSG00000026608	Kctd3	4930438A20Rik|9330185B06|E330032J19Rik|NY-REN-45	potassium channel tetramerisation domain containing 3	protein-coding
Diff_Nuc18172	chr16	90829642	90829781	+	0	NA	intron (NM_001316760, intron 2 of 9)	intron (NM_001316760, intron 2 of 9)	-1393	NR_133572	70967	Mm.253077	NM_027627	ENSMUSG00000039903	Eva1c	1700092M14Rik|4931408A02Rik|Fam176c	eva-1 homolog C (C. elegans)	protein-coding
Diff_Nuc43384	chr3	24901782	24901921	+	0	NA	Intergenic	Intergenic	-218923	NM_001326288	635702	Mm.448351	NM_001326288	ENSMUSG00000102758	Naaladl2	2810043G22Rik|EG635702|Gm1021	N-acetylated alpha-linked acidic dipeptidase-like 2	protein-coding
Diff_Nuc59966	chr8	14573812	14573951	+	0	NA	intron (NM_172910, intron 4 of 15)	intron (NM_172910, intron 4 of 15)	-314655	NM_012000	26889	Mm.254027	NM_012000	ENSMUSG00000026317	Cln8	mnd	ceroid-lipofuscinosis, neuronal 8	protein-coding
Diff_Nuc24327	chr19	24399942	24400081	+	0	NA	intron (NM_008846, intron 13 of 14)	(CATG)n|Simple_repeat|Simple_repeat	-44935	NM_008044	14297	Mm.7319	NM_008044	ENSMUSG00000059363	Fxn	FA|FARR|Frda|X25	frataxin	protein-coding
Diff_Nuc39124	chr4	13062862	13063001	+	0	NA	Intergenic	Intergenic	228947	NM_001171801	208820	Mm.12057	NM_173746	ENSMUSG00000055963	Triqk	C130086A10|Gm11818|OTTMUSG00000004461	triple QxxK/R motif containing	protein-coding
Diff_Nuc45623	chr3	118066302	118066441	+	0	NA	Intergenic	Intergenic	-70404	NR_029551	387155		NR_029551	ENSMUSG00000065569	Mir137	Mirn137|mir-137|mmu-mir-137	microRNA 137	ncRNA
Diff_Nuc37313	chr5	103990962	103991101	+	0	NA	exon (NM_011204, exon 29 of 48)	exon (NM_011204, exon 29 of 48)	67391	NM_029415	75750	Mm.7446	NM_029415	ENSMUSG00000029321	Slc10a6	8430417G17Rik|C78479|Soat	solute carrier family 10 (sodium/bile acid cotransporter family), member 6	protein-coding
Diff_Nuc33137	chr6	82399632	82399771	+	0	NA	intron (NM_009313, intron 2 of 5)	intron (NM_009313, intron 2 of 5)	47232	NM_009313	21336	Mm.8055	NM_009313	ENSMUSG00000030043	Tacr1	Nk1r|Spr|Tac1r	tachykinin receptor 1	protein-coding
Diff_Nuc47221	chr2	27895432	27895571	+	0	NA	TTS (NM_015734)	TTS (NM_015734)	44897	NM_010190	14134	Mm.182935	NM_010190	ENSMUSG00000026835	Fcnb	Fcn2	ficolin B	protein-coding
Diff_Nuc29670	chr7	101623372	101623511	+	0	NA	Intergenic	L1Md_F2|LINE|L1	1395052	NM_021427	58238	Mm.113787	NM_021427	ENSMUSG00000051515	Fam181b	A830059I20Rik|AB041569	family with sequence similarity 181, member B	protein-coding
Diff_Nuc7955	chr11	63959092	63959231	+	0	NA	Intergenic	(CA)n|Simple_repeat|Simple_repeat	66175	NR_033780	66456	Mm.124828	NR_033780	ENSMUSG00000087497	2810001G20Rik	AW045514	RIKEN cDNA 2810001G20 gene	ncRNA
Diff_Nuc56949	chr9	31460622	31460761	+	0	NA	Intergenic	Intergenic	-188868	NM_144936	235135	Mm.390134	NM_144936	ENSMUSG00000041737	Tmem45b	BC018222	transmembrane protein 45b	protein-coding
Diff_Nuc50024	chr2	130087082	130087221	+	0	NA	intron (NM_138655, intron 19 of 19)	intron (NM_138655, intron 19 of 19)	-12997	NM_024193	67134	Mm.29363	NM_024193	ENSMUSG00000027405	Nop56	2310044F10Rik|Nol5a	NOP56 ribonucleoprotein	protein-coding
Diff_Nuc60088	chr8	20002022	20002161	+	0	NA	intron (NR_030708, intron 2 of 4).2	intron (NR_030708, intron 2 of 4).2	18187	NR_030708	547150	Mm.359054	NR_030708	ENSMUSG00000071796	6820431F20Rik	-	cadherin 11 pseudogene	pseudo
Diff_Nuc5824	chr12	101568072	101568211	+	0	NA	intron (NM_001033213, intron 18 of 19)	B4|SINE|B4	53322	NR_045741	100038713	Mm.470751	NR_045741		Gm10432	ENSMUSG00000072882	predicted gene 10432	ncRNA
Diff_Nuc14921	chr17	56750902	56751041	+	0	NA	Intergenic	Intergenic	-1777	NM_153152	224904	Mm.34002	NM_153152	ENSMUSG00000049760	2410015M20Rik	Mic13|QIL1|sr104	RIKEN cDNA 2410015M20 gene	protein-coding
Diff_Nuc15049	chr17	63829262	63829401	+	0	NA	intron (NM_015794, intron 3 of 8)	L1MC1|LINE|L1	20598	NM_015794	50758	Mm.136366	NM_015794	ENSMUSG00000023965	Fbxl17	6330576B01Rik|AI452053|BB073797|C130023C01Rik|Fbx13|Fbxo13	F-box and leucine-rich repeat protein 17	protein-coding
Diff_Nuc8958	chr11	94272982	94273121	+	0	NA	intron (NM_009783, intron 33 of 35)	intron (NM_009783, intron 33 of 35)	-18761	NM_029600	76408	Mm.23942	NM_029600	ENSMUSG00000020865	Abcc3	1700019L09Rik|ABC31|MLP2|MOAT-D|MRP3	ATP-binding cassette, sub-family C (CFTR/MRP), member 3	protein-coding
Diff_Nuc7236	chr11	39040212	39040351	+	0	NA	Intergenic	Intergenic	163446	NR_126439	75315	Mm.461295	NR_126439		4930553C11Rik	-	RIKEN cDNA 4930553C11 gene	ncRNA
Diff_Nuc29461	chr7	95474502	95474641	+	0	NA	Intergenic	Intergenic	47976	NM_001311790	13032	Mm.89295	NM_009982	ENSMUSG00000030560	Ctsc	AI047818|CatC|DPP1|DPPI	cathepsin C	protein-coding
Diff_Nuc17986	chr16	83603702	83603841	+	0	NA	Intergenic	MTA_Mm|LTR|MaLR	-767617	NR_040567	75247	Mm.417813	NR_040567		4930553E22Rik	-	RIKEN cDNA 4930553E22 gene	ncRNA
Diff_Nuc7511	chr11	49774792	49774931	+	0	NA	intron (NM_001347462, intron 6 of 13)	intron (NM_001347462, intron 6 of 13)	59198	NM_001347462	74563	Mm.258798	NM_029004	ENSMUSG00000020374	Rasgef1c	9130006A14Rik	RasGEF domain family, member 1C	protein-coding
Diff_Nuc1939	chr13	56674772	56674911	+	0	NA	Intergenic	Intergenic	-24942	NM_010702	16841	Mm.16973	NM_010702	ENSMUSG00000021539	Lect2	-	leukocyte cell-derived chemotaxin 2	protein-coding
Diff_Nuc26787	chr18	59683032	59683171	+	0	NA	Intergenic	Lx4B|LINE|L1	-56183	NR_105773	102465182		NR_105773	ENSMUSG00000098287	Mir6355	Gm27473|mmu-mir-6355	microRNA 6355	ncRNA
Diff_Nuc48773	chr2	85378822	85378961	+	0	NA	Intergenic	Lx4A|LINE|L1	-19799	NM_001081664	228151	Mm.17636	NM_001081664	ENSMUSG00000075217	4833423E24Rik	Fads2p1|Gm113	RIKEN cDNA 4833423E24 gene	protein-coding
Diff_Nuc51013	chr2	161443162	161443301	+	0	NA	intron (NM_021464, intron 15 of 29)	Lx6|LINE|L1	-508409	NR_126509	71389	Mm.122738	NM_173368	ENSMUSG00000057133	Chd6	5430439G14Rik|6330406J24Rik|CHD-6	chromodomain helicase DNA binding protein 6	protein-coding
Diff_Nuc21452	chr14	27588592	27588731	+	0	NA	Intergenic	L1M2|LINE|L1	-99329	NM_178668	211948	Mm.290758	NM_178668	ENSMUSG00000043702	Pde12	2'-PDE|E430028B21Rik	phosphodiesterase 12	protein-coding
Diff_Nuc17556	chr16	60562322	60562461	+	0	NA	intron (NM_007938, intron 1 of 17)	MTA_Mm|LTR|MaLR	42966	NM_007938	13840	Mm.455790	NM_007938	ENSMUSG00000055540	Epha6	Ehk2|Hek12|m-ehk2	Eph receptor A6	protein-coding
Diff_Nuc57471	chr9	49516332	49516471	+	0	NA	intron (NM_001311065, intron 1 of 17)	intron (NM_001311065, intron 1 of 17)	90773	NM_001081445	17967	Mm.4974	NM_010875	ENSMUSG00000039542	Ncam1	CD56|E-NCAM|NCAM-1|Ncam	neural cell adhesion molecule 1	protein-coding
Diff_Nuc56400	chr9	9946052	9946191	+	0	NA	intron (NM_001033359, intron 9 of 20)	RMER17B|LTR|ERVK	51690	NR_105745	102466147		NR_105745	ENSMUSG00000098408	Mir6237	Gm27411|mmu-mir-6237	microRNA 6237	ncRNA
Diff_Nuc18864	chr15	25322732	25322871	+	0	NA	intron (NM_027395, intron 1 of 1)	intron (NM_027395, intron 1 of 1)	20718	NM_027395	70350	Mm.29586	NM_027395	ENSMUSG00000045763	Basp1	2610024P12Rik|CAP-23|CAP23|Ckap3|NAP-22|NAP22	brain abundant, membrane attached signal protein 1	protein-coding
Diff_Nuc42641	chr4	147202032	147202171	+	0	NA	intron (NM_198619, intron 3 of 3)	MurSatRep1|Unknown|Unknown	-5790	NR_033639	277692	Mm.474523	NR_033639	ENSMUSG00000080059	Rps19-ps3	BE292558|Gm13143|OTTMUSG00000010662|Rps19-ps	ribosomal protein S19, pseudogene 3	pseudo
Diff_Nuc14785	chr17	50979632	50979771	+	0	NA	intron (NM_001285991, intron 15 of 22)	intron (NM_001285991, intron 15 of 22)	141695	NM_001297747	12228	Mm.392910	NM_009770	ENSMUSG00000022863	Btg3	ANA|tob5	B cell translocation gene 3	protein-coding
Diff_Nuc56292	chr9	4744912	4745051	+	0	NA	intron (NM_001113180, intron 3 of 16)	Lx8|LINE|L1	51253	NM_001113180	14802	Mm.209263	NM_019691	ENSMUSG00000025892	Gria4	GluA4|GluR-D|Glur-4|Glur4|Gluralpha4|spkw1	glutamate receptor, ionotropic, AMPA4 (alpha 4)	protein-coding
Diff_Nuc15929	chr16	4136612	4136751	+	0	NA	intron (NM_001025432, intron 5 of 30)	intron (NM_001025432, intron 5 of 30)	-58871	NM_026508	68015	Mm.123366	NM_026508	ENSMUSG00000005981	Trap1	2410002K23Rik|HSP75	TNF receptor-associated protein 1	protein-coding
Diff_Nuc48647	chr2	80144337	80144476	+	0	NA	Intergenic	Intergenic	-11217	NM_024181	66861	Mm.21762	NM_024181	ENSMUSG00000027006	Dnajc10	1200006L06Rik|D2Ertd706e|ERdj5|JPDI	DnaJ heat shock protein family (Hsp40) member C10	protein-coding
Diff_Nuc48960	chr2	93124902	93125041	+	0	NA	intron (NM_183180, intron 2 of 9)	intron (NM_183180, intron 2 of 9)	49673	NM_183180	241556	Mm.274159	NM_183180	ENSMUSG00000027217	Tspan18	2610042G18Rik|6720430O15|BB226562	tetraspanin 18	protein-coding
Diff_Nuc34906	chr5	7359422	7359561	+	0	NA	Intergenic	Intergenic	-15113	NM_001163223	207618	Mm.478808	NM_001163223	ENSMUSG00000092094	Zfp804b	Gm441	zinc finger protein 804B	protein-coding
Diff_Nuc62205	chr8	113411872	113412011	+	0	NA	intron (NR_052009, intron 15 of 23)	intron (NR_052009, intron 15 of 23)	14447	NM_172283	234730	Mm.102591	NM_172283	ENSMUSG00000033703	Fuk	1110046B12Rik|AI303278	fucokinase	protein-coding
Diff_Nuc45262	chr3	103828602	103828741	+	0	NA	intron (NM_133853, intron 16 of 21)	intron (NM_133853, intron 16 of 21)	-56432	NR_030676	100125931	Mm.400392	NR_030676	ENSMUSG00000089998	Phtf1os	A130049A11Rik	putative homeodomain transcription factor 1, opposite strand	ncRNA
Diff_Nuc524	chr13	4465062	4465201	+	0	NA	Intergenic	RLTR9E|LTR|ERVK	31542	NM_030611	83702	Mm.196666	NM_030611	ENSMUSG00000021210	Akr1c6	3alpha-HSD|Akr1c1|Hsd17b5	aldo-keto reductase family 1, member C6	protein-coding
Diff_Nuc19717	chr15	59030512	59030651	+	0	NA	Intergenic	L2b|LINE|L2	-107922	NR_045613	100416830	Mm.490788	NR_045613	ENSMUSG00000098528	Zfp572	4930472F24Rik	zinc finger protein 572	pseudo
Diff_Nuc52153	chr1	29460922	29461061	+	0	NA	Intergenic	Intergenic	-17342	NR_105760	102465174		NR_105760	ENSMUSG00000099257	Mir6342	Gm27268|mmu-mir-6342	microRNA 6342	ncRNA
Diff_Nuc27613	chr7	6585072	6585211	+	0	NA	Intergenic	Intergenic	29938	NR_131759	76637	Mm.159751	NR_131759	ENSMUSG00000108113	Zim2	1700116N21Rik	zinc finger, imprinted 2	ncRNA
Diff_Nuc24955	chr19	46662972	46663111	+	0	NA	intron (NM_053196, intron 6 of 11)	ID4|SINE|ID	-10555	NM_001177812	226178	Mm.329895	NM_146099	ENSMUSG00000047731	Wbp1l	D19Wsu162e|Opal1	WW domain binding protein 1 like	protein-coding
Diff_Nuc11302	chr10	54810642	54810781	+	0	NA	Intergenic	Intergenic	1014983	NR_038016	100502920	Mm.403982	NR_038016	ENSMUSG00000097069	Gm16998	-	predicted gene, 16998	ncRNA
Diff_Nuc57996	chr9	65308022	65308161	+	0	NA	promoter-TSS (NM_138584)	promoter-TSS (NM_138584)	-653	NM_138584	27965	Mm.272475	NM_138584	ENSMUSG00000032388	Spg21	ACP33|BM-019|C78576|D9Wsu18e|GL010|MAST	spastic paraplegia 21 homolog (human)	protein-coding
Diff_Nuc51987	chr1	24048112	24048251	+	0	NA	intron (NM_026604, intron 11 of 20)	B4A|SINE|B4	-35702	NM_026503	68002	Mm.250424	NM_026503	ENSMUSG00000026154	Sdhaf4	1110058L19Rik|1700001E18Rik|C6orf57	succinate dehydrogenase complex assembly factor 4	protein-coding
Diff_Nuc44100	chr3	56586512	56586651	+	0	NA	Intergenic	Intergenic	519260	NM_008536	17112	Mm.856	NM_008536	ENSMUSG00000027800	Tm4sf1	L6|M3s1	transmembrane 4 superfamily member 1	protein-coding
Diff_Nuc32776	chr6	65014412	65014551	+	0	NA	intron (NM_001253392, intron 3 of 21)	intron (NM_001253392, intron 3 of 21)	21281	NM_001253392	13990	Mm.99113	NM_007958	ENSMUSG00000029920	Smarcad1	AV081750|AW226546|D6Pas1|Etl1|mKIAA1122	SWI/SNF-related, matrix-associated actin-dependent regulator of chromatin, subfamily a, containing DEAD/H box 1	protein-coding
Diff_Nuc26008	chr18	31501552	31501691	+	0	NA	Intergenic	RMER1C|Other|Other	-24839	NM_009065	19762	Mm.5163	NM_009065	ENSMUSG00000057455	Rit2	RIBA|Rin|Roc2	Ras-like without CAAX 2	protein-coding
Diff_Nuc56318	chr9	5829232	5829371	+	0	NA	Intergenic	RMER12|LTR|ERVK	-339311	NM_027924	71785	Mm.390122	NM_027924	ENSMUSG00000032006	Pdgfd	1110003I09Rik	platelet-derived growth factor, D polypeptide	protein-coding
Diff_Nuc11974	chr10	79028292	79028431	+	0	NA	Intergenic	Lx2B|LINE|L1	-10488	NM_027422	70427	Mm.334193	NM_027422	ENSMUSG00000042570	Mier2	2700087H15Rik|mKIAA1193	MIER family member 2	protein-coding
Diff_Nuc38987	chr4	8596632	8596771	+	0	NA	Intergenic	Lx9|LINE|L1	-20852	NM_001277149	320790	Mm.138792	NM_001033395	ENSMUSG00000041235	Chd7	A730019I05Rik|Cycn|Cyn|Dz|Edy|Flo|GENA 47|GENA 60|Gena 52|Lda|Mt|Obt|Todo|WBE1|Whi|metis	chromodomain helicase DNA binding protein 7	protein-coding
Diff_Nuc4232	chr12	38167602	38167741	+	0	NA	intron (NM_178767, intron 12 of 12)	intron (NM_178767, intron 12 of 12)	199445	NM_178767	319660	Mm.485540	NM_178767	ENSMUSG00000050103	Agmo	A530016O06Rik|AI790538|Tmem195	alkylglycerol monooxygenase	protein-coding
Diff_Nuc12642	chr10	101722032	101722171	+	0	NA	intron (NM_001162369, intron 1 of 5)	Lx2|LINE|L1	100388	NM_001162369	67569	Mm.25252	NM_026243	ENSMUSG00000019888	Mgat4c	9130411I17Rik|GntIVh	MGAT4 family, member C	protein-coding
Diff_Nuc49534	chr2	113813662	113813801	+	0	NA	Intergenic	Intergenic	-25570	NR_028423	320846	Mm.441458	NR_028423	ENSMUSG00000087694	A530058N18Rik	-	RIKEN cDNA A530058N18 gene	ncRNA
Diff_Nuc1574	chr13	44331982	44332121	+	0	NA	Intergenic	B1_Mur1|SINE|Alu	-20195	NR_045088	100503592	Mm.184925	NR_045088		A330076C08Rik	-	RIKEN cDNA A330076C08 gene	ncRNA
Diff_Nuc62157	chr8	112209272	112209411	+	0	NA	intron (NM_028018, intron 1 of 9)	PB1|SINE|Alu	7853	NM_028018	71955	Mm.290036	NM_028018	ENSMUSG00000031729	Ist1	2400003C14Rik|AW536298|mKIAA0174	increased sodium tolerance 1 homolog (yeast)	protein-coding
Diff_Nuc41885	chr4	124702662	124702801	+	0	NA	Intergenic	Intergenic	-4527	NM_145552	230737	Mm.90760	NM_145552	ENSMUSG00000028869	Gnl2	BC003262|HUMAUANTIG|Ngp-1	guanine nucleotide binding protein-like 2 (nucleolar)	protein-coding
Diff_Nuc49194	chr2	101282672	101282811	+	0	NA	Intergenic	Lx4A|LINE|L1	-182164	NM_009020	19374	Mm.4988	NM_009020	ENSMUSG00000032864	Rag2	Rag-2	recombination activating gene 2	protein-coding
Diff_Nuc19622	chr15	55223822	55223961	+	0	NA	intron (NM_181277, intron 14 of 47)	Lx5|LINE|L1	84586	NM_181277	12818	Mm.297859	NM_181277	ENSMUSG00000022371	Col14a1	5730412L22Rik|AW108078	collagen, type XIV, alpha 1	protein-coding
Diff_Nuc59985	chr8	16513452	16513591	+	0	NA	intron (NM_053171, intron 5 of 69)	intron (NM_053171, intron 5 of 69)	-344683	NR_037214	100526464		NR_037214	ENSMUSG00000093142	Mir3106	mir-3106|mmu-mir-3106	microRNA 3106	ncRNA
Diff_Nuc27156	chr18	72932432	72932571	+	0	NA	Intergenic	Intergenic	-421778	NM_007831	13176	Mm.167882	NM_007831	ENSMUSG00000060534	Dcc	C030036D22Rik|Igdcc1	deleted in colorectal carcinoma	protein-coding
Diff_Nuc25109	chr19	53647642	53647781	+	0	NA	Intergenic	B1F2|SINE|Alu	-27175	NM_007790	13006	Mm.14910	NM_007790	ENSMUSG00000024974	Smc3	Bamacan|Cspg6|HCAP|Mmip1|SMC-3|SmcD	structural maintenance of chromosomes 3	protein-coding
Diff_Nuc51961	chr1	23337272	23337411	+	0	NA	Intergenic	RMER21B|LTR|ERV1	38801	NR_029717	723964		NR_029717	ENSMUSG00000065567	Mir30c-2	Mirn30c-2|mir-30c-2	microRNA 30c-2	ncRNA
Diff_Nuc42640	chr4	147185672	147185811	+	0	NA	Intergenic	RLTR40|LTR|ERVK	-1844	NM_001127189	100041677	Mm.327194	NM_001127189	ENSMUSG00000078495	Zfp984	Gm13157|OTTMUSG00000010679	zinc finger protein 984	protein-coding
Diff_Nuc40717	chr4	82957632	82957771	+	0	NA	intron (NM_027238, intron 1 of 19)	intron (NM_027238, intron 1 of 19)	12392	NM_027238	69863	Mm.5540	NM_025782	ENSMUSG00000038172	Ttc39b	1810054D07Rik|9130422G05Rik|AI450603|AV103077|AW215585	tetratricopeptide repeat domain 39B	protein-coding
Diff_Nuc27860	chr7	20408092	20408231	+	0	NA	promoter-TSS (NM_033601)	promoter-TSS (NM_033601)	-57	NM_033601	12051	Mm.439658	NM_033601	ENSMUSG00000053175	Bcl3	AI528691|Bcl-3	B cell leukemia/lymphoma 3	protein-coding
Diff_Nuc2267	chr13	69605232	69605371	+	0	NA	Intergenic	Intergenic	67441	NM_198600	210106	Mm.315959	NM_198600	ENSMUSG00000034575	Papd7	LAK-1|POLK|Pols|TRF4|TRF4-1	PAP associated domain containing 7	protein-coding
Diff_Nuc29776	chr7	106083462	106083601	+	0	NA	intron (NM_178635, intron 13 of 14)	intron (NM_178635, intron 13 of 14)	96176	NM_001285795	22411	Mm.22182	NM_009519	ENSMUSG00000015957	Wnt11	-	wingless-type MMTV integration site family, member 11	protein-coding
Diff_Nuc45931	chr3	131302042	131302181	+	0	NA	intron (NM_001289477, intron 12 of 12)	intron (NM_001289477, intron 12 of 12)	73115	NM_001289477	23971	Mm.244912	NM_011863	ENSMUSG00000028032	Papss1	AI325286|Asapk|SK1	3'-phosphoadenosine 5'-phosphosulfate synthase 1	protein-coding
Diff_Nuc51903	chr1	21584992	21585131	+	0	NA	intron (NM_023872, intron 1 of 13)	Lx6|LINE|L1	211424	NM_001113187	98582	Mm.326336	NM_001113187	ENSMUSG00000085079	Khdc1b	AU014713|AU015226|AU024076|AY238603|C85331|C86372|C88118|Khdc1|Khdc1c	KH domain containing 1B	protein-coding
Diff_Nuc62475	chr8	122760152	122760291	+	0	NA	Intergenic	Intergenic	-8091	NR_110496	434353	Mm.411793	NR_110496	ENSMUSG00000097960	A330074K22Rik	-	RIKEN cDNA A330074K22 gene	ncRNA
Diff_Nuc61055	chr8	70109162	70109301	+	0	NA	Intergenic	Intergenic	61478	NM_008674	17962	Mm.57193	NM_008674	ENSMUSG00000056426	Nat3	-	N-acetyltransferase 3	protein-coding
Diff_Nuc31901	chr6	34847452	34847591	+	0	NA	intron (NM_001013366, intron 6 of 14)	L1MC|LINE|L1	13310	NM_001013366	101240	Mm.152120	NM_001013366	ENSMUSG00000058486	Wdr91	9530020G05Rik|AI987683|AU018665	WD repeat domain 91	protein-coding
Diff_Nuc47051	chr2	22604972	22605111	+	0	NA	Intergenic	L1_Mus1|LINE|L1	-24806	NM_019456	54519	Mm.14255	NM_019456	ENSMUSG00000026786	Apbb1ip	9930118P07Rik|Prp48	amyloid beta (A4) precursor protein-binding, family B, member 1 interacting protein	protein-coding
Diff_Nuc53088	chr1	66913112	66913251	+	0	NA	Intergenic	Intergenic	-3298	NM_007381	11363	Mm.2445	NM_007381	ENSMUSG00000026003	Acadl	AA960361|AU018452|C79855|LCAD	acyl-Coenzyme A dehydrogenase, long-chain	protein-coding
Diff_Nuc29246	chr7	87094852	87094991	+	0	NA	Intergenic	Intergenic	-14771	NM_027420	70420	Mm.34266	NM_027420	ENSMUSG00000039043	Arpin	2610034B18Rik	actin-related protein 2/3 complex inhibitor	protein-coding
Diff_Nuc9474	chr11	106759372	106759511	+	0	NA	intron (NM_025481, intron 1 of 18)	intron (NM_025481, intron 1 of 18)	22588	NM_025481	66313	Mm.340955	NM_025481	ENSMUSG00000018363	Smurf2	2810411E22Rik|AI558114|AI649275	SMAD specific E3 ubiquitin protein ligase 2	protein-coding
Diff_Nuc13823	chr17	18045982	18046121	+	0	NA	Intergenic	Intergenic	21263	NM_008039	14289	Mm.378918	NM_008039	ENSMUSG00000052270	Fpr2	E330010I07Rik|Fpr-rs2	formyl peptide receptor 2	protein-coding
Diff_Nuc44190	chr3	60289502	60289641	+	0	NA	intron (NM_001253713, intron 2 of 9)	L1MA8|LINE|L1	12819	NM_001253713	56758	Mm.255723	NM_020007	ENSMUSG00000027763	Mbnl1	Mbnl|mKIAA0428	muscleblind-like 1 (Drosophila)	protein-coding
Diff_Nuc3204	chr13	110031102	110031241	+	0	NA	intron (NM_011056, intron 3 of 16)	intron (NM_011056, intron 3 of 16)	-83767	NR_030644	100124489		NR_030644	ENSMUSG00000076946	Mir582	Mirn582|mir-582|mmu-mir-582	microRNA 582	ncRNA
Diff_Nuc1597	chr13	44859762	44859901	+	0	NA	intron (NM_001205043, intron 1 of 17)	intron (NM_001205043, intron 1 of 17)	33191	NM_001205043	16468	Mm.25059	NM_021878	ENSMUSG00000038518	Jarid2	Jmj|jumonji	jumonji, AT rich interactive domain 2	protein-coding
Diff_Nuc50202	chr2	135957312	135957451	+	0	NA	intron (NM_172858, intron 3 of 9)	L1_Mur3|LINE|L1	73718	NM_029530	76161	Mm.41638	NM_029530	ENSMUSG00000027270	Lamp5	3110035N03Rik|6330527O06Rik|BAD-LAMP|LAMP-5	lysosomal-associated membrane protein family, member 5	protein-coding
Diff_Nuc11770	chr10	71440622	71440761	+	0	NA	Intergenic	Intergenic	2747	NR_003644	108950	Mm.212793	NM_175390	ENSMUSG00000043859	1700049L16Rik	-	hematological and neurological expressed 1-like pseudogene	pseudo
Diff_Nuc12992	chr10	114738842	114738981	+	0	NA	intron (NM_024454, intron 2 of 6)	intron (NM_024454, intron 2 of 6)	13736	NM_024454	216344	Mm.21936	NM_024454	ENSMUSG00000020132	Rab21	9630024B22	RAB21, member RAS oncogene family	protein-coding
Diff_Nuc15545	chr17	82758012	82758151	+	0	NA	Intergenic	Lx3C|LINE|L1	-620354	NM_011406	20541	Mm.265834	NM_011406	ENSMUSG00000054640	Slc8a1	AI852629|AV344025|D930008O12Rik|Ncx1	solute carrier family 8 (sodium/calcium exchanger), member 1	protein-coding
Diff_Nuc36132	chr5	51883512	51883651	+	0	NA	intron (NR_132764, intron 5 of 12)	intron (NR_132764, intron 5 of 12)	61579	NR_027710	19017	Mm.259072	NM_008904	ENSMUSG00000029167	Ppargc1a	A830037N07Rik|ENSMUSG00000079510|Gm11133|PGC-1|PPARGC-1-alpha|Pgc-1alpha|Pgc1|Pgco1|Ppargc1	peroxisome proliferative activated receptor, gamma, coactivator 1 alpha	protein-coding
Diff_Nuc13695	chr17	13168042	13168181	+	0	NA	3' UTR (NM_001113532, exon 6 of 6)	3' UTR (NM_001113532, exon 6 of 6)	-14520	NM_009338	110460	Mm.439711	NM_009338	ENSMUSG00000023832	Acat2	AW742799|Tcp-1x|Tcp1-rs1	acetyl-Coenzyme A acetyltransferase 2	protein-coding
Diff_Nuc38863	chr4	3182612	3182751	+	0	NA	Intergenic	MMERVK10C-int|LTR|ERVK	-70229	NM_001167535	100312471	Mm.377218	NM_001167535	ENSMUSG00000095982	Vmn1r3	Gm11778|OTTMUSG00000004181	vomeronasal 1 receptor 3	protein-coding
Diff_Nuc8641	chr11	85302952	85303091	+	0	NA	intron (NM_138681, intron 14 of 25)	intron (NM_138681, intron 14 of 25)	136355	NM_001166643	192197	Mm.209989	NM_138681	ENSMUSG00000059439	Bcas3	1500019F07Rik|2610028P08Rik|AU021018|BC028339|K20D4|rudhira	breast carcinoma amplified sequence 3	protein-coding
Diff_Nuc16690	chr16	28928242	28928381	+	0	NA	intron (NM_177718, intron 1 of 1)	intron (NM_177718, intron 1 of 1)	1473	NM_177718	239796	Mm.155887	NM_177718	ENSMUSG00000051065	Mb21d2	1600021P15Rik|A430031N04|C87006	Mab-21 domain containing 2	protein-coding
Diff_Nuc56274	chr9	3794442	3794581	+	0	NA	intron (NM_001033322, intron 5 of 7)	L1_Mus2|LINE|L1	262162	NM_001033322	234889	Mm.91240	NM_001033322	ENSMUSG00000041624	Gucy1a2	6330407I18Rik|A230060L24Rik	guanylate cyclase 1, soluble, alpha 2	protein-coding
Diff_Nuc38522	chr5	140229922	140230061	+	0	NA	intron (NM_026748, intron 41 of 46)	intron (NM_026748, intron 41 of 46)	13906	NR_106004	102465628		NR_106004	ENSMUSG00000098574	Mir7037	Gm27447|mmu-mir-7037	microRNA 7037	ncRNA
Diff_Nuc28257	chr7	38330502	38330641	+	0	NA	intron (NM_172385, intron 4 of 5)	intron (NM_172385, intron 4 of 5)	224200	NM_172385	243937	Mm.322505	NM_172385	ENSMUSG00000043456	Zfp536	9630010P11Rik|Znf536|mKIAA0390	zinc finger protein 536	protein-coding
Diff_Nuc1893	chr13	55396932	55397071	+	0	NA	intron (NM_008739, intron 15 of 22)	B4A|SINE|B4	26340	NM_009000	19336	Mm.220923	NM_009000	ENSMUSG00000034789	Rab24	6530406O07Rik	RAB24, member RAS oncogene family	protein-coding
Diff_Nuc7306	chr11	42159032	42159171	+	0	NA	Intergenic	L1M4|LINE|L1	-24527	NM_001099641	14399	Mm.4915	NM_008068	ENSMUSG00000020428	Gabra6	GABA-ARalpha6|Gabra-6|alpha6	gamma-aminobutyric acid (GABA) A receptor, subunit alpha 6	protein-coding
Diff_Nuc6176	chr12	113883382	113883521	+	0	NA	intron (NM_001161737, intron 1 of 2)	CpG	412	NM_013929	30954	Mm.289812	NM_013929	ENSMUSG00000064326	Siva1	CD27bp|Siva	SIVA1, apoptosis-inducing factor	protein-coding
Diff_Nuc37999	chr5	124445912	124446051	+	0	NA	promoter-TSS (NR_105999)	promoter-TSS (NR_105999)	-880	NR_105999	102465625		NR_105999	ENSMUSG00000098454	Mir7032	Gm27309|mmu-mir-7032	microRNA 7032	ncRNA
Diff_Nuc54535	chr1	134505302	134505441	+	0	NA	intron (NM_182716, intron 15 of 29)	intron (NM_182716, intron 15 of 29)	34064	NM_001160316	269116	Mm.326702	NM_182716	ENSMUSG00000026442	Nfasc	AA387016|D430023G06Rik|NF|mKIAA0756	neurofascin	protein-coding
Diff_Nuc58620	chr9	86691992	86692131	+	0	NA	intron (NR_102729, intron 17 of 29)	intron (NR_102729, intron 17 of 29)	55627	NM_178738	244954	Mm.257629	NM_178738	ENSMUSG00000033491	Prss35	6030424L22Rik|P3D9	protease, serine 35	protein-coding
Diff_Nuc41834	chr4	122968322	122968461	+	0	NA	intron (NM_148917, intron 5 of 13)	intron (NM_148917, intron 5 of 13)	7863	NM_148917	230721	Mm.277091	NM_130881	ENSMUSG00000011257	Pabpc4	-	poly(A) binding protein, cytoplasmic 4	protein-coding
Diff_Nuc57193	chr9	40909362	40909501	+	0	NA	intron (NM_176860, intron 1 of 13)	intron (NM_176860, intron 1 of 13)	56146	NM_176860	72828	Mm.133615	NM_176860	ENSMUSG00000032020	Ubash3b	2810457I06Rik|BB125008|TULA-2|p70	ubiquitin associated and SH3 domain containing, B	protein-coding
Diff_Nuc26717	chr18	55892072	55892211	+	0	NA	Intergenic	Intergenic	-699645	NM_026240	107022	Mm.24356	NM_026240	ENSMUSG00000001700	Gramd3	9030613F08Rik|9130427A09Rik|AW061306|NS3TP2	GRAM domain containing 3	protein-coding
Diff_Nuc1391	chr13	38070782	38070921	+	0	NA	3' UTR (NM_025965, exon 8 of 8)	3' UTR (NM_025965, exon 8 of 8)	15208	NM_025965	107513	Mm.426670	NM_025965	ENSMUSG00000021427	Ssr1	2510001K09Rik|6330400D04|AI159733|AI452176|SSR|TRAPA	signal sequence receptor, alpha	protein-coding
Diff_Nuc53141	chr1	69515342	69515481	+	0	NA	Intergenic	MLT1D|LTR|MaLR	217123	NM_011770	22779	Mm.106343	NM_011770	ENSMUSG00000025997	Ikzf2	A730095J18Rik|Helios|Zfpn1a2|Znfn1a2	IKAROS family zinc finger 2	protein-coding
Diff_Nuc61929	chr8	101628882	101629021	+	0	NA	intron (NR_133570, intron 8 of 10)	Lx2|LINE|L1	93164	NR_110579	100873092	Mm.414599	NR_110579	ENSMUSG00000089819	Gm15679	OTTMUSG00000025218	predicted gene 15679	ncRNA
Diff_Nuc53597	chr1	88453522	88453661	+	0	NA	intron (NM_008801, intron 1 of 4)	B3|SINE|B2	25485	NM_008801	18582	Mm.12925	NM_008801	ENSMUSG00000026239	Pde6d	AI841218|PrBP/delta	phosphodiesterase 6D, cGMP-specific, rod, delta	protein-coding
Diff_Nuc8496	chr11	80682282	80682421	+	0	NA	Intergenic	Lx4B|LINE|L1	10460	NM_029367	75622	Mm.26988	NM_029367	ENSMUSG00000053184	Spaca3	1700025M08Rik|ALLP17|Lyc3|SLLP1|mSLLP1	sperm acrosome associated 3	protein-coding
Diff_Nuc59955	chr8	13935802	13935941	+	0	NA	intron (NM_025785, intron 9 of 9)	intron (NM_025785, intron 9 of 9)	28065	NM_025785	66822	Mm.37950	NM_025785	ENSMUSG00000038365	Fbxo25	9130015I06Rik|AI649137|Fbx25	F-box protein 25	protein-coding
Diff_Nuc39704	chr4	40361532	40361671	+	0	NA	Intergenic	Intergenic	-57612	NM_177175	320500	Mm.156365	NM_177175	ENSMUSG00000046593	Tmem215	A930001M12Rik	transmembrane protein 215	protein-coding
Diff_Nuc23983	chr19	10351302	10351441	+	0	NA	intron (NM_198114, intron 1 of 19)	intron (NM_198114, intron 1 of 19)	27996	NM_198114	269060	Mm.329718	NM_198114	ENSMUSG00000035735	Dagla	Nsddr	diacylglycerol lipase, alpha	protein-coding
Diff_Nuc11183	chr10	49313372	49313511	+	0	NA	intron (NM_001111268, intron 2 of 16)	RLTR17|LTR|ERVK	195119	NM_010349	14806	Mm.332838	NM_010349	ENSMUSG00000056073	Grik2	AW124492|GluK2|Glur-6|Glur6|Glurbeta2	glutamate receptor, ionotropic, kainate 2 (beta 2)	protein-coding
Diff_Nuc18833	chr15	23686282	23686421	+	0	NA	Intergenic	L1MC|LINE|L1	720133	NM_001081299	320865	Mm.241965	NM_001081299	ENSMUSG00000040420	Cdh18	B230220E17Rik|Cdh14l	cadherin 18	protein-coding
Diff_Nuc7711	chr11	55127052	55127191	+	0	NA	Intergenic	Intergenic	-1362	NM_001029988	245827	Mm.339363	NM_001029988	ENSMUSG00000055333	Fat2	EMI2|Fath2|Gm523|mKIAA0811	FAT atypical cadherin 2	protein-coding
Diff_Nuc58818	chr9	94892752	94892891	+	0	NA	intron (NM_177909, intron 9 of 15)	intron (NM_177909, intron 9 of 15)	240573	NR_106116	102465763		NR_106116	ENSMUSG00000098251	Mir7656	Gm27614|mmu-mir-7656	microRNA 7656	ncRNA
Diff_Nuc47417	chr2	32440152	32440291	+	0	NA	TTS (NM_198191)	TTS (NM_198191)	-2377	NM_001276425	20448	Mm.27446	NM_011373	ENSMUSG00000079442	St6galnac4	SIAT7-D|ST6GalNAcIV|Siat7d	ST6 (alpha-N-acetyl-neuraminyl-2,3-beta-galactosyl-1,3)-N-acetylgalactosaminide alpha-2,6-sialyltransferase 4	protein-coding
Diff_Nuc13424	chr17	4215532	4215671	+	0	NA	Intergenic	Intergenic	-93499	NR_045462	78043	Mm.398313	NR_045462		4930548J01Rik	1700113K09Rik	RIKEN cDNA 4930548J01 gene	ncRNA
Diff_Nuc2355	chr13	74585402	74585541	+	0	NA	Intergenic	MMSAT4|Satellite|Satellite	40958	NR_109835	735288		NR_109835	ENSMUSG00000094403	Mir692-2	Mir692-2a|Mir692-3|Mirn692-2|Mirn692-2a|mir-692-2|mmu-mir-692-2	microRNA 692-2	ncRNA
Diff_Nuc52133	chr1	28637622	28637761	+	0	NA	Intergenic	MurERV4_19-int|LTR|ERVK	199406	NM_001013750	210962	Mm.214178	NM_001013750	ENSMUSG00000048411	Gm597	-	predicted gene 597	protein-coding
Diff_Nuc52336	chr1	37273812	37273951	+	0	NA	Intergenic	Intergenic	-1242	NM_001282010	12790	Mm.214224	NM_009918	ENSMUSG00000026114	Cnga3	CNG3	cyclic nucleotide gated channel alpha 3	protein-coding
Diff_Nuc33024	chr6	76938262	76938401	+	0	NA	intron (NM_009819, intron 9 of 18)	intron (NM_009819, intron 9 of 18)	-254380	NM_028880	74342	Mm.292568	NM_028880	ENSMUSG00000060780	Lrrtm1	4632401D06Rik|AW125451	leucine rich repeat transmembrane neuronal 1	protein-coding
Diff_Nuc8407	chr11	78341642	78341781	+	0	NA	intron (NM_001159392, intron 5 of 6)	intron (NM_001159392, intron 5 of 6)	8051	NM_001159392	21927	Mm.386774	NM_009395	ENSMUSG00000017615	Tnfaip1	Bacurd2|Edp-1|Edp1|Tnfip1	tumor necrosis factor, alpha-induced protein 1 (endothelial)	protein-coding
Diff_Nuc5091	chr12	77385382	77385521	+	0	NA	intron (NM_138745, intron 8 of 27)	Tigger7|DNA|MER2_type	29232	NM_138745	108156	Mm.29584	NM_138745	ENSMUSG00000021048	Mthfd1	Dcs|E430024A07Rik|Mthfd	methylenetetrahydrofolate dehydrogenase (NADP+ dependent), methenyltetrahydrofolate cyclohydrolase, formyltetrahydrofolate synthase	protein-coding
Diff_Nuc14544	chr17	42213592	42213731	+	0	NA	Intergenic	L1Md_F|LINE|L1	-239235	NM_028474	627626	Mm.390999	NM_028474	ENSMUSG00000042256	Ptchd4	3110082D06Rik|Gm321	patched domain containing 4	protein-coding
Diff_Nuc37908	chr5	122389592	122389731	+	0	NA	intron (NM_001312908, intron 2 of 22)	intron (NM_001312908, intron 2 of 22)	90624	NM_175474	231717	Mm.12654	NM_175474	ENSMUSG00000044134	Fam109a	A230106M15Rik|AU017694|IPIP27A|Ses1	family with sequence similarity 109, member A	protein-coding
Diff_Nuc31597	chr6	24182572	24182711	+	0	NA	Intergenic	Intergenic	-64549	NM_019481	55961	Mm.19299	NM_019481	ENSMUSG00000029700	Slc13a1	AI314066|AI987826|NaSi-1|Nas1	solute carrier family 13 (sodium/sulfate symporters), member 1	protein-coding
Diff_Nuc44080	chr3	55726902	55727041	+	0	NA	intron (NM_030595, intron 34 of 57)	L1VL4|LINE|L1	75944	NR_033592	71182	Mm.195603	NR_033592	ENSMUSG00000106572	4933417G07Rik	-	SEC13 homolog pseudogene	pseudo
Diff_Nuc39935	chr4	47762352	47762491	+	0	NA	Intergenic	Intergenic	274888	NM_024171	66212	Mm.20188	NM_024171	ENSMUSG00000053317	Sec61b	1190006C12Rik|AI326121|AW122942	Sec61 beta subunit	protein-coding
Diff_Nuc15359	chr17	75249622	75249761	+	0	NA	intron (NM_152817, intron 16 of 19)	intron (NM_152817, intron 16 of 19)	132601	NM_152817	74196	Mm.209503	NM_152817	ENSMUSG00000024078	Ttc27	2610511O17Rik	tetratricopeptide repeat domain 27	protein-coding
Diff_Nuc37803	chr5	118544192	118544331	+	0	NA	intron (NM_172721, intron 6 of 10)	intron (NM_172721, intron 6 of 10)	61206	NM_172721	231672	Mm.221769	NM_172721	ENSMUSG00000032867	Fbxw8	4930438M06Rik|FBW6|FBW8|FBXO29|Fbx29	F-box and WD-40 domain protein 8	protein-coding
Diff_Nuc38783	chr5	149914522	149914661	+	0	NA	Intergenic	Intergenic	-41248	NR_137278	105242579	Mm.445929	NR_137278	ENSMUSG00000107388	Gm42788	-	predicted gene 42788	ncRNA
Diff_Nuc3693	chr12	10845052	10845191	+	0	NA	Intergenic	L1_Mus1|LINE|L1	-209498	NR_045860	71457	Mm.95280	NR_045860		7420701I03Rik	-	RIKEN cDNA 7420701I03 gene	ncRNA
Diff_Nuc45202	chr3	101498302	101498441	+	0	NA	Intergenic	Intergenic	-89741	NM_144900	11928	Mm.193670	NM_144900	ENSMUSG00000033161	Atp1a1	Atpa-1|BC010319	ATPase, Na+/K+ transporting, alpha 1 polypeptide	protein-coding
Diff_Nuc38060	chr5	125548732	125548871	+	0	NA	intron (NM_011424, intron 15 of 46)	intron (NM_011424, intron 15 of 46)	64956	NM_028443	73121	Mm.296138	NM_028443	ENSMUSG00000037962	Rflna	3110032G18Rik|Fam101a|cfm|cfm2	refilin A	protein-coding
Diff_Nuc38382	chr5	135903192	135903331	+	0	NA	intron (NM_146001, intron 22 of 30)	RMER15|LTR|ERVL	-32845	NM_148932	107939	Mm.28399	NM_148932	ENSMUSG00000053293	Pom121	2610027A18Rik|C80273|mKIAA0618	nuclear pore membrane protein 121	protein-coding
Diff_Nuc20559	chr15	89146182	89146321	+	0	NA	promoter-TSS (NM_001170561)	promoter-TSS (NM_001170561)	-509	NM_001170561	77980	Mm.35483	NM_030019	ENSMUSG00000036529	Sbf1	2610510A08Rik|B230113C15Rik|Mtmr5|mKIAA3020	SET binding factor 1	protein-coding
Diff_Nuc57397	chr9	47355502	47355641	+	0	NA	intron (NM_207676, intron 1 of 9)	intron (NM_207676, intron 1 of 9)	17136	NM_018770	54725	Mm.234832	NM_018770	ENSMUSG00000032076	Cadm1	2900073G06Rik|3100001I08Rik|AI987920|Bl2|Igsf4|Igsf4a|Necl2|RA175|RA175A|RA175B|RA175C|RA175N|ST17|SgIGSF|SynCam|Tslc1	cell adhesion molecule 1	protein-coding
Diff_Nuc56088	chr1	194380782	194380921	+	0	NA	intron (NM_144881, intron 10 of 11)	intron (NM_144881, intron 10 of 11)	216562	NM_144881	226861	Mm.145857	NM_144881	ENSMUSG00000037375	Hhat	2810432O22Rik|AI462858|AP-2CRE|Skn|Tg(TFAP2A-cre)1Will	hedgehog acyltransferase	protein-coding
Diff_Nuc24214	chr19	21676562	21676701	+	0	NA	intron (NM_025423, intron 2 of 3)	intron (NM_025423, intron 2 of 3)	50650	NM_025423	66206	Mm.272430	NM_025423	ENSMUSG00000035171	1110059E24Rik	-	RIKEN cDNA 1110059E24 gene	protein-coding
Diff_Nuc4955	chr12	72698542	72698681	+	0	NA	Intergenic	RLTR20C|LTR|ERVK	57017	NR_045941	73815	Mm.416916	NR_045941		4930404H11Rik	-	RIKEN cDNA 4930404H11 gene	ncRNA
Diff_Nuc58073	chr9	66838332	66838471	+	0	NA	Intergenic	Intergenic	-15110	NM_030717	80907	Mm.157882	NM_030717	ENSMUSG00000032370	Lactb	LACT-1|Lact1|Mrpl56	lactamase, beta	protein-coding
Diff_Nuc40196	chr4	59629332	59629471	+	0	NA	intron (NM_001301367, intron 11 of 11)	intron (NM_001301367, intron 11 of 11)	-9682	NM_001015681	230259	Mm.45688	NM_153158	ENSMUSG00000045071	E130308A19Rik	-	RIKEN cDNA E130308A19 gene	protein-coding
Diff_Nuc14228	chr17	29771672	29771811	+	0	NA	intron (NR_132314, intron 6 of 27)	intron (NR_132314, intron 6 of 27)	20007	NM_021419	58230	Mm.305994	NM_021419	ENSMUSG00000090083	Rnf8	3830404E21Rik|AIP37|laXp180	ring finger protein 8	protein-coding
Diff_Nuc37981	chr5	124032032	124032171	+	0	NA	intron (NM_019765, intron 22 of 23)	B2_Mm2|SINE|B2	-9077	NM_029929	77573	Mm.41372	NM_029929	ENSMUSG00000029434	Vps33a	3830421M04Rik|AI503300|AW048546|AW554476|bf	VPS33A CORVET/HOPS core subunit	protein-coding
Diff_Nuc53161	chr1	70733352	70733491	+	0	NA	intron (NM_025728, intron 7 of 7)	L1_Mur2|LINE|L1	-38868	NM_177164	320460	Mm.360649	NM_177164	ENSMUSG00000045648	Vwc2l	A830006F12Rik|Brl	von Willebrand factor C domain-containing protein 2-like	protein-coding
Diff_Nuc48428	chr2	71721952	71722091	+	0	NA	intron (NM_172665, intron 5 of 10)	intron (NM_172665, intron 5 of 10)	10740	NM_172665	228026	Mm.34411	NM_172665	ENSMUSG00000006494	Pdk1	B830012B01|D530020C15Rik	pyruvate dehydrogenase kinase, isoenzyme 1	protein-coding
Diff_Nuc19666	chr15	57544952	57545091	+	0	NA	intron (NM_199449, intron 1 of 3)	intron (NM_199449, intron 1 of 3)	18799	NM_199449	387609	Mm.36557	NM_199449	ENSMUSG00000071757	Zhx2	Afr-1|Afr1|Raf|mKIAA0854	zinc fingers and homeoboxes 2	protein-coding
Diff_Nuc44103	chr3	56787962	56788101	+	0	NA	Intergenic	MLT1C|LTR|MaLR	317810	NM_008536	17112	Mm.856	NM_008536	ENSMUSG00000027800	Tm4sf1	L6|M3s1	transmembrane 4 superfamily member 1	protein-coding
Diff_Nuc55687	chr1	179978432	179978571	+	0	NA	TTS (NM_001034899)	TTS (NM_001034899)	56935	NM_001034899	545391	Mm.442974	NM_001034899	ENSMUSG00000091476	Gm16432	EG545391|EG666250	predicted gene 16432	protein-coding
Diff_Nuc28030	chr7	29018262	29018401	+	0	NA	Intergenic	MMERVK10C-int|LTR|ERVK	-34569	NM_198425	386655	Mm.258201	NM_198425	ENSMUSG00000046058	Eid2	Cri2|EID-2	EP300 interacting inhibitor of differentiation 2	protein-coding
Diff_Nuc30983	chr7	149266772	149266911	+	0	NA	3' UTR (NM_008748, exon 7 of 7)	3' UTR (NM_008748, exon 7 of 7)	14348	NM_008748	18218	Mm.39725	NM_008748	ENSMUSG00000037887	Dusp8	5530400B01Rik|AI593498|Nttp1	dual specificity phosphatase 8	protein-coding
Diff_Nuc55174	chr1	161214272	161214411	+	0	NA	intron (NM_011931, intron 9 of 19)	ID_B1|SINE|B4	-9563	NR_144489	100846986		NR_144489		Pou5f1-rs1	Gm21053|Oct4P2|Otf-3rs|Otf3-rs1|Otf3a	POU domain, class 5, transcription factor 1, related sequence 1	pseudo
Diff_Nuc48411	chr2	71116732	71116871	+	0	NA	intron (NM_172436, intron 15 of 17)	intron (NM_172436, intron 15 of 17)	66798	NM_010064	13427	Mm.249479	NM_010064	ENSMUSG00000027012	Dync1i2	3110079H08Rik|AW554389|Dncic2	dynein cytoplasmic 1 intermediate chain 2	protein-coding
Diff_Nuc45582	chr3	116227682	116227821	+	0	NA	intron (NM_010022, intron 3 of 10)	PB1D7|SINE|Alu	11754	NM_010022	13171	Mm.3636	NM_010022	ENSMUSG00000000340	Dbt	D3Wsu60e	dihydrolipoamide branched chain transacylase E2	protein-coding
Diff_Nuc34759	chr6	147530322	147530461	+	0	NA	intron (NM_025911, intron 8 of 12)	RMER15|LTR|ERVL	105998	NM_025911	67015	Mm.209774	NM_025911	ENSMUSG00000030301	Ccdc91	1700086G08Rik|1810060J02Rik|AU045683|AW555238|p56	coiled-coil domain containing 91	protein-coding
Diff_Nuc61979	chr8	104459392	104459531	+	0	NA	Intergenic	Intergenic	849550	NM_009866	12552	Mm.1571	NM_009866	ENSMUSG00000031673	Cdh11	Cad11|OSF-4	cadherin 11	protein-coding
Diff_Nuc54947	chr1	153809672	153809811	+	0	NA	intron (NM_197990, intron 3 of 5)	intron (NM_197990, intron 3 of 5)	127709	NM_197990	69399	Mm.278031	NM_197990	ENSMUSG00000032666	1700025G04Rik	2610510E02Rik|2900042O04Rik|ENSMUSG00000073540	RIKEN cDNA 1700025G04 gene	protein-coding
Diff_Nuc53219	chr1	73164722	73164861	+	0	NA	Intergenic	Intergenic	93631	NR_038002	69449	Mm.250447	NR_038001	ENSMUSG00000101968	1700027A15Rik	-	RIKEN cDNA 1700027A15 gene	ncRNA
Diff_Nuc61595	chr8	88142442	88142581	+	0	NA	Intergenic	Intergenic	-63341	NM_019794	56445	Mm.475573	NM_019794	ENSMUSG00000031701	Dnaja2	1500017M13Rik|2010206B19Rik|DNAJ|DNJ3|Dnaj3|HIRIP4|PRO3015|mDj3	DnaJ heat shock protein family (Hsp40) member A2	protein-coding
Diff_Nuc49474	chr2	112019572	112019711	+	0	NA	Intergenic	L1VL2|LINE|L1	23586	NM_001011802	258022	Mm.377330	NM_001011802	ENSMUSG00000049758	Olfr1318	MOR245-16	olfactory receptor 1318	protein-coding
Diff_Nuc28119	chr7	30947852	30947991	+	0	NA	5' UTR (NM_011980, exon 2 of 2)	5' UTR (NM_011980, exon 2 of 2)	6825	NM_011980	26465	Mm.446516	NM_011980	ENSMUSG00000037029	Zfp146	OZF|Znf146	zinc finger protein 146	protein-coding
Diff_Nuc55936	chr1	188151832	188151971	+	0	NA	Intergenic	(TATG)n|Simple_repeat|Simple_repeat	-210712	NM_146106	226791	Mm.257116	NM_146106	ENSMUSG00000039246	Lyplal1	BC027340|Q96AVO	lysophospholipase-like 1	protein-coding
Diff_Nuc40331	chr4	65592432	65592571	+	0	NA	intron (NM_207109, intron 7 of 22)	L1_Mm|LINE|L1	326481	NM_001161782	69807	Mm.22786	NM_053084	ENSMUSG00000051675	Trim32	1810045E12Rik|3f3|BBS11|Zfp117	tripartite motif-containing 32	protein-coding
Diff_Nuc16396	chr16	18290942	18291081	+	0	NA	Intergenic	B2_Mm2|SINE|B2	-1750	NM_033324	94223	Mm.447352	NM_033324	ENSMUSG00000022718	Dgcr8	D16H22S1742E|D16H22S788E|D16Wis2|Gy1|N41|Vo59c07|mir-1306	DiGeorge syndrome critical region gene 8	protein-coding
Diff_Nuc55201	chr1	162178442	162178581	+	0	NA	intron (NM_001038621, intron 3 of 8)	intron (NM_001038621, intron 3 of 8)	-35488	NM_009786	12301	Mm.10702	NM_009786	ENSMUSG00000014226	Cacybp	SIP	calcyclin binding protein	protein-coding
Diff_Nuc49921	chr2	126555797	126555936	+	0	NA	intron (NM_019729, intron 5 of 18)	intron (NM_019729, intron 5 of 18)	22802	NM_019729	84092	Mm.272629	NM_019729	ENSMUSG00000027363	Usp8	AI574262|AW557536|Ubpy|mKIAA0055	ubiquitin specific peptidase 8	protein-coding
Diff_Nuc5298	chr12	82753052	82753191	+	0	NA	intron (NM_001033149, intron 1 of 2)	Lx8|LINE|L1	20885	NM_001033149	69480	Mm.130002	NM_001033149	ENSMUSG00000042734	Ttc9	-	tetratricopeptide repeat domain 9	protein-coding
Diff_Nuc22578	chr14	71114262	71114401	+	0	NA	intron (NM_023045, intron 1 of 27)	intron (NM_023045, intron 1 of 27)	52104	NM_023045	65246	Mm.152987	NM_023045	ENSMUSG00000022100	Xpo7	4930506C02Rik|BB164534|Ranbp16|mKIAA0745	exportin 7	protein-coding
Diff_Nuc28333	chr7	48527462	48527601	+	0	NA	Intergenic	Intergenic	-12166	NM_001033782	434172	Mm.247214	NM_001033782	ENSMUSG00000072259	Gm5592	EG434172	predicted gene 5592	protein-coding
Diff_Nuc44005	chr3	52891162	52891301	+	0	NA	intron (NM_175386, intron 2 of 3)	intron (NM_175386, intron 2 of 3)	45762	NM_175386	108927	Mm.118617	NM_175386	ENSMUSG00000048332	Lhfp	2810489O06Rik|AI194968	lipoma HMGIC fusion partner	protein-coding
Diff_Nuc56021	chr1	191985502	191985641	+	0	NA	exon (NM_008937, exon 2 of 5)	exon (NM_008937, exon 2 of 5)	8988	NM_008937	19130	Mm.132579	NM_008937	ENSMUSG00000010175	Prox1	A230003G05Rik	prospero homeobox 1	protein-coding
Diff_Nuc58029	chr9	65962272	65962411	+	0	NA	intron (NM_019727, intron 1 of 14)	intron (NM_019727, intron 1 of 14)	10352	NM_019727	56440	Mm.271891	NM_019727	ENSMUSG00000032382	Snx1	-	sorting nexin 1	protein-coding
Diff_Nuc43988	chr3	52375242	52375381	+	0	NA	Intergenic	Intergenic	-168335	NR_038079	329639	Mm.131245	NR_038079	ENSMUSG00000102785	Gm2447	100039832|A530017F20	predicted gene 2447	ncRNA
Diff_Nuc46012	chr3	135021762	135021901	+	0	NA	intron (NM_028946, intron 4 of 12)	Lx5|LINE|L1	10830	NM_028946	74446	Mm.85000	NM_028946	ENSMUSG00000050150	Slc9b1	1700094G20Rik|4933424B12Rik|4933425K02Rik|Nhedc1|mtsNHE	solute carrier family 9, subfamily B (NHA1, cation proton antiporter 1), member 1	protein-coding
Diff_Nuc59115	chr9	105063162	105063301	+	0	NA	Intergenic	Intergenic	-15819	NM_028562	73532	Mm.23516	NM_028562	ENSMUSG00000032566	1700080E11Rik	AI429110|Tseg8	RIKEN cDNA 1700080E11 gene	protein-coding
Diff_Nuc60433	chr8	37312632	37312771	+	0	NA	promoter-TSS (NM_001081150)	promoter-TSS (NM_001081150)	-131	NM_001081150	244421	Mm.324032	NM_001081150	ENSMUSG00000039633	Lonrf1	-	LON peptidase N-terminal domain and ring finger 1	protein-coding
Diff_Nuc42575	chr4	144954532	144954671	+	0	NA	Intergenic	Intergenic	-49551	NM_009401	21941	Mm.12810	NM_009401	ENSMUSG00000028602	Tnfrsf8	Cd30|D1S166E|Ki|Ki-1	tumor necrosis factor receptor superfamily, member 8	protein-coding
Diff_Nuc52659	chr1	50968452	50968591	+	0	NA	Intergenic	Lx3C|LINE|L1	-15846	NM_019790	56363	Mm.245154	NM_019790	ENSMUSG00000026109	Tmeff2	4832418D20Rik|7630402F16Rik|TR-2	transmembrane protein with EGF-like and two follistatin-like domains 2	protein-coding
Diff_Nuc18113	chr16	89231642	89231781	+	0	NA	Intergenic	Intergenic	25605	NM_001163615	622935	Mm.459837	NM_001163615	ENSMUSG00000091039	Krtap20-2	1190004K03Rik|EG622935|Gm6371	keratin associated protein 20-2	protein-coding
Diff_Nuc50398	chr2	141814292	141814431	+	0	NA	intron (NM_001013802, intron 8 of 18)	intron (NM_001013802, intron 8 of 18)	912839	NM_001081133	16558	Mm.251934	NM_001081133	ENSMUSG00000038844	Kif16b	8430434E15Rik|AA623607|AI789011|C80253|C80902|mKIAA1590	kinesin family member 16B	protein-coding
Diff_Nuc28322	chr7	47910462	47910601	+	0	NA	Intergenic	Intergenic	-19576	NR_045504	71029	Mm.399496	NR_045504	ENSMUSG00000102004	4933402C06Rik	-	RIKEN cDNA 4933402C06 gene	ncRNA
Diff_Nuc17878	chr16	77378472	77378611	+	0	NA	intron (NR_015543, intron 2 of 4)	Lx3C|LINE|L1	48968	NR_015543	77994	Mm.394688	NR_015543	ENSMUSG00000090386	Mir99ahg	2810055G20Rik|D730043B02Rik	Mir99a and Mirlet7c-1 host gene (non-protein coding)	ncRNA
Diff_Nuc11220	chr10	50358332	50358471	+	0	NA	intron (NM_198007, intron 5 of 41)	intron (NM_198007, intron 5 of 41)	45926	NM_198007	77987	Mm.222497	NM_198007	ENSMUSG00000038774	Ascc3	ASC1p200|B630009I04Rik|BC023451|D430001L07Rik|D630041L21|Helic1|RNAH	activating signal cointegrator 1 complex subunit 3	protein-coding
Diff_Nuc11613	chr10	65514912	65515051	+	0	NA	Intergenic	L1_Mus3|LINE|L1	71831	NR_038039	69433	Mm.23366	NR_038039	ENSMUSG00000100000	1700023F02Rik	AV205046	RIKEN cDNA 1700023F02 gene	ncRNA
Diff_Nuc38896	chr4	4259892	4260031	+	0	NA	Intergenic	L1MDb|LINE|L1	-194369	NM_001002927	18619	Mm.475097	NM_001002927	ENSMUSG00000045573	Penk	AI326464|ENK|PPA|Penk1	preproenkephalin	protein-coding
Diff_Nuc10663	chr10	27354312	27354451	+	0	NA	Intergenic	Intergenic	-17633	NM_008481	16773	Mm.256087	NM_008481	ENSMUSG00000019899	Lama2	5830440B04|dy|mKIAA4087|mer|merosin	laminin, alpha 2	protein-coding
Diff_Nuc54378	chr1	129284252	129284391	+	0	NA	intron (NM_145128, intron 9 of 17)	intron (NM_145128, intron 9 of 17)	182758	NM_145128	107895	Mm.214682	NM_145128	ENSMUSG00000036155	Mgat5	4930471A21Rik|5330407H02Rik|AI480971|GlcNAc-TV	mannoside acetylglucosaminyltransferase 5	protein-coding
Diff_Nuc21447	chr14	27446892	27447031	+	0	NA	exon (NM_145969, exon 18 of 18)	exon (NM_145969, exon 18 of 18)	-10722	NM_007479	11843	Mm.297768	NM_007479	ENSMUSG00000021877	Arf4	AA407803	ADP-ribosylation factor 4	protein-coding
Diff_Nuc11427	chr10	59172592	59172731	+	0	NA	intron (NM_144822, intron 1 of 11)	PB1D7|SINE|Alu	7350	NM_001291443	216001	Mm.27199	NM_144822	ENSMUSG00000020111	Micu1	C730016L05Rik|Calc|Cbara1	mitochondrial calcium uptake 1	protein-coding
Diff_Nuc39199	chr4	15893102	15893241	+	0	NA	intron (NM_013752, intron 5 of 15)	intron (NM_013752, intron 5 of 15)	8057	NM_013752	27354	Mm.20866	NM_013752	ENSMUSG00000028224	Nbn	Nbs1	nibrin	protein-coding
Diff_Nuc30318	chr7	125191862	125192001	+	0	NA	Intergenic	B3|SINE|B2	67730	NM_170669	267019	Mm.288212	NM_170669	ENSMUSG00000008683	Rps15a	A630031B11Rik	ribosomal protein S15A	protein-coding
Diff_Nuc9213	chr11	100931702	100931841	+	0	NA	exon (NM_013792, exon 1 of 6)	exon (NM_013792, exon 1 of 6)	363	NM_013792	27419	Mm.95452	NM_013792	ENSMUSG00000001751	Naglu	-	alpha-N-acetylglucosaminidase (Sanfilippo disease IIIB)	protein-coding
Diff_Nuc46525	chr3	156847742	156847881	+	0	NA	intron (NM_001039094, intron 6 of 6)	intron (NM_001039094, intron 6 of 6)	-349550	NM_017381	53861	Mm.259036	NM_017381	ENSMUSG00000028180	Zranb2	AI227013|Zfp265|Zis|Znf265	zinc finger, RAN-binding domain containing 2	protein-coding
Diff_Nuc33139	chr6	82478352	82478491	+	0	NA	intron (NM_009313, intron 3 of 5)	intron (NM_009313, intron 3 of 5)	124438	NM_025882	66979	Mm.195753	NM_025882	ENSMUSG00000030042	Pole4	2400007P05Rik|5830430F06Rik	polymerase (DNA-directed), epsilon 4 (p12 subunit)	protein-coding
Diff_Nuc16707	chr16	29603322	29603461	+	0	NA	intron (NM_133752, intron 6 of 28)	B1_Mus2|SINE|Alu	23971	NM_001199177	74143	Mm.274285	NM_133752	ENSMUSG00000038084	Opa1	1200011N24Rik|AI225888|AI847218|lilr3|mKIAA0567	OPA1, mitochondrial dynamin like GTPase	protein-coding
Diff_Nuc9858	chr11	119364422	119364561	+	0	NA	intron (NM_177394, intron 6 of 7)	ORR1A4|LTR|MaLR	11557	NM_177394	338371	Mm.271946	NM_177394	ENSMUSG00000039850	Endov	A730011L01Rik	endonuclease V	protein-coding
Diff_Nuc25941	chr18	29180682	29180821	+	0	NA	Intergenic	Lx8|LINE|L1	-421103	NR_045395	78199	Mm.243850	NR_045395		4930527G23Rik	-	RIKEN cDNA 4930527G23 gene	ncRNA
Diff_Nuc20033	chr15	73192112	73192251	+	0	NA	intron (NM_007982, intron 2 of 31)	intron (NM_007982, intron 2 of 31)	61440	NM_007982	14083	Mm.254494	NM_007982	ENSMUSG00000022607	Ptk2	FAK|FRNK|Fadk|mKIAA4203|p125FAK	PTK2 protein tyrosine kinase 2	protein-coding
Diff_Nuc37922	chr5	122631782	122631921	+	0	NA	Intergenic	B4A|SINE|B4	23563	NM_013636	19047	Mm.280784	NM_013636	ENSMUSG00000004455	Ppp1cc	PP-1G|PP1|dis2m1	protein phosphatase 1, catalytic subunit, gamma isoform	protein-coding
Diff_Nuc54238	chr1	121589222	121589361	+	0	NA	intron (NM_019933, intron 16 of 26)	intron (NM_019933, intron 16 of 26)	-43714	NM_145506	226352	Mm.253156	NM_145506	ENSMUSG00000026383	Epb41l5	1700030C16Rik|AL022914|BE37|E230025E14Rik|Epb4.1l5|Lulu1|NBL5	erythrocyte membrane protein band 4.1 like 5	protein-coding
Diff_Nuc43084	chr3	10419082	10419221	+	0	NA	exon (NM_029068, exon 8 of 8)	exon (NM_029068, exon 8 of 8)	20979	NM_029068	74718	Mm.440548	NM_029068	ENSMUSG00000027534	Snx16	4930522N22Rik|AI117577|AI747675	sorting nexin 16	protein-coding
Diff_Nuc12259	chr10	85947152	85947291	+	0	NA	intron (NM_001164495, intron 1 of 6)	intron (NM_001164495, intron 1 of 6)	14420	NM_001164495	27204	Mm.394931	NM_013722	ENSMUSG00000059602	Syn3	-	synapsin III	protein-coding
Diff_Nuc56941	chr9	31085632	31085771	+	0	NA	Intergenic	RMER10A|LTR|ERVL	6715	NM_001101597	638580	Mm.373655	NM_001101597		Gm7244	EG638580	predicted gene 7244	protein-coding
Diff_Nuc49941	chr2	126943542	126943681	+	0	NA	intron (NM_144818, intron 10 of 17)	intron (NM_144818, intron 10 of 17)	16079	NM_144818	215387	Mm.29786	NM_144818	ENSMUSG00000034906	Ncaph	A730011O11Rik|Brrn1|HCAP-H|mKIAA0074	non-SMC condensin I complex, subunit H	protein-coding
Diff_Nuc22088	chr14	55295622	55295761	+	0	NA	intron (NM_023190, intron 4 of 18)	ID_B1|SINE|B4	-9317	NM_021437	58248	Mm.197509	NM_021437	ENSMUSG00000040822	1700123O20Rik	MNCb-2990	RIKEN cDNA 1700123O20 gene	protein-coding
Diff_Nuc46018	chr3	135121902	135122041	+	0	NA	intron (NM_025356, intron 5 of 7)	intron (NM_025356, intron 5 of 7)	20248	NM_025356	66105	Mm.49884	NM_025356	ENSMUSG00000078578	Ube2d3	1100001F19Rik|9430029A22Rik|AA414951	ubiquitin-conjugating enzyme E2D 3	protein-coding
Diff_Nuc51490	chr2	181629692	181629831	+	0	NA	Intergenic	L1VL4|LINE|L1	30696	NM_025901	67005	Mm.271986	NM_025901	ENSMUSG00000038628	Polr3k	12.3kDa|1500004O14Rik|AI196849|AU014893|C11|RPC10|RPC11	polymerase (RNA) III (DNA directed) polypeptide K	protein-coding
Diff_Nuc45253	chr3	103699182	103699321	+	0	NA	intron (NM_008979, intron 16 of 20)	B4|SINE|B4	-18792	NM_172684	229675	Mm.29366	NM_172684	ENSMUSG00000044098	Rsbn1	C230004D03Rik|E330004N01|Rosbin|Rsbn|Rsbp|mKIAA3002	rosbin, round spermatid basic protein 1	protein-coding
Diff_Nuc1071	chr13	26412792	26412931	+	0	NA	Intergenic	Intergenic	-8586	NR_045933	73576	Mm.45473	NR_045933		1700092E19Rik	-	RIKEN cDNA 1700092E19 gene	ncRNA
Diff_Nuc57935	chr9	64019802	64019941	+	0	NA	intron (NM_026507, intron 1 of 18)	B1_Mus2|SINE|Alu	867	NM_026507	68014	Mm.335237	NM_026507	ENSMUSG00000032400	Zwilch	2310031L18Rik	zwilch kinetochore protein	protein-coding
Diff_Nuc31085	chr6	3458942	3459081	+	0	NA	intron (NM_024260, intron 2 of 27)	intron (NM_024260, intron 2 of 27)	10618	NM_001167750	73288	Mm.45539	NM_024260	ENSMUSG00000001376	Vps50	1700034M03Rik|8430415E05Rik|BLM|C87205|Ccdc132|mKIAA1861	VPS50 EARP/GARPII complex subunit	protein-coding
Diff_Nuc21286	chr14	20884542	20884681	+	0	NA	Intergenic	Intergenic	17783	NM_026209	67509	Mm.292423	NM_026209	ENSMUSG00000045107	Saysd1	1810063B07Rik|4930488P03Rik	SAYSVFN motif domain containing 1	protein-coding
Diff_Nuc43254	chr3	19530052	19530191	+	0	NA	Intergenic	Intergenic	-14339	NM_001081281	381485	Mm.35419	NM_001081281	ENSMUSG00000060913	Trim55	D830041C10Rik|Murf2|Rnf29	tripartite motif-containing 55	protein-coding
Diff_Nuc25581	chr18	13961622	13961761	+	0	NA	intron (NM_145492, intron 5 of 7)	intron (NM_145492, intron 5 of 7)	169551	NM_145492	225207	Mm.40325	NM_145492	ENSMUSG00000024420	Zfp521	B930086A16Rik|Evi3|Znf521	zinc finger protein 521	protein-coding
Diff_Nuc3710	chr12	11390812	11390951	+	0	NA	intron (NM_012038, intron 2 of 3)	intron (NM_012038, intron 2 of 3)	52574	NM_012038	26950	Mm.27005	NM_012038	ENSMUSG00000054459	Vsnl1	VILIP|Vnsl1	visinin-like 1	protein-coding
Diff_Nuc18571	chr15	10263352	10263491	+	0	NA	3' UTR (NM_011169, exon 10 of 10)	3' UTR (NM_011169, exon 10 of 10)	-24867	NM_001310736	268782	Mm.482244	NM_001031851	ENSMUSG00000089678	Agxt2	AI303810|AI663818	alanine-glyoxylate aminotransferase 2	protein-coding
Diff_Nuc59608	chr9	121757992	121758131	+	0	NA	3' UTR (NM_019814, exon 4 of 4)	3' UTR (NM_019814, exon 4 of 4)	9057	NM_019814	56295	Mm.347915	NM_019814	ENSMUSG00000038412	Higd1a	2210020B17Rik|7420700H20Rik|AI303276|AW049839|HIMP1|Hig1	HIG1 domain family, member 1A	protein-coding
Diff_Nuc51063	chr2	163275562	163275701	+	0	NA	intron (NM_144891, intron 3 of 5)	intron (NM_144891, intron 3 of 5)	11428	NM_144891	228858	Mm.102080	NM_144891	ENSMUSG00000017943	Gdap1l1	Gdap1l	ganglioside-induced differentiation-associated protein 1-like 1	protein-coding
Diff_Nuc6680	chr11	17216672	17216811	+	0	NA	Intergenic	MusHAL1|LINE|L1	59050	NM_001330649	57316	Mm.287982	NM_020558	ENSMUSG00000000581	C1d	1110036E10Rik|AI875855|SUN-CoR	C1D nuclear receptor co-repressor	protein-coding
Diff_Nuc50310	chr2	139091122	139091261	+	0	NA	Intergenic	Intergenic	-228465	NM_175467	228677	Mm.100450	NM_175467	ENSMUSG00000039092	Sptlc3	C130053K05Rik	serine palmitoyltransferase, long chain base subunit 3	protein-coding
Diff_Nuc16352	chr16	17408652	17408791	+	0	NA	intron (NM_023348, intron 1 of 4)	intron (NM_023348, intron 1 of 4)	-2314	NM_001001983	224020	Mm.5718	NM_001001983	ENSMUSG00000041720	Pi4ka	Pik4ca	phosphatidylinositol 4-kinase, catalytic, alpha polypeptide	protein-coding
Diff_Nuc44305	chr3	65675482	65675621	+	0	NA	Intergenic	Intergenic	86596	NM_019937	56706	Mm.175612	NM_019937	ENSMUSG00000027829	Ccnl1	2610030E23Rik|AU018493|Ccnl|ania-6a	cyclin L1	protein-coding
Diff_Nuc19753	chr15	60431332	60431471	+	0	NA	Intergenic	L3|LINE|CR1	-223119	NR_030696	320469	Mm.230853	NM_177166		9930014A18Rik	-	RIKEN cDNA 9930014A18 gene	ncRNA
Diff_Nuc47000	chr2	21130162	21130301	+	0	NA	intron (NM_001001297, intron 1 of 2)	RMER17B|LTR|ERVK	2880	NM_177588	208967	Mm.268841	NM_177588	ENSMUSG00000048550	Thnsl1	AW413632	threonine synthase-like 1 (bacterial)	protein-coding
Diff_Nuc1264	chr13	33476482	33476621	+	0	NA	Intergenic	L1Md_F2|LINE|L1	60605	NM_183197	20709	Mm.474264	NM_183197	ENSMUSG00000038327	Serpinb9f	BC052216|NK21|NK21L1|Spi13|ovalbumin	serine (or cysteine) peptidase inhibitor, clade B, member 9f	protein-coding
Diff_Nuc12673	chr10	103572092	103572231	+	0	NA	Intergenic	Intergenic	-33408	NM_001270898	100861880	Mm.441727	NM_001270898	ENSMUSG00000091779	Gm21293	-	predicted gene, 21293	protein-coding
Diff_Nuc24189	chr19	20577102	20577241	+	0	NA	intron (NR_015502, intron 2 of 3)	intron (NR_015502, intron 2 of 3)	9966	NR_015502	320092	Mm.482524	NR_015502		E030003E18Rik	1700127G21Rik	RIKEN cDNA E030003E18 gene	ncRNA
Diff_Nuc60111	chr8	23344192	23344331	+	0	NA	intron (NM_001205253, intron 1 of 3)	Lx7|LINE|L1	6486	NM_001293688	56229	Mm.32067	NM_019576	ENSMUSG00000031480	Thsd1	4833423O18Rik|Tmtsp	thrombospondin, type I, domain 1	protein-coding
Diff_Nuc53007	chr1	64389702	64389841	+	0	NA	Intergenic	Intergenic	-189607	NM_133828	12912	Mm.422634	NM_009952	ENSMUSG00000025958	Creb1	2310001E10Rik|3526402H21Rik|AV083133|Creb|Creb-1	cAMP responsive element binding protein 1	protein-coding
Diff_Nuc765	chr13	14597932	14598071	+	0	NA	intron (NM_001081348, intron 1 of 28)	intron (NM_001081348, intron 1 of 28)	17492	NM_001081348	94253	Mm.125298	NM_153130	ENSMUSG00000021301	Hecw1	9330116H24Rik|AV273951|E130207I19Rik|Nedl1	HECT, C2 and WW domain containing E3 ubiquitin protein ligase 1	protein-coding
Diff_Nuc12497	chr10	95315652	95315791	+	0	NA	Intergenic	Intergenic	-87576	NM_001001932	216238	Mm.210035	NM_001001932	ENSMUSG00000036499	Eea1	A430109M19Rik|B230358H09Rik|ZFYVE2	early endosome antigen 1	protein-coding
Diff_Nuc53013	chr1	64578142	64578281	+	0	NA	Intergenic	Intergenic	-1167	NM_133828	12912	Mm.422634	NM_009952	ENSMUSG00000025958	Creb1	2310001E10Rik|3526402H21Rik|AV083133|Creb|Creb-1	cAMP responsive element binding protein 1	protein-coding
Diff_Nuc46852	chr2	15685482	15685621	+	0	NA	intron (NM_001310455, intron 18 of 38)	ETnERV2-int|LTR|ERVK	237445	NM_001310455	102635496		NM_001310455	ENSMUSG00000075520	Malrd1	-	MAM and LDL receptor class A domain containing 1	protein-coding
Diff_Nuc47037	chr2	21783942	21784081	+	0	NA	Intergenic	Intergenic	-365119	NM_148413	667663	Mm.330033	NM_148413	ENSMUSG00000025716	Myo3a	9030416P08Rik	myosin IIIA	protein-coding
Diff_Nuc30041	chr7	116077242	116077381	+	0	NA	promoter-TSS (NM_025344)	promoter-TSS (NM_025344)	-618	NM_025344	66085	Mm.182962	NM_025344	ENSMUSG00000031029	Eif3f	0610037M02Rik|AA409853|Eif3s5	eukaryotic translation initiation factor 3, subunit F	protein-coding
Diff_Nuc17060	chr16	40331682	40331821	+	0	NA	Intergenic	Intergenic	-1201188	NM_001347236	268890	Mm.310524	NM_175548	ENSMUSG00000061080	Lsamp	5430428I19|AW046674|B130007O04Rik|D930023J12Rik|Lam|Lamp	limbic system-associated membrane protein	protein-coding
Diff_Nuc9447	chr11	106292872	106293011	+	0	NA	intron (NM_023913, intron 4 of 21)	RMER19A|LTR|ERVK	-48846	NM_010494	15896	Mm.394	NM_010494	ENSMUSG00000001029	Icam2	CD102|Icam-2|Ly-60	intercellular adhesion molecule 2	protein-coding
Diff_Nuc41880	chr4	124537702	124537841	+	0	NA	intron (NM_001007573, intron 1 of 3)	intron (NM_001007573, intron 1 of 3)	1644	NM_001007573	215090	Mm.472762	NM_001007573	ENSMUSG00000042763	Maneal	Gm50	mannosidase, endo-alpha-like	protein-coding
Diff_Nuc37075	chr5	94904232	94904371	+	0	NA	Intergenic	L1_Mus1|LINE|L1	-51008	NM_001243937	100041102	Mm.420028	NM_001243937	ENSMUSG00000095074	Gm3139	-	predicted gene 3139	protein-coding
Diff_Nuc26784	chr18	59368652	59368791	+	0	NA	intron (NM_001081328, intron 2 of 2)	intron (NM_001081328, intron 2 of 2)	33727	NM_001081328	78923	Mm.84007	NM_001081328	ENSMUSG00000058152	Chsy3	4833446K15Rik|AI662215	chondroitin sulfate synthase 3	protein-coding
Diff_Nuc53640	chr1	89833312	89833451	+	0	NA	exon (NM_177646, exon 24 of 30)	exon (NM_177646, exon 24 of 30)	71745	NM_001198573	227334	Mm.80484	NM_001033291	ENSMUSG00000005501	Usp40	B230215L03Rik|C730029K03	ubiquitin specific peptidase 40	protein-coding
Diff_Nuc10643	chr10	26419872	26420011	+	0	NA	Intergenic	Intergenic	-25484	NR_033633	667572	Mm.482728	NR_033633	ENSMUSG00000098179	Gm8709	EG667572	glyceraldehyde-3-phosphate dehydrogenase pseudogene	pseudo
Diff_Nuc4197	chr12	36629172	36629311	+	0	NA	Intergenic	Intergenic	-22967	NM_207531	403205	Mm.190508	NM_207531	ENSMUSG00000036231	Agr3	BCMP11|E030025L21Rik|Gm888	anterior gradient 3	protein-coding
Diff_Nuc42488	chr4	141310302	141310441	+	0	NA	intron (NM_001081408, intron 2 of 6)	RMER6A|LTR|ERVK	7781	NM_001081408	75986	Mm.30032	NM_001081408	ENSMUSG00000040706	Agmat	5033405N08Rik	agmatine ureohydrolase (agmatinase)	protein-coding
Diff_Nuc18840	chr15	23974602	23974741	+	0	NA	Intergenic	Intergenic	1008453	NM_001081299	320865	Mm.241965	NM_001081299	ENSMUSG00000040420	Cdh18	B230220E17Rik|Cdh14l	cadherin 18	protein-coding
Diff_Nuc5204	chr12	80044682	80044821	+	0	NA	Intergenic	ID_B1|SINE|B4	-36826	NM_013738	27260	Mm.103380	NM_013738	ENSMUSG00000021118	Plek2	-	pleckstrin 2	protein-coding
Diff_Nuc47200	chr2	27260302	27260441	+	0	NA	intron (NM_009500, intron 1 of 27)	intron (NM_009500, intron 1 of 27)	22757	NR_133905	22325	Mm.179011	NM_009500	ENSMUSG00000009621	Vav2	2810040F13Rik|AI847175|Vav-2	vav 2 oncogene	protein-coding
Diff_Nuc9639	chr11	114047542	114047681	+	0	NA	Intergenic	Intergenic	-11961	NR_045930	73536	Mm.54275	NR_045930	ENSMUSG00000078600	1700092K14Rik	-	RIKEN cDNA 1700092K14 gene	ncRNA
Diff_Nuc22952	chr14	89621192	89621331	+	0	NA	Intergenic	RLTR28|LTR|ERVL	-674770	NR_002862	328451	Mm.320571	NR_002862		Gm5088	EG328451|Pabpc4l	poly(A)-binding protein, cytoplasmic pseudogene	pseudo
Diff_Nuc8975	chr11	94823392	94823531	+	0	NA	TTS (NM_009161)	TTS (NM_009161)	-5446	NM_018792	54388	Mm.30482	NM_018792	ENSMUSG00000038994	Hils1	H1.9|TISP64	histone H1-like protein in spermatids 1	protein-coding
Diff_Nuc54874	chr1	151157172	151157311	+	0	NA	Intergenic	Lx3B|LINE|L1	612328	NM_001305632	18783	Mm.4186	NM_008869	ENSMUSG00000056220	Pla2g4a	Pla2g4|cPLA2|cPLA2-alpha|cPLA2alpha	phospholipase A2, group IVA (cytosolic, calcium-dependent)	protein-coding
Diff_Nuc15524	chr17	81891862	81892001	+	0	NA	intron (NR_104580, intron 2 of 8)	intron (NR_104580, intron 2 of 8)	245796	NM_001286684	20541	Mm.265834	NM_011406	ENSMUSG00000054640	Slc8a1	AI852629|AV344025|D930008O12Rik|Ncx1	solute carrier family 8 (sodium/calcium exchanger), member 1	protein-coding
Diff_Nuc10209	chr10	10375842	10375981	+	0	NA	Intergenic	Lx5|LINE|L1	50168	NR_033630	382450	Mm.422788	NR_033630	ENSMUSG00000098065	Gm5177	EG382450	glyceraldehyde-3-phosphate dehydrogenase pseudogene	pseudo
Diff_Nuc30753	chr7	140115232	140115371	+	0	NA	Intergenic	(TATG)n|Simple_repeat|Simple_repeat	-26004	NM_207302	360216	Mm.389984	NM_207302	ENSMUSG00000030967	Zranb1	9330160G10Rik|D7Wsu87e|Gm1956|Trabid	zinc finger, RAN-binding domain containing 1	protein-coding
Diff_Nuc5240	chr12	81323562	81323701	+	0	NA	intron (NM_001346669, intron 1 of 20)	intron (NM_001346669, intron 1 of 20)	37727	NM_134156	109711	Mm.253564	NM_134156	ENSMUSG00000015143	Actn1	3110023F10Rik|Actn1a	actinin, alpha 1	protein-coding
Diff_Nuc36229	chr5	56021112	56021251	+	0	NA	Intergenic	Lx5|LINE|L1	1279950	NR_038045	330086	Mm.254449	NM_177871	ENSMUSG00000105912	Gm10440	D130065D13|ENSMUSG00000072936	predicted gene 10440	ncRNA
Diff_Nuc31874	chr6	33967092	33967231	+	0	NA	Intergenic	ORR1D2|LTR|MaLR	-12287	NM_028886	74354	Mm.127952	NM_028886	ENSMUSG00000056215	Lrguk	4921528H16Rik	leucine-rich repeats and guanylate kinase domain containing	protein-coding
Diff_Nuc56952	chr9	31584222	31584361	+	0	NA	Intergenic	Intergenic	136579	NM_013800	12023	Mm.261044	NM_013800	ENSMUSG00000032033	Barx2	2310006E12Rik|Barx2b	BarH-like homeobox 2	protein-coding
Diff_Nuc2219	chr13	67227782	67227921	+	0	NA	Intergenic	Intergenic	-1313	NM_172392	268670	Mm.56274	NM_172392	ENSMUSG00000057396	Zfp759	BC028265|Rslcan-8|Rslcan8	zinc finger protein 759	protein-coding
Diff_Nuc1384	chr13	37549532	37549671	+	0	NA	Intergenic	Intergenic	112387	NM_010745	17084	Mm.2639	NM_010745	ENSMUSG00000021423	Ly86	MD-1|MD1|ly86_tv2	lymphocyte antigen 86	protein-coding
Diff_Nuc49203	chr2	101571422	101571561	+	0	NA	intron (NM_001083810, intron 7 of 8)	intron (NM_001083810, intron 7 of 8)	52914	NM_001303273	22034	Mm.292729	NM_009424	ENSMUSG00000027164	Traf6	2310003F17Rik|AI851288|C630032O20Rik	TNF receptor-associated factor 6	protein-coding
Diff_Nuc14845	chr17	54083722	54083861	+	0	NA	Intergenic	Lx6|LINE|L1	46165	NM_018751	20888	Mm.10108	NM_018751	ENSMUSG00000023943	Sult1c1	(PST)G|P-SULT|ST1C1|Stp2|Sult1a2|mOLFST	sulfotransferase family, cytosolic, 1C, member 1	protein-coding
Diff_Nuc14416	chr17	35068872	35069011	+	0	NA	exon (NM_010893, exon 2 of 6)	exon (NM_010893, exon 2 of 6)	743	NM_010893	18010	Mm.8856	NM_010893	ENSMUSG00000007038	Neu1	AA407268|AA407316|Aglp|Apl|Bat-7|Bat7|G9|Map-2|Neu|Neu-1	neuraminidase 1	protein-coding
Diff_Nuc62763	chr8	130551282	130551421	+	0	NA	Intergenic	MTD|LTR|MaLR	250774	NR_105822	102465212		NR_105822	ENSMUSG00000099326	Mir21c	Gm28013|mmu-mir-21c	microRNA 21c	ncRNA
Diff_Nuc47732	chr2	43576022	43576161	+	0	NA	Intergenic	Intergenic	-28253	NM_001301832	76117	Mm.217350	NM_153820	ENSMUSG00000049744	Arhgap15	5830480G12Rik	Rho GTPase activating protein 15	protein-coding
Diff_Nuc27296	chr18	78391202	78391341	+	0	NA	intron (NM_030683, intron 7 of 11)	intron (NM_030683, intron 7 of 11)	11908	NM_001110274	27411	Mm.44158	NM_030683	ENSMUSG00000024552	Slc14a2	UT-A1|UT-A3	solute carrier family 14 (urea transporter), member 2	protein-coding
Diff_Nuc25794	chr18	24112872	24113011	+	0	NA	promoter-TSS (NM_027007)	promoter-TSS (NM_027007)	-248	NM_027007	69256	Mm.218343	NM_027007	ENSMUSG00000024276	Zfp397	2810411K16Rik|6720480F11Rik|AI461664	zinc finger protein 397	protein-coding
Diff_Nuc26071	chr18	33285562	33285701	+	0	NA	intron (NM_009793, intron 4 of 10)	intron (NM_009793, intron 4 of 10)	87885	NM_001347624	170459	Mm.127058	NM_133774	ENSMUSG00000024378	Stard4	4632419C16Rik|9030213J02Rik	StAR-related lipid transfer (START) domain containing 4	protein-coding
Diff_Nuc52786	chr1	55112622	55112761	+	0	NA	intron (NM_026424, intron 1 of 3)	B2_Mm2|SINE|B2	3077	NM_001039710	67876	Mm.281019	NM_026424	ENSMUSG00000025981	Coq10b	1500041J02Rik|1700030I21Rik|9530077A17Rik|AV002237|AW742641	coenzyme Q10B	protein-coding
Diff_Nuc7639	chr11	53381252	53381391	+	0	NA	intron (NM_008443, intron 1 of 17)	CpG	450	NM_001290806	16568	Mm.88694	NM_008443	ENSMUSG00000018395	Kif3a	Kif3|Kifl|Kns3	kinesin family member 3A	protein-coding
Diff_Nuc55147	chr1	160286552	160286691	+	0	NA	promoter-TSS (NM_207583)	promoter-TSS (NM_207583)	-230	NM_207583	240843	Mm.329579	NM_207583	ENSMUSG00000004031	Brinp2	6430517E21Rik|BB361039|Fam5b|mKIAA1747	bone morphogenic protein/retinoic acid inducible neural-specific 2	protein-coding
Diff_Nuc41132	chr4	100402992	100403131	+	0	NA	Intergenic	L1M2|LINE|L1	-46223	NM_198037	320508	Mm.151962	NM_198037	ENSMUSG00000028532	Cachd1	1190007F10Rik|AI852726|B430218L07Rik|Vwcd1|mKIAA1573	cache domain containing 1	protein-coding
Diff_Nuc49144	chr2	98502422	98502561	+	0	NA	Intergenic	GSAT_MM|Satellite|Satellite	1194677	NM_178725	241568	Mm.241682	NM_178725	ENSMUSG00000050587	Lrrc4c	6430556C10Rik|NGL-1	leucine rich repeat containing 4C	protein-coding
Diff_Nuc34423	chr6	131325852	131325991	+	0	NA	intron (NM_011733, intron 5 of 8)	GA-rich|Low_complexity|Low_complexity	12547	NM_139117	56449	Mm.458000	NM_011733	ENSMUSG00000030189	Ybx3	Csda|Dpba|MSY3|MSY4|Yb2|dbpA|oxyR	Y box protein 3	protein-coding
Diff_Nuc49120	chr2	97428422	97428561	+	0	NA	intron (NM_001289744, intron 1 of 1)	intron (NM_001289744, intron 1 of 1)	120677	NM_178725	241568	Mm.241682	NM_178725	ENSMUSG00000050587	Lrrc4c	6430556C10Rik|NGL-1	leucine rich repeat containing 4C	protein-coding
Diff_Nuc427	chrX	149705342	149705481	+	0	NA	intron (NM_173780, intron 1 of 6)	Lx3C|LINE|L1	32823	NM_173780	245671	Mm.260751	NM_173780	ENSMUSG00000041649	Klf8	A830097P10Rik|BKLF3|ZNF74	Kruppel-like factor 8	protein-coding
Diff_Nuc59127	chr9	105394272	105394411	+	0	NA	intron (NM_001253831, intron 1 of 26)	intron (NM_001253831, intron 1 of 26)	3122	NM_175025	235574	Mm.326247	NM_175025	ENSMUSG00000032570	Atp2c1	1700121J11Rik|ATP2C1A|AW061228|BCPM|D930003G21Rik|HHD|SPCA|pmr1	ATPase, Ca++-sequestering	protein-coding
Diff_Nuc18682	chr15	16330972	16331111	+	0	NA	Intergenic	ORR1A2|LTR|MaLR	-376815	NM_009869	12565	Mm.439758	NM_009869	ENSMUSG00000025370	Cdh9	-	cadherin 9	protein-coding
Diff_Nuc39817	chr4	44899872	44900011	+	0	NA	intron (NM_138590, intron 2 of 8)	intron (NM_138590, intron 2 of 8)	-94325	NM_080289	76238	Mm.196574	NM_080289	ENSMUSG00000035637	Grhpr	1110059D05Rik|6430629L09Rik|Glxr	glyoxylate reductase/hydroxypyruvate reductase	protein-coding
Diff_Nuc3996	chr12	29212932	29213071	+	0	NA	intron (NM_001177964, intron 5 of 8)	RMER19C|LTR|ERVK	20201	NM_001177964	68511	Mm.310284	NM_001177964	ENSMUSG00000020633	Dcdc2c	1110015M06Rik	doublecortin domain containing 2C	protein-coding
Diff_Nuc24368	chr19	26512322	26512461	+	0	NA	Intergenic	L1M3|LINE|L1	-167259	NM_011416	67155	Mm.342988	NM_011416	ENSMUSG00000024921	Smarca2	2610209L14Rik|SNF2alpha|Snf2l2|brahma|brm	SWI/SNF related, matrix associated, actin dependent regulator of chromatin, subfamily a, member 2	protein-coding
Diff_Nuc30896	chr7	146658862	146659001	+	0	NA	intron (NM_183144, intron 2 of 15)	intron (NM_183144, intron 2 of 15)	83923	NM_001127363	212111	Mm.28308	NM_183144	ENSMUSG00000025477	Inpp5a	-	inositol polyphosphate-5-phosphatase A	protein-coding
Diff_Nuc29967	chr7	111746182	111746321	+	0	NA	promoter-TSS (NM_146820)	promoter-TSS (NM_146820)	-558	NM_146820	258817	Mm.377706	NM_146820	ENSMUSG00000051182	Olfr655	MOR38-1	olfactory receptor 655	protein-coding
Diff_Nuc338	chrX	110463592	110463731	+	0	NA	intron (NM_001289734, intron 4 of 15)	L1_Mus2|LINE|L1	51796	NM_001142570	93837	Mm.79760	NM_033605	ENSMUSG00000025592	Dach2	9430028N04Rik	dachshund 2 (Drosophila)	protein-coding
Diff_Nuc52192	chr1	32006342	32006481	+	0	NA	Intergenic	Lx2|LINE|L1	-223240	NM_133235	170771	Mm.336594	NM_133235	ENSMUSG00000026058	Khdrbs2	6330586C16Rik|Slim1|Slm-1|Slm1|mSLM-1	KH domain containing, RNA binding, signal transduction associated 2	protein-coding
Diff_Nuc42516	chr4	142376032	142376171	+	0	NA	Intergenic	IAPLTR2_Mm|LTR|ERVK	349964	NR_105988	102465618		NR_105988	ENSMUSG00000106597	Mir7021	mmu-mir-7021	microRNA 7021	ncRNA
Diff_Nuc30180	chr7	119667292	119667431	+	0	NA	intron (NM_020606, intron 1 of 12)	intron (NM_020606, intron 1 of 12)	96141	NM_020606	57342	Mm.143763	NM_020606	ENSMUSG00000030770	Parva	2010012A22Rik|5430400F08Rik|AI225929|AU042898|Actp|CH-ILKBP|Parvin	parvin, alpha	protein-coding
Diff_Nuc38329	chr5	134649032	134649171	+	0	NA	intron (NM_033572, intron 1 of 10)	intron (NM_033572, intron 1 of 10)	3536	NM_033572	94254	Mm.29508	NM_033572	ENSMUSG00000061979	Rcc1l	5730496C04Rik|AU019812|Wbscr16	reculator of chromosome condensation 1 like	protein-coding
Diff_Nuc18355	chr16	96963242	96963381	+	0	NA	intron (NM_031174, intron 11 of 32)	Lx2|LINE|L1	274098	NM_008791	18546	Mm.5023	NM_008791	ENSMUSG00000090223	Pcp4	P16Rimb19|Pcp-4|Pep19	Purkinje cell protein 4	protein-coding
Diff_Nuc30074	chr7	116757222	116757361	+	0	NA	intron (NM_029811, intron 1 of 18)	intron (NM_029811, intron 1 of 18)	2791	NR_037617	76954	Mm.252009	NM_029811	ENSMUSG00000031024	St5	2010004M01Rik|2610305K15Rik	suppression of tumorigenicity 5	protein-coding
Diff_Nuc19134	chr15	35107502	35107641	+	0	NA	Intergenic	Lx|LINE|L1	-22010	NM_019635	56274	Mm.262330	NM_019635	ENSMUSG00000022329	Stk3	0610042I06Rik|MST|Mst2|Mst3|Ste20|mess1	serine/threonine kinase 3	protein-coding
Diff_Nuc11905	chr10	76758712	76758851	+	0	NA	intron (NM_001024837, intron 9 of 10)	intron (NM_001024837, intron 9 of 10)	36736	NM_030262	80294	Mm.203556	NM_030262	ENSMUSG00000020260	Pofut2	2310011G23Rik|AI256847|BC003494|C21orf80|FUT13	protein O-fucosyltransferase 2	protein-coding
Diff_Nuc56210	chr9	3024142	3024281	+	0	NA	Intergenic	GSAT_MM|Satellite|Satellite	14532	NR_039546	100628572		NR_039546	ENSMUSG00000106183	Mir101c	mir-101c|mmu-mir-101c	microRNA 101c	ncRNA
Diff_Nuc3882	chr12	21128522	21128661	+	0	NA	intron (NM_001004364, intron 1 of 26)	L1MB5|LINE|L1	10974	NM_001135192	211914	Mm.358946	NM_001004364	ENSMUSG00000052632	Asap2	6530401G17Rik|Ddef2|Gm1523|Gm592|PAG3|PAP	ArfGAP with SH3 domain, ankyrin repeat and PH domain 2	protein-coding
Diff_Nuc54990	chr1	155033412	155033551	+	0	NA	promoter-TSS (NM_008485)	promoter-TSS (NM_008485)	96	NM_008485	16782	Mm.329272	NM_008485	ENSMUSG00000026479	Lamc2	AA589349	laminin, gamma 2	protein-coding
Diff_Nuc24	chrX	5700252	5700391	+	0	NA	Intergenic	RLTR18|LTR|ERVK	-39783	NM_001033211	102991	Mm.199793	NM_001033211	ENSMUSG00000073294	AU022751	AU023811	expressed sequence AU022751	protein-coding
Diff_Nuc16287	chr16	15703752	15703891	+	0	NA	intron (NM_011159, intron 29 of 85)	intron (NM_011159, intron 29 of 85)	65862	NM_011159	19090	Mm.71	NM_011159	ENSMUSG00000022672	Prkdc	AI326420|AU019811|DNA-PKcs|DNAPDcs|DNAPK|DNPK1|DOXNPH|HYRC1|XRCC7|dxnph|p460|scid|slip	protein kinase, DNA activated, catalytic polypeptide	protein-coding
Diff_Nuc39901	chr4	46792182	46792321	+	0	NA	intron (NM_001081141, intron 7 of 18)	intron (NM_001081141, intron 7 of 18)	-129180	NM_198664	381605	Mm.331595	NM_198664	ENSMUSG00000039813	Tbc1d2	A630005A06Rik|BC022630|Gm1037|PARIS-1|PARIS1	TBC1 domain family, member 2	protein-coding
Diff_Nuc33569	chr6	97814452	97814591	+	0	NA	intron (NM_001113198, intron 1 of 9)	intron (NM_001113198, intron 1 of 9)	57469	NM_001113198	17342	Mm.333284	NM_008601	ENSMUSG00000035158	Mitf	BCC2|Bhlhe32|Gsfbcc2|Vitiligo|Wh|bw|mi|vit	microphthalmia-associated transcription factor	protein-coding
Diff_Nuc5896	chr12	103612412	103612551	+	0	NA	intron (NM_001161365, intron 7 of 9)	MLT1C|LTR|MaLR	65542	NM_011175	19141	Mm.17185	NM_011175	ENSMUSG00000021190	Lgmn	AEP|AI746452|AU022324|Prsc1	legumain	protein-coding
Diff_Nuc18976	chr15	29994152	29994291	+	0	NA	Intergenic	Intergenic	-108127	NM_008729	18163	Mm.321648	NM_008729	ENSMUSG00000022240	Ctnnd2	Catnd2|Nprap|neurojugin	catenin (cadherin associated protein), delta 2	protein-coding
Diff_Nuc33452	chr6	91965882	91966021	+	0	NA	intron (NM_172731, intron 2 of 20)	intron (NM_172731, intron 2 of 20)	36992	NM_172731	232237	Mm.295740	NM_172731	ENSMUSG00000034037	Fgd5	C330025N11Rik|ZFYVE23|mFLJ00274	FYVE, RhoGEF and PH domain containing 5	protein-coding
Diff_Nuc29566	chr7	98252382	98252521	+	0	NA	intron (NM_011807, intron 1 of 22)	intron (NM_011807, intron 1 of 22)	13155	NM_011807	23859	Mm.147213	NM_011807	ENSMUSG00000052572	Dlg2	A330103J02Rik|B230218P12Rik|B330007M19Rik|Dlgh2|Gm1197|Gm21505|PSD93	discs, large homolog 2 (Drosophila)	protein-coding
Diff_Nuc31480	chr6	20088272	20088411	+	0	NA	Intergenic	Lx9|LINE|L1	582999	NR_105789	102465192		NR_105789	ENSMUSG00000099149	Mir6370	Gm27480|mmu-mir-6370	microRNA 6370	ncRNA
Diff_Nuc54159	chr1	116716382	116716521	+	0	NA	Intergenic	Intergenic	-865263	NM_001077425	636808	Mm.101576	NM_001077425	ENSMUSG00000070695	Cntnap5a	Caspr5-1|EG636808	contactin associated protein-like 5A	protein-coding
Diff_Nuc44393	chr3	69278132	69278271	+	0	NA	intron (NM_178726, intron 1 of 3)	intron (NM_178726, intron 1 of 3)	124681	NM_020026	26879	Mm.153710	NM_020026	ENSMUSG00000043300	B3galnt1	B3galt3|b3GT3	UDP-GalNAc:betaGlcNAc beta 1,3-galactosaminyltransferase, polypeptide 1	protein-coding
Diff_Nuc36111	chr5	50811312	50811451	+	0	NA	Intergenic	L1Md_F2|LINE|L1	167380	NR_106197	102465903		NR_106197	ENSMUSG00000099124	Mir8117	Gm27323|mmu-mir-8117	microRNA 8117	ncRNA
Diff_Nuc56101	chr1	194827382	194827521	+	0	NA	intron (NM_181546, intron 2 of 7)	intron (NM_181546, intron 2 of 7)	34518	NM_001301370	329324	Mm.76710	NM_181546	ENSMUSG00000016200	Syt14	B230320I09Rik|sytXIV	synaptotagmin XIV	protein-coding
Diff_Nuc35137	chr5	18693582	18693721	+	0	NA	Intergenic	GA-rich|Low_complexity|Low_complexity	38722	NR_102341	70832	Mm.398993	NR_102341	ENSMUSG00000097626	4921504A21Rik	-	RIKEN cDNA 4921504A21 gene	ncRNA
Diff_Nuc2503	chr13	80086122	80086261	+	0	NA	Intergenic	MTE2a|LTR|MaLR	-936492	NM_001042591	105171	Mm.423137	NM_001042591	ENSMUSG00000074794	Arrdc3	AI450344|mKIAA1376	arrestin domain containing 3	protein-coding
Diff_Nuc27087	chr18	69571232	69571371	+	0	NA	intron (NM_001083967, intron 3 of 19)	intron (NM_001083967, intron 3 of 19)	65926	NM_001083967	21413	Mm.4269	NM_013685	ENSMUSG00000053477	Tcf4	5730422P05Rik|ASP-I2|E2-2|E2.2|ITF-2|ITF-2b|ITF2|ME2|MITF-2A|MITF-2B|SEF-2|SEF2|SEF2-1|TFE|Tcf-4|bHLHb19	transcription factor 4	protein-coding
Diff_Nuc56524	chr9	15550312	15550451	+	0	NA	Intergenic	Intergenic	36168	NM_172289	234967	Mm.138815	NM_172289	ENSMUSG00000043885	Slc36a4	6330573I15Rik|PAT4	solute carrier family 36 (proton/amino acid symporter), member 4	protein-coding
Diff_Nuc41106	chr4	99787822	99787961	+	0	NA	intron (NM_013845, intron 1 of 8)	B3A|SINE|B2	19495	NM_001312690	26563	Mm.57252	NM_013845	ENSMUSG00000035305	Ror1	2810404D04Rik|Ntrkr1	receptor tyrosine kinase-like orphan receptor 1	protein-coding
Diff_Nuc11873	chr10	76158872	76159011	+	0	NA	Intergenic	Lx8|LINE|L1	29848	NM_009933	12833	Mm.2509	NM_009933	ENSMUSG00000001119	Col6a1	AI747156|Col6a-1	collagen, type VI, alpha 1	protein-coding
Diff_Nuc9273	chr11	102183242	102183381	+	0	NA	Intergenic	Intergenic	-2901	NM_011551	21429	Mm.2845	NM_011551	ENSMUSG00000020923	Ubtf	A930005G04Rik|NOR-90|Tcfubf|UBF|UBF-1|UBF1	upstream binding transcription factor, RNA polymerase I	protein-coding
Diff_Nuc1957	chr13	57391922	57392061	+	0	NA	Intergenic	Intergenic	-394841	NM_001302373	26946	Mm.62409	NM_012035	ENSMUSG00000021541	Trpc7	TRP7|Trrp8	transient receptor potential cation channel, subfamily C, member 7	protein-coding
Diff_Nuc14056	chr17	26137462	26137601	+	0	NA	intron (NM_153140, intron 5 of 11)	L1Md_F2|LINE|L1	-14712	NM_001347334	50817	Mm.216072	NM_015830	ENSMUSG00000037326	Capn15	Solh	calpain 15	protein-coding
Diff_Nuc54060	chr1	111274152	111274291	+	0	NA	Intergenic	L1Md_F|LINE|L1	-605256	NM_001316743	241201	Mm.213407	NM_172853	ENSMUSG00000026312	Cdh7	9330156F07Rik|CDH7L1	cadherin 7, type 2	protein-coding
Diff_Nuc26025	chr18	31987052	31987191	+	0	NA	exon (NM_001170966, exon 2 of 6)	exon (NM_001170966, exon 2 of 6)	23410	NM_001170966	74320	Mm.277705	NM_028866	ENSMUSG00000024400	Wdr33	1110001N06Rik|2310011G05Rik|2810021O11Rik|8430413N20Rik|WDC146	WD repeat domain 33	protein-coding
Diff_Nuc13069	chr10	117115842	117115981	+	0	NA	intron (NM_027468, intron 7 of 8)	ID4|SINE|ID	31903	NM_010786	17246	Mm.22670	NM_010786	ENSMUSG00000020184	Mdm2	1700007J15Rik|AA415488|Mdm-2	transformed mouse 3T3 cell double minute 2	protein-coding
Diff_Nuc44961	chr3	92702782	92702921	+	0	NA	Intergenic	Intergenic	27301	NM_001039594	545548	Mm.387664	NM_001039594	ENSMUSG00000054325	Lce3a	EG545548	late cornified envelope 3A	protein-coding
Diff_Nuc4535	chr12	52945722	52945861	+	0	NA	Intergenic	Intergenic	-15268	NM_144788	207304	Mm.249391	NM_144788	ENSMUSG00000035247	Hectd1	A630086P08Rik|AI844876|b2b327Clo|opm	HECT domain containing 1	protein-coding
Diff_Nuc58937	chr9	99023842	99023981	+	0	NA	intron (NM_029094, intron 1 of 23)	MER45A|DNA|Tip100	16719	NM_029094	74769	Mm.213128	NM_029094	ENSMUSG00000032462	Pik3cb	1110001J02Rik|AI447572|p110beta	phosphatidylinositol 3-kinase, catalytic, beta polypeptide	protein-coding
Diff_Nuc53565	chr1	87706832	87706971	+	0	NA	intron (NM_133781, intron 1 of 8)	URR1A|DNA|MER1_type	16879	NM_133781	12283	Mm.26135	NM_133781	ENSMUSG00000036707	Cab39	AA408805|AA960512|C78372|MO25|MO25alpha	calcium binding protein 39	protein-coding
Diff_Nuc47860	chr2	49554712	49554851	+	0	NA	intron (NM_008449, intron 8 of 25)	intron (NM_008449, intron 8 of 25)	79947	NM_008449	16574	Mm.256342	NM_008449	ENSMUSG00000026764	Kif5c	KINN|Khc|NKHC|NKHC2	kinesin family member 5C	protein-coding
Diff_Nuc15674	chr17	87390912	87391051	+	0	NA	intron (NM_145491, intron 2 of 4)	B3|SINE|B2	28530	NM_145491	104215	Mm.826	NM_145491	ENSMUSG00000024143	Rhoq	Arhq|TC10A|Tc10	ras homolog family member Q	protein-coding
Diff_Nuc45045	chr3	95649232	95649371	+	0	NA	intron (NM_027541, intron 6 of 15)	intron (NM_027541, intron 6 of 15)	10375	NM_027541	70767	Mm.279872	NM_027541	ENSMUSG00000015748	Prpf3	3632413F13Rik	pre-mRNA processing factor 3	protein-coding
Diff_Nuc30496	chr7	130970382	130970521	+	0	NA	Intergenic	Intergenic	-156244	NM_001252072	628779	Mm.40210	NM_001252072	ENSMUSG00000078591	Hs3st4	EG628779|Gm6915	heparan sulfate (glucosamine) 3-O-sulfotransferase 4	protein-coding
Diff_Nuc10758	chr10	31960622	31960761	+	0	NA	intron (NM_001025286, intron 3 of 3)	intron (NM_001025286, intron 3 of 3)	-631160	NM_001146349	268291	Mm.295212	NM_001146349	ENSMUSG00000063760	Rnf217	AU016819|Ibrdc1	ring finger protein 217	protein-coding
Diff_Nuc39860	chr4	46111192	46111331	+	0	NA	intron (NM_021883, intron 8 of 9)	intron (NM_021883, intron 8 of 9)	40086	NM_173033	272027	Mm.331588	NM_173033	ENSMUSG00000035495	Tstd2	3010020C06	thiosulfate sulfurtransferase (rhodanese)-like domain containing 2	protein-coding
Diff_Nuc3550	chr12	4777412	4777551	+	0	NA	intron (NM_028376, intron 1 of 3)	intron (NM_028376, intron 1 of 3)	1380	NM_028376	382562	Mm.251575	NM_028376	ENSMUSG00000020639	Pfn4	2900024P18Rik	profilin family, member 4	protein-coding
Diff_Nuc60129	chr8	23819072	23819211	+	0	NA	Intergenic	Intergenic	-2086	NM_001159774	16150	Mm.277886	NM_010546	ENSMUSG00000031537	Ikbkb	AI132552|IKK-2|IKK-beta|IKK2|IKK[b]|IKKbeta	inhibitor of kappaB kinase beta	protein-coding
Diff_Nuc45754	chr3	123338892	123339031	+	0	NA	intron (NR_121616, intron 2 of 13)	intron (NR_121616, intron 2 of 13)	-16593	NM_001293682	83398	Mm.443908	NM_031186	ENSMUSG00000027977	Ndst3	4921531K01Rik|4930511P15Rik|N-HSST 3|NDST-3	N-deacetylase/N-sulfotransferase (heparan glucosaminyl) 3	protein-coding
Diff_Nuc37896	chr5	122067062	122067201	+	0	NA	intron (NM_178799, intron 1 of 10)	MIRb|SINE|MIR	1816	NM_178799	338350	Mm.482918	NM_178799	ENSMUSG00000042647	Acad12	9330129D05Rik	acyl-Coenzyme A dehydrogenase family, member 12	protein-coding
Diff_Nuc59373	chr9	111949982	111950121	+	0	NA	Intergenic	Intergenic	71164	NR_029823	723815		NR_029823	ENSMUSG00000065441	Mir128-2	Mirn128-2|Mirn128b|mir-128-2|mir-128b	microRNA 128-2	ncRNA
Diff_Nuc59552	chr9	119921392	119921531	+	0	NA	Intergenic	Intergenic	11255	NM_011724	22437	Mm.10117	NM_011724	ENSMUSG00000079243	Xirp1	AI415219|Cmya1	xin actin-binding repeat containing 1	protein-coding
Diff_Nuc4612	chr12	55828372	55828511	+	0	NA	Intergenic	MMERVK10C-int|LTR|ERVK	-31560	NM_025456	66266	Mm.156440	NM_025456	ENSMUSG00000054302	Eapp	1810011O16Rik	E2F-associated phosphoprotein	protein-coding
Diff_Nuc31231	chr6	9626072	9626211	+	0	NA	Intergenic	MTA_Mm|LTR|MaLR	726122	NM_008751	18231	Mm.46954	NM_008751	ENSMUSG00000046178	Nxph1	C130005L03Rik	neurexophilin 1	protein-coding
Diff_Nuc52302	chr1	36097312	36097451	+	0	NA	Intergenic	RLTR1B|LTR|ERV1	-27864	NM_015818	50785	Mm.213566	NM_015818	ENSMUSG00000045216	Hs6st1	6Ost1	heparan sulfate 6-O-sulfotransferase 1	protein-coding
Diff_Nuc28745	chr7	65099802	65099941	+	0	NA	Intergenic	RLTR25A|LTR|ERVK	253328	NM_008071	14402	Mm.8004	NM_008071	ENSMUSG00000033676	Gabrb3	A230092K12Rik|AW049585|Cp1|Gabrb-3|beta3	gamma-aminobutyric acid (GABA) A receptor, subunit beta 3	protein-coding
Diff_Nuc58703	chr9	89998172	89998311	+	0	NA	intron (NM_024431, intron 3 of 11)	intron (NM_024431, intron 3 of 11)	11417	NM_001039147	21761	Mm.426209	NM_024431	ENSMUSG00000062270	Morf4l1	MORFRG15|MRG15|TEG-189|Tex189|mKIAA4002	mortality factor 4 like 1	protein-coding
Diff_Nuc8440	chr11	79312962	79313101	+	0	NA	intron (NM_010897, intron 36 of 57)	intron (NM_010897, intron 36 of 57)	4553	NM_019409	18377	Mm.93335	NM_019409	ENSMUSG00000049612	Omg	-	oligodendrocyte myelin glycoprotein	protein-coding
Diff_Nuc16427	chr16	19240202	19240341	+	0	NA	Intergenic	RLTR11A|LTR|ERVK	46563	NM_146451	258443	Mm.377506	NM_146451	ENSMUSG00000050742	Olfr164	MOR279-2	olfactory receptor 164	protein-coding
Diff_Nuc27091	chr18	69598332	69598471	+	0	NA	intron (NM_001083967, intron 3 of 19)	intron (NM_001083967, intron 3 of 19)	93026	NM_001083967	21413	Mm.4269	NM_013685	ENSMUSG00000053477	Tcf4	5730422P05Rik|ASP-I2|E2-2|E2.2|ITF-2|ITF-2b|ITF2|ME2|MITF-2A|MITF-2B|SEF-2|SEF2|SEF2-1|TFE|Tcf-4|bHLHb19	transcription factor 4	protein-coding
Diff_Nuc43032	chr3	8364292	8364431	+	0	NA	Intergenic	L1_Mus2|LINE|L1	98737	NR_033512	620966	Mm.301719	NR_033512		Gm6194	1700003N22Rik|EG620966	transmembrane protein 189 pseudogene	pseudo
Diff_Nuc51460	chr2	181242812	181242951	+	0	NA	exon (NM_001291197, exon 5 of 8)	exon (NM_001291197, exon 5 of 8)	11034	NM_001291204	66314	Mm.136648	NM_025482	ENSMUSG00000000827	Tpd52l2	2810411G23Rik|AU016537|C86069|D54	tumor protein D52-like 2	protein-coding
Diff_Nuc40839	chr4	87860612	87860751	+	0	NA	intron (NM_001081184, intron 11 of 43)	MT2A|LTR|ERVL	92737	NR_030478	735282		NR_030478	ENSMUSG00000070077	Mir491	Mirn491|mir-491|mmu-mir-491	microRNA 491	ncRNA
Diff_Nuc37942	chr5	122946162	122946301	+	0	NA	intron (NM_001110140, intron 3 of 19)	B3A|SINE|B2	6003	NM_001110140	11938	Mm.227583	NM_009722	ENSMUSG00000029467	Atp2a2	9530097L16Rik|D5Wsu150e|SERCA2|SERCA2B|Serca2a|mKIAA4195	ATPase, Ca++ transporting, cardiac muscle, slow twitch 2	protein-coding
Diff_Nuc28404	chr7	51730432	51730571	+	0	NA	Intergenic	Intergenic	4784	NR_106019	102465637		NR_106019	ENSMUSG00000098661	Mir7052	Gm27583|mmu-mir-7052	microRNA 7052	ncRNA
Diff_Nuc20915	chr15	102019912	102020051	+	0	NA	promoter-TSS (NM_144942)	promoter-TSS (NM_144942)	-507	NM_144942	246277	Mm.296382	NM_144942	ENSMUSG00000023044	Csad	Csd	cysteine sulfinic acid decarboxylase	protein-coding
Diff_Nuc32323	chr6	48161612	48161751	+	0	NA	Intergenic	Intergenic	-125089	NM_001163475	69228	Mm.207555	NM_001163475	ENSMUSG00000057691	Zfp746	2810407L07Rik|AI317225|Znf746	zinc finger protein 746	protein-coding
Diff_Nuc39929	chr4	47531412	47531551	+	0	NA	Intergenic	Intergenic	43948	NM_024171	66212	Mm.20188	NM_024171	ENSMUSG00000053317	Sec61b	1190006C12Rik|AI326121|AW122942	Sec61 beta subunit	protein-coding
Diff_Nuc33440	chr6	91618182	91618321	+	0	NA	Intergenic	Intergenic	-15810	NM_009320	21366	Mm.395650	NM_009320	ENSMUSG00000030096	Slc6a6	AA589629|C80501|Taut	solute carrier family 6 (neurotransmitter transporter, taurine), member 6	protein-coding
Diff_Nuc28854	chr7	70629862	70630001	+	0	NA	intron (NM_130880, intron 1 of 13)	intron (NM_130880, intron 1 of 13)	40273	NM_130880	170711	Mm.156872	NM_130880	ENSMUSG00000033510	Otud7a	AJ430384|Otud7	OTU domain containing 7A	protein-coding
Diff_Nuc362	chrX	120275052	120275191	+	0	NA	Intergenic	Lx3A|LINE|L1	57989	NM_028426	73061	Mm.292979	NM_028426	ENSMUSG00000079450	Cldn34c1	3110007F17Rik	claudin 34C1	protein-coding
Diff_Nuc29487	chr7	96411692	96411831	+	0	NA	intron (NM_028343, intron 4 of 14)	intron (NM_028343, intron 4 of 14)	75536	NM_028343	72759	Mm.208477	NM_028343	ENSMUSG00000039428	Tmem135	2810439K08Rik|AW319712|PMP52	transmembrane protein 135	protein-coding
Diff_Nuc44334	chr3	66892072	66892211	+	0	NA	intron (NM_025822, intron 4 of 9)	MTD|LTR|MaLR	102547	NM_025822	66880	Mm.316418	NM_025822	ENSMUSG00000034544	Rsrc1	1200013F24Rik|SRrp53	arginine/serine-rich coiled-coil 1	protein-coding
Diff_Nuc34081	chr6	118391912	118392051	+	0	NA	intron (NM_028335, intron 3 of 5)	RMER12|LTR|ERVK	13543	NM_028335	72720	Mm.212572	NM_028335	ENSMUSG00000030145	Zfp248	2810037F07Rik|E130106N01Rik	zinc finger protein 248	protein-coding
Diff_Nuc17511	chr16	58162832	58162971	+	0	NA	Intergenic	MTEa|LTR|MaLR	-245747	NM_028523	73379	Mm.373589	NM_028523	ENSMUSG00000035107	Dcbld2	1700055P21Rik|AW146002|CLCP1|Esdn	discoidin, CUB and LCCL domain containing 2	protein-coding
Diff_Nuc40596	chr4	75899142	75899281	+	0	NA	intron (NM_011211, intron 11 of 39)	intron (NM_011211, intron 11 of 39)	-975021	NM_025849	66928	Mm.24332	NM_025849	ENSMUSG00000028398	Tmem261	1700027K24Rik|3110001D03Rik	transmembrane protein 261	protein-coding
Diff_Nuc17337	chr16	49813032	49813171	+	0	NA	Intergenic	Intergenic	-42666	NM_010581	16423	Mm.31752	NM_010581	ENSMUSG00000055447	Cd47	9130415E20Rik|AA407862|AI848868|AW108519|B430305P08Rik|IAP|Itgp	CD47 antigen (Rh-related antigen, integrin-associated signal transducer)	protein-coding
Diff_Nuc11636	chr10	66265632	66265771	+	0	NA	Intergenic	L1MA9|LINE|L1	117431	NR_138560	68488	Mm.338835	NR_138560		1110002J07Rik	-	RIKEN cDNA 1110002J07 gene	ncRNA
Diff_Nuc18223	chr16	91898292	91898431	+	0	NA	intron (NM_010587, intron 32 of 38)	intron (NM_010587, intron 32 of 38)	33514	NM_138597	28080	Mm.41	NM_138597	ENSMUSG00000022956	Atp5o	ATPO|D12Wsu28e|OSCP	ATP synthase, H+ transporting, mitochondrial F1 complex, O subunit	protein-coding
Diff_Nuc9854	chr11	119338842	119338981	+	0	NA	Intergenic	Intergenic	-13750	NM_001164636	338371	Mm.271946	NM_177394	ENSMUSG00000039850	Endov	A730011L01Rik	endonuclease V	protein-coding
Diff_Nuc5044	chr12	75870302	75870441	+	0	NA	Intergenic	B4|SINE|B4	407948	NM_172805	238271	Mm.44465	NM_172805	ENSMUSG00000034402	Kcnh5	Eag2	potassium voltage-gated channel, subfamily H (eag-related), member 5	protein-coding
Diff_Nuc20684	chr15	93465032	93465171	+	0	NA	Intergenic	Intergenic	-38779	NM_001033217	106042	Mm.150314	NM_001033217	ENSMUSG00000036158	Prickle1	1110058P22Rik|AW215793|Prickle|b2b019Clo|mpk1	prickle planar cell polarity protein 1	protein-coding
Diff_Nuc37134	chr5	97677032	97677171	+	0	NA	Intergenic	Intergenic	-136486	NM_198422	231474	Mm.332505	NM_198422	ENSMUSG00000055725	Paqr3	6330415A20Rik|AY424292|RKTG	progestin and adipoQ receptor family member III	protein-coding
Diff_Nuc54444	chr1	131351272	131351411	+	0	NA	intron (NM_172485, intron 2 of 27)	MTE2b|LTR|MaLR	181460	NM_172485	210417	Mm.380518	NM_172485	ENSMUSG00000042581	Thsd7b	1700074E13Rik|B930082A18|D130067I03Rik	thrombospondin, type I, domain containing 7B	protein-coding
Diff_Nuc47507	chr2	34981762	34981901	+	0	NA	intron (NM_012018, intron 8 of 43)	RSINE1|SINE|B4	-5923	NM_001290635	26920	Mm.231332	NM_012018	ENSMUSG00000057110	Cntrl	6720467O09Rik|AA968343|Cep1|Cep110|IB3/5|Ma2a8|b2b1468.1Clo|b2b1468Clo	centriolin	protein-coding
Diff_Nuc52059	chr1	25676602	25676741	+	0	NA	intron (NM_175642, intron 2 of 30)	intron (NM_175642, intron 2 of 30)	209881	NM_175642	210933	Mm.336569	NM_175642	ENSMUSG00000033569	Adgrb3	A830096D10Rik|Bai3	adhesion G protein-coupled receptor B3	protein-coding
Diff_Nuc26312	chr18	38599722	38599861	+	0	NA	intron (NM_022996, intron 1 of 7)	intron (NM_022996, intron 1 of 7)	21162	NM_022996	65113	Mm.102496	NM_022996	ENSMUSG00000024425	Ndfip1	0610010M22Rik|N4wbp5	Nedd4 family interacting protein 1	protein-coding
Diff_Nuc25932	chr18	28734382	28734521	+	0	NA	intron (NR_045398, intron 1 of 4)	L1_Mm|LINE|L1	15786	NR_045398	320624	Mm.50107	NR_045398		4930474G06Rik	-	RIKEN cDNA 4930474G06 gene	ncRNA
Diff_Nuc44156	chr3	58732202	58732341	+	0	NA	Intergenic	Intergenic	-43137	NM_153385	229320	Mm.131502	NM_153384	ENSMUSG00000043850	Clrn1	A130002D11Rik|USH3|Ush3a|clarin-1	clarin 1	protein-coding
Diff_Nuc21265	chr14	19727832	19727971	+	0	NA	Intergenic	ID4_|SINE|ID	-1760	NM_144839	218793	Mm.23551	NM_144839	ENSMUSG00000058317	Ube2e2	BC016265	ubiquitin-conjugating enzyme E2E 2	protein-coding
Diff_Nuc14805	chr17	51887912	51888051	+	0	NA	intron (NM_001163632, intron 9 of 10)	intron (NM_001163632, intron 9 of 10)	63398	NM_001163630	20230	Mm.311655	NM_009122	ENSMUSG00000023927	Satb1	2610306G12Rik|AW413156	special AT-rich sequence binding protein 1	protein-coding
Diff_Nuc18787	chr15	22591452	22591591	+	0	NA	Intergenic	L1Md_F2|LINE|L1	53218	NM_001165971	545091	Mm.475598	NM_001165971		Gm5803	EG545091	predicted gene 5803	protein-coding
Diff_Nuc7171	chr11	36092352	36092491	+	0	NA	intron (NM_011856, intron 4 of 28)	intron (NM_011856, intron 4 of 28)	-298830	NM_170779	211652	Mm.31267	NM_170779	ENSMUSG00000018849	Wwc1	AA408228|AU017197|BC037006|Kibra|mKIAA0869	WW, C2 and coiled-coil domain containing 1	protein-coding
Diff_Nuc16340	chr16	17227842	17227981	+	0	NA	Intergenic	Lx7|LINE|L1	-5769	NM_178922	58180	Mm.261602	NM_178922	ENSMUSG00000050240	Hic2	AA409108|HRG22|mKIAA1020	hypermethylated in cancer 2	protein-coding
Diff_Nuc45816	chr3	126535692	126535831	+	0	NA	intron (NM_001346636, intron 16 of 20)	intron (NM_001346636, intron 16 of 20)	110543	NM_001034168	109676	Mm.220242	NM_178655	ENSMUSG00000032826	Ank2	100043364|AI835472|AW491075|Ank-2|Gm4392	ankyrin 2, brain	protein-coding
Diff_Nuc40259	chr4	62964592	62964731	+	0	NA	intron (NM_025685, intron 34 of 60)	intron (NM_025685, intron 34 of 60)	-40929	NM_008768	18405	Mm.4777	NM_008768	ENSMUSG00000039196	Orm1	Agp-1|Agp-2|Orm-1	orosomucoid 1	protein-coding
Diff_Nuc7338	chr11	42789482	42789621	+	0	NA	Intergenic	L1Md_F2|LINE|L1	-173828	NM_176999	319767	Mm.252339	NM_176999	ENSMUSG00000055415	Atp10b	5930426O13Rik|9030605H24Rik	ATPase, class V, type 10B	protein-coding
Diff_Nuc54201	chr1	120173462	120173601	+	0	NA	Intergenic	L1Md_F3|LINE|L1	34178	NM_011650	22099	Mm.426637	NM_011650	ENSMUSG00000026374	Tsn	2610034C24Rik|AU040286|C3PO|TB-RBP	translin	protein-coding
Diff_Nuc44418	chr3	70720912	70721051	+	0	NA	Intergenic	L1M3e|LINE|L1	-109768	NR_040556	625901	Mm.366028	NR_040556	ENSMUSG00000097252	Gm6634	EG625901	predicted gene 6634	ncRNA
Diff_Nuc28974	chr7	74668202	74668341	+	0	NA	intron (NR_028144, intron 8 of 8)	intron (NR_028144, intron 8 of 8)	121851	NM_175124	67867	Mm.31247	NM_027413	ENSMUSG00000030556	Lrrc28	1300004K21Rik|2210012C09Rik|2310058O11Rik	leucine rich repeat containing 28	protein-coding
Diff_Nuc49740	chr2	120790362	120790501	+	0	NA	intron (NM_009461, intron 1 of 46)	intron (NM_009461, intron 1 of 46)	6020	NM_009461	22222	Mm.389330	NM_009461	ENSMUSG00000027272	Ubr1	AI504731	ubiquitin protein ligase E3 component n-recognin 1	protein-coding
Diff_Nuc27443	chr18	85409622	85409761	+	0	NA	Intergenic	Intergenic	-288775	NM_025969	67105	Mm.250617	NM_025969	ENSMUSG00000024645	Timm21	1700034H14Rik|2700002I20Rik	tranlocase of inner mitochondrial membrane 21	protein-coding
Diff_Nuc41174	chr4	101879782	101879921	+	0	NA	Intergenic	Intergenic	-47496	NM_001177983	18578	Mm.20181	NM_019840	ENSMUSG00000028525	Pde4b	Dpde4|R74983|dunce	phosphodiesterase 4B, cAMP specific	protein-coding
Diff_Nuc9592	chr11	111595242	111595381	+	0	NA	Intergenic	Intergenic	667833	NM_008425	16518	Mm.4951	NM_008425	ENSMUSG00000041695	Kcnj2	IRK1|Kcnf1|Kir2.1	potassium inwardly-rectifying channel, subfamily J, member 2	protein-coding
Diff_Nuc2854	chr13	96444002	96444141	+	0	NA	intron (NM_027711, intron 18 of 35)	intron (NM_027711, intron 18 of 35)	-22804	NM_010170	14064	Mm.440952	NM_010170	ENSMUSG00000021675	F2rl2	F730031A08|PAR3	coagulation factor II (thrombin) receptor-like 2	protein-coding
Diff_Nuc4164	chr12	35253852	35253991	+	0	NA	intron (NM_001271386, intron 3 of 27)	intron (NM_001271386, intron 3 of 27)	-40167	NM_024124	79221	Mm.310551	NM_024124	ENSMUSG00000004698	Hdac9	AV022454|D030072B18Rik|HD7B|HD9|HDRP|Hdac7b|Mitr|mKIAA0744	histone deacetylase 9	protein-coding
Diff_Nuc19390	chr15	42266472	42266611	+	0	NA	intron (NM_001286062, intron 8 of 8)	intron (NM_001286062, intron 8 of 8)	241982	NM_001286062	11600	Mm.309336	NM_009640	ENSMUSG00000022309	Angpt1	1110046O21Rik|Ang-1|Ang1	angiopoietin 1	protein-coding
Diff_Nuc57033	chr9	34779122	34779261	+	0	NA	intron (NM_026324, intron 4 of 15)	intron (NM_026324, intron 4 of 15)	-145122	NR_029475	78934	Mm.391688	NR_029475	ENSMUSG00000070315	4930581F22Rik	-	RIKEN cDNA 4930581F22 gene	ncRNA
Diff_Nuc42194	chr4	133250632	133250771	+	0	NA	exon (NM_001080819, exon 7 of 20)	exon (NM_001080819, exon 7 of 20)	-22139	NM_001145956	230801	Mm.217004	NM_178698	ENSMUSG00000043257	Pigv	B330013B03|D430024F16Rik	phosphatidylinositol glycan anchor biosynthesis, class V	protein-coding
Diff_Nuc13523	chr17	7899952	7900091	+	0	NA	Intergenic	Intergenic	97818	NM_001081416	68655	Mm.379161	NM_001081416	ENSMUSG00000071984	Fndc1	1110027O12Rik|1110051A18Rik|mKIAA1866	fibronectin type III domain containing 1	protein-coding
Diff_Nuc12573	chr10	98174872	98175011	+	0	NA	Intergenic	Intergenic	-202845	NM_026482	67972	Mm.166944	NM_026482	ENSMUSG00000019943	Atp2b1	2810442I22Rik|E130111D10Rik|Pmca1	ATPase, Ca++ transporting, plasma membrane 1	protein-coding
Diff_Nuc23158	chr14	100248352	100248491	+	0	NA	Intergenic	MTEa|LTR|MaLR	300594	NM_010636	16597	Mm.396499	NM_010636	ENSMUSG00000072294	Klf12	2700063E05Rik|AI225908|AI315654|AP-2rep|B130052C06Rik|D530033K05Rik	Kruppel-like factor 12	protein-coding
Diff_Nuc55077	chr1	157636102	157636241	+	0	NA	intron (NM_001024945, intron 7 of 11)	intron (NM_001024945, intron 7 of 11)	23858	NM_023268	104009	Mm.27035	NM_023268	ENSMUSG00000033684	Qsox1	1300003H02Rik|QSOX|Qscn6|SOx	quiescin Q6 sulfhydryl oxidase 1	protein-coding
Diff_Nuc4881	chr12	70512952	70513091	+	0	NA	Intergenic	B1_Mur1|SINE|Alu	39884	NM_007481	11845	Mm.27308	NM_007481	ENSMUSG00000044147	Arf6	AI788669|AW496366	ADP-ribosylation factor 6	protein-coding
Diff_Nuc43532	chr3	31883632	31883771	+	0	NA	intron (NM_028231, intron 2 of 5)	intron (NM_028231, intron 2 of 5)	82076	NM_028231	72413	Mm.64790	NM_028231	ENSMUSG00000037610	Kcnmb2	2700049B16Rik|3110031N04Rik	potassium large conductance calcium-activated channel, subfamily M, beta member 2	protein-coding
Diff_Nuc36078	chr5	49546342	49546481	+	0	NA	intron (NM_001199244, intron 1 of 7)	B3A|SINE|B2	130487	NM_001199244	80334	Mm.160172	NM_030265	ENSMUSG00000029088	Kcnip4	AV032399|Calp|Calp250|KChIP4|KChIP4a	Kv channel interacting protein 4	protein-coding
Diff_Nuc19007	chr15	30818462	30818601	+	0	NA	intron (NM_008729, intron 14 of 22)	intron (NM_008729, intron 14 of 22)	-150350	NR_045186	73784	Mm.66947	NR_045186		4930430F21Rik	-	RIKEN cDNA 4930430F21 gene	ncRNA
Diff_Nuc751	chr13	14349562	14349701	+	0	NA	intron (NM_001081348, intron 23 of 28)	L1_Mur2|LINE|L1	193580	NM_198122	94246	Mm.439784	NM_194262	ENSMUSG00000039219	Arid4b	BCAA|BRCAA1|RBBP1L1|Rbp1l1|SAP180	AT rich interactive domain 4B (RBP1-like)	protein-coding
Diff_Nuc7591	chr11	51899182	51899321	+	0	NA	Intergenic	Intergenic	-13075	NM_019411	19052	Mm.260288	NM_019411	ENSMUSG00000020349	Ppp2ca	PP2A|R75353	protein phosphatase 2 (formerly 2A), catalytic subunit, alpha isoform	protein-coding
Diff_Nuc60893	chr8	60723272	60723411	+	0	NA	intron (NM_175032, intron 4 of 11)	LTR73|LTR|ERV1	456252	NM_001177534	100271928	Mm.484123	NM_001177534		Gm15881	OTTMUSG00000027193	predicted gene 15881	protein-coding
Diff_Nuc30868	chr7	145713432	145713571	+	0	NA	Intergenic	Intergenic	-32424	NR_131022	75187	Mm.410810	NR_131022	ENSMUSG00000110037	4930543N07Rik	-	RIKEN cDNA 4930543N07 gene	ncRNA
Diff_Nuc60865	chr8	59925182	59925321	+	0	NA	Intergenic	ORR1A2|LTR|MaLR	-9469	NM_009136	20284	Mm.12886	NM_009136	ENSMUSG00000031610	Scrg1	AW124307	scrapie responsive gene 1	protein-coding
Diff_Nuc43048	chr3	8917192	8917331	+	0	NA	intron (NM_025434, intron 1 of 2)	intron (NM_025434, intron 1 of 2)	6596	NM_025434	66230	Mm.38460	NM_025434	ENSMUSG00000040269	Mrps28	1500012D08Rik|AW061224	mitochondrial ribosomal protein S28	protein-coding
Diff_Nuc60241	chr8	27419552	27419691	+	0	NA	Intergenic	Tigger7|DNA|MER2_type	150980	NM_199042	73754	Mm.383241	NM_199042	ENSMUSG00000037214	Thap1	4833431A01Rik|AW490810	THAP domain containing, apoptosis associated protein 1	protein-coding
Diff_Nuc13093	chr10	118491332	118491471	+	0	NA	Intergenic	ORR1E|LTR|MaLR	-38560	NR_045348	73400	Mm.416864	NR_045348	ENSMUSG00000100681	1700064J06Rik	-	RIKEN cDNA 1700064J06 gene	ncRNA
Diff_Nuc58594	chr9	85987302	85987441	+	0	NA	Intergenic	L1Md_F2|LINE|L1	250912	NM_001164792	21983	Mm.20864	NM_011627	ENSMUSG00000035274	Tpbg	5T4|AW495680|WAIF1	trophoblast glycoprotein	protein-coding
Diff_Nuc50003	chr2	129087912	129088051	+	0	NA	Intergenic	Intergenic	34967	NM_181589	70466	Mm.45785	NM_181589	ENSMUSG00000048327	Ckap2l	2010016H04Rik|2610318C08Rik|AV070319|radmis|rdm	cytoskeleton associated protein 2-like	protein-coding
Diff_Nuc32987	chr6	74905712	74905851	+	0	NA	Intergenic	Intergenic	-1484766	NR_108032	73408	Mm.233629	NR_108032	ENSMUSG00000107408	1700065L07Rik	-	RIKEN cDNA 1700065L07 gene	ncRNA
Diff_Nuc11066	chr10	44097742	44097881	+	0	NA	Intergenic	Intergenic	18329	NR_035450	100316688		NR_035450	ENSMUSG00000089260	Mir1929	mir-1929|mmu-mir-1929	microRNA 1929	ncRNA
Diff_Nuc10098	chr10	6289872	6290011	+	0	NA	intron (NM_172308, intron 19 of 27)	intron (NM_172308, intron 19 of 27)	83525	NM_001170786	270685	Mm.184752	NM_172308	ENSMUSG00000040675	Mthfd1l	2410004L15Rik|AI647056|Fthfsdc1	methylenetetrahydrofolate dehydrogenase (NADP+ dependent) 1-like	protein-coding
Diff_Nuc7073	chr11	32466972	32467111	+	0	NA	intron (NM_009288, intron 2 of 18)	intron (NM_009288, intron 2 of 18)	33775	NM_009288	20868	Mm.8235	NM_009288	ENSMUSG00000020272	Stk10	Gek1|Lok|mKIAA4026	serine/threonine kinase 10	protein-coding
Diff_Nuc5793	chr12	100738452	100738591	+	0	NA	Intergenic	Intergenic	-50237	NM_183186	71375	Mm.341972	NM_183186	ENSMUSG00000033713	Foxn3	5430426H20Rik|AA589593|AW556347|Ches1|Ches1l|HTLFL1	forkhead box N3	protein-coding
Diff_Nuc50902	chr2	156945172	156945311	+	0	NA	intron (NM_018851, intron 6 of 15)	PB1D9|SINE|Alu	15717	NM_001139520	56045	Mm.248478	NM_018851	ENSMUSG00000027639	Samhd1	E330031J07Rik|Mg11	SAM domain and HD domain, 1	protein-coding
Diff_Nuc28828	chr7	69127972	69128111	+	0	NA	promoter-TSS (NR_015599)	promoter-TSS (NR_015599)	-796	NR_037287	100526507		NR_037287	ENSMUSG00000092850	Mir344g	mir-344g|mmu-mir-344g	microRNA 344g	ncRNA
Diff_Nuc29145	chr7	83233202	83233341	+	0	NA	Intergenic	ORR1C1|LTR|MaLR	-141502	NM_001199224	244071	Mm.322829	NM_172902	ENSMUSG00000025754	Agbl1	Ccp4|D430020F16|EG244071|Nna1-l1	ATP/GTP binding protein-like 1	protein-coding
Diff_Nuc13314	chr10	127523172	127523311	+	0	NA	TTS (NR_030442)	TTS (NR_030442)	899	NR_030442	751518		NR_030442	ENSMUSG00000093245	Mir677	Mirn677|mir-677|mmu-mir-677	microRNA 677	ncRNA
Diff_Nuc25908	chr18	27326952	27327091	+	0	NA	Intergenic	L1_Mus1|LINE|L1	-1391644	NR_045398	320624	Mm.50107	NR_045398		4930474G06Rik	-	RIKEN cDNA 4930474G06 gene	ncRNA
Diff_Nuc3238	chr13	110672082	110672221	+	0	NA	intron (NM_011056, intron 7 of 16)	intron (NM_011056, intron 7 of 16)	-21866	NR_035442	100316683		NR_035442	ENSMUSG00000084651	Mir1904	Mirn1904|mmu-mir-1904	microRNA 1904	ncRNA
Diff_Nuc35239	chr5	21389462	21389601	+	0	NA	TTS (NM_001310464)	TTS (NM_001310464)	-18109	NM_030727	80979	Mm.160370	NM_030727	ENSMUSG00000029015	Slc26a5	Pres|prestin	solute carrier family 26, member 5	protein-coding
Diff_Nuc56606	chr9	20386132	20386271	+	0	NA	intron (NM_172919, intron 1 of 5)	intron (NM_172919, intron 1 of 5)	429	NM_172919	244721	Mm.86627	NM_172919	ENSMUSG00000058192	Zfp846	2210010B09Rik|9130221F13|Znf846	zinc finger protein 846	protein-coding
Diff_Nuc10856	chr10	37317622	37317761	+	0	NA	Intergenic	L1_Mus4|LINE|L1	-458959	NM_008538	17118	Mm.30059	NM_008538	ENSMUSG00000069662	Marcks	Macs|PKCSL	myristoylated alanine rich protein kinase C substrate	protein-coding
Diff_Nuc16082	chr16	7942062	7942201	+	0	NA	Intergenic	Intergenic	483098	NM_029070	74720	Mm.159318	NM_029070	ENSMUSG00000022715	Tmem114	4930511J11Rik|Cldn26	transmembrane protein 114	protein-coding
Diff_Nuc58336	chr9	75385482	75385621	+	0	NA	intron (NM_016963, intron 1 of 9)	RMER17C-int|LTR|ERVK	21913	NM_016963	50875	Mm.38445	NM_016963	ENSMUSG00000058587	Tmod3	U-Tmod|UTMOD	tropomodulin 3	protein-coding
Diff_Nuc51046	chr2	162674402	162674541	+	0	NA	Intergenic	Intergenic	-82773	NM_026499	67996	Mm.24042	NM_026499	ENSMUSG00000016921	Srsf6	1210001E11Rik|AI314910|AW146126|Sfrs6	serine/arginine-rich splicing factor 6	protein-coding
Diff_Nuc11786	chr10	72749662	72749801	+	0	NA	Intergenic	L1Md_F2|LINE|L1	-200278	NR_040646	327768	Mm.417745	NR_040646		A330049N07Rik	-	RIKEN cDNA A330049N07 gene	ncRNA
Diff_Nuc56700	chr9	22599252	22599391	+	0	NA	intron (NM_181316, intron 19 of 21)	intron (NM_181316, intron 19 of 21)	319162	NM_178415	319845	Mm.176725	NM_178415	ENSMUSG00000035919	Bbs9	E130103I17Rik	Bardet-Biedl syndrome 9 (human)	protein-coding
Diff_Nuc54471	chr1	132690112	132690251	+	0	NA	Intergenic	Intergenic	-7298	NM_001170632	64435	Mm.31821	NM_144960	ENSMUSG00000026415	Fcamr	-	Fc receptor, IgA, IgM, high affinity	protein-coding
Diff_Nuc42079	chr4	130324682	130324821	+	0	NA	exon (NM_001159603, exon 18 of 22)	exon (NM_001159603, exon 18 of 22)	19198	NR_028565	100217460		NR_028565	ENSMUSG00000065196	Snord85	MBII-251|Z50	small nucleolar RNA, C/D box 85	snoRNA
Diff_Nuc27822	chr7	19734022	19734161	+	0	NA	intron (NM_026111, intron 1 of 6)	intron (NM_026111, intron 1 of 6)	454	NM_026111	67369	Mm.234876	NM_026111	ENSMUSG00000030407	Qpctl	1810019P04Rik|BB101812|gQC	glutaminyl-peptide cyclotransferase-like	protein-coding
Diff_Nuc43765	chr3	41222022	41222161	+	0	NA	Intergenic	B1_Mus2|SINE|Alu	75030	NR_040385	78706	Mm.366094	NR_040385	ENSMUSG00000097639	Platr4	C430002E04Rik	pluripotency associated transcript 4	ncRNA
Diff_Nuc14659	chr17	46608542	46608681	+	0	NA	intron (NM_001162864, intron 10 of 14)	B3|SINE|B2	16013	NM_001162864	106763	Mm.297613	NM_175351	ENSMUSG00000015599	Ttbk1	AU017937|AW048023|C330008L01Rik	tau tubulin kinase 1	protein-coding
Diff_Nuc62588	chr8	125947432	125947571	+	0	NA	Intergenic	Intergenic	12037	NM_023279	22152	Mm.40068	NM_023279	ENSMUSG00000062380	Tubb3	3200002H15Rik|M(beta)3|M(beta)6	tubulin, beta 3 class III	protein-coding
Diff_Nuc58516	chr9	82779162	82779301	+	0	NA	intron (NM_001081216, intron 31 of 39)	intron (NM_001081216, intron 31 of 39)	55818	NM_022986	65099	Mm.41415	NM_022986	ENSMUSG00000032251	Irak1bp1	4921528N06Rik|AI851240|Aabp3|Aip70|Simpl	interleukin-1 receptor-associated kinase 1 binding protein 1	protein-coding
Diff_Nuc26435	chr18	43463792	43463931	+	0	NA	intron (NM_178749, intron 7 of 12)	L2b|LINE|L2	69065	NM_001136086	22240	Mm.8180	NM_009468	ENSMUSG00000024501	Dpysl3	CRMP-4|DRP-3|TUC4|ULIP-1|Ulip|Ulip1	dihydropyrimidinase-like 3	protein-coding
Diff_Nuc26155	chr18	35379952	35380091	+	0	NA	intron (NM_009818, intron 7 of 17)	intron (NM_009818, intron 7 of 17)	-5343	NM_178005	107065	Mm.39900	NM_178005	ENSMUSG00000071862	Lrrtm2	AI851755|BB129880|C630011A14Rik|mKIAA0416	leucine rich repeat transmembrane neuronal 2	protein-coding
Diff_Nuc35931	chr5	43472972	43473111	+	0	NA	Intergenic	Intergenic	-151661	NM_175937	231207	Mm.7233	NM_175937	ENSMUSG00000039782	Cpeb2	A630055H10Rik|Cpe-bp2	cytoplasmic polyadenylation element binding protein 2	protein-coding
Diff_Nuc59262	chr9	108548522	108548661	+	0	NA	intron (NM_011790, intron 1 of 15)	intron (NM_011790, intron 1 of 15)	3120	NM_011790	23807	Mm.290447	NM_011790	ENSMUSG00000064145	Arih2	AI843547|ARI2|TRIAD1|UIP48	ariadne RBR E3 ubiquitin protein ligase 2	protein-coding
Diff_Nuc32150	chr6	43500032	43500171	+	0	NA	intron (NM_013861, intron 4 of 8)	intron (NM_013861, intron 4 of 8)	107673	NR_045988	319812	Mm.446393	NR_045988		9430018G01Rik	-	RIKEN cDNA 9430018G01 gene	ncRNA
Diff_Nuc43955	chr3	51474422	51474561	+	0	NA	intron (NM_174995, intron 2 of 4)	RLTR28|LTR|ERVL	9390	NM_001310482	211666	Mm.24679	NM_174995	ENSMUSG00000074604	Mgst2	GST2|MGST-II	microsomal glutathione S-transferase 2	protein-coding
Diff_Nuc18992	chr15	30456842	30456981	+	0	NA	intron (NM_008729, intron 3 of 22)	intron (NM_008729, intron 3 of 22)	354563	NM_008729	18163	Mm.321648	NM_008729	ENSMUSG00000022240	Ctnnd2	Catnd2|Nprap|neurojugin	catenin (cadherin associated protein), delta 2	protein-coding
Diff_Nuc25993	chr18	31297202	31297341	+	0	NA	intron (NM_009065, intron 4 of 4)	intron (NM_009065, intron 4 of 4)	179511	NM_009065	19762	Mm.5163	NM_009065	ENSMUSG00000057455	Rit2	RIBA|Rin|Roc2	Ras-like without CAAX 2	protein-coding
Diff_Nuc21171	chr14	16162212	16162351	+	0	NA	Intergenic	Intergenic	109220	NM_146052	218763	Mm.138039	NM_146052	ENSMUSG00000045201	Lrrc3b	BC019794|LRP15	leucine rich repeat containing 3B	protein-coding
Diff_Nuc56168	chr9	3001882	3002021	+	0	NA	Intergenic	GSAT_MM|Satellite|Satellite	36792	NR_039546	100628572		NR_039546	ENSMUSG00000106183	Mir101c	mir-101c|mmu-mir-101c	microRNA 101c	ncRNA
Diff_Nuc29353	chr7	90353472	90353611	+	0	NA	Intergenic	Intergenic	56561	NM_177895	330578	Mm.5796	NM_177895	ENSMUSG00000053528	A530021J07Rik	-	Riken cDNA A530021J07 gene	protein-coding
Diff_Nuc42209	chr4	133493552	133493691	+	0	NA	Intergenic	RLTR11A2|LTR|ERVK	30285	NM_016957	15331	Mm.319660	NM_016957	ENSMUSG00000003038	Hmgn2	HMG-17|Hmg17	high mobility group nucleosomal binding domain 2	protein-coding
Diff_Nuc20474	chr15	86007342	86007481	+	0	NA	intron (NM_145475, intron 1 of 12)	intron (NM_145475, intron 1 of 12)	9160	NM_145475	223753	Mm.222685	NM_145475	ENSMUSG00000035891	Cerk	AI848610|D330016D08Rik|mKIAA1646	ceramide kinase	protein-coding
Diff_Nuc50974	chr2	160529312	160529451	+	0	NA	exon (NM_009408, exon 11 of 21)	exon (NM_009408, exon 11 of 21)	-27665	NM_021280	18803	Mm.44463	NM_021280	ENSMUSG00000016933	Plcg1	AI894140|Cded|Plc-1|Plc-gamma1|Plcg-1	phospholipase C, gamma 1	protein-coding
Diff_Nuc12668	chr10	103339132	103339271	+	0	NA	Intergenic	L1_Mur2|LINE|L1	-266368	NM_001270898	100861880	Mm.441727	NM_001270898	ENSMUSG00000091779	Gm21293	-	predicted gene, 21293	protein-coding
Diff_Nuc47669	chr2	40500702	40500841	+	0	NA	intron (NM_053011, intron 84 of 90)	intron (NM_053011, intron 84 of 90)	-1418913	NM_024209	67857	Mm.389242	NM_024209	ENSMUSG00000026753	Ppp6c	2310003C10Rik	protein phosphatase 6, catalytic subunit	protein-coding
Diff_Nuc38132	chr5	129031572	129031711	+	0	NA	Intergenic	RMER15|LTR|ERVL	74921	NR_015517	319616	Mm.387738	NR_015517	ENSMUSG00000072591	5930412G12Rik	-	RIKEN cDNA 5930412G12 gene	ncRNA
Diff_Nuc6039	chr12	110012962	110013101	+	0	NA	Intergenic	MYSERV6-int|LTR|ERVK	-18490	NM_009537	22632	Mm.3868	NM_009537	ENSMUSG00000021264	Yy1	AW488674|NF-E1	YY1 transcription factor	protein-coding
Diff_Nuc3130	chr13	107257292	107257431	+	0	NA	Intergenic	MTD|LTR|MaLR	469634	NM_029665	76582	Mm.132208	NM_029665	ENSMUSG00000042590	Ipo11	1700081H05Rik|2510001A17Rik|AI314624|AW555235|E330021B14Rik|Ranbp11	importin 11	protein-coding
Diff_Nuc57381	chr9	46688042	46688181	+	0	NA	Intergenic	L1MD|LINE|L1	-33575	NR_015605	73040	Mm.265384	NR_015605	ENSMUSG00000099696	2900052N01Rik	AU067665	RIKEN cDNA 2900052N01 gene	ncRNA
Diff_Nuc11285	chr10	53472822	53472961	+	0	NA	Intergenic	RMER10A|LTR|ERVL	-2176	NM_001081428	75906	Mm.436785	NM_001081428	ENSMUSG00000019856	Fam184a	3110012E06Rik|4930438C08Rik|4930589M24Rik	family with sequence similarity 184, member A	protein-coding
Diff_Nuc2603	chr13	85105572	85105711	+	0	NA	Intergenic	Intergenic	-223349	NM_001347587	66671	Mm.18474	NM_023243	ENSMUSG00000021548	Ccnh	6330408H09Rik|AI661354|AV102684|AW538719	cyclin H	protein-coding
Diff_Nuc35325	chr5	23941292	23941431	+	0	NA	intron (NM_001253892, intron 12 of 21)	intron (NM_001253892, intron 12 of 21)	8022	NM_001253892	20535	Mm.4580	NM_009207	ENSMUSG00000028962	Slc4a2	Ae2|B3RP	solute carrier family 4 (anion exchanger), member 2	protein-coding
Diff_Nuc27808	chr7	19433782	19433921	+	0	NA	intron (NM_153761, intron 2 of 5)	intron (NM_153761, intron 2 of 5)	8536	NM_153760	243864	Mm.233503	NM_153760	ENSMUSG00000040987	Mill2	Micb	MHC I like leukocyte 2	protein-coding
Diff_Nuc14853	chr17	54389962	54390101	+	0	NA	Intergenic	Intergenic	48328	NM_022025	63993	Mm.155241	NM_022025	ENSMUSG00000023945	Slc5a7	CHT1	solute carrier family 5 (choline transporter), member 7	protein-coding
Diff_Nuc43734	chr3	40555642	40555781	+	0	NA	intron (NM_011020, intron 2 of 18)	B3A|SINE|B2	6176	NM_011020	18415	Mm.39330	NM_011020	ENSMUSG00000025757	Hspa4l	94kDa|AI461691|APG-1|Osp94	heat shock protein 4 like	protein-coding
Diff_Nuc36435	chr5	66777402	66777541	+	0	NA	intron (NM_001201413, intron 9 of 16)	intron (NM_001201413, intron 9 of 16)	-48567	NM_001201416	11787	Mm.5159	NM_009686	ENSMUSG00000029207	Apbb2	2310007D03Rik|FE65L1|Rirl1|TR2L|Zfra	amyloid beta (A4) precursor protein-binding, family B, member 2	protein-coding
Diff_Nuc24685	chr19	38324092	38324231	+	0	NA	Intergenic	Intergenic	-15111	NM_020278	56839	Mm.298251	NM_020278	ENSMUSG00000067242	Lgi1	BB130740	leucine-rich repeat LGI family, member 1	protein-coding
Diff_Nuc34769	chr6	148128092	148128231	+	0	NA	3' UTR (NM_001286560, exon 13 of 13)	3' UTR (NM_001286560, exon 13 of 13)	-32649	NR_015615	320737	Mm.137858	NR_015615		4732416N19Rik	-	RIKEN cDNA 4732416N19 gene	ncRNA
Diff_Nuc30630	chr7	135035222	135035361	+	0	NA	promoter-TSS (NM_001081268)	promoter-TSS (NM_001081268)	-807	NM_001081268	330657	Mm.425491	NM_001081268	ENSMUSG00000044139	Prss53	Pol3s|mFLJ00289	protease, serine 53	protein-coding
Diff_Nuc16773	chr16	31762952	31763091	+	0	NA	intron (NM_001252436, intron 1 of 22)	B3A|SINE|B2	8585	NM_001252436	13383	Mm.382	NM_007862	ENSMUSG00000022770	Dlg1	B130052P05Rik|Dlgh1|E-dlg/SAP97|SAP-97|SAP97|mKIAA4187	discs, large homolog 1 (Drosophila)	protein-coding
Diff_Nuc3649	chr12	8683332	8683471	+	0	NA	intron (NM_030723, intron 1 of 20)	B1_Mus2|SINE|Alu	1914	NM_030723	80913	Mm.341243	NM_030723	ENSMUSG00000020594	Pum2	5730503J23Rik|Pumm2	pumilio RNA-binding family member 2	protein-coding
Diff_Nuc7133	chr11	34791982	34792121	+	0	NA	Intergenic	ORR1C2|LTR|MaLR	-142907	NM_011412	20564	Mm.478604	NM_011412	ENSMUSG00000056427	Slit3	Slil2|Slit1|b2b2362.1Clo	slit homolog 3 (Drosophila)	protein-coding
Diff_Nuc55376	chr1	167947642	167947781	+	0	NA	Intergenic	B3A|SINE|B2	-14946	NM_011137	18986	Mm.245261	NM_011137	ENSMUSG00000026565	Pou2f1	2810482H01Rik|NF-A1|Oct-1|Oct1|Otf-1|Otf1	POU domain, class 2, transcription factor 1	protein-coding
Diff_Nuc35026	chr5	13402512	13402651	+	0	NA	intron (NM_009152, intron 1 of 16)	intron (NM_009152, intron 1 of 16)	3272	NM_009152	20346	Mm.372039	NM_009152	ENSMUSG00000028883	Sema3a	Hsema-I|SEMA1|SemD|Semad|coll-1	sema domain, immunoglobulin domain (Ig), short basic domain, secreted, (semaphorin) 3A	protein-coding
Diff_Nuc30389	chr7	127659072	127659211	+	0	NA	intron (NM_001278944, intron 18 of 29)	intron (NM_001278944, intron 18 of 29)	-81998	NR_024324	78552	Mm.289190	NR_024324	ENSMUSG00000044141	E130201H02Rik	-	Y box protein 1 pseudogene	pseudo
Diff_Nuc29069	chr7	79256422	79256561	+	0	NA	intron (NM_001024703, intron 19 of 22)	Lx3C|LINE|L1	-149587	NR_126483	102640608	Mm.399138	NR_126483	ENSMUSG00000108480	Gm36633	-	predicted gene, 36633	ncRNA
Diff_Nuc12492	chr10	95037082	95037221	+	0	NA	Intergenic	B1F|SINE|Alu	-10350	NM_027722	71207	Mm.24397	NM_027722	ENSMUSG00000020029	Nudt4	4933436C10Rik|DIPP2|DIPP2alpha|DIPP2beta|HDCMB47P	nudix (nucleoside diphosphate linked moiety X)-type motif 4	protein-coding
Diff_Nuc22197	chr14	58244592	58244731	+	0	NA	intron (NM_020506, intron 6 of 22)	PB1D10|SINE|Alu	39132	NM_020506	57258	Mm.202747	NM_020506	ENSMUSG00000021952	Xpo4	B430309A01Rik|mKIAA1721	exportin 4	protein-coding
Diff_Nuc10347	chr10	14435012	14435151	+	0	NA	TTS (NM_029722)	TTS (NM_029722)	2939	NM_029722	76743	Mm.136985	NM_029722	ENSMUSG00000019867	Gje1	AEY12|Cx23|D230044M03Rik|Gjf1|Gsfaey12	gap junction protein, epsilon 1	protein-coding
Diff_Nuc16623	chr16	27094172	27094311	+	0	NA	Intergenic	RLTR17|LTR|ERVK	-102503	NM_001285918	239789	Mm.326909	NM_001013761	ENSMUSG00000068428	Gmnc	Gemc1|Gm1778|Gm606	geminin coiled-coil domain containing	protein-coding
Diff_Nuc60368	chr8	35282632	35282771	+	0	NA	Intergenic	Intergenic	-52935	NR_105820	102465211		NR_105820	ENSMUSG00000098785	Mir6395	Gm27561|mmu-mir-6395	microRNA 6395	ncRNA
Diff_Nuc28798	chr7	67562202	67562341	+	0	NA	Intergenic	L1Md_F|LINE|L1	-277166	NM_001082962	20646	Mm.274995	NM_013670	ENSMUSG00000102252	Snrpn	2410045I01Rik|HCERN3|Peg4|Pwcr1|SMN	small nuclear ribonucleoprotein N	protein-coding
Diff_Nuc21556	chr14	31405712	31405851	+	0	NA	Intergenic	RLTR12B|LTR|ERVK	17715	NM_001310682	18753	Mm.2314	NM_011103	ENSMUSG00000021948	Prkcd	AI385711|D14Ertd420e|PKC[d]|PKCdelta|Pkcd	protein kinase C, delta	protein-coding
Diff_Nuc10995	chr10	41641352	41641491	+	0	NA	intron (NM_001034858, intron 17 of 17)	intron (NM_001034858, intron 17 of 17)	34176	NM_001013370	140742	Mm.139418	NM_001013370	ENSMUSG00000038332	Sesn1	1110002G11Rik|AU044290|Pa26|Sest1	sestrin 1	protein-coding
Diff_Nuc46508	chr3	156441132	156441271	+	0	NA	intron (NM_001039094, intron 1 of 6)	intron (NM_001039094, intron 1 of 6)	216443	NM_001039094	320840	Mm.317293	NM_177274	ENSMUSG00000040037	Negr1	5330422G01Rik|KILON|Ntra	neuronal growth regulator 1	protein-coding
Diff_Nuc19164	chr15	35768692	35768831	+	0	NA	intron (NM_177151, intron 40 of 61)	intron (NM_177151, intron 40 of 61)	99240	NM_053071	12864	Mm.548	NM_053071	ENSMUSG00000014313	Cox6c	-	cytochrome c oxidase subunit VIc	protein-coding
Diff_Nuc57170	chr9	40327752	40327891	+	0	NA	Intergenic	Intergenic	-64472	NM_172768	235283	Mm.138434	NM_172768	ENSMUSG00000040111	Gramd1b	3222402H23|A930008A22Rik|AI593249|mKIAA1201	GRAM domain containing 1B	protein-coding
Diff_Nuc43067	chr3	9587882	9588021	+	0	NA	intron (NM_133218, intron 1 of 8)	ID_B1|SINE|B4	22134	NM_133218	170753	Mm.212908	NM_133218	ENSMUSG00000040209	Zfp704	C030026M03|C030034L19Rik|Gig1|Znf704	zinc finger protein 704	protein-coding
Diff_Nuc58236	chr9	72582692	72582831	+	0	NA	intron (NM_010890, intron 18 of 28)	intron (NM_010890, intron 18 of 28)	-72320	NM_175485	235472	Mm.31696	NM_175485	ENSMUSG00000036030	Prtg	A230098A12Rik|Igdcc5	protogenin	protein-coding
Diff_Nuc43521	chr3	31205672	31205811	+	0	NA	intron (NM_172861, intron 1 of 7)	MER3|DNA|MER1_type	3500	NM_172861	241919	Mm.285366	NM_172861	ENSMUSG00000069072	Slc7a14	A930013N06|BC061928	solute carrier family 7 (cationic amino acid transporter, y+ system), member 14	protein-coding
Diff_Nuc37698	chr5	115423342	115423481	+	0	NA	Intergenic	Intergenic	-2340	NM_009327	21405	Mm.332607	NM_009327	ENSMUSG00000029556	Hnf1a	AI323641|HNF1|HNF1-alpha|HNF1[a]|Hnf-1|Hnf1alpha|LFB1|Tcf-1|Tcf1	HNF1 homeobox A	protein-coding
Diff_Nuc62119	chr8	109808507	109808646	+	0	NA	intron (NR_039557, intron 2 of 3).2	intron (NR_039557, intron 2 of 3).2	-8794	NM_018823	54446	Mm.390057	NM_018823	ENSMUSG00000003847	Nfat5	AI225870|B130038B15Rik|CAG-8|CAG80|NFATL1|OREBP|TonEBP|mKIAA0827|nfatz	nuclear factor of activated T cells 5	protein-coding
Diff_Nuc42339	chr4	136827962	136828101	+	0	NA	Intergenic	B4A|SINE|B4	-5519	NM_009523	22417	Mm.20355	NM_009523	ENSMUSG00000036856	Wnt4	Wnt-4	wingless-type MMTV integration site family, member 4	protein-coding
Diff_Nuc35662	chr5	33130512	33130651	+	0	NA	Intergenic	B1_Mm|SINE|Alu	-2306	NM_177298	320951	Mm.273765	NM_177298	ENSMUSG00000023452	Pisd	9030221M09Rik	phosphatidylserine decarboxylase	protein-coding
Diff_Nuc42077	chr4	130298872	130299011	+	0	NA	intron (NM_001159606, intron 4 of 17)	B1F1|SINE|Alu	-6612	NR_028565	100217460		NR_028565	ENSMUSG00000065196	Snord85	MBII-251|Z50	small nucleolar RNA, C/D box 85	snoRNA
Diff_Nuc39536	chr4	32972122	32972261	+	0	NA	intron (NM_001012450, intron 1 of 16)	intron (NM_001012450, intron 1 of 16)	38289	NM_080471	140577	Mm.214766	NM_080471	ENSMUSG00000040183	Ankrd6	-	ankyrin repeat domain 6	protein-coding
Diff_Nuc56505	chr9	14601942	14602081	+	0	NA	intron (NM_001310728, intron 6 of 18)	intron (NM_001310728, intron 6 of 18)	12913	NM_018736	17535	Mm.149071	NM_018736	ENSMUSG00000031928	Mre11a	Mre11|Mre11b	MRE11A homolog A, double strand break repair nuclease	protein-coding
Diff_Nuc46510	chr3	156501632	156501771	+	0	NA	intron (NM_001039094, intron 1 of 6)	intron (NM_001039094, intron 1 of 6)	276943	NM_001039094	320840	Mm.317293	NM_177274	ENSMUSG00000040037	Negr1	5330422G01Rik|KILON|Ntra	neuronal growth regulator 1	protein-coding
Diff_Nuc3490	chr12	3573432	3573571	+	0	NA	intron (NM_007886, intron 1 of 18)	intron (NM_007886, intron 1 of 18)	460	NM_007886	13528	Mm.286202	NM_007886	ENSMUSG00000071454	Dtnb	-	dystrobrevin, beta	protein-coding
Diff_Nuc47561	chr2	37320942	37321081	+	0	NA	intron (NM_001033960, intron 1 of 18)	intron (NM_001033960, intron 1 of 18)	13237	NM_001033960	227800	Mm.383192	NM_146121	ENSMUSG00000035437	Rabgap1	Gapcena|mKIAA4104	RAB GTPase activating protein 1	protein-coding
Diff_Nuc41225	chr4	102640882	102641021	+	0	NA	non-coding (NR_040444, exon 4 of 4)	non-coding (NR_040444, exon 4 of 4)	-18033	NM_001163767	67344	Mm.111346	NM_026100	ENSMUSG00000028523	Tctex1d1	1700055O19Rik	Tctex1 domain containing 1	protein-coding
Diff_Nuc30534	chr7	133166352	133166491	+	0	NA	intron (NM_001101488, intron 1 of 6)	intron (NM_001101488, intron 1 of 6)	59504	NM_001101488	269994	Mm.39599	NM_001101488	ENSMUSG00000046182	Gsg1l	AI852434|C230098I05Rik|G630023A01Rik|Gm637|g1l	GSG1-like	protein-coding
Diff_Nuc53299	chr1	76196762	76196901	+	0	NA	Intergenic	Intergenic	-288877	NR_038012	620079	Mm.378379	NR_038012	ENSMUSG00000100553	Gm17751	-	predicted gene, 17751	ncRNA
Diff_Nuc37728	chr5	116127802	116127941	+	0	NA	intron (NM_001080808, intron 2 of 8)	L1_Rod|LINE|L1	32289	NR_105997	102465623		NR_105997	ENSMUSG00000099254	Mir7030	Gm27267|mmu-mir-7030	microRNA 7030	ncRNA
Diff_Nuc3358	chr13	115063112	115063251	+	0	NA	Intergenic	Intergenic	115121	NM_010887	17993	Mm.253142	NM_010887	ENSMUSG00000021764	Ndufs4	6720411N02Rik|C1-18k	NADH dehydrogenase (ubiquinone) Fe-S protein 4	protein-coding
Diff_Nuc27187	chr18	74092632	74092771	+	0	NA	intron (NM_172632, intron 5 of 5)	intron (NM_172632, intron 5 of 5)	73662	NM_001305882	71263	Mm.126220	NM_027741	ENSMUSG00000064036	Mro	4930507C04Rik|4933435E20Rik	maestro	protein-coding
Diff_Nuc25969	chr18	30743902	30744041	+	0	NA	Intergenic	Intergenic	311421	NM_181414	225326	Mm.194127	NM_181414	ENSMUSG00000033628	Pik3c3	5330434F23Rik|Vps34	phosphoinositide-3-kinase, class 3	protein-coding
Diff_Nuc51957	chr1	23235362	23235501	+	0	NA	Intergenic	MER58A|DNA|MER1_type	-43677	NR_029533	387225		NR_029533	ENSMUSG00000065405	Mir30a	Mirn30a|mir-30a|mmu-mir-30a	microRNA 30a	ncRNA
Diff_Nuc887	chr13	19631962	19632101	+	0	NA	Intergenic	L1_Mus4|LINE|L1	-35795	NR_131037	319466		NR_131037		9330199G10Rik	-	RIKEN cDNA 9330199G10 gene	ncRNA
Diff_Nuc54383	chr1	129358692	129358831	+	0	NA	intron (NM_145128, intron 14 of 17)	intron (NM_145128, intron 14 of 17)	215837	NM_028135	72160	Mm.281287	NM_028135	ENSMUSG00000026347	Tmem163	2610024A01Rik|SV31	transmembrane protein 163	protein-coding
Diff_Nuc34395	chr6	129496232	129496371	+	0	NA	Intergenic	Intergenic	-12999	NR_045270	100504641	Mm.398286	NR_045270	ENSMUSG00000097675	1700101I11Rik	-	RIKEN cDNA 1700101I11 gene	ncRNA
Diff_Nuc24181	chr19	20038832	20038971	+	0	NA	Intergenic	Intergenic	426260	NM_010730	16952	Mm.248360	NM_010730	ENSMUSG00000024659	Anxa1	Anx-1|Anx-A1|C430014K04Rik|Lpc-1|Lpc1	annexin A1	protein-coding
Diff_Nuc50083	chr2	131668872	131669011	+	0	NA	intron (NR_029381, intron 1 of 2)	ORR1D1|LTR|MaLR	4451	NR_029381	414081	Mm.246905	NR_029381	ENSMUSG00000086822	5330413P13Rik	-	RIKEN cDNA 5330413P13 gene	ncRNA
Diff_Nuc55987	chr1	190844772	190844911	+	0	NA	Intergenic	Intergenic	-13122	NM_172650	226823	Mm.209880	NM_172650	ENSMUSG00000026608	Kctd3	4930438A20Rik|9330185B06|E330032J19Rik|NY-REN-45	potassium channel tetramerisation domain containing 3	protein-coding
Diff_Nuc52588	chr1	47111532	47111671	+	0	NA	Intergenic	Lx5|LINE|L1	-201247	NM_172653	227059	Mm.233889	NM_172653	ENSMUSG00000025986	Slc39a10	2900042E17Rik|5430433I10|mKIAA1265	solute carrier family 39 (zinc transporter), member 10	protein-coding
Diff_Nuc30102	chr7	117477692	117477831	+	0	NA	intron (NM_177324, intron 31 of 40)	intron (NM_177324, intron 31 of 40)	112544	NM_009302	20947	Mm.334144	NM_009302	ENSMUSG00000031015	Swap70	70kDa|AV235546	SWA-70 protein	protein-coding
Diff_Nuc50825	chr2	155555702	155555841	+	0	NA	promoter-TSS (NM_145537)	promoter-TSS (NM_145537)	-560	NM_145537	108687	Mm.273706	NM_145537	ENSMUSG00000038312	Edem2	9530090G24Rik|AI327354	ER degradation enhancer, mannosidase alpha-like 2	protein-coding
Diff_Nuc37866	chr5	121550652	121550791	+	0	NA	Intergenic	Intergenic	-90620	NM_001302344	19894	Mm.181166	NM_011286	ENSMUSG00000029608	Rph3a	2900002P20Rik|AU022689|AW108370	rabphilin 3A	protein-coding
Diff_Nuc36707	chr5	77032602	77032741	+	0	NA	intron (NM_199032, intron 7 of 24)	B2_Mm2|SINE|B2	11932	NM_199032	381644	Mm.332452	NM_199032	ENSMUSG00000036403	Cep135	BC062951|Cep4|Gm1044	centrosomal protein 135	protein-coding
Diff_Nuc55262	chr1	163929132	163929271	+	0	NA	intron (NM_001038619, intron 20 of 20)	intron (NM_001038619, intron 20 of 20)	-5899	NR_040562	72753	Mm.452125	NR_040562	ENSMUSG00000090260	2810442N19Rik	-	RIKEN cDNA 2810442N19 gene	ncRNA
Diff_Nuc37657	chr5	114155552	114155691	+	0	NA	intron (NR_033216, intron 2 of 2)	intron (NR_033216, intron 2 of 2)	19160	NR_033216	381707	Mm.159016	NR_033216	ENSMUSG00000042184	1700069L16Rik	1700096P12Rik	RIKEN cDNA 1700069L16 gene	ncRNA
Diff_Nuc29376	chr7	90990782	90990921	+	0	NA	Intergenic	B4A|SINE|B4	42000	NM_030705	80889	Mm.272998	NM_030705	ENSMUSG00000070462	Mesdc1	AW061151	mesoderm development candidate 1	protein-coding
Diff_Nuc47954	chr2	52979962	52980101	+	0	NA	intron (NM_172409, intron 21 of 26)	intron (NM_172409, intron 21 of 26)	70190	NM_018785	56194	Mm.257474	NM_018785	ENSMUSG00000061136	Prpf40a	2810012K09Rik|FBP-11|FBP11|Fnbp11|Fnbp3	pre-mRNA processing factor 40A	protein-coding
Diff_Nuc26754	chr18	57868092	57868231	+	0	NA	intron (NM_029290, intron 6 of 6)	intron (NM_029290, intron 6 of 6)	-69922	NR_045360	70157	Mm.490532	NR_045360		2210409D07Rik	-	RIKEN cDNA 2210409D07 gene	ncRNA
Diff_Nuc18205	chr16	91510462	91510601	+	0	NA	3' UTR (NM_010508, exon 11 of 11)	3' UTR (NM_010508, exon 11 of 11)	17258	NR_105786	102465190		NR_105786	ENSMUSG00000099308	Mir6367	Gm27467|mmu-mir-6367	microRNA 6367	ncRNA
Diff_Nuc61797	chr8	96097572	96097711	+	0	NA	Intergenic	Intergenic	-38034	NM_001003951	67935	Mm.65457	NM_001003951	ENSMUSG00000058019	Ces5a	1700081L16Rik|1700122C07Rik|BB081581|Ces7|Gm503|cauxin	carboxylesterase 5A	protein-coding
Diff_Nuc41198	chr4	102173382	102173521	+	0	NA	intron (NM_019840, intron 4 of 14)	intron (NM_019840, intron 4 of 14)	-69214	NM_001177980	18578	Mm.20181	NM_019840	ENSMUSG00000028525	Pde4b	Dpde4|R74983|dunce	phosphodiesterase 4B, cAMP specific	protein-coding
Diff_Nuc35394	chr5	26424442	26424581	+	0	NA	TTS (NM_207657)	TTS (NM_207657)	7320	NM_001281516	100862359		NM_001281516	ENSMUSG00000095550	Gm21671	-	predicted gene, 21671	protein-coding
Diff_Nuc4829	chr12	67637192	67637331	+	0	NA	intron (NM_207010, intron 10 of 15)	Lx6|LINE|L1	-251873	NM_001162933	238217	Mm.188575	NM_001162933	ENSMUSG00000060499	Rpl10l	EG238217	ribosomal protein L10-like	protein-coding
Diff_Nuc22537	chr14	70133852	70133991	+	0	NA	intron (NR_130157, intron 1 of 2)	intron (NR_130157, intron 1 of 2)	1280	NR_130157	75016	Mm.394574	NR_130157	ENSMUSG00000097284	4930480K23Rik	-	RIKEN cDNA 4930480K23 gene	ncRNA
Diff_Nuc59223	chr9	107951692	107951831	+	0	NA	TTS (NM_013785)	TTS (NM_013785)	140	NM_177910	331026	Mm.22554	NM_177910	ENSMUSG00000070284	Gmppb	AI317178|E430010H19	GDP-mannose pyrophosphorylase B	protein-coding
Diff_Nuc37577	chr5	111377792	111377931	+	0	NA	intron (NM_001267622, intron 2 of 23)	intron (NM_001267622, intron 2 of 23)	-55302	NR_030482	735278		NR_030482	ENSMUSG00000076163	Mir701	Mirn701|mir-701|mmu-mir-701	microRNA 701	ncRNA
Diff_Nuc1737	chr13	49459592	49459731	+	0	NA	intron (NM_029791, intron 1 of 7)	intron (NM_029791, intron 1 of 7)	22743	NM_001039180	76895	Mm.197387	NM_029791	ENSMUSG00000037933	Bicd2	-	bicaudal D homolog 2 (Drosophila)	protein-coding
Diff_Nuc20217	chr15	78886162	78886301	+	0	NA	intron (NM_144849, intron 4 of 7)	intron (NM_144849, intron 4 of 7)	7058	NM_144849	223690	Mm.24262	NM_144849	ENSMUSG00000033055	Ankrd54	C730048E16Rik|EST1068184|EST475269|Liar	ankyrin repeat domain 54	protein-coding
Diff_Nuc57339	chr9	45760152	45760291	+	0	NA	intron (NM_172257, intron 4 of 25)	intron (NM_172257, intron 4 of 25)	3111	NM_172257	214597	Mm.379345	NM_172257	ENSMUSG00000034908	Sidt2	B930096O19|BC023957|CGI-40	SID1 transmembrane family, member 2	protein-coding
Diff_Nuc56647	chr9	21275342	21275481	+	0	NA	intron (NM_007871, intron 4 of 19)	intron (NM_007871, intron 4 of 19)	25597	NR_029585	387194		NR_029585	ENSMUSG00000065547	Mir199a-1	Mirn199|Mirn199a-1|mir-199a-1	microRNA 199a-1	ncRNA
Diff_Nuc20827	chr15	99261782	99261921	+	0	NA	intron (NM_001001884, intron 6 of 12)	MIRb|SINE|MIR	26328	NM_001001884	380969	Mm.22915	NM_001001884	ENSMUSG00000023009	Nckap5l	C230021P08Rik|Cep169	NCK-associated protein 5-like	protein-coding
Diff_Nuc56459	chr9	13012522	13012661	+	0	NA	Intergenic	ORR1D2|LTR|MaLR	93264	NR_040755	78219	Mm.414868	NR_040755	ENSMUSG00000111830	4930568E12Rik	-	RIKEN cDNA 4930568E12 gene	ncRNA
Diff_Nuc36717	chr5	77614092	77614231	+	0	NA	Intergenic	ID_B1|SINE|B4	26069	NM_001289767	69982	Mm.46106	NM_183284	ENSMUSG00000053030	Spink2	1700007F22Rik|AV038945|HUSI-II	serine peptidase inhibitor, Kazal type 2	protein-coding
Diff_Nuc48112	chr2	58605402	58605541	+	0	NA	intron (NM_001289660, intron 1 of 7)	intron (NM_001289660, intron 1 of 7)	-2124	NM_001289659	76654	Mm.200370	NM_029692	ENSMUSG00000026839	Upp2	1700124F02Rik|AI266885|UDRPASE2|UP2|UPASE2	uridine phosphorylase 2	protein-coding
Diff_Nuc55570	chr1	176436492	176436631	+	0	NA	intron (NM_019445, intron 1 of 17)	intron (NM_019445, intron 1 of 17)	4605	NM_019445	54418	Mm.330620	NM_019445	ENSMUSG00000028354	Fmn2	AU024104	formin 2	protein-coding
Diff_Nuc27903	chr7	24963002	24963141	+	0	NA	intron (NM_001029933, intron 3 of 3)	B3|SINE|B2	3007	NM_001029933	232966	Mm.435485	NM_001029933	ENSMUSG00000068962	Zfp114	Gm1957|Zfp110	zinc finger protein 114	protein-coding
Diff_Nuc38498	chr5	139702382	139702521	+	0	NA	intron (NM_001256118, intron 3 of 17)	intron (NM_001256118, intron 3 of 17)	11339	NM_001256116	77053	Mm.210845	NM_024451	ENSMUSG00000036817	Sun1	4632417G13Rik|5730434D03Rik|Unc84a|mKIAA0810	Sad1 and UNC84 domain containing 1	protein-coding
Diff_Nuc21493	chr14	28817742	28817881	+	0	NA	intron (NM_177814, intron 7 of 15)	intron (NM_177814, intron 7 of 15)	382218	NM_177814	238988	Mm.318004	NM_177814	ENSMUSG00000040640	Erc2	6430531D06|CAST|CAST1/ERC2|D14Ertd171e|ELKS2alpha	ELKS/RAB6-interacting/CAST family member 2	protein-coding
Diff_Nuc34392	chr6	129472672	129472811	+	0	NA	Intergenic	RMER12|LTR|ERVK	10166	NM_001081186	330428	Mm.44237	NM_001081186	ENSMUSG00000030160	Tmem52b	D630042F21Rik	transmembrane protein 52B	protein-coding
Diff_Nuc27866	chr7	20946462	20946601	+	0	NA	Intergenic	L1_Mus1|LINE|L1	-2264	NR_030707	100042966	Mm.431911	NR_030707		Vmn1r-ps79	Gm652	vomeronasal 1 receptor, pseudogene 79	pseudo
Diff_Nuc12412	chr10	92159102	92159241	+	0	NA	intron (NM_008682, intron 8 of 14)	intron (NM_008682, intron 8 of 14)	25992	NM_008682	17997	Mm.2998	NM_008682	ENSMUSG00000019988	Nedd1	-	neural precursor cell expressed, developmentally down-regulated gene 1	protein-coding
Diff_Nuc60521	chr8	41520842	41520981	+	0	NA	intron (NM_178395, intron 1 of 12)	MTD|LTR|MaLR	11742	NM_178395	70546	Mm.34326	NM_178395	ENSMUSG00000039470	Zdhhc2	5730415P04Rik|6430583A19Rik	zinc finger, DHHC domain containing 2	protein-coding
Diff_Nuc49157	chr2	98507412	98507551	+	0	NA	Intergenic	GSAT_MM|Satellite|Satellite	1199667	NM_178725	241568	Mm.241682	NM_178725	ENSMUSG00000050587	Lrrc4c	6430556C10Rik|NGL-1	leucine rich repeat containing 4C	protein-coding
Diff_Nuc42914	chr4	155208432	155208571	+	0	NA	Intergenic	Intergenic	3123	NM_025338	66077	Mm.28999	NM_025338	ENSMUSG00000065990	Aurkaip1	0610033H09Rik|Aip|Akip|MRP-S38	aurora kinase A interacting protein 1	protein-coding
Diff_Nuc28413	chr7	51875052	51875191	+	0	NA	intron (NM_028021, intron 31 of 39)	intron (NM_028021, intron 31 of 39)	28865	NM_001290682	16504	Mm.40312	NM_008422	ENSMUSG00000062785	Kcnc3	KShIIID|Kcr2-3|Kv3.3	potassium voltage gated channel, Shaw-related subfamily, member 3	protein-coding
Diff_Nuc7196	chr11	37085802	37085941	+	0	NA	Intergenic	Intergenic	-328128	NM_011856	23964	Mm.439889	NM_011856	ENSMUSG00000049336	Tenm2	Odz2|Odz3|Ten-2|Ten-m2	teneurin transmembrane protein 2	protein-coding
Diff_Nuc5782	chr12	100504652	100504791	+	0	NA	intron (NM_183186, intron 4 of 5)	intron (NM_183186, intron 4 of 5)	-103703	NR_038130	67639	Mm.87374	NR_038130		4930474N09Rik	-	RIKEN cDNA 4930474N09 gene	ncRNA
Diff_Nuc12742	chr10	105897372	105897511	+	0	NA	Intergenic	Intergenic	-9925	NM_177373	327814	Mm.391424	NM_177373	ENSMUSG00000053825	Ppfia2	5330438O12|B230207K17Rik|E130120L08Rik|mKIAA4112	protein tyrosine phosphatase, receptor type, f polypeptide (PTPRF), interacting protein (liprin), alpha 2	protein-coding
Diff_Nuc50461	chr2	143760952	143761091	+	0	NA	intron (NM_019771, intron 1 of 3)	B2_Mm2|SINE|B2	19954	NM_019771	56431	Mm.28919	NM_019771	ENSMUSG00000015932	Dstn	2610043P17Rik|ADF|AU042046|Dsn|corn1|sid23p	destrin	protein-coding
Diff_Nuc35840	chr5	39454712	39454851	+	0	NA	Intergenic	Intergenic	-186849	NM_013748	27278	Mm.440845	NM_013748	ENSMUSG00000039315	Clnk	MIST	cytokine-dependent hematopoietic cell linker	protein-coding
Diff_Nuc57230	chr9	42510222	42510361	+	0	NA	intron (NM_175481, intron 3 of 20)	intron (NM_175481, intron 3 of 20)	-229982	NM_173038	272589	Mm.34483	NM_173038	ENSMUSG00000037287	Tbcel	D330014K23|E130107N23Rik|Lrrc35	tubulin folding cofactor E-like	protein-coding
Diff_Nuc22600	chr14	73034092	73034231	+	0	NA	intron (NM_207636, intron 3 of 25)	MLT1E3|LTR|MaLR	75649	NM_207636	319448	Mm.205421	NM_207636	ENSMUSG00000033487	Fndc3a	1700094E19Rik|D14Ertd453e|F730017H24Rik|Fndc3|sys	fibronectin type III domain containing 3A	protein-coding
Diff_Nuc29915	chr7	109096152	109096291	+	0	NA	Intergenic	RSINE1|SINE|B4	-13850	NM_001162973	69358	Mm.214841	NM_027053	ENSMUSG00000064307	Lrrc51	1700008D07Rik|Lrtomt	leucine rich repeat containing 51	protein-coding
Diff_Nuc5881	chr12	103122002	103122141	+	0	NA	exon (NM_028446, exon 11 of 21)	exon (NM_028446, exon 11 of 21)	29310	NM_028446	109181	Mm.208618	NM_028446	ENSMUSG00000021188	Trip11	2610511G22Rik|3110031G15Rik|6030460N08Rik|AI450776|GMAP-210|TRIP230	thyroid hormone receptor interactor 11	protein-coding
Diff_Nuc48178	chr2	60151022	60151161	+	0	NA	intron (NM_013825, intron 28 of 34)	intron (NM_013825, intron 28 of 34)	-28550	NM_001290660	66205	Mm.227281	NM_025422	ENSMUSG00000060703	Cd302	1110055L24Rik|AI159627	CD302 antigen	protein-coding
Diff_Nuc56556	chr9	17863802	17863941	+	0	NA	Intergenic	L1VL4|LINE|L1	-232840	NM_025844	66917	Mm.103534	NM_025844	ENSMUSG00000001774	Chordc1	1110001O09Rik|AA409036|Chp-1|morgana	cysteine and histidine-rich domain (CHORD)-containing, zinc-binding protein 1	protein-coding
Diff_Nuc45367	chr3	106391402	106391541	+	0	NA	Intergenic	MERVL-int|LTR|ERVL	-40751	NM_133869	99712	Mm.429443	NM_133869	ENSMUSG00000040774	Cept1	9930118K05Rik|mCEPT1	choline/ethanolaminephosphotransferase 1	protein-coding
Diff_Nuc1413	chr13	38703672	38703811	+	0	NA	intron (NM_139063, intron 4 of 4)	intron (NM_139063, intron 4 of 4)	23237	NM_139063	17828	Mm.261554	NM_139063	ENSMUSG00000038982	Bloc1s5	1810074A19Rik|Muted|mu	biogenesis of lysosomal organelles complex-1, subunit 5, muted	protein-coding
Diff_Nuc24190	chr19	20683342	20683481	+	0	NA	intron (NM_013467, intron 1 of 12)	intron (NM_013467, intron 1 of 12)	6939	NM_013467	11668	Mm.250866	NM_013467	ENSMUSG00000053279	Aldh1a1	Ahd-2|Ahd2|Aldh1|Aldh1a2|E1|Raldh1	aldehyde dehydrogenase family 1, subfamily A1	protein-coding
Diff_Nuc16039	chr16	6969342	6969481	+	0	NA	intron (NM_021477, intron 5 of 16)	intron (NM_021477, intron 5 of 16)	-100517	NM_183188	268859	Mm.370334	NM_021477	ENSMUSG00000008658	Rbfox1	A2bp|A2bp1|Hrnbp1|fox-1	RNA binding protein, fox-1 homolog (C. elegans) 1	protein-coding
Diff_Nuc29016	chr7	75889602	75889741	+	0	NA	exon (NM_001042592, exon 3 of 8)	exon (NM_001042592, exon 3 of 8)	4453	NM_001042592	66412	Mm.251199	NM_025549	ENSMUSG00000042659	Arrdc4	2410003C09Rik|AV216361	arrestin domain containing 4	protein-coding
Diff_Nuc42165	chr4	132622032	132622171	+	0	NA	exon (NM_146155, exon 6 of 7)	exon (NM_146155, exon 6 of 7)	54680	NM_146155	230793	Mm.31816	NM_146155	ENSMUSG00000037692	Ahdc1	D030015G18Rik	AT hook, DNA binding motif, containing 1	protein-coding
Diff_Nuc55055	chr1	157006092	157006231	+	0	NA	intron (NM_021433, intron 1 of 7)	CpG	328	NM_021433	58244	Mm.66264	NM_021433	ENSMUSG00000026470	Stx6	2310039E05Rik|2410005I16Rik|AA437559|AI415714|AI845861	syntaxin 6	protein-coding
Diff_Nuc13484	chr17	6122412	6122551	+	0	NA	intron (NM_001103181, intron 1 of 13)	MMAR1|DNA|Mariner	15651	NM_001103181	68842	Mm.449307	NM_054040	ENSMUSG00000034377	Tulp4	1110057P05Rik|2210038L17Rik|Tusp	tubby like protein 4	protein-coding
Diff_Nuc33777	chr6	107206332	107206471	+	0	NA	Intergenic	Intergenic	-273319	NM_008516	16979	Mm.428543	NM_008516	ENSMUSG00000034648	Lrrn1	2810047E21Rik|NLRR-1	leucine rich repeat protein 1, neuronal	protein-coding
Diff_Nuc61771	chr8	94115752	94115891	+	0	NA	intron (NM_011936, intron 8 of 8)	intron (NM_011936, intron 8 of 8)	209732	NM_001253822	16373	Mm.238044	NM_008393	ENSMUSG00000031734	Irx3	AI894186	Iroquois related homeobox 3	protein-coding
Diff_Nuc21567	chr14	31612862	31613001	+	0	NA	exon (NM_019460, exon 13 of 21)	exon (NM_019460, exon 13 of 21)	-25849	NM_028839	69179	Mm.143025	NM_028839	ENSMUSG00000006526	Tmem110	1810038N08Rik|2310014H19Rik|AW554125|STIMATE	transmembrane protein 110	protein-coding
Diff_Nuc9715	chr11	115933692	115933831	+	0	NA	intron (NM_001009573, intron 13 of 32)	intron (NM_001009573, intron 13 of 32)	5514	NM_001009573	70450	Mm.259460	NM_001009573	ENSMUSG00000057948	Unc13d	2610108D09Rik|Jinx|Munc13-4|mFLJ00067	unc-13 homolog D (C. elegans)	protein-coding
Diff_Nuc62303	chr8	116656512	116656651	+	0	NA	promoter-TSS (NM_001290182)	promoter-TSS (NM_001290182)	-893	NM_024446	67528	Mm.27889	NM_024437	ENSMUSG00000031767	Nudt7	1300007B24Rik|2210404C19Rik	nudix (nucleoside diphosphate linked moiety X)-type motif 7	protein-coding
Diff_Nuc20425	chr15	84635002	84635141	+	0	NA	intron (NR_030731, intron 4 of 11)	intron (NR_030731, intron 4 of 11)	51488	NM_001081166	271305	Mm.101022	NM_001081166	ENSMUSG00000016624	Phf21b	A730032D07Rik	PHD finger protein 21B	protein-coding
Diff_Nuc28757	chr7	65658672	65658811	+	0	NA	Intergenic	LTR33B|LTR|ERVL	-254831	NM_009728	11982	Mm.135129	NM_009728	ENSMUSG00000025324	Atp10a	Atp10c|pfatp	ATPase, class V, type 10A	protein-coding
Diff_Nuc12218	chr10	84656412	84656551	+	0	NA	Intergenic	Lx4A|LINE|L1	-8682	NM_007771	12952	Mm.26237	NM_007771	ENSMUSG00000020038	Cry1	AU020726|AU021000|Phll1	cryptochrome 1 (photolyase-like)	protein-coding
Diff_Nuc57278	chr9	44256002	44256141	+	0	NA	Intergenic	B1_Mur4|SINE|Alu	6779	NM_009476	22269	Mm.4453	NM_009476	ENSMUSG00000041523	Upk2	AW491716|UPII	uroplakin 2	protein-coding
Diff_Nuc56360	chr9	8046452	8046591	+	0	NA	Intergenic	B2_Mm2|SINE|B2	-3698	NM_199017	234912	Mm.172430	NM_199017	ENSMUSG00000053070	9230110C19Rik	-	RIKEN cDNA 9230110C19 gene	protein-coding
Diff_Nuc33691	chr6	103587312	103587451	+	0	NA	intron (NM_007697, intron 2 of 26)	intron (NM_007697, intron 2 of 26)	126511	NM_007697	12661	Mm.251288	NM_007697	ENSMUSG00000030077	Chl1	A530023M13Rik|AI465420|CALL|LICAM2	cell adhesion molecule L1-like	protein-coding
Diff_Nuc25825	chr18	24865442	24865581	+	0	NA	Intergenic	PB1D9|SINE|Alu	-1613	NM_001289654	225288	Mm.329322	NM_175276	ENSMUSG00000034295	Fhod3	A930009H06Rik|FHOS2|mKIAA1695	formin homology 2 domain containing 3	protein-coding
Diff_Nuc46639	chr2	4384192	4384331	+	0	NA	intron (NM_001347086, intron 3 of 24)	intron (NM_001347086, intron 3 of 24)	62239	NM_001177843	209630	Mm.37932	NM_172475	ENSMUSG00000026657	Frmd4a	2700017I06Rik|5330420J21|AI594879|C230040M21Rik|Frmd4|Gm13190|OTTMUSG00000010806|mKIAA1294	FERM domain containing 4A	protein-coding
Diff_Nuc13501	chr17	6859822	6859961	+	0	NA	intron (NM_001166630, intron 1 of 4).4	CpG	657	NM_001166630	100040563	Mm.457381	NM_001166630	ENSMUSG00000000579	Dynlt1c	100040603|Dynlt1d	dynein light chain Tctex-type 1C	protein-coding
Diff_Nuc51391	chr2	179832182	179832321	+	0	NA	Intergenic	Intergenic	6861	NR_102309	99296	Mm.285360	NM_133849	ENSMUSG00000039059	Hrh3	AW049250|H3R|HH3R	histamine receptor H3	protein-coding
Diff_Nuc12315	chr10	89237462	89237601	+	0	NA	intron (NM_029166, intron 3 of 20)	intron (NM_029166, intron 3 of 20)	29795	NM_029166	75089	Mm.268922	NM_029166	ENSMUSG00000019951	Uhrf1bp1l	2010319N22Rik|4930506D01Rik|AA589495|C80672|E030041M21Rik|mKIAA0701	UHRF1 (ICBP90) binding protein 1-like	protein-coding
Diff_Nuc6191	chr12	114085962	114086101	+	0	NA	Intergenic	GA-rich|Low_complexity|Low_complexity	13096	NM_019925	56696	Mm.20455	NM_019925	ENSMUSG00000021298	Gpr132	G2a	G protein-coupled receptor 132	protein-coding
Diff_Nuc57695	chr9	56364172	56364311	+	0	NA	Intergenic	Intergenic	97588	NM_025812	66867	Mm.150856	NM_025812	ENSMUSG00000032329	Hmg20a	1200004E06Rik|5730490E10Rik|Hmgxb1|Ibraf	high mobility group 20A	protein-coding
Diff_Nuc50383	chr2	141503602	141503741	+	0	NA	intron (NM_001013802, intron 6 of 18)	intron (NM_001013802, intron 6 of 18)	-1006459	NM_178382	71436	Mm.426781	NM_178382	ENSMUSG00000051379	Flrt3	5530600M07Rik|C430047I10Rik|mKIAA1469	fibronectin leucine rich transmembrane protein 3	protein-coding
Diff_Nuc60322	chr8	33251162	33251301	+	0	NA	Intergenic	Intergenic	-11136	NR_046039	666589	Mm.367675	NR_046039		Gm8179	EG666589	predicted gene 8179	ncRNA
Diff_Nuc31234	chr6	9703912	9704051	+	0	NA	Intergenic	Lx5|LINE|L1	803962	NM_008751	18231	Mm.46954	NM_008751	ENSMUSG00000046178	Nxph1	C130005L03Rik	neurexophilin 1	protein-coding
Diff_Nuc2387	chr13	75934352	75934491	+	0	NA	Intergenic	Intergenic	-42913	NM_053108	93692	Mm.25844	NM_053108	ENSMUSG00000021591	Glrx	C86710|D13Wsu156e|Glrx1|Grx1|TTase	glutaredoxin	protein-coding
Diff_Nuc50794	chr2	154973772	154973911	+	0	NA	intron (NM_008395, intron 2 of 24)	L1Md_F2|LINE|L1	14624	NM_008395	16396	Mm.208286	NM_008395	ENSMUSG00000027598	Itch	6720481N21Rik|8030492O04Rik|A130065M08|AIP4|C230047C07Rik	itchy, E3 ubiquitin protein ligase	protein-coding
Diff_Nuc33664	chr6	102384622	102384761	+	0	NA	intron (NM_008779, intron 2 of 21)	(TG)n|Simple_repeat|Simple_repeat	29970	NM_008779	18488	Mm.435479	NM_008779	ENSMUSG00000030075	Cntn3	Pang	contactin 3	protein-coding
Diff_Nuc29738	chr7	104898592	104898731	+	0	NA	Intergenic	Intergenic	-11904	NM_175105	66333	Mm.29756	NM_175105	ENSMUSG00000042797	Aqp11	1700015P13Rik|AI648923|sjds	aquaporin 11	protein-coding
Diff_Nuc59874	chr8	11803282	11803421	+	0	NA	intron (NM_001113518, intron 7 of 20)	intron (NM_001113518, intron 7 of 20)	-37170	NM_029326	75528	Mm.440342	NM_029326	ENSMUSG00000031512	Tex29	1700018L24Rik	testis expressed 29	protein-coding
Diff_Nuc42578	chr4	145029332	145029471	+	0	NA	Intergenic	Intergenic	-24712	NR_002888	545700	Mm.389595	NR_002888	ENSMUSG00000052912	Smarca5-ps	9230115A19Rik|OTTMUSG00000011029	SWI/SNF related, matrix associated, actin depenent ragulator of chromatin, subfamily a, member 5, pseudogene	pseudo
Diff_Nuc27153	chr18	72543362	72543501	+	0	NA	Intergenic	B4A|SINE|B4	-32708	NM_007831	13176	Mm.167882	NM_007831	ENSMUSG00000060534	Dcc	C030036D22Rik|Igdcc1	deleted in colorectal carcinoma	protein-coding
Diff_Nuc9554	chr11	109870532	109870671	+	0	NA	Intergenic	Lx|LINE|L1	-13471	NM_013851	27404	Mm.341004	NM_013851	ENSMUSG00000020620	Abca8b	Abca8	ATP-binding cassette, sub-family A (ABC1), member 8b	protein-coding
Diff_Nuc1987	chr13	58208662	58208801	+	0	NA	Intergenic	Intergenic	-4942	NM_001195075	100503085	Mm.379256	NM_001195075	ENSMUSG00000014164	Klhl3	7530408C15Rik|AI430941|EG627648	kelch-like 3	protein-coding
Diff_Nuc7034	chr11	31017402	31017541	+	0	NA	Intergenic	RLTR11A2|LTR|ERVK	-131106	NM_001290667	68044	Mm.32656	NM_026527	ENSMUSG00000020309	Chac2	-	ChaC, cation transport regulator 2	protein-coding
Diff_Nuc9714	chr11	115915072	115915211	+	0	NA	intron (NM_172569, intron 9 of 15)	intron (NM_172569, intron 9 of 15)	23511	NM_172569	217331	Mm.297706	NM_172569	ENSMUSG00000020770	Unk	B230379M23Rik|Zc3h5|Zc3hdc5|mKIAA1753	unkempt family zinc finger	protein-coding
Diff_Nuc26882	chr18	63297872	63298011	+	0	NA	intron (NM_001039485, intron 7 of 53)	L1_Mus4|LINE|L1	160371	NM_028017	108123	Mm.292687	NM_028017	ENSMUSG00000024581	Napg	2400003O04Rik|SNARE	N-ethylmaleimide sensitive fusion protein attachment protein gamma	protein-coding
Diff_Nuc12733	chr10	105479512	105479651	+	0	NA	Intergenic	Lx3C|LINE|L1	201046	NM_025602	52713	Mm.339224	NM_025602	ENSMUSG00000019897	Ccdc59	2300004H16Rik|D10Ertd718e	coiled-coil domain containing 59	protein-coding
Diff_Nuc22344	chr14	62232032	62232171	+	0	NA	TTS (NM_001039105)	TTS (NM_001039105)	5807	NM_001039105	328424	Mm.224464	NM_206974	ENSMUSG00000046168	Kcnrg	Clld4|E030012H22Rik|Gm745	potassium channel regulator	protein-coding
Diff_Nuc55715	chr1	180485942	180486081	+	0	NA	intron (NM_001161665, intron 2 of 14)	intron (NM_001161665, intron 2 of 14)	26755	NM_001161665	269152	Mm.129727	NM_177724	ENSMUSG00000026494	Kif26b	4832420M10|BC056349|D230039L06Rik	kinesin family member 26B	protein-coding
Diff_Nuc45012	chr3	94845142	94845281	+	0	NA	intron (NM_001282017, intron 1 of 9)	intron (NM_001282017, intron 1 of 9)	1325	NM_001282017	19185	Mm.2261	NM_008951	ENSMUSG00000005625	Psmd4	Af1|Mcb1|angiocidin	proteasome (prosome, macropain) 26S subunit, non-ATPase, 4	protein-coding
Diff_Nuc59934	chr8	13529842	13529981	+	0	NA	Intergenic	Intergenic	32550	NM_025601	66501	Mm.46136	NM_025601	ENSMUSG00000031452	1700029H14Rik	-	RIKEN cDNA 1700029H14 gene	protein-coding
Diff_Nuc35251	chr5	21503792	21503931	+	0	NA	exon (NM_001310464, exon 27 of 64)	exon (NM_001310464, exon 27 of 64)	-132439	NM_030727	80979	Mm.160370	NM_030727	ENSMUSG00000029015	Slc26a5	Pres|prestin	solute carrier family 26, member 5	protein-coding
Diff_Nuc41379	chr4	107891672	107891811	+	0	NA	Intergenic	ID_B1|SINE|B4	-1214	NM_001167936	230590	Mm.301798	NM_001167936	ENSMUSG00000034645	Zyg11a	BC022150	zyg-11 family member A, cell cycle regulator	protein-coding
Diff_Nuc41599	chr4	115689912	115690051	+	0	NA	intron (NM_010173, intron 1 of 14)	CpG	526	NM_010173	14073	Mm.256025	NM_010173	ENSMUSG00000034171	Faah	AW412498	fatty acid amide hydrolase	protein-coding
Diff_Nuc33990	chr6	115318252	115318391	+	0	NA	intron (NM_001308354, intron 1 of 7)	intron (NM_001308354, intron 1 of 7)	5954	NM_001308354	19016	Mm.3020	NM_011146	ENSMUSG00000000440	Pparg	Nr1c3|PPAR-gamma|PPAR-gamma2|PPARgamma|PPARgamma2	peroxisome proliferator activated receptor gamma	protein-coding
Diff_Nuc28224	chr7	36209142	36209281	+	0	NA	intron (NM_028120, intron 12 of 18)	PB1|SINE|Alu	-24900	NM_001199015	30962	Mm.45874	NM_021291	ENSMUSG00000030492	Slc7a9	CSNU3	solute carrier family 7 (cationic amino acid transporter, y+ system), member 9	protein-coding
Diff_Nuc22437	chr14	65252922	65253061	+	0	NA	Intergenic	Intergenic	-18377	NM_001081177	16554	Mm.23611	NM_001081177	ENSMUSG00000060012	Kif13b	5330429L19Rik|6030414C01|AI429803|C130021D12Rik|GAKIN	kinesin family member 13B	protein-coding
Diff_Nuc18618	chr15	12190502	12190641	+	0	NA	intron (NM_172958, intron 11 of 15)	intron (NM_172958, intron 11 of 15)	55722	NM_172958	268783	Mm.54460	NM_172958	ENSMUSG00000039458	Mtmr12	3Pap|4932703C11|C730015A02Rik|Pip3ap|mKIAA1682	myotubularin related protein 12	protein-coding
Diff_Nuc29899	chr7	108791812	108791951	+	0	NA	Intergenic	B2_Mm2|SINE|B2	-20401	NM_009191	20480	Mm.3990	NM_009191	ENSMUSG00000001829	Clpb	AL118244|Skd3	ClpB caseinolytic peptidase B	protein-coding
Diff_Nuc34800	chr6	149105652	149105791	+	0	NA	TTS (NM_001113424)	TTS (NM_001113424)	15686	NM_177101	320204	Mm.274099	NM_177101	ENSMUSG00000039958	Etfbkmt	4833442J19Rik|AI256744|ETFB-KMT|Mettl20	electron transfer flavoprotein beta subunit lysine methyltransferase	protein-coding
Diff_Nuc49866	chr2	124497192	124497331	+	0	NA	Intergenic	Lx5|LINE|L1	17944	NM_199239	214968	Mm.330536	NM_172537	ENSMUSG00000027200	Sema6d	1110067B02Rik|AA409156|D330011G23|mKIAA1479	sema domain, transmembrane domain (TM), and cytoplasmic domain, (semaphorin) 6D	protein-coding
Diff_Nuc11848	chr10	75254662	75254801	+	0	NA	intron (NM_008185, intron 3 of 4)	(ATG)n|Simple_repeat|Simple_repeat	6598	NM_008185	14871	Mm.2746	NM_008185	ENSMUSG00000001663	Gstt1	AI255817|Gstt1-1	glutathione S-transferase, theta 1	protein-coding
Diff_Nuc59954	chr8	13935502	13935641	+	0	NA	intron (NM_025785, intron 9 of 9)	intron (NM_025785, intron 9 of 9)	27765	NM_025785	66822	Mm.37950	NM_025785	ENSMUSG00000038365	Fbxo25	9130015I06Rik|AI649137|Fbx25	F-box protein 25	protein-coding
Diff_Nuc42179	chr4	132923452	132923591	+	0	NA	Intergenic	B4A|SINE|B4	-2166	NM_016981	20544	Mm.4312	NM_016981	ENSMUSG00000028854	Slc9a1	AW554487|Apnh|Mir5122|Nhe1|mir-5122|swe	solute carrier family 9 (sodium/hydrogen exchanger), member 1	protein-coding
Diff_Nuc17486	chr16	57121052	57121191	+	0	NA	promoter-TSS (NM_138599)	promoter-TSS (NM_138599)	-706	NM_138599	28185	Mm.196933	NM_138599	ENSMUSG00000022752	Tomm70a	2610044B22Rik|D16Ium22|D16Ium22e|D16Wsu109e|Tom70|Tomm70|mKIAA0719	translocase of outer mitochondrial membrane 70 homolog A (yeast)	protein-coding
Diff_Nuc61107	chr8	71997882	71998021	+	0	NA	Intergenic	Intergenic	-78508	NR_038043	378466	Mm.37846	NM_194351	ENSMUSG00000110444	Gm10033	9330175B10Rik|ENSMUSG00000057924|Gm10311	predicted gene 10033	ncRNA
Diff_Nuc56414	chr9	10656982	10657121	+	0	NA	intron (NM_001033359, intron 1 of 20)	intron (NM_001033359, intron 1 of 20)	247675	NM_001033359	244682	Mm.187021	NM_001033359	ENSMUSG00000039488	Cntn5	6720426O10Rik|A830025P08Rik|Gm507|NB-2	contactin 5	protein-coding
Diff_Nuc34519	chr6	135395052	135395191	+	0	NA	Intergenic	Intergenic	77610	NM_001288627	13730	Mm.182785	NM_010128	ENSMUSG00000030208	Emp1	I-8-09|TMP	epithelial membrane protein 1	protein-coding
Diff_Nuc45947	chr3	132063562	132063701	+	0	NA	Intergenic	Intergenic	-229524	NM_001270430	433653		NM_001270430	ENSMUSG00000091721	Gimd1	EG433653|Gm5549	GIMAP family P-loop NTPase domain containing 1	protein-coding
Diff_Nuc26986	chr18	66401032	66401171	+	0	NA	intron (NM_178793, intron 2 of 10)	L1_Mus1|LINE|L1	-22114	NR_030467	751558		NR_030467	ENSMUSG00000076147	Mir694	Mirn694|mir-694|mmu-mir-694	microRNA 694	ncRNA
Diff_Nuc38353	chr5	135080242	135080381	+	0	NA	intron (NM_020044, intron 9 of 12)	intron (NM_020044, intron 9 of 12)	10584	NM_022964	56743	Mm.391375	NM_020044	ENSMUSG00000040751	Lat2	AW125574|LAB|NTAL|WSCR5|Wbscr15|Wbscr5	linker for activation of T cells family, member 2	protein-coding
Diff_Nuc16065	chr16	7337442	7337581	+	0	NA	intron (NM_183188, intron 8 of 12)	intron (NM_183188, intron 8 of 12)	267583	NM_183188	268859	Mm.370334	NM_021477	ENSMUSG00000008658	Rbfox1	A2bp|A2bp1|Hrnbp1|fox-1	RNA binding protein, fox-1 homolog (C. elegans) 1	protein-coding
Diff_Nuc57759	chr9	58238442	58238581	+	0	NA	Intergenic	Intergenic	20200	NR_040727	73529	Mm.490924	NR_040727	ENSMUSG00000100487	1700072B07Rik	-	RIKEN cDNA 1700072B07 gene	ncRNA
Diff_Nuc23646	chr14	123834962	123835101	+	0	NA	intron (NM_177393, intron 13 of 43)	intron (NM_177393, intron 13 of 43)	191335	NM_177393	338370	Mm.255348	NM_177393	ENSMUSG00000000197	Nalcn	A530023G15Rik|AI849508|Vgcnl1	sodium leak channel, non-selective	protein-coding
Diff_Nuc32797	chr6	65740672	65740811	+	0	NA	intron (NM_029549, intron 1 of 10)	intron (NM_029549, intron 1 of 10)	11785	NM_029549	70779	Mm.263355	NM_027547	ENSMUSG00000029913	Prdm5	4432417F03Rik|6530401I24Rik|AI197291|E130112L17Rik|PFM2	PR domain containing 5	protein-coding
Diff_Nuc7401	chr11	44721272	44721411	+	0	NA	intron (NM_007897, intron 8 of 15)	intron (NM_007897, intron 8 of 15)	209089	NR_045100	100504255	Mm.123608	NR_045100	ENSMUSG00000084773	Gm12159	OTTMUSG00000005475	predicted gene 12159	ncRNA
Diff_Nuc7179	chr11	36378992	36379131	+	0	NA	intron (NM_011856, intron 2 of 28)	intron (NM_011856, intron 2 of 28)	378682	NM_001290702	23964	Mm.439889	NM_011856	ENSMUSG00000049336	Tenm2	Odz2|Odz3|Ten-2|Ten-m2	teneurin transmembrane protein 2	protein-coding
Diff_Nuc61315	chr8	78779412	78779551	+	0	NA	Intergenic	Intergenic	644591	NR_028579	100039211	Mm.367571	NR_028579	ENSMUSG00000074235	Gm10649	ENSMUSG00000074235	predicted gene 10649	ncRNA
Diff_Nuc17025	chr16	38686992	38687131	+	0	NA	intron (NM_020260, intron 1 of 11)	B3A|SINE|B2	26087	NM_020260	12549	Mm.370848	NM_020260	ENSMUSG00000022799	Arhgap31	5830477L08Rik|AU041750|Cdgap|D330026I07Rik	Rho GTPase activating protein 31	protein-coding
Diff_Nuc56734	chr9	23884222	23884361	+	0	NA	Intergenic	B4|SINE|B4	-18171	NM_175678	319239	Mm.130824	NM_175678	ENSMUSG00000043659	Npsr1	9330128H10Rik|GPRA|Gpr154|MVTR|PGR14|VRR1	neuropeptide S receptor 1	protein-coding
Diff_Nuc12341	chr10	89804002	89804141	+	0	NA	intron (NM_001128086, intron 11 of 24)	Lx3_Mus|LINE|L1	-234401	NM_001177397	77531	Mm.440605	NM_181398	ENSMUSG00000058589	Anks1b	AIDA-1b|C030032C09Rik|E530015N03Rik|ENSMUSG00000078431|Gm10937|Gm1555	ankyrin repeat and sterile alpha motif domain containing 1B	protein-coding
Diff_Nuc46379	chr3	150147802	150147941	+	0	NA	Intergenic	L1_Mus1|LINE|L1	538955	NR_039540	100628568		NR_039540	ENSMUSG00000092830	Mir3963	mmu-mir-3963|mu-mir-3963	microRNA 3963	ncRNA
Diff_Nuc42899	chr4	154922452	154922591	+	0	NA	intron (NM_008142, intron 7 of 11)	RSINE1|SINE|B4	-13980	NM_138671	192185	Mm.28347	NM_138671	ENSMUSG00000029063	Nadk	4432404C02Rik|BC004012	NAD kinase	protein-coding
Diff_Nuc39339	chr4	23632832	23632971	+	0	NA	Intergenic	L2|LINE|L2	-790708	NM_199467	212377	Mm.120919	NM_199467	ENSMUSG00000045751	Mms22l	F730047E07Rik|Gm134	MMS22-like, DNA repair protein	protein-coding
Diff_Nuc24134	chr19	17208592	17208731	+	0	NA	intron (NM_181348, intron 9 of 19)	intron (NM_181348, intron 9 of 19)	178053	NM_181348	353211	Mm.257354	NM_181348	ENSMUSG00000039126	Prune2	6330414G02Rik|A230083H22Rik|A330102H22Rik|Bmcc1|mKIAA0367	prune homolog 2	protein-coding
Diff_Nuc12403	chr10	91574502	91574641	+	0	NA	intron (NR_028262, intron 9 of 12)	intron (NR_028262, intron 9 of 12)	25397	NR_037219	100526517		NR_037219	ENSMUSG00000093227	Mir1251	mir-1251|mmu-mir-1251	microRNA 1251	ncRNA
Diff_Nuc23004	chr14	93055562	93055701	+	0	NA	Intergenic	Lx3A|LINE|L1	1232476	NM_001271800	211712	Mm.37126	NM_001081377	ENSMUSG00000055421	Pcdh9	-	protocadherin 9	protein-coding
Diff_Nuc19611	chr15	54906932	54907071	+	0	NA	TTS (NM_183089)	TTS (NM_183089)	-3294	NM_001081288	319944	Mm.380957	NM_001081288	ENSMUSG00000037343	Taf2	150kDa|4732460C16Rik|AI425886|CIF150|TAF2B|TAFII-150|TAFII150	TATA-box binding protein associated factor 2	protein-coding
Diff_Nuc29340	chr7	89643712	89643851	+	0	NA	intron (NM_001190374, intron 8 of 29)	B4A|SINE|B4	153257	NM_177894	330577	Mm.222812	NM_177894	ENSMUSG00000038570	Saxo2	1700129I04Rik|D030069K18|Fam154b	stabilizer of axonemal microtubules 2	protein-coding
Diff_Nuc50969	chr2	160426902	160427041	+	0	NA	Intergenic	B3|SINE|B2	-44662	NM_009408	21969	Mm.217233	NM_009408	ENSMUSG00000070544	Top1	AI467334|D130064I21Rik|Top-1	topoisomerase (DNA) I	protein-coding
Diff_Nuc6931	chr11	27744042	27744181	+	0	NA	Intergenic	L1MC1|LINE|L1	740213	NM_001166661	216613	Mm.93759	NM_181577	ENSMUSG00000032878	Ccdc85a	-	coiled-coil domain containing 85A	protein-coding
Diff_Nuc33623	chr6	99806152	99806291	+	0	NA	Intergenic	ORR1E|LTR|MaLR	-129835	NM_001170419	50501	Mm.87365	NM_015768	ENSMUSG00000030069	Prok2	Bv8|PK2|Prok1	prokineticin 2	protein-coding
Diff_Nuc34865	chr5	5117172	5117311	+	0	NA	intron (NM_011074, intron 6 of 14)	RLTR22_Mur|LTR|ERVK	148827	NM_001310448	18647	Mm.389061	NM_011074	ENSMUSG00000028926	Cdk14	Pftk1|mKIAA0834	cyclin-dependent kinase 14	protein-coding
Diff_Nuc34110	chr6	118828792	118828931	+	0	NA	intron (NM_009781, intron 3 of 46)	Tigger15a|DNA|TcMar	-1315	NR_046053	74363	Mm.399403	NR_046053		4931430N09Rik	-	RIKEN cDNA 4931430N09 gene	ncRNA
Diff_Nuc8989	chr11	95235712	95235851	+	0	NA	intron (NM_172543, intron 3 of 7)	B1_Mur1|SINE|Alu	-10455	NM_016752	110172	Mm.4593	NM_016752	ENSMUSG00000020873	Slc35b1	Ugalt2	solute carrier family 35, member B1	protein-coding
Diff_Nuc6859	chr11	23271612	23271751	+	0	NA	intron (NM_001190401, intron 18 of 79)	B1_Mus2|SINE|Alu	64786	NM_001190401	17847	Mm.119155	NM_001190401	ENSMUSG00000056342	Usp34	A530081C03Rik|Murr2	ubiquitin specific peptidase 34	protein-coding
Diff_Nuc8247	chr11	74543392	74543531	+	0	NA	Intergenic	Intergenic	-5575	NM_013625	18472	Mm.397111	NM_013625	ENSMUSG00000020745	Pafah1b1	LIS-1|Lis1|MMS10-U|Mdsh|Ms10u|Pafaha	platelet-activating factor acetylhydrolase, isoform 1b, subunit 1	protein-coding
Diff_Nuc35970	chr5	44776012	44776151	+	0	NA	Intergenic	Charlie12|DNA|MER1_type	-158236	NM_173764	231225	Mm.30688	NM_173764	ENSMUSG00000046985	Tapt1	4932414K18Rik	transmembrane anterior posterior transformation 1	protein-coding
Diff_Nuc29789	chr7	106259192	106259331	+	0	NA	intron (NM_178635, intron 2 of 14)	intron (NM_178635, intron 2 of 14)	30393	NM_178635	78610	Mm.323072	NM_178635	ENSMUSG00000035354	Uvrag	9530039D02Rik|AI648770|BB124205|Uvrag1|Uvragl	UV radiation resistance associated gene	protein-coding
Diff_Nuc25339	chr18	5551662	5551801	+	0	NA	intron (NR_033552, intron 3 of 6)	L1_Mus3|LINE|L1	-40127	NM_011546	21417	Mm.3929	NM_011546	ENSMUSG00000024238	Zeb1	3110032K11Rik|AREB6|BZP|MEB1|Nil2|TCF-8|Tcf18|Tcf8|Tw|ZEB|Zfhep|Zfhx1a|Zfx1a|Zfx1ha|[delta]EF1	zinc finger E-box binding homeobox 1	protein-coding
Diff_Nuc46786	chr2	11815542	11815681	+	0	NA	Intergenic	RMER1A|Other|Other	116231	NM_177268	320816	Mm.260201	NM_177268	ENSMUSG00000047909	Ankrd16	2810455F06Rik|AI646698|D430029B21Rik	ankyrin repeat domain 16	protein-coding
Diff_Nuc23655	chr14	124108332	124108471	+	0	NA	intron (NM_145467, intron 2 of 10)	L1Md_F2|LINE|L1	49039	NM_145467	223272	Mm.383176	NM_145467	ENSMUSG00000032925	Itgbl1	B930011D01Rik	integrin, beta-like 1	protein-coding
Diff_Nuc6098	chr12	112065732	112065871	+	0	NA	intron (NM_011973, intron 3 of 11)	intron (NM_011973, intron 3 of 11)	13348	NM_011973	26448	Mm.140948	NM_011973	ENSMUSG00000056458	Mok	RAGE1|Rage|Stk30	MOK protein kinase	protein-coding
Diff_Nuc13881	chr17	21146892	21147031	+	0	NA	intron (NM_145483, intron 1 of 4)	intron (NM_145483, intron 1 of 4)	1056	NM_145483	224585	Mm.296036	NM_145483	ENSMUSG00000067942	Zfp160	6720480D16Rik|F11|HKr18|HZF5|KR18|mKIAA1611|mszf47	zinc finger protein 160	protein-coding
Diff_Nuc21114	chr14	14431052	14431191	+	0	NA	intron (NM_001163032, intron 3 of 4)	MTA_Mm-int|LTR|MaLR	-72269	NM_177624	218739	Mm.39919	NM_177624	ENSMUSG00000044772	Sntn	A430083B19Rik	sentan, cilia apical structure protein	protein-coding
Diff_Nuc47846	chr2	49322832	49322971	+	0	NA	intron (NM_172663, intron 1 of 13)	intron (NM_172663, intron 1 of 13)	15895	NM_172663	227867	Mm.29167	NM_172663	ENSMUSG00000069495	Epc2	5830499L14|D2Ertd694e	enhancer of polycomb homolog 2 (Drosophila)	protein-coding
Diff_Nuc10972	chr10	40987592	40987731	+	0	NA	intron (NM_133999, intron 6 of 22)	intron (NM_133999, intron 6 of 22)	35386	NM_133999	103199	Mm.277242	NM_133999	ENSMUSG00000038417	Fig4	A530089I17Rik|AI326867|Sac3	FIG4 phosphoinositide 5-phosphatase	protein-coding
Diff_Nuc20145	chr15	76743582	76743721	+	0	NA	intron (NM_172817, intron 4 of 4)	intron (NM_172817, intron 4 of 4)	9150	NM_012053	26961	Mm.30066	NM_012053	ENSMUSG00000003970	Rpl8	-	ribosomal protein L8	protein-coding
Diff_Nuc58793	chr9	94080312	94080451	+	0	NA	Intergenic	Intergenic	358119	NM_001033145	68861	Mm.258746	NM_001033145	ENSMUSG00000045414	1190002N15Rik	GoPro49|HASF	RIKEN cDNA 1190002N15 gene	protein-coding
Diff_Nuc52225	chr1	33902682	33902821	+	0	NA	Intergenic	Intergenic	-6992	NM_001161816	433287	Mm.383632	NM_001161816		Gm15455	AA692849|OTTMUSG00000022109	predicted gene 15455	protein-coding
Diff_Nuc38049	chr5	125357162	125357301	+	0	NA	intron (NM_001081750, intron 2 of 3)	intron (NM_001081750, intron 2 of 3)	14156	NM_001081750	269704	Mm.138617	NM_001081750	ENSMUSG00000079215	Zfp664	AW060232|D930038J03Rik|ZFOC1|Znf664	zinc finger protein 664	protein-coding
Diff_Nuc26396	chr18	40520942	40521081	+	0	NA	intron (NM_026135, intron 1 of 1)	intron (NM_026135, intron 1 of 1)	102996	NM_026135	383348	Mm.76366	NM_026135	ENSMUSG00000051401	Kctd16	4930434H12Rik|Gm1267	potassium channel tetramerisation domain containing 16	protein-coding
Diff_Nuc60773	chr8	52718712	52718851	+	0	NA	Intergenic	ORR1A2|LTR|MaLR	1265315	NR_046067	100039954	Mm.400419	NR_046067	ENSMUSG00000110281	Gm2516	-	predicted gene 2516	ncRNA
Diff_Nuc30281	chr7	123154582	123154721	+	0	NA	intron (NM_001025559, intron 1 of 15)	MER5A1|DNA|MER1_type	-16051	NM_011445	20679	Mm.323365	NM_011445	ENSMUSG00000051910	Sox6	AI987981|SOX-LZ	SRY (sex determining region Y)-box 6	protein-coding
Diff_Nuc19482	chr15	47319052	47319191	+	0	NA	Intergenic	ORR1A4|LTR|MaLR	864270	NR_045811	75281	Mm.159487	NR_045811	ENSMUSG00000051198	4930548G14Rik	-	RIKEN cDNA 4930548G14 gene	ncRNA
Diff_Nuc10577	chr10	23989522	23989661	+	0	NA	intron (NM_021509, intron 4 of 11)	B4A|SINE|B4	46268	NM_021509	59012	Mm.285934	NM_021509	ENSMUSG00000020000	Moxd1	3230402N08Rik|MNCb-5203	monooxygenase, DBH-like 1	protein-coding
Diff_Nuc49893	chr2	125449962	125450101	+	0	NA	intron (NM_001081091, intron 1 of 27)	intron (NM_001081091, intron 1 of 27)	818	NM_001081091	99100	Mm.330545	NM_001081091	ENSMUSG00000068394	Cep152	AI851464|mKIAA0912	centrosomal protein 152	protein-coding
Diff_Nuc36064	chr5	49240952	49241091	+	0	NA	intron (NM_001199244, intron 1 of 7)	Tigger5|DNA|MER2_type	39775	NM_030265	80334	Mm.160172	NM_030265	ENSMUSG00000029088	Kcnip4	AV032399|Calp|Calp250|KChIP4|KChIP4a	Kv channel interacting protein 4	protein-coding
Diff_Nuc31278	chr6	12102622	12102761	+	0	NA	Intergenic	Lx|LINE|L1	-43111	NR_003631	625347	Mm.389084	NM_001039041	ENSMUSG00000057223	Gm6578	EG625347	mitochondrial ribosomal protein L32 pseudogene	pseudo
Diff_Nuc33454	chr6	92051002	92051141	+	0	NA	intron (NM_001347342, intron 1 of 14)	RSINE1|SINE|B4	8644	NM_001347342	22026	Mm.87062	NM_011630	ENSMUSG00000005893	Nr2c2	TAK1|Tr4|mKIAA4145	nuclear receptor subfamily 2, group C, member 2	protein-coding
Diff_Nuc28214	chr7	35985472	35985611	+	0	NA	TTS (NM_001024707)	TTS (NM_001024707)	14137	NM_017394	53896	Mm.35567	NM_017394	ENSMUSG00000030495	Slc7a10	AL024237|Asc-1|D7Bwg0847e	solute carrier family 7 (cationic amino acid transporter, y+ system), member 10	protein-coding
Diff_Nuc4223	chr12	37660752	37660891	+	0	NA	Intergenic	B4|SINE|B4	118029	NR_039558	100628578		NR_039558	ENSMUSG00000092998	Mir5099	mmu-mir-5099|mu-mir-5099	microRNA 5099	ncRNA
Diff_Nuc1166	chr13	30131112	30131251	+	0	NA	Intergenic	Intergenic	-53249	NM_010093	13557	Mm.268356	NM_010093	ENSMUSG00000016477	E2f3	E2F3b|E2f3a	E2F transcription factor 3	protein-coding
Diff_Nuc36172	chr5	53206202	53206341	+	0	NA	intron (NM_001308144, intron 8 of 12)	MER5A|DNA|MER1_type	-19103	NM_024213	52206	Mm.272568	NM_024213	ENSMUSG00000029176	Anapc4	2610306D21Rik|APC4|D5Ertd249e	anaphase promoting complex subunit 4	protein-coding
Diff_Nuc52388	chr1	38372682	38372821	+	0	NA	intron (NM_001290814, intron 8 of 21)	B3A|SINE|B2	-186244	NM_019570	56210	Mm.389103	NM_019570	ENSMUSG00000026082	Rev1	1110027I23Rik|AU022044|Rev1l	REV1, DNA directed polymerase	protein-coding
Diff_Nuc917	chr13	20707162	20707301	+	0	NA	Intergenic	Intergenic	142372	NM_198093	140580	Mm.342392	NM_080288	ENSMUSG00000041112	Elmo1	6330578D22Rik|C230095H21Rik|CED-12	engulfment and cell motility 1	protein-coding
Diff_Nuc51747	chr1	13416402	13416541	+	0	NA	Intergenic	Intergenic	-52307	NM_008678	17978	Mm.2537	NM_008678	ENSMUSG00000005886	Ncoa2	D1Ertd433e|GRIP-1|Grip1|KAT13C|NCoA-2|SRC-2|TIF2|bHLHe75	nuclear receptor coactivator 2	protein-coding
Diff_Nuc33273	chr6	86387322	86387461	+	0	NA	Intergenic	Intergenic	-1001	NM_146170	232196	Mm.404040	NM_146170	ENSMUSG00000046679	C87436	-	expressed sequence C87436	protein-coding
Diff_Nuc59732	chr8	5677242	5677381	+	0	NA	Intergenic	CT-rich|Low_complexity|Low_complexity	-572024	NM_011388	20494	Mm.3500	NM_011388	ENSMUSG00000023073	Slc10a2	9130221J18Rik|AI605518|ASBT|IBAT|ISBT	solute carrier family 10, member 2	protein-coding
Diff_Nuc44624	chr3	80607742	80607881	+	0	NA	Intergenic	Intergenic	-1098	NM_001039195	14800	Mm.220224	NM_013540	ENSMUSG00000033981	Gria2	GluA2|GluR-B|Glur-2|Glur2	glutamate receptor, ionotropic, AMPA2 (alpha 2)	protein-coding
Diff_Nuc5145	chr12	78586712	78586851	+	0	NA	Intergenic	Intergenic	75653	NM_001252616	53618	Mm.35628	NM_016893	ENSMUSG00000021065	Fut8	-	fucosyltransferase 8	protein-coding
Diff_Nuc5804	chr12	101199282	101199421	+	0	NA	Intergenic	Lx8|LINE|L1	-3358	NM_001164426	217826	Mm.312335	NM_146037	ENSMUSG00000045404	Kcnk13	BB085247|F730021E22Rik|Gm1570|Gm1685	potassium channel, subfamily K, member 13	protein-coding
Diff_Nuc45616	chr3	117654842	117654981	+	0	NA	Intergenic	ID_B1|SINE|B4	-83057	NM_029655	76561	Mm.33824	NM_029655	ENSMUSG00000028007	Snx7	2510028H01Rik	sorting nexin 7	protein-coding
Diff_Nuc21311	chr14	21552842	21552981	+	0	NA	intron (NM_010811, intron 1 of 14)	intron (NM_010811, intron 1 of 14)	873	NM_010811	17423	Mm.4084	NM_010811	ENSMUSG00000039308	Ndst2	Mndns|NDST-2	N-deacetylase/N-sulfotransferase (heparan glucosaminyl) 2	protein-coding
Diff_Nuc55476	chr1	172300662	172300801	+	0	NA	intron (NM_027528, intron 4 of 7)	MTE2b|LTR|MaLR	61739	NM_001039593	76925	Mm.33631	NM_001039593	ENSMUSG00000042800	1700015E13Rik	-	RIKEN cDNA 1700015E13 gene	protein-coding
Diff_Nuc28610	chr7	58595562	58595701	+	0	NA	Intergenic	Intergenic	-170768	NR_073508	233246	Mm.254431	NM_177694	ENSMUSG00000055489	Ano5	9330162L24|Gdd1|Tmem16e	anoctamin 5	protein-coding
Diff_Nuc8255	chr11	74799092	74799231	+	0	NA	intron (NM_001002764, intron 9 of 18)	intron (NM_001002764, intron 9 of 18)	59787	NM_001002764	103677	Mm.288460	NM_001002764	ENSMUSG00000038290	Smg6	AI317223|AU041178	Smg-6 homolog, nonsense mediated mRNA decay factor (C. elegans)	protein-coding
Diff_Nuc36271	chr5	58668702	58668841	+	0	NA	Intergenic	Lx3C|LINE|L1	175466	NR_046190	78163	Mm.243828	NR_046190	ENSMUSG00000105234	4930459L07Rik	-	RIKEN cDNA 4930459L07 gene	ncRNA
Diff_Nuc44239	chr3	63000842	63000981	+	0	NA	Intergenic	Intergenic	-98446	NM_001289462	17380	Mm.296022	NM_008604	ENSMUSG00000027820	Mme	6030454K05Rik|C85356|CALLA|CD10|NEP|SFE	membrane metallo endopeptidase	protein-coding
Diff_Nuc54129	chr1	114453272	114453411	+	0	NA	Intergenic	L1Md_A|LINE|L1	-691846	NM_001081316	319901	Mm.103468	NM_001081316	ENSMUSG00000038702	Dsel	9330132E09Rik|DS-epi2	dermatan sulfate epimerase-like	protein-coding
Diff_Nuc25210	chr19	57466892	57467031	+	0	NA	Intergenic	Lx7|LINE|L1	31462	NM_145505	226252	Mm.358870	NM_145505	ENSMUSG00000033478	Fam160b1	AI450540|mKIAA1600	family with sequence similarity 160, member B1	protein-coding
Diff_Nuc3295	chr13	112707942	112708081	+	0	NA	Intergenic	MTD|LTR|MaLR	49867	NR_130345	102636620	Mm.402328	NR_130345	ENSMUSG00000086111	Gm15326	OTTMUSG00000020187	predicted gene 15326	ncRNA
Diff_Nuc35825	chr5	39011832	39011971	+	0	NA	Intergenic	Intergenic	-59067	NM_011715	22388	Mm.2654	NM_011715	ENSMUSG00000005103	Wdr1	Aip1|D5Wsu185e|rede	WD repeat domain 1	protein-coding
Diff_Nuc35908	chr5	42225682	42225821	+	0	NA	intron (NM_001310601, intron 2 of 25)	intron (NM_001310601, intron 2 of 25)	9803	NM_001310601	665775	Mm.158726	NM_001081422	ENSMUSG00000061755	Bod1l	A230054D04Rik|AI853319|FAM44A|mKIAA1327	biorientation of chromosomes in cell division 1-like	protein-coding
Diff_Nuc9203	chr11	100720052	100720191	+	0	NA	promoter-TSS (NM_011488)	promoter-TSS (NM_011488)	-544	NM_011488	20850	Mm.277403	NM_011488	ENSMUSG00000004043	Stat5a	AA959963|STAT5	signal transducer and activator of transcription 5A	protein-coding
Diff_Nuc46585	chr3	158795462	158795601	+	0	NA	intron (NR_040750, intron 2 of 4)	intron (NR_040750, intron 2 of 4)	56203	NR_040750	624759	Mm.491054	NR_040750	ENSMUSG00000106053	Gm20752	-	predicted gene, 20752	ncRNA
Diff_Nuc31729	chr6	29567432	29567571	+	0	NA	Intergenic	RMER4B|LTR|ERVK	-7388	NM_001347079	320938	Mm.276381	NM_177296	ENSMUSG00000012535	Tnpo3	5730544L10Rik|C430013M08Rik|C81142|D6Ertd313e|Trn-SR|mKIAA4133	transportin 3	protein-coding
Diff_Nuc21408	chr14	25875652	25875791	+	0	NA	Intergenic	Intergenic	87006	NR_045718	75862	Mm.109191	NR_045718		4930572O13Rik	-	RIKEN cDNA 4930572O13 gene	ncRNA
Diff_Nuc22963	chr14	90201222	90201361	+	0	NA	Intergenic	RMER6C|LTR|ERVK	-94740	NR_002862	328451	Mm.320571	NR_002862		Gm5088	EG328451|Pabpc4l	poly(A)-binding protein, cytoplasmic pseudogene	pseudo
Diff_Nuc50414	chr2	142211292	142211431	+	0	NA	intron (NM_001013802, intron 18 of 18)	intron (NM_001013802, intron 18 of 18)	515839	NM_001081133	16558	Mm.251934	NM_001081133	ENSMUSG00000038844	Kif16b	8430434E15Rik|AA623607|AI789011|C80253|C80902|mKIAA1590	kinesin family member 16B	protein-coding
Diff_Nuc39443	chr4	28275462	28275601	+	0	NA	Intergenic	L1_Mur2|LINE|L1	-464750	NM_001290434	13841	Mm.257266	NM_010141	ENSMUSG00000028289	Epha7	Cek11|Ebk|Ehk3|Hek11|Mdk1	Eph receptor A7	protein-coding
Diff_Nuc21109	chr14	14291002	14291141	+	0	NA	intron (NM_001163032, intron 1 of 4)	intron (NM_001163032, intron 1 of 4)	4599	NM_001163032	72003	Mm.317515	NM_028052	ENSMUSG00000056296	Synpr	1500003F20Rik|SPO	synaptoporin	protein-coding
Diff_Nuc1513	chr13	43082392	43082531	+	0	NA	intron (NM_001302636, intron 2 of 12)	B4A|SINE|B4	120845	NM_001302636	218194	Mm.160124	NM_198419	ENSMUSG00000054728	Phactr1	9630030F18Rik|Rpel1	phosphatase and actin regulator 1	protein-coding
Diff_Nuc61394	chr8	81729502	81729641	+	0	NA	Intergenic	Intergenic	42911	NM_026315	67687	Mm.178707	NM_026315	ENSMUSG00000031682	1700011L22Rik	-	RIKEN cDNA 1700011L22 gene	protein-coding
Diff_Nuc25542	chr18	12930462	12930601	+	0	NA	intron (NM_207530, intron 18 of 27)	MER57E1|LTR|ERV1	30667	NM_027687	71132	Mm.179740	NM_027687	ENSMUSG00000024430	Cabyr	1700016C01Rik|4933421A18Rik|CBP86|FSP-2	calcium-binding tyrosine-(Y)-phosphorylation regulated (fibrousheathin 2)	protein-coding
Diff_Nuc18003	chr16	84457572	84457711	+	0	NA	Intergenic	Intergenic	86253	NR_040567	75247	Mm.417813	NR_040567		4930553E22Rik	-	RIKEN cDNA 4930553E22 gene	ncRNA
Diff_Nuc37087	chr5	95671882	95672021	+	0	NA	Intergenic	L1Md_F2|LINE|L1	60297	NM_001031622	545762	Mm.425309	NM_001031622	ENSMUSG00000096550	Gm16367	-	predicted gene 16367	protein-coding
Diff_Nuc10994	chr10	41601152	41601291	+	0	NA	intron (NM_001162908, intron 1 of 9)	intron (NM_001162908, intron 1 of 9)	-6024	NM_001013370	140742	Mm.139418	NM_001013370	ENSMUSG00000038332	Sesn1	1110002G11Rik|AU044290|Pa26|Sest1	sestrin 1	protein-coding
Diff_Nuc37919	chr5	122621382	122621521	+	0	NA	intron (NM_013636, intron 3 of 6)	intron (NM_013636, intron 3 of 6)	13163	NM_013636	19047	Mm.280784	NM_013636	ENSMUSG00000004455	Ppp1cc	PP-1G|PP1|dis2m1	protein phosphatase 1, catalytic subunit, gamma isoform	protein-coding
Diff_Nuc19388	chr15	42202082	42202221	+	0	NA	Intergenic	Intergenic	306372	NM_001286062	11600	Mm.309336	NM_009640	ENSMUSG00000022309	Angpt1	1110046O21Rik|Ang-1|Ang1	angiopoietin 1	protein-coding
Diff_Nuc118	chrX	36184402	36184541	+	0	NA	intron (NM_183126, intron 1 of 3)	Lx|LINE|L1	58514	NM_183126	77883	Mm.113311	NM_183126	ENSMUSG00000051361	6030498E09Rik	-	RIKEN cDNA 6030498E09 gene	protein-coding
Diff_Nuc14018	chr17	25219132	25219271	+	0	NA	intron (NM_134126, intron 18 of 29)	intron (NM_134126, intron 18 of 29)	-1142	NM_001001183	407831	Mm.34379	NM_001001183	ENSMUSG00000024168	Tmem204	-	transmembrane protein 204	protein-coding
Diff_Nuc30211	chr7	120510942	120511081	+	0	NA	intron (NM_133700, intron 2 of 10)	Charlie8|DNA|MER1_type	1842	NM_133700	68815	Mm.238034	NM_133700	ENSMUSG00000038187	Btbd10	1110056N09Rik|Gmrp1	BTB (POZ) domain containing 10	protein-coding
Diff_Nuc12556	chr10	97705752	97705891	+	0	NA	Intergenic	L1Md_F2|LINE|L1	108680	NR_045179	667438	Mm.414522	NR_045179		Gm8633	EG667438	predicted gene 8633	ncRNA
Diff_Nuc22746	chr14	78033872	78034011	+	0	NA	intron (NM_001253759, intron 14 of 19)	intron (NM_001253759, intron 14 of 19)	-127266	NR_033141	629678	Mm.390721	NM_001037935	ENSMUSG00000067973	Gm6994	EG629678	predicted gene 6994	ncRNA
Diff_Nuc45502	chr3	111934192	111934331	+	0	NA	Intergenic	Intergenic	249440	NR_045362	625585	Mm.389497	NR_045362	ENSMUSG00000104543	Gm6602	-	predicted gene 6602	ncRNA
Diff_Nuc58094	chr9	67935912	67936051	+	0	NA	Intergenic	Intergenic	-62460	NR_045745	434412	Mm.490707	NR_045745	ENSMUSG00000111841	Gm20745	-	predicted gene, 20745	ncRNA
Diff_Nuc37580	chr5	111476372	111476511	+	0	NA	intron (NM_001267622, intron 2 of 23)	intron (NM_001267622, intron 2 of 23)	43278	NR_030482	735278		NR_030482	ENSMUSG00000076163	Mir701	Mirn701|mir-701|mmu-mir-701	microRNA 701	ncRNA
Diff_Nuc30695	chr7	137717782	137717921	+	0	NA	Intergenic	Intergenic	-3147	NM_001004468	57752	Mm.86322	NM_021314	ENSMUSG00000030852	Tacc2	mKIAA4180	transforming, acidic coiled-coil containing protein 2	protein-coding
Diff_Nuc22247	chr14	59703142	59703281	+	0	NA	Intergenic	Intergenic	58519	NM_026461	67932	Mm.65550	NM_026461	ENSMUSG00000021977	1700129C05Rik	-	RIKEN cDNA 1700129C05 gene	protein-coding
Diff_Nuc35032	chr5	13704142	13704281	+	0	NA	Intergenic	Intergenic	-87408	NM_027650	71026	Mm.158536	NM_027650	ENSMUSG00000067855	Speer3	4933405P08Rik|SPEER-3	spermatogenesis associated glutamate (E)-rich protein 3	protein-coding
Diff_Nuc33895	chr6	113004802	113004941	+	0	NA	intron (NM_008188, intron 3 of 9)	intron (NM_008188, intron 3 of 9)	8550	NM_008188	14911	Mm.781	NM_008188	ENSMUSG00000030264	Thumpd3	AW556087|Gt(ROSA)26asSor|Gtrosa26as	THUMP domain containing 3	protein-coding
Diff_Nuc14259	chr17	30609102	30609241	+	0	NA	intron (NM_172618, intron 6 of 11)	ID4|SINE|ID	-76046	NR_030688	623169	Mm.440508	NR_030688		Gm6402	EG623169	ribosomal protein S17 pseudogene	pseudo
Diff_Nuc7580	chr11	51632092	51632231	+	0	NA	intron (NM_199299, intron 10 of 11)	intron (NM_199299, intron 10 of 11)	38822	NM_199299	76901	Mm.259996	NM_199299	ENSMUSG00000020387	Jade2	1200017K05Rik|AI480685|Phf15|mKIAA0239	jade family PHD finger 2	protein-coding
Diff_Nuc32275	chr6	47233542	47233681	+	0	NA	intron (NM_001004357, intron 22 of 23)	intron (NM_001004357, intron 22 of 23)	39216	NM_025771	66797	Mm.440084	NM_025771	ENSMUSG00000039419	Cntnap2	5430425M22Rik|Caspr2|mKIAA0868	contactin associated protein-like 2	protein-coding
Diff_Nuc23614	chr14	123173412	123173551	+	0	NA	intron (NM_144844, intron 19 of 23)	L1Md_T|LINE|L1	138906	NM_145466	223267	Mm.379358	NM_145466	ENSMUSG00000041625	Ggact	A2ld1	gamma-glutamylamine cyclotransferase	protein-coding
Diff_Nuc16795	chr16	32113492	32113631	+	0	NA	Intergenic	Intergenic	13673	NM_025892	66994	Mm.22990	NM_025892	ENSMUSG00000035790	Cep19	1500031L02Rik|AI428934|AL022620	centrosomal protein 19	protein-coding
Diff_Nuc32149	chr6	43456972	43457111	+	0	NA	intron (NM_013861, intron 5 of 8)	L1_Mus3|LINE|L1	64613	NR_045988	319812	Mm.446393	NR_045988		9430018G01Rik	-	RIKEN cDNA 9430018G01 gene	ncRNA
Diff_Nuc8523	chr11	81869742	81869881	+	0	NA	Intergenic	Intergenic	-1523	NM_011330	20292	Mm.4686	NM_011330	ENSMUSG00000020676	Ccl11	Scya11|eotaxin	chemokine (C-C motif) ligand 11	protein-coding
Diff_Nuc29029	chr7	76644872	76645011	+	0	NA	TTS (NR_045940)	TTS (NR_045940)	3961	NR_045940	73796	Mm.410832	NR_045940	ENSMUSG00000108885	4930402F11Rik	-	RIKEN cDNA 4930402F11 gene	ncRNA
Diff_Nuc2351	chr13	74494192	74494331	+	0	NA	exon (NM_001168659, exon 3 of 3)	exon (NM_001168659, exon 3 of 3)	6496	NM_001168658	67433	Mm.101586	NM_024201	ENSMUSG00000021578	Ccdc127	0610011N22Rik|5430420E17Rik|A430066A18|AI256405|AW050060|C130002N06	coiled-coil domain containing 127	protein-coding
Diff_Nuc59263	chr9	108554122	108554261	+	0	NA	Intergenic	Intergenic	-2480	NM_011790	23807	Mm.290447	NM_011790	ENSMUSG00000064145	Arih2	AI843547|ARI2|TRIAD1|UIP48	ariadne RBR E3 ubiquitin protein ligase 2	protein-coding
Diff_Nuc42498	chr4	141636502	141636641	+	0	NA	intron (NM_145402, intron 1 of 2)	RSINE1|SINE|B4	-3642	NR_027137	100038693	Mm.402714	NR_027137	ENSMUSG00000073728	Tmem51os1	ENSMUSG00000073728|Gm10565|Tmem51as1	Tmem51 opposite strand 1	ncRNA
Diff_Nuc61585	chr8	87808362	87808501	+	0	NA	intron (NM_022997, intron 5 of 16)	U6|snRNA|snRNA	14965	NM_022997	65114	Mm.296520	NM_022997	ENSMUSG00000031696	Vps35	AI647796|Mem3	VPS35 retromer complex component	protein-coding
Diff_Nuc40309	chr4	65142692	65142831	+	0	NA	intron (NM_207109, intron 19 of 22)	intron (NM_207109, intron 19 of 22)	-123259	NM_053084	69807	Mm.22786	NM_053084	ENSMUSG00000051675	Trim32	1810045E12Rik|3f3|BBS11|Zfp117	tripartite motif-containing 32	protein-coding
Diff_Nuc2821	chr13	95301302	95301441	+	0	NA	intron (NM_009680, intron 23 of 26)	intron (NM_009680, intron 23 of 26)	172456	NM_009680	11774	Mm.21185	NM_009680	ENSMUSG00000021686	Ap3b1	AP-3|AU015684|C78395|Hps2|beta3A|pe|pearl|rim2	adaptor-related protein complex 3, beta 1 subunit	protein-coding
Diff_Nuc48651	chr2	80167952	80168091	+	0	NA	intron (NM_024181, intron 8 of 22)	intron (NM_024181, intron 8 of 22)	12398	NM_024181	66861	Mm.21762	NM_024181	ENSMUSG00000027006	Dnajc10	1200006L06Rik|D2Ertd706e|ERdj5|JPDI	DnaJ heat shock protein family (Hsp40) member C10	protein-coding
Diff_Nuc11586	chr10	64532642	64532781	+	0	NA	Intergenic	MTD|LTR|MaLR	-979708	NM_178678	216028	Mm.431318	NM_178678	ENSMUSG00000042846	Lrrtm3	9630044H04Rik	leucine rich repeat transmembrane neuronal 3	protein-coding
Diff_Nuc53239	chr1	73859922	73860061	+	0	NA	intron (NR_045311, intron 6 of 8)	L1Md_T|LINE|L1	42158	NR_105769	102465179		NR_105769	ENSMUSG00000098504	Mir6351	Gm27936|mmu-mir-6351	microRNA 6351	ncRNA
Diff_Nuc41587	chr4	115358982	115359121	+	0	NA	Intergenic	Intergenic	-38741	NM_007823	13120	Mm.1840	NM_007823	ENSMUSG00000028713	Cyp4b1	-	cytochrome P450, family 4, subfamily b, polypeptide 1	protein-coding
Diff_Nuc26277	chr18	38044852	38044991	+	0	NA	intron (NM_001305980, intron 17 of 27)	intron (NM_001305980, intron 17 of 27)	-30607	NR_105945	102465592		NR_105945	ENSMUSG00000098706	Mir6979	Gm27524|mmu-mir-6979	microRNA 6979	ncRNA
Diff_Nuc23841	chr19	5917492	5917631	+	0	NA	TTS (NM_026772)	TTS (NM_026772)	-4690	NM_001291078	19708	Mm.2651	NM_011262	ENSMUSG00000024826	Dpf2	2210010M07Rik|BAF45D|Req|ubi-d4	D4, zinc and double PHD fingers family 2	protein-coding
Diff_Nuc29714	chr7	104466662	104466801	+	0	NA	intron (NM_001177412, intron 5 of 9)	intron (NM_001177412, intron 5 of 9)	7743	NM_001177412	244144	Mm.297541	NM_001177412	ENSMUSG00000035713	Usp35	Gm1088|Gm493	ubiquitin specific peptidase 35	protein-coding
Diff_Nuc59817	chr8	9651072	9651211	+	0	NA	intron (NM_001347127, intron 1 of 3)	intron (NM_001347127, intron 1 of 3)	119882	NM_173446	270028	Mm.268163	NM_173446	ENSMUSG00000079157	Fam155a	6430500D16|AW121567|Tmem28	family with sequence similarity 155, member A	protein-coding
Diff_Nuc7738	chr11	57023632	57023771	+	0	NA	intron (NM_001252403, intron 5 of 15)	ORR1B1|LTR|MaLR	197153	NM_001252403	14799	Mm.4920	NM_008165	ENSMUSG00000020524	Gria1	2900051M01Rik|Glr-1|Glr1|GluA1|GluR-A|GluRA|Glur-1|Glur1|HIPA1|gluR-K1	glutamate receptor, ionotropic, AMPA1 (alpha 1)	protein-coding
Diff_Nuc39646	chr4	36955382	36955521	+	0	NA	Intergenic	Intergenic	-56674	NM_001165999	242384	Mm.132507	NM_175516	ENSMUSG00000045083	Lingo2	B230217C06Rik|Lern3|Lrrn6c	leucine rich repeat and Ig domain containing 2	protein-coding
Diff_Nuc41134	chr4	100615652	100615791	+	0	NA	intron (NM_198037, intron 4 of 26)	intron (NM_198037, intron 4 of 26)	-125922	NM_183024	242570	Mm.185636	NM_183024	ENSMUSG00000035275	Raver2	A430091O22Rik	ribonucleoprotein, PTB-binding 2	protein-coding
Diff_Nuc43282	chr3	20876732	20876871	+	0	NA	Intergenic	Intergenic	-610702	NM_175086	11608	Mm.134863	NM_175086	ENSMUSG00000054988	Agtr1b	AT1B|AT2R1B|Agtr-1b|Angtr-1b	angiotensin II receptor, type 1b	protein-coding
Diff_Nuc59010	chr9	101177842	101177981	+	0	NA	Intergenic	G-rich|Low_complexity|Low_complexity	-23749	NM_001161362	235542	Mm.335386	NM_172144	ENSMUSG00000043154	Ppp2r3a	3222402P14Rik|A730042E07	protein phosphatase 2, regulatory subunit B'', alpha	protein-coding
Diff_Nuc9387	chr11	104540782	104540921	+	0	NA	Intergenic	Intergenic	71537	NM_016780	16416	Mm.87150	NM_016780	ENSMUSG00000020689	Itgb3	CD61|GP3A|INGRB3	integrin beta 3	protein-coding
Diff_Nuc34954	chr5	9205432	9205571	+	0	NA	Intergenic	Lx8|LINE|L1	-43725	NM_011806	23857	Mm.22480	NM_011806	ENSMUSG00000042508	Dmtf1	Dimp|Dmp1	cyclin D binding myb-like transcription factor 1	protein-coding
Diff_Nuc28996	chr7	75196072	75196211	+	0	NA	intron (NM_010513, intron 2 of 20)	intron (NM_010513, intron 2 of 20)	98998	NM_010513	16001	Mm.275742	NM_010513	ENSMUSG00000005533	Igf1r	A330103N21Rik|CD221|D930020L01|IGF-1R|hyft	insulin-like growth factor I receptor	protein-coding
Diff_Nuc33234	chr6	85130952	85131091	+	0	NA	Intergenic	Intergenic	-6904	NM_010131	13796	Mm.391473	NM_010131	ENSMUSG00000033726	Emx1	-	empty spiracles homeobox 1	protein-coding
Diff_Nuc46806	chr2	12426402	12426541	+	0	NA	Intergenic	Intergenic	-85384	NM_024185	66960	Mm.34059	NM_024185	ENSMUSG00000026767	Fam188a	1810041E18Rik|2310047O13Rik|5830410F13Rik|AI447827|AW111958	family with sequence similarity 188, member A	protein-coding
Diff_Nuc4144	chr12	34551667	34551806	+	0	NA	Intergenic	Intergenic	-61554	NM_033522	114712	Mm.204643	NM_033522	ENSMUSG00000046518	Ferd3l	Mnato3|N-twist|Nato|Nato3|Ntwist|Ptfb|bHLHa31|fer3	Fer3-like (Drosophila)	protein-coding
Diff_Nuc281	chrX	96036192	96036331	+	0	NA	intron (NM_001313754, intron 3 of 25)	intron (NM_001313754, intron 3 of 25)	50103	NM_052976	94190	Mm.33536	NM_052976	ENSMUSG00000031214	Ophn1	C130037N19Rik|Wtgr	oligophrenin 1	protein-coding
Diff_Nuc23116	chr14	98450132	98450271	+	0	NA	intron (NM_007826, intron 1 of 11)	intron (NM_007826, intron 1 of 11)	118783	NM_001038610	13134	Mm.320593	NM_007826	ENSMUSG00000055639	Dach1	Dac|Dach	dachshund 1 (Drosophila)	protein-coding
Diff_Nuc10546	chr10	22109772	22109911	+	0	NA	Intergenic	Intergenic	-12778	NR_028580	100038752	Mm.392859	NR_028580	ENSMUSG00000096937	Gm10825	ENSMUSG00000075295	predicted gene 10825	ncRNA
Diff_Nuc54852	chr1	149863392	149863531	+	0	NA	Intergenic	L1_Mur1|LINE|L1	1518644	NM_001145807	215378	Mm.441817	NM_153539	ENSMUSG00000035131	Brinp3	B830045N13Rik|Fam5c	bone morphogenetic protein/retinoic acid inducible neural specific 3	protein-coding
Diff_Nuc45027	chr3	95295862	95296001	+	0	NA	intron (NM_009709, intron 18 of 20)	intron (NM_009709, intron 18 of 20)	-7201	NM_007802	13038	Mm.272085	NM_007802	ENSMUSG00000028111	Ctsk	AI323530|MMS10-Q|Ms10q|catK	cathepsin K	protein-coding
Diff_Nuc23595	chr14	122797672	122797811	+	0	NA	intron (NR_033326, intron 1 of 3)	L1MB2|LINE|L1	52596	NR_033325	328479	Mm.86095	NR_033325	ENSMUSG00000064052	Gm5089	6530402A20|C030005G22Rik|EG328479	predicted gene 5089	ncRNA
Diff_Nuc3909	chr12	23126122	23126261	+	0	NA	Intergenic	Lx4B|LINE|L1	135494	NR_015504	69732	Mm.391403	NM_028362	ENSMUSG00000073164	2410018L13Rik	2810480C08Rik	RIKEN cDNA 2410018L13 gene	ncRNA
Diff_Nuc61008	chr8	67098732	67098871	+	0	NA	intron (NM_013494, intron 1 of 8)	MTD|LTR|MaLR	73105	NM_013494	12876	Mm.31395	NM_013494	ENSMUSG00000037852	Cpe	CPH|Cph-1|Cph1|R74677|fat	carboxypeptidase E	protein-coding
Diff_Nuc58320	chr9	75193432	75193571	+	0	NA	non-coding (NR_073186, exon 12 of 12)	non-coding (NR_073186, exon 12 of 12)	-2064	NM_013479	12049	Mm.25988	NM_013479	ENSMUSG00000032191	Bcl2l10	AA420380|AU023065|Boo|C85687|Diva	Bcl2-like 10	protein-coding
Diff_Nuc62041	chr8	107992212	107992351	+	0	NA	intron (NM_026481, intron 2 of 3)	intron (NM_026481, intron 2 of 3)	3041	NM_026481	67971	Mm.29358	NM_026481	ENSMUSG00000014846	Tppp3	2700055K07Rik|CGI-38|Ceacam9|mmCGM8	tubulin polymerization-promoting protein family member 3	protein-coding
Diff_Nuc59604	chr9	121650992	121651131	+	0	NA	intron (NM_010918, intron 8 of 16)	L2|LINE|L2	18000	NR_033503	320301	Mm.373883	NR_033503		E530011L22Rik	-	RIKEN cDNA E530011L22 gene	ncRNA
Diff_Nuc32938	chr6	72544712	72544851	+	0	NA	exon (NM_001253692, exon 2 of 12)	exon (NM_001253692, exon 2 of 12)	3626	NM_144917	232089	Mm.167232	NM_144917	ENSMUSG00000056698	Elmod3	AI844780|C330008I15Rik|RBM29|Rbed1	ELMO/CED-12 domain containing 3	protein-coding
Diff_Nuc23606	chr14	122968202	122968341	+	0	NA	intron (NM_144844, intron 4 of 23)	(CCTA)n|Simple_repeat|Simple_repeat	34721	NM_144844	110821	Mm.23876	NM_144844	ENSMUSG00000041650	Pcca	C79630	propionyl-Coenzyme A carboxylase, alpha polypeptide	protein-coding
Diff_Nuc19936	chr15	69945422	69945561	+	0	NA	Intergenic	Lx6|LINE|L1	190828	NR_045071	100503580	Mm.404646	NR_045071		Gm19782	-	predicted gene, 19782	ncRNA
Diff_Nuc13047	chr10	116295812	116295951	+	0	NA	intron (NM_001033333, intron 2 of 24)	intron (NM_001033333, intron 2 of 24)	38054	NM_001033333	237558	Mm.336386	NM_001033333	ENSMUSG00000034057	Myrfl	Gm239	myelin regulatory factor-like	protein-coding
Diff_Nuc40303	chr4	65014212	65014351	+	0	NA	3' UTR (NM_021362, exon 22 of 22)	3' UTR (NM_021362, exon 22 of 22)	229073	NM_021362	18491	Mm.317854	NM_021362	ENSMUSG00000028370	Pappa	8430414N03Rik|IGFBP-4ase|PAG1|PAPP-A	pregnancy-associated plasma protein A	protein-coding
Diff_Nuc27434	chr18	85018992	85019131	+	0	NA	Intergenic	Intergenic	-1745	NM_025797	109672	Mm.31018	NM_025797	ENSMUSG00000024646	Cyb5a	0610009N12Rik|Cyb5	cytochrome b5 type A (microsomal)	protein-coding
Diff_Nuc41065	chr4	98292072	98292211	+	0	NA	intron (NM_001005787, intron 5 of 15)	B1_Mur1|SINE|Alu	78816	NM_001005787	12695	Mm.90218	NM_007704	ENSMUSG00000061859	Patj	Cipp|Inadl	PATJ, crumbs cell polarity complex component	protein-coding
Diff_Nuc19933	chr15	69645322	69645461	+	0	NA	Intergenic	L1M5|LINE|L1	-109272	NR_045071	100503580	Mm.404646	NR_045071		Gm19782	-	predicted gene, 19782	ncRNA
Diff_Nuc45170	chr3	99997432	99997571	+	0	NA	intron (NM_010269, intron 10 of 13)	intron (NM_010269, intron 10 of 13)	31115	NR_104341	14547	Mm.279228	NM_010269	ENSMUSG00000027865	Gdap2	C77050|D3Ertd801e	ganglioside-induced differentiation-associated-protein 2	protein-coding
Diff_Nuc38414	chr5	136771162	136771301	+	0	NA	intron (NM_009986, intron 20 of 23)	intron (NM_009986, intron 20 of 23)	-50421	NM_018825	23921	Mm.425294	NM_018825	ENSMUSG00000005057	Sh2b2	Aps	SH2B adaptor protein 2	protein-coding
Diff_Nuc33422	chr6	91044982	91045121	+	0	NA	intron (NM_018815, intron 3 of 39)	intron (NM_018815, intron 3 of 39)	21769	NM_018815	54563	Mm.28162	NM_018815	ENSMUSG00000030091	Nup210	9830001L10|AI836801|Pom210|gp190|gp210	nucleoporin 210	protein-coding
Diff_Nuc32401	chr6	50520622	50520761	+	0	NA	intron (NR_027892, intron 1 of 2)	intron (NR_027892, intron 1 of 2)	-1706	NR_105790	102465193		NR_105790	ENSMUSG00000099221	Mir6371	Gm27376|mmu-mir-6371	microRNA 6371	ncRNA
Diff_Nuc30921	chr7	147296822	147296961	+	0	NA	intron (NM_053119, intron 4 of 7)	intron (NM_053119, intron 4 of 7)	5431	NM_053119	93747	Mm.24452	NM_053119	ENSMUSG00000025465	Echs1	C80529	enoyl Coenzyme A hydratase, short chain, 1, mitochondrial	protein-coding
Diff_Nuc7634	chr11	53337112	53337251	+	0	NA	intron (NM_001347496, intron 1 of 9)	intron (NM_001347496, intron 1 of 9)	3943	NM_001347496	20362	Mm.274399	NM_033144	ENSMUSG00000018398	Sept8	AW046166|Sepl	septin 8	protein-coding
Diff_Nuc30166	chr7	119359242	119359381	+	0	NA	Intergenic	RSINE1|SINE|B4	-10039	NM_177282	320878	Mm.52312	NM_177282	ENSMUSG00000038244	Mical2	5330438E18Rik|9530064J02|MICAL-2|mKIAA0750	microtubule associated monooxygenase, calponin and LIM domain containing 2	protein-coding
Diff_Nuc52268	chr1	34735902	34736041	+	0	NA	Intergenic	Intergenic	-42916	NR_033627	241051	Mm.282827	NR_033627		AA619741	-	PHD finger protein 19 pseudogene	pseudo
Diff_Nuc36671	chr5	75169552	75169691	+	0	NA	Intergenic	Intergenic	-70693	NM_001159577	16924	Mm.440403	NM_010727	ENSMUSG00000029228	Lnx1	Lnx	ligand of numb-protein X 1	protein-coding
Diff_Nuc4083	chr12	32332302	32332441	+	0	NA	intron (NM_028002, intron 3 of 6)	intron (NM_028002, intron 3 of 6)	7320	NM_028002	71916	Mm.62979	NM_028002	ENSMUSG00000020648	Dus4l	2310069P03Rik|2700089B10Rik|AI482040|Pp35	dihydrouridine synthase 4-like (S. cerevisiae)	protein-coding
Diff_Nuc11215	chr10	50138622	50138761	+	0	NA	Intergenic	RLTR13C2|LTR|ERVK	-173784	NM_198007	77987	Mm.222497	NM_198007	ENSMUSG00000038774	Ascc3	ASC1p200|B630009I04Rik|BC023451|D430001L07Rik|D630041L21|Helic1|RNAH	activating signal cointegrator 1 complex subunit 3	protein-coding
Diff_Nuc50637	chr2	150619732	150619871	+	0	NA	intron (NM_153781, intron 1 of 19)	B3A|SINE|B2	7269	NM_153781	110078	Mm.222584	NM_153781	ENSMUSG00000033059	Pygb	-	brain glycogen phosphorylase	protein-coding
Diff_Nuc53893	chr1	101560122	101560261	+	0	NA	Intergenic	RLTR13C1|LTR|ERVK	-109151	NM_172851	241175	Mm.251301	NM_172851	ENSMUSG00000067028	Cntnap5b	C230078M14Rik|Caspr5-2	contactin associated protein-like 5B	protein-coding
Diff_Nuc49327	chr2	105678602	105678741	+	0	NA	intron (NM_023876, intron 4 of 9)	L1Md_F2|LINE|L1	66050	NM_023876	77766	Mm.3608	NM_023876	ENSMUSG00000027167	Elp4	A330107A17Rik|Paxneb	elongator acetyltransferase complex subunit 4	protein-coding
Diff_Nuc46594	chr3	159295542	159295681	+	0	NA	Intergenic	B2_Mm2|SINE|B2	33466	NM_029987	19892	Mm.131708	NM_029987	ENSMUSG00000028174	Rpe65	65kDa|A930029L06Rik|LCA2|Mord1|RP20|rd12	retinal pigment epithelium 65	protein-coding
Diff_Nuc59314	chr9	110208412	110208551	+	0	NA	intron (NM_001081381, intron 1 of 6)	B1_Mus1|SINE|Alu	785	NM_001081381	72341	Mm.374250	NM_001081381	ENSMUSG00000054836	Elp6	2610001P13Rik|2610002I17Rik|AV159994|Tmem103	elongator acetyltransferase complex subunit 6	protein-coding
Diff_Nuc17469	chr16	56180152	56180291	+	0	NA	intron (NM_025483, intron 19 of 23)	intron (NM_025483, intron 19 of 23)	-24205	NM_174876	224224	Mm.151998	NM_174876	ENSMUSG00000035270	Impg2	IPM200|PG10.2|Rsbp|Spacrcan	interphotoreceptor matrix proteoglycan 2	protein-coding
Diff_Nuc27950	chr7	26294192	26294331	+	0	NA	intron (NR_015569, intron 4 of 6)	MYSERV6-int|LTR|ERVK	30762	NM_001113368	26367	Mm.439731	NM_007543	ENSMUSG00000054385	Ceacam2	AI267129|Bgp2|Ceacam2-L	carcinoembryonic antigen-related cell adhesion molecule 2	protein-coding
Diff_Nuc4545	chr12	53181562	53181701	+	0	NA	Intergenic	(CAGG)n|Simple_repeat|Simple_repeat	-17102	NM_029760	76826	Mm.244781	NM_029760	ENSMUSG00000035142	Nubpl	2410170E07Rik	nucleotide binding protein-like	protein-coding
Diff_Nuc52443	chr1	40310842	40310981	+	0	NA	intron (NM_008362, intron 1 of 10)	intron (NM_008362, intron 1 of 10)	-12520	NM_001123382	16177	Mm.896	NM_008362	ENSMUSG00000026072	Il1r1	CD121a|CD121b|IL-1R1|IL-iR|Il1r-1	interleukin 1 receptor, type I	protein-coding
Diff_Nuc15014	chr17	62893032	62893171	+	0	NA	Intergenic	Intergenic	337565	NM_207654	13640	Mm.7978	NM_010109	ENSMUSG00000048915	Efna5	AL-1|AV158822|EFL-5|Ephrin-A5|Epl7|LERK-7|RAGS	ephrin A5	protein-coding
Diff_Nuc20191	chr15	77990822	77990961	+	0	NA	intron (NM_025931, intron 6 of 6)	intron (NM_025931, intron 6 of 6)	13647	NM_025931	67042	Mm.30191	NM_025931	ENSMUSG00000016637	Ift27	2600013G09Rik|Rabl4	intraflagellar transport 27	protein-coding
Diff_Nuc18579	chr15	10457642	10457781	+	0	NA	intron (NM_029430, intron 7 of 10)	MTEa|LTR|MaLR	30712	NM_029430	75777	Mm.48812	NM_029430	ENSMUSG00000022249	Ttc23l	4930401A09Rik	tetratricopeptide repeat domain 23-like	protein-coding
Diff_Nuc45150	chr3	99255342	99255481	+	0	NA	Intergenic	B1_Mur1|SINE|Alu	197728	NM_009323	21384	Mm.88761	NM_009323	ENSMUSG00000027868	Tbx15	Tbx14|Tbx8|de	T-box 15	protein-coding
Diff_Nuc44677	chr3	84057422	84057561	+	0	NA	intron (NM_001271726, intron 1 of 11)	intron (NM_001271726, intron 1 of 11)	6210	NM_001271727	80890	Mm.44876	NM_030706	ENSMUSG00000027993	Trim2	mKIAA0517|narf	tripartite motif-containing 2	protein-coding
Diff_Nuc28983	chr7	74933792	74933931	+	0	NA	intron (NR_045954, intron 1 of 2)	intron (NR_045954, intron 1 of 2)	14521	NR_045954	73904	Mm.70992	NR_045954	ENSMUSG00000097697	4833412C05Rik	Bigheart	RIKEN cDNA 4833412C05 gene	ncRNA
Diff_Nuc59959	chr8	14089572	14089711	+	0	NA	intron (NM_001034862, intron 1 of 5)	intron (NM_001034862, intron 1 of 5)	686	NM_001034862	234086	Mm.268896	NM_001034862	ENSMUSG00000051978	Erich1	-	glutamate rich 1	protein-coding
Diff_Nuc43356	chr3	24034262	24034401	+	0	NA	intron (NM_001326288, intron 9 of 13)	L1_Mus1|LINE|L1	648597	NM_001326288	635702	Mm.448351	NM_001326288	ENSMUSG00000102758	Naaladl2	2810043G22Rik|EG635702|Gm1021	N-acetylated alpha-linked acidic dipeptidase-like 2	protein-coding
Diff_Nuc38723	chr5	148068552	148068691	+	0	NA	intron (NR_038157, intron 1 of 5)	L1MDa|LINE|L1	-13086	NM_008814	18609	Mm.389714	NM_008814	ENSMUSG00000029644	Pdx1	IDX-1|IPF-1|Ipf1|Mody4|STF-1|pdx-1	pancreatic and duodenal homeobox 1	protein-coding
Diff_Nuc35058	chr5	14668532	14668671	+	0	NA	intron (NM_011995, intron 3 of 24)	intron (NM_011995, intron 3 of 24)	153683	NM_001110796	26875	Mm.146275	NM_011995	ENSMUSG00000061601	Pclo	Acz|Pico	piccolo (presynaptic cytomatrix protein)	protein-coding
Diff_Nuc49403	chr2	108949032	108949171	+	0	NA	intron (NM_029790, intron 5 of 5)	intron (NM_029790, intron 5 of 5)	169346	NM_029790	76894	Mm.330451	NM_029790	ENSMUSG00000057234	Mettl15	0610027B03Rik|AI303697|AW049952|Mett5d1	methyltransferase like 15	protein-coding
Diff_Nuc19793	chr15	62995032	62995171	+	0	NA	Intergenic	Intergenic	316062	NR_045279	432958	Mm.255105	NR_045279		Gm20740	-	predicted gene, 20740	ncRNA
Diff_Nuc48052	chr2	56928802	56928941	+	0	NA	Intergenic	Intergenic	38578	NM_013613	18227	Mm.3507	NM_013613	ENSMUSG00000026826	Nr4a2	HZF-3|NOT|Nurr1|RNR-1|TINOR|TINUR	nuclear receptor subfamily 4, group A, member 2	protein-coding
Diff_Nuc53814	chr1	96230572	96230711	+	0	NA	Intergenic	Intergenic	-281511	NM_008798	18566	Mm.5024	NM_008798	ENSMUSG00000026285	Pdcd1	Ly101|PD-1|Pdc1	programmed cell death 1	protein-coding
Diff_Nuc59851	chr8	11318652	11318791	+	0	NA	intron (NM_009932, intron 3 of 47)	intron (NM_009932, intron 3 of 47)	-5895	NM_009931	12826	Mm.738	NM_009931	ENSMUSG00000031502	Col4a1	Bru|Col4a-1|Raw|Svc	collagen, type IV, alpha 1	protein-coding
Diff_Nuc45979	chr3	133185262	133185401	+	0	NA	intron (NM_001040400, intron 1 of 10)	intron (NM_001040400, intron 1 of 10)	22023	NM_001346736	214133	Mm.347816	NM_145989	ENSMUSG00000040943	Tet2	Ayu17-449|E130014J05Rik|mKIAA1546	tet methylcytosine dioxygenase 2	protein-coding
Diff_Nuc36559	chr5	70878412	70878551	+	0	NA	Intergenic	Lx2B|LINE|L1	355375	NM_010252	14405	Mm.255292	NM_010252	ENSMUSG00000001260	Gabrg1	GabaA|GabaA/BZ	gamma-aminobutyric acid (GABA) A receptor, subunit gamma 1	protein-coding
Diff_Nuc48948	chr2	92614502	92614641	+	0	NA	Intergenic	Intergenic	-140687	NM_030725	80976	Mm.33490	NM_030725	ENSMUSG00000027220	Syt13	5730409J20Rik|AI549909|mKIAA1427	synaptotagmin XIII	protein-coding
Diff_Nuc19198	chr15	36714892	36715031	+	0	NA	intron (NM_011740, intron 3 of 6)	MTC-int|LTR|MaLR	5726	NM_001253807	22631	Mm.3360	NM_011740	ENSMUSG00000022285	Ywhaz	1110013I11Rik|14-3-3zeta|AI596267|AL022924|AU020854	tyrosine 3-monooxygenase/tryptophan 5-monooxygenase activation protein, zeta polypeptide	protein-coding
Diff_Nuc18439	chr15	4965932	4966071	+	0	NA	intron (NM_001243837, intron 9 of 17)	ID_B1|SINE|B4	47772	NM_001243837	109828	Mm.208034	NM_001243837	ENSMUSG00000079105	C7	A530026G17|Gm1238	complement component 7	protein-coding
Diff_Nuc59105	chr9	104277442	104277581	+	0	NA	Intergenic	Intergenic	-37459	NM_207668	56318	Mm.19941	NM_019807	ENSMUSG00000032561	Acpp	5'-NT|A030005E02Rik|FRAP|Lap|PAP|Ppal	acid phosphatase, prostate	protein-coding
Diff_Nuc7510	chr11	49774672	49774811	+	0	NA	intron (NM_001347462, intron 6 of 13)	intron (NM_001347462, intron 6 of 13)	59078	NM_001347462	74563	Mm.258798	NM_029004	ENSMUSG00000020374	Rasgef1c	9130006A14Rik	RasGEF domain family, member 1C	protein-coding
Diff_Nuc29261	chr7	87513602	87513741	+	0	NA	exon (NM_172903, exon 4 of 24)	exon (NM_172903, exon 4 of 24)	2590	NM_172903	140481	Mm.269245	NM_172903	ENSMUSG00000038886	Man2a2	1700052O22Rik|4931438M07Rik|AI480988|MX|Man IIx	mannosidase 2, alpha 2	protein-coding
Diff_Nuc24841	chr19	43923122	43923261	+	0	NA	intron (NM_001306088, intron 13 of 13)	PB1D7|SINE|Alu	9898	NR_033472	100038628	Mm.212585	NR_033472	ENSMUSG00000025194	Gm10768	ENSMUSG00000074828	predicted gene 10768	ncRNA
Diff_Nuc21466	chr14	28162232	28162371	+	0	NA	intron (NM_001289687, intron 1 of 9)	intron (NM_001289687, intron 1 of 9)	-12274	NM_001289688	71704	Mm.248606	NM_027871	ENSMUSG00000021895	Arhgef3	1200004I24Rik|9830169H03Rik|C76747|Xpln	Rho guanine nucleotide exchange factor (GEF) 3	protein-coding
Diff_Nuc6456	chr11	5791212	5791351	+	0	NA	Intergenic	Intergenic	7504	NM_022879	17898	Mm.46514	NM_022879	ENSMUSG00000020469	Myl7	MLC-2alpha|MLC2a|MYL2A|Mylc2a|RLC-A	myosin, light polypeptide 7, regulatory	protein-coding
Diff_Nuc38901	chr4	4760772	4760911	+	0	NA	Intergenic	Intergenic	-40388	NM_177730	242291	Mm.218889	NM_177730	ENSMUSG00000066324	Impad1	1110001C20Rik|AA408880|AI451589|AL022796|B230207P20|Jaws|gPAPP	inositol monophosphatase domain containing 1	protein-coding
Diff_Nuc16277	chr16	15493862	15494001	+	0	NA	Intergenic	L1VL2|LINE|L1	100680	NM_001159351	70620	Mm.235407	NM_023585	ENSMUSG00000022674	Ube2v2	1110021H13Rik|4632410D19Rik|5730524P06Rik|6820402M05|AI848315|C81524|MMS2	ubiquitin-conjugating enzyme E2 variant 2	protein-coding
Diff_Nuc55801	chr1	182655122	182655261	+	0	NA	promoter-TSS (NM_133225)	promoter-TSS (NM_133225)	-983	NM_133225	170760	Mm.272981	NM_133225	ENSMUSG00000026499	Acbd3	60kDa|8430407O11Rik|D1Ertd10e|GCP60|GOLPH1|Gocap1|Pap7	acyl-Coenzyme A binding domain containing 3	protein-coding
Diff_Nuc13308	chr10	127388242	127388381	+	0	NA	Intergenic	Intergenic	52720	NM_027301	70061	Mm.158320	NM_027301	ENSMUSG00000040127	Sdr9c7	1810054F20Rik|Rdh20|Rdhs|SDR-O|Sdro	4short chain dehydrogenase/reductase family 9C, member 7	protein-coding
Diff_Nuc37332	chr5	104474062	104474201	+	0	NA	Intergenic	RMER5|LTR|ERV1	-1752	NM_028794	74167	Mm.241484	NM_028794	ENSMUSG00000029310	Nudt9	1190002C07Rik|ADPR-PPase|AI462474	nudix (nucleoside diphosphate linked moiety X)-type motif 9	protein-coding
Diff_Nuc34263	chr6	124369962	124370101	+	0	NA	Intergenic	L1MDa|LINE|L1	-4946	NM_001277805	19305	Mm.22418	NM_008995	ENSMUSG00000005069	Pex5	AW212715|ESTM1|PTS1R|Pxr1|X83306	peroxisomal biogenesis factor 5	protein-coding
Diff_Nuc29937	chr7	109647512	109647651	+	0	NA	Intergenic	Intergenic	-4294	NM_146840	258837	Mm.377714	NM_146840	ENSMUSG00000044824	Olfr545	MOR42-1|S50	olfactory receptor 545	protein-coding
Diff_Nuc27147	chr18	72294882	72295021	+	0	NA	intron (NM_007831, intron 1 of 28)	intron (NM_007831, intron 1 of 28)	215772	NM_007831	13176	Mm.167882	NM_007831	ENSMUSG00000060534	Dcc	C030036D22Rik|Igdcc1	deleted in colorectal carcinoma	protein-coding
Diff_Nuc50865	chr2	156420972	156421111	+	0	NA	Intergenic	MER46C|DNA|MER2_type	18117	NR_040372	100504350	Mm.94426	NR_040372	ENSMUSG00000086118	Gm14169	OTTMUSG00000015869	predicted gene 14169	ncRNA
Diff_Nuc43222	chr3	18047972	18048111	+	0	NA	intron (NM_007825, intron 1 of 5)	intron (NM_007825, intron 1 of 5)	93716	NM_021560	59058	Mm.149938	NM_021560	ENSMUSG00000025128	Bhlhe22	Beta3|Beta3a|Bhlhb5	basic helix-loop-helix family, member e22	protein-coding
Diff_Nuc24883	chr19	45124962	45125101	+	0	NA	intron (NM_053197, intron 4 of 10)	intron (NM_053197, intron 4 of 10)	2965	NM_001178013	94280	Mm.36169	NM_053197	ENSMUSG00000025212	Sfxn3	-	sideroflexin 3	protein-coding
Diff_Nuc11340	chr10	56629832	56629971	+	0	NA	Intergenic	RLTR10E|LTR|ERVK	532795	NM_010288	14609	Mm.378921	NM_010288	ENSMUSG00000050953	Gja1	AU042049|AW546267|Cnx43|Cx43|Cx43alpha1|Gja-1|Npm1|connexin43	gap junction protein, alpha 1	protein-coding
Diff_Nuc9275	chr11	102247902	102248041	+	0	NA	Intergenic	Intergenic	-6746	NM_016759	51799	Mm.2560	NM_016759	ENSMUSG00000006575	Rundc3a	RPIP-8|Rap2ip|Rpip8	RUN domain containing 3A	protein-coding
Diff_Nuc38931	chr4	6144052	6144191	+	0	NA	3' UTR (NM_026534, exon 8 of 8)	3' UTR (NM_026534, exon 8 of 8)	25869	NM_026534	68053	Mm.404043	NM_026534	ENSMUSG00000028243	Ubxn2b	3110003A22Rik|6430407D20Rik|AI451665|p37	UBX domain protein 2B	protein-coding
Diff_Nuc36322	chr5	62941002	62941141	+	0	NA	Intergenic	Intergenic	216345	NM_178407	212285	Mm.244403	NM_178407	ENSMUSG00000037999	Arap2	Centd1|Gm148|mKIAA0580	ArfGAP with RhoGAP domain, ankyrin repeat and PH domain 2	protein-coding
Diff_Nuc1119	chr13	29071132	29071271	+	0	NA	Intergenic	Intergenic	-25650	NM_009238	20677	Mm.240627	NM_009238	ENSMUSG00000076431	Sox4	AA682046|Sox-4	SRY (sex determining region Y)-box 4	protein-coding
Diff_Nuc36753	chr5	80392042	80392181	+	0	NA	Intergenic	Intergenic	-1057485	NM_001347367	319387	Mm.273631	NM_198702	ENSMUSG00000037605	Adgrl3	5430402I23Rik|CIRL-3|D130075K09Rik|Gm1379|LEC3|Lphn3|mKIAA0768	adhesion G protein-coupled receptor L3	protein-coding
Diff_Nuc15695	chr17	87920932	87921071	+	0	NA	Intergenic	Intergenic	-74726	NM_007589	12314	Mm.329243	NM_007589	ENSMUSG00000036438	Calm2	1500001E21Rik|AL024017	calmodulin 2	protein-coding
Diff_Nuc53134	chr1	69232492	69232631	+	0	NA	Intergenic	L1Md_F3|LINE|L1	-77928	NM_010154	13869	Mm.442420	NM_010154	ENSMUSG00000062209	Erbb4	Her4|c-erbB-4	erb-b2 receptor tyrosine kinase 4	protein-coding
Diff_Nuc54079	chr1	111903402	111903541	+	0	NA	intron (NM_001316744, intron 3 of 12)	Lx|LINE|L1	23171	NM_172853	241201	Mm.213407	NM_172853	ENSMUSG00000026312	Cdh7	9330156F07Rik|CDH7L1	cadherin 7, type 2	protein-coding
Diff_Nuc38296	chr5	133769802	133769941	+	0	NA	Intergenic	MuRRS4-int|LTR|ERV1	-751658	NM_177047	319974	Mm.409595	NM_177047	ENSMUSG00000029673	Auts2	2700063G02Rik|A730011F23Rik|D830032G16Rik	autism susceptibility candidate 2	protein-coding
Diff_Nuc56910	chr9	29801842	29801981	+	0	NA	Intergenic	Intergenic	-31197	NM_172290	235106	Mm.283138	NM_172290	ENSMUSG00000059974	Ntm	6230410L23Rik|B230210G24Rik|Hnt|Igdcc2|R75390	neurotrimin	protein-coding
Diff_Nuc42874	chr4	154524132	154524271	+	0	NA	Intergenic	Intergenic	63515	NM_001081100	76866	Mm.200590	NM_001081100	ENSMUSG00000029049	Morn1	2900057D20Rik|4930417P05Rik|AU042805	MORN repeat containing 1	protein-coding
Diff_Nuc4993	chr12	73870452	73870591	+	0	NA	intron (NM_008910, intron 1 of 5)	RMER1A|Other|Other	8323	NM_008910	19042	Mm.261045	NM_008910	ENSMUSG00000021096	Ppm1a	2310003C21Rik|2900017D14Rik|AI427932|AU017636|MMPa-2|MPPa-1	protein phosphatase 1A, magnesium dependent, alpha isoform	protein-coding
Diff_Nuc256	chrX	84867292	84867431	+	0	NA	intron (NM_001160403, intron 2 of 10)	L1Md_F2|LINE|L1	493601	NM_001160403	331461	Mm.121680	NM_001160403	ENSMUSG00000052372	Il1rapl1	6330532G10Rik|C030039N24|IL1R8|IL1RAPL|MRX34|OPHN4|TIGIRR-2	interleukin 1 receptor accessory protein-like 1	protein-coding
Diff_Nuc24963	chr19	46800692	46800831	+	0	NA	intron (NM_020577, intron 10 of 10)	B3|SINE|B2	18828	NM_020577	57344	Mm.28566	NM_020577	ENSMUSG00000003559	As3mt	2310045H08Rik|Cyt19	arsenic (+3 oxidation state) methyltransferase	protein-coding
Diff_Nuc3148	chr13	107833802	107833941	+	0	NA	Intergenic	ID_B1|SINE|B4	21221	NR_015471	100040322	Mm.133867	NR_015471		3830408C21Rik	-	RIKEN cDNA 3830408C21 gene	ncRNA
Diff_Nuc7658	chr11	53968372	53968511	+	0	NA	Intergenic	Intergenic	54015	NM_011031	18452	Mm.3705	NM_011031	ENSMUSG00000018906	P4ha2	AA407196|C76437|P4hl	procollagen-proline, 2-oxoglutarate 4-dioxygenase (proline 4-hydroxylase), alpha II polypeptide	protein-coding
Diff_Nuc27913	chr7	25192312	25192451	+	0	NA	intron (NM_028047, intron 5 of 13)	intron (NM_028047, intron 5 of 13)	7734	NM_028047	71997	Mm.150977	NM_028047	ENSMUSG00000002210	Smg9	1500002O20Rik|AI429693|N28092	smg-9 homolog, nonsense mediated mRNA decay factor (C. elegans)	protein-coding
Diff_Nuc11484	chr10	61026912	61027051	+	0	NA	intron (NM_153542, intron 4 of 4)	intron (NM_153542, intron 4 of 4)	-31251	NM_001177511	237362	Mm.131297	NM_001177511	ENSMUSG00000020090	Npffr1	Gm236|Gpr147|NPFF1|NPFF1R|OT7T022	neuropeptide FF receptor 1	protein-coding
Diff_Nuc23076	chr14	96184572	96184711	+	0	NA	Intergenic	Lx|LINE|L1	-95844	NM_025733	66732	Mm.75060	NM_025733	ENSMUSG00000034689	4921530L21Rik	-	RIKEN cDNA 4921530L21 gene	protein-coding
Diff_Nuc56354	chr9	7772582	7772721	+	0	NA	intron (NM_133739, intron 2 of 4)	intron (NM_133739, intron 2 of 4)	8574	NM_133739	71929	Mm.283293	NM_133739	ENSMUSG00000050912	Tmem123	2310075C12Rik	transmembrane protein 123	protein-coding
Diff_Nuc18328	chr16	95642092	95642231	+	0	NA	intron (NM_001302152, intron 3 of 10)	intron (NM_001302152, intron 3 of 10)	38794	NM_001302154	13876	Mm.164531	NM_133659	ENSMUSG00000040732	Erg	D030036I24Rik	avian erythroblastosis virus E-26 (v-ets) oncogene related	protein-coding
Diff_Nuc4402	chr12	45311842	45311981	+	0	NA	promoter-TSS (NM_013760)	promoter-TSS (NM_013760)	611	NR_049203	100885842		NR_049203	ENSMUSG00000093618	Mir5627	Gm23684|mir-5627|mmu-mir-5627	microRNA 5627	ncRNA
Diff_Nuc27730	chr7	15457382	15457521	+	0	NA	Intergenic	L1Md_F3|LINE|L1	212394	NM_001038676	194588	Mm.389816	NM_001038676	ENSMUSG00000055942	Obox7	EG194588|Gm4745	oocyte specific homeobox 7	protein-coding
Diff_Nuc13381	chr10	128938562	128938701	+	0	NA	exon (NM_146933, exon 1 of 1)	exon (NM_146933, exon 1 of 1)	689	NM_146933	258935	Mm.377756	NM_146933	ENSMUSG00000044025	Olfr790	MOR112-1	olfactory receptor 790	protein-coding
Diff_Nuc6660	chr11	16767012	16767151	+	0	NA	intron (NM_207655, intron 4 of 27)	intron (NM_207655, intron 4 of 27)	84204	NR_110421	72735	Mm.268598	NR_015469		Eldr	2810442I21Rik|4930500E12Rik|Fabl	Egfr long non-coding downstream RNA	ncRNA
Diff_Nuc17448	chr16	55935562	55935701	+	0	NA	promoter-TSS (NM_028815)	promoter-TSS (NM_028815)	-670	NM_001159365	74201	Mm.178427	NM_028815	ENSMUSG00000022604	Cep97	2810403B08Rik|4932439K18Rik|AA437768|E130116N02Rik|Lrriq2	centrosomal protein 97	protein-coding
Diff_Nuc40703	chr4	82249342	82249481	+	0	NA	Intergenic	Intergenic	95518	NR_137202	102635783	Mm.41666	NR_137202		Gm11266	OTTMUSG00000000396	predicted gene 11266	ncRNA
Diff_Nuc59328	chr9	110514332	110514471	+	0	NA	intron (NM_001081340, intron 18 of 20)	B1_Mm|SINE|Alu	12496	NM_026012	67169	Mm.46680	NM_026012	ENSMUSG00000032491	Nradd	2610311B09Rik|BB104149|NRDD|NRH2|PLAIDD	neurotrophin receptor associated death domain	protein-coding
Diff_Nuc42909	chr4	155117262	155117401	+	0	NA	intron (NM_179203, intron 15 of 15)	intron (NM_179203, intron 15 of 15)	8418	NM_001101506	381582	Mm.379515	NM_001101506	ENSMUSG00000084845	Tmem240	EG381582|Gm5151	transmembrane protein 240	protein-coding
Diff_Nuc1444	chr13	39972512	39972651	+	0	NA	Intergenic	Intergenic	410799	NM_172143	218165	Mm.364096	NM_172143	ENSMUSG00000047094	Ofcc1	opo	orofacial cleft 1 candidate 1	protein-coding
Diff_Nuc35928	chr5	43444742	43444881	+	0	NA	Intergenic	L1_Mus1|LINE|L1	-179891	NM_175937	231207	Mm.7233	NM_175937	ENSMUSG00000039782	Cpeb2	A630055H10Rik|Cpe-bp2	cytoplasmic polyadenylation element binding protein 2	protein-coding
Diff_Nuc41219	chr4	102537512	102537651	+	0	NA	intron (NM_144906, intron 4 of 23)	intron (NM_144906, intron 4 of 23)	104841	NM_001285859	73094	Mm.54201	NM_144906	ENSMUSG00000028524	Sgip1	3110007P09Rik|SGIP1alpha|gag	SH3-domain GRB2-like (endophilin) interacting protein 1	protein-coding
Diff_Nuc33698	chr6	103782372	103782511	+	0	NA	Intergenic	Intergenic	132237	NR_144494	100846987		NR_144494		Pou5f1-rs5	Gm21054|Oct4P5|Otf3-rs5|Otf3e	POU domain, class 5, transcription factor 1, related sequence 5	pseudo
Diff_Nuc9060	chr11	97340202	97340341	+	0	NA	intron (NM_021493, intron 15 of 18)	intron (NM_021493, intron 15 of 18)	21383	NM_001289118	100141474	Mm.482426	NM_001289118	ENSMUSG00000047988	4933428G20Rik	-	RIKEN cDNA 4933428G20 gene	protein-coding
Diff_Nuc4378	chr12	43752432	43752571	+	0	NA	Intergenic	Lx7|LINE|L1	-1539857	NM_010733	16981	Mm.404786	NM_010733	ENSMUSG00000036295	Lrrn3	NLRR-3	leucine rich repeat protein 3, neuronal	protein-coding
Diff_Nuc14073	chr17	26696222	26696361	+	0	NA	Intergenic	B1_Mm|SINE|Alu	-2166	NM_026170	67458	Mm.30496	NM_026170	ENSMUSG00000001576	Ergic1	1200007D18Rik|maa-136	endoplasmic reticulum-golgi intermediate compartment (ERGIC) 1	protein-coding
Diff_Nuc46187	chr3	140583522	140583661	+	0	NA	Intergenic	Lx5|LINE|L1	291728	NM_008811	18598	Mm.4223	NM_008811	ENSMUSG00000047674	Pdha2	Pdhal	pyruvate dehydrogenase E1 alpha 2	protein-coding
Diff_Nuc57551	chr9	52270392	52270531	+	0	NA	Intergenic	Intergenic	217081	NM_178906	330941	Mm.335160	NM_177907	ENSMUSG00000078307	AI593442	E130102D23	expressed sequence AI593442	protein-coding
Diff_Nuc11540	chr10	62617842	62617981	+	0	NA	intron (NM_182992, intron 6 of 19)	intron (NM_182992, intron 6 of 19)	48789	NM_182992	68802	Mm.259767	NM_182992	ENSMUSG00000020067	Mypn	1110056A04Rik|9830112J03|AI853556|mKIAA4170	myopalladin	protein-coding
Diff_Nuc38117	chr5	128024162	128024301	+	0	NA	intron (NM_175432, intron 5 of 8)	intron (NM_175432, intron 5 of 8)	73531	NM_133895	100561	Mm.28506	NM_133895	ENSMUSG00000029416	Slc15a4	AA987064|AW742963|C130069N12Rik|PHT1|PTR4	solute carrier family 15, member 4	protein-coding
Diff_Nuc49320	chr2	105415097	105415236	+	0	NA	intron (NR_002867, intron 3 of 3)	intron (NR_002867, intron 3 of 3)	86334	NR_117095	103164605	Mm.444995	NR_117095	ENSMUSG00000102424	Paupar	-	Pax6 upstream antisense RNA	ncRNA
Diff_Nuc39749	chr4	41581612	41581751	+	0	NA	intron (NM_175138, intron 18 of 19)	intron (NM_175138, intron 18 of 19)	5654	NM_027147	69638	Mm.372459	NM_027147	ENSMUSG00000028445	Enho	1110065P19Rik|2310040A07Rik	energy homeostasis associated	protein-coding
Diff_Nuc28305	chr7	46752042	46752181	+	0	NA	Intergenic	B4A|SINE|B4	-21025	NM_001004139	70227	Mm.333800	NM_001004139	ENSMUSG00000068959	Zfp619	3000002G13Rik	zinc finger protein 619	protein-coding
Diff_Nuc58274	chr9	73649492	73649631	+	0	NA	intron (NM_001081153, intron 3 of 30)	Lx2|LINE|L1	131813	NM_001081153	208898	Mm.41035	NM_001081153	ENSMUSG00000062151	Unc13c	1500037O19Rik|AU019458|D9Ertd414e|Munc13-3|Unc13h3	unc-13 homolog C (C. elegans)	protein-coding
Diff_Nuc42852	chr4	153476362	153476501	+	0	NA	intron (NM_011642, intron 3 of 13)	intron (NM_011642, intron 3 of 13)	-5149	NM_001126331	22062	Mm.78015	NM_011642	ENSMUSG00000029026	Trp73	TAp73|Tp73|deltaNp73|p73	transformation related protein 73	protein-coding
Diff_Nuc24693	chr19	38516532	38516671	+	0	NA	Intergenic	Intergenic	46131	NM_175507	240660	Mm.262085	NM_175507	ENSMUSG00000044026	Slc35g1	AA590464|D330039I19Rik|Tmem20	solute carrier family 35, member G1	protein-coding
Diff_Nuc36571	chr5	72092032	72092171	+	0	NA	exon (NM_008069, exon 3 of 9)	exon (NM_008069, exon 3 of 9)	846	NM_008069	14400	Mm.38567	NM_008069	ENSMUSG00000029212	Gabrb1	AW061132|B230208N19Rik|Gabrb-1	gamma-aminobutyric acid (GABA) A receptor, subunit beta 1	protein-coding
Diff_Nuc62262	chr8	115014472	115014611	+	0	NA	Intergenic	Intergenic	78934	NR_132433	102640845	Mm.405615	NR_132433	ENSMUSG00000098075	Gm26994	-	predicted gene, 26994	ncRNA
Diff_Nuc15489	chr17	81021312	81021451	+	0	NA	intron (NM_001290345, intron 16 of 33)	intron (NM_001290345, intron 16 of 33)	-58207	NM_001033443	381113	Mm.329216	NM_001033443	ENSMUSG00000033966	Cdkl4	AU067824|Gm942	cyclin-dependent kinase-like 4	protein-coding
Diff_Nuc56721	chr9	23290892	23291031	+	0	NA	Intergenic	Intergenic	263441	NM_028472	73230	Mm.335020	NM_028472	ENSMUSG00000031963	Bmper	3110056H04Rik|CV-2|Crim3|Cv2	BMP-binding endothelial regulator	protein-coding
Diff_Nuc13120	chr10	119911282	119911421	+	0	NA	intron (NM_010441, intron 1 of 4)	intron (NM_010441, intron 1 of 4)	2174	NM_001347170	15364	Mm.157190	NM_010441	ENSMUSG00000056758	Hmga2	9430083A20Rik|HMGI-C|Hmgic|pg|pygmy	high mobility group AT-hook 2	protein-coding
Diff_Nuc16313	chr16	16560992	16561131	+	0	NA	promoter-TSS (NM_139232)	promoter-TSS (NM_139232)	-749	NM_139232	224014	Mm.256131	NM_139232	ENSMUSG00000022788	Fgd4	9030023J02Rik|9330209B17Rik|Frabp|ZFYVE6	FYVE, RhoGEF and PH domain containing 4	protein-coding
Diff_Nuc1225	chr13	32132452	32132591	+	0	NA	intron (NM_146041, intron 7 of 10)	intron (NM_146041, intron 7 of 10)	234006	NM_008592	17300	Mm.12949	NM_008592	ENSMUSG00000050295	Foxc1	FREAC3|Fkh1|Mf1|Mf4|ch|fkh-1|frkhda	forkhead box C1	protein-coding
Diff_Nuc29686	chr7	102741602	102741741	+	0	NA	Intergenic	Intergenic	-578083	NM_001310762	23966	Mm.254610	NM_011858	ENSMUSG00000048078	Tenm4	Doc4|ELM2|Odz4|R75022|Ten-m4|l(7)-3Rn|l7Rn3|mKIAA1302	teneurin transmembrane protein 4	protein-coding
Diff_Nuc7661	chr11	54055372	54055511	+	0	NA	Intergenic	Intergenic	7960	NM_009969	12981	Mm.4922	NM_009969	ENSMUSG00000018916	Csf2	Csfgm|GMCSF|Gm-CSf|MGI-IGM	colony stimulating factor 2 (granulocyte-macrophage)	protein-coding
Diff_Nuc5107	chr12	77767522	77767661	+	0	NA	intron (NM_013675, intron 1 of 35)	L1ME1|LINE|L1	43943	NM_013675	20741	Mm.32881	NM_013675	ENSMUSG00000021061	Sptb	AI842465|D330027P03Rik|Gm1301|Spnb-1|Spnb1|ja|jaundiced|mKIAA4219	spectrin beta, erythrocytic	protein-coding
Diff_Nuc40968	chr4	94630912	94631051	+	0	NA	intron (NM_177239, intron 8 of 19)	intron (NM_177239, intron 8 of 19)	14810	NM_177239	320713	Mm.208868	NM_177239	ENSMUSG00000062627	Mysm1	C130067A03Rik|C530050H10Rik	myb-like, SWIRM and MPN domains 1	protein-coding
Diff_Nuc46026	chr3	135238342	135238481	+	0	NA	Intergenic	Intergenic	89836	NM_027288	110173	Mm.280536	NM_027288	ENSMUSG00000028164	Manba	2410030O07Rik|B930014J03Rik|Bmn	mannosidase, beta A, lysosomal	protein-coding
Diff_Nuc12436	chr10	93073562	93073701	+	0	NA	Intergenic	Intergenic	-21228	NM_027246	69878	Mm.259642	NM_027246	ENSMUSG00000020018	Snrpf	2010013O18Rik|SMF|sm-F|snRNP-F	small nuclear ribonucleoprotein polypeptide F	protein-coding
Diff_Nuc7702	chr11	54832422	54832561	+	0	NA	intron (NM_013472, intron 2 of 25)	intron (NM_013472, intron 2 of 25)	14482	NR_138556	11749	Mm.265347	NM_013472	ENSMUSG00000018340	Anxa6	AW107198|Anx6|AnxVI|Cabm|Camb	annexin A6	protein-coding
Diff_Nuc55845	chr1	183825292	183825431	+	0	NA	Intergenic	Intergenic	-52829	NM_133815	98386	Mm.4538	NM_133815	ENSMUSG00000004880	Lbr	AI505894|ic	lamin B receptor	protein-coding
Diff_Nuc37722	chr5	116026132	116026271	+	0	NA	exon (NM_172719, exon 5 of 58)	exon (NM_172719, exon 5 of 58)	-4757	NR_105996	102466790		NR_105996	ENSMUSG00000099047	Mir7029	Gm27293|mmu-mir-7029	microRNA 7029	ncRNA
Diff_Nuc21927	chr14	49350622	49350761	+	0	NA	intron (NR_029384, intron 4 of 4)	intron (NR_029384, intron 4 of 4)	61728	NR_029384	606497	Mm.165199	NR_029384	ENSMUSG00000098682	Otx2os1	-	orthodenticle homeobox 2 opposite strand 1	ncRNA
Diff_Nuc38638	chr5	144978392	144978531	+	0	NA	intron (NM_027410, intron 2 of 24)	intron (NM_027410, intron 2 of 24)	5986	NM_027410	70381	Mm.239412	NM_027410	ENSMUSG00000066621	Tecpr1	2210010N04Rik|mKIAA1358	tectonin beta-propeller repeat containing 1	protein-coding
Diff_Nuc46449	chr3	153516342	153516481	+	0	NA	exon (NM_025758, exon 3 of 3)	exon (NM_025758, exon 3 of 3)	-1023	NR_040373	72317	Mm.440147	NR_040373	ENSMUSG00000086438	Asb17os	2510003D18Rik	ankyrin repeat and SOCS box-containing 17, opposite strand	ncRNA
Diff_Nuc13058	chr10	116551432	116551571	+	0	NA	intron (NM_177798, intron 1 of 9)	B4A|SINE|B4	34029	NM_177798	327826	Mm.135965	NM_177798	ENSMUSG00000020170	Frs2	4732458E18|C330018A15Rik|Frs2alpha|SNT1	fibroblast growth factor receptor substrate 2	protein-coding
Diff_Nuc40120	chr4	56861842	56861981	+	0	NA	intron (NM_018761, intron 1 of 18)	intron (NM_018761, intron 1 of 18)	16172	NM_018761	54366	Mm.218891	NM_018761	ENSMUSG00000038816	Ctnnal1	ACRP|AI616177|AW545119|C86009|Catnal1	catenin (cadherin associated protein), alpha-like 1	protein-coding
Diff_Nuc48540	chr2	75963752	75963891	+	0	NA	intron (NM_001081033, intron 9 of 19)	ORR1C2|LTR|MaLR	-143797	NM_030188	78802	Mm.282339	NM_030188	ENSMUSG00000075271	Ttc30a1	4930506L13Rik	tetratricopeptide repeat domain 30A1	protein-coding
Diff_Nuc39095	chr4	12009342	12009481	+	0	NA	intron (NR_110955, intron 2 of 28)	RodERV21-int|LTR|ERV1	5693	NM_177861	329795	Mm.475125	NM_177861	ENSMUSG00000049488	Tmem67	5330408M12Rik|B230117O07|b2b1163.1Clo|b2b1291.1Clo	transmembrane protein 67	protein-coding
Diff_Nuc41561	chr4	113758092	113758231	+	0	NA	Intergenic	MTB|LTR|MaLR	-77828	NM_177669	230623	Mm.124482	NM_177669	ENSMUSG00000057977	Skint11	A630098G03Rik|Gm569	selection and upkeep of intraepithelial T cells 11	protein-coding
Diff_Nuc4674	chr12	57811652	57811791	+	0	NA	3' UTR (NM_011041, exon 4 of 4)	3' UTR (NM_011041, exon 4 of 4)	15263	NM_011041	18511	Mm.5035	NM_011041	ENSMUSG00000001497	Pax9	Pax-9	paired box 9	protein-coding
Diff_Nuc52282	chr1	34971742	34971881	+	0	NA	Intergenic	Intergenic	65007	NM_145516	226971	Mm.292751	NM_145516	ENSMUSG00000026123	Plekhb2	2310009M15Rik|AU018239|Evt2|Phdc|evt-2	pleckstrin homology domain containing, family B (evectins) member 2	protein-coding
Diff_Nuc39735	chr4	41346387	41346526	+	0	NA	intron (NM_024241, intron 9 of 12)	intron (NM_024241, intron 9 of 12)	50427	NM_023305	67123	Mm.289795	NM_023305	ENSMUSG00000028437	Ubap1	2700092A01Rik|NAG20|UBAP-1|Ubap	ubiquitin-associated protein 1	protein-coding
Diff_Nuc53555	chr1	85264652	85264791	+	0	NA	intron (NM_001037909, intron 1 of 6)	MERVL-int|LTR|ERVL	2420	NM_175219	620078	Mm.386456	NM_175219	ENSMUSG00000052477	C130026I21Rik	4930565N07Rik|OTTMUSG00000029174	RIKEN cDNA C130026I21 gene	protein-coding
Diff_Nuc30095	chr7	117271192	117271331	+	0	NA	intron (NM_009516, intron 5 of 10)	intron (NM_009516, intron 5 of 10)	5688	NM_009516	22390	Mm.287173	NM_009516	ENSMUSG00000031016	Wee1	Wee1A	WEE 1 homolog 1 (S. pombe)	protein-coding
Diff_Nuc58892	chr9	97042632	97042771	+	0	NA	Intergenic	Intergenic	-31241	NM_138756	192287	Mm.228067	NM_138756	ENSMUSG00000032449	Slc25a36	C330005L02Rik	solute carrier family 25, member 36	protein-coding
Diff_Nuc16195	chr16	11459572	11459711	+	0	NA	intron (NM_001290148, intron 6 of 13)	intron (NM_001290148, intron 6 of 13)	53900	NM_001290148	74478	Mm.325831	NM_028964	ENSMUSG00000071669	Snx29	4933437K13Rik|ENSMUSG00000079738|Gm11170|Gm1737|Gm930|Rundc2a	sorting nexin 29	protein-coding
Diff_Nuc8764	chr11	87862352	87862491	+	0	NA	intron (NM_173374, intron 2 of 3)	intron (NM_173374, intron 2 of 3)	1546	NM_173374	110809	Mm.391719	NM_173374	ENSMUSG00000018379	Srsf1	1110054N12Rik|5730507C05Rik|6330415C05Rik|AI482334|AW491331|Asf|Sf2|Sfrs1	serine/arginine-rich splicing factor 1	protein-coding
Diff_Nuc60738	chr8	50488202	50488341	+	0	NA	Intergenic	Intergenic	-728227	NM_011857	23965	Mm.42191	NM_011857	ENSMUSG00000031561	Tenm3	2610100B16Rik|Odz1|Odz3|Ten-m3|mKIAA1455	teneurin transmembrane protein 3	protein-coding
Diff_Nuc12756	chr10	106209262	106209401	+	0	NA	intron (NM_177373, intron 6 of 31)	intron (NM_177373, intron 6 of 31)	-169795	NR_131026	75833	Mm.159596	NR_131026		4930532I03Rik	-	RIKEN cDNA 4930532I03 gene	ncRNA
Diff_Nuc5060	chr12	76623942	76624081	+	0	NA	intron (NM_012024, intron 2 of 13)	intron (NM_012024, intron 2 of 13)	73176	NM_012024	26932	Mm.259626	NM_012024	ENSMUSG00000021051	Ppp2r5e	4633401M22Rik|AI449017|B56beta	protein phosphatase 2, regulatory subunit B', epsilon	protein-coding
Diff_Nuc57675	chr9	56039252	56039391	+	0	NA	Intergenic	Intergenic	-30444	NM_019793	56434	Mm.28484	NM_019793	ENSMUSG00000032324	Tspan3	1700055K04Rik|TM4-A|Tm4sf8	tetraspanin 3	protein-coding
Diff_Nuc17283	chr16	46415532	46415671	+	0	NA	intron (NM_021496, intron 7 of 8)	intron (NM_021496, intron 7 of 8)	81479	NM_021496	58998	Mm.40477	NM_021495	ENSMUSG00000022656	Nectin3	2610301B19Rik|3000002N23Rik|4921513D19Rik|AA407785|AU016832|AW538082|CD113|Pvrl3	nectin cell adhesion molecule 3	protein-coding
Diff_Nuc62131	chr8	110040312	110040451	+	0	NA	intron (NM_025830, intron 7 of 23)	intron (NM_025830, intron 7 of 23)	-34763	NR_029553	387158		NR_029553	ENSMUSG00000065439	Mir140	Mirn140|mir-140|mmu-mir-140	microRNA 140	ncRNA
Diff_Nuc56770	chr9	25304652	25304791	+	0	NA	intron (NM_026189, intron 2 of 7)	intron (NM_026189, intron 2 of 7)	15539	NM_026189	67484	Mm.112977	NM_026189	ENSMUSG00000036611	Eepd1	2310005P05Rik|AI481005	endonuclease/exonuclease/phosphatase family domain containing 1	protein-coding
Diff_Nuc3715	chr12	11571332	11571471	+	0	NA	Intergenic	Intergenic	108516	NM_001111118	209550	Mm.341257	NM_001111118	ENSMUSG00000086022	Rad51ap2	EG209550	RAD51 associated protein 2	protein-coding
Diff_Nuc54240	chr1	121616792	121616931	+	0	NA	intron (NM_019933, intron 12 of 26)	intron (NM_019933, intron 12 of 26)	-71284	NM_145506	226352	Mm.253156	NM_145506	ENSMUSG00000026383	Epb41l5	1700030C16Rik|AL022914|BE37|E230025E14Rik|Epb4.1l5|Lulu1|NBL5	erythrocyte membrane protein band 4.1 like 5	protein-coding
Diff_Nuc12115	chr10	81763582	81763721	+	0	NA	Intergenic	B3|SINE|B2	-59631	NM_001105557	237411		NM_172789	ENSMUSG00000062931	Zfp938	B230315N10Rik	zinc finger protein 938	protein-coding
Diff_Nuc30333	chr7	125353352	125353491	+	0	NA	intron (NM_001031814, intron 4 of 62)	intron (NM_001031814, intron 4 of 62)	33730	NM_001031814	233789	Mm.309053	NM_177180	ENSMUSG00000030655	Smg1	2610207I05Rik|5430435M13Rik|C130002K18Rik|mKIAA0421	SMG1 homolog, phosphatidylinositol 3-kinase-related kinase (C. elegans)	protein-coding
Diff_Nuc40492	chr4	71180352	71180491	+	0	NA	Intergenic	Intergenic	681506	NM_011599	21885	Mm.278444	NM_011599	ENSMUSG00000008305	Tle1	C230057C06Rik|Estm14|Grg-1|Grg1|Tle4l	transducin-like enhancer of split 1	protein-coding
Diff_Nuc2464	chr13	77718732	77718871	+	0	NA	intron (NM_001145676, intron 19 of 19)	RLTR33|LTR|ERVK	-129150	NM_001163420	68675	Mm.343005	NM_138312	ENSMUSG00000064138	Fam172a	1110033M05Rik|2610318O14Rik|53-E6|9430037D06Rik|AF064782|pEN87	family with sequence similarity 172, member A	protein-coding
Diff_Nuc51047	chr2	162732402	162732541	+	0	NA	Intergenic	RMER1A|Other|Other	-24773	NM_026499	67996	Mm.24042	NM_026499	ENSMUSG00000016921	Srsf6	1210001E11Rik|AI314910|AW146126|Sfrs6	serine/arginine-rich splicing factor 6	protein-coding
Diff_Nuc28896	chr7	71687452	71687591	+	0	NA	intron (NM_001291167, intron 1 of 13)	MT2A|LTR|ERVL	40497	NM_001291167	11784	Mm.4657	NM_007461	ENSMUSG00000030519	Apba2	X11-like|X11L|XllL|mXllL	amyloid beta (A4) precursor protein-binding, family A, member 2	protein-coding
Diff_Nuc7222	chr11	38343742	38343881	+	0	NA	Intergenic	Intergenic	-10264	NR_040295	100502917	Mm.61144	NR_040295		Gm12130	OTTMUSG00000005424	predicted gene 12130	ncRNA
Diff_Nuc39874	chr4	46364182	46364321	+	0	NA	Intergenic	Intergenic	7185	NM_183298	110805	Mm.354634	NM_183298	ENSMUSG00000070990	Foxe1	Titf2	forkhead box E1	protein-coding
Diff_Nuc47587	chr2	37787442	37787581	+	0	NA	intron (NM_146122, intron 13 of 21)	intron (NM_146122, intron 13 of 21)	155742	NM_001163566	241324	Mm.392369	NM_001163566	ENSMUSG00000035403	Crb2	5930402A21|BC043114	crumbs family member 2	protein-coding
Diff_Nuc37507	chr5	109984862	109985001	+	0	NA	intron (NM_001164735, intron 5 of 7)	CpG-11318	3081	NM_016715	57914	Mm.35771	NM_016715	ENSMUSG00000033467	Crlf2	CRLM2|Ly114|Tpte2|Tslpr	cytokine receptor-like factor 2	protein-coding
Diff_Nuc45653	chr3	119744992	119745131	+	0	NA	Intergenic	Intergenic	-258755	NM_019550	56195	Mm.29966	NM_019550	ENSMUSG00000028134	Ptbp2	Ptb2|brPTB|nPTB	polypyrimidine tract binding protein 2	protein-coding
Diff_Nuc21514	chr14	29762952	29763091	+	0	NA	intron (NM_009785, intron 34 of 37)	intron (NM_009785, intron 34 of 37)	-68373	NM_176920	319476	Mm.95780	NM_176920	ENSMUSG00000045776	Lrtm1	A930016D02Rik	leucine-rich repeats and transmembrane domains 1	protein-coding
Diff_Nuc8150	chr11	70796912	70797051	+	0	NA	promoter-TSS (NM_007573)	promoter-TSS (NM_007573)	-453	NM_007573	12261	Mm.30049	NM_007573	ENSMUSG00000018446	C1qbp	AA407365|AA986492|D11Wsu182e|HABP1|P32|gC1qBP	complement component 1, q subcomponent binding protein	protein-coding
Diff_Nuc59431	chr9	113835832	113835971	+	0	NA	Intergenic	Lx9|LINE|L1	-4151	NM_001083319	22221	Mm.28052	NM_013699	ENSMUSG00000009741	Ubp1	Cp2b|LBP-1a|LBP-1b|NF2d9	upstream binding protein 1	protein-coding
Diff_Nuc60370	chr8	35387232	35387371	+	0	NA	Intergenic	RMER15-int|LTR|ERVL	-157535	NR_105820	102465211		NR_105820	ENSMUSG00000098785	Mir6395	Gm27561|mmu-mir-6395	microRNA 6395	ncRNA
Diff_Nuc7326	chr11	42505042	42505181	+	0	NA	Intergenic	Intergenic	270259	NM_001347314	14401	Mm.338723	NM_008070	ENSMUSG00000007653	Gabrb2	AI834970|C030002O17Rik|C030021G16Rik|Gabrab2|Gabrb-2	gamma-aminobutyric acid (GABA) A receptor, subunit beta 2	protein-coding
Diff_Nuc20984	chr14	8666432	8666571	+	0	NA	intron (NM_134080, intron 1 of 45)	B1_Mus2|SINE|Alu	16030	NM_134080	286940	Mm.489652	NM_134080	ENSMUSG00000025278	Flnb	AL024016|Fln-b	filamin, beta	protein-coding
Diff_Nuc6970	chr11	29308382	29308521	+	0	NA	intron (NM_176841, intron 3 of 31)	L1_Mus3|LINE|L1	34279	NM_176841	108686	Mm.338284	NM_176841	ENSMUSG00000032740	Ccdc88a	A430106J12Rik|AI848406|Ape|C130096N06Rik|C330012F17Rik|D130005J21Rik|Girdin|Giv|Grdn|Hkrp1	coiled coil domain containing 88A	protein-coding
Diff_Nuc58441	chr9	79401002	79401141	+	0	NA	Intergenic	L1MEg|LINE|L1	-33962	NR_045336	100038575	Mm.367838	NR_045336	ENSMUSG00000111765	Gm10635	ENSMUSG00000074174	predicted gene 10635	ncRNA
Diff_Nuc25942	chr18	29449802	29449941	+	0	NA	Intergenic	MIR|SINE|MIR	-151983	NR_045395	78199	Mm.243850	NR_045395		4930527G23Rik	-	RIKEN cDNA 4930527G23 gene	ncRNA
Diff_Nuc34080	chr6	118388982	118389121	+	0	NA	intron (NM_028335, intron 3 of 5)	L1MA6|LINE|L1	16473	NM_028335	72720	Mm.212572	NM_028335	ENSMUSG00000030145	Zfp248	2810037F07Rik|E130106N01Rik	zinc finger protein 248	protein-coding
Diff_Nuc62780	chr8	131734792	131734931	+	0	NA	Intergenic	Intergenic	143827	NM_001168369	75453	Mm.286964	NM_029292	ENSMUSG00000056018	Ccdc7b	1700008F21Rik	coiled-coil domain containing 7B	protein-coding
Diff_Nuc21717	chr14	37693507	37693646	+	0	NA	intron (NM_001347502, intron 8 of 8)	intron (NM_001347502, intron 8 of 8)	39145	NM_001347503	72972	Mm.27621	NM_027045	ENSMUSG00000058690	Ccser2	1700012P13Rik|2900054P12Rik|AI035535|AW108503|Fam190b|Gcap14	coiled-coil serine rich 2	protein-coding
Diff_Nuc3037	chr13	103921872	103922011	+	0	NA	intron (NM_175171, intron 3 of 28)	intron (NM_175171, intron 3 of 28)	202631	NM_175171	328329	Mm.202606	NM_175171	ENSMUSG00000034751	Mast4	4930420O11Rik|AI642422|mKIAA0303	microtubule associated serine/threonine kinase family member 4	protein-coding
Diff_Nuc5681	chr12	95749802	95749941	+	0	NA	Intergenic	Intergenic	584373	NR_106175	102465890		NR_106175	ENSMUSG00000098498	Mir8099-1	Gm27917|mmu-mir-8099-1	microRNA 8099-1	ncRNA
Diff_Nuc43860	chr3	47212382	47212521	+	0	NA	Intergenic	Intergenic	-507747	NR_105800	102465199		NR_105800	ENSMUSG00000098417	Mir6379	Gm27730|mmu-mir-6379	microRNA 6379	ncRNA
Diff_Nuc11233	chr10	50796122	50796261	+	0	NA	Intergenic	RMER10A|LTR|ERVL	180734	NM_011376	20464	Mm.4774	NM_011376	ENSMUSG00000019913	Sim1	bHLHe14|mSIM1	single-minded homolog 1 (Drosophila)	protein-coding
Diff_Nuc11221	chr10	50391232	50391371	+	0	NA	intron (NM_198007, intron 13 of 41)	intron (NM_198007, intron 13 of 41)	78826	NM_198007	77987	Mm.222497	NM_198007	ENSMUSG00000038774	Ascc3	ASC1p200|B630009I04Rik|BC023451|D430001L07Rik|D630041L21|Helic1|RNAH	activating signal cointegrator 1 complex subunit 3	protein-coding
Diff_Nuc44786	chr3	87863442	87863581	+	0	NA	Intergenic	B2_Mm2|SINE|B2	-1094	NM_144897	246703	Mm.205996	NM_144897	ENSMUSG00000028070	Apoa1bp	AA087124|AI-BP|AIBP|Apoa1ip|ESTM37|Naxe	apolipoprotein A-I binding protein	protein-coding
Diff_Nuc38622	chr5	144317472	144317611	+	0	NA	intron (NM_026050, intron 2 of 2)	intron (NM_026050, intron 2 of 2)	7967	NM_026050	67238	Mm.383219	NM_026050	ENSMUSG00000083012	Fam220a	1500026F15Rik|2810453I06Rik|AW047776|Acpin1|Sipar	family with sequence similarity 220, member A	protein-coding
Diff_Nuc12222	chr10	84703942	84704081	+	0	NA	Intergenic	MTE2b|LTR|MaLR	-56212	NM_007771	12952	Mm.26237	NM_007771	ENSMUSG00000020038	Cry1	AU020726|AU021000|Phll1	cryptochrome 1 (photolyase-like)	protein-coding
Diff_Nuc10121	chr10	7126692	7126831	+	0	NA	Intergenic	L1Md_F2|LINE|L1	47991	NM_001204916	670558	Mm.398582	NM_001204916	ENSMUSG00000091618	H60c	4632413I24Rik|Gm9491	histocompatibility 60c	protein-coding
Diff_Nuc55202	chr1	162179312	162179451	+	0	NA	intron (NM_001038621, intron 3 of 8)	intron (NM_001038621, intron 3 of 8)	-36358	NM_009786	12301	Mm.10702	NM_009786	ENSMUSG00000014226	Cacybp	SIP	calcyclin binding protein	protein-coding
Diff_Nuc59222	chr9	107936782	107936921	+	0	NA	intron (NM_013785, intron 3 of 5)	intron (NM_013785, intron 3 of 5)	-14770	NM_177910	331026	Mm.22554	NM_177910	ENSMUSG00000070284	Gmppb	AI317178|E430010H19	GDP-mannose pyrophosphorylase B	protein-coding
Diff_Nuc13767	chr17	15798112	15798251	+	0	NA	Intergenic	B2_Mm2|SINE|B2	29429	NR_045431	71008	Mm.399492	NR_045431		4933401D09Rik	-	RIKEN cDNA 4933401D09 gene	ncRNA
Diff_Nuc60626	chr8	46121892	46122031	+	0	NA	intron (NM_001081286, intron 17 of 25)	intron (NM_001081286, intron 17 of 25)	28811	NR_033588	434310	Mm.334512	NR_033588	ENSMUSG00000066158	AY512931	-	cDNA sequence AY512931	ncRNA
Diff_Nuc25580	chr18	13950352	13950491	+	0	NA	intron (NM_145492, intron 5 of 7)	intron (NM_145492, intron 5 of 7)	180821	NM_145492	225207	Mm.40325	NM_145492	ENSMUSG00000024420	Zfp521	B930086A16Rik|Evi3|Znf521	zinc finger protein 521	protein-coding
Diff_Nuc22923	chr14	87864522	87864661	+	0	NA	intron (NM_172605, intron 3 of 13)	intron (NM_172605, intron 3 of 13)	48201	NM_001253755	219249	Mm.35168	NM_172605	ENSMUSG00000022019	Tdrd3	4732418C03Rik|6720468N18	tudor domain containing 3	protein-coding
Diff_Nuc6401	chr11	4407252	4407391	+	0	NA	intron (NM_028860, intron 7 of 17)	intron (NM_028860, intron 7 of 17)	-66236	NM_029458	75828	Mm.159592	NM_029458	ENSMUSG00000020419	Hormad2	4930529M09Rik	HORMA domain containing 2	protein-coding
Diff_Nuc31375	chr6	17616882	17617021	+	0	NA	TTS (NM_007604)	TTS (NM_007604)	-27043	NM_001289624	64213	Mm.12051	NM_022332	ENSMUSG00000029534	St7	9430001H04Rik|Fam4a2|HELG|RAY1|SEN4|TSG7	suppression of tumorigenicity 7	protein-coding
Diff_Nuc45373	chr3	106802102	106802241	+	0	NA	Intergenic	Intergenic	-36909	NM_008418	16491	Mm.30640	NM_008418	ENSMUSG00000047959	Kcna3	Kca1-3|Kv1.3|Mk-3	potassium voltage-gated channel, shaker-related subfamily, member 3	protein-coding
Diff_Nuc42771	chr4	150522352	150522491	+	0	NA	intron (NM_001081557, intron 8 of 23)	intron (NM_001081557, intron 8 of 23)	58742	NM_001308446	105704528	Mm.415128	NM_001308446	ENSMUSG00000078491	Gm13090	OTTMUSG00000010356	predicted gene 13090	protein-coding
Diff_Nuc4598	chr12	54796652	54796791	+	0	NA	intron (NM_013780, intron 4 of 11)	intron (NM_013780, intron 4 of 11)	447057	NM_013780	27386	Mm.247044	NM_013780	ENSMUSG00000021010	Npas3	4930423H22Rik|bHLHe12	neuronal PAS domain protein 3	protein-coding
Diff_Nuc46436	chr3	152987812	152987951	+	0	NA	intron (NM_011372, intron 3 of 4)	intron (NM_011372, intron 3 of 4)	-26268	NR_126464	75489	Mm.443252	NR_126464	ENSMUSG00000105023	1700012D16Rik	-	RIKEN cDNA 1700012D16 gene	ncRNA
Diff_Nuc13586	chr17	10246067	10246206	+	0	NA	Intergenic	Intergenic	266090	NM_021881	19317	Mm.130694	NM_021881	ENSMUSG00000062078	Qk	1110003F05Rik|1500005P18|QkI|l(17)-1Wis|l17Wis1	quaking	protein-coding
Diff_Nuc1336	chr13	35688062	35688201	+	0	NA	Intergenic	MTD|LTR|MaLR	-63600	NM_009881	12593	Mm.29002	NM_009881	ENSMUSG00000059288	Cdyl	AI325931	chromodomain protein, Y chromosome-like	protein-coding
Diff_Nuc56072	chr1	193943272	193943411	+	0	NA	intron (NM_001346740, intron 8 of 11)	intron (NM_001346740, intron 8 of 11)	-17439	NR_033536	100038712	Mm.474908	NR_033536	ENSMUSG00000097316	Gm10516	ENSMUSG00000073476	predicted gene 10516	ncRNA
Diff_Nuc41027	chr4	97445342	97445481	+	0	NA	intron (NM_010905, intron 1 of 10)	CpG	1094	NM_010905	18027	Mm.31274	NM_010905	ENSMUSG00000028565	Nfia	1110047K16Rik|9430022M17Rik|CTF|NF1-A|NF1A	nuclear factor I/A	protein-coding
Diff_Nuc1025	chr13	23850352	23850491	+	0	NA	Intergenic	Intergenic	1615	NM_178193	326620	Mm.261642	NM_178193	ENSMUSG00000069266	Hist1h4b	-	histone cluster 1, H4b	protein-coding
Diff_Nuc36884	chr5	87105162	87105301	+	0	NA	promoter-TSS (NM_177024)	promoter-TSS (NM_177024)	92	NM_177024	319875	Mm.253994	NM_177024	ENSMUSG00000035861	Tmprss11b	9930019B18Rik|Tmprss11bnl	transmembrane protease, serine 11B	protein-coding
Diff_Nuc30932	chr7	148050772	148050911	+	0	NA	intron (NM_022433, intron 6 of 6)	intron (NM_022433, intron 6 of 6)	7545	NM_053194	101489	Mm.281916	NM_053194	ENSMUSG00000025485	Ric8a	AI114950|RIC-8|Ric8	RIC8 guanine nucleotide exchange factor A	protein-coding
Diff_Nuc57449	chr9	48977762	48977901	+	0	NA	Intergenic	Intergenic	66947	NM_030709	80893	Mm.72799	NM_030709	ENSMUSG00000032268	Tmprss5	spinesin	transmembrane protease, serine 5 (spinesin)	protein-coding
Diff_Nuc15198	chr17	69524242	69524381	+	0	NA	intron (NM_013813, intron 1 of 21)	intron (NM_013813, intron 1 of 21)	18161	NM_013813	13823	Mm.131135	NM_013813	ENSMUSG00000024044	Epb41l3	4.1B|DAL1P|Dal1|Epb4.1l3|NBL3	erythrocyte membrane protein band 4.1 like 3	protein-coding
Diff_Nuc5205	chr12	80054557	80054696	+	0	NA	Intergenic	Intergenic	29839	NM_001170401	268567	Mm.341747	NM_178745	ENSMUSG00000046157	Tmem229b	6330442E10Rik|9830138K24|AU019070	transmembrane protein 229B	protein-coding
Diff_Nuc29509	chr7	96950922	96951061	+	0	NA	intron (NM_181407, intron 5 of 13)	intron (NM_181407, intron 5 of 13)	101148	NM_001162979	70884	Mm.252823	NM_001162979	ENSMUSG00000039391	Ccdc81	4921513D09Rik	coiled-coil domain containing 81	protein-coding
Diff_Nuc25667	chr18	18284532	18284671	+	0	NA	Intergenic	Intergenic	-545102	NR_045374	75162	Mm.60874	NR_045374		4930545E07Rik	-	RIKEN cDNA 4930545E07 gene	ncRNA
Diff_Nuc56163	chr9	3000742	3000881	+	0	NA	Intergenic	GSAT_MM|Satellite|Satellite	37932	NR_039546	100628572		NR_039546	ENSMUSG00000106183	Mir101c	mir-101c|mmu-mir-101c	microRNA 101c	ncRNA
Diff_Nuc62477	chr8	122801732	122801871	+	0	NA	Intergenic	Intergenic	-49671	NR_110496	434353	Mm.411793	NR_110496	ENSMUSG00000097960	A330074K22Rik	-	RIKEN cDNA A330074K22 gene	ncRNA
Diff_Nuc49252	chr2	103330712	103330851	+	0	NA	Intergenic	Intergenic	-5471	NM_009804	12359	Mm.4215	NM_009804	ENSMUSG00000027187	Cat	2210418N07|Cas-1|Cas1|Cs-1	catalase	protein-coding
Diff_Nuc61729	chr8	92879902	92880041	+	0	NA	Intergenic	Lx8|LINE|L1	-7820	NM_172913	244579	Mm.302755	NM_172913	ENSMUSG00000043668	Tox3	500-9|BC052044|C230068E13|CAGF9|Tnrc9	TOX high mobility group box family member 3	protein-coding
Diff_Nuc34603	chr6	140474262	140474401	+	0	NA	intron (NM_144920, intron 4 of 30)	intron (NM_144920, intron 4 of 30)	-96853	NM_178803	11569	Mm.86453	NM_009637	ENSMUSG00000030232	Aebp2	AU023766|B230313N05Rik	AE binding protein 2	protein-coding
Diff_Nuc40918	chr4	92115412	92115551	+	0	NA	Intergenic	Intergenic	-301569	NM_027034	69314	Mm.55891	NM_027034	ENSMUSG00000028533	Izumo3	1700011H22Rik	IZUMO family member 3	protein-coding
Diff_Nuc20009	chr15	72827762	72827901	+	0	NA	intron (NM_001164643, intron 8 of 8)	intron (NM_001164643, intron 8 of 8)	58411	NM_029640	76510	Mm.158902	NM_029640	ENSMUSG00000047921	Trappc9	1810044A24Rik|2900005P22Rik|4632408O18Rik|Ibp|Nibp|TRS130|mKIAA1882	trafficking protein particle complex 9	protein-coding
Diff_Nuc53315	chr1	77042462	77042601	+	0	NA	Intergenic	MER5A|DNA|MER1_type	450812	NR_105770	102465180		NR_105770	ENSMUSG00000099141	Mir6352	Gm27481|mmu-mir-6352	microRNA 6352	ncRNA
Diff_Nuc45788	chr3	125271072	125271211	+	0	NA	intron (NM_022565, intron 3 of 13)	L1_Mus2|LINE|L1	164132	NM_022565	64580	Mm.444289	NM_022565	ENSMUSG00000027971	Ndst4	4930439H17Rik	N-deacetylase/N-sulfotransferase (heparin glucosaminyl) 4	protein-coding
Diff_Nuc35929	chr5	43447302	43447441	+	0	NA	Intergenic	URR1B|DNA|MER1_type	-177331	NM_175937	231207	Mm.7233	NM_175937	ENSMUSG00000039782	Cpeb2	A630055H10Rik|Cpe-bp2	cytoplasmic polyadenylation element binding protein 2	protein-coding
Diff_Nuc55010	chr1	155504682	155504821	+	0	NA	intron (NM_026380, intron 1 of 6)	intron (NM_026380, intron 1 of 6)	4584	NM_026380	67792	Mm.379143	NM_026380	ENSMUSG00000042671	Rgs8	6530413N01Rik	regulator of G-protein signaling 8	protein-coding
Diff_Nuc6448	chr11	5561522	5561661	+	0	NA	intron (NM_023816, intron 24 of 26)	B2_Mm2|SINE|B2	46111	NM_026080	64660	Mm.7328	NM_026080	ENSMUSG00000020477	Mrps24	3110030K20Rik|AI414579|Rpms24	mitochondrial ribosomal protein S24	protein-coding
Diff_Nuc59219	chr9	107894952	107895091	+	0	NA	Intergenic	Intergenic	-6774	NM_026597	68176	Mm.76166	NM_026597	ENSMUSG00000042106	Fam212a	6230427J02Rik|Inka1	family with sequence similarity 212, member A	protein-coding
Diff_Nuc53014	chr1	64585502	64585641	+	0	NA	intron (NM_001037726, intron 1 of 6)	intron (NM_001037726, intron 1 of 6)	6193	NM_001037726	12912	Mm.422634	NM_009952	ENSMUSG00000025958	Creb1	2310001E10Rik|3526402H21Rik|AV083133|Creb|Creb-1	cAMP responsive element binding protein 1	protein-coding
Diff_Nuc27987	chr7	28136942	28137081	+	0	NA	exon (NM_138676, exon 8 of 18)	exon (NM_138676, exon 8 of 18)	4016	NM_138676	192192	Mm.21297	NM_138676	ENSMUSG00000089832	Shkbp1	B930062H15Rik|Sb1	Sh3kbp1 binding protein 1	protein-coding
Diff_Nuc21057	chr14	12793862	12794001	+	0	NA	intron (NM_008981, intron 3 of 29)	intron (NM_008981, intron 3 of 29)	-228526	NM_001347593	19270	Mm.431266	NM_008981	ENSMUSG00000021745	Ptprg	5430405N12Rik|AW046354|AW549872|RPTPgamma	protein tyrosine phosphatase, receptor type, G	protein-coding
Diff_Nuc12534	chr10	96769082	96769221	+	0	NA	Intergenic	Intergenic	-116961	NR_039547	100628616		NR_039547	ENSMUSG00000105557	Mir3966	mmu-mir-3966|mu-mir-3966	microRNA 3966	ncRNA
Diff_Nuc50195	chr2	135798682	135798821	+	0	NA	exon (NM_013829, exon 25 of 37)	exon (NM_013829, exon 25 of 37)	-84912	NM_029530	76161	Mm.41638	NM_029530	ENSMUSG00000027270	Lamp5	3110035N03Rik|6330527O06Rik|BAD-LAMP|LAMP-5	lysosomal-associated membrane protein family, member 5	protein-coding
Diff_Nuc48075	chr2	57439042	57439181	+	0	NA	Intergenic	Intergenic	348318	NM_010274	14571	Mm.3711	NM_010274	ENSMUSG00000026827	Gpd2	AA408484|AI448216|AU021455|AW494132|GPDH|Gdm1|Gpd-m|Gpdh-m|TISP38	glycerol phosphate dehydrogenase 2, mitochondrial	protein-coding
Diff_Nuc1002	chr13	23545442	23545581	+	0	NA	Intergenic	Intergenic	12259	NM_013483	12231	Mm.1420	NM_013483	ENSMUSG00000000706	Btn1a1	Btn	butyrophilin, subfamily 1, member A1	protein-coding
Diff_Nuc16168	chr16	10866212	10866351	+	0	NA	Intergenic	Intergenic	31129	NM_001162932	223970	Mm.325777	NM_001033278	ENSMUSG00000037991	Rmi2	A630055G03Rik|Gm537|Gm929	RecQ mediated genome instability 2	protein-coding
Diff_Nuc42645	chr4	147266392	147266531	+	0	NA	intron (NM_001285923, intron 4 of 18)	L1MB3|LINE|L1	12346	NM_001285923	170731	Mm.154312	NM_133201	ENSMUSG00000029020	Mfn2	D630023P19Rik|Fzo	mitofusin 2	protein-coding
Diff_Nuc60585	chr8	44130642	44130781	+	0	NA	Intergenic	Lx7|LINE|L1	96129	NM_177742	244448	Mm.64542	NM_177742	ENSMUSG00000031651	Triml1	4933403D14|BC050188	tripartite motif family-like 1	protein-coding
Diff_Nuc38964	chr4	7608452	7608591	+	0	NA	Intergenic	Intergenic	120686	NR_040645	71510	Mm.410775	NR_040645	ENSMUSG00000086070	8430436N08Rik	-	RIKEN cDNA 8430436N08 gene	ncRNA
Diff_Nuc58724	chr9	91154662	91154801	+	0	NA	Intergenic	Intergenic	105906	NM_009573	22771	Mm.335350	NM_009573	ENSMUSG00000032368	Zic1	ZIC|ZNF201	zinc finger protein of the cerebellum 1	protein-coding
Diff_Nuc56512	chr9	15097812	15097951	+	0	NA	intron (NM_001199484, intron 5 of 8)	intron (NM_001199484, intron 5 of 8)	8170	NM_133732	70984	Mm.261842	NM_133732	ENSMUSG00000031938	4931406C07Rik	-	RIKEN cDNA 4931406C07 gene	protein-coding
Diff_Nuc27274	chr18	77475012	77475151	+	0	NA	intron (NM_153124, intron 2 of 6)	(TTC)n|Simple_repeat|Simple_repeat	-45616	NM_172834	240411	Mm.380247	NM_172834	ENSMUSG00000032818	Loxhd1	1700096C21Rik|4932417K07|sba	lipoxygenase homology domains 1	protein-coding
Diff_Nuc19314	chr15	40286812	40286951	+	0	NA	Intergenic	L2a|LINE|L2	71942	NR_046185	432945	Mm.321981	NR_046185	ENSMUSG00000056332	Gm16294	EG432945|OTTMUSG00000033304	predicted gene 16294	ncRNA
Diff_Nuc23745	chr19	3999702	3999841	+	0	NA	promoter-TSS (NM_025529)	promoter-TSS (NM_025529)	-809	NM_025529	66387	Mm.259222	NM_025529	ENSMUSG00000024869	Nudt8	2310039H17Rik	nudix (nucleoside diphosphate linked moiety X)-type motif 8	protein-coding
Diff_Nuc41359	chr4	107565852	107565991	+	0	NA	intron (NM_001347160, intron 5 of 7)	intron (NM_001347160, intron 5 of 7)	3417	NM_028754	74098	Mm.274853	NM_028754	ENSMUSG00000028608	0610037L13Rik	1110008H16Rik	RIKEN cDNA 0610037L13 gene	protein-coding
Diff_Nuc3686	chr12	10389072	10389211	+	0	NA	intron (NM_027588, intron 8 of 8)	L1M4|LINE|L1	-8445	NM_023697	105014	Mm.119343	NM_023697	ENSMUSG00000020621	Rdh14	3110030G19Rik|AW215439|PAN2	retinol dehydrogenase 14 (all-trans and 9-cis)	protein-coding
Diff_Nuc6655	chr11	16514332	16514471	+	0	NA	Intergenic	LTR16B2|LTR|ERVL	-105914	NM_001109971	20335	Mm.325350	NM_011343	ENSMUSG00000078974	Sec61g	-	SEC61, gamma subunit	protein-coding
Diff_Nuc10445	chr10	18548102	18548241	+	0	NA	intron (NR_038034, intron 1 of 2)	B3|SINE|B2	3565	NR_038035	73968	Mm.55591	NR_038034		4930444F02Rik	1700010L24Rik|mpiR	RIKEN cDNA 4930444F02 gene	ncRNA
Diff_Nuc38369	chr5	135643792	135643931	+	0	NA	promoter-TSS (NM_009745)	promoter-TSS (NM_009745)	-381	NM_009745	12054	Mm.405834	NM_009745	ENSMUSG00000029681	Bcl7b	-	B cell CLL/lymphoma 7B	protein-coding
Diff_Nuc3320	chr13	113684882	113685021	+	0	NA	intron (NM_028151, intron 16 of 26)	B2_Mm2|SINE|B2	32637	NM_028151	72198	Mm.291029	NM_028151	ENSMUSG00000016018	Skiv2l2	2610528A15Rik|mKIAA0052	superkiller viralicidic activity 2-like 2 (S. cerevisiae)	protein-coding
Diff_Nuc13794	chr17	17183202	17183341	+	0	NA	Intergenic	Lx6|LINE|L1	-17796	NM_001005358	449000	Mm.483718	NM_001005358	ENSMUSG00000096696	Zfp960	-	zinc finger protein 960	protein-coding
Diff_Nuc8056	chr11	68614012	68614151	+	0	NA	intron (NM_175260, intron 28 of 40)	intron (NM_175260, intron 28 of 40)	52552	NM_023668	83431	Mm.31979	NM_023668	ENSMUSG00000018736	Ndel1	2600006O07Rik|MITAP1|NUDEL|mNudel	nudE neurodevelopment protein 1 like 1	protein-coding
Diff_Nuc61480	chr8	85297762	85297901	+	0	NA	intron (NM_145600, intron 1 of 9)	intron (NM_145600, intron 1 of 9)	194	NM_145600	30932	Mm.269248	NM_145600	ENSMUSG00000031711	Zfp330	BC008086|Noa36|Znf330	zinc finger protein 330	protein-coding
Diff_Nuc8106	chr11	69792182	69792321	+	0	NA	intron (NM_018740, intron 4 of 8)	intron (NM_018740, intron 4 of 8)	1581	NM_001253700	54351	Mm.13430	NM_018740	ENSMUSG00000018565	Elp5	Derp6|Rai12	elongator acetyltransferase complex subunit 5	protein-coding
Diff_Nuc48435	chr2	71900862	71901001	+	0	NA	intron (NM_001204166, intron 1 of 27)	intron (NM_001204166, intron 1 of 27)	8257	NM_001204166	56508	Mm.196153	NM_019688	ENSMUSG00000049044	Rapgef4	1300003D15Rik|5730402K07Rik|6330581N18Rik|EPAC 2|Epac-2|Epac2|mKIAA4040	Rap guanine nucleotide exchange factor (GEF) 4	protein-coding
Diff_Nuc62715	chr8	129105812	129105951	+	0	NA	Intergenic	Intergenic	11455	NM_001164598	270110	Mm.334918	NM_001164598	ENSMUSG00000051495	Irf2bp2	E130305N23Rik|IRF-2BP2	interferon regulatory factor 2 binding protein 2	protein-coding
Diff_Nuc35526	chr5	29956322	29956461	+	0	NA	intron (NM_133907, intron 13 of 22)	B3A|SINE|B2	60609	NM_133907	100763	Mm.137746	NM_133907	ENSMUSG00000039000	Ube3c	AI853514|mKIAA0010	ubiquitin protein ligase E3C	protein-coding
Diff_Nuc59725	chr8	5358652	5358791	+	0	NA	Intergenic	LTRIS2|LTR|ERV1	-253434	NM_011388	20494	Mm.3500	NM_011388	ENSMUSG00000023073	Slc10a2	9130221J18Rik|AI605518|ASBT|IBAT|ISBT	solute carrier family 10, member 2	protein-coding
Diff_Nuc13078	chr10	117386202	117386341	+	0	NA	TTS (NR_045342)	TTS (NR_045342)	23756	NR_045342	71067	Mm.410793	NR_045342		4933411E08Rik	-	RIKEN cDNA 4933411E08 gene	ncRNA
Diff_Nuc35530	chr5	30047462	30047601	+	0	NA	Intergenic	Intergenic	-14907	NM_001037940	23950	Mm.290110	NM_011847	ENSMUSG00000029131	Dnajb6	Mrj|mDj4	DnaJ heat shock protein family (Hsp40) member B6	protein-coding
Diff_Nuc59060	chr9	103115572	103115711	+	0	NA	intron (NM_133977, intron 14 of 16)	intron (NM_133977, intron 14 of 16)	-11246	NM_009275	20818	Mm.273053	NM_009275	ENSMUSG00000032553	Srprb	AA409543	signal recognition particle receptor, B subunit	protein-coding
Diff_Nuc61238	chr8	75084202	75084341	+	0	NA	Intergenic	Lx|LINE|L1	10676	NM_172396	66818	Mm.22565	NM_172396	ENSMUSG00000044600	Smim7	9130011J15Rik	small integral membrane protein 7	protein-coding
Diff_Nuc36712	chr5	77399712	77399851	+	0	NA	Intergenic	L1_Mus1|LINE|L1	-3945	NM_025691	66661	Mm.296976	NM_025691	ENSMUSG00000036323	Srp72	5730576P14Rik|72kDa|AI132477|BC019196|C77589	signal recognition particle 72	protein-coding
Diff_Nuc31573	chr6	23555222	23555361	+	0	NA	intron (NM_001252109, intron 3 of 4)	L1Md_F2|LINE|L1	45014	NM_198251	386611	Mm.436547	NM_198251	ENSMUSG00000051956	Rnf133	Greul2	ring finger protein 133	protein-coding
Diff_Nuc3203	chr13	110013852	110013991	+	0	NA	intron (NM_011056, intron 3 of 16)	L1Md_F2|LINE|L1	-101017	NR_030644	100124489		NR_030644	ENSMUSG00000076946	Mir582	Mirn582|mir-582|mmu-mir-582	microRNA 582	ncRNA
Diff_Nuc40842	chr4	88068942	88069081	+	0	NA	intron (NM_025760, intron 4 of 6)	intron (NM_025760, intron 4 of 6)	15819	NM_025760	66775	Mm.386788	NM_025760	ENSMUSG00000028497	Hacd4	4933428I03Rik|Hcad4|Ptplad2	3-hydroxyacyl-CoA dehydratase 4	protein-coding
Diff_Nuc21126	chr14	14826492	14826631	+	0	NA	Intergenic	Intergenic	-18444	NM_139227	246103	Mm.133625	NM_139227	ENSMUSG00000021738	Atxn7	A430107N12Rik|AI627028|Sca7|ataxin-7	ataxin 7	protein-coding
Diff_Nuc53409	chr1	80671352	80671491	+	0	NA	intron (NM_175291, intron 1 of 55)	intron (NM_175291, intron 1 of 55)	-9494	NM_001285927	210293	Mm.133473	NM_175291	ENSMUSG00000038608	Dock10	9330153B10Rik|A630054M16Rik|Jr4|Jr5|R75174|ZIZ3|Zizimin3|mKIAA0694	dedicator of cytokinesis 10	protein-coding
Diff_Nuc33078	chr6	78949132	78949271	+	0	NA	Intergenic	Lx7|LINE|L1	-32835	NR_040302	100504701	Mm.400420	NR_040301	ENSMUSG00000108072	Gm20362	-	predicted gene, 20362	ncRNA
Diff_Nuc12180	chr10	83727042	83727181	+	0	NA	Intergenic	MERVL_2A-int|LTR|ERVL	176105	NM_001004363	77976	Mm.25874	NM_001004363	ENSMUSG00000020032	Nuak1	AU014801|AW494241|B230104P22Rik|Omphk1	NUAK family, SNF1-like kinase, 1	protein-coding
Diff_Nuc35777	chr5	36257822	36257961	+	0	NA	intron (NM_027373, intron 1 of 16)	intron (NM_027373, intron 1 of 16)	21923	NM_027373	70292	Mm.125167	NM_027373	ENSMUSG00000029094	Afap1	2600003E23Rik|9630044L16Rik|AI848729|Afap|mKIAA3018	actin filament associated protein 1	protein-coding
Diff_Nuc25192	chr19	57117937	57118076	+	0	NA	intron (NM_001347459, intron 11 of 15)	intron (NM_001347459, intron 11 of 15)	-34941	NM_001177797	226250	Mm.226284	NM_146102	ENSMUSG00000025083	Afap1l2	AU041783|C86904|mKIAA1914	actin filament associated protein 1-like 2	protein-coding
Diff_Nuc56048	chr1	192977352	192977491	+	0	NA	Intergenic	Intergenic	11275	NM_001109759	619288	Mm.61148	NM_001109759	ENSMUSG00000091017	Fam71a	4933417M04Rik|GARI-L4	family with sequence similarity 71, member A	protein-coding
Diff_Nuc41821	chr4	122636442	122636581	+	0	NA	intron (NM_029662, intron 2 of 13)	intron (NM_029662, intron 2 of 13)	1920	NM_029662	76574	Mm.331842	NM_029662	ENSMUSG00000028655	Mfsd2a	1700018O18Rik|Mfsd2|NLS1	major facilitator superfamily domain containing 2A	protein-coding
Diff_Nuc36150	chr5	52452432	52452571	+	0	NA	Intergenic	Intergenic	74755	NR_105845	102466648		NR_105845	ENSMUSG00000098726	Mir6417	Gm27334|mmu-mir-6417	microRNA 6417	ncRNA
Diff_Nuc16251	chr16	14318402	14318541	+	0	NA	Intergenic	Intergenic	-1046	NM_025345	66086	Mm.42072	NM_025345	ENSMUSG00000022677	Fopnl	0610037P05Rik	Fgfr1op N-terminal like	protein-coding
Diff_Nuc13797	chr17	17236132	17236271	+	0	NA	Intergenic	Intergenic	-22146	NM_011765	22759	Mm.436633	NM_011765	ENSMUSG00000095990	Zfp97	NGD16-4	zinc finger protein 97	protein-coding
Diff_Nuc57680	chr9	56126022	56126161	+	0	NA	intron (NM_172924, intron 3 of 6)	MIRb|SINE|MIR	-117214	NM_019793	56434	Mm.28484	NM_019793	ENSMUSG00000032324	Tspan3	1700055K04Rik|TM4-A|Tm4sf8	tetraspanin 3	protein-coding
Diff_Nuc44366	chr3	68311642	68311781	+	0	NA	intron (NM_001282044, intron 2 of 7)	Lx4B|LINE|L1	13608	NM_001282044	30953	Mm.331064	NM_013928	ENSMUSG00000027777	Schip1	Nf2ip|Schip-1	schwannomin interacting protein 1	protein-coding
Diff_Nuc28294	chr7	46400112	46400251	+	0	NA	Intergenic	L1Md_F|LINE|L1	119723	NR_073038	100861861	Mm.60620	NR_073038		Gm21276	-	predicted gene, 21276	pseudo
Diff_Nuc29401	chr7	91803652	91803791	+	0	NA	intron (NM_022985, intron 1 of 7)	intron (NM_022985, intron 1 of 7)	24140	NM_022985	65098	Mm.209349	NM_022985	ENSMUSG00000030629	Zfand6	3110005P07Rik|Awp1|Za20d3	zinc finger, AN1-type domain 6	protein-coding
Diff_Nuc1165	chr13	30090112	30090251	+	0	NA	Intergenic	Ricksha|DNA|MuDR	-12249	NM_010093	13557	Mm.268356	NM_010093	ENSMUSG00000016477	E2f3	E2F3b|E2f3a	E2F transcription factor 3	protein-coding
Diff_Nuc3417	chr13	118515612	118515751	+	0	NA	intron (NM_010408, intron 2 of 7)	Lx8|LINE|L1	-6863	NR_045508	71100	Mm.414841	NR_045508	ENSMUSG00000079048	4933413L06Rik	-	RIKEN cDNA 4933413L06 gene	ncRNA
Diff_Nuc37376	chr5	106359892	106360031	+	0	NA	Intergenic	B3A|SINE|B2	54374	NM_018759	54367	Mm.248876	NM_018759	ENSMUSG00000029290	Zfp326	5730470H14Rik|ZAN75|Znf326	zinc finger protein 326	protein-coding
Diff_Nuc32834	chr6	67996522	67996661	+	0	NA	Intergenic	L1Md_F|LINE|L1	-480898	NR_003100	75070	Mm.463364	NR_003100		4930515G16Rik	-	myc induced nuclear antigen pseudogene	pseudo
Diff_Nuc49957	chr2	127423052	127423191	+	0	NA	intron (NM_029963, intron 6 of 11)	intron (NM_029963, intron 6 of 11)	9959	NM_029963	77721	Mm.274601	NM_029963	ENSMUSG00000027374	Mrps5	1620401I16Rik|AI850294	mitochondrial ribosomal protein S5	protein-coding
Diff_Nuc13206	chr10	123218692	123218831	+	0	NA	Intergenic	MTE2a|LTR|MaLR	517629	NM_001252387	268354	Mm.51939	NM_182807	ENSMUSG00000044071	Fam19a2	6330575M02|FAM19A2 TAFA-2|TAFA2|Tafa-2	family with sequence similarity 19, member A2	protein-coding
Diff_Nuc4279	chr12	39746422	39746561	+	0	NA	Intergenic	Intergenic	236193	NM_001163154	14009	Mm.4866	NM_007960	ENSMUSG00000004151	Etv1	ER81|Etsrp81	ets variant 1	protein-coding
Diff_Nuc15636	chr17	86144262	86144401	+	0	NA	Intergenic	Intergenic	-56737	NM_011380	20472	Mm.5039	NM_011380	ENSMUSG00000024134	Six2	-	sine oculis-related homeobox 2	protein-coding
Diff_Nuc23772	chr19	4629972	4630111	+	0	NA	intron (NM_001033447, intron 13 of 14)	intron (NM_001033447, intron 13 of 14)	-4424	NM_023131	19671	Mm.391143	NM_023131	ENSMUSG00000024889	Rce1	D19Ertd283e|D19Ertd98e	Ras converting CAAX endopeptidase 1	protein-coding
Diff_Nuc22382	chr14	63672212	63672351	+	0	NA	Intergenic	Intergenic	-1629	NR_046019	72609	Mm.387101	NR_046019		2700070H01Rik	-	RIKEN cDNA 2700070H01 gene	ncRNA
Diff_Nuc16482	chr16	20969302	20969441	+	0	NA	Intergenic	B3|SINE|B2	184646	NM_025634	66561	Mm.422867	NM_025634	ENSMUSG00000090356	Teddm3	2310042E22Rik	transmembrane epididymal family member 3	protein-coding
Diff_Nuc25145	chr19	55431502	55431641	+	0	NA	intron (NM_016862, intron 3 of 7)	B1_Mm|SINE|Alu	41024	NM_001293686	53611	Mm.258637	NM_016862	ENSMUSG00000024983	Vti1a	1110014F16Rik|1110018K19Rik|4921537J05Rik|MVti1|MVti1a|Vti1|Vti1-rp2	vesicle transport through interaction with t-SNAREs 1A	protein-coding
Diff_Nuc17915	chr16	79093772	79093911	+	0	NA	Intergenic	Intergenic	-2499	NM_178855	19146	Mm.5184	NM_008941	ENSMUSG00000022857	Tmprss15	Entk|Prss7	transmembrane protease, serine 15	protein-coding
Diff_Nuc46426	chr3	152406562	152406701	+	0	NA	intron (NM_178016, intron 7 of 11)	intron (NM_178016, intron 7 of 11)	29567	NM_025662	329777	Mm.331447	NM_025662	ENSMUSG00000039047	Pigk	3000001O05Rik	phosphatidylinositol glycan anchor biosynthesis, class K	protein-coding
Diff_Nuc29074	chr7	79871472	79871611	+	0	NA	Intergenic	Intergenic	375413	NR_046024	625243	Mm.261798	NR_046024	ENSMUSG00000108383	Gm6567	-	predicted gene 6567	ncRNA
Diff_Nuc46115	chr3	138143842	138143981	+	0	NA	intron (NM_175224, intron 2 of 10)	intron (NM_175224, intron 2 of 10)	8435	NM_175224	75624	Mm.26833	NM_175224	ENSMUSG00000005813	Metap1	1700029C17Rik|AW047992|mKIAA0094	methionyl aminopeptidase 1	protein-coding
Diff_Nuc32931	chr6	72344382	72344521	+	0	NA	Intergenic	Intergenic	-3790	NM_016794	22320	Mm.1838	NM_016794	ENSMUSG00000050732	Vamp8	AU041171|Edb|endobrevin	vesicle-associated membrane protein 8	protein-coding
Diff_Nuc31368	chr6	17025692	17025831	+	0	NA	intron (NM_207176, intron 1 of 6)	intron (NM_207176, intron 1 of 6)	10612	NM_207176	21753	Mm.436548	NM_011570	ENSMUSG00000029552	Tes	D6Ertd352e|TESS|Tes1|Tes2|testin2	testis derived transcript	protein-coding
Diff_Nuc30817	chr7	142596202	142596341	+	0	NA	Intergenic	Intergenic	-5779	NM_183193	270004	Mm.132547	NM_183193	ENSMUSG00000048377	Foxi2	B130055A05Rik	forkhead box I2	protein-coding
Diff_Nuc23363	chr14	110866492	110866631	+	0	NA	Intergenic	RLTR18B|LTR|ERVK	287810	NM_175499	239250	Mm.49728	NM_175499	ENSMUSG00000045871	Slitrk6	4832410J21Rik|Sltk6	SLIT and NTRK-like family, member 6	protein-coding
Diff_Nuc21704	chr14	35566062	35566201	+	0	NA	Intergenic	Intergenic	-67191	NM_008166	14803	Mm.121569	NM_008166	ENSMUSG00000041078	Grid1	GluD1|GluRdelta1	glutamate receptor, ionotropic, delta 1	protein-coding
Diff_Nuc24393	chr19	27213172	27213311	+	0	NA	Intergenic	Intergenic	-77733	NM_001347441	22359	Mm.4141	NM_013703	ENSMUSG00000024924	Vldlr	AA408956|AI451093|AW047288	very low density lipoprotein receptor	protein-coding
Diff_Nuc13521	chr17	7824512	7824651	+	0	NA	Intergenic	Intergenic	173258	NM_001081416	68655	Mm.379161	NM_001081416	ENSMUSG00000071984	Fndc1	1110027O12Rik|1110051A18Rik|mKIAA1866	fibronectin type III domain containing 1	protein-coding
Diff_Nuc8303	chr11	75622912	75623051	+	0	NA	intron (NR_136933, intron 1 of 3)	MIR|SINE|MIR	-13419	NM_007873	13447	Mm.5137	NM_007873	ENSMUSG00000020848	Doc2b	-	double C2, beta	protein-coding
Diff_Nuc33227	chr6	85010162	85010301	+	0	NA	intron (NM_177077, intron 1 of 21)	Lx3_Mus|LINE|L1	9276	NM_177077	75914	Mm.159621	NM_177077	ENSMUSG00000033769	Exoc6b	4930569O18Rik|G430127E12Rik|Sec15b|Sec15l2|mKIAA0919	exocyst complex component 6B	protein-coding
Diff_Nuc39017	chr4	9259142	9259281	+	0	NA	intron (NM_028940, intron 2 of 5)	intron (NM_028940, intron 2 of 5)	62747	NM_028940	74438	Mm.473368	NM_028940	ENSMUSG00000041216	Clvs1	4933402J24Rik|Clvl1|Rlbp1l1	clavesin 1	protein-coding
Diff_Nuc24255	chr19	22810142	22810281	+	0	NA	intron (NM_001035245, intron 6 of 7)	intron (NM_001035245, intron 6 of 7)	-14884	NR_029591	387200		NR_029591	ENSMUSG00000065507	Mir204	Mirn204|mir-204|mmu-mir-204	microRNA 204	ncRNA
Diff_Nuc39354	chr4	24350852	24350991	+	0	NA	Intergenic	Intergenic	-72688	NM_199467	212377	Mm.120919	NM_199467	ENSMUSG00000045751	Mms22l	F730047E07Rik|Gm134	MMS22-like, DNA repair protein	protein-coding
Diff_Nuc22498	chr14	67628712	67628851	+	0	NA	Intergenic	Intergenic	-1067	NM_009761	12177	Mm.29820	NM_009761	ENSMUSG00000022051	Bnip3l	C86132|D14Ertd719e|Nip3L|Nix	BCL2/adenovirus E1B interacting protein 3-like	protein-coding
Diff_Nuc11735	chr10	69869102	69869241	+	0	NA	Intergenic	Intergenic	-34245	NM_001143777	71721	Mm.477813	NM_024244	ENSMUSG00000043259	Fam13c	1200015N20Rik|C030038O19Rik|mKIAA1796	family with sequence similarity 13, member C	protein-coding
Diff_Nuc40360	chr4	66206242	66206381	+	0	NA	Intergenic	RMER13A|LTR|ERVK	-140794	NM_207109	56079	Mm.445312	NM_019514	ENSMUSG00000028373	Astn2	1d8|Astnl|bM452J22.1	astrotactin 2	protein-coding
Diff_Nuc13645	chr17	11720222	11720361	+	0	NA	intron (NM_016694, intron 6 of 11)	intron (NM_016694, intron 6 of 11)	355764	NR_045808	52027	Mm.442257	NR_045808		D17Ertd648e	-	DNA segment, Chr 17, ERATO Doi 648, expressed	ncRNA
Diff_Nuc62223	chr8	113866582	113866721	+	0	NA	Intergenic	MLT1A1|LTR|MaLR	-4546	NM_029005	74568	Mm.207971	NM_029005	ENSMUSG00000012519	Mlkl	9130019I15Rik	mixed lineage kinase domain-like	protein-coding
Diff_Nuc55125	chr1	158930382	158930521	+	0	NA	Intergenic	Intergenic	-60694	NM_023884	78255	Mm.28376	NM_023884	ENSMUSG00000026594	Ralgps2	1810020P17Rik|2210408F11Rik|4921528G01Rik|9130014M22Rik|AU043409|AW046161	Ral GEF with PH domain and SH3 binding motif 2	protein-coding
Diff_Nuc31230	chr6	9503302	9503441	+	0	NA	Intergenic	Intergenic	603352	NM_008751	18231	Mm.46954	NM_008751	ENSMUSG00000046178	Nxph1	C130005L03Rik	neurexophilin 1	protein-coding
Diff_Nuc32142	chr6	43289672	43289811	+	0	NA	Intergenic	Intergenic	-30188	NM_130869	18291	Mm.17715	NM_130869	ENSMUSG00000029736	Nobox	OG2|Og2x	NOBOX oogenesis homeobox	protein-coding
Diff_Nuc10723	chr10	30330112	30330251	+	0	NA	exon (NM_025798, exon 4 of 5)	exon (NM_025798, exon 4 of 5)	-3741	NR_045008	100504586	Mm.86217	NR_045008	ENSMUSG00000111080	Gm20300	-	predicted gene, 20300	ncRNA
Diff_Nuc51881	chr1	19590592	19590731	+	0	NA	Intergenic	L1_Mus3|LINE|L1	388526	NM_001025305	21419	Mm.137021	NM_009334	ENSMUSG00000025927	Tfap2b	AI606113|AP-2(beta)|E130018K07Rik|Tcfap2b	transcription factor AP-2 beta	protein-coding
Diff_Nuc42628	chr4	146937022	146937161	+	0	NA	intron (NM_001014397, intron 3 of 5)	intron (NM_001014397, intron 3 of 5)	9705	NM_001014397	433804	Mm.332047	NM_001014397	ENSMUSG00000065999	Zfp985	Gm13154|OTTMUSG00000010673	zinc finger protein 985	protein-coding
Diff_Nuc47418	chr2	32441832	32441971	+	0	NA	promoter-TSS (NM_001276425)	promoter-TSS (NM_001276425)	-697	NM_001276425	20448	Mm.27446	NM_011373	ENSMUSG00000079442	St6galnac4	SIAT7-D|ST6GalNAcIV|Siat7d	ST6 (alpha-N-acetyl-neuraminyl-2,3-beta-galactosyl-1,3)-N-acetylgalactosaminide alpha-2,6-sialyltransferase 4	protein-coding
Diff_Nuc24836	chr19	43643682	43643821	+	0	NA	Intergenic	L1MEc|LINE|L1	-43064	NM_008699	18089	Mm.56994	NM_008699	ENSMUSG00000044220	Nkx2-3	Nkx-2.3|Nkx2.3|tinman	NK2 homeobox 3	protein-coding
Diff_Nuc19337	chr15	40829582	40829721	+	0	NA	intron (NM_011766, intron 5 of 7)	intron (NM_011766, intron 5 of 7)	343063	NM_011766	22762	Mm.39496	NM_011766	ENSMUSG00000022306	Zfpm2	B330005D23Rik|FOG-2|FOG2	zinc finger protein, multitype 2	protein-coding
Diff_Nuc43465	chr3	28715862	28716001	+	0	NA	Intergenic	Lx8|LINE|L1	11498	NM_026517	68028	Mm.371630	NM_026517	ENSMUSG00000039221	Rpl22l1	3110001N18Rik|AU041196	ribosomal protein L22 like 1	protein-coding
Diff_Nuc8794	chr11	88506352	88506491	+	0	NA	intron (NM_054043, intron 5 of 13)	GA-rich|Low_complexity|Low_complexity	25856	NR_131025	68397	Mm.426889	NR_131025		0610039H22Rik	-	RIKEN cDNA 0610039H22 gene	ncRNA
Diff_Nuc3287	chr13	112570042	112570181	+	0	NA	intron (NM_011945, intron 1 of 19)	intron (NM_011945, intron 1 of 19)	29080	NM_011945	26401	Mm.15918	NM_011945	ENSMUSG00000021754	Map3k1	MAPKKK1|MEKK1|Mekk	mitogen-activated protein kinase kinase kinase 1	protein-coding
Diff_Nuc15086	chr17	64837832	64837971	+	0	NA	Intergenic	Intergenic	47755	NR_105848	102465228		NR_105848	ENSMUSG00000098984	Mir6420	Gm28007|mmu-mir-6420	microRNA 6420	ncRNA
Diff_Nuc33112	chr6	80670512	80670651	+	0	NA	intron (NM_001347261, intron 2 of 2)	(TG)n|Simple_repeat|Simple_repeat	700944	NM_178731	243499	Mm.483425	NM_178731	ENSMUSG00000052581	Lrrtm4	7530419J18Rik|A230052N11	leucine rich repeat transmembrane neuronal 4	protein-coding
Diff_Nuc51671	chr1	9726162	9726301	+	0	NA	intron (NM_173443, intron 2 of 2)	L1Md_A|LINE|L1	-11498	NR_040462	73331	Mm.460470	NR_040462		1700034P13Rik	-	RIKEN cDNA 1700034P13 gene	ncRNA
Diff_Nuc39597	chr4	34642652	34642791	+	0	NA	intron (NM_001347062, intron 11 of 12)	L1Md_T|LINE|L1	-8034	NM_011895	24060	Mm.281885	NM_011895	ENSMUSG00000028293	Slc35a1	AA408150|AI314851	solute carrier family 35 (CMP-sialic acid transporter), member 1	protein-coding
Diff_Nuc38843	chr5	151638892	151639031	+	0	NA	Intergenic	Intergenic	-116221	NM_013823	16591	Mm.6500	NM_013823	ENSMUSG00000058488	Kl	alpha-kl	klotho	protein-coding
Diff_Nuc33656	chr6	101941992	101942131	+	0	NA	Intergenic	B4|SINE|B4	217818	NR_027989	207157	Mm.57632	NM_177579	ENSMUSG00000052236	Gm9871	0610005I04|EG207157|ENSMUSG00000052236	predicted gene 9871	ncRNA
Diff_Nuc27899	chr7	24906282	24906421	+	0	NA	intron (NM_021307, intron 2 of 4)	B4A|SINE|B4	9012	NM_021307	57745	Mm.82678	NM_021307	ENSMUSG00000052675	Zfp112	Znf112|Znf228	zinc finger protein 112	protein-coding
Diff_Nuc15736	chr17	88840232	88840371	+	0	NA	intron (NM_180974, intron 1 of 5)	CpG	249	NM_180974	14236	Mm.112824	NM_180974	ENSMUSG00000034998	Foxn2	3230402J05Rik|6030465J18Rik|Fkh19|Foxn1|HTLF	forkhead box N2	protein-coding
Diff_Nuc50011	chr2	129368432	129368571	+	0	NA	Intergenic	L1MB3|LINE|L1	-6163	NM_177653	228592	Mm.452175	NM_177653	ENSMUSG00000043727	F830045P16Rik	Sirpb3	RIKEN cDNA F830045P16 gene	protein-coding
Diff_Nuc29486	chr7	96402922	96403061	+	0	NA	intron (NM_028343, intron 4 of 14)	intron (NM_028343, intron 4 of 14)	84306	NM_028343	72759	Mm.208477	NM_028343	ENSMUSG00000039428	Tmem135	2810439K08Rik|AW319712|PMP52	transmembrane protein 135	protein-coding
Diff_Nuc42160	chr4	132461962	132462101	+	0	NA	intron (NM_001163792, intron 5 of 7)	intron (NM_001163792, intron 5 of 7)	16435	NM_145553	230789	Mm.11473	NM_145553	ENSMUSG00000028878	Fam76a	-	family with sequence similarity 76, member A	protein-coding
Diff_Nuc34551	chr6	136982832	136982971	+	0	NA	Intergenic	Intergenic	79857	NM_023898	78600	Mm.290622	NM_023898	ENSMUSG00000064330	Pde6h	A930033D18Rik|PDEgamma	phosphodiesterase 6H, cGMP-specific, cone, gamma	protein-coding
Diff_Nuc12549	chr10	97143102	97143241	+	0	NA	TTS (NR_033537)	TTS (NR_033537)	-12522	NM_025724	66716	Mm.56430	NM_025724	ENSMUSG00000047025	Ccer1	4921510H08Rik|AV259683	coiled-coil glutamate-rich protein 1	protein-coding
Diff_Nuc681	chr13	12180012	12180151	+	0	NA	intron (NM_023868, intron 1 of 104)	RMER17C|LTR|ERVK	19131	NM_023868	20191	Mm.239871	NM_023868	ENSMUSG00000021313	Ryr2	9330127I20Rik|RYR-2	ryanodine receptor 2, cardiac	protein-coding
Diff_Nuc2065	chr13	61455402	61455541	+	0	NA	intron (NM_019539, intron 6 of 7)	intron (NM_019539, intron 6 of 7)	4060	NM_019539	56092	Mm.3692	NM_019539	ENSMUSG00000021440	Cts7	AA408230|AA408952|CTS1|Epcs24|Epcs71	cathepsin 7	protein-coding
Diff_Nuc39237	chr4	17916622	17916761	+	0	NA	intron (NM_019724, intron 2 of 9)	intron (NM_019724, intron 2 of 9)	136086	NM_019724	17389	Mm.187315	NM_019724	ENSMUSG00000028226	Mmp16	MT-MMP 3|MT3-MMP|Mt3mmp	matrix metallopeptidase 16	protein-coding
Diff_Nuc24140	chr19	17475912	17476051	+	0	NA	TTS (NM_019437)	TTS (NM_019437)	7448	NM_019437	54391	Mm.7013	NM_019437	ENSMUSG00000024712	Rfk	0610038L10Rik|AF031381|KOI-4	riboflavin kinase	protein-coding
Diff_Nuc7007	chr11	30135662	30135801	+	0	NA	Intergenic	RMER1B|Other|Other	-15959	NM_175836	20742	Mm.123110	NM_009260	ENSMUSG00000020315	Sptbn1	9930031C03Rik|AL033301|SPTB2|Spnb-2|Spnb2|elf1|elf3|mKIAA4049	spectrin beta, non-erythrocytic 1	protein-coding
Diff_Nuc1878	chr13	55200862	55201001	+	0	NA	intron (NR_121592, intron 1 of 13)	intron (NR_121592, intron 1 of 13)	725	NM_011307	20184	Mm.259301	NM_011307	ENSMUSG00000025878	Uimc1	9430016E08Rik|D330018D10Rik|D630032M02Rik|RIP110|Rxrip110	ubiquitin interaction motif containing 1	protein-coding
Diff_Nuc51408	chr2	180421922	180422061	+	0	NA	intron (NM_011805, intron 4 of 5)	intron (NM_011805, intron 4 of 5)	4762	NR_111965	23856	Mm.253836	NM_011805	ENSMUSG00000038914	Dido1	6720461J16Rik|D130048F08Rik|DATF-1|DIO-1|Datf1|dido	death inducer-obliterator 1	protein-coding
Diff_Nuc50912	chr2	157224962	157225101	+	0	NA	Intergenic	L1MA9|LINE|L1	-24998	NM_009271	20779	Mm.22845	NM_009271	ENSMUSG00000027646	Src	AW259666|pp60c-src	Rous sarcoma oncogene	protein-coding
Diff_Nuc46997	chr2	21063132	21063271	+	0	NA	Intergenic	Intergenic	63791	NM_027728	71233	Mm.27658	NM_027728	ENSMUSG00000026679	Enkur	4933434I06Rik|AU016229	enkurin, TRPC channel interacting protein	protein-coding
Diff_Nuc23480	chr14	118608142	118608281	+	0	NA	Intergenic	Intergenic	-27243	NR_131969	105245869	Mm.460408	NR_131969	ENSMUSG00000090534	LOC105245869	-	uncharacterized LOC105245869	ncRNA
Diff_Nuc23045	chr14	94399292	94399431	+	0	NA	Intergenic	Intergenic	-109463	NM_001346722	211712	Mm.37126	NM_001081377	ENSMUSG00000055421	Pcdh9	-	protocadherin 9	protein-coding
Diff_Nuc18665	chr15	15214132	15214271	+	0	NA	Intergenic	Lx3C|LINE|L1	-1493655	NM_009869	12565	Mm.439758	NM_009869	ENSMUSG00000025370	Cdh9	-	cadherin 9	protein-coding
Diff_Nuc42202	chr4	133393592	133393731	+	0	NA	Intergenic	L1MD|LINE|L1	36985	NM_001285506	20111	Mm.301827	NM_009097	ENSMUSG00000003644	Rps6ka1	Mapkapk-1a|Rsk|Rsk-1|Rsk1|S6K-alpha-1|p90-Rsk1|p90Rsk1|p90S6K|p90rsk	ribosomal protein S6 kinase polypeptide 1	protein-coding
Diff_Nuc61263	chr8	75779612	75779751	+	0	NA	intron (NM_010687, intron 1 of 14)	intron (NM_010687, intron 1 of 14)	97758	NM_001317391	16795	Mm.324371	NM_010687	ENSMUSG00000004383	Large1	BPFD#36|Gyltl1a|Large|Mbp-1|Mbp1|enr|fg|froggy|myd	LARGE xylosyl- and glucuronyltransferase 1	protein-coding
Diff_Nuc28703	chr7	63361612	63361751	+	0	NA	intron (NM_010418, intron 15 of 92)	intron (NM_010418, intron 15 of 92)	56156	NM_010418	15204	Mm.20929	NM_010418	ENSMUSG00000030451	Herc2	D15F32S1h|D7H15F32S1|D7H15F37S1|jdf2|mKIAA0393|rjs	HECT and RLD domain containing E3 ubiquitin protein ligase 2	protein-coding
Diff_Nuc7477	chr11	48622602	48622741	+	0	NA	exon (NM_145377, exon 3 of 6)	exon (NM_145377, exon 3 of 6)	6030	NR_028564	100216540		NR_028564	ENSMUSG00000064780	Snord95	-	small nucleolar RNA, C/D box 95	snoRNA
Diff_Nuc15745	chr17	89011032	89011171	+	0	NA	Intergenic	RLTR22_Mus|LTR|ERVK	-14794	NM_029858	77057	Mm.482203	NM_029858	ENSMUSG00000033855	Ston1	4921524J06Rik|C86231|Salf|Sblf	stonin 1	protein-coding
Diff_Nuc41673	chr4	117720352	117720491	+	0	NA	intron (NM_001285521, intron 2 of 10)	L2|LINE|L2	87130	NM_001285520	20441	Mm.251002	NM_009176	ENSMUSG00000028538	St3gal3	ST3GalIII|ST3N|Siat3|Siat6	ST3 beta-galactoside alpha-2,3-sialyltransferase 3	protein-coding
Diff_Nuc26321	chr18	38928472	38928611	+	0	NA	Intergenic	Intergenic	-123569	NM_001033789	545253	Mm.244585	NM_001033789	ENSMUSG00000036452	Gm5820	EG545253	predicted gene 5820	protein-coding
Diff_Nuc62217	chr8	113659202	113659341	+	0	NA	TTS (NM_198308)	TTS (NM_198308)	10127	NR_040363	434350	Mm.442061	NR_040363		9430091E24Rik	-	RIKEN cDNA 9430091E24 gene	ncRNA
Diff_Nuc38336	chr5	134760902	134761041	+	0	NA	intron (NM_001080747, intron 6 of 33)	intron (NM_001080747, intron 6 of 33)	29659	NM_001080746	14886	Mm.261570	NM_010365	ENSMUSG00000060261	Gtf2i	6030441I21Rik|BAP-135|Diws1t|GtfII-I|Spin|TFII-I|WBSCR6	general transcription factor II I	protein-coding
Diff_Nuc18580	chr15	10475862	10476001	+	0	NA	intron (NM_029430, intron 3 of 10)	intron (NM_029430, intron 3 of 10)	12492	NM_029430	75777	Mm.48812	NM_029430	ENSMUSG00000022249	Ttc23l	4930401A09Rik	tetratricopeptide repeat domain 23-like	protein-coding
Diff_Nuc4846	chr12	68976572	68976711	+	0	NA	Intergenic	Intergenic	-653105	NM_207010	320772	Mm.227680	NM_207010	ENSMUSG00000034912	Mdga2	6720489L24Rik|9330209L04Rik|Adp|Mamdc1	MAM domain containing glycosylphosphatidylinositol anchor 2	protein-coding
Diff_Nuc50390	chr2	141613542	141613681	+	0	NA	intron (NM_001013802, intron 7 of 18)	intron (NM_001013802, intron 7 of 18)	1113589	NM_001081133	16558	Mm.251934	NM_001081133	ENSMUSG00000038844	Kif16b	8430434E15Rik|AA623607|AI789011|C80253|C80902|mKIAA1590	kinesin family member 16B	protein-coding
Diff_Nuc9874	chr11	119666722	119666861	+	0	NA	intron (NM_001306081, intron 9 of 32)	intron (NM_001306081, intron 9 of 32)	28888	NR_045313	319454	Mm.442144	NR_045312	ENSMUSG00000085081	Rptoros	A430071A18Rik	regulatory associated protein of MTOR, complex 1, opposite strand	ncRNA
Diff_Nuc52980	chr1	63744732	63744871	+	0	NA	TTS (NM_029696)	TTS (NM_029696)	-11300	NM_001081658	241073	Mm.297680	NM_001081658	ENSMUSG00000069085	Dytn	Gm215	dystrotelin	protein-coding
Diff_Nuc26881	chr18	63262662	63262801	+	0	NA	intron (NM_001039485, intron 16 of 53)	MTB_Mm|LTR|MaLR	125161	NM_028017	108123	Mm.292687	NM_028017	ENSMUSG00000024581	Napg	2400003O04Rik|SNARE	N-ethylmaleimide sensitive fusion protein attachment protein gamma	protein-coding
Diff_Nuc37973	chr5	123718852	123718991	+	0	NA	Intergenic	Intergenic	40722	NM_026000	67151	Mm.278997	NM_026000	ENSMUSG00000029440	Psmd9	1500011J20Rik|2610202L11Rik|Bridge-1|P27	proteasome (prosome, macropain) 26S subunit, non-ATPase, 9	protein-coding
Diff_Nuc23936	chr19	8843832	8843971	+	0	NA	intron (NM_001276704, intron 18 of 19)	intron (NM_001276704, intron 18 of 19)	-1585	NM_025791	66836	Mm.440071	NM_025791	ENSMUSG00000010097	Tmem223	0610006I08Rik	transmembrane protein 223	protein-coding
Diff_Nuc26616	chr18	51052092	51052231	+	0	NA	Intergenic	Intergenic	-225391	NM_001081224	71373	Mm.63546	NM_001081224	ENSMUSG00000073565	Prr16	5430406M13Rik|AI607429	proline rich 16	protein-coding
Diff_Nuc1920	chr13	55814852	55814991	+	0	NA	Intergenic	B3|SINE|B2	-1090	NM_175150	69672	Mm.294457	NM_175150	ENSMUSG00000021497	Txndc15	2310047H23Rik|AI854086|C5orf14|UNQ335	thioredoxin domain containing 15	protein-coding
Diff_Nuc8617	chr11	84573712	84573851	+	0	NA	Intergenic	MIRb|SINE|MIR	-39847	NR_046197	78471	Mm.47152	NR_046197	ENSMUSG00000085044	1700109G15Rik	-	RIKEN cDNA 1700109G15 gene	ncRNA
Diff_Nuc58597	chr9	86060902	86061041	+	0	NA	Intergenic	Intergenic	297552	NM_027394	70348	Mm.53469	NM_027394	ENSMUSG00000032415	Ube2cbp	2610018I03Rik|Ube3d	ubiquitin-conjugating enzyme E2C binding protein	protein-coding
Diff_Nuc40256	chr4	62897242	62897381	+	0	NA	intron (NM_025685, intron 5 of 60)	intron (NM_025685, intron 5 of 60)	-20574	NR_030477	735262		NR_030477	ENSMUSG00000070102	Mir455	Mirn455|mir-455|mmu-mir-455	microRNA 455	ncRNA
Diff_Nuc17652	chr16	66432502	66432641	+	0	NA	Intergenic	L1Md_A|LINE|L1	-224792	NR_040512	75501	Mm.394300	NR_040512	ENSMUSG00000092599	1700010K23Rik	-	RIKEN cDNA 1700010K23 gene	ncRNA
Diff_Nuc44320	chr3	66524322	66524461	+	0	NA	Intergenic	MTD|LTR|MaLR	258342	NM_001302358	20429	Mm.39093	NM_013665	ENSMUSG00000027833	Shox2	6330543G17Rik|OG12|Og12x|Prx3|SHOT	short stature homeobox 2	protein-coding
Diff_Nuc61122	chr8	72366392	72366531	+	0	NA	intron (NM_001024954, intron 1 of 7)	ID_B1|SINE|B4	9858	NM_001024954	80720	Mm.210823	NM_030555	ENSMUSG00000031860	Pbx4	2410015M21Rik|AI429113|AW045266	pre B cell leukemia homeobox 4	protein-coding
Diff_Nuc4116	chr12	33445492	33445631	+	0	NA	Intergenic	MER90|LTR|ERV1	-59639	NM_021524	59027	Mm.202727	NM_021524	ENSMUSG00000020572	Nampt	1110035O14Rik|AI314458|AI480535|NAmPRTase|Pbef|Pbef1|Visfatin	nicotinamide phosphoribosyltransferase	protein-coding
Diff_Nuc35831	chr5	39257122	39257261	+	0	NA	intron (NM_013748, intron 1 of 18)	intron (NM_013748, intron 1 of 18)	10741	NM_013748	27278	Mm.440845	NM_013748	ENSMUSG00000039315	Clnk	MIST	cytokine-dependent hematopoietic cell linker	protein-coding
Diff_Nuc14244	chr17	30255372	30255511	+	0	NA	intron (NM_148926, intron 2 of 4)	intron (NM_148926, intron 2 of 4)	113409	NM_148926	21769	Mm.220972	NM_148926	ENSMUSG00000044477	Zfand3	AW539211|TEG-27|Tex27	zinc finger, AN1-type domain 3	protein-coding
Diff_Nuc3631	chr12	8243302	8243441	+	0	NA	intron (NM_001167767, intron 3 of 5)	Lx6|LINE|L1	28438	NM_001167767	68832	Mm.25608	NM_172401	ENSMUSG00000037669	Ldah	1110057K04Rik|mLDAH	lipid droplet associated hydrolase	protein-coding
Diff_Nuc35676	chr5	33311022	33311161	+	0	NA	intron (NM_001170567, intron 35 of 42)	intron (NM_001170567, intron 35 of 42)	-50374	NM_011738	22629	Mm.332314	NM_011738	ENSMUSG00000018965	Ywhah	-	tyrosine 3-monooxygenase/tryptophan 5-monooxygenase activation protein, eta polypeptide	protein-coding
Diff_Nuc6275	chr12	118896122	118896261	+	0	NA	intron (NM_175930, intron 10 of 27)	intron (NM_175930, intron 10 of 27)	141239	NM_175930	217944	Mm.227642	NM_175930	ENSMUSG00000041992	Rapgef5	4932413M22|C86120|D030051B22Rik|GFR|Mrgef|mKIAA0277|mmr-gef	Rap guanine nucleotide exchange factor (GEF) 5	protein-coding
Diff_Nuc3377	chr13	115878622	115878761	+	0	NA	3' UTR (NM_134058, exon 2 of 2)	3' UTR (NM_134058, exon 2 of 2)	1675	NM_134058	105083	Mm.486295	NM_134058	ENSMUSG00000042275	Pelo	AA409897|AI852218	pelota homolog (Drosophila)	protein-coding
Diff_Nuc1196	chr13	31029842	31029981	+	0	NA	intron (NM_025588, intron 3 of 27)	intron (NM_025588, intron 3 of 27)	9719	NM_153072	210554	Mm.450571	NM_153072	ENSMUSG00000076430	Hus1b	-	HUS1 checkpoint clamp component B	protein-coding
Diff_Nuc5295	chr12	82581762	82581901	+	0	NA	intron (NM_001309809, intron 2 of 3)	intron (NM_001309809, intron 2 of 3)	4007	NR_132135	66272	Mm.439970	NM_025461	ENSMUSG00000091803	Cox16	1810020G14Rik|1810055I05Rik|BB388670	cytochrome c oxidase assembly protein 16	protein-coding
Diff_Nuc21804	chr14	43724082	43724221	+	0	NA	Intergenic	Intergenic	-30042	NM_001244671	100042055	Mm.429109	NM_001244671	ENSMUSG00000095226	Gm10377	ENSMUSG00000072606	predicted gene 10377	protein-coding
Diff_Nuc52485	chr1	42881822	42881961	+	0	NA	Intergenic	Lx9|LINE|L1	-26187	NM_023514	69527	Mm.252982	NM_023514	ENSMUSG00000060679	Mrps9	2310002A08Rik|AW322516|Mrp-S9|S9mt|mg637	mitochondrial ribosomal protein S9	protein-coding
Diff_Nuc34090	chr6	118546942	118547081	+	0	NA	intron (NM_009781, intron 45 of 46)	intron (NM_009781, intron 45 of 46)	-34737	NM_001081112	232339	Mm.276116	NM_001081112	ENSMUSG00000007827	Ankrd26	5730521P14Rik|BC008111|mKIAA1074	ankyrin repeat domain 26	protein-coding
Diff_Nuc5895	chr12	103582712	103582851	+	0	NA	intron (NM_001161365, intron 3 of 9)	intron (NM_001161365, intron 3 of 9)	60930	NM_001161365	217835	Mm.24145	NM_177620	ENSMUSG00000044456	Rin3	6430500K07|C86933	Ras and Rab interactor 3	protein-coding
Diff_Nuc44594	chr3	79424052	79424191	+	0	NA	intron (NM_025794, intron 3 of 12)	B3|SINE|B2	8568	NM_025794	66841	Mm.28336	NM_025794	ENSMUSG00000027809	Etfdh	0610010I20Rik|AV001013	electron transferring flavoprotein, dehydrogenase	protein-coding
Diff_Nuc32798	chr6	65778252	65778391	+	0	NA	intron (NM_029549, intron 2 of 10)	MTE2b|LTR|MaLR	49365	NM_029549	70779	Mm.263355	NM_027547	ENSMUSG00000029913	Prdm5	4432417F03Rik|6530401I24Rik|AI197291|E130112L17Rik|PFM2	PR domain containing 5	protein-coding
Diff_Nuc10038	chr10	4801962	4802101	+	0	NA	intron (NM_001347732, intron 1 of 145)	intron (NM_001347732, intron 1 of 145)	6182	NM_001347732	64009	Mm.331626	NM_022027	ENSMUSG00000096054	Syne1	8B|A330049M09Rik|BE692247|C130039F11Rik|CPG2|Myne1|mKIAA1756|myne-1	spectrin repeat containing, nuclear envelope 1	protein-coding
Diff_Nuc31242	chr6	10057622	10057761	+	0	NA	Intergenic	Lx3B|LINE|L1	866687	NR_033776	57866	Mm.4397	NR_033776		AA545190	-	EST AA545190	ncRNA
Diff_Nuc20169	chr15	77598482	77598621	+	0	NA	intron (NM_022410, intron 31 of 40)	intron (NM_022410, intron 31 of 40)	-12892	NM_001081970	239552	Mm.125650	NM_001081970	ENSMUSG00000056656	Apol8	9830006J20Rik|APOL-II|Apol2	apolipoprotein L 8	protein-coding
Diff_Nuc47268	chr2	29049152	29049291	+	0	NA	Intergenic	Intergenic	54398	NM_001305805	171171	Mm.442448	NM_133500	ENSMUSG00000035513	Ntng2	2610016D08Rik|Lmnt2	netrin G2	protein-coding
Diff_Nuc35647	chr5	32622922	32623061	+	0	NA	intron (NM_001081407, intron 33 of 58)	intron (NM_001081407, intron 33 of 58)	-32962	NM_172147	665270	Mm.160067	NM_030072	ENSMUSG00000029134	Plb1	4632413E21Rik|4930433E17Rik|4930539A06Rik|BC033606	phospholipase B1	protein-coding
Diff_Nuc15216	chr17	70377702	70377841	+	0	NA	intron (NM_001347411, intron 1 of 14)	intron (NM_001347411, intron 1 of 14)	59358	NM_001347411	224997	Mm.311840	NM_027712	ENSMUSG00000003279	Dlgap1	4933422O14Rik|9630002F18|AI845682|AI848168|BB075781|D17Bwg0511e|GKAP/SAPAP|GKPA/SAPAP|Gkap|Sapap1|mKIAA4162	discs, large (Drosophila) homolog-associated protein 1	protein-coding
Diff_Nuc56607	chr9	20386972	20387111	+	0	NA	intron (NM_172919, intron 1 of 5)	B1_Mus2|SINE|Alu	1269	NM_172919	244721	Mm.86627	NM_172919	ENSMUSG00000058192	Zfp846	2210010B09Rik|9130221F13|Znf846	zinc finger protein 846	protein-coding
Diff_Nuc43204	chr3	17312542	17312681	+	0	NA	Intergenic	L1Md_F2|LINE|L1	-377310	NR_033490	70441	Mm.458192	NR_033490	ENSMUSG00000100252	Mir124-2hg	100040120|2610100L16Rik|6430547I21Rik|A930005K07Rik|AW125202|Gm2612	Mir124-2 host gene (non-protein coding)	ncRNA
Diff_Nuc38882	chr4	3707192	3707331	+	0	NA	intron (NM_010747, intron 10 of 12)	MLT1A0|LTR|MaLR	55541	NM_026147	67427	Mm.21938	NM_026147	ENSMUSG00000028234	Rps20	4632426K06Rik|Dsk4	ribosomal protein S20	protein-coding
Diff_Nuc35723	chr5	34553722	34553861	+	0	NA	intron (NM_001015039, intron 8 of 12)	B1_Mur4|SINE|Alu	-23432	NM_010753	17122	Mm.259260	NM_010753	ENSMUSG00000037235	Mxd4	2810410A03Rik|Mad4|bHLHc12	Max dimerization protein 4	protein-coding
Diff_Nuc50603	chr2	149651712	149651851	+	0	NA	Intergenic	Intergenic	-4738	NM_001085521	433485	Mm.330649	NM_001085521	ENSMUSG00000074736	Syndig1	AW123113|DSPC2|Gm14134|H2C20orf39|OTTMUSG00000015750|Tmem90b	synapse differentiation inducing 1	protein-coding
Diff_Nuc15496	chr17	81166012	81166151	+	0	NA	Intergenic	Intergenic	-38716	NM_001290345	225028	Mm.311948	NM_001081357	ENSMUSG00000024242	Map4k3	4833416M01Rik|4833416M07Rik|9530052P13Rik|Glk|MAPKKKK3|MEKKK 3|MEKKK3|RAB8IPL1	mitogen-activated protein kinase kinase kinase kinase 3	protein-coding
Diff_Nuc32502	chr6	54124342	54124481	+	0	NA	intron (NM_001163640, intron 2 of 12)	intron (NM_001163640, intron 2 of 12)	-90441	NM_001311133	69993	Mm.321147	NM_023543	ENSMUSG00000004633	Chn2	1700026N20Rik|4930557O16Rik|ARHGAP3|Bch	chimerin 2	protein-coding
Diff_Nuc25703	chr18	20889682	20889821	+	0	NA	intron (NM_019737, intron 1 of 8)	intron (NM_019737, intron 1 of 8)	15154	NM_019737	56386	Mm.393827	NM_019737	ENSMUSG00000056124	B4galt6	AA536803|AU022389	UDP-Gal:betaGlcNAc beta 1,4-galactosyltransferase, polypeptide 6	protein-coding
Diff_Nuc61874	chr8	98397082	98397221	+	0	NA	intron (NM_010325, intron 4 of 9)	ORR1A2-int|LTR|MaLR	15114	NM_010325	14719	Mm.230169	NM_010325	ENSMUSG00000031672	Got2	AL022787|FABP-pm|Got-2|Kyat4|mAspAT	glutamatic-oxaloacetic transaminase 2, mitochondrial	protein-coding
Diff_Nuc22025	chr14	52619532	52619671	+	0	NA	exon (NM_001145921, exon 17 of 24)	exon (NM_001145921, exon 17 of 24)	-11097	NR_045728	100502764	Mm.437219	NR_045728	ENSMUSG00000097633	Gm16617	-	predicted gene, 16617	ncRNA
Diff_Nuc56813	chr9	27065182	27065321	+	0	NA	Intergenic	Intergenic	-41438	NM_001326702	235086	Mm.48719	NM_001033323	ENSMUSG00000034275	Igsf9b	AI414108|AI854107|Gm508|mKIAA1030	immunoglobulin superfamily, member 9B	protein-coding
Diff_Nuc9232	chr11	101458872	101459011	+	0	NA	Intergenic	RMER17A2|LTR|ERVK	-13073	NM_001256318	666331	Mm.303457	NM_001256318		LOC666331	-	uncharacterized LOC666331	protein-coding
Diff_Nuc50091	chr2	131920602	131920741	+	0	NA	intron (NM_018824, intron 2 of 15)	intron (NM_018824, intron 2 of 15)	50173	NM_018824	54338	Mm.103581	NM_018824	ENSMUSG00000027340	Slc23a2	AI844736|NBTL1|SVCT2|Slc23a1|YSPL2|YSPL3|mKIAA0238	solute carrier family 23 (nucleobase transporters), member 2	protein-coding
Diff_Nuc143	chrX	44998642	44998781	+	0	NA	Intergenic	L1_Mus2|LINE|L1	247018	NM_053123	93761	Mm.229151	NM_053123	ENSMUSG00000031099	Smarca1	5730494M04Rik|Snf2l	SWI/SNF related, matrix associated, actin dependent regulator of chromatin, subfamily a, member 1	protein-coding
Diff_Nuc30304	chr7	124441132	124441271	+	0	NA	Intergenic	Intergenic	-83292	NM_175645	233781	Mm.461427	NM_175645	ENSMUSG00000030657	Xylt1	8030490L12	xylosyltransferase 1	protein-coding
Diff_Nuc38639	chr5	145062562	145062701	+	0	NA	intron (NM_025833, intron 3 of 13)	intron (NM_025833, intron 3 of 13)	24701	NR_040432	100504231	Mm.441035	NR_040432	ENSMUSG00000086894	Gm15708	OTTMUSG00000025583	predicted gene 15708	ncRNA
Diff_Nuc20413	chr15	84109592	84109731	+	0	NA	intron (NM_133167, intron 3 of 12)	intron (NM_133167, intron 3 of 12)	-45489	NM_022321	64099	Mm.251356	NM_022321	ENSMUSG00000022439	Parvg	AI413459	parvin, gamma	protein-coding
Diff_Nuc33576	chr6	98008012	98008151	+	0	NA	Intergenic	Intergenic	66304	NM_008601	17342	Mm.333284	NM_008601	ENSMUSG00000035158	Mitf	BCC2|Bhlhe32|Gsfbcc2|Vitiligo|Wh|bw|mi|vit	microphthalmia-associated transcription factor	protein-coding
Diff_Nuc28188	chr7	35018602	35018741	+	0	NA	Intergenic	Intergenic	-3316	NM_008155	14751	Mm.589	NM_008155	ENSMUSG00000036427	Gpi1	Amf|Gpi|Gpi-1|Gpi-1r|Gpi-1s|Gpi-1t|Gpi1-r|Gpi1-s|Gpi1-t|Gpi1s|MF|NK|NK/GPI|Nlk|Org|Pgi|Phi	glucose phosphate isomerase 1	protein-coding
Diff_Nuc17758	chr16	70034012	70034151	+	0	NA	Intergenic	L1_Mur2|LINE|L1	-170092	NM_173069	224318	Mm.212743	NM_173069	ENSMUSG00000063163	Speer2	SPEER-2	spermatogenesis associated glutamate (E)-rich protein 2	protein-coding
Diff_Nuc4444	chr12	47776852	47776991	+	0	NA	Intergenic	MTD|LTR|MaLR	142841	NM_021361	664883	Mm.247195	NM_021361	ENSMUSG00000021047	Nova1	9430099M15Rik|G630039L02|Nova-1	neuro-oncological ventral antigen 1	protein-coding
Diff_Nuc49922	chr2	126598072	126598211	+	0	NA	intron (NM_029163, intron 5 of 6)	B3|SINE|B2	11055	NM_029163	75083	Mm.389373	NM_029163	ENSMUSG00000027364	Usp50	1700086G18Rik|4930511O11Rik	ubiquitin specific peptidase 50	protein-coding
Diff_Nuc41120	chr4	100031022	100031161	+	0	NA	intron (NM_013845, intron 4 of 8)	intron (NM_013845, intron 4 of 8)	-120381	NM_001033773	381534	Mm.318133	NM_001033773	ENSMUSG00000069733	Ube2u	-	ubiquitin-conjugating enzyme E2U (putative)	protein-coding
Diff_Nuc21172	chr14	16165652	16165791	+	0	NA	Intergenic	Intergenic	105780	NM_146052	218763	Mm.138039	NM_146052	ENSMUSG00000045201	Lrrc3b	BC019794|LRP15	leucine rich repeat containing 3B	protein-coding
Diff_Nuc19347	chr15	41092982	41093121	+	0	NA	Intergenic	ORR1A0-int|LTR|MaLR	-185977	NM_001130166	170719	Mm.254267	NM_130885	ENSMUSG00000022307	Oxr1	2210416C20Rik|C7|C7B	oxidation resistance 1	protein-coding
Diff_Nuc40085	chr4	54589892	54590031	+	0	NA	Intergenic	MTD|LTR|MaLR	-370856	NM_172867	242466	Mm.102904	NM_172867	ENSMUSG00000060206	Zfp462	6030417H05|9430078C22Rik|Gt4-2|Zfpip	zinc finger protein 462	protein-coding
Diff_Nuc14391	chr17	34033737	34033876	+	0	NA	Intergenic	B2_Mm2|SINE|B2	-6228	NM_001195298	100502766	Mm.335713	NM_001195298	ENSMUSG00000079553	Kifc1	100042970|Gm4137|HSET|KNSL2|Kifc5a|Knsl2a|Tctex-7|Tctex-7A|Tctex7|Tctex7a	kinesin family member C1	protein-coding
Diff_Nuc52226	chr1	33935312	33935451	+	0	NA	intron (NM_001310484, intron 1 of 5)	intron (NM_001310484, intron 1 of 5)	29085	NM_177235	320705	Mm.336619	NM_177235	ENSMUSG00000042182	Bend6	B230209C24Rik	BEN domain containing 6	protein-coding
Diff_Nuc42152	chr4	132379162	132379301	+	0	NA	Intergenic	Intergenic	19853	NM_001290725	100336	Mm.105230	NM_146154	ENSMUSG00000028882	Ppp1r8	6330548N22Rik|AU044684|NIPP1	protein phosphatase 1, regulatory (inhibitor) subunit 8	protein-coding
Diff_Nuc22077	chr14	55141632	55141771	+	0	NA	Intergenic	Intergenic	-5394	NM_001313907	27374	Mm.196585	NM_013768	ENSMUSG00000023110	Prmt5	Jbp1|Skb1	protein arginine N-methyltransferase 5	protein-coding
Diff_Nuc39052	chr4	10952552	10952691	+	0	NA	Intergenic	RMER19C|LTR|ERVK	-17855	NM_175175	71801	Mm.34351	NM_175175	ENSMUSG00000049969	Plekhf2	1110070J07Rik|AA673237|ZFYVE18	pleckstrin homology domain containing, family F (with FYVE domain) member 2	protein-coding
Diff_Nuc33382	chr6	89400162	89400301	+	0	NA	intron (NM_001167736, intron 4 of 6)	intron (NM_001167736, intron 4 of 6)	-87624	NM_008881	18844	Mm.3789	NM_008881	ENSMUSG00000030084	Plxna1	2600013D04Rik|NOV|PlexA1|Plxn1|mKIAA4053	plexin A1	protein-coding
Diff_Nuc53402	chr1	80365382	80365521	+	0	NA	Intergenic	L1_Mus3|LINE|L1	-28186	NM_016716	26554	Mm.12665	NM_016716	ENSMUSG00000004364	Cul3	KIAA0617	cullin 3	protein-coding
Diff_Nuc57976	chr9	64884732	64884871	+	0	NA	exon (NM_028906, exon 3 of 21)	exon (NM_028906, exon 3 of 21)	4536	NM_028906	74388	Mm.202749	NM_028906	ENSMUSG00000032393	Dpp8	2310004I03Rik|4932434F09Rik|AI666706|DPP VIII	dipeptidylpeptidase 8	protein-coding
Diff_Nuc48242	chr2	63313562	63313701	+	0	NA	Intergenic	RMER15|LTR|ERVL	-291287	NM_133207	170738	Mm.242532	NM_133207	ENSMUSG00000059742	Kcnh7	9330137I11Rik|Kv11.3|erg3	potassium voltage-gated channel, subfamily H (eag-related), member 7	protein-coding
Diff_Nuc21750	chr14	39369652	39369791	+	0	NA	intron (NM_008734, intron 3 of 9)	intron (NM_008734, intron 3 of 9)	-341869	NR_045713	75170	Mm.372967	NR_045713	ENSMUSG00000093528	Nrg3os	4930529F24Rik	neuregulin 3, opposite strand	ncRNA
Diff_Nuc36090	chr5	49936682	49936821	+	0	NA	Intergenic	Intergenic	-259853	NM_001199244	80334	Mm.160172	NM_030265	ENSMUSG00000029088	Kcnip4	AV032399|Calp|Calp250|KChIP4|KChIP4a	Kv channel interacting protein 4	protein-coding
Diff_Nuc31751	chr6	30047902	30048041	+	0	NA	intron (NM_001164229, intron 5 of 12)	B1_Mur2|SINE|Alu	21650	NM_001164229	18181	Mm.259258	NM_010938	ENSMUSG00000058440	Nrf1	C87038|D6Ertd415e	nuclear respiratory factor 1	protein-coding
Diff_Nuc9790	chr11	117696702	117696841	+	0	NA	intron (NM_027827, intron 7 of 10)	intron (NM_027827, intron 7 of 10)	-9443	NM_009387	21877	Mm.2661	NM_009387	ENSMUSG00000025574	Tk1	D530002A18Rik|Tk-1|Tk1a|Tk1b	thymidine kinase 1	protein-coding
Diff_Nuc8858	chr11	91816812	91816951	+	0	NA	Intergenic	CT-rich|Low_complexity|Low_complexity	-378012	NM_028547	73470	Mm.67677	NM_028547	ENSMUSG00000046755	Kif2b	1700063D03Rik	kinesin family member 2B	protein-coding
Diff_Nuc1436	chr13	39433262	39433401	+	0	NA	Intergenic	ORR1E|LTR|MaLR	-380587	NM_001170431	108652	Mm.255506	NM_134060	ENSMUSG00000021432	Slc35b3	4921526O06Rik|AI428480|CGI-19|PABST2|PAPST2	solute carrier family 35, member B3	protein-coding
Diff_Nuc8506	chr11	81354552	81354691	+	0	NA	intron (NM_001034013, intron 1 of 9)	intron (NM_001034013, intron 1 of 9)	32420	NM_001033765	237880	Mm.435528	NM_001033765		1700071K01Rik	-	RIKEN cDNA 1700071K01 gene	protein-coding
Diff_Nuc42173	chr4	132799182	132799321	+	0	NA	exon (NM_016693, exon 4 of 29)	exon (NM_016693, exon 4 of 29)	2518	NM_016693	53608	Mm.36640	NM_016693	ENSMUSG00000028862	Map3k6	Ask2|MAPKKK6|MEKK6	mitogen-activated protein kinase kinase kinase 6	protein-coding
Diff_Nuc17679	chr16	67040372	67040511	+	0	NA	intron (NM_178721, intron 1 of 9)	L1_Mus1|LINE|L1	383078	NR_040512	75501	Mm.394300	NR_040512	ENSMUSG00000092599	1700010K23Rik	-	RIKEN cDNA 1700010K23 gene	ncRNA
Diff_Nuc25379	chr18	6574502	6574641	+	0	NA	Intergenic	RMER16-int|LTR|ERVK	-29060	NM_027598	70901	Mm.158484	NM_027598	ENSMUSG00000039540	4921524L21Rik	-	RIKEN cDNA 4921524L21 gene	protein-coding
Diff_Nuc56209	chr9	3023922	3024061	+	0	NA	Intergenic	GSAT_MM|Satellite|Satellite	14752	NR_039546	100628572		NR_039546	ENSMUSG00000106183	Mir101c	mir-101c|mmu-mir-101c	microRNA 101c	ncRNA
Diff_Nuc58302	chr9	74882972	74883111	+	0	NA	Intergenic	B1_Mus1|SINE|Alu	-2380	NM_001142655	59046	Mm.247837	NM_021548	ENSMUSG00000007656	Arpp19	19kDa|2700024H10Rik|ARPP-19|AW559096|Arpp12	cAMP-regulated phosphoprotein 19	protein-coding
Diff_Nuc7214	chr11	37824932	37825071	+	0	NA	Intergenic	Intergenic	352510	NR_131154	100039148	Mm.120467	NR_131154	ENSMUSG00000087388	Gm12128	OTTMUSG00000005422	predicted gene 12128	ncRNA
Diff_Nuc36254	chr5	57742792	57742931	+	0	NA	Intergenic	Lx6|LINE|L1	366297	NR_015588	319216	Mm.332387	NR_015588	ENSMUSG00000097216	4932441J04Rik	-	RIKEN cDNA 4932441J04 gene	ncRNA
Diff_Nuc12241	chr10	85491972	85492111	+	0	NA	intron (NM_001347151, intron 3 of 8)	ORR1A3|LTR|MaLR	7142	NM_001347151	69754	Mm.44236	NM_153195	ENSMUSG00000001786	Fbxo7	2410015K21Rik|A230052G17Rik|AI117679|AW260462|C85118	F-box protein 7	protein-coding
Diff_Nuc44947	chr3	92044072	92044211	+	0	NA	Intergenic	RLTRETN_Mm|LTR|ERVK	-10428	NM_001164787	100303744	Mm.429851	NM_001164787	ENSMUSG00000068893	Sprr2a2	-	small proline-rich protein 2A2	protein-coding
Diff_Nuc44203	chr3	60780122	60780261	+	0	NA	Intergenic	MLT1D|LTR|MaLR	-26516	NM_008772	18441	Mm.281452	NM_008772	ENSMUSG00000027765	P2ry1	P2Y1	purinergic receptor P2Y, G-protein coupled 1	protein-coding
Diff_Nuc23339	chr14	109313572	109313711	+	0	NA	promoter-TSS (NM_199065)	promoter-TSS (NM_199065)	-185	NM_199065	76965	Mm.257268	NM_199065	ENSMUSG00000075478	Slitrk1	3200001I04Rik	SLIT and NTRK-like family, member 1	protein-coding
Diff_Nuc16973	chr16	37254242	37254381	+	0	NA	intron (NM_172440, intron 9 of 27)	intron (NM_172440, intron 9 of 27)	130733	NM_001114613	207227	Mm.80170	NM_172440	ENSMUSG00000022829	Stxbp5l	9430094L02|A830015P08Rik|LLGL4|T2dm1|t2md1|tomosyn-2	syntaxin binding protein 5-like	protein-coding
Diff_Nuc14226	chr17	29768952	29769091	+	0	NA	intron (NR_132314, intron 5 of 27)	MER102a|DNA|MER1_type	17287	NM_021419	58230	Mm.305994	NM_021419	ENSMUSG00000090083	Rnf8	3830404E21Rik|AIP37|laXp180	ring finger protein 8	protein-coding
Diff_Nuc7730	chr11	56210292	56210431	+	0	NA	Intergenic	L1Md_T|LINE|L1	-355872	NM_153079	216749	Mm.213205	NM_153079	ENSMUSG00000037393	Nmur2	Nmu2r	neuromedin U receptor 2	protein-coding
Diff_Nuc3487	chr12	3468312	3468451	+	0	NA	intron (NM_172421, intron 4 of 10)	intron (NM_172421, intron 4 of 10)	41524	NM_172421	75302	Mm.120475	NM_172421	ENSMUSG00000037486	Asxl2	4930556B16Rik|mKIAA1685	additional sex combs like 2 (Drosophila)	protein-coding
Diff_Nuc36747	chr5	79830172	79830311	+	0	NA	Intergenic	L1VL1|LINE|L1	-1619355	NM_001347367	319387	Mm.273631	NM_198702	ENSMUSG00000037605	Adgrl3	5430402I23Rik|CIRL-3|D130075K09Rik|Gm1379|LEC3|Lphn3|mKIAA0768	adhesion G protein-coupled receptor L3	protein-coding
Diff_Nuc19928	chr15	69389272	69389411	+	0	NA	Intergenic	Lx5|LINE|L1	288378	NR_130983	75076		NR_130983		4930504C09Rik	-	RIKEN cDNA 4930504C09 gene	ncRNA
Diff_Nuc710	chr13	12992042	12992181	+	0	NA	Intergenic	Lx8|LINE|L1	-99765	NM_011118	18812	Mm.457984	NM_011118	ENSMUSG00000056457	Prl2c3	Ghd1|MRP-2|MRP-3|Mrpplf3|PLF-2|PLF-3|Plf2|Prl2c4|mrp/plf3	prolactin family 2, subfamily c, member 3	protein-coding
Diff_Nuc6370	chr11	3602272	3602411	+	0	NA	Intergenic	Intergenic	19889	NM_001302631	74309	Mm.61022	NM_152818	ENSMUSG00000020435	Osbp2	1700095P05Rik|C630001G20Rik|Gm244|ORP-4|OSBPL1	oxysterol binding protein 2	protein-coding
Diff_Nuc18004	chr16	84502652	84502791	+	0	NA	Intergenic	Intergenic	131333	NR_040567	75247	Mm.417813	NR_040567		4930553E22Rik	-	RIKEN cDNA 4930553E22 gene	ncRNA
Diff_Nuc42859	chr4	153760962	153761101	+	0	NA	intron (NM_001291029, intron 3 of 15)	intron (NM_001291029, intron 3 of 15)	-87027	NM_001112744	230972	Mm.38481	NM_001112744	ENSMUSG00000029032	Arhgef16	-	Rho guanine nucleotide exchange factor (GEF) 16	protein-coding
Diff_Nuc61395	chr8	81858962	81859101	+	0	NA	Intergenic	Intergenic	40054	NR_045823	234479	Mm.238026	NR_045822		Gm4890	A630049P17	predicted gene 4890	ncRNA
Diff_Nuc23169	chr14	100444582	100444721	+	0	NA	intron (NM_010636, intron 2 of 6)	intron (NM_010636, intron 2 of 6)	104364	NM_010636	16597	Mm.396499	NM_010636	ENSMUSG00000072294	Klf12	2700063E05Rik|AI225908|AI315654|AP-2rep|B130052C06Rik|D530033K05Rik	Kruppel-like factor 12	protein-coding
Diff_Nuc2268	chr13	69614312	69614451	+	0	NA	Intergenic	Lx|LINE|L1	58361	NM_198600	210106	Mm.315959	NM_198600	ENSMUSG00000034575	Papd7	LAK-1|POLK|Pols|TRF4|TRF4-1	PAP associated domain containing 7	protein-coding
Diff_Nuc57951	chr9	64364362	64364501	+	0	NA	intron (NM_172522, intron 4 of 22)	intron (NM_172522, intron 4 of 22)	130998	NM_001134399	214058	Mm.127721	NM_172522	ENSMUSG00000036466	Megf11	2410080H04Rik|D130061K05	multiple EGF-like-domains 11	protein-coding
Diff_Nuc32033	chr6	39360432	39360571	+	0	NA	intron (NM_018810, intron 1 of 7)	intron (NM_018810, intron 1 of 7)	9274	NM_001311109	54484	Mm.270484	NM_018810	ENSMUSG00000029922	Mkrn1	RFP	makorin, ring finger protein, 1	protein-coding
Diff_Nuc57366	chr9	46171732	46171871	+	0	NA	Intergenic	MIRc|SINE|MIR	-43732	NM_183104	74361	Mm.159169	NM_183104	ENSMUSG00000056617	4931429L15Rik	-	RIKEN cDNA 4931429L15 gene	protein-coding
Diff_Nuc46656	chr2	4938162	4938301	+	0	NA	Intergenic	MT2B|LTR|ERVL	-4394	NM_027290	70024	Mm.23828	NM_027290	ENSMUSG00000026669	Mcm10	2410041F14Rik|AU018508|C330019M07Rik|C79164	minichromosome maintenance 10 replication initiation factor	protein-coding
Diff_Nuc14181	chr17	28624212	28624351	+	0	NA	Intergenic	B2_Mm2|SINE|B2	-1187	NM_010220	14229	Mm.276405	NM_010220	ENSMUSG00000024222	Fkbp5	D17Ertd592e|Dit1|FKBP-5|FKBP51	FK506 binding protein 5	protein-coding
Diff_Nuc54065	chr1	111399822	111399961	+	0	NA	Intergenic	L1Md_Gf|LINE|L1	-479586	NM_001316743	241201	Mm.213407	NM_172853	ENSMUSG00000026312	Cdh7	9330156F07Rik|CDH7L1	cadherin 7, type 2	protein-coding
Diff_Nuc58595	chr9	86050272	86050411	+	0	NA	Intergenic	L1_Mus2|LINE|L1	308182	NM_027394	70348	Mm.53469	NM_027394	ENSMUSG00000032415	Ube2cbp	2610018I03Rik|Ube3d	ubiquitin-conjugating enzyme E2C binding protein	protein-coding
Diff_Nuc47971	chr2	54057662	54057801	+	0	NA	Intergenic	L1Md_F2|LINE|L1	-119768	NM_023396	67874	Mm.27086	NM_023396	ENSMUSG00000075334	Rprm	2410012A13Rik|Reprimo	reprimo, TP53 dependent G2 arrest mediator candidate	protein-coding
Diff_Nuc48863	chr2	90817452	90817591	+	0	NA	intron (NM_001244891, intron 2 of 14)	intron (NM_001244891, intron 2 of 14)	36967	NM_017368	13046	Mm.29495	NM_017368	ENSMUSG00000005506	Celf1	1600010O03Rik|AA407467|Brunol2|CUG-BP|CUG-BP1|CUGBP|Cugbp1|D2Wsu101e|HNAB50|NAB50	CUGBP, Elav-like family member 1	protein-coding
Diff_Nuc22729	chr14	77742212	77742351	+	0	NA	intron (NM_172813, intron 3 of 18)	intron (NM_172813, intron 3 of 18)	164394	NR_033141	629678	Mm.390721	NM_001037935	ENSMUSG00000067973	Gm6994	EG629678	predicted gene 6994	ncRNA
Diff_Nuc22626	chr14	73823832	73823971	+	0	NA	Intergenic	Intergenic	-38823	NM_008410	16432	Mm.4266	NM_008410	ENSMUSG00000022108	Itm2b	AI256040|Bri|Bri2|Bricd2b|D14Sel6|E25BMM|imBRI2	integral membrane protein 2B	protein-coding
Diff_Nuc59130	chr9	105516042	105516181	+	0	NA	Intergenic	Intergenic	-29214	NM_001081309	75669	Mm.274830	NM_029380	ENSMUSG00000032571	Pik3r4	2210010O15Rik|C730038E05Rik|C85833|D9Ertd418e	phosphatidylinositol 3 kinase, regulatory subunit, polypeptide 4, p150	protein-coding
Diff_Nuc54209	chr1	120524362	120524501	+	0	NA	promoter-TSS (NM_023755)	promoter-TSS (NM_023755)	-91	NM_023755	81879	Mm.24621	NM_023755	ENSMUSG00000026380	Tfcp2l1	1810030F05Rik|4932442M07Rik|AA575098|Cp2l1|Crtr-1|D930018N21Rik|LBP-9|Tcfcp2l1	transcription factor CP2-like 1	protein-coding
Diff_Nuc18720	chr15	18633162	18633301	+	0	NA	Intergenic	Lx2|LINE|L1	-115471	NM_001316758	320873	Mm.117794	NM_009865	ENSMUSG00000022321	Cdh10	A830016G23Rik|C030003B10Rik|C030011H18Rik	cadherin 10	protein-coding
Diff_Nuc16964	chr16	37010192	37010331	+	0	NA	Intergenic	MIR|SINE|MIR	-1611	NM_029977	77782	Mm.259114	NM_029977	ENSMUSG00000034206	Polq	A430110D14Rik	polymerase (DNA directed), theta	protein-coding
Diff_Nuc28786	chr7	67013992	67014131	+	0	NA	TTS (NR_002895).8	TTS (NR_002895).8	246	NR_002895	64243	Mm.423722	NR_002895	ENSMUSG00000096019	Snord116	MBII-85|Pwcr1	small nucleolar RNA, C/D box 116	snoRNA
Diff_Nuc14417	chr17	35076232	35076371	+	0	NA	Intergenic	Intergenic	8103	NM_010893	18010	Mm.8856	NM_010893	ENSMUSG00000007038	Neu1	AA407268|AA407316|Aglp|Apl|Bat-7|Bat7|G9|Map-2|Neu|Neu-1	neuraminidase 1	protein-coding
Diff_Nuc9971	chr11	121342322	121342461	+	0	NA	intron (NM_029878, intron 7 of 38)	intron (NM_029878, intron 7 of 38)	29128	NM_029878	108903	Mm.23686	NM_029878	ENSMUSG00000039230	Tbcd	2310057L06Rik|A030005L14Rik|mKIAA0988	tubulin-specific chaperone d	protein-coding
Diff_Nuc31797	chr6	31227682	31227821	+	0	NA	intron (NR_040257, intron 2 of 7)	intron (NR_040257, intron 2 of 7)	57400	NR_040261	73652	Mm.441297	NR_040257	ENSMUSG00000087380	2210408F21Rik	-	RIKEN cDNA 2210408F21 gene	ncRNA
Diff_Nuc27528	chr7	3359082	3359221	+	0	NA	intron (NM_133189, intron 3 of 4)	RSINE1|SINE|B4	22466	NM_133189	81904	Mm.214994	NM_133189	ENSMUSG00000069806	Cacng7	-	calcium channel, voltage-dependent, gamma subunit 7	protein-coding
Diff_Nuc49143	chr2	98502232	98502371	+	0	NA	Intergenic	Intergenic	1194487	NM_178725	241568	Mm.241682	NM_178725	ENSMUSG00000050587	Lrrc4c	6430556C10Rik|NGL-1	leucine rich repeat containing 4C	protein-coding
Diff_Nuc60997	chr8	66745292	66745431	+	0	NA	Intergenic	Intergenic	-60571	NM_009390	21892	Mm.418367	NM_009390	ENSMUSG00000053626	Tll1	Tll|Tll-1	tolloid-like	protein-coding
Diff_Nuc23571	chr14	122018792	122018931	+	0	NA	intron (NM_001128308, intron 26 of 53)	intron (NM_001128308, intron 26 of 53)	78778	NM_001347596	105445	Mm.378591	NM_134074	ENSMUSG00000025558	Dock9	AA959601|AW538057|B230309H04Rik|D14Wsu89e|Zizimin1|mKIAA1058	dedicator of cytokinesis 9	protein-coding
Diff_Nuc36195	chr5	54204092	54204231	+	0	NA	intron (NM_144517, intron 1 of 20)	Lx7|LINE|L1	3295	NM_144517	67249	Mm.28823	NM_144517	ENSMUSG00000039178	Tbc1d19	2810453K03Rik	TBC1 domain family, member 19	protein-coding
Diff_Nuc21455	chr14	27744492	27744631	+	0	NA	intron (NM_145221, intron 16 of 21)	MTB-int|LTR|MaLR	36771	NM_080856	142687	Mm.138259	NM_080856	ENSMUSG00000021898	Asb14	Asb-14	ankyrin repeat and SOCS box-containing 14	protein-coding
Diff_Nuc48024	chr2	55427452	55427591	+	0	NA	intron (NM_008426, intron 3 of 3)	L1MC2|LINE|L1	139140	NM_008426	16519	Mm.5127	NM_008426	ENSMUSG00000026824	Kcnj3	GIRK-1|GIRK1|Kcnf3|Kir3.1	potassium inwardly-rectifying channel, subfamily J, member 3	protein-coding
Diff_Nuc11116	chr10	46739692	46739831	+	0	NA	Intergenic	Intergenic	1212251	NR_040624	320363	Mm.123343	NR_040624	ENSMUSG00000110874	D030045P18Rik	-	RIKEN cDNA D030045P18 gene	ncRNA
Diff_Nuc38000	chr5	124454592	124454731	+	0	NA	TTS (NM_177876)	TTS (NM_177876)	7800	NR_105999	102465625		NR_105999	ENSMUSG00000098454	Mir7032	Gm27309|mmu-mir-7032	microRNA 7032	ncRNA
Diff_Nuc20722	chr15	95298262	95298401	+	0	NA	intron (NM_001289653, intron 4 of 20)	intron (NM_001289653, intron 4 of 20)	60352	NM_001289653	54003	Mm.3959	NM_016743	ENSMUSG00000022454	Nell2	A330108N19Rik|R75516|mel91	NEL-like 2	protein-coding
Diff_Nuc16249	chr16	14224262	14224401	+	0	NA	intron (NM_001161775, intron 16 of 40)	intron (NM_001161775, intron 16 of 40)	60963	NM_001114085	67203	Mm.24105	NM_023317	ENSMUSG00000022678	Nde1	2810027M15Rik|AU042936|AW822251|Nude|mNudE	nudE neurodevelopment protein 1	protein-coding
Diff_Nuc17420	chr16	54362812	54362951	+	0	NA	Intergenic	L1Md_F3|LINE|L1	920469	NM_178720	239852	Mm.245045	NM_178720	ENSMUSG00000064310	Zpld1	9430016A21Rik	zona pellucida like domain containing 1	protein-coding
Diff_Nuc39829	chr4	45084192	45084331	+	0	NA	intron (NM_001024142, intron 1 of 10)	B3A|SINE|B2	13215	NM_001024142	269529	Mm.389552	NM_001024142	ENSMUSG00000048232	Fbxo10	FBX10|Gm634	F-box protein 10	protein-coding
Diff_Nuc43752	chr3	40876812	40876951	+	0	NA	intron (NM_027558, intron 1 of 2)	intron (NM_027558, intron 1 of 2)	10087	NM_027558	70804	Mm.40321	NM_027558	ENSMUSG00000049940	Pgrmc2	4631434O19Rik|5730409G06Rik|DG6|PMBP	progesterone receptor membrane component 2	protein-coding
Diff_Nuc58061	chr9	66526522	66526661	+	0	NA	Intergenic	Intergenic	-34902	NM_178396	76459	Mm.277921	NM_178396	ENSMUSG00000032373	Car12	2310047E01Rik|AI314958|CA-XII|Ca12	carbonic anhydrase 12	protein-coding
Diff_Nuc22854	chr14	82781062	82781201	+	0	NA	Intergenic	Intergenic	-2062239	NM_001013753	219228	Mm.153643	NM_001013753	ENSMUSG00000035566	Pcdh17	C030033F14Rik|Gm78	protocadherin 17	protein-coding
Diff_Nuc44006	chr3	52916642	52916781	+	0	NA	intron (NM_175386, intron 2 of 3)	intron (NM_175386, intron 2 of 3)	71242	NM_175386	108927	Mm.118617	NM_175386	ENSMUSG00000048332	Lhfp	2810489O06Rik|AI194968	lipoma HMGIC fusion partner	protein-coding
Diff_Nuc29458	chr7	95382302	95382441	+	0	NA	Intergenic	Intergenic	-44224	NM_009982	13032	Mm.89295	NM_009982	ENSMUSG00000030560	Ctsc	AI047818|CatC|DPP1|DPPI	cathepsin C	protein-coding
Diff_Nuc20557	chr15	89110862	89111001	+	0	NA	intron (NM_026813, intron 19 of 24)	intron (NM_026813, intron 19 of 24)	25232	NR_105924	102465981		NR_105924	ENSMUSG00000098442	Mir6959	Gm27807|mmu-mir-6959	microRNA 6959	ncRNA
Diff_Nuc26657	chr18	53415562	53415701	+	0	NA	intron (NM_029394, intron 1 of 6)	RSINE1|SINE|B4	10315	NM_029394	69226	Mm.32414	NM_029394	ENSMUSG00000024535	Snx24	2810011K15Rik|5730433I16Rik|AI451341	sorting nexing 24	protein-coding
Diff_Nuc58472	chr9	80450862	80451001	+	0	NA	Intergenic	RMER2|LTR|ERV1	-91886	NM_022016	63859	Mm.422780	NM_022016	ENSMUSG00000032343	Impg1	A930015H12Rik|IMP150|SPACR	interphotoreceptor matrix proteoglycan 1	protein-coding
Diff_Nuc47373	chr2	31826572	31826711	+	0	NA	3' UTR (NM_145144, exon 6 of 6)	3' UTR (NM_145144, exon 6 of 6)	-3329	NM_172268	227720	Mm.289686	NM_172268	ENSMUSG00000001855	Nup214	BC039282|CAN|D2H9S46E	nucleoporin 214	protein-coding
Diff_Nuc58616	chr9	86451022	86451161	+	0	NA	intron (NM_001163746, intron 10 of 11)	intron (NM_001163746, intron 10 of 11)	14358	NM_001163746	109785	Mm.390201	NM_028352	ENSMUSG00000056131	Pgm3	2810473H05Rik|Agm1|BB187688|C77933|PAGM|Pgm-3	phosphoglucomutase 3	protein-coding
Diff_Nuc42695	chr4	148483502	148483641	+	0	NA	intron (NM_001025296, intron 3 of 5)	B1F1|SINE|Alu	5320	NM_001025296	13347	Mm.41433	NM_010044	ENSMUSG00000028974	Dffa	A330085O09Rik|DFF35|Dff45|ICAD|ICAD-L|ICAD-S	DNA fragmentation factor, alpha subunit	protein-coding
Diff_Nuc51445	chr2	181101392	181101531	+	0	NA	intron (NM_001048148, intron 1 of 5)	ID4_|SINE|ID	1333	NM_001048148	229007	Mm.87720	NM_144894	ENSMUSG00000027582	Zgpat	1500006I01Rik|BC021513	zinc finger, CCCH-type with G patch domain	protein-coding
Diff_Nuc3344	chr13	114529412	114529551	+	0	NA	Intergenic	RSINE1|SINE|B4	-55235	NM_172595	218639	Mm.79837	NM_172595	ENSMUSG00000042348	Arl15	A430036I03|Arfrp2|C230032K13Rik	ADP-ribosylation factor-like 15	protein-coding
Diff_Nuc27750	chr7	16616922	16617061	+	0	NA	Intergenic	Intergenic	-32147	NM_001081418	243842	Mm.440249	NM_001081418	ENSMUSG00000070808	Gltscr1	-	glioma tumor suppressor candidate region gene 1	protein-coding
Diff_Nuc55630	chr1	178083242	178083381	+	0	NA	intron (NM_176916, intron 1 of 9)	Tigger7|DNA|MER2_type	60762	NM_001195816	319455	Mm.338001	NM_176916	ENSMUSG00000055214	Pld5	B230365F16Rik	phospholipase D family, member 5	protein-coding
Diff_Nuc51410	chr2	180443932	180444071	+	0	NA	promoter-TSS (NM_001289652)	promoter-TSS (NM_001289652)	703	NM_177852	23856	Mm.253836	NM_011805	ENSMUSG00000038914	Dido1	6720461J16Rik|D130048F08Rik|DATF-1|DIO-1|Datf1|dido	death inducer-obliterator 1	protein-coding
Diff_Nuc39064	chr4	11152622	11152761	+	0	NA	intron (NM_001159595, intron 15 of 26)	intron (NM_001159595, intron 15 of 26)	28715	NM_178112	72656	Mm.246713	NM_178112	ENSMUSG00000040738	Ints8	2810013E07Rik|AV063769|D130008D20Rik	integrator complex subunit 8	protein-coding
Diff_Nuc40137	chr4	57274097	57274236	+	0	NA	intron (NM_011207, intron 5 of 25)	intron (NM_011207, intron 5 of 25)	40543	NM_011207	545622	Mm.246552	NM_011207	ENSMUSG00000038764	Ptpn3	9530011I20Rik|PTP-H1|PTPCL	protein tyrosine phosphatase, non-receptor type 3	protein-coding
Diff_Nuc47315	chr2	30035002	30035141	+	0	NA	Intergenic	Intergenic	-1092	NM_172660	227695	Mm.4449	NM_172660	ENSMUSG00000039660	Spout1	9930028P05|AL033358|D2Wsu81e	SPOUT domain containing methyltransferase 1	protein-coding
Diff_Nuc11906	chr10	76760452	76760591	+	0	NA	intron (NM_001024837, intron 9 of 10)	PB1D10|SINE|Alu	38476	NM_030262	80294	Mm.203556	NM_030262	ENSMUSG00000020260	Pofut2	2310011G23Rik|AI256847|BC003494|C21orf80|FUT13	protein O-fucosyltransferase 2	protein-coding
Diff_Nuc47894	chr2	51393602	51393741	+	0	NA	Intergenic	RLTR14|LTR|ERV1	-89360	NM_199158	387511	Mm.377918	NM_199158	ENSMUSG00000056115	Tas2r134	T2R134|Tas2r34	taste receptor, type 2, member 134	protein-coding
Diff_Nuc1897	chr13	55572952	55573091	+	0	NA	intron (NM_001030296, intron 1 of 2)	CpG	6116	NR_105909	102465569		NR_105909	ENSMUSG00000098341	Mir6944	Gm27710|mmu-mir-6944	microRNA 6944	ncRNA
Diff_Nuc41136	chr4	100817492	100817631	+	0	NA	intron (NM_183024, intron 11 of 11)	L1MB7|LINE|L1	75918	NM_183024	242570	Mm.185636	NM_183024	ENSMUSG00000035275	Raver2	A430091O22Rik	ribonucleoprotein, PTB-binding 2	protein-coding
Diff_Nuc59173	chr9	106879422	106879561	+	0	NA	intron (NM_153413, intron 23 of 52)	A-rich|Low_complexity|Low_complexity	-85222	NM_029103	74840	Mm.29778	NM_029103	ENSMUSG00000032575	Manf	3230402M22Rik|AA407711|AA408789|AA673178|Armet|D17914|D18Mgi17	mesencephalic astrocyte-derived neurotrophic factor	protein-coding
Diff_Nuc5012	chr12	74436842	74436981	+	0	NA	intron (NM_001037717, intron 6 of 15)	(TTTTG)n|Simple_repeat|Simple_repeat	49076	NM_001037717	625098	Mm.32075	NM_001037717	ENSMUSG00000044712	Slc38a6	AW322671|EG625098	solute carrier family 38, member 6	protein-coding
Diff_Nuc55385	chr1	168328082	168328221	+	0	NA	3' UTR (NM_001142948, exon 5 of 5)	3' UTR (NM_001142948, exon 5 of 5)	11808	NM_175170	71592	Mm.192094	NM_175170	ENSMUSG00000040596	Pogk	9130401E23Rik|BASS2|mKIAA1513	pogo transposable element with KRAB domain	protein-coding
Diff_Nuc37362	chr5	105823882	105824021	+	0	NA	Intergenic	MTC|LTR|MaLR	-20843	NM_001033550	433926	Mm.439781	NM_001033550	ENSMUSG00000070639	Lrrc8b	R75581|Ta-lrrp|mKIAA0231	leucine rich repeat containing 8 family, member B	protein-coding
Diff_Nuc58930	chr9	98460302	98460441	+	0	NA	Intergenic	Intergenic	3659	NR_029444	75881	Mm.483402	NM_175227	ENSMUSG00000051074	4930579K19Rik	-	RIKEN cDNA 4930579K19 gene	ncRNA
Diff_Nuc26311	chr18	38597712	38597851	+	0	NA	intron (NM_022996, intron 1 of 7)	intron (NM_022996, intron 1 of 7)	19152	NM_022996	65113	Mm.102496	NM_022996	ENSMUSG00000024425	Ndfip1	0610010M22Rik|N4wbp5	Nedd4 family interacting protein 1	protein-coding
Diff_Nuc60964	chr8	64747772	64747911	+	0	NA	Intergenic	Intergenic	-145851	NM_011922	26359	Mm.42179	NM_011922	ENSMUSG00000031635	Anxa10	-	annexin A10	protein-coding
Diff_Nuc12159	chr10	82797922	82798061	+	0	NA	intron (NM_177388, intron 1 of 10)	intron (NM_177388, intron 1 of 10)	2571	NM_177388	338365	Mm.67073	NM_177388	ENSMUSG00000034591	Slc41a2	A230035L05Rik|SLC41A1-L1	solute carrier family 41, member 2	protein-coding
Diff_Nuc57301	chr9	44855232	44855371	+	0	NA	exon (NM_007962, exon 4 of 6)	exon (NM_007962, exon 4 of 6)	4874	NM_007962	14012	Mm.33240	NM_007962	ENSMUSG00000032092	Mpzl2	Eva|Eva1	myelin protein zero-like 2	protein-coding
Diff_Nuc15405	chr17	78629462	78629601	+	0	NA	intron (NM_015800, intron 1 of 16)	intron (NM_015800, intron 1 of 16)	29943	NM_015800	50766	Mm.311912	NM_015800	ENSMUSG00000024074	Crim1	AU015004	cysteine rich transmembrane BMP regulator 1 (chordin like)	protein-coding
Diff_Nuc33314	chr6	87065502	87065641	+	0	NA	Intergenic	Intergenic	10831	NM_001167937	52372	Mm.282851	NM_001167937	ENSMUSG00000090891	D6Ertd527e	AU043841	DNA segment, Chr 6, ERATO Doi 527, expressed	protein-coding
Diff_Nuc22176	chr14	57547722	57547861	+	0	NA	intron (NM_029498, intron 10 of 23)	intron (NM_029498, intron 10 of 23)	41159	NM_029498	76007	Mm.31417	NM_029498	ENSMUSG00000021945	Zmym2	5830413P05Rik|FIM|MYM|RAMP|SCLL|Zfp198|Znf198	zinc finger, MYM-type 2	protein-coding
Diff_Nuc41480	chr4	109933922	109934061	+	0	NA	intron (NM_001163397, intron 1 of 5)	intron (NM_001163397, intron 1 of 5)	25448	NM_010488	15572	Mm.3970	NM_010488	ENSMUSG00000028546	Elavl4	Elav|Hud|PNEM	ELAV (embryonic lethal, abnormal vision, Drosophila)-like 4 (Hu antigen D)	protein-coding
Diff_Nuc4366	chr12	42991802	42991941	+	0	NA	intron (NM_053122, intron 6 of 6)	MER96B|DNA|hAT	-779227	NM_010733	16981	Mm.404786	NM_010733	ENSMUSG00000036295	Lrrn3	NLRR-3	leucine rich repeat protein 3, neuronal	protein-coding
Diff_Nuc57376	chr9	46622432	46622571	+	0	NA	Intergenic	Intergenic	-99185	NR_015605	73040	Mm.265384	NR_015605	ENSMUSG00000099696	2900052N01Rik	AU067665	RIKEN cDNA 2900052N01 gene	ncRNA
Diff_Nuc38439	chr5	137374482	137374621	+	0	NA	Intergenic	(CAGAGA)n|Simple_repeat|Simple_repeat	-9469	NM_026073	67286	Mm.41779	NM_026073	ENSMUSG00000007987	Ift22	3110017O03Rik|AI835745|AI847427|Rabl5	intraflagellar transport 22	protein-coding
Diff_Nuc48344	chr2	68672462	68672601	+	0	NA	Intergenic	Intergenic	-26967	NM_172856	241447	Mm.222222	NM_172856	ENSMUSG00000027035	Cers6	4732462C07Rik|AW544719|Lass6|T1L	ceramide synthase 6	protein-coding
Diff_Nuc28622	chr7	59259212	59259351	+	0	NA	intron (NM_001160345, intron 2 of 3)	intron (NM_001160345, intron 2 of 3)	1803	NR_027704	75744	Mm.386823	NM_001160345	ENSMUSG00000074093	Svip	1700006C13Rik|6620401M08Rik	small VCP/p97-interacting protein	protein-coding
Diff_Nuc42129	chr4	131779022	131779161	+	0	NA	3' UTR (NM_020273, exon 10 of 10)	3' UTR (NM_020273, exon 10 of 10)	-2587	NR_036572	664903	Mm.425212	NR_036572		Rps15a-ps4	Gm13253|Lethe|OTTMUSG00000011114	ribosomal protein S15A, pseudogene 4	pseudo
Diff_Nuc20079	chr15	74916902	74917041	+	0	NA	Intergenic	Intergenic	25408	NM_001099217	100041546	Mm.482110	NM_001099217	ENSMUSG00000022584	Ly6c2	Ly-6C.2|Ly-6C2	lymphocyte antigen 6 complex, locus C2	protein-coding
Diff_Nuc50344	chr2	140122912	140123051	+	0	NA	intron (NM_001033296, intron 3 of 19)	RLTR26|LTR|ERVK	92465	NM_001033296	228684	Mm.486585	NM_001033296	ENSMUSG00000074764	Sel1l2	Gm118	sel-1 suppressor of lin-12-like 2 (C. elegans)	protein-coding
Diff_Nuc42786	chr4	150908802	150908941	+	0	NA	intron (NM_001081557, intron 4 of 23)	intron (NM_001081557, intron 4 of 23)	327006	NM_001081557	100072	Mm.318846	NM_001081557	ENSMUSG00000014592	Camta1	1810059M14Rik|2310058O09Rik|AI316882|AW987475|mKIAA0833	calmodulin binding transcription activator 1	protein-coding
Diff_Nuc27090	chr18	69598222	69598361	+	0	NA	intron (NM_001083967, intron 3 of 19)	(CA)n|Simple_repeat|Simple_repeat	92916	NM_001083967	21413	Mm.4269	NM_013685	ENSMUSG00000053477	Tcf4	5730422P05Rik|ASP-I2|E2-2|E2.2|ITF-2|ITF-2b|ITF2|ME2|MITF-2A|MITF-2B|SEF-2|SEF2|SEF2-1|TFE|Tcf-4|bHLHb19	transcription factor 4	protein-coding
Diff_Nuc24875	chr19	44953522	44953661	+	0	NA	Intergenic	Intergenic	-43163	NR_045315	73322	Mm.250457	NR_045315	ENSMUSG00000092369	1700039E22Rik	-	RIKEN cDNA 1700039E22 gene	ncRNA
Diff_Nuc27793	chr7	17675382	17675521	+	0	NA	intron (NM_001310628, intron 1 of 5)	intron (NM_001310628, intron 1 of 5)	16062	NM_007676	26436	Mm.143686	NM_007676	ENSMUSG00000066760	Psg16	Cea11|PSG|bCEA	pregnancy specific glycoprotein 16	protein-coding
Diff_Nuc48807	chr2	87833052	87833191	+	0	NA	Intergenic	L1_Mus4|LINE|L1	2851	NM_146645	258639	Mm.377606	NM_146645	ENSMUSG00000062793	Olfr1158	MOR173-3	olfactory receptor 1158	protein-coding
Diff_Nuc39563	chr4	33984442	33984581	+	0	NA	Intergenic	B4|SINE|B4	-27096	NM_007726	12801	Mm.7992	NM_007726	ENSMUSG00000044288	Cnr1	CB-R|CB1|CB1R	cannabinoid receptor 1 (brain)	protein-coding
Diff_Nuc39216	chr4	16622492	16622631	+	0	NA	Intergenic	L1_Mus1|LINE|L1	531304	NR_045765	100415915	Mm.387180	NR_045765	ENSMUSG00000085112	A530072M11Rik	-	RIKEN cDNA gene A530072M11	ncRNA
Diff_Nuc25476	chr18	10352072	10352211	+	0	NA	intron (NM_001083628, intron 1 of 32)	intron (NM_001083628, intron 1 of 32)	26964	NM_001083628	381157	Mm.261535	NM_001083628	ENSMUSG00000042942	Greb1l	mKIAA4095	growth regulation by estrogen in breast cancer-like	protein-coding
Diff_Nuc23984	chr19	10464642	10464781	+	0	NA	intron (NM_173067, intron 1 of 9)	intron (NM_173067, intron 1 of 9)	1131	NM_173068	54525	Mm.182654	NM_018801	ENSMUSG00000024743	Syt7	AI851541|B230112P13Rik	synaptotagmin VII	protein-coding
Diff_Nuc23756	chr19	4227232	4227371	+	0	NA	intron (NR_132308, intron 2 of 3)	intron (NR_132308, intron 2 of 3)	-4592	NM_027196	69745	Mm.32518	NM_027196	ENSMUSG00000024854	Pold4	2410012M21Rik|AI463381|AW060307|Polds|p12	polymerase (DNA-directed), delta 4	protein-coding
Diff_Nuc58938	chr9	99029132	99029271	+	0	NA	intron (NM_029094, intron 1 of 23)	intron (NM_029094, intron 1 of 23)	11429	NM_029094	74769	Mm.213128	NM_029094	ENSMUSG00000032462	Pik3cb	1110001J02Rik|AI447572|p110beta	phosphatidylinositol 3-kinase, catalytic, beta polypeptide	protein-coding
Diff_Nuc29199	chr7	85504442	85504581	+	0	NA	intron (NM_182809, intron 11 of 13)	intron (NM_182809, intron 11 of 13)	218213	NM_008746	18213	Mm.33496	NM_008746	ENSMUSG00000059146	Ntrk3	AW125844|Ntrk3_tv3|TrkC	neurotrophic tyrosine kinase, receptor, type 3	protein-coding
Diff_Nuc56253	chr9	3454462	3454601	+	0	NA	intron (NM_027545, intron 12 of 17)	intron (NM_027545, intron 12 of 17)	50446	NM_027545	244672	Mm.245482	NM_027545	ENSMUSG00000025898	Cwf19l2	3230401L03Rik|9030209E10	CWF19-like 2, cell cycle control (S. pombe)	protein-coding
Diff_Nuc28621	chr7	59250022	59250161	+	0	NA	TTS (NM_001330607)	TTS (NM_001330607)	10993	NR_027704	75744	Mm.386823	NM_001160345	ENSMUSG00000074093	Svip	1700006C13Rik|6620401M08Rik	small VCP/p97-interacting protein	protein-coding
Diff_Nuc30073	chr7	116757062	116757201	+	0	NA	intron (NM_029811, intron 1 of 18)	intron (NM_029811, intron 1 of 18)	2951	NR_037617	76954	Mm.252009	NM_029811	ENSMUSG00000031024	St5	2010004M01Rik|2610305K15Rik	suppression of tumorigenicity 5	protein-coding
Diff_Nuc53819	chr1	96548062	96548201	+	0	NA	Intergenic	L1Md_T|LINE|L1	-145888	NR_040473	74689	Mm.399187	NR_040473	ENSMUSG00000100518	4930440C22Rik	-	RIKEN cDNA 4930440C22 gene	ncRNA
Diff_Nuc37242	chr5	101510612	101510751	+	0	NA	Intergenic	Intergenic	235433	NM_172715	231510	Mm.271911	NM_172715	ENSMUSG00000029314	Agpat9	1-AGPAT|1-AGPAT 9|4933407I02Rik|4933408F15|A230097K15Rik|GPAT-3|Gpat3|mGPAT3	1-acylglycerol-3-phosphate O-acyltransferase 9	protein-coding
Diff_Nuc9011	chr11	95689872	95690011	+	0	NA	intron (NM_153104, intron 1 of 2)	intron (NM_153104, intron 1 of 2)	4127	NM_153104	237928	Mm.133075	NM_153104	ENSMUSG00000050860	Phospho1	D11Moh36|Phospo1	phosphatase, orphan 1	protein-coding
Diff_Nuc18514	chr15	8251432	8251571	+	0	NA	intron (NM_201232, intron 40 of 45)	intron (NM_201232, intron 40 of 45)	132395	NM_001162906	73692	Mm.164436	NM_001162906	ENSMUSG00000039801	2410089E03Rik	4732468D17Rik|Hug|Jbts17|b2b012Clo	RIKEN cDNA 2410089E03 gene	protein-coding
Diff_Nuc1317	chr13	35088072	35088211	+	0	NA	Intergenic	Intergenic	-2128	NM_001110331	23986	Mm.491141	NM_011868	ENSMUSG00000021417	Eci2	Acbd2|Drs1|Hca88|Peci	enoyl-Coenzyme A delta isomerase 2	protein-coding
Diff_Nuc43007	chr3	7370392	7370531	+	0	NA	intron (NM_008862, intron 1 of 2)	L1_Mus2|LINE|L1	3857	NM_008862	18767	Mm.3193	NM_008862	ENSMUSG00000027499	Pkia	AI415001|PKIalpha	protein kinase inhibitor, alpha	protein-coding
Diff_Nuc28660	chr7	61520742	61520881	+	0	NA	Intergenic	Lx8|LINE|L1	-373552	NR_105746	102466619		NR_105746	ENSMUSG00000099176	Mir6238	Gm27982|mmu-mir-6238	microRNA 6238	ncRNA
Diff_Nuc2356	chr13	74593192	74593331	+	0	NA	Intergenic	Intergenic	38137	NM_146231	235956	Mm.296909	NM_146231	ENSMUSG00000069208	Zfp825	-	zinc finger protein 825	protein-coding
Diff_Nuc42636	chr4	147076642	147076781	+	0	NA	promoter-TSS (NM_001127188)	promoter-TSS (NM_001127188)	29	NM_001127188	100503584	Mm.276881	NM_001127188	ENSMUSG00000062518	Zfp534	Gm13159|OTTMUSG00000010681	zinc finger protein 534	protein-coding
Diff_Nuc45031	chr3	95382272	95382411	+	0	NA	intron (NM_026489, intron 10 of 15)	intron (NM_026489, intron 10 of 15)	-10515	NM_146133	229593	Mm.245830	NM_146133	ENSMUSG00000046519	Golph3l	2010204I15Rik|AU015439|AW549227|C77637|Gpp34r	golgi phosphoprotein 3-like	protein-coding
Diff_Nuc5798	chr12	100956872	100957011	+	0	NA	3' UTR (NM_030172, exon 6 of 6)	3' UTR (NM_030172, exon 6 of 6)	-90757	NR_045288	73457	Mm.383439	NR_045288	ENSMUSG00000100211	1700064M15Rik	-	RIKEN cDNA 1700064M15 gene	ncRNA
Diff_Nuc29812	chr7	106827542	106827681	+	0	NA	intron (NM_175316, intron 7 of 13)	B4|SINE|B4	16708	NM_001252531	101488	Mm.11249	NM_175316	ENSMUSG00000030737	Slco2b1	AI060904|AI852653|OATP-B|Slc21a9	solute carrier organic anion transporter family, member 2b1	protein-coding
[truncated: 4,852 more rows]
