# Supplementary material for: Remodeling of epigenome and transcriptome landscapes with aging in mice reveals widespread induction of inflammatory responses
Source: HighWire-hosted journal article supplement (doi:10.1101/gr.240093.118), 2019-03-11
Supplement: Supplemental_Code_Figure3_Machine_learning.zip [file HOMER_dposREF_Cerebellum_DiNUP_DANPOS_LOST.xls]

PeakID (cmd=annotatePeaks.pl dposREF_Cerebellum_DiNUP_DANPOS_LOST.bed mm9)	Chr	Start	End	Strand	Peak Score	Focus Ratio/Region Size	Annotation	Detailed Annotation	Distance to TSS	Nearest PromoterID	Entrez ID	Nearest Unigene	Nearest Refseq	Nearest Ensembl	Gene Name	Gene Alias	Gene Description	Gene Type
Diff_Nuc59909	chr8	73983652	73983791	+	0	NA	intron (NM_022419, intron 2 of 4)	PB1D10|SINE|Alu	3835	NM_022419	64296	Mm.276383	NM_022419	ENSMUSG00000007950	Abhd8	0910001L24Rik|AB030191	abhydrolase domain containing 8	protein-coding
Diff_Nuc42106	chr3	3437912	3438051	+	0	NA	Intergenic	L1_Mm|LINE|L1	-70049	NM_013920	30942	Mm.330897	NM_013920	ENSMUSG00000017688	Hnf4g	NR2A2	hepatocyte nuclear factor 4, gamma	protein-coding
Diff_Nuc16223	chr16	34265312	34265451	+	0	NA	intron (NM_001164268, intron 10 of 33)	intron (NM_001164268, intron 10 of 33)	248732	NM_001164268	545156	Mm.82274	NM_177357	ENSMUSG00000061751	Kalrn	2210407G14Rik|AV235988|DUET|E530005C20Rik|Gm539|Hapip|TRAD	kalirin, RhoGEF kinase	protein-coding
Diff_Nuc2803	chr13	97033012	97033151	+	0	NA	Intergenic	Intergenic	-125168	NM_026173	67463	Mm.86472	NM_026173	ENSMUSG00000021671	Poc5	1200014M14Rik|AV144706	POC5 centriolar protein	protein-coding
Diff_Nuc32708	chr6	88829922	88830061	+	0	NA	Intergenic	Intergenic	-4953	NM_001347327	319655	Mm.302613	NM_176973	ENSMUSG00000033152	Podxl2	D130074J02Rik|PODLX2	podocalyxin-like 2	protein-coding
Diff_Nuc40763	chr4	110280542	110280681	+	0	NA	intron (NM_001048189, intron 3 of 12)	Lx5|LINE|L1	210308	NM_030231	78933	Mm.435620	NM_030231	ENSMUSG00000061298	Agbl4	4930578N11Rik|4931433A01Rik	ATP/GTP binding protein-like 4	protein-coding
Diff_Nuc22479	chr14	98824052	98824191	+	0	NA	Intergenic	Lx2B|LINE|L1	-255137	NM_007826	13134	Mm.320593	NM_007826	ENSMUSG00000055639	Dach1	Dac|Dach	dachshund 1 (Drosophila)	protein-coding
Diff_Nuc41788	chr4	146679642	146679781	+	0	NA	intron (NM_001039209, intron 1 of 2)	intron (NM_001039209, intron 1 of 2)	129736	NM_001039209	195531	Mm.270762	NM_001039209	ENSMUSG00000078496	Zfp982	Gm13152|OTTMUSG00000010671	zinc finger protein 982	protein-coding
Diff_Nuc21113	chr14	44974182	44974321	+	0	NA	Intergenic	Intergenic	-145542	NM_198677	385138	Mm.293026	NM_198677	ENSMUSG00000072145	BC061237	-	cDNA sequence BC061237	protein-coding
Diff_Nuc27675	chr7	34509342	34509481	+	0	NA	Intergenic	L1Md_F2|LINE|L1	14903	NM_177446	233090	Mm.261648	NM_177446	ENSMUSG00000046438	Scgb2b24	Abpbg24|Abpz|C2b|Scgb2b3	secretoglobin, family 2B, member 24	protein-coding
Diff_Nuc31636	chr6	45806262	45806401	+	0	NA	intron (NM_001004357, intron 3 of 23)	L1Md_F3|LINE|L1	796271	NM_001004357	66797	Mm.440084	NM_025771	ENSMUSG00000039419	Cntnap2	5430425M22Rik|Caspr2|mKIAA0868	contactin associated protein-like 2	protein-coding
Diff_Nuc20821	chr14	31513262	31513401	+	0	NA	Intergenic	Intergenic	-14704	NM_019460	54650	Mm.294662	NM_019460	ENSMUSG00000006527	Sfmbt1	4930442N21Rik|9330180L21Rik|AA536974|Sfmbt|Smr	Scm-like with four mbt domains 1	protein-coding
Diff_Nuc31704	chr6	48030912	48031051	+	0	NA	intron (NM_001347142, intron 4 of 6)	intron (NM_001347142, intron 4 of 6)	5611	NM_001347142	69228	Mm.207555	NM_001163475	ENSMUSG00000057691	Zfp746	2810407L07Rik|AI317225|Znf746	zinc finger protein 746	protein-coding
Diff_Nuc20649	chr14	26113932	26114071	+	0	NA	Intergenic	Intergenic	-151274	NR_045718	75862	Mm.109191	NR_045718		4930572O13Rik	-	RIKEN cDNA 4930572O13 gene	ncRNA
Diff_Nuc58943	chr8	27193742	27193881	+	0	NA	intron (NR_110583, intron 1 of 4)	intron (NR_110583, intron 1 of 4)	730	NR_110583	76604	Mm.437190	NR_110583	ENSMUSG00000085437	1700047A11Rik	4930554C15Rik	RIKEN cDNA 1700047A11 gene	ncRNA
Diff_Nuc15327	chr16	5894082	5894221	+	0	NA	intron (NM_021477, intron 1 of 16)	MTC|LTR|MaLR	9265	NM_021477	268859	Mm.370334	NM_021477	ENSMUSG00000008658	Rbfox1	A2bp|A2bp1|Hrnbp1|fox-1	RNA binding protein, fox-1 homolog (C. elegans) 1	protein-coding
Diff_Nuc34518	chr5	15682167	15682306	+	0	NA	intron (NM_001110843, intron 4 of 38)	B4A|SINE|B4	241727	NM_001110844	12293	Mm.159842	NM_009784	ENSMUSG00000040118	Cacna2d1	Ca(v)alpha2delta1|Cacna2|Cchl2a	calcium channel, voltage-dependent, alpha2/delta subunit 1	protein-coding
Diff_Nuc22030	chr14	77616962	77617101	+	0	NA	intron (NM_172813, intron 1 of 18)	MER45B|DNA|Tip100	60461	NM_172813	239188	Mm.441158	NM_172813	ENSMUSG00000022012	Enox1	B230207J08|D230005D02Rik	ecto-NOX disulfide-thiol exchanger 1	protein-coding
Diff_Nuc15609	chr16	13763632	13763771	+	0	NA	Intergenic	PB1D10|SINE|Alu	-17091	NM_001039521	106298	Mm.288606	NM_001039521	ENSMUSG00000022682	Rrn3	AL023001|E130302O19Rik|R75565|TIF-1A|Tif1a	RRN3 RNA polymerase I transcription factor homolog (yeast)	protein-coding
Diff_Nuc13509	chr17	26329552	26329691	+	0	NA	intron (NM_009733, intron 9 of 10)	intron (NM_009733, intron 9 of 10)	6411	NM_001081070	69191	Mm.32631	NM_001081070	ENSMUSG00000024184	Pdia2	1810041F13Rik|AI661267|Pdip|Pdipl	protein disulfide isomerase associated 2	protein-coding
Diff_Nuc47196	chr2	55937902	55938041	+	0	NA	Intergenic	Intergenic	649590	NM_008426	16519	Mm.5127	NM_008426	ENSMUSG00000026824	Kcnj3	GIRK-1|GIRK1|Kcnf3|Kir3.1	potassium inwardly-rectifying channel, subfamily J, member 3	protein-coding
Diff_Nuc30465	chr7	147270072	147270211	+	0	NA	Intergenic	Intergenic	-1694	NM_026769	68566	Mm.44241	NM_026769	ENSMUSG00000025468	Caly	0710001P07Rik|1110004A22Rik|Calcyon|Drd1ip	calcyon neuron-specific vesicular protein	protein-coding
Diff_Nuc10242	chr10	29708102	29708241	+	0	NA	Intergenic	Lx8|LINE|L1	212175	NM_001109747	66311	Mm.251779	NM_001109747	ENSMUSG00000075266	Cenpw	2610036L11Rik|Cug2	centromere protein W	protein-coding
Diff_Nuc36063	chr5	75427612	75427751	+	0	NA	intron (NM_028850, intron 1 of 5)	B1_Mur3|SINE|Alu	12985	NM_028850	74277	Mm.239814	NM_028850	ENSMUSG00000029229	Chic2	1700081B18Rik|4930502K01Rik|BTL	cysteine-rich hydrophobic domain 2	protein-coding
Diff_Nuc58905	chr8	26156112	26156251	+	0	NA	intron (NM_031257, intron 10 of 11)	B4A|SINE|B4	-6747	NM_001081187	330723	Mm.334452	NM_001081187	ENSMUSG00000037406	Htra4	B430206E18Rik	HtrA serine peptidase 4	protein-coding
Diff_Nuc24123	chr19	41946642	41946781	+	0	NA	intron (NM_199447, intron 25 of 33)	intron (NM_199447, intron 25 of 33)	23932	NM_199447	107094	Mm.276044	NM_199447	ENSMUSG00000035049	Rrp12	AA408556|AA536972|mKIAA0690	ribosomal RNA processing 12 homolog (S. cerevisiae)	protein-coding
Diff_Nuc20255	chr14	12469622	12469761	+	0	NA	intron (NM_008981, intron 1 of 29)	intron (NM_008981, intron 1 of 29)	83624	NM_008981	19270	Mm.431266	NM_008981	ENSMUSG00000021745	Ptprg	5430405N12Rik|AW046354|AW549872|RPTPgamma	protein tyrosine phosphatase, receptor type, G	protein-coding
Diff_Nuc6381	chr11	3821232	3821371	+	0	NA	intron (NM_001130459, intron 8 of 9)	intron (NM_001130459, intron 8 of 9)	-6634	NM_153142	103710	Mm.171514	NM_153142	ENSMUSG00000048807	Slc35e4	A330108F03Rik|AI414849|AI536442	solute carrier family 35, member E4	protein-coding
Diff_Nuc42884	chr3	35842972	35843111	+	0	NA	Intergenic	MERVL_2A-int|LTR|ERVL	-11153	NM_001205361	114893	Mm.374810	NM_033623	ENSMUSG00000027708	Dcun1d1	Rp42|SCCRO|Tes3|pTes3	DCN1, defective in cullin neddylation 1, domain containing 1 (S. cerevisiae)	protein-coding
Diff_Nuc61321	chr8	125612312	125612451	+	0	NA	intron (NM_153176, intron 10 of 16)	intron (NM_153176, intron 10 of 16)	-13869	NM_016738	270106	Mm.319719	NM_016738	ENSMUSG00000000740	Rpl13	A52|L13	ribosomal protein L13	protein-coding
Diff_Nuc8988	chr11	100905562	100905701	+	0	NA	intron (NM_016920, intron 16 of 21)	B1F|SINE|Alu	13977	NR_105893	102466767		NR_105893	ENSMUSG00000098415	Mir6928	Gm27728|mmu-mir-6928	microRNA 6928	ncRNA
Diff_Nuc19270	chr15	72869062	72869201	+	0	NA	intron (NM_001164643, intron 4 of 8)	intron (NM_001164643, intron 4 of 8)	17111	NM_029640	76510	Mm.158902	NM_029640	ENSMUSG00000047921	Trappc9	1810044A24Rik|2900005P22Rik|4632408O18Rik|Ibp|Nibp|TRS130|mKIAA1882	trafficking protein particle complex 9	protein-coding
Diff_Nuc39513	chr4	58383702	58383841	+	0	NA	intron (NM_001037127, intron 15 of 15)	intron (NM_001037127, intron 15 of 15)	70199	NR_037278	100526502		NR_037278	ENSMUSG00000093293	Mir3095	mir-3095|mmu-mir-3095	microRNA 3095	ncRNA
Diff_Nuc58416	chr8	5586752	5586891	+	0	NA	Intergenic	RLTR1D|LTR|ERV1	-481534	NM_011388	20494	Mm.3500	NM_011388	ENSMUSG00000023073	Slc10a2	9130221J18Rik|AI605518|ASBT|IBAT|ISBT	solute carrier family 10, member 2	protein-coding
Diff_Nuc9164	chr11	106449832	106449971	+	0	NA	intron (NM_198292, intron 1 of 11)	intron (NM_198292, intron 1 of 11)	24343	NM_198292	21763	Mm.102407	NM_198292	ENSMUSG00000040548	Tex2	4930568E07Rik|AI553404|Def-5|Taz4	testis expressed gene 2	protein-coding
Diff_Nuc45897	chr2	3898982	3899121	+	0	NA	Intergenic	MuRRS4-int|LTR|ERV1	-39678	NM_001347086	209630	Mm.37932	NM_172475	ENSMUSG00000026657	Frmd4a	2700017I06Rik|5330420J21|AI594879|C230040M21Rik|Frmd4|Gm13190|OTTMUSG00000010806|mKIAA1294	FERM domain containing 4A	protein-coding
Diff_Nuc23144	chr19	4643272	4643411	+	0	NA	intron (NM_001033447, intron 11 of 14)	RMER12|LTR|ERVK	-17724	NM_023131	19671	Mm.391143	NM_023131	ENSMUSG00000024889	Rce1	D19Ertd283e|D19Ertd98e	Ras converting CAAX endopeptidase 1	protein-coding
Diff_Nuc13319	chr17	19313232	19313371	+	0	NA	Intergenic	Intergenic	122844	NM_001104550	224552	Mm.469860	NM_001104550	ENSMUSG00000096717	Vmn2r98	EG224552	vomeronasal 2, receptor 98	protein-coding
Diff_Nuc25216	chr18	27829052	27829191	+	0	NA	Intergenic	Intergenic	-889544	NR_045398	320624	Mm.50107	NR_045398		4930474G06Rik	-	RIKEN cDNA 4930474G06 gene	ncRNA
Diff_Nuc50425	chr1	4930042	4930181	+	0	NA	intron (NM_001177795, intron 2 of 5)	intron (NM_001177795, intron 2 of 5)	78704	NM_001290372	58175	Mm.103771	NM_021374	ENSMUSG00000002459	Rgs20	2900073E09Rik|Rgsz1	regulator of G-protein signaling 20	protein-coding
Diff_Nuc47695	chr2	76622602	76622741	+	0	NA	intron (NM_028004, intron 104 of 191)	intron (NM_028004, intron 104 of 191)	109299	NM_031256	83435	Mm.41636	NM_031256	ENSMUSG00000002733	Plekha3	FAPP1	pleckstrin homology domain-containing, family A (phosphoinositide binding specific) member 3	protein-coding
Diff_Nuc26082	chr18	59434612	59434751	+	0	NA	intron (NM_001081328, intron 2 of 2)	Lx3C|LINE|L1	99687	NM_001081328	78923	Mm.84007	NM_001081328	ENSMUSG00000058152	Chsy3	4833446K15Rik|AI662215	chondroitin sulfate synthase 3	protein-coding
Diff_Nuc21182	chr14	47861132	47861271	+	0	NA	3' UTR (NM_172598, exon 25 of 25)	3' UTR (NM_172598, exon 25 of 25)	35331	NM_172598	218973	Mm.265615	NM_172598	ENSMUSG00000037572	Wdhd1	A630092E18|AND-1|D630024B06Rik	WD repeat and HMG-box DNA binding protein 1	protein-coding
Diff_Nuc3569	chr12	6857692	6857831	+	0	NA	Intergenic	Intergenic	529375	NR_045045	73575	Mm.179463	NR_045045	ENSMUSG00000102096	1700101O22Rik	-	RIKEN cDNA 1700101O22 gene	ncRNA
Diff_Nuc2385	chr13	81276762	81276901	+	0	NA	intron (NM_054053, intron 87 of 89)	intron (NM_054053, intron 87 of 89)	173496	NR_015587	319983	Mm.343027	NR_015587	ENSMUSG00000097098	9330111N05Rik	-	RIKEN cDNA 9330111N05 gene	ncRNA
Diff_Nuc52260	chr1	78371062	78371201	+	0	NA	intron (NM_001004173, intron 2 of 4)	intron (NM_001004173, intron 2 of 4)	64210	NM_001004173	433323	Mm.276248	NM_001004173	ENSMUSG00000032908	Sgpp2	SPPase2|Spp2	sphingosine-1-phosphate phosphotase 2	protein-coding
Diff_Nuc48199	chr2	97221122	97221261	+	0	NA	intron (NM_001289742, intron 5 of 7)	L1_Mus3|LINE|L1	-86623	NM_001289744	241568	Mm.241682	NM_178725	ENSMUSG00000050587	Lrrc4c	6430556C10Rik|NGL-1	leucine rich repeat containing 4C	protein-coding
Diff_Nuc26395	chr18	69958452	69958591	+	0	NA	Intergenic	Intergenic	-126692	NM_201362	381175	Mm.266831	NM_201362	ENSMUSG00000038903	Ccdc68	BC046343	coiled-coil domain containing 68	protein-coding
Diff_Nuc23388	chr19	13111482	13111621	+	0	NA	Intergenic	Lx|LINE|L1	-8734	NM_146700	258695	Mm.223130	NM_146700	ENSMUSG00000094755	Olfr1453	MOR202-6	olfactory receptor 1453	protein-coding
Diff_Nuc32450	chr6	78541382	78541521	+	0	NA	Intergenic	MLT1K|LTR|MaLR	-122583	NM_011260	19695	Mm.252385	NM_011260	ENSMUSG00000030017	Reg3g	AI449515|REG-3-gamma|reg III-gamma	regenerating islet-derived 3 gamma	protein-coding
Diff_Nuc17478	chr16	90066052	90066191	+	0	NA	Intergenic	Intergenic	-76361	NR_033476	100038709	Mm.484070	NR_033476		Gm10789	ENSMUSG00000074924	predicted gene 10789	ncRNA
Diff_Nuc48936	chr2	125885402	125885541	+	0	NA	intron (NM_008008, intron 2 of 3)	PB1D10|SINE|Alu	25077	NM_008008	14178	Mm.330557	NM_008008	ENSMUSG00000027208	Fgf7	Kgf	fibroblast growth factor 7	protein-coding
Diff_Nuc57142	chr9	77297492	77297631	+	0	NA	intron (NM_001146048, intron 10 of 13)	intron (NM_001146048, intron 10 of 13)	-50338	NR_040378	70487	Mm.58958	NR_040378	ENSMUSG00000099170	5730403I07Rik	-	RIKEN cDNA 5730403I07 gene	ncRNA
Diff_Nuc5599	chr12	92351242	92351381	+	0	NA	intron (NM_181815, intron 20 of 25)	MTC|LTR|MaLR	67023	NR_045858	71349	Mm.442093	NR_045858		5430427M07Rik	-	RIKEN cDNA 5430427M07 gene	ncRNA
Diff_Nuc50438	chr1	5395302	5395441	+	0	NA	Intergenic	Lx5|LINE|L1	-183203	NM_011011	18387	Mm.7977	NM_011011	ENSMUSG00000025905	Oprk1	K-OR-1|KOR|KOR-1|MSL-1|Oprk2|R21	opioid receptor, kappa 1	protein-coding
Diff_Nuc22964	chr14	120982662	120982801	+	0	NA	Intergenic	B4|SINE|B4	105048	NM_029519	76108	Mm.261448	NM_029519	ENSMUSG00000051615	Rap2a	5830461H18Rik	RAS related protein 2a	protein-coding
Diff_Nuc14224	chr17	51253582	51253721	+	0	NA	intron (NM_001285991, intron 2 of 22)	B4A|SINE|B4	45052	NM_001285993	72238	Mm.120650	NM_028162	ENSMUSG00000023923	Tbc1d5	1600014N05Rik	TBC1 domain family, member 5	protein-coding
Diff_Nuc47158	chr2	54778502	54778641	+	0	NA	intron (NM_173030, intron 8 of 12)	IAPEY3-int|LTR|ERVK	489773	NM_173030	271786	Mm.330227	NM_173030	ENSMUSG00000060988	Galnt13	A230002A12|A230020F20|BB182356	UDP-N-acetyl-alpha-D-galactosamine:polypeptide N-acetylgalactosaminyltransferase 13	protein-coding
Diff_Nuc39251	chr4	48366882	48367021	+	0	NA	intron (NM_001281978, intron 4 of 18)	intron (NM_001281978, intron 4 of 18)	74319	NM_001281977	16348	Mm.317706	NM_010569	ENSMUSG00000028344	Invs	Nphp2|inv	inversin	protein-coding
Diff_Nuc56864	chr9	67673322	67673461	+	0	NA	Intergenic	L1ME1|LINE|L1	6746	NM_001163143	244911	Mm.325849	NM_001163143	ENSMUSG00000047990	C2cd4a	EG244911|Fam148a	C2 calcium-dependent domain containing 4A	protein-coding
Diff_Nuc44199	chr3	89041642	89041781	+	0	NA	non-coding (NR_121683, exon 9 of 11)	non-coding (NR_121683, exon 9 of 11)	7224	NR_121683	360213	Mm.331156	NM_183037	ENSMUSG00000042766	Trim46	TRIFIC	tripartite motif-containing 46	protein-coding
Diff_Nuc11146	chr10	69163112	69163251	+	0	NA	intron (NM_170730, intron 1 of 17)	PB1D10|SINE|Alu	166725	NM_146005	11735	Mm.235960	NM_009670	ENSMUSG00000069601	Ank3	2900054D09Rik|AI314020|Ank-3|AnkG|Ankyrin-3|Ankyrin-G	ankyrin 3, epithelial	protein-coding
Diff_Nuc36114	chr5	77407332	77407471	+	0	NA	intron (NM_025691, intron 2 of 18)	RMER4A|LTR|ERVK	3675	NM_025691	66661	Mm.296976	NM_025691	ENSMUSG00000036323	Srp72	5730576P14Rik|72kDa|AI132477|BC019196|C77589	signal recognition particle 72	protein-coding
Diff_Nuc10249	chr10	29889572	29889711	+	0	NA	Intergenic	Lx3_Mus|LINE|L1	30705	NM_001109747	66311	Mm.251779	NM_001109747	ENSMUSG00000075266	Cenpw	2610036L11Rik|Cug2	centromere protein W	protein-coding
Diff_Nuc54731	chr1	182265632	182265771	+	0	NA	intron (NM_001081175, intron 2 of 7)	intron (NM_001081175, intron 2 of 7)	-5021	NR_003623	277333	Mm.389223	NM_199472		Gm5069	EG277333	glyceraldehyde-3-phosphate dehydrogenase pseudogene	pseudo
Diff_Nuc20540	chr14	21811682	21811821	+	0	NA	intron (NM_009502, intron 6 of 20)	intron (NM_009502, intron 6 of 20)	59913	NM_018829	55946	Mm.376269	NM_018829	ENSMUSG00000021824	Ap3m1	1200013D09Rik|C78982|R75378	adaptor-related protein complex 3, mu 1 subunit	protein-coding
Diff_Nuc11071	chr10	66371212	66371351	+	0	NA	Intergenic	Intergenic	11851	NR_138560	68488	Mm.338835	NR_138560		1110002J07Rik	-	RIKEN cDNA 1110002J07 gene	ncRNA
Diff_Nuc47594	chr2	72494432	72494571	+	0	NA	Intergenic	Intergenic	-47066	NR_040503	74541	Mm.410774	NR_040503	ENSMUSG00000085252	8430437L04Rik	-	RIKEN cDNA 8430437L04 gene	ncRNA
Diff_Nuc46229	chr2	18556302	18556441	+	0	NA	Intergenic	Intergenic	-37718	NM_147778	12238	Mm.249586	NM_147778	ENSMUSG00000051154	Commd3	AW550818|Bup|D2Ertd542e	COMM domain containing 3	protein-coding
Diff_Nuc18290	chr15	30589672	30589811	+	0	NA	intron (NM_008729, intron 7 of 22)	intron (NM_008729, intron 7 of 22)	-379140	NR_045186	73784	Mm.66947	NR_045186		4930430F21Rik	-	RIKEN cDNA 4930430F21 gene	ncRNA
Diff_Nuc19058	chr15	62786092	62786231	+	0	NA	Intergenic	Intergenic	525002	NR_045279	432958	Mm.255105	NR_045279		Gm20740	-	predicted gene, 20740	ncRNA
Diff_Nuc10631	chr10	45454612	45454751	+	0	NA	Intergenic	ORR1A1|LTR|MaLR	-72829	NR_040624	320363	Mm.123343	NR_040624	ENSMUSG00000110874	D030045P18Rik	-	RIKEN cDNA D030045P18 gene	ncRNA
Diff_Nuc11943	chr10	94670212	94670351	+	0	NA	intron (NM_009950, intron 2 of 2)	intron (NM_009950, intron 2 of 2)	-61822	NR_131146	628062		NR_131146		Gm29684	-	predicted gene, 29684	ncRNA
Diff_Nuc59523	chr8	55523192	55523331	+	0	NA	Intergenic	L1_Mus3|LINE|L1	92090	NM_029701	76687	Mm.86437	NM_029701	ENSMUSG00000054408	Spcs3	1810011E08Rik|SPC22/23	signal peptidase complex subunit 3 homolog (S. cerevisiae)	protein-coding
Diff_Nuc46817	chr2	39048882	39049021	+	0	NA	Intergenic	Intergenic	-2701	NM_178778	320271	Mm.204836	NM_178778	ENSMUSG00000035236	Scai	9330112M16|A930041I02Rik|AI662729	suppressor of cancer cell invasion	protein-coding
Diff_Nuc44503	chr3	100659472	100659611	+	0	NA	intron (NM_178594, intron 1 of 5)	intron (NM_178594, intron 1 of 5)	30159	NM_178594	242122	Mm.137467	NM_178594	ENSMUSG00000051076	Vtcn1	B7h4|B7s1|B7x|BC032925	V-set domain containing T cell activation inhibitor 1	protein-coding
Diff_Nuc56588	chr9	59006382	59006521	+	0	NA	Intergenic	B4A|SINE|B4	-122203	NM_001042752	18007	Mm.42249	NM_008684	ENSMUSG00000032340	Neo1	2610028H22Rik|AI327052|D930014N22Rik|Igdcc2	neogenin	protein-coding
Diff_Nuc45734	chr3	154210482	154210621	+	0	NA	Intergenic	Intergenic	-49124	NM_009968	12972	Mm.374855	NM_009968	ENSMUSG00000028199	Cryz	Sez9	crystallin, zeta	protein-coding
Diff_Nuc49263	chr2	137807012	137807151	+	0	NA	Intergenic	Intergenic	-275239	NM_001025431	228662	Mm.153405	NM_145534	ENSMUSG00000062098	Btbd3	mKIAA0952	BTB (POZ) domain containing 3	protein-coding
Diff_Nuc18984	chr15	59402372	59402511	+	0	NA	intron (NM_026746, intron 4 of 6)	intron (NM_026746, intron 4 of 6)	-77768	NM_144549	211770	Mm.40298	NM_144549	ENSMUSG00000032501	Trib1	A530090O15Rik|TRB-1|Trb1	tribbles pseudokinase 1	protein-coding
Diff_Nuc21094	chr14	44013602	44013741	+	0	NA	Intergenic	Intergenic	12673	NM_027940	71826	Mm.335855	NM_027940	ENSMUSG00000095384	1700001F09Rik	Gm10377	RIKEN cDNA 1700001F09 gene	protein-coding
Diff_Nuc49499	chr2	146195902	146196041	+	0	NA	intron (NM_001033348, intron 24 of 40)	MTEa|LTR|MaLR	110949	NR_040619	77806	Mm.392819	NR_040619	ENSMUSG00000085958	A930019D19Rik	-	RIKEN cDNA A930019D19 gene	ncRNA
Diff_Nuc44240	chr3	90600182	90600321	+	0	NA	Intergenic	L1Md_F3|LINE|L1	69423	NM_207263	384997	Mm.316644	NM_207263	ENSMUSG00000042250	Pglyrp4	Gm1478|Gm413	peptidoglycan recognition protein 4	protein-coding
Diff_Nuc43312	chr3	53010432	53010571	+	0	NA	intron (NM_175386, intron 2 of 3)	intron (NM_175386, intron 2 of 3)	165032	NM_175386	108927	Mm.118617	NM_175386	ENSMUSG00000048332	Lhfp	2810489O06Rik|AI194968	lipoma HMGIC fusion partner	protein-coding
Diff_Nuc17538	chr16	91929032	91929171	+	0	NA	intron (NM_138597, intron 3 of 6)	intron (NM_138597, intron 3 of 6)	2774	NM_138597	28080	Mm.41	NM_138597	ENSMUSG00000022956	Atp5o	ATPO|D12Wsu28e|OSCP	ATP synthase, H+ transporting, mitochondrial F1 complex, O subunit	protein-coding
Diff_Nuc57460	chr9	91201782	91201921	+	0	NA	Intergenic	B4A|SINE|B4	58786	NM_009573	22771	Mm.335350	NM_009573	ENSMUSG00000032368	Zic1	ZIC|ZNF201	zinc finger protein of the cerebellum 1	protein-coding
Diff_Nuc57828	chr9	106178982	106179121	+	0	NA	Intergenic	Intergenic	-4341	NM_027354	70235	Mm.23054	NM_027354	ENSMUSG00000023345	Poc1a	2510040D07Rik|Wdr51a|cha	POC1 centriolar protein A	protein-coding
Diff_Nuc39582	chr4	62043862	62044001	+	0	NA	intron (NM_175090, intron 1 of 4)	intron (NM_175090, intron 1 of 4)	22196	NM_175090	20529	Mm.248637	NM_175090	ENSMUSG00000066150	Slc31a1	4930445G01Rik|AI787263|AU016967|Ctr1	solute carrier family 31, member 1	protein-coding
Diff_Nuc26465	chr18	72536232	72536371	+	0	NA	Intergenic	B1_Mm|SINE|Alu	-25578	NM_007831	13176	Mm.167882	NM_007831	ENSMUSG00000060534	Dcc	C030036D22Rik|Igdcc1	deleted in colorectal carcinoma	protein-coding
Diff_Nuc28213	chr7	59411732	59411871	+	0	NA	Intergenic	Lx4B|LINE|L1	-140715	NM_001195601	100503036	Mm.279725	NM_001195601	ENSMUSG00000094445	1700015G11Rik	Ccdc179	RIKEN cDNA 1700015G11 gene	protein-coding
Diff_Nuc48018	chr2	90835932	90836071	+	0	NA	intron (NM_017368, intron 2 of 14)	intron (NM_017368, intron 2 of 14)	-39783	NM_009023	19400	Mm.1272	NM_009023	ENSMUSG00000002104	Rapsn	43kDa|Nraps|Raps|rapsyn	receptor-associated protein of the synapse	protein-coding
Diff_Nuc35343	chr5	45837822	45837961	+	0	NA	intron (NM_024236, intron 2 of 6)	intron (NM_024236, intron 2 of 6)	3577	NM_024236	110391	Mm.30204	NM_024236	ENSMUSG00000015806	Qdpr	2610008L04Rik|D5Ertd371e|Dhpr|PKU2	quinoid dihydropteridine reductase	protein-coding
Diff_Nuc33375	chr6	117055382	117055521	+	0	NA	Intergenic	Intergenic	-63102	NM_001012477	20315	Mm.303231	NM_013655	ENSMUSG00000061353	Cxcl12	Pbsf|Scyb12|Sdf1|Tlsf|Tpar1	chemokine (C-X-C motif) ligand 12	protein-coding
Diff_Nuc60700	chr8	101747682	101747821	+	0	NA	intron (NM_001039154, intron 4 of 12)	intron (NM_001039154, intron 4 of 12)	192620	NM_001285913	12564	Mm.441131	NM_007667	ENSMUSG00000036510	Cdh8	AI851472|cad8	cadherin 8	protein-coding
Diff_Nuc40953	chr4	118380682	118380821	+	0	NA	Intergenic	Intergenic	-1263	NM_146853	258852	Mm.377720	NM_146853	ENSMUSG00000046790	Olfr1341	MOR258-1	olfactory receptor 1341	protein-coding
Diff_Nuc5034	chr12	72267362	72267501	+	0	NA	intron (NM_029818, intron 14 of 27)	B1_Mus2|SINE|Alu	29596	NM_001163378	76967	Mm.87290	NM_029818	ENSMUSG00000034601	2700049A03Rik	Ta3|Talpid3|mKIAA0586	RIKEN cDNA 2700049A03 gene	protein-coding
Diff_Nuc40037	chr4	82575402	82575541	+	0	NA	intron (NM_177863, intron 26 of 35)	intron (NM_177863, intron 26 of 35)	-44416	NM_009887	12622	Mm.6780	NM_009887	ENSMUSG00000038192	Cer1	Cerl|Cerl1|Cerr1|cer-1	cerberus 1, DAN family BMP antagonist	protein-coding
Diff_Nuc59594	chr8	60622742	60622881	+	0	NA	intron (NM_175032, intron 4 of 11)	Lx2B|LINE|L1	-490959	NM_144731	108150	Mm.62886	NM_144731	ENSMUSG00000031608	Galnt7	AI225872	UDP-N-acetyl-alpha-D-galactosamine: polypeptide N-acetylgalactosaminyltransferase 7	protein-coding
Diff_Nuc23809	chr19	29422452	29422591	+	0	NA	TTS (NM_026362)	TTS (NM_026362)	-13361	NM_011272	19773	Mm.5033	NM_011272	ENSMUSG00000039097	Rln1	Rln|rlx	relaxin 1	protein-coding
Diff_Nuc3386	chr13	117739542	117739681	+	0	NA	intron (NM_001081009, intron 3 of 26)	intron (NM_001081009, intron 3 of 26)	74712	NM_001081009	52552	Mm.274466	NM_027272	ENSMUSG00000021725	Parp8	2810430O08Rik|ARTD16|D13Ertd275e	poly (ADP-ribose) polymerase family, member 8	protein-coding
Diff_Nuc5988	chr12	108786542	108786681	+	0	NA	Intergenic	Intergenic	187087	NR_045973	74968	Mm.359821	NR_045973	ENSMUSG00000085641	4930465M20Rik	4930431H15Rik	RIKEN cDNA 4930465M20 gene	ncRNA
Diff_Nuc52911	chr1	103794352	103794491	+	0	NA	Intergenic	L1_Mus1|LINE|L1	742076	NR_037989	100504525	Mm.87065	NR_037989	ENSMUSG00000100684	Gm20268	-	predicted gene, 20268	ncRNA
Diff_Nuc57560	chr9	95765832	95765971	+	0	NA	exon (NM_019864, exon 4 of 47)	exon (NM_019864, exon 4 of 47)	-7600	NM_001271569	73410	Mm.443314	NM_028533	ENSMUSG00000096655	1700065D16Rik	-	RIKEN cDNA 1700065D16 gene	protein-coding
Diff_Nuc27177	chr7	16600882	16601021	+	0	NA	Intergenic	Intergenic	-16107	NM_001081418	243842	Mm.440249	NM_001081418	ENSMUSG00000070808	Gltscr1	-	glioma tumor suppressor candidate region gene 1	protein-coding
Diff_Nuc52258	chr1	78311202	78311341	+	0	NA	intron (NM_001004173, intron 1 of 4)	ORR1D2|LTR|MaLR	4350	NM_001004173	433323	Mm.276248	NM_001004173	ENSMUSG00000032908	Sgpp2	SPPase2|Spp2	sphingosine-1-phosphate phosphotase 2	protein-coding
Diff_Nuc44458	chr3	98887352	98887491	+	0	NA	Intergenic	L1Md_F2|LINE|L1	33676	NR_110516	102634753		NR_110516	ENSMUSG00000086833	Gm12440	OTTMUSG00000006864	predicted gene 12440	ncRNA
Diff_Nuc17543	chr16	92295492	92295631	+	0	NA	intron (NM_134110, intron 1 of 1)	intron (NM_134110, intron 1 of 1)	2927	NM_134110	246133	Mm.156736	NM_134110	ENSMUSG00000039672	Kcne2	2200002I16Rik|AW048273|MiRP1	potassium voltage-gated channel, Isk-related subfamily, gene 2	protein-coding
Diff_Nuc5484	chr12	87424372	87424511	+	0	NA	intron (NM_029601, intron 1 of 7)	L2a|LINE|L2	930	NM_001199843	76411	Mm.292345	NM_029601	ENSMUSG00000007867	Ift43	1700019E19Rik|R75064	intraflagellar transport 43	protein-coding
Diff_Nuc685	chr13	14421952	14422091	+	0	NA	intron (NM_001081348, intron 7 of 28)	Lx2B|LINE|L1	193472	NM_001081348	94253	Mm.125298	NM_153130	ENSMUSG00000021301	Hecw1	9330116H24Rik|AV273951|E130207I19Rik|Nedl1	HECT, C2 and WW domain containing E3 ubiquitin protein ligase 1	protein-coding
Diff_Nuc50121	chr2	168402892	168403031	+	0	NA	intron (NM_001291169, intron 1 of 10)	intron (NM_001291169, intron 1 of 10)	12904	NM_001291178	18019	Mm.116802	NM_010899	ENSMUSG00000027544	Nfatc2	AI607462|NF-ATc2|NF-ATp|NFAT1|NFAT1-D|Nfatp	nuclear factor of activated T cells, cytoplasmic, calcineurin dependent 2	protein-coding
Diff_Nuc16303	chr16	37426622	37426761	+	0	NA	Intergenic	B2_Mm1t|SINE|B2	-41647	NM_172440	207227	Mm.80170	NM_172440	ENSMUSG00000022829	Stxbp5l	9430094L02|A830015P08Rik|LLGL4|T2dm1|t2md1|tomosyn-2	syntaxin binding protein 5-like	protein-coding
Diff_Nuc55359	chr9	13541122	13541261	+	0	NA	Intergenic	Intergenic	-12434	NM_023858	77116	Mm.210405	NM_023858	ENSMUSG00000031918	Mtmr2	6030445P13Rik	myotubularin related protein 2	protein-coding
Diff_Nuc49213	chr2	135981322	135981461	+	0	NA	intron (NM_172858, intron 3 of 9)	L1Md_F2|LINE|L1	97728	NM_029530	76161	Mm.41638	NM_029530	ENSMUSG00000027270	Lamp5	3110035N03Rik|6330527O06Rik|BAD-LAMP|LAMP-5	lysosomal-associated membrane protein family, member 5	protein-coding
Diff_Nuc30108	chr7	133581992	133582131	+	0	NA	intron (NM_030566, intron 4 of 12)	intron (NM_030566, intron 4 of 12)	9780	NM_030566	70314	Mm.35467	NM_030566	ENSMUSG00000030727	Rabep2	2610011A08Rik|AI462746|Fra	rabaptin, RAB GTPase binding effector protein 2	protein-coding
Diff_Nuc28052	chr7	53830692	53830831	+	0	NA	intron (NM_013789, intron 9 of 10)	intron (NM_013789, intron 9 of 10)	64416	NM_013789	27414	Mm.76659	NM_013789	ENSMUSG00000030839	Sergef	DelGEF|Gef|Gnef|Gnefr	secretion regulating guanine nucleotide exchange factor	protein-coding
Diff_Nuc21968	chr14	75312682	75312821	+	0	NA	intron (NM_001252132, intron 1 of 18)	B1_Mus1|SINE|Alu	34933	NM_001252132	380916	Mm.288868	NM_001033439	ENSMUSG00000068015	Lrch1	4832412D13Rik|AI552548|AW215503|Chdc1|mKIAA1016	leucine-rich repeats and calponin homology (CH) domain containing 1	protein-coding
Diff_Nuc22160	chr14	82900132	82900271	+	0	NA	Intergenic	Lx9|LINE|L1	-1943169	NM_001013753	219228	Mm.153643	NM_001013753	ENSMUSG00000035566	Pcdh17	C030033F14Rik|Gm78	protocadherin 17	protein-coding
Diff_Nuc99	chrX	32085892	32086031	+	0	NA	Intergenic	ORR1A4-int|LTR|MaLR	45739	NM_001270667	100861966	Mm.443264	NM_001270667	ENSMUSG00000100249	Btbd35f23	Gm21950|Mgclh	BTB domain containing 35, family member 23	protein-coding
Diff_Nuc36448	chr5	93748972	93749111	+	0	NA	Intergenic	L1_Mus1|LINE|L1	52442	NM_007635	12452	Mm.3527	NM_007635	ENSMUSG00000029385	Ccng2	-	cyclin G2	protein-coding
Diff_Nuc10083	chr10	21177322	21177461	+	0	NA	Intergenic	Intergenic	80285	NM_178713	237320	Mm.90181	NM_178713	ENSMUSG00000037542	Aldh8a1	Raldh4	aldehyde dehydrogenase 8 family, member A1	protein-coding
Diff_Nuc34913	chr5	29980422	29980561	+	0	NA	intron (NM_133907, intron 18 of 22)	B4|SINE|B4	-81947	NM_001037940	23950	Mm.290110	NM_011847	ENSMUSG00000029131	Dnajb6	Mrj|mDj4	DnaJ heat shock protein family (Hsp40) member B6	protein-coding
Diff_Nuc60791	chr8	106457282	106457421	+	0	NA	Intergenic	MTB|LTR|MaLR	-168174	NM_009868	12562	Mm.21767	NM_009868	ENSMUSG00000031871	Cdh5	7B4|AA408225|Cd144|VE-Cad|VECD|VEcad|Vec	cadherin 5	protein-coding
Diff_Nuc58993	chr8	29492132	29492271	+	0	NA	Intergenic	Intergenic	-296876	NR_033590	666422	Mm.484413	NR_033590	ENSMUSG00000110372	Gm8096	EG666422	3-phosphoglycerate dehydrogenase pseudogene	pseudo
Diff_Nuc9835	chr10	11321202	11321341	+	0	NA	Intergenic	L1Md_F2|LINE|L1	-7751	NM_013898	30058	Mm.214504	NM_013898	ENSMUSG00000048007	Timm8a1	DXHXS1274E|Ddp1|Fci-12|Tim8a|Timm8a	translocase of inner mitochondrial membrane 8A1	protein-coding
Diff_Nuc59395	chr8	48657462	48657601	+	0	NA	Intergenic	Intergenic	38532	NM_203507	192174	Mm.273081	NM_203507	ENSMUSG00000031568	Rwdd4a	BC016198|Gm1942|Rwdd4	RWD domain containing 4A	protein-coding
Diff_Nuc51155	chr1	35995492	35995631	+	0	NA	Intergenic	MTE2a|LTR|MaLR	-129684	NM_015818	50785	Mm.213566	NM_015818	ENSMUSG00000045216	Hs6st1	6Ost1	heparan sulfate 6-O-sulfotransferase 1	protein-coding
Diff_Nuc55110	chr1	196927832	196927971	+	0	NA	Intergenic	L1_Mus3|LINE|L1	-9459	NM_010778	17221	Mm.12884	NM_010778	ENSMUSG00000016493	Cd46	Mcp	CD46 antigen, complement regulatory protein	protein-coding
Diff_Nuc5620	chr12	93306182	93306321	+	0	NA	Intergenic	Intergenic	-218654	NM_011344	20338	Mm.250605	NM_011344	ENSMUSG00000020964	Sel1l	AW493766|Sel1h|mKIAA4137	sel-1 suppressor of lin-12-like (C. elegans)	protein-coding
Diff_Nuc3009	chr13	103518682	103518821	+	0	NA	Intergenic	Intergenic	-31584	NR_130318	76624	Mm.426384	NR_130171	ENSMUSG00000091906	1700099I09Rik	-	RIKEN cDNA 1700099I09 gene	ncRNA
Diff_Nuc7252	chr11	40930022	40930161	+	0	NA	Intergenic	L1Md_F2|LINE|L1	-361303	NM_009831	12450	Mm.2103	NM_009831	ENSMUSG00000020326	Ccng1	AI314029	cyclin G1	protein-coding
Diff_Nuc18538	chr15	39242342	39242481	+	0	NA	intron (NM_053271, intron 5 of 26)	MLT1B|LTR|MaLR	212579	NM_053271	116838	Mm.309296	NM_053271	ENSMUSG00000037386	Rims2	2810036I15Rik|AW048769|RIM2|Rab3ip2|Rim2(+40A)|Rim2(+44A)|Rim2(+4A)|Serg2|Syt3-rs|mKIAA0751	regulating synaptic membrane exocytosis 2	protein-coding
Diff_Nuc2148	chr13	72165262	72165401	+	0	NA	Intergenic	Intergenic	-64160	NM_010573	16371	Mm.316056	NM_010573	ENSMUSG00000060969	Irx1	-	Iroquois related homeobox 1 (Drosophila)	protein-coding
Diff_Nuc56030	chr9	39734302	39734441	+	0	NA	Intergenic	GA-rich|Low_complexity|Low_complexity	-15476	NM_147107	259111	Mm.223481	NM_147107	ENSMUSG00000051493	Olfr974	MOR171-1	olfactory receptor 974	protein-coding
Diff_Nuc27399	chr7	25983772	25983911	+	0	NA	Intergenic	Intergenic	18903	NR_106015	102466794		NR_106015	ENSMUSG00000098325	Mir7048	Gm27274|mmu-mir-7048	microRNA 7048	ncRNA
Diff_Nuc18261	chr15	29438632	29438771	+	0	NA	Intergenic	Intergenic	204458	NR_039542	100628607		NR_039542	ENSMUSG00000092639	Mir3964	mmu-mir-3964|mu-mir-3964	microRNA 3964	ncRNA
Diff_Nuc26039	chr18	57680642	57680781	+	0	NA	intron (NR_015541, intron 1 of 1)	L1Md_F2|LINE|L1	12695	NR_015541	74916	Mm.444721	NR_015541	ENSMUSG00000085800	1700066O22Rik	4930500F21Rik|4930515O13Rik|4930542C11Rik	RIKEN cDNA 1700066O22 gene	ncRNA
Diff_Nuc43792	chr3	73849522	73849661	+	0	NA	Intergenic	Intergenic	-28392	NR_040450	100504692	Mm.394454	NR_040450	ENSMUSG00000104096	Gm20356	-	predicted gene, 20356	ncRNA
Diff_Nuc12500	chr10	116116522	116116661	+	0	NA	Intergenic	ORR1C1|LTR|MaLR	49642	NR_045345	72286	Mm.396207	NR_045345	ENSMUSG00000100198	1700030O20Rik	-	RIKEN cDNA 1700030O20 gene	ncRNA
Diff_Nuc22315	chr14	90634892	90635031	+	0	NA	intron (NR_045712, intron 5 of 8)	L1_Mus4|LINE|L1	108263	NR_045712	74967	Mm.390704	NR_045712		4930474H20Rik	-	RIKEN cDNA 4930474H20 gene	ncRNA
Diff_Nuc7384	chr11	45684352	45684491	+	0	NA	intron (NM_001346760, intron 1 of 11)	MER82|DNA|MER2_type	18955	NM_001045520	216705	Mm.169673	NM_001045520	ENSMUSG00000006169	Clint1	AI642036|AW537616|C530049I24Rik|Enth|Epn4|F630206G17Rik|mKIAA0171	clathrin interactor 1	protein-coding
Diff_Nuc2210	chr13	74598092	74598231	+	0	NA	Intergenic	Intergenic	33237	NM_146231	235956	Mm.296909	NM_146231	ENSMUSG00000069208	Zfp825	-	zinc finger protein 825	protein-coding
Diff_Nuc41727	chr4	145446832	145446971	+	0	NA	Intergenic	Lx2B|LINE|L1	19779	NR_033612	236069	Mm.276881	NR_033612	ENSMUSG00000096233	Gm13238	OTTMUSG00000011065	carnitine deficiency-associated gene expressed in ventricle 3 pseudogene	pseudo
Diff_Nuc6905	chr11	25760017	25760156	+	0	NA	intron (NR_027973, intron 2 of 5)	intron (NR_027973, intron 2 of 5)	-342154	NR_105791	102466154		NR_105791	ENSMUSG00000099015	Mir6372	Gm27358|mmu-mir-6372	microRNA 6372	ncRNA
Diff_Nuc32026	chr6	59407702	59407841	+	0	NA	Intergenic	RLTR46|LTR|ERVK	-31487	NM_183183	243385	Mm.138080	NM_183183	ENSMUSG00000045441	Gprin3	C030038J10Rik|C730021L23	GPRIN family member 3	protein-coding
Diff_Nuc19603	chr15	83815942	83816081	+	0	NA	intron (NM_029946, intron 7 of 31)	B4|SINE|B4	-49486	NM_001161628	77627	Mm.196288	NM_029946	ENSMUSG00000022441	Efcab6	4931407K02Rik|4932408N08Rik|bM150J22.2|mKIAA1672	EF-hand calcium binding domain 6	protein-coding
Diff_Nuc9456	chr11	116716032	116716171	+	0	NA	intron (NM_178620, intron 2 of 12)	intron (NM_178620, intron 2 of 12)	772	NM_178620	69900	Mm.348004	NM_178620	ENSMUSG00000020818	Mfsd11	2600014M03Rik	major facilitator superfamily domain containing 11	protein-coding
Diff_Nuc5567	chr12	90996772	90996911	+	0	NA	intron (NM_001198587, intron 14 of 19)	intron (NM_001198587, intron 14 of 19)	-54082	NM_001252074	18191	Mm.425766	NM_172544	ENSMUSG00000066392	Nrxn3	-	neurexin III	protein-coding
Diff_Nuc32454	chr6	78883472	78883611	+	0	NA	Intergenic	Lx2|LINE|L1	-98495	NR_040302	100504701	Mm.400420	NR_040301	ENSMUSG00000108072	Gm20362	-	predicted gene, 20362	ncRNA
Diff_Nuc22736	chr14	109847482	109847621	+	0	NA	Intergenic	Lx|LINE|L1	-534095	NM_199065	76965	Mm.257268	NM_199065	ENSMUSG00000075478	Slitrk1	3200001I04Rik	SLIT and NTRK-like family, member 1	protein-coding
Diff_Nuc19231	chr15	72032322	72032461	+	0	NA	Intergenic	Intergenic	-167734	NM_027174	69700	Mm.322500	NM_027174	ENSMUSG00000079022	Col22a1	2310067L16Rik|C80743	collagen, type XXII, alpha 1	protein-coding
Diff_Nuc16007	chr16	26901512	26901651	+	0	NA	Intergenic	Intergenic	66750	NM_001285916	239789	Mm.326909	NM_001013761	ENSMUSG00000068428	Gmnc	Gemc1|Gm1778|Gm606	geminin coiled-coil domain containing	protein-coding
Diff_Nuc55598	chr9	24139142	24139281	+	0	NA	Intergenic	B4A|SINE|B4	168373	NM_172920	244745	Mm.38526	NM_172920	ENSMUSG00000043067	Dpy19l1	1100001I19Rik|6030402K12|AI225861|AW558481	dpy-19-like 1 (C. elegans)	protein-coding
Diff_Nuc57812	chr9	105391262	105391401	+	0	NA	intron (NM_001253831, intron 1 of 26)	intron (NM_001253831, intron 1 of 26)	6132	NM_175025	235574	Mm.326247	NM_175025	ENSMUSG00000032570	Atp2c1	1700121J11Rik|ATP2C1A|AW061228|BCPM|D930003G21Rik|HHD|SPCA|pmr1	ATPase, Ca++-sequestering	protein-coding
Diff_Nuc37690	chr5	135751092	135751231	+	0	NA	Intergenic	B4|SINE|B4	-24244	NM_010246	14371	Mm.6256	NM_010246	ENSMUSG00000049551	Fzd9	mfz9	frizzled class receptor 9	protein-coding
Diff_Nuc32252	chr6	70543122	70543261	+	0	NA	Intergenic	MER52-int|LTR|ERV1	198978	NM_009075	19895	Mm.17905	NM_009075	ENSMUSG00000053604	Rpia	RPI	ribose 5-phosphate isomerase A	protein-coding
Diff_Nuc8888	chr11	97345892	97346031	+	0	NA	intron (NM_021493, intron 15 of 18)	intron (NM_021493, intron 15 of 18)	15693	NM_001289118	100141474	Mm.482426	NM_001289118	ENSMUSG00000047988	4933428G20Rik	-	RIKEN cDNA 4933428G20 gene	protein-coding
Diff_Nuc35674	chr5	59448972	59449111	+	0	NA	Intergenic	MLT1C|LTR|MaLR	-604804	NR_046190	78163	Mm.243828	NR_046190	ENSMUSG00000105234	4930459L07Rik	-	RIKEN cDNA 4930459L07 gene	ncRNA
Diff_Nuc47978	chr2	88928782	88928921	+	0	NA	Intergenic	Intergenic	9269	NM_146900	258902	Mm.223312	NM_146900	ENSMUSG00000101480	Olfr1220	MOR2335	olfactory receptor 1220	protein-coding
Diff_Nuc38979	chr4	37129882	37130021	+	0	NA	Intergenic	L1_Mur1|LINE|L1	-231174	NM_001165999	242384	Mm.132507	NM_175516	ENSMUSG00000045083	Lingo2	B230217C06Rik|Lern3|Lrrn6c	leucine rich repeat and Ig domain containing 2	protein-coding
Diff_Nuc9590	chr11	120739652	120739791	+	0	NA	intron (NM_027745, intron 14 of 18)	intron (NM_027745, intron 14 of 18)	-53860	NM_007988	14104	Mm.236443	NM_007988	ENSMUSG00000025153	Fasn	A630082H08Rik|FAS	fatty acid synthase	protein-coding
Diff_Nuc51437	chr1	46727452	46727591	+	0	NA	intron (NM_001310335, intron 42 of 64)	Lx9|LINE|L1	182833	NM_172653	227059	Mm.233889	NM_172653	ENSMUSG00000025986	Slc39a10	2900042E17Rik|5430433I10|mKIAA1265	solute carrier family 39 (zinc transporter), member 10	protein-coding
Diff_Nuc26554	chr18	75833912	75834051	+	0	NA	intron (NM_201354, intron 1 of 11)	intron (NM_201354, intron 1 of 11)	23369	NM_201354	269037	Mm.36745	NM_201354	ENSMUSG00000052928	Ctif	Gm672	CBP80/20-dependent translation initiation factor	protein-coding
Diff_Nuc10407	chr10	37664542	37664681	+	0	NA	Intergenic	Intergenic	-230969	NR_131035	75877	Mm.402094	NR_131035	ENSMUSG00000111234	4930591E09Rik	-	RIKEN cDNA 4930591E09 gene	ncRNA
Diff_Nuc51378	chr1	44066012	44066151	+	0	NA	TTS (NM_001013799)	TTS (NM_001013799)	10770	NM_001013799	433294	Mm.123621	NM_001013799	ENSMUSG00000047343	Mettl21c	A530098C11Rik	methyltransferase like 21C	protein-coding
Diff_Nuc47342	chr2	61505592	61505731	+	0	NA	Intergenic	Intergenic	-44090	NM_021526	59029	Mm.218198	NM_021526	ENSMUSG00000026914	Psmd14	2610312C03Rik|3200001M20Rik|AA986732|Pad1|Poh1|rpm11	proteasome (prosome, macropain) 26S subunit, non-ATPase, 14	protein-coding
Diff_Nuc16889	chr16	62196542	62196681	+	0	NA	Intergenic	RLTR11A2|LTR|ERVK	589931	NM_178925	106338	Mm.26321	NM_178925	ENSMUSG00000050312	Nsun3	6720484A09Rik|AU022521	NOL1/NOP2/Sun domain family member 3	protein-coding
Diff_Nuc6689	chr11	17627682	17627821	+	0	NA	Intergenic	Intergenic	226127	NM_026576	68145	Mm.178684	NM_026576	ENSMUSG00000016984	Etaa1	5730466H23Rik|AA672646	Ewing tumor-associated antigen 1	protein-coding
Diff_Nuc51271	chr1	39591782	39591921	+	0	NA	promoter-TSS (NM_028043)	promoter-TSS (NM_028043)	-796	NM_028043	52846	Mm.259421	NM_028043	ENSMUSG00000003135	Cnot11	2410015L18Rik|C40|D1Bwg0212e	CCR4-NOT transcription complex, subunit 11	protein-coding
Diff_Nuc31809	chr6	51903702	51903841	+	0	NA	intron (NM_018773, intron 4 of 12)	L1_Mus1|LINE|L1	58777	NM_018773	54353	Mm.221479	NM_018773	ENSMUSG00000059182	Skap2	2610021A10Rik|AA960083|BB137539|RA70|SKAP-HOM|Saps|Scap2|mSKAP55R	src family associated phosphoprotein 2	protein-coding
Diff_Nuc33526	chr6	122255672	122255811	+	0	NA	Intergenic	B1_Mm|SINE|Alu	-3287	NM_010749	17113	Mm.249225	NM_010749	ENSMUSG00000007458	M6pr	CD-MPR|Mpr46	mannose-6-phosphate receptor, cation dependent	protein-coding
Diff_Nuc5882	chr12	104033002	104033141	+	0	NA	intron (NM_172806, intron 8 of 11)	intron (NM_172806, intron 8 of 11)	36886	NM_025666	66622	Mm.34261	NM_025666	ENSMUSG00000041712	Ubr7	5730410I19Rik|AA589405|AW557761	ubiquitin protein ligase E3 component n-recognin 7 (putative)	protein-coding
Diff_Nuc57681	chr9	100699312	100699451	+	0	NA	intron (NM_009282, intron 8 of 33)	B2_Mm1t|SINE|B2	155339	NM_009282	20842	Mm.42135	NM_009282	ENSMUSG00000037286	Stag1	AU045003|SA-1|Scc3	stromal antigen 1	protein-coding
Diff_Nuc54460	chr1	172466872	172467011	+	0	NA	intron (NM_001109985, intron 1 of 9)	RSINE1|SINE|B4	20300	NM_027528	70729	Mm.487078	NM_027528	ENSMUSG00000038473	Nos1ap	6330408P19Rik|Capon	nitric oxide synthase 1 (neuronal) adaptor protein	protein-coding
Diff_Nuc21610	chr14	62934292	62934431	+	0	NA	Intergenic	ORR1B1|LTR|MaLR	-16581	NM_026001	67153	Mm.26040	NM_026001	ENSMUSG00000021932	Rnaseh2b	1110019N06Rik|2610207P08Rik|Dleu8	ribonuclease H2, subunit B	protein-coding
Diff_Nuc23517	chr19	19254692	19254831	+	0	NA	Intergenic	MTD|LTR|MaLR	-69075	NM_001043354	225998	Mm.234641	NM_146095	ENSMUSG00000036192	Rorb	Nr1f2|RZR-beta|RZRB|Rorbeta|hstp	RAR-related orphan receptor beta	protein-coding
Diff_Nuc22920	chr14	119596002	119596141	+	0	NA	intron (NM_015820, intron 1 of 1)	L1MA5|LINE|L1	58584	NM_015820	50787	Mm.445777	NM_015820	ENSMUSG00000053465	Hs6st3	6OST3|HS6ST-3	heparan sulfate 6-O-sulfotransferase 3	protein-coding
Diff_Nuc9991	chr10	17863412	17863551	+	0	NA	intron (NM_001195036, intron 13 of 20)	intron (NM_001195036, intron 13 of 20)	67215	NM_001195036	100045792	Mm.380617	NM_001195036	ENSMUSG00000071392	Ect2l	C330021H03Rik|ENSMUSG00000071392|Gm10331	epithelial cell transforming sequence 2 oncogene-like	protein-coding
Diff_Nuc22716	chr14	108812952	108813091	+	0	NA	Intergenic	Lx3_Mus|LINE|L1	500435	NM_199065	76965	Mm.257268	NM_199065	ENSMUSG00000075478	Slitrk1	3200001I04Rik	SLIT and NTRK-like family, member 1	protein-coding
Diff_Nuc17434	chr16	87799082	87799221	+	0	NA	Intergenic	Intergenic	99952	NM_007520	12013	Mm.26147	NM_007520	ENSMUSG00000025612	Bach1	6230421P05Rik|AI323795	BTB and CNC homology 1, basic leucine zipper transcription factor 1	protein-coding
Diff_Nuc17129	chr16	72912182	72912321	+	0	NA	intron (NM_019413, intron 3 of 28)	intron (NM_019413, intron 3 of 28)	248857	NM_019413	19876	Mm.310772	NM_019413	ENSMUSG00000022883	Robo1	AW494633|AW742721|DUTT1|Gm310	roundabout guidance receptor 1	protein-coding
Diff_Nuc60972	chr8	112742442	112742581	+	0	NA	intron (NM_146215, intron 1 of 1)	L2a|LINE|L2	651	NM_146215	234728	Mm.275341	NM_146215	ENSMUSG00000046441	Cmtr2	AU022703|C730036L12Rik|Ftsjd1|MTr2	cap methyltransferase 2	protein-coding
Diff_Nuc17743	chr15	5094192	5094331	+	0	NA	intron (NM_001013367, intron 1 of 8)	intron (NM_001013367, intron 1 of 8)	400	NM_001013367	105787	Mm.207004	NM_001013367	ENSMUSG00000050697	Prkaa1	AI194361|AI450832|AL024255|AMPKalpha1|C130083N04Rik	protein kinase, AMP-activated, alpha 1 catalytic subunit	protein-coding
Diff_Nuc17019	chr16	68172822	68172961	+	0	NA	Intergenic	Intergenic	-551738	NM_178721	239857	Mm.394300	NM_178721	ENSMUSG00000064115	Cadm2	2900078E11Rik|9330131D06|A830029E02Rik|Igdf4d|Igsf4d|NECL3|SynCAM 2|SynCAM2	cell adhesion molecule 2	protein-coding
Diff_Nuc25325	chr18	32180402	32180541	+	0	NA	intron (NM_032394, intron 2 of 46)	intron (NM_032394, intron 2 of 46)	16114	NM_032394	17922	Mm.440013	NM_032394	ENSMUSG00000024388	Myo7b	-	myosin VIIB	protein-coding
Diff_Nuc22136	chr14	81844892	81845031	+	0	NA	Intergenic	Intergenic	1444852	NM_001030294	380924	Mm.26456	NM_001030294	ENSMUSG00000022026	Olfm4	GC1|GW112|Gm296|Gm913|OlfD|pPD4	olfactomedin 4	protein-coding
Diff_Nuc52689	chr1	93261052	93261191	+	0	NA	Intergenic	ORR1C2|LTR|MaLR	-1886	NM_173395	227358	Mm.389157	NM_173395	ENSMUSG00000047443	Erfe	4832406C22|Fam132b|myonectin	erythroferrone	protein-coding
Diff_Nuc22223	chr14	85657492	85657631	+	0	NA	Intergenic	RLTR18|LTR|ERVK	-781330	NR_015539	319903	Mm.440481	NR_015539		9630013A20Rik	-	RIKEN cDNA 9630013A20 gene	ncRNA
Diff_Nuc50168	chr2	171076512	171076651	+	0	NA	Intergenic	Intergenic	519274	NM_001163686	76829	Mm.41633	NM_029761	ENSMUSG00000027560	Dok5	2700055C10Rik	docking protein 5	protein-coding
Diff_Nuc31657	chr6	46473312	46473451	+	0	NA	intron (NM_001004357, intron 13 of 23)	B4|SINE|B4	-721014	NM_025771	66797	Mm.440084	NM_025771	ENSMUSG00000039419	Cntnap2	5430425M22Rik|Caspr2|mKIAA0868	contactin associated protein-like 2	protein-coding
Diff_Nuc8162	chr11	73414782	73414921	+	0	NA	Intergenic	Lx|LINE|L1	-1233	NM_207224	193053	Mm.377230	NM_207224	ENSMUSG00000060335	Olfr384	GA_x5J8B7U2A8F-1-327|GA_x6K02T2P1NL-3773152-3774090|MOR135-5|Olfr384-ps1|Olfr386	olfactory receptor 384	protein-coding
Diff_Nuc41778	chr4	146538152	146538291	+	0	NA	intron (NM_001083918, intron 3 of 6)	intron (NM_001083918, intron 3 of 6)	-11754	NM_001039209	195531	Mm.270762	NM_001039209	ENSMUSG00000078496	Zfp982	Gm13152|OTTMUSG00000010671	zinc finger protein 982	protein-coding
Diff_Nuc33680	chr6	128485332	128485471	+	0	NA	Intergenic	ORR1B1-int|LTR|MaLR	-8663	NM_007376	11287	Mm.260144	NM_007376	ENSMUSG00000030359	Pzp	A1m|A2m|AI893533|MAM	pregnancy zone protein	protein-coding
Diff_Nuc41454	chr4	136157442	136157581	+	0	NA	intron (NM_001347221, intron 1 of 19)	intron (NM_001347221, intron 1 of 19)	1127	NM_133872	99982	Mm.28540	NM_133872	ENSMUSG00000036940	Kdm1a	1810043O07Rik|AA408884|Aof2|D4Ertd478e|Kdm1|Lsd1|mKIAA0601	lysine (K)-specific demethylase 1A	protein-coding
Diff_Nuc46967	chr2	45955112	45955251	+	0	NA	Intergenic	L1_Mus3|LINE|L1	403056	NR_040497	69405	Mm.396184	NR_040497	ENSMUSG00000086202	1700019E08Rik	-	RIKEN cDNA 1700019E08 gene	ncRNA
Diff_Nuc14395	chr17	59293382	59293521	+	0	NA	Intergenic	Lx|LINE|L1	-140706	NM_026497	67993	Mm.36507	NM_026497	ENSMUSG00000024228	Nudt12	0610016O18Rik	nudix (nucleoside diphosphate linked moiety X)-type motif 12	protein-coding
Diff_Nuc43392	chr3	55571572	55571711	+	0	NA	intron (NM_030595, intron 41 of 57)	intron (NM_030595, intron 41 of 57)	-14791	NM_010750	17116	Mm.440209	NM_010750	ENSMUSG00000056947	Mab21l1	AW047968	mab-21-like 1 (C. elegans)	protein-coding
Diff_Nuc21239	chr14	49816742	49816881	+	0	NA	Intergenic	LTR16A|LTR|ERVL	24890	NM_027492	70646	Mm.275688	NM_027492	ENSMUSG00000036282	Naa30	4930487N19Rik|5730533P17Rik|AI447922|AW322455|Nat12	N(alpha)-acetyltransferase 30, NatC catalytic subunit	protein-coding
Diff_Nuc55786	chr9	30284292	30284431	+	0	NA	Intergenic	Intergenic	49447	NM_028874	102607	Mm.35084	NM_028874	ENSMUSG00000031993	Snx19	3526401K03Rik|AI195321|AI848208|mKIAA0254	sorting nexin 19	protein-coding
Diff_Nuc58461	chr8	7910302	7910441	+	0	NA	Intergenic	Intergenic	750402	NM_010111	13642	Mm.209813	NM_010111	ENSMUSG00000001300	Efnb2	ELF-2|Epl5|Eplg5|Htk-L|LERK-5|Lerk5|NLERK-1	ephrin B2	protein-coding
Diff_Nuc41218	chr4	128403912	128404051	+	0	NA	promoter-TSS (NM_001195083)	promoter-TSS (NM_001195083)	-834	NM_001195083	54383	Mm.473738	NM_018774	ENSMUSG00000028796	Phc2	A3galt2|AA415044|D130050K19Rik|D4Ertd810e|Edr2|Mph2|p36	polyhomeotic-like 2 (Drosophila)	protein-coding
Diff_Nuc11602	chr10	83180372	83180511	+	0	NA	Intergenic	Intergenic	-5169	NM_001145198	69784	Mm.271188	NM_001145198	ENSMUSG00000087651	1500009L16Rik	2700050C19Rik|OCC-1	RIKEN cDNA 1500009L16 gene	protein-coding
Diff_Nuc6369	chr11	3571822	3571961	+	0	NA	intron (NM_198162, intron 5 of 25)	intron (NM_198162, intron 5 of 25)	13188	NM_198162	74522	Mm.139127	NM_198162	ENSMUSG00000034543	Morc2a	8430403M08Rik|Zcwcc1	microrchidia 2A	protein-coding
Diff_Nuc47742	chr2	77696242	77696381	+	0	NA	Intergenic	Intergenic	-41438	NM_178723	241494	Mm.490320	NM_178723	ENSMUSG00000027016	Zfp385b	B830010L13Rik|C130013B13Rik|Zfp533|Znf385b	zinc finger protein 385B	protein-coding
Diff_Nuc38722	chr4	25102622	25102761	+	0	NA	Intergenic	ORR1E|LTR|MaLR	67332	NM_021318	57756	Mm.87325	NM_021318	ENSMUSG00000028259	Fhl5	1700027G07Rik|Act	four and a half LIM domains 5	protein-coding
Diff_Nuc31509	chr6	40034092	40034231	+	0	NA	Intergenic	MTEb|LTR|MaLR	-26091	NM_001004182	434008	Mm.130209	NM_001004182	ENSMUSG00000057716	Tmem178b	EG434008|Gm5567	transmembrane protein 178B	protein-coding
Diff_Nuc19940	chr15	96234132	96234271	+	0	NA	3' UTR (NM_175251, exon 21 of 21)	3' UTR (NM_175251, exon 21 of 21)	57073	NM_028148	72193	Mm.324474	NM_028148	ENSMUSG00000033228	Scaf11	1110061H03Rik|2610510E10Rik|AI462454|CASP11|SIP1|SRRP129|Sfrs2ip|Srsf2ip|mKIAA3013	SR-related CTD-associated factor 11	protein-coding
Diff_Nuc30096	chr7	133312372	133312511	+	0	NA	intron (NM_028816, intron 4 of 23)	intron (NM_028816, intron 4 of 23)	31481	NM_028816	74204	Mm.235663	NM_028816	ENSMUSG00000000131	Xpo6	2610005L19Rik|AL022631|C230091E20Rik|R75304|Ranbp20|mKIAA0370	exportin 6	protein-coding
Diff_Nuc18195	chr15	27162432	27162571	+	0	NA	Intergenic	Intergenic	-13376	NR_029647	723831		NR_029647	ENSMUSG00000094316	Mir297-1	Mir297a-1|Mirn297-1	microRNA 297-1	ncRNA
Diff_Nuc49636	chr2	152019842	152019981	+	0	NA	Intergenic	RSINE1|SINE|B4	-32665	NM_007788	12995	Mm.23692	NM_007788	ENSMUSG00000074698	Csnk2a1	Csnk2a1-rs4	casein kinase 2, alpha 1 polypeptide	protein-coding
Diff_Nuc44318	chr3	94187392	94187531	+	0	NA	intron (NR_121656, intron 1 of 9)	intron (NR_121656, intron 1 of 9)	6107	NR_121656	19885	Mm.4372	NM_011281	ENSMUSG00000028150	Rorc	Nr1f3|RORgamma|TOR|Thor	RAR-related orphan receptor gamma	protein-coding
Diff_Nuc17531	chr16	91761632	91761771	+	0	NA	intron (NM_010587, intron 1 of 38)	intron (NM_010587, intron 1 of 38)	32085	NM_010587	16443	Mm.40546	NM_010587	ENSMUSG00000022957	Itsn1	AA517634|AA545208|AI316805|AI839402|AI848451|Ehsh1|Ese1|Itsn|Sh3p17	intersectin 1 (SH3 domain protein 1A)	protein-coding
Diff_Nuc29847	chr7	122686672	122686811	+	0	NA	intron (NM_001025560, intron 11 of 15)	intron (NM_001025560, intron 11 of 15)	258382	NM_001277328	20679	Mm.323365	NM_011445	ENSMUSG00000051910	Sox6	AI987981|SOX-LZ	SRY (sex determining region Y)-box 6	protein-coding
Diff_Nuc24365	chr19	51995672	51995811	+	0	NA	Intergenic	Lx2|LINE|L1	-343046	NM_008386	16333	Mm.46269	NM_008386	ENSMUSG00000035804	Ins1	Ins-1|Ins2-rs1	insulin I	protein-coding
Diff_Nuc14741	chr17	74350362	74350501	+	0	NA	Intergenic	Intergenic	46825	NM_053188	94224	Mm.38933	NM_053188	ENSMUSG00000038541	Srd5a2	5ART2|S5AR 2	steroid 5 alpha-reductase 2	protein-coding
Diff_Nuc11565	chr10	82510482	82510621	+	0	NA	intron (NM_021439, intron 1 of 2)	intron (NM_021439, intron 1 of 2)	62309	NM_021439	58250	Mm.360747	NM_021439	ENSMUSG00000034612	Chst11	1110020P09Rik|C4ST|C4ST-1|C4ST1|C4s	carbohydrate sulfotransferase 11	protein-coding
Diff_Nuc27851	chr7	46730702	46730841	+	0	NA	intron (NM_001243021, intron 5 of 5)	RLTR16|LTR|ERVK	25883	NM_001243021	233147	Mm.148946	NM_001243021	ENSMUSG00000030424	Zfp939	9430025M13Rik	zinc finger protein 939	protein-coding
Diff_Nuc11458	chr10	79608862	79609001	+	0	NA	TTS (NM_025313)	TTS (NM_025313)	-2086	NM_001305798	59090	Mm.143813	NM_021565	ENSMUSG00000035621	Midn	3000003C15Rik	midnolin	protein-coding
Diff_Nuc24880	chr18	13329672	13329811	+	0	NA	Intergenic	Intergenic	164242	NM_153087	225192	Mm.207073	NM_153087	ENSMUSG00000037346	Hrh4	AXOR35|BG26|GPCR105|GPRv53|H4|H4R|HH4R	histamine receptor H4	protein-coding
Diff_Nuc38504	chr4	14503702	14503841	+	0	NA	intron (NM_145947, intron 4 of 18)	ORR1C2-int|LTR|MaLR	45154	NM_145947	208890	Mm.483839	NM_145947	ENSMUSG00000040569	Slc26a7	-	solute carrier family 26, member 7	protein-coding
Diff_Nuc36045	chr5	74899552	74899691	+	0	NA	intron (NM_178672, intron 2 of 4)	L1Md_F2|LINE|L1	28146	NM_178672	212986	Mm.134147	NM_178672	ENSMUSG00000062110	Scfd2	E430013M20Rik|STXBP1L1	Sec1 family domain containing 2	protein-coding
Diff_Nuc22041	chr14	77942892	77943031	+	0	NA	intron (NM_172813, intron 7 of 18)	intron (NM_172813, intron 7 of 18)	-36286	NR_033141	629678	Mm.390721	NM_001037935	ENSMUSG00000067973	Gm6994	EG629678	predicted gene 6994	ncRNA
Diff_Nuc26380	chr18	69591902	69592041	+	0	NA	intron (NM_001083967, intron 3 of 19)	intron (NM_001083967, intron 3 of 19)	86596	NM_001083967	21413	Mm.4269	NM_013685	ENSMUSG00000053477	Tcf4	5730422P05Rik|ASP-I2|E2-2|E2.2|ITF-2|ITF-2b|ITF2|ME2|MITF-2A|MITF-2B|SEF-2|SEF2|SEF2-1|TFE|Tcf-4|bHLHb19	transcription factor 4	protein-coding
Diff_Nuc37733	chr5	136877622	136877761	+	0	NA	intron (NM_009986, intron 3 of 23)	intron (NM_009986, intron 3 of 23)	-26018	NR_030500	723975		NR_030500	ENSMUSG00000106479	Mir721	Mirn721|miRY|mir-721|mmu-mir-721	microRNA 721	ncRNA
Diff_Nuc1736	chr13	55871792	55871931	+	0	NA	intron (NM_028281, intron 2 of 3)	B3|SINE|B2	-14079	NM_029772	76856	Mm.159795	NM_029772	ENSMUSG00000021499	Catsper3	4921522D01Rik|CACRC	cation channel, sperm associated 3	protein-coding
Diff_Nuc45004	chr3	121979652	121979791	+	0	NA	exon (NM_153806, exon 2 of 7)	exon (NM_153806, exon 2 of 7)	2389	NM_153806	99480	Mm.398647	NM_153806	ENSMUSG00000039756	Dnttip2	4930588M11Rik|AA408582|AU014960|HSU15552	deoxynucleotidyltransferase, terminal, interacting protein 2	protein-coding
Diff_Nuc34784	chr5	24988792	24988931	+	0	NA	intron (NM_001081383, intron 1 of 58)	intron (NM_001081383, intron 1 of 58)	15740	NM_001081383	231051	Mm.332268	NM_001081383	ENSMUSG00000038056	Kmt2c	E330008K23Rik|HALR|Mll3|mKIAA1506	lysine (K)-specific methyltransferase 2C	protein-coding
Diff_Nuc35406	chr5	48808442	48808581	+	0	NA	intron (NM_001199242, intron 3 of 7)	intron (NM_001199242, intron 3 of 7)	21699	NR_045500	70592	Mm.437183	NR_045500	ENSMUSG00000029089	5730480H06Rik	-	RIKEN cDNA 5730480H06 gene	ncRNA
Diff_Nuc53337	chr1	125263652	125263791	+	0	NA	intron (NM_199021, intron 19 of 25)	MTE2a|LTR|MaLR	678415	NM_199021	269109	Mm.417716	NM_199021	ENSMUSG00000036815	Dpp10	6430601K09Rik|DPP X|Dprp3	dipeptidylpeptidase 10	protein-coding
Diff_Nuc46718	chr2	36114182	36114321	+	0	NA	Intergenic	Intergenic	28305	NM_008969	19224	Mm.275434	NM_008969	ENSMUSG00000047250	Ptgs1	COX1|Cox-1|Cox-3|PGHS-1|PHS 1|Pghs1	prostaglandin-endoperoxide synthase 1	protein-coding
Diff_Nuc603	chr13	12116792	12116931	+	0	NA	intron (NM_023868, intron 1 of 104)	intron (NM_023868, intron 1 of 104)	82351	NM_023868	20191	Mm.239871	NM_023868	ENSMUSG00000021313	Ryr2	9330127I20Rik|RYR-2	ryanodine receptor 2, cardiac	protein-coding
Diff_Nuc22903	chr14	119274322	119274461	+	0	NA	TTS (NM_001160097)	TTS (NM_001160097)	20219	NM_001160099	58187	Mm.390755	NM_021386	ENSMUSG00000022132	Cldn10	6720456I16Rik|Cldn10a|Cldn10b|D14Ertd728e	claudin 10	protein-coding
Diff_Nuc18797	chr15	51412642	51412781	+	0	NA	Intergenic	Intergenic	-185555	NR_045092	100502643	Mm.131987	NR_045092		Gm19303	-	predicted gene, 19303	ncRNA
Diff_Nuc36193	chr5	81282992	81283131	+	0	NA	Intergenic	Intergenic	-166535	NM_001347367	319387	Mm.273631	NM_198702	ENSMUSG00000037605	Adgrl3	5430402I23Rik|CIRL-3|D130075K09Rik|Gm1379|LEC3|Lphn3|mKIAA0768	adhesion G protein-coupled receptor L3	protein-coding
Diff_Nuc12757	chr10	127147152	127147291	+	0	NA	exon (NM_001081219, exon 8 of 27)	exon (NM_001081219, exon 8 of 27)	4909	NM_001081219	432516	Mm.90450	NM_001081219	ENSMUSG00000025401	Myo1a	BBM-I|Myhl	myosin IA	protein-coding
Diff_Nuc34175	chr6	146988722	146988861	+	0	NA	Intergenic	L1VL2|LINE|L1	-2501	NM_145573	232536	Mm.46656	NM_145573	ENSMUSG00000040112	Mrps35	MDSO23|MRP-S28|MRPS28	mitochondrial ribosomal protein S35	protein-coding
Diff_Nuc34323	chr5	5842882	5843021	+	0	NA	Intergenic	LTR87|LTR|ERVL?	-93634	NM_027399	70358	Mm.85429	NM_027399	ENSMUSG00000015652	Steap1	2410007B19Rik|Prss24|Steap	six transmembrane epithelial antigen of the prostate 1	protein-coding
Diff_Nuc17456	chr16	89120672	89120811	+	0	NA	Intergenic	L1_Mus1|LINE|L1	-56494	NM_001276278	68637	Mm.384089	NM_001276278	ENSMUSG00000068073	1110025L11Rik	-	RIKEN cDNA 1110025L11 gene	protein-coding
Diff_Nuc50080	chr2	166890152	166890291	+	0	NA	promoter-TSS (NR_028540)	promoter-TSS (NR_028540)	-572	NR_028540	100217443		NR_028540		Snord12	MBII-99	small nucleolar RNA, C/D box 12	snoRNA
Diff_Nuc10137	chr10	23815142	23815281	+	0	NA	Intergenic	Lx2B|LINE|L1	-3111	NM_001010837	382348	Mm.377897	NM_001010837	ENSMUSG00000100186	Taar8b	Gm1149|taR-8b	trace amine-associated receptor 8B	protein-coding
Diff_Nuc7390	chr11	45777532	45777671	+	0	NA	Intergenic	Intergenic	-8596	NM_001080969	66628	Mm.269083	NM_001080969	ENSMUSG00000011254	Thg1l	-	tRNA-histidine guanylyltransferase 1-like (S. cerevisiae)	protein-coding
Diff_Nuc24743	chr18	7757092	7757231	+	0	NA	Intergenic	Intergenic	-111669	NM_001282093	225131	Mm.204524	NM_153085	ENSMUSG00000024283	Wac	1110067P07Rik|A230035H12Rik|AI256735|AI256776|Wwp4	WW domain containing adaptor with coiled-coil	protein-coding
Diff_Nuc55779	chr9	30184012	30184151	+	0	NA	Intergenic	Lx2A|LINE|L1	-50833	NM_028874	102607	Mm.35084	NM_028874	ENSMUSG00000031993	Snx19	3526401K03Rik|AI195321|AI848208|mKIAA0254	sorting nexin 19	protein-coding
Diff_Nuc41982	chr4	151515032	151515171	+	0	NA	intron (NM_207687, intron 2 of 15)	intron (NM_207687, intron 2 of 15)	-4667	NM_207690	56226	Mm.264215	NM_019585	ENSMUSG00000028943	Espn	je	espin	protein-coding
Diff_Nuc57587	chr9	96605312	96605451	+	0	NA	intron (NM_175537, intron 2 of 2)	intron (NM_175537, intron 2 of 2)	26713	NM_175537	245007	Mm.485954	NM_175537	ENSMUSG00000040433	Zbtb38	A930014K01Rik|CIBZ	zinc finger and BTB domain containing 38	protein-coding
Diff_Nuc36240	chr5	84245232	84245371	+	0	NA	Intergenic	L1Md_F2|LINE|L1	-461081	NM_153801	243078	Mm.126783	NM_153801	ENSMUSG00000049537	Tecrl	D330017N19Rik|Srd5a2l2	trans-2,3-enoyl-CoA reductase-like	protein-coding
Diff_Nuc3025	chr13	104216022	104216161	+	0	NA	Intergenic	Intergenic	-91519	NM_175171	328329	Mm.202606	NM_175171	ENSMUSG00000034751	Mast4	4930420O11Rik|AI642422|mKIAA0303	microtubule associated serine/threonine kinase family member 4	protein-coding
Diff_Nuc55023	chr1	194242242	194242381	+	0	NA	intron (NM_010600, intron 8 of 10)	L2c|LINE|L2	227652	NM_010600	16510	Mm.4489	NM_010600	ENSMUSG00000058248	Kcnh1	EAG1|Kv10.1|M-eag	potassium voltage-gated channel, subfamily H (eag-related), member 1	protein-coding
Diff_Nuc48261	chr2	99498702	99498841	+	0	NA	Intergenic	MTC|LTR|MaLR	-1966134	NM_009020	19374	Mm.4988	NM_009020	ENSMUSG00000032864	Rag2	Rag-2	recombination activating gene 2	protein-coding
Diff_Nuc46807	chr2	38728202	38728341	+	0	NA	intron (NM_010264, intron 2 of 10)	intron (NM_010264, intron 2 of 10)	18921	NR_029904	723903		NR_029904	ENSMUSG00000065578	Mir181b-2	Mirn181b-2|mir-181b-2	microRNA 181b-2	ncRNA
Diff_Nuc4384	chr12	41703142	41703281	+	0	NA	Intergenic	Intergenic	-47466	NM_053122	93757	Mm.363813	NM_053122	ENSMUSG00000056899	Immp2l	AI853880|IMP2	IMP2 inner mitochondrial membrane peptidase-like (S. cerevisiae)	protein-coding
Diff_Nuc58533	chr8	10845772	10845911	+	0	NA	Intergenic	L1M3|LINE|L1	36613	NR_040705	320014	Mm.403203	NR_040705	ENSMUSG00000109473	B930025P03Rik	-	RIKEN cDNA B930025P03 gene	ncRNA
Diff_Nuc44742	chr3	109235682	109235821	+	0	NA	intron (NM_020505, intron 2 of 26)	intron (NM_020505, intron 2 of 26)	92150	NM_020505	57257	Mm.282257	NM_020505	ENSMUSG00000033721	Vav3	A530094I06Rik|AA986410|Idd18.1	vav 3 oncogene	protein-coding
Diff_Nuc37346	chr5	124012662	124012801	+	0	NA	intron (NM_029929, intron 6 of 12)	intron (NM_029929, intron 6 of 12)	10293	NM_029929	77573	Mm.41372	NM_029929	ENSMUSG00000029434	Vps33a	3830421M04Rik|AI503300|AW048546|AW554476|bf	VPS33A CORVET/HOPS core subunit	protein-coding
Diff_Nuc12314	chr10	109870122	109870261	+	0	NA	Intergenic	Intergenic	-167515	NR_028438	109335	Mm.367727	NR_028438		9230102K24Rik	-	RIKEN cDNA 9230102K24 gene	ncRNA
Diff_Nuc58085	chr9	113585012	113585151	+	0	NA	intron (NM_011052, intron 9 of 17)	intron (NM_011052, intron 9 of 17)	32296	NM_001164678	18571	Mm.29816	NM_011052	ENSMUSG00000032504	Pdcd6ip	AI480591|AW544830|Aip1|Alix|C76364|Eig2|mKIAA1375	programmed cell death 6 interacting protein	protein-coding
Diff_Nuc8420	chr11	81402572	81402711	+	0	NA	intron (NM_001034013, intron 1 of 9)	RMER10A|LTR|ERVL	-15600	NM_001033765	237880	Mm.435528	NM_001033765		1700071K01Rik	-	RIKEN cDNA 1700071K01 gene	protein-coding
Diff_Nuc22898	chr14	119126072	119126211	+	0	NA	Intergenic	ID_B1|SINE|B4	-20700	NM_001033336	239273	Mm.40537	NM_001033336	ENSMUSG00000032849	Abcc4	ABCC4-N1|D630049P08Rik|MOATB|MRP4	ATP-binding cassette, sub-family C (CFTR/MRP), member 4	protein-coding
Diff_Nuc10424	chr10	38891962	38892101	+	0	NA	Intergenic	Intergenic	-8431	NM_001127376	327743	Mm.208111	NM_001127376	ENSMUSG00000062074	Wisp3	CCN6|ENSMUSG00000062074|Gm735|WISP-3	WNT1 inducible signaling pathway protein 3	protein-coding
Diff_Nuc54330	chr1	167578072	167578211	+	0	NA	TTS (NM_001038846)	TTS (NM_001038846)	-13469	NM_001083897	68481	Mm.46438	NM_001001880	ENSMUSG00000026566	Mpzl1	1110007A10Rik|PZR	myelin protein zero-like 1	protein-coding
Diff_Nuc16723	chr16	54176092	54176231	+	0	NA	Intergenic	L1Md_F2|LINE|L1	1107189	NM_178720	239852	Mm.245045	NM_178720	ENSMUSG00000064310	Zpld1	9430016A21Rik	zona pellucida like domain containing 1	protein-coding
Diff_Nuc31365	chr6	35043922	35044061	+	0	NA	intron (NM_001164414, intron 1 of 10)	B3A|SINE|B2	39746	NM_001164412	53621	Mm.214525	NM_016877	ENSMUSG00000038784	Cnot4	Not4|Not4h|Not4hp	CCR4-NOT transcription complex, subunit 4	protein-coding
Diff_Nuc15055	chr17	87070892	87071031	+	0	NA	Intergenic	Intergenic	-82243	NM_010137	13819	Mm.1415	NM_010137	ENSMUSG00000024140	Epas1	HIF-2alpha|HIF2A|HLF|HRF|MOP2|bHLHe73	endothelial PAS domain protein 1	protein-coding
Diff_Nuc160	chrX	68188992	68189131	+	0	NA	Intergenic	Intergenic	-114370	NM_001256048	333639	Mm.371730	NM_001081354	ENSMUSG00000059401	Mamld1	G630014P10Rik	mastermind-like domain containing 1	protein-coding
Diff_Nuc2950	chr13	101575942	101576081	+	0	NA	intron (NM_022885, intron 14 of 15)	intron (NM_022885, intron 14 of 15)	-19570	NM_172301	268697	Mm.260114	NM_172301	ENSMUSG00000041431	Ccnb1	Ccnb1-rs1|Ccnb1-rs13|CycB1|Cycb-4|Cycb-5|Cycb1-rs1	cyclin B1	protein-coding
Diff_Nuc39907	chr4	76059462	76059601	+	0	NA	intron (NM_011211, intron 10 of 39)	MTD|LTR|MaLR	-1135341	NM_025849	66928	Mm.24332	NM_025849	ENSMUSG00000028398	Tmem261	1700027K24Rik|3110001D03Rik	transmembrane protein 261	protein-coding
Diff_Nuc12229	chr10	106819582	106819721	+	0	NA	exon (NM_001039354, exon 4 of 6)	exon (NM_001039354, exon 4 of 6)	103539	NM_008656	17877	Mm.4984	NM_008656	ENSMUSG00000000435	Myf5	B130010J22Rik|Myf-5|bHLHc2	myogenic factor 5	protein-coding
Diff_Nuc58250	chr9	120256052	120256191	+	0	NA	intron (NM_144557, intron 2 of 16)	intron (NM_144557, intron 2 of 16)	42930	NM_144557	245049	Mm.100936	NM_144557	ENSMUSG00000041794	Myrip	A230081N12Rik|Slac2-c|Slac2c	myosin VIIA and Rab interacting protein	protein-coding
Diff_Nuc38858	chr4	31020492	31020631	+	0	NA	Intergenic	Intergenic	428815	NR_040655	75332	Mm.108636	NR_040655		4930556G01Rik	-	RIKEN cDNA 4930556G01 gene	ncRNA
Diff_Nuc13211	chr17	14695352	14695491	+	0	NA	Intergenic	Intergenic	135848	NM_011581	21826	Mm.26688	NM_011581	ENSMUSG00000023885	Thbs2	TSP2|Thbs-2	thrombospondin 2	protein-coding
Diff_Nuc6673	chr11	16765152	16765291	+	0	NA	intron (NM_207655, intron 4 of 27)	Lx8|LINE|L1	86064	NR_110421	72735	Mm.268598	NR_015469		Eldr	2810442I21Rik|4930500E12Rik|Fabl	Egfr long non-coding downstream RNA	ncRNA
Diff_Nuc33050	chr6	103498092	103498231	+	0	NA	intron (NM_007697, intron 1 of 26)	intron (NM_007697, intron 1 of 26)	37291	NM_007697	12661	Mm.251288	NM_007697	ENSMUSG00000030077	Chl1	A530023M13Rik|AI465420|CALL|LICAM2	cell adhesion molecule L1-like	protein-coding
Diff_Nuc15379	chr16	7013482	7013621	+	0	NA	intron (NM_021477, intron 5 of 16)	intron (NM_021477, intron 5 of 16)	-56377	NM_183188	268859	Mm.370334	NM_021477	ENSMUSG00000008658	Rbfox1	A2bp|A2bp1|Hrnbp1|fox-1	RNA binding protein, fox-1 homolog (C. elegans) 1	protein-coding
Diff_Nuc38637	chr4	21063582	21063721	+	0	NA	Intergenic	L1_Mus2|LINE|L1	-357836	NM_172987	269513	Mm.317473	NM_172987	ENSMUSG00000055761	Nkain3	C530048M05|E130310K16Rik	Na+/K+ transporting ATPase interacting 3	protein-coding
Diff_Nuc49371	chr2	142004972	142005111	+	0	NA	intron (NM_001013802, intron 9 of 18)	intron (NM_001013802, intron 9 of 18)	722159	NM_001081133	16558	Mm.251934	NM_001081133	ENSMUSG00000038844	Kif16b	8430434E15Rik|AA623607|AI789011|C80253|C80902|mKIAA1590	kinesin family member 16B	protein-coding
Diff_Nuc40787	chr4	111820132	111820271	+	0	NA	intron (NM_001347180, intron 10 of 11)	L1VL1|LINE|L1	66126	NM_178786	320640	Mm.253775	NM_178786	ENSMUSG00000055960	Skint4	9530098N22Rik	selection and upkeep of intraepithelial T cells 4	protein-coding
Diff_Nuc26018	chr18	57009322	57009461	+	0	NA	intron (NM_177115, intron 1 of 4)	L1_Mus4|LINE|L1	75811	NM_177115	320253	Mm.312623	NM_177115	ENSMUSG00000032656	March3	6330411I15Rik|A530081L18Rik|AI843639|MARCH-III	membrane-associated ring finger (C3HC4) 3	protein-coding
Diff_Nuc2411	chr13	81901362	81901501	+	0	NA	Intergenic	RSINE1|SINE|B4	-20860	NM_007684	12626	Mm.12481	NM_007684	ENSMUSG00000021537	Cetn3	MmCEN3	centrin 3	protein-coding
Diff_Nuc34702	chr5	22361412	22361551	+	0	NA	intron (NM_029990, intron 1 of 2)	intron (NM_029990, intron 1 of 2)	-108779	NR_027362	330052	Mm.459265	NR_027362	ENSMUSG00000105076	A930003O13Rik	-	RIKEN cDNA A930003O13 gene	ncRNA
Diff_Nuc20322	chr14	14596902	14597041	+	0	NA	Intergenic	Intergenic	93581	NM_177624	218739	Mm.39919	NM_177624	ENSMUSG00000044772	Sntn	A430083B19Rik	sentan, cilia apical structure protein	protein-coding
Diff_Nuc53813	chr1	146059502	146059641	+	0	NA	Intergenic	Intergenic	-35069	NM_153171	246709	Mm.38271	NM_153171	ENSMUSG00000051079	Rgs13	-	regulator of G-protein signaling 13	protein-coding
Diff_Nuc49924	chr2	160871022	160871161	+	0	NA	intron (NM_173368, intron 3 of 36)	intron (NM_173368, intron 3 of 36)	63731	NM_173368	71389	Mm.122738	NM_173368	ENSMUSG00000057133	Chd6	5430439G14Rik|6330406J24Rik|CHD-6	chromodomain helicase DNA binding protein 6	protein-coding
Diff_Nuc34216	chr6	148846132	148846271	+	0	NA	Intergenic	Intergenic	-1442	NM_181541	232560	Mm.150568	NM_181541	ENSMUSG00000030309	Caprin2	C1qdc1|Eeg1|rng140	caprin family member 2	protein-coding
Diff_Nuc29629	chr7	116140782	116140921	+	0	NA	Intergenic	Lx8|LINE|L1	-13543	NM_021885	22141	Mm.439722	NM_021885	ENSMUSG00000031028	Tub	rd5|tub	tubby candidate gene	protein-coding
Diff_Nuc42257	chr3	10023642	10023781	+	0	NA	Intergenic	Intergenic	11126	NM_001272098	16592	Mm.741	NM_010634	ENSMUSG00000027533	Fabp5	E-FABP|Fabpe|Klbp|PA-FABP|mal1	fatty acid binding protein 5, epidermal	protein-coding
Diff_Nuc1324	chr13	42340102	42340241	+	0	NA	Intergenic	Intergenic	-56674	NM_010104	13614	Mm.14543	NM_010104	ENSMUSG00000021367	Edn1	ET-1|PPET1|preproET	endothelin 1	protein-coding
Diff_Nuc2313	chr13	78081922	78082061	+	0	NA	intron (NR_028109, intron 7 of 10)	L1_Mus3|LINE|L1	-82172	NM_029315	75507	Mm.443255	NM_029315	ENSMUSG00000093668	Pou5f2	1700013G10Rik|SPRM-1|Sprm1	POU domain class 5, transcription factor 2	protein-coding
Diff_Nuc12825	chr10	128963242	128963381	+	0	NA	promoter-TSS (NM_146930)	promoter-TSS (NM_146930)	26	NM_146930	258932	Mm.377754	NM_146930	ENSMUSG00000047626	Olfr791	MOR114-1	olfactory receptor 791	protein-coding
Diff_Nuc29833	chr7	122156362	122156501	+	0	NA	Intergenic	Intergenic	61643	NR_040319	101786	Mm.395157	NR_040317	ENSMUSG00000108379	A730082K24Rik	AU044236	RIKEN cDNA A730082K24 gene	ncRNA
Diff_Nuc47207	chr2	56782382	56782521	+	0	NA	Intergenic	L1Md_F2|LINE|L1	144229	NR_105751	102465169		NR_105751	ENSMUSG00000098437	Mir195b	Gm27491|mmu-mir-195b	microRNA 195b	ncRNA
Diff_Nuc36010	chr5	73948252	73948391	+	0	NA	intron (NM_178896, intron 9 of 10)	intron (NM_178896, intron 9 of 10)	66056	NM_178896	100737	Mm.220312	NM_178896	ENSMUSG00000051674	Dcun1d4	AI836376	DCN1, defective in cullin neddylation 1, domain containing 4 (S. cerevisiae)	protein-coding
Diff_Nuc31662	chr6	46727232	46727371	+	0	NA	intron (NM_001004357, intron 14 of 23)	intron (NM_001004357, intron 14 of 23)	-467094	NM_025771	66797	Mm.440084	NM_025771	ENSMUSG00000039419	Cntnap2	5430425M22Rik|Caspr2|mKIAA0868	contactin associated protein-like 2	protein-coding
Diff_Nuc2050	chr13	67834312	67834451	+	0	NA	intron (NR_027969, intron 1 of 2)	LTRIS_Mus|LTR|ERV1	4182	NR_027969	68271	Mm.145530	NM_026649		Zfp85os	4930441O14Rik	zinc finger protein 85, opposite strand	ncRNA
Diff_Nuc36394	chr5	92016202	92016341	+	0	NA	intron (NM_145562, intron 1 of 3)	intron (NM_145562, intron 1 of 3)	69545	NM_145562	231440	Mm.5002	NM_145562	ENSMUSG00000034981	Parm1	2210012L08Rik|9130213B05Rik|W91666	prostate androgen-regulated mucin-like protein 1	protein-coding
Diff_Nuc14907	chr17	81532192	81532331	+	0	NA	Intergenic	MIRb|SINE|MIR	-67836	NM_028138	72167	Mm.273257	NM_028138	ENSMUSG00000024246	Thumpd2	2810025A12Rik	THUMP domain containing 2	protein-coding
Diff_Nuc59212	chr8	40699192	40699331	+	0	NA	intron (NM_031195, intron 6 of 8)	L1Md_F3|LINE|L1	28771	NM_031195	20288	Mm.239291	NM_031195	ENSMUSG00000025044	Msr1	MRS-A|MSR|MSR-A|SR-AI|SR-AII|Scara1|Scvr	macrophage scavenger receptor 1	protein-coding
Diff_Nuc49432	chr2	143962982	143963121	+	0	NA	Intergenic	Intergenic	51975	NR_136884	433481	Mm.330630	NR_136884	ENSMUSG00000074758	Gm5535	EG433481	predicted gene 5535	ncRNA
Diff_Nuc19039	chr15	61879572	61879711	+	0	NA	intron (NR_132746, intron 1 of 6)	B1_Mus1|SINE|Alu	8829	NR_132746	19296	Mm.4608	NM_011222	ENSMUSG00000097039	Pvt1	Ayu21-84Imeg|Gt(pU21)84Imeg|Mis-1|Mlvi-1|Pvt-1	plasmacytoma variant translocation 1	ncRNA
Diff_Nuc25568	chr18	39419232	39419371	+	0	NA	intron (NM_175164, intron 17 of 22)	intron (NM_175164, intron 17 of 22)	227598	NM_008173	14815	Mm.129481	NM_008173	ENSMUSG00000024431	Nr3c1	GR|Grl-1|Grl1	nuclear receptor subfamily 3, group C, member 1	protein-coding
Diff_Nuc15383	chr16	7089572	7089711	+	0	NA	intron (NM_183188, intron 1 of 12)	intron (NM_183188, intron 1 of 12)	19713	NM_183188	268859	Mm.370334	NM_021477	ENSMUSG00000008658	Rbfox1	A2bp|A2bp1|Hrnbp1|fox-1	RNA binding protein, fox-1 homolog (C. elegans) 1	protein-coding
Diff_Nuc13040	chr17	9142682	9142821	+	0	NA	intron (NM_001347321, intron 11 of 21)	intron (NM_001347321, intron 11 of 21)	-38447	NM_025851	66931	Mm.67591	NM_025851	ENSMUSG00000023873	1700010I14Rik	-	RIKEN cDNA 1700010I14 gene	protein-coding
Diff_Nuc22100	chr14	80012962	80013101	+	0	NA	intron (NM_026474, intron 10 of 12)	ORR1A3-int|LTR|MaLR	25533	NM_026474	67955	Mm.18972	NM_026474	ENSMUSG00000022024	Sugt1	2410174K12Rik|SGT1	SGT1, suppressor of G2 allele of SKP1 (S. cerevisiae)	protein-coding
Diff_Nuc49424	chr2	143691742	143691881	+	0	NA	Intergenic	B3|SINE|B2	-2902	NM_001291061	12075	Mm.275937	NM_009751	ENSMUSG00000027420	Bfsp1	CP95	beaded filament structural protein 1, in lens-CP94	protein-coding
Diff_Nuc5368	chr12	83906162	83906301	+	0	NA	intron (NM_001282061, intron 2 of 16)	intron (NM_001282061, intron 2 of 16)	133911	NR_046045	74283	Mm.398247	NR_046045	ENSMUSG00000100890	1700085C21Rik	-	RIKEN cDNA 1700085C21 gene	ncRNA
Diff_Nuc7163	chr11	36618422	36618561	+	0	NA	intron (NM_011856, intron 2 of 28)	intron (NM_011856, intron 2 of 28)	139252	NM_001290702	23964	Mm.439889	NM_011856	ENSMUSG00000049336	Tenm2	Odz2|Odz3|Ten-2|Ten-m2	teneurin transmembrane protein 2	protein-coding
Diff_Nuc46912	chr2	43003012	43003151	+	0	NA	Intergenic	L1_Mus1|LINE|L1	-407764	NM_001289593	70789	Mm.105278	NM_027552	ENSMUSG00000026866	Kynu	4432411A05Rik	kynureninase (L-kynurenine hydrolase)	protein-coding
Diff_Nuc30255	chr7	138688662	138688801	+	0	NA	TTS (NM_008257)	TTS (NM_008257)	2254	NM_008257	15373	Mm.323562	NM_008257	ENSMUSG00000040148	Hmx3	Nkx-5.1|Nkx5-1|Nkx5.1	H6 homeobox 3	protein-coding
Diff_Nuc3397	chr13	118019662	118019801	+	0	NA	intron (NM_010330, intron 1 of 8)	intron (NM_010330, intron 1 of 8)	10351	NM_010330	13723	Mm.274926	NM_010330	ENSMUSG00000021728	Emb	AL022799|Gp70	embigin	protein-coding
Diff_Nuc40372	chr4	97383812	97383951	+	0	NA	intron (NM_001122952, intron 1 of 10)	intron (NM_001122952, intron 1 of 10)	-60436	NM_001122953	18027	Mm.31274	NM_010905	ENSMUSG00000028565	Nfia	1110047K16Rik|9430022M17Rik|CTF|NF1-A|NF1A	nuclear factor I/A	protein-coding
Diff_Nuc39059	chr4	41144102	41144241	+	0	NA	intron (NM_026872, intron 22 of 28)	intron (NM_026872, intron 22 of 28)	61117	NM_026275	67615	Mm.389540	NM_026275	ENSMUSG00000036241	Ube2r2	1200003M11Rik|Cdc34b|Ubc3b	ubiquitin-conjugating enzyme E2R 2	protein-coding
Diff_Nuc31644	chr6	46138102	46138241	+	0	NA	intron (NM_001004357, intron 9 of 23)	intron (NM_001004357, intron 9 of 23)	-1056224	NM_025771	66797	Mm.440084	NM_025771	ENSMUSG00000039419	Cntnap2	5430425M22Rik|Caspr2|mKIAA0868	contactin associated protein-like 2	protein-coding
Diff_Nuc36019	chr5	74294972	74295111	+	0	NA	Intergenic	ORR1A2|LTR|MaLR	169395	NM_177561	69727	Mm.48795	NM_177561	ENSMUSG00000054814	Usp46	1190009E20Rik|2410018I08Rik|AI451644	ubiquitin specific peptidase 46	protein-coding
Diff_Nuc43458	chr3	58888192	58888331	+	0	NA	intron (NM_177855, intron 11 of 43)	intron (NM_177855, intron 11 of 43)	17482	NM_173398	229323	Mm.123648	NM_173398	ENSMUSG00000050075	Gpr171	A630006E05|F730001G15Rik|H963	G protein-coupled receptor 171	protein-coding
Diff_Nuc8332	chr11	78395372	78395511	+	0	NA	intron (NM_008702, intron 7 of 10)	intron (NM_008702, intron 7 of 10)	-31204	NM_133706	69071	Mm.29431	NM_133706	ENSMUSG00000037278	Tmem97	1810014L12Rik|AI115531|AL022956|D11Bhm182e	transmembrane protein 97	protein-coding
Diff_Nuc50689	chr1	15935932	15936071	+	0	NA	Intergenic	L1_Mus3|LINE|L1	-53198	NM_001033288	226866	Mm.131665	NM_001033288	ENSMUSG00000032719	Sbspon	Gm106|Rpesp	somatomedin B and thrombospondin, type 1 domain containing	protein-coding
Diff_Nuc47236	chr2	58007902	58008041	+	0	NA	intron (NM_139200, intron 1 of 7)	intron (NM_139200, intron 1 of 7)	4562	NM_139200	227929	Mm.273905	NM_139200	ENSMUSG00000026832	Cytip	A130053M09Rik|AI462064|C80816|Cbp|Cybr|Pscdbp	cytohesin 1 interacting protein	protein-coding
Diff_Nuc45950	chr2	5937442	5937581	+	0	NA	intron (NM_001081132, intron 10 of 21)	ID_B1|SINE|B4	64996	NM_001081132	326622	Mm.31102	NM_001081132	ENSMUSG00000043241	Upf2	-	UPF2 regulator of nonsense transcripts homolog (yeast)	protein-coding
Diff_Nuc19828	chr15	92078982	92079121	+	0	NA	intron (NM_007727, intron 9 of 23)	Lx3_Mus|LINE|L1	87263	NM_001159647	12805	Mm.4911	NM_007727	ENSMUSG00000055022	Cntn1	AW495098|CNTN|F3cam|usl	contactin 1	protein-coding
Diff_Nuc13872	chr17	37660322	37660461	+	0	NA	Intergenic	L1Md_F3|LINE|L1	-6511	NM_001005485	545205	Mm.383371	NM_001005485	ENSMUSG00000090675	Olfr111	-	olfactory receptor 111	protein-coding
Diff_Nuc37719	chr5	136659282	136659421	+	0	NA	intron (NM_025774, intron 5 of 5)	intron (NM_025774, intron 5 of 5)	-12825	NM_178751	269717	Mm.308396	NM_178751	ENSMUSG00000039747	Orai2	A730041O15Rik|Tmem142b	ORAI calcium release-activated calcium modulator 2	protein-coding
Diff_Nuc55454	chr9	17280692	17280831	+	0	NA	Intergenic	Lx2B|LINE|L1	-815950	NM_025844	66917	Mm.103534	NM_025844	ENSMUSG00000001774	Chordc1	1110001O09Rik|AA409036|Chp-1|morgana	cysteine and histidine-rich domain (CHORD)-containing, zinc-binding protein 1	protein-coding
Diff_Nuc40639	chr4	106445442	106445581	+	0	NA	intron (NM_001347159, intron 1 of 15)	ORR1D1|LTR|MaLR	26925	NM_025590	329910	Mm.222956	NM_025590	ENSMUSG00000034853	Acot11	1110020M10Rik|2010309H15Rik|AW060409|BFIT|BFIT1|Thea|Them1|mKIAA0707	acyl-CoA thioesterase 11	protein-coding
Diff_Nuc42350	chr3	14064372	14064511	+	0	NA	intron (NM_001163328, intron 3 of 8)	ORR1E|LTR|MaLR	118069	NM_001163330	76897	Mm.422625	NM_178631	ENSMUSG00000039717	Ralyl	0710005M24Rik	RALY RNA binding protein-like	protein-coding
Diff_Nuc9830	chr10	11197592	11197731	+	0	NA	Intergenic	Intergenic	-131361	NM_013898	30058	Mm.214504	NM_013898	ENSMUSG00000048007	Timm8a1	DXHXS1274E|Ddp1|Fci-12|Tim8a|Timm8a	translocase of inner mitochondrial membrane 8A1	protein-coding
Diff_Nuc14446	chr17	62604922	62605061	+	0	NA	Intergenic	Lx9|LINE|L1	625675	NM_207654	13640	Mm.7978	NM_010109	ENSMUSG00000048915	Efna5	AL-1|AV158822|EFL-5|Ephrin-A5|Epl7|LERK-7|RAGS	ephrin A5	protein-coding
Diff_Nuc15084	chr17	88105692	88105831	+	0	NA	intron (NM_008628, intron 8 of 15)	B1_Mur3|SINE|Alu	33864	NM_008628	17685	Mm.4619	NM_008628	ENSMUSG00000024151	Msh2	AI788990	mutS homolog 2	protein-coding
Diff_Nuc47189	chr2	55631242	55631381	+	0	NA	Intergenic	L1Md_F2|LINE|L1	342930	NM_008426	16519	Mm.5127	NM_008426	ENSMUSG00000026824	Kcnj3	GIRK-1|GIRK1|Kcnf3|Kir3.1	potassium inwardly-rectifying channel, subfamily J, member 3	protein-coding
Diff_Nuc37546	chr5	131438882	131439021	+	0	NA	intron (NM_145218, intron 6 of 10)	B4A|SINE|B4	344441	NM_145218	212996	Mm.299204	NM_145218	ENSMUSG00000034040	Wbscr17	AA388321|E330012B09Rik	Williams-Beuren syndrome chromosome region 17 homolog (human)	protein-coding
Diff_Nuc22181	chr14	83631722	83631861	+	0	NA	Intergenic	B1_Mus1|SINE|Alu	-1211579	NM_001013753	219228	Mm.153643	NM_001013753	ENSMUSG00000035566	Pcdh17	C030033F14Rik|Gm78	protocadherin 17	protein-coding
Diff_Nuc50089	chr2	167133242	167133381	+	0	NA	intron (NM_019835, intron 3 of 8)	intron (NM_019835, intron 3 of 8)	41367	NM_019835	56336	Mm.200886	NM_019835	ENSMUSG00000017929	B4galt5	9430078I07Rik|AW049941|AW539721	UDP-Gal:betaGlcNAc beta 1,4-galactosyltransferase, polypeptide 5	protein-coding
Diff_Nuc30833	chr6	15117802	15117941	+	0	NA	intron (NM_053242, intron 3 of 18)	Lx8|LINE|L1	-17635	NM_212435	114142	Mm.332919	NM_053242	ENSMUSG00000029563	Foxp2	2810043D05Rik|AI449000|CAG-16|D0Kist7	forkhead box P2	protein-coding
Diff_Nuc44204	chr3	89349122	89349261	+	0	NA	intron (NM_080466, intron 1 of 7)	intron (NM_080466, intron 1 of 7)	25105	NM_080466	140493	Mm.120250	NM_080466	ENSMUSG00000000794	Kcnn3	KCa2.3|SK3|SKCA3	potassium intermediate/small conductance calcium-activated channel, subfamily N, member 3	protein-coding
Diff_Nuc26441	chr18	71478792	71478931	+	0	NA	intron (NM_007831, intron 25 of 28)	ORR1D2|LTR|MaLR	750915	NM_010773	17191	Mm.322	NM_010773	ENSMUSG00000024513	Mbd2	MBD2a	methyl-CpG binding domain protein 2	protein-coding
Diff_Nuc2505	chr13	85356362	85356501	+	0	NA	intron (NM_145452, intron 24 of 24)	intron (NM_145452, intron 24 of 24)	27441	NM_023243	66671	Mm.18474	NM_023243	ENSMUSG00000021548	Ccnh	6330408H09Rik|AI661354|AV102684|AW538719	cyclin H	protein-coding
Diff_Nuc510	chr13	8966302	8966441	+	0	NA	Intergenic	B1_Mur3|SINE|Alu	14262	NM_177197	320581	Mm.313743	NM_177197	ENSMUSG00000033520	Idi2	4833405L16Rik|IPPI2	isopentenyl-diphosphate delta isomerase 2	protein-coding
Diff_Nuc45977	chr2	6983462	6983601	+	0	NA	intron (NM_001110231, intron 3 of 15)	intron (NM_001110231, intron 3 of 15)	18817	NM_001110230	14007	Mm.398543	NM_010160	ENSMUSG00000002107	Celf2	B230218O03|B230345P09Rik|C88023|CELF-2|CUG-BP2|Cugbp2|D230046B21Rik|Etr-3|Napor|Napor-2|mETR-3	CUGBP, Elav-like family member 2	protein-coding
Diff_Nuc18533	chr15	39081512	39081651	+	0	NA	intron (NM_001256383, intron 1 of 25)	RLTR45|LTR|ERVK	51749	NM_053271	116838	Mm.309296	NM_053271	ENSMUSG00000037386	Rims2	2810036I15Rik|AW048769|RIM2|Rab3ip2|Rim2(+40A)|Rim2(+44A)|Rim2(+4A)|Serg2|Syt3-rs|mKIAA0751	regulating synaptic membrane exocytosis 2	protein-coding
Diff_Nuc52846	chr1	100033042	100033181	+	0	NA	intron (NR_040439, intron 2 of 2)	RMER19B|LTR|ERVK	5067	NR_040439	69030	Mm.402692	NR_040439	ENSMUSG00000100182	1810006J02Rik	-	RIKEN cDNA 1810006J02 gene	ncRNA
Diff_Nuc4450	chr12	46134562	46134701	+	0	NA	intron (NM_144552, intron 1 of 5)	intron (NM_144552, intron 1 of 5)	40839	NM_144552	217517	Mm.285400	NM_144552	ENSMUSG00000046314	Stxbp6	BC024598|C85317	syntaxin binding protein 6 (amisyn)	protein-coding
Diff_Nuc40131	chr4	86698152	86698291	+	0	NA	intron (NM_172426, intron 4 of 10)	intron (NM_172426, intron 4 of 10)	175646	NM_001110240	76376	Mm.490487	NM_172426	ENSMUSG00000037996	Slc24a2	2810021B17Rik|6330417K15Rik|AI847460|Nckx2	solute carrier family 24 (sodium/potassium/calcium exchanger), member 2	protein-coding
Diff_Nuc33438	chr6	119299602	119299741	+	0	NA	intron (NM_001347427, intron 36 of 36)	intron (NM_001347427, intron 36 of 36)	-18887	NM_172492	211187	Mm.121498	NM_172492	ENSMUSG00000055003	Lrtm2	A230084J22|AI841794	leucine-rich repeats and transmembrane domains 2	protein-coding
Diff_Nuc14473	chr17	63557842	63557981	+	0	NA	intron (NM_015794, intron 7 of 8)	intron (NM_015794, intron 7 of 8)	104411	NR_130176	414079	Mm.444282	NR_130176	ENSMUSG00000090565	4930405O22Rik	-	RIKEN cDNA 4930405O22 gene	ncRNA
Diff_Nuc43420	chr3	57241402	57241541	+	0	NA	intron (NM_145539, intron 3 of 4)	intron (NM_145539, intron 3 of 4)	12139	NM_145539	229302	Mm.26618	NM_145539	ENSMUSG00000027801	Tm4sf4	Iltmp	transmembrane 4 superfamily member 4	protein-coding
Diff_Nuc15556	chr16	11692742	11692881	+	0	NA	intron (NM_001290148, intron 11 of 13)	intron (NM_001290148, intron 11 of 13)	-86984	NR_126430	73761	Mm.39183	NR_126430		4833415N18Rik	-	RIKEN cDNA 4833415N18 gene	ncRNA
Diff_Nuc17675	chr16	97431802	97431941	+	0	NA	Intergenic	Intergenic	-39529	NM_031174	13508	Mm.102437	NM_031174	ENSMUSG00000050272	Dscam	4932410A21Rik	Down syndrome cell adhesion molecule	protein-coding
Diff_Nuc49240	chr2	136752722	136752861	+	0	NA	intron (NM_001038641, intron 2 of 7)	L1_Mus1|LINE|L1	27704	NM_001038641	74243	Mm.330612	NM_028201	ENSMUSG00000027281	Slx4ip	2210009G21Rik|2410004I22Rik|C85661|Slxip	SLX4 interacting protein	protein-coding
Diff_Nuc47473	chr2	68012572	68012711	+	0	NA	Intergenic	Intergenic	69912	NM_020283	26877	Mm.226435	NM_020283	ENSMUSG00000034780	B3galt1	beta3Gal-T1	UDP-Gal:betaGlcNAc beta 1,3-galactosyltransferase, polypeptide 1	protein-coding
Diff_Nuc59104	chr8	35887002	35887141	+	0	NA	Intergenic	Intergenic	16407	NM_176933	319520	Mm.170276	NM_176933	ENSMUSG00000031530	Dusp4	2700078F24Rik|AI844617|BB104621|E130306H24Rik|MKP2	dual specificity phosphatase 4	protein-coding
Diff_Nuc52036	chr1	69338062	69338201	+	0	NA	Intergenic	Intergenic	-183498	NM_010154	13869	Mm.442420	NM_010154	ENSMUSG00000062209	Erbb4	Her4|c-erbB-4	erb-b2 receptor tyrosine kinase 4	protein-coding
Diff_Nuc34319	chr5	5680342	5680481	+	0	NA	intron (NM_028734, intron 3 of 5)	intron (NM_028734, intron 3 of 5)	13678	NM_001285471	74051	Mm.274956	NM_028734	ENSMUSG00000015653	Steap2	4921538B17Rik|AI930049|AW045895|IPCA-1|IPCA1|PCANAP1|STAMP1|STMP	six transmembrane epithelial antigen of prostate 2	protein-coding
Diff_Nuc27717	chr7	36145052	36145191	+	0	NA	intron (NM_027897, intron 2 of 14)	intron (NM_027897, intron 2 of 14)	25865	NM_027897	52428	Mm.286600	NM_027897	ENSMUSG00000030494	Rhpn2	1300002E07Rik|AA536890|C85860|D7Ertd784e	rhophilin, Rho GTPase binding protein 2	protein-coding
Diff_Nuc52767	chr1	95471122	95471261	+	0	NA	intron (NM_145519, intron 9 of 26)	ID_B1|SINE|B4	61113	NM_021537	59041	Mm.28761	NM_021537	ENSMUSG00000026277	Stk25	1500019J11Rik|AU018434|C86992|Ste20-like|Ysk1	serine/threonine kinase 25 (yeast)	protein-coding
Diff_Nuc33008	chr6	100980792	100980931	+	0	NA	Intergenic	Intergenic	197229	NM_182939	232314	Mm.27223	NM_182939	ENSMUSG00000052144	Ppp4r2	BE691708|C230060M08Rik	protein phosphatase 4, regulatory subunit 2	protein-coding
Diff_Nuc467	chr13	6494782	6494921	+	0	NA	Intergenic	B1_Mur3|SINE|Alu	-52552	NM_145131	69617	Mm.41933	NM_145131	ENSMUSG00000021193	Pitrm1	2310012C15Rik|AA410010|MP-1|MP1|Ntup1|PreP|mKIAA1104	pitrilysin metallepetidase 1	protein-coding
Diff_Nuc28077	chr7	54659252	54659391	+	0	NA	Intergenic	L1Md_F3|LINE|L1	48188	NM_001172588	668727	Mm.431311	NM_001172588	ENSMUSG00000093973	Mrgpra2a	-	MAS-related GPR, member A2A	protein-coding
Diff_Nuc32102	chr6	63265342	63265481	+	0	NA	intron (NM_008167, intron 1 of 15)	Lx8|LINE|L1	58560	NM_008167	14804	Mm.439651	NM_008167	ENSMUSG00000071424	Grid2	B230104L07Rik|GluD2|GluRdelta2|Lc|Lc<J>|MMS10-AC|Ms10ac|cpr|ho|nmf408|tpr	glutamate receptor, ionotropic, delta 2	protein-coding
Diff_Nuc50286	chr2	178147822	178147961	+	0	NA	3' UTR (NM_001085501, exon 1 of 1)	3' UTR (NM_001085501, exon 1 of 1)	1277	NM_001085501	228966	Mm.472736	NM_001085501	ENSMUSG00000049999	Ppp1r3d	2610024M03Rik|Gm359	protein phosphatase 1, regulatory subunit 3D	protein-coding
Diff_Nuc29531	chr7	112806532	112806671	+	0	NA	Intergenic	Intergenic	17547	NM_019502	14356	Mm.220330	NM_019502	ENSMUSG00000089847	Timm10b	Fxc1|Tim10b|Tim9b	translocase of inner mitochondrial membrane 10B	protein-coding
Diff_Nuc13371	chr17	21677462	21677601	+	0	NA	intron (NM_144515, intron 2 of 4)	RLTR21|LTR|ERVK	-4689	NR_131123	319870	Mm.488274	NR_131123	ENSMUSG00000097781	9330136K24Rik	-	RIKEN cDNA 9330136K24 gene	ncRNA
Diff_Nuc10897	chr10	58934942	58935081	+	0	NA	intron (NM_001033259, intron 2 of 7)	Lx5|LINE|L1	-30484	NM_010959	18302	Mm.123013	NM_010959	ENSMUSG00000009654	Oit3	EF-9|LZP	oncoprotein induced transcript 3	protein-coding
Diff_Nuc2884	chr13	99744692	99744831	+	0	NA	Intergenic	ORR1A3|LTR|MaLR	9759	NM_027064	69382	Mm.45466	NM_027064	ENSMUSG00000045022	1700024P04Rik	H2bl1|Subh2bv	RIKEN cDNA 1700024P04 gene	protein-coding
Diff_Nuc35499	chr5	52466462	52466601	+	0	NA	Intergenic	Intergenic	60725	NR_105845	102466648		NR_105845	ENSMUSG00000098726	Mir6417	Gm27334|mmu-mir-6417	microRNA 6417	ncRNA
Diff_Nuc43184	chr3	47917432	47917571	+	0	NA	Intergenic	Lx6|LINE|L1	-86820	NR_040408	666202	Mm.465057	NR_040408	ENSMUSG00000103257	Gm7977	EG666202	tyrosine 3-monooxygenase/tryptophan 5-monooxygenase activation protein, theta polypeptide pseudogene	pseudo
Diff_Nuc57075	chr9	75025922	75026061	+	0	NA	intron (NM_010864, intron 23 of 40)	RLTR15|LTR|ERVK	-53830	NM_001081322	208943	Mm.41339	NM_001081322	ENSMUSG00000033590	Myo5c	9130003O20Rik|BB085560|C330029I24	myosin VC	protein-coding
Diff_Nuc48960	chr2	126818972	126819111	+	0	NA	Intergenic	Intergenic	-15406	NM_175550	108011	Mm.134045	NM_175550	ENSMUSG00000001998	Ap4e1	2310033A20Rik|9930028M04Rik|AV087807	adaptor-related protein complex AP-4, epsilon 1	protein-coding
Diff_Nuc45201	chr3	129627162	129627301	+	0	NA	intron (NM_025779, intron 4 of 7)	MTD|LTR|MaLR	22898	NM_009811	12368	Mm.281379	NM_009811	ENSMUSG00000027997	Casp6	CASP-6|Mch2	caspase 6	protein-coding
Diff_Nuc32052	chr6	60849732	60849871	+	0	NA	Intergenic	L1Md_F2|LINE|L1	-44510	NM_027613	70945	Mm.389770	NM_027613	ENSMUSG00000054641	Mmrn1	4921530G03Rik|Emilin4|Mmrn	multimerin 1	protein-coding
Diff_Nuc1950	chr13	64226182	64226321	+	0	NA	intron (NM_001001321, intron 1 of 11)	MTD-int|LTR|MaLR	4387	NM_001001321	70484	Mm.133731	NM_001001321	ENSMUSG00000033114	Slc35d2	5730408I21Rik|SQV7L|UGTrel8|hfrc|mUGTrel8	solute carrier family 35, member D2	protein-coding
Diff_Nuc42052	chr4	154542532	154542671	+	0	NA	intron (NM_011385, intron 1 of 6)	intron (NM_011385, intron 1 of 6)	54043	NM_011385	20481	Mm.28520	NM_011385	ENSMUSG00000029050	Ski	2310012I02Rik|2610001A11Rik|AA062172|AA589460|BC004088	ski sarcoma viral oncogene homolog (avian)	protein-coding
Diff_Nuc39239	chr4	47926332	47926471	+	0	NA	Intergenic	Intergenic	-131776	NM_015743	18124	Mm.247261	NM_015743	ENSMUSG00000028341	Nr4a3	AI573420|CHN|CSMF|MINOR|NOR-1|Nor1|TEC	nuclear receptor subfamily 4, group A, member 3	protein-coding
Diff_Nuc44100	chr3	85809502	85809641	+	0	NA	Intergenic	Intergenic	-3158	NM_001001650	368202	Mm.253822	NM_001001650	ENSMUSG00000049013	Prss48	Esspl|Gm1019	protease, serine 48	protein-coding
Diff_Nuc56318	chr9	49627402	49627541	+	0	NA	Intergenic	B4|SINE|B4	-19973	NM_001311065	17967	Mm.4974	NM_010875	ENSMUSG00000039542	Ncam1	CD56|E-NCAM|NCAM-1|Ncam	neural cell adhesion molecule 1	protein-coding
Diff_Nuc52667	chr1	92386062	92386201	+	0	NA	Intergenic	MTE2a|LTR|MaLR	-113869	NM_133805	108679	Mm.119177	NM_133805	ENSMUSG00000034432	Cops8	9430009J09Rik|AA408242|Csn8|Sgn8	COP9 signalosome subunit 8	protein-coding
Diff_Nuc45397	chr3	138481032	138481171	+	0	NA	intron (NM_019571, intron 1 of 7)	B4|SINE|B4	75929	NM_019571	56224	Mm.31927	NM_019571	ENSMUSG00000028152	Tspan5	2810455A09Rik|4930505M03Rik|NET-4|Tm4sf9	tetraspanin 5	protein-coding
Diff_Nuc22383	chr14	94108012	94108151	+	0	NA	intron (NM_001346722, intron 2 of 4)	intron (NM_001346722, intron 2 of 4)	180026	NM_001271800	211712	Mm.37126	NM_001081377	ENSMUSG00000055421	Pcdh9	-	protocadherin 9	protein-coding
Diff_Nuc49625	chr2	151702052	151702191	+	0	NA	Intergenic	Intergenic	33458	NM_001040689	228770	Mm.159868	NM_001040689	ENSMUSG00000032852	Rspo4	A730099F22|A930029K19Rik	R-spondin 4	protein-coding
Diff_Nuc39389	chr4	54075342	54075481	+	0	NA	Intergenic	Intergenic	236494	NM_028053	52076	Mm.27184	NM_028053	ENSMUSG00000028420	Tmem38b	1600017F22Rik|AA437809|AV051057|D4Ertd89e|TRIC-B|mg33b	transmembrane protein 38B	protein-coding
Diff_Nuc34451	chr5	13116152	13116291	+	0	NA	Intergenic	L1_Mus1|LINE|L1	-280563	NM_001243072	20346	Mm.372039	NM_009152	ENSMUSG00000028883	Sema3a	Hsema-I|SEMA1|SemD|Semad|coll-1	sema domain, immunoglobulin domain (Ig), short basic domain, secreted, (semaphorin) 3A	protein-coding
Diff_Nuc12265	chr10	108327302	108327441	+	0	NA	intron (NM_001252342, intron 2 of 10)	L1_Mus3|LINE|L1	120660	NM_009306	20979	Mm.289702	NM_009306	ENSMUSG00000035864	Syt1	AW124717|G630098F17Rik|SytI	synaptotagmin I	protein-coding
Diff_Nuc14329	chr17	56340192	56340331	+	0	NA	intron (NM_172624, intron 9 of 20)	B3|SINE|B2	-16918	NM_080837	28106	Mm.294870	NM_080837	ENSMUSG00000019579	Mydgf	D17Wsu104e|Il25|Ly6elg	myeloid derived growth factor	protein-coding
Diff_Nuc21277	chr14	51574312	51574451	+	0	NA	Intergenic	B2_Mm2|SINE|B2	-1435	NM_001123371	667034	Mm.482171	NM_001123371	ENSMUSG00000068417	Pnp2	-	purine-nucleoside phosphorylase 2	protein-coding
Diff_Nuc19633	chr15	85189232	85189371	+	0	NA	intron (NM_016843, intron 1 of 11)	intron (NM_016843, intron 1 of 11)	22490	NM_016843	54138	Mm.248906	NM_016843	ENSMUSG00000016541	Atxn10	AI325283|C77170|E46|Sca10|TEG-169|Tex169	ataxin 10	protein-coding
Diff_Nuc39906	chr4	76020532	76020671	+	0	NA	intron (NM_011211, intron 10 of 39)	intron (NM_011211, intron 10 of 39)	-1096411	NM_025849	66928	Mm.24332	NM_025849	ENSMUSG00000028398	Tmem261	1700027K24Rik|3110001D03Rik	transmembrane protein 261	protein-coding
Diff_Nuc2818	chr13	97467102	97467241	+	0	NA	Intergenic	MER2|DNA|MER2_type	-26280	NM_008255	15357	Mm.316652	NM_008255	ENSMUSG00000021670	Hmgcr	HMG-CoAR|Red	3-hydroxy-3-methylglutaryl-Coenzyme A reductase	protein-coding
Diff_Nuc16631	chr16	49894802	49894941	+	0	NA	intron (NM_010581, intron 5 of 9)	intron (NM_010581, intron 5 of 9)	39104	NM_010581	16423	Mm.31752	NM_010581	ENSMUSG00000055447	Cd47	9130415E20Rik|AA407862|AI848868|AW108519|B430305P08Rik|IAP|Itgp	CD47 antigen (Rh-related antigen, integrin-associated signal transducer)	protein-coding
Diff_Nuc3409	chr13	118570432	118570571	+	0	NA	intron (NM_010408, intron 2 of 7)	B3|SINE|B2	-61683	NR_045508	71100	Mm.414841	NR_045508	ENSMUSG00000079048	4933413L06Rik	-	RIKEN cDNA 4933413L06 gene	ncRNA
Diff_Nuc29157	chr7	98049282	98049421	+	0	NA	Intergenic	MTB|LTR|MaLR	-189945	NM_011807	23859	Mm.147213	NM_011807	ENSMUSG00000052572	Dlg2	A330103J02Rik|B230218P12Rik|B330007M19Rik|Dlgh2|Gm1197|Gm21505|PSD93	discs, large homolog 2 (Drosophila)	protein-coding
Diff_Nuc4638	chr12	54254762	54254901	+	0	NA	Intergenic	Intergenic	-94833	NM_013780	27386	Mm.247044	NM_013780	ENSMUSG00000021010	Npas3	4930423H22Rik|bHLHe12	neuronal PAS domain protein 3	protein-coding
Diff_Nuc49272	chr2	138251302	138251441	+	0	NA	Intergenic	Intergenic	147142	NM_145534	228662	Mm.153405	NM_145534	ENSMUSG00000062098	Btbd3	mKIAA0952	BTB (POZ) domain containing 3	protein-coding
Diff_Nuc54786	chr1	183921312	183921451	+	0	NA	intron (NM_010135, intron 1 of 14)	intron (NM_010135, intron 1 of 14)	28730	NM_008680	13800	Mm.87759	NM_008680	ENSMUSG00000022995	Enah	Mena|NDPP-1|Ndpp1|WBP8	enabled homolog (Drosophila)	protein-coding
Diff_Nuc2203	chr13	74319302	74319441	+	0	NA	intron (NM_177333, intron 9 of 12)	intron (NM_177333, intron 9 of 12)	26777	NM_177333	211446	Mm.261859	NM_177333	ENSMUSG00000034152	Exoc3	2810050O03Rik|E430013E20Rik|Sec6|Sec6l1	exocyst complex component 3	protein-coding
Diff_Nuc38493	chr4	13824852	13824991	+	0	NA	Intergenic	ORR1B1|LTR|MaLR	112992	NM_009822	12395	Mm.4909	NM_009822	ENSMUSG00000006586	Runx1t1	Cbfa2t1h|ETO|MTG8	runt-related transcription factor 1; translocated to, 1 (cyclin D-related)	protein-coding
Diff_Nuc24765	chr18	8782192	8782331	+	0	NA	Intergenic	L1Md_F2|LINE|L1	-430593	NM_008058	14370	Mm.184289	NM_008058	ENSMUSG00000036904	Fzd8	Fz8	frizzled class receptor 8	protein-coding
Diff_Nuc9762	chr10	7983362	7983501	+	0	NA	intron (NM_177387, intron 5 of 7)	L1Md_T|LINE|L1	255192	NM_177387	338362	Mm.41163	NM_177387	ENSMUSG00000047712	Ust	D930010O20Rik|UA2OST	uronyl-2-sulfotransferase	protein-coding
Diff_Nuc36374	chr5	91324192	91324331	+	0	NA	Intergenic	Lx3C|LINE|L1	3990	NM_008176	14825	Mm.21013	NM_008176	ENSMUSG00000029380	Cxcl1	Fsp|Gro1|KC|Mgsa|N51|Scyb1|gro	chemokine (C-X-C motif) ligand 1	protein-coding
Diff_Nuc9276	chr11	110146252	110146391	+	0	NA	intron (NM_147219, intron 28 of 38)	RSINE1|SINE|B4	-33231	NM_001166557	76184	Mm.159704	NM_147218	ENSMUSG00000044749	Abca6	6330565N06Rik	ATP-binding cassette, sub-family A (ABC1), member 6	protein-coding
Diff_Nuc27284	chr7	20194222	20194361	+	0	NA	intron (NM_001290457, intron 10 of 10)	Lx4B|LINE|L1	-4456	NR_125836	53609	Mm.20913	NM_016680	ENSMUSG00000061028	Clasrp	Clasp|Sfrs16|Srsf16|Swap2	CLK4-associating serine/arginine rich protein	protein-coding
Diff_Nuc22096	chr14	79873942	79874081	+	0	NA	intron (NM_018765, intron 4 of 9)	intron (NM_018765, intron 4 of 9)	-6990	NM_007920	13709	Mm.20938	NM_007920	ENSMUSG00000036461	Elf1	Elf-1|Sts1|mElf-1|p70	E74-like factor 1	protein-coding
Diff_Nuc40388	chr4	98046382	98046521	+	0	NA	intron (NM_053157, intron 2 of 6)	PB1D9|SINE|Alu	3505	NM_053157	94043	Mm.331719	NM_053157	ENSMUSG00000028563	Tm2d1	2310026L18Rik|AA990549|Bbp	TM2 domain containing 1	protein-coding
Diff_Nuc13535	chr17	26892082	26892221	+	0	NA	intron (NM_029870, intron 4 of 8)	intron (NM_029870, intron 4 of 8)	-25873	NM_172149	224630	Mm.21795	NM_172149	ENSMUSG00000024191	Bnip1	2010005M06Rik|5930429G21Rik|Sec20	BCL2/adenovirus E1B interacting protein 1	protein-coding
Diff_Nuc61011	chr8	113742902	113743041	+	0	NA	intron (NM_009149, intron 1 of 25)	intron (NM_009149, intron 1 of 25)	40131	NM_009149	20340	Mm.276271	NM_009149	ENSMUSG00000003316	Glg1	AI593353|AW537898|CFR|CFR-1|ESL-1|MG-160|MG160|Selel	golgi apparatus protein 1	protein-coding
Diff_Nuc55499	chr9	19892392	19892531	+	0	NA	Intergenic	Lx4A|LINE|L1	-10609	NM_146559	258552	Mm.223084	NM_146559	ENSMUSG00000044106	Olfr868	MOR145-4	olfactory receptor 868	protein-coding
Diff_Nuc33788	chr6	132377852	132377991	+	0	NA	Intergenic	L1Md_F2|LINE|L1	-63768	NM_053251	114600	Mm.428480	NM_053251		Gm4736	EG114600|Mp4|Mp6	predicted gene 4736	protein-coding
Diff_Nuc44190	chr3	88890412	88890551	+	0	NA	intron (NM_028188, intron 10 of 10)	B3|SINE|B2	3472	NM_001083808	72296	Mm.27687	NM_028188	ENSMUSG00000041263	Rusc1	2210403N08Rik|AA408288|NESCA	RUN and SH3 domain containing 1	protein-coding
Diff_Nuc49541	chr2	147836472	147836611	+	0	NA	Intergenic	Intergenic	34659	NM_001291067	15376	Mm.938	NM_010446	ENSMUSG00000037025	Foxa2	HNF3-beta|HNF3beta|Hnf-3b|Hnf3b|Tcf-3b|Tcf3b	forkhead box A2	protein-coding
Diff_Nuc8569	chr11	86725842	86725981	+	0	NA	Intergenic	RMER17A|LTR|ERVK	81353	NM_001005341	77864	Mm.191894	NM_001005341	ENSMUSG00000018427	Ypel2	6430570G24|E130113K08Rik	yippee-like 2 (Drosophila)	protein-coding
Diff_Nuc1597	chr13	51784512	51784651	+	0	NA	Intergenic	Intergenic	37504	NM_029279	75420	Mm.275981	NM_029279	ENSMUSG00000035139	Secisbp2	2210413N07Rik|2810012K13Rik|SBP2	SECIS binding protein 2	protein-coding
Diff_Nuc39482	chr4	57209472	57209611	+	0	NA	intron (NM_011207, intron 23 of 25)	intron (NM_011207, intron 23 of 25)	24598	NR_040669	329851	Mm.392470	NR_040669	ENSMUSG00000085967	Gm12530	D730003B17|OTTMUSG00000007337	predicted gene 12530	ncRNA
Diff_Nuc41031	chr4	120868802	120868941	+	0	NA	intron (NM_001346660, intron 1 of 7)	intron (NM_001346660, intron 1 of 7)	18818	NM_001346660	109263	Mm.215745	NM_001081013	ENSMUSG00000049878	Rlf	9230110M18Rik|AI195322|MommeD8	rearranged L-myc fusion sequence	protein-coding
Diff_Nuc55959	chr9	36636502	36636641	+	0	NA	Intergenic	ID_B1|SINE|B4	-14673	NM_183171	235180	Mm.5264	NM_183171	ENSMUSG00000032118	Fez1	UNC-76|UNC76	fasciculation and elongation protein zeta 1 (zygin I)	protein-coding
Diff_Nuc45985	chr2	7282552	7282691	+	0	NA	intron (NM_001110231, intron 2 of 15)	intron (NM_001110231, intron 2 of 15)	35006	NM_001110232	14007	Mm.398543	NM_010160	ENSMUSG00000002107	Celf2	B230218O03|B230345P09Rik|C88023|CELF-2|CUG-BP2|Cugbp2|D230046B21Rik|Etr-3|Napor|Napor-2|mETR-3	CUGBP, Elav-like family member 2	protein-coding
Diff_Nuc27245	chr7	18426782	18426921	+	0	NA	Intergenic	Intergenic	28820	NM_025957	67084	Mm.33709	NM_025957	ENSMUSG00000023185	Ceacam14	1600021E03Rik|1600025E09Rik|AV033953	carcinoembryonic antigen-related cell adhesion molecule 14	protein-coding
Diff_Nuc4978	chr12	70389992	70390131	+	0	NA	Intergenic	Lx9|LINE|L1	-7607	NM_027117	69554	Mm.234368	NM_027117	ENSMUSG00000020978	Klhdc2	2310022K15Rik|D12Ertd522e|HCLP-1|LCP	kelch domain containing 2	protein-coding
Diff_Nuc6781	chr11	20868472	20868611	+	0	NA	Intergenic	Intergenic	-122786	NM_023324	67245	Mm.28957	NM_023324	ENSMUSG00000020134	Peli1	2810468L03Rik|A930031K15Rik|AA409794|AI586297|D11Ertd676e	pellino 1	protein-coding
Diff_Nuc55341	chr9	13241552	13241691	+	0	NA	Intergenic	Intergenic	7040	NR_028271	18689	Mm.41972	NM_008835	ENSMUSG00000031802	Phxr4	Sp5	per-hexamer repeat gene 4	ncRNA
Diff_Nuc20448	chr14	18473662	18473801	+	0	NA	Intergenic	ORR1D2|LTR|MaLR	-19743	NM_001113417	21834	Mm.32563	NM_009380	ENSMUSG00000021779	Thrb	Nr1a2|T3R[b]|T3Rbeta|Thrb1|Thrb2|c-erbAbeta	thyroid hormone receptor beta	protein-coding
Diff_Nuc31736	chr6	49326092	49326231	+	0	NA	exon (NM_001172216, exon 3 of 6)	exon (NM_001172216, exon 3 of 6)	8423	NM_172727	231946	Mm.35199	NM_172727	ENSMUSG00000047115	Fam221a	D330028D13Rik	family with sequence similarity 221, member A	protein-coding
Diff_Nuc6196	chr12	116199752	116199891	+	0	NA	Intergenic	Lx5|LINE|L1	-447916	NR_106063	102465664		NR_106063	ENSMUSG00000098357	Mir7094-2	Gm27508|mmu-mir-7094-2	microRNA 7094-2	ncRNA
Diff_Nuc40344	chr4	96579532	96579671	+	0	NA	Intergenic	L1_Mus3|LINE|L1	-127750	NM_001081284	620779	Mm.439625	NM_001081284	ENSMUSG00000078639	Gm12695	OTTMUSG00000008003	predicted gene 12695	protein-coding
Diff_Nuc36888	chr5	108349902	108350041	+	0	NA	intron (NM_026062, intron 2 of 4)	intron (NM_026062, intron 2 of 4)	20424	NM_016980	100503670	Mm.277897	NM_016980	ENSMUSG00000058558	Rpl5	U21RNA	ribosomal protein L5	protein-coding
Diff_Nuc27348	chr7	24451312	24451451	+	0	NA	Intergenic	RMER1B|Other|Other	8046	NM_030735	81010	Mm.379267	NM_030735	ENSMUSG00000035523	Vmn1r172	V1rd9|V3R9	vomeronasal 1 receptor 172	protein-coding
Diff_Nuc21196	chr14	48502862	48503001	+	0	NA	Intergenic	Intergenic	-15608	NR_045959	73961	Mm.390702	NR_045959		4930447J18Rik	4930425M13Rik	RIKEN cDNA 4930447J18 gene	ncRNA
Diff_Nuc858	chr13	21840382	21840521	+	0	NA	Intergenic	Intergenic	1971	NM_178211	319160	Mm.255646	NM_178211	ENSMUSG00000064288	Hist1h4k	-	histone cluster 1, H4k	protein-coding
Diff_Nuc44187	chr3	88867442	88867581	+	0	NA	intron (NM_138679, intron 16 of 26)	intron (NM_138679, intron 16 of 26)	26442	NM_001083808	72296	Mm.27687	NM_028188	ENSMUSG00000041263	Rusc1	2210403N08Rik|AA408288|NESCA	RUN and SH3 domain containing 1	protein-coding
Diff_Nuc36520	chr5	95403772	95403911	+	0	NA	Intergenic	Intergenic	-13878	NR_044992	622894	Mm.380053	NR_044992	ENSMUSG00000096742	Gm6367	EG622894	predicted gene 6367	pseudo
Diff_Nuc56579	chr9	58727702	58727841	+	0	NA	intron (NM_008684, intron 27 of 28)	intron (NM_008684, intron 27 of 28)	56452	NM_001081192	330953	Mm.151967	NM_001081192	ENSMUSG00000032338	Hcn4	Bcng3|Hcn3	hyperpolarization-activated, cyclic nucleotide-gated K+ 4	protein-coding
Diff_Nuc20387	chr14	16480912	16481051	+	0	NA	Intergenic	Intergenic	-209480	NM_146052	218763	Mm.138039	NM_146052	ENSMUSG00000045201	Lrrc3b	BC019794|LRP15	leucine rich repeat containing 3B	protein-coding
Diff_Nuc51894	chr1	64407942	64408081	+	0	NA	Intergenic	Intergenic	-171367	NM_133828	12912	Mm.422634	NM_009952	ENSMUSG00000025958	Creb1	2310001E10Rik|3526402H21Rik|AV083133|Creb|Creb-1	cAMP responsive element binding protein 1	protein-coding
Diff_Nuc1991	chr13	65510302	65510441	+	0	NA	Intergenic	Lx4B|LINE|L1	130209	NM_178364	170936	Mm.151546	NM_178364	ENSMUSG00000021514	Zfp369	B930030B22Rik|D230020H11Rik|NRIF2	zinc finger protein 369	protein-coding
Diff_Nuc57949	chr9	109782682	109782821	+	0	NA	intron (NM_007658, intron 5 of 14)	intron (NM_007658, intron 5 of 14)	4668	NM_007658	12530	Mm.307103	NM_007658	ENSMUSG00000032477	Cdc25a	D9Ertd393e	cell division cycle 25A	protein-coding
Diff_Nuc38685	chr4	23412582	23412721	+	0	NA	Intergenic	Intergenic	994956	NR_131335	105500046		NR_131335	ENSMUSG00000107859	Gm30731	Pnky|lnc-pou3f2	predicted gene, 30731	ncRNA
Diff_Nuc48813	chr2	120169212	120169351	+	0	NA	intron (NR_027618, intron 6 of 25)	intron (NR_027618, intron 6 of 25)	9588	NM_178851	269338	Mm.246131	NM_147153	ENSMUSG00000027291	Vps39	A230065P22Rik|AW743070|Vam6|Vam6P|mVam6	VPS39 HOPS complex subunit	protein-coding
Diff_Nuc31402	chr6	36685062	36685201	+	0	NA	intron (NM_008973, intron 4 of 4)	L1Md_F2|LINE|L1	76230	NM_008973	19242	Mm.279690	NM_008973	ENSMUSG00000029838	Ptn	HARP|HB-GAM|HBBN|HBGF-8|HBNF|OSF|Osf-1|Osf1	pleiotrophin	protein-coding
Diff_Nuc2355	chr13	79968802	79968941	+	0	NA	Intergenic	RMER17A|LTR|ERVK	-1053812	NM_001042591	105171	Mm.423137	NM_001042591	ENSMUSG00000074794	Arrdc3	AI450344|mKIAA1376	arrestin domain containing 3	protein-coding
Diff_Nuc54802	chr1	184257682	184257821	+	0	NA	intron (NM_175127, intron 2 of 4)	B3|SINE|B2	13986	NM_175127	67948	Mm.30737	NM_175127	ENSMUSG00000047539	Fbxo28	4833428J17Rik|5730505P19Rik|D1Ertd578e|Fbx28|mKIAA0483	F-box protein 28	protein-coding
Diff_Nuc54311	chr1	166977822	166977961	+	0	NA	Intergenic	Intergenic	44170	NR_040480	75857	Mm.109021	NR_040480	ENSMUSG00000102408	4930568G15Rik	-	RIKEN cDNA 4930568G15 gene	ncRNA
Diff_Nuc53037	chr1	109450132	109450271	+	0	NA	Intergenic	L1Md_F2|LINE|L1	24621	NM_198028	241197	Mm.123919	NM_198028	ENSMUSG00000092572	Serpinb10	9830131G07|BB233602|Serpinb10-ps	serine (or cysteine) peptidase inhibitor, clade B (ovalbumin), member 10	protein-coding
Diff_Nuc17987	chr15	17063842	17063981	+	0	NA	Intergenic	Lx3_Mus|LINE|L1	356055	NM_009869	12565	Mm.439758	NM_009869	ENSMUSG00000025370	Cdh9	-	cadherin 9	protein-coding
Diff_Nuc33024	chr6	101860962	101861101	+	0	NA	Intergenic	L1MA6|LINE|L1	136788	NR_027989	207157	Mm.57632	NM_177579	ENSMUSG00000052236	Gm9871	0610005I04|EG207157|ENSMUSG00000052236	predicted gene 9871	ncRNA
Diff_Nuc2593	chr13	89145412	89145551	+	0	NA	intron (NM_001037987, intron 3 of 10)	Lx2B|LINE|L1	184404	NM_001037987	13612	Mm.125580	NM_010103	ENSMUSG00000034488	Edil3	Del-1|Del1	EGF-like repeats and discoidin I-like domains 3	protein-coding
Diff_Nuc45949	chr2	5897482	5897621	+	0	NA	intron (NM_001081132, intron 5 of 21)	intron (NM_001081132, intron 5 of 21)	25036	NM_001081132	326622	Mm.31102	NM_001081132	ENSMUSG00000043241	Upf2	-	UPF2 regulator of nonsense transcripts homolog (yeast)	protein-coding
Diff_Nuc42681	chr3	27169012	27169151	+	0	NA	Intergenic	Intergenic	-46918	NM_009425	22035	Mm.1062	NM_009425	ENSMUSG00000039304	Tnfsf10	A330042I21Rik|AI448571|APO-2L|Ly81|TL2|Tnlg6a|Trail	tumor necrosis factor (ligand) superfamily, member 10	protein-coding
Diff_Nuc7846	chr11	61915982	61916121	+	0	NA	intron (NM_001029936, intron 1 of 12)	B1_Mm|SINE|Alu	25525	NM_001029936	432572	Mm.438022	NM_001029936	ENSMUSG00000042331	Specc1	2810012G08Rik|B230396K10Rik|Cytsb	sperm antigen with calponin homology and coiled-coil domains 1	protein-coding
Diff_Nuc15752	chr16	18125512	18125651	+	0	NA	Intergenic	Intergenic	-2218	NM_022982	65079	Mm.40149	NM_022982	ENSMUSG00000043811	Rtn4r	NOGOR|NgR|NgR1	reticulon 4 receptor	protein-coding
Diff_Nuc49608	chr2	150868652	150868791	+	0	NA	Intergenic	Intergenic	-3606	NM_026086	67311	Mm.480682	NM_026086	ENSMUSG00000053916	Nanp	1600031M04Rik|Hdhd4	N-acetylneuraminic acid phosphatase	protein-coding
Diff_Nuc36839	chr5	106661932	106662071	+	0	NA	Intergenic	B4|SINE|B4	-88358	NR_136913	102635633	Mm.383511	NR_136913	ENSMUSG00000105508	Gm32921	-	predicted gene, 32921	ncRNA
Diff_Nuc24654	chr18	4238852	4238991	+	0	NA	Intergenic	Intergenic	73091	NM_026092	67328	Mm.158148	NM_026092	ENSMUSG00000024233	Lyzl1	1700038F02Rik|Lyc2|Lyzd1	lysozyme-like 1	protein-coding
Diff_Nuc57124	chr9	76302082	76302221	+	0	NA	Intergenic	Intergenic	91460	NM_001045518	208994	Mm.256929	NM_001045518	ENSMUSG00000032358	Fam83b	C530008M07Rik|Gm516	family with sequence similarity 83, member B	protein-coding
Diff_Nuc52360	chr1	82239422	82239561	+	0	NA	intron (NM_010570, intron 1 of 1)	intron (NM_010570, intron 1 of 1)	48523	NM_010570	16367	Mm.4952	NM_010570	ENSMUSG00000055980	Irs1	G972R|IRS-1	insulin receptor substrate 1	protein-coding
Diff_Nuc48529	chr2	109827882	109828021	+	0	NA	intron (NM_172671, intron 2 of 17)	intron (NM_172671, intron 2 of 17)	-30023	NM_026613	68201	Mm.181767	NM_026613	ENSMUSG00000027160	Ccdc34	2810027O19Rik|4930522P10Rik|AI596202	coiled-coil domain containing 34	protein-coding
Diff_Nuc9102	chr11	104433702	104433841	+	0	NA	intron (NM_010858, intron 2 of 8)	intron (NM_010858, intron 2 of 8)	-10259	NR_130177	100415912	Mm.446786	NR_130177		Gm11665	Gm11664|OTTMUSG00000003182|OTTMUSG00000003183	predicted gene 11665	ncRNA
Diff_Nuc58950	chr8	27399772	27399911	+	0	NA	Intergenic	L2b|LINE|L2	131200	NM_199042	73754	Mm.383241	NM_199042	ENSMUSG00000037214	Thap1	4833431A01Rik|AW490810	THAP domain containing, apoptosis associated protein 1	protein-coding
Diff_Nuc20559	chr14	22578502	22578641	+	0	NA	intron (NM_026283, intron 1 of 5)	Lx8|LINE|L1	8818	NM_026283	67630	Mm.102765	NM_026283	ENSMUSG00000021770	Samd8	1110053F04Rik|1700010P07Rik|SMSr	sterile alpha motif domain containing 8	protein-coding
Diff_Nuc14228	chr17	51373192	51373331	+	0	NA	Intergenic	MLT1J|LTR|MaLR	-54584	NM_001285991	72238	Mm.120650	NM_028162	ENSMUSG00000023923	Tbc1d5	1600014N05Rik	TBC1 domain family, member 5	protein-coding
Diff_Nuc37981	chr5	145669852	145669991	+	0	NA	intron (NM_029438, intron 1 of 17)	ORR1D1|LTR|MaLR	-12236	NR_106006	102465629		NR_106006	ENSMUSG00000098822	Mir7039	Gm27824|mmu-mir-7039	microRNA 7039	ncRNA
Diff_Nuc1101	chr13	33304872	33305011	+	0	NA	Intergenic	RLTR20A2|LTR|ERVK	20113	NM_011460	20726	Mm.234774	NM_011460	ENSMUSG00000054266	Serpinb9d	AT2|Spi9|ovalbumin	serine (or cysteine) peptidase inhibitor, clade B, member 9d	protein-coding
Diff_Nuc14755	chr17	74667122	74667261	+	0	NA	intron (NM_133771, intron 1 of 8)	intron (NM_133771, intron 1 of 8)	27012	NM_133771	76890	Mm.311874	NM_133771	ENSMUSG00000058704	Memo1	0610016J10Rik|D930048L02Rik	mediator of cell motility 1	protein-coding
Diff_Nuc13077	chr17	10668332	10668471	+	0	NA	intron (NR_077237, intron 1 of 1)	intron (NR_077237, intron 1 of 1)	19319	NR_077238	319750	Mm.383485	NR_077237	ENSMUSG00000089633	A230009B12Rik	-	RIKEN cDNA A230009B12 gene	ncRNA
Diff_Nuc46697	chr2	35537802	35537941	+	0	NA	intron (NM_001290641, intron 3 of 15)	intron (NM_001290641, intron 3 of 15)	-9643	NM_001001602	69601	Mm.29629	NM_001001602	ENSMUSG00000026883	Dab2ip	2310011D08Rik|AI480459|Aip1|mKIAA1743	disabled 2 interacting protein	protein-coding
Diff_Nuc8653	chr11	88999702	88999841	+	0	NA	Intergenic	ID_B1|SINE|B4	64616	NM_001033266	217071	Mm.342127	NM_001033266	ENSMUSG00000072553	Gm525	-	predicted gene 525	protein-coding
Diff_Nuc39453	chr4	56581592	56581731	+	0	NA	Intergenic	Lx3_Mus|LINE|L1	172636	NM_025271	11471	Mm.251434	NM_025271	ENSMUSG00000070980	Actl7b	Tact1	actin-like 7b	protein-coding
Diff_Nuc37032	chr5	113868062	113868201	+	0	NA	Intergenic	Intergenic	-51336	NM_177292	320916	Mm.102783	NM_177292	ENSMUSG00000063430	Wscd2	4933413A10Rik|C530024P05Rik|Gm450	WSC domain containing 2	protein-coding
Diff_Nuc9896	chr10	13723812	13723951	+	0	NA	intron (NM_010437, intron 1 of 8)	intron (NM_010437, intron 1 of 8)	37696	NM_010437	15273	Mm.42157	NM_010437	ENSMUSG00000015501	Hivep2	Gm20114|MIBP1|Schnurri-2|Shn-2	human immunodeficiency virus type I enhancer binding protein 2	protein-coding
Diff_Nuc4009	chr12	28690082	28690221	+	0	NA	Intergenic	L1_Mur3|LINE|L1	543051	NM_001177964	68511	Mm.310284	NM_001177964	ENSMUSG00000020633	Dcdc2c	1110015M06Rik	doublecortin domain containing 2C	protein-coding
Diff_Nuc18087	chr15	22755742	22755881	+	0	NA	Intergenic	MTD|LTR|MaLR	-111072	NM_001165971	545091	Mm.475598	NM_001165971		Gm5803	EG545091	predicted gene 5803	protein-coding
Diff_Nuc2553	chr13	87486932	87487071	+	0	NA	Intergenic	Lx3A|LINE|L1	-1300601	NM_007749	12867	Mm.378898	NM_007749	ENSMUSG00000017778	Cox7c	COXVIIc|Cox7c1	cytochrome c oxidase subunit VIIc	protein-coding
Diff_Nuc32396	chr6	76673262	76673401	+	0	NA	Intergenic	L1_Mus1|LINE|L1	-519380	NM_028880	74342	Mm.292568	NM_028880	ENSMUSG00000060780	Lrrtm1	4632401D06Rik|AW125451	leucine rich repeat transmembrane neuronal 1	protein-coding
Diff_Nuc36573	chr5	96429572	96429711	+	0	NA	Intergenic	RLTR22_Mur|LTR|ERVK	43683	NM_018866	55985	Mm.10116	NM_018866	ENSMUSG00000023078	Cxcl13	4631412M08Rik|ANGIE2|Angie|BCA-1|BLC|BLR1L|Scyb13	chemokine (C-X-C motif) ligand 13	protein-coding
Diff_Nuc25351	chr18	33505762	33505901	+	0	NA	Intergenic	Intergenic	117457	NM_001267717	27528	Mm.407415	NM_053078	ENSMUSG00000042834	Nrep	AI325076|D0H4S114|Harp|P311|PTZ17|SEZ17	neuronal regeneration related protein	protein-coding
Diff_Nuc56582	chr9	58825672	58825811	+	0	NA	intron (NM_008684, intron 5 of 28)	intron (NM_008684, intron 5 of 28)	58507	NM_008684	18007	Mm.42249	NM_008684	ENSMUSG00000032340	Neo1	2610028H22Rik|AI327052|D930014N22Rik|Igdcc2	neogenin	protein-coding
Diff_Nuc12336	chr10	110453702	110453841	+	0	NA	Intergenic	Intergenic	-6649	NM_172554	320150	Mm.339281	NM_172554	ENSMUSG00000035798	Zdhhc17	A230053P19Rik|BB187739|D130071N24Rik|Hip14	zinc finger, DHHC domain containing 17	protein-coding
Diff_Nuc46273	chr2	20631672	20631811	+	0	NA	intron (NM_001177631, intron 4 of 19)	intron (NM_001177631, intron 4 of 19)	190601	NM_001177631	208618	Mm.237935	NM_029895	ENSMUSG00000036617	Etl4	6620402G01Rik|9430077C05Rik|BC026657|E330027G05Rik|Etl-4|Skt	enhancer trap locus 4	protein-coding
Diff_Nuc8537	chr11	85329792	85329931	+	0	NA	intron (NM_138681, intron 16 of 25)	intron (NM_138681, intron 16 of 25)	163195	NM_001166643	192197	Mm.209989	NM_138681	ENSMUSG00000059439	Bcas3	1500019F07Rik|2610028P08Rik|AU021018|BC028339|K20D4|rudhira	breast carcinoma amplified sequence 3	protein-coding
Diff_Nuc19346	chr15	75855002	75855141	+	0	NA	Intergenic	RLTR42-int|LTR|ERVK	-10305	NM_134087	105732	Mm.267178	NM_134087	ENSMUSG00000046761	Fam83h	AA409316	family with sequence similarity 83, member H	protein-coding
Diff_Nuc4814	chr12	62509332	62509471	+	0	NA	Intergenic	RMER12|LTR|ERVK	113406	NR_045049	100504101	Mm.235026	NR_045049		Gm20063	-	predicted gene, 20063	ncRNA
Diff_Nuc51183	chr1	36739852	36739991	+	0	NA	5' UTR (NM_001126046, exon 1 of 15)	5' UTR (NM_001126046, exon 1 of 15)	107	NM_001126046	381337	Mm.17413	NM_027957	ENSMUSG00000046337	Fam178b	1700024G10Rik|Gm990	family with sequence similarity 178, member B	protein-coding
Diff_Nuc52387	chr1	83327572	83327711	+	0	NA	intron (NM_172430, intron 3 of 10)	B4|SINE|B4	77134	NM_172430	77629	Mm.154303	NM_172430	ENSMUSG00000026163	Sphkap	4930544G21Rik|A930009L15Rik|AI852220|SKIP|mKIAA1678	SPHK1 interactor, AKAP domain containing	protein-coding
Diff_Nuc51994	chr1	67948432	67948571	+	0	NA	Intergenic	ORR1A2|LTR|MaLR	778900	NM_001080809	227231	Mm.343942	NM_001080809	ENSMUSG00000025991	Cps1	4732433M03Rik|CPS|D1Ucla3	carbamoyl-phosphate synthetase 1	protein-coding
Diff_Nuc20161	chr14	4330782	4330921	+	0	NA	Intergenic	B1_Mus1|SINE|Alu	-106951	NM_001309398	554327	Mm.460196	NM_001309398	ENSMUSG00000079388	2610042L04Rik	Tksn|takusan	RIKEN cDNA 2610042L04 gene	protein-coding
Diff_Nuc61487	chr8	130236322	130236461	+	0	NA	Intergenic	Intergenic	412839	NM_001013580	93742	Mm.299254	NM_033620	ENSMUSG00000025812	Pard3	AA960621|AI256638|Asip|D8Ertd580e|Par-3|Par3|Pard-3|Pard3a|Phip	par-3 family cell polarity regulator	protein-coding
Diff_Nuc47907	chr2	85259882	85260021	+	0	NA	Intergenic	Intergenic	-4917	NM_146435	258427	Mm.377495	NM_146435	ENSMUSG00000075220	Olfr993	MOR203-2	olfactory receptor 993	protein-coding
Diff_Nuc1185	chr13	36084382	36084521	+	0	NA	intron (NM_201358, intron 2 of 2)	intron (NM_201358, intron 2 of 2)	24676	NM_029628	76487	Mm.44745	NM_029628	ENSMUSG00000050423	Ppp1r3g	1600032L17Rik	protein phosphatase 1, regulatory (inhibitor) subunit 3G	protein-coding
Diff_Nuc27838	chr7	46587192	46587331	+	0	NA	Intergenic	Intergenic	-67357	NR_073038	100861861	Mm.60620	NR_073038		Gm21276	-	predicted gene, 21276	pseudo
Diff_Nuc20438	chr14	17679872	17680011	+	0	NA	intron (NM_001289760, intron 1 of 9)	intron (NM_001289760, intron 1 of 9)	234904	NM_001289760	218772	Mm.259318	NM_011243	ENSMUSG00000017491	Rarb	A830025K23|Hap|Nr1b2	retinoic acid receptor, beta	protein-coding
Diff_Nuc18743	chr15	48965442	48965581	+	0	NA	Intergenic	Lx3_Mus|LINE|L1	-341976	NM_001081391	239420	Mm.309363	NM_001081391	ENSMUSG00000022311	Csmd3	4930500N14Rik|mKIAA1894	CUB and Sushi multiple domains 3	protein-coding
Diff_Nuc42913	chr3	36835592	36835731	+	0	NA	intron (NM_172679, intron 22 of 85)	intron (NM_172679, intron 22 of 85)	73633	NM_172679	229227	Mm.207907	NM_172679	ENSMUSG00000037270	4932438A13Rik	4732443H21|B830039D19Rik|D630029K19Rik|FSA|Kiaa1109|Tweek	RIKEN cDNA 4932438A13 gene	protein-coding
Diff_Nuc596	chr13	11973862	11974001	+	0	NA	intron (NM_023868, intron 7 of 104)	intron (NM_023868, intron 7 of 104)	225281	NM_023868	20191	Mm.239871	NM_023868	ENSMUSG00000021313	Ryr2	9330127I20Rik|RYR-2	ryanodine receptor 2, cardiac	protein-coding
Diff_Nuc53366	chr1	126533702	126533841	+	0	NA	Intergenic	Intergenic	-591635	NM_199021	269109	Mm.417716	NM_199021	ENSMUSG00000036815	Dpp10	6430601K09Rik|DPP X|Dprp3	dipeptidylpeptidase 10	protein-coding
Diff_Nuc46012	chr2	9048562	9048701	+	0	NA	Intergenic	Intergenic	-62511	NR_038180	73438	Mm.23558	NR_038180	ENSMUSG00000085580	1700061F12Rik	-	RIKEN cDNA 1700061F12 gene	ncRNA
Diff_Nuc60065	chr8	78686462	78686601	+	0	NA	Intergenic	Intergenic	713938	NM_001164235	71831	Mm.443238	NM_027944	ENSMUSG00000031620	1700007B14Rik	-	RIKEN cDNA 1700007B14 gene	protein-coding
Diff_Nuc23706	chr19	25468672	25468811	+	0	NA	intron (NM_181404, intron 4 of 13)	intron (NM_181404, intron 4 of 13)	-111455	NM_015826	50796	Mm.391208	NM_015826	ENSMUSG00000024837	Dmrt1	-	doublesex and mab-3 related transcription factor 1	protein-coding
Diff_Nuc59972	chr8	75633702	75633841	+	0	NA	intron (NM_010687, intron 4 of 14)	L1_Mus2|LINE|L1	93360	NR_039551	100628574		NR_039551	ENSMUSG00000093140	Mir28b	mmu-mir-28b	microRNA 28b	ncRNA
Diff_Nuc14317	chr17	56023512	56023651	+	0	NA	Intergenic	RMER19B|LTR|ERVK	-5363	NM_144546	104349	Mm.460659	NM_144546	ENSMUSG00000057835	Zfp119a	AL024077|Mzf13|Zfp119	zinc finger protein 119a	protein-coding
Diff_Nuc32202	chr6	67795302	67795441	+	0	NA	Intergenic	Intergenic	-279678	NR_003100	75070	Mm.463364	NR_003100		4930515G16Rik	-	myc induced nuclear antigen pseudogene	pseudo
Diff_Nuc11150	chr10	69253512	69253651	+	0	NA	intron (NM_170730, intron 1 of 17)	MamSINE1|SINE|tRNA	-134699	NM_170687	11735	Mm.235960	NM_009670	ENSMUSG00000069601	Ank3	2900054D09Rik|AI314020|Ank-3|AnkG|Ankyrin-3|Ankyrin-G	ankyrin 3, epithelial	protein-coding
Diff_Nuc40942	chr4	117774572	117774711	+	0	NA	intron (NM_009176, intron 2 of 11)	intron (NM_009176, intron 2 of 11)	32910	NM_001285520	20441	Mm.251002	NM_009176	ENSMUSG00000028538	St3gal3	ST3GalIII|ST3N|Siat3|Siat6	ST3 beta-galactoside alpha-2,3-sialyltransferase 3	protein-coding
Diff_Nuc55334	chr9	12749742	12749881	+	0	NA	Intergenic	L1VL2|LINE|L1	356044	NR_040755	78219	Mm.414868	NR_040755	ENSMUSG00000111830	4930568E12Rik	-	RIKEN cDNA 4930568E12 gene	ncRNA
Diff_Nuc29382	chr7	106625072	106625211	+	0	NA	Intergenic	Intergenic	3076	NR_002173	449631	Mm.236868	NR_002173	ENSMUSG00000064966	Snord15b	Gm5775|Rnu15-b|Rnu15b|U15B	small nucleolar RNA, C/D box 14B	snoRNA
Diff_Nuc2475	chr13	84194612	84194751	+	0	NA	intron (NR_131220, intron 1 of 1)	intron (NR_131220, intron 1 of 1)	9698	NR_131220	553095	Mm.39702	NR_131220	ENSMUSG00000098087	Gm17750	-	predicted gene, 17750	ncRNA
Diff_Nuc25901	chr18	52674192	52674331	+	0	NA	Intergenic	Tigger1|DNA|MER2_type	15114	NM_001286181	16948	Mm.172	NM_010728	ENSMUSG00000024529	Lox	AI893619|TSC-160|rrg	lysyl oxidase	protein-coding
Diff_Nuc28164	chr7	57482682	57482821	+	0	NA	intron (NM_001037906, intron 7 of 19)	intron (NM_001037906, intron 7 of 19)	252031	NM_001037906	338352	Mm.383528	NM_001037906	ENSMUSG00000055409	Nell1	B230343H07Rik|l7R6	NEL-like 1	protein-coding
Diff_Nuc51267	chr1	39455412	39455551	+	0	NA	intron (NM_018775, intron 5 of 19)	intron (NM_018775, intron 5 of 19)	30785	NM_001252218	114641	Mm.379302	NM_053257	ENSMUSG00000073702	Rpl31	Dts	ribosomal protein L31	protein-coding
Diff_Nuc43084	chr3	42749132	42749271	+	0	NA	Intergenic	Lx5|LINE|L1	1202661	NM_027271	73852	Mm.29006	NM_027271	ENSMUSG00000025766	D3Ertd751e	2810009O15Rik|4930415G15Rik	DNA segment, Chr 3, ERATO Doi 751, expressed	protein-coding
Diff_Nuc12871	chr17	3332852	3332991	+	0	NA	intron (NM_001122998, intron 1 of 26)	intron (NM_001122998, intron 1 of 26)	6348	NM_001122998	24001	Mm.137134	NM_011878	ENSMUSG00000023800	Tiam2	3000002F19Rik|STEF|mKIAA2016	T cell lymphoma invasion and metastasis 2	protein-coding
Diff_Nuc37754	chr5	137462392	137462531	+	0	NA	promoter-TSS (NM_011962)	promoter-TSS (NM_011962)	313	NM_001310747	70103	Mm.273147	NM_027318	ENSMUSG00000059518	Znhit1	2700001K05Rik|ZNFN4A1	zinc finger, HIT domain containing 1	protein-coding
Diff_Nuc3003	chr13	103178122	103178261	+	0	NA	Intergenic	L1ME2|LINE|L1	-305447	NM_008533	17079	Mm.373974	NM_008533	ENSMUSG00000021624	Cd180	F630107B15|Ly78|RP105	CD180 antigen	protein-coding
Diff_Nuc12815	chr10	128565982	128566121	+	0	NA	Intergenic	Lx5|LINE|L1	4771	NM_146863	258862	Mm.391449	NM_146863	ENSMUSG00000047868	Olfr770	MOR114-5	olfactory receptor 770	protein-coding
Diff_Nuc51490	chr1	49164282	49164421	+	0	NA	Intergenic	L1_Mus1|LINE|L1	-1640382	NR_105768	102466969		NR_105768	ENSMUSG00000098876	Mir6350	Gm27958|mmu-mir-6350	microRNA 6350	ncRNA
Diff_Nuc38695	chr4	23997692	23997831	+	0	NA	Intergenic	L1VL2|LINE|L1	-425848	NM_199467	212377	Mm.120919	NM_199467	ENSMUSG00000045751	Mms22l	F730047E07Rik|Gm134	MMS22-like, DNA repair protein	protein-coding
Diff_Nuc58644	chr8	14744782	14744921	+	0	NA	intron (NM_172910, intron 7 of 15)	MTB_Mm|LTR|MaLR	-143685	NM_012000	26889	Mm.254027	NM_012000	ENSMUSG00000026317	Cln8	mnd	ceroid-lipofuscinosis, neuronal 8	protein-coding
Diff_Nuc34464	chr5	13931102	13931241	+	0	NA	Intergenic	RMER6A|LTR|ERVK	-94105	NM_011348	20349	Mm.134093	NM_011348	ENSMUSG00000063531	Sema3e	6430702L12|AA408817|Semah|mKIAA0331	sema domain, immunoglobulin domain (Ig), short basic domain, secreted, (semaphorin) 3E	protein-coding
Diff_Nuc46647	chr2	34214942	34215081	+	0	NA	intron (NM_016768, intron 2 of 8)	intron (NM_016768, intron 2 of 8)	12554	NM_001290576	18516	Mm.239941	NM_016768	ENSMUSG00000038718	Pbx3	-	pre B cell leukemia homeobox 3	protein-coding
Diff_Nuc1662	chr13	53882252	53882391	+	0	NA	Intergenic	RMER19A|LTR|ERVK	138367	NR_131010	75252	Mm.401989	NR_131010		4930555G21Rik	-	RIKEN cDNA 4930555G21 gene	ncRNA
Diff_Nuc1026	chr13	29915532	29915671	+	0	NA	intron (NM_001308486, intron 4 of 5)	intron (NM_001308486, intron 4 of 5)	31941	NR_131896	68916	Mm.212227	NM_144536	ENSMUSG00000006191	Cdkal1	1190005B03Rik|6620401C13Rik	CDK5 regulatory subunit associated protein 1-like 1	protein-coding
Diff_Nuc23835	chr19	30631942	30632081	+	0	NA	Intergenic	Intergenic	-8025	NM_010051	13380	Mm.214717	NM_010051	ENSMUSG00000024868	Dkk1	mdkk-1	dickkopf WNT signaling pathway inhibitor 1	protein-coding
Diff_Nuc2806	chr13	97155342	97155481	+	0	NA	Intergenic	Intergenic	-2838	NM_026173	67463	Mm.86472	NM_026173	ENSMUSG00000021671	Poc5	1200014M14Rik|AV144706	POC5 centriolar protein	protein-coding
Diff_Nuc51063	chr1	33586242	33586381	+	0	NA	intron (NM_008922, intron 8 of 13)	intron (NM_008922, intron 8 of 13)	140328	NM_008922	19076	Mm.27705	NM_008922	ENSMUSG00000026134	Prim2	AI323589	DNA primase, p58 subunit	protein-coding
Diff_Nuc6680	chr11	16988472	16988611	+	0	NA	Intergenic	L1_Mus3|LINE|L1	36604	NM_029861	380686	Mm.425666	NM_029861	ENSMUSG00000044629	Cnrip1	1500041B16Rik|3110054C06Rik|5330437A18Rik|AI854501|C2orf32	cannabinoid receptor interacting protein 1	protein-coding
Diff_Nuc1435	chr13	45989742	45989881	+	0	NA	intron (NM_009124, intron 2 of 7)	intron (NM_009124, intron 2 of 7)	70549	NM_001199304	20238	Mm.342683	NM_009124	ENSMUSG00000046876	Atxn1	2900016G23Rik|Atx1|C85907|ENSMUSG00000074917|Gm10786|Sca1	ataxin 1	protein-coding
Diff_Nuc26247	chr18	65338272	65338411	+	0	NA	intron (NM_031881, intron 15 of 29)	intron (NM_031881, intron 15 of 29)	-70174	NR_029600	387231		NR_029600	ENSMUSG00000065402	Mir122	Mir122a|Mirn122a|mir-122|mmu-mir-122	microRNA 122	ncRNA
Diff_Nuc14986	chr17	84760212	84760351	+	0	NA	intron (NM_183021, intron 26 of 37)	B1_Mus2|SINE|Alu	105267	NM_183021	240174	Mm.246767	NM_177826	ENSMUSG00000024251	Thada	6530405K19|A930021O22|AU019899|BC052885|GITA	thyroid adenoma associated	protein-coding
Diff_Nuc35552	chr5	53685352	53685491	+	0	NA	Intergenic	Intergenic	27076	NM_001145433	66278	Mm.27900	NM_001145433	ENSMUSG00000061461	Smim20	1110067B18Rik|1810013D10Rik|N28078	small integral membrane protein 20	protein-coding
Diff_Nuc60053	chr8	78037482	78037621	+	0	NA	intron (NM_001164235, intron 2 of 13)	RLTR25B|LTR|ERVK	64958	NM_001164235	71831	Mm.443238	NM_027944	ENSMUSG00000031620	1700007B14Rik	-	RIKEN cDNA 1700007B14 gene	protein-coding
Diff_Nuc16331	chr16	38220222	38220361	+	0	NA	intron (NM_001347232, intron 10 of 11)	ORR1E|LTR|MaLR	74619	NM_010936	18171	Mm.8509	NM_010936	ENSMUSG00000022809	Nr1i2	PXR|PXR.1|PXR.2|PXR1|SXR|mPXR	nuclear receptor subfamily 1, group I, member 2	protein-coding
Diff_Nuc57028	chr9	73331412	73331551	+	0	NA	exon (NM_001081153, exon 30 of 31)	exon (NM_001081153, exon 30 of 31)	370205	NM_198609	225215	Mm.379366	NM_198609	ENSMUSG00000032215	Rsl24d1	2410159K22Rik	ribosomal L24 domain containing 1	protein-coding
Diff_Nuc58529	chr8	10561722	10561861	+	0	NA	intron (NM_001319151, intron 30 of 34)	intron (NM_001319151, intron 30 of 34)	320663	NR_040705	320014	Mm.403203	NR_040705	ENSMUSG00000109473	B930025P03Rik	-	RIKEN cDNA B930025P03 gene	ncRNA
Diff_Nuc42041	chr4	154342662	154342801	+	0	NA	intron (NM_001305804, intron 1 of 19)	intron (NM_001305804, intron 1 of 19)	4499	NR_131230	269614	Mm.30042	NM_172990	ENSMUSG00000029056	Pank4	D030031I12Rik|R75150	pantothenate kinase 4	protein-coding
Diff_Nuc34455	chr5	13312692	13312831	+	0	NA	Intergenic	Intergenic	-84023	NM_001243072	20346	Mm.372039	NM_009152	ENSMUSG00000028883	Sema3a	Hsema-I|SEMA1|SemD|Semad|coll-1	sema domain, immunoglobulin domain (Ig), short basic domain, secreted, (semaphorin) 3A	protein-coding
Diff_Nuc42772	chr3	31194322	31194461	+	0	NA	intron (NM_172861, intron 1 of 7)	intron (NM_172861, intron 1 of 7)	14850	NM_172861	241919	Mm.285366	NM_172861	ENSMUSG00000069072	Slc7a14	A930013N06|BC061928	solute carrier family 7 (cationic amino acid transporter, y+ system), member 14	protein-coding
Diff_Nuc28803	chr7	83405672	83405811	+	0	NA	intron (NM_001199224, intron 1 of 22)	L1_Mus3|LINE|L1	30968	NM_001199224	244071	Mm.322829	NM_172902	ENSMUSG00000025754	Agbl1	Ccp4|D430020F16|EG244071|Nna1-l1	ATP/GTP binding protein-like 1	protein-coding
Diff_Nuc55510	chr9	20397122	20397261	+	0	NA	intron (NM_172919, intron 5 of 5)	(TAGA)n|Simple_repeat|Simple_repeat	11419	NM_172919	244721	Mm.86627	NM_172919	ENSMUSG00000058192	Zfp846	2210010B09Rik|9130221F13|Znf846	zinc finger protein 846	protein-coding
Diff_Nuc55308	chr9	11127472	11127611	+	0	NA	Intergenic	L1_Mus1|LINE|L1	-222766	NM_001170787	244682	Mm.187021	NM_001033359	ENSMUSG00000039488	Cntn5	6720426O10Rik|A830025P08Rik|Gm507|NB-2	contactin 5	protein-coding
Diff_Nuc51458	chr1	47868892	47869031	+	0	NA	Intergenic	RMER6D|LTR|ERVK	-344992	NR_105768	102466969		NR_105768	ENSMUSG00000098876	Mir6350	Gm27958|mmu-mir-6350	microRNA 6350	ncRNA
Diff_Nuc47324	chr2	60619612	60619751	+	0	NA	intron (NM_001141931, intron 5 of 13)	intron (NM_001141931, intron 5 of 13)	-59021	NM_001159564	16420	Mm.98193	NM_021359	ENSMUSG00000026971	Itgb6	2210409C20Rik|4831415H04Rik	integrin beta 6	protein-coding
Diff_Nuc2088	chr13	69656362	69656501	+	0	NA	intron (NM_198600, intron 1 of 12)	intron (NM_198600, intron 1 of 12)	16311	NM_198600	210106	Mm.315959	NM_198600	ENSMUSG00000034575	Papd7	LAK-1|POLK|Pols|TRF4|TRF4-1	PAP associated domain containing 7	protein-coding
Diff_Nuc44298	chr3	92987572	92987711	+	0	NA	Intergenic	RMER1A|Other|Other	-13554	NM_001013804	229574	Mm.10755	NM_001013804		Flg2	EG229574	filaggrin family member 2	protein-coding
Diff_Nuc40997	chr4	119785592	119785731	+	0	NA	intron (NM_010657, intron 5 of 8)	intron (NM_010657, intron 5 of 8)	-48150	NM_007902	13615	Mm.284855	NM_007902	ENSMUSG00000028635	Edn2	ET-2|PPET2|VIC	endothelin 2	protein-coding
Diff_Nuc24811	chr18	10588072	10588211	+	0	NA	intron (NM_001081222, intron 4 of 10)	intron (NM_001081222, intron 4 of 10)	22209	NM_001081222	77805	Mm.210996	NM_144542	ENSMUSG00000024293	Esco1	A930014I12Rik	establishment of sister chromatid cohesion N-acetyltransferase 1	protein-coding
Diff_Nuc9151	chr11	106177662	106177801	+	0	NA	Intergenic	Intergenic	-1855	NM_001313939	15985	Mm.2987	NM_008339	ENSMUSG00000040592	Cd79b	B29|Ig-beta|Igb|Igbeta	CD79B antigen	protein-coding
Diff_Nuc18903	chr15	55943232	55943371	+	0	NA	Intergenic	Intergenic	-204797	NM_016667	20649	Mm.309425	NM_016667	ENSMUSG00000060429	Sntb1	-	syntrophin, basic 1	protein-coding
Diff_Nuc13712	chr17	32180542	32180681	+	0	NA	intron (NM_028244, intron 1 of 15)	intron (NM_028244, intron 1 of 15)	-4619	NM_001163734	72462	Mm.102761	NM_028244	ENSMUSG00000058392	Rrp1b	2600005C20Rik|D030064A17|Kiaa0179|mKIAA0179	ribosomal RNA processing 1 homolog B (S. cerevisiae)	protein-coding
Diff_Nuc16883	chr16	61846162	61846301	+	0	NA	Intergenic	Lx5|LINE|L1	940311	NM_178925	106338	Mm.26321	NM_178925	ENSMUSG00000050312	Nsun3	6720484A09Rik|AU022521	NOL1/NOP2/Sun domain family member 3	protein-coding
Diff_Nuc5204	chr12	77884262	77884401	+	0	NA	TTS (NM_206534)	TTS (NM_206534)	12210	NM_030677	14776	Mm.441856	NM_030677	ENSMUSG00000042808	Gpx2	GI-GPx|GPx-GI|GSHPx-2|GSHPx-GI	glutathione peroxidase 2	protein-coding
Diff_Nuc60701	chr8	101820532	101820671	+	0	NA	intron (NM_001039154, intron 2 of 12)	intron (NM_001039154, intron 2 of 12)	119770	NM_001285913	12564	Mm.441131	NM_007667	ENSMUSG00000036510	Cdh8	AI851472|cad8	cadherin 8	protein-coding
Diff_Nuc54874	chr1	187243692	187243831	+	0	NA	intron (NM_029735, intron 28 of 31)	intron (NM_029735, intron 28 of 31)	21937	NR_038006	319562	Mm.184335	NM_176943	ENSMUSG00000051295	9630028B13Rik	-	RIKEN cDNA 9630028B13 gene	ncRNA
Diff_Nuc38778	chr4	26780132	26780271	+	0	NA	Intergenic	RMER17A|LTR|ERVK	-147605	NR_040656	75360	Mm.67233	NR_040656	ENSMUSG00000086257	4930548K13Rik	-	RIKEN cDNA 4930548K13 gene	ncRNA
Diff_Nuc15524	chr16	10885832	10885971	+	0	NA	Intergenic	Intergenic	28989	NR_131135	545180	Mm.373756	NR_131135	ENSMUSG00000095369	Gm21859	-	predicted gene, 21859	ncRNA
Diff_Nuc14745	chr17	74391052	74391191	+	0	NA	intron (NM_053188, intron 1 of 4)	intron (NM_053188, intron 1 of 4)	6135	NM_053188	94224	Mm.38933	NM_053188	ENSMUSG00000038541	Srd5a2	5ART2|S5AR 2	steroid 5 alpha-reductase 2	protein-coding
Diff_Nuc30007	chr7	129604312	129604451	+	0	NA	intron (NM_008855, intron 5 of 16)	intron (NM_008855, intron 5 of 16)	171742	NM_008855	18751	Mm.207496	NM_008855	ENSMUSG00000052889	Prkcb	PKC-B|PKC-Beta|Pkcb|Prkcb1|Prkcb2	protein kinase C, beta	protein-coding
Diff_Nuc21692	chr14	64931542	64931681	+	0	NA	intron (NM_001253714, intron 1 of 4)	intron (NM_001253714, intron 1 of 4)	104182	NM_001253716	110265	Mm.26713	NM_026322	ENSMUSG00000054733	Msra	2310045J23Rik|6530413P12Rik|MSR-A	methionine sulfoxide reductase A	protein-coding
Diff_Nuc30219	chr7	137530132	137530271	+	0	NA	Intergenic	B4A|SINE|B4	-119879	NM_201601	14183	Mm.16340	NM_010207	ENSMUSG00000030849	Fgfr2	AU043015|AW556123|Bek|Fgfr-2|Fgfr-7|Fgfr7|KGFR|KGFRTr|svs	fibroblast growth factor receptor 2	protein-coding
Diff_Nuc1384	chr13	44067632	44067771	+	0	NA	Intergenic	MLT1A1|LTR|MaLR	-148835	NR_045285	328235	Mm.188356	NR_045285	ENSMUSG00000089815	Gm5083	A730030A06	predicted gene 5083	ncRNA
Diff_Nuc49203	chr2	135753712	135753851	+	0	NA	intron (NM_013829, intron 6 of 36)	intron (NM_013829, intron 6 of 36)	-129882	NM_029530	76161	Mm.41638	NM_029530	ENSMUSG00000027270	Lamp5	3110035N03Rik|6330527O06Rik|BAD-LAMP|LAMP-5	lysosomal-associated membrane protein family, member 5	protein-coding
Diff_Nuc27296	chr7	20913352	20913491	+	0	NA	Intergenic	Lx6|LINE|L1	5993	NM_001167158	100042964	Mm.484995	NM_001167158	ENSMUSG00000095745	Gm4133	Vmn1r98	predicted gene 4133	protein-coding
Diff_Nuc23849	chr19	31192342	31192481	+	0	NA	intron (NM_001013833, intron 3 of 17)	RLTR40|LTR|ERVK	35080	NM_031249	83410	Mm.22031	NM_031249	ENSMUSG00000053536	Cstf2t	64kDa|C77975|tCstF-64|tauCstF-64	cleavage stimulation factor, 3' pre-RNA subunit 2, tau	protein-coding
Diff_Nuc60342	chr8	88047852	88047991	+	0	NA	intron (NM_173866, intron 11 of 11)	intron (NM_173866, intron 11 of 11)	31249	NM_019794	56445	Mm.475573	NM_019794	ENSMUSG00000031701	Dnaja2	1500017M13Rik|2010206B19Rik|DNAJ|DNJ3|Dnaj3|HIRIP4|PRO3015|mDj3	DnaJ heat shock protein family (Hsp40) member A2	protein-coding
Diff_Nuc16904	chr16	62780932	62781071	+	0	NA	intron (NM_178925, intron 2 of 5)	intron (NM_178925, intron 2 of 5)	5541	NM_178925	106338	Mm.26321	NM_178925	ENSMUSG00000050312	Nsun3	6720484A09Rik|AU022521	NOL1/NOP2/Sun domain family member 3	protein-coding
Diff_Nuc52165	chr1	74613612	74613751	+	0	NA	exon (NM_001310668, exon 9 of 9)	exon (NM_001310668, exon 9 of 9)	20921	NM_001310668	77264	Mm.207298	NM_029888	ENSMUSG00000026135	Zfp142	9330177B18Rik|BB154236|mKIAA0236	zinc finger protein 142	protein-coding
Diff_Nuc34423	chr5	10721322	10721461	+	0	NA	Intergenic	Intergenic	-143638	NR_003596	623849	Mm.335888	NR_003596	ENSMUSG00000091422	Gm6455	EG623849	predicted gene 6455	pseudo
Diff_Nuc61024	chr8	114076832	114076971	+	0	NA	intron (NM_001168623, intron 1 of 4)	intron (NM_001168623, intron 1 of 4)	14658	NM_001168623	170737	Mm.271578	NM_133206	ENSMUSG00000033545	Znrf1	B830022L21Rik|Rnf42|Zrfp1|nin283	zinc and ring finger 1	protein-coding
Diff_Nuc43612	chr3	65657812	65657951	+	0	NA	Intergenic	Intergenic	104266	NM_019937	56706	Mm.175612	NM_019937	ENSMUSG00000027829	Ccnl1	2610030E23Rik|AU018493|Ccnl|ania-6a	cyclin L1	protein-coding
Diff_Nuc42500	chr3	19978762	19978901	+	0	NA	intron (NR_105047, intron 10 of 23)	L1M2|LINE|L1	20540	NR_105047	20585	Mm.209650	NM_009210	ENSMUSG00000002428	Hltf	AF010600|BC057116|P113|Smarca3|Snf2l3	helicase-like transcription factor	protein-coding
Diff_Nuc88	chrX	30493302	30493441	+	0	NA	Intergenic	L1Md_F2|LINE|L1	-104940	NM_001168334	100040482	Mm.479861	NM_001168334	ENSMUSG00000096194	Btbd35f2	Gm2799	BTB domain containing 35, family member 2	protein-coding
Diff_Nuc39817	chr4	72152982	72153121	+	0	NA	Intergenic	IAP-d-int|LTR|ERVK	290773	NR_027923	68285	Mm.37541	NR_027923		C630043F03Rik	AI851307	RIKEN cDNA C630043F03 gene	ncRNA
Diff_Nuc20591	chr14	23846422	23846561	+	0	NA	intron (NM_028275, intron 6 of 6)	intron (NM_028275, intron 6 of 6)	67302	NR_033550	791307	Mm.364384	NR_033550	ENSMUSG00000068680	Gm10248	ENSMUSG00000068680	predicted gene 10248	ncRNA
Diff_Nuc2349	chr13	79607112	79607251	+	0	NA	Intergenic	L1Md_F3|LINE|L1	-1269047	NM_010151	13865	Mm.439653	NM_010151	ENSMUSG00000069171	Nr2f1	COUP-TF1|COUP-TFI|COUPTFA|EAR-3|EAR3|Erbal3|SVP44|Tcfcoup1	nuclear receptor subfamily 2, group F, member 1	protein-coding
Diff_Nuc59284	chr8	44533102	44533241	+	0	NA	Intergenic	Intergenic	80320	NM_001009547	382007	Mm.55952	NM_001009547	ENSMUSG00000063900	Adam26b	-	a disintegrin and metallopeptidase domain 26B	protein-coding
Diff_Nuc29814	chr7	121412332	121412471	+	0	NA	intron (NM_011965, intron 7 of 9)	intron (NM_011965, intron 7 of 9)	7229	NM_011965	26440	Mm.121265	NM_011965	ENSMUSG00000030751	Psma1	C2|HC2|Pros-30|alpha-type	proteasome (prosome, macropain) subunit, alpha type 1	protein-coding
Diff_Nuc59044	chr8	32809182	32809321	+	0	NA	Intergenic	Lx9|LINE|L1	219424	NM_178591	211323	Mm.153432	NM_178591	ENSMUSG00000062991	Nrg1	6030402G23Rik|ARIA|D230005F13Rik|GGF|GGFII|HRG|HRGalpha|Hgl|NDF|SMDF	neuregulin 1	protein-coding
Diff_Nuc10170	chr10	25038322	25038461	+	0	NA	Intergenic	Intergenic	-19422	NM_018747	432442	Mm.485937	NM_018747	ENSMUSG00000039166	Akap7	6430401D08|AI662165|AKAP15|Akap18|BB170514	A kinase (PRKA) anchor protein 7	protein-coding
Diff_Nuc10931	chr10	60303642	60303781	+	0	NA	Intergenic	B1_Mus1|SINE|Alu	-9382	NM_029770	107449	Mm.290433	NM_029770	ENSMUSG00000020099	Unc5b	6330415E02Rik|A630020F16|D10Bwg0792e|Unc5h2	unc-5 netrin receptor B	protein-coding
Diff_Nuc38468	chr4	13111012	13111151	+	0	NA	Intergenic	IAP-d-int|LTR|ERVK	277097	NM_001171801	208820	Mm.12057	NM_173746	ENSMUSG00000055963	Triqk	C130086A10|Gm11818|OTTMUSG00000004461	triple QxxK/R motif containing	protein-coding
Diff_Nuc18498	chr15	37834532	37834671	+	0	NA	Intergenic	B4A|SINE|B4	56209	NM_199476	382985	Mm.24738	NM_199476	ENSMUSG00000022292	Rrm2b	p53R2	ribonucleotide reductase M2 B (TP53 inducible)	protein-coding
Diff_Nuc35540	chr5	53506222	53506361	+	0	NA	intron (NM_172710, intron 23 of 23)	intron (NM_172710, intron 23 of 23)	65699	NM_011402	20531	Mm.284891	NM_011402	ENSMUSG00000029188	Slc34a2	AA536683|D5Ertd227e|NaPi-2b|Npt2b	solute carrier family 34 (sodium phosphate), member 2	protein-coding
Diff_Nuc55799	chr9	30847312	30847451	+	0	NA	intron (NM_172765, intron 1 of 5)	intron (NM_172765, intron 1 of 5)	9152	NM_172765	235132	Mm.239355	NM_172765	ENSMUSG00000047412	Zbtb44	6030404E16Rik|Btbd15|E230011F09	zinc finger and BTB domain containing 44	protein-coding
Diff_Nuc56210	chr9	45455042	45455181	+	0	NA	intron (NM_001081270, intron 3 of 32)	intron (NM_001081270, intron 3 of 32)	181610	NM_001081373	214552	Mm.260103	NM_172531	ENSMUSG00000043987	Cep164	AI450905|BC027092|D030051D21|mKIAA1052	centrosomal protein 164	protein-coding
Diff_Nuc639	chr13	13004582	13004721	+	0	NA	Intergenic	L1VL4|LINE|L1	92946	NM_031191	18811	Mm.88796	NM_031191	ENSMUSG00000079092	Prl2c2	Ghd2|MRP-1|PLF-1|Plf|Plf1	prolactin family 2, subfamily c, member 2	protein-coding
Diff_Nuc57014	chr9	72875527	72875666	+	0	NA	intron (NM_018889, intron 6 of 11)	RMER17A-int|LTR|ERVK	11910	NM_018889	55981	Mm.139905	NM_018889	ENSMUSG00000079469	Pigb	Pig-b	phosphatidylinositol glycan anchor biosynthesis, class B	protein-coding
Diff_Nuc51515	chr1	50363972	50364111	+	0	NA	Intergenic	B1_Mm|SINE|Alu	-620326	NM_019790	56363	Mm.245154	NM_019790	ENSMUSG00000026109	Tmeff2	4832418D20Rik|7630402F16Rik|TR-2	transmembrane protein with EGF-like and two follistatin-like domains 2	protein-coding
Diff_Nuc22913	chr14	119382752	119382891	+	0	NA	Intergenic	MTC|LTR|MaLR	45667	NM_008929	100037258	Mm.12616	NM_008929	ENSMUSG00000022136	Dnajc3	AA408985|AU067833|Dnajc3a|Dnajc3b|Prkri|mp58|p58|p58IPK	DnaJ heat shock protein family (Hsp40) member C3	protein-coding
Diff_Nuc15426	chr16	7935562	7935701	+	0	NA	Intergenic	Intergenic	489598	NM_029070	74720	Mm.159318	NM_029070	ENSMUSG00000022715	Tmem114	4930511J11Rik|Cldn26	transmembrane protein 114	protein-coding
Diff_Nuc55177	chr9	4716682	4716821	+	0	NA	intron (NM_001113180, intron 3 of 16)	intron (NM_001113180, intron 3 of 16)	79483	NM_001113180	14802	Mm.209263	NM_019691	ENSMUSG00000025892	Gria4	GluA4|GluR-D|Glur-4|Glur4|Gluralpha4|spkw1	glutamate receptor, ionotropic, AMPA4 (alpha 4)	protein-coding
Diff_Nuc55796	chr9	30706922	30707061	+	0	NA	3' UTR (NM_001329420, exon 8 of 8)	3' UTR (NM_001329420, exon 8 of 8)	21544	NM_001329420	235130	Mm.65867	NM_001024139	ENSMUSG00000033453	Adamts15	-	a disintegrin-like and metallopeptidase (reprolysin type) with thrombospondin type 1 motif, 15	protein-coding
Diff_Nuc44958	chr3	119897922	119898061	+	0	NA	Intergenic	Intergenic	-411685	NM_019550	56195	Mm.29966	NM_019550	ENSMUSG00000028134	Ptbp2	Ptb2|brPTB|nPTB	polypyrimidine tract binding protein 2	protein-coding
Diff_Nuc19098	chr15	64821362	64821501	+	0	NA	Intergenic	Intergenic	-67573	NM_009623	11514	Mm.1425	NM_009623	ENSMUSG00000022376	Adcy8	AC8|AW060868	adenylate cyclase 8	protein-coding
Diff_Nuc33569	chr6	124748152	124748291	+	0	NA	Intergenic	MMETn-int|LTR|ERVK	-10458	NM_001306051	14794	Mm.261906	NM_013539	ENSMUSG00000038451	Spsb2	AI461677|C9|Grcc9|SSB2	splA/ryanodine receptor domain and SOCS box containing 2	protein-coding
Diff_Nuc8232	chr11	75569772	75569911	+	0	NA	intron (NM_009536, intron 3 of 5)	intron (NM_009536, intron 3 of 5)	23452	NM_009536	22627	Mm.234700	NM_009536	ENSMUSG00000020849	Ywhae	AU019196	tyrosine 3-monooxygenase/tryptophan 5-monooxygenase activation protein, epsilon polypeptide	protein-coding
Diff_Nuc33452	chr6	119675692	119675831	+	0	NA	intron (NR_104484, intron 14 of 20)	intron (NR_104484, intron 14 of 20)	122407	NM_053204	111173	Mm.288860	NM_053204	ENSMUSG00000030172	Erc1	4930404L01Rik|5033405M01Rik|9630025C19Rik|B430107L16Rik|CAST2|ELKS|Elks1|RAB6IP2A|RAB6IP2B|Rab6ip2|mKIAA1081	ELKS/RAB6-interacting/CAST family member 1	protein-coding
Diff_Nuc29566	chr7	114002542	114002681	+	0	NA	Intergenic	L1_Mus4|LINE|L1	-5885	NM_001011749	257902	Mm.377292	NM_001011749	ENSMUSG00000073900	Olfr704	MOR283-12P	olfactory receptor 704	protein-coding
Diff_Nuc26519	chr18	75124432	75124571	+	0	NA	Intergenic	Intergenic	-3584	NM_010720	16891	Mm.299647	NM_010720	ENSMUSG00000053846	Lipg	3110013K01Rik|EL|lipase|mEDL	lipase, endothelial	protein-coding
Diff_Nuc15210	chr17	92938062	92938201	+	0	NA	Intergenic	Lx2|LINE|L1	-660226	NM_001315503	11516	Mm.3407	NM_009625	ENSMUSG00000024256	Adcyap1	PACAP	adenylate cyclase activating polypeptide 1	protein-coding
Diff_Nuc18415	chr15	34885172	34885311	+	0	NA	intron (NM_019635, intron 9 of 10)	L1_Mus1|LINE|L1	117437	NM_001271704	16539	Mm.71045	NM_181317	ENSMUSG00000050963	Kcns2	E130006J24Rik|Kv9.2	K+ voltage-gated channel, subfamily S, 2	protein-coding
Diff_Nuc43506	chr3	60888212	60888351	+	0	NA	Intergenic	L1VL1|LINE|L1	81574	NM_001282016	18441	Mm.281452	NM_008772	ENSMUSG00000027765	P2ry1	P2Y1	purinergic receptor P2Y, G-protein coupled 1	protein-coding
Diff_Nuc57808	chr9	105301062	105301201	+	0	NA	intron (NM_025651, intron 2 of 4)	LTR87|LTR|ERVL?	-1987	NM_001164828	66595	Mm.84941	NM_025651	ENSMUSG00000032567	Aste1	1100001A21Rik|AV006403	asteroid homolog 1 (Drosophila)	protein-coding
Diff_Nuc18248	chr15	29065092	29065231	+	0	NA	Intergenic	Lx9|LINE|L1	577998	NR_039542	100628607		NR_039542	ENSMUSG00000092639	Mir3964	mmu-mir-3964|mu-mir-3964	microRNA 3964	ncRNA
Diff_Nuc35137	chr5	37383262	37383401	+	0	NA	Intergenic	Intergenic	-3110	NM_011716	22393	Mm.20916	NM_011716	ENSMUSG00000039474	Wfs1	AI481085|wolframin	Wolfram syndrome 1 homolog (human)	protein-coding
Diff_Nuc9798	chr10	9606912	9607051	+	0	NA	intron (NM_001081344, intron 2 of 25)	intron (NM_001081344, intron 2 of 25)	13857	NM_001081344	78808	Mm.331751	NM_030191	ENSMUSG00000019790	Stxbp5	0710001E20Rik|4930565N16Rik|AW742610|LGL3|mKIAA1006	syntaxin binding protein 5 (tomosyn)	protein-coding
Diff_Nuc3511	chr12	4588192	4588331	+	0	NA	Intergenic	Intergenic	-11553	NM_001198969	20403	Mm.341204	NM_011365	ENSMUSG00000020640	Itsn2	AI327390|Ese2|Sh3d1B|Sh3p18|mKIAA1256	intersectin 2	protein-coding
Diff_Nuc7567	chr11	52951012	52951151	+	0	NA	intron (NM_177059, intron 7 of 15)	intron (NM_177059, intron 7 of 15)	-17523	NR_046047	790909	Mm.404626	NR_046047	ENSMUSG00000087668	Gm11186	OTTMUSG00000000039	predicted gene 11186	ncRNA
Diff_Nuc34313	chr5	5500032	5500171	+	0	NA	Intergenic	Lx7|LINE|L1	14688	NM_001193660	64945	Mm.40132	NM_022890	ENSMUSG00000046798	Cldn12	-	claudin 12	protein-coding
Diff_Nuc10738	chr10	50487712	50487851	+	0	NA	intron (NM_198007, intron 36 of 41)	L1_Mus2|LINE|L1	-127676	NM_011376	20464	Mm.4774	NM_011376	ENSMUSG00000019913	Sim1	bHLHe14|mSIM1	single-minded homolog 1 (Drosophila)	protein-coding
Diff_Nuc17069	chr16	70251342	70251481	+	0	NA	Intergenic	Intergenic	-62783	NM_028803	74185	Mm.396102	NM_028803	ENSMUSG00000022707	Gbe1	2310045H19Rik|2810426P10Rik|D16Ertd536e	glucan (1,4-alpha-), branching enzyme 1	protein-coding
Diff_Nuc4117	chr12	32666792	32666931	+	0	NA	intron (NM_011158, intron 4 of 10)	Lx8|LINE|L1	-31461	NM_153198	73389	Mm.390461	NM_153198	ENSMUSG00000002996	Hbp1	1700058O05Rik|BE629963|C330012F01Rik|C86454	high mobility group box transcription factor 1	protein-coding
Diff_Nuc38349	chr4	9196452	9196591	+	0	NA	promoter-TSS (NM_028940)	promoter-TSS (NM_028940)	57	NM_028940	74438	Mm.473368	NM_028940	ENSMUSG00000041216	Clvs1	4933402J24Rik|Clvl1|Rlbp1l1	clavesin 1	protein-coding
Diff_Nuc21377	chr14	55658422	55658561	+	0	NA	intron (NR_073535, intron 1 of 1)	B1F|SINE|Alu	1192	NR_073535	100151693	Mm.378403	NR_073535	ENSMUSG00000072492	Gm10364	EG545052|ENSMUSG00000072492	glyceraldehyde-3-phosphate dehydrogenase pseudogene	pseudo
Diff_Nuc20985	chr14	38739372	38739511	+	0	NA	Intergenic	L1_Mus1|LINE|L1	-790933	NM_078478	66092	Mm.182912	NM_078478	ENSMUSG00000041028	Ghitm	1010001P14Rik|C77840|MICS1|PTD010|Tmbim5	growth hormone inducible transmembrane protein	protein-coding
Diff_Nuc37814	chr5	139689922	139690061	+	0	NA	intron (NM_024451, intron 1 of 22)	intron (NM_024451, intron 1 of 22)	-1121	NM_001256118	77053	Mm.210845	NM_024451	ENSMUSG00000036817	Sun1	4632417G13Rik|5730434D03Rik|Unc84a|mKIAA0810	Sad1 and UNC84 domain containing 1	protein-coding
Diff_Nuc30615	chr6	4562622	4562761	+	0	NA	intron (NM_145398, intron 3 of 17)	L1M5|LINE|L1	11625	NM_145398	213819	Mm.270703	NM_145398	ENSMUSG00000015189	Casd1	Cas1|Cast1	CAS1 domain containing 1	protein-coding
Diff_Nuc3572	chr12	7018082	7018221	+	0	NA	Intergenic	Lx|LINE|L1	368985	NR_045045	73575	Mm.179463	NR_045045	ENSMUSG00000102096	1700101O22Rik	-	RIKEN cDNA 1700101O22 gene	ncRNA
Diff_Nuc49459	chr2	144754562	144754701	+	0	NA	Intergenic	Intergenic	105229	NM_025490	66328	Mm.45377	NM_025490	ENSMUSG00000027431	Scp2d1	1700010M22Rik	SCP2 sterol-binding domain containing 1	protein-coding
Diff_Nuc44961	chr3	120071522	120071661	+	0	NA	Intergenic	L1Md_F2|LINE|L1	518059	NR_130170	320739	Mm.388474	NR_130170		6530403H02Rik	-	RIKEN cDNA 6530403H02 gene	ncRNA
Diff_Nuc36330	chr5	89269392	89269531	+	0	NA	Intergenic	Intergenic	-46824	NM_001197147	54403	Mm.41044	NM_018760	ENSMUSG00000060961	Slc4a4	AI835705|NBC|NBC1	solute carrier family 4 (anion exchanger), member 4	protein-coding
Diff_Nuc48188	chr2	96848102	96848241	+	0	NA	intron (NM_001289743, intron 3 of 6)	intron (NM_001289743, intron 3 of 6)	-459643	NM_001289744	241568	Mm.241682	NM_178725	ENSMUSG00000050587	Lrrc4c	6430556C10Rik|NGL-1	leucine rich repeat containing 4C	protein-coding
Diff_Nuc19604	chr15	83856892	83857031	+	0	NA	intron (NM_029946, intron 4 of 31)	intron (NM_029946, intron 4 of 31)	38818	NM_029946	77627	Mm.196288	NM_029946	ENSMUSG00000022441	Efcab6	4931407K02Rik|4932408N08Rik|bM150J22.2|mKIAA1672	EF-hand calcium binding domain 6	protein-coding
Diff_Nuc18927	chr15	57471632	57471771	+	0	NA	Intergenic	Intergenic	-54521	NM_199449	387609	Mm.36557	NM_199449	ENSMUSG00000071757	Zhx2	Afr-1|Afr1|Raf|mKIAA0854	zinc fingers and homeoboxes 2	protein-coding
Diff_Nuc5098	chr12	74141052	74141191	+	0	NA	Intergenic	Intergenic	6578	NM_009189	20471	Mm.4645	NM_009189	ENSMUSG00000051367	Six1	BB138287	sine oculis-related homeobox 1	protein-coding
Diff_Nuc44929	chr3	118499422	118499561	+	0	NA	intron (NM_170778, intron 5 of 22)	intron (NM_170778, intron 5 of 22)	234395	NM_170778	99586	Mm.27907	NM_170778	ENSMUSG00000033308	Dpyd	AI315208|DPD|E330028L06Rik	dihydropyrimidine dehydrogenase	protein-coding
Diff_Nuc47316	chr2	60340752	60340891	+	0	NA	intron (NM_008867, intron 7 of 29)	intron (NM_008867, intron 7 of 29)	50544	NM_008867	18779	Mm.5092	NM_008867	ENSMUSG00000054580	Pla2r1	Pla2-r|Pla2g1br|Pla2r	phospholipase A2 receptor 1	protein-coding
Diff_Nuc14280	chr17	54319972	54320111	+	0	NA	Intergenic	Intergenic	118318	NM_022025	63993	Mm.155241	NM_022025	ENSMUSG00000023945	Slc5a7	CHT1	solute carrier family 5 (choline transporter), member 7	protein-coding
Diff_Nuc37896	chr5	142723872	142724011	+	0	NA	Intergenic	Intergenic	-153510	NM_199068	17425	Mm.24214	NM_010812	ENSMUSG00000056493	Foxk1	A630048H08Rik|AI463295|ENSMUSG00000075577|Gm10868|Mnf	forkhead box K1	protein-coding
Diff_Nuc54297	chr1	166295812	166295951	+	0	NA	intron (NM_138314, intron 9 of 13)	RMER1A|Other|Other	58078	NM_178071	171567	Mm.219428	NM_138314	ENSMUSG00000026575	Nme7	D530024H21Rik|Nm23-M7|Nm23-r7	NME/NM23 family member 7	protein-coding
Diff_Nuc4612	chr12	53720582	53720721	+	0	NA	Intergenic	RLTR31_Mur|LTR|ERVK	-17342	NR_045910	73278	Mm.396209	NR_045910	ENSMUSG00000100315	1700031P21Rik	-	RIKEN cDNA 1700031P21 gene	ncRNA
Diff_Nuc31382	chr6	35889202	35889341	+	0	NA	Intergenic	L1_Mus3|LINE|L1	-399383	NM_008098	14489	Mm.182746	NM_008098	ENSMUSG00000029840	Mtpn	5033418D15Rik|Gcdp|V1	myotrophin	protein-coding
Diff_Nuc6442	chr11	5617122	5617261	+	0	NA	exon (NM_001077661, exon 6 of 6)	exon (NM_001077661, exon 6 of 6)	-9489	NM_026080	64660	Mm.7328	NM_026080	ENSMUSG00000020477	Mrps24	3110030K20Rik|AI414579|Rpms24	mitochondrial ribosomal protein S24	protein-coding
Diff_Nuc21320	chr14	52954272	52954411	+	0	NA	Intergenic	Intergenic	-5996	NM_015772	50524	Mm.39487	NM_015772	ENSMUSG00000049532	Sall2	AI225809|AW559097|Msal-2|Sal-2|mKIAA0360|p150(Sal2)	sal-like 2 (Drosophila)	protein-coding
Diff_Nuc36730	chr5	102667502	102667641	+	0	NA	Intergenic	Intergenic	-168631	NM_172882	72145	Mm.332522	NM_172882	ENSMUSG00000043940	Wdfy3	2610509D04Rik|ALFY|AW319683|B930017C24|BWF1|Bchs|D5Ertd66e|Ggtb3|ZFYVE25|mKIAA0993	WD repeat and FYVE domain containing 3	protein-coding
Diff_Nuc5936	chr12	106271102	106271241	+	0	NA	promoter-TSS (NR_003145)	promoter-TSS (NR_003145)	343	NM_028419	73046	Mm.29128	NM_028419	ENSMUSG00000021102	Glrx5	-	glutaredoxin 5	protein-coding
Diff_Nuc29877	chr7	124120282	124120421	+	0	NA	Intergenic	L1_Mus1|LINE|L1	-404142	NM_175645	233781	Mm.461427	NM_175645	ENSMUSG00000030657	Xylt1	8030490L12	xylosyltransferase 1	protein-coding
Diff_Nuc20278	chr14	13044202	13044341	+	0	NA	intron (NM_001347593, intron 7 of 16)	intron (NM_001347593, intron 7 of 16)	21814	NM_001347593	19270	Mm.431266	NM_008981	ENSMUSG00000021745	Ptprg	5430405N12Rik|AW046354|AW549872|RPTPgamma	protein tyrosine phosphatase, receptor type, G	protein-coding
Diff_Nuc46877	chr2	41642752	41642891	+	0	NA	intron (NM_053011, intron 4 of 90)	Lx4B|LINE|L1	660267	NR_105754	102465171		NR_105754	ENSMUSG00000098660	Mir6336	Gm27584|mmu-mir-6336	microRNA 6336	ncRNA
Diff_Nuc58801	chr8	22641422	22641561	+	0	NA	Intergenic	Intergenic	1989	NM_001177521	100041890	Mm.423382	NM_001177521	ENSMUSG00000094818	Defa32	ENSMUSG00000065957|Gm15308|OTTMUSG00000019860	defensin, alpha, 32	protein-coding
Diff_Nuc11508	chr10	80649512	80649651	+	0	NA	intron (NM_007828, intron 1 of 7)	intron (NM_007828, intron 1 of 7)	2918	NM_007828	13144	Mm.10294	NM_007828	ENSMUSG00000034974	Dapk3	ZIPK|dlk	death-associated protein kinase 3	protein-coding
Diff_Nuc13885	chr17	38111292	38111431	+	0	NA	Intergenic	LTRIS3|LTR|ERV1	-21394	NM_001011829	258094	Mm.377348	NM_001011829	ENSMUSG00000109376	Olfr761	MOR218-12|MOR218-5P|MOR218-6P|Olfr1552-ps1	olfactory receptor 761	protein-coding
Diff_Nuc40710	chr4	108551102	108551241	+	0	NA	promoter-TSS (NM_023537)	promoter-TSS (NM_023537)	-504	NM_023537	69908	Mm.41580	NM_023537	ENSMUSG00000003411	Rab3b	2610528C18Rik	RAB3B, member RAS oncogene family	protein-coding
Diff_Nuc2252	chr13	76355022	76355161	+	0	NA	Intergenic	Lx7|LINE|L1	118909	NM_001081352	218343	Mm.277964	NM_001081352	ENSMUSG00000033991	Ttc37	mKIAA0372	tetratricopeptide repeat domain 37	protein-coding
Diff_Nuc12661	chr10	122977692	122977831	+	0	NA	intron (NM_182807, intron 2 of 5)	Lx8|LINE|L1	276629	NM_001252387	268354	Mm.51939	NM_182807	ENSMUSG00000044071	Fam19a2	6330575M02|FAM19A2 TAFA-2|TAFA2|Tafa-2	family with sequence similarity 19, member A2	protein-coding
Diff_Nuc11837	chr10	90977032	90977171	+	0	NA	Intergenic	B3A|SINE|B2	-342737	NM_001080130	21917	Mm.159684	NM_011605	ENSMUSG00000019961	Tmpo	5630400D24Rik|AI195756|AI606875|AW214352|AW547477|LAP2|TP	thymopoietin	protein-coding
Diff_Nuc362	chrX	158941522	158941661	+	0	NA	intron (NM_178256, intron 13 of 17)	intron (NM_178256, intron 13 of 17)	139999	NM_001290633	194590	Mm.442441	NM_178256	ENSMUSG00000040855	Reps2	POB1	RALBP1 associated Eps domain containing protein 2	protein-coding
Diff_Nuc20209	chr14	10007062	10007201	+	0	NA	Intergenic	MTA_Mm-int|LTR|MaLR	508227	NR_045968	74859	Mm.84041	NR_045968	ENSMUSG00000097898	4930455B14Rik	1700027C12Rik	RIKEN cDNA 4930455B14 gene	ncRNA
Diff_Nuc4865	chr12	65046602	65046741	+	0	NA	Intergenic	Lx7|LINE|L1	529214	NM_001163271	623046	Mm.189552	NM_001163271	ENSMUSG00000043060	Fscb	EG623046	fibrous sheath CABYR binding protein	protein-coding
Diff_Nuc60593	chr8	97204102	97204241	+	0	NA	intron (NM_026385, intron 1 of 3)	intron (NM_026385, intron 1 of 3)	13180	NM_024269	107566	Mm.393247	NM_024191	ENSMUSG00000031776	Arl2bp	1700010P10Rik|1700027H16Rik|6330544B05Rik|AI482273|AI849834|BART|Bart1	ADP-ribosylation factor-like 2 binding protein	protein-coding
Diff_Nuc57476	chr9	91916452	91916591	+	0	NA	Intergenic	Intergenic	-171253	NM_001195693	100504689	Mm.464262	NM_001195693	ENSMUSG00000095654	Plscr5	331000	phospholipid scramblase family, member 5	protein-coding
Diff_Nuc48035	chr2	91345472	91345611	+	0	NA	intron (NM_172668, intron 34 of 37)	RSINE1|SINE|B4	-40938	NM_001165989	75786	Mm.168478	NM_029437	ENSMUSG00000040549	Ckap5	3110043H24Rik|4930432B04Rik|D730027C18Rik|T25636|mKIAA0097	cytoskeleton associated protein 5	protein-coding
Diff_Nuc42417	chr3	16631442	16631581	+	0	NA	Intergenic	Intergenic	548328	NM_001145919	229096	Mm.23834	NM_172677	ENSMUSG00000047213	Ythdf3	9130022A11Rik	YTH domain family 3	protein-coding
Diff_Nuc40689	chr4	107998782	107998921	+	0	NA	Intergenic	PB1D10|SINE|Alu	-1906	NM_027250	69893	Mm.28354	NM_027250	ENSMUSG00000048351	Coa7	2010305A19Rik|AI451324|D4Ertd796e|Selrc1	cytochrome c oxidase assembly factor 7	protein-coding
Diff_Nuc24031	chr19	38360562	38360701	+	0	NA	intron (NM_020278, intron 4 of 7)	ORR1D1|LTR|MaLR	21359	NM_020278	56839	Mm.298251	NM_020278	ENSMUSG00000067242	Lgi1	BB130740	leucine-rich repeat LGI family, member 1	protein-coding
Diff_Nuc60554	chr8	96408382	96408521	+	0	NA	intron (NM_001113384, intron 2 of 7)	intron (NM_001113384, intron 2 of 7)	-70996	NR_026888	75809	Mm.443272	NM_029449		4930488L21Rik	4930452J22Rik	RIKEN cDNA 4930488L21 gene	ncRNA
Diff_Nuc56457	chr9	54793452	54793591	+	0	NA	intron (NM_177351, intron 4 of 4)	intron (NM_177351, intron 4 of 4)	-5145	NM_011966	26441	Mm.30270	NM_011966	ENSMUSG00000032301	Psma4	C9	proteasome (prosome, macropain) subunit, alpha type 4	protein-coding
Diff_Nuc33518	chr6	121911942	121912081	+	0	NA	Intergenic	Lx2B|LINE|L1	-44805	NM_008646	17837	Mm.479223	NM_008646	ENSMUSG00000030131	Mug2	Cpamd8	murinoglobulin 2	protein-coding
Diff_Nuc47808	chr2	80612662	80612801	+	0	NA	Intergenic	HERV16-int|LTR|ERVL	133310	NM_001190179	69482	Mm.29200	NM_027091	ENSMUSG00000026999	Nup35	2310006I24Rik|35kDa|5330402E05Rik|MP44|NO44	nucleoporin 35	protein-coding
Diff_Nuc20684	chr14	27179332	27179471	+	0	NA	intron (NR_038005, intron 1 of 7)	intron (NR_038005, intron 1 of 7)	2368	NR_038005	71106	Mm.158564	NR_038005	ENSMUSG00000021874	4933413J09Rik	GCSE	RIKEN cDNA 4933413J09 gene	ncRNA
Diff_Nuc42943	chr3	37621562	37621701	+	0	NA	intron (NM_198657, intron 1 of 2)	intron (NM_198657, intron 1 of 2)	1651	NM_198657	381438	Mm.490549	NM_198657	ENSMUSG00000058174	Gm5148	EG381438	predicted gene 5148	protein-coding
Diff_Nuc23351	chr19	11266412	11266551	+	0	NA	intron (NM_001347435, intron 2 of 6)	intron (NM_001347435, intron 2 of 6)	4732	NM_198224	73466	Mm.272723	NM_198224	ENSMUSG00000057240	Ms4a13	1700060E18Rik|Tetm4.2	membrane-spanning 4-domains, subfamily A, member 13	protein-coding
Diff_Nuc14666	chr17	71108562	71108701	+	0	NA	intron (NM_001347411, intron 9 of 14)	intron (NM_001347411, intron 9 of 14)	87486	NM_001164077	21815	Mm.101034	NM_009372	ENSMUSG00000047407	Tgif1	AA959811|AI462167|Tgif	TGFB-induced factor homeobox 1	protein-coding
Diff_Nuc35921	chr5	70443732	70443871	+	0	NA	Intergenic	L1_Mus2|LINE|L1	-460258	NM_001347363	67980	Mm.33830	NM_027681	ENSMUSG00000029209	Gnpda2	4921523I18Rik|4933412A11Rik|BB189630|GNPDA|Gnp2|Sb52|mKIAA4008	glucosamine-6-phosphate deaminase 2	protein-coding
Diff_Nuc14697	chr17	72160272	72160411	+	0	NA	intron (NM_175378, intron 8 of 13)	intron (NM_175378, intron 8 of 13)	29054	NM_030179	78785	Mm.196382	NM_030179	ENSMUSG00000024059	Clip4	1700024K14Rik|1700074B05Rik|4833417L20Rik|5830409B12Rik|Rsnl2	CAP-GLY domain containing linker protein family, member 4	protein-coding
Diff_Nuc27826	chr7	46531872	46532011	+	0	NA	Intergenic	Intergenic	-12037	NR_073038	100861861	Mm.60620	NR_073038		Gm21276	-	predicted gene, 21276	pseudo
Diff_Nuc28528	chr7	72345892	72346031	+	0	NA	Intergenic	L1MC3|LINE|L1	-44547	NM_183087	70638	Mm.441986	NM_183087	ENSMUSG00000030518	Fam189a1	5730507A09Rik|AW047451	family with sequence similarity 189, member A1	protein-coding
Diff_Nuc21265	chr14	51128922	51129061	+	0	NA	intron (NR_045759, intron 1 of 2)	Lx6|LINE|L1	5547	NR_045759	73889	Mm.416918	NR_045759		4930413M19Rik	-	RIKEN cDNA 4930413M19 gene	ncRNA
Diff_Nuc21075	chr14	43435872	43436011	+	0	NA	Intergenic	Intergenic	-59199	NM_001244671	100042055	Mm.429109	NM_001244671	ENSMUSG00000095226	Gm10377	ENSMUSG00000072606	predicted gene 10377	protein-coding
Diff_Nuc9575	chr11	120151662	120151801	+	0	NA	3' UTR (NM_198423, exon 28 of 28)	3' UTR (NM_198423, exon 28 of 28)	56996	NR_105900	102465564		NR_105900	ENSMUSG00000098955	Mir6935	Gm27344|mmu-mir-6935	microRNA 6935	ncRNA
Diff_Nuc45816	chr3	157198102	157198241	+	0	NA	intron (NM_017381, intron 1 of 9)	intron (NM_017381, intron 1 of 9)	810	NM_017381	53861	Mm.259036	NM_017381	ENSMUSG00000028180	Zranb2	AI227013|Zfp265|Zis|Znf265	zinc finger, RAN-binding domain containing 2	protein-coding
Diff_Nuc19585	chr15	83038992	83039131	+	0	NA	Intergenic	RMER21B|LTR|ERV1	-36423	NM_029787	109754	Mm.22560	NM_029787	ENSMUSG00000018042	Cyb5r3	0610016L08Rik|2500002N19Rik|C85115|Dia-1|Dia1|WU:AL591952.1-001|WU:AL591952.1-002|WU:AL591952.1-003|WU:Cyb5r3	cytochrome b5 reductase 3	protein-coding
Diff_Nuc34147	chr6	146357652	146357791	+	0	NA	intron (NM_019923, intron 9 of 56)	intron (NM_019923, intron 9 of 56)	93024	NM_010586	16439	Mm.7800	NM_010586	ENSMUSG00000030287	Itpr2	AI649341|InsP3R-2|InsP3R-5|Ip3r2|Itpr5|insP3R2	inositol 1,4,5-triphosphate receptor 2	protein-coding
Diff_Nuc10427	chr10	38970592	38970731	+	0	NA	Intergenic	Intergenic	-87061	NM_001127376	327743	Mm.208111	NM_001127376	ENSMUSG00000062074	Wisp3	CCN6|ENSMUSG00000062074|Gm735|WISP-3	WNT1 inducible signaling pathway protein 3	protein-coding
Diff_Nuc3958	chr12	26281312	26281451	+	0	NA	Intergenic	Intergenic	467342	NR_045844	432641	Mm.112955	NR_045844		Gm17746	-	predicted gene, 17746	ncRNA
Diff_Nuc44346	chr3	94931662	94931801	+	0	NA	exon (NM_016712, exon 7 of 10)	exon (NM_016712, exon 7 of 10)	3295	NM_016712	50874	Mm.71935	NM_016712	ENSMUSG00000005628	Tmod4	MTMOD|Sk-Tmod	tropomodulin 4	protein-coding
Diff_Nuc61407	chr8	128260932	128261071	+	0	NA	intron (NM_025636, intron 2 of 4)	ORR1A2|LTR|MaLR	2898	NM_001310688	66566	Mm.25296	NM_025636	ENSMUSG00000031851	Ntpcr	2310079N02Rik|AI449709	nucleoside-triphosphatase, cancer-related	protein-coding
Diff_Nuc31367	chr6	35213172	35213311	+	0	NA	Intergenic	Intergenic	10509	NR_027875	67705	Mm.228046	NR_015608	ENSMUSG00000073155	1810058I24Rik	AI414869|AI848234	RIKEN cDNA 1810058I24 gene	ncRNA
Diff_Nuc8439	chr11	82068012	82068151	+	0	NA	Intergenic	Intergenic	-74767	NM_011329	20290	Mm.1283	NM_011329	ENSMUSG00000020702	Ccl1	BF534335|I-309|Scya1|Tca-3	chemokine (C-C motif) ligand 1	protein-coding
Diff_Nuc9233	chr11	108571992	108572131	+	0	NA	intron (NM_029586, intron 1 of 4)	intron (NM_029586, intron 1 of 4)	28129	NM_029586	76380	Mm.344071	NM_029586	ENSMUSG00000020728	Cep112	1700001M19Rik|1700029K01Rik|8430407H02Rik|AV043680|AV207351|Ccdc46|Macoco	centrosomal protein 112	protein-coding
Diff_Nuc6589	chr11	11028022	11028161	+	0	NA	intron (NM_177033, intron 2 of 3)	intron (NM_177033, intron 2 of 3)	14072	NM_177033	319922	Mm.337851	NM_177033	ENSMUSG00000050830	Vwc2	A930041G11Rik|G11|PSST739|UNQ739|cradin	von Willebrand factor C domain containing 2	protein-coding
Diff_Nuc48055	chr2	91730602	91730741	+	0	NA	intron (NM_172669, intron 14 of 17)	intron (NM_172669, intron 14 of 17)	-31675	NM_007699	12672	Mm.330405	NM_007699	ENSMUSG00000040495	Chrm4	Chrm-4|M4	cholinergic receptor, muscarinic 4	protein-coding
Diff_Nuc40415	chr4	98710912	98711051	+	0	NA	intron (NM_026082, intron 14 of 47)	intron (NM_026082, intron 14 of 47)	13336	NM_013913	30924	Mm.28341	NM_013913	ENSMUSG00000028553	Angptl3	hypl	angiopoietin-like 3	protein-coding
Diff_Nuc38479	chr4	13413122	13413261	+	0	NA	Intergenic	Intergenic	-257258	NM_001111026	12395	Mm.4909	NM_009822	ENSMUSG00000006586	Runx1t1	Cbfa2t1h|ETO|MTG8	runt-related transcription factor 1; translocated to, 1 (cyclin D-related)	protein-coding
Diff_Nuc11296	chr10	74296152	74296291	+	0	NA	Intergenic	L1Md_F|LINE|L1	-133755	NM_010311	14687	Mm.32595	NM_010311	ENSMUSG00000040009	Gnaz	AI847979|Gz	guanine nucleotide binding protein, alpha z subunit	protein-coding
Diff_Nuc3776	chr12	15543762	15543901	+	0	NA	Intergenic	Intergenic	264076	NR_105809	102465204		NR_105809	ENSMUSG00000098480	Mir6387	Gm27281|mmu-mir-6387	microRNA 6387	ncRNA
Diff_Nuc20298	chr14	13436152	13436291	+	0	NA	exon (NM_012061, exon 5 of 29)	exon (NM_012061, exon 5 of 29)	219372	NM_001042617	27062	Mm.260881	NM_012061	ENSMUSG00000054423	Cadps	AU067781|CAPS|CAPS1|mKIAA1121	Ca2+-dependent secretion activator	protein-coding
Diff_Nuc22352	chr14	92804832	92804971	+	0	NA	Intergenic	RMER6D|LTR|ERVK	1483206	NM_001271800	211712	Mm.37126	NM_001081377	ENSMUSG00000055421	Pcdh9	-	protocadherin 9	protein-coding
Diff_Nuc22936	chr14	119974872	119975011	+	0	NA	intron (NM_015820, intron 1 of 1)	Lx2B|LINE|L1	-173508	NR_045621	75432	Mm.443277	NR_045621	ENSMUSG00000100274	1700006F04Rik	-	RIKEN cDNA 1700006F04 gene	ncRNA
Diff_Nuc42344	chr3	13840912	13841051	+	0	NA	intron (NM_001163328, intron 2 of 8)	intron (NM_001163328, intron 2 of 8)	-105391	NM_001163329	76897	Mm.422625	NM_178631	ENSMUSG00000039717	Ralyl	0710005M24Rik	RALY RNA binding protein-like	protein-coding
Diff_Nuc14016	chr17	43687302	43687441	+	0	NA	Intergenic	RMER10A|LTR|ERVL	-6783	NM_001254953	100043332	Mm.17626	NM_001254953	ENSMUSG00000096140	Ankrd66	AU041848|D730048J04Rik|Gm4368	ankyrin repeat domain 66	protein-coding
Diff_Nuc55077	chr1	195950672	195950811	+	0	NA	Intergenic	Intergenic	98212	NR_040477	74942	Mm.60689	NR_040477	ENSMUSG00000103692	4930503O07Rik	-	RIKEN cDNA 4930503O07 gene	ncRNA
Diff_Nuc47796	chr2	80353162	80353301	+	0	NA	intron (NM_016965, intron 25 of 30)	intron (NM_016965, intron 25 of 30)	-65678	NM_011356	20378	Mm.427436	NM_011356	ENSMUSG00000027004	Frzb	Frp|Sfrp3|frezzled|fritz|frzb-1	frizzled-related protein	protein-coding
Diff_Nuc19007	chr15	60434482	60434621	+	0	NA	Intergenic	Lx8|LINE|L1	-219969	NR_030696	320469	Mm.230853	NM_177166		9930014A18Rik	-	RIKEN cDNA 9930014A18 gene	ncRNA
Diff_Nuc29856	chr7	123101052	123101191	+	0	NA	intron (NM_001025559, intron 1 of 15)	Lx6|LINE|L1	37479	NM_011445	20679	Mm.323365	NM_011445	ENSMUSG00000051910	Sox6	AI987981|SOX-LZ	SRY (sex determining region Y)-box 6	protein-coding
Diff_Nuc21542	chr14	60533342	60533481	+	0	NA	intron (NM_015803, intron 24 of 35)	B1F|SINE|Alu	172260	NM_015803	50769	Mm.319599	NM_015803	ENSMUSG00000021983	Atp8a2	AI415030|Atpc1b|agil|wl	ATPase, aminophospholipid transporter-like, class I, type 8A, member 2	protein-coding
Diff_Nuc56823	chr9	66557772	66557911	+	0	NA	Intergenic	B3|SINE|B2	-3652	NM_178396	76459	Mm.277921	NM_178396	ENSMUSG00000032373	Car12	2310047E01Rik|AI314958|CA-XII|Ca12	carbonic anhydrase 12	protein-coding
Diff_Nuc14865	chr17	80034192	80034331	+	0	NA	intron (NM_201361, intron 2 of 10)	L1MB2|LINE|L1	20021	NM_201361	381110	Mm.209801	NM_201361	ENSMUSG00000036368	Rmdn2	AW061290|Fam82a1|RMD-2|mRMD-2	regulator of microtubule dynamics 2	protein-coding
Diff_Nuc36417	chr5	93011852	93011991	+	0	NA	intron (NM_001033478, intron 4 of 6)	MER20|DNA|MER1_type	11358	NM_001170571	384198	Mm.76757	NM_001033478	ENSMUSG00000057068	Fam47e	C730043O17|Gm1381	family with sequence similarity 47, member E	protein-coding
Diff_Nuc28187	chr7	58468862	58469001	+	0	NA	Intergenic	Intergenic	-297468	NR_073508	233246	Mm.254431	NM_177694	ENSMUSG00000055489	Ano5	9330162L24|Gdd1|Tmem16e	anoctamin 5	protein-coding
Diff_Nuc17195	chr16	76653762	76653901	+	0	NA	Intergenic	Charlie1a|DNA|MER1_type	-280537	NM_173440	268903	Mm.74711	NM_173440	ENSMUSG00000048490	Nrip1	6030458L20Rik|8430438I05Rik|9630050P12|AA959574|AW456757|RIP140	nuclear receptor interacting protein 1	protein-coding
Diff_Nuc60865	chr8	108618772	108618911	+	0	NA	intron (NM_010901, intron 4 of 9)	L1_Mus3|LINE|L1	35338	NM_010901	18021	Mm.383185	NM_010901	ENSMUSG00000031902	Nfatc3	C80703|D8Ertd281e|NFAT4|NFATx	nuclear factor of activated T cells, cytoplasmic, calcineurin dependent 3	protein-coding
Diff_Nuc31794	chr6	51496442	51496581	+	0	NA	intron (NM_028035, intron 1 of 6)	MIR|SINE|MIR	1989	NM_001127348	71982	Mm.294166	NM_028035	ENSMUSG00000038301	Snx10	2410004M09Rik	sorting nexin 10	protein-coding
Diff_Nuc8	chrY	2784112	2784251	+	0	NA	Intergenic	Intergenic	396923	NM_001270512	100041505	Mm.491824	NM_001270512	ENSMUSG00000096520	Gm3376	Rbmy1b	predicted gene 3376	protein-coding
Diff_Nuc43120	chr3	44644042	44644181	+	0	NA	Intergenic	ORR1C1-int|LTR|MaLR	538071	NR_045172	72511	Mm.140700	NR_045172	ENSMUSG00000097040	2610316D01Rik	-	RIKEN cDNA 2610316D01 gene	ncRNA
Diff_Nuc40982	chr4	119312462	119312601	+	0	NA	TTS (NM_008190)	TTS (NM_008190)	2194	NM_008190	14915	Mm.2614	NM_008190	ENSMUSG00000023247	Guca2a	Guca2	guanylate cyclase activator 2a (guanylin)	protein-coding
Diff_Nuc37869	chr5	141821502	141821641	+	0	NA	intron (NM_177879, intron 1 of 44)	intron (NM_177879, intron 1 of 44)	104083	NM_177879	330222	Mm.151931	NM_177879	ENSMUSG00000039683	Sdk1	5330440E10|6720466O15Rik	sidekick cell adhesion molecule 1	protein-coding
Diff_Nuc9519	chr11	118536892	118537031	+	0	NA	intron (NM_001039167, intron 2 of 14)	B4A|SINE|B4	85394	NM_001285438	52897	Mm.341103	NM_001024931	ENSMUSG00000025576	Rbfox3	Fox-3|Hrnbp3|NeuN|Neuna60	RNA binding protein, fox-1 homolog (C. elegans) 3	protein-coding
Diff_Nuc50742	chr1	18451792	18451931	+	0	NA	Intergenic	Intergenic	-196642	NM_001040027	77673	Mm.99530	NM_183124	ENSMUSG00000067773	Defb41	9230102D03Rik|BD-17|Bd-41|Defb16|Defb17|Gm15386|OTTMUSG00000020946|OTTMUSG00000020948	defensin beta 41	protein-coding
Diff_Nuc43118	chr3	44560782	44560921	+	0	NA	Intergenic	L1VL4|LINE|L1	621331	NR_045172	72511	Mm.140700	NR_045172	ENSMUSG00000097040	2610316D01Rik	-	RIKEN cDNA 2610316D01 gene	ncRNA
Diff_Nuc36270	chr5	85816952	85817091	+	0	NA	Intergenic	L1Md_F2|LINE|L1	677587	NM_001345902	12617	Mm.4649	NM_007683	ENSMUSG00000029253	Cenpc1	CENP-C|Cenpc	centromere protein C1	protein-coding
Diff_Nuc13093	chr17	11058552	11058691	+	0	NA	intron (NM_016694, intron 1 of 11)	intron (NM_016694, intron 1 of 11)	25396	NM_016694	50873	Mm.311110	NM_016694	ENSMUSG00000023826	Park2	PRKN	Parkinson disease (autosomal recessive, juvenile) 2, parkin	protein-coding
Diff_Nuc7009	chr11	30905362	30905501	+	0	NA	intron (NM_023906, intron 2 of 9)	MERVL_2A-int|LTR|ERVL	-19066	NM_001290667	68044	Mm.32656	NM_026527	ENSMUSG00000020309	Chac2	-	ChaC, cation transport regulator 2	protein-coding
Diff_Nuc48181	chr2	96582782	96582921	+	0	NA	intron (NM_001289743, intron 2 of 6)	A-rich|Low_complexity|Low_complexity	424525	NM_001289743	241568	Mm.241682	NM_178725	ENSMUSG00000050587	Lrrc4c	6430556C10Rik|NGL-1	leucine rich repeat containing 4C	protein-coding
Diff_Nuc50003	chr2	163936592	163936731	+	0	NA	intron (NM_021420, intron 9 of 10)	B4A|SINE|B4	36747	NM_021420	58231	Mm.234472	NM_021420	ENSMUSG00000018209	Stk4	AI447339|AU020804|Kas-2|Mst1|Ysk3	serine/threonine kinase 4	protein-coding
Diff_Nuc11066	chr10	66199592	66199731	+	0	NA	Intergenic	Intergenic	183471	NR_138560	68488	Mm.338835	NR_138560		1110002J07Rik	-	RIKEN cDNA 1110002J07 gene	ncRNA
Diff_Nuc44817	chr3	112578832	112578971	+	0	NA	Intergenic	L1Md_F2|LINE|L1	380744	NM_001190404	545562	Mm.462977	NM_001190403		Amy2b	Amy-X|Amy2-2|OTTMUSG00000022462|mAmy2-1	amylase 2b	protein-coding
Diff_Nuc40271	chr4	93068002	93068141	+	0	NA	Intergenic	RMER15|LTR|ERVL	-65869	NM_026954	69136	Mm.171558	NM_026954	ENSMUSG00000054000	Tusc1	2200001D17Rik|TSG-9	tumor suppressor candidate 1	protein-coding
Diff_Nuc28155	chr7	56868582	56868721	+	0	NA	Intergenic	Intergenic	23554	NM_001005232	13172	Mm.307176	NM_001005232	ENSMUSG00000030507	Dbx1	AI426026|Dbx	developing brain homeobox 1	protein-coding
Diff_Nuc4155	chr12	33888172	33888311	+	0	NA	intron (NM_028139, intron 2 of 3)	intron (NM_028139, intron 2 of 3)	55690	NM_028139	380753	Mm.41540	NM_028139	ENSMUSG00000020564	Atxn7l1	2810423G08Rik|Atxn7l4	ataxin 7-like 1	protein-coding
Diff_Nuc58342	chr9	123494422	123494561	+	0	NA	intron (NM_030692, intron 16 of 19)	intron (NM_030692, intron 16 of 19)	47192	NM_011731	22599	Mm.41963	NM_011731	ENSMUSG00000025243	Slc6a20b	AA986306|Sit1|Slc6a20|XT3|Xtrp3	solute carrier family 6 (neurotransmitter transporter), member 20B	protein-coding
Diff_Nuc55917	chr9	35178742	35178881	+	0	NA	Intergenic	Intergenic	-80850	NM_021339	57810	Mm.80509	NM_021339	ENSMUSG00000038119	Cdon	CDO|Cd0|Orcam	cell adhesion molecule-related/down-regulated by oncogenes	protein-coding
Diff_Nuc53414	chr1	129143602	129143741	+	0	NA	intron (NM_145128, intron 1 of 17)	intron (NM_145128, intron 1 of 17)	42108	NM_145128	107895	Mm.214682	NM_145128	ENSMUSG00000036155	Mgat5	4930471A21Rik|5330407H02Rik|AI480971|GlcNAc-TV	mannoside acetylglucosaminyltransferase 5	protein-coding
Diff_Nuc41502	chr4	137906812	137906951	+	0	NA	intron (NM_028176, intron 2 of 3)	ID_B1|SINE|B4	16989	NM_028176	72269	Mm.46182	NM_028176	ENSMUSG00000028755	Cda	2210401N16Rik	cytidine deaminase	protein-coding
Diff_Nuc22707	chr14	108384892	108385031	+	0	NA	Intergenic	Intergenic	928495	NM_199065	76965	Mm.257268	NM_199065	ENSMUSG00000075478	Slitrk1	3200001I04Rik	SLIT and NTRK-like family, member 1	protein-coding
Diff_Nuc13972	chr17	41990572	41990711	+	0	NA	Intergenic	L1Md_F2|LINE|L1	-462255	NM_028474	627626	Mm.390999	NM_028474	ENSMUSG00000042256	Ptchd4	3110082D06Rik|Gm321	patched domain containing 4	protein-coding
Diff_Nuc21731	chr14	65909462	65909601	+	0	NA	intron (NM_015795, intron 3 of 7)	RSINE1|SINE|B4	23993	NM_015795	50759	Mm.65308	NM_015795	ENSMUSG00000034532	Fbxo16	4932435C24Rik|Fbx16	F-box protein 16	protein-coding
Diff_Nuc55230	chr9	7417692	7417831	+	0	NA	Intergenic	L1Md_F2|LINE|L1	-28061	NM_010809	17392	Mm.4993	NM_010809	ENSMUSG00000043613	Mmp3	EMS-2|MMP-3|SL-1|SLN-1|SLN1|STR-1|Stmy1|Str1	matrix metallopeptidase 3	protein-coding
Diff_Nuc20704	chr14	27921112	27921251	+	0	NA	TTS (NM_134437)	TTS (NM_134437)	-35998	NM_001289686	71704	Mm.248606	NM_027871	ENSMUSG00000021895	Arhgef3	1200004I24Rik|9830169H03Rik|C76747|Xpln	Rho guanine nucleotide exchange factor (GEF) 3	protein-coding
Diff_Nuc34971	chr5	31773012	31773151	+	0	NA	intron (NM_172993, intron 8 of 13)	intron (NM_172993, intron 8 of 13)	-15151	NM_026296	67656	Mm.23355	NM_026296	ENSMUSG00000029138	4930548H24Rik	AI427865	RIKEN cDNA 4930548H24 gene	protein-coding
Diff_Nuc48942	chr2	126197972	126198111	+	0	NA	intron (NM_001080944, intron 19 of 27)	intron (NM_001080944, intron 19 of 27)	119248	NM_001080944	241633	Mm.222235	NM_001080944	ENSMUSG00000060131	Atp8b4	A530043E15|Im	ATPase, class I, type 8B, member 4	protein-coding
Diff_Nuc19659	chr15	85940722	85940861	+	0	NA	intron (NM_001205353, intron 3 of 18)	intron (NM_001205353, intron 3 of 18)	51634	NM_001205353	223752	Mm.24442	NM_172611	ENSMUSG00000035900	Gramd4	9930016O13	GRAM domain containing 4	protein-coding
Diff_Nuc44170	chr3	88494262	88494401	+	0	NA	intron (NM_028814, intron 4 of 13)	intron (NM_028814, intron 4 of 13)	4615	NM_028814	74200	Mm.251800	NM_028814	ENSMUSG00000028060	2810403A07Rik	A430106P18Rik|AI256352|AI451678|Blom7|Kiaa0907	RIKEN cDNA 2810403A07 gene	protein-coding
Diff_Nuc52484	chr1	87384672	87384811	+	0	NA	Intergenic	Intergenic	110644	NM_030194	109032	Mm.335802	NM_030194	ENSMUSG00000070034	Sp110	5031415C07Rik|52kDa|5830484A20Rik|ENSMUSG00000075603|Ifi75|Ipr1	Sp110 nuclear body protein	protein-coding
Diff_Nuc32150	chr6	65340132	65340271	+	0	NA	intron (NM_175524, intron 1 of 5)	IAPEz-int|LTR|ERVK	8913	NM_175524	243407	Mm.389758	NM_175524	ENSMUSG00000029917	C130060K24Rik	-	RIKEN cDNA C130060K24 gene	protein-coding
Diff_Nuc39051	chr4	40900612	40900751	+	0	NA	intron (NM_029814, intron 5 of 7)	B3A|SINE|B2	5095	NM_029814	76959	Mm.212763	NM_029814	ENSMUSG00000028419	Chmp5	2210412K09Rik|AW545668	charged multivesicular body protein 5	protein-coding
Diff_Nuc39523	chr4	58815632	58815771	+	0	NA	intron (NM_172381, intron 47 of 48)	RLTR16|LTR|ERVK	-17109	NM_146920	258922	Mm.223327	NM_146920	ENSMUSG00000043385	Olfr267	MOR262-1	olfactory receptor 267	protein-coding
Diff_Nuc38082	chr5	149026582	149026721	+	0	NA	intron (NM_029920, intron 5 of 14)	intron (NM_029920, intron 5 of 14)	177740	NM_001301424	11987	Mm.275489	NM_007513	ENSMUSG00000041313	Slc7a1	4831426K01Rik|AI447493|Atrc-1|Atrc1|Cat1|Rec-1|Rev-1|mCAT-1	solute carrier family 7 (cationic amino acid transporter, y+ system), member 1	protein-coding
Diff_Nuc56168	chr9	44577672	44577811	+	0	NA	Intergenic	Lx5|LINE|L1	-1850	NM_145985	213827	Mm.371682	NM_145985	ENSMUSG00000032096	Arcn1	4632432M07Rik|nur17	archain 1	protein-coding
Diff_Nuc35174	chr5	38612872	38613011	+	0	NA	intron (NM_025281, intron 1 of 8)	intron (NM_025281, intron 1 of 8)	1220	NM_025281	17089	Mm.28560	NM_025281	ENSMUSG00000067367	Lyar	MLZ-264	Ly1 antibody reactive clone	protein-coding
Diff_Nuc6402	chr11	4591302	4591441	+	0	NA	Intergenic	Intergenic	12976	NM_197979	66152	Mm.269736	NM_197979	ENSMUSG00000059534	Uqcr10	1110020P15Rik|AA960494|Ucrc	ubiquinol-cytochrome c reductase, complex III subunit X	protein-coding
Diff_Nuc42209	chr3	8418742	8418881	+	0	NA	Intergenic	L1_Mus2|LINE|L1	44287	NR_033512	620966	Mm.301719	NR_033512		Gm6194	1700003N22Rik|EG620966	transmembrane protein 189 pseudogene	pseudo
Diff_Nuc57096	chr9	75522682	75522821	+	0	NA	intron (NM_009130, intron 6 of 11)	intron (NM_009130, intron 6 of 11)	9112	NM_001164790	20255	Mm.2386	NM_009130	ENSMUSG00000032181	Scg3	1B1075|AI385542|Chgd|SgIII	secretogranin III	protein-coding
Diff_Nuc50974	chr1	28284382	28284521	+	0	NA	Intergenic	Intergenic	552646	NM_001013750	210962	Mm.214178	NM_001013750	ENSMUSG00000048411	Gm597	-	predicted gene 597	protein-coding
Diff_Nuc27267	chr7	19503222	19503361	+	0	NA	Intergenic	Intergenic	-7538	NM_001033314	232933	Mm.333624	NM_001033314	ENSMUSG00000074358	Ccdc61	C530028I08Rik|Gm159	coiled-coil domain containing 61	protein-coding
Diff_Nuc60655	chr8	100278732	100278871	+	0	NA	Intergenic	RLTR26|LTR|ERVK	-1256986	NR_110579	100873092	Mm.414599	NR_110579	ENSMUSG00000089819	Gm15679	OTTMUSG00000025218	predicted gene 15679	ncRNA
Diff_Nuc54683	chr1	181153532	181153671	+	0	NA	intron (NM_027188, intron 5 of 11)	intron (NM_027188, intron 5 of 11)	294533	NM_027188	69726	Mm.222338	NM_027188	ENSMUSG00000055067	Smyd3	2410008A19Rik|Zmynd1	SET and MYND domain containing 3	protein-coding
Diff_Nuc44460	chr3	99009152	99009291	+	0	NA	exon (NM_027462, exon 4 of 6)	exon (NM_027462, exon 4 of 6)	-5845	NR_105852	102465230		NR_105852	ENSMUSG00000098918	Mir6481	Gm27744|mmu-mir-6481	microRNA 6481	ncRNA
Diff_Nuc47001	chr2	48241812	48241951	+	0	NA	Intergenic	Intergenic	-427748	NM_007396	11480	Mm.314338	NM_007396	ENSMUSG00000052155	Acvr2a	ActrIIa|Acvr2|TactrII	activin receptor IIA	protein-coding
Diff_Nuc1421	chr13	45538342	45538481	+	0	NA	Intergenic	Intergenic	53300	NM_153789	218203	Mm.212855	NM_153789	ENSMUSG00000038175	Mylip	9430057C20Rik|Mir	myosin regulatory light chain interacting protein	protein-coding
Diff_Nuc29338	chr7	105485702	105485841	+	0	NA	Intergenic	MTE2a|LTR|MaLR	24027	NM_001168540	244152	Mm.25317	NM_001024619	ENSMUSG00000049580	Tsku	9530051K01Rik|E2ig4|Lrrc54|Tsk	tsukushi, small leucine rich proteoglycan	protein-coding
Diff_Nuc47876	chr2	83874122	83874261	+	0	NA	Intergenic	Lx8|LINE|L1	-92808	NM_027964	71861	Mm.116957	NM_027964	ENSMUSG00000034552	Zswim2	1700025P14Rik|4933437F18Rik|MEX	zinc finger SWIM-type containing 2	protein-coding
Diff_Nuc25480	chr18	36928472	36928611	+	0	NA	intron (NM_008214, intron 10 of 12)	intron (NM_008214, intron 10 of 12)	-2673	NM_173383	213236	Mm.234464	NM_173383	ENSMUSG00000044595	Dnd1	BC034897|RBMS4|Ter	DND microRNA-mediated repression inhibitor 1	protein-coding
Diff_Nuc8393	chr11	80412452	80412591	+	0	NA	intron (NM_177390, intron 17 of 21)	Lx8|LINE|L1	-89913	NR_126552	77417	Mm.437510	NR_126552	ENSMUSG00000085078	C030013C21Rik	-	RIKEN cDNA C030013C21 gene	ncRNA
Diff_Nuc59933	chr8	74433102	74433241	+	0	NA	intron (NM_001166645, intron 1 of 2)	intron (NM_001166645, intron 1 of 2)	666	NM_001166645	382019	Mm.251482	NM_001166645	ENSMUSG00000089857	Zfp882	ENSMUSG00000052439|Gm15468|OTTMUSG00000022410	zinc finger protein 882	protein-coding
Diff_Nuc9535	chr11	118860472	118860611	+	0	NA	Intergenic	Intergenic	11039	NM_001030291	238011	Mm.244114	NM_001030291	ENSMUSG00000046697	Enpp7	Alk-SMase|Gm254	ectonucleotide pyrophosphatase/phosphodiesterase 7	protein-coding
Diff_Nuc43579	chr3	64250722	64250861	+	0	NA	Intergenic	L1Md_F2|LINE|L1	-36812	NM_001104615	637053	Mm.425135	NM_001104615	ENSMUSG00000092049	Vmn2r4	AW742767|EG637053	vomeronasal 2, receptor 4	protein-coding
Diff_Nuc41959	chr4	150815372	150815511	+	0	NA	intron (NM_001081557, intron 5 of 23)	ORR1D1|LTR|MaLR	351762	NM_001308446	105704528	Mm.415128	NM_001308446	ENSMUSG00000078491	Gm13090	OTTMUSG00000010356	predicted gene 13090	protein-coding
Diff_Nuc33734	chr6	130278892	130279031	+	0	NA	intron (NM_010648, intron 5 of 6)	Lx4A|LINE|L1	8683	NM_001289605	16634	Mm.425338	NM_010648	ENSMUSG00000067591	Klra3	5E6|Ly49c|NK-2.1|Nk-2|Nk2|Nk2.1	killer cell lectin-like receptor, subfamily A, member 3	protein-coding
Diff_Nuc10983	chr10	62469092	62469231	+	0	NA	intron (NM_027425, intron 13 of 17)	B1_Mur4|SINE|Alu	13887	NM_001347457	432467	Mm.274784	NM_001079824	ENSMUSG00000020069	Hnrnph3	AA693301|AI666703|Hnrph3	heterogeneous nuclear ribonucleoprotein H3	protein-coding
Diff_Nuc50435	chr1	5211262	5211401	+	0	NA	Intergenic	MTE2b|LTR|MaLR	138164	NM_001310442	108664	Mm.27082	NM_133826	ENSMUSG00000033793	Atp6v1h	0710001F19Rik|AU022349|CGI-11|SFD|SFDalpha|SFDbeta|VMA13	ATPase, H+ transporting, lysosomal V1 subunit H	protein-coding
Diff_Nuc33320	chr6	115183382	115183521	+	0	NA	intron (NM_001111015, intron 1 of 12)	L1_Mus4|LINE|L1	-5561	NM_001326560	20965	Mm.441431	NM_013681	ENSMUSG00000009394	Syn2	2900074L19Rik|AI836018|AI841723	synapsin II	protein-coding
Diff_Nuc28512	chr7	71833612	71833751	+	0	NA	intron (NM_007461, intron 3 of 14)	intron (NM_007461, intron 3 of 14)	184245	NM_023239	66647	Mm.19944	NM_023239	ENSMUSG00000070520	Ndnl2	5730494G16Rik|AI642138|BB044375|HCA4|Mageg1|Nsmce3|mage-g1	necdin-like 2	protein-coding
Diff_Nuc53412	chr1	129118182	129118321	+	0	NA	intron (NM_145128, intron 1 of 17)	B3|SINE|B2	16688	NM_145128	107895	Mm.214682	NM_145128	ENSMUSG00000036155	Mgat5	4930471A21Rik|5330407H02Rik|AI480971|GlcNAc-TV	mannoside acetylglucosaminyltransferase 5	protein-coding
Diff_Nuc13739	chr17	32995042	32995181	+	0	NA	Intergenic	L1_Mus3|LINE|L1	-27905	NM_177359	240064	Mm.476307	NM_177359	ENSMUSG00000095253	Zfp799	6030490I01Rik	zinc finger protein 799	protein-coding
Diff_Nuc53685	chr1	139587582	139587721	+	0	NA	Intergenic	Lx8|LINE|L1	-275381	NR_029795	735252		NR_029795	ENSMUSG00000065565	Mir181a-1	Mirn181a-1|Mirn213|miR-213|mir-181a-1|mmu-mir-213	microRNA 181a-1	ncRNA
Diff_Nuc12455	chr10	114855452	114855591	+	0	NA	intron (NM_001033261, intron 21 of 34)	intron (NM_001033261, intron 21 of 34)	33506	NM_001033261	216345	Mm.207621	NM_001033261	ENSMUSG00000034163	Zfc3h1	BC033596|Ccdc131|Psrc2	zinc finger, C3H1-type containing	protein-coding
Diff_Nuc55250	chr9	8311512	8311651	+	0	NA	Intergenic	L1_Mus3|LINE|L1	64795	NR_035437	100316772		NR_035437	ENSMUSG00000084747	Mir1899	Mirn1899|mmu-mir-1899	microRNA 1899	ncRNA
Diff_Nuc25032	chr18	20234652	20234791	+	0	NA	Intergenic	Intergenic	-16666	NM_001317365	13506	Mm.280547	NM_013505	ENSMUSG00000024331	Dsc2	AW228162	desmocollin 2	protein-coding
Diff_Nuc21556	chr14	60900842	60900981	+	0	NA	exon (NM_144843, exon 4 of 14)	exon (NM_144843, exon 4 of 14)	16869	NM_144843	219135	Mm.247007	NM_144843	ENSMUSG00000021987	Mtmr6	4022440C11Rik|AI428804|AU041072	myotubularin related protein 6	protein-coding
Diff_Nuc4373	chr12	41380062	41380201	+	0	NA	intron (NM_172803, intron 8 of 52)	intron (NM_172803, intron 8 of 52)	207491	NM_172803	238130	Mm.341423	NM_172803	ENSMUSG00000035954	Dock4	5330406C03|6330411N01Rik|AF263288|C030023J22|mKIAA0716	dedicator of cytokinesis 4	protein-coding
Diff_Nuc49556	chr2	148430382	148430521	+	0	NA	Intergenic	Intergenic	-67900	NM_019761	56488	Mm.34663	NM_019761	ENSMUSG00000036992	Nxt1	1110001N02Rik	NTF2-related export protein 1	protein-coding
Diff_Nuc7091	chr11	33858442	33858581	+	0	NA	intron (NM_001190886, intron 1 of 7)	ORR1B1|LTR|MaLR	-4502	NM_031169	16533	Mm.6206	NM_031169	ENSMUSG00000020155	Kcnmb1	BKbeta1	potassium large conductance calcium-activated channel, subfamily M, beta member 1	protein-coding
Diff_Nuc51570	chr1	52670602	52670741	+	0	NA	Intergenic	L1VL4|LINE|L1	-16878	NR_024590	227094	Mm.83541	NM_172654	ENSMUSG00000043015	Nemp2	5330401P04Rik|9830163O08|Tmem194b	nuclear envelope integral membrane protein 2	protein-coding
Diff_Nuc44700	chr3	107510102	107510241	+	0	NA	Intergenic	ID_B1|SINE|B4	-10705	NM_145542	229709	Mm.220328	NM_145542	ENSMUSG00000027893	Ahcyl1	1110034F20Rik|AA409031|AA414901|Ahcy-rs3|DCAL|Irbit	S-adenosylhomocysteine hydrolase-like 1	protein-coding
Diff_Nuc29000	chr7	91080892	91081031	+	0	NA	TTS (NM_030728)	TTS (NM_030728)	40451	NM_023403	67943	Mm.117365	NM_023403	ENSMUSG00000038503	Mesdc2	2210015O11Rik|AW537813|mKIAA0081|mesd|msd	mesoderm development candidate 2	protein-coding
Diff_Nuc58528	chr8	10500912	10501051	+	0	NA	intron (NM_001319151, intron 24 of 34)	intron (NM_001319151, intron 24 of 34)	347070	NM_001319151	244281	Mm.422761	NM_001081397	ENSMUSG00000039057	Myo16	BM140241|C230040D10Rik|Gm1105|NYAP3|mKIAA0865	myosin XVI	protein-coding
Diff_Nuc40868	chr4	115837972	115838111	+	0	NA	intron (NM_133681, intron 2 of 7)	intron (NM_133681, intron 2 of 7)	2162	NM_133681	66805	Mm.45994	NM_133681	ENSMUSG00000028699	Tspan1	9030418M05Rik	tetraspanin 1	protein-coding
Diff_Nuc53473	chr1	131096052	131096191	+	0	NA	Intergenic	Intergenic	-73760	NM_172485	210417	Mm.380518	NM_172485	ENSMUSG00000042581	Thsd7b	1700074E13Rik|B930082A18|D130067I03Rik	thrombospondin, type I, domain containing 7B	protein-coding
Diff_Nuc16869	chr16	61476132	61476271	+	0	NA	Intergenic	Lx5|LINE|L1	-870844	NM_007938	13840	Mm.455790	NM_007938	ENSMUSG00000055540	Epha6	Ehk2|Hek12|m-ehk2	Eph receptor A6	protein-coding
Diff_Nuc16713	chr16	53599712	53599851	+	0	NA	Intergenic	MT2A|LTR|ERVL	-783924	NR_040495	73820	Mm.60493	NR_040495		4930404A05Rik	-	RIKEN cDNA 4930404A05 gene	ncRNA
Diff_Nuc5485	chr12	87434982	87435121	+	0	NA	intron (NM_029601, intron 2 of 7)	intron (NM_029601, intron 2 of 7)	11540	NM_001199843	76411	Mm.292345	NM_029601	ENSMUSG00000007867	Ift43	1700019E19Rik|R75064	intraflagellar transport 43	protein-coding
Diff_Nuc56217	chr9	45840142	45840281	+	0	NA	intron (NM_027498, intron 1 of 24)	intron (NM_027498, intron 1 of 24)	19308	NM_027498	70661	Mm.219459	NM_027498	ENSMUSG00000034135	Sik3	5730525O22Rik|9030204A07Rik|AI447252|AI846254|AI849445|Qsk|SIK-3|mKIAA0999	SIK family kinase 3	protein-coding
Diff_Nuc46510	chr2	29856362	29856501	+	0	NA	intron (NM_001177668, intron 22 of 55)	intron (NM_001177668, intron 22 of 55)	4961	NR_105963	102465603		NR_105963	ENSMUSG00000098453	Mir6997	Gm27310|mmu-mir-6997	microRNA 6997	ncRNA
Diff_Nuc58572	chr8	12641782	12641921	+	0	NA	intron (NM_198031, intron 11 of 21)	intron (NM_198031, intron 11 of 21)	30249	NM_198031	259279	Mm.142095	NM_198031	ENSMUSG00000000759	Tubgcp3	GCP3|Spc98p	tubulin, gamma complex associated protein 3	protein-coding
Diff_Nuc29442	chr7	108924732	108924871	+	0	NA	intron (NM_009191, intron 9 of 15)	intron (NM_009191, intron 9 of 15)	-42026	NM_008887	11859	Mm.5028	NM_008887	ENSMUSG00000007946	Phox2a	Arix|Phox2|Pmx2|Pmx2a|Px2a	paired-like homeobox 2a	protein-coding
Diff_Nuc45553	chr3	144623382	144623521	+	0	NA	intron (NM_207208, intron 9 of 13)	intron (NM_207208, intron 9 of 13)	14558	NM_207208	99663	Mm.442050	NM_207208	ENSMUSG00000068547	Clca4a	9130020L07Rik|AI504701|Clca4|Clca6	chloride channel accessory 4A	protein-coding
Diff_Nuc19464	chr15	79371972	79372111	+	0	NA	intron (NM_199079, intron 3 of 10)	intron (NM_199079, intron 3 of 10)	4948	NM_199079	67040	Mm.29644	NM_152806	ENSMUSG00000055065	Ddx17	2610007K22Rik|A430025E01Rik|AI047725|C80929|Gm926|p72	DEAD (Asp-Glu-Ala-Asp) box polypeptide 17	protein-coding
Diff_Nuc16935	chr16	64111242	64111381	+	0	NA	Intergenic	L1MA6|LINE|L1	-247328	NM_010140	13837	Mm.1977	NM_010140	ENSMUSG00000052504	Epha3	AW492086|Cek4|ETK1|End3|Hek|Hek4|Mek4|Tyro4	Eph receptor A3	protein-coding
Diff_Nuc39766	chr4	70212922	70213061	+	0	NA	Intergenic	RodERV21-int|LTR|ERV1	-17029	NM_172694	230316	Mm.251188	NM_172694	ENSMUSG00000039270	Megf9	4933405H16Rik|9630025C07|Egfl5|mKIAA0818	multiple EGF-like-domains 9	protein-coding
Diff_Nuc42365	chr3	14873822	14873961	+	0	NA	Intergenic	Intergenic	10353	NM_007606	12350	Mm.300	NM_007606	ENSMUSG00000027559	Car3	BB219044|Ca3|Car-3	carbonic anhydrase 3	protein-coding
Diff_Nuc8625	chr11	88268132	88268271	+	0	NA	intron (NM_054043, intron 7 of 13)	intron (NM_054043, intron 7 of 13)	101926	NR_039545	100628571		NR_039545	ENSMUSG00000092985	Mir378b	mir-378b|mmu-mir-378b	microRNA 378b	ncRNA
Diff_Nuc22323	chr14	91442882	91443021	+	0	NA	Intergenic	L1Md_F2|LINE|L1	916253	NR_045712	74967	Mm.390704	NR_045712		4930474H20Rik	-	RIKEN cDNA 4930474H20 gene	ncRNA
Diff_Nuc19354	chr15	76079332	76079471	+	0	NA	TTS (NR_105918)	TTS (NR_105918)	780	NR_105918	102465575		NR_105918	ENSMUSG00000098625	Mir6953	Gm27738|mmu-mir-6953	microRNA 6953	ncRNA
Diff_Nuc17522	chr16	91584342	91584481	+	0	NA	intron (NM_030018, intron 2 of 6)	intron (NM_030018, intron 2 of 6)	13514	NM_030018	77975	Mm.290341	NM_030018	ENSMUSG00000022964	Tmem50b	AU015466|AU019872|B230114J08Rik	transmembrane protein 50B	protein-coding
Diff_Nuc33475	chr6	120275632	120275771	+	0	NA	intron (NR_045558, intron 9 of 9)	ID_B1|SINE|B4	-31124	NM_198884	330406	Mm.321840	NM_198884	ENSMUSG00000041372	B4galnt3	AB114826|B4GalNAcT3|C330047A21	beta-1,4-N-acetyl-galactosaminyl transferase 3	protein-coding
Diff_Nuc10050	chr10	20058512	20058651	+	0	NA	intron (NM_153787, intron 11 of 12)	intron (NM_153787, intron 11 of 12)	-9044	NM_027930	71804	Mm.262151	NM_027930	ENSMUSG00000019992	Mtfr2	2610016C23Rik|4933412C16Rik|Dufd1|Fam54a	mitochondrial fission regulator 2	protein-coding
Diff_Nuc10017	chr10	18924642	18924781	+	0	NA	non-coding (NR_038021, exon 4 of 4)	non-coding (NR_038021, exon 4 of 4)	37667	NR_038022	100504265	Mm.383417	NR_038021		Gm20139	-	predicted gene, 20139	ncRNA
Diff_Nuc4607	chr12	53649052	53649191	+	0	NA	intron (NM_009706, intron 2 of 5)	Lx8|LINE|L1	32057	NM_009706	11855	Mm.35059	NM_009706	ENSMUSG00000035133	Arhgap5	p190-B|p190B	Rho GTPase activating protein 5	protein-coding
Diff_Nuc59978	chr8	75731842	75731981	+	0	NA	intron (NM_010687, intron 2 of 14)	intron (NM_010687, intron 2 of 14)	145528	NM_001317391	16795	Mm.324371	NM_010687	ENSMUSG00000004383	Large1	BPFD#36|Gyltl1a|Large|Mbp-1|Mbp1|enr|fg|froggy|myd	LARGE xylosyl- and glucuronyltransferase 1	protein-coding
Diff_Nuc37007	chr5	113210252	113210391	+	0	NA	intron (NM_028901, intron 33 of 43)	MTD|LTR|MaLR	-11991	NR_040675	67360	Mm.59218	NR_040675	ENSMUSG00000098230	1700095B10Rik	-	RIKEN cDNA 1700095B10 gene	ncRNA
Diff_Nuc36943	chr5	110630742	110630881	+	0	NA	intron (NM_001347389, intron 9 of 23)	B3|SINE|B2	25091	NM_008146	269682	Mm.9392	NM_008146	ENSMUSG00000029502	Golga3	5330413L04|5430416E01Rik|AI449376|AW490576|G1-499-14|Mea-2|Mea2|repro27	golgi autoantigen, golgin subfamily a, 3	protein-coding
Diff_Nuc50495	chr1	7669722	7669861	+	0	NA	Intergenic	MuRRS4-int|LTR|ERV1	590790	NM_183028	319263	Mm.21539	NM_183028	ENSMUSG00000051285	Pcmtd1	8430411F12Rik|A030012M09Rik	protein-L-isoaspartate (D-aspartate) O-methyltransferase domain containing 1	protein-coding
Diff_Nuc16302	chr16	37405052	37405191	+	0	NA	Intergenic	Intergenic	-20077	NM_172440	207227	Mm.80170	NM_172440	ENSMUSG00000022829	Stxbp5l	9430094L02|A830015P08Rik|LLGL4|T2dm1|t2md1|tomosyn-2	syntaxin binding protein 5-like	protein-coding
Diff_Nuc40162	chr4	87544282	87544421	+	0	NA	intron (NM_027326, intron 2 of 10)	PB1D9|SINE|Alu	-92124	NM_029931	70122	Mm.288898	NM_027326	ENSMUSG00000028496	Mllt3	2210011H10Rik|2610012I03Rik|3830408D16Rik|Af9|D4Ertd321e	myeloid/lymphoid or mixed-lineage leukemia; translocated to, 3	protein-coding
Diff_Nuc30330	chr7	140730162	140730301	+	0	NA	Intergenic	MTB|LTR|MaLR	63567	NM_028654	73808	Mm.159067	NM_028654	ENSMUSG00000030976	Tex36	4930404H21Rik	testis expressed 36	protein-coding
Diff_Nuc42269	chr3	10433322	10433461	+	0	NA	intron (NM_001127191, intron 4 of 6)	RLTR20B2|LTR|ERVK	6739	NM_029068	74718	Mm.440548	NM_029068	ENSMUSG00000027534	Snx16	4930522N22Rik|AI117577|AI747675	sorting nexin 16	protein-coding
Diff_Nuc35394	chr5	48048372	48048511	+	0	NA	Intergenic	ORR1D2|LTR|MaLR	-325953	NR_111900	20563	Mm.289739	NM_178804	ENSMUSG00000031558	Slit2	Drad-1|E030015M03Rik|E130320P19Rik|Slil3|mKIAA4141|slit-2	slit homolog 2 (Drosophila)	protein-coding
Diff_Nuc14634	chr17	70256032	70256171	+	0	NA	Intergenic	Lx3_Mus|LINE|L1	-62312	NM_001347412	224997	Mm.311840	NM_027712	ENSMUSG00000003279	Dlgap1	4933422O14Rik|9630002F18|AI845682|AI848168|BB075781|D17Bwg0511e|GKAP/SAPAP|GKPA/SAPAP|Gkap|Sapap1|mKIAA4162	discs, large (Drosophila) homolog-associated protein 1	protein-coding
Diff_Nuc34806	chr5	26355132	26355271	+	0	NA	intron (NM_001281516, intron 4 of 4)	L1Md_F2|LINE|L1	-5770	NM_001281525	545739		NM_001281525	ENSMUSG00000067700	Gm5862	EG545739	predicted gene 5862	protein-coding
Diff_Nuc5621	chr12	93453272	93453411	+	0	NA	Intergenic	B4A|SINE|B4	-365744	NM_011344	20338	Mm.250605	NM_011344	ENSMUSG00000020964	Sel1l	AW493766|Sel1h|mKIAA4137	sel-1 suppressor of lin-12-like (C. elegans)	protein-coding
Diff_Nuc43599	chr3	65258272	65258411	+	0	NA	Intergenic	RMER19C|LTR|ERVK	-61866	NM_026155	67437	Mm.232728	NM_026155	ENSMUSG00000027828	Ssr3	0610038P07Rik|AL022999|AU022074|AW553833|TRAPG	signal sequence receptor, gamma	protein-coding
Diff_Nuc51844	chr1	63002042	63002181	+	0	NA	Intergenic	Intergenic	158730	NM_001081436	227195	Mm.74718	NM_001081436	ENSMUSG00000040865	Ino80d	7330405I11|A430093A21Rik|BC010584|OTTMUSG00000002594	INO80 complex subunit D	protein-coding
Diff_Nuc42798	chr3	32233062	32233201	+	0	NA	TTS (NM_009517)	TTS (NM_009517)	-31280	NR_027966	67576	Mm.435324	NR_027966		4930429B21Rik	-	RIKEN cDNA 4930429B21 gene	ncRNA
Diff_Nuc42871	chr3	35154092	35154231	+	0	NA	Intergenic	Intergenic	-332588	NR_105799	102466155		NR_105799	ENSMUSG00000098862	Mir6378	Gm27706|mmu-mir-6378	microRNA 6378	ncRNA
Diff_Nuc26553	chr18	75774792	75774931	+	0	NA	intron (NM_201354, intron 3 of 11)	intron (NM_201354, intron 3 of 11)	82489	NM_201354	269037	Mm.36745	NM_201354	ENSMUSG00000052928	Ctif	Gm672	CBP80/20-dependent translation initiation factor	protein-coding
Diff_Nuc17544	chr16	92397122	92397261	+	0	NA	intron (NM_001081549, intron 2 of 3)	intron (NM_001081549, intron 2 of 3)	3132	NM_019466	54720	Mm.265744	NM_019466	ENSMUSG00000022951	Rcan1	Adapt78|CALP1L|CSP1|DSC1|Dscr1|MCIP1|RCN1	regulator of calcineurin 1	protein-coding
Diff_Nuc15988	chr16	25917222	25917361	+	0	NA	Intergenic	L1Md_F2|LINE|L1	115289	NM_001127264	22061	Mm.20894	NM_011641	ENSMUSG00000022510	Trp63	AI462811|Ket|P51/P63|P63|P73l|Tp63|Trp53rp1	transformation related protein 63	protein-coding
Diff_Nuc8001	chr11	68513352	68513491	+	0	NA	intron (NM_175260, intron 2 of 40)	intron (NM_175260, intron 2 of 40)	8004	NM_175260	77579	Mm.218233	NM_175260	ENSMUSG00000020900	Myh10	5730504C04Rik|9330167F11Rik|Fltn|Myhn-2|Myhn2|NMHC II-B|NMHC-B|NMHCII-B|NMMHC II-b|NMMHC-B|NMMHC-IIB|SMemb|mKIAA3005	myosin, heavy polypeptide 10, non-muscle	protein-coding
Diff_Nuc47930	chr2	86608832	86608971	+	0	NA	Intergenic	L1Md_F|LINE|L1	-14008	NM_146847	258844	Mm.377717	NM_146847	ENSMUSG00000075172	Olfr1090	MOR188-4	olfactory receptor 1090	protein-coding
Diff_Nuc36639	chr5	99509442	99509581	+	0	NA	Intergenic	Intergenic	-43413	NM_008926	19092	Mm.263002	NM_008926	ENSMUSG00000029334	Prkg2	AW212535|CGKII|Prkgr2|cGK-II	protein kinase, cGMP-dependent, type II	protein-coding
Diff_Nuc39886	chr4	75492192	75492331	+	0	NA	Intergenic	Intergenic	-568071	NM_025849	66928	Mm.24332	NM_025849	ENSMUSG00000028398	Tmem261	1700027K24Rik|3110001D03Rik	transmembrane protein 261	protein-coding
Diff_Nuc34055	chr6	143010312	143010451	+	0	NA	exon (NM_001109688, exon 10 of 25)	exon (NM_001109688, exon 10 of 25)	38291	NM_001286578	74741	Mm.130260	NM_029081	ENSMUSG00000030279	C2cd5	5730419I09Rik|C030008B15Rik|CDP138	C2 calcium-dependent domain containing 5	protein-coding
Diff_Nuc5751	chr12	100175572	100175711	+	0	NA	intron (NM_198311, intron 2 of 14)	intron (NM_198311, intron 2 of 14)	16819	NM_198311	76260	Mm.282660	NM_029553	ENSMUSG00000021013	Ttc8	0610012F22Rik|AV001447|BBS8	tetratricopeptide repeat domain 8	protein-coding
Diff_Nuc34637	chr5	20222682	20222821	+	0	NA	Intergenic	Intergenic	165191	NM_172992	68770	Mm.86410	NM_172992	ENSMUSG00000039987	Phtf2	1110054G21Rik|9530062N20Rik|AI447096|C77923	putative homeodomain transcription factor 2	protein-coding
Diff_Nuc26974	chr7	5984797	5984936	+	0	NA	Intergenic	Lx5|LINE|L1	-11897	NM_031389	83564	Mm.247765	NM_031389	ENSMUSG00000034690	Nlrp4c	Nalp-alpha|Nalp4c|Rnh2	NLR family, pyrin domain containing 4C	protein-coding
Diff_Nuc1413	chr13	45074822	45074961	+	0	NA	intron (NM_025772, intron 5 of 9)	intron (NM_025772, intron 5 of 9)	22574	NM_025772	94245	Mm.352311	NM_025772	ENSMUSG00000057531	Dtnbp1	5430437B18Rik|AW048963|Bloc1s8|dysbindin|sdy	dystrobrevin binding protein 1	protein-coding
Diff_Nuc30040	chr7	130766042	130766181	+	0	NA	Intergenic	Intergenic	-122148	NM_001081329	210162	Mm.135397	NM_175435	ENSMUSG00000030757	Zkscan2	9430065N20Rik|AW493225|Zfp694	zinc finger with KRAB and SCAN domains 2	protein-coding
Diff_Nuc33777	chr6	132029022	132029161	+	0	NA	Intergenic	L1_Mus2|LINE|L1	131448	NM_198669	381833	Mm.7982	NM_198669	ENSMUSG00000067543	Prb1	BC011176|Prpg2	proline-rich protein BstNI subfamily 1	protein-coding
Diff_Nuc52613	chr1	90602062	90602201	+	0	NA	Intergenic	Intergenic	-3365	NM_177305	320982	Mm.27968	NM_177305	ENSMUSG00000049866	Arl4c	A630084M22Rik|Arl7|LAK	ADP-ribosylation factor-like 4C	protein-coding
Diff_Nuc30175	chr7	135805212	135805351	+	0	NA	intron (NM_178641, intron 3 of 19)	intron (NM_178641, intron 3 of 19)	-27103	NM_001346517	101490	Mm.490344	NM_178641	ENSMUSG00000042105	Inpp5f	5830435P03Rik|AI115354|AW561896|SAC2|cI-27|hSAC2|mKIAA0966	inositol polyphosphate-5-phosphatase F	protein-coding
Diff_Nuc4637	chr12	54247052	54247191	+	0	NA	intron (NM_198111, intron 13 of 13)	intron (NM_198111, intron 13 of 13)	-102543	NM_013780	27386	Mm.247044	NM_013780	ENSMUSG00000021010	Npas3	4930423H22Rik|bHLHe12	neuronal PAS domain protein 3	protein-coding
Diff_Nuc25298	chr18	31213822	31213961	+	0	NA	intron (NM_009065, intron 4 of 4)	intron (NM_009065, intron 4 of 4)	262891	NM_009065	19762	Mm.5163	NM_009065	ENSMUSG00000057455	Rit2	RIBA|Rin|Roc2	Ras-like without CAAX 2	protein-coding
Diff_Nuc25638	chr18	42815112	42815251	+	0	NA	intron (NM_028392, intron 7 of 8)	ORR1A2|LTR|MaLR	-75875	NM_181543	240239	Mm.186779	NM_181543	ENSMUSG00000042816	Gpr151	C130082O03Rik|GalRL|PGR7|nGPCR-2037	G protein-coupled receptor 151	protein-coding
Diff_Nuc54421	chr1	170851372	170851511	+	0	NA	Intergenic	ORR1E|LTR|MaLR	97779	NR_105772	102466632		NR_105772	ENSMUSG00000098829	Mir6354	Gm27282|mmu-mir-6354	microRNA 6354	ncRNA
Diff_Nuc31160	chr6	28629592	28629731	+	0	NA	intron (NM_019776, intron 12 of 23)	L1Md_F2|LINE|L1	152086	NM_138682	192198	Mm.443660	NM_138682	ENSMUSG00000049939	Lrrc4	MBAG1|NGL-2|NGL2|NLG-2|Nag14	leucine rich repeat containing 4	protein-coding
Diff_Nuc40644	chr4	106777812	106777951	+	0	NA	exon (NM_172873, exon 3 of 4)	exon (NM_172873, exon 3 of 4)	8385	NM_172873	242603	Mm.257231	NM_172873	ENSMUSG00000047636	Cdcp2	D030010E02Rik	CUB domain containing protein 2	protein-coding
Diff_Nuc21540	chr14	60493852	60493991	+	0	NA	intron (NM_015803, intron 24 of 35)	intron (NM_015803, intron 24 of 35)	211750	NM_015803	50769	Mm.319599	NM_015803	ENSMUSG00000021983	Atp8a2	AI415030|Atpc1b|agil|wl	ATPase, aminophospholipid transporter-like, class I, type 8A, member 2	protein-coding
Diff_Nuc50383	chr1	3244522	3244661	+	0	NA	intron (NM_001011874, intron 2 of 2)	intron (NM_001011874, intron 2 of 2)	416988	NM_001011874	497097	Mm.454496	NM_001011874	ENSMUSG00000051951	Xkr4	AY534250|Gm210|XRG4|mKIAA1889	X-linked Kx blood group related 4	protein-coding
Diff_Nuc44606	chr3	104186542	104186681	+	0	NA	Intergenic	C-rich|Low_complexity|Low_complexity	129230	NM_001310698	269473	Mm.34855	NM_001025067	ENSMUSG00000032913	Lrig2	4632419I10Rik|BB096938|LIG-2	leucine-rich repeats and immunoglobulin-like domains 2	protein-coding
Diff_Nuc7769	chr11	59586602	59586741	+	0	NA	intron (NM_012027, intron 23 of 23)	L3|LINE|CR1	14053	NR_110894	194908	Mm.344651	NM_183139	ENSMUSG00000043648	Pld6	4933433K01Rik|Gm10|Zuc|mZuc|mitoPLD	phospholipase D family, member 6	protein-coding
Diff_Nuc41782	chr4	146615512	146615651	+	0	NA	intron (NM_001039209, intron 1 of 2)	Lx3B|LINE|L1	65606	NM_001039209	195531	Mm.270762	NM_001039209	ENSMUSG00000078496	Zfp982	Gm13152|OTTMUSG00000010671	zinc finger protein 982	protein-coding
Diff_Nuc51837	chr1	62828312	62828451	+	0	NA	intron (NM_001077404, intron 12 of 16)	intron (NM_001077404, intron 12 of 16)	12925	NR_040601	74992	Mm.401979	NR_040601		4930487H11Rik	-	RIKEN cDNA 4930487H11 gene	ncRNA
Diff_Nuc46035	chr2	9962732	9962871	+	0	NA	intron (NM_027748, intron 2 of 6)	L1MB3|LINE|L1	7435	NM_027748	209361	Mm.86343	NM_027748	ENSMUSG00000025782	Taf3	140kDa|4933439M23Rik|AW539625|TAF140|TAFII-140|TAFII140|mTAFII140	TATA-box binding protein associated factor 3	protein-coding
Diff_Nuc17463	chr16	89481382	89481521	+	0	NA	Intergenic	Intergenic	6746	NM_010675	16703	Mm.13979	NM_010675	ENSMUSG00000059632	Krtap8-1	AI326176	keratin associated protein 8-1	protein-coding
Diff_Nuc8453	chr11	82618142	82618281	+	0	NA	TTS (NM_001291245)	TTS (NM_001291245)	23600	NM_010716	16882	Mm.277136	NM_010716	ENSMUSG00000020697	Lig3	D11Wsu78e	ligase III, DNA, ATP-dependent	protein-coding
Diff_Nuc59516	chr8	54992612	54992751	+	0	NA	Intergenic	ORR1B1|LTR|MaLR	-170205	NM_009506	22341	Mm.1402	NM_009506	ENSMUSG00000031520	Vegfc	AW228853|VEGF-C	vascular endothelial growth factor C	protein-coding
Diff_Nuc60973	chr8	112742592	112742731	+	0	NA	intron (NM_146215, intron 1 of 1)	L2a|LINE|L2	801	NM_146215	234728	Mm.275341	NM_146215	ENSMUSG00000046441	Cmtr2	AU022703|C730036L12Rik|Ftsjd1|MTr2	cap methyltransferase 2	protein-coding
Diff_Nuc54745	chr1	182583502	182583641	+	0	NA	intron (NR_120498, intron 4 of 14)	intron (NR_120498, intron 4 of 14)	12290	NR_120498	72568	Mm.275044	NM_175186	ENSMUSG00000058729	Lin9	2700022J23Rik|Bara|Lin-9|TGS|TGS1|mLin-9	lin-9 homolog (C. elegans)	protein-coding
Diff_Nuc42668	chr3	26373632	26373771	+	0	NA	Intergenic	RMER1C|Other|Other	-142870	NM_138666	192167	Mm.316080	NM_138666	ENSMUSG00000063887	Nlgn1	6330415N05Rik|BB179718|NL1|Nlg1|mKIAA1070	neuroligin 1	protein-coding
Diff_Nuc38891	chr4	33174432	33174571	+	0	NA	intron (NM_008076, intron 8 of 8)	B2_Mm1a|SINE|B2	24414	NM_008076	14409	Mm.6227	NM_008076	ENSMUSG00000023267	Gabrr2	-	gamma-aminobutyric acid (GABA) C receptor, subunit rho 2	protein-coding
Diff_Nuc28942	chr7	88915222	88915361	+	0	NA	TTS (NM_025997)	TTS (NM_025997)	7452	NM_025997	67148	Mm.241472	NM_025997	ENSMUSG00000038646	Fam103a1	2410047I02Rik|2610204K14Rik|RAM	family with sequence similarity 103, member A1	protein-coding
Diff_Nuc26882	chr18	90670932	90671071	+	0	NA	Intergenic	Intergenic	-8545	NM_198295	67988	Mm.268041	NM_198295	ENSMUSG00000024614	Tmx3	6430411B10Rik|A730024F05Rik|AV259382|Txndc10|mKIAA1830	thioredoxin-related transmembrane protein 3	protein-coding
Diff_Nuc12733	chr10	126440302	126440441	+	0	NA	intron (NM_009635, intron 1 of 19)	intron (NM_009635, intron 1 of 19)	2606	NM_009635	11567	Mm.10739	NM_009635	ENSMUSG00000025432	Avil	Advil|DOC6	advillin	protein-coding
Diff_Nuc45012	chr3	122397302	122397441	+	0	NA	Intergenic	MTA_Mm|LTR|MaLR	-34705	NM_153422	242202	Mm.134911	NM_153422	ENSMUSG00000053965	Pde5a	Cgbpde|Cn5n|PDE5a2|Pde5|Pde5a1	phosphodiesterase 5A, cGMP-specific	protein-coding
Diff_Nuc33701	chr6	129235182	129235321	+	0	NA	Intergenic	Intergenic	-9864	NM_001033122	12515	Mm.74745	NM_001033122	ENSMUSG00000030156	Cd69	5830438K24Rik|AI452015|AIM|VEA	CD69 antigen	protein-coding
Diff_Nuc39897	chr4	75783642	75783781	+	0	NA	intron (NM_011211, intron 16 of 39)	intron (NM_011211, intron 16 of 39)	-859521	NM_025849	66928	Mm.24332	NM_025849	ENSMUSG00000028398	Tmem261	1700027K24Rik|3110001D03Rik	transmembrane protein 261	protein-coding
Diff_Nuc58192	chr9	118046662	118046801	+	0	NA	intron (NM_026442, intron 1 of 3)	Lx8|LINE|L1	12583	NM_026442	67899	Mm.9953	NM_026442	ENSMUSG00000039163	Cmc1	2010110K16Rik|2010312P05Rik|AI596001	COX assembly mitochondrial protein 1	protein-coding
Diff_Nuc19230	chr15	71932522	71932661	+	0	NA	Intergenic	Intergenic	-67934	NM_027174	69700	Mm.322500	NM_027174	ENSMUSG00000079022	Col22a1	2310067L16Rik|C80743	collagen, type XXII, alpha 1	protein-coding
Diff_Nuc53207	chr1	119821252	119821391	+	0	NA	Intergenic	L1Md_T|LINE|L1	386388	NM_011650	22099	Mm.426637	NM_011650	ENSMUSG00000026374	Tsn	2610034C24Rik|AU040286|C3PO|TB-RBP	translin	protein-coding
Diff_Nuc33990	chr6	140542202	140542341	+	0	NA	3' UTR (NM_144920, exon 31 of 31)	3' UTR (NM_144920, exon 31 of 31)	-28913	NM_178803	11569	Mm.86453	NM_009637	ENSMUSG00000030232	Aebp2	AU023766|B230313N05Rik	AE binding protein 2	protein-coding
Diff_Nuc16888	chr16	62063052	62063191	+	0	NA	Intergenic	Lx2B|LINE|L1	723421	NM_178925	106338	Mm.26321	NM_178925	ENSMUSG00000050312	Nsun3	6720484A09Rik|AU022521	NOL1/NOP2/Sun domain family member 3	protein-coding
Diff_Nuc6594	chr11	11687672	11687811	+	0	NA	Intergenic	Lx8|LINE|L1	21224	NM_021891	60530	Mm.236114	NM_021891	ENSMUSG00000035455	Fignl1	-	fidgetin-like 1	protein-coding
Diff_Nuc19302	chr15	74530502	74530641	+	0	NA	Intergenic	(TGGA)n|Simple_repeat|Simple_repeat	-9020	NR_033197	66769	Mm.482908	NM_025756	ENSMUSG00000044276	4933427E11Rik	-	RIKEN cDNA 4933427E11 gene	ncRNA
Diff_Nuc48725	chr2	117306342	117306481	+	0	NA	Intergenic	Intergenic	-137798	NM_011246	19419	Mm.42150	NM_011246	ENSMUSG00000027347	Rasgrp1	Rasgrp	RAS guanyl releasing protein 1	protein-coding
Diff_Nuc43807	chr3	74339912	74340051	+	0	NA	Intergenic	Lx6|LINE|L1	-518782	NR_040450	100504692	Mm.394454	NR_040450	ENSMUSG00000104096	Gm20356	-	predicted gene, 20356	ncRNA
Diff_Nuc44416	chr3	96997382	96997521	+	0	NA	Intergenic	B3A|SINE|B2	33836	NM_029933	77578	Mm.226175	NM_029933	ENSMUSG00000038256	Bcl9	2610202E01Rik|8030475K17Rik|A330041G23Rik|Gm130	B cell CLL/lymphoma 9	protein-coding
Diff_Nuc47380	chr2	62851082	62851221	+	0	NA	intron (NM_133207, intron 2 of 15)	intron (NM_133207, intron 2 of 15)	171193	NM_133207	170738	Mm.242532	NM_133207	ENSMUSG00000059742	Kcnh7	9330137I11Rik|Kv11.3|erg3	potassium voltage-gated channel, subfamily H (eag-related), member 7	protein-coding
Diff_Nuc7374	chr11	45259962	45260101	+	0	NA	Intergenic	Intergenic	-329601	NR_045100	100504255	Mm.123608	NR_045100	ENSMUSG00000084773	Gm12159	OTTMUSG00000005475	predicted gene 12159	ncRNA
Diff_Nuc48010	chr2	90700732	90700871	+	0	NA	intron (NM_001317243, intron 9 of 11)	intron (NM_001317243, intron 9 of 11)	13489	NM_001317242	56428	Mm.28023	NM_019758	ENSMUSG00000027282	Mtch2	2310034D24Rik|4930539J07Rik|HSPC032	mitochondrial carrier 2	protein-coding
Diff_Nuc38173	chr4	3056052	3056191	+	0	NA	Intergenic	Lx|LINE|L1	-43109	NM_001167534	100312470	Mm.480297	NM_001167534	ENSMUSG00000094798	Vmn1r2	Gm11776|OTTMUSG00000004179	vomeronasal 1 receptor 2	protein-coding
Diff_Nuc14394	chr17	59244022	59244161	+	0	NA	Intergenic	MTA_Mm|LTR|MaLR	-91346	NM_026497	67993	Mm.36507	NM_026497	ENSMUSG00000024228	Nudt12	0610016O18Rik	nudix (nucleoside diphosphate linked moiety X)-type motif 12	protein-coding
Diff_Nuc23441	chr19	16319972	16320111	+	0	NA	intron (NM_008139, intron 2 of 6)	L1_Rod|LINE|L1	69453	NR_105832	102465218		NR_105832	ENSMUSG00000098718	Mir496b	Gm28028|mmu-mir-496b	microRNA 496b	ncRNA
Diff_Nuc29649	chr7	116666752	116666891	+	0	NA	TTS (NM_011975)	TTS (NM_011975)	3175	NR_028079	100302499	Mm.482651	NR_028079	ENSMUSG00000065016	Snora3	MBI-28	small nucleolar RNA, H/ACA box 3	snoRNA
Diff_Nuc47712	chr2	77119382	77119521	+	0	NA	promoter-TSS (NM_175465)	promoter-TSS (NM_175465)	-802	NM_175465	228071	Mm.27120	NM_175465	ENSMUSG00000042272	Sestd1	1500031J16Rik|A930010O20|Solo/Trio8	SEC14 and spectrin domains 1	protein-coding
Diff_Nuc42883	chr3	35786912	35787051	+	0	NA	Intergenic	B1_Mur4|SINE|Alu	42015	NM_033623	114893	Mm.374810	NM_033623	ENSMUSG00000027708	Dcun1d1	Rp42|SCCRO|Tes3|pTes3	DCN1, defective in cullin neddylation 1, domain containing 1 (S. cerevisiae)	protein-coding
Diff_Nuc5203	chr12	77826242	77826381	+	0	NA	Intergenic	MTEb-int|LTR|MaLR	-14777	NM_013675	20741	Mm.32881	NM_013675	ENSMUSG00000021061	Sptb	AI842465|D330027P03Rik|Gm1301|Spnb-1|Spnb1|ja|jaundiced|mKIAA4219	spectrin beta, erythrocytic	protein-coding
Diff_Nuc35274	chr5	42930842	42930981	+	0	NA	Intergenic	L1Md_F3|LINE|L1	471712	NR_131130	433882	Mm.319353	NR_131130	ENSMUSG00000067285	Gm16223	EG433882|OTTMUSG00000031875	predicted gene 16223	ncRNA
Diff_Nuc31243	chr6	31407512	31407651	+	0	NA	intron (NM_013791, intron 8 of 17)	MTEb-int|LTR|MaLR	58753	NM_013791	27418	Mm.238038	NM_013791	ENSMUSG00000025609	Mkln1	A130067F06Rik|AU015903|BB154892	muskelin 1, intracellular mediator containing kelch motifs	protein-coding
Diff_Nuc48231	chr2	98431082	98431221	+	0	NA	Intergenic	L1_Mus1|LINE|L1	1123337	NM_178725	241568	Mm.241682	NM_178725	ENSMUSG00000050587	Lrrc4c	6430556C10Rik|NGL-1	leucine rich repeat containing 4C	protein-coding
Diff_Nuc43542	chr3	62584932	62585071	+	0	NA	Intergenic	ORR1E|LTR|MaLR	-175939	NM_177346	229357	Mm.95181	NM_177346	ENSMUSG00000043441	Gpr149	9630018L10Rik|Ieda|PGR10|R35	G protein-coupled receptor 149	protein-coding
Diff_Nuc2002	chr13	66100122	66100261	+	0	NA	Intergenic	IAPEz-int|LTR|ERVK	-114198	NM_001177832	628709	Mm.390595	NM_001177832	ENSMUSG00000095909	Gm10324	ENSMUSG00000071302	predicted gene 10324	protein-coding
Diff_Nuc28832	chr7	85174892	85175031	+	0	NA	Intergenic	L1Md_F2|LINE|L1	547763	NM_008746	18213	Mm.33496	NM_008746	ENSMUSG00000059146	Ntrk3	AW125844|Ntrk3_tv3|TrkC	neurotrophic tyrosine kinase, receptor, type 3	protein-coding
Diff_Nuc10256	chr10	30124232	30124371	+	0	NA	Intergenic	Intergenic	196254	NM_028604	73681	Mm.294503	NM_028604	ENSMUSG00000019792	Trmt11	2410075D05Rik|3110045I18Rik|AW213713	tRNA methyltransferase 11	protein-coding
Diff_Nuc50416	chr1	4793832	4793971	+	0	NA	Intergenic	Intergenic	-4073	NM_008866	18777	Mm.299955	NM_008866	ENSMUSG00000025903	Lypla1	Pla1a	lysophospholipase 1	protein-coding
Diff_Nuc2325	chr13	78508392	78508531	+	0	NA	Intergenic	L1_Mur2|LINE|L1	-170327	NM_010151	13865	Mm.439653	NM_010151	ENSMUSG00000069171	Nr2f1	COUP-TF1|COUP-TFI|COUPTFA|EAR-3|EAR3|Erbal3|SVP44|Tcfcoup1	nuclear receptor subfamily 2, group F, member 1	protein-coding
Diff_Nuc16511	chr16	44688902	44689041	+	0	NA	Intergenic	Intergenic	-35443	NM_145972	212547	Mm.310573	NM_145972	ENSMUSG00000036208	Nepro	-	nucleolus and neural progenitor protein	protein-coding
Diff_Nuc23646	chr19	23591552	23591691	+	0	NA	Intergenic	Intergenic	-68809	NM_174857	71738	Mm.50841	NM_174857	ENSMUSG00000033207	Mamdc2	1200015L10Rik|AI591564|mamcan	MAM domain containing 2	protein-coding
Diff_Nuc32797	chr6	91896802	91896941	+	0	NA	intron (NM_198668, intron 17 of 19)	intron (NM_198668, intron 17 of 19)	-32088	NM_172731	232237	Mm.295740	NM_172731	ENSMUSG00000034037	Fgd5	C330025N11Rik|ZFYVE23|mFLJ00274	FYVE, RhoGEF and PH domain containing 5	protein-coding
Diff_Nuc14815	chr17	77458492	77458631	+	0	NA	Intergenic	Lx3C|LINE|L1	-1141027	NM_015800	50766	Mm.311912	NM_015800	ENSMUSG00000024074	Crim1	AU015004	cysteine rich transmembrane BMP regulator 1 (chordin like)	protein-coding
Diff_Nuc42203	chr3	8184972	8185111	+	0	NA	Intergenic	L1Md_T|LINE|L1	-230154	NR_040587	75476	Mm.491752	NR_040587	ENSMUSG00000100010	1700010I02Rik	-	RIKEN cDNA 1700010I02 gene	ncRNA
Diff_Nuc7179	chr11	37084712	37084851	+	0	NA	Intergenic	Intergenic	-327038	NM_011856	23964	Mm.439889	NM_011856	ENSMUSG00000049336	Tenm2	Odz2|Odz3|Ten-2|Ten-m2	teneurin transmembrane protein 2	protein-coding
Diff_Nuc51548	chr1	51904272	51904411	+	0	NA	intron (NM_010863, intron 3 of 29)	intron (NM_010863, intron 3 of 29)	68481	NM_001290982	17912	Mm.3390	NM_010863	ENSMUSG00000018417	Myo1b	AA406997|MIH-L|MMIa	myosin IB	protein-coding
Diff_Nuc56734	chr9	64081042	64081181	+	0	NA	intron (NM_008927, intron 1 of 10)	B2_Mm2|SINE|B2	-1897	NM_033607	93841	Mm.390180	NM_033607	ENSMUSG00000035337	Uchl4	-	ubiquitin carboxyl-terminal esterase L4	protein-coding
Diff_Nuc27380	chr7	25394002	25394141	+	0	NA	TTS (NM_023154)	TTS (NM_023154)	-2276	NM_001102613	232970	Mm.333663	NM_001102613	ENSMUSG00000074277	Phldb3	EG232970|ENSMUSG00000061511|Gm10102	pleckstrin homology like domain, family B, member 3	protein-coding
Diff_Nuc10965	chr10	61771192	61771331	+	0	NA	intron (NM_010438, intron 5 of 21)	B4|SINE|B4	31908	NM_001146100	15275	Mm.196605	NM_010438	ENSMUSG00000037012	Hk1	BB404130|Hk-1|Hk1-s|dea|mHk1-s	hexokinase 1	protein-coding
Diff_Nuc2943	chr13	101357592	101357731	+	0	NA	Intergenic	MLT1N2|LTR|MaLR	29238	NM_178410	218518	Mm.25300	NM_178410	ENSMUSG00000021636	Marveld2	BC003296|MARVD2|Mrvldc2|Tric|Trica|Tricb|Tricc	MARVEL (membrane-associating) domain containing 2	protein-coding
Diff_Nuc53659	chr1	138455932	138456071	+	0	NA	Intergenic	Intergenic	-65477	NM_177643	226442	Mm.62521	NM_177643	ENSMUSG00000041483	Zfp281	Znf281	zinc finger protein 281	protein-coding
Diff_Nuc12178	chr10	105025032	105025171	+	0	NA	Intergenic	Intergenic	13494	NR_038032	327812	Mm.191660	NR_038032	ENSMUSG00000085282	Gm15663	9330159K06|OTTMUSG00000025047	predicted gene 15663	ncRNA
Diff_Nuc12341	chr10	110682232	110682371	+	0	NA	intron (NM_175489, intron 4 of 23)	intron (NM_175489, intron 4 of 23)	-53434	NM_027914	71769	Mm.45256	NM_027914	ENSMUSG00000035759	Bbs10	1300007O09Rik|AI452285	Bardet-Biedl syndrome 10 (human)	protein-coding
Diff_Nuc3847	chr12	20323972	20324111	+	0	NA	Intergenic	MTE-int|LTR|MaLR	497599	NR_015521	69513	Mm.273972	NR_015521	ENSMUSG00000099759	1700030C10Rik	-	RIKEN cDNA 1700030C10 gene	ncRNA
Diff_Nuc3758	chr12	14018012	14018151	+	0	NA	Intergenic	Lx|LINE|L1	140763	NM_029007	105005	Mm.227253	NM_029007	ENSMUSG00000020607	Fam84a	2310003N02Rik|4731402F03Rik|AW125753|Nse1	family with sequence similarity 84, member A	protein-coding
Diff_Nuc16262	chr16	35729512	35729651	+	0	NA	intron (NM_153550, intron 5 of 8)	intron (NM_153550, intron 5 of 8)	39861	NM_153550	224132	Mm.24094	NM_153550	ENSMUSG00000022848	Dirc2	RCC4	disrupted in renal carcinoma 2 (human)	protein-coding
Diff_Nuc52853	chr1	100353752	100353891	+	0	NA	intron (NM_027584, intron 6 of 13)	MurERV4-int|LTR|ERVK	36120	NM_027584	70866	Mm.389164	NM_027584	ENSMUSG00000026336	Slco6d1	4921511I05Rik	solute carrier organic anion transporter family, member 6d1	protein-coding
Diff_Nuc35100	chr5	35674882	35675021	+	0	NA	Intergenic	Intergenic	-29251	NR_046060	74429	Mm.399502	NR_046060	ENSMUSG00000106762	4930478P22Rik	4933405A14Rik	RIKEN cDNA 4930478P22 gene	ncRNA
Diff_Nuc49778	chr2	156077712	156077851	+	0	NA	intron (NM_172674, intron 3 of 17)	intron (NM_172674, intron 3 of 17)	55398	NM_172674	228829	Mm.427078	NM_172674	ENSMUSG00000038116	Phf20	6820402O20Rik	PHD finger protein 20	protein-coding
Diff_Nuc29104	chr7	96394432	96394571	+	0	NA	intron (NM_028343, intron 4 of 14)	intron (NM_028343, intron 4 of 14)	92796	NM_028343	72759	Mm.208477	NM_028343	ENSMUSG00000039428	Tmem135	2810439K08Rik|AW319712|PMP52	transmembrane protein 135	protein-coding
Diff_Nuc11812	chr10	90191282	90191421	+	0	NA	intron (NM_181398, intron 3 of 9)	intron (NM_181398, intron 3 of 9)	-101048	NM_001347054	77531	Mm.440605	NM_181398	ENSMUSG00000058589	Anks1b	AIDA-1b|C030032C09Rik|E530015N03Rik|ENSMUSG00000078431|Gm10937|Gm1555	ankyrin repeat and sterile alpha motif domain containing 1B	protein-coding
Diff_Nuc11792	chr10	89727552	89727691	+	0	NA	intron (NM_001128086, intron 10 of 24)	intron (NM_001128086, intron 10 of 24)	-310851	NM_001177397	77531	Mm.440605	NM_181398	ENSMUSG00000058589	Anks1b	AIDA-1b|C030032C09Rik|E530015N03Rik|ENSMUSG00000078431|Gm10937|Gm1555	ankyrin repeat and sterile alpha motif domain containing 1B	protein-coding
Diff_Nuc30457	chr7	147103332	147103471	+	0	NA	intron (NM_177261, intron 9 of 30)	B1_Mur4|SINE|Alu	22806	NM_177261	76484	Mm.44442	NM_177261	ENSMUSG00000066129	Kndc1	2410012C07Rik|B830014K08Rik|VKIND|very-kind	kinase non-catalytic C-lobe domain (KIND) containing 1	protein-coding
Diff_Nuc7351	chr11	44668422	44668561	+	0	NA	intron (NM_007897, intron 6 of 15)	intron (NM_007897, intron 6 of 15)	236889	NM_001290710	13591	Mm.439662	NM_007897	ENSMUSG00000057098	Ebf1	Ebf|O/E-1|OE-1|Olf-1|Olf1	early B cell factor 1	protein-coding
Diff_Nuc21114	chr14	45103852	45103991	+	0	NA	Intergenic	L1_Mus4|LINE|L1	-15872	NM_198677	385138	Mm.293026	NM_198677	ENSMUSG00000072145	BC061237	-	cDNA sequence BC061237	protein-coding
Diff_Nuc44260	chr3	91309682	91309821	+	0	NA	Intergenic	Intergenic	-415024	NM_001101461	229550	Mm.98335	NM_001101461	ENSMUSG00000091175	9130204L05Rik	Gm127	RIKEN cDNA 9130204L05 gene	protein-coding
Diff_Nuc52875	chr1	101806942	101807081	+	0	NA	intron (NM_172851, intron 1 of 23)	intron (NM_172851, intron 1 of 23)	137669	NM_172851	241175	Mm.251301	NM_172851	ENSMUSG00000067028	Cntnap5b	C230078M14Rik|Caspr5-2	contactin associated protein-like 5B	protein-coding
Diff_Nuc56315	chr9	49458652	49458791	+	0	NA	intron (NM_001311065, intron 1 of 17)	intron (NM_001311065, intron 1 of 17)	132328	NR_029465	100036537	Mm.437541	NR_029465	ENSMUSG00000079564	Gm11149	ENSMUSG00000060603|ENSMUSG00000079564	predicted gene 11149	ncRNA
Diff_Nuc20670	chr14	26649272	26649411	+	0	NA	Intergenic	Intergenic	-12300	NM_013469	11744	Mm.294083	NM_013469	ENSMUSG00000021866	Anxa11	A830099O17Rik|Anx11	annexin A11	protein-coding
Diff_Nuc10577	chr10	43402952	43403091	+	0	NA	Intergenic	Intergenic	-62943	NR_040581	69443	Mm.484042	NR_040581	ENSMUSG00000111422	1700027J07Rik	-	RIKEN cDNA 1700027J07 gene	ncRNA
Diff_Nuc56655	chr9	61612052	61612191	+	0	NA	Intergenic	RSINE1|SINE|B4	150196	NM_018853	56040	Mm.3158	NM_018853	ENSMUSG00000007892	Rplp1	2410042H16Rik|Arpp1|C430017H15Rik	ribosomal protein, large, P1	protein-coding
Diff_Nuc34718	chr5	22991492	22991631	+	0	NA	intron (NM_026984, intron 13 of 25)	intron (NM_026984, intron 13 of 25)	51314	NM_026984	69188	Mm.205190	NM_026984	ENSMUSG00000029004	Kmt2e	1810033J14Rik|9530077A04Rik|D230038D11Rik|Mll5|NKp44L	lysine (K)-specific methyltransferase 2E	protein-coding
Diff_Nuc23299	chr19	9068012	9068151	+	0	NA	intron (NM_001286518, intron 1 of 6)	intron (NM_001286518, intron 1 of 6)	4307	NM_001286518	66395	Mm.203866	NM_009643	ENSMUSG00000069833	Ahnak	DY6	AHNAK nucleoprotein (desmoyokin)	protein-coding
Diff_Nuc928	chr13	24902202	24902341	+	0	NA	intron (NM_024473, intron 4 of 4)	intron (NM_024473, intron 4 of 4)	8745	NM_024473	79555	Mm.266668	NM_024473	ENSMUSG00000019132	BC005537	8030460C05Rik|C78201	cDNA sequence BC005537	protein-coding
Diff_Nuc21049	chr14	41783272	41783411	+	0	NA	Intergenic	B1_Mus1|SINE|Alu	-3156	NM_145928	52588	Mm.28876	NM_145928	ENSMUSG00000037824	Tspan14	AA958793|D14Ertd226e|Tm4sf14|tspan-14	tetraspanin 14	protein-coding
Diff_Nuc28878	chr7	87040822	87040961	+	0	NA	intron (NM_009682, intron 4 of 5)	intron (NM_009682, intron 4 of 5)	24635	NM_009682	11778	Mm.220173	NM_009682	ENSMUSG00000063801	Ap3s2	[s]3B	adaptor-related protein complex 3, sigma 2 subunit	protein-coding
Diff_Nuc38443	chr4	12331622	12331761	+	0	NA	Intergenic	RLTR13C2|LTR|ERVK	-232529	NM_026558	68099	Mm.25340	NM_026558	ENSMUSG00000028218	Fam92a	6720467C03Rik|Fam92a1	family with sequence similarity 92, member A	protein-coding
Diff_Nuc22416	chr14	95878542	95878681	+	0	NA	Intergenic	Intergenic	-401874	NM_025733	66732	Mm.75060	NM_025733	ENSMUSG00000034689	4921530L21Rik	-	RIKEN cDNA 4921530L21 gene	protein-coding
Diff_Nuc44877	chr3	116030562	116030701	+	0	NA	intron (NM_001173553, intron 7 of 13)	intron (NM_001173553, intron 7 of 13)	-74229	NM_022427	64378	Mm.40025	NM_022427	ENSMUSG00000068696	Gpr88	AW061286|Strg	G-protein coupled receptor 88	protein-coding
Diff_Nuc7938	chr11	65229912	65230051	+	0	NA	Intergenic	B1_Mur1|SINE|Alu	-128646	NR_040280	327946	Mm.383301	NR_040280	ENSMUSG00000085162	Gm12295	A730013G04|OTTMUSG00000005904	predicted gene 12295	ncRNA
Diff_Nuc26447	chr18	71830692	71830831	+	0	NA	intron (NM_007831, intron 7 of 28)	intron (NM_007831, intron 7 of 28)	679962	NM_007831	13176	Mm.167882	NM_007831	ENSMUSG00000060534	Dcc	C030036D22Rik|Igdcc1	deleted in colorectal carcinoma	protein-coding
Diff_Nuc42801	chr3	32289902	32290041	+	0	NA	Intergenic	MTEb|LTR|MaLR	-25384	NM_009517	22401	Mm.35705	NM_009517	ENSMUSG00000027663	Zmat3	Wig1	zinc finger matrin type 3	protein-coding
Diff_Nuc21985	chr14	76024392	76024531	+	0	NA	Intergenic	B4|SINE|B4	-17605	NM_029230	75272	Mm.159483	NM_029230	ENSMUSG00000022002	Erich6b	4930564B18Rik	glutamate rich 6B	protein-coding
Diff_Nuc5430	chr12	85706792	85706931	+	0	NA	intron (NM_172582, intron 1 of 11)	B1_Mm|SINE|Alu	3943	NM_172582	217707	Mm.280062	NM_172582	ENSMUSG00000021235	Coq6	5930427M12Rik|AW742344	coenzyme Q6 monooxygenase	protein-coding
Diff_Nuc44624	chr3	104841232	104841371	+	0	NA	intron (NM_030249, intron 2 of 5)	B4A|SINE|B4	14570	NM_001163333	80281	Mm.200327	NM_030249	ENSMUSG00000062127	Cttnbp2nl	AA552995|AA589392|AU018624|BC003236|mKIAA1433	CTTNBP2 N-terminal like	protein-coding
Diff_Nuc26676	chr18	80514832	80514971	+	0	NA	intron (NM_001190373, intron 3 of 3)	intron (NM_001190373, intron 3 of 3)	46092	NM_001190373	240444	Mm.279568	NM_001190373	ENSMUSG00000059852	Kcng2	AA591524	potassium voltage-gated channel, subfamily G, member 2	protein-coding
Diff_Nuc15102	chr17	88733162	88733301	+	0	NA	Intergenic	RLTR11A|LTR|ERVK	-106821	NM_180974	14236	Mm.112824	NM_180974	ENSMUSG00000034998	Foxn2	3230402J05Rik|6030465J18Rik|Fkh19|Foxn1|HTLF	forkhead box N2	protein-coding
Diff_Nuc40977	chr4	119089852	119089991	+	0	NA	Intergenic	Intergenic	-1795	NM_029286	73332	Mm.425204	NM_028506	ENSMUSG00000028637	Ccdc30	1700001O02Rik|1700041C02Rik|1700111D19Rik|4930445I03Rik	coiled-coil domain containing 30	protein-coding
Diff_Nuc35898	chr5	69258052	69258191	+	0	NA	Intergenic	L1VL4|LINE|L1	474827	NM_175519	243043	Mm.234821	NM_175519	ENSMUSG00000037653	Kctd8	A730087N02Rik	potassium channel tetramerisation domain containing 8	protein-coding
Diff_Nuc29680	chr7	117551102	117551241	+	0	NA	intron (NM_177324, intron 16 of 40)	intron (NM_177324, intron 16 of 40)	185954	NM_009302	20947	Mm.334144	NM_009302	ENSMUSG00000031015	Swap70	70kDa|AV235546	SWA-70 protein	protein-coding
Diff_Nuc55539	chr9	21430302	21430441	+	0	NA	intron (NM_011417, intron 1 of 33)	intron (NM_011417, intron 1 of 33)	9758	NM_001174078	20586	Mm.286593	NM_011417	ENSMUSG00000032187	Smarca4	Brg1|HP1-BP72|SNF2beta|SW1/SNF|b2b508.1Clo|b2b692Clo	SWI/SNF related, matrix associated, actin dependent regulator of chromatin, subfamily a, member 4	protein-coding
Diff_Nuc36271	chr5	85859312	85859451	+	0	NA	Intergenic	Lx4A|LINE|L1	635227	NM_001345902	12617	Mm.4649	NM_007683	ENSMUSG00000029253	Cenpc1	CENP-C|Cenpc	centromere protein C1	protein-coding
Diff_Nuc31496	chr6	39695342	39695481	+	0	NA	Intergenic	L1_Mur3|LINE|L1	-19949	NM_139294	109880	Mm.245513	NM_139294	ENSMUSG00000002413	Braf	9930012E13Rik|AA120551|AA387315|AA473386|B-raf|Braf-2|Braf2|C230098H17|C87398|D6Ertd631e	Braf transforming gene	protein-coding
Diff_Nuc1530	chr13	49219192	49219331	+	0	NA	intron (NM_001290311, intron 2 of 28)	intron (NM_001290311, intron 2 of 28)	24436	NM_029361	75607	Mm.342723	NM_029361	ENSMUSG00000037989	Wnk2	1810073P09Rik|AW122246|ESTM15|X83337|mKIAA1760	WNK lysine deficient protein kinase 2	protein-coding
Diff_Nuc4493	chr12	48305932	48306071	+	0	NA	Intergenic	L1Md_F3|LINE|L1	-386239	NM_021361	664883	Mm.247195	NM_021361	ENSMUSG00000021047	Nova1	9430099M15Rik|G630039L02|Nova-1	neuro-oncological ventral antigen 1	protein-coding
Diff_Nuc43016	chr3	40639132	40639271	+	0	NA	exon (NM_028140, exon 4 of 12)	exon (NM_028140, exon 4 of 12)	11575	NM_028140	72175	Mm.130610	NM_028140	ENSMUSG00000025759	Mfsd8	2810423E13Rik|AI836898|AV142426|Cln7	major facilitator superfamily domain containing 8	protein-coding
Diff_Nuc15744	chr16	17792712	17792851	+	0	NA	exon (NM_145479, exon 7 of 7)	exon (NM_145479, exon 7 of 7)	-4594	NM_153790	224024	Mm.194950	NM_153790	ENSMUSG00000012017	Scarf2	NSR1|SREC-II|SRECRP-1|Scatf1|Srec2|SrecII	scavenger receptor class F, member 2	protein-coding
Diff_Nuc27859	chr7	46918142	46918281	+	0	NA	Intergenic	Intergenic	145075	NM_001004139	70227	Mm.333800	NM_001004139	ENSMUSG00000068959	Zfp619	3000002G13Rik	zinc finger protein 619	protein-coding
Diff_Nuc45293	chr3	134557112	134557251	+	0	NA	intron (NM_021382, intron 3 of 4)	intron (NM_021382, intron 3 of 4)	65210	NM_021382	21338	Mm.103810	NM_021382	ENSMUSG00000028172	Tacr3	Nk3r|Nkr|Tac3r	tachykinin receptor 3	protein-coding
Diff_Nuc29114	chr7	96648612	96648751	+	0	NA	Intergenic	Intergenic	17415	NM_029614	76453	Mm.250438	NM_029614	ENSMUSG00000039405	Prss23	2310046G15Rik|4930479H08Rik|AI790574|Spuve	protease, serine 23	protein-coding
Diff_Nuc48128	chr2	94176352	94176491	+	0	NA	intron (NM_183106, intron 17 of 24)	intron (NM_183106, intron 17 of 24)	70425	NM_183106	74569	Mm.248504	NM_183106	ENSMUSG00000027194	Ttc17	9130020K17Rik|D2Bwg1005e	tetratricopeptide repeat domain 17	protein-coding
Diff_Nuc39581	chr4	62006872	62007011	+	0	NA	intron (NM_001045528, intron 3 of 27)	intron (NM_001045528, intron 3 of 27)	14641	NM_001045528	338355	Mm.357792	NM_001045528	ENSMUSG00000066151	Fkbp15	BB131447|C430014M02Rik|FKBO133|FKBP-133|FKBP-15|FKBP133|mKIAA0674	FK506 binding protein 15	protein-coding
Diff_Nuc32643	chr6	86367922	86368061	+	0	NA	intron (NM_011585, intron 3 of 12)	B4|SINE|B4	13778	NM_001164078	21841	Mm.333219	NM_011585	ENSMUSG00000071337	Tia1	2310050N03Rik|AI256674|TIA-1|mTIA-1	cytotoxic granule-associated RNA binding protein 1	protein-coding
Diff_Nuc45276	chr3	133384582	133384721	+	0	NA	Intergenic	RMER1C|Other|Other	-177297	NM_001040400	214133	Mm.347816	NM_145989	ENSMUSG00000040943	Tet2	Ayu17-449|E130014J05Rik|mKIAA1546	tet methylcytosine dioxygenase 2	protein-coding
Diff_Nuc20925	chr14	35150432	35150571	+	0	NA	intron (NM_008133, intron 9 of 12)	B2_Mm2|SINE|B2	-7740	NR_027380	100041231	Mm.425871	NR_027380		Gm3219	-	B-cell CLL/lymphoma 7C pseudogene	pseudo
Diff_Nuc1513	chr13	48755132	48755271	+	0	NA	Intergenic	Intergenic	-3204	NM_007526	12022	Mm.42241	NM_007526	ENSMUSG00000021381	Barx1	-	BarH-like homeobox 1	protein-coding
Diff_Nuc18003	chr15	17918212	17918351	+	0	NA	Intergenic	Intergenic	381101	NR_045711	70886	Mm.399021	NR_045711		4921515E04Rik	-	RIKEN cDNA 4921515E04 gene	ncRNA
Diff_Nuc37545	chr5	131438762	131438901	+	0	NA	intron (NM_145218, intron 6 of 10)	intron (NM_145218, intron 6 of 10)	344561	NM_145218	212996	Mm.299204	NM_145218	ENSMUSG00000034040	Wbscr17	AA388321|E330012B09Rik	Williams-Beuren syndrome chromosome region 17 homolog (human)	protein-coding
Diff_Nuc42787	chr3	31801812	31801951	+	0	NA	intron (NM_028231, intron 1 of 5)	intron (NM_028231, intron 1 of 5)	256	NM_028231	72413	Mm.64790	NM_028231	ENSMUSG00000037610	Kcnmb2	2700049B16Rik|3110031N04Rik	potassium large conductance calcium-activated channel, subfamily M, beta member 2	protein-coding
Diff_Nuc60851	chr8	108411822	108411961	+	0	NA	exon (NM_181594, exon 14 of 29)	exon (NM_181594, exon 14 of 29)	-5576	NM_001301174	234700	Mm.133990	NM_175024	ENSMUSG00000044287	Nrn1l	Cpg15-2|G630049C14Rik	neuritin 1-like	protein-coding
Diff_Nuc45502	chr3	142360732	142360871	+	0	NA	Intergenic	ORR1A2|LTR|MaLR	-3211	NM_173763	229905	Mm.289643	NM_173763	ENSMUSG00000040213	Kyat3	Ccbl2|KATIII|Kat3	kynurenine aminotransferase 3	protein-coding
Diff_Nuc39522	chr4	58748702	58748841	+	0	NA	Intergenic	B2_Mm2|SINE|B2	49821	NM_146920	258922	Mm.223327	NM_146920	ENSMUSG00000043385	Olfr267	MOR262-1	olfactory receptor 267	protein-coding
Diff_Nuc49188	chr2	135322172	135322311	+	0	NA	Intergenic	Intergenic	86715	NR_015544	320684	Mm.421433	NR_015544	ENSMUSG00000085631	9630028H03Rik	-	RIKEN cDNA 9630028H03 gene	ncRNA
Diff_Nuc55225	chr9	7209062	7209201	+	0	NA	Intergenic	Intergenic	24565	NM_029775	76863	Mm.27293	NM_029775	ENSMUSG00000032002	Dcun1d5	3110001A18Rik|4833420K19Rik|AW060460|D430047L21Rik	DCN1, defective in cullin neddylation 1, domain containing 5 (S. cerevisiae)	protein-coding
Diff_Nuc54309	chr1	166898152	166898291	+	0	NA	Intergenic	RMER1B|Other|Other	-32580	NM_008510	16963	Mm.190	NM_008510	ENSMUSG00000026573	Xcl1	AI661682|ATAC|LTN|Lptn|SCM-1|SCM-1a|Scyc1	chemokine (C motif) ligand 1	protein-coding
Diff_Nuc31967	chr6	56916112	56916251	+	0	NA	Intergenic	L1Md_F2|LINE|L1	9674	NM_134176	171194	Mm.222754	NM_134176	ENSMUSG00000071893	Vmn1r4	C230065D10Rik|V1rc21	vomeronasal 1 receptor 4	protein-coding
Diff_Nuc46116	chr2	13961442	13961581	+	0	NA	intron (NM_001012396, intron 4 of 5)	B1_Mur4|SINE|Alu	16151	NM_001012396	30963	Mm.241205	NM_013935	ENSMUSG00000063275	Hacd1	Ptpla	3-hydroxyacyl-CoA dehydratase 1	protein-coding
Diff_Nuc53101	chr1	112881792	112881931	+	0	NA	Intergenic	L1Md_F2|LINE|L1	-7912	NM_001081386	227485	Mm.322070	NM_001081386	ENSMUSG00000047216	Cdh19	-	cadherin 19, type 2	protein-coding
Diff_Nuc40525	chr4	101902572	101902711	+	0	NA	Intergenic	Intergenic	-24706	NM_001177983	18578	Mm.20181	NM_019840	ENSMUSG00000028525	Pde4b	Dpde4|R74983|dunce	phosphodiesterase 4B, cAMP specific	protein-coding
Diff_Nuc42799	chr3	32244682	32244821	+	0	NA	intron (NM_009517, intron 2 of 5)	MTD|LTR|MaLR	-19660	NR_027966	67576	Mm.435324	NR_027966		4930429B21Rik	-	RIKEN cDNA 4930429B21 gene	ncRNA
Diff_Nuc27020	chr7	10601482	10601621	+	0	NA	Intergenic	RLTR27|LTR|ERVK	-24063	NM_001105156	625605	Mm.484763	NM_001105156	ENSMUSG00000096180	Vmn2r49	-	vomeronasal 2, receptor 49	protein-coding
Diff_Nuc2351	chr13	79795132	79795271	+	0	NA	Intergenic	Intergenic	-1227482	NM_001042591	105171	Mm.423137	NM_001042591	ENSMUSG00000074794	Arrdc3	AI450344|mKIAA1376	arrestin domain containing 3	protein-coding
Diff_Nuc42498	chr3	19932982	19933121	+	0	NA	intron (NM_001146324, intron 1 of 8)	MTEa|LTR|MaLR	2259	NM_001146323	12807	Mm.291533	NM_080634	ENSMUSG00000027615	Hps3	coa	Hermansky-Pudlak syndrome 3	protein-coding
Diff_Nuc10586	chr10	43977412	43977551	+	0	NA	Intergenic	MYSERV6-int|LTR|ERVK	-10664	NM_001314013	11793	Mm.22264	NM_053069	ENSMUSG00000038160	Atg5	2010107M05Rik|3110067M24Rik|AW319544|Apg5l|Atg5l|C88337|Paddy	autophagy related 5	protein-coding
Diff_Nuc26177	chr18	62931472	62931611	+	0	NA	Intergenic	HAL1|LINE|L1	-15540	NR_037693	78449	Mm.262195	NR_037693	ENSMUSG00000041789	2700046A07Rik	A330042I05Rik	RIKEN cDNA 2700046A07 gene	ncRNA
Diff_Nuc10896	chr10	58934822	58934961	+	0	NA	intron (NM_001033259, intron 2 of 7)	intron (NM_001033259, intron 2 of 7)	-30364	NM_010959	18302	Mm.123013	NM_010959	ENSMUSG00000009654	Oit3	EF-9|LZP	oncoprotein induced transcript 3	protein-coding
Diff_Nuc41215	chr4	128349542	128349681	+	0	NA	intron (NM_001195130, intron 1 of 14)	intron (NM_001195130, intron 1 of 14)	-16371	NM_018774	54383	Mm.473738	NM_018774	ENSMUSG00000028796	Phc2	A3galt2|AA415044|D130050K19Rik|D4Ertd810e|Edr2|Mph2|p36	polyhomeotic-like 2 (Drosophila)	protein-coding
Diff_Nuc53239	chr1	120970712	120970851	+	0	NA	Intergenic	Intergenic	-20585	NM_001081125	14633	Mm.273292	NM_001081125	ENSMUSG00000048402	Gli2	-	GLI-Kruppel family member GLI2	protein-coding
Diff_Nuc58669	chr8	15803082	15803221	+	0	NA	Intergenic	L1Md_F2|LINE|L1	365687	NR_037214	100526464		NR_037214	ENSMUSG00000093142	Mir3106	mir-3106|mmu-mir-3106	microRNA 3106	ncRNA
Diff_Nuc39554	chr4	60298762	60298901	+	0	NA	Intergenic	L1Md_F3|LINE|L1	-63360	NM_001134676	100041687	Mm.457982	NM_001134676	ENSMUSG00000078687	Mup8	Gm12809|Mup5|OTTMUSG00000008509	major urinary protein 8	protein-coding
Diff_Nuc36655	chr5	100200572	100200711	+	0	NA	Intergenic	L1_Mus1|LINE|L1	-17649	NR_131054	330133	Mm.447264	NR_131054	ENSMUSG00000105218	Gm38413	A830083F22	predicted gene, 38413	ncRNA
Diff_Nuc23841	chr19	30885672	30885811	+	0	NA	intron (NM_001013833, intron 5 of 17)	intron (NM_001013833, intron 5 of 17)	119711	NR_033643	625995	Mm.454508	NR_033643		Gm6642	EG625995	ubiquitin-like 5 pseudogene	pseudo
Diff_Nuc136	chrX	53910142	53910281	+	0	NA	intron (NM_172780, intron 14 of 15)	intron (NM_172780, intron 14 of 15)	47199	NM_172780	236794	Mm.17815	NM_172780	ENSMUSG00000060681	Slc9a6	3732426M05|6430520C02Rik|NHE6|mKIAA0267	solute carrier family 9 (sodium/hydrogen exchanger), member 6	protein-coding
Diff_Nuc31760	chr6	50399852	50399991	+	0	NA	intron (NM_001347213, intron 1 of 23)	intron (NM_001347213, intron 1 of 23)	6248	NM_001163645	71720	Mm.44153	NM_027881	ENSMUSG00000029822	Osbpl3	1200014M06Rik|6720421I08Rik|A530055M08|ORP-3|ORP3|OSBP3	oxysterol binding protein-like 3	protein-coding
Diff_Nuc3600	chr12	8507742	8507881	+	0	NA	Intergenic	Intergenic	-1020	NM_007483	11852	Mm.687	NM_007483	ENSMUSG00000054364	Rhob	AA017882|Arh6|Arhb	ras homolog family member B	protein-coding
Diff_Nuc16460	chr16	43370552	43370691	+	0	NA	intron (NM_181058, intron 2 of 6)	L2a|LINE|L2	49688	NR_046026	626693	Mm.447083	NR_046026	ENSMUSG00000085499	Gm15713	OTTMUSG00000025617	predicted gene 15713	ncRNA
Diff_Nuc7408	chr11	46449222	46449361	+	0	NA	TTS (NR_028066)	TTS (NR_028066)	-6515	NM_001163358	347708	Mm.18119	NM_178247	ENSMUSG00000064010	Dppa1	C77727	developmental pluripotency associated 1	protein-coding
Diff_Nuc8284	chr11	76998872	76999011	+	0	NA	intron (NM_176965, intron 1 of 17)	B3|SINE|B2	3529	NM_176965	319634	Mm.108786	NM_176965	ENSMUSG00000050944	Efcab5	4930563A03Rik	EF-hand calcium binding domain 5	protein-coding
Diff_Nuc40215	chr4	90130162	90130301	+	0	NA	Intergenic	Lx2|LINE|L1	-102226	NR_033610	619842	Mm.484218	NR_033610	ENSMUSG00000080756	Gm12633	OTTMUSG00000007790	zinc finger protein 352 pseudogene	pseudo
Diff_Nuc4606	chr12	53637662	53637801	+	0	NA	intron (NM_009706, intron 1 of 5)	B4|SINE|B4	20667	NM_009706	11855	Mm.35059	NM_009706	ENSMUSG00000035133	Arhgap5	p190-B|p190B	Rho GTPase activating protein 5	protein-coding
Diff_Nuc15719	chr16	17202152	17202291	+	0	NA	promoter-TSS (NM_009456)	promoter-TSS (NM_009456)	-636	NM_009456	22195	Mm.3074	NM_009456	ENSMUSG00000038965	Ube2l3	C79827|UbcM4|Ubce7	ubiquitin-conjugating enzyme E2L 3	protein-coding
Diff_Nuc61204	chr8	120164482	120164621	+	0	NA	Intergenic	ORR1B1|LTR|MaLR	30864	NM_028725	74032	Mm.296302	NM_028725	ENSMUSG00000034308	Sdr42e1	4632417N05Rik|AI117603	short chain dehydrogenase/reductase family 42E, member 1	protein-coding
Diff_Nuc16586	chr16	47723252	47723391	+	0	NA	Intergenic	Lx4B|LINE|L1	-560527	NM_028610	73693	Mm.35597	NM_028610	ENSMUSG00000058550	Dppa4	2410091M23Rik|C76608|ECAT15-1	developmental pluripotency associated 4	protein-coding
Diff_Nuc60988	chr8	113328832	113328971	+	0	NA	intron (NM_029646, intron 1 of 7)	B4|SINE|B4	923	NM_029646	76527	Mm.77697	NM_029646	ENSMUSG00000031750	Il34	2010004A03Rik|AI593503	interleukin 34	protein-coding
Diff_Nuc24167	chr19	43616382	43616521	+	0	NA	Intergenic	B1_Mus2|SINE|Alu	-17356	NM_010324	14718	Mm.19039	NM_010324	ENSMUSG00000025190	Got1	AI789014|Got-1|cAspAT|cCAT	glutamic-oxaloacetic transaminase 1, soluble	protein-coding
Diff_Nuc28996	chr7	90868402	90868541	+	0	NA	intron (NM_010551, intron 2 of 18)	ID_B1|SINE|B4	15529	NM_010551	16170	Mm.10137	NM_010551	ENSMUSG00000001741	Il16	mKIAA4048	interleukin 16	protein-coding
Diff_Nuc12910	chr17	4352762	4352901	+	0	NA	Intergenic	Intergenic	-230729	NR_045462	78043	Mm.398313	NR_045462		4930548J01Rik	1700113K09Rik	RIKEN cDNA 4930548J01 gene	ncRNA
Diff_Nuc3957	chr12	26249292	26249431	+	0	NA	Intergenic	Intergenic	435322	NR_045844	432641	Mm.112955	NR_045844		Gm17746	-	predicted gene, 17746	ncRNA
Diff_Nuc27845	chr7	46605912	46606051	+	0	NA	Intergenic	Intergenic	62549	NM_177890	330513	Mm.67238	NM_177890	ENSMUSG00000053742	Gm5114	4921507A12|EG330513	predicted gene 5114	protein-coding
Diff_Nuc24653	chr18	4192192	4192331	+	0	NA	Intergenic	L1MA5A|LINE|L1	26431	NM_026092	67328	Mm.158148	NM_026092	ENSMUSG00000024233	Lyzl1	1700038F02Rik|Lyc2|Lyzd1	lysozyme-like 1	protein-coding
Diff_Nuc49933	chr2	161126412	161126551	+	0	NA	Intergenic	Intergenic	-191659	NR_126509	71389	Mm.122738	NM_173368	ENSMUSG00000057133	Chd6	5430439G14Rik|6330406J24Rik|CHD-6	chromodomain helicase DNA binding protein 6	protein-coding
Diff_Nuc5097	chr12	74137392	74137531	+	0	NA	Intergenic	Lx8|LINE|L1	10238	NM_009189	20471	Mm.4645	NM_009189	ENSMUSG00000051367	Six1	BB138287	sine oculis-related homeobox 1	protein-coding
Diff_Nuc10129	chr10	23508292	23508431	+	0	NA	Intergenic	PB1D9|SINE|Alu	-1346	NM_011295	20042	Mm.371846	NM_011295	ENSMUSG00000061983	Rps12	-	ribosomal protein S12	protein-coding
Diff_Nuc47222	chr2	57374032	57374171	+	0	NA	Intergenic	Intergenic	283308	NM_010274	14571	Mm.3711	NM_010274	ENSMUSG00000026827	Gpd2	AA408484|AI448216|AU021455|AW494132|GPDH|Gdm1|Gpd-m|Gpdh-m|TISP38	glycerol phosphate dehydrogenase 2, mitochondrial	protein-coding
Diff_Nuc11992	chr10	96517742	96517881	+	0	NA	intron (NR_045358, intron 4 of 4)	ORR1D1|LTR|MaLR	19409	NR_045358	75301	Mm.108650	NR_045358		4930556N09Rik	-	RIKEN cDNA 4930556N09 gene	ncRNA
Diff_Nuc61008	chr8	113681452	113681591	+	0	NA	TTS (NM_009149)	TTS (NM_009149)	-12123	NR_040364	434350	Mm.442061	NR_040363		9430091E24Rik	-	RIKEN cDNA 9430091E24 gene	ncRNA
Diff_Nuc58320	chr9	123021942	123022081	+	0	NA	promoter-TSS (NM_001081188)	promoter-TSS (NM_001081188)	312	NM_026917	69035	Mm.28300	NM_026917	ENSMUSG00000025786	Zdhhc3	1110020O22Rik|1810006O10Rik|2210017C02Rik|DHHC-3|GODZ|Gramp1|Zfp373	zinc finger, DHHC domain containing 3	protein-coding
Diff_Nuc50615	chr1	13232132	13232271	+	0	NA	intron (NM_008678, intron 2 of 22)	intron (NM_008678, intron 2 of 22)	-114957	NM_001081209	383491	Mm.309380	NM_001081209	ENSMUSG00000042414	Prdm14	-	PR domain containing 14	protein-coding
Diff_Nuc53274	chr1	122179382	122179521	+	0	NA	Intergenic	B1_Mur2|SINE|Alu	-11792	NM_001085409	68428	Mm.181033	NM_133186	ENSMUSG00000026389	Steap3	1010001D01Rik|Tsap6|pHyde	STEAP family member 3	protein-coding
Diff_Nuc43597	chr3	65175512	65175651	+	0	NA	intron (NM_001289450, intron 14 of 14)	intron (NM_001289450, intron 14 of 14)	20894	NM_026155	67437	Mm.232728	NM_026155	ENSMUSG00000027828	Ssr3	0610038P07Rik|AL022999|AU022074|AW553833|TRAPG	signal sequence receptor, gamma	protein-coding
Diff_Nuc45284	chr3	134069922	134070061	+	0	NA	intron (NR_040600, intron 6 of 8)	L1M4c|LINE|L1	16608	NR_040600	75208	Mm.84580	NR_040600	ENSMUSG00000105765	4930539C22Rik	-	RIKEN cDNA 4930539C22 gene	ncRNA
Diff_Nuc41065	chr4	122549262	122549401	+	0	NA	intron (NM_001301067, intron 2 of 12)	intron (NM_001301067, intron 2 of 12)	13969	NM_007598	12331	Mm.8687	NM_007598	ENSMUSG00000028656	Cap1	-	CAP, adenylate cyclase-associated protein 1 (yeast)	protein-coding
Diff_Nuc24003	chr19	37178182	37178321	+	0	NA	intron (NM_001290829, intron 4 of 9)	intron (NM_001290829, intron 4 of 9)	-70082	NR_045329	319931	Mm.446730	NR_045329	ENSMUSG00000097591	A330032B11Rik	-	RIKEN cDNA A330032B11 gene	ncRNA
Diff_Nuc51258	chr1	39253182	39253321	+	0	NA	intron (NM_008719, intron 1 of 20)	intron (NM_008719, intron 1 of 20)	2134	NM_008719	18143	Mm.2380	NM_008719	ENSMUSG00000026077	Npas2	MOP4|bHLHe9	neuronal PAS domain protein 2	protein-coding
Diff_Nuc54549	chr1	176058052	176058191	+	0	NA	Intergenic	Lx2B|LINE|L1	-8756	NM_146721	258716	Mm.377651	NM_146721	ENSMUSG00000051528	Olfr424	MOR105-2	olfactory receptor 424	protein-coding
Diff_Nuc44984	chr3	121047922	121048061	+	0	NA	intron (NM_024178, intron 3 of 3)	PB1D10|SINE|Alu	53256	NM_024178	66789	Mm.269881	NM_024178	ENSMUSG00000039887	Alg14	5430428G01Rik|AI854024	asparagine-linked glycosylation 14	protein-coding
Diff_Nuc30372	chr7	142797012	142797151	+	0	NA	promoter-TSS (NM_001316679)	promoter-TSS (NM_001316679)	-430	NM_001316679	19267	Mm.945	NM_011212	ENSMUSG00000041836	Ptpre	PTPe|PTPepsilon|RPTPepsilon	protein tyrosine phosphatase, receptor type, E	protein-coding
Diff_Nuc15532	chr16	11158942	11159081	+	0	NA	intron (NR_027502, intron 5 of 22)	intron (NR_027502, intron 5 of 22)	17475	NR_027502	106205	Mm.226860	NM_145931	ENSMUSG00000037965	Zc3h7a	A430104C18Rik|AI447294|AW556219|HSPC055|Zc3h7|Zc3hdc7	zinc finger CCCH type containing 7 A	protein-coding
Diff_Nuc12973	chr17	6238722	6238861	+	0	NA	3' UTR (NM_001103181, exon 14 of 14)	3' UTR (NM_001103181, exon 14 of 14)	-31679	NM_001033178	77106	Mm.381893	NM_001033178	ENSMUSG00000038141	Tmem181a	5930418K15Rik|C76977|Gpr178|Tmem181|mKIAA1423	transmembrane protein 181A	protein-coding
Diff_Nuc53283	chr1	122622232	122622371	+	0	NA	Intergenic	B4A|SINE|B4	123237	NM_010133	13798	Mm.2657	NM_010133	ENSMUSG00000058665	En1	En-1|Mo-en.1|engrailed-1	engrailed 1	protein-coding
Diff_Nuc13520	chr17	26681982	26682121	+	0	NA	Intergenic	Intergenic	-16406	NM_026170	67458	Mm.30496	NM_026170	ENSMUSG00000001576	Ergic1	1200007D18Rik|maa-136	endoplasmic reticulum-golgi intermediate compartment (ERGIC) 1	protein-coding
Diff_Nuc48027	chr2	91179392	91179531	+	0	NA	intron (NM_175123, intron 3 of 8)	intron (NM_175123, intron 3 of 8)	74189	NM_023854	77038	Mm.43636	NM_023854	ENSMUSG00000027255	Arfgap2	2310032E02Rik|Zfp289	ADP-ribosylation factor GTPase activating protein 2	protein-coding
Diff_Nuc34923	chr5	30151422	30151561	+	0	NA	Intergenic	Intergenic	-89015	NR_028426	332993	Mm.473746	NR_028426		Gm5129	EG332993|ENSMUSG00000053121	predicted gene 5129	ncRNA
Diff_Nuc53891	chr1	150317282	150317421	+	0	NA	Intergenic	L1Md_F3|LINE|L1	1452218	NM_001305632	18783	Mm.4186	NM_008869	ENSMUSG00000056220	Pla2g4a	Pla2g4|cPLA2|cPLA2-alpha|cPLA2alpha	phospholipase A2, group IVA (cytosolic, calcium-dependent)	protein-coding
Diff_Nuc10196	chr10	26611142	26611281	+	0	NA	intron (NM_176837, intron 12 of 14)	intron (NM_176837, intron 12 of 14)	118893	NM_176837	73910	Mm.356496	NM_176837	ENSMUSG00000039031	Arhgap18	4833419J07Rik|AI314906|AI843501	Rho GTPase activating protein 18	protein-coding
Diff_Nuc45336	chr3	136329372	136329511	+	0	NA	Intergenic	ORR1A2|LTR|MaLR	-3589	NM_008913	19055	Mm.331389	NM_008913	ENSMUSG00000028161	Ppp3ca	2900074D19Rik|CN|Caln|Calna|CnA	protein phosphatase 3, catalytic subunit, alpha isoform	protein-coding
Diff_Nuc54054	chr1	156965542	156965681	+	0	NA	Intergenic	Intergenic	-18845	NM_010500	15939	Mm.12246	NM_010500	ENSMUSG00000056708	Ier5	-	immediate early response 5	protein-coding
Diff_Nuc8887	chr11	97298922	97299061	+	0	NA	Intergenic	Intergenic	-12483	NM_021493	58996	Mm.394118	NM_021493	ENSMUSG00000049807	Arhgap23	A330041B18Rik	Rho GTPase activating protein 23	protein-coding
Diff_Nuc31959	chr6	56492282	56492421	+	0	NA	Intergenic	MTC|LTR|MaLR	162342	NM_025520	66373	Mm.25642	NM_025520	ENSMUSG00000091625	Lsm5	2010208O10Rik|2310034K10Rik	LSM5 homolog, U6 small nuclear RNA and mRNA degradation associated	protein-coding
Diff_Nuc30701	chr6	8095442	8095581	+	0	NA	intron (NM_001037865, intron 11 of 34)	Lx|LINE|L1	47106	NM_001037865	213945	Mm.297404	NM_001037865	ENSMUSG00000068794	Col28a1	Col28|Gm466	collagen, type XXVIII, alpha 1	protein-coding
Diff_Nuc59851	chr8	72311522	72311661	+	0	NA	Intergenic	L1Md_F3|LINE|L1	-3471	NM_133224	170759	Mm.186066	NM_133224	ENSMUSG00000031862	Atp13a1	Atp13a|Cgi152|catp	ATPase type 13A1	protein-coding
Diff_Nuc45456	chr3	140884882	140885021	+	0	NA	Intergenic	Intergenic	-9632	NM_008811	18598	Mm.4223	NM_008811	ENSMUSG00000047674	Pdha2	Pdhal	pyruvate dehydrogenase E1 alpha 2	protein-coding
Diff_Nuc49819	chr2	157082162	157082301	+	0	NA	intron (NM_001039557, intron 5 of 24)	intron (NM_001039557, intron 5 of 24)	-22603	NM_019642	20014	Mm.22130	NM_019642	ENSMUSG00000027642	Rpn2	1300012C06Rik|AV261018|Rpn-2	ribophorin II	protein-coding
Diff_Nuc20776	chr14	30227502	30227641	+	0	NA	intron (NM_009785, intron 4 of 37)	intron (NM_009785, intron 4 of 37)	307479	NM_009785	12294	Mm.386754	NM_009785	ENSMUSG00000021991	Cacna2d3	Cacnad3|alapha2delta3	calcium channel, voltage-dependent, alpha2/delta subunit 3	protein-coding
Diff_Nuc2059	chr13	68357772	68357911	+	0	NA	Intergenic	MT2B|LTR|ERVL	363140	NM_001308475	210009	Mm.205514	NM_172480	ENSMUSG00000034617	Mtrr	4732420G08|MSR	5-methyltetrahydrofolate-homocysteine methyltransferase reductase	protein-coding
Diff_Nuc48207	chr2	97550492	97550631	+	0	NA	Intergenic	ORR1B1-int|LTR|MaLR	242747	NM_178725	241568	Mm.241682	NM_178725	ENSMUSG00000050587	Lrrc4c	6430556C10Rik|NGL-1	leucine rich repeat containing 4C	protein-coding
Diff_Nuc37979	chr5	145589722	145589861	+	0	NA	intron (NM_001081362, intron 50 of 70)	intron (NM_001081362, intron 50 of 70)	60130	NM_001081362	100683	Mm.273570	NM_001081362	ENSMUSG00000045482	Trrap	AI481500	transformation/transcription domain-associated protein	protein-coding
Diff_Nuc17272	chr16	80285802	80285941	+	0	NA	Intergenic	Lx6|LINE|L1	-915071	NM_001113208	17968	Mm.433941	NM_010954	ENSMUSG00000022762	Ncam2	Ncam-2|Ocam|RNCAM	neural cell adhesion molecule 2	protein-coding
Diff_Nuc6456	chr11	6003572	6003711	+	0	NA	Intergenic	Intergenic	-37890	NM_007595	12323	Mm.439733	NM_007595	ENSMUSG00000057897	Camk2b	CaMKII	calcium/calmodulin-dependent protein kinase II, beta	protein-coding
Diff_Nuc44844	chr3	114529222	114529361	+	0	NA	Intergenic	Intergenic	-77705	NM_153458	229759	Mm.54183	NM_153157	ENSMUSG00000027965	Olfm3	B230206G02Rik	olfactomedin 3	protein-coding
Diff_Nuc29600	chr7	115251312	115251451	+	0	NA	Intergenic	B1_Mus1|SINE|Alu	4556	NM_146735	258730	Mm.377661	NM_146735	ENSMUSG00000078118	Olfr483	MOR204-12	olfactory receptor 483	protein-coding
Diff_Nuc58079	chr9	113317812	113317951	+	0	NA	Intergenic	Intergenic	178389	NR_040760	102688	Mm.394901	NR_040760	ENSMUSG00000109890	AU023762	-	expressed sequence AU023762	ncRNA
Diff_Nuc47987	chr2	89579992	89580131	+	0	NA	Intergenic	L1_Mur1|LINE|L1	12922	NM_146373	258370	Mm.480193	NM_146373	ENSMUSG00000075075	Olfr1253	MOR231-18|MOR231-19P|Olfr1253-ps1|Olfr1559-ps1	olfactory receptor 1253	protein-coding
Diff_Nuc37271	chr5	121856772	121856911	+	0	NA	intron (NM_172722, intron 1 of 23)	intron (NM_172722, intron 1 of 23)	8850	NM_172722	231713	Mm.33919	NM_172722	ENSMUSG00000042719	Naa25	4833422K13Rik|A630046C11|AI450868|C330023M02Rik|Mdm20	N(alpha)-acetyltransferase 25, NatB auxiliary subunit	protein-coding
Diff_Nuc10295	chr10	32038612	32038751	+	0	NA	intron (NM_001025286, intron 3 of 3)	MTB|LTR|MaLR	571040	NM_001013411	432450	Mm.49665	NM_001013411	ENSMUSG00000069670	Nkain2	6330571D19Rik|AW455467|Tcba1	Na+/K+ transporting ATPase interacting 2	protein-coding
Diff_Nuc9657	chr10	4242972	4243111	+	0	NA	Intergenic	MT2B|LTR|ERVL	-181100	NM_001161822	56533	Mm.44606	NM_019958	ENSMUSG00000019775	Rgs17	6430507P11Rik|Rgsz2	regulator of G-protein signaling 17	protein-coding
Diff_Nuc46356	chr2	24619482	24619621	+	0	NA	promoter-TSS (NM_001042528)	promoter-TSS (NM_001042528)	-879	NM_007579	12287	Mm.4424	NM_007579	ENSMUSG00000004113	Cacna1b	AW050276|AW060892|AW822256|BIII|Cav2.2|Cchn1a|alpha(1B)	calcium channel, voltage-dependent, N type, alpha 1B subunit	protein-coding
Diff_Nuc34931	chr5	30416792	30416931	+	0	NA	Intergenic	RLTR13C2|LTR|ERVK	-2619	NR_045694	242914	Mm.400417	NR_045694	ENSMUSG00000104667	Gm4961	EG242914|Gm19623|Kif2c	kinesin superfamily protein 2C pseudogene	pseudo
Diff_Nuc44423	chr3	97412702	97412841	+	0	NA	intron (NM_026539, intron 1 of 22)	Lx9|LINE|L1	1342	NM_026539	68058	Mm.31761	NM_026539	ENSMUSG00000028089	Chd1l	4432404A22Rik|Alc1|Snf2p	chromodomain helicase DNA binding protein 1-like	protein-coding
Diff_Nuc34987	chr5	32183892	32184031	+	0	NA	intron (NM_181282, intron 6 of 11)	intron (NM_181282, intron 6 of 11)	183538	NM_144541	107976	Mm.482126	NM_144541	ENSMUSG00000052139	Bre	6030405P19Rik|AI429776|B830038C02Rik	brain and reproductive organ-expressed protein	protein-coding
Diff_Nuc58671	chr8	15831702	15831841	+	0	NA	Intergenic	RMER4B|LTR|ERVK	337067	NR_037214	100526464		NR_037214	ENSMUSG00000093142	Mir3106	mir-3106|mmu-mir-3106	microRNA 3106	ncRNA
Diff_Nuc55787	chr9	30324532	30324671	+	0	NA	Intergenic	B4|SINE|B4	89687	NM_028874	102607	Mm.35084	NM_028874	ENSMUSG00000031993	Snx19	3526401K03Rik|AI195321|AI848208|mKIAA0254	sorting nexin 19	protein-coding
Diff_Nuc20457	chr14	18795472	18795611	+	0	NA	intron (NM_001113417, intron 3 of 9)	intron (NM_001113417, intron 3 of 9)	-18617	NM_009380	21834	Mm.32563	NM_009380	ENSMUSG00000021779	Thrb	Nr1a2|T3R[b]|T3Rbeta|Thrb1|Thrb2|c-erbAbeta	thyroid hormone receptor beta	protein-coding
Diff_Nuc58284	chr9	121865912	121866051	+	0	NA	intron (NM_001199927, intron 1 of 4)	intron (NM_001199927, intron 1 of 4)	5843	NM_001199927	245050	Mm.71062	NM_177743	ENSMUSG00000038233	Fam198a	C730027P07Rik	family with sequence similarity 198, member A	protein-coding
Diff_Nuc51296	chr1	40864002	40864141	+	0	NA	intron (NM_001081198, intron 2 of 4)	intron (NM_001081198, intron 2 of 4)	1625	NM_001081198	381339	Mm.334678	NM_001081198	ENSMUSG00000079588	Tmem182	2310079P10Rik|AI414494	transmembrane protein 182	protein-coding
Diff_Nuc23734	chr19	26790572	26790711	+	0	NA	exon (NM_011416, exon 26 of 33)	exon (NM_011416, exon 26 of 33)	-32014	NM_001347439	67155	Mm.342988	NM_011416	ENSMUSG00000024921	Smarca2	2610209L14Rik|SNF2alpha|Snf2l2|brahma|brm	SWI/SNF related, matrix associated, actin dependent regulator of chromatin, subfamily a, member 2	protein-coding
Diff_Nuc42133	chr3	4761222	4761361	+	0	NA	Intergenic	Intergenic	-37417	NR_045272	100503859	Mm.75172	NR_045272	ENSMUSG00000098659	1110015O18Rik	-	RIKEN cDNA 1110015O18 gene	ncRNA
Diff_Nuc50255	chr2	177101652	177101791	+	0	NA	Intergenic	MurSatRep1|Unknown|Unknown	-147726	NM_001177568	628308	Mm.460436	NM_001177568	ENSMUSG00000078866	Zfp970	Gm14420|OTTMUSG00000016588	zinc finger protein 970	protein-coding
Diff_Nuc48551	chr2	110623142	110623281	+	0	NA	intron (NM_001128103, intron 6 of 26)	intron (NM_001128103, intron 6 of 26)	61560	NM_172979	269328	Mm.32566	NM_172979	ENSMUSG00000050808	Muc15	4732460E09|D730046L02Rik|MUC-15	mucin 15	protein-coding
Diff_Nuc53531	chr1	133219542	133219681	+	0	NA	intron (NM_001081011, intron 14 of 22)	L2a|LINE|L2	-43471	NM_019777	56489	Mm.386783	NM_019777	ENSMUSG00000042349	Ikbke	AW558201|IKK-i|IKKepsilon|Ikki	inhibitor of kappaB kinase epsilon	protein-coding
Diff_Nuc50885	chr1	25089952	25090091	+	0	NA	Intergenic	Lx2B|LINE|L1	244778	NM_001204913	100504323	Mm.484176	NM_001204913		Gm20172	-	predicted gene, 20172	protein-coding
Diff_Nuc63	chrX	17481852	17481991	+	0	NA	Intergenic	MuRRS-int|LTR|ERV1	-241075	NM_028568	73547	Mm.159027	NM_028568	ENSMUSG00000025043	Dusp21	1700094E07Rik|DSP21	dual specificity phosphatase 21	protein-coding
Diff_Nuc12686	chr10	124317892	124318031	+	0	NA	Intergenic	L1Md_F2|LINE|L1	411831	NR_028310	75030	Mm.159403	NR_028310		4930503E24Rik	-	eukaryotic translation initiation factor 3, subunit I pseudogene	pseudo
Diff_Nuc7205	chr11	38514542	38514681	+	0	NA	Intergenic	Intergenic	-181064	NR_040295	100502917	Mm.61144	NR_040295		Gm12130	OTTMUSG00000005424	predicted gene 12130	ncRNA
Diff_Nuc32925	chr6	98056562	98056701	+	0	NA	Intergenic	Intergenic	114854	NM_008601	17342	Mm.333284	NM_008601	ENSMUSG00000035158	Mitf	BCC2|Bhlhe32|Gsfbcc2|Vitiligo|Wh|bw|mi|vit	microphthalmia-associated transcription factor	protein-coding
Diff_Nuc16648	chr16	50425252	50425391	+	0	NA	intron (NM_001347240, intron 2 of 16)	intron (NM_001347240, intron 2 of 16)	7181	NM_027444	70508	Mm.28940	NM_027444	ENSMUSG00000022641	Bbx	5530401J07Rik|5730403O13Rik	bobby sox HMG box containing	protein-coding
Diff_Nuc15163	chr17	91167062	91167201	+	0	NA	intron (NM_001346957, intron 3 of 18)	RLTR41|LTR|ERV1	25685	NR_136930	102634634		NR_136930		Gm20491	-	enolase 1, alpha non-neuron pseudogene	pseudo
Diff_Nuc43393	chr3	55572532	55572671	+	0	NA	intron (NM_030595, intron 41 of 57)	intron (NM_030595, intron 41 of 57)	-13831	NM_010750	17116	Mm.440209	NM_010750	ENSMUSG00000056947	Mab21l1	AW047968	mab-21-like 1 (C. elegans)	protein-coding
Diff_Nuc35069	chr5	34617132	34617271	+	0	NA	intron (NM_001015039, intron 1 of 12)	intron (NM_001015039, intron 1 of 12)	13772	NM_001015039	231125	Mm.113388	NM_001015039	ENSMUSG00000037224	Zfyve28	9630058O20Rik|Gm146|mKIAA1643	zinc finger, FYVE domain containing 28	protein-coding
Diff_Nuc38789	chr4	27267692	27267831	+	0	NA	Intergenic	Lx2B|LINE|L1	-635165	NR_040656	75360	Mm.67233	NR_040656	ENSMUSG00000086257	4930548K13Rik	-	RIKEN cDNA 4930548K13 gene	ncRNA
Diff_Nuc7891	chr11	63002882	63003021	+	0	NA	Intergenic	Intergenic	56646	NM_001302260	18858	Mm.1237	NM_008885	ENSMUSG00000018217	Pmp22	22kDa|Gas-3|HNPP|Tr|trembler	peripheral myelin protein 22	protein-coding
Diff_Nuc2167	chr13	72986822	72986961	+	0	NA	Intergenic	Intergenic	-32680	NR_046196	78446	Mm.244082	NR_046196		D730050B12Rik	-	RIKEN cDNA D730050B12 gene	ncRNA
Diff_Nuc37849	chr5	141168972	141169111	+	0	NA	intron (NM_028833, intron 4 of 22)	intron (NM_028833, intron 4 of 22)	9291	NM_028833	74239	Mm.179704	NM_028833	ENSMUSG00000036555	Iqce	1700028P05Rik|mKIAA1023	IQ motif containing E	protein-coding
Diff_Nuc28779	chr7	82519142	82519281	+	0	NA	Intergenic	RMER21B|LTR|ERV1	-65063	NM_153579	64176	Mm.273082	NM_153579	ENSMUSG00000053025	Sv2b	A830038F04Rik|AI850768|mKIAA0735	synaptic vesicle glycoprotein 2 b	protein-coding
Diff_Nuc983	chr13	28609112	28609251	+	0	NA	intron (NR_045053, intron 7 of 8)	intron (NR_045053, intron 7 of 8)	193561	NR_105787	102466635		NR_105787	ENSMUSG00000099158	Mir6368	Gm27800|mmu-mir-6368	microRNA 6368	ncRNA
Diff_Nuc6660	chr11	15951692	15951831	+	0	NA	Intergenic	Lx2|LINE|L1	-205966	NM_001290539	211739	Mm.284015	NM_145967	ENSMUSG00000048834	Vstm2a	Vstm2	V-set and transmembrane domain containing 2A	protein-coding
Diff_Nuc27048	chr7	11332772	11332911	+	0	NA	TTS (NM_145848)	TTS (NM_145848)	2046	NM_145848	252910	Mm.451639	NM_145848	ENSMUSG00000059206	Vmn1r71	V1re13	vomeronasal 1 receptor 71	protein-coding
Diff_Nuc16873	chr16	61583272	61583411	+	0	NA	Intergenic	Lx4B|LINE|L1	-977984	NM_007938	13840	Mm.455790	NM_007938	ENSMUSG00000055540	Epha6	Ehk2|Hek12|m-ehk2	Eph receptor A6	protein-coding
Diff_Nuc30129	chr7	134015912	134016051	+	0	NA	exon (NM_001163774, exon 14 of 19)	exon (NM_001163774, exon 14 of 19)	10495	NM_172746	233876	Mm.363427	NM_172746	ENSMUSG00000042606	Hirip3	B130036O03|C86302	HIRA interacting protein 3	protein-coding
Diff_Nuc17530	chr16	91756052	91756191	+	0	NA	intron (NM_010587, intron 1 of 38)	MT2B2|LTR|ERVL	26505	NM_010587	16443	Mm.40546	NM_010587	ENSMUSG00000022957	Itsn1	AA517634|AA545208|AI316805|AI839402|AI848451|Ehsh1|Ese1|Itsn|Sh3p17	intersectin 1 (SH3 domain protein 1A)	protein-coding
Diff_Nuc26046	chr18	58168962	58169101	+	0	NA	3' UTR (NM_010181, exon 65 of 65)	3' UTR (NM_010181, exon 65 of 65)	130699	NM_009194	20496	Mm.399997	NM_009194	ENSMUSG00000024597	Slc12a2	9330166H04Rik|Nkcc1|mBSC2|sy-ns	solute carrier family 12, member 2	protein-coding
Diff_Nuc1596	chr13	51777122	51777261	+	0	NA	intron (NM_029279, intron 14 of 16)	MIR|SINE|MIR	30114	NM_029279	75420	Mm.275981	NM_029279	ENSMUSG00000035139	Secisbp2	2210413N07Rik|2810012K13Rik|SBP2	SECIS binding protein 2	protein-coding
Diff_Nuc4178	chr12	34513952	34514091	+	0	NA	Intergenic	Intergenic	-99269	NM_033522	114712	Mm.204643	NM_033522	ENSMUSG00000046518	Ferd3l	Mnato3|N-twist|Nato|Nato3|Ntwist|Ptfb|bHLHa31|fer3	Fer3-like (Drosophila)	protein-coding
Diff_Nuc55505	chr9	20278472	20278611	+	0	NA	intron (NM_146221, intron 4 of 6)	B4A|SINE|B4	-13937	NM_011753	22688	Mm.107441	NM_011753	ENSMUSG00000063108	Zfp26	5033428C05Rik|KRAB15|Zfp-26|Zfp70|Zfp81-rs1|mKIAA4196|mkr-3|mszf14|mszf52	zinc finger protein 26	protein-coding
Diff_Nuc25575	chr18	39765802	39765941	+	0	NA	Intergenic	Intergenic	-118972	NM_008173	14815	Mm.129481	NM_008173	ENSMUSG00000024431	Nr3c1	GR|Grl-1|Grl1	nuclear receptor subfamily 3, group C, member 1	protein-coding
Diff_Nuc17100	chr16	71509412	71509551	+	0	NA	Intergenic	Intergenic	259332	NR_040576	78221	Mm.399298	NR_040576		4930567J20Rik	-	RIKEN cDNA 4930567J20 gene	ncRNA
Diff_Nuc10136	chr10	23779022	23779161	+	0	NA	Intergenic	Intergenic	9775	NM_001010839	435207	Mm.377966	NM_001010839	ENSMUSG00000100950	Taar7f	taR-7f	trace amine-associated receptor 7F	protein-coding
Diff_Nuc35764	chr5	64687042	64687181	+	0	NA	intron (NM_001310611, intron 14 of 21)	intron (NM_001310611, intron 14 of 21)	65515	NM_001289514	57915	Mm.286353	NM_019636	ENSMUSG00000029174	Tbc1d1	1110062G02Rik|AI385682|AW555803|Nob1|Nobq1|Tbc1|mKIAA1108	TBC1 domain family, member 1	protein-coding
Diff_Nuc16059	chr16	28608602	28608741	+	0	NA	intron (NM_010199, intron 2 of 5)	intron (NM_010199, intron 2 of 5)	-8542	NR_030463	751543		NR_030463	ENSMUSG00000076064	Mir690	Mirn690|mir-690|mmu-mir-690	microRNA 690	ncRNA
Diff_Nuc638	chr13	13003352	13003491	+	0	NA	Intergenic	L1VL4|LINE|L1	94176	NM_031191	18811	Mm.88796	NM_031191	ENSMUSG00000079092	Prl2c2	Ghd2|MRP-1|PLF-1|Plf|Plf1	prolactin family 2, subfamily c, member 2	protein-coding
Diff_Nuc9753	chr10	7670742	7670881	+	0	NA	intron (NM_138667, intron 1 of 6)	intron (NM_138667, intron 1 of 6)	5110	NM_138667	68652	Mm.193041	NM_138667	ENSMUSG00000015755	Tab2	1110030N06Rik|A530078N03Rik|Map3k7ip2|mKIAA0733	TGF-beta activated kinase 1/MAP3K7 binding protein 2	protein-coding
Diff_Nuc48226	chr2	98282992	98283131	+	0	NA	Intergenic	L1_Mur1|LINE|L1	975247	NM_178725	241568	Mm.241682	NM_178725	ENSMUSG00000050587	Lrrc4c	6430556C10Rik|NGL-1	leucine rich repeat containing 4C	protein-coding
Diff_Nuc5672	chr12	96336042	96336181	+	0	NA	Intergenic	Intergenic	-594325	NM_201518	399558	Mm.341948	NM_201518	ENSMUSG00000047414	Flrt2	-	fibronectin leucine rich transmembrane protein 2	protein-coding
Diff_Nuc5112	chr12	74480112	74480251	+	0	NA	intron (NR_046013, intron 2 of 3)	intron (NR_046013, intron 2 of 3)	30369	NR_046013	380765	Mm.490476	NR_046013		D830013O20Rik	Gm891	RIKEN cDNA D830013O20 gene	ncRNA
Diff_Nuc29641	chr7	116472262	116472401	+	0	NA	intron (NM_054103, intron 8 of 13)	L2a|LINE|L2	110236	NM_054103	117229	Mm.389950	NM_054103	ENSMUSG00000031027	Stk33	4921505G21Rik|AW061264	serine/threonine kinase 33	protein-coding
Diff_Nuc2903	chr13	100277512	100277651	+	0	NA	intron (NM_008634, intron 2 of 6)	intron (NM_008634, intron 2 of 6)	8976	NM_008634	17755	Mm.4173	NM_008634	ENSMUSG00000052727	Map1b	A230055D22|AI843217|LC1|MAP5|Mtap-5|Mtap1b|Mtap5	microtubule-associated protein 1B	protein-coding
Diff_Nuc44741	chr3	109017962	109018101	+	0	NA	Intergenic	Intergenic	91964	NM_172685	229731	Mm.33574	NM_172685	ENSMUSG00000040322	Slc25a24	2610016M12Rik	solute carrier family 25 (mitochondrial carrier, phosphate carrier), member 24	protein-coding
Diff_Nuc37569	chr5	132028942	132029081	+	0	NA	intron (NM_177047, intron 5 of 19)	intron (NM_177047, intron 5 of 19)	-245619	NM_145218	212996	Mm.299204	NM_145218	ENSMUSG00000034040	Wbscr17	AA388321|E330012B09Rik	Williams-Beuren syndrome chromosome region 17 homolog (human)	protein-coding
Diff_Nuc7834	chr11	61572812	61572951	+	0	NA	intron (NM_144806, intron 1 of 11)	intron (NM_144806, intron 1 of 11)	2709	NM_144806	212627	Mm.27703	NM_144806	ENSMUSG00000020528	Prpsap2	A230054F23Rik	phosphoribosyl pyrophosphate synthetase-associated protein 2	protein-coding
Diff_Nuc40449	chr4	99699852	99699991	+	0	NA	Intergenic	Intergenic	-68475	NM_013845	26563	Mm.57252	NM_013845	ENSMUSG00000035305	Ror1	2810404D04Rik|Ntrkr1	receptor tyrosine kinase-like orphan receptor 1	protein-coding
Diff_Nuc30163	chr7	135136472	135136611	+	0	NA	intron (NM_023258, intron 2 of 2)	intron (NM_023258, intron 2 of 2)	840	NM_023258	66824	Mm.24163	NM_023258	ENSMUSG00000030793	Pycard	9130417A21Rik|Asc|CARD5|TMS-1|TNS1|masc	PYD and CARD domain containing	protein-coding
Diff_Nuc16851	chr16	60757802	60757941	+	0	NA	Intergenic	L1_Mus2|LINE|L1	-152514	NM_007938	13840	Mm.455790	NM_007938	ENSMUSG00000055540	Epha6	Ehk2|Hek12|m-ehk2	Eph receptor A6	protein-coding
Diff_Nuc6126	chr12	113619862	113620001	+	0	NA	Intergenic	Intergenic	41478	NR_036459	100504733	Mm.255309	NM_176956		A730018C14Rik	-	RIKEN cDNA A730018C14 gene	ncRNA
Diff_Nuc37207	chr5	119315432	119315571	+	0	NA	Intergenic	Intergenic	-86847	NR_040694	74627	Mm.410828	NR_040694	ENSMUSG00000107144	4930413E15Rik	-	RIKEN cDNA 4930413E15 gene	ncRNA
Diff_Nuc10846	chr10	57062212	57062351	+	0	NA	Intergenic	Lx5|LINE|L1	143878	NR_045353	74928	Mm.416643	NR_045353	ENSMUSG00000097370	4930467K11Rik	-	RIKEN cDNA 4930467K11 gene	ncRNA
Diff_Nuc51756	chr1	59533022	59533161	+	0	NA	Intergenic	MER5B|DNA|MER1_type	-5900	NM_008057	14369	Mm.297906	NM_008057	ENSMUSG00000041075	Fzd7	Fz7	frizzled class receptor 7	protein-coding
Diff_Nuc19917	chr15	95274492	95274631	+	0	NA	intron (NM_001289653, intron 4 of 20)	intron (NM_001289653, intron 4 of 20)	84122	NM_001289653	54003	Mm.3959	NM_016743	ENSMUSG00000022454	Nell2	A330108N19Rik|R75516|mel91	NEL-like 2	protein-coding
Diff_Nuc50059	chr2	166198532	166198671	+	0	NA	Intergenic	BGLII_A|LTR|ERVK	-74350	NR_015558	319684	Mm.399746	NR_015558		5031425F14Rik	-	RIKEN cDNA 5031425F14 gene	ncRNA
Diff_Nuc2278	chr13	77194972	77195111	+	0	NA	intron (NM_134071, intron 15 of 20)	L1_Mus3|LINE|L1	79688	NM_134071	105377	Mm.209730	NM_134071	ENSMUSG00000021597	Slf1	2700017A04Rik|AW545819|Ankrd32|Brctd1|Brctx|C730024G01Rik	SMC5-SMC6 complex localization factor 1	protein-coding
Diff_Nuc991	chr13	28762212	28762351	+	0	NA	intron (NR_045054, intron 3 of 7)	intron (NR_045054, intron 3 of 7)	40461	NR_105787	102466635		NR_105787	ENSMUSG00000099158	Mir6368	Gm27800|mmu-mir-6368	microRNA 6368	ncRNA
Diff_Nuc22943	chr14	120182272	120182411	+	0	NA	intron (NM_015820, intron 1 of 1)	L1Md_F2|LINE|L1	33892	NR_045621	75432	Mm.443277	NR_045621	ENSMUSG00000100274	1700006F04Rik	-	RIKEN cDNA 1700006F04 gene	ncRNA
Diff_Nuc17111	chr16	72159022	72159161	+	0	NA	Intergenic	RMER6C|LTR|ERVK	75481	NR_131116	319533	Mm.373754	NR_131115		8030451O07Rik	-	RIKEN cDNA 8030451O07 gene	ncRNA
Diff_Nuc19685	chr15	87065302	87065441	+	0	NA	Intergenic	Intergenic	-309358	NM_001252310	106014	Mm.244319	NM_134096	ENSMUSG00000054863	Fam19a5	TAFA5|Tafa-5|Tara-5	family with sequence similarity 19, member A5	protein-coding
Diff_Nuc50853	chr1	24032932	24033071	+	0	NA	intron (NM_026604, intron 15 of 20)	intron (NM_026604, intron 15 of 20)	-20522	NM_026503	68002	Mm.250424	NM_026503	ENSMUSG00000026154	Sdhaf4	1110058L19Rik|1700001E18Rik|C6orf57	succinate dehydrogenase complex assembly factor 4	protein-coding
Diff_Nuc17435	chr16	87889692	87889831	+	0	NA	Intergenic	Intergenic	190562	NM_007520	12013	Mm.26147	NM_007520	ENSMUSG00000025612	Bach1	6230421P05Rik|AI323795	BTB and CNC homology 1, basic leucine zipper transcription factor 1	protein-coding
Diff_Nuc19674	chr15	86625462	86625601	+	0	NA	Intergenic	Intergenic	580642	NM_145476	223754	Mm.28904	NM_145476	ENSMUSG00000051864	Tbc1d22a	BC023106|D15Ertd781e	TBC1 domain family, member 22a	protein-coding
Diff_Nuc2463	chr13	83782902	83783041	+	0	NA	intron (NM_001347564, intron 7 of 11)	intron (NM_001347564, intron 7 of 11)	70206	NM_001347569	17260	Mm.24001	NM_025282	ENSMUSG00000005583	Mef2c	5430401D19Rik|9930028G15Rik|AV011172|Mef2	myocyte enhancer factor 2C	protein-coding
Diff_Nuc39095	chr4	42976702	42976841	+	0	NA	Intergenic	MTE-int|LTR|MaLR	-6047	NM_026088	67317	Mm.478018	NM_026088	ENSMUSG00000028451	1700022I11Rik	-	RIKEN cDNA 1700022I11 gene	protein-coding
Diff_Nuc60708	chr8	102043012	102043151	+	0	NA	intron (NR_132435, intron 1 of 4)	RMER19C|LTR|ERVK	102507	NR_132435	234624	Mm.124595	NM_175479	ENSMUSG00000052479	A330008L17Rik	-	RIKEN cDNA A330008L17 gene	ncRNA
Diff_Nuc45620	chr3	148164992	148165131	+	0	NA	Intergenic	L2a|LINE|L2	452538	NM_001081298	99633	Mm.9776	NM_001081298	ENSMUSG00000028184	Adgrl2	AI450192|CIRL-2|Gm619|Lec1|Lphh1|Lphn2|mKIAA0786	adhesion G protein-coupled receptor L2	protein-coding
Diff_Nuc3598	chr12	8492292	8492431	+	0	NA	Intergenic	Intergenic	14430	NM_007483	11852	Mm.687	NM_007483	ENSMUSG00000054364	Rhob	AA017882|Arh6|Arhb	ras homolog family member B	protein-coding
Diff_Nuc39735	chr4	68431172	68431311	+	0	NA	intron (NM_019967, intron 7 of 7)	B4|SINE|B4	184190	NM_019967	56710	Mm.248788	NM_019967	ENSMUSG00000028351	Brinp1	BRINP|Dbc1|Dbccr1|Fam5a	bone morphogenic protein/retinoic acid inducible neural specific 1	protein-coding
Diff_Nuc42651	chr3	25550852	25550991	+	0	NA	intron (NM_001163387, intron 3 of 5)	intron (NM_001163387, intron 3 of 5)	501308	NM_001163387	192167	Mm.316080	NM_138666	ENSMUSG00000063887	Nlgn1	6330415N05Rik|BB179718|NL1|Nlg1|mKIAA1070	neuroligin 1	protein-coding
Diff_Nuc23126	chr19	4282472	4282611	+	0	NA	intron (NM_026720, intron 1 of 14)	intron (NM_026720, intron 1 of 14)	596	NM_026720	68423	Mm.23642	NM_026720	ENSMUSG00000005986	Ankrd13d	0710001P18Rik|AI430801	ankyrin repeat domain 13 family, member D	protein-coding
Diff_Nuc8764	chr11	93385862	93386001	+	0	NA	intron (NM_028296, intron 4 of 8)	intron (NM_028296, intron 4 of 8)	361149	NM_001013375	217109	Mm.379350	NM_001013375	ENSMUSG00000054079	Utp18	6230425C22Rik|6430513M13|Wdr50	UTP18 small subunit processome component	protein-coding
Diff_Nuc8995	chr11	101152602	101152741	+	0	NA	intron (NM_019584, intron 9 of 11)	intron (NM_019584, intron 9 of 11)	10910	NM_019584	56208	Mm.178947	NM_019584	ENSMUSG00000035086	Becn1	4921513J16Rik|5430417M23Rik|Atg6	beclin 1, autophagy related	protein-coding
Diff_Nuc12756	chr10	127134212	127134351	+	0	NA	3' UTR (NM_001113211, exon 9 of 9)	3' UTR (NM_001113211, exon 9 of 9)	-8031	NM_001081219	432516	Mm.90450	NM_001081219	ENSMUSG00000025401	Myo1a	BBM-I|Myhl	myosin IA	protein-coding
Diff_Nuc26658	chr18	80265492	80265631	+	0	NA	intron (NM_053117, intron 1 of 2)	L1MB7|LINE|L1	21927	NM_053117	93737	Mm.24678	NM_053117	ENSMUSG00000056214	Pard6g	2410049N21Rik|Par6a	par-6 family cell polarity regulator gamma	protein-coding
Diff_Nuc13615	chr17	29357202	29357341	+	0	NA	intron (NM_153166, intron 3 of 20)	(CA)n|Simple_repeat|Simple_repeat	17464	NM_153166	240058	Mm.39905	NM_153166	ENSMUSG00000024008	Cpne5	A830083G22Rik	copine V	protein-coding
Diff_Nuc4893	chr12	66215822	66215961	+	0	NA	intron (NM_178912, intron 16 of 22)	RLTR13C2|LTR|ERVK	39298	NM_178912	104806	Mm.374847	NM_178912	ENSMUSG00000055884	Fancm	AI427100|C730036B14Rik|D12Ertd364e	Fanconi anemia, complementation group M	protein-coding
Diff_Nuc37249	chr5	121214677	121214816	+	0	NA	intron (NM_145226, intron 7 of 15)	intron (NM_145226, intron 7 of 15)	12922	NM_145226	246727	Mm.204887	NM_145226	ENSMUSG00000032661	Oas3	Oasl10	2'-5' oligoadenylate synthetase 3	protein-coding
Diff_Nuc3715	chr12	12513062	12513201	+	0	NA	Intergenic	B4A|SINE|B4	-113850	NR_045829	70858	Mm.410838	NR_045829		4921511I17Rik	-	RIKEN cDNA 4921511I17 gene	ncRNA
Diff_Nuc54240	chr1	163860002	163860141	+	0	NA	Intergenic	Intergenic	39208	NM_001204905	75368	Mm.108728	NM_001204904	ENSMUSG00000086277	4930558K02Rik	-	RIKEN cDNA 4930558K02 gene	protein-coding
Diff_Nuc55517	chr9	20730302	20730441	+	0	NA	intron (NM_001199432, intron 16 of 38)	intron (NM_001199432, intron 16 of 38)	-11763	NR_106049	102466802		NR_106049	ENSMUSG00000099147	Mir7081	Gm27904|mmu-mir-7081	microRNA 7081	ncRNA
Diff_Nuc10943	chr10	60775362	60775501	+	0	NA	Intergenic	Intergenic	14847	NM_011073	18646	Mm.240313	NM_011073	ENSMUSG00000037202	Prf1	Pfn|Pfp|Prf-1	perforin 1 (pore forming protein)	protein-coding
Diff_Nuc47587	chr2	72129392	72129531	+	0	NA	intron (NM_178084, intron 1 of 9)	(TG)n|Simple_repeat|Simple_repeat	5703	NM_178084	65964	Mm.304143	NM_023057	ENSMUSG00000004085	Map3k20	AV006891|B230120H23Rik|MLTK|MLTKalpha|MLTKbeta|Zak	mitogen-activated protein kinase kinase kinase 20	protein-coding
Diff_Nuc11106	chr10	67348187	67348326	+	0	NA	TTS (NM_178679)	TTS (NM_178679)	27154	NM_178679	216049	Mm.268346	NM_178679	ENSMUSG00000037855	Zfp365	AI839779|AV340892|DBZ|Su48|Znf365|talanin	zinc finger protein 365	protein-coding
Diff_Nuc56144	chr9	44014662	44014801	+	0	NA	intron (NM_007619, intron 1 of 15)	intron (NM_007619, intron 1 of 15)	27398	NM_007619	12402	Mm.266871	NM_007619	ENSMUSG00000034342	Cbl	4732447J05Rik|Cbl-2|c-Cbl|cbl	Casitas B-lineage lymphoma	protein-coding
Diff_Nuc43299	chr3	52284082	52284221	+	0	NA	Intergenic	MTD|LTR|MaLR	211892	NM_019739	56458	Mm.29891	NM_019739	ENSMUSG00000044167	Foxo1	AI876417|Afxh|FKHR|Fkhr1|Foxo1a	forkhead box O1	protein-coding
Diff_Nuc4439	chr12	45493082	45493221	+	0	NA	intron (NM_176930, intron 2 of 30)	ORR1A2|LTR|MaLR	63279	NM_001146031	319504	Mm.208439	NM_176930	ENSMUSG00000020598	Nrcam	Bravo|C030017F07Rik|C130076O07Rik|mKIAA0343	neuronal cell adhesion molecule	protein-coding
Diff_Nuc5880	chr12	104000772	104000911	+	0	NA	intron (NM_025666, intron 3 of 10)	intron (NM_025666, intron 3 of 10)	4656	NM_025666	66622	Mm.34261	NM_025666	ENSMUSG00000041712	Ubr7	5730410I19Rik|AA589405|AW557761	ubiquitin protein ligase E3 component n-recognin 7 (putative)	protein-coding
Diff_Nuc41697	chr4	144715162	144715301	+	0	NA	intron (NM_001276465, intron 30 of 69)	MIRm|SINE|MIR	65338	NM_001276502	230895	Mm.240310	NM_001033190	ENSMUSG00000020220	Vps13d	-	vacuolar protein sorting 13D	protein-coding
Diff_Nuc32877	chr6	95389502	95389641	+	0	NA	Intergenic	Lx8|LINE|L1	-105584	NR_033559	414067	Mm.355990	NR_033559	ENSMUSG00000068180	AY512915	-	cDNA sequence AY512915	ncRNA
Diff_Nuc28927	chr7	88271182	88271321	+	0	NA	intron (NM_001004184, intron 7 of 17)	intron (NM_001004184, intron 7 of 17)	11566	NM_001004184	434203	Mm.389909	NM_001004184	ENSMUSG00000025726	Slc28a1	Cnt1	solute carrier family 28 (sodium-coupled nucleoside transporter), member 1	protein-coding
Diff_Nuc34080	chr6	144103532	144103671	+	0	NA	exon (NM_001113559, exon 2 of 14)	exon (NM_001113559, exon 2 of 14)	54487	NM_001113559	20678	Mm.1752	NM_011444	ENSMUSG00000041540	Sox5	A730017D01Rik|AI528773	SRY (sex determining region Y)-box 5	protein-coding
Diff_Nuc28498	chr7	71461242	71461381	+	0	NA	intron (NM_172742, intron 7 of 15)	ORR1C2|LTR|MaLR	28755	NM_172742	233315	Mm.214959	NM_172742	ENSMUSG00000030522	Mtmr10	BB128963|C79734	myotubularin related protein 10	protein-coding
Diff_Nuc61199	chr8	119722812	119722951	+	0	NA	intron (NM_001081151, intron 9 of 10)	B2_Mm1t|SINE|B2	40846	NM_001081151	209239	Mm.132992	NM_001081151	ENSMUSG00000052557	Gan	A330045G18|gigaxonin	giant axonal neuropathy	protein-coding
Diff_Nuc28163	chr7	57482572	57482711	+	0	NA	intron (NM_001037906, intron 7 of 19)	intron (NM_001037906, intron 7 of 19)	251921	NM_001037906	338352	Mm.383528	NM_001037906	ENSMUSG00000055409	Nell1	B230343H07Rik|l7R6	NEL-like 1	protein-coding
Diff_Nuc16706	chr16	53004302	53004441	+	0	NA	Intergenic	MTD|LTR|MaLR	-188514	NR_040495	73820	Mm.60493	NR_040495		4930404A05Rik	-	RIKEN cDNA 4930404A05 gene	ncRNA
Diff_Nuc58882	chr8	25015082	25015221	+	0	NA	intron (NM_001277239, intron 5 of 7)	MTB|LTR|MaLR	235018	NM_177086	320158	Mm.121274	NM_177086	ENSMUSG00000037492	Zmat4	9630048M01Rik	zinc finger, matrin type 4	protein-coding
Diff_Nuc55202	chr9	6048462	6048601	+	0	NA	Intergenic	RMER17D2|LTR|ERVK	-120081	NM_027924	71785	Mm.390122	NM_027924	ENSMUSG00000032006	Pdgfd	1110003I09Rik	platelet-derived growth factor, D polypeptide	protein-coding
Diff_Nuc20160	chr14	3009792	3009931	+	0	NA	Intergenic	L1Md_T|LINE|L1	-39424	NM_001177715	100040671	Mm.360540	NM_001177714	ENSMUSG00000079410	Gm2897	ENSMUSG00000079410	predicted gene 2897	protein-coding
Diff_Nuc26246	chr18	65311072	65311211	+	0	NA	intron (NM_031881, intron 5 of 29)	intron (NM_031881, intron 5 of 29)	-97374	NR_029600	387231		NR_029600	ENSMUSG00000065402	Mir122	Mir122a|Mirn122a|mir-122|mmu-mir-122	microRNA 122	ncRNA
Diff_Nuc46853	chr2	40619362	40619501	+	0	NA	intron (NM_053011, intron 66 of 90)	L1Md_A|LINE|L1	-1537573	NM_024209	67857	Mm.389242	NM_024209	ENSMUSG00000026753	Ppp6c	2310003C10Rik	protein phosphatase 6, catalytic subunit	protein-coding
Diff_Nuc13464	chr17	24863262	24863401	+	0	NA	Intergenic	MTD|LTR|MaLR	-1443	NM_001163945	66211	Mm.46198	NM_025425	ENSMUSG00000002500	Rpl3l	1110057H16Rik	ribosomal protein L3-like	protein-coding
Diff_Nuc31375	chr6	35659052	35659191	+	0	NA	Intergenic	Intergenic	-169233	NM_008098	14489	Mm.182746	NM_008098	ENSMUSG00000029840	Mtpn	5033418D15Rik|Gcdp|V1	myotrophin	protein-coding
Diff_Nuc44164	chr3	88373632	88373771	+	0	NA	TTS (NM_033526)	TTS (NM_033526)	-9892	NM_025448	66256	Mm.7091	NM_025448	ENSMUSG00000041355	Ssr2	1500032E05Rik|AI315033|AU020133|TLAP|TRAPB|TRAPbeta	signal sequence receptor, beta	protein-coding
Diff_Nuc2828	chr13	97717732	97717871	+	0	NA	3' UTR (NM_001166065, exon 3 of 3)	3' UTR (NM_001166065, exon 3 of 3)	23157	NM_001166065	218476	Mm.483490	NM_001166065	ENSMUSG00000091387	Gcnt4	C2gnt3|Gm279|Gm73	glucosaminyl (N-acetyl) transferase 4, core 2 (beta-1,6-N-acetylglucosaminyltransferase)	protein-coding
Diff_Nuc43748	chr3	71866752	71866891	+	0	NA	Intergenic	RMER6A|LTR|ERVK	903967	NM_001081137	69983	Mm.261054	NM_001081137	ENSMUSG00000027790	Sis	2010204N08Rik|SI|Si-s	sucrase isomaltase (alpha-glucosidase)	protein-coding
Diff_Nuc24757	chr18	8539012	8539151	+	0	NA	Intergenic	L1_Mus3|LINE|L1	669886	NM_153085	225131	Mm.204524	NM_153085	ENSMUSG00000024283	Wac	1110067P07Rik|A230035H12Rik|AI256735|AI256776|Wwp4	WW domain containing adaptor with coiled-coil	protein-coding
Diff_Nuc3945	chr12	25713442	25713581	+	0	NA	intron (NM_001081378, intron 22 of 31)	ORR1A2|LTR|MaLR	53714	NM_001081378	77480	Mm.250641	NM_001081378	ENSMUSG00000036333	Kidins220	3110039L19Rik|AI194387|AI316525|C330002I19Rik|mKIAA1250	kinase D-interacting substrate 220	protein-coding
Diff_Nuc18955	chr15	58321802	58321941	+	0	NA	Intergenic	Intergenic	74848	NM_145959	210998	Mm.3224	NM_145959	ENSMUSG00000037119	Fam91a1	AV220772|BC033609|D15Ertd621e|SKIN|mKIAA0493	family with sequence similarity 91, member A1	protein-coding
Diff_Nuc44186	chr3	88845692	88845831	+	0	NA	intron (NM_138679, intron 9 of 26)	B1F2|SINE|Alu	48192	NM_001083808	72296	Mm.27687	NM_028188	ENSMUSG00000041263	Rusc1	2210403N08Rik|AA408288|NESCA	RUN and SH3 domain containing 1	protein-coding
Diff_Nuc58038	chr9	112346042	112346181	+	0	NA	Intergenic	Intergenic	187033	NR_033433	620760	Mm.259863	NR_015468	ENSMUSG00000087038	2900079G21Rik	C130083B14|Gm6179	RIKEN cDNA 2900079G21 gene	ncRNA
Diff_Nuc1336	chr13	42921512	42921651	+	0	NA	intron (NM_001005740, intron 1 of 12)	intron (NM_001005740, intron 1 of 12)	-40035	NM_001302636	218194	Mm.160124	NM_198419	ENSMUSG00000054728	Phactr1	9630030F18Rik|Rpel1	phosphatase and actin regulator 1	protein-coding
Diff_Nuc49399	chr2	142878262	142878401	+	0	NA	Intergenic	Lx|LINE|L1	-10474	NM_021335	20639	Mm.1323	NM_021335	ENSMUSG00000008333	Snrpb2	2810052G09Rik	U2 small nuclear ribonucleoprotein B	protein-coding
Diff_Nuc29046	chr7	93239012	93239151	+	0	NA	Intergenic	RLTR9D|LTR|ERVK	81153	NM_001102578	546981	Mm.469835	NM_001102578	ENSMUSG00000090436	Vmn2r75	EG546981	vomeronasal 2, receptor 75	protein-coding
Diff_Nuc49064	chr2	130425142	130425281	+	0	NA	intron (NM_001255994, intron 4 of 5)	intron (NM_001255994, intron 4 of 5)	-16887	NM_009732	11998	Mm.6190	NM_009732	ENSMUSG00000037727	Avp	Vp|Vsp	arginine vasopressin	protein-coding
Diff_Nuc37618	chr5	133310852	133310991	+	0	NA	Intergenic	ZP3AR|Satellite|Satellite	-292708	NM_177047	319974	Mm.409595	NM_177047	ENSMUSG00000029673	Auts2	2700063G02Rik|A730011F23Rik|D830032G16Rik	autism susceptibility candidate 2	protein-coding
Diff_Nuc2636	chr13	91299122	91299261	+	0	NA	intron (NM_025770, intron 2 of 7)	intron (NM_025770, intron 2 of 7)	64401	NM_025770	66795	Mm.235385	NM_025770	ENSMUSG00000021619	Atg10	5330424L23Rik|5430428K15Rik|AI852123|APG10|Agp10|Apg10l|Apg10p|Atg10l	autophagy related 10	protein-coding
Diff_Nuc58959	chr8	27658462	27658601	+	0	NA	Intergenic	Intergenic	276364	NR_045904	72316	Mm.490534	NR_045904	ENSMUSG00000100335	2310008N11Rik	-	RIKEN cDNA 2310008N11 gene	ncRNA
Diff_Nuc10093	chr10	21599982	21600121	+	0	NA	Intergenic	Intergenic	-1939	NM_001161845	20393	Mm.28405	NM_011361	ENSMUSG00000019970	Sgk1	Sgk	serum/glucocorticoid regulated kinase 1	protein-coding
Diff_Nuc50693	chr1	16096532	16096671	+	0	NA	intron (NM_133832, intron 1 of 5)	intron (NM_133832, intron 1 of 5)	638	NM_133832	98711	Mm.274376	NM_133832	ENSMUSG00000025921	Rdh10	3110069K09Rik|4921506A21Rik|AI875664|AW549993|D1Ertd762e|m366Asp	retinol dehydrogenase 10 (all-trans)	protein-coding
Diff_Nuc1945	chr13	64113192	64113331	+	0	NA	Intergenic	Intergenic	77248	NM_008291	15487	Mm.5109	NM_008291	ENSMUSG00000033122	Hsd17b3	-	hydroxysteroid (17-beta) dehydrogenase 3	protein-coding
Diff_Nuc61134	chr8	117436582	117436721	+	0	NA	intron (NM_019573, intron 8 of 8)	B4A|SINE|B4	473099	NM_019573	80707	Mm.440420	NM_019573	ENSMUSG00000004637	Wwox	5330426P09Rik|9030416C10Rik|WOX1	WW domain-containing oxidoreductase	protein-coding
Diff_Nuc2097	chr13	70070752	70070891	+	0	NA	Intergenic	Intergenic	-27890	NR_138559	67550	Mm.158159	NR_138559		4933416O17Rik	-	RIKEN cDNA 4933416O17 gene	ncRNA
Diff_Nuc35929	chr5	70763182	70763321	+	0	NA	Intergenic	L1Md_F|LINE|L1	470605	NM_010252	14405	Mm.255292	NM_010252	ENSMUSG00000001260	Gabrg1	GabaA|GabaA/BZ	gamma-aminobutyric acid (GABA) A receptor, subunit gamma 1	protein-coding
Diff_Nuc54233	chr1	163575172	163575311	+	0	NA	Intergenic	Lx2B|LINE|L1	143385	NM_001205243	14103	Mm.3355	NM_010177	ENSMUSG00000000817	Fasl	APT1LG1|CD178|CD95-L|CD95L|Fas-L|Faslg|Tnfsf6|Tnlg1a|gld	Fas ligand (TNF superfamily, member 6)	protein-coding
Diff_Nuc28314	chr7	64758632	64758771	+	0	NA	intron (NM_176942, intron 2 of 9)	intron (NM_176942, intron 2 of 9)	6678	NM_176942	110886	Mm.273114	NM_176942	ENSMUSG00000055078	Gabra5	A230018I05Rik	gamma-aminobutyric acid (GABA) A receptor, subunit alpha 5	protein-coding
Diff_Nuc50919	chr1	26156252	26156391	+	0	NA	Intergenic	MTC|LTR|MaLR	-269769	NM_175642	210933	Mm.336569	NM_175642	ENSMUSG00000033569	Adgrb3	A830096D10Rik|Bai3	adhesion G protein-coupled receptor B3	protein-coding
Diff_Nuc44836	chr3	113837152	113837291	+	0	NA	intron (NM_007729, intron 31 of 66)	L1_Mus4|LINE|L1	103763	NM_007729	12814	Mm.209715	NM_007729	ENSMUSG00000027966	Col11a1	C530001D20Rik|cho	collagen, type XI, alpha 1	protein-coding
Diff_Nuc43471	chr3	59275752	59275891	+	0	NA	Intergenic	RMER10A|LTR|ERVL	-127643	NM_001162884	242050	Mm.228086	NM_001162884	ENSMUSG00000036334	Igsf10	6530405F15Rik|9030224D03|AA409708|AA536958|AI414626|Adlican2|CMF608	immunoglobulin superfamily, member 10	protein-coding
Diff_Nuc6448	chr11	5721632	5721771	+	0	NA	Intergenic	ORR1C1|LTR|MaLR	16318	NM_017401	54125	Mm.260194	NM_017401	ENSMUSG00000020474	Polm	AI462166|B230309I03Rik|Tdt-N	polymerase (DNA directed), mu	protein-coding
Diff_Nuc17926	chr15	13112682	13112821	+	0	NA	Intergenic	Intergenic	-9321	NM_007666	12563	Mm.57048	NM_007666	ENSMUSG00000039385	Cdh6	cad6	cadherin 6	protein-coding
Diff_Nuc55391	chr9	14398642	14398781	+	0	NA	intron (NM_001081395, intron 2 of 12)	intron (NM_001081395, intron 2 of 12)	20733	NM_001081395	75723	Mm.159552	NM_001081395	ENSMUSG00000013076	Amotl1	2310010G08Rik|2310067L22Rik|4932416D09Rik|JEAP|mFLJ00155	angiomotin-like 1	protein-coding
Diff_Nuc53014	chr1	108452132	108452271	+	0	NA	intron (NM_009741, intron 1 of 1)	intron (NM_009741, intron 1 of 1)	-8993	NR_106164	102466254		NR_106164	ENSMUSG00000098344	Mir3473f	Gm27846|mmu-mir-3473f	microRNA 3473f	ncRNA
Diff_Nuc49767	chr2	155824332	155824471	+	0	NA	3' UTR (NM_001130000, exon 33 of 33)	3' UTR (NM_001130000, exon 33 of 33)	5762	NM_001145351	320095	Mm.442175	NM_001145351	ENSMUSG00000074646	6430550D23Rik	-	RIKEN cDNA 6430550D23 gene	protein-coding
Diff_Nuc10874	chr10	57995087	57995226	+	0	NA	intron (NM_001162956, intron 10 of 15)	ETnERV2-int|LTR|ERVK	34471	NM_001162956	76138	Mm.211744	NM_001162956	ENSMUSG00000038010	Ccdc138	6230424H07Rik|BC042726	coiled-coil domain containing 138	protein-coding
Diff_Nuc35435	chr5	49884542	49884681	+	0	NA	Intergenic	Intergenic	-207713	NM_001199244	80334	Mm.160172	NM_030265	ENSMUSG00000029088	Kcnip4	AV032399|Calp|Calp250|KChIP4|KChIP4a	Kv channel interacting protein 4	protein-coding
Diff_Nuc55042	chr1	194777232	194777371	+	0	NA	intron (NM_181546, intron 4 of 7)	L1M4|LINE|L1	84668	NM_001301370	329324	Mm.76710	NM_181546	ENSMUSG00000016200	Syt14	B230320I09Rik|sytXIV	synaptotagmin XIV	protein-coding
Diff_Nuc5556	chr12	90316072	90316211	+	0	NA	intron (NM_172544, intron 2 of 19)	intron (NM_172544, intron 2 of 19)	124307	NM_172544	18191	Mm.425766	NM_172544	ENSMUSG00000066392	Nrxn3	-	neurexin III	protein-coding
Diff_Nuc40185	chr4	88370762	88370901	+	0	NA	Intergenic	Intergenic	-2419	NM_172871	242521	Mm.260601	NM_172871	ENSMUSG00000070923	Klhl9	8030469P05|C530050O22Rik|ENSMUSG00000070923|mKIAA1354	kelch-like 9	protein-coding
Diff_Nuc1433	chr13	45956832	45956971	+	0	NA	intron (NM_009124, intron 2 of 7)	intron (NM_009124, intron 2 of 7)	103459	NM_001199304	20238	Mm.342683	NM_009124	ENSMUSG00000046876	Atxn1	2900016G23Rik|Atx1|C85907|ENSMUSG00000074917|Gm10786|Sca1	ataxin 1	protein-coding
Diff_Nuc23745	chr19	27240052	27240191	+	0	NA	Intergenic	L1MC1|LINE|L1	-50853	NM_001347441	22359	Mm.4141	NM_013703	ENSMUSG00000024924	Vldlr	AA408956|AI451093|AW047288	very low density lipoprotein receptor	protein-coding
Diff_Nuc34879	chr5	28752542	28752681	+	0	NA	Intergenic	Intergenic	-40913	NR_015562	654796	Mm.57202	NR_015562	ENSMUSG00000097726	9530036O11Rik	-	RIKEN cDNA 9530036O11Rik	ncRNA
Diff_Nuc27660	chr7	34086942	34087081	+	0	NA	Intergenic	Intergenic	14685	NM_001281526	434676		NM_001281526	ENSMUSG00000095232	Scgb1b19	Abpa19|EG434676|Gm5632	secretoglobin, family 1B, member 19	protein-coding
Diff_Nuc25910	chr18	53278532	53278671	+	0	NA	Intergenic	Lx5|LINE|L1	-57418	NM_026386	67804	Mm.252171	NM_026386	ENSMUSG00000034484	Snx2	0610030A03Rik	sorting nexin 2	protein-coding
Diff_Nuc52491	chr1	87477482	87477621	+	0	NA	intron (NM_175397, intron 10 of 12)	intron (NM_175397, intron 10 of 12)	17834	NM_030194	109032	Mm.335802	NM_030194	ENSMUSG00000070034	Sp110	5031415C07Rik|52kDa|5830484A20Rik|ENSMUSG00000075603|Ifi75|Ipr1	Sp110 nuclear body protein	protein-coding
Diff_Nuc3320	chr13	114771122	114771261	+	0	NA	intron (NM_172595, intron 4 of 4)	intron (NM_172595, intron 4 of 4)	170609	NR_045836	319803	Mm.386896	NM_177004		A430090L17Rik	-	RIKEN cDNA A430090L17 gene	ncRNA
Diff_Nuc61480	chr8	130043742	130043881	+	0	NA	intron (NM_033620, intron 22 of 24)	B4|SINE|B4	220259	NM_001013580	93742	Mm.299254	NM_033620	ENSMUSG00000025812	Pard3	AA960621|AI256638|Asip|D8Ertd580e|Par-3|Par3|Pard-3|Pard3a|Phip	par-3 family cell polarity regulator	protein-coding
Diff_Nuc15600	chr16	13455672	13455811	+	0	NA	Intergenic	Intergenic	1808	NR_029855	723899		NR_029855	ENSMUSG00000065449	Mir365-1	Mirn365-1|mir-365-1	microRNA 365-1	ncRNA
Diff_Nuc799	chr13	20109672	20109811	+	0	NA	Intergenic	Intergenic	-72635	NM_080288	140580	Mm.342392	NM_080288	ENSMUSG00000041112	Elmo1	6330578D22Rik|C230095H21Rik|CED-12	engulfment and cell motility 1	protein-coding
Diff_Nuc48435	chr2	105677992	105678131	+	0	NA	intron (NM_023876, intron 4 of 9)	L1Md_F2|LINE|L1	66660	NM_023876	77766	Mm.3608	NM_023876	ENSMUSG00000027167	Elp4	A330107A17Rik|Paxneb	elongator acetyltransferase complex subunit 4	protein-coding
Diff_Nuc56104	chr9	42048522	42048661	+	0	NA	Intergenic	Intergenic	23792	NM_172769	235293	Mm.32700	NM_172769	ENSMUSG00000032018	Sc5d	A830037K02|A830073K23Rik|Sc5dl	sterol-C5-desaturase	protein-coding
Diff_Nuc16691	chr16	52118582	52118721	+	0	NA	intron (NM_001033238, intron 4 of 17)	RLTR16|LTR|ERVK	86989	NM_001033238	208650	Mm.328206	NM_001033238	ENSMUSG00000022637	Cblb	AI429560|AI851073|Cbl-b	Casitas B-lineage lymphoma b	protein-coding
Diff_Nuc32177	chr6	66561102	66561241	+	0	NA	TTS (NM_134169)	TTS (NM_134169)	1391	NM_134169	171187	Mm.451648	NM_134169	ENSMUSG00000059375	Vmn1r33	V1rc14	vomeronasal 1 receptor 33	protein-coding
Diff_Nuc17277	chr16	80537982	80538121	+	0	NA	Intergenic	Intergenic	-662891	NM_001113208	17968	Mm.433941	NM_010954	ENSMUSG00000022762	Ncam2	Ncam-2|Ocam|RNCAM	neural cell adhesion molecule 2	protein-coding
Diff_Nuc34372	chr5	8412382	8412521	+	0	NA	intron (NM_013726, intron 2 of 11)	B1_Mm|SINE|Alu	10265	NM_013726	27214	Mm.292470	NM_013726	ENSMUSG00000002297	Dbf4	AA545217|Ask	DBF4 zinc finger	protein-coding
Diff_Nuc49073	chr2	130595552	130595691	+	0	NA	intron (NM_029432, intron 17 of 36)	intron (NM_029432, intron 17 of 36)	34216	NR_024097	100043766	Mm.447040	NR_024097		Gm14057	OTTMUSG00000015563	Ppp1r14c pseudogene	pseudo
Diff_Nuc57726	chr9	102535642	102535781	+	0	NA	intron (NM_181394, intron 2 of 2)	intron (NM_181394, intron 2 of 2)	7085	NM_181394	69010	Mm.2000	NM_181394	ENSMUSG00000035048	Anapc13	1810004D07Rik|APC13|SWM1	anaphase promoting complex subunit 13	protein-coding
Diff_Nuc16159	chr16	32178092	32178231	+	0	NA	Intergenic	Intergenic	-1725	NM_001033539	328660	Mm.441006	NM_001033539	ENSMUSG00000075269	Bex6	B020003O03Rik	brain expressed family member 6	protein-coding
Diff_Nuc61238	chr8	122223662	122223801	+	0	NA	promoter-TSS (NM_026922)	promoter-TSS (NM_026922)	-178	NM_026922	69047	Mm.46251	NM_026922	ENSMUSG00000034112	Atp2c2	1810010G06Rik|Spca2|mKIAA0703	ATPase, Ca++ transporting, type 2C, member 2	protein-coding
Diff_Nuc31573	chr6	42704562	42704701	+	0	NA	Intergenic	B3|SINE|B2	-7422	NM_146986	258988	Mm.377777	NM_146986	ENSMUSG00000095236	Olfr38	18A|MOR257-2	olfactory receptor 38	protein-coding
Diff_Nuc4513	chr12	49313962	49314101	+	0	NA	Intergenic	L1_Mus3|LINE|L1	-1169839	NM_001160112	15228	Mm.4704	NM_008241	ENSMUSG00000020950	Foxg1	2900064B05Rik|BF-1|Bf1|Hfh9|Hfhbf1	forkhead box G1	protein-coding
Diff_Nuc27981	chr7	51839492	51839631	+	0	NA	intron (NM_008437, intron 5 of 8)	B2_Mm2|SINE|B2	-6695	NM_008422	16504	Mm.40312	NM_008422	ENSMUSG00000062785	Kcnc3	KShIIID|Kcr2-3|Kv3.3	potassium voltage gated channel, Shaw-related subfamily, member 3	protein-coding
Diff_Nuc12901	chr17	3980892	3981031	+	0	NA	Intergenic	Intergenic	102034	NR_045764	75815	Mm.183387	NR_045764		4930470H14Rik	-	RIKEN cDNA 4930470H14 gene	ncRNA
Diff_Nuc1486	chr13	47734962	47735101	+	0	NA	Intergenic	B4A|SINE|B4	-270773	NR_045156	619327	Mm.412752	NR_045156		G630093K05Rik	-	RIKEN cDNA G630093K05 gene	ncRNA
Diff_Nuc38180	chr4	3168612	3168751	+	0	NA	Intergenic	B3|SINE|B2	-56229	NM_001167535	100312471	Mm.377218	NM_001167535	ENSMUSG00000095982	Vmn1r3	Gm11778|OTTMUSG00000004181	vomeronasal 1 receptor 3	protein-coding
Diff_Nuc53144	chr1	115972932	115973071	+	0	NA	Intergenic	L1VL2|LINE|L1	-1608713	NM_001077425	636808	Mm.101576	NM_001077425	ENSMUSG00000070695	Cntnap5a	Caspr5-1|EG636808	contactin associated protein-like 5A	protein-coding
Diff_Nuc57680	chr9	100663847	100663986	+	0	NA	intron (NM_009282, intron 5 of 33)	ORR1E|LTR|MaLR	119874	NM_009282	20842	Mm.42135	NM_009282	ENSMUSG00000037286	Stag1	AU045003|SA-1|Scc3	stromal antigen 1	protein-coding
Diff_Nuc14583	chr17	68034362	68034501	+	0	NA	Intergenic	Intergenic	-12174	NM_008480	16772	Mm.303386	NM_008480	ENSMUSG00000032796	Lama1	AA408497|Lama	laminin, alpha 1	protein-coding
Diff_Nuc16041	chr16	28150712	28150851	+	0	NA	Intergenic	L1_Mur3|LINE|L1	295380	NM_183064	14167	Mm.7996	NM_010199	ENSMUSG00000022523	Fgf12	AV114868|B230343J05Rik|FGF-12|FHF-1|Fhf1	fibroblast growth factor 12	protein-coding
Diff_Nuc51427	chr1	46205152	46205291	+	0	NA	intron (NM_001160386, intron 20 of 65)	L1Md_F2|LINE|L1	81638	NM_001160386	227058	Mm.296880	NM_001160386	ENSMUSG00000041144	Dnah7b	Dnahc7b|Gm107	dynein, axonemal, heavy chain 7B	protein-coding
Diff_Nuc24356	chr19	51262342	51262481	+	0	NA	Intergenic	Intergenic	-509275	NM_001290356	58178	Mm.313672	NM_021377	ENSMUSG00000043531	Sorcs1	Sorcs|mSorCS	sortilin-related VPS10 domain containing receptor 1	protein-coding
Diff_Nuc3512	chr12	4613292	4613431	+	0	NA	intron (NM_001198969, intron 1 of 16)	intron (NM_001198969, intron 1 of 16)	13547	NM_001198968	20403	Mm.341204	NM_011365	ENSMUSG00000020640	Itsn2	AI327390|Ese2|Sh3d1B|Sh3p18|mKIAA1256	intersectin 2	protein-coding
Diff_Nuc32834	chr6	93631722	93631861	+	0	NA	non-coding (NR_104594, exon 20 of 20)	non-coding (NR_104594, exon 20 of 20)	231166	NR_104594	14924	Mm.217216	NM_010367	ENSMUSG00000045095	Magi1	AIP3|BAP1|Baiap1|Gukmi1|MAGI1c|Magi-1|TNRC19|WWP3|mKIAA4129	membrane associated guanylate kinase, WW and PDZ domain containing 1	protein-coding
Diff_Nuc9949	chr10	16525722	16525861	+	0	NA	Intergenic	Intergenic	289797	NR_038020	100504235	Mm.84044	NR_038020	ENSMUSG00000101969	Gm20125	-	predicted gene, 20125	ncRNA
Diff_Nuc15972	chr16	25310602	25310741	+	0	NA	intron (NM_175165, intron 1 of 5)	intron (NM_175165, intron 1 of 5)	23768	NM_175165	71338	Mm.126851	NM_175165	ENSMUSG00000048399	Tprg	5430420C16Rik|Tprg1	transformation related protein 63 regulated	protein-coding
Diff_Nuc56817	chr9	66386142	66386281	+	0	NA	intron (NM_144937, intron 8 of 14)	intron (NM_144937, intron 8 of 14)	-23811	NM_175206	74165	Mm.297998	NM_175206	ENSMUSG00000050503	Fbxl22	1110004B15Rik	F-box and leucine-rich repeat protein 22	protein-coding
Diff_Nuc9781	chr10	8970577	8970716	+	0	NA	Intergenic	Intergenic	-364778	NM_175155	70097	Mm.338275	NM_175155	ENSMUSG00000015305	Sash1	1100001C18Rik|2500002E12Rik|A330076K04Rik|mKIAA0790	SAM and SH3 domain containing 1	protein-coding
Diff_Nuc23579	chr19	21910422	21910561	+	0	NA	intron (NM_031997, intron 19 of 24)	intron (NM_031997, intron 19 of 24)	57661	NM_031997	83921	Mm.329776	NM_031997	ENSMUSG00000024754	Tmem2	-	transmembrane protein 2	protein-coding
Diff_Nuc53598	chr1	135554922	135555061	+	0	NA	exon (NM_001166552, exon 1 of 1)	exon (NM_001166552, exon 1 of 1)	2471	NM_001166552	667118	Mm.245357	NM_001166552	ENSMUSG00000094410	Zbed6	Gm8466|MGR	zinc finger, BED type containing 6	protein-coding
Diff_Nuc23772	chr19	27967662	27967801	+	0	NA	intron (NM_011265, intron 2 of 16)	Lx2A|LINE|L1	89707	NM_001166414	19726	Mm.313321	NM_011265	ENSMUSG00000040929	Rfx3	C230093O12Rik|MRFX3	regulatory factor X, 3 (influences HLA class II expression)	protein-coding
Diff_Nuc8530	chr11	85127402	85127541	+	0	NA	intron (NM_016910, intron 1 of 5)	B3A|SINE|B2	2715	NM_016910	53892	Mm.45609	NM_016910	ENSMUSG00000020525	Ppm1d	AV338790|Wip1	protein phosphatase 1D magnesium-dependent, delta isoform	protein-coding
Diff_Nuc46120	chr2	14124222	14124361	+	0	NA	intron (NM_001081310, intron 3 of 3)	intron (NM_001081310, intron 3 of 3)	-26750	NM_008625	17533	Mm.2019	NM_008625	ENSMUSG00000026712	Mrc1	AW259686|CD206|MR	mannose receptor, C type 1	protein-coding
Diff_Nuc57269	chr9	83183712	83183851	+	0	NA	Intergenic	Intergenic	-141373	NR_102437	100039186	Mm.212721	NR_102437	ENSMUSG00000099718	Gm2087	-	predicted gene 2087	ncRNA
Diff_Nuc17915	chr15	12694282	12694421	+	0	NA	Intergenic	Intergenic	60061	NM_029998	77877	Mm.207311	NM_029998	ENSMUSG00000022195	6030458C11Rik	-	RIKEN cDNA 6030458C11 gene	protein-coding
Diff_Nuc349	chrX	154773272	154773411	+	0	NA	Intergenic	L1Md_T|LINE|L1	-292212	NM_177751	245684	Mm.197074	NM_177751	ENSMUSG00000025658	Cnksr2	Cnk2|Ksr2	connector enhancer of kinase suppressor of Ras 2	protein-coding
Diff_Nuc56018	chr9	39065372	39065511	+	0	NA	exon (NM_146506, exon 1 of 1)	exon (NM_146506, exon 1 of 1)	823	NM_146506	258499	Mm.377538	NM_146506	ENSMUSG00000063380	Olfr945	MOR171-20	olfactory receptor 945	protein-coding
Diff_Nuc34452	chr5	13182642	13182781	+	0	NA	Intergenic	CT-rich|Low_complexity|Low_complexity	-214073	NM_001243072	20346	Mm.372039	NM_009152	ENSMUSG00000028883	Sema3a	Hsema-I|SEMA1|SemD|Semad|coll-1	sema domain, immunoglobulin domain (Ig), short basic domain, secreted, (semaphorin) 3A	protein-coding
Diff_Nuc18714	chr15	47618492	47618631	+	0	NA	intron (NM_001081391, intron 32 of 70)	intron (NM_001081391, intron 32 of 70)	1004974	NM_001081391	239420	Mm.309363	NM_001081391	ENSMUSG00000022311	Csmd3	4930500N14Rik|mKIAA1894	CUB and Sushi multiple domains 3	protein-coding
Diff_Nuc27783	chr7	39050852	39050991	+	0	NA	exon (NM_025390, exon 5 of 7)	exon (NM_025390, exon 5 of 7)	5446	NM_025390	66161	Mm.22284	NM_025390	ENSMUSG00000030423	Pop4	1110023P21Rik|Rpp29	processing of precursor 4, ribonuclease P/MRP family, (S. cerevisiae)	protein-coding
Diff_Nuc23439	chr19	16296362	16296501	+	0	NA	intron (NM_008139, intron 2 of 6)	intron (NM_008139, intron 2 of 6)	57843	NR_033228	595139	Mm.405662	NR_033228		E030024N20Rik	9030417F11Rik|Ppia-ps8	peptidylprolyl isomerase A pseudogene 8	pseudo
Diff_Nuc56854	chr9	67388192	67388331	+	0	NA	intron (NM_001081242, intron 1 of 57)	intron (NM_001081242, intron 1 of 57)	19249	NM_001081242	70549	Mm.33645	NM_027458	ENSMUSG00000052698	Tln2	5730421P04Rik|AI507121|AI787438|AL118320|mKIAA0320	talin 2	protein-coding
Diff_Nuc49180	chr2	135072012	135072151	+	0	NA	intron (NM_001145830, intron 4 of 31)	Lx8|LINE|L1	-30729	NR_040517	78805	Mm.78702	NR_040517	ENSMUSG00000085247	4930545L23Rik	-	RIKEN cDNA 4930545L23 gene	ncRNA
Diff_Nuc46943	chr2	44838392	44838531	+	0	NA	TTS (NM_001289521)	TTS (NM_001289521)	40236	NR_039591	100628598		NR_039591	ENSMUSG00000092679	Mir5129	mir-5129|mmu-mir-5129|mu-mir-5129	microRNA 5129	ncRNA
Diff_Nuc10155	chr10	24720672	24720811	+	0	NA	Intergenic	Intergenic	-73465	NM_007482	11846	Mm.154144	NM_007482	ENSMUSG00000019987	Arg1	AI|AI256583|Arg-1|PGIF	arginase, liver	protein-coding
Diff_Nuc9227	chr11	108363922	108364061	+	0	NA	intron (NM_029606, intron 10 of 27)	intron (NM_029606, intron 10 of 27)	77411	NM_029606	76380	Mm.344071	NM_029586	ENSMUSG00000020728	Cep112	1700001M19Rik|1700029K01Rik|8430407H02Rik|AV043680|AV207351|Ccdc46|Macoco	centrosomal protein 112	protein-coding
Diff_Nuc33591	chr6	125109302	125109441	+	0	NA	intron (NR_126495, intron 8 of 8)	intron (NR_126495, intron 8 of 8)	6420	NM_008084	14433	Mm.304088	NM_008084	ENSMUSG00000057666	Gapdh	Gapd	glyceraldehyde-3-phosphate dehydrogenase	protein-coding
Diff_Nuc50999	chr1	30207892	30208031	+	0	NA	Intergenic	MTD|LTR|MaLR	712140	NM_001081080	213109	Mm.194486	NM_025871	ENSMUSG00000048874	Phf3	2310061N19Rik|mKIAA0244	PHD finger protein 3	protein-coding
Diff_Nuc41343	chr4	132326572	132326711	+	0	NA	intron (NM_011284, intron 3 of 8)	B4A|SINE|B4	2366	NM_011284	19891	Mm.2870	NM_011284	ENSMUSG00000028884	Rpa2	AA409079|AI325195|AU020965|RPA34|Rf-A2	replication protein A2	protein-coding
Diff_Nuc7067	chr11	33011102	33011241	+	0	NA	Intergenic	Intergenic	36229	NM_008005	14172	Mm.339812	NM_008005	ENSMUSG00000057967	Fgf18	D130055P09Rik|FGF-18	fibroblast growth factor 18	protein-coding
Diff_Nuc37418	chr5	125958912	125959051	+	0	NA	intron (NM_030210, intron 1 of 17)	B1_Mur1|SINE|Alu	2738	NM_030210	78894	Mm.431573	NM_030210	ENSMUSG00000029482	Aacs	2210408B16Rik|SUR5	acetoacetyl-CoA synthetase	protein-coding
Diff_Nuc268	chrX	120795412	120795551	+	0	NA	Intergenic	Intergenic	454038	NR_038052	22314	Mm.458976	NM_009494	ENSMUSG00000057021	Vmn2r-ps159	V2r8|V2r9|Vmn2r-ps160	vomeronasal 2, receptor, pseudogene 159	pseudo
Diff_Nuc55739	chr9	28950212	28950351	+	0	NA	intron (NM_172290, intron 3 of 7)	L1Md_F2|LINE|L1	820433	NM_172290	235106	Mm.283138	NM_172290	ENSMUSG00000059974	Ntm	6230410L23Rik|B230210G24Rik|Hnt|Igdcc2|R75390	neurotrimin	protein-coding
Diff_Nuc6088	chr12	112376712	112376851	+	0	NA	Intergenic	B2_Mm1a|SINE|B2	-27800	NM_001286122	22031	Mm.27431	NM_011632	ENSMUSG00000021277	Traf3	AI528849|CAP-1|CD40bp|CRAF1|LAP1|T-BAM|amn	TNF receptor-associated factor 3	protein-coding
Diff_Nuc49126	chr2	132476392	132476531	+	0	NA	TTS (NR_033469)	TTS (NR_033469)	-39558	NM_028637	73747	Mm.284114	NM_028637	ENSMUSG00000044991	1110034G24Rik	-	RIKEN cDNA 1110034G24 gene	protein-coding
Diff_Nuc43707	chr3	70393192	70393331	+	0	NA	Intergenic	Intergenic	217952	NR_040556	625901	Mm.366028	NR_040556	ENSMUSG00000097252	Gm6634	EG625901	predicted gene 6634	ncRNA
Diff_Nuc30517	chr7	149647412	149647551	+	0	NA	intron (NM_001136071, intron 1 of 10)	intron (NM_001136071, intron 1 of 10)	764	NM_001136071	16985	Mm.234003	NM_019391	ENSMUSG00000018819	Lsp1	Lsp-1|WP34|p50|pp52	lymphocyte specific 1	protein-coding
Diff_Nuc7430	chr11	47681592	47681731	+	0	NA	Intergenic	Intergenic	-488857	NM_011891	24052	Mm.338890	NM_011891	ENSMUSG00000020354	Sgcd	35kDa|delta-SG	sarcoglycan, delta (dystrophin-associated glycoprotein)	protein-coding
Diff_Nuc53036	chr1	109425992	109426131	+	0	NA	intron (NM_001160307, intron 1 of 6)	intron (NM_001160307, intron 1 of 6)	481	NM_198028	241197	Mm.123919	NM_198028	ENSMUSG00000092572	Serpinb10	9830131G07|BB233602|Serpinb10-ps	serine (or cysteine) peptidase inhibitor, clade B (ovalbumin), member 10	protein-coding
Diff_Nuc13744	chr17	33047612	33047751	+	0	NA	intron (NM_001204336, intron 6 of 12)	intron (NM_001204336, intron 6 of 12)	6351	NM_022434	64385	Mm.486449	NM_022434	ENSMUSG00000024292	Cyp4f14	1300014O15Rik|cyp4f-14	cytochrome P450, family 4, subfamily f, polypeptide 14	protein-coding
Diff_Nuc28175	chr7	57817942	57818081	+	0	NA	intron (NM_001037906, intron 14 of 19)	intron (NM_001037906, intron 14 of 19)	13243	NR_045928	73515	Mm.437440	NR_045928	ENSMUSG00000085265	Nell1os	1700081H22Rik	NEL-like 1, opposite strand	ncRNA
Diff_Nuc46928	chr2	44097222	44097361	+	0	NA	intron (NM_001301831, intron 11 of 14)	intron (NM_001301831, intron 11 of 14)	-176447	NR_040622	320872	Mm.445023	NR_040622	ENSMUSG00000085089	Arhgap15os	A430092G05Rik	Rho GTPase activating protein 15, opposite strand	ncRNA
Diff_Nuc27698	chr7	35199332	35199471	+	0	NA	Intergenic	ORR1A2-int|LTR|MaLR	-24842	NM_025948	67070	Mm.276503	NM_025948	ENSMUSG00000066568	Lsm14a	2700023B17Rik|AA407828|AU017544|Tral	LSM14A mRNA processing body assembly factor	protein-coding
Diff_Nuc40440	chr4	99390772	99390911	+	0	NA	intron (NM_001081264, intron 2 of 14)	B4A|SINE|B4	8520	NM_001081264	320438	Mm.32408	NM_001081264	ENSMUSG00000073792	Alg6	E230028F23Rik	asparagine-linked glycosylation 6 (alpha-1,3,-glucosyltransferase)	protein-coding
Diff_Nuc54877	chr1	187343702	187343841	+	0	NA	Intergenic	Intergenic	22586	NR_033600	114668	Mm.379303	NR_033600	ENSMUSG00000102185	5033404E19Rik	-	NSA2 ribosome biogenesis homolog pseudogene	pseudo
Diff_Nuc28426	chr7	69410612	69410751	+	0	NA	Intergenic	Lx2|LINE|L1	-82482	NM_010882	17984	Mm.400253	NM_010882	ENSMUSG00000033585	Ndn	AI528698|Peg6	necdin	protein-coding
Diff_Nuc2853	chr13	98746292	98746431	+	0	NA	intron (NM_012026, intron 16 of 35)	intron (NM_012026, intron 16 of 35)	229759	NM_012026	110596	Mm.252718	NM_012026	ENSMUSG00000021662	Arhgef28	9230110L08Rik|AI323540|D13Bwg1089e|RIP2|Rgnef|RhoGEF|Rhoip2|p190RhoGEF	Rho guanine nucleotide exchange factor (GEF) 28	protein-coding
Diff_Nuc8519	chr11	84695772	84695911	+	0	NA	intron (NM_025414, intron 1 of 24)	intron (NM_025414, intron 1 of 24)	-2054	NM_001077636	70325	Mm.390414	NM_027388	ENSMUSG00000045140	Pigw	2610044A17Rik|Gwt1	phosphatidylinositol glycan anchor biosynthesis, class W	protein-coding
Diff_Nuc45591	chr3	146435022	146435161	+	0	NA	intron (NM_011100, intron 1 of 9)	intron (NM_011100, intron 1 of 9)	-1434	NM_001164199	18749	Mm.16766	NM_011100	ENSMUSG00000005034	Prkacb	CbPKA|Pkacb	protein kinase, cAMP dependent, catalytic, beta	protein-coding
Diff_Nuc501	chr13	8382422	8382561	+	0	NA	intron (NM_001289530, intron 1 of 9)	MTB_Mm|LTR|MaLR	180379	NM_052977	94191	Mm.425794	NM_052977	ENSMUSG00000052551	Adarb2	Adar3|RED2	adenosine deaminase, RNA-specific, B2	protein-coding
Diff_Nuc6806	chr11	21787492	21787631	+	0	NA	intron (NM_145425, intron 17 of 17)	L1_Mus2|LINE|L1	114093	NM_011023	18423	Mm.129663	NM_011023	ENSMUSG00000005917	Otx1	A730044F23Rik|jv	orthodenticle homeobox 1	protein-coding
Diff_Nuc24140	chr19	42595332	42595471	+	0	NA	intron (NM_177464, intron 1 of 6)	intron (NM_177464, intron 1 of 6)	2106	NM_177464	52013	Mm.254169	NM_177464	ENSMUSG00000025184	R3hcc1l	1700036B12Rik|AI450607|C10orf28|D19Ertd386e|GIDRP86|Gidrp88	R3H domain and coiled-coil containing 1 like	protein-coding
Diff_Nuc3761	chr12	14134342	14134481	+	0	NA	Intergenic	Intergenic	24433	NM_029007	105005	Mm.227253	NM_029007	ENSMUSG00000020607	Fam84a	2310003N02Rik|4731402F03Rik|AW125753|Nse1	family with sequence similarity 84, member A	protein-coding
Diff_Nuc1968	chr13	64815982	64816121	+	0	NA	Intergenic	L1_Mus3|LINE|L1	189145	NM_001081129	238680	Mm.390590	NM_001081129	ENSMUSG00000033063	Cntnap3	-	contactin associated protein-like 3	protein-coding
Diff_Nuc51408	chr1	45538702	45538841	+	0	NA	intron (NM_007737, intron 1 of 53)	intron (NM_007737, intron 1 of 53)	21356	NM_007737	12832	Mm.10299	NM_007737	ENSMUSG00000026042	Col5a2	1110014L14Rik	collagen, type V, alpha 2	protein-coding
Diff_Nuc9103	chr11	104466452	104466591	+	0	NA	Intergenic	ORR1D1|LTR|MaLR	-2793	NM_016780	16416	Mm.87150	NM_016780	ENSMUSG00000020689	Itgb3	CD61|GP3A|INGRB3	integrin beta 3	protein-coding
Diff_Nuc23480	chr19	17678682	17678821	+	0	NA	intron (NM_001163144, intron 10 of 20)	intron (NM_001163144, intron 10 of 20)	210218	NM_019437	54391	Mm.7013	NM_019437	ENSMUSG00000024712	Rfk	0610038L10Rik|AF031381|KOI-4	riboflavin kinase	protein-coding
Diff_Nuc58847	chr8	23750262	23750401	+	0	NA	intron (NM_011130, intron 10 of 13)	intron (NM_011130, intron 10 of 13)	-3050	NR_027886	68074	Mm.463136	NR_027886		A930013F10Rik	-	RIKEN cDNA A930013F10 gene	ncRNA
Diff_Nuc22274	chr14	88411652	88411791	+	0	NA	Intergenic	Intergenic	459482	NM_178685	219257	Mm.128861	NM_178685	ENSMUSG00000050505	Pcdh20	C630015B17Rik|Pcdh13	protocadherin 20	protein-coding
Diff_Nuc13002	chr17	7575952	7576091	+	0	NA	intron (NM_001142539, intron 7 of 9)	intron (NM_001142539, intron 7 of 9)	13633	NM_001142539	667055	Mm.327371	NM_001142539	ENSMUSG00000056133	Gm9992	ENSMUSG00000056133	predicted gene 9992	protein-coding
Diff_Nuc732	chr13	17678342	17678481	+	0	NA	intron (NM_138654, intron 6 of 13)	Lx2|LINE|L1	108188	NM_138654	192136	Mm.364180	NM_138654	ENSMUSG00000055137	Sugct	5033411D12Rik|D17907	succinyl-CoA glutarate-CoA transferase	protein-coding
Diff_Nuc31216	chr6	30755132	30755271	+	0	NA	intron (NM_017478, intron 20 of 23)	intron (NM_017478, intron 20 of 23)	63902	NR_029900	723930		NR_029900	ENSMUSG00000065501	Mir335	Mirn335|mir-335|mmu-mir-335	microRNA 335	ncRNA
Diff_Nuc34965	chr5	31539782	31539921	+	0	NA	Intergenic	PB1D9|SINE|Alu	-3405	NM_001347326	192292	Mm.292040	NM_147201	ENSMUSG00000029148	Nrbp1	B230344L17Rik|Nrbp	nuclear receptor binding protein 1	protein-coding
Diff_Nuc59805	chr8	70771022	70771161	+	0	NA	Intergenic	Intergenic	-29336	NM_028182	72281	Mm.40974	NM_028182	ENSMUSG00000053886	Sh2d4a	2210402M20Rik|SH2A	SH2 domain containing 4A	protein-coding
Diff_Nuc46197	chr2	17330882	17331021	+	0	NA	intron (NM_028757, intron 4 of 6)	intron (NM_028757, intron 4 of 6)	-154190	NR_105847	102465964		NR_105847	ENSMUSG00000099161	Mir6419	Gm27713|mmu-mir-6419	microRNA 6419	ncRNA
Diff_Nuc59183	chr8	39228182	39228321	+	0	NA	intron (NM_145841, intron 1 of 7)	Lx2|LINE|L1	87005	NR_029884	723860		NR_029884	ENSMUSG00000065457	Mir383	Mirn383|mir-383|mmu-mir-383	microRNA 383	ncRNA
Diff_Nuc55158	chr9	3567332	3567471	+	0	NA	intron (NM_001033322, intron 1 of 7)	L1_Mus3|LINE|L1	35052	NM_001033322	234889	Mm.91240	NM_001033322	ENSMUSG00000041624	Gucy1a2	6330407I18Rik|A230060L24Rik	guanylate cyclase 1, soluble, alpha 2	protein-coding
Diff_Nuc36077	chr5	76361322	76361461	+	0	NA	intron (NM_010612, intron 7 of 29)	L2|LINE|L2	13062	NM_010612	16542	Mm.285	NM_010612	ENSMUSG00000062960	Kdr	6130401C07|Flk-1|Flk1|Krd-1|Ly73|VEGFR-2|VEGFR2|sVEGFR-2	kinase insert domain protein receptor	protein-coding
Diff_Nuc32084	chr6	61690362	61690501	+	0	NA	intron (NM_183310, intron 8 of 10)	intron (NM_183310, intron 8 of 10)	-559627	NR_040287	100504262	Mm.438066	NR_040287		A730020E08Rik	-	RIKEN cDNA A730020E08 gene	ncRNA
Diff_Nuc20340	chr14	15107432	15107571	+	0	NA	Intergenic	L1Md_A|LINE|L1	-53126	NM_147027	18330	Mm.484338	NM_147027	ENSMUSG00000072707	Olfr31	MOR274-1|MTPCR53	olfactory receptor 31	protein-coding
Diff_Nuc26057	chr18	58517352	58517491	+	0	NA	Intergenic	Intergenic	-147841	NM_010181	14119	Mm.20271	NM_010181	ENSMUSG00000024598	Fbn2	BC063774|Fib-2|mKIAA4226|sne|sy	fibrillin 2	protein-coding
Diff_Nuc8617	chr11	88071742	88071881	+	0	NA	Intergenic	Intergenic	-35734	NM_028859	74297	Mm.207320	NM_028859	ENSMUSG00000034031	Ccdc182	1700106J16Rik	coiled-coil domain containing 182	protein-coding
Diff_Nuc29256	chr7	102238352	102238491	+	0	NA	Intergenic	Intergenic	-1081333	NM_001310762	23966	Mm.254610	NM_011858	ENSMUSG00000048078	Tenm4	Doc4|ELM2|Odz4|R75022|Ten-m4|l(7)-3Rn|l7Rn3|mKIAA1302	teneurin transmembrane protein 4	protein-coding
Diff_Nuc40926	chr4	117352922	117353061	+	0	NA	intron (NM_023178, intron 4 of 10)	L2a|LINE|L2	1839	NM_023178	66233	Mm.29142	NM_023178	ENSMUSG00000009640	Dmap1	1500016M21Rik|DNMAP1|DNMTAP1|Dmtap1|mKIAA1425	DNA methyltransferase 1-associated protein 1	protein-coding
Diff_Nuc8759	chr11	93328452	93328591	+	0	NA	intron (NM_028296, intron 3 of 8)	intron (NM_028296, intron 3 of 8)	367917	NM_028296	72605	Mm.342160	NM_028296	ENSMUSG00000056158	Car10	2700029L05Rik|BB085816|Ca10	carbonic anhydrase 10	protein-coding
Diff_Nuc28329	chr7	65523502	65523641	+	0	NA	Intergenic	Intergenic	-390001	NM_009728	11982	Mm.135129	NM_009728	ENSMUSG00000025324	Atp10a	Atp10c|pfatp	ATPase, class V, type 10A	protein-coding
Diff_Nuc61122	chr8	117027102	117027241	+	0	NA	intron (NM_019573, intron 5 of 8)	intron (NM_019573, intron 5 of 8)	63619	NM_019573	80707	Mm.440420	NM_019573	ENSMUSG00000004637	Wwox	5330426P09Rik|9030416C10Rik|WOX1	WW domain-containing oxidoreductase	protein-coding
Diff_Nuc22282	chr14	88785522	88785661	+	0	NA	Intergenic	Intergenic	85612	NM_178685	219257	Mm.128861	NM_178685	ENSMUSG00000050505	Pcdh20	C630015B17Rik|Pcdh13	protocadherin 20	protein-coding
Diff_Nuc12766	chr10	127457632	127457771	+	0	NA	intron (NM_008921, intron 5 of 12)	(CA)n|Simple_repeat|Simple_repeat	5430	NM_008921	19075	Mm.2903	NM_008921	ENSMUSG00000025395	Prim1	AI324982	DNA primase, p49 subunit	protein-coding
Diff_Nuc7500	chr11	50324102	50324241	+	0	NA	Intergenic	Intergenic	-79558	NM_172557	216724	Mm.390400	NM_172557	ENSMUSG00000020375	Rufy1	3000002E04Rik|Rabip4|ZFYVE12	RUN and FYVE domain containing 1	protein-coding
Diff_Nuc9150	chr11	106146582	106146721	+	0	NA	intron (NM_029467, intron 5 of 7)	intron (NM_029467, intron 5 of 7)	8665	NM_029467	75870	Mm.159608	NM_029467	ENSMUSG00000020712	Tcam1	4930570F09Rik|AI429105	testicular cell adhesion molecule 1	protein-coding
Diff_Nuc47099	chr2	52209022	52209161	+	0	NA	Intergenic	Lx4B|LINE|L1	-14773	NM_010889	17996	Mm.389247	NM_010889	ENSMUSG00000026950	Neb	AI595938	nebulin	protein-coding
Diff_Nuc44476	chr3	99680312	99680451	+	0	NA	Intergenic	Intergenic	-8959	NM_028892	74362	Mm.55847	NM_028892	ENSMUSG00000027867	Spag17	4931427F14Rik|PF6|Spag17-ps	sperm associated antigen 17	protein-coding
Diff_Nuc27009	chr7	9136932	9137071	+	0	NA	Intergenic	L1Md_F|LINE|L1	-10158	NM_001105071	545909	Mm.469894	NM_001105071	ENSMUSG00000096658	Vmn2r39	EG545909	vomeronasal 2, receptor 39	protein-coding
Diff_Nuc9026	chr11	102095652	102095791	+	0	NA	Intergenic	MIR3|SINE|MIR	-4235	NM_001284250	15184	Mm.22665	NM_010412	ENSMUSG00000008855	Hdac5	AI426555|Hdac4|mHDA1|mKIAA0600	histone deacetylase 5	protein-coding
Diff_Nuc53773	chr1	144175142	144175281	+	0	NA	Intergenic	Lx3C|LINE|L1	-1312616	NM_020025	26878	Mm.285580	NM_020025	ENSMUSG00000033849	B3galt2	-	UDP-Gal:betaGlcNAc beta 1,3-galactosyltransferase, polypeptide 2	protein-coding
Diff_Nuc14263	chr17	53468662	53468801	+	0	NA	Intergenic	RMER17B|LTR|ERVK	133915	NM_172497	211482	Mm.60887	NM_172497	ENSMUSG00000023931	Efhb	4921525D22Rik	EF hand domain family, member B	protein-coding
Diff_Nuc13905	chr17	38712662	38712801	+	0	NA	Intergenic	Intergenic	21594	NM_001177585	100126773	Mm.471587	NM_001177585	ENSMUSG00000092244	Esp34	Gm20410	exocrine gland secreted peptide 34	protein-coding
Diff_Nuc11448	chr10	79466172	79466311	+	0	NA	intron (NM_001347081, intron 15 of 45)	intron (NM_001347081, intron 15 of 45)	5881	NM_013850	27403	Mm.103351	NM_013850	ENSMUSG00000035722	Abca7	ABCX|Abc51	ATP-binding cassette, sub-family A (ABC1), member 7	protein-coding
Diff_Nuc19017	chr15	60951432	60951571	+	0	NA	Intergenic	Lx2A1|LINE|L1	-198676	NM_001081067	117586	Mm.291499	NM_001081067	ENSMUSG00000022347	A1bg	C44	alpha-1-B glycoprotein	protein-coding
Diff_Nuc22706	chr14	108374242	108374381	+	0	NA	Intergenic	Lx6|LINE|L1	939145	NM_199065	76965	Mm.257268	NM_199065	ENSMUSG00000075478	Slitrk1	3200001I04Rik	SLIT and NTRK-like family, member 1	protein-coding
Diff_Nuc4398	chr12	42712522	42712661	+	0	NA	intron (NM_053122, intron 4 of 6)	intron (NM_053122, intron 4 of 6)	-499947	NM_010733	16981	Mm.404786	NM_010733	ENSMUSG00000036295	Lrrn3	NLRR-3	leucine rich repeat protein 3, neuronal	protein-coding
Diff_Nuc13854	chr17	36979762	36979901	+	0	NA	intron (NM_001286727, intron 2 of 9)	intron (NM_001286727, intron 2 of 9)	5740	NM_001286726	22670	Mm.34587	NM_030698	ENSMUSG00000024457	Trim26	AI462198|Zfp173|Zfp1736	tripartite motif-containing 26	protein-coding
Diff_Nuc40811	chr4	112804922	112805061	+	0	NA	intron (NM_001103199, intron 12 of 48)	intron (NM_001103199, intron 12 of 48)	154587	NM_001103199	230622	Mm.291107	NM_001103199	ENSMUSG00000087194	Skint6	OTTMUSG00000008519	selection and upkeep of intraepithelial T cells 6	protein-coding
Diff_Nuc1409	chr13	44802812	44802951	+	0	NA	Intergenic	Intergenic	-23262	NM_021878	16468	Mm.25059	NM_021878	ENSMUSG00000038518	Jarid2	Jmj|jumonji	jumonji, AT rich interactive domain 2	protein-coding
Diff_Nuc56607	chr9	59510972	59511111	+	0	NA	intron (NM_001253883, intron 1 of 10)	intron (NM_001253883, intron 1 of 10)	6866	NM_001253883	18746	Mm.326167	NM_011099	ENSMUSG00000032294	Pkm	AA414905|AL024370|AL024424|Pk-2|Pk-3|Pk3|Pkm2	pyruvate kinase, muscle	protein-coding
Diff_Nuc43204	chr3	48871002	48871141	+	0	NA	Intergenic	Intergenic	-458049	NR_003617	66332	Mm.46124	NM_025493		1700018B24Rik	-	enhancer of rudimentary homolog pseudogene	pseudo
Diff_Nuc35723	chr5	62549722	62549861	+	0	NA	Intergenic	Intergenic	349709	NM_019468	14380	Mm.347430	NM_019468	ENSMUSG00000089992	G6pd2	G6pdx-ps1|Gpd-2|Gpd2	glucose-6-phosphate dehydrogenase 2	protein-coding
Diff_Nuc15496	chr16	10227312	10227451	+	0	NA	intron (NM_153123, intron 6 of 10)	RLTR9E|LTR|ERVK	34382	NM_029253	75329	Mm.108729	NM_029253	ENSMUSG00000039200	Atf7ip2	4930558K11Rik|BC018510|Get-1|PSM2	activating transcription factor 7 interacting protein 2	protein-coding
Diff_Nuc8763	chr11	93379822	93379961	+	0	NA	intron (NM_028296, intron 4 of 8)	Lx8|LINE|L1	367189	NM_001013375	217109	Mm.379350	NM_001013375	ENSMUSG00000054079	Utp18	6230425C22Rik|6430513M13|Wdr50	UTP18 small subunit processome component	protein-coding
Diff_Nuc10074	chr10	20710842	20710981	+	0	NA	intron (NM_026203, intron 15 of 23)	intron (NM_026203, intron 15 of 23)	38558	NM_026203	52906	Mm.253280	NM_026203	ENSMUSG00000019986	Ahi1	1700015F03Rik|Ahi-1|D10Bwg0629e	Abelson helper integration site 1	protein-coding
Diff_Nuc32502	chr6	81481582	81481721	+	0	NA	Intergenic	Intergenic	364006	NR_106091	102465711		NR_106091	ENSMUSG00000106154	Mir7232	mmu-mir-7232	microRNA 7232	ncRNA
Diff_Nuc7243	chr11	40343362	40343501	+	0	NA	Intergenic	Intergenic	162753	NM_134017	108645	Mm.293771	NM_134017	ENSMUSG00000042032	Mat2b	1110064C04Rik|2410018D16Rik|AI182287|AU022853|MAT-II|MATIIbeta|TGR	methionine adenosyltransferase II, beta	protein-coding
Diff_Nuc35906	chr5	69458182	69458321	+	0	NA	Intergenic	L1Md_F2|LINE|L1	274697	NM_175519	243043	Mm.234821	NM_175519	ENSMUSG00000037653	Kctd8	A730087N02Rik	potassium channel tetramerisation domain containing 8	protein-coding
Diff_Nuc50754	chr1	19195822	19195961	+	0	NA	Intergenic	Intergenic	-3104	NM_009334	21419	Mm.137021	NM_009334	ENSMUSG00000025927	Tfap2b	AI606113|AP-2(beta)|E130018K07Rik|Tcfap2b	transcription factor AP-2 beta	protein-coding
Diff_Nuc54551	chr1	176128522	176128661	+	0	NA	exon (NM_011465, exon 17 of 52)	exon (NM_011465, exon 17 of 52)	25684	NM_011465	20739	Mm.200611	NM_011465	ENSMUSG00000026532	Spta1	AF093576|AI451697|Spna-1|Spna1|ha|ihj|nmf4|sph	spectrin alpha, erythrocytic 1	protein-coding
Diff_Nuc4895	chr12	66373152	66373291	+	0	NA	Intergenic	Intergenic	46717	NM_027614	70948	Mm.219475	NM_027614	ENSMUSG00000035560	Wdr20rt	4921538B03Rik|4930427E19Rik|Wdr20|Wdr20b	WD repeat domain 20, retrogene	protein-coding
Diff_Nuc143	chrX	56851652	56851791	+	0	NA	Intergenic	RLTR11B|LTR|ERVK	-12972	NM_001290414	14168	Mm.7995	NM_010200	ENSMUSG00000031137	Fgf13	Fhf2	fibroblast growth factor 13	protein-coding
Diff_Nuc2383	chr13	81244372	81244511	+	0	NA	intron (NM_054053, intron 88 of 89)	Lx5|LINE|L1	141106	NR_015587	319983	Mm.343027	NR_015587	ENSMUSG00000097098	9330111N05Rik	-	RIKEN cDNA 9330111N05 gene	ncRNA
Diff_Nuc49118	chr2	132096792	132096931	+	0	NA	intron (NM_138651, intron 1 of 12)	intron (NM_138651, intron 1 of 12)	7977	NM_138651	110911	Mm.284503	NM_138651	ENSMUSG00000058793	Cds2	5730450N06Rik|5730460C18Rik|AI854580|D2Wsu127e	CDP-diacylglycerol synthase (phosphatidate cytidylyltransferase) 2	protein-coding
Diff_Nuc15155	chr17	90858212	90858351	+	0	NA	intron (NM_001346957, intron 14 of 18)	MER82|DNA|MER2_type	-3061	NM_001346959	18189	Mm.478418	NM_020252	ENSMUSG00000024109	Nrxn1	1700062G21Rik|9330127H16Rik|A230068P09Rik|mKIAA0578	neurexin I	protein-coding
Diff_Nuc45111	chr3	126645942	126646081	+	0	NA	exon (NM_001327939, exon 37 of 46)	exon (NM_001327939, exon 37 of 46)	293	NM_001034168	109676	Mm.220242	NM_178655	ENSMUSG00000032826	Ank2	100043364|AI835472|AW491075|Ank-2|Gm4392	ankyrin 2, brain	protein-coding
Diff_Nuc20761	chr14	29870282	29870421	+	0	NA	intron (NM_009785, intron 23 of 37)	intron (NM_009785, intron 23 of 37)	38957	NM_176920	319476	Mm.95780	NM_176920	ENSMUSG00000045776	Lrtm1	A930016D02Rik	leucine-rich repeats and transmembrane domains 1	protein-coding
Diff_Nuc56424	chr9	53459402	53459541	+	0	NA	intron (NM_027807, intron 3 of 18)	intron (NM_027807, intron 3 of 18)	16141	NM_001161618	75717	Mm.218910	NM_027807	ENSMUSG00000032030	Cul5	4921514I20Rik|8430423K24Rik|AI852817|C030032G03Rik|C330021I08Rik|VACM-1|VACM1	cullin 5	protein-coding
Diff_Nuc2949	chr13	101569112	101569251	+	0	NA	Intergenic	MERVL_2A-int|LTR|ERVL	-12740	NM_172301	268697	Mm.260114	NM_172301	ENSMUSG00000041431	Ccnb1	Ccnb1-rs1|Ccnb1-rs13|CycB1|Cycb-4|Cycb-5|Cycb1-rs1	cyclin B1	protein-coding
Diff_Nuc33528	chr6	122303242	122303381	+	0	NA	Intergenic	Intergenic	-13066	NM_001271579	13619	Mm.6822	NM_007905	ENSMUSG00000040669	Phc1	AW557034|Edr|Edr1|Mph1|Rae-28|rae28	polyhomeotic-like 1 (Drosophila)	protein-coding
Diff_Nuc2112	chr13	70701732	70701871	+	0	NA	Intergenic	RMER12|LTR|ERVK	-10318	NR_045934	73584	Mm.442491	NR_045934	ENSMUSG00000101051	1700100L14Rik	-	RIKEN cDNA 1700100L14 gene	ncRNA
Diff_Nuc50233	chr2	174330512	174330651	+	0	NA	Intergenic	Intergenic	-32139	NM_025531	66390	Mm.182294	NM_025531	ENSMUSG00000016257	Slmo2	2310042G06Rik|AA407013|Prelid3b	slowmo homolog 2 (Drosophila)	protein-coding
Diff_Nuc39798	chr4	71391182	71391321	+	0	NA	Intergenic	Intergenic	470676	NM_011599	21885	Mm.278444	NM_011599	ENSMUSG00000008305	Tle1	C230057C06Rik|Estm14|Grg-1|Grg1|Tle4l	transducin-like enhancer of split 1	protein-coding
Diff_Nuc59532	chr8	56200822	56200961	+	0	NA	Intergenic	Intergenic	160810	NM_001253756	234267	Mm.241700	NM_153581	ENSMUSG00000031517	Gpm6a	Gpm6|M6A	glycoprotein m6a	protein-coding
Diff_Nuc60052	chr8	78034172	78034311	+	0	NA	intron (NM_001164235, intron 2 of 13)	ORR1A1|LTR|MaLR	61648	NM_001164235	71831	Mm.443238	NM_027944	ENSMUSG00000031620	1700007B14Rik	-	RIKEN cDNA 1700007B14 gene	protein-coding
Diff_Nuc33977	chr6	140165862	140166001	+	0	NA	Intergenic	Intergenic	175885	NM_007605	12344	Mm.12817	NM_007605	ENSMUSG00000041791	Capza3	510-4|Cappa3|Gsg3|Tex8|repro32	capping protein (actin filament) muscle Z-line, alpha 3	protein-coding
Diff_Nuc32687	chr6	88155482	88155621	+	0	NA	3' UTR (NM_008090, exon 6 of 6)	3' UTR (NM_008090, exon 6 of 6)	6893	NM_008090	14461	Mm.491156	NM_008090	ENSMUSG00000015053	Gata2	Gata-2	GATA binding protein 2	protein-coding
Diff_Nuc4295	chr12	39159822	39159961	+	0	NA	intron (NM_178681, intron 21 of 24)	Lx3_Mus|LINE|L1	181217	NR_045943	73867	Mm.78933	NR_045943		4930428E07Rik	-	RIKEN cDNA 4930428E07 gene	ncRNA
Diff_Nuc6753	chr11	20140082	20140221	+	0	NA	exon (NM_172260, exon 3 of 7)	exon (NM_172260, exon 3 of 7)	9276	NM_172260	216543	Mm.260314	NM_172260	ENSMUSG00000044066	Cep68	6030463E10Rik|AI481761|BC027174|Kiaa0582	centrosomal protein 68	protein-coding
Diff_Nuc10178	chr10	25406732	25406871	+	0	NA	Intergenic	Intergenic	150442	NR_045349	73803	Mm.258921	NR_045349		4930401C15Rik	-	RIKEN cDNA 4930401C15 gene	ncRNA
Diff_Nuc18752	chr15	49348112	49348251	+	0	NA	Intergenic	Lx4B|LINE|L1	-724646	NM_001081391	239420	Mm.309363	NM_001081391	ENSMUSG00000022311	Csmd3	4930500N14Rik|mKIAA1894	CUB and Sushi multiple domains 3	protein-coding
Diff_Nuc48924	chr2	124960042	124960181	+	0	NA	Intergenic	ORR1D1|LTR|MaLR	-2317	NM_001162934	381418	Mm.295608	NM_001162934	ENSMUSG00000074872	Ctxn2	BB181834|Gm1638	cortexin 2	protein-coding
Diff_Nuc11667	chr10	85153612	85153751	+	0	NA	Intergenic	MT2C_Mm|LTR|ERVL	92525	NM_001017525	74007	Mm.36544	NM_028709	ENSMUSG00000020042	Btbd11	6330404E16Rik	BTB (POZ) domain containing 11	protein-coding
Diff_Nuc6632	chr11	14064992	14065131	+	0	NA	intron (NR_131011, intron 1 of 3)	Lx6|LINE|L1	13983	NR_131011	75280	Mm.108492	NR_131011	ENSMUSG00000085452	4930554G24Rik	-	RIKEN cDNA 4930554G24 gene	ncRNA
Diff_Nuc24277	chr19	46948852	46948991	+	0	NA	intron (NM_033569, intron 6 of 7)	intron (NM_033569, intron 6 of 7)	87920	NM_029810	76952	Mm.40965	NM_029810	ENSMUSG00000025041	Nt5c2	2010002I23Rik|CnII|ENSMUSG00000025039|Gm9751|Gmp|Nt5b|Pnt5|cN-II	5'-nucleotidase, cytosolic II	protein-coding
Diff_Nuc10395	chr10	37178542	37178681	+	0	NA	Intergenic	Intergenic	-319879	NM_008538	17118	Mm.30059	NM_008538	ENSMUSG00000069662	Marcks	Macs|PKCSL	myristoylated alanine rich protein kinase C substrate	protein-coding
Diff_Nuc10012	chr10	18461742	18461881	+	0	NA	intron (NM_001033258, intron 1 of 33)	intron (NM_001033258, intron 1 of 33)	1753	NM_001033258	215821	Mm.40491	NM_001033258	ENSMUSG00000019852	Arfgef3	9630004D11|B930094H20Rik|BIG3|D10Bwg1379e|mKIAA1244	ARFGEF family member 3	protein-coding
Diff_Nuc46004	chr2	8406052	8406191	+	0	NA	Intergenic	ORR1A4-int|LTR|MaLR	-705021	NR_038180	73438	Mm.23558	NR_038180	ENSMUSG00000085580	1700061F12Rik	-	RIKEN cDNA 1700061F12 gene	ncRNA
Diff_Nuc44634	chr3	105458602	105458741	+	0	NA	intron (NM_001039347, intron 2 of 6)	intron (NM_001039347, intron 2 of 6)	31818	NM_017397	53975	Mm.272826	NM_017397	ENSMUSG00000027905	Ddx20	GEMIN3|dp103	DEAD (Asp-Glu-Ala-Asp) box polypeptide 20	protein-coding
Diff_Nuc50280	chr2	178051932	178052071	+	0	NA	intron (NM_001177790, intron 8 of 12)	intron (NM_001177790, intron 8 of 12)	90362	NM_177191	320558	Mm.70781	NM_177191	ENSMUSG00000060445	Sycp2	3830402K23Rik|4930518F03Rik	synaptonemal complex protein 2	protein-coding
Diff_Nuc8506	chr11	84112132	84112271	+	0	NA	intron (NM_133360, intron 31 of 53)	intron (NM_133360, intron 31 of 53)	103261	NM_133360	107476	Mm.31374	NM_133360	ENSMUSG00000020532	Acaca	A530025K05Rik|Acac|Acc1|Gm738	acetyl-Coenzyme A carboxylase alpha	protein-coding
Diff_Nuc61286	chr8	124828702	124828841	+	0	NA	intron (NM_009569, intron 1 of 9)	intron (NM_009569, intron 1 of 9)	22730	NM_009569	22761	Mm.3105	NM_009569	ENSMUSG00000049577	Zfpm1	FOG|Fog1	zinc finger protein, multitype 1	protein-coding
Diff_Nuc48171	chr2	96298922	96299061	+	0	NA	intron (NM_001289743, intron 1 of 6)	intron (NM_001289743, intron 1 of 6)	140665	NM_001289743	241568	Mm.241682	NM_178725	ENSMUSG00000050587	Lrrc4c	6430556C10Rik|NGL-1	leucine rich repeat containing 4C	protein-coding
Diff_Nuc14919	chr17	81904892	81905031	+	0	NA	intron (NR_104580, intron 2 of 8)	intron (NR_104580, intron 2 of 8)	232766	NM_001286684	20541	Mm.265834	NM_011406	ENSMUSG00000054640	Slc8a1	AI852629|AV344025|D930008O12Rik|Ncx1	solute carrier family 8 (sodium/calcium exchanger), member 1	protein-coding
Diff_Nuc49462	chr2	144890692	144890831	+	0	NA	Intergenic	Intergenic	-177586	NM_053195	94249	Mm.217171	NM_053195	ENSMUSG00000063873	Slc24a3	NCKX3	solute carrier family 24 (sodium/potassium/calcium exchanger), member 3	protein-coding
Diff_Nuc1929	chr13	63608702	63608841	+	0	NA	TTS (NM_008957)	TTS (NM_008957)	58272	NM_008957	19206	Mm.228798	NM_008957	ENSMUSG00000021466	Ptch1	A230106A15Rik|Ptc|Ptc1|Ptch|mes	patched 1	protein-coding
Diff_Nuc29004	chr7	91173202	91173341	+	0	NA	intron (NM_030728, intron 1 of 28)	intron (NM_030728, intron 1 of 28)	61744	NM_030728	80982	Mm.160389	NM_030728	ENSMUSG00000052353	Cemip	12H19.01.T7|6330404C01Rik|9930013L23Rik|AY007814|Kiaa1199	cell migration inducing protein, hyaluronan binding	protein-coding
Diff_Nuc54756	chr1	182970322	182970461	+	0	NA	Intergenic	LTR33A_|LTR|ERVL	-10977	NM_001033819	619326	Mm.355174	NM_001033819	ENSMUSG00000038768	9130409I23Rik	-	RIKEN cDNA 9130409I23 gene	protein-coding
Diff_Nuc9113	chr11	104826152	104826291	+	0	NA	Intergenic	L1_Mus2|LINE|L1	-127312	NM_001081046	70894	Mm.87320	NM_001081046	ENSMUSG00000020690	Efcab3	4921510J17Rik	EF-hand calcium binding domain 3	protein-coding
Diff_Nuc19042	chr15	61996872	61997011	+	0	NA	intron (NR_003368, intron 4 of 8)	PB1|SINE|Alu	54065	NR_003523	67552	Mm.484027	NM_026230		H2afy3	4933432H23Rik	H2A histone family, member Y3	pseudo
Diff_Nuc17898	chr15	12135812	12135951	+	0	NA	intron (NM_172958, intron 1 of 15)	intron (NM_172958, intron 1 of 15)	1032	NM_172958	268783	Mm.54460	NM_172958	ENSMUSG00000039458	Mtmr12	3Pap|4932703C11|C730015A02Rik|Pip3ap|mKIAA1682	myotubularin related protein 12	protein-coding
Diff_Nuc42859	chr3	34696202	34696341	+	0	NA	Intergenic	Intergenic	25274	NR_110488	102638436	Mm.261793	NR_110488	ENSMUSG00000106519	Gm38509	Peril	predicted gene, 38509	ncRNA
Diff_Nuc36805	chr5	105263932	105264071	+	0	NA	intron (NM_001039231, intron 1 of 4)	RLTR13B1|LTR|ERVK	25086	NM_001039231	626391	Mm.385405	NM_001039231	ENSMUSG00000072774	Zfp951	C230055K05Rik	zinc finger protein 951	protein-coding
Diff_Nuc28727	chr7	80585372	80585511	+	0	NA	intron (NM_001081345, intron 37 of 38)	intron (NM_001081345, intron 37 of 38)	-64781	NR_040324	319783	Mm.349813	NR_040324	ENSMUSG00000097756	A730056A06Rik	C76391	RIKEN cDNA A730056A06 gene	ncRNA
Diff_Nuc38137	chr5	151282512	151282651	+	0	NA	intron (NM_172887, intron 57 of 60)	intron (NM_172887, intron 57 of 60)	22213	NR_024513	194292	Mm.300184	NR_024513		Gm5	Gm1812	predicted gene 5	ncRNA
Diff_Nuc48042	chr2	91457932	91458071	+	0	NA	intron (NM_029437, intron 41 of 42)	intron (NM_029437, intron 41 of 42)	18613	NM_010168	14061	Mm.89048	NM_010168	ENSMUSG00000027249	F2	Cf-2|Cf2|FII	coagulation factor II	protein-coding
Diff_Nuc60915	chr8	109950052	109950191	+	0	NA	intron (NR_039557, intron 2 of 3).2	MT2B|LTR|ERVL	-1183	NM_026277	67619	Mm.36817	NM_026277	ENSMUSG00000003848	Nob1	1700021I09Rik|ART-4|Nob1p|Psmd8bp1	NIN1/RPN12 binding protein 1 homolog	protein-coding
Diff_Nuc508	chr13	8786662	8786801	+	0	NA	Intergenic	Intergenic	83559	NM_001039389	207615	Mm.284654	NM_172445	ENSMUSG00000021147	Wdr37	-	WD repeat domain 37	protein-coding
Diff_Nuc31589	chr6	43204892	43205031	+	0	NA	Intergenic	Intergenic	-10682	NM_133674	54324	Mm.320978	NM_133674	ENSMUSG00000033542	Arhgef5	2210412D05Rik|AA717842|AW495314|Tim1	Rho guanine nucleotide exchange factor (GEF) 5	protein-coding
Diff_Nuc15543	chr16	11359122	11359261	+	0	NA	intron (NM_028964, intron 3 of 20)	intron (NM_028964, intron 3 of 20)	36194	NM_028964	74478	Mm.325831	NM_028964	ENSMUSG00000071669	Snx29	4933437K13Rik|ENSMUSG00000079738|Gm11170|Gm1737|Gm930|Rundc2a	sorting nexin 29	protein-coding
Diff_Nuc16772	chr16	56743362	56743501	+	0	NA	intron (NM_172825, intron 11 of 15)	URR1B|DNA|MER1_type	-25868	NM_019678	21787	Mm.425970	NM_019678	ENSMUSG00000022757	Tfg	AI173908	Trk-fused gene	protein-coding
Diff_Nuc58595	chr8	13128302	13128441	+	0	NA	intron (NM_146207, intron 9 of 19)	intron (NM_146207, intron 9 of 19)	-7701	NR_106032	102465645		NR_106032	ENSMUSG00000098532	Mir7065	Gm27871|mmu-mir-7065	microRNA 7065	ncRNA
Diff_Nuc25766	chr18	47340652	47340791	+	0	NA	Intergenic	Intergenic	187801	NM_018744	20358	Mm.40909	NM_018744	ENSMUSG00000019647	Sema6a	A730020P05Rik|AI851735|Sema6A-1|Semaq|VIa	sema domain, transmembrane domain (TM), and cytoplasmic domain, (semaphorin) 6A	protein-coding
Diff_Nuc23532	chr19	20134762	20134901	+	0	NA	Intergenic	MT2C_Mm|LTR|ERVL	330330	NM_010730	16952	Mm.248360	NM_010730	ENSMUSG00000024659	Anxa1	Anx-1|Anx-A1|C430014K04Rik|Lpc-1|Lpc1	annexin A1	protein-coding
Diff_Nuc47552	chr2	71441162	71441301	+	0	NA	Intergenic	Intergenic	-56420	NM_010054	13392	Mm.3896	NM_010054	ENSMUSG00000023391	Dlx2	AW121999|Dlx-2|Tes-1	distal-less homeobox 2	protein-coding
Diff_Nuc17996	chr15	17515872	17516011	+	0	NA	Intergenic	Lx4B|LINE|L1	783441	NR_045711	70886	Mm.399021	NR_045711		4921515E04Rik	-	RIKEN cDNA 4921515E04 gene	ncRNA
Diff_Nuc59428	chr8	50075742	50075881	+	0	NA	Intergenic	IAPEz-int|LTR|ERVK	-315767	NM_011857	23965	Mm.42191	NM_011857	ENSMUSG00000031561	Tenm3	2610100B16Rik|Odz1|Odz3|Ten-m3|mKIAA1455	teneurin transmembrane protein 3	protein-coding
Diff_Nuc25080	chr18	22287602	22287741	+	0	NA	intron (NM_027616, intron 8 of 22)	L1Md_F2|LINE|L1	42226	NM_027616	70950	Mm.235716	NM_027616	ENSMUSG00000024306	Ccdc178	4921528I01Rik	coiled coil domain containing 178	protein-coding
Diff_Nuc37582	chr5	132379952	132380091	+	0	NA	intron (NM_177047, intron 4 of 19)	ID_B1|SINE|B4	23882	NR_040704	75369	Mm.389696	NR_040704	ENSMUSG00000105773	4930563F08Rik	-	RIKEN cDNA 4930563F08 gene	ncRNA
Diff_Nuc36483	chr5	94678292	94678431	+	0	NA	Intergenic	MT-int|LTR|MaLR	57460	NM_177913	331195	Mm.26025	NM_177913	ENSMUSG00000094560	A430089I19Rik	Gm16522	RIKEN cDNA A430089I19 gene	protein-coding
Diff_Nuc47301	chr2	59831542	59831681	+	0	NA	intron (NM_001001182, intron 4 of 35)	intron (NM_001001182, intron 4 of 35)	-110948	NM_028118	72137	Mm.288734	NM_028118	ENSMUSG00000026988	Wdsub1	1700048E19Rik|2610014F08Rik	WD repeat, SAM and U-box domain containing 1	protein-coding
Diff_Nuc49029	chr2	129123582	129123721	+	0	NA	promoter-TSS (NM_181589)	promoter-TSS (NM_181589)	545	NR_040371	100503468	Mm.446943	NR_040371	ENSMUSG00000085498	Gm14023	OTTMUSG00000015408	predicted gene 14023	ncRNA
Diff_Nuc9299	chr11	111365462	111365601	+	0	NA	Intergenic	MTC|LTR|MaLR	438053	NM_008425	16518	Mm.4951	NM_008425	ENSMUSG00000041695	Kcnj2	IRK1|Kcnf1|Kir2.1	potassium inwardly-rectifying channel, subfamily J, member 2	protein-coding
Diff_Nuc27691	chr7	34997092	34997231	+	0	NA	intron (NM_008155, intron 9 of 17)	B1_Mus2|SINE|Alu	-15495	NM_026549	68079	Mm.38173	NM_026549	ENSMUSG00000002635	Pdcd2l	6030457N17Rik	programmed cell death 2-like	protein-coding
Diff_Nuc25121	chr18	23915367	23915506	+	0	NA	intron (NM_001162941, intron 1 of 7)	Lx7|LINE|L1	3210	NM_001162941	212307	Mm.132237	NM_153058	ENSMUSG00000024277	Mapre2	AI314113|C820009F03Rik|D18Abb1e|EB1|EB2|RP1	microtubule-associated protein, RP/EB family, member 2	protein-coding
Diff_Nuc46537	chr2	30957942	30958081	+	0	NA	intron (NM_001038700, intron 2 of 14)	intron (NM_001038700, intron 2 of 14)	-5991	NM_001177650	14269	Mm.52297	NM_019406	ENSMUSG00000075415	Fnbp1	1110057E06Rik|2210010H06Rik|FBP1|Fbp17	formin binding protein 1	protein-coding
Diff_Nuc3857	chr12	20841122	20841261	+	0	NA	Intergenic	Intergenic	-19551	NR_015521	69513	Mm.273972	NR_015521	ENSMUSG00000099759	1700030C10Rik	-	RIKEN cDNA 1700030C10 gene	ncRNA
Diff_Nuc53384	chr1	127601182	127601321	+	0	NA	intron (NM_027677, intron 1 of 1)	L1_Mur2|LINE|L1	27678	NM_027677	71111	Mm.32727	NM_027677	ENSMUSG00000026343	Gpr39	4933415E13Rik	G protein-coupled receptor 39	protein-coding
Diff_Nuc12965	chr17	6026092	6026231	+	0	NA	exon (NM_001290698, exon 13 of 20)	exon (NM_001290698, exon 13 of 20)	18581	NM_001290698	20975	Mm.236068	NM_011523	ENSMUSG00000023805	Synj2	AI481647|SJ2|mKIAA0348	synaptojanin 2	protein-coding
Diff_Nuc37268	chr5	121790402	121790541	+	0	NA	intron (NM_181421, intron 55 of 75)	intron (NM_181421, intron 55 of 75)	45153	NM_001163470	231712	Mm.20488	NM_172275	ENSMUSG00000042726	Trafd1	1110008K06Rik|Fln29	TRAF type zinc finger domain containing 1	protein-coding
Diff_Nuc29215	chr7	99999277	99999416	+	0	NA	Intergenic	Intergenic	23396	NM_001080995	74041	Mm.26468	NM_028729	ENSMUSG00000030641	Ddias	4632434I11Rik|noxin	DNA damage-induced apoptosis suppressor	protein-coding
Diff_Nuc28701	chr7	79499562	79499701	+	0	NA	Intergenic	L1VL2|LINE|L1	-48150	NM_001024703	244049	Mm.217412	NM_001024703	ENSMUSG00000032776	Mctp2	Gm489	multiple C2 domains, transmembrane 2	protein-coding
Diff_Nuc26074	chr18	59178432	59178571	+	0	NA	intron (NM_175506, intron 18 of 22)	intron (NM_175506, intron 18 of 22)	-43534	NR_033764	225583	Mm.209711	NM_173759	ENSMUSG00000050875	A730017C20Rik	-	RIKEN cDNA A730017C20 gene	protein-coding
Diff_Nuc24902	chr18	13826272	13826411	+	0	NA	Intergenic	Intergenic	304901	NM_145492	225207	Mm.40325	NM_145492	ENSMUSG00000024420	Zfp521	B930086A16Rik|Evi3|Znf521	zinc finger protein 521	protein-coding
Diff_Nuc9018	chr11	101711972	101712111	+	0	NA	Intergenic	B4|SINE|B4	43627	NM_010791	17285	Mm.3404	NM_010791	ENSMUSG00000001493	Meox1	AI385561|D330041M02Rik|Mox-1|Mox1	mesenchyme homeobox 1	protein-coding
Diff_Nuc43794	chr3	73891122	73891261	+	0	NA	Intergenic	Lx2|LINE|L1	-69992	NR_040450	100504692	Mm.394454	NR_040450	ENSMUSG00000104096	Gm20356	-	predicted gene, 20356	ncRNA
Diff_Nuc14140	chr17	48616062	48616201	+	0	NA	Intergenic	MTE2b|LTR|MaLR	21905	NM_152823	76589	Mm.311629	NM_152823	ENSMUSG00000043592	Unc5cl	2510009H09Rik|BB155270|Zud	unc-5 family C-terminal like	protein-coding
Diff_Nuc56408	chr9	52998422	52998561	+	0	NA	intron (NM_029936, intron 13 of 17)	B3A|SINE|B2	57726	NM_029936	77591	Mm.133560	NM_029936	ENSMUSG00000053289	Ddx10	4632415A01Rik|AI646054	DEAD (Asp-Glu-Ala-Asp) box polypeptide 10	protein-coding
Diff_Nuc44829	chr3	113008362	113008501	+	0	NA	Intergenic	Lx2A|LINE|L1	-48786	NM_001190403	545562	Mm.462977	NM_001190403		Amy2b	Amy-X|Amy2-2|OTTMUSG00000022462|mAmy2-1	amylase 2b	protein-coding
Diff_Nuc59690	chr8	65590862	65591001	+	0	NA	intron (NM_001252620, intron 3 of 11)	Lx8|LINE|L1	160789	NM_023689	72902	Mm.334552	NM_023689	ENSMUSG00000054162	Spock3	2900045C01Rik|AI428471|mKIAA4039	sparc/osteonectin, cwcv and kazal-like domains proteoglycan 3	protein-coding
Diff_Nuc52972	chr1	107230232	107230371	+	0	NA	intron (NM_001160368, intron 1 of 1)	B4A|SINE|B4	22986	NM_178779	320311	Mm.389162	NM_178779	ENSMUSG00000047496	Rnf152	A930029B02Rik	ring finger protein 152	protein-coding
Diff_Nuc29903	chr7	125275352	125275491	+	0	NA	3' UTR (NM_001031814, exon 63 of 63)	3' UTR (NM_001031814, exon 63 of 63)	-2282	NM_019419	54208	Mm.29924	NM_019419	ENSMUSG00000030654	Arl6ip1	AIP-6|AL022945|ARMER|AU042858|Aip-1|Arl6ip|C85138|mKIAA0069	ADP-ribosylation factor-like 6 interacting protein 1	protein-coding
Diff_Nuc57809	chr9	105323182	105323321	+	0	NA	intron (NM_001253831, intron 22 of 26)	intron (NM_001253831, intron 22 of 26)	20133	NM_001164828	66595	Mm.84941	NM_025651	ENSMUSG00000032567	Aste1	1100001A21Rik|AV006403	asteroid homolog 1 (Drosophila)	protein-coding
Diff_Nuc12411	chr10	113330192	113330331	+	0	NA	Intergenic	L1Md_F2|LINE|L1	908165	NM_146241	237553	Mm.445550	NM_146241	ENSMUSG00000050663	Trhde	9330155P21Rik	TRH-degrading enzyme	protein-coding
Diff_Nuc54061	chr1	157313842	157313981	+	0	NA	Intergenic	Intergenic	-49337	NM_011273	19775	Mm.266215	NM_011273	ENSMUSG00000026469	Xpr1	Rmc-1|Rmc1|Sxv|Syg1|XR	xenotropic and polytropic retrovirus receptor 1	protein-coding
Diff_Nuc18509	chr15	38220562	38220701	+	0	NA	TTS (NM_001289471)	TTS (NM_001289471)	9835	NM_013692	21847	Mm.4292	NM_013692	ENSMUSG00000037465	Klf10	AI115143|EGR[a]|Egral|Gdnfif|TIEG-1|Tieg|Tieg1|mGIF	Kruppel-like factor 10	protein-coding
Diff_Nuc11534	chr10	81467732	81467871	+	0	NA	Intergenic	ORR1A2|LTR|MaLR	-43067	NM_001319203	408062	Mm.391409	NM_001024626	ENSMUSG00000061371	Zfp873	-	zinc finger protein 873	protein-coding
Diff_Nuc7557	chr11	52396372	52396511	+	0	NA	Intergenic	MTE2b-int|LTR|MaLR	-181767	NM_177059	320027	Mm.44518	NM_177059	ENSMUSG00000036264	Fstl4	B230374F23Rik|SPIG1|mKIAA1061	follistatin-like 4	protein-coding
Diff_Nuc48554	chr2	110688602	110688741	+	0	NA	intron (NM_001128103, intron 4 of 26)	L1_Mm|LINE|L1	101730	NM_001128103	228432	Mm.483325	NM_001081556	ENSMUSG00000074968	Ano3	AI838058|B230324K02Rik|Tmem16c	anoctamin 3	protein-coding
Diff_Nuc15795	chr16	19643562	19643701	+	0	NA	Intergenic	L1Md_F2|LINE|L1	-18437	NM_146958	258960	Mm.377771	NM_146958	ENSMUSG00000060480	Olfr171	MOR273-1|MOR273-5	olfactory receptor 171	protein-coding
Diff_Nuc13696	chr17	31639972	31640111	+	0	NA	intron (NM_021322, intron 4 of 10)	intron (NM_021322, intron 4 of 10)	9391	NM_021322	57773	Mm.143771	NM_021322	ENSMUSG00000024037	Wdr4	AI415180|AI448349|D530049K22Rik	WD repeat domain 4	protein-coding
Diff_Nuc16574	chr16	47327652	47327791	+	0	NA	Intergenic	Intergenic	-830641	NM_021497	58998	Mm.40477	NM_021495	ENSMUSG00000022656	Nectin3	2610301B19Rik|3000002N23Rik|4921513D19Rik|AA407785|AU016832|AW538082|CD113|Pvrl3	nectin cell adhesion molecule 3	protein-coding
Diff_Nuc17119	chr16	72451612	72451751	+	0	NA	Intergenic	B4A|SINE|B4	-211713	NM_019413	19876	Mm.310772	NM_019413	ENSMUSG00000022883	Robo1	AW494633|AW742721|DUTT1|Gm310	roundabout guidance receptor 1	protein-coding
Diff_Nuc9645	chr10	3918022	3918161	+	0	NA	Intergenic	Intergenic	-330143	NM_001302795	18390	Mm.438000	NM_011013	ENSMUSG00000000766	Oprm1	M-OR-1|MOP-R|MOR-1|MOR-1O|Oprm|mor|muOR	opioid receptor, mu 1	protein-coding
Diff_Nuc6743	chr11	19903132	19903271	+	0	NA	intron (NM_033523, intron 2 of 5)	intron (NM_033523, intron 2 of 5)	78756	NM_033523	114716	Mm.266627	NM_033523	ENSMUSG00000045671	Spred2	C79158	sprouty-related, EVH1 domain containing 2	protein-coding
Diff_Nuc51410	chr1	45587712	45587851	+	0	NA	Intergenic	Intergenic	-27654	NM_007737	12832	Mm.10299	NM_007737	ENSMUSG00000026042	Col5a2	1110014L14Rik	collagen, type V, alpha 2	protein-coding
Diff_Nuc19881	chr15	94288292	94288431	+	0	NA	Intergenic	Intergenic	-53580	NM_001164786	223838	Mm.214132	NM_177431	ENSMUSG00000022449	Adamts20	Adamst20|bt	a disintegrin-like and metallopeptidase (reprolysin type) with thrombospondin type 1 motif, 20	protein-coding
Diff_Nuc56265	chr9	47619462	47619601	+	0	NA	intron (NM_207676, intron 6 of 9)	intron (NM_207676, intron 6 of 9)	6760	NR_046048	100038460	Mm.447649	NR_046048		Gm10677	ENSMUSG00000074363	predicted gene 10677	ncRNA
Diff_Nuc59193	chr8	39851912	39852051	+	0	NA	Intergenic	Lx5|LINE|L1	-127419	NM_145841	244431	Mm.210388	NM_145841	ENSMUSG00000039539	Sgcz	C230085N17Rik	sarcoglycan zeta	protein-coding
Diff_Nuc13329	chr17	19934012	19934151	+	0	NA	intron (NM_001104565, intron 4 of 5)	MTA_Mm|LTR|MaLR	23754	NM_001104565	627636	Mm.469855	NM_001104565	ENSMUSG00000091771	Vmn2r103	EG627636|Vmn103	vomeronasal 2, receptor 103	protein-coding
Diff_Nuc12189	chr10	105554782	105554921	+	0	NA	Intergenic	Lx8|LINE|L1	276316	NM_025602	52713	Mm.339224	NM_025602	ENSMUSG00000019897	Ccdc59	2300004H16Rik|D10Ertd718e	coiled-coil domain containing 59	protein-coding
Diff_Nuc18168	chr15	25747782	25747921	+	0	NA	Intergenic	Intergenic	-25202	NM_001034851	66270	Mm.25311	NM_025459	ENSMUSG00000022270	Fam134b	1810015C04Rik|AU015349	family with sequence similarity 134, member B	protein-coding
Diff_Nuc7560	chr11	52565332	52565471	+	0	NA	Intergenic	Intergenic	-12807	NM_177059	320027	Mm.44518	NM_177059	ENSMUSG00000036264	Fstl4	B230374F23Rik|SPIG1|mKIAA1061	follistatin-like 4	protein-coding
Diff_Nuc60964	chr8	112513122	112513261	+	0	NA	Intergenic	Intergenic	-1145	NM_146214	234724	Mm.28110	NM_146214	ENSMUSG00000001670	Tat	-	tyrosine aminotransferase	protein-coding
Diff_Nuc1374	chr13	43706622	43706761	+	0	NA	Intergenic	MT2A|LTR|ERVL	-4475	NM_183204	328234	Mm.40588	NM_183204	ENSMUSG00000044164	Rnf182	C630023L15Rik	ring finger protein 182	protein-coding
Diff_Nuc22823	chr14	114957642	114957781	+	0	NA	Intergenic	L1_Mus3|LINE|L1	-273476	NR_045661	75822	Mm.410813	NR_045661		4930524C18Rik	-	RIKEN cDNA 4930524C18 gene	ncRNA
Diff_Nuc22884	chr14	118605212	118605351	+	0	NA	Intergenic	Intergenic	-30173	NR_131969	105245869	Mm.460408	NR_131969	ENSMUSG00000090534	LOC105245869	-	uncharacterized LOC105245869	ncRNA
Diff_Nuc20940	chr14	35923202	35923341	+	0	NA	intron (NM_008166, intron 4 of 15)	intron (NM_008166, intron 4 of 15)	215476	NR_029774	723847		NR_029774	ENSMUSG00000065481	Mir346	Mirn346|mir-346|mmu-mir-346	microRNA 346	ncRNA
Diff_Nuc50481	chr1	6866842	6866981	+	0	NA	Intergenic	GA-rich|Low_complexity|Low_complexity	146779	NR_045188	240690	Mm.234612	NM_173868	ENSMUSG00000033740	St18	AV348974|Myt3|NZF-3|Nzf3|mKIAA0535	suppression of tumorigenicity 18	protein-coding
Diff_Nuc31130	chr6	27032592	27032731	+	0	NA	Intergenic	L1Md_F2|LINE|L1	854089	NR_030420	735266		NR_030420	ENSMUSG00000076067	Mir592	Mirn592|mir-592|mmu-mir-592	microRNA 592	ncRNA
Diff_Nuc55668	chr9	27064552	27064691	+	0	NA	Intergenic	Intergenic	-42068	NM_001326702	235086	Mm.48719	NM_001033323	ENSMUSG00000034275	Igsf9b	AI414108|AI854107|Gm508|mKIAA1030	immunoglobulin superfamily, member 9B	protein-coding
Diff_Nuc23005	chr14	122302637	122302776	+	0	NA	intron (NM_026861, intron 1 of 8)	intron (NM_026861, intron 1 of 8)	12290	NM_182806	110168	Mm.37405	NM_182806	ENSMUSG00000050350	Gpr18	-	G protein-coupled receptor 18	protein-coding
Diff_Nuc15139	chr17	90189382	90189521	+	0	NA	Intergenic	MTA_Mm-int|LTR|MaLR	298257	NM_001346962	18189	Mm.478418	NM_020252	ENSMUSG00000024109	Nrxn1	1700062G21Rik|9330127H16Rik|A230068P09Rik|mKIAA0578	neurexin I	protein-coding
Diff_Nuc12696	chr10	124925652	124925791	+	0	NA	Intergenic	Lx9|LINE|L1	-160130	NM_011391	20503	Mm.29161	NM_011391	ENSMUSG00000020102	Slc16a7	4921534N07Rik|Mct2	solute carrier family 16 (monocarboxylic acid transporters), member 7	protein-coding
Diff_Nuc4862	chr12	64982572	64982711	+	0	NA	Intergenic	Lx3_Mus|LINE|L1	593244	NM_001163271	623046	Mm.189552	NM_001163271	ENSMUSG00000043060	Fscb	EG623046	fibrous sheath CABYR binding protein	protein-coding
Diff_Nuc7496	chr11	50206882	50207021	+	0	NA	intron (NM_172557, intron 15 of 17)	intron (NM_172557, intron 15 of 17)	15730	NM_001347487	59013	Mm.21740	NM_021510	ENSMUSG00000007850	Hnrnph1	AI642080|E430005G16Rik|Hnrnph|Hnrph1	heterogeneous nuclear ribonucleoprotein H1	protein-coding
Diff_Nuc18217	chr15	27772242	27772381	+	0	NA	intron (NM_001081302, intron 19 of 56)	intron (NM_001081302, intron 19 of 56)	-161014	NM_001242423	223433	Mm.266485	NM_198301	ENSMUSG00000056069	Fam105a	9830126M18	family with sequence similarity 105, member A	protein-coding
Diff_Nuc12781	chr10	127729912	127730051	+	0	NA	TTS (NM_019963)	TTS (NM_019963)	5159	NM_031252	83430	Mm.125482	NM_031252	ENSMUSG00000025383	Il23a	IL-23|p19	interleukin 23, alpha subunit p19	protein-coding
Diff_Nuc42403	chr3	16079792	16079931	+	0	NA	Intergenic	Intergenic	-3322	NR_027375	229096	Mm.23834	NM_172677	ENSMUSG00000047213	Ythdf3	9130022A11Rik	YTH domain family 3	protein-coding
Diff_Nuc36644	chr5	99771712	99771851	+	0	NA	intron (NR_030692, intron 3 of 3)	MTD|LTR|MaLR	-89835	NM_145839	320292	Mm.259074	NM_145839	ENSMUSG00000089809	Rasgef1b	4732452O09Rik|GPIgamma4|Gpig4	RasGEF domain family, member 1B	protein-coding
Diff_Nuc29650	chr7	116682472	116682611	+	0	NA	non-coding (NR_037617, exon 10 of 20)	non-coding (NR_037617, exon 10 of 20)	18895	NR_028079	100302499	Mm.482651	NR_028079	ENSMUSG00000065016	Snora3	MBI-28	small nucleolar RNA, H/ACA box 3	snoRNA
Diff_Nuc20079	chr15	100600912	100601051	+	0	NA	intron (NM_021530, intron 1 of 24)	PB1D9|SINE|Alu	8803	NM_021530	59033	Mm.209856	NM_021530	ENSMUSG00000023032	Slc4a8	AW493845|C230026C11|NDCBE|kNBC-3	solute carrier family 4 (anion exchanger), member 8	protein-coding
Diff_Nuc60128	chr8	80862052	80862191	+	0	NA	intron (NM_183096, intron 12 of 13)	Lx3_Mus|LINE|L1	98430	NM_138944	18997	Mm.234261	NM_138944	ENSMUSG00000031688	Pou4f2	Brn-3.2|Brn-3b|Brn3b|Pou4f-rs1|mBrn3-3R	POU domain, class 4, transcription factor 2	protein-coding
Diff_Nuc15537	chr16	11230212	11230351	+	0	NA	intron (NM_146066, intron 9 of 14)	B2_Mm2|SINE|B2	24137	NM_001130008	14852	Mm.325827	NM_146066	ENSMUSG00000062203	Gspt1	AI314175|AI326449|AV307676|C79774|G1st|Gst-1	G1 to S phase transition 1	protein-coding
Diff_Nuc38897	chr4	33460342	33460481	+	0	NA	intron (NM_001305273, intron 11 of 15)	MTA_Mm|LTR|MaLR	63125	NM_001305273	24018	Mm.240024	NM_011884	ENSMUSG00000028274	Rngtt	AU020997|HCE|MCE1	RNA guanylyltransferase and 5'-phosphatase	protein-coding
Diff_Nuc5919	chr12	105349457	105349596	+	0	NA	Intergenic	Intergenic	-1408	NM_028740	74069	Mm.159128	NM_028740	ENSMUSG00000041536	Serpina3a	-	serine (or cysteine) peptidase inhibitor, clade A, member 3A	protein-coding
Diff_Nuc43896	chr3	78723972	78724111	+	0	NA	Intergenic	Intergenic	224768	NM_001310536	76089	Mm.31220	NM_001099624	ENSMUSG00000062232	Rapgef2	5830453M24Rik|CNRasGEF|Pdzgef1|RA-GEF-1|mKIAA0313|nRapGEP	Rap guanine nucleotide exchange factor (GEF) 2	protein-coding
Diff_Nuc23807	chr19	29407272	29407411	+	0	NA	intron (NM_011272, intron 1 of 1)	intron (NM_011272, intron 1 of 1)	1819	NM_011272	19773	Mm.5033	NM_011272	ENSMUSG00000039097	Rln1	Rln|rlx	relaxin 1	protein-coding
Diff_Nuc53637	chr1	137628022	137628161	+	0	NA	intron (NM_007791, intron 1 of 5)	intron (NM_007791, intron 1 of 5)	2317	NM_007791	13007	Mm.196484	NM_007791	ENSMUSG00000026421	Csrp1	AA408841|AA959891|AW545626|CRP1|Csrp	cysteine and glycine-rich protein 1	protein-coding
Diff_Nuc43005	chr3	40421822	40421961	+	0	NA	promoter-TSS (NR_040445)	promoter-TSS (NR_040445)	-57	NR_040445	100040882	Mm.272869	NR_040445	ENSMUSG00000037884	1700017G19Rik	-	RIKEN cDNA 1700017G19 gene	ncRNA
Diff_Nuc22202	chr14	84706362	84706501	+	0	NA	Intergenic	Lx3A|LINE|L1	-136939	NM_001013753	219228	Mm.153643	NM_001013753	ENSMUSG00000035566	Pcdh17	C030033F14Rik|Gm78	protocadherin 17	protein-coding
Diff_Nuc56220	chr9	45907412	45907551	+	0	NA	intron (NM_027498, intron 1 of 24)	intron (NM_027498, intron 1 of 24)	86578	NM_027498	70661	Mm.219459	NM_027498	ENSMUSG00000034135	Sik3	5730525O22Rik|9030204A07Rik|AI447252|AI846254|AI849445|Qsk|SIK-3|mKIAA0999	SIK family kinase 3	protein-coding
Diff_Nuc27215	chr7	17317612	17317751	+	0	NA	Intergenic	PB1D9|SINE|Alu	-6112	NM_198613	232910	Mm.333597	NM_198613	ENSMUSG00000008036	Ap2s1	AI043088	adaptor-related protein complex 2, sigma 1 subunit	protein-coding
Diff_Nuc12110	chr10	101451252	101451391	+	0	NA	intron (NM_001205098, intron 2 of 7)	Lx3C|LINE|L1	-170171	NM_001162368	67569	Mm.25252	NM_026243	ENSMUSG00000019888	Mgat4c	9130411I17Rik|GntIVh	MGAT4 family, member C	protein-coding
Diff_Nuc25476	chr18	36796162	36796301	+	0	NA	intron (NM_175375, intron 20 of 33)	intron (NM_175375, intron 20 of 33)	-27483	NM_201256	108112	Mm.24790	NM_201256	ENSMUSG00000090264	Eif4ebp3	4e-bp3	eukaryotic translation initiation factor 4E binding protein 3	protein-coding
Diff_Nuc54561	chr1	176596222	176596361	+	0	NA	intron (NM_019445, intron 7 of 17)	MTC|LTR|MaLR	164335	NM_019445	54418	Mm.330620	NM_019445	ENSMUSG00000028354	Fmn2	AU024104	formin 2	protein-coding
Diff_Nuc39535	chr4	59352412	59352551	+	0	NA	intron (NM_001163288, intron 12 of 16)	intron (NM_001163288, intron 12 of 16)	79558	NR_105031	101055769	Mm.421401	NR_105031		Gm12596	OTTMUSG00000007649	predicted gene 12596	ncRNA
Diff_Nuc39201	chr4	46523032	46523171	+	0	NA	intron (NM_029077, intron 5 of 5)	PB1D10|SINE|Alu	20900	NM_053179	94181	Mm.249349	NM_053179	ENSMUSG00000028334	Nans	4632418E04Rik|BB056474|Sas	N-acetylneuraminic acid synthase (sialic acid synthase)	protein-coding
Diff_Nuc55587	chr9	23679062	23679201	+	0	NA	Intergenic	Lx5|LINE|L1	-223331	NM_175678	319239	Mm.130824	NM_175678	ENSMUSG00000043659	Npsr1	9330128H10Rik|GPRA|Gpr154|MVTR|PGR14|VRR1	neuropeptide S receptor 1	protein-coding
Diff_Nuc34692	chr5	21877022	21877161	+	0	NA	Intergenic	L1Md_T|LINE|L1	-26568	NM_001310464	19699	Mm.425236	NM_011261	ENSMUSG00000042453	Reln	reeler|rl	reelin	protein-coding
Diff_Nuc59417	chr8	49606052	49606191	+	0	NA	intron (NM_001145937, intron 2 of 26)	L1_Mus1|LINE|L1	153923	NM_001145937	23965	Mm.42191	NM_011857	ENSMUSG00000031561	Tenm3	2610100B16Rik|Odz1|Odz3|Ten-m3|mKIAA1455	teneurin transmembrane protein 3	protein-coding
Diff_Nuc43923	chr3	79421822	79421961	+	0	NA	intron (NM_025794, intron 5 of 12)	intron (NM_025794, intron 5 of 12)	10798	NM_025794	66841	Mm.28336	NM_025794	ENSMUSG00000027809	Etfdh	0610010I20Rik|AV001013	electron transferring flavoprotein, dehydrogenase	protein-coding
Diff_Nuc30073	chr7	132594842	132594981	+	0	NA	intron (NM_029842, intron 1 of 7)	intron (NM_029842, intron 1 of 7)	6777	NM_029842	77035	Mm.307239	NM_029842	ENSMUSG00000030752	Kdm8	3110005O21Rik|Jmjd5	lysine (K)-specific demethylase 8	protein-coding
Diff_Nuc4801	chr12	61842672	61842811	+	0	NA	Intergenic	Lx3_Mus|LINE|L1	780066	NR_045049	100504101	Mm.235026	NR_045049		Gm20063	-	predicted gene, 20063	ncRNA
Diff_Nuc15947	chr16	24490852	24490991	+	0	NA	intron (NM_001145952, intron 2 of 11)	intron (NM_001145952, intron 2 of 11)	-38479	NR_038091	624582	Mm.439775	NR_038091		Morf4l1-ps1	A730098P11Rik	mortality factor 4 like 1, pseudogene 1	pseudo
Diff_Nuc59588	chr8	60373962	60374101	+	0	NA	intron (NM_175032, intron 6 of 11)	intron (NM_175032, intron 6 of 11)	-242179	NM_144731	108150	Mm.62886	NM_144731	ENSMUSG00000031608	Galnt7	AI225872	UDP-N-acetyl-alpha-D-galactosamine: polypeptide N-acetylgalactosaminyltransferase 7	protein-coding
Diff_Nuc26309	chr18	67413082	67413221	+	0	NA	Intergenic	PB1D10|SINE|Alu	-7667	NM_172630	225651	Mm.235792	NM_172630	ENSMUSG00000062526	Mppe1	A530095G11	metallophosphoesterase 1	protein-coding
Diff_Nuc18766	chr15	50007542	50007681	+	0	NA	Intergenic	RMER1B|Other|Other	712984	NM_001310481	83925	Mm.30466	NM_032000	ENSMUSG00000038679	Trps1	AI115454|AI447310|D15Ertd586e	trichorhinophalangeal syndrome I (human)	protein-coding
Diff_Nuc45753	chr3	154917832	154917971	+	0	NA	Intergenic	L1Md_F2|LINE|L1	161503	NM_028938	74435	Mm.195711	NM_028938	ENSMUSG00000028182	Lrriq3	4930438B07Rik|4930511J15Rik|4933403H06Rik|BB020367|Lrrc44	leucine-rich repeats and IQ motif containing 3	protein-coding
Diff_Nuc29062	chr7	94129902	94130041	+	0	NA	Intergenic	L1_Mus1|LINE|L1	-15004	NM_001105190	621430	Mm.469903	NM_001105190	ENSMUSG00000090362	Vmn2r79	EG621430	vomeronasal 2, receptor 79	protein-coding
Diff_Nuc51167	chr1	36399982	36400121	+	0	NA	intron (NM_172652, intron 20 of 20)	intron (NM_172652, intron 20 of 20)	5552	NR_105863	102465541		NR_105863	ENSMUSG00000098680	Mir6898	Gm27816|mmu-mir-6898	microRNA 6898	ncRNA
Diff_Nuc28491	chr7	71250382	71250521	+	0	NA	Intergenic	ORR1E|LTR|MaLR	-48270	NM_001039104	17364	Mm.38875	NM_018752	ENSMUSG00000030523	Trpm1	4732499L03Rik|AI606771|Ltrpc1|Mlsn1	transient receptor potential cation channel, subfamily M, member 1	protein-coding
Diff_Nuc14734	chr17	74093732	74093871	+	0	NA	Intergenic	Intergenic	-34010	NM_027864	71685	Mm.271953	NM_027864	ENSMUSG00000024064	Galnt14	0610033M06Rik	UDP-N-acetyl-alpha-D-galactosamine:polypeptide N-acetylgalactosaminyltransferase 14	protein-coding
Diff_Nuc10468	chr10	39971762	39971901	+	0	NA	intron (NM_026113, intron 4 of 5)	intron (NM_026113, intron 4 of 5)	-4986	NM_023323	67239	Mm.11480	NM_023323	ENSMUSG00000038510	Rpf2	2810470K21Rik|AU040229|AU043242|Bxdc1	ribosome production factor 2 homolog	protein-coding
Diff_Nuc25501	chr18	37657442	37657581	+	0	NA	exon (NM_053144, exon 1 of 1)	exon (NM_053144, exon 1 of 1)	859	NM_053144	93890	Mm.118311	NM_053144	ENSMUSG00000043313	Pcdhb19	Pcdhb11|PcdhbS	protocadherin beta 19	protein-coding
Diff_Nuc24910	chr18	13956212	13956351	+	0	NA	intron (NM_145492, intron 5 of 7)	intron (NM_145492, intron 5 of 7)	174961	NM_145492	225207	Mm.40325	NM_145492	ENSMUSG00000024420	Zfp521	B930086A16Rik|Evi3|Znf521	zinc finger protein 521	protein-coding
Diff_Nuc48	chrX	8429542	8429681	+	0	NA	Intergenic	Intergenic	8491	NM_001081564	625480	Mm.430078	NM_001081564	ENSMUSG00000079699	Gm6592	EG625480	predicted gene 6592	protein-coding
Diff_Nuc38871	chr4	32351042	32351181	+	0	NA	Intergenic	L1MB5|LINE|L1	-153299	NM_001109661	12014	Mm.491223	NM_007521	ENSMUSG00000040270	Bach2	E030004N02Rik	BTB and CNC homology, basic leucine zipper transcription factor 2	protein-coding
Diff_Nuc18109	chr15	23422682	23422821	+	0	NA	Intergenic	Lx2|LINE|L1	456533	NM_001081299	320865	Mm.241965	NM_001081299	ENSMUSG00000040420	Cdh18	B230220E17Rik|Cdh14l	cadherin 18	protein-coding
Diff_Nuc53339	chr1	125374492	125374631	+	0	NA	intron (NM_199021, intron 7 of 25)	ORR1C1|LTR|MaLR	567575	NM_199021	269109	Mm.417716	NM_199021	ENSMUSG00000036815	Dpp10	6430601K09Rik|DPP X|Dprp3	dipeptidylpeptidase 10	protein-coding
Diff_Nuc25673	chr18	44291882	44292021	+	0	NA	Intergenic	RLTR21|LTR|ERVK	27588	NM_001281470	100042855	Mm.479515	NM_001165950	ENSMUSG00000069385	Gm10267	ENSMUSG00000069385|Vtlgl1	predicted gene 10267	protein-coding
Diff_Nuc22177	chr14	83463432	83463571	+	0	NA	Intergenic	Lx3C|LINE|L1	-1379869	NM_001013753	219228	Mm.153643	NM_001013753	ENSMUSG00000035566	Pcdh17	C030033F14Rik|Gm78	protocadherin 17	protein-coding
Diff_Nuc59774	chr8	69246212	69246351	+	0	NA	Intergenic	MTEa|LTR|MaLR	24960	NM_010934	18166	Mm.5112	NM_010934	ENSMUSG00000036437	Npy1r	Npyr|Y1-R	neuropeptide Y receptor Y1	protein-coding
Diff_Nuc8695	chr11	90749252	90749391	+	0	NA	intron (NR_045956, intron 2 of 2)	L1Md_F2|LINE|L1	83316	NR_045956	73922	Mm.233289	NR_045956	ENSMUSG00000085940	4930405D11Rik	-	RIKEN cDNA 4930405D11 gene	ncRNA
Diff_Nuc6266	chr12	118765332	118765471	+	0	NA	intron (NM_175930, intron 2 of 27)	intron (NM_175930, intron 2 of 27)	10449	NM_175930	217944	Mm.227642	NM_175930	ENSMUSG00000041992	Rapgef5	4932413M22|C86120|D030051B22Rik|GFR|Mrgef|mKIAA0277|mmr-gef	Rap guanine nucleotide exchange factor (GEF) 5	protein-coding
Diff_Nuc2063	chr13	68558442	68558581	+	0	NA	Intergenic	RNERVK23-int|LTR|ERVK	162470	NM_001308475	210009	Mm.205514	NM_172480	ENSMUSG00000034617	Mtrr	4732420G08|MSR	5-methyltetrahydrofolate-homocysteine methyltransferase reductase	protein-coding
Diff_Nuc49484	chr2	145693762	145693901	+	0	NA	intron (NM_028724, intron 9 of 12)	intron (NM_028724, intron 9 of 12)	-35146	NM_026425	67877	Mm.151168	NM_026425	ENSMUSG00000002728	Naa20	1500004D14Rik|2900026I01Rik|AU041458|D2Ertd186e|Nat5	N(alpha)-acetyltransferase 20, NatB catalytic subunit	protein-coding
Diff_Nuc59133	chr8	36839372	36839511	+	0	NA	Intergenic	Intergenic	50172	NM_027998	71908	Mm.37817	NM_027998	ENSMUSG00000055976	Cldn23	2310014B08Rik	claudin 23	protein-coding
Diff_Nuc42343	chr3	13814332	13814471	+	0	NA	intron (NM_001163328, intron 2 of 8)	intron (NM_001163328, intron 2 of 8)	-131971	NM_001163329	76897	Mm.422625	NM_178631	ENSMUSG00000039717	Ralyl	0710005M24Rik	RALY RNA binding protein-like	protein-coding
Diff_Nuc56392	chr9	52147572	52147711	+	0	NA	Intergenic	B3|SINE|B2	-171425	NM_001162921	244871	Mm.295686	NM_001162921	ENSMUSG00000035164	Zc3h12c	A230108E06|C230027N18Rik|mKIAA1726	zinc finger CCCH type containing 12C	protein-coding
Diff_Nuc57824	chr9	106108772	106108911	+	0	NA	intron (NM_011876, intron 1 of 8)	intron (NM_011876, intron 1 of 8)	3402	NM_011876	23999	Mm.274346	NM_011876	ENSMUSG00000023277	Twf2	A6-related|AU014993|Ptk9l|Ptk9r	twinfilin actin binding protein 2	protein-coding
Diff_Nuc42185	chr3	7502842	7502981	+	0	NA	promoter-TSS (NM_173181)	promoter-TSS (NM_173181)	-515	NM_173181	67306	Mm.332366	NM_173181	ENSMUSG00000043542	Zc2hc1a	3110050N22Rik|AI790358|AU023959|Fam164a	zinc finger, C2HC-type containing 1A	protein-coding
Diff_Nuc40045	chr4	82698022	82698161	+	0	NA	promoter-TSS (NM_001198811)	promoter-TSS (NM_001198811)	-20	NM_001198811	329872	Mm.242337	NM_177863	ENSMUSG00000059049	Frem1	BC037594|D430009N09|D630008K06|crf11|eye<m02Jus>|eyes2|heb|qbrick	Fras1 related extracellular matrix protein 1	protein-coding
Diff_Nuc40629	chr4	105991742	105991881	+	0	NA	intron (NM_183225, intron 1 of 67)	intron (NM_183225, intron 1 of 67)	2993	NM_183225	329908	Mm.234544	NM_183225	ENSMUSG00000028514	Usp24	2700066K03Rik|2810030C21Rik|AI414051|B130021E18|C79851	ubiquitin specific peptidase 24	protein-coding
Diff_Nuc35425	chr5	49541762	49541901	+	0	NA	intron (NM_001199244, intron 1 of 7)	intron (NM_001199244, intron 1 of 7)	135067	NM_001199244	80334	Mm.160172	NM_030265	ENSMUSG00000029088	Kcnip4	AV032399|Calp|Calp250|KChIP4|KChIP4a	Kv channel interacting protein 4	protein-coding
Diff_Nuc49770	chr2	155930652	155930791	+	0	NA	intron (NM_029397, intron 1 of 2)	ID_B1|SINE|B4	6980	NM_170598	75710	Mm.27660	NM_029397	ENSMUSG00000089824	Rbm12	5730420G12Rik|9430070C08Rik|AI852903|SWAN|mKIAA0765	RNA binding motif protein 12	protein-coding
Diff_Nuc40472	chr4	100124602	100124741	+	0	NA	Intergenic	Lx9|LINE|L1	-26801	NM_001033773	381534	Mm.318133	NM_001033773	ENSMUSG00000069733	Ube2u	-	ubiquitin-conjugating enzyme E2U (putative)	protein-coding
Diff_Nuc1215	chr13	37023462	37023601	+	0	NA	intron (NM_001166391, intron 8 of 14)	intron (NM_001166391, intron 8 of 14)	117551	NM_028784	74145	Mm.235105	NM_028784	ENSMUSG00000039109	F13a1	1200014I03Rik|AI462306|F13a	coagulation factor XIII, A1 subunit	protein-coding
Diff_Nuc58873	chr8	24321752	24321891	+	0	NA	Intergenic	Intergenic	-2896	NM_018743	102247	Mm.200898	NM_018743	ENSMUSG00000031545	Gpat4	AU041707|AW545732|Agpat6|Tsarg7	glycerol-3-phosphate acyltransferase 4	protein-coding
Diff_Nuc30069	chr7	132362822	132362961	+	0	NA	Intergenic	Intergenic	130409	NR_045804	71208	Mm.159465	NM_172408	ENSMUSG00000045928	4933440M02Rik	-	RIKEN cDNA 4933440M02 gene	ncRNA
Diff_Nuc9326	chr11	112903792	112903931	+	0	NA	Intergenic	Intergenic	159291	NR_015556	72386	Mm.266961	NR_015556	ENSMUSG00000087259	2610035D17Rik	-	RIKEN cDNA 2610035D17 gene	ncRNA
Diff_Nuc54327	chr1	167508622	167508761	+	0	NA	Intergenic	B1_Mm|SINE|Alu	55981	NM_001001880	68481	Mm.46438	NM_001001880	ENSMUSG00000026566	Mpzl1	1110007A10Rik|PZR	myelin protein zero-like 1	protein-coding
Diff_Nuc10364	chr10	36054742	36054881	+	0	NA	Intergenic	Lx|LINE|L1	-171802	NM_001253355	319415	Mm.332442	NM_001081208	ENSMUSG00000044499	Hs3st5	D930005L05Rik|Gm1151|Hs3ost5	heparan sulfate (glucosamine) 3-O-sulfotransferase 5	protein-coding
Diff_Nuc19602	chr15	83814622	83814761	+	0	NA	intron (NM_029946, intron 7 of 31)	intron (NM_029946, intron 7 of 31)	-48166	NM_001161628	77627	Mm.196288	NM_029946	ENSMUSG00000022441	Efcab6	4931407K02Rik|4932408N08Rik|bM150J22.2|mKIAA1672	EF-hand calcium binding domain 6	protein-coding
Diff_Nuc36383	chr5	91500692	91500831	+	0	NA	Intergenic	L1_Rod|LINE|L1	-2882	NM_007950	13874	Mm.4791	NM_007950	ENSMUSG00000029377	Ereg	EPR	epiregulin	protein-coding
Diff_Nuc34756	chr5	23953202	23953341	+	0	NA	intron (NM_022418, intron 1 of 2)	intron (NM_022418, intron 1 of 2)	393	NM_022418	64295	Mm.150098	NM_022418	ENSMUSG00000028958	Tmub1	2010004O20Rik|AB030183|Hops	transmembrane and ubiquitin-like domain containing 1	protein-coding
Diff_Nuc46109	chr2	13427322	13427461	+	0	NA	Intergenic	Intergenic	-13888	NM_001081084	65969	Mm.313915	NM_001081084	ENSMUSG00000026726	Cubn	AA408369|AL022750|D2Wsu88e	cubilin (intrinsic factor-cobalamin receptor)	protein-coding
Diff_Nuc31993	chr6	58382532	58382671	+	0	NA	Intergenic	Lx3_Mus|LINE|L1	3238	NM_134177	171195	Mm.389764	NM_134177	ENSMUSG00000095670	Vmn1r30	V1rc22|V1rc9	vomeronasal 1 receptor 30	protein-coding
Diff_Nuc39875	chr4	74991582	74991721	+	0	NA	Intergenic	L1_Mus1|LINE|L1	-67461	NM_025849	66928	Mm.24332	NM_025849	ENSMUSG00000028398	Tmem261	1700027K24Rik|3110001D03Rik	transmembrane protein 261	protein-coding
Diff_Nuc24489	chr19	56556682	56556821	+	0	NA	intron (NM_172641, intron 11 of 12)	intron (NM_172641, intron 11 of 12)	20624	NM_172641	226245	Mm.156742	NM_172641	ENSMUSG00000035818	Plekhs1	9930023K05Rik	pleckstrin homology domain containing, family S member 1	protein-coding
Diff_Nuc48396	chr2	104679622	104679761	+	0	NA	intron (NM_178695, intron 4 of 5)	intron (NM_178695, intron 4 of 5)	10316	NM_178695	228413	Mm.259609	NM_178695	ENSMUSG00000027171	Prrg4	9930111I18Rik|TMG4	proline rich Gla (G-carboxyglutamic acid) 4 (transmembrane)	protein-coding
Diff_Nuc42873	chr3	35238462	35238601	+	0	NA	Intergenic	Intergenic	326554	NR_040748	625963	Mm.251506	NR_040748	ENSMUSG00000105662	Gm6639	-	predicted gene 6639	ncRNA
Diff_Nuc2191	chr13	74150292	74150431	+	0	NA	intron (NM_182839, intron 1 of 3)	MLT1A1|LTR|MaLR	3494	NM_182839	72948	Mm.39752	NM_182839	ENSMUSG00000021573	Tppp	2900041A09Rik|AI849835	tubulin polymerization promoting protein	protein-coding
Diff_Nuc52730	chr1	94519252	94519391	+	0	NA	Intergenic	Tigger5|DNA|MER2_type	2863	NM_206896	257890	Mm.337259	NM_206896	ENSMUSG00000061616	Olfr12	MOR208-5	olfactory receptor 12	protein-coding
Diff_Nuc52294	chr1	79857172	79857311	+	0	NA	Intergenic	Intergenic	-2001	NM_009255	20720	Mm.3093	NM_009255	ENSMUSG00000026249	Serpine2	B230326M24Rik|PAI-1|PI-7|PI7|PN-1|Spi4	serine (or cysteine) peptidase inhibitor, clade E, member 2	protein-coding
Diff_Nuc52189	chr1	75252112	75252251	+	0	NA	intron (NM_008985, intron 9 of 22)	intron (NM_008985, intron 9 of 22)	8602	NM_008985	19275	Mm.2902	NM_008985	ENSMUSG00000026204	Ptprn	IA-2|mIA-A|mKIAA4064	protein tyrosine phosphatase, receptor type, N	protein-coding
Diff_Nuc20742	chr14	29051992	29052131	+	0	NA	intron (NM_177814, intron 13 of 15)	intron (NM_177814, intron 13 of 15)	-266598	NM_009524	22418	Mm.287544	NM_009524	ENSMUSG00000021994	Wnt5a	8030457G12Rik|Wnt-5a	wingless-type MMTV integration site family, member 5A	protein-coding
Diff_Nuc45969	chr2	6604152	6604291	+	0	NA	intron (NM_001347094, intron 2 of 12)	L1Md_F2|LINE|L1	38487	NM_001310447	14007	Mm.398543	NM_010160	ENSMUSG00000002107	Celf2	B230218O03|B230345P09Rik|C88023|CELF-2|CUG-BP2|Cugbp2|D230046B21Rik|Etr-3|Napor|Napor-2|mETR-3	CUGBP, Elav-like family member 2	protein-coding
Diff_Nuc22896	chr14	119114217	119114356	+	0	NA	Intergenic	Intergenic	-8845	NM_001033336	239273	Mm.40537	NM_001033336	ENSMUSG00000032849	Abcc4	ABCC4-N1|D630049P08Rik|MOATB|MRP4	ATP-binding cassette, sub-family C (CFTR/MRP), member 4	protein-coding
Diff_Nuc53329	chr1	124798092	124798231	+	0	NA	Intergenic	L1Md_F3|LINE|L1	1143975	NM_199021	269109	Mm.417716	NM_199021	ENSMUSG00000036815	Dpp10	6430601K09Rik|DPP X|Dprp3	dipeptidylpeptidase 10	protein-coding
Diff_Nuc50349	chr2	181017022	181017161	+	0	NA	intron (NM_198169, intron 1 of 9)	intron (NM_198169, intron 1 of 9)	5580	NM_198169	229004	Mm.220423	NM_198169	ENSMUSG00000038705	Gmeb2	AI839884	glucocorticoid modulatory element binding protein 2	protein-coding
Diff_Nuc18540	chr15	39259312	39259451	+	0	NA	intron (NM_053271, intron 5 of 26)	intron (NM_053271, intron 5 of 26)	229549	NM_053271	116838	Mm.309296	NM_053271	ENSMUSG00000037386	Rims2	2810036I15Rik|AW048769|RIM2|Rab3ip2|Rim2(+40A)|Rim2(+44A)|Rim2(+4A)|Serg2|Syt3-rs|mKIAA0751	regulating synaptic membrane exocytosis 2	protein-coding
Diff_Nuc44846	chr3	114689232	114689371	+	0	NA	intron (NM_001286750, intron 1 of 5)	RLTR13D4|LTR|ERVK	81748	NM_001286750	229759	Mm.54183	NM_153157	ENSMUSG00000027965	Olfm3	B230206G02Rik	olfactomedin 3	protein-coding
Diff_Nuc54967	chr1	191939982	191940121	+	0	NA	Intergenic	B3|SINE|B2	54508	NM_008937	19130	Mm.132579	NM_008937	ENSMUSG00000010175	Prox1	A230003G05Rik	prospero homeobox 1	protein-coding
Diff_Nuc54271	chr1	165481962	165482101	+	0	NA	Intergenic	ORR1D2|LTR|MaLR	-148231	NM_178883	98376	Mm.32901	NM_178883	ENSMUSG00000040124	Gorab	NTKL-BP1|SCYL1-BP1|Scyl1bp1	golgin, RAB6-interacting	protein-coding
Diff_Nuc30920	chr6	19035522	19035661	+	0	NA	Intergenic	RMER13A|LTR|ERVK	193252	NR_126084	74725	Mm.387798	NR_126084	ENSMUSG00000107217	4930524B17Rik	-	RIKEN cDNA 4930524B17 gene	ncRNA
Diff_Nuc3609	chr12	8676812	8676951	+	0	NA	Intergenic	MER5A1|DNA|MER1_type	-4059	NM_001160221	80913	Mm.341243	NM_030723	ENSMUSG00000020594	Pum2	5730503J23Rik|Pumm2	pumilio RNA-binding family member 2	protein-coding
Diff_Nuc2403	chr13	81657732	81657871	+	0	NA	intron (NM_054053, intron 33 of 89)	intron (NM_054053, intron 33 of 89)	114342	NM_054053	110789	Mm.288694	NM_054053	ENSMUSG00000069170	Adgrv1	Frings|Gpr98|Mass1|Mgr1|VLGR1	adhesion G protein-coupled receptor V1	protein-coding
Diff_Nuc54151	chr1	160612702	160612841	+	0	NA	intron (NM_007495, intron 21 of 22)	intron (NM_007495, intron 21 of 22)	177015	NR_030441	735253		NR_030441	ENSMUSG00000070103	Mir488	Mirn488|mir-488|mmu-mir-488	microRNA 488	ncRNA
Diff_Nuc18800	chr15	51508332	51508471	+	0	NA	Intergenic	Intergenic	188606	NM_080635	68135	Mm.289800	NM_080635	ENSMUSG00000022312	Eif3h	1110008A16Rik|40kD|9430017H16Rik|EIF3-P40|EIF3-gamma|Eif3s3	eukaryotic translation initiation factor 3, subunit H	protein-coding
Diff_Nuc30666	chr6	6299052	6299191	+	0	NA	intron (NR_136905, intron 3 of 3)	intron (NR_136905, intron 3 of 3)	100462	NR_136905	101056138	Mm.389085	NR_136904	ENSMUSG00000093482	Gm20619	-	predicted gene 20619	ncRNA
Diff_Nuc46263	chr2	19809072	19809211	+	0	NA	Intergenic	Intergenic	229452	NM_027715	71198	Mm.83981	NM_027715	ENSMUSG00000043415	Otud1	4933428L19Rik	OTU domain containing 1	protein-coding
Diff_Nuc7897	chr11	63251402	63251541	+	0	NA	Intergenic	L1M4|LINE|L1	305166	NM_001302260	18858	Mm.1237	NM_008885	ENSMUSG00000018217	Pmp22	22kDa|Gas-3|HNPP|Tr|trembler	peripheral myelin protein 22	protein-coding
Diff_Nuc10157	chr10	24752812	24752951	+	0	NA	Intergenic	Intergenic	-105605	NM_007482	11846	Mm.154144	NM_007482	ENSMUSG00000019987	Arg1	AI|AI256583|Arg-1|PGIF	arginase, liver	protein-coding
Diff_Nuc50236	chr2	174467692	174467831	+	0	NA	Intergenic	PB1D10|SINE|Alu	-1274	NM_001099328	100043757	Mm.48711	NM_001099328	ENSMUSG00000050600	Zfp831	ENSMUSG00000050600|OTTMUSG00000017459	zinc finger protein 831	protein-coding
Diff_Nuc17714	chr15	3930182	3930321	+	0	NA	promoter-TSS (NM_134099)	promoter-TSS (NM_134099)	-678	NM_134099	106052	Mm.234191	NM_134099	ENSMUSG00000022184	Fbxo4	1700096C12Rik|AI851261|AW494535|Fbx4	F-box protein 4	protein-coding
Diff_Nuc29998	chr7	129402822	129402961	+	0	NA	Intergenic	B4A|SINE|B4	-29748	NM_001316672	18751	Mm.207496	NM_008855	ENSMUSG00000052889	Prkcb	PKC-B|PKC-Beta|Pkcb|Prkcb1|Prkcb2	protein kinase C, beta	protein-coding
Diff_Nuc3314	chr13	114659222	114659361	+	0	NA	intron (NM_172595, intron 1 of 4)	intron (NM_172595, intron 1 of 4)	74575	NM_172595	218639	Mm.79837	NM_172595	ENSMUSG00000042348	Arl15	A430036I03|Arfrp2|C230032K13Rik	ADP-ribosylation factor-like 15	protein-coding
Diff_Nuc3345	chr13	115677412	115677551	+	0	NA	intron (NM_008396, intron 2 of 29)	intron (NM_008396, intron 2 of 29)	44768	NM_008396	16398	Mm.5007	NM_008396	ENSMUSG00000015533	Itga2	CD49B|DX5	integrin alpha 2	protein-coding
Diff_Nuc36050	chr5	75027992	75028131	+	0	NA	intron (NM_001159577, intron 2 of 10)	B3|SINE|B2	45836	NM_001159580	16924	Mm.440403	NM_010727	ENSMUSG00000029228	Lnx1	Lnx	ligand of numb-protein X 1	protein-coding
Diff_Nuc21663	chr14	64513102	64513241	+	0	NA	intron (NM_028228, intron 6 of 6)	intron (NM_028228, intron 6 of 6)	34022	NM_028228	72400	Mm.379214	NM_028228	ENSMUSG00000021958	Pinx1	2210403I16Rik|2610028A01Rik|67-11-3|AU024023|LPTS|LPTS1	PIN2/TERF1 interacting, telomerase inhibitor 1	protein-coding
Diff_Nuc53517	chr1	132768612	132768751	+	0	NA	intron (NM_026976, intron 1 of 7)	intron (NM_026976, intron 1 of 7)	6327	NM_026976	69169	Mm.46042	NM_026976	ENSMUSG00000042474	Fcmr	1810037B05Rik|Faim3|FcmuR|Toso	Fc fragment of IgM receptor	protein-coding
Diff_Nuc608	chr13	12167182	12167321	+	0	NA	intron (NM_023868, intron 1 of 104)	RMER1A|Other|Other	31961	NM_023868	20191	Mm.239871	NM_023868	ENSMUSG00000021313	Ryr2	9330127I20Rik|RYR-2	ryanodine receptor 2, cardiac	protein-coding
Diff_Nuc54992	chr1	192927902	192928041	+	0	NA	intron (NM_030060, intron 2 of 2)	intron (NM_030060, intron 2 of 2)	5678	NM_030060	381319	Mm.6922	NM_030060	ENSMUSG00000026630	Batf3	9130211I03Rik|Snft	basic leucine zipper transcription factor, ATF-like 3	protein-coding
Diff_Nuc50893	chr1	25155962	25156101	+	0	NA	intron (NM_175642, intron 26 of 30)	intron (NM_175642, intron 26 of 30)	178768	NM_001204913	100504323	Mm.484176	NM_001204913		Gm20172	-	predicted gene, 20172	protein-coding
Diff_Nuc50787	chr1	20586092	20586231	+	0	NA	intron (NM_153179, intron 5 of 66)	L1_Mus1|LINE|L1	21977	NM_153179	241035	Mm.249253	NM_153179	ENSMUSG00000043760	Pkhd1	AI118496|AI182499|FPC|Tigm1	polycystic kidney and hepatic disease 1	protein-coding
Diff_Nuc24582	chr19	59931002	59931141	+	0	NA	Intergenic	ORR1E|LTR|MaLR	88196	NM_001033172	74998	Mm.24167	NM_001033172	ENSMUSG00000040022	Rab11fip2	4930470G04Rik|A830046J09Rik|AW558126|Nrip11	RAB11 family interacting protein 2 (class I)	protein-coding
Diff_Nuc10162	chr10	24837252	24837391	+	0	NA	Intergenic	RMER1B|Other|Other	82655	NM_001347460	432442	Mm.485937	NM_018747	ENSMUSG00000039166	Akap7	6430401D08|AI662165|AKAP15|Akap18|BB170514	A kinase (PRKA) anchor protein 7	protein-coding
Diff_Nuc53245	chr1	121150292	121150431	+	0	NA	Intergenic	ID_B1|SINE|B4	168464	NM_008381	16324	Mm.3092	NM_008381	ENSMUSG00000037035	Inhbb	-	inhibin beta-B	protein-coding
Diff_Nuc45411	chr3	139044402	139044541	+	0	NA	intron (NM_198659, intron 10 of 13)	intron (NM_198659, intron 10 of 13)	175614	NM_198659	381476	Mm.188334	NM_198659	ENSMUSG00000047940	Stpg2	B930007M17Rik|Gm1017	sperm tail PG rich repeat containing 2	protein-coding
Diff_Nuc53488	chr1	131779692	131779831	+	0	NA	intron (NM_172485, intron 12 of 27)	intron (NM_172485, intron 12 of 27)	539859	NM_007827	13137	Mm.436759	NM_007827	ENSMUSG00000026401	Cd55b	AI323748|Daf|Daf-TM|Daf2|TM-DAF	CD55 molecule, decay accelerating factor for complement B	protein-coding
Diff_Nuc21082	chr14	43740942	43741081	+	0	NA	Intergenic	Intergenic	-46902	NM_001244671	100042055	Mm.429109	NM_001244671	ENSMUSG00000095226	Gm10377	ENSMUSG00000072606	predicted gene 10377	protein-coding
Diff_Nuc2709	chr13	94175242	94175381	+	0	NA	TTS (NM_152134)	TTS (NM_152134)	94452	NM_021310	57748	Mm.100273	NM_021310	ENSMUSG00000021690	Jmy	-	junction-mediating and regulatory protein	protein-coding
Diff_Nuc23465	chr19	17046592	17046731	+	0	NA	intron (NM_181348, intron 1 of 19)	intron (NM_181348, intron 1 of 19)	16053	NM_181348	353211	Mm.257354	NM_181348	ENSMUSG00000039126	Prune2	6330414G02Rik|A230083H22Rik|A330102H22Rik|Bmcc1|mKIAA0367	prune homolog 2	protein-coding
Diff_Nuc55685	chr9	27387112	27387251	+	0	NA	Intergenic	Lx|LINE|L1	182384	NM_001305058	75469	Mm.45824	NM_029299	ENSMUSG00000031991	Spata19	1700001L23Rik|AV047838|spergen-1	spermatogenesis associated 19	protein-coding
Diff_Nuc30876	chr6	17442102	17442241	+	0	NA	exon (NM_008591, exon 3 of 22)	exon (NM_008591, exon 3 of 22)	28214	NM_008591	17295	Mm.86844	NM_008591	ENSMUSG00000009376	Met	AI838057|HGF|HGFR|Par4|c-Met	met proto-oncogene	protein-coding
Diff_Nuc7849	chr11	61946082	61946221	+	0	NA	intron (NM_001029936, intron 5 of 12)	intron (NM_001029936, intron 5 of 12)	55625	NM_001029936	432572	Mm.438022	NM_001029936	ENSMUSG00000042331	Specc1	2810012G08Rik|B230396K10Rik|Cytsb	sperm antigen with calponin homology and coiled-coil domains 1	protein-coding
Diff_Nuc27685	chr7	34912282	34912421	+	0	NA	intron (NM_207212, intron 1 of 7)	ORR1D1|LTR|MaLR	5936	NM_207212	101543	Mm.422738	NM_207212	ENSMUSG00000036459	Wtip	-	WT1-interacting protein	protein-coding
Diff_Nuc53653	chr1	138199382	138199521	+	0	NA	intron (NM_001347110, intron 3 of 16)	Lx8|LINE|L1	-42001	NM_001101516	383563	Mm.40367	NM_001101516	ENSMUSG00000052759	Gpr25	Gm1300	G protein-coupled receptor 25	protein-coding
Diff_Nuc52423	chr1	84316002	84316141	+	0	NA	Intergenic	Intergenic	-34851	NM_001003948	98496	Mm.187470	NM_001003948	ENSMUSG00000045658	Pid1	5033414K04Rik|NYGGF4	phosphotyrosine interaction domain containing 1	protein-coding
Diff_Nuc40035	chr4	82530962	82531101	+	0	NA	promoter-TSS (NM_009887)	promoter-TSS (NM_009887)	24	NM_009887	12622	Mm.6780	NM_009887	ENSMUSG00000038192	Cer1	Cerl|Cerl1|Cerr1|cer-1	cerberus 1, DAN family BMP antagonist	protein-coding
Diff_Nuc20200	chr14	9386032	9386171	+	0	NA	intron (NM_028934, intron 6 of 15)	Lx9|LINE|L1	112703	NM_028934	74430	Mm.271901	NM_028934	ENSMUSG00000021747	4930452B06Rik	4933406L09Rik|AI854000	RIKEN cDNA 4930452B06 gene	protein-coding
Diff_Nuc4658	chr12	55421262	55421401	+	0	NA	Intergenic	Intergenic	70974	NR_033689	665239	Mm.26856	NR_033689		Gm7550	EG665239|Gm666	predicted gene 7550	ncRNA
Diff_Nuc47480	chr2	68214507	68214646	+	0	NA	intron (NM_016866, intron 5 of 17)	intron (NM_016866, intron 5 of 17)	95462	NM_016866	53416	Mm.198414	NM_016866	ENSMUSG00000027030	Stk39	AW227544|AW556857|DCHT|RF005|Rnl5|SPAK	serine/threonine kinase 39	protein-coding
Diff_Nuc50930	chr1	26623712	26623851	+	0	NA	Intergenic	Intergenic	120524	NM_001033764	210940	Mm.297614	NM_001033764	ENSMUSG00000073722	4931408C20Rik	-	RIKEN cDNA 4931408C20 gene	protein-coding
Diff_Nuc2760	chr13	95613022	95613161	+	0	NA	TTS (NM_009321)	TTS (NM_009321)	-32491	NM_011021	18420	Mm.42051	NM_011021	ENSMUSG00000021685	Otp	-	orthopedia homeobox	protein-coding
Diff_Nuc28632	chr7	76227682	76227821	+	0	NA	Intergenic	Intergenic	-333627	NM_025549	66412	Mm.251199	NM_025549	ENSMUSG00000042659	Arrdc4	2410003C09Rik|AV216361	arrestin domain containing 4	protein-coding
Diff_Nuc41934	chr4	149910282	149910421	+	0	NA	intron (NM_001085492, intron 11 of 22)	intron (NM_001085492, intron 11 of 22)	115932	NM_173774	242773	Mm.29280	NM_173774	ENSMUSG00000039838	Slc45a1	C230078B22|Dnb5	solute carrier family 45, member 1	protein-coding
Diff_Nuc51864	chr1	63667982	63668121	+	0	NA	Intergenic	Intergenic	65450	NM_001081658	241073	Mm.297680	NM_001081658	ENSMUSG00000069085	Dytn	Gm215	dystrotelin	protein-coding
Diff_Nuc43028	chr3	41069492	41069631	+	0	NA	Intergenic	B1_Mus2|SINE|Alu	-182593	NM_027558	70804	Mm.40321	NM_027558	ENSMUSG00000049940	Pgrmc2	4631434O19Rik|5730409G06Rik|DG6|PMBP	progesterone receptor membrane component 2	protein-coding
Diff_Nuc25238	chr18	28980502	28980641	+	0	NA	intron (NR_045398, intron 2 of 4)	Lx5|LINE|L1	261906	NR_045398	320624	Mm.50107	NR_045398		4930474G06Rik	-	RIKEN cDNA 4930474G06 gene	ncRNA
Diff_Nuc8164	chr11	73425232	73425371	+	0	NA	Intergenic	L1Md_A|LINE|L1	9217	NM_207224	193053	Mm.377230	NM_207224	ENSMUSG00000060335	Olfr384	GA_x5J8B7U2A8F-1-327|GA_x6K02T2P1NL-3773152-3774090|MOR135-5|Olfr384-ps1|Olfr386	olfactory receptor 384	protein-coding
Diff_Nuc51581	chr1	53255172	53255311	+	0	NA	intron (NM_153556, intron 9 of 12)	intron (NM_153556, intron 9 of 12)	-10780	NM_027070	69397	Mm.307084	NM_027070	ENSMUSG00000060715	1700019A02Rik	-	RIKEN cDNA 1700019A02 gene	protein-coding
Diff_Nuc39177	chr4	46023562	46023701	+	0	NA	intron (NM_146142, intron 8 of 16)	intron (NM_146142, intron 8 of 16)	-28463	NM_021883	21916	Mm.249594	NM_021883	ENSMUSG00000028328	Tmod1	E-Tmod|Tmod	tropomodulin 1	protein-coding
Diff_Nuc42721	chr3	28853152	28853291	+	0	NA	Intergenic	L1_Mus1|LINE|L1	61682	NM_001033479	385263	Mm.60893	NM_001033479	ENSMUSG00000074655	Gm1527	Gm1136	predicted gene 1527	protein-coding
Diff_Nuc25135	chr18	24238962	24239101	+	0	NA	Intergenic	Intergenic	41289	NM_172625	225280	Mm.258973	NM_172625	ENSMUSG00000047989	Ino80c	D030070L09Rik	INO80 complex subunit C	protein-coding
Diff_Nuc41101	chr4	123412232	123412371	+	0	NA	TTS (NM_023423)	TTS (NM_023423)	15241	NM_023423	68050	Mm.27903	NM_023423	ENSMUSG00000023075	Akirin1	6330407G11Rik	akirin 1	protein-coding
Diff_Nuc4739	chr12	58647552	58647691	+	0	NA	promoter-TSS (NM_008259)	promoter-TSS (NM_008259)	-513	NM_008259	15375	Mm.4578	NM_008259	ENSMUSG00000035451	Foxa1	Hnf-3a|Hnf3a|Tcf-3a|Tcf3a	forkhead box A1	protein-coding
Diff_Nuc33214	chr6	110883372	110883511	+	0	NA	intron (NM_001346640, intron 2 of 10)	L2|LINE|L2	287849	NM_177328	108073	Mm.240881	NM_177328	ENSMUSG00000056755	Grm7	6330570A01Rik|BB176677|C030018L03|E130018M02Rik|Gpr1g|Gprc1g|SMN2|Tg(SMN2)89Ahmb|mGluR7	glutamate receptor, metabotropic 7	protein-coding
Diff_Nuc23304	chr19	9449542	9449681	+	0	NA	Intergenic	Intergenic	184127	NR_073559	619371	Mm.316894	NM_001030317		Stxbp3-ps	Munc18c(L)|Stxbp3-1|Stxbp3b	syntaxin-binding protein 3, pseudogene	pseudo
Diff_Nuc47352	chr2	61894292	61894431	+	0	NA	intron (NM_033552, intron 1 of 25)	Lx8|LINE|L1	9789	NM_033552	94229	Mm.314497	NM_033552	ENSMUSG00000026904	Slc4a10	NCBE|mKIAA4136	solute carrier family 4, sodium bicarbonate cotransporter-like, member 10	protein-coding
Diff_Nuc40189	chr4	88477972	88478111	+	0	NA	Intergenic	Intergenic	-3388	NM_010505	15968	Mm.377089	NM_010505	ENSMUSG00000096682	Ifna5	Ifa5	interferon alpha 5	protein-coding
Diff_Nuc32943	chr6	98701002	98701141	+	0	NA	Intergenic	Intergenic	277221	NM_001197322	108655	Mm.234965	NM_053202	ENSMUSG00000030067	Foxp1	3110052D19Rik|4932443N09Rik|AI461938|AW494214	forkhead box P1	protein-coding
Diff_Nuc56108	chr9	42222282	42222421	+	0	NA	3' UTR (NM_173038, exon 8 of 8)	3' UTR (NM_173038, exon 8 of 8)	-14339	NM_001324548	21683	Mm.42209	NM_009347	ENSMUSG00000037705	Tecta	Tctna	tectorin alpha	protein-coding
Diff_Nuc46029	chr2	9862692	9862831	+	0	NA	intron (NM_027748, intron 3 of 6)	intron (NM_027748, intron 3 of 6)	-51594	NR_040511	77682	Mm.488621	NR_040511	ENSMUSG00000079602	9230102O04Rik	-	RIKEN cDNA 9230102O04 gene	ncRNA
Diff_Nuc51467	chr1	48339832	48339971	+	0	NA	Intergenic	L1Md_F2|LINE|L1	-815932	NR_105768	102466969		NR_105768	ENSMUSG00000098876	Mir6350	Gm27958|mmu-mir-6350	microRNA 6350	ncRNA
Diff_Nuc26688	chr18	81063472	81063611	+	0	NA	intron (NM_015805, intron 7 of 28)	intron (NM_015805, intron 7 of 28)	67256	NM_001201569	50771	Mm.247138	NM_015805	ENSMUSG00000024566	Atp9b	AA934181|Atpc2b|IIb|MMR	ATPase, class II, type 9B	protein-coding
Diff_Nuc6285	chr12	119486052	119486191	+	0	NA	intron (NM_009239, intron 5 of 5)	intron (NM_009239, intron 5 of 5)	-48605	NM_010060	13411	Mm.390540	NM_010060	ENSMUSG00000018581	Dnah11	Dnahc11|b2b1203Clo|b2b1279Clo|b2b1289Clo|b2b1727Clo|b2b598Clo|iv|lrd	dynein, axonemal, heavy chain 11	protein-coding
Diff_Nuc9368	chr11	114466622	114466761	+	0	NA	Intergenic	ORR1B1|LTR|MaLR	-63166	NM_023372	67671	Mm.238817	NM_023372	ENSMUSG00000057322	Rpl38	0610025G13Rik|Rbt|Ts|Tss	ribosomal protein L38	protein-coding
Diff_Nuc10451	chr10	39561612	39561751	+	0	NA	intron (NM_011264, intron 20 of 31)	intron (NM_011264, intron 20 of 31)	57363	NR_033628	213332	Mm.484359	NR_033628		Mfsd4b4	AA474331	major facilitator superfamily domain containing 4B4	pseudo
Diff_Nuc13159	chr17	13379372	13379511	+	0	NA	Intergenic	RMER1A|Other|Other	-18467	NR_033458	100038394	Mm.401677	NR_033458		Gm10512	ENSMUSG00000073459	predicted gene 10512	ncRNA
Diff_Nuc28199	chr7	59064132	59064271	+	0	NA	Intergenic	L1Md_F2|LINE|L1	-53184	NM_001330608	14453	Mm.207360	NM_008087	ENSMUSG00000030498	Gas2	Gas-2	growth arrest specific 2	protein-coding
Diff_Nuc1579	chr13	51238492	51238631	+	0	NA	intron (NM_001283030, intron 3 of 4)	intron (NM_001283030, intron 3 of 4)	8874	NM_011462	20729	Mm.188432	NM_011462	ENSMUSG00000021395	Spin1	Spin	spindlin 1	protein-coding
Diff_Nuc8754	chr11	93263422	93263561	+	0	NA	intron (NM_028296, intron 3 of 8)	intron (NM_028296, intron 3 of 8)	302887	NM_028296	72605	Mm.342160	NM_028296	ENSMUSG00000056158	Car10	2700029L05Rik|BB085816|Ca10	carbonic anhydrase 10	protein-coding
Diff_Nuc11437	chr10	79178272	79178411	+	0	NA	Intergenic	Intergenic	-1038	NM_008226	15166	Mm.12956	NM_008226	ENSMUSG00000020331	Hcn2	BCNG2|HAC1|trls	hyperpolarization-activated, cyclic nucleotide-gated K+ 2	protein-coding
Diff_Nuc4185	chr12	34833122	34833261	+	0	NA	intron (NM_001271386, intron 24 of 27)	L1_Mus3|LINE|L1	190655	NM_011658	22160	Mm.3280	NM_011658	ENSMUSG00000035799	Twist1	M-Twist|Pde|Ska10|Ska<m10Jus>|Twist|bHLHa38|pdt	twist basic helix-loop-helix transcription factor 1	protein-coding
Diff_Nuc49409	chr2	143074442	143074581	+	0	NA	Intergenic	L1Md_F2|LINE|L1	170283	NM_020595	57329	Mm.157751	NM_020595	ENSMUSG00000027416	Otor	CDRAP|Fdp|MIA|MIAL	otoraplin	protein-coding
Diff_Nuc35709	chr5	61706262	61706401	+	0	NA	Intergenic	Intergenic	-493751	NM_019468	14380	Mm.347430	NM_019468	ENSMUSG00000089992	G6pd2	G6pdx-ps1|Gpd-2|Gpd2	glucose-6-phosphate dehydrogenase 2	protein-coding
Diff_Nuc28308	chr7	64258422	64258561	+	0	NA	intron (NM_008074, intron 3 of 9)	(GGAA)n|Simple_repeat|Simple_repeat	383750	NM_008074	14407	Mm.434343	NM_008074	ENSMUSG00000055026	Gabrg3	B230362M20Rik|Gabrg-3	gamma-aminobutyric acid (GABA) A receptor, subunit gamma 3	protein-coding
Diff_Nuc20037	chr15	99715492	99715631	+	0	NA	Intergenic	B1_Mur2|SINE|Alu	-9674	NM_001113545	65970	Mm.33207	NM_023063	ENSMUSG00000023022	Lima1	Eplin	LIM domain and actin binding 1	protein-coding
Diff_Nuc9040	chr11	102598602	102598741	+	0	NA	Intergenic	Intergenic	-24078	NM_009613	11488	Mm.89854	NM_009613	ENSMUSG00000020926	Adam11	AW060611|Mdc	a disintegrin and metallopeptidase domain 11	protein-coding
Diff_Nuc52933	chr1	105087982	105088121	+	0	NA	Intergenic	B4A|SINE|B4	-1577345	NM_011800	23836	Mm.103640	NM_011800	ENSMUSG00000050840	Cdh20	Cdh7	cadherin 20	protein-coding
Diff_Nuc56928	chr9	70112872	70113011	+	0	NA	intron (NM_181072, intron 1 of 27)	intron (NM_181072, intron 1 of 27)	57784	NM_181072	71602	Mm.249311	NM_181072	ENSMUSG00000032220	Myo1e	2310020N23Rik|9130023P14Rik|AA407778|myosin-1e|myr 3	myosin IE	protein-coding
Diff_Nuc19852	chr15	93040382	93040521	+	0	NA	Intergenic	Intergenic	65064	NM_001033275	223827	Mm.22819	NM_001033275	ENSMUSG00000036197	Gxylt1	Glt8d3|Gm1228|Gm87	glucoside xylosyltransferase 1	protein-coding
Diff_Nuc28510	chr7	71779972	71780111	+	0	NA	intron (NM_007461, intron 3 of 14)	intron (NM_007461, intron 3 of 14)	133017	NM_001291167	11784	Mm.4657	NM_007461	ENSMUSG00000030519	Apba2	X11-like|X11L|XllL|mXllL	amyloid beta (A4) precursor protein-binding, family A, member 2	protein-coding
Diff_Nuc18451	chr15	36099282	36099421	+	0	NA	Intergenic	ID_B1|SINE|B4	-4414	NM_023127	17749	Mm.27375	NM_023127	ENSMUSG00000045996	Polr2k	ABC10-alpha|MafY|Mt1a|RPABC4|RPB10alpha|RPB12|RPB7.0	polymerase (RNA) II (DNA directed) polypeptide K	protein-coding
Diff_Nuc35356	chr5	46057092	46057231	+	0	NA	Intergenic	MTA_Mm-int|LTR|MaLR	3786	NR_073433	69788	Mm.381492	NR_073433	ENSMUSG00000104986	1600023N17Rik	AV119442	RIKEN cDNA 1600023N17 gene	ncRNA
Diff_Nuc45560	chr3	145210237	145210376	+	0	NA	intron (NM_027770, intron 59 of 59)	ORR1A2|LTR|MaLR	-28866	NM_001081094	229937	Mm.24586	NM_001081094	ENSMUSG00000074182	Znhit6	2410019A14Rik	zinc finger, HIT type 6	protein-coding
Diff_Nuc32280	chr6	71537512	71537651	+	0	NA	Intergenic	Intergenic	43733	NM_025783	66700	Mm.181278	NM_025783	ENSMUSG00000053119	Chmp3	25.1|4921505F14Rik|9130011K15Rik|CGI-49|D6Ertd286e|NEDF|Vps24	charged multivesicular body protein 3	protein-coding
Diff_Nuc36604	chr5	97685722	97685861	+	0	NA	Intergenic	Intergenic	135558	NM_001033191	97243	Mm.11746	NM_001033191	ENSMUSG00000046000	Naa11	Ard1b|Ard2|C80008	N(alpha)-acetyltransferase 11, NatA catalytic subunit	protein-coding
Diff_Nuc14021	chr17	43904402	43904541	+	0	NA	Intergenic	ORR1A4|LTR|MaLR	-34329	NM_207649	53901	Mm.251242	NM_030598	ENSMUSG00000039601	Rcan2	Csp2|Dscr1l1|MCIP2|ZAKI-4	regulator of calcineurin 2	protein-coding
Diff_Nuc27809	chr7	46406602	46406741	+	0	NA	Intergenic	L1Md_F2|LINE|L1	113233	NR_073038	100861861	Mm.60620	NR_073038		Gm21276	-	predicted gene, 21276	pseudo
Diff_Nuc12413	chr10	113410052	113410191	+	0	NA	Intergenic	Intergenic	828305	NM_146241	237553	Mm.445550	NM_146241	ENSMUSG00000050663	Trhde	9330155P21Rik	TRH-degrading enzyme	protein-coding
Diff_Nuc44034	chr3	84032202	84032341	+	0	NA	intron (NM_001271726, intron 1 of 11)	intron (NM_001271726, intron 1 of 11)	-7472	NM_030706	80890	Mm.44876	NM_030706	ENSMUSG00000027993	Trim2	mKIAA0517|narf	tripartite motif-containing 2	protein-coding
Diff_Nuc49059	chr2	130336032	130336171	+	0	NA	intron (NM_008980, intron 3 of 21)	intron (NM_008980, intron 3 of 21)	53384	NR_040348	321014	Mm.442588	NR_040348	ENSMUSG00000060029	4930473A02Rik	-	RIKEN cDNA 4930473A02 gene	ncRNA
Diff_Nuc20749	chr14	29283672	29283811	+	0	NA	intron (NM_001347497, intron 19 of 19)	intron (NM_001347497, intron 19 of 19)	-34918	NM_009524	22418	Mm.287544	NM_009524	ENSMUSG00000021994	Wnt5a	8030457G12Rik|Wnt-5a	wingless-type MMTV integration site family, member 5A	protein-coding
Diff_Nuc54800	chr1	184209322	184209461	+	0	NA	exon (NM_007853, exon 2 of 3)	exon (NM_007853, exon 2 of 3)	3499	NM_007853	13244	Mm.29648	NM_007853	ENSMUSG00000038633	Degs1	AA536663|Degs|Des1|Mdes	delta(4)-desaturase, sphingolipid 1	protein-coding
Diff_Nuc3140	chr13	108876852	108876991	+	0	NA	intron (NM_001127346, intron 2 of 3)	intron (NM_001127346, intron 2 of 3)	42253	NM_001048250	75616	Mm.491164	NM_001048250	ENSMUSG00000071180	Smim15	2810008M24Rik	small integral membrane protein 15	protein-coding
Diff_Nuc39956	chr4	78591212	78591351	+	0	NA	Intergenic	L1_Mus2|LINE|L1	351330	NR_131142	623726		NR_131142		A430085M09Rik	EG623726	RIKEN cDNA A430085M09 gene	ncRNA
Diff_Nuc33457	chr6	119761752	119761891	+	0	NA	intron (NM_178085, intron 2 of 5)	RMER6A|LTR|ERVK	36347	NM_053204	111173	Mm.288860	NM_053204	ENSMUSG00000030172	Erc1	4930404L01Rik|5033405M01Rik|9630025C19Rik|B430107L16Rik|CAST2|ELKS|Elks1|RAB6IP2A|RAB6IP2B|Rab6ip2|mKIAA1081	ELKS/RAB6-interacting/CAST family member 1	protein-coding
Diff_Nuc31342	chr6	34382592	34382731	+	0	NA	Intergenic	L1_Mm|LINE|L1	20299	NM_009731	11997	Mm.482073	NM_009731	ENSMUSG00000052131	Akr1b7	AR|Avdp|MVDP	aldo-keto reductase family 1, member B7	protein-coding
Diff_Nuc26642	chr18	79495712	79495851	+	0	NA	Intergenic	Intergenic	-189651	NM_053099	240427	Mm.312871	NM_053099	ENSMUSG00000024548	Setbp1	C130092E12|Seb|mKIAA0437	SET binding protein 1	protein-coding
Diff_Nuc8824	chr11	95183822	95183961	+	0	NA	Intergenic	L2c|LINE|L2	-12331	NM_001195003	217127	Mm.90213	NM_177619	ENSMUSG00000038909	Kat7	Hbo1|Hboa|Myst2	K(lysine) acetyltransferase 7	protein-coding
Diff_Nuc32856	chr6	94483222	94483361	+	0	NA	intron (NM_026255, intron 3 of 9)	intron (NM_026255, intron 3 of 9)	32983	NM_026255	67582	Mm.280725	NM_026255	ENSMUSG00000045100	Slc25a26	4930433D19Rik|4933433F13Rik|AW557176|D6Bwg0781e|Slc25a6	solute carrier family 25 (mitochondrial carrier, phosphate carrier), member 26	protein-coding
Diff_Nuc19088	chr15	64408812	64408951	+	0	NA	Intergenic	Intergenic	-194400	NM_010026	13196	Mm.277236	NM_010026	ENSMUSG00000022377	Asap1	AV239055|DEF-1|Ddef1|PAP|mKIAA1249|s19	ArfGAP with SH3 domain, ankyrin repeat and PH domain1	protein-coding
Diff_Nuc59241	chr8	42276332	42276471	+	0	NA	TTS (NM_145594)	TTS (NM_145594)	24109	NM_145594	234199	Mm.277955	NM_145594	ENSMUSG00000031594	Fgl1	Mfire1	fibrinogen-like protein 1	protein-coding
Diff_Nuc50455	chr1	6233042	6233181	+	0	NA	intron (NM_009826, intron 7 of 23)	RSINE1|SINE|B4	28368	NM_009826	12421	Mm.293811	NM_009826	ENSMUSG00000025907	Rb1cc1	2900055E04Rik|5930404L04Rik|Cc1|FIP200|LaXp180	RB1-inducible coiled-coil 1	protein-coding
Diff_Nuc40822	chr4	113250592	113250731	+	0	NA	intron (NM_001167878, intron 41 of 57)	MurERV4-int|LTR|ERVK	-291083	NM_001103199	230622	Mm.291107	NM_001103199	ENSMUSG00000087194	Skint6	OTTMUSG00000008519	selection and upkeep of intraepithelial T cells 6	protein-coding
Diff_Nuc54094	chr1	158399712	158399851	+	0	NA	intron (NM_009230, intron 1 of 15)	ORR1B1|LTR|MaLR	4678	NM_009230	20652	Mm.28099	NM_009230	ENSMUSG00000026600	Soat1	8430426K15Rik|ACAT-1|AW550831|Acact|ald|hid	sterol O-acyltransferase 1	protein-coding
Diff_Nuc54589	chr1	177530962	177531101	+	0	NA	TTS (NM_010209)	TTS (NM_010209)	24735	NM_010209	14194	Mm.41502	NM_010209	ENSMUSG00000026526	Fh1	Fh|Fh-1	fumarate hydratase 1	protein-coding
Diff_Nuc22527	chr14	100569422	100569561	+	0	NA	Intergenic	Intergenic	-20476	NM_010636	16597	Mm.396499	NM_010636	ENSMUSG00000072294	Klf12	2700063E05Rik|AI225908|AI315654|AP-2rep|B130052C06Rik|D530033K05Rik	Kruppel-like factor 12	protein-coding
Diff_Nuc11968	chr10	95750342	95750481	+	0	NA	Intergenic	Intergenic	61570	NR_110448	74881	Mm.410819	NR_110448		4930459C07Rik	-	RIKEN cDNA 4930459C07 gene	ncRNA
Diff_Nuc42597	chr3	23552652	23552791	+	0	NA	Intergenic	RMER17B|LTR|ERVK	1130207	NM_001326288	635702	Mm.448351	NM_001326288	ENSMUSG00000102758	Naaladl2	2810043G22Rik|EG635702|Gm1021	N-acetylated alpha-linked acidic dipeptidase-like 2	protein-coding
Diff_Nuc36654	chr5	100181472	100181611	+	0	NA	intron (NR_131054, intron 2 of 11)	B2_Mm2|SINE|B2	1451	NR_131054	330133	Mm.447264	NR_131054	ENSMUSG00000105218	Gm38413	A830083F22	predicted gene, 38413	ncRNA
Diff_Nuc31872	chr6	53902702	53902841	+	0	NA	intron (NM_001289714, intron 5 of 11)	intron (NM_001289714, intron 5 of 11)	25896	NM_001289714	71287	Mm.158654	NM_027749	ENSMUSG00000052955	Cpvl	4933436L16Rik|HVLP	carboxypeptidase, vitellogenic-like	protein-coding
Diff_Nuc10498	chr10	40989292	40989431	+	0	NA	intron (NM_133999, intron 6 of 22)	intron (NM_133999, intron 6 of 22)	33686	NM_133999	103199	Mm.277242	NM_133999	ENSMUSG00000038417	Fig4	A530089I17Rik|AI326867|Sac3	FIG4 phosphoinositide 5-phosphatase	protein-coding
Diff_Nuc16009	chr16	26927322	26927461	+	0	NA	Intergenic	MT2C_Mm|LTR|ERVL	40940	NM_001285916	239789	Mm.326909	NM_001013761	ENSMUSG00000068428	Gmnc	Gemc1|Gm1778|Gm606	geminin coiled-coil domain containing	protein-coding
Diff_Nuc11033	chr10	64957822	64957961	+	0	NA	Intergenic	Intergenic	628921	NR_038039	69433	Mm.23366	NR_038039	ENSMUSG00000100000	1700023F02Rik	AV205046	RIKEN cDNA 1700023F02 gene	ncRNA
Diff_Nuc38746	chr4	25791042	25791181	+	0	NA	Intergenic	Lx6|LINE|L1	-63961	NM_010243	14348	Mm.39101	NM_010243	ENSMUSG00000055373	Fut9	AI746471|AU067636|mFUT9|mFuc-TIX	fucosyltransferase 9	protein-coding
Diff_Nuc29493	chr7	111313142	111313281	+	0	NA	intron (NM_172905, intron 1 of 5)	intron (NM_172905, intron 1 of 5)	119	NM_172905	244180	Mm.17149	NM_172905	ENSMUSG00000044265	Olfm5	E030002O03Rik	olfactomedin 5	protein-coding
Diff_Nuc36035	chr5	74729332	74729471	+	0	NA	intron (NM_001286437, intron 5 of 7)	intron (NM_001286437, intron 5 of 7)	138050	NM_026878	68939	Mm.293316	NM_026878	ENSMUSG00000049907	Rasl11b	1190017B18Rik	RAS-like, family 11, member B	protein-coding
Diff_Nuc26205	chr18	64088682	64088821	+	0	NA	intron (NM_001014981, intron 25 of 27)	intron (NM_001014981, intron 25 of 27)	220402	NM_001014981	104082	Mm.30850	NM_001014981	ENSMUSG00000040560	Wdr7	AI462727|TRAG|mKIAA0541	WD repeat domain 7	protein-coding
Diff_Nuc49671	chr2	152975162	152975301	+	0	NA	intron (NM_010407, intron 12 of 12)	B1_Mur1|SINE|Alu	-11806	NM_133847	99237	Mm.330674	NM_133847	ENSMUSG00000068040	Tm9sf4	AA986553|AU045326|B930079E06|mKIAA0255	transmembrane 9 superfamily protein member 4	protein-coding
Diff_Nuc42231	chr3	9370802	9370941	+	0	NA	Intergenic	ORR1B1-int|LTR|MaLR	-32207	NR_015499	320088	Mm.212908	NR_015499	ENSMUSG00000097365	C030034L19Rik	A130044O20Rik	RIKEN cDNA C030034L19 gene	ncRNA
Diff_Nuc9636	chr10	3618952	3619091	+	0	NA	Intergenic	Lx5|LINE|L1	-31073	NM_001302795	18390	Mm.438000	NM_011013	ENSMUSG00000000766	Oprm1	M-OR-1|MOP-R|MOR-1|MOR-1O|Oprm|mor|muOR	opioid receptor, mu 1	protein-coding
Diff_Nuc23139	chr19	4517522	4517661	+	0	NA	intron (NM_001162946, intron 2 of 20)	intron (NM_001162946, intron 2 of 20)	7119	NM_001162946	18563	Mm.1845	NM_008797	ENSMUSG00000024892	Pcx	Pc|Pcb	pyruvate carboxylase	protein-coding
Diff_Nuc32274	chr6	71405542	71405681	+	0	NA	Intergenic	B3A|SINE|B2	-14980	NM_024288	68477	Mm.28474	NM_024288	ENSMUSG00000002222	Rmnd5a	1110007A06Rik|AJ237586|AW125795|Gid2|MTA.D02.090	required for meiotic nuclear division 5 homolog A	protein-coding
Diff_Nuc49373	chr2	142043962	142044101	+	0	NA	intron (NM_001013802, intron 11 of 18)	intron (NM_001013802, intron 11 of 18)	683169	NM_001081133	16558	Mm.251934	NM_001081133	ENSMUSG00000038844	Kif16b	8430434E15Rik|AA623607|AI789011|C80253|C80902|mKIAA1590	kinesin family member 16B	protein-coding
Diff_Nuc45308	chr3	135148092	135148231	+	0	NA	promoter-TSS (NM_027288)	promoter-TSS (NM_027288)	-414	NM_027288	110173	Mm.280536	NM_027288	ENSMUSG00000028164	Manba	2410030O07Rik|B930014J03Rik|Bmn	mannosidase, beta A, lysosomal	protein-coding
Diff_Nuc58606	chr8	13478032	13478171	+	0	NA	intron (NM_019521, intron 6 of 14)	intron (NM_019521, intron 6 of 14)	16434	NM_019521	14456	Mm.3982	NM_019521	ENSMUSG00000031451	Gas6	Gas-6	growth arrest specific 6	protein-coding
Diff_Nuc27095	chr7	13531882	13532021	+	0	NA	Intergenic	Intergenic	19186	NM_029809	381845	Mm.439896	NM_029809	ENSMUSG00000033967	Rnf225	2310014L17Rik|AV237412|C77118	ring finger protein 225	protein-coding
Diff_Nuc26114	chr18	60694902	60695041	+	0	NA	intron (NM_026302, intron 2 of 12)	intron (NM_026302, intron 2 of 12)	9096	NM_026302	67665	Mm.272801	NM_026302	ENSMUSG00000024603	Dctn4	1110001K06Rik|4930547K17Rik|C130039E17Rik|p62	dynactin 4	protein-coding
Diff_Nuc22789	chr14	113298622	113298761	+	0	NA	Intergenic	RMER6C|LTR|ERVK	1224354	NM_198865	75409	Mm.235097	NM_029273	ENSMUSG00000033214	Slitrk5	2610019D03Rik	SLIT and NTRK-like family, member 5	protein-coding
Diff_Nuc6545	chr11	9400662	9400801	+	0	NA	intron (NM_178259, intron 42 of 61)	intron (NM_178259, intron 42 of 61)	308786	NM_178259	268379	Mm.39270	NM_178259	ENSMUSG00000004668	Abca13	9830132L24|A930002G16Rik|AI956815	ATP-binding cassette, sub-family A (ABC1), member 13	protein-coding
Diff_Nuc55187	chr9	5012352	5012491	+	0	NA	Intergenic	Lx4A|LINE|L1	-216187	NM_019691	14802	Mm.209263	NM_019691	ENSMUSG00000025892	Gria4	GluA4|GluR-D|Glur-4|Glur4|Gluralpha4|spkw1	glutamate receptor, ionotropic, AMPA4 (alpha 4)	protein-coding
Diff_Nuc45162	chr3	128290242	128290381	+	0	NA	Intergenic	L1Md_F2|LINE|L1	-355788	NR_045704	402774	Mm.209170	NR_045704	ENSMUSG00000105816	D030025E07Rik	-	RIKEN cDNA D030025E07 gene	ncRNA
Diff_Nuc20834	chr14	31919202	31919341	+	0	NA	intron (NM_001081251, intron 26 of 32)	intron (NM_001081251, intron 26 of 32)	22845	NM_001308466	66487	Mm.379116	NM_001308091	ENSMUSG00000058351	Smim4	2010107H07Rik|Gm41122	small integral membrane protein 4	protein-coding
Diff_Nuc21617	chr14	63226672	63226811	+	0	NA	3' UTR (NM_001243857, exon 4 of 4)	3' UTR (NM_001243857, exon 4 of 4)	52167	NM_001243857	629059	Mm.291864	NM_001243857	ENSMUSG00000035184	Fam124a	EG629059	family with sequence similarity 124, member A	protein-coding
Diff_Nuc53021	chr1	108615412	108615551	+	0	NA	Intergenic	Intergenic	-4614	NM_177410	12043	Mm.257460	NM_009741	ENSMUSG00000057329	Bcl2	AW986256|Bcl-2|C430015F12Rik|D630044D05Rik|D830018M01Rik	B cell leukemia/lymphoma 2	protein-coding
Diff_Nuc18876	chr15	55043712	55043851	+	0	NA	exon (NM_145470, exon 6 of 9)	exon (NM_145470, exon 6 of 9)	78790	NM_001037937	97998	Mm.295397	NM_145470	ENSMUSG00000022419	Deptor	Depdc6	DEP domain containing MTOR-interacting protein	protein-coding
Diff_Nuc3031	chr13	104614002	104614141	+	0	NA	intron (NM_001289474, intron 21 of 23)	B1F2|SINE|Alu	-59409	NM_172592	218543	Mm.458176	NM_172592	ENSMUSG00000032621	Srek1	8430401B01|AI450757|AI462342|SRrp508|SRrp86|Sfrs12|Srsf12	splicing regulatory glutamine/lysine-rich protein 1	protein-coding
Diff_Nuc14550	chr17	66167472	66167611	+	0	NA	intron (NR_104465, intron 10 of 18)	B3A|SINE|B2	34846	NR_104465	70351	Mm.48686	NM_146081	ENSMUSG00000061950	Ppp4r1	3110001J10Rik|Pp4r1	protein phosphatase 4, regulatory subunit 1	protein-coding
Diff_Nuc29027	chr7	92244932	92245071	+	0	NA	Intergenic	Lx2|LINE|L1	59411	NM_001102579	620672	Mm.469836	NM_001102579	ENSMUSG00000095664	Vmn2r67	EG620672	vomeronasal 2, receptor 67	protein-coding
Diff_Nuc1703	chr13	54975122	54975261	+	0	NA	Intergenic	Intergenic	-75581	NM_001311128	107448	Mm.23573	NM_153131	ENSMUSG00000025876	Unc5a	Unc5h1|mKIAA1976	unc-5 netrin receptor A	protein-coding
Diff_Nuc32004	chr6	58869292	58869431	+	0	NA	3' UTR (NM_028705, exon 25 of 25)	3' UTR (NM_028705, exon 25 of 25)	-12241	NM_021432	58243	Mm.389747	NM_021432	ENSMUSG00000055430	Nap1l5	1110020M21Rik	nucleosome assembly protein 1-like 5	protein-coding
Diff_Nuc18519	chr15	38751122	38751261	+	0	NA	Intergenic	Intergenic	-14264	NM_080640	118452	Mm.233837	NM_080640		Baalc	2810457D07Rik	brain and acute leukemia, cytoplasmic	protein-coding
Diff_Nuc48243	chr2	98631482	98631621	+	0	NA	Intergenic	RLTR26|LTR|ERVK	1323737	NM_178725	241568	Mm.241682	NM_178725	ENSMUSG00000050587	Lrrc4c	6430556C10Rik|NGL-1	leucine rich repeat containing 4C	protein-coding
Diff_Nuc24866	chr18	12802752	12802891	+	0	NA	intron (NM_028341, intron 1 of 13)	CpG	779	NM_028341	72747	Mm.52526	NM_028341	ENSMUSG00000024424	Ttc39c	1700008N02Rik|2810439F02Rik	tetratricopeptide repeat domain 39C	protein-coding
Diff_Nuc60247	chr8	85028542	85028681	+	0	NA	Intergenic	MTA_Mm|LTR|MaLR	-102126	NM_008357	16168	Mm.4392	NM_008357	ENSMUSG00000031712	Il15	AI503618|IL-15	interleukin 15	protein-coding
Diff_Nuc35252	chr5	42103082	42103221	+	0	NA	Intergenic	L1Md_F3|LINE|L1	-3733	NM_001310590	100972	Mm.41555	NM_027295	ENSMUSG00000029128	Rab28	2700023P08Rik|AW496496	RAB28, member RAS oncogene family	protein-coding
Diff_Nuc5819	chr12	101834842	101834981	+	0	NA	intron (NM_153587, intron 6 of 17)	intron (NM_153587, intron 6 of 17)	-75879	NM_001033213	104718	Mm.295441	NM_001033213	ENSMUSG00000033530	Ttc7b	AA408451|Ttc7l1	tetratricopeptide repeat domain 7B	protein-coding
Diff_Nuc45872	chr2	3137772	3137911	+	0	NA	intron (NM_001347067, intron 6 of 7)	intron (NM_001347067, intron 6 of 7)	-63643	NM_008708	18108	Mm.65021	NM_008708	ENSMUSG00000026643	Nmt2	A930001K02Rik|AI605445|AU044698|hNMT-2	N-myristoyltransferase 2	protein-coding
Diff_Nuc12741	chr10	126726802	126726941	+	0	NA	promoter-TSS (NM_007837)	promoter-TSS (NM_007837)	-797	NM_033072	110962	Mm.372826	NM_033072	ENSMUSG00000025409	Mbd6	D10Wsu93e	methyl-CpG binding domain protein 6	protein-coding
Diff_Nuc16014	chr16	26979342	26979481	+	0	NA	intron (NM_001013761, intron 2 of 5)	L1Md_F2|LINE|L1	-11080	NM_001285916	239789	Mm.326909	NM_001013761	ENSMUSG00000068428	Gmnc	Gemc1|Gm1778|Gm606	geminin coiled-coil domain containing	protein-coding
Diff_Nuc41753	chr4	145755432	145755571	+	0	NA	Intergenic	Intergenic	-6492	NM_001085522	433791	Mm.276881	NM_001085522	ENSMUSG00000070605	Zfp992	Gm13251|OTTMUSG00000011097	zinc finger protein 992	protein-coding
Diff_Nuc15533	chr16	11179942	11180081	+	0	NA	Intergenic	MMERGLN-int|LTR|ERV1	-3525	NM_145931	106205	Mm.226860	NM_145931	ENSMUSG00000037965	Zc3h7a	A430104C18Rik|AI447294|AW556219|HSPC055|Zc3h7|Zc3hdc7	zinc finger CCCH type containing 7 A	protein-coding
Diff_Nuc22300	chr14	89610912	89611051	+	0	NA	Intergenic	Lx6|LINE|L1	-685050	NR_002862	328451	Mm.320571	NR_002862		Gm5088	EG328451|Pabpc4l	poly(A)-binding protein, cytoplasmic pseudogene	pseudo
Diff_Nuc34512	chr5	15563812	15563951	+	0	NA	intron (NM_001110843, intron 3 of 38)	B3|SINE|B2	123372	NM_001110844	12293	Mm.159842	NM_009784	ENSMUSG00000040118	Cacna2d1	Ca(v)alpha2delta1|Cacna2|Cchl2a	calcium channel, voltage-dependent, alpha2/delta subunit 1	protein-coding
Diff_Nuc19796	chr15	91082332	91082471	+	0	NA	Intergenic	ORR1D1|LTR|MaLR	-60163	NM_011994	26874	Mm.295456	NM_011994	ENSMUSG00000055782	Abcd2	ABC39|ALDL1|ALDR|ALDRP	ATP-binding cassette, sub-family D (ALD), member 2	protein-coding
Diff_Nuc25208	chr18	27425652	27425791	+	0	NA	Intergenic	L1_Mus1|LINE|L1	-1292944	NR_045398	320624	Mm.50107	NR_045398		4930474G06Rik	-	RIKEN cDNA 4930474G06 gene	ncRNA
Diff_Nuc8827	chr11	95254952	95255091	+	0	NA	Intergenic	Intergenic	8785	NM_016752	110172	Mm.4593	NM_016752	ENSMUSG00000020873	Slc35b1	Ugalt2	solute carrier family 35, member B1	protein-coding
Diff_Nuc20113	chr15	102053842	102053981	+	0	NA	exon (NM_013566, exon 5 of 15)	exon (NM_013566, exon 5 of 15)	8455	NM_013566	16421	Mm.58	NM_013566	ENSMUSG00000001281	Itgb7	Ly69	integrin beta 7	protein-coding
Diff_Nuc47603	chr2	72727812	72727951	+	0	NA	Intergenic	Intergenic	-76107	NR_102349	76218	Mm.75260	NR_102348	ENSMUSG00000085427	6430710C18Rik	5033406J01Rik	RIKEN cDNA 6430710C18 gene	ncRNA
Diff_Nuc51850	chr1	63191272	63191411	+	0	NA	intron (NR_045914, intron 2 of 3)	intron (NR_045914, intron 2 of 3)	30027	NR_045914	100380944	Mm.392955	NR_045914	ENSMUSG00000084799	Ino80dos	Gm11602|OTTMUSG00000002611	INO80 complex subunit D, opposite strand	ncRNA
Diff_Nuc1343	chr13	43080822	43080961	+	0	NA	intron (NM_001302636, intron 2 of 12)	intron (NM_001302636, intron 2 of 12)	119275	NM_001302636	218194	Mm.160124	NM_198419	ENSMUSG00000054728	Phactr1	9630030F18Rik|Rpel1	phosphatase and actin regulator 1	protein-coding
Diff_Nuc34132	chr6	145931862	145932001	+	0	NA	Intergenic	L1_Mur2|LINE|L1	49264	NM_010656	16651	Mm.49689	NM_010656	ENSMUSG00000030255	Sspn	Krag	sarcospan	protein-coding
Diff_Nuc60551	chr8	96399092	96399231	+	0	NA	intron (NM_001113384, intron 2 of 7)	intron (NM_001113384, intron 2 of 7)	-61706	NR_026888	75809	Mm.443272	NM_029449		4930488L21Rik	4930452J22Rik	RIKEN cDNA 4930488L21 gene	ncRNA
Diff_Nuc2284	chr13	77300682	77300821	+	0	NA	intron (NM_001145676, intron 1 of 19)	intron (NM_001145676, intron 1 of 19)	25954	NM_001145676	72371	Mm.81475	NM_028215	ENSMUSG00000071252	2210408I21Rik	-	RIKEN cDNA 2210408I21 gene	protein-coding
Diff_Nuc14083	chr17	46271362	46271501	+	0	NA	intron (NM_029338, intron 4 of 4)	intron (NM_029338, intron 4 of 4)	9716	NM_029338	75564	Mm.17993	NM_029338	ENSMUSG00000023966	Rsph9	1700027N10Rik	radial spoke head 9 homolog (Chlamydomonas)	protein-coding
Diff_Nuc47542	chr2	71032442	71032581	+	0	NA	Intergenic	ORR1E|LTR|MaLR	-17252	NM_001198875	13427	Mm.249479	NM_010064	ENSMUSG00000027012	Dync1i2	3110079H08Rik|AW554389|Dncic2	dynein cytoplasmic 1 intermediate chain 2	protein-coding
Diff_Nuc1819	chr13	58966342	58966481	+	0	NA	intron (NM_001025074, intron 9 of 17)	intron (NM_001025074, intron 9 of 17)	57353	NM_001025074	18212	Mm.130054	NM_008745	ENSMUSG00000055254	Ntrk2	GP145-TrkB/GP95-TrkB|Tkrb|trk-B|trkB	neurotrophic tyrosine kinase, receptor, type 2	protein-coding
Diff_Nuc37773	chr5	138137672	138137811	+	0	NA	Intergenic	B4|SINE|B4	-11760	NM_001303266	231801	Mm.260869	NM_145566	ENSMUSG00000029722	Agfg2	A630095P14Rik|Hrbl|RAB-R|RABR	ArfGAP with FG repeats 2	protein-coding
Diff_Nuc22168	chr14	83222842	83222981	+	0	NA	Intergenic	L1_Mus4|LINE|L1	-1620459	NM_001013753	219228	Mm.153643	NM_001013753	ENSMUSG00000035566	Pcdh17	C030033F14Rik|Gm78	protocadherin 17	protein-coding
Diff_Nuc60543	chr8	96163102	96163241	+	0	NA	Intergenic	Lx8|LINE|L1	-103564	NM_001003951	67935	Mm.65457	NM_001003951	ENSMUSG00000058019	Ces5a	1700081L16Rik|1700122C07Rik|BB081581|Ces7|Gm503|cauxin	carboxylesterase 5A	protein-coding
Diff_Nuc40766	chr4	110480542	110480681	+	0	NA	intron (NM_001048189, intron 3 of 12)	Lx5|LINE|L1	410308	NM_030231	78933	Mm.435620	NM_030231	ENSMUSG00000061298	Agbl4	4930578N11Rik|4931433A01Rik	ATP/GTP binding protein-like 4	protein-coding
Diff_Nuc37187	chr5	118659262	118659401	+	0	NA	intron (NM_001109902, intron 7 of 10)	intron (NM_001109902, intron 7 of 10)	35539	NM_172998	269695	Mm.320042	NM_172998	ENSMUSG00000032850	Rnft2	AW049082|B830028P19Rik|Tmem118	ring finger protein, transmembrane 2	protein-coding
Diff_Nuc23058	chr14	123890982	123891121	+	0	NA	intron (NM_177393, intron 10 of 43)	intron (NM_177393, intron 10 of 43)	135315	NM_177393	338370	Mm.255348	NM_177393	ENSMUSG00000000197	Nalcn	A530023G15Rik|AI849508|Vgcnl1	sodium leak channel, non-selective	protein-coding
Diff_Nuc59565	chr8	59471232	59471371	+	0	NA	Intergenic	B4A|SINE|B4	328355	NR_110474	102636514		NR_110474	ENSMUSG00000100510	Uph	-	upperhand	ncRNA
Diff_Nuc8776	chr11	93543882	93544021	+	0	NA	Intergenic	B4|SINE|B4	203129	NM_001013375	217109	Mm.379350	NM_001013375	ENSMUSG00000054079	Utp18	6230425C22Rik|6430513M13|Wdr50	UTP18 small subunit processome component	protein-coding
Diff_Nuc28959	chr7	89632712	89632851	+	0	NA	intron (NM_001190374, intron 7 of 29)	PB1D7|SINE|Alu	148577	NM_001190374	269959	Mm.65306	NM_001190374	ENSMUSG00000070469	Adamtsl3	9230119C12Rik|C130057K09|mKIAA1233	ADAMTS-like 3	protein-coding
Diff_Nuc46099	chr2	13129662	13129801	+	0	NA	intron (NM_009105, intron 7 of 8)	intron (NM_009105, intron 7 of 8)	63311	NM_009105	20163	Mm.905	NM_009105	ENSMUSG00000026727	Rsu1	RsuI|rsp-1	Ras suppressor protein 1	protein-coding
Diff_Nuc22974	chr14	121524162	121524301	+	0	NA	intron (NM_134082, intron 2 of 26)	intron (NM_134082, intron 2 of 26)	89435	NM_134082	223254	Mm.223980	NM_134082	ENSMUSG00000025555	Farp1	AW228844|BC030329|Cdep	FERM, RhoGEF (Arhgef) and pleckstrin domain protein 1 (chondrocyte-derived)	protein-coding
Diff_Nuc58676	chr8	16131522	16131661	+	0	NA	intron (NM_053171, intron 25 of 69)	intron (NM_053171, intron 25 of 69)	37247	NR_037214	100526464		NR_037214	ENSMUSG00000093142	Mir3106	mir-3106|mmu-mir-3106	microRNA 3106	ncRNA
Diff_Nuc32981	chr6	100076602	100076741	+	0	NA	Intergenic	MLT1D|LTR|MaLR	160681	NM_019743	56353	Mm.321633	NM_019743	ENSMUSG00000072872	Rybp	2410018J24Rik|DEDAF|YEAF1	RING1 and YY1 binding protein	protein-coding
Diff_Nuc11361	chr10	75956722	75956861	+	0	NA	intron (NM_019434, intron 16 of 28)	B2_Mm1t|SINE|B2	-24932	NM_172550	216119	Mm.344778	NM_172550	ENSMUSG00000033126	Ybey	1110068N23Rik|A130042E20Rik|C21orf57|ORF57|ORF66	ybeY metallopeptidase	protein-coding
Diff_Nuc57779	chr9	104155472	104155611	+	0	NA	intron (NM_001163026, intron 1 of 55)	intron (NM_001163026, intron 1 of 55)	9719	NM_001163026	235567	Mm.217256	NM_001163026	ENSMUSG00000032560	Dnajc13	D030002L11Rik|Gm1124|RME-8|Rme8|mKIAA0678	DnaJ heat shock protein family (Hsp40) member C13	protein-coding
Diff_Nuc46287	chr2	21056302	21056441	+	0	NA	Intergenic	RodERV21-int|LTR|ERV1	70621	NM_027728	71233	Mm.27658	NM_027728	ENSMUSG00000026679	Enkur	4933434I06Rik|AU016229	enkurin, TRPC channel interacting protein	protein-coding
Diff_Nuc17066	chr16	70164642	70164781	+	0	NA	Intergenic	L1_Mus3|LINE|L1	-149483	NM_028803	74185	Mm.396102	NM_028803	ENSMUSG00000022707	Gbe1	2310045H19Rik|2810426P10Rik|D16Ertd536e	glucan (1,4-alpha-), branching enzyme 1	protein-coding
Diff_Nuc57919	chr9	108627602	108627741	+	0	NA	intron (NM_008924, intron 4 of 10)	RLTR20C|LTR|ERVK	33197	NM_008924	19087	Mm.253102	NM_008924	ENSMUSG00000032601	Prkar2a	1110061A24Rik|AI317181|AI836829|RII(alpha)	protein kinase, cAMP dependent regulatory, type II alpha	protein-coding
Diff_Nuc60956	chr8	112231952	112232091	+	0	NA	5' UTR (NM_001286391, exon 3 of 9)	5' UTR (NM_001286391, exon 3 of 9)	2102	NM_029468	75871	Mm.180410	NM_029468	ENSMUSG00000031728	Zfp821	4930566A11Rik|Znf821	zinc finger protein 821	protein-coding
Diff_Nuc4245	chr12	37291912	37292051	+	0	NA	intron (NM_001289503, intron 9 of 9)	MER67B|LTR|ERV1	183247	NM_001289503	75847	Mm.261764	NM_178629	ENSMUSG00000043153	Ispd	4930579E17Rik|AV040780	isoprenoid synthase domain containing	protein-coding
Diff_Nuc5452	chr12	86396212	86396351	+	0	NA	intron (NM_178363, intron 16 of 20)	intron (NM_178363, intron 16 of 20)	51100	NM_175198	73422	Mm.311944	NM_175198	ENSMUSG00000042320	Prox2	1700058C01Rik	prospero homeobox 2	protein-coding
Diff_Nuc60935	chr8	111420672	111420811	+	0	NA	intron (NM_007496, intron 4 of 9)	intron (NM_007496, intron 4 of 9)	-40019	NR_037295	100526511		NR_037295	ENSMUSG00000093241	Mir3108	mir-3108|mmu-mir-3108	microRNA 3108	ncRNA
Diff_Nuc49103	chr2	131802592	131802731	+	0	NA	Intergenic	Intergenic	25888	NM_001278520	26434	Mm.180750	NM_023043	ENSMUSG00000027338	Prnd	AI450264|Dpl|PrPLP|doppel	prion protein dublet	protein-coding
Diff_Nuc57849	chr9	106731122	106731261	+	0	NA	intron (NM_001015507, intron 1 of 22)	B1_Mus1|SINE|Alu	6884	NM_001015507	321006	Mm.440089	NM_001015507	ENSMUSG00000040325	Vprbp	AI447437|B930007L02Rik|mKIAA0800	Vpr (HIV-1) binding protein	protein-coding
Diff_Nuc19941	chr15	96249312	96249451	+	0	NA	exon (NM_028148, exon 11 of 15)	exon (NM_028148, exon 11 of 15)	41893	NM_028148	72193	Mm.324474	NM_028148	ENSMUSG00000033228	Scaf11	1110061H03Rik|2610510E10Rik|AI462454|CASP11|SIP1|SRRP129|Sfrs2ip|Srsf2ip|mKIAA3013	SR-related CTD-associated factor 11	protein-coding
Diff_Nuc49346	chr2	141016852	141016991	+	0	NA	intron (NM_001013802, intron 5 of 18)	intron (NM_001013802, intron 5 of 18)	-519709	NM_178382	71436	Mm.426781	NM_178382	ENSMUSG00000051379	Flrt3	5530600M07Rik|C430047I10Rik|mKIAA1469	fibronectin leucine rich transmembrane protein 3	protein-coding
Diff_Nuc61314	chr8	125472242	125472381	+	0	NA	intron (NR_037865, intron 2 of 13)	B1_Mur4|SINE|Alu	93873	NR_037865	77087	Mm.31567	NM_001081379	ENSMUSG00000035569	Ankrd11	2410104C19Rik|3010027A04Rik|6330578C09Rik|9530048I21Rik|AA930108|Gm176|Yod	ankyrin repeat domain 11	protein-coding
Diff_Nuc46783	chr2	38145742	38145881	+	0	NA	Intergenic	Intergenic	-2907	NM_146122	227801	Mm.314245	NM_146122	ENSMUSG00000035392	Dennd1a	6030446I19Rik|connecdenn	DENN/MADD domain containing 1A	protein-coding
Diff_Nuc58188	chr9	117973182	117973321	+	0	NA	TTS (NM_026442)	TTS (NM_026442)	23611	NM_013727	27215	Mm.92705	NM_013727	ENSMUSG00000039285	Azi2	AA410145|AZ2	5-azacytidine induced gene 2	protein-coding
Diff_Nuc39548	chr4	59794522	59794661	+	0	NA	intron (NM_001013577, intron 2 of 4)	B4A|SINE|B4	2136	NM_001013577	66209	Mm.51988	NM_001013577	ENSMUSG00000038544	Inip	1110054O05Rik|2610312O17Rik|AA399876|Ssbip1	INTS3 and NABP interacting protein	protein-coding
Diff_Nuc1984	chr13	65331442	65331581	+	0	NA	Intergenic	L1_Mus2|LINE|L1	-24487	NM_175290	97895	Mm.315815	NM_175290	ENSMUSG00000032999	Nlrp4f	C330026N02Rik|C86045|Nalp-kappa|Nalp4f	NLR family, pyrin domain containing 4F	protein-coding
Diff_Nuc56039	chr9	40103472	40103611	+	0	NA	Intergenic	Intergenic	26740	NM_178227	235281	Mm.290083	NM_153522	ENSMUSG00000049281	Scn3b	1110001K16Rik|4833414B02Rik|Scnb3	sodium channel, voltage-gated, type III, beta	protein-coding
Diff_Nuc16087	chr16	29674662	29674801	+	0	NA	Intergenic	Intergenic	95311	NM_001199177	74143	Mm.274285	NM_133752	ENSMUSG00000038084	Opa1	1200011N24Rik|AI225888|AI847218|lilr3|mKIAA0567	OPA1, mitochondrial dynamin like GTPase	protein-coding
Diff_Nuc38145	chr5	151474592	151474731	+	0	NA	Intergenic	Intergenic	-1741	NM_175310	100710	Mm.32959	NM_175310	ENSMUSG00000034021	Pds5b	AI646570|AS3|AW212954|Aprin|Tg(Wap-ERBB2)229Wzw|WAP-Her-2|mKIAA0979	PDS5 cohesin associated factor B	protein-coding
Diff_Nuc32058	chr6	61128802	61128941	+	0	NA	intron (NR_040287, intron 2 of 2)	intron (NR_040287, intron 2 of 2)	-1448	NM_001164316	232035	Mm.150324	NM_183310	ENSMUSG00000039578	Ccser1	6230405M12Rik|C130092O11Rik|Fam190a	coiled-coil serine rich 1	protein-coding
Diff_Nuc57242	chr9	81849912	81850051	+	0	NA	intron (NM_175213, intron 3 of 4)	intron (NM_175213, intron 3 of 4)	92630	NM_175213	75033	Mm.335329	NM_175213	ENSMUSG00000043289	Mei4	4930486G11Rik	meiotic double-stranded break formation protein 4	protein-coding
Diff_Nuc55608	chr9	24572582	24572721	+	0	NA	intron (NM_194263, intron 3 of 7)	GA-rich|Low_complexity|Low_complexity	6096	NM_020496	57246	Mm.31452	NM_020496	ENSMUSG00000031965	Tbx20	9430010M06Rik|AL022859|Tbx12	T-box 20	protein-coding
Diff_Nuc13936	chr17	40000462	40000601	+	0	NA	Intergenic	B4A|SINE|B4	20589	NR_046233	100861531		NR_046233		Rn45s	-	45S pre-ribosomal RNA	rRNA
Diff_Nuc7062	chr11	32796872	32797011	+	0	NA	Intergenic	MTA_Mm|LTR|MaLR	-72347	NM_027050	69351	Mm.65488	NM_027050	ENSMUSG00000020270	Smim23	1700008A04Rik	small integral membrane protein 23	protein-coding
Diff_Nuc3636	chr12	9322602	9322741	+	0	NA	Intergenic	L1Md_F2|LINE|L1	254720	NR_045488	69420	Mm.396193	NR_045488	ENSMUSG00000099360	1700022H16Rik	-	RIKEN cDNA 1700022H16 gene	ncRNA
Diff_Nuc49342	chr2	140904772	140904911	+	0	NA	intron (NM_001013802, intron 5 of 18)	intron (NM_001013802, intron 5 of 18)	-407629	NM_178382	71436	Mm.426781	NM_178382	ENSMUSG00000051379	Flrt3	5530600M07Rik|C430047I10Rik|mKIAA1469	fibronectin leucine rich transmembrane protein 3	protein-coding
Diff_Nuc35106	chr5	36234792	36234931	+	0	NA	Intergenic	MTE2b|LTR|MaLR	-1107	NM_027373	70292	Mm.125167	NM_027373	ENSMUSG00000029094	Afap1	2600003E23Rik|9630044L16Rik|AI848729|Afap|mKIAA3018	actin filament associated protein 1	protein-coding
[truncated: 4,281 more rows]
