# Supplementary material for: Remodeling of epigenome and transcriptome landscapes with aging in mice reveals widespread induction of inflammatory responses
Source: HighWire-hosted journal article supplement (doi:10.1101/gr.240093.118), 2019-03-11
Supplement: Supplemental_Code_Figure3_Machine_learning.zip [file HOMER_dposREF_Heart_DiNUP_DANPOS_GAINED.xls]

PeakID (cmd=annotatePeaks.pl dposREF_Heart_DiNUP_DANPOS_GAINED.bed mm9)	Chr	Start	End	Strand	Peak Score	Focus Ratio/Region Size	Annotation	Detailed Annotation	Distance to TSS	Nearest PromoterID	Entrez ID	Nearest Unigene	Nearest Refseq	Nearest Ensembl	Gene Name	Gene Alias	Gene Description	Gene Type
Diff_Nuc26400	chr2	71161632	71161771	+	0	NA	intron (NM_172436, intron 5 of 17)	intron (NM_172436, intron 5 of 17)	43910	NM_172436	78830	Mm.30928	NM_172436	ENSMUSG00000027010	Slc25a12	2610002D09Rik|AI839531|B230107K20Rik|BB129864	solute carrier family 25 (mitochondrial carrier, Aralar), member 12	protein-coding
Diff_Nuc6139	chr10	66578132	66578271	+	0	NA	Intergenic	Intergenic	-11805	NM_207221	108829	Mm.23846	NM_207221	ENSMUSG00000037876	Jmjd1c	5430433L24Rik|D630035I23Rik|Jmjdic|TRIP8	jumonji domain containing 1C	protein-coding
Diff_Nuc28400	chr1	47117772	47117911	+	0	NA	Intergenic	Intergenic	-207487	NM_172653	227059	Mm.233889	NM_172653	ENSMUSG00000025986	Slc39a10	2900042E17Rik|5430433I10|mKIAA1265	solute carrier family 39 (zinc transporter), member 10	protein-coding
Diff_Nuc16223	chr7	90587402	90587541	+	0	NA	Intergenic	L1VL4|LINE|L1	-145970	NM_177695	233424	Mm.486619	NM_177695	ENSMUSG00000038540	Tmc3	9030203A06	transmembrane channel-like gene family 3	protein-coding
Diff_Nuc30370	chr1	184359282	184359421	+	0	NA	intron (NM_173378, intron 2 of 17)	intron (NM_173378, intron 2 of 17)	20053	NM_173378	209456	Mm.287450	NM_173378	ENSMUSG00000026510	Trp53bp2	53BP2|AI746547|ASPP2|PPP1R13A|Tp53bp2|X98550	transformation related protein 53 binding protein 2	protein-coding
Diff_Nuc2390	chr12	52799162	52799301	+	0	NA	intron (NM_001329698, intron 1 of 5)	B2_Mm2|SINE|B2	-6330	NM_052973	94186	Mm.65979	NM_052973	ENSMUSG00000020954	Strn3	Gs2na|SG2NA	striatin, calmodulin binding protein 3	protein-coding
Diff_Nuc33988	chr8	122055682	122055821	+	0	NA	intron (NM_001167910, intron 10 of 22)	intron (NM_001167910, intron 10 of 22)	26910	NM_001167910	56453	Mm.206934	NM_019709	ENSMUSG00000031835	Mbtps1	0610038M03Rik|AV003995|S1P|SKI-1|Ski1|mKIAA0091	membrane-bound transcription factor peptidase, site 1	protein-coding
Diff_Nuc19722	chr5	44228782	44228921	+	0	NA	intron (NM_009763, intron 7 of 8)	intron (NM_009763, intron 7 of 8)	18719	NM_009763	12182	Mm.246332	NM_009763	ENSMUSG00000029082	Bst1	114/A10|A530073F09|BP-3|Bp3|Bsta1|CD157|Ly65	bone marrow stromal cell antigen 1	protein-coding
Diff_Nuc20844	chr5	126800742	126800881	+	0	NA	Intergenic	Intergenic	-710348	NR_040685	71247	Mm.399586	NR_040685	ENSMUSG00000105490	4933438B17Rik	-	RIKEN cDNA 4933438B17 gene	ncRNA
Diff_Nuc12515	chr14	83402502	83402641	+	0	NA	Intergenic	L1VL4|LINE|L1	-1440799	NM_001013753	219228	Mm.153643	NM_001013753	ENSMUSG00000035566	Pcdh17	C030033F14Rik|Gm78	protocadherin 17	protein-coding
Diff_Nuc30677	chr9	11826482	11826621	+	0	NA	Intergenic	RLTR6_Mm|LTR|ERV1	-921776	NM_001170787	244682	Mm.187021	NM_001033359	ENSMUSG00000039488	Cntn5	6720426O10Rik|A830025P08Rik|Gm507|NB-2	contactin 5	protein-coding
Diff_Nuc20601	chr5	111239292	111239431	+	0	NA	promoter-TSS (NM_009469)	promoter-TSS (NM_009469)	-261	NM_001347394	22241	Mm.271898	NM_009469	ENSMUSG00000029512	Ulk1	AU041434|Unc51.1|mKIAA0722	unc-51 like kinase 1	protein-coding
Diff_Nuc19588	chr5	33951162	33951301	+	0	NA	intron (NM_178390, intron 4 of 5)	intron (NM_178390, intron 4 of 5)	21053	NM_178390	74504	Mm.294695	NM_178390	ENSMUSG00000037339	Fam53a	2410018C17Rik|5430419M09Rik|Dntnp	family with sequence similarity 53, member A	protein-coding
Diff_Nuc10555	chr15	51841932	51842071	+	0	NA	Intergenic	Intergenic	-18695	NM_009009	19357	Mm.182628	NM_009009	ENSMUSG00000022314	Rad21	SCC1|mKIAA0078	RAD21 cohesin complex component	protein-coding
Diff_Nuc15194	chr18	90417272	90417411	+	0	NA	Intergenic	RLTR31_Mm|LTR|ERVK	-262205	NM_198295	67988	Mm.268041	NM_198295	ENSMUSG00000024614	Tmx3	6430411B10Rik|A730024F05Rik|AV259382|Txndc10|mKIAA1830	thioredoxin-related transmembrane protein 3	protein-coding
Diff_Nuc8902	chr16	29909052	29909191	+	0	NA	Intergenic	Intergenic	70089	NR_037689	328657	Mm.425982	NM_001033403		Gm1968	-	predicted gene 1968	ncRNA
Diff_Nuc19434	chr5	23304202	23304341	+	0	NA	intron (NM_177323, intron 3 of 14)	intron (NM_177323, intron 3 of 14)	10742	NM_001310467	72772	Mm.133300	NM_177323	ENSMUSG00000028999	Rint1	1500019C06Rik|2810450M21Rik|Rint-1	RAD50 interactor 1	protein-coding
Diff_Nuc22840	chr4	128417372	128417511	+	0	NA	intron (NM_001195083, intron 1 of 6)	B2_Mm1t|SINE|B2	12626	NM_001195083	54383	Mm.473738	NM_018774	ENSMUSG00000028796	Phc2	A3galt2|AA415044|D130050K19Rik|D4Ertd810e|Edr2|Mph2|p36	polyhomeotic-like 2 (Drosophila)	protein-coding
Diff_Nuc31704	chr9	78319092	78319231	+	0	NA	intron (NM_026658, intron 11 of 11)	B1_Mm|SINE|Alu	10370	NM_010106	13627	Mm.138471	NM_010106	ENSMUSG00000037742	Eef1a1	-	eukaryotic translation elongation factor 1 alpha 1	protein-coding
Diff_Nuc4209	chr11	63392122	63392261	+	0	NA	Intergenic	Intergenic	343595	NM_018805	54710	Mm.274426	NM_018805	ENSMUSG00000070407	Hs3st3b1	3-OST-3B|3OST3B1|3Ost3b|AU041882|AW536289|Hs3st3b|m3-OST-3B	heparan sulfate (glucosamine) 3-O-sulfotransferase 3B1	protein-coding
Diff_Nuc9066	chr16	38189312	38189451	+	0	NA	intron (NM_001347232, intron 5 of 11)	intron (NM_001347232, intron 5 of 11)	-100035	NR_033221	414072	Mm.483602	NR_033221		BC031361	-	cDNA sequence BC031361	ncRNA
Diff_Nuc16164	chr7	87222322	87222461	+	0	NA	intron (NM_175433, intron 1 of 4)	intron (NM_175433, intron 1 of 4)	-2248	NR_045695	100859962	Mm.392575	NR_045695	ENSMUSG00000108714	Gm21057	-	predicted gene, 21057	ncRNA
Diff_Nuc23949	chr3	54305962	54306101	+	0	NA	Intergenic	Intergenic	141002	NM_015784	50706	Mm.236067	NM_015784	ENSMUSG00000027750	Postn	A630052E07Rik|AI747096|OSF-2|Osf2|PLF|PN	periostin, osteoblast specific factor	protein-coding
Diff_Nuc8972	chr16	32657222	32657361	+	0	NA	intron (NM_016788, intron 1 of 15)	intron (NM_016788, intron 1 of 15)	10992	NR_033493	675921	Mm.404316	NR_033493	ENSMUSG00000075265	Tnk2os	ENSMUSG00000075265|Gm10818	tyrosine kinase, non-receptor 2, opposite strand	ncRNA
Diff_Nuc30465	chr1	193047822	193047961	+	0	NA	Intergenic	Intergenic	-40679	NM_007498	11910	Mm.2706	NM_007498	ENSMUSG00000026628	Atf3	LRG-21	activating transcription factor 3	protein-coding
Diff_Nuc25857	chr2	30997992	30998131	+	0	NA	promoter-TSS (NM_019406)	promoter-TSS (NM_019406)	-533	NM_001038700	14269	Mm.52297	NM_019406	ENSMUSG00000075415	Fnbp1	1110057E06Rik|2210010H06Rik|FBP1|Fbp17	formin binding protein 1	protein-coding
Diff_Nuc1205	chr13	77672662	77672801	+	0	NA	intron (NM_001145676, intron 19 of 19)	B4A|SINE|B4	-175220	NM_001163420	68675	Mm.343005	NM_138312	ENSMUSG00000064138	Fam172a	1110033M05Rik|2610318O14Rik|53-E6|9430037D06Rik|AF064782|pEN87	family with sequence similarity 172, member A	protein-coding
Diff_Nuc4239	chr11	66186432	66186571	+	0	NA	intron (NM_001034874, intron 2 of 4)	intron (NM_001034874, intron 2 of 4)	153127	NM_001034874	380702	Mm.351764	NM_001034874	ENSMUSG00000053930	Shisa6	Gm879|ckamp52	shisa family member 6	protein-coding
Diff_Nuc23220	chr4	147417422	147417561	+	0	NA	intron (NR_027809, intron 2 of 12)	intron (NR_027809, intron 2 of 12)	2193	NM_001161798	17769	Mm.89959	NM_010840	ENSMUSG00000029009	Mthfr	AI323986	5,10-methylenetetrahydrofolate reductase	protein-coding
Diff_Nuc6742	chr10	104264542	104264681	+	0	NA	Intergenic	L1MEc|LINE|L1	540288	NR_105838	102465222		NR_105838	ENSMUSG00000099264	Mir6411	Gm27767|mmu-mir-6411	microRNA 6411	ncRNA
Diff_Nuc379	chr13	14350842	14350981	+	0	NA	intron (NM_001081348, intron 23 of 28)	L1_Mm|LINE|L1	194860	NM_198122	94246	Mm.439784	NM_194262	ENSMUSG00000039219	Arid4b	BCAA|BRCAA1|RBBP1L1|Rbp1l1|SAP180	AT rich interactive domain 4B (RBP1-like)	protein-coding
Diff_Nuc10242	chr15	31552792	31552931	+	0	NA	Intergenic	Intergenic	20990	NM_026546	68073	Mm.119185	NM_026546	ENSMUSG00000039065	Fam173b	A930016P21Rik|AA987072	family with sequence similarity 173, member B	protein-coding
Diff_Nuc9162	chr16	44695902	44696041	+	0	NA	Intergenic	LFSINE_Vert|SINE|SINE	-28443	NM_145972	212547	Mm.310573	NM_145972	ENSMUSG00000036208	Nepro	-	nucleolus and neural progenitor protein	protein-coding
Diff_Nuc29772	chr1	144945312	144945451	+	0	NA	Intergenic	Intergenic	-542446	NM_020025	26878	Mm.285580	NM_020025	ENSMUSG00000033849	B3galt2	-	UDP-Gal:betaGlcNAc beta 1,3-galactosyltransferase, polypeptide 2	protein-coding
Diff_Nuc20176	chr5	80502532	80502671	+	0	NA	Intergenic	GA-rich|Low_complexity|Low_complexity	-946995	NM_001347367	319387	Mm.273631	NM_198702	ENSMUSG00000037605	Adgrl3	5430402I23Rik|CIRL-3|D130075K09Rik|Gm1379|LEC3|Lphn3|mKIAA0768	adhesion G protein-coupled receptor L3	protein-coding
Diff_Nuc7494	chr17	26914742	26914881	+	0	NA	Intergenic	B1_Mur3|SINE|Alu	-3213	NM_172149	224630	Mm.21795	NM_172149	ENSMUSG00000024191	Bnip1	2010005M06Rik|5930429G21Rik|Sec20	BCL2/adenovirus E1B interacting protein 1	protein-coding
Diff_Nuc19074	chr6	141294412	141294551	+	0	NA	intron (NM_018779, intron 1 of 15)	intron (NM_018779, intron 1 of 15)	5407	NR_033555	100093700	Mm.483778	NR_033555	ENSMUSG00000107456	Gm10400	ENSMUSG00000072690	predicted gene 10400	ncRNA
Diff_Nuc8487	chr17	92313962	92314101	+	0	NA	Intergenic	Intergenic	-821889	NM_020252	18189	Mm.478418	NM_020252	ENSMUSG00000024109	Nrxn1	1700062G21Rik|9330127H16Rik|A230068P09Rik|mKIAA0578	neurexin I	protein-coding
Diff_Nuc18001	chr6	64120942	64121081	+	0	NA	intron (NM_008167, intron 8 of 15)	intron (NM_008167, intron 8 of 15)	-558129	NM_007500	11921	Mm.57229	NM_007500	ENSMUSG00000073043	Atoh1	Hath1|MATH-1|Math1|bHLHa14	atonal bHLH transcription factor 1	protein-coding
Diff_Nuc14300	chr18	32241562	32241701	+	0	NA	intron (NM_173441, intron 3 of 13)	intron (NM_173441, intron 3 of 13)	14243	NM_173441	73473	Mm.66853	NM_173441	ENSMUSG00000024384	Iws1	1700069O15Rik|3000008H23|AL117927|AW214353	IWS1, SUPT6 interacting protein	protein-coding
Diff_Nuc33898	chr8	113908662	113908801	+	0	NA	intron (NM_178086, intron 1 of 6)	intron (NM_178086, intron 1 of 6)	8990	NM_178086	338521	Mm.41083	NM_178086	ENSMUSG00000033579	Fa2h	FAAH|Faxdc1|G630055L08Rik	fatty acid 2-hydroxylase	protein-coding
Diff_Nuc32592	chr8	19769152	19769291	+	0	NA	Intergenic	L1Md_F|LINE|L1	39645	NM_001039553	626415	Mm.425517	NM_001039553	ENSMUSG00000096265	4930467E23Rik	ENSMUSG00000074453|OTTMUSG00000018948|TSAP	RIKEN cDNA 4930467E23 gene	protein-coding
Diff_Nuc30135	chr1	170050022	170050161	+	0	NA	3' UTR (NM_008783, exon 8 of 8)	3' UTR (NM_008783, exon 8 of 8)	312209	NM_001291508	18514	Mm.43358	NM_008783	ENSMUSG00000052534	Pbx1	2310056B04Rik|D230003C07Rik|Pbx-1	pre B cell leukemia homeobox 1	protein-coding
Diff_Nuc24491	chr3	91530642	91530781	+	0	NA	Intergenic	Intergenic	-287794	NM_207247	242100	Mm.297406	NM_207247	ENSMUSG00000042244	Pglyrp3	Gm420	peptidoglycan recognition protein 3	protein-coding
Diff_Nuc23558	chr3	22729992	22730131	+	0	NA	Intergenic	L1Md_F2|LINE|L1	579769	NR_004439	19784		NR_004439		Rprl2	RPRH3|Rmrp3	ribonuclease P RNA-like 2	ncRNA
Diff_Nuc21178	chr5	149143782	149143921	+	0	NA	3' UTR (NM_001301424, exon 13 of 13)	3' UTR (NM_001301424, exon 13 of 13)	60540	NM_001301424	11987	Mm.275489	NM_007513	ENSMUSG00000041313	Slc7a1	4831426K01Rik|AI447493|Atrc-1|Atrc1|Cat1|Rec-1|Rev-1|mCAT-1	solute carrier family 7 (cationic amino acid transporter, y+ system), member 1	protein-coding
Diff_Nuc23144	chr4	145369292	145369431	+	0	NA	Intergenic	RLTR40|LTR|ERVK	-57761	NR_033612	236069	Mm.276881	NR_033612	ENSMUSG00000096233	Gm13238	OTTMUSG00000011065	carnitine deficiency-associated gene expressed in ventricle 3 pseudogene	pseudo
Diff_Nuc28782	chr1	70719852	70719991	+	0	NA	intron (NM_025728, intron 7 of 7)	intron (NM_025728, intron 7 of 7)	-52368	NM_177164	320460	Mm.360649	NM_177164	ENSMUSG00000045648	Vwc2l	A830006F12Rik|Brl	von Willebrand factor C domain-containing protein 2-like	protein-coding
Diff_Nuc25889	chr2	32565632	32565771	+	0	NA	exon (NM_130860, exon 4 of 7)	exon (NM_130860, exon 4 of 7)	2603	NM_130860	107951	Mm.27557	NM_130860	ENSMUSG00000009555	Cdk9	PITALRE	cyclin-dependent kinase 9 (CDC2-related kinase)	protein-coding
Diff_Nuc22236	chr4	85716182	85716321	+	0	NA	intron (NM_029967, intron 1 of 27)	intron (NM_029967, intron 1 of 27)	16432	NM_029967	77739	Mm.331690	NM_029967	ENSMUSG00000066113	Adamtsl1	5930437A14Rik|6720426B09Rik|ADAMTSL-1	ADAMTS-like 1	protein-coding
Diff_Nuc4904	chr11	102901982	102902121	+	0	NA	intron (NM_008707, intron 1 of 11)	B1_Mus2|SINE|Alu	12175	NM_008707	18107	Mm.10265	NM_008707	ENSMUSG00000020936	Nmt1	AW536594	N-myristoyltransferase 1	protein-coding
Diff_Nuc1766	chr13	115138782	115138921	+	0	NA	intron (NM_010887, intron 2 of 4)	intron (NM_010887, intron 2 of 4)	39451	NM_010887	17993	Mm.253142	NM_010887	ENSMUSG00000021764	Ndufs4	6720411N02Rik|C1-18k	NADH dehydrogenase (ubiquinone) Fe-S protein 4	protein-coding
Diff_Nuc26082	chr2	46179662	46179801	+	0	NA	Intergenic	Intergenic	627606	NR_040497	69405	Mm.396184	NR_040497	ENSMUSG00000086202	1700019E08Rik	-	RIKEN cDNA 1700019E08 gene	ncRNA
Diff_Nuc23013	chr4	136914382	136914521	+	0	NA	promoter-TSS (NM_009861)	promoter-TSS (NM_009861)	-777	NM_001243769	12540	Mm.1022	NM_009861	ENSMUSG00000006699	Cdc42	AI747189|AU018915	cell division cycle 42	protein-coding
Diff_Nuc2385	chr12	52395272	52395411	+	0	NA	Intergenic	RMER4B|LTR|ERVK	-53876	NM_001167964	217558	Mm.253264	NM_001015099	ENSMUSG00000035293	G2e3	6030408C04Rik|9030416F18|AW046379|D930034K21Rik|mKIAA1333	G2/M-phase specific E3 ubiquitin ligase	protein-coding
Diff_Nuc26395	chr2	70936632	70936771	+	0	NA	intron (NM_001165981, intron 14 of 14)	intron (NM_001165981, intron 14 of 14)	-19410	NM_028593	73649	Mm.45435	NM_028593	ENSMUSG00000027015	Cybrd1	2210407P13Rik|Dcytb	cytochrome b reductase 1	protein-coding
Diff_Nuc18083	chr6	71896632	71896771	+	0	NA	intron (NM_009088, intron 14 of 33)	MLT1A0|LTR|MaLR	37654	NM_009088	20019	Mm.135581	NM_009088	ENSMUSG00000049553	Polr1a	194kDa|3010014K16Rik|RPA194|Rpo1-4|mRPA1	polymerase (RNA) I polypeptide A	protein-coding
Diff_Nuc27098	chr2	123856042	123856181	+	0	NA	Intergenic	L1MA10|LINE|L1	-59594	NM_001290997	214968	Mm.330536	NM_172537	ENSMUSG00000027200	Sema6d	1110067B02Rik|AA409156|D330011G23|mKIAA1479	sema domain, transmembrane domain (TM), and cytoplasmic domain, (semaphorin) 6D	protein-coding
Diff_Nuc28479	chr1	52269352	52269491	+	0	NA	intron (NM_001113383, intron 5 of 14)	L1_Mus4|LINE|L1	20655	NM_001081081	14660	Mm.398608	NM_001081081	ENSMUSG00000026103	Gls	6330442B14|AI314027|B230365M23Rik	glutaminase	protein-coding
Diff_Nuc28031	chr1	16346222	16346361	+	0	NA	intron (NM_001347044, intron 13 of 13)	Lx5|LINE|L1	162905	NM_001347044	29819	Mm.216257	NM_025303	ENSMUSG00000025920	Stau2	-	staufen (RNA binding protein) homolog 2 (Drosophila)	protein-coding
Diff_Nuc12592	chr14	90634952	90635091	+	0	NA	intron (NR_045712, intron 5 of 8)	L1_Mus4|LINE|L1	108323	NR_045712	74967	Mm.390704	NR_045712		4930474H20Rik	-	RIKEN cDNA 4930474H20 gene	ncRNA
Diff_Nuc32450	chr8	10969462	10969601	+	0	NA	Intergenic	B4|SINE|B4	-38319	NR_046017	619321	Mm.403007	NR_046017	ENSMUSG00000096938	9530052E02Rik	-	RIKEN cDNA 9530052E02 gene	ncRNA
Diff_Nuc5599	chr10	26869712	26869851	+	0	NA	intron (NM_008481, intron 32 of 63)	intron (NM_008481, intron 32 of 63)	-239891	NR_131034	75855	Mm.402080	NR_131034	ENSMUSG00000101636	4930579H20Rik	-	RIKEN cDNA 4930579H20 gene	ncRNA
Diff_Nuc458	chr13	21688142	21688281	+	0	NA	Intergenic	Intergenic	15662	NM_146744	258739	Mm.377667	NM_146744	ENSMUSG00000051258	Olfr1362	MOR256-8|Olfr1363-ps1	olfactory receptor 1362	protein-coding
Diff_Nuc6109	chr10	64200502	64200641	+	0	NA	intron (NM_001164519, intron 8 of 12)	intron (NM_001164519, intron 8 of 12)	-647568	NM_178678	216028	Mm.431318	NM_178678	ENSMUSG00000042846	Lrrtm3	9630044H04Rik	leucine rich repeat transmembrane neuronal 3	protein-coding
Diff_Nuc28518	chr1	54317202	54317341	+	0	NA	intron (NM_030025, intron 2 of 27)	ORR1D2|LTR|MaLR	9744	NM_030025	78016	Mm.67455	NM_030025	ENSMUSG00000025983	Ccdc150	4930511H11Rik	coiled-coil domain containing 150	protein-coding
Diff_Nuc27381	chr2	141349912	141350051	+	0	NA	intron (NM_001013802, intron 6 of 18)	L1Md_F2|LINE|L1	-852769	NM_178382	71436	Mm.426781	NM_178382	ENSMUSG00000051379	Flrt3	5530600M07Rik|C430047I10Rik|mKIAA1469	fibronectin leucine rich transmembrane protein 3	protein-coding
Diff_Nuc15278	chr7	13022692	13022831	+	0	NA	Intergenic	L1_Mus1|LINE|L1	-14921	NM_001033820	619331	Mm.361832	NM_001033820	ENSMUSG00000034071	Zfp551	9630004E07Rik|Znf551	zinc fingr protein 551	protein-coding
Diff_Nuc569	chr13	30746852	30746991	+	0	NA	Intergenic	RLTR25B|LTR|ERVK	-5007	NM_001037955	105352	Mm.289646	NM_134068	ENSMUSG00000069255	Dusp22	JKAP|JSP1|LMW-DSP2|MKPX	dual specificity phosphatase 22	protein-coding
Diff_Nuc23311	chr4	154964182	154964321	+	0	NA	3' UTR (NM_138671, exon 12 of 12)	3' UTR (NM_138671, exon 12 of 12)	-11274	NM_177186	320541	Mm.306018	NM_177186	ENSMUSG00000042202	Slc35e2	A530082C11Rik|AI957035	solute carrier family 35, member E2	protein-coding
Diff_Nuc27427	chr2	145667882	145668021	+	0	NA	intron (NM_028724, intron 4 of 12)	MER5A|DNA|MER1_type	56099	NM_028724	74030	Mm.228799	NM_028724	ENSMUSG00000001768	Rin2	2010003K16Rik|4632403N06Rik|AW821980|RASSF4	Ras and Rab interactor 2	protein-coding
Diff_Nuc20939	chr5	134974312	134974451	+	0	NA	intron (NM_009990, intron 11 of 16)	intron (NM_009990, intron 11 of 16)	-41795	NM_001081464	57080	Mm.332735	NM_020331	ENSMUSG00000023079	Gtf2ird1	1700012P16Rik|BEN|Cream1|ESTM9|GTF3|Gtf2il|MusTRD1|Tg(Alb1-Myc)166.8Sst|WBSCR11|X83320	general transcription factor II I repeat domain-containing 1	protein-coding
Diff_Nuc24528	chr3	94679642	94679781	+	0	NA	intron (NM_172683, intron 12 of 18)	intron (NM_172683, intron 12 of 18)	11169	NM_008945	19172	Mm.368	NM_008945	ENSMUSG00000005779	Psmb4	Pros-27	proteasome (prosome, macropain) subunit, beta type 4	protein-coding
Diff_Nuc3244	chr12	113794302	113794441	+	0	NA	Intergenic	Intergenic	-32624	NM_198411	70435	Mm.250193	NM_198411	ENSMUSG00000037679	Inf2	2610204M08Rik|AA589465|AW125550|EG629699	inverted formin, FH2 and WH2 domain containing	protein-coding
Diff_Nuc24417	chr3	88482732	88482871	+	0	NA	Intergenic	MYSERV6-int|LTR|ERVK	-6915	NM_028814	74200	Mm.251800	NM_028814	ENSMUSG00000028060	2810403A07Rik	A430106P18Rik|AI256352|AI451678|Blom7|Kiaa0907	RIKEN cDNA 2810403A07 gene	protein-coding
Diff_Nuc11939	chr14	46162322	46162461	+	0	NA	promoter-TSS (NR_045809)	promoter-TSS (NR_045809)	-994	NR_045809	67651	Mm.55930	NR_045809		4930527F14Rik	-	RIKEN cDNA 4930527F14 gene	ncRNA
Diff_Nuc24553	chr3	95682662	95682801	+	0	NA	exon (NM_001033302, exon 6 of 6)	exon (NM_001033302, exon 6 of 6)	3420	NM_001033302	229599	Mm.331218	NM_001033302	ENSMUSG00000038550	Ciart	Chrono|Gm129	circadian associated repressor of transcription	protein-coding
Diff_Nuc28021	chr1	15128492	15128631	+	0	NA	Intergenic	Intergenic	-173972	NM_001098528	98741	Mm.156081	NM_001033195	ENSMUSG00000092083	Kcnb2	9630047L19Rik|BB130875|Kv2.2	potassium voltage gated channel, Shab-related subfamily, member 2	protein-coding
Diff_Nuc20088	chr5	73516292	73516431	+	0	NA	intron (NM_028194, intron 8 of 62)	intron (NM_028194, intron 8 of 62)	118218	NM_173403	231290	Mm.491387	NM_173403	ENSMUSG00000029219	Slc10a4	E130304D01	solute carrier family 10 (sodium/bile acid cotransporter family), member 4	protein-coding
Diff_Nuc20676	chr5	115985102	115985241	+	0	NA	intron (NM_133915, intron 1 of 11)	intron (NM_133915, intron 1 of 11)	-24305	NM_007475	11837	Mm.5286	NM_007475	ENSMUSG00000067274	Rplp0	36B4|Arbp|L10E	ribosomal protein, large, P0	protein-coding
Diff_Nuc31878	chr9	91607922	91608061	+	0	NA	Intergenic	L1Md_F2|LINE|L1	344181	NM_009576	22774	Mm.8062	NM_009576	ENSMUSG00000036972	Zic4	-	zinc finger protein of the cerebellum 4	protein-coding
Diff_Nuc16665	chr7	118219772	118219911	+	0	NA	exon (NM_013507, exon 14 of 22)	exon (NM_013507, exon 14 of 22)	6703	NM_001040131	13690	Mm.185453	NM_013507	ENSMUSG00000005610	Eif4g2	DAP-5|E130105L11Rik|Nat1|Natm1|p97	eukaryotic translation initiation factor 4, gamma 2	protein-coding
Diff_Nuc23186	chr4	146802452	146802591	+	0	NA	intron (NM_001039209, intron 1 of 2)	L1VL2|LINE|L1	-124865	NM_001014397	433804	Mm.332047	NM_001014397	ENSMUSG00000065999	Zfp985	Gm13154|OTTMUSG00000010673	zinc finger protein 985	protein-coding
Diff_Nuc16247	chr7	92798462	92798601	+	0	NA	Intergenic	MTA_Mm|LTR|MaLR	34559	NM_001105184	233445	Mm.389930	NM_001105184	ENSMUSG00000091205	Vmn2r71	EG233445	vomeronasal 2, receptor 71	protein-coding
Diff_Nuc6256	chr10	73652392	73652531	+	0	NA	intron (NM_001142748, intron 5 of 25)	intron (NM_001142748, intron 5 of 25)	367846	NM_001142735	11994	Mm.338933	NM_023115	ENSMUSG00000052613	Pcdh15	BB078305|ENSMUSG00000046980|Gm9815|Ush1f|av|nmf19|roda	protocadherin 15	protein-coding
Diff_Nuc720	chr13	41603372	41603511	+	0	NA	Intergenic	Lx|LINE|L1	-20712	NM_001111324	18003	Mm.288980	NM_017464	ENSMUSG00000021365	Nedd9	Cas-L|CasL|HEF1|MEF1|Nedd-9|p105	neural precursor cell expressed, developmentally down-regulated gene 9	protein-coding
Diff_Nuc34137	chr8	131348382	131348521	+	0	NA	Intergenic	PB1D10|SINE|Alu	138897	NM_010578	16412	Mm.263396	NM_010578	ENSMUSG00000025809	Itgb1	4633401G24Rik|AA409975|AA960159|CD29|ENSMUSG00000051907|Fnrb|Gm9863|gpIIa	integrin beta 1 (fibronectin receptor beta)	protein-coding
Diff_Nuc29369	chr1	109542432	109542571	+	0	NA	Intergenic	Intergenic	55918	NM_001159748	20725	Mm.83909	NM_011459	ENSMUSG00000026315	Serpinb8	CAP-2|CAP2|NK10|Spi8|ovalbumin	serine (or cysteine) peptidase inhibitor, clade B, member 8	protein-coding
Diff_Nuc2079	chr12	27075212	27075351	+	0	NA	intron (NM_080563, intron 1 of 8)	B4A|SINE|B4	24594	NR_105856	102466676		NR_105856	ENSMUSG00000098771	Mir6538	Gm27439|mmu-mir-6538	microRNA 6538	ncRNA
Diff_Nuc1251	chr13	81872522	81872661	+	0	NA	intron (NM_028372, intron 1 of 1)	MTD|LTR|MaLR	22175	NM_028372	72852	Mm.31095	NM_028372	ENSMUSG00000051098	Mblac2	2900024O10Rik	metallo-beta-lactamase domain containing 2	protein-coding
Diff_Nuc32796	chr8	33334672	33334811	+	0	NA	Intergenic	Intergenic	72374	NR_046039	666589	Mm.367675	NR_046039		Gm8179	EG666589	predicted gene 8179	ncRNA
Diff_Nuc24749	chr3	107483022	107483161	+	0	NA	intron (NM_145542, intron 1 of 16)	intron (NM_145542, intron 1 of 16)	16375	NM_145542	229709	Mm.220328	NM_145542	ENSMUSG00000027893	Ahcyl1	1110034F20Rik|AA409031|AA414901|Ahcy-rs3|DCAL|Irbit	S-adenosylhomocysteine hydrolase-like 1	protein-coding
Diff_Nuc24444	chr3	89535522	89535661	+	0	NA	intron (NM_019655, intron 1 of 14)	intron (NM_019655, intron 1 of 14)	951	NM_019655	56417	Mm.316628	NM_019655	ENSMUSG00000027951	Adar	AV242451|Adar1|Adar1p110|Adar1p150|mZaADAR	adenosine deaminase, RNA-specific	protein-coding
Diff_Nuc22553	chr4	108842192	108842331	+	0	NA	intron (NM_001346502, intron 2 of 23)	L1MC5|LINE|L1	32616	NM_133885	100273	Mm.366315	NM_133885	ENSMUSG00000028559	Osbpl9	2600011I06Rik|AU015843|Orp-9	oxysterol binding protein-like 9	protein-coding
Diff_Nuc8050	chr17	64197042	64197181	+	0	NA	Intergenic	Intergenic	-16219	NM_001037997	14158	Mm.23039	NM_008000	ENSMUSG00000000127	Fer	AV082135|C330004K01Rik|Fert|Fert2	fer (fms/fps related) protein kinase	protein-coding
Diff_Nuc29282	chr1	104279362	104279501	+	0	NA	Intergenic	ETnERV2-int|LTR|ERVK	1227086	NR_037989	100504525	Mm.87065	NR_037989	ENSMUSG00000100684	Gm20268	-	predicted gene, 20268	ncRNA
Diff_Nuc8345	chr17	82593212	82593351	+	0	NA	Intergenic	ETnERV2-int|LTR|ERVK	-455554	NM_011406	20541	Mm.265834	NM_011406	ENSMUSG00000054640	Slc8a1	AI852629|AV344025|D930008O12Rik|Ncx1	solute carrier family 8 (sodium/calcium exchanger), member 1	protein-coding
Diff_Nuc8079	chr17	65877782	65877921	+	0	NA	intron (NM_001289486, intron 1 of 14)	intron (NM_001289486, intron 1 of 14)	12271	NM_001008973	381107	Mm.141275	NM_001008973	ENSMUSG00000045036	Tmem232	E130009J12Rik|Gm940|Tes13-L|Tes13-S	transmembrane protein 232	protein-coding
Diff_Nuc5389	chr10	12250432	12250571	+	0	NA	intron (NM_011682, intron 51 of 73)	ID_B1|SINE|B4	331032	NM_011682	22288	Mm.331784	NM_011682	ENSMUSG00000019820	Utrn	AA589569|DRP|Dmdl	utrophin	protein-coding
Diff_Nuc3070	chr12	101471492	101471631	+	0	NA	Intergenic	Intergenic	33207	NM_001313934	12313	Mm.285993	NM_009790	ENSMUSG00000001175	Calm1	AI256814|AI327027|AI461935|AL024000|CaM|Calm	calmodulin 1	protein-coding
Diff_Nuc6956	chr10	119580072	119580211	+	0	NA	exon (NM_028679, exon 12 of 12)	exon (NM_028679, exon 12 of 12)	-30120	NM_080446	117599	Mm.214703	NM_080446	ENSMUSG00000020228	Helb	AI447783|D10Ertd664e	helicase (DNA) B	protein-coding
Diff_Nuc9502	chr16	71812412	71812551	+	0	NA	Intergenic	Intergenic	422091	NR_131116	319533	Mm.373754	NR_131115		8030451O07Rik	-	RIKEN cDNA 8030451O07 gene	ncRNA
Diff_Nuc29681	chr1	137609482	137609621	+	0	NA	Intergenic	L1MB8|LINE|L1	-16223	NM_007791	13007	Mm.196484	NM_007791	ENSMUSG00000026421	Csrp1	AA408841|AA959891|AW545626|CRP1|Csrp	cysteine and glycine-rich protein 1	protein-coding
Diff_Nuc25550	chr2	11587552	11587691	+	0	NA	intron (NM_008367, intron 1 of 7)	intron (NM_008367, intron 1 of 7)	23202	NM_008367	16184	Mm.915	NM_008367	ENSMUSG00000026770	Il2ra	CD25|Il2r|Ly-43	interleukin 2 receptor, alpha chain	protein-coding
Diff_Nuc3895	chr11	44822612	44822751	+	0	NA	Intergenic	Intergenic	107749	NR_045100	100504255	Mm.123608	NR_045100	ENSMUSG00000084773	Gm12159	OTTMUSG00000005475	predicted gene 12159	ncRNA
Diff_Nuc27132	chr2	125738132	125738271	+	0	NA	intron (NM_001291002, intron 5 of 9)	B4A|SINE|B4	46242	NM_001291002	69976	Mm.20216	NM_175154	ENSMUSG00000027207	Galk2	2810017M24Rik|AI327030|Gk2	galactokinase 2	protein-coding
Diff_Nuc22864	chr4	129316402	129316541	+	0	NA	intron (NM_001199695, intron 3 of 10)	intron (NM_001199695, intron 3 of 10)	1578	NM_001005506	109658	Mm.268863	NM_001005506	ENSMUSG00000053841	Txlna	2600010N21Rik|AI425952|AW209241|Il14|Txln	taxilin alpha	protein-coding
Diff_Nuc10692	chr15	60558302	60558441	+	0	NA	Intergenic	MER21B|LTR|ERV1	-96149	NR_030696	320469	Mm.230853	NM_177166		9930014A18Rik	-	RIKEN cDNA 9930014A18 gene	ncRNA
Diff_Nuc692	chr13	38620802	38620941	+	0	NA	promoter-TSS (NM_145367)	promoter-TSS (NM_145367)	-178	NM_001289598	105245	Mm.28622	NM_145367	ENSMUSG00000038991	Txndc5	AL022641|ERp46|PC-TRP	thioredoxin domain containing 5	protein-coding
Diff_Nuc18507	chr6	100593612	100593751	+	0	NA	intron (NM_181590, intron 6 of 10)	intron (NM_181590, intron 6 of 10)	27470	NM_181590	72171	Mm.256022	NM_181590	ENSMUSG00000035378	Shq1	2810403P18Rik|Grim-1	SHQ1 homolog (S. cerevisiae)	protein-coding
Diff_Nuc28167	chr1	29575332	29575471	+	0	NA	Intergenic	(TTGG)n|Simple_repeat|Simple_repeat	97068	NR_105760	102465174		NR_105760	ENSMUSG00000099257	Mir6342	Gm27268|mmu-mir-6342	microRNA 6342	ncRNA
Diff_Nuc9909	chr15	6544902	6545041	+	0	NA	intron (NM_001278269, intron 1 of 16)	intron (NM_001278269, intron 1 of 16)	15124	NM_011815	23880	Mm.170905	NM_011815	ENSMUSG00000022148	Fyb	ADAP|B630013F22Rik|FYB-120/130|Slap130|p120/130|p120/p130	FYN binding protein	protein-coding
Diff_Nuc29123	chr1	91692682	91692821	+	0	NA	intron (NM_001037136, intron 12 of 16)	intron (NM_001037136, intron 12 of 16)	-112284	NR_015540	74403	Mm.444291	NR_015540		4933400F21Rik	1700091C04Rik|4930565K10Rik	RIKEN cDNA 4933400F21 gene	ncRNA
Diff_Nuc16975	chr7	138708202	138708341	+	0	NA	intron (NM_001317350, intron 4 of 7)	intron (NM_001317350, intron 4 of 7)	4263	NM_001317350	12237	Mm.927	NM_009774	ENSMUSG00000066979	Bub3	AU019800|AU021329|AU043350|AW146323|C78067	BUB3 mitotic checkpoint protein	protein-coding
Diff_Nuc23809	chr3	41134822	41134961	+	0	NA	Intergenic	Intergenic	162230	NR_040385	78706	Mm.366094	NR_040385	ENSMUSG00000097639	Platr4	C430002E04Rik	pluripotency associated transcript 4	ncRNA
Diff_Nuc7662	chr17	34914012	34914151	+	0	NA	Intergenic	Intergenic	27290	NM_009995	13079	Mm.440407	NM_009995	ENSMUSG00000024365	Cyp21a1	21-OH|21OH|21OHA|21OHB|CYP21OH-A|Cyp21|Cyp21-ps1|Cyp21B|Cyp21a2-ps|Cyp21a2ps|Oh21-1|Oh21-2	cytochrome P450, family 21, subfamily a, polypeptide 1	protein-coding
Diff_Nuc16445	chr7	106951172	106951311	+	0	NA	Intergenic	Intergenic	25686	NM_016720	50877	Mm.103703	NM_016720	ENSMUSG00000035239	Neu3	-	neuraminidase 3	protein-coding
Diff_Nuc5784	chr10	41922362	41922501	+	0	NA	intron (NM_019740, intron 2 of 3)	intron (NM_019740, intron 2 of 3)	74117	NM_019740	56484	Mm.338613	NM_019740	ENSMUSG00000048756	Foxo3	1110048B16Rik|2010203A17Rik|C76856|FKHRL1|Fkhr2|Foxo3a	forkhead box O3	protein-coding
Diff_Nuc20732	chr5	120811012	120811151	+	0	NA	Intergenic	Intergenic	-70814	NM_008499	16873	Mm.5151	NM_008499	ENSMUSG00000029595	Lhx5	Lim2	LIM homeobox protein 5	protein-coding
Diff_Nuc31567	chr9	70590852	70590991	+	0	NA	intron (NM_007399, intron 5 of 15)	intron (NM_007399, intron 5 of 15)	64132	NM_007399	11487	Mm.3037	NM_007399	ENSMUSG00000054693	Adam10	1700031C13Rik|MADM|kuz|kuzbanian	a disintegrin and metallopeptidase domain 10	protein-coding
Diff_Nuc5495	chr10	19278742	19278881	+	0	NA	Intergenic	Intergenic	-32944	NM_010511	15979	Mm.549	NM_010511	ENSMUSG00000020009	Ifngr1	CD119|IFN-gammaR|Ifgr|Ifngr|Nktar	interferon gamma receptor 1	protein-coding
Diff_Nuc19558	chr5	32366112	32366251	+	0	NA	intron (NM_181282, intron 11 of 11)	intron (NM_181282, intron 11 of 11)	-72664	NM_008037	14284	Mm.24684	NM_008037	ENSMUSG00000029135	Fosl2	Fra-2	fos-like antigen 2	protein-coding
Diff_Nuc12670	chr14	98929952	98930091	+	0	NA	Intergenic	Lx|LINE|L1	-361037	NM_007826	13134	Mm.320593	NM_007826	ENSMUSG00000055639	Dach1	Dac|Dach	dachshund 1 (Drosophila)	protein-coding
Diff_Nuc5668	chr10	32449802	32449941	+	0	NA	intron (NM_001025286, intron 1 of 3)	intron (NM_001025286, intron 1 of 3)	159850	NM_001013411	432450	Mm.49665	NM_001013411	ENSMUSG00000069670	Nkain2	6330571D19Rik|AW455467|Tcba1	Na+/K+ transporting ATPase interacting 2	protein-coding
Diff_Nuc5999	chr10	58045502	58045641	+	0	NA	Intergenic	Lx|LINE|L1	84886	NM_001162956	76138	Mm.211744	NM_001162956	ENSMUSG00000038010	Ccdc138	6230424H07Rik|BC042726	coiled-coil domain containing 138	protein-coding
Diff_Nuc3491	chr11	12668642	12668781	+	0	NA	Intergenic	Lx7|LINE|L1	-303748	NM_001282993	12808	Mm.22847	NM_172496	ENSMUSG00000020173	Cobl	-	cordon-bleu WH2 repeat	protein-coding
Diff_Nuc23061	chr4	139155592	139155731	+	0	NA	intron (NM_001205173, intron 1 of 8)	(CA)n|Simple_repeat|Simple_repeat	-23148	NM_175438	212647	Mm.273571	NM_175438	ENSMUSG00000028737	Aldh4a1	A930035F14Rik|Ahd-1|Ahd1|Aldh4|Aldh5a1|E330022C09|P5cd|P5cdh|P5cdhl|P5cdhs|Ssdh1	aldehyde dehydrogenase 4 family, member A1	protein-coding
Diff_Nuc5484	chr10	18755192	18755331	+	0	NA	Intergenic	Intergenic	-20045	NM_009397	21929	Mm.116683	NM_009397	ENSMUSG00000019850	Tnfaip3	A20|Tnfip3	tumor necrosis factor, alpha-induced protein 3	protein-coding
Diff_Nuc23212	chr4	147225062	147225201	+	0	NA	Intergenic	Lx4A|LINE|L1	-2647	NM_198619	242747	Mm.332053	NM_198619	ENSMUSG00000059423	Zfp933	2810408P10Rik	zinc finger protein 933	protein-coding
Diff_Nuc28740	chr1	67437992	67438131	+	0	NA	Intergenic	Intergenic	268460	NM_001080809	227231	Mm.343942	NM_001080809	ENSMUSG00000025991	Cps1	4732433M03Rik|CPS|D1Ucla3	carbamoyl-phosphate synthetase 1	protein-coding
Diff_Nuc17779	chr6	47523442	47523581	+	0	NA	intron (NM_001146689, intron 3 of 19)	intron (NM_001146689, intron 3 of 19)	21518	NM_007971	14056	Mm.246688	NM_007971	ENSMUSG00000029687	Ezh2	Enx-1|Enx1h|KMT6|mKIAA4065	enhancer of zeste 2 polycomb repressive complex 2 subunit	protein-coding
Diff_Nuc9884	chr15	5232722	5232861	+	0	NA	Intergenic	Lx3C|LINE|L1	-38604	NM_008965	19219	Mm.18509	NM_008965	ENSMUSG00000039942	Ptger4	EP4|Ptgerep4	prostaglandin E receptor 4 (subtype EP4)	protein-coding
Diff_Nuc22598	chr4	111669022	111669161	+	0	NA	Intergenic	L1VL4|LINE|L1	-9783	NM_001102662	639781	Mm.398873	NM_001102662	ENSMUSG00000089773	Skint1	OTTMUSG00000008542|Skint-1	selection and upkeep of intraepithelial T cells 1	protein-coding
Diff_Nuc13240	chr19	18851102	18851241	+	0	NA	intron (NM_153417, intron 2 of 38)	intron (NM_153417, intron 2 of 38)	26698	NM_153417	225997	Mm.215171	NM_153417	ENSMUSG00000024727	Trpm6	CHAK2|TRPM6/CHAK2	transient receptor potential cation channel, subfamily M, member 6	protein-coding
Diff_Nuc7654	chr17	34385572	34385711	+	0	NA	Intergenic	Intergenic	9791	NM_010389	15002	Mm.327358	NM_010389	ENSMUSG00000041538	H2-Ob	A-beta-2|A-beta2|H-2Ab|H-2I|H-2Ob|H2-Ab|H2-Ab2|H2-IAb2|Ob	histocompatibility 2, O region beta locus	protein-coding
Diff_Nuc32806	chr8	34258832	34258971	+	0	NA	Intergenic	Lx8|LINE|L1	-198403	NM_001177589	100042715	Mm.291093	NM_001177589		Gm3985	-	predicted gene 3985	protein-coding
Diff_Nuc26924	chr2	113169292	113169431	+	0	NA	intron (NM_010230, intron 1 of 19)	intron (NM_010230, intron 1 of 19)	1468	NM_010230	14260	Mm.4938	NM_010230	ENSMUSG00000044042	Fmn1	Fmn|formin-1|ld	formin 1	protein-coding
Diff_Nuc25914	chr2	33826422	33826561	+	0	NA	Intergenic	Intergenic	-83025	NM_175184	72543	Mm.254914	NM_175184	ENSMUSG00000038740	Mvb12b	2610200O14Rik|2610528K11Rik|AI414895|Fam125b	multivesicular body subunit 12B	protein-coding
Diff_Nuc21968	chr4	61462812	61462951	+	0	NA	Intergenic	Intergenic	-19623	NM_001135127	100189605	Mm.457980	NM_001135127	ENSMUSG00000078673	Mup19	100039247|Gm12552|Mup11|Mup14|Mup17|Mup6|Mup8|OTTMUSG00000007472	major urinary protein 19	protein-coding
Diff_Nuc5318	chr10	7049622	7049761	+	0	NA	Intergenic	Lx|LINE|L1	-29079	NM_001204916	670558	Mm.398582	NM_001204916	ENSMUSG00000091618	H60c	4632413I24Rik|Gm9491	histocompatibility 60c	protein-coding
Diff_Nuc22160	chr4	80661852	80661991	+	0	NA	Intergenic	Lx4A|LINE|L1	105331	NM_026821	52829	Mm.273986	NM_026821	ENSMUSG00000048706	Lurap1l	1110029A09Rik|AV077978|AV175137|D4Bwg0951e|WI-13707|bM350F23.1	leucine rich adaptor protein 1-like	protein-coding
Diff_Nuc22778	chr4	123366692	123366831	+	0	NA	Intergenic	B2_Mm2|SINE|B2	-5158	NM_001199136	11426	Mm.402299	NM_009600	ENSMUSG00000028649	Macf1	ABP620|Acf7|Aclp7|MACF|R74989|mKIAA0465	microtubule-actin crosslinking factor 1	protein-coding
Diff_Nuc16994	chr7	140143632	140143771	+	0	NA	intron (NM_207302, intron 1 of 8)	B3|SINE|B2	2396	NM_207302	360216	Mm.389984	NM_207302	ENSMUSG00000030967	Zranb1	9330160G10Rik|D7Wsu87e|Gm1956|Trabid	zinc finger, RAN-binding domain containing 1	protein-coding
Diff_Nuc24416	chr3	88431432	88431571	+	0	NA	intron (NM_001198913, intron 1 of 21)	intron (NM_001198913, intron 1 of 21)	6185	NM_001198912	16800	Mm.239329	NM_008487	ENSMUSG00000028059	Arhgef2	AA408978|GEF|GEF-H1|GEFH1|LFP40|Lbcl1|Lfc|P40|mKIAA0651	rho/rac guanine nucleotide exchange factor (GEF) 2	protein-coding
Diff_Nuc30508	chr1	195721252	195721391	+	0	NA	Intergenic	Intergenic	327632	NR_040477	74942	Mm.60689	NR_040477	ENSMUSG00000103692	4930503O07Rik	-	RIKEN cDNA 4930503O07 gene	ncRNA
Diff_Nuc26497	chr2	77211692	77211831	+	0	NA	Intergenic	MER90|LTR|ERV1	-88940	NR_040368	100503106	Mm.443215	NR_040368	ENSMUSG00000085845	Gm13944	OTTMUSG00000015155	predicted gene 13944	ncRNA
Diff_Nuc10315	chr15	35806422	35806561	+	0	NA	exon (NM_177151, exon 47 of 62)	exon (NM_177151, exon 47 of 62)	61510	NM_053071	12864	Mm.548	NM_053071	ENSMUSG00000014313	Cox6c	-	cytochrome c oxidase subunit VIc	protein-coding
Diff_Nuc19092	chr6	142637402	142637541	+	0	NA	intron (NM_021042, intron 6 of 39)	intron (NM_021042, intron 6 of 39)	13323	NM_021041	20928	Mm.35670	NM_011511	ENSMUSG00000030249	Abcc9	AI414027|AI449286|SUR2A|SUR2B|Sur2	ATP-binding cassette, sub-family C (CFTR/MRP), member 9	protein-coding
Diff_Nuc5171	chr11	117734952	117735091	+	0	NA	promoter-TSS (NM_027919)	promoter-TSS (NM_027919)	-181	NM_027919	71776	Mm.3200	NM_027919	ENSMUSG00000017713	Tha1	1300017K07Rik|GLY1	threonine aldolase 1	protein-coding
Diff_Nuc1519	chr13	99655322	99655461	+	0	NA	intron (NM_001048267, intron 3 of 23)	intron (NM_001048267, intron 3 of 23)	5606	NM_001048267	238799	Mm.173286	NM_178716	ENSMUSG00000009470	Tnpo1	AU021749|D13Ertd688e|IPO2|Kpnb2|MIP|MIP1|TRN	transportin 1	protein-coding
Diff_Nuc5158	chr11	117223992	117224131	+	0	NA	TTS (NM_001113486)	TTS (NM_001113486)	30434	NM_001113488	53860	Mm.38450	NM_017380	ENSMUSG00000059248	Sept9	MSF1|Msf|PNUTL4|Sint1	septin 9	protein-coding
Diff_Nuc16307	chr7	97221692	97221831	+	0	NA	Intergenic	Lx8|LINE|L1	44092	NR_110364	319711	Mm.31753	NR_015614	ENSMUSG00000097585	E230029C05Rik	AI452102|B230337J15	RIKEN cDNA E230029C05 gene	ncRNA
Diff_Nuc33046	chr8	52175552	52175691	+	0	NA	Intergenic	MTD|LTR|MaLR	722155	NR_046067	100039954	Mm.400419	NR_046067	ENSMUSG00000110281	Gm2516	-	predicted gene 2516	ncRNA
Diff_Nuc28283	chr1	38136252	38136391	+	0	NA	intron (NM_019570, intron 8 of 22)	intron (NM_019570, intron 8 of 22)	50186	NM_019570	56210	Mm.389103	NM_019570	ENSMUSG00000026082	Rev1	1110027I23Rik|AU022044|Rev1l	REV1, DNA directed polymerase	protein-coding
Diff_Nuc12500	chr14	82132992	82133131	+	0	NA	Intergenic	MusHAL1|LINE|L1	1732952	NM_001030294	380924	Mm.26456	NM_001030294	ENSMUSG00000022026	Olfm4	GC1|GW112|Gm296|Gm913|OlfD|pPD4	olfactomedin 4	protein-coding
Diff_Nuc3638	chr11	23638372	23638511	+	0	NA	Intergenic	Intergenic	32529	NM_009044	19696	Mm.4869	NM_009044	ENSMUSG00000020275	Rel	c-Rel	reticuloendotheliosis oncogene	protein-coding
Diff_Nuc22442	chr4	100916452	100916591	+	0	NA	intron (NM_146145, intron 1 of 24)	intron (NM_146145, intron 1 of 24)	21366	NM_146145	16451	Mm.289657	NM_146145	ENSMUSG00000028530	Jak1	AA960307|BAP004|C130039L05Rik	Janus kinase 1	protein-coding
Diff_Nuc27657	chr2	160572692	160572831	+	0	NA	intron (NM_021280, intron 2 of 33)	intron (NM_021280, intron 2 of 33)	15715	NM_021280	18803	Mm.44463	NM_021280	ENSMUSG00000016933	Plcg1	AI894140|Cded|Plc-1|Plc-gamma1|Plcg-1	phospholipase C, gamma 1	protein-coding
Diff_Nuc19882	chr5	57761012	57761151	+	0	NA	Intergenic	L1Md_F|LINE|L1	348077	NR_015588	319216	Mm.332387	NR_015588	ENSMUSG00000097216	4932441J04Rik	-	RIKEN cDNA 4932441J04 gene	ncRNA
Diff_Nuc25585	chr2	14158272	14158411	+	0	NA	intron (NM_008625, intron 1 of 29)	intron (NM_008625, intron 1 of 29)	7300	NM_008625	17533	Mm.2019	NM_008625	ENSMUSG00000026712	Mrc1	AW259686|CD206|MR	mannose receptor, C type 1	protein-coding
Diff_Nuc6432	chr10	83112532	83112671	+	0	NA	Intergenic	Intergenic	-1192	NM_145220	216190	Mm.282985	NM_145220	ENSMUSG00000020263	Appl2	Dip3b	adaptor protein, phosphotyrosine interaction, PH domain and leucine zipper containing 2	protein-coding
Diff_Nuc12637	chr14	95401842	95401981	+	0	NA	Intergenic	Lx8|LINE|L1	-878574	NM_025733	66732	Mm.75060	NM_025733	ENSMUSG00000034689	4921530L21Rik	-	RIKEN cDNA 4921530L21 gene	protein-coding
Diff_Nuc9582	chr16	77596822	77596961	+	0	NA	Intergenic	Intergenic	-2290	NR_029535	387229		NR_029535	ENSMUSG00000065530	Mir99a	Mirn99a|mir-99a|mmu-mir-99a	microRNA 99a	ncRNA
Diff_Nuc1970	chr12	14832412	14832551	+	0	NA	Intergenic	MLT1D|LTR|MaLR	224714	NR_045960	73972	Mm.107680	NR_045960		4930448C13Rik	-	RIKEN cDNA 4930448C13 gene	ncRNA
Diff_Nuc6905	chr10	116372482	116372621	+	0	NA	intron (NM_001003950, intron 3 of 9)	L1MEc|LINE|L1	14885	NM_001003950	216363	Mm.336394	NM_001003950	ENSMUSG00000064181	Rab3ip	B230311A06|Gtpat12|Rabin3	RAB3A interacting protein	protein-coding
Diff_Nuc32599	chr8	19899622	19899761	+	0	NA	Intergenic	Intergenic	-6681	NR_030708	547150	Mm.359054	NR_030708	ENSMUSG00000071796	6820431F20Rik	-	cadherin 11 pseudogene	pseudo
Diff_Nuc9789	chr16	93150722	93150861	+	0	NA	Intergenic	Intergenic	202643	NR_040486	69857	Mm.81192	NR_040486	ENSMUSG00000100277	1810053B23Rik	1810008L18Rik|1810056K14Rik	RIKEN cDNA 1810053B23 gene	ncRNA
Diff_Nuc33286	chr8	72412442	72412581	+	0	NA	Intergenic	Intergenic	-1220	NM_026818	68709	Mm.334584	NM_026818	ENSMUSG00000044006	Cilp2	1110031K21Rik|AA407300|CLIP-2	cartilage intermediate layer protein 2	protein-coding
Diff_Nuc32556	chr8	17784632	17784771	+	0	NA	Intergenic	Intergenic	-249316	NM_053171	94109	Mm.436988	NM_053171	ENSMUSG00000060924	Csmd1	B930082H09|mKIAA1890	CUB and Sushi multiple domains 1	protein-coding
Diff_Nuc28160	chr1	28937782	28937921	+	0	NA	Intergenic	Intergenic	-100754	NM_001013750	210962	Mm.214178	NM_001013750	ENSMUSG00000048411	Gm597	-	predicted gene 597	protein-coding
Diff_Nuc5055	chr11	110670682	110670821	+	0	NA	Intergenic	Intergenic	-158596	NM_010604	16517	Mm.30176	NM_010604	ENSMUSG00000051497	Kcnj16	6430410F18Rik|AI132396|Kir5.1	potassium inwardly-rectifying channel, subfamily J, member 16	protein-coding
Diff_Nuc24069	chr3	65177402	65177541	+	0	NA	intron (NM_001289450, intron 14 of 14)	intron (NM_001289450, intron 14 of 14)	19004	NM_026155	67437	Mm.232728	NM_026155	ENSMUSG00000027828	Ssr3	0610038P07Rik|AL022999|AU022074|AW553833|TRAPG	signal sequence receptor, gamma	protein-coding
Diff_Nuc18860	chr6	126079972	126080111	+	0	NA	intron (NM_008742, intron 1 of 1)	intron (NM_008742, intron 1 of 1)	34937	NM_001164035	18205	Mm.267570	NM_008742	ENSMUSG00000049107	Ntf3	AI316846|AI835689|HDNF|NGF-2|Nt3|Ntf-3	neurotrophin 3	protein-coding
Diff_Nuc12127	chr14	58583062	58583201	+	0	NA	intron (NM_028643, intron 2 of 11)	intron (NM_028643, intron 2 of 11)	34968	NM_028643	68514	Mm.26834	NM_028643	ENSMUSG00000021973	Micu2	1110008L20Rik|4833427E09Rik|AU041871|Efha1|Smhs2	mitochondrial calcium uptake 2	protein-coding
Diff_Nuc10701	chr15	61066462	61066601	+	0	NA	Intergenic	Intergenic	-313706	NM_001081067	117586	Mm.291499	NM_001081067	ENSMUSG00000022347	A1bg	C44	alpha-1-B glycoprotein	protein-coding
Diff_Nuc18247	chr6	84887112	84887251	+	0	NA	intron (NM_177077, intron 6 of 21)	L1_Mus3|LINE|L1	132326	NM_177077	75914	Mm.159621	NM_177077	ENSMUSG00000033769	Exoc6b	4930569O18Rik|G430127E12Rik|Sec15b|Sec15l2|mKIAA0919	exocyst complex component 6B	protein-coding
Diff_Nuc12683	chr14	100172672	100172811	+	0	NA	Intergenic	Intergenic	376274	NM_010636	16597	Mm.396499	NM_010636	ENSMUSG00000072294	Klf12	2700063E05Rik|AI225908|AI315654|AP-2rep|B130052C06Rik|D530033K05Rik	Kruppel-like factor 12	protein-coding
Diff_Nuc23719	chr3	35559332	35559471	+	0	NA	non-coding (NR_040748, exon 3 of 19)	non-coding (NR_040748, exon 3 of 19)	5684	NR_040748	625963	Mm.251506	NR_040748	ENSMUSG00000105662	Gm6639	-	predicted gene 6639	ncRNA
Diff_Nuc23548	chr3	21974562	21974701	+	0	NA	promoter-TSS (NM_030732)	promoter-TSS (NM_030732)	-943	NM_030732	81004	Mm.202966	NM_030732	ENSMUSG00000027630	Tbl1xr1	8030499H02Rik|A630076E03Rik|AW539987|C21|C230089I12Rik|DC42|Ira1|TBLR1	transducin (beta)-like 1X-linked receptor 1	protein-coding
Diff_Nuc13841	chr19	59917112	59917251	+	0	NA	Intergenic	MTA_Mm|LTR|MaLR	102086	NM_001033172	74998	Mm.24167	NM_001033172	ENSMUSG00000040022	Rab11fip2	4930470G04Rik|A830046J09Rik|AW558126|Nrip11	RAB11 family interacting protein 2 (class I)	protein-coding
Diff_Nuc14582	chr18	46900762	46900901	+	0	NA	promoter-TSS (NM_001303015)	promoter-TSS (NM_001303015)	402	NM_026217	67526	Mm.9852	NM_026217	ENSMUSG00000032905	Atg12	4931423H11Rik|A330058M13Rik|Apg12l|Atg12l	autophagy related 12	protein-coding
Diff_Nuc10712	chr15	61769422	61769561	+	0	NA	Intergenic	Intergenic	-47405	NM_001177354	17869	Mm.2444	NM_010849	ENSMUSG00000022346	Myc	AU016757|Myc2|Niard|Nird|bHLHe39	myelocytomatosis oncogene	protein-coding
Diff_Nuc2374	chr12	51618692	51618831	+	0	NA	intron (NM_008858, intron 1 of 18)	intron (NM_008858, intron 1 of 18)	131449	NM_008858	18760	Mm.133719	NM_008858	ENSMUSG00000002688	Prkd1	PKD|PKD1|Pkcm|Prkcm	protein kinase D1	protein-coding
Diff_Nuc14585	chr18	47017732	47017871	+	0	NA	intron (NM_029008, intron 1 of 19)	intron (NM_029008, intron 1 of 19)	8108	NM_029008	74574	Mm.26379	NM_029008	ENSMUSG00000024481	Lvrn	4833403I15Rik|APQ|Aqpep	laeverin	protein-coding
Diff_Nuc19301	chr5	12379692	12379831	+	0	NA	Intergenic	Intergenic	-3405	NM_028882	108151	Mm.89313	NM_028882	ENSMUSG00000040254	Sema3d	4631426B19Rik	sema domain, immunoglobulin domain (Ig), short basic domain, secreted, (semaphorin) 3D	protein-coding
Diff_Nuc7198	chr17	7570077	7570216	+	0	NA	intron (NM_001142539, intron 9 of 9)	intron (NM_001142539, intron 9 of 9)	-13101	NM_001098267	100216474	Mm.477432	NM_001098267	ENSMUSG00000079722	Ttll2	EG625850|ENSMUSG00000079722	tubulin tyrosine ligase-like family, member 2	protein-coding
Diff_Nuc31546	chr9	69813752	69813891	+	0	NA	Intergenic	ID_B1|SINE|B4	-23452	NM_016787	12175	Mm.159777	NM_016787	ENSMUSG00000011958	Bnip2	5730523P12Rik|BNIP2beta|Nip21	BCL2/adenovirus E1B interacting protein 2	protein-coding
Diff_Nuc260	chr13	6310622	6310761	+	0	NA	Intergenic	Lx5|LINE|L1	-236712	NM_145131	69617	Mm.41933	NM_145131	ENSMUSG00000021193	Pitrm1	2310012C15Rik|AA410010|MP-1|MP1|Ntup1|PreP|mKIAA1104	pitrilysin metallepetidase 1	protein-coding
Diff_Nuc31982	chr9	99611802	99611941	+	0	NA	intron (NM_001194921, intron 1 of 4)	intron (NM_001194921, intron 1 of 4)	-1389	NM_001194922	56492	Mm.386784	NM_019815	ENSMUSG00000032473	Cldn18	-	claudin 18	protein-coding
Diff_Nuc9991	chr15	10760192	10760331	+	0	NA	intron (NR_040357, intron 1 of 2)	MTEb|LTR|MaLR	1455	NR_040357	100502601	Mm.399434	NR_040357		Gm19276	-	predicted gene, 19276	ncRNA
Diff_Nuc22495	chr4	105277722	105277861	+	0	NA	Intergenic	L1Md_F3|LINE|L1	447839	NM_080555	67916	Mm.348326	NM_080555	ENSMUSG00000028517	Plpp3	1110003O22Rik|2610002D05Rik|AV025606|D4Bwg0538e|D4Bwg1535e|Lpp3|Ppab2b|Ppap2b	phospholipid phosphatase 3	protein-coding
Diff_Nuc28855	chr1	75200812	75200951	+	0	NA	intron (NM_029010, intron 5 of 16)	intron (NM_029010, intron 5 of 16)	6472	NM_029010	74577	Mm.458319	NM_029010	ENSMUSG00000026200	Glb1l	4833408P15Rik	galactosidase, beta 1-like	protein-coding
Diff_Nuc26009	chr2	39921622	39921761	+	0	NA	Intergenic	Lx3B|LINE|L1	-839833	NM_024209	67857	Mm.389242	NM_024209	ENSMUSG00000026753	Ppp6c	2310003C10Rik	protein phosphatase 6, catalytic subunit	protein-coding
Diff_Nuc33272	chr8	71831812	71831951	+	0	NA	Intergenic	Lx5|LINE|L1	36902	NM_172491	211135	Mm.294970	NM_172491	ENSMUSG00000079038	D130040H23Rik	-	RIKEN cDNA D130040H23 gene	protein-coding
Diff_Nuc152	chrX	120765072	120765211	+	0	NA	Intergenic	Lx5|LINE|L1	484378	NR_038052	22314	Mm.458976	NM_009494	ENSMUSG00000057021	Vmn2r-ps159	V2r8|V2r9|Vmn2r-ps160	vomeronasal 2, receptor, pseudogene 159	pseudo
Diff_Nuc11933	chr14	45921092	45921231	+	0	NA	intron (NM_015774, intron 6 of 15)	L1M3|LINE|L1	17086	NM_015774	50527	Mm.387108	NM_015774	ENSMUSG00000021831	Ero1l	ERO1-L|Ero1a	ERO1-like (S. cerevisiae)	protein-coding
Diff_Nuc1857	chr12	4309522	4309661	+	0	NA	intron (NM_010881, intron 9 of 22)	L1_Mus3|LINE|L1	-75297	NM_134046	52504	Mm.70546	NM_134046	ENSMUSG00000020652	Cenpo	2810429O05Rik|8430427C03Rik|D12Ertd482e	centromere protein O	protein-coding
Diff_Nuc14862	chr18	65620302	65620441	+	0	NA	intron (NM_172833, intron 9 of 15)	intron (NM_172833, intron 9 of 15)	29720	NM_172833	240354	Mm.132613	NM_172833	ENSMUSG00000032688	Malt1	A630046N12|D430033E09Rik|Pcasp1	MALT1 paracaspase	protein-coding
Diff_Nuc9003	chr16	33908392	33908531	+	0	NA	intron (NM_001145884, intron 8 of 14)	intron (NM_001145884, intron 8 of 14)	58628	NM_009471	22247	Mm.13145	NM_009471	ENSMUSG00000022814	Umps	1700095D23Rik|AA408257|AL033308|BB164745	uridine monophosphate synthetase	protein-coding
Diff_Nuc14610	chr18	49091812	49091951	+	0	NA	Intergenic	L1_Mus3|LINE|L1	-591062	NR_033785	67321	Mm.245802	NR_033785	ENSMUSG00000100297	1700044K03Rik	-	RIKEN cDNA 1700044K03 gene	ncRNA
Diff_Nuc20912	chr5	132764672	132764811	+	0	NA	intron (NM_177047, intron 1 of 19)	B3A|SINE|B2	253472	NM_177047	319974	Mm.409595	NM_177047	ENSMUSG00000029673	Auts2	2700063G02Rik|A730011F23Rik|D830032G16Rik	autism susceptibility candidate 2	protein-coding
Diff_Nuc4501	chr11	79188382	79188521	+	0	NA	intron (NM_010897, intron 1 of 57)	Lx8|LINE|L1	35057	NM_010897	18015	Mm.255596	NM_010897	ENSMUSG00000020716	Nf1	AW494271|Dsk9|E030030H24Rik|Mhdadsk9|Nf-1	neurofibromin 1	protein-coding
Diff_Nuc2666	chr12	73048302	73048441	+	0	NA	intron (NM_001286452, intron 11 of 24)	intron (NM_001286452, intron 11 of 24)	57841	NM_001286452	208846	Mm.87417	NM_026102	ENSMUSG00000034574	Daam1	-	dishevelled associated activator of morphogenesis 1	protein-coding
Diff_Nuc31291	chr9	55561432	55561571	+	0	NA	intron (NM_001081341, intron 24 of 32)	intron (NM_001081341, intron 24 of 32)	172545	NM_027397	104360	Mm.273996	NM_027397	ENSMUSG00000032318	Isl2	3110001N10Rik	insulin related protein 2 (islet 2)	protein-coding
Diff_Nuc5218	chr11	120233332	120233471	+	0	NA	intron (NM_027980, intron 7 of 9)	intron (NM_027980, intron 7 of 9)	6659	NM_027980	71885	Mm.274890	NM_027980	ENSMUSG00000025384	Faap100	2310003H01Rik	Fanconi anemia core complex associated protein 100	protein-coding
Diff_Nuc31002	chr9	36111722	36111861	+	0	NA	Intergenic	Lx3_Mus|LINE|L1	-127678	NM_001167586	639025	Mm.386535	NM_001167586	ENSMUSG00000023093	Gm7257	EG639025|Pate-q|Pate12	predicted gene 7257	protein-coding
Diff_Nuc19027	chr6	137007422	137007561	+	0	NA	intron (NM_001164214, intron 2 of 3)	intron (NM_001164214, intron 2 of 3)	104447	NM_023898	78600	Mm.290622	NM_023898	ENSMUSG00000064330	Pde6h	A930033D18Rik|PDEgamma	phosphodiesterase 6H, cGMP-specific, cone, gamma	protein-coding
Diff_Nuc21870	chr4	55478442	55478581	+	0	NA	Intergenic	Intergenic	-46797	NR_040674	100415914	Mm.261765	NR_040674	ENSMUSG00000087070	Gm12505	OTTMUSG00000007226	predicted gene 12505	ncRNA
Diff_Nuc11467	chr14	8715272	8715411	+	0	NA	intron (NM_134080, intron 6 of 45)	intron (NM_134080, intron 6 of 45)	64870	NM_134080	286940	Mm.489652	NM_134080	ENSMUSG00000025278	Flnb	AL024016|Fln-b	filamin, beta	protein-coding
Diff_Nuc8517	chr17	94409032	94409171	+	0	NA	Intergenic	Intergenic	740131	NM_176917	76781	Mm.139146	NM_176917	ENSMUSG00000055660	Mettl4	2410198H06Rik|A730091E08Rik|AV296509|HsT661	methyltransferase like 4	protein-coding
Diff_Nuc21239	chr4	3156702	3156841	+	0	NA	Intergenic	Intergenic	-44319	NM_001167535	100312471	Mm.377218	NM_001167535	ENSMUSG00000095982	Vmn1r3	Gm11778|OTTMUSG00000004181	vomeronasal 1 receptor 3	protein-coding
Diff_Nuc650	chr13	36418322	36418461	+	0	NA	intron (NM_024274, intron 4 of 6)	intron (NM_024274, intron 4 of 6)	208879	NM_001039189	69955	Mm.70690	NM_024274	ENSMUSG00000021420	Fars2	Fars1|pheRS	phenylalanine-tRNA synthetase 2 (mitochondrial)	protein-coding
Diff_Nuc10362	chr15	37982742	37982881	+	0	NA	intron (NM_001112721, intron 1 of 58)	PB1D9|SINE|Alu	25798	NM_001112721	70790	Mm.476840	NM_027553	ENSMUSG00000037487	Ubr5	Edd|Edd1	ubiquitin protein ligase E3 component n-recognin 5	protein-coding
Diff_Nuc34068	chr8	126800472	126800611	+	0	NA	intron (NM_139272, intron 1 of 15)	intron (NM_139272, intron 1 of 15)	45247	NM_139272	108148	Mm.33808	NM_139272	ENSMUSG00000089704	Galnt2	AI480629	UDP-N-acetyl-alpha-D-galactosamine:polypeptide N-acetylgalactosaminyltransferase 2	protein-coding
Diff_Nuc30872	chr9	25829522	25829661	+	0	NA	Intergenic	Lx9|LINE|L1	540409	NM_026189	67484	Mm.112977	NM_026189	ENSMUSG00000036611	Eepd1	2310005P05Rik|AI481005	endonuclease/exonuclease/phosphatase family domain containing 1	protein-coding
Diff_Nuc16953	chr7	136849892	136850031	+	0	NA	Intergenic	Lx6|LINE|L1	114584	NM_172255	207425	Mm.229323	NM_172255	ENSMUSG00000042055	Wdr11	2900055P10Rik|AW489876|Brwd2|mKIAA1351	WD repeat domain 11	protein-coding
Diff_Nuc13477	chr19	36690912	36691051	+	0	NA	intron (NM_172637, intron 20 of 20)	intron (NM_172637, intron 20 of 20)	61852	NM_172637	226098	Mm.61107	NM_172637	ENSMUSG00000041180	Hectd2	4921524L07|A630025O09Rik|AW212605	HECT domain containing 2	protein-coding
Diff_Nuc7124	chr17	3307302	3307441	+	0	NA	Intergenic	(CA)n|Simple_repeat|Simple_repeat	-19202	NM_001122998	24001	Mm.137134	NM_011878	ENSMUSG00000023800	Tiam2	3000002F19Rik|STEF|mKIAA2016	T cell lymphoma invasion and metastasis 2	protein-coding
Diff_Nuc4324	chr11	70948102	70948241	+	0	NA	intron (NM_001004142, intron 2 of 13)	L1Md_F2|LINE|L1	10035	NM_001004142	195046	Mm.240227	NM_001004142	ENSMUSG00000069830	Nlrp1a	CARD7|DEFCAP|Gm14|Gm15|NAC|Nalp1|Nalp1a|Nlrp1|PP1044	NLR family, pyrin domain containing 1A	protein-coding
Diff_Nuc27978	chr1	11082192	11082331	+	0	NA	intron (NM_029525, intron 6 of 39)	intron (NM_029525, intron 6 of 39)	98715	NM_029525	109294	Mm.123247	NM_029525	ENSMUSG00000048960	Prex2	6230420N16Rik|AI316880|AI553603|C030045D06Rik|D430013K02|Depdc2|P-Rex2	phosphatidylinositol-3,4,5-trisphosphate-dependent Rac exchange factor 2	protein-coding
Diff_Nuc20707	chr5	118939322	118939461	+	0	NA	Intergenic	Intergenic	-71337	NM_001347445	76199	Mm.206238	NM_172424	ENSMUSG00000018076	Med13l	2210413I17Rik|6330591G05Rik|9030618F05Rik|Thrap2|Trap240L|mKIAA1025	mediator complex subunit 13-like	protein-coding
Diff_Nuc5446	chr10	16345262	16345401	+	0	NA	Intergenic	Intergenic	470257	NR_038020	100504235	Mm.84044	NR_038020	ENSMUSG00000101969	Gm20125	-	predicted gene, 20125	ncRNA
Diff_Nuc6532	chr10	90603112	90603251	+	0	NA	Intergenic	RSINE1|SINE|B4	-16473	NM_133668	18674	Mm.298	NM_133668	ENSMUSG00000061904	Slc25a3	5730556H19Rik|PTP|Phc	solute carrier family 25 (mitochondrial carrier, phosphate carrier), member 3	protein-coding
Diff_Nuc2193	chr12	36066012	36066151	+	0	NA	Intergenic	MTA_Mm|LTR|MaLR	153580	NM_013464	11622	Mm.341377	NM_013464	ENSMUSG00000019256	Ahr	Ah|Ahh|Ahre|In|bHLHe76	aryl-hydrocarbon receptor	protein-coding
Diff_Nuc25784	chr2	27597552	27597691	+	0	NA	intron (NM_001290482, intron 4 of 9)	intron (NM_001290482, intron 4 of 9)	31518	NM_001290482	20181	Mm.24624	NM_011305	ENSMUSG00000015846	Rxra	9530071D11Rik|Nr2b1|RXRalpha1	retinoid X receptor alpha	protein-coding
Diff_Nuc29963	chr1	157860232	157860371	+	0	NA	intron (NM_144791, intron 6 of 6)	intron (NM_144791, intron 6 of 6)	21646	NM_001160019	208263	Mm.211654	NM_144791	ENSMUSG00000026466	Tor1aip1	LAP1|Lap1B	torsin A interacting protein 1	protein-coding
Diff_Nuc16081	chr7	80784132	80784271	+	0	NA	Intergenic	Intergenic	47248	NR_033604	244061	Mm.484605	NR_033604	ENSMUSG00000108337	Gm4971	EG244061	Smad nuclear interacting protein 1 pseudogene	pseudo
Diff_Nuc12621	chr14	93473602	93473741	+	0	NA	intron (NM_001346722, intron 4 of 4)	intron (NM_001346722, intron 4 of 4)	814436	NM_001271800	211712	Mm.37126	NM_001081377	ENSMUSG00000055421	Pcdh9	-	protocadherin 9	protein-coding
Diff_Nuc22944	chr4	133832552	133832691	+	0	NA	3' UTR (NM_001163794, exon 3 of 3)	3' UTR (NM_001163794, exon 3 of 3)	10547	NM_001163794	230809	Mm.22778	NM_146156	ENSMUSG00000050890	Pdik1l	BC027088|stk35l2	PDLIM1 interacting kinase 1 like	protein-coding
Diff_Nuc11044	chr15	81755742	81755881	+	0	NA	intron (NM_030229, intron 1 of 5)	B1_Mur4|SINE|Alu	832	NM_030229	78929	Mm.215115	NM_030229	ENSMUSG00000022476	Polr3h	5031409G22Rik|RPC8	polymerase (RNA) III (DNA directed) polypeptide H	protein-coding
Diff_Nuc3488	chr11	12426832	12426971	+	0	NA	Intergenic	Intergenic	-61938	NM_001282993	12808	Mm.22847	NM_172496	ENSMUSG00000020173	Cobl	-	cordon-bleu WH2 repeat	protein-coding
Diff_Nuc1656	chr13	108241122	108241261	+	0	NA	Intergenic	Intergenic	-18711	NR_045083	105120	Mm.417700	NR_045083		AI197445	-	expressed sequence AI197445	ncRNA
Diff_Nuc1201	chr13	77544472	77544611	+	0	NA	intron (NM_001145676, intron 19 of 19)	L1_Mus1|LINE|L1	269744	NM_001145676	72371	Mm.81475	NM_028215	ENSMUSG00000071252	2210408I21Rik	-	RIKEN cDNA 2210408I21 gene	protein-coding
Diff_Nuc24643	chr3	101899932	101900071	+	0	NA	intron (NM_009814, intron 1 of 10)	intron (NM_009814, intron 1 of 10)	9623	NM_009814	12373	Mm.15343	NM_009814	ENSMUSG00000027861	Casq2	AA033488|AW146219|Csq2|ESTM52|cCSQ	calsequestrin 2	protein-coding
Diff_Nuc1732	chr13	113549112	113549251	+	0	NA	Intergenic	L1MB7|LINE|L1	-41804	NM_008903	19012	Mm.291029	NM_008247	ENSMUSG00000021759	Plpp1	Hic53|Hpic53|LPP-1|LPP1|PAP-2a|PAP2-alpha|PAP2a|Ppap2a|mPAP	phospholipid phosphatase 1	protein-coding
Diff_Nuc22481	chr4	104064422	104064561	+	0	NA	intron (NR_104385, intron 1 of 15)	intron (NR_104385, intron 1 of 15)	24348	NM_177259	13131	Mm.289682	NM_010014	ENSMUSG00000028519	Dab1	AI956902|C630028C02Rik|scm|scr|scrambler|yot	disabled 1	protein-coding
Diff_Nuc27047	chr2	120572652	120572791	+	0	NA	intron (NM_001024856, intron 14 of 15)	intron (NM_001024856, intron 14 of 15)	-15468	NM_026891	68968	Mm.2289	NM_026891	ENSMUSG00000027284	Cdan1	1500015A01Rik|AI448026|AW492297|CDA-I|CDA1|CDAI	congenital dyserythropoietic anemia, type I (human)	protein-coding
Diff_Nuc11855	chr14	38418762	38418901	+	0	NA	Intergenic	L1Md_F3|LINE|L1	-470323	NM_078478	66092	Mm.182912	NM_078478	ENSMUSG00000041028	Ghitm	1010001P14Rik|C77840|MICS1|PTD010|Tmbim5	growth hormone inducible transmembrane protein	protein-coding
Diff_Nuc26954	chr2	115709132	115709271	+	0	NA	intron (NM_001346047, intron 10 of 13)	intron (NM_001346047, intron 10 of 13)	181154	NM_001346044	17536	Mm.247566	NM_010825	ENSMUSG00000027210	Meis2	A430109D20Rik|Mrg1|Stra10	Meis homeobox 2	protein-coding
Diff_Nuc30350	chr1	183240442	183240581	+	0	NA	Intergenic	ORR1E|LTR|MaLR	-42248	NM_028408	72978	Mm.338083	NM_028408	ENSMUSG00000026514	Cnih3	2900075G08Rik|CNIH-3	cornichon family AMPA receptor auxiliary protein 3	protein-coding
Diff_Nuc22513	chr4	106449532	106449671	+	0	NA	intron (NM_001347159, intron 1 of 15)	GA-rich|Low_complexity|Low_complexity	22835	NM_025590	329910	Mm.222956	NM_025590	ENSMUSG00000034853	Acot11	1110020M10Rik|2010309H15Rik|AW060409|BFIT|BFIT1|Thea|Them1|mKIAA0707	acyl-CoA thioesterase 11	protein-coding
Diff_Nuc24130	chr3	70588472	70588611	+	0	NA	intron (NR_040556, intron 3 of 3)	L1_Mur2|LINE|L1	22672	NR_040556	625901	Mm.366028	NR_040556	ENSMUSG00000097252	Gm6634	EG625901	predicted gene 6634	ncRNA
Diff_Nuc12872	chr14	116366702	116366841	+	0	NA	intron (NM_175500, intron 7 of 7)	L1_Mus1|LINE|L1	-557997	NR_045761	75088	Mm.444706	NR_045761	ENSMUSG00000093551	4930505G20Rik	-	RIKEN cDNA 4930505G20 gene	ncRNA
Diff_Nuc15773	chr7	57052192	57052331	+	0	NA	intron (NM_133740, intron 8 of 15)	intron (NM_133740, intron 8 of 15)	18533	NM_133740	71974	Mm.33202	NM_133740	ENSMUSG00000030505	Prmt3	2010005E20Rik|2410018A17Rik|AL033309|Hrmt1l3	protein arginine N-methyltransferase 3	protein-coding
Diff_Nuc8224	chr17	75537682	75537821	+	0	NA	intron (NM_019919, intron 3 of 33)	L1Md_F2|LINE|L1	-40370	NM_001331236	268977	Mm.269747	NM_019919	ENSMUSG00000001870	Ltbp1	9430031G15Rik|9830146M04|Ltbp-1|Ltbp1L|TGF-beta1-BP-1|Tgfb|b2b1000Clo	latent transforming growth factor beta binding protein 1	protein-coding
Diff_Nuc19891	chr5	58329042	58329181	+	0	NA	intron (NM_001122758, intron 2 of 2)	intron (NM_001122758, intron 2 of 2)	219791	NM_018764	54216	Mm.332387	NM_018764	ENSMUSG00000029108	Pcdh7	-	protocadherin 7	protein-coding
Diff_Nuc14072	chr18	14242742	14242881	+	0	NA	Intergenic	Intergenic	-111569	NM_145492	225207	Mm.40325	NM_145492	ENSMUSG00000024420	Zfp521	B930086A16Rik|Evi3|Znf521	zinc finger protein 521	protein-coding
Diff_Nuc16280	chr7	95637572	95637711	+	0	NA	intron (NM_028238, intron 2 of 2)	intron (NM_028238, intron 2 of 2)	58858	NM_028238	72433	Mm.276669	NM_028238	ENSMUSG00000030559	Rab38	2310011F14Rik|AU043391|cht	RAB38, member RAS oncogene family	protein-coding
Diff_Nuc22022	chr4	66587132	66587271	+	0	NA	Intergenic	Intergenic	98616	NM_021297	21898	Mm.38049	NM_021297	ENSMUSG00000039005	Tlr4	Lps|Ly87|Ran/M1|Rasl2-8	toll-like receptor 4	protein-coding
Diff_Nuc22826	chr4	126797362	126797501	+	0	NA	intron (NR_104366, intron 13 of 15)	B1_Mus2|SINE|Alu	-5856	NM_001099319	100039968	Mm.392655	NM_001099319	ENSMUSG00000070737	Tmem35b	Gm12942|OTTMUSG00000009332|Zmym6nb	transmembrane protein 35B	protein-coding
Diff_Nuc31265	chr9	53853792	53853931	+	0	NA	Intergenic	IAPEY_LTR|LTR|ERVK	-30753	NM_177769	270162	Mm.259791	NM_177769	ENSMUSG00000041986	Elmod1	4831417L10|AI428506|AI834991	ELMO/CED-12 domain containing 1	protein-coding
Diff_Nuc31799	chr9	84953582	84953721	+	0	NA	Intergenic	Intergenic	267080	NM_001160378	212943	Mm.74610	NM_001160378	ENSMUSG00000032265	Fam46a	BAP014|D930050G01Rik	family with sequence similarity 46, member A	protein-coding
Diff_Nuc29547	chr1	126122392	126122531	+	0	NA	Intergenic	Intergenic	-180325	NM_199021	269109	Mm.417716	NM_199021	ENSMUSG00000036815	Dpp10	6430601K09Rik|DPP X|Dprp3	dipeptidylpeptidase 10	protein-coding
Diff_Nuc30953	chr9	32557482	32557621	+	0	NA	intron (NM_011808, intron 6 of 7)	intron (NM_011808, intron 6 of 7)	53924	NM_001038642	23871	Mm.292415	NM_011808	ENSMUSG00000032035	Ets1	AI196000|AI448617|D230050P06|Ets-1|Tpl1|vs	E26 avian leukemia oncogene 1, 5' domain	protein-coding
Diff_Nuc4287	chr11	69567912	69568051	+	0	NA	intron (NM_001291068, intron 1 of 28)	intron (NM_001291068, intron 1 of 28)	4154	NM_001291068	20020	Mm.16533	NM_009089	ENSMUSG00000005198	Polr2a	220kDa|Rpb1|Rpo2-1	polymerase (RNA) II (DNA directed) polypeptide A	protein-coding
Diff_Nuc124	chrX	102303862	102304001	+	0	NA	intron (NM_001281871, intron 5 of 5)	L1MA7|LINE|L1	-11786	NM_053201	107528	Mm.24341	NM_053201	ENSMUSG00000031227	Magee1	AI847422|DAMAGE|mMage-e1	melanoma antigen, family E, 1	protein-coding
Diff_Nuc26045	chr2	43131092	43131231	+	0	NA	Intergenic	Intergenic	-279684	NM_001289593	70789	Mm.105278	NM_027552	ENSMUSG00000026866	Kynu	4432411A05Rik	kynureninase (L-kynurenine hydrolase)	protein-coding
Diff_Nuc22850	chr4	128886912	128887051	+	0	NA	exon (NM_134151, exon 7 of 13)	exon (NM_134151, exon 7 of 13)	18174	NM_001285866	97130	Mm.331907	NM_001033189	ENSMUSG00000050390	C77080	Kiaa1522|mKIAA1522	expressed sequence C77080	protein-coding
Diff_Nuc8624	chr16	11239272	11239411	+	0	NA	intron (NM_146066, intron 3 of 14)	B2_Mm2|SINE|B2	15077	NM_001130008	14852	Mm.325827	NM_146066	ENSMUSG00000062203	Gspt1	AI314175|AI326449|AV307676|C79774|G1st|Gst-1	G1 to S phase transition 1	protein-coding
Diff_Nuc8118	chr17	68299312	68299451	+	0	NA	intron (NM_172964, intron 1 of 17)	intron (NM_172964, intron 1 of 17)	899	NM_001347410	268970	Mm.9935	NM_172964	ENSMUSG00000024043	Arhgap28	AU044757|AW550892|E130310N06	Rho GTPase activating protein 28	protein-coding
Diff_Nuc24584	chr3	97513882	97514021	+	0	NA	intron (NM_001289701, intron 33 of 46)	intron (NM_001289701, intron 33 of 46)	-19466	NR_106084	102466229		NR_106084	ENSMUSG00000098381	Mir7225	Gm27499|mmu-mir-7225	microRNA 7225	ncRNA
Diff_Nuc17386	chr6	20630862	20631001	+	0	NA	Intergenic	L1MA5|LINE|L1	-535178	NM_019697	16508	Mm.425316	NM_019697	ENSMUSG00000060882	Kcnd2	AI839615|AW555701|Kv4.2|R75121|mKIAA1044	potassium voltage-gated channel, Shal-related family, member 2	protein-coding
Diff_Nuc5571	chr10	24881552	24881691	+	0	NA	Intergenic	B4A|SINE|B4	38355	NM_001347460	432442	Mm.485937	NM_018747	ENSMUSG00000039166	Akap7	6430401D08|AI662165|AKAP15|Akap18|BB170514	A kinase (PRKA) anchor protein 7	protein-coding
Diff_Nuc20974	chr5	136046622	136046761	+	0	NA	exon (NM_019577, exon 3 of 3)	exon (NM_019577, exon 3 of 3)	2222	NM_019577	56221	Mm.31505	NM_019577	ENSMUSG00000004814	Ccl24	CKb-6|MPIF-2|Scya24	chemokine (C-C motif) ligand 24	protein-coding
Diff_Nuc20146	chr5	77747942	77748081	+	0	NA	intron (NM_153798, intron 3 of 24)	intron (NM_153798, intron 3 of 24)	8502	NM_153798	231329	Mm.273217	NM_153798	ENSMUSG00000029250	Polr2b	Pol2rb|Rpb140|Rpb2	polymerase (RNA) II (DNA directed) polypeptide B	protein-coding
Diff_Nuc10029	chr15	13251242	13251381	+	0	NA	Intergenic	Intergenic	-147881	NM_007666	12563	Mm.57048	NM_007666	ENSMUSG00000039385	Cdh6	cad6	cadherin 6	protein-coding
Diff_Nuc4673	chr11	88478662	88478801	+	0	NA	intron (NM_054043, intron 5 of 13)	intron (NM_054043, intron 5 of 13)	-1834	NR_131025	68397	Mm.426889	NR_131025		0610039H22Rik	-	RIKEN cDNA 0610039H22 gene	ncRNA
Diff_Nuc26720	chr2	95153042	95153181	+	0	NA	Intergenic	L1_Mus3|LINE|L1	-874768	NM_001305258	11800	Mm.181824	NM_007466	ENSMUSG00000027193	Api5	AAC-11|AI196452|API-5	apoptosis inhibitor 5	protein-coding
Diff_Nuc22733	chr4	120730652	120730791	+	0	NA	Intergenic	Intergenic	18550	NM_007741	12840	Mm.269384	NM_007741	ENSMUSG00000028626	Col9a2	AI427499|Col9a-2	collagen, type IX, alpha 2	protein-coding
Diff_Nuc4436	chr11	76221002	76221141	+	0	NA	intron (NM_023355, intron 1 of 2)	intron (NM_023355, intron 1 of 2)	426	NM_019818	56322	Mm.18803	NM_019818	ENSMUSG00000020843	Timm22	Tim22	translocase of inner mitochondrial membrane 22	protein-coding
Diff_Nuc1500	chr13	98566262	98566401	+	0	NA	Intergenic	Intergenic	236376	NR_046157	328314	Mm.138047	NR_046157	ENSMUSG00000110235	Gm5086	B230311A21|EG328314	predicted gene 5086	ncRNA
Diff_Nuc19144	chr6	146446032	146446171	+	0	NA	intron (NM_019923, intron 1 of 56)	B1_Mus2|SINE|Alu	4644	NM_010586	16439	Mm.7800	NM_010586	ENSMUSG00000030287	Itpr2	AI649341|InsP3R-2|InsP3R-5|Ip3r2|Itpr5|insP3R2	inositol 1,4,5-triphosphate receptor 2	protein-coding
Diff_Nuc15860	chr7	64839942	64840081	+	0	NA	Intergenic	L1M2c|LINE|L1	3580	NR_105812	102466156		NR_105812	ENSMUSG00000099203	Mir6389	Gm27946|mmu-mir-6389	microRNA 6389	ncRNA
Diff_Nuc30081	chr1	166269422	166269561	+	0	NA	intron (NM_138314, intron 5 of 13)	intron (NM_138314, intron 5 of 13)	31688	NM_178071	171567	Mm.219428	NM_138314	ENSMUSG00000026575	Nme7	D530024H21Rik|Nm23-M7|Nm23-r7	NME/NM23 family member 7	protein-coding
Diff_Nuc21906	chr4	57501982	57502121	+	0	NA	Intergenic	Intergenic	-79069	NM_001304544	677884	Mm.331630	NM_001304544	ENSMUSG00000089945	Pakap	AF064781|Gm20459|Palm2-Akap2|Palm2Akap2|Palm2akap2	paralemmin A kinase anchor protein	protein-coding
Diff_Nuc8696	chr16	15947302	15947441	+	0	NA	intron (NM_146068, intron 10 of 19)	intron (NM_146068, intron 10 of 19)	59992	NM_007679	12609	Mm.347407	NM_007679	ENSMUSG00000071637	Cebpd	c/EBPdelta	CCAAT/enhancer binding protein (C/EBP), delta	protein-coding
Diff_Nuc24692	chr3	104706462	104706601	+	0	NA	intron (NM_001253702, intron 11 of 13)	intron (NM_001253702, intron 11 of 13)	39107	NM_153091	229681	Mm.206379	NM_153091	ENSMUSG00000045576	St7l	St7r	suppression of tumorigenicity 7-like	protein-coding
Diff_Nuc23123	chr4	144626512	144626651	+	0	NA	intron (NM_001276465, intron 65 of 69)	intron (NM_001276465, intron 65 of 69)	143541	NM_011303	20148	Mm.14063	NM_011303	ENSMUSG00000066026	Dhrs3	Rsdr1|retSDR1	dehydrogenase/reductase (SDR family) member 3	protein-coding
Diff_Nuc4263	chr11	68269612	68269751	+	0	NA	intron (NM_177320, intron 1 of 18)	L1MC|LINE|L1	24054	NM_177320	320207	Mm.244960	NM_177320	ENSMUSG00000020901	Pik3r5	AV230647|F730038I15Rik	phosphoinositide-3-kinase, regulatory subunit 5, p101	protein-coding
Diff_Nuc31478	chr9	65727732	65727871	+	0	NA	intron (NM_019797, intron 5 of 15)	intron (NM_019797, intron 5 of 15)	5179	NM_001170907	56404	Mm.208379	NM_019797	ENSMUSG00000032386	Trip4	4930558E03Rik|ASC-1|Asc1|BB191711	thyroid hormone receptor interactor 4	protein-coding
Diff_Nuc30444	chr1	191042822	191042961	+	0	NA	intron (NM_001281847, intron 6 of 6)	intron (NM_001281847, intron 6 of 6)	124341	NM_001159850	16526	Mm.33304	NM_010607	ENSMUSG00000037624	Kcnk2	A430027H14Rik|AI848635|TREK-1	potassium channel, subfamily K, member 2	protein-coding
Diff_Nuc20747	chr5	121851642	121851781	+	0	NA	intron (NM_172722, intron 1 of 23)	B4|SINE|B4	3720	NM_172722	231713	Mm.33919	NM_172722	ENSMUSG00000042719	Naa25	4833422K13Rik|A630046C11|AI450868|C330023M02Rik|Mdm20	N(alpha)-acetyltransferase 25, NatB auxiliary subunit	protein-coding
Diff_Nuc30013	chr1	162124002	162124141	+	0	NA	Intergenic	Intergenic	-1275	NM_025474	64659	Mm.29599	NM_025474	ENSMUSG00000058267	Mrps14	1810032L21Rik|AL022847|Rpms14	mitochondrial ribosomal protein S14	protein-coding
Diff_Nuc32073	chr9	107250902	107251041	+	0	NA	3' UTR (NM_175486, exon 6 of 6)	3' UTR (NM_175486, exon 6 of 6)	8000	NM_175486	235599	Mm.71039	NM_175486	ENSMUSG00000037977	6430571L13Rik	-	RIKEN cDNA 6430571L13 gene	protein-coding
Diff_Nuc14039	chr18	12024412	12024551	+	0	NA	intron (NM_022021, intron 1 of 8)	ORR1A3-int|LTR|MaLR	-25534	NR_035447	100316686		NR_035447	ENSMUSG00000084565	Mir1901	Mirn1901|mmu-mir-1901	microRNA 1901	ncRNA
Diff_Nuc19844	chr5	55187102	55187241	+	0	NA	Intergenic	Intergenic	445940	NR_038045	330086	Mm.254449	NM_177871	ENSMUSG00000105912	Gm10440	D130065D13|ENSMUSG00000072936	predicted gene 10440	ncRNA
Diff_Nuc25504	chr2	6818022	6818161	+	0	NA	intron (NM_001110231, intron 4 of 15)	intron (NM_001110231, intron 4 of 15)	-12049	NM_001160293	14007	Mm.398543	NM_010160	ENSMUSG00000002107	Celf2	B230218O03|B230345P09Rik|C88023|CELF-2|CUG-BP2|Cugbp2|D230046B21Rik|Etr-3|Napor|Napor-2|mETR-3	CUGBP, Elav-like family member 2	protein-coding
Diff_Nuc17065	chr7	146330732	146330871	+	0	NA	intron (NM_001162540, intron 1 of 11)	intron (NM_001162540, intron 1 of 11)	43592	NM_021302	57740	Mm.65336	NM_021302	ENSMUSG00000015981	Stk32c	PKE|Pkek|YANK3	serine/threonine kinase 32C	protein-coding
Diff_Nuc14838	chr18	64796032	64796171	+	0	NA	intron (NM_001001488, intron 1 of 27)	intron (NM_001001488, intron 1 of 27)	24553	NM_001001488	54670	Mm.270043	NM_001001488	ENSMUSG00000039529	Atp8b1	AI451886|FIC1|Ic	ATPase, class I, type 8B, member 1	protein-coding
Diff_Nuc33017	chr8	49257452	49257591	+	0	NA	Intergenic	Intergenic	62154	NM_001161515	320685	Mm.121549	NM_178788	ENSMUSG00000031562	Dctd	6030466N05Rik	dCMP deaminase	protein-coding
Diff_Nuc4699	chr11	92091532	92091671	+	0	NA	Intergenic	Intergenic	-652732	NM_028547	73470	Mm.67677	NM_028547	ENSMUSG00000046755	Kif2b	1700063D03Rik	kinesin family member 2B	protein-coding
Diff_Nuc19162	chr6	146973332	146973471	+	0	NA	intron (NM_026221, intron 21 of 26)	intron (NM_026221, intron 21 of 26)	-7658	NM_025620	66532	Mm.45888	NM_025620	ENSMUSG00000040121	Rep15	2210417D09Rik	RAB15 effector protein	protein-coding
Diff_Nuc10594	chr15	54804432	54804571	+	0	NA	Intergenic	ID_B1|SINE|B4	-52800	NM_001285994	18606	Mm.250256	NM_015744	ENSMUSG00000022425	Enpp2	ATX|E-NPP 2|Npps2|PD-Ialpha|Pdnp2|lysoPLD	ectonucleotide pyrophosphatase/phosphodiesterase 2	protein-coding
Diff_Nuc9484	chr16	69726642	69726781	+	0	NA	Intergenic	Lx5|LINE|L1	73915	NR_130991	78110	Mm.211406	NR_130991	ENSMUSG00000107073	4930428D20Rik	-	RIKEN cDNA 4930428D20 gene	ncRNA
Diff_Nuc3449	chr11	9936742	9936881	+	0	NA	Intergenic	Lx3A|LINE|L1	844866	NM_178259	268379	Mm.39270	NM_178259	ENSMUSG00000004668	Abca13	9830132L24|A930002G16Rik|AI956815	ATP-binding cassette, sub-family A (ABC1), member 13	protein-coding
Diff_Nuc13135	chr19	11184452	11184591	+	0	NA	intron (NM_027058, intron 4 of 6)	intron (NM_027058, intron 4 of 6)	20847	NM_027058	69369	Mm.391200	NM_027058	ENSMUSG00000024729	1700017D01Rik	-	RIKEN cDNA 1700017D01 gene	protein-coding
Diff_Nuc29441	chr1	116164622	116164761	+	0	NA	Intergenic	Intergenic	-1417023	NM_001077425	636808	Mm.101576	NM_001077425	ENSMUSG00000070695	Cntnap5a	Caspr5-1|EG636808	contactin associated protein-like 5A	protein-coding
Diff_Nuc18732	chr6	117940502	117940641	+	0	NA	Intergenic	Intergenic	-20984	NM_001316749	70727	Mm.87660	NM_027526	ENSMUSG00000030134	Rasgef1a	6330404M18Rik|AI835194	RasGEF domain family, member 1A	protein-coding
Diff_Nuc24424	chr3	88687692	88687831	+	0	NA	intron (NM_027389, intron 14 of 31)	intron (NM_027389, intron 14 of 31)	30111	NM_144898	229524	Mm.440405	NM_144898	ENSMUSG00000068922	Msto1	BC008103|mst	misato 1, mitochondrial distribution and morphology regulator	protein-coding
Diff_Nuc10095	chr15	17722362	17722501	+	0	NA	Intergenic	Lx2|LINE|L1	576951	NR_045711	70886	Mm.399021	NR_045711		4921515E04Rik	-	RIKEN cDNA 4921515E04 gene	ncRNA
Diff_Nuc9656	chr16	84704732	84704871	+	0	NA	Intergenic	Intergenic	-8467	NR_132106	100653389	Mm.261808	NR_132106	ENSMUSG00000097418	Mir155hg	Bic|Gm26667	Mir155 host gene (non-protein coding)	ncRNA
Diff_Nuc20480	chr5	102883702	102883841	+	0	NA	Intergenic	Intergenic	-26639	NM_146161	231532	Mm.440191	NM_029270	ENSMUSG00000057315	Arhgap24	0610025G21Rik	Rho GTPase activating protein 24	protein-coding
Diff_Nuc30826	chr9	22130502	22130641	+	0	NA	Intergenic	Intergenic	4563	NR_033622	625603	Mm.37987	NR_033622		Gm6607	EG625603	40S ribosomal protein S20 pseudogene	pseudo
Diff_Nuc19013	chr6	136043462	136043601	+	0	NA	intron (NM_008171, intron 3 of 14)	intron (NM_008171, intron 3 of 14)	79998	NM_008171	14812	Mm.436649	NM_008171	ENSMUSG00000030209	Grin2b	AW490526|GluN2B|NR2B|Nmdar2b	glutamate receptor, ionotropic, NMDA2B (epsilon 2)	protein-coding
Diff_Nuc9086	chr16	39194952	39195091	+	0	NA	Intergenic	Intergenic	292563	NM_170599	207683	Mm.245564	NM_170599	ENSMUSG00000022790	Igsf11	1700025L02Rik|BT-IgSF|Igsf13	immunoglobulin superfamily, member 11	protein-coding
Diff_Nuc10788	chr15	66648392	66648531	+	0	NA	intron (NM_009192, intron 1 of 8)	intron (NM_009192, intron 1 of 8)	14930	NM_001029841	20491	Mm.7601	NM_009192	ENSMUSG00000022372	Sla	Slap|Slap-1	src-like adaptor	protein-coding
Diff_Nuc7484	chr17	26424472	26424611	+	0	NA	Intergenic	Intergenic	34686	NR_037905	66978	Mm.440216	NM_025881	ENSMUSG00000024188	Luc7l	1810045C04Rik|2410018D03Rik	Luc7-like	protein-coding
Diff_Nuc26724	chr2	95783332	95783471	+	0	NA	Intergenic	L1Md_F2|LINE|L1	-374925	NM_001289742	241568	Mm.241682	NM_178725	ENSMUSG00000050587	Lrrc4c	6430556C10Rik|NGL-1	leucine rich repeat containing 4C	protein-coding
Diff_Nuc7299	chr17	13600482	13600621	+	0	NA	Intergenic	Intergenic	53113	NM_001167578	100041352	Mm.490251	NM_001167578	ENSMUSG00000052469	Tcp10c	D17Leh66C|D17Leh66ca|Gm9880|T66C-a|Tcp-10c	t-complex protein 10c	protein-coding
Diff_Nuc31421	chr9	62919042	62919181	+	0	NA	Intergenic	Charlie1a|DNA|MER1_type	75676	NM_172446	207667	Mm.36349	NM_172446	ENSMUSG00000022245	Skor1	AV273001|C230094B15Rik|Corl1|Lbxcor1	SKI family transcriptional corepressor 1	protein-coding
Diff_Nuc2089	chr12	28138632	28138771	+	0	NA	Intergenic	Intergenic	-111118	NM_009234	20666	Mm.41702	NM_009234	ENSMUSG00000063632	Sox11	1110038H03Rik|6230403H02Rik|AI836553|end1	SRY (sex determining region Y)-box 11	protein-coding
Diff_Nuc30805	chr9	21403722	21403861	+	0	NA	Intergenic	B2_Mm2|SINE|B2	-6516	NM_001205157	74766	Mm.475712	NM_138303	ENSMUSG00000032182	Yipf2	1300010K09Rik	Yip1 domain family, member 2	protein-coding
Diff_Nuc3990	chr11	51417242	51417381	+	0	NA	TTS (NM_028398)	TTS (NM_028398)	3072	NM_001048061	15384	Mm.256875	NM_010448	ENSMUSG00000020358	Hnrnpab	3010025C11Rik|CBF-A|Cgbfa|Hnrpab	heterogeneous nuclear ribonucleoprotein A/B	protein-coding
Diff_Nuc620	chr13	34946182	34946321	+	0	NA	Intergenic	Intergenic	-21112	NM_013830	19134	Mm.10027	NM_013830	ENSMUSG00000021413	Prpf4b	2610037H07|Prp4|Prp4k|Prpk|cbp143	pre-mRNA processing factor 4B	protein-coding
Diff_Nuc6918	chr10	117226562	117226701	+	0	NA	intron (NM_134010, intron 3 of 27)	intron (NM_134010, intron 3 of 27)	3130	NM_134010	103468	Mm.12568	NM_134010	ENSMUSG00000052798	Nup107	AW541137|C76801	nucleoporin 107	protein-coding
Diff_Nuc2990	chr12	95615882	95616021	+	0	NA	Intergenic	(TTC)n|Simple_repeat|Simple_repeat	450453	NR_106175	102465890		NR_106175	ENSMUSG00000098498	Mir8099-1	Gm27917|mmu-mir-8099-1	microRNA 8099-1	ncRNA
Diff_Nuc27531	chr2	154195902	154196041	+	0	NA	intron (NM_025876, intron 2 of 13)	RSINE1|SINE|B4	2484	NM_025876	66971	Mm.289427	NM_025876	ENSMUSG00000027487	Cdk5rap1	2310066P17Rik	CDK5 regulatory subunit associated protein 1	protein-coding
Diff_Nuc15847	chr7	63738312	63738451	+	0	NA	intron (NM_021879, intron 23 of 23)	Lx4B|LINE|L1	243240	NM_021879	18431	Mm.137052	NM_021879	ENSMUSG00000030450	Oca2	D7H15S12|D7Icr28RN|D7Nic1|p|p<cas>	oculocutaneous albinism II	protein-coding
Diff_Nuc7267	chr17	12618762	12618901	+	0	NA	intron (NM_011395, intron 8 of 10)	intron (NM_011395, intron 8 of 10)	-40879	NR_077216	77414	Mm.417145	NR_077216		C030013G03Rik	-	RIKEN cDNA C030013G03 gene	ncRNA
Diff_Nuc11842	chr14	36641712	36641851	+	0	NA	Intergenic	L1_Mur3|LINE|L1	-16617	NM_001033766	239036	Mm.239970	NM_001033766	ENSMUSG00000041068	4930596D02Rik	-	RIKEN cDNA 4930596D02 gene	protein-coding
Diff_Nuc10791	chr15	66776462	66776601	+	0	NA	intron (NM_008681, intron 5 of 15)	intron (NM_008681, intron 5 of 15)	24672	NM_008681	17988	Mm.30837	NM_008681	ENSMUSG00000005125	Ndrg1	CAP43|CMT4D|DRG1|HMSNL|NMSL|Ndr1|Ndrl|PROXY1|RTP|TDD5	N-myc downstream regulated gene 1	protein-coding
Diff_Nuc30212	chr1	174621212	174621351	+	0	NA	Intergenic	Intergenic	-6906	NM_007768	12944	Mm.28767	NM_007768	ENSMUSG00000037942	Crp	AI255847	C-reactive protein, pentraxin-related	protein-coding
Diff_Nuc6950	chr10	119163032	119163171	+	0	NA	intron (NM_133442, intron 1 of 21)	intron (NM_133442, intron 1 of 21)	35654	NR_045359	75321	Mm.402041	NR_045359	ENSMUSG00000084764	Grip1os2	4930564G21Rik	glutamate receptor interacting protein 1, opposite strand 2	ncRNA
Diff_Nuc7812	chr17	45126392	45126531	+	0	NA	intron (NM_178652, intron 3 of 11)	Lx5|LINE|L1	-108627	NM_029257	75341	Mm.386821	NM_029257		4930564C03Rik	-	RIKEN cDNA 4930564C03 gene	protein-coding
Diff_Nuc2050	chr12	25213422	25213561	+	0	NA	intron (NR_028341, intron 7 of 13)	intron (NR_028341, intron 7 of 13)	30045	NR_028341	21340	Mm.39082	NM_020614	ENSMUSG00000059669	Taf1b	4930408G01Rik|A230108M10Rik|TAFI68|Tafi86|p63	TATA-box binding protein associated factor, RNA polymerase I, B	protein-coding
Diff_Nuc24934	chr3	121248882	121249021	+	0	NA	Intergenic	Intergenic	-13689	NM_145394	213603	Mm.33062	NM_145394	ENSMUSG00000039865	Slc44a3	BC010552	solute carrier family 44, member 3	protein-coding
Diff_Nuc25568	chr2	13279902	13280041	+	0	NA	intron (NM_001081084, intron 33 of 66)	intron (NM_001081084, intron 33 of 66)	-86929	NM_009105	20163	Mm.905	NM_009105	ENSMUSG00000026727	Rsu1	RsuI|rsp-1	Ras suppressor protein 1	protein-coding
Diff_Nuc30606	chr9	6179802	6179941	+	0	NA	intron (NM_027924, intron 1 of 6)	MER58B|DNA|MER1_type	11259	NM_027924	71785	Mm.390122	NM_027924	ENSMUSG00000032006	Pdgfd	1110003I09Rik	platelet-derived growth factor, D polypeptide	protein-coding
Diff_Nuc1156	chr13	74449842	74449981	+	0	NA	intron (NM_011051, intron 2 of 5)	intron (NM_011051, intron 2 of 5)	4863	NM_011051	18570	Mm.24254	NM_011051	ENSMUSG00000021576	Pdcd6	AV299538|Alg2|MA-3|PS2|alg-2	programmed cell death 6	protein-coding
Diff_Nuc6315	chr10	76993232	76993371	+	0	NA	intron (NM_008404, intron 1 of 15)	intron (NM_008404, intron 1 of 15)	208	NM_008404	16414	Mm.1137	NM_008404	ENSMUSG00000000290	Itgb2	2E6|AI528527|Cd18|LAD|LCAMB|Lfa1|MF17	integrin beta 2	protein-coding
Diff_Nuc7833	chr17	46492902	46493041	+	0	NA	Intergenic	MMERGLN-int|LTR|ERV1	-27744	NM_207671	57908	Mm.439916	NM_021346	ENSMUSG00000015597	Zfp318	2610034E08Rik|D530032D06Rik|TZF|Znf318	zinc finger protein 318	protein-coding
Diff_Nuc7828	chr17	46233242	46233381	+	0	NA	Intergenic	Intergenic	-14642	NM_026768	68565	Mm.287443	NM_026768	ENSMUSG00000023967	Mrps18a	1110004O20Rik|C79712	mitochondrial ribosomal protein S18A	protein-coding
Diff_Nuc5368	chr10	10919302	10919441	+	0	NA	intron (NM_001284354, intron 25 of 28)	ORR1B1|LTR|MaLR	50143	NM_001284354	268281	Mm.133101	NM_172937	ENSMUSG00000090112	Shprh	2610103K11Rik|AA450458|AU024614|BC006883|D230017O13Rik|E130018M05	SNF2 histone linker PHD RING helicase	protein-coding
Diff_Nuc24200	chr3	76480772	76480911	+	0	NA	intron (NM_001253719, intron 15 of 15)	intron (NM_001253719, intron 15 of 15)	601336	NM_001253719	213262	Mm.379337	NM_178673	ENSMUSG00000034098	Fstl5	9130207J01Rik	follistatin-like 5	protein-coding
Diff_Nuc6019	chr10	59072592	59072731	+	0	NA	intron (NM_001033259, intron 1 of 7)	intron (NM_001033259, intron 1 of 7)	6779	NM_001033259	215999	Mm.296470	NM_001033259	ENSMUSG00000009647	Mcu	2010012O16Rik|AV064928|C10orf42|Ccdc109a|D130073L02Rik|Gm64	mitochondrial calcium uniporter	protein-coding
Diff_Nuc1451	chr13	95179562	95179701	+	0	NA	intron (NM_009680, intron 6 of 26)	intron (NM_009680, intron 6 of 26)	50716	NM_009680	11774	Mm.21185	NM_009680	ENSMUSG00000021686	Ap3b1	AP-3|AU015684|C78395|Hps2|beta3A|pe|pearl|rim2	adaptor-related protein complex 3, beta 1 subunit	protein-coding
Diff_Nuc24226	chr3	78910342	78910481	+	0	NA	intron (NM_001099624, intron 2 of 23)	B3|SINE|B2	38398	NM_001310536	76089	Mm.31220	NM_001099624	ENSMUSG00000062232	Rapgef2	5830453M24Rik|CNRasGEF|Pdzgef1|RA-GEF-1|mKIAA0313|nRapGEP	Rap guanine nucleotide exchange factor (GEF) 2	protein-coding
Diff_Nuc12459	chr14	79073402	79073541	+	0	NA	intron (NM_001081336, intron 1 of 28)	B1_Mus2|SINE|Alu	-29213	NR_104044	380921	Mm.89591	NM_001081336	ENSMUSG00000034731	Dgkh	5930402B05Rik|D130015C16|DGK	diacylglycerol kinase, eta	protein-coding
Diff_Nuc15013	chr18	75395272	75395411	+	0	NA	intron (NM_027727, intron 15 of 16)	ORR1B1|LTR|MaLR	61630	NR_045394	100503117	Mm.250517	NR_045393	ENSMUSG00000102047	2010010A06Rik	5033420E22Rik	RIKEN cDNA 2010010A06 gene	ncRNA
Diff_Nuc1043	chr13	62662902	62663041	+	0	NA	Intergenic	Intergenic	-3012	NM_001162911	77117	Mm.470091	NM_175252	ENSMUSG00000074865	Zfp934	6720457D02Rik	zinc finger protein 934	protein-coding
Diff_Nuc26807	chr2	102060102	102060241	+	0	NA	Intergenic	Intergenic	-33554	NM_001290784	241576	Mm.489740	NM_178886	ENSMUSG00000048058	Ldlrad3	6430500P08|AI194318|Lrad3	low density lipoprotein receptor class A domain containing 3	protein-coding
Diff_Nuc25876	chr2	32092172	32092311	+	0	NA	promoter-TSS (NM_145145)	promoter-TSS (NM_145145)	38	NM_145145	99011	Mm.31192	NM_145145	ENSMUSG00000039254	Pomt1	AI505244	protein-O-mannosyltransferase 1	protein-coding
Diff_Nuc11035	chr15	81580702	81580841	+	0	NA	intron (NM_001081016, intron 1 of 22)	B1F2|SINE|Alu	5493	NM_001081016	20286	Mm.432075	NM_001081016	ENSMUSG00000022390	Zc3h7b	Gm627|Scrg3|Zc2h7b|mKIAA1031	zinc finger CCCH type containing 7B	protein-coding
Diff_Nuc19138	chr6	146277362	146277501	+	0	NA	intron (NM_019923, intron 28 of 56)	intron (NM_019923, intron 28 of 56)	173314	NM_010586	16439	Mm.7800	NM_010586	ENSMUSG00000030287	Itpr2	AI649341|InsP3R-2|InsP3R-5|Ip3r2|Itpr5|insP3R2	inositol 1,4,5-triphosphate receptor 2	protein-coding
Diff_Nuc6406	chr10	81376532	81376671	+	0	NA	intron (NM_001346707, intron 1 of 4).2	ORR1B1-int|LTR|MaLR	16624	NM_199062	331188	Mm.351497	NM_199062	ENSMUSG00000096718	Zfp781	A130081B01	zinc finger protein 781	protein-coding
Diff_Nuc30070	chr1	165778822	165778961	+	0	NA	exon (NM_001305643, exon 11 of 20)	exon (NM_001305643, exon 11 of 20)	69177	NM_010629	16579	Mm.4651	NM_010629	ENSMUSG00000026585	Kifap3	KAP-3|KAP3|SMAP	kinesin-associated protein 3	protein-coding
Diff_Nuc14022	chr18	11255092	11255231	+	0	NA	Intergenic	Intergenic	-202596	NR_105023	68434	Mm.57626	NR_105022	ENSMUSG00000097222	1010001N08Rik	Gata6as	RIKEN cDNA 1010001N08 gene	ncRNA
Diff_Nuc6341	chr10	77904822	77904961	+	0	NA	intron (NM_172134, intron 9 of 10)	intron (NM_172134, intron 9 of 10)	3011	NR_105873	102466762		NR_105873	ENSMUSG00000098279	Mir6908	Gm27827|mmu-mir-6908	microRNA 6908	ncRNA
Diff_Nuc1626	chr13	105478892	105479031	+	0	NA	intron (NM_026072, intron 11 of 13)	intron (NM_026072, intron 11 of 13)	128072	NM_026072	67285	Mm.235398	NM_026072	ENSMUSG00000021715	Cwc27	3110009E13Rik|NY-CO-10|Sdccag10	CWC27 spliceosome-associated protein	protein-coding
Diff_Nuc21924	chr4	58156462	58156601	+	0	NA	intron (NM_022814, intron 5 of 47)	intron (NM_022814, intron 5 of 47)	62937	NM_022814	64817	Mm.261024	NM_022814	ENSMUSG00000028369	Svep1	1110021D17Rik|4833413O10Rik|AA387071|D430029O09Rik|Polydom	sushi, von Willebrand factor type A, EGF and pentraxin domain containing 1	protein-coding
Diff_Nuc19808	chr5	52615422	52615561	+	0	NA	Intergenic	Intergenic	-7819	NR_040717	414111	Mm.417638	NR_040717	ENSMUSG00000106464	C130083M11Rik	-	RIKEN cDNA C130083M11 gene	ncRNA
Diff_Nuc29226	chr1	99191022	99191161	+	0	NA	Intergenic	ORR1B1-int|LTR|MaLR	-166211	NM_028942	74441	Mm.60362	NM_028942	ENSMUSG00000026331	Slco6c1	4933404A18Rik|C79179	solute carrier organic anion transporter family, member 6c1	protein-coding
Diff_Nuc23030	chr4	137728672	137728811	+	0	NA	intron (NM_172703, intron 21 of 34)	MTD|LTR|MaLR	9617	NR_105825	102466907		NR_105825	ENSMUSG00000098513	Mir6399	Gm27667|mir-6399|mmu-mir-6399	microRNA 6399	ncRNA
Diff_Nuc21599	chr4	34594122	34594261	+	0	NA	intron (NM_181406, intron 10 of 19)	PB1D9|SINE|Alu	31984	NM_181406	109093	Mm.22363	NM_181406	ENSMUSG00000028292	Rars2	1500002I10Rik|PRO1992|Rarsl	arginyl-tRNA synthetase 2, mitochondrial	protein-coding
Diff_Nuc27197	chr2	128523092	128523231	+	0	NA	Intergenic	B1_Mur1|SINE|Alu	-1572	NM_008587	17289	Mm.239655	NM_008587	ENSMUSG00000014361	Mertk	Eyk|Mer|Nyk|nmf12	c-mer proto-oncogene tyrosine kinase	protein-coding
Diff_Nuc23673	chr3	30858062	30858201	+	0	NA	intron (NM_153421, intron 3 of 14)	intron (NM_153421, intron 3 of 14)	10206	NM_001165954	241915	Mm.233173	NM_153421	ENSMUSG00000037652	Phc3	E030046K01Rik|Edr3|Hph3	polyhomeotic-like 3 (Drosophila)	protein-coding
Diff_Nuc13439	chr19	33200692	33200831	+	0	NA	Intergenic	Lx5|LINE|L1	-30841	NR_039552	100628575		NR_039552	ENSMUSG00000106278	Mir3970	mmu-mir-3970|mu-mir-3970	microRNA 3970	ncRNA
Diff_Nuc7840	chr17	46961282	46961421	+	0	NA	intron (NM_001100452, intron 4 of 10)	intron (NM_001100452, intron 4 of 10)	7011	NM_001100452	210982	Mm.37642	NM_001100452	ENSMUSG00000036568	Gltscr1l	mKIAA0240	GLTSCR1-like	protein-coding
Diff_Nuc1441	chr13	94220202	94220341	+	0	NA	intron (NM_021310, intron 7 of 10)	intron (NM_021310, intron 7 of 10)	49492	NM_021310	57748	Mm.100273	NM_021310	ENSMUSG00000021690	Jmy	-	junction-mediating and regulatory protein	protein-coding
Diff_Nuc18341	chr6	90454492	90454631	+	0	NA	Intergenic	B1_Mus1|SINE|Alu	41941	NM_023184	66277	Mm.38343	NM_023184	ENSMUSG00000030087	Klf15	1810013I09Rik|AV048136|AW494632|CKLF|KKLF	Kruppel-like factor 15	protein-coding
Diff_Nuc15084	chr18	80285382	80285521	+	0	NA	intron (NM_053117, intron 2 of 2)	intron (NM_053117, intron 2 of 2)	41817	NM_053117	93737	Mm.24678	NM_053117	ENSMUSG00000056214	Pard6g	2410049N21Rik|Par6a	par-6 family cell polarity regulator gamma	protein-coding
Diff_Nuc32341	chr9	124003572	124003711	+	0	NA	Intergenic	L1Md_F|LINE|L1	-13281	NM_009915	12772	Mm.6272	NM_009915	ENSMUSG00000049103	Ccr2	Cc-ckr-2|Ccr2a|Ccr2b|Ckr2|Ckr2a|Ckr2b|Cmkbr2|mJe-r	chemokine (C-C motif) receptor 2	protein-coding
Diff_Nuc2754	chr12	78591162	78591301	+	0	NA	Intergenic	L2a|LINE|L2	80103	NM_001252616	53618	Mm.35628	NM_016893	ENSMUSG00000021065	Fut8	-	fucosyltransferase 8	protein-coding
Diff_Nuc6960	chr10	119819122	119819261	+	0	NA	intron (NM_010441, intron 3 of 4)	intron (NM_010441, intron 3 of 4)	-7388	NR_040626	320626	Mm.446091	NR_040626	ENSMUSG00000090191	9230105E05Rik	-	RIKEN cDNA 9230105E05 gene	ncRNA
Diff_Nuc12724	chr14	103479292	103479431	+	0	NA	TTS (NM_015822)	TTS (NM_015822)	9928	NM_001033242	211286	Mm.295289	NM_001033242	ENSMUSG00000022125	Cln5	A730075N08Rik	ceroid-lipofuscinosis, neuronal 5	protein-coding
Diff_Nuc26186	chr2	53882712	53882851	+	0	NA	Intergenic	(GAAA)n|Simple_repeat|Simple_repeat	55182	NM_023396	67874	Mm.27086	NM_023396	ENSMUSG00000075334	Rprm	2410012A13Rik|Reprimo	reprimo, TP53 dependent G2 arrest mediator candidate	protein-coding
Diff_Nuc11682	chr14	26317892	26318031	+	0	NA	intron (NM_183208, intron 1 of 23)	L2c|LINE|L2	-35964	NR_037236	100526533		NR_037236	ENSMUSG00000093081	Mir3075	mir-3075|mmu-mir-3075	microRNA 3075	ncRNA
Diff_Nuc6891	chr10	115924002	115924141	+	0	NA	intron (NM_001037846, intron 15 of 15)	intron (NM_001037846, intron 15 of 15)	-13492	NM_021452	58802	Mm.440652	NM_021452	ENSMUSG00000054934	Kcnmb4	1700058G18Rik|2900045G12Rik	potassium large conductance calcium-activated channel, subfamily M, beta member 4	protein-coding
Diff_Nuc33068	chr8	53856152	53856291	+	0	NA	Intergenic	L1_Mus2|LINE|L1	-740835	NM_001205054	11593	Mm.334535	NM_001005847	ENSMUSG00000031521	Aga	AW060726	aspartylglucosaminidase	protein-coding
Diff_Nuc16078	chr7	80678822	80678961	+	0	NA	intron (NM_001081345, intron 2 of 38)	MIRb|SINE|MIR	7741	NM_001081345	244059	Mm.34539	NM_001081345	ENSMUSG00000078671	Chd2	2810013C04Rik|2810040A01Rik|5630401D06Rik|AI851092|BC029703|CHD-2	chromodomain helicase DNA binding protein 2	protein-coding
Diff_Nuc7047	chr10	126606302	126606441	+	0	NA	TTS (NM_001244617)	TTS (NM_001244617)	3484	NM_001244618	14421	Mm.386762	NM_008080	ENSMUSG00000006731	B4galnt1	4933429D13Rik|Gal-NAc-T|GalNAc-T|GalNAcT|Galgt1|Ggm-2|Ggm2	beta-1,4-N-acetyl-galactosaminyl transferase 1	protein-coding
Diff_Nuc25287	chr3	146926322	146926461	+	0	NA	Intergenic	Intergenic	411060	NM_001302958	70892	Mm.187793	NM_027594	ENSMUSG00000036745	Ttll7	1110049N09Rik|4921517B04Rik|C630030B20|mTTLL7	tubulin tyrosine ligase-like family, member 7	protein-coding
Diff_Nuc4243	chr11	66378072	66378211	+	0	NA	Intergenic	Intergenic	-38513	NM_001034874	380702	Mm.351764	NM_001034874	ENSMUSG00000053930	Shisa6	Gm879|ckamp52	shisa family member 6	protein-coding
Diff_Nuc19395	chr5	20882382	20882521	+	0	NA	3' UTR (NM_008013, exon 2 of 2)	3' UTR (NM_008013, exon 2 of 2)	3960	NM_008013	14190	Mm.292100	NM_008013	ENSMUSG00000039899	Fgl2	AI385601|musfiblp	fibrinogen-like protein 2	protein-coding
Diff_Nuc26482	chr2	76223962	76224101	+	0	NA	Intergenic	L1Md_F3|LINE|L1	15990	NM_153405	241490	Mm.33310	NM_153405	ENSMUSG00000042369	Rbm45	Drb1|Drbp1|G430095G15Rik	RNA binding motif protein 45	protein-coding
Diff_Nuc10601	chr15	55034782	55034921	+	0	NA	intron (NM_001037937, intron 4 of 8)	intron (NM_001037937, intron 4 of 8)	69860	NM_001037937	97998	Mm.295397	NM_145470	ENSMUSG00000022419	Deptor	Depdc6	DEP domain containing MTOR-interacting protein	protein-coding
Diff_Nuc13278	chr19	22525012	22525151	+	0	NA	intron (NM_177341, intron 1 of 26)	intron (NM_177341, intron 1 of 26)	2383	NM_177341	226025	Mm.131943	NM_177341	ENSMUSG00000052387	Trpm3	6330504P12Rik|9330180E14|AU018608|B930001P07Rik|LTRPC3|MLSN2	transient receptor potential cation channel, subfamily M, member 3	protein-coding
Diff_Nuc33819	chr8	108662192	108662331	+	0	NA	non-coding (NR_040344, exon 5 of 5)	non-coding (NR_040344, exon 5 of 5)	-1387	NM_176838	77411	Mm.183003	NM_176838	ENSMUSG00000084128	Esrp2	9530027K23Rik|Rbm35b	epithelial splicing regulatory protein 2	protein-coding
Diff_Nuc13432	chr19	32691932	32692071	+	0	NA	intron (NM_001201470, intron 1 of 11)	intron (NM_001201470, intron 1 of 11)	-2494	NM_011864	23972	Mm.203916	NM_011864	ENSMUSG00000024899	Papss2	1810018P12Rik|AI159688|AtpsU2|Atpsk2|Sk2|bm	3'-phosphoadenosine 5'-phosphosulfate synthase 2	protein-coding
Diff_Nuc4591	chr11	84813092	84813231	+	0	NA	intron (NM_001029934, intron 29 of 33)	intron (NM_001029934, intron 29 of 33)	41905	NM_007607	12351	Mm.1641	NM_007607	ENSMUSG00000000805	Car4	AW456718|Ca4	carbonic anhydrase 4	protein-coding
Diff_Nuc30023	chr1	162777362	162777501	+	0	NA	Intergenic	Lx8|LINE|L1	-54362	NM_013862	29809	Mm.25833	NM_013862	ENSMUSG00000026721	Rabgap1l	5830411O09Rik|8430421H08Rik|9630005B12Rik|AW049894|HHL|Hh1|mKIAA0471	RAB GTPase activating protein 1-like	protein-coding
Diff_Nuc21306	chr4	9529807	9529946	+	0	NA	intron (NM_001177852, intron 6 of 13)	intron (NM_001177852, intron 6 of 13)	40988	NM_001177853	65973	Mm.222206	NM_023066	ENSMUSG00000028207	Asph	2310005F16Rik|3110001L23Rik|AI848629|AW261690|AW561901|BAH|C79816|cI-37	aspartate-beta-hydroxylase	protein-coding
Diff_Nuc11605	chr14	20752462	20752601	+	0	NA	intron (NM_001285909, intron 3 of 5)	intron (NM_001285909, intron 3 of 5)	43384	NM_001285911	14702	Mm.41737	NM_010315	ENSMUSG00000043004	Gng2	-	guanine nucleotide binding protein (G protein), gamma 2	protein-coding
Diff_Nuc13754	chr19	54099462	54099601	+	0	NA	intron (NM_019658, intron 4 of 8)	Lx6|LINE|L1	-20141	NM_007417	11551	Mm.235195	NM_007417	ENSMUSG00000033717	Adra2a	AW122659|Adra-2|Adra-2a|alpha(2A)AR|alpha2-C10|alpha2A|alpha2A-AR	adrenergic receptor, alpha 2a	protein-coding
Diff_Nuc30768	chr9	19680822	19680961	+	0	NA	Intergenic	Intergenic	7856	NM_146562	258555	Mm.434360	NM_146562	ENSMUSG00000063842	Olfr862	MOR146-1	olfactory receptor 862	protein-coding
Diff_Nuc18778	chr6	120489632	120489771	+	0	NA	Intergenic	Intergenic	-8384	NM_144815	214932	Mm.255322	NM_144815	ENSMUSG00000058979	Cecr5	A930002G03Rik	cat eye syndrome chromosome region, candidate 5	protein-coding
Diff_Nuc19207	chr5	3642692	3642831	+	0	NA	intron (NM_026033, intron 4 of 4)	intron (NM_026033, intron 4 of 4)	5175	NM_026033	67210	Mm.178424	NM_026033	ENSMUSG00000007415	Gatad1	2310031E19Rik|2810047M21Rik|8430439A17Rik|9130430G15Rik|B330017N08Rik|ENSMUSG00000073241|Odag	GATA zinc finger domain containing 1	protein-coding
Diff_Nuc10826	chr15	69448012	69448151	+	0	NA	Intergenic	Intergenic	-306582	NR_045071	100503580	Mm.404646	NR_045071		Gm19782	-	predicted gene, 19782	ncRNA
Diff_Nuc12796	chr14	109234452	109234591	+	0	NA	Intergenic	Lx5|LINE|L1	78935	NM_199065	76965	Mm.257268	NM_199065	ENSMUSG00000075478	Slitrk1	3200001I04Rik	SLIT and NTRK-like family, member 1	protein-coding
Diff_Nuc6391	chr10	80606332	80606471	+	0	NA	intron (NM_010731, intron 1 of 2)	intron (NM_010731, intron 1 of 2)	7385	NM_010731	16969	Mm.20920	NM_010731	ENSMUSG00000035011	Zbtb7a	9030619K07Rik|9130006G12Rik|AI452336|FBI-1|Lrf|Pokemon|Zbtb7	zinc finger and BTB domain containing 7a	protein-coding
Diff_Nuc26470	chr2	75511712	75511851	+	0	NA	Intergenic	Intergenic	14434	NR_033513	627828	Mm.459502	NR_033513	ENSMUSG00000092086	Gm6793	EG627828	heterogeneous nuclear ribonucleoprotein A3 pseudogene	pseudo
Diff_Nuc26431	chr2	73047812	73047951	+	0	NA	intron (NM_030091, intron 2 of 7)	B1_Mur4|SINE|Alu	4623	NM_030091	67059	Mm.22661	NM_025942	ENSMUSG00000027108	Ola1	2510025G09Rik|2810405J23Rik|2810409H07Rik|Gtpbp9|PTD004	Obg-like ATPase 1	protein-coding
Diff_Nuc22533	chr4	107929512	107929651	+	0	NA	intron (NM_001033634, intron 4 of 13)	intron (NM_001033634, intron 4 of 13)	-39054	NM_001167936	230590	Mm.301798	NM_001167936	ENSMUSG00000034645	Zyg11a	BC022150	zyg-11 family member A, cell cycle regulator	protein-coding
Diff_Nuc18576	chr6	105645362	105645501	+	0	NA	intron (NM_001109749, intron 1 of 25)	intron (NM_001109749, intron 1 of 25)	17692	NM_173004	269784	Mm.321683	NM_173004	ENSMUSG00000064293	Cntn4	9630050B05|Axcam|BIG-2	contactin 4	protein-coding
Diff_Nuc2611	chr12	70517652	70517791	+	0	NA	Intergenic	Intergenic	44584	NM_007481	11845	Mm.27308	NM_007481	ENSMUSG00000044147	Arf6	AI788669|AW496366	ADP-ribosylation factor 6	protein-coding
Diff_Nuc31735	chr9	80126542	80126681	+	0	NA	intron (NM_001039546, intron 20 of 32)	intron (NM_001039546, intron 20 of 32)	113770	NM_001039546	17920	Mm.4040	NM_008662	ENSMUSG00000033577	Myo6	BC029719|Tlc|sv	myosin VI	protein-coding
Diff_Nuc581	chr13	32131462	32131601	+	0	NA	intron (NM_146041, intron 7 of 10)	intron (NM_146041, intron 7 of 10)	233016	NM_008592	17300	Mm.12949	NM_008592	ENSMUSG00000050295	Foxc1	FREAC3|Fkh1|Mf1|Mf4|ch|fkh-1|frkhda	forkhead box C1	protein-coding
Diff_Nuc14051	chr18	12955422	12955561	+	0	NA	intron (NM_207530, intron 17 of 27)	intron (NM_207530, intron 17 of 27)	22925	NR_045524	64291	Mm.259470	NM_020573	ENSMUSG00000044252	Osbpl1a	G430090F17Rik|Gm753|ORP-1|Osbpl1b	oxysterol binding protein-like 1A	protein-coding
Diff_Nuc19620	chr5	35499962	35500101	+	0	NA	Intergenic	Intergenic	-51685	NM_013587	16976	Mm.277661	NM_013587	ENSMUSG00000029103	Lrpap1	AA617339|AI790446|AU042172|C77774|HBP44|RAP	low density lipoprotein receptor-related protein associated protein 1	protein-coding
Diff_Nuc14145	chr18	20658472	20658611	+	0	NA	Intergenic	Intergenic	-10234	NM_030596	13512	Mm.106811	NM_030596	ENSMUSG00000056632	Dsg3	bal	desmoglein 3	protein-coding
Diff_Nuc12629	chr14	94277962	94278101	+	0	NA	intron (NM_001346722, intron 2 of 4)	intron (NM_001346722, intron 2 of 4)	10076	NM_001271800	211712	Mm.37126	NM_001081377	ENSMUSG00000055421	Pcdh9	-	protocadherin 9	protein-coding
Diff_Nuc13544	chr19	40607042	40607181	+	0	NA	Intergenic	Intergenic	-18809	NM_009166	20411	Mm.210815	NM_009166	ENSMUSG00000025006	Sorbs1	2310065E01Rik|9530001P15Rik|CAP|SH3P12|Sh3d5|mKIAA1296	sorbin and SH3 domain containing 1	protein-coding
Diff_Nuc4108	chr11	58134242	58134381	+	0	NA	intron (NR_046280, intron 2 of 2)	intron (NR_046280, intron 2 of 2)	2304	NM_001256518	319475	Mm.72124	NM_178761	ENSMUSG00000049755	Zfp672	4930488P06Rik|4930511N19Rik|Znf672	zinc finger protein 672	protein-coding
Diff_Nuc25396	chr3	154811312	154811451	+	0	NA	intron (NM_028938, intron 5 of 7)	L1Md_T|LINE|L1	54983	NM_028938	74435	Mm.195711	NM_028938	ENSMUSG00000028182	Lrriq3	4930438B07Rik|4930511J15Rik|4933403H06Rik|BB020367|Lrrc44	leucine-rich repeats and IQ motif containing 3	protein-coding
Diff_Nuc17059	chr7	145229572	145229711	+	0	NA	Intergenic	Lx9|LINE|L1	359772	NM_183289	70571	Mm.334297	NM_183289	ENSMUSG00000091002	Tcerg1l	5730476P14Rik	transcription elongation regulator 1-like	protein-coding
Diff_Nuc31835	chr9	87836862	87837001	+	0	NA	Intergenic	MTE2b|LTR|MaLR	-210836	NM_023814	76365	Mm.158789	NM_023814	ENSMUSG00000032419	Tbx18	2810012F10Rik|2810404D13Rik	T-box18	protein-coding
Diff_Nuc11440	chr15	102412782	102412921	+	0	NA	intron (NM_001310070, intron 2 of 11)	L1MC1|LINE|L1	43044	NM_001310070	223922	Mm.208714	NM_146065	ENSMUSG00000052414	Atf7	1110012F10Rik|9430065F09Rik|AI549878|C130020M04Rik	activating transcription factor 7	protein-coding
Diff_Nuc2884	chr12	86370032	86370171	+	0	NA	exon (NM_178363, exon 5 of 21)	exon (NM_178363, exon 5 of 21)	32830	NM_178363	56531	Mm.153183	NM_178363	ENSMUSG00000021244	Ylpm1	A930013E17Rik|ZAP|Zap3	YLP motif containing 1	protein-coding
Diff_Nuc16213	chr7	89831902	89832041	+	0	NA	intron (NM_175317, intron 9 of 19)	intron (NM_175317, intron 9 of 19)	34847	NM_175317	101592	Mm.238020	NM_175317	ENSMUSG00000038563	Efl1	4932434J20Rik|6030468D11Rik|AI451340|AU019507|AU022896|D7Ertd791e|Eftud1	elongation factor like GPTase 1	protein-coding
Diff_Nuc3783	chr11	35467932	35468071	+	0	NA	intron (NM_011412, intron 23 of 35)	intron (NM_011412, intron 23 of 35)	37683	NR_029799	723924		NR_029799	ENSMUSG00000065583	Mir218-2	Mirn218-2|mir-218-2	microRNA 218-2	ncRNA
Diff_Nuc19297	chr5	12023142	12023281	+	0	NA	Intergenic	MTE2b|LTR|MaLR	105168	NM_001177510	545732	Mm.389066	NM_001177510	ENSMUSG00000067848	4933402N22Rik	-	RIKEN cDNA 4933402N22 gene	protein-coding
Diff_Nuc16055	chr7	79042162	79042301	+	0	NA	Intergenic	Intergenic	-12350	NR_130995	78156	Mm.243818	NR_130995	ENSMUSG00000108669	4930441H08Rik	-	RIKEN cDNA 4930441H08 gene	ncRNA
Diff_Nuc6395	chr10	80639982	80640121	+	0	NA	intron (NM_007907, intron 1 of 13)	intron (NM_007907, intron 1 of 13)	675	NM_007907	13629	Mm.2903	NM_007907	ENSMUSG00000034994	Eef2	Ef-2	eukaryotic translation elongation factor 2	protein-coding
Diff_Nuc15932	chr7	70928082	70928221	+	0	NA	Intergenic	L1_Mus4|LINE|L1	-133592	NM_001256311	381994	Mm.425466	NM_001256311	ENSMUSG00000095061	E030018B13Rik	Gm1697	RIKEN cDNA E030018B13 gene	protein-coding
Diff_Nuc12587	chr14	89841932	89842071	+	0	NA	Intergenic	L1Md_F2|LINE|L1	-454030	NR_002862	328451	Mm.320571	NR_002862		Gm5088	EG328451|Pabpc4l	poly(A)-binding protein, cytoplasmic pseudogene	pseudo
Diff_Nuc24529	chr3	94878132	94878271	+	0	NA	intron (NM_008847, intron 3 of 14)	intron (NM_008847, intron 3 of 14)	-31665	NM_008951	19185	Mm.2261	NM_008951	ENSMUSG00000005625	Psmd4	Af1|Mcb1|angiocidin	proteasome (prosome, macropain) 26S subunit, non-ATPase, 4	protein-coding
Diff_Nuc19329	chr5	14954972	14955111	+	0	NA	intron (NR_001584, intron 1 of 3)	Lx|LINE|L1	9747	NR_001584	74062	Mm.394766	NR_001584		Speer8-ps1	4933405L09Rik|SPEER-8|Speer8-ps	spermatogenesis associated glutamate (E)-rich protein 8, pseudogene 1	pseudo
Diff_Nuc32052	chr9	105548882	105549021	+	0	NA	intron (NM_001081309, intron 2 of 19)	ORR1D1|LTR|MaLR	3626	NM_001081309	75669	Mm.274830	NM_029380	ENSMUSG00000032571	Pik3r4	2210010O15Rik|C730038E05Rik|C85833|D9Ertd418e	phosphatidylinositol 3 kinase, regulatory subunit, polypeptide 4, p150	protein-coding
Diff_Nuc18783	chr6	120693602	120693741	+	0	NA	intron (NM_001128151, intron 7 of 18)	intron (NM_001128151, intron 7 of 18)	-30115	NM_001081048	71803	Mm.425340	NM_001081048	ENSMUSG00000004902	Slc25a18	1500015I14Rik|AW125787	solute carrier family 25 (mitochondrial carrier), member 18	protein-coding
Diff_Nuc16918	chr7	134691832	134691971	+	0	NA	intron (NM_001304266, intron 25 of 33)	intron (NM_001304266, intron 25 of 33)	-12836	NM_001304267	105180375	Mm.428042	NM_001304267	ENSMUSG00000106715	Tmem265	-	transmembrane protein 265	protein-coding
Diff_Nuc25443	chr3	157974872	157975011	+	0	NA	intron (NM_001291453, intron 5 of 25)	L1MA6|LINE|L1	250244	NM_001291453	242274	Mm.132162	NM_001081358	ENSMUSG00000028176	Lrrc7	AK122498|densin|mKIAA1365	leucine rich repeat containing 7	protein-coding
Diff_Nuc17171	chr6	4242112	4242251	+	0	NA	Intergenic	ID4|SINE|ID	-205254	NM_009748	12068	Mm.286457	NM_009748	ENSMUSG00000032757	Bet1	AW555236|Bet-1	Bet1 golgi vesicular membrane trafficking protein	protein-coding
Diff_Nuc26941	chr2	114335162	114335301	+	0	NA	Intergenic	L1_Mus3|LINE|L1	145433	NM_025675	66632	Mm.117809	NM_025675	ENSMUSG00000057147	Dph6	5730421E18Rik|Atpbd4	diphthamine biosynthesis 6	protein-coding
Diff_Nuc3223	chr12	112637462	112637601	+	0	NA	Intergenic	Intergenic	-7489	NM_001101503	380787	Mm.125602	NM_001101503	ENSMUSG00000087075	A230065H16Rik	Gm898|Lbh2	RIKEN cDNA A230065H16 gene	protein-coding
Diff_Nuc26008	chr2	39883482	39883621	+	0	NA	Intergenic	Lx|LINE|L1	-801693	NM_024209	67857	Mm.389242	NM_024209	ENSMUSG00000026753	Ppp6c	2310003C10Rik	protein phosphatase 6, catalytic subunit	protein-coding
Diff_Nuc23513	chr3	19560822	19560961	+	0	NA	intron (NM_001081281, intron 3 of 9)	intron (NM_001081281, intron 3 of 9)	16431	NM_001081281	381485	Mm.35419	NM_001081281	ENSMUSG00000060913	Trim55	D830041C10Rik|Murf2|Rnf29	tripartite motif-containing 55	protein-coding
Diff_Nuc7829	chr17	46281352	46281491	+	0	NA	promoter-TSS (NM_029338)	promoter-TSS (NM_029338)	-274	NM_029338	75564	Mm.17993	NM_029338	ENSMUSG00000023966	Rsph9	1700027N10Rik	radial spoke head 9 homolog (Chlamydomonas)	protein-coding
Diff_Nuc2750	chr12	78442862	78443001	+	0	NA	intron (NM_001252614, intron 5 of 12)	intron (NM_001252614, intron 5 of 12)	-46920	NM_001252615	53618	Mm.35628	NM_016893	ENSMUSG00000021065	Fut8	-	fucosyltransferase 8	protein-coding
Diff_Nuc28069	chr1	20912332	20912471	+	0	NA	intron (NM_028829, intron 1 of 2)	intron (NM_028829, intron 1 of 2)	-29306	NM_027974	71877	Mm.29178	NM_027974	ENSMUSG00000041809	Efhc1	1700029F22Rik|mRib72-1|myoclonin1	EF-hand domain (C-terminal) containing 1	protein-coding
Diff_Nuc24303	chr3	83601062	83601201	+	0	NA	Intergenic	Intergenic	30888	NM_009144	20319	Mm.19155	NM_009144	ENSMUSG00000027996	Sfrp2	AI851596|Sdf5	secreted frizzled-related protein 2	protein-coding
Diff_Nuc18643	chr6	113142902	113143041	+	0	NA	intron (NM_177763, intron 2 of 3)	intron (NM_177763, intron 2 of 3)	2407	NM_177763	269788	Mm.37943	NM_177763	ENSMUSG00000042873	Lhfpl4	1190004M23Rik|AI604880|B230384L07|mKIAA4027	lipoma HMGIC fusion partner-like protein 4	protein-coding
Diff_Nuc31227	chr9	51872042	51872181	+	0	NA	intron (NM_001104616, intron 3 of 13)	B4A|SINE|B4	-15301	NR_023357	629557	Mm.422775	NR_023357		Gm6981	EG629557	glyceraldehyde-3-phosphate dehydrogenase pseudogene	pseudo
Diff_Nuc2529	chr12	63456512	63456651	+	0	NA	Intergenic	Lx|LINE|L1	-332193	NR_131949	73309	Mm.276558	NR_131949		Spanxn4	1700047L15Rik	SPANX family, member N4	ncRNA
Diff_Nuc5850	chr10	45753252	45753391	+	0	NA	Intergenic	RMER19B|LTR|ERVK	225811	NR_040624	320363	Mm.123343	NR_040624	ENSMUSG00000110874	D030045P18Rik	-	RIKEN cDNA D030045P18 gene	ncRNA
Diff_Nuc25211	chr3	141942242	141942381	+	0	NA	intron (NM_019808, intron 7 of 12)	Tigger13a|DNA|MER2_type	-110119	NM_001277216	12167	Mm.39089	NM_007560	ENSMUSG00000052430	Bmpr1b	AI385617|ALK-6|AV355320|Acvrlk6|Alk6|BMPR-1B|BMPR-IB|CFK-43a|SKR6	bone morphogenetic protein receptor, type 1B	protein-coding
Diff_Nuc23859	chr3	46126142	46126281	+	0	NA	Intergenic	Intergenic	125652	NM_001101479	241989	Mm.119234	NM_001101479	ENSMUSG00000090919	Pabpc4l	C330050A14Rik|EG241989	poly(A) binding protein, cytoplasmic 4-like	protein-coding
Diff_Nuc23873	chr3	47736522	47736661	+	0	NA	Intergenic	L1Md_F2|LINE|L1	94090	NR_040408	666202	Mm.465057	NR_040408	ENSMUSG00000103257	Gm7977	EG666202	tyrosine 3-monooxygenase/tryptophan 5-monooxygenase activation protein, theta polypeptide pseudogene	pseudo
Diff_Nuc2203	chr12	36850002	36850141	+	0	NA	intron (NM_025840, intron 4 of 11)	intron (NM_025840, intron 4 of 11)	33105	NR_003649	432649	Mm.347860	NM_001014396	ENSMUSG00000059301	Gm5434	EG432649	ubiquitin-conjugating enzyme E2F (putative) pseudogene	pseudo
Diff_Nuc15009	chr18	75250362	75250501	+	0	NA	intron (NM_027727, intron 8 of 16)	intron (NM_027727, intron 8 of 16)	72005	NM_027727	69190	Mm.173826	NM_027727	ENSMUSG00000035765	Dym	1810041M12Rik|4933427L07Rik|C030019K18Rik	dymeclin	protein-coding
Diff_Nuc21983	chr4	62373132	62373271	+	0	NA	Intergenic	B4A|SINE|B4	38193	NM_001310706	50780	Mm.286753	NM_019492	ENSMUSG00000059810	Rgs3	4930506N09Rik|C2PA-RGS3|C2pa|PDZ-RGS3|RGS3S	regulator of G-protein signaling 3	protein-coding
Diff_Nuc12382	chr14	75235442	75235581	+	0	NA	exon (NM_001033439, exon 3 of 20)	exon (NM_001033439, exon 3 of 20)	103407	NM_016903	13885	Mm.38055	NM_016903	ENSMUSG00000021996	Esd	Es-10|Es10|FGH|sid478	esterase D/formylglutathione hydrolase	protein-coding
Diff_Nuc7720	chr17	37570892	37571031	+	0	NA	Intergenic	Intergenic	-11464	NM_146465	258457	Mm.377511	NM_146465	ENSMUSG00000059687	Olfr108	MOR156-5	olfactory receptor 108	protein-coding
Diff_Nuc28389	chr1	45972292	45972431	+	0	NA	intron (NM_016917, intron 5 of 7)	intron (NM_016917, intron 5 of 7)	10078	NM_016917	53945	Mm.28756	NM_016917	ENSMUSG00000025993	Slc40a1	Dusg|Fpn1|IREG1|MTP|MTP1|Ol5|Pcm|Slc11a3|Slc39a1	solute carrier family 40 (iron-regulated transporter), member 1	protein-coding
Diff_Nuc2807	chr12	81464422	81464561	+	0	NA	intron (NM_177267, intron 7 of 8)	B1_Mus1|SINE|Alu	28173	NR_037207	100526530		NR_037207	ENSMUSG00000105972	Mir1843a	Mir1843|mir-1843a|mmu-mir-1843|mmu-mir-1843a	microRNA 1843a	ncRNA
Diff_Nuc13535	chr19	40300992	40301131	+	0	NA	intron (NM_016861, intron 5 of 6)	intron (NM_016861, intron 5 of 6)	-39285	NM_145499	226105	Mm.29119	NM_145499	ENSMUSG00000060613	Cyp2c70	-	cytochrome P450, family 2, subfamily c, polypeptide 70	protein-coding
Diff_Nuc9474	chr16	68825452	68825591	+	0	NA	Intergenic	L1_Mur2|LINE|L1	975105	NR_130991	78110	Mm.211406	NR_130991	ENSMUSG00000107073	4930428D20Rik	-	RIKEN cDNA 4930428D20 gene	ncRNA
Diff_Nuc2921	chr12	88169422	88169561	+	0	NA	Intergenic	B1_Mm|SINE|Alu	56273	NM_145836	238330	Mm.248358	NM_145836	ENSMUSG00000034168	Irf2bpl	6430527G18Rik|Eap1	interferon regulatory factor 2 binding protein-like	protein-coding
Diff_Nuc14686	chr18	55093192	55093331	+	0	NA	intron (NM_175751, intron 3 of 9)	intron (NM_175751, intron 3 of 9)	56573	NM_175751	269023	Mm.192984	NM_175751	ENSMUSG00000052713	Zfp608	4932417D18Rik|D430007A19Rik|Znf608	zinc finger protein 608	protein-coding
Diff_Nuc25531	chr2	10011282	10011421	+	0	NA	intron (NM_025280, intron 2 of 4)	intron (NM_025280, intron 2 of 4)	9112	NM_025280	16588	Mm.35498	NM_025280	ENSMUSG00000037262	Kin	Kin17	Kin17 DNA and RNA binding protein	protein-coding
Diff_Nuc11724	chr14	28242682	28242821	+	0	NA	intron (NM_028945, intron 1 of 23)	CpG	718	NM_001114879	218850	Mm.247767	NM_028945	ENSMUSG00000040651	Fam208a	4732418E12|4933409E02Rik|D14Abb1e|MommeD6	family with sequence similarity 208, member A	protein-coding
Diff_Nuc2919	chr12	88112812	88112951	+	0	NA	Intergenic	MER21B|LTR|ERV1	37562	NM_001195767	627607	Mm.341880	NM_001195767	ENSMUSG00000059114	Lrrc74a	EG627607|Gm6772|Lrrc74	leucine rich repeat containing 74A	protein-coding
Diff_Nuc1981	chr12	15799112	15799251	+	0	NA	3' UTR (NM_144551, exon 3 of 3)	3' UTR (NM_144551, exon 3 of 3)	8726	NR_105809	102465204		NR_105809	ENSMUSG00000098480	Mir6387	Gm27281|mmu-mir-6387	microRNA 6387	ncRNA
Diff_Nuc26775	chr2	99396602	99396741	+	0	NA	Intergenic	Lx2A|LINE|L1	-2068234	NM_009020	19374	Mm.4988	NM_009020	ENSMUSG00000032864	Rag2	Rag-2	recombination activating gene 2	protein-coding
Diff_Nuc9437	chr16	66100592	66100731	+	0	NA	Intergenic	Intergenic	284783	NM_028572	73569	Mm.25670	NM_028572	ENSMUSG00000091243	Vgll3	1700110N18Rik|4832416J22|C80713|Vgl-3|Vito-2	vestigial like family member 3	protein-coding
Diff_Nuc27841	chr2	178284582	178284721	+	0	NA	Intergenic	ORR1A2|LTR|MaLR	119431	NM_198656	381409	Mm.330860	NM_198656	ENSMUSG00000039155	Cdh26	Gm1010	cadherin-like 26	protein-coding
Diff_Nuc13644	chr19	45895802	45895941	+	0	NA	intron (NM_198296, intron 24 of 25)	intron (NM_198296, intron 24 of 25)	-5318	NM_145703	80906	Mm.213204	NM_030716	ENSMUSG00000025221	Kcnip2	KChIP2	Kv channel-interacting protein 2	protein-coding
Diff_Nuc24852	chr3	115580272	115580411	+	0	NA	Intergenic	ID_B1|SINE|B4	10636	NR_027894	68161	Mm.392043	NR_015487	ENSMUSG00000054426	A930005H10Rik	-	RIKEN cDNA A930005H10 gene	ncRNA
Diff_Nuc3240	chr12	113587092	113587231	+	0	NA	Intergenic	L1M2|LINE|L1	74248	NR_036459	100504733	Mm.255309	NM_176956		A730018C14Rik	-	RIKEN cDNA A730018C14 gene	ncRNA
Diff_Nuc251	chr13	5773282	5773421	+	0	NA	Intergenic	Intergenic	83987	NR_045891	71867	Mm.179181	NR_045891	ENSMUSG00000100625	1700016G22Rik	-	RIKEN cDNA 1700016G22 gene	ncRNA
Diff_Nuc30192	chr1	173335912	173336051	+	0	NA	intron (NM_001005508, intron 10 of 11)	MIRb|SINE|MIR	-5463	NM_001305678	22278	Mm.8	NM_009480	ENSMUSG00000026641	Usf1	bHLHb11	upstream transcription factor 1	protein-coding
Diff_Nuc28257	chr1	36609392	36609531	+	0	NA	intron (NM_001304329, intron 9 of 14)	intron (NM_001304329, intron 9 of 14)	4941	NM_001304330	20353	Mm.29558	NM_001126047	ENSMUSG00000026121	Sema4c	AI426163|M-Sema F|Semacl1|Semaf|Semai|sema I	sema domain, immunoglobulin domain (Ig), transmembrane domain (TM) and short cytoplasmic domain, (semaphorin) 4C	protein-coding
Diff_Nuc23518	chr3	19883332	19883471	+	0	NA	exon (NM_007752, exon 14 of 19)	exon (NM_007752, exon 14 of 19)	26347	NM_007752	12870	Mm.13787	NM_007752	ENSMUSG00000003617	Cp	D3Ertd555e	ceruloplasmin	protein-coding
Diff_Nuc27457	chr2	148701382	148701521	+	0	NA	promoter-TSS (NM_009976)	promoter-TSS (NM_009976)	-203	NM_009976	13010	Mm.4263	NM_009976	ENSMUSG00000027447	Cst3	CysC	cystatin C	protein-coding
Diff_Nuc24796	chr3	110888522	110888661	+	0	NA	Intergenic	Intergenic	-796230	NR_045362	625585	Mm.389497	NR_045362	ENSMUSG00000104543	Gm6602	-	predicted gene 6602	ncRNA
Diff_Nuc27436	chr2	146709602	146709741	+	0	NA	intron (NM_001033298, intron 4 of 13)	L1M4|LINE|L1	28046	NM_001033298	228730	Mm.292352	NM_001033298	ENSMUSG00000074749	Kiz	Gm114|Ncrna00153|Plk1s1	kizuna centrosomal protein	protein-coding
Diff_Nuc33640	chr8	96219442	96219581	+	0	NA	Intergenic	Intergenic	-115227	NM_010308	14681	Mm.251445	NM_010308	ENSMUSG00000031748	Gnao1	AW050213|Galphao|Gnao|alphaO	guanine nucleotide binding protein, alpha O	protein-coding
Diff_Nuc24234	chr3	79230702	79230841	+	0	NA	intron (NM_001142953, intron 3 of 4)	intron (NM_001142953, intron 3 of 4)	81473	NM_001142953	100233207	Mm.373801	NM_001142953	ENSMUSG00000091685	Gm17359	-	predicted gene, 17359	protein-coding
Diff_Nuc20547	chr5	106894552	106894691	+	0	NA	Intergenic	Intergenic	-7436	NM_001005477	104382	Mm.271593	NM_001005477	ENSMUSG00000034384	Barhl2	E130309B19Rik|MBH1	BarH-like 2 (Drosophila)	protein-coding
Diff_Nuc21728	chr4	44698422	44698561	+	0	NA	intron (NM_008782, intron 3 of 9)	intron (NM_008782, intron 3 of 9)	-17181	NR_073462	70602	Mm.491142	NR_073462	ENSMUSG00000103995	5730488B01Rik	-	RIKEN cDNA 5730488B01 gene	ncRNA
Diff_Nuc1391	chr13	91049512	91049651	+	0	NA	Intergenic	Intergenic	-4621	NM_001145879	435376	Mm.292579	NM_001145879	ENSMUSG00000078958	Atp6ap1l	EG435376	ATPase, H+ transporting, lysosomal accessory protein 1-like	protein-coding
Diff_Nuc26983	chr2	118093242	118093381	+	0	NA	Intergenic	Intergenic	-10609	NM_027759	71313	Mm.85046	NM_027759	ENSMUSG00000027344	Fsip1	1700012M13Rik|4933432K11Rik	fibrous sheath-interacting protein 1	protein-coding
Diff_Nuc18716	chr6	117235982	117236121	+	0	NA	Intergenic	Intergenic	117498	NM_021704	20315	Mm.303231	NM_013655	ENSMUSG00000061353	Cxcl12	Pbsf|Scyb12|Sdf1|Tlsf|Tpar1	chemokine (C-X-C motif) ligand 12	protein-coding
Diff_Nuc2160	chr12	34038042	34038181	+	0	NA	intron (NM_001033436, intron 5 of 7)	Lx4B|LINE|L1	41514	NR_131031	75836	Mm.410807	NR_131031	ENSMUSG00000085664	Atxn7l1os2	4930556N08Rik	ataxin 7-like 1, opposite strand 2	ncRNA
Diff_Nuc24405	chr3	87897042	87897181	+	0	NA	intron (NM_001033484, intron 11 of 37)	intron (NM_001033484, intron 11 of 37)	11138	NM_001033484	404710	Mm.331133	NM_001033484	ENSMUSG00000028068	Iqgap3	AI593484|D030034H08	IQ motif containing GTPase activating protein 3	protein-coding
Diff_Nuc14264	chr18	29287322	29287461	+	0	NA	Intergenic	B2_Mm2|SINE|B2	-314463	NR_045395	78199	Mm.243850	NR_045395		4930527G23Rik	-	RIKEN cDNA 4930527G23 gene	ncRNA
Diff_Nuc21382	chr4	15897402	15897541	+	0	NA	intron (NM_013752, intron 6 of 15)	intron (NM_013752, intron 6 of 15)	12357	NM_013752	27354	Mm.20866	NM_013752	ENSMUSG00000028224	Nbn	Nbs1	nibrin	protein-coding
Diff_Nuc19854	chr5	55763132	55763271	+	0	NA	Intergenic	Lx8|LINE|L1	1021970	NR_038045	330086	Mm.254449	NM_177871	ENSMUSG00000105912	Gm10440	D130065D13|ENSMUSG00000072936	predicted gene 10440	ncRNA
Diff_Nuc20124	chr5	76582762	76582901	+	0	NA	intron (NM_020611, intron 5 of 5)	B1_Mus1|SINE|Alu	13533	NM_020611	57357	Mm.289446	NM_020611	ENSMUSG00000029233	Srd5a3	1110025P14Rik|A430076C09|AV364670|AW987574|D730040M03Rik|H5ar|S5AR 3|Srd5a2l	steroid 5 alpha-reductase 3	protein-coding
Diff_Nuc2225	chr12	38307792	38307931	+	0	NA	intron (NM_178767, intron 12 of 12)	intron (NM_178767, intron 12 of 12)	-299431	NM_178681	217480	Mm.126525	NM_178681	ENSMUSG00000036095	Dgkb	6430574F24|90kda|C630029D13Rik|DAGK2|DGK|DGK-beta|mKIAA0718	diacylglycerol kinase, beta	protein-coding
Diff_Nuc1078	chr13	65313252	65313391	+	0	NA	Intergenic	Lx7|LINE|L1	-6297	NM_175290	97895	Mm.315815	NM_175290	ENSMUSG00000032999	Nlrp4f	C330026N02Rik|C86045|Nalp-kappa|Nalp4f	NLR family, pyrin domain containing 4F	protein-coding
Diff_Nuc1834	chr12	3315462	3315601	+	0	NA	Intergenic	Intergenic	-5562	NM_016676	19325	Mm.378993	NM_016676	ENSMUSG00000020671	Rab10	AW107754	RAB10, member RAS oncogene family	protein-coding
Diff_Nuc18051	chr6	70270872	70271011	+	0	NA	Intergenic	Intergenic	471228	NM_009075	19895	Mm.17905	NM_009075	ENSMUSG00000053604	Rpia	RPI	ribose 5-phosphate isomerase A	protein-coding
Diff_Nuc33024	chr8	49768492	49768631	+	0	NA	Intergenic	L1MEc|LINE|L1	-8517	NM_011857	23965	Mm.42191	NM_011857	ENSMUSG00000031561	Tenm3	2610100B16Rik|Odz1|Odz3|Ten-m3|mKIAA1455	teneurin transmembrane protein 3	protein-coding
Diff_Nuc10578	chr15	53346462	53346601	+	0	NA	intron (NM_177225, intron 4 of 4)	ORR1D1|LTR|MaLR	99303	NR_039538	100628567		NR_039538	ENSMUSG00000104794	Mir28c	mmu-mir-28c	microRNA 28c	ncRNA
Diff_Nuc7158	chr17	5428732	5428871	+	0	NA	intron (NM_027457, intron 3 of 3)	intron (NM_027457, intron 3 of 3)	-10034	NM_175349	106557	Mm.432764	NM_175349	ENSMUSG00000101959	Ldhal6b	4933402O15Rik|AI326310|LDHL|Ldhal	lactate dehydrogenase A-like 6B	protein-coding
Diff_Nuc12754	chr14	105716022	105716161	+	0	NA	Intergenic	Intergenic	58201	NM_001190989	76273	Mm.290669	NM_029561	ENSMUSG00000053253	Ndfip2	0710001O20Rik|2810436B12Rik|9130207N19Rik|N4wbp5a|mKIAA1165	Nedd4 family interacting protein 2	protein-coding
Diff_Nuc33303	chr8	73071952	73072091	+	0	NA	intron (NM_007924, intron 1 of 11)	intron (NM_007924, intron 1 of 11)	8447	NM_007924	13716	Mm.271973	NM_007924	ENSMUSG00000070002	Ell	Ell1|Men	elongation factor RNA polymerase II	protein-coding
Diff_Nuc10851	chr15	71649302	71649441	+	0	NA	intron (NM_027174, intron 55 of 63)	intron (NM_027174, intron 55 of 63)	-91103	NM_177819	70363	Mm.126450	NM_177819	ENSMUSG00000036800	Fam135b	1700010C24Rik|A830008O07Rik	family with sequence similarity 135, member B	protein-coding
Diff_Nuc15939	chr7	71443322	71443461	+	0	NA	intron (NM_172742, intron 3 of 15)	intron (NM_172742, intron 3 of 15)	10835	NM_172742	233315	Mm.214959	NM_172742	ENSMUSG00000030522	Mtmr10	BB128963|C79734	myotubularin related protein 10	protein-coding
Diff_Nuc14544	chr18	44807302	44807441	+	0	NA	intron (NM_001085373, intron 3 of 18)	B4A|SINE|B4	-13948	NR_026853	626275	Mm.427116	NR_026853	ENSMUSG00000097610	A930012L18Rik	-	RIKEN cDNA A930012L18 gene	ncRNA
Diff_Nuc7442	chr17	24544132	24544271	+	0	NA	intron (NM_013855, intron 28 of 32)	intron (NM_013855, intron 28 of 32)	7257	NR_033554	654822	Mm.489806	NM_001039561	ENSMUSG00000073437	D330041H03Rik	-	RIKEN cDNA D330041H03 gene	ncRNA
Diff_Nuc20373	chr5	95174632	95174771	+	0	NA	Intergenic	Lx5|LINE|L1	-119840	NM_001200055	100041253	Mm.422705	NM_001200055	ENSMUSG00000095996	Gm16513	-	predicted gene, Gm16513	protein-coding
Diff_Nuc4805	chr11	98105842	98105981	+	0	NA	intron (NM_026952, intron 12 of 12)	ID_B1|SINE|B4	-18009	NR_039579	100628613		NR_039579	ENSMUSG00000093176	Mir5119	mmu-mir-5119|mu-mir-5119	microRNA 5119	ncRNA
Diff_Nuc9173	chr16	45085712	45085851	+	0	NA	Intergenic	Intergenic	-8385	NM_026439	67896	Mm.181074	NM_026439	ENSMUSG00000022665	Ccdc80	2610001E17Rik|DRO1|Ssg1|Urb	coiled-coil domain containing 80	protein-coding
Diff_Nuc8962	chr16	32233772	32233911	+	0	NA	intron (NM_173439, intron 2 of 2)	intron (NM_173439, intron 2 of 2)	13270	NM_173439	268882	Mm.256137	NM_173439	ENSMUSG00000035764	Fbxo45	2610017J04Rik|AI463119|BC026799	F-box protein 45	protein-coding
Diff_Nuc9677	chr16	85385752	85385891	+	0	NA	Intergenic	Intergenic	164797	NM_144853	224405	Mm.213203	NM_144853	ENSMUSG00000041134	Cyyr1	-	cysteine and tyrosine-rich protein 1	protein-coding
Diff_Nuc31514	chr9	67509652	67509791	+	0	NA	Intergenic	(CA)n|Simple_repeat|Simple_repeat	65866	NR_106100	102466824		NR_106100	ENSMUSG00000098937	Mir7241	Gm27918|mmu-mir-7241	microRNA 7241	ncRNA
Diff_Nuc3380	chr11	4998282	4998421	+	0	NA	promoter-TSS (NM_001290491)	promoter-TSS (NM_001290491)	740	NM_001283062	14030	Mm.142822	NM_007968	ENSMUSG00000009079	Ewsr1	Ews|Ewsh	Ewing sarcoma breakpoint region 1	protein-coding
Diff_Nuc29844	chr1	150080332	150080471	+	0	NA	Intergenic	Lx|LINE|L1	1689168	NM_001305632	18783	Mm.4186	NM_008869	ENSMUSG00000056220	Pla2g4a	Pla2g4|cPLA2|cPLA2-alpha|cPLA2alpha	phospholipase A2, group IVA (cytosolic, calcium-dependent)	protein-coding
Diff_Nuc9102	chr16	40824542	40824681	+	0	NA	Intergenic	Intergenic	-708328	NM_001347236	268890	Mm.310524	NM_175548	ENSMUSG00000061080	Lsamp	5430428I19|AW046674|B130007O04Rik|D930023J12Rik|Lam|Lamp	limbic system-associated membrane protein	protein-coding
Diff_Nuc1682	chr13	110729292	110729431	+	0	NA	intron (NM_011056, intron 12 of 16)	intron (NM_011056, intron 12 of 16)	35344	NR_035442	100316683		NR_035442	ENSMUSG00000084651	Mir1904	Mirn1904|mmu-mir-1904	microRNA 1904	ncRNA
Diff_Nuc33864	chr8	112012432	112012571	+	0	NA	Intergenic	RMER17B|LTR|ERVK	-5426	NM_019938	56523	Mm.42166	NM_019938	ENSMUSG00000031727	Pmfbp1	1700016D22Rik|F77|Stap	polyamine modulated factor 1 binding protein 1	protein-coding
Diff_Nuc33657	chr8	97089232	97089371	+	0	NA	intron (NM_153507, intron 14 of 15)	intron (NM_153507, intron 14 of 15)	32373	NM_153507	234577	Mm.291815	NM_153507	ENSMUSG00000034361	Cpne2	3322401K10Rik	copine II	protein-coding
Diff_Nuc31290	chr9	55518812	55518951	+	0	NA	intron (NM_001081341, intron 25 of 32)	L1_Mus1|LINE|L1	129925	NM_027397	104360	Mm.273996	NM_027397	ENSMUSG00000032318	Isl2	3110001N10Rik	insulin related protein 2 (islet 2)	protein-coding
Diff_Nuc25172	chr3	138593322	138593461	+	0	NA	intron (NM_145544, intron 13 of 13)	L1_Mus3|LINE|L1	144774	NM_145544	229877	Mm.28893	NM_145544	ENSMUSG00000028149	Rap1gds1	BC011279|GDS1	RAP1, GTP-GDP dissociation stimulator 1	protein-coding
Diff_Nuc13153	chr19	12816422	12816561	+	0	NA	Intergenic	Lx2B|LINE|L1	23631	NM_170786	12803	Mm.290924	NM_053007	ENSMUSG00000079415	Cntf	AI429687	ciliary neurotrophic factor	protein-coding
Diff_Nuc14366	chr18	35600742	35600881	+	0	NA	intron (NM_030749, intron 1 of 9)	intron (NM_030749, intron 1 of 9)	57768	NM_030749	81500	Mm.291482	NM_030749	ENSMUSG00000024357	Sil1	1810057E01Rik|AI042831|wz	endoplasmic reticulum chaperone SIL1 homolog (S. cerevisiae)	protein-coding
Diff_Nuc6072	chr10	61789832	61789971	+	0	NA	intron (NM_010438, intron 4 of 21)	intron (NM_010438, intron 4 of 21)	13268	NM_001146100	15275	Mm.196605	NM_010438	ENSMUSG00000037012	Hk1	BB404130|Hk-1|Hk1-s|dea|mHk1-s	hexokinase 1	protein-coding
Diff_Nuc20465	chr5	101430732	101430871	+	0	NA	Intergenic	MTE-int|LTR|MaLR	155553	NM_172715	231510	Mm.271911	NM_172715	ENSMUSG00000029314	Agpat9	1-AGPAT|1-AGPAT 9|4933407I02Rik|4933408F15|A230097K15Rik|GPAT-3|Gpat3|mGPAT3	1-acylglycerol-3-phosphate O-acyltransferase 9	protein-coding
Diff_Nuc19666	chr5	39837232	39837371	+	0	NA	Intergenic	Intergenic	157512	NR_045416	75095	Mm.332354	NR_045416	ENSMUSG00000106741	4930513D17Rik	-	RIKEN cDNA 4930513D17 gene	ncRNA
Diff_Nuc25160	chr3	137551712	137551851	+	0	NA	intron (NM_001033155, intron 2 of 7)	ORR1C1|LTR|MaLR	21142	NM_001033155	70604	Mm.256488	NM_001033155	ENSMUSG00000074212	Dnajb14	5730496F10Rik	DnaJ heat shock protein family (Hsp40) member B14	protein-coding
Diff_Nuc32499	chr8	14065202	14065341	+	0	NA	intron (NM_001034862, intron 2 of 5)	ORR1E|LTR|MaLR	25056	NM_001034862	234086	Mm.268896	NM_001034862	ENSMUSG00000051978	Erich1	-	glutamate rich 1	protein-coding
Diff_Nuc32396	chr8	6717262	6717401	+	0	NA	Intergenic	Lx|LINE|L1	-1612044	NM_011388	20494	Mm.3500	NM_011388	ENSMUSG00000023073	Slc10a2	9130221J18Rik|AI605518|ASBT|IBAT|ISBT	solute carrier family 10, member 2	protein-coding
Diff_Nuc30983	chr9	34942422	34942561	+	0	NA	intron (NM_027030, intron 3 of 5)	URR1A|DNA|MER1_type	-18096	NM_009178	20443	Mm.275973	NM_009178	ENSMUSG00000032038	St3gal4	Siat4c	ST3 beta-galactoside alpha-2,3-sialyltransferase 4	protein-coding
Diff_Nuc25789	chr2	28027762	28027901	+	0	NA	Intergenic	Intergenic	-20782	NM_001038613	56177	Mm.43278	NM_019498	ENSMUSG00000026833	Olfm1	AMY|AW742568|Noe1|OlfA|Pancortin|Pancortin3	olfactomedin 1	protein-coding
Diff_Nuc1744	chr13	113873012	113873151	+	0	NA	intron (NM_001281487, intron 9 of 11)	intron (NM_001281487, intron 9 of 11)	18108	NM_010370	14938	Mm.15510	NM_010370	ENSMUSG00000023132	Gzma	AW494114|Ctla-3|Ctla3|Hf|Hf1|SE1|TSP-1|TSP1	granzyme A	protein-coding
Diff_Nuc4170	chr11	61429952	61430091	+	0	NA	Intergenic	Intergenic	-36802	NM_027817	71520	Mm.202760	NM_027817	ENSMUSG00000004837	Grap	8430435N19Rik|BB233594	GRB2-related adaptor protein	protein-coding
Diff_Nuc2906	chr12	87435202	87435341	+	0	NA	intron (NM_029601, intron 2 of 7)	B4A|SINE|B4	11760	NM_001199843	76411	Mm.292345	NM_029601	ENSMUSG00000007867	Ift43	1700019E19Rik|R75064	intraflagellar transport 43	protein-coding
Diff_Nuc32277	chr9	120402192	120402331	+	0	NA	intron (NM_026892, intron 1 of 3)	intron (NM_026892, intron 1 of 3)	537	NM_026892	68969	Mm.28753	NM_026892	ENSMUSG00000006941	Eif1b	1500010M16Rik|3110001N14Rik|Gc20	eukaryotic translation initiation factor 1B	protein-coding
Diff_Nuc782	chr13	45501972	45502111	+	0	NA	exon (NM_153789, exon 5 of 7)	exon (NM_153789, exon 5 of 7)	16930	NM_153789	218203	Mm.212855	NM_153789	ENSMUSG00000038175	Mylip	9430057C20Rik|Mir	myosin regulatory light chain interacting protein	protein-coding
Diff_Nuc1538	chr13	100724572	100724711	+	0	NA	exon (NM_030026, exon 14 of 17)	exon (NM_030026, exon 14 of 17)	-54003	NM_001081493	27220	Mm.75498	NM_013732	ENSMUSG00000021647	Cartpt	Cart	CART prepropeptide	protein-coding
Diff_Nuc30292	chr1	179827022	179827161	+	0	NA	Intergenic	L1_Mus2|LINE|L1	-94475	NM_001034899	545391	Mm.442974	NM_001034899	ENSMUSG00000091476	Gm16432	EG545391|EG666250	predicted gene 16432	protein-coding
Diff_Nuc6518	chr10	89148142	89148281	+	0	NA	promoter-TSS (NR_130956)	promoter-TSS (NR_130956)	819	NM_198021	213326	Mm.27651	NM_198021	ENSMUSG00000069539	Scyl2	AU015688|AW536445|BC030932|CVAK104|D10Ertd802e	SCY1-like 2 (S. cerevisiae)	protein-coding
Diff_Nuc27607	chr2	157609262	157609401	+	0	NA	intron (NM_025680, intron 3 of 15)	Charlie1|DNA|MER1_type	46194	NM_025680	66642	Mm.45193	NM_025680	ENSMUSG00000027649	Ctnnbl1	5730471K09Rik|NAP|NYD-SP19|P14L	catenin, beta like 1	protein-coding
Diff_Nuc18307	chr6	88744782	88744921	+	0	NA	intron (NM_001166251, intron 3 of 7)	intron (NM_001166251, intron 3 of 7)	47078	NM_030251	80283	Mm.166858	NM_030251	ENSMUSG00000030083	Abtb1	AI847549|BC003234|BPOZ|EF1ABP	ankyrin repeat and BTB (POZ) domain containing 1	protein-coding
Diff_Nuc4139	chr11	60063942	60064081	+	0	NA	intron (NM_001039092, intron 7 of 13)	B3|SINE|B2	-29882	NM_001313979	20787	Mm.278701	NM_011480	ENSMUSG00000020538	Srebf1	ADD1|SREBP-1a|SREBP1|SREBP1c|bHLHd1	sterol regulatory element binding transcription factor 1	protein-coding
Diff_Nuc20438	chr5	99677962	99678101	+	0	NA	intron (NM_181318, intron 1 of 13)	intron (NM_181318, intron 1 of 13)	3915	NM_181318	320292	Mm.259074	NM_145839	ENSMUSG00000089809	Rasgef1b	4732452O09Rik|GPIgamma4|Gpig4	RasGEF domain family, member 1B	protein-coding
Diff_Nuc18812	chr6	122854772	122854911	+	0	NA	Intergenic	Intergenic	-17025	NM_199311	269799	Mm.297275	NM_199311	ENSMUSG00000049037	Clec4a1	BC049354|Dcir4	C-type lectin domain family 4, member a1	protein-coding
Diff_Nuc20516	chr5	104591042	104591181	+	0	NA	Intergenic	Intergenic	-8611	NM_010080	666279	Mm.319832	NM_010080	ENSMUSG00000053268	Dspp	Dmp2|Dmp3|Dpp|Dsp	dentin sialophosphoprotein	protein-coding
Diff_Nuc12596	chr14	90922142	90922281	+	0	NA	Intergenic	Intergenic	395513	NR_045712	74967	Mm.390704	NR_045712		4930474H20Rik	-	RIKEN cDNA 4930474H20 gene	ncRNA
Diff_Nuc596	chr13	32909392	32909531	+	0	NA	intron (NM_030215, intron 4 of 6)	intron (NM_030215, intron 4 of 6)	15562	NM_030215	78903	Mm.286680	NM_030215	ENSMUSG00000021400	Wrnip1	4833444L21Rik|WHIP|Wrnip	Werner helicase interacting protein 1	protein-coding
Diff_Nuc23462	chr3	15215632	15215771	+	0	NA	Intergenic	Intergenic	116601	NM_001076679	751864	Mm.431296	NM_001076679	ENSMUSG00000078783	Gm9733	-	predicted gene 9733	protein-coding
Diff_Nuc8316	chr17	81196942	81197081	+	0	NA	Intergenic	CT-rich|Low_complexity|Low_complexity	-69646	NM_001290345	225028	Mm.311948	NM_001081357	ENSMUSG00000024242	Map4k3	4833416M01Rik|4833416M07Rik|9530052P13Rik|Glk|MAPKKKK3|MEKKK 3|MEKKK3|RAB8IPL1	mitogen-activated protein kinase kinase kinase kinase 3	protein-coding
Diff_Nuc17284	chr6	13089052	13089191	+	0	NA	Intergenic	Intergenic	69362	NM_027992	71900	Mm.27742	NM_027992	ENSMUSG00000029571	Tmem106b	2310036D22Rik|5830455K21Rik|6430519M21Rik|AI428776|AI661344	transmembrane protein 106B	protein-coding
Diff_Nuc6852	chr10	112507852	112507991	+	0	NA	Intergenic	MTC|LTR|MaLR	-141839	NM_001033474	382423	Mm.431239	NM_001033474	ENSMUSG00000074748	Atxn7l3b	4921506J03Rik|6230409E21Rik|AI315132|ENSMUSG00000074747	ataxin 7-like 3B	protein-coding
Diff_Nuc6267	chr10	74502212	74502351	+	0	NA	intron (NM_029781, intron 2 of 10)	intron (NM_029781, intron 2 of 10)	2447	NM_029781	76877	Mm.133593	NM_029781	ENSMUSG00000020175	Rab36	6330593L16Rik|AW047545	RAB36, member RAS oncogene family	protein-coding
Diff_Nuc21179	chr5	149143922	149144061	+	0	NA	3' UTR (NM_001301424, exon 13 of 13)	3' UTR (NM_001301424, exon 13 of 13)	60400	NM_001301424	11987	Mm.275489	NM_007513	ENSMUSG00000041313	Slc7a1	4831426K01Rik|AI447493|Atrc-1|Atrc1|Cat1|Rec-1|Rev-1|mCAT-1	solute carrier family 7 (cationic amino acid transporter, y+ system), member 1	protein-coding
Diff_Nuc18294	chr6	87610082	87610221	+	0	NA	intron (NM_024251, intron 3 of 9)	L1M4|LINE|L1	12011	NM_024251	72103	Mm.31770	NM_024251	ENSMUSG00000030051	Aplf	2010301N04Rik|AI452191	aprataxin and PNKP like factor	protein-coding
Diff_Nuc3036	chr12	99970462	99970601	+	0	NA	intron (NM_001146199, intron 2 of 18)	intron (NM_001146199, intron 2 of 18)	2324	NM_011877	24000	Mm.4420	NM_011877	ENSMUSG00000021009	Ptpn21	PTPD1|PTPRL10	protein tyrosine phosphatase, non-receptor type 21	protein-coding
Diff_Nuc20595	chr5	110574502	110574641	+	0	NA	intron (NM_172717, intron 6 of 17)	intron (NM_172717, intron 6 of 17)	9722	NM_001289580	231600	Mm.30264	NM_172717	ENSMUSG00000014668	Chfr	5730484M20Rik|C230082M18|RNF116	checkpoint with forkhead and ring finger domains	protein-coding
Diff_Nuc33639	chr8	96198152	96198291	+	0	NA	Intergenic	Intergenic	-136517	NM_010308	14681	Mm.251445	NM_010308	ENSMUSG00000031748	Gnao1	AW050213|Galphao|Gnao|alphaO	guanine nucleotide binding protein, alpha O	protein-coding
Diff_Nuc30114	chr1	168130992	168131131	+	0	NA	TTS (NM_175296)	TTS (NM_175296)	37814	NM_175296	98558	Mm.26189	NM_175296	ENSMUSG00000040629	Mael	4933405K18Rik|AU019877	maelstrom spermatogenic transposon silencer	protein-coding
Diff_Nuc7765	chr17	41496702	41496841	+	0	NA	Intergenic	RMER15-int|LTR|ERVL	425137	NM_008650	17850	Mm.259884	NM_008650	ENSMUSG00000023921	Mut	D230010K02Rik|Mcm	methylmalonyl-Coenzyme A mutase	protein-coding
Diff_Nuc11963	chr14	47432402	47432541	+	0	NA	intron (NM_022023, intron 6 of 6)	(CAAAA)n|Simple_repeat|Simple_repeat	9446	NM_022023	63985	Mm.87312	NM_022023	ENSMUSG00000062014	Gmfb	3110001H22Rik|3110001O16Rik|AI851627|C79176|D14Ertd630e	glia maturation factor, beta	protein-coding
Diff_Nuc27900	chr1	4809572	4809711	+	0	NA	intron (NM_008866, intron 2 of 8)	B1_Mus2|SINE|Alu	11667	NM_008866	18777	Mm.299955	NM_008866	ENSMUSG00000025903	Lypla1	Pla1a	lysophospholipase 1	protein-coding
Diff_Nuc11613	chr14	21286352	21286491	+	0	NA	intron (NM_009674, intron 5 of 12)	intron (NM_009674, intron 5 of 12)	12934	NM_001110794	11750	Mm.280231	NM_009674	ENSMUSG00000021814	Anxa7	AI265384|AI316497|Anx7|synexin	annexin A7	protein-coding
Diff_Nuc21006	chr5	138052932	138053071	+	0	NA	promoter-TSS (NM_008788)	promoter-TSS (NM_008788)	-369	NM_008788	18542	Mm.262345	NM_008788	ENSMUSG00000029718	Pcolce	Astt-2|Astt2|P14|PCPE-1	procollagen C-endopeptidase enhancer protein	protein-coding
Diff_Nuc14629	chr18	50275282	50275421	+	0	NA	Intergenic	Intergenic	-12504	NM_008292	15488	Mm.277857	NM_008292	ENSMUSG00000024507	Hsd17b4	17-beta-HSD|17[b]-HSD|DBP|MFE-2|MFP2|MPF-2|Mfp-2|perMFE-2	hydroxysteroid (17-beta) dehydrogenase 4	protein-coding
Diff_Nuc26713	chr2	94384602	94384741	+	0	NA	Intergenic	Lx4B|LINE|L1	-106328	NM_001305258	11800	Mm.181824	NM_007466	ENSMUSG00000027193	Api5	AAC-11|AI196452|API-5	apoptosis inhibitor 5	protein-coding
Diff_Nuc23723	chr3	35750382	35750521	+	0	NA	intron (NM_029570, intron 29 of 29)	MTE2a|LTR|MaLR	78545	NM_033623	114893	Mm.374810	NM_033623	ENSMUSG00000027708	Dcun1d1	Rp42|SCCRO|Tes3|pTes3	DCN1, defective in cullin neddylation 1, domain containing 1 (S. cerevisiae)	protein-coding
Diff_Nuc663	chr13	37347312	37347451	+	0	NA	Intergenic	L1_Mur3|LINE|L1	-89833	NM_010745	17084	Mm.2639	NM_010745	ENSMUSG00000021423	Ly86	MD-1|MD1|ly86_tv2	lymphocyte antigen 86	protein-coding
Diff_Nuc19817	chr5	53061752	53061891	+	0	NA	promoter-TSS (NM_172490)	promoter-TSS (NM_172490)	-881	NM_172490	211006	Mm.244719	NM_172490	ENSMUSG00000029173	Sepsecs	AA986712|D5Ertd135e|SLA|SecS	Sep (O-phosphoserine) tRNA:Sec (selenocysteine) tRNA synthase	protein-coding
Diff_Nuc16865	chr7	132650592	132650731	+	0	NA	Intergenic	Intergenic	-15605	NM_026330	67711	Mm.4467	NM_026330	ENSMUSG00000030750	Nsmce1	2510027N19Rik	NSE1 homolog, SMC5-SMC6 complex component	protein-coding
Diff_Nuc1772	chr13	115684512	115684651	+	0	NA	intron (NM_008396, intron 2 of 29)	intron (NM_008396, intron 2 of 29)	37668	NM_008396	16398	Mm.5007	NM_008396	ENSMUSG00000015533	Itga2	CD49B|DX5	integrin alpha 2	protein-coding
Diff_Nuc15864	chr7	65270062	65270201	+	0	NA	Intergenic	Intergenic	423588	NM_008071	14402	Mm.8004	NM_008071	ENSMUSG00000033676	Gabrb3	A230092K12Rik|AW049585|Cp1|Gabrb-3|beta3	gamma-aminobutyric acid (GABA) A receptor, subunit beta 3	protein-coding
Diff_Nuc976	chr13	57590172	57590311	+	0	NA	intron (NM_001166466, intron 7 of 11)	intron (NM_001166466, intron 7 of 11)	419452	NM_009262	20745	Mm.379020	NM_009262	ENSMUSG00000056222	Spock1	Spock|Ticn1|testican	sparc/osteonectin, cwcv and kazal-like domains proteoglycan 1	protein-coding
Diff_Nuc27479	chr2	150283032	150283171	+	0	NA	Intergenic	MTB_Mm|LTR|MaLR	-5864	NM_001310645	668923	Mm.393876	NM_001177550	ENSMUSG00000068130	Zfp442	OTTMUSG00000015730|ZIPO-II	zinc finger protein 442	protein-coding
Diff_Nuc7690	chr17	35976362	35976501	+	0	NA	Intergenic	Intergenic	-1185	NM_011655	22154	Mm.273538	NM_011655	ENSMUSG00000001525	Tubb5	AA408537|AI596182|B130022C14Rik|M(beta)5	tubulin, beta 5 class I	protein-coding
Diff_Nuc866	chr13	50331602	50331741	+	0	NA	Intergenic	Intergenic	14006	NM_001033438	380882	Mm.425809	NM_001033438	ENSMUSG00000095300	Gm906	-	predicted gene 906	protein-coding
Diff_Nuc10666	chr15	59235492	59235631	+	0	NA	intron (NM_026746, intron 2 of 6)	Lx2B|LINE|L1	29808	NM_001164604	68501	Mm.27762	NM_026746	ENSMUSG00000059586	Nsmce2	1110014D18Rik|AI661537	NSE2/MMS21 homolog, SMC5-SMC6 complex SUMO ligase	protein-coding
Diff_Nuc24839	chr3	115299072	115299211	+	0	NA	Intergenic	Intergenic	118832	NM_007901	13609	Mm.982	NM_007901	ENSMUSG00000045092	S1pr1	AI849002|Edg1|Lpb1|S1p|S1p1	sphingosine-1-phosphate receptor 1	protein-coding
Diff_Nuc7836	chr17	46709952	46710091	+	0	NA	intron (NM_175168, intron 15 of 19)	intron (NM_175168, intron 15 of 19)	-16910	NM_020493	20807	Mm.45044	NM_020493	ENSMUSG00000015605	Srf	AW049942|AW240594	serum response factor	protein-coding
Diff_Nuc20012	chr5	65924042	65924181	+	0	NA	Intergenic	RMER19A|LTR|ERVK	-4373	NM_016786	53323	Mm.319512	NM_016786	ENSMUSG00000029203	Ube2k	AW492011|D5Ertd601e|E2-25k|HIP-2|Hip2|Hypg|Lig	ubiquitin-conjugating enzyme E2K	protein-coding
Diff_Nuc5521	chr10	20443542	20443681	+	0	NA	intron (NM_013875, intron 1 of 12)	intron (NM_013875, intron 1 of 12)	1273	NM_013875	29863	Mm.425617	NM_013875	ENSMUSG00000019990	Pde7b	-	phosphodiesterase 7B	protein-coding
Diff_Nuc31337	chr9	58197802	58197941	+	0	NA	Intergenic	ORR1B1|LTR|MaLR	20305	NM_028854	74286	Mm.252761	NM_028854	ENSMUSG00000036244	Tbc1d21	1700095K08Rik|MgcRabGAP	TBC1 domain family, member 21	protein-coding
Diff_Nuc21850	chr4	54066852	54066991	+	0	NA	Intergenic	MIRc|SINE|MIR	228004	NM_028053	52076	Mm.27184	NM_028053	ENSMUSG00000028420	Tmem38b	1600017F22Rik|AA437809|AV051057|D4Ertd89e|TRIC-B|mg33b	transmembrane protein 38B	protein-coding
Diff_Nuc27149	chr2	126514222	126514361	+	0	NA	Intergenic	ORR1A4|LTR|MaLR	-12218	NM_001271470	14391	Mm.293266	NM_010249	ENSMUSG00000027361	Gabpb1	BABPB2|E4TF1|E4TF1-47|E4TF1-53|E4Tf1B|GABPB|GABPB-1|GABPB-2|GABPB1-1|GABPB1-2|NRF2B1|NRF2B2	GA repeat binding protein, beta 1	protein-coding
Diff_Nuc28936	chr1	80532962	80533101	+	0	NA	intron (NM_175291, intron 40 of 55)	intron (NM_175291, intron 40 of 55)	90524	NR_040460	72208	Mm.396181	NR_040460	ENSMUSG00000101483	1700016L21Rik	Jr3	RIKEN cDNA 1700016L21 gene	ncRNA
Diff_Nuc4971	chr11	106413132	106413271	+	0	NA	intron (NM_198292, intron 2 of 11)	intron (NM_198292, intron 2 of 11)	50896	NR_030703	100216537		NR_030703	ENSMUSG00000065126	Snord104	-	small nucleolar RNA, C/D box 104	snoRNA
Diff_Nuc8470	chr17	90990662	90990801	+	0	NA	intron (NM_001346957, intron 10 of 18)	intron (NM_001346957, intron 10 of 18)	-135511	NM_001346959	18189	Mm.478418	NM_020252	ENSMUSG00000024109	Nrxn1	1700062G21Rik|9330127H16Rik|A230068P09Rik|mKIAA0578	neurexin I	protein-coding
Diff_Nuc1071	chr13	64444842	64444981	+	0	NA	Intergenic	Intergenic	26917	NM_009984	13039	Mm.930	NM_009984	ENSMUSG00000021477	Ctsl	1190035F06Rik|CatL|Ctsl1|MEP|fs|nkt	cathepsin L	protein-coding
Diff_Nuc6487	chr10	86302632	86302771	+	0	NA	Intergenic	Intergenic	60951	NM_175331	103466	Mm.200446	NM_175331	ENSMUSG00000054027	Nt5dc3	AU040402|AW540062|C630002B14Rik|TU12B1-TY	5'-nucleotidase domain containing 3	protein-coding
Diff_Nuc17747	chr6	44940842	44940981	+	0	NA	Intergenic	Lx2B|LINE|L1	-69149	NM_001004357	66797	Mm.440084	NM_025771	ENSMUSG00000039419	Cntnap2	5430425M22Rik|Caspr2|mKIAA0868	contactin associated protein-like 2	protein-coding
Diff_Nuc459	chr13	21706922	21707061	+	0	NA	Intergenic	Lx3_Mus|LINE|L1	-3118	NM_146744	258739	Mm.377667	NM_146744	ENSMUSG00000051258	Olfr1362	MOR256-8|Olfr1363-ps1	olfactory receptor 1362	protein-coding
Diff_Nuc25039	chr3	128474092	128474231	+	0	NA	Intergenic	L1Md_A|LINE|L1	-428635	NM_001286942	18741	Mm.246804	NM_011098	ENSMUSG00000028023	Pitx2	9430085M16Rik|Brx1|Brx1b|Munc30|Otlx2|Ptx2|Rieg	paired-like homeodomain transcription factor 2	protein-coding
Diff_Nuc21078	chr5	142298792	142298931	+	0	NA	intron (NM_177879, intron 5 of 44)	intron (NM_177879, intron 5 of 44)	-578590	NM_199068	17425	Mm.24214	NM_010812	ENSMUSG00000056493	Foxk1	A630048H08Rik|AI463295|ENSMUSG00000075577|Gm10868|Mnf	forkhead box K1	protein-coding
Diff_Nuc25581	chr2	13703642	13703781	+	0	NA	intron (NM_145838, intron 2 of 7)	intron (NM_145838, intron 2 of 7)	11436	NM_145838	241230	Mm.330004	NM_145838	ENSMUSG00000003418	St8sia6	1700007J08Rik|AI314453|AI875066|ST8SiaVI|Siat8f	ST8 alpha-N-acetyl-neuraminide alpha-2,8-sialyltransferase 6	protein-coding
Diff_Nuc23026	chr4	137540272	137540411	+	0	NA	Intergenic	Intergenic	-9030	NM_001256198	230861	Mm.268903	NM_172703	ENSMUSG00000028760	Eif4g3	1500002J22Rik|4930523M17Rik|G1-419-52|eIF4GII|repro8	eukaryotic translation initiation factor 4 gamma, 3	protein-coding
Diff_Nuc142	chrX	116654832	116654971	+	0	NA	Intergenic	Lx2|LINE|L1	-385904	NM_053114	93728	Mm.125979	NM_053114	ENSMUSG00000034732	Pabpc5	C820015E17	poly(A) binding protein, cytoplasmic 5	protein-coding
Diff_Nuc8672	chr16	14183982	14184121	+	0	NA	intron (NM_023317, intron 5 of 8)	intron (NM_023317, intron 5 of 8)	20683	NM_001114085	67203	Mm.24105	NM_023317	ENSMUSG00000022678	Nde1	2810027M15Rik|AU042936|AW822251|Nude|mNudE	nudE neurodevelopment protein 1	protein-coding
Diff_Nuc3710	chr11	29746282	29746421	+	0	NA	intron (NM_146016, intron 10 of 41)	Lx2|LINE|L1	-20683	NM_176829	216622	Mm.443260	NM_176829	ENSMUSG00000078157	4931440F15Rik	Fem1ab	RIKEN cDNA 4931440F15 gene	protein-coding
Diff_Nuc33589	chr8	91219922	91220061	+	0	NA	promoter-TSS (NM_001128171)	promoter-TSS (NM_001128171)	-936	NM_001128170	74256	Mm.490395	NM_173369	ENSMUSG00000036712	Cyld	2010013M14Rik|2900009M21Rik|C130039D01Rik|CDMT|CYLD1|EAC|mKIAA0849	CYLD lysine 63 deubiquitinase	protein-coding
Diff_Nuc27922	chr1	6856732	6856871	+	0	NA	Intergenic	Intergenic	136669	NR_045188	240690	Mm.234612	NM_173868	ENSMUSG00000033740	St18	AV348974|Myt3|NZF-3|Nzf3|mKIAA0535	suppression of tumorigenicity 18	protein-coding
Diff_Nuc1435	chr13	94000632	94000771	+	0	NA	Intergenic	MLT1C|LTR|MaLR	-38463	NM_133905	100715	Mm.242865	NM_133905	ENSMUSG00000042167	Papd4	8030446C20Rik|AI649009|GLD-2|Gld2	PAP associated domain containing 4	protein-coding
Diff_Nuc26247	chr2	59104412	59104551	+	0	NA	exon (NM_175464, exon 3 of 21)	exon (NM_175464, exon 3 of 21)	105574	NM_175464	227937	Mm.260938	NM_026361	ENSMUSG00000026991	Pkp4	5031422I09Rik|9430019K17Rik|Armrp|p0071	plakophilin 4	protein-coding
Diff_Nuc16538	chr7	110574602	110574741	+	0	NA	Intergenic	Lx6|LINE|L1	9461	NM_010089	13532	Mm.382906	NM_010089	ENSMUSG00000058976	Usp17lc	Dub-2|Dub2|Dub2b|Usp17l5	ubiquitin specific peptidase 17-like C	protein-coding
Diff_Nuc14986	chr18	73615102	73615241	+	0	NA	Intergenic	Intergenic	-117188	NM_001039214	240396	Mm.24131	NM_001039214	ENSMUSG00000037253	Mex3c	A130001D14Rik|BC035207|BM-013|Rkhd2	mex3 RNA binding family member C	protein-coding
Diff_Nuc17560	chr6	32192092	32192231	+	0	NA	intron (NM_175750, intron 5 of 31)	MIRc|SINE|MIR	191873	NM_029587	76382	Mm.23510	NM_029587	ENSMUSG00000029766	1700012A03Rik	AI429084	RIKEN cDNA 1700012A03 gene	protein-coding
Diff_Nuc27583	chr2	156105562	156105701	+	0	NA	intron (NM_172674, intron 9 of 17)	intron (NM_172674, intron 9 of 17)	-32578	NM_027585	70873	Mm.475234	NM_027585	ENSMUSG00000038085	Cnbd2	4921517L17Rik|5430421B09Rik|Cris	cyclic nucleotide binding domain containing 2	protein-coding
Diff_Nuc30587	chr9	4374292	4374431	+	0	NA	Intergenic	Intergenic	-9176	NM_145609	78100	Mm.206549	NM_145609	ENSMUSG00000041124	Msantd4	8430410K20Rik|Mysantd4	Myb/SANT-like DNA-binding domain containing 4 with coiled-coils	protein-coding
Diff_Nuc22870	chr4	129582082	129582221	+	0	NA	Intergenic	RMER1A|Other|Other	-1319	NR_045190	319894	Mm.59196	NR_045190	ENSMUSG00000086369	E330017L17Rik	-	RIKEN cDNA E330017L17 gene	ncRNA
Diff_Nuc17614	chr6	35326242	35326381	+	0	NA	Intergenic	Intergenic	45465	NR_040526	73409	Mm.69443	NR_040526	ENSMUSG00000107341	1700065J11Rik	-	RIKEN cDNA 1700065J11 gene	ncRNA
Diff_Nuc15209	chr7	3568212	3568351	+	0	NA	promoter-TSS (NM_001290377)	promoter-TSS (NM_001290377)	-522	NM_001290377	232790	Mm.358882	NM_175632	ENSMUSG00000054594	Oscar	mOSCAR|mOSCAR-M1|mOSCAR-M2|mOSCAR-M3	osteoclast associated receptor	protein-coding
Diff_Nuc20181	chr5	81290192	81290331	+	0	NA	Intergenic	Lx7|LINE|L1	-159335	NM_001347367	319387	Mm.273631	NM_198702	ENSMUSG00000037605	Adgrl3	5430402I23Rik|CIRL-3|D130075K09Rik|Gm1379|LEC3|Lphn3|mKIAA0768	adhesion G protein-coupled receptor L3	protein-coding
Diff_Nuc30179	chr1	173058982	173059121	+	0	NA	TTS (NM_025321)	TTS (NM_025321)	7259	NM_001081275	75472	Mm.32760	NM_029301	ENSMUSG00000026649	Cfap126	1700009P17Rik|AV282292|Flattop|Fltp	cilia and flagella associated protein 126	protein-coding
Diff_Nuc6770	chr10	105996132	105996271	+	0	NA	intron (NM_177373, intron 3 of 31)	MTC|LTR|MaLR	41910	NR_131027	75833	Mm.159596	NR_131026		4930532I03Rik	-	RIKEN cDNA 4930532I03 gene	ncRNA
Diff_Nuc30530	chr9	3000832	3000971	+	0	NA	Intergenic	GSAT_MM|Satellite|Satellite	37842	NR_039546	100628572		NR_039546	ENSMUSG00000106183	Mir101c	mir-101c|mmu-mir-101c	microRNA 101c	ncRNA
Diff_Nuc23204	chr4	147021942	147022081	+	0	NA	Intergenic	RLTR18|LTR|ERVK	-5394	NM_145078	112422	Mm.327194	NM_145078	ENSMUSG00000066000	Zfp979	2610305D13Rik|Ssm1b	zinc finger protein 979	protein-coding
Diff_Nuc765	chr13	44188172	44188311	+	0	NA	Intergenic	Intergenic	-28295	NR_045285	328235	Mm.188356	NR_045285	ENSMUSG00000089815	Gm5083	A730030A06	predicted gene 5083	ncRNA
Diff_Nuc12497	chr14	81929962	81930101	+	0	NA	Intergenic	Intergenic	1529922	NM_001030294	380924	Mm.26456	NM_001030294	ENSMUSG00000022026	Olfm4	GC1|GW112|Gm296|Gm913|OlfD|pPD4	olfactomedin 4	protein-coding
Diff_Nuc16817	chr7	128010402	128010541	+	0	NA	intron (NM_001267710, intron 2 of 17)	intron (NM_001267710, intron 2 of 17)	15768	NM_001267711	13631	Mm.25997	NM_007908	ENSMUSG00000035064	Eef2k	C86191|eEF-2K	eukaryotic elongation factor-2 kinase	protein-coding
Diff_Nuc13106	chr19	8922342	8922481	+	0	NA	exon (NM_001136064, exon 10 of 12)	exon (NM_001136064, exon 10 of 12)	-2864	NM_001013019	68852	Mm.265792	NM_001013019	ENSMUSG00000071656	Lrrn4cl	1110067I12Rik	LRRN4 C-terminal like	protein-coding
Diff_Nuc25094	chr3	132761492	132761631	+	0	NA	intron (NM_027927, intron 3 of 6)	intron (NM_027927, intron 3 of 6)	6742	NM_027927	71793	Mm.246726	NM_027927	ENSMUSG00000028016	Ints12	1110020M19Rik|2810027J24Rik|4930529N21Rik|A230056J18Rik|AI666778|Phf22|int12	integrator complex subunit 12	protein-coding
Diff_Nuc28432	chr1	49669212	49669351	+	0	NA	Intergenic	Lx5|LINE|L1	-1315086	NM_019790	56363	Mm.245154	NM_019790	ENSMUSG00000026109	Tmeff2	4832418D20Rik|7630402F16Rik|TR-2	transmembrane protein with EGF-like and two follistatin-like domains 2	protein-coding
Diff_Nuc27632	chr2	158789402	158789541	+	0	NA	Intergenic	Intergenic	168928	NM_001291144	71715	Mm.315652	NM_145742	ENSMUSG00000027655	Dhx35	1200009D07Rik|Ddx35	DEAH (Asp-Glu-Ala-His) box polypeptide 35	protein-coding
Diff_Nuc16883	chr7	133319532	133319671	+	0	NA	intron (NM_028816, intron 1 of 23)	intron (NM_028816, intron 1 of 23)	24321	NM_028816	74204	Mm.235663	NM_028816	ENSMUSG00000000131	Xpo6	2610005L19Rik|AL022631|C230091E20Rik|R75304|Ranbp20|mKIAA0370	exportin 6	protein-coding
Diff_Nuc95	chrX	72674952	72675091	+	0	NA	intron (NM_001166459, intron 4 of 10)	L1VL4|LINE|L1	13054	NM_001166459	210766	Mm.226957	NM_145956	ENSMUSG00000031201	Brcc3	C6.1A	BRCA1/BRCA2-containing complex, subunit 3	protein-coding
Diff_Nuc8621	chr16	11073392	11073531	+	0	NA	3' UTR (NM_009223, exon 2 of 2)	3' UTR (NM_009223, exon 2 of 2)	7070	NM_009223	20621	Mm.325800	NM_009223	ENSMUSG00000037972	Snn	2810407J07Rik|AI848521|AW547286	stannin	protein-coding
Diff_Nuc13258	chr19	21180482	21180621	+	0	NA	TTS (NR_126458)	TTS (NR_126458)	1351	NR_126458	75354	Mm.243873	NR_126458		4930554I06Rik	-	RIKEN cDNA 4930554I06 gene	ncRNA
Diff_Nuc9639	chr16	82791162	82791301	+	0	NA	Intergenic	RLTR22_Mur|LTR|ERVK	-1580157	NR_040567	75247	Mm.417813	NR_040567		4930553E22Rik	-	RIKEN cDNA 4930553E22 gene	ncRNA
Diff_Nuc20977	chr5	136191472	136191611	+	0	NA	intron (NM_008898, intron 1 of 15)	intron (NM_008898, intron 1 of 15)	20218	NR_106001	102466791		NR_106001	ENSMUSG00000099197	Mir7034	Gm27372|mmu-mir-7034	microRNA 7034	ncRNA
Diff_Nuc8975	chr16	32716382	32716521	+	0	NA	Intergenic	RMER4B|LTR|ERVK	-19521	NM_080457	140474	Mm.214599	NM_080457	ENSMUSG00000079620	Muc4	4933405I11Rik|Asgp	mucin 4	protein-coding
Diff_Nuc15524	chr7	30933202	30933341	+	0	NA	Intergenic	Intergenic	21475	NM_011980	26465	Mm.446516	NM_011980	ENSMUSG00000037029	Zfp146	OZF|Znf146	zinc finger protein 146	protein-coding
Diff_Nuc8060	chr17	64843422	64843561	+	0	NA	Intergenic	Intergenic	53345	NR_105848	102465228		NR_105848	ENSMUSG00000098984	Mir6420	Gm28007|mmu-mir-6420	microRNA 6420	ncRNA
Diff_Nuc5500	chr10	19518092	19518231	+	0	NA	Intergenic	IAPEz-int|LTR|ERVK	53104	NM_029529	76157	Mm.74324	NM_029529	ENSMUSG00000050473	Slc35d3	6230421J19Rik|Frcl1	solute carrier family 35, member D3	protein-coding
Diff_Nuc20793	chr5	123922692	123922831	+	0	NA	Intergenic	Intergenic	9349	NM_029594	76399	Mm.75049	NM_029594	ENSMUSG00000029437	Il31	1700013B14Rik	interleukin 31	protein-coding
Diff_Nuc8769	chr16	20338362	20338501	+	0	NA	intron (NM_013790, intron 27 of 29)	intron (NM_013790, intron 27 of 29)	-12954	NM_183158	224044	Mm.276400	NM_183158	ENSMUSG00000022818	Cyp2ab1	EG224044|F730023N20	cytochrome P450, family 2, subfamily ab, polypeptide 1	protein-coding
Diff_Nuc31164	chr9	47407192	47407331	+	0	NA	intron (NM_207676, intron 1 of 9)	intron (NM_207676, intron 1 of 9)	68826	NM_018770	54725	Mm.234832	NM_018770	ENSMUSG00000032076	Cadm1	2900073G06Rik|3100001I08Rik|AI987920|Bl2|Igsf4|Igsf4a|Necl2|RA175|RA175A|RA175B|RA175C|RA175N|ST17|SgIGSF|SynCam|Tslc1	cell adhesion molecule 1	protein-coding
Diff_Nuc25188	chr3	139616732	139616871	+	0	NA	Intergenic	Intergenic	-74412	NR_105798	102465198		NR_105798	ENSMUSG00000099169	Mir7j	Gm27716|Mirlet7j|mmu-let-7j	microRNA 7j	ncRNA
Diff_Nuc10634	chr15	57883732	57883871	+	0	NA	exon (NM_001042438, exon 4 of 5)	exon (NM_001042438, exon 4 of 5)	-17952	NM_029418	75758	Mm.455792	NM_029418	ENSMUSG00000101892	9130401M01Rik	AI849328	RIKEN cDNA 9130401M01 gene	protein-coding
Diff_Nuc11795	chr14	32644672	32644811	+	0	NA	Intergenic	Intergenic	-1140	NM_001024604	105522	Mm.37660	NM_001024604	ENSMUSG00000014496	Ankrd28	AI465466|AI604979|E430019N21Rik|mKIAA0379	ankyrin repeat domain 28	protein-coding
Diff_Nuc34052	chr8	126155732	126155871	+	0	NA	Intergenic	B2_Mm1a|SINE|B2	-22028	NM_133955	69581	Mm.168257	NM_133955	ENSMUSG00000039960	Rhou	2310026M05Rik|AI182090|Arhu|CDC42L1|G28K|WRCH-1|WRCH1|mG28K	ras homolog family member U	protein-coding
Diff_Nuc1013	chr13	59861922	59862061	+	0	NA	intron (NM_026921, intron 2 of 3)	MTC|LTR|MaLR	9159	NM_026921	69046	Mm.7884	NM_026921	ENSMUSG00000044792	Isca1	1810010A06Rik|Hbld2	iron-sulfur cluster assembly 1	protein-coding
Diff_Nuc14048	chr18	12403642	12403781	+	0	NA	Intergenic	MuRRS4-int|LTR|ERV1	-8816	NM_008720	18145	Mm.3484	NM_008720	ENSMUSG00000024413	Npc1	A430089E03Rik|C85354|D18Ertd139e|D18Ertd723e|lcsd|nmf164|spm	Niemann-Pick type C1	protein-coding
Diff_Nuc9848	chr16	98171852	98171991	+	0	NA	exon (NM_001081684, exon 2 of 2)	exon (NM_001081684, exon 2 of 2)	11866	NM_001081685	114565	Mm.474489	NM_175428	ENSMUSG00000046962	Zbtb21	5430437K12Rik|B430213I24Rik|Zfp295|Znf295|mKIAA1227	zinc finger and BTB domain containing 21	protein-coding
Diff_Nuc32476	chr8	12861982	12862121	+	0	NA	intron (NR_121603, intron 29 of 29)	intron (NR_121603, intron 29 of 29)	-30132	NR_045775	100504249	Mm.441494	NR_045775	ENSMUSG00000084780	Gm15350	OTTMUSG00000020611	predicted gene 15350	ncRNA
Diff_Nuc6925	chr10	117579382	117579521	+	0	NA	intron (NM_148922, intron 1 of 13)	intron (NM_148922, intron 1 of 13)	608	NM_010785	17245	Mm.101191	NM_010785	ENSMUSG00000020212	Mdm1	Arrd2|Mdm-1	transformed mouse 3T3 cell double minute 1	protein-coding
Diff_Nuc17372	chr6	19660992	19661131	+	0	NA	Intergenic	ORR1B2|LTR|MaLR	155719	NR_105789	102465192		NR_105789	ENSMUSG00000099149	Mir6370	Gm27480|mmu-mir-6370	microRNA 6370	ncRNA
Diff_Nuc8067	chr17	65093732	65093871	+	0	NA	intron (NM_008549, intron 20 of 21)	intron (NM_008549, intron 20 of 21)	-22650	NR_105051	101202683	Mm.393309	NR_105051		Dreh	-	down-regulated in hepatocellular carcinoma	ncRNA
Diff_Nuc4929	chr11	104439042	104439181	+	0	NA	intron (NM_010858, intron 3 of 8)	B3|SINE|B2	-15599	NR_130177	100415912	Mm.446786	NR_130177		Gm11665	Gm11664|OTTMUSG00000003182|OTTMUSG00000003183	predicted gene 11665	ncRNA
Diff_Nuc21560	chr4	32546492	32546631	+	0	NA	intron (NM_001109661, intron 1 of 4)	L1VL2|LINE|L1	42151	NM_001109661	12014	Mm.491223	NM_007521	ENSMUSG00000040270	Bach2	E030004N02Rik	BTB and CNC homology, basic leucine zipper transcription factor 2	protein-coding
Diff_Nuc20659	chr5	115201462	115201601	+	0	NA	intron (NM_001347400, intron 9 of 19)	intron (NM_001347400, intron 9 of 19)	21969	NM_019834	26431	Mm.195632	NM_019834	ENSMUSG00000041890	Git2	1500036H07Rik|5830420E16Rik|6430510B20Rik|9630056M03Rik|B230104M05Rik|CAT2|mKIAA0148	G protein-coupled receptor kinase-interactor 2	protein-coding
Diff_Nuc12230	chr14	65348202	65348341	+	0	NA	intron (NM_001081177, intron 10 of 39)	intron (NM_001081177, intron 10 of 39)	76903	NM_001081177	16554	Mm.23611	NM_001081177	ENSMUSG00000060012	Kif13b	5330429L19Rik|6030414C01|AI429803|C130021D12Rik|GAKIN	kinesin family member 13B	protein-coding
Diff_Nuc3045	chr12	100448712	100448851	+	0	NA	intron (NM_183186, intron 4 of 5)	intron (NM_183186, intron 4 of 5)	-47763	NR_038130	67639	Mm.87374	NR_038130		4930474N09Rik	-	RIKEN cDNA 4930474N09 gene	ncRNA
Diff_Nuc28094	chr1	23321512	23321651	+	0	NA	Intergenic	Intergenic	23041	NR_029717	723964		NR_029717	ENSMUSG00000065567	Mir30c-2	Mirn30c-2|mir-30c-2	microRNA 30c-2	ncRNA
Diff_Nuc427	chr13	19404882	19405021	+	0	NA	Intergenic	MuRRS-int|LTR|ERV1	82731	NM_024270	76205	Mm.41940	NM_024270	ENSMUSG00000003062	Stard3nl	0610035N01Rik|6530409L22Rik|AW124774|MENTHO	STARD3 N-terminal like	protein-coding
Diff_Nuc16382	chr7	103842052	103842191	+	0	NA	intron (NM_001310760, intron 6 of 32)	MIRc|SINE|MIR	107938	NR_045874	791381	Mm.402112	NR_045874	ENSMUSG00000053049	Gm15413	ENSMUSG00000053049|OTTMUSG00000021246	predicted gene 15413	ncRNA
Diff_Nuc4025	chr11	53691982	53692121	+	0	NA	intron (NM_011396, intron 2 of 9)	Ricksha|DNA|MuDR	13154	NM_011396	20520	Mm.42253	NM_011396	ENSMUSG00000018900	Slc22a5	Lstpl|Octn2|jvs	solute carrier family 22 (organic cation transporter), member 5	protein-coding
Diff_Nuc20518	chr5	104683202	104683341	+	0	NA	Intergenic	Intergenic	-45035	NM_008318	15891	Mm.4987	NM_008318	ENSMUSG00000029306	Ibsp	BSP|BSP II|BSPII|Bsp2	integrin binding sialoprotein	protein-coding
Diff_Nuc4809	chr11	98514402	98514541	+	0	NA	intron (NM_029727, intron 7 of 10)	B2_Mm1a|SINE|B2	6398	NM_029727	76758	Mm.159149	NM_029727	ENSMUSG00000017211	Gsdma2	2200001G21Rik|2210006M16Rik|2210009F20Rik|2210411P14Rik|Gsdm2|Gsdml2	gasdermin A2	protein-coding
Diff_Nuc32723	chr8	28163812	28163951	+	0	NA	exon (NM_054057, exon 8 of 8)	exon (NM_054057, exon 8 of 8)	10854	NM_054057	114863	Mm.277501	NM_054057	ENSMUSG00000031485	Prosc	1700024N20Rik|2200002F22Rik	proline synthetase co-transcribed	protein-coding
Diff_Nuc7605	chr17	32187282	32187421	+	0	NA	intron (NM_001163734, intron 3 of 12)	PB1D10|SINE|Alu	2121	NM_001163734	72462	Mm.102761	NM_028244	ENSMUSG00000058392	Rrp1b	2600005C20Rik|D030064A17|Kiaa0179|mKIAA0179	ribosomal RNA processing 1 homolog B (S. cerevisiae)	protein-coding
Diff_Nuc1318	chr13	86202772	86202911	+	0	NA	Intergenic	ORR1A2|LTR|MaLR	-16441	NM_007749	12867	Mm.378898	NM_007749	ENSMUSG00000017778	Cox7c	COXVIIc|Cox7c1	cytochrome c oxidase subunit VIIc	protein-coding
Diff_Nuc32709	chr8	27315382	27315521	+	0	NA	Intergenic	Lx|LINE|L1	46810	NM_199042	73754	Mm.383241	NM_199042	ENSMUSG00000037214	Thap1	4833431A01Rik|AW490810	THAP domain containing, apoptosis associated protein 1	protein-coding
Diff_Nuc5491	chr10	19146112	19146251	+	0	NA	Intergenic	Intergenic	69836	NM_053008	94222	Mm.156946	NM_053008	ENSMUSG00000045591	Olig3	Bhlhb7|bHLHe20|oligo3	oligodendrocyte transcription factor 3	protein-coding
Diff_Nuc28337	chr1	42506512	42506651	+	0	NA	Intergenic	MIRb|SINE|MIR	245089	NR_027826	66297	Mm.45203	NM_183252	ENSMUSG00000060424	Pantr1	2610017I09Rik|Pou3f3os|linc-Brn1a	POU domain, class 3, transcription factor 3 adjacent noncoding transcript 1	ncRNA
Diff_Nuc18355	chr6	90988982	90989121	+	0	NA	intron (NM_018815, intron 25 of 39)	intron (NM_018815, intron 25 of 39)	77769	NM_018815	54563	Mm.28162	NM_018815	ENSMUSG00000030091	Nup210	9830001L10|AI836801|Pom210|gp190|gp210	nucleoporin 210	protein-coding
Diff_Nuc14399	chr18	36849722	36849861	+	0	NA	intron (NM_172831, intron 6 of 12)	intron (NM_172831, intron 6 of 12)	5788	NM_172831	240216	Mm.252323	NM_172831	ENSMUSG00000044719	E230025N22Rik	EG240216	Riken cDNA E230025N22 gene	protein-coding
Diff_Nuc24742	chr3	107182112	107182251	+	0	NA	Intergenic	Intergenic	-45974	NM_001045807	229700	Mm.27966	NM_001045807	ENSMUSG00000048109	Rbm15	C230088J01Rik|mKIAA1438	RNA binding motif protein 15	protein-coding
Diff_Nuc23533	chr3	21136022	21136161	+	0	NA	Intergenic	MTD|LTR|MaLR	-839483	NM_030732	81004	Mm.202966	NM_030732	ENSMUSG00000027630	Tbl1xr1	8030499H02Rik|A630076E03Rik|AW539987|C21|C230089I12Rik|DC42|Ira1|TBLR1	transducin (beta)-like 1X-linked receptor 1	protein-coding
Diff_Nuc13299	chr19	23670052	23670191	+	0	NA	intron (NM_026188, intron 2 of 5)	intron (NM_026188, intron 2 of 5)	57181	NM_026188	67483	Mm.443287	NM_026188	ENSMUSG00000033053	1700028P14Rik	AV209940	RIKEN cDNA 1700028P14 gene	protein-coding
Diff_Nuc3247	chr12	113832652	113832791	+	0	NA	intron (NM_198411, intron 1 of 22)	intron (NM_198411, intron 1 of 22)	5726	NM_198411	70435	Mm.250193	NM_198411	ENSMUSG00000037679	Inf2	2610204M08Rik|AA589465|AW125550|EG629699	inverted formin, FH2 and WH2 domain containing	protein-coding
Diff_Nuc9488	chr16	69919182	69919321	+	0	NA	Intergenic	Lx8|LINE|L1	-55262	NM_173069	224318	Mm.212743	NM_173069	ENSMUSG00000063163	Speer2	SPEER-2	spermatogenesis associated glutamate (E)-rich protein 2	protein-coding
Diff_Nuc28010	chr1	13778242	13778381	+	0	NA	Intergenic	Intergenic	-1301	NR_004447	433273	Mm.304088	NR_004447	ENSMUSG00000097711	Gm5523	EG433273	glyceraldehyde-3-phosphate dehydrogenase pseudogene	pseudo
Diff_Nuc28641	chr1	60583132	60583271	+	0	NA	intron (NM_001045513, intron 3 of 13)	intron (NM_001045513, intron 3 of 13)	40408	NM_001045513	77300	Mm.440325	NM_001045513	ENSMUSG00000026014	Raph1	9430025M21Rik|C730009O10Rik|Lpd	Ras association (RalGDS/AF-6) and pleckstrin homology domains 1	protein-coding
Diff_Nuc28206	chr1	33502442	33502581	+	0	NA	Intergenic	Intergenic	224128	NM_008922	19076	Mm.27705	NM_008922	ENSMUSG00000026134	Prim2	AI323589	DNA primase, p58 subunit	protein-coding
Diff_Nuc24	chrX	7246762	7246901	+	0	NA	exon (NM_019755, exon 2 of 5)	exon (NM_019755, exon 2 of 5)	1685	NM_019755	18824	Mm.18565	NM_019755	ENSMUSG00000031146	Plp2	mIMA4	proteolipid protein 2	protein-coding
Diff_Nuc33129	chr8	62112582	62112721	+	0	NA	Intergenic	Intergenic	-191795	NR_126087	75017	Mm.60775	NR_126087	ENSMUSG00000110406	4930470O06Rik	-	RIKEN cDNA 4930470O06 gene	ncRNA
Diff_Nuc19733	chr5	45540622	45540761	+	0	NA	intron (NR_131933, intron 5 of 5)	Lx3_Mus|LINE|L1	183251	NR_073013	75783	Mm.218472	NR_073013	ENSMUSG00000062496	4930431F12Rik	-	RIKEN cDNA 4930431F12 gene	ncRNA
Diff_Nuc25996	chr2	39034542	39034681	+	0	NA	intron (NM_178778, intron 2 of 17)	RLTR24|LTR|ERV1	11639	NM_178778	320271	Mm.204836	NM_178778	ENSMUSG00000035236	Scai	9330112M16|A930041I02Rik|AI662729	suppressor of cancer cell invasion	protein-coding
Diff_Nuc24668	chr3	103638052	103638191	+	0	NA	intron (NM_001142960, intron 2 of 3)	intron (NM_001142960, intron 2 of 3)	1502	NM_001142960	229672	Mm.297245	NM_001142959	ENSMUSG00000044165	Bcl2l15	Bfk|Gm566	BCLl2-like 15	protein-coding
Diff_Nuc17845	chr6	52366372	52366511	+	0	NA	Intergenic	Intergenic	-76004	NR_046049	74304	Mm.490579	NR_046049	ENSMUSG00000107895	1700094M24Rik	-	RIKEN cDNA 1700094M24 gene	ncRNA
Diff_Nuc16732	chr7	121374482	121374621	+	0	NA	intron (NM_033370, intron 14 of 21)	L1MB4|LINE|L1	23643	NM_033370	70349	Mm.277024	NM_033370	ENSMUSG00000030754	Copb1	2610019B04Rik	coatomer protein complex, subunit beta 1	protein-coding
Diff_Nuc11947	chr14	46613842	46613981	+	0	NA	Intergenic	Intergenic	-89791	NR_002875	218963	Mm.282093	NR_002875		Gm1821	-	ubiquitin pseudogene	pseudo
Diff_Nuc31927	chr9	96114382	96114521	+	0	NA	intron (NM_178667, intron 2 of 13)	Lx8|LINE|L1	17757	NM_001184706	211586	Mm.17977	NM_178667	ENSMUSG00000032411	Tfdp2	1110029I05Rik|A330080J22Rik|DP-3|DP3	transcription factor Dp 2	protein-coding
Diff_Nuc18449	chr6	97095722	97095861	+	0	NA	intron (NM_175313, intron 3 of 17)	intron (NM_175313, intron 3 of 17)	3086	NM_175313	101351	Mm.116802	NM_175313	ENSMUSG00000035245	Eogt	A130022J15Rik|AI447490|AW214473|AW259391|Aer61	EGF domain-specific O-linked N-acetylglucosamine (GlcNAc) transferase	protein-coding
Diff_Nuc30017	chr1	162420262	162420401	+	0	NA	intron (NM_013862, intron 13 of 20)	RMER4A|LTR|ERVK	87553	NM_001146330	620246	Mm.478780	NM_001146330		Gpr52	EG620246	G protein-coupled receptor 52	protein-coding
Diff_Nuc9552	chr16	75586692	75586831	+	0	NA	promoter-TSS (NM_001252513)	promoter-TSS (NM_001252513)	-455	NM_001252513	320355	Mm.99517	NM_177142	ENSMUSG00000032948	Lipi	D930038D03Rik|lpd1	lipase, member I	protein-coding
Diff_Nuc329	chr13	12534592	12534731	+	0	NA	intron (NM_018886, intron 9 of 9)	intron (NM_018886, intron 9 of 9)	16922	NM_001291055	56048	Mm.474138	NM_018886	ENSMUSG00000057554	Lgals8	1200015E08Rik|AI326142|D13Ertd524e|Lgals-8	lectin, galactose binding, soluble 8	protein-coding
Diff_Nuc21241	chr4	3158782	3158921	+	0	NA	Intergenic	Intergenic	-46399	NM_001167535	100312471	Mm.377218	NM_001167535	ENSMUSG00000095982	Vmn1r3	Gm11778|OTTMUSG00000004181	vomeronasal 1 receptor 3	protein-coding
Diff_Nuc4215	chr11	63978302	63978441	+	0	NA	Intergenic	Intergenic	85385	NR_033780	66456	Mm.124828	NR_033780	ENSMUSG00000087497	2810001G20Rik	AW045514	RIKEN cDNA 2810001G20 gene	ncRNA
Diff_Nuc19820	chr5	53132832	53132971	+	0	NA	promoter-TSS (NM_028744)	promoter-TSS (NM_028744)	88	NM_025951	67073	Mm.248647	NM_025951	ENSMUSG00000029186	Pi4k2b	2610042N09Rik|4933409G22Rik	phosphatidylinositol 4-kinase type 2 beta	protein-coding
Diff_Nuc5474	chr10	18411552	18411691	+	0	NA	intron (NM_001033258, intron 4 of 33)	intron (NM_001033258, intron 4 of 33)	51943	NM_001033258	215821	Mm.40491	NM_001033258	ENSMUSG00000019852	Arfgef3	9630004D11|B930094H20Rik|BIG3|D10Bwg1379e|mKIAA1244	ARFGEF family member 3	protein-coding
Diff_Nuc31315	chr9	57110482	57110621	+	0	NA	promoter-TSS (NM_028820)	promoter-TSS (NM_028820)	-145	NM_028820	74211	Mm.428905	NM_028820	ENSMUSG00000032300	1700017B05Rik	AA682102|D9Ertd278e	RIKEN cDNA 1700017B05 gene	protein-coding
Diff_Nuc29993	chr1	160846832	160846971	+	0	NA	intron (NM_001085376, intron 2 of 21)	intron (NM_001085376, intron 2 of 21)	40668	NM_001085376	23850	Mm.458621	NM_001085376	ENSMUSG00000073530	Pappa2	PAPP-A2|PLAC3|Pappe	pappalysin 2	protein-coding
Diff_Nuc30616	chr9	6975712	6975851	+	0	NA	intron (NM_029851, intron 83 of 88)	L1Md_F|LINE|L1	201265	NM_029851	110350	Mm.237596	NM_029851	ENSMUSG00000047193	Dync2h1	4432416O06Rik|AI448217|D030010H02Rik|D330044F14Rik|DHC1b|DHC2|Dnchc2|b2b414Clo|mKIAA1997	dynein cytoplasmic 2 heavy chain 1	protein-coding
Diff_Nuc9798	chr16	93842832	93842971	+	0	NA	intron (NM_001045529, intron 2 of 16)	intron (NM_001045529, intron 2 of 16)	10535	NM_001045529	338467	Mm.287329	NM_001045529	ENSMUSG00000039456	Morc3	1110051N18Rik|AI452146|BF318192|D16Jhu32e|NXP2|Zcwcc3	microrchidia 3	protein-coding
Diff_Nuc2503	chr12	61449802	61449941	+	0	NA	Intergenic	L1Md_F2|LINE|L1	-1129401	NM_001033156	70611	Mm.311026	NM_001033156	ENSMUSG00000035329	Fbxo33	5730501N20Rik|AI642135	F-box protein 33	protein-coding
Diff_Nuc16796	chr7	126768772	126768911	+	0	NA	intron (NM_054094, intron 2 of 13)	Lx|LINE|L1	7499	NM_054094	117147	Mm.427560	NM_054094	ENSMUSG00000033533	Acsm1	Acas3|Bucs1|Macs	acyl-CoA synthetase medium-chain family member 1	protein-coding
Diff_Nuc32244	chr9	117979492	117979631	+	0	NA	TTS (NM_001286507)	TTS (NM_001286507)	29921	NM_013727	27215	Mm.92705	NM_013727	ENSMUSG00000039285	Azi2	AA410145|AZ2	5-azacytidine induced gene 2	protein-coding
Diff_Nuc900	chr13	52040702	52040841	+	0	NA	Intergenic	B4|SINE|B4	98727	NM_011817	23882	Mm.281298	NM_011817	ENSMUSG00000021453	Gadd45g	AI327420|C86281|CR6|DDIT2|OIG37	growth arrest and DNA-damage-inducible 45 gamma	protein-coding
Diff_Nuc31038	chr9	38893772	38893911	+	0	NA	Intergenic	L1Md_F2|LINE|L1	-7513	NM_146438	258430	Mm.271358	NM_146438	ENSMUSG00000048501	Olfr938	MOR171-25	olfactory receptor 938	protein-coding
Diff_Nuc33632	chr8	95370482	95370621	+	0	NA	intron (NM_008610, intron 11 of 12)	MIR|SINE|MIR	-8698	NM_173014	270084	Mm.21463	NM_173014	ENSMUSG00000033192	Lpcat2	A330042H22|Aytl1|Aytl1a|lpafat1	lysophosphatidylcholine acyltransferase 2	protein-coding
Diff_Nuc23790	chr3	39999477	39999616	+	0	NA	Intergenic	Intergenic	422288	NR_040445	100040882	Mm.272869	NR_040445	ENSMUSG00000037884	1700017G19Rik	-	RIKEN cDNA 1700017G19 gene	ncRNA
Diff_Nuc17164	chr6	3655452	3655591	+	0	NA	intron (NM_001042725, intron 9 of 14)	intron (NM_001042725, intron 9 of 14)	15864	NR_030612	100124468		NR_030612	ENSMUSG00000076357	Mir653	Mirn653|mir-653|mmu-mir-653	microRNA 653	ncRNA
Diff_Nuc27439	chr2	147121332	147121471	+	0	NA	intron (NR_030769, intron 3 of 5)	RSINE1|SINE|B4	67128	NR_040330	99041	Mm.373081	NR_040330		AI646519	Aspax1|OTTMUSG00000015701	expressed sequence AI646519	ncRNA
Diff_Nuc11567	chr14	17521142	17521281	+	0	NA	intron (NM_001289760, intron 2 of 9)	L1Md_F2|LINE|L1	-113221	NM_001289762	218772	Mm.259318	NM_011243	ENSMUSG00000017491	Rarb	A830025K23|Hap|Nr1b2	retinoic acid receptor, beta	protein-coding
Diff_Nuc9273	chr16	52624972	52625111	+	0	NA	Intergenic	Intergenic	-171847	NM_001331110	11658	Mm.288282	NM_009655	ENSMUSG00000022636	Alcam	AI853494|BEN|CD166|DM-GRASP|MuSC|SC1	activated leukocyte cell adhesion molecule	protein-coding
Diff_Nuc18071	chr6	71467572	71467711	+	0	NA	Intergenic	RSINE1|SINE|B4	23770	NM_001308303	22644	Mm.422969	NM_009543	ENSMUSG00000052656	Rnf103	AW146237|AW212918|Zfp103|kf-1	ring finger protein 103	protein-coding
Diff_Nuc20985	chr5	136454552	136454691	+	0	NA	Intergenic	Intergenic	-1354	NM_011776	22788	Mm.1381	NM_011776	ENSMUSG00000004948	Zp3	Zp-3	zona pellucida glycoprotein 3	protein-coding
Diff_Nuc14056	chr18	13119022	13119161	+	0	NA	Intergenic	Intergenic	-11670	NM_008378	16210	Mm.8154	NM_008378	ENSMUSG00000024423	Impact	E430016J11Rik	impact, RWD domain protein	protein-coding
Diff_Nuc26830	chr2	103474772	103474911	+	0	NA	intron (NM_178890, intron 1 of 16)	RMER17D|LTR|ERVK	68374	NM_178890	99382	Mm.35850	NM_178890	ENSMUSG00000032724	Abtb2	AW539457|BPOZ-2	ankyrin repeat and BTB (POZ) domain containing 2	protein-coding
Diff_Nuc19574	chr5	33161492	33161631	+	0	NA	intron (NM_194340, intron 9 of 10)	RMER17A2|LTR|ERVK	-33286	NM_177298	320951	Mm.273765	NM_177298	ENSMUSG00000023452	Pisd	9030221M09Rik	phosphatidylserine decarboxylase	protein-coding
Diff_Nuc11683	chr14	26338242	26338381	+	0	NA	intron (NM_183208, intron 2 of 23)	intron (NM_183208, intron 2 of 23)	-15614	NR_037236	100526533		NR_037236	ENSMUSG00000093081	Mir3075	mir-3075|mmu-mir-3075	microRNA 3075	ncRNA
Diff_Nuc2120	chr12	31989482	31989621	+	0	NA	exon (NM_008482, exon 20 of 33)	exon (NM_008482, exon 20 of 33)	39392	NM_008482	16777	Mm.172674	NM_008482	ENSMUSG00000002900	Lamb1	C77966|C80098|C81607|D130003D08Rik|Lamb-1|Lamb1-1	laminin B1	protein-coding
Diff_Nuc20543	chr5	106320802	106320941	+	0	NA	intron (NR_030777, intron 4 of 9)	B1_Mur1|SINE|Alu	15284	NM_018759	54367	Mm.248876	NM_018759	ENSMUSG00000029290	Zfp326	5730470H14Rik|ZAN75|Znf326	zinc finger protein 326	protein-coding
Diff_Nuc17089	chr7	148415512	148415651	+	0	NA	intron (NM_001081118, intron 1 of 17)	intron (NM_001081118, intron 1 of 17)	894	NM_001081118	101471	Mm.248656	NM_207211	ENSMUSG00000038611	Phrf1	AA673488	PHD and ring finger domains 1	protein-coding
Diff_Nuc1874	chr12	6285032	6285171	+	0	NA	Intergenic	L1_Mm|LINE|L1	901793	NR_015579	72669	Mm.10434	NM_028318		2810032G03Rik	AI461720	RIKEN cDNA 2810032G03 gene	ncRNA
Diff_Nuc22824	chr4	126759542	126759681	+	0	NA	intron (NR_104366, intron 1 of 15)	ORR1E|LTR|MaLR	4984	NM_001285887	100177	Mm.276096	NM_177462	ENSMUSG00000042408	Zmym6	9330177P20Rik|AI593204|AI661340|D4Wsu24e|Zfp258	zinc finger, MYM-type 6	protein-coding
Diff_Nuc4975	chr11	106541212	106541351	+	0	NA	intron (NM_008816, intron 12 of 14)	intron (NM_008816, intron 12 of 14)	35314	NM_001305158	18613	Mm.343951	NM_008816	ENSMUSG00000020717	Pecam1	C85791|Cd31|PECAM-1|Pecam	platelet/endothelial cell adhesion molecule 1	protein-coding
Diff_Nuc26706	chr2	94163192	94163331	+	0	NA	exon (NM_183106, exon 22 of 25)	exon (NM_183106, exon 22 of 25)	-61705	NR_030431	735259		NR_030431	ENSMUSG00000076335	Mir670	Mirn670|mir-670|mmu-mir-670	microRNA 670	ncRNA
Diff_Nuc12843	chr14	114201512	114201651	+	0	NA	Intergenic	L1MC4a|LINE|L1	-1029606	NR_045661	75822	Mm.410813	NR_045661		4930524C18Rik	-	RIKEN cDNA 4930524C18 gene	ncRNA
Diff_Nuc6498	chr10	87674872	87675011	+	0	NA	intron (NM_026070, intron 2 of 6)	intron (NM_026070, intron 2 of 6)	11099	NM_027487	67282	Mm.208465	NM_026070	ENSMUSG00000020056	Washc3	2900091E11Rik|5730495F03Rik|Ccdc53	WASH complex subunit 3	protein-coding
Diff_Nuc32672	chr8	26066832	26066971	+	0	NA	intron (NM_001270996, intron 20 of 21)	intron (NM_001270996, intron 20 of 21)	-7625	NM_153397	353188	Mm.269223	NM_153397	ENSMUSG00000037437	Adam32	-	a disintegrin and metallopeptidase domain 32	protein-coding
Diff_Nuc8440	chr17	88624932	88625071	+	0	NA	Intergenic	ORR1B1|LTR|MaLR	100149	NM_001190356	225058	Mm.312053	NM_001190356		Gm4832	EG225058	predicted gene 4832	protein-coding
Diff_Nuc33791	chr8	107309272	107309411	+	0	NA	Intergenic	Intergenic	-46203	NM_198171	234669	Mm.443387	NM_198171	ENSMUSG00000050097	Ces2b	-	carboxyesterase 2B	protein-coding
Diff_Nuc1208	chr13	77983412	77983551	+	0	NA	intron (NR_028109, intron 6 of 10)	L1_Mur3|LINE|L1	135530	NM_001163419	68675	Mm.343005	NM_138312	ENSMUSG00000064138	Fam172a	1110033M05Rik|2610318O14Rik|53-E6|9430037D06Rik|AF064782|pEN87	family with sequence similarity 172, member A	protein-coding
Diff_Nuc7751	chr17	40200512	40200651	+	0	NA	Intergenic	Intergenic	113116	NM_001256051	100126775	Mm.471585	NM_001256051	ENSMUSG00000095886	Esp38	Gm21946	exocrine gland secreted peptide 38	protein-coding
Diff_Nuc6937	chr10	118304292	118304431	+	0	NA	intron (NM_001014390, intron 2 of 2)	intron (NM_001014390, intron 2 of 2)	1598	NM_001014390	69181	Mm.45565	NM_001014390	ENSMUSG00000028630	Dyrk2	1810038L18Rik	dual-specificity tyrosine-(Y)-phosphorylation regulated kinase 2	protein-coding
Diff_Nuc8211	chr17	75020242	75020381	+	0	NA	intron (NM_007566, intron 33 of 72)	L1_Mus1|LINE|L1	92676	NM_007566	12211	Mm.442564	NM_007566	ENSMUSG00000024073	Birc6	A430032G04Rik|A430040A19Rik|AA501170|Bruce|D630005A10Rik|mKIAA1289	baculoviral IAP repeat-containing 6	protein-coding
Diff_Nuc9270	chr16	52320362	52320501	+	0	NA	intron (NM_001331110, intron 1 of 14)	Lx9|LINE|L1	132763	NM_009655	11658	Mm.288282	NM_009655	ENSMUSG00000022636	Alcam	AI853494|BEN|CD166|DM-GRASP|MuSC|SC1	activated leukocyte cell adhesion molecule	protein-coding
Diff_Nuc21489	chr4	25670822	25670961	+	0	NA	intron (NM_010243, intron 1 of 2)	Lx9|LINE|L1	56259	NM_010243	14348	Mm.39101	NM_010243	ENSMUSG00000055373	Fut9	AI746471|AU067636|mFUT9|mFuc-TIX	fucosyltransferase 9	protein-coding
Diff_Nuc5235	chr11	120967072	120967211	+	0	NA	Intergenic	Intergenic	12850	NM_027622	70956	Mm.158506	NM_027622	ENSMUSG00000039337	Tex19.2	4921530G04Rik|Tex19b	testis expressed gene 19.2	protein-coding
Diff_Nuc16618	chr7	116581332	116581471	+	0	NA	intron (NM_054103, intron 1 of 13)	L2|LINE|L2	1166	NM_054103	117229	Mm.389950	NM_054103	ENSMUSG00000031027	Stk33	4921505G21Rik|AW061264	serine/threonine kinase 33	protein-coding
Diff_Nuc27755	chr2	168468052	168468191	+	0	NA	intron (NM_015731, intron 23 of 27)	RSINE1|SINE|B4	-1862	NR_105971	102466784		NR_105971	ENSMUSG00000105496	Mir7004	mmu-mir-7004	microRNA 7004	ncRNA
Diff_Nuc11910	chr14	43539672	43539811	+	0	NA	Intergenic	B1F2|SINE|Alu	154368	NM_001244671	100042055	Mm.429109	NM_001244671	ENSMUSG00000095226	Gm10377	ENSMUSG00000072606	predicted gene 10377	protein-coding
Diff_Nuc31826	chr9	86926322	86926461	+	0	NA	intron (NM_024195, intron 3 of 15)	intron (NM_024195, intron 3 of 15)	9527	NM_024195	266690	Mm.30166	NM_024195	ENSMUSG00000032872	Cyb5r4	2810034J18Rik|B5+B5R|C79736|Cb5cb5r|Ncb5or|b5/b5r|b5b5r	cytochrome b5 reductase 4	protein-coding
Diff_Nuc19191	chr6	148994762	148994901	+	0	NA	intron (NM_177192, intron 4 of 20)	MT2A|LTR|ERVL	55371	NM_177192	320560	Mm.426874	NM_177192	ENSMUSG00000030313	Dennd5b	9330160C06Rik|AI852444|D030011O10Rik|ENSMUSG00000072657|Gm17524	DENN/MADD domain containing 5B	protein-coding
Diff_Nuc20132	chr5	77155812	77155951	+	0	NA	Intergenic	Intergenic	-113743	NM_001163793	320827	Mm.101504	NM_001163793	ENSMUSG00000036377	C530008M17Rik	2810489J07Rik|4930529A19Rik|4931405B09Rik|Kiaa1211|mKIAA1211	RIKEN cDNA C530008M17 gene	protein-coding
Diff_Nuc15068	chr18	79425152	79425291	+	0	NA	Intergenic	L1MC4|LINE|L1	-119091	NM_053099	240427	Mm.312871	NM_053099	ENSMUSG00000024548	Setbp1	C130092E12|Seb|mKIAA0437	SET binding protein 1	protein-coding
Diff_Nuc14691	chr18	55483012	55483151	+	0	NA	Intergenic	Intergenic	-333247	NM_175751	269023	Mm.192984	NM_175751	ENSMUSG00000052713	Zfp608	4932417D18Rik|D430007A19Rik|Znf608	zinc finger protein 608	protein-coding
Diff_Nuc13691	chr19	47878762	47878901	+	0	NA	intron (NM_027559, intron 8 of 37)	intron (NM_027559, intron 8 of 37)	33020	NM_027559	100048534	Mm.29457	NM_027559	ENSMUSG00000044948	Cfap43	4632415N18Rik|4930428C11Rik|4930463G05Rik|AI429486|D19Ertd652e|Wdr96	cilia and flagella associated protein 43	protein-coding
Diff_Nuc17696	chr6	39885052	39885191	+	0	NA	Intergenic	Intergenic	-124186	NM_001010930	14548	Mm.377071	NM_010270	ENSMUSG00000029918	Mrps33	AI841153|CGI-139|Gdap3|MRP-S33|PTD003	mitochondrial ribosomal protein S33	protein-coding
Diff_Nuc12783	chr14	108092432	108092571	+	0	NA	Intergenic	Lx3C|LINE|L1	-1206764	NR_045938	73631	Mm.48862	NR_045938	ENSMUSG00000099794	1700128A07Rik	-	RIKEN cDNA 1700128A07 gene	ncRNA
Diff_Nuc8368	chr17	84055652	84055791	+	0	NA	Intergenic	Intergenic	-24486	NM_153512	225030	Mm.223506	NM_153512	ENSMUSG00000045053	Kcng3	KV6.3|Kv10.1a|Kv10.1b	potassium voltage-gated channel, subfamily G, member 3	protein-coding
Diff_Nuc550	chr13	28616752	28616891	+	0	NA	intron (NR_045053, intron 7 of 8)	intron (NR_045053, intron 7 of 8)	185921	NR_105787	102466635		NR_105787	ENSMUSG00000099158	Mir6368	Gm27800|mmu-mir-6368	microRNA 6368	ncRNA
Diff_Nuc20684	chr5	116857572	116857711	+	0	NA	TTS (NM_030704)	TTS (NM_030704)	15232	NM_030704	80888	Mm.21549	NM_030704	ENSMUSG00000041548	Hspb8	AU018630|AW413033|Cryac|D5Ucla4|E2IG1|H11|H11K|HSP20-like|HSP22	heat shock protein 8	protein-coding
Diff_Nuc9094	chr16	39969742	39969881	+	0	NA	Intergenic	RLTR11A2|LTR|ERVK	1067353	NM_170599	207683	Mm.245564	NM_170599	ENSMUSG00000022790	Igsf11	1700025L02Rik|BT-IgSF|Igsf13	immunoglobulin superfamily, member 11	protein-coding
Diff_Nuc6873	chr10	114614592	114614731	+	0	NA	intron (NM_173391, intron 4 of 10)	MIR|SINE|MIR	7417	NM_173391	216343	Mm.31597	NM_173391	ENSMUSG00000006764	Tph2	AU043594|Ntph	tryptophan hydroxylase 2	protein-coding
Diff_Nuc2055	chr12	25325932	25326071	+	0	NA	Intergenic	MER2|DNA|MER2_type	-10235	NM_178357	194655	Mm.9616	NM_178357	ENSMUSG00000020653	Klf11	9830142A17|D12Ertd427e|Tieg2|Tieg2b|Tieg3	Kruppel-like factor 11	protein-coding
Diff_Nuc834	chr13	48667342	48667481	+	0	NA	Intergenic	Intergenic	-33770	NR_029725	387244		NR_029725	ENSMUSG00000065421	Mirlet7a-1	Let-7a|Mirnlet7a|Mirnlet7a-1|let-7a-1	microRNA let7a-1	ncRNA
Diff_Nuc19616	chr5	35227532	35227671	+	0	NA	intron (NM_010414, intron 49 of 66)	intron (NM_010414, intron 49 of 66)	-30963	NM_207277	403174	Mm.291225	NM_207277	ENSMUSG00000051246	Msantd1	A930005I04Rik|Gm144	Myb/SANT-like DNA-binding domain containing 1	protein-coding
Diff_Nuc1411	chr13	91982152	91982291	+	0	NA	Intergenic	L1Md_F2|LINE|L1	34269	NM_198415	76722	Mm.316438	NM_198415	ENSMUSG00000021622	Ckmt2	2300008A19Rik|ScCKmit	creatine kinase, mitochondrial 2	protein-coding
Diff_Nuc26980	chr2	117748072	117748211	+	0	NA	intron (NR_126479, intron 8 of 9)	intron (NR_126479, intron 8 of 9)	100477	NR_040631	73938	Mm.399107	NR_040631	ENSMUSG00000086221	4930412B13Rik	-	RIKEN cDNA 4930412B13 gene	ncRNA
Diff_Nuc20522	chr5	104882832	104882971	+	0	NA	Intergenic	Intergenic	-5575	NM_008861	18764	Mm.6442	NM_008861	ENSMUSG00000034462	Pkd2	C030034P18Rik|PC2|TRPP2	polycystic kidney disease 2	protein-coding
Diff_Nuc25945	chr2	35894722	35894861	+	0	NA	intron (NM_026703, intron 3 of 3)	intron (NM_026703, intron 3 of 3)	10021	NM_026703	68375	Mm.19834	NM_026703	ENSMUSG00000026895	Ndufa8	0610033L03Rik|AW261656	NADH dehydrogenase (ubiquinone) 1 alpha subcomplex, 8	protein-coding
Diff_Nuc18771	chr6	120289512	120289651	+	0	NA	intron (NM_026028, intron 5 of 11)	B1_Mur1|SINE|Alu	17906	NM_026028	67200	Mm.45767	NM_026028	ENSMUSG00000030177	Ccdc77	2400002C23Rik|2700091N06Rik|AV168274	coiled-coil domain containing 77	protein-coding
Diff_Nuc29991	chr1	160671762	160671901	+	0	NA	intron (NM_001085376, intron 20 of 21)	intron (NM_001085376, intron 20 of 21)	215738	NM_001085376	23850	Mm.458621	NM_001085376	ENSMUSG00000073530	Pappa2	PAPP-A2|PLAC3|Pappe	pappalysin 2	protein-coding
Diff_Nuc15739	chr7	54190902	54191041	+	0	NA	intron (NM_001040695, intron 9 of 11)	B3|SINE|B2	-15671	NM_021884	22088	Mm.241334	NM_021884	ENSMUSG00000014402	Tsg101	AI255943|CC2	tumor susceptibility gene 101	protein-coding
Diff_Nuc23903	chr3	50872352	50872491	+	0	NA	Intergenic	L1MA5|LINE|L1	-155948	NM_009834	12457	Mm.86541	NM_009834	ENSMUSG00000023087	Noct	AU043840|Ccr4|Ccrn4l	nocturnin	protein-coding
Diff_Nuc9575	chr16	77066752	77066891	+	0	NA	intron (NM_013918, intron 8 of 23)	intron (NM_013918, intron 8 of 23)	52507	NM_013918	30940	Mm.40986	NM_013918	ENSMUSG00000022867	Usp25	-	ubiquitin specific peptidase 25	protein-coding
Diff_Nuc25897	chr2	32759422	32759561	+	0	NA	intron (NM_146119, intron 1 of 13)	intron (NM_146119, intron 1 of 13)	27837	NM_146119	227737	Mm.301646	NM_146119	ENSMUSG00000026796	Fam129b	9130404D14Rik	family with sequence similarity 129, member B	protein-coding
Diff_Nuc9285	chr16	53541462	53541601	+	0	NA	Intergenic	Intergenic	-725674	NR_040495	73820	Mm.60493	NR_040495		4930404A05Rik	-	RIKEN cDNA 4930404A05 gene	ncRNA
Diff_Nuc5734	chr10	37663702	37663841	+	0	NA	Intergenic	ORR1A2|LTR|MaLR	-231809	NR_131035	75877	Mm.402094	NR_131035	ENSMUSG00000111234	4930591E09Rik	-	RIKEN cDNA 4930591E09 gene	ncRNA
Diff_Nuc26265	chr2	59830602	59830741	+	0	NA	intron (NM_001001182, intron 4 of 35)	intron (NM_001001182, intron 4 of 35)	-110008	NM_028118	72137	Mm.288734	NM_028118	ENSMUSG00000026988	Wdsub1	1700048E19Rik|2610014F08Rik	WD repeat, SAM and U-box domain containing 1	protein-coding
Diff_Nuc23038	chr4	138073402	138073541	+	0	NA	Intergenic	Intergenic	62408	NM_025451	66259	Mm.41603	NM_025451	ENSMUSG00000046447	Camk2n1	1810006K23Rik|AI848599|AI891706	calcium/calmodulin-dependent protein kinase II inhibitor 1	protein-coding
Diff_Nuc10427	chr15	42530512	42530651	+	0	NA	Intergenic	Intergenic	-22058	NM_009640	11600	Mm.309336	NM_009640	ENSMUSG00000022309	Angpt1	1110046O21Rik|Ang-1|Ang1	angiopoietin 1	protein-coding
Diff_Nuc17645	chr6	37217702	37217841	+	0	NA	intron (NM_001347104, intron 1 of 32)	intron (NM_001347104, intron 1 of 32)	32205	NM_001081206	320127	Mm.119469	NM_001081206	ENSMUSG00000038665	Dgki	C130010K08Rik	diacylglycerol kinase, iota	protein-coding
Diff_Nuc13003	chr19	3776672	3776811	+	0	NA	intron (NM_001167884, intron 3 of 13)	intron (NM_001167884, intron 3 of 13)	9320	NM_001167885	225888	Mm.278578	NM_144871	ENSMUSG00000045098	Kmt5b	AA117471|C630029K18Rik|Suv4-20h1|Suv420h1	lysine methyltransferase 5B	protein-coding
Diff_Nuc11421	chr15	102063822	102063961	+	0	NA	Intergenic	B2_Mm1t|SINE|B2	-1525	NM_013566	16421	Mm.58	NM_013566	ENSMUSG00000001281	Itgb7	Ly69	integrin beta 7	protein-coding
Diff_Nuc31138	chr9	45316992	45317131	+	0	NA	intron (NM_001081270, intron 3 of 32)	B3A|SINE|B2	-77746	NR_040732	74602	Mm.394117	NR_040732	ENSMUSG00000097074	4833428L15Rik	-	RIKEN cDNA 4833428L15 gene	ncRNA
Diff_Nuc24994	chr3	125216712	125216851	+	0	NA	intron (NM_022565, intron 2 of 13)	intron (NM_022565, intron 2 of 13)	109772	NM_022565	64580	Mm.444289	NM_022565	ENSMUSG00000027971	Ndst4	4930439H17Rik	N-deacetylase/N-sulfotransferase (heparin glucosaminyl) 4	protein-coding
Diff_Nuc8439	chr17	88611392	88611531	+	0	NA	Intergenic	Intergenic	86609	NM_001190356	225058	Mm.312053	NM_001190356		Gm4832	EG225058	predicted gene 4832	protein-coding
Diff_Nuc29030	chr1	87427462	87427601	+	0	NA	Intergenic	B4A|SINE|B4	67854	NM_030194	109032	Mm.335802	NM_030194	ENSMUSG00000070034	Sp110	5031415C07Rik|52kDa|5830484A20Rik|ENSMUSG00000075603|Ifi75|Ipr1	Sp110 nuclear body protein	protein-coding
Diff_Nuc15536	chr7	31814742	31814881	+	0	NA	Intergenic	Intergenic	10525	NR_106017	102465635		NR_106017	ENSMUSG00000098783	Mir7050	Gm27578|mmu-mir-7050	microRNA 7050	ncRNA
Diff_Nuc8826	chr16	24248852	24248991	+	0	NA	Intergenic	Intergenic	-144515	NM_178665	210126	Mm.209385	NM_178665	ENSMUSG00000033306	Lpp	9430020K16Rik|AA959454|AU024130|B130055L10Rik|C79715|D630048H16	LIM domain containing preferred translocation partner in lipoma	protein-coding
Diff_Nuc5608	chr10	27237302	27237441	+	0	NA	intron (NM_008481, intron 1 of 63)	intron (NM_008481, intron 1 of 63)	99377	NM_008481	16773	Mm.256087	NM_008481	ENSMUSG00000019899	Lama2	5830440B04|dy|mKIAA4087|mer|merosin	laminin, alpha 2	protein-coding
Diff_Nuc9233	chr16	49941072	49941211	+	0	NA	Intergenic	Intergenic	-39432	NR_045001	628951	Mm.428032	NR_045001		Gm6936	-	predicted gene 6936	ncRNA
Diff_Nuc30356	chr1	183755882	183756021	+	0	NA	intron (NM_133815, intron 6 of 13)	B1_Mm|SINE|Alu	16581	NM_133815	98386	Mm.4538	NM_133815	ENSMUSG00000004880	Lbr	AI505894|ic	lamin B receptor	protein-coding
Diff_Nuc4164	chr11	61166012	61166151	+	0	NA	intron (NM_026183, intron 14 of 16)	intron (NM_026183, intron 14 of 16)	-9719	NM_001033542	380701	Mm.340166	NM_001033542	ENSMUSG00000069855	Slc47a2	4933429E10Rik	solute carrier family 47, member 2	protein-coding
Diff_Nuc28611	chr1	59446682	59446821	+	0	NA	Intergenic	Intergenic	-92240	NM_008057	14369	Mm.297906	NM_008057	ENSMUSG00000041075	Fzd7	Fz7	frizzled class receptor 7	protein-coding
Diff_Nuc22352	chr4	94721482	94721621	+	0	NA	Intergenic	MLT1I|LTR|MaLR	-2638	NM_010591	16476	Mm.275071	NM_010591	ENSMUSG00000052684	Jun	AP-1|Junc|c-jun	jun proto-oncogene	protein-coding
Diff_Nuc15842	chr7	63395602	63395741	+	0	NA	intron (NM_010418, intron 35 of 92)	PB1D9|SINE|Alu	90146	NM_010418	15204	Mm.20929	NM_010418	ENSMUSG00000030451	Herc2	D15F32S1h|D7H15F32S1|D7H15F37S1|jdf2|mKIAA0393|rjs	HECT and RLD domain containing E3 ubiquitin protein ligase 2	protein-coding
Diff_Nuc22936	chr4	133363532	133363671	+	0	NA	Intergenic	Intergenic	-54075	NM_001080819	93760	Mm.22478	NM_001080819	ENSMUSG00000007880	Arid1a	1110030E03Rik|BAF250a|Osa1|Smarcf1	AT rich interactive domain 1A (SWI-like)	protein-coding
Diff_Nuc10035	chr15	13532532	13532671	+	0	NA	Intergenic	Lx|LINE|L1	-429171	NM_007666	12563	Mm.57048	NM_007666	ENSMUSG00000039385	Cdh6	cad6	cadherin 6	protein-coding
Diff_Nuc4847	chr11	100584602	100584741	+	0	NA	intron (NM_024456, intron 1 of 5)	RLTR15|LTR|ERVK	9507	NM_029307	75482	Mm.46175	NM_029307	ENSMUSG00000017832	Hspb9	1700007H20Rik	heat shock protein, alpha-crystallin-related, B9	protein-coding
Diff_Nuc3948	chr11	48850932	48851071	+	0	NA	TTS (NM_173434).2	TTS (NM_173434).2	-13234	NM_010999	18356	Mm.24769	NM_010999	ENSMUSG00000040328	Olfr56	IF7|MOR276-1	olfactory receptor 56	protein-coding
Diff_Nuc2133	chr12	32626042	32626181	+	0	NA	intron (NM_177993, intron 2 of 8)	intron (NM_177993, intron 2 of 8)	9289	NM_177993	73389	Mm.390461	NM_153198	ENSMUSG00000002996	Hbp1	1700058O05Rik|BE629963|C330012F01Rik|C86454	high mobility group box transcription factor 1	protein-coding
Diff_Nuc9050	chr16	37067322	37067461	+	0	NA	intron (NM_029977, intron 18 of 29)	intron (NM_029977, intron 18 of 29)	55519	NM_001159369	77782	Mm.259114	NM_029977	ENSMUSG00000034206	Polq	A430110D14Rik	polymerase (DNA directed), theta	protein-coding
Diff_Nuc751	chr13	43514952	43515091	+	0	NA	exon (NM_019930, exon 9 of 14)	exon (NM_019930, exon 9 of 14)	21276	NM_023554	70078	Mm.439927	NM_023554	ENSMUSG00000063200	Nol7	2210008F15Rik|5730556I21Rik|NOP27|RARG-1	nucleolar protein 7	protein-coding
Diff_Nuc2474	chr12	58027312	58027451	+	0	NA	intron (NM_172577, intron 2 of 9)	intron (NM_172577, intron 2 of 9)	230923	NM_011041	18511	Mm.5035	NM_011041	ENSMUSG00000001497	Pax9	Pax-9	paired box 9	protein-coding
Diff_Nuc5853	chr10	46148382	46148521	+	0	NA	Intergenic	Intergenic	620941	NR_040624	320363	Mm.123343	NR_040624	ENSMUSG00000110874	D030045P18Rik	-	RIKEN cDNA D030045P18 gene	ncRNA
Diff_Nuc2249	chr12	41137772	41137911	+	0	NA	intron (NM_172575, intron 1 of 12)	L1Md_F2|LINE|L1	34536	NM_172575	246196	Mm.26852	NM_172575	ENSMUSG00000055917	Zfp277	2410017E24Rik|NIRF4	zinc finger protein 277	protein-coding
Diff_Nuc30172	chr1	172792652	172792791	+	0	NA	intron (NM_001081304, intron 1 of 15)	intron (NM_001081304, intron 1 of 15)	5181	NM_001081304	226641	Mm.377046	NM_001081304	ENSMUSG00000026663	Atf6	9130025P16Rik|9630036G24|AA789574|Atf6alpha|ESTM49	activating transcription factor 6	protein-coding
Diff_Nuc1623	chr13	105209402	105209541	+	0	NA	intron (NM_001081020, intron 15 of 24)	B2_Mm2|SINE|B2	131556	NM_001081020	108154	Mm.208125	NM_175496	ENSMUSG00000046169	Adamts6	A930019D11Rik|ADAM-TS6|b2b1879.1Clo|b2b2029Clo|b2b2182Clo|b2b2187.1Clo|b2b2228Clo	a disintegrin-like and metallopeptidase (reprolysin type) with thrombospondin type 1 motif, 6	protein-coding
Diff_Nuc8	chrY	2787082	2787221	+	0	NA	Intergenic	Intergenic	399893	NM_001270512	100041505	Mm.491824	NM_001270512	ENSMUSG00000096520	Gm3376	Rbmy1b	predicted gene 3376	protein-coding
Diff_Nuc26999	chr2	118948872	118949011	+	0	NA	intron (NM_011234, intron 4 of 9)	intron (NM_011234, intron 4 of 9)	10388	NM_011234	19361	Mm.330492	NM_011234	ENSMUSG00000027323	Rad51	AV304093|Rad51a|Reca	RAD51 recombinase	protein-coding
Diff_Nuc29133	chr1	92547402	92547541	+	0	NA	Intergenic	Intergenic	47471	NM_133805	108679	Mm.119177	NM_133805	ENSMUSG00000034432	Cops8	9430009J09Rik|AA408242|Csn8|Sgn8	COP9 signalosome subunit 8	protein-coding
Diff_Nuc19173	chr6	147973102	147973241	+	0	NA	Intergenic	L1MCa|LINE|L1	-22767	NM_001347516	330450	Mm.447274	NM_178797	ENSMUSG00000030303	Far2	A230046P18|AW048109|BC055759|Mlstd1	fatty acyl CoA reductase 2	protein-coding
Diff_Nuc32987	chr8	47485502	47485641	+	0	NA	Intergenic	Intergenic	-70820	NM_007981	14081	Mm.210323	NM_007981	ENSMUSG00000018796	Acsl1	Acas|Acas1|Acs|FACS|Facl2|LACS 1|LACS1	acyl-CoA synthetase long-chain family member 1	protein-coding
Diff_Nuc22595	chr4	111344482	111344621	+	0	NA	Intergenic	Intergenic	-48064	NM_026470	67946	Mm.275526	NM_026470	ENSMUSG00000034401	Spata6	1700062C23Rik|AI790763|Hash|KRP|Mash	spermatogenesis associated 6	protein-coding
Diff_Nuc10098	chr15	17848132	17848271	+	0	NA	Intergenic	Lx5|LINE|L1	451181	NR_045711	70886	Mm.399021	NR_045711		4921515E04Rik	-	RIKEN cDNA 4921515E04 gene	ncRNA
Diff_Nuc785	chr13	45551712	45551851	+	0	NA	Intergenic	L3|LINE|CR1	-51032	NM_025508	66355	Mm.290802	NM_025508	ENSMUSG00000000253	Gmpr	2310004P21Rik|AV028449|GMPR 1	guanosine monophosphate reductase	protein-coding
Diff_Nuc29395	chr1	111348882	111349021	+	0	NA	Intergenic	MTD|LTR|MaLR	-530526	NM_001316743	241201	Mm.213407	NM_172853	ENSMUSG00000026312	Cdh7	9330156F07Rik|CDH7L1	cadherin 7, type 2	protein-coding
Diff_Nuc5325	chr10	7369202	7369341	+	0	NA	intron (NM_001347228, intron 1 of 7)	intron (NM_001347228, intron 1 of 7)	-13898	NR_030698	320642	Mm.398806	NR_030698		A630066F11Rik	-	RIKEN cDNA A630066F11 gene	ncRNA
Diff_Nuc19913	chr5	60232532	60232671	+	0	NA	Intergenic	B2_Mm2|SINE|B2	144640	NR_040683	71057	Mm.50817	NR_040682	ENSMUSG00000106013	4933402J10Rik	-	RIKEN cDNA 4933402J10 gene	ncRNA
Diff_Nuc13948	chr18	7162852	7162991	+	0	NA	intron (NM_001081393, intron 18 of 20)	L1VL4|LINE|L1	134978	NM_001081393	74934	Mm.107918	NM_001081393	ENSMUSG00000061802	Armc4	4930463I21Rik|b2b227.1Clo|b2b643Clo	armadillo repeat containing 4	protein-coding
Diff_Nuc16082	chr7	80956712	80956851	+	0	NA	intron (NR_077222, intron 1 of 3)	intron (NR_077222, intron 1 of 3)	4608	NR_077222	100579147	Mm.109205	NR_077222	ENSMUSG00000074067	Gm10619	4932443D20|ENSMUSG00000074067	predicted gene 10619	ncRNA
Diff_Nuc33892	chr8	113750762	113750901	+	0	NA	intron (NM_009149, intron 1 of 25)	B3A|SINE|B2	32271	NM_009149	20340	Mm.276271	NM_009149	ENSMUSG00000003316	Glg1	AI593353|AW537898|CFR|CFR-1|ESL-1|MG-160|MG160|Selel	golgi apparatus protein 1	protein-coding
Diff_Nuc28311	chr1	40080702	40080841	+	0	NA	intron (NM_001252202, intron 28 of 29)	intron (NM_001252202, intron 28 of 29)	-60842	NM_010555	16178	Mm.1349	NM_010555	ENSMUSG00000026073	Il1r2	CD121b|Il1r-2	interleukin 1 receptor, type II	protein-coding
Diff_Nuc17760	chr6	46111332	46111471	+	0	NA	intron (NM_001004357, intron 8 of 23)	intron (NM_001004357, intron 8 of 23)	-1082994	NM_025771	66797	Mm.440084	NM_025771	ENSMUSG00000039419	Cntnap2	5430425M22Rik|Caspr2|mKIAA0868	contactin associated protein-like 2	protein-coding
Diff_Nuc8867	chr16	26968832	26968971	+	0	NA	promoter-TSS (NM_001285916)	promoter-TSS (NM_001285916)	-570	NM_001285916	239789	Mm.326909	NM_001013761	ENSMUSG00000068428	Gmnc	Gemc1|Gm1778|Gm606	geminin coiled-coil domain containing	protein-coding
Diff_Nuc27768	chr2	169522972	169523111	+	0	NA	intron (NM_080455, intron 1 of 1)	MER20|DNA|MER1_type	63895	NM_080455	228911	Mm.315789	NM_080455	ENSMUSG00000047907	Tshz2	2900073F20Rik|B830045G17|Mtsh2|Sdccag33l|Tsh2|Zfp218|mKIAA4248|teashirt2	teashirt zinc finger family member 2	protein-coding
Diff_Nuc17078	chr7	147326322	147326461	+	0	NA	intron (NM_199301, intron 3 of 10)	intron (NM_199301, intron 3 of 10)	2928	NM_199301	212508	Mm.296088	NM_199301	ENSMUSG00000039018	Mtg1	Gm169|Gtpbp7	mitochondrial ribosome-associated GTPase 1	protein-coding
Diff_Nuc15871	chr7	65957672	65957811	+	0	NA	intron (NM_009728, intron 1 of 20)	RSINE1|SINE|B4	44169	NM_009728	11982	Mm.135129	NM_009728	ENSMUSG00000025324	Atp10a	Atp10c|pfatp	ATPase, class V, type 10A	protein-coding
Diff_Nuc26435	chr2	73256222	73256361	+	0	NA	Intergenic	Intergenic	-31754	NM_001276444	68526	Mm.451014	NM_001080707	ENSMUSG00000041762	Gpr155	1110017O10Rik|DEPDC3|F730029F15Rik|PGR22	G protein-coupled receptor 155	protein-coding
Diff_Nuc19565	chr5	32717532	32717671	+	0	NA	Intergenic	ID_B1|SINE|B4	-43742	NM_172707	19046	Mm.241931	NM_172707	ENSMUSG00000014956	Ppp1cb	1200010B19	protein phosphatase 1, catalytic subunit, beta isoform	protein-coding
Diff_Nuc1328	chr13	86799072	86799211	+	0	NA	Intergenic	Lx2|LINE|L1	-612741	NM_007749	12867	Mm.378898	NM_007749	ENSMUSG00000017778	Cox7c	COXVIIc|Cox7c1	cytochrome c oxidase subunit VIIc	protein-coding
Diff_Nuc22843	chr4	128673852	128673991	+	0	NA	intron (NR_138540, intron 1 of 6)	PB1D10|SINE|Alu	3453	NM_001033966	11637	Mm.29460	NM_016895	ENSMUSG00000028792	Ak2	Ak-2|D4Ertd220e	adenylate kinase 2	protein-coding
Diff_Nuc33155	chr8	64441152	64441291	+	0	NA	intron (NM_001293783, intron 12 of 37)	ORR1A4-int|LTR|MaLR	34337	NM_001293783	234311	Mm.275233	NM_144928	ENSMUSG00000037921	Ddx60	9830118M07	DEAD (Asp-Glu-Ala-Asp) box polypeptide 60	protein-coding
Diff_Nuc5152	chr11	116933582	116933721	+	0	NA	Intergenic	Intergenic	-4446	NR_027059	76972	Mm.309167	NR_027059	ENSMUSG00000086859	Snhg20	2810008D09Rik	small nucleolar RNA host gene 20	ncRNA
Diff_Nuc3150	chr12	107041942	107042081	+	0	NA	intron (NM_011112, intron 3 of 21)	intron (NM_011112, intron 3 of 21)	19104	NM_001347440	18789	Mm.255877	NM_011112	ENSMUSG00000021111	Papola	Pap|PapIII|Plap	poly (A) polymerase alpha	protein-coding
Diff_Nuc12728	chr14	103694912	103695051	+	0	NA	intron (NM_207215, intron 7 of 84)	ORR1D1|LTR|MaLR	51036	NM_207215	105689	Mm.6478	NM_207215	ENSMUSG00000033004	Mycbp2	AU023734|AW107953|AW546647|C130061D10Rik|Pam|Phr1|R75243	MYC binding protein 2	protein-coding
Diff_Nuc6788	chr10	107681042	107681181	+	0	NA	intron (NM_027892, intron 9 of 25)	L1MC4|LINE|L1	81655	NM_027892	17931	Mm.422959	NM_027892	ENSMUSG00000019907	Ppp1r12a	1200015F06Rik|5730577I22Rik|AA792106|AV099298|D10Ertd625e|Mypt1	protein phosphatase 1, regulatory (inhibitor) subunit 12A	protein-coding
Diff_Nuc1726	chr13	113322622	113322761	+	0	NA	intron (NM_139299, intron 12 of 16)	B4|SINE|B4	48179	NM_139299	218624	Mm.380801	NM_139299	ENSMUSG00000050377	Il31ra	CRL3|GLM-R|GPL|Glmr|NR10	interleukin 31 receptor A	protein-coding
Diff_Nuc16129	chr7	84367177	84367316	+	0	NA	Intergenic	ORR1E|LTR|MaLR	992473	NM_001199224	244071	Mm.322829	NM_172902	ENSMUSG00000025754	Agbl1	Ccp4|D430020F16|EG244071|Nna1-l1	ATP/GTP binding protein-like 1	protein-coding
Diff_Nuc5347	chr10	9375692	9375831	+	0	NA	intron (NM_177271, intron 1 of 1)	RLTR26|LTR|ERVK	19245	NM_177271	320825	Mm.101115	NM_177271	ENSMUSG00000060487	Samd5	E130306M17Rik	sterile alpha motif domain containing 5	protein-coding
Diff_Nuc5224	chr11	120452982	120453121	+	0	NA	Intergenic	Intergenic	6628	NM_011568	21681	Mm.1886	NM_011568	ENSMUSG00000025134	Alyref	ALY|REF1|Refbp1|Thoc4	Aly/REF export factor	protein-coding
Diff_Nuc7406	chr17	22074812	22074951	+	0	NA	intron (NM_001199048, intron 3 of 5)	L1_Mus1|LINE|L1	24550	NM_001199048	73233	Mm.311219	NM_001199048	ENSMUSG00000071267	Zfp942	3110048L19Rik	zinc finger protein 942	protein-coding
Diff_Nuc32023	chr9	103707972	103708111	+	0	NA	Intergenic	Intergenic	-43874	NM_178638	81907	Mm.384704	NM_178638	ENSMUSG00000042757	Tmem108	AI462967|B130017P16Rik|R74726	transmembrane protein 108	protein-coding
Diff_Nuc19399	chr5	21010402	21010541	+	0	NA	intron (NM_177076, intron 16 of 19)	intron (NM_177076, intron 16 of 19)	-38874	NM_028977	74511	Mm.439963	NM_028977	ENSMUSG00000039883	Lrrc17	37kDa|4833425M04Rik|6130400C22Rik|P37nb	leucine rich repeat containing 17	protein-coding
Diff_Nuc10366	chr15	38036802	38036941	+	0	NA	Intergenic	RMER17B|LTR|ERVK	-28262	NM_001081359	70790	Mm.476840	NM_027553	ENSMUSG00000037487	Ubr5	Edd|Edd1	ubiquitin protein ligase E3 component n-recognin 5	protein-coding
Diff_Nuc22804	chr4	126076432	126076571	+	0	NA	intron (NM_153402, intron 5 of 18)	intron (NM_153402, intron 5 of 18)	30285	NM_153402	214150	Mm.440915	NM_153402	ENSMUSG00000028842	Ago3	AW048688|C130014L07Rik|Eif2c3	argonaute RISC catalytic subunit 3	protein-coding
Diff_Nuc20695	chr5	117953302	117953441	+	0	NA	intron (NM_001312914, intron 2 of 19)	intron (NM_001312914, intron 2 of 19)	89360	NM_001312914	333050	Mm.437947	NM_001034873	ENSMUSG00000061578	Ksr2	-	kinase suppressor of ras 2	protein-coding
Diff_Nuc10641	chr15	57982202	57982341	+	0	NA	intron (NM_001326602, intron 3 of 3)	intron (NM_001326602, intron 3 of 3)	9350	NM_001326599	76773	Mm.26771	NM_029734	ENSMUSG00000022359	Wdyhv1	2410187C16Rik|AU014961|AW550036|Ntaq1	WDYHV motif containing 1	protein-coding
Diff_Nuc24232	chr3	79212492	79212631	+	0	NA	intron (NM_001142953, intron 2 of 4)	intron (NM_001142953, intron 2 of 4)	63263	NM_001142953	100233207	Mm.373801	NM_001142953	ENSMUSG00000091685	Gm17359	-	predicted gene, 17359	protein-coding
Diff_Nuc20772	chr5	123111992	123112131	+	0	NA	intron (NM_001284402, intron 5 of 12)	Lx8|LINE|L1	11628	NM_001284402	18439	Mm.42026	NM_011027	ENSMUSG00000029468	P2rx7	AI467586|P2X(7)|P2X7R	purinergic receptor P2X, ligand-gated ion channel, 7	protein-coding
Diff_Nuc17918	chr6	56933462	56933601	+	0	NA	Intergenic	B3|SINE|B2	-1805	NM_134174	171192	Mm.377172	NM_134174	ENSMUSG00000090346	Vmn1r5	V1rc19	vomeronasal 1 receptor 5	protein-coding
Diff_Nuc9535	chr16	74375062	74375201	+	0	NA	intron (NM_175549, intron 1 of 27)	intron (NM_175549, intron 1 of 27)	-32819	NR_030464	751561		NR_030464	ENSMUSG00000104758	Mir691	Mirn691|mir-691|mmu-mir-691	microRNA 691	ncRNA
Diff_Nuc13730	chr19	52497052	52497191	+	0	NA	Intergenic	Intergenic	158334	NM_008386	16333	Mm.46269	NM_008386	ENSMUSG00000035804	Ins1	Ins-1|Ins2-rs1	insulin I	protein-coding
Diff_Nuc31489	chr9	66288862	66289001	+	0	NA	intron (NM_145617, intron 33 of 77)	MER2|DNA|MER2_type	73469	NM_175206	74165	Mm.297998	NM_175206	ENSMUSG00000050503	Fbxl22	1110004B15Rik	F-box and leucine-rich repeat protein 22	protein-coding
Diff_Nuc319	chr13	11988142	11988281	+	0	NA	intron (NM_023868, intron 4 of 104)	intron (NM_023868, intron 4 of 104)	211001	NM_023868	20191	Mm.239871	NM_023868	ENSMUSG00000021313	Ryr2	9330127I20Rik|RYR-2	ryanodine receptor 2, cardiac	protein-coding
Diff_Nuc29909	chr1	154380372	154380511	+	0	NA	intron (NM_001346119, intron 13 of 17)	intron (NM_001346119, intron 13 of 17)	91906	NM_016846	19731	Mm.245270	NM_016846	ENSMUSG00000026482	Rgl1	Rgl|mKIAA0959	ral guanine nucleotide dissociation stimulator,-like 1	protein-coding
Diff_Nuc4415	chr11	75418672	75418811	+	0	NA	intron (NM_008850, intron 4 of 11)	intron (NM_008850, intron 4 of 11)	-5008	NR_110477	654359	Mm.439961	NR_110477		Gm12338	OTTMUSG00000006216	cytochrome c oxidase, subunit VIIc pseudogene	pseudo
Diff_Nuc33320	chr8	73572472	73572611	+	0	NA	Intergenic	Intergenic	-21887	NR_045487	69419	Mm.188688	NR_045487	ENSMUSG00000101854	1700026F02Rik	-	RIKEN cDNA 1700026F02 gene	ncRNA
Diff_Nuc30834	chr9	22699492	22699631	+	0	NA	Intergenic	L1_Mur3|LINE|L1	-327959	NM_028472	73230	Mm.335020	NM_028472	ENSMUSG00000031963	Bmper	3110056H04Rik|CV-2|Crim3|Cv2	BMP-binding endothelial regulator	protein-coding
Diff_Nuc18198	chr6	81885252	81885391	+	0	NA	intron (NM_177884, intron 4 of 16)	intron (NM_177884, intron 4 of 16)	11658	NM_177884	330361	Mm.474487	NM_177884	ENSMUSG00000035125	Gcfc2	A130099G21|AW146020|GCF2|Tcf9	GC-rich sequence DNA binding factor 2	protein-coding
Diff_Nuc11543	chr14	15532952	15533091	+	0	NA	Intergenic	Lx6|LINE|L1	-2518	NM_001033270	218756	Mm.258893	NM_001033270	ENSMUSG00000021733	Slc4a7	E430014N10Rik|NBC3|NBCn1|NBCn1-G	solute carrier family 4, sodium bicarbonate cotransporter, member 7	protein-coding
Diff_Nuc27760	chr2	168888052	168888191	+	0	NA	Intergenic	Intergenic	84352	NR_040326	75508	Mm.271256	NR_040326	ENSMUSG00000086348	1700017J07Rik	-	RIKEN cDNA 1700017J07 gene	ncRNA
Diff_Nuc4750	chr11	95911112	95911251	+	0	NA	3' UTR (NM_172300, exon 7 of 7)	3' UTR (NM_172300, exon 7 of 7)	14950	NM_033568	27681	Mm.372235	NM_033568	ENSMUSG00000006058	Snf8	D11Moh34	SNF8, ESCRT-II complex subunit, homolog (S. cerevisiae)	protein-coding
Diff_Nuc1004	chr13	59498702	59498841	+	0	NA	Intergenic	Lx2|LINE|L1	147041	NM_001284221	67269	Mm.153008	NM_023328	ENSMUSG00000021557	Agtpbp1	1700020N17Rik|2310001G17Rik|2900054O13Rik|4930445M19Rik|5730402G09Rik|CCP1|Nna1|nmf243|pcd	ATP/GTP binding protein 1	protein-coding
Diff_Nuc16190	chr7	88381472	88381611	+	0	NA	intron (NM_008803, intron 1 of 21)	intron (NM_008803, intron 1 of 21)	22851	NM_008803	18584	Mm.371577	NM_008803	ENSMUSG00000025584	Pde8a	AI551852|Pde8	phosphodiesterase 8A	protein-coding
Diff_Nuc17157	chr6	3091602	3091741	+	0	NA	Intergenic	Intergenic	-146848	NR_036696	667335	Mm.380219	NR_036696	ENSMUSG00000106779	Gm8579	EG667335	spermatogenesis associated glutamate (E)-rich protein 4a pseudogene	pseudo
Diff_Nuc1496	chr13	98330922	98331061	+	0	NA	intron (NR_046157, intron 1 of 2)	intron (NR_046157, intron 1 of 2)	1036	NR_046157	328314	Mm.138047	NR_046157	ENSMUSG00000110235	Gm5086	B230311A21|EG328314	predicted gene 5086	ncRNA
Diff_Nuc7091	chr10	127962312	127962451	+	0	NA	intron (NM_011843, intron 1 of 30)	CpG	534	NM_011843	23943	Mm.66056	NM_011843	ENSMUSG00000025366	Esyt1	Fam62a|Mbc2|vp115	extended synaptotagmin-like protein 1	protein-coding
Diff_Nuc2915	chr12	87985822	87985961	+	0	NA	Intergenic	Intergenic	-33759	NM_177354	238328	Mm.216101	NM_177354	ENSMUSG00000021256	Vash1	AI834978|D930046M13Rik|G630009D10Rik	vasohibin 1	protein-coding
Diff_Nuc4449	chr11	77213252	77213391	+	0	NA	intron (NM_001291190, intron 3 of 13)	RSINE1|SINE|B4	51539	NM_001291190	237860	Mm.440381	NM_177710	ENSMUSG00000037926	Ssh2	SSH-2|SSH-2L|mSSH-2L	slingshot homolog 2 (Drosophila)	protein-coding
Diff_Nuc16763	chr7	124523882	124524021	+	0	NA	promoter-TSS (NM_175645)	promoter-TSS (NM_175645)	-542	NM_175645	233781	Mm.461427	NM_175645	ENSMUSG00000030657	Xylt1	8030490L12	xylosyltransferase 1	protein-coding
Diff_Nuc19164	chr6	147025002	147025141	+	0	NA	intron (NM_001034903, intron 2 of 2)	intron (NM_001034903, intron 2 of 2)	10483	NM_001034903	545893	Mm.224739	NM_001034903	ENSMUSG00000072662	Mansc4	A430079E08|EG545893|Gm5887	MANSC domain containing 4	protein-coding
Diff_Nuc22347	chr4	94571542	94571681	+	0	NA	Intergenic	Intergenic	23923	NM_027089	67753	Mm.25097	NM_027089	ENSMUSG00000028575	Eqtn	1700028B15Rik|4930579C15Rik|Afaf|C81058|Eqtl|Eqts	equatorin, sperm acrosome associated	protein-coding
Diff_Nuc24791	chr3	110520142	110520281	+	0	NA	Intergenic	L2a|LINE|L2	-466294	NR_024139	99890	Mm.36115	NM_178891	ENSMUSG00000049300	Prmt6	AW124876|BB233495|Hrmt1l6	protein arginine N-methyltransferase 6	protein-coding
Diff_Nuc18093	chr6	72268852	72268991	+	0	NA	3' UTR (NM_138592, exon 13 of 13)	3' UTR (NM_138592, exon 13 of 13)	14317	NM_147779	20388	Mm.46033	NM_147779	ENSMUSG00000056370	Sftpb	AI562151|SF-B|SP-B|Sftp-3|Sftp3	surfactant associated protein B	protein-coding
Diff_Nuc4135	chr11	59959402	59959541	+	0	NA	intron (NM_001037764, intron 1 of 4)	intron (NM_001037764, intron 1 of 4)	5887	NM_001037764	19377	Mm.296366	NM_009021	ENSMUSG00000062115	Rai1	Gt1	retinoic acid induced 1	protein-coding
Diff_Nuc6326	chr10	77388712	77388851	+	0	NA	intron (NM_138301, intron 21 of 33)	intron (NM_138301, intron 21 of 33)	-23500	NM_145152	237387	Mm.133301	NM_145152	ENSMUSG00000051652	Lrrc3	1300011L04Rik|C21orf102	leucine rich repeat containing 3	protein-coding
Diff_Nuc30439	chr1	190211812	190211951	+	0	NA	intron (NM_021408, intron 10 of 70)	intron (NM_021408, intron 10 of 70)	125164	NM_021408	22283	Mm.331238	NM_021408	ENSMUSG00000026609	Ush2a	A930011D15Rik|A930037M10Rik|Gm676|Gm983|Mush2a|Usherin|Ushrn	Usher syndrome 2A	protein-coding
Diff_Nuc30898	chr9	28915752	28915891	+	0	NA	intron (NM_172290, intron 4 of 7)	LTR16A|LTR|ERVL	854893	NM_172290	235106	Mm.283138	NM_172290	ENSMUSG00000059974	Ntm	6230410L23Rik|B230210G24Rik|Hnt|Igdcc2|R75390	neurotrimin	protein-coding
Diff_Nuc32827	chr8	35237132	35237271	+	0	NA	Intergenic	Intergenic	-7435	NR_105820	102465211		NR_105820	ENSMUSG00000098785	Mir6395	Gm27561|mmu-mir-6395	microRNA 6395	ncRNA
Diff_Nuc14298	chr18	32226542	32226681	+	0	NA	promoter-TSS (NM_173441)	promoter-TSS (NM_173441)	-777	NM_173441	73473	Mm.66853	NM_173441	ENSMUSG00000024384	Iws1	1700069O15Rik|3000008H23|AL117927|AW214353	IWS1, SUPT6 interacting protein	protein-coding
Diff_Nuc15867	chr7	65554522	65554661	+	0	NA	Intergenic	Intergenic	-358981	NM_009728	11982	Mm.135129	NM_009728	ENSMUSG00000025324	Atp10a	Atp10c|pfatp	ATPase, class V, type 10A	protein-coding
Diff_Nuc22363	chr4	95601982	95602121	+	0	NA	Intergenic	Intergenic	31675	NR_045777	319247	Mm.473527	NM_175680	ENSMUSG00000044125	9530080O11Rik	-	RIKEN cDNA 9530080O11 gene	ncRNA
Diff_Nuc6433	chr10	83179032	83179171	+	0	NA	Intergenic	L1Md_T|LINE|L1	-6509	NM_001145198	69784	Mm.271188	NM_001145198	ENSMUSG00000087651	1500009L16Rik	2700050C19Rik|OCC-1	RIKEN cDNA 1500009L16 gene	protein-coding
Diff_Nuc30404	chr1	187335022	187335161	+	0	NA	Intergenic	(TG)n|Simple_repeat|Simple_repeat	13906	NR_033600	114668	Mm.379303	NR_033600	ENSMUSG00000102185	5033404E19Rik	-	NSA2 ribosome biogenesis homolog pseudogene	pseudo
Diff_Nuc23721	chr3	35654322	35654461	+	0	NA	intron (NM_029570, intron 1 of 29)	intron (NM_029570, intron 1 of 29)	1331	NM_029570	76295	Mm.239416	NM_029570	ENSMUSG00000037400	Atp11b	1110019I14Rik|ATPIF|ATPIR|mKIAA0956	ATPase, class VI, type 11B	protein-coding
Diff_Nuc25679	chr2	21155652	21155791	+	0	NA	Intergenic	Intergenic	28370	NM_177588	208967	Mm.268841	NM_177588	ENSMUSG00000048550	Thnsl1	AW413632	threonine synthase-like 1 (bacterial)	protein-coding
Diff_Nuc19464	chr5	24932592	24932731	+	0	NA	intron (NM_001081383, intron 2 of 58)	Lx3A|LINE|L1	71940	NM_001081383	231051	Mm.332268	NM_001081383	ENSMUSG00000038056	Kmt2c	E330008K23Rik|HALR|Mll3|mKIAA1506	lysine (K)-specific methyltransferase 2C	protein-coding
Diff_Nuc3358	chr11	3585832	3585971	+	0	NA	intron (NM_198162, intron 23 of 25)	intron (NM_198162, intron 23 of 25)	27198	NM_198162	74522	Mm.139127	NM_198162	ENSMUSG00000034543	Morc2a	8430403M08Rik|Zcwcc1	microrchidia 2A	protein-coding
Diff_Nuc9965	chr15	9312032	9312171	+	0	NA	Intergenic	Lx3_Mus|LINE|L1	46748	NM_144845	223337	Mm.422853	NM_144845	ENSMUSG00000049152	Ugt3a2	AI313915	UDP glycosyltransferases 3 family, polypeptide A2	protein-coding
Diff_Nuc1006	chr13	59635692	59635831	+	0	NA	intron (NM_001048008, intron 3 of 17)	intron (NM_001048008, intron 3 of 17)	10051	NM_001284221	67269	Mm.153008	NM_023328	ENSMUSG00000021557	Agtpbp1	1700020N17Rik|2310001G17Rik|2900054O13Rik|4930445M19Rik|5730402G09Rik|CCP1|Nna1|nmf243|pcd	ATP/GTP binding protein 1	protein-coding
Diff_Nuc1048	chr13	63081932	63082071	+	0	NA	intron (NM_001289924, intron 1 of 16)	intron (NM_001289924, intron 1 of 16)	15748	NM_001289924	72061	Mm.188105	NM_028079	ENSMUSG00000021458	2010111I01Rik	2300006M17Rik|AP-O|AW742919|Aopep|ApO|mir-23b|mir-24-1|mir-27b	RIKEN cDNA 2010111I01 gene	protein-coding
Diff_Nuc24181	chr3	74910122	74910261	+	0	NA	intron (NM_172515, intron 5 of 16)	intron (NM_172515, intron 5 of 16)	37503	NM_001310529	213234	Mm.80075	NM_172515	ENSMUSG00000034151	Zbbx	4931432L23	zinc finger, B-box domain containing	protein-coding
Diff_Nuc12692	chr14	100504202	100504341	+	0	NA	intron (NM_010636, intron 2 of 6)	intron (NM_010636, intron 2 of 6)	44744	NM_010636	16597	Mm.396499	NM_010636	ENSMUSG00000072294	Klf12	2700063E05Rik|AI225908|AI315654|AP-2rep|B130052C06Rik|D530033K05Rik	Kruppel-like factor 12	protein-coding
Diff_Nuc8441	chr17	88636582	88636721	+	0	NA	Intergenic	L1MCc|LINE|L1	111799	NM_001190356	225058	Mm.312053	NM_001190356		Gm4832	EG225058	predicted gene 4832	protein-coding
Diff_Nuc18756	chr6	119708832	119708971	+	0	NA	intron (NR_104484, intron 9 of 20)	B3A|SINE|B2	89267	NM_053204	111173	Mm.288860	NM_053204	ENSMUSG00000030172	Erc1	4930404L01Rik|5033405M01Rik|9630025C19Rik|B430107L16Rik|CAST2|ELKS|Elks1|RAB6IP2A|RAB6IP2B|Rab6ip2|mKIAA1081	ELKS/RAB6-interacting/CAST family member 1	protein-coding
Diff_Nuc2145	chr12	33373132	33373271	+	0	NA	Intergenic	Intergenic	-131999	NM_021524	59027	Mm.202727	NM_021524	ENSMUSG00000020572	Nampt	1110035O14Rik|AI314458|AI480535|NAmPRTase|Pbef|Pbef1|Visfatin	nicotinamide phosphoribosyltransferase	protein-coding
Diff_Nuc29376	chr1	110029802	110029941	+	0	NA	Intergenic	RMER13A|LTR|ERVK	216035	NR_102307	319596	Mm.136054	NR_102306	ENSMUSG00000100457	D830032E09Rik	-	RIKEN cDNA D830032E09 gene	ncRNA
Diff_Nuc4184	chr11	62101352	62101491	+	0	NA	intron (NM_029704, intron 5 of 8)	Lx4A|LINE|L1	6446	NM_029704	72795	Mm.489722	NM_028360	ENSMUSG00000042298	Ttc19	2010204O13Rik|2810460C24Rik|AI505442	tetratricopeptide repeat domain 19	protein-coding
Diff_Nuc3353	chr11	3361272	3361411	+	0	NA	intron (NR_028317, intron 1 of 3)	RLTR14-int|LTR|ERV1	-8382	NM_001290473	193670	Mm.136973	NM_145355	ENSMUSG00000020448	Rnf185	-	ring finger protein 185	protein-coding
Diff_Nuc23244	chr4	148861342	148861481	+	0	NA	intron (NM_026963, intron 2 of 6)	ID_B1|SINE|B4	1969	NM_026963	69151	Mm.464434	NM_026963	ENSMUSG00000028990	Lzic	1810030J04Rik|AW047580	leucine zipper and CTNNBIP1 domain containing	protein-coding
Diff_Nuc1679	chr13	110229212	110229351	+	0	NA	intron (NM_011056, intron 3 of 16)	intron (NM_011056, intron 3 of 16)	114343	NR_030644	100124489		NR_030644	ENSMUSG00000076946	Mir582	Mirn582|mir-582|mmu-mir-582	microRNA 582	ncRNA
Diff_Nuc31580	chr9	71477772	71477911	+	0	NA	intron (NM_026599, intron 18 of 18)	intron (NM_026599, intron 18 of 18)	-37674	NM_001033208	102371	Mm.27585	NM_001033208	ENSMUSG00000041361	Myzap	AA407270|AV006038|Gcom1|Gm640|Grinl1a7|Myozap	myocardial zonula adherens protein	protein-coding
Diff_Nuc15621	chr7	46529562	46529701	+	0	NA	Intergenic	Intergenic	-9727	NR_073038	100861861	Mm.60620	NR_073038		Gm21276	-	predicted gene, 21276	pseudo
Diff_Nuc684	chr13	38293422	38293561	+	0	NA	Intergenic	Intergenic	-3317	NM_026382	67797	Mm.250783	NM_026382	ENSMUSG00000021431	Snrnp48	1110050F08Rik|6530403A03Rik|C6orf151	small nuclear ribonucleoprotein 48 (U11/U12)	protein-coding
Diff_Nuc25958	chr2	36715722	36715861	+	0	NA	promoter-TSS (NM_146942)	promoter-TSS (NM_146942)	75	NM_146942	258944	Mm.377763	NM_146942	ENSMUSG00000075383	Olfr351	MOR127-2	olfactory receptor 351	protein-coding
Diff_Nuc16694	chr7	119447932	119448071	+	0	NA	intron (NM_177282, intron 4 of 19)	intron (NM_177282, intron 4 of 19)	-63821	NM_027587	100504195	Mm.291129	NM_027587	ENSMUSG00000030771	Micalcl	4921517J23Rik	MICAL C-terminal like	protein-coding
Diff_Nuc11978	chr14	48334222	48334361	+	0	NA	intron (NM_001347528, intron 29 of 37)	intron (NM_001347528, intron 29 of 37)	50860	NM_001347522	16709	Mm.3110	NM_008477	ENSMUSG00000021843	Ktn1	-	kinectin 1	protein-coding
Diff_Nuc27291	chr2	134949612	134949751	+	0	NA	intron (NM_001145830, intron 3 of 31)	intron (NM_001145830, intron 3 of 31)	91671	NR_040517	78805	Mm.78702	NR_040517	ENSMUSG00000085247	4930545L23Rik	-	RIKEN cDNA 4930545L23 gene	ncRNA
Diff_Nuc15380	chr7	20175422	20175561	+	0	NA	intron (NR_125836, intron 6 of 17)	intron (NR_125836, intron 6 of 17)	12855	NM_022409	63872	Mm.23310	NM_022409	ENSMUSG00000011267	Zfp296	2210018A16Rik|Znf296	zinc finger protein 296	protein-coding
Diff_Nuc27578	chr2	155951392	155951531	+	0	NA	intron (NM_010911, intron 11 of 12)	intron (NM_010911, intron 11 of 12)	-13760	NM_170588	266692	Mm.27660	NM_170588	ENSMUSG00000074643	Cpne1	1810028N16Rik|mKIAA4108	copine I	protein-coding
Diff_Nuc14634	chr18	50625892	50626031	+	0	NA	Intergenic	Lx4A|LINE|L1	102392	NM_026108	67365	Mm.158150	NM_026108	ENSMUSG00000048875	Hdhd1a	1700121L12Rik|GS1|Hdhd1|Pudp	haloacid dehalogenase-like hydrolase domain containing 1A	protein-coding
Diff_Nuc9829	chr16	95541312	95541451	+	0	NA	Intergenic	Intergenic	62216	NM_001271690	16516	Mm.272239	NM_019664	ENSMUSG00000062609	Kcnj15	4930414N08Rik|AI182284|AI267127|IRKK|Kir4.2	potassium inwardly-rectifying channel, subfamily J, member 15	protein-coding
Diff_Nuc18142	chr6	76457032	76457171	+	0	NA	Intergenic	Intergenic	-735610	NM_028880	74342	Mm.292568	NM_028880	ENSMUSG00000060780	Lrrtm1	4632401D06Rik|AW125451	leucine rich repeat transmembrane neuronal 1	protein-coding
Diff_Nuc9866	chr15	4351632	4351771	+	0	NA	intron (NM_177355, intron 1 of 2)	MER68|LTR|ERVL	26210	NM_177355	239318	Mm.308996	NM_177355	ENSMUSG00000049148	Plcxd3	B130016O10Rik	phosphatidylinositol-specific phospholipase C, X domain containing 3	protein-coding
Diff_Nuc5621	chr10	28276242	28276381	+	0	NA	intron (NM_008983, intron 14 of 31)	intron (NM_008983, intron 14 of 31)	-111855	NM_001305663	210757	Mm.123021	NM_178666	ENSMUSG00000049109	Themis	E430004N04Rik|Gasp|Spot|Tsepa|thylex	thymocyte selection associated	protein-coding
Diff_Nuc7006	chr10	123543702	123543841	+	0	NA	Intergenic	Intergenic	-362359	NR_028310	75030	Mm.159403	NR_028310		4930503E24Rik	-	eukaryotic translation initiation factor 3, subunit I pseudogene	pseudo
Diff_Nuc30128	chr1	169614792	169614931	+	0	NA	Intergenic	L1_Mur3|LINE|L1	-4828	NM_033652	110648	Mm.330081	NM_033652	ENSMUSG00000026686	Lmx1a	Lmx1.1|dr|dreher|sst	LIM homeobox transcription factor 1 alpha	protein-coding
Diff_Nuc2011	chr12	17699062	17699201	+	0	NA	intron (NM_016677, intron 1 of 3)	intron (NM_016677, intron 1 of 3)	1511	NM_016677	53602	Mm.313619	NM_016677	ENSMUSG00000071379	Hpcal1	NVP-3|Nvp3|VILIP3|Vnsl3|Vsnl3	hippocalcin-like 1	protein-coding
Diff_Nuc4274	chr11	68709722	68709861	+	0	NA	Intergenic	B1_Mus2|SINE|Alu	-5277	NM_009080	19941	Mm.3229	NM_009080	ENSMUSG00000060938	Rpl26	SIG-20	ribosomal protein L26	protein-coding
Diff_Nuc13238	chr19	18755102	18755241	+	0	NA	intron (NM_026120, intron 3 of 7)	intron (NM_026120, intron 3 of 7)	9901	NM_026120	67383	Mm.306602	NM_026120	ENSMUSG00000024726	Carnmt1	2410127L17Rik	carnosine N-methyltransferase 1	protein-coding
Diff_Nuc18539	chr6	102546262	102546401	+	0	NA	Intergenic	L1VL4|LINE|L1	-131670	NM_008779	18488	Mm.435479	NM_008779	ENSMUSG00000030075	Cntn3	Pang	contactin 3	protein-coding
Diff_Nuc23765	chr3	38262842	38262981	+	0	NA	Intergenic	Intergenic	120827	NM_001167883	99696	Mm.290937	NM_001033198	ENSMUSG00000044864	Ankrd50	AI662170|E430012K20Rik|mKIAA1223|mKIAA3019	ankyrin repeat domain 50	protein-coding
Diff_Nuc21623	chr4	36303842	36303981	+	0	NA	intron (NM_001165999, intron 3 of 7)	RMER1A|Other|Other	288575	NR_030545	100124458		NR_030545	ENSMUSG00000077851	Mir876	Mirn876|mir-876|mmu-mir-876	microRNA 876	ncRNA
Diff_Nuc19694	chr5	42259392	42259531	+	0	NA	Intergenic	Lx4B|LINE|L1	-23120	NR_105842	102465225		NR_105842	ENSMUSG00000098264	Mir6414	Gm27518|mmu-mir-6414	microRNA 6414	ncRNA
Diff_Nuc9938	chr15	7951272	7951411	+	0	NA	intron (NM_001081402, intron 9 of 17)	intron (NM_001081402, intron 9 of 17)	97868	NM_001081402	545085	Mm.321312	NM_198413	ENSMUSG00000039828	Wdr70	4833422F06Rik	WD repeat domain 70	protein-coding
Diff_Nuc8547	chr16	4474002	4474141	+	0	NA	Intergenic	MTA_Mm|LTR|MaLR	48982	NM_175347	106393	Mm.35811	NM_175347	ENSMUSG00000022519	Srl	9830004M20Rik|AW108387|sar	sarcalumenin	protein-coding
Diff_Nuc17014	chr7	141759292	141759431	+	0	NA	Intergenic	Intergenic	-103009	NM_001033420	330662	Mm.436572	NM_001033420	ENSMUSG00000058325	Dock1	9130006G06Rik|AI854900|D630004B07Rik	dedicator of cytokinesis 1	protein-coding
Diff_Nuc30714	chr9	14610272	14610411	+	0	NA	intron (NM_001310728, intron 9 of 18)	Lx8|LINE|L1	21243	NM_018736	17535	Mm.149071	NM_018736	ENSMUSG00000031928	Mre11a	Mre11|Mre11b	MRE11A homolog A, double strand break repair nuclease	protein-coding
Diff_Nuc28270	chr1	37492522	37492661	+	0	NA	intron (NM_026123, intron 3 of 5)	intron (NM_026123, intron 3 of 5)	5574	NM_026123	67387	Mm.27404	NM_026123	ENSMUSG00000026111	Unc50	1110002A21Rik|GMH1|UNCL|URP	unc-50 homolog (C. elegans)	protein-coding
Diff_Nuc10486	chr15	46962072	46962211	+	0	NA	Intergenic	L1Md_F|LINE|L1	507290	NR_045811	75281	Mm.159487	NR_045811	ENSMUSG00000051198	4930548G14Rik	-	RIKEN cDNA 4930548G14 gene	ncRNA
Diff_Nuc5704	chr10	35309372	35309511	+	0	NA	Intergenic	Lx2B|LINE|L1	-917172	NM_001253355	319415	Mm.332442	NM_001081208	ENSMUSG00000044499	Hs3st5	D930005L05Rik|Gm1151|Hs3ost5	heparan sulfate (glucosamine) 3-O-sulfotransferase 5	protein-coding
Diff_Nuc9120	chr16	42278632	42278771	+	0	NA	intron (NM_008083, intron 2 of 2)	intron (NM_008083, intron 2 of 2)	24881	NR_105858	102466172		NR_105858	ENSMUSG00000098300	Mir6540	Gm27780|mir-6540|mmu-mir-6540	microRNA 6540	ncRNA
Diff_Nuc17305	chr6	14845332	14845471	+	0	NA	Intergenic	Intergenic	-5948	NM_053242	114142	Mm.332919	NM_053242	ENSMUSG00000029563	Foxp2	2810043D05Rik|AI449000|CAG-16|D0Kist7	forkhead box P2	protein-coding
Diff_Nuc11263	chr15	94760402	94760541	+	0	NA	intron (NM_178789, intron 4 of 7)	MTC|LTR|MaLR	219278	NR_015482	100043315	Mm.159041	NR_015482	ENSMUSG00000100603	LOC100043315	-	uncharacterized LOC100043315	ncRNA
Diff_Nuc7534	chr17	29095482	29095621	+	0	NA	intron (NM_025888, intron 2 of 7)	intron (NM_025888, intron 2 of 7)	5390	NM_025888	66989	Mm.435	NM_025888	ENSMUSG00000005936	Kctd20	2410004N11Rik|AI451943|AW541186|D17Ertd562e	potassium channel tetramerisation domain containing 20	protein-coding
Diff_Nuc29262	chr1	102306302	102306441	+	0	NA	intron (NM_172851, intron 19 of 23)	intron (NM_172851, intron 19 of 23)	637029	NM_172851	241175	Mm.251301	NM_172851	ENSMUSG00000067028	Cntnap5b	C230078M14Rik|Caspr5-2	contactin associated protein-like 5B	protein-coding
Diff_Nuc16079	chr7	80735842	80735981	+	0	NA	Intergenic	B1_Mur3|SINE|Alu	-32630	NR_037569	69170	Mm.34539	NR_037569	ENSMUSG00000101970	1810026B05Rik	-	RIKEN cDNA 1810026B05 gene	ncRNA
Diff_Nuc5167	chr11	117588422	117588561	+	0	NA	intron (NM_198022, intron 5 of 21)	intron (NM_198022, intron 5 of 21)	53444	NM_181321	217353	Mm.286963	NM_145439	ENSMUSG00000025572	Tmc6	D11Ertd204e|EVER1	transmembrane channel-like gene family 6	protein-coding
Diff_Nuc3193	chr12	110152962	110153101	+	0	NA	intron (NM_177602, intron 2 of 6)	intron (NM_177602, intron 2 of 6)	20549	NM_177602	212198	Mm.342082	NM_177602	ENSMUSG00000040877	Wdr25	B930090D16Rik	WD repeat domain 25	protein-coding
Diff_Nuc7746	chr17	39885932	39886071	+	0	NA	Intergenic	Intergenic	-93941	NR_046233	100861531		NR_046233		Rn45s	-	45S pre-ribosomal RNA	rRNA
Diff_Nuc18501	chr6	100103312	100103451	+	0	NA	Intergenic	Intergenic	133971	NM_019743	56353	Mm.321633	NM_019743	ENSMUSG00000072872	Rybp	2410018J24Rik|DEDAF|YEAF1	RING1 and YY1 binding protein	protein-coding
Diff_Nuc18430	chr6	95286722	95286861	+	0	NA	Intergenic	Lx5|LINE|L1	-2804	NR_033559	414067	Mm.355990	NR_033559	ENSMUSG00000068180	AY512915	-	cDNA sequence AY512915	ncRNA
Diff_Nuc25415	chr3	156101262	156101401	+	0	NA	Intergenic	L1Md_A|LINE|L1	123320	NR_040398	329782	Mm.183459	NR_040398	ENSMUSG00000085084	4930570G19Rik	C630015G22	RIKEN cDNA 4930570G19 gene	ncRNA
Diff_Nuc7910	chr17	51768582	51768721	+	0	NA	Intergenic	Intergenic	-181057	NR_046166	328837	Mm.236143	NR_046166		C330011F03Rik	C330011F03	RIKEN cDNA C330011F03 gene	ncRNA
Diff_Nuc24514	chr3	93619742	93619881	+	0	NA	Intergenic	L1_Mur3|LINE|L1	-10131	NM_207271	399674	Mm.377923	NM_207271	ENSMUSG00000058005	Tdpoz3	-	TD and POZ domain containing 3	protein-coding
Diff_Nuc29720	chr1	140790642	140790781	+	0	NA	Intergenic	L1_Mur3|LINE|L1	-17184	NR_138576	75546	Mm.71176	NR_138576	ENSMUSG00000099808	1700019P21Rik	-	RIKEN cDNA 1700019P21 gene	ncRNA
Diff_Nuc34030	chr8	125028892	125029031	+	0	NA	intron (NM_001037298, intron 5 of 50)	GA-rich|Low_complexity|Low_complexity	28918	NM_153775	66965	Mm.482288	NM_153775	ENSMUSG00000049482	Ctu2	2310061F22Rik|C16orf84|Ncs2	cytosolic thiouridylase subunit 2	protein-coding
Diff_Nuc22314	chr4	90609982	90610121	+	0	NA	Intergenic	Intergenic	428695	NM_010486	15569	Mm.318042	NM_010486	ENSMUSG00000008489	Elavl2	Hub|mel-N1	ELAV (embryonic lethal, abnormal vision, Drosophila)-like 2 (Hu antigen B)	protein-coding
Diff_Nuc2567	chr12	66620322	66620461	+	0	NA	Intergenic	Intergenic	293887	NM_027614	70948	Mm.219475	NM_027614	ENSMUSG00000035560	Wdr20rt	4921538B03Rik|4930427E19Rik|Wdr20|Wdr20b	WD repeat domain 20, retrogene	protein-coding
Diff_Nuc5656	chr10	30860222	30860361	+	0	NA	Intergenic	Intergenic	-172920	NM_027168	69692	Mm.245537	NM_027168	ENSMUSG00000000295	Hddc2	2310057G13Rik	HD domain containing 2	protein-coding
Diff_Nuc4697	chr11	91930582	91930721	+	0	NA	Intergenic	LTR16E2|LTR|ERVL	-491782	NM_028547	73470	Mm.67677	NM_028547	ENSMUSG00000046755	Kif2b	1700063D03Rik	kinesin family member 2B	protein-coding
Diff_Nuc6026	chr10	59373912	59374051	+	0	NA	Intergenic	Intergenic	31642	NM_019965	56709	Mm.103610	NM_019965	ENSMUSG00000020109	Dnajb12	Dj10|mDj10	DnaJ heat shock protein family (Hsp40) member B12	protein-coding
Diff_Nuc27219	chr2	130299412	130299551	+	0	NA	intron (NM_008980, intron 1 of 21)	intron (NM_008980, intron 1 of 21)	23467	NM_001163688	19262	Mm.224246	NM_008980	ENSMUSG00000027303	Ptpra	Ptpa|Ptpalpha|Rptpalpha|Rptra|Rptralpha	protein tyrosine phosphatase, receptor type, A	protein-coding
Diff_Nuc3611	chr11	22690712	22690851	+	0	NA	Intergenic	Intergenic	68954	NM_016888	53625	Mm.395495	NM_016888	ENSMUSG00000051650	B3gnt2	AA408337|AA409404|AW260308|B3Galt6|B3gnt1|BGnT-1|BGnT-2|BGnT1|BGnT2|Beta3gnt	UDP-GlcNAc:betaGal beta-1,3-N-acetylglucosaminyltransferase 2	protein-coding
Diff_Nuc31547	chr9	69838402	69838541	+	0	NA	intron (NM_016787, intron 1 of 10)	intron (NM_016787, intron 1 of 10)	1198	NM_001008238	12175	Mm.159777	NM_016787	ENSMUSG00000011958	Bnip2	5730523P12Rik|BNIP2beta|Nip21	BCL2/adenovirus E1B interacting protein 2	protein-coding
Diff_Nuc33953	chr8	119111802	119111941	+	0	NA	intron (NM_029441, intron 4 of 6)	intron (NM_029441, intron 4 of 6)	82956	NM_029297	75465	Mm.23114	NM_029297	ENSMUSG00000034467	Dynlrb2	1700009A04Rik|DNLC2B|Dncl2b	dynein light chain roadblock-type 2	protein-coding
Diff_Nuc23701	chr3	33614152	33614291	+	0	NA	Intergenic	L1VL2|LINE|L1	-84884	NM_027619	67120	Mm.275710	NM_025978	ENSMUSG00000027677	Ttc14	2700016E08Rik|4930434D01Rik|4931403I22Rik|4933402I15Rik|AI662468|AU014779|AW561908|cI-44|mKIAA1980	tetratricopeptide repeat domain 14	protein-coding
Diff_Nuc21510	chr4	27988462	27988601	+	0	NA	Intergenic	L1Md_A|LINE|L1	-751750	NM_001290434	13841	Mm.257266	NM_010141	ENSMUSG00000028289	Epha7	Cek11|Ebk|Ehk3|Hek11|Mdk1	Eph receptor A7	protein-coding
Diff_Nuc17895	chr6	55513202	55513341	+	0	NA	Intergenic	ORR1E|LTR|MaLR	111299	NM_007407	11517	Mm.44245	NM_007407	ENSMUSG00000029778	Adcyap1r1	2900024I10Rik|AI846590|PAC1|PAC1R|PACAP1-R	adenylate cyclase activating polypeptide 1 receptor 1	protein-coding
Diff_Nuc13620	chr19	44981532	44981671	+	0	NA	Intergenic	RSINE1|SINE|B4	-24008	NM_001081225	226151	Mm.212609	NM_172638	ENSMUSG00000036097	Fam178a	3632432H19|6030443O07Rik|AU014917|Slf2	family with sequence similarity 178, member A	protein-coding
Diff_Nuc12315	chr14	70588762	70588901	+	0	NA	intron (NM_011366, intron 16 of 20)	B1_Mm|SINE|Alu	3222	NM_001271409	20410	Mm.5068	NM_011366	ENSMUSG00000022091	Sorbs3	SCAM-1|SH3P3|Sh3d4|vinexin-g	sorbin and SH3 domain containing 3	protein-coding
Diff_Nuc21348	chr4	12657522	12657661	+	0	NA	Intergenic	Intergenic	-176393	NM_173746	208820	Mm.12057	NM_173746	ENSMUSG00000055963	Triqk	C130086A10|Gm11818|OTTMUSG00000004461	triple QxxK/R motif containing	protein-coding
Diff_Nuc31905	chr9	93910082	93910221	+	0	NA	Intergenic	(TCTA)n|Simple_repeat|Simple_repeat	528349	NM_001033145	68861	Mm.258746	NM_001033145	ENSMUSG00000045414	1190002N15Rik	GoPro49|HASF	RIKEN cDNA 1190002N15 gene	protein-coding
Diff_Nuc8453	chr17	89245742	89245881	+	0	NA	Intergenic	Intergenic	-54495	NM_013582	16867	Mm.1644	NM_013582	ENSMUSG00000024107	Lhcgr	Gpcr19-rs1|LH-R|Lhr	luteinizing hormone/choriogonadotropin receptor	protein-coding
Diff_Nuc15672	chr7	50394782	50394921	+	0	NA	Intergenic	L1_Mur2|LINE|L1	-38107	NM_001034893	668620	Mm.388871	NM_001034893	ENSMUSG00000064194	Zfp936	EG435970|EG668620|Gm9272|I1C0022H11Rik	zinc finger protein 936	protein-coding
Diff_Nuc2742	chr12	77863212	77863351	+	0	NA	Intergenic	MYSERV16_I-int|LTR|ERVK	-3279	NM_206534	211151	Mm.80970	NM_206534	ENSMUSG00000090258	Churc1	1700030P15Rik|My015|chch	churchill domain containing 1	protein-coding
Diff_Nuc31891	chr9	92532662	92532801	+	0	NA	Intergenic	RMER19C|LTR|ERVK	-80823	NR_040770	331003	Mm.50805	NR_040770	ENSMUSG00000101734	4933400C23Rik	4933400C23	RIKEN cDNA 4933400C23 gene	ncRNA
Diff_Nuc6974	chr10	121012272	121012411	+	0	NA	intron (NM_019786, intron 4 of 20)	ID_B1|SINE|B4	11509	NM_019786	56480	Mm.34580	NM_019786	ENSMUSG00000020115	Tbk1	1200008B05Rik|AI462036|AW048562	TANK-binding kinase 1	protein-coding
Diff_Nuc17021	chr7	142018432	142018571	+	0	NA	intron (NM_001033420, intron 23 of 51)	intron (NM_001033420, intron 23 of 51)	111612	NM_001143802	627214	Mm.323610	NM_001143802	ENSMUSG00000073805	Fam196a	B830028B13Rik	family with sequence similarity 196, member A	protein-coding
Diff_Nuc33332	chr8	73917062	73917201	+	0	NA	intron (NM_181418, intron 4 of 12)	PB1D10|SINE|Alu	2569	NM_181418	234395	Mm.34874	NM_181418	ENSMUSG00000034911	Ushbp1	2210404N08Rik|9430064H24|AIEBP|MCC2	Usher syndrome 1C binding protein 1	protein-coding
Diff_Nuc26138	chr2	50630392	50630531	+	0	NA	Intergenic	Intergenic	-134743	NR_033595	227885	Mm.301654	NR_033595	ENSMUSG00000083270	Gm13498	OTTMUSG00000012426	heat shock protein 90 alpha (cytosolic), class B member 1 pseudogene	pseudo
Diff_Nuc19957	chr5	62680572	62680711	+	0	NA	Intergenic	Lx|LINE|L1	476775	NM_178407	212285	Mm.244403	NM_178407	ENSMUSG00000037999	Arap2	Centd1|Gm148|mKIAA0580	ArfGAP with RhoGAP domain, ankyrin repeat and PH domain 2	protein-coding
Diff_Nuc12805	chr14	110316652	110316791	+	0	NA	Intergenic	L1Md_A|LINE|L1	837650	NM_175499	239250	Mm.49728	NM_175499	ENSMUSG00000045871	Slitrk6	4832410J21Rik|Sltk6	SLIT and NTRK-like family, member 6	protein-coding
Diff_Nuc7572	chr17	30626522	30626661	+	0	NA	intron (NM_172618, intron 6 of 11)	intron (NM_172618, intron 6 of 11)	86641	NM_172618	224671	Mm.41220	NM_027060	ENSMUSG00000062202	Btbd9	1700023F20Rik|4930402L05|AI464421	BTB (POZ) domain containing 9	protein-coding
Diff_Nuc25532	chr2	10065272	10065411	+	0	NA	Intergenic	ORR1B1|LTR|MaLR	-9829	NM_172471	209378	Mm.313876	NM_172471	ENSMUSG00000025780	Itih5	4631408O11Rik|5430408M01Rik|E130106B02	inter-alpha (globulin) inhibitor H5	protein-coding
Diff_Nuc11708	chr14	27455822	27455961	+	0	NA	Intergenic	Intergenic	-1792	NM_007479	11843	Mm.297768	NM_007479	ENSMUSG00000021877	Arf4	AA407803	ADP-ribosylation factor 4	protein-coding
Diff_Nuc32424	chr8	8740512	8740651	+	0	NA	Intergenic	MLT2B1|LTR|ERVL	-50044	NM_176849	234023	Mm.251655	NM_176849	ENSMUSG00000040459	Arglu1	9430010O03Rik|C130008N12	arginine and glutamate rich 1	protein-coding
Diff_Nuc27872	chr2	180955222	180955361	+	0	NA	intron (NM_199312, intron 1 of 2)	intron (NM_199312, intron 1 of 2)	570	NM_199312	332713	Mm.23349	NM_199312	ENSMUSG00000047841	BC051628	1700026M20Rik|Fndc11	cDNA sequence BC051628	protein-coding
Diff_Nuc2044	chr12	22830802	22830941	+	0	NA	Intergenic	B4A|SINE|B4	-159826	NR_015504	69732	Mm.391403	NM_028362	ENSMUSG00000073164	2410018L13Rik	2810480C08Rik	RIKEN cDNA 2410018L13 gene	ncRNA
Diff_Nuc5355	chr10	9629032	9629171	+	0	NA	Intergenic	L2a|LINE|L2	-8263	NM_001081344	78808	Mm.331751	NM_030191	ENSMUSG00000019790	Stxbp5	0710001E20Rik|4930565N16Rik|AW742610|LGL3|mKIAA1006	syntaxin binding protein 5 (tomosyn)	protein-coding
Diff_Nuc22634	chr4	115199272	115199411	+	0	NA	intron (NM_010011, intron 9 of 12)	L1_Mus3|LINE|L1	8449	NM_010011	13117	Mm.10742	NM_010011	ENSMUSG00000066072	Cyp4a10	AI647584|Cyp4a|D4Rp1|Msp-3|RP1	cytochrome P450, family 4, subfamily a, polypeptide 10	protein-coding
Diff_Nuc17341	chr6	17494902	17495041	+	0	NA	intron (NM_008591, intron 12 of 21)	intron (NM_008591, intron 12 of 21)	81014	NM_008591	17295	Mm.86844	NM_008591	ENSMUSG00000009376	Met	AI838057|HGF|HGFR|Par4|c-Met	met proto-oncogene	protein-coding
Diff_Nuc13163	chr19	13371392	13371531	+	0	NA	Intergenic	Intergenic	17312	NM_001011841	258121	Mm.377353	NM_001011841	ENSMUSG00000062199	Olfr1465	MOR202-28	olfactory receptor 1465	protein-coding
Diff_Nuc29754	chr1	142794402	142794541	+	0	NA	Intergenic	L1_Mus4|LINE|L1	-241492	NR_040604	75910	Mm.483845	NR_040604	ENSMUSG00000102368	4930590L20Rik	-	RIKEN cDNA 4930590L20 gene	ncRNA
Diff_Nuc28832	chr1	73449352	73449491	+	0	NA	intron (NR_040605, intron 2 of 2)	MTEa|LTR|MaLR	3879	NR_040605	78718	Mm.244075	NR_040605	ENSMUSG00000101812	D530049I02Rik	-	RIKEN cDNA D530049I02 gene	ncRNA
Diff_Nuc30360	chr1	183960792	183960931	+	0	NA	Intergenic	Intergenic	-10750	NM_010135	13800	Mm.87759	NM_008680	ENSMUSG00000022995	Enah	Mena|NDPP-1|Ndpp1|WBP8	enabled homolog (Drosophila)	protein-coding
Diff_Nuc18106	chr6	72890182	72890321	+	0	NA	Intergenic	RSINE1|SINE|B4	17975	NM_001039392	19240	Mm.3532	NM_025284	ENSMUSG00000079523	Tmsb10	Ptmb10|Tb10	thymosin, beta 10	protein-coding
Diff_Nuc18131	chr6	75559992	75560131	+	0	NA	Intergenic	Intergenic	-1632650	NM_028880	74342	Mm.292568	NM_028880	ENSMUSG00000060780	Lrrtm1	4632401D06Rik|AW125451	leucine rich repeat transmembrane neuronal 1	protein-coding
Diff_Nuc28369	chr1	44596752	44596891	+	0	NA	Intergenic	Lx2|LINE|L1	-11695	NM_028450	70676	Mm.133132	NM_027506	ENSMUSG00000056870	Gulp1	3110030A04Rik|5730529O06Rik|CED-6|Ced6|GULP|Gulp-2	GULP, engulfment adaptor PTB domain containing 1	protein-coding
Diff_Nuc26902	chr2	111085362	111085501	+	0	NA	Intergenic	IAPEY3_LTR|LTR|ERVK	-11843	NM_146395	258390	Mm.377474	NM_146395	ENSMUSG00000063844	Olfr1276	MOR245-10	olfactory receptor 1276	protein-coding
Diff_Nuc1769	chr13	115669222	115669361	+	0	NA	intron (NM_008396, intron 6 of 29)	intron (NM_008396, intron 6 of 29)	52958	NM_008396	16398	Mm.5007	NM_008396	ENSMUSG00000015533	Itga2	CD49B|DX5	integrin alpha 2	protein-coding
Diff_Nuc14212	chr18	25353552	25353691	+	0	NA	intron (NM_001033532, intron 4 of 10)	intron (NM_001033532, intron 4 of 10)	26100	NM_001033532	225289	Mm.391081	NM_001033532	ENSMUSG00000033632	AW554918	4921538P22|AI461742|Kiaa1328|mKIAA1328	expressed sequence AW554918	protein-coding
Diff_Nuc24203	chr3	76665972	76666111	+	0	NA	Intergenic	Lx5|LINE|L1	786536	NM_001253719	213262	Mm.379337	NM_178673	ENSMUSG00000034098	Fstl5	9130207J01Rik	follistatin-like 5	protein-coding
Diff_Nuc22977	chr4	134987082	134987221	+	0	NA	intron (NM_022980, intron 1 of 4)	B3A|SINE|B2	2569	NM_022980	53902	Mm.331970	NM_022980	ENSMUSG00000059713	Rcan3	AU041093|Csp3|Dscr1l2	regulator of calcineurin 3	protein-coding
Diff_Nuc3564	chr11	19988982	19989121	+	0	NA	intron (NM_146243, intron 4 of 8)	intron (NM_146243, intron 4 of 8)	23903	NM_146243	66713	Mm.259045	NM_146243	ENSMUSG00000020152	Actr2	4921510D23Rik|AA409782|Arp2|D6Ertd746e	ARP2 actin-related protein 2	protein-coding
Diff_Nuc33223	chr8	70217012	70217151	+	0	NA	3' UTR (NM_027626, exon 8 of 8)	3' UTR (NM_027626, exon 8 of 8)	125113	NM_027626	234353	Mm.32525	NM_027626	ENSMUSG00000030465	Psd3	4931420C21Rik|AI661273|BC003498|D430018P08|EFA6D	pleckstrin and Sec7 domain containing 3	protein-coding
Diff_Nuc25696	chr2	22320542	22320681	+	0	NA	intron (NM_148413, intron 17 of 33)	RSINE1|SINE|B4	-157236	NM_008078	14417	Mm.4784	NM_008078	ENSMUSG00000026787	Gad2	6330404F12Rik|GAD(65)|GAD65|Gad-2	glutamic acid decarboxylase 2	protein-coding
Diff_Nuc31524	chr9	67871612	67871751	+	0	NA	intron (NR_045745, intron 2 of 2)	intron (NR_045745, intron 2 of 2)	1840	NR_045745	434412	Mm.490707	NR_045745	ENSMUSG00000111841	Gm20745	-	predicted gene, 20745	ncRNA
Diff_Nuc3870	chr11	43381672	43381811	+	0	NA	intron (NM_001045530, intron 3 of 5)	intron (NM_001045530, intron 3 of 5)	33323	NM_008375	16204	Mm.142716	NM_008375	ENSMUSG00000020405	Fabp6	GT|I-15P|I-BABP|ILBP|ILBP3|Illbp	fatty acid binding protein 6, ileal (gastrotropin)	protein-coding
Diff_Nuc21856	chr4	54649892	54650031	+	0	NA	Intergenic	Intergenic	-310856	NM_172867	242466	Mm.102904	NM_172867	ENSMUSG00000060206	Zfp462	6030417H05|9430078C22Rik|Gt4-2|Zfpip	zinc finger protein 462	protein-coding
Diff_Nuc24134	chr3	71023352	71023491	+	0	NA	Intergenic	Intergenic	-412208	NR_040556	625901	Mm.366028	NR_040556	ENSMUSG00000097252	Gm6634	EG625901	predicted gene 6634	ncRNA
Diff_Nuc12403	chr14	76380642	76380781	+	0	NA	intron (NM_026816, intron 4 of 7)	LTR16C|LTR|ERVL	25901	NM_026214	67516	Mm.390712	NM_026214	ENSMUSG00000046523	Kctd4	2210017A09Rik|AU017169	potassium channel tetramerisation domain containing 4	protein-coding
Diff_Nuc26296	chr2	61505992	61506131	+	0	NA	Intergenic	Intergenic	-43690	NM_021526	59029	Mm.218198	NM_021526	ENSMUSG00000026914	Psmd14	2610312C03Rik|3200001M20Rik|AA986732|Pad1|Poh1|rpm11	proteasome (prosome, macropain) 26S subunit, non-ATPase, 14	protein-coding
Diff_Nuc31247	chr9	53011222	53011361	+	0	NA	intron (NM_029936, intron 13 of 17)	intron (NM_029936, intron 13 of 17)	44926	NM_029936	77591	Mm.133560	NM_029936	ENSMUSG00000053289	Ddx10	4632415A01Rik|AI646054	DEAD (Asp-Glu-Ala-Asp) box polypeptide 10	protein-coding
Diff_Nuc21322	chr4	11087792	11087931	+	0	NA	intron (NM_001199105, intron 1 of 4)	B1_Mur2|SINE|Alu	4273	NM_021897	60599	Mm.393018	NM_021897	ENSMUSG00000028211	Trp53inp1	2700057G22Rik|SIP|SIP18|SIP27|Stinp|Teap	transformation related protein 53 inducible nuclear protein 1	protein-coding
Diff_Nuc1214	chr13	78307232	78307371	+	0	NA	Intergenic	Intergenic	28409	NM_001347538	13865	Mm.439653	NM_010151	ENSMUSG00000069171	Nr2f1	COUP-TF1|COUP-TFI|COUPTFA|EAR-3|EAR3|Erbal3|SVP44|Tcfcoup1	nuclear receptor subfamily 2, group F, member 1	protein-coding
Diff_Nuc22463	chr4	102620642	102620781	+	0	NA	intron (NM_001285859, intron 17 of 23)	intron (NM_001285859, intron 17 of 23)	-38273	NM_001163767	67344	Mm.111346	NM_026100	ENSMUSG00000028523	Tctex1d1	1700055O19Rik	Tctex1 domain containing 1	protein-coding
Diff_Nuc17735	chr6	44036962	44037101	+	0	NA	Intergenic	Intergenic	-420754	NM_013861	29807	Mm.320979	NM_013861	ENSMUSG00000029735	Tpk1	-	thiamine pyrophosphokinase	protein-coding
Diff_Nuc27567	chr2	155418552	155418691	+	0	NA	promoter-TSS (NM_001291111)	promoter-TSS (NM_001291111)	-75	NM_008180	14854	Mm.252316	NM_008180	ENSMUSG00000027610	Gss	AI314904|GS-A/GS-B|GSH-S	glutathione synthetase	protein-coding
Diff_Nuc20831	chr5	125837132	125837271	+	0	NA	Intergenic	B1_Mus1|SINE|Alu	-15737	NM_001205083	20778	Mm.282242	NM_016741	ENSMUSG00000037936	Scarb1	AI120173|CD36|Cd36l1|Chohd1|Cla-1|Cla1|D5Ertd460e|Hdlq1|Hlb398|SR-B1|SR-BI|SRBI|Srb1|mSR-BI	scavenger receptor class B, member 1	protein-coding
Diff_Nuc616	chr13	34718582	34718721	+	0	NA	Intergenic	Intergenic	25899	NM_025831	66895	Mm.28943	NM_025831	ENSMUSG00000021411	Pxdc1	1300014I06Rik	PX domain containing 1	protein-coding
Diff_Nuc29677	chr1	137509782	137509921	+	0	NA	Intergenic	Intergenic	-27919	NM_173437	215690	Mm.34977	NM_173437	ENSMUSG00000009418	Nav1	9530089B19|9930003A20Rik|C230080M11Rik|Pomfil3|Unc53h1|mKIAA1151|steerin-1	neuron navigator 1	protein-coding
Diff_Nuc8989	chr16	33239212	33239351	+	0	NA	intron (NM_176840, intron 12 of 12)	B1_Mur3|SINE|Alu	-12261	NM_080557	69150	Mm.28196	NM_080557	ENSMUSG00000022808	Snx4	1810036H14Rik|AI037066	sorting nexin 4	protein-coding
Diff_Nuc24803	chr3	111439302	111439441	+	0	NA	Intergenic	L1_Mus2|LINE|L1	-245450	NR_045362	625585	Mm.389497	NR_045362	ENSMUSG00000104543	Gm6602	-	predicted gene 6602	ncRNA
Diff_Nuc23009	chr4	136679392	136679531	+	0	NA	Intergenic	L1Md_F3|LINE|L1	41520	NR_040443	100503595	Mm.421314	NR_040443	ENSMUSG00000085833	Gm13003	OTTMUSG00000009822	predicted gene 13003	ncRNA
Diff_Nuc18846	chr6	125126312	125126451	+	0	NA	intron (NM_146171, intron 16 of 31)	intron (NM_146171, intron 16 of 31)	-9896	NM_001289726	14433	Mm.304088	NM_008084	ENSMUSG00000057666	Gapdh	Gapd	glyceraldehyde-3-phosphate dehydrogenase	protein-coding
Diff_Nuc10840	chr15	70375482	70375621	+	0	NA	Intergenic	RLTR11A|LTR|ERVK	620888	NR_045071	100503580	Mm.404646	NR_045071		Gm19782	-	predicted gene, 19782	ncRNA
Diff_Nuc25339	chr3	150425792	150425931	+	0	NA	Intergenic	(TCTA)n|Simple_repeat|Simple_repeat	260965	NR_039540	100628568		NR_039540	ENSMUSG00000092830	Mir3963	mmu-mir-3963|mu-mir-3963	microRNA 3963	ncRNA
Diff_Nuc390	chr13	14766472	14766611	+	0	NA	Intergenic	RLTR41|LTR|ERV1	44016	NM_134067	105351	Mm.41450	NM_134067	ENSMUSG00000039182	AW209491	-	expressed sequence AW209491	protein-coding
Diff_Nuc10272	chr15	33712712	33712851	+	0	NA	Intergenic	L1Md_F3|LINE|L1	-95143	NM_001085421	239364	Mm.60794	NM_001085421	ENSMUSG00000038984	Tspyl5	6330530B20|E130308C19Rik	testis-specific protein, Y-encoded-like 5	protein-coding
Diff_Nuc1643	chr13	107209342	107209481	+	0	NA	Intergenic	Lx2B|LINE|L1	517584	NM_029665	76582	Mm.132208	NM_029665	ENSMUSG00000042590	Ipo11	1700081H05Rik|2510001A17Rik|AI314624|AW555235|E330021B14Rik|Ranbp11	importin 11	protein-coding
Diff_Nuc33350	chr8	74371322	74371461	+	0	NA	Intergenic	Lx4B|LINE|L1	-34576	NM_145624	236193	Mm.290790	NM_145624	ENSMUSG00000056019	Zfp709	BC021921|GIOT-4|HIT-40	zinc finger protein 709	protein-coding
Diff_Nuc12964	chr14	123682002	123682141	+	0	NA	intron (NM_177393, intron 42 of 43)	intron (NM_177393, intron 42 of 43)	113663	NR_045144	380934	Mm.393838	NR_045143		AA536875	Gm1591	expressed sequence AA536875	ncRNA
Diff_Nuc19187	chr6	148715552	148715691	+	0	NA	Intergenic	RMER17B|LTR|ERVK	64368	NM_001081113	320727	Mm.260105	NM_001081113	ENSMUSG00000040029	Ipo8	6230418K12Rik|Abcc10|C130009K11Rik|MRP7|OM-1|Om1|Ranbp8	importin 8	protein-coding
Diff_Nuc28707	chr1	64883692	64883831	+	0	NA	intron (NM_001039493, intron 6 of 7)	intron (NM_001039493, intron 6 of 7)	-99437	NM_022721	14367	Mm.150813	NM_022721	ENSMUSG00000045005	Fzd5	5330434N09Rik|AI427138|Fz-5|Fz5|mFz5	frizzled class receptor 5	protein-coding
Diff_Nuc7183	chr17	6924272	6924411	+	0	NA	intron (NM_183368, intron 3 of 8)	MMTV-int|LTR|ERVK	14162	NM_183368	83672	Mm.442201	NM_031395	ENSMUSG00000041831	Sytl3	A430092N21|Slp3|Slp3-a|Slp3-b|mFLJ00307	synaptotagmin-like 3	protein-coding
Diff_Nuc31846	chr9	88661092	88661231	+	0	NA	Intergenic	Intergenic	-34473	NM_007536	12047	Mm.378888	NM_007536	ENSMUSG00000099974	Bcl2a1d	A1-d	B cell leukemia/lymphoma 2 related protein A1d	protein-coding
Diff_Nuc16084	chr7	81186022	81186161	+	0	NA	Intergenic	Intergenic	-27523	NM_009181	20450	Mm.4954	NM_009181	ENSMUSG00000025789	St8sia2	AI323367|ST8SiaII|STX|Siat8b	ST8 alpha-N-acetyl-neuraminide alpha-2,8-sialyltransferase 2	protein-coding
Diff_Nuc28634	chr1	60481772	60481911	+	0	NA	intron (NM_001198571, intron 1 of 10)	L1Md_F2|LINE|L1	15378	NM_001198570	329165	Mm.212066	NM_198127	ENSMUSG00000026782	Abi2	8430425M24Rik|AI839867|C130078H13	abl-interactor 2	protein-coding
Diff_Nuc16255	chr7	93527152	93527291	+	0	NA	Intergenic	MYSERV16_I-int|LTR|ERVK	7947	NM_001011828	258089	Mm.377347	NM_001011828	ENSMUSG00000062426	Olfr304	MOR219-3P	olfactory receptor 304	protein-coding
Diff_Nuc11171	chr15	89299962	89300101	+	0	NA	Intergenic	Intergenic	-6652	NR_077233	100532730	Mm.461541	NR_077233		C230037L18Rik	-	RIKEN cDNA C230037L18 gene	ncRNA
Diff_Nuc1838	chr12	3462802	3462941	+	0	NA	intron (NM_172421, intron 4 of 10)	intron (NM_172421, intron 4 of 10)	36014	NM_172421	75302	Mm.120475	NM_172421	ENSMUSG00000037486	Asxl2	4930556B16Rik|mKIAA1685	additional sex combs like 2 (Drosophila)	protein-coding
Diff_Nuc21950	chr4	59541192	59541331	+	0	NA	intron (NM_178164, intron 1 of 13)	intron (NM_178164, intron 1 of 13)	20975	NM_178164	230257	Mm.331640	NM_144904	ENSMUSG00000028382	Ptbp3	5830471K22Rik|AA407443|AI462022|AW107884|C86549|Rod1	polypyrimidine tract binding protein 3	protein-coding
Diff_Nuc20636	chr5	114052902	114053041	+	0	NA	Intergenic	ID_B1|SINE|B4	47428	NM_008153	14747	Mm.5196	NM_008153	ENSMUSG00000042190	Cmklr1	ChemR23|DEZ|Gpcr27|mcmklr1	chemokine-like receptor 1	protein-coding
Diff_Nuc24351	chr3	85488842	85488981	+	0	NA	intron (NM_172682, intron 6 of 11)	intron (NM_172682, intron 6 of 11)	61220	NM_172682	229488	Mm.119926	NM_172682	ENSMUSG00000051000	Fam160a1	9930021J17Rik	family with sequence similarity 160, member A1	protein-coding
Diff_Nuc10201	chr15	27837362	27837501	+	0	NA	intron (NM_001081302, intron 3 of 56)	intron (NM_001081302, intron 3 of 56)	118172	NM_001081302	223435	Mm.485422	NM_001081302	ENSMUSG00000022263	Trio	6720464I07Rik|AA408740|Solo	triple functional domain (PTPRF interacting)	protein-coding
Diff_Nuc13763	chr19	55287122	55287261	+	0	NA	intron (NM_001081076, intron 14 of 20)	L1MC3|LINE|L1	20023	NR_106146	102465990		NR_106146	ENSMUSG00000098289	Mir6715	Gm27474|mmu-mir-6715	microRNA 6715	ncRNA
Diff_Nuc30149	chr1	171142932	171143071	+	0	NA	Intergenic	Intergenic	-193781	NR_105772	102466632		NR_105772	ENSMUSG00000098829	Mir6354	Gm27282|mmu-mir-6354	microRNA 6354	ncRNA
Diff_Nuc31208	chr9	50769832	50769971	+	0	NA	intron (NM_178710, intron 3 of 15)	B1_Mus2|SINE|Alu	47277	NM_178710	235344	Mm.104932	NM_178710	ENSMUSG00000037112	Sik2	G630080D20Rik|Snf1lk2	salt inducible kinase 2	protein-coding
Diff_Nuc2996	chr12	96523072	96523211	+	0	NA	Intergenic	Intergenic	-407295	NM_201518	399558	Mm.341948	NM_201518	ENSMUSG00000047414	Flrt2	-	fibronectin leucine rich transmembrane protein 2	protein-coding
Diff_Nuc3048	chr12	100477312	100477451	+	0	NA	intron (NM_183186, intron 4 of 5)	intron (NM_183186, intron 4 of 5)	-76363	NR_038130	67639	Mm.87374	NR_038130		4930474N09Rik	-	RIKEN cDNA 4930474N09 gene	ncRNA
Diff_Nuc6492	chr10	86931472	86931611	+	0	NA	Intergenic	(ACTAG)n|Simple_repeat|Simple_repeat	24864	NM_008553	17172	Mm.136217	NM_008553	ENSMUSG00000020052	Ascl1	AI225900|ASH1|Mash1|bHLHa46	achaete-scute family bHLH transcription factor 1	protein-coding
Diff_Nuc22873	chr4	129620662	129620801	+	0	NA	Intergenic	MIR|SINE|MIR	-16887	NR_040647	72225	Mm.102193	NR_040647		1700003M07Rik	-	RIKEN cDNA 1700003M07 gene	ncRNA
Diff_Nuc609	chr13	34158692	34158831	+	0	NA	intron (NM_026512, intron 6 of 6)	L1_Mus3|LINE|L1	11116	NM_009450	22151	Mm.422827	NM_009450	ENSMUSG00000058672	Tubb2a	M(beta)2|Tubb2	tubulin, beta 2A class IIA	protein-coding
Diff_Nuc28716	chr1	65730172	65730311	+	0	NA	Intergenic	Intergenic	-242855	NM_027010	12969	Mm.275362	NM_027010	ENSMUSG00000025945	Crygf	3110001K11Rik|Cryg-2|DGcry-2|Len-2	crystallin, gamma F	protein-coding
Diff_Nuc28310	chr1	40078142	40078281	+	0	NA	intron (NM_001252202, intron 26 of 29)	intron (NM_001252202, intron 26 of 29)	-63402	NM_010555	16178	Mm.1349	NM_010555	ENSMUSG00000026073	Il1r2	CD121b|Il1r-2	interleukin 1 receptor, type II	protein-coding
Diff_Nuc18711	chr6	117085962	117086101	+	0	NA	Intergenic	Intergenic	-32522	NM_001012477	20315	Mm.303231	NM_013655	ENSMUSG00000061353	Cxcl12	Pbsf|Scyb12|Sdf1|Tlsf|Tpar1	chemokine (C-X-C motif) ligand 12	protein-coding
Diff_Nuc9	chrY	2793747	2793886	+	0	NA	Intergenic	Intergenic	406558	NM_001270512	100041505	Mm.491824	NM_001270512	ENSMUSG00000096520	Gm3376	Rbmy1b	predicted gene 3376	protein-coding
Diff_Nuc4223	chr11	64478212	64478351	+	0	NA	Intergenic	Intergenic	-228105	NR_028445	654805	Mm.436132	NR_028445		F930015N05Rik	-	RIKEN cDNA F930015N05 gene	ncRNA
Diff_Nuc13162	chr19	13355382	13355521	+	0	NA	Intergenic	Lx2B|LINE|L1	33322	NM_001011841	258121	Mm.377353	NM_001011841	ENSMUSG00000062199	Olfr1465	MOR202-28	olfactory receptor 1465	protein-coding
Diff_Nuc6919	chr10	117334032	117334171	+	0	NA	Intergenic	Intergenic	-28414	NR_045342	71067	Mm.410793	NR_045342		4933411E08Rik	-	RIKEN cDNA 4933411E08 gene	ncRNA
Diff_Nuc7938	chr17	54876732	54876871	+	0	NA	Intergenic	L1_Mus3|LINE|L1	-367402	NR_045825	69418	Mm.391004	NR_045825	ENSMUSG00000099747	1700025K24Rik	-	RIKEN cDNA 1700025K24 gene	ncRNA
Diff_Nuc11102	chr15	84767372	84767511	+	0	NA	intron (NM_016714, intron 5 of 7)	intron (NM_016714, intron 5 of 7)	13583	NM_016714	18141	Mm.28379	NM_016714	ENSMUSG00000016619	Nup50	1700030K07Rik|AI413123|Npap60	nucleoporin 50	protein-coding
Diff_Nuc8929	chr16	31064682	31064821	+	0	NA	intron (NM_198626, intron 1 of 3)	MTE2a-int|LTR|MaLR	16767	NM_198626	268880	Mm.286693	NM_198626	ENSMUSG00000047434	Xxylt1	AI480653	xyloside xylosyltransferase 1	protein-coding
Diff_Nuc9646	chr16	83430652	83430791	+	0	NA	Intergenic	RLTR22_Mur|LTR|ERVK	-940667	NR_040567	75247	Mm.417813	NR_040567		4930553E22Rik	-	RIKEN cDNA 4930553E22 gene	ncRNA
Diff_Nuc24626	chr3	100881022	100881161	+	0	NA	exon (NM_011197, exon 3 of 9)	exon (NM_011197, exon 3 of 9)	32998	NM_011197	19221	Mm.24807	NM_011197	ENSMUSG00000027864	Ptgfrn	4833445A08Rik|AU042434|CD9P-1|FPRP|Trim45	prostaglandin F2 receptor negative regulator	protein-coding
Diff_Nuc26676	chr2	91719072	91719211	+	0	NA	intron (NM_172669, intron 12 of 17)	PB1D7|SINE|Alu	-43205	NM_007699	12672	Mm.330405	NM_007699	ENSMUSG00000040495	Chrm4	Chrm-4|M4	cholinergic receptor, muscarinic 4	protein-coding
Diff_Nuc10881	chr15	73680232	73680371	+	0	NA	Intergenic	Intergenic	-10200	NM_001033365	268816	Mm.440635	NM_001033365	ENSMUSG00000072487	Mroh5	Gm628	maestro heat-like repeat family member 5	protein-coding
Diff_Nuc6100	chr10	63524672	63524811	+	0	NA	intron (NM_178678, intron 2 of 2)	intron (NM_178678, intron 2 of 2)	28262	NM_178678	216028	Mm.431318	NM_178678	ENSMUSG00000042846	Lrrtm3	9630044H04Rik	leucine rich repeat transmembrane neuronal 3	protein-coding
Diff_Nuc23235	chr4	148489322	148489461	+	0	NA	intron (NM_001025296, intron 3 of 5)	B1_Mus1|SINE|Alu	11140	NM_001025296	13347	Mm.41433	NM_010044	ENSMUSG00000028974	Dffa	A330085O09Rik|DFF35|Dff45|ICAD|ICAD-L|ICAD-S	DNA fragmentation factor, alpha subunit	protein-coding
Diff_Nuc6451	chr10	83897202	83897341	+	0	NA	intron (NM_001004363, intron 1 of 6)	intron (NM_001004363, intron 1 of 6)	5945	NM_001004363	77976	Mm.25874	NM_001004363	ENSMUSG00000020032	Nuak1	AU014801|AW494241|B230104P22Rik|Omphk1	NUAK family, SNF1-like kinase, 1	protein-coding
Diff_Nuc7169	chr17	6157682	6157821	+	0	NA	intron (NM_054040, intron 1 of 13)	RMER15|LTR|ERVL	19603	NM_054040	68842	Mm.449307	NM_054040	ENSMUSG00000034377	Tulp4	1110057P05Rik|2210038L17Rik|Tusp	tubby like protein 4	protein-coding
Diff_Nuc28046	chr1	17471262	17471401	+	0	NA	Intergenic	Intergenic	-120651	NM_053191	94227	Mm.442452	NM_053191	ENSMUSG00000067780	Pi15	P24TI|P25TI|PI-15|SugarCrisp	peptidase inhibitor 15	protein-coding
Diff_Nuc28002	chr1	13173922	13174061	+	0	NA	intron (NM_008678, intron 7 of 22)	intron (NM_008678, intron 7 of 22)	-56747	NM_001081209	383491	Mm.309380	NM_001081209	ENSMUSG00000042414	Prdm14	-	PR domain containing 14	protein-coding
Diff_Nuc8315	chr17	81172532	81172671	+	0	NA	Intergenic	Intergenic	-45236	NM_001290345	225028	Mm.311948	NM_001081357	ENSMUSG00000024242	Map4k3	4833416M01Rik|4833416M07Rik|9530052P13Rik|Glk|MAPKKKK3|MEKKK 3|MEKKK3|RAB8IPL1	mitogen-activated protein kinase kinase kinase kinase 3	protein-coding
Diff_Nuc25210	chr3	141940492	141940631	+	0	NA	intron (NM_019808, intron 8 of 12)	intron (NM_019808, intron 8 of 12)	-108369	NM_001277216	12167	Mm.39089	NM_007560	ENSMUSG00000052430	Bmpr1b	AI385617|ALK-6|AV355320|Acvrlk6|Alk6|BMPR-1B|BMPR-IB|CFK-43a|SKR6	bone morphogenetic protein receptor, type 1B	protein-coding
Diff_Nuc22928	chr4	133171372	133171511	+	0	NA	intron (NM_001017968, intron 2 of 7)	intron (NM_001017968, intron 2 of 7)	-13358	NM_018754	55948	Mm.44482	NM_018754	ENSMUSG00000047281	Sfn	Er|Mme1|Ywhas	stratifin	protein-coding
Diff_Nuc3295	chr12	118972352	118972491	+	0	NA	intron (NM_175930, intron 22 of 27)	RLTR42-int|LTR|ERVK	-109913	NM_146040	217946	Mm.281149	NM_146040	ENSMUSG00000021175	Cdca7l	BC006933|JPO2	cell division cycle associated 7 like	protein-coding
Diff_Nuc26765	chr2	98569322	98569461	+	0	NA	Intergenic	L1Md_F3|LINE|L1	1261577	NM_178725	241568	Mm.241682	NM_178725	ENSMUSG00000050587	Lrrc4c	6430556C10Rik|NGL-1	leucine rich repeat containing 4C	protein-coding
Diff_Nuc31470	chr9	65554222	65554361	+	0	NA	intron (NM_172536, intron 3 of 9)	ID_B1|SINE|B4	29936	NM_001301307	18247	Mm.116749	NM_010952	ENSMUSG00000040652	Oaz2	AZ-2|AZ2|Oaz2-ps|Sez15	ornithine decarboxylase antizyme 2	protein-coding
Diff_Nuc29049	chr1	87842212	87842351	+	0	NA	intron (NM_001033290, intron 1 of 1)	B4A|SINE|B4	15349	NM_001033290	227326	Mm.244158	NM_001033290	ENSMUSG00000049608	Gpr55	CTFL|Gm218|Lpir1	G protein-coupled receptor 55	protein-coding
Diff_Nuc19557	chr5	32268232	32268371	+	0	NA	intron (NM_181282, intron 7 of 11)	intron (NM_181282, intron 7 of 11)	-170544	NM_008037	14284	Mm.24684	NM_008037	ENSMUSG00000029135	Fosl2	Fra-2	fos-like antigen 2	protein-coding
Diff_Nuc8515	chr17	94051742	94051881	+	0	NA	Intergenic	L1_Mus4|LINE|L1	453303	NM_009625	11516	Mm.3407	NM_009625	ENSMUSG00000024256	Adcyap1	PACAP	adenylate cyclase activating polypeptide 1	protein-coding
Diff_Nuc17588	chr6	33743952	33744091	+	0	NA	intron (NM_009148, intron 11 of 17)	intron (NM_009148, intron 11 of 17)	-235427	NM_028886	74354	Mm.127952	NM_028886	ENSMUSG00000056215	Lrguk	4921528H16Rik	leucine-rich repeats and guanylate kinase domain containing	protein-coding
Diff_Nuc29534	chr1	124710542	124710681	+	0	NA	Intergenic	Intergenic	1231525	NM_199021	269109	Mm.417716	NM_199021	ENSMUSG00000036815	Dpp10	6430601K09Rik|DPP X|Dprp3	dipeptidylpeptidase 10	protein-coding
Diff_Nuc14940	chr18	70270372	70270511	+	0	NA	intron (NM_001082553, intron 2 of 6)	Lx9|LINE|L1	30818	NM_001082553	80718	Mm.246753	NM_030554	ENSMUSG00000024511	Rab27b	2310021G14Rik|B130064M09Rik	RAB27B, member RAS oncogene family	protein-coding
Diff_Nuc10789	chr15	66693002	66693141	+	0	NA	Intergenic	Intergenic	-29680	NM_009192	20491	Mm.7601	NM_009192	ENSMUSG00000022372	Sla	Slap|Slap-1	src-like adaptor	protein-coding
Diff_Nuc3182	chr12	109722722	109722861	+	0	NA	intron (NM_001043335, intron 3 of 21)	intron (NM_001043335, intron 3 of 21)	61765	NM_001043335	68519	Mm.236645	NM_001043335	ENSMUSG00000058070	Eml1	1110008N23Rik|A930030P13Rik|AA171013|AI847476|AI853955|ELP79|EMAP|EMAPL|heco	echinoderm microtubule associated protein like 1	protein-coding
Diff_Nuc5598	chr10	26753902	26754041	+	0	NA	intron (NM_008481, intron 48 of 63)	MTD|LTR|MaLR	261653	NM_176837	73910	Mm.356496	NM_176837	ENSMUSG00000039031	Arhgap18	4833419J07Rik|AI314906|AI843501	Rho GTPase activating protein 18	protein-coding
Diff_Nuc28626	chr1	60195232	60195371	+	0	NA	intron (NM_001285473, intron 7 of 13)	B1_Mur4|SINE|Alu	30374	NR_104344	241066	Mm.276441	NM_139150	ENSMUSG00000026017	Carf	Als2cr8|ECBRC-FC1|ECBRC-FC2	calcium response factor	protein-coding
Diff_Nuc30308	chr1	181197562	181197701	+	0	NA	intron (NM_027188, intron 5 of 11)	ORR1A4|LTR|MaLR	250503	NM_027188	69726	Mm.222338	NM_027188	ENSMUSG00000055067	Smyd3	2410008A19Rik|Zmynd1	SET and MYND domain containing 3	protein-coding
Diff_Nuc23323	chr4	155310422	155310561	+	0	NA	Intergenic	MIR|SINE|MIR	-7431	NM_001039158	140499	Mm.371673	NM_021402	ENSMUSG00000023286	Ube2j2	1200007B18Rik|2400008G19Rik|5730472G04Rik|AL022923|NCUBE-2|Ubc6|Ubc6p	ubiquitin-conjugating enzyme E2J 2	protein-coding
Diff_Nuc17526	chr6	30321952	30322091	+	0	NA	intron (NM_172735, intron 8 of 10)	B1_Mm|SINE|Alu	18989	NM_172735	232679	Mm.29780	NM_172735	ENSMUSG00000039130	Zc3hc1	1110054L24Rik|AU018540|AU019789|HSPC216|Nipa	zinc finger, C3HC type 1	protein-coding
Diff_Nuc30211	chr1	174548282	174548421	+	0	NA	Intergenic	Intergenic	14754	NM_026725	68440	Mm.33024	NM_026725	ENSMUSG00000026544	Dusp23	1300005N15Rik|LDP-3	dual specificity phosphatase 23	protein-coding
Diff_Nuc24339	chr3	84878032	84878171	+	0	NA	Intergenic	RMER6C|LTR|ERVK	121968	NM_080428	50754	Mm.196475	NM_080428	ENSMUSG00000028086	Fbxw7	1110001A17Rik|AGO|Cdc4|Fbw7|Fbwd6|Fbx30|Fbxo30|Fbxw6|SEL-10	F-box and WD-40 domain protein 7	protein-coding
Diff_Nuc18612	chr6	108806732	108806871	+	0	NA	3' UTR (NM_138677, exon 12 of 12)	3' UTR (NM_138677, exon 12 of 12)	28166	NM_138677	192193	Mm.21596	NM_138677	ENSMUSG00000030104	Edem1	A130059K23Rik|EDEM|mKIAA0212	ER degradation enhancer, mannosidase alpha-like 1	protein-coding
Diff_Nuc30695	chr9	13378972	13379111	+	0	NA	Intergenic	Intergenic	-45392	NM_001013813	270118	Mm.116898	NM_173776	ENSMUSG00000031925	Maml2	5930431H10|BC032967	mastermind like 2 (Drosophila)	protein-coding
Diff_Nuc6519	chr10	89366842	89366981	+	0	NA	intron (NM_001128086, intron 1 of 24)	URR1A|DNA|MER1_type	30657	NM_001128086	77531	Mm.440605	NM_181398	ENSMUSG00000058589	Anks1b	AIDA-1b|C030032C09Rik|E530015N03Rik|ENSMUSG00000078431|Gm10937|Gm1555	ankyrin repeat and sterile alpha motif domain containing 1B	protein-coding
Diff_Nuc30201	chr1	174001802	174001941	+	0	NA	intron (NM_021607, intron 8 of 16)	intron (NM_021607, intron 8 of 16)	-10789	NM_009938	12847	Mm.30041	NM_009938	ENSMUSG00000026553	Copa	AU040324|xenin	coatomer protein complex subunit alpha	protein-coding
Diff_Nuc14716	chr18	56972132	56972271	+	0	NA	intron (NM_177115, intron 1 of 4)	intron (NM_177115, intron 1 of 4)	104734	NM_010721	16906	Mm.4105	NM_010721	ENSMUSG00000024590	Lmnb1	-	lamin B1	protein-coding
Diff_Nuc19228	chr5	5064732	5064871	+	0	NA	intron (NM_011074, intron 8 of 14)	intron (NM_011074, intron 8 of 14)	201267	NM_001310448	18647	Mm.389061	NM_011074	ENSMUSG00000028926	Cdk14	Pftk1|mKIAA0834	cyclin-dependent kinase 14	protein-coding
Diff_Nuc12802	chr14	109493152	109493291	+	0	NA	Intergenic	MTA_Mm|LTR|MaLR	-179765	NM_199065	76965	Mm.257268	NM_199065	ENSMUSG00000075478	Slitrk1	3200001I04Rik	SLIT and NTRK-like family, member 1	protein-coding
Diff_Nuc1637	chr13	106751422	106751561	+	0	NA	Intergenic	MLT2E|LTR|ERVL	517718	NM_008308	15550	Mm.4716	NM_008308	ENSMUSG00000021721	Htr1a	Gpcr18	5-hydroxytryptamine (serotonin) receptor 1A	protein-coding
Diff_Nuc34113	chr8	129451632	129451771	+	0	NA	Intergenic	B1F1|SINE|Alu	18120	NM_024214	67952	Mm.6932	NM_024214	ENSMUSG00000093904	Tomm20	1810060K07Rik|BB284719|Gm19268|MAS20|MOM19|TOM20|mKIAA0016	translocase of outer mitochondrial membrane 20 homolog (yeast)	protein-coding
Diff_Nuc316	chr13	11620872	11621011	+	0	NA	Intergenic	Intergenic	6622	NR_027813	664793	Mm.410565	NR_027813		Zp4-ps	EG664793|Zp4|Zpb	zona pellucida glycoprotein 4, pseudogene	pseudo
Diff_Nuc5299	chr10	5967962	5968101	+	0	NA	intron (NM_001033466, intron 1 of 2)	intron (NM_001033466, intron 1 of 2)	9598	NM_001033466	381990	Mm.262466	NM_001033466	ENSMUSG00000075327	Zbtb2	Gm1103	zinc finger and BTB domain containing 2	protein-coding
Diff_Nuc6966	chr10	120321522	120321661	+	0	NA	intron (NM_177092, intron 1 of 6)	ORR1D1|LTR|MaLR	14436	NM_177092	320183	Mm.169755	NM_177092	ENSMUSG00000051236	Msrb3	D430026P16Rik|I-8-23|MsrB2	methionine sulfoxide reductase B3	protein-coding
Diff_Nuc29029	chr1	87423472	87423611	+	0	NA	Intergenic	Intergenic	71844	NM_030194	109032	Mm.335802	NM_030194	ENSMUSG00000070034	Sp110	5031415C07Rik|52kDa|5830484A20Rik|ENSMUSG00000075603|Ifi75|Ipr1	Sp110 nuclear body protein	protein-coding
Diff_Nuc27035	chr2	120269512	120269651	+	0	NA	intron (NM_172672, intron 15 of 23)	B1_Mur4|SINE|Alu	-19748	NM_001177799	12335	Mm.458021	NM_007601	ENSMUSG00000079110	Capn3	AI323605|Capa-3|Capa3|Lp82|p94	calpain 3	protein-coding
Diff_Nuc14222	chr18	26028782	26028921	+	0	NA	Intergenic	MIRc|SINE|MIR	-116367	NM_001174074	108013	Mm.266435	NM_133195	ENSMUSG00000024268	Celf4	A230070D14Rik|BRUNOL-4|Brul4|Brunol4|C130060B05Rik	CUGBP, Elav-like family member 4	protein-coding
Diff_Nuc26653	chr2	90805642	90805781	+	0	NA	intron (NM_001244891, intron 2 of 14)	intron (NM_001244891, intron 2 of 14)	25157	NM_017368	13046	Mm.29495	NM_017368	ENSMUSG00000005506	Celf1	1600010O03Rik|AA407467|Brunol2|CUG-BP|CUG-BP1|CUGBP|Cugbp1|D2Wsu101e|HNAB50|NAB50	CUGBP, Elav-like family member 1	protein-coding
Diff_Nuc18367	chr6	91667672	91667811	+	0	NA	intron (NM_009320, intron 2 of 14)	B3|SINE|B2	33680	NM_009320	21366	Mm.395650	NM_009320	ENSMUSG00000030096	Slc6a6	AA589629|C80501|Taut	solute carrier family 6 (neurotransmitter transporter, taurine), member 6	protein-coding
Diff_Nuc11742	chr14	30172062	30172201	+	0	NA	intron (NM_009785, intron 5 of 37)	intron (NM_009785, intron 5 of 37)	340737	NM_176920	319476	Mm.95780	NM_176920	ENSMUSG00000045776	Lrtm1	A930016D02Rik	leucine-rich repeats and transmembrane domains 1	protein-coding
Diff_Nuc1418	chr13	92823192	92823331	+	0	NA	intron (NM_009027, intron 2 of 23)	intron (NM_009027, intron 2 of 23)	78188	NM_009027	19418	Mm.248630	NM_009027	ENSMUSG00000021708	Rasgrf2	6330417G04Rik|AW048350|Grf2|Ras-GRF2	RAS protein-specific guanine nucleotide-releasing factor 2	protein-coding
Diff_Nuc32652	chr8	24319212	24319351	+	0	NA	promoter-TSS (NM_018743)	promoter-TSS (NM_018743)	-356	NM_018743	102247	Mm.200898	NM_018743	ENSMUSG00000031545	Gpat4	AU041707|AW545732|Agpat6|Tsarg7	glycerol-3-phosphate acyltransferase 4	protein-coding
Diff_Nuc756	chr13	43666392	43666531	+	0	NA	Intergenic	Intergenic	-10901	NM_001081059	76137	Mm.426290	NM_001081059	ENSMUSG00000021371	Mcur1	6230416A05Rik|AU015498|AV136929|AW554392|C88263|Ccdc90a	mitochondrial calcium uniporter regulator 1	protein-coding
Diff_Nuc26862	chr2	105026162	105026301	+	0	NA	Intergenic	Intergenic	-38268	NM_028747	74088	Mm.46188	NM_028747	ENSMUSG00000055312	Them7	0610012H03Rik	thioesterase superfamily member 7	protein-coding
Diff_Nuc33116	chr8	60566612	60566751	+	0	NA	intron (NM_175032, intron 4 of 11)	MLT1E3|LTR|MaLR	-434829	NM_144731	108150	Mm.62886	NM_144731	ENSMUSG00000031608	Galnt7	AI225872	UDP-N-acetyl-alpha-D-galactosamine: polypeptide N-acetylgalactosaminyltransferase 7	protein-coding
Diff_Nuc28736	chr1	67085492	67085631	+	0	NA	promoter-TSS (NM_001190984)	promoter-TSS (NM_001190984)	-115	NM_021295	14768	Mm.20522	NM_021295	ENSMUSG00000026000	Lancl1	AW124738|Gpr69|Gpr69a|p40	LanC (bacterial lantibiotic synthetase component C)-like 1	protein-coding
Diff_Nuc29671	chr1	137301702	137301841	+	0	NA	intron (NM_153774, intron 10 of 23)	B1_Mus2|SINE|Alu	25297	NM_153774	226432	Mm.271642	NM_153774	ENSMUSG00000041879	Ipo9	0710008K06Rik|AI845704|C78347|Imp9|Ranbp9|mKIAA1192	importin 9	protein-coding
Diff_Nuc26641	chr2	89641012	89641151	+	0	NA	Intergenic	ORR1A3|LTR|MaLR	-11574	NM_146476	258468	Mm.314870	NM_146476	ENSMUSG00000075074	Olfr1254	MOR231-13	olfactory receptor 1254	protein-coding
Diff_Nuc23247	chr4	148998462	148998601	+	0	NA	intron (NM_001290989, intron 2 of 17)	B3A|SINE|B2	31145	NR_105990	102465983		NR_105990	ENSMUSG00000098580	Mir7023	Gm27912|mmu-mir-7023	microRNA 7023	ncRNA
Diff_Nuc18231	chr6	83896842	83896981	+	0	NA	intron (NM_008717, intron 7 of 26)	BC1_Mm|scRNA|scRNA	32564	NM_008717	18139	Mm.132392	NM_008717	ENSMUSG00000030016	Zfp638	AI323587|Np220|Zfml|Znf638|mNP220	zinc finger protein 638	protein-coding
Diff_Nuc24109	chr3	68883652	68883791	+	0	NA	intron (NM_008467, intron 14 of 16)	intron (NM_008467, intron 14 of 16)	-35057	NM_025863	66949	Mm.176695	NM_025863	ENSMUSG00000034317	Trim59	2310035M22Rik|2700022F13Rik|Mrf1|TSBF1	tripartite motif-containing 59	protein-coding
Diff_Nuc14967	chr18	71841012	71841151	+	0	NA	intron (NM_007831, intron 6 of 28)	intron (NM_007831, intron 6 of 28)	669642	NM_007831	13176	Mm.167882	NM_007831	ENSMUSG00000060534	Dcc	C030036D22Rik|Igdcc1	deleted in colorectal carcinoma	protein-coding
Diff_Nuc5551	chr10	23049562	23049701	+	0	NA	intron (NM_010167, intron 1 of 18)	intron (NM_010167, intron 1 of 18)	20065	NM_001347372	14051	Mm.332128	NM_010167	ENSMUSG00000010461	Eya4	B130023L16Rik	EYA transcriptional coactivator and phosphatase 4	protein-coding
Diff_Nuc7962	chr17	56382122	56382261	+	0	NA	promoter-TSS (NR_029827)	promoter-TSS (NR_029827)	-220	NR_029827	723883		NR_029827	ENSMUSG00000065491	Mir7b	Mirn7b|mir-7b|mmu-mir-7b	microRNA 7b	ncRNA
Diff_Nuc18476	chr6	98470502	98470641	+	0	NA	Intergenic	Intergenic	-177823	NM_001128092	330390	Mm.484161	NM_001128092	ENSMUSG00000090667	Gm765	-	predicted gene 765	protein-coding
Diff_Nuc15719	chr7	53053182	53053321	+	0	NA	intron (NM_001290990, intron 11 of 14)	intron (NM_001290990, intron 11 of 14)	12501	NM_001290990	381983	Mm.44928	NM_001005511	ENSMUSG00000062044	Lmtk3	BC059845|aatyk3	lemur tyrosine kinase 3	protein-coding
Diff_Nuc1380	chr13	90309562	90309701	+	0	NA	Intergenic	Intergenic	80359	NM_025335	66074	Mm.241387	NM_025335	ENSMUSG00000012422	Tmem167	0610041E09Rik|5730424F14Rik|AU041184|AW537806|ENSMUSG00000060669|Gm10085|Tmem167a	transmembrane protein 167	protein-coding
Diff_Nuc20541	chr5	106048222	106048361	+	0	NA	Intergenic	MTE2a|LTR|MaLR	-80697	NM_001122768	231549	Mm.23837	NM_178701	ENSMUSG00000046079	Lrrc8d	2810473G09Rik|4930525N13Rik|A930019F03|Lrrc5	leucine rich repeat containing 8D	protein-coding
Diff_Nuc17962	chr6	60117537	60117676	+	0	NA	Intergenic	L1Md_F|LINE|L1	236095	NR_015565	208079	Mm.131226	NM_177329	ENSMUSG00000046764	A530053G22Rik	-	RIKEN cDNA A530053G22 gene	ncRNA
Diff_Nuc33234	chr8	70520262	70520401	+	0	NA	Intergenic	Intergenic	-21858	NM_177698	234353	Mm.32525	NM_027626	ENSMUSG00000030465	Psd3	4931420C21Rik|AI661273|BC003498|D430018P08|EFA6D	pleckstrin and Sec7 domain containing 3	protein-coding
Diff_Nuc7508	chr17	27905212	27905351	+	0	NA	intron (NM_001044719, intron 3 of 4)	intron (NM_001044719, intron 3 of 4)	-39385	NM_013891	30051	Mm.26768	NM_013891	ENSMUSG00000024215	Spdef	PDEF|Pse	SAM pointed domain containing ets transcription factor	protein-coding
Diff_Nuc7602	chr17	31991032	31991171	+	0	NA	intron (NM_010831, intron 3 of 13)	intron (NM_010831, intron 3 of 13)	1636	NM_010831	17691	Mm.290941	NM_010831	ENSMUSG00000024042	Sik1	Msk|Sik|Snf1lk	salt inducible kinase 1	protein-coding
Diff_Nuc21202	chr5	151016642	151016781	+	0	NA	Intergenic	Intergenic	-45794	NM_172887	320365	Mm.216590	NM_172887	ENSMUSG00000056602	Fry	13CDNA73|9330186A19Rik|AF346502|AI462658|C87180|D930046M03|cg003|mKIAA4143	FRY microtubule binding protein	protein-coding
Diff_Nuc8290	chr17	79934212	79934351	+	0	NA	Intergenic	RLTR16|LTR|ERVK	-24455	NR_033462	100038718	Mm.414347	NR_033462		Gm10494	ENSMUSG00000073373	predicted gene 10494	ncRNA
Diff_Nuc23722	chr3	35659752	35659891	+	0	NA	intron (NM_029570, intron 1 of 29)	Lx8|LINE|L1	6761	NM_029570	76295	Mm.239416	NM_029570	ENSMUSG00000037400	Atp11b	1110019I14Rik|ATPIF|ATPIR|mKIAA0956	ATPase, class VI, type 11B	protein-coding
Diff_Nuc16637	chr7	117220502	117220641	+	0	NA	exon (NM_009281, exon 8 of 16)	exon (NM_009281, exon 8 of 16)	15355	NM_009281	20841	Mm.10815	NM_009281	ENSMUSG00000061079	Zfp143	AA959806|AU015869|D7Ertd805e|KRAB14|SBF|Staf|Zfp79|Zfp80-rs1|Znf143|pHZ-1	zinc finger protein 143	protein-coding
Diff_Nuc14561	chr18	45678912	45679051	+	0	NA	intron (NM_001312905, intron 2 of 10)	Lx2B|LINE|L1	-40827	NM_080465	140492	Mm.411614	NM_080465	ENSMUSG00000054477	Kcnn2	KCa2.2|SK2|SKCA2|bc|fri	potassium intermediate/small conductance calcium-activated channel, subfamily N, member 2	protein-coding
Diff_Nuc30667	chr9	10242472	10242611	+	0	NA	intron (NM_001170787, intron 3 of 24)	intron (NM_001170787, intron 3 of 24)	348110	NR_105745	102466147		NR_105745	ENSMUSG00000098408	Mir6237	Gm27411|mmu-mir-6237	microRNA 6237	ncRNA
Diff_Nuc13538	chr19	40407362	40407501	+	0	NA	intron (NM_001034962, intron 14 of 22)	intron (NM_001034962, intron 14 of 22)	-61325	NM_016861	54132	Mm.5567	NM_016861	ENSMUSG00000055044	Pdlim1	CLP36|Clim1|mClim1	PDZ and LIM domain 1 (elfin)	protein-coding
Diff_Nuc16841	chr7	129531312	129531451	+	0	NA	intron (NM_008855, intron 2 of 16)	MIRc|SINE|MIR	98742	NM_008855	18751	Mm.207496	NM_008855	ENSMUSG00000052889	Prkcb	PKC-B|PKC-Beta|Pkcb|Prkcb1|Prkcb2	protein kinase C, beta	protein-coding
Diff_Nuc10129	chr15	20649172	20649311	+	0	NA	Intergenic	RMER10A|LTR|ERVL	-52736	NM_022816	64833	Mm.352763	NM_022816	ENSMUSG00000047565	Acot10	Acate3|MT-ACT48|p48	acyl-CoA thioesterase 10	protein-coding
Diff_Nuc18697	chr6	115984482	115984621	+	0	NA	intron (NM_177412, intron 4 of 5)	intron (NM_177412, intron 4 of 5)	-39528	NM_026376	67784	Mm.3085	NM_026376	ENSMUSG00000030123	Plxnd1	6230425C21Rik|b2b1863Clo|b2b553Clo	plexin D1	protein-coding
Diff_Nuc15567	chr7	35640082	35640221	+	0	NA	Intergenic	RMER1B|Other|Other	-42421	NM_175140	68947	Mm.29380	NM_175140	ENSMUSG00000060402	Chst8	1500011J21Rik|AI426009	carbohydrate (N-acetylgalactosamine 4-0) sulfotransferase 8	protein-coding
Diff_Nuc1183	chr13	76336722	76336861	+	0	NA	Intergenic	Intergenic	100609	NM_001081352	218343	Mm.277964	NM_001081352	ENSMUSG00000033991	Ttc37	mKIAA0372	tetratricopeptide repeat domain 37	protein-coding
Diff_Nuc521	chr13	26249022	26249161	+	0	NA	Intergenic	Intergenic	155184	NR_045933	73576	Mm.45473	NR_045933		1700092E19Rik	-	RIKEN cDNA 1700092E19 gene	ncRNA
Diff_Nuc6869	chr10	114041502	114041641	+	0	NA	intron (NM_146241, intron 3 of 18)	(CA)n|Simple_repeat|Simple_repeat	196855	NM_146241	237553	Mm.445550	NM_146241	ENSMUSG00000050663	Trhde	9330155P21Rik	TRH-degrading enzyme	protein-coding
Diff_Nuc15844	chr7	63484712	63484851	+	0	NA	intron (NM_010418, intron 91 of 92)	intron (NM_010418, intron 91 of 92)	-10360	NM_021879	18431	Mm.137052	NM_021879	ENSMUSG00000030450	Oca2	D7H15S12|D7Icr28RN|D7Nic1|p|p<cas>	oculocutaneous albinism II	protein-coding
Diff_Nuc914	chr13	53067072	53067211	+	0	NA	intron (NM_017373, intron 1 of 1)	intron (NM_017373, intron 1 of 1)	9267	NM_017373	18030	Mm.136604	NM_017373	ENSMUSG00000056749	Nfil3	AV225605|E4BP4	nuclear factor, interleukin 3, regulated	protein-coding
Diff_Nuc32295	chr9	121283352	121283491	+	0	NA	intron (NM_175114, intron 1 of 15)	intron (NM_175114, intron 1 of 15)	7345	NM_175114	67095	Mm.491112	NM_175114	ENSMUSG00000032536	Trak1	2310001H13Rik|AI413908|AI467545|hyrt|mKIAA1042	trafficking protein, kinesin binding 1	protein-coding
Diff_Nuc27224	chr2	130589662	130589801	+	0	NA	intron (NM_029432, intron 20 of 36)	MLT1E2|LTR|MaLR	40106	NR_024097	100043766	Mm.447040	NR_024097		Gm14057	OTTMUSG00000015563	Ppp1r14c pseudogene	pseudo
Diff_Nuc31362	chr9	59490562	59490701	+	0	NA	intron (NM_029922, intron 20 of 23)	PB1D10|SINE|Alu	-13544	NM_011099	18746	Mm.326167	NM_011099	ENSMUSG00000032294	Pkm	AA414905|AL024370|AL024424|Pk-2|Pk-3|Pk3|Pkm2	pyruvate kinase, muscle	protein-coding
Diff_Nuc19936	chr5	61499422	61499561	+	0	NA	Intergenic	Intergenic	-700591	NM_019468	14380	Mm.347430	NM_019468	ENSMUSG00000089992	G6pd2	G6pdx-ps1|Gpd-2|Gpd2	glucose-6-phosphate dehydrogenase 2	protein-coding
Diff_Nuc23433	chr3	13151622	13151761	+	0	NA	Intergenic	RMER17A|LTR|ERVK	-319964	NM_178631	76897	Mm.422625	NM_178631	ENSMUSG00000039717	Ralyl	0710005M24Rik	RALY RNA binding protein-like	protein-coding
Diff_Nuc20787	chr5	123801122	123801261	+	0	NA	intron (NM_029850, intron 1 of 5)	MIR|SINE|MIR	6734	NM_029850	77045	Mm.151960	NM_029850	ENSMUSG00000029438	Bcl7a	4432415N06Rik|AI448316	B cell CLL/lymphoma 7A	protein-coding
Diff_Nuc20110	chr5	75086072	75086211	+	0	NA	intron (NM_001159577, intron 1 of 10)	intron (NM_001159577, intron 1 of 10)	-12244	NM_001159579	16924	Mm.440403	NM_010727	ENSMUSG00000029228	Lnx1	Lnx	ligand of numb-protein X 1	protein-coding
Diff_Nuc30591	chr9	4712832	4712971	+	0	NA	intron (NM_001113180, intron 3 of 16)	B1_Mur3|SINE|Alu	83333	NM_001113180	14802	Mm.209263	NM_019691	ENSMUSG00000025892	Gria4	GluA4|GluR-D|Glur-4|Glur4|Gluralpha4|spkw1	glutamate receptor, ionotropic, AMPA4 (alpha 4)	protein-coding
Diff_Nuc15474	chr7	28384642	28384781	+	0	NA	intron (NM_001331108, intron 1 of 13)	intron (NM_001331108, intron 1 of 13)	2862	NM_001331108	11652	Mm.177194	NM_007434	ENSMUSG00000004056	Akt2	2410016A19Rik|AW554154|PKB|PKBbeta	thymoma viral proto-oncogene 2	protein-coding
Diff_Nuc19933	chr5	61427302	61427441	+	0	NA	Intergenic	Intergenic	-772711	NM_019468	14380	Mm.347430	NM_019468	ENSMUSG00000089992	G6pd2	G6pdx-ps1|Gpd-2|Gpd2	glucose-6-phosphate dehydrogenase 2	protein-coding
Diff_Nuc17135	chr7	151303352	151303491	+	0	NA	Intergenic	Intergenic	-58004	NM_001113373	210274	Mm.483624	NM_001081370	ENSMUSG00000037541	Shank2	ProSAP1|mKIAA1022	SH3/ankyrin domain gene 2	protein-coding
Diff_Nuc10034	chr15	13519742	13519881	+	0	NA	Intergenic	LTR33|LTR|ERVL	-416381	NM_007666	12563	Mm.57048	NM_007666	ENSMUSG00000039385	Cdh6	cad6	cadherin 6	protein-coding
Diff_Nuc32818	chr8	34913692	34913831	+	0	NA	TTS (NM_001042675)	TTS (NM_001042675)	-55519	NM_001206849	72632	Mm.443483	NM_001206849	ENSMUSG00000094500	Smim18	2700090O03Rik|AI835723	small integral membrane protein 18	protein-coding
Diff_Nuc28343	chr1	43265432	43265571	+	0	NA	Intergenic	Intergenic	-11895	NM_001289533	14200	Mm.6799	NM_010212	ENSMUSG00000008136	Fhl2	FHL-2|SLIM-3|SLIM3	four and a half LIM domains 2	protein-coding
Diff_Nuc10999	chr15	79776222	79776361	+	0	NA	Intergenic	MTA_Mm|LTR|MaLR	-13215	NM_144811	52609	Mm.323442	NM_144811	ENSMUSG00000053411	Cbx7	1600014J01Rik|AI851678|D15Ertd417e	chromobox 7	protein-coding
Diff_Nuc21396	chr4	16937502	16937641	+	0	NA	Intergenic	L1_Mus2|LINE|L1	-842469	NR_135158	17389	Mm.187315	NM_019724	ENSMUSG00000028226	Mmp16	MT-MMP 3|MT3-MMP|Mt3mmp	matrix metallopeptidase 16	protein-coding
Diff_Nuc24403	chr3	87764642	87764781	+	0	NA	Intergenic	Intergenic	-10304	NM_016701	18008	Mm.331129	NM_016701	ENSMUSG00000004891	Nes	AA166324|C78523|ESTM46	nestin	protein-coding
Diff_Nuc22534	chr4	108031072	108031211	+	0	NA	Intergenic	Intergenic	25119	NM_001099303	545667	Mm.380025	NM_001099303	ENSMUSG00000059816	Fam159a	OTTMUSG00000008243	family with sequence similarity 159, member A	protein-coding
Diff_Nuc33582	chr8	90742652	90742791	+	0	NA	intron (NM_001164499, intron 2 of 11)	intron (NM_001164499, intron 2 of 11)	19609	NM_001164498	214627	Mm.491211	NM_001164497	ENSMUSG00000036779	Papd5	5730445M16Rik|5830428A09	PAP associated domain containing 5	protein-coding
Diff_Nuc19861	chr5	56478762	56478901	+	0	NA	Intergenic	IAPEY3_LTR|LTR|ERVK	1630327	NR_015588	319216	Mm.332387	NR_015588	ENSMUSG00000097216	4932441J04Rik	-	RIKEN cDNA 4932441J04 gene	ncRNA
Diff_Nuc17880	chr6	54576222	54576361	+	0	NA	intron (NM_001001335, intron 9 of 13)	L1ME2z|LINE|L1	23150	NM_001001335	231999	Mm.35416	NM_001001335	ENSMUSG00000005225	Plekha8	6330400G01|AA517676|BC052360|Fapp-2|Fapp2	pleckstrin homology domain containing, family A (phosphoinositide binding specific) member 8	protein-coding
Diff_Nuc3341	chr11	3099702	3099841	+	0	NA	Intergenic	ID4_|SINE|ID	-2585	NM_001166548	74203	Mm.255649	NM_023743	ENSMUSG00000020454	Eif4enif1	2610509L04Rik|A930019J01Rik|AA410001|AU021239|Clast4|D11Ertd166e	eukaryotic translation initiation factor 4E nuclear import factor 1	protein-coding
Diff_Nuc6902	chr10	116320662	116320801	+	0	NA	intron (NM_001033333, intron 1 of 24)	intron (NM_001033333, intron 1 of 24)	13204	NM_001033333	237558	Mm.336386	NM_001033333	ENSMUSG00000034057	Myrfl	Gm239	myelin regulatory factor-like	protein-coding
Diff_Nuc15126	chr18	84162962	84163101	+	0	NA	Intergenic	ORR1A2|LTR|MaLR	92923	NM_001081300	110796	Mm.102136	NM_001081300	ENSMUSG00000046982	Tshz1	5730407I04Rik|D18Bwg1409e|Mtsh1|NY-CO-33|Sdccag33|Tsh1|mKIAA4206|teashirt1	teashirt zinc finger family member 1	protein-coding
Diff_Nuc17676	chr6	39214042	39214181	+	0	NA	Intergenic	Intergenic	-57339	NM_001033430	338523	Mm.293175	NM_001033430	ENSMUSG00000042599	Kdm7a	A630082K20Rik|BB041802|ENSMUSG00000073143|Jhdm1d|mKIAA1718	lysine (K)-specific demethylase 7A	protein-coding
Diff_Nuc4394	chr11	74662252	74662391	+	0	NA	TTS (NM_197943)	TTS (NM_197943)	17895	NM_010813	17428	Mm.3759	NM_010813	ENSMUSG00000000282	Mnt	Rox|bHLHd3	max binding protein	protein-coding
Diff_Nuc27950	chr1	9526652	9526791	+	0	NA	Intergenic	RMER1A|Other|Other	-8768	NM_021511	59014	Mm.29061	NM_021511	ENSMUSG00000061024	Rrs1	5730466A07Rik|AA415037|D1Ertd701e|Rrr	ribosome biogenesis regulator 1	protein-coding
Diff_Nuc15014	chr18	75426902	75427041	+	0	NA	intron (NM_027727, intron 16 of 16)	B1F|SINE|Alu	30000	NR_045394	100503117	Mm.250517	NR_045393	ENSMUSG00000102047	2010010A06Rik	5033420E22Rik	RIKEN cDNA 2010010A06 gene	ncRNA
Diff_Nuc24530	chr3	94921432	94921571	+	0	NA	intron (NM_009336, intron 1 of 5)	ID_B1|SINE|B4	6537	NM_009336	21427	Mm.133919	NM_009336	ENSMUSG00000008958	Vps72	Tcfl1|YL-1	vacuolar protein sorting 72	protein-coding
Diff_Nuc18030	chr6	67001832	67001971	+	0	NA	intron (NR_040278, intron 1 of 6)	L1_Mus1|LINE|L1	-14500	NM_007836	13197	Mm.72235	NM_007836	ENSMUSG00000036390	Gadd45a	AA545191|Ddit1|GADD45	growth arrest and DNA-damage-inducible 45 alpha	protein-coding
Diff_Nuc24251	chr3	79731452	79731591	+	0	NA	intron (NM_133187, intron 2 of 3)	intron (NM_133187, intron 2 of 3)	41669	NM_133187	68659	Mm.427274	NM_133187	ENSMUSG00000027955	Fam198b	1110032E23Rik|2210419I08Rik|AV011458|Ened	family with sequence similarity 198, member B	protein-coding
Diff_Nuc32777	chr8	31915312	31915451	+	0	NA	Intergenic	HAL1-2a_MD|LINE|L1	236514	NR_045856	71314	Mm.158666	NR_045856	ENSMUSG00000097044	4933433F19Rik	-	RIKEN cDNA 4933433F19 gene	ncRNA
Diff_Nuc4073	chr11	56050252	56050391	+	0	NA	Intergenic	ID_B1|SINE|B4	-195832	NM_153079	216749	Mm.213205	NM_153079	ENSMUSG00000037393	Nmur2	Nmu2r	neuromedin U receptor 2	protein-coding
Diff_Nuc21318	chr4	10930212	10930351	+	0	NA	intron (NM_175175, intron 1 of 1)	intron (NM_175175, intron 1 of 1)	4485	NM_175175	71801	Mm.34351	NM_175175	ENSMUSG00000049969	Plekhf2	1110070J07Rik|AA673237|ZFYVE18	pleckstrin homology domain containing, family F (with FYVE domain) member 2	protein-coding
Diff_Nuc2609	chr12	70453252	70453391	+	0	NA	exon (NM_025441, exon 6 of 33)	exon (NM_025441, exon 6 of 33)	4842	NM_025441	66244	Mm.46705	NM_025441	ENSMUSG00000020982	Nemf	1500011I12Rik|4933405E14Rik|Sdccag1	nuclear export mediator factor	protein-coding
Diff_Nuc737	chr13	42461642	42461781	+	0	NA	Intergenic	Lx8|LINE|L1	64866	NM_010104	13614	Mm.14543	NM_010104	ENSMUSG00000021367	Edn1	ET-1|PPET1|preproET	endothelin 1	protein-coding
Diff_Nuc3937	chr11	48056782	48056921	+	0	NA	Intergenic	Intergenic	-557011	NM_008143	14694	Mm.5305	NM_008143	ENSMUSG00000020372	Rack1	AL033335|GB-like|Gnb2-rs1|Gnb2l1|p205	receptor for activated C kinase 1	protein-coding
Diff_Nuc30701	chr9	13754912	13755051	+	0	NA	Intergenic	MTA_Mm|LTR|MaLR	122810	NM_176836	72826	Mm.246174	NM_176836	ENSMUSG00000037808	Fam76b	2810485I05Rik|C78303	family with sequence similarity 76, member B	protein-coding
Diff_Nuc925	chr13	54011642	54011781	+	0	NA	Intergenic	Intergenic	138438	NM_001291801	13488	Mm.54161	NM_010076	ENSMUSG00000021478	Drd1	C030036C15Rik|Drd-1|Drd1a|Gpcr15	dopamine receptor D1	protein-coding
Diff_Nuc17555	chr6	31941142	31941281	+	0	NA	Intergenic	L1ME2|LINE|L1	-59077	NM_029587	76382	Mm.23510	NM_029587	ENSMUSG00000029766	1700012A03Rik	AI429084	RIKEN cDNA 1700012A03 gene	protein-coding
Diff_Nuc29666	chr1	136721837	136721976	+	0	NA	intron (NM_001081307, intron 18 of 23)	intron (NM_001081307, intron 18 of 23)	-21608	NR_015606	329251	Mm.188709	NM_001081307	ENSMUSG00000073557	Ppp1r12b	1810037O03Rik|9530009M10Rik|AI132431|Mypt2	protein phosphatase 1, regulatory (inhibitor) subunit 12B	protein-coding
Diff_Nuc21245	chr4	3583752	3583891	+	0	NA	intron (NR_040643, intron 1 of 3)	L2b|LINE|L2	168	NR_040643	70143	Mm.417835	NR_040643	ENSMUSG00000085394	2210414B05Rik	-	RIKEN cDNA 2210414B05 gene	ncRNA
Diff_Nuc11606	chr14	20773482	20773621	+	0	NA	intron (NM_001285909, intron 3 of 5)	intron (NM_001285909, intron 3 of 5)	22364	NM_001285911	14702	Mm.41737	NM_010315	ENSMUSG00000043004	Gng2	-	guanine nucleotide binding protein (G protein), gamma 2	protein-coding
Diff_Nuc6729	chr10	102911222	102911361	+	0	NA	Intergenic	Intergenic	80849	NM_175328	103098	Mm.458408	NM_175328	ENSMUSG00000019894	Slc6a15	AA536730|AI326450|AI326451|v7-3	solute carrier family 6 (neurotransmitter transporter), member 15	protein-coding
Diff_Nuc28657	chr1	62194472	62194611	+	0	NA	intron (NM_001081050, intron 5 of 22)	L1Md_F2|LINE|L1	509143	NM_001081050	72823	Mm.35153	NM_001081050	ENSMUSG00000052062	Pard3b	1810008K04Rik|2010002N16Rik|2810455B10Rik|Als2cr19|PAR3B|PAR3L|PAR3beta	par-3 family cell polarity regulator beta	protein-coding
Diff_Nuc25785	chr2	27626342	27626481	+	0	NA	Intergenic	Intergenic	60308	NM_001290482	20181	Mm.24624	NM_011305	ENSMUSG00000015846	Rxra	9530071D11Rik|Nr2b1|RXRalpha1	retinoid X receptor alpha	protein-coding
Diff_Nuc24091	chr3	67230662	67230801	+	0	NA	Intergenic	B1_Mus2|SINE|Alu	-3306	NM_138591	28030	Mm.122466	NM_138591	ENSMUSG00000027774	Gfm1	AW545374|D3Wsu133e|Gfm	G elongation factor, mitochondrial 1	protein-coding
Diff_Nuc16176	chr7	87831342	87831481	+	0	NA	intron (NM_173863, intron 1 of 14)	intron (NM_173863, intron 1 of 14)	2352	NM_173863	70461	Mm.392175	NM_173863	ENSMUSG00000030527	Crtc3	2610312F20Rik|6332415K15Rik|AI429792|BC011210|TORC3	CREB regulated transcription coactivator 3	protein-coding
Diff_Nuc1494	chr13	98164422	98164561	+	0	NA	Intergenic	Intergenic	-40434	NR_110432	100039691	Mm.219358	NR_110430	ENSMUSG00000078952	Lncenc1	ENSMUSG00000078952|Gm11019|Gm2373|Lincenc1|Platr18|linc-Enc1	long non-coding RNA, embryonic stem cells expressed 1	ncRNA
Diff_Nuc461	chr13	21804992	21805131	+	0	NA	Intergenic	Intergenic	2951	NM_178199	319185		NM_178199	ENSMUSG00000094338	Hist1h2bl	H2b-291a	histone cluster 1, H2bl	protein-coding
Diff_Nuc6603	chr10	94805092	94805231	+	0	NA	intron (NR_045337, intron 1 of 2)	(ATTG)n|Simple_repeat|Simple_repeat	6251	NR_045337	69629	Mm.250542	NR_045337	ENSMUSG00000100550	2310039L15Rik	-	RIKEN cDNA 2310039L15 gene	ncRNA
Diff_Nuc2173	chr12	35076522	35076661	+	0	NA	intron (NM_024124, intron 9 of 11)	intron (NM_024124, intron 9 of 11)	137163	NM_024124	79221	Mm.310551	NM_024124	ENSMUSG00000004698	Hdac9	AV022454|D030072B18Rik|HD7B|HD9|HDRP|Hdac7b|Mitr|mKIAA0744	histone deacetylase 9	protein-coding
Diff_Nuc1126	chr13	69665412	69665551	+	0	NA	intron (NM_198600, intron 1 of 12)	intron (NM_198600, intron 1 of 12)	7261	NM_198600	210106	Mm.315959	NM_198600	ENSMUSG00000034575	Papd7	LAK-1|POLK|Pols|TRF4|TRF4-1	PAP associated domain containing 7	protein-coding
Diff_Nuc27147	chr2	126480062	126480201	+	0	NA	intron (NM_001271468, intron 2 of 8)	intron (NM_001271468, intron 2 of 8)	21197	NM_001271469	14391	Mm.293266	NM_010249	ENSMUSG00000027361	Gabpb1	BABPB2|E4TF1|E4TF1-47|E4TF1-53|E4Tf1B|GABPB|GABPB-1|GABPB-2|GABPB1-1|GABPB1-2|NRF2B1|NRF2B2	GA repeat binding protein, beta 1	protein-coding
Diff_Nuc23418	chr3	11159672	11159811	+	0	NA	Intergenic	Lx3C|LINE|L1	684618	NR_040751	100038545	Mm.388494	NR_040751	ENSMUSG00000104015	Gm10745	ENSMUSG00000074696	predicted gene 10745	ncRNA
Diff_Nuc4424	chr11	75537642	75537781	+	0	NA	Intergenic	ORR1A1|LTR|MaLR	-8678	NM_009536	22627	Mm.234700	NM_009536	ENSMUSG00000020849	Ywhae	AU019196	tyrosine 3-monooxygenase/tryptophan 5-monooxygenase activation protein, epsilon polypeptide	protein-coding
Diff_Nuc16281	chr7	95757972	95758111	+	0	NA	Intergenic	Intergenic	179258	NM_028238	72433	Mm.276669	NM_028238	ENSMUSG00000030559	Rab38	2310011F14Rik|AU043391|cht	RAB38, member RAS oncogene family	protein-coding
Diff_Nuc20022	chr5	66764992	66765131	+	0	NA	intron (NM_001201413, intron 9 of 16)	intron (NM_001201413, intron 9 of 16)	-36157	NM_001201416	11787	Mm.5159	NM_009686	ENSMUSG00000029207	Apbb2	2310007D03Rik|FE65L1|Rirl1|TR2L|Zfra	amyloid beta (A4) precursor protein-binding, family B, member 2	protein-coding
Diff_Nuc11373	chr15	100383322	100383461	+	0	NA	promoter-TSS (NM_001289603)	promoter-TSS (NM_001289603)	-952	NM_001289603	21422	Mm.219040	NM_033476	ENSMUSG00000009733	Tfcp2	CP-2|CP2|D230015P20Rik|LBP-1c|LBP-1d|LBP1|LSF|Tcfcp2|UBP-1	transcription factor CP2	protein-coding
Diff_Nuc15269	chr7	11353972	11354111	+	0	NA	Intergenic	Lx4A|LINE|L1	-19154	NM_145848	252910	Mm.451639	NM_145848	ENSMUSG00000059206	Vmn1r71	V1re13	vomeronasal 1 receptor 71	protein-coding
Diff_Nuc13301	chr19	23728462	23728601	+	0	NA	Intergenic	Intergenic	-1229	NM_026188	67483	Mm.443287	NM_026188	ENSMUSG00000033053	1700028P14Rik	AV209940	RIKEN cDNA 1700028P14 gene	protein-coding
Diff_Nuc15189	chr18	89290282	89290421	+	0	NA	exon (NM_175542, exon 46 of 49)	exon (NM_175542, exon 46 of 49)	-76468	NM_178687	225825	Mm.139293	NM_178687	ENSMUSG00000034028	Cd226	BC051526|DNAM-1|DNAM1|Pta1|TLiSA1	CD226 antigen	protein-coding
Diff_Nuc15597	chr7	38790872	38791011	+	0	NA	intron (NM_011274, intron 1 of 10)	intron (NM_011274, intron 1 of 10)	13630	NM_011274	19777	Mm.387220	NM_011274	ENSMUSG00000030421	Uri1	C80913|NNX3|Rmp	URI1, prefoldin-like chaperone	protein-coding
Diff_Nuc11603	chr14	20599562	20599701	+	0	NA	intron (NM_008695, intron 7 of 20)	intron (NM_008695, intron 7 of 20)	29152	NM_008695	18074	Mm.20348	NM_008695	ENSMUSG00000021806	Nid2	AW547149|Ly111|NID-2|entactin-2|nidogen-2	nidogen 2	protein-coding
Diff_Nuc31990	chr9	100459512	100459651	+	0	NA	intron (NM_001101483, intron 1 of 1)	intron (NM_001101483, intron 1 of 1)	11923	NM_001101483	245020	Mm.236289	NM_001101483	ENSMUSG00000070287	Slc35g2	Gm519|Tmem22	solute carrier family 35, member G2	protein-coding
Diff_Nuc30087	chr1	166561202	166561341	+	0	NA	Intergenic	MIR|SINE|MIR	-165592	NM_019759	56429	Mm.28935	NM_019759	ENSMUSG00000026574	Dpt	1810032B19Rik|5033416F05Rik|EQ-1|Eq1	dermatopontin	protein-coding
Diff_Nuc26477	chr2	75954672	75954811	+	0	NA	intron (NM_001081033, intron 9 of 19)	ORR1E|LTR|MaLR	-134717	NM_030188	78802	Mm.282339	NM_030188	ENSMUSG00000075271	Ttc30a1	4930506L13Rik	tetratricopeptide repeat domain 30A1	protein-coding
Diff_Nuc4573	chr11	83667412	83667551	+	0	NA	intron (NM_001291269, intron 1 of 8)	intron (NM_001291269, intron 1 of 8)	1019	NM_001291269	21410	Mm.7226	NM_009330	ENSMUSG00000020679	Hnf1b	HNF-1-beta|HNF-1B|HNF-1Beta|Hnf1beta|LFB3|Tcf-2|Tcf2|vHNF1	HNF1 homeobox B	protein-coding
Diff_Nuc23152	chr4	145586442	145586581	+	0	NA	Intergenic	Intergenic	-64655	NR_045468	67524	Mm.444300	NR_045468	ENSMUSG00000086046	1700095A21Rik	-	RIKEN cDNA 1700095A21 gene	ncRNA
Diff_Nuc1733	chr13	113553322	113553461	+	0	NA	Intergenic	Intergenic	-37594	NM_008903	19012	Mm.291029	NM_008247	ENSMUSG00000021759	Plpp1	Hic53|Hpic53|LPP-1|LPP1|PAP-2a|PAP2-alpha|PAP2a|Ppap2a|mPAP	phospholipid phosphatase 1	protein-coding
Diff_Nuc7922	chr17	53060052	53060191	+	0	NA	Intergenic	Intergenic	61209	NM_001031811	211468	Mm.399068	NM_001031811	ENSMUSG00000035580	Kcnh8	C130090D05Rik|ELK|ELK1|ELK3|Kv12.1	potassium voltage-gated channel, subfamily H (eag-related), member 8	protein-coding
Diff_Nuc20931	chr5	134853292	134853431	+	0	NA	intron (NM_001347488, intron 19 of 27)	intron (NM_001347488, intron 19 of 27)	51037	NR_039544	100628570		NR_039544	ENSMUSG00000093311	Mir3965	mmu-mir-3965|mu-mir-3965	microRNA 3965	ncRNA
Diff_Nuc10115	chr15	19344222	19344361	+	0	NA	Intergenic	B1_Mus1|SINE|Alu	594207	NM_009865	320873	Mm.117794	NM_009865	ENSMUSG00000022321	Cdh10	A830016G23Rik|C030003B10Rik|C030011H18Rik	cadherin 10	protein-coding
Diff_Nuc27883	chr2	181588752	181588891	+	0	NA	intron (NM_153594, intron 6 of 6)	intron (NM_153594, intron 6 of 6)	-10244	NM_025901	67005	Mm.271986	NM_025901	ENSMUSG00000038628	Polr3k	12.3kDa|1500004O14Rik|AI196849|AU014893|C11|RPC10|RPC11	polymerase (RNA) III (DNA directed) polypeptide K	protein-coding
Diff_Nuc26680	chr2	91898302	91898441	+	0	NA	Intergenic	Intergenic	-34044	NM_011957	26427	Mm.10353	NM_011957	ENSMUSG00000027230	Creb3l1	Oasis	cAMP responsive element binding protein 3-like 1	protein-coding
Diff_Nuc24963	chr3	122516452	122516591	+	0	NA	intron (NM_153422, intron 11 of 20)	L1_Mur3|LINE|L1	-11623	NR_045168	71647	Mm.449992	NR_045168	ENSMUSG00000106583	4930447N08Rik	-	RIKEN cDNA 4930447N08 gene	ncRNA
Diff_Nuc7154	chr17	5328152	5328291	+	0	NA	intron (NM_001085355, intron 15 of 19)	intron (NM_001085355, intron 15 of 19)	90546	NM_175349	106557	Mm.432764	NM_175349	ENSMUSG00000101959	Ldhal6b	4933402O15Rik|AI326310|LDHL|Ldhal	lactate dehydrogenase A-like 6B	protein-coding
Diff_Nuc21299	chr4	8544392	8544531	+	0	NA	Intergenic	MurERV4-int|LTR|ERVK	-73092	NM_001277149	320790	Mm.138792	NM_001033395	ENSMUSG00000041235	Chd7	A730019I05Rik|Cycn|Cyn|Dz|Edy|Flo|GENA 47|GENA 60|Gena 52|Lda|Mt|Obt|Todo|WBE1|Whi|metis	chromodomain helicase DNA binding protein 7	protein-coding
Diff_Nuc17767	chr6	46613412	46613551	+	0	NA	intron (NM_001004357, intron 13 of 23)	intron (NM_001004357, intron 13 of 23)	-580914	NM_025771	66797	Mm.440084	NM_025771	ENSMUSG00000039419	Cntnap2	5430425M22Rik|Caspr2|mKIAA0868	contactin associated protein-like 2	protein-coding
Diff_Nuc13496	chr19	37638102	37638241	+	0	NA	intron (NM_175353, intron 1 of 21)	intron (NM_175353, intron 1 of 21)	13263	NM_175353	107371	Mm.24865	NM_175353	ENSMUSG00000053799	Exoc6	4833405E05Rik|AW413330|C430002C19|Sec15|Sec15l1|hbd|msec15	exocyst complex component 6	protein-coding
Diff_Nuc8586	chr16	7918942	7919081	+	0	NA	Intergenic	Lx7|LINE|L1	506218	NM_029070	74720	Mm.159318	NM_029070	ENSMUSG00000022715	Tmem114	4930511J11Rik|Cldn26	transmembrane protein 114	protein-coding
Diff_Nuc22106	chr4	75406392	75406531	+	0	NA	Intergenic	GA-rich|Low_complexity|Low_complexity	-482271	NM_025849	66928	Mm.24332	NM_025849	ENSMUSG00000028398	Tmem261	1700027K24Rik|3110001D03Rik	transmembrane protein 261	protein-coding
Diff_Nuc32701	chr8	26914892	26915031	+	0	NA	TTS (NM_026032)	TTS (NM_026032)	-3985	NM_011485	20845	Mm.293314	NM_011485	ENSMUSG00000031574	Star	AV363654|D8Ertd419e|stARD1	steroidogenic acute regulatory protein	protein-coding
Diff_Nuc27765	chr2	169182842	169182981	+	0	NA	Intergenic	Intergenic	-276235	NM_080455	228911	Mm.315789	NM_080455	ENSMUSG00000047907	Tshz2	2900073F20Rik|B830045G17|Mtsh2|Sdccag33l|Tsh2|Zfp218|mKIAA4248|teashirt2	teashirt zinc finger family member 2	protein-coding
Diff_Nuc10174	chr15	25150502	25150641	+	0	NA	Intergenic	L1Md_F2|LINE|L1	192948	NM_027395	70350	Mm.29586	NM_027395	ENSMUSG00000045763	Basp1	2610024P12Rik|CAP-23|CAP23|Ckap3|NAP-22|NAP22	brain abundant, membrane attached signal protein 1	protein-coding
Diff_Nuc29811	chr1	147654142	147654281	+	0	NA	Intergenic	RLTR13B2|LTR|ERVK	-688585	NM_153539	215378	Mm.441817	NM_153539	ENSMUSG00000035131	Brinp3	B830045N13Rik|Fam5c	bone morphogenetic protein/retinoic acid inducible neural specific 3	protein-coding
Diff_Nuc6660	chr10	98443392	98443531	+	0	NA	intron (NM_026482, intron 3 of 20)	intron (NM_026482, intron 3 of 20)	65675	NM_026482	67972	Mm.166944	NM_026482	ENSMUSG00000019943	Atp2b1	2810442I22Rik|E130111D10Rik|Pmca1	ATPase, Ca++ transporting, plasma membrane 1	protein-coding
Diff_Nuc17448	chr6	24575922	24576061	+	0	NA	intron (NM_028459, intron 6 of 10)	L1_Mus1|LINE|L1	28220	NM_053098	93677	Mm.332941	NM_053098	ENSMUSG00000029683	Lmod2	C-Lmod	leiomodin 2 (cardiac)	protein-coding
Diff_Nuc17642	chr6	36878952	36879091	+	0	NA	intron (NM_001347104, intron 23 of 32)	intron (NM_001347104, intron 23 of 32)	-117660	NM_008973	19242	Mm.279690	NM_008973	ENSMUSG00000029838	Ptn	HARP|HB-GAM|HBBN|HBGF-8|HBNF|OSF|Osf-1|Osf1	pleiotrophin	protein-coding
Diff_Nuc6282	chr10	75226392	75226531	+	0	NA	intron (NM_172549, intron 1 of 36)	intron (NM_172549, intron 1 of 36)	641	NM_172549	104248	Mm.257404	NM_172549	ENSMUSG00000020196	Cabin1	A330070M20Rik|Cain|Ppp3in	calcineurin binding protein 1	protein-coding
Diff_Nuc1312	chr13	85722742	85722881	+	0	NA	Intergenic	L1VL4|LINE|L1	-293720	NM_145452	218397	Mm.259653	NM_145452	ENSMUSG00000021549	Rasa1	Gap|RasGAP|Rasa	RAS p21 protein activator 1	protein-coding
Diff_Nuc9060	chr16	38038502	38038641	+	0	NA	intron (NR_040565, intron 3 of 3)	RLTR13D1|LTR|ERVK	21162	NR_040565	75175	Mm.399335	NR_040565		4930542C21Rik	-	RIKEN cDNA 4930542C21 gene	ncRNA
Diff_Nuc16059	chr7	79338292	79338431	+	0	NA	intron (NM_001024703, intron 12 of 22)	intron (NM_001024703, intron 12 of 22)	113120	NM_001024703	244049	Mm.217412	NM_001024703	ENSMUSG00000032776	Mctp2	Gm489	multiple C2 domains, transmembrane 2	protein-coding
Diff_Nuc5440	chr10	15424212	15424351	+	0	NA	Intergenic	Intergenic	-87302	NR_131087	77538	Mm.128235	NR_131087		C330004P14Rik	-	RIKEN cDNA C330004P14 gene	ncRNA
Diff_Nuc9753	chr16	91018222	91018361	+	0	NA	intron (NM_026110, intron 16 of 17)	L1MC4|LINE|L1	-6738	NM_001164483	104015	Mm.187079	NM_001045515	ENSMUSG00000022973	Synj1	A930006D20Rik|AA675315|mKIAA0910	synaptojanin 1	protein-coding
Diff_Nuc24160	chr3	73481692	73481831	+	0	NA	intron (NM_009738, intron 2 of 3)	Lx5|LINE|L1	30576	NM_009738	12038	Mm.250719	NM_009738	ENSMUSG00000027792	Bche	C730038G20Rik	butyrylcholinesterase	protein-coding
Diff_Nuc5974	chr10	55848582	55848721	+	0	NA	intron (NM_001033385, intron 21 of 32)	intron (NM_001033385, intron 21 of 32)	21928	NM_001163833	73390	Mm.181475	NM_133751	ENSMUSG00000047669	Msl3l2	1700060H10Rik	male-specific lethal 3-like 2 (Drosophila)	protein-coding
Diff_Nuc12838	chr14	113844512	113844651	+	0	NA	Intergenic	MLT1A|LTR|MaLR	-1386606	NR_045661	75822	Mm.410813	NR_045661		4930524C18Rik	-	RIKEN cDNA 4930524C18 gene	ncRNA
Diff_Nuc9795	chr16	93614332	93614471	+	0	NA	Intergenic	Intergenic	6319	NM_007620	12408	Mm.26940	NM_007620	ENSMUSG00000051483	Cbr1	AW261796|CR|Cbr	carbonyl reductase 1	protein-coding
Diff_Nuc9855	chr15	3422722	3422861	+	0	NA	intron (NM_001048178, intron 1 of 8)	intron (NM_001048178, intron 1 of 8)	109051	NM_001286370	14600	Mm.3986	NM_010284	ENSMUSG00000055737	Ghr	GHBP|GHR/BP	growth hormone receptor	protein-coding
Diff_Nuc19450	chr5	24076962	24077101	+	0	NA	exon (NM_001190443, exon 6 of 14)	exon (NM_001190443, exon 6 of 14)	6254	NM_013853	27407	Mm.21629	NM_013853	ENSMUSG00000028953	Abcf2	0710005O05Rik|Drr3|E430001O06	ATP-binding cassette, sub-family F (GCN20), member 2	protein-coding
Diff_Nuc15050	chr18	78117072	78117211	+	0	NA	intron (NM_013831, intron 13 of 14)	intron (NM_013831, intron 13 of 14)	-18065	NM_001195633	100502841	Mm.297782	NM_001195633	ENSMUSG00000039840	Epg5	4732475F16|5430411K18Rik|AI661957|AW456499|mKIAA1632	ectopic P-granules autophagy protein 5 homolog (C. elegans)	protein-coding
Diff_Nuc3704	chr11	29470742	29470881	+	0	NA	intron (NM_001163521, intron 9 of 11)	RLTR20D|LTR|ERVK	-22771	NM_001033865	78294	Mm.180003	NM_024277	ENSMUSG00000020460	Rps27a	0610006J14Rik|Uba52|Ubb|Ubc	ribosomal protein S27A	protein-coding
Diff_Nuc29766	chr1	144331207	144331346	+	0	NA	Intergenic	Lx4A|LINE|L1	-1156551	NM_020025	26878	Mm.285580	NM_020025	ENSMUSG00000033849	B3galt2	-	UDP-Gal:betaGlcNAc beta 1,3-galactosyltransferase, polypeptide 2	protein-coding
Diff_Nuc28305	chr1	39893092	39893231	+	0	NA	Intergenic	Intergenic	11014	NR_040465	73426	Mm.396239	NR_040465	ENSMUSG00000101634	1700066B17Rik	-	RIKEN cDNA 1700066B17 gene	ncRNA
Diff_Nuc21587	chr4	33903702	33903841	+	0	NA	Intergenic	L1_Mus2|LINE|L1	-107836	NM_007726	12801	Mm.7992	NM_007726	ENSMUSG00000044288	Cnr1	CB-R|CB1|CB1R	cannabinoid receptor 1 (brain)	protein-coding
Diff_Nuc2903	chr12	87298132	87298271	+	0	NA	intron (NM_001347395, intron 29 of 32)	intron (NM_001347395, intron 29 of 32)	121790	NM_009368	21809	Mm.3992	NM_009368	ENSMUSG00000021253	Tgfb3	TGF-beta-3|Tgfb-3	transforming growth factor, beta 3	protein-coding
Diff_Nuc15679	chr7	50546602	50546741	+	0	NA	Intergenic	Intergenic	21960	NM_027264	69930	Mm.45367	NM_027264	ENSMUSG00000012640	Zfp715	2610041B18Rik|mszf15	zinc finger protein 715	protein-coding
Diff_Nuc3027	chr12	99085322	99085461	+	0	NA	Intergenic	Lx3A|LINE|L1	412278	NM_008079	14420	Mm.5120	NM_008079	ENSMUSG00000021003	Galc	2310068B06Rik|A930008M05Rik|AW212969|AW413532|Gacy|twi|twitcher	galactosylceramidase	protein-coding
Diff_Nuc32042	chr9	105333322	105333461	+	0	NA	intron (NM_001253836, intron 19 of 20)	L1ME1|LINE|L1	30273	NM_001164828	66595	Mm.84941	NM_025651	ENSMUSG00000032567	Aste1	1100001A21Rik|AV006403	asteroid homolog 1 (Drosophila)	protein-coding
Diff_Nuc20470	chr5	102138972	102139111	+	0	NA	Intergenic	RMER17B|LTR|ERVK	-45311	NM_144955	18096	Mm.193072	NM_144955	ENSMUSG00000035187	Nkx6-1	NKX6A|Nkx6.1	NK6 homeobox 1	protein-coding
Diff_Nuc16494	chr7	109048552	109048691	+	0	NA	TTS (NM_001291353)	TTS (NM_001291353)	3678	NM_001282088	791260	Mm.475469	NM_001081679	ENSMUSG00000078630	Tomt	Comt2|F930017I19Rik	transmembrane O-methyltransferase	protein-coding
Diff_Nuc31798	chr9	84802752	84802891	+	0	NA	Intergenic	Intergenic	134816	NR_040739	75253	Mm.401984	NR_040739	ENSMUSG00000099724	4930554C24Rik	-	RIKEN cDNA 4930554C24 gene	ncRNA
Diff_Nuc11982	chr14	48503252	48503391	+	0	NA	Intergenic	Intergenic	-15218	NR_045959	73961	Mm.390702	NR_045959		4930447J18Rik	4930425M13Rik	RIKEN cDNA 4930447J18 gene	ncRNA
Diff_Nuc25107	chr3	133605202	133605341	+	0	NA	Intergenic	MER5B|DNA|MER1_type	-294188	NM_001004367	319478	Mm.224814	NM_001004367	ENSMUSG00000044365	Cxxc4	9330210J02Rik|C030003J12Rik|Idax	CXXC finger 4	protein-coding
Diff_Nuc32368	chr8	4249752	4249891	+	0	NA	intron (NM_001195258, intron 3 of 6)	intron (NM_001195258, intron 3 of 6)	1607	NM_001195258	100044509	Mm.439193	NM_001195258	ENSMUSG00000089736	Tgfbr3l	Gm14378|OTTMUSG00000016477	transforming growth factor, beta receptor III-like	protein-coding
Diff_Nuc26414	chr2	71912812	71912951	+	0	NA	intron (NM_001204166, intron 1 of 27)	intron (NM_001204166, intron 1 of 27)	20207	NM_001204166	56508	Mm.196153	NM_019688	ENSMUSG00000049044	Rapgef4	1300003D15Rik|5730402K07Rik|6330581N18Rik|EPAC 2|Epac-2|Epac2|mKIAA4040	Rap guanine nucleotide exchange factor (GEF) 4	protein-coding
Diff_Nuc16931	chr7	135105462	135105601	+	0	NA	Intergenic	Intergenic	-5462	NM_001347649	233908	Mm.277680	NM_139149	ENSMUSG00000030795	Fus	D430004D17Rik|D930039C12Rik|Fus1|Tls	fused in sarcoma	protein-coding
Diff_Nuc2278	chr12	43141452	43141591	+	0	NA	Intergenic	Intergenic	-928877	NM_010733	16981	Mm.404786	NM_010733	ENSMUSG00000036295	Lrrn3	NLRR-3	leucine rich repeat protein 3, neuronal	protein-coding
Diff_Nuc25864	chr2	31436562	31436701	+	0	NA	intron (NM_001290548, intron 1 of 18)	intron (NM_001290548, intron 1 of 18)	8460	NM_001290548	320267	Mm.207261	NM_001033389	ENSMUSG00000026843	Fubp3	A330051M14Rik|AV006371|FBP3|Marta2	far upstream element (FUSE) binding protein 3	protein-coding
Diff_Nuc31978	chr9	99475112	99475251	+	0	NA	Intergenic	RMER2|LTR|ERV1	-1037	NM_031403	83703	Mm.31324	NM_031403	ENSMUSG00000032469	Dbr1	AW018415	debranching RNA lariats 1	protein-coding
Diff_Nuc28698	chr1	64576692	64576831	+	0	NA	Intergenic	B3|SINE|B2	-2617	NM_133828	12912	Mm.422634	NM_009952	ENSMUSG00000025958	Creb1	2310001E10Rik|3526402H21Rik|AV083133|Creb|Creb-1	cAMP responsive element binding protein 1	protein-coding
Diff_Nuc17111	chr7	149692772	149692911	+	0	NA	promoter-TSS (NR_033261)	promoter-TSS (NR_033261)	-165	NR_033261	677289	Mm.350054	NR_033261	ENSMUSG00000043795	Prr33	ENSMUSG00000043795|Gm14492|OTTMUSG00000016823	proline rich 33	ncRNA
Diff_Nuc2967	chr12	93251362	93251501	+	0	NA	Intergenic	Intergenic	-163834	NM_011344	20338	Mm.250605	NM_011344	ENSMUSG00000020964	Sel1l	AW493766|Sel1h|mKIAA4137	sel-1 suppressor of lin-12-like (C. elegans)	protein-coding
Diff_Nuc26490	chr2	76771412	76771551	+	0	NA	intron (NM_028004, intron 40 of 191)	intron (NM_028004, intron 40 of 191)	49123	NM_028004	22138	Mm.373672	NM_011652	ENSMUSG00000051747	Ttn	1100001C23Rik|2310036G12Rik|2310057K23Rik|2310074I15Rik|AF006999|AV006427|D330041I19Rik|D830007G01Rik|L56|mdm|shru	titin	protein-coding
Diff_Nuc15962	chr7	73216582	73216721	+	0	NA	intron (NM_021336, intron 8 of 8)	intron (NM_021336, intron 8 of 8)	-7884	NM_024439	109815	Mm.482127	NM_024439	ENSMUSG00000075701	Selenos	1500011E07Rik|C78786|H-4|H-47|H4|H47|Sels|Vimp	selenoprotein S	protein-coding
Diff_Nuc1353	chr13	89022022	89022161	+	0	NA	intron (NM_010103, intron 1 of 9)	Lx5|LINE|L1	61014	NM_001037987	13612	Mm.125580	NM_010103	ENSMUSG00000034488	Edil3	Del-1|Del1	EGF-like repeats and discoidin I-like domains 3	protein-coding
Diff_Nuc295	chr13	9589512	9589651	+	0	NA	intron (NM_001081426, intron 17 of 36)	intron (NM_001081426, intron 17 of 36)	173475	NM_001347471	66505	Mm.397307	NM_144516	ENSMUSG00000021156	Zmynd11	2210402G22Rik|BS69	zinc finger, MYND domain containing 11	protein-coding
Diff_Nuc32471	chr8	12066882	12067021	+	0	NA	Intergenic	Intergenic	226430	NM_029326	75528	Mm.440342	NM_029326	ENSMUSG00000031512	Tex29	1700018L24Rik	testis expressed 29	protein-coding
Diff_Nuc25723	chr2	24586482	24586621	+	0	NA	intron (NM_007579, intron 5 of 45)	MLT1H|LTR|MaLR	32121	NM_001042528	12287	Mm.4424	NM_007579	ENSMUSG00000004113	Cacna1b	AW050276|AW060892|AW822256|BIII|Cav2.2|Cchn1a|alpha(1B)	calcium channel, voltage-dependent, N type, alpha 1B subunit	protein-coding
Diff_Nuc19029	chr6	137069562	137069701	+	0	NA	intron (NM_181988, intron 2 of 4)	L1MB8|LINE|L1	48608	NM_001164214	232441	Mm.46233	NM_181988	ENSMUSG00000030222	Rerg	-	RAS-like, estrogen-regulated, growth-inhibitor	protein-coding
Diff_Nuc9619	chr16	81042822	81042961	+	0	NA	Intergenic	Intergenic	-158051	NM_001113208	17968	Mm.433941	NM_010954	ENSMUSG00000022762	Ncam2	Ncam-2|Ocam|RNCAM	neural cell adhesion molecule 2	protein-coding
Diff_Nuc28191	chr1	32049612	32049751	+	0	NA	Intergenic	Intergenic	-179970	NM_133235	170771	Mm.336594	NM_133235	ENSMUSG00000026058	Khdrbs2	6330586C16Rik|Slim1|Slm-1|Slm1|mSLM-1	KH domain containing, RNA binding, signal transduction associated 2	protein-coding
Diff_Nuc19055	chr6	139474462	139474601	+	0	NA	Intergenic	Intergenic	-24101	NM_001128090	632971	Mm.475610	NM_001128090	ENSMUSG00000092164	Rergl	EG632971	RERG/RAS-like	protein-coding
Diff_Nuc25434	chr3	157241062	157241201	+	0	NA	intron (NM_011196, intron 1 of 2)	intron (NM_011196, intron 1 of 2)	11275	NM_011196	19218	Mm.30424	NM_011196	ENSMUSG00000040016	Ptger3	EP3|Pgerep3|Ptgerep3	prostaglandin E receptor 3 (subtype EP3)	protein-coding
Diff_Nuc22264	chr4	87289452	87289591	+	0	NA	Intergenic	Intergenic	162706	NM_001286158	70122	Mm.288898	NM_027326	ENSMUSG00000028496	Mllt3	2210011H10Rik|2610012I03Rik|3830408D16Rik|Af9|D4Ertd321e	myeloid/lymphoid or mixed-lineage leukemia; translocated to, 3	protein-coding
Diff_Nuc32973	chr8	46837112	46837251	+	0	NA	intron (NM_172752, intron 6 of 22)	intron (NM_172752, intron 6 of 22)	67470	NR_045739	319940	Mm.441720	NR_045739	ENSMUSG00000085440	Sorbs2os	D330022K07Rik	sorbin and SH3 domain containing 2, opposite strand	ncRNA
Diff_Nuc22407	chr4	98596382	98596521	+	0	NA	exon (NM_001301414, exon 5 of 9)	exon (NM_001301414, exon 5 of 9)	5950	NM_146144	230484	Mm.371692	NM_146144	ENSMUSG00000028560	Usp1	-	ubiquitin specific peptidase 1	protein-coding
Diff_Nuc21876	chr4	55869932	55870071	+	0	NA	Intergenic	Intergenic	-324654	NM_010637	16600	Mm.4325	NM_010637	ENSMUSG00000003032	Klf4	EZF|Gklf|Zie	Kruppel-like factor 4 (gut)	protein-coding
Diff_Nuc18546	chr6	103044182	103044321	+	0	NA	Intergenic	ORR1D2|LTR|MaLR	299873	NR_105792	102466636		NR_105792	ENSMUSG00000098533	Mir6373	Gm27870|mmu-mir-6373	microRNA 6373	ncRNA
Diff_Nuc8484	chr17	92146422	92146561	+	0	NA	Intergenic	RLTR26|LTR|ERVK	-654349	NM_020252	18189	Mm.478418	NM_020252	ENSMUSG00000024109	Nrxn1	1700062G21Rik|9330127H16Rik|A230068P09Rik|mKIAA0578	neurexin I	protein-coding
Diff_Nuc28843	chr1	74312512	74312651	+	0	NA	intron (NM_029711, intron 9 of 9)	ORR1A4|LTR|MaLR	-12593	NM_174985	227289	Mm.246587	NM_174985	ENSMUSG00000064272	Gpbar1	BG37|GPCR|GPR131|M-BAR|TGR5	G protein-coupled bile acid receptor 1	protein-coding
Diff_Nuc22468	chr4	102917442	102917581	+	0	NA	intron (NM_027612, intron 5 of 8)	Lx7|LINE|L1	-30022	NM_177732	242585	Mm.281800	NM_177732	ENSMUSG00000028521	Slc35d1	AI834976|C330011J09|UGTREL7|mKIAA0260	solute carrier family 35 (UDP-glucuronic acid/UDP-N-acetylgalactosamine dual transporter), member D1	protein-coding
Diff_Nuc12953	chr14	123177032	123177171	+	0	NA	intron (NM_144844, intron 19 of 23)	L1Md_F2|LINE|L1	135286	NM_145466	223267	Mm.379358	NM_145466	ENSMUSG00000041625	Ggact	A2ld1	gamma-glutamylamine cyclotransferase	protein-coding
Diff_Nuc6667	chr10	98976272	98976411	+	0	NA	Intergenic	Intergenic	-95464	NR_038019	100504202	Mm.403801	NR_038019		Gm20110	-	predicted gene, 20110	ncRNA
Diff_Nuc8566	chr16	5260212	5260351	+	0	NA	Intergenic	RSINE1|SINE|B4	-4232	NM_027446	70511	Mm.45780	NM_027446	ENSMUSG00000022544	Eef2kmt	5730409G15Rik|Fam86|Fam86a|eEF2-KMT	eukaryotic elongation factor 2 lysine methyltransferase	protein-coding
Diff_Nuc17539	chr6	31133532	31133671	+	0	NA	intron (NR_110470, intron 1 of 2)	intron (NR_110470, intron 1 of 2)	34873	NR_110470	232685	Mm.443019	NM_144555	ENSMUSG00000044471	Lncpint	Lincpint|MNCb-1768|Pint|linc-Pint	long non-protein coding RNA, Trp53 induced transcript	ncRNA
Diff_Nuc16781	chr7	125723552	125723691	+	0	NA	intron (NM_172476, intron 1 of 15)	intron (NM_172476, intron 1 of 15)	4579	NM_172476	209760	Mm.69380	NM_172476	ENSMUSG00000042246	Tmc7	1700030H01Rik|C230064B05|C630024K23Rik	transmembrane channel-like gene family 7	protein-coding
Diff_Nuc25615	chr2	16832942	16833081	+	0	NA	Intergenic	L1_Mus2|LINE|L1	102342	NR_040632	75069	Mm.50378	NR_040632		4930515L03Rik	-	RIKEN cDNA 4930515L03 gene	ncRNA
Diff_Nuc21175	chr5	149057162	149057301	+	0	NA	intron (NM_029920, intron 7 of 14)	ORR1B2|LTR|MaLR	147160	NM_001301424	11987	Mm.275489	NM_007513	ENSMUSG00000041313	Slc7a1	4831426K01Rik|AI447493|Atrc-1|Atrc1|Cat1|Rec-1|Rev-1|mCAT-1	solute carrier family 7 (cationic amino acid transporter, y+ system), member 1	protein-coding
Diff_Nuc8261	chr17	78668652	78668791	+	0	NA	intron (NM_015800, intron 2 of 16)	URR1B|DNA|MER1_type	69133	NM_015800	50766	Mm.311912	NM_015800	ENSMUSG00000024074	Crim1	AU015004	cysteine rich transmembrane BMP regulator 1 (chordin like)	protein-coding
Diff_Nuc17412	chr6	22055572	22055711	+	0	NA	intron (NM_001081351, intron 6 of 21)	intron (NM_001081351, intron 6 of 21)	119731	NM_001081351	214642	Mm.221404	NM_001081351	ENSMUSG00000062980	Cped1	6720481P07|A430107O13Rik|AI552584	cadherin-like and PC-esterase domain containing 1	protein-coding
Diff_Nuc7627	chr17	33198682	33198821	+	0	NA	Intergenic	RLTR6-int|LTR|ERV1	6252	NM_001009544	74042	Mm.84774	NM_001009544	ENSMUSG00000023350	4921501E09Rik	PHF8	RIKEN cDNA 4921501E09 gene	protein-coding
Diff_Nuc6094	chr10	62809792	62809931	+	0	NA	Intergenic	ORR1D2|LTR|MaLR	-8078	NM_001159589	93759	Mm.351459	NM_019812	ENSMUSG00000020063	Sirt1	AA673258|SIR2L1|Sir2|Sir2a|Sir2alpha	sirtuin 1	protein-coding
Diff_Nuc24840	chr3	115299332	115299471	+	0	NA	Intergenic	Intergenic	118572	NM_007901	13609	Mm.982	NM_007901	ENSMUSG00000045092	S1pr1	AI849002|Edg1|Lpb1|S1p|S1p1	sphingosine-1-phosphate receptor 1	protein-coding
Diff_Nuc7287	chr17	13404452	13404591	+	0	NA	Intergenic	MTEa|LTR|MaLR	6613	NR_033458	100038394	Mm.401677	NR_033458		Gm10512	ENSMUSG00000073459	predicted gene 10512	ncRNA
Diff_Nuc30310	chr1	181319942	181320081	+	0	NA	intron (NM_027188, intron 5 of 11)	(CA)n|Simple_repeat|Simple_repeat	128123	NM_027188	69726	Mm.222338	NM_027188	ENSMUSG00000055067	Smyd3	2410008A19Rik|Zmynd1	SET and MYND domain containing 3	protein-coding
Diff_Nuc7222	chr17	9562672	9562811	+	0	NA	Intergenic	Intergenic	-201854	NR_027881	67791	Mm.158175	NR_027881	ENSMUSG00000097049	6530411M01Rik	-	RIKEN cDNA 6530411M01 gene	ncRNA
Diff_Nuc20015	chr5	66125872	66126011	+	0	NA	Intergenic	(TTTG)n|Simple_repeat|Simple_repeat	-28819	NM_001024917	333789	Mm.332398	NM_001024917	ENSMUSG00000037795	N4bp2	B3bp|E430014I16|Gm1791|Gm868	NEDD4 binding protein 2	protein-coding
Diff_Nuc7524	chr17	28603412	28603551	+	0	NA	intron (NM_010220, intron 1 of 10)	intron (NM_010220, intron 1 of 10)	19613	NM_010220	14229	Mm.276405	NM_010220	ENSMUSG00000024222	Fkbp5	D17Ertd592e|Dit1|FKBP-5|FKBP51	FK506 binding protein 5	protein-coding
Diff_Nuc11871	chr14	39830652	39830791	+	0	NA	intron (NM_008734, intron 1 of 9)	intron (NM_008734, intron 1 of 9)	119131	NR_045713	75170	Mm.372967	NR_045713	ENSMUSG00000093528	Nrg3os	4930529F24Rik	neuregulin 3, opposite strand	ncRNA
Diff_Nuc342	chr13	12909592	12909731	+	0	NA	Intergenic	L1_Mus1|LINE|L1	-17315	NM_011118	18812	Mm.457984	NM_011118	ENSMUSG00000056457	Prl2c3	Ghd1|MRP-2|MRP-3|Mrpplf3|PLF-2|PLF-3|Plf2|Prl2c4|mrp/plf3	prolactin family 2, subfamily c, member 3	protein-coding
Diff_Nuc195	chrX	157097852	157097991	+	0	NA	intron (NM_011147, intron 6 of 15)	intron (NM_011147, intron 6 of 15)	59983	NM_011147	237178	Mm.296779	NM_011147	ENSMUSG00000062168	Ppef1	PPEF-1	protein phosphatase with EF hand calcium-binding domain 1	protein-coding
Diff_Nuc20629	chr5	113378412	113378551	+	0	NA	intron (NM_001285806, intron 9 of 20)	RMER4B|LTR|ERVK	-53099	NM_028901	74376	Mm.441903	NM_028901	ENSMUSG00000072720	Myo18b	4932408L24Rik|4933411E19Rik|Gm448	myosin XVIIIb	protein-coding
Diff_Nuc3369	chr11	4789402	4789541	+	0	NA	intron (NM_008698, intron 6 of 9)	intron (NM_008698, intron 6 of 9)	-1877	NR_105883	102466764		NR_105883	ENSMUSG00000098296	Mir6918	Gm27968|mmu-mir-6918	microRNA 6918	ncRNA
Diff_Nuc446	chr13	20988722	20988861	+	0	NA	intron (NM_012054, intron 4 of 20)	L1_Mur3|LINE|L1	102809	NM_012054	27052	Mm.314046	NM_012054	ENSMUSG00000021322	Aoah	4930433E13Rik	acyloxyacyl hydrolase	protein-coding
Diff_Nuc7025	chr10	124768512	124768651	+	0	NA	Intergenic	Intergenic	-2990	NM_011391	20503	Mm.29161	NM_011391	ENSMUSG00000020102	Slc16a7	4921534N07Rik|Mct2	solute carrier family 16 (monocarboxylic acid transporters), member 7	protein-coding
Diff_Nuc9526	chr16	73850752	73850891	+	0	NA	Intergenic	Intergenic	491491	NR_030464	751561		NR_030464	ENSMUSG00000104758	Mir691	Mirn691|mir-691|mmu-mir-691	microRNA 691	ncRNA
Diff_Nuc30145	chr1	170723052	170723191	+	0	NA	Intergenic	Intergenic	226099	NR_105772	102466632		NR_105772	ENSMUSG00000098829	Mir6354	Gm27282|mmu-mir-6354	microRNA 6354	ncRNA
Diff_Nuc28498	chr1	52919972	52920111	+	0	NA	intron (NM_146108, intron 4 of 13)	intron (NM_146108, intron 4 of 13)	18159	NM_146108	227095	Mm.222063	NM_146108	ENSMUSG00000041426	Hibch	2610509I15Rik|HIBYL-COA-H	3-hydroxyisobutyryl-Coenzyme A hydrolase	protein-coding
Diff_Nuc23797	chr3	40577912	40578051	+	0	NA	intron (NM_011020, intron 12 of 18)	intron (NM_011020, intron 12 of 18)	-25892	NM_173169	20873	Mm.3794	NM_011495	ENSMUSG00000025758	Plk4	1700028H20|AI385771|Sak|Stk18	polo-like kinase 4	protein-coding
Diff_Nuc9625	chr16	81626832	81626971	+	0	NA	Intergenic	Intergenic	425959	NM_010954	17968	Mm.433941	NM_010954	ENSMUSG00000022762	Ncam2	Ncam-2|Ocam|RNCAM	neural cell adhesion molecule 2	protein-coding
Diff_Nuc2683	chr12	73879922	73880061	+	0	NA	intron (NM_008910, intron 1 of 5)	intron (NM_008910, intron 1 of 5)	17793	NM_008910	19042	Mm.261045	NM_008910	ENSMUSG00000021096	Ppm1a	2310003C21Rik|2900017D14Rik|AI427932|AU017636|MMPa-2|MPPa-1	protein phosphatase 1A, magnesium dependent, alpha isoform	protein-coding
Diff_Nuc6679	chr10	99412722	99412861	+	0	NA	Intergenic	Intergenic	-65664	NM_001347156	17311	Mm.45124	NM_013598	ENSMUSG00000019966	Kitl	Clo|Con|Gb|Kitlg|Mgf|SCF|SF|SLF|Sl|blz|contrasted	kit ligand	protein-coding
Diff_Nuc22242	chr4	86184392	86184531	+	0	NA	intron (NM_001081096, intron 1 of 3)	Lx3A|LINE|L1	19746	NM_001081096	75811	Mm.56451	NM_001081096	ENSMUSG00000028492	Saxo1	4930500O09Rik|Fam154a	stabilizer of axonemal microtubules 1	protein-coding
Diff_Nuc612	chr13	34274652	34274791	+	0	NA	3' UTR (NM_001033167, exon 11 of 11)	3' UTR (NM_001033167, exon 11 of 11)	19888	NM_001110515	69666	Mm.24788	NM_001101430	ENSMUSG00000071451	Psmg4	PAC-4|mPAC4	proteasome (prosome, macropain) assembly chaperone 4	protein-coding
Diff_Nuc31177	chr9	48309782	48309921	+	0	NA	Intergenic	Intergenic	6403	NM_001004191	434402	Mm.386950	NM_001004191	ENSMUSG00000042293	Gm5617	EG434402	predicted gene 5617	protein-coding
Diff_Nuc1734	chr13	113554522	113554661	+	0	NA	Intergenic	Intergenic	-36394	NM_008903	19012	Mm.291029	NM_008247	ENSMUSG00000021759	Plpp1	Hic53|Hpic53|LPP-1|LPP1|PAP-2a|PAP2-alpha|PAP2a|Ppap2a|mPAP	phospholipid phosphatase 1	protein-coding
Diff_Nuc11558	chr14	16751302	16751441	+	0	NA	Intergenic	Intergenic	-330457	NM_021504	59007	Mm.258381	NM_021504	ENSMUSG00000021785	Ngly1	1110002C09Rik|PNGase|Png1	N-glycanase 1	protein-coding
Diff_Nuc24984	chr3	123847072	123847211	+	0	NA	Intergenic	Intergenic	-176814	NM_146140	229801	Mm.165810	NM_146140	ENSMUSG00000044528	Tram1l1	A830091N21Rik	translocation associated membrane protein 1-like 1	protein-coding
Diff_Nuc7888	chr17	50366212	50366351	+	0	NA	Intergenic	Lx8|LINE|L1	-12252	NR_131975	446210	Mm.378184	NM_001004437	ENSMUSG00000067103	AY702103	STDP2	cDNA sequence AY702103	ncRNA
Diff_Nuc2391	chr12	52804192	52804331	+	0	NA	intron (NM_001329698, intron 1 of 5)	B1F|SINE|Alu	-11360	NM_052973	94186	Mm.65979	NM_052973	ENSMUSG00000020954	Strn3	Gs2na|SG2NA	striatin, calmodulin binding protein 3	protein-coding
Diff_Nuc18188	chr6	81012352	81012491	+	0	NA	Intergenic	Intergenic	833236	NR_106091	102465711		NR_106091	ENSMUSG00000106154	Mir7232	mmu-mir-7232	microRNA 7232	ncRNA
Diff_Nuc32259	chr9	118740112	118740251	+	0	NA	intron (NM_001113514, intron 4 of 13)	intron (NM_001113514, intron 4 of 13)	-95473	NM_133710	69274	Mm.439928	NM_133710	ENSMUSG00000047409	Ctdspl	2810418J22Rik|AI426263|HYA22|SCP3	CTD (carboxy-terminal domain, RNA polymerase II, polypeptide A) small phosphatase-like	protein-coding
Diff_Nuc21446	chr4	22445212	22445351	+	0	NA	Intergenic	Lx8|LINE|L1	27586	NR_131335	105500046		NR_131335	ENSMUSG00000107859	Gm30731	Pnky|lnc-pou3f2	predicted gene, 30731	ncRNA
Diff_Nuc5921	chr10	52133032	52133171	+	0	NA	Intergenic	Intergenic	-4252	NM_030250	52014	Mm.199964	NM_030250	ENSMUSG00000023068	Nus1	1600027K07Rik|AU019165|AW538011|BC003223|D10Ertd438e	NUS1 dehydrodolichyl diphosphate synthase subunit	protein-coding
Diff_Nuc8648	chr16	13077992	13078131	+	0	NA	Intergenic	ORR1A4|LTR|MaLR	-31768	NM_015769	50505	Mm.287837	NM_015769	ENSMUSG00000022545	Ercc4	AI606920|Xpf	excision repair cross-complementing rodent repair deficiency, complementation group 4	protein-coding
Diff_Nuc33265	chr8	71611352	71611491	+	0	NA	intron (NM_153054, intron 1 of 16)	intron (NM_153054, intron 1 of 16)	-1214	NM_007509	11966	Mm.249096	NM_007509	ENSMUSG00000006273	Atp6v1b2	AI194269|AI790362|Atp6b2|HO57|R74844	ATPase, H+ transporting, lysosomal V1 subunit B2	protein-coding
Diff_Nuc20394	chr5	96235672	96235811	+	0	NA	Intergenic	L1_Mus1|LINE|L1	14083	NM_001167793	100041354	Mm.422721	NM_001122678	ENSMUSG00000079423	Gm3286	-	predicted gene 3286	protein-coding
Diff_Nuc23203	chr4	147010292	147010431	+	0	NA	intron (NM_145078, intron 2 of 4)	L1_Mus3|LINE|L1	6256	NM_145078	112422	Mm.327194	NM_145078	ENSMUSG00000066000	Zfp979	2610305D13Rik|Ssm1b	zinc finger protein 979	protein-coding
Diff_Nuc25398	chr3	154896342	154896481	+	0	NA	Intergenic	Intergenic	140013	NM_028938	74435	Mm.195711	NM_028938	ENSMUSG00000028182	Lrriq3	4930438B07Rik|4930511J15Rik|4933403H06Rik|BB020367|Lrrc44	leucine-rich repeats and IQ motif containing 3	protein-coding
Diff_Nuc5718	chr10	36694962	36695101	+	0	NA	intron (NM_008229, intron 1 of 13)	CpG	681	NM_008229	15182	Mm.19806	NM_008229	ENSMUSG00000019777	Hdac2	D10Wsu179e|YAF1|Yy1bp|mRPD3	histone deacetylase 2	protein-coding
Diff_Nuc9436	chr16	65925112	65925251	+	0	NA	Intergenic	Intergenic	109303	NM_028572	73569	Mm.25670	NM_028572	ENSMUSG00000091243	Vgll3	1700110N18Rik|4832416J22|C80713|Vgl-3|Vito-2	vestigial like family member 3	protein-coding
Diff_Nuc15198	chr18	90657922	90658061	+	0	NA	Intergenic	ORR1A2|LTR|MaLR	-21555	NM_198295	67988	Mm.268041	NM_198295	ENSMUSG00000024614	Tmx3	6430411B10Rik|A730024F05Rik|AV259382|Txndc10|mKIAA1830	thioredoxin-related transmembrane protein 3	protein-coding
Diff_Nuc10889	chr15	74797902	74798041	+	0	NA	Intergenic	Intergenic	12435	NM_001164040	17069	Mm.788	NM_008529	ENSMUSG00000022587	Ly6e	Ly67|RIG-E|Sca-2|TSA-1|Tsa1	lymphocyte antigen 6 complex, locus E	protein-coding
Diff_Nuc10711	chr15	61635222	61635361	+	0	NA	Intergenic	Intergenic	-29285	NR_040350	432956	Mm.404918	NR_040350		D030024E09Rik	-	RIKEN cDNA D030024E09 gene	ncRNA
Diff_Nuc26619	chr2	86910312	86910451	+	0	NA	TTS (NM_146844)	TTS (NM_146844)	1999	NM_146844	258841	Mm.223265	NM_146844	ENSMUSG00000075163	Olfr1107	MOR172-2	olfactory receptor 1107	protein-coding
Diff_Nuc12368	chr14	73987972	73988111	+	0	NA	intron (NM_011506, intron 6 of 10)	B3|SINE|B2	35448	NM_011506	20916	Mm.38951	NM_011506	ENSMUSG00000022110	Sucla2	4930547K18Rik|A-SCS	succinate-Coenzyme A ligase, ADP-forming, beta subunit	protein-coding
Diff_Nuc31550	chr9	70144282	70144421	+	0	NA	intron (NM_181072, intron 2 of 27)	intron (NM_181072, intron 2 of 27)	89194	NM_181072	71602	Mm.249311	NM_181072	ENSMUSG00000032220	Myo1e	2310020N23Rik|9130023P14Rik|AA407778|myosin-1e|myr 3	myosin IE	protein-coding
Diff_Nuc30364	chr1	184130482	184130621	+	0	NA	Intergenic	RLTR14|LTR|ERV1	-42322	NM_001166728	625823	Mm.479992	NM_001166728	ENSMUSG00000091013	Vmn1r1	EG625823|Gm6628	vomeronasal 1 receptor 1	protein-coding
Diff_Nuc3166	chr12	109378342	109378481	+	0	NA	intron (NM_028262, intron 6 of 12)	intron (NM_028262, intron 6 of 12)	39083	NM_028262	52690	Mm.159185	NM_028262	ENSMUSG00000056770	Setd3	2610102I01Rik|2610305M23Rik|6030490B17Rik|D12Ertd771e	SET domain containing 3	protein-coding
Diff_Nuc2866	chr12	85646442	85646581	+	0	NA	intron (NM_029880, intron 5 of 9)	MTC|LTR|MaLR	-11298	NR_045546	52708	Mm.255150	NM_144833	ENSMUSG00000042472	Zfp410	Apa1|D12Ertd748e|Znf410	zinc finger protein 410	protein-coding
Diff_Nuc28219	chr1	34331312	34331451	+	0	NA	intron (NM_134448, intron 78 of 97)	intron (NM_134448, intron 78 of 97)	114206	NM_010081	13518	Mm.336625	NM_010081	ENSMUSG00000026131	Dst	2310001O04Rik|A830042E19Rik|AW554249|BP230|BPAG1-n|Bpag|Bpag1|Macf2|ah|athetoid|dt|mKIAA0728|nmf203|nmf339	dystonin	protein-coding
Diff_Nuc22765	chr4	123028852	123028991	+	0	NA	intron (NM_001199137, intron 92 of 92)	intron (NM_001199137, intron 92 of 92)	-8426	NM_007558	12163	Mm.439749	NM_007558	ENSMUSG00000032726	Bmp8a	Bmp7r1|OP-2|OP2	bone morphogenetic protein 8a	protein-coding
Diff_Nuc19400	chr5	21011002	21011141	+	0	NA	intron (NM_177076, intron 16 of 19)	intron (NM_177076, intron 16 of 19)	-38274	NM_028977	74511	Mm.439963	NM_028977	ENSMUSG00000039883	Lrrc17	37kDa|4833425M04Rik|6130400C22Rik|P37nb	leucine rich repeat containing 17	protein-coding
Diff_Nuc9030	chr16	35936892	35937031	+	0	NA	intron (NM_001013371, intron 1 of 4)	B1_Mur2|SINE|Alu	-1595	NM_030253	80285	Mm.49074	NM_030253	ENSMUSG00000022906	Parp9	ARTD9|AW214463|BC003281|Bagl|Bal|PARP-9	poly (ADP-ribose) polymerase family, member 9	protein-coding
Diff_Nuc11612	chr14	21266532	21266671	+	0	NA	intron (NM_029698, intron 3 of 28)	intron (NM_029698, intron 3 of 28)	4846	NM_001163638	76670	Mm.159759	NM_029698	ENSMUSG00000039543	Cfap70	Ttc18	cilia and flagella associated protein 70	protein-coding
Diff_Nuc11445	chr15	102842282	102842421	+	0	NA	TTS (NM_010465)	TTS (NM_010465)	-2088	NM_175730	15424	Mm.103825	NM_175730	ENSMUSG00000022485	Hoxc5	AI181837|Hox-3.4|Hox-6.2	homeobox C5	protein-coding
Diff_Nuc31115	chr9	44171782	44171921	+	0	NA	Intergenic	Intergenic	-2098	NM_027889	71732	Mm.295013	NM_027889	ENSMUSG00000032127	Vps11	1200011A11Rik	VPS11, CORVET/HOPS core subunit	protein-coding
Diff_Nuc21037	chr5	139738432	139738571	+	0	NA	exon (NM_026269, exon 2 of 9)	exon (NM_026269, exon 2 of 9)	9050	NM_001163316	67604	Mm.270137	NM_026269	ENSMUSG00000025858	Get4	1110007L15Rik|AW412535|Cee	golgi to ER traffic protein 4	protein-coding
Diff_Nuc27363	chr2	139822632	139822771	+	0	NA	intron (NM_001289611, intron 5 of 6)	intron (NM_001289611, intron 5 of 6)	69840	NM_001159640	75812	Mm.293449	NM_175225	ENSMUSG00000039033	Tasp1	4930485D02Rik|AW986064	taspase, threonine aspartase 1	protein-coding
Diff_Nuc16474	chr7	108232262	108232401	+	0	NA	Intergenic	L1MB4|LINE|L1	-24958	NM_001146010	207278	Mm.263041	NM_199012	ENSMUSG00000030691	Fchsd2	BC034086|R74866|Sh3md3|mKIAA0769	FCH and double SH3 domains 2	protein-coding
Diff_Nuc14308	chr18	32440482	32440621	+	0	NA	Intergenic	RLTR33|LTR|ERVK	40566	NM_133658	13872	Mm.282335	NM_133658	ENSMUSG00000024382	Ercc3	BTF2 p89|Ercc-3|XPB	excision repair cross-complementing rodent repair deficiency, complementation group 3	protein-coding
Diff_Nuc20432	chr5	99022702	99022841	+	0	NA	intron (NM_001024614, intron 3 of 5)	L1_Mur3|LINE|L1	-118088	NR_030484	735265		NR_030484	ENSMUSG00000105814	Mir703	Mirn703|mir-703|mmu-mir-703	microRNA 703	ncRNA
Diff_Nuc2156	chr12	33864092	33864231	+	0	NA	intron (NM_028139, intron 2 of 3)	intron (NM_028139, intron 2 of 3)	31610	NM_028139	380753	Mm.41540	NM_028139	ENSMUSG00000020564	Atxn7l1	2810423G08Rik|Atxn7l4	ataxin 7-like 1	protein-coding
Diff_Nuc1524	chr13	99836912	99837051	+	0	NA	Intergenic	L1VL2|LINE|L1	20895	NR_045495	69603	Mm.390632	NR_045495	ENSMUSG00000100410	2310020H05Rik	-	RIKEN cDNA 2310020H05 gene	ncRNA
Diff_Nuc3722	chr11	30519352	30519491	+	0	NA	intron (NM_029344, intron 3 of 3)	RLTR20D|LTR|ERVK	29975	NM_029344	75572	Mm.390319	NM_029344	ENSMUSG00000060923	Acyp2	2310004B09Rik	acylphosphatase 2, muscle type	protein-coding
Diff_Nuc6879	chr10	114725472	114725611	+	0	NA	Intergenic	Intergenic	27106	NM_024454	216344	Mm.21936	NM_024454	ENSMUSG00000020132	Rab21	9630024B22	RAB21, member RAS oncogene family	protein-coding
Diff_Nuc15022	chr18	75693442	75693581	+	0	NA	intron (NM_201354, intron 7 of 11)	intron (NM_201354, intron 7 of 11)	19212	NR_045879	100038353	Mm.440724	NR_045879	ENSMUSG00000097712	Gm10532	ENSMUSG00000073534	predicted gene 10532	ncRNA
Diff_Nuc16168	chr7	87429062	87429201	+	0	NA	intron (NM_178070, intron 9 of 22)	intron (NM_178070, intron 9 of 22)	-10206	NM_145150	233406	Mm.227274	NM_145150	ENSMUSG00000038943	Prc1	D7Ertd348e	protein regulator of cytokinesis 1	protein-coding
Diff_Nuc27572	chr2	155595442	155595581	+	0	NA	Intergenic	L2a|LINE|L2	-5567	NM_010808	17391	Mm.389325	NM_010808	ENSMUSG00000027612	Mmp24	AU040325|MMP-21|MT5-MMP|MT5MMP|MTMMP5	matrix metallopeptidase 24	protein-coding
Diff_Nuc4963	chr11	106081482	106081621	+	0	NA	intron (NM_028074, intron 1 of 17)	intron (NM_028074, intron 1 of 17)	3311	NM_028074	72047	Mm.41367	NM_028074	ENSMUSG00000020705	Ddx42	1810047H21Rik|AW319508|AW556242|B430002H05Rik|RHELP|RNAHP|SF3b125	DEAD (Asp-Glu-Ala-Asp) box polypeptide 42	protein-coding
Diff_Nuc5394	chr10	12412612	12412751	+	0	NA	intron (NM_011682, intron 25 of 73)	intron (NM_011682, intron 25 of 73)	168852	NM_011682	22288	Mm.331784	NM_011682	ENSMUSG00000019820	Utrn	AA589569|DRP|Dmdl	utrophin	protein-coding
Diff_Nuc28330	chr1	41478072	41478211	+	0	NA	Intergenic	ORR1A2-int|LTR|MaLR	-240044	NR_040475	74897	Mm.243822	NR_040475	ENSMUSG00000104072	4930448I06Rik	-	RIKEN cDNA 4930448I06 gene	ncRNA
Diff_Nuc1219	chr13	78961092	78961231	+	0	NA	Intergenic	Lx4A|LINE|L1	-623027	NM_010151	13865	Mm.439653	NM_010151	ENSMUSG00000069171	Nr2f1	COUP-TF1|COUP-TFI|COUPTFA|EAR-3|EAR3|Erbal3|SVP44|Tcfcoup1	nuclear receptor subfamily 2, group F, member 1	protein-coding
Diff_Nuc2239	chr12	40057862	40058001	+	0	NA	Intergenic	Intergenic	547633	NM_001163154	14009	Mm.4866	NM_007960	ENSMUSG00000004151	Etv1	ER81|Etsrp81	ets variant 1	protein-coding
Diff_Nuc25169	chr3	138066302	138066441	+	0	NA	Intergenic	Lx|LINE|L1	-12090	NM_011996	26876	Mm.158750	NM_011996	ENSMUSG00000037797	Adh4	Adh2	alcohol dehydrogenase 4 (class II), pi polypeptide	protein-coding
Diff_Nuc18260	chr6	85553082	85553221	+	0	NA	intron (NM_145223, intron 3 of 22)	intron (NM_145223, intron 3 of 22)	15626	NM_145223	236266	Mm.246967	NM_145223	ENSMUSG00000063810	Alms1	bbb	Alstrom syndrome 1	protein-coding
Diff_Nuc7650	chr17	34226752	34226891	+	0	NA	intron (NR_046183, intron 3 of 4)	B3|SINE|B2	-2503	NM_008206	15001	Mm.116	NM_008206	ENSMUSG00000024334	H2-Oa	H-2Oa	histocompatibility 2, O region alpha locus	protein-coding
Diff_Nuc29	chrX	12917312	12917451	+	0	NA	Intergenic	L1_Mm|LINE|L1	59233	NM_010028	13205	Mm.289662	NM_010028	ENSMUSG00000000787	Ddx3x	D1Pas1-rs2|Ddx3|Fin14	DEAD/H (Asp-Glu-Ala-Asp/His) box polypeptide 3, X-linked	protein-coding
Diff_Nuc30000	chr1	161383282	161383421	+	0	NA	Intergenic	Intergenic	-70549	NM_022312	21960	Mm.44701	NM_022312	ENSMUSG00000015829	Tnr	J1-tenascin|TN-R|janusin|restrictin	tenascin R	protein-coding
Diff_Nuc7671	chr17	35300592	35300731	+	0	NA	intron (NM_001199044, intron 1 of 30)	intron (NM_001199044, intron 1 of 30)	1161	NM_001199044	53761	Mm.272462	NM_020027	ENSMUSG00000024393	Prrc2a	3110039B05Rik|Bat-2|Bat2|D17H6S51E|G2|Wbp12|mKIAA4178	proline-rich coiled-coil 2A	protein-coding
Diff_Nuc31617	chr9	73156432	73156571	+	0	NA	Intergenic	L1Md_F2|LINE|L1	195225	NM_198609	225215	Mm.379366	NM_198609	ENSMUSG00000032215	Rsl24d1	2410159K22Rik	ribosomal L24 domain containing 1	protein-coding
Diff_Nuc272	chr13	8131452	8131591	+	0	NA	Intergenic	Intergenic	-70591	NM_001289530	94191	Mm.425794	NM_052977	ENSMUSG00000052551	Adarb2	Adar3|RED2	adenosine deaminase, RNA-specific, B2	protein-coding
Diff_Nuc25178	chr3	138743832	138743971	+	0	NA	Intergenic	B1_Mur4|SINE|Alu	-5736	NM_001040690	229877	Mm.28893	NM_145544	ENSMUSG00000028149	Rap1gds1	BC011279|GDS1	RAP1, GTP-GDP dissociation stimulator 1	protein-coding
Diff_Nuc2075	chr12	26995432	26995571	+	0	NA	3' UTR (NM_001081977, exon 10 of 10)	3' UTR (NM_001081977, exon 10 of 10)	-36074	NR_130981	75243	Mm.444753	NR_130981		4930549C15Rik	-	RIKEN cDNA 4930549C15 gene	ncRNA
Diff_Nuc17254	chr6	11312282	11312421	+	0	NA	Intergenic	Lx8|LINE|L1	-387973	NR_033776	57866	Mm.4397	NR_033776		AA545190	-	EST AA545190	ncRNA
Diff_Nuc2878	chr12	86102082	86102221	+	0	NA	intron (NM_023409, intron 2 of 3)	intron (NM_023409, intron 2 of 3)	11911	NM_023409	67963	Mm.282556	NM_023409	ENSMUSG00000021242	Npc2	2700012J19Rik|AA408070|AU045843|HE1	Niemann-Pick type C2	protein-coding
Diff_Nuc11652	chr14	23334752	23334891	+	0	NA	intron (NR_046307, intron 3 of 3)	MLT1J|LTR|MaLR	27199	NR_046307	74896	Mm.444661	NR_046307		4930405A10Rik	4930456G20Rik	RIKEN cDNA 4930405A10 gene	ncRNA
Diff_Nuc20635	chr5	114006012	114006151	+	0	NA	intron (NM_177292, intron 2 of 8)	intron (NM_177292, intron 2 of 8)	86614	NM_177292	320916	Mm.102783	NM_177292	ENSMUSG00000063430	Wscd2	4933413A10Rik|C530024P05Rik|Gm450	WSC domain containing 2	protein-coding
Diff_Nuc29359	chr1	109186682	109186821	+	0	NA	Intergenic	Intergenic	-11803	NM_201363	381286	Mm.337362	NM_201363	ENSMUSG00000073601	Serpinb3c	1110001H02Rik|1110013A16Rik|Scca2|Serpinb4	serine (or cysteine) peptidase inhibitor, clade B, member 3C	protein-coding
Diff_Nuc33341	chr8	74219582	74219721	+	0	NA	intron (NM_028189, intron 1 of 2)	intron (NM_028189, intron 1 of 2)	6048	NM_028189	72297	Mm.290837	NM_028189	ENSMUSG00000031803	B3gnt3	2210008L19Rik	UDP-GlcNAc:betaGal beta-1,3-N-acetylglucosaminyltransferase 3	protein-coding
Diff_Nuc25536	chr2	10591252	10591391	+	0	NA	Intergenic	RMER5|LTR|ERV1	151539	NR_035418	100316831		NR_035418	ENSMUSG00000080594	Mir669h	Mirn669h|mir-669h|mmu-mir-669h	microRNA 669h	ncRNA
Diff_Nuc1963	chr12	14181122	14181261	+	0	NA	Intergenic	Intergenic	-22347	NM_029007	105005	Mm.227253	NM_029007	ENSMUSG00000020607	Fam84a	2310003N02Rik|4731402F03Rik|AW125753|Nse1	family with sequence similarity 84, member A	protein-coding
Diff_Nuc27672	chr2	161910302	161910441	+	0	NA	intron (NM_021464, intron 7 of 29)	intron (NM_021464, intron 7 of 29)	-306178	NR_040617	77645	Mm.447752	NR_040617	ENSMUSG00000084919	Ptprtos	C330008G21Rik	protein tyrosine phosphatase, receptor type T, opposite strand	ncRNA
Diff_Nuc4049	chr11	54649512	54649651	+	0	NA	Intergenic	Intergenic	16160	NR_040284	432562	Mm.406948	NR_040284	ENSMUSG00000086789	Lyrm7os	Gm12228|OTTMUSG00000005674	LYR motif containing 7, opposite strand	ncRNA
Diff_Nuc16159	chr7	87039002	87039141	+	0	NA	intron (NM_009682, intron 4 of 5)	intron (NM_009682, intron 4 of 5)	26455	NM_009682	11778	Mm.220173	NM_009682	ENSMUSG00000063801	Ap3s2	[s]3B	adaptor-related protein complex 3, sigma 2 subunit	protein-coding
Diff_Nuc12914	chr14	120732612	120732751	+	0	NA	intron (NM_207515, intron 2 of 7)	MER2|DNA|MER2_type	57790	NM_175341	105559	Mm.238266	NM_175341	ENSMUSG00000022139	Mbnl2	1110002M11Rik|AI047808|AI837313|AI849185|AL118326|MBLL|R75232|mKIAA4072	muscleblind-like 2	protein-coding
Diff_Nuc11702	chr14	27240592	27240731	+	0	NA	intron (NM_032008, intron 20 of 22)	intron (NM_032008, intron 20 of 22)	63628	NR_038005	71106	Mm.158564	NR_038005	ENSMUSG00000021874	4933413J09Rik	GCSE	RIKEN cDNA 4933413J09 gene	ncRNA
Diff_Nuc26919	chr2	112466752	112466891	+	0	NA	intron (NM_001165935, intron 2 of 4)	L1_Mus3|LINE|L1	66982	NM_001165935	74268	Mm.315125	NM_028844	ENSMUSG00000003604	Aven	1700013A01Rik|1700056A21Rik|mAven-L|mAven-S	apoptosis, caspase activation inhibitor	protein-coding
Diff_Nuc3620	chr11	23238242	23238381	+	0	NA	intron (NM_001190401, intron 3 of 79)	ID4_|SINE|ID	31416	NM_001190401	17847	Mm.119155	NM_001190401	ENSMUSG00000056342	Usp34	A530081C03Rik|Murr2	ubiquitin specific peptidase 34	protein-coding
Diff_Nuc10475	chr15	46383692	46383831	+	0	NA	Intergenic	MMERVK10C-int|LTR|ERVK	-56036	NR_040451	74726	Mm.78172	NR_040451		4930523O13Rik	4921524H24Rik	RIKEN cDNA 4930523O13 gene	ncRNA
Diff_Nuc10649	chr15	58403732	58403871	+	0	NA	Intergenic	B3A|SINE|B2	156778	NM_145959	210998	Mm.3224	NM_145959	ENSMUSG00000037119	Fam91a1	AV220772|BC033609|D15Ertd621e|SKIN|mKIAA0493	family with sequence similarity 91, member A1	protein-coding
Diff_Nuc25614	chr2	16662732	16662871	+	0	NA	intron (NM_026162, intron 13 of 13)	intron (NM_026162, intron 13 of 13)	272552	NR_040632	75069	Mm.50378	NR_040632		4930515L03Rik	-	RIKEN cDNA 4930515L03 gene	ncRNA
Diff_Nuc10119	chr15	19762102	19762241	+	0	NA	Intergenic	L1_Mus1|LINE|L1	834334	NM_022816	64833	Mm.352763	NM_022816	ENSMUSG00000047565	Acot10	Acate3|MT-ACT48|p48	acyl-CoA thioesterase 10	protein-coding
Diff_Nuc22120	chr4	76858002	76858141	+	0	NA	intron (NM_011211, intron 6 of 39)	Lx3_Mus|LINE|L1	999728	NM_011211	19266	Mm.184021	NM_011211	ENSMUSG00000028399	Ptprd	1110002J03Rik|3000002J10Rik|B230219D21Rik|R-PTP-delta	protein tyrosine phosphatase, receptor type, D	protein-coding
Diff_Nuc3417	chr11	6748662	6748801	+	0	NA	Intergenic	ETnERV2-int|LTR|ERVK	-128691	NR_046025	626419	Mm.390334	NR_046025	ENSMUSG00000086808	Gm11981	OTTMUSG00000005129	predicted gene 11981	ncRNA
Diff_Nuc30663	chr9	9976392	9976531	+	0	NA	intron (NM_001033359, intron 6 of 20)	intron (NM_001033359, intron 6 of 20)	82030	NR_105745	102466147		NR_105745	ENSMUSG00000098408	Mir6237	Gm27411|mmu-mir-6237	microRNA 6237	ncRNA
Diff_Nuc3512	chr11	15051122	15051261	+	0	NA	Intergenic	L1_Mur1|LINE|L1	551948	NM_001164166	432536	Mm.33646	NM_001164166	ENSMUSG00000084135	Pom121l12	1700054H16Rik	POM121 membrane glycoprotein-like 12	protein-coding
Diff_Nuc5885	chr10	48959562	48959701	+	0	NA	intron (NM_001111268, intron 14 of 16)	intron (NM_001111268, intron 14 of 16)	-143982	NR_046212	100418235	Mm.185993	NR_046212		C130030K03Rik	-	proteasome (prosome, macropain) subunit, alpha type 6 pseudogene	pseudo
Diff_Nuc7457	chr17	24985522	24985661	+	0	NA	TTS (NM_023480)	TTS (NM_023480)	1656	NM_023480	68636	Mm.347964	NM_023480	ENSMUSG00000045316	Fahd1	1110025H10Rik|AV002085	fumarylacetoacetate hydrolase domain containing 1	protein-coding
Diff_Nuc12337	chr14	72058242	72058381	+	0	NA	Intergenic	L2b|LINE|L2	-198205	NR_046274	74667	Mm.159286	NR_046274		4930434J06Rik	-	RIKEN cDNA 4930434J06 gene	ncRNA
Diff_Nuc6716	chr10	102086672	102086811	+	0	NA	Intergenic	Intergenic	111885	NM_146240	237504	Mm.282672	NM_146240	ENSMUSG00000044921	Rassf9	AW322107|Pamci	Ras association (RalGDS/AF-6) domain family (N-terminal) member 9	protein-coding
Diff_Nuc877	chr13	50858732	50858871	+	0	NA	intron (NR_045364, intron 2 of 3)	intron (NR_045364, intron 2 of 3)	1816	NR_045364	71654	Mm.427318	NR_045364		4930518P08Rik	-	RIKEN cDNA 4930518P08 gene	ncRNA
Diff_Nuc29372	chr1	109681902	109682041	+	0	NA	Intergenic	Lx2|LINE|L1	-131865	NR_102306	319596	Mm.136054	NR_102306	ENSMUSG00000100457	D830032E09Rik	-	RIKEN cDNA D830032E09 gene	ncRNA
Diff_Nuc11410	chr15	101657902	101658041	+	0	NA	Intergenic	Intergenic	-9371	NM_010668	16681	Mm.358616	NM_010668	ENSMUSG00000064201	Krt2	BB005427|Krt2-17|Krt2-2|Krt2e	keratin 2	protein-coding
Diff_Nuc8530	chr16	3094032	3094171	+	0	NA	Intergenic	Lx5|LINE|L1	-498297	NM_146860	258859	Mm.377723	NM_146860	ENSMUSG00000051003	Olfr161	MOR131-1|OR912-47M6	olfactory receptor 161	protein-coding
Diff_Nuc34136	chr8	131348222	131348361	+	0	NA	Intergenic	Intergenic	138737	NM_010578	16412	Mm.263396	NM_010578	ENSMUSG00000025809	Itgb1	4633401G24Rik|AA409975|AA960159|CD29|ENSMUSG00000051907|Fnrb|Gm9863|gpIIa	integrin beta 1 (fibronectin receptor beta)	protein-coding
Diff_Nuc23670	chr3	30774052	30774191	+	0	NA	intron (NM_001286994, intron 1 of 3)	Lx9|LINE|L1	19249	NM_001286994	71862	Mm.272019	NM_027965	ENSMUSG00000037661	Gpr160	1700025D19Rik|GPCR150	G protein-coupled receptor 160	protein-coding
Diff_Nuc3116	chr12	103845422	103845561	+	0	NA	intron (NM_172584, intron 3 of 9)	B4|SINE|B4	52340	NM_007693	12652	Mm.4137	NM_007693	ENSMUSG00000021194	Chga	ChrA|cgA	chromogranin A	protein-coding
Diff_Nuc27783	chr2	170118742	170118881	+	0	NA	Intergenic	Intergenic	-63050	NR_040610	73303	Mm.443297	NR_040610	ENSMUSG00000086999	Bcas1os2	1700040N02Rik	breast carcinoma amplified sequence 1, opposite strand 2	ncRNA
Diff_Nuc1171	chr13	75700952	75701091	+	0	NA	Intergenic	L1_Mus1|LINE|L1	-81473	NR_030451	751556		NR_030451	ENSMUSG00000076236	Mir682	Mirn682|mir-682|mmu-mir-682	microRNA 682	ncRNA
Diff_Nuc5696	chr10	34930382	34930521	+	0	NA	Intergenic	Intergenic	727245	NM_010237	14302	Mm.332432	NM_010237	ENSMUSG00000019779	Frk	BSK|BSK/IYK|C85044|GTK|RAK	fyn-related kinase	protein-coding
Diff_Nuc16069	chr7	80048092	80048231	+	0	NA	Intergenic	RMER15|LTR|ERVL	198793	NR_046024	625243	Mm.261798	NR_046024	ENSMUSG00000108383	Gm6567	-	predicted gene 6567	ncRNA
Diff_Nuc24853	chr3	115631832	115631971	+	0	NA	3' UTR (NM_027193, exon 8 of 8)	3' UTR (NM_027193, exon 8 of 8)	40800	NM_027193	69740	Mm.5915	NM_027193	ENSMUSG00000033554	Dph5	2410012M04Rik|AU045680|C80186	diphthamide biosynthesis 5	protein-coding
Diff_Nuc371	chr13	14092832	14092971	+	0	NA	intron (NR_130788, intron 14 of 16)	intron (NR_130788, intron 14 of 16)	39004	NR_130788	70430	Mm.260209	NM_178337	ENSMUSG00000039233	Tbce	2610206D02Rik|C530005D02Rik|pmn	tubulin-specific chaperone E	protein-coding
Diff_Nuc32974	chr8	46865512	46865651	+	0	NA	intron (NM_172752, intron 12 of 22)	intron (NM_172752, intron 12 of 22)	39070	NR_045739	319940	Mm.441720	NR_045739	ENSMUSG00000085440	Sorbs2os	D330022K07Rik	sorbin and SH3 domain containing 2, opposite strand	ncRNA
Diff_Nuc21704	chr4	43099562	43099701	+	0	NA	intron (NM_021468, intron 1 of 39)	intron (NM_021468, intron 1 of 39)	27806	NM_001310758	22249	Mm.128892	NM_021468	ENSMUSG00000028456	Unc13b	Munc13-1|Munc13-2|Unc13a|Unc13h1|Unc13h2	unc-13 homolog B (C. elegans)	protein-coding
Diff_Nuc12203	chr14	63319472	63319611	+	0	NA	exon (NM_008715, exon 15 of 19)	exon (NM_008715, exon 15 of 19)	37037	NM_001199945	319433	Mm.483827	NM_001199945	ENSMUSG00000091155	Serpine3	E130113E03Rik	serpin peptidase inhibitor, clade E (nexin, plasminogen activator inhibitor type 1), member 3	protein-coding
Diff_Nuc17489	chr6	28254522	28254661	+	0	NA	Intergenic	ORR1A4-int|LTR|MaLR	-42990	NM_001081678	627049	Mm.84441	NM_001081678	ENSMUSG00000039841	Zfp800	AA407452|Znf800	zinc finger protein 800	protein-coding
Diff_Nuc1758	chr13	114655552	114655691	+	0	NA	intron (NM_172595, intron 1 of 4)	intron (NM_172595, intron 1 of 4)	70905	NM_172595	218639	Mm.79837	NM_172595	ENSMUSG00000042348	Arl15	A430036I03|Arfrp2|C230032K13Rik	ADP-ribosylation factor-like 15	protein-coding
Diff_Nuc33378	chr8	75445232	75445371	+	0	NA	intron (NM_010687, intron 6 of 14)	L1_Mus3|LINE|L1	-95110	NR_039551	100628574		NR_039551	ENSMUSG00000093140	Mir28b	mmu-mir-28b	microRNA 28b	ncRNA
Diff_Nuc3785	chr11	35592442	35592581	+	0	NA	intron (NM_145962, intron 4 of 6)	intron (NM_145962, intron 4 of 6)	-3387	NR_029754	723824		NR_029754	ENSMUSG00000065553	Mir103-1	Mirn103-1|mir-103-1	microRNA 103-1	ncRNA
Diff_Nuc14125	chr18	18892412	18892551	+	0	NA	Intergenic	Intergenic	-1152982	NR_045374	75162	Mm.60874	NR_045374		4930545E07Rik	-	RIKEN cDNA 4930545E07 gene	ncRNA
Diff_Nuc8303	chr17	80572282	80572421	+	0	NA	intron (NM_176963, intron 4 of 6)	intron (NM_176963, intron 4 of 6)	34294	NM_001195486	225027	Mm.292016	NM_146083	ENSMUSG00000024097	Srsf7	35kDa|9430065L19Rik|9G8|NX-96|Sfrs7	serine/arginine-rich splicing factor 7	protein-coding
Diff_Nuc28210	chr1	33887672	33887811	+	0	NA	Intergenic	RLTR9A|LTR|ERVK	8018	NM_001161816	433287	Mm.383632	NM_001161816		Gm15455	AA692849|OTTMUSG00000022109	predicted gene 15455	protein-coding
Diff_Nuc17068	chr7	146545022	146545161	+	0	NA	Intergenic	B2_Mm2|SINE|B2	-29917	NM_183144	212111	Mm.28308	NM_183144	ENSMUSG00000025477	Inpp5a	-	inositol polyphosphate-5-phosphatase A	protein-coding
Diff_Nuc1886	chr12	7398272	7398411	+	0	NA	Intergenic	Intergenic	-11205	NR_045045	73575	Mm.179463	NR_045045	ENSMUSG00000102096	1700101O22Rik	-	RIKEN cDNA 1700101O22 gene	ncRNA
Diff_Nuc11622	chr14	21602972	21603111	+	0	NA	intron (NM_178597, intron 2 of 20)	(TCCA)n|Simple_repeat|Simple_repeat	10269	NM_001039138	12325	Mm.235182	NM_178597	ENSMUSG00000021820	Camk2g	Camkg	calcium/calmodulin-dependent protein kinase II gamma	protein-coding
Diff_Nuc8843	chr16	25050562	25050701	+	0	NA	Intergenic	Intergenic	-9094	NR_040374	319487	Mm.137341	NR_040374	ENSMUSG00000096960	A230028O05Rik	-	RIKEN cDNA A230028O05 gene	ncRNA
Diff_Nuc30277	chr1	178816112	178816251	+	0	NA	intron (NM_029756, intron 12 of 17)	intron (NM_029756, intron 12 of 17)	-49917	NR_037996	15365	Mm.441435	NR_037996		Hmga2-ps1	EG666235|Gm7996|Hmgic-ps1|[y]i-c	high mobility group AT-hook 2, pseudogene 1	pseudo
Diff_Nuc30629	chr9	7772862	7773001	+	0	NA	intron (NM_133739, intron 2 of 4)	intron (NM_133739, intron 2 of 4)	8854	NM_133739	71929	Mm.283293	NM_133739	ENSMUSG00000050912	Tmem123	2310075C12Rik	transmembrane protein 123	protein-coding
Diff_Nuc24255	chr3	79797922	79798061	+	0	NA	Intergenic	Intergenic	108139	NM_133187	68659	Mm.427274	NM_133187	ENSMUSG00000027955	Fam198b	1110032E23Rik|2210419I08Rik|AV011458|Ened	family with sequence similarity 198, member B	protein-coding
Diff_Nuc6023	chr10	59307792	59307931	+	0	NA	intron (NM_144822, intron 10 of 11)	B3|SINE|B2	-34478	NM_019965	56709	Mm.103610	NM_019965	ENSMUSG00000020109	Dnajb12	Dj10|mDj10	DnaJ heat shock protein family (Hsp40) member B12	protein-coding
Diff_Nuc23141	chr4	145297502	145297641	+	0	NA	Intergenic	Lx2B|LINE|L1	36971	NM_001103158	100041379	Mm.276881	NM_001103158	ENSMUSG00000058186	Zfp980	Gm13242|OTTMUSG00000011070	zinc finger protein 980	protein-coding
Diff_Nuc17163	chr6	3626722	3626861	+	0	NA	Intergenic	ETnERV2-int|LTR|ERVK	44594	NR_030612	100124468		NR_030612	ENSMUSG00000076357	Mir653	Mirn653|mir-653|mmu-mir-653	microRNA 653	ncRNA
Diff_Nuc28288	chr1	38502352	38502491	+	0	NA	intron (NM_001290814, intron 4 of 21)	intron (NM_001290814, intron 4 of 21)	181668	NM_001290814	16764	Mm.336679	NM_010678	ENSMUSG00000037138	Aff3	3222402O04Rik|A730046J16|LAF-4|Laf4	AF4/FMR2 family, member 3	protein-coding
Diff_Nuc17316	chr6	15686882	15687021	+	0	NA	intron (NM_175088, intron 2 of 4)	intron (NM_175088, intron 2 of 4)	16290	NM_175088	16543	Mm.1314	NM_175088	ENSMUSG00000041390	Mdfic	Kdt1|Mdfid	MyoD family inhibitor domain containing	protein-coding
Diff_Nuc31520	chr9	67819662	67819801	+	0	NA	intron (NM_177184, intron 75 of 84)	intron (NM_177184, intron 75 of 84)	53790	NR_045745	434412	Mm.490707	NR_045745	ENSMUSG00000111841	Gm20745	-	predicted gene, 20745	ncRNA
Diff_Nuc15976	chr7	73804842	73804981	+	0	NA	non-coding (NR_003961, exon 7 of 8)	non-coding (NR_003961, exon 7 of 8)	29536	NM_080443	117589	Mm.34785	NM_080443	ENSMUSG00000030509	Asb7	AI449039|Asb-7|D030055C23Rik	ankyrin repeat and SOCS box-containing 7	protein-coding
Diff_Nuc32437	chr8	9990112	9990251	+	0	NA	3' UTR (NM_001081119, exon 2 of 2)	3' UTR (NM_001081119, exon 2 of 2)	12464	NM_026868	68904	Mm.142570	NM_026868	ENSMUSG00000040396	Abhd13	1110065L07Rik|AI463703|AI788994	abhydrolase domain containing 13	protein-coding
Diff_Nuc20170	chr5	79705752	79705891	+	0	NA	Intergenic	B1_Mur4|SINE|Alu	-1743775	NM_001347367	319387	Mm.273631	NM_198702	ENSMUSG00000037605	Adgrl3	5430402I23Rik|CIRL-3|D130075K09Rik|Gm1379|LEC3|Lphn3|mKIAA0768	adhesion G protein-coupled receptor L3	protein-coding
Diff_Nuc29283	chr1	104413602	104413741	+	0	NA	Intergenic	B4|SINE|B4	1361326	NR_037989	100504525	Mm.87065	NR_037989	ENSMUSG00000100684	Gm20268	-	predicted gene, 20268	ncRNA
Diff_Nuc3635	chr11	23594712	23594851	+	0	NA	intron (NM_001033654, intron 4 of 17)	B1_Mur4|SINE|Alu	28805	NM_028304	74467	Mm.29536	NM_028304	ENSMUSG00000020280	Pus10	2810013G11Rik|4933435A13Rik|AU014648|C77560|Ccdc139	pseudouridylate synthase 10	protein-coding
Diff_Nuc5330	chr10	7509042	7509181	+	0	NA	Intergenic	RLTR18|LTR|ERVK	-3581	NM_026141	67418	Mm.38927	NM_026141	ENSMUSG00000015757	Ppil4	3732410E19Rik|3830425H19Rik|AI788954|AW146233|PPIase	peptidylprolyl isomerase (cyclophilin)-like 4	protein-coding
Diff_Nuc7533	chr17	29092582	29092721	+	0	NA	intron (NM_025888, intron 1 of 7)	PB1D10|SINE|Alu	2490	NM_025888	66989	Mm.435	NM_025888	ENSMUSG00000005936	Kctd20	2410004N11Rik|AI451943|AW541186|D17Ertd562e	potassium channel tetramerisation domain containing 20	protein-coding
Diff_Nuc20929	chr5	134741862	134742001	+	0	NA	intron (NM_001080747, intron 12 of 33)	intron (NM_001080747, intron 12 of 33)	-36436	NR_104383	17969	Mm.425296	NM_010876	ENSMUSG00000015950	Ncf1	NCF-47K|NOXO2|Ncf-1|p47-phox|p47<phox>|p47phox	neutrophil cytosolic factor 1	protein-coding
Diff_Nuc13296	chr19	23384462	23384601	+	0	NA	intron (NM_174857, intron 12 of 13)	intron (NM_174857, intron 12 of 13)	-36144	NM_001252684	226026	Mm.23267	NM_153808	ENSMUSG00000024943	Smc5	MLZ-453|SMC-5|Smc5l1|mKIAA0594|mSMC5	structural maintenance of chromosomes 5	protein-coding
Diff_Nuc33629	chr8	94870872	94871011	+	0	NA	non-coding (NR_110452, exon 3 of 4)	non-coding (NR_110452, exon 3 of 4)	9078	NR_110452	71296	Mm.86664	NR_033641	ENSMUSG00000031736	Crnde	4933436C20Rik	colorectal neoplasia differentially expressed (non-protein coding)	ncRNA
Diff_Nuc8276	chr17	79277242	79277381	+	0	NA	intron (NM_011163, intron 2 of 15)	B4A|SINE|B4	4601	NM_011163	19106	Mm.378990	NM_011163	ENSMUSG00000024079	Eif2ak2	2310047A08Rik|4732414G15Rik|AI467567|AI747578|Pkr|Prkr|Tik	eukaryotic translation initiation factor 2-alpha kinase 2	protein-coding
Diff_Nuc24771	chr3	108712162	108712301	+	0	NA	intron (NM_025845, intron 1 of 5)	intron (NM_025845, intron 1 of 5)	2391	NM_025845	66921	Mm.51049	NM_025845	ENSMUSG00000027881	Prpf38b	1110021E09Rik|AU018955	PRP38 pre-mRNA processing factor 38 (yeast) domain containing B	protein-coding
Diff_Nuc12968	chr14	123976492	123976631	+	0	NA	intron (NM_177393, intron 6 of 43)	MER2B|DNA|MER2_type	49805	NM_177393	338370	Mm.255348	NM_177393	ENSMUSG00000000197	Nalcn	A530023G15Rik|AI849508|Vgcnl1	sodium leak channel, non-selective	protein-coding
Diff_Nuc22335	chr4	93481482	93481621	+	0	NA	Intergenic	Intergenic	-479349	NM_026954	69136	Mm.171558	NM_026954	ENSMUSG00000054000	Tusc1	2200001D17Rik|TSG-9	tumor suppressor candidate 1	protein-coding
Diff_Nuc21963	chr4	60252182	60252321	+	0	NA	Intergenic	Intergenic	-16780	NM_001134676	100041687	Mm.457982	NM_001134676	ENSMUSG00000078687	Mup8	Gm12809|Mup5|OTTMUSG00000008509	major urinary protein 8	protein-coding
Diff_Nuc3573	chr11	20664102	20664241	+	0	NA	Intergenic	L1Md_F3|LINE|L1	-22612	NM_181411	216549	Mm.356580	NM_181411	ENSMUSG00000049659	Aftph	-	aftiphilin	protein-coding
Diff_Nuc2492	chr12	60269632	60269771	+	0	NA	intron (NM_001329047, intron 19 of 29)	L1_Mur1|LINE|L1	37261	NM_001165253	338320	Mm.213215	NM_146034	ENSMUSG00000021000	Mia2	Ctage5|D12Bwg0579e|Mea6|Mgea|Mgea6	melanoma inhibitory activity 2	protein-coding
Diff_Nuc8336	chr17	82043152	82043291	+	0	NA	intron (NR_104580, intron 2 of 8)	intron (NR_104580, intron 2 of 8)	94506	NM_001286684	20541	Mm.265834	NM_011406	ENSMUSG00000054640	Slc8a1	AI852629|AV344025|D930008O12Rik|Ncx1	solute carrier family 8 (sodium/calcium exchanger), member 1	protein-coding
Diff_Nuc29138	chr1	92926062	92926201	+	0	NA	intron (NM_001111312, intron 1 of 12)	intron (NM_001111312, intron 1 of 12)	-23890	NM_001310732	16978	Mm.45039	NM_008515	ENSMUSG00000026305	Lrrfip1	AU024550|Fliiap1	leucine rich repeat (in FLII) interacting protein 1	protein-coding
Diff_Nuc17857	chr6	52994502	52994641	+	0	NA	intron (NM_173406, intron 1 of 4)	intron (NM_173406, intron 1 of 4)	24047	NM_173406	231986	Mm.386865	NM_173406	ENSMUSG00000063568	Jazf1	AI591476|C820002C15|Jaz1|Tip27	JAZF zinc finger 1	protein-coding
Diff_Nuc8149	chr17	71119222	71119361	+	0	NA	intron (NM_001347411, intron 11 of 14)	intron (NM_001347411, intron 11 of 14)	76826	NM_001164077	21815	Mm.101034	NM_009372	ENSMUSG00000047407	Tgif1	AA959811|AI462167|Tgif	TGFB-induced factor homeobox 1	protein-coding
Diff_Nuc3761	chr11	33054172	33054311	+	0	NA	TTS (NM_001252261)	TTS (NM_001252261)	-6841	NR_102395	14172	Mm.339812	NM_008005	ENSMUSG00000057967	Fgf18	D130055P09Rik|FGF-18	fibroblast growth factor 18	protein-coding
Diff_Nuc24778	chr3	109237782	109237921	+	0	NA	intron (NM_020505, intron 2 of 26)	RCHARR1|DNA|MER1_type	94250	NM_020505	57257	Mm.282257	NM_020505	ENSMUSG00000033721	Vav3	A530094I06Rik|AA986410|Idd18.1	vav 3 oncogene	protein-coding
Diff_Nuc22630	chr4	114711992	114712131	+	0	NA	intron (NM_009185, intron 16 of 16)	intron (NM_009185, intron 16 of 16)	-16970	NM_011527	21349	Mm.239869	NM_011527	ENSMUSG00000028717	Tal1	Hpt|SCL/tal-1|Scl|bHLHa17|tal-1	T cell acute lymphocytic leukemia 1	protein-coding
Diff_Nuc7732	chr17	38724282	38724421	+	0	NA	Intergenic	L1Md_F2|LINE|L1	33214	NM_001177585	100126773	Mm.471587	NM_001177585	ENSMUSG00000092244	Esp34	Gm20410	exocrine gland secreted peptide 34	protein-coding
Diff_Nuc7269	chr17	12894632	12894771	+	0	NA	intron (NM_010515, intron 29 of 47)	intron (NM_010515, intron 29 of 47)	-25997	NM_009202	20517	Mm.594	NM_009202	ENSMUSG00000023829	Slc22a1	Lx1|Oct1|Orct|Orct1	solute carrier family 22 (organic cation transporter), member 1	protein-coding
Diff_Nuc26069	chr2	45079202	45079341	+	0	NA	Intergenic	Intergenic	-110472	NM_015753	24136	Mm.440702	NM_015753	ENSMUSG00000026872	Zeb2	9130203F04Rik|D130016B08Rik|SIP1|Zfhx1b|Zfx1b|Zfxh1b	zinc finger E-box binding homeobox 2	protein-coding
Diff_Nuc12142	chr14	59524232	59524371	+	0	NA	Intergenic	ID_B1|SINE|B4	237429	NM_026461	67932	Mm.65550	NM_026461	ENSMUSG00000021977	1700129C05Rik	-	RIKEN cDNA 1700129C05 gene	protein-coding
Diff_Nuc8781	chr16	20894142	20894281	+	0	NA	Intergenic	RodERV21-int|LTR|ERV1	-159627	NM_009379	21832	Mm.3943	NM_009379	ENSMUSG00000022847	Thpo	Mgdf|Ml|Mpllg|Tpo	thrombopoietin	protein-coding
Diff_Nuc11923	chr14	44130582	44130721	+	0	NA	Intergenic	Intergenic	55027	NM_001098269	100042342	Mm.429750	NM_001098269	ENSMUSG00000095528	Gm10375	ENSMUSG00000072602	predicted gene 10375	protein-coding
Diff_Nuc606	chr13	34067182	34067321	+	0	NA	intron (NM_001163242, intron 3 of 6)	L1_Mus1|LINE|L1	8229	NM_001163242	18105	Mm.264036	NM_020282	ENSMUSG00000046949	Nqo2	NMO2|Nmor2|Ox2	NAD(P)H dehydrogenase, quinone 2	protein-coding
Diff_Nuc30681	chr9	12088802	12088941	+	0	NA	Intergenic	L1Md_F2|LINE|L1	1016984	NR_040755	78219	Mm.414868	NR_040755	ENSMUSG00000111830	4930568E12Rik	-	RIKEN cDNA 4930568E12 gene	ncRNA
Diff_Nuc26321	chr2	63790392	63790531	+	0	NA	Intergenic	Intergenic	145634	NM_001267846	60344	Mm.130769	NM_021716	ENSMUSG00000075324	Fign	fi|fidget	fidgetin	protein-coding
Diff_Nuc24503	chr3	92264612	92264751	+	0	NA	Intergenic	L1_Mus1|LINE|L1	-2039	NM_011478	20766	Mm.57092	NM_011478	ENSMUSG00000045539	Sprr3	SPR3	small proline-rich protein 3	protein-coding
Diff_Nuc2687	chr12	73949382	73949521	+	0	NA	Intergenic	Intergenic	69301	NM_029444	75801	Mm.242892	NM_029444	ENSMUSG00000021098	4930447C04Rik	4921504I02Rik|A930035O15Rik|Six6OS|Six6as|Six6os1	RIKEN cDNA 4930447C04 gene	protein-coding
Diff_Nuc8745	chr16	18243622	18243761	+	0	NA	intron (NM_011239, intron 3 of 5)	intron (NM_011239, intron 3 of 5)	5096	NM_011239	19385	Mm.235287	NM_011239	ENSMUSG00000005732	Ranbp1	Htf9a	RAN binding protein 1	protein-coding
Diff_Nuc27545	chr2	154688122	154688261	+	0	NA	intron (NM_023130, intron 5 of 8)	B3|SINE|B2	30451	NM_026030	67204	Mm.377134	NM_026030	ENSMUSG00000074656	Eif2s2	2810026E11Rik|38kDa|AA408636|AA571381|AA986487|AW822225|D2Ertd303e|EIF2|EIF2B	eukaryotic translation initiation factor 2, subunit 2 (beta)	protein-coding
Diff_Nuc9820	chr16	94988242	94988381	+	0	NA	intron (NM_010606, intron 3 of 3)	MIR|SINE|MIR	89986	NM_001025590	16522	Mm.328720	NM_010606	ENSMUSG00000043301	Kcnj6	BIR1|GIRK2|KATP2|KCNJ7|Kir3.2|weaver|wv	potassium inwardly-rectifying channel, subfamily J, member 6	protein-coding
Diff_Nuc32084	chr9	107671212	107671351	+	0	NA	intron (NM_148930, intron 2 of 24)	intron (NM_148930, intron 2 of 24)	2052	NM_148930	83486	Mm.259197	NM_148930	ENSMUSG00000032580	Rbm5	D030069N10Rik	RNA binding motif protein 5	protein-coding
Diff_Nuc32766	chr8	30948822	30948961	+	0	NA	Intergenic	Intergenic	-618783	NM_001347498	210801	Mm.248433	NM_153135	ENSMUSG00000063626	Unc5d	D930029E11Rik|Unc5h4|mKIAA1777	unc-5 netrin receptor D	protein-coding
Diff_Nuc21339	chr4	11807702	11807841	+	0	NA	Intergenic	RMER17B|LTR|ERVK	85089	NM_001098231	381511	Mm.331489	NM_001033453	ENSMUSG00000049225	Pdp1	Gm1024|Ppm2c	pyruvate dehyrogenase phosphatase catalytic subunit 1	protein-coding
Diff_Nuc15300	chr7	15066852	15066991	+	0	NA	intron (NM_001184981, intron 3 of 6)	L1Md_F|LINE|L1	11354	NM_001184981	638251	Mm.482063	NM_001184981	ENSMUSG00000094156	Sult2a7	EG638251|Gm7231	sulfotransferase family 2A, dehydroepiandrosterone (DHEA)-preferring, member 7	protein-coding
Diff_Nuc31120	chr9	44463482	44463621	+	0	NA	Intergenic	Intergenic	-17765	NM_001277851	58866	Mm.45380	NM_021481	ENSMUSG00000032098	Treh	2210412M19Rik	trehalase (brush-border membrane glycoprotein)	protein-coding
Diff_Nuc28098	chr1	23371902	23372041	+	0	NA	Intergenic	L1_Mus1|LINE|L1	18043	NM_001081079	70155	Mm.28013	NM_001081079	ENSMUSG00000026158	Ogfrl1	2210417C17Rik	opioid growth factor receptor-like 1	protein-coding
Diff_Nuc26616	chr2	86612142	86612281	+	0	NA	Intergenic	L1VL2|LINE|L1	-13678	NM_146366	258363	Mm.223054	NM_146366	ENSMUSG00000047969	Olfr1093	MOR179-6	olfactory receptor 1093	protein-coding
Diff_Nuc27610	chr2	157832472	157832611	+	0	NA	intron (NM_029282, intron 1 of 6)	MIRb|SINE|MIR	2555	NM_029282	75425	Mm.29068	NM_029282	ENSMUSG00000027650	Tti1	2610036D13Rik|AI449463	TELO2 interacting protein 1	protein-coding
Diff_Nuc25597	chr2	15268072	15268211	+	0	NA	Intergenic	Lx9|LINE|L1	-179965	NM_001310455	102635496		NM_001310455	ENSMUSG00000075520	Malrd1	-	MAM and LDL receptor class A domain containing 1	protein-coding
Diff_Nuc22592	chr4	111298642	111298781	+	0	NA	intron (NM_001048189, intron 11 of 12)	intron (NM_001048189, intron 11 of 12)	-93904	NM_026470	67946	Mm.275526	NM_026470	ENSMUSG00000034401	Spata6	1700062C23Rik|AI790763|Hash|KRP|Mash	spermatogenesis associated 6	protein-coding
Diff_Nuc31555	chr9	70278692	70278831	+	0	NA	exon (NM_033604, exon 13 of 15)	exon (NM_033604, exon 13 of 15)	-9400	NM_007630	12442	Mm.22592	NM_007630	ENSMUSG00000032218	Ccnb2	CycB2	cyclin B2	protein-coding
Diff_Nuc8299	chr17	80421442	80421581	+	0	NA	Intergenic	Intergenic	40097	NM_144802	72692	Mm.64579	NM_144802	ENSMUSG00000024095	Hnrnpll	2510028H02Rik|2810036L13Rik|AI256697|AI852082|Hnrpll	heterogeneous nuclear ribonucleoprotein L-like	protein-coding
Diff_Nuc30205	chr1	174117042	174117181	+	0	NA	intron (NM_153555, intron 9 of 13)	intron (NM_153555, intron 9 of 13)	19824	NM_001329871	18611	Mm.544	NM_011063	ENSMUSG00000013698	Pea15a	Mat1|PEA-15|Pea15|Pkcs15	phosphoprotein enriched in astrocytes 15A	protein-coding
Diff_Nuc6118	chr10	64871672	64871811	+	0	NA	Intergenic	ORR1A4|LTR|MaLR	715071	NR_038039	69433	Mm.23366	NR_038039	ENSMUSG00000100000	1700023F02Rik	AV205046	RIKEN cDNA 1700023F02 gene	ncRNA
Diff_Nuc334	chr13	12816232	12816371	+	0	NA	Intergenic	Lx|LINE|L1	-73639	NR_003568	664862	Mm.415635	NR_003568		Gpr137b-ps	2310041G17Rik|ENSMUSG00000075118	G protein-coupled receptor 137B, pseudogene	pseudo
Diff_Nuc22684	chr4	117324202	117324341	+	0	NA	intron (NM_080469, intron 8 of 8)	intron (NM_080469, intron 8 of 8)	30559	NM_023178	66233	Mm.29142	NM_023178	ENSMUSG00000009640	Dmap1	1500016M21Rik|DNMAP1|DNMTAP1|Dmtap1|mKIAA1425	DNA methyltransferase 1-associated protein 1	protein-coding
Diff_Nuc16075	chr7	80577692	80577831	+	0	NA	intron (NM_001081345, intron 38 of 38)	URR1B|DNA|MER1_type	-57101	NR_040324	319783	Mm.349813	NR_040324	ENSMUSG00000097756	A730056A06Rik	C76391	RIKEN cDNA A730056A06 gene	ncRNA
Diff_Nuc5295	chr10	5773252	5773391	+	0	NA	Intergenic	Intergenic	-38769	NM_007956	13982	Mm.9213	NM_007956	ENSMUSG00000019768	Esr1	ER|ER-alpha|ERa|ERalpha|ESR|Estr|Estra|Nr3a1	estrogen receptor 1 (alpha)	protein-coding
Diff_Nuc9026	chr16	35355192	35355331	+	0	NA	intron (NM_133704, intron 2 of 6)	intron (NM_133704, intron 2 of 6)	8743	NM_133704	317717	Mm.259164	NM_133704	ENSMUSG00000034473	Sec22a	1810005C06Rik|Sec22l2	SEC22 homolog A, vesicle trafficking protein	protein-coding
Diff_Nuc27484	chr2	150503712	150503851	+	0	NA	Intergenic	Intergenic	-9805	NM_080575	68738	Mm.7044	NM_080575	ENSMUSG00000027452	Acss1	1110032O15Rik|AI788978|Acas2|Acas2l|AceCS2	acyl-CoA synthetase short-chain family member 1	protein-coding
Diff_Nuc5794	chr10	42244742	42244881	+	0	NA	intron (NM_017472, intron 1 of 3)	intron (NM_017472, intron 1 of 3)	22951	NM_017472	54198	Mm.277870	NM_017472	ENSMUSG00000019804	Snx3	SDP3	sorting nexin 3	protein-coding
Diff_Nuc30949	chr9	32439792	32439931	+	0	NA	Intergenic	Intergenic	-63766	NM_011808	23871	Mm.292415	NM_011808	ENSMUSG00000032035	Ets1	AI196000|AI448617|D230050P06|Ets-1|Tpl1|vs	E26 avian leukemia oncogene 1, 5' domain	protein-coding
Diff_Nuc29132	chr1	92384192	92384331	+	0	NA	Intergenic	ORR1C2-int|LTR|MaLR	-115739	NM_133805	108679	Mm.119177	NM_133805	ENSMUSG00000034432	Cops8	9430009J09Rik|AA408242|Csn8|Sgn8	COP9 signalosome subunit 8	protein-coding
Diff_Nuc16328	chr7	98973342	98973481	+	0	NA	intron (NM_011807, intron 4 of 22)	ORR1D2|LTR|MaLR	-237493	NM_001243046	23859	Mm.147213	NM_011807	ENSMUSG00000052572	Dlg2	A330103J02Rik|B230218P12Rik|B330007M19Rik|Dlgh2|Gm1197|Gm21505|PSD93	discs, large homolog 2 (Drosophila)	protein-coding
Diff_Nuc22706	chr4	118790222	118790361	+	0	NA	intron (NM_011400, intron 1 of 9)	L2c|LINE|L2	8941	NM_011400	20525	Mm.21002	NM_011400	ENSMUSG00000028645	Slc2a1	Glut-1|Glut1	solute carrier family 2 (facilitated glucose transporter), member 1	protein-coding
Diff_Nuc6493	chr10	87162522	87162661	+	0	NA	Intergenic	Intergenic	-158419	NM_001314010	16000	Mm.268521	NM_010512	ENSMUSG00000020053	Igf1	C730016P09Rik|Igf-1|Igf-I	insulin-like growth factor 1	protein-coding
Diff_Nuc7315	chr17	15116462	15116601	+	0	NA	promoter-TSS (NM_001123367)	promoter-TSS (NM_001123367)	703	NM_001123370	100041574	Mm.393767	NM_001123370	ENSMUSG00000036552	9030025P20Rik	D17Zt9e	RIKEN cDNA 9030025P20 gene	protein-coding
Diff_Nuc30668	chr9	10412902	10413041	+	0	NA	intron (NM_001170787, intron 3 of 24)	AT_rich|Low_complexity|Low_complexity	491755	NM_001033359	244682	Mm.187021	NM_001033359	ENSMUSG00000039488	Cntn5	6720426O10Rik|A830025P08Rik|Gm507|NB-2	contactin 5	protein-coding
Diff_Nuc20169	chr5	79691567	79691706	+	0	NA	Intergenic	MTE2a|LTR|MaLR	-1757960	NM_001347367	319387	Mm.273631	NM_198702	ENSMUSG00000037605	Adgrl3	5430402I23Rik|CIRL-3|D130075K09Rik|Gm1379|LEC3|Lphn3|mKIAA0768	adhesion G protein-coupled receptor L3	protein-coding
Diff_Nuc16052	chr7	78823892	78824031	+	0	NA	Intergenic	Intergenic	-230620	NR_130995	78156	Mm.243818	NR_130995	ENSMUSG00000108669	4930441H08Rik	-	RIKEN cDNA 4930441H08 gene	ncRNA
Diff_Nuc2248	chr12	41071062	41071201	+	0	NA	intron (NM_178845, intron 4 of 11)	intron (NM_178845, intron 4 of 11)	101246	NM_172575	246196	Mm.26852	NM_172575	ENSMUSG00000055917	Zfp277	2410017E24Rik|NIRF4	zinc finger protein 277	protein-coding
Diff_Nuc25703	chr2	22884672	22884811	+	0	NA	intron (NM_001077190, intron 1 of 10)	PB1D9|SINE|Alu	11020	NM_001077192	11308	Mm.205647	NM_007380	ENSMUSG00000058835	Abi1	E3B1|NAP1|Ssh3bp1|abi-1	abl-interactor 1	protein-coding
Diff_Nuc32774	chr8	31507072	31507211	+	0	NA	Intergenic	RMER15|LTR|ERVL	-171726	NR_045856	71314	Mm.158666	NR_045856	ENSMUSG00000097044	4933433F19Rik	-	RIKEN cDNA 4933433F19 gene	ncRNA
Diff_Nuc21469	chr4	23710712	23710851	+	0	NA	Intergenic	Intergenic	-712828	NM_199467	212377	Mm.120919	NM_199467	ENSMUSG00000045751	Mms22l	F730047E07Rik|Gm134	MMS22-like, DNA repair protein	protein-coding
Diff_Nuc4401	chr11	74883962	74884101	+	0	NA	intron (NM_001002764, intron 13 of 18)	(TTTG)n|Simple_repeat|Simple_repeat	-4538	NR_030454	735274		NR_030454	ENSMUSG00000106252	Mir684-1	Mirn684-1	microRNA 684-1	ncRNA
Diff_Nuc20808	chr5	124523162	124523301	+	0	NA	intron (NM_019875, intron 10 of 11)	B3|SINE|B2	22576	NM_019875	56325	Mm.254839	NM_019875	ENSMUSG00000029408	Abcb9	TAPL|mKIAA1520	ATP-binding cassette, sub-family B (MDR/TAP), member 9	protein-coding
Diff_Nuc12471	chr14	79779822	79779961	+	0	NA	intron (NM_025832, intron 5 of 19)	intron (NM_025832, intron 5 of 19)	10584	NM_025832	66897	Mm.24425	NM_025832	ENSMUSG00000022020	Naa16	1300019C06Rik|Narg1l	N(alpha)-acetyltransferase 16, NatA auxiliary subunit	protein-coding
Diff_Nuc19377	chr5	19545262	19545401	+	0	NA	intron (NM_001170745, intron 1 of 20)	L1MC1|LINE|L1	131995	NM_015823	50791	Mm.332231	NM_015823	ENSMUSG00000040003	Magi2	AIP-1|Acvri1|Acvrinp1|Acvrip1|Magi-2|S-SCAM|mKIAA0705	membrane associated guanylate kinase, WW and PDZ domain containing 2	protein-coding
Diff_Nuc778	chr13	45041432	45041571	+	0	NA	intron (NM_025772, intron 7 of 9)	intron (NM_025772, intron 7 of 9)	55964	NM_025772	94245	Mm.352311	NM_025772	ENSMUSG00000057531	Dtnbp1	5430437B18Rik|AW048963|Bloc1s8|dysbindin|sdy	dystrobrevin binding protein 1	protein-coding
Diff_Nuc22719	chr4	120145812	120145951	+	0	NA	intron (NM_013883, intron 7 of 16)	L1MC4|LINE|L1	-58955	NM_177570	194219	Mm.29788	NM_177570	ENSMUSG00000047518	Slfnl1	4933406A14Rik	schlafen like 1	protein-coding
Diff_Nuc20378	chr5	95499002	95499141	+	0	NA	Intergenic	L1Md_F2|LINE|L1	81352	NR_044992	622894	Mm.380053	NR_044992	ENSMUSG00000096742	Gm6367	EG622894	predicted gene 6367	pseudo
Diff_Nuc18843	chr6	125047892	125048031	+	0	NA	TTS (NR_106012)	TTS (NR_106012)	919	NR_106012	102466272		NR_106012	ENSMUSG00000098762	Mir7045	Gm27758|mmu-mir-7045	microRNA 7045	ncRNA
Diff_Nuc2934	chr12	88869242	88869381	+	0	NA	Intergenic	MTA_Mm|LTR|MaLR	14045	NM_001177565	666806	Mm.379796	NM_001177565	ENSMUSG00000079034	Gm8300	EG666806	predicted gene 8300	protein-coding
Diff_Nuc32130	chr9	109790002	109790141	+	0	NA	intron (NM_007658, intron 10 of 14)	intron (NM_007658, intron 10 of 14)	-2076	NR_106057	102465660		NR_106057	ENSMUSG00000098490	Mir7089	Gm27418|mmu-mir-7089	microRNA 7089	ncRNA
Diff_Nuc19645	chr5	37866572	37866711	+	0	NA	intron (NM_022416, intron 6 of 11)	intron (NM_022416, intron 6 of 11)	136924	NM_145920	68525	Mm.25506	NM_145920	ENSMUSG00000050248	Evc2	1110017L09Rik|Lbn|limbin	Ellis van Creveld syndrome 2	protein-coding
Diff_Nuc20381	chr5	95534212	95534351	+	0	NA	Intergenic	Lx7|LINE|L1	-77362	NM_001200055	100041253	Mm.422705	NM_001200055	ENSMUSG00000095996	Gm16513	-	predicted gene, Gm16513	protein-coding
Diff_Nuc12516	chr14	83440492	83440631	+	0	NA	Intergenic	Intergenic	-1402809	NM_001013753	219228	Mm.153643	NM_001013753	ENSMUSG00000035566	Pcdh17	C030033F14Rik|Gm78	protocadherin 17	protein-coding
Diff_Nuc17156	chr7	152483262	152483401	+	0	NA	Intergenic	Intergenic	-3483	NM_145379	211577	Mm.215151	NM_145379	ENSMUSG00000031070	Mrgprf	BC019711|Mgrc|MrgF	MAS-related GPR, member F	protein-coding
Diff_Nuc26156	chr2	51787232	51787371	+	0	NA	intron (NM_001141981, intron 2 of 4)	B1_Mus2|SINE|Alu	2863	NM_001141982	71684	Mm.28309	NM_030243	ENSMUSG00000036249	Rbm43	0610033I05Rik	RNA binding motif protein 43	protein-coding
Diff_Nuc12379	chr14	75138452	75138591	+	0	NA	intron (NM_016903, intron 3 of 8)	B3A|SINE|B2	6417	NM_016903	13885	Mm.38055	NM_016903	ENSMUSG00000021996	Esd	Es-10|Es10|FGH|sid478	esterase D/formylglutathione hydrolase	protein-coding
Diff_Nuc32462	chr8	11393132	11393271	+	0	NA	intron (NM_009932, intron 4 of 47)	intron (NM_009932, intron 4 of 47)	-80375	NM_009931	12826	Mm.738	NM_009931	ENSMUSG00000031502	Col4a1	Bru|Col4a-1|Raw|Svc	collagen, type IV, alpha 1	protein-coding
Diff_Nuc25090	chr3	132533822	132533961	+	0	NA	intron (NR_102297, intron 1 of 3)	intron (NR_102297, intron 1 of 3)	7669	NR_102297	101243624	Mm.306256	NR_102297	ENSMUSG00000106230	Gm29811	-	predicted gene, 29811	ncRNA
Diff_Nuc11172	chr15	89329252	89329391	+	0	NA	promoter-TSS (NM_021423)	promoter-TSS (NM_021423)	-967	NM_021423	58234	Mm.146855	NM_021423	ENSMUSG00000022623	Shank3	AI841104|SHANK3c-3|SHANK3c-4|Shank3b	SH3/ankyrin domain gene 3	protein-coding
Diff_Nuc31143	chr9	45726962	45727101	+	0	NA	intron (NR_104055, intron 10 of 17)	intron (NR_104055, intron 10 of 17)	-12037	NM_001310840	235315	Mm.3255	NM_178709	ENSMUSG00000042790	Rnf214	D130054N24Rik	ring finger protein 214	protein-coding
Diff_Nuc6165	chr10	67761922	67762061	+	0	NA	Intergenic	Intergenic	-20517	NM_023598	71371	Mm.440357	NM_023598	ENSMUSG00000019947	Arid5b	4930580B11|5430435G07Rik|AI467247|Desrt|Mrf2|Mrf2alpha|Mrf2beta	AT rich interactive domain 5B (MRF1-like)	protein-coding
Diff_Nuc31397	chr9	61797052	61797191	+	0	NA	Intergenic	Lx7|LINE|L1	-2515	NM_024245	71819	Mm.259374	NM_024245	ENSMUSG00000032254	Kif23	3110001D19Rik|C87313|CHO1|Knsl5|MKLP-1|MKLP1	kinesin family member 23	protein-coding
Diff_Nuc20105	chr5	74589582	74589721	+	0	NA	Intergenic	Intergenic	-1700	NM_026878	68939	Mm.293316	NM_026878	ENSMUSG00000049907	Rasl11b	1190017B18Rik	RAS-like, family 11, member B	protein-coding
Diff_Nuc33833	chr8	109493542	109493681	+	0	NA	intron (NM_009229, intron 1 of 6)	B2_Mm2|SINE|B2	33961	NM_009229	20650	Mm.30228	NM_009229	ENSMUSG00000041308	Sntb2	Snt2	syntrophin, basic 2	protein-coding
Diff_Nuc2196	chr12	36338512	36338651	+	0	NA	Intergenic	Lx5|LINE|L1	32395	NR_045051	71581	Mm.100110	NR_045050		9130015A21Rik	100043575|Gm4527	RIKEN cDNA 9130015A21 gene	ncRNA
Diff_Nuc7877	chr17	49792382	49792521	+	0	NA	intron (NM_177052, intron 3 of 22)	intron (NM_177052, intron 3 of 22)	37954	NM_177052	319991	Mm.441340	NM_177052	ENSMUSG00000023999	Kif6	D130004B10Rik|D130084M03Rik	kinesin family member 6	protein-coding
Diff_Nuc11119	chr15	85926362	85926501	+	0	NA	intron (NM_001205353, intron 2 of 18)	ID_B1|SINE|B4	37274	NM_001205353	223752	Mm.24442	NM_172611	ENSMUSG00000035900	Gramd4	9930016O13	GRAM domain containing 4	protein-coding
Diff_Nuc1436	chr13	94056352	94056491	+	0	NA	Intergenic	Intergenic	-17291	NM_147176	26556	Mm.37533	NM_011982	ENSMUSG00000007617	Homer1	PSD-Zip45|SYN47|Ves-1|homer-1|vesl-1	homer scaffolding protein 1	protein-coding
Diff_Nuc13131	chr19	10954592	10954731	+	0	NA	intron (NM_134142, intron 1 of 3)	intron (NM_134142, intron 1 of 3)	1572	NM_134142	68539	Mm.251890	NM_134142	ENSMUSG00000034659	Tmem109	1110006I15Rik|AA958958|C77652	transmembrane protein 109	protein-coding
Diff_Nuc5522	chr10	20542472	20542611	+	0	NA	Intergenic	Intergenic	-97657	NM_013875	29863	Mm.425617	NM_013875	ENSMUSG00000019990	Pde7b	-	phosphodiesterase 7B	protein-coding
Diff_Nuc5983	chr10	56458552	56458691	+	0	NA	Intergenic	MIR|SINE|MIR	361515	NM_010288	14609	Mm.378921	NM_010288	ENSMUSG00000050953	Gja1	AU042049|AW546267|Cnx43|Cx43|Cx43alpha1|Gja-1|Npm1|connexin43	gap junction protein, alpha 1	protein-coding
Diff_Nuc1456	chr13	95608922	95609061	+	0	NA	intron (NM_009321, intron 3 of 3)	MTE2a-int|LTR|MaLR	-36591	NM_011021	18420	Mm.42051	NM_011021	ENSMUSG00000021685	Otp	-	orthopedia homeobox	protein-coding
Diff_Nuc15981	chr7	73869792	73869931	+	0	NA	Intergenic	Intergenic	-18529	NM_001164201	545975	Mm.380104	NM_001164201	ENSMUSG00000030510	Cers3	4930550L11Rik|Gm488|Lass3|T3L	ceramide synthase 3	protein-coding
Diff_Nuc32257	chr9	118667192	118667331	+	0	NA	intron (NM_001113514, intron 1 of 13)	(CA)n|Simple_repeat|Simple_repeat	46451	NM_001113514	104099	Mm.335520	NM_133721	ENSMUSG00000039115	Itga9	(alpha)9|2610002H11Rik|6720458D17Rik|AI461869|D130073C02|D9Ertd428e	integrin alpha 9	protein-coding
Diff_Nuc23911	chr3	51435592	51435731	+	0	NA	Intergenic	RLTR25B|LTR|ERVK	-29440	NM_174995	211666	Mm.24679	NM_174995	ENSMUSG00000074604	Mgst2	GST2|MGST-II	microsomal glutathione S-transferase 2	protein-coding
Diff_Nuc27044	chr2	120495672	120495811	+	0	NA	Intergenic	PB1D7|SINE|Alu	60410	NM_001290807	66296	Mm.221900	NM_025475	ENSMUSG00000027285	Haus2	1700101G24Rik|2410007P03Rik|AU020217|Cep27	HAUS augmin-like complex, subunit 2	protein-coding
Diff_Nuc5116	chr11	115438672	115438811	+	0	NA	intron (NM_001002929, intron 7 of 18)	L1_Mus1|LINE|L1	12983	NM_001002929	445007	Mm.4379	NM_001002929	ENSMUSG00000020739	Nup85	Pcnt1|frount	nucleoporin 85	protein-coding
Diff_Nuc8037	chr17	63204312	63204451	+	0	NA	intron (NM_207654, intron 1 of 4)	intron (NM_207654, intron 1 of 4)	26285	NM_207654	13640	Mm.7978	NM_010109	ENSMUSG00000048915	Efna5	AL-1|AV158822|EFL-5|Ephrin-A5|Epl7|LERK-7|RAGS	ephrin A5	protein-coding
Diff_Nuc9756	chr16	91396482	91396621	+	0	NA	intron (NM_001347258, intron 7 of 7)	intron (NM_001347258, intron 7 of 7)	-9929	NM_008349	16155	Mm.4154	NM_008349	ENSMUSG00000022969	Il10rb	6620401D04Rik|AI528744|CRF2-4|Crfb4|D16H21S58|D21S58h|IL-10R2|Il10r2	interleukin 10 receptor, beta	protein-coding
Diff_Nuc27923	chr1	6914312	6914451	+	0	NA	Intergenic	L1_Mus2|LINE|L1	-164620	NM_183028	319263	Mm.21539	NM_183028	ENSMUSG00000051285	Pcmtd1	8430411F12Rik|A030012M09Rik	protein-L-isoaspartate (D-aspartate) O-methyltransferase domain containing 1	protein-coding
Diff_Nuc11844	chr14	36818452	36818591	+	0	NA	Intergenic	Intergenic	-89630	NM_175008	218921	Mm.212464	NM_175008	ENSMUSG00000096405	4930474N05Rik	-	RIKEN cDNA 4930474N05 gene	protein-coding
Diff_Nuc21594	chr4	34494952	34495091	+	0	NA	Intergenic	Intergenic	-2843	NM_001007589	433693	Mm.389532	NM_026019	ENSMUSG00000028291	Akirin2	2700059D21Rik|AA114675|AA522011|AU019887|Akirin-2	akirin 2	protein-coding
Diff_Nuc17935	chr6	58319752	58319891	+	0	NA	Intergenic	Lx6|LINE|L1	62530	NM_053232	113859	Mm.377156	NM_053232	ENSMUSG00000091734	Vmn1r29	V1rc2	vomeronasal 1 receptor 29	protein-coding
Diff_Nuc8752	chr16	18787282	18787421	+	0	NA	intron (NM_009862, intron 14 of 19)	intron (NM_009862, intron 14 of 19)	10411	NM_013805	12741	Mm.22768	NM_013805	ENSMUSG00000041378	Cldn5	AI854493|MBEC1|Tmvcf	claudin 5	protein-coding
Diff_Nuc32086	chr9	107710702	107710841	+	0	NA	intron (NM_029169, intron 6 of 20)	intron (NM_029169, intron 6 of 20)	-37438	NM_148930	83486	Mm.259197	NM_148930	ENSMUSG00000032580	Rbm5	D030069N10Rik	RNA binding motif protein 5	protein-coding
Diff_Nuc710	chr13	40481862	40482001	+	0	NA	Intergenic	Intergenic	-98551	NM_172143	218165	Mm.364096	NM_172143	ENSMUSG00000047094	Ofcc1	opo	orofacial cleft 1 candidate 1	protein-coding
Diff_Nuc21848	chr4	53871792	53871931	+	0	NA	intron (NM_028053, intron 5 of 5)	intron (NM_028053, intron 5 of 5)	32944	NM_028053	52076	Mm.27184	NM_028053	ENSMUSG00000028420	Tmem38b	1600017F22Rik|AA437809|AV051057|D4Ertd89e|TRIC-B|mg33b	transmembrane protein 38B	protein-coding
Diff_Nuc28963	chr1	82265882	82266021	+	0	NA	intron (NM_010570, intron 1 of 1)	L1MC3|LINE|L1	22063	NM_010570	16367	Mm.4952	NM_010570	ENSMUSG00000055980	Irs1	G972R|IRS-1	insulin receptor substrate 1	protein-coding
Diff_Nuc14362	chr18	35212852	35212991	+	0	NA	Intergenic	Intergenic	-65645	NM_009818	12385	Mm.18962	NM_009818	ENSMUSG00000037815	Ctnna1	2010010M04Rik|AA517462|AI988031|Catna1	catenin (cadherin associated protein), alpha 1	protein-coding
Diff_Nuc24302	chr3	83446882	83447021	+	0	NA	Intergenic	L1_Mur3|LINE|L1	-68911	NR_036591	69460	Mm.389464	NR_036591	ENSMUSG00000101334	1700028M03Rik	-	RIKEN cDNA 1700028M03 gene	ncRNA
Diff_Nuc19734	chr5	45607192	45607331	+	0	NA	intron (NR_131933, intron 4 of 5)	intron (NR_131933, intron 4 of 5)	208378	NR_131933	52401	Mm.33854	NR_131933	ENSMUSG00000029092	D5Ertd615e	4930435H24Rik	DNA segment, Chr 5, ERATO Doi 615, expressed	ncRNA
Diff_Nuc31533	chr9	68771252	68771391	+	0	NA	intron (NM_013646, intron 1 of 10)	intron (NM_013646, intron 1 of 10)	158168	NR_033299	320440	Mm.483129	NM_177159		9530091C08Rik	-	RIKEN cDNA 9530091C08 gene	ncRNA
Diff_Nuc33787	chr8	107047562	107047701	+	0	NA	intron (NM_144931, intron 8 of 19)	intron (NM_144931, intron 8 of 19)	10906	NM_144931	234664	Mm.237670	NM_144931	ENSMUSG00000031878	Nae1	59kDa|Appbp1	NEDD8 activating enzyme E1 subunit 1	protein-coding
Diff_Nuc21853	chr4	54474652	54474791	+	0	NA	Intergenic	Intergenic	-486096	NM_172867	242466	Mm.102904	NM_172867	ENSMUSG00000060206	Zfp462	6030417H05|9430078C22Rik|Gt4-2|Zfpip	zinc finger protein 462	protein-coding
Diff_Nuc17131	chr7	150933462	150933601	+	0	NA	Intergenic	(TG)n|Simple_repeat|Simple_repeat	-5663	NM_024289	79196	Mm.21199	NM_024289	ENSMUSG00000037606	Osbpl5	1110006M06Rik|AI462538|ORP5|Obph1|Osbp2	oxysterol binding protein-like 5	protein-coding
Diff_Nuc14567	chr18	46173492	46173631	+	0	NA	intron (NR_040342, intron 2 of 3)	intron (NR_040342, intron 2 of 3)	31353	NR_040342	107003	Mm.395148	NR_040342		A330093E20Rik	AU043608	RIKEN cDNA A330093E20 gene	ncRNA
Diff_Nuc14573	chr18	46400782	46400921	+	0	NA	3' UTR (NM_172627, exon 9 of 9)	3' UTR (NM_172627, exon 9 of 9)	-28590	NM_178872	28105	Mm.277382	NM_178872	ENSMUSG00000033949	Trim36	D18Wsu100e|haprin	tripartite motif-containing 36	protein-coding
Diff_Nuc27713	chr2	165795302	165795441	+	0	NA	Intergenic	RSINE1|SINE|B4	-22766	NM_008679	17979	Mm.469663	NM_008679	ENSMUSG00000027678	Ncoa3	2010305B15Rik|AW321064|Actr|Aib1|KAT13B|Rac3|Src3|Tram-1|Tram1|bHLHe42|p/Cip|pCip	nuclear receptor coactivator 3	protein-coding
Diff_Nuc15288	chr7	13617452	13617591	+	0	NA	exon (NM_026885, exon 6 of 6)	exon (NM_026885, exon 6 of 6)	2605	NM_026885	68953	Mm.295670	NM_026885	ENSMUSG00000033916	Chmp2a	1500016L11Rik	charged multivesicular body protein 2A	protein-coding
Diff_Nuc32307	chr9	122110492	122110631	+	0	NA	intron (NM_133979, intron 12 of 12)	intron (NM_133979, intron 12 of 12)	72585	NR_106185	102465896		NR_106185	ENSMUSG00000098922	Mir8106	Gm27594|mmu-mir-8106	microRNA 8106	ncRNA
Diff_Nuc2243	chr12	40398372	40398511	+	0	NA	Intergenic	ORR1E|LTR|MaLR	365522	NM_007487	11861	Mm.12723	NM_007487	ENSMUSG00000047446	Arl4a	AI467555|Arl4	ADP-ribosylation factor-like 4A	protein-coding
Diff_Nuc14808	chr18	63049882	63050021	+	0	NA	Intergenic	Intergenic	-32030	NM_133237	494504	Mm.391102	NM_133237	ENSMUSG00000071847	Apcdd1	AB023957|AU041258|Drapc1|EIG180	adenomatosis polyposis coli down-regulated 1	protein-coding
Diff_Nuc3516	chr11	15331912	15332051	+	0	NA	Intergenic	Intergenic	-825746	NM_001290539	211739	Mm.284015	NM_145967	ENSMUSG00000048834	Vstm2a	Vstm2	V-set and transmembrane domain containing 2A	protein-coding
Diff_Nuc8142	chr17	70767752	70767891	+	0	NA	intron (NM_001347411, intron 3 of 14)	Lx4A|LINE|L1	-6311	NM_177639	224997	Mm.311840	NM_027712	ENSMUSG00000003279	Dlgap1	4933422O14Rik|9630002F18|AI845682|AI848168|BB075781|D17Bwg0511e|GKAP/SAPAP|GKPA/SAPAP|Gkap|Sapap1|mKIAA4162	discs, large (Drosophila) homolog-associated protein 1	protein-coding
Diff_Nuc25080	chr3	131553022	131553161	+	0	NA	Intergenic	Intergenic	-195165	NM_020265	56811	Mm.103593	NM_020265	ENSMUSG00000028031	Dkk2	-	dickkopf WNT signaling pathway inhibitor 2	protein-coding
Diff_Nuc8876	chr16	27514872	27515011	+	0	NA	Intergenic	MLT1D|LTR|MaLR	125899	NM_001289436	67501	Mm.258985	NM_026202	ENSMUSG00000038127	Ccdc50	C3orf6	coiled-coil domain containing 50	protein-coding
Diff_Nuc30195	chr1	173653422	173653561	+	0	NA	Intergenic	RLTR10C|LTR|ERVK	41305	NM_007649	12506	Mm.1738	NM_007649	ENSMUSG00000015355	Cd48	AI449234|AW610730|BCM1|BLAST|BLAST-1|BLAST1|Bcm-1|MEM-102|SLAMF2|Sgp-60	CD48 antigen	protein-coding
Diff_Nuc4098	chr11	57851932	57852071	+	0	NA	intron (NM_028451, intron 1 of 18)	intron (NM_028451, intron 1 of 18)	29435	NM_028451	73158	Mm.248843	NM_028451	ENSMUSG00000037331	Larp1	1810024J12Rik|3110040D16Rik|Larp|mKIAA0731	La ribonucleoprotein domain family, member 1	protein-coding
Diff_Nuc28387	chr1	45834992	45835131	+	0	NA	Intergenic	MERVK26-int|LTR|ERVK	-17285	NM_028599	73674	Mm.270376	NM_028599	ENSMUSG00000025995	Wdr75	1300003A18Rik|2410118I19Rik|C77608	WD repeat domain 75	protein-coding
Diff_Nuc28263	chr1	36872457	36872596	+	0	NA	intron (NM_018872, intron 24 of 40)	intron (NM_018872, intron 24 of 40)	36697	NM_001289612	22637	Mm.8038	NM_009539	ENSMUSG00000026117	Zap70	Srk|ZAP-70|mrtle|mur	zeta-chain (TCR) associated protein kinase	protein-coding
Diff_Nuc25498	chr2	6582332	6582471	+	0	NA	intron (NM_001347094, intron 3 of 12)	intron (NM_001347094, intron 3 of 12)	60307	NM_001310447	14007	Mm.398543	NM_010160	ENSMUSG00000002107	Celf2	B230218O03|B230345P09Rik|C88023|CELF-2|CUG-BP2|Cugbp2|D230046B21Rik|Etr-3|Napor|Napor-2|mETR-3	CUGBP, Elav-like family member 2	protein-coding
Diff_Nuc19527	chr5	30565392	30565531	+	0	NA	intron (NM_027652, intron 1 of 9)	MER44B|DNA|MER2_type	6340	NR_137634	28042	Mm.168854	NM_027652	ENSMUSG00000075703	Selenoi	4933402G07Rik|AI448296|AI452230|C79563|D5Wsu178e|Ept1|SELI|mKIAA1724	selenoprotein I	protein-coding
Diff_Nuc11686	chr14	26456262	26456401	+	0	NA	intron (NM_183208, intron 7 of 23)	intron (NM_183208, intron 7 of 23)	33332	NM_001309430	100188919	Mm.473810	NM_001309430		Israa	-	immune system released activating agent	protein-coding
Diff_Nuc1388	chr13	90908432	90908571	+	0	NA	Intergenic	L1VL4|LINE|L1	136459	NM_001145879	435376	Mm.292579	NM_001145879	ENSMUSG00000078958	Atp6ap1l	EG435376	ATPase, H+ transporting, lysosomal accessory protein 1-like	protein-coding
Diff_Nuc13898	chr18	4735832	4735971	+	0	NA	Intergenic	Intergenic	-76583	NR_045881	100038439	Mm.387569	NR_045881	ENSMUSG00000097043	Gm10556	ENSMUSG00000073646	predicted gene 10556	ncRNA
Diff_Nuc29700	chr1	138981372	138981511	+	0	NA	Intergenic	Intergenic	-124416	NM_030676	26424	Mm.16794	NM_030676	ENSMUSG00000026398	Nr5a2	AU020803|D1Ertd308e|Ftf|LRH-1|UF2-H3B	nuclear receptor subfamily 5, group A, member 2	protein-coding
Diff_Nuc25157	chr3	137532452	137532591	+	0	NA	intron (NM_001033155, intron 1 of 7)	L1MB2|LINE|L1	1882	NM_001033155	70604	Mm.256488	NM_001033155	ENSMUSG00000074212	Dnajb14	5730496F10Rik	DnaJ heat shock protein family (Hsp40) member B14	protein-coding
Diff_Nuc17145	chr7	152112812	152112951	+	0	NA	intron (NM_001347536, intron 4 of 4)	MTE2b|LTR|MaLR	11782	NM_028184	72284	Mm.273049	NM_028184	ENSMUSG00000031072	Oraov1	2210010N10Rik|TAOS1	oral cancer overexpressed 1	protein-coding
Diff_Nuc30092	chr1	166867012	166867151	+	0	NA	Intergenic	Intergenic	-1440	NM_008510	16963	Mm.190	NM_008510	ENSMUSG00000026573	Xcl1	AI661682|ATAC|LTN|Lptn|SCM-1|SCM-1a|Scyc1	chemokine (C motif) ligand 1	protein-coding
Diff_Nuc12107	chr14	58125322	58125461	+	0	NA	intron (NM_009376, intron 23 of 25)	B4A|SINE|B4	-18275	NM_145837	239114	Mm.390726	NM_145837	ENSMUSG00000050222	Il17d	AI462269|IL-17D	interleukin 17D	protein-coding
Diff_Nuc31797	chr9	84639652	84639791	+	0	NA	Intergenic	(TG)n|Simple_repeat|Simple_repeat	-28284	NR_040739	75253	Mm.401984	NR_040739	ENSMUSG00000099724	4930554C24Rik	-	RIKEN cDNA 4930554C24 gene	ncRNA
Diff_Nuc28957	chr1	82014932	82015071	+	0	NA	Intergenic	Intergenic	-113490	NR_105762	102466629		NR_105762	ENSMUSG00000098797	Mir6344	Gm27840|mmu-mir-6344	microRNA 6344	ncRNA
Diff_Nuc32760	chr8	30686212	30686351	+	0	NA	Intergenic	Intergenic	-356173	NM_001347498	210801	Mm.248433	NM_153135	ENSMUSG00000063626	Unc5d	D930029E11Rik|Unc5h4|mKIAA1777	unc-5 netrin receptor D	protein-coding
Diff_Nuc17952	chr6	59354782	59354921	+	0	NA	intron (NM_183183, intron 1 of 1)	intron (NM_183183, intron 1 of 1)	21433	NM_183183	243385	Mm.138080	NM_183183	ENSMUSG00000045441	Gprin3	C030038J10Rik|C730021L23	GPRIN family member 3	protein-coding
Diff_Nuc7622	chr17	33007212	33007351	+	0	NA	Intergenic	B3A|SINE|B2	21267	NM_207245	240066	Mm.26636	NM_207245	ENSMUSG00000095325	Zfp870	AI173952	zinc finger protein 870	protein-coding
Diff_Nuc33181	chr8	66035672	66035811	+	0	NA	Intergenic	L1Md_F2|LINE|L1	395226	NM_001195687	244495	Mm.485331	NM_001195687	ENSMUSG00000094443	Sgol2b	EG244495|Gm4975|Sgo2B	shugoshin like 2b (S. pombe)	protein-coding
Diff_Nuc29609	chr1	132672282	132672421	+	0	NA	Intergenic	L1MB7|LINE|L1	-25128	NM_001170632	64435	Mm.31821	NM_144960	ENSMUSG00000026415	Fcamr	-	Fc receptor, IgA, IgM, high affinity	protein-coding
Diff_Nuc4627	chr11	86512272	86512411	+	0	NA	intron (NM_001003908, intron 30 of 31)	intron (NM_001003908, intron 30 of 31)	14758	NM_001098810	217057	Mm.24868	NM_175004	ENSMUSG00000072582	Ptrh2	A230072I16Rik|Bit1|CGI-147	peptidyl-tRNA hydrolase 2	protein-coding
Diff_Nuc11116	chr15	85805772	85805911	+	0	NA	intron (NM_009886, intron 2 of 34)	intron (NM_009886, intron 2 of 34)	58366	NM_009886	12614	Mm.22680	NM_009886	ENSMUSG00000016028	Celsr1	Adgrc1|Crsh|Scy|crash	cadherin, EGF LAG seven-pass G-type receptor 1	protein-coding
Diff_Nuc26523	chr2	79198012	79198151	+	0	NA	intron (NM_001048176, intron 4 of 12)	intron (NM_001048176, intron 4 of 12)	71064	NM_001048176	228094	Mm.440704	NM_001033295	ENSMUSG00000075256	Cerkl	Gm1958|Rp26	ceramide kinase-like	protein-coding
Diff_Nuc16905	chr7	134036382	134036521	+	0	NA	intron (NM_028389, intron 3 of 5)	intron (NM_028389, intron 3 of 5)	5341	NM_026827	68742	Mm.248646	NM_026827	ENSMUSG00000060538	Tmem219	1110032O16Rik|2900045G02Rik|IGFBP-3R	transmembrane protein 219	protein-coding
Diff_Nuc16689	chr7	119243562	119243701	+	0	NA	intron (NM_177249, intron 21 of 28)	intron (NM_177249, intron 21 of 28)	58940	NM_015814	50781	Mm.55143	NM_015814	ENSMUSG00000030772	Dkk3	AW061014|C87148	dickkopf WNT signaling pathway inhibitor 3	protein-coding
Diff_Nuc15715	chr7	52892662	52892801	+	0	NA	intron (NM_028544, intron 10 of 11)	B1_Mur1|SINE|Alu	-2616	NM_172418	74490	Mm.107442	NM_172418	ENSMUSG00000042918	Mamstr	2810022D01Rik|5430432N15Rik|AW743872|Mastr	MEF2 activating motif and SAP domain containing transcriptional regulator	protein-coding
Diff_Nuc9082	chr16	38856212	38856351	+	0	NA	Intergenic	Intergenic	-27419	NM_029042	74663	Mm.50263	NM_029042	ENSMUSG00000022798	4930435E12Rik	TSCPA	RIKEN cDNA 4930435E12 gene	protein-coding
Diff_Nuc15945	chr7	71814422	71814561	+	0	NA	intron (NM_007461, intron 3 of 14)	intron (NM_007461, intron 3 of 14)	167467	NM_001291167	11784	Mm.4657	NM_007461	ENSMUSG00000030519	Apba2	X11-like|X11L|XllL|mXllL	amyloid beta (A4) precursor protein-binding, family A, member 2	protein-coding
Diff_Nuc24928	chr3	120996752	120996891	+	0	NA	intron (NM_024178, intron 1 of 3)	intron (NM_024178, intron 1 of 3)	2086	NM_024178	66789	Mm.269881	NM_024178	ENSMUSG00000039887	Alg14	5430428G01Rik|AI854024	asparagine-linked glycosylation 14	protein-coding
Diff_Nuc8326	chr17	81671832	81671971	+	0	NA	Intergenic	Intergenic	-207476	NM_028138	72167	Mm.273257	NM_028138	ENSMUSG00000024246	Thumpd2	2810025A12Rik	THUMP domain containing 2	protein-coding
Diff_Nuc15249	chr7	6384992	6385131	+	0	NA	Intergenic	B3|SINE|B2	-7552	NM_177061	257882	Mm.479489	NM_177061	ENSMUSG00000090824	Olfr1344	4930415J05Rik|MOR124-1	olfactory receptor 1344	protein-coding
Diff_Nuc32285	chr9	120967392	120967531	+	0	NA	intron (NM_177589, intron 34 of 36)	intron (NM_177589, intron 34 of 36)	103257	NR_106058	102465661		NR_106058	ENSMUSG00000106193	Mir7090	mmu-mir-7090	microRNA 7090	ncRNA
Diff_Nuc13838	chr19	59611152	59611291	+	0	NA	intron (NR_045308, intron 2 of 4)	intron (NR_045308, intron 2 of 4)	43595	NR_045308	72647	Mm.410849	NR_045308	ENSMUSG00000100119	2700089I24Rik	-	RIKEN cDNA 2700089I24 gene	ncRNA
Diff_Nuc25701	chr2	22790302	22790441	+	0	NA	intron (NM_019501, intron 9 of 10)	intron (NM_019501, intron 9 of 10)	39329	NM_019501	56075	Mm.249752	NM_019501	ENSMUSG00000026784	Pdss1	2610203G20Rik|2700031G06Rik|TPT|TPT 1|Tprt|mDLP1|mSPS1	prenyl (solanesyl) diphosphate synthase, subunit 1	protein-coding
Diff_Nuc9000	chr16	33713372	33713511	+	0	NA	intron (NM_175256, intron 2 of 14)	intron (NM_175256, intron 2 of 14)	28889	NM_175256	77446	Mm.245741	NM_172934	ENSMUSG00000075254	Heg1	4632417D23Rik|5530401I02Rik|9530025L16Rik|BC038614|Gm629|OTTMUSG00000027315	heart development protein with EGF-like domains 1	protein-coding
Diff_Nuc22092	chr4	74501402	74501541	+	0	NA	Intergenic	ORR1B1|LTR|MaLR	422719	NM_025849	66928	Mm.24332	NM_025849	ENSMUSG00000028398	Tmem261	1700027K24Rik|3110001D03Rik	transmembrane protein 261	protein-coding
Diff_Nuc20600	chr5	111181972	111182111	+	0	NA	intron (NM_173066, intron 2 of 50)	intron (NM_173066, intron 2 of 50)	17695	NM_029337	75560	Mm.270487	NM_029337	ENSMUSG00000029505	Ep400	1700020J09Rik|AU023439|mDomino|mKIAA1498|p400	E1A binding protein p400	protein-coding
Diff_Nuc31481	chr9	65866877	65867016	+	0	NA	intron (NM_173185, intron 11 of 13)	intron (NM_173185, intron 11 of 13)	-41030	NM_011149	19035	Mm.335249	NM_011149	ENSMUSG00000032383	Ppib	AA408962|AA553318|AI844835|Cphn-2|Cphn2|CyP-20b	peptidylprolyl isomerase B	protein-coding
Diff_Nuc16574	chr7	112916772	112916911	+	0	NA	intron (NM_001162943, intron 2 of 20)	intron (NM_001162943, intron 2 of 20)	-16092	NM_009906	12751	Mm.20837	NM_009906	ENSMUSG00000030894	Tpp1	Cln2|LPIC|TPP-1|TPP-I	tripeptidyl peptidase I	protein-coding
Diff_Nuc3344	chr11	3180302	3180441	+	0	NA	Intergenic	(TAAA)n|Simple_repeat|Simple_repeat	-8763	NR_045108	56218	Mm.275563	NM_019574	ENSMUSG00000020453	Patz1	8430401L15Rik|AI447519|Mazr|Patz|Zfp278	POZ (BTB) and AT hook containing zinc finger 1	protein-coding
Diff_Nuc30808	chr9	21423622	21423761	+	0	NA	intron (NM_011417, intron 1 of 33)	B2_Mm2|SINE|B2	3078	NM_001174078	20586	Mm.286593	NM_011417	ENSMUSG00000032187	Smarca4	Brg1|HP1-BP72|SNF2beta|SW1/SNF|b2b508.1Clo|b2b692Clo	SWI/SNF related, matrix associated, actin dependent regulator of chromatin, subfamily a, member 4	protein-coding
Diff_Nuc20713	chr5	119372452	119372591	+	0	NA	Intergenic	Intergenic	-29827	NR_040694	74627	Mm.410828	NR_040694	ENSMUSG00000107144	4930413E15Rik	-	RIKEN cDNA 4930413E15 gene	ncRNA
Diff_Nuc30903	chr9	29208392	29208531	+	0	NA	intron (NM_172290, intron 2 of 7)	intron (NM_172290, intron 2 of 7)	562253	NM_172290	235106	Mm.283138	NM_172290	ENSMUSG00000059974	Ntm	6230410L23Rik|B230210G24Rik|Hnt|Igdcc2|R75390	neurotrimin	protein-coding
Diff_Nuc10015	chr15	12254702	12254841	+	0	NA	intron (NM_025673, intron 1 of 3)	intron (NM_025673, intron 1 of 3)	3520	NM_025673	66629	Mm.157655	NM_025673	ENSMUSG00000022200	Golph3	4733401N08Rik|5730410D03Rik|AW413496	golgi phosphoprotein 3	protein-coding
Diff_Nuc33790	chr8	107233862	107234001	+	0	NA	Intergenic	RMER4B|LTR|ERVK	-23972	NM_001190330	102022	Mm.212983	NM_133960	ENSMUSG00000055730	Ces2a	9130231C15Rik|AI266984|Ces6	carboxylesterase 2A	protein-coding
Diff_Nuc29164	chr1	95370802	95370941	+	0	NA	intron (NM_133808, intron 1 of 27)	Lx8|LINE|L1	4623	NM_133808	110611	Mm.30012	NM_133808	ENSMUSG00000034088	Hdlbp	1110005P14Rik|AA960365|AI118566|D1Ertd101e	high density lipoprotein (HDL) binding protein	protein-coding
Diff_Nuc12249	chr14	67245972	67246111	+	0	NA	Intergenic	L1Md_F2|LINE|L1	-8047	NM_001271759	11549	Mm.57064	NM_013461	ENSMUSG00000045875	Adra1a	Adra1c	adrenergic receptor, alpha 1a	protein-coding
Diff_Nuc33258	chr8	71407782	71407921	+	0	NA	intron (NM_008509, intron 1 of 9)	intron (NM_008509, intron 1 of 9)	3397	NM_008509	16956	Mm.1514	NM_008509	ENSMUSG00000015568	Lpl	-	lipoprotein lipase	protein-coding
Diff_Nuc29097	chr1	90162142	90162281	+	0	NA	exon (NM_198652, exon 8 of 8)	exon (NM_198652, exon 8 of 8)	3772	NR_040291	78605	Mm.384762	NR_040291		6430706D22Rik	-	RIKEN cDNA 6430706D22 gene	ncRNA
Diff_Nuc21372	chr4	14980052	14980191	+	0	NA	intron (NM_178617, intron 4 of 12)	intron (NM_178617, intron 4 of 12)	96157	NM_178617	69352	Mm.389031	NM_178617	ENSMUSG00000040536	Necab1	1700003H21Rik|Efcbp1|STIP-1	N-terminal EF-hand calcium binding protein 1	protein-coding
Diff_Nuc17847	chr6	52525912	52526051	+	0	NA	intron (NM_145567, intron 4 of 7)	intron (NM_145567, intron 4 of 7)	64313	NM_145567	58875	Mm.286458	NM_145567	ENSMUSG00000029776	Hibadh	6430402H10Rik|AI265272	3-hydroxyisobutyrate dehydrogenase	protein-coding
Diff_Nuc25873	chr2	31872172	31872311	+	0	NA	intron (NM_172268, intron 21 of 35)	intron (NM_172268, intron 21 of 35)	-34225	NR_106135	102466844		NR_106135	ENSMUSG00000099075	Mir7674	Gm27563|mmu-mir-7674	microRNA 7674	ncRNA
Diff_Nuc22803	chr4	126011722	126011861	+	0	NA	Intergenic	Intergenic	-9348	NM_011902	24084	Mm.23895	NM_011902	ENSMUSG00000028845	Tekt2	AU014974|tektin-t	tektin 2	protein-coding
Diff_Nuc7830	chr17	46306762	46306901	+	0	NA	TTS (NM_001145979)	TTS (NM_001145979)	8850	NM_001145979	56055	Mm.22147	NM_019581	ENSMUSG00000023952	Gtpbp2	nmf205	GTP binding protein 2	protein-coding
Diff_Nuc23713	chr3	35143822	35143961	+	0	NA	Intergenic	Intergenic	-322318	NR_105799	102466155		NR_105799	ENSMUSG00000098862	Mir6378	Gm27706|mmu-mir-6378	microRNA 6378	ncRNA
Diff_Nuc31037	chr9	38893642	38893781	+	0	NA	Intergenic	L1Md_F2|LINE|L1	-7383	NM_146438	258430	Mm.271358	NM_146438	ENSMUSG00000048501	Olfr938	MOR171-25	olfactory receptor 938	protein-coding
Diff_Nuc9907	chr15	6477642	6477781	+	0	NA	Intergenic	Intergenic	-52136	NM_001278269	23880	Mm.170905	NM_011815	ENSMUSG00000022148	Fyb	ADAP|B630013F22Rik|FYB-120/130|Slap130|p120/130|p120/p130	FYN binding protein	protein-coding
Diff_Nuc29979	chr1	159330042	159330181	+	0	NA	intron (NM_177644, intron 1 of 17)	intron (NM_177644, intron 1 of 17)	-12372	NR_027984	69953	Mm.286863	NM_027274	ENSMUSG00000049881	2810025M15Rik	AI429618	RIKEN cDNA 2810025M15 gene	ncRNA
Diff_Nuc20198	chr5	83213612	83213751	+	0	NA	Intergenic	MT2C_Mm|LTR|ERVL	14409	NR_035415	100316803		NR_035415	ENSMUSG00000080586	Mir1187	Mirn1187|mir-1187|mmu-mir-1187	microRNA 1187	ncRNA
Diff_Nuc17459	chr6	25742252	25742391	+	0	NA	intron (NM_133931, intron 5 of 17)	L1_Mus2|LINE|L1	16905	NM_133931	101185	Mm.274589	NM_133931	ENSMUSG00000029676	Pot1a	1500031H18Rik|AI851169|Pot1	protection of telomeres 1A	protein-coding
Diff_Nuc1068	chr13	64372542	64372681	+	0	NA	intron (NM_172587, intron 1 of 13)	intron (NM_172587, intron 1 of 13)	3685	NM_172587	218294	Mm.25335	NM_172587	ENSMUSG00000033102	Cdc14b	2810432N10Rik|A530086E13Rik|AA472821|CDC14B3|Cdc14B1	CDC14 cell division cycle 14B	protein-coding
Diff_Nuc31130	chr9	44727282	44727421	+	0	NA	intron (NM_013795, intron 1 of 2)	intron (NM_013795, intron 1 of 2)	1474	NM_013795	27425	Mm.14663	NM_013795	ENSMUSG00000038717	Atp5l	4933437C06Rik	ATP synthase, H+ transporting, mitochondrial F0 complex, subunit G	protein-coding
Diff_Nuc12159	chr14	60264922	60265061	+	0	NA	Intergenic	Intergenic	20873	NM_145463	219134	Mm.275409	NM_145463	ENSMUSG00000044461	Shisa2	9430059P22Rik|MAd2|Tmem46|mShisa|shisa	shisa family member 2	protein-coding
Diff_Nuc15405	chr7	24116652	24116791	+	0	NA	intron (NM_001004194, intron 2 of 8)	ETnERV3-int|LTR|ERVK	30510	NM_001004194	446099	Mm.442342	NM_001004194	ENSMUSG00000045693	Nlrp4e	4930406H16Rik|Nalp-epsilon|Nalp4e|Nlrp4	NLR family, pyrin domain containing 4E	protein-coding
Diff_Nuc17338	chr6	17269832	17269971	+	0	NA	intron (NM_007616, intron 2 of 2)	intron (NM_007616, intron 2 of 2)	12261	NM_001243064	12389	Mm.28278	NM_007616	ENSMUSG00000007655	Cav1	Cav|Cav-1	caveolin 1, caveolae protein	protein-coding
Diff_Nuc12696	chr14	100702382	100702521	+	0	NA	Intergenic	Intergenic	-153436	NM_010636	16597	Mm.396499	NM_010636	ENSMUSG00000072294	Klf12	2700063E05Rik|AI225908|AI315654|AP-2rep|B130052C06Rik|D530033K05Rik	Kruppel-like factor 12	protein-coding
Diff_Nuc12557	chr14	86768302	86768441	+	0	NA	Intergenic	B2_Mm1t|SINE|B2	122594	NR_040457	75155	Mm.399239	NR_040457		4930529K09Rik	4930507G21Rik	RIKEN cDNA 4930529K09 gene	ncRNA
Diff_Nuc2295	chr12	44896702	44896841	+	0	NA	Intergenic	L1_Mus2|LINE|L1	414284	NM_013760	27362	Mm.27432	NM_013760	ENSMUSG00000014905	Dnajb9	AA408011|AA673251|AA673481|AW556981|ERdj4|Mdg1|mDj7	DnaJ heat shock protein family (Hsp40) member B9	protein-coding
Diff_Nuc2671	chr12	73213312	73213451	+	0	NA	intron (NM_028687, intron 15 of 20)	intron (NM_028687, intron 15 of 20)	26555	NM_024205	104771	Mm.258935	NM_024205	ENSMUSG00000005078	Jkamp	1200003C05Rik|2310047L11Rik|Jamp	JNK1/MAPK8-associated membrane protein	protein-coding
Diff_Nuc1070	chr13	64444562	64444701	+	0	NA	Intergenic	Intergenic	27197	NM_009984	13039	Mm.930	NM_009984	ENSMUSG00000021477	Ctsl	1190035F06Rik|CatL|Ctsl1|MEP|fs|nkt	cathepsin L	protein-coding
Diff_Nuc20505	chr5	104306402	104306541	+	0	NA	intron (NM_178741, intron 2 of 9)	B1_Mus1|SINE|Alu	33777	NM_178741	246293	Mm.179871	NM_178741	ENSMUSG00000029312	Klhl8	2310001P09Rik|D5Ertd431e	kelch-like 8	protein-coding
Diff_Nuc4659	chr11	87893742	87893881	+	0	NA	intron (NM_016686, intron 5 of 5)	B3|SINE|B2	12030	NM_016686	22344	Mm.46628	NM_016686	ENSMUSG00000018377	Vezf1	AI848691|AW046909|db1	vascular endothelial zinc finger 1	protein-coding
Diff_Nuc8582	chr16	7686652	7686791	+	0	NA	Intergenic	Intergenic	616793	NM_183188	268859	Mm.370334	NM_021477	ENSMUSG00000008658	Rbfox1	A2bp|A2bp1|Hrnbp1|fox-1	RNA binding protein, fox-1 homolog (C. elegans) 1	protein-coding
Diff_Nuc27530	chr2	154195772	154195911	+	0	NA	intron (NM_025876, intron 2 of 13)	PB1D10|SINE|Alu	2614	NM_025876	66971	Mm.289427	NM_025876	ENSMUSG00000027487	Cdk5rap1	2310066P17Rik	CDK5 regulatory subunit associated protein 1	protein-coding
Diff_Nuc16121	chr7	83997072	83997211	+	0	NA	intron (NM_001199224, intron 21 of 22)	intron (NM_001199224, intron 21 of 22)	622368	NM_001199224	244071	Mm.322829	NM_172902	ENSMUSG00000025754	Agbl1	Ccp4|D430020F16|EG244071|Nna1-l1	ATP/GTP binding protein-like 1	protein-coding
Diff_Nuc33544	chr8	87311902	87312041	+	0	NA	intron (NM_010906, intron 1 of 8)	intron (NM_010906, intron 1 of 8)	12266	NM_010906	18032	Mm.9394	NM_010906	ENSMUSG00000001911	Nfix	CTF|NF-I/X|NF1-X|NFI-X	nuclear factor I/X	protein-coding
Diff_Nuc3498	chr11	13183192	13183331	+	0	NA	Intergenic	L1_Mus2|LINE|L1	-818298	NM_001282993	12808	Mm.22847	NM_172496	ENSMUSG00000020173	Cobl	-	cordon-bleu WH2 repeat	protein-coding
Diff_Nuc2823	chr12	82409692	82409831	+	0	NA	intron (NM_080440, intron 2 of 7)	intron (NM_080440, intron 2 of 7)	24406	NM_001167920	110893	Mm.443748	NM_080440	ENSMUSG00000079055	Slc8a3	AW742262|Ncx3	solute carrier family 8 (sodium/calcium exchanger), member 3	protein-coding
Diff_Nuc22518	chr4	106624432	106624571	+	0	NA	intron (NM_198438, intron 4 of 16)	intron (NM_198438, intron 4 of 16)	40426	NM_023672	72475	Mm.195635	NM_023672	ENSMUSG00000061887	Ssbp3	2610021L12Rik|2610200M23Rik|5730488C10Rik|AI854733|AW551939|LAST|SSDP1	single-stranded DNA binding protein 3	protein-coding
Diff_Nuc8900	chr16	29826512	29826651	+	0	NA	Intergenic	Intergenic	152629	NR_037689	328657	Mm.425982	NM_001033403		Gm1968	-	predicted gene 1968	ncRNA
Diff_Nuc17525	chr6	30309012	30309151	+	0	NA	Intergenic	MIRb|SINE|MIR	31929	NM_172735	232679	Mm.29780	NM_172735	ENSMUSG00000039130	Zc3hc1	1110054L24Rik|AU018540|AU019789|HSPC216|Nipa	zinc finger, C3HC type 1	protein-coding
Diff_Nuc11267	chr15	94973632	94973771	+	0	NA	intron (NR_015482, intron 2 of 2)	RMER19B|LTR|ERVK	6048	NR_015482	100043315	Mm.159041	NR_015482	ENSMUSG00000100603	LOC100043315	-	uncharacterized LOC100043315	ncRNA
Diff_Nuc25219	chr3	142364052	142364191	+	0	NA	5' UTR (NM_001293560, exon 1 of 14)	5' UTR (NM_001293560, exon 1 of 14)	109	NM_001293560	229905	Mm.289643	NM_173763	ENSMUSG00000040213	Kyat3	Ccbl2|KATIII|Kat3	kynurenine aminotransferase 3	protein-coding
Diff_Nuc5535	chr10	21697302	21697441	+	0	NA	intron (NM_001161845, intron 3 of 13)	intron (NM_001161845, intron 3 of 13)	-1107	NM_001161847	20393	Mm.28405	NM_011361	ENSMUSG00000019970	Sgk1	Sgk	serum/glucocorticoid regulated kinase 1	protein-coding
Diff_Nuc14099	chr18	16864702	16864841	+	0	NA	intron (NM_007664, intron 2 of 15)	L1_Mm|LINE|L1	102984	NM_007664	12558	Mm.257437	NM_007664	ENSMUSG00000024304	Cdh2	CDHN|N-CAD|Ncad	cadherin 2	protein-coding
Diff_Nuc844	chr13	49011652	49011791	+	0	NA	intron (NM_001033268, intron 7 of 17)	intron (NM_001033268, intron 7 of 17)	-45467	NM_011078	18676	Mm.486213	NM_011078	ENSMUSG00000038025	Phf2	GRC5	PHD finger protein 2	protein-coding
Diff_Nuc24438	chr3	89310412	89310551	+	0	NA	Intergenic	Intergenic	-13605	NM_080466	140493	Mm.120250	NM_080466	ENSMUSG00000000794	Kcnn3	KCa2.3|SK3|SKCA3	potassium intermediate/small conductance calcium-activated channel, subfamily N, member 3	protein-coding
Diff_Nuc17910	chr6	56674052	56674191	+	0	NA	intron (NM_030235, intron 2 of 15)	B1_Mus2|SINE|Alu	9222	NM_030235	78937	Mm.105343	NM_030235	ENSMUSG00000029787	Avl9	5830411G16Rik|D730049P16Rik|mKIAA0241	AVL9 cell migration associated	protein-coding
Diff_Nuc33193	chr8	67338382	67338521	+	0	NA	intron (NM_178633, intron 3 of 14)	intron (NM_178633, intron 3 of 14)	35371	NM_178633	77113	Mm.350347	NM_178633	ENSMUSG00000031605	Klhl2	6030411N21Rik|ABP-KELCH|AU020744|Mav	kelch-like 2, Mayven	protein-coding
Diff_Nuc28837	chr1	74000332	74000471	+	0	NA	exon (NM_027884, exon 19 of 35)	exon (NM_027884, exon 19 of 35)	-89361	NR_045311	109198	Mm.359721	NR_045311	ENSMUSG00000100301	6030407O03Rik	-	RIKEN cDNA 6030407O03 gene	ncRNA
Diff_Nuc15774	chr7	57091212	57091351	+	0	NA	intron (NM_133740, intron 13 of 15)	intron (NM_133740, intron 13 of 15)	57553	NM_133740	71974	Mm.33202	NM_133740	ENSMUSG00000030505	Prmt3	2010005E20Rik|2410018A17Rik|AL033309|Hrmt1l3	protein arginine N-methyltransferase 3	protein-coding
Diff_Nuc15757	chr7	55767002	55767141	+	0	NA	Intergenic	L1_Mus3|LINE|L1	-12431	NM_001034868	243978	Mm.333873	NM_001034868	ENSMUSG00000074109	Mrgprx2	G370024M05Rik|MrgB10|Mrgprb10	MAS-related GPR, member X2	protein-coding
Diff_Nuc28602	chr1	59191562	59191701	+	0	NA	intron (NM_001164682, intron 15 of 22)	intron (NM_001164682, intron 15 of 22)	-14691	NM_001033449	381259	Mm.261275	NM_001033449	ENSMUSG00000038079	Tmem237	AI853305|Als2cr4|Gm972	transmembrane protein 237	protein-coding
Diff_Nuc21240	chr4	3156922	3157061	+	0	NA	Intergenic	Intergenic	-44539	NM_001167535	100312471	Mm.377218	NM_001167535	ENSMUSG00000095982	Vmn1r3	Gm11778|OTTMUSG00000004181	vomeronasal 1 receptor 3	protein-coding
Diff_Nuc5234	chr11	120961652	120961791	+	0	NA	Intergenic	RMER10A|LTR|ERVL	18270	NM_027622	70956	Mm.158506	NM_027622	ENSMUSG00000039337	Tex19.2	4921530G04Rik|Tex19b	testis expressed gene 19.2	protein-coding
Diff_Nuc29999	chr1	161292862	161293001	+	0	NA	Intergenic	B1_Mm|SINE|Alu	22442	NR_039543	100628622		NR_039543	ENSMUSG00000105399	Mir1843b	mir-1843b|mmu-mir-1843b	microRNA 1843b	ncRNA
Diff_Nuc10468	chr15	45856192	45856331	+	0	NA	Intergenic	Intergenic	-299870	NR_045509	71120	Mm.158571	NR_045509	ENSMUSG00000099751	1700022A22Rik	4933413D07Rik	RIKEN cDNA 1700022A22 gene	ncRNA
Diff_Nuc25501	chr2	6637432	6637571	+	0	NA	intron (NM_001347094, intron 2 of 12)	intron (NM_001347094, intron 2 of 12)	5207	NM_001310447	14007	Mm.398543	NM_010160	ENSMUSG00000002107	Celf2	B230218O03|B230345P09Rik|C88023|CELF-2|CUG-BP2|Cugbp2|D230046B21Rik|Etr-3|Napor|Napor-2|mETR-3	CUGBP, Elav-like family member 2	protein-coding
Diff_Nuc13460	chr19	35225822	35225961	+	0	NA	Intergenic	Intergenic	186005	NR_035473	100316775		NR_035473	ENSMUSG00000089151	Mir1950	mmu-mir-1950	microRNA 1950	ncRNA
Diff_Nuc16671	chr7	118293992	118294131	+	0	NA	Intergenic	Intergenic	-27872	NR_015573	75479	Mm.381620	NR_015573	ENSMUSG00000110424	1700012D14Rik	-	RIKEN cDNA 1700012D14 gene	ncRNA
Diff_Nuc25832	chr2	30049402	30049541	+	0	NA	intron (NM_172404, intron 3 of 13)	intron (NM_172404, intron 3 of 13)	11748	NM_172404	70266	Mm.216089	NM_172404	ENSMUSG00000039648	Kyat1	2010009K05Rik|AI182306|Ccbl1|Gtk|Kat1|KatI	kynurenine aminotransferase 1	protein-coding
Diff_Nuc16961	chr7	137831132	137831271	+	0	NA	intron (NM_001004468, intron 5 of 21)	intron (NM_001004468, intron 5 of 21)	-4869	NM_001347637	57752	Mm.86322	NM_021314	ENSMUSG00000030852	Tacc2	mKIAA4180	transforming, acidic coiled-coil containing protein 2	protein-coding
Diff_Nuc30110	chr1	167829082	167829221	+	0	NA	intron (NM_198932, intron 9 of 15)	B3|SINE|B2	35928	NM_198933	18986	Mm.245261	NM_011137	ENSMUSG00000026565	Pou2f1	2810482H01Rik|NF-A1|Oct-1|Oct1|Otf-1|Otf1	POU domain, class 2, transcription factor 1	protein-coding
Diff_Nuc25750	chr2	25780412	25780551	+	0	NA	Intergenic	Intergenic	47178	NM_001302351	227632	Mm.119462	NM_175462	ENSMUSG00000058740	Kcnt1	C030030G16Rik|Slack|Slo2.2|slo2	potassium channel, subfamily T, member 1	protein-coding
Diff_Nuc25673	chr2	20834332	20834471	+	0	NA	intron (NM_001128084, intron 2 of 24)	intron (NM_001128084, intron 2 of 24)	54947	NM_001081364	71435	Mm.28507	NM_001081364	ENSMUSG00000036591	Arhgap21	5530401C11Rik|AA416458|ARHGAP10	Rho GTPase activating protein 21	protein-coding
Diff_Nuc15692	chr7	51860892	51861031	+	0	NA	TTS (NM_001271540)	TTS (NM_001271540)	14705	NM_001290682	16504	Mm.40312	NM_008422	ENSMUSG00000062785	Kcnc3	KShIIID|Kcr2-3|Kv3.3	potassium voltage gated channel, Shaw-related subfamily, member 3	protein-coding
Diff_Nuc26348	chr2	66374142	66374281	+	0	NA	exon (NM_001290674, exon 14 of 27)	exon (NM_001290674, exon 14 of 27)	95274	NR_033495	100038743	Mm.330264	NR_033495		Gm13629	OTTMUSG00000013098	predicted gene 13629	ncRNA
Diff_Nuc18473	chr6	98294302	98294441	+	0	NA	Intergenic	Intergenic	-1623	NM_001128092	330390	Mm.484161	NM_001128092	ENSMUSG00000090667	Gm765	-	predicted gene 765	protein-coding
Diff_Nuc23939	chr3	52955202	52955341	+	0	NA	intron (NM_175386, intron 2 of 3)	intron (NM_175386, intron 2 of 3)	109802	NM_175386	108927	Mm.118617	NM_175386	ENSMUSG00000048332	Lhfp	2810489O06Rik|AI194968	lipoma HMGIC fusion partner	protein-coding
Diff_Nuc2323	chr12	47297202	47297341	+	0	NA	Intergenic	MLT1A|LTR|MaLR	622491	NM_021361	664883	Mm.247195	NM_021361	ENSMUSG00000021047	Nova1	9430099M15Rik|G630039L02|Nova-1	neuro-oncological ventral antigen 1	protein-coding
Diff_Nuc8695	chr16	15921652	15921791	+	0	NA	intron (NM_146068, intron 11 of 19)	L1_Mur3|LINE|L1	34342	NM_007679	12609	Mm.347407	NM_007679	ENSMUSG00000071637	Cebpd	c/EBPdelta	CCAAT/enhancer binding protein (C/EBP), delta	protein-coding
Diff_Nuc13323	chr19	25596002	25596141	+	0	NA	intron (NM_015826, intron 2 of 4)	intron (NM_015826, intron 2 of 4)	15875	NM_015826	50796	Mm.391208	NM_015826	ENSMUSG00000024837	Dmrt1	-	doublesex and mab-3 related transcription factor 1	protein-coding
Diff_Nuc5875	chr10	48227762	48227901	+	0	NA	Intergenic	L1Md_F2|LINE|L1	587818	NR_046212	100418235	Mm.185993	NR_046212		C130030K03Rik	-	proteasome (prosome, macropain) subunit, alpha type 6 pseudogene	pseudo
Diff_Nuc7782	chr17	42984462	42984601	+	0	NA	intron (NM_009847, intron 2 of 17)	intron (NM_009847, intron 2 of 17)	28842	NM_009847	12488	Mm.218637	NM_009847	ENSMUSG00000061665	Cd2ap	AL024079|C78928|METS-1|Mets1	CD2-associated protein	protein-coding
Diff_Nuc32966	chr8	46410072	46410211	+	0	NA	intron (NM_133969, intron 2 of 10)	intron (NM_133969, intron 2 of 10)	8409	NM_133969	102294	Mm.245297	NM_133969	ENSMUSG00000079057	Cyp4v3	AU043077|AW111961|Cyp4v2	cytochrome P450, family 4, subfamily v, polypeptide 3	protein-coding
Diff_Nuc28690	chr1	64213312	64213451	+	0	NA	Intergenic	Intergenic	-45418	NM_033563	93691	Mm.29466	NM_033563	ENSMUSG00000025959	Klf7	9830124P08Rik	Kruppel-like factor 7 (ubiquitous)	protein-coding
Diff_Nuc14054	chr18	13087712	13087851	+	0	NA	intron (NM_207530, intron 2 of 27)	intron (NM_207530, intron 2 of 27)	12569	NM_207530	64291	Mm.259470	NM_020573	ENSMUSG00000044252	Osbpl1a	G430090F17Rik|Gm753|ORP-1|Osbpl1b	oxysterol binding protein-like 1A	protein-coding
Diff_Nuc3642	chr11	24062092	24062231	+	0	NA	intron (NM_001159290, intron 3 of 4)	intron (NM_001159290, intron 3 of 4)	81466	NM_001159290	14025	Mm.53687	NM_016707	ENSMUSG00000000861	Bcl11a	2810047E18Rik|BCL-11A|Ctip1|D930021L15Rik|Evi9|Evi9a|Evi9b|Evi9c|mKIAA1809	B cell CLL/lymphoma 11A (zinc finger protein)	protein-coding
Diff_Nuc4169	chr11	61410642	61410781	+	0	NA	Intergenic	B3|SINE|B2	-17522	NM_001252189	13855	Mm.139695	NM_010148	ENSMUSG00000001036	Epn2	9530051D10Rik|AA536924|Ibp2	epsin 2	protein-coding
Diff_Nuc12301	chr14	70019712	70019851	+	0	NA	intron (NM_033325, intron 1 of 13)	L1M2|LINE|L1	10498	NM_033325	94352	Mm.116714	NM_033325	ENSMUSG00000034205	Loxl2	1110004B06Rik|4930526G11Rik|9430067E15Rik	lysyl oxidase-like 2	protein-coding
Diff_Nuc13307	chr19	24251732	24251871	+	0	NA	intron (NM_011597, intron 1 of 22)	intron (NM_011597, intron 1 of 22)	-3171	NM_001198985	21873	Mm.104744	NM_011597	ENSMUSG00000024812	Tjp2	ZO-2	tight junction protein 2	protein-coding
Diff_Nuc13633	chr19	45532132	45532271	+	0	NA	intron (NM_001037758, intron 3 of 14)	intron (NM_001037758, intron 3 of 14)	93977	NM_001037758	12234	Mm.119717	NM_009771	ENSMUSG00000025217	Btrc	Beta-Trcp1|E3RS-IkappaB|E3RSIkappaB|FWD1|Fbw1a|HOS|Slimb|b-TrCP|beta-TrCP	beta-transducin repeat containing protein	protein-coding
Diff_Nuc2114	chr12	31588212	31588351	+	0	NA	intron (NM_021330, intron 3 of 5)	L1_Mus2|LINE|L1	8196	NM_021330	11431	Mm.359831	NM_021330	ENSMUSG00000044573	Acp1	4632432E04Rik|AI427468|Acp-1|LMW-PTP|Lmptp	acid phosphatase 1, soluble	protein-coding
Diff_Nuc4933	chr11	104990542	104990681	+	0	NA	intron (NM_172567, intron 3 of 8)	intron (NM_172567, intron 3 of 8)	2872	NM_172567	52686	Mm.270091	NM_172567	ENSMUSG00000020691	Mettl2	2810438F06Rik|AW493404|C130031G21Rik|D11Ertd768e|METL|PSENIP1	methyltransferase like 2	protein-coding
Diff_Nuc11793	chr14	32556102	32556241	+	0	NA	intron (NM_001024604, intron 8 of 27)	intron (NM_001024604, intron 8 of 27)	87430	NM_001024604	105522	Mm.37660	NM_001024604	ENSMUSG00000014496	Ankrd28	AI465466|AI604979|E430019N21Rik|mKIAA0379	ankyrin repeat domain 28	protein-coding
Diff_Nuc33765	chr8	105164622	105164761	+	0	NA	intron (NM_009866, intron 11 of 12)	intron (NM_009866, intron 11 of 12)	144320	NM_009866	12552	Mm.1571	NM_009866	ENSMUSG00000031673	Cdh11	Cad11|OSF-4	cadherin 11	protein-coding
Diff_Nuc32591	chr8	19756262	19756401	+	0	NA	Intergenic	Intergenic	26755	NM_001039553	626415	Mm.425517	NM_001039553	ENSMUSG00000096265	4930467E23Rik	ENSMUSG00000074453|OTTMUSG00000018948|TSAP	RIKEN cDNA 4930467E23 gene	protein-coding
Diff_Nuc28968	chr1	82585802	82585941	+	0	NA	intron (NM_007734, intron 1 of 51)	intron (NM_007734, intron 1 of 51)	2375	NM_007734	12828	Mm.389135	NM_007734	ENSMUSG00000079465	Col4a3	[a]3(IV)|alpha3(IV)	collagen, type IV, alpha 3	protein-coding
Diff_Nuc18920	chr6	129689302	129689441	+	0	NA	intron (NM_177155, intron 1 of 5)	intron (NM_177155, intron 1 of 5)	1131	NM_177155	320407	Mm.123265	NM_177155	ENSMUSG00000043932	Klri2	A530090P03Rik	killer cell lectin-like receptor family I member 2	protein-coding
Diff_Nuc16906	chr7	134071302	134071441	+	0	NA	Intergenic	B4|SINE|B4	-1022	NM_172747	233877	Mm.245897	NM_172747	ENSMUSG00000030685	Kctd13	1500003N18Rik|AV259508|PDIP1alpha|Pdip1|Poldip1	potassium channel tetramerisation domain containing 13	protein-coding
Diff_Nuc23735	chr3	36357702	36357841	+	0	NA	intron (NM_009673, intron 6 of 12)	L1MA9|LINE|L1	16675	NR_105976	102466786		NR_105976	ENSMUSG00000098808	Mir7009	Gm27472|mmu-mir-7009	microRNA 7009	ncRNA
Diff_Nuc21951	chr4	59609032	59609171	+	0	NA	intron (NM_001301367, intron 5 of 11)	B1F|SINE|Alu	14666	NM_024255	72479	Mm.272905	NM_024255	ENSMUSG00000028383	Hsdl2	2610207I16Rik	hydroxysteroid dehydrogenase like 2	protein-coding
Diff_Nuc2668	chr12	73122362	73122501	+	0	NA	Intergenic	Intergenic	49547	NM_181752	238252	Mm.390508	NM_181752	ENSMUSG00000043398	Gpr135	PAFR	G protein-coupled receptor 135	protein-coding
Diff_Nuc14410	chr18	37546942	37547081	+	0	NA	intron (NM_001301259, intron 1 of 3)	L1Md_F|LINE|L1	-13498	NM_053134	93880	Mm.286019	NM_053134	ENSMUSG00000051242	Pcdhb9	Pcdhb4C|PcdhbI	protocadherin beta 9	protein-coding
Diff_Nuc20089	chr5	73550682	73550821	+	0	NA	intron (NM_028194, intron 3 of 62)	B1_Mur2|SINE|Alu	97106	NM_028194	72313	Mm.260594	NM_028194	ENSMUSG00000070733	Fryl	2010313D22Rik|2310004H21Rik|2510002A14Rik|9030227G01Rik|mKIAA0826	FRY like transcription coactivator	protein-coding
Diff_Nuc29858	chr1	151462832	151462971	+	0	NA	Intergenic	Intergenic	306668	NM_001305632	18783	Mm.4186	NM_008869	ENSMUSG00000056220	Pla2g4a	Pla2g4|cPLA2|cPLA2-alpha|cPLA2alpha	phospholipase A2, group IVA (cytosolic, calcium-dependent)	protein-coding
Diff_Nuc2007	chr12	17404022	17404161	+	0	NA	intron (NM_001008421, intron 13 of 20)	intron (NM_001008421, intron 13 of 20)	41893	NR_037226	100526470		NR_037226	ENSMUSG00000093037	Mir3066	mir-3066|mmu-mir-3066	microRNA 3066	ncRNA
Diff_Nuc15246	chr7	6300262	6300401	+	0	NA	Intergenic	ORR1B2|LTR|MaLR	-15684	NM_001025163	330463	Mm.136456	NM_177888	ENSMUSG00000055150	Zfp78	A330079D15|KRAB12|Zfp77	zinc finger protein 78	protein-coding
Diff_Nuc2727	chr12	77003322	77003461	+	0	NA	intron (NM_001005510, intron 11 of 115)	RLTR9A|LTR|ERVK	-6699	NR_039560	100628610		NR_039560	ENSMUSG00000092922	Mir5101	mmu-mir-5101|mu-mir-5101	microRNA 5101	ncRNA
Diff_Nuc2155	chr12	33801082	33801221	+	0	NA	intron (NR_015602, intron 5 of 5)	L1MC1|LINE|L1	-23411	NM_001024478	68764	Mm.60083	NM_001024478	ENSMUSG00000035860	Cdhr3	1110049B09Rik|BB172694|Cdh28	cadherin-related family member 3	protein-coding
Diff_Nuc27049	chr2	120664292	120664431	+	0	NA	intron (NM_080788, intron 1 of 15)	L1_Mus3|LINE|L1	11793	NM_001024857	140810	Mm.275698	NM_080788	ENSMUSG00000090100	Ttbk2	2610507N02Rik|AI326283|B930008N24Rik|TTK|Ttbk|Ttbk1|mKIAA0847	tau tubulin kinase 2	protein-coding
Diff_Nuc20230	chr5	85301772	85301911	+	0	NA	Intergenic	Intergenic	-455434	NM_007937	13839	Mm.137991	NM_007937	ENSMUSG00000029245	Epha5	AI854630|AW125296|Cek7|Ehk1|Els1|Hek7|Rek7|bsk	Eph receptor A5	protein-coding
Diff_Nuc31200	chr9	50412112	50412251	+	0	NA	promoter-TSS (NM_025848)	promoter-TSS (NM_025848)	175	NM_013897	30057	Mm.335149	NM_013897	ENSMUSG00000039016	Timm8b	Tim8b	translocase of inner mitochondrial membrane 8B	protein-coding
Diff_Nuc12950	chr14	122953402	122953541	+	0	NA	intron (NM_144844, intron 1 of 23)	intron (NM_144844, intron 1 of 23)	19921	NM_144844	110821	Mm.23876	NM_144844	ENSMUSG00000041650	Pcca	C79630	propionyl-Coenzyme A carboxylase, alpha polypeptide	protein-coding
Diff_Nuc20624	chr5	112649452	112649591	+	0	NA	intron (NR_033657, intron 6 of 6)	intron (NR_033657, intron 6 of 6)	8447	NR_033657	330166	Mm.44854	NR_003718	ENSMUSG00000097767	Miat	3632434I06|A230057G18Rik|Rncr2|gomafu	myocardial infarction associated transcript (non-protein coding)	ncRNA
Diff_Nuc32336	chr9	123719212	123719351	+	0	NA	exon (NM_030712, exon 2 of 2)	exon (NM_030712, exon 2 of 2)	3686	NM_030712	80901	Mm.124289	NM_030712	ENSMUSG00000048521	Cxcr6	BB217514|BONZO|STRL33	chemokine (C-X-C motif) receptor 6	protein-coding
Diff_Nuc22971	chr4	134829542	134829681	+	0	NA	promoter-TSS (NM_013885)	promoter-TSS (NM_013885)	-936	NM_013885	29876	Mm.257765	NM_013885	ENSMUSG00000037242	Clic4	D0Jmb3|TU-74|mc3s5|mtCLIC	chloride intracellular channel 4 (mitochondrial)	protein-coding
Diff_Nuc20742	chr5	121712422	121712561	+	0	NA	intron (NM_181421, intron 4 of 75)	intron (NM_181421, intron 4 of 75)	42263	NM_181421	269700	Mm.184589	NM_181421	ENSMUSG00000042744	Gm15800	A130010L24|AU042671|BC019639|EG545802|OTTMUSG00000026283|mKIAA0614	predicted gene 15800	protein-coding
Diff_Nuc28618	chr1	59903212	59903351	+	0	NA	intron (NM_007561, intron 6 of 12)	intron (NM_007561, intron 6 of 12)	-66569	NM_001037725	72750	Mm.258250	NM_001037725	ENSMUSG00000041040	Fam117b	2810425F24Rik|6330416D14Rik|Als2cr13	family with sequence similarity 117, member B	protein-coding
Diff_Nuc18781	chr6	120580882	120581021	+	0	NA	Intergenic	Intergenic	-35488	NM_001128151	330409	Mm.333357	NM_001128151	ENSMUSG00000071226	Cecr2	2610101O16Rik|2810409N01Rik|Gtl4|mKIAA1740	cat eye syndrome chromosome region, candidate 2	protein-coding
Diff_Nuc1092	chr13	66441892	66442031	+	0	NA	Intergenic	MurSatRep1|Unknown|Unknown	100093	NM_183119	76803	Mm.183391	NM_183119	ENSMUSG00000074832	2410141K09Rik	4930482J15Rik|Ayu21-35|Gt(pU21)35Imeg	RIKEN cDNA 2410141K09 gene	protein-coding
Diff_Nuc15191	chr18	89858682	89858821	+	0	NA	intron (NM_001039173, intron 1 of 7)	Lx9|LINE|L1	79777	NM_001039173	623279	Mm.447164	NM_001039173	ENSMUSG00000073514	Dok6	Dok-6	docking protein 6	protein-coding
Diff_Nuc4483	chr11	78639772	78639911	+	0	NA	promoter-TSS (NM_001076681)	promoter-TSS (NM_001076681)	-256	NM_001076681	66274	Mm.258932	NM_001076681	ENSMUSG00000072640	Lyrm9	1810012P15Rik	LYR motif containing 9	protein-coding
Diff_Nuc29214	chr1	98492002	98492141	+	0	NA	Intergenic	RMER10B|LTR|ERVL	67079	NR_040478	75159	Mm.243854	NR_040478	ENSMUSG00000100589	4930533P14Rik	-	RIKEN cDNA 4930533P14 gene	ncRNA
Diff_Nuc7486	chr17	26589352	26589491	+	0	NA	Intergenic	Intergenic	37511	NM_001081656	240055	Mm.133211	NM_001081656	ENSMUSG00000034413	Neurl1b	C230078M08Rik|EG240055	neuralized E3 ubiquitin protein ligase 1B	protein-coding
Diff_Nuc23589	chr3	25432872	25433011	+	0	NA	intron (NM_001163387, intron 3 of 5)	intron (NM_001163387, intron 3 of 5)	619288	NM_001163387	192167	Mm.316080	NM_138666	ENSMUSG00000063887	Nlgn1	6330415N05Rik|BB179718|NL1|Nlg1|mKIAA1070	neuroligin 1	protein-coding
Diff_Nuc26378	chr2	69661372	69661511	+	0	NA	intron (NM_177784, intron 1 of 3)	intron (NM_177784, intron 1 of 3)	1014	NM_177784	277396	Mm.138073	NM_177784	ENSMUSG00000042155	Klhl23	C130068N17Rik	kelch-like 23	protein-coding
Diff_Nuc19021	chr6	136553842	136553981	+	0	NA	exon (NM_019426, exon 14 of 15)	exon (NM_019426, exon 14 of 15)	56503	NM_025806	66857	Mm.3311	NM_025806	ENSMUSG00000030214	Plbd1	1100001H23Rik	phospholipase B domain containing 1	protein-coding
Diff_Nuc4267	chr11	68514932	68515071	+	0	NA	intron (NM_175260, intron 2 of 40)	ORR1C2|LTR|MaLR	9584	NM_175260	77579	Mm.218233	NM_175260	ENSMUSG00000020900	Myh10	5730504C04Rik|9330167F11Rik|Fltn|Myhn-2|Myhn2|NMHC II-B|NMHC-B|NMHCII-B|NMMHC II-b|NMMHC-B|NMMHC-IIB|SMemb|mKIAA3005	myosin, heavy polypeptide 10, non-muscle	protein-coding
[truncated: 1,642 more rows]
