# Supplementary material for: Remodeling of epigenome and transcriptome landscapes with aging in mice reveals widespread induction of inflammatory responses
Source: HighWire-hosted journal article supplement (doi:10.1101/gr.240093.118), 2019-03-11
Supplement: Supplemental_Code_Figure3_Machine_learning.zip [file HOMER_dposREF_Heart_DiNUP_DANPOS_LOST.xls]

PeakID (cmd=annotatePeaks.pl dposREF_Heart_DiNUP_DANPOS_LOST.bed mm9)	Chr	Start	End	Strand	Peak Score	Focus Ratio/Region Size	Annotation	Detailed Annotation	Distance to TSS	Nearest PromoterID	Entrez ID	Nearest Unigene	Nearest Refseq	Nearest Ensembl	Gene Name	Gene Alias	Gene Description	Gene Type
Diff_Nuc6139	chr11	78512202	78512341	+	0	NA	Intergenic	Intergenic	-1344	NM_008702	18099	Mm.9001	NM_008702	ENSMUSG00000017376	Nlk	AI194375	nemo like kinase	protein-coding
Diff_Nuc15528	chr14	55635342	55635481	+	0	NA	intron (NM_026890, intron 2 of 10)	LTRIS2|LTR|ERV1	1120	NM_026890	68966	Mm.21214	NM_026890	ENSMUSG00000022204	Ngdn	1500001L15Rik|Ngd|neuroguidin	neuroguidin, EIF4E binding protein	protein-coding
Diff_Nuc42273	chr8	27461542	27461681	+	0	NA	Intergenic	Intergenic	192970	NM_199042	73754	Mm.383241	NM_199042	ENSMUSG00000037214	Thap1	4833431A01Rik|AW490810	THAP domain containing, apoptosis associated protein 1	protein-coding
Diff_Nuc42114	chr8	15971552	15971691	+	0	NA	intron (NM_053171, intron 49 of 69)	L1Md_T|LINE|L1	197217	NR_037214	100526464		NR_037214	ENSMUSG00000093142	Mir3106	mir-3106|mmu-mir-3106	microRNA 3106	ncRNA
Diff_Nuc22811	chr6	56176582	56176721	+	0	NA	intron (NM_001159956, intron 1 of 16)	L1Md_F|LINE|L1	135735	NM_001159952	18575	Mm.5145	NM_011054	ENSMUSG00000004347	Pde1c	-	phosphodiesterase 1C	protein-coding
Diff_Nuc4490	chr12	112933952	112934091	+	0	NA	Intergenic	Intergenic	17143	NM_001324481	70369	Mm.44239	NM_027404	ENSMUSG00000049792	Bag5	1600025G07Rik|4930405J06Rik|Bag-5	BCL2-associated athanogene 5	protein-coding
Diff_Nuc24598	chr5	9149152	9149291	+	0	NA	intron (NM_011806, intron 3 of 17)	intron (NM_011806, intron 3 of 17)	12555	NM_001110327	23857	Mm.22480	NM_011806	ENSMUSG00000042508	Dmtf1	Dimp|Dmp1	cyclin D binding myb-like transcription factor 1	protein-coding
Diff_Nuc33988	chr2	72985892	72986031	+	0	NA	intron (NM_030091, intron 5 of 7)	MTE-int|LTR|MaLR	66543	NM_030091	67059	Mm.22661	NM_025942	ENSMUSG00000027108	Ola1	2510025G09Rik|2810405J23Rik|2810409H07Rik|Gtpbp9|PTD004	Obg-like ATPase 1	protein-coding
Diff_Nuc39466	chr1	194538302	194538441	+	0	NA	intron (NM_144881, intron 7 of 11)	intron (NM_144881, intron 7 of 11)	59042	NM_144881	226861	Mm.145857	NM_144881	ENSMUSG00000037375	Hhat	2810432O22Rik|AI462858|AP-2CRE|Skn|Tg(TFAP2A-cre)1Will	hedgehog acyltransferase	protein-coding
Diff_Nuc26771	chr5	132664142	132664281	+	0	NA	intron (NM_177047, intron 2 of 19)	intron (NM_177047, intron 2 of 19)	308072	NR_040704	75369	Mm.389696	NR_040704	ENSMUSG00000105773	4930563F08Rik	-	RIKEN cDNA 4930563F08 gene	ncRNA
Diff_Nuc33331	chr2	37899482	37899621	+	0	NA	intron (NM_146122, intron 6 of 21)	intron (NM_146122, intron 6 of 21)	243353	NM_146122	227801	Mm.314245	NM_146122	ENSMUSG00000035392	Dennd1a	6030446I19Rik|connecdenn	DENN/MADD domain containing 1A	protein-coding
Diff_Nuc22462	chr6	37560702	37560841	+	0	NA	Intergenic	RMER1C|Other|Other	80598	NM_145364	208665	Mm.262635	NM_145364	ENSMUSG00000038641	Akr1d1	-	aldo-keto reductase family 1, member D1	protein-coding
Diff_Nuc10555	chr17	61011662	61011801	+	0	NA	Intergenic	Lx7|LINE|L1	-1858986	NM_026497	67993	Mm.36507	NM_026497	ENSMUSG00000024228	Nudt12	0610016O18Rik	nudix (nucleoside diphosphate linked moiety X)-type motif 12	protein-coding
Diff_Nuc4364	chr12	105334462	105334601	+	0	NA	Intergenic	Intergenic	-4792	NM_172953	268591	Mm.73172	NM_172953	ENSMUSG00000041550	Serpina5	4933415L04|PAI-3|Pci	serine (or cysteine) peptidase inhibitor, clade A, member 5	protein-coding
Diff_Nuc42102	chr8	14896572	14896711	+	0	NA	exon (NM_012000, exon 3 of 3)	exon (NM_012000, exon 3 of 3)	8105	NM_012000	26889	Mm.254027	NM_012000	ENSMUSG00000026317	Cln8	mnd	ceroid-lipofuscinosis, neuronal 8	protein-coding
Diff_Nuc22390	chr6	33479752	33479891	+	0	NA	intron (NM_009148, intron 9 of 17)	L1Md_F2|LINE|L1	280671	NM_009148	20336	Mm.265512	NM_009148	ENSMUSG00000029763	Exoc4	C78892|Sec8|Sec8l1	exocyst complex component 4	protein-coding
Diff_Nuc8325	chr10	66337012	66337151	+	0	NA	Intergenic	ORR1A2|LTR|MaLR	46051	NR_138560	68488	Mm.338835	NR_138560		1110002J07Rik	-	RIKEN cDNA 1110002J07 gene	ncRNA
Diff_Nuc31704	chr3	107416202	107416341	+	0	NA	exon (NM_153563, exon 21 of 21)	exon (NM_153563, exon 21 of 21)	18322	NM_007441	11694	Mm.10112	NM_007441	ENSMUSG00000014603	Alx3	-	aristaless-like homeobox 3	protein-coding
Diff_Nuc16736	chr19	3390672	3390811	+	0	NA	intron (NM_001286558, intron 1 of 8)	B3|SINE|B2	1363	NM_001286558	17771	Mm.209941	NM_010841	ENSMUSG00000024905	Mtl5	tesmin	metallothionein-like 5, testis-specific (tesmin)	protein-coding
Diff_Nuc28815	chr4	106858272	106858411	+	0	NA	intron (NM_029565, intron 1 of 7)	intron (NM_029565, intron 1 of 7)	7106	NM_029565	56374	Mm.291192	NM_029565	ENSMUSG00000028618	Tmem59	1110001M20Rik|3110046P06Rik|AI256529|D4Ertd20e|MTDCF1|ORF18	transmembrane protein 59	protein-coding
Diff_Nuc14823	chr14	17206312	17206451	+	0	NA	intron (NM_009409, intron 1 of 35)	intron (NM_009409, intron 1 of 35)	8661	NM_009409	21974	Mm.130362	NM_009409	ENSMUSG00000017485	Top2b	D230016L12Rik|Top-2	topoisomerase (DNA) II beta	protein-coding
Diff_Nuc30731	chr3	57203622	57203761	+	0	NA	Intergenic	MTD|LTR|MaLR	-25641	NM_145539	229302	Mm.26618	NM_145539	ENSMUSG00000027801	Tm4sf4	Iltmp	transmembrane 4 superfamily member 4	protein-coding
Diff_Nuc24421	chr6	146823612	146823751	+	0	NA	Intergenic	MTEa|LTR|MaLR	-13335	NM_001170433	67533	Mm.103382	NM_026221	ENSMUSG00000016487	Ppfibp1	4632409B19Rik|AW214454|AW261454	PTPRF interacting protein, binding protein 1 (liprin beta 1)	protein-coding
Diff_Nuc5136	chr11	30425762	30425901	+	0	NA	intron (NM_029344, intron 3 of 3)	Lx|LINE|L1	-54002	NM_001100394	75087	Mm.159422	NM_001100394	ENSMUSG00000040919	4930505A04Rik	-	RIKEN cDNA 4930505A04 gene	protein-coding
Diff_Nuc34837	chr2	119188252	119188391	+	0	NA	Intergenic	Intergenic	11343	NM_026929	69065	Mm.35083	NM_026929	ENSMUSG00000027313	Chac1	1810008K03Rik	ChaC, cation transport regulator 1	protein-coding
Diff_Nuc5117	chr11	30034942	30035081	+	0	NA	intron (NM_009260, intron 16 of 30)	intron (NM_009260, intron 16 of 30)	63246	NM_009260	20742	Mm.123110	NM_009260	ENSMUSG00000020315	Sptbn1	9930031C03Rik|AL033301|SPTB2|Spnb-2|Spnb2|elf1|elf3|mKIAA4049	spectrin beta, non-erythrocytic 1	protein-coding
Diff_Nuc8972	chr10	100062632	100062771	+	0	NA	intron (NM_001081246, intron 3 of 12)	intron (NM_001081246, intron 3 of 12)	7681	NM_001081246	66605	Mm.72646	NM_001081246	ENSMUSG00000056912	1700017N19Rik	-	RIKEN cDNA 1700017N19 gene	protein-coding
Diff_Nuc31961	chr3	121155632	121155771	+	0	NA	intron (NM_028044, intron 5 of 6)	intron (NM_028044, intron 5 of 6)	26242	NM_028044	71994	Mm.275555	NM_028044	ENSMUSG00000053931	Cnn3	1600014M03Rik|C85854|Calpo3	calponin 3, acidic	protein-coding
Diff_Nuc1205	chr13	44133892	44134031	+	0	NA	Intergenic	Intergenic	-82575	NR_045285	328235	Mm.188356	NR_045285	ENSMUSG00000089815	Gm5083	A730030A06	predicted gene 5083	ncRNA
Diff_Nuc26677	chr5	125829122	125829261	+	0	NA	Intergenic	Intergenic	-7727	NM_001205083	20778	Mm.282242	NM_016741	ENSMUSG00000037936	Scarb1	AI120173|CD36|Cd36l1|Chohd1|Cla-1|Cla1|D5Ertd460e|Hdlq1|Hlb398|SR-B1|SR-BI|SRBI|Srb1|mSR-BI	scavenger receptor class B, member 1	protein-coding
Diff_Nuc40427	chr9	47294372	47294511	+	0	NA	Intergenic	Intergenic	-43812	NM_001310841	54725	Mm.234832	NM_018770	ENSMUSG00000032076	Cadm1	2900073G06Rik|3100001I08Rik|AI987920|Bl2|Igsf4|Igsf4a|Necl2|RA175|RA175A|RA175B|RA175C|RA175N|ST17|SgIGSF|SynCam|Tslc1	cell adhesion molecule 1	protein-coding
Diff_Nuc6742	chr11	104978232	104978371	+	0	NA	intron (NM_001081046, intron 9 of 9)	intron (NM_001081046, intron 9 of 9)	-9438	NM_172567	52686	Mm.270091	NM_172567	ENSMUSG00000020691	Mettl2	2810438F06Rik|AW493404|C130031G21Rik|D11Ertd768e|METL|PSENIP1	methyltransferase like 2	protein-coding
Diff_Nuc8846	chr10	93499592	93499731	+	0	NA	intron (NM_053072, intron 1 of 20)	intron (NM_053072, intron 1 of 20)	915	NM_053072	13998	Mm.269596	NM_053072	ENSMUSG00000020021	Fgd6	AA123052|Etohd4|ZFYVE24	FYVE, RhoGEF and PH domain containing 6	protein-coding
Diff_Nuc11271	chr16	5039912	5040051	+	0	NA	intron (NM_028720, intron 3 of 15)	intron (NM_028720, intron 3 of 15)	10022	NM_001079814	74022	Mm.21652	NM_028720	ENSMUSG00000022536	Glyr1	2810419J22Rik|3930401K13Rik|AW545332|Npac	glyoxylate reductase 1 homolog (Arabidopsis)	protein-coding
Diff_Nuc41905	chr9	123024242	123024381	+	0	NA	intron (NM_001081188, intron 1 of 7)	PB1D9|SINE|Alu	1962	NM_001081188	66446	Mm.41562	NM_001081188	ENSMUSG00000025785	Exosc7	2610002K22Rik|AV212732|mKIAA0116	exosome component 7	protein-coding
Diff_Nuc23472	chr6	93987932	93988071	+	0	NA	intron (NM_001286785, intron 1 of 24)	intron (NM_001286785, intron 1 of 24)	-124317	NM_001083320	14924	Mm.217216	NM_010367	ENSMUSG00000045095	Magi1	AIP3|BAP1|Baiap1|Gukmi1|MAGI1c|Magi-1|TNRC19|WWP3|mKIAA4129	membrane associated guanylate kinase, WW and PDZ domain containing 1	protein-coding
Diff_Nuc38937	chr1	167496782	167496921	+	0	NA	intron (NM_173029, intron 29 of 33)	RMER5|LTR|ERV1	67821	NM_001001880	68481	Mm.46438	NM_001001880	ENSMUSG00000026566	Mpzl1	1110007A10Rik|PZR	myelin protein zero-like 1	protein-coding
Diff_Nuc23042	chr6	71501922	71502061	+	0	NA	intron (NM_025783, intron 1 of 5)	intron (NM_025783, intron 1 of 5)	8143	NM_025783	66700	Mm.181278	NM_025783	ENSMUSG00000053119	Chmp3	25.1|4921505F14Rik|9130011K15Rik|CGI-49|D6Ertd286e|NEDF|Vps24	charged multivesicular body protein 3	protein-coding
Diff_Nuc21002	chr7	106220512	106220651	+	0	NA	intron (NM_178635, intron 5 of 14)	intron (NM_178635, intron 5 of 14)	69073	NM_178635	78610	Mm.323072	NM_178635	ENSMUSG00000035354	Uvrag	9530039D02Rik|AI648770|BB124205|Uvrag1|Uvragl	UV radiation resistance associated gene	protein-coding
Diff_Nuc26704	chr5	128598942	128599081	+	0	NA	intron (NM_172885, intron 3 of 8)	ORR1B1|LTR|MaLR	339926	NM_172885	243274	Mm.447698	NM_172885	ENSMUSG00000034310	Tmem132d	C630028F04Rik	transmembrane protein 132D	protein-coding
Diff_Nuc25773	chr5	77341412	77341551	+	0	NA	TTS (NM_172146)	TTS (NM_172146)	-6942	NM_173765	231326	Mm.39271	NM_173765	ENSMUSG00000055923	Aasdh	A230062G08Rik|A830035E16|Acsf4|U26	aminoadipate-semialdehyde dehydrogenase	protein-coding
Diff_Nuc20255	chr7	62069242	62069381	+	0	NA	Intergenic	Intergenic	-21304	NM_178705	233271	Mm.387344	NM_178705	ENSMUSG00000063297	Luzp2	9330154K17Rik|D130073E01	leucine zipper protein 2	protein-coding
Diff_Nuc13191	chr15	21104802	21104941	+	0	NA	intron (NM_001008420, intron 1 of 11)	L1Md_F2|LINE|L1	63664	NM_001008420	215654	Mm.300909	NM_001008420	ENSMUSG00000040452	Cdh12	Cdhb	cadherin 12	protein-coding
Diff_Nuc34868	chr2	119953462	119953601	+	0	NA	intron (NM_133838, intron 2 of 5)	intron (NM_133838, intron 2 of 5)	26780	NM_133838	98878	Mm.132226	NM_133838	ENSMUSG00000027293	Ehd4	2210022F10Rik|AI197390|AI846352|AV006278|Past2	EH-domain containing 4	protein-coding
Diff_Nuc35021	chr2	126060022	126060161	+	0	NA	Intergenic	Intergenic	82214	NM_026981	69185	Mm.29019	NM_026981	ENSMUSG00000023330	Dtwd1	1810033A06Rik	DTW domain containing 1	protein-coding
Diff_Nuc18001	chr18	5137102	5137241	+	0	NA	Intergenic	Intergenic	90584	NM_001347449	225115	Mm.136791	NM_153153	ENSMUSG00000024236	Svil	AU024053|B430302E16Rik	supervillin	protein-coding
Diff_Nuc12640	chr16	85174452	85174591	+	0	NA	promoter-TSS (NM_001198823)	promoter-TSS (NM_001198823)	-569	NM_001198826	11820	Mm.277585	NM_007471	ENSMUSG00000022892	App	Abeta|Abpp|Adap|Ag|Cvap|E030013M08Rik|betaApp	amyloid beta (A4) precursor protein	protein-coding
Diff_Nuc24154	chr6	131461812	131461951	+	0	NA	Intergenic	L1Md_F2|LINE|L1	25457	NM_001347484	102638913		NM_001347484	ENSMUSG00000095577	LOC102638913	-	otolin-1-like	protein-coding
Diff_Nuc4716	chr11	6685192	6685331	+	0	NA	Intergenic	RLTR11A2|LTR|ERVK	-65221	NR_046025	626419	Mm.390334	NR_046025	ENSMUSG00000086808	Gm11981	OTTMUSG00000005129	predicted gene 11981	ncRNA
Diff_Nuc38147	chr1	127475992	127476131	+	0	NA	intron (NM_028787, intron 10 of 15)	(TG)n|Simple_repeat|Simple_repeat	18468	NM_028787	74150	Mm.28654	NM_028787	ENSMUSG00000026342	Slc35f5	1300003P13Rik|AI646727	solute carrier family 35, member F5	protein-coding
Diff_Nuc23994	chr6	121687482	121687621	+	0	NA	Intergenic	Lx8|LINE|L1	-101008	NM_008645	17836	Mm.1311	NM_008645	ENSMUSG00000059908	Mug1	-	murinoglobulin 1	protein-coding
Diff_Nuc23207	chr6	83057432	83057571	+	0	NA	exon (NM_001081266, exon 7 of 9)	exon (NM_001081266, exon 7 of 9)	-1601	NM_026744	68499	Mm.333183	NM_026744	ENSMUSG00000030037	Mrpl53	1110007K17Rik	mitochondrial ribosomal protein L53	protein-coding
Diff_Nuc22635	chr6	47466942	47467081	+	0	NA	intron (NM_012042, intron 12 of 21)	intron (NM_012042, intron 12 of 21)	62688	NM_012042	26965	Mm.87611	NM_012042	ENSMUSG00000029686	Cul1	-	cullin 1	protein-coding
Diff_Nuc9348	chr10	122576592	122576731	+	0	NA	intron (NM_027604, intron 8 of 21)	Lx|LINE|L1	57414	NM_027604	14479	Mm.244209	NM_027604	ENSMUSG00000020124	Usp15	4921514G19Rik|AI327321|E430033I05Rik|Gcap18	ubiquitin specific peptidase 15	protein-coding
Diff_Nuc24491	chr5	3004402	3004541	+	0	NA	Intergenic	Intergenic	-339422	NM_009873	12571	Mm.31672	NM_009873	ENSMUSG00000040274	Cdk6	AI504062|Crk2	cyclin-dependent kinase 6	protein-coding
Diff_Nuc17082	chr19	20339082	20339221	+	0	NA	Intergenic	Lx6|LINE|L1	126010	NM_010730	16952	Mm.248360	NM_010730	ENSMUSG00000024659	Anxa1	Anx-1|Anx-A1|C430014K04Rik|Lpc-1|Lpc1	annexin A1	protein-coding
Diff_Nuc8644	chr10	82642862	82643001	+	0	NA	intron (NM_021439, intron 2 of 2)	intron (NM_021439, intron 2 of 2)	157631	NM_177388	338365	Mm.67073	NM_177388	ENSMUSG00000034591	Slc41a2	A230035L05Rik|SLC41A1-L1	solute carrier family 41, member 2	protein-coding
Diff_Nuc6808	chr11	106716332	106716471	+	0	NA	intron (NM_025481, intron 7 of 18)	intron (NM_025481, intron 7 of 18)	65628	NM_025481	66313	Mm.340955	NM_025481	ENSMUSG00000018363	Smurf2	2810411E22Rik|AI558114|AI649275	SMAD specific E3 ubiquitin protein ligase 2	protein-coding
Diff_Nuc34092	chr2	79072952	79073091	+	0	NA	Intergenic	ORR1A1|LTR|MaLR	-22562	NM_010576	16401	Mm.31903	NM_010576	ENSMUSG00000027009	Itga4	CD49D|Itga4B	integrin alpha 4	protein-coding
Diff_Nuc16062	chr14	82281492	82281631	+	0	NA	Intergenic	Lx2|LINE|L1	1881452	NM_001030294	380924	Mm.26456	NM_001030294	ENSMUSG00000022026	Olfm4	GC1|GW112|Gm296|Gm913|OlfD|pPD4	olfactomedin 4	protein-coding
Diff_Nuc12340	chr16	63994092	63994231	+	0	NA	Intergenic	Intergenic	-130178	NM_010140	13837	Mm.1977	NM_010140	ENSMUSG00000052504	Epha3	AW492086|Cek4|ETK1|End3|Hek|Hek4|Mek4|Tyro4	Eph receptor A3	protein-coding
Diff_Nuc9300	chr10	119684732	119684871	+	0	NA	Intergenic	Intergenic	20685	NM_025431	66225	Mm.291755	NM_025431	ENSMUSG00000020224	Llph	1190005P17Rik	LLP homolog, long-term synaptic facilitation (Aplysia)	protein-coding
Diff_Nuc23144	chr6	77440362	77440501	+	0	NA	intron (NM_009819, intron 7 of 18)	intron (NM_009819, intron 7 of 18)	-107962	NR_045141	70753	Mm.490700	NR_045141	ENSMUSG00000108077	6330415B21Rik	-	RIKEN cDNA 6330415B21 gene	ncRNA
Diff_Nuc32576	chr3	159483492	159483631	+	0	NA	Intergenic	ORR1A2|LTR|MaLR	-19098	NR_037590	68151	Mm.6766	NM_026582	ENSMUSG00000028173	Wls	5031439A09Rik|AI173978|AI987742|Gpr177	wntless homolog (Drosophila)	protein-coding
Diff_Nuc30515	chr3	44565542	44565681	+	0	NA	Intergenic	L1_Mur2|LINE|L1	616571	NR_045172	72511	Mm.140700	NR_045172	ENSMUSG00000097040	2610316D01Rik	-	RIKEN cDNA 2610316D01 gene	ncRNA
Diff_Nuc33853	chr2	66900222	66900361	+	0	NA	Intergenic	L1Md_F2|LINE|L1	-111600	NM_001033477	383709	Mm.244520	NM_001033477		Gm1322	-	predicted gene 1322	protein-coding
Diff_Nuc26082	chr5	96309822	96309961	+	0	NA	Intergenic	Intergenic	-76067	NM_018866	55985	Mm.10116	NM_018866	ENSMUSG00000023078	Cxcl13	4631412M08Rik|ANGIE2|Angie|BCA-1|BLC|BLR1L|Scyb13	chemokine (C-X-C motif) ligand 13	protein-coding
Diff_Nuc20664	chr7	87046102	87046241	+	0	NA	intron (NM_009682, intron 4 of 5)	intron (NM_009682, intron 4 of 5)	19355	NM_009682	11778	Mm.220173	NM_009682	ENSMUSG00000063801	Ap3s2	[s]3B	adaptor-related protein complex 3, sigma 2 subunit	protein-coding
Diff_Nuc6713	chr11	103834782	103834921	+	0	NA	intron (NM_007477, intron 3 of 4)	intron (NM_007477, intron 3 of 4)	6666	NM_007477	11841	Mm.5061	NM_007477	ENSMUSG00000062421	Arf2	-	ADP-ribosylation factor 2	protein-coding
Diff_Nuc951	chr13	33029222	33029361	+	0	NA	Intergenic	MYSERV16_I-int|LTR|ERVK	-28091	NM_011454	20708	Mm.36526	NM_011454	ENSMUSG00000042842	Serpinb6b	NK13|Spi12|ovalbumin	serine (or cysteine) peptidase inhibitor, clade B, member 6b	protein-coding
Diff_Nuc41087	chr9	78870052	78870191	+	0	NA	Intergenic	Intergenic	406768	NM_153098	235505	Mm.32955	NM_153098	ENSMUSG00000046186	Cd109	9930012E15Rik|AI480638|GARP	CD109 antigen	protein-coding
Diff_Nuc36441	chr1	29016442	29016581	+	0	NA	Intergenic	Intergenic	-179414	NM_001013750	210962	Mm.214178	NM_001013750	ENSMUSG00000048411	Gm597	-	predicted gene 597	protein-coding
Diff_Nuc35635	chr2	155262762	155262901	+	0	NA	intron (NM_001242558, intron 2 of 12)	intron (NM_001242558, intron 2 of 12)	3688	NM_001242558	56406	Mm.27592	NM_019825	ENSMUSG00000038369	Ncoa6	AIB3|ASC-2|ASC2|NRC|Ncoa7|PRIP|RAP250|mKIAA0181	nuclear receptor coactivator 6	protein-coding
Diff_Nuc16056	chr14	81346282	81346421	+	0	NA	Intergenic	Intergenic	946242	NM_001030294	380924	Mm.26456	NM_001030294	ENSMUSG00000022026	Olfm4	GC1|GW112|Gm296|Gm913|OlfD|pPD4	olfactomedin 4	protein-coding
Diff_Nuc40841	chr9	66060202	66060341	+	0	NA	intron (NM_010019, intron 2 of 11)	Charlie15a|DNA|MER1_type	54238	NM_010019	13143	Mm.304472	NM_010019	ENSMUSG00000032380	Dapk2	-	death-associated protein kinase 2	protein-coding
Diff_Nuc43374	chr8	90343652	90343791	+	0	NA	intron (NM_033327, intron 3 of 7)	Lx9|LINE|L1	-15383	NM_001310520	94187	Mm.23452	NM_033327	ENSMUSG00000045333	Zfp423	Ebfaz|Roaz|Zfp104|Znf423|ataxia1|mKIAA0760|nur12	zinc finger protein 423	protein-coding
Diff_Nuc28479	chr4	88928272	88928411	+	0	NA	promoter-TSS (NM_001040654)	promoter-TSS (NM_001040654)	-245	NM_001040654	12578	Mm.4733	NM_009877	ENSMUSG00000044303	Cdkn2a	ARF-INK4a|Arf|INK4a-ARF|Ink4a/Arf|MTS1|Pctr1|p16|p16(INK4a)|p16INK4a|p19<ARF>|p19ARF	cyclin-dependent kinase inhibitor 2A	protein-coding
Diff_Nuc32450	chr3	150277302	150277441	+	0	NA	Intergenic	MER3|DNA|MER1_type	409455	NR_039540	100628568		NR_039540	ENSMUSG00000092830	Mir3963	mmu-mir-3963|mu-mir-3963	microRNA 3963	ncRNA
Diff_Nuc28870	chr4	108939942	108940081	+	0	NA	Intergenic	MTD-int|LTR|MaLR	-12869	NM_007943	13858	Mm.318250	NM_007943	ENSMUSG00000028552	Eps15	2410112D09Rik	epidermal growth factor receptor pathway substrate 15	protein-coding
Diff_Nuc17478	chr19	38632522	38632661	+	0	NA	intron (NM_019588, intron 1 of 31)	intron (NM_019588, intron 1 of 31)	33904	NM_019588	74055	Mm.34031	NM_019588	ENSMUSG00000024998	Plce1	4933403A21Rik|PLCepsilon|Plce|mKIAA1516	phospholipase C, epsilon 1	protein-coding
Diff_Nuc16202	chr14	94233492	94233631	+	0	NA	intron (NM_001346722, intron 2 of 4)	intron (NM_001346722, intron 2 of 4)	54546	NM_001271800	211712	Mm.37126	NM_001081377	ENSMUSG00000055421	Pcdh9	-	protocadherin 9	protein-coding
Diff_Nuc5848	chr11	66542312	66542451	+	0	NA	Intergenic	Intergenic	-183112	NM_178656	193003	Mm.440256	NM_178656	ENSMUSG00000048070	Pirt	A530088H08Rik	phosphoinositide-interacting regulator of transient receptor potential channels	protein-coding
Diff_Nuc29130	chr4	123273032	123273171	+	0	NA	intron (NM_001199137, intron 1 of 92)	B1_Mus1|SINE|Alu	-20562	NR_105824	102465214		NR_105824	ENSMUSG00000099005	Mir6398	Gm27657|mmu-mir-6398	microRNA 6398	ncRNA
Diff_Nuc35331	chr2	141522942	141523081	+	0	NA	intron (NM_001013802, intron 6 of 18)	intron (NM_001013802, intron 6 of 18)	-1025799	NM_178382	71436	Mm.426781	NM_178382	ENSMUSG00000051379	Flrt3	5530600M07Rik|C430047I10Rik|mKIAA1469	fibronectin leucine rich transmembrane protein 3	protein-coding
Diff_Nuc41356	chr9	94419872	94420011	+	0	NA	3' UTR (NM_001033145, exon 3 of 3)	3' UTR (NM_001033145, exon 3 of 3)	18559	NM_001033145	68861	Mm.258746	NM_001033145	ENSMUSG00000045414	1190002N15Rik	GoPro49|HASF	RIKEN cDNA 1190002N15 gene	protein-coding
Diff_Nuc26446	chr5	114644892	114645031	+	0	NA	intron (NM_133904, intron 8 of 51)	B1F|SINE|Alu	29434	NM_133904	100705	Mm.81793	NM_133904	ENSMUSG00000042010	Acacb	AI597064|AW743042|Acc2|Accb	acetyl-Coenzyme A carboxylase beta	protein-coding
Diff_Nuc7899	chr10	41821192	41821331	+	0	NA	Intergenic	MIR|SINE|MIR	-83073	NM_001034858	213402	Mm.211320	NM_001034858	ENSMUSG00000071324	Armc2	2610018I05Rik	armadillo repeat containing 2	protein-coding
Diff_Nuc4624	chr11	3179712	3179851	+	0	NA	Intergenic	Intergenic	-9353	NR_045108	56218	Mm.275563	NM_019574	ENSMUSG00000020453	Patz1	8430401L15Rik|AI447519|Mazr|Patz|Zfp278	POZ (BTB) and AT hook containing zinc finger 1	protein-coding
Diff_Nuc2769	chr12	14485292	14485431	+	0	NA	Intergenic	Intergenic	217021	NR_045003	791361	Mm.217963	NR_045003		Gm16497	ENSMUSG00000066623	predicted gene 16497	ncRNA
Diff_Nuc19483	chr18	85030312	85030451	+	0	NA	intron (NM_025797, intron 1 of 4)	intron (NM_025797, intron 1 of 4)	9575	NM_025797	109672	Mm.31018	NM_025797	ENSMUSG00000024646	Cyb5a	0610009N12Rik|Cyb5	cytochrome b5 type A (microsomal)	protein-coding
Diff_Nuc3061	chr12	35694492	35694631	+	0	NA	Intergenic	Intergenic	25128	NM_029294	75456	Mm.79179	NM_029294	ENSMUSG00000092305	Prps1l1	1700011K15Rik	phosphoribosyl pyrophosphate synthetase 1-like 1	protein-coding
Diff_Nuc41290	chr9	90676212	90676351	+	0	NA	Intergenic	Intergenic	-510674	NM_194334	67016	Mm.335347	NM_194334	ENSMUSG00000037410	Tbc1d2b	1810061M12Rik|AI480956|AV021536|AV023399|AW491493|mKIAA1055	TBC1 domain family, member 2B	protein-coding
Diff_Nuc5180	chr11	32455372	32455511	+	0	NA	intron (NM_009288, intron 2 of 18)	intron (NM_009288, intron 2 of 18)	22175	NM_009288	20868	Mm.8235	NM_009288	ENSMUSG00000020272	Stk10	Gek1|Lok|mKIAA4026	serine/threonine kinase 10	protein-coding
Diff_Nuc41416	chr9	97027492	97027631	+	0	NA	Intergenic	RSINE1|SINE|B4	-16101	NM_138756	192287	Mm.228067	NM_138756	ENSMUSG00000032449	Slc25a36	C330005L02Rik	solute carrier family 25, member 36	protein-coding
Diff_Nuc28209	chr4	70819652	70819791	+	0	NA	Intergenic	L1Md_F2|LINE|L1	-623759	NM_172694	230316	Mm.251188	NM_172694	ENSMUSG00000039270	Megf9	4933405H16Rik|9630025C07|Egfl5|mKIAA0818	multiple EGF-like-domains 9	protein-coding
Diff_Nuc35254	chr2	136733492	136733631	+	0	NA	intron (NM_001038641, intron 2 of 7)	intron (NM_001038641, intron 2 of 7)	8474	NM_001038641	74243	Mm.330612	NM_028201	ENSMUSG00000027281	Slx4ip	2210009G21Rik|2410004I22Rik|C85661|Slxip	SLX4 interacting protein	protein-coding
Diff_Nuc34043	chr2	75545382	75545521	+	0	NA	Intergenic	RLTR19-int|LTR|ERVK	-2731	NM_010902	18024	Mm.1025	NM_010902	ENSMUSG00000015839	Nfe2l2	Nrf2	nuclear factor, erythroid derived 2, like 2	protein-coding
Diff_Nuc30823	chr3	61285982	61286121	+	0	NA	Intergenic	Intergenic	117622	NM_028712	74012	Mm.422674	NM_028712	ENSMUSG00000036894	Rap2b	4021402C18Rik|AA408554	RAP2B, member of RAS oncogene family	protein-coding
Diff_Nuc21025	chr7	107401592	107401731	+	0	NA	intron (NM_027629, intron 3 of 13)	intron (NM_027629, intron 3 of 13)	-11393	NR_033563	14777	Mm.57225	NR_033563		Gpx2-ps1	AU041318	glutathione peroxidase 2, pseudogene 1	pseudo
Diff_Nuc30991	chr3	72385732	72385871	+	0	NA	Intergenic	Lx5|LINE|L1	384987	NM_001081137	69983	Mm.261054	NM_001081137	ENSMUSG00000027790	Sis	2010204N08Rik|SI|Si-s	sucrase isomaltase (alpha-glucosidase)	protein-coding
Diff_Nuc28407	chr4	84383212	84383351	+	0	NA	Intergenic	Intergenic	-62291	NM_172870	242509	Mm.190774	NM_172870	ENSMUSG00000028487	Bnc2	5031434M05Rik|8430420F16Rik	basonuclin 2	protein-coding
Diff_Nuc27427	chr4	21617412	21617551	+	0	NA	Intergenic	Intergenic	-4371	NM_001080771	230025	Mm.208541	NM_001080771	ENSMUSG00000040478	Prdm13	-	PR domain containing 13	protein-coding
Diff_Nuc24349	chr6	143677432	143677571	+	0	NA	Intergenic	Intergenic	-77693	NR_045732	73425	Mm.417844	NR_045732	ENSMUSG00000086887	1700060C16Rik	-	RIKEN cDNA 1700060C16 gene	ncRNA
Diff_Nuc36114	chr1	6209862	6210001	+	0	NA	intron (NM_009826, intron 1 of 23)	intron (NM_009826, intron 1 of 23)	5188	NM_009826	12421	Mm.293811	NM_009826	ENSMUSG00000025907	Rb1cc1	2900055E04Rik|5930404L04Rik|Cc1|FIP200|LaXp180	RB1-inducible coiled-coil 1	protein-coding
Diff_Nuc31090	chr3	79290802	79290941	+	0	NA	intron (NM_001162999, intron 12 of 16)	intron (NM_001162999, intron 12 of 16)	80730	NM_001162999	329679	Mm.244005	NM_001162999	ENSMUSG00000061175	Fnip2	D630023B12Rik|mKIAA1450	folliculin interacting protein 2	protein-coding
Diff_Nuc14485	chr15	96116712	96116851	+	0	NA	Intergenic	CpG	-1172	NM_175251	77044	Mm.17166	NM_175251	ENSMUSG00000033237	Arid2	1700124K17Rik|4432409D24Rik|zipzap/p200	AT rich interactive domain 2 (ARID, RFX-like)	protein-coding
Diff_Nuc14759	chr14	12988232	12988371	+	0	NA	intron (NM_008981, intron 12 of 29)	intron (NM_008981, intron 12 of 29)	-34156	NM_001347593	19270	Mm.431266	NM_008981	ENSMUSG00000021745	Ptprg	5430405N12Rik|AW046354|AW549872|RPTPgamma	protein tyrosine phosphatase, receptor type, G	protein-coding
Diff_Nuc37378	chr1	78018672	78018811	+	0	NA	Intergenic	Intergenic	174970	NM_008781	18505	Mm.1371	NM_008781	ENSMUSG00000004872	Pax3	Pax-3|Sp|Splchl2|splotch	paired box 3	protein-coding
Diff_Nuc29113	chr4	123072832	123072971	+	0	NA	intron (NM_001199137, intron 57 of 92)	intron (NM_001199137, intron 57 of 92)	16253	NM_001167918	442834	Mm.483803	NM_001167918		D830031N03Rik	Kiaa0754|mKIAA0754	RIKEN cDNA D830031N03 gene	protein-coding
Diff_Nuc23163	chr6	79354482	79354621	+	0	NA	Intergenic	Intergenic	372515	NR_040301	100504701	Mm.400420	NR_040301	ENSMUSG00000108072	Gm20362	-	predicted gene, 20362	ncRNA
Diff_Nuc18462	chr18	32181872	32182011	+	0	NA	intron (NM_032394, intron 1 of 46)	B4A|SINE|B4	14644	NM_032394	17922	Mm.440013	NM_032394	ENSMUSG00000024388	Myo7b	-	myosin VIIB	protein-coding
Diff_Nuc35337	chr2	141863122	141863261	+	0	NA	intron (NM_001013802, intron 8 of 18)	intron (NM_001013802, intron 8 of 18)	864009	NM_001081133	16558	Mm.251934	NM_001081133	ENSMUSG00000038844	Kif16b	8430434E15Rik|AA623607|AI789011|C80253|C80902|mKIAA1590	kinesin family member 16B	protein-coding
Diff_Nuc3346	chr12	52750542	52750681	+	0	NA	intron (NM_052973, intron 6 of 17)	MTB|LTR|MaLR	-41342	NM_001329699	11782	Mm.386749	NM_021710	ENSMUSG00000020955	Ap4s1	AI314282	adaptor-related protein complex AP-4, sigma 1	protein-coding
Diff_Nuc38409	chr1	139887472	139887611	+	0	NA	Intergenic	Intergenic	24325	NR_029820	723890		NR_029820	ENSMUSG00000065458	Mir181b-1	Mirn181b-1|mir-181b-1	microRNA 181b-1	ncRNA
Diff_Nuc16665	chr14	122223472	122223611	+	0	NA	Intergenic	Intergenic	-26585	NM_134074	105445	Mm.378591	NM_134074	ENSMUSG00000025558	Dock9	AA959601|AW538057|B230309H04Rik|D14Wsu89e|Zizimin1|mKIAA1058	dedicator of cytokinesis 9	protein-coding
Diff_Nuc10339	chr17	47902372	47902511	+	0	NA	intron (NM_001161723, intron 1 of 8)	(TCCA)n|Simple_repeat|Simple_repeat	-20252	NM_011549	21425	Mm.2305	NM_011549	ENSMUSG00000023990	Tfeb	Tcfeb|bHLHe35	transcription factor EB	protein-coding
Diff_Nuc17080	chr19	20041292	20041431	+	0	NA	Intergenic	Lx7|LINE|L1	423800	NM_010730	16952	Mm.248360	NM_010730	ENSMUSG00000024659	Anxa1	Anx-1|Anx-A1|C430014K04Rik|Lpc-1|Lpc1	annexin A1	protein-coding
Diff_Nuc39556	chr9	3015532	3015671	+	0	NA	Intergenic	GSAT_MM|Satellite|Satellite	23142	NR_039546	100628572		NR_039546	ENSMUSG00000106183	Mir101c	mir-101c|mmu-mir-101c	microRNA 101c	ncRNA
Diff_Nuc5146	chr11	30744442	30744581	+	0	NA	intron (NM_134013, intron 32 of 46)	intron (NM_134013, intron 32 of 46)	-40847	NM_175490	237716	Mm.338361	NM_175490	ENSMUSG00000043999	Gpr75	-	G protein-coupled receptor 75	protein-coding
Diff_Nuc12371	chr16	65561872	65562011	+	0	NA	intron (NM_026879, intron 1 of 5)	intron (NM_026879, intron 1 of 5)	1001	NM_026879	68942	Mm.432944	NM_026879	ENSMUSG00000004843	Chmp2b	1190006E07Rik	charged multivesicular body protein 2B	protein-coding
Diff_Nuc35795	chr2	163425702	163425841	+	0	NA	Intergenic	MTE2b|LTR|MaLR	-2279	NM_181734	76080	Mm.89828	NM_029512	ENSMUSG00000017679	Ttpal	3110080A02Rik|5830472M02Rik	tocopherol (alpha) transfer protein-like	protein-coding
Diff_Nuc2342	chr13	107601412	107601551	+	0	NA	intron (NM_029665, intron 29 of 29)	intron (NM_029665, intron 29 of 29)	125514	NM_029665	76582	Mm.132208	NM_029665	ENSMUSG00000042590	Ipo11	1700081H05Rik|2510001A17Rik|AI314624|AW555235|E330021B14Rik|Ranbp11	importin 11	protein-coding
Diff_Nuc22560	chr6	42279012	42279151	+	0	NA	Intergenic	B4A|SINE|B4	-4442	NM_029528	76156	Mm.234314	NM_029528	ENSMUSG00000029861	Fam131b	6330503C03Rik|6530406I18Rik|AV277466	family with sequence similarity 131, member B	protein-coding
Diff_Nuc20351	chr7	69144652	69144791	+	0	NA	Intergenic	Intergenic	-17476	NR_037287	100526507		NR_037287	ENSMUSG00000092850	Mir344g	mir-344g|mmu-mir-344g	microRNA 344g	ncRNA
Diff_Nuc15648	chr14	61224642	61224781	+	0	NA	Intergenic	MER31A|LTR|ERV1	-28831	NM_001033272	219140	Mm.149776	NM_001033272	ENSMUSG00000021990	Spata13	C79050|ESTM11|X83327|mFLJ00298	spermatogenesis associated 13	protein-coding
Diff_Nuc42617	chr8	47899912	47900051	+	0	NA	intron (NM_008391, intron 5 of 8)	intron (NM_008391, intron 5 of 8)	74882	NM_008391	16363	Mm.1149	NM_008391	ENSMUSG00000031627	Irf2	9830146E22Rik|AI646973|Irf-2	interferon regulatory factor 2	protein-coding
Diff_Nuc22984	chr6	67223582	67223721	+	0	NA	intron (NM_001113564, intron 5 of 7)	B3|SINE|B2	6678	NM_025814	66870	Mm.240490	NM_025814	ENSMUSG00000036371	Serbp1	1200009K13Rik|9330147J08Rik|AL022786|Pairbp1	serpine1 mRNA binding protein 1	protein-coding
Diff_Nuc35907	chr2	167751182	167751321	+	0	NA	Intergenic	ID_B1|SINE|B4	-6576	NM_011201	19246	Mm.277916	NM_011201	ENSMUSG00000027540	Ptpn1	PTP-1B|PTP-HA2|PTP1B	protein tyrosine phosphatase, non-receptor type 1	protein-coding
Diff_Nuc140	chrX	84766782	84766921	+	0	NA	intron (NM_001160403, intron 2 of 10)	Lx4A|LINE|L1	594111	NM_001160403	331461	Mm.121680	NM_001160403	ENSMUSG00000052372	Il1rapl1	6330532G10Rik|C030039N24|IL1R8|IL1RAPL|MRX34|OPHN4|TIGIRR-2	interleukin 1 receptor accessory protein-like 1	protein-coding
Diff_Nuc16146	chr14	88806852	88806991	+	0	NA	Intergenic	L1_Mus1|LINE|L1	64282	NM_178685	219257	Mm.128861	NM_178685	ENSMUSG00000050505	Pcdh20	C630015B17Rik|Pcdh13	protocadherin 20	protein-coding
Diff_Nuc2702	chr12	9313612	9313751	+	0	NA	Intergenic	RSINE1|SINE|B4	263710	NR_045488	69420	Mm.396193	NR_045488	ENSMUSG00000099360	1700022H16Rik	-	RIKEN cDNA 1700022H16 gene	ncRNA
Diff_Nuc1226	chr13	44953992	44954131	+	0	NA	intron (NM_001205043, intron 3 of 17)	intron (NM_001205043, intron 3 of 17)	127421	NM_001205043	16468	Mm.25059	NM_021878	ENSMUSG00000038518	Jarid2	Jmj|jumonji	jumonji, AT rich interactive domain 2	protein-coding
Diff_Nuc8079	chr10	53102892	53103031	+	0	NA	Intergenic	Intergenic	-3304	NM_001204983	100038725	Mm.441403	NM_001204983	ENSMUSG00000038594	Cep85l	ENSMUSG00000038594|Gm9766	centrosomal protein 85-like	protein-coding
Diff_Nuc14959	chr14	24407002	24407141	+	0	NA	intron (NM_001253376, intron 5 of 26)	intron (NM_001253376, intron 5 of 26)	416356	NM_001253375	16531	Mm.343607	NM_010610	ENSMUSG00000063142	Kcnma1	5730414M22Rik|BKCa|MaxiK|Slo|Slo1|mSlo|mSlo1	potassium large conductance calcium-activated channel, subfamily M, alpha member 1	protein-coding
Diff_Nuc5723	chr11	60101002	60101141	+	0	NA	intron (NM_001039092, intron 1 of 13)	intron (NM_001039092, intron 1 of 13)	65336	NM_153080	216810	Mm.218875	NM_153080	ENSMUSG00000000538	Tom1l2	2900016I08Rik|A730055F12Rik|AU042072|Srebf1	target of myb1-like 2 (chicken)	protein-coding
Diff_Nuc39582	chr9	3024622	3024761	+	0	NA	Intergenic	GSAT_MM|Satellite|Satellite	14052	NR_039546	100628572		NR_039546	ENSMUSG00000106183	Mir101c	mir-101c|mmu-mir-101c	microRNA 101c	ncRNA
Diff_Nuc34866	chr2	119933272	119933411	+	0	NA	intron (NM_133838, intron 3 of 5)	intron (NM_133838, intron 3 of 5)	46970	NM_133838	98878	Mm.132226	NM_133838	ENSMUSG00000027293	Ehd4	2210022F10Rik|AI197390|AI846352|AV006278|Past2	EH-domain containing 4	protein-coding
Diff_Nuc38795	chr1	159386682	159386821	+	0	NA	Intergenic	ID2|SINE|ID	-1962	NM_001033284	226527	Mm.215960	NM_001033284	ENSMUSG00000033488	BC026585	-	cDNA sequence BC026585	protein-coding
Diff_Nuc15542	chr14	56378602	56378741	+	0	NA	Intergenic	B4|SINE|B4	-1410	NM_009894	12684	Mm.466766	NM_009894	ENSMUSG00000022219	Cideb	1110030C18Rik|AI790179|CIDE-B	cell death-inducing DNA fragmentation factor, alpha subunit-like effector B	protein-coding
Diff_Nuc22571	chr6	42882092	42882231	+	0	NA	Intergenic	Intergenic	4929	NM_146295	258292	Mm.222992	NM_146295	ENSMUSG00000073111	Olfr446	MOR261-12	olfactory receptor 446	protein-coding
Diff_Nuc33653	chr2	56968062	56968201	+	0	NA	promoter-TSS (NM_013613)	promoter-TSS (NM_013613)	-682	NM_013613	18227	Mm.3507	NM_013613	ENSMUSG00000026826	Nr4a2	HZF-3|NOT|Nurr1|RNR-1|TINOR|TINUR	nuclear receptor subfamily 4, group A, member 2	protein-coding
Diff_Nuc25550	chr5	66851972	66852111	+	0	NA	intron (NM_001201413, intron 4 of 16)	ORR1C1|LTR|MaLR	-123137	NM_001201416	11787	Mm.5159	NM_009686	ENSMUSG00000029207	Apbb2	2310007D03Rik|FE65L1|Rirl1|TR2L|Zfra	amyloid beta (A4) precursor protein-binding, family B, member 2	protein-coding
Diff_Nuc1613	chr13	64680052	64680191	+	0	NA	Intergenic	Lx9|LINE|L1	-81021	NM_001195435	68880	Mm.390594	NM_001195435	ENSMUSG00000096537	1190003K10Rik	-	RIKEN cDNA 1190003K10 gene	protein-coding
Diff_Nuc3241	chr12	46124312	46124451	+	0	NA	intron (NM_144552, intron 1 of 5)	intron (NM_144552, intron 1 of 5)	51089	NM_144552	217517	Mm.285400	NM_144552	ENSMUSG00000046314	Stxbp6	BC024598|C85317	syntaxin binding protein 6 (amisyn)	protein-coding
Diff_Nuc3089	chr12	36869172	36869311	+	0	NA	intron (NM_025840, intron 1 of 11)	B3|SINE|B2	14171	NM_025840	66912	Mm.288669	NM_025840	ENSMUSG00000020547	Bzw2	1110001I24Rik|Bdm2|HSPC028	basic leucine zipper and W2 domains 2	protein-coding
Diff_Nuc1038	chr13	36566922	36567061	+	0	NA	intron (NM_024274, intron 6 of 6)	intron (NM_024274, intron 6 of 6)	259355	NM_153529	68404	Mm.232930	NM_153529	ENSMUSG00000039114	Nrn1	0710008J23Rik|Cpg15|Nrn	neuritin 1	protein-coding
Diff_Nuc34945	chr2	122921332	122921471	+	0	NA	Intergenic	RMER2|LTR|ERV1	313666	NM_021507	59010	Mm.28986	NM_021507	ENSMUSG00000005803	Sqrdl	0610039J17Rik|4930557M22Rik|SQOR	sulfide quinone reductase-like (yeast)	protein-coding
Diff_Nuc29174	chr4	126025472	126025611	+	0	NA	intron (NM_153402, intron 16 of 18)	intron (NM_153402, intron 16 of 18)	-23098	NM_011902	24084	Mm.23895	NM_011902	ENSMUSG00000028845	Tekt2	AU014974|tektin-t	tektin 2	protein-coding
Diff_Nuc5988	chr11	73212982	73213121	+	0	NA	promoter-TSS (NM_146921)	promoter-TSS (NM_146921)	-54	NM_146921	258923	Mm.246523	NM_146921	ENSMUSG00000069823	Olfr1	I54|MOR135-13	olfactory receptor 1	protein-coding
Diff_Nuc13582	chr15	44256092	44256231	+	0	NA	intron (NM_026149, intron 1 of 9)	RLTR12B|LTR|ERVK	-3496	NM_175009	223527	Mm.291828	NM_175009	ENSMUSG00000022338	Eny2	1810057B09Rik|6720481I12|DC6|Ey2	enhancer of yellow 2 homolog (Drosophila)	protein-coding
Diff_Nuc1936	chr13	86304892	86305031	+	0	NA	Intergenic	L1_Mm|LINE|L1	-118561	NM_007749	12867	Mm.378898	NM_007749	ENSMUSG00000017778	Cox7c	COXVIIc|Cox7c1	cytochrome c oxidase subunit VIIc	protein-coding
Diff_Nuc22251	chr6	28105842	28105981	+	0	NA	Intergenic	Lx5|LINE|L1	-21542	NM_008174	14823	Mm.320732	NM_008174	ENSMUSG00000024211	Grm8	A230002O04|Gprc1h|mGluR8	glutamate receptor, metabotropic 8	protein-coding
Diff_Nuc43000	chr8	73106012	73106151	+	0	NA	intron (NM_007924, intron 5 of 11)	intron (NM_007924, intron 5 of 11)	-12299	NM_023627	71780	Mm.29357	NM_023627	ENSMUSG00000019139	Isyna1	1300017C10Rik|AU018670	myo-inositol 1-phosphate synthase A1	protein-coding
Diff_Nuc32314	chr3	142188512	142188651	+	0	NA	Intergenic	RLTR13D6|LTR|ERVK	-4719	NM_001083312	229900	Mm.45740	NM_145545	ENSMUSG00000040253	Gbp7	9830147J24Rik	guanylate binding protein 7	protein-coding
Diff_Nuc39542	chr9	3006822	3006961	+	0	NA	Intergenic	GSAT_MM|Satellite|Satellite	31852	NR_039546	100628572		NR_039546	ENSMUSG00000106183	Mir101c	mir-101c|mmu-mir-101c	microRNA 101c	ncRNA
Diff_Nuc22454	chr6	37353122	37353261	+	0	NA	intron (NM_178661, intron 1 of 11)	intron (NM_178661, intron 1 of 11)	38957	NM_178661	208647	Mm.169929	NM_178661	ENSMUSG00000038648	Creb3l2	BBF2H7|C530025K05Rik|SCIRR69	cAMP responsive element binding protein 3-like 2	protein-coding
Diff_Nuc21932	chr6	5786942	5787081	+	0	NA	intron (NM_010063, intron 6 of 16)	intron (NM_010063, intron 6 of 16)	111372	NM_001191026	13426	Mm.20893	NM_010063	ENSMUSG00000029757	Dync1i1	DH IC-1|DHIC-1|DIC|Dncic1|IC74	dynein cytoplasmic 1 intermediate chain 1	protein-coding
Diff_Nuc7204	chr10	6041742	6041881	+	0	NA	intron (NM_031185, intron 1 of 3)	intron (NM_031185, intron 1 of 3)	38401	NM_031185	83397	Mm.27481	NM_031185	ENSMUSG00000038587	Akap12	AI317366|SSeCKS|Srcs5|Tsga12	A kinase (PRKA) anchor protein (gravin) 12	protein-coding
Diff_Nuc540	chr13	12640262	12640401	+	0	NA	Intergenic	RMER5|LTR|ERV1	-17819	NM_026184	67475	Mm.358706	NM_026184	ENSMUSG00000057069	Ero1lb	1300013B24Rik|1700065B09Rik|AI447560|Ero1b|ero1-beta	ERO1-like beta (S. cerevisiae)	protein-coding
Diff_Nuc37667	chr1	94980602	94980741	+	0	NA	intron (NM_008440, intron 1 of 47)	MTD|LTR|MaLR	-1614	NM_001294150	16560	Mm.276408	NM_008440	ENSMUSG00000014602	Kif1a	ATSV|C630002N23Rik|Gm1626|Kns1	kinesin family member 1A	protein-coding
Diff_Nuc15201	chr14	35376792	35376931	+	0	NA	intron (NM_001039076, intron 7 of 7)	intron (NM_001039076, intron 7 of 7)	24932	NM_001039074	24131	Mm.29733	NM_011918	ENSMUSG00000021798	Ldb3	AW742271|PDLIM6|ZASP	LIM domain binding 3	protein-coding
Diff_Nuc11738	chr16	30920222	30920361	+	0	NA	Intergenic	RMER17C|LTR|ERVK	161227	NM_198626	268880	Mm.286693	NM_198626	ENSMUSG00000047434	Xxylt1	AI480653	xyloside xylosyltransferase 1	protein-coding
Diff_Nuc805	chr13	24804242	24804381	+	0	NA	intron (NM_029679, intron 16 of 22)	intron (NM_029679, intron 16 of 22)	49495	NM_020567	57441	Mm.12239	NM_020567	ENSMUSG00000006715	Gmnn	AW546347|Gem	geminin	protein-coding
Diff_Nuc2720	chr12	10877852	10877991	+	0	NA	Intergenic	L1_Mus1|LINE|L1	-176698	NR_045860	71457	Mm.95280	NR_045860		7420701I03Rik	-	RIKEN cDNA 7420701I03 gene	ncRNA
Diff_Nuc23754	chr6	111158702	111158841	+	0	NA	intron (NM_001346640, intron 5 of 10)	intron (NM_001346640, intron 5 of 10)	563179	NM_177328	108073	Mm.240881	NM_177328	ENSMUSG00000056755	Grm7	6330570A01Rik|BB176677|C030018L03|E130018M02Rik|Gpr1g|Gprc1g|SMN2|Tg(SMN2)89Ahmb|mGluR7	glutamate receptor, metabotropic 7	protein-coding
Diff_Nuc5910	chr11	69551592	69551731	+	0	NA	intron (NM_001291068, intron 22 of 28)	intron (NM_001291068, intron 22 of 28)	20474	NM_001291068	20020	Mm.16533	NM_009089	ENSMUSG00000005198	Polr2a	220kDa|Rpb1|Rpo2-1	polymerase (RNA) II (DNA directed) polypeptide A	protein-coding
Diff_Nuc17779	chr19	53264932	53265071	+	0	NA	intron (NM_013758, intron 1 of 15)	intron (NM_013758, intron 1 of 15)	46514	NM_013758	27360	Mm.426080	NM_013758	ENSMUSG00000025026	Add3	AI463285|R75380	adducin 3 (gamma)	protein-coding
Diff_Nuc76	chrX	41188122	41188261	+	0	NA	Intergenic	Lx8|LINE|L1	244025	NM_001195271	637093	Mm.368463	NM_001195271	ENSMUSG00000078320	Tex13c1	Gm362|Tex13c	TEX13 family member C1	protein-coding
Diff_Nuc18491	chr18	33452612	33452751	+	0	NA	Intergenic	Intergenic	-79165	NM_133774	170459	Mm.127058	NM_133774	ENSMUSG00000024378	Stard4	4632419C16Rik|9030213J02Rik	StAR-related lipid transfer (START) domain containing 4	protein-coding
Diff_Nuc34404	chr2	94981562	94981701	+	0	NA	Intergenic	Intergenic	-703288	NM_001305258	11800	Mm.181824	NM_007466	ENSMUSG00000027193	Api5	AAC-11|AI196452|API-5	apoptosis inhibitor 5	protein-coding
Diff_Nuc43238	chr8	84496052	84496191	+	0	NA	intron (NM_001024617, intron 14 of 24)	intron (NM_001024617, intron 14 of 24)	430364	NM_001254747	16168	Mm.4392	NM_008357	ENSMUSG00000031712	Il15	AI503618|IL-15	interleukin 15	protein-coding
Diff_Nuc28877	chr4	109176942	109177081	+	0	NA	TTS (NM_001199090)	TTS (NM_001199090)	26798	NM_001199090	67646	Mm.45820	NM_026291	ENSMUSG00000060491	4930522H14Rik	1700007J23Rik	RIKEN cDNA 4930522H14 gene	protein-coding
Diff_Nuc26966	chr5	144325972	144326111	+	0	NA	TTS (NM_026050)	TTS (NM_026050)	16467	NM_026050	67238	Mm.383219	NM_026050	ENSMUSG00000083012	Fam220a	1500026F15Rik|2810453I06Rik|AW047776|Acpin1|Sipar	family with sequence similarity 220, member A	protein-coding
Diff_Nuc22598	chr6	45100952	45101091	+	0	NA	intron (NM_001004357, intron 1 of 23)	Lx5|LINE|L1	90961	NM_001004357	66797	Mm.440084	NM_025771	ENSMUSG00000039419	Cntnap2	5430425M22Rik|Caspr2|mKIAA0868	contactin associated protein-like 2	protein-coding
Diff_Nuc22069	chr6	15676342	15676481	+	0	NA	intron (NM_175088, intron 2 of 4)	intron (NM_175088, intron 2 of 4)	5750	NM_175088	16543	Mm.1314	NM_175088	ENSMUSG00000041390	Mdfic	Kdt1|Mdfid	MyoD family inhibitor domain containing	protein-coding
Diff_Nuc5106	chr11	29607402	29607541	+	0	NA	exon (NM_194051, exon 3 of 9)	exon (NM_194051, exon 3 of 9)	-11092	NM_024226	68585	Mm.192580	NM_024226	ENSMUSG00000020458	Rtn4	1110020G17Rik|AA407876|AA409940|AA960376|ASY|C130026I10Rik|NOGO|NSP-CL|NgA|Nogo-A|Nogo-B|Nogo-C|mKIAA0886|mKIAA4153	reticulon 4	protein-coding
Diff_Nuc6528	chr11	96635742	96635881	+	0	NA	intron (NM_001163389, intron 2 of 7)	intron (NM_001163389, intron 2 of 7)	3058	NM_028965	74479	Mm.270781	NM_028965	ENSMUSG00000020876	Snx11	4933439F10Rik|A930041K09Rik|AI117694	sorting nexin 11	protein-coding
Diff_Nuc29916	chr3	9519082	9519221	+	0	NA	intron (NM_133218, intron 2 of 8)	ORR1B2|LTR|MaLR	90934	NM_133218	170753	Mm.212908	NM_133218	ENSMUSG00000040209	Zfp704	C030026M03|C030034L19Rik|Gig1|Znf704	zinc finger protein 704	protein-coding
Diff_Nuc20216	chr7	57673452	57673591	+	0	NA	intron (NM_001037906, intron 12 of 19)	intron (NM_001037906, intron 12 of 19)	157733	NR_045928	73515	Mm.437440	NR_045928	ENSMUSG00000085265	Nell1os	1700081H22Rik	NEL-like 1, opposite strand	ncRNA
Diff_Nuc14540	chr15	98606972	98607111	+	0	NA	exon (NM_011718, exon 3 of 5)	exon (NM_011718, exon 3 of 5)	1540	NM_011718	22410	Mm.4709	NM_011718	ENSMUSG00000022996	Wnt10b	Wnt12	wingless-type MMTV integration site family, member 10B	protein-coding
Diff_Nuc36737	chr1	44206442	44206581	+	0	NA	intron (NM_011729, intron 1 of 14)	intron (NM_011729, intron 1 of 14)	1922	NM_011729	22592	Mm.2213	NM_011729	ENSMUSG00000026048	Ercc5	Xpg	excision repair cross-complementing rodent repair deficiency, complementation group 5	protein-coding
Diff_Nuc41729	chr9	114289422	114289561	+	0	NA	intron (NM_019922, intron 4 of 6)	intron (NM_019922, intron 4 of 6)	10339	NM_019922	56693	Mm.20904	NM_019922	ENSMUSG00000032431	Crtap	5730529N23Rik|CASP|Leprel3|P3h5	cartilage associated protein	protein-coding
Diff_Nuc16556	chr14	115805522	115805661	+	0	NA	intron (NR_045761, intron 2 of 3)	intron (NR_045761, intron 2 of 3)	3183	NR_045761	75088	Mm.444706	NR_045761	ENSMUSG00000093551	4930505G20Rik	-	RIKEN cDNA 4930505G20 gene	ncRNA
Diff_Nuc10083	chr17	33949062	33949201	+	0	NA	intron (NM_030697, intron 1 of 10)	B1F2|SINE|Alu	1663	NM_030697	80880	Mm.196330	NM_030697	ENSMUSG00000042099	Kank3	0610013D04Rik|Ankrd47|D17Ertd288e|NG28	KN motif and ankyrin repeat domains 3	protein-coding
Diff_Nuc27904	chr4	51549942	51550081	+	0	NA	Intergenic	RMER10A|LTR|ERVL	320461	NM_001162865	74914	Mm.159368	NM_001162865	ENSMUSG00000039555	Cylc2	4930488P18Rik	cylicin, basic protein of sperm head cytoskeleton 2	protein-coding
Diff_Nuc37714	chr1	97421502	97421641	+	0	NA	Intergenic	Lx5|LINE|L1	142600	NM_009183	20452	Mm.306228	NM_009183	ENSMUSG00000040710	St8sia4	PST|PST-1|SIAT8-D|ST8SiaIV|Siat8d	ST8 alpha-N-acetyl-neuraminide alpha-2,8-sialyltransferase 4	protein-coding
Diff_Nuc3678	chr12	71980882	71981021	+	0	NA	intron (NM_028127, intron 5 of 13)	intron (NM_028127, intron 5 of 13)	54450	NM_028127	319710	Mm.2962	NM_028127	ENSMUSG00000048285	Frmd6	2610019M19Rik|4930488L10Rik|AW212977|Willin	FERM domain containing 6	protein-coding
Diff_Nuc43520	chr8	98540632	98540771	+	0	NA	Intergenic	ORR1B1|LTR|MaLR	-128436	NM_010325	14719	Mm.230169	NM_010325	ENSMUSG00000031672	Got2	AL022787|FABP-pm|Got-2|Kyat4|mAspAT	glutamatic-oxaloacetic transaminase 2, mitochondrial	protein-coding
Diff_Nuc42396	chr8	35936042	35936181	+	0	NA	exon (NM_175091, exon 8 of 27)	exon (NM_175091, exon 8 of 27)	65447	NM_176933	319520	Mm.170276	NM_176933	ENSMUSG00000031530	Dusp4	2700078F24Rik|AI844617|BB104621|E130306H24Rik|MKP2	dual specificity phosphatase 4	protein-coding
Diff_Nuc2744	chr12	12428202	12428341	+	0	NA	Intergenic	Intergenic	-28990	NR_045829	70858	Mm.410838	NR_045829		4921511I17Rik	-	RIKEN cDNA 4921511I17 gene	ncRNA
Diff_Nuc31064	chr3	78762072	78762211	+	0	NA	Intergenic	Intergenic	186668	NM_001310536	76089	Mm.31220	NM_001099624	ENSMUSG00000062232	Rapgef2	5830453M24Rik|CNRasGEF|Pdzgef1|RA-GEF-1|mKIAA0313|nRapGEP	Rap guanine nucleotide exchange factor (GEF) 2	protein-coding
Diff_Nuc5620	chr11	55189032	55189171	+	0	NA	Intergenic	Intergenic	44481	NM_009242	20692	Mm.291442	NM_009242	ENSMUSG00000018593	Sparc	BM-40|ON	secreted acidic cysteine rich glycoprotein	protein-coding
Diff_Nuc37008	chr1	59243152	59243291	+	0	NA	intron (NM_028717, intron 16 of 33)	intron (NM_028717, intron 16 of 33)	-22988	NM_001164682	227157	Mm.474049	NM_145143	ENSMUSG00000079550	Mpp4	Dlg6	membrane protein, palmitoylated 4 (MAGUK p55 subfamily member 4)	protein-coding
Diff_Nuc24020	chr6	123887802	123887941	+	0	NA	Intergenic	Lx2B|LINE|L1	-84663	NM_001104641	545874	Mm.347595	NM_001104641	ENSMUSG00000094672	Vmn2r25	EG545874	vomeronasal 2, receptor 25	protein-coding
Diff_Nuc5171	chr11	32086722	32086861	+	0	NA	Intergenic	Intergenic	13488	NM_001134458	16199	Mm.384	NM_008374	ENSMUSG00000020279	Il9r	-	interleukin 9 receptor	protein-coding
Diff_Nuc34530	chr2	102271722	102271861	+	0	NA	Intergenic	Intergenic	20158	NM_010218	14221	Mm.29730	NM_010218	ENSMUSG00000075012	Fjx1	-	four jointed box 1 (Drosophila)	protein-coding
Diff_Nuc27399	chr4	19427092	19427231	+	0	NA	intron (NM_013927, intron 15 of 17)	Lx8|LINE|L1	70090	NM_027769	70568	Mm.38390	NM_027769	ENSMUSG00000028228	Cpne3	5430428M23Rik|5730450C07Rik|C85108|CPN3	copine III	protein-coding
Diff_Nuc23020	chr6	71002122	71002261	+	0	NA	Intergenic	Lx8|LINE|L1	92183	NM_001033929	232078	Mm.37547	NM_178413	ENSMUSG00000054474	Thnsl2	BC051244|TSH2	threonine synthase-like 2 (bacterial)	protein-coding
Diff_Nuc6055	chr11	75727292	75727431	+	0	NA	intron (NM_001291159, intron 1 of 4)	intron (NM_001291159, intron 1 of 4)	-2800	NM_029548	380714	Mm.425697	NM_029548	ENSMUSG00000020847	Rph3al	Gm1753|Noc2	rabphilin 3A-like (without C2 domains)	protein-coding
Diff_Nuc39035	chr1	172319172	172319311	+	0	NA	intron (NM_027528, intron 3 of 7)	intron (NM_027528, intron 3 of 7)	80249	NM_001039593	76925	Mm.33631	NM_001039593	ENSMUSG00000042800	1700015E13Rik	-	RIKEN cDNA 1700015E13 gene	protein-coding
Diff_Nuc32237	chr3	137604682	137604821	+	0	NA	intron (NM_011932, intron 4 of 8)	MER2|DNA|MER2_type	23232	NM_019920	56692	Mm.331392	NM_019920	ENSMUSG00000091512	Lamtor3	AW556229|Map2k1ip1|Mapbp|Mapksp1|Mp1	late endosomal/lysosomal adaptor, MAPK and MTOR activator 3	protein-coding
Diff_Nuc15568	chr14	57398172	57398311	+	0	NA	Intergenic	Intergenic	-1088	NM_025682	66645	Mm.20129	NM_025682	ENSMUSG00000021938	Pspc1	5730470C09Rik|AI327109|AI449052|PSP1	paraspeckle protein 1	protein-coding
Diff_Nuc43409	chr8	92417152	92417291	+	0	NA	Intergenic	ORR1A2|LTR|MaLR	454930	NM_172913	244579	Mm.302755	NM_172913	ENSMUSG00000043668	Tox3	500-9|BC052044|C230068E13|CAGF9|Tnrc9	TOX high mobility group box family member 3	protein-coding
Diff_Nuc29540	chr4	142265182	142265321	+	0	NA	Intergenic	Intergenic	460814	NR_105988	102465618		NR_105988	ENSMUSG00000106597	Mir7021	mmu-mir-7021	microRNA 7021	ncRNA
Diff_Nuc35710	chr2	158552642	158552781	+	0	NA	intron (NM_153089, intron 2 of 10)	L1MC4|LINE|L1	-41124	NM_027975	71878	Mm.85162	NM_027975	ENSMUSG00000027654	Fam83d	2310007D09Rik|BB104611	family with sequence similarity 83, member D	protein-coding
Diff_Nuc18628	chr18	38812932	38813071	+	0	NA	Intergenic	(CAAA)n|Simple_repeat|Simple_repeat	-52079	NM_011898	24066	Mm.42038	NM_011898	ENSMUSG00000024427	Spry4	A030006O18Rik|sprouty4	sprouty homolog 4 (Drosophila)	protein-coding
Diff_Nuc42833	chr8	63764442	63764581	+	0	NA	intron (NR_045475, intron 1 of 4)	intron (NR_045475, intron 1 of 4)	3158	NR_045475	69279	Mm.417857	NR_045475	ENSMUSG00000099419	1700001D01Rik	-	RIKEN cDNA 1700001D01 gene	ncRNA
Diff_Nuc25151	chr5	42057732	42057871	+	0	NA	intron (NM_001310589, intron 4 of 6)	Lx7|LINE|L1	41129	NM_001310592	100972	Mm.41555	NM_027295	ENSMUSG00000029128	Rab28	2700023P08Rik|AW496496	RAB28, member RAS oncogene family	protein-coding
Diff_Nuc36815	chr1	49351792	49351931	+	0	NA	Intergenic	RMER19A|LTR|ERVK	-1632506	NM_019790	56363	Mm.245154	NM_019790	ENSMUSG00000026109	Tmeff2	4832418D20Rik|7630402F16Rik|TR-2	transmembrane protein with EGF-like and two follistatin-like domains 2	protein-coding
Diff_Nuc34564	chr2	103890142	103890281	+	0	NA	intron (NM_212433, intron 6 of 10)	B4A|SINE|B4	-20956	NM_181858	333883	Mm.359026	NM_181858	ENSMUSG00000068686	Cd59b	-	CD59b antigen	protein-coding
Diff_Nuc42935	chr8	70613762	70613901	+	0	NA	Intergenic	MLT1J2|LTR|MaLR	-115358	NM_177698	234353	Mm.32525	NM_027626	ENSMUSG00000030465	Psd3	4931420C21Rik|AI661273|BC003498|D430018P08|EFA6D	pleckstrin and Sec7 domain containing 3	protein-coding
Diff_Nuc39691	chr9	8311582	8311721	+	0	NA	Intergenic	L1_Mus3|LINE|L1	64865	NR_035437	100316772		NR_035437	ENSMUSG00000084747	Mir1899	Mirn1899|mmu-mir-1899	microRNA 1899	ncRNA
Diff_Nuc9828	chr17	24273122	24273261	+	0	NA	intron (NM_001286662, intron 1 of 13)	intron (NM_001286662, intron 1 of 13)	5370	NM_011062	18607	Mm.10504	NM_011062	ENSMUSG00000024122	Pdpk1	Pdk1	3-phosphoinositide dependent protein kinase 1	protein-coding
Diff_Nuc7273	chr10	8660092	8660231	+	0	NA	Intergenic	Intergenic	-54293	NM_175155	70097	Mm.338275	NM_175155	ENSMUSG00000015305	Sash1	1100001C18Rik|2500002E12Rik|A330076K04Rik|mKIAA0790	SAM and SH3 domain containing 1	protein-coding
Diff_Nuc17040	chr19	17336402	17336541	+	0	NA	Intergenic	LTR16C|LTR|ERVL	77524	NM_001136484	14537	Mm.244825	NM_010265	ENSMUSG00000038843	Gcnt1	5630400D21Rik|B130048E03|C2 GlcNAcT|C2GNT|IGnT	glucosaminyl (N-acetyl) transferase 1, core 2	protein-coding
Diff_Nuc17835	chr19	55896762	55896901	+	0	NA	intron (NR_138565, intron 4 of 15)	intron (NR_138565, intron 4 of 15)	-72980	NM_001142924	21416	Mm.139815	NM_009333	ENSMUSG00000024985	Tcf7l2	TCF4B|TCF4E|Tcf-4|Tcf4	transcription factor 7 like 2, T cell specific, HMG box	protein-coding
Diff_Nuc8714	chr10	85923852	85923991	+	0	NA	intron (NM_001164495, intron 2 of 6)	intron (NM_001164495, intron 2 of 6)	37720	NM_001164495	27204	Mm.394931	NM_013722	ENSMUSG00000059602	Syn3	-	synapsin III	protein-coding
Diff_Nuc26973	chr5	144518502	144518641	+	0	NA	promoter-TSS (NR_015486)	promoter-TSS (NR_015486)	-652	NR_015486	320064	Mm.332820	NR_015486		D130017N08Rik	1700012G11Rik	RIKEN cDNA D130017N08 gene	ncRNA
Diff_Nuc5082	chr11	28619632	28619771	+	0	NA	Intergenic	L1_Mus2|LINE|L1	-26490	NR_030419	735308		NR_030419	ENSMUSG00000076318	Mir216b	Mirn216b|mir-216b	microRNA 216b	ncRNA
Diff_Nuc6905	chr11	109789762	109789901	+	0	NA	Intergenic	Intergenic	67299	NM_013851	27404	Mm.341004	NM_013851	ENSMUSG00000020620	Abca8b	Abca8	ATP-binding cassette, sub-family A (ABC1), member 8b	protein-coding
Diff_Nuc39283	chr1	184484072	184484211	+	0	NA	Intergenic	L1MC5|LINE|L1	-10997	NM_001145806	170725	Mm.189201	NM_130890	ENSMUSG00000038599	Capn8	nCL-2|nCL-2'	calpain 8	protein-coding
Diff_Nuc5749	chr11	61369112	61369251	+	0	NA	intron (NM_010148, intron 1 of 9)	intron (NM_010148, intron 1 of 9)	24008	NM_010148	13855	Mm.139695	NM_010148	ENSMUSG00000001036	Epn2	9530051D10Rik|AA536924|Ibp2	epsin 2	protein-coding
Diff_Nuc743	chr13	22089832	22089971	+	0	NA	Intergenic	Intergenic	11709	NM_019429	54373	Mm.32043	NM_019429	ENSMUSG00000006179	Prss16	AI448615|TSSP	protease, serine 16 (thymus)	protein-coding
Diff_Nuc2977	chr12	31649072	31649211	+	0	NA	Intergenic	L1VL1|LINE|L1	52607	NM_013709	24057	Mm.218624	NM_013709	ENSMUSG00000020669	Sh3yl1	AI314953|Ray|YSC84	Sh3 domain YSC-like 1	protein-coding
Diff_Nuc22105	chr6	18155892	18156031	+	0	NA	intron (NM_021050, intron 3 of 26)	intron (NM_021050, intron 3 of 26)	35274	NM_021050	12638	Mm.15621	NM_021050	ENSMUSG00000041301	Cftr	AW495489|Abcc7	cystic fibrosis transmembrane conductance regulator	protein-coding
Diff_Nuc6844	chr11	107313132	107313271	+	0	NA	intron (NM_145823, intron 1 of 9)	RSINE1|SINE|B4	18833	NM_145823	71795	Mm.397413	NM_145823	ENSMUSG00000040430	Pitpnc1	1110020B03Rik|5830436L09Rik|AI662802|AI851387|C330017I21Rik|Dnr411|RDGBB|RDGBB1|rdgB-beta	phosphatidylinositol transfer protein, cytoplasmic 1	protein-coding
Diff_Nuc3764	chr12	75070402	75070541	+	0	NA	intron (NM_178392, intron 3 of 9)	RSINE1|SINE|B4	4954	NM_178392	75627	Mm.25937	NM_178392	ENSMUSG00000021113	Snapc1	2700033G17Rik|AU015787	small nuclear RNA activating complex, polypeptide 1	protein-coding
Diff_Nuc24456	chr6	148296612	148296751	+	0	NA	intron (NM_001347518, intron 5 of 18)	intron (NM_001347518, intron 5 of 18)	-6497	NR_003634	66184	Mm.391542	NM_025405	ENSMUSG00000063171	Rps4l	1110033J19Rik|AA407494|Rps4y2	ribosomal protein S4-like	pseudo
Diff_Nuc21719	chr7	142895222	142895361	+	0	NA	intron (NM_001081117, intron 10 of 13)	intron (NM_001081117, intron 10 of 13)	12771	NM_001081117	17345	Mm.4078	NM_001081117	ENSMUSG00000031004	Mki67	D630048A14Rik|Ki-67|Ki67	antigen identified by monoclonal antibody Ki 67	protein-coding
Diff_Nuc37743	chr1	99826122	99826261	+	0	NA	intron (NM_013626, intron 5 of 25)	intron (NM_013626, intron 5 of 25)	118179	NR_037993	78603	Mm.442597	NR_037993	ENSMUSG00000089706	B230216N24Rik	-	RIKEN cDNA B230216N24 gene	ncRNA
Diff_Nuc36702	chr1	43161102	43161241	+	0	NA	intron (NM_133818, intron 2 of 3)	Lx3_Mus|LINE|L1	5616	NM_133818	98404	Mm.28817	NM_133818	ENSMUSG00000010290	AI597479	-	expressed sequence AI597479	protein-coding
Diff_Nuc10599	chr17	63733762	63733901	+	0	NA	intron (NM_015794, intron 5 of 8)	intron (NM_015794, intron 5 of 8)	-71509	NR_130176	414079	Mm.444282	NR_130176	ENSMUSG00000090565	4930405O22Rik	-	RIKEN cDNA 4930405O22 gene	ncRNA
Diff_Nuc40730	chr9	61815432	61815571	+	0	NA	intron (NM_028748, intron 5 of 7)	intron (NM_028748, intron 5 of 7)	-20895	NM_024245	71819	Mm.259374	NM_024245	ENSMUSG00000032254	Kif23	3110001D19Rik|C87313|CHO1|Knsl5|MKLP-1|MKLP1	kinesin family member 23	protein-coding
Diff_Nuc34883	chr2	120392582	120392721	+	0	NA	promoter-TSS (NM_001177792)	promoter-TSS (NM_001177792)	-756	NM_001177792	20619	Mm.245715	NM_009222	ENSMUSG00000027287	Snap23	23kDa|AA408749|SNAP-23|Sndt|Syndet	synaptosomal-associated protein 23	protein-coding
Diff_Nuc43790	chr8	113562942	113563081	+	0	NA	intron (NM_146217, intron 2 of 20)	RLTR25B|LTR|ERVK	5269	NM_146217	234734	Mm.24174	NM_146217	ENSMUSG00000031960	Aars	AI316495|C76919|sti	alanyl-tRNA synthetase	protein-coding
Diff_Nuc32252	chr3	138151072	138151211	+	0	NA	intron (NM_175224, intron 1 of 10)	B1_Mur3|SINE|Alu	1205	NM_175224	75624	Mm.26833	NM_175224	ENSMUSG00000005813	Metap1	1700029C17Rik|AW047992|mKIAA0094	methionyl aminopeptidase 1	protein-coding
Diff_Nuc11231	chr16	3273712	3273851	+	0	NA	Intergenic	Lx2|LINE|L1	-318617	NM_146860	258859	Mm.377723	NM_146860	ENSMUSG00000051003	Olfr161	MOR131-1|OR912-47M6	olfactory receptor 161	protein-coding
Diff_Nuc3779	chr12	76156802	76156941	+	0	NA	intron (NM_172805, intron 7 of 10)	ORR1E|LTR|MaLR	121448	NM_172805	238271	Mm.44465	NM_172805	ENSMUSG00000034402	Kcnh5	Eag2	potassium voltage-gated channel, subfamily H (eag-related), member 5	protein-coding
Diff_Nuc26486	chr5	117473182	117473321	+	0	NA	Intergenic	Intergenic	92751	NM_001122666	71954	Mm.34456	NM_178622	ENSMUSG00000066900	Suds3	2400003N08Rik|2410008L21Rik|AU067672|mSds3	suppressor of defective silencing 3 homolog (S. cerevisiae)	protein-coding
Diff_Nuc5126	chr11	30178287	30178426	+	0	NA	Intergenic	Lx9|LINE|L1	-58584	NM_175836	20742	Mm.123110	NM_009260	ENSMUSG00000020315	Sptbn1	9930031C03Rik|AL033301|SPTB2|Spnb-2|Spnb2|elf1|elf3|mKIAA4049	spectrin beta, non-erythrocytic 1	protein-coding
Diff_Nuc14475	chr15	95659302	95659441	+	0	NA	intron (NM_175344, intron 1 of 19)	intron (NM_175344, intron 1 of 19)	38097	NM_001253813	105722	Mm.38087	NM_175344	ENSMUSG00000064210	Ano6	2900059G15Rik|AA407480|AW554778|F730003B03Rik|Tmem16f	anoctamin 6	protein-coding
Diff_Nuc35128	chr2	131142692	131142831	+	0	NA	intron (NM_178607, intron 1 of 5)	L1_Mur3|LINE|L1	28973	NR_029755	723825		NR_029755	ENSMUSG00000065563	Mir103-2	Mirn103-2|mir-103-2	microRNA 103-2	ncRNA
Diff_Nuc35153	chr2	132362852	132362991	+	0	NA	intron (NM_001042672, intron 15 of 18)	intron (NM_001042672, intron 15 of 18)	41063	NM_001291050	74182	Mm.211211	NM_027096	ENSMUSG00000027346	Gpcpd1	2310004G06Rik|2310032D16Rik|AU015213|Gde5|Prei4|mKIAA1434	glycerophosphocholine phosphodiesterase 1	protein-coding
Diff_Nuc14167	chr15	77623802	77623941	+	0	NA	intron (NM_022410, intron 5 of 40)	intron (NM_022410, intron 5 of 40)	-38212	NM_001081970	239552	Mm.125650	NM_001081970	ENSMUSG00000056656	Apol8	9830006J20Rik|APOL-II|Apol2	apolipoprotein L 8	protein-coding
Diff_Nuc41128	chr9	80348922	80349061	+	0	NA	intron (NM_022016, intron 1 of 16)	intron (NM_022016, intron 1 of 16)	10054	NM_022016	63859	Mm.422780	NM_022016	ENSMUSG00000032343	Impg1	A930015H12Rik|IMP150|SPACR	interphotoreceptor matrix proteoglycan 1	protein-coding
Diff_Nuc23719	chr6	108734002	108734141	+	0	NA	intron (NM_026011, intron 1 of 6)	intron (NM_026011, intron 1 of 6)	1018	NM_026011	67166	Mm.271178	NM_026011	ENSMUSG00000030105	Arl8b	2610313E07Rik|3100002J04Rik|Arl10c|gie1	ADP-ribosylation factor-like 8B	protein-coding
Diff_Nuc23548	chr6	97819642	97819781	+	0	NA	intron (NM_001113198, intron 1 of 9)	intron (NM_001113198, intron 1 of 9)	-60100	NM_001178049	17342	Mm.333284	NM_008601	ENSMUSG00000035158	Mitf	BCC2|Bhlhe32|Gsfbcc2|Vitiligo|Wh|bw|mi|vit	microphthalmia-associated transcription factor	protein-coding
Diff_Nuc25678	chr5	73447642	73447781	+	0	NA	intron (NM_028194, intron 49 of 62)	intron (NM_028194, intron 49 of 62)	49568	NM_173403	231290	Mm.491387	NM_173403	ENSMUSG00000029219	Slc10a4	E130304D01	solute carrier family 10 (sodium/bile acid cotransporter family), member 4	protein-coding
Diff_Nuc21835	chr7	149209742	149209881	+	0	NA	intron (NM_028308, intron 1 of 4)	intron (NM_028308, intron 1 of 4)	31727	NR_037291	100526509		NR_037291	ENSMUSG00000092652	Mir3104	mir-3104|mmu-mir-3104	microRNA 3104	ncRNA
Diff_Nuc18432	chr18	30913242	30913381	+	0	NA	Intergenic	L1Md_F2|LINE|L1	480761	NM_181414	225326	Mm.194127	NM_181414	ENSMUSG00000033628	Pik3c3	5330434F23Rik|Vps34	phosphoinositide-3-kinase, class 3	protein-coding
Diff_Nuc37000	chr1	58994602	58994741	+	0	NA	intron (NM_172406, intron 2 of 15)	intron (NM_172406, intron 2 of 15)	35655	NM_172406	70827	Mm.222887	NM_172406	ENSMUSG00000026028	Trak2	2900022D04Rik|4733401O11Rik|AI480836|AW046271|Als2cr3|CALS-C|GRIF-1|GRIF1|OIP98|mKIAA0549	trafficking protein, kinesin binding 2	protein-coding
Diff_Nuc15797	chr14	69431982	69432121	+	0	NA	Intergenic	MTD|LTR|MaLR	-158152	NM_183366	13522	Mm.117450	NM_010082	ENSMUSG00000014725	Adam28	C130072N01Rik|D430033C21Rik|Dtgn1|MDC-L|MDCL|TECADAM|eMDCII	a disintegrin and metallopeptidase domain 28	protein-coding
Diff_Nuc43131	chr8	79161112	79161251	+	0	NA	Intergenic	L1_Mus3|LINE|L1	262891	NR_028579	100039211	Mm.367571	NR_028579	ENSMUSG00000074235	Gm10649	ENSMUSG00000074235	predicted gene 10649	ncRNA
Diff_Nuc3111	chr12	38129432	38129571	+	0	NA	intron (NM_178767, intron 8 of 12)	intron (NM_178767, intron 8 of 12)	161275	NM_178767	319660	Mm.485540	NM_178767	ENSMUSG00000050103	Agmo	A530016O06Rik|AI790538|Tmem195	alkylglycerol monooxygenase	protein-coding
Diff_Nuc1510	chr13	59472772	59472911	+	0	NA	Intergenic	Intergenic	172971	NM_001284221	67269	Mm.153008	NM_023328	ENSMUSG00000021557	Agtpbp1	1700020N17Rik|2310001G17Rik|2900054O13Rik|4930445M19Rik|5730402G09Rik|CCP1|Nna1|nmf243|pcd	ATP/GTP binding protein 1	protein-coding
Diff_Nuc35108	chr2	130449402	130449541	+	0	NA	intron (NM_198176, intron 2 of 2)	intron (NM_198176, intron 2 of 2)	6292	NM_198176	380601	Mm.27090	NM_198176	ENSMUSG00000079043	Fastkd5	C78212|mKIAA1792	FAST kinase domains 5	protein-coding
Diff_Nuc7198	chr10	5913352	5913491	+	0	NA	promoter-TSS (NM_025343)	promoter-TSS (NM_025343)	515	NM_024261	73419	Mm.346733	NM_024261	ENSMUSG00000061759	Armt1	1700052N19Rik|AW320013|AW536799	acidic residue methyltransferase 1	protein-coding
Diff_Nuc31546	chr3	100462712	100462851	+	0	NA	intron (NM_010763, intron 1 of 12)	Lx3C|LINE|L1	26615	NM_010763	17156	Mm.271617	NM_010763	ENSMUSG00000008763	Man1a2	AI428775|AI528764|AI854422|Man1b|PCR2	mannosidase, alpha, class 1A, member 2	protein-coding
Diff_Nuc13834	chr15	58956372	58956511	+	0	NA	Intergenic	ORR1D1|LTR|MaLR	-42860	NM_144800	211401	Mm.215481	NM_144800	ENSMUSG00000022353	Mtss1	2310003N14Rik|BC024131|D130001D01Rik|Mim|mKIAA0429	metastasis suppressor 1	protein-coding
Diff_Nuc10529	chr17	59195072	59195211	+	0	NA	Intergenic	BGLII|LTR|ERVK	-42396	NM_026497	67993	Mm.36507	NM_026497	ENSMUSG00000024228	Nudt12	0610016O18Rik	nudix (nucleoside diphosphate linked moiety X)-type motif 12	protein-coding
Diff_Nuc9605	chr17	10465992	10466131	+	0	NA	intron (NM_001159516, intron 3 of 6)	intron (NM_001159516, intron 3 of 6)	46165	NM_021881	19317	Mm.130694	NM_021881	ENSMUSG00000062078	Qk	1110003F05Rik|1500005P18|QkI|l(17)-1Wis|l17Wis1	quaking	protein-coding
Diff_Nuc8790	chr10	90513272	90513411	+	0	NA	intron (NM_001042558, intron 12 of 26)	BGLII_B|LTR|ERVK	32147	NM_001042558	11783	Mm.220289	NM_009684	ENSMUSG00000019979	Apaf1	6230400I06Rik|Apaf-1|Apaf1l|fog|mKIAA0413	apoptotic peptidase activating factor 1	protein-coding
Diff_Nuc39848	chr9	18316822	18316961	+	0	NA	Intergenic	RSINE1|SINE|B4	34052	NM_028557	73503	Mm.160088	NM_028557	ENSMUSG00000038691	Mbd3l1	1700070G05Rik|1700095H13Rik|Mbd3l	methyl-CpG binding domain protein 3-like 1	protein-coding
Diff_Nuc22920	chr6	63580222	63580361	+	0	NA	intron (NM_008167, intron 2 of 15)	intron (NM_008167, intron 2 of 15)	373440	NM_008167	14804	Mm.439651	NM_008167	ENSMUSG00000071424	Grid2	B230104L07Rik|GluD2|GluRdelta2|Lc|Lc<J>|MMS10-AC|Ms10ac|cpr|ho|nmf408|tpr	glutamate receptor, ionotropic, delta 2	protein-coding
Diff_Nuc16506	chr14	112148502	112148641	+	0	NA	Intergenic	Lx3_Mus|LINE|L1	74234	NM_198865	75409	Mm.235097	NM_029273	ENSMUSG00000033214	Slitrk5	2610019D03Rik	SLIT and NTRK-like family, member 5	protein-coding
Diff_Nuc4907	chr11	19307192	19307331	+	0	NA	Intergenic	Intergenic	341983	NR_046037	74059	Mm.292321	NR_046037	ENSMUSG00000086025	4933406G16Rik	-	RIKEN cDNA 4933406G16 gene	ncRNA
Diff_Nuc36173	chr1	9924882	9925021	+	0	NA	intron (NM_177722, intron 13 of 14)	intron (NM_177722, intron 13 of 14)	7673	NR_004410	266793		NR_004410	ENSMUSG00000093178	Snord87	MBII-276|Rnu87|U87	small nucleolar RNA, C/D box 87	snoRNA
Diff_Nuc190	chrX	120989522	120989661	+	0	NA	Intergenic	Lx5|LINE|L1	259928	NR_038052	22314	Mm.458976	NM_009494	ENSMUSG00000057021	Vmn2r-ps159	V2r8|V2r9|Vmn2r-ps160	vomeronasal 2, receptor, pseudogene 159	pseudo
Diff_Nuc30438	chr3	38621092	38621231	+	0	NA	Intergenic	RMER15|LTR|ERVL	-164701	NM_183221	329628	Mm.316210	NM_183221	ENSMUSG00000046743	Fat4	6030410K14Rik|9430004M15	FAT atypical cadherin 4	protein-coding
Diff_Nuc36450	chr1	29415242	29415381	+	0	NA	Intergenic	RLTR11A|LTR|ERVK	-63022	NR_105760	102465174		NR_105760	ENSMUSG00000099257	Mir6342	Gm27268|mmu-mir-6342	microRNA 6342	ncRNA
Diff_Nuc41598	chr9	108133442	108133581	+	0	NA	intron (NM_001276485, intron 1 of 2)	B1_Mur3|SINE|Alu	32635	NM_010017	13138	Mm.7524	NM_010017	ENSMUSG00000039952	Dag1	D9Wsu13e|DG|Dp427|Dp71	dystroglycan 1	protein-coding
Diff_Nuc19484	chr18	85043327	85043466	+	0	NA	intron (NM_025797, intron 3 of 4)	intron (NM_025797, intron 3 of 4)	22590	NM_025797	109672	Mm.31018	NM_025797	ENSMUSG00000024646	Cyb5a	0610009N12Rik|Cyb5	cytochrome b5 type A (microsomal)	protein-coding
Diff_Nuc39954	chr9	22546892	22547031	+	0	NA	intron (NM_181316, intron 18 of 21)	intron (NM_181316, intron 18 of 21)	266802	NM_178415	319845	Mm.176725	NM_178415	ENSMUSG00000035919	Bbs9	E130103I17Rik	Bardet-Biedl syndrome 9 (human)	protein-coding
Diff_Nuc40580	chr9	55554842	55554981	+	0	NA	intron (NM_001081341, intron 24 of 32)	intron (NM_001081341, intron 24 of 32)	165955	NM_027397	104360	Mm.273996	NM_027397	ENSMUSG00000032318	Isl2	3110001N10Rik	insulin related protein 2 (islet 2)	protein-coding
Diff_Nuc23821	chr6	114867642	114867781	+	0	NA	intron (NM_177683, intron 1 of 4)	intron (NM_177683, intron 1 of 4)	4059	NM_177683	232334	Mm.268357	NM_177683	ENSMUSG00000030315	Vgll4	BC048841|VGL-4	vestigial like family member 4	protein-coding
Diff_Nuc11490	chr16	18338522	18338661	+	0	NA	intron (NM_138583, intron 1 of 8)	intron (NM_138583, intron 1 of 8)	5434	NM_138583	27883	Mm.265990	NM_138583	ENSMUSG00000013539	Tango2	D16H22S680E|T10	transport and golgi organization 2	protein-coding
Diff_Nuc6268	chr11	84681252	84681391	+	0	NA	intron (NM_153144, intron 2 of 13)	intron (NM_153144, intron 2 of 13)	-2186	NR_131201	102635561	Mm.341797	NR_131197		Ggnbp2os	-	gametogenetin binding protein 2, opposite strand	ncRNA
Diff_Nuc21281	chr7	119431982	119432121	+	0	NA	intron (NM_177282, intron 3 of 19)	intron (NM_177282, intron 3 of 19)	62701	NM_001193305	320878	Mm.52312	NM_177282	ENSMUSG00000038244	Mical2	5330438E18Rik|9530064J02|MICAL-2|mKIAA0750	microtubule associated monooxygenase, calponin and LIM domain containing 2	protein-coding
Diff_Nuc14299	chr15	83267882	83268021	+	0	NA	intron (NM_001159509, intron 1 of 10)	RSINE1|SINE|B4	-4671	NM_001159510	23970	Mm.23978	NM_011862	ENSMUSG00000016664	Pacsin2	AI197433	protein kinase C and casein kinase substrate in neurons 2	protein-coding
Diff_Nuc41778	chr9	117022722	117022861	+	0	NA	intron (NM_001172126, intron 1 of 12)	intron (NM_001172126, intron 1 of 12)	138810	NM_001172123	207181	Mm.326411	NM_178660	ENSMUSG00000039607	Rbms3	6720477E09Rik|8430436O14Rik	RNA binding motif, single stranded interacting protein	protein-coding
Diff_Nuc14906	chr14	21440222	21440361	+	0	NA	Intergenic	URR1A|DNA|MER1_type	-2715	NM_030180	78787	Mm.301173	NM_030180	ENSMUSG00000034235	Usp54	4930429G18Rik|AI115571|C030002J06Rik	ubiquitin specific peptidase 54	protein-coding
Diff_Nuc39423	chr1	193120002	193120141	+	0	NA	Intergenic	Intergenic	21926	NM_025424	66208	Mm.46444	NM_025424	ENSMUSG00000037499	Nenf	1110060M21Rik|SCIRP10|Spuf	neuron derived neurotrophic factor	protein-coding
Diff_Nuc42455	chr8	37873002	37873141	+	0	NA	intron (NM_001194940, intron 4 of 17)	L1Md_F2|LINE|L1	-76963	NM_001194941	50768	Mm.125155	NM_015802	ENSMUSG00000031523	Dlc1	A730069N07Rik|Arhgap7|HP|STARD12|dlc-1	deleted in liver cancer 1	protein-coding
Diff_Nuc33998	chr2	73200612	73200751	+	0	NA	exon (NM_001190297, exon 11 of 17)	exon (NM_001190297, exon 11 of 17)	23856	NM_001276443	68526	Mm.451014	NM_001080707	ENSMUSG00000041762	Gpr155	1110017O10Rik|DEPDC3|F730029F15Rik|PGR22	G protein-coupled receptor 155	protein-coding
Diff_Nuc7599	chr10	24747892	24748031	+	0	NA	Intergenic	(CA)n|Simple_repeat|Simple_repeat	-100685	NM_007482	11846	Mm.154144	NM_007482	ENSMUSG00000019987	Arg1	AI|AI256583|Arg-1|PGIF	arginase, liver	protein-coding
Diff_Nuc5218	chr11	35324702	35324841	+	0	NA	intron (NM_011412, intron 5 of 35)	intron (NM_011412, intron 5 of 35)	-105547	NR_029799	723924		NR_029799	ENSMUSG00000065583	Mir218-2	Mirn218-2|mir-218-2	microRNA 218-2	ncRNA
Diff_Nuc23865	chr6	116290232	116290371	+	0	NA	intron (NM_001302385, intron 2 of 6)	intron (NM_001302385, intron 2 of 6)	2261	NM_027920	71779	Mm.27064	NM_027920	ENSMUSG00000025702	March8	1300017E09Rik|MARCH-VIII|Mir	membrane-associated ring finger (C3HC4) 8	protein-coding
Diff_Nuc34671	chr2	109798182	109798321	+	0	NA	intron (NM_172671, intron 1 of 17)	intron (NM_172671, intron 1 of 17)	40447	NM_172671	107515	Mm.277351	NM_172671	ENSMUSG00000050199	Lgr4	9130225G07|A330106J01Rik|A930009A08Rik|Gpr48	leucine-rich repeat-containing G protein-coupled receptor 4	protein-coding
Diff_Nuc33370	chr2	40297522	40297661	+	0	NA	Intergenic	Lx2B|LINE|L1	-1215733	NM_024209	67857	Mm.389242	NM_024209	ENSMUSG00000026753	Ppp6c	2310003C10Rik	protein phosphatase 6, catalytic subunit	protein-coding
Diff_Nuc21870	chr7	151261492	151261631	+	0	NA	Intergenic	Intergenic	66402	NR_037292	100526562		NR_037292	ENSMUSG00000093221	Mir3105	mmu-mir-3105	microRNA 3105	ncRNA
Diff_Nuc8517	chr10	75923262	75923401	+	0	NA	3' UTR (NM_029816, exon 8 of 8)	3' UTR (NM_029816, exon 8 of 8)	-8385	NM_019434	54387	Mm.30098	NM_019434	ENSMUSG00000001150	Mcm3ap	GANP|mKIAA0572	minichromosome maintenance complex component 3 associated protein	protein-coding
Diff_Nuc3147	chr12	39991352	39991491	+	0	NA	Intergenic	Lx|LINE|L1	481123	NM_001163154	14009	Mm.4866	NM_007960	ENSMUSG00000004151	Etv1	ER81|Etsrp81	ets variant 1	protein-coding
Diff_Nuc20700	chr7	88124542	88124681	+	0	NA	Intergenic	RMER6B|LTR|ERVK	-13959	NM_178707	233410	Mm.29525	NM_178707	ENSMUSG00000005621	Zfp592	8430405N24|A730014M16Rik|Znf592|mKIAA0211	zinc finger protein 592	protein-coding
Diff_Nuc8265	chr10	62269942	62270081	+	0	NA	3' UTR (NM_001253857, exon 12 of 12)	3' UTR (NM_001253857, exon 12 of 12)	-14895	NM_026201	67500	Mm.196371	NM_026201	ENSMUSG00000020074	Ccar1	2610511G16Rik|9430036H15Rik|Carp1	cell division cycle and apoptosis regulator 1	protein-coding
Diff_Nuc33444	chr2	45035492	45035631	+	0	NA	Intergenic	(TCC)n|Simple_repeat|Simple_repeat	-66762	NM_015753	24136	Mm.440702	NM_015753	ENSMUSG00000026872	Zeb2	9130203F04Rik|D130016B08Rik|SIP1|Zfhx1b|Zfx1b|Zfxh1b	zinc finger E-box binding homeobox 2	protein-coding
Diff_Nuc20919	chr7	101691132	101691271	+	0	NA	Intergenic	Intergenic	1462812	NM_021427	58238	Mm.113787	NM_021427	ENSMUSG00000051515	Fam181b	A830059I20Rik|AB041569	family with sequence similarity 181, member B	protein-coding
Diff_Nuc6090	chr11	76982032	76982171	+	0	NA	intron (NM_176965, intron 2 of 17)	ORR1A4|LTR|MaLR	20369	NM_176965	319634	Mm.108786	NM_176965	ENSMUSG00000050944	Efcab5	4930563A03Rik	EF-hand calcium binding domain 5	protein-coding
Diff_Nuc40817	chr9	65226172	65226311	+	0	NA	intron (NM_001111145, intron 6 of 6)	intron (NM_001111145, intron 6 of 6)	13218	NM_028974	74492	Mm.159223	NM_028974	ENSMUSG00000054978	Kbtbd13	5430433E21Rik	kelch repeat and BTB (POZ) domain containing 13	protein-coding
Diff_Nuc33153	chr2	30981352	30981491	+	0	NA	intron (NM_001038700, intron 1 of 14)	intron (NM_001038700, intron 1 of 14)	16107	NM_001177649	14269	Mm.52297	NM_019406	ENSMUSG00000075415	Fnbp1	1110057E06Rik|2210010H06Rik|FBP1|Fbp17	formin binding protein 1	protein-coding
Diff_Nuc27403	chr4	19543652	19543791	+	0	NA	intron (NR_074090, intron 24 of 24)	L1MA4A|LINE|L1	41508	NM_025476	66302	Mm.440686	NM_025476	ENSMUSG00000028229	Rmdn1	Fam82b|RMD-1	regulator of microtubule dynamics 1	protein-coding
Diff_Nuc3917	chr12	81206892	81207031	+	0	NA	Intergenic	Intergenic	7039	NM_007564	12192	Mm.235132	NM_007564	ENSMUSG00000021127	Zfp36l1	AW742437|AW743212|Berg36|Brf1|D530020L18Rik|ERF1|TIS11b|cMG1	zinc finger protein 36, C3H type-like 1	protein-coding
Diff_Nuc1947	chr13	87408532	87408671	+	0	NA	Intergenic	Lx2B|LINE|L1	-1222201	NM_007749	12867	Mm.378898	NM_007749	ENSMUSG00000017778	Cox7c	COXVIIc|Cox7c1	cytochrome c oxidase subunit VIIc	protein-coding
Diff_Nuc22427	chr6	35311522	35311661	+	0	NA	Intergenic	L1M5|LINE|L1	30745	NR_040526	73409	Mm.69443	NR_040526	ENSMUSG00000107341	1700065J11Rik	-	RIKEN cDNA 1700065J11 gene	ncRNA
Diff_Nuc8737	chr10	87227702	87227841	+	0	NA	Intergenic	Lx7|LINE|L1	-93239	NM_001314010	16000	Mm.268521	NM_010512	ENSMUSG00000020053	Igf1	C730016P09Rik|Igf-1|Igf-I	insulin-like growth factor 1	protein-coding
Diff_Nuc8635	chr10	82212222	82212361	+	0	NA	3' UTR (NM_010914, exon 8 of 8)	3' UTR (NM_010914, exon 8 of 8)	14595	NM_010914	18045	Mm.245998	NM_010914	ENSMUSG00000020248	Nfyb	AA985999|Cbf-A	nuclear transcription factor-Y beta	protein-coding
Diff_Nuc33565	chr2	51120022	51120161	+	0	NA	intron (NR_040636, intron 1 of 2)	intron (NR_040636, intron 1 of 2)	22740	NR_040636	329404	Mm.417725	NR_040636	ENSMUSG00000086349	Gm13497	A730015I17|OTTMUSG00000012425	predicted gene 13497	ncRNA
Diff_Nuc34816	chr2	118379792	118379931	+	0	NA	Intergenic	Intergenic	-4439	NM_138313	171543	Mm.210125	NM_138313	ENSMUSG00000040093	Bmf	AW260063|AW411872	BCL2 modifying factor	protein-coding
Diff_Nuc24838	chr5	23950372	23950511	+	0	NA	TTS (NM_022418)	TTS (NM_022418)	612	NM_023229	66587	Mm.28123	NM_023229	ENSMUSG00000028959	Fastk	0610011K02Rik|610011K02Rik	Fas-activated serine/threonine kinase	protein-coding
Diff_Nuc18531	chr18	35127322	35127461	+	0	NA	Intergenic	B3A|SINE|B2	-13386	NM_010481	15526	Mm.209419	NM_010481	ENSMUSG00000024359	Hspa9	74kDa|Csa|Grp75|Hsc74|Hsp74|Hsp74a|Hspa9a|Mortalin|Mot-2|Mot2|Mthsp70|Pbp74	heat shock protein 9	protein-coding
Diff_Nuc3717	chr12	72966852	72966991	+	0	NA	intron (NM_026102, intron 1 of 25)	intron (NM_026102, intron 1 of 25)	-23609	NM_001286452	208846	Mm.87417	NM_026102	ENSMUSG00000034574	Daam1	-	dishevelled associated activator of morphogenesis 1	protein-coding
Diff_Nuc29984	chr3	15142952	15143091	+	0	NA	Intergenic	Intergenic	171820	NR_040550	77127	Mm.195792	NR_040549	ENSMUSG00000098008	A930001A20Rik	-	RIKEN cDNA A930001A20 gene	ncRNA
Diff_Nuc2518	chr13	116254162	116254301	+	0	NA	Intergenic	L1_Mur1|LINE|L1	-362059	NM_001033228	109700	Mm.317280	NM_001033228	ENSMUSG00000042284	Itga1	CD49A|E130012M19Rik|Vla1	integrin alpha 1	protein-coding
Diff_Nuc33430	chr2	44422422	44422561	+	0	NA	intron (NM_172662, intron 10 of 10)	intron (NM_172662, intron 10 of 10)	294651	NM_172662	227835	Mm.314312	NM_172662	ENSMUSG00000036890	Gtdc1	E330008O22Rik	glycosyltransferase-like domain containing 1	protein-coding
Diff_Nuc10070	chr17	33385032	33385171	+	0	NA	intron (NM_029952, intron 1 of 3)	intron (NM_029952, intron 1 of 3)	6989	NM_029952	77652	Mm.460572	NM_029952	ENSMUSG00000094441	Zfp955a	AI842447|Zfp883a	zinc finger protein 955A	protein-coding
Diff_Nuc12071	chr16	45093832	45093971	+	0	NA	promoter-TSS (NM_026439)	promoter-TSS (NM_026439)	-265	NM_026439	67896	Mm.181074	NM_026439	ENSMUSG00000022665	Ccdc80	2610001E17Rik|DRO1|Ssg1|Urb	coiled-coil domain containing 80	protein-coding
Diff_Nuc3488	chr12	59163542	59163681	+	0	NA	Intergenic	Lx4A|LINE|L1	-149180	NM_009216	20605	Mm.278336	NM_009216	ENSMUSG00000035431	Sstr1	SRIF-2|SS-1-R|SS1-R|SS1R|Smstr-1|Smstr1|sst1	somatostatin receptor 1	protein-coding
Diff_Nuc2584	chr12	3440312	3440451	+	0	NA	intron (NM_172421, intron 1 of 10)	intron (NM_172421, intron 1 of 10)	13524	NM_172421	75302	Mm.120475	NM_172421	ENSMUSG00000037486	Asxl2	4930556B16Rik|mKIAA1685	additional sex combs like 2 (Drosophila)	protein-coding
Diff_Nuc21571	chr7	135109112	135109251	+	0	NA	Intergenic	Intergenic	-1812	NM_001347649	233908	Mm.277680	NM_139149	ENSMUSG00000030795	Fus	D430004D17Rik|D930039C12Rik|Fus1|Tls	fused in sarcoma	protein-coding
Diff_Nuc41681	chr9	111137212	111137351	+	0	NA	intron (NM_001324522, intron 14 of 18)	intron (NM_001324522, intron 14 of 18)	36831	NM_026810	17350	Mm.486383	NM_026810	ENSMUSG00000032498	Mlh1	1110035C23Rik|AI317206|AI325952|AI561766	mutL homolog 1	protein-coding
Diff_Nuc20458	chr7	74861552	74861691	+	0	NA	intron (NM_025905, intron 10 of 11)	intron (NM_025905, intron 10 of 11)	43007	NM_183312	233335	Mm.60526	NM_183312	ENSMUSG00000030554	Synm	4930412K21Rik|AI852401|Dmn|E130104F11|Syn|Synemin	synemin, intermediate filament protein	protein-coding
Diff_Nuc8854	chr10	93819062	93819201	+	0	NA	Intergenic	Lx8|LINE|L1	-57683	NR_033209	215472	Mm.255656	NM_174999	ENSMUSG00000053420	Gm4792	E130012K09|EG215472	predicted gene 4792	ncRNA
Diff_Nuc6567	chr11	98204412	98204551	+	0	NA	Intergenic	Intergenic	-5239	NM_144828	19049	Mm.45372	NM_144828	ENSMUSG00000061718	Ppp1r1b	AU040756|DARPP-32|Darpp32	protein phosphatase 1, regulatory (inhibitor) subunit 1B	protein-coding
Diff_Nuc4643	chr11	3806482	3806621	+	0	NA	TTS (NM_153142)	TTS (NM_153142)	8116	NM_153142	103710	Mm.171514	NM_153142	ENSMUSG00000048807	Slc35e4	A330108F03Rik|AI414849|AI536442	solute carrier family 35, member E4	protein-coding
Diff_Nuc36752	chr1	45075472	45075611	+	0	NA	Intergenic	Intergenic	-273747	NR_040602	75066	Mm.416932	NR_040602	ENSMUSG00000101701	4930521E06Rik	-	RIKEN cDNA 4930521E06 gene	ncRNA
Diff_Nuc10086	chr17	34075842	34075981	+	0	NA	TTS (NM_010385)	TTS (NM_010385)	1364	NM_001185182	14976	Mm.2948	NM_010385	ENSMUSG00000024309	Pfdn6	H-2Ke2|H2-Ke2|Ke-2	prefoldin subunit 6	protein-coding
Diff_Nuc15986	chr14	78648462	78648601	+	0	NA	Intergenic	L1MA4|LINE|L1	-57246	NR_035499	100316715		NR_035499	ENSMUSG00000087932	Mir1971	mmu-mir-1971	microRNA 1971	ncRNA
Diff_Nuc25680	chr5	73470072	73470211	+	0	NA	intron (NM_028194, intron 36 of 62)	intron (NM_028194, intron 36 of 62)	71998	NM_173403	231290	Mm.491387	NM_173403	ENSMUSG00000029219	Slc10a4	E130304D01	solute carrier family 10 (sodium/bile acid cotransporter family), member 4	protein-coding
Diff_Nuc3736	chr12	73669342	73669481	+	0	NA	intron (NM_026327, intron 7 of 10)	L1_Mus3|LINE|L1	32067	NM_026327	67708	Mm.11233	NM_026327	ENSMUSG00000034501	Pcnx4	1810048J11Rik|4932413O10|AU017192|Pcnxl4	pecanex homolog 4	protein-coding
Diff_Nuc24628	chr5	12866272	12866411	+	0	NA	Intergenic	MYSERV16_I-int|LTR|ERVK	483175	NM_028882	108151	Mm.89313	NM_028882	ENSMUSG00000040254	Sema3d	4631426B19Rik	sema domain, immunoglobulin domain (Ig), short basic domain, secreted, (semaphorin) 3D	protein-coding
Diff_Nuc32014	chr3	122955252	122955391	+	0	NA	Intergenic	Lx|LINE|L1	-15093	NM_027135	69608	Mm.29293	NM_027135	ENSMUSG00000039234	Sec24d	2310020L09Rik|Gm1349	Sec24 related gene family, member D (S. cerevisiae)	protein-coding
Diff_Nuc30363	chr3	36119632	36119771	+	0	NA	intron (NM_198192, intron 1 of 5)	intron (NM_198192, intron 1 of 5)	1496	NM_198192	229214	Mm.330975	NM_198192	ENSMUSG00000058400	Qrfpr	AQ27|Gpr103|SP9155	pyroglutamylated RFamide peptide receptor	protein-coding
Diff_Nuc1009	chr13	35274022	35274161	+	0	NA	intron (NR_045616, intron 1 of 2)	Lx8|LINE|L1	599	NR_045616	100503727	Mm.32214	NR_045616	ENSMUSG00000102099	1700011B04Rik	-	RIKEN cDNA 1700011B04 gene	ncRNA
Diff_Nuc37733	chr1	99551162	99551301	+	0	NA	5' UTR (NM_133825, exon 2 of 3)	5' UTR (NM_133825, exon 2 of 3)	7364	NM_133825	52392	Mm.12309	NM_133825	ENSMUSG00000044768	D1Ertd622e	AI987691|AW047450	DNA segment, Chr 1, ERATO Doi 622, expressed	protein-coding
Diff_Nuc30235	chr3	29145562	29145701	+	0	NA	intron (NM_001167748, intron 4 of 12)	Lx5|LINE|L1	164132	NM_029412	75740	Mm.330948	NM_029412	ENSMUSG00000063600	Egfem1	6130401L20Rik|Efcab11	EGF-like and EMI domain containing 1	protein-coding
Diff_Nuc21738	chr7	143853512	143853651	+	0	NA	Intergenic	Intergenic	48706	NR_046021	621677	Mm.207290	NR_046021	ENSMUSG00000110101	Gm6249	EG621677	predicted gene 6249	ncRNA
Diff_Nuc42972	chr8	72000732	72000871	+	0	NA	Intergenic	ORR1D1|LTR|MaLR	-81358	NR_038043	378466	Mm.37846	NM_194351	ENSMUSG00000110444	Gm10033	9330175B10Rik|ENSMUSG00000057924|Gm10311	predicted gene 10033	ncRNA
Diff_Nuc40850	chr9	66298972	66299111	+	0	NA	exon (NM_145617, exon 38 of 78)	exon (NM_145617, exon 38 of 78)	63359	NM_175206	74165	Mm.297998	NM_175206	ENSMUSG00000050503	Fbxl22	1110004B15Rik	F-box and leucine-rich repeat protein 22	protein-coding
Diff_Nuc17247	chr19	27939692	27939831	+	0	NA	intron (NM_011265, intron 3 of 16)	L1MA6|LINE|L1	117677	NM_001166414	19726	Mm.313321	NM_011265	ENSMUSG00000040929	Rfx3	C230093O12Rik|MRFX3	regulatory factor X, 3 (influences HLA class II expression)	protein-coding
Diff_Nuc24352	chr6	144075832	144075971	+	0	NA	intron (NM_001243163, intron 2 of 13)	ID_B1|SINE|B4	82187	NM_001113559	20678	Mm.1752	NM_011444	ENSMUSG00000041540	Sox5	A730017D01Rik|AI528773	SRY (sex determining region Y)-box 5	protein-coding
Diff_Nuc932	chr13	32333782	32333921	+	0	NA	intron (NM_146041, intron 1 of 10)	MTD|LTR|MaLR	96562	NM_146041	218138	Mm.247143	NM_146041	ENSMUSG00000038372	Gmds	BC031788|C87208	GDP-mannose 4, 6-dehydratase	protein-coding
Diff_Nuc721	chr13	21494702	21494841	+	0	NA	promoter-TSS (NM_001145778)	promoter-TSS (NM_001145778)	-147	NM_023685	72739	Mm.296071	NM_023685	ENSMUSG00000021327	Zkscan3	2810435N07Rik|AA408594|AI132359|Skz1|Zf47|Zfp-47|Zfp306|Zfp307|mszf35	zinc finger with KRAB and SCAN domains 3	protein-coding
Diff_Nuc18815	chr18	48290212	48290351	+	0	NA	Intergenic	Lx4B|LINE|L1	85292	NM_001025388	433182	Mm.70666	NM_001025388	ENSMUSG00000059040	Eno1b	EG433182|Eno1|Gm5506	enolase 1B, retrotransposed	protein-coding
Diff_Nuc29212	chr4	128383592	128383731	+	0	NA	intron (NM_018774, intron 2 of 14)	B1F|SINE|Alu	17679	NM_018774	54383	Mm.473738	NM_018774	ENSMUSG00000028796	Phc2	A3galt2|AA415044|D130050K19Rik|D4Ertd810e|Edr2|Mph2|p36	polyhomeotic-like 2 (Drosophila)	protein-coding
Diff_Nuc42322	chr8	30246162	30246301	+	0	NA	intron (NM_001347498, intron 1 of 14)	intron (NM_001347498, intron 1 of 14)	83877	NM_001347499	210801	Mm.248433	NM_153135	ENSMUSG00000063626	Unc5d	D930029E11Rik|Unc5h4|mKIAA1777	unc-5 netrin receptor D	protein-coding
Diff_Nuc22501	chr6	38896652	38896791	+	0	NA	intron (NM_011539, intron 1 of 12)	L1_Mus3|LINE|L1	27736	NM_011539	21391	Mm.4054	NM_011539	ENSMUSG00000029925	Tbxas1	CYP5|CYP5A1|THAS|TS|TXAS|TXS	thromboxane A synthase 1, platelet	protein-coding
Diff_Nuc44054	chr8	126810042	126810181	+	0	NA	intron (NM_139272, intron 1 of 15)	intron (NM_139272, intron 1 of 15)	54817	NM_139272	108148	Mm.33808	NM_139272	ENSMUSG00000089704	Galnt2	AI480629	UDP-N-acetyl-alpha-D-galactosamine:polypeptide N-acetylgalactosaminyltransferase 2	protein-coding
Diff_Nuc38664	chr1	153799672	153799811	+	0	NA	intron (NM_197990, intron 3 of 5)	B4A|SINE|B4	137709	NM_197990	69399	Mm.278031	NM_197990	ENSMUSG00000032666	1700025G04Rik	2610510E02Rik|2900042O04Rik|ENSMUSG00000073540	RIKEN cDNA 1700025G04 gene	protein-coding
Diff_Nuc31265	chr3	88145172	88145311	+	0	NA	intron (NM_178246, intron 1 of 21)	intron (NM_178246, intron 1 of 21)	5059	NM_178246	229512	Mm.439830	NM_173188	ENSMUSG00000001415	Smg5	BC024683|mKIAA1089	Smg-5 homolog, nonsense mediated mRNA decay factor (C. elegans)	protein-coding
Diff_Nuc16647	chr14	121659802	121659941	+	0	NA	intron (NM_134082, intron 16 of 26)	intron (NM_134082, intron 16 of 26)	118581	NM_145465	223255	Mm.390756	NM_145465	ENSMUSG00000063410	Stk24	1810013H02Rik|C76483|MST-3|Mst3|STE20	serine/threonine kinase 24	protein-coding
Diff_Nuc11537	chr16	20829162	20829301	+	0	NA	Intergenic	Intergenic	-94647	NM_009379	21832	Mm.3943	NM_009379	ENSMUSG00000022847	Thpo	Mgdf|Ml|Mpllg|Tpo	thrombopoietin	protein-coding
Diff_Nuc26664	chr5	125591772	125591911	+	0	NA	intron (NM_011424, intron 4 of 46)	intron (NM_011424, intron 4 of 46)	67743	NM_001253905	20602	Mm.278646	NM_011424	ENSMUSG00000029478	Ncor2	N-CoR|SMRT|SMRTe	nuclear receptor co-repressor 2	protein-coding
Diff_Nuc22675	chr6	49201872	49202011	+	0	NA	intron (NM_001347209, intron 2 of 7)	B3A|SINE|B2	12110	NM_001347209	101214	Mm.196598	NM_198102	ENSMUSG00000029817	Tra2a	1500010G04Rik|AL022798|G430041M01Rik|mAWMS1	transformer 2 alpha homolog (Drosophila)	protein-coding
Diff_Nuc14111	chr15	75752482	75752621	+	0	NA	promoter-TSS (NM_025412)	promoter-TSS (NM_025412)	-561	NM_025412	66194	Mm.250599	NM_025412	ENSMUSG00000022571	Pycrl	1110058B13Rik|2700073G24Rik	pyrroline-5-carboxylate reductase-like	protein-coding
Diff_Nuc40873	chr9	67337192	67337331	+	0	NA	intron (NM_001081242, intron 1 of 57)	intron (NM_001081242, intron 1 of 57)	70249	NM_001081242	70549	Mm.33645	NM_027458	ENSMUSG00000052698	Tln2	5730421P04Rik|AI507121|AI787438|AL118320|mKIAA0320	talin 2	protein-coding
Diff_Nuc18622	chr18	38568172	38568311	+	0	NA	Intergenic	Intergenic	-10388	NM_022996	65113	Mm.102496	NM_022996	ENSMUSG00000024425	Ndfip1	0610010M22Rik|N4wbp5	Nedd4 family interacting protein 1	protein-coding
Diff_Nuc34175	chr2	84103882	84104021	+	0	NA	Intergenic	Intergenic	161472	NM_018782	54598	Mm.75467	NM_018782	ENSMUSG00000059588	Calcrl	AV071593|CRLR	calcitonin receptor-like	protein-coding
Diff_Nuc34323	chr2	91108582	91108721	+	0	NA	exon (NM_001166024, exon 7 of 17)	exon (NM_001166024, exon 7 of 17)	3379	NM_023854	77038	Mm.43636	NM_023854	ENSMUSG00000027255	Arfgap2	2310032E02Rik|Zfp289	ADP-ribosylation factor GTPase activating protein 2	protein-coding
Diff_Nuc16089	chr14	84360232	84360371	+	0	NA	Intergenic	Lx3C|LINE|L1	-483069	NM_001013753	219228	Mm.153643	NM_001013753	ENSMUSG00000035566	Pcdh17	C030033F14Rik|Gm78	protocadherin 17	protein-coding
Diff_Nuc10106	chr17	34792992	34793131	+	0	NA	Intergenic	Intergenic	8970	NM_017406	12915	Mm.4068	NM_017406	ENSMUSG00000015461	Atf6b	AA617266|ATF6beta|Creb-rp|Crebl1	activating transcription factor 6 beta	protein-coding
Diff_Nuc41016	chr9	74819412	74819551	+	0	NA	intron (NM_001113283, intron 2 of 12)	intron (NM_001113283, intron 2 of 12)	-4437	NM_153584	235493	Mm.208955	NM_153584	ENSMUSG00000034858	Fam214a	6330415I01Rik|AI553555|C130047D21Rik|Kiaa1370|mKIAA1370	family with sequence similarity 214, member A	protein-coding
Diff_Nuc37759	chr1	100857972	100858111	+	0	NA	Intergenic	MTEa|LTR|MaLR	540340	NM_027584	70866	Mm.389164	NM_027584	ENSMUSG00000026336	Slco6d1	4921511I05Rik	solute carrier organic anion transporter family, member 6d1	protein-coding
Diff_Nuc25251	chr5	47778802	47778941	+	0	NA	Intergenic	B4|SINE|B4	-595523	NR_111900	20563	Mm.289739	NM_178804	ENSMUSG00000031558	Slit2	Drad-1|E030015M03Rik|E130320P19Rik|Slil3|mKIAA4141|slit-2	slit homolog 2 (Drosophila)	protein-coding
Diff_Nuc19428	chr18	81035692	81035831	+	0	NA	intron (NM_015805, intron 10 of 28)	intron (NM_015805, intron 10 of 28)	95036	NM_001201569	50771	Mm.247138	NM_015805	ENSMUSG00000024566	Atp9b	AA934181|Atpc2b|IIb|MMR	ATPase, class II, type 9B	protein-coding
Diff_Nuc18455	chr18	32008942	32009081	+	0	NA	intron (NM_028866, intron 7 of 21)	intron (NM_028866, intron 7 of 21)	45300	NM_001170966	74320	Mm.277705	NM_028866	ENSMUSG00000024400	Wdr33	1110001N06Rik|2310011G05Rik|2810021O11Rik|8430413N20Rik|WDC146	WD repeat domain 33	protein-coding
Diff_Nuc32988	chr2	23054372	23054511	+	0	NA	3' UTR (NM_013771, exon 19 of 19)	3' UTR (NM_013771, exon 19 of 19)	-8555	NM_027635	70981	Mm.314026	NM_027635	ENSMUSG00000026774	4931423N10Rik	-	RIKEN cDNA 4931423N10 gene	protein-coding
Diff_Nuc7973	chr10	45712342	45712481	+	0	NA	Intergenic	Intergenic	184901	NR_040624	320363	Mm.123343	NR_040624	ENSMUSG00000110874	D030045P18Rik	-	RIKEN cDNA D030045P18 gene	ncRNA
Diff_Nuc42965	chr8	71573632	71573771	+	0	NA	intron (NM_153054, intron 11 of 16)	intron (NM_153054, intron 11 of 16)	-38934	NM_007509	11966	Mm.249096	NM_007509	ENSMUSG00000006273	Atp6v1b2	AI194269|AI790362|Atp6b2|HO57|R74844	ATPase, H+ transporting, lysosomal V1 subunit B2	protein-coding
Diff_Nuc32508	chr3	152987742	152987881	+	0	NA	intron (NM_011372, intron 3 of 4)	intron (NM_011372, intron 3 of 4)	-26198	NR_126464	75489	Mm.443252	NR_126464	ENSMUSG00000105023	1700012D16Rik	-	RIKEN cDNA 1700012D16 gene	ncRNA
Diff_Nuc26054	chr5	94860152	94860291	+	0	NA	Intergenic	MTA_Mm|LTR|MaLR	53856	NM_178894	100554	Mm.327439	NM_178894	ENSMUSG00000073497	AA792892	-	expressed sequence AA792892	protein-coding
Diff_Nuc24692	chr5	15882392	15882531	+	0	NA	Intergenic	Lx8|LINE|L1	-176852	NM_001289460	15234	Mm.267078	NM_010427	ENSMUSG00000028864	Hgf	C230052L06Rik|HGF/SF|NK1|NK2|SF|SF/HGF	hepatocyte growth factor	protein-coding
Diff_Nuc30444	chr3	38843262	38843401	+	0	NA	intron (NM_183221, intron 2 of 16)	intron (NM_183221, intron 2 of 16)	57469	NM_183221	329628	Mm.316210	NM_183221	ENSMUSG00000046743	Fat4	6030410K14Rik|9430004M15	FAT atypical cadherin 4	protein-coding
Diff_Nuc23588	chr6	99748692	99748831	+	0	NA	Intergenic	L1ME2|LINE|L1	-72375	NM_001170419	50501	Mm.87365	NM_015768	ENSMUSG00000030069	Prok2	Bv8|PK2|Prok1	prokineticin 2	protein-coding
Diff_Nuc40986	chr9	72639082	72639221	+	0	NA	Intergenic	RSINE1|SINE|B4	-15930	NM_175485	235472	Mm.31696	NM_175485	ENSMUSG00000036030	Prtg	A230098A12Rik|Igdcc5	protogenin	protein-coding
Diff_Nuc39724	chr9	10590052	10590191	+	0	NA	intron (NM_001033359, intron 2 of 20)	Lx2B|LINE|L1	314605	NM_001033359	244682	Mm.187021	NM_001033359	ENSMUSG00000039488	Cntn5	6720426O10Rik|A830025P08Rik|Gm507|NB-2	contactin 5	protein-coding
Diff_Nuc33083	chr2	28288782	28288921	+	0	NA	Intergenic	B1_Mus2|SINE|Alu	-14610	NM_001005420	241289	Mm.330095	NM_001005420	ENSMUSG00000035829	Ppp1r26	Gm347|Kiaa0649|mKIAA0649	protein phosphatase 1, regulatory subunit 26	protein-coding
Diff_Nuc19844	chr7	27323792	27323931	+	0	NA	intron (NM_001302792, intron 1 of 8)	intron (NM_001302792, intron 1 of 8)	3819	NM_001048219	233001	Mm.11889	NM_194056	ENSMUSG00000054102	Nlrp9a	D7Ertd565e|Nalp-theta|Nalp9a	NLR family, pyrin domain containing 9A	protein-coding
Diff_Nuc4262	chr12	100917602	100917741	+	0	NA	Intergenic	RMER16|LTR|ERVK	-51487	NR_045288	73457	Mm.383439	NR_045288	ENSMUSG00000100211	1700064M15Rik	-	RIKEN cDNA 1700064M15 gene	ncRNA
Diff_Nuc3300	chr12	49673922	49674061	+	0	NA	Intergenic	Lx|LINE|L1	-809879	NM_001160112	15228	Mm.4704	NM_008241	ENSMUSG00000020950	Foxg1	2900064B05Rik|BF-1|Bf1|Hfh9|Hfhbf1	forkhead box G1	protein-coding
Diff_Nuc35925	chr2	169459002	169459141	+	0	NA	promoter-TSS (NM_080455)	promoter-TSS (NM_080455)	-75	NM_080455	228911	Mm.315789	NM_080455	ENSMUSG00000047907	Tshz2	2900073F20Rik|B830045G17|Mtsh2|Sdccag33l|Tsh2|Zfp218|mKIAA4248|teashirt2	teashirt zinc finger family member 2	protein-coding
Diff_Nuc4699	chr11	6100902	6101041	+	0	NA	promoter-TSS (NM_173748)	promoter-TSS (NM_173748)	-517	NM_173748	209586	Mm.25321	NM_173748	ENSMUSG00000053838	Nudcd3	AI427847|BC024322|mKIAA1068	NudC domain containing 3	protein-coding
Diff_Nuc19162	chr18	66490982	66491121	+	0	NA	Intergenic	Intergenic	-39559	NM_178793	320924	Mm.442049	NM_178793	ENSMUSG00000046318	Ccbe1	4933426F18Rik|9430093N24Rik|mKIAA1983	collagen and calcium binding EGF domains 1	protein-coding
Diff_Nuc5113	chr11	29809862	29810001	+	0	NA	intron (NM_146016, intron 2 of 41)	intron (NM_146016, intron 2 of 41)	-84263	NM_176829	216622	Mm.443260	NM_176829	ENSMUSG00000078157	4931440F15Rik	Fem1ab	RIKEN cDNA 4931440F15 gene	protein-coding
Diff_Nuc11466	chr16	17071172	17071311	+	0	NA	intron (NM_001291053, intron 1 of 3)	intron (NM_001291053, intron 1 of 3)	1009	NM_001291047	106369	Mm.237941	NM_023249	ENSMUSG00000022773	Ypel1	0610009L05Rik|1700016N17Rik|1700019O22Rik|4921520K19Rik|4930511F14Rik|AV118478|DGL-1|Dgl1|Ppil2|mdgl-1	yippee-like 1 (Drosophila)	protein-coding
Diff_Nuc8420	chr10	70336252	70336391	+	0	NA	Intergenic	Intergenic	-217610	NR_045292	319646	Mm.483039	NR_045291	ENSMUSG00000037747	D630013N20Rik	-	RIKEN cDNA D630013N20 gene	ncRNA
Diff_Nuc37968	chr1	113663262	113663401	+	0	NA	Intergenic	Intergenic	98164	NM_001081316	319901	Mm.103468	NM_001081316	ENSMUSG00000038702	Dsel	9330132E09Rik|DS-epi2	dermatan sulfate epimerase-like	protein-coding
Diff_Nuc31429	chr3	95361782	95361921	+	0	NA	Intergenic	L1_Mus2|LINE|L1	-1748	NM_026489	67981	Mm.179050	NM_026489	ENSMUSG00000028109	Hormad1	4921522K05Rik|Nohma	HORMA domain containing 1	protein-coding
Diff_Nuc20246	chr7	60880392	60880531	+	0	NA	Intergenic	ORR1D1|LTR|MaLR	266798	NR_105746	102466619		NR_105746	ENSMUSG00000099176	Mir6238	Gm27982|mmu-mir-6238	microRNA 6238	ncRNA
Diff_Nuc9484	chr17	3643432	3643571	+	0	NA	intron (NM_198958, intron 12 of 12)	intron (NM_198958, intron 12 of 12)	52760	NM_198958	224480	Mm.328756	NM_198958	ENSMUSG00000023802	Nox3	GP91-3|het|nmf250	NADPH oxidase 3	protein-coding
Diff_Nuc42872	chr8	66537702	66537841	+	0	NA	intron (NM_009390, intron 12 of 20)	L1MB2|LINE|L1	-106804	NM_001195687	244495	Mm.485331	NM_001195687	ENSMUSG00000094443	Sgol2b	EG244495|Gm4975|Sgo2B	shugoshin like 2b (S. pombe)	protein-coding
Diff_Nuc8994	chr10	101284732	101284871	+	0	NA	intron (NM_001205098, intron 1 of 7)	Lx8|LINE|L1	49475	NR_037211	100526516		NR_037211	ENSMUSG00000092952	Mir3059	mir-3059|mmu-mir-3059	microRNA 3059	ncRNA
Diff_Nuc36004	chr2	177721152	177721291	+	0	NA	Intergenic	MTA_Mm-int|LTR|MaLR	-29228	NM_001190302	665211	Mm.441314	NM_001190302	ENSMUSG00000078862	Gm14326	OTTMUSG00000016327	predicted gene 14326	protein-coding
Diff_Nuc11276	chr16	5161762	5161901	+	0	NA	intron (NM_001127725, intron 2 of 15)	intron (NM_001127725, intron 2 of 15)	14629	NM_001127725	665119	Mm.102072	NM_001127725	ENSMUSG00000091712	Sec14l5	-	SEC14-like lipid binding 5	protein-coding
Diff_Nuc34159	chr2	83103222	83103361	+	0	NA	Intergenic	L1Md_F3|LINE|L1	-381444	NM_026934	69082	Mm.27804	NM_026934	ENSMUSG00000027091	Zc3h15	1700006A17Rik|1810012H02Rik|2610312B22Rik|FM22|Ierepo4	zinc finger CCCH-type containing 15	protein-coding
Diff_Nuc30014	chr3	16414392	16414531	+	0	NA	Intergenic	B4|SINE|B4	331278	NM_001145919	229096	Mm.23834	NM_172677	ENSMUSG00000047213	Ythdf3	9130022A11Rik	YTH domain family 3	protein-coding
Diff_Nuc20204	chr7	56789032	56789171	+	0	NA	intron (NM_175272, intron 11 of 37)	intron (NM_175272, intron 11 of 37)	103104	NM_001005232	13172	Mm.307176	NM_001005232	ENSMUSG00000030507	Dbx1	AI426026|Dbx	developing brain homeobox 1	protein-coding
Diff_Nuc16852	chr19	7059622	7059761	+	0	NA	intron (NM_011697, intron 6 of 6)	intron (NM_011697, intron 6 of 6)	2450	NM_001185164	22340	Mm.15607	NM_011697	ENSMUSG00000024962	Vegfb	VEGF-B|Vrf	vascular endothelial growth factor B	protein-coding
Diff_Nuc12006	chr16	42876132	42876271	+	0	NA	promoter-TSS (NR_040521)	promoter-TSS (NR_040521)	-326	NR_040522	75722	Mm.243747	NR_040521	ENSMUSG00000075070	4932412D23Rik	ENSMUSG00000075070|Gm10809	RIKEN cDNA 4932412D23 gene	ncRNA
Diff_Nuc11759	chr16	31430592	31430731	+	0	NA	intron (NM_001122683, intron 1 of 6)	PB1|SINE|Alu	1822	NM_001122683	71911	Mm.293470	NM_175177	ENSMUSG00000046598	Bdh1	2310032J20Rik|AI327223|Bdh	3-hydroxybutyrate dehydrogenase, type 1	protein-coding
Diff_Nuc9785	chr17	21979772	21979911	+	0	NA	intron (NM_029281, intron 1 of 4)	L1M4|LINE|L1	2885	NM_029281	75424	Mm.271252	NM_029281	ENSMUSG00000069743	Zfp820	2610036F08Rik	zinc finger protein 820	protein-coding
Diff_Nuc17782	chr19	53343072	53343211	+	0	NA	Intergenic	Intergenic	-13446	NR_036590	69319	Mm.57452	NR_036590		1700001K23Rik	-	RIKEN cDNA 1700001K23 gene	ncRNA
Diff_Nuc30088	chr3	21350942	21351081	+	0	NA	Intergenic	L1Md_A|LINE|L1	-624563	NM_030732	81004	Mm.202966	NM_030732	ENSMUSG00000027630	Tbl1xr1	8030499H02Rik|A630076E03Rik|AW539987|C21|C230089I12Rik|DC42|Ira1|TBLR1	transducin (beta)-like 1X-linked receptor 1	protein-coding
Diff_Nuc25185	chr5	44091692	44091831	+	0	NA	intron (NM_172274, intron 15 of 39)	intron (NM_172274, intron 15 of 39)	38143	NM_172274	231214	Mm.44434	NM_172274	ENSMUSG00000039765	Cc2d2a	5730509K17Rik|b2b1035Clo	coiled-coil and C2 domain containing 2A	protein-coding
Diff_Nuc14916	chr14	21776862	21777001	+	0	NA	intron (NM_009502, intron 1 of 20)	intron (NM_009502, intron 1 of 20)	28276	NM_009502	22330	Mm.279361	NM_009502	ENSMUSG00000021823	Vcl	9430097D22|AA571387|AI462105|AW545629	vinculin	protein-coding
Diff_Nuc12229	chr16	57382152	57382291	+	0	NA	intron (NM_001040397, intron 1 of 4)	intron (NM_001040397, intron 1 of 4)	28831	NM_001040397	78749	Mm.328360	NM_001040397	ENSMUSG00000043336	Filip1l	4631422O05Rik|Doc1	filamin A interacting protein 1-like	protein-coding
Diff_Nuc7484	chr10	19243742	19243881	+	0	NA	Intergenic	RLTR14|LTR|ERV1	-67944	NM_010511	15979	Mm.549	NM_010511	ENSMUSG00000020009	Ifngr1	CD119|IFN-gammaR|Ifgr|Ifngr|Nktar	interferon gamma receptor 1	protein-coding
Diff_Nuc4167	chr12	94128212	94128351	+	0	NA	Intergenic	MMTV-int|LTR|ERVK	554982	NR_126436	75295	Mm.243878	NR_126436		4930559C10Rik	-	RIKEN cDNA 4930559C10 gene	ncRNA
Diff_Nuc32298	chr3	141211952	141212091	+	0	NA	intron (NM_009472, intron 1 of 15)	intron (NM_009472, intron 1 of 15)	83493	NM_001293561	22253	Mm.24430	NM_009472	ENSMUSG00000059921	Unc5c	B130051O18Rik|Unc5h3|rcm	unc-5 netrin receptor C	protein-coding
Diff_Nuc42653	chr8	49876382	49876521	+	0	NA	Intergenic	Intergenic	-116407	NM_011857	23965	Mm.42191	NM_011857	ENSMUSG00000031561	Tenm3	2610100B16Rik|Odz1|Odz3|Ten-m3|mKIAA1455	teneurin transmembrane protein 3	protein-coding
Diff_Nuc16632	chr14	120839062	120839201	+	0	NA	Intergenic	ORR1C2|LTR|MaLR	-38552	NM_029519	76108	Mm.261448	NM_029519	ENSMUSG00000051615	Rap2a	5830461H18Rik	RAS related protein 2a	protein-coding
Diff_Nuc9338	chr10	121658442	121658581	+	0	NA	Intergenic	Intergenic	101758	NR_027637	100043513	Mm.429141	NR_027637		Gm4489	Gm241	predicted gene 4489	ncRNA
Diff_Nuc7324	chr10	10993172	10993311	+	0	NA	Intergenic	BGLII_Mus|LTR|ERVK	-7887	NM_027968	71865	Mm.276229	NM_027968	ENSMUSG00000047648	Fbxo30	1700026A16Rik|MUSA1	F-box protein 30	protein-coding
Diff_Nuc5241	chr11	36764302	36764441	+	0	NA	Intergenic	L1MD1|LINE|L1	-6628	NM_011856	23964	Mm.439889	NM_011856	ENSMUSG00000049336	Tenm2	Odz2|Odz3|Ten-2|Ten-m2	teneurin transmembrane protein 2	protein-coding
Diff_Nuc38637	chr1	153046722	153046861	+	0	NA	Intergenic	Intergenic	61627	NR_038011	402734	Mm.337666	NR_038011		C730036E19Rik	lncLSTR	RIKEN cDNA C730036E19 gene	ncRNA
Diff_Nuc29611	chr4	146134872	146135011	+	0	NA	intron (NM_001177545, intron 2 of 4)	intron (NM_001177545, intron 2 of 4)	9850	NM_001177545	667666	Mm.459230	NM_001177545	ENSMUSG00000066007	Zfp600	Gm13164|OTTMUSG00000010694	zinc finger protein 600	protein-coding
Diff_Nuc27151	chr4	3495682	3495821	+	0	NA	intron (NM_028097, intron 3 of 7)	intron (NM_028097, intron 3 of 7)	6164	NM_028097	72098	Mm.441135	NM_028097	ENSMUSG00000028232	Tmem68	2010300G19Rik|AA408325|AW123402	transmembrane protein 68	protein-coding
Diff_Nuc17868	chr19	57126272	57126411	+	0	NA	intron (NM_001290815, intron 12 of 20)	intron (NM_001290815, intron 12 of 20)	-43276	NM_001177797	226250	Mm.226284	NM_146102	ENSMUSG00000025083	Afap1l2	AU041783|C86904|mKIAA1914	actin filament associated protein 1-like 2	protein-coding
Diff_Nuc31711	chr3	107597732	107597871	+	0	NA	Intergenic	ORR1E|LTR|MaLR	-34414	NM_001113529	12977	Mm.795	NM_007778	ENSMUSG00000014599	Csf1	C87615|Csfm|MCSF|op	colony stimulating factor 1 (macrophage)	protein-coding
Diff_Nuc41669	chr9	110653772	110653911	+	0	NA	Intergenic	Intergenic	-4192	NM_011199	19228	Mm.3542	NM_011199	ENSMUSG00000032492	Pth1r	PPR|Pthr|Pthr1	parathyroid hormone 1 receptor	protein-coding
Diff_Nuc13828	chr15	58817742	58817881	+	0	NA	intron (NM_144800, intron 3 of 14)	URR1A|DNA|MER1_type	52446	NM_023172	66218	Mm.322294	NM_023172	ENSMUSG00000022354	Ndufb9	1190008J14Rik	NADH dehydrogenase (ubiquinone) 1 beta subcomplex, 9	protein-coding
Diff_Nuc10402	chr17	51095542	51095681	+	0	NA	intron (NM_001285991, intron 8 of 22)	A-rich|Low_complexity|Low_complexity	203092	NM_001285993	72238	Mm.120650	NM_028162	ENSMUSG00000023923	Tbc1d5	1600014N05Rik	TBC1 domain family, member 5	protein-coding
Diff_Nuc26018	chr5	93072662	93072801	+	0	NA	intron (NM_177230, intron 14 of 24)	intron (NM_177230, intron 14 of 24)	31422	NM_177230	320696	Mm.209991	NM_177230	ENSMUSG00000050050	Ccdc158	4932413O14Rik	coiled-coil domain containing 158	protein-coding
Diff_Nuc890	chr13	30472602	30472741	+	0	NA	intron (NM_177322, intron 2 of 2)	intron (NM_177322, intron 2 of 2)	44446	NM_177322	11607	Mm.35062	NM_177322	ENSMUSG00000049115	Agtr1a	1810074K20Rik|AG2S|AI551199|AT1|AT1a|AT2R1|AT2R1A|Agtr-1a|Agtr1|Angtr-1a	angiotensin II receptor, type 1a	protein-coding
Diff_Nuc2411	chr13	111409052	111409191	+	0	NA	Intergenic	LTR86A1|LTR|ERVL	223869	NM_152804	20620	Mm.380	NM_152804	ENSMUSG00000021701	Plk2	Snk	polo-like kinase 2	protein-coding
Diff_Nuc9641	chr17	12609492	12609631	+	0	NA	intron (NM_008877, intron 17 of 18)	intron (NM_008877, intron 17 of 18)	38086	NM_008877	18815	Mm.971	NM_008877	ENSMUSG00000059481	Plg	AI649309|Pg	plasminogen	protein-coding
Diff_Nuc43315	chr8	87512962	87513101	+	0	NA	Intergenic	Intergenic	-1463	NM_133255	170833	Mm.247775	NM_133255	ENSMUSG00000052566	Hook2	A630054I03Rik	hook microtubule tethering protein 2	protein-coding
Diff_Nuc29023	chr4	117617612	117617751	+	0	NA	intron (NM_009176, intron 9 of 11)	L1_Mus1|LINE|L1	-15313	NM_001284192	11876	Mm.56897	NM_009711	ENSMUSG00000028539	Artn	neublastin	artemin	protein-coding
Diff_Nuc39621	chr9	3580502	3580641	+	0	NA	intron (NM_001033322, intron 2 of 7)	Lx3_Mus|LINE|L1	48222	NM_001033322	234889	Mm.91240	NM_001033322	ENSMUSG00000041624	Gucy1a2	6330407I18Rik|A230060L24Rik	guanylate cyclase 1, soluble, alpha 2	protein-coding
Diff_Nuc36616	chr1	39043842	39043981	+	0	NA	promoter-TSS (NM_026850)	promoter-TSS (NM_026850)	-748	NM_026850	68833	Mm.28121	NM_026850	ENSMUSG00000026078	Pdcl3	1110061A19Rik|C80025|Viaf1	phosducin-like 3	protein-coding
Diff_Nuc25900	chr5	86495387	86495526	+	0	NA	promoter-TSS (NM_001345902)	promoter-TSS (NM_001345902)	-848	NM_007683	12617	Mm.4649	NM_007683	ENSMUSG00000029253	Cenpc1	CENP-C|Cenpc	centromere protein C1	protein-coding
Diff_Nuc4619	chr11	3029502	3029641	+	0	NA	intron (NR_003518, intron 5 of 6)	intron (NR_003518, intron 5 of 6)	5541	NR_003518	66776	Mm.247625	NR_003518		Pisd-ps3	4933439C20Rik	phosphatidylserine decarboxylase, pseudogene 3	pseudo
Diff_Nuc21135	chr7	111898302	111898441	+	0	NA	Intergenic	L1Md_F|LINE|L1	27613	NM_001256973	625530	Mm.14130	NM_001256973	ENSMUSG00000043073	Usp17le	DUB-3|Dub3|Dub6|EG625530|Gm6596|USP17|USP17-E|Usp17l2	ubiquitin specific peptidase 17-like E	protein-coding
Diff_Nuc41032	chr9	75380092	75380231	+	0	NA	intron (NM_016963, intron 2 of 9)	intron (NM_016963, intron 2 of 9)	27303	NM_016963	50875	Mm.38445	NM_016963	ENSMUSG00000058587	Tmod3	U-Tmod|UTMOD	tropomodulin 3	protein-coding
Diff_Nuc23988	chr6	121376402	121376541	+	0	NA	intron (NR_110358, intron 2 of 13)	intron (NR_110358, intron 2 of 13)	47225	NM_001033354	243621	Mm.299442	NM_001033354	ENSMUSG00000040797	Iqsec3	AK122446|BRAG3|mKIAA1110|synarfGEF	IQ motif and Sec7 domain 3	protein-coding
Diff_Nuc29402	chr4	135376672	135376811	+	0	NA	Intergenic	B1_Mus1|SINE|Alu	-35245	NM_001284196	14105	Mm.10229	NM_010178	ENSMUSG00000028676	Srsf10	FUSIP2|Fusip1|NSSR1|NSSR2|Nssr|SRrp40|Sfrs13a|Srsf13a|TASR|TASR1|TASR2	serine/arginine-rich splicing factor 10	protein-coding
Diff_Nuc23805	chr6	113589172	113589311	+	0	NA	intron (NM_001113553, intron 1 of 11)	intron (NM_001113553, intron 1 of 11)	780	NM_001113553	108960	Mm.152142	NM_172161	ENSMUSG00000060477	Irak2	6330415L08Rik|AI649099|IRAK-2	interleukin-1 receptor-associated kinase 2	protein-coding
Diff_Nuc12256	chr16	58493852	58493991	+	0	NA	5' UTR (NM_018784, exon 3 of 11)	5' UTR (NM_018784, exon 3 of 11)	29504	NM_018784	54613	Mm.212742	NM_018784	ENSMUSG00000022747	St3gal6	1700023B24Rik|AI930218|AW552396|Siat10|St3galVI	ST3 beta-galactoside alpha-2,3-sialyltransferase 6	protein-coding
Diff_Nuc34941	chr2	122684932	122685071	+	0	NA	Intergenic	Intergenic	77266	NM_021507	59010	Mm.28986	NM_021507	ENSMUSG00000005803	Sqrdl	0610039J17Rik|4930557M22Rik|SQOR	sulfide quinone reductase-like (yeast)	protein-coding
Diff_Nuc9404	chr10	126663832	126663971	+	0	NA	3' UTR (NM_001039000, exon 29 of 29)	3' UTR (NM_001039000, exon 29 of 29)	-15223	NM_054097	117150	Mm.22682	NM_054097	ENSMUSG00000025417	Pip4k2c	Pip5k2c	phosphatidylinositol-5-phosphate 4-kinase, type II, gamma	protein-coding
Diff_Nuc14907	chr14	21465452	21465591	+	0	NA	Intergenic	Intergenic	10241	NM_021508	59011	Mm.439911	NM_021508	ENSMUSG00000068697	Myoz1	2310001N11Rik|AV090278|FATZ|Myoz	myozenin 1	protein-coding
Diff_Nuc13861	chr15	60660452	60660591	+	0	NA	non-coding (NR_030696, exon 3 of 3)	non-coding (NR_030696, exon 3 of 3)	-3886	NM_001162926	399603	Mm.411968	NM_207269	ENSMUSG00000072568	Fam84b	BF642811|D330050I23Rik	family with sequence similarity 84, member B	protein-coding
Diff_Nuc35943	chr2	170425152	170425291	+	0	NA	intron (NR_027825, intron 1 of 1)	intron (NR_027825, intron 1 of 1)	2296	NR_027825	67637	Mm.158163	NM_026287	ENSMUSG00000043583	4930470P17Rik	-	RIKEN cDNA 4930470P17 gene	ncRNA
Diff_Nuc25017	chr5	33234962	33235101	+	0	NA	intron (NM_001170567, intron 8 of 42)	Lx7|LINE|L1	28661	NM_001170567	277854	Mm.101524	NM_177786	ENSMUSG00000037426	Depdc5	AV016528	DEP domain containing 5	protein-coding
Diff_Nuc39580	chr9	3024292	3024431	+	0	NA	Intergenic	GSAT_MM|Satellite|Satellite	14382	NR_039546	100628572		NR_039546	ENSMUSG00000106183	Mir101c	mir-101c|mmu-mir-101c	microRNA 101c	ncRNA
Diff_Nuc25568	chr5	67254642	67254781	+	0	NA	intron (NM_001001980, intron 2 of 25)	intron (NM_001001980, intron 2 of 25)	-104944	NM_001256122	77569	Mm.374778	NM_001001980	ENSMUSG00000037736	Limch1	3732412D22Rik|mKIAA1102	LIM and calponin homology domains 1	protein-coding
Diff_Nuc10799	chr17	73473812	73473951	+	0	NA	intron (NM_001081071, intron 1 of 5)	L1_Mus4|LINE|L1	16556	NM_001177967	225010	Mm.329194	NM_001081071	ENSMUSG00000054469	Lclat1	AI181996|Agpat8|Alcat1|Gm91|Lycat	lysocardiolipin acyltransferase 1	protein-coding
Diff_Nuc16934	chr19	10950322	10950461	+	0	NA	intron (NM_134142, intron 1 of 3)	ORR1A3-int|LTR|MaLR	5842	NM_134142	68539	Mm.251890	NM_134142	ENSMUSG00000034659	Tmem109	1110006I15Rik|AA958958|C77652	transmembrane protein 109	protein-coding
Diff_Nuc36864	chr1	51949252	51949391	+	0	NA	intron (NM_010863, intron 1 of 29)	intron (NM_010863, intron 1 of 29)	23501	NM_001290982	17912	Mm.3390	NM_010863	ENSMUSG00000018417	Myo1b	AA406997|MIH-L|MMIa	myosin IB	protein-coding
Diff_Nuc35811	chr2	163817962	163818101	+	0	NA	Intergenic	L1MC2|LINE|L1	-2902	NM_018753	54401	Mm.34319	NM_018753	ENSMUSG00000018326	Ywhab	1300003C17Rik|14-3-3b	tyrosine 3-monooxygenase/tryptophan 5-monooxygenase activation protein, beta polypeptide	protein-coding
Diff_Nuc28383	chr4	82971312	82971451	+	0	NA	Intergenic	Intergenic	-1288	NM_027238	69863	Mm.5540	NM_025782	ENSMUSG00000038172	Ttc39b	1810054D07Rik|9130422G05Rik|AI450603|AV103077|AW215585	tetratricopeptide repeat domain 39B	protein-coding
Diff_Nuc17231	chr19	27327052	27327191	+	0	NA	3' UTR (NM_001161420, exon 18 of 18)	3' UTR (NM_001161420, exon 18 of 18)	35611	NM_001161420	22359	Mm.4141	NM_013703	ENSMUSG00000024924	Vldlr	AA408956|AI451093|AW047288	very low density lipoprotein receptor	protein-coding
Diff_Nuc40854	chr9	66390682	66390821	+	0	NA	intron (NM_144937, intron 6 of 14)	ID_B1|SINE|B4	-28351	NM_175206	74165	Mm.297998	NM_175206	ENSMUSG00000050503	Fbxl22	1110004B15Rik	F-box and leucine-rich repeat protein 22	protein-coding
Diff_Nuc24702	chr5	16973572	16973711	+	0	NA	Intergenic	Lx6|LINE|L1	-8299	NM_027609	70935	Mm.332225	NM_027609	ENSMUSG00000058643	Speer4f1	4922502J04Rik|SPEER-4F|Speer4f	spermatogenesis associated glutamate (E)-rich protein 4F1	protein-coding
Diff_Nuc31534	chr3	99858822	99858961	+	0	NA	exon (NM_028892, exon 22 of 49)	exon (NM_028892, exon 22 of 49)	107435	NM_175552	269470	Mm.24591	NM_175552	ENSMUSG00000033285	Wdr3	AW546279|D030020G18Rik	WD repeat domain 3	protein-coding
Diff_Nuc5552	chr11	52528992	52529131	+	0	NA	Intergenic	L1MC|LINE|L1	-49147	NM_177059	320027	Mm.44518	NM_177059	ENSMUSG00000036264	Fstl4	B230374F23Rik|SPIG1|mKIAA1061	follistatin-like 4	protein-coding
Diff_Nuc22269	chr6	28766602	28766741	+	0	NA	intron (NM_019776, intron 16 of 23)	intron (NM_019776, intron 16 of 23)	15076	NM_138682	192198	Mm.443660	NM_138682	ENSMUSG00000049939	Lrrc4	MBAG1|NGL-2|NGL2|NLG-2|Nag14	leucine rich repeat containing 4	protein-coding
Diff_Nuc16770	chr19	4234062	4234201	+	0	NA	TTS (NR_132308)	TTS (NR_132308)	1716	NR_132280	69745	Mm.32518	NM_027196	ENSMUSG00000024854	Pold4	2410012M21Rik|AI463381|AW060307|Polds|p12	polymerase (DNA-directed), delta 4	protein-coding
Diff_Nuc2858	chr12	21379922	21380061	+	0	NA	promoter-TSS (NR_102380)	promoter-TSS (NR_102380)	-498	NM_009615	11491	Mm.27681	NM_009615	ENSMUSG00000052593	Adam17	CD156b|Tace	a disintegrin and metallopeptidase domain 17	protein-coding
Diff_Nuc34227	chr2	85705582	85705721	+	0	NA	Intergenic	Lx8|LINE|L1	-3100	NM_146589	258582	Mm.377577	NM_146589	ENSMUSG00000057761	Olfr1022	MOR196-1	olfactory receptor 1022	protein-coding
Diff_Nuc30200	chr3	27643722	27643861	+	0	NA	Intergenic	Intergenic	-34430	NM_173182	72007	Mm.38832	NM_173182	ENSMUSG00000039286	Fndc3b	1600019O04Rik|AW550168|Fad104|mKIAA4164	fibronectin type III domain containing 3B	protein-coding
Diff_Nuc29518	chr4	141269882	141270021	+	0	NA	intron (NM_001017966, intron 1 of 9)	intron (NM_001017966, intron 1 of 9)	9383	NM_001017966	68817	Mm.393721	NM_001017966	ENSMUSG00000078515	Ddi2	1110056G13Rik|1700027M01Rik|9130022E05Rik|AI604911|AU040698	DNA-damage inducible protein 2	protein-coding
Diff_Nuc21924	chr6	5211682	5211821	+	0	NA	Intergenic	Lx3_Mus|LINE|L1	-5518	NM_173006	269823	Mm.9122	NM_173006	ENSMUSG00000029759	Pon3	2810004E20|AI786302	paraoxonase 3	protein-coding
Diff_Nuc32107	chr3	129544002	129544141	+	0	NA	intron (NM_001329552, intron 1 of 13)	intron (NM_001329552, intron 1 of 13)	4414	NM_007686	12630	Mm.117180	NM_007686	ENSMUSG00000058952	Cfi	-	complement component factor i	protein-coding
Diff_Nuc28711	chr4	102179472	102179611	+	0	NA	intron (NM_019840, intron 5 of 14)	intron (NM_019840, intron 5 of 14)	-63124	NM_001177980	18578	Mm.20181	NM_019840	ENSMUSG00000028525	Pde4b	Dpde4|R74983|dunce	phosphodiesterase 4B, cAMP specific	protein-coding
Diff_Nuc29065	chr4	120201192	120201331	+	0	NA	intron (NM_013883, intron 16 of 16)	intron (NM_013883, intron 16 of 16)	-3575	NM_177570	194219	Mm.29788	NM_177570	ENSMUSG00000047518	Slfnl1	4933406A14Rik	schlafen like 1	protein-coding
Diff_Nuc29996	chr3	15774122	15774261	+	0	NA	Intergenic	L1Md_T|LINE|L1	-25704	NM_001173459	100038947	Mm.330924	NM_001173459	ENSMUSG00000074677	LOC100038947	-	signal-regulatory protein beta 1-like	protein-coding
Diff_Nuc23825	chr6	115055412	115055551	+	0	NA	Intergenic	LTR16B2|LTR|ERVL	29372	NR_132436	100503783	Mm.102390	NR_132436	ENSMUSG00000097486	Gm17733	-	predicted gene, 17733	ncRNA
Diff_Nuc43281	chr8	86327592	86327731	+	0	NA	Intergenic	Intergenic	-62451	NM_001163031	26364	Mm.334648	NM_011925	ENSMUSG00000002885	Adgre5	AA409984|Cd97|TM7LN1	adhesion G protein-coupled receptor E5	protein-coding
Diff_Nuc7613	chr10	25471872	25472011	+	0	NA	Intergenic	L1Md_F2|LINE|L1	85302	NR_045349	73803	Mm.258921	NR_045349		4930401C15Rik	-	RIKEN cDNA 4930401C15 gene	ncRNA
Diff_Nuc18172	chr18	12326152	12326291	+	0	NA	Intergenic	L1M5|LINE|L1	-1018	NM_029623	76482	Mm.196596	NM_029623	ENSMUSG00000024410	3110002H16Rik	2400010D15Rik|Mic-1|Mic1	RIKEN cDNA 3110002H16 gene	protein-coding
Diff_Nuc38306	chr1	135209922	135210061	+	0	NA	intron (NM_026680, intron 1 of 4)	MT2B|LTR|ERVL	3591	NM_026680	68338	Mm.247935	NM_026680	ENSMUSG00000098306	Golt1a	0610012C01Rik|Kiss1|metastatin	golgi transport 1A	protein-coding
Diff_Nuc13782	chr15	57162082	57162221	+	0	NA	intron (NM_172378, intron 2 of 11)	intron (NM_172378, intron 2 of 11)	147029	NM_172378	210463	Mm.26555	NM_172378	ENSMUSG00000022366	Slc22a22	oat-pg	solute carrier family 22 (organic cation transporter), member 22	protein-coding
Diff_Nuc1381	chr13	51834652	51834791	+	0	NA	intron (NM_001281880, intron 2 of 16)	intron (NM_001281880, intron 2 of 16)	54395	NM_001281880	20354	Mm.33903	NM_013660	ENSMUSG00000021451	Sema4d	CD100|Semacl2|Semaj|Semcl2|coll-4	sema domain, immunoglobulin domain (Ig), transmembrane domain (TM) and short cytoplasmic domain, (semaphorin) 4D	protein-coding
Diff_Nuc12041	chr16	43890262	43890401	+	0	NA	promoter-TSS (NM_029128)	promoter-TSS (NM_029128)	316	NM_027801	212153	Mm.209835	NM_027801	ENSMUSG00000022701	Ccdc191	2610015P09Rik|8430422M09Rik|AU040712	coiled-coil domain containing 191	protein-coding
Diff_Nuc3966	chr12	82886512	82886651	+	0	NA	Intergenic	B1_Mus2|SINE|Alu	-4424	NM_001174107	338372	Mm.35284	NM_177395	ENSMUSG00000042724	Map3k9	E130314H24Rik|Mlk1|Prke1	mitogen-activated protein kinase kinase kinase 9	protein-coding
Diff_Nuc1359	chr13	51047422	51047561	+	0	NA	Intergenic	L1MA4|LINE|L1	148605	NR_029463	77428	Mm.405630	NR_029463		9430083A17Rik	-	RIKEN cDNA 9430083A17 gene	ncRNA
Diff_Nuc809	chr13	24852672	24852811	+	0	NA	intron (NM_020567, intron 1 of 6)	intron (NM_020567, intron 1 of 6)	1065	NM_020567	57441	Mm.12239	NM_020567	ENSMUSG00000006715	Gmnn	AW546347|Gem	geminin	protein-coding
Diff_Nuc14204	chr15	79487142	79487281	+	0	NA	intron (NM_029407, intron 1 of 17)	intron (NM_029407, intron 1 of 17)	2175	NM_029407	75729	Mm.78946	NM_029407	ENSMUSG00000042564	Fam227a	4933432B09Rik	family with sequence similarity 227, member A	protein-coding
Diff_Nuc3352	chr12	52854862	52855001	+	0	NA	intron (NM_144788, intron 34 of 42)	intron (NM_144788, intron 34 of 42)	-62030	NM_052973	94186	Mm.65979	NM_052973	ENSMUSG00000020954	Strn3	Gs2na|SG2NA	striatin, calmodulin binding protein 3	protein-coding
Diff_Nuc13076	chr15	12888432	12888571	+	0	NA	Intergenic	L1_Mus4|LINE|L1	133931	NM_001130149	14000	Mm.293142	NM_026799	ENSMUSG00000022191	Drosha	1110013A17Rik|AI874853|Etohi2|Rn3|Rnasen	drosha, ribonuclease type III	protein-coding
Diff_Nuc17244	chr19	27851932	27852071	+	0	NA	intron (NM_011265, intron 15 of 16)	intron (NM_011265, intron 15 of 16)	205437	NM_001166414	19726	Mm.313321	NM_011265	ENSMUSG00000040929	Rfx3	C230093O12Rik|MRFX3	regulatory factor X, 3 (influences HLA class II expression)	protein-coding
Diff_Nuc13016	chr15	10016492	10016631	+	0	NA	Intergenic	MTEb|LTR|MaLR	-90432	NM_011169	19116	Mm.10516	NM_011169	ENSMUSG00000005268	Prlr	AI987712|Pr-1|Pr-3|Prlr-rs1	prolactin receptor	protein-coding
Diff_Nuc30203	chr3	27731172	27731311	+	0	NA	Intergenic	RMER1C|Other|Other	64049	NM_001164437	208613	Mm.59189	NM_001164437	ENSMUSG00000043164	Tmem212	E030011K20Rik|Gm564	transmembrane protein 212	protein-coding
Diff_Nuc20390	chr7	71538962	71539101	+	0	NA	intron (NM_028626, intron 1 of 2)	ID_B1|SINE|B4	1374	NM_028626	73724	Mm.10093	NM_028626	ENSMUSG00000033429	Mcee	1110007A04Rik	methylmalonyl CoA epimerase	protein-coding
Diff_Nuc5164	chr11	31561472	31561611	+	0	NA	Intergenic	Intergenic	10321	NM_001024919	69556	Mm.34183	NM_001024919	ENSMUSG00000044502	Bod1	2310022M17Rik|BOD2.1|Fam44b	biorientation of chromosomes in cell division 1	protein-coding
Diff_Nuc4074	chr12	87342502	87342641	+	0	NA	intron (NM_001347395, intron 30 of 32)	intron (NM_001347395, intron 30 of 32)	77420	NM_009368	21809	Mm.3992	NM_009368	ENSMUSG00000021253	Tgfb3	TGF-beta-3|Tgfb-3	transforming growth factor, beta 3	protein-coding
Diff_Nuc37292	chr1	73587852	73587991	+	0	NA	Intergenic	Intergenic	-133778	NR_003202	723792	Mm.385493	NR_003202		Pinc	-	pregnancy induced noncoding RNA	ncRNA
Diff_Nuc21480	chr7	130135852	130135991	+	0	NA	exon (NM_011247, exon 13 of 18)	exon (NM_011247, exon 13 of 18)	21843	NM_175023	19647	Mm.4480	NM_011247	ENSMUSG00000030779	Rbbp6	4933422O15Rik|AI316869|BB233631|C030034J04Rik|C77662|P2P-R|PACT	retinoblastoma binding protein 6	protein-coding
Diff_Nuc26859	chr5	137572982	137573121	+	0	NA	Intergenic	B1_Mur1|SINE|Alu	19026	NM_201373	384309	Mm.100647	NM_201373	ENSMUSG00000043279	Trim56	A130009K11Rik|Gm452|RNF109	tripartite motif-containing 56	protein-coding
Diff_Nuc17881	chr19	57290912	57291051	+	0	NA	promoter-TSS (NM_001290813)	promoter-TSS (NM_001290813)	-459	NM_178688	226251	Mm.217161	NM_178688	ENSMUSG00000025085	Ablim1	2210411C18Rik|2610209L21Rik|4833406P10Rik|9330196J19Rik|AV079770|AW060987|AW215784|Limab1|mKIAA0059	actin-binding LIM protein 1	protein-coding
Diff_Nuc18348	chr18	24723212	24723351	+	0	NA	Intergenic	MERVL_2A-int|LTR|ERVL	-34576	NM_144861	225283	Mm.28427	NM_144861	ENSMUSG00000040446	Rprd1a	C77387|mKIAA4077	regulation of nuclear pre-mRNA domain containing 1A	protein-coding
Diff_Nuc14085	chr15	73455902	73456041	+	0	NA	promoter-TSS (NM_001033219)	promoter-TSS (NM_001033219)	-797	NM_001033219	106068	Mm.212813	NM_001033219	ENSMUSG00000079020	Slc45a4	9330175B01Rik|AW552276	solute carrier family 45, member 4	protein-coding
Diff_Nuc6980	chr11	115394242	115394381	+	0	NA	intron (NM_133354, intron 2 of 3)	intron (NM_133354, intron 2 of 3)	3233	NM_133354	170930	Mm.29923	NM_133354	ENSMUSG00000020738	Sumo2	SUMO-2|Smt3A|Smt3b|Smt3h2	small ubiquitin-like modifier 2	protein-coding
Diff_Nuc29461	chr4	137699152	137699291	+	0	NA	intron (NM_172703, intron 12 of 34)	intron (NM_172703, intron 12 of 34)	-4788	NR_126429	73563	Mm.444294	NR_126429	ENSMUSG00000084804	1700095J12Rik	-	RIKEN cDNA 1700095J12 gene	ncRNA
Diff_Nuc41042	chr9	76085002	76085141	+	0	NA	intron (NM_198962, intron 4 of 7)	intron (NM_198962, intron 4 of 7)	-23607	NM_205844	404194	Mm.213862	NM_205844	ENSMUSG00000059383	Gfral	AY457637|Gral	GDNF family receptor alpha like	protein-coding
Diff_Nuc1074	chr13	38106822	38106961	+	0	NA	intron (NM_027724, intron 9 of 12)	B3A|SINE|B2	-20832	NM_025965	107513	Mm.426670	NM_025965	ENSMUSG00000021427	Ssr1	2510001K09Rik|6330400D04|AI159733|AI452176|SSR|TRAPA	signal sequence receptor, alpha	protein-coding
Diff_Nuc26470	chr5	115961912	115962051	+	0	NA	intron (NM_133915, intron 1 of 11)	intron (NM_133915, intron 1 of 11)	5296	NM_133915	19303	Mm.18714	NM_011223	ENSMUSG00000029528	Pxn	AW108311|AW123232|Pax	paxillin	protein-coding
Diff_Nuc24468	chr6	148762172	148762311	+	0	NA	intron (NM_001081113, intron 5 of 24)	intron (NM_001081113, intron 5 of 24)	17748	NM_001081113	320727	Mm.260105	NM_001081113	ENSMUSG00000040029	Ipo8	6230418K12Rik|Abcc10|C130009K11Rik|MRP7|OM-1|Om1|Ranbp8	importin 8	protein-coding
Diff_Nuc16911	chr19	10121452	10121591	+	0	NA	intron (NM_021890, intron 1 of 11)	intron (NM_021890, intron 1 of 11)	5483	NM_021890	60527	Mm.253875	NM_021890	ENSMUSG00000024664	Fads3	AI464531	fatty acid desaturase 3	protein-coding
Diff_Nuc29169	chr4	125836432	125836571	+	0	NA	intron (NM_001162533, intron 10 of 15)	RLTR42-int|LTR|ERVK	3408	NM_025856	66938	Mm.29813	NM_025856	ENSMUSG00000073758	Sh3d21	1700029G01Rik|AU019788	SH3 domain containing 21	protein-coding
Diff_Nuc2611	chr12	4309372	4309511	+	0	NA	intron (NM_010881, intron 9 of 22)	L1_Mus3|LINE|L1	-75147	NM_134046	52504	Mm.70546	NM_134046	ENSMUSG00000020652	Cenpo	2810429O05Rik|8430427C03Rik|D12Ertd482e	centromere protein O	protein-coding
Diff_Nuc581	chr13	13815722	13815861	+	0	NA	intron (NM_010748, intron 39 of 52)	intron (NM_010748, intron 39 of 52)	-60535	NM_001302997	14706	Mm.215394	NM_010317	ENSMUSG00000021303	Gng4	-	guanine nucleotide binding protein (G protein), gamma 4	protein-coding
Diff_Nuc32845	chr2	16310942	16311081	+	0	NA	intron (NM_026162, intron 1 of 13)	intron (NM_026162, intron 1 of 13)	33080	NM_026162	67448	Mm.313938	NM_026162	ENSMUSG00000026748	Plxdc2	1200007L24Rik|5430431D22Rik|AI646728|AU022916|AV231634|Tem7r	plexin domain containing 2	protein-coding
Diff_Nuc24822	chr5	23441512	23441651	+	0	NA	intron (NM_001310471, intron 10 of 10)	intron (NM_001310471, intron 10 of 10)	83530	NR_028536	100217436		NR_028536		Snord93	Gm22397|MBII-336	small nucleolar RNA, C/D box 93	snoRNA
Diff_Nuc20876	chr7	99004462	99004601	+	0	NA	intron (NM_011807, intron 4 of 22)	MLT1A1|LTR|MaLR	-206373	NM_001243046	23859	Mm.147213	NM_011807	ENSMUSG00000052572	Dlg2	A330103J02Rik|B230218P12Rik|B330007M19Rik|Dlgh2|Gm1197|Gm21505|PSD93	discs, large homolog 2 (Drosophila)	protein-coding
Diff_Nuc10227	chr17	42840272	42840411	+	0	NA	Intergenic	Intergenic	-11108	NM_030067	78249	Mm.66217	NM_030067	ENSMUSG00000023918	Adgrf4	4632435A09Rik|AV239010|Gpr115	adhesion G protein-coupled receptor F4	protein-coding
Diff_Nuc29907	chr3	9200962	9201101	+	0	NA	Intergenic	RSINE1|SINE|B4	-49536	NM_177660	229055	Mm.103262	NM_177660	ENSMUSG00000069114	Zbtb10	4832414A18|AU021107|RINZF	zinc finger and BTB domain containing 10	protein-coding
Diff_Nuc29563	chr4	143623062	143623201	+	0	NA	Intergenic	ID_B1|SINE|B4	-25898	NM_001001319	347710	Mm.271697	NM_178248	ENSMUSG00000073724	Pramel4	C79430|D4Ertd792e	preferentially expressed antigen in melanoma like 4	protein-coding
Diff_Nuc3581	chr12	66560012	66560151	+	0	NA	Intergenic	L1Md_F|LINE|L1	233577	NM_027614	70948	Mm.219475	NM_027614	ENSMUSG00000035560	Wdr20rt	4921538B03Rik|4930427E19Rik|Wdr20|Wdr20b	WD repeat domain 20, retrogene	protein-coding
Diff_Nuc904	chr13	31385437	31385576	+	0	NA	Intergenic	Intergenic	-52551	NR_045957	73924	Mm.417825	NR_045957	ENSMUSG00000087460	4930401O12Rik	-	RIKEN cDNA 4930401O12 gene	ncRNA
Diff_Nuc40824	chr9	65564802	65564941	+	0	NA	intron (NM_172536, intron 3 of 9)	B1_Mus2|SINE|Alu	40516	NM_001301307	18247	Mm.116749	NM_010952	ENSMUSG00000040652	Oaz2	AZ-2|AZ2|Oaz2-ps|Sez15	ornithine decarboxylase antizyme 2	protein-coding
Diff_Nuc39352	chr1	188894432	188894571	+	0	NA	intron (NM_028848, intron 9 of 9)	RLTR12B|LTR|ERVK	-54516	NR_040554	69308	Mm.490882	NR_040554	ENSMUSG00000089730	1700007P06Rik	-	RIKEN cDNA 1700007P06 gene	ncRNA
Diff_Nuc1151	chr13	41999662	41999801	+	0	NA	intron (NR_033545, intron 3 of 6)	intron (NR_033545, intron 3 of 6)	38447	NR_033545	100038577	Mm.387093	NR_033545		Gm10790	ENSMUSG00000074927	predicted gene 10790	ncRNA
Diff_Nuc21790	chr7	147019252	147019391	+	0	NA	promoter-TSS (NM_177469)	promoter-TSS (NM_177469)	-752	NM_177469	52389	Mm.39863	NM_177469	ENSMUSG00000025475	Adgra1	2900059M17Rik|D7Ertd680e|Gpr123	adhesion G protein-coupled receptor A1	protein-coding
Diff_Nuc30374	chr3	36430382	36430521	+	0	NA	Intergenic	Intergenic	-10084	NR_040411	100503068	Mm.389423	NR_040411	ENSMUSG00000085007	Gm11549	OTTMUSG00000002111	predicted gene 11549	ncRNA
Diff_Nuc10977	chr17	81479892	81480031	+	0	NA	Intergenic	Intergenic	-15536	NM_028138	72167	Mm.273257	NM_028138	ENSMUSG00000024246	Thumpd2	2810025A12Rik	THUMP domain containing 2	protein-coding
Diff_Nuc36237	chr1	13647692	13647831	+	0	NA	intron (NM_145381, intron 1 of 6)	Lx9|LINE|L1	2829	NM_145381	212442	Mm.89572	NM_145381	ENSMUSG00000025937	Lactb2	Cgi-83|E430032H21Rik	lactamase, beta 2	protein-coding
Diff_Nuc588	chr13	14094872	14095011	+	0	NA	intron (NM_178337, intron 13 of 16)	intron (NM_178337, intron 13 of 16)	36964	NR_130788	70430	Mm.260209	NM_178337	ENSMUSG00000039233	Tbce	2610206D02Rik|C530005D02Rik|pmn	tubulin-specific chaperone E	protein-coding
Diff_Nuc34937	chr2	122436372	122436511	+	0	NA	intron (NM_025961, intron 1 of 8)	intron (NM_025961, intron 1 of 8)	572	NM_025961	67092	Mm.29975	NM_025961	ENSMUSG00000027199	Gatm	1810003P21Rik|AI314789|AT	glycine amidinotransferase (L-arginine:glycine amidinotransferase)	protein-coding
Diff_Nuc15125	chr14	31912252	31912391	+	0	NA	intron (NM_001081251, intron 25 of 32)	L1_Mus4|LINE|L1	29795	NM_001308466	66487	Mm.379116	NM_001308091	ENSMUSG00000058351	Smim4	2010107H07Rik|Gm41122	small integral membrane protein 4	protein-coding
Diff_Nuc5271	chr11	39424142	39424281	+	0	NA	Intergenic	Intergenic	-220484	NR_126439	75315	Mm.461295	NR_126439		4930553C11Rik	-	RIKEN cDNA 4930553C11 gene	ncRNA
Diff_Nuc42641	chr8	48953412	48953551	+	0	NA	intron (NM_133791, intron 11 of 22)	intron (NM_133791, intron 11 of 22)	43645	NM_029383	75677	Mm.390033	NM_029383	ENSMUSG00000038064	Cldn22	2210404A22Rik|5330431C14Rik|9530051B05Rik	claudin 22	protein-coding
Diff_Nuc19297	chr18	73406092	73406231	+	0	NA	Intergenic	Intergenic	-326198	NM_001039214	240396	Mm.24131	NM_001039214	ENSMUSG00000037253	Mex3c	A130001D14Rik|BC035207|BM-013|Rkhd2	mex3 RNA binding family member C	protein-coding
Diff_Nuc9936	chr17	28096902	28097041	+	0	NA	intron (NM_181413, intron 1 of 24)	intron (NM_181413, intron 1 of 24)	50720	NM_181413	224650	Mm.32556	NM_181413	ENSMUSG00000024219	Anks1	Anks1a|mKIAA0229	ankyrin repeat and SAM domain containing 1	protein-coding
Diff_Nuc21666	chr7	139995262	139995401	+	0	NA	intron (NM_212473, intron 1 of 4)	intron (NM_212473, intron 1 of 4)	9548	NM_212473	77938	Mm.225649	NM_175268	ENSMUSG00000030956	Fam53b	A930008G19Rik|mKIAA0140	family with sequence similarity 53, member B	protein-coding
Diff_Nuc26697	chr5	127201162	127201301	+	0	NA	Intergenic	Intergenic	-309928	NR_040685	71247	Mm.399586	NR_040685	ENSMUSG00000105490	4933438B17Rik	-	RIKEN cDNA 4933438B17 gene	ncRNA
Diff_Nuc13164	chr15	19399752	19399891	+	0	NA	Intergenic	ORR1E|LTR|MaLR	649737	NM_009865	320873	Mm.117794	NM_009865	ENSMUSG00000022321	Cdh10	A830016G23Rik|C030003B10Rik|C030011H18Rik	cadherin 10	protein-coding
Diff_Nuc9289	chr10	118781432	118781571	+	0	NA	Intergenic	Intergenic	24211	NR_126085	74905	Mm.399357	NR_126085		4930477N07Rik	-	RIKEN cDNA 4930477N07 gene	ncRNA
Diff_Nuc5356	chr11	44445492	44445631	+	0	NA	intron (NM_007897, intron 4 of 15)	intron (NM_007897, intron 4 of 15)	13959	NM_001290710	13591	Mm.439662	NM_007897	ENSMUSG00000057098	Ebf1	Ebf|O/E-1|OE-1|Olf-1|Olf1	early B cell factor 1	protein-coding
Diff_Nuc25443	chr5	62161582	62161721	+	0	NA	Intergenic	L1VL4|LINE|L1	-38431	NM_019468	14380	Mm.347430	NM_019468	ENSMUSG00000089992	G6pd2	G6pdx-ps1|Gpd-2|Gpd2	glucose-6-phosphate dehydrogenase 2	protein-coding
Diff_Nuc8521	chr10	76343862	76344001	+	0	NA	intron (NM_001347216, intron 2 of 15)	B3A|SINE|B2	80761	NM_001347216	59093	Mm.272803	NM_021568	ENSMUSG00000001120	Pcbp3	AlphaCP-3	poly(rC) binding protein 3	protein-coding
Diff_Nuc38226	chr1	131594302	131594441	+	0	NA	intron (NM_172485, intron 7 of 27)	L1Md_F2|LINE|L1	424490	NM_172485	210417	Mm.380518	NM_172485	ENSMUSG00000042581	Thsd7b	1700074E13Rik|B930082A18|D130067I03Rik	thrombospondin, type I, domain containing 7B	protein-coding
Diff_Nuc32320	chr3	142321202	142321341	+	0	NA	Intergenic	ORR1E-int|LTR|MaLR	-34361	NR_105802	102465200		NR_105802	ENSMUSG00000098871	Mir6381	Gm27963|mmu-mir-6381	microRNA 6381	ncRNA
Diff_Nuc8959	chr10	99483452	99483591	+	0	NA	intron (NM_013598, intron 1 of 9)	intron (NM_013598, intron 1 of 9)	5066	NM_013598	17311	Mm.45124	NM_013598	ENSMUSG00000019966	Kitl	Clo|Con|Gb|Kitlg|Mgf|SCF|SF|SLF|Sl|blz|contrasted	kit ligand	protein-coding
Diff_Nuc24876	chr5	25053337	25053476	+	0	NA	Intergenic	RLTR10B2|LTR|ERVK	17570	NR_027388	73571	Mm.105263	NR_027388	ENSMUSG00000101856	1700096K18Rik	-	RIKEN cDNA 1700096K18 gene	ncRNA
Diff_Nuc8008	chr10	48638062	48638201	+	0	NA	Intergenic	Lx6|LINE|L1	177518	NR_046212	100418235	Mm.185993	NR_046212		C130030K03Rik	-	proteasome (prosome, macropain) subunit, alpha type 6 pseudogene	pseudo
Diff_Nuc25833	chr5	81419462	81419601	+	0	NA	Intergenic	L1MA5|LINE|L1	-30065	NM_001347367	319387	Mm.273631	NM_198702	ENSMUSG00000037605	Adgrl3	5430402I23Rik|CIRL-3|D130075K09Rik|Gm1379|LEC3|Lphn3|mKIAA0768	adhesion G protein-coupled receptor L3	protein-coding
Diff_Nuc2282	chr13	104281352	104281491	+	0	NA	Intergenic	Intergenic	-156849	NM_175171	328329	Mm.202606	NM_175171	ENSMUSG00000034751	Mast4	4930420O11Rik|AI642422|mKIAA0303	microtubule associated serine/threonine kinase family member 4	protein-coding
Diff_Nuc36347	chr1	22192532	22192671	+	0	NA	Intergenic	Intergenic	-239870	NM_001310477	226922	Mm.336519	NM_023872	ENSMUSG00000028033	Kcnq5	7730402H11|9230107O05Rik|AA589396|D1Mgi1	potassium voltage-gated channel, subfamily Q, member 5	protein-coding
Diff_Nuc29289	chr4	131729132	131729271	+	0	NA	Intergenic	Intergenic	-28800	NM_013622	18386	Mm.5243	NM_013622	ENSMUSG00000050511	Oprd1	DOR|DOR-1|Nbor|mDOR	opioid receptor, delta 1	protein-coding
Diff_Nuc33961	chr2	71985382	71985521	+	0	NA	intron (NM_019688, intron 6 of 29)	intron (NM_019688, intron 6 of 29)	92777	NM_001204166	56508	Mm.196153	NM_019688	ENSMUSG00000049044	Rapgef4	1300003D15Rik|5730402K07Rik|6330581N18Rik|EPAC 2|Epac-2|Epac2|mKIAA4040	Rap guanine nucleotide exchange factor (GEF) 4	protein-coding
Diff_Nuc11974	chr16	40361802	40361941	+	0	NA	Intergenic	Intergenic	-1171068	NM_001347236	268890	Mm.310524	NM_175548	ENSMUSG00000061080	Lsamp	5430428I19|AW046674|B130007O04Rik|D930023J12Rik|Lam|Lamp	limbic system-associated membrane protein	protein-coding
Diff_Nuc38933	chr1	167387632	167387771	+	0	NA	intron (NM_028759, intron 1 of 18)	intron (NM_028759, intron 1 of 18)	2893	NM_028759	74106	Mm.227605	NM_028759	ENSMUSG00000026571	Dcaf6	1200006M05Rik|Iqwd1|PC326	DDB1 and CUL4 associated factor 6	protein-coding
Diff_Nuc22383	chr6	33285962	33286101	+	0	NA	intron (NM_001347089, intron 6 of 9)	intron (NM_001347089, intron 6 of 9)	86881	NM_009148	20336	Mm.265512	NM_009148	ENSMUSG00000029763	Exoc4	C78892|Sec8|Sec8l1	exocyst complex component 4	protein-coding
Diff_Nuc4347	chr12	104008882	104009021	+	0	NA	intron (NM_025666, intron 9 of 10)	intron (NM_025666, intron 9 of 10)	12766	NM_025666	66622	Mm.34261	NM_025666	ENSMUSG00000041712	Ubr7	5730410I19Rik|AA589405|AW557761	ubiquitin protein ligase E3 component n-recognin 7 (putative)	protein-coding
Diff_Nuc34273	chr2	89131712	89131851	+	0	NA	Intergenic	FordPrefect|DNA|Tip100	5644	NM_146789	258785	Mm.377689	NM_146789	ENSMUSG00000075094	Olfr1230	MOR237-1	olfactory receptor 1230	protein-coding
Diff_Nuc21277	chr7	119353702	119353841	+	0	NA	Intergenic	Intergenic	-15579	NM_177282	320878	Mm.52312	NM_177282	ENSMUSG00000038244	Mical2	5330438E18Rik|9530064J02|MICAL-2|mKIAA0750	microtubule associated monooxygenase, calponin and LIM domain containing 2	protein-coding
Diff_Nuc553	chr13	12938372	12938511	+	0	NA	Intergenic	Lx3_Mus|LINE|L1	-46095	NM_011118	18812	Mm.457984	NM_011118	ENSMUSG00000056457	Prl2c3	Ghd1|MRP-2|MRP-3|Mrpplf3|PLF-2|PLF-3|Plf2|Prl2c4|mrp/plf3	prolactin family 2, subfamily c, member 3	protein-coding
Diff_Nuc24303	chr6	140611522	140611661	+	0	NA	intron (NM_009637, intron 8 of 8)	intron (NM_009637, intron 8 of 8)	36185	NM_001309436	11569	Mm.86453	NM_009637	ENSMUSG00000030232	Aebp2	AU023766|B230313N05Rik	AE binding protein 2	protein-coding
Diff_Nuc1574	chr13	62507222	62507361	+	0	NA	Intergenic	L1_Mus3|LINE|L1	-22757	NM_001162910	100041979	Mm.445930	NM_001162910	ENSMUSG00000094942	Gm3604	-	predicted gene 3604	protein-coding
Diff_Nuc2818	chr12	16830572	16830711	+	0	NA	intron (NR_027677, intron 6 of 7)	intron (NR_027677, intron 6 of 7)	12870	NM_033270	50496	Mm.23296	NM_033270	ENSMUSG00000057469	E2f6	AI462434|E2F6a|E2F6b|EMA	E2F transcription factor 6	protein-coding
Diff_Nuc40562	chr9	54313512	54313651	+	0	NA	intron (NM_172771, intron 6 of 43)	MLT1E1A|LTR|MaLR	35852	NM_172771	235380	Mm.93636	NM_172771	ENSMUSG00000041268	Dmxl2	6330586A12|6430411K14Rik|E130119P06Rik|mKIAA0856	Dmx-like 2	protein-coding
Diff_Nuc27829	chr4	47135682	47135821	+	0	NA	3' UTR (NM_172693, exon 10 of 10)	3' UTR (NM_172693, exon 10 of 10)	30926	NM_172693	230145	Mm.132246	NM_172693	ENSMUSG00000039774	Galnt12	9130206E10|A630062B03Rik	UDP-N-acetyl-alpha-D-galactosamine:polypeptide N-acetylgalactosaminyltransferase 12	protein-coding
Diff_Nuc18942	chr18	56183152	56183291	+	0	NA	Intergenic	GA-rich|Low_complexity|Low_complexity	-408565	NM_026240	107022	Mm.24356	NM_026240	ENSMUSG00000001700	Gramd3	9030613F08Rik|9130427A09Rik|AW061306|NS3TP2	GRAM domain containing 3	protein-coding
Diff_Nuc7695	chr10	30939112	30939251	+	0	NA	Intergenic	Intergenic	-94030	NM_027168	69692	Mm.245537	NM_027168	ENSMUSG00000000295	Hddc2	2310057G13Rik	HD domain containing 2	protein-coding
Diff_Nuc3409	chr12	55314322	55314461	+	0	NA	Intergenic	Intergenic	-9530	NM_028133	112407	Mm.133037	NM_028133	ENSMUSG00000035105	Egln3	2610021G09Rik|AI505553|AI648162|Hif-p4h-3|Phd3|SM-20	egl-9 family hypoxia-inducible factor 3	protein-coding
Diff_Nuc25987	chr5	91172362	91172501	+	0	NA	Intergenic	Intergenic	-15893	NM_009141	20311	Mm.4660	NM_009141	ENSMUSG00000029371	Cxcl5	AMCF-II|Cxcl6|ENA-78|GCP-2|LIX|Scyb5|Scyb6	chemokine (C-X-C motif) ligand 5	protein-coding
Diff_Nuc27156	chr4	3631102	3631241	+	0	NA	intron (NM_010747, intron 1 of 12)	intron (NM_010747, intron 1 of 12)	-10940	NR_028126	70720	Mm.445696	NR_028126		6330407A03Rik	-	RIKEN cDNA 6330407A03 gene	ncRNA
Diff_Nuc11800	chr16	32684442	32684581	+	0	NA	TTS (NM_001110147)	TTS (NM_001110147)	11271	NM_001289443	51789	Mm.251115	NM_016788	ENSMUSG00000022791	Tnk2	Ack|Ack-1|Ack1|Cdgip|Pyk1	tyrosine kinase, non-receptor, 2	protein-coding
Diff_Nuc8866	chr10	94452652	94452791	+	0	NA	Intergenic	Intergenic	-45509	NM_018797	54712	Mm.256712	NM_018797	ENSMUSG00000074785	Plxnc1	2510048K12Rik|AW742158|CD232|Vespr	plexin C1	protein-coding
Diff_Nuc3304	chr12	50239152	50239291	+	0	NA	Intergenic	Intergenic	-244649	NM_001160112	15228	Mm.4704	NM_008241	ENSMUSG00000020950	Foxg1	2900064B05Rik|BF-1|Bf1|Hfh9|Hfhbf1	forkhead box G1	protein-coding
Diff_Nuc42988	chr8	72723082	72723221	+	0	NA	intron (NM_001007570, intron 1 of 7)	intron (NM_001007570, intron 1 of 7)	13029	NM_001007570	73095	Mm.185413	NM_001007570	ENSMUSG00000002346	Slc25a42	2900084M01Rik	solute carrier family 25, member 42	protein-coding
Diff_Nuc38561	chr1	147872112	147872251	+	0	NA	Intergenic	Lx3C|LINE|L1	-470615	NM_153539	215378	Mm.441817	NM_153539	ENSMUSG00000035131	Brinp3	B830045N13Rik|Fam5c	bone morphogenetic protein/retinoic acid inducible neural specific 3	protein-coding
Diff_Nuc6636	chr11	101180592	101180731	+	0	NA	intron (NM_011192, intron 4 of 10)	intron (NM_011192, intron 4 of 10)	3096	NM_011192	19192	Mm.288477	NM_011192	ENSMUSG00000078652	Psme3	AA410043|AU020960|Ki|PA28gamma|REGgamma|pa28g	proteaseome (prosome, macropain) activator subunit 3 (PA28 gamma, Ki)	protein-coding
Diff_Nuc34011	chr2	73579582	73579721	+	0	NA	intron (NM_001166603, intron 1 of 11)	intron (NM_001166603, intron 1 of 11)	33752	NM_001166603	108699	Mm.257073	NM_029716	ENSMUSG00000056486	Chn1	0610007I19Rik|0710001E19Rik|1700112L09Rik|2900046J01Rik|AI413815|ARHGAP2	chimerin 1	protein-coding
Diff_Nuc26194	chr5	102381722	102381861	+	0	NA	intron (NM_172882, intron 8 of 66)	intron (NM_172882, intron 8 of 66)	117149	NM_172882	72145	Mm.332522	NM_172882	ENSMUSG00000043940	Wdfy3	2610509D04Rik|ALFY|AW319683|B930017C24|BWF1|Bchs|D5Ertd66e|Ggtb3|ZFYVE25|mKIAA0993	WD repeat and FYVE domain containing 3	protein-coding
Diff_Nuc18133	chr18	10736472	10736611	+	0	NA	intron (NM_144860, intron 1 of 20)	intron (NM_144860, intron 1 of 20)	10918	NM_144860	225164	Mm.21500	NM_144860	ENSMUSG00000024294	Mib1	DIP-1|E430019M12Rik|Mib|mKIAA1323	mindbomb E3 ubiquitin protein ligase 1	protein-coding
Diff_Nuc38677	chr1	154243752	154243891	+	0	NA	Intergenic	RLTR45|LTR|ERVK	-3176	NM_177756	269132	Mm.23782	NM_177756	ENSMUSG00000032649	Colgalt2	AI427652|D730024P12|Glt25d2	collagen beta(1-O)galactosyltransferase 2	protein-coding
Diff_Nuc11475	chr16	17672912	17673051	+	0	NA	intron (NM_033609, intron 7 of 17)	intron (NM_033609, intron 7 of 17)	26418	NM_001166164	72315	Mm.297777	NM_001166164	ENSMUSG00000041617	Ccdc74a	2310015A05Rik	coiled-coil domain containing 74A	protein-coding
Diff_Nuc32412	chr3	148210622	148210761	+	0	NA	Intergenic	Intergenic	406908	NM_001081298	99633	Mm.9776	NM_001081298	ENSMUSG00000028184	Adgrl2	AI450192|CIRL-2|Gm619|Lec1|Lphh1|Lphn2|mKIAA0786	adhesion G protein-coupled receptor L2	protein-coding
Diff_Nuc40388	chr9	44851142	44851281	+	0	NA	intron (NM_007962, intron 1 of 5)	intron (NM_007962, intron 1 of 5)	784	NM_007962	14012	Mm.33240	NM_007962	ENSMUSG00000032092	Mpzl2	Eva|Eva1	myelin protein zero-like 2	protein-coding
Diff_Nuc33409	chr2	42848632	42848771	+	0	NA	Intergenic	Intergenic	-339583	NM_053011	94217	Mm.441398	NM_053011	ENSMUSG00000049252	Lrp1b	9630004P12Rik|LRP-DIT	low density lipoprotein-related protein 1B (deleted in tumors)	protein-coding
Diff_Nuc13535	chr15	40912032	40912171	+	0	NA	intron (NM_011766, intron 5 of 7)	intron (NM_011766, intron 5 of 7)	-366927	NM_001130166	170719	Mm.254267	NM_130885	ENSMUSG00000022307	Oxr1	2210416C20Rik|C7|C7B	oxidation resistance 1	protein-coding
Diff_Nuc10748	chr17	70627962	70628101	+	0	NA	intron (NM_001347411, intron 2 of 14)	L1VL4|LINE|L1	-146101	NM_177639	224997	Mm.311840	NM_027712	ENSMUSG00000003279	Dlgap1	4933422O14Rik|9630002F18|AI845682|AI848168|BB075781|D17Bwg0511e|GKAP/SAPAP|GKPA/SAPAP|Gkap|Sapap1|mKIAA4162	discs, large (Drosophila) homolog-associated protein 1	protein-coding
Diff_Nuc4348	chr12	104019362	104019501	+	0	NA	Intergenic	Intergenic	23246	NM_025666	66622	Mm.34261	NM_025666	ENSMUSG00000041712	Ubr7	5730410I19Rik|AA589405|AW557761	ubiquitin protein ligase E3 component n-recognin 7 (putative)	protein-coding
Diff_Nuc19548	chr18	90179722	90179861	+	0	NA	Intergenic	L1Md_F2|LINE|L1	-241263	NM_001039173	623279	Mm.447164	NM_001039173	ENSMUSG00000073514	Dok6	Dok-6	docking protein 6	protein-coding
Diff_Nuc6278	chr11	85195192	85195331	+	0	NA	intron (NM_138681, intron 6 of 25)	intron (NM_138681, intron 6 of 25)	28595	NM_001166643	192197	Mm.209989	NM_138681	ENSMUSG00000059439	Bcas3	1500019F07Rik|2610028P08Rik|AU021018|BC028339|K20D4|rudhira	breast carcinoma amplified sequence 3	protein-coding
Diff_Nuc19505	chr18	86894352	86894491	+	0	NA	Intergenic	Intergenic	12964	NM_172633	12405	Mm.70775	NM_172633	ENSMUSG00000024647	Cbln2	6330593N19Rik|A730004O05	cerebellin 2 precursor protein	protein-coding
Diff_Nuc39482	chr1	195983002	195983141	+	0	NA	Intergenic	L1MC|LINE|L1	65882	NR_040477	74942	Mm.60689	NR_040477	ENSMUSG00000103692	4930503O07Rik	-	RIKEN cDNA 4930503O07 gene	ncRNA
Diff_Nuc25358	chr5	55664082	55664221	+	0	NA	Intergenic	L1Md_F|LINE|L1	922920	NR_038045	330086	Mm.254449	NM_177871	ENSMUSG00000105912	Gm10440	D130065D13|ENSMUSG00000072936	predicted gene 10440	ncRNA
Diff_Nuc15545	chr14	56395122	56395261	+	0	NA	intron (NM_080435, intron 11 of 25)	PB1D10|SINE|Alu	7665	NM_080435	104110	Mm.287010	NM_080435	ENSMUSG00000022220	Adcy4	mKIAA4004	adenylate cyclase 4	protein-coding
Diff_Nuc21614	chr7	137536382	137536521	+	0	NA	3' UTR (NM_001271343, exon 12 of 12)	3' UTR (NM_001271343, exon 12 of 12)	-126129	NM_201601	14183	Mm.16340	NM_010207	ENSMUSG00000030849	Fgfr2	AU043015|AW556123|Bek|Fgfr-2|Fgfr-7|Fgfr7|KGFR|KGFRTr|svs	fibroblast growth factor receptor 2	protein-coding
Diff_Nuc27841	chr4	47494372	47494511	+	0	NA	intron (NM_024171, intron 3 of 3)	intron (NM_024171, intron 3 of 3)	6908	NM_024171	66212	Mm.20188	NM_024171	ENSMUSG00000053317	Sec61b	1190006C12Rik|AI326121|AW122942	Sec61 beta subunit	protein-coding
Diff_Nuc16040	chr14	80091452	80091591	+	0	NA	Intergenic	Intergenic	-11206	NR_045060	73989	Mm.107775	NR_045060		4930452G13Rik	-	RIKEN cDNA 4930452G13 gene	ncRNA
Diff_Nuc12679	chr16	86411392	86411531	+	0	NA	Intergenic	L1Md_F2|LINE|L1	-510091	NM_011782	23794	Mm.112933	NM_011782	ENSMUSG00000022894	Adamts5	9530092O11Rik|ADAM-TS5|ADAMTS1|ADAMTS11|ADMP-2|AI481094|ASMP-2	a disintegrin-like and metallopeptidase (reprolysin type) with thrombospondin type 1 motif, 5 (aggrecanase-2)	protein-coding
Diff_Nuc42785	chr8	60620332	60620471	+	0	NA	intron (NM_175032, intron 4 of 11)	L1Md_F2|LINE|L1	-488549	NM_144731	108150	Mm.62886	NM_144731	ENSMUSG00000031608	Galnt7	AI225872	UDP-N-acetyl-alpha-D-galactosamine: polypeptide N-acetylgalactosaminyltransferase 7	protein-coding
Diff_Nuc26119	chr5	98497502	98497641	+	0	NA	Intergenic	Intergenic	-37590	NM_133738	71914	Mm.24842	NM_133738	ENSMUSG00000029338	Antxr2	2310046B19Rik|AW561899|CMG-2|CMG2|cI-35	anthrax toxin receptor 2	protein-coding
Diff_Nuc8553	chr10	77761632	77761771	+	0	NA	intron (NM_053014, intron 2 of 9)	intron (NM_053014, intron 2 of 9)	41251	NR_106119	102465765		NR_106119	ENSMUSG00000098885	Mir7659	Gm27433|mmu-mir-7659	microRNA 7659	ncRNA
Diff_Nuc12215	chr16	55991252	55991391	+	0	NA	intron (NM_173026, intron 4 of 10)	intron (NM_173026, intron 4 of 10)	-16591	NR_027965	66391	Mm.472722	NM_133677	ENSMUSG00000102101	Zbtb11os1	2310061J03Rik	zinc finger and BTB domain containing 11, opposite strand 1	ncRNA
Diff_Nuc22123	chr6	19847262	19847401	+	0	NA	Intergenic	Lx4B|LINE|L1	341989	NR_105789	102465192		NR_105789	ENSMUSG00000099149	Mir6370	Gm27480|mmu-mir-6370	microRNA 6370	ncRNA
Diff_Nuc4981	chr11	22109832	22109971	+	0	NA	intron (NM_153078, intron 5 of 24)	L1_Mus1|LINE|L1	76897	NM_153078	216565	Mm.491265	NM_153078	ENSMUSG00000042302	Ehbp1	AF424697|Flj21950|NACSIN	EH domain binding protein 1	protein-coding
Diff_Nuc41344	chr9	93569752	93569891	+	0	NA	Intergenic	Lx2B|LINE|L1	-669250	NR_040756	78349	Mm.52612	NR_040756	ENSMUSG00000100294	1700034K08Rik	-	RIKEN cDNA 1700034K08 gene	ncRNA
Diff_Nuc33206	chr2	32823352	32823491	+	0	NA	Intergenic	Intergenic	4600	NR_002898	104367	Mm.250030	NR_002898	ENSMUSG00000065124	Snora65	MBII-351|Rnu65	small nucleolar RNA, H/ACA box 65	snoRNA
Diff_Nuc18941	chr18	56099502	56099641	+	0	NA	Intergenic	Intergenic	-492215	NM_026240	107022	Mm.24356	NM_026240	ENSMUSG00000001700	Gramd3	9030613F08Rik|9130427A09Rik|AW061306|NS3TP2	GRAM domain containing 3	protein-coding
Diff_Nuc8896	chr10	95405072	95405211	+	0	NA	intron (NM_001001932, intron 1 of 28)	MER20|DNA|MER1_type	1844	NM_001001932	216238	Mm.210035	NM_001001932	ENSMUSG00000036499	Eea1	A430109M19Rik|B230358H09Rik|ZFYVE2	early endosome antigen 1	protein-coding
Diff_Nuc2394	chr13	110410892	110411031	+	0	NA	intron (NM_011056, intron 3 of 16)	L1_Rod|LINE|L1	-283056	NR_035442	100316683		NR_035442	ENSMUSG00000084651	Mir1904	Mirn1904|mmu-mir-1904	microRNA 1904	ncRNA
Diff_Nuc858	chr13	28819342	28819481	+	0	NA	intron (NR_045053, intron 3 of 8)	CT-rich|Low_complexity|Low_complexity	-16669	NR_105787	102466635		NR_105787	ENSMUSG00000099158	Mir6368	Gm27800|mmu-mir-6368	microRNA 6368	ncRNA
Diff_Nuc11014	chr17	83419302	83419441	+	0	NA	Intergenic	MLT1J|LTR|MaLR	58194	NR_045094	100503434	Mm.187281	NR_045094		Gm19689	-	predicted gene, 19689	ncRNA
Diff_Nuc20863	chr7	98090872	98091011	+	0	NA	Intergenic	MIR|SINE|MIR	-148355	NM_011807	23859	Mm.147213	NM_011807	ENSMUSG00000052572	Dlg2	A330103J02Rik|B230218P12Rik|B330007M19Rik|Dlgh2|Gm1197|Gm21505|PSD93	discs, large homolog 2 (Drosophila)	protein-coding
Diff_Nuc43051	chr8	74639322	74639461	+	0	NA	Intergenic	Intergenic	8452	NM_146338	258335	Mm.377439	NM_146338	ENSMUSG00000046881	Olfr374	MOR130-1	olfactory receptor 374	protein-coding
Diff_Nuc3391	chr12	54349992	54350131	+	0	NA	intron (NM_013780, intron 1 of 11)	intron (NM_013780, intron 1 of 11)	397	NM_013780	27386	Mm.247044	NM_013780	ENSMUSG00000021010	Npas3	4930423H22Rik|bHLHe12	neuronal PAS domain protein 3	protein-coding
Diff_Nuc36984	chr1	58353062	58353201	+	0	NA	intron (NM_001008419, intron 10 of 35)	intron (NM_001008419, intron 10 of 35)	17961	NM_001008419	213043	Mm.414292	NM_001008419	ENSMUSG00000079554	Aox2	Aoh3|Aox3l1	aldehyde oxidase 2	protein-coding
Diff_Nuc35248	chr2	136520302	136520441	+	0	NA	Intergenic	Intergenic	-18815	NM_011428	20614	Mm.45953	NM_011428	ENSMUSG00000027273	Snap25	Bdr|GENA70|SNAP-25|SUP|sp	synaptosomal-associated protein 25	protein-coding
Diff_Nuc30848	chr3	62786522	62786661	+	0	NA	Intergenic	L1MA5|LINE|L1	-312766	NM_001289462	17380	Mm.296022	NM_008604	ENSMUSG00000027820	Mme	6030454K05Rik|C85356|CALLA|CD10|NEP|SFE	membrane metallo endopeptidase	protein-coding
Diff_Nuc2014	chr13	91928862	91929001	+	0	NA	Intergenic	Intergenic	18370	NM_145453	69085	Mm.52356	NM_145453	ENSMUSG00000021621	Zcchc9	1810019C21Rik	zinc finger, CCHC domain containing 9	protein-coding
Diff_Nuc22451	chr6	36982142	36982281	+	0	NA	intron (NM_001347104, intron 14 of 32)	intron (NM_001347104, intron 14 of 32)	-220850	NM_008973	19242	Mm.279690	NM_008973	ENSMUSG00000029838	Ptn	HARP|HB-GAM|HBBN|HBGF-8|HBNF|OSF|Osf-1|Osf1	pleiotrophin	protein-coding
Diff_Nuc3198	chr12	42954472	42954611	+	0	NA	intron (NM_053122, intron 6 of 6)	intron (NM_053122, intron 6 of 6)	-741897	NM_010733	16981	Mm.404786	NM_010733	ENSMUSG00000036295	Lrrn3	NLRR-3	leucine rich repeat protein 3, neuronal	protein-coding
Diff_Nuc20044	chr7	39302162	39302301	+	0	NA	TTS (NM_001013810)	TTS (NM_001013810)	10981	NM_001013810	434171	Mm.60990	NM_001013810	ENSMUSG00000060565	Gm5591	EG434171	predicted gene 5591	protein-coding
Diff_Nuc38606	chr1	151734842	151734981	+	0	NA	intron (NM_008869, intron 5 of 17)	intron (NM_008869, intron 5 of 17)	34658	NM_001305632	18783	Mm.4186	NM_008869	ENSMUSG00000056220	Pla2g4a	Pla2g4|cPLA2|cPLA2-alpha|cPLA2alpha	phospholipase A2, group IVA (cytosolic, calcium-dependent)	protein-coding
Diff_Nuc33828	chr2	65229672	65229811	+	0	NA	Intergenic	Intergenic	-27284	NR_105755	102466151		NR_105755	ENSMUSG00000099184	Mir6337	Gm27877|mmu-mir-6337	microRNA 6337	ncRNA
Diff_Nuc22360	chr6	32376382	32376521	+	0	NA	intron (NM_175750, intron 3 of 31)	intron (NM_175750, intron 3 of 31)	-84690	NR_040277	319849	Mm.440860	NR_040277	ENSMUSG00000086763	Plxna4os1	B230378P21Rik	plexin A4, opposite strand 1	ncRNA
Diff_Nuc21656	chr7	139768632	139768771	+	0	NA	promoter-TSS (NM_016978)	promoter-TSS (NM_016978)	-620	NM_016978	18242	Mm.13694	NM_016978	ENSMUSG00000030934	Oat	AI194874|rhg	ornithine aminotransferase	protein-coding
Diff_Nuc32163	chr3	133799147	133799286	+	0	NA	Intergenic	Intergenic	-100243	NM_001004367	319478	Mm.224814	NM_001004367	ENSMUSG00000044365	Cxxc4	9330210J02Rik|C030003J12Rik|Idax	CXXC finger 4	protein-coding
Diff_Nuc30434	chr3	38460412	38460551	+	0	NA	Intergenic	MTD|LTR|MaLR	-76743	NM_001167883	99696	Mm.290937	NM_001033198	ENSMUSG00000044864	Ankrd50	AI662170|E430012K20Rik|mKIAA1223|mKIAA3019	ankyrin repeat domain 50	protein-coding
Diff_Nuc42620	chr8	47929242	47929381	+	0	NA	intron (NM_008391, intron 7 of 8)	MLT1E1A|LTR|MaLR	104212	NM_008391	16363	Mm.1149	NM_008391	ENSMUSG00000031627	Irf2	9830146E22Rik|AI646973|Irf-2	interferon regulatory factor 2	protein-coding
Diff_Nuc34779	chr2	116768512	116768651	+	0	NA	Intergenic	URR1A|DNA|MER1_type	42693	NR_040335	320975	Mm.132509	NR_040335	ENSMUSG00000085316	D330050G23Rik	-	RIKEN cDNA D330050G23 gene	ncRNA
Diff_Nuc26328	chr5	108456982	108457121	+	0	NA	Intergenic	MER20|DNA|MER1_type	-37642	NM_001253877	17765	Mm.257149	NM_013827	ENSMUSG00000029267	Mtf2	9230112N11Rik|AA537621|C76717|M96|Pcl2	metal response element binding transcription factor 2	protein-coding
Diff_Nuc25246	chr5	47611382	47611521	+	0	NA	Intergenic	L1_Mur2|LINE|L1	-762943	NR_111900	20563	Mm.289739	NM_178804	ENSMUSG00000031558	Slit2	Drad-1|E030015M03Rik|E130320P19Rik|Slil3|mKIAA4141|slit-2	slit homolog 2 (Drosophila)	protein-coding
Diff_Nuc8536	chr10	76877642	76877781	+	0	NA	intron (NM_001024837, intron 1 of 10)	intron (NM_001024837, intron 1 of 10)	3307	NM_130895	110532	Mm.276815	NM_130895	ENSMUSG00000020262	Adarb1	1700057H01Rik|AW124433|AW558573|Adar2|BB220382|D10Bwg0447e|Red1	adenosine deaminase, RNA-specific, B1	protein-coding
Diff_Nuc44080	chr8	127808732	127808871	+	0	NA	Intergenic	L2a|LINE|L2	207809	NM_001081337	244668	Mm.271668	NM_001081337	ENSMUSG00000001995	Sipa1l2	BC058408|mKIAA1389	signal-induced proliferation-associated 1 like 2	protein-coding
Diff_Nuc2456	chr13	113485842	113485981	+	0	NA	intron (NM_178746, intron 7 of 14)	intron (NM_178746, intron 7 of 14)	34937	NM_178746	268706	Mm.40834	NM_175376	ENSMUSG00000047789	Slc38a9	4833412L08Rik|6720411P22Rik|9130023D20Rik|9430067K09Rik|A730092C09	solute carrier family 38, member 9	protein-coding
Diff_Nuc21483	chr7	130244852	130244991	+	0	NA	Intergenic	Intergenic	-22478	NM_144925	233833	Mm.102305	NM_144925	ENSMUSG00000052707	Tnrc6a	2010321I05Rik|3110054G10Rik|AW557223|CAGH26|D130023A07Rik|GW182|Tnrc6	trinucleotide repeat containing 6a	protein-coding
Diff_Nuc37803	chr1	104679082	104679221	+	0	NA	Intergenic	L1_Mus1|LINE|L1	1626806	NR_037989	100504525	Mm.87065	NR_037989	ENSMUSG00000100684	Gm20268	-	predicted gene, 20268	ncRNA
Diff_Nuc18623	chr18	38592927	38593066	+	0	NA	intron (NM_022996, intron 1 of 7)	B1_Mus1|SINE|Alu	14367	NM_022996	65113	Mm.102496	NM_022996	ENSMUSG00000024425	Ndfip1	0610010M22Rik|N4wbp5	Nedd4 family interacting protein 1	protein-coding
Diff_Nuc6920	chr11	110995472	110995611	+	0	NA	Intergenic	Intergenic	68063	NM_008425	16518	Mm.4951	NM_008425	ENSMUSG00000041695	Kcnj2	IRK1|Kcnf1|Kir2.1	potassium inwardly-rectifying channel, subfamily J, member 2	protein-coding
Diff_Nuc3288	chr12	48565072	48565211	+	0	NA	Intergenic	Intergenic	-645379	NM_021361	664883	Mm.247195	NM_021361	ENSMUSG00000021047	Nova1	9430099M15Rik|G630039L02|Nova-1	neuro-oncological ventral antigen 1	protein-coding
Diff_Nuc2519	chr13	116266522	116266661	+	0	NA	Intergenic	Intergenic	-374419	NM_001033228	109700	Mm.317280	NM_001033228	ENSMUSG00000042284	Itga1	CD49A|E130012M19Rik|Vla1	integrin alpha 1	protein-coding
Diff_Nuc28620	chr4	97499762	97499901	+	0	NA	intron (NM_010905, intron 2 of 10)	intron (NM_010905, intron 2 of 10)	55514	NM_010905	18027	Mm.31274	NM_010905	ENSMUSG00000028565	Nfia	1110047K16Rik|9430022M17Rik|CTF|NF1-A|NF1A	nuclear factor I/A	protein-coding
Diff_Nuc9102	chr10	108090692	108090831	+	0	NA	intron (NM_001252342, intron 4 of 10)	intron (NM_001252342, intron 4 of 10)	46455	NM_203660	368203	Mm.452758	NM_203660		Gm5136	C6.1AL|EG368203	predicted gene 5136	protein-coding
Diff_Nuc3461	chr12	56955342	56955481	+	0	NA	intron (NM_001037756, intron 4 of 9)	intron (NM_001037756, intron 4 of 9)	18058	NM_001037756	52592	Mm.24761	NM_027867	ENSMUSG00000012076	Brms1l	0710008O11Rik|AI159718|BRMS1|D12Ertd407e	breast cancer metastasis-suppressor 1-like	protein-coding
Diff_Nuc9134	chr10	109625422	109625561	+	0	NA	Intergenic	L1MA9|LINE|L1	-188216	NM_001081035	260315	Mm.225050	NM_177797	ENSMUSG00000020181	Nav3	4732483H20Rik|9630020C08Rik|POMFIL1|Pomfil1p|mKIAA0938|unc53H3	neuron navigator 3	protein-coding
Diff_Nuc15274	chr14	40542882	40543021	+	0	NA	Intergenic	Intergenic	74000	NR_045936	73591	Mm.65499	NR_045936	ENSMUSG00000101261	1700109I08Rik	-	RIKEN cDNA 1700109I08 gene	ncRNA
Diff_Nuc26339	chr5	108999612	108999751	+	0	NA	intron (NM_001282052, intron 25 of 26)	intron (NM_001282052, intron 25 of 26)	-20635	NM_007756	12889	Mm.5195	NM_007756	ENSMUSG00000033615	Cplx1	921-S	complexin 1	protein-coding
Diff_Nuc31290	chr3	88911072	88911211	+	0	NA	Intergenic	RMER6B|LTR|ERVK	-5252	NM_001253751	110196	Mm.39472	NM_134469	ENSMUSG00000059743	Fdps	6030492I17Rik|AI256750|Fdpsl1|mKIAA1293	farnesyl diphosphate synthetase	protein-coding
Diff_Nuc13801	chr15	57848912	57849051	+	0	NA	Intergenic	MLT2B4|LTR|ERVL	16868	NM_029418	75758	Mm.455792	NM_029418	ENSMUSG00000101892	9130401M01Rik	AI849328	RIKEN cDNA 9130401M01 gene	protein-coding
Diff_Nuc20171	chr7	54049682	54049821	+	0	NA	intron (NM_001005247, intron 1 of 22)	intron (NM_001005247, intron 1 of 22)	1500	NM_001005248	246694	Mm.379442	NM_178742	ENSMUSG00000014418	Hps5	AI646796|AL022647|C85120|haze|hz|maroon|mr|ru-2|ru2	Hermansky-Pudlak syndrome 5	protein-coding
Diff_Nuc18894	chr18	54058462	54058601	+	0	NA	intron (NM_152809, intron 2 of 12)	MTA_Mm|LTR|MaLR	36764	NM_152809	70425	Mm.368668	NM_152809	ENSMUSG00000073563	Csnk1g3	3300002K07Rik|C330049O21Rik	casein kinase 1, gamma 3	protein-coding
Diff_Nuc6072	chr11	76199402	76199541	+	0	NA	intron (NM_008750, intron 1 of 7)	intron (NM_008750, intron 1 of 7)	13172	NM_008750	18230	Mm.27915	NM_008750	ENSMUSG00000020844	Nxn	l11Jus13	nucleoredoxin	protein-coding
Diff_Nuc20465	chr7	75217862	75218001	+	0	NA	intron (NM_010513, intron 2 of 20)	intron (NM_010513, intron 2 of 20)	120788	NM_010513	16001	Mm.275742	NM_010513	ENSMUSG00000005533	Igf1r	A330103N21Rik|CD221|D930020L01|IGF-1R|hyft	insulin-like growth factor I receptor	protein-coding
Diff_Nuc11109	chr17	87202512	87202651	+	0	NA	intron (NM_010137, intron 2 of 15)	intron (NM_010137, intron 2 of 15)	49377	NM_010137	13819	Mm.1415	NM_010137	ENSMUSG00000024140	Epas1	HIF-2alpha|HIF2A|HLF|HRF|MOP2|bHLHe73	endothelial PAS domain protein 1	protein-coding
Diff_Nuc44103	chr8	128994582	128994721	+	0	NA	intron (NM_001159907, intron 2 of 29)	intron (NM_001159907, intron 2 of 29)	4314	NM_001159907	212728	Mm.482479	NM_001159907	ENSMUSG00000090290	Tarbp1	Gm17296|Gm179	TAR RNA binding protein 1	protein-coding
Diff_Nuc9896	chr17	26331072	26331211	+	0	NA	intron (NM_001159598, intron 9 of 9)	intron (NM_001159598, intron 9 of 9)	4891	NM_001081070	69191	Mm.32631	NM_001081070	ENSMUSG00000024184	Pdia2	1810041F13Rik|AI661267|Pdip|Pdipl	protein disulfide isomerase associated 2	protein-coding
Diff_Nuc18087	chr18	8929342	8929481	+	0	NA	Intergenic	Intergenic	-283443	NM_008058	14370	Mm.184289	NM_008058	ENSMUSG00000036904	Fzd8	Fz8	frizzled class receptor 8	protein-coding
Diff_Nuc23046	chr6	71585472	71585611	+	0	NA	Intergenic	ID_B1|SINE|B4	-2630	NM_001038695	104263	Mm.260479	NM_173001	ENSMUSG00000053470	Kdm3a	1700105C21Rik|C230043E16Rik|JHDM2a|Jmjd1|Jmjd1a|KDM2A|TGSA|Tsga	lysine (K)-specific demethylase 3A	protein-coding
Diff_Nuc11601	chr16	24443662	24443801	+	0	NA	intron (NM_178665, intron 2 of 12)	MIRc|SINE|MIR	-4446	NM_001145952	210126	Mm.209385	NM_178665	ENSMUSG00000033306	Lpp	9430020K16Rik|AA959454|AU024130|B130055L10Rik|C79715|D630048H16	LIM domain containing preferred translocation partner in lipoma	protein-coding
Diff_Nuc36573	chr1	37051792	37051931	+	0	NA	Intergenic	B4A|SINE|B4	-55489	NM_018872	56030	Mm.186943	NM_018872	ENSMUSG00000026116	Tmem131	2610524E03Rik|CC28|D1Bwg0491e|Neg|RW1|YR-23|mKIAA0257	transmembrane protein 131	protein-coding
Diff_Nuc16547	chr14	115201552	115201691	+	0	NA	Intergenic	Intergenic	-29566	NR_045661	75822	Mm.410813	NR_045661		4930524C18Rik	-	RIKEN cDNA 4930524C18 gene	ncRNA
Diff_Nuc7525	chr10	20554802	20554941	+	0	NA	Intergenic	Intergenic	-109987	NM_013875	29863	Mm.425617	NM_013875	ENSMUSG00000019990	Pde7b	-	phosphodiesterase 7B	protein-coding
Diff_Nuc32277	chr3	139619972	139620111	+	0	NA	Intergenic	Intergenic	-71172	NR_105798	102465198		NR_105798	ENSMUSG00000099169	Mir7j	Gm27716|Mirlet7j|mmu-let-7j	microRNA 7j	ncRNA
Diff_Nuc43035	chr8	74130912	74131051	+	0	NA	intron (NM_001166213, intron 14 of 14)	intron (NM_001166213, intron 14 of 14)	-3942	NM_146211	234407	Mm.240885	NM_146211	ENSMUSG00000034807	Colgalt1	2810024B22Rik|Glt25d1	collagen beta(1-O)galactosyltransferase 1	protein-coding
Diff_Nuc41314	chr9	92180612	92180751	+	0	NA	intron (NM_008880, intron 2 of 7)	intron (NM_008880, intron 2 of 7)	10241	NM_001195084	18828	Mm.10306	NM_008880	ENSMUSG00000032372	Plscr2	-	phospholipid scramblase 2	protein-coding
Diff_Nuc35714	chr2	158812822	158812961	+	0	NA	Intergenic	MLT1G1|LTR|MaLR	192348	NM_001291144	71715	Mm.315652	NM_145742	ENSMUSG00000027655	Dhx35	1200009D07Rik|Ddx35	DEAH (Asp-Glu-Ala-His) box polypeptide 35	protein-coding
Diff_Nuc21387	chr7	124624562	124624701	+	0	NA	intron (NM_175645, intron 2 of 11)	intron (NM_175645, intron 2 of 11)	100138	NM_175645	233781	Mm.461427	NM_175645	ENSMUSG00000030657	Xylt1	8030490L12	xylosyltransferase 1	protein-coding
Diff_Nuc23074	chr6	72331242	72331381	+	0	NA	promoter-TSS (NM_001080742)	promoter-TSS (NM_001080742)	-849	NM_001080742	53620	Mm.440321	NM_016872	ENSMUSG00000073002	Vamp5	AF119384|Camp	vesicle-associated membrane protein 5	protein-coding
Diff_Nuc13123	chr15	15678862	15679001	+	0	NA	Intergenic	Lx6|LINE|L1	-1028925	NM_009869	12565	Mm.439758	NM_009869	ENSMUSG00000025370	Cdh9	-	cadherin 9	protein-coding
Diff_Nuc41897	chr9	122795222	122795361	+	0	NA	Intergenic	Intergenic	-2298	NM_001177505	382118	Mm.86999	NM_001177505	ENSMUSG00000063488	Zkscan7	BC042569|Zfp167	zinc finger with KRAB and SCAN domains 7	protein-coding
Diff_Nuc20971	chr7	104839752	104839891	+	0	NA	3' UTR (NM_001081267, exon 16 of 16)	3' UTR (NM_001081267, exon 16 of 16)	-5346	NM_023671	12729	Mm.21482	NM_023671	ENSMUSG00000025439	Clns1a	2610036D06Rik|2610100O04Rik|Clci|Clcni|ICLN	chloride channel, nucleotide-sensitive, 1A	protein-coding
Diff_Nuc2040	chr13	93382682	93382821	+	0	NA	intron (NM_172588, intron 1 of 11)	intron (NM_172588, intron 1 of 11)	1658	NM_172588	218442	Mm.297970	NM_172588	ENSMUSG00000021703	Serinc5	A130038L21Rik|AIGP3|C86123|TPO1	serine incorporator 5	protein-coding
Diff_Nuc38023	chr1	118180032	118180171	+	0	NA	intron (NM_001077425, intron 12 of 23)	ID_B1|SINE|B4	598387	NM_001077425	636808	Mm.101576	NM_001077425	ENSMUSG00000070695	Cntnap5a	Caspr5-1|EG636808	contactin associated protein-like 5A	protein-coding
Diff_Nuc29925	chr3	9883312	9883451	+	0	NA	Intergenic	Intergenic	-49702	NM_001195031	94212	Mm.23897	NM_053182	ENSMUSG00000027508	Pag1	Cbp|F730007C19Rik|Pag	phosphoprotein associated with glycosphingolipid microdomains 1	protein-coding
Diff_Nuc24191	chr6	134095702	134095841	+	0	NA	intron (NM_007961, intron 2 of 7)	intron (NM_007961, intron 2 of 7)	110053	NM_007961	14011	Mm.269995	NM_007961	ENSMUSG00000030199	Etv6	AW123102|AW557856|Tel	ets variant 6	protein-coding
Diff_Nuc13569	chr15	43330742	43330881	+	0	NA	intron (NM_025736, intron 5 of 10)	B3|SINE|B2	22036	NM_025736	66736	Mm.244512	NM_025736	ENSMUSG00000022337	Emc2	4921531G14Rik|AV060620|AW209495|Ttc35	ER membrane protein complex subunit 2	protein-coding
Diff_Nuc4508	chr12	113903432	113903571	+	0	NA	intron (NM_001331107, intron 2 of 13)	intron (NM_001331107, intron 2 of 13)	-5939	NR_105904	102465566		NR_105904	ENSMUSG00000098380	Mir6939	Gm27498|mmu-mir-6939	microRNA 6939	ncRNA
Diff_Nuc9674	chr17	14343012	14343151	+	0	NA	Intergenic	Intergenic	-2243	NM_172826	240025	Mm.79993	NM_172826	ENSMUSG00000048826	Dact2	2900084M21Rik|A630024E20|Dpr2|Frd2|dapper2	dishevelled-binding antagonist of beta-catenin 2	protein-coding
Diff_Nuc38395	chr1	139486832	139486971	+	0	NA	Intergenic	L1M3|LINE|L1	-376131	NR_029795	735252		NR_029795	ENSMUSG00000065565	Mir181a-1	Mirn181a-1|Mirn213|miR-213|mir-181a-1|mmu-mir-213	microRNA 181a-1	ncRNA
Diff_Nuc2731	chr12	11698862	11699001	+	0	NA	Intergenic	Lx8|LINE|L1	190774	NR_003964	627110	Mm.194735	NR_003964		Tubb2a-ps2	C79445	tubulin, beta 2a, pseudogene 2	pseudo
Diff_Nuc39280	chr1	184395432	184395571	+	0	NA	Intergenic	Intergenic	52113	NM_009794	12334	Mm.19306	NM_009794	ENSMUSG00000026509	Capn2	AI326419|Capa-2|Capa2|m-calpain|m-calpin	calpain 2	protein-coding
Diff_Nuc34360	chr2	92891012	92891151	+	0	NA	Intergenic	Intergenic	-4780	NM_001177536	100042784	Mm.102816	NM_001177536	ENSMUSG00000075028	Prdm11	8030443D09Rik|AA163972|Gm707	PR domain containing 11	protein-coding
Diff_Nuc11960	chr16	39522902	39523041	+	0	NA	Intergenic	L1_Mur2|LINE|L1	620513	NM_170599	207683	Mm.245564	NM_170599	ENSMUSG00000022790	Igsf11	1700025L02Rik|BT-IgSF|Igsf13	immunoglobulin superfamily, member 11	protein-coding
Diff_Nuc9986	chr17	29784972	29785111	+	0	NA	intron (NR_132314, intron 7 of 27)	CT-rich|Low_complexity|Low_complexity	-12499	NM_028791	74157	Mm.390979	NM_028791	ENSMUSG00000024019	Cmtr1	1300018I05Rik|AI451264|Ftsjd2|MTr1	cap methyltransferase 1	protein-coding
Diff_Nuc21424	chr7	127025912	127026051	+	0	NA	intron (NM_001163703, intron 1 of 2)	intron (NM_001163703, intron 1 of 2)	12991	NM_173408	233805	Mm.31539	NM_173408	ENSMUSG00000048787	Dcun1d3	1700020A13Rik|BC030335	DCN1, defective in cullin neddylation 1, domain containing 3 (S. cerevisiae)	protein-coding
Diff_Nuc596	chr13	14256142	14256281	+	0	NA	intron (NM_198122, intron 14 of 22)	intron (NM_198122, intron 14 of 22)	100160	NM_198122	94246	Mm.439784	NM_194262	ENSMUSG00000039219	Arid4b	BCAA|BRCAA1|RBBP1L1|Rbp1l1|SAP180	AT rich interactive domain 4B (RBP1-like)	protein-coding
Diff_Nuc8316	chr10	65196512	65196651	+	0	NA	Intergenic	MTA_Mm|LTR|MaLR	390231	NR_038039	69433	Mm.23366	NR_038039	ENSMUSG00000100000	1700023F02Rik	AV205046	RIKEN cDNA 1700023F02 gene	ncRNA
Diff_Nuc37648	chr1	93741052	93741191	+	0	NA	intron (NM_007855, intron 1 of 1)	GA-rich|Low_complexity|Low_complexity	43083	NM_007855	13345	Mm.9474	NM_007855	ENSMUSG00000007805	Twist2	Dermo1|bHLHa39	twist basic helix-loop-helix transcription factor 2	protein-coding
Diff_Nuc25483	chr5	64467512	64467651	+	0	NA	Intergenic	Intergenic	-16608	NM_025700	66681	Mm.2325	NM_025700	ENSMUSG00000029171	Pgm1	3230402E02Rik|Pgm-1|Pgm2	phosphoglucomutase 1	protein-coding
Diff_Nuc13265	chr15	27063632	27063771	+	0	NA	Intergenic	ORR1B2|LTR|MaLR	-112176	NR_029647	723831		NR_029647	ENSMUSG00000094316	Mir297-1	Mir297a-1|Mirn297-1	microRNA 297-1	ncRNA
Diff_Nuc39306	chr1	186681162	186681301	+	0	NA	Intergenic	MLT1D|LTR|MaLR	-11505	NM_133684	67247	Mm.177724	NM_133684	ENSMUSG00000073481	Marc2	2810484M10Rik|Mosc2|mARC1	mitochondrial amidoxime reducing component 2	protein-coding
Diff_Nuc37570	chr1	89562552	89562691	+	0	NA	intron (NR_122078, intron 3 of 27)	intron (NR_122078, intron 3 of 27)	45734	NM_001110193	16331	Mm.15105	NM_010566	ENSMUSG00000026288	Inpp5d	SHIP|SHIP-1|SHIP1|SIP-145|p150Ship|s-SHIP	inositol polyphosphate-5-phosphatase D	protein-coding
Diff_Nuc35785	chr2	162532712	162532851	+	0	NA	Intergenic	Intergenic	45882	NR_033569	77288	Mm.376571	NR_033569		9430021M05Rik	-	RIKEN cDNA 9430021M05 gene	ncRNA
Diff_Nuc28951	chr4	114590822	114590961	+	0	NA	intron (NR_030721, intron 3 of 3)	B1_Mur1|SINE|Alu	7727	NM_015758	30923	Mm.377122	NM_015758	ENSMUSG00000044518	Foxe3	FREAC8|dyl|rct	forkhead box E3	protein-coding
Diff_Nuc10663	chr17	66417582	66417721	+	0	NA	intron (NM_001025572, intron 1 of 12)	RLTR30|LTR|ERV1	8735	NM_001025572	106585	Mm.34706	NM_001025572	ENSMUSG00000034647	Ankrd12	2900001A12Rik|AI447928|ANCO-2|AV347965|GAC-1|mKIAA0874	ankyrin repeat domain 12	protein-coding
Diff_Nuc38246	chr1	132564112	132564251	+	0	NA	Intergenic	Intergenic	-5986	NM_007576	12269	Mm.306720	NM_007576	ENSMUSG00000026405	C4bp	AI195242|C4bpa	complement component 4 binding protein	protein-coding
Diff_Nuc21682	chr7	140268442	140268581	+	0	NA	intron (NM_009980, intron 2 of 10)	intron (NM_009980, intron 2 of 10)	5032	NM_001347623	13017	Mm.246240	NM_009980	ENSMUSG00000030970	Ctbp2	AA407280|D7Ertd45e|Gtrgeo6|Ribeye	C-terminal binding protein 2	protein-coding
Diff_Nuc11382	chr16	13145112	13145251	+	0	NA	intron (NM_015769, intron 10 of 10)	intron (NM_015769, intron 10 of 10)	35352	NM_015769	50505	Mm.287837	NM_015769	ENSMUSG00000022545	Ercc4	AI606920|Xpf	excision repair cross-complementing rodent repair deficiency, complementation group 4	protein-coding
Diff_Nuc38574	chr1	148957472	148957611	+	0	NA	Intergenic	L1Md_F2|LINE|L1	612724	NM_001145807	215378	Mm.441817	NM_153539	ENSMUSG00000035131	Brinp3	B830045N13Rik|Fam5c	bone morphogenetic protein/retinoic acid inducible neural specific 3	protein-coding
Diff_Nuc14255	chr15	81666642	81666781	+	0	NA	Intergenic	Intergenic	22045	NM_020507	57259	Mm.323595	NM_020507	ENSMUSG00000048546	Tob2	2900090N22Rik|4930545K18Rik|AV071822|mKIAA1663	transducer of ERBB2, 2	protein-coding
Diff_Nuc7420	chr10	15481522	15481661	+	0	NA	Intergenic	MTD-int|LTR|MaLR	-29992	NR_131087	77538	Mm.128235	NR_131087		C330004P14Rik	-	RIKEN cDNA C330004P14 gene	ncRNA
Diff_Nuc14698	chr14	8877382	8877521	+	0	NA	intron (NM_001331064, intron 5 of 8)	intron (NM_001331064, intron 5 of 8)	-35376	NM_025938	67053	Mm.210048	NM_025938	ENSMUSG00000023156	Rpp14	2610511E03Rik|AA682089	ribonuclease P 14 subunit	protein-coding
Diff_Nuc29073	chr4	120522872	120523011	+	0	NA	Intergenic	B3|SINE|B2	-18757	NM_001048168	18046	Mm.435590	NM_008692	ENSMUSG00000032897	Nfyc	-	nuclear transcription factor-Y gamma	protein-coding
Diff_Nuc19259	chr18	70743482	70743621	+	0	NA	TTS (NM_001311071)	TTS (NM_001311071)	15605	NM_010773	17191	Mm.322	NM_010773	ENSMUSG00000024513	Mbd2	MBD2a	methyl-CpG binding domain protein 2	protein-coding
Diff_Nuc43570	chr8	103637182	103637321	+	0	NA	Intergenic	L1Md_F3|LINE|L1	1671760	NM_009866	12552	Mm.1571	NM_009866	ENSMUSG00000031673	Cdh11	Cad11|OSF-4	cadherin 11	protein-coding
Diff_Nuc36627	chr1	39493002	39493141	+	0	NA	intron (NM_018775, intron 1 of 19)	L1MCb|LINE|L1	42521	NM_018775	54610	Mm.387293	NM_018775	ENSMUSG00000003134	Tbc1d8	AD3|HBLP1|VRP	TBC1 domain family, member 8	protein-coding
Diff_Nuc9858	chr17	24988782	24988921	+	0	NA	intron (NM_001159626, intron 1 of 8)	intron (NM_001159626, intron 1 of 8)	1239	NM_001159626	14651	Mm.43784	NM_024284	ENSMUSG00000024158	Hagh	BC019817|Glo-2|Glo2|Rsp29	hydroxyacyl glutathione hydrolase	protein-coding
Diff_Nuc1772	chr13	76015572	76015711	+	0	NA	intron (NM_028493, intron 9 of 11)	intron (NM_028493, intron 9 of 11)	38307	NM_053108	93692	Mm.25844	NM_053108	ENSMUSG00000021591	Glrx	C86710|D13Wsu156e|Glrx1|Grx1|TTase	glutaredoxin	protein-coding
Diff_Nuc34820	chr2	118462332	118462471	+	0	NA	intron (NM_009773, intron 19 of 22)	intron (NM_009773, intron 19 of 22)	-26912	NM_001033254	214230	Mm.241857	NM_001033254	ENSMUSG00000074923	Pak6	4732456M09	p21 protein (Cdc42/Rac)-activated kinase 6	protein-coding
Diff_Nuc14025	chr15	69491602	69491741	+	0	NA	Intergenic	L1Md_F3|LINE|L1	-262992	NR_045071	100503580	Mm.404646	NR_045071		Gm19782	-	predicted gene, 19782	ncRNA
Diff_Nuc40282	chr9	40260452	40260591	+	0	NA	intron (NM_172768, intron 1 of 19)	MER2|DNA|MER2_type	2828	NM_172768	235283	Mm.138434	NM_172768	ENSMUSG00000040111	Gramd1b	3222402H23|A930008A22Rik|AI593249|mKIAA1201	GRAM domain containing 1B	protein-coding
Diff_Nuc1924	chr13	85489482	85489621	+	0	NA	Intergenic	ORR1D2|LTR|MaLR	-60460	NM_145452	218397	Mm.259653	NM_145452	ENSMUSG00000021549	Rasa1	Gap|RasGAP|Rasa	RAS p21 protein activator 1	protein-coding
Diff_Nuc24972	chr5	31551342	31551481	+	0	NA	intron (NM_001347326, intron 11 of 18)	B1_Mur4|SINE|Alu	-2668	NM_027221	69815	Mm.389609	NM_027221	ENSMUSG00000029149	Krtcap3	2010001C09Rik|AW321088|Kcp3	keratinocyte associated protein 3	protein-coding
Diff_Nuc40551	chr9	53474532	53474671	+	0	NA	intron (NM_027807, intron 1 of 18)	intron (NM_027807, intron 1 of 18)	1011	NM_001161618	75717	Mm.218910	NM_027807	ENSMUSG00000032030	Cul5	4921514I20Rik|8430423K24Rik|AI852817|C030032G03Rik|C330021I08Rik|VACM-1|VACM1	cullin 5	protein-coding
Diff_Nuc12948	chr15	5546492	5546631	+	0	NA	Intergenic	Intergenic	100243	NR_045274	71432	Mm.291087	NR_045274		5430437J10Rik	-	RIKEN cDNA 5430437J10 gene	ncRNA
Diff_Nuc30710	chr3	55418802	55418941	+	0	NA	Intergenic	Intergenic	153191	NM_001195540	13175	Mm.393242	NM_019978	ENSMUSG00000027797	Dclk1	1700113D08Rik|2810480F11Rik|AI836758|Click-I|Cpg16|Dcamkl1|Dcl|Dclk|mKIAA0369	doublecortin-like kinase 1	protein-coding
Diff_Nuc30541	chr3	46798632	46798771	+	0	NA	Intergenic	Intergenic	-93997	NR_105800	102465199		NR_105800	ENSMUSG00000098417	Mir6379	Gm27730|mmu-mir-6379	microRNA 6379	ncRNA
Diff_Nuc21458	chr7	128793582	128793721	+	0	NA	intron (NM_001033173, intron 15 of 15)	MER58A|DNA|MER1_type	57116	NM_001033173	76179	Mm.122538	NM_001033173	ENSMUSG00000063317	Usp31	6330567E21Rik|mKIAA1203	ubiquitin specific peptidase 31	protein-coding
Diff_Nuc459	chr13	9092102	9092241	+	0	NA	promoter-TSS (NM_001311117)	promoter-TSS (NM_001311117)	-956	NM_001311117	217980	Mm.234944	NM_172585	ENSMUSG00000033499	Larp4b	A630096F19|AI256361|D13Wsu64e|Larp5	La ribonucleoprotein domain family, member 4B	protein-coding
Diff_Nuc44165	chr8	131075362	131075501	+	0	NA	Intergenic	Intergenic	-134123	NM_010578	16412	Mm.263396	NM_010578	ENSMUSG00000025809	Itgb1	4633401G24Rik|AA409975|AA960159|CD29|ENSMUSG00000051907|Fnrb|Gm9863|gpIIa	integrin beta 1 (fibronectin receptor beta)	protein-coding
Diff_Nuc36795	chr1	48007702	48007841	+	0	NA	Intergenic	Intergenic	-483802	NR_105768	102466969		NR_105768	ENSMUSG00000098876	Mir6350	Gm27958|mmu-mir-6350	microRNA 6350	ncRNA
Diff_Nuc12294	chr16	61259482	61259621	+	0	NA	Intergenic	RMER19C|LTR|ERVK	-654194	NM_007938	13840	Mm.455790	NM_007938	ENSMUSG00000055540	Epha6	Ehk2|Hek12|m-ehk2	Eph receptor A6	protein-coding
Diff_Nuc29404	chr4	135403622	135403761	+	0	NA	Intergenic	Intergenic	-8295	NM_001284196	14105	Mm.10229	NM_010178	ENSMUSG00000028676	Srsf10	FUSIP2|Fusip1|NSSR1|NSSR2|Nssr|SRrp40|Sfrs13a|Srsf13a|TASR|TASR1|TASR2	serine/arginine-rich splicing factor 10	protein-coding
Diff_Nuc10716	chr17	67988652	67988791	+	0	NA	Intergenic	B4A|SINE|B4	-6658	NM_001033340	240131	Mm.295736	NM_001033340	ENSMUSG00000073375	Lrrc30	Gm326	leucine rich repeat containing 30	protein-coding
Diff_Nuc3710	chr12	72852332	72852471	+	0	NA	Intergenic	Intergenic	-79654	NM_026102	208846	Mm.87417	NM_026102	ENSMUSG00000034574	Daam1	-	dishevelled associated activator of morphogenesis 1	protein-coding
Diff_Nuc11415	chr16	14317902	14318041	+	0	NA	promoter-TSS (NM_025345)	promoter-TSS (NM_025345)	-546	NM_025345	66086	Mm.42072	NM_025345	ENSMUSG00000022677	Fopnl	0610037P05Rik	Fgfr1op N-terminal like	protein-coding
Diff_Nuc26586	chr5	122652782	122652921	+	0	NA	Intergenic	Intergenic	-6887	NM_001042489	74096	Mm.28804	NM_028752	ENSMUSG00000064267	Hvcn1	0610039P13Rik|AI450555|BTS|HV1|Vsop.|mVSOP	hydrogen voltage-gated channel 1	protein-coding
Diff_Nuc21604	chr7	136792992	136793131	+	0	NA	Intergenic	Intergenic	57684	NM_172255	207425	Mm.229323	NM_172255	ENSMUSG00000042055	Wdr11	2900055P10Rik|AW489876|Brwd2|mKIAA1351	WD repeat domain 11	protein-coding
Diff_Nuc3115	chr12	38292422	38292561	+	0	NA	intron (NM_178767, intron 12 of 12)	intron (NM_178767, intron 12 of 12)	-314801	NM_178681	217480	Mm.126525	NM_178681	ENSMUSG00000036095	Dgkb	6430574F24|90kda|C630029D13Rik|DAGK2|DGK|DGK-beta|mKIAA0718	diacylglycerol kinase, beta	protein-coding
Diff_Nuc8540	chr10	77029712	77029851	+	0	NA	Intergenic	Intergenic	-14731	NM_145925	108705	Mm.28853	NM_145925	ENSMUSG00000009291	Pttg1ip	1810010L20Rik|AI314311|AU018448|C79540	pituitary tumor-transforming 1 interacting protein	protein-coding
Diff_Nuc7116	chr11	120416702	120416841	+	0	NA	Intergenic	Intergenic	-4325	NM_026814	68701	Mm.46477	NM_026814	ENSMUSG00000025129	Ppp1r27	1110033I14Rik|Dysfip1|toonin	protein phosphatase 1, regulatory subunit 27	protein-coding
Diff_Nuc18410	chr18	29474382	29474521	+	0	NA	Intergenic	L1Md_F2|LINE|L1	-127403	NR_045395	78199	Mm.243850	NR_045395		4930527G23Rik	-	RIKEN cDNA 4930527G23 gene	ncRNA
Diff_Nuc4888	chr11	18157762	18157901	+	0	NA	Intergenic	Intergenic	161842	NR_131129	327872		NR_131129	ENSMUSG00000085453	Gm12018	OTTMUSG00000005202	predicted gene 12018	ncRNA
Diff_Nuc36462	chr1	30026812	30026951	+	0	NA	Intergenic	RMER19B|LTR|ERVK	548548	NR_105760	102465174		NR_105760	ENSMUSG00000099257	Mir6342	Gm27268|mmu-mir-6342	microRNA 6342	ncRNA
Diff_Nuc23016	chr6	70753282	70753421	+	0	NA	Intergenic	Intergenic	-11182	NM_009075	19895	Mm.17905	NM_009075	ENSMUSG00000053604	Rpia	RPI	ribose 5-phosphate isomerase A	protein-coding
Diff_Nuc38754	chr1	157708302	157708441	+	0	NA	intron (NM_001039184, intron 34 of 37)	intron (NM_001039184, intron 34 of 37)	-48342	NM_001024945	104009	Mm.27035	NM_023268	ENSMUSG00000033684	Qsox1	1300003H02Rik|QSOX|Qscn6|SOx	quiescin Q6 sulfhydryl oxidase 1	protein-coding
Diff_Nuc24735	chr5	18941582	18941721	+	0	NA	intron (NM_001170746, intron 1 of 22)	ORR1A1|LTR|MaLR	208787	NM_001170746	50791	Mm.332231	NM_015823	ENSMUSG00000040003	Magi2	AIP-1|Acvri1|Acvrinp1|Acvrip1|Magi-2|S-SCAM|mKIAA0705	membrane associated guanylate kinase, WW and PDZ domain containing 2	protein-coding
Diff_Nuc22870	chr6	59491292	59491431	+	0	NA	Intergenic	L1_Mm|LINE|L1	-115077	NM_183183	243385	Mm.138080	NM_183183	ENSMUSG00000045441	Gprin3	C030038J10Rik|C730021L23	GPRIN family member 3	protein-coding
Diff_Nuc17614	chr19	45083572	45083711	+	0	NA	intron (NM_153796, intron 1 of 4)	B1_Mus1|SINE|Alu	2593	NM_153796	226153	Mm.105585	NM_153796	ENSMUSG00000025209	Twnk	D19Ertd626e|PEO|Peo1|Twinl	twinkle mtDNA helicase	protein-coding
Diff_Nuc5641	chr11	56028782	56028921	+	0	NA	Intergenic	L1_Mus1|LINE|L1	-174362	NM_153079	216749	Mm.213205	NM_153079	ENSMUSG00000037393	Nmur2	Nmu2r	neuromedin U receptor 2	protein-coding
Diff_Nuc34294	chr2	90519872	90520011	+	0	NA	exon (NM_021512, exon 3 of 37)	exon (NM_021512, exon 3 of 37)	2569	NM_021512	59015	Mm.24532	NM_021512	ENSMUSG00000051329	Nup160	160kDa|2810011M03Rik|AA414952|AU020188|Gtl-13|Gtl1-13|Gtl13|mKIAA0197	nucleoporin 160	protein-coding
Diff_Nuc28247	chr4	73194122	73194261	+	0	NA	Intergenic	Intergenic	-72387	NM_001277512	100502896	Mm.389560	NM_001277512		Gm11238	OTTMUSG00000000282	predicted gene 11238	protein-coding
Diff_Nuc35182	chr2	134330142	134330281	+	0	NA	intron (NM_010403, intron 5 of 7)	intron (NM_010403, intron 5 of 7)	49877	NM_010403	15112	Mm.26634	NM_010403	ENSMUSG00000027261	Hao1	GOX|Gox1|Hao-1	hydroxyacid oxidase 1, liver	protein-coding
Diff_Nuc19097	chr18	64104002	64104141	+	0	NA	intron (NM_001014981, intron 26 of 27)	intron (NM_001014981, intron 26 of 27)	235722	NM_001014981	104082	Mm.30850	NM_001014981	ENSMUSG00000040560	Wdr7	AI462727|TRAG|mKIAA0541	WD repeat domain 7	protein-coding
Diff_Nuc37669	chr1	94986662	94986801	+	0	NA	intron (NM_008440, intron 1 of 47)	intron (NM_008440, intron 1 of 47)	-7674	NM_001294150	16560	Mm.276408	NM_008440	ENSMUSG00000014602	Kif1a	ATSV|C630002N23Rik|Gm1626|Kns1	kinesin family member 1A	protein-coding
Diff_Nuc37561	chr1	88749612	88749751	+	0	NA	intron (NM_153530, intron 6 of 20)	intron (NM_153530, intron 6 of 20)	149302	NM_001172157	208718	Mm.389152	NM_153530	ENSMUSG00000053333	Dis3l2	4930429A22Rik|8030493P09Rik	DIS3 like 3'-5' exoribonuclease 2	protein-coding
Diff_Nuc1190	chr13	43445972	43446111	+	0	NA	Intergenic	Intergenic	-20044	NM_178848	68346	Mm.35325	NM_178848	ENSMUSG00000054021	Sirt5	0610012J09Rik|1500032M05Rik|AV001953	sirtuin 5	protein-coding
Diff_Nuc12535	chr16	77592482	77592621	+	0	NA	Intergenic	Intergenic	-6630	NR_029535	387229		NR_029535	ENSMUSG00000065530	Mir99a	Mirn99a|mir-99a|mmu-mir-99a	microRNA 99a	ncRNA
Diff_Nuc23421	chr6	92422072	92422211	+	0	NA	intron (NM_001081146, intron 2 of 8)	intron (NM_001081146, intron 2 of 8)	9245	NM_001134460	243548	Mm.248820	NM_001081146	ENSMUSG00000030020	Prickle2	6230400G14Rik|6720451F06Rik|mpk2	prickle planar cell polarity protein 2	protein-coding
Diff_Nuc10794	chr17	73282772	73282911	+	0	NA	intron (NM_029999, intron 2 of 2)	intron (NM_029999, intron 2 of 2)	15196	NM_029999	77889	Mm.154109	NM_029999	ENSMUSG00000024063	Lbh	1810009F10Rik|6720416L16Rik	limb-bud and heart	protein-coding
Diff_Nuc796	chr13	24515422	24515561	+	0	NA	intron (NM_007717, intron 4 of 15)	RLTR22_Mur|LTR|ERVK	8500	NM_001284520	12763	Mm.8396	NM_007717	ENSMUSG00000016756	Cmah	-	cytidine monophospho-N-acetylneuraminic acid hydroxylase	protein-coding
Diff_Nuc40479	chr9	49475592	49475731	+	0	NA	intron (NM_001311065, intron 1 of 17)	intron (NM_001311065, intron 1 of 17)	131513	NM_001081445	17967	Mm.4974	NM_010875	ENSMUSG00000039542	Ncam1	CD56|E-NCAM|NCAM-1|Ncam	neural cell adhesion molecule 1	protein-coding
Diff_Nuc8701	chr10	85732512	85732651	+	0	NA	intron (NM_013722, intron 6 of 13)	intron (NM_013722, intron 6 of 13)	-30576	NM_011595	21859	Mm.4871	NM_011595	ENSMUSG00000020044	Timp3	Timp-3	tissue inhibitor of metalloproteinase 3	protein-coding
Diff_Nuc184	chrX	117322322	117322461	+	0	NA	Intergenic	RLTR13D5|LTR|ERVK	-81545	NM_001271809	245578	Mm.39691	NM_001081385	ENSMUSG00000034755	Pcdh11x	PCDHX|PCDHX11|Pcdh11	protocadherin 11 X-linked	protein-coding
Diff_Nuc44133	chr8	129953492	129953631	+	0	NA	intron (NM_033620, intron 20 of 24)	intron (NM_033620, intron 20 of 24)	130009	NM_001013580	93742	Mm.299254	NM_033620	ENSMUSG00000025812	Pard3	AA960621|AI256638|Asip|D8Ertd580e|Par-3|Par3|Pard-3|Pard3a|Phip	par-3 family cell polarity regulator	protein-coding
Diff_Nuc936	chr13	32550772	32550911	+	0	NA	Intergenic	Intergenic	-120428	NM_146041	218138	Mm.247143	NM_146041	ENSMUSG00000038372	Gmds	BC031788|C87208	GDP-mannose 4, 6-dehydratase	protein-coding
Diff_Nuc5393	chr11	45916192	45916331	+	0	NA	TTS (NR_106177)	TTS (NR_106177)	489	NR_106177	102465996		NR_106177	ENSMUSG00000098942	Mir8100	Gm27638|mmu-mir-8100	microRNA 8100	ncRNA
Diff_Nuc34571	chr2	104295832	104295971	+	0	NA	intron (NM_001145824, intron 2 of 15)	B4|SINE|B4	-26804	NR_035432	100316678		NR_035432	ENSMUSG00000084516	Mir1902	Mirn1902|mmu-mir-1902	microRNA 1902	ncRNA
Diff_Nuc28830	chr4	107744782	107744921	+	0	NA	intron (NM_011327, intron 11 of 15)	Lx9|LINE|L1	-15111	NR_105823	102465213		NR_105823	ENSMUSG00000098980	Mir6397	Gm28004|mmu-mir-6397	microRNA 6397	ncRNA
Diff_Nuc15432	chr14	50320532	50320671	+	0	NA	intron (NM_026142, intron 5 of 7)	MLT2B4|LTR|ERVL	82441	NM_026142	67419	Mm.318710	NM_026142	ENSMUSG00000036242	3632451O06Rik	AU067705	RIKEN cDNA 3632451O06 gene	protein-coding
Diff_Nuc26439	chr5	114408812	114408951	+	0	NA	exon (NM_198109, exon 8 of 15)	exon (NM_198109, exon 8 of 15)	34885	NM_198109	231637	Mm.389682	NM_198109	ENSMUSG00000042121	Ssh1	AW551225|Gm1394|Gm1395|SSH-1|SSH-1L	slingshot homolog 1 (Drosophila)	protein-coding
Diff_Nuc31682	chr3	106110242	106110381	+	0	NA	Intergenic	Lx8|LINE|L1	-87914	NM_145126	104183	Mm.425140	NM_145126	ENSMUSG00000063779	Chil4	Chi3l4|Ym2	chitinase-like 4	protein-coding
Diff_Nuc31699	chr3	107137012	107137151	+	0	NA	promoter-TSS (NM_001045807)	promoter-TSS (NM_001045807)	-874	NM_001045807	229700	Mm.27966	NM_001045807	ENSMUSG00000048109	Rbm15	C230088J01Rik|mKIAA1438	RNA binding motif protein 15	protein-coding
Diff_Nuc31453	chr3	95688362	95688501	+	0	NA	intron (NM_001346514, intron 5 of 5)	intron (NM_001346514, intron 5 of 5)	-2280	NM_001033302	229599	Mm.331218	NM_001033302	ENSMUSG00000038550	Ciart	Chrono|Gm129	circadian associated repressor of transcription	protein-coding
Diff_Nuc11668	chr16	27400052	27400191	+	0	NA	intron (NM_026202, intron 1 of 10)	intron (NM_026202, intron 1 of 10)	11079	NM_001289436	67501	Mm.258985	NM_026202	ENSMUSG00000038127	Ccdc50	C3orf6	coiled-coil domain containing 50	protein-coding
Diff_Nuc20566	chr7	81543182	81543321	+	0	NA	intron (NM_023908, intron 2 of 9)	intron (NM_023908, intron 2 of 9)	156415	NM_023908	108116	Mm.425467	NM_023908	ENSMUSG00000025790	Slco3a1	5830414C08Rik|Anr1|MJAM|OATP-D|R75096|Slc21a11	solute carrier organic anion transporter family, member 3a1	protein-coding
Diff_Nuc10403	chr17	51096492	51096631	+	0	NA	intron (NM_001285991, intron 8 of 22)	intron (NM_001285991, intron 8 of 22)	202142	NM_001285993	72238	Mm.120650	NM_028162	ENSMUSG00000023923	Tbc1d5	1600014N05Rik	TBC1 domain family, member 5	protein-coding
Diff_Nuc20977	chr7	105104272	105104411	+	0	NA	intron (NM_177696, intron 1 of 17)	B3A|SINE|B2	35873	NM_177696	233537	Mm.375772	NM_177696	ENSMUSG00000035582	Gdpd4	4921513O04	glycerophosphodiester phosphodiesterase domain containing 4	protein-coding
Diff_Nuc13129	chr15	15958862	15959001	+	0	NA	Intergenic	Intergenic	-748925	NM_009869	12565	Mm.439758	NM_009869	ENSMUSG00000025370	Cdh9	-	cadherin 9	protein-coding
Diff_Nuc8060	chr10	52022312	52022451	+	0	NA	intron (NM_001347444, intron 4 of 9)	B4A|SINE|B4	68956	NM_025705	66686	Mm.62982	NM_025705	ENSMUSG00000019891	Dcbld1	4631413K11Rik	discoidin, CUB and LCCL domain containing 1	protein-coding
Diff_Nuc33059	chr2	26786092	26786231	+	0	NA	intron (NM_011512, intron 1 of 5)	intron (NM_011512, intron 1 of 5)	2870	NM_011512	20932	Mm.300594	NM_011512	ENSMUSG00000014867	Surf4	AL033340|AL033373|Surf-4	surfeit gene 4	protein-coding
Diff_Nuc8809	chr10	91703062	91703201	+	0	NA	intron (NR_046027, intron 7 of 8)	intron (NR_046027, intron 7 of 8)	-75208	NR_028262	110333	Mm.429764	NR_028262		Rmst	100041799|AI853140|C230053E11Rik|D930049J19Rik|Dmt2|Gm3515|M2|Ncrms	rhabdomyosarcoma 2 associated transcript (non-coding RNA)	ncRNA
Diff_Nuc6868	chr11	108192562	108192701	+	0	NA	intron (NM_011101, intron 2 of 16)	intron (NM_011101, intron 2 of 16)	12571	NM_011101	18750	Mm.222178	NM_011101	ENSMUSG00000050965	Prkca	AI875142|Pkca	protein kinase C, alpha	protein-coding
Diff_Nuc31463	chr3	95871032	95871171	+	0	NA	Intergenic	Intergenic	-8723	NM_013841	22365	Mm.263185	NM_013841	ENSMUSG00000015747	Vps45	AI462172|AW554165|mVps45	vacuolar protein sorting 45	protein-coding
Diff_Nuc40899	chr9	68976442	68976581	+	0	NA	intron (NM_013646, intron 1 of 10)	ID2|SINE|ID	-161137	NM_001289916	19883	Mm.378450	NM_013646	ENSMUSG00000032238	Rora	9530021D13Rik|Nr1f1|ROR1|ROR2|ROR3|nmf267|sg|staggerer|tmgc26	RAR-related orphan receptor alpha	protein-coding
Diff_Nuc11526	chr16	20386032	20386171	+	0	NA	intron (NM_013790, intron 12 of 29)	MT2A|LTR|ERVL	40366	NM_013790	27416	Mm.20845	NM_013790	ENSMUSG00000022822	Abcc5	2900011L11Rik|AI132311|Abcc5a|Abcc5b|Mrp5	ATP-binding cassette, sub-family C (CFTR/MRP), member 5	protein-coding
Diff_Nuc5240	chr11	36719082	36719221	+	0	NA	intron (NM_011856, intron 1 of 28)	intron (NM_011856, intron 1 of 28)	38592	NM_001290702	23964	Mm.439889	NM_011856	ENSMUSG00000049336	Tenm2	Odz2|Odz3|Ten-2|Ten-m2	teneurin transmembrane protein 2	protein-coding
Diff_Nuc36594	chr1	37929612	37929751	+	0	NA	intron (NM_001037918, intron 1 of 1)	intron (NM_001037918, intron 1 of 1)	630	NM_001037918	623661	Mm.138000	NM_001037918	ENSMUSG00000037216	Lipt1	EG623661	lipoyltransferase 1	protein-coding
Diff_Nuc16983	chr19	14146992	14147131	+	0	NA	Intergenic	MTE2a|LTR|MaLR	153549	NM_001011850	258151	Mm.377361	NM_001011850	ENSMUSG00000062314	Olfr1505	MOR211-4P	olfactory receptor 1505	protein-coding
Diff_Nuc42768	chr8	59989832	59989971	+	0	NA	promoter-TSS (NM_008252)	promoter-TSS (NM_008252)	-739	NM_008252	97165	Mm.276881	NM_008252	ENSMUSG00000054717	Hmgb2	C80539|HMG-2|Hmg2	high mobility group box 2	protein-coding
Diff_Nuc41066	chr9	77759132	77759271	+	0	NA	Intergenic	Intergenic	-5971	NM_134255	68801	Mm.430736	NM_134255	ENSMUSG00000032349	Elovl5	1110059L23Rik|AI747313|AU043003|HELO1	ELOVL family member 5, elongation of long chain fatty acids (yeast)	protein-coding
Diff_Nuc6474	chr11	94387712	94387851	+	0	NA	Intergenic	Intergenic	-4965	NM_170671	104601	Mm.84725	NM_170671	ENSMUSG00000039110	Mycbpap	4932408B01Rik|AMAP-1|AW125474	MYCBP associated protein	protein-coding
Diff_Nuc19652	chr7	13403802	13403941	+	0	NA	intron (NM_026046, intron 1 of 1)	CpG	338	NM_026046	67230	Mm.333574	NM_026046	ENSMUSG00000057894	Zfp329	2810439M05Rik|4632409L22Rik|ZNF329	zinc finger protein 329	protein-coding
Diff_Nuc35549	chr2	152276432	152276571	+	0	NA	Intergenic	ID4|SINE|ID	13855	NM_001037933	629114	Mm.389372	NM_001037933	ENSMUSG00000074681	Defb23	EG629114	defensin beta 23	protein-coding
Diff_Nuc27296	chr4	12088682	12088821	+	0	NA	intron (NM_026558, intron 5 of 7)	MTC|LTR|MaLR	10411	NM_001310743	68099	Mm.25340	NM_026558	ENSMUSG00000028218	Fam92a	6720467C03Rik|Fam92a1	family with sequence similarity 92, member A	protein-coding
Diff_Nuc25975	chr5	90728972	90729111	+	0	NA	exon (NM_030886, exon 4 of 35)	exon (NM_030886, exon 4 of 35)	66170	NM_030886	81702	Mm.245522	NM_030886	ENSMUSG00000055204	Ankrd17	4933425K22Rik|A130069E23Rik|A930008M01|AA407558|AA516750|AU040470|Foe|Gtar|Mask|mKIAA0697	ankyrin repeat domain 17	protein-coding
Diff_Nuc11369	chr16	12021242	12021381	+	0	NA	intron (NM_028277, intron 2 of 4)	intron (NM_028277, intron 2 of 4)	37105	NM_001174086	72555	Mm.310139	NM_028277	ENSMUSG00000022494	Shisa9	2700045P11Rik|Ckamp44	shisa family member 9	protein-coding
Diff_Nuc29043	chr4	118992792	118992931	+	0	NA	intron (NM_001110130, intron 1 of 8)	CpG	267	NM_001110129	66101	Mm.304080	NM_028677	ENSMUSG00000060288	Ppih	1100001J08Rik|2010111B15Rik|4833408F11Rik|AI464484|CYP-20|CYPH|D4Wsu43e	peptidyl prolyl isomerase H	protein-coding
Diff_Nuc16029	chr14	79891962	79892101	+	0	NA	intron (NM_007920, intron 1 of 8)	MER21B|LTR|ERV1	-10956	NM_018765	22380	Mm.476813	NM_018765	ENSMUSG00000022023	Wbp4	AW545037|BB101031|FBP21	WW domain binding protein 4	protein-coding
Diff_Nuc36833	chr1	50684872	50685011	+	0	NA	Intergenic	Intergenic	-299426	NM_019790	56363	Mm.245154	NM_019790	ENSMUSG00000026109	Tmeff2	4832418D20Rik|7630402F16Rik|TR-2	transmembrane protein with EGF-like and two follistatin-like domains 2	protein-coding
Diff_Nuc13350	chr15	31958682	31958821	+	0	NA	Intergenic	Intergenic	-148293	NM_020503	57254	Mm.377133	NM_020503	ENSMUSG00000045267	Tas2r119	T2r19|Tas2r19|mGR19|mt2r19	taste receptor, type 2, member 119	protein-coding
Diff_Nuc10016	chr17	30860792	30860931	+	0	NA	intron (NM_013811, intron 37 of 92)	intron (NM_013811, intron 37 of 92)	96980	NM_013811	13417	Mm.426017	NM_013811	ENSMUSG00000033826	Dnah8	ATPase|Dnahc8|Hst6.7b|P1-Loop	dynein, axonemal, heavy chain 8	protein-coding
Diff_Nuc7928	chr10	42972132	42972271	+	0	NA	intron (NM_001168289, intron 1 of 7)	intron (NM_001168289, intron 1 of 7)	30909	NM_001168289	71365	Mm.490430	NM_027772	ENSMUSG00000038240	Pdss2	5430420P03Rik|Gm60|Plmp|kd|mDLP1	prenyl (solanesyl) diphosphate synthase, subunit 2	protein-coding
Diff_Nuc33103	chr2	29512952	29513091	+	0	NA	intron (NM_054050, intron 1 of 23)	(TG)n|Simple_repeat|Simple_repeat	37781	NM_001039086	107746	Mm.298274	NM_054050	ENSMUSG00000039844	Rapgef1	4932418O06Rik|C3G|Grf2	Rap guanine nucleotide exchange factor (GEF) 1	protein-coding
Diff_Nuc432	chr13	6657222	6657361	+	0	NA	Intergenic	Intergenic	-9274	NM_001291071	56421	Mm.273874	NM_019703	ENSMUSG00000021196	Pfkp	1200015H23Rik|9330125N24Rik|ATP-PFK|PFK-C|PFK-P	phosphofructokinase, platelet	protein-coding
Diff_Nuc12268	chr16	59296972	59297111	+	0	NA	Intergenic	Lx9|LINE|L1	-5940	NM_146486	258479	Mm.377524	NM_146486	ENSMUSG00000068182	Olfr203	MOR182-5	olfactory receptor 203	protein-coding
Diff_Nuc25895	chr5	86004262	86004401	+	0	NA	Intergenic	B1F1|SINE|Alu	490277	NM_001345902	12617	Mm.4649	NM_007683	ENSMUSG00000029253	Cenpc1	CENP-C|Cenpc	centromere protein C1	protein-coding
Diff_Nuc34076	chr2	77075672	77075811	+	0	NA	intron (NM_175465, intron 3 of 17)	intron (NM_175465, intron 3 of 17)	42908	NM_175465	228071	Mm.27120	NM_175465	ENSMUSG00000042272	Sestd1	1500031J16Rik|A930010O20|Solo/Trio8	SEC14 and spectrin domains 1	protein-coding
Diff_Nuc7394	chr10	13859472	13859611	+	0	NA	intron (NM_010437, intron 6 of 8)	intron (NM_010437, intron 6 of 8)	173356	NM_010437	15273	Mm.42157	NM_010437	ENSMUSG00000015501	Hivep2	Gm20114|MIBP1|Schnurri-2|Shn-2	human immunodeficiency virus type I enhancer binding protein 2	protein-coding
Diff_Nuc6123	chr11	77844732	77844871	+	0	NA	TTS (NM_174852)	TTS (NM_174852)	-1014	NM_183286	70451	Mm.390342	NM_183286	ENSMUSG00000020834	Dhrs13	2610209N15Rik	dehydrogenase/reductase (SDR family) member 13	protein-coding
Diff_Nuc5459	chr11	49060292	49060431	+	0	NA	promoter-TSS (NM_001110149)	promoter-TSS (NM_001110149)	-618	NM_001110149	17308	Mm.196933	NM_010794	ENSMUSG00000020346	Mgat1	Mgat-1	mannoside acetylglucosaminyltransferase 1	protein-coding
Diff_Nuc28507	chr4	91320042	91320181	+	0	NA	Intergenic	Intergenic	-253436	NM_207685	15569	Mm.318042	NM_010486	ENSMUSG00000008489	Elavl2	Hub|mel-N1	ELAV (embryonic lethal, abnormal vision, Drosophila)-like 2 (Hu antigen B)	protein-coding
Diff_Nuc17444	chr19	37175342	37175481	+	0	NA	intron (NM_001290829, intron 4 of 9)	intron (NM_001290829, intron 4 of 9)	-72922	NR_045329	319931	Mm.446730	NR_045329	ENSMUSG00000097591	A330032B11Rik	-	RIKEN cDNA A330032B11 gene	ncRNA
Diff_Nuc10206	chr17	40962542	40962681	+	0	NA	intron (NM_011269, intron 1 of 9)	intron (NM_011269, intron 1 of 9)	14513	NM_011269	19743	Mm.12961	NM_011269	ENSMUSG00000023926	Rhag	CD241|Rh50|Rh50A	Rhesus blood group-associated A glycoprotein	protein-coding
Diff_Nuc22465	chr6	37730312	37730451	+	0	NA	Intergenic	Intergenic	-90430	NM_001272064	21848	Mm.41063	NM_145076	ENSMUSG00000029833	Trim24	A130082H20Rik|AI447469|D430004I05Rik|TIF1|TIF1-alpha|TIF1alpha|Tif1a	tripartite motif-containing 24	protein-coding
Diff_Nuc23288	chr6	86399582	86399721	+	0	NA	intron (NM_001243742, intron 4 of 9)	ID_B1|SINE|B4	11011	NM_001243741	232196	Mm.404040	NM_146170	ENSMUSG00000046679	C87436	-	expressed sequence C87436	protein-coding
Diff_Nuc20426	chr7	73599362	73599501	+	0	NA	Intergenic	Intergenic	-27068	NM_053080	56847	Mm.140988	NM_053080	ENSMUSG00000015134	Aldh1a3	ALDH6|RALDH3|V1	aldehyde dehydrogenase family 1, subfamily A3	protein-coding
Diff_Nuc485	chr13	9721942	9722081	+	0	NA	intron (NM_001347481, intron 1 of 13)	intron (NM_001347481, intron 1 of 13)	41045	NM_001347471	66505	Mm.397307	NM_144516	ENSMUSG00000021156	Zmynd11	2210402G22Rik|BS69	zinc finger, MYND domain containing 11	protein-coding
Diff_Nuc3451	chr12	56600362	56600501	+	0	NA	Intergenic	Intergenic	-6797	NM_010907	18035	Mm.170515	NM_010907	ENSMUSG00000021025	Nfkbia	AI462015|Nfkbi	nuclear factor of kappa light polypeptide gene enhancer in B cells inhibitor, alpha	protein-coding
Diff_Nuc4809	chr11	13926852	13926991	+	0	NA	Intergenic	L1Md_F2|LINE|L1	152123	NR_131011	75280	Mm.108492	NR_131011	ENSMUSG00000085452	4930554G24Rik	-	RIKEN cDNA 4930554G24 gene	ncRNA
Diff_Nuc32723	chr2	10007512	10007651	+	0	NA	intron (NM_025280, intron 2 of 4)	intron (NM_025280, intron 2 of 4)	5342	NM_025280	16588	Mm.35498	NM_025280	ENSMUSG00000037262	Kin	Kin17	Kin17 DNA and RNA binding protein	protein-coding
Diff_Nuc10938	chr17	79849672	79849811	+	0	NA	Intergenic	Intergenic	27484	NR_033463	74622	Mm.311921	NR_033463		4930429F11Rik	-	RIKEN cDNA 4930429F11 gene	ncRNA
Diff_Nuc7605	chr10	25127592	25127731	+	0	NA	promoter-TSS (NM_013511)	promoter-TSS (NM_013511)	-513	NM_013511	13822	Mm.306026	NM_013511	ENSMUSG00000019978	Epb41l2	4.1G|AW555191|D10Ertd398e|Epb4.1l2|NBL2	erythrocyte membrane protein band 4.1 like 2	protein-coding
Diff_Nuc31558	chr3	100868992	100869131	+	0	NA	intron (NM_011197, intron 4 of 8)	intron (NM_011197, intron 4 of 8)	-35643	NM_001167906	630146	Mm.190915	NM_001099332	ENSMUSG00000086564	Cd101	EWI-101|Gm1016|Gm734|Igsf2	CD101 antigen	protein-coding
Diff_Nuc39655	chr9	6317002	6317141	+	0	NA	intron (NM_027924, intron 3 of 6)	RMER19B|LTR|ERVK	-50524	NM_027942	71829	Mm.141452	NM_027942	ENSMUSG00000047619	Ddi1	1700011N24Rik	DNA-damage inducible 1	protein-coding
Diff_Nuc29625	chr4	146723042	146723181	+	0	NA	intron (NM_001039209, intron 1 of 2)	RMER16-int|LTR|ERVK	173136	NM_001039209	195531	Mm.270762	NM_001039209	ENSMUSG00000078496	Zfp982	Gm13152|OTTMUSG00000010671	zinc finger protein 982	protein-coding
Diff_Nuc25152	chr5	42066372	42066511	+	0	NA	intron (NM_001310589, intron 4 of 6)	Lx6|LINE|L1	32489	NM_001310592	100972	Mm.41555	NM_027295	ENSMUSG00000029128	Rab28	2700023P08Rik|AW496496	RAB28, member RAS oncogene family	protein-coding
Diff_Nuc6774	chr11	106010062	106010201	+	0	NA	exon (NM_011947, exon 10 of 16)	exon (NM_011947, exon 10 of 16)	11325	NM_172397	67803	Mm.21687	NM_172397	ENSMUSG00000040699	Limd2	0610025L06Rik|AI413966	LIM domain containing 2	protein-coding
Diff_Nuc9369	chr10	123771192	123771331	+	0	NA	Intergenic	Intergenic	-134869	NR_028310	75030	Mm.159403	NR_028310		4930503E24Rik	-	eukaryotic translation initiation factor 3, subunit I pseudogene	pseudo
Diff_Nuc7488	chr10	19296912	19297051	+	0	NA	Intergenic	MTE2a|LTR|MaLR	-14774	NM_010511	15979	Mm.549	NM_010511	ENSMUSG00000020009	Ifngr1	CD119|IFN-gammaR|Ifgr|Ifngr|Nktar	interferon gamma receptor 1	protein-coding
Diff_Nuc5491	chr11	50135002	50135141	+	0	NA	intron (NM_001110500, intron 1 of 14)	intron (NM_001110500, intron 1 of 14)	4104	NM_001110499	12330	Mm.248827	NM_007597	ENSMUSG00000020368	Canx	1110069N15Rik|AI988026|Cnx|D11Ertd153e	calnexin	protein-coding
Diff_Nuc33813	chr2	64461312	64461451	+	0	NA	Intergenic	Lx4A|LINE|L1	399442	NM_016719	50915	Mm.214554	NM_016719	ENSMUSG00000026888	Grb14	AI505286	growth factor receptor bound protein 14	protein-coding
Diff_Nuc28337	chr4	80804242	80804381	+	0	NA	Intergenic	Intergenic	247721	NM_026821	52829	Mm.273986	NM_026821	ENSMUSG00000048706	Lurap1l	1110029A09Rik|AV077978|AV175137|D4Bwg0951e|WI-13707|bM350F23.1	leucine rich adaptor protein 1-like	protein-coding
Diff_Nuc26199	chr5	102528302	102528441	+	0	NA	Intergenic	Intergenic	-29431	NM_172882	72145	Mm.332522	NM_172882	ENSMUSG00000043940	Wdfy3	2610509D04Rik|ALFY|AW319683|B930017C24|BWF1|Bchs|D5Ertd66e|Ggtb3|ZFYVE25|mKIAA0993	WD repeat and FYVE domain containing 3	protein-coding
Diff_Nuc18689	chr18	41822582	41822721	+	0	NA	Intergenic	Lx|LINE|L1	288197	NM_029942	77619	Mm.30649	NM_029942	ENSMUSG00000056671	Prelid2	1700003A01Rik|C330008K14Rik	PRELI domain containing 2	protein-coding
Diff_Nuc25671	chr5	73274882	73275021	+	0	NA	Intergenic	(GAGAA)n|Simple_repeat|Simple_repeat	-15264	NM_001113460	21682	Mm.319581	NM_013689	ENSMUSG00000029217	Tec	-	tec protein tyrosine kinase	protein-coding
Diff_Nuc24967	chr5	31495162	31495301	+	0	NA	promoter-TSS (NM_153680)	promoter-TSS (NM_153680)	281	NM_001127355	13667	Mm.29394	NM_010122	ENSMUSG00000029145	Eif2b4	Eif2b	eukaryotic translation initiation factor 2B, subunit 4 delta	protein-coding
Diff_Nuc17886	chr19	57392972	57393111	+	0	NA	Intergenic	Intergenic	42348	NR_040316	320879	Mm.375089	NR_040316	ENSMUSG00000097785	B230217O12Rik	-	RIKEN cDNA B230217O12 gene	ncRNA
Diff_Nuc25806	chr5	79429122	79429261	+	0	NA	Intergenic	L1Md_F2|LINE|L1	1534678	NR_131050	69370	Mm.426881	NR_131050	ENSMUSG00000107232	1700017L05Rik	-	RIKEN cDNA 1700017L05 gene	ncRNA
Diff_Nuc17848	chr19	56530342	56530481	+	0	NA	Intergenic	Intergenic	-5716	NM_001164263	226245	Mm.156742	NM_172641	ENSMUSG00000035818	Plekhs1	9930023K05Rik	pleckstrin homology domain containing, family S member 1	protein-coding
Diff_Nuc11905	chr16	36936872	36937011	+	0	NA	intron (NM_008225, intron 1 of 13)	intron (NM_008225, intron 1 of 13)	1872	NM_008225	15163	Mm.4091	NM_008225	ENSMUSG00000022831	Hcls1	AW213261|HS1	hematopoietic cell specific Lyn substrate 1	protein-coding
Diff_Nuc27770	chr4	44177642	44177781	+	0	NA	intron (NM_001038993, intron 1 of 11)	ID_B1|SINE|B4	2699	NM_175201	73469	Mm.262859	NM_175201	ENSMUSG00000035696	Rnf38	1700065B19Rik|2610202O07Rik|AA673263|Oip1	ring finger protein 38	protein-coding
Diff_Nuc15426	chr14	49956792	49956931	+	0	NA	intron (NM_029238, intron 1 of 7)	intron (NM_029238, intron 1 of 7)	-91758	NM_025956	67082	Mm.87439	NM_025956	ENSMUSG00000021850	1700011H14Rik	-	RIKEN cDNA 1700011H14 gene	protein-coding
Diff_Nuc12852	chr16	95686962	95687101	+	0	NA	intron (NM_001302152, intron 3 of 10)	intron (NM_001302152, intron 3 of 10)	-6076	NM_001302153	13876	Mm.164531	NM_133659	ENSMUSG00000040732	Erg	D030036I24Rik	avian erythroblastosis virus E-26 (v-ets) oncogene related	protein-coding
Diff_Nuc28641	chr4	97827832	97827971	+	0	NA	Intergenic	Intergenic	222055	NM_053157	94043	Mm.331719	NM_053157	ENSMUSG00000028563	Tm2d1	2310026L18Rik|AA990549|Bbp	TM2 domain containing 1	protein-coding
Diff_Nuc30511	chr3	44111962	44112101	+	0	NA	Intergenic	Lx6|LINE|L1	1070151	NR_045172	72511	Mm.140700	NR_045172	ENSMUSG00000097040	2610316D01Rik	-	RIKEN cDNA 2610316D01 gene	ncRNA
Diff_Nuc619	chr13	15680352	15680491	+	0	NA	intron (NM_008130, intron 3 of 14)	intron (NM_008130, intron 3 of 14)	124865	NM_008130	14634	Mm.5098	NM_008130	ENSMUSG00000021318	Gli3	AI854843|AU023367|Bph|GLI3-190|GLI3FL|Pdn|Xt|add	GLI-Kruppel family member GLI3	protein-coding
Diff_Nuc36482	chr1	31187102	31187241	+	0	NA	Intergenic	ORR1D1|LTR|MaLR	-33872	NR_136907	102634473	Mm.484482	NR_136907	ENSMUSG00000100371	Gm29669	-	predicted gene 29669	ncRNA
Diff_Nuc13663	chr15	50108512	50108651	+	0	NA	Intergenic	L1_Mur3|LINE|L1	612014	NM_001310481	83925	Mm.30466	NM_032000	ENSMUSG00000038679	Trps1	AI115454|AI447310|D15Ertd586e	trichorhinophalangeal syndrome I (human)	protein-coding
Diff_Nuc17845	chr19	56453542	56453681	+	0	NA	exon (NM_001286552, exon 9 of 40)	exon (NM_001286552, exon 9 of 40)	10917	NM_198059	18175	Mm.386769	NM_008733	ENSMUSG00000049134	Nrap	-	nebulin-related anchoring protein	protein-coding
Diff_Nuc43416	chr8	93065642	93065781	+	0	NA	Intergenic	Intergenic	-193560	NM_172913	244579	Mm.302755	NM_172913	ENSMUSG00000043668	Tox3	500-9|BC052044|C230068E13|CAGF9|Tnrc9	TOX high mobility group box family member 3	protein-coding
Diff_Nuc30580	chr3	49858422	49858561	+	0	NA	Intergenic	L1Md_T|LINE|L1	-297253	NM_130448	73173	Mm.87246	NM_130448	ENSMUSG00000037892	Pcdh18	3110038E07Rik|BB095589|PCDH68L	protocadherin 18	protein-coding
Diff_Nuc24373	chr6	145530212	145530351	+	0	NA	Intergenic	Intergenic	-34202	NM_009449	22147	Mm.270295	NM_009449	ENSMUSG00000067338	Tuba3b	M[a]7|Tuba7	tubulin, alpha 3B	protein-coding
Diff_Nuc15946	chr14	76258712	76258851	+	0	NA	Intergenic	B2_Mm2|SINE|B2	11051	NR_028481	100303751	Mm.484707	NR_028481	ENSMUSG00000065147	Snora31	MBI-161	small nucleolar RNA, H/ACA box 31	snoRNA
Diff_Nuc24038	chr6	125016032	125016171	+	0	NA	Intergenic	MT2B2|LTR|ERVL	-1837	NM_001163269	381810	Mm.333386	NM_001163268	ENSMUSG00000067714	Lpar5	GPR93|Gm1072|Gpr92|LPA5	lysophosphatidic acid receptor 5	protein-coding
Diff_Nuc29798	chr4	154609092	154609231	+	0	NA	Intergenic	Intergenic	-12517	NM_011385	20481	Mm.28520	NM_011385	ENSMUSG00000029050	Ski	2310012I02Rik|2610001A11Rik|AA062172|AA589460|BC004088	ski sarcoma viral oncogene homolog (avian)	protein-coding
Diff_Nuc27937	chr4	53657482	53657621	+	0	NA	intron (NM_001195284, intron 1 of 12)	intron (NM_001195284, intron 1 of 12)	13208	NM_001195284	319636	Mm.103464	NM_176966	ENSMUSG00000054752	Fsd1l	A230072O16Rik|Ccdc10|Csdufd1|Fsd1nl|OTTMUSG00000007002	fibronectin type III and SPRY domain containing 1-like	protein-coding
Diff_Nuc4215	chr12	98337302	98337441	+	0	NA	Intergenic	Intergenic	-1051939	NR_103800	69423	Mm.46121	NM_027076		1700019M22Rik	-	NFX-like protein	pseudo
Diff_Nuc5530	chr11	51754852	51754991	+	0	NA	Intergenic	B1_Mm|SINE|Alu	-26212	NM_029976	52626	Mm.289456	NM_029976	ENSMUSG00000020392	Cdkn2aipnl	A430101B06Rik|AA409260|D11Ertd497e|MNCb-1520	CDKN2A interacting protein N-terminal like	protein-coding
Diff_Nuc36529	chr1	34533532	34533671	+	0	NA	Intergenic	B1F|SINE|Alu	17010	NM_011206	19253	Mm.361	NM_011206	ENSMUSG00000026126	Ptpn18	FLP1|HSCF|PTP-HSCF|PTP-K1|Ptpk1	protein tyrosine phosphatase, non-receptor type 18	protein-coding
Diff_Nuc15989	chr14	78877962	78878101	+	0	NA	Intergenic	Intergenic	44478	NM_001346784	219181	Mm.89413	NM_001164503	ENSMUSG00000022016	Akap11	6330501D17Rik|AKAP220|Gm80|PRKA11|mKIAA0629	A kinase (PRKA) anchor protein 11	protein-coding
Diff_Nuc29604	chr4	145763052	145763191	+	0	NA	Intergenic	Intergenic	-14112	NM_001085522	433791	Mm.276881	NM_001085522	ENSMUSG00000070605	Zfp992	Gm13251|OTTMUSG00000011097	zinc finger protein 992	protein-coding
Diff_Nuc41029	chr9	75278152	75278291	+	0	NA	Intergenic	Intergenic	-11110	NM_001039522	235497	Mm.41508	NM_001006122	ENSMUSG00000042487	Leo1	Gm185	Leo1, Paf1/RNA polymerase II complex component	protein-coding
Diff_Nuc39759	chr9	13302632	13302771	+	0	NA	Intergenic	Intergenic	68120	NR_028271	18689	Mm.41972	NM_008835	ENSMUSG00000031802	Phxr4	Sp5	per-hexamer repeat gene 4	ncRNA
Diff_Nuc14208	chr15	79776997	79777136	+	0	NA	Intergenic	Intergenic	-13990	NM_144811	52609	Mm.323442	NM_144811	ENSMUSG00000053411	Cbx7	1600014J01Rik|AI851678|D15Ertd417e	chromobox 7	protein-coding
Diff_Nuc5412	chr11	47019282	47019421	+	0	NA	intron (NM_011891, intron 2 of 7)	intron (NM_011891, intron 2 of 7)	173453	NM_011891	24052	Mm.338890	NM_011891	ENSMUSG00000020354	Sgcd	35kDa|delta-SG	sarcoglycan, delta (dystrophin-associated glycoprotein)	protein-coding
Diff_Nuc3135	chr12	39308852	39308991	+	0	NA	intron (NR_045943, intron 4 of 8)	Lx|LINE|L1	32187	NR_045943	73867	Mm.78933	NR_045943		4930428E07Rik	-	RIKEN cDNA 4930428E07 gene	ncRNA
Diff_Nuc43708	chr8	109581112	109581251	+	0	NA	promoter-TSS (NM_139229)	promoter-TSS (NM_139229)	404	NR_028367	66164	Mm.334789	NM_025391	ENSMUSG00000031917	Nip7	1110017C15Rik|6330509M23Rik|AA408773|AA410017|PEachy	NIP7, nucleolar pre-rRNA processing protein	protein-coding
Diff_Nuc27637	chr4	35706952	35707091	+	0	NA	intron (NM_001165999, intron 7 of 7)	intron (NM_001165999, intron 7 of 7)	85424	NM_001166001	242384	Mm.132507	NM_175516	ENSMUSG00000045083	Lingo2	B230217C06Rik|Lern3|Lrrn6c	leucine rich repeat and Ig domain containing 2	protein-coding
Diff_Nuc19123	chr18	65092972	65093111	+	0	NA	intron (NM_001114386, intron 1 of 30)	intron (NM_001114386, intron 1 of 30)	45631	NM_001114386	83814	Mm.98668	NM_031881	ENSMUSG00000024589	Nedd4l	1300012C07Rik|Nedd4-2|Nedd4b	neural precursor cell expressed, developmentally down-regulated gene 4-like	protein-coding
Diff_Nuc5615	chr11	54895142	54895281	+	0	NA	Intergenic	Intergenic	-3578	NM_177471	52570	Mm.22361	NM_177471	ENSMUSG00000049588	Ccdc69	2210021E03Rik|D11Ertd461e	coiled-coil domain containing 69	protein-coding
Diff_Nuc4793	chr11	12631852	12631991	+	0	NA	Intergenic	Intergenic	-266958	NM_001282993	12808	Mm.22847	NM_172496	ENSMUSG00000020173	Cobl	-	cordon-bleu WH2 repeat	protein-coding
Diff_Nuc29571	chr4	144632782	144632921	+	0	NA	intron (NM_001276465, intron 65 of 69)	MIRm|SINE|MIR	147718	NM_001276502	230895	Mm.240310	NM_001033190	ENSMUSG00000020220	Vps13d	-	vacuolar protein sorting 13D	protein-coding
Diff_Nuc15836	chr14	70496372	70496511	+	0	NA	Intergenic	Intergenic	-3511	NM_021328	57784	Mm.24186	NM_021328	ENSMUSG00000022089	Bin3	1700015F07Rik	bridging integrator 3	protein-coding
Diff_Nuc2401	chr13	110622052	110622191	+	0	NA	intron (NM_011056, intron 7 of 16)	intron (NM_011056, intron 7 of 16)	-71896	NR_035442	100316683		NR_035442	ENSMUSG00000084651	Mir1904	Mirn1904|mmu-mir-1904	microRNA 1904	ncRNA
Diff_Nuc40846	chr9	66106692	66106831	+	0	NA	intron (NM_010019, intron 9 of 11)	intron (NM_010019, intron 9 of 11)	-91496	NM_145617	235439	Mm.244179	NM_145617	ENSMUSG00000038664	Herc1	2810449H11Rik|B230218H07|D130015N03Rik|tbl	HECT and RLD domain containing E3 ubiquitin protein ligase family member 1	protein-coding
Diff_Nuc25040	chr5	34850012	34850151	+	0	NA	intron (NM_139064, intron 1 of 5)	intron (NM_139064, intron 1 of 5)	6547	NM_139064	231130	Mm.28615	NM_139064	ENSMUSG00000059866	Tnip2	1810020H16Rik|ABIN-2|AI428870	TNFAIP3 interacting protein 2	protein-coding
Diff_Nuc41098	chr9	79452012	79452151	+	0	NA	intron (NM_001290308, intron 63 of 65)	intron (NM_001290308, intron 63 of 65)	-84972	NR_045336	100038575	Mm.367838	NR_045336	ENSMUSG00000111765	Gm10635	ENSMUSG00000074174	predicted gene 10635	ncRNA
Diff_Nuc40904	chr9	69358412	69358551	+	0	NA	Intergenic	MLT1A|LTR|MaLR	53730	NR_037296	100526560		NR_037296	ENSMUSG00000093042	Mir3109	mir-3109|mmu-mir-3109	microRNA 3109	ncRNA
Diff_Nuc25011	chr5	32853052	32853191	+	0	NA	Intergenic	Intergenic	-60423	NM_001205133	22612	Mm.4558	NM_009535	ENSMUSG00000014932	Yes1	Yes|p61-Yes	YES proto-oncogene 1, Src family tyrosine kinase	protein-coding
Diff_Nuc43402	chr8	91957412	91957551	+	0	NA	Intergenic	Intergenic	-389420	NM_021390	58198	Mm.214361	NM_021390	ENSMUSG00000031665	Sall1	Msal-3	sal-like 1 (Drosophila)	protein-coding
Diff_Nuc822	chr13	26025802	26025941	+	0	NA	intron (NR_045062, intron 1 of 3)	intron (NR_045062, intron 1 of 3)	32314	NR_045062	100503530	Mm.86763	NR_045062	ENSMUSG00000086531	Gm11351	OTTMUSG00000000620	predicted gene 11351	ncRNA
Diff_Nuc23301	chr6	86634912	86635051	+	0	NA	promoter-TSS (NM_025665)	promoter-TSS (NM_025665)	-496	NM_025665	66618	Mm.182650	NM_025665	ENSMUSG00000001158	Snrnp27	2610209M04Rik|AI449063|AU022368|Ry1	small nuclear ribonucleoprotein 27 (U4/U6.U5)	protein-coding
Diff_Nuc10722	chr17	68232722	68232861	+	0	NA	intron (NM_001347410, intron 4 of 17)	intron (NM_001347410, intron 4 of 17)	67489	NM_001347410	268970	Mm.9935	NM_172964	ENSMUSG00000024043	Arhgap28	AU044757|AW550892|E130310N06	Rho GTPase activating protein 28	protein-coding
Diff_Nuc3499	chr12	60113432	60113571	+	0	NA	promoter-TSS (NM_009147)	promoter-TSS (NM_009147)	-497	NM_009147	20334	Mm.491137	NM_009147	ENSMUSG00000020986	Sec23a	Msec23|Sec23r	SEC23 homolog A, COPII coat complex component	protein-coding
Diff_Nuc35881	chr2	167170232	167170371	+	0	NA	intron (NM_019835, intron 1 of 8)	intron (NM_019835, intron 1 of 8)	4377	NM_019835	56336	Mm.200886	NM_019835	ENSMUSG00000017929	B4galt5	9430078I07Rik|AW049941|AW539721	UDP-Gal:betaGlcNAc beta 1,4-galactosyltransferase, polypeptide 5	protein-coding
Diff_Nuc15915	chr14	75138742	75138881	+	0	NA	intron (NM_016903, intron 3 of 8)	intron (NM_016903, intron 3 of 8)	6707	NM_016903	13885	Mm.38055	NM_016903	ENSMUSG00000021996	Esd	Es-10|Es10|FGH|sid478	esterase D/formylglutathione hydrolase	protein-coding
Diff_Nuc10284	chr17	45547482	45547621	+	0	NA	intron (NM_152810, intron 11 of 15)	URR1A|DNA|MER1_type	23105	NM_152810	71702	Mm.28270	NM_152810	ENSMUSG00000023932	Cdc5l	1200002I02Rik|AA408004|PCDC5RP	cell division cycle 5-like (S. pombe)	protein-coding
Diff_Nuc43182	chr8	81616392	81616531	+	0	NA	intron (NM_178267, intron 5 of 14)	intron (NM_178267, intron 5 of 14)	64125	NM_178267	622675	Mm.48724	NM_178267	ENSMUSG00000071064	Zfp827	2810449M09Rik|D630040G17Rik|Znf827	zinc finger protein 827	protein-coding
Diff_Nuc39637	chr9	4796982	4797121	+	0	NA	promoter-TSS (NM_019691)	promoter-TSS (NM_019691)	-817	NM_019691	14802	Mm.209263	NM_019691	ENSMUSG00000025892	Gria4	GluA4|GluR-D|Glur-4|Glur4|Gluralpha4|spkw1	glutamate receptor, ionotropic, AMPA4 (alpha 4)	protein-coding
Diff_Nuc10923	chr17	79137232	79137371	+	0	NA	Intergenic	Intergenic	-1401	NM_011500	268980	Mm.311915	NM_011500	ENSMUSG00000024077	Strn	AU022939|D130055P19	striatin, calmodulin binding protein	protein-coding
Diff_Nuc40912	chr9	69819532	69819671	+	0	NA	Intergenic	Intergenic	-17672	NM_016787	12175	Mm.159777	NM_016787	ENSMUSG00000011958	Bnip2	5730523P12Rik|BNIP2beta|Nip21	BCL2/adenovirus E1B interacting protein 2	protein-coding
Diff_Nuc41041	chr9	76066082	76066221	+	0	NA	Intergenic	Intergenic	-4687	NM_205844	404194	Mm.213862	NM_205844	ENSMUSG00000059383	Gfral	AY457637|Gral	GDNF family receptor alpha like	protein-coding
Diff_Nuc220	chrX	141948962	141949101	+	0	NA	Intergenic	Intergenic	-26849	NM_153319	27494	Mm.100068	NM_153319	ENSMUSG00000041688	Amot	CAG-2|D0Kist1|Sii6	angiomotin	protein-coding
Diff_Nuc27091	chr5	150372652	150372791	+	0	NA	intron (NM_029440, intron 7 of 22)	intron (NM_029440, intron 7 of 22)	-32116	NR_045423	100415916	Mm.145528	NR_045423	ENSMUSG00000107132	Gm15997	OTTMUSG00000028862	predicted gene 15997	ncRNA
Diff_Nuc13139	chr15	17268632	17268771	+	0	NA	Intergenic	Intergenic	560845	NM_009869	12565	Mm.439758	NM_009869	ENSMUSG00000025370	Cdh9	-	cadherin 9	protein-coding
Diff_Nuc33871	chr2	67855862	67856001	+	0	NA	Intergenic	Intergenic	-86798	NM_020283	26877	Mm.226435	NM_020283	ENSMUSG00000034780	B3galt1	beta3Gal-T1	UDP-Gal:betaGlcNAc beta 1,3-galactosyltransferase, polypeptide 1	protein-coding
Diff_Nuc2009	chr13	91692522	91692661	+	0	NA	intron (NM_024186, intron 3 of 15)	L1Md_F2|LINE|L1	91889	NM_024186	66970	Mm.343095	NM_024186	ENSMUSG00000003992	Ssbp2	1500004K09Rik|2310079I02Rik|9330163K02Rik|A830008M03Rik|AU067692|AW558684|Hspc116|SSDP2	single-stranded DNA binding protein 2	protein-coding
Diff_Nuc748	chr13	22131232	22131371	+	0	NA	Intergenic	B1_Mus1|SINE|Alu	1930	NM_175656	319158	Mm.14775	NM_175656	ENSMUSG00000060639	Hist1h4i	-	histone cluster 1, H4i	protein-coding
Diff_Nuc30118	chr3	22316752	22316891	+	0	NA	Intergenic	L1Md_Gf|LINE|L1	166529	NR_004439	19784		NR_004439		Rprl2	RPRH3|Rmrp3	ribonuclease P RNA-like 2	ncRNA
Diff_Nuc42308	chr8	29584622	29584761	+	0	NA	Intergenic	Intergenic	-389366	NR_033590	666422	Mm.484413	NR_033590	ENSMUSG00000110372	Gm8096	EG666422	3-phosphoglycerate dehydrogenase pseudogene	pseudo
Diff_Nuc34382	chr2	93815752	93815891	+	0	NA	Intergenic	Intergenic	-4370	NR_045827	70852	Mm.437014	NR_045827	ENSMUSG00000027196	Alkbh3os1	4921507L20Rik	alkB homolog 3, opposite strand 1	ncRNA
Diff_Nuc11915	chr16	37677062	37677201	+	0	NA	Intergenic	Intergenic	-22677	NM_026610	68194	Mm.379154	NM_026610	ENSMUSG00000022820	Ndufb4	0610006N12Rik|1300010H20Rik	NADH dehydrogenase (ubiquinone) 1 beta subcomplex 4	protein-coding
Diff_Nuc5002	chr11	22804392	22804531	+	0	NA	intron (NM_144514, intron 2 of 2)	ID_B1|SINE|B4	-44125	NM_001169114	53625	Mm.395495	NM_016888	ENSMUSG00000051650	B3gnt2	AA408337|AA409404|AW260308|B3Galt6|B3gnt1|BGnT-1|BGnT-2|BGnT1|BGnT2|Beta3gnt	UDP-GlcNAc:betaGal beta-1,3-N-acetylglucosaminyltransferase 2	protein-coding
Diff_Nuc7227	chr10	6760942	6761081	+	0	NA	Intergenic	MTA_Mm-int|LTR|MaLR	45251	NM_027391	70337	Mm.24153	NM_027391	ENSMUSG00000019762	Iyd	0610009A07Rik|AI265638|Dehal1	iodotyrosine deiodinase	protein-coding
Diff_Nuc30674	chr3	53511602	53511741	+	0	NA	Intergenic	Intergenic	-50394	NM_172862	242022	Mm.38378	NM_172862	ENSMUSG00000037016	Frem2	6030440P17Rik|8430406N05Rik|Gm409|b2b1562Clo|my|ne|nv1	Fras1 related extracellular matrix protein 2	protein-coding
Diff_Nuc39929	chr9	21473632	21473771	+	0	NA	intron (NM_011417, intron 20 of 33)	intron (NM_011417, intron 20 of 33)	53088	NM_001174078	20586	Mm.286593	NM_011417	ENSMUSG00000032187	Smarca4	Brg1|HP1-BP72|SNF2beta|SW1/SNF|b2b508.1Clo|b2b692Clo	SWI/SNF related, matrix associated, actin dependent regulator of chromatin, subfamily a, member 4	protein-coding
Diff_Nuc20616	chr7	84018542	84018681	+	0	NA	intron (NM_001199224, intron 21 of 22)	intron (NM_001199224, intron 21 of 22)	643838	NM_001199224	244071	Mm.322829	NM_172902	ENSMUSG00000025754	Agbl1	Ccp4|D430020F16|EG244071|Nna1-l1	ATP/GTP binding protein-like 1	protein-coding
Diff_Nuc13505	chr15	39240002	39240141	+	0	NA	intron (NM_053271, intron 5 of 26)	intron (NM_053271, intron 5 of 26)	210239	NM_053271	116838	Mm.309296	NM_053271	ENSMUSG00000037386	Rims2	2810036I15Rik|AW048769|RIM2|Rab3ip2|Rim2(+40A)|Rim2(+44A)|Rim2(+4A)|Serg2|Syt3-rs|mKIAA0751	regulating synaptic membrane exocytosis 2	protein-coding
Diff_Nuc39446	chr1	193721232	193721371	+	0	NA	intron (NR_030669, intron 4 of 4)	intron (NR_030669, intron 4 of 4)	-9359	NM_009579	22782	Mm.9024	NM_009579	ENSMUSG00000037434	Slc30a1	AI839647|C130040I11Rik|Znt1	solute carrier family 30 (zinc transporter), member 1	protein-coding
Diff_Nuc32815	chr2	14731232	14731371	+	0	NA	intron (NM_023116, intron 2 of 13)	RLTR21|LTR|ERVK	-14418	NM_001252533	12296	Mm.313930	NM_023116	ENSMUSG00000057914	Cacnb2	AW060387|CAB2|Cavbeta2|Cchb2	calcium channel, voltage-dependent, beta 2 subunit	protein-coding
Diff_Nuc28347	chr4	81266282	81266421	+	0	NA	Intergenic	Intergenic	-177632	NM_001305284	17475	Mm.153039	NM_010820	ENSMUSG00000028402	Mpdz	AI225843|B930003D11Rik|MUPP1	multiple PDZ domain protein	protein-coding
Diff_Nuc36872	chr1	52208532	52208671	+	0	NA	intron (NM_001205313, intron 20 of 24)	GA-rich|Low_complexity|Low_complexity	32135	NM_001205313	20846	Mm.277406	NM_009283	ENSMUSG00000026104	Stat1	2010005J02Rik|AA408197	signal transducer and activator of transcription 1	protein-coding
Diff_Nuc36454	chr1	29521272	29521411	+	0	NA	Intergenic	L1_Mus2|LINE|L1	43008	NR_105760	102465174		NR_105760	ENSMUSG00000099257	Mir6342	Gm27268|mmu-mir-6342	microRNA 6342	ncRNA
Diff_Nuc26564	chr5	121878752	121878891	+	0	NA	intron (NM_172722, intron 15 of 23)	intron (NM_172722, intron 15 of 23)	23662	NM_026129	67397	Mm.154570	NM_026129	ENSMUSG00000029616	Erp29	1200015M03Rik|2810446M09Rik|AW209030|Erp28|Erp31|PDI-Db	endoplasmic reticulum protein 29	protein-coding
Diff_Nuc11837	chr16	33742472	33742611	+	0	NA	exon (NM_175256, exon 10 of 15)	exon (NM_175256, exon 10 of 15)	-51582	NM_010739	17063	Mm.3177	NM_010739	ENSMUSG00000022824	Muc13	114/A10|14/A10|AI159736|Lrrp|Ly64|NJ-1	mucin 13, epithelial transmembrane	protein-coding
Diff_Nuc14157	chr15	77242992	77243131	+	0	NA	Intergenic	Intergenic	-1551	NM_001162883	223672	Mm.243758	NM_173786	ENSMUSG00000057346	Apol9a	-	apolipoprotein L 9a	protein-coding
Diff_Nuc20582	chr7	82274832	82274971	+	0	NA	intron (NM_153579, intron 9 of 12)	intron (NM_153579, intron 9 of 12)	99804	NR_131122	75205	Mm.399304	NR_131122	ENSMUSG00000108803	4930533N22Rik	-	RIKEN cDNA 4930533N22 gene	ncRNA
Diff_Nuc41615	chr9	108531502	108531641	+	0	NA	intron (NM_011790, intron 3 of 15)	intron (NM_011790, intron 3 of 15)	20140	NM_011790	23807	Mm.290447	NM_011790	ENSMUSG00000064145	Arih2	AI843547|ARI2|TRIAD1|UIP48	ariadne RBR E3 ubiquitin protein ligase 2	protein-coding
Diff_Nuc37005	chr1	59136402	59136541	+	0	NA	intron (NM_175200, intron 1 of 12)	intron (NM_175200, intron 1 of 12)	15273	NM_175200	73463	Mm.252811	NM_175200	ENSMUSG00000072295	Als2cr11	1700052H20Rik|4930408G06Rik	amyotrophic lateral sclerosis 2 (juvenile) chromosome region, candidate 11 (human)	protein-coding
Diff_Nuc15068	chr14	28950282	28950421	+	0	NA	intron (NM_177814, intron 12 of 15)	intron (NM_177814, intron 12 of 15)	-368308	NM_009524	22418	Mm.287544	NM_009524	ENSMUSG00000021994	Wnt5a	8030457G12Rik|Wnt-5a	wingless-type MMTV integration site family, member 5A	protein-coding
Diff_Nuc24547	chr5	5672862	5673001	+	0	NA	3' UTR (NM_001103157, exon 6 of 6)	3' UTR (NM_001103157, exon 6 of 6)	-8699	NM_172447	207686	Mm.319007	NM_172447	ENSMUSG00000040473	Cfap69	4921525K03|A330021E22Rik|AI427898	cilia and flagella associated protein 69	protein-coding
Diff_Nuc24366	chr6	145087702	145087841	+	0	NA	intron (NM_008511, intron 3 of 18)	L1MB5|LINE|L1	17512	NM_008511	16970	Mm.843	NM_008511	ENSMUSG00000030263	Lrmp	D6Int3|D6Int4|D6Int5|D6Int7|D6Int8|Jaw1	lymphoid-restricted membrane protein	protein-coding
Diff_Nuc32467	chr3	151176862	151177001	+	0	NA	intron (NM_133222, intron 11 of 15)	L1VL4|LINE|L1	76085	NM_133222	170757	Mm.317261	NM_133222	ENSMUSG00000039167	Adgrl4	1110033N21Rik|ETL1|Eltd1|Etl	adhesion G protein-coupled receptor L4	protein-coding
Diff_Nuc36850	chr1	51318892	51319031	+	0	NA	intron (NR_045151, intron 2 of 4)	intron (NR_045151, intron 2 of 4)	-27009	NM_138741	20324	Mm.398690	NM_138741	ENSMUSG00000045954	Sdpr	-	serum deprivation response	protein-coding
Diff_Nuc28338	chr4	80926722	80926861	+	0	NA	intron (NM_010820, intron 46 of 46)	intron (NM_010820, intron 46 of 46)	161928	NM_010820	17475	Mm.153039	NM_010820	ENSMUSG00000028402	Mpdz	AI225843|B930003D11Rik|MUPP1	multiple PDZ domain protein	protein-coding
Diff_Nuc2891	chr12	25588022	25588161	+	0	NA	intron (NM_001083341, intron 3 of 11)	L1MB7|LINE|L1	71627	NM_001083341	67216	Mm.167671	NM_026037	ENSMUSG00000020646	Mboat2	2810049G06Rik|AU022889|AW547221|LPCAT4|Moact2|Oact2	membrane bound O-acyltransferase domain containing 2	protein-coding
Diff_Nuc18898	chr18	54111722	54111861	+	0	NA	intron (NM_152809, intron 12 of 12)	intron (NM_152809, intron 12 of 12)	90024	NM_152809	70425	Mm.368668	NM_152809	ENSMUSG00000073563	Csnk1g3	3300002K07Rik|C330049O21Rik	casein kinase 1, gamma 3	protein-coding
Diff_Nuc28467	chr4	88509012	88509151	+	0	NA	Intergenic	(TCTG)n|Simple_repeat|Simple_repeat	13090	NM_010502	15962	Mm.57127	NM_010502	ENSMUSG00000095498	Ifna1	Ifa1	interferon alpha 1	protein-coding
Diff_Nuc23351	chr6	89364012	89364151	+	0	NA	intron (NM_025351, intron 6 of 7)	MERVL_2A-int|LTR|ERVL	-51474	NM_008881	18844	Mm.3789	NM_008881	ENSMUSG00000030084	Plxna1	2600013D04Rik|NOV|PlexA1|Plxn1|mKIAA4053	plexin A1	protein-coding
Diff_Nuc38234	chr1	132015852	132015991	+	0	NA	intron (NM_172485, intron 17 of 27)	intron (NM_172485, intron 17 of 27)	303699	NM_007827	13137	Mm.436759	NM_007827	ENSMUSG00000026401	Cd55b	AI323748|Daf|Daf-TM|Daf2|TM-DAF	CD55 molecule, decay accelerating factor for complement B	protein-coding
Diff_Nuc21434	chr7	127779322	127779461	+	0	NA	intron (NM_025899, intron 1 of 13)	intron (NM_025899, intron 1 of 13)	688	NM_025899	67003	Mm.334206	NM_025899	ENSMUSG00000030884	Uqcrc2	1500004O06Rik	ubiquinol cytochrome c reductase core protein 2	protein-coding
Diff_Nuc15709	chr14	64588712	64588851	+	0	NA	Intergenic	Intergenic	17836	NM_026359	67750	Mm.33864	NM_026359	ENSMUSG00000021961	4930578I06Rik	AI429111	RIKEN cDNA 4930578I06 gene	protein-coding
Diff_Nuc39390	chr1	191236902	191237041	+	0	NA	Intergenic	ORR1E|LTR|MaLR	-10819	NM_001281848	16526	Mm.33304	NM_010607	ENSMUSG00000037624	Kcnk2	A430027H14Rik|AI848635|TREK-1	potassium channel, subfamily K, member 2	protein-coding
Diff_Nuc30680	chr3	53878802	53878941	+	0	NA	Intergenic	Intergenic	-81108	NM_001253683	22066	Mm.10100	NM_016984	ENSMUSG00000027748	Trpc4	CCE1|STRPC4|Trp4|Trrp4	transient receptor potential cation channel, subfamily C, member 4	protein-coding
Diff_Nuc25945	chr5	89186192	89186331	+	0	NA	3' UTR (NM_026735, exon 6 of 6)	3' UTR (NM_026735, exon 6 of 6)	-7777	NM_007832	13178	Mm.298892	NM_007832	ENSMUSG00000029366	Dck	-	deoxycytidine kinase	protein-coding
Diff_Nuc4010	chr12	84989282	84989421	+	0	NA	intron (NM_027349, intron 5 of 18)	B2_Mm1t|SINE|B2	16167	NM_027349	67039	Mm.46005	NM_027349	ENSMUSG00000010608	Rbm25	2600011C06Rik|2610015J01Rik|A130095G20Rik|AI159652|AL023075|AU043498|RNPC7	RNA binding motif protein 25	protein-coding
Diff_Nuc21864	chr7	150800452	150800591	+	0	NA	intron (NM_175649, intron 5 of 7)	MTC|LTR|MaLR	13229	NM_175649	244237	Mm.247498	NM_175649	ENSMUSG00000045362	Tnfrsf26	Tnfrh3|Tnfrsf24	tumor necrosis factor receptor superfamily, member 26	protein-coding
Diff_Nuc29991	chr3	15366562	15366701	+	0	NA	Intergenic	MT2B2|LTR|ERVL	-34329	NM_001076679	751864	Mm.431296	NM_001076679	ENSMUSG00000078783	Gm9733	-	predicted gene 9733	protein-coding
Diff_Nuc22155	chr6	21741042	21741181	+	0	NA	intron (NM_173007, intron 8 of 8)	intron (NM_173007, intron 8 of 8)	61404	NM_173007	269831	Mm.21950	NM_173007	ENSMUSG00000029669	Tspan12	9030619E17|AI426782|AI663988|AW111457|Tm4sf12	tetraspanin 12	protein-coding
Diff_Nuc14026	chr15	69559482	69559621	+	0	NA	Intergenic	MLT1A0|LTR|MaLR	-195112	NR_045071	100503580	Mm.404646	NR_045071		Gm19782	-	predicted gene, 19782	ncRNA
Diff_Nuc22740	chr6	52548112	52548251	+	0	NA	intron (NM_145567, intron 4 of 7)	intron (NM_145567, intron 4 of 7)	42113	NM_145567	58875	Mm.286458	NM_145567	ENSMUSG00000029776	Hibadh	6430402H10Rik|AI265272	3-hydroxyisobutyrate dehydrogenase	protein-coding
Diff_Nuc20202	chr7	56709672	56709811	+	0	NA	intron (NM_175272, intron 7 of 37)	intron (NM_175272, intron 7 of 37)	182464	NM_001005232	13172	Mm.307176	NM_001005232	ENSMUSG00000030507	Dbx1	AI426026|Dbx	developing brain homeobox 1	protein-coding
Diff_Nuc39183	chr1	180247002	180247141	+	0	NA	Intergenic	Intergenic	-2213	NM_025511	66359	Mm.489720	NM_025511	ENSMUSG00000026500	Cox20	2310005N03Rik|Fam36a	COX20 Cox2 chaperone	protein-coding
Diff_Nuc32148	chr3	132817982	132818121	+	0	NA	Intergenic	Intergenic	63232	NM_027927	71793	Mm.246726	NM_027927	ENSMUSG00000028016	Ints12	1110020M19Rik|2810027J24Rik|4930529N21Rik|A230056J18Rik|AI666778|Phf22|int12	integrator complex subunit 12	protein-coding
Diff_Nuc30132	chr3	23513852	23513991	+	0	NA	Intergenic	Lx4A|LINE|L1	1169007	NM_001326288	635702	Mm.448351	NM_001326288	ENSMUSG00000102758	Naaladl2	2810043G22Rik|EG635702|Gm1021	N-acetylated alpha-linked acidic dipeptidase-like 2	protein-coding
Diff_Nuc43498	chr8	97861332	97861471	+	0	NA	intron (NM_133954, intron 2 of 6)	RLTR17|LTR|ERVK	5217	NM_133954	101985	Mm.29069	NM_133954	ENSMUSG00000031792	Usb1	AA960436	U6 snRNA biogenesis 1	protein-coding
Diff_Nuc32620	chr2	4508382	4508521	+	0	NA	intron (NM_001347086, intron 16 of 24)	B4|SINE|B4	27651	NM_001177844	209630	Mm.37932	NM_172475	ENSMUSG00000026657	Frmd4a	2700017I06Rik|5330420J21|AI594879|C230040M21Rik|Frmd4|Gm13190|OTTMUSG00000010806|mKIAA1294	FERM domain containing 4A	protein-coding
Diff_Nuc25837	chr5	81628352	81628491	+	0	NA	intron (NM_001347367, intron 3 of 27)	intron (NM_001347367, intron 3 of 27)	177803	NM_198702	319387	Mm.273631	NM_198702	ENSMUSG00000037605	Adgrl3	5430402I23Rik|CIRL-3|D130075K09Rik|Gm1379|LEC3|Lphn3|mKIAA0768	adhesion G protein-coupled receptor L3	protein-coding
Diff_Nuc33371	chr2	40386532	40386671	+	0	NA	Intergenic	RodERV21-int|LTR|ERV1	-1304743	NM_024209	67857	Mm.389242	NM_024209	ENSMUSG00000026753	Ppp6c	2310003C10Rik	protein phosphatase 6, catalytic subunit	protein-coding
Diff_Nuc42137	chr8	18289942	18290081	+	0	NA	Intergenic	ORR1E|LTR|MaLR	-305162	NM_173189	244329	Mm.235296	NM_173189	ENSMUSG00000039842	Mcph1	5430437K10Rik|BRIT1|D030046N04Rik|MCT	microcephaly, primary autosomal recessive 1	protein-coding
Diff_Nuc23134	chr6	75827532	75827671	+	0	NA	Intergenic	RMER1B|Other|Other	-1365110	NM_028880	74342	Mm.292568	NM_028880	ENSMUSG00000060780	Lrrtm1	4632401D06Rik|AW125451	leucine rich repeat transmembrane neuronal 1	protein-coding
Diff_Nuc39151	chr1	178703972	178704111	+	0	NA	intron (NM_001099637, intron 8 of 19)	intron (NM_001099637, intron 8 of 19)	-1487	NR_029775	723921		NR_029775	ENSMUSG00000065573	Mir350	Mirn350|mir-350|mmu-mir-350	microRNA 350	ncRNA
Diff_Nuc29030	chr4	117964792	117964931	+	0	NA	promoter-TSS (NM_011213)	promoter-TSS (NM_011213)	-859	NM_011213	19268	Mm.29855	NM_011213	ENSMUSG00000033295	Ptprf	AA591035|LAR|LARS|RPTP-LAR	protein tyrosine phosphatase, receptor type, F	protein-coding
Diff_Nuc12486	chr16	75115552	75115691	+	0	NA	Intergenic	Intergenic	470685	NM_001252513	320355	Mm.99517	NM_177142	ENSMUSG00000032948	Lipi	D930038D03Rik|lpd1	lipase, member I	protein-coding
Diff_Nuc8826	chr10	92780812	92780951	+	0	NA	Intergenic	Intergenic	-6977	NM_001322265	13713	Mm.4454	NM_013508	ENSMUSG00000008398	Elk3	D430049E23Rik|Erp|Etrp|Net|Sap-2	ELK3, member of ETS oncogene family	protein-coding
Diff_Nuc31892	chr3	117470572	117470711	+	0	NA	Intergenic	Lx3C|LINE|L1	101213	NM_001190156	76561	Mm.33824	NM_029655	ENSMUSG00000028007	Snx7	2510028H01Rik	sorting nexin 7	protein-coding
Diff_Nuc25757	chr5	76643872	76644011	+	0	NA	3' UTR (NM_001289826, exon 23 of 23)	3' UTR (NM_001289826, exon 23 of 23)	31036	NM_011626	21982	Mm.790	NM_011626	ENSMUSG00000029234	Tmem165	AV026557|Tpardl|Tparl|pFT27	transmembrane protein 165	protein-coding
Diff_Nuc35043	chr2	126718142	126718281	+	0	NA	3' UTR (NM_023220, exon 15 of 15)	3' UTR (NM_023220, exon 15 of 15)	9910	NR_106202	102466258		NR_106202	ENSMUSG00000098896	Mir3473g	Gm27751|mmu-mir-3473g	microRNA 3473g	ncRNA
Diff_Nuc19390	chr18	79021022	79021161	+	0	NA	intron (NM_053099, intron 4 of 5)	intron (NM_053099, intron 4 of 5)	-227402	NM_030683	27411	Mm.44158	NM_030683	ENSMUSG00000024552	Slc14a2	UT-A1|UT-A3	solute carrier family 14 (urea transporter), member 2	protein-coding
Diff_Nuc42194	chr8	23357002	23357141	+	0	NA	intron (NM_001293688, intron 3 of 3)	intron (NM_001293688, intron 3 of 3)	19296	NM_001293688	56229	Mm.32067	NM_019576	ENSMUSG00000031480	Thsd1	4833423O18Rik|Tmtsp	thrombospondin, type I, domain 1	protein-coding
Diff_Nuc36519	chr1	34252682	34252821	+	0	NA	exon (NM_001276764, exon 43 of 103)	exon (NM_001276764, exon 43 of 103)	35576	NM_010081	13518	Mm.336625	NM_010081	ENSMUSG00000026131	Dst	2310001O04Rik|A830042E19Rik|AW554249|BP230|BPAG1-n|Bpag|Bpag1|Macf2|ah|athetoid|dt|mKIAA0728|nmf203|nmf339	dystonin	protein-coding
Diff_Nuc37317	chr1	74397312	74397451	+	0	NA	intron (NM_019999, intron 7 of 8)	intron (NM_019999, intron 7 of 8)	-11301	NM_001033345	241112	Mm.310460	NM_001033345	ENSMUSG00000073650	Catip	Gm216	ciliogenesis associated TTC17 interacting protein	protein-coding
Diff_Nuc8628	chr10	82047372	82047511	+	0	NA	Intergenic	MTC|LTR|MaLR	38532	NM_001135569	544717	Mm.334867	NM_001135567	ENSMUSG00000063320	1190007I07Rik	-	RIKEN cDNA 1190007I07 gene	protein-coding
Diff_Nuc21468	chr7	129637912	129638051	+	0	NA	intron (NM_008855, intron 5 of 16)	intron (NM_008855, intron 5 of 16)	-177277	NM_019430	54376	Mm.444212	NM_019430	ENSMUSG00000066189	Cacng3	-	calcium channel, voltage-dependent, gamma subunit 3	protein-coding
Diff_Nuc25390	chr5	58144032	58144171	+	0	NA	intron (NM_001310608, intron 1 of 3)	MTD|LTR|MaLR	34781	NM_018764	54216	Mm.332387	NM_018764	ENSMUSG00000029108	Pcdh7	-	protocadherin 7	protein-coding
Diff_Nuc22643	chr6	47778072	47778211	+	0	NA	intron (NM_177882, intron 1 of 3)	B1_Mus2|SINE|Alu	2363	NM_177882	330301	Mm.128149	NM_177882	ENSMUSG00000051499	Zfp786	A730012O14Rik|Znf786	zinc finger protein 786	protein-coding
Diff_Nuc42315	chr8	29802992	29803131	+	0	NA	intron (NM_001347498, intron 11 of 14)	intron (NM_001347498, intron 11 of 14)	527047	NM_001347499	210801	Mm.248433	NM_153135	ENSMUSG00000063626	Unc5d	D930029E11Rik|Unc5h4|mKIAA1777	unc-5 netrin receptor D	protein-coding
Diff_Nuc4881	chr11	17689192	17689331	+	0	NA	Intergenic	Intergenic	164617	NM_026576	68145	Mm.178684	NM_026576	ENSMUSG00000016984	Etaa1	5730466H23Rik|AA672646	Ewing tumor-associated antigen 1	protein-coding
Diff_Nuc4968	chr11	21494212	21494351	+	0	NA	intron (NM_145425, intron 1 of 17)	Lx3_Mus|LINE|L1	21997	NM_145425	216560	Mm.138090	NM_145425	ENSMUSG00000020319	Wdpcp	AV249152	WD repeat containing planar cell polarity effector	protein-coding
Diff_Nuc21542	chr7	134119092	134119231	+	0	NA	promoter-TSS (NM_026638)	promoter-TSS (NM_026638)	-267	NM_026638	52858	Mm.28219	NM_026638	ENSMUSG00000030682	Cdipt	9530042F15Rik|D7Bwg0575e|Pis|Pis1	CDP-diacylglycerol--inositol 3-phosphatidyltransferase (phosphatidylinositol synthase)	protein-coding
Diff_Nuc13831	chr15	58870442	58870581	+	0	NA	intron (NM_144800, intron 3 of 14)	ORR1D1|LTR|MaLR	43070	NM_001146180	211401	Mm.215481	NM_144800	ENSMUSG00000022353	Mtss1	2310003N14Rik|BC024131|D130001D01Rik|Mim|mKIAA0429	metastasis suppressor 1	protein-coding
Diff_Nuc9050	chr10	104848912	104849051	+	0	NA	intron (NM_177368, intron 2 of 11)	RCHARR1|DNA|MER1_type	162554	NM_177368	278279	Mm.25225	NM_177368	ENSMUSG00000036019	Tmtc2	8430438D04Rik|D330034A10Rik	transmembrane and tetratricopeptide repeat containing 2	protein-coding
Diff_Nuc19757	chr7	19379362	19379501	+	0	NA	exon (NM_011964, exon 3 of 5)	exon (NM_011964, exon 3 of 5)	4428	NM_011964	26439	Mm.36878	NM_011964	ENSMUSG00000004542	Psg19	CGM7|Cea-4|Cea4	pregnancy specific glycoprotein 19	protein-coding
Diff_Nuc13677	chr15	51133822	51133961	+	0	NA	intron (NR_045092, intron 2 of 5)	intron (NR_045092, intron 2 of 5)	93265	NR_045092	100502643	Mm.131987	NR_045092		Gm19303	-	predicted gene, 19303	ncRNA
Diff_Nuc24086	chr6	127454742	127454881	+	0	NA	Intergenic	Intergenic	51070	NM_181402	101187	Mm.110818	NM_181402	ENSMUSG00000037997	Parp11	5330431N24Rik|AI851877|ARTD11|HIN1L|PARP-11	poly (ADP-ribose) polymerase family, member 11	protein-coding
Diff_Nuc1623	chr13	65647742	65647881	+	0	NA	Intergenic	Intergenic	267649	NM_178364	170936	Mm.151546	NM_178364	ENSMUSG00000021514	Zfp369	B930030B22Rik|D230020H11Rik|NRIF2	zinc finger protein 369	protein-coding
Diff_Nuc17786	chr19	53440132	53440271	+	0	NA	intron (NM_001008543, intron 3 of 5)	intron (NM_001008543, intron 3 of 5)	24862	NM_172429	76479	Mm.313687	NM_172429	ENSMUSG00000025024	Smndc1	2410004J23Rik|4933440I19Rik	survival motor neuron domain containing 1	protein-coding
Diff_Nuc22615	chr6	47050922	47051061	+	0	NA	intron (NM_001004357, intron 19 of 23)	MIR|SINE|MIR	-143404	NM_025771	66797	Mm.440084	NM_025771	ENSMUSG00000039419	Cntnap2	5430425M22Rik|Caspr2|mKIAA0868	contactin associated protein-like 2	protein-coding
Diff_Nuc32012	chr3	122909662	122909801	+	0	NA	intron (NM_080451, intron 1 of 4)	intron (NM_080451, intron 1 of 4)	29336	NM_080451	118449	Mm.34359	NM_080451	ENSMUSG00000050315	Synpo2	1110069I04Rik|2310068J10Rik|9530006G20Rik|AI848603|Myo	synaptopodin 2	protein-coding
Diff_Nuc22004	chr6	10549062	10549201	+	0	NA	Intergenic	L1_Mur1|LINE|L1	375247	NR_033776	57866	Mm.4397	NR_033776		AA545190	-	EST AA545190	ncRNA
Diff_Nuc34201	chr2	84639772	84639911	+	0	NA	intron (NM_019949, intron 1 of 3)	intron (NM_019949, intron 1 of 3)	856	NM_019949	56791	Mm.38261	NM_019949	ENSMUSG00000027078	Ube2l6	2810489I21Rik|RIG-B|UBCH8|Ubce8|Ubcm8	ubiquitin-conjugating enzyme E2L 6	protein-coding
Diff_Nuc11951	chr16	38682122	38682261	+	0	NA	intron (NM_020260, intron 1 of 11)	intron (NM_020260, intron 1 of 11)	30957	NM_020260	12549	Mm.370848	NM_020260	ENSMUSG00000022799	Arhgap31	5830477L08Rik|AU041750|Cdgap|D330026I07Rik	Rho GTPase activating protein 31	protein-coding
Diff_Nuc10098	chr17	34724782	34724921	+	0	NA	exon (NM_010929, exon 30 of 30)	exon (NM_010929, exon 30 of 30)	-1900	NM_134116	106512	Mm.26584	NM_134116	ENSMUSG00000034786	Gpsm3	AA960287|AGS4	G-protein signalling modulator 3 (AGS3-like, C. elegans)	protein-coding
Diff_Nuc20380	chr7	71045002	71045141	+	0	NA	intron (NM_021366, intron 1 of 1)	RSINE1|SINE|B4	-16672	NM_001256311	381994	Mm.425466	NM_001256311	ENSMUSG00000095061	E030018B13Rik	Gm1697	RIKEN cDNA E030018B13 gene	protein-coding
Diff_Nuc29449	chr4	137362392	137362531	+	0	NA	Intergenic	ID_B1|SINE|B4	-10162	NM_007431	11647	Mm.288186	NM_007431	ENSMUSG00000028766	Alpl	ALP|APTNAP|Akp-2|Akp2|TNAP|TNSALP	alkaline phosphatase, liver/bone/kidney	protein-coding
Diff_Nuc35239	chr2	135889132	135889271	+	0	NA	intron (NM_029530, intron 5 of 5)	intron (NM_029530, intron 5 of 5)	5538	NM_029530	76161	Mm.41638	NM_029530	ENSMUSG00000027270	Lamp5	3110035N03Rik|6330527O06Rik|BAD-LAMP|LAMP-5	lysosomal-associated membrane protein family, member 5	protein-coding
Diff_Nuc3252	chr12	46709422	46709561	+	0	NA	Intergenic	L1MA8|LINE|L1	-534021	NM_144552	217517	Mm.285400	NM_144552	ENSMUSG00000046314	Stxbp6	BC024598|C85317	syntaxin binding protein 6 (amisyn)	protein-coding
Diff_Nuc28073	chr4	60828612	60828751	+	0	NA	Intergenic	Intergenic	60578	NM_001347134	100039089	Mm.443549	NM_001134674	ENSMUSG00000089873	Mup13	Gm13513|Mup11|OTTMUSG00000012492	major urinary protein 13	protein-coding
Diff_Nuc22638	chr6	47481272	47481411	+	0	NA	intron (NM_007971, intron 19 of 19)	intron (NM_007971, intron 19 of 19)	63688	NM_007971	14056	Mm.246688	NM_007971	ENSMUSG00000029687	Ezh2	Enx-1|Enx1h|KMT6|mKIAA4065	enhancer of zeste 2 polycomb repressive complex 2 subunit	protein-coding
Diff_Nuc23964	chr6	120436232	120436371	+	0	NA	Intergenic	Intergenic	7524	NM_033567	94047	Mm.23088	NM_033567	ENSMUSG00000094626	Cecr6	AW048664	cat eye syndrome chromosome region, candidate 6	protein-coding
Diff_Nuc42389	chr8	35540992	35541131	+	0	NA	Intergenic	B1F2|SINE|Alu	162309	NR_040706	330734	Mm.149998	NR_040706	ENSMUSG00000109819	B930018H19Rik	B930018H19	RIKEN cDNA B930018H19 gene	ncRNA
Diff_Nuc37287	chr1	73227112	73227251	+	0	NA	Intergenic	Intergenic	156021	NR_038002	69449	Mm.250447	NR_038001	ENSMUSG00000101968	1700027A15Rik	-	RIKEN cDNA 1700027A15 gene	ncRNA
Diff_Nuc2575	chr12	3238162	3238301	+	0	NA	intron (NR_015551, intron 4 of 6)	intron (NR_015551, intron 4 of 6)	2440	NR_015551	74173	Mm.309774	NM_028796	ENSMUSG00000079179	Rab10os	1700012B15Rik|1810036A22Rik	RAB10, member RAS oncogene family, opposite strand	ncRNA
Diff_Nuc15540	chr14	56304412	56304551	+	0	NA	Intergenic	Intergenic	-3827	NM_145705	28113	Mm.29346	NM_145705	ENSMUSG00000007589	Tinf2	AW552114|D14Wsu146e|Tin2	Terf1 (TRF1)-interacting nuclear factor 2	protein-coding
Diff_Nuc8152	chr10	56574242	56574381	+	0	NA	Intergenic	Intergenic	477205	NM_010288	14609	Mm.378921	NM_010288	ENSMUSG00000050953	Gja1	AU042049|AW546267|Cnx43|Cx43|Cx43alpha1|Gja-1|Npm1|connexin43	gap junction protein, alpha 1	protein-coding
Diff_Nuc27768	chr4	44160772	44160911	+	0	NA	intron (NM_001038993, intron 4 of 11)	intron (NM_001038993, intron 4 of 11)	19569	NM_175201	73469	Mm.262859	NM_175201	ENSMUSG00000035696	Rnf38	1700065B19Rik|2610202O07Rik|AA673263|Oip1	ring finger protein 38	protein-coding
Diff_Nuc43765	chr8	112308152	112308291	+	0	NA	intron (NM_009677, intron 1 of 23)	intron (NM_009677, intron 1 of 23)	5738	NM_001301211	11765	Mm.37210	NM_009677	ENSMUSG00000031731	Ap1g1	AA409002|AU041323|AW551707|Adtg|D8Ertd374e	adaptor protein complex AP-1, gamma 1 subunit	protein-coding
Diff_Nuc27114	chr5	151483272	151483411	+	0	NA	intron (NM_001346503, intron 1 of 34)	intron (NM_001346503, intron 1 of 34)	6939	NM_001346503	100710	Mm.32959	NM_175310	ENSMUSG00000034021	Pds5b	AI646570|AS3|AW212954|Aprin|Tg(Wap-ERBB2)229Wzw|WAP-Her-2|mKIAA0979	PDS5 cohesin associated factor B	protein-coding
Diff_Nuc6461	chr11	93941882	93942021	+	0	NA	intron (NM_001025429, intron 6 of 26)	intron (NM_001025429, intron 6 of 26)	36432	NM_001025429	70834	Mm.260737	NM_027569	ENSMUSG00000020859	Spag9	3110018C07Rik|4733401I23Rik|4831406C20Rik|AW552012|JLP|JSAP2|JSAP2a|Jip4|Mapk8ip4|syd1	sperm associated antigen 9	protein-coding
Diff_Nuc14999	chr14	26346142	26346281	+	0	NA	intron (NM_183208, intron 2 of 23)	intron (NM_183208, intron 2 of 23)	-7714	NR_037236	100526533		NR_037236	ENSMUSG00000093081	Mir3075	mir-3075|mmu-mir-3075	microRNA 3075	ncRNA
Diff_Nuc37236	chr1	70091962	70092101	+	0	NA	intron (NM_025728, intron 2 of 7)	RMER1C|Other|Other	93842	NM_025728	66722	Mm.440554	NM_025728	ENSMUSG00000053153	Spag16	4921511D23Rik|4930524F24Rik|4930585K05Rik|AV261009|Pf20|Wdr29	sperm associated antigen 16	protein-coding
Diff_Nuc40164	chr9	33096872	33097011	+	0	NA	Intergenic	Intergenic	-360390	NR_131058	330917	Mm.488283	NR_131058		Gm27162	A430016B06	predicted gene 27162	ncRNA
Diff_Nuc35644	chr2	155527922	155528061	+	0	NA	exon (NM_145537, exon 11 of 11)	exon (NM_145537, exon 11 of 11)	-9871	NM_001163452	56407	Mm.234944	NM_019828	ENSMUSG00000038324	Trpc4ap	4833429F06Rik|D2Ertd113e|Trrp4ap|mFLJ00177|truss	transient receptor potential cation channel, subfamily C, member 4 associated protein	protein-coding
Diff_Nuc115	chrX	69849332	69849471	+	0	NA	intron (NM_008067, intron 1 of 9)	intron (NM_008067, intron 1 of 9)	-12483	NR_030546	100124463		NR_030546	ENSMUSG00000077847	Mir105	Mirn105|mmu-mir-105	microRNA 105	ncRNA
Diff_Nuc30931	chr3	67858532	67858671	+	0	NA	intron (NM_001113419, intron 3 of 10)	intron (NM_001113419, intron 3 of 10)	-10123	NM_001113421	30953	Mm.331064	NM_013928	ENSMUSG00000027777	Schip1	Nf2ip|Schip-1	schwannomin interacting protein 1	protein-coding
Diff_Nuc6507	chr11	95484612	95484751	+	0	NA	Intergenic	Intergenic	-35669	NM_033217	18053	Mm.283893	NM_033217	ENSMUSG00000000120	Ngfr	LNGFR|Tnfrsf16|p75|p75NGFR|p75NTR	nerve growth factor receptor (TNFR superfamily, member 16)	protein-coding
Diff_Nuc8291	chr10	63307182	63307321	+	0	NA	intron (NM_001164519, intron 1 of 12)	intron (NM_001164519, intron 1 of 12)	23448	NM_001164519	216033	Mm.444692	NM_177612	ENSMUSG00000060843	Ctnna3	4930429L08Rik|4933408A16|Catna3|Vr22	catenin (cadherin associated protein), alpha 3	protein-coding
Diff_Nuc5842	chr11	65633432	65633571	+	0	NA	intron (NM_026107, intron 5 of 7)	(CA)n|Simple_repeat|Simple_repeat	12824	NM_001302375	52712	Mm.340052	NM_026107	ENSMUSG00000018347	Zkscan6	1700128E15Rik|D11Ertd714e|KOX11|Zfp535|Znf18	zinc finger with KRAB and SCAN domains 6	protein-coding
Diff_Nuc2157	chr13	98708552	98708691	+	0	NA	intron (NM_012026, intron 31 of 35)	intron (NM_012026, intron 31 of 35)	267499	NM_012026	110596	Mm.252718	NM_012026	ENSMUSG00000021662	Arhgef28	9230110L08Rik|AI323540|D13Bwg1089e|RIP2|Rgnef|RhoGEF|Rhoip2|p190RhoGEF	Rho guanine nucleotide exchange factor (GEF) 28	protein-coding
Diff_Nuc7241	chr10	7231862	7232001	+	0	NA	Intergenic	Intergenic	18583	NR_045946	619314	Mm.145928	NR_045946	ENSMUSG00000110909	B020014A21Rik	-	RIKEN cDNA B020014A21 gene	ncRNA
Diff_Nuc15783	chr14	67989822	67989961	+	0	NA	intron (NR_045961, intron 3 of 5)	intron (NR_045961, intron 3 of 5)	26688	NR_045961	73977	Mm.414915	NR_045961	ENSMUSG00000093472	4930438E09Rik	-	RIKEN cDNA 4930438E09 gene	ncRNA
Diff_Nuc8403	chr10	69583842	69583981	+	0	NA	intron (NM_001111121, intron 1 of 8)	intron (NM_001111121, intron 1 of 8)	24042	NM_001111121	76551	Mm.281741	NM_001111121	ENSMUSG00000048701	Ccdc6	2810012H18Rik|AA536681|AA960498|AW061011	coiled-coil domain containing 6	protein-coding
Diff_Nuc43020	chr8	73801092	73801231	+	0	NA	intron (NM_001142323, intron 1 of 38)	PB1D7|SINE|Alu	4548	NM_001142323	17925	Mm.33779	NM_015742	ENSMUSG00000004677	Myo9b	-	myosin IXb	protein-coding
Diff_Nuc29353	chr4	133226282	133226421	+	0	NA	intron (NM_001145955, intron 1 of 3)	intron (NM_001145955, intron 1 of 3)	2211	NM_001145955	230801	Mm.217004	NM_178698	ENSMUSG00000043257	Pigv	B330013B03|D430024F16Rik	phosphatidylinositol glycan anchor biosynthesis, class V	protein-coding
Diff_Nuc24703	chr5	17020782	17020921	+	0	NA	Intergenic	RMER6C|LTR|ERVK	38911	NM_027609	70935	Mm.332225	NM_027609	ENSMUSG00000058643	Speer4f1	4922502J04Rik|SPEER-4F|Speer4f	spermatogenesis associated glutamate (E)-rich protein 4F1	protein-coding
Diff_Nuc21998	chr6	10052802	10052941	+	0	NA	Intergenic	B3A|SINE|B2	871507	NR_033776	57866	Mm.4397	NR_033776		AA545190	-	EST AA545190	ncRNA
Diff_Nuc568	chr13	13239532	13239671	+	0	NA	Intergenic	Lx|LINE|L1	-35382	NM_181852	107849	Mm.392548	NM_181852	ENSMUSG00000055360	Prl2c5	Ghd3|MRP-4|Mrpplf4|PLF-4	prolactin family 2, subfamily c, member 5	protein-coding
Diff_Nuc43669	chr8	108377162	108377301	+	0	NA	Intergenic	B2_Mm2|SINE|B2	-1323	NM_177150	320394	Mm.334775	NM_177150	ENSMUSG00000036672	Cenpt	G630055P03Rik	centromere protein T	protein-coding
Diff_Nuc20953	chr7	104226612	104226751	+	0	NA	Intergenic	Intergenic	-3580	NM_001162477	14389	Mm.42033	NM_010248	ENSMUSG00000004508	Gab2	AI463667|D130058I17Rik|p97	growth factor receptor bound protein 2-associated protein 2	protein-coding
Diff_Nuc15154	chr14	32715842	32715981	+	0	NA	Intergenic	Intergenic	-72310	NM_001024604	105522	Mm.37660	NM_001024604	ENSMUSG00000014496	Ankrd28	AI465466|AI604979|E430019N21Rik|mKIAA0379	ankyrin repeat domain 28	protein-coding
Diff_Nuc41497	chr9	103010082	103010221	+	0	NA	Intergenic	L1_Mus3|LINE|L1	-4253	NM_173781	270192	Mm.490252	NM_173781	ENSMUSG00000032549	Rab6b	9630015C03|AI844641|C330006L04Rik|D9Bwg0185e	RAB6B, member RAS oncogene family	protein-coding
Diff_Nuc11447	chr16	16308137	16308276	+	0	NA	intron (NR_038046, intron 4 of 4)	intron (NR_038046, intron 4 of 4)	5148	NM_198246	70120	Mm.37486	NM_198246	ENSMUSG00000022792	Yars2	2210023C10Rik|tyrRS	tyrosyl-tRNA synthetase 2 (mitochondrial)	protein-coding
Diff_Nuc14951	chr14	23592432	23592571	+	0	NA	intron (NM_028275, intron 5 of 6)	intron (NM_028275, intron 5 of 6)	-230481	NR_046307	74896	Mm.444661	NR_046307		4930405A10Rik	4930456G20Rik	RIKEN cDNA 4930405A10 gene	ncRNA
Diff_Nuc4057	chr12	86695932	86696071	+	0	NA	intron (NM_026775, intron 1 of 4)	B3A|SINE|B2	-15689	NM_145138	217718	Mm.29071	NM_145138	ENSMUSG00000034290	Nek9	C130021H08Rik	NIMA (never in mitosis gene a)-related expressed kinase 9	protein-coding
Diff_Nuc5347	chr11	44134172	44134311	+	0	NA	Intergenic	Intergenic	-79324	NM_001303244	16160	Mm.239707	NM_008352	ENSMUSG00000004296	Il12b	Il-12b|Il-12p40|Il12p40|p40	interleukin 12b	protein-coding
Diff_Nuc32009	chr3	122848712	122848851	+	0	NA	intron (NM_080451, intron 1 of 4)	intron (NM_080451, intron 1 of 4)	90286	NM_080451	118449	Mm.34359	NM_080451	ENSMUSG00000050315	Synpo2	1110069I04Rik|2310068J10Rik|9530006G20Rik|AI848603|Myo	synaptopodin 2	protein-coding
Diff_Nuc5224	chr11	35579662	35579801	+	0	NA	Intergenic	Intergenic	-3266	NM_145962	211347	Mm.255044	NM_145962	ENSMUSG00000018846	Pank3	-	pantothenate kinase 3	protein-coding
Diff_Nuc28274	chr4	75486122	75486261	+	0	NA	Intergenic	RMER15|LTR|ERVL	-562001	NM_025849	66928	Mm.24332	NM_025849	ENSMUSG00000028398	Tmem261	1700027K24Rik|3110001D03Rik	transmembrane protein 261	protein-coding
Diff_Nuc36444	chr1	29186742	29186881	+	0	NA	Intergenic	Intergenic	-291522	NR_105760	102465174		NR_105760	ENSMUSG00000099257	Mir6342	Gm27268|mmu-mir-6342	microRNA 6342	ncRNA
Diff_Nuc11975	chr16	40374692	40374831	+	0	NA	Intergenic	Intergenic	-1158178	NM_001347236	268890	Mm.310524	NM_175548	ENSMUSG00000061080	Lsamp	5430428I19|AW046674|B130007O04Rik|D930023J12Rik|Lam|Lamp	limbic system-associated membrane protein	protein-coding
Diff_Nuc16773	chr19	4320212	4320351	+	0	NA	exon (NM_001001984, exon 20 of 21)	exon (NM_001001984, exon 20 of 21)	-14059	NM_001290818	110355	Mm.254144	NM_130863	ENSMUSG00000024858	Grk2	Adrbk-1|Adrbk1|Bark-1|beta ARK|betaARK1	G protein-coupled receptor kinase 2	protein-coding
Diff_Nuc7264	chr10	8466832	8466971	+	0	NA	intron (NM_175155, intron 10 of 19)	intron (NM_175155, intron 10 of 19)	138967	NM_175155	70097	Mm.338275	NM_175155	ENSMUSG00000015305	Sash1	1100001C18Rik|2500002E12Rik|A330076K04Rik|mKIAA0790	SAM and SH3 domain containing 1	protein-coding
Diff_Nuc4361	chr12	104682092	104682231	+	0	NA	promoter-TSS (NM_001281830)	promoter-TSS (NM_001281830)	-271	NM_001281830	76933	Mm.271275	NM_029803	ENSMUSG00000079017	Ifi27l2a	2310061N23Rik|Ifi27|Isg12|Isg12(b1)	interferon, alpha-inducible protein 27 like 2A	protein-coding
Diff_Nuc5445	chr11	48779462	48779601	+	0	NA	3' UTR (NM_173434, exon 3 of 3)	3' UTR (NM_173434, exon 3 of 3)	13352	NM_001114679	667214	Mm.441306	NM_001114679	ENSMUSG00000069893	9930111J21Rik1	9930111J21Rik|Iigp	RIKEN cDNA 9930111J21 gene 1	protein-coding
Diff_Nuc17927	chr19	60007032	60007171	+	0	NA	intron (NM_001164367, intron 3 of 4)	intron (NM_001164367, intron 3 of 4)	12166	NM_001033172	74998	Mm.24167	NM_001033172	ENSMUSG00000040022	Rab11fip2	4930470G04Rik|A830046J09Rik|AW558126|Nrip11	RAB11 family interacting protein 2 (class I)	protein-coding
Diff_Nuc19453	chr18	83539862	83540001	+	0	NA	Intergenic	MT2A|LTR|ERVL	-44655	NR_045361	70960	Mm.410834	NR_045361		4921531P14Rik	1700108N05Rik	RIKEN cDNA 4921531P14 gene	ncRNA
Diff_Nuc39356	chr1	189343802	189343941	+	0	NA	Intergenic	(TG)n|Simple_repeat|Simple_repeat	-89014	NM_001243792	26381	Mm.89989	NM_011935	ENSMUSG00000026610	Esrrg	ERR3|Errg|NR3B3|mKIAA0832	estrogen-related receptor gamma	protein-coding
Diff_Nuc37192	chr1	67100942	67101081	+	0	NA	Intergenic	Intergenic	-15565	NM_021295	14768	Mm.20522	NM_021295	ENSMUSG00000026000	Lancl1	AW124738|Gpr69|Gpr69a|p40	LanC (bacterial lantibiotic synthetase component C)-like 1	protein-coding
Diff_Nuc23937	chr6	119548462	119548601	+	0	NA	intron (NM_053204, intron 19 of 20)	intron (NM_053204, intron 19 of 20)	-54166	NM_009525	22419	Mm.321818	NM_009525	ENSMUSG00000030170	Wnt5b	AW545702|Wnt-5b	wingless-type MMTV integration site family, member 5B	protein-coding
Diff_Nuc43705	chr8	109512262	109512401	+	0	NA	intron (NM_009229, intron 2 of 6)	MTD|LTR|MaLR	-42895	NM_126165	116733	Mm.236004	NM_126165	ENSMUSG00000031913	Vps4a	4930589C15Rik|AI325971|AW553189	vacuolar protein sorting 4A	protein-coding
Diff_Nuc3933	chr12	81538352	81538491	+	0	NA	promoter-TSS (NM_177267)	promoter-TSS (NM_177267)	-833	NM_177267	320808	Mm.220310	NM_177267	ENSMUSG00000049106	Dcaf5	9430020B07Rik|AI325023|AI430035|AI848110|AW124614|BCRG2|BCRP2|Wdr22	DDB1 and CUL4 associated factor 5	protein-coding
Diff_Nuc12492	chr16	75622992	75623131	+	0	NA	Intergenic	L1_Mus3|LINE|L1	29925	NM_198302	224344	Mm.273214	NM_198302	ENSMUSG00000032940	Rbm11	A330018F01	RNA binding motif protein 11	protein-coding
Diff_Nuc4601	chr12	119869262	119869401	+	0	NA	Intergenic	Intergenic	-100665	NR_045947	100384890	Mm.484658	NR_045947		D230030E09Rik	Npe	Riken cDNA D230030E09 gene	ncRNA
Diff_Nuc39073	chr1	173534902	173535041	+	0	NA	intron (NM_001277968, intron 1 of 8)	RLTR31_Mur|LTR|ERVK	2494	NR_102726	17085	Mm.560	NM_008534	ENSMUSG00000004707	Ly9	AI893573|CD229|Lgp100|Ly-9|SLAMF3|T100	lymphocyte antigen 9	protein-coding
Diff_Nuc37901	chr1	109387192	109387331	+	0	NA	Intergenic	Intergenic	-20739	NM_001174170	18788	Mm.271870	NM_011111	ENSMUSG00000062345	Serpinb2	PAI-2|Planh2|ovalbumin	serine (or cysteine) peptidase inhibitor, clade B, member 2	protein-coding
Diff_Nuc30834	chr3	62173712	62173851	+	0	NA	intron (NM_001081295, intron 3 of 13)	intron (NM_001081295, intron 3 of 13)	31082	NM_001081295	622434	Mm.153974	NM_001081295	ENSMUSG00000036885	Arhgef26	4631416L12Rik|8430436L14Rik|AI303572|AW491953|SGEF	Rho guanine nucleotide exchange factor (GEF) 26	protein-coding
Diff_Nuc19415	chr18	80755442	80755581	+	0	NA	Intergenic	Intergenic	-14226	NR_028424	100039348	Mm.254722	NR_028424		Gm2176	A430076E10Rik	glucosamine-6-phosphate deaminase 1 pseudogene	pseudo
Diff_Nuc12969	chr15	6799612	6799751	+	0	NA	intron (NM_001310469, intron 3 of 17)	intron (NM_001310469, intron 3 of 17)	24632	NM_011019	18414	Mm.10760	NM_011019	ENSMUSG00000022146	Osmr	OSMRB	oncostatin M receptor	protein-coding
Diff_Nuc20935	chr7	102813012	102813151	+	0	NA	Intergenic	Intergenic	-506673	NM_001310762	23966	Mm.254610	NM_011858	ENSMUSG00000048078	Tenm4	Doc4|ELM2|Odz4|R75022|Ten-m4|l(7)-3Rn|l7Rn3|mKIAA1302	teneurin transmembrane protein 4	protein-coding
Diff_Nuc10347	chr17	48280562	48280701	+	0	NA	intron (NM_001177897, intron 2 of 3)	ORR1B2|LTR|MaLR	2626	NM_001177897	328829	Mm.466999	NM_177824	ENSMUSG00000073386	9830107B12Rik	Trem5	RIKEN cDNA 9830107B12 gene	protein-coding
Diff_Nuc15190	chr14	35048542	35048681	+	0	NA	Intergenic	Intergenic	15379	NM_181529	319508	Mm.228006	NM_176931	ENSMUSG00000041479	Syt15	CHR10SYT|E230025K04Rik|sytXV	synaptotagmin XV	protein-coding
Diff_Nuc1540	chr13	60805452	60805591	+	0	NA	intron (NM_001285917, intron 3 of 26)	intron (NM_001285917, intron 3 of 26)	82204	NM_199148	218275	Mm.222427	NM_199148	ENSMUSG00000042243	BC051665	-	cDNA sequence BC051665	protein-coding
Diff_Nuc18152	chr18	11700192	11700331	+	0	NA	Intergenic	Lx9|LINE|L1	-91524	NM_001252495	225182	Mm.154275	NM_175458	ENSMUSG00000041238	Rbbp8	9930104E21Rik|CtIP|RBBP-8|RIM|SAE2	retinoblastoma binding protein 8	protein-coding
Diff_Nuc16190	chr14	92817497	92817636	+	0	NA	Intergenic	Lx8|LINE|L1	1470541	NM_001271800	211712	Mm.37126	NM_001081377	ENSMUSG00000055421	Pcdh9	-	protocadherin 9	protein-coding
Diff_Nuc17331	chr19	32024912	32025051	+	0	NA	Intergenic	Intergenic	81730	NM_001081074	69865	Mm.87538	NM_001081074	ENSMUSG00000052595	A1cf	1810073H04Rik|ACF64|ACF65|ASP|Acf|MCM|MerCreMer|Tg(Myh6-cre/Esr1*)1Jmk|mer	APOBEC1 complementation factor	protein-coding
Diff_Nuc43623	chr8	106757472	106757611	+	0	NA	intron (NR_045642, intron 5 of 8)	intron (NR_045642, intron 5 of 8)	14917	NR_045642	57813	Mm.183110	NM_021028	ENSMUSG00000035824	Tk2	AU024611|mt-TK	thymidine kinase 2, mitochondrial	protein-coding
Diff_Nuc23051	chr6	71778262	71778401	+	0	NA	Intergenic	B2_Mm2|SINE|B2	-2983	NM_001253681	76614	Mm.235123	NM_029673	ENSMUSG00000052337	Immt	1700082C19Rik|D830041H16Rik|HMP|P87|P87/89|P89	inner membrane protein, mitochondrial	protein-coding
Diff_Nuc2647	chr12	6575102	6575241	+	0	NA	Intergenic	RLTR45-int|LTR|ERVK	811965	NR_045045	73575	Mm.179463	NR_045045	ENSMUSG00000102096	1700101O22Rik	-	RIKEN cDNA 1700101O22 gene	ncRNA
Diff_Nuc40116	chr9	31309322	31309461	+	0	NA	Intergenic	ORR1A3|LTR|MaLR	-37568	NM_144936	235135	Mm.390134	NM_144936	ENSMUSG00000041737	Tmem45b	BC018222	transmembrane protein 45b	protein-coding
Diff_Nuc39847	chr9	18274682	18274821	+	0	NA	intron (NM_028935, intron 2 of 7)	RMER15|LTR|ERVL	3252	NM_028935	72230	Mm.289689	NM_028935	ENSMUSG00000074500	Zfp558	1700007A21Rik|4932704I17Rik|Zfp558-ps	zinc finger protein 558	protein-coding
Diff_Nuc24453	chr6	148198602	148198741	+	0	NA	intron (NM_001347518, intron 12 of 18)	intron (NM_001347518, intron 12 of 18)	-37775	NM_001286560	67456	Mm.59812	NM_026168	ENSMUSG00000030304	Ergic2	1200009B18Rik|4930572C01Rik|AA408438|Ptx1	ERGIC and golgi 2	protein-coding
Diff_Nuc4763	chr11	10140082	10140221	+	0	NA	Intergenic	Intergenic	-873868	NM_177033	319922	Mm.337851	NM_177033	ENSMUSG00000050830	Vwc2	A930041G11Rik|G11|PSST739|UNQ739|cradin	von Willebrand factor C domain containing 2	protein-coding
Diff_Nuc34896	chr2	120843352	120843491	+	0	NA	TTS (NM_010761)	TTS (NM_010761)	9277	NM_010761	17151	Mm.7838	NM_010761	ENSMUSG00000023572	Ccndbp1	AU022347|DIP1|GCIP|Maid|SECC-8|SSEC-8	cyclin D-type binding-protein 1	protein-coding
Diff_Nuc28923	chr4	111989072	111989211	+	0	NA	Intergenic	Lx5|LINE|L1	84115	NM_001102474	195564	Mm.259652	NM_177578	ENSMUSG00000070868	Skint3	A430090E18Rik|Skint-3	selection and upkeep of intraepithelial T cells 3	protein-coding
Diff_Nuc10449	chr17	54057452	54057591	+	0	NA	Intergenic	L1_Mus4|LINE|L1	-72238	NM_026935	69083	Mm.19320	NM_026935	ENSMUSG00000023122	Sult1c2	1810008N17Rik|ST1C1|ST1C2|Sult1c1	sulfotransferase family, cytosolic, 1C, member 2	protein-coding
Diff_Nuc7762	chr10	35763302	35763441	+	0	NA	Intergenic	B1_Mur1|SINE|Alu	-463242	NM_001253355	319415	Mm.332442	NM_001081208	ENSMUSG00000044499	Hs3st5	D930005L05Rik|Gm1151|Hs3ost5	heparan sulfate (glucosamine) 3-O-sulfotransferase 5	protein-coding
Diff_Nuc13849	chr15	59388537	59388676	+	0	NA	intron (NM_026746, intron 4 of 6)	intron (NM_026746, intron 4 of 6)	-91603	NM_144549	211770	Mm.40298	NM_144549	ENSMUSG00000032501	Trib1	A530090O15Rik|TRB-1|Trb1	tribbles pseudokinase 1	protein-coding
Diff_Nuc1544	chr13	60915072	60915211	+	0	NA	Intergenic	Intergenic	-10936	NM_027344	70202	Mm.158337	NM_027344	ENSMUSG00000056728	Ctsll3	2310051M13Rik	cathepsin L-like 3	protein-coding
Diff_Nuc9834	chr17	24356322	24356461	+	0	NA	intron (NM_028056, intron 4 of 9)	intron (NM_028056, intron 4 of 9)	1323	NM_028056	72016	Mm.23881	NM_028056	ENSMUSG00000024118	1600002H07Rik	-	RIKEN cDNA 1600002H07 gene	protein-coding
Diff_Nuc8913	chr10	96911222	96911361	+	0	NA	Intergenic	Lx3A|LINE|L1	25179	NR_039547	100628616		NR_039547	ENSMUSG00000105557	Mir3966	mmu-mir-3966|mu-mir-3966	microRNA 3966	ncRNA
Diff_Nuc30534	chr3	46087372	46087511	+	0	NA	Intergenic	RMER15|LTR|ERVL	164422	NM_001101479	241989	Mm.119234	NM_001101479	ENSMUSG00000090919	Pabpc4l	C330050A14Rik|EG241989	poly(A) binding protein, cytoplasmic 4-like	protein-coding
Diff_Nuc25679	chr5	73454102	73454241	+	0	NA	intron (NM_028194, intron 47 of 62)	B1F1|SINE|Alu	56028	NM_173403	231290	Mm.491387	NM_173403	ENSMUSG00000029219	Slc10a4	E130304D01	solute carrier family 10 (sodium/bile acid cotransporter family), member 4	protein-coding
Diff_Nuc19806	chr7	24345782	24345921	+	0	NA	Intergenic	Lx2|LINE|L1	-16353	NM_001166843	100043103	Mm.480300	NM_001166843	ENSMUSG00000094602	Vmn1r169	Gm4232	vomeronasal 1 receptor 169	protein-coding
Diff_Nuc4898	chr11	18807922	18808061	+	0	NA	intron (NM_010789, intron 8 of 11)	intron (NM_010789, intron 8 of 11)	110981	NM_001193271	17268	Mm.356578	NM_010789	ENSMUSG00000020160	Meis1	C530044H18Rik|Evi8	Meis homeobox 1	protein-coding
Diff_Nuc27797	chr4	45632842	45632981	+	0	NA	Intergenic	Intergenic	-63550	NM_001033412	329839	Mm.331582	NM_001033412		Gm829	-	predicted gene 829	protein-coding
Diff_Nuc25946	chr5	89192412	89192551	+	0	NA	Intergenic	Lx7|LINE|L1	-1557	NM_007832	13178	Mm.298892	NM_007832	ENSMUSG00000029366	Dck	-	deoxycytidine kinase	protein-coding
Diff_Nuc24827	chr5	23603092	23603231	+	0	NA	Intergenic	Intergenic	-3247	NM_026448	52323	Mm.273768	NM_026448	ENSMUSG00000028986	Klhl7	2700038B03Rik|D5Ertd363e|SBBI26	kelch-like 7	protein-coding
Diff_Nuc8447	chr10	71899642	71899781	+	0	NA	Intergenic	Intergenic	-217883	NM_025635	52696	Mm.62876	NM_025635	ENSMUSG00000019923	Zwint	2010007E07Rik|2600001N01Rik|D10Ertd749e|Zwint-1	ZW10 interactor	protein-coding
Diff_Nuc8625	chr10	81515462	81515601	+	0	NA	intron (NM_001024626, intron 1 of 2)	ORR1B1-int|LTR|MaLR	4659	NM_001024626	408062	Mm.391409	NM_001024626	ENSMUSG00000061371	Zfp873	-	zinc finger protein 873	protein-coding
Diff_Nuc16542	chr14	114942642	114942781	+	0	NA	Intergenic	Intergenic	-288476	NR_045661	75822	Mm.410813	NR_045661		4930524C18Rik	-	RIKEN cDNA 4930524C18 gene	ncRNA
Diff_Nuc17983	chr18	4117807	4117946	+	0	NA	Intergenic	Intergenic	-47954	NM_026092	67328	Mm.158148	NM_026092	ENSMUSG00000024233	Lyzl1	1700038F02Rik|Lyc2|Lyzd1	lysozyme-like 1	protein-coding
Diff_Nuc30449	chr3	39015002	39015141	+	0	NA	Intergenic	ORR1B1|LTR|MaLR	229209	NM_183221	329628	Mm.316210	NM_183221	ENSMUSG00000046743	Fat4	6030410K14Rik|9430004M15	FAT atypical cadherin 4	protein-coding
Diff_Nuc19354	chr18	76448162	76448301	+	0	NA	intron (NM_001311070, intron 2 of 8)	intron (NM_001311070, intron 2 of 8)	26132	NM_001311070	17126	Mm.152699	NM_010754	ENSMUSG00000024563	Smad2	7120426M23Rik|Madh2|Madr2|Smad-2|mMad2	SMAD family member 2	protein-coding
Diff_Nuc11093	chr17	86905132	86905271	+	0	NA	intron (NM_011104, intron 10 of 14)	intron (NM_011104, intron 10 of 14)	-218683	NR_045435	72104	Mm.443401	NR_045435	ENSMUSG00000100738	2010106C02Rik	-	RIKEN cDNA 2010106C02 gene	ncRNA
Diff_Nuc42806	chr8	62489642	62489781	+	0	NA	Intergenic	Intergenic	185265	NR_126087	75017	Mm.60775	NR_126087	ENSMUSG00000110406	4930470O06Rik	-	RIKEN cDNA 4930470O06 gene	ncRNA
Diff_Nuc31953	chr3	120819922	120820061	+	0	NA	Intergenic	Intergenic	54622	NM_028456	66568	Mm.263163	NM_025637	ENSMUSG00000028133	Rwdd3	2510027J23Rik|3110037C01Rik|AI035684|AI662458|Rsume|X2CR1	RWD domain containing 3	protein-coding
Diff_Nuc2489	chr13	114954982	114955121	+	0	NA	Intergenic	Intergenic	-13251	NR_045836	319803	Mm.386896	NM_177004		A430090L17Rik	-	RIKEN cDNA A430090L17 gene	ncRNA
Diff_Nuc36634	chr1	39621412	39621551	+	0	NA	intron (NM_001033135, intron 2 of 6)	intron (NM_001033135, intron 2 of 6)	12711	NM_001033135	67702	Mm.28614	NM_001033135	ENSMUSG00000048234	Rnf149	1600023E10Rik|AV037261|C76763|Gm15832|Greul4|OTTMUSG00000026591	ring finger protein 149	protein-coding
Diff_Nuc30523	chr3	45323472	45323611	+	0	NA	Intergenic	Intergenic	-80310	NR_040594	72274	Mm.396202	NR_040594	ENSMUSG00000100799	1700027H10Rik	-	RIKEN cDNA 1700027H10 gene	ncRNA
Diff_Nuc20609	chr7	83543792	83543931	+	0	NA	intron (NM_001199224, intron 6 of 22)	intron (NM_001199224, intron 6 of 22)	169088	NM_001199224	244071	Mm.322829	NM_172902	ENSMUSG00000025754	Agbl1	Ccp4|D430020F16|EG244071|Nna1-l1	ATP/GTP binding protein-like 1	protein-coding
Diff_Nuc4521	chr12	114346562	114346701	+	0	NA	intron (NM_001346696, intron 1 of 19)	intron (NM_001346696, intron 1 of 19)	10142	NM_054081	116870	Mm.212577	NM_054081	ENSMUSG00000021144	Mta1	-	metastasis associated 1	protein-coding
Diff_Nuc18205	chr18	14040922	14041061	+	0	NA	intron (NM_145492, intron 3 of 7)	intron (NM_145492, intron 3 of 7)	90251	NM_145492	225207	Mm.40325	NM_145492	ENSMUSG00000024420	Zfp521	B930086A16Rik|Evi3|Znf521	zinc finger protein 521	protein-coding
Diff_Nuc36739	chr1	44236762	44236901	+	0	NA	intron (NM_011729, intron 14 of 14)	intron (NM_011729, intron 14 of 14)	32242	NM_011729	22592	Mm.2213	NM_011729	ENSMUSG00000026048	Ercc5	Xpg	excision repair cross-complementing rodent repair deficiency, complementation group 5	protein-coding
Diff_Nuc16694	chr14	123312402	123312541	+	0	NA	promoter-TSS (NM_145466)	promoter-TSS (NM_145466)	-84	NM_145466	223267	Mm.379358	NM_145466	ENSMUSG00000041625	Ggact	A2ld1	gamma-glutamylamine cyclotransferase	protein-coding
Diff_Nuc14634	chr15	102133652	102133791	+	0	NA	intron (NM_001014976, intron 6 of 30)	MER5B|DNA|MER1_type	6997	NM_001014976	105988	Mm.288324	NM_001014976	ENSMUSG00000058290	Espl1	AL024103|AU045071|Cerp|ESP1|PRCE|SSE	extra spindle pole bodies 1, separase	protein-coding
Diff_Nuc628	chr13	16110922	16111061	+	0	NA	intron (NM_008380, intron 4 of 4)	intron (NM_008380, intron 4 of 4)	7307	NM_008380	16323	Mm.8042	NM_008380	ENSMUSG00000041324	Inhba	-	inhibin beta-A	protein-coding
Diff_Nuc5338	chr11	43492622	43492761	+	0	NA	Intergenic	Intergenic	-2809	NM_027557	70802	Mm.397449	NM_027557	ENSMUSG00000044950	Pwwp2a	4631424J17Rik|AI891583|AU024105|D930040F23Rik	PWWP domain containing 2A	protein-coding
Diff_Nuc37115	chr1	63227312	63227451	+	0	NA	TTS (NM_018796)	TTS (NM_018796)	1784	NR_028558	100217464	Mm.484706	NR_028558	ENSMUSG00000064602	Snora41	MBI-83	small nucleolar RNA, H/ACA box 41	snoRNA
Diff_Nuc4274	chr12	101424652	101424791	+	0	NA	Intergenic	Intergenic	-1457	NR_045282	100038378	Mm.387075	NR_045282	ENSMUSG00000072884	Gm10433	ENSMUSG00000072884	predicted gene 10433	ncRNA
Diff_Nuc8493	chr10	74902642	74902781	+	0	NA	3' UTR (NM_133995, exon 10 of 10)	3' UTR (NM_133995, exon 10 of 10)	-9544	NR_045841	71125	Mm.399516	NR_045841		4933407G14Rik	-	RIKEN cDNA 4933407G14 gene	ncRNA
Diff_Nuc39227	chr1	182241892	182242031	+	0	NA	Intergenic	ORR1E|LTR|MaLR	-18646	NM_001081175	320404	Mm.132535	NM_001081175	ENSMUSG00000038855	Itpkb	1110033J02Rik|E130307H12Rik	inositol 1,4,5-trisphosphate 3-kinase B	protein-coding
Diff_Nuc31862	chr3	116105932	116106071	+	0	NA	intron (NM_001173553, intron 3 of 13)	B4A|SINE|B4	20949	NM_001080818	229776	Mm.17647	NM_001080818	ENSMUSG00000033502	Cdc14a	A830059A17Rik|CDC14A2|CDC14a1|Cdc14	CDC14 cell division cycle 14A	protein-coding
Diff_Nuc22890	chr6	61432632	61432771	+	0	NA	intron (NM_183310, intron 5 of 10)	L1Md_F2|LINE|L1	-301897	NR_040287	100504262	Mm.438066	NR_040287		A730020E08Rik	-	RIKEN cDNA A730020E08 gene	ncRNA
Diff_Nuc164	chrX	102892372	102892511	+	0	NA	Intergenic	ORR1A1|LTR|MaLR	-67375	NM_030614	80903	Mm.154768	NM_030614	ENSMUSG00000031230	Fgf16	-	fibroblast growth factor 16	protein-coding
Diff_Nuc37339	chr1	75187592	75187731	+	0	NA	intron (NR_109938, intron 1 of 15)	intron (NR_109938, intron 1 of 15)	923	NM_001003917	245860	Mm.238266	NM_001003917	ENSMUSG00000033124	Atg9a	AU019532|Apg9l1|Atg9|Atg9l1	autophagy related 9A	protein-coding
Diff_Nuc42008	chr8	8843222	8843361	+	0	NA	Intergenic	Intergenic	-152754	NM_176849	234023	Mm.251655	NM_176849	ENSMUSG00000040459	Arglu1	9430010O03Rik|C130008N12	arginine and glutamate rich 1	protein-coding
Diff_Nuc11020	chr17	83587092	83587231	+	0	NA	Intergenic	MIRm|SINE|MIR	-27462	NM_134117	106522	Mm.311974	NM_134117	ENSMUSG00000024247	Pkdcc	AI115348|AW548124|Adtk1|ESTM17|MAd1|Sgk493|Vlk|X83346	protein kinase domain containing, cytoplasmic	protein-coding
Diff_Nuc9938	chr17	28109152	28109291	+	0	NA	intron (NM_181413, intron 1 of 24)	intron (NM_181413, intron 1 of 24)	62970	NM_181413	224650	Mm.32556	NM_181413	ENSMUSG00000024219	Anks1	Anks1a|mKIAA0229	ankyrin repeat and SAM domain containing 1	protein-coding
Diff_Nuc27382	chr4	17875672	17875811	+	0	NA	intron (NM_019724, intron 1 of 9)	intron (NM_019724, intron 1 of 9)	95136	NM_019724	17389	Mm.187315	NM_019724	ENSMUSG00000028226	Mmp16	MT-MMP 3|MT3-MMP|Mt3mmp	matrix metallopeptidase 16	protein-coding
Diff_Nuc23268	chr6	85281792	85281931	+	0	NA	intron (NM_178639, intron 1 of 13)	intron (NM_178639, intron 1 of 13)	1555	NM_178639	94282	Mm.121485	NM_178639	ENSMUSG00000033720	Sfxn5	C230001H08Rik	sideroflexin 5	protein-coding
Diff_Nuc13396	chr15	34317532	34317671	+	0	NA	intron (NM_016762, intron 5 of 18)	L2a|LINE|L2	-29974	NM_001256161	77358	Mm.402759	NM_001256161	ENSMUSG00000094447	9430069I07Rik	-	RIKEN cDNA 9430069I07 gene	protein-coding
Diff_Nuc18211	chr18	14198182	14198321	+	0	NA	Intergenic	Intergenic	-67009	NM_145492	225207	Mm.40325	NM_145492	ENSMUSG00000024420	Zfp521	B930086A16Rik|Evi3|Znf521	zinc finger protein 521	protein-coding
Diff_Nuc28270	chr4	75396702	75396841	+	0	NA	Intergenic	Lx5|LINE|L1	-472581	NM_025849	66928	Mm.24332	NM_025849	ENSMUSG00000028398	Tmem261	1700027K24Rik|3110001D03Rik	transmembrane protein 261	protein-coding
Diff_Nuc12487	chr16	75325662	75325801	+	0	NA	Intergenic	Intergenic	260575	NM_001252513	320355	Mm.99517	NM_177142	ENSMUSG00000032948	Lipi	D930038D03Rik|lpd1	lipase, member I	protein-coding
Diff_Nuc14624	chr15	101966912	101967051	+	0	NA	promoter-TSS (NM_001033277)	promoter-TSS (NM_001033277)	-335	NM_001033277	223918	Mm.385009	NM_001033277	ENSMUSG00000036966	Spryd3	BC008150	SPRY domain containing 3	protein-coding
Diff_Nuc13231	chr15	24962002	24962141	+	0	NA	Intergenic	Intergenic	381448	NM_027395	70350	Mm.29586	NM_027395	ENSMUSG00000045763	Basp1	2610024P12Rik|CAP-23|CAP23|Ckap3|NAP-22|NAP22	brain abundant, membrane attached signal protein 1	protein-coding
Diff_Nuc9562	chr17	8014462	8014601	+	0	NA	Intergenic	Intergenic	-16692	NM_001081416	68655	Mm.379161	NM_001081416	ENSMUSG00000071984	Fndc1	1110027O12Rik|1110051A18Rik|mKIAA1866	fibronectin type III domain containing 1	protein-coding
Diff_Nuc7196	chr10	5902812	5902951	+	0	NA	intron (NM_024261, intron 3 of 4)	L1VL2|LINE|L1	11055	NM_024261	73419	Mm.346733	NM_024261	ENSMUSG00000061759	Armt1	1700052N19Rik|AW320013|AW536799	acidic residue methyltransferase 1	protein-coding
Diff_Nuc28360	chr4	81926572	81926711	+	0	NA	Intergenic	Intergenic	215357	NR_040659	545641	Mm.216028	NR_040659	ENSMUSG00000085022	Gm5860	EG545641	predicted gene 5860	ncRNA
Diff_Nuc17305	chr19	30898552	30898691	+	0	NA	intron (NM_001013833, intron 5 of 17)	Lx5|LINE|L1	106831	NR_033643	625995	Mm.454508	NR_033643		Gm6642	EG625995	ubiquitin-like 5 pseudogene	pseudo
Diff_Nuc41183	chr9	83961642	83961781	+	0	NA	intron (NM_199195, intron 8 of 10)	intron (NM_199195, intron 8 of 10)	119323	NM_199195	12040	Mm.12819	NM_199195	ENSMUSG00000032263	Bckdhb	BCKDE1B|BCKDH E1-beta	branched chain ketoacid dehydrogenase E1, beta polypeptide	protein-coding
Diff_Nuc29262	chr4	130257342	130257481	+	0	NA	intron (NM_001159606, intron 3 of 17)	intron (NM_001159606, intron 3 of 17)	38137	NM_001159605	80912	Mm.440206	NM_030722	ENSMUSG00000028580	Pum1	AA517475|Pumm|mKIAA0099	pumilio RNA-binding family member 1	protein-coding
Diff_Nuc631	chr13	16436352	16436491	+	0	NA	Intergenic	Intergenic	332737	NM_008380	16323	Mm.8042	NM_008380	ENSMUSG00000041324	Inhba	-	inhibin beta-A	protein-coding
Diff_Nuc38918	chr1	166739092	166739231	+	0	NA	exon (NM_019759, exon 2 of 4)	exon (NM_019759, exon 2 of 4)	12298	NM_019759	56429	Mm.28935	NM_019759	ENSMUSG00000026574	Dpt	1810032B19Rik|5033416F05Rik|EQ-1|Eq1	dermatopontin	protein-coding
Diff_Nuc35469	chr2	148204802	148204941	+	0	NA	Intergenic	Intergenic	-16242	NM_009219	20608	Mm.35324	NM_009219	ENSMUSG00000037014	Sstr4	Smstr4|sst4	somatostatin receptor 4	protein-coding
Diff_Nuc32661	chr2	6423952	6424091	+	0	NA	Intergenic	ORR1E|LTR|MaLR	150239	NM_181399	98910	Mm.40673	NM_181399	ENSMUSG00000039046	Usp6nl	AI316785|RNTRE|TRE2NL|mKIAA0019	USP6 N-terminal like	protein-coding
Diff_Nuc20005	chr7	36934962	36935101	+	0	NA	Intergenic	Intergenic	-347023	NM_177739	668501	Mm.286296	NM_177739	ENSMUSG00000044452	Zfp507	1810022O10Rik|A230056M16Rik|AL024009|AU021817|BB105092|Gm480|Znf507|mKIAA1084	zinc finger protein 507	protein-coding
Diff_Nuc17188	chr19	24766162	24766301	+	0	NA	intron (NM_175013, intron 10 of 10)	intron (NM_175013, intron 10 of 10)	17733	NM_183160	226040	Mm.391170	NM_183160	ENSMUSG00000048572	Tmem252	E030010A14Rik	transmembrane protein 252	protein-coding
Diff_Nuc31628	chr3	104167502	104167641	+	0	NA	Intergenic	Intergenic	-143242	NM_001159354	99470	Mm.264849	NM_133853	ENSMUSG00000052539	Magi3	4732496O19Rik|6530407C02Rik|AA407180|AI120132|mKIAA1634	membrane associated guanylate kinase, WW and PDZ domain containing 3	protein-coding
Diff_Nuc28427	chr4	86440882	86441021	+	0	NA	intron (NM_184088, intron 9 of 31)	intron (NM_184088, intron 9 of 31)	46492	NM_184088	329877	Mm.273718	NM_184088	ENSMUSG00000038024	Dennd4c	1700065A05Rik|AA420392	DENN/MADD domain containing 4C	protein-coding
Diff_Nuc26974	chr5	144753522	144753661	+	0	NA	intron (NM_177682, intron 11 of 14)	intron (NM_177682, intron 11 of 14)	22131	NM_177682	231874	Mm.320432	NM_177682	ENSMUSG00000029617	Ccz1	AU022870	CCZ1 vacuolar protein trafficking and biogenesis associated	protein-coding
Diff_Nuc4724	chr11	7445782	7445921	+	0	NA	Intergenic	Intergenic	-331925	NM_008343	16009	Mm.29254	NM_008343	ENSMUSG00000020427	Igfbp3	AI649005|IGFBP-3|IGgfbp3	insulin-like growth factor binding protein 3	protein-coding
Diff_Nuc26409	chr5	112688552	112688691	+	0	NA	intron (NM_001312893, intron 3 of 5)	intron (NM_001312893, intron 3 of 5)	3781	NM_001312893	12960	Mm.29488	NM_023695	ENSMUSG00000029343	Crybb1	3110006K12Rik|BB1CRY	crystallin, beta B1	protein-coding
Diff_Nuc19233	chr18	69662752	69662891	+	0	NA	intron (NM_001083967, intron 5 of 19)	intron (NM_001083967, intron 5 of 19)	157446	NM_001083967	21413	Mm.4269	NM_013685	ENSMUSG00000053477	Tcf4	5730422P05Rik|ASP-I2|E2-2|E2.2|ITF-2|ITF-2b|ITF2|ME2|MITF-2A|MITF-2B|SEF-2|SEF2|SEF2-1|TFE|Tcf-4|bHLHb19	transcription factor 4	protein-coding
Diff_Nuc11068	chr17	85469702	85469841	+	0	NA	exon (NM_001163624, exon 9 of 14)	exon (NM_001163624, exon 9 of 14)	19836	NM_145984	213760	Mm.259035	NM_145984	ENSMUSG00000024127	Prepl	2810457N15Rik|9530014L06Rik|D030028O16Rik|mKIAA0436	prolyl endopeptidase-like	protein-coding
Diff_Nuc34663	chr2	109145102	109145241	+	0	NA	intron (NM_139303, intron 10 of 16)	Charlie1b|DNA|MER1_type	24276	NM_139303	228421	Mm.274086	NM_139303	ENSMUSG00000027115	Kif18a	AU024633|B130001M12Rik|gcd2	kinesin family member 18A	protein-coding
Diff_Nuc32841	chr2	15867362	15867501	+	0	NA	intron (NM_001310455, intron 27 of 38)	Lx4B|LINE|L1	-410500	NM_026162	67448	Mm.313938	NM_026162	ENSMUSG00000026748	Plxdc2	1200007L24Rik|5430431D22Rik|AI646728|AU022916|AV231634|Tem7r	plexin domain containing 2	protein-coding
Diff_Nuc30988	chr3	72330872	72331011	+	0	NA	Intergenic	L1Md_F2|LINE|L1	439847	NM_001081137	69983	Mm.261054	NM_001081137	ENSMUSG00000027790	Sis	2010204N08Rik|SI|Si-s	sucrase isomaltase (alpha-glucosidase)	protein-coding
Diff_Nuc28171	chr4	68071202	68071341	+	0	NA	Intergenic	RMER20B|LTR|ERVK	544160	NM_019967	56710	Mm.248788	NM_019967	ENSMUSG00000028351	Brinp1	BRINP|Dbc1|Dbccr1|Fam5a	bone morphogenic protein/retinoic acid inducible neural specific 1	protein-coding
Diff_Nuc25965	chr5	90252282	90252421	+	0	NA	intron (NM_177872, intron 3 of 21)	intron (NM_177872, intron 3 of 21)	60008	NM_177872	330119	Mm.133062	NM_177872	ENSMUSG00000043635	Adamts3	1100001H14Rik|6330442E02Rik	a disintegrin-like and metallopeptidase (reprolysin type) with thrombospondin type 1 motif, 3	protein-coding
Diff_Nuc21352	chr7	122618952	122619091	+	0	NA	3' UTR (NM_011445, exon 17 of 17)	3' UTR (NM_011445, exon 17 of 17)	326102	NM_001277328	20679	Mm.323365	NM_011445	ENSMUSG00000051910	Sox6	AI987981|SOX-LZ	SRY (sex determining region Y)-box 6	protein-coding
Diff_Nuc14972	chr14	25193602	25193741	+	0	NA	Intergenic	Intergenic	81085	NM_001033214	105418	Mm.2077	NM_001033214	ENSMUSG00000038925	E330034G19Rik	AA415275|Zpac	RIKEN cDNA E330034G19 gene	protein-coding
Diff_Nuc11403	chr16	13707352	13707491	+	0	NA	Intergenic	BGLII_A|LTR|ERVK	-22508	NR_040574	76684	Mm.491043	NR_040574		Pla2g10os	1810007I06Rik	phospholipase A2, group X, opposite strand	ncRNA
Diff_Nuc34810	chr2	118026362	118026501	+	0	NA	Intergenic	ORR1D2|LTR|MaLR	56271	NM_027759	71313	Mm.85046	NM_027759	ENSMUSG00000027344	Fsip1	1700012M13Rik|4933432K11Rik	fibrous sheath-interacting protein 1	protein-coding
Diff_Nuc20441	chr7	74387522	74387661	+	0	NA	intron (NM_001291196, intron 9 of 11)	L1_Mus1|LINE|L1	20089	NM_001191051	75099	Mm.121691	NM_175215	ENSMUSG00000043831	Lysmd4	4930506D23Rik	LysM, putative peptidoglycan-binding, domain containing 4	protein-coding
Diff_Nuc16006	chr14	79386502	79386641	+	0	NA	intron (NM_027906, intron 14 of 44)	intron (NM_027906, intron 14 of 44)	137586	NM_173758	219189	Mm.159651	NM_027906	ENSMUSG00000058997	Vwa8	1300010F03Rik|4932416F07Rik|AI957255|Kiaa0564|mKIAA0564	von Willebrand factor A domain containing 8	protein-coding
Diff_Nuc37596	chr1	91085432	91085571	+	0	NA	Intergenic	MTD|LTR|MaLR	118464	NM_133816	98402	Mm.170983	NM_133816	ENSMUSG00000036206	Sh3bp4	AI594717|AW227605|BOG25	SH3-domain binding protein 4	protein-coding
Diff_Nuc21567	chr7	134855592	134855731	+	0	NA	promoter-TSS (NM_001301283)	promoter-TSS (NM_001301283)	-589	NM_007795	13019	Mm.389954	NM_007795	ENSMUSG00000042340	Ctf1	CT-1	cardiotrophin 1	protein-coding
Diff_Nuc16870	chr19	7876552	7876691	+	0	NA	exon (NM_146232, exon 1 of 10)	exon (NM_146232, exon 1 of 10)	536	NM_146232	236149	Mm.207060	NM_146232	ENSMUSG00000053303	Slc22a26	-	solute carrier family 22 (organic cation transporter), member 26	protein-coding
Diff_Nuc5656	chr11	57382722	57382861	+	0	NA	Intergenic	ORR1E|LTR|MaLR	50624	NM_145426	216760	Mm.30501	NM_145426	ENSMUSG00000020522	Mfap3	2610509F16Rik|2700079M14Rik|AW536327	microfibrillar-associated protein 3	protein-coding
Diff_Nuc6477	chr11	94491942	94492081	+	0	NA	intron (NM_133807, intron 1 of 6)	intron (NM_133807, intron 1 of 6)	873	NM_133807	98238	Mm.172720	NM_133807	ENSMUSG00000020869	Lrrc59	AA959742|C78668	leucine rich repeat containing 59	protein-coding
Diff_Nuc32587	chr2	3089192	3089331	+	0	NA	intron (NM_001347067, intron 1 of 7)	intron (NM_001347067, intron 1 of 7)	53304	NM_001347067	269233	Mm.23044	NM_001081161	ENSMUSG00000050530	Fam171a1	9630050M13Rik|AA409679	family with sequence similarity 171, member A1	protein-coding
Diff_Nuc42328	chr8	31014352	31014491	+	0	NA	Intergenic	Lx7|LINE|L1	-664446	NR_045856	71314	Mm.158666	NR_045856	ENSMUSG00000097044	4933433F19Rik	-	RIKEN cDNA 4933433F19 gene	ncRNA
Diff_Nuc41091	chr9	79079632	79079771	+	0	NA	Intergenic	L1_Mm|LINE|L1	287408	NR_045336	100038575	Mm.367838	NR_045336	ENSMUSG00000111765	Gm10635	ENSMUSG00000074174	predicted gene 10635	ncRNA
Diff_Nuc37019	chr1	59708132	59708271	+	0	NA	intron (NM_009460, intron 2 of 4)	RLTR16|LTR|ERVK	19477	NM_009460	22218	Mm.362118	NM_009460	ENSMUSG00000026021	Sumo1	GMP1|PIC1|SENTRIN|SMT3|SMT3H3|SMTP3|SUMO-1|Smt3C|Ubl1	small ubiquitin-like modifier 1	protein-coding
Diff_Nuc30837	chr3	62267522	62267661	+	0	NA	Intergenic	LTR16A|LTR|ERVL	43319	NM_028136	72162	Mm.224233	NM_028136	ENSMUSG00000027770	Dhx36	2810407E23Rik|AI452301|AU022184|Ddx36|mKIAA1488	DEAH (Asp-Glu-Ala-His) box polypeptide 36	protein-coding
Diff_Nuc56	chrX	23218032	23218171	+	0	NA	Intergenic	Intergenic	-52076	NM_175180	72404	Mm.423	NM_175180	ENSMUSG00000036769	Wdr44	2610034K17Rik|RAB11BP|RPH11	WD repeat domain 44	protein-coding
Diff_Nuc1426	chr13	55136472	55136611	+	0	NA	intron (NR_121592, intron 10 of 13)	intron (NR_121592, intron 10 of 13)	-13795	NM_001033245	212032	Mm.267479	NM_001033245	ENSMUSG00000025877	Hk3	HK III|HK-III	hexokinase 3	protein-coding
Diff_Nuc39979	chr9	23891772	23891911	+	0	NA	Intergenic	Intergenic	-10621	NM_175678	319239	Mm.130824	NM_175678	ENSMUSG00000043659	Npsr1	9330128H10Rik|GPRA|Gpr154|MVTR|PGR14|VRR1	neuropeptide S receptor 1	protein-coding
Diff_Nuc36540	chr1	35531932	35532071	+	0	NA	Intergenic	RLTR13D2|LTR|ERVK	-593244	NM_015818	50785	Mm.213566	NM_015818	ENSMUSG00000045216	Hs6st1	6Ost1	heparan sulfate 6-O-sulfotransferase 1	protein-coding
Diff_Nuc28135	chr4	66093842	66093981	+	0	NA	Intergenic	Intergenic	-28394	NM_207109	56079	Mm.445312	NM_019514	ENSMUSG00000028373	Astn2	1d8|Astnl|bM452J22.1	astrotactin 2	protein-coding
Diff_Nuc20584	chr7	82534432	82534571	+	0	NA	Intergenic	B1_Mur1|SINE|Alu	-65919	NM_029332	75547	Mm.216107	NM_029332	ENSMUSG00000066406	Akap13	1700026G02Rik|5730522G15Rik|5830460E08Rik|AKAP-13|AKAP-Lbc|BRX|Ht31|LBC|PROTO-LB|PROTO-LBC	A kinase (PRKA) anchor protein 13	protein-coding
Diff_Nuc18952	chr18	56714702	56714841	+	0	NA	intron (NM_138600, intron 3 of 17)	intron (NM_138600, intron 3 of 17)	7181	NM_138600	110695	Mm.30250	NM_138600	ENSMUSG00000053644	Aldh7a1	Atq1|D18Wsu181e	aldehyde dehydrogenase family 7, member A1	protein-coding
Diff_Nuc20039	chr7	39249332	39249471	+	0	NA	Intergenic	Lx6|LINE|L1	63811	NM_001013810	434171	Mm.60990	NM_001013810	ENSMUSG00000060565	Gm5591	EG434171	predicted gene 5591	protein-coding
Diff_Nuc40223	chr9	36541932	36542071	+	0	NA	exon (NM_008408, exon 17 of 18)	exon (NM_008408, exon 17 of 18)	-7758	NM_007691	12649	Mm.16753	NM_007691	ENSMUSG00000032113	Chek1	C85740|Chk1|rad27	checkpoint kinase 1	protein-coding
Diff_Nuc21102	chr7	109925632	109925771	+	0	NA	Intergenic	Intergenic	2661	NM_147092	259096	Mm.377839	NM_147092	ENSMUSG00000073966	Olfr561	MOR14-2	olfactory receptor 561	protein-coding
Diff_Nuc20797	chr7	93486452	93486591	+	0	NA	Intergenic	MTEb|LTR|MaLR	-1617	NM_146617	258610	Mm.377592	NM_146617	ENSMUSG00000055610	Olfr307	MOR219-1	olfactory receptor 307	protein-coding
Diff_Nuc24669	chr5	14933882	14934021	+	0	NA	3' UTR (NM_001122661, exon 5 of 5)	3' UTR (NM_001122661, exon 5 of 5)	4524	NM_001122661	624245	Mm.368256	NM_001122661	ENSMUSG00000091255	Speer4e	-	spermatogenesis associated glutamate (E)-rich protein 4e	protein-coding
Diff_Nuc41124	chr9	80094712	80094851	+	0	NA	intron (NM_001039546, intron 9 of 32)	L1VL2|LINE|L1	81940	NM_001039546	17920	Mm.4040	NM_008662	ENSMUSG00000033577	Myo6	BC029719|Tlc|sv	myosin VI	protein-coding
Diff_Nuc39314	chr1	187068782	187068921	+	0	NA	intron (NM_001163754, intron 9 of 34)	Lx3_Mus|LINE|L1	1997	NR_035529	100316737		NR_035529	ENSMUSG00000105770	Mir664	mir-664|mmu-mir-664	microRNA 664	ncRNA
Diff_Nuc34438	chr2	97504212	97504351	+	0	NA	Intergenic	Intergenic	196467	NM_178725	241568	Mm.241682	NM_178725	ENSMUSG00000050587	Lrrc4c	6430556C10Rik|NGL-1	leucine rich repeat containing 4C	protein-coding
Diff_Nuc27153	chr4	3604542	3604681	+	0	NA	promoter-TSS (NM_001111096)	promoter-TSS (NM_001111096)	-657	NM_001111096	17096	Mm.317331	NM_010747	ENSMUSG00000042228	Lyn	AA407514|Hck-2|p53Lyn|p56Lyn	LYN proto-oncogene, Src family tyrosine kinase	protein-coding
Diff_Nuc17463	chr19	37725942	37726081	+	0	NA	intron (NM_175353, intron 19 of 21)	intron (NM_175353, intron 19 of 21)	-34159	NM_001105201	546726	Mm.457750	NM_001105201	ENSMUSG00000062432	Cyp26c1	EG546726	cytochrome P450, family 26, subfamily c, polypeptide 1	protein-coding
Diff_Nuc14842	chr14	18658292	18658431	+	0	NA	intron (NM_001113417, intron 1 of 9)	intron (NM_001113417, intron 1 of 9)	-155797	NM_009380	21834	Mm.32563	NM_009380	ENSMUSG00000021779	Thrb	Nr1a2|T3R[b]|T3Rbeta|Thrb1|Thrb2|c-erbAbeta	thyroid hormone receptor beta	protein-coding
Diff_Nuc13419	chr15	35344532	35344671	+	0	NA	intron (NM_177151, intron 3 of 61)	intron (NM_177151, intron 3 of 61)	43300	NM_177151	666173	Mm.309250	NM_177151	ENSMUSG00000037646	Vps13b	1810042B05Rik|2310042E16Rik|4732488H20|C330002D13Rik|C87206|Coh1|D230005K13|mKIAA0532|mKIAA5032	vacuolar protein sorting 13B	protein-coding
Diff_Nuc1987	chr13	90617512	90617651	+	0	NA	Intergenic	Intergenic	388309	NM_025335	66074	Mm.241387	NM_025335	ENSMUSG00000012422	Tmem167	0610041E09Rik|5730424F14Rik|AU041184|AW537806|ENSMUSG00000060669|Gm10085|Tmem167a	transmembrane protein 167	protein-coding
Diff_Nuc27059	chr5	149323912	149324051	+	0	NA	intron (NM_011908, intron 1 of 4)	intron (NM_011908, intron 1 of 4)	40383	NM_011908	24109	Mm.21846	NM_011908	ENSMUSG00000001687	Ubl3	AW108023|HCG	ubiquitin-like 3	protein-coding
Diff_Nuc6340	chr11	87171112	87171251	+	0	NA	intron (NM_177167, intron 1 of 6)	intron (NM_177167, intron 1 of 6)	1315	NM_177167	320472	Mm.341988	NM_177167	ENSMUSG00000046442	Ppm1e	AW049266|B930008A12Rik|POPX1|PP2CH|mKIAA1072	protein phosphatase 1E (PP2C domain containing)	protein-coding
Diff_Nuc18213	chr18	14282772	14282911	+	0	NA	Intergenic	L1_Mus1|LINE|L1	-107974	NR_045373	74529	Mm.400519	NR_045373		8430422H06Rik	-	RIKEN cDNA 8430422H06 gene	ncRNA
Diff_Nuc9714	chr17	17222162	17222301	+	0	NA	intron (NM_001163919, intron 1 of 4)	MurSatRep1|Unknown|Unknown	21164	NM_001163919	449000	Mm.483718	NM_001005358	ENSMUSG00000096696	Zfp960	-	zinc finger protein 960	protein-coding
Diff_Nuc24906	chr5	28695662	28695801	+	0	NA	intron (NM_028234, intron 10 of 18)	intron (NM_028234, intron 10 of 18)	52002	NM_028234	381626	Mm.304075	NM_028234	ENSMUSG00000048271	Rbm33	3200001K10Rik|6430512A10Rik|AA386890|Prr8	RNA binding motif protein 33	protein-coding
Diff_Nuc10469	chr17	56080782	56080921	+	0	NA	intron (NM_001310337, intron 1 of 3)	MurSatRep1|Unknown|Unknown	3831	NM_146249	240120	Mm.441018	NM_146249	ENSMUSG00000062101	Zfp119b	-	zinc finger protein 119b	protein-coding
Diff_Nuc41022	chr9	74968792	74968931	+	0	NA	intron (NM_010864, intron 3 of 40)	intron (NM_010864, intron 3 of 40)	49848	NM_010864	17918	Mm.3645	NM_010864	ENSMUSG00000034593	Myo5a	9630007J19Rik|AI413174|AI661011|Dbv|MVa|Myo5|MyoVA|Sev-1|d|d-120J|flail|flr	myosin VA	protein-coding
Diff_Nuc39415	chr1	192860612	192860751	+	0	NA	promoter-TSS (NM_029336)	promoter-TSS (NM_029336)	-20	NM_029336	75558	Mm.383398	NM_029336	ENSMUSG00000057072	Spata45	1700022P22Rik	spermatogenesis associated 45	protein-coding
Diff_Nuc11549	chr16	21573662	21573801	+	0	NA	intron (NM_001285894, intron 40 of 45)	intron (NM_001285894, intron 40 of 45)	121007	NM_001001881	72190	Mm.131606	NM_001001881	ENSMUSG00000043391	2510009E07Rik	AI194952	RIKEN cDNA 2510009E07 gene	protein-coding
Diff_Nuc13420	chr15	35410592	35410731	+	0	NA	intron (NM_177151, intron 17 of 61)	intron (NM_177151, intron 17 of 61)	109360	NM_177151	666173	Mm.309250	NM_177151	ENSMUSG00000037646	Vps13b	1810042B05Rik|2310042E16Rik|4732488H20|C330002D13Rik|C87206|Coh1|D230005K13|mKIAA0532|mKIAA5032	vacuolar protein sorting 13B	protein-coding
Diff_Nuc5453	chr11	48900722	48900861	+	0	NA	intron (NM_010999, intron 2 of 5)	intron (NM_010999, intron 2 of 5)	272	NM_008330	15953	Mm.24769	NM_008330	ENSMUSG00000078920	Ifi47	47kDa|IRG-47|Ifggc1|Igrd|Iigp4|Iipg4|Irgd	interferon gamma inducible protein 47	protein-coding
Diff_Nuc11698	chr16	29176217	29176356	+	0	NA	Intergenic	Intergenic	-33495	NM_013751	27281	Mm.103650	NM_013751	ENSMUSG00000022525	Hrasls	2810012B06Rik|A-C1|HRSL1|Hrasrs	HRAS-like suppressor	protein-coding
Diff_Nuc24457	chr6	148324322	148324461	+	0	NA	intron (NM_001347518, intron 5 of 18)	intron (NM_001347518, intron 5 of 18)	21213	NR_003634	66184	Mm.391542	NM_025405	ENSMUSG00000063171	Rps4l	1110033J19Rik|AA407494|Rps4y2	ribosomal protein S4-like	pseudo
Diff_Nuc40821	chr9	65414452	65414591	+	0	NA	intron (NM_153119, intron 2 of 5)	Lx8|LINE|L1	13373	NM_153119	102595	Mm.247303	NM_153119	ENSMUSG00000050721	Plekho2	AI840980|Plekhq1	pleckstrin homology domain containing, family O member 2	protein-coding
Diff_Nuc33926	chr2	70665872	70666011	+	0	NA	Intergenic	Intergenic	-2404	NM_172664	228012	Mm.136511	NM_172664	ENSMUSG00000041997	Tlk1	4930545J15Rik	tousled-like kinase 1	protein-coding
Diff_Nuc33332	chr2	37980262	37980401	+	0	NA	intron (NM_146122, intron 5 of 21)	MT2A|LTR|ERVL	162573	NM_146122	227801	Mm.314245	NM_146122	ENSMUSG00000035392	Dennd1a	6030446I19Rik|connecdenn	DENN/MADD domain containing 1A	protein-coding
Diff_Nuc10372	chr17	50118832	50118971	+	0	NA	Intergenic	Intergenic	210921	NM_181397	76438	Mm.41854	NM_181397	ENSMUSG00000039316	Rftn1	2310015N21Rik|AI853526	raftlin lipid raft linker 1	protein-coding
Diff_Nuc6314	chr11	86483442	86483581	+	0	NA	intron (NM_029478, intron 1 of 11)	intron (NM_029478, intron 1 of 11)	13813	NM_029478	75909	Mm.390398	NM_029478	ENSMUSG00000018171	Vmp1	3110098I04Rik|4930579A11Rik|AI787464|Tango5|Tmem49|mir-21a|ni-2	vacuole membrane protein 1	protein-coding
Diff_Nuc43807	chr8	114090592	114090731	+	0	NA	intron (NM_001168623, intron 1 of 4)	intron (NM_001168623, intron 1 of 4)	28418	NM_001168623	170737	Mm.271578	NM_133206	ENSMUSG00000033545	Znrf1	B830022L21Rik|Rnf42|Zrfp1|nin283	zinc and ring finger 1	protein-coding
Diff_Nuc25879	chr5	84630972	84631111	+	0	NA	intron (NM_007937, intron 3 of 15)	intron (NM_007937, intron 3 of 15)	215366	NM_007937	13839	Mm.137991	NM_007937	ENSMUSG00000029245	Epha5	AI854630|AW125296|Cek7|Ehk1|Els1|Hek7|Rek7|bsk	Eph receptor A5	protein-coding
Diff_Nuc8814	chr10	92344292	92344431	+	0	NA	intron (NM_001347060, intron 56 of 67)	intron (NM_001347060, intron 56 of 67)	-159198	NM_008682	17997	Mm.2998	NM_008682	ENSMUSG00000019988	Nedd1	-	neural precursor cell expressed, developmentally down-regulated gene 1	protein-coding
Diff_Nuc18618	chr18	38464982	38465121	+	0	NA	intron (NM_001164621, intron 5 of 9)	intron (NM_001164621, intron 5 of 9)	8592	NM_001164621	56736	Mm.228903	NM_020012	ENSMUSG00000060450	Rnf14	2310075C09Rik|2610005D23Rik|AA986456|AU041447|D18Ertd188e|D7Bwg0165e|Triad2	ring finger protein 14	protein-coding
Diff_Nuc29790	chr4	154351112	154351251	+	0	NA	intron (NM_001305804, intron 12 of 19)	intron (NM_001305804, intron 12 of 19)	12949	NR_131230	269614	Mm.30042	NM_172990	ENSMUSG00000029056	Pank4	D030031I12Rik|R75150	pantothenate kinase 4	protein-coding
Diff_Nuc14394	chr15	89879892	89880031	+	0	NA	Intergenic	L1Md_F2|LINE|L1	-174781	NM_001033441	380959	Mm.17853	NM_001033441	ENSMUSG00000075470	Alg10b	AA469671|AU045404|AW123895|C85569|Deaf1|Gm917|nse5	asparagine-linked glycosylation 10B (alpha-1,2-glucosyltransferase)	protein-coding
Diff_Nuc26041	chr5	93705872	93706011	+	0	NA	TTS (NM_007635)	TTS (NM_007635)	9342	NM_007635	12452	Mm.3527	NM_007635	ENSMUSG00000029385	Ccng2	-	cyclin G2	protein-coding
Diff_Nuc32978	chr2	22261582	22261721	+	0	NA	intron (NM_148413, intron 13 of 33)	intron (NM_148413, intron 13 of 33)	112521	NM_148413	667663	Mm.330033	NM_148413	ENSMUSG00000025716	Myo3a	9030416P08Rik	myosin IIIA	protein-coding
Diff_Nuc32424	chr3	148708802	148708941	+	0	NA	Intergenic	B1_Mur1|SINE|Alu	-91272	NM_001081298	99633	Mm.9776	NM_001081298	ENSMUSG00000028184	Adgrl2	AI450192|CIRL-2|Gm619|Lec1|Lphh1|Lphn2|mKIAA0786	adhesion G protein-coupled receptor L2	protein-coding
Diff_Nuc23794	chr6	113185887	113186026	+	0	NA	Intergenic	B1_Mus2|SINE|Alu	-1881	NM_026849	97287	Mm.197816	NM_026849	ENSMUSG00000030269	Mtmr14	1110061O04Rik|AW553738|C76151	myotubularin related protein 14	protein-coding
Diff_Nuc1534	chr13	60666522	60666661	+	0	NA	Intergenic	RLTR28|LTR|ERVL	-36717	NM_001285917	69635	Mm.24103	NM_029653	ENSMUSG00000021559	Dapk1	D13Ucla1|DAP-Kinase	death associated protein kinase 1	protein-coding
Diff_Nuc16592	chr14	118430872	118431011	+	0	NA	intron (NM_010024, intron 6 of 7)	intron (NM_010024, intron 6 of 7)	20527	NM_010024	13190	Mm.19987	NM_010024	ENSMUSG00000022129	Dct	DT|TRP-2|TRP2|Tyrp-2|Tyrp2|slaty|slt	dopachrome tautomerase	protein-coding
Diff_Nuc38660	chr1	153637102	153637241	+	0	NA	intron (NM_001311166, intron 8 of 19)	intron (NM_001311166, intron 8 of 19)	34667	NM_001311166	66967	Mm.337691	NM_001039644	ENSMUSG00000043019	Edem3	2310050N11Rik	ER degradation enhancer, mannosidase alpha-like 3	protein-coding
Diff_Nuc24057	chr6	125635762	125635901	+	0	NA	exon (NM_011708, exon 51 of 52)	exon (NM_011708, exon 51 of 52)	-4606	NM_153589	243634	Mm.333398	NM_153589	ENSMUSG00000038115	Ano2	BC033409|Tmem16b	anoctamin 2	protein-coding
Diff_Nuc29759	chr4	151562832	151562971	+	0	NA	intron (NM_001146057, intron 1 of 8)	ID_B1|SINE|B4	2658	NM_001146057	70025	Mm.296191	NM_133348	ENSMUSG00000028937	Acot7	2410041A17Rik|Ach1|Act|Bach|CTE-IIa|Cte-II|Lach1	acyl-CoA thioesterase 7	protein-coding
Diff_Nuc5135	chr11	30417732	30417871	+	0	NA	intron (NM_029344, intron 3 of 3)	intron (NM_029344, intron 3 of 3)	-45972	NM_001100394	75087	Mm.159422	NM_001100394	ENSMUSG00000040919	4930505A04Rik	-	RIKEN cDNA 4930505A04 gene	protein-coding
Diff_Nuc43008	chr8	73315762	73315901	+	0	NA	intron (NM_199308, intron 1 of 25)	MIR|SINE|MIR	501	NM_199308	546071	Mm.250731	NM_199308	ENSMUSG00000031833	Mast3	BC024265|mKIAA0561	microtubule associated serine/threonine kinase 3	protein-coding
Diff_Nuc22338	chr6	31246932	31247071	+	0	NA	intron (NR_040261, intron 3 of 4)	ORR1E|LTR|MaLR	76650	NR_040261	73652	Mm.441297	NR_040257	ENSMUSG00000087380	2210408F21Rik	-	RIKEN cDNA 2210408F21 gene	ncRNA
Diff_Nuc27019	chr5	147846982	147847121	+	0	NA	intron (NM_080795, intron 2 of 9)	intron (NM_080795, intron 2 of 9)	41097	NM_080795	140887	Mm.272203	NM_080795	ENSMUSG00000016520	Lnx2	9630046H24|AW209022	ligand of numb-protein X 2	protein-coding
Diff_Nuc14599	chr15	100975692	100975831	+	0	NA	TTS (NM_009612)	TTS (NM_009612)	16808	NM_001277257	11482	Mm.279542	NM_009612	ENSMUSG00000000530	Acvrl1	AI115505|AI427544|Acvrlk1|Alk1	activin A receptor, type II-like 1	protein-coding
Diff_Nuc30579	chr3	49810712	49810851	+	0	NA	Intergenic	Lx3_Mus|LINE|L1	-249543	NM_130448	73173	Mm.87246	NM_130448	ENSMUSG00000037892	Pcdh18	3110038E07Rik|BB095589|PCDH68L	protocadherin 18	protein-coding
Diff_Nuc29754	chr4	151471552	151471691	+	0	NA	intron (NM_001285999, intron 1 of 20)	intron (NM_001285999, intron 1 of 20)	793	NM_001285999	269608	Mm.332102	NM_001004156	ENSMUSG00000039713	Plekhg5	BC023181|Syx	pleckstrin homology domain containing, family G (with RhoGef domain) member 5	protein-coding
Diff_Nuc39195	chr1	181095612	181095751	+	0	NA	intron (NM_027188, intron 5 of 11)	intron (NM_027188, intron 5 of 11)	352453	NM_027188	69726	Mm.222338	NM_027188	ENSMUSG00000055067	Smyd3	2410008A19Rik|Zmynd1	SET and MYND domain containing 3	protein-coding
Diff_Nuc35419	chr2	145884992	145885131	+	0	NA	Intergenic	Intergenic	124541	NM_175280	78774	Mm.136347	NM_175280	ENSMUSG00000037143	Cfap61	4930529M08Rik|BB178539|BC024760	cilia and flagella associated protein 61	protein-coding
Diff_Nuc36528	chr1	34440522	34440661	+	0	NA	Intergenic	Intergenic	49453	NR_039562	100628580		NR_039562	ENSMUSG00000092852	Mir5103	mir-5103|mmu-mir-5103|mu-mir-5103	microRNA 5103	ncRNA
Diff_Nuc18131	chr18	10692412	10692551	+	0	NA	intron (NM_134130, intron 3 of 8)	ETnERV3-int|LTR|ERVK	14213	NM_134130	106861	Mm.273108	NM_134130	ENSMUSG00000002475	Abhd3	AA675331|LABH3	abhydrolase domain containing 3	protein-coding
Diff_Nuc333	chrX	166436792	166436931	+	0	NA	Intergenic	Intergenic	-20012	NR_029457	654820	Mm.34441	NM_001039559	ENSMUSG00000072844	G530011O06Rik	-	RIKEN cDNA G530011O06 gene	ncRNA
Diff_Nuc2113	chr13	96813292	96813431	+	0	NA	intron (NM_029210, intron 3 of 12)	Lx9|LINE|L1	89171	NM_029210	75209	Mm.40436	NM_029210	ENSMUSG00000051111	Sv2c	4930527L09Rik|AI841971	synaptic vesicle glycoprotein 2c	protein-coding
Diff_Nuc28369	chr4	82072692	82072831	+	0	NA	intron (NM_008687, intron 2 of 8)	intron (NM_008687, intron 2 of 8)	78922	NM_001286127	18028	Mm.317947	NM_008687	ENSMUSG00000008575	Nfib	6720429L07Rik|CTF|E030026I10Rik|NF-I/B|NF1-B|NFI-B	nuclear factor I/B	protein-coding
Diff_Nuc20463	chr7	75197592	75197731	+	0	NA	intron (NM_010513, intron 2 of 20)	intron (NM_010513, intron 2 of 20)	100518	NM_010513	16001	Mm.275742	NM_010513	ENSMUSG00000005533	Igf1r	A330103N21Rik|CD221|D930020L01|IGF-1R|hyft	insulin-like growth factor I receptor	protein-coding
Diff_Nuc37985	chr1	114903632	114903771	+	0	NA	Intergenic	MTD|LTR|MaLR	-1142206	NM_001081316	319901	Mm.103468	NM_001081316	ENSMUSG00000038702	Dsel	9330132E09Rik|DS-epi2	dermatan sulfate epimerase-like	protein-coding
Diff_Nuc23642	chr6	103463642	103463781	+	0	NA	intron (NM_007697, intron 1 of 26)	intron (NM_007697, intron 1 of 26)	2841	NM_007697	12661	Mm.251288	NM_007697	ENSMUSG00000030077	Chl1	A530023M13Rik|AI465420|CALL|LICAM2	cell adhesion molecule L1-like	protein-coding
Diff_Nuc27293	chr4	12020292	12020431	+	0	NA	exon (NM_198957, exon 4 of 4)	exon (NM_198957, exon 4 of 4)	3844	NM_198957	77604	Mm.474129	NM_198957	ENSMUSG00000052137	Rbm12b2	AV299215|C430048L16Rik|Rbm12bb	RNA binding motif protein 12 B2	protein-coding
Diff_Nuc17827	chr19	55504512	55504651	+	0	NA	intron (NM_016862, intron 5 of 7)	intron (NM_016862, intron 5 of 7)	114034	NM_001293686	53611	Mm.258637	NM_016862	ENSMUSG00000024983	Vti1a	1110014F16Rik|1110018K19Rik|4921537J05Rik|MVti1|MVti1a|Vti1|Vti1-rp2	vesicle transport through interaction with t-SNAREs 1A	protein-coding
Diff_Nuc14815	chr14	16919592	16919731	+	0	NA	Intergenic	RLTR9E|LTR|ERVK	-162167	NM_021504	59007	Mm.258381	NM_021504	ENSMUSG00000021785	Ngly1	1110002C09Rik|PNGase|Png1	N-glycanase 1	protein-coding
Diff_Nuc6247	chr11	83394872	83395011	+	0	NA	promoter-TSS (NR_036452)	promoter-TSS (NR_036452)	-622	NR_036453	100504464	Mm.341706	NR_036452	ENSMUSG00000051832	E230016K23Rik	-	RIKEN cDNA E230016K23 gene	ncRNA
Diff_Nuc24203	chr6	134482692	134482831	+	0	NA	intron (NM_008514, intron 2 of 22)	intron (NM_008514, intron 2 of 22)	34170	NM_008514	16974	Mm.321990	NM_008514	ENSMUSG00000030201	Lrp6	C030016K15Rik|Cd|Gw|ska26|ska<m26Jus>|skax26	low density lipoprotein receptor-related protein 6	protein-coding
Diff_Nuc24629	chr5	12881212	12881351	+	0	NA	Intergenic	RMER17B|LTR|ERVK	498115	NM_028882	108151	Mm.89313	NM_028882	ENSMUSG00000040254	Sema3d	4631426B19Rik	sema domain, immunoglobulin domain (Ig), short basic domain, secreted, (semaphorin) 3D	protein-coding
Diff_Nuc12856	chr16	95916312	95916451	+	0	NA	Intergenic	Intergenic	-7633	NM_011809	23872	Mm.290207	NM_011809	ENSMUSG00000022895	Ets2	AU022856|Ets-2	E26 avian leukemia oncogene 2, 3' domain	protein-coding
Diff_Nuc2943	chr12	29502012	29502151	+	0	NA	intron (NM_201357, intron 3 of 8)	intron (NM_201357, intron 3 of 8)	65388	NM_201357	380752	Mm.273724	NM_201357	ENSMUSG00000036613	Tssc1	D12Ertd604e|Eipr1	tumor suppressing subtransferable candidate 1	protein-coding
Diff_Nuc40795	chr9	64225152	64225291	+	0	NA	Intergenic	Intergenic	-8212	NM_172522	214058	Mm.127721	NM_172522	ENSMUSG00000036466	Megf11	2410080H04Rik|D130061K05	multiple EGF-like-domains 11	protein-coding
Diff_Nuc38259	chr1	133245752	133245891	+	0	NA	intron (NM_001081011, intron 8 of 22)	RMER17D2|LTR|ERVK	-69681	NM_019777	56489	Mm.386783	NM_019777	ENSMUSG00000042349	Ikbke	AW558201|IKK-i|IKKepsilon|Ikki	inhibitor of kappaB kinase epsilon	protein-coding
Diff_Nuc30691	chr3	54220222	54220361	+	0	NA	Intergenic	Intergenic	55262	NM_015784	50706	Mm.236067	NM_015784	ENSMUSG00000027750	Postn	A630052E07Rik|AI747096|OSF-2|Osf2|PLF|PN	periostin, osteoblast specific factor	protein-coding
Diff_Nuc25696	chr5	74071632	74071771	+	0	NA	TTS (NM_178387)	TTS (NM_178387)	29082	NM_178387	73472	Mm.87067	NM_178387	ENSMUSG00000029155	Spata18	1700067I02Rik	spermatogenesis associated 18	protein-coding
Diff_Nuc43663	chr8	108147632	108147771	+	0	NA	Intergenic	Intergenic	8335	NR_035492	100316712		NR_035492	ENSMUSG00000089432	Mir1966	mir-1966|mmu-mir-1966	microRNA 1966	ncRNA
Diff_Nuc7512	chr10	20188962	20189101	+	0	NA	intron (NM_013875, intron 3 of 12)	RLTR33|LTR|ERVK	79103	NM_001347366	29863	Mm.425617	NM_013875	ENSMUSG00000019990	Pde7b	-	phosphodiesterase 7B	protein-coding
Diff_Nuc40929	chr9	70685772	70685911	+	0	NA	intron (NM_001324473, intron 1 of 8)	intron (NM_001324473, intron 1 of 8)	96774	NM_008280	15450	Mm.390187	NM_008280	ENSMUSG00000032207	Lipc	AI256194|HL|Hpl	lipase, hepatic	protein-coding
Diff_Nuc40144	chr9	32191162	32191301	+	0	NA	intron (NM_019659, intron 1 of 1)	intron (NM_019659, intron 1 of 1)	-10339	NM_001168354	56379	Mm.390168	NM_019659	ENSMUSG00000041248	Kcnj1	Kir1.1|ROMK|Romk2	potassium inwardly-rectifying channel, subfamily J, member 1	protein-coding
Diff_Nuc28753	chr4	104610232	104610371	+	0	NA	intron (NM_001285953, intron 1 of 19)	MTC|LTR|MaLR	24240	NM_001285952	242594	Mm.65181	NM_001162980	ENSMUSG00000078612	1700024P16Rik	C1orf168|Gm620	RIKEN cDNA 1700024P16 gene	protein-coding
Diff_Nuc19193	chr18	68247092	68247231	+	0	NA	intron (NM_172631, intron 2 of 5)	intron (NM_172631, intron 2 of 5)	154250	NM_172631	52662	Mm.440183	NM_172631	ENSMUSG00000024544	Ldlrad4	8230401C20Rik|A430083H02|A430108L08Rik|C18orf1|D18Ertd653e|D330030L18Rik	low density lipoprotein receptor class A domain containing 4	protein-coding
Diff_Nuc762	chr13	23461532	23461671	+	0	NA	promoter-TSS (NM_001111107)	promoter-TSS (NM_001111107)	-524	NM_001286155	218100	Mm.286454	NM_172586	ENSMUSG00000046351	Zfp322a	Znf322|Znf322a	zinc finger protein 322A	protein-coding
Diff_Nuc21282	chr7	119435232	119435371	+	0	NA	intron (NM_177282, intron 3 of 19)	B4|SINE|B4	65951	NM_001193305	320878	Mm.52312	NM_177282	ENSMUSG00000038244	Mical2	5330438E18Rik|9530064J02|MICAL-2|mKIAA0750	microtubule associated monooxygenase, calponin and LIM domain containing 2	protein-coding
Diff_Nuc38773	chr1	158653352	158653491	+	0	NA	Intergenic	RLTR10|LTR|ERVK	-4380	NM_145413	215015	Mm.229107	NM_145413	ENSMUSG00000033557	Fam20b	C530043G21Rik|mKIAA0475	family with sequence similarity 20, member B	protein-coding
Diff_Nuc30841	chr3	62311122	62311261	+	0	NA	promoter-TSS (NM_028136)	promoter-TSS (NM_028136)	-281	NM_028136	72162	Mm.224233	NM_028136	ENSMUSG00000027770	Dhx36	2810407E23Rik|AI452301|AU022184|Ddx36|mKIAA1488	DEAH (Asp-Glu-Ala-His) box polypeptide 36	protein-coding
Diff_Nuc1214	chr13	44464102	44464241	+	0	NA	Intergenic	Intergenic	-70925	NR_045489	69491	Mm.392410	NR_045489	ENSMUSG00000098144	1700029N11Rik	-	RIKEN cDNA 1700029N11 gene	ncRNA
Diff_Nuc38308	chr1	135348442	135348581	+	0	NA	Intergenic	B4A|SINE|B4	-27722	NM_011439	20668	Mm.8575	NM_011439	ENSMUSG00000070643	Sox13	AA407916|AW259412|AW540933|Sox-13	SRY (sex determining region Y)-box 13	protein-coding
Diff_Nuc34538	chr2	102675172	102675311	+	0	NA	intron (NM_001177786, intron 5 of 11)	intron (NM_001177786, intron 5 of 11)	66581	NM_001177785	12505	Mm.423621	NM_009851	ENSMUSG00000005087	Cd44	AU023126|AW121933|AW146109|HERMES|Ly-24|Pgp-1	CD44 antigen	protein-coding
Diff_Nuc38220	chr1	131297572	131297711	+	0	NA	intron (NM_172485, intron 1 of 27)	intron (NM_172485, intron 1 of 27)	127760	NM_172485	210417	Mm.380518	NM_172485	ENSMUSG00000042581	Thsd7b	1700074E13Rik|B930082A18|D130067I03Rik	thrombospondin, type I, domain containing 7B	protein-coding
Diff_Nuc41957	chr8	4765982	4766121	+	0	NA	intron (NM_011369, intron 3 of 12)	intron (NM_011369, intron 3 of 12)	13483	NM_011369	20419	Mm.37801	NM_011369	ENSMUSG00000022322	Shcbp1	mPAL	Shc SH2-domain binding protein 1	protein-coding
Diff_Nuc36830	chr1	50571422	50571561	+	0	NA	Intergenic	Intergenic	-412876	NM_019790	56363	Mm.245154	NM_019790	ENSMUSG00000026109	Tmeff2	4832418D20Rik|7630402F16Rik|TR-2	transmembrane protein with EGF-like and two follistatin-like domains 2	protein-coding
Diff_Nuc37033	chr1	60139352	60139491	+	0	NA	exon (NM_021312, exon 9 of 13)	exon (NM_021312, exon 9 of 13)	15330	NM_021312	57750	Mm.281079	NM_021312	ENSMUSG00000026019	Wdr12	4933402C23Rik|Ytm1|Ytm1p	WD repeat domain 12	protein-coding
Diff_Nuc998	chr13	34829882	34830021	+	0	NA	Intergenic	Intergenic	-1560	NM_138746	108161	Mm.41991	NM_138746	ENSMUSG00000038246	Fam50b	D0H6S2654E|X5L|XAP-5-like	family with sequence similarity 50, member B	protein-coding
Diff_Nuc23471	chr6	93951962	93952101	+	0	NA	intron (NM_001286785, intron 1 of 24)	intron (NM_001286785, intron 1 of 24)	-88347	NM_001083320	14924	Mm.217216	NM_010367	ENSMUSG00000045095	Magi1	AIP3|BAP1|Baiap1|Gukmi1|MAGI1c|Magi-1|TNRC19|WWP3|mKIAA4129	membrane associated guanylate kinase, WW and PDZ domain containing 1	protein-coding
Diff_Nuc6098	chr11	77107682	77107821	+	0	NA	intron (NM_177710, intron 1 of 14)	intron (NM_177710, intron 1 of 14)	-54031	NM_001291190	237860	Mm.440381	NM_177710	ENSMUSG00000037926	Ssh2	SSH-2|SSH-2L|mSSH-2L	slingshot homolog 2 (Drosophila)	protein-coding
Diff_Nuc41393	chr9	96041552	96041691	+	0	NA	intron (NM_177352, intron 5 of 16)	intron (NM_177352, intron 5 of 16)	21773	NM_177352	235533	Mm.213651	NM_177352	ENSMUSG00000041440	Gk5	AV095337|C330018K18Rik|G630067D24Rik	glycerol kinase 5 (putative)	protein-coding
Diff_Nuc13881	chr15	61181222	61181361	+	0	NA	Intergenic	Lx2B|LINE|L1	424715	NR_040350	432956	Mm.404918	NR_040350		D030024E09Rik	-	RIKEN cDNA D030024E09 gene	ncRNA
Diff_Nuc38453	chr1	141592032	141592171	+	0	NA	Intergenic	MERVL_2A-int|LTR|ERVL	85715	NM_001029977	214403	Mm.337613	NM_001029977	ENSMUSG00000070594	Gm4788	Cfhrc|EG214403	predicted gene 4788	protein-coding
Diff_Nuc39683	chr9	7896682	7896821	+	0	NA	Intergenic	L1_Mus3|LINE|L1	-23581	NM_007464	11796	Mm.2026	NM_007464	ENSMUSG00000032000	Birc3	AW107670|Api1|Api2|Birc2|C-IAP2|HIAP2|IAP1|IAP2|MIAP1|MIAP2|MIHB|MIHC|RNF49|cIAP-1|cIAP-2|cIAP1|cIAP2	baculoviral IAP repeat-containing 3	protein-coding
Diff_Nuc7142	chr11	121402472	121402611	+	0	NA	intron (NM_029878, intron 14 of 38)	intron (NM_029878, intron 14 of 38)	-21885	NM_178763	319530	Mm.11395	NM_178763	ENSMUSG00000039238	Zfp750	A030007D23Rik|Znf750	zinc finger protein 750	protein-coding
Diff_Nuc4942	chr11	20616912	20617051	+	0	NA	intron (NM_181411, intron 2 of 8)	B3|SINE|B2	24578	NM_001290545	216549	Mm.356580	NM_181411	ENSMUSG00000049659	Aftph	-	aftiphilin	protein-coding
Diff_Nuc41088	chr9	78882092	78882231	+	0	NA	Intergenic	Intergenic	418808	NM_153098	235505	Mm.32955	NM_153098	ENSMUSG00000046186	Cd109	9930012E15Rik|AI480638|GARP	CD109 antigen	protein-coding
Diff_Nuc20350	chr7	69124832	69124971	+	0	NA	intron (NR_015599, intron 2 of 3)	intron (NR_015599, intron 2 of 3)	2288	NR_015599	320026	Mm.131850	NR_015599	ENSMUSG00000109321	A330076H08Rik	Mirh1	RIKEN cDNA A330076H08 gene	ncRNA
Diff_Nuc6470	chr11	94058792	94058931	+	0	NA	Intergenic	Intergenic	-13907	NM_009427	22057	Mm.259673	NM_009427	ENSMUSG00000037573	Tob1	Tob|Trob	transducer of ErbB-2.1	protein-coding
Diff_Nuc39755	chr9	13024572	13024711	+	0	NA	Intergenic	Lx2|LINE|L1	81214	NR_040755	78219	Mm.414868	NR_040755	ENSMUSG00000111830	4930568E12Rik	-	RIKEN cDNA 4930568E12 gene	ncRNA
Diff_Nuc43731	chr8	110071932	110072071	+	0	NA	intron (NM_025830, intron 11 of 23)	intron (NM_025830, intron 11 of 23)	-3143	NR_029553	387158		NR_029553	ENSMUSG00000065439	Mir140	Mirn140|mir-140|mmu-mir-140	microRNA 140	ncRNA
Diff_Nuc36162	chr1	9529432	9529571	+	0	NA	Intergenic	L1ME3B|LINE|L1	-5988	NM_021511	59014	Mm.29061	NM_021511	ENSMUSG00000061024	Rrs1	5730466A07Rik|AA415037|D1Ertd701e|Rrr	ribosome biogenesis regulator 1	protein-coding
Diff_Nuc14767	chr14	13221752	13221891	+	0	NA	intron (NM_001042617, intron 29 of 30)	intron (NM_001042617, intron 29 of 30)	-43442	NM_080433	54713	Mm.34644	NM_080433	ENSMUSG00000021743	Fezf2	AI451466|AI852056|Fez|Fezl|Zfp312	Fez family zinc finger 2	protein-coding
Diff_Nuc36415	chr1	26174422	26174561	+	0	NA	Intergenic	MTA_Mm|LTR|MaLR	-287939	NM_175642	210933	Mm.336569	NM_175642	ENSMUSG00000033569	Adgrb3	A830096D10Rik|Bai3	adhesion G protein-coupled receptor B3	protein-coding
Diff_Nuc29047	chr4	119201272	119201411	+	0	NA	Intergenic	L1_Mus1|LINE|L1	10033	NM_001004178	433752	Mm.425205	NM_001004178	ENSMUSG00000087385	AA415398	-	expressed sequence AA415398	protein-coding
Diff_Nuc41415	chr9	96996152	96996291	+	0	NA	intron (NM_138756, intron 3 of 6)	intron (NM_138756, intron 3 of 6)	15239	NM_138756	192287	Mm.228067	NM_138756	ENSMUSG00000032449	Slc25a36	C330005L02Rik	solute carrier family 25, member 36	protein-coding
Diff_Nuc24942	chr5	30564452	30564591	+	0	NA	intron (NM_027652, intron 1 of 9)	intron (NM_027652, intron 1 of 9)	5400	NR_137634	28042	Mm.168854	NM_027652	ENSMUSG00000075703	Selenoi	4933402G07Rik|AI448296|AI452230|C79563|D5Wsu178e|Ept1|SELI|mKIAA1724	selenoprotein I	protein-coding
Diff_Nuc2343	chr13	107699772	107699911	+	0	NA	intron (NM_029665, intron 5 of 29)	MTEa|LTR|MaLR	27154	NM_029665	76582	Mm.132208	NM_029665	ENSMUSG00000042590	Ipo11	1700081H05Rik|2510001A17Rik|AI314624|AW555235|E330021B14Rik|Ranbp11	importin 11	protein-coding
Diff_Nuc39452	chr1	193784862	193785001	+	0	NA	Intergenic	Intergenic	-16320	NM_001177900	74023	Mm.274393	NM_023727	ENSMUSG00000049353	Rd3	3322402L07Rik|rd-3|rd3	retinal degeneration 3	protein-coding
Diff_Nuc609	chr13	14988972	14989111	+	0	NA	Intergenic	Intergenic	266516	NM_134067	105351	Mm.41450	NM_134067	ENSMUSG00000039182	AW209491	-	expressed sequence AW209491	protein-coding
Diff_Nuc7589	chr10	24198612	24198751	+	0	NA	Intergenic	Intergenic	-116567	NM_010217	14219	Mm.390287	NM_010217	ENSMUSG00000019997	Ctgf	Ccn2|Fisp12|Hcs24|fisp-12	connective tissue growth factor	protein-coding
Diff_Nuc8637	chr10	82275182	82275321	+	0	NA	intron (NR_038042, intron 1 of 2)	B1_Mus2|SINE|Alu	383	NR_038042	70003	Mm.48789	NR_038042	ENSMUSG00000056821	1700028I16Rik	-	RIKEN cDNA 1700028I16 gene	ncRNA
Diff_Nuc9218	chr10	115164902	115165041	+	0	NA	Intergenic	MER102a|DNA|MER1_type	-89369	NM_001168680	216350	Mm.22270	NM_146010	ENSMUSG00000034127	Tspan8	C76990|E330007O21Rik|Tm4sf3	tetraspanin 8	protein-coding
Diff_Nuc9859	chr17	25028922	25029061	+	0	NA	TTS (NM_001163102)	TTS (NM_001163102)	3041	NM_001163102	193838	Mm.440199	NM_001163102	ENSMUSG00000073436	Eme2	2810013J18Rik	essential meiotic structure-specific endonuclease subunit 2	protein-coding
Diff_Nuc38824	chr1	161963247	161963386	+	0	NA	Intergenic	MER66-int|LTR|ERV1	-11195	NR_028111	67647	Mm.171518	NM_001024470	ENSMUSG00000090394	4930523C07Rik	-	RIKEN cDNA 4930523C07 gene	protein-coding
Diff_Nuc20055	chr7	46502312	46502451	+	0	NA	Intergenic	L1_Mur2|LINE|L1	17523	NR_073038	100861861	Mm.60620	NR_073038		Gm21276	-	predicted gene, 21276	pseudo
Diff_Nuc24370	chr6	145305382	145305521	+	0	NA	Intergenic	RLTR13D2|LTR|ERVK	-30694	NR_003625	381827	Mm.179075	NM_001001987		1700073E17Rik	-	ribosomal protein L7 pseudogene	pseudo
Diff_Nuc14371	chr15	88536772	88536911	+	0	NA	intron (NM_001033274, intron 7 of 12)	intron (NM_001033274, intron 7 of 12)	27808	NM_001033274	223770	Mm.254438	NM_001033274	ENSMUSG00000022387	Brd1	1110059H06Rik|AI316859|mKIAA4191	bromodomain containing 1	protein-coding
Diff_Nuc26602	chr5	123392862	123393001	+	0	NA	intron (NM_001003953, intron 8 of 22)	ORR1A2|LTR|MaLR	-42572	NM_013910	30841	Mm.86406	NM_013910	ENSMUSG00000029475	Kdm2b	Cxxc2|Fbl10|Fbxl10|Jhdm1b|PCCX2	lysine (K)-specific demethylase 2B	protein-coding
Diff_Nuc26447	chr5	114705852	114705991	+	0	NA	intron (NM_148935, intron 9 of 9)	MIRm|SINE|MIR	17849	NM_148935	116810	Mm.17709	NM_148935	ENSMUSG00000042002	Foxn4	-	forkhead box N4	protein-coding
Diff_Nuc4903	chr11	18886402	18886541	+	0	NA	intron (NM_010789, intron 7 of 11)	intron (NM_010789, intron 7 of 11)	32501	NM_001193271	17268	Mm.356578	NM_010789	ENSMUSG00000020160	Meis1	C530044H18Rik|Evi8	Meis homeobox 1	protein-coding
Diff_Nuc38129	chr1	126428122	126428261	+	0	NA	Intergenic	Lx4B|LINE|L1	-486055	NM_199021	269109	Mm.417716	NM_199021	ENSMUSG00000036815	Dpp10	6430601K09Rik|DPP X|Dprp3	dipeptidylpeptidase 10	protein-coding
Diff_Nuc1028	chr13	36104182	36104321	+	0	NA	intron (NM_201358, intron 2 of 2)	L1MB3|LINE|L1	44476	NM_029628	76487	Mm.44745	NM_029628	ENSMUSG00000050423	Ppp1r3g	1600032L17Rik	protein phosphatase 1, regulatory (inhibitor) subunit 3G	protein-coding
Diff_Nuc16790	chr19	5060302	5060441	+	0	NA	Intergenic	Intergenic	-7707	NM_054042	70445	Mm.29597	NM_054042	ENSMUSG00000056481	Cd248	2610111G01Rik|AI842296|Cd164l1|Tem1	CD248 antigen, endosialin	protein-coding
Diff_Nuc25814	chr5	79985762	79985901	+	0	NA	Intergenic	B4A|SINE|B4	-1463765	NM_001347367	319387	Mm.273631	NM_198702	ENSMUSG00000037605	Adgrl3	5430402I23Rik|CIRL-3|D130075K09Rik|Gm1379|LEC3|Lphn3|mKIAA0768	adhesion G protein-coupled receptor L3	protein-coding
Diff_Nuc42759	chr8	59555052	59555191	+	0	NA	Intergenic	Intergenic	244535	NR_110474	102636514		NR_110474	ENSMUSG00000100510	Uph	-	upperhand	ncRNA
Diff_Nuc16362	chr14	103569612	103569751	+	0	NA	intron (NM_207215, intron 56 of 84)	intron (NM_207215, intron 56 of 84)	-70898	NM_001347600	50789	Mm.214746	NM_015822	ENSMUSG00000022124	Fbxl3	AU041772|AW212966|FBK|Fbl3a|Fbxl3a|Ovtm|Play68	F-box and leucine-rich repeat protein 3	protein-coding
Diff_Nuc34575	chr2	104548792	104548931	+	0	NA	intron (NM_177190, intron 1 of 9)	RLTR20D|LTR|ERVK	3458	NM_177190	320554	Mm.249065	NM_177190	ENSMUSG00000027175	Tcp11l1	C130096D04Rik	t-complex 11 like 1	protein-coding
Diff_Nuc30423	chr3	38029442	38029581	+	0	NA	Intergenic	Intergenic	77530	NR_040541	71342	Mm.410782	NR_040541	ENSMUSG00000106002	5430434I15Rik	-	RIKEN cDNA 5430434I15 gene	ncRNA
Diff_Nuc23235	chr6	83991552	83991691	+	0	NA	intron (NM_021469, intron 3 of 54)	RLTR14|LTR|ERV1	22241	NM_021469	26903	Mm.220982	NM_021469	ENSMUSG00000033788	Dysf	2310004N10Rik|AI604795|D6Pas3	dysferlin	protein-coding
Diff_Nuc39208	chr1	181488022	181488161	+	0	NA	intron (NM_146105, intron 1 of 10)	intron (NM_146105, intron 1 of 10)	11431	NM_146105	226744	Mm.87662	NM_146105	ENSMUSG00000038949	Cnst	9630058J23Rik	consortin, connexin sorting protein	protein-coding
Diff_Nuc6451	chr11	93849412	93849551	+	0	NA	Intergenic	Intergenic	-7924	NM_001199203	70834	Mm.260737	NM_027569	ENSMUSG00000020859	Spag9	3110018C07Rik|4733401I23Rik|4831406C20Rik|AW552012|JLP|JSAP2|JSAP2a|Jip4|Mapk8ip4|syd1	sperm associated antigen 9	protein-coding
Diff_Nuc14594	chr15	100538072	100538211	+	0	NA	intron (NM_172451, intron 4 of 11)	intron (NM_172451, intron 4 of 11)	12767	NM_001161768	207839	Mm.22969	NM_172451	ENSMUSG00000037280	Galnt6	4632410F13|AW047994|GalNAc-T6	UDP-N-acetyl-alpha-D-galactosamine:polypeptide N-acetylgalactosaminyltransferase 6	protein-coding
Diff_Nuc36658	chr1	40350762	40350901	+	0	NA	intron (NM_001123382, intron 4 of 10)	B3A|SINE|B2	27400	NM_001123382	16177	Mm.896	NM_008362	ENSMUSG00000026072	Il1r1	CD121a|CD121b|IL-1R1|IL-iR|Il1r-1	interleukin 1 receptor, type I	protein-coding
Diff_Nuc35796	chr2	163427382	163427521	+	0	NA	promoter-TSS (NM_029512)	promoter-TSS (NM_029512)	-599	NM_181734	76080	Mm.89828	NM_029512	ENSMUSG00000017679	Ttpal	3110080A02Rik|5830472M02Rik	tocopherol (alpha) transfer protein-like	protein-coding
Diff_Nuc41490	chr9	102658012	102658151	+	0	NA	intron (NR_033301, intron 3 of 3)	intron (NR_033301, intron 3 of 3)	16103	NR_033301	434510	Mm.387937	NM_001034892	ENSMUSG00000093812	Gm5627	EG434510	predicted gene 5627	ncRNA
Diff_Nuc22720	chr6	51459042	51459181	+	0	NA	Intergenic	RMER5|LTR|ERV1	-14791	NM_001127349	71982	Mm.294166	NM_028035	ENSMUSG00000038301	Snx10	2410004M09Rik	sorting nexin 10	protein-coding
Diff_Nuc42153	chr8	19684262	19684401	+	0	NA	Intergenic	Intergenic	-45245	NM_001270553	100861668	Mm.491087	NM_001270553	ENSMUSG00000095294	Gm21119	-	predicted gene, 21119	protein-coding
Diff_Nuc21010	chr7	106396852	106396991	+	0	NA	Intergenic	Intergenic	-9800	NM_177448	233549	Mm.208030	NM_177448	ENSMUSG00000052396	Mogat2	DGAT2L5|MGAT2|Mgat1l	monoacylglycerol O-acyltransferase 2	protein-coding
Diff_Nuc13611	chr15	46404662	46404801	+	0	NA	Intergenic	Lx4A|LINE|L1	-50120	NR_045811	75281	Mm.159487	NR_045811	ENSMUSG00000051198	4930548G14Rik	-	RIKEN cDNA 4930548G14 gene	ncRNA
Diff_Nuc11944	chr16	38550512	38550651	+	0	NA	promoter-TSS (NM_001300827)	promoter-TSS (NM_001300827)	-243	NM_001300827	224143	Mm.284366	NM_172380	ENSMUSG00000034064	Poglut1	9630046K23Rik|Clp46|Ktelc1|Rumi	protein O-glucosyltransferase 1	protein-coding
Diff_Nuc11176	chr17	91732652	91732791	+	0	NA	Intergenic	RMER6D|LTR|ERVK	-240579	NM_020252	18189	Mm.478418	NM_020252	ENSMUSG00000024109	Nrxn1	1700062G21Rik|9330127H16Rik|A230068P09Rik|mKIAA0578	neurexin I	protein-coding
Diff_Nuc40235	chr9	37295722	37295861	+	0	NA	Intergenic	B1_Mur4|SINE|Alu	-1115	NM_146222	235184	Mm.127892	NM_146222	ENSMUSG00000042138	Msantd2	2810450G17Rik|9530092B10Rik	Myb/SANT-like DNA-binding domain containing 2	protein-coding
Diff_Nuc15036	chr14	27689224	27689363	+	0	NA	Intergenic	Intergenic	-18497	NM_001170748	142687	Mm.138259	NM_080856	ENSMUSG00000021898	Asb14	Asb-14	ankyrin repeat and SOCS box-containing 14	protein-coding
Diff_Nuc19557	chr18	90689652	90689791	+	0	NA	intron (NM_198295, intron 5 of 15)	intron (NM_198295, intron 5 of 15)	10175	NM_198295	67988	Mm.268041	NM_198295	ENSMUSG00000024614	Tmx3	6430411B10Rik|A730024F05Rik|AV259382|Txndc10|mKIAA1830	thioredoxin-related transmembrane protein 3	protein-coding
Diff_Nuc43338	chr8	88259362	88259501	+	0	NA	intron (NM_028007, intron 13 of 17)	B1F|SINE|Alu	34627	NR_106189	102465898		NR_106189	ENSMUSG00000098388	Mir8109	Gm27495|mmu-mir-8109	microRNA 8109	ncRNA
Diff_Nuc16737	chr19	3399332	3399471	+	0	NA	intron (NM_001286558, intron 5 of 8)	intron (NM_001286558, intron 5 of 8)	10023	NM_001286558	17771	Mm.209941	NM_010841	ENSMUSG00000024905	Mtl5	tesmin	metallothionein-like 5, testis-specific (tesmin)	protein-coding
Diff_Nuc24013	chr6	123187592	123187731	+	0	NA	intron (NM_020001, intron 4 of 5)	Lx9|LINE|L1	7800	NM_001190321	56620	Mm.271782	NM_020001	ENSMUSG00000023349	Clec4n	Clec6a|Clecsf10|Nkcl	C-type lectin domain family 4, member n	protein-coding
Diff_Nuc39581	chr9	3024482	3024621	+	0	NA	Intergenic	GSAT_MM|Satellite|Satellite	14192	NR_039546	100628572		NR_039546	ENSMUSG00000106183	Mir101c	mir-101c|mmu-mir-101c	microRNA 101c	ncRNA
Diff_Nuc18663	chr18	39727092	39727231	+	0	NA	Intergenic	Intergenic	-80262	NM_008173	14815	Mm.129481	NM_008173	ENSMUSG00000024431	Nr3c1	GR|Grl-1|Grl1	nuclear receptor subfamily 3, group C, member 1	protein-coding
Diff_Nuc10789	chr17	73162952	73163091	+	0	NA	Intergenic	Intergenic	-23023	NM_027166	383295	Mm.277533	NM_027166	ENSMUSG00000039770	Ypel5	2310076K21Rik|CGI-127	yippee-like 5 (Drosophila)	protein-coding
Diff_Nuc18551	chr18	35727602	35727741	+	0	NA	intron (NM_010771, intron 1 of 14)	intron (NM_010771, intron 1 of 14)	5859	NM_010771	17184	Mm.215034	NM_010771	ENSMUSG00000037236	Matr3	1110061A14Rik|2810017I02Rik|AI841759|AW555618|D030046F20Rik|mKIAA0723	matrin 3	protein-coding
Diff_Nuc20925	chr7	102059402	102059541	+	0	NA	Intergenic	L1_Mus3|LINE|L1	-1260283	NM_001310762	23966	Mm.254610	NM_011858	ENSMUSG00000048078	Tenm4	Doc4|ELM2|Odz4|R75022|Ten-m4|l(7)-3Rn|l7Rn3|mKIAA1302	teneurin transmembrane protein 4	protein-coding
Diff_Nuc12927	chr15	4197032	4197171	+	0	NA	Intergenic	RCHARR1|DNA|MER1_type	-128390	NM_177355	239318	Mm.308996	NM_177355	ENSMUSG00000049148	Plcxd3	B130016O10Rik	phosphatidylinositol-specific phospholipase C, X domain containing 3	protein-coding
Diff_Nuc4300	chr12	102017382	102017521	+	0	NA	5' UTR (NM_145448, exon 1 of 13)	5' UTR (NM_145448, exon 1 of 13)	118	NM_145448	217830	Mm.218590	NM_145448	ENSMUSG00000021185	9030617O03Rik	-	RIKEN cDNA 9030617O03 gene	protein-coding
Diff_Nuc30317	chr3	32557502	32557641	+	0	NA	Intergenic	Intergenic	-42114	NM_013531	14696	Mm.139192	NM_013531	ENSMUSG00000027669	Gnb4	6720453A21Rik|G(beta)4	guanine nucleotide binding protein (G protein), beta 4	protein-coding
Diff_Nuc28626	chr4	97547602	97547741	+	0	NA	intron (NM_010905, intron 2 of 10)	intron (NM_010905, intron 2 of 10)	103354	NM_010905	18027	Mm.31274	NM_010905	ENSMUSG00000028565	Nfia	1110047K16Rik|9430022M17Rik|CTF|NF1-A|NF1A	nuclear factor I/A	protein-coding
Diff_Nuc32352	chr3	144242482	144242621	+	0	NA	intron (NM_053102, intron 2 of 4)	intron (NM_053102, intron 2 of 4)	9160	NM_053102	93684	Mm.29812	NM_053102	ENSMUSG00000037072	Selenof	9430015P09Rik|Sep15	selenoprotein F	protein-coding
Diff_Nuc40874	chr9	67371872	67372011	+	0	NA	intron (NM_001081242, intron 1 of 57)	intron (NM_001081242, intron 1 of 57)	35569	NM_001081242	70549	Mm.33645	NM_027458	ENSMUSG00000052698	Tln2	5730421P04Rik|AI507121|AI787438|AL118320|mKIAA0320	talin 2	protein-coding
Diff_Nuc5667	chr11	57835342	57835481	+	0	NA	intron (NM_028451, intron 1 of 18)	intron (NM_028451, intron 1 of 18)	12845	NM_028451	73158	Mm.248843	NM_028451	ENSMUSG00000037331	Larp1	1810024J12Rik|3110040D16Rik|Larp|mKIAA0731	La ribonucleoprotein domain family, member 1	protein-coding
Diff_Nuc34490	chr2	99826472	99826611	+	0	NA	Intergenic	Lx3A|LINE|L1	-1638364	NM_009020	19374	Mm.4988	NM_009020	ENSMUSG00000032864	Rag2	Rag-2	recombination activating gene 2	protein-coding
Diff_Nuc30211	chr3	27884592	27884731	+	0	NA	intron (NM_008875, intron 1 of 25)	intron (NM_008875, intron 1 of 25)	1568	NM_008875	18805	Mm.212039	NM_008875	ENSMUSG00000027695	Pld1	AA536939|C85393|Pld1a|Pld1b|mPLD1	phospholipase D1	protein-coding
Diff_Nuc11460	chr16	16872652	16872791	+	0	NA	intron (NM_011624, intron 1 of 17)	intron (NM_011624, intron 1 of 17)	1892	NM_011624	21976	Mm.326089	NM_011624	ENSMUSG00000022779	Top3b	-	topoisomerase (DNA) III beta	protein-coding
Diff_Nuc20892	chr7	100106642	100106781	+	0	NA	Intergenic	Lx8|LINE|L1	82948	NM_028243	72461	Mm.389969	NM_028243	ENSMUSG00000061119	Prcp	2510048K03Rik|2610104A14Rik|AI451719|HUMPCP|PCP	prolylcarboxypeptidase (angiotensinase C)	protein-coding
Diff_Nuc2857	chr12	21313722	21313861	+	0	NA	intron (NM_018813, intron 12 of 17)	B1_Mm|SINE|Alu	-8462	NM_026347	67732	Mm.335830	NM_026347	ENSMUSG00000062054	Iah1	1500019E20Rik|4833421E05Rik	isoamyl acetate-hydrolyzing esterase 1 homolog	protein-coding
Diff_Nuc31673	chr3	105998332	105998471	+	0	NA	Intergenic	L1Md_F2|LINE|L1	23996	NM_145126	104183	Mm.425140	NM_145126	ENSMUSG00000063779	Chil4	Chi3l4|Ym2	chitinase-like 4	protein-coding
Diff_Nuc39508	chr1	196795322	196795461	+	0	NA	intron (NR_033564, intron 2 of 4)	IAP-d-int|LTR|ERVK	7762	NR_033564	320400	Mm.417608	NR_033564	ENSMUSG00000097325	Gm16897	C030002c11rik	predicted gene, 16897	ncRNA
Diff_Nuc30696	chr3	54393422	54393561	+	0	NA	Intergenic	L1_Mus4|LINE|L1	-103536	NM_019995	56790	Mm.486375	NM_019995	ENSMUSG00000027751	Supt20	AA667204|AI450544|D3Ertd300e|Fam48a|Supt20h|p38IP	suppressor of Ty 20	protein-coding
Diff_Nuc11253	chr16	4488132	4488271	+	0	NA	intron (NM_001347162, intron 3 of 5)	intron (NM_001347162, intron 3 of 5)	34852	NM_175347	106393	Mm.35811	NM_175347	ENSMUSG00000022519	Srl	9830004M20Rik|AW108387|sar	sarcalumenin	protein-coding
Diff_Nuc29066	chr4	120201492	120201631	+	0	NA	intron (NM_013883, intron 16 of 16)	intron (NM_013883, intron 16 of 16)	-3275	NM_177570	194219	Mm.29788	NM_177570	ENSMUSG00000047518	Slfnl1	4933406A14Rik	schlafen like 1	protein-coding
Diff_Nuc43423	chr8	93255392	93255531	+	0	NA	Intergenic	Intergenic	-97273	NM_177224	109151	Mm.100615	NM_177224	ENSMUSG00000056608	Chd9	1810014J18Rik|9030205D12Rik|A330063D19Rik|AD013|PRIC320|mKIAA0308	chromodomain helicase DNA binding protein 9	protein-coding
Diff_Nuc43444	chr8	94313352	94313491	+	0	NA	Intergenic	Intergenic	12132	NM_001253822	16373	Mm.238044	NM_008393	ENSMUSG00000031734	Irx3	AI894186	Iroquois related homeobox 3	protein-coding
Diff_Nuc42498	chr8	40505002	40505141	+	0	NA	Intergenic	L1Md_F2|LINE|L1	121737	NR_044988	621335	Mm.208080	NR_044988	ENSMUSG00000109827	Gm6213	EG621335	predicted gene 6213	ncRNA
Diff_Nuc19255	chr18	70615132	70615271	+	0	NA	intron (NM_172967, intron 8 of 8)	Lx8|LINE|L1	-16907	NM_029019	170461	Mm.83623	NM_029019	ENSMUSG00000079608	Stard6	1700011K09Rik|4833424I06Rik|4933429L05Rik|AI644424	StAR-related lipid transfer (START) domain containing 6	protein-coding
Diff_Nuc10320	chr17	46874782	46874921	+	0	NA	intron (NM_001305990, intron 1 of 3)	intron (NM_001305990, intron 1 of 3)	-8737	NM_010321	14711	Mm.29395	NM_010321	ENSMUSG00000002769	Gnmt	-	glycine N-methyltransferase	protein-coding
Diff_Nuc25553	chr5	66888772	66888911	+	0	NA	intron (NM_001201413, intron 2 of 16)	intron (NM_001201413, intron 2 of 16)	121215	NM_009686	11787	Mm.5159	NM_009686	ENSMUSG00000029207	Apbb2	2310007D03Rik|FE65L1|Rirl1|TR2L|Zfra	amyloid beta (A4) precursor protein-binding, family B, member 2	protein-coding
Diff_Nuc10896	chr17	77893662	77893801	+	0	NA	Intergenic	Lx|LINE|L1	-705857	NM_015800	50766	Mm.311912	NM_015800	ENSMUSG00000024074	Crim1	AU015004	cysteine rich transmembrane BMP regulator 1 (chordin like)	protein-coding
Diff_Nuc41215	chr9	86111742	86111881	+	0	NA	Intergenic	Lx3_Mus|LINE|L1	246712	NM_027394	70348	Mm.53469	NM_027394	ENSMUSG00000032415	Ube2cbp	2610018I03Rik|Ube3d	ubiquitin-conjugating enzyme E2C binding protein	protein-coding
Diff_Nuc11742	chr16	31014252	31014391	+	0	NA	intron (NM_198626, intron 2 of 3)	intron (NM_198626, intron 2 of 3)	67197	NM_198626	268880	Mm.286693	NM_198626	ENSMUSG00000047434	Xxylt1	AI480653	xyloside xylosyltransferase 1	protein-coding
Diff_Nuc43992	chr8	124114482	124114621	+	0	NA	intron (NM_026160, intron 1 of 3)	CpG	183	NM_026160	67443	Mm.28357	NM_026160	ENSMUSG00000031812	Map1lc3b	1010001C15Rik|Atg8|LC3b|Map1lc3	microtubule-associated protein 1 light chain 3 beta	protein-coding
Diff_Nuc42746	chr8	58408932	58409071	+	0	NA	Intergenic	Lx2|LINE|L1	-10621	NM_080438	110304	Mm.307061	NM_080438	ENSMUSG00000038257	Glra3	-	glycine receptor, alpha 3 subunit	protein-coding
Diff_Nuc12155	chr16	50378842	50378981	+	0	NA	intron (NM_001347240, intron 2 of 16)	intron (NM_001347240, intron 2 of 16)	53591	NM_027444	70508	Mm.28940	NM_027444	ENSMUSG00000022641	Bbx	5530401J07Rik|5730403O13Rik	bobby sox HMG box containing	protein-coding
Diff_Nuc24460	chr6	148350082	148350221	+	0	NA	intron (NM_001347518, intron 5 of 18)	intron (NM_001347518, intron 5 of 18)	42723	NM_001347518	387314	Mm.137858	NM_198967	ENSMUSG00000030306	Tmtc1	Arg99|BC023818	transmembrane and tetratricopeptide repeat containing 1	protein-coding
Diff_Nuc26857	chr5	137450702	137450841	+	0	NA	exon (NM_021719, exon 5 of 5)	exon (NM_021719, exon 5 of 5)	7032	NM_021719	60363	Mm.87202	NM_021719	ENSMUSG00000001739	Cldn15	2210009B08Rik|BB107105	claudin 15	protein-coding
Diff_Nuc11082	chr17	86652582	86652721	+	0	NA	intron (NM_011104, intron 1 of 14)	intron (NM_011104, intron 1 of 14)	33867	NR_045435	72104	Mm.443401	NR_045435	ENSMUSG00000100738	2010106C02Rik	-	RIKEN cDNA 2010106C02 gene	ncRNA
Diff_Nuc2522	chr13	116485132	116485271	+	0	NA	Intergenic	L1_Mus4|LINE|L1	-593029	NM_001033228	109700	Mm.317280	NM_001033228	ENSMUSG00000042284	Itga1	CD49A|E130012M19Rik|Vla1	integrin alpha 1	protein-coding
Diff_Nuc28552	chr4	94394252	94394391	+	0	NA	Intergenic	Intergenic	-11659	NM_001290549	21687	Mm.14313	NM_013690	ENSMUSG00000006386	Tek	AA517024|Cd202b|Hyk|STK1|Tie-2|Tie2	endothelial-specific receptor tyrosine kinase	protein-coding
Diff_Nuc32436	chr3	149350702	149350841	+	0	NA	Intergenic	MTE-int|LTR|MaLR	413070	NR_040591	381482	Mm.393866	NR_040591		Gm1653	-	predicted gene 1653	ncRNA
Diff_Nuc12287	chr16	60617972	60618111	+	0	NA	Intergenic	Lx2A1|LINE|L1	-12684	NM_007938	13840	Mm.455790	NM_007938	ENSMUSG00000055540	Epha6	Ehk2|Hek12|m-ehk2	Eph receptor A6	protein-coding
Diff_Nuc28736	chr4	102994032	102994171	+	0	NA	intron (NM_025909, intron 2 of 8)	intron (NM_025909, intron 2 of 8)	7650	NM_025909	67013	Mm.30021	NM_025909	ENSMUSG00000035069	Oma1	2010001O09Rik|MPRP-1|ZMPOMA1	OMA1 zinc metallopeptidase	protein-coding
Diff_Nuc19037	chr18	61538652	61538791	+	0	NA	intron (NM_133249, intron 1 of 11)	intron (NM_133249, intron 1 of 11)	18833	NR_029879	723889		NR_029879	ENSMUSG00000105200	Mir378a	Mir378|Mirn378|mmu-mir-378|mmu-mir-378a	microRNA 378a	ncRNA
Diff_Nuc11390	chr16	13313722	13313861	+	0	NA	intron (NM_181860, intron 1 of 3)	intron (NM_181860, intron 1 of 3)	-44723	NM_153588	239719	Mm.270643	NM_153588	ENSMUSG00000009569	Mkl2	ENSMUSG00000075401|Gt4-1|MRTF-B|Mrtfb|mKIAA1243	MKL/myocardin-like 2	protein-coding
Diff_Nuc26641	chr5	124476962	124477101	+	0	NA	intron (NM_177876, intron 1 of 3)	intron (NM_177876, intron 1 of 3)	5238	NM_177876	330192	Mm.4079	NM_177876	ENSMUSG00000066278	Vps37b	2300007F24Rik|AI415429|BC026744	vacuolar protein sorting 37B	protein-coding
Diff_Nuc5719	chr11	60009332	60009471	+	0	NA	intron (NM_001037764, intron 3 of 4)	intron (NM_001037764, intron 3 of 4)	4718	NR_105886	102465555		NR_105886	ENSMUSG00000098547	Mir6921	Gm27352|mmu-mir-6921	microRNA 6921	ncRNA
Diff_Nuc7738	chr10	33759062	33759201	+	0	NA	3' UTR (NM_001081165, exon 2 of 2)	3' UTR (NM_001081165, exon 2 of 2)	1728	NM_001162937	692132	Mm.383415	NM_001162937	ENSMUSG00000071340	Trappc3l	Bet3l|ENSMUSG00000071340	trafficking protein particle complex 3 like	protein-coding
Diff_Nuc6200	chr11	80667092	80667231	+	0	NA	intron (NR_110449, intron 1 of 2)	intron (NR_110449, intron 1 of 2)	4641	NR_110449	75043	Mm.410815	NR_110449	ENSMUSG00000086703	4930507D10Rik	-	RIKEN cDNA 4930507D10 gene	ncRNA
Diff_Nuc8284	chr10	63045052	63045191	+	0	NA	intron (NM_001164376, intron 5 of 17)	intron (NM_001164376, intron 5 of 17)	124862	NM_001164376	216033	Mm.444692	NM_177612	ENSMUSG00000060843	Ctnna3	4930429L08Rik|4933408A16|Catna3|Vr22	catenin (cadherin associated protein), alpha 3	protein-coding
Diff_Nuc42385	chr8	35076432	35076571	+	0	NA	Intergenic	B1_Mm|SINE|Alu	-36166	NM_001042675	19663	Mm.323997	NM_019733	ENSMUSG00000031586	Rbpms	2010300K22Rik|2700019M19Rik|AU017537|RBP-MS|hermes	RNA binding protein gene with multiple splicing	protein-coding
Diff_Nuc25718	chr5	74935632	74935771	+	0	NA	intron (NM_024183, intron 3 of 16)	intron (NM_024183, intron 3 of 16)	4194	NM_001159574	66899	Mm.272468	NM_024183	ENSMUSG00000029227	Fip1l1	1300019H17Rik|Rje	FIP1 like 1 (S. cerevisiae)	protein-coding
Diff_Nuc11016	chr17	83473562	83473701	+	0	NA	intron (NR_045094, intron 2 of 3)	intron (NR_045094, intron 2 of 3)	3934	NR_045094	100503434	Mm.187281	NR_045094		Gm19689	-	predicted gene, 19689	ncRNA
Diff_Nuc7274	chr10	8670122	8670261	+	0	NA	Intergenic	ID4|SINE|ID	-64323	NM_175155	70097	Mm.338275	NM_175155	ENSMUSG00000015305	Sash1	1100001C18Rik|2500002E12Rik|A330076K04Rik|mKIAA0790	SAM and SH3 domain containing 1	protein-coding
Diff_Nuc34226	chr2	85506502	85506641	+	0	NA	Intergenic	Intergenic	-1959	NM_013728	27216	Mm.377120	NM_013728	ENSMUSG00000075212	Olfr154	912-93|MOR175-1|OR93|Olfr4-3	olfactory receptor 154	protein-coding
Diff_Nuc29465	chr4	137859812	137859951	+	0	NA	promoter-TSS (NM_007838)	promoter-TSS (NM_007838)	-772	NM_007838	13200	Mm.7236	NM_007838	ENSMUSG00000028757	Ddost	-	dolichyl-di-phosphooligosaccharide-protein glycotransferase	protein-coding
Diff_Nuc44045	chr8	126467142	126467281	+	0	NA	intron (NM_172288, intron 3 of 25)	RLTR11A|LTR|ERVK	5954	NM_172288	234865	Mm.267812	NM_172288	ENSMUSG00000039509	Nup133	mermaid	nucleoporin 133	protein-coding
Diff_Nuc1380	chr13	51822682	51822821	+	0	NA	intron (NM_013660, intron 2 of 15)	intron (NM_013660, intron 2 of 15)	66365	NM_001281880	20354	Mm.33903	NM_013660	ENSMUSG00000021451	Sema4d	CD100|Semacl2|Semaj|Semcl2|coll-4	sema domain, immunoglobulin domain (Ig), transmembrane domain (TM) and short cytoplasmic domain, (semaphorin) 4D	protein-coding
Diff_Nuc6231	chr11	82893112	82893251	+	0	NA	Intergenic	Intergenic	14567	NM_011408	20556	Mm.278689	NM_011408	ENSMUSG00000072620	Slfn2	Shlf2	schlafen 2	protein-coding
Diff_Nuc36250	chr1	14636922	14637061	+	0	NA	Intergenic	Intergenic	109056	NM_010827	17681	Mm.5820	NM_010827	ENSMUSG00000025930	Msc	MyoR|bHLHa22	musculin	protein-coding
Diff_Nuc1370	chr13	51292452	51292591	+	0	NA	Intergenic	Intergenic	5914	NR_132443	667728		NR_132443		Hist1h2al	EG667728	histone cluster 1, H2al	pseudo
Diff_Nuc24716	chr5	17508182	17508321	+	0	NA	intron (NM_001081143, intron 4 of 7)	intron (NM_001081143, intron 4 of 7)	39863	NM_001081143	242851	Mm.332230	NM_001081143	ENSMUSG00000028777	Gnat3	Ggust|Gtn	guanine nucleotide binding protein, alpha transducing 3	protein-coding
Diff_Nuc22099	chr6	17790192	17790331	+	0	NA	intron (NM_022332, intron 3 of 15)	intron (NM_022332, intron 3 of 15)	91091	NM_022332	64213	Mm.12051	NM_022332	ENSMUSG00000029534	St7	9430001H04Rik|Fam4a2|HELG|RAY1|SEN4|TSG7	suppression of tumorigenicity 7	protein-coding
Diff_Nuc15012	chr14	26621782	26621921	+	0	NA	Intergenic	ORR1B2|LTR|MaLR	-33509	NM_001101433	71918	Mm.41904	NM_001101433	ENSMUSG00000055538	Zcchc24	2310047A01Rik	zinc finger, CCHC domain containing 24	protein-coding
Diff_Nuc6497	chr11	95003992	95004131	+	0	NA	intron (NM_007867, intron 1 of 2)	intron (NM_007867, intron 1 of 2)	-2306	NR_040279	320453	Mm.442212	NR_040279	ENSMUSG00000086552	Dlx4os	A730090H04Rik|Dlx4as	distal-less homeobox 4, opposite strand	ncRNA
Diff_Nuc21422	chr7	127021032	127021171	+	0	NA	intron (NM_001163703, intron 1 of 2)	intron (NM_001163703, intron 1 of 2)	17871	NM_173408	233805	Mm.31539	NM_173408	ENSMUSG00000048787	Dcun1d3	1700020A13Rik|BC030335	DCN1, defective in cullin neddylation 1, domain containing 3 (S. cerevisiae)	protein-coding
Diff_Nuc24653	chr5	14022822	14022961	+	0	NA	Intergenic	RMER6C|LTR|ERVK	-2385	NM_011348	20349	Mm.134093	NM_011348	ENSMUSG00000063531	Sema3e	6430702L12|AA408817|Semah|mKIAA0331	sema domain, immunoglobulin domain (Ig), short basic domain, secreted, (semaphorin) 3E	protein-coding
Diff_Nuc36074	chr1	3752802	3752941	+	0	NA	Intergenic	Lx|LINE|L1	-91292	NM_001011874	497097	Mm.454496	NM_001011874	ENSMUSG00000051951	Xkr4	AY534250|Gm210|XRG4|mKIAA1889	X-linked Kx blood group related 4	protein-coding
Diff_Nuc29083	chr4	120840722	120840861	+	0	NA	intron (NM_001346660, intron 5 of 7)	intron (NM_001346660, intron 5 of 7)	46898	NM_001346660	109263	Mm.215745	NM_001081013	ENSMUSG00000049878	Rlf	9230110M18Rik|AI195322|MommeD8	rearranged L-myc fusion sequence	protein-coding
Diff_Nuc41538	chr9	105380132	105380271	+	0	NA	intron (NM_001253831, intron 1 of 26)	intron (NM_001253831, intron 1 of 26)	17262	NM_175025	235574	Mm.326247	NM_175025	ENSMUSG00000032570	Atp2c1	1700121J11Rik|ATP2C1A|AW061228|BCPM|D930003G21Rik|HHD|SPCA|pmr1	ATPase, Ca++-sequestering	protein-coding
Diff_Nuc38656	chr1	153533472	153533611	+	0	NA	intron (NM_022018, intron 5 of 13)	intron (NM_022018, intron 5 of 13)	-68963	NM_001311165	66967	Mm.337691	NM_001039644	ENSMUSG00000043019	Edem3	2310050N11Rik	ER degradation enhancer, mannosidase alpha-like 3	protein-coding
Diff_Nuc23780	chr6	112733622	112733761	+	0	NA	intron (NM_080448, intron 4 of 21)	MIR|SINE|MIR	-87027	NM_001167730	58186	Mm.103812	NM_021385	ENSMUSG00000030254	Rad18	2810024C04Rik|Rad18sc	RAD18 E3 ubiquitin protein ligase	protein-coding
Diff_Nuc8612	chr10	80729732	80729871	+	0	NA	promoter-TSS (NM_025317)	promoter-TSS (NM_025317)	-130	NM_025317	66047	Mm.43397	NM_025317	ENSMUSG00000034932	Mrpl54	0610008M19Rik|D10Sut1e	mitochondrial ribosomal protein L54	protein-coding
Diff_Nuc11992	chr16	41815872	41816011	+	0	NA	intron (NM_001347236, intron 1 of 6)	intron (NM_001347236, intron 1 of 6)	282486	NM_175548	268890	Mm.310524	NM_175548	ENSMUSG00000061080	Lsamp	5430428I19|AW046674|B130007O04Rik|D930023J12Rik|Lam|Lamp	limbic system-associated membrane protein	protein-coding
Diff_Nuc43215	chr8	83260112	83260251	+	0	NA	intron (NM_053124, intron 2 of 23)	intron (NM_053124, intron 2 of 23)	3177	NM_053124	93762	Mm.246803	NM_053124	ENSMUSG00000031715	Smarca5	4933427E24Rik|D030040M08Rik|D330027N15Rik|MommeD4|Snf2h	SWI/SNF related, matrix associated, actin dependent regulator of chromatin, subfamily a, member 5	protein-coding
Diff_Nuc1625	chr13	65944812	65944951	+	0	NA	Intergenic	LTRIS_Mus|LTR|ERV1	-269508	NM_001177832	628709	Mm.390595	NM_001177832	ENSMUSG00000095909	Gm10324	ENSMUSG00000071302	predicted gene 10324	protein-coding
Diff_Nuc32127	chr3	130974402	130974541	+	0	NA	intron (NM_008212, intron 1 of 7)	(GAAA)n|Simple_repeat|Simple_repeat	548	NM_008212	15107	Mm.260164	NM_008212	ENSMUSG00000027984	Hadh	AA409008|AU019341|AW742602|HCDH|Hadhsc|Schad	hydroxyacyl-Coenzyme A dehydrogenase	protein-coding
Diff_Nuc19440	chr18	82626452	82626591	+	0	NA	Intergenic	Intergenic	-17994	NM_010777	17196	Mm.252063	NM_010777	ENSMUSG00000041607	Mbp	C76307|Hmbpr|R75289|golli-mbp|jve|mld|shi	myelin basic protein	protein-coding
Diff_Nuc19137	chr18	65615612	65615751	+	0	NA	intron (NM_172833, intron 8 of 15)	intron (NM_172833, intron 8 of 15)	25030	NM_172833	240354	Mm.132613	NM_172833	ENSMUSG00000032688	Malt1	A630046N12|D430033E09Rik|Pcasp1	MALT1 paracaspase	protein-coding
Diff_Nuc7247	chr10	7404292	7404431	+	0	NA	intron (NM_010690, intron 1 of 7)	intron (NM_010690, intron 1 of 7)	3354	NM_010690	16798	Mm.34083	NM_010690	ENSMUSG00000040021	Lats1	AW208599	large tumor suppressor	protein-coding
Diff_Nuc4256	chr12	100812172	100812311	+	0	NA	intron (NR_136760, intron 2 of 3)	intron (NR_136760, intron 2 of 3)	10190	NR_136760	102639404	Mm.396324	NR_136760	ENSMUSG00000097917	Gm26839	-	predicted gene, 26839	ncRNA
Diff_Nuc1860	chr13	81288782	81288921	+	0	NA	intron (NM_054053, intron 87 of 89)	intron (NM_054053, intron 87 of 89)	185516	NR_015587	319983	Mm.343027	NR_015587	ENSMUSG00000097098	9330111N05Rik	-	RIKEN cDNA 9330111N05 gene	ncRNA
Diff_Nuc33972	chr2	72214882	72215021	+	0	NA	intron (NM_178084, intron 7 of 9)	intron (NM_178084, intron 7 of 9)	91193	NM_178084	65964	Mm.304143	NM_023057	ENSMUSG00000004085	Map3k20	AV006891|B230120H23Rik|MLTK|MLTKalpha|MLTKbeta|Zak	mitogen-activated protein kinase kinase kinase 20	protein-coding
Diff_Nuc23433	chr6	92806022	92806161	+	0	NA	intron (NM_175314, intron 16 of 29)	intron (NM_175314, intron 16 of 29)	45344	NM_175314	101401	Mm.158235	NM_175314	ENSMUSG00000030022	Adamts9	1810011L16Rik|8430403M15Rik|AW743315|E030027K14Rik	a disintegrin-like and metallopeptidase (reprolysin type) with thrombospondin type 1 motif, 9	protein-coding
Diff_Nuc35834	chr2	165068672	165068811	+	0	NA	Intergenic	Intergenic	-8504	NM_174988	104010	Mm.151819	NM_174988	ENSMUSG00000053166	Cdh22	-	cadherin 22	protein-coding
Diff_Nuc16023	chr14	79740112	79740251	+	0	NA	intron (NM_025832, intron 16 of 19)	MTD|LTR|MaLR	-38739	NM_025427	66214	Mm.29811	NM_025427	ENSMUSG00000022018	Rgcc	1190002H23Rik|Rgc-32|Rgc32	regulator of cell cycle	protein-coding
Diff_Nuc98	chrX	54920922	54921061	+	0	NA	Intergenic	MER58B|DNA|MER1_type	-164057	NM_001033360	245424	Mm.336070	NM_001033360	ENSMUSG00000036357	Gpr101	GPCR6|Gm365	G protein-coupled receptor 101	protein-coding
Diff_Nuc15179	chr14	33849312	33849451	+	0	NA	intron (NM_001146022, intron 40 of 58)	RMER4B|LTR|ERVK	44813	NM_026253	67580	Mm.46115	NM_026253	ENSMUSG00000041673	Lrrc18	4930442L21Rik|MTLR1	leucine rich repeat containing 18	protein-coding
Diff_Nuc9743	chr17	19179232	19179371	+	0	NA	Intergenic	IAPLTR4_I|LTR|ERVK	-11156	NM_001104550	224552	Mm.469860	NM_001104550	ENSMUSG00000096717	Vmn2r98	EG224552	vomeronasal 2, receptor 98	protein-coding
Diff_Nuc42206	chr8	23715342	23715481	+	0	NA	Intergenic	Intergenic	-11126	NM_011696	22335	Mm.227704	NM_011696	ENSMUSG00000008892	Vdac3	-	voltage-dependent anion channel 3	protein-coding
Diff_Nuc41074	chr9	78073672	78073811	+	0	NA	Intergenic	Intergenic	-4735	NM_008181	14857	Mm.467426	NM_008181	ENSMUSG00000074183	Gsta1	Gst2-1|OTTMUSG00000031890	glutathione S-transferase, alpha 1 (Ya)	protein-coding
Diff_Nuc27339	chr4	14805822	14805961	+	0	NA	intron (NM_028264, intron 1 of 6)	MTA_Mm|LTR|MaLR	14525	NM_028264	72519	Mm.279158	NM_028264	ENSMUSG00000028221	Tmem55a	2610319K07Rik|AI315591|AV001360	transmembrane protein 55A	protein-coding
Diff_Nuc7517	chr10	20344142	20344281	+	0	NA	intron (NM_013875, intron 1 of 12)	MT2C_Mm|LTR|ERVL	-76077	NM_001347366	29863	Mm.425617	NM_013875	ENSMUSG00000019990	Pde7b	-	phosphodiesterase 7B	protein-coding
Diff_Nuc42467	chr8	38136662	38136801	+	0	NA	Intergenic	MTE2a|LTR|MaLR	-49439	NR_126063	414128	Mm.450976	NR_126063	ENSMUSG00000110242	G630064G18Rik	-	RIKEN cDNA G630064G18 gene	ncRNA
Diff_Nuc39982	chr9	24027292	24027431	+	0	NA	intron (NM_175678, intron 3 of 9)	intron (NM_175678, intron 3 of 9)	124899	NM_175678	319239	Mm.130824	NM_175678	ENSMUSG00000043659	Npsr1	9330128H10Rik|GPRA|Gpr154|MVTR|PGR14|VRR1	neuropeptide S receptor 1	protein-coding
Diff_Nuc38953	chr1	167717972	167718111	+	0	NA	promoter-TSS (NM_001113391)	promoter-TSS (NM_001113391)	-771	NM_031162	12503	Mm.217308	NM_031162	ENSMUSG00000005763	Cd247	4930549J05Rik|A430104F18Rik|AW552088|Cd3|Cd3-eta|Cd3-zeta|Cd3h|Cd3z|Cd3zeta|T3z|Tcrk|Tcrz	CD247 antigen	protein-coding
Diff_Nuc5740	chr11	60904792	60904931	+	0	NA	Intergenic	Intergenic	25555	NM_010603	16515	Mm.4970	NM_010603	ENSMUSG00000042529	Kcnj12	IRK-2|IRK2|Kir2.2|MB-IRK2	potassium inwardly-rectifying channel, subfamily J, member 12	protein-coding
Diff_Nuc43892	chr8	119533532	119533671	+	0	NA	exon (NM_029686, exon 39 of 43)	exon (NM_029686, exon 39 of 43)	-16252	NM_026572	68133	Mm.258462	NM_026572	ENSMUSG00000034424	Gcsh	1100001L02Rik|5730591C18Rik	glycine cleavage system protein H (aminomethyl carrier)	protein-coding
Diff_Nuc20845	chr7	97230892	97231031	+	0	NA	Intergenic	Intergenic	47023	NR_046006	78329	Mm.389940	NR_046006	ENSMUSG00000097162	2310010J17Rik	-	RIKEN cDNA 2310010J17 gene	ncRNA
Diff_Nuc20194	chr7	56016072	56016211	+	0	NA	Intergenic	Intergenic	-28232	NM_028031	243983	Mm.279116	NM_028031	ENSMUSG00000030471	Zdhhc13	2410004E01Rik|C530010M18|HIP3RP|Hip14l|kojak|skc4	zinc finger, DHHC domain containing 13	protein-coding
Diff_Nuc12112	chr16	47757142	47757281	+	0	NA	Intergenic	Intergenic	-526637	NM_028610	73693	Mm.35597	NM_028610	ENSMUSG00000058550	Dppa4	2410091M23Rik|C76608|ECAT15-1	developmental pluripotency associated 4	protein-coding
Diff_Nuc32157	chr3	133273962	133274101	+	0	NA	Intergenic	RMER4A|LTR|ERVK	-66677	NM_001040400	214133	Mm.347816	NM_145989	ENSMUSG00000040943	Tet2	Ayu17-449|E130014J05Rik|mKIAA1546	tet methylcytosine dioxygenase 2	protein-coding
Diff_Nuc19635	chr7	12304712	12304851	+	0	NA	Intergenic	Intergenic	-36825	NM_134203	171237	Mm.377193	NM_134203	ENSMUSG00000051687	Vmn1r73	V1rg2	vomeronasal 1 receptor 73	protein-coding
Diff_Nuc40546	chr9	53277862	53278001	+	0	NA	intron (NM_007499, intron 39 of 63)	intron (NM_007499, intron 39 of 63)	64540	NM_029247	75311	Mm.26078	NM_029247	ENSMUSG00000005131	4930550C14Rik	AU017961	RIKEN cDNA 4930550C14 gene	protein-coding
Diff_Nuc22534	chr6	40281222	40281361	+	0	NA	intron (NM_023538, intron 2 of 15)	intron (NM_023538, intron 2 of 15)	5814	NM_023538	69923	Mm.32840	NM_023538	ENSMUSG00000029916	Agk	2610037M15Rik|6720408I04Rik|AI465370|Mulk	acylglycerol kinase	protein-coding
Diff_Nuc1282	chr13	46954162	46954301	+	0	NA	intron (NM_010617, intron 3 of 37)	PB1D10|SINE|Alu	70856	NM_010617	16553	Mm.342703	NM_010617	ENSMUSG00000021375	Kif13a	4930505I07Rik|mKIAA4109	kinesin family member 13A	protein-coding
Diff_Nuc26442	chr5	114427532	114427671	+	0	NA	intron (NM_198109, intron 2 of 14)	intron (NM_198109, intron 2 of 14)	16165	NM_198109	231637	Mm.389682	NM_198109	ENSMUSG00000042121	Ssh1	AW551225|Gm1394|Gm1395|SSH-1|SSH-1L	slingshot homolog 1 (Drosophila)	protein-coding
Diff_Nuc1469	chr13	56682822	56682961	+	0	NA	Intergenic	MIR|SINE|MIR	-28073	NM_009369	21810	Mm.14455	NM_009369	ENSMUSG00000035493	Tgfbi	68kDa|AI181842|AI747162|Beta-ig|big-h3	transforming growth factor, beta induced	protein-coding
Diff_Nuc7634	chr10	26764272	26764411	+	0	NA	exon (NM_008481, exon 45 of 64)	exon (NM_008481, exon 45 of 64)	272023	NM_176837	73910	Mm.356496	NM_176837	ENSMUSG00000039031	Arhgap18	4833419J07Rik|AI314906|AI843501	Rho GTPase activating protein 18	protein-coding
Diff_Nuc27191	chr4	6289262	6289401	+	0	NA	Intergenic	Intergenic	-3496	NM_016807	53378	Mm.247473	NM_016807	ENSMUSG00000028249	Sdcbp	MDA-9|Sycl|syntenin-1	syndecan binding protein	protein-coding
Diff_Nuc15002	chr14	26413852	26413991	+	0	NA	intron (NM_183208, intron 6 of 23)	intron (NM_183208, intron 6 of 23)	7631	NR_033492	77592	Mm.444871	NM_175264		4931406H21Rik	-	RIKEN cDNA 4931406H21 gene	ncRNA
Diff_Nuc339	chrX	166438722	166438861	+	0	NA	Intergenic	Intergenic	-21942	NR_029457	654820	Mm.34441	NM_001039559	ENSMUSG00000072844	G530011O06Rik	-	RIKEN cDNA G530011O06 gene	ncRNA
Diff_Nuc26103	chr5	97322282	97322421	+	0	NA	Intergenic	RMER4B|LTR|ERVK	-27940	NR_131152	666266	Mm.32442	NR_131152	ENSMUSG00000106357	Gm8013	EG666266	predicted gene 8013	ncRNA
Diff_Nuc25200	chr5	44695372	44695511	+	0	NA	Intergenic	Intergenic	-77596	NM_173764	231225	Mm.30688	NM_173764	ENSMUSG00000046985	Tapt1	4932414K18Rik	transmembrane anterior posterior transformation 1	protein-coding
Diff_Nuc18541	chr18	35495942	35496081	+	0	NA	intron (NM_030749, intron 5 of 9)	RMER17C|LTR|ERVK	-121333	NM_178005	107065	Mm.39900	NM_178005	ENSMUSG00000071862	Lrrtm2	AI851755|BB129880|C630011A14Rik|mKIAA0416	leucine rich repeat transmembrane neuronal 2	protein-coding
Diff_Nuc6460	chr11	93934372	93934511	+	0	NA	intron (NM_001025430, intron 5 of 25)	intron (NM_001025430, intron 5 of 25)	28922	NM_001025429	70834	Mm.260737	NM_027569	ENSMUSG00000020859	Spag9	3110018C07Rik|4733401I23Rik|4831406C20Rik|AW552012|JLP|JSAP2|JSAP2a|Jip4|Mapk8ip4|syd1	sperm associated antigen 9	protein-coding
Diff_Nuc36950	chr1	55503502	55503641	+	0	NA	intron (NM_001114663, intron 1 of 5)	intron (NM_001114663, intron 1 of 5)	40781	NM_001114663	227120	Mm.194183	NM_001114663	ENSMUSG00000038349	Plcl1	C230017K02Rik|PLC-L|PLC-L1|PLCE|PLCL|PLDL1|PRIP|PRIP-1	phospholipase C-like 1	protein-coding
Diff_Nuc24531	chr5	5038162	5038301	+	0	NA	intron (NM_011074, intron 8 of 14)	ORR1E|LTR|MaLR	227837	NM_001310448	18647	Mm.389061	NM_011074	ENSMUSG00000028926	Cdk14	Pftk1|mKIAA0834	cyclin-dependent kinase 14	protein-coding
Diff_Nuc6892	chr11	109228532	109228671	+	0	NA	intron (NM_010303, intron 2 of 3)	intron (NM_010303, intron 2 of 3)	-3633	NR_038097	100036768	Mm.467767	NR_038097	ENSMUSG00000056687	Gm11696	OTTMUSG00000003456	predicted gene 11696	ncRNA
Diff_Nuc21162	chr7	114166872	114167011	+	0	NA	Intergenic	Lx2|LINE|L1	-12709	NM_147034	259036	Mm.377801	NM_147034	ENSMUSG00000073898	Olfr713	MOR263-1|P3	olfactory receptor 713	protein-coding
Diff_Nuc16444	chr14	108380392	108380531	+	0	NA	Intergenic	Intergenic	932995	NM_199065	76965	Mm.257268	NM_199065	ENSMUSG00000075478	Slitrk1	3200001I04Rik	SLIT and NTRK-like family, member 1	protein-coding
Diff_Nuc15126	chr14	31938572	31938711	+	0	NA	intron (NM_001308091, intron 1 of 1)	intron (NM_001308091, intron 1 of 1)	3475	NM_001308466	66487	Mm.379116	NM_001308091	ENSMUSG00000058351	Smim4	2010107H07Rik|Gm41122	small integral membrane protein 4	protein-coding
Diff_Nuc12944	chr15	5291782	5291921	+	0	NA	Intergenic	B4A|SINE|B4	-97664	NM_008965	19219	Mm.18509	NM_008965	ENSMUSG00000039942	Ptger4	EP4|Ptgerep4	prostaglandin E receptor 4 (subtype EP4)	protein-coding
Diff_Nuc299	chrX	166425052	166425191	+	0	NA	intron (NM_001290506, intron 8 of 9)	CpG	-8272	NR_029457	654820	Mm.34441	NM_001039559	ENSMUSG00000072844	G530011O06Rik	-	RIKEN cDNA G530011O06 gene	ncRNA
Diff_Nuc40105	chr9	30951352	30951491	+	0	NA	Intergenic	B1_Mur2|SINE|Alu	-12037	NM_011176	19143	Mm.243926	NM_011176	ENSMUSG00000031995	St14	Epithin|MT-SP1|Prss14|Tmprss14|mCAP3|matriptase	suppression of tumorigenicity 14 (colon carcinoma)	protein-coding
Diff_Nuc29945	chr3	11722172	11722311	+	0	NA	Intergenic	Lx4A|LINE|L1	122118	NR_040751	100038545	Mm.388494	NR_040751	ENSMUSG00000104015	Gm10745	ENSMUSG00000074696	predicted gene 10745	ncRNA
Diff_Nuc33783	chr2	62430452	62430591	+	0	NA	Intergenic	Intergenic	-18443	NM_007986	14089	Mm.41816	NM_007986	ENSMUSG00000000392	Fap	SIMP	fibroblast activation protein	protein-coding
Diff_Nuc11264	chr16	4743162	4743301	+	0	NA	intron (NM_010443, intron 1 of 5)	RLTR28|LTR|ERVL	1618	NM_010443	15369	Mm.272866	NM_010443	ENSMUSG00000004070	Hmox2	HO-2|HO2	heme oxygenase 2	protein-coding
Diff_Nuc5516	chr11	51263572	51263711	+	0	NA	intron (NM_153393, intron 2 of 28)	L1MB4|LINE|L1	-134618	NM_028398	72947	Mm.256875	NM_028398	ENSMUSG00000020359	Phykpl	2900006B13Rik|Agxt2l2	5-phosphohydroxy-L-lysine phospholyase	protein-coding
Diff_Nuc11470	chr16	17166532	17166671	+	0	NA	intron (NM_009456, intron 2 of 3)	intron (NM_009456, intron 2 of 3)	-19279	NM_001306169	76872	Mm.101656	NM_029779	ENSMUSG00000022768	Ccdc116	4930432J16Rik	coiled-coil domain containing 116	protein-coding
Diff_Nuc25044	chr5	35118942	35119081	+	0	NA	intron (NM_010414, intron 1 of 66)	intron (NM_010414, intron 1 of 66)	14622	NM_010414	15194	Mm.209071	NM_010414	ENSMUSG00000029104	Htt	AI256365|C430023I11Rik|Hd|Hdh|IT15	huntingtin	protein-coding
Diff_Nuc23819	chr6	114843062	114843201	+	0	NA	intron (NM_177683, intron 1 of 4)	intron (NM_177683, intron 1 of 4)	28639	NM_177683	232334	Mm.268357	NM_177683	ENSMUSG00000030315	Vgll4	BC048841|VGL-4	vestigial like family member 4	protein-coding
Diff_Nuc22239	chr6	26955232	26955371	+	0	NA	Intergenic	Lx7|LINE|L1	931449	NR_030420	735266		NR_030420	ENSMUSG00000076067	Mir592	Mirn592|mir-592|mmu-mir-592	microRNA 592	ncRNA
Diff_Nuc35050	chr2	127067352	127067491	+	0	NA	3' UTR (NM_025296, exon 7 of 7)	3' UTR (NM_025296, exon 7 of 7)	6131	NM_025296	26371	Mm.45179	NM_025296	ENSMUSG00000003662	Ciao1	AW210570|Wdr39	cytosolic iron-sulfur protein assembly 1	protein-coding
Diff_Nuc30701	chr3	54558712	54558851	+	0	NA	promoter-TSS (NM_019483)	promoter-TSS (NM_019483)	-723	NM_019483	55994	Mm.244353	NM_019483	ENSMUSG00000027796	Smad9	MADH6|Madh8|Madh9|Smad8	SMAD family member 9	protein-coding
Diff_Nuc27504	chr4	28488572	28488711	+	0	NA	Intergenic	BGLII|LTR|ERVK	-251640	NM_001290434	13841	Mm.257266	NM_010141	ENSMUSG00000028289	Epha7	Cek11|Ebk|Ehk3|Hek11|Mdk1	Eph receptor A7	protein-coding
Diff_Nuc31023	chr3	75504632	75504771	+	0	NA	Intergenic	Intergenic	-45048	NR_040539	69193	Mm.374088	NR_040539	ENSMUSG00000099370	Platr10	2410007B07Rik	pluripotency associated transcript 10	ncRNA
Diff_Nuc30793	chr3	59898022	59898161	+	0	NA	Intergenic	Intergenic	12300	NM_032400	84112	Mm.125110	NM_032400	ENSMUSG00000027762	Sucnr1	Gpr91	succinate receptor 1	protein-coding
Diff_Nuc2775	chr12	14917032	14917171	+	0	NA	Intergenic	Lx2B|LINE|L1	140094	NR_045960	73972	Mm.107680	NR_045960		4930448C13Rik	-	RIKEN cDNA 4930448C13 gene	ncRNA
Diff_Nuc6792	chr11	106505052	106505191	+	0	NA	Intergenic	RMER12|LTR|ERVK	-30877	NM_198292	21763	Mm.102407	NM_198292	ENSMUSG00000040548	Tex2	4930568E07Rik|AI553404|Def-5|Taz4	testis expressed gene 2	protein-coding
Diff_Nuc36559	chr1	36786792	36786931	+	0	NA	intron (NR_040290, intron 4 of 8)	intron (NR_040290, intron 4 of 8)	15478	NR_040290	71166	Mm.157049	NR_040290	ENSMUSG00000102416	4933424G06Rik	1700104I15Rik	RIKEN cDNA 4933424G06 gene	ncRNA
Diff_Nuc29525	chr4	141421662	141421801	+	0	NA	intron (NM_025994, intron 1 of 3)	intron (NM_025994, intron 1 of 3)	9104	NM_025994	27984	Mm.395598	NM_025994	ENSMUSG00000040659	Efhd2	2600015J22Rik|AA408606|D4Wsu27e	EF hand domain containing 2	protein-coding
Diff_Nuc1211	chr13	44267142	44267281	+	0	NA	Intergenic	Intergenic	44645	NR_045088	100503592	Mm.184925	NR_045088		A330076C08Rik	-	RIKEN cDNA A330076C08 gene	ncRNA
Diff_Nuc22851	chr6	58561132	58561271	+	0	NA	intron (NM_011920, intron 1 of 15)	ID_B1|SINE|B4	14535	NM_011920	26357	Mm.333096	NM_011920	ENSMUSG00000029802	Abcg2	ABC15|ABCP|AI428558|BCRP|Bcrp1|MXR|MXR1	ATP-binding cassette, sub-family G (WHITE), member 2	protein-coding
Diff_Nuc19198	chr18	68351062	68351201	+	0	NA	intron (NM_172631, intron 3 of 5)	intron (NM_172631, intron 3 of 5)	69496	NR_106078	102465702		NR_106078	ENSMUSG00000098253	Mir7219	Gm27613|mmu-mir-7219	microRNA 7219	ncRNA
Diff_Nuc24131	chr6	129653472	129653611	+	0	NA	exon (NM_001012520, exon 2 of 6)	exon (NM_001012520, exon 2 of 6)	11988	NR_030447	735268		NR_030447	ENSMUSG00000076212	Mir680-1	Mirn680-1	microRNA 680-1	ncRNA
Diff_Nuc24841	chr5	23998432	23998571	+	0	NA	intron (NM_139153, intron 10 of 17)	intron (NM_139153, intron 10 of 17)	34165	NM_015739	231044	Mm.246596	NM_015739	ENSMUSG00000067724	Gbx1	Gbx-1	gastrulation brain homeobox 1	protein-coding
Diff_Nuc42456	chr8	37873132	37873271	+	0	NA	intron (NM_001194940, intron 4 of 17)	L1Md_F2|LINE|L1	-77093	NM_001194941	50768	Mm.125155	NM_015802	ENSMUSG00000031523	Dlc1	A730069N07Rik|Arhgap7|HP|STARD12|dlc-1	deleted in liver cancer 1	protein-coding
Diff_Nuc27614	chr4	34608682	34608821	+	0	NA	Intergenic	RMER1A|Other|Other	25936	NM_011895	24060	Mm.281885	NM_011895	ENSMUSG00000028293	Slc35a1	AA408150|AI314851	solute carrier family 35 (CMP-sialic acid transporter), member 1	protein-coding
Diff_Nuc38983	chr1	169239362	169239501	+	0	NA	intron (NM_001039483, intron 1 of 6)	intron (NM_001039483, intron 1 of 6)	630	NM_001039483	68944	Mm.330045	NM_026881	ENSMUSG00000052428	Tmco1	1190006A08Rik|4930403O06Rik|AA109065|AU022572|ESTM39	transmembrane and coiled-coil domains 1	protein-coding
Diff_Nuc40220	chr9	36378522	36378661	+	0	NA	Intergenic	Lx2|LINE|L1	11629	NM_001167584	100312948	Mm.475849	NM_001167584	ENSMUSG00000091248	Gm17689	Pate-g|Pate8	predicted gene, 17689	protein-coding
Diff_Nuc26406	chr5	112464372	112464511	+	0	NA	Intergenic	Intergenic	-171342	NR_045377	75569	Mm.243721	NR_045377	ENSMUSG00000101683	1700028D13Rik	-	RIKEN cDNA 1700028D13 gene	ncRNA
Diff_Nuc25737	chr5	75713352	75713491	+	0	NA	Intergenic	ORR1B1|LTR|MaLR	140565	NR_105992	102465620		NR_105992	ENSMUSG00000099060	Mir7025	Gm27860|mmu-mir-7025	microRNA 7025	ncRNA
Diff_Nuc23632	chr6	102801837	102801976	+	0	NA	Intergenic	MTA_Mm|LTR|MaLR	57528	NR_105792	102466636		NR_105792	ENSMUSG00000098533	Mir6373	Gm27870|mmu-mir-6373	microRNA 6373	ncRNA
Diff_Nuc9473	chr17	3209672	3209811	+	0	NA	Intergenic	Intergenic	94769	NM_134123	106583	Mm.124373	NM_134123	ENSMUSG00000046201	Scaf8	A630086M08Rik|A930036P18Rik|AA408306|AI447644|AI448652|AU015035|Rbm16|mKIAA1116	SR-related CTD-associated factor 8	protein-coding
Diff_Nuc37213	chr1	68668582	68668721	+	0	NA	intron (NM_010154, intron 2 of 26)	intron (NM_010154, intron 2 of 26)	485982	NM_010154	13869	Mm.442420	NM_010154	ENSMUSG00000062209	Erbb4	Her4|c-erbB-4	erb-b2 receptor tyrosine kinase 4	protein-coding
Diff_Nuc7862	chr10	39973452	39973591	+	0	NA	intron (NM_026113, intron 4 of 5)	B3A|SINE|B2	3950	NM_026113	67371	Mm.64104	NM_026113	ENSMUSG00000019837	Gtf3c6	2410016F19Rik|AU019813	general transcription factor IIIC, polypeptide 6, alpha	protein-coding
Diff_Nuc28495	chr4	90532679	90532818	+	0	NA	Intergenic	Intergenic	-504743	NR_033610	619842	Mm.484218	NR_033610	ENSMUSG00000080756	Gm12633	OTTMUSG00000007790	zinc finger protein 352 pseudogene	pseudo
Diff_Nuc24345	chr6	143131582	143131721	+	0	NA	intron (NM_029250, intron 2 of 7)	intron (NM_029250, intron 2 of 7)	15901	NM_029250	75320	Mm.272548	NM_029250	ENSMUSG00000030275	Etnk1	1110061E11Rik|4930555L11Rik|AI195356|AI841245|C80956|D6Ertd3e|EKI1	ethanolamine kinase 1	protein-coding
Diff_Nuc25007	chr5	32735292	32735431	+	0	NA	Intergenic	Intergenic	-25982	NM_172707	19046	Mm.241931	NM_172707	ENSMUSG00000014956	Ppp1cb	1200010B19	protein phosphatase 1, catalytic subunit, beta isoform	protein-coding
Diff_Nuc37860	chr1	107864392	107864531	+	0	NA	Intergenic	Lx9|LINE|L1	-22522	NM_001122676	227449	Mm.210188	NM_001122675	ENSMUSG00000038866	Zcchc2	9930114B20Rik|AW212015	zinc finger, CCHC domain containing 2	protein-coding
Diff_Nuc24883	chr5	25302932	25303071	+	0	NA	intron (NM_001310504, intron 1 of 10)	intron (NM_001310504, intron 1 of 10)	37210	NM_001004365	242894	Mm.150319	NM_001004365	ENSMUSG00000056367	Actr3b	9630005C02|ARP11|AW047569|Arp3b|Arp3beta	ARP3 actin-related protein 3B	protein-coding
Diff_Nuc9769	chr17	21385632	21385771	+	0	NA	Intergenic	L1Md_F2|LINE|L1	-11690	NM_134199	171233	Mm.222636	NM_134199	ENSMUSG00000050102	Vmn1r235	V1rf2	vomeronasal 1 receptor 235	protein-coding
Diff_Nuc37143	chr1	64385902	64386041	+	0	NA	Intergenic	L1MC3|LINE|L1	-193407	NM_133828	12912	Mm.422634	NM_009952	ENSMUSG00000025958	Creb1	2310001E10Rik|3526402H21Rik|AV083133|Creb|Creb-1	cAMP responsive element binding protein 1	protein-coding
Diff_Nuc14216	chr15	80076082	80076221	+	0	NA	intron (NM_178719, intron 2 of 5)	ORR1A2-int|LTR|MaLR	-9463	NM_001287180	11911	Mm.641	NM_009716	ENSMUSG00000042406	Atf4	Atf-4|C/ATF|CREB2|TAXREB67	activating transcription factor 4	protein-coding
Diff_Nuc41865	chr9	121629242	121629381	+	0	NA	intron (NM_010918, intron 2 of 16)	intron (NM_010918, intron 2 of 16)	1012	NM_010918	18087	Mm.32842	NM_010918	ENSMUSG00000032525	Nktr	5330401F18Rik|D9Wsu172e	natural killer tumor recognition sequence	protein-coding
Diff_Nuc16498	chr14	111558382	111558521	+	0	NA	Intergenic	RMER2|LTR|ERV1	-404080	NM_175499	239250	Mm.49728	NM_175499	ENSMUSG00000045871	Slitrk6	4832410J21Rik|Sltk6	SLIT and NTRK-like family, member 6	protein-coding
Diff_Nuc9254	chr10	117270192	117270331	+	0	NA	intron (NM_024457, intron 1 of 7)	intron (NM_024457, intron 1 of 7)	12769	NM_024457	215449	Mm.233009	NM_024457	ENSMUSG00000052681	Rap1b	2810443E11Rik	RAS related protein 1b	protein-coding
Diff_Nuc39320	chr1	187565122	187565261	+	0	NA	Intergenic	Intergenic	244006	NR_033600	114668	Mm.379303	NR_033600	ENSMUSG00000102185	5033404E19Rik	-	NSA2 ribosome biogenesis homolog pseudogene	pseudo
Diff_Nuc43140	chr8	79537692	79537831	+	0	NA	intron (NM_001083906, intron 2 of 8)	MTC|LTR|MaLR	111354	NM_001083906	110784	Mm.324393	NM_001083906	ENSMUSG00000031618	Nr3c2	MR|Mlr	nuclear receptor subfamily 3, group C, member 2	protein-coding
Diff_Nuc13451	chr15	36919502	36919641	+	0	NA	Intergenic	Intergenic	17586	NM_026521	68036	Mm.371631	NM_026521	ENSMUSG00000062397	Zfp706	3110006P09Rik|AA793007|AW536850|C77232|Znf706	zinc finger protein 706	protein-coding
Diff_Nuc39246	chr1	182706472	182706611	+	0	NA	Intergenic	Intergenic	37195	NM_008210	15078	Mm.138832	NM_008210	ENSMUSG00000060743	H3f3a	H3.3A	H3 histone, family 3A	protein-coding
Diff_Nuc11890	chr16	36021822	36021961	+	0	NA	intron (NM_008465, intron 9 of 13)	MTD|LTR|MaLR	-19385	NM_027113	69544	Mm.37802	NM_027113	ENSMUSG00000034379	Wdr5b	2310009C03Rik|AI606931	WD repeat domain 5B	protein-coding
Diff_Nuc40716	chr9	61060852	61060991	+	0	NA	Intergenic	Intergenic	74599	NR_045705	619328	Mm.325722	NR_045705	ENSMUSG00000110998	I730028E13Rik	-	RIKEN cDNA I730028E13 gene	ncRNA
Diff_Nuc28231	chr4	72038092	72038231	+	0	NA	Intergenic	Intergenic	175883	NR_027923	68285	Mm.37541	NR_027923		C630043F03Rik	AI851307	RIKEN cDNA C630043F03 gene	ncRNA
Diff_Nuc16696	chr14	123423592	123423731	+	0	NA	Intergenic	Intergenic	-41178	NM_028651	70551	Mm.271988	NM_028651	ENSMUSG00000041594	Tmtc4	4930403J22Rik|5730419O14Rik	transmembrane and tetratricopeptide repeat containing 4	protein-coding
Diff_Nuc38885	chr1	164671342	164671481	+	0	NA	promoter-TSS (NM_001081290)	promoter-TSS (NM_001081290)	-724	NM_001081290	226562	Mm.245446	NM_001081290	ENSMUSG00000040225	Prrc2c	1810043M20Rik|9630039I18Rik|A630006J20|Bat2d|Bat2d1|Bat2l2|E130112L15Rik|Prrc3|mKIAA1096	proline-rich coiled-coil 2C	protein-coding
Diff_Nuc788	chr13	23845652	23845791	+	0	NA	Intergenic	Intergenic	1472	NM_178203	319150		NM_178203	ENSMUSG00000069267	Hist1h3b	H3-53	histone cluster 1, H3b	protein-coding
Diff_Nuc4993	chr11	22546242	22546381	+	0	NA	Intergenic	Intergenic	134025	NM_153596	103765	Mm.221274	NM_153596	ENSMUSG00000049904	Tmem17	AI503894|AW049890	transmembrane protein 17	protein-coding
Diff_Nuc2513	chr13	116107782	116107921	+	0	NA	Intergenic	B3|SINE|B2	-215679	NM_001033228	109700	Mm.317280	NM_001033228	ENSMUSG00000042284	Itga1	CD49A|E130012M19Rik|Vla1	integrin alpha 1	protein-coding
Diff_Nuc43270	chr8	85783892	85784031	+	0	NA	intron (NM_001111304, intron 15 of 20)	intron (NM_001111304, intron 15 of 20)	-30286	NM_009463	22227	Mm.4177	NM_009463	ENSMUSG00000031710	Ucp1	AI385626|Slc25a7|Ucp	uncoupling protein 1 (mitochondrial, proton carrier)	protein-coding
Diff_Nuc37066	chr1	61197032	61197171	+	0	NA	Intergenic	Intergenic	162343	NM_017480	54167	Mm.42044	NM_017480	ENSMUSG00000026009	Icos	AILIM|CCLP|CRP-1|H4|Ly115	inducible T cell co-stimulator	protein-coding
Diff_Nuc26680	chr5	125864162	125864301	+	0	NA	Intergenic	Intergenic	6156	NM_019639	22190	Mm.331	NM_019639	ENSMUSG00000008348	Ubc	2700054O04Rik|AI194771|Rps27a|TI-225|Uba52|Ubb	ubiquitin C	protein-coding
Diff_Nuc7598	chr10	24733602	24733741	+	0	NA	Intergenic	Intergenic	-86395	NM_007482	11846	Mm.154144	NM_007482	ENSMUSG00000019987	Arg1	AI|AI256583|Arg-1|PGIF	arginase, liver	protein-coding
Diff_Nuc32063	chr3	126320072	126320211	+	0	NA	intron (NM_001346636, intron 2 of 20)	intron (NM_001346636, intron 2 of 20)	20272	NM_023813	108058	Mm.255822	NM_023813	ENSMUSG00000053819	Camk2d	2810011D23Rik|8030469K03Rik|CaMK II|[d]-CaMKII	calcium/calmodulin-dependent protein kinase II, delta	protein-coding
Diff_Nuc38093	chr1	123285502	123285641	+	0	NA	Intergenic	RSINE1|SINE|B4	-42073	NM_029955	70829	Mm.25788	NM_027567	ENSMUSG00000026339	Ccdc93	4633402D15Rik|9230102M16Rik	coiled-coil domain containing 93	protein-coding
Diff_Nuc12848	chr16	95623232	95623371	+	0	NA	intron (NM_001302152, intron 4 of 10)	(CAGAGA)n|Simple_repeat|Simple_repeat	57654	NM_001302154	13876	Mm.164531	NM_133659	ENSMUSG00000040732	Erg	D030036I24Rik	avian erythroblastosis virus E-26 (v-ets) oncogene related	protein-coding
Diff_Nuc19892	chr7	29124242	29124381	+	0	NA	promoter-TSS (NM_013676)	promoter-TSS (NM_013676)	-573	NM_013676	20924	Mm.285906	NM_013676	ENSMUSG00000003435	Supt5	AL033283|AL033321|AU019549|Spt5|Supt5h	suppressor of Ty 5	protein-coding
Diff_Nuc37849	chr1	107549532	107549671	+	0	NA	intron (NM_013784, intron 7 of 30)	PB1D10|SINE|Alu	10652	NM_013784	27392	Mm.268911	NM_013784	ENSMUSG00000056536	Pign	Gm20308|PIG-N	phosphatidylinositol glycan anchor biosynthesis, class N	protein-coding
Diff_Nuc19906	chr7	29698352	29698491	+	0	NA	exon (NM_021895, exon 6 of 21)	exon (NM_021895, exon 6 of 21)	31746	NM_001110807	60594	Mm.476990	NM_021894	ENSMUSG00000054083	Capn12	CANP 12	calpain 12	protein-coding
Diff_Nuc11564	chr16	22250722	22250861	+	0	NA	intron (NM_009186, intron 5 of 8)	intron (NM_009186, intron 5 of 8)	15287	NM_001330554	20462	Mm.210352	NM_009186	ENSMUSG00000022858	Tra2b	5730405G21Rik|D16Ertd266e|SIG-41|Sfrs10|Silg41|TRA2beta	transformer 2 beta homolog (Drosophila)	protein-coding
Diff_Nuc27639	chr4	36166192	36166331	+	0	NA	intron (NM_001165999, intron 4 of 7)	intron (NM_001165999, intron 4 of 7)	-373816	NM_175516	242384	Mm.132507	NM_175516	ENSMUSG00000045083	Lingo2	B230217C06Rik|Lern3|Lrrn6c	leucine rich repeat and Ig domain containing 2	protein-coding
Diff_Nuc30129	chr3	23375002	23375141	+	0	NA	Intergenic	Intergenic	1224779	NR_004439	19784		NR_004439		Rprl2	RPRH3|Rmrp3	ribonuclease P RNA-like 2	ncRNA
Diff_Nuc26683	chr5	125921092	125921231	+	0	NA	promoter-TSS (NM_029752)	promoter-TSS (NM_029752)	-777	NM_029752	76809	Mm.290720	NM_029752	ENSMUSG00000037905	Bri3bp	2410150I18Rik|AI841257|AW742481	Bri3 binding protein	protein-coding
Diff_Nuc18157	chr18	11888532	11888671	+	0	NA	intron (NR_045526, intron 13 of 17)	B2_Mm2|SINE|B2	72743	NM_001081223	225182	Mm.154275	NM_175458	ENSMUSG00000041238	Rbbp8	9930104E21Rik|CtIP|RBBP-8|RIM|SAE2	retinoblastoma binding protein 8	protein-coding
Diff_Nuc30009	chr3	16157952	16158091	+	0	NA	Intergenic	ETnERV2-int|LTR|ERVK	74838	NM_001145919	229096	Mm.23834	NM_172677	ENSMUSG00000047213	Ythdf3	9130022A11Rik	YTH domain family 3	protein-coding
Diff_Nuc10911	chr17	78809132	78809271	+	0	NA	intron (NM_199448, intron 2 of 7)	intron (NM_199448, intron 2 of 7)	8291	NM_001285949	225020	Mm.236835	NM_199448	ENSMUSG00000056121	Fez2	9030616F16|D17Ertd315e	fasciculation and elongation protein zeta 2 (zygin II)	protein-coding
Diff_Nuc34142	chr2	81464592	81464731	+	0	NA	Intergenic	Lx4B|LINE|L1	-429154	NM_175513	241514	Mm.119383	NM_175513	ENSMUSG00000070866	Zfp804a	C630007C17Rik|Znf804a	zinc finger protein 804A	protein-coding
Diff_Nuc26046	chr5	94048802	94048941	+	0	NA	Intergenic	Intergenic	51618	NM_001164284	381654	Mm.326591	NM_001164284	ENSMUSG00000070686	C87414	-	expressed sequence C87414	protein-coding
Diff_Nuc9313	chr10	120277152	120277291	+	0	NA	intron (NM_177092, intron 4 of 6)	L1_Rod|LINE|L1	-17464	NR_038023	100504616	Mm.451174	NR_038023	ENSMUSG00000087480	Gm15910	OTTMUSG00000027725	predicted gene 15910	ncRNA
Diff_Nuc21781	chr7	146611522	146611661	+	0	NA	intron (NM_183144, intron 1 of 15)	IAPEz-int|LTR|ERVK	36583	NM_001127363	212111	Mm.28308	NM_183144	ENSMUSG00000025477	Inpp5a	-	inositol polyphosphate-5-phosphatase A	protein-coding
Diff_Nuc39167	chr1	179323512	179323651	+	0	NA	Intergenic	Intergenic	-51211	NM_001012330	30928	Mm.330700	NM_013915	ENSMUSG00000063659	Zbtb18	RP58|Zfp238|Znf238	zinc finger and BTB domain containing 18	protein-coding
Diff_Nuc25959	chr5	90068082	90068221	+	0	NA	Intergenic	Intergenic	22690	NR_037571	631105	Mm.7732	NR_037571		Gm7056	Gm149	predicted gene 7056	ncRNA
Diff_Nuc24644	chr5	13532442	13532581	+	0	NA	intron (NM_009152, intron 6 of 16)	Lx|LINE|L1	133202	NM_009152	20346	Mm.372039	NM_009152	ENSMUSG00000028883	Sema3a	Hsema-I|SEMA1|SemD|Semad|coll-1	sema domain, immunoglobulin domain (Ig), short basic domain, secreted, (semaphorin) 3A	protein-coding
Diff_Nuc29161	chr4	125466062	125466201	+	0	NA	Intergenic	Intergenic	133423	NR_015560	72395	Mm.112888	NR_015560	ENSMUSG00000085562	2610028E06Rik	BB043107	RIKEN cDNA 2610028E06 gene	ncRNA
Diff_Nuc5440	chr11	48682802	48682941	+	0	NA	intron (NM_008326, intron 1 of 2)	intron (NM_008326, intron 1 of 2)	1977	NM_008326	15944	Mm.29938	NM_008326	ENSMUSG00000046879	Irgm1	Ifggd3|Ifi1|Iigp3|Iipg3|Irgm|LRG-47	immunity-related GTPase family M member 1	protein-coding
Diff_Nuc13853	chr15	59585272	59585411	+	0	NA	Intergenic	B3A|SINE|B2	41173	NR_045076	100503021	Mm.402924	NR_045076		Gm19510	-	predicted gene, 19510	ncRNA
Diff_Nuc38314	chr1	135529932	135530071	+	0	NA	intron (NM_144530, intron 11 of 16)	MTD|LTR|MaLR	-23144	NM_009227	20643	Mm.249110	NM_009227	ENSMUSG00000090553	Snrpe	AL022645|C76690|SME	small nuclear ribonucleoprotein E	protein-coding
Diff_Nuc35587	chr2	153357222	153357361	+	0	NA	Intergenic	L2b|LINE|L2	-1584	NM_001134300	329540	Mm.50600	NM_001001986	ENSMUSG00000061411	Nol4l	4931410H15|8430427H17Rik|AI429157|Gm1636	nucleolar protein 4-like	protein-coding
Diff_Nuc41009	chr9	74131082	74131221	+	0	NA	TTS (NM_001033500)	TTS (NM_001033500)	173010	NM_001033500	546144	Mm.335289	NM_177908	ENSMUSG00000044976	Wdr72	AW558070|D230040E23	WD repeat domain 72	protein-coding
Diff_Nuc32888	chr2	18053502	18053641	+	0	NA	intron (NR_045539, intron 10 of 24)	Lx6|LINE|L1	67359	NM_001252561	17354	Mm.209175	NM_010804	ENSMUSG00000026743	Mllt10	Af10|B130021D15Rik|D630001B22Rik|mKIAA4140	myeloid/lymphoid or mixed-lineage leukemia; translocated to, 10	protein-coding
Diff_Nuc10731	chr17	69115032	69115171	+	0	NA	intron (NM_177278, intron 19 of 20)	intron (NM_177278, intron 19 of 20)	-71375	NM_001206661	622645	Mm.86422	NM_001206661	ENSMUSG00000095407	Tmem200c	EG622645|Gm6338	transmembrane protein 200C	protein-coding
Diff_Nuc14225	chr15	80540712	80540851	+	0	NA	promoter-TSS (NM_144812)	promoter-TSS (NM_144812)	-962	NM_144812	213988	Mm.131328	NM_144812	ENSMUSG00000047888	Tnrc6b	2700090M07Rik|A730065C02Rik|AI848765|D230019K20Rik	trinucleotide repeat containing 6b	protein-coding
Diff_Nuc13485	chr15	38519192	38519331	+	0	NA	intron (NR_045757, intron 1 of 2)	B1_Mur3|SINE|Alu	5428	NR_045757	69679	Mm.416890	NR_045757	ENSMUSG00000102106	2310043O21Rik	-	RIKEN cDNA 2310043O21 gene	ncRNA
Diff_Nuc6379	chr11	88678462	88678601	+	0	NA	Intergenic	MTEa|LTR|MaLR	34286	NM_009648	11640	Mm.2969	NM_009648	ENSMUSG00000018428	Akap1	AKAP121|AKAP84|Akap|C76494|C81186|DAKAP1|S-AKAP84	A kinase (PRKA) anchor protein 1	protein-coding
Diff_Nuc42023	chr8	9962812	9962951	+	0	NA	Intergenic	L1Md_F|LINE|L1	13442	NM_176953	319583	Mm.80584	NM_176953	ENSMUSG00000049717	Lig4	5830471N16Rik|tiny	ligase IV, DNA, ATP-dependent	protein-coding
Diff_Nuc35799	chr2	163458532	163458671	+	0	NA	intron (NM_012032, intron 4 of 9)	B1_Mus2|SINE|Alu	-11985	NR_028113	68386	Mm.410649	NR_028113	ENSMUSG00000058812	0610039K10Rik	-	RIKEN cDNA 0610039K10 gene	ncRNA
Diff_Nuc14124	chr15	76180412	76180551	+	0	NA	intron (NM_025340, intron 2 of 8)	intron (NM_025340, intron 2 of 8)	1059	NM_025340	106025	Mm.41463	NM_025340	ENSMUSG00000022552	Sharpin	0610041B22Rik|AW121341|RBCKL1|SIPL1|cpdm	SHANK-associated RH domain interacting protein	protein-coding
Diff_Nuc8163	chr10	57164492	57164631	+	0	NA	Intergenic	BC1_Mm|scRNA|scRNA	41598	NR_045353	74928	Mm.416643	NR_045353	ENSMUSG00000097370	4930467K11Rik	-	RIKEN cDNA 4930467K11 gene	ncRNA
Diff_Nuc33122	chr2	30101072	30101211	+	0	NA	intron (NM_177725, intron 2 of 3)	PB1|SINE|Alu	7852	NM_177725	241296	Mm.389232	NM_177725	ENSMUSG00000007476	Lrrc8a	Lrrc8|mKIAA1437	leucine rich repeat containing 8A	protein-coding
Diff_Nuc28083	chr4	61940022	61940161	+	0	NA	Intergenic	(CA)n|Simple_repeat|Simple_repeat	-7372	NM_025286	20530	Mm.292539	NM_025286	ENSMUSG00000066152	Slc31a2	AI604396|CTR2	solute carrier family 31, member 2	protein-coding
Diff_Nuc25136	chr5	40854092	40854231	+	0	NA	Intergenic	Lx5|LINE|L1	-818291	NM_010474	15476	Mm.12559	NM_010474	ENSMUSG00000051022	Hs3st1	3-Ost|D5Wsu110e|Hsg3ost	heparan sulfate (glucosamine) 3-O-sulfotransferase 1	protein-coding
Diff_Nuc40900	chr9	69128922	69129061	+	0	NA	intron (NM_013646, intron 2 of 10)	intron (NM_013646, intron 2 of 10)	-8657	NM_001289916	19883	Mm.378450	NM_013646	ENSMUSG00000032238	Rora	9530021D13Rik|Nr1f1|ROR1|ROR2|ROR3|nmf267|sg|staggerer|tmgc26	RAR-related orphan receptor alpha	protein-coding
Diff_Nuc37569	chr1	89534592	89534731	+	0	NA	intron (NR_122078, intron 2 of 27)	ID_B1|SINE|B4	17774	NM_001110193	16331	Mm.15105	NM_010566	ENSMUSG00000026288	Inpp5d	SHIP|SHIP-1|SHIP1|SIP-145|p150Ship|s-SHIP	inositol polyphosphate-5-phosphatase D	protein-coding
Diff_Nuc15679	chr14	63173482	63173621	+	0	NA	Intergenic	Intergenic	-1023	NM_001243857	629059	Mm.291864	NM_001243857	ENSMUSG00000035184	Fam124a	EG629059	family with sequence similarity 124, member A	protein-coding
Diff_Nuc42457	chr8	37873242	37873381	+	0	NA	intron (NM_001194940, intron 4 of 17)	L1Md_F2|LINE|L1	-77203	NM_001194941	50768	Mm.125155	NM_015802	ENSMUSG00000031523	Dlc1	A730069N07Rik|Arhgap7|HP|STARD12|dlc-1	deleted in liver cancer 1	protein-coding
Diff_Nuc33195	chr2	32579882	32580021	+	0	NA	intron (NR_045535, intron 1 of 12)	B3A|SINE|B2	-3258	NM_001252547	27387	Mm.9593	NM_013781	ENSMUSG00000059013	Sh2d3c	Chat|Nsp3|Shep1	SH2 domain containing 3C	protein-coding
Diff_Nuc6305	chr11	86153602	86153741	+	0	NA	intron (NM_001080931, intron 3 of 29)	ID_B1|SINE|B4	17356	NM_001080931	327987	Mm.341886	NM_001080931	ENSMUSG00000034297	Med13	1110067M05Rik|D030023K18|Thrap1|Trap240	mediator complex subunit 13	protein-coding
Diff_Nuc3743	chr12	73963762	73963901	+	0	NA	Intergenic	L1M3|LINE|L1	54921	NM_029444	75801	Mm.242892	NM_029444	ENSMUSG00000021098	4930447C04Rik	4921504I02Rik|A930035O15Rik|Six6OS|Six6as|Six6os1	RIKEN cDNA 4930447C04 gene	protein-coding
Diff_Nuc37892	chr1	108671442	108671581	+	0	NA	intron (NM_009190, intron 9 of 10)	intron (NM_009190, intron 9 of 10)	-15192	NM_001316750	70750	Mm.458911	NM_027534	ENSMUSG00000009905	Kdsr	6330410P18Rik|9430079B08Rik|Fvt1	3-ketodihydrosphingosine reductase	protein-coding
Diff_Nuc19213	chr18	68549052	68549191	+	0	NA	Intergenic	Intergenic	38373	NM_001271717	17200	Mm.426053	NM_008560	ENSMUSG00000045569	Mc2r	ACTH-R|ACTHR|MC2-R	melanocortin 2 receptor	protein-coding
Diff_Nuc12063	chr16	44729652	44729791	+	0	NA	exon (NM_145972, exon 4 of 9)	exon (NM_145972, exon 4 of 9)	5307	NM_145972	212547	Mm.310573	NM_145972	ENSMUSG00000036208	Nepro	-	nucleolus and neural progenitor protein	protein-coding
Diff_Nuc14422	chr15	92209792	92209931	+	0	NA	Intergenic	MTD|LTR|MaLR	-17380	NM_001164593	239618	Mm.309826	NM_001164593	ENSMUSG00000036218	Pdzrn4	1110017D07Rik|LNX4|SAMCAP3L|mKIAA3027	PDZ domain containing RING finger 4	protein-coding
Diff_Nuc31798	chr3	112713692	112713831	+	0	NA	Intergenic	ORR1C2-int|LTR|MaLR	245884	NM_001190404	545562	Mm.462977	NM_001190403		Amy2b	Amy-X|Amy2-2|OTTMUSG00000022462|mAmy2-1	amylase 2b	protein-coding
Diff_Nuc14152	chr15	77094462	77094601	+	0	NA	intron (NM_175387, intron 1 of 12)	ORR1B1|LTR|MaLR	42952	NM_001110827	93686	Mm.202774	NM_053104	ENSMUSG00000033565	Rbfox2	Fbm2|Fxh|Hrnbp2|Rbm9	RNA binding protein, fox-1 homolog (C. elegans) 2	protein-coding
Diff_Nuc16931	chr19	10889692	10889831	+	0	NA	intron (NM_001037801, intron 1 of 11)	intron (NM_001037801, intron 1 of 11)	14787	NM_001037801	12511	Mm.290897	NM_009852	ENSMUSG00000024670	Cd6	-	CD6 antigen	protein-coding
Diff_Nuc14102	chr15	74786852	74786991	+	0	NA	intron (NM_008529, intron 1 of 3)	intron (NM_008529, intron 1 of 3)	1385	NM_001164040	17069	Mm.788	NM_008529	ENSMUSG00000022587	Ly6e	Ly67|RIG-E|Sca-2|TSA-1|Tsa1	lymphocyte antigen 6 complex, locus E	protein-coding
Diff_Nuc950	chr13	32896252	32896391	+	0	NA	intron (NM_030215, intron 1 of 6)	intron (NM_030215, intron 1 of 6)	2422	NM_030215	78903	Mm.286680	NM_030215	ENSMUSG00000021400	Wrnip1	4833444L21Rik|WHIP|Wrnip	Werner helicase interacting protein 1	protein-coding
Diff_Nuc2278	chr13	104066712	104066851	+	0	NA	intron (NM_175171, intron 1 of 28)	intron (NM_175171, intron 1 of 28)	57791	NM_175171	328329	Mm.202606	NM_175171	ENSMUSG00000034751	Mast4	4930420O11Rik|AI642422|mKIAA0303	microtubule associated serine/threonine kinase family member 4	protein-coding
Diff_Nuc158	chrX	97818442	97818581	+	0	NA	3' UTR (NM_028303, exon 7 of 7)	3' UTR (NM_028303, exon 7 of 7)	2735	NM_028303	72621	Mm.291607	NM_028303	ENSMUSG00000015668	Pdzd11	1810012H22Rik|2310079D11Rik|2700099C19Rik|AI854765|Pdzk11	PDZ domain containing 11	protein-coding
Diff_Nuc7258	chr10	8163232	8163371	+	0	NA	intron (NM_177387, intron 1 of 7)	intron (NM_177387, intron 1 of 7)	75322	NM_177387	338362	Mm.41163	NM_177387	ENSMUSG00000047712	Ust	D930010O20Rik|UA2OST	uronyl-2-sulfotransferase	protein-coding
Diff_Nuc31978	chr3	121823602	121823741	+	0	NA	intron (NM_007378, intron 18 of 49)	intron (NM_007378, intron 18 of 49)	76293	NM_007378	11304	Mm.3918	NM_007378	ENSMUSG00000028125	Abca4	AW050280|Abc10|Abcr|D430003I15Rik|RmP	ATP-binding cassette, sub-family A (ABC1), member 4	protein-coding
Diff_Nuc28698	chr4	101017402	101017541	+	0	NA	Intergenic	RLTR13A|LTR|ERVK	2161	NR_029537	387143		NR_029537	ENSMUSG00000065451	Mir101a	Mirn101|Mirn101a|miR-101|mir-101a	microRNA 101a	ncRNA
Diff_Nuc22943	chr6	65631242	65631381	+	0	NA	intron (NM_172399, intron 1 of 3)	Lx8|LINE|L1	9706	NM_172399	68169	Mm.52392	NM_172399	ENSMUSG00000049001	Ndnf	A930038C07Rik|epidermacan	neuron-derived neurotrophic factor	protein-coding
Diff_Nuc29211	chr4	128287752	128287891	+	0	NA	promoter-TSS (NM_177758)	promoter-TSS (NM_177758)	-479	NM_177758	269585	Mm.153291	NM_177758	ENSMUSG00000061894	Zscan20	C130001F22|Zfp31|Zkscan20	zinc finger and SCAN domains 20	protein-coding
Diff_Nuc23574	chr6	99307412	99307551	+	0	NA	intron (NM_001347345, intron 2 of 19)	intron (NM_001347345, intron 2 of 19)	77858	NM_053202	108655	Mm.234965	NM_053202	ENSMUSG00000030067	Foxp1	3110052D19Rik|4932443N09Rik|AI461938|AW494214	forkhead box P1	protein-coding
Diff_Nuc12302	chr16	61851872	61852011	+	0	NA	Intergenic	L1_Mus3|LINE|L1	934601	NM_178925	106338	Mm.26321	NM_178925	ENSMUSG00000050312	Nsun3	6720484A09Rik|AU022521	NOL1/NOP2/Sun domain family member 3	protein-coding
Diff_Nuc389	chr13	4746782	4746921	+	0	NA	Intergenic	Intergenic	-138441	NM_018859	56043	Mm.251908	NM_018859	ENSMUSG00000045410	Akr1e1	1810061I10Rik|Akr1e2	aldo-keto reductase family 1, member E1	protein-coding
Diff_Nuc40849	chr9	66232722	66232861	+	0	NA	intron (NM_145617, intron 3 of 77)	intron (NM_145617, intron 3 of 77)	34534	NM_145617	235439	Mm.244179	NM_145617	ENSMUSG00000038664	Herc1	2810449H11Rik|B230218H07|D130015N03Rik|tbl	HECT and RLD domain containing E3 ubiquitin protein ligase family member 1	protein-coding
Diff_Nuc9022	chr10	102533682	102533821	+	0	NA	exon (NM_001163559, exon 24 of 26)	exon (NM_001163559, exon 24 of 26)	-42340	NM_172553	216285	Mm.19287	NM_172553	ENSMUSG00000036602	Alx1	AI314867|C130005I02|Cart1	ALX homeobox 1	protein-coding
Diff_Nuc38940	chr1	167572812	167572951	+	0	NA	Intergenic	Intergenic	-8209	NM_001083897	68481	Mm.46438	NM_001001880	ENSMUSG00000026566	Mpzl1	1110007A10Rik|PZR	myelin protein zero-like 1	protein-coding
Diff_Nuc38640	chr1	153266222	153266361	+	0	NA	intron (NM_025819, intron 4 of 19)	B1F|SINE|Alu	9274	NM_025819	66875	Mm.290905	NM_025819	ENSMUSG00000052748	Swt1	1200016B10Rik|C1orf26	SWT1 RNA endoribonuclease homolog (S. cerevisiae)	protein-coding
Diff_Nuc32681	chr2	7604252	7604391	+	0	NA	Intergenic	Intergenic	-286496	NM_001110231	14007	Mm.398543	NM_010160	ENSMUSG00000002107	Celf2	B230218O03|B230345P09Rik|C88023|CELF-2|CUG-BP2|Cugbp2|D230046B21Rik|Etr-3|Napor|Napor-2|mETR-3	CUGBP, Elav-like family member 2	protein-coding
Diff_Nuc42121	chr8	16959922	16960061	+	0	NA	intron (NM_053171, intron 3 of 69)	intron (NM_053171, intron 3 of 69)	575394	NM_053171	94109	Mm.436988	NM_053171	ENSMUSG00000060924	Csmd1	B930082H09|mKIAA1890	CUB and Sushi multiple domains 1	protein-coding
Diff_Nuc4854	chr11	16505752	16505891	+	0	NA	Intergenic	Lx9|LINE|L1	-97334	NM_001109971	20335	Mm.325350	NM_011343	ENSMUSG00000078974	Sec61g	-	SEC61, gamma subunit	protein-coding
Diff_Nuc41277	chr9	90013102	90013241	+	0	NA	Intergenic	Charlie4a|DNA|MER1_type	-3513	NM_024431	21761	Mm.426209	NM_024431	ENSMUSG00000062270	Morf4l1	MORFRG15|MRG15|TEG-189|Tex189|mKIAA4002	mortality factor 4 like 1	protein-coding
Diff_Nuc30850	chr3	63256232	63256371	+	0	NA	Intergenic	L1Md_F2|LINE|L1	156284	NM_001289463	17380	Mm.296022	NM_008604	ENSMUSG00000027820	Mme	6030454K05Rik|C85356|CALLA|CD10|NEP|SFE	membrane metallo endopeptidase	protein-coding
Diff_Nuc8246	chr10	61762082	61762221	+	0	NA	intron (NM_010438, intron 6 of 21)	intron (NM_010438, intron 6 of 21)	41018	NM_001146100	15275	Mm.196605	NM_010438	ENSMUSG00000037012	Hk1	BB404130|Hk-1|Hk1-s|dea|mHk1-s	hexokinase 1	protein-coding
Diff_Nuc23509	chr6	95437022	95437161	+	0	NA	intron (NM_001326558, intron 10 of 10)	L1_Rod|LINE|L1	-153104	NR_033559	414067	Mm.355990	NR_033559	ENSMUSG00000068180	AY512915	-	cDNA sequence AY512915	ncRNA
Diff_Nuc3837	chr12	78113402	78113541	+	0	NA	Intergenic	Intergenic	-50236	NM_001146176	17187	Mm.268548	NM_008558	ENSMUSG00000059436	Max	AA960152|AI875693|bHLHd4|bHLHd5|bHLHd6|bHLHd7|bHLHd8	Max protein	protein-coding
Diff_Nuc27661	chr4	37661052	37661191	+	0	NA	Intergenic	Lx3A|LINE|L1	-762344	NM_001165999	242384	Mm.132507	NM_175516	ENSMUSG00000045083	Lingo2	B230217C06Rik|Lern3|Lrrn6c	leucine rich repeat and Ig domain containing 2	protein-coding
Diff_Nuc8078	chr10	53092182	53092321	+	0	NA	intron (NM_001204983, intron 1 of 12)	MurERV4-int|LTR|ERVK	7406	NM_001204983	100038725	Mm.441403	NM_001204983	ENSMUSG00000038594	Cep85l	ENSMUSG00000038594|Gm9766	centrosomal protein 85-like	protein-coding
Diff_Nuc39055	chr1	173166572	173166711	+	0	NA	intron (NM_153064, intron 10 of 12)	intron (NM_153064, intron 10 of 12)	-2161	NM_010185	14127	Mm.22673	NM_010185	ENSMUSG00000058715	Fcer1g	AI573376|CD23|FcR-gamma|FcR[g]|FcRgamma|Fce1g|FcepsilonRI|Ly-50	Fc receptor, IgE, high affinity I, gamma polypeptide	protein-coding
Diff_Nuc22899	chr6	62449122	62449261	+	0	NA	Intergenic	L1Md_F2|LINE|L1	-757660	NM_008167	14804	Mm.439651	NM_008167	ENSMUSG00000071424	Grid2	B230104L07Rik|GluD2|GluRdelta2|Lc|Lc<J>|MMS10-AC|Ms10ac|cpr|ho|nmf408|tpr	glutamate receptor, ionotropic, delta 2	protein-coding
Diff_Nuc39613	chr9	3334902	3335041	+	0	NA	promoter-TSS (NM_026303)	promoter-TSS (NM_026303)	-260	NM_026303	67667	Mm.116968	NM_026303	ENSMUSG00000025899	Alkbh8	4930562C03Rik|8030431D03Rik|9430088N01Rik|Abh8	alkB homolog 8, tRNA methyltransferase	protein-coding
Diff_Nuc39541	chr9	3006632	3006771	+	0	NA	Intergenic	GSAT_MM|Satellite|Satellite	32042	NR_039546	100628572		NR_039546	ENSMUSG00000106183	Mir101c	mir-101c|mmu-mir-101c	microRNA 101c	ncRNA
Diff_Nuc10142	chr17	36042232	36042371	+	0	NA	intron (NM_001347378, intron 6 of 11)	B3|SINE|B2	4712	NM_001142745	73242	Mm.273155	NM_028476	ENSMUSG00000024426	Atat1	0610011P08Rik|2610008K08Rik|2610110G12Rik|3110080J08Rik|Mec17|TAT	alpha tubulin acetyltransferase 1	protein-coding
Diff_Nuc31010	chr3	74252092	74252231	+	0	NA	Intergenic	Lx7|LINE|L1	-430962	NR_040450	100504692	Mm.394454	NR_040450	ENSMUSG00000104096	Gm20356	-	predicted gene, 20356	ncRNA
Diff_Nuc5217	chr11	35272452	35272591	+	0	NA	intron (NM_011412, intron 4 of 35)	intron (NM_011412, intron 4 of 35)	-157797	NR_029799	723924		NR_029799	ENSMUSG00000065583	Mir218-2	Mirn218-2|mir-218-2	microRNA 218-2	ncRNA
Diff_Nuc34707	chr2	112398962	112399101	+	0	NA	promoter-TSS (NM_001165935)	promoter-TSS (NM_001165935)	-808	NM_001165935	74268	Mm.315125	NM_028844	ENSMUSG00000003604	Aven	1700013A01Rik|1700056A21Rik|mAven-L|mAven-S	apoptosis, caspase activation inhibitor	protein-coding
Diff_Nuc7031	chr11	117172062	117172201	+	0	NA	intron (NM_001113487, intron 2 of 10)	B4|SINE|B4	-20898	NM_017380	53860	Mm.38450	NM_017380	ENSMUSG00000059248	Sept9	MSF1|Msf|PNUTL4|Sint1	septin 9	protein-coding
Diff_Nuc42659	chr8	50258242	50258381	+	0	NA	Intergenic	(GGAA)n|Simple_repeat|Simple_repeat	-498267	NM_011857	23965	Mm.42191	NM_011857	ENSMUSG00000031561	Tenm3	2610100B16Rik|Odz1|Odz3|Ten-m3|mKIAA1455	teneurin transmembrane protein 3	protein-coding
Diff_Nuc33548	chr2	50526102	50526241	+	0	NA	Intergenic	(TG)n|Simple_repeat|Simple_repeat	-239033	NR_033595	227885	Mm.301654	NR_033595	ENSMUSG00000083270	Gm13498	OTTMUSG00000012426	heat shock protein 90 alpha (cytosolic), class B member 1 pseudogene	pseudo
Diff_Nuc33301	chr2	36708022	36708161	+	0	NA	Intergenic	Intergenic	2523	NM_146627	258620	Mm.377597	NM_146627	ENSMUSG00000050015	Olfr350	MOR136-13	olfactory receptor 350	protein-coding
Diff_Nuc17283	chr19	29524232	29524371	+	0	NA	intron (NM_021396, intron 4 of 5)	RLTR14-int|LTR|ERV1	38892	NM_021396	58205	Mm.116737	NM_021396	ENSMUSG00000016498	Pdcd1lg2	B7-DC|Btdc|F730015O22Rik|PD-L2	programmed cell death 1 ligand 2	protein-coding
Diff_Nuc8505	chr10	75385082	75385221	+	0	NA	promoter-TSS (NM_001161853)	promoter-TSS (NM_001161853)	-792	NM_001161853	20587	Mm.279751	NM_011418	ENSMUSG00000000902	Smarcb1	AU020204|Baf47|Ini1|SNF5/INI1|Snf5	SWI/SNF related, matrix associated, actin dependent regulator of chromatin, subfamily b, member 1	protein-coding
Diff_Nuc31425	chr3	95239602	95239741	+	0	NA	intron (NM_009709, intron 1 of 20)	B3A|SINE|B2	1359	NM_001037737	11863	Mm.250265	NM_009709	ENSMUSG00000015522	Arnt	D3Ertd557e|Drnt|ESTM42|Hif1b|W08714|bHLHe2|mKIAA4051	aryl hydrocarbon receptor nuclear translocator	protein-coding
Diff_Nuc41555	chr9	106261192	106261331	+	0	NA	Intergenic	B1_Mur2|SINE|Alu	-9702	NM_153459	235584	Mm.275584	NM_153459	ENSMUSG00000053716	Dusp7	AU015694|Mkpx|Pyst2	dual specificity phosphatase 7	protein-coding
Diff_Nuc34157	chr2	82967792	82967931	+	0	NA	Intergenic	MTE2a|LTR|MaLR	-516874	NM_026934	69082	Mm.27804	NM_026934	ENSMUSG00000027091	Zc3h15	1700006A17Rik|1810012H02Rik|2610312B22Rik|FM22|Ierepo4	zinc finger CCCH-type containing 15	protein-coding
Diff_Nuc3715	chr12	72963712	72963851	+	0	NA	intron (NM_026102, intron 1 of 25)	intron (NM_026102, intron 1 of 25)	-26749	NM_001286452	208846	Mm.87417	NM_026102	ENSMUSG00000034574	Daam1	-	dishevelled associated activator of morphogenesis 1	protein-coding
Diff_Nuc19690	chr7	16155602	16155741	+	0	NA	Intergenic	Lx2B|LINE|L1	23065	NM_027802	71468	Mm.415195	NM_027802	ENSMUSG00000054310	Obox1	7420700M11Rik|AU015708|AU024152	oocyte specific homeobox 1	protein-coding
Diff_Nuc35287	chr2	139154502	139154641	+	0	NA	Intergenic	Intergenic	-165085	NM_175467	228677	Mm.100450	NM_175467	ENSMUSG00000039092	Sptlc3	C130053K05Rik	serine palmitoyltransferase, long chain base subunit 3	protein-coding
Diff_Nuc21724	chr7	143094972	143095111	+	0	NA	Intergenic	Intergenic	-186979	NM_001081117	17345	Mm.4078	NM_001081117	ENSMUSG00000031004	Mki67	D630048A14Rik|Ki-67|Ki67	antigen identified by monoclonal antibody Ki 67	protein-coding
Diff_Nuc10866	chr17	75947842	75947981	+	0	NA	intron (NM_133747, intron 1 of 7)	ID_B1|SINE|B4	3375	NM_133747	72722	Mm.24641	NM_133747	ENSMUSG00000002017	Fam98a	2810405J04Rik|AL024114	family with sequence similarity 98, member A	protein-coding
Diff_Nuc17867	chr19	57112992	57113131	+	0	NA	intron (NM_001347459, intron 15 of 15)	intron (NM_001347459, intron 15 of 15)	-29996	NM_001177797	226250	Mm.226284	NM_146102	ENSMUSG00000025083	Afap1l2	AU041783|C86904|mKIAA1914	actin filament associated protein 1-like 2	protein-coding
Diff_Nuc10943	chr17	79932652	79932791	+	0	NA	Intergenic	L1_Mus3|LINE|L1	-22895	NR_033462	100038718	Mm.414347	NR_033462		Gm10494	ENSMUSG00000073373	predicted gene 10494	ncRNA
Diff_Nuc5653	chr11	57362652	57362791	+	0	NA	Intergenic	Intergenic	30554	NM_145426	216760	Mm.30501	NM_145426	ENSMUSG00000020522	Mfap3	2610509F16Rik|2700079M14Rik|AW536327	microfibrillar-associated protein 3	protein-coding
Diff_Nuc17028	chr19	16729712	16729851	+	0	NA	exon (NM_173028, exon 55 of 72)	exon (NM_173028, exon 55 of 72)	125642	NM_173028	271564	Mm.211963	NM_173028	ENSMUSG00000046230	Vps13a	4930425F11|4930516E05Rik|4930543C13Rik|9930023P20|Chac|Chorein|D330038K10Rik|mKIAA0986	vacuolar protein sorting 13A	protein-coding
Diff_Nuc4544	chr12	116224812	116224951	+	0	NA	Intergenic	MTA_Mm|LTR|MaLR	-472976	NR_106063	102465664		NR_106063	ENSMUSG00000098357	Mir7094-2	Gm27508|mmu-mir-7094-2	microRNA 7094-2	ncRNA
Diff_Nuc7837	chr10	39131282	39131421	+	0	NA	intron (NM_001122892, intron 2 of 12)	B1_Mus2|SINE|Alu	41746	NM_001122893	14360	Mm.4848	NM_008054	ENSMUSG00000019843	Fyn	AI448320|AW552119	Fyn proto-oncogene	protein-coding
Diff_Nuc30790	chr3	59732032	59732171	+	0	NA	intron (NM_177661, intron 2 of 5)	Lx8|LINE|L1	2965	NM_177661	229333	Mm.75765	NM_177661	ENSMUSG00000036951	C130079G13Rik	-	RIKEN cDNA C130079G13 gene	protein-coding
Diff_Nuc20629	chr7	85167972	85168111	+	0	NA	Intergenic	MER58A|DNA|MER1_type	554683	NM_008746	18213	Mm.33496	NM_008746	ENSMUSG00000059146	Ntrk3	AW125844|Ntrk3_tv3|TrkC	neurotrophic tyrosine kinase, receptor, type 3	protein-coding
Diff_Nuc11304	chr16	7463852	7463991	+	0	NA	Intergenic	Intergenic	393993	NM_183188	268859	Mm.370334	NM_021477	ENSMUSG00000008658	Rbfox1	A2bp|A2bp1|Hrnbp1|fox-1	RNA binding protein, fox-1 homolog (C. elegans) 1	protein-coding
Diff_Nuc3711	chr12	72871962	72872101	+	0	NA	Intergenic	(CA)n|Simple_repeat|Simple_repeat	-60024	NM_026102	208846	Mm.87417	NM_026102	ENSMUSG00000034574	Daam1	-	dishevelled associated activator of morphogenesis 1	protein-coding
Diff_Nuc31537	chr3	99995532	99995671	+	0	NA	non-coding (NR_104341, exon 10 of 14)	non-coding (NR_104341, exon 10 of 14)	29215	NR_104341	14547	Mm.279228	NM_010269	ENSMUSG00000027865	Gdap2	C77050|D3Ertd801e	ganglioside-induced differentiation-associated-protein 2	protein-coding
Diff_Nuc8085	chr10	53233352	53233491	+	0	NA	intron (NR_037973, intron 2 of 3)	intron (NR_037973, intron 2 of 3)	5374	NR_037973	100502868	Mm.297722	NR_037973		Gm20597	B230314j19	predicted gene, 20597	ncRNA
Diff_Nuc23584	chr6	99472002	99472141	+	0	NA	Intergenic	CpG-12337	-1084	NM_001347345	108655	Mm.234965	NM_053202	ENSMUSG00000030067	Foxp1	3110052D19Rik|4932443N09Rik|AI461938|AW494214	forkhead box P1	protein-coding
Diff_Nuc16258	chr14	98294032	98294171	+	0	NA	intron (NM_007826, intron 7 of 11)	Lx8|LINE|L1	274883	NM_001038610	13134	Mm.320593	NM_007826	ENSMUSG00000055639	Dach1	Dac|Dach	dachshund 1 (Drosophila)	protein-coding
Diff_Nuc14877	chr14	20068382	20068521	+	0	NA	Intergenic	L1Md_A|LINE|L1	-342310	NM_144839	218793	Mm.23551	NM_144839	ENSMUSG00000058317	Ube2e2	BC016265	ubiquitin-conjugating enzyme E2E 2	protein-coding
Diff_Nuc11531	chr16	20550492	20550631	+	0	NA	exon (NM_013852, exon 7 of 21)	exon (NM_013852, exon 7 of 21)	1885	NM_013852	27406	Mm.27135	NM_013852	ENSMUSG00000003234	Abcf3	AI326318|AU016058|BB119416	ATP-binding cassette, sub-family F (GCN20), member 3	protein-coding
Diff_Nuc8150	chr10	56504372	56504511	+	0	NA	Intergenic	MLT1B|LTR|MaLR	407335	NM_010288	14609	Mm.378921	NM_010288	ENSMUSG00000050953	Gja1	AU042049|AW546267|Cnx43|Cx43|Cx43alpha1|Gja-1|Npm1|connexin43	gap junction protein, alpha 1	protein-coding
Diff_Nuc9675	chr17	14405742	14405881	+	0	NA	Intergenic	Intergenic	-10702	NM_022315	64074	Mm.30162	NM_022315	ENSMUSG00000023886	Smoc2	1700056C05Rik|5430426J21Rik|Smoc2l	SPARC related modular calcium binding 2	protein-coding
Diff_Nuc40756	chr9	62765322	62765461	+	0	NA	intron (NM_019663, intron 6 of 13)	intron (NM_019663, intron 6 of 13)	-55560	NR_003965	677044	Mm.422004	NR_003965	ENSMUSG00000074250	Gm10653	ENSMUSG00000074250	ribsomal protein S2 pseudogene	pseudo
Diff_Nuc2971	chr12	31496802	31496941	+	0	NA	Intergenic	Lx5|LINE|L1	-72318	NM_001159743	100294583	Mm.399726	NM_001159743	ENSMUSG00000054204	Fam150b	6230419C23Rik	family with sequence similarity 150, member B	protein-coding
Diff_Nuc12861	chr16	96053522	96053661	+	0	NA	non-coding (NR_040485, exon 4 of 4)	non-coding (NR_040485, exon 4 of 4)	66729	NR_040485	69776	Mm.120470	NR_040484	ENSMUSG00000086899	1600002D24Rik	-	RIKEN cDNA 1600002D24 gene	ncRNA
Diff_Nuc18310	chr18	23602352	23602491	+	0	NA	intron (NM_207650, intron 1 of 20)	L1MA8|LINE|L1	28511	NM_001285811	13527	Mm.94371	NM_010087	ENSMUSG00000024302	Dtna	2210407P21Rik|DTN-A|Dtn|Gm19389|a-DB-1|adbn	dystrobrevin alpha	protein-coding
Diff_Nuc12056	chr16	44353602	44353741	+	0	NA	intron (NM_144550, intron 1 of 17)	intron (NM_144550, intron 1 of 17)	6157	NM_144550	212514	Mm.24035	NM_144550	ENSMUSG00000043065	Spice1	Ccdc52|D16Ertd480e	spindle and centriole associated protein 1	protein-coding
Diff_Nuc25942	chr5	89097202	89097341	+	0	NA	intron (NM_178700, intron 5 of 9)	ID_B1|SINE|B4	7334	NM_001098476	231413	Mm.332474	NM_178700	ENSMUSG00000044221	Grsf1	BB232551|C80280|D5Wsu31e	G-rich RNA sequence binding factor 1	protein-coding
Diff_Nuc12464	chr16	73032572	73032711	+	0	NA	intron (NM_019413, intron 26 of 28)	intron (NM_019413, intron 26 of 28)	369247	NM_019413	19876	Mm.310772	NM_019413	ENSMUSG00000022883	Robo1	AW494633|AW742721|DUTT1|Gm310	roundabout guidance receptor 1	protein-coding
Diff_Nuc2416	chr13	111629922	111630061	+	0	NA	Intergenic	Intergenic	-63716	NR_131193	75139	Mm.490931	NR_131193		Gm38397	-	predicted gene, 38397	ncRNA
Diff_Nuc42635	chr8	48684872	48685011	+	0	NA	Intergenic	Intergenic	65942	NM_203507	192174	Mm.273081	NM_203507	ENSMUSG00000031568	Rwdd4a	BC016198|Gm1942|Rwdd4	RWD domain containing 4A	protein-coding
Diff_Nuc4765	chr11	10324502	10324641	+	0	NA	Intergenic	Intergenic	-689448	NM_177033	319922	Mm.337851	NM_177033	ENSMUSG00000050830	Vwc2	A930041G11Rik|G11|PSST739|UNQ739|cradin	von Willebrand factor C domain containing 2	protein-coding
Diff_Nuc14112	chr15	75758412	75758551	+	0	NA	intron (NM_031201, intron 3 of 10)	B3|SINE|B2	1679	NM_031201	22122	Mm.22596	NM_031201	ENSMUSG00000022570	Tsta3	AI256181|FX|Tstap35b	tissue specific transplantation antigen P35B	protein-coding
Diff_Nuc4774	chr11	11338122	11338261	+	0	NA	intron (NM_015785, intron 2 of 7)	L1_Mur3|LINE|L1	24231	NM_015785	53604	Mm.9500	NM_015785	ENSMUSG00000020193	Zpbp	4930486K01Rik|Iam38|Sp38	zona pellucida binding protein	protein-coding
Diff_Nuc39762	chr9	13338632	13338771	+	0	NA	Intergenic	Intergenic	-85732	NM_001013813	270118	Mm.116898	NM_173776	ENSMUSG00000031925	Maml2	5930431H10|BC032967	mastermind like 2 (Drosophila)	protein-coding
Diff_Nuc24243	chr6	136931982	136932121	+	0	NA	Intergenic	Intergenic	29007	NM_023898	78600	Mm.290622	NM_023898	ENSMUSG00000064330	Pde6h	A930033D18Rik|PDEgamma	phosphodiesterase 6H, cGMP-specific, cone, gamma	protein-coding
Diff_Nuc2506	chr13	115779632	115779771	+	0	NA	intron (NM_001033228, intron 15 of 28)	intron (NM_001033228, intron 15 of 28)	-57452	NM_008396	16398	Mm.5007	NM_008396	ENSMUSG00000015533	Itga2	CD49B|DX5	integrin alpha 2	protein-coding
Diff_Nuc35352	chr2	142689442	142689581	+	0	NA	intron (NM_001081133, intron 2 of 25)	Lx8|LINE|L1	37689	NM_001081133	16558	Mm.251934	NM_001081133	ENSMUSG00000038844	Kif16b	8430434E15Rik|AA623607|AI789011|C80253|C80902|mKIAA1590	kinesin family member 16B	protein-coding
Diff_Nuc3519	chr12	62142052	62142191	+	0	NA	Intergenic	Intergenic	480686	NR_045049	100504101	Mm.235026	NR_045049		Gm20063	-	predicted gene, 20063	ncRNA
Diff_Nuc39321	chr1	187623932	187624071	+	0	NA	Intergenic	Intergenic	302816	NR_033600	114668	Mm.379303	NR_033600	ENSMUSG00000102185	5033404E19Rik	-	NSA2 ribosome biogenesis homolog pseudogene	pseudo
Diff_Nuc2700	chr12	9217162	9217301	+	0	NA	Intergenic	Intergenic	180428	NM_029321	75516	Mm.37581	NM_029321	ENSMUSG00000066637	Ttc32	1700013G20Rik	tetratricopeptide repeat domain 32	protein-coding
Diff_Nuc9249	chr10	116958342	116958481	+	0	NA	Intergenic	Intergenic	-108145	NM_027468	70574	Mm.339332	NM_027468	ENSMUSG00000020183	Cpm	1110060I01Rik|5730456K23Rik|AA589379|E030045M14Rik	carboxypeptidase M	protein-coding
Diff_Nuc25580	chr5	67709992	67710131	+	0	NA	intron (NM_001310629, intron 2 of 16)	MT2A|LTR|ERVL	11867	NM_001310629	109108	Mm.234455	NM_178651	ENSMUSG00000029221	Slc30a9	2310024J23Rik|AL024256|GAC63|HUEL|znT-9	solute carrier family 30 (zinc transporter), member 9	protein-coding
Diff_Nuc22648	chr6	48191762	48191901	+	0	NA	Intergenic	MMVL30-int|LTR|ERV1	-153754	NM_001347152	77827	Mm.107646	NM_133922	ENSMUSG00000042810	Krba1	A930040G15Rik|AI448780	KRAB-A domain containing 1	protein-coding
Diff_Nuc19269	chr18	71510532	71510671	+	0	NA	intron (NM_007831, intron 21 of 28)	RMER15|LTR|ERVL	782655	NM_010773	17191	Mm.322	NM_010773	ENSMUSG00000024513	Mbd2	MBD2a	methyl-CpG binding domain protein 2	protein-coding
Diff_Nuc14505	chr15	96650432	96650571	+	0	NA	Intergenic	L1M2|LINE|L1	-120372	NM_175121	67760	Mm.46754	NM_175121	ENSMUSG00000022462	Slc38a2	5033402L14Rik|AI316867|ATA2|SAT2|mKIAA1382	solute carrier family 38, member 2	protein-coding
Diff_Nuc18007	chr18	5245382	5245521	+	0	NA	5' UTR (NM_178722, exon 3 of 5)	5' UTR (NM_178722, exon 3 of 5)	88986	NM_178722	240186	Mm.118257	NM_178722	ENSMUSG00000050945	Zfp438	9430031G09|9430091M14Rik|B830013J05Rik	zinc finger protein 438	protein-coding
Diff_Nuc35015	chr2	125950542	125950681	+	0	NA	intron (NM_029455, intron 5 of 16)	intron (NM_029455, intron 5 of 16)	27129	NM_029455	75823	Mm.444732	NM_029455	ENSMUSG00000027209	Fam227b	4930525F21Rik	family with sequence similarity 227, member B	protein-coding
Diff_Nuc25953	chr5	89658762	89658901	+	0	NA	intron (NM_001136260, intron 23 of 24)	intron (NM_001136260, intron 23 of 24)	228092	NM_008096	14473	Mm.196595	NM_008096	ENSMUSG00000035540	Gc	DBP|VDB	group specific component	protein-coding
Diff_Nuc40380	chr9	44526482	44526621	+	0	NA	intron (NM_153537, intron 4 of 21)	intron (NM_153537, intron 4 of 21)	16730	NM_153537	102693	Mm.28639	NM_153537	ENSMUSG00000048537	Phldb1	AU041016|D330037A14Rik|Ll5a	pleckstrin homology like domain, family B, member 1	protein-coding
Diff_Nuc29038	chr4	118691892	118692031	+	0	NA	Intergenic	Intergenic	49755	NR_131914	433751	Mm.224312	NR_131914	ENSMUSG00000066060	Gm12866	OTTMUSG00000008833	predicted gene 12866	ncRNA
Diff_Nuc16567	chr14	116445952	116446091	+	0	NA	intron (NM_175500, intron 7 of 7)	intron (NM_175500, intron 7 of 7)	-637247	NR_045761	75088	Mm.444706	NR_045761	ENSMUSG00000093551	4930505G20Rik	-	RIKEN cDNA 4930505G20 gene	ncRNA
Diff_Nuc18955	chr18	56797062	56797201	+	0	NA	Intergenic	ORR1B1|LTR|MaLR	49129	NM_026099	67343	Mm.87057	NM_026099	ENSMUSG00000032900	Tex43	1700065I17Rik|Tseg7	testis expressed 43	protein-coding
Diff_Nuc33984	chr2	72733962	72734101	+	0	NA	Intergenic	L1_Mus3|LINE|L1	-82257	NR_102349	76218	Mm.75260	NR_102348	ENSMUSG00000085427	6430710C18Rik	5033406J01Rik	RIKEN cDNA 6430710C18 gene	ncRNA
Diff_Nuc12727	chr16	89398462	89398601	+	0	NA	Intergenic	Intergenic	5488	NM_028621	170656	Mm.46109	NM_028621	ENSMUSG00000058368	Krtap21-1	1110017B05Rik|AI506979|KAP21.1|Krtap16-7	keratin associated protein 21-1	protein-coding
Diff_Nuc10900	chr17	78618212	78618351	+	0	NA	intron (NM_015800, intron 1 of 16)	intron (NM_015800, intron 1 of 16)	18693	NM_015800	50766	Mm.311912	NM_015800	ENSMUSG00000024074	Crim1	AU015004	cysteine rich transmembrane BMP regulator 1 (chordin like)	protein-coding
Diff_Nuc4531	chr12	115291252	115291391	+	0	NA	Intergenic	RLTR40|LTR|ERVK	416356	NR_106062	102465663		NR_106062	ENSMUSG00000105438	Mir7094-1	mmu-mir-7094-1	microRNA 7094-1	ncRNA
Diff_Nuc37751	chr1	100157982	100158121	+	0	NA	Intergenic	RMER19B|LTR|ERVK	130007	NR_040439	69030	Mm.402692	NR_040439	ENSMUSG00000100182	1810006J02Rik	-	RIKEN cDNA 1810006J02 gene	ncRNA
Diff_Nuc3200	chr12	43151132	43151271	+	0	NA	Intergenic	Intergenic	-938557	NM_010733	16981	Mm.404786	NM_010733	ENSMUSG00000036295	Lrrn3	NLRR-3	leucine rich repeat protein 3, neuronal	protein-coding
Diff_Nuc5928	chr11	70456422	70456561	+	0	NA	TTS (NM_010326)	TTS (NM_010326)	3867	NM_010326	14723	Mm.377085	NM_010326	ENSMUSG00000050675	Gp1ba	GPIba|GPIbalpha	glycoprotein 1b, alpha polypeptide	protein-coding
Diff_Nuc10503	chr17	57400152	57400291	+	0	NA	intron (NM_134125, intron 10 of 13)	B4A|SINE|B4	11347	NM_001242389	106628	Mm.37368	NM_134125	ENSMUSG00000019487	Trip10	AI646975|Cip4	thyroid hormone receptor interactor 10	protein-coding
Diff_Nuc11671	chr16	27548482	27548621	+	0	NA	Intergenic	Intergenic	159509	NM_001289436	67501	Mm.258985	NM_026202	ENSMUSG00000038127	Ccdc50	C3orf6	coiled-coil domain containing 50	protein-coding
Diff_Nuc43879	chr8	118972662	118972801	+	0	NA	Intergenic	B4|SINE|B4	-56184	NM_029297	75465	Mm.23114	NM_029297	ENSMUSG00000034467	Dynlrb2	1700009A04Rik|DNLC2B|Dncl2b	dynein light chain roadblock-type 2	protein-coding
Diff_Nuc40148	chr9	32233292	32233431	+	0	NA	intron (NM_008026, intron 8 of 8)	intron (NM_008026, intron 8 of 8)	31791	NM_001168354	56379	Mm.390168	NM_019659	ENSMUSG00000041248	Kcnj1	Kir1.1|ROMK|Romk2	potassium inwardly-rectifying channel, subfamily J, member 1	protein-coding
Diff_Nuc15195	chr14	35172482	35172621	+	0	NA	Intergenic	L1MA9|LINE|L1	-3972	NM_183278	69134	Mm.27156	NM_183278	ENSMUSG00000043681	Fam25c	2200001I15Rik|Fam25	family with sequence similarity 25, member C	protein-coding
Diff_Nuc1445	chr13	55536112	55536251	+	0	NA	Intergenic	RLTR10-int|LTR|ERVK	-8016	NM_021489	58992	Mm.42224	NM_021489	ENSMUSG00000021492	F12	FXII|HAF	coagulation factor XII (Hageman factor)	protein-coding
Diff_Nuc7409	chr10	14707852	14707991	+	0	NA	Intergenic	MYSERV16_I-int|LTR|ERVK	227826	NM_008703	18101	Mm.487342	NM_008703	ENSMUSG00000019865	Nmbr	BB182387	neuromedin B receptor	protein-coding
Diff_Nuc35956	chr2	171415682	171415821	+	0	NA	Intergenic	Intergenic	372548	NR_040509	75655	Mm.396203	NR_040509	ENSMUSG00000086823	1700028P15Rik	-	RIKEN cDNA 1700028P15 gene	ncRNA
Diff_Nuc1025	chr13	35946932	35947071	+	0	NA	intron (NM_001123386, intron 2 of 6)	intron (NM_001123386, intron 2 of 6)	51215	NM_145938	208366	Mm.35545	NM_145938	ENSMUSG00000021418	Rpp40	D8Bwg1265e|Rnasep1	ribonuclease P 40 subunit	protein-coding
Diff_Nuc15577	chr14	57689192	57689331	+	0	NA	Intergenic	Intergenic	-12394	NM_016975	14611	Mm.57207	NM_016975	ENSMUSG00000048582	Gja3	Cnx46|Cx43|Cx46|Gja-3	gap junction protein, alpha 3	protein-coding
Diff_Nuc9436	chr10	127624102	127624241	+	0	NA	Intergenic	Intergenic	-6818	NM_001039080	56516	Mm.42247	NM_019711	ENSMUSG00000040043	Rbms2	2610315E04Rik|Scr3	RNA binding motif, single stranded interacting protein 2	protein-coding
Diff_Nuc41972	chr8	5782452	5782591	+	0	NA	Intergenic	ORR1D1|LTR|MaLR	-677234	NM_011388	20494	Mm.3500	NM_011388	ENSMUSG00000023073	Slc10a2	9130221J18Rik|AI605518|ASBT|IBAT|ISBT	solute carrier family 10, member 2	protein-coding
Diff_Nuc37513	chr1	87375362	87375501	+	0	NA	Intergenic	L1Md_F2|LINE|L1	119954	NM_030194	109032	Mm.335802	NM_030194	ENSMUSG00000070034	Sp110	5031415C07Rik|52kDa|5830484A20Rik|ENSMUSG00000075603|Ifi75|Ipr1	Sp110 nuclear body protein	protein-coding
Diff_Nuc17563	chr19	42256712	42256851	+	0	NA	intron (NM_177319, intron 5 of 12)	MIRb|SINE|MIR	11724	NM_001164531	319740	Mm.287359	NM_177319	ENSMUSG00000018820	Zfyve27	2210011N02Rik|9530077C24Rik|AI426636|AI593546|AI835681	zinc finger, FYVE domain containing 27	protein-coding
Diff_Nuc22371	chr6	32883552	32883691	+	0	NA	intron (NM_025336, intron 4 of 7)	intron (NM_025336, intron 4 of 7)	126531	NM_025336	66075	Mm.21501	NM_025336	ENSMUSG00000053768	Chchd3	0610041L09Rik|1700039J09Rik|AW558177	coiled-coil-helix-coiled-coil-helix domain containing 3	protein-coding
Diff_Nuc40699	chr9	60369202	60369341	+	0	NA	Intergenic	Intergenic	-10429	NM_001040426	207596	Mm.28791	NM_172444	ENSMUSG00000032289	Thsd4	ADAMTSL-6|ADAMTSL6|AI585901|Adamtsl4|B230114P05Rik	thrombospondin, type I, domain containing 4	protein-coding
Diff_Nuc38187	chr1	129319822	129319961	+	0	NA	intron (NM_145128, intron 12 of 17)	intron (NM_145128, intron 12 of 17)	218328	NM_145128	107895	Mm.214682	NM_145128	ENSMUSG00000036155	Mgat5	4930471A21Rik|5330407H02Rik|AI480971|GlcNAc-TV	mannoside acetylglucosaminyltransferase 5	protein-coding
Diff_Nuc32022	chr3	123072192	123072331	+	0	NA	3' UTR (NM_201638, exon 11 of 11)	3' UTR (NM_201638, exon 11 of 11)	16647	NM_201638	210529	Mm.260039	NM_201638	ENSMUSG00000028114	Mettl14	G430022H21Rik|mKIAA1627	methyltransferase like 14	protein-coding
Diff_Nuc43936	chr8	121599872	121600011	+	0	NA	intron (NM_019707, intron 6 of 13)	intron (NM_019707, intron 6 of 13)	-268497	NM_024219	68196	Mm.358714	NM_024219	ENSMUSG00000031839	Hsbp1	0610007A03Rik|AA408769|Hsp25	heat shock factor binding protein 1	protein-coding
Diff_Nuc34064	chr2	76551382	76551521	+	0	NA	exon (NM_011652, exon 307 of 313)	exon (NM_011652, exon 307 of 313)	38079	NM_031256	83435	Mm.41636	NM_031256	ENSMUSG00000002733	Plekha3	FAPP1	pleckstrin homology domain-containing, family A (phosphoinositide binding specific) member 3	protein-coding
Diff_Nuc19096	chr18	64087172	64087311	+	0	NA	intron (NM_001014981, intron 25 of 27)	B2_Mm1a|SINE|B2	218892	NM_001014981	104082	Mm.30850	NM_001014981	ENSMUSG00000040560	Wdr7	AI462727|TRAG|mKIAA0541	WD repeat domain 7	protein-coding
Diff_Nuc16436	chr14	107682492	107682631	+	0	NA	Intergenic	L1_Mus1|LINE|L1	-796824	NR_045938	73631	Mm.48862	NR_045938	ENSMUSG00000099794	1700128A07Rik	-	RIKEN cDNA 1700128A07 gene	ncRNA
Diff_Nuc14278	chr15	82648942	82649081	+	0	NA	intron (NM_001114140, intron 3 of 5)	intron (NM_001114140, intron 3 of 5)	-24336	NM_029562	76279	Mm.439931	NM_029562	ENSMUSG00000022445	Cyp2d26	1300006E06Rik	cytochrome P450, family 2, subfamily d, polypeptide 26	protein-coding
Diff_Nuc11609	chr16	24624072	24624211	+	0	NA	intron (NM_001145952, intron 4 of 11)	intron (NM_001145952, intron 4 of 11)	94741	NR_038091	624582	Mm.439775	NR_038091		Morf4l1-ps1	A730098P11Rik	mortality factor 4 like 1, pseudogene 1	pseudo
Diff_Nuc935	chr13	32420602	32420741	+	0	NA	intron (NM_146041, intron 1 of 10)	L1_Mus3|LINE|L1	9742	NM_146041	218138	Mm.247143	NM_146041	ENSMUSG00000038372	Gmds	BC031788|C87208	GDP-mannose 4, 6-dehydratase	protein-coding
Diff_Nuc23050	chr6	71754432	71754571	+	0	NA	intron (NM_178608, intron 6 of 6)	intron (NM_178608, intron 6 of 6)	19277	NM_025430	66223	Mm.28579	NM_025430	ENSMUSG00000052962	Mrpl35	1110066C01Rik	mitochondrial ribosomal protein L35	protein-coding
Diff_Nuc2097	chr13	95759992	95760131	+	0	NA	intron (NM_172590, intron 2 of 12)	intron (NM_172590, intron 2 of 12)	13762	NM_172590	218460	Mm.33856	NM_172590	ENSMUSG00000042015	Wdr41	B830029I03Rik|MSTP048	WD repeat domain 41	protein-coding
Diff_Nuc28394	chr4	83571122	83571261	+	0	NA	Intergenic	Intergenic	119592	NR_130998	78238	Mm.243903	NR_130998	ENSMUSG00000085217	6030471H07Rik	-	RIKEN cDNA 6030471H07 gene	ncRNA
Diff_Nuc38084	chr1	122190122	122190261	+	0	NA	Intergenic	RLTR23|LTR|ERV1	-22532	NM_001085409	68428	Mm.181033	NM_133186	ENSMUSG00000026389	Steap3	1010001D01Rik|Tsap6|pHyde	STEAP family member 3	protein-coding
Diff_Nuc18615	chr18	38455802	38455941	+	0	NA	promoter-TSS (NM_001164622)	promoter-TSS (NM_001164622)	-418	NM_020012	56736	Mm.228903	NM_020012	ENSMUSG00000060450	Rnf14	2310075C09Rik|2610005D23Rik|AA986456|AU041447|D18Ertd188e|D7Bwg0165e|Triad2	ring finger protein 14	protein-coding
Diff_Nuc19113	chr18	64695752	64695891	+	0	NA	intron (NM_001001488, intron 26 of 27)	Lx8|LINE|L1	-19610	NM_001142950	70223	Mm.29192	NM_027350	ENSMUSG00000024587	Nars	3010001M15Rik|AA960128|ASNRS|C78150	asparaginyl-tRNA synthetase	protein-coding
Diff_Nuc35183	chr2	134386192	134386331	+	0	NA	Intergenic	L1Md_F2|LINE|L1	-6173	NM_010403	15112	Mm.26634	NM_010403	ENSMUSG00000027261	Hao1	GOX|Gox1|Hao-1	hydroxyacid oxidase 1, liver	protein-coding
Diff_Nuc27580	chr4	33337962	33338101	+	0	NA	Intergenic	Intergenic	-2269	NM_001033225	108767	Mm.27769	NM_001033225	ENSMUSG00000040128	Pnrc1	5730463C12Rik|B4-2|PRR2|Prol2	proline-rich nuclear receptor coactivator 1	protein-coding
Diff_Nuc17439	chr19	37010892	37011031	+	0	NA	intron (NM_001080706, intron 1 of 37)	intron (NM_001080706, intron 1 of 37)	10392	NM_001080706	107182	Mm.295062	NM_001080706	ENSMUSG00000040565	Btaf1	AI414500|AI447930|E430027O22Rik|TAF170	B-TFIID TATA-box binding protein associated factor 1	protein-coding
Diff_Nuc9863	chr17	25093092	25093231	+	0	NA	intron (NM_198937, intron 1 of 4)	intron (NM_198937, intron 1 of 4)	4407	NM_198937	52009	Mm.371601	NM_198937	ENSMUSG00000024165	Hn1l	2810430B18Rik|AL022629|C16orf34|D17Ertd441e	hematological and neurological expressed 1-like	protein-coding
Diff_Nuc40477	chr9	49308022	49308161	+	0	NA	Intergenic	(TG)n|Simple_repeat|Simple_repeat	-13761	NM_172770	235330	Mm.177413	NM_172770	ENSMUSG00000040219	Ttc12	E330017O07Rik	tetratricopeptide repeat domain 12	protein-coding
Diff_Nuc14067	chr15	72749402	72749541	+	0	NA	intron (NM_001164642, intron 15 of 16)	B4|SINE|B4	-108717	NR_002864	353342	Mm.440245	NR_002864	ENSMUSG00000106847	Peg13	-	paternally expressed 13	ncRNA
Diff_Nuc42067	chr8	12070252	12070391	+	0	NA	Intergenic	Intergenic	229800	NM_029326	75528	Mm.440342	NM_029326	ENSMUSG00000031512	Tex29	1700018L24Rik	testis expressed 29	protein-coding
Diff_Nuc35206	chr2	135056202	135056341	+	0	NA	intron (NM_001145830, intron 4 of 31)	intron (NM_001145830, intron 4 of 31)	-14919	NR_040517	78805	Mm.78702	NR_040517	ENSMUSG00000085247	4930545L23Rik	-	RIKEN cDNA 4930545L23 gene	ncRNA
Diff_Nuc15022	chr14	27233372	27233511	+	0	NA	3' UTR (NM_001310445, exon 23 of 23)	3' UTR (NM_001310445, exon 23 of 23)	56408	NR_038005	71106	Mm.158564	NR_038005	ENSMUSG00000021874	4933413J09Rik	GCSE	RIKEN cDNA 4933413J09 gene	ncRNA
Diff_Nuc38964	chr1	167974122	167974261	+	0	NA	Intergenic	Intergenic	-41426	NM_011137	18986	Mm.245261	NM_011137	ENSMUSG00000026565	Pou2f1	2810482H01Rik|NF-A1|Oct-1|Oct1|Otf-1|Otf1	POU domain, class 2, transcription factor 1	protein-coding
Diff_Nuc2629	chr12	4981352	4981491	+	0	NA	intron (NM_001099628, intron 16 of 30)	intron (NM_001099628, intron 16 of 30)	57262	NM_001099628	320817	Mm.210966	NM_001099628	ENSMUSG00000052812	Atad2b	1110014E10Rik|BC032887|C79189|D530031C13Rik	ATPase family, AAA domain containing 2B	protein-coding
Diff_Nuc32623	chr2	4570922	4571061	+	0	NA	intron (NM_026045, intron 1 of 9)	intron (NM_026045, intron 1 of 9)	2141	NM_026045	67229	Mm.38529	NM_026045	ENSMUSG00000039449	Prpf18	2810441A10Rik	pre-mRNA processing factor 18	protein-coding
Diff_Nuc34128	chr2	80601932	80602071	+	0	NA	Intergenic	B1_Mur3|SINE|Alu	122580	NM_001190179	69482	Mm.29200	NM_027091	ENSMUSG00000026999	Nup35	2310006I24Rik|35kDa|5330402E05Rik|MP44|NO44	nucleoporin 35	protein-coding
Diff_Nuc6147	chr11	78879582	78879721	+	0	NA	intron (NM_013571, intron 2 of 17)	intron (NM_013571, intron 2 of 17)	42552	NR_045873	790910	Mm.440410	NR_045873		Gm11201	ENSMUSG00000072637|OTTMUSG00000000169	predicted gene 11201	ncRNA
Diff_Nuc40185	chr9	34637962	34638101	+	0	NA	intron (NM_001190912, intron 1 of 15)	intron (NM_001190912, intron 1 of 15)	-286282	NR_029475	78934	Mm.391688	NR_029475	ENSMUSG00000070315	4930581F22Rik	-	RIKEN cDNA 4930581F22 gene	ncRNA
Diff_Nuc10651	chr17	66045572	66045711	+	0	NA	exon (NM_133685, exon 5 of 7)	exon (NM_133685, exon 5 of 7)	-54097	NM_001146002	213272	Mm.255732	NM_153519	ENSMUSG00000050612	Txndc2	AU021712|Sptrx-1|Sptrx1|Trx4	thioredoxin domain containing 2 (spermatozoa)	protein-coding
Diff_Nuc21401	chr7	125380802	125380941	+	0	NA	intron (NM_001031814, intron 1 of 62)	RSINE1|SINE|B4	6280	NM_001031814	233789	Mm.309053	NM_177180	ENSMUSG00000030655	Smg1	2610207I05Rik|5430435M13Rik|C130002K18Rik|mKIAA0421	SMG1 homolog, phosphatidylinositol 3-kinase-related kinase (C. elegans)	protein-coding
Diff_Nuc39088	chr1	174311512	174311651	+	0	NA	3' UTR (NM_026234, exon 1 of 1)	3' UTR (NM_026234, exon 1 of 1)	4919	NM_026234	67556	Mm.26612	NM_026234	ENSMUSG00000050229	Pigm	4933437L05Rik|AI644422|AV302080|C920011G20Rik	phosphatidylinositol glycan anchor biosynthesis, class M	protein-coding
Diff_Nuc23568	chr6	99127002	99127141	+	0	NA	intron (NM_001347345, intron 4 of 19)	intron (NM_001347345, intron 4 of 19)	89438	NM_001197321	108655	Mm.234965	NM_053202	ENSMUSG00000030067	Foxp1	3110052D19Rik|4932443N09Rik|AI461938|AW494214	forkhead box P1	protein-coding
Diff_Nuc16669	chr14	122407892	122408031	+	0	NA	intron (NM_026861, intron 7 of 8)	intron (NM_026861, intron 7 of 8)	-25935	NM_001037744	223262	Mm.297637	NM_001037744	ENSMUSG00000071229	Timm8a2	-	translocase of inner mitochondrial membrane 8A2	protein-coding
Diff_Nuc2126	chr13	97330352	97330491	+	0	NA	intron (NM_001164222, intron 2 of 16)	L1_Rod|LINE|L1	17731	NM_023420	68018	Mm.24125	NM_023420	ENSMUSG00000021669	Col4a3bp	2810404O15Rik|9230101K08Rik|AU016711|CERT|GPBP	collagen, type IV, alpha 3 (Goodpasture antigen) binding protein	protein-coding
Diff_Nuc10325	chr17	47251792	47251931	+	0	NA	Intergenic	Intergenic	-26030	NM_001097623	224829	Mm.260989	NM_172622		Trerf1	9430096I18Rik|AI429294|B830015H24|RAPA|Trep-132|Trep132	transcriptional regulating factor 1	protein-coding
Diff_Nuc38369	chr1	137489742	137489881	+	0	NA	Intergenic	Intergenic	-7879	NM_173437	215690	Mm.34977	NM_173437	ENSMUSG00000009418	Nav1	9530089B19|9930003A20Rik|C230080M11Rik|Pomfil3|Unc53h1|mKIAA1151|steerin-1	neuron navigator 1	protein-coding
Diff_Nuc2188	chr13	99976992	99977131	+	0	NA	intron (NM_001004149, intron 1 of 4)	intron (NM_001004149, intron 1 of 4)	22283	NM_001004149	238803	Mm.343207	NM_001004149	ENSMUSG00000050919	Zfp366	DC-SCRIPT|Znf366	zinc finger protein 366	protein-coding
Diff_Nuc26628	chr5	124120462	124120601	+	0	NA	intron (NM_001347468, intron 1 of 24)	intron (NM_001347468, intron 1 of 24)	13839	NM_019765	56430	Mm.241109	NM_019765	ENSMUSG00000049550	Clip1	1110007I12Rik|4631429H07Rik|AV017631|C81039|CLIP-170|CLIP170|CYLN1|Clip50|Rsn|mKIAA4046|restin	CAP-GLY domain containing linker protein 1	protein-coding
Diff_Nuc6469	chr11	94040032	94040171	+	0	NA	Intergenic	Intergenic	-32667	NM_009427	22057	Mm.259673	NM_009427	ENSMUSG00000037573	Tob1	Tob|Trob	transducer of ErbB-2.1	protein-coding
Diff_Nuc10205	chr17	40946642	40946781	+	0	NA	Intergenic	Intergenic	-1387	NM_011269	19743	Mm.12961	NM_011269	ENSMUSG00000023926	Rhag	CD241|Rh50|Rh50A	Rhesus blood group-associated A glycoprotein	protein-coding
Diff_Nuc41719	chr9	113764502	113764641	+	0	NA	intron (NM_001114347, intron 18 of 39)	intron (NM_001114347, intron 18 of 39)	42867	NM_001081960	76499	Mm.222272	NM_029633	ENSMUSG00000033392	Clasp2	1500004F14Rik|8030404L10Rik|C77448|CLASP2beta|mKIAA0627	CLIP associating protein 2	protein-coding
Diff_Nuc17371	chr19	33404152	33404291	+	0	NA	intron (NM_001167818, intron 4 of 6)	RMER6D|LTR|ERVK	62564	NM_001167818	67795	Mm.204591	NM_001146342	ENSMUSG00000071573	Rnls	6530404N21Rik|AI452315|AW060440|C10orf59	renalase, FAD-dependent amine oxidase	protein-coding
Diff_Nuc35011	chr2	125808742	125808881	+	0	NA	TTS (NM_029455)	TTS (NM_029455)	-51583	NM_008008	14178	Mm.330557	NM_008008	ENSMUSG00000027208	Fgf7	Kgf	fibroblast growth factor 7	protein-coding
Diff_Nuc23864	chr6	116267782	116267921	+	0	NA	intron (NM_001290338, intron 7 of 8)	L1MB2|LINE|L1	-20189	NM_001302385	71779	Mm.27064	NM_027920	ENSMUSG00000025702	March8	1300017E09Rik|MARCH-VIII|Mir	membrane-associated ring finger (C3HC4) 8	protein-coding
Diff_Nuc42574	chr8	46095272	46095411	+	0	NA	exon (NM_001081286, exon 4 of 26)	exon (NM_001081286, exon 4 of 26)	55431	NR_033588	434310	Mm.334512	NR_033588	ENSMUSG00000066158	AY512931	-	cDNA sequence AY512931	ncRNA
Diff_Nuc3555	chr12	65240632	65240771	+	0	NA	Intergenic	Intergenic	335184	NM_001163271	623046	Mm.189552	NM_001163271	ENSMUSG00000043060	Fscb	EG623046	fibrous sheath CABYR binding protein	protein-coding
Diff_Nuc33743	chr2	60783572	60783711	+	0	NA	intron (NM_020296, intron 1 of 13)	MER2|DNA|MER2_type	17620	NM_020296	56878	Mm.259667	NM_020296	ENSMUSG00000026970	Rbms1	2600014B10Rik|AI255215|MSSP-1|MSSP-2|MSSP-3|YC1	RNA binding motif, single stranded interacting protein 1	protein-coding
Diff_Nuc4358	chr12	104614352	104614491	+	0	NA	promoter-TSS (NR_033587)	promoter-TSS (NR_033587)	-683	NR_033587	68149	Mm.127378	NM_026580	ENSMUSG00000021203	Otub2	2010015L18Rik|4930586I02Rik|AI413508|AW557219|OTB2|OTU2	OTU domain, ubiquitin aldehyde binding 2	protein-coding
Diff_Nuc9009	chr10	102111862	102112001	+	0	NA	Intergenic	Intergenic	137075	NM_146240	237504	Mm.282672	NM_146240	ENSMUSG00000044921	Rassf9	AW322107|Pamci	Ras association (RalGDS/AF-6) domain family (N-terminal) member 9	protein-coding
Diff_Nuc19614	chr7	9195372	9195511	+	0	NA	Intergenic	L1Md_F|LINE|L1	48282	NM_001105071	545909	Mm.469894	NM_001105071	ENSMUSG00000096658	Vmn2r39	EG545909	vomeronasal 2, receptor 39	protein-coding
[truncated: 2,333 more rows]
