# Supplementary material for: Remodeling of epigenome and transcriptome landscapes with aging in mice reveals widespread induction of inflammatory responses
Source: HighWire-hosted journal article supplement (doi:10.1101/gr.240093.118), 2019-03-11
Supplement: Supplemental_Code_Figure3_Machine_learning.zip [file HOMER_dposREF_Liver_DiNUP_DANPOS_GAINED.xls]

PeakID (cmd=annotatePeaks.pl dposREF_Liver_DiNUP_DANPOS_GAINED.bed mm9)	Chr	Start	End	Strand	Peak Score	Focus Ratio/Region Size	Annotation	Detailed Annotation	Distance to TSS	Nearest PromoterID	Entrez ID	Nearest Unigene	Nearest Refseq	Nearest Ensembl	Gene Name	Gene Alias	Gene Description	Gene Type
Diff_Nuc31174	chr3	89232932	89233071	+	0	NA	3' UTR (NM_001113331, exon 12 of 12)	3' UTR (NM_001113331, exon 12 of 12)	-1135	NM_001293768	68911	Mm.22521	NM_026869	ENSMUSG00000047824	Pygo2	1190004M21Rik	pygopus 2	protein-coding
Diff_Nuc23383	chr6	108519262	108519401	+	0	NA	Intergenic	Intergenic	53830	NR_040757	75394	Mm.395061	NR_040757	ENSMUSG00000087341	0610040F04Rik	-	RIKEN cDNA 0610040F04 gene	ncRNA
Diff_Nuc10638	chr17	63577692	63577831	+	0	NA	intron (NM_015794, intron 6 of 8)	intron (NM_015794, intron 6 of 8)	84561	NR_130176	414079	Mm.444282	NR_130176	ENSMUSG00000090565	4930405O22Rik	-	RIKEN cDNA 4930405O22 gene	ncRNA
Diff_Nuc2803	chr12	35595662	35595801	+	0	NA	intron (NM_001271386, intron 2 of 27)	B4|SINE|B4	6036	NM_001271386	79221	Mm.310551	NM_024124	ENSMUSG00000004698	Hdac9	AV022454|D030072B18Rik|HD7B|HD9|HDRP|Hdac7b|Mitr|mKIAA0744	histone deacetylase 9	protein-coding
Diff_Nuc43221	chr8	115802912	115803051	+	0	NA	Intergenic	Lx7|LINE|L1	211819	NR_033584	791378	Mm.350576	NR_033584	ENSMUSG00000110541	Gm10280	ENSMUSG00000069883	predicted gene 10280	ncRNA
Diff_Nuc37856	chr1	130081672	130081811	+	0	NA	intron (NM_181750, intron 15 of 26)	B1_Mm|SINE|Alu	-17197	NR_029543	387147		NR_029543	ENSMUSG00000065520	Mir128-1	Mirn128|Mirn128-1|Mirn128a|mir-128-1	microRNA 128-1	ncRNA
Diff_Nuc27526	chr4	37152652	37152791	+	0	NA	Intergenic	L1Md_F2|LINE|L1	-253944	NM_001165999	242384	Mm.132507	NM_175516	ENSMUSG00000045083	Lingo2	B230217C06Rik|Lern3|Lrrn6c	leucine rich repeat and Ig domain containing 2	protein-coding
Diff_Nuc25069	chr5	52065462	52065601	+	0	NA	Intergenic	Intergenic	-106567	NR_132764	19017	Mm.259072	NM_008904	ENSMUSG00000029167	Ppargc1a	A830037N07Rik|ENSMUSG00000079510|Gm11133|PGC-1|PPARGC-1-alpha|Pgc-1alpha|Pgc1|Pgco1|Ppargc1	peroxisome proliferative activated receptor, gamma, coactivator 1 alpha	protein-coding
Diff_Nuc38354	chr1	155914132	155914271	+	0	NA	Intergenic	Intergenic	-134116	NM_001204908	100503355	Mm.484410	NM_001204908	ENSMUSG00000066797	Zfp648	ENSMUSG00000066797|Gm10178|Gm203	zinc finger protein 648	protein-coding
Diff_Nuc40683	chr9	83931602	83931741	+	0	NA	intron (NM_199195, intron 8 of 10)	intron (NM_199195, intron 8 of 10)	89283	NM_199195	12040	Mm.12819	NM_199195	ENSMUSG00000032263	Bckdhb	BCKDE1B|BCKDH E1-beta	branched chain ketoacid dehydrogenase E1, beta polypeptide	protein-coding
Diff_Nuc17611	chr19	57187642	57187781	+	0	NA	intron (NM_178688, intron 6 of 24)	intron (NM_178688, intron 6 of 24)	5803	NM_001347459	226251	Mm.217161	NM_178688	ENSMUSG00000025085	Ablim1	2210411C18Rik|2610209L21Rik|4833406P10Rik|9330196J19Rik|AV079770|AW060987|AW215784|Limab1|mKIAA0059	actin-binding LIM protein 1	protein-coding
Diff_Nuc37081	chr1	74419102	74419241	+	0	NA	Intergenic	B3A|SINE|B2	-2606	NM_013612	18173	Mm.2913	NM_013612	ENSMUSG00000026177	Slc11a1	Bcg|Ity|Ity1|Lsh|Nramp|Nramp1|ity	solute carrier family 11 (proton-coupled divalent metal ion transporters), member 1	protein-coding
Diff_Nuc21600	chr6	10888902	10889041	+	0	NA	Intergenic	RLTR6_Mm|LTR|ERV1	35407	NR_033776	57866	Mm.4397	NR_033776		AA545190	-	EST AA545190	ncRNA
Diff_Nuc8325	chr10	70489132	70489271	+	0	NA	intron (NM_031397, intron 3 of 20)	B2_Mm2|SINE|B2	133237	NM_031397	83675	Mm.286834	NM_031397	ENSMUSG00000014329	Bicc1	Bic-C|bpk|jcpk	BicC family RNA binding protein 1	protein-coding
Diff_Nuc19424	chr7	26210992	26211131	+	0	NA	intron (NR_015569, intron 4 of 6)	intron (NR_015569, intron 4 of 6)	-13156	NM_153576	232983	Mm.10545	NM_153576	ENSMUSG00000060188	Cxcl17	VCC-1|Vcc1	chemokine (C-X-C motif) ligand 17	protein-coding
Diff_Nuc22159	chr6	38382312	38382451	+	0	NA	Intergenic	Intergenic	-1544	NM_177185	320538	Mm.302831	NM_177185	ENSMUSG00000038538	Ubn2	2900060J04Rik|6030408G03Rik|BC060116|D130059P03Rik|mKIAA2030	ubinuclein 2	protein-coding
Diff_Nuc23391	chr6	108656942	108657081	+	0	NA	Intergenic	ID_B1|SINE|B4	-46083	NR_104577	75394	Mm.395061	NR_040757	ENSMUSG00000087341	0610040F04Rik	-	RIKEN cDNA 0610040F04 gene	ncRNA
Diff_Nuc8972	chr10	98381742	98381881	+	0	NA	intron (NM_026482, intron 1 of 20)	intron (NM_026482, intron 1 of 20)	4025	NM_026482	67972	Mm.166944	NM_026482	ENSMUSG00000019943	Atp2b1	2810442I22Rik|E130111D10Rik|Pmca1	ATPase, Ca++ transporting, plasma membrane 1	protein-coding
Diff_Nuc13509	chr15	53055812	53055951	+	0	NA	intron (NM_010162, intron 1 of 10)	intron (NM_010162, intron 1 of 10)	121857	NM_010162	14042	Mm.309395	NM_010162	ENSMUSG00000061731	Ext1	AA409028	exostoses (multiple) 1	protein-coding
Diff_Nuc25925	chr5	100422582	100422721	+	0	NA	Intergenic	(CA)n|Simple_repeat|Simple_repeat	-14694	NM_001077267	11991	Mm.150231	NM_007516	ENSMUSG00000000568	Hnrnpd	Auf1|Hnrpd	heterogeneous nuclear ribonucleoprotein D	protein-coding
Diff_Nuc1205	chr13	54771282	54771421	+	0	NA	Intergenic	Intergenic	17818	NM_001146025	105239	Mm.25366	NM_134064	ENSMUSG00000034928	Rnf44	AI854545|mKIAA1100	ring finger protein 44	protein-coding
Diff_Nuc35848	chr2	174758812	174758951	+	0	NA	Intergenic	Intergenic	134389	NM_001085546	664987		NM_001085546	ENSMUSG00000078905	Gm14393	OTTMUSG00000016546	predicted gene 14393	protein-coding
Diff_Nuc29171	chr4	129434502	129434641	+	0	NA	Intergenic	Intergenic	-15024	NR_045036	20218	Mm.8256	NM_011317	ENSMUSG00000028790	Khdrbs1	Sam68|p62|p68	KH domain containing, RNA binding, signal transduction associated 1	protein-coding
Diff_Nuc23472	chr6	113587122	113587261	+	0	NA	Intergenic	Intergenic	-1270	NM_172161	108960	Mm.152142	NM_172161	ENSMUSG00000060477	Irak2	6330415L08Rik|AI649099|IRAK-2	interleukin-1 receptor-associated kinase 2	protein-coding
Diff_Nuc30624	chr3	59736482	59736621	+	0	NA	exon (NM_177661, exon 5 of 6)	exon (NM_177661, exon 5 of 6)	7415	NM_177661	229333	Mm.75765	NM_177661	ENSMUSG00000036951	C130079G13Rik	-	RIKEN cDNA C130079G13 gene	protein-coding
Diff_Nuc16064	chr14	94803832	94803971	+	0	NA	Intergenic	L1_Mus3|LINE|L1	-514003	NM_001346722	211712	Mm.37126	NM_001081377	ENSMUSG00000055421	Pcdh9	-	protocadherin 9	protein-coding
Diff_Nuc2942	chr12	44227752	44227891	+	0	NA	Intergenic	Intergenic	1083234	NM_013760	27362	Mm.27432	NM_013760	ENSMUSG00000014905	Dnajb9	AA408011|AA673251|AA673481|AW556981|ERdj4|Mdg1|mDj7	DnaJ heat shock protein family (Hsp40) member B9	protein-coding
Diff_Nuc34528	chr2	107869042	107869181	+	0	NA	Intergenic	ID_B1|SINE|B4	738365	NM_021275	16492	Mm.142718	NM_021275	ENSMUSG00000042604	Kcna4	Kv1.4	potassium voltage-gated channel, shaker-related subfamily, member 4	protein-coding
Diff_Nuc42898	chr8	97160442	97160581	+	0	NA	intron (NM_026274, intron 7 of 14)	intron (NM_026274, intron 7 of 14)	-29989	NM_024191	107566	Mm.393247	NM_024191	ENSMUSG00000031776	Arl2bp	1700010P10Rik|1700027H16Rik|6330544B05Rik|AI482273|AI849834|BART|Bart1	ADP-ribosylation factor-like 2 binding protein	protein-coding
Diff_Nuc24000	chr6	137703777	137703916	+	0	NA	intron (NM_172733, intron 1 of 8)	intron (NM_172733, intron 1 of 8)	748	NM_172733	232449	Mm.29181	NM_172733	ENSMUSG00000030225	Dera	2010002D22Rik|2500002K03Rik|DEOC	deoxyribose-phosphate aldolase (putative)	protein-coding
Diff_Nuc22633	chr6	64362722	64362861	+	0	NA	intron (NM_008167, intron 12 of 15)	L1Md_F|LINE|L1	-316349	NM_007500	11921	Mm.57229	NM_007500	ENSMUSG00000073043	Atoh1	Hath1|MATH-1|Math1|bHLHa14	atonal bHLH transcription factor 1	protein-coding
Diff_Nuc13191	chr15	33224562	33224701	+	0	NA	intron (NM_176073, intron 3 of 7)	(TTTG)n|Simple_repeat|Simple_repeat	111063	NR_033608	73486	Mm.483393	NM_028551	ENSMUSG00000058101	1700084J12Rik	-	ribosomal protein L7-like 1 pseudogene	pseudo
Diff_Nuc36638	chr1	52195512	52195651	+	0	NA	intron (NM_001205313, intron 9 of 24)	MTD|LTR|MaLR	19115	NM_001205313	20846	Mm.277406	NM_009283	ENSMUSG00000026104	Stat1	2010005J02Rik|AA408197	signal transducer and activator of transcription 1	protein-coding
Diff_Nuc15703	chr14	69888212	69888351	+	0	NA	intron (NM_026331, intron 1 of 3)	intron (NM_026331, intron 1 of 3)	14879	NM_026331	67712	Mm.293635	NM_026331	ENSMUSG00000034248	Slc25a37	1700020E22Rik|4930513O14Rik|4930526G11Rik|AI848481|C330015G08Rik|Mfrn|Mfrn1|Mscp|frascati|mitoferrin	solute carrier family 25, member 37	protein-coding
Diff_Nuc8988	chr10	98748562	98748701	+	0	NA	Intergenic	Intergenic	22766	NM_026268	67603	Mm.1791	NM_026268	ENSMUSG00000019960	Dusp6	1300019I03Rik|MKP-3|MKP3|PYST1	dual specificity phosphatase 6	protein-coding
Diff_Nuc39325	chr9	13643142	13643281	+	0	NA	intron (NM_176836, intron 8 of 9)	intron (NM_176836, intron 8 of 9)	11040	NM_176836	72826	Mm.246174	NM_176836	ENSMUSG00000037808	Fam76b	2810485I05Rik|C78303	family with sequence similarity 76, member B	protein-coding
Diff_Nuc23558	chr6	117274622	117274761	+	0	NA	Intergenic	MTB|LTR|MaLR	156138	NM_021704	20315	Mm.303231	NM_013655	ENSMUSG00000061353	Cxcl12	Pbsf|Scyb12|Sdf1|Tlsf|Tpar1	chemokine (C-X-C motif) ligand 12	protein-coding
Diff_Nuc17182	chr19	37047592	37047731	+	0	NA	intron (NM_001080706, intron 14 of 37)	B3A|SINE|B2	47092	NM_001080706	107182	Mm.295062	NM_001080706	ENSMUSG00000040565	Btaf1	AI414500|AI447930|E430027O22Rik|TAF170	B-TFIID TATA-box binding protein associated factor 1	protein-coding
Diff_Nuc11321	chr16	11058662	11058801	+	0	NA	Intergenic	B3A|SINE|B2	-7660	NM_009223	20621	Mm.325800	NM_009223	ENSMUSG00000037972	Snn	2810407J07Rik|AI848521|AW547286	stannin	protein-coding
Diff_Nuc9747	chr17	15097172	15097311	+	0	NA	intron (NM_024250, intron 1 of 11)	intron (NM_024250, intron 1 of 11)	996	NM_024250	72057	Mm.440085	NM_024250	ENSMUSG00000023883	Phf10	1810055P05Rik|AV024533	PHD finger protein 10	protein-coding
Diff_Nuc42213	chr8	59065192	59065331	+	0	NA	intron (NM_015791, intron 3 of 5)	intron (NM_015791, intron 3 of 5)	35330	NM_015791	50753	Mm.251174	NM_015791	ENSMUSG00000038206	Fbxo8	Fbx8	F-box protein 8	protein-coding
Diff_Nuc21321	chr7	143676292	143676431	+	0	NA	Intergenic	(TG)n|Simple_repeat|Simple_repeat	-135263	NR_040459	330664	Mm.127762	NR_040459	ENSMUSG00000109633	C230079O03Rik	C230079O03	RIKEN cDNA C230079O03 gene	ncRNA
Diff_Nuc9319	chr10	119616597	119616736	+	0	NA	intron (NM_028679, intron 2 of 11)	L1M4|LINE|L1	21927	NM_028679	73914	Mm.146194	NM_028679	ENSMUSG00000020227	Irak3	4833428C18Rik|AI563835|IRAK-M	interleukin-1 receptor-associated kinase 3	protein-coding
Diff_Nuc16056	chr14	93850082	93850221	+	0	NA	intron (NM_001271798, intron 2 of 3)	intron (NM_001271798, intron 2 of 3)	437956	NM_001271800	211712	Mm.37126	NM_001081377	ENSMUSG00000055421	Pcdh9	-	protocadherin 9	protein-coding
Diff_Nuc908	chr13	41580742	41580881	+	0	NA	intron (NM_001111324, intron 1 of 7)	intron (NM_001111324, intron 1 of 7)	1918	NM_001111324	18003	Mm.288980	NM_017464	ENSMUSG00000021365	Nedd9	Cas-L|CasL|HEF1|MEF1|Nedd-9|p105	neural precursor cell expressed, developmentally down-regulated gene 9	protein-coding
Diff_Nuc12592	chr16	91045402	91045541	+	0	NA	promoter-TSS (NM_026110)	promoter-TSS (NM_026110)	-847	NM_026110	67367	Mm.347	NM_026110	ENSMUSG00000022974	Paxbp1	1810007M14Rik|C21orf66|Gcfc|Gcfc1|Pax3/7bp	PAX3 and PAX7 binding protein 1	protein-coding
Diff_Nuc14606	chr14	11529672	11529811	+	0	NA	intron (NM_010210, intron 3 of 8)	intron (NM_010210, intron 3 of 8)	-41326	NR_131139	547334	Mm.434606	NR_131139	ENSMUSG00000089833	Fhitos	Gm16542	fragile histidine triad gene, opposite strand	ncRNA
Diff_Nuc35331	chr2	150168422	150168561	+	0	NA	intron (NM_027017, intron 3 of 3)	MMSAT4|Satellite|Satellite	20010	NM_027017	69277	Mm.272470	NM_027017	ENSMUSG00000063364	3300002I08Rik	2900016H11Rik	RIKEN cDNA 3300002I08 gene	protein-coding
Diff_Nuc10828	chr17	74302812	74302951	+	0	NA	Intergenic	Intergenic	-3345	NM_011723	22436	Mm.11223	NM_011723	ENSMUSG00000024066	Xdh	XO|Xor|Xox-1|Xox1	xanthine dehydrogenase	protein-coding
Diff_Nuc42807	chr8	93462242	93462381	+	0	NA	intron (NM_001310530, intron 1 of 37)	intron (NM_001310530, intron 1 of 37)	6163	NM_001310530	109151	Mm.100615	NM_177224	ENSMUSG00000056608	Chd9	1810014J18Rik|9030205D12Rik|A330063D19Rik|AD013|PRIC320|mKIAA0308	chromodomain helicase DNA binding protein 9	protein-coding
Diff_Nuc26446	chr5	122912372	122912511	+	0	NA	intron (NM_001110140, intron 11 of 19)	intron (NM_001110140, intron 11 of 19)	39793	NM_001110140	11938	Mm.227583	NM_009722	ENSMUSG00000029467	Atp2a2	9530097L16Rik|D5Wsu150e|SERCA2|SERCA2B|Serca2a|mKIAA4195	ATPase, Ca++ transporting, cardiac muscle, slow twitch 2	protein-coding
Diff_Nuc19104	chr18	86286052	86286191	+	0	NA	Intergenic	L1Md_F2|LINE|L1	-278223	NM_144946	246317	Mm.329578	NM_144946	ENSMUSG00000050321	Neto1	AI851453|Btcl1|C130005O10Rik	neuropilin (NRP) and tolloid (TLL)-like 1	protein-coding
Diff_Nuc6695	chr11	107126522	107126661	+	0	NA	intron (NM_145823, intron 5 of 9)	intron (NM_145823, intron 5 of 9)	-75896	NM_001161329	68979	Mm.294617	NM_133702	ENSMUSG00000018433	Nol11	1500002M01Rik|AU015220|AU019874	nucleolar protein 11	protein-coding
Diff_Nuc24179	chr6	145658782	145658921	+	0	NA	Intergenic	Intergenic	94368	NM_009449	22147	Mm.270295	NM_009449	ENSMUSG00000067338	Tuba3b	M[a]7|Tuba7	tubulin, alpha 3B	protein-coding
Diff_Nuc30140	chr3	27364692	27364831	+	0	NA	exon (NM_173182, exon 15 of 26)	exon (NM_173182, exon 15 of 26)	94488	NM_177330	208188	Mm.194721	NM_177330	ENSMUSG00000051136	Ghsr	C530020I22Rik|Ghsr1a	growth hormone secretagogue receptor	protein-coding
Diff_Nuc37811	chr1	127433522	127433661	+	0	NA	Intergenic	MIRc|SINE|MIR	-24002	NM_028787	74150	Mm.28654	NM_028787	ENSMUSG00000026342	Slc35f5	1300003P13Rik|AI646727	solute carrier family 35, member F5	protein-coding
Diff_Nuc37227	chr1	84270042	84270181	+	0	NA	intron (NM_001003948, intron 1 of 2)	intron (NM_001003948, intron 1 of 2)	11109	NM_001003948	98496	Mm.187470	NM_001003948	ENSMUSG00000045658	Pid1	5033414K04Rik|NYGGF4	phosphotyrosine interaction domain containing 1	protein-coding
Diff_Nuc32124	chr3	134765922	134766061	+	0	NA	Intergenic	Intergenic	-109536	NM_173762	229841	Mm.161470	NM_173762	ENSMUSG00000045328	Cenpe	312kDa|AU019344|BC049989|C530022J18|CENP-E|Kif10	centromere protein E	protein-coding
Diff_Nuc19389	chr7	25084262	25084401	+	0	NA	5' UTR (NM_009561, exon 1 of 7)	5' UTR (NM_009561, exon 1 of 7)	237	NM_009561	22719	Mm.12832	NM_009561	ENSMUSG00000050605	Zfp61	-	zinc finger protein 61	protein-coding
Diff_Nuc16440	chr14	122907272	122907411	+	0	NA	Intergenic	L1Md_F3|LINE|L1	-26209	NM_144844	110821	Mm.23876	NM_144844	ENSMUSG00000041650	Pcca	C79630	propionyl-Coenzyme A carboxylase, alpha polypeptide	protein-coding
Diff_Nuc14044	chr15	79249782	79249921	+	0	NA	intron (NM_013767, intron 10 of 10)	intron (NM_013767, intron 10 of 10)	-16118	NM_172608	223693	Mm.323358	NM_172608	ENSMUSG00000009035	Tmem184b	2610507A11|4732495E13Rik	transmembrane protein 184b	protein-coding
Diff_Nuc42617	chr8	82801182	82801321	+	0	NA	Intergenic	BLACKJACK|DNA|AcHobo	-216693	NM_010369	14934	Mm.13123	NM_010369	ENSMUSG00000051839	Gypa	AI853584|CD235a|GPA	glycophorin A	protein-coding
Diff_Nuc22984	chr6	86975302	86975441	+	0	NA	intron (NM_001170591, intron 6 of 7)	intron (NM_001170591, intron 6 of 7)	15541	NM_020045	56748	Mm.23809	NM_020045	ENSMUSG00000029993	Nfu1	0610006G17Rik|CGI-33|Hirip5	NFU1 iron-sulfur cluster scaffold	protein-coding
Diff_Nuc32796	chr2	18311362	18311501	+	0	NA	intron (NM_007869, intron 1 of 11)	MTD|LTR|MaLR	3026	NM_001190817	13418	Mm.246674	NM_007869	ENSMUSG00000026740	Dnajc1	4733401K02Rik|AA960110|D230036H06Rik|Dnajl1|ERdj1|ERj1p|MTJ1	DnaJ heat shock protein family (Hsp40) member C1	protein-coding
Diff_Nuc41493	chr8	3322372	3322511	+	0	NA	Intergenic	B1_Mur4|SINE|Alu	-30974	NM_001033378	319493	Mm.234565	NM_001033378	ENSMUSG00000074497	A430078G23Rik	-	RIKEN cDNA A430078G23 gene	protein-coding
Diff_Nuc25543	chr5	81612332	81612471	+	0	NA	intron (NM_001347367, intron 2 of 27)	intron (NM_001347367, intron 2 of 27)	161783	NM_198702	319387	Mm.273631	NM_198702	ENSMUSG00000037605	Adgrl3	5430402I23Rik|CIRL-3|D130075K09Rik|Gm1379|LEC3|Lphn3|mKIAA0768	adhesion G protein-coupled receptor L3	protein-coding
Diff_Nuc15067	chr14	36699902	36700041	+	0	NA	Intergenic	Intergenic	-74807	NM_001033766	239036	Mm.239970	NM_001033766	ENSMUSG00000041068	4930596D02Rik	-	RIKEN cDNA 4930596D02 gene	protein-coding
Diff_Nuc24444	chr5	14744862	14745001	+	0	NA	intron (NM_011995, intron 9 of 24)	RMER16-int|LTR|ERVK	169958	NM_198666	381714	Mm.368256	NM_198666	ENSMUSG00000033219	Gm9758	ENSMUSG00000033219	predicted gene 9758	protein-coding
Diff_Nuc4251	chr12	114336052	114336191	+	0	NA	promoter-TSS (NM_054081)	promoter-TSS (NM_054081)	-368	NM_001346696	116870	Mm.212577	NM_054081	ENSMUSG00000021144	Mta1	-	metastasis associated 1	protein-coding
Diff_Nuc36093	chr1	13367942	13368081	+	0	NA	Intergenic	B4A|SINE|B4	-3847	NM_008678	17978	Mm.2537	NM_008678	ENSMUSG00000005886	Ncoa2	D1Ertd433e|GRIP-1|Grip1|KAT13C|NCoA-2|SRC-2|TIF2|bHLHe75	nuclear receptor coactivator 2	protein-coding
Diff_Nuc42196	chr8	58572952	58573091	+	0	NA	intron (NM_080438, intron 7 of 9)	RLTR18|LTR|ERVK	153399	NM_080438	110304	Mm.307061	NM_080438	ENSMUSG00000038257	Glra3	-	glycine receptor, alpha 3 subunit	protein-coding
Diff_Nuc17828	chr18	9733502	9733641	+	0	NA	intron (NM_130449, intron 2 of 9)	intron (NM_130449, intron 2 of 9)	25925	NM_130449	140792	Mm.218571	NM_130449	ENSMUSG00000036103	Colec12	CL-P1|SRCL|Scara4	collectin sub-family member 12	protein-coding
Diff_Nuc17594	chr19	56510552	56510691	+	0	NA	intron (NM_007611, intron 4 of 6)	intron (NM_007611, intron 4 of 6)	-25506	NM_001164263	226245	Mm.156742	NM_172641	ENSMUSG00000035818	Plekhs1	9930023K05Rik	pleckstrin homology domain containing, family S member 1	protein-coding
Diff_Nuc34866	chr2	125504632	125504771	+	0	NA	intron (NM_199022, intron 3 of 11)	intron (NM_199022, intron 3 of 11)	5865	NM_025613	58521	Mm.425101	NM_025613	ENSMUSG00000091337	Eid1	2610002K20Rik|Cri1|EID-1|ORF12|PNAS-22|PTD014	EP300 interacting inhibitor of differentiation 1	protein-coding
Diff_Nuc31356	chr3	96044892	96045031	+	0	NA	promoter-TSS (NM_013549)	promoter-TSS (NM_013549)	-664	NM_178212	319192	Mm.5220	NM_178212	ENSMUSG00000063954	Hist2h2aa2	H2a-614|H2a-615	histone cluster 2, H2aa2	protein-coding
Diff_Nuc23596	chr6	119353172	119353311	+	0	NA	intron (NM_197985, intron 1 of 7)	B3A|SINE|B2	14260	NM_197985	68465	Mm.291826	NM_197985	ENSMUSG00000030168	Adipor2	1110001I14Rik|ADCR2|AI115388|AW554121|D6Ucla1e|Paqr2	adiponectin receptor 2	protein-coding
Diff_Nuc7032	chr11	120575862	120576001	+	0	NA	promoter-TSS (NM_016665)	promoter-TSS (NM_016665)	664	NM_153545	217366	Mm.347545	NM_153545	ENSMUSG00000025145	Lrrc45	BC023296	leucine rich repeat containing 45	protein-coding
Diff_Nuc11779	chr16	31799122	31799261	+	0	NA	intron (NM_001252436, intron 8 of 22)	intron (NM_001252436, intron 8 of 22)	44755	NM_001252436	13383	Mm.382	NM_007862	ENSMUSG00000022770	Dlg1	B130052P05Rik|Dlgh1|E-dlg/SAP97|SAP-97|SAP97|mKIAA4187	discs, large homolog 1 (Drosophila)	protein-coding
Diff_Nuc7121	chr10	5501102	5501241	+	0	NA	intron (NM_007956, intron 4 of 8)	intron (NM_007956, intron 4 of 8)	135212	NM_001302531	13982	Mm.9213	NM_007956	ENSMUSG00000019768	Esr1	ER|ER-alpha|ERa|ERalpha|ESR|Estr|Estra|Nr3a1	estrogen receptor 1 (alpha)	protein-coding
Diff_Nuc18407	chr18	44995162	44995301	+	0	NA	intron (NM_001163013, intron 4 of 29)	intron (NM_001163013, intron 4 of 29)	6912	NM_001163013	240255	Mm.244482	NM_001163013	ENSMUSG00000034653	Ythdc2	3010002F02Rik|BC037178	YTH domain containing 2	protein-coding
Diff_Nuc4	chrX	3210622	3210761	+	0	NA	Intergenic	Intergenic	32893	NM_001270667	100861966	Mm.443264	NM_001270667	ENSMUSG00000100249	Btbd35f23	Gm21950|Mgclh	BTB domain containing 35, family member 23	protein-coding
Diff_Nuc29469	chr4	139129132	139129271	+	0	NA	intron (NM_183148, intron 4 of 11)	intron (NM_183148, intron 4 of 11)	-1434	NM_001205173	212632	Mm.30464	NM_183148	ENSMUSG00000041025	Iffo2	C79267	intermediate filament family orphan 2	protein-coding
Diff_Nuc8508	chr10	80041492	80041631	+	0	NA	Intergenic	Intergenic	-1520	NM_078477	118445	Mm.41513	NM_078477	ENSMUSG00000035397	Klf16	AI843742|BTEB4|DRRF	Kruppel-like factor 16	protein-coding
Diff_Nuc30026	chr3	19211902	19212041	+	0	NA	promoter-TSS (NM_001122759)	promoter-TSS (NM_001122759)	-649	NM_001122759	18583	Mm.355614	NM_008802	ENSMUSG00000069094	Pde7a	AU015378|AW047537	phosphodiesterase 7A	protein-coding
Diff_Nuc13330	chr15	39063902	39064041	+	0	NA	intron (NM_001256383, intron 1 of 25)	MuRRS4-int|LTR|ERV1	34139	NM_053271	116838	Mm.309296	NM_053271	ENSMUSG00000037386	Rims2	2810036I15Rik|AW048769|RIM2|Rab3ip2|Rim2(+40A)|Rim2(+44A)|Rim2(+4A)|Serg2|Syt3-rs|mKIAA0751	regulating synaptic membrane exocytosis 2	protein-coding
Diff_Nuc35009	chr2	131180972	131181111	+	0	NA	Intergenic	Lx8|LINE|L1	-2413	NM_178607	51902	Mm.477523	NM_178607	ENSMUSG00000048911	Rnf24	2810473M14Rik|4930505A13Rik|AI317164|C86507|D2Ertd504e	ring finger protein 24	protein-coding
Diff_Nuc32334	chr3	145590342	145590481	+	0	NA	intron (NM_009740, intron 1 of 2)	intron (NM_009740, intron 1 of 2)	3185	NM_009740	12042	Mm.239141	NM_009740	ENSMUSG00000028191	Bcl10	AI132454|BCL-10|C81403|CARMEN|CIPER|CLAP|ME10|cE10	B cell leukemia/lymphoma 10	protein-coding
Diff_Nuc43350	chr8	123106752	123106891	+	0	NA	intron (NM_178856, intron 3 of 4)	B3A|SINE|B2	6154	NM_178856	272551	Mm.275910	NM_178856	ENSMUSG00000031821	Gins2	2210013I18Rik|4833427B12Rik|AI323585|Pfs2	GINS complex subunit 2 (Psf2 homolog)	protein-coding
Diff_Nuc33555	chr2	54415482	54415621	+	0	NA	intron (NM_173030, intron 3 of 12)	RMER1B|Other|Other	126753	NM_173030	271786	Mm.330227	NM_173030	ENSMUSG00000060988	Galnt13	A230002A12|A230020F20|BB182356	UDP-N-acetyl-alpha-D-galactosamine:polypeptide N-acetylgalactosaminyltransferase 13	protein-coding
Diff_Nuc26944	chr5	147543122	147543261	+	0	NA	Intergenic	RLTR20B2|LTR|ERVK	63341	NM_011669	22217	Mm.167971	NM_011669	ENSMUSG00000029640	Usp12	Ubh1	ubiquitin specific peptidase 12	protein-coding
Diff_Nuc41097	chr9	106939062	106939201	+	0	NA	intron (NM_153413, intron 9 of 52)	Lx2B|LINE|L1	-144862	NM_029103	74840	Mm.29778	NM_029103	ENSMUSG00000032575	Manf	3230402M22Rik|AA407711|AA408789|AA673178|Armet|D17914|D18Mgi17	mesencephalic astrocyte-derived neurotrophic factor	protein-coding
Diff_Nuc37485	chr1	97214062	97214201	+	0	NA	intron (NM_026321, intron 1 of 2)	intron (NM_026321, intron 1 of 2)	3926	NM_026321	67698	Mm.272705	NM_026321	ENSMUSG00000051185	Fam174a	2310044D20Rik|Fam174|Naa6|Tmem157	family with sequence similarity 174, member A	protein-coding
Diff_Nuc2822	chr12	36037112	36037251	+	0	NA	Intergenic	L1Md_T|LINE|L1	-157612	NR_030449	751520		NR_030449	ENSMUSG00000076253	Mir680-3	Mirn680-3	microRNA 680-3	ncRNA
Diff_Nuc32314	chr3	144928842	144928981	+	0	NA	Intergenic	L1_Mm|LINE|L1	-26525	NM_027770	71355	Mm.235570	NM_027770	ENSMUSG00000028197	Col24a1	5430404K19Rik	collagen, type XXIV, alpha 1	protein-coding
Diff_Nuc27177	chr4	11475452	11475591	+	0	NA	intron (NM_001081183, intron 23 of 24)	intron (NM_001081183, intron 23 of 24)	-10546	NM_001039556	623474	Mm.491200	NM_177285	ENSMUSG00000078773	Rad54b	E130016E03Rik	RAD54 homolog B (S. cerevisiae)	protein-coding
Diff_Nuc31102	chr3	86456892	86457031	+	0	NA	intron (NM_030695, intron 46 of 56)	L2a|LINE|L2	-104756	NM_011839	23937	Mm.389466	NM_011839	ENSMUSG00000057777	Mab21l2	-	mab-21-like 2 (C. elegans)	protein-coding
Diff_Nuc14715	chr14	20529462	20529601	+	0	NA	Intergenic	Intergenic	-40948	NM_008695	18074	Mm.20348	NM_008695	ENSMUSG00000021806	Nid2	AW547149|Ly111|NID-2|entactin-2|nidogen-2	nidogen 2	protein-coding
Diff_Nuc43342	chr8	122771392	122771531	+	0	NA	Intergenic	Intergenic	-19331	NR_110496	434353	Mm.411793	NR_110496	ENSMUSG00000097960	A330074K22Rik	-	RIKEN cDNA A330074K22 gene	ncRNA
Diff_Nuc37667	chr1	111121342	111121481	+	0	NA	Intergenic	Intergenic	-758066	NM_001316743	241201	Mm.213407	NM_172853	ENSMUSG00000026312	Cdh7	9330156F07Rik|CDH7L1	cadherin 7, type 2	protein-coding
Diff_Nuc31767	chr3	116638202	116638341	+	0	NA	intron (NM_023245, intron 3 of 7)	intron (NM_023245, intron 3 of 7)	-32914	NR_040596	74654	Mm.410820	NR_040596	ENSMUSG00000080907	4930455H04Rik	-	RIKEN cDNA 4930455H04 gene	ncRNA
Diff_Nuc33065	chr2	29799752	29799891	+	0	NA	intron (NM_028923, intron 9 of 15)	intron (NM_028923, intron 9 of 15)	8892	NM_028923	74412	Mm.275121	NM_028923	ENSMUSG00000019715	Gle1	4933405K21Rik|AA553313|Gle1l	GLE1 RNA export mediator (yeast)	protein-coding
Diff_Nuc12732	chr16	97121602	97121741	+	0	NA	intron (NM_031174, intron 3 of 32)	intron (NM_031174, intron 3 of 32)	270671	NM_031174	13508	Mm.102437	NM_031174	ENSMUSG00000050272	Dscam	4932410A21Rik	Down syndrome cell adhesion molecule	protein-coding
Diff_Nuc28740	chr4	108066352	108066491	+	0	NA	Intergenic	MER44D|DNA|MER2_type	-10161	NM_001099303	545667	Mm.380025	NM_001099303	ENSMUSG00000059816	Fam159a	OTTMUSG00000008243	family with sequence similarity 159, member A	protein-coding
Diff_Nuc3398	chr12	73117902	73118041	+	0	NA	Intergenic	ORR1A4-int|LTR|MaLR	54007	NM_181752	238252	Mm.390508	NM_181752	ENSMUSG00000043398	Gpr135	PAFR	G protein-coupled receptor 135	protein-coding
Diff_Nuc43119	chr8	110077922	110078061	+	0	NA	exon (NM_025830, exon 18 of 24)	exon (NM_025830, exon 18 of 24)	2847	NR_029553	387158		NR_029553	ENSMUSG00000065439	Mir140	Mirn140|mir-140|mmu-mir-140	microRNA 140	ncRNA
Diff_Nuc23160	chr6	94747152	94747291	+	0	NA	Intergenic	Intergenic	-97082	NM_008377	16206	Mm.245210	NM_008377	ENSMUSG00000030029	Lrig1	D6Bwg0781e|Img|LIG-1	leucine-rich repeats and immunoglobulin-like domains 1	protein-coding
Diff_Nuc8741	chr10	88264392	88264531	+	0	NA	intron (NM_175158, intron 18 of 61)	B1_Mur4|SINE|Alu	25098	NM_175158	70683	Mm.29631	NM_175158	ENSMUSG00000004356	Utp20	3830408P06Rik|AA617408|Drim|mDRIM|mDRIN	UTP20 small subunit processome component	protein-coding
Diff_Nuc5318	chr11	59121122	59121261	+	0	NA	intron (NM_139298, intron 1 of 3)	intron (NM_139298, intron 1 of 3)	759	NM_139298	216795	Mm.218794	NM_139298	ENSMUSG00000000126	Wnt9a	Wnt14	wingless-type MMTV integration site family, member 9A	protein-coding
Diff_Nuc25331	chr5	66881902	66882041	+	0	NA	intron (NM_001201413, intron 3 of 16)	intron (NM_001201413, intron 3 of 16)	128085	NM_009686	11787	Mm.5159	NM_009686	ENSMUSG00000029207	Apbb2	2310007D03Rik|FE65L1|Rirl1|TR2L|Zfra	amyloid beta (A4) precursor protein-binding, family B, member 2	protein-coding
Diff_Nuc18183	chr18	34980602	34980741	+	0	NA	intron (NM_001081256, intron 12 of 23)	intron (NM_001081256, intron 12 of 23)	-19572	NM_001204914	225362	Mm.293588	NM_144865	ENSMUSG00000038555	Reep2	-	receptor accessory protein 2	protein-coding
Diff_Nuc25691	chr5	90677532	90677671	+	0	NA	intron (NM_198010, intron 28 of 33)	ORR1A2-int|LTR|MaLR	-24580	NM_001163456	231430	Mm.319697	NM_001033310	ENSMUSG00000035505	Cox18	BC038311	cytochrome c oxidase assembly protein 18	protein-coding
Diff_Nuc31814	chr3	118798442	118798581	+	0	NA	intron (NM_170778, intron 14 of 22)	intron (NM_170778, intron 14 of 22)	533415	NM_170778	99586	Mm.27907	NM_170778	ENSMUSG00000033308	Dpyd	AI315208|DPD|E330028L06Rik	dihydropyrimidine dehydrogenase	protein-coding
Diff_Nuc24416	chr5	11397032	11397171	+	0	NA	Intergenic	Intergenic	55640	NM_001309520	70896	Mm.425218	NM_001309520	ENSMUSG00000095829	Speer1	4921519H07Rik|SPEER-1|Speer1-ps1	spermatogenesis associated glutamate (E)-rich protein 1	protein-coding
Diff_Nuc18219	chr18	35726462	35726601	+	0	NA	intron (NM_010771, intron 1 of 14)	B3|SINE|B2	4719	NM_010771	17184	Mm.215034	NM_010771	ENSMUSG00000037236	Matr3	1110061A14Rik|2810017I02Rik|AI841759|AW555618|D030046F20Rik|mKIAA0723	matrin 3	protein-coding
Diff_Nuc34036	chr2	77413692	77413831	+	0	NA	intron (NM_178723, intron 3 of 9)	intron (NM_178723, intron 3 of 9)	-56038	NM_001113400	241494	Mm.490320	NM_178723	ENSMUSG00000027016	Zfp385b	B830010L13Rik|C130013B13Rik|Zfp533|Znf385b	zinc finger protein 385B	protein-coding
Diff_Nuc25639	chr5	88868372	88868511	+	0	NA	Intergenic	Intergenic	-16575	NM_001303431	11698	Mm.8437	NM_009664	ENSMUSG00000029288	Ambn	-	ameloblastin	protein-coding
Diff_Nuc37008	chr1	71123722	71123861	+	0	NA	intron (NM_007525, intron 3 of 10)	intron (NM_007525, intron 3 of 10)	25755	NM_007525	12021	Mm.10764	NM_007525	ENSMUSG00000026196	Bard1	ENSMUSG00000060893|ENSMUSG00000073653	BRCA1 associated RING domain 1	protein-coding
Diff_Nuc27399	chr4	29411942	29412081	+	0	NA	Intergenic	Lx3C|LINE|L1	671716	NM_001122889	13841	Mm.257266	NM_010141	ENSMUSG00000028289	Epha7	Cek11|Ebk|Ehk3|Hek11|Mdk1	Eph receptor A7	protein-coding
Diff_Nuc3602	chr12	81603582	81603721	+	0	NA	Intergenic	Intergenic	-4542	NR_045490	69522	Mm.390530	NR_045490		2310002D06Rik	-	RIKEN cDNA 2310002D06 gene	ncRNA
Diff_Nuc39035	chr1	186719227	186719366	+	0	NA	Intergenic	B3|SINE|B2	-12381	NM_178692	226777	Mm.169542	NM_178692	ENSMUSG00000039349	C130074G19Rik	-	RIKEN cDNA C130074G19 gene	protein-coding
Diff_Nuc22355	chr6	48795582	48795721	+	0	NA	TTS (NM_001098271)	TTS (NM_001098271)	3996	NM_001098271	66058	Mm.27061	NM_025326	ENSMUSG00000023367	Tmem176a	0610011I04Rik|AU040201|AU041743|Keg2	transmembrane protein 176A	protein-coding
Diff_Nuc7384	chr10	19887762	19887901	+	0	NA	intron (NM_008635, intron 1 of 17)	intron (NM_008635, intron 1 of 17)	19105	NM_001198635	17761	Mm.20928	NM_008635	ENSMUSG00000019996	Map7	E-MAP-115|MAP-7|Mtap7|R75000|mshi|mste|ste	microtubule-associated protein 7	protein-coding
Diff_Nuc6522	chr11	102279802	102279941	+	0	NA	Intergenic	B1_Mur2|SINE|Alu	-11040	NM_026542	68066	Mm.44226	NM_026542	ENSMUSG00000018677	Slc25a39	3010027G13Rik|D11Ertd333e	solute carrier family 25, member 39	protein-coding
Diff_Nuc32586	chr2	4853212	4853351	+	0	NA	intron (NM_010726, intron 6 of 8)	URR1B|DNA|MER1_type	13239	NM_010726	16922	Mm.391704	NM_010726	ENSMUSG00000026664	Phyh	AI256161|AI265699|Lnap1|PAHX	phytanoyl-CoA hydroxylase	protein-coding
Diff_Nuc20581	chr7	107128342	107128481	+	0	NA	intron (NM_175388, intron 1 of 5)	CpG	557	NM_175388	108937	Mm.323087	NM_175388	ENSMUSG00000058761	Rnf169	2900057K09Rik	ring finger protein 169	protein-coding
Diff_Nuc649	chr13	29038152	29038291	+	0	NA	Intergenic	Intergenic	7330	NM_009238	20677	Mm.240627	NM_009238	ENSMUSG00000076431	Sox4	AA682046|Sox-4	SRY (sex determining region Y)-box 4	protein-coding
Diff_Nuc38899	chr1	179723282	179723421	+	0	NA	intron (NM_007422, intron 1 of 12)	intron (NM_007422, intron 1 of 12)	3289	NM_007422	11566	Mm.338021	NM_007422	ENSMUSG00000015961	Adss	AI314886|AS|Adss2	adenylosuccinate synthetase, non muscle	protein-coding
Diff_Nuc38917	chr1	181038782	181038921	+	0	NA	intron (NM_027188, intron 5 of 11)	intron (NM_027188, intron 5 of 11)	409283	NM_027188	69726	Mm.222338	NM_027188	ENSMUSG00000055067	Smyd3	2410008A19Rik|Zmynd1	SET and MYND domain containing 3	protein-coding
Diff_Nuc15570	chr14	63836782	63836921	+	0	NA	intron (NM_001310610, intron 2 of 6)	B3|SINE|B2	-24489	NM_201610	382913	Mm.239490	NM_201610	ENSMUSG00000035121	Neil2	Gm1212|NEH2	nei like 2 (E. coli)	protein-coding
Diff_Nuc40510	chr9	72822382	72822521	+	0	NA	Intergenic	Intergenic	10732	NM_001198789	546143	Mm.260946	NM_001198789	ENSMUSG00000086158	Ccpg1os	EG546143|Gm5918	cell cycle progression 1, opposite strand	protein-coding
Diff_Nuc20486	chr7	102390252	102390391	+	0	NA	Intergenic	Lx3A|LINE|L1	-929433	NM_001310762	23966	Mm.254610	NM_011858	ENSMUSG00000048078	Tenm4	Doc4|ELM2|Odz4|R75022|Ten-m4|l(7)-3Rn|l7Rn3|mKIAA1302	teneurin transmembrane protein 4	protein-coding
Diff_Nuc12544	chr16	87447082	87447221	+	0	NA	Intergenic	Lx2A|LINE|L1	-6314	NM_016924	53858	Mm.162406	NM_016924	ENSMUSG00000041079	Rwdd2b	ORF5	RWD domain containing 2B	protein-coding
Diff_Nuc25272	chr5	65602212	65602351	+	0	NA	intron (NM_153391, intron 4 of 36)	MTC|LTR|MaLR	11346	NM_153391	213081	Mm.127550	NM_153391	ENSMUSG00000037890	Wdr19	C330027H04Rik|D330023L08Rik|DYF2|Ift144|PWDMP|mKIAA1638	WD repeat domain 19	protein-coding
Diff_Nuc10237	chr17	36410942	36411081	+	0	NA	Intergenic	Intergenic	-2062	NM_024468	79263	Mm.40624	NM_024468	ENSMUSG00000045409	Trim39	1100001D15Rik|E130103K13Rik|RBCC-B30.2|Rnf23|mKIAA4179|tfp	tripartite motif-containing 39	protein-coding
Diff_Nuc19900	chr7	63115452	63115591	+	0	NA	intron (NM_001164661, intron 2 of 31)	intron (NM_001164661, intron 2 of 31)	18080	NM_001164661	20430	Mm.37249	NM_011370	ENSMUSG00000030447	Cyfip1	E030028J09Rik|P140SRA-1|P140sra1|Shyc|Sra-1|Sra1|l(7)1Rl|l71Rl|l7Rl1|mKIAA0068|pl-1	cytoplasmic FMR1 interacting protein 1	protein-coding
Diff_Nuc10837	chr17	74621242	74621381	+	0	NA	intron (NM_133771, intron 6 of 8)	intron (NM_133771, intron 6 of 8)	72892	NM_133771	76890	Mm.311874	NM_133771	ENSMUSG00000058704	Memo1	0610016J10Rik|D930048L02Rik	mediator of cell motility 1	protein-coding
Diff_Nuc5981	chr11	83046822	83046961	+	0	NA	Intergenic	MMETn-int|LTR|ERVK	9813	NR_015519	100043636	Mm.295569	NR_015519	ENSMUSG00000087107	AI662270	AW496474	expressed sequence AI662270	ncRNA
Diff_Nuc25966	chr5	102272252	102272391	+	0	NA	intron (NM_172882, intron 66 of 66)	intron (NM_172882, intron 66 of 66)	78172	NM_173370	74596	Mm.46764	NM_173370	ENSMUSG00000029330	Cds1	4833409J18Rik|AI314024|AW125888	CDP-diacylglycerol synthase 1	protein-coding
Diff_Nuc17098	chr19	32780592	32780731	+	0	NA	intron (NM_026487, intron 2 of 9)	intron (NM_026487, intron 2 of 9)	6127	NM_026487	67979	Mm.27123	NM_026487	ENSMUSG00000013662	Atad1	4921525H23Rik|AW107648|Thorase	ATPase family, AAA domain containing 1	protein-coding
Diff_Nuc25907	chr5	99661772	99661911	+	0	NA	intron (NM_181318, intron 6 of 13)	intron (NM_181318, intron 6 of 13)	20105	NM_181318	320292	Mm.259074	NM_145839	ENSMUSG00000089809	Rasgef1b	4732452O09Rik|GPIgamma4|Gpig4	RasGEF domain family, member 1B	protein-coding
Diff_Nuc4771	chr11	25738002	25738141	+	0	NA	intron (NR_027973, intron 2 of 5)	intron (NR_027973, intron 2 of 5)	-364169	NR_105791	102466154		NR_105791	ENSMUSG00000099015	Mir6372	Gm27358|mmu-mir-6372	microRNA 6372	ncRNA
Diff_Nuc24069	chr6	141200752	141200891	+	0	NA	intron (NM_018779, intron 1 of 15)	intron (NM_018779, intron 1 of 15)	3031	NM_018779	54611	Mm.103728	NM_018779	ENSMUSG00000041741	Pde3a	A930022O17Rik|C87899	phosphodiesterase 3A, cGMP inhibited	protein-coding
Diff_Nuc38711	chr1	172125402	172125541	+	0	NA	Intergenic	Intergenic	20053	NM_010633	16589	Mm.209150	NM_010633	ENSMUSG00000026667	Uhmk1	4732477C12Rik|4930500M09Rik|AA673513|AI449218|AU021979|C820018A03Rik|KIS|Kist|OTTMUSG00000021542|P-CIP2	U2AF homology motif (UHM) kinase 1	protein-coding
Diff_Nuc11312	chr16	10757162	10757301	+	0	NA	Intergenic	Intergenic	28398	NM_009896	12703	Mm.130	NM_009896	ENSMUSG00000038037	Socs1	Cish1|Cish7|JAB|SOCS-1|SSI-1	suppressor of cytokine signaling 1	protein-coding
Diff_Nuc42132	chr8	48812512	48812651	+	0	NA	Intergenic	Intergenic	-13296	NM_172407	70925	Mm.393807	NM_172407	ENSMUSG00000038069	Cdkn2aip	4921511I16Rik|AW208986|CARF	CDKN2A interacting protein	protein-coding
Diff_Nuc21101	chr7	133429192	133429331	+	0	NA	intron (NM_145587, intron 1 of 3)	intron (NM_145587, intron 1 of 3)	13128	NM_145587	104175	Mm.29660	NM_145587	ENSMUSG00000042978	Sbk1	Sbk	SH3-binding kinase 1	protein-coding
Diff_Nuc6689	chr11	107057862	107058001	+	0	NA	Intergenic	B1_Mur1|SINE|Alu	-7236	NM_001161329	68979	Mm.294617	NM_133702	ENSMUSG00000018433	Nol11	1500002M01Rik|AU015220|AU019874	nucleolar protein 11	protein-coding
Diff_Nuc10355	chr17	45117882	45118021	+	0	NA	intron (NM_178652, intron 3 of 11)	intron (NM_178652, intron 3 of 11)	-100117	NM_029257	75341	Mm.386821	NM_029257		4930564C03Rik	-	RIKEN cDNA 4930564C03 gene	protein-coding
Diff_Nuc10375	chr17	46016062	46016201	+	0	NA	Intergenic	(TTTC)n|Simple_repeat|Simple_repeat	-145338	NM_028164	72240	Mm.482897	NM_028164	ENSMUSG00000094690	1600014C23Rik	-	RIKEN cDNA 1600014C23 gene	protein-coding
Diff_Nuc3111	chr12	54403462	54403601	+	0	NA	intron (NM_013780, intron 1 of 11)	MTA_Mm|LTR|MaLR	53867	NM_013780	27386	Mm.247044	NM_013780	ENSMUSG00000021010	Npas3	4930423H22Rik|bHLHe12	neuronal PAS domain protein 3	protein-coding
Diff_Nuc31546	chr3	105483672	105483811	+	0	NA	intron (NM_017397, intron 8 of 10)	intron (NM_017397, intron 8 of 10)	6748	NM_017397	53975	Mm.272826	NM_017397	ENSMUSG00000027905	Ddx20	GEMIN3|dp103	DEAD (Asp-Glu-Ala-Asp) box polypeptide 20	protein-coding
Diff_Nuc21610	chr6	11857992	11858131	+	0	NA	promoter-TSS (NM_010886)	promoter-TSS (NM_010886)	-615	NM_010886	17992	Mm.415865	NM_010886	ENSMUSG00000029632	Ndufa4	MLRQ	NADH dehydrogenase (ubiquinone) 1 alpha subcomplex, 4	protein-coding
Diff_Nuc31111	chr3	86790772	86790911	+	0	NA	intron (NR_038188, intron 1 of 5)	intron (NR_038188, intron 1 of 5)	333	NR_038188	12480	Mm.389465	NM_007640	ENSMUSG00000041750	Cd1d2	CD1.2|Cd1b|Ly-38	CD1d2 antigen	protein-coding
Diff_Nuc16506	chr19	4051282	4051421	+	0	NA	Intergenic	Intergenic	7943	NM_144869	225884	Mm.440201	NM_144869	ENSMUSG00000058216	Gstp3	-	glutathione S-transferase pi 3	protein-coding
Diff_Nuc9228	chr10	114220022	114220161	+	0	NA	intron (NM_146241, intron 2 of 18)	MLT1G3-int|LTR|MaLR	18335	NM_146241	237553	Mm.445550	NM_146241	ENSMUSG00000050663	Trhde	9330155P21Rik	TRH-degrading enzyme	protein-coding
Diff_Nuc28855	chr4	115723982	115724121	+	0	NA	intron (NM_028142, intron 1 of 5)	intron (NM_028142, intron 1 of 5)	2430	NM_028142	72181	Mm.282560	NM_028142	ENSMUSG00000028706	Nsun4	2310010O12Rik|2810405F18Rik|AI507900|Shtap	NOL1/NOP2/Sun domain family, member 4	protein-coding
Diff_Nuc21829	chr6	24473302	24473441	+	0	NA	intron (NM_026614, intron 2 of 4)	MTC-int|LTR|MaLR	4314	NM_001311068	68202	Mm.275780	NM_026614	ENSMUSG00000023089	Ndufa5	2900002J19Rik	NADH dehydrogenase (ubiquinone) 1 alpha subcomplex, 5	protein-coding
Diff_Nuc19224	chr7	7231882	7232021	+	0	NA	promoter-TSS (NR_003555)	promoter-TSS (NR_003555)	-951	NR_003555	76229	Mm.387947	NM_001113468	ENSMUSG00000095730	Vmn2r29	6430701C03Rik	vomeronasal 2, receptor 29	protein-coding
Diff_Nuc152	chrX	131071942	131072081	+	0	NA	3' UTR (NM_013898, exon 2 of 2)	3' UTR (NM_013898, exon 2 of 2)	4198	NM_013898	30058	Mm.214504	NM_013898	ENSMUSG00000048007	Timm8a1	DXHXS1274E|Ddp1|Fci-12|Tim8a|Timm8a	translocase of inner mitochondrial membrane 8A1	protein-coding
Diff_Nuc25325	chr5	66622702	66622841	+	0	NA	Intergenic	Intergenic	-28366	NM_001302833	70918	Mm.23166	NM_027602	ENSMUSG00000029206	Nsun7	4921525L17Rik	NOL1/NOP2/Sun domain family, member 7	protein-coding
Diff_Nuc11933	chr16	37139752	37139891	+	0	NA	intron (NM_172440, intron 23 of 27)	intron (NM_172440, intron 23 of 27)	127949	NM_001159369	77782	Mm.259114	NM_029977	ENSMUSG00000034206	Polq	A430110D14Rik	polymerase (DNA directed), theta	protein-coding
Diff_Nuc20210	chr7	84846322	84846461	+	0	NA	Intergenic	Intergenic	876333	NM_008746	18213	Mm.33496	NM_008746	ENSMUSG00000059146	Ntrk3	AW125844|Ntrk3_tv3|TrkC	neurotrophic tyrosine kinase, receptor, type 3	protein-coding
Diff_Nuc7464	chr10	24071722	24071861	+	0	NA	Intergenic	Intergenic	128468	NM_021509	59012	Mm.285934	NM_021509	ENSMUSG00000020000	Moxd1	3230402N08Rik|MNCb-5203	monooxygenase, DBH-like 1	protein-coding
Diff_Nuc1064	chr13	47320332	47320471	+	0	NA	intron (NM_001170643, intron 3 of 7)	intron (NM_001170643, intron 3 of 7)	31029	NM_001170643	218215	Mm.287609	NM_146042	ENSMUSG00000038068	Rnf144b	BC025007|E130105P19Rik|Ibrdc2|Pir2	ring finger protein 144B	protein-coding
Diff_Nuc31657	chr3	109858942	109859081	+	0	NA	intron (NM_001163349, intron 2 of 5)	intron (NM_001163349, intron 2 of 5)	87379	NM_001163348	80883	Mm.39262	NM_030699	ENSMUSG00000059857	Ntng1	A930010C08Rik|AI853992|Lmnt1	netrin G1	protein-coding
Diff_Nuc14299	chr15	90995362	90995501	+	0	NA	intron (NM_011994, intron 6 of 9)	intron (NM_011994, intron 6 of 9)	26807	NM_011994	26874	Mm.295456	NM_011994	ENSMUSG00000055782	Abcd2	ABC39|ALDL1|ALDR|ALDRP	ATP-binding cassette, sub-family D (ALD), member 2	protein-coding
Diff_Nuc10763	chr17	71078402	71078541	+	0	NA	intron (NM_001347411, intron 9 of 14)	Tigger7|DNA|MER2_type	117646	NM_001164077	21815	Mm.101034	NM_009372	ENSMUSG00000047407	Tgif1	AA959811|AI462167|Tgif	TGFB-induced factor homeobox 1	protein-coding
Diff_Nuc33998	chr2	75603472	75603611	+	0	NA	Intergenic	Intergenic	-60821	NM_010902	18024	Mm.1025	NM_010902	ENSMUSG00000015839	Nfe2l2	Nrf2	nuclear factor, erythroid derived 2, like 2	protein-coding
Diff_Nuc34683	chr2	118194842	118194981	+	0	NA	intron (NM_201367, intron 1 of 2)	B4A|SINE|B4	4244	NM_201367	381413	Mm.70979	NM_201367	ENSMUSG00000040133	Gpr176	Gm1012	G protein-coupled receptor 176	protein-coding
Diff_Nuc21609	chr6	11796562	11796701	+	0	NA	Intergenic	L1_Mur3|LINE|L1	60815	NM_010886	17992	Mm.415865	NM_010886	ENSMUSG00000029632	Ndufa4	MLRQ	NADH dehydrogenase (ubiquinone) 1 alpha subcomplex, 4	protein-coding
Diff_Nuc17653	chr19	59121742	59121881	+	0	NA	intron (NM_001114312, intron 3 of 16)	intron (NM_001114312, intron 3 of 16)	28748	NM_175172	71653	Mm.37338	NM_175172	ENSMUSG00000041362	Shtn1	4930506M07Rik|Kiaa1598|Shootin1|mKIAA1598	shootin 1	protein-coding
Diff_Nuc27898	chr4	57893202	57893341	+	0	NA	intron (NM_009649, intron 2 of 2)	intron (NM_009649, intron 2 of 2)	25837	NM_001035533	11641	Mm.467752	NM_009649	ENSMUSG00000038729	Akap2	AA959716|AI649048|Akap-2|Akap-kl|B230340M18Rik|Prka2	A kinase (PRKA) anchor protein 2	protein-coding
Diff_Nuc17876	chr18	11484692	11484831	+	0	NA	Intergenic	Intergenic	-307024	NM_001252495	225182	Mm.154275	NM_175458	ENSMUSG00000041238	Rbbp8	9930104E21Rik|CtIP|RBBP-8|RIM|SAE2	retinoblastoma binding protein 8	protein-coding
Diff_Nuc20025	chr7	73504162	73504301	+	0	NA	intron (NM_146191, intron 2 of 33)	L1M3|LINE|L1	22379	NR_106024	102465640		NR_106024	ENSMUSG00000098353	Mir7057	Gm27550|mmu-mir-7057	microRNA 7057	ncRNA
Diff_Nuc14395	chr15	96613572	96613711	+	0	NA	Intergenic	Intergenic	-83512	NM_175121	67760	Mm.46754	NM_175121	ENSMUSG00000022462	Slc38a2	5033402L14Rik|AI316867|ATA2|SAT2|mKIAA1382	solute carrier family 38, member 2	protein-coding
Diff_Nuc8452	chr10	77438142	77438281	+	0	NA	Intergenic	Intergenic	-3184	NM_026431	67884	Mm.297512	NM_026431	ENSMUSG00000020284	1810043G02Rik	AV026620|D10Jhu13e	RIKEN cDNA 1810043G02 gene	protein-coding
Diff_Nuc3147	chr12	56013832	56013971	+	0	NA	intron (NM_013815, intron 18 of 26)	intron (NM_013815, intron 18 of 26)	-50037	NM_007688	12632	Mm.276826	NM_007688	ENSMUSG00000062929	Cfl2	-	cofilin 2, muscle	protein-coding
Diff_Nuc21590	chr6	10235002	10235141	+	0	NA	Intergenic	B1_Mus1|SINE|Alu	689307	NR_033776	57866	Mm.4397	NR_033776		AA545190	-	EST AA545190	ncRNA
Diff_Nuc10362	chr17	45545172	45545311	+	0	NA	intron (NM_152810, intron 12 of 15)	intron (NM_152810, intron 12 of 15)	25415	NM_152810	71702	Mm.28270	NM_152810	ENSMUSG00000023932	Cdc5l	1200002I02Rik|AA408004|PCDC5RP	cell division cycle 5-like (S. pombe)	protein-coding
Diff_Nuc10841	chr17	74683922	74684061	+	0	NA	intron (NM_133771, intron 1 of 8)	L2|LINE|L2	10212	NM_133771	76890	Mm.311874	NM_133771	ENSMUSG00000058704	Memo1	0610016J10Rik|D930048L02Rik	mediator of cell motility 1	protein-coding
Diff_Nuc22515	chr6	55190342	55190481	+	0	NA	intron (NM_001142781, intron 5 of 17)	intron (NM_001142781, intron 5 of 17)	37034	NM_001142781	330323	Mm.268997	NM_177883	ENSMUSG00000038022	Fam188b	C330043M08Rik|Gm1406	family with sequence similarity 188, member B	protein-coding
Diff_Nuc32428	chr3	149901682	149901821	+	0	NA	Intergenic	Intergenic	785075	NR_039540	100628568		NR_039540	ENSMUSG00000092830	Mir3963	mmu-mir-3963|mu-mir-3963	microRNA 3963	ncRNA
Diff_Nuc17957	chr18	16896802	16896941	+	0	NA	intron (NM_007664, intron 2 of 15)	RSINE1|SINE|B4	70884	NM_007664	12558	Mm.257437	NM_007664	ENSMUSG00000024304	Cdh2	CDHN|N-CAD|Ncad	cadherin 2	protein-coding
Diff_Nuc9290	chr10	117851232	117851371	+	0	NA	Intergenic	URR1A|DNA|MER1_type	-26801	NM_008337	15978	Mm.240327	NM_008337	ENSMUSG00000055170	Ifng	IFN-g|Ifg	interferon gamma	protein-coding
Diff_Nuc2228	chr13	112929342	112929481	+	0	NA	Intergenic	Intergenic	-149248	NM_001168403	77318	Mm.159895	NM_029898	ENSMUSG00000049985	Ankrd55	C030011J08Rik	ankyrin repeat domain 55	protein-coding
Diff_Nuc26937	chr5	147254282	147254421	+	0	NA	intron (NM_145155, intron 3 of 9)	ORR1B1|LTR|MaLR	-39168	NM_001243104	623198	Mm.489582	NM_001243104	ENSMUSG00000096344	Gm6408	-	predicted gene 6408	protein-coding
Diff_Nuc31485	chr3	102892292	102892431	+	0	NA	exon (NM_001033303, exon 6 of 16)	exon (NM_001033303, exon 6 of 16)	14424	NM_001033303	229665	Mm.331272	NM_001033303	ENSMUSG00000070385	Ampd1	AI553520|Ampd-1	adenosine monophosphate deaminase 1	protein-coding
Diff_Nuc19939	chr7	67429252	67429391	+	0	NA	Intergenic	Intergenic	-144216	NM_001082962	20646	Mm.274995	NM_013670	ENSMUSG00000102252	Snrpn	2410045I01Rik|HCERN3|Peg4|Pwcr1|SMN	small nuclear ribonucleoprotein N	protein-coding
Diff_Nuc18531	chr18	54624212	54624351	+	0	NA	Intergenic	Intergenic	42332	NR_040338	77433	Mm.159919	NR_040338		Redrum	9430076G02Rik	Redrum, erythroid developmental long intergenic non-protein coding transcript	ncRNA
Diff_Nuc21916	chr6	28783742	28783881	+	0	NA	intron (NM_019776, intron 16 of 23)	intron (NM_019776, intron 16 of 23)	-2064	NM_138682	192198	Mm.443660	NM_138682	ENSMUSG00000049939	Lrrc4	MBAG1|NGL-2|NGL2|NLG-2|Nag14	leucine rich repeat containing 4	protein-coding
Diff_Nuc2518	chr12	12278562	12278701	+	0	NA	intron (NM_001146119, intron 1 of 11)	(TG)n|Simple_repeat|Simple_repeat	9686	NM_001146119	76820	Mm.440802	NM_029758	ENSMUSG00000020589	Fam49a	2410157M17Rik|9630047E15|D12Ertd553e	family with sequence similarity 49, member A	protein-coding
Diff_Nuc36970	chr1	67560882	67561021	+	0	NA	Intergenic	RMER19C|LTR|ERVK	391350	NM_001080809	227231	Mm.343942	NM_001080809	ENSMUSG00000025991	Cps1	4732433M03Rik|CPS|D1Ucla3	carbamoyl-phosphate synthetase 1	protein-coding
Diff_Nuc32869	chr2	22840372	22840511	+	0	NA	intron (NM_001077190, intron 2 of 10)	intron (NM_001077190, intron 2 of 10)	55320	NM_001077192	11308	Mm.205647	NM_007380	ENSMUSG00000058835	Abi1	E3B1|NAP1|Ssh3bp1|abi-1	abl-interactor 1	protein-coding
Diff_Nuc17644	chr19	58510002	58510141	+	0	NA	intron (NM_010279, intron 4 of 10)	intron (NM_010279, intron 4 of 10)	19817	NM_001285457	14585	Mm.88367	NM_010279	ENSMUSG00000025089	Gfra1	AU042498	glial cell line derived neurotrophic factor family receptor alpha 1	protein-coding
Diff_Nuc13866	chr15	72919292	72919431	+	0	NA	Intergenic	Intergenic	-1481	NM_053068	93696	Mm.23095	NM_053068	ENSMUSG00000068391	Chrac1	2410152E03Rik|2810406L04Rik|YCL1	chromatin accessibility complex 1	protein-coding
Diff_Nuc12071	chr16	45850932	45851071	+	0	NA	Intergenic	Lx7|LINE|L1	-6510	NM_001252442	208177	Mm.211477	NM_153412	ENSMUSG00000033149	Phldb2	AV253284|C820004H04Rik|LL5b|LL5beta	pleckstrin homology like domain, family B, member 2	protein-coding
Diff_Nuc10434	chr17	48277852	48277991	+	0	NA	intron (NM_001177897, intron 2 of 3)	intron (NM_001177897, intron 2 of 3)	5336	NM_001177897	328829	Mm.466999	NM_177824	ENSMUSG00000073386	9830107B12Rik	Trem5	RIKEN cDNA 9830107B12 gene	protein-coding
Diff_Nuc22481	chr6	53874702	53874841	+	0	NA	intron (NM_001289714, intron 10 of 11)	intron (NM_001289714, intron 10 of 11)	53896	NM_001289714	71287	Mm.158654	NM_027749	ENSMUSG00000052955	Cpvl	4933436L16Rik|HVLP	carboxypeptidase, vitellogenic-like	protein-coding
Diff_Nuc20458	chr7	99483012	99483151	+	0	NA	intron (NM_001243046, intron 5 of 14)	intron (NM_001243046, intron 5 of 14)	99601	NM_001243047	23859	Mm.147213	NM_011807	ENSMUSG00000052572	Dlg2	A330103J02Rik|B230218P12Rik|B330007M19Rik|Dlgh2|Gm1197|Gm21505|PSD93	discs, large homolog 2 (Drosophila)	protein-coding
Diff_Nuc17956	chr18	16866172	16866311	+	0	NA	intron (NM_007664, intron 2 of 15)	B4A|SINE|B4	101514	NM_007664	12558	Mm.257437	NM_007664	ENSMUSG00000024304	Cdh2	CDHN|N-CAD|Ncad	cadherin 2	protein-coding
Diff_Nuc661	chr13	29717092	29717231	+	0	NA	intron (NM_144536, intron 9 of 15)	intron (NM_144536, intron 9 of 15)	230381	NR_131896	68916	Mm.212227	NM_144536	ENSMUSG00000006191	Cdkal1	1190005B03Rik|6620401C13Rik	CDK5 regulatory subunit associated protein 1-like 1	protein-coding
Diff_Nuc39178	chr1	195224752	195224891	+	0	NA	Intergenic	Intergenic	-28345	NM_144817	215303	Mm.40329	NM_144817	ENSMUSG00000016179	Camk1g	CLICK-III|CaMKIgamma	calcium/calmodulin-dependent protein kinase I gamma	protein-coding
Diff_Nuc30828	chr3	70109132	70109271	+	0	NA	Intergenic	Lx2B|LINE|L1	297666	NM_001018031	229389	Mm.331071	NM_001018031	ENSMUSG00000027788	Otol1	Gm414	otolin 1	protein-coding
Diff_Nuc24880	chr5	38291172	38291311	+	0	NA	Intergenic	B4A|SINE|B4	-75417	NM_010835	17701	Mm.256509	NM_010835	ENSMUSG00000048450	Msx1	AA675338|AI324650|Hox-7|Hox7|Hox7.1|msh	msh homeobox 1	protein-coding
Diff_Nuc9735	chr17	13911672	13911811	+	0	NA	intron (NM_010806, intron 1 of 32)	intron (NM_010806, intron 1 of 32)	-13340	NM_022311	21646	Mm.486358	NM_022311	ENSMUSG00000038347	Tcte2	AI429268|Tcte-2	t-complex-associated testis expressed 2	protein-coding
Diff_Nuc29365	chr4	135677902	135678041	+	0	NA	Intergenic	B4A|SINE|B4	-21766	NM_008321	15903	Mm.110	NM_008321	ENSMUSG00000007872	Id3	Hlh462|Idb3|bHLHb25	inhibitor of DNA binding 3	protein-coding
Diff_Nuc40328	chr9	65826062	65826201	+	0	NA	intron (NM_173185, intron 4 of 13)	ID_B1|SINE|B4	69314	NM_173185	214897	Mm.325816	NM_173185	ENSMUSG00000032384	Csnk1g1	9130020E21Rik	casein kinase 1, gamma 1	protein-coding
Diff_Nuc37634	chr1	108185802	108185941	+	0	NA	intron (NM_133821, intron 3 of 16)	intron (NM_133821, intron 3 of 16)	117425	NM_133821	98432	Mm.24115	NM_133821	ENSMUSG00000044340	Phlpp1	AI836256|Phlpp|Plekhe1|SCOP|mKIAA0606	PH domain and leucine rich repeat protein phosphatase 1	protein-coding
Diff_Nuc38504	chr1	162676212	162676351	+	0	NA	intron (NM_013862, intron 1 of 20)	intron (NM_013862, intron 1 of 20)	46788	NM_013862	29809	Mm.25833	NM_013862	ENSMUSG00000026721	Rabgap1l	5830411O09Rik|8430421H08Rik|9630005B12Rik|AW049894|HHL|Hh1|mKIAA0471	RAB GTPase activating protein 1-like	protein-coding
Diff_Nuc28908	chr4	117286492	117286631	+	0	NA	intron (NM_080469, intron 6 of 8)	intron (NM_080469, intron 6 of 8)	63591	NM_080469	140546	Mm.235891	NM_080469	ENSMUSG00000033423	Eri3	PINT1|Prnpip1	exoribonuclease 3	protein-coding
Diff_Nuc11024	chr17	84588622	84588761	+	0	NA	TTS (NM_183021)	TTS (NM_183021)	-1404	NM_001001806	12193	Mm.259321	NM_001001806	ENSMUSG00000045817	Zfp36l2	Brf2|ERF2|Tis11d	zinc finger protein 36, C3H type-like 2	protein-coding
Diff_Nuc4710	chr11	22855242	22855381	+	0	NA	intron (NM_144514, intron 2 of 2)	intron (NM_144514, intron 2 of 2)	-16694	NM_011663	22183	Mm.29542	NM_011663	ENSMUSG00000044068	Zrsr1	D11Ncvs75|Irlgs2|SP2|U2af1-rs1|U2afbp-rs	zinc finger (CCCH type), RNA binding motif and serine/arginine rich 1	protein-coding
Diff_Nuc37397	chr1	91756942	91757081	+	0	NA	intron (NM_001037136, intron 15 of 16)	intron (NM_001037136, intron 15 of 16)	70740	NM_010262	14472	Mm.204730	NM_010262	ENSMUSG00000034486	Gbx2	D130058E05Rik|Gbx-2|MMoxA|Stra7	gastrulation brain homeobox 2	protein-coding
Diff_Nuc8224	chr10	66495112	66495251	+	0	NA	intron (NR_110511, intron 3 of 6)	intron (NR_110511, intron 3 of 6)	27358	NR_110511	102634101	Mm.445258	NR_110511		Gm31763	-	predicted gene, 31763	ncRNA
Diff_Nuc10684	chr17	65039892	65040031	+	0	NA	intron (NM_008549, intron 12 of 21)	intron (NM_008549, intron 12 of 21)	-76490	NR_105051	101202683	Mm.393309	NR_105051		Dreh	-	down-regulated in hepatocellular carcinoma	ncRNA
Diff_Nuc8141	chr10	62050522	62050661	+	0	NA	intron (NM_019553, intron 10 of 14)	intron (NM_019553, intron 10 of 14)	-9386	NM_028197	72320	Mm.258955	NM_028197	ENSMUSG00000036955	Kif1bp	0710007C18Rik|2510003E04Rik|KBP|mKIAA1279	KIF1 binding protein	protein-coding
Diff_Nuc514	chr13	22061712	22061851	+	0	NA	Intergenic	RLTR25A|LTR|ERVK	-11269	NM_001162928	195236	Mm.204664	NM_001162928	ENSMUSG00000016982	Pom121l2	Gm24	POM121 membrane glycoprotein-like 2 (rat)	protein-coding
Diff_Nuc34784	chr2	120989752	120989891	+	0	NA	exon (NM_001290819, exon 4 of 5)	exon (NM_001290819, exon 4 of 5)	7040	NM_001290819	99334	Mm.188422	NM_178889	ENSMUSG00000050619	Zscan29	AW125441|Zfp690	zinc finger SCAN domains 29	protein-coding
Diff_Nuc28503	chr4	97510582	97510721	+	0	NA	intron (NM_010905, intron 2 of 10)	intron (NM_010905, intron 2 of 10)	66334	NM_010905	18027	Mm.31274	NM_010905	ENSMUSG00000028565	Nfia	1110047K16Rik|9430022M17Rik|CTF|NF1-A|NF1A	nuclear factor I/A	protein-coding
Diff_Nuc12220	chr16	56599292	56599431	+	0	NA	intron (NM_178790, intron 14 of 34)	intron (NM_178790, intron 14 of 34)	118202	NM_001252443	21787	Mm.425970	NM_019678	ENSMUSG00000022757	Tfg	AI173908	Trk-fused gene	protein-coding
Diff_Nuc32902	chr2	24000782	24000921	+	0	NA	Intergenic	L1Md_F3|LINE|L1	-7841	NM_027163	69677	Mm.45901	NM_027163	ENSMUSG00000026985	Il1f8	2310043N20Rik|Il36b	interleukin 1 family, member 8	protein-coding
Diff_Nuc13725	chr15	62998242	62998381	+	0	NA	Intergenic	Intergenic	312852	NR_045279	432958	Mm.255105	NR_045279		Gm20740	-	predicted gene, 20740	ncRNA
Diff_Nuc26664	chr5	135594622	135594761	+	0	NA	intron (NM_021455, intron 2 of 16)	intron (NM_021455, intron 2 of 16)	11930	NM_021455	58805	Mm.34213	NM_021455	ENSMUSG00000005373	Mlxipl	ChREBP|Mlx|WS-bHLH|Wbscr14|bHLHd14	MLX interacting protein-like	protein-coding
Diff_Nuc40873	chr9	96320332	96320471	+	0	NA	Intergenic	Lx8|LINE|L1	-55683	NM_007502	11933	Mm.424	NM_007502	ENSMUSG00000032412	Atp1b3	AA409958|AI664000|AW212096	ATPase, Na+/K+ transporting, beta 3 polypeptide	protein-coding
Diff_Nuc27071	chr4	4628452	4628591	+	0	NA	Intergenic	Intergenic	91932	NM_177730	242291	Mm.218889	NM_177730	ENSMUSG00000066324	Impad1	1110001C20Rik|AA408880|AI451589|AL022796|B230207P20|Jaws|gPAPP	inositol monophosphatase domain containing 1	protein-coding
Diff_Nuc34175	chr2	85830922	85831061	+	0	NA	promoter-TSS (NM_001011759)	promoter-TSS (NM_001011759)	-985	NM_001011759	257916	Mm.377301	NM_001011759	ENSMUSG00000043267	Olfr1031	MOR200-1	olfactory receptor 1031	protein-coding
Diff_Nuc42187	chr8	55361742	55361881	+	0	NA	Intergenic	Intergenic	198925	NM_009506	22341	Mm.1402	NM_009506	ENSMUSG00000031520	Vegfc	AW228853|VEGF-C	vascular endothelial growth factor C	protein-coding
Diff_Nuc36765	chr1	58560792	58560931	+	0	NA	intron (NM_008765, intron 1 of 17)	B4A|SINE|B4	1092	NM_001271526	18393	Mm.3411	NM_008765	ENSMUSG00000026037	Orc2	AU041563|Orc2l	origin recognition complex, subunit 2	protein-coding
Diff_Nuc29711	chr4	149361222	149361361	+	0	NA	intron (NM_173371, intron 3 of 4)	intron (NM_173371, intron 3 of 4)	16054	NM_001291004	100198	Mm.22183	NM_173371	ENSMUSG00000028980	H6pd	AI785303|G6pd1|Gpd-1|Gpd1	hexose-6-phosphate dehydrogenase (glucose 1-dehydrogenase)	protein-coding
Diff_Nuc19144	chr18	90771122	90771261	+	0	NA	Intergenic	Intergenic	91645	NM_198295	67988	Mm.268041	NM_198295	ENSMUSG00000024614	Tmx3	6430411B10Rik|A730024F05Rik|AV259382|Txndc10|mKIAA1830	thioredoxin-related transmembrane protein 3	protein-coding
Diff_Nuc17072	chr19	32212252	32212391	+	0	NA	intron (NM_144792, intron 7 of 9)	intron (NM_144792, intron 7 of 9)	-34691	NM_018830	54447	Mm.491229	NM_018830	ENSMUSG00000024887	Asah2	AI585898	N-acylsphingosine amidohydrolase 2	protein-coding
Diff_Nuc18455	chr18	48406632	48406771	+	0	NA	Intergenic	Lx3C|LINE|L1	201712	NM_001025388	433182	Mm.70666	NM_001025388	ENSMUSG00000059040	Eno1b	EG433182|Eno1|Gm5506	enolase 1B, retrotransposed	protein-coding
Diff_Nuc40040	chr9	55043952	55044091	+	0	NA	intron (NM_001346657, intron 10 of 11)	MIR|SINE|MIR	-12721	NM_028049	71999	Mm.276429	NM_028049	ENSMUSG00000032309	Fbxo22	0610033L19Rik|1600016C16Rik	F-box protein 22	protein-coding
Diff_Nuc32069	chr3	131749112	131749251	+	0	NA	exon (NM_020265, exon 1 of 4)	exon (NM_020265, exon 1 of 4)	925	NM_020265	56811	Mm.103593	NM_020265	ENSMUSG00000028031	Dkk2	-	dickkopf WNT signaling pathway inhibitor 2	protein-coding
Diff_Nuc17449	chr19	46867002	46867141	+	0	NA	intron (NM_001102471, intron 1 of 6)	intron (NM_001102471, intron 1 of 6)	30972	NM_001102471	94219	Mm.306903	NM_033569	ENSMUSG00000064105	Cnnm2	AU015877|AW048635|Acdp2|Clp2	cyclin M2	protein-coding
Diff_Nuc33099	chr2	30629152	30629291	+	0	NA	Intergenic	Intergenic	28036	NM_198000	73598	Mm.34166	NM_198000	ENSMUSG00000044320	1700001O22Rik	1700113K14Rik|4930549G18Rik	RIKEN cDNA 1700001O22 gene	protein-coding
Diff_Nuc18043	chr18	24386942	24387081	+	0	NA	intron (NM_001160404, intron 1 of 12)	ORR1B1-int|LTR|MaLR	22516	NM_001160404	14423	Mm.30249	NM_013814	ENSMUSG00000000420	Galnt1	-	UDP-N-acetyl-alpha-D-galactosamine:polypeptide N-acetylgalactosaminyltransferase 1	protein-coding
Diff_Nuc5927	chr11	79996112	79996251	+	0	NA	Intergenic	B2_Mm2|SINE|B2	-1193	NM_028019	71956	Mm.22985	NM_028019	ENSMUSG00000020707	Rnf135	0610037N03Rik|2410006N06Rik	ring finger protein 135	protein-coding
Diff_Nuc3422	chr12	73877012	73877151	+	0	NA	intron (NM_008910, intron 1 of 5)	intron (NM_008910, intron 1 of 5)	14883	NM_008910	19042	Mm.261045	NM_008910	ENSMUSG00000021096	Ppm1a	2310003C21Rik|2900017D14Rik|AI427932|AU017636|MMPa-2|MPPa-1	protein phosphatase 1A, magnesium dependent, alpha isoform	protein-coding
Diff_Nuc3026	chr12	51070932	51071071	+	0	NA	Intergenic	Intergenic	-489152	NR_045472	69054	Mm.417838	NR_045472	ENSMUSG00000100844	1810007C17Rik	-	RIKEN cDNA 1810007C17 gene	ncRNA
Diff_Nuc20943	chr7	124407242	124407381	+	0	NA	Intergenic	(TG)n|Simple_repeat|Simple_repeat	-117182	NM_175645	233781	Mm.461427	NM_175645	ENSMUSG00000030657	Xylt1	8030490L12	xylosyltransferase 1	protein-coding
Diff_Nuc22411	chr6	51059592	51059731	+	0	NA	Intergenic	Lx9|LINE|L1	160248	NR_029719	387166		NR_029719	ENSMUSG00000065505	Mir148a	Mirn148|Mirn148a|mir-148a	microRNA 148a	ncRNA
Diff_Nuc20407	chr7	96356352	96356491	+	0	NA	intron (NM_028343, intron 5 of 14)	intron (NM_028343, intron 5 of 14)	130876	NM_028343	72759	Mm.208477	NM_028343	ENSMUSG00000039428	Tmem135	2810439K08Rik|AW319712|PMP52	transmembrane protein 135	protein-coding
Diff_Nuc8994	chr10	98954932	98955071	+	0	NA	Intergenic	Lx|LINE|L1	-116804	NR_038019	100504202	Mm.403801	NR_038019		Gm20110	-	predicted gene, 20110	ncRNA
Diff_Nuc38273	chr1	152210107	152210246	+	0	NA	intron (NM_001077237, intron 12 of 12)	intron (NM_001077237, intron 12 of 12)	-16275	NR_040603	75584	Mm.47709	NR_040603	ENSMUSG00000099447	2310030A07Rik	-	RIKEN cDNA 2310030A07 gene	ncRNA
Diff_Nuc29441	chr4	138187312	138187451	+	0	NA	Intergenic	MTD|LTR|MaLR	-7474	NM_029401	75718	Mm.251530	NM_029401	ENSMUSG00000028753	Vwa5b1	4931403E03Rik	von Willebrand factor A domain containing 5B1	protein-coding
Diff_Nuc11276	chr16	8606572	8606711	+	0	NA	intron (NM_172961, intron 11 of 15)	intron (NM_172961, intron 11 of 15)	31153	NM_025708	66690	Mm.10068	NM_025708	ENSMUSG00000043140	Tmem186	2810440M13Rik|4432406C05Rik|AI648175|AW210586	transmembrane protein 186	protein-coding
Diff_Nuc34159	chr2	84796672	84796811	+	0	NA	intron (NM_021398, intron 12 of 12)	intron (NM_021398, intron 12 of 12)	19938	NM_021398	58207	Mm.290729	NM_021398	ENSMUSG00000027074	Slc43a3	Eeg1|SEEEG-1	solute carrier family 43, member 3	protein-coding
Diff_Nuc27633	chr4	43985012	43985151	+	0	NA	intron (NM_027450, intron 4 of 4)	intron (NM_027450, intron 4 of 4)	-11295	NM_001002787	442829	Mm.348215	NM_001002787	ENSMUSG00000070999	Ccin	4933417A14Rik	calicin	protein-coding
Diff_Nuc24424	chr5	12756772	12756911	+	0	NA	Intergenic	(CA)n|Simple_repeat|Simple_repeat	373675	NM_028882	108151	Mm.89313	NM_028882	ENSMUSG00000040254	Sema3d	4631426B19Rik	sema domain, immunoglobulin domain (Ig), short basic domain, secreted, (semaphorin) 3D	protein-coding
Diff_Nuc19918	chr7	64215452	64215591	+	0	NA	intron (NM_008074, intron 5 of 9)	Lx8|LINE|L1	426720	NM_008074	14407	Mm.434343	NM_008074	ENSMUSG00000055026	Gabrg3	B230362M20Rik|Gabrg-3	gamma-aminobutyric acid (GABA) A receptor, subunit gamma 3	protein-coding
Diff_Nuc40403	chr9	69657542	69657681	+	0	NA	intron (NR_040765, intron 2 of 4)	intron (NR_040765, intron 2 of 4)	48658	NR_040765	319970	Mm.186434	NR_040765	ENSMUSG00000097623	B230323A14Rik	-	RIKEN cDNA B230323A14 gene	ncRNA
Diff_Nuc12006	chr16	42899642	42899781	+	0	NA	intron (NR_040402, intron 1 of 3)	B3|SINE|B2	-8047	NM_001285805	56490	Mm.136238	NM_019778	ENSMUSG00000022708	Zbtb20	1300017A20Rik|7330412A13Rik|A930017C21Rik|D16Wsu73e|DPZF|HOF|ODA-8S|Oda8|Zfp288	zinc finger and BTB domain containing 20	protein-coding
Diff_Nuc31365	chr3	96318762	96318901	+	0	NA	Intergenic	RLTR10C|LTR|ERVK	-10277	NM_027126	69585	Mm.171314	NM_027126	ENSMUSG00000038403	Hfe2	2310035L15Rik|5230400G09Rik|AI414844|AI789733|DL-M|HJV|Rgmc|hemojuvelin	hemochromatosis type 2 (juvenile)	protein-coding
Diff_Nuc39748	chr9	40999992	41000131	+	0	NA	Intergenic	Intergenic	-14177	NR_040392	78500	Mm.275715	NR_040392	ENSMUSG00000100837	1700063D05Rik	-	RIKEN cDNA 1700063D05 gene	ncRNA
Diff_Nuc10788	chr17	71713212	71713351	+	0	NA	intron (NM_028887, intron 39 of 47)	B3|SINE|B2	-22137	NR_028023	100043644	Mm.362377	NR_028023		Gm4566	-	ubiquitin specific peptidase 16 pseudogene	pseudo
Diff_Nuc2245	chr13	113320962	113321101	+	0	NA	intron (NM_139299, intron 13 of 16)	L1M4|LINE|L1	49839	NM_139299	218624	Mm.380801	NM_139299	ENSMUSG00000050377	Il31ra	CRL3|GLM-R|GPL|Glmr|NR10	interleukin 31 receptor A	protein-coding
Diff_Nuc41267	chr9	113607882	113608021	+	0	NA	intron (NM_011052, intron 2 of 17)	intron (NM_011052, intron 2 of 17)	9426	NM_001164678	18571	Mm.29816	NM_011052	ENSMUSG00000032504	Pdcd6ip	AI480591|AW544830|Aip1|Alix|C76364|Eig2|mKIAA1375	programmed cell death 6 interacting protein	protein-coding
Diff_Nuc41910	chr8	36221852	36221991	+	0	NA	Intergenic	Intergenic	-193177	NM_175091	21951	Mm.88364	NM_175091	ENSMUSG00000031529	Tnks	4930554K12Rik|AI662855|ARTD5|C86528|D130072O21Rik|TANK1|mTNKS1	tankyrase, TRF1-interacting ankyrin-related ADP-ribose polymerase	protein-coding
Diff_Nuc3051	chr12	52399182	52399321	+	0	NA	Intergenic	L1M5|LINE|L1	-49966	NM_001167964	217558	Mm.253264	NM_001015099	ENSMUSG00000035293	G2e3	6030408C04Rik|9030416F18|AW046379|D930034K21Rik|mKIAA1333	G2/M-phase specific E3 ubiquitin ligase	protein-coding
Diff_Nuc37768	chr1	121544492	121544631	+	0	NA	intron (NM_001113416, intron 1 of 16)	A-rich|Low_complexity|Low_complexity	1016	NM_001113416	226352	Mm.253156	NM_145506	ENSMUSG00000026383	Epb41l5	1700030C16Rik|AL022914|BE37|E230025E14Rik|Epb4.1l5|Lulu1|NBL5	erythrocyte membrane protein band 4.1 like 5	protein-coding
Diff_Nuc33168	chr2	32781982	32782121	+	0	NA	3' UTR (NM_199302, exon 25 of 25)	3' UTR (NM_199302, exon 25 of 25)	34724	NM_199302	227738	Mm.248037	NM_199302	ENSMUSG00000026792	Lrsam1	-	leucine rich repeat and sterile alpha motif containing 1	protein-coding
Diff_Nuc30805	chr3	69114422	69114561	+	0	NA	Intergenic	ORR1B2|LTR|MaLR	-6349	NM_178726	242083	Mm.40577	NM_178726	ENSMUSG00000027784	Ppm1l	3222401G13|5930404J21Rik|AI481720|AW045850|PP2C|PP2Cepsilon|Pp2ce|Ppp2ce|mKIAA4175	protein phosphatase 1 (formerly 2C)-like	protein-coding
Diff_Nuc15379	chr14	55660502	55660641	+	0	NA	non-coding (NR_073535, exon 2 of 2)	non-coding (NR_073535, exon 2 of 2)	3272	NR_073535	100151693	Mm.378403	NR_073535	ENSMUSG00000072492	Gm10364	EG545052|ENSMUSG00000072492	glyceraldehyde-3-phosphate dehydrogenase pseudogene	pseudo
Diff_Nuc3990	chr12	102293282	102293421	+	0	NA	intron (NM_211355, intron 6 of 14)	B1_Mus2|SINE|Alu	-26158	NM_026681	68339	Mm.156217	NM_026681	ENSMUSG00000021182	Ccdc88c	0610010D24Rik|AV000935|AW324073|Daple|mKIAA1509	coiled-coil domain containing 88C	protein-coding
Diff_Nuc27151	chr4	10881962	10882101	+	0	NA	Intergenic	Intergenic	52735	NM_175175	71801	Mm.34351	NM_175175	ENSMUSG00000049969	Plekhf2	1110070J07Rik|AA673237|ZFYVE18	pleckstrin homology domain containing, family F (with FYVE domain) member 2	protein-coding
Diff_Nuc16154	chr14	102348572	102348711	+	0	NA	Intergenic	B4A|SINE|B4	108801	NM_001347628	380928	Mm.218981	NM_201529	ENSMUSG00000033060	Lmo7	C78582|FBXO20|Gm914|mKIAA0858	LIM domain only 7	protein-coding
Diff_Nuc17883	chr18	11817342	11817481	+	0	NA	intron (NR_045526, intron 1 of 17)	intron (NR_045526, intron 1 of 17)	1553	NM_001081223	225182	Mm.154275	NM_175458	ENSMUSG00000041238	Rbbp8	9930104E21Rik|CtIP|RBBP-8|RIM|SAE2	retinoblastoma binding protein 8	protein-coding
Diff_Nuc3975	chr12	101573542	101573681	+	0	NA	intron (NM_001033213, intron 17 of 19)	intron (NM_001033213, intron 17 of 19)	58792	NR_045741	100038713	Mm.470751	NR_045741		Gm10432	ENSMUSG00000072882	predicted gene 10432	ncRNA
Diff_Nuc23179	chr6	95446632	95446771	+	0	NA	intron (NM_001326558, intron 10 of 10)	Charlie1a|DNA|MER1_type	-162714	NR_033559	414067	Mm.355990	NR_033559	ENSMUSG00000068180	AY512915	-	cDNA sequence AY512915	ncRNA
Diff_Nuc2411	chr12	4210902	4211041	+	0	NA	TTS (NM_134046)	TTS (NM_134046)	-23056	NM_001204912	69709	Mm.250552	NM_001204912	ENSMUSG00000096199	Ptrhd1	2410017P09Rik	peptidyl-tRNA hydrolase domain containing 1	protein-coding
Diff_Nuc34702	chr2	118800192	118800331	+	0	NA	Intergenic	PB1D10|SINE|Alu	48028	NM_028117	72136	Mm.486238	NM_028117	ENSMUSG00000074916	Chst14	2600016L03Rik|D4ST-1|D4st1	carbohydrate (N-acetylgalactosamine 4-0) sulfotransferase 14	protein-coding
Diff_Nuc20322	chr7	90782652	90782791	+	0	NA	intron (NM_023377, intron 3 of 5)	intron (NM_023377, intron 3 of 5)	2194	NM_023377	170460	Mm.357953	NM_023377	ENSMUSG00000046027	Stard5	2310058G22Rik|AI607880|D7Ertd152e	StAR-related lipid transfer (START) domain containing 5	protein-coding
Diff_Nuc9580	chr17	6005492	6005631	+	0	NA	intron (NM_001113352, intron 7 of 25)	intron (NM_001113352, intron 7 of 25)	-2019	NM_001290698	20975	Mm.236068	NM_011523	ENSMUSG00000023805	Synj2	AI481647|SJ2|mKIAA0348	synaptojanin 2	protein-coding
Diff_Nuc8187	chr10	63805222	63805361	+	0	NA	intron (NM_001164519, intron 4 of 12)	Lx8|LINE|L1	-252288	NM_178678	216028	Mm.431318	NM_178678	ENSMUSG00000042846	Lrrtm3	9630044H04Rik	leucine rich repeat transmembrane neuronal 3	protein-coding
Diff_Nuc42634	chr8	83524572	83524711	+	0	NA	intron (NM_027554, intron 4 of 9)	intron (NM_027554, intron 4 of 9)	14164	NM_027554	74841	Mm.246018	NM_027554	ENSMUSG00000038250	Usp38	4631402N15Rik|4833420O05Rik|AA536967|AU044701|AW544820|mKIAA1891	ubiquitin specific peptidase 38	protein-coding
Diff_Nuc40173	chr9	60942532	60942671	+	0	NA	Intergenic	MTE2a|LTR|MaLR	10592	NR_105026	66785	Mm.158134	NR_105026	ENSMUSG00000111807	4933433G08Rik	-	RIKEN cDNA 4933433G08 gene	ncRNA
Diff_Nuc25384	chr5	72425712	72425851	+	0	NA	intron (NM_008069, intron 5 of 8)	L1_Mur2|LINE|L1	133641	NM_178599	27784	Mm.44223	NM_178599	ENSMUSG00000029213	Commd8	C77770|D5Buc26e	COMM domain containing 8	protein-coding
Diff_Nuc29629	chr4	146722172	146722311	+	0	NA	intron (NM_001039209, intron 1 of 2)	intron (NM_001039209, intron 1 of 2)	172266	NM_001039209	195531	Mm.270762	NM_001039209	ENSMUSG00000078496	Zfp982	Gm13152|OTTMUSG00000010671	zinc finger protein 982	protein-coding
Diff_Nuc22080	chr6	34694802	34694941	+	0	NA	intron (NM_001347100, intron 4 of 13)	intron (NM_001347100, intron 4 of 13)	35427	NM_145575	109624	Mm.308134	NM_145575	ENSMUSG00000029761	Cald1	4833423D12Rik|AI195384|AV071549|AW536160|C920027I18Rik	caldesmon 1	protein-coding
Diff_Nuc4218	chr12	113063162	113063301	+	0	NA	exon (NM_026752, exon 5 of 7)	exon (NM_026752, exon 5 of 7)	10850	NM_026752	68520	Mm.390497	NM_026752	ENSMUSG00000021286	Zfyve21	1110013H04Rik|AW558780|C85416	zinc finger, FYVE domain containing 21	protein-coding
Diff_Nuc35879	chr2	177776432	177776571	+	0	NA	Intergenic	L1Md_F|LINE|L1	18512	NM_001177399	626848	Mm.422604	NM_001177399	ENSMUSG00000074519	Zfp971	Etohi1	zinc finger protein 971	protein-coding
Diff_Nuc16371	chr14	120682832	120682971	+	0	NA	intron (NM_207515, intron 1 of 7)	MTEa|LTR|MaLR	8010	NM_175341	105559	Mm.238266	NM_175341	ENSMUSG00000022139	Mbnl2	1110002M11Rik|AI047808|AI837313|AI849185|AL118326|MBLL|R75232|mKIAA4072	muscleblind-like 2	protein-coding
Diff_Nuc9053	chr10	102487942	102488081	+	0	NA	exon (NM_172553, exon 2 of 4)	exon (NM_172553, exon 2 of 4)	3400	NM_172553	216285	Mm.19287	NM_172553	ENSMUSG00000036602	Alx1	AI314867|C130005I02|Cart1	ALX homeobox 1	protein-coding
Diff_Nuc19177	chr7	4258052	4258191	+	0	NA	Intergenic	RLTR45-int|LTR|ERVK	-31205	NM_010746	17086	Mm.240231	NM_010746	ENSMUSG00000062524	Ncr1	Ly94|NKp46	natural cytotoxicity triggering receptor 1	protein-coding
Diff_Nuc6950	chr11	117753652	117753791	+	0	NA	Intergenic	Intergenic	-18881	NM_027919	71776	Mm.3200	NM_027919	ENSMUSG00000017713	Tha1	1300017K07Rik|GLY1	threonine aldolase 1	protein-coding
Diff_Nuc6793	chr11	111274652	111274791	+	0	NA	Intergenic	Intergenic	347243	NM_008425	16518	Mm.4951	NM_008425	ENSMUSG00000041695	Kcnj2	IRK1|Kcnf1|Kir2.1	potassium inwardly-rectifying channel, subfamily J, member 2	protein-coding
Diff_Nuc29291	chr4	133279512	133279651	+	0	NA	intron (NM_001080819, intron 1 of 19)	intron (NM_001080819, intron 1 of 19)	-6558	NR_106086	102465707		NR_106086	ENSMUSG00000104566	Mir7227	mmu-mir-7227	microRNA 7227	ncRNA
Diff_Nuc18617	chr18	59325922	59326061	+	0	NA	Intergenic	L1Md_F2|LINE|L1	-9003	NM_001081328	78923	Mm.84007	NM_001081328	ENSMUSG00000058152	Chsy3	4833446K15Rik|AI662215	chondroitin sulfate synthase 3	protein-coding
Diff_Nuc31043	chr3	84577842	84577981	+	0	NA	Intergenic	Intergenic	-41588	NM_001177773	50754	Mm.196475	NM_080428	ENSMUSG00000028086	Fbxw7	1110001A17Rik|AGO|Cdc4|Fbw7|Fbwd6|Fbx30|Fbxo30|Fbxw6|SEL-10	F-box and WD-40 domain protein 7	protein-coding
Diff_Nuc11966	chr16	38295772	38295911	+	0	NA	promoter-TSS (NM_010936)	promoter-TSS (NM_010936)	-931	NM_001098404	18171	Mm.8509	NM_010936	ENSMUSG00000022809	Nr1i2	PXR|PXR.1|PXR.2|PXR1|SXR|mPXR	nuclear receptor subfamily 1, group I, member 2	protein-coding
Diff_Nuc30606	chr3	58680872	58681011	+	0	NA	intron (NM_153384, intron 1 of 3)	ORR1A1|LTR|MaLR	8193	NM_153386	229320	Mm.131502	NM_153384	ENSMUSG00000043850	Clrn1	A130002D11Rik|USH3|Ush3a|clarin-1	clarin 1	protein-coding
Diff_Nuc30602	chr3	58478622	58478761	+	0	NA	TTS (NM_009174)	TTS (NM_009174)	17619	NM_009174	20439	Mm.2847	NM_009174	ENSMUSG00000036432	Siah2	AA415433|Sinh2	seven in absentia 2	protein-coding
Diff_Nuc23534	chr6	116180592	116180731	+	0	NA	intron (NM_026585, intron 16 of 30)	MT2A|LTR|ERVL	22610	NM_026585	28006	Mm.28524	NM_026585	ENSMUSG00000024104	Washc2	A130095H06|C530005J20Rik|D6Wsu116e|Fam21	WASH complex subunit 2	protein-coding
Diff_Nuc27466	chr4	33561652	33561791	+	0	NA	intron (NM_001305273, intron 14 of 15)	ORR1D1|LTR|MaLR	36665	NR_106198	102465904		NR_106198	ENSMUSG00000098310	Mir8118	Gm27954|mmu-mir-8118	microRNA 8118	ncRNA
Diff_Nuc15464	chr14	59733592	59733731	+	0	NA	Intergenic	MER20B|DNA|MER1_type	28069	NM_026461	67932	Mm.65550	NM_026461	ENSMUSG00000021977	1700129C05Rik	-	RIKEN cDNA 1700129C05 gene	protein-coding
Diff_Nuc5907	chr11	79572332	79572471	+	0	NA	Intergenic	RSINE1|SINE|B4	32499	NR_029959	723853		NR_029959	ENSMUSG00000065489	Mir365-2	Mirn365-2|mir-365-2	microRNA 365-2	ncRNA
Diff_Nuc31644	chr3	108634302	108634441	+	0	NA	intron (NM_011504, intron 1 of 18)	intron (NM_011504, intron 1 of 18)	9049	NM_011504	20912	Mm.316894	NM_011504	ENSMUSG00000027882	Stxbp3	Munc-18c|Stxbp3a|Sxtbp3|Unc18-3	syntaxin binding protein 3	protein-coding
Diff_Nuc35031	chr2	132105062	132105201	+	0	NA	intron (NM_138651, intron 1 of 12)	intron (NM_138651, intron 1 of 12)	-6544	NM_001291039	110911	Mm.284503	NM_138651	ENSMUSG00000058793	Cds2	5730450N06Rik|5730460C18Rik|AI854580|D2Wsu127e	CDP-diacylglycerol synthase (phosphatidate cytidylyltransferase) 2	protein-coding
Diff_Nuc9465	chr10	127234962	127235101	+	0	NA	Intergenic	ORR1A0-int|LTR|MaLR	-3178	NM_009040	19683	Mm.100276	NM_009040	ENSMUSG00000069456	Rdh16	CRAD|CRAD1|Rdh6	retinol dehydrogenase 16	protein-coding
Diff_Nuc28534	chr4	98702202	98702341	+	0	NA	intron (NM_013913, intron 5 of 6)	intron (NM_013913, intron 5 of 6)	4626	NM_013913	30924	Mm.28341	NM_013913	ENSMUSG00000028553	Angptl3	hypl	angiopoietin-like 3	protein-coding
Diff_Nuc22269	chr6	44909232	44909371	+	0	NA	Intergenic	L1Md_F|LINE|L1	-100759	NM_001004357	66797	Mm.440084	NM_025771	ENSMUSG00000039419	Cntnap2	5430425M22Rik|Caspr2|mKIAA0868	contactin associated protein-like 2	protein-coding
Diff_Nuc13878	chr15	73384652	73384791	+	0	NA	intron (NM_001081066, intron 13 of 22)	intron (NM_001081066, intron 13 of 22)	41731	NM_001081066	105841	Mm.322557	NM_001081066	ENSMUSG00000036661	Dennd3	AI447457|E030003N15Rik	DENN/MADD domain containing 3	protein-coding
Diff_Nuc16125	chr14	100516102	100516241	+	0	NA	intron (NM_010636, intron 1 of 6)	intron (NM_010636, intron 1 of 6)	32844	NM_010636	16597	Mm.396499	NM_010636	ENSMUSG00000072294	Klf12	2700063E05Rik|AI225908|AI315654|AP-2rep|B130052C06Rik|D530033K05Rik	Kruppel-like factor 12	protein-coding
Diff_Nuc34388	chr2	100184182	100184321	+	0	NA	Intergenic	Lx7|LINE|L1	-1280654	NM_009020	19374	Mm.4988	NM_009020	ENSMUSG00000032864	Rag2	Rag-2	recombination activating gene 2	protein-coding
Diff_Nuc13872	chr15	73136622	73136761	+	0	NA	intron (NM_001130409, intron 9 of 29)	intron (NM_001130409, intron 9 of 29)	-51379	NR_029561	387169		NR_029561	ENSMUSG00000065612	Mir151	Mirn151|mir-151|mmu-mir-151	microRNA 151	ncRNA
Diff_Nuc37719	chr1	116644472	116644611	+	0	NA	Intergenic	Intergenic	-937173	NM_001077425	636808	Mm.101576	NM_001077425	ENSMUSG00000070695	Cntnap5a	Caspr5-1|EG636808	contactin associated protein-like 5A	protein-coding
Diff_Nuc26317	chr5	116594532	116594671	+	0	NA	intron (NM_177759, intron 8 of 13)	MT2B2|LTR|ERVL	-61346	NM_001101546	545798	Mm.483995	NM_001101546	ENSMUSG00000079278	Tmem233	DSPB2|Gm13843|OTTMUSG00000014722	transmembrane protein 233	protein-coding
Diff_Nuc39910	chr9	48041482	48041621	+	0	NA	Intergenic	Intergenic	107430	NM_030069	78252	Mm.31626	NM_030069	ENSMUSG00000032028	Nxpe2	4432416J03Rik|AI323362|Fam55b	neurexophilin and PC-esterase domain family, member 2	protein-coding
Diff_Nuc29962	chr3	14229322	14229461	+	0	NA	Intergenic	L1_Mur1|LINE|L1	-133726	NR_033591	622229	Mm.486084	NR_033591		Gm6300	EG622229	solute carrier family 7 (cationic amino acid transporter, y+ system), member pseudogene	pseudo
Diff_Nuc29920	chr3	10145252	10145391	+	0	NA	Intergenic	Intergenic	38564	NM_001030305	18857	Mm.371777	NM_001030305	ENSMUSG00000052468	Pmp2	P2	peripheral myelin protein 2	protein-coding
Diff_Nuc7840	chr10	44101752	44101891	+	0	NA	Intergenic	Intergenic	22339	NR_035450	100316688		NR_035450	ENSMUSG00000089260	Mir1929	mir-1929|mmu-mir-1929	microRNA 1929	ncRNA
Diff_Nuc22181	chr6	39073152	39073291	+	0	NA	intron (NR_045813, intron 1 of 3)	MER74A|LTR|ERVL	4749	NR_045813	75379	Mm.348014	NR_045813	ENSMUSG00000073144	4930599N23Rik	-	RIKEN cDNA 4930599N23 gene	ncRNA
Diff_Nuc39682	chr9	36576612	36576751	+	0	NA	Intergenic	RSINE1|SINE|B4	-1518	NM_008408	16430	Mm.2863	NM_008408	ENSMUSG00000032116	Stt3a	AA408947|BB081708|Itm1	STT3, subunit of the oligosaccharyltransferase complex, homolog A (S. cerevisiae)	protein-coding
Diff_Nuc38321	chr1	154520642	154520781	+	0	NA	intron (NM_001346118, intron 2 of 18)	intron (NM_001346118, intron 2 of 18)	-48364	NM_016846	19731	Mm.245270	NM_016846	ENSMUSG00000026482	Rgl1	Rgl|mKIAA0959	ral guanine nucleotide dissociation stimulator,-like 1	protein-coding
Diff_Nuc17941	chr18	15852232	15852371	+	0	NA	intron (NM_199055, intron 1 of 3)	intron (NM_199055, intron 1 of 3)	24254	NM_199055	71367	Mm.329304	NM_199055	ENSMUSG00000047161	Chst9	5430438D01Rik	carbohydrate (N-acetylgalactosamine 4-0) sulfotransferase 9	protein-coding
Diff_Nuc16078	chr14	96008402	96008541	+	0	NA	Intergenic	Intergenic	-272014	NM_025733	66732	Mm.75060	NM_025733	ENSMUSG00000034689	4921530L21Rik	-	RIKEN cDNA 4921530L21 gene	protein-coding
Diff_Nuc2505	chr12	10466392	10466531	+	0	NA	intron (NR_110487, intron 1 of 11)	intron (NR_110487, intron 1 of 11)	13267	NR_110487	328061	Mm.56067	NR_110487		Gm38407	4931412M21	predicted gene, 38407	ncRNA
Diff_Nuc32940	chr2	25277152	25277291	+	0	NA	Intergenic	Intergenic	-1541	NM_001289453	14347	Mm.1203	NM_013524	ENSMUSG00000036587	Fut7	AI853193|FTVII|Fuc-TVII|FucT-VII	fucosyltransferase 7	protein-coding
Diff_Nuc12483	chr16	83391322	83391461	+	0	NA	Intergenic	Intergenic	-979997	NR_040567	75247	Mm.417813	NR_040567		4930553E22Rik	-	RIKEN cDNA 4930553E22 gene	ncRNA
Diff_Nuc26482	chr5	123797082	123797221	+	0	NA	intron (NM_029850, intron 1 of 5)	MER53|DNA|hAT	2694	NM_029850	77045	Mm.151960	NM_029850	ENSMUSG00000029438	Bcl7a	4432415N06Rik|AI448316	B cell CLL/lymphoma 7A	protein-coding
Diff_Nuc2393	chr12	3605522	3605661	+	0	NA	intron (NM_001162465, intron 4 of 17)	intron (NM_001162465, intron 4 of 17)	32550	NM_007886	13528	Mm.286202	NM_007886	ENSMUSG00000071454	Dtnb	-	dystrobrevin, beta	protein-coding
Diff_Nuc21014	chr7	127949402	127949541	+	0	NA	TTS (NM_177697)	TTS (NM_177697)	-36874	NM_007908	13631	Mm.25997	NM_007908	ENSMUSG00000035064	Eef2k	C86191|eEF-2K	eukaryotic elongation factor-2 kinase	protein-coding
Diff_Nuc39467	chr9	22249232	22249371	+	0	NA	TTS (NM_026739)	TTS (NM_026739)	23499	NM_018739	55934	Mm.38235	NM_018739	ENSMUSG00000032239	Rp9	PAP-1|Rp9h	retinitis pigmentosa 9 (human)	protein-coding
Diff_Nuc18172	chr18	34664042	34664181	+	0	NA	intron (NM_146084, intron 1 of 20)	B3|SINE|B2	2366	NM_146084	225358	Mm.226899	NM_146084	ENSMUSG00000036501	Fam13b	2610024E20Rik|AW060714|AW546153	family with sequence similarity 13, member B	protein-coding
Diff_Nuc37523	chr1	99602432	99602571	+	0	NA	TTS (NM_173760)	TTS (NM_173760)	-43906	NM_133825	52392	Mm.12309	NM_133825	ENSMUSG00000044768	D1Ertd622e	AI987691|AW047450	DNA segment, Chr 1, ERATO Doi 622, expressed	protein-coding
Diff_Nuc31253	chr3	92809342	92809481	+	0	NA	Intergenic	RMER20B|LTR|ERVK	10197	NM_028798	74175	Mm.35806	NM_028798	ENSMUSG00000027913	Crct1	2300002G24Rik|AA589624|Nice-1	cysteine-rich C-terminal 1	protein-coding
Diff_Nuc8849	chr10	93802322	93802461	+	0	NA	Intergenic	Intergenic	-40943	NR_033209	215472	Mm.255656	NM_174999	ENSMUSG00000053420	Gm4792	E130012K09|EG215472	predicted gene 4792	ncRNA
Diff_Nuc1359	chr13	63643222	63643361	+	0	NA	intron (NM_001328514, intron 8 of 23)	intron (NM_001328514, intron 8 of 23)	23752	NM_008957	19206	Mm.228798	NM_008957	ENSMUSG00000021466	Ptch1	A230106A15Rik|Ptc|Ptc1|Ptch|mes	patched 1	protein-coding
Diff_Nuc23737	chr6	124773272	124773411	+	0	NA	intron (NM_013700, intron 7 of 19)	intron (NM_013700, intron 7 of 19)	6161	NM_001326594	22225	Mm.3571	NM_013700	ENSMUSG00000038429	Usp5	AA407472|ISOT|ISOT-1|Ucht	ubiquitin specific peptidase 5 (isopeptidase T)	protein-coding
Diff_Nuc42779	chr8	91517162	91517301	+	0	NA	Intergenic	Intergenic	-31403	NR_106190	102465899		NR_106190	ENSMUSG00000099078	Mir8110	Gm27571|mmu-mir-8110	microRNA 8110	ncRNA
Diff_Nuc37761	chr1	121121222	121121361	+	0	NA	Intergenic	Intergenic	-171095	NM_001081125	14633	Mm.273292	NM_001081125	ENSMUSG00000048402	Gli2	-	GLI-Kruppel family member GLI2	protein-coding
Diff_Nuc21306	chr7	142799012	142799151	+	0	NA	intron (NM_001316679, intron 1 of 19)	intron (NM_001316679, intron 1 of 19)	1570	NM_001316679	19267	Mm.945	NM_011212	ENSMUSG00000041836	Ptpre	PTPe|PTPepsilon|RPTPepsilon	protein tyrosine phosphatase, receptor type, E	protein-coding
Diff_Nuc25457	chr5	75212122	75212261	+	0	NA	Intergenic	B4|SINE|B4	-113263	NM_001159577	16924	Mm.440403	NM_010727	ENSMUSG00000029228	Lnx1	Lnx	ligand of numb-protein X 1	protein-coding
Diff_Nuc13016	chr15	19277972	19278111	+	0	NA	Intergenic	RSINE1|SINE|B4	527957	NM_009865	320873	Mm.117794	NM_009865	ENSMUSG00000022321	Cdh10	A830016G23Rik|C030003B10Rik|C030011H18Rik	cadherin 10	protein-coding
Diff_Nuc13553	chr15	55190452	55190591	+	0	NA	intron (NM_181277, intron 5 of 47)	intron (NM_181277, intron 5 of 47)	51216	NM_181277	12818	Mm.297859	NM_181277	ENSMUSG00000022371	Col14a1	5730412L22Rik|AW108078	collagen, type XIV, alpha 1	protein-coding
Diff_Nuc33827	chr2	68891392	68891531	+	0	NA	intron (NM_172856, intron 6 of 9)	intron (NM_172856, intron 6 of 9)	-82396	NM_181547	329416	Mm.90047	NM_181547	ENSMUSG00000034738	Nostrin	Daip2|mDaIP2	nitric oxide synthase trafficker	protein-coding
Diff_Nuc18637	chr18	60402832	60402971	+	0	NA	intron (NM_001033767, intron 2 of 2)	intron (NM_001033767, intron 2 of 2)	30020	NM_001034859	225594	Mm.329460	NM_001034859	ENSMUSG00000068606	Gm4841	EG225594|Ifgga3	predicted gene 4841	protein-coding
Diff_Nuc14921	chr14	30786962	30787101	+	0	NA	intron (NM_019979, intron 4 of 4)	(TG)n|Simple_repeat|Simple_repeat	-4492	NM_027493	56249	Mm.215110	NM_027493	ENSMUSG00000015971	Actr8	5730542K05Rik|ARP8	ARP8 actin-related protein 8	protein-coding
Diff_Nuc6391	chr11	98570202	98570341	+	0	NA	intron (NM_011869, intron 19 of 25)	L1MB2|LINE|L1	7644	NM_009971	12985	Mm.1238	NM_009971	ENSMUSG00000038067	Csf3	Csfg|G-CSF|MGI-IG	colony stimulating factor 3 (granulocyte)	protein-coding
Diff_Nuc15120	chr14	41695712	41695851	+	0	NA	intron (NM_177816, intron 1 of 7)	intron (NM_177816, intron 1 of 7)	10473	NM_177816	328381	Mm.235694	NM_177816	ENSMUSG00000037833	Sh2d4b	A430109M18Rik|D030001E08	SH2 domain containing 4B	protein-coding
Diff_Nuc19111	chr18	87554282	87554421	+	0	NA	Intergenic	L1_Rod|LINE|L1	672894	NM_172633	12405	Mm.70775	NM_172633	ENSMUSG00000024647	Cbln2	6330593N19Rik|A730004O05	cerebellin 2 precursor protein	protein-coding
Diff_Nuc17859	chr18	10818912	10819051	+	0	NA	Intergenic	Intergenic	-33431	NR_029781	723959		NR_029781	ENSMUSG00000106348	Mir1a-2	Mir1-2|Mirn1-2|mir-1a-2|mmu-mir-1-2|mmu-mir-1a-2	microRNA 1a-2	ncRNA
Diff_Nuc24715	chr5	30825232	30825371	+	0	NA	intron (NM_028483, intron 3 of 6)	intron (NM_028483, intron 3 of 6)	22908	NM_028483	73259	Mm.443299	NM_028483	ENSMUSG00000053194	Cib4	1700041E20Rik	calcium and integrin binding family member 4	protein-coding
Diff_Nuc37182	chr1	80844372	80844511	+	0	NA	Intergenic	Intergenic	-89313	NM_175291	210293	Mm.133473	NM_175291	ENSMUSG00000038608	Dock10	9330153B10Rik|A630054M16Rik|Jr4|Jr5|R75174|ZIZ3|Zizimin3|mKIAA0694	dedicator of cytokinesis 10	protein-coding
Diff_Nuc34667	chr2	116854932	116855071	+	0	NA	Intergenic	Intergenic	-91806	NM_001277256	114715	Mm.245890	NM_033524	ENSMUSG00000027351	Spred1	5730461F13Rik|AL024345|AW047647	sprouty protein with EVH-1 domain 1, related sequence	protein-coding
Diff_Nuc17440	chr19	46711882	46712021	+	0	NA	intron (NM_001177813, intron 1 of 3)	MTD|LTR|MaLR	14060	NM_001177813	226178	Mm.329895	NM_146099	ENSMUSG00000047731	Wbp1l	D19Wsu162e|Opal1	WW domain binding protein 1 like	protein-coding
Diff_Nuc9609	chr17	8023012	8023151	+	0	NA	Intergenic	Intergenic	-25242	NM_001081416	68655	Mm.379161	NM_001081416	ENSMUSG00000071984	Fndc1	1110027O12Rik|1110051A18Rik|mKIAA1866	fibronectin type III domain containing 1	protein-coding
Diff_Nuc7511	chr10	25954832	25954971	+	0	NA	intron (NM_001013766, intron 4 of 7)	intron (NM_001013766, intron 4 of 7)	5388	NM_001115154	268288	Mm.213322	NM_001013766	ENSMUSG00000051354	Samd3	Gm623	sterile alpha motif domain containing 3	protein-coding
Diff_Nuc16451	chr14	123306622	123306761	+	0	NA	intron (NM_145466, intron 1 of 2)	L1_Mur3|LINE|L1	5696	NM_145466	223267	Mm.379358	NM_145466	ENSMUSG00000041625	Ggact	A2ld1	gamma-glutamylamine cyclotransferase	protein-coding
Diff_Nuc32845	chr2	20669082	20669221	+	0	NA	intron (NM_001177631, intron 6 of 19)	MIRb|SINE|MIR	220197	NM_001081364	71435	Mm.28507	NM_001081364	ENSMUSG00000036591	Arhgap21	5530401C11Rik|AA416458|ARHGAP10	Rho GTPase activating protein 21	protein-coding
Diff_Nuc13289	chr15	37923002	37923141	+	0	NA	intron (NM_001112721, intron 40 of 58)	L1_Mus1|LINE|L1	-32261	NM_199476	382985	Mm.24738	NM_199476	ENSMUSG00000022292	Rrm2b	p53R2	ribonucleotide reductase M2 B (TP53 inducible)	protein-coding
Diff_Nuc904	chr13	41519382	41519521	+	0	NA	intron (NM_001111324, intron 2 of 7)	intron (NM_001111324, intron 2 of 7)	63278	NM_001111324	18003	Mm.288980	NM_017464	ENSMUSG00000021365	Nedd9	Cas-L|CasL|HEF1|MEF1|Nedd-9|p105	neural precursor cell expressed, developmentally down-regulated gene 9	protein-coding
Diff_Nuc28567	chr4	99987932	99988071	+	0	NA	intron (NM_013845, intron 2 of 8)	intron (NM_013845, intron 2 of 8)	-163471	NM_001033773	381534	Mm.318133	NM_001033773	ENSMUSG00000069733	Ube2u	-	ubiquitin-conjugating enzyme E2U (putative)	protein-coding
Diff_Nuc9524	chr17	3188332	3188471	+	0	NA	intron (NM_134123, intron 15 of 19)	ID4|SINE|ID	73429	NM_134123	106583	Mm.124373	NM_134123	ENSMUSG00000046201	Scaf8	A630086M08Rik|A930036P18Rik|AA408306|AI447644|AI448652|AU015035|Rbm16|mKIAA1116	SR-related CTD-associated factor 8	protein-coding
Diff_Nuc29531	chr4	141189462	141189601	+	0	NA	intron (NM_001347237, intron 7 of 18)	intron (NM_001347237, intron 7 of 18)	-9782	NM_001013780	384071	Mm.295682	NM_001013780	ENSMUSG00000040740	Slc25a34	Gm1369	solute carrier family 25, member 34	protein-coding
Diff_Nuc26843	chr5	143559742	143559881	+	0	NA	intron (NM_178242, intron 2 of 15)	MER44D|DNA|MER2_type	19255	NM_178242	231861	Mm.354649	NM_178242	ENSMUSG00000039477	Tnrc18	BC025631|EG381742|Zfp469	trinucleotide repeat containing 18	protein-coding
Diff_Nuc19315	chr7	17092562	17092701	+	0	NA	intron (NM_172739, intron 5 of 6)	ORR1A2|LTR|MaLR	-30502	NM_008718	18142	Mm.145821	NM_008718	ENSMUSG00000001988	Npas1	MOP5|bHLHe11	neuronal PAS domain protein 1	protein-coding
Diff_Nuc11440	chr16	16601492	16601631	+	0	NA	Intergenic	Intergenic	-1490	NM_001301817	224014	Mm.256131	NM_139232	ENSMUSG00000022788	Fgd4	9030023J02Rik|9330209B17Rik|Frabp|ZFYVE6	FYVE, RhoGEF and PH domain containing 4	protein-coding
Diff_Nuc19935	chr7	66602082	66602221	+	0	NA	Intergenic	Intergenic	-22632	NR_015479	330544	Mm.9002	NR_015479	ENSMUSG00000100826	C230091D08Rik	-	RIKEN cDNA C230091D08 gene	ncRNA
Diff_Nuc15125	chr14	41797392	41797531	+	0	NA	Intergenic	ORR1D2|LTR|MaLR	-17276	NM_145928	52588	Mm.28876	NM_145928	ENSMUSG00000037824	Tspan14	AA958793|D14Ertd226e|Tm4sf14|tspan-14	tetraspanin 14	protein-coding
Diff_Nuc9192	chr10	111391972	111392111	+	0	NA	Intergenic	Intergenic	-17710	NM_178610	52705	Mm.34606	NM_178610	ENSMUSG00000063334	Krr1	2610511F02Rik|AI255219|AI428520|D10Ertd773e|Hrb2	KRR1, small subunit (SSU) processome component, homolog (yeast)	protein-coding
Diff_Nuc34233	chr2	90770112	90770251	+	0	NA	Intergenic	Intergenic	-10373	NM_198683	13046	Mm.29495	NM_017368	ENSMUSG00000005506	Celf1	1600010O03Rik|AA407467|Brunol2|CUG-BP|CUG-BP1|CUGBP|Cugbp1|D2Wsu101e|HNAB50|NAB50	CUGBP, Elav-like family member 1	protein-coding
Diff_Nuc21666	chr6	14590402	14590541	+	0	NA	Intergenic	B3|SINE|B2	114803	NM_080464	140491	Mm.209429	NM_080464	ENSMUSG00000042717	Ppp1r3a	GM|RG1|RGL	protein phosphatase 1, regulatory (inhibitor) subunit 3A	protein-coding
Diff_Nuc15929	chr14	79953532	79953671	+	0	NA	intron (NM_001286412, intron 2 of 7)	RMER6C|LTR|ERVK	-33897	NM_026474	67955	Mm.18972	NM_026474	ENSMUSG00000022024	Sugt1	2410174K12Rik|SGT1	SGT1, suppressor of G2 allele of SKP1 (S. cerevisiae)	protein-coding
Diff_Nuc28202	chr4	81088832	81088971	+	0	NA	promoter-TSS (NM_001305284)	promoter-TSS (NM_001305284)	-182	NM_001305284	17475	Mm.153039	NM_010820	ENSMUSG00000028402	Mpdz	AI225843|B930003D11Rik|MUPP1	multiple PDZ domain protein	protein-coding
Diff_Nuc34300	chr2	92618292	92618431	+	0	NA	Intergenic	MYSERV6-int|LTR|ERVK	-136897	NM_030725	80976	Mm.33490	NM_030725	ENSMUSG00000027220	Syt13	5730409J20Rik|AI549909|mKIAA1427	synaptotagmin XIII	protein-coding
Diff_Nuc4512	chr11	12092002	12092141	+	0	NA	Intergenic	Intergenic	-154648	NM_010345	14783	Mm.273117	NM_010345	ENSMUSG00000020176	Grb10	5730571D09Rik|AI325020|Meg1|mKIAA0207	growth factor receptor bound protein 10	protein-coding
Diff_Nuc10195	chr17	35389202	35389341	+	0	NA	TTS (NR_106169)	TTS (NR_106169)	1037	NR_106169	102465886		NR_106169	ENSMUSG00000098269	Mir8094	Gm27513|mmu-mir-8094	microRNA 8094	ncRNA
Diff_Nuc1950	chr13	100124262	100124401	+	0	NA	intron (NM_173757, intron 2 of 10)	L1MC5|LINE|L1	9590	NM_173757	218506	Mm.30208	NM_173757	ENSMUSG00000041632	Mrps27	2610028H14Rik	mitochondrial ribosomal protein S27	protein-coding
Diff_Nuc3826	chr12	90700302	90700441	+	0	NA	intron (NM_001198587, intron 9 of 19)	L4|LINE|RTE	-350552	NM_001252074	18191	Mm.425766	NM_172544	ENSMUSG00000066392	Nrxn3	-	neurexin III	protein-coding
Diff_Nuc35432	chr2	154998972	154999111	+	0	NA	intron (NM_001243712, intron 6 of 25)	B2_Mm2|SINE|B2	39824	NM_008395	16396	Mm.208286	NM_008395	ENSMUSG00000027598	Itch	6720481N21Rik|8030492O04Rik|A130065M08|AIP4|C230047C07Rik	itchy, E3 ubiquitin protein ligase	protein-coding
Diff_Nuc42380	chr8	71637232	71637371	+	0	NA	3' UTR (NM_007509, exon 14 of 14)	3' UTR (NM_007509, exon 14 of 14)	-24180	NM_153054	110877	Mm.19301	NM_153054	ENSMUSG00000036330	Slc18a1	4832416I10Rik|Vat1|Vmat1	solute carrier family 18 (vesicular monoamine), member 1	protein-coding
Diff_Nuc19717	chr7	47630942	47631081	+	0	NA	Intergenic	(TATATG)n|Simple_repeat|Simple_repeat	-299096	NR_045504	71029	Mm.399496	NR_045504	ENSMUSG00000102004	4933402C06Rik	-	RIKEN cDNA 4933402C06 gene	ncRNA
Diff_Nuc19794	chr7	53115152	53115291	+	0	NA	intron (NM_008172, intron 2 of 11)	B1F2|SINE|Alu	6830	NM_008172	14814	Mm.322594	NM_008172	ENSMUSG00000002771	Grin2d	GluN2D|NMDAR2D|NR2D	glutamate receptor, ionotropic, NMDA2D (epsilon 4)	protein-coding
Diff_Nuc41627	chr8	13135822	13135961	+	0	NA	promoter-TSS (NR_106032)	promoter-TSS (NR_106032)	-181	NR_106032	102465645		NR_106032	ENSMUSG00000098532	Mir7065	Gm27871|mmu-mir-7065	microRNA 7065	ncRNA
Diff_Nuc7908	chr10	49006702	49006841	+	0	NA	intron (NM_001111268, intron 11 of 16)	L1_Mus2|LINE|L1	-191122	NR_046212	100418235	Mm.185993	NR_046212		C130030K03Rik	-	proteasome (prosome, macropain) subunit, alpha type 6 pseudogene	pseudo
Diff_Nuc31304	chr3	95016782	95016921	+	0	NA	intron (NM_029885, intron 2 of 9)	intron (NM_029885, intron 2 of 9)	-4528	NR_108026	100504029	Mm.478537	NR_108026	ENSMUSG00000097167	Gm16740	-	predicted gene, 16740	ncRNA
Diff_Nuc7829	chr10	43692072	43692211	+	0	NA	intron (NM_172393, intron 11 of 19)	intron (NM_172393, intron 11 of 19)	32511	NM_172393	11630	Mm.292082	NM_172393	ENSMUSG00000019866	Aim1	AI462491|AI463325	absent in melanoma 1	protein-coding
Diff_Nuc3416	chr12	73786132	73786271	+	0	NA	Intergenic	Intergenic	-20386	NM_025522	66375	Mm.289653	NM_025522	ENSMUSG00000021094	Dhrs7	2310016E22Rik|5730564L20Rik|AW061210|Retdsr4|Retsdr4	dehydrogenase/reductase (SDR family) member 7	protein-coding
Diff_Nuc8197	chr10	64340412	64340551	+	0	NA	intron (NM_001164519, intron 10 of 12)	intron (NM_001164519, intron 10 of 12)	-787478	NM_178678	216028	Mm.431318	NM_178678	ENSMUSG00000042846	Lrrtm3	9630044H04Rik	leucine rich repeat transmembrane neuronal 3	protein-coding
Diff_Nuc21630	chr6	12779372	12779511	+	0	NA	Intergenic	MTC|LTR|MaLR	-80188	NM_001164805	330267	Mm.11989	NM_001164805	ENSMUSG00000032625	Thsd7a	Gm837	thrombospondin, type I, domain containing 7A	protein-coding
Diff_Nuc15147	chr14	44018152	44018291	+	0	NA	Intergenic	L1Md_F2|LINE|L1	8123	NM_027940	71826	Mm.335855	NM_027940	ENSMUSG00000095384	1700001F09Rik	Gm10377	RIKEN cDNA 1700001F09 gene	protein-coding
Diff_Nuc12642	chr16	93533802	93533941	+	0	NA	Intergenic	Intergenic	70189	NM_145482	224440	Mm.10628	NM_145482	ENSMUSG00000022948	Setd4	AY037804|C21orf18|ORF21	SET domain containing 4	protein-coding
Diff_Nuc19079	chr18	84611072	84611211	+	0	NA	intron (NM_001033341, intron 3 of 8)	intron (NM_001033341, intron 3 of 8)	147755	NM_001033341	240476	Mm.329575	NM_001033341	ENSMUSG00000048410	Zfp407	6430585N13Rik|Gm333|Gm334|Gm948|ZNF407	zinc finger protein 407	protein-coding
Diff_Nuc3409	chr12	73586442	73586581	+	0	NA	intron (NM_001142728, intron 21 of 31)	intron (NM_001142728, intron 21 of 31)	43275	NM_001142729	78257	Mm.266280	NM_030070	ENSMUSG00000021090	Lrrc9	4921529O18Rik|4930432K16Rik	leucine rich repeat containing 9	protein-coding
Diff_Nuc18857	chr18	69648012	69648151	+	0	NA	intron (NM_001083967, intron 5 of 19)	intron (NM_001083967, intron 5 of 19)	142706	NM_001083967	21413	Mm.4269	NM_013685	ENSMUSG00000053477	Tcf4	5730422P05Rik|ASP-I2|E2-2|E2.2|ITF-2|ITF-2b|ITF2|ME2|MITF-2A|MITF-2B|SEF-2|SEF2|SEF2-1|TFE|Tcf-4|bHLHb19	transcription factor 4	protein-coding
Diff_Nuc42640	chr8	84261452	84261591	+	0	NA	intron (NM_001024617, intron 3 of 24)	intron (NM_001024617, intron 3 of 24)	395060	NM_001297593	234515	Mm.324468	NM_001024617	ENSMUSG00000037940	Inpp4b	E130107I17Rik	inositol polyphosphate-4-phosphatase, type II	protein-coding
Diff_Nuc16901	chr19	22811462	22811601	+	0	NA	intron (NM_001035245, intron 6 of 7)	intron (NM_001035245, intron 6 of 7)	-13564	NR_029591	387200		NR_029591	ENSMUSG00000065507	Mir204	Mirn204|mir-204|mmu-mir-204	microRNA 204	ncRNA
Diff_Nuc43216	chr8	115453042	115453181	+	0	NA	Intergenic	Intergenic	-138051	NR_033584	791378	Mm.350576	NR_033584	ENSMUSG00000110541	Gm10280	ENSMUSG00000069883	predicted gene 10280	ncRNA
Diff_Nuc12574	chr16	90336082	90336221	+	0	NA	Intergenic	Intergenic	-50491	NM_015755	26559	Mm.125874	NM_015755	ENSMUSG00000053414	Hunk	Bstk1|Mak-v	hormonally upregulated Neu-associated kinase	protein-coding
Diff_Nuc27860	chr4	55663692	55663831	+	0	NA	Intergenic	Intergenic	-118414	NM_010637	16600	Mm.4325	NM_010637	ENSMUSG00000003032	Klf4	EZF|Gklf|Zie	Kruppel-like factor 4 (gut)	protein-coding
Diff_Nuc20049	chr7	74712562	74712701	+	0	NA	intron (NM_175124, intron 5 of 9)	intron (NM_175124, intron 5 of 9)	77491	NM_175124	67867	Mm.31247	NM_027413	ENSMUSG00000030556	Lrrc28	1300004K21Rik|2210012C09Rik|2310058O11Rik	leucine rich repeat containing 28	protein-coding
Diff_Nuc2267	chr13	114218882	114219021	+	0	NA	Intergenic	ORR1A0|LTR|MaLR	74101	NR_045501	70917	Mm.491036	NR_045501		4921509O07Rik	-	RIKEN cDNA 4921509O07 gene	ncRNA
Diff_Nuc10154	chr17	34249372	34249511	+	0	NA	non-coding (NR_037970, exon 13 of 13)	non-coding (NR_037970, exon 13 of 13)	7404	NR_037970	14312	Mm.3444	NM_010238	ENSMUSG00000024335	Brd2	AW228947|D17H6S113E|Frg-1|Fsrg-1|Fsrg1|Nat|Ring3|Rnf3|mKIAA4005	bromodomain containing 2	protein-coding
Diff_Nuc28389	chr4	93124252	93124391	+	0	NA	Intergenic	L1Md_F2|LINE|L1	-122119	NM_026954	69136	Mm.171558	NM_026954	ENSMUSG00000054000	Tusc1	2200001D17Rik|TSG-9	tumor suppressor candidate 1	protein-coding
Diff_Nuc27284	chr4	19566232	19566371	+	0	NA	intron (NR_074090, intron 14 of 24)	intron (NR_074090, intron 14 of 24)	64088	NM_025476	66302	Mm.440686	NM_025476	ENSMUSG00000028229	Rmdn1	Fam82b|RMD-1	regulator of microtubule dynamics 1	protein-coding
Diff_Nuc33409	chr2	45632912	45633051	+	0	NA	Intergenic	RMER1B|Other|Other	80856	NR_040497	69405	Mm.396184	NR_040497	ENSMUSG00000086202	1700019E08Rik	-	RIKEN cDNA 1700019E08 gene	ncRNA
Diff_Nuc13535	chr15	54804012	54804151	+	0	NA	Intergenic	B1F|SINE|Alu	-52380	NM_001285994	18606	Mm.250256	NM_015744	ENSMUSG00000022425	Enpp2	ATX|E-NPP 2|Npps2|PD-Ialpha|Pdnp2|lysoPLD	ectonucleotide pyrophosphatase/phosphodiesterase 2	protein-coding
Diff_Nuc25525	chr5	79686782	79686921	+	0	NA	Intergenic	L1Md_F2|LINE|L1	-1762745	NM_001347367	319387	Mm.273631	NM_198702	ENSMUSG00000037605	Adgrl3	5430402I23Rik|CIRL-3|D130075K09Rik|Gm1379|LEC3|Lphn3|mKIAA0768	adhesion G protein-coupled receptor L3	protein-coding
Diff_Nuc29107	chr4	126194142	126194281	+	0	NA	exon (NM_153177, exon 6 of 18)	exon (NM_153177, exon 6 of 18)	16491	NM_153177	76850	Mm.86705	NM_153177	ENSMUSG00000042500	Ago4	5730550L01Rik|AI481660|Eif2c4	argonaute RISC catalytic subunit 4	protein-coding
Diff_Nuc29116	chr4	126573162	126573301	+	0	NA	intron (NM_001114399, intron 18 of 29)	intron (NM_001114399, intron 18 of 29)	71936	NM_001114399	67785	Mm.165401	NM_001114399	ENSMUSG00000042446	Zmym4	6330503C17Rik|AI480785|AW493829|CDIR|D630001M21|MYM|Zfp262|Znf262|mKIAA0425	zinc finger, MYM-type 4	protein-coding
Diff_Nuc21549	chr6	7748472	7748611	+	0	NA	Intergenic	Lx8|LINE|L1	-46683	NM_052993	94192	Mm.102752	NM_052993	ENSMUSG00000042460	C1galt1	2210410E06Rik|AV284120|T-synthase	core 1 synthase, glycoprotein-N-acetylgalactosamine 3-beta-galactosyltransferase, 1	protein-coding
Diff_Nuc15131	chr14	41984662	41984801	+	0	NA	TTS (NM_009160)	TTS (NM_009160)	13756	NM_009160	20390	Mm.1321	NM_009160	ENSMUSG00000021795	Sftpd	AI573415|SP-D|Sfpd|Sftp4	surfactant associated protein D	protein-coding
Diff_Nuc27170	chr4	11177512	11177651	+	0	NA	intron (NM_001159595, intron 2 of 26)	L1_Mus1|LINE|L1	3825	NM_178112	72656	Mm.246713	NM_178112	ENSMUSG00000040738	Ints8	2810013E07Rik|AV063769|D130008D20Rik	integrator complex subunit 8	protein-coding
Diff_Nuc15096	chr14	38299332	38299471	+	0	NA	Intergenic	Intergenic	-350893	NM_078478	66092	Mm.182912	NM_078478	ENSMUSG00000041028	Ghitm	1010001P14Rik|C77840|MICS1|PTD010|Tmbim5	growth hormone inducible transmembrane protein	protein-coding
Diff_Nuc11331	chr16	11382942	11383081	+	0	NA	intron (NM_028964, intron 4 of 20)	B4A|SINE|B4	-22730	NM_001290148	74478	Mm.325831	NM_028964	ENSMUSG00000071669	Snx29	4933437K13Rik|ENSMUSG00000079738|Gm11170|Gm1737|Gm930|Rundc2a	sorting nexin 29	protein-coding
Diff_Nuc2877	chr12	40183292	40183431	+	0	NA	Intergenic	Intergenic	580602	NM_007487	11861	Mm.12723	NM_007487	ENSMUSG00000047446	Arl4a	AI467555|Arl4	ADP-ribosylation factor-like 4A	protein-coding
Diff_Nuc30664	chr3	61098502	61098641	+	0	NA	Intergenic	Intergenic	-69858	NM_028712	74012	Mm.422674	NM_028712	ENSMUSG00000036894	Rap2b	4021402C18Rik|AA408554	RAP2B, member of RAS oncogene family	protein-coding
Diff_Nuc8268	chr10	67747682	67747821	+	0	NA	Intergenic	Intergenic	-6277	NM_023598	71371	Mm.440357	NM_023598	ENSMUSG00000019947	Arid5b	4930580B11|5430435G07Rik|AI467247|Desrt|Mrf2|Mrf2alpha|Mrf2beta	AT rich interactive domain 5B (MRF1-like)	protein-coding
Diff_Nuc13644	chr15	58872512	58872651	+	0	NA	intron (NM_144800, intron 3 of 14)	intron (NM_144800, intron 3 of 14)	41000	NM_001146180	211401	Mm.215481	NM_144800	ENSMUSG00000022353	Mtss1	2310003N14Rik|BC024131|D130001D01Rik|Mim|mKIAA0429	metastasis suppressor 1	protein-coding
Diff_Nuc42606	chr8	82162342	82162481	+	0	NA	Intergenic	Intergenic	-1164	NM_001256033	73945	Mm.34348	NM_001081164	ENSMUSG00000036990	Otud4	4930431L18Rik|AI449692|D8Ertd69e|mKIAA1046	OTU domain containing 4	protein-coding
Diff_Nuc27245	chr4	16127022	16127161	+	0	NA	intron (NR_045765, intron 2 of 6)	intron (NR_045765, intron 2 of 6)	35834	NR_045765	100415915	Mm.387180	NR_045765	ENSMUSG00000085112	A530072M11Rik	-	RIKEN cDNA gene A530072M11	ncRNA
Diff_Nuc42785	chr8	91820552	91820691	+	0	NA	Intergenic	Intergenic	-252560	NM_021390	58198	Mm.214361	NM_021390	ENSMUSG00000031665	Sall1	Msal-3	sal-like 1 (Drosophila)	protein-coding
Diff_Nuc38522	chr1	163014222	163014361	+	0	NA	intron (NR_131030, intron 4 of 4)	B3|SINE|B2	13393	NR_131028	70454	Mm.248212	NM_027429	ENSMUSG00000026708	Cenpl	2610300B10Rik|AW121806|AW550697|CENP-L	centromere protein L	protein-coding
Diff_Nuc6781	chr11	110348582	110348721	+	0	NA	intron (NM_011943, intron 2 of 11)	B3A|SINE|B2	88215	NM_011943	26399	Mm.14487	NM_011943	ENSMUSG00000020623	Map2k6	MEK6|MKK6|Prkmk6|SAPKK3	mitogen-activated protein kinase kinase 6	protein-coding
Diff_Nuc23518	chr6	115795482	115795621	+	0	NA	intron (NM_010774, intron 4 of 7)	intron (NM_010774, intron 4 of 7)	-7121	NM_001110506	212516	Mm.333333	NM_198603	ENSMUSG00000030321	Efcab12	BB124106	EF-hand calcium binding domain 12	protein-coding
Diff_Nuc20448	chr7	97655512	97655651	+	0	NA	Intergenic	Intergenic	-31076	NM_026734	68472	Mm.289791	NM_026734	ENSMUSG00000030614	Tmem126b	1110001A23Rik	transmembrane protein 126B	protein-coding
Diff_Nuc14489	chr15	99893482	99893621	+	0	NA	intron (NM_001159361, intron 1 of 37)	intron (NM_001159361, intron 1 of 37)	24456	NM_001159361	239667	Mm.243658	NM_172819	ENSMUSG00000023026	Dip2b	4932422C22|AI317237|AI854602|mKIAA1463	disco interacting protein 2 homolog B	protein-coding
Diff_Nuc9505	chr10	128358122	128358261	+	0	NA	intron (NM_015740, intron 2 of 3)	intron (NM_015740, intron 2 of 3)	-1838	NM_134006	19682	Mm.439856	NM_134006	ENSMUSG00000025350	Rdh5	9-cis|AI987873|RDH4|cRDH	retinol dehydrogenase 5	protein-coding
Diff_Nuc7579	chr10	29079512	29079651	+	0	NA	intron (NM_026518, intron 1 of 2)	intron (NM_026518, intron 1 of 2)	-2062	NM_001284279	68031	Mm.28930	NM_026518	ENSMUSG00000038876	Rnf146	2610509H23Rik|Iduna	ring finger protein 146	protein-coding
Diff_Nuc10509	chr17	53744402	53744541	+	0	NA	intron (NM_001190846, intron 1 of 17)	intron (NM_001190846, intron 1 of 17)	21020	NM_001190846	18519	Mm.255025	NM_020005	ENSMUSG00000000708	Kat2b	A930006P13Rik|AI461839|AW536563|Pcaf|p/CAF	K(lysine) acetyltransferase 2B	protein-coding
Diff_Nuc31736	chr3	115777272	115777411	+	0	NA	Intergenic	Intergenic	55265	NM_011693	22329	Mm.76649	NM_011693	ENSMUSG00000027962	Vcam1	CD106|Vcam-1	vascular cell adhesion molecule 1	protein-coding
Diff_Nuc15177	chr14	46153992	46154131	+	0	NA	Intergenic	L1MB5|LINE|L1	-4321	NM_146054	218952	Mm.210018	NM_146054	ENSMUSG00000037712	Fermt2	AA960555|Kindlin-2|Mig2|Plekhc1	fermitin family member 2	protein-coding
Diff_Nuc26983	chr5	149554152	149554291	+	0	NA	intron (NR_028285, intron 1 of 1)	intron (NR_028285, intron 1 of 1)	805	NR_028285	70138	Mm.417834	NR_028285	ENSMUSG00000086494	2210417A02Rik	AV081004	RIKEN cDNA 2210417A02 gene	ncRNA
Diff_Nuc18716	chr18	63831402	63831541	+	0	NA	intron (NM_016792, intron 6 of 7)	intron (NM_016792, intron 6 of 7)	20542	NM_016792	53382	Mm.19169	NM_016792	ENSMUSG00000024583	Txnl1	32kDa|TRP32|Txnl	thioredoxin-like 1	protein-coding
Diff_Nuc22402	chr6	50540702	50540841	+	0	NA	intron (NR_027892, intron 2 of 2)	PB1D10|SINE|Alu	5818	NM_027564	70821	Mm.157323	NM_027564	ENSMUSG00000029828	4921507P07Rik	TISP74	RIKEN cDNA 4921507P07 gene	protein-coding
Diff_Nuc13909	chr15	75017192	75017331	+	0	NA	Intergenic	Intergenic	31570	NM_001310438	546644		NM_008531	ENSMUSG00000022582	Ly6g	Gr-1|Gr1|Ly-6G	lymphocyte antigen 6 complex, locus G	protein-coding
Diff_Nuc36183	chr1	21317392	21317531	+	0	NA	Intergenic	L1_Mm|LINE|L1	-22297	NM_183322	368204	Mm.26006	NM_183322	ENSMUSG00000067750	Khdc1a	AU014713|C88118|Ndg1	KH domain containing 1A	protein-coding
Diff_Nuc8780	chr10	90604052	90604191	+	0	NA	Intergenic	B1_Mur4|SINE|Alu	-17413	NM_133668	18674	Mm.298	NM_133668	ENSMUSG00000061904	Slc25a3	5730556H19Rik|PTP|Phc	solute carrier family 25 (mitochondrial carrier, phosphate carrier), member 3	protein-coding
Diff_Nuc15404	chr14	56486122	56486261	+	0	NA	intron (NM_001040072, intron 5 of 7)	intron (NM_001040072, intron 5 of 7)	13239	NM_001040072	277154	Mm.319347	NM_001040072	ENSMUSG00000075592	Nynrin	AA409373|C80530|mKIAA1305	NYN domain and retroviral integrase containing	protein-coding
Diff_Nuc30848	chr3	72287642	72287781	+	0	NA	Intergenic	ORR1B1|LTR|MaLR	483077	NM_001081137	69983	Mm.261054	NM_001081137	ENSMUSG00000027790	Sis	2010204N08Rik|SI|Si-s	sucrase isomaltase (alpha-glucosidase)	protein-coding
Diff_Nuc9187	chr10	111233732	111233871	+	0	NA	Intergenic	Intergenic	77631	NR_046029	629206	Mm.391444	NR_046029		Gm20758	-	predicted gene, 20758	ncRNA
Diff_Nuc17987	chr18	20655542	20655681	+	0	NA	Intergenic	Intergenic	-13164	NM_030596	13512	Mm.106811	NM_030596	ENSMUSG00000056632	Dsg3	bal	desmoglein 3	protein-coding
Diff_Nuc36784	chr1	59176302	59176441	+	0	NA	intron (NM_001033449, intron 1 of 12)	intron (NM_001033449, intron 1 of 12)	279	NM_001037812	381259	Mm.261275	NM_001033449	ENSMUSG00000038079	Tmem237	AI853305|Als2cr4|Gm972	transmembrane protein 237	protein-coding
Diff_Nuc34779	chr2	120795017	120795156	+	0	NA	intron (NM_009461, intron 1 of 46)	(CAAA)n|Simple_repeat|Simple_repeat	1365	NM_009461	22222	Mm.389330	NM_009461	ENSMUSG00000027272	Ubr1	AI504731	ubiquitin protein ligase E3 component n-recognin 1	protein-coding
Diff_Nuc15752	chr14	71029032	71029171	+	0	NA	promoter-TSS (NM_001252665)	promoter-TSS (NM_001252665)	-247	NM_001252665	13829	Mm.210863	NM_013514	ENSMUSG00000022099	Dmtn	AI325486|Epb4.9|Epb49|dematin	dematin actin binding protein	protein-coding
Diff_Nuc6803	chr11	111846052	111846191	+	0	NA	Intergenic	Intergenic	726549	NR_024085	217294	Mm.297761	NM_146031	ENSMUSG00000041674	BC006965	-	cDNA sequence BC006965	ncRNA
Diff_Nuc35246	chr2	145640642	145640781	+	0	NA	intron (NM_028724, intron 2 of 12)	(CATA)n|Simple_repeat|Simple_repeat	28859	NM_028724	74030	Mm.228799	NM_028724	ENSMUSG00000001768	Rin2	2010003K16Rik|4632403N06Rik|AW821980|RASSF4	Ras and Rab interactor 2	protein-coding
Diff_Nuc27118	chr4	8481932	8482071	+	0	NA	intron (NM_021518, intron 1 of 7)	intron (NM_021518, intron 1 of 7)	19210	NM_021518	59021	Mm.397471	NM_021518	ENSMUSG00000047187	Rab2a	9330148M11Rik|C80220|Rab2	RAB2A, member RAS oncogene family	protein-coding
Diff_Nuc20559	chr7	106481622	106481761	+	0	NA	intron (NM_010837, intron 3 of 3)	intron (NM_010837, intron 3 of 3)	20058	NM_009825	12406	Mm.22708	NM_009825	ENSMUSG00000070436	Serpinh1	BERF-1|Cbp1|Cbp2|Hsp47|J6|Serpinh2|gp46	serine (or cysteine) peptidase inhibitor, clade H, member 1	protein-coding
Diff_Nuc19554	chr7	30950912	30951051	+	0	NA	intron (NM_011980, intron 1 of 1)	L1M5|LINE|L1	3765	NM_011980	26465	Mm.446516	NM_011980	ENSMUSG00000037029	Zfp146	OZF|Znf146	zinc finger protein 146	protein-coding
Diff_Nuc27259	chr4	17333192	17333331	+	0	NA	Intergenic	L1_Mus4|LINE|L1	-446779	NR_135158	17389	Mm.187315	NM_019724	ENSMUSG00000028226	Mmp16	MT-MMP 3|MT3-MMP|Mt3mmp	matrix metallopeptidase 16	protein-coding
Diff_Nuc2352	chr13	118288042	118288181	+	0	NA	Intergenic	L1_Mus1|LINE|L1	-103016	NM_010408	15165	Mm.343429	NM_010408	ENSMUSG00000021730	Hcn1	Bcng1|C630013B14Rik|HAC2	hyperpolarization-activated, cyclic nucleotide-gated K+ 1	protein-coding
Diff_Nuc2605	chr12	18617112	18617251	+	0	NA	Intergenic	CpG	95865	NM_001201330	236366	Mm.352227	NM_001033157	ENSMUSG00000073197	5730507C01Rik	-	RIKEN cDNA 5730507C01 gene	protein-coding
Diff_Nuc18568	chr18	56304532	56304671	+	0	NA	Intergenic	Intergenic	-287185	NM_026240	107022	Mm.24356	NM_026240	ENSMUSG00000001700	Gramd3	9030613F08Rik|9130427A09Rik|AW061306|NS3TP2	GRAM domain containing 3	protein-coding
Diff_Nuc39453	chr9	21922672	21922811	+	0	NA	Intergenic	Intergenic	-4128	NM_170777	66126	Mm.29801	NM_170777	ENSMUSG00000013822	Elof1	1110011K10Rik	ELF1 homolog, elongation factor 1	protein-coding
Diff_Nuc33147	chr2	32348792	32348931	+	0	NA	Intergenic	Intergenic	-41871	NM_146118	227731	Mm.37395	NM_146118	ENSMUSG00000026819	Slc25a25	1110030N17Rik|MCSC|mKIAA1896	solute carrier family 25 (mitochondrial carrier, phosphate carrier), member 25	protein-coding
Diff_Nuc24759	chr5	32169987	32170126	+	0	NA	intron (NM_181282, intron 6 of 11)	intron (NM_181282, intron 6 of 11)	169633	NM_144541	107976	Mm.482126	NM_144541	ENSMUSG00000052139	Bre	6030405P19Rik|AI429776|B830038C02Rik	brain and reproductive organ-expressed protein	protein-coding
Diff_Nuc42145	chr8	49776342	49776481	+	0	NA	Intergenic	Intergenic	-16367	NM_011857	23965	Mm.42191	NM_011857	ENSMUSG00000031561	Tenm3	2610100B16Rik|Odz1|Odz3|Ten-m3|mKIAA1455	teneurin transmembrane protein 3	protein-coding
Diff_Nuc28030	chr4	65617952	65618091	+	0	NA	intron (NM_207109, intron 6 of 22)	L1Md_F3|LINE|L1	352001	NM_001161782	69807	Mm.22786	NM_053084	ENSMUSG00000051675	Trim32	1810045E12Rik|3f3|BBS11|Zfp117	tripartite motif-containing 32	protein-coding
Diff_Nuc30269	chr3	35824572	35824711	+	0	NA	intron (NM_001205361, intron 1 of 6)	intron (NM_001205361, intron 1 of 6)	4355	NM_033623	114893	Mm.374810	NM_033623	ENSMUSG00000027708	Dcun1d1	Rp42|SCCRO|Tes3|pTes3	DCN1, defective in cullin neddylation 1, domain containing 1 (S. cerevisiae)	protein-coding
Diff_Nuc6809	chr11	112098682	112098821	+	0	NA	Intergenic	Intergenic	473919	NR_024085	217294	Mm.297761	NM_146031	ENSMUSG00000041674	BC006965	-	cDNA sequence BC006965	ncRNA
Diff_Nuc2553	chr12	15620432	15620571	+	0	NA	Intergenic	Intergenic	187406	NR_105809	102465204		NR_105809	ENSMUSG00000098480	Mir6387	Gm27281|mmu-mir-6387	microRNA 6387	ncRNA
Diff_Nuc1008	chr13	45150142	45150281	+	0	NA	Intergenic	Intergenic	-52746	NM_025772	94245	Mm.352311	NM_025772	ENSMUSG00000057531	Dtnbp1	5430437B18Rik|AW048963|Bloc1s8|dysbindin|sdy	dystrobrevin binding protein 1	protein-coding
Diff_Nuc25222	chr5	63199912	63200051	+	0	NA	Intergenic	RMER6C|LTR|ERVK	-5081	NM_001170705	100322896	Mm.479821	NM_001170705	ENSMUSG00000090326	Dthd1	Gm17384	death domain containing 1	protein-coding
Diff_Nuc20990	chr7	126863452	126863591	+	0	NA	intron (NM_145585, intron 1 of 3)	intron (NM_145585, intron 1 of 3)	791	NM_145585	233802	Mm.26392	NM_145585	ENSMUSG00000030942	Thumpd1	6330575P11Rik	THUMP domain containing 1	protein-coding
Diff_Nuc41530	chr8	5797192	5797331	+	0	NA	Intergenic	IAPEz-int|LTR|ERVK	-691974	NM_011388	20494	Mm.3500	NM_011388	ENSMUSG00000023073	Slc10a2	9130221J18Rik|AI605518|ASBT|IBAT|ISBT	solute carrier family 10, member 2	protein-coding
Diff_Nuc41314	chr9	115867682	115867821	+	0	NA	intron (NM_028638, intron 8 of 14)	intron (NM_028638, intron 8 of 14)	49178	NM_028638	73748	Mm.485018	NM_028638	ENSMUSG00000056880	Gadl1	1110027M19Rik|ADC|CSADC	glutamate decarboxylase-like 1	protein-coding
Diff_Nuc25891	chr5	98551982	98552121	+	0	NA	Intergenic	MLT1H1|LTR|MaLR	-57837	NM_029947	77630	Mm.332511	NM_029947	ENSMUSG00000035456	Prdm8	4930565F05Rik|PFM5	PR domain containing 8	protein-coding
Diff_Nuc13262	chr15	36574382	36574521	+	0	NA	Intergenic	Intergenic	-35723	NM_008774	18458	Mm.371570	NM_008774	ENSMUSG00000022283	Pabpc1	PABP|Pabp1|PabpI|Pabpl1|ePAB	poly(A) binding protein, cytoplasmic 1	protein-coding
Diff_Nuc5298	chr11	57858332	57858471	+	0	NA	intron (NM_028451, intron 8 of 18)	intron (NM_028451, intron 8 of 18)	35835	NM_028451	73158	Mm.248843	NM_028451	ENSMUSG00000037331	Larp1	1810024J12Rik|3110040D16Rik|Larp|mKIAA0731	La ribonucleoprotein domain family, member 1	protein-coding
Diff_Nuc28333	chr4	88068872	88069011	+	0	NA	exon (NM_025760, exon 5 of 7)	exon (NM_025760, exon 5 of 7)	15889	NM_025760	66775	Mm.386788	NM_025760	ENSMUSG00000028497	Hacd4	4933428I03Rik|Hcad4|Ptplad2	3-hydroxyacyl-CoA dehydratase 4	protein-coding
Diff_Nuc34098	chr2	81842282	81842421	+	0	NA	Intergenic	Intergenic	-51464	NM_175513	241514	Mm.119383	NM_175513	ENSMUSG00000070866	Zfp804a	C630007C17Rik|Znf804a	zinc finger protein 804A	protein-coding
Diff_Nuc3439	chr12	74758872	74759011	+	0	NA	intron (NM_008856, intron 2 of 13)	intron (NM_008856, intron 2 of 13)	73158	NM_008856	18755	Mm.341677	NM_008856	ENSMUSG00000021108	Prkch	Pkch	protein kinase C, eta	protein-coding
Diff_Nuc26167	chr5	111120962	111121101	+	0	NA	intron (NM_173066, intron 27 of 50)	intron (NM_173066, intron 27 of 50)	-25871	NR_105993	102466216		NR_105993	ENSMUSG00000099284	Mir7026	Gm27988|mmu-mir-7026	microRNA 7026	ncRNA
Diff_Nuc12116	chr16	49902552	49902691	+	0	NA	intron (NM_010581, intron 8 of 9)	intron (NM_010581, intron 8 of 9)	46854	NM_010581	16423	Mm.31752	NM_010581	ENSMUSG00000055447	Cd47	9130415E20Rik|AA407862|AI848868|AW108519|B430305P08Rik|IAP|Itgp	CD47 antigen (Rh-related antigen, integrin-associated signal transducer)	protein-coding
Diff_Nuc3812	chr12	88823952	88824091	+	0	NA	Intergenic	Intergenic	-10772	NM_025507	66354	Mm.271174	NM_025507	ENSMUSG00000021039	Snw1	2310008B08Rik|AW048543|NCoA-62|SKIP|Skiip	SNW domain containing 1	protein-coding
Diff_Nuc8432	chr10	76578532	76578671	+	0	NA	intron (NM_009929, intron 2 of 41)	intron (NM_009929, intron 2 of 41)	-2151	NM_001109991	12822	Mm.4352	NM_009929	ENSMUSG00000001435	Col18a1	-	collagen, type XVIII, alpha 1	protein-coding
Diff_Nuc42913	chr8	97657952	97658091	+	0	NA	intron (NM_001145831, intron 3 of 21)	intron (NM_001145831, intron 3 of 21)	8419	NM_010631	16582	Mm.378951	NM_010631	ENSMUSG00000031788	Kifc3	AI325457|BB123200	kinesin family member C3	protein-coding
Diff_Nuc12032	chr16	43474672	43474811	+	0	NA	intron (NM_181058, intron 3 of 6)	L1_Mus1|LINE|L1	-54432	NR_046026	626693	Mm.447083	NR_046026	ENSMUSG00000085499	Gm15713	OTTMUSG00000025617	predicted gene 15713	ncRNA
Diff_Nuc20978	chr7	126033262	126033401	+	0	NA	intron (NM_001081446, intron 4 of 8)	RMER10A|LTR|ERVL	-33819	NM_023197	66356	Mm.482278	NM_023197	ENSMUSG00000030980	Knop1	2310008H09Rik|Tsg118	lysine rich nucleolar protein 1	protein-coding
Diff_Nuc6267	chr11	95034342	95034481	+	0	NA	Intergenic	B3|SINE|B2	-27296	NM_007867	13394	Mm.439766	NM_007867	ENSMUSG00000020871	Dlx4	Dlx-4|Dlx7	distal-less homeobox 4	protein-coding
Diff_Nuc11781	chr16	31855882	31856021	+	0	NA	intron (NM_001252436, intron 17 of 22)	(TTTG)n|Simple_repeat|Simple_repeat	-22945	NM_013900	30060	Mm.30988	NM_013900	ENSMUSG00000022780	Mfi2	CD228|MTf|Meltf	antigen p97 (melanoma associated) identified by monoclonal antibodies 133.2 and 96.5	protein-coding
Diff_Nuc1600	chr13	78357432	78357571	+	0	NA	intron (NR_045195, intron 1 of 2)	intron (NR_045195, intron 1 of 2)	-19367	NM_010151	13865	Mm.439653	NM_010151	ENSMUSG00000069171	Nr2f1	COUP-TF1|COUP-TFI|COUPTFA|EAR-3|EAR3|Erbal3|SVP44|Tcfcoup1	nuclear receptor subfamily 2, group F, member 1	protein-coding
Diff_Nuc23706	chr6	123058542	123058681	+	0	NA	Intergenic	Lx2B|LINE|L1	-14097	NM_001170332	26888	Mm.47384	NM_011999	ENSMUSG00000030148	Clec4a2	Clec4a|Clecsf6|DCIR|Dcir1	C-type lectin domain family 4, member a2	protein-coding
Diff_Nuc11613	chr16	24155592	24155731	+	0	NA	Intergenic	(TG)n|Simple_repeat|Simple_repeat	-166963	NM_009744	12053	Mm.347398	NM_009744	ENSMUSG00000022508	Bcl6	Bcl5	B cell leukemia/lymphoma 6	protein-coding
Diff_Nuc19816	chr7	54165512	54165651	+	0	NA	intron (NM_021884, intron 3 of 9)	intron (NM_021884, intron 3 of 9)	9719	NM_021884	22088	Mm.241334	NM_021884	ENSMUSG00000014402	Tsg101	AI255943|CC2	tumor susceptibility gene 101	protein-coding
Diff_Nuc9512	chr10	129278132	129278271	+	0	NA	TTS (NM_146795)	TTS (NM_146795)	1895	NM_146795	258791	Mm.337275	NM_146795	ENSMUSG00000049052	Olfr812	MOR110-1	olfactory receptor 812	protein-coding
Diff_Nuc41711	chr8	23374092	23374231	+	0	NA	Intergenic	Intergenic	-19752	NM_199257	234129	Mm.450553	NM_181851	ENSMUSG00000031481	Tpte	Pten2	transmembrane phosphatase with tensin homology	protein-coding
Diff_Nuc14317	chr15	91766352	91766491	+	0	NA	Intergenic	LTR16A|LTR|ERVL	97662	NM_198927	223809	Mm.486225	NM_198927	ENSMUSG00000047295	Smgc	2310010P21Rik|DXImx49e|Muc19|Muc19/Smgc|Sfc21	submandibular gland protein C	protein-coding
Diff_Nuc30380	chr3	41999482	41999621	+	0	NA	Intergenic	Intergenic	453011	NM_027271	73852	Mm.29006	NM_027271	ENSMUSG00000025766	D3Ertd751e	2810009O15Rik|4930415G15Rik	DNA segment, Chr 3, ERATO Doi 751, expressed	protein-coding
Diff_Nuc11150	chr17	90317262	90317401	+	0	NA	Intergenic	ID4_|SINE|ID	170377	NM_001346962	18189	Mm.478418	NM_020252	ENSMUSG00000024109	Nrxn1	1700062G21Rik|9330127H16Rik|A230068P09Rik|mKIAA0578	neurexin I	protein-coding
Diff_Nuc2748	chr12	32605522	32605661	+	0	NA	intron (NM_001163126, intron 21 of 22)	intron (NM_001163126, intron 21 of 22)	29809	NM_177993	73389	Mm.390461	NM_153198	ENSMUSG00000002996	Hbp1	1700058O05Rik|BE629963|C330012F01Rik|C86454	high mobility group box transcription factor 1	protein-coding
Diff_Nuc16707	chr19	10364127	10364266	+	0	NA	intron (NM_198114, intron 1 of 19)	intron (NM_198114, intron 1 of 19)	15171	NM_198114	269060	Mm.329718	NM_198114	ENSMUSG00000035735	Dagla	Nsddr	diacylglycerol lipase, alpha	protein-coding
Diff_Nuc40942	chr9	100434727	100434866	+	0	NA	intron (NM_010878, intron 1 of 3)	intron (NM_010878, intron 1 of 3)	11757	NM_010878	17973	Mm.181485	NM_010878	ENSMUSG00000032475	Nck1	6330586M15Rik|D230010O13Rik|Nck|Nck-1	non-catalytic region of tyrosine kinase adaptor protein 1	protein-coding
Diff_Nuc4759	chr11	24903352	24903491	+	0	NA	Intergenic	Intergenic	-272699	NR_033491	100038617	Mm.387376	NR_033491	ENSMUSG00000073103	Gm10466	ENSMUSG00000073103	predicted gene 10466	ncRNA
Diff_Nuc42719	chr8	87940872	87941011	+	0	NA	intron (NR_033144, intron 1 of 2)	intron (NR_033144, intron 1 of 2)	15799	NR_033144	66714	Mm.272748	NM_025722	ENSMUSG00000036934	4921524J17Rik	-	RIKEN cDNA 4921524J17 gene	protein-coding
Diff_Nuc43472	chr8	129020522	129020661	+	0	NA	Intergenic	MLT1B|LTR|MaLR	-21626	NM_001159907	212728	Mm.482479	NM_001159907	ENSMUSG00000090290	Tarbp1	Gm17296|Gm179	TAR RNA binding protein 1	protein-coding
Diff_Nuc23258	chr6	99357522	99357661	+	0	NA	intron (NM_001347345, intron 2 of 19)	intron (NM_001347345, intron 2 of 19)	27748	NM_053202	108655	Mm.234965	NM_053202	ENSMUSG00000030067	Foxp1	3110052D19Rik|4932443N09Rik|AI461938|AW494214	forkhead box P1	protein-coding
Diff_Nuc9858	chr17	23952302	23952441	+	0	NA	exon (NM_175229, exon 10 of 14)	exon (NM_175229, exon 10 of 14)	-7887	NR_039586	100628593		NR_039586	ENSMUSG00000092981	Mir5125	mmu-mir-5125|mu-mir-5125	microRNA 5125	ncRNA
Diff_Nuc22241	chr6	41490762	41490901	+	0	NA	Intergenic	Intergenic	19056	NM_009430	22072	Mm.276926	NM_009430	ENSMUSG00000057163	Prss2	TRY8|TRYP|Ta|Tesp4|Try2	protease, serine 2	protein-coding
Diff_Nuc27100	chr4	6968982	6969121	+	0	NA	Intergenic	Intergenic	-51181	NM_145711	252838	Mm.435828	NM_145711	ENSMUSG00000041272	Tox	1700007F02Rik	thymocyte selection-associated high mobility group box	protein-coding
Diff_Nuc25901	chr5	99174892	99175031	+	0	NA	intron (NM_001024614, intron 4 of 5)	intron (NM_001024614, intron 4 of 5)	-108473	NM_173404	110075	Mm.136461	NM_173404	ENSMUSG00000029335	Bmp3	9530029I04Rik	bone morphogenetic protein 3	protein-coding
Diff_Nuc18145	chr18	33134002	33134141	+	0	NA	intron (NM_009793, intron 1 of 10)	Lx8|LINE|L1	35376	NM_009793	12326	Mm.222329	NM_009793	ENSMUSG00000038128	Camk4	A430110E23Rik|AI666733|CaMKIV|CaMKIV/Gr|D18Bwg0362e	calcium/calmodulin-dependent protein kinase IV	protein-coding
Diff_Nuc13008	chr15	17277392	17277531	+	0	NA	Intergenic	ERVL-B4-int|LTR|ERVL	569605	NM_009869	12565	Mm.439758	NM_009869	ENSMUSG00000025370	Cdh9	-	cadherin 9	protein-coding
Diff_Nuc3618	chr12	81961042	81961181	+	0	NA	intron (NM_001242419, intron 3 of 6)	B1_Mur1|SINE|Alu	64323	NR_033786	67340	Mm.386790	NR_033786	ENSMUSG00000101912	1700052I22Rik	-	RIKEN cDNA 1700052I22 gene	ncRNA
Diff_Nuc29270	chr4	132852932	132853071	+	0	NA	intron (NM_199306, intron 13 of 15)	intron (NM_199306, intron 13 of 15)	-19296	NR_110978	52174	Mm.244748	NM_025667	ENSMUSG00000028857	Tmem222	5730406H10Rik|AA409341|D4Ertd196e	transmembrane protein 222	protein-coding
Diff_Nuc8524	chr10	80290252	80290391	+	0	NA	intron (NM_001301034, intron 1 of 4)	intron (NM_001301034, intron 1 of 4)	880	NR_027656	100041965	Mm.328806	NR_027656		Oaz1-ps	ENSMUSG00000043801|Gm1823|Gm9786|Oaz-ps	ornithine decarboxylase antizyme 1, pseudogene	pseudo
Diff_Nuc22088	chr6	34876132	34876271	+	0	NA	intron (NM_009292, intron 1 of 8)	B3A|SINE|B2	5241	NM_009292	20899	Mm.5171	NM_009292	ENSMUSG00000029848	Stra8	-	stimulated by retinoic acid gene 8	protein-coding
Diff_Nuc21743	chr6	18476052	18476191	+	0	NA	Intergenic	MLT1A|LTR|MaLR	-11296	NM_080285	30785	Mm.224189	NM_080285	ENSMUSG00000000416	Cttnbp2	3010022N24Rik|4732477G22Rik|6430526E05|9130022E09Rik|AU040881|Cortbp2|ORF4|mKIAA1758	cortactin binding protein 2	protein-coding
Diff_Nuc2277	chr13	114654422	114654561	+	0	NA	intron (NM_172595, intron 1 of 4)	intron (NM_172595, intron 1 of 4)	69775	NM_172595	218639	Mm.79837	NM_172595	ENSMUSG00000042348	Arl15	A430036I03|Arfrp2|C230032K13Rik	ADP-ribosylation factor-like 15	protein-coding
Diff_Nuc31337	chr3	95685612	95685751	+	0	NA	intron (NM_001033302, intron 1 of 5)	intron (NM_001033302, intron 1 of 5)	470	NM_001033302	229599	Mm.331218	NM_001033302	ENSMUSG00000038550	Ciart	Chrono|Gm129	circadian associated repressor of transcription	protein-coding
Diff_Nuc15409	chr14	56824352	56824491	+	0	NA	intron (NM_010374, intron 4 of 4)	intron (NM_010374, intron 4 of 4)	5823	NM_010374	14943	Mm.457976	NM_010374	ENSMUSG00000015441	Gzmf	CCP4|Ctla-7|Ctla7|MCSP-3	granzyme F	protein-coding
Diff_Nuc13177	chr15	31593252	31593391	+	0	NA	Intergenic	L1_Mus1|LINE|L1	61450	NM_026546	68073	Mm.119185	NM_026546	ENSMUSG00000039065	Fam173b	A930016P21Rik|AA987072	family with sequence similarity 173, member B	protein-coding
Diff_Nuc21036	chr7	129341732	129341871	+	0	NA	Intergenic	B1F|SINE|Alu	-12056	NM_001316689	26918	Mm.20452	NM_012016	ENSMUSG00000030866	Ern2	Ern1|Ire1|Ire1b|ire1-beta|mIre1	endoplasmic reticulum (ER) to nucleus signalling 2	protein-coding
Diff_Nuc35966	chr1	5090762	5090901	+	0	NA	intron (NM_001310442, intron 6 of 12)	intron (NM_001310442, intron 6 of 12)	17664	NM_001310442	108664	Mm.27082	NM_133826	ENSMUSG00000033793	Atp6v1h	0710001F19Rik|AU022349|CGI-11|SFD|SFDalpha|SFDbeta|VMA13	ATPase, H+ transporting, lysosomal V1 subunit H	protein-coding
Diff_Nuc31446	chr3	100608392	100608531	+	0	NA	Intergenic	Intergenic	-20921	NM_178594	242122	Mm.137467	NM_178594	ENSMUSG00000051076	Vtcn1	B7h4|B7s1|B7x|BC032925	V-set domain containing T cell activation inhibitor 1	protein-coding
Diff_Nuc36795	chr1	59666702	59666841	+	0	NA	intron (NM_001013771, intron 13 of 19)	intron (NM_001013771, intron 13 of 19)	60907	NM_009460	22218	Mm.362118	NM_009460	ENSMUSG00000026021	Sumo1	GMP1|PIC1|SENTRIN|SMT3|SMT3H3|SMTP3|SUMO-1|Smt3C|Ubl1	small ubiquitin-like modifier 1	protein-coding
Diff_Nuc15447	chr14	58357652	58357791	+	0	NA	intron (NM_015771, intron 1 of 7)	intron (NM_015771, intron 1 of 7)	-4466	NM_153382	50523	Mm.347899	NM_015771	ENSMUSG00000021959	Lats2	4932411G09Rik|AV277261|AW228608	large tumor suppressor 2	protein-coding
Diff_Nuc1662	chr13	82419722	82419861	+	0	NA	Intergenic	Intergenic	417541	NR_039537	100628621		NR_039537	ENSMUSG00000106655	Mir3961	mmu-mir-3961	microRNA 3961	ncRNA
Diff_Nuc20567	chr7	106844362	106844501	+	0	NA	promoter-TSS (NM_001252531)	promoter-TSS (NM_001252531)	-112	NM_001252531	101488	Mm.11249	NM_175316	ENSMUSG00000030737	Slco2b1	AI060904|AI852653|OATP-B|Slc21a9	solute carrier organic anion transporter family, member 2b1	protein-coding
Diff_Nuc3710	chr12	85578352	85578491	+	0	NA	Intergenic	B3|SINE|B2	-18590	NM_001163501	238317	Mm.31256	NM_001163501	ENSMUSG00000042507	Elmsan1	9430029N19Rik|C130039O16Rik|Gm260	ELM2 and Myb/SANT-like domain containing 1	protein-coding
Diff_Nuc2806	chr12	35685482	35685621	+	0	NA	Intergenic	B2_Mm2|SINE|B2	16118	NM_029294	75456	Mm.79179	NM_029294	ENSMUSG00000092305	Prps1l1	1700011K15Rik	phosphoribosyl pyrophosphate synthetase 1-like 1	protein-coding
Diff_Nuc17001	chr19	29360632	29360771	+	0	NA	intron (NM_008413, intron 9 of 24)	intron (NM_008413, intron 9 of 24)	34408	NM_008413	16452	Mm.275839	NM_008413	ENSMUSG00000024789	Jak2	Fd17	Janus kinase 2	protein-coding
Diff_Nuc2847	chr12	37462472	37462611	+	0	NA	Intergenic	Intergenic	-80251	NR_039558	100628578		NR_039558	ENSMUSG00000092998	Mir5099	mmu-mir-5099|mu-mir-5099	microRNA 5099	ncRNA
Diff_Nuc19753	chr7	51628292	51628431	+	0	NA	intron (NM_027049, intron 2 of 5)	intron (NM_027049, intron 2 of 5)	2039	NM_027049	69349	Mm.358922	NM_027049	ENSMUSG00000008028	1700008O03Rik	-	RIKEN cDNA 1700008O03 gene	protein-coding
Diff_Nuc33987	chr2	75445662	75445801	+	0	NA	Intergenic	Intergenic	-51585	NM_146130	229279	Mm.316306	NM_053263	ENSMUSG00000059005	Hnrnpa3	2410013L13Rik|2610209F03Rik|2610510D13Rik|Hnrpa3	heterogeneous nuclear ribonucleoprotein A3	protein-coding
Diff_Nuc21442	chr7	150424532	150424671	+	0	NA	non-coding (NR_001461, exon 1 of 1)	non-coding (NR_001461, exon 1 of 1)	57851	NR_001461	63830	Mm.356096	NR_001461	ENSMUSG00000101609	Kcnq1ot1	Kvlqt1-as|Lit1|Tssc8	KCNQ1 overlapping transcript 1	ncRNA
Diff_Nuc18410	chr18	45186572	45186711	+	0	NA	Intergenic	L1Md_A|LINE|L1	198322	NM_001163013	240255	Mm.244482	NM_001163013	ENSMUSG00000034653	Ythdc2	3010002F02Rik|BC037178	YTH domain containing 2	protein-coding
Diff_Nuc21089	chr7	132963392	132963531	+	0	NA	intron (NM_001081022, intron 12 of 27)	intron (NM_001081022, intron 12 of 27)	112071	NM_001081022	233865	Mm.274389	NM_001081022	ENSMUSG00000032743	D430042O09Rik	Kiaa0556	RIKEN cDNA D430042O09 gene	protein-coding
Diff_Nuc41968	chr8	39969682	39969821	+	0	NA	Intergenic	Intergenic	-99170	NM_030254	80286	Mm.272722	NM_030254	ENSMUSG00000039530	Tusc3	AU022242|BC003311|N33	tumor suppressor candidate 3	protein-coding
Diff_Nuc20752	chr7	116737312	116737451	+	0	NA	intron (NM_029811, intron 1 of 18)	RLTR19-int|LTR|ERVK	22701	NR_037617	76954	Mm.252009	NM_029811	ENSMUSG00000031024	St5	2010004M01Rik|2610305K15Rik	suppression of tumorigenicity 5	protein-coding
Diff_Nuc24843	chr5	35354032	35354171	+	0	NA	intron (NM_001163512, intron 1 of 13)	intron (NM_001163512, intron 1 of 13)	-9597	NR_037280	100526557		NR_037280	ENSMUSG00000093097	Mir3097	mir-3097|mmu-mir-3097	microRNA 3097	ncRNA
Diff_Nuc29508	chr4	140693002	140693141	+	0	NA	intron (NM_001277195, intron 1 of 3)	intron (NM_001277195, intron 1 of 3)	2640	NR_102344	213491	Mm.332006	NM_174996	ENSMUSG00000040842	Szrd1	1110022I03|D4Ertd22e	SUZ RNA binding domain containing 1	protein-coding
Diff_Nuc43268	chr8	119300872	119301011	+	0	NA	Intergenic	Intergenic	24371	NR_046193	78213	Mm.402039	NR_046193		4930563M20Rik	-	RIKEN cDNA 4930563M20 gene	ncRNA
Diff_Nuc32190	chr3	137423372	137423511	+	0	NA	Intergenic	Intergenic	23138	NR_105801	102466638		NR_105801	ENSMUSG00000099011	Mir6380	Gm27356|mmu-mir-6380	microRNA 6380	ncRNA
Diff_Nuc20016	chr7	73321162	73321301	+	0	NA	Intergenic	Intergenic	66830	NM_001081163	269941	Mm.333916	NM_001081163	ENSMUSG00000032640	Chsy1	mKIAA0990	chondroitin sulfate synthase 1	protein-coding
Diff_Nuc14450	chr15	98751292	98751431	+	0	NA	Intergenic	B1_Mus1|SINE|Alu	-2832	NM_029098	74775	Mm.385020	NM_029098	ENSMUSG00000022999	Lmbr1l	1110013E13Rik|AA415653|D15Ertd735e|Limr	limb region 1 like	protein-coding
Diff_Nuc37046	chr1	72491252	72491391	+	0	NA	intron (NM_001045533, intron 3 of 3)	intron (NM_001045533, intron 3 of 3)	91817	NM_001045533	381270	Mm.337023	NM_001045533	ENSMUSG00000039372	March4	BC056494|mKIAA1399	membrane-associated ring finger (C3HC4) 4	protein-coding
Diff_Nuc34259	chr2	91458362	91458501	+	0	NA	intron (NM_029437, intron 41 of 42)	B3|SINE|B2	18183	NM_010168	14061	Mm.89048	NM_010168	ENSMUSG00000027249	F2	Cf-2|Cf2|FII	coagulation factor II	protein-coding
Diff_Nuc31426	chr3	98896902	98897041	+	0	NA	Intergenic	Intergenic	43226	NR_110516	102634753		NR_110516	ENSMUSG00000086833	Gm12440	OTTMUSG00000006864	predicted gene 12440	ncRNA
Diff_Nuc17060	chr19	31601202	31601341	+	0	NA	intron (NM_001013833, intron 2 of 17)	RMER1B|Other|Other	137589	NM_011160	19091	Mm.381170	NM_011160	ENSMUSG00000052920	Prkg1	AW125416|CGKI|Gm19690|Prkg1b|Prkgr1b	protein kinase, cGMP-dependent, type I	protein-coding
Diff_Nuc40997	chr9	102758472	102758611	+	0	NA	intron (NM_001284258, intron 1 of 13)	intron (NM_001284258, intron 1 of 13)	21291	NM_001042607	20187	Mm.335391	NM_013649	ENSMUSG00000032547	Ryk	AW536699|ERK-3|Vik	receptor-like tyrosine kinase	protein-coding
Diff_Nuc29780	chr4	152020472	152020611	+	0	NA	Intergenic	Intergenic	-51108	NR_033138	330004	Mm.291863	NM_001033414		Gm833	-	predicted gene 833	ncRNA
Diff_Nuc36826	chr1	60488872	60489011	+	0	NA	intron (NM_001198571, intron 1 of 10)	L1M2|LINE|L1	22478	NM_001198570	329165	Mm.212066	NM_198127	ENSMUSG00000026782	Abi2	8430425M24Rik|AI839867|C130078H13	abl-interactor 2	protein-coding
Diff_Nuc30387	chr3	42466762	42466901	+	0	NA	Intergenic	Intergenic	920291	NM_027271	73852	Mm.29006	NM_027271	ENSMUSG00000025766	D3Ertd751e	2810009O15Rik|4930415G15Rik	DNA segment, Chr 3, ERATO Doi 751, expressed	protein-coding
Diff_Nuc26784	chr5	140271742	140271881	+	0	NA	intron (NM_010757, intron 1 of 2)	intron (NM_010757, intron 1 of 2)	4321	NM_010757	17135	Mm.157313	NM_010757	ENSMUSG00000018143	Mafk	AW061068|NF-E2|Nfe2u	v-maf musculoaponeurotic fibrosarcoma oncogene family, protein K (avian)	protein-coding
Diff_Nuc27690	chr4	46165142	46165281	+	0	NA	intron (NM_001033201, intron 7 of 22)	intron (NM_001033201, intron 7 of 22)	13828	NM_001033201	433702	Mm.389536	NM_001033201	ENSMUSG00000028330	Ncbp1	AU014645|AW538051|CBP80	nuclear cap binding protein subunit 1	protein-coding
Diff_Nuc9298	chr10	118135032	118135171	+	0	NA	Intergenic	MTE2a|LTR|MaLR	-141520	NR_104123	103214	Mm.30529	NR_104123		Tmevpg1	AI447422	Theiler's murine encephalomyelitis virus persistence candidate gene 1	ncRNA
Diff_Nuc37373	chr1	90784382	90784521	+	0	NA	Intergenic	Intergenic	-128237	NR_040471	73475	Mm.491040	NR_040471	ENSMUSG00000099378	1700067G17Rik	-	RIKEN cDNA 1700067G17 gene	ncRNA
Diff_Nuc23325	chr6	104029802	104029941	+	0	NA	Intergenic	Intergenic	-115193	NR_144494	100846987		NR_144494		Pou5f1-rs5	Gm21054|Oct4P5|Otf3-rs5|Otf3e	POU domain, class 5, transcription factor 1, related sequence 5	pseudo
Diff_Nuc3556	chr12	80475032	80475171	+	0	NA	intron (NM_009014, intron 7 of 10)	B2_Mm2|SINE|B2	76763	NM_001252562	19363	Mm.341756	NM_009014	ENSMUSG00000059060	Rad51b	AI553500|R51H2|Rad51l1|mREC2	RAD51 paralog B	protein-coding
Diff_Nuc16699	chr19	10242712	10242851	+	0	NA	Intergenic	RSINE1|SINE|B4	-14597	NM_146094	76267	Mm.30158	NM_146094	ENSMUSG00000010663	Fads1	0710001O03Rik|A930006B21Rik|AI317215|DSD	fatty acid desaturase 1	protein-coding
Diff_Nuc38267	chr1	151758142	151758281	+	0	NA	intron (NM_008869, intron 3 of 17)	intron (NM_008869, intron 3 of 17)	11358	NM_001305632	18783	Mm.4186	NM_008869	ENSMUSG00000056220	Pla2g4a	Pla2g4|cPLA2|cPLA2-alpha|cPLA2alpha	phospholipase A2, group IVA (cytosolic, calcium-dependent)	protein-coding
Diff_Nuc30416	chr3	46395562	46395701	+	0	NA	Intergenic	Lx6|LINE|L1	-143768	NM_001101479	241989	Mm.119234	NM_001101479	ENSMUSG00000090919	Pabpc4l	C330050A14Rik|EG241989	poly(A) binding protein, cytoplasmic 4-like	protein-coding
Diff_Nuc3357	chr12	71840882	71841021	+	0	NA	Intergenic	Intergenic	-85550	NM_028127	319710	Mm.2962	NM_028127	ENSMUSG00000048285	Frmd6	2610019M19Rik|4930488L10Rik|AW212977|Willin	FERM domain containing 6	protein-coding
Diff_Nuc27296	chr4	20233702	20233841	+	0	NA	intron (NM_172987, intron 3 of 4)	Lx2B|LINE|L1	264572	NM_010281	14590	Mm.20461	NM_010281	ENSMUSG00000073987	Ggh	gamma-GH	gamma-glutamyl hydrolase	protein-coding
Diff_Nuc30744	chr3	65766932	65767071	+	0	NA	Intergenic	Intergenic	-4854	NM_019937	56706	Mm.175612	NM_019937	ENSMUSG00000027829	Ccnl1	2610030E23Rik|AU018493|Ccnl|ania-6a	cyclin L1	protein-coding
Diff_Nuc16971	chr19	27210352	27210491	+	0	NA	Intergenic	Intergenic	-80553	NM_001347441	22359	Mm.4141	NM_013703	ENSMUSG00000024924	Vldlr	AA408956|AI451093|AW047288	very low density lipoprotein receptor	protein-coding
Diff_Nuc42584	chr8	81531252	81531391	+	0	NA	Intergenic	Intergenic	-21015	NM_001294279	622675	Mm.48724	NM_178267	ENSMUSG00000071064	Zfp827	2810449M09Rik|D630040G17Rik|Znf827	zinc finger protein 827	protein-coding
Diff_Nuc34280	chr2	92005322	92005461	+	0	NA	Intergenic	B1F2|SINE|Alu	-18948	NM_138755	192285	Mm.330408	NM_138755	ENSMUSG00000058318	Phf21a	80kDa|Bhc|Bhc80|D030065N23Rik|PFTF1	PHD finger protein 21A	protein-coding
Diff_Nuc26071	chr5	107521252	107521391	+	0	NA	Intergenic	L2|LINE|L2	127741	NM_001271566	12545	Mm.20842	NM_009863	ENSMUSG00000029283	Cdc7	AI597260|Cdc7l1|muCdc7	cell division cycle 7 (S. cerevisiae)	protein-coding
Diff_Nuc34423	chr2	102674082	102674221	+	0	NA	intron (NM_001177787, intron 5 of 10)	intron (NM_001177787, intron 5 of 10)	67671	NM_001177785	12505	Mm.423621	NM_009851	ENSMUSG00000005087	Cd44	AU023126|AW121933|AW146109|HERMES|Ly-24|Pgp-1	CD44 antigen	protein-coding
Diff_Nuc29814	chr4	155000872	155001011	+	0	NA	exon (NM_007661, exon 3 of 20)	exon (NM_007661, exon 3 of 20)	1963	NM_007661	12537	Mm.267410	NM_007661	ENSMUSG00000029062	Cdk11b	AA989746|CDK11-p110|CDK11-p46|CDK11-p58|Cdc11b|Cdc2l1|Cdc2l2|Cdk11|p58	cyclin-dependent kinase 11B	protein-coding
Diff_Nuc30896	chr3	76645742	76645881	+	0	NA	Intergenic	Intergenic	766306	NM_001253719	213262	Mm.379337	NM_178673	ENSMUSG00000034098	Fstl5	9130207J01Rik	follistatin-like 5	protein-coding
Diff_Nuc5127	chr11	50234982	50235121	+	0	NA	intron (NM_172557, intron 2 of 17)	L2a|LINE|L2	9562	NM_172557	216724	Mm.390400	NM_172557	ENSMUSG00000020375	Rufy1	3000002E04Rik|Rabip4|ZFYVE12	RUN and FYVE domain containing 1	protein-coding
Diff_Nuc10170	chr17	34849792	34849931	+	0	NA	exon (NM_031176, exon 18 of 33)	exon (NM_031176, exon 18 of 33)	30981	NM_009780	12268	Mm.477109	NM_009780	ENSMUSG00000073418	C4b	C4|Ss	complement component 4B (Chido blood group)	protein-coding
Diff_Nuc14733	chr14	21284172	21284311	+	0	NA	intron (NM_009674, intron 5 of 12)	intron (NM_009674, intron 5 of 12)	-12794	NM_001163639	76670	Mm.159759	NM_029698	ENSMUSG00000039543	Cfap70	Ttc18	cilia and flagella associated protein 70	protein-coding
Diff_Nuc15287	chr14	51473442	51473581	+	0	NA	intron (NM_009351, intron 12 of 54)	intron (NM_009351, intron 12 of 54)	16718	NM_009351	21745	Mm.318736	NM_009351	ENSMUSG00000006281	Tep1	Tp1	telomerase associated protein 1	protein-coding
Diff_Nuc10931	chr17	80404342	80404481	+	0	NA	Intergenic	Intergenic	57197	NM_144802	72692	Mm.64579	NM_144802	ENSMUSG00000024095	Hnrnpll	2510028H02Rik|2810036L13Rik|AI256697|AI852082|Hnrpll	heterogeneous nuclear ribonucleoprotein L-like	protein-coding
Diff_Nuc30228	chr3	32258172	32258311	+	0	NA	intron (NM_009517, intron 2 of 5)	intron (NM_009517, intron 2 of 5)	-6170	NR_027966	67576	Mm.435324	NR_027966		4930429B21Rik	-	RIKEN cDNA 4930429B21 gene	ncRNA
Diff_Nuc11463	chr16	17534772	17534911	+	0	NA	Intergenic	B1_Mus2|SINE|Alu	-3696	NM_026909	69009	Mm.10174	NM_026909	ENSMUSG00000022760	Thap7	1810004B07Rik	THAP domain containing 7	protein-coding
Diff_Nuc42024	chr8	42430532	42430671	+	0	NA	intron (NM_019734, intron 10 of 13)	intron (NM_019734, intron 10 of 13)	29450	NM_019734	11886	Mm.22547	NM_019734	ENSMUSG00000031591	Asah1	2310081N20Rik|AC|Asah	N-acylsphingosine amidohydrolase 1	protein-coding
Diff_Nuc7942	chr10	51151412	51151551	+	0	NA	Intergenic	L1_Mur1|LINE|L1	-48937	NM_008147	14727	Mm.439661	NM_008147	ENSMUSG00000062593	Lilr4b	Gp49a|gp49	leukocyte immunoglobulin-like receptor, subfamily B, member 4B	protein-coding
Diff_Nuc13796	chr15	66954752	66954891	+	0	NA	intron (NM_009177, intron 3 of 8)	Lx8|LINE|L1	53623	NM_009177	20442	Mm.248334	NM_009177	ENSMUSG00000013846	St3gal1	5330418N22Rik|AI467004|ST3GalI|Siat4|Siat4a|St3gal-1	ST3 beta-galactoside alpha-2,3-sialyltransferase 1	protein-coding
Diff_Nuc23533	chr6	116173092	116173231	+	0	NA	intron (NM_026585, intron 10 of 30)	intron (NM_026585, intron 10 of 30)	15110	NM_026585	28006	Mm.28524	NM_026585	ENSMUSG00000024104	Washc2	A130095H06|C530005J20Rik|D6Wsu116e|Fam21	WASH complex subunit 2	protein-coding
Diff_Nuc19777	chr7	52594372	52594511	+	0	NA	TTS (NM_029741)	TTS (NM_029741)	3802	NM_010473	15464	Mm.39968	NM_010473	ENSMUSG00000038239	Hrc	-	histidine rich calcium binding protein	protein-coding
Diff_Nuc17848	chr18	10433212	10433351	+	0	NA	intron (NM_001083628, intron 1 of 32)	L1_Mus4|LINE|L1	108104	NM_001083628	381157	Mm.261535	NM_001083628	ENSMUSG00000042942	Greb1l	mKIAA4095	growth regulation by estrogen in breast cancer-like	protein-coding
Diff_Nuc7000	chr11	119660962	119661101	+	0	NA	intron (NM_001306081, intron 9 of 32)	ORR1E|LTR|MaLR	34648	NR_045313	319454	Mm.442144	NR_045312	ENSMUSG00000085081	Rptoros	A430071A18Rik	regulatory associated protein of MTOR, complex 1, opposite strand	ncRNA
Diff_Nuc3882	chr12	96297232	96297371	+	0	NA	Intergenic	Intergenic	-633135	NM_201518	399558	Mm.341948	NM_201518	ENSMUSG00000047414	Flrt2	-	fibronectin leucine rich transmembrane protein 2	protein-coding
Diff_Nuc18760	chr18	65251452	65251591	+	0	NA	intron (NM_031881, intron 4 of 29)	Lx5|LINE|L1	68340	NM_031881	83814	Mm.98668	NM_031881	ENSMUSG00000024589	Nedd4l	1300012C07Rik|Nedd4-2|Nedd4b	neural precursor cell expressed, developmentally down-regulated gene 4-like	protein-coding
Diff_Nuc19733	chr7	49735692	49735831	+	0	NA	intron (NM_001309389, intron 3 of 4)	RLTR18B|LTR|ERVK	25362	NM_001309389	434178	Mm.333810	NM_001309388	ENSMUSG00000092416	Zfp141	-	zinc finger protein 141	protein-coding
Diff_Nuc15809	chr14	74877762	74877901	+	0	NA	Intergenic	Intergenic	122497	NR_046059	74425	Mm.399498	NR_046059		4933402J15Rik	-	RIKEN cDNA 4933402J15 gene	ncRNA
Diff_Nuc21294	chr7	142061202	142061341	+	0	NA	intron (NM_001033420, intron 25 of 51)	intron (NM_001033420, intron 25 of 51)	68842	NM_001143802	627214	Mm.323610	NM_001143802	ENSMUSG00000073805	Fam196a	B830028B13Rik	family with sequence similarity 196, member A	protein-coding
Diff_Nuc27491	chr4	34808832	34808971	+	0	NA	intron (NM_013889, intron 1 of 7)	ID_B1|SINE|B4	21296	NM_013889	30046	Mm.38193	NM_013889	ENSMUSG00000039967	Zfp292	5730450D02Rik|5830493J20Rik|9430062L07Rik|AI449016|Krox-10|Zfp-15|Zfp15|Zn-15|Zn-16|mKIAA0530	zinc finger protein 292	protein-coding
Diff_Nuc38001	chr1	135865992	135866131	+	0	NA	Intergenic	Intergenic	-48083	NM_054077	116847	Mm.214514	NM_054077	ENSMUSG00000041577	Prelp	7330409J17Rik|SLRR2A	proline arginine-rich end leucine-rich repeat	protein-coding
Diff_Nuc33569	chr2	56520062	56520201	+	0	NA	Intergenic	Intergenic	-118091	NR_105751	102465169		NR_105751	ENSMUSG00000098437	Mir195b	Gm27491|mmu-mir-195b	microRNA 195b	ncRNA
Diff_Nuc5896	chr11	79344562	79344701	+	0	NA	promoter-TSS (NM_146023)	promoter-TSS (NM_146023)	-520	NM_010161	14017	Mm.439665	NM_010161	ENSMUSG00000078771	Evi2a	AW491894|Evi-2|Evi2	ecotropic viral integration site 2a	protein-coding
Diff_Nuc26363	chr5	119148462	119148601	+	0	NA	intron (NM_001347445, intron 4 of 30)	intron (NM_001347445, intron 4 of 30)	137803	NM_172424	76199	Mm.206238	NM_172424	ENSMUSG00000018076	Med13l	2210413I17Rik|6330591G05Rik|9030618F05Rik|Thrap2|Trap240L|mKIAA1025	mediator complex subunit 13-like	protein-coding
Diff_Nuc18976	chr18	77176702	77176841	+	0	NA	intron (NM_025409, intron 1 of 2)	RLTR21|LTR|ERVK	-6083	NM_029826	76987	Mm.236127	NM_029826	ENSMUSG00000025421	Hdhd2	0610039H12Rik|3110052N05Rik	haloacid dehalogenase-like hydrolase domain containing 2	protein-coding
Diff_Nuc8232	chr10	66606972	66607111	+	0	NA	intron (NM_207221, intron 1 of 25)	intron (NM_207221, intron 1 of 25)	17035	NM_207221	108829	Mm.23846	NM_207221	ENSMUSG00000037876	Jmjd1c	5430433L24Rik|D630035I23Rik|Jmjdic|TRIP8	jumonji domain containing 1C	protein-coding
Diff_Nuc35581	chr2	160807262	160807401	+	0	NA	non-coding (NR_126509, exon 24 of 36)	non-coding (NR_126509, exon 24 of 36)	-69256	NM_182840	280635	Mm.330747	NM_182840	ENSMUSG00000050700	Emilin3	1110013O17Rik|EMILIN-3|EMILIN-5|EMILIN-T|Emilin5	elastin microfibril interfacer 3	protein-coding
Diff_Nuc33452	chr2	48939242	48939381	+	0	NA	intron (NM_029924, intron 2 of 16)	B3|SINE|B2	134283	NM_029924	109241	Mm.440436	NM_029924	ENSMUSG00000036792	Mbd5	9430004D19Rik|AA536666|AI426407|C030040A15Rik|Gm1630|OTTMUSG00000012483	methyl-CpG binding domain protein 5	protein-coding
Diff_Nuc40592	chr9	77740552	77740691	+	0	NA	Intergenic	Intergenic	-24551	NM_134255	68801	Mm.430736	NM_134255	ENSMUSG00000032349	Elovl5	1110059L23Rik|AI747313|AU043003|HELO1	ELOVL family member 5, elongation of long chain fatty acids (yeast)	protein-coding
Diff_Nuc43506	chr8	129812522	129812661	+	0	NA	intron (NM_033620, intron 3 of 24)	intron (NM_033620, intron 3 of 24)	-10921	NM_001013581	93742	Mm.299254	NM_033620	ENSMUSG00000025812	Pard3	AA960621|AI256638|Asip|D8Ertd580e|Par-3|Par3|Pard-3|Pard3a|Phip	par-3 family cell polarity regulator	protein-coding
Diff_Nuc8953	chr10	96831962	96832101	+	0	NA	Intergenic	ORR1B2|LTR|MaLR	-54081	NR_039547	100628616		NR_039547	ENSMUSG00000105557	Mir3966	mmu-mir-3966|mu-mir-3966	microRNA 3966	ncRNA
Diff_Nuc42372	chr8	71368922	71369061	+	0	NA	Intergenic	Intergenic	-35463	NM_008509	16956	Mm.1514	NM_008509	ENSMUSG00000015568	Lpl	-	lipoprotein lipase	protein-coding
Diff_Nuc41593	chr8	11470592	11470731	+	0	NA	intron (NM_011227, intron 1 of 1)	B1_Mur1|SINE|Alu	-7268	NR_126558	102132	Mm.37632	NR_126558	ENSMUSG00000096957	E230013L22Rik	AI645545	RIKEN cDNA E230013L22 gene	ncRNA
Diff_Nuc35137	chr2	138116772	138116911	+	0	NA	Intergenic	MIR|SINE|MIR	12612	NM_145534	228662	Mm.153405	NM_145534	ENSMUSG00000062098	Btbd3	mKIAA0952	BTB (POZ) domain containing 3	protein-coding
Diff_Nuc29993	chr3	16301262	16301401	+	0	NA	Intergenic	Lx|LINE|L1	218148	NM_001145919	229096	Mm.23834	NM_172677	ENSMUSG00000047213	Ythdf3	9130022A11Rik	YTH domain family 3	protein-coding
Diff_Nuc33013	chr2	27776672	27776811	+	0	NA	intron (NM_015734, intron 1 of 65)	MTE2a|LTR|MaLR	34796	NM_015734	12831	Mm.7281	NM_015734	ENSMUSG00000026837	Col5a1	AI413331	collagen, type V, alpha 1	protein-coding
Diff_Nuc41106	chr9	107226922	107227061	+	0	NA	Intergenic	Intergenic	13690	NM_133984	69536	Mm.259467	NM_133984	ENSMUSG00000032579	Hemk1	2310008M14Rik|AW049265	HemK methyltransferase family member 1	protein-coding
Diff_Nuc18393	chr18	43503052	43503191	+	0	NA	intron (NM_001136086, intron 7 of 13)	intron (NM_001136086, intron 7 of 13)	29805	NM_001136086	22240	Mm.8180	NM_009468	ENSMUSG00000024501	Dpysl3	CRMP-4|DRP-3|TUC4|ULIP-1|Ulip|Ulip1	dihydropyrimidinase-like 3	protein-coding
Diff_Nuc32299	chr3	143948912	143949051	+	0	NA	Intergenic	Intergenic	-80762	NM_010723	16911	Mm.29187	NM_010723	ENSMUSG00000028266	Lmo4	A730077C12Rik|Crp3|Etohi4	LIM domain only 4	protein-coding
Diff_Nuc38349	chr1	155742592	155742731	+	0	NA	Intergenic	Intergenic	3885	NM_178244	240819	Mm.453236	NM_178244	ENSMUSG00000047053	Teddm1a	Epdd1|Teddm1|e9-1	transmembrane epididymal protein 1A	protein-coding
Diff_Nuc18071	chr18	25418132	25418271	+	0	NA	intron (NM_001033532, intron 5 of 10)	L1_Mus3|LINE|L1	90680	NM_001033532	225289	Mm.391081	NM_001033532	ENSMUSG00000033632	AW554918	4921538P22|AI461742|Kiaa1328|mKIAA1328	expressed sequence AW554918	protein-coding
Diff_Nuc13543	chr15	55032162	55032301	+	0	NA	intron (NM_001037937, intron 4 of 8)	intron (NM_001037937, intron 4 of 8)	67240	NM_001037937	97998	Mm.295397	NM_145470	ENSMUSG00000022419	Deptor	Depdc6	DEP domain containing MTOR-interacting protein	protein-coding
Diff_Nuc22728	chr6	71838032	71838171	+	0	NA	intron (NM_027275, intron 17 of 23)	intron (NM_027275, intron 17 of 23)	20655	NM_027275	69956	Mm.30256	NM_027275	ENSMUSG00000063884	Ptcd3	2610034F17Rik|2810422B04Rik|AA589622|AU045708|MRP-S39	pentatricopeptide repeat domain 3	protein-coding
Diff_Nuc11259	chr16	7093542	7093681	+	0	NA	intron (NM_183188, intron 1 of 12)	intron (NM_183188, intron 1 of 12)	23683	NM_183188	268859	Mm.370334	NM_021477	ENSMUSG00000008658	Rbfox1	A2bp|A2bp1|Hrnbp1|fox-1	RNA binding protein, fox-1 homolog (C. elegans) 1	protein-coding
Diff_Nuc30777	chr3	67579172	67579311	+	0	NA	Intergenic	RLTR10B2|LTR|ERVK	-116901	NM_001113419	100505386	Mm.331064	NM_001113419	ENSMUSG00000102422	Gm21949	Iqcj-schip1|Schip-1-iqcj|Schip1	predicted gene, 21949	protein-coding
Diff_Nuc15674	chr14	68338672	68338811	+	0	NA	intron (NM_001285933, intron 1 of 11)	B3A|SINE|B2	4586	NM_001285933	105440	Mm.6720	NM_134073	ENSMUSG00000034327	Kctd9	-	potassium channel tetramerisation domain containing 9	protein-coding
Diff_Nuc19836	chr7	56595072	56595211	+	0	NA	intron (NM_175272, intron 1 of 37)	L1MC3|LINE|L1	93582	NM_175272	78286	Mm.333881	NM_175272	ENSMUSG00000052512	Nav2	5330421F07Rik|AU067780|BQ960892|HELAD1|POMFIL2|RAINB1|RAINB2|Unc53H2|mKIAA3015	neuron navigator 2	protein-coding
Diff_Nuc37896	chr1	132317552	132317691	+	0	NA	intron (NM_001317361, intron 2 of 7)	(GAAA)n|Simple_repeat|Simple_repeat	1999	NM_007827	13137	Mm.436759	NM_007827	ENSMUSG00000026401	Cd55b	AI323748|Daf|Daf-TM|Daf2|TM-DAF	CD55 molecule, decay accelerating factor for complement B	protein-coding
Diff_Nuc40919	chr9	98748592	98748731	+	0	NA	Intergenic	Intergenic	5655	NM_001134660	623166	Mm.390211	NM_001134660	ENSMUSG00000091080	Prr23a1	EG623166|Gm6400|Prr23a	proline rich 23A, member 1	protein-coding
Diff_Nuc16427	chr14	122495352	122495491	+	0	NA	Intergenic	ORR1B2|LTR|MaLR	10775	NR_015586	319727	Mm.215552	NR_015586		A330035P11Rik	-	RIKEN cDNA A330035P11 gene	ncRNA
Diff_Nuc18425	chr18	46335452	46335591	+	0	NA	intron (NM_178872, intron 6 of 9)	intron (NM_178872, intron 6 of 9)	22951	NM_001170855	28105	Mm.277382	NM_178872	ENSMUSG00000033949	Trim36	D18Wsu100e|haprin	tripartite motif-containing 36	protein-coding
Diff_Nuc33871	chr2	70607752	70607891	+	0	NA	intron (NM_172664, intron 3 of 19)	intron (NM_172664, intron 3 of 19)	55716	NM_172664	228012	Mm.136511	NM_172664	ENSMUSG00000041997	Tlk1	4930545J15Rik	tousled-like kinase 1	protein-coding
Diff_Nuc32565	chr2	3612142	3612281	+	0	NA	Intergenic	RMER3D-int|LTR|ERVK	-18519	NM_025626	66540	Mm.277864	NM_025626	ENSMUSG00000026655	Fam107b	3110001A13Rik|AA589595|AA959793|AI132312	family with sequence similarity 107, member B	protein-coding
Diff_Nuc40474	chr9	71923742	71923881	+	0	NA	intron (NM_011544, intron 3 of 20)	intron (NM_011544, intron 3 of 20)	35197	NM_001253862	21406	Mm.171615	NM_011544	ENSMUSG00000032228	Tcf12	A130037E08Rik|ALF1|HEB|HEBAlt|HTF-4|HTF4|ME1|REB|bHLHb20	transcription factor 12	protein-coding
Diff_Nuc28404	chr4	94236842	94236981	+	0	NA	intron (NM_172695, intron 13 of 13)	RLTR11A2|LTR|ERVK	-13424	NM_026368	67770	Mm.35170	NM_026368	ENSMUSG00000028578	Caap1	5830433M19Rik|AI536248|CAAP	caspase activity and apoptosis inhibitor 1	protein-coding
Diff_Nuc28159	chr4	76015022	76015161	+	0	NA	intron (NM_011211, intron 10 of 39)	intron (NM_011211, intron 10 of 39)	-1090901	NM_025849	66928	Mm.24332	NM_025849	ENSMUSG00000028398	Tmem261	1700027K24Rik|3110001D03Rik	transmembrane protein 261	protein-coding
Diff_Nuc36872	chr1	61924822	61924961	+	0	NA	intron (NM_001081050, intron 2 of 22)	intron (NM_001081050, intron 2 of 22)	239493	NM_001081050	72823	Mm.35153	NM_001081050	ENSMUSG00000052062	Pard3b	1810008K04Rik|2010002N16Rik|2810455B10Rik|Als2cr19|PAR3B|PAR3L|PAR3beta	par-3 family cell polarity regulator beta	protein-coding
Diff_Nuc28854	chr4	115713722	115713861	+	0	NA	intron (NM_028142, intron 3 of 5)	MTD|LTR|MaLR	12690	NM_028142	72181	Mm.282560	NM_028142	ENSMUSG00000028706	Nsun4	2310010O12Rik|2810405F18Rik|AI507900|Shtap	NOL1/NOP2/Sun domain family, member 4	protein-coding
Diff_Nuc5815	chr11	77607552	77607691	+	0	NA	intron (NM_011586, intron 1 of 39)	intron (NM_011586, intron 1 of 39)	-7179	NM_001291214	360013	Mm.341248	NM_011586	ENSMUSG00000000631	Myo18a	MAJN|MyoPDZ|MysPDZ|SP-R210	myosin XVIIIA	protein-coding
Diff_Nuc29487	chr4	139850132	139850271	+	0	NA	Intergenic	MIRm|SINE|MIR	-47475	NM_198610	230868	Mm.298731	NM_198610	ENSMUSG00000040972	Igsf21	BC055811|Gm141	immunoglobulin superfamily, member 21	protein-coding
Diff_Nuc9806	chr17	17763272	17763411	+	0	NA	Intergenic	Intergenic	-1888	NM_172827	240028	Mm.328807	NM_172827	ENSMUSG00000023845	Lnpep	2010309L07Rik|4732490P18Rik|CAP|IRAP|PLAP|gp160|vp165	leucyl/cystinyl aminopeptidase	protein-coding
Diff_Nuc19855	chr7	58251332	58251471	+	0	NA	Intergenic	MTD|LTR|MaLR	396841	NM_172901	243996	Mm.443270	NM_172901	ENSMUSG00000084234	4933405O20Rik	-	RIKEN cDNA 4933405O20 gene	protein-coding
Diff_Nuc3928	chr12	99912152	99912291	+	0	NA	Intergenic	ORR1D1|LTR|MaLR	45869	NM_001289574	104871	Mm.210053	NM_178914	ENSMUSG00000021007	Spata7	AI661438|B230306G18Rik|HSD3	spermatogenesis associated 7	protein-coding
Diff_Nuc42417	chr8	72994562	72994701	+	0	NA	intron (NM_178771, intron 1 of 2)	L1MB8|LINE|L1	6211	NM_001122830	234378	Mm.187090	NM_172052	ENSMUSG00000055707	Klhl26	C630013N10Rik|Klkl26	kelch-like 26	protein-coding
Diff_Nuc17097	chr19	32773222	32773361	+	0	NA	intron (NM_026487, intron 4 of 9)	intron (NM_026487, intron 4 of 9)	13497	NM_026487	67979	Mm.27123	NM_026487	ENSMUSG00000013662	Atad1	4921525H23Rik|AW107648|Thorase	ATPase family, AAA domain containing 1	protein-coding
Diff_Nuc15164	chr14	45921102	45921241	+	0	NA	intron (NM_015774, intron 6 of 15)	intron (NM_015774, intron 6 of 15)	17076	NM_015774	50527	Mm.387108	NM_015774	ENSMUSG00000021831	Ero1l	ERO1-L|Ero1a	ERO1-like (S. cerevisiae)	protein-coding
Diff_Nuc1930	chr13	99492302	99492441	+	0	NA	TTS (NM_172591)	TTS (NM_172591)	-27585	NM_001025606	380863	Mm.28264	NM_001025606	ENSMUSG00000052485	Tmem171	Gm905	transmembrane protein 171	protein-coding
Diff_Nuc29828	chr4	155462912	155463051	+	0	NA	Intergenic	B3A|SINE|B2	-21126	NM_145557	230996	Mm.318925	NM_145557	ENSMUSG00000059939	9430015G10Rik	-	RIKEN cDNA 9430015G10 gene	protein-coding
Diff_Nuc8121	chr10	60972432	60972571	+	0	NA	intron (NM_153542, intron 2 of 4)	intron (NM_153542, intron 2 of 4)	33920	NM_153542	216011	Mm.136116	NM_153542	ENSMUSG00000037151	Lrrc20	BC036304	leucine rich repeat containing 20	protein-coding
Diff_Nuc42451	chr8	73916302	73916441	+	0	NA	exon (NM_181418, exon 5 of 13)	exon (NM_181418, exon 5 of 13)	3329	NM_181418	234395	Mm.34874	NM_181418	ENSMUSG00000034911	Ushbp1	2210404N08Rik|9430064H24|AIEBP|MCC2	Usher syndrome 1C binding protein 1	protein-coding
Diff_Nuc2891	chr12	40952782	40952921	+	0	NA	intron (NR_045157, intron 2 of 2)	intron (NR_045157, intron 2 of 2)	2900	NR_045157	629820	Mm.435540	NR_045157	ENSMUSG00000035983	Gm7008	EG629820	predicted gene 7008	ncRNA
Diff_Nuc20684	chr7	111703352	111703491	+	0	NA	TTS (NM_146813)	TTS (NM_146813)	2023	NM_146813	258809	Mm.223236	NM_146813	ENSMUSG00000073928	Olfr651	MOR31-11	olfactory receptor 651	protein-coding
Diff_Nuc37134	chr1	78436232	78436371	+	0	NA	intron (NM_011811, intron 16 of 16)	intron (NM_011811, intron 16 of 16)	49171	NR_102758	23874	Mm.17898	NM_011811	ENSMUSG00000026245	Farsb	C76708|Farsa|Farsl|Farslb|Frsb	phenylalanyl-tRNA synthetase, beta subunit	protein-coding
Diff_Nuc17627	chr19	57832352	57832491	+	0	NA	intron (NM_181415, intron 24 of 28)	intron (NM_181415, intron 24 of 28)	146897	NM_181415	226255	Mm.245340	NM_181415	ENSMUSG00000054843	Atrnl1	AI504415|AW555641|Alp|Atrnl|Atrnlp	attractin like 1	protein-coding
Diff_Nuc5952	chr11	80624392	80624531	+	0	NA	intron (NM_029537, intron 1 of 6)	intron (NM_029537, intron 1 of 6)	544	NM_029537	103743	Mm.27682	NM_029537	ENSMUSG00000035413	Tmem98	6530411B15Rik|AI463522	transmembrane protein 98	protein-coding
Diff_Nuc22043	chr6	32953802	32953941	+	0	NA	intron (NM_025336, intron 3 of 7)	intron (NM_025336, intron 3 of 7)	56281	NM_025336	66075	Mm.21501	NM_025336	ENSMUSG00000053768	Chchd3	0610041L09Rik|1700039J09Rik|AW558177	coiled-coil-helix-coiled-coil-helix domain containing 3	protein-coding
Diff_Nuc14666	chr14	17075382	17075521	+	0	NA	intron (NM_027695, intron 1 of 2)	intron (NM_027695, intron 1 of 2)	-6377	NM_021504	59007	Mm.258381	NM_021504	ENSMUSG00000021785	Ngly1	1110002C09Rik|PNGase|Png1	N-glycanase 1	protein-coding
Diff_Nuc19295	chr7	16488432	16488571	+	0	NA	intron (NM_001145190, intron 2 of 2)	B1_Mur1|SINE|Alu	1506	NM_001145190	546024	Mm.259041	NM_001033638	ENSMUSG00000074365	Crxos	AA606869|AY590891|Crxos1|Egam1	cone-rod homeobox, opposite strand	protein-coding
Diff_Nuc28692	chr4	106268122	106268261	+	0	NA	intron (NM_183182, intron 9 of 9)	ORR1B1|LTR|MaLR	21652	NM_183182	242602	Mm.235591	NM_183182	ENSMUSG00000054362	Lexm	-	lymphocyte expansion molecule	protein-coding
Diff_Nuc30995	chr3	82564832	82564971	+	0	NA	Intergenic	MTEa|LTR|MaLR	115504	NM_001277170	633285	Mm.265114	NM_001146328	ENSMUSG00000033882	Rbm46	EG633285|ENSMUSG00000033882|Gm761	RNA binding motif protein 46	protein-coding
Diff_Nuc29191	chr4	130325062	130325201	+	0	NA	intron (NM_030722, intron 18 of 21)	intron (NM_030722, intron 18 of 21)	19578	NR_028565	100217460		NR_028565	ENSMUSG00000065196	Snord85	MBII-251|Z50	small nucleolar RNA, C/D box 85	snoRNA
Diff_Nuc26854	chr5	144104112	144104251	+	0	NA	Intergenic	ETnERV2-int|LTR|ERVK	13194	NR_027874	67672	Mm.30983	NR_027874	ENSMUSG00000089889	0610040B10Rik	-	RIKEN cDNA 0610040B10 gene	ncRNA
Diff_Nuc24105	chr6	142725062	142725201	+	0	NA	TTS (NM_009908)	TTS (NM_009908)	19925	NM_009908	12764	Mm.3820	NM_009908	ENSMUSG00000030282	Cmas	AW208911|CMPNeu5Ac|D6Bwg0250e	cytidine monophospho-N-acetylneuraminic acid synthetase	protein-coding
Diff_Nuc18771	chr18	65381392	65381531	+	0	NA	Intergenic	Intergenic	-27054	NR_029600	387231		NR_029600	ENSMUSG00000065402	Mir122	Mir122a|Mirn122a|mir-122|mmu-mir-122	microRNA 122	ncRNA
Diff_Nuc9740	chr17	14342872	14343011	+	0	NA	Intergenic	Intergenic	-2103	NM_172826	240025	Mm.79993	NM_172826	ENSMUSG00000048826	Dact2	2900084M21Rik|A630024E20|Dpr2|Frd2|dapper2	dishevelled-binding antagonist of beta-catenin 2	protein-coding
Diff_Nuc7171	chr10	7621052	7621191	+	0	NA	Intergenic	Intergenic	54800	NM_138667	68652	Mm.193041	NM_138667	ENSMUSG00000015755	Tab2	1110030N06Rik|A530078N03Rik|Map3k7ip2|mKIAA0733	TGF-beta activated kinase 1/MAP3K7 binding protein 2	protein-coding
Diff_Nuc11338	chr16	11494252	11494391	+	0	NA	intron (NM_001290148, intron 6 of 13)	intron (NM_001290148, intron 6 of 13)	88580	NM_001290148	74478	Mm.325831	NM_028964	ENSMUSG00000071669	Snx29	4933437K13Rik|ENSMUSG00000079738|Gm11170|Gm1737|Gm930|Rundc2a	sorting nexin 29	protein-coding
Diff_Nuc7286	chr10	13920022	13920161	+	0	NA	Intergenic	Intergenic	233906	NM_010437	15273	Mm.42157	NM_010437	ENSMUSG00000015501	Hivep2	Gm20114|MIBP1|Schnurri-2|Shn-2	human immunodeficiency virus type I enhancer binding protein 2	protein-coding
Diff_Nuc1108	chr13	49552902	49553041	+	0	NA	intron (NR_075085, intron 12 of 13)	intron (NR_075085, intron 12 of 13)	35988	NM_001276399	75678	Mm.390586	NM_199056	ENSMUSG00000021385	Ippk	1810043M15Rik|InsP6	inositol 1,3,4,5,6-pentakisphosphate 2-kinase	protein-coding
Diff_Nuc32362	chr3	146357032	146357171	+	0	NA	Intergenic	Intergenic	-42820	NM_029144	75015	Mm.250432	NM_029144	ENSMUSG00000048652	4930503B20Rik	1700013A07Rik|1700095G21Rik|4930483N21Rik|Gm1652|Samd13	RIKEN cDNA 4930503B20 gene	protein-coding
Diff_Nuc40420	chr9	70338762	70338901	+	0	NA	intron (NM_033604, intron 2 of 14)	intron (NM_033604, intron 2 of 14)	12701	NM_033604	93836	Mm.29783	NM_033604	ENSMUSG00000032217	Rnf111	ARK|Arkadia	ring finger 111	protein-coding
Diff_Nuc26963	chr5	148326582	148326721	+	0	NA	intron (NM_028291, intron 5 of 18)	MurERV4-int|LTR|ERVK	84495	NM_028291	72587	Mm.320469	NM_028291	ENSMUSG00000029647	Pan3	2700050F09Rik|A430027N15Rik|AU014670	PAN3 poly(A) specific ribonuclease subunit	protein-coding
Diff_Nuc23038	chr6	88995482	88995621	+	0	NA	Intergenic	Intergenic	-50553	NR_134978	232217	Mm.281744	NM_175017	ENSMUSG00000055403	4933427D06Rik	-	RIKEN cDNA 4933427D06 gene	ncRNA
Diff_Nuc41467	chr9	123443852	123443991	+	0	NA	intron (NM_030692, intron 1 of 19)	intron (NM_030692, intron 1 of 19)	4921	NM_030692	83493	Mm.273671	NM_030692	ENSMUSG00000025240	Sacm1l	SAC1|Sac1p|mKIAA0851	SAC1 suppressor of actin mutations 1-like (yeast)	protein-coding
Diff_Nuc3958	chr12	100865522	100865661	+	0	NA	intron (NR_045288, intron 1 of 1)	intron (NR_045288, intron 1 of 1)	593	NR_045288	73457	Mm.383439	NR_045288	ENSMUSG00000100211	1700064M15Rik	-	RIKEN cDNA 1700064M15 gene	ncRNA
Diff_Nuc28974	chr4	120463762	120463901	+	0	NA	intron (NM_001048168, intron 1 of 9)	intron (NM_001048168, intron 1 of 9)	-18529	NR_029602	723836		NR_029602	ENSMUSG00000065409	Mir30e	Mirn30e|mir-30e|mmu-mir-30e	microRNA 30e	ncRNA
Diff_Nuc17645	chr19	58516342	58516481	+	0	NA	intron (NM_010279, intron 4 of 10)	intron (NM_010279, intron 4 of 10)	13477	NM_001285457	14585	Mm.88367	NM_010279	ENSMUSG00000025089	Gfra1	AU042498	glial cell line derived neurotrophic factor family receptor alpha 1	protein-coding
Diff_Nuc10365	chr17	45689942	45690081	+	0	NA	Intergenic	Lx4B|LINE|L1	-2638	NM_008690	18037	Mm.57043	NM_008690	ENSMUSG00000023947	Nfkbie	I-kappa-B-epsilon|IKBE|IkB-E|NF-kappa-BIE|ikB-epsilon	nuclear factor of kappa light polypeptide gene enhancer in B cells inhibitor, epsilon	protein-coding
Diff_Nuc32712	chr2	12460782	12460921	+	0	NA	Intergenic	RMER15|LTR|ERVL	-119764	NM_024185	66960	Mm.34059	NM_024185	ENSMUSG00000026767	Fam188a	1810041E18Rik|2310047O13Rik|5830410F13Rik|AI447827|AW111958	family with sequence similarity 188, member A	protein-coding
Diff_Nuc37887	chr1	131591622	131591761	+	0	NA	intron (NM_172485, intron 7 of 27)	intron (NM_172485, intron 7 of 27)	421810	NM_172485	210417	Mm.380518	NM_172485	ENSMUSG00000042581	Thsd7b	1700074E13Rik|B930082A18|D130067I03Rik	thrombospondin, type I, domain containing 7B	protein-coding
Diff_Nuc37387	chr1	91478012	91478151	+	0	NA	intron (NM_001037136, intron 1 of 16)	CpG	102386	NR_015540	74403	Mm.444291	NR_015540		4933400F21Rik	1700091C04Rik|4930565K10Rik	RIKEN cDNA 4933400F21 gene	ncRNA
Diff_Nuc21699	chr6	15997462	15997601	+	0	NA	Intergenic	B3|SINE|B2	326870	NM_175088	16543	Mm.1314	NM_175088	ENSMUSG00000041390	Mdfic	Kdt1|Mdfid	MyoD family inhibitor domain containing	protein-coding
Diff_Nuc13707	chr15	62165222	62165361	+	0	NA	Intergenic	L1_Mus1|LINE|L1	-114285	NR_003523	67552	Mm.484027	NM_026230		H2afy3	4933432H23Rik	H2A histone family, member Y3	pseudo
Diff_Nuc39151	chr1	194143822	194143961	+	0	NA	intron (NM_010600, intron 6 of 10)	intron (NM_010600, intron 6 of 10)	129232	NM_010600	16510	Mm.4489	NM_010600	ENSMUSG00000058248	Kcnh1	EAG1|Kv10.1|M-eag	potassium voltage-gated channel, subfamily H (eag-related), member 1	protein-coding
Diff_Nuc4050	chr12	104499972	104500111	+	0	NA	Intergenic	Intergenic	-19685	NM_133364	170952	Mm.217019	NM_133364	ENSMUSG00000041669	Prima1	B230212M13Rik|BB120497|PRiMA	proline rich membrane anchor 1	protein-coding
Diff_Nuc709	chr13	32052722	32052861	+	0	NA	intron (NM_146041, intron 7 of 10)	intron (NM_146041, intron 7 of 10)	154276	NM_008592	17300	Mm.12949	NM_008592	ENSMUSG00000050295	Foxc1	FREAC3|Fkh1|Mf1|Mf4|ch|fkh-1|frkhda	forkhead box C1	protein-coding
Diff_Nuc5996	chr11	83547552	83547691	+	0	NA	Intergenic	RMER6C|LTR|ERVK	-12821	NM_183249	66107	Mm.902	NM_183249	ENSMUSG00000051748	Wfdc21	1100001G20Rik|Wdnm1-like	WAP four-disulfide core domain 21	protein-coding
Diff_Nuc2854	chr12	38027312	38027451	+	0	NA	intron (NM_178767, intron 3 of 12)	intron (NM_178767, intron 3 of 12)	59155	NM_178767	319660	Mm.485540	NM_178767	ENSMUSG00000050103	Agmo	A530016O06Rik|AI790538|Tmem195	alkylglycerol monooxygenase	protein-coding
Diff_Nuc38479	chr1	162188802	162188941	+	0	NA	intron (NM_001038621, intron 2 of 8)	intron (NM_001038621, intron 2 of 8)	37232	NR_035448	100316784		NR_035448	ENSMUSG00000089204	Mir1927	mmu-mir-1927	microRNA 1927	ncRNA
Diff_Nuc19390	chr7	25192982	25193121	+	0	NA	intron (NM_028047, intron 6 of 13)	B3|SINE|B2	8404	NM_028047	71997	Mm.150977	NM_028047	ENSMUSG00000002210	Smg9	1500002O20Rik|AI429693|N28092	smg-9 homolog, nonsense mediated mRNA decay factor (C. elegans)	protein-coding
Diff_Nuc1515	chr13	74470142	74470281	+	0	NA	intron (NM_023281, intron 8 of 14)	intron (NM_023281, intron 8 of 14)	-15437	NM_011051	18570	Mm.24254	NM_011051	ENSMUSG00000021576	Pdcd6	AV299538|Alg2|MA-3|PS2|alg-2	programmed cell death 6	protein-coding
Diff_Nuc3776	chr12	87406622	87406761	+	0	NA	intron (NM_009368, intron 3 of 6)	intron (NM_009368, intron 3 of 6)	13300	NM_009368	21809	Mm.3992	NM_009368	ENSMUSG00000021253	Tgfb3	TGF-beta-3|Tgfb-3	transforming growth factor, beta 3	protein-coding
Diff_Nuc37972	chr1	134948052	134948191	+	0	NA	intron (NM_001099276, intron 1 of 32)	intron (NM_001099276, intron 1 of 32)	5532	NM_001099276	240752	Mm.387308	NM_001099276	ENSMUSG00000026447	Pik3c2b	C330011J12Rik|Gm199|PI3K-C2beta|PI3KC2beta	phosphoinositide-3-kinase, class 2, beta polypeptide	protein-coding
Diff_Nuc22352	chr6	48764792	48764931	+	0	NA	Intergenic	MTC|LTR|MaLR	26126	NM_023056	65963	Mm.28385	NM_023056	ENSMUSG00000029810	Tmem176b	1810009M01Rik|Clast1|Lr8	transmembrane protein 176B	protein-coding
Diff_Nuc17475	chr19	47414647	47414786	+	0	NA	intron (NM_008018, intron 6 of 14)	RMER5|LTR|ERV1	-66637	NR_105961	102466782		NR_105961	ENSMUSG00000098786	Mir6995	Gm27576|mmu-mir-6995	microRNA 6995	ncRNA
Diff_Nuc209	chr13	3305257	3305396	+	0	NA	Intergenic	Intergenic	156605	NR_001581	73266	Mm.335891	NR_001581		Speer6-ps1	1700039A02Rik|SPEER-6	spermatogenesis associated glutamate (E)-rich protein 6, pseudogene 1	pseudo
Diff_Nuc8818	chr10	92542882	92543021	+	0	NA	intron (NM_001347060, intron 1 of 67)	Tigger7|DNA|MER2_type	1390	NM_001347060	380654	Mm.34980	NM_001347060	ENSMUSG00000020014	Cfap54	4930485B16Rik|Gm872	cilia and flagella associated protein 54	protein-coding
Diff_Nuc34245	chr2	90919272	90919411	+	0	NA	Intergenic	Intergenic	-8869	NM_001290765	68427	Mm.192375	NM_026721	ENSMUSG00000002105	Slc39a13	1100001L14Rik|AA387663|ZIP-13|ZIP13	solute carrier family 39 (metal ion transporter), member 13	protein-coding
Diff_Nuc10973	chr17	81315952	81316091	+	0	NA	intron (NR_131127, intron 1 of 5)	intron (NR_131127, intron 1 of 5)	19888	NR_131127	320784	Mm.474182	NR_131127		C230072F16Rik	-	RIKEN cDNA C230072F16 gene	ncRNA
Diff_Nuc6648	chr11	106352382	106352521	+	0	NA	Intergenic	RSINE1|SINE|B4	-3341	NM_023913	78943	Mm.340943	NM_023913	ENSMUSG00000020715	Ern1	9030414B18Rik|AI225830|C85377|Ire1a|Ire1alpha|Ire1p	endoplasmic reticulum (ER) to nucleus signalling 1	protein-coding
Diff_Nuc21468	chr7	152002562	152002701	+	0	NA	Intergenic	Intergenic	-21886	NM_008007	14174	Mm.4947	NM_008007	ENSMUSG00000031074	Fgf3	Fgf-3|Int-2|Int-P	fibroblast growth factor 3	protein-coding
Diff_Nuc27325	chr4	22823462	22823601	+	0	NA	Intergenic	RMER20B|LTR|ERVK	405836	NR_131335	105500046		NR_131335	ENSMUSG00000107859	Gm30731	Pnky|lnc-pou3f2	predicted gene, 30731	ncRNA
Diff_Nuc40269	chr9	64141342	64141481	+	0	NA	intron (NR_136926, intron 3 of 6)	MTC|LTR|MaLR	12019	NM_001324557	66131	Mm.196219	NM_025372	ENSMUSG00000032397	Tipin	1110005A05Rik|1110018P21Rik	timeless interacting protein	protein-coding
Diff_Nuc2133	chr13	109191922	109192061	+	0	NA	Intergenic	L1_Mus4|LINE|L1	85460	NM_178683	218581	Mm.32318	NM_178683	ENSMUSG00000021697	Depdc1b	9830132O03|AW260467|XTP1	DEP domain containing 1B	protein-coding
Diff_Nuc19007	chr18	79175122	79175261	+	0	NA	intron (NM_053099, intron 2 of 5)	intron (NM_053099, intron 2 of 5)	130939	NM_053099	240427	Mm.312871	NM_053099	ENSMUSG00000024548	Setbp1	C130092E12|Seb|mKIAA0437	SET binding protein 1	protein-coding
Diff_Nuc39650	chr9	34442442	34442581	+	0	NA	intron (NM_001190912, intron 1 of 15)	intron (NM_001190912, intron 1 of 15)	146195	NM_001190911	67703	Mm.220710	NM_026324	ENSMUSG00000032036	Kirrel3	1500010O20Rik|2900036G11Rik|NEPH2|SST4|mKIAA1867	kin of IRRE like 3 (Drosophila)	protein-coding
Diff_Nuc19879	chr7	60862342	60862481	+	0	NA	Intergenic	Lx2|LINE|L1	284848	NR_105746	102466619		NR_105746	ENSMUSG00000099176	Mir6238	Gm27982|mmu-mir-6238	microRNA 6238	ncRNA
Diff_Nuc5853	chr11	78437292	78437431	+	0	NA	intron (NM_008702, intron 2 of 10)	MIRb|SINE|MIR	-73124	NM_133706	69071	Mm.29431	NM_133706	ENSMUSG00000037278	Tmem97	1810014L12Rik|AI115531|AL022956|D11Bhm182e	transmembrane protein 97	protein-coding
Diff_Nuc32103	chr3	133222402	133222541	+	0	NA	Intergenic	Intergenic	-15117	NM_001040400	214133	Mm.347816	NM_145989	ENSMUSG00000040943	Tet2	Ayu17-449|E130014J05Rik|mKIAA1546	tet methylcytosine dioxygenase 2	protein-coding
Diff_Nuc23787	chr6	127395252	127395391	+	0	NA	Intergenic	B4A|SINE|B4	-1537	NM_001346513	101187	Mm.110818	NM_181402	ENSMUSG00000037997	Parp11	5330431N24Rik|AI851877|ARTD11|HIN1L|PARP-11	poly (ADP-ribose) polymerase family, member 11	protein-coding
Diff_Nuc9519	chr17	3082592	3082731	+	0	NA	intron (NR_003519, intron 1 of 7)	intron (NR_003519, intron 1 of 7)	1522	NR_003519	328734	Mm.335641	NR_003519		Pisd-ps2	D030013I16Rik	phosphatidylserine decarboxylase, pseudogene 2	pseudo
Diff_Nuc8879	chr10	94705822	94705961	+	0	NA	intron (NM_009950, intron 2 of 2)	Tigger13a|DNA|MER2_type	80452	NM_001330138	12905	Mm.473739	NM_009950	ENSMUSG00000045867	Cradd	RAIDD	CASP2 and RIPK1 domain containing adaptor with death domain	protein-coding
Diff_Nuc22615	chr6	62143682	62143821	+	0	NA	intron (NM_183310, intron 10 of 10)	Lx2|LINE|L1	-1012947	NR_040287	100504262	Mm.438066	NR_040287		A730020E08Rik	-	RIKEN cDNA A730020E08 gene	ncRNA
Diff_Nuc22004	chr6	31289342	31289481	+	0	NA	Intergenic	Intergenic	59362	NR_040300	100503869	Mm.370532	NR_040300	ENSMUSG00000086212	Mkln1os	Gm13845|OTTMUSG00000014733	muskelin 1, intracellular mediator containing kelch motifs, opposite strand	ncRNA
Diff_Nuc35573	chr2	160666282	160666421	+	0	NA	intron (NM_177263, intron 1 of 3)	intron (NM_177263, intron 1 of 3)	32375	NM_177263	320799	Mm.436734	NM_177263	ENSMUSG00000035877	Zhx3	1810059C13Rik|4932418O04Rik|9530010N21Rik|Tix1|mKIAA0395	zinc fingers and homeoboxes 3	protein-coding
Diff_Nuc31394	chr3	97449362	97449501	+	0	NA	intron (NM_010232, intron 6 of 8)	intron (NM_010232, intron 6 of 8)	-12704	NM_182997	108097	Mm.31175	NM_182997	ENSMUSG00000038205	Prkab2	5730553K21Rik|AW049591|BB124140	protein kinase, AMP-activated, beta 2 non-catalytic subunit	protein-coding
Diff_Nuc12204	chr16	55878892	55879031	+	0	NA	intron (NM_001134457, intron 2 of 5)	L1_Mur2|LINE|L1	16431	NM_001134457	385658	Mm.310635	NM_001134457	ENSMUSG00000075033	Nxpe3	Fam55c|Gm1752|Gm611	neurexophilin and PC-esterase domain family, member 3	protein-coding
Diff_Nuc41072	chr9	106085302	106085441	+	0	NA	intron (NM_029896, intron 3 of 8)	intron (NM_029896, intron 3 of 8)	4200	NR_029526	387249		NR_029526	ENSMUSG00000065440	Mirlet7g	Mirnlet7g|let-7g|mmu-let-7g	microRNA let7g	ncRNA
Diff_Nuc29449	chr4	138569832	138569971	+	0	NA	intron (NM_029857, intron 8 of 16)	B4A|SINE|B4	41081	NM_029857	77056	Mm.122336	NM_029857	ENSMUSG00000041143	Tmco4	4632413C14Rik|AI430825	transmembrane and coiled-coil domains 4	protein-coding
Diff_Nuc7380	chr10	19791062	19791201	+	0	NA	intron (NM_008580, intron 11 of 29)	intron (NM_008580, intron 11 of 29)	-77595	NM_008635	17761	Mm.20928	NM_008635	ENSMUSG00000019996	Map7	E-MAP-115|MAP-7|Mtap7|R75000|mshi|mste|ste	microtubule-associated protein 7	protein-coding
Diff_Nuc40271	chr9	64168182	64168321	+	0	NA	intron (NM_172519, intron 7 of 16)	B4|SINE|B4	20013	NM_172519	213550	Mm.268341	NM_172519	ENSMUSG00000032396	Dis3l	AV340375	DIS3 like exosome 3'-5' exoribonuclease	protein-coding
Diff_Nuc24892	chr5	39387332	39387471	+	0	NA	Intergenic	Intergenic	-119469	NM_013748	27278	Mm.440845	NM_013748	ENSMUSG00000039315	Clnk	MIST	cytokine-dependent hematopoietic cell linker	protein-coding
Diff_Nuc41502	chr8	3518542	3518681	+	0	NA	intron (NM_001122818, intron 6 of 34)	B1_Mm|SINE|Alu	3227	NM_015801	50767	Mm.23085	NM_015801	ENSMUSG00000004565	Pnpla6	AI661849|MSws|Nte	patatin-like phospholipase domain containing 6	protein-coding
Diff_Nuc36022	chr1	8867472	8867611	+	0	NA	intron (NM_001290393, intron 3 of 19)	L1Md_F2|LINE|L1	422417	NM_001290390	71096	Mm.336395	NM_027671	ENSMUSG00000025909	Sntg1	4933426D16Rik|G1SYN|SYN4	syntrophin, gamma 1	protein-coding
Diff_Nuc18275	chr18	38031532	38031671	+	0	NA	intron (NM_001305980, intron 17 of 27)	intron (NM_001305980, intron 17 of 27)	-17287	NR_105945	102465592		NR_105945	ENSMUSG00000098706	Mir6979	Gm27524|mmu-mir-6979	microRNA 6979	ncRNA
Diff_Nuc42079	chr8	47063972	47064111	+	0	NA	intron (NM_138668, intron 1 of 11)	B2_Mm2|SINE|B2	3159	NM_138668	192169	Mm.210882	NM_138668	ENSMUSG00000031634	Ufsp2	1810047C23Rik	UFM1-specific peptidase 2	protein-coding
Diff_Nuc28355	chr4	88917972	88918111	+	0	NA	Intergenic	Intergenic	10055	NM_001040654	12578	Mm.4733	NM_009877	ENSMUSG00000044303	Cdkn2a	ARF-INK4a|Arf|INK4a-ARF|Ink4a/Arf|MTS1|Pctr1|p16|p16(INK4a)|p16INK4a|p19<ARF>|p19ARF	cyclin-dependent kinase inhibitor 2A	protein-coding
Diff_Nuc19565	chr7	31372252	31372391	+	0	NA	exon (NM_001290573, exon 2 of 37)	exon (NM_001290573, exon 2 of 37)	1424	NM_001290573	75410	Mm.168688	NM_029274	ENSMUSG00000006307	Kmt2b	2610014H22Rik|Mll2|Wbp7|mKIAA0304	lysine (K)-specific methyltransferase 2B	protein-coding
Diff_Nuc6631	chr11	105980622	105980761	+	0	NA	intron (NM_011947, intron 5 of 15)	MTC|LTR|MaLR	34475	NM_011947	26406	Mm.27041	NM_011947	ENSMUSG00000020700	Map3k3	AW548911|MAPKKK3|Mekk3|mKIAA4031	mitogen-activated protein kinase kinase kinase 3	protein-coding
Diff_Nuc2838	chr12	36448582	36448721	+	0	NA	Intergenic	Intergenic	-68861	NR_045050	71581	Mm.100110	NR_045050		9130015A21Rik	100043575|Gm4527	RIKEN cDNA 9130015A21 gene	ncRNA
Diff_Nuc13985	chr15	77161002	77161141	+	0	NA	Intergenic	(TTTG)n|Simple_repeat|Simple_repeat	-23588	NM_053104	93686	Mm.202774	NM_053104	ENSMUSG00000033565	Rbfox2	Fbm2|Fxh|Hrnbp2|Rbm9	RNA binding protein, fox-1 homolog (C. elegans) 2	protein-coding
Diff_Nuc1665	chr13	82814322	82814461	+	0	NA	Intergenic	B3|SINE|B2	22941	NR_039537	100628621		NR_039537	ENSMUSG00000106655	Mir3961	mmu-mir-3961	microRNA 3961	ncRNA
Diff_Nuc32559	chr2	3427492	3427631	+	0	NA	intron (NR_103465, intron 3 of 4)	intron (NR_103465, intron 3 of 4)	2525	NR_103465	50497	Mm.89341	NM_015765	ENSMUSG00000051396	Hspa14	70kDa|HSP70L1|Hsp70-4|NST-1|hsr.1	heat shock protein 14	protein-coding
Diff_Nuc2157	chr13	110427482	110427621	+	0	NA	intron (NM_011056, intron 3 of 16)	intron (NM_011056, intron 3 of 16)	-266466	NR_035442	100316683		NR_035442	ENSMUSG00000084651	Mir1904	Mirn1904|mmu-mir-1904	microRNA 1904	ncRNA
Diff_Nuc2031	chr13	103280052	103280191	+	0	NA	Intergenic	MER58C|DNA|MER1_type	-203517	NM_008533	17079	Mm.373974	NM_008533	ENSMUSG00000021624	Cd180	F630107B15|Ly78|RP105	CD180 antigen	protein-coding
Diff_Nuc18992	chr18	78006622	78006761	+	0	NA	promoter-TSS (NM_146089)	promoter-TSS (NM_146089)	-172	NM_146089	225745	Mm.39293	NM_146089	ENSMUSG00000041840	Haus1	BC024400|Ccdc5|HEI-C	HAUS augmin-like complex, subunit 1	protein-coding
Diff_Nuc1242	chr13	56253422	56253561	+	0	NA	Intergenic	Intergenic	-16580	NM_001159513	26914	Mm.283802	NM_012015	ENSMUSG00000015937	H2afy	H2AF12M|mH2a1|macroH2A1	H2A histone family, member Y	protein-coding
Diff_Nuc40123	chr9	58321572	58321711	+	0	NA	Intergenic	Intergenic	-14769	NM_176921	319477	Mm.153674	NM_176921	ENSMUSG00000066607	6030419C18Rik	-	RIKEN cDNA 6030419C18 gene	protein-coding
Diff_Nuc42209	chr8	59021302	59021441	+	0	NA	intron (NM_001009951, intron 5 of 10)	intron (NM_001009951, intron 5 of 10)	7992	NM_001009951	382010	Mm.425534	NM_001009951	ENSMUSG00000038215	Cep44	4933440G23Rik|mKIAA1712	centrosomal protein 44	protein-coding
Diff_Nuc20474	chr7	100077682	100077821	+	0	NA	intron (NM_028243, intron 8 of 8)	intron (NM_028243, intron 8 of 8)	53988	NM_028243	72461	Mm.389969	NM_028243	ENSMUSG00000061119	Prcp	2510048K03Rik|2610104A14Rik|AI451719|HUMPCP|PCP	prolylcarboxypeptidase (angiotensinase C)	protein-coding
Diff_Nuc34130	chr2	84203192	84203331	+	0	NA	intron (NM_018782, intron 9 of 15)	RMER1A|Other|Other	62162	NM_018782	54598	Mm.75467	NM_018782	ENSMUSG00000059588	Calcrl	AV071593|CRLR	calcitonin receptor-like	protein-coding
Diff_Nuc32048	chr3	130515072	130515211	+	0	NA	Intergenic	Intergenic	-81825	NM_001005859	68436	Mm.140568	NM_026724	ENSMUSG00000062006	Rpl34	1100001I22Rik	ribosomal protein L34	protein-coding
Diff_Nuc27478	chr4	34502412	34502551	+	0	NA	intron (NM_001007589, intron 1 of 4)	Lx8|LINE|L1	4617	NM_001007589	433693	Mm.389532	NM_026019	ENSMUSG00000028291	Akirin2	2700059D21Rik|AA114675|AA522011|AU019887|Akirin-2	akirin 2	protein-coding
Diff_Nuc20953	chr7	125279052	125279191	+	0	NA	exon (NM_001031814, exon 63 of 63)	exon (NM_001031814, exon 63 of 63)	-5982	NM_019419	54208	Mm.29924	NM_019419	ENSMUSG00000030654	Arl6ip1	AIP-6|AL022945|ARMER|AU042858|Aip-1|Arl6ip|C85138|mKIAA0069	ADP-ribosylation factor-like 6 interacting protein 1	protein-coding
Diff_Nuc6080	chr11	86052562	86052701	+	0	NA	intron (NM_027421, intron 9 of 24)	intron (NM_027421, intron 9 of 24)	18439	NM_027421	70422	Mm.171304	NM_027421	ENSMUSG00000018068	Ints2	2810417D08Rik|AA408260|AI987735|mKIAA1287	integrator complex subunit 2	protein-coding
Diff_Nuc36609	chr1	51300212	51300351	+	0	NA	intron (NR_045151, intron 4 of 4)	intron (NR_045151, intron 4 of 4)	-45689	NM_138741	20324	Mm.398690	NM_138741	ENSMUSG00000045954	Sdpr	-	serum deprivation response	protein-coding
Diff_Nuc16129	chr14	100683692	100683831	+	0	NA	Intergenic	Intergenic	-134746	NM_010636	16597	Mm.396499	NM_010636	ENSMUSG00000072294	Klf12	2700063E05Rik|AI225908|AI315654|AP-2rep|B130052C06Rik|D530033K05Rik	Kruppel-like factor 12	protein-coding
Diff_Nuc39591	chr9	31098242	31098381	+	0	NA	Intergenic	Intergenic	19325	NM_001101597	638580	Mm.373655	NM_001101597		Gm7244	EG638580	predicted gene 7244	protein-coding
Diff_Nuc33762	chr2	65728392	65728531	+	0	NA	intron (NM_153409, intron 3 of 6)	intron (NM_153409, intron 3 of 6)	-41461	NM_001290665	77771	Mm.102025	NM_153409	ENSMUSG00000044647	Csrnp3	A330102K23Rik|CSRNP-3|Csnrp3|Mbu1|taip-2	cysteine-serine-rich nuclear protein 3	protein-coding
Diff_Nuc13355	chr15	40863502	40863641	+	0	NA	intron (NM_011766, intron 5 of 7)	intron (NM_011766, intron 5 of 7)	376983	NM_011766	22762	Mm.39496	NM_011766	ENSMUSG00000022306	Zfpm2	B330005D23Rik|FOG-2|FOG2	zinc finger protein, multitype 2	protein-coding
Diff_Nuc11199	chr17	95259592	95259731	+	0	NA	Intergenic	PB1D10|SINE|Alu	-25501	NM_153780	72139	Mm.426514	NM_153780	ENSMUSG00000071302	2610044O15Rik8	2610044O15Rik	RIKEN cDNA 2610044O15 gene	protein-coding
Diff_Nuc3457	chr12	75589342	75589481	+	0	NA	Intergenic	MTD|LTR|MaLR	190950	NM_198866	386753	Mm.341686	NM_198866	ENSMUSG00000029878	Dbpht2	Spot2	DNA binding protein with his-thr domain	protein-coding
Diff_Nuc31759	chr3	116417342	116417481	+	0	NA	Intergenic	B1F|SINE|Alu	-2213	NM_144902	229782	Mm.190758	NM_144902	ENSMUSG00000027957	Slc35a3	2310050P13Rik	solute carrier family 35 (UDP-N-acetylglucosamine (UDP-GlcNAc) transporter), member 3	protein-coding
Diff_Nuc34565	chr2	109854052	109854191	+	0	NA	3' UTR (NM_172671, exon 18 of 18)	3' UTR (NM_172671, exon 18 of 18)	-3853	NM_026613	68201	Mm.181767	NM_026613	ENSMUSG00000027160	Ccdc34	2810027O19Rik|4930522P10Rik|AI596202	coiled-coil domain containing 34	protein-coding
Diff_Nuc30630	chr3	59851882	59852021	+	0	NA	Intergenic	L1M2|LINE|L1	16241	NM_023383	67758	Mm.24547	NM_023383	ENSMUSG00000027761	Aadac	5033417E09Rik|AI265437|Aada	arylacetamide deacetylase (esterase)	protein-coding
Diff_Nuc16773	chr19	14622992	14623131	+	0	NA	intron (NM_011600, intron 5 of 19)	intron (NM_011600, intron 5 of 19)	48642	NM_001302951	21888	Mm.103638	NM_011600	ENSMUSG00000024642	Tle4	5730411M05Rik|AA792082|Bce-1|Bce1|ESTM13|ESTM14|Grg4|X83332|X83333|grg-4	transducin-like enhancer of split 4	protein-coding
Diff_Nuc43101	chr8	109692352	109692491	+	0	NA	intron (NM_025558, intron 1 of 4)	B1_Mus2|SINE|Alu	17860	NM_025558	66427	Mm.20242	NM_025558	ENSMUSG00000031924	Cyb5b	1810044O22Rik|AU015618|Cyb5m	cytochrome b5 type B	protein-coding
Diff_Nuc23937	chr6	134737462	134737601	+	0	NA	intron (NM_001048054, intron 1 of 6)	(A)n|Simple_repeat|Simple_repeat	5115	NM_130447	70686	Mm.491182	NM_130447	ENSMUSG00000030203	Dusp16	3830417M17Rik|AW558566|D6Ertd213e|MKP-7|MKP7|Mkpm	dual specificity phosphatase 16	protein-coding
Diff_Nuc26127	chr5	109055027	109055166	+	0	NA	intron (NM_001282052, intron 1 of 26)	L1M4|LINE|L1	3700	NM_153569	231580	Mm.276647	NM_153569	ENSMUSG00000062234	Gak	D130045N16Rik	cyclin G associated kinase	protein-coding
Diff_Nuc10118	chr17	33059282	33059421	+	0	NA	Intergenic	B1_Mur3|SINE|Alu	-5064	NM_001204336	64385	Mm.486449	NM_022434	ENSMUSG00000024292	Cyp4f14	1300014O15Rik|cyp4f-14	cytochrome P450, family 4, subfamily f, polypeptide 14	protein-coding
Diff_Nuc7588	chr10	29670612	29670751	+	0	NA	Intergenic	Lx9|LINE|L1	249665	NM_001109747	66311	Mm.251779	NM_001109747	ENSMUSG00000075266	Cenpw	2610036L11Rik|Cug2	centromere protein W	protein-coding
Diff_Nuc37901	chr1	132561432	132561571	+	0	NA	Intergenic	Intergenic	-3306	NM_007576	12269	Mm.306720	NM_007576	ENSMUSG00000026405	C4bp	AI195242|C4bpa	complement component 4 binding protein	protein-coding
Diff_Nuc30567	chr3	57558212	57558351	+	0	NA	intron (NM_001304454, intron 1 of 9)	intron (NM_001304454, intron 1 of 9)	18297	NR_130743	24017	Mm.274360	NM_011883	ENSMUSG00000036503	Rnf13	2010001H16Rik|Rzf	ring finger protein 13	protein-coding
Diff_Nuc19415	chr7	26005782	26005921	+	0	NA	promoter-TSS (NM_207677)	promoter-TSS (NM_207677)	-593	NM_175436	210172	Mm.129371	NM_175436	ENSMUSG00000046541	Zfp526	D030024H03Rik|Znf526	zinc finger protein 526	protein-coding
Diff_Nuc11543	chr16	21858582	21858721	+	0	NA	Intergenic	Intergenic	-33391	NM_172821	71751	Mm.420837	NM_172821	ENSMUSG00000033618	Map3k13	C130026N12Rik|LZK	mitogen-activated protein kinase kinase kinase 13	protein-coding
Diff_Nuc6717	chr11	107582972	107583111	+	0	NA	Intergenic	Intergenic	-5251	NM_007582	12299	Mm.57093	NM_007582	ENSMUSG00000020722	Cacng1	-	calcium channel, voltage-dependent, gamma subunit 1	protein-coding
Diff_Nuc23056	chr6	90289332	90289471	+	0	NA	intron (NM_001347329, intron 6 of 19)	B1_Mur2|SINE|Alu	6118	NM_144940	243537	Mm.335669	NM_144940	ENSMUSG00000034456	Uroc1	AI265605|BC022133	urocanase domain containing 1	protein-coding
Diff_Nuc43014	chr8	107267122	107267261	+	0	NA	Intergenic	L1_Mus2|LINE|L1	9288	NM_133960	102022	Mm.212983	NM_133960	ENSMUSG00000055730	Ces2a	9130231C15Rik|AI266984|Ces6	carboxylesterase 2A	protein-coding
Diff_Nuc35781	chr2	169888152	169888291	+	0	NA	non-coding (NR_033634, exon 3 of 3)	non-coding (NR_033634, exon 3 of 3)	7950	NR_033634	100043910	Mm.468546	NR_033632	ENSMUSG00000097065	A630075F10Rik	4831414D02|Gm4722	RIKEN cDNA A630075F10 gene	ncRNA
Diff_Nuc21484	chr6	3378502	3378641	+	0	NA	Intergenic	MTD-int|LTR|MaLR	-29000	NM_010156	209086	Mm.196013	NM_010156	ENSMUSG00000047735	Samd9l	AA175286|ESTM25|mKIAA2005	sterile alpha motif domain containing 9-like	protein-coding
Diff_Nuc14947	chr14	31633642	31633781	+	0	NA	3' UTR (NM_019460, exon 21 of 21)	3' UTR (NM_019460, exon 21 of 21)	-5069	NM_028839	69179	Mm.143025	NM_028839	ENSMUSG00000006526	Tmem110	1810038N08Rik|2310014H19Rik|AW554125|STIMATE	transmembrane protein 110	protein-coding
Diff_Nuc20384	chr7	94957232	94957371	+	0	NA	intron (NM_001081414, intron 4 of 9)	L1_Mm|LINE|L1	224623	NM_001143834	108071	Mm.235018	NM_001033224	ENSMUSG00000049583	Grm5	6430542K11Rik|AI850523|Glu5R|Gprc1e|mGluR5|mGluR5b	glutamate receptor, metabotropic 5	protein-coding
Diff_Nuc33556	chr2	54427552	54427691	+	0	NA	intron (NM_173030, intron 3 of 12)	Lx|LINE|L1	138823	NM_173030	271786	Mm.330227	NM_173030	ENSMUSG00000060988	Galnt13	A230002A12|A230020F20|BB182356	UDP-N-acetyl-alpha-D-galactosamine:polypeptide N-acetylgalactosaminyltransferase 13	protein-coding
Diff_Nuc6484	chr11	101317882	101318021	+	0	NA	exon (NM_027320, exon 2 of 7)	exon (NM_027320, exon 2 of 7)	8225	NM_027320	70110	Mm.45558	NM_027320	ENSMUSG00000010358	Ifi35	2010008K16Rik|AW986054|IFP35|ifi-35	interferon-induced protein 35	protein-coding
Diff_Nuc22363	chr6	49109452	49109591	+	0	NA	intron (NM_023670, intron 3 of 14)	intron (NM_023670, intron 3 of 14)	55432	NM_023670	140488	Mm.281018	NM_023670	ENSMUSG00000029814	Igf2bp3	2610101N11Rik|AA522010|AL022933|AU045931|IMP-3|IMP3|Koc13|Neilsen|mimp3	insulin-like growth factor 2 mRNA binding protein 3	protein-coding
Diff_Nuc41225	chr9	110905432	110905571	+	0	NA	Intergenic	Intergenic	-13284	NM_153100	235636	Mm.441138	NM_153100	ENSMUSG00000066319	Rtp3	Tmem7	receptor transporter protein 3	protein-coding
Diff_Nuc43039	chr8	108198012	108198151	+	0	NA	intron (NM_181322, intron 7 of 11)	B1_Mur2|SINE|Alu	-16725	NM_001033320	234695	Mm.471640	NM_001033320	ENSMUSG00000050357	Carmil2	CG1399-PB|D130029J02Rik|Gm585|Rltpr	capping protein regulator and myosin 1 linker 2	protein-coding
Diff_Nuc34378	chr2	98853972	98854111	+	0	NA	Intergenic	RLTR1B|LTR|ERV1	1546227	NM_178725	241568	Mm.241682	NM_178725	ENSMUSG00000050587	Lrrc4c	6430556C10Rik|NGL-1	leucine rich repeat containing 4C	protein-coding
Diff_Nuc32445	chr3	151655982	151656121	+	0	NA	Intergenic	Intergenic	-155559	NM_008966	19220	Mm.331442	NM_008966	ENSMUSG00000028036	Ptgfr	AI957154|PGF|fp	prostaglandin F receptor	protein-coding
Diff_Nuc12290	chr16	63104152	63104291	+	0	NA	Intergenic	Intergenic	250088	NM_011173	19128	Mm.127156	NM_011173	ENSMUSG00000022912	Pros1	AW214361	protein S (alpha)	protein-coding
Diff_Nuc13251	chr15	36170362	36170501	+	0	NA	promoter-TSS (NR_106173)	promoter-TSS (NR_106173)	-512	NR_106173	102465888		NR_106173	ENSMUSG00000098457	Mir8097	Gm27497|mmu-mir-8097	microRNA 8097	ncRNA
Diff_Nuc26257	chr5	115008482	115008621	+	0	NA	Intergenic	Intergenic	-9709	NM_001004180	433940	Mm.194212	NM_001004180	ENSMUSG00000041930	Fam222a	-	family with sequence similarity 222, member A	protein-coding
Diff_Nuc8447	chr10	77099442	77099581	+	0	NA	intron (NM_019803, intron 3 of 5)	intron (NM_019803, intron 3 of 5)	-4458	NR_035451	100316811		NR_035451	ENSMUSG00000089424	Mir1930	mir-1930|mmu-mir-1930	microRNA 1930	ncRNA
Diff_Nuc32380	chr3	147211642	147211781	+	0	NA	Intergenic	Intergenic	696380	NM_001302958	70892	Mm.187793	NM_027594	ENSMUSG00000036745	Ttll7	1110049N09Rik|4921517B04Rik|C630030B20|mTTLL7	tubulin tyrosine ligase-like family, member 7	protein-coding
Diff_Nuc17522	chr19	53435612	53435751	+	0	NA	intron (NM_001008543, intron 3 of 5)	L1Md_F2|LINE|L1	29382	NM_172429	76479	Mm.313687	NM_172429	ENSMUSG00000025024	Smndc1	2410004J23Rik|4933440I19Rik	survival motor neuron domain containing 1	protein-coding
Diff_Nuc39928	chr9	48626392	48626531	+	0	NA	intron (NM_001033324, intron 2 of 6)	intron (NM_001033324, intron 2 of 6)	17589	NM_001033324	235320	Mm.457803	NM_001033324	ENSMUSG00000066687	Zbtb16	AI467657|PLZF|Zfp145|lu	zinc finger and BTB domain containing 16	protein-coding
Diff_Nuc34197	chr2	87901352	87901491	+	0	NA	Intergenic	MurERV4_19-int|LTR|ERVK	10143	NM_146644	258638	Mm.271486	NM_146644	ENSMUSG00000075137	Olfr1163	MOR174-8	olfactory receptor 1163	protein-coding
Diff_Nuc6003	chr11	83710102	83710241	+	0	NA	intron (NM_001291268, intron 8 of 8)	intron (NM_001291268, intron 8 of 8)	43709	NM_001291269	21410	Mm.7226	NM_009330	ENSMUSG00000020679	Hnf1b	HNF-1-beta|HNF-1B|HNF-1Beta|Hnf1beta|LFB3|Tcf-2|Tcf2|vHNF1	HNF1 homeobox B	protein-coding
Diff_Nuc14933	chr14	31272792	31272931	+	0	NA	intron (NR_131095, intron 1 of 3)	intron (NR_131095, intron 1 of 3)	1639	NR_131095	77710	Mm.410773	NR_131095		4831407H17Rik	-	RIKEN cDNA 4831407H17 gene	ncRNA
Diff_Nuc39036	chr1	186738242	186738381	+	0	NA	intron (NM_145515, intron 11 of 17)	intron (NM_145515, intron 11 of 17)	-31396	NM_178692	226777	Mm.169542	NM_178692	ENSMUSG00000039349	C130074G19Rik	-	RIKEN cDNA C130074G19 gene	protein-coding
Diff_Nuc28581	chr4	100903282	100903421	+	0	NA	intron (NM_146145, intron 1 of 24)	intron (NM_146145, intron 1 of 24)	34536	NM_146145	16451	Mm.289657	NM_146145	ENSMUSG00000028530	Jak1	AA960307|BAP004|C130039L05Rik	Janus kinase 1	protein-coding
Diff_Nuc26754	chr5	139185152	139185291	+	0	NA	Intergenic	MER63D|DNA|AcHobo	-45814	NM_030565	80752	Mm.320355	NM_030565	ENSMUSG00000025854	Fam20c	C76981|DMP-4|DMP4|GEF-CK|mKIAA4081	family with sequence similarity 20, member C	protein-coding
Diff_Nuc4607	chr11	19844272	19844411	+	0	NA	intron (NM_033523, intron 1 of 5)	intron (NM_033523, intron 1 of 5)	19896	NM_033523	114716	Mm.266627	NM_033523	ENSMUSG00000045671	Spred2	C79158	sprouty-related, EVH1 domain containing 2	protein-coding
Diff_Nuc33854	chr2	69707312	69707451	+	0	NA	intron (NM_001110145, intron 8 of 11)	RSINE1|SINE|B4	7762	NM_009278	20823	Mm.10508	NM_009278	ENSMUSG00000068882	Ssb	SS-B	Sjogren syndrome antigen B	protein-coding
Diff_Nuc13348	chr15	40651602	40651741	+	0	NA	intron (NM_011766, intron 3 of 7)	intron (NM_011766, intron 3 of 7)	165083	NM_011766	22762	Mm.39496	NM_011766	ENSMUSG00000022306	Zfpm2	B330005D23Rik|FOG-2|FOG2	zinc finger protein, multitype 2	protein-coding
Diff_Nuc40330	chr9	65910332	65910471	+	0	NA	intron (NM_011149, intron 2 of 4)	ID_B1|SINE|B4	2425	NM_011149	19035	Mm.335249	NM_011149	ENSMUSG00000032383	Ppib	AA408962|AA553318|AI844835|Cphn-2|Cphn2|CyP-20b	peptidylprolyl isomerase B	protein-coding
Diff_Nuc5054	chr11	46396942	46397081	+	0	NA	intron (NM_001025435, intron 3 of 5)	intron (NM_001025435, intron 3 of 5)	11996	NM_001025435	407814	Mm.271088	NM_001025435	ENSMUSG00000046974	BC053393	-	cDNA sequence BC053393	protein-coding
Diff_Nuc40036	chr9	54669022	54669161	+	0	NA	Intergenic	Intergenic	-42471	NM_022655	64602	Mm.208991	NM_022655	ENSMUSG00000032293	Ireb2	D9Ertd85e|Irp2	iron responsive element binding protein 2	protein-coding
Diff_Nuc34806	chr2	121838532	121838671	+	0	NA	3' UTR (NM_001290991, exon 13 of 13)	3' UTR (NM_001290991, exon 13 of 13)	-15715	NM_144545	78655	Mm.458184	NM_144545	ENSMUSG00000027236	Eif3j1	1810016I04Rik|2700079K05Rik|AA409117|AA409446|C78575|Eif3j|Eif3j-1|Eif3j-2|Eif3j2|Eif3s1|eIF-3-alpha-A|eIF-3-alpha-B|eIF3-alpha|eIF3-p35|eIF3j-A|eIF3j-B	eukaryotic translation initiation factor 3, subunit J1	protein-coding
Diff_Nuc5187	chr11	52202002	52202141	+	0	NA	3' UTR (NM_011694, exon 9 of 9)	3' UTR (NM_011694, exon 9 of 9)	-7859	NM_153117	213673	Mm.291979	NM_153117	ENSMUSG00000036275	9530068E07Rik	C85061|Kct2	RIKEN cDNA 9530068E07 gene	protein-coding
Diff_Nuc5621	chr11	70824682	70824821	+	0	NA	intron (NM_001291146, intron 6 of 6)	B3|SINE|B2	-6817	NM_178367	216877	Mm.35399	NM_178367	ENSMUSG00000040620	Dhx33	3110057P17Rik|9430096J02Rik|Ddx33	DEAH (Asp-Glu-Ala-His) box polypeptide 33	protein-coding
Diff_Nuc41438	chr9	122752792	122752931	+	0	NA	Intergenic	Intergenic	22263	NM_173364	235682	Mm.326477	NM_173364	ENSMUSG00000047036	Zfp445	AW610627|ZNF168|Znf445|mszf29|mszf50	zinc finger protein 445	protein-coding
Diff_Nuc23281	chr6	100215092	100215231	+	0	NA	intron (NM_019743, intron 2 of 4)	intron (NM_019743, intron 2 of 4)	22191	NM_019743	56353	Mm.321633	NM_019743	ENSMUSG00000072872	Rybp	2410018J24Rik|DEDAF|YEAF1	RING1 and YY1 binding protein	protein-coding
Diff_Nuc32959	chr2	26289682	26289821	+	0	NA	intron (NM_153125, intron 3 of 29)	intron (NM_153125, intron 3 of 29)	10985	NM_153125	227648	Mm.206371	NM_153125	ENSMUSG00000026924	Sec16a	AU024582|C230052J16Rik	SEC16 homolog A, endoplasmic reticulum export factor	protein-coding
Diff_Nuc30100	chr3	23923392	23923531	+	0	NA	intron (NM_001326288, intron 10 of 13)	L1Md_T|LINE|L1	759467	NM_001326288	635702	Mm.448351	NM_001326288	ENSMUSG00000102758	Naaladl2	2810043G22Rik|EG635702|Gm1021	N-acetylated alpha-linked acidic dipeptidase-like 2	protein-coding
Diff_Nuc36717	chr1	55251032	55251171	+	0	NA	exon (NM_028713, exon 7 of 9)	exon (NM_028713, exon 7 of 9)	32525	NM_028713	74013	Mm.292050	NM_028713	ENSMUSG00000025978	Rftn2	2700010E02Rik|3222401M22Rik	raftlin family member 2	protein-coding
Diff_Nuc17733	chr18	5030232	5030371	+	0	NA	Intergenic	MTA_Mm|LTR|MaLR	-16286	NM_153153	225115	Mm.136791	NM_153153	ENSMUSG00000024236	Svil	AU024053|B430302E16Rik	supervillin	protein-coding
Diff_Nuc5987	chr11	83204002	83204141	+	0	NA	intron (NM_001035854, intron 19 of 21)	intron (NM_001035854, intron 19 of 21)	-19503	NM_001013386	276952	Mm.66275	NM_001013386	ENSMUSG00000020684	Rasl10b	B230331P10Rik|Gm729|VTS58635	RAS-like, family 10, member B	protein-coding
Diff_Nuc41701	chr8	19970612	19970751	+	0	NA	Intergenic	Intergenic	-11901	NM_001177408	100040599	Mm.491087	NM_001177408	ENSMUSG00000074449	Gm15319	OTTMUSG00000020118	predicted gene 15319	protein-coding
Diff_Nuc19594	chr7	34982442	34982581	+	0	NA	promoter-TSS (NM_026549)	promoter-TSS (NM_026549)	-845	NM_026549	68079	Mm.38173	NM_026549	ENSMUSG00000002635	Pdcd2l	6030457N17Rik	programmed cell death 2-like	protein-coding
Diff_Nuc1556	chr13	76078882	76079021	+	0	NA	intron (NM_028493, intron 2 of 11)	intron (NM_028493, intron 2 of 11)	2321	NM_028493	73296	Mm.276200	NM_028493	ENSMUSG00000021589	Rhobtb3	1700040C17Rik|2610033K01Rik|4930503C18Rik|AI317148|AW208826|mKIAA0878	Rho-related BTB domain containing 3	protein-coding
Diff_Nuc4912	chr11	33601417	33601556	+	0	NA	intron (NM_001190885, intron 1 of 8)	LTR33|LTR|ERVL	-122529	NM_146017	216643	Mm.99989	NM_146017	ENSMUSG00000020159	Gabrp	-	gamma-aminobutyric acid (GABA) A receptor, pi	protein-coding
Diff_Nuc37782	chr1	123112242	123112381	+	0	NA	Intergenic	Intergenic	111944	NM_001271531	72999	Mm.27136	NM_133748	ENSMUSG00000003721	Insig2	2900053I11Rik|C730043J18Rik|Insig-2	insulin induced gene 2	protein-coding
Diff_Nuc27903	chr4	58157902	58158041	+	0	NA	intron (NM_022814, intron 5 of 47)	intron (NM_022814, intron 5 of 47)	61497	NM_022814	64817	Mm.261024	NM_022814	ENSMUSG00000028369	Svep1	1110021D17Rik|4833413O10Rik|AA387071|D430029O09Rik|Polydom	sushi, von Willebrand factor type A, EGF and pentraxin domain containing 1	protein-coding
Diff_Nuc2010	chr13	102483832	102483971	+	0	NA	intron (NM_001077495, intron 2 of 15)	intron (NM_001077495, intron 2 of 15)	-21316	NM_001024955	18708	Mm.259333	NM_001024955	ENSMUSG00000041417	Pik3r1	PI3K|p50alpha|p55alpha|p85alpha	phosphatidylinositol 3-kinase, regulatory subunit, polypeptide 1 (p85 alpha)	protein-coding
Diff_Nuc38498	chr1	162556512	162556651	+	0	NA	intron (NM_013862, intron 13 of 20)	ORR1B1|LTR|MaLR	-48697	NM_001146330	620246	Mm.478780	NM_001146330		Gpr52	EG620246	G protein-coupled receptor 52	protein-coding
Diff_Nuc17014	chr19	29653332	29653471	+	0	NA	intron (NM_001081319, intron 11 of 25)	B4A|SINE|B4	56629	NM_001081319	226089	Mm.353838	NM_177641	ENSMUSG00000038658	Ric1	C030046E11Rik|C130057E09Rik|Kiaa1432	RAB6A GEF complex partner 1	protein-coding
Diff_Nuc11949	chr16	37905702	37905841	+	0	NA	Intergenic	ORR1A2|LTR|MaLR	-10811	NM_153394	239845	Mm.228018	NM_153394	ENSMUSG00000046961	Gpr156	Gababl	G protein-coupled receptor 156	protein-coding
Diff_Nuc42914	chr8	97678442	97678581	+	0	NA	Intergenic	Intergenic	-12071	NM_001145831	16582	Mm.378951	NM_010631	ENSMUSG00000031788	Kifc3	AI325457|BB123200	kinesin family member C3	protein-coding
Diff_Nuc38883	chr1	178892502	178892641	+	0	NA	intron (NM_029756, intron 16 of 17)	intron (NM_029756, intron 16 of 17)	-126307	NR_037996	15365	Mm.441435	NR_037996		Hmga2-ps1	EG666235|Gm7996|Hmgic-ps1|[y]i-c	high mobility group AT-hook 2, pseudogene 1	pseudo
Diff_Nuc41183	chr9	109382822	109382961	+	0	NA	intron (NM_177703, intron 9 of 9)	L1MDa|LINE|L1	15477	NM_177703	235612	Mm.133921	NM_177703	ENSMUSG00000074061	Fbxw19	E330023O18	F-box and WD-40 domain protein 19	protein-coding
Diff_Nuc16518	chr19	4315142	4315281	+	0	NA	TTS (NM_001001984)	TTS (NM_001001984)	-8989	NM_001290818	110355	Mm.254144	NM_130863	ENSMUSG00000024858	Grk2	Adrbk-1|Adrbk1|Bark-1|beta ARK|betaARK1	G protein-coupled receptor kinase 2	protein-coding
Diff_Nuc25431	chr5	74388452	74388591	+	0	NA	Intergenic	Intergenic	75915	NM_177561	69727	Mm.48795	NM_177561	ENSMUSG00000054814	Usp46	1190009E20Rik|2410018I08Rik|AI451644	ubiquitin specific peptidase 46	protein-coding
Diff_Nuc42916	chr8	97865432	97865571	+	0	NA	intron (NM_133954, intron 3 of 6)	intron (NM_133954, intron 3 of 6)	9317	NM_133954	101985	Mm.29069	NM_133954	ENSMUSG00000031792	Usb1	AA960436	U6 snRNA biogenesis 1	protein-coding
Diff_Nuc31060	chr3	85403032	85403171	+	0	NA	intron (NM_144896, intron 2 of 12)	intron (NM_144896, intron 2 of 12)	25050	NM_144896	229487	Mm.52275	NM_144896	ENSMUSG00000028085	Gatb	9430026F02Rik|Pet112|Pet112l	glutamyl-tRNA(Gln) amidotransferase, subunit B	protein-coding
Diff_Nuc4724	chr11	23147302	23147441	+	0	NA	Intergenic	ORR1A1-int|LTR|MaLR	-8670	NM_001035226	103573	Mm.217547	NM_134014	ENSMUSG00000020290	Xpo1	AA420417|Crm1|Exp1	exportin 1	protein-coding
Diff_Nuc4927	chr11	35325742	35325881	+	0	NA	intron (NM_011412, intron 5 of 35)	intron (NM_011412, intron 5 of 35)	-104507	NR_029799	723924		NR_029799	ENSMUSG00000065583	Mir218-2	Mirn218-2|mir-218-2	microRNA 218-2	ncRNA
Diff_Nuc1413	chr13	67093022	67093161	+	0	NA	intron (NM_008959, intron 10 of 12)	intron (NM_008959, intron 10 of 12)	40250	NR_045851	71226	Mm.399574	NR_045851		4933433G19Rik	-	RIKEN cDNA 4933433G19 gene	ncRNA
Diff_Nuc43139	chr8	111790382	111790521	+	0	NA	Intergenic	RMER4B|LTR|ERVK	74357	NR_002928	384864	Mm.390083	NR_002928		Gm1943	-	WD repeat domain 70 pseudogene	pseudo
Diff_Nuc44	chrX	32110032	32110171	+	0	NA	Intergenic	L1_Mus3|LINE|L1	21599	NM_001270667	100861966	Mm.443264	NM_001270667	ENSMUSG00000100249	Btbd35f23	Gm21950|Mgclh	BTB domain containing 35, family member 23	protein-coding
Diff_Nuc27907	chr4	58361202	58361341	+	0	NA	intron (NM_001037127, intron 9 of 15)	ID_B1|SINE|B4	62437	NM_010944	18198	Mm.16148	NM_010944	ENSMUSG00000057280	Musk	Mdk4|Mlk|Nsk1|Nsk2|Nsk3	muscle, skeletal, receptor tyrosine kinase	protein-coding
Diff_Nuc16271	chr14	111727412	111727551	+	0	NA	Intergenic	Intergenic	-346856	NM_198865	75409	Mm.235097	NM_029273	ENSMUSG00000033214	Slitrk5	2610019D03Rik	SLIT and NTRK-like family, member 5	protein-coding
Diff_Nuc4390	chr11	4729422	4729561	+	0	NA	intron (NM_010898, intron 1 of 15)	intron (NM_010898, intron 1 of 15)	3647	NM_001252253	18016	Mm.297109	NM_010898	ENSMUSG00000009073	Nf2	merlin	neurofibromin 2	protein-coding
Diff_Nuc11887	chr16	35422562	35422701	+	0	NA	intron (NM_028295, intron 11 of 16)	intron (NM_028295, intron 11 of 16)	-58627	NM_133704	317717	Mm.259164	NM_133704	ENSMUSG00000034473	Sec22a	1810005C06Rik|Sec22l2	SEC22 homolog A, vesicle trafficking protein	protein-coding
Diff_Nuc17574	chr19	55706842	55706981	+	0	NA	Intergenic	Intergenic	69783	NR_045318	77594	Mm.329924	NR_045318	ENSMUSG00000097632	4930552P12Rik	-	RIKEN cDNA 4930552P12 gene	ncRNA
Diff_Nuc35033	chr2	132118842	132118981	+	0	NA	intron (NM_001291039, intron 1 of 12)	intron (NM_001291039, intron 1 of 12)	7236	NM_001291039	110911	Mm.284503	NM_138651	ENSMUSG00000058793	Cds2	5730450N06Rik|5730460C18Rik|AI854580|D2Wsu127e	CDP-diacylglycerol synthase (phosphatidate cytidylyltransferase) 2	protein-coding
Diff_Nuc9373	chr10	122452482	122452621	+	0	NA	intron (NM_153395, intron 24 of 33)	intron (NM_153395, intron 24 of 33)	-29771	NR_029527	387251		NR_029527	ENSMUSG00000065406	Mirlet7i	Mirnlet7i|let-7i|mmu-let-7i	microRNA let7i	ncRNA
Diff_Nuc27424	chr4	32306502	32306641	+	0	NA	Intergenic	Intergenic	-197839	NM_001109661	12014	Mm.491223	NM_007521	ENSMUSG00000040270	Bach2	E030004N02Rik	BTB and CNC homology, basic leucine zipper transcription factor 2	protein-coding
Diff_Nuc17099	chr19	32785622	32785761	+	0	NA	intron (NM_026487, intron 1 of 9)	B4|SINE|B4	1097	NM_026487	67979	Mm.27123	NM_026487	ENSMUSG00000013662	Atad1	4921525H23Rik|AW107648|Thorase	ATPase family, AAA domain containing 1	protein-coding
Diff_Nuc18952	chr18	75655032	75655171	+	0	NA	intron (NM_201354, intron 9 of 11)	intron (NM_201354, intron 9 of 11)	-19198	NR_045879	100038353	Mm.440724	NR_045879	ENSMUSG00000097712	Gm10532	ENSMUSG00000073534	predicted gene 10532	ncRNA
Diff_Nuc4858	chr11	30350692	30350831	+	0	NA	intron (NM_001100394, intron 2 of 4)	RLTR28|LTR|ERVL	21068	NM_001100394	75087	Mm.159422	NM_001100394	ENSMUSG00000040919	4930505A04Rik	-	RIKEN cDNA 4930505A04 gene	protein-coding
Diff_Nuc23380	chr6	108483222	108483361	+	0	NA	intron (NM_010585, intron 60 of 61)	intron (NM_010585, intron 60 of 61)	43554	NR_106121	102465766		NR_106121	ENSMUSG00000105697	Mir7661	mmu-mir-7661	microRNA 7661	ncRNA
Diff_Nuc13620	chr15	58264422	58264561	+	0	NA	exon (NM_145959, exon 14 of 24)	exon (NM_145959, exon 14 of 24)	17468	NM_145959	210998	Mm.3224	NM_145959	ENSMUSG00000037119	Fam91a1	AV220772|BC033609|D15Ertd621e|SKIN|mKIAA0493	family with sequence similarity 91, member A1	protein-coding
Diff_Nuc12519	chr16	85678232	85678371	+	0	NA	Intergenic	Intergenic	125057	NM_009621	11504	Mm.1421	NM_009621	ENSMUSG00000022893	Adamts1	ADAM-TS1|ADAMTS|ADAMTS-1|C3-C5|METH-1|METH1	a disintegrin-like and metallopeptidase (reprolysin type) with thrombospondin type 1 motif, 1	protein-coding
Diff_Nuc3729	chr12	86405412	86405551	+	0	NA	intron (NM_178363, intron 18 of 20)	intron (NM_178363, intron 18 of 20)	41900	NM_175198	73422	Mm.311944	NM_175198	ENSMUSG00000042320	Prox2	1700058C01Rik	prospero homeobox 2	protein-coding
Diff_Nuc31574	chr3	106487592	106487731	+	0	NA	promoter-TSS (NM_001039478)	promoter-TSS (NM_001039478)	-244	NM_001039478	321000	Mm.259638	NM_028081	ENSMUSG00000056260	Lrif1	2010012G17Rik|4933421E11Rik|AI450568	ligand dependent nuclear receptor interacting factor 1	protein-coding
Diff_Nuc31234	chr3	91245042	91245181	+	0	NA	Intergenic	L1_Rod|LINE|L1	-350384	NM_001101461	229550	Mm.98335	NM_001101461	ENSMUSG00000091175	9130204L05Rik	Gm127	RIKEN cDNA 9130204L05 gene	protein-coding
Diff_Nuc18330	chr18	39519082	39519221	+	0	NA	intron (NM_175164, intron 21 of 22)	intron (NM_175164, intron 21 of 22)	127748	NM_008173	14815	Mm.129481	NM_008173	ENSMUSG00000024431	Nr3c1	GR|Grl-1|Grl1	nuclear receptor subfamily 3, group C, member 1	protein-coding
Diff_Nuc8453	chr10	77472132	77472271	+	0	NA	intron (NM_008826, intron 1 of 21)	CpG	340	NM_008826	18641	Mm.269649	NM_008826	ENSMUSG00000020277	Pfkl	AA407869|ATP-PFK|PFK-L	phosphofructokinase, liver, B-type	protein-coding
Diff_Nuc4558	chr11	16733572	16733711	+	0	NA	intron (NM_207655, intron 1 of 27)	intron (NM_207655, intron 1 of 27)	81435	NM_007912	13649	Mm.8534	NM_007912	ENSMUSG00000020122	Egfr	9030024J15Rik|AI552599|Erbb|Errb1|Errp|Wa5|wa-2|wa2	epidermal growth factor receptor	protein-coding
Diff_Nuc15672	chr14	68332152	68332291	+	0	NA	intron (NM_175384, intron 3 of 14)	intron (NM_175384, intron 3 of 14)	1446	NM_001110162	108912	Mm.33831	NM_175384	ENSMUSG00000048922	Cdca2	2610311M19Rik|AI586158	cell division cycle associated 2	protein-coding
Diff_Nuc6077	chr11	85910352	85910491	+	0	NA	intron (NM_178309, intron 16 of 19)	intron (NM_178309, intron 16 of 19)	-72569	NR_046030	629393	Mm.372867	NR_046030		Gm20759	-	predicted gene, 20759	ncRNA
Diff_Nuc43185	chr8	113536982	113537121	+	0	NA	intron (NM_001190786, intron 6 of 11)	B1_Mur4|SINE|Alu	3379	NR_039583	100628592		NR_039583	ENSMUSG00000093087	Mir3473d	mmu-mir-3473d	microRNA 3473d	ncRNA
Diff_Nuc10469	chr17	50885142	50885281	+	0	NA	intron (NM_001285991, intron 20 of 22)	L1_Mur3|LINE|L1	47205	NM_001297747	12228	Mm.392910	NM_009770	ENSMUSG00000022863	Btg3	ANA|tob5	B cell translocation gene 3	protein-coding
Diff_Nuc41626	chr8	13114752	13114891	+	0	NA	intron (NM_146207, intron 2 of 19)	intron (NM_146207, intron 2 of 19)	9100	NM_146207	99375	Mm.212861	NM_146207	ENSMUSG00000031446	Cul4a	2810470J21Rik|AW495282	cullin 4A	protein-coding
Diff_Nuc36610	chr1	51388562	51388701	+	0	NA	intron (NR_045151, intron 1 of 4)	intron (NR_045151, intron 1 of 4)	1992	NR_045151	442821	Mm.118030	NR_045151	ENSMUSG00000101799	9330175M20Rik	-	RIKEN cDNA 9330175M20 gene	ncRNA
Diff_Nuc3626	chr12	82293742	82293881	+	0	NA	Intergenic	RLTR16|LTR|ERVK	26673	NR_037227	100526532		NR_037227	ENSMUSG00000092673	Mir3067	mir-3067|mmu-mir-3067	microRNA 3067	ncRNA
Diff_Nuc41599	chr8	11627232	11627371	+	0	NA	intron (NM_001281975, intron 3 of 6)	B1F1|SINE|Alu	7735	NR_030781	102334	Mm.12459	NM_133971	ENSMUSG00000031508	Ankrd10	4833425P12Rik|AW549277	ankyrin repeat domain 10	protein-coding
Diff_Nuc36814	chr1	60306692	60306831	+	0	NA	intron (NM_173444, intron 20 of 54)	intron (NM_173444, intron 20 of 54)	69318	NM_173444	269198	Mm.205224	NM_173444	ENSMUSG00000073664	Nbeal1	2310076G13Rik|A530050O19Rik|A530083I02Rik|AI662228|ALS2CR17	neurobeachin like 1	protein-coding
Diff_Nuc33009	chr2	27597682	27597821	+	0	NA	intron (NM_001290482, intron 4 of 9)	intron (NM_001290482, intron 4 of 9)	31648	NM_001290482	20181	Mm.24624	NM_011305	ENSMUSG00000015846	Rxra	9530071D11Rik|Nr2b1|RXRalpha1	retinoid X receptor alpha	protein-coding
Diff_Nuc6314	chr11	96533052	96533191	+	0	NA	intron (NM_001033186, intron 4 of 12)	B3|SINE|B2	105748	NM_028965	74479	Mm.270781	NM_028965	ENSMUSG00000020876	Snx11	4933439F10Rik|A930041K09Rik|AI117694	sorting nexin 11	protein-coding
Diff_Nuc3162	chr12	56348652	56348791	+	0	NA	intron (NM_001100110, intron 7 of 15)	RSINE1|SINE|B4	17256	NM_001100110	100101806	Mm.471968	NM_001100110	ENSMUSG00000079108	Srp54c	E330029E12Rik	signal recognition particle 54C	protein-coding
Diff_Nuc20982	chr7	126405862	126406001	+	0	NA	Intergenic	L1_Mus3|LINE|L1	-78043	NM_001024138	209776	Mm.300632	NM_001024138	ENSMUSG00000066197	Gpr139	GPRg1|Gm495|PGR3	G protein-coupled receptor 139	protein-coding
Diff_Nuc7374	chr10	19691732	19691871	+	0	NA	intron (NM_008580, intron 1 of 29)	B4A|SINE|B4	37469	NM_008580	26408	Mm.6595	NM_008580	ENSMUSG00000071369	Map3k5	7420452D20Rik|ASK|ASK1|MAPKKK5|Mekk5	mitogen-activated protein kinase kinase kinase 5	protein-coding
Diff_Nuc3153	chr12	56070092	56070231	+	0	NA	intron (NM_013815, intron 3 of 26)	PB1D10|SINE|Alu	17162	NM_013815	217578	Mm.479583	NM_013815	ENSMUSG00000035021	Baz1a	Acf1|B930060C03|BC065123|Gtl5|Wcrf180|cbp146	bromodomain adjacent to zinc finger domain 1A	protein-coding
Diff_Nuc33485	chr2	50378942	50379081	+	0	NA	Intergenic	Intergenic	226681	NR_040362	100502624	Mm.382825	NR_040361	ENSMUSG00000085862	Gm13483	OTTMUSG00000012382	predicted gene 13483	ncRNA
Diff_Nuc28958	chr4	119470942	119471081	+	0	NA	Intergenic	Intergenic	-16272	NM_010657	16656	Mm.302758	NM_010657	ENSMUSG00000028634	Hivep3	2900056N03Rik|A130075N07|AI848000|E030045D18Rik|KBP-1|KBP1|Krc|Rc|Schnurri-3|Shn3|Zas3	human immunodeficiency virus type I enhancer binding protein 3	protein-coding
Diff_Nuc37998	chr1	135759902	135760041	+	0	NA	Intergenic	Intergenic	43779	NM_054076	269120	Mm.59985	NM_054076	ENSMUSG00000010311	Optc	-	opticin	protein-coding
Diff_Nuc21187	chr7	136789922	136790061	+	0	NA	Intergenic	MTE2b|LTR|MaLR	54614	NM_172255	207425	Mm.229323	NM_172255	ENSMUSG00000042055	Wdr11	2900055P10Rik|AW489876|Brwd2|mKIAA1351	WD repeat domain 11	protein-coding
Diff_Nuc8064	chr10	58640352	58640491	+	0	NA	intron (NM_001024911, intron 6 of 9)	(TATG)n|Simple_repeat|Simple_repeat	44174	NM_001024911	103080	Mm.346842	NM_001024910	ENSMUSG00000019917	Sept10	4921515A04Rik|9430099J10Rik|AA408298|AI874685	septin 10	protein-coding
Diff_Nuc37382	chr1	91422362	91422501	+	0	NA	intron (NM_001037136, intron 1 of 16)	Lx7|LINE|L1	71045	NM_001037136	347722	Mm.291135	NM_178119	ENSMUSG00000055013	Agap1	Centg2|Ggap1|R75364|mKIAA1099	ArfGAP with GTPase domain, ankyrin repeat and PH domain 1	protein-coding
Diff_Nuc20285	chr7	88669897	88670036	+	0	NA	intron (NR_045299, intron 1 of 4)	intron (NR_045299, intron 1 of 4)	1530	NR_045299	100504421	Mm.217071	NR_045299	ENSMUSG00000097277	2900076A07Rik	WI1-1616M8.2	RIKEN cDNA 2900076A07 gene	ncRNA
Diff_Nuc28814	chr4	112936192	112936331	+	0	NA	intron (NM_001103199, intron 2 of 48)	Lx8|LINE|L1	23317	NM_001103199	230622	Mm.291107	NM_001103199	ENSMUSG00000087194	Skint6	OTTMUSG00000008519	selection and upkeep of intraepithelial T cells 6	protein-coding
Diff_Nuc13506	chr15	53015462	53015601	+	0	NA	intron (NM_010162, intron 1 of 10)	intron (NM_010162, intron 1 of 10)	162207	NM_010162	14042	Mm.309395	NM_010162	ENSMUSG00000061731	Ext1	AA409028	exostoses (multiple) 1	protein-coding
Diff_Nuc3275	chr12	66074352	66074491	+	0	NA	intron (NM_177805, intron 1 of 19)	B4A|SINE|B4	7692	NM_177805	328108	Mm.138465	NM_177805	ENSMUSG00000035614	Fam179b	A430041B07Rik|BC062107|C130034K06|mKIAA0423	family with sequence similarity 179, member B	protein-coding
Diff_Nuc33176	chr2	33155252	33155391	+	0	NA	intron (NM_001290570, intron 3 of 16)	intron (NM_001290570, intron 3 of 16)	71693	NM_001290570	241308	Mm.274249	NM_175211	ENSMUSG00000038831	Ralgps1	5830418G11Rik|AI853783|AI854138|RALGEF2|RALGPS1A|RalGEF 2|mKIAA0351	Ral GEF with PH domain and SH3 binding motif 1	protein-coding
Diff_Nuc28832	chr4	115111232	115111371	+	0	NA	3' UTR (NM_172306, exon 12 of 12)	3' UTR (NM_172306, exon 12 of 12)	-13908	NM_001100185	435802	Mm.466611	NM_001100185	ENSMUSG00000084346	Cyp4a30b	Cyp4a30b-ps|OTTMUSG00000008626	cytochrome P450, family 4, subfamily a, polypeptide 30b	protein-coding
Diff_Nuc30360	chr3	40735882	40736021	+	0	NA	intron (NM_026622, intron 10 of 12)	intron (NM_026622, intron 10 of 12)	-18602	NM_001040399	214048	Mm.46782	NM_027663	ENSMUSG00000025762	Larp1b	1700108L22Rik|4933421B21Rik|AA690246|Larp2	La ribonucleoprotein domain family, member 1B	protein-coding
Diff_Nuc39398	chr9	20336192	20336331	+	0	NA	Intergenic	Intergenic	-10398	NM_001082485	77519	Mm.431849	NM_001082485	ENSMUSG00000060510	Zfp266	5330440G10Rik|5730601F06Rik|AW552317	zinc finger protein 266	protein-coding
Diff_Nuc24061	chr6	140904802	140904941	+	0	NA	Intergenic	Intergenic	-292919	NM_018779	54611	Mm.103728	NM_018779	ENSMUSG00000041741	Pde3a	A930022O17Rik|C87899	phosphodiesterase 3A, cGMP inhibited	protein-coding
Diff_Nuc11166	chr17	91838922	91839061	+	0	NA	Intergenic	L1_Rod|LINE|L1	-346849	NM_020252	18189	Mm.478418	NM_020252	ENSMUSG00000024109	Nrxn1	1700062G21Rik|9330127H16Rik|A230068P09Rik|mKIAA0578	neurexin I	protein-coding
Diff_Nuc33360	chr2	43491382	43491521	+	0	NA	3' UTR (NM_001289594, exon 11 of 11)	3' UTR (NM_001289594, exon 11 of 11)	80606	NM_027552	70789	Mm.105278	NM_027552	ENSMUSG00000026866	Kynu	4432411A05Rik	kynureninase (L-kynurenine hydrolase)	protein-coding
Diff_Nuc3179	chr12	57185542	57185681	+	0	NA	Intergenic	MTEa-int|LTR|MaLR	-168619	NR_045048	100503961	Mm.136732	NR_045048		Gm19990	-	predicted gene, 19990	ncRNA
Diff_Nuc511	chr13	21810052	21810191	+	0	NA	TTS (NM_178206)	TTS (NM_178206)	624	NM_178206	319152	Mm.377874	NM_178206	ENSMUSG00000101355	Hist1h3h	H3-291	histone cluster 1, H3h	protein-coding
Diff_Nuc23542	chr6	116300752	116300891	+	0	NA	intron (NM_001302385, intron 2 of 6)	intron (NM_001302385, intron 2 of 6)	12781	NM_027920	71779	Mm.27064	NM_027920	ENSMUSG00000025702	March8	1300017E09Rik|MARCH-VIII|Mir	membrane-associated ring finger (C3HC4) 8	protein-coding
Diff_Nuc7401	chr10	20498182	20498321	+	0	NA	Intergenic	Intergenic	-53367	NM_013875	29863	Mm.425617	NM_013875	ENSMUSG00000019990	Pde7b	-	phosphodiesterase 7B	protein-coding
Diff_Nuc24203	chr6	146583922	146584061	+	0	NA	promoter-TSS (NM_026281)	promoter-TSS (NM_026281)	-877	NM_026281	67623	Mm.278037	NM_026281	ENSMUSG00000040234	Tm7sf3	2010003B14Rik|NARP1	transmembrane 7 superfamily member 3	protein-coding
Diff_Nuc22977	chr6	86845532	86845671	+	0	NA	intron (NM_001040106, intron 1 of 20)	Lx3A|LINE|L1	46090	NM_001040106	269774	Mm.221038	NM_177762	ENSMUSG00000057230	Aak1	5530400K14Rik|9630042K20|AU067724|AU067726|BC028270|C79663|D6Ertd245e|R75501|mKIAA1048	AP2 associated kinase 1	protein-coding
Diff_Nuc17025	chr19	29965872	29966011	+	0	NA	Intergenic	RLTR13D6|LTR|ERVK	-33663	NM_133775	77125	Mm.182359	NM_133775	ENSMUSG00000024810	Il33	9230117N10Rik|Il-33|Il1f11|NF-HEV	interleukin 33	protein-coding
Diff_Nuc12051	chr16	44392702	44392841	+	0	NA	Intergenic	Intergenic	-2141	NM_001033247	212517	Mm.327888	NM_001033247	ENSMUSG00000071550	Cfap44	6330444M21Rik|D16Ertd642e|Gm1750|Wdr52	cilia and flagella associated protein 44	protein-coding
Diff_Nuc40795	chr9	91263142	91263281	+	0	NA	promoter-TSS (NM_009576)	promoter-TSS (NM_009576)	-599	NM_009576	22774	Mm.8062	NM_009576	ENSMUSG00000036972	Zic4	-	zinc finger protein of the cerebellum 4	protein-coding
Diff_Nuc9126	chr10	107623062	107623201	+	0	NA	intron (NM_027892, intron 1 of 25)	intron (NM_027892, intron 1 of 25)	23675	NM_027892	17931	Mm.422959	NM_027892	ENSMUSG00000019907	Ppp1r12a	1200015F06Rik|5730577I22Rik|AA792106|AV099298|D10Ertd625e|Mypt1	protein phosphatase 1, regulatory (inhibitor) subunit 12A	protein-coding
Diff_Nuc39142	chr1	193576062	193576201	+	0	NA	intron (NM_001134829, intron 3 of 7)	ORR1C2|LTR|MaLR	33857	NM_001134829	226856	Mm.277958	NM_172266	ENSMUSG00000026623	Lpgat1	AI649174|AW112037|BC013667	lysophosphatidylglycerol acyltransferase 1	protein-coding
Diff_Nuc37123	chr1	77068272	77068411	+	0	NA	Intergenic	Intergenic	425002	NR_105770	102465180		NR_105770	ENSMUSG00000099141	Mir6352	Gm27481|mmu-mir-6352	microRNA 6352	ncRNA
Diff_Nuc24509	chr5	20230562	20230701	+	0	NA	Intergenic	L1ME1|LINE|L1	157311	NM_172992	68770	Mm.86410	NM_172992	ENSMUSG00000039987	Phtf2	1110054G21Rik|9530062N20Rik|AI447096|C77923	putative homeodomain transcription factor 2	protein-coding
Diff_Nuc12178	chr16	53028692	53028831	+	0	NA	Intergenic	L1Md_F2|LINE|L1	-212904	NR_040495	73820	Mm.60493	NR_040495		4930404A05Rik	-	RIKEN cDNA 4930404A05 gene	ncRNA
Diff_Nuc31203	chr3	89897222	89897361	+	0	NA	intron (NM_001271764, intron 8 of 8)	intron (NM_001271764, intron 8 of 8)	-10763	NM_029937	77595	Mm.159949	NM_029937	ENSMUSG00000027939	Nup210l	4930548O11Rik|R26-EGFP|Tg(Gt(ROSA)26Sor-EGFP)130910Eps	nucleoporin 210-like	protein-coding
Diff_Nuc21856	chr6	25515412	25515551	+	0	NA	Intergenic	L1Md_T|LINE|L1	124499	NM_010338	14763	Mm.409670	NM_010338	ENSMUSG00000039904	Gpr37	AI848630|Pael-R	G protein-coupled receptor 37	protein-coding
Diff_Nuc33268	chr2	37489982	37490121	+	0	NA	intron (NM_009261, intron 4 of 16)	intron (NM_009261, intron 4 of 16)	12754	NM_009261	20744	Mm.237095	NM_009261	ENSMUSG00000026915	Strbp	6430510M02Rik|AI852513|C230082I21Rik|C86322|Spnr	spermatid perinuclear RNA binding protein	protein-coding
Diff_Nuc31248	chr3	92445682	92445821	+	0	NA	Intergenic	Intergenic	6478	NM_025984	67127	Mm.41969	NM_025984	ENSMUSG00000057609	Lce1a1	2200008B06Rik|Sprrl3	late cornified envelope 1A1	protein-coding
Diff_Nuc24134	chr6	143930642	143930781	+	0	NA	intron (NM_001113559, intron 6 of 13)	intron (NM_001113559, intron 6 of 13)	-35085	NM_001347506	20678	Mm.1752	NM_011444	ENSMUSG00000041540	Sox5	A730017D01Rik|AI528773	SRY (sex determining region Y)-box 5	protein-coding
Diff_Nuc12403	chr16	76294832	76294971	+	0	NA	exon (NM_173440, exon 4 of 4)	exon (NM_173440, exon 4 of 4)	78393	NM_173440	268903	Mm.74711	NM_173440	ENSMUSG00000048490	Nrip1	6030458L20Rik|8430438I05Rik|9630050P12|AA959574|AW456757|RIP140	nuclear receptor interacting protein 1	protein-coding
Diff_Nuc3758	chr12	86959452	86959591	+	0	NA	intron (NM_001205053, intron 2 of 3)	intron (NM_001205053, intron 2 of 3)	18553	NM_001205053	81703	Mm.103560	NM_030887	ENSMUSG00000034271	Jdp2	Jundm2|Jundp2|TIF	Jun dimerization protein 2	protein-coding
Diff_Nuc16262	chr14	110881027	110881166	+	0	NA	Intergenic	RLTR17|LTR|ERVK	273275	NM_175499	239250	Mm.49728	NM_175499	ENSMUSG00000045871	Slitrk6	4832410J21Rik|Sltk6	SLIT and NTRK-like family, member 6	protein-coding
Diff_Nuc13471	chr15	50765712	50765851	+	0	NA	Intergenic	MER21B|LTR|ERV1	-44194	NM_032000	83925	Mm.30466	NM_032000	ENSMUSG00000038679	Trps1	AI115454|AI447310|D15Ertd586e	trichorhinophalangeal syndrome I (human)	protein-coding
Diff_Nuc24507	chr5	19921182	19921321	+	0	NA	intron (NM_001170745, intron 8 of 20)	Lx9|LINE|L1	466691	NM_172992	68770	Mm.86410	NM_172992	ENSMUSG00000039987	Phtf2	1110054G21Rik|9530062N20Rik|AI447096|C77923	putative homeodomain transcription factor 2	protein-coding
Diff_Nuc21646	chr6	13551892	13552031	+	0	NA	intron (NM_001347059, intron 1 of 3)	intron (NM_001347059, intron 1 of 3)	6137	NM_001347059	101118	Mm.254845	NM_028990	ENSMUSG00000029569	Tmem168	5730526F17Rik|8430437G11Rik|AI462344|AI504145	transmembrane protein 168	protein-coding
Diff_Nuc17197	chr19	37566702	37566841	+	0	NA	Intergenic	Intergenic	27027	NR_131009	78640	Mm.234265	NR_131008		1700122C19Rik	-	RIKEN cDNA 1700122C19 gene	ncRNA
Diff_Nuc30286	chr3	36395972	36396111	+	0	NA	Intergenic	(CA)n|Simple_repeat|Simple_repeat	9690	NR_040590	329623	Mm.490730	NR_040590	ENSMUSG00000085320	Gm11548	E330009D11|OTTMUSG00000002110	predicted gene 11548	ncRNA
Diff_Nuc10250	chr17	37033172	37033311	+	0	NA	Intergenic	Intergenic	-1834	NM_146077	224762	Mm.213417	NM_146077	ENSMUSG00000058063	Trim31	BC026666|HCG1|HCGI|RNF	tripartite motif-containing 31	protein-coding
Diff_Nuc14869	chr14	27991552	27991691	+	0	NA	intron (NM_001289686, intron 2 of 12)	intron (NM_001289686, intron 2 of 12)	34442	NM_001289686	71704	Mm.248606	NM_027871	ENSMUSG00000021895	Arhgef3	1200004I24Rik|9830169H03Rik|C76747|Xpln	Rho guanine nucleotide exchange factor (GEF) 3	protein-coding
Diff_Nuc36566	chr1	47227882	47228021	+	0	NA	Intergenic	Intergenic	296018	NR_105768	102466969		NR_105768	ENSMUSG00000098876	Mir6350	Gm27958|mmu-mir-6350	microRNA 6350	ncRNA
Diff_Nuc40608	chr9	78332302	78332441	+	0	NA	Intergenic	B1_Mur3|SINE|Alu	-2840	NM_010106	13627	Mm.138471	NM_010106	ENSMUSG00000037742	Eef1a1	-	eukaryotic translation elongation factor 1 alpha 1	protein-coding
Diff_Nuc34155	chr2	84668452	84668591	+	0	NA	intron (NM_013899, intron 2 of 2)	B1_Mus2|SINE|Alu	1343	NM_013899	30059	Mm.21826	NM_013899	ENSMUSG00000027076	Timm10	Tim13|Timm13a	translocase of inner mitochondrial membrane 10	protein-coding
Diff_Nuc34604	chr2	113332462	113332601	+	0	NA	intron (NM_001285459, intron 3 of 16)	intron (NM_001285459, intron 3 of 16)	51310	NM_001285459	14260	Mm.4938	NM_010230	ENSMUSG00000044042	Fmn1	Fmn|formin-1|ld	formin 1	protein-coding
Diff_Nuc9487	chr10	127785962	127786101	+	0	NA	intron (NM_026444, intron 1 of 10)	intron (NM_026444, intron 1 of 10)	11248	NM_026444	12974	Mm.58836	NM_026444	ENSMUSG00000005683	Cs	2610511A05Rik|9030605P22Rik|Ahl4|BB234005|Cis	citrate synthase	protein-coding
Diff_Nuc39683	chr9	36605182	36605321	+	0	NA	promoter-TSS (NM_007915)	promoter-TSS (NM_007915)	-273	NM_001199494	13663	Mm.4337	NM_007915	ENSMUSG00000062762	Ei24	AA536736|AI115355|PIG8	etoposide induced 2.4 mRNA	protein-coding
Diff_Nuc31778	chr3	117518892	117519031	+	0	NA	intron (NM_029655, intron 7 of 8)	intron (NM_029655, intron 7 of 8)	52893	NM_001190156	76561	Mm.33824	NM_029655	ENSMUSG00000028007	Snx7	2510028H01Rik	sorting nexin 7	protein-coding
Diff_Nuc10972	chr17	81242742	81242881	+	0	NA	Intergenic	B4A|SINE|B4	-53322	NR_131128	320784	Mm.474182	NR_131127		C230072F16Rik	-	RIKEN cDNA C230072F16 gene	ncRNA
Diff_Nuc7142	chr10	6400922	6401061	+	0	NA	intron (NM_001159942, intron 11 of 16)	URR1A|DNA|MER1_type	-27525	NM_172308	270685	Mm.184752	NM_172308	ENSMUSG00000040675	Mthfd1l	2410004L15Rik|AI647056|Fthfsdc1	methylenetetrahydrofolate dehydrogenase (NADP+ dependent) 1-like	protein-coding
Diff_Nuc5	chrX	4228672	4228811	+	0	NA	Intergenic	Intergenic	8758	NR_040410	546185	Mm.359482	NR_040410		Gm5925	EG546185	germ cell-less homolog 1 family pseudogene	pseudo
Diff_Nuc36373	chr1	36424082	36424221	+	0	NA	intron (NM_172652, intron 2 of 20)	intron (NM_172652, intron 2 of 20)	1875	NM_172652	226976	Mm.24734	NM_172652	ENSMUSG00000010453	Kansl3	4632411B12Rik|4932435K23|AI431067|AI647574|C85723|Kiaa1310|mKIAA1310	KAT8 regulatory NSL complex subunit 3	protein-coding
Diff_Nuc17683	chr19	61023192	61023331	+	0	NA	intron (NM_018869, intron 1 of 15)	intron (NM_018869, intron 1 of 15)	57609	NM_018869	14773	Mm.279400	NM_018869	ENSMUSG00000003228	Grk5	Gprk5	G protein-coupled receptor kinase 5	protein-coding
Diff_Nuc21950	chr6	30189012	30189151	+	0	NA	intron (NM_001169576, intron 3 of 4)	B1_Mus1|SINE|Alu	4722	NM_001169577	22214	Mm.332967	NM_009459	ENSMUSG00000039159	Ube2h	1500009C23Rik|AI181839|AI326965|AI462483|AW227540|E2-20K|Gid3|N28148|Ubc8	ubiquitin-conjugating enzyme E2H	protein-coding
Diff_Nuc11953	chr16	38094302	38094441	+	0	NA	intron (NM_001347232, intron 1 of 11)	intron (NM_001347232, intron 1 of 11)	-5025	NR_033221	414072	Mm.483602	NR_033221		BC031361	-	cDNA sequence BC031361	ncRNA
Diff_Nuc19103	chr18	86264452	86264591	+	0	NA	Intergenic	B3A|SINE|B2	-299823	NM_144946	246317	Mm.329578	NM_144946	ENSMUSG00000050321	Neto1	AI851453|Btcl1|C130005O10Rik	neuropilin (NRP) and tolloid (TLL)-like 1	protein-coding
Diff_Nuc30281	chr3	36309122	36309261	+	0	NA	Intergenic	Lx5|LINE|L1	65255	NR_105976	102466786		NR_105976	ENSMUSG00000098808	Mir7009	Gm27472|mmu-mir-7009	microRNA 7009	ncRNA
Diff_Nuc25449	chr5	74884862	74885001	+	0	NA	intron (NM_178672, intron 2 of 4)	L1_Mus3|LINE|L1	42836	NM_178672	212986	Mm.134147	NM_178672	ENSMUSG00000062110	Scfd2	E430013M20Rik|STXBP1L1	Sec1 family domain containing 2	protein-coding
Diff_Nuc28457	chr4	95620472	95620611	+	0	NA	Intergenic	RMER16-int|LTR|ERVK	13185	NR_045777	319247	Mm.473527	NM_175680	ENSMUSG00000044125	9530080O11Rik	-	RIKEN cDNA 9530080O11 gene	ncRNA
Diff_Nuc20670	chr7	110365192	110365331	+	0	NA	Intergenic	L1M3e|LINE|L1	-2973	NM_207143	258246	Mm.377390	NM_207143	ENSMUSG00000073954	Olfr594	MOR32-10	olfactory receptor 594	protein-coding
Diff_Nuc1358	chr13	63457772	63457911	+	0	NA	intron (NM_001347514, intron 6 of 15)	intron (NM_001347514, intron 6 of 15)	-55250	NR_037235	100526474		NR_037235	ENSMUSG00000092741	Mir3074-1	mmu-mir-3074-1	microRNA 3074-1	ncRNA
Diff_Nuc23299	chr6	100829822	100829961	+	0	NA	Intergenic	Intergenic	46259	NM_182939	232314	Mm.27223	NM_182939	ENSMUSG00000052144	Ppp4r2	BE691708|C230060M08Rik	protein phosphatase 4, regulatory subunit 2	protein-coding
Diff_Nuc34044	chr2	77870302	77870441	+	0	NA	Intergenic	L2|LINE|L2	-18863	NR_108098	78158	Mm.78473	NR_108098	ENSMUSG00000085431	4930440I19Rik	-	RIKEN cDNA 4930440I19 gene	ncRNA
Diff_Nuc6382	chr11	98377642	98377781	+	0	NA	intron (NM_011771, intron 3 of 7)	PB1D10|SINE|Alu	29634	NM_011771	22780	Mm.133367	NM_011771	ENSMUSG00000018168	Ikzf3	5830411O07Rik|Aiolos|Zfpn1a3|Znfn1a3	IKAROS family zinc finger 3	protein-coding
Diff_Nuc22416	chr6	51175502	51175641	+	0	NA	Intergenic	Intergenic	44338	NR_029719	387166		NR_029719	ENSMUSG00000065505	Mir148a	Mirn148|Mirn148a|mir-148a	microRNA 148a	ncRNA
Diff_Nuc3980	chr12	101826572	101826711	+	0	NA	intron (NM_153587, intron 7 of 17)	intron (NM_153587, intron 7 of 17)	-67609	NM_001033213	104718	Mm.295441	NM_001033213	ENSMUSG00000033530	Ttc7b	AA408451|Ttc7l1	tetratricopeptide repeat domain 7B	protein-coding
Diff_Nuc34322	chr2	93833572	93833711	+	0	NA	intron (NM_026944, intron 8 of 9)	intron (NM_026944, intron 8 of 9)	13450	NR_045827	70852	Mm.437014	NR_045827	ENSMUSG00000027196	Alkbh3os1	4921507L20Rik	alkB homolog 3, opposite strand 1	ncRNA
Diff_Nuc26447	chr5	122997292	122997431	+	0	NA	Intergenic	Intergenic	-45127	NR_027838	11938	Mm.227583	NM_009722	ENSMUSG00000029467	Atp2a2	9530097L16Rik|D5Wsu150e|SERCA2|SERCA2B|Serca2a|mKIAA4195	ATPase, Ca++ transporting, cardiac muscle, slow twitch 2	protein-coding
Diff_Nuc21985	chr6	31034312	31034451	+	0	NA	Intergenic	Intergenic	-21288	NR_029532	387223		NR_029532	ENSMUSG00000065604	Mir29b-1	Mirn29b|Mirn29b-1|mir-29b-1	microRNA 29b-1	ncRNA
Diff_Nuc5145	chr11	51347812	51347951	+	0	NA	intron (NM_153393, intron 5 of 28)	B1_Mur4|SINE|Alu	-50378	NM_028398	72947	Mm.256875	NM_028398	ENSMUSG00000020359	Phykpl	2900006B13Rik|Agxt2l2	5-phosphohydroxy-L-lysine phospholyase	protein-coding
Diff_Nuc41252	chr9	112411452	112411591	+	0	NA	Intergenic	MTEa|LTR|MaLR	252443	NR_033433	620760	Mm.259863	NR_015468	ENSMUSG00000087038	2900079G21Rik	C130083B14|Gm6179	RIKEN cDNA 2900079G21 gene	ncRNA
Diff_Nuc7958	chr10	52051652	52051791	+	0	NA	Intergenic	ORR1D1|LTR|MaLR	50209	NM_053187	94221	Mm.390258	NM_053187	ENSMUSG00000019861	Gopc	2210402P09Rik|AI844555|CAL|FIG|GOPC1|PIST	golgi associated PDZ and coiled-coil motif containing	protein-coding
Diff_Nuc19059	chr18	83143192	83143331	+	0	NA	intron (NM_001177464, intron 2 of 5)	intron (NM_001177464, intron 2 of 5)	-53309	NR_033307	75853	Mm.420737	NR_033307		4930592I03Rik	-	RIKEN cDNA 4930592I03 gene	ncRNA
Diff_Nuc3126	chr12	55410312	55410451	+	0	NA	Intergenic	Intergenic	75779	NR_108033	73592	Mm.416874	NR_108033		1700104L18Rik	-	RIKEN cDNA 1700104L18 gene	ncRNA
Diff_Nuc24445	chr5	14755662	14755801	+	0	NA	intron (NM_011995, intron 10 of 24)	Lx6|LINE|L1	159158	NM_198666	381714	Mm.368256	NM_198666	ENSMUSG00000033219	Gm9758	ENSMUSG00000033219	predicted gene 9758	protein-coding
Diff_Nuc39208	chr1	196814632	196814771	+	0	NA	Intergenic	Intergenic	-11548	NR_033564	320400	Mm.417608	NR_033564	ENSMUSG00000097325	Gm16897	C030002c11rik	predicted gene, 16897	ncRNA
Diff_Nuc8319	chr10	69758822	69758961	+	0	NA	Intergenic	Intergenic	50867	NM_025807	66859	Mm.19325	NM_025807	ENSMUSG00000037762	Slc16a9	1200003C15Rik|4930425B13Rik|AI552636	solute carrier family 16 (monocarboxylic acid transporters), member 9	protein-coding
Diff_Nuc42892	chr8	97037017	97037156	+	0	NA	intron (NM_001033207, intron 34 of 48)	intron (NM_001033207, intron 34 of 48)	8140	NR_106040	102466800		NR_106040	ENSMUSG00000098511	Mir7072	Gm27665|mmu-mir-7072	microRNA 7072	ncRNA
Diff_Nuc25818	chr5	95481902	95482041	+	0	NA	Intergenic	L1_Mus1|LINE|L1	64252	NR_044992	622894	Mm.380053	NR_044992	ENSMUSG00000096742	Gm6367	EG622894	predicted gene 6367	pseudo
Diff_Nuc14460	chr15	99222862	99223001	+	0	NA	promoter-TSS (NM_001171034)	promoter-TSS (NM_001171034)	-447	NM_026669	110213	Mm.16769	NM_026669	ENSMUSG00000023010	Tmbim6	5031406P05Rik|Bi1|Tegt	transmembrane BAX inhibitor motif containing 6	protein-coding
Diff_Nuc30732	chr3	65305802	65305941	+	0	NA	Intergenic	L1_Mur1|LINE|L1	-26498	NM_178892	99929	Mm.246398	NM_178892	ENSMUSG00000034640	Tiparp	ARTD14|AW558171|PARP7	TCDD-inducible poly(ADP-ribose) polymerase	protein-coding
Diff_Nuc1252	chr13	56657682	56657821	+	0	NA	Intergenic	L1MB7|LINE|L1	-7852	NM_010702	16841	Mm.16973	NM_010702	ENSMUSG00000021539	Lect2	-	leukocyte cell-derived chemotaxin 2	protein-coding
Diff_Nuc35636	chr2	163920342	163920481	+	0	NA	intron (NM_021420, intron 5 of 10)	intron (NM_021420, intron 5 of 10)	20497	NM_021420	58231	Mm.234472	NM_021420	ENSMUSG00000018209	Stk4	AI447339|AU020804|Kas-2|Mst1|Ysk3	serine/threonine kinase 4	protein-coding
Diff_Nuc25713	chr5	91562662	91562801	+	0	NA	Intergenic	Intergenic	-5894	NM_009704	11839	Mm.8039	NM_009704	ENSMUSG00000029378	Areg	AR|Mcub|Sdgf	amphiregulin	protein-coding
Diff_Nuc4663	chr11	21335362	21335501	+	0	NA	Intergenic	MTA_Mm|LTR|MaLR	-64161	NM_001290634	216558	Mm.28877	NM_139297	ENSMUSG00000001891	Ugp2	UDPGP|UGPase	UDP-glucose pyrophosphorylase 2	protein-coding
Diff_Nuc39625	chr9	32637842	32637981	+	0	NA	Intergenic	Intergenic	98640	NR_131058	330917	Mm.488283	NR_131058		Gm27162	A430016B06	predicted gene 27162	ncRNA
Diff_Nuc31470	chr3	102113532	102113671	+	0	NA	Intergenic	Intergenic	47273	NR_040391	319951	Mm.225196	NR_040391	ENSMUSG00000105891	A230001M10Rik	-	RIKEN cDNA A230001M10 gene	ncRNA
Diff_Nuc27859	chr4	55633022	55633161	+	0	NA	Intergenic	Intergenic	-87744	NM_010637	16600	Mm.4325	NM_010637	ENSMUSG00000003032	Klf4	EZF|Gklf|Zie	Kruppel-like factor 4 (gut)	protein-coding
Diff_Nuc19363	chr7	20148912	20149051	+	0	NA	Intergenic	ID_B1|SINE|B4	-1234	NM_199149	232947	Mm.219662	NM_199149	ENSMUSG00000051403	Ppp1r37	Gm158|Lrrc68	protein phosphatase 1, regulatory subunit 37	protein-coding
Diff_Nuc43096	chr8	109662002	109662141	+	0	NA	Intergenic	Intergenic	-12490	NM_025558	66427	Mm.20242	NM_025558	ENSMUSG00000031924	Cyb5b	1810044O22Rik|AU015618|Cyb5m	cytochrome b5 type B	protein-coding
Diff_Nuc19783	chr7	52764342	52764481	+	0	NA	intron (NM_001163662, intron 2 of 12)	intron (NM_001163662, intron 2 of 12)	1367	NM_008749	18220	Mm.258923	NM_008749	ENSMUSG00000030824	Nucb1	B230337F23Rik|C77483|Calnuc|MTEST82|Nucb	nucleobindin 1	protein-coding
Diff_Nuc26381	chr5	120544142	120544281	+	0	NA	Intergenic	B1_Mus1|SINE|Alu	-22311	NM_028762	74111	Mm.41022	NM_028762	ENSMUSG00000029594	Rbm19	1200009A02Rik|AV302714|NPO	RNA binding motif protein 19	protein-coding
Diff_Nuc18663	chr18	61351012	61351151	+	0	NA	Intergenic	MTB|LTR|MaLR	-14377	NM_134134	106894	Mm.22574	NM_134134	ENSMUSG00000024622	Hmgxb3	2510002C16Rik|A630042L21Rik|AI413166|mKIAA0194	HMG box domain containing 3	protein-coding
Diff_Nuc14940	chr14	31361132	31361271	+	0	NA	Intergenic	Intergenic	-1116	NM_009388	21881	Mm.290692	NM_009388	ENSMUSG00000021957	Tkt	p68	transketolase	protein-coding
Diff_Nuc18551	chr18	55187522	55187661	+	0	NA	Intergenic	Intergenic	-37757	NM_175751	269023	Mm.192984	NM_175751	ENSMUSG00000052713	Zfp608	4932417D18Rik|D430007A19Rik|Znf608	zinc finger protein 608	protein-coding
Diff_Nuc34778	chr2	120773752	120773891	+	0	NA	intron (NM_009461, intron 5 of 46)	PB1|SINE|Alu	22630	NM_009461	22222	Mm.389330	NM_009461	ENSMUSG00000027272	Ubr1	AI504731	ubiquitin protein ligase E3 component n-recognin 1	protein-coding
Diff_Nuc25542	chr5	81546822	81546961	+	0	NA	intron (NM_001347367, intron 2 of 27)	intron (NM_001347367, intron 2 of 27)	96273	NM_198702	319387	Mm.273631	NM_198702	ENSMUSG00000037605	Adgrl3	5430402I23Rik|CIRL-3|D130075K09Rik|Gm1379|LEC3|Lphn3|mKIAA0768	adhesion G protein-coupled receptor L3	protein-coding
Diff_Nuc18003	chr18	21291562	21291701	+	0	NA	intron (NM_001033445, intron 4 of 5)	intron (NM_001033445, intron 4 of 5)	60786	NM_008586	17288	Mm.2682	NM_008586	ENSMUSG00000024313	Mep1b	Mep-1b	meprin 1 beta	protein-coding
Diff_Nuc17141	chr19	34928742	34928881	+	0	NA	intron (NM_001114339, intron 1 of 6)	B3|SINE|B2	23596	NM_023792	75735	Mm.24742	NM_023792	ENSMUSG00000033610	Pank1	Pank|Pank1b	pantothenate kinase 1	protein-coding
Diff_Nuc28633	chr4	104056412	104056551	+	0	NA	intron (NR_104385, intron 1 of 15)	intron (NR_104385, intron 1 of 15)	16338	NM_177259	13131	Mm.289682	NM_010014	ENSMUSG00000028519	Dab1	AI956902|C630028C02Rik|scm|scr|scrambler|yot	disabled 1	protein-coding
Diff_Nuc25385	chr5	72520092	72520231	+	0	NA	intron (NM_008069, intron 8 of 8)	intron (NM_008069, intron 8 of 8)	39261	NM_178599	27784	Mm.44223	NM_178599	ENSMUSG00000029213	Commd8	C77770|D5Buc26e	COMM domain containing 8	protein-coding
Diff_Nuc10779	chr17	71489432	71489571	+	0	NA	Intergenic	RLTR1D|LTR|ERV1	-43817	NM_022882	64898	Mm.227924	NM_022882	ENSMUSG00000024052	Lpin2	2610511G02Rik|AI481352|AW742896	lipin 2	protein-coding
Diff_Nuc5667	chr11	72603542	72603681	+	0	NA	intron (NM_001024926, intron 1 of 3)	intron (NM_001024926, intron 1 of 3)	5730	NM_001024926	192986	Mm.194755	NM_001024926	ENSMUSG00000057778	Cyb5d2	9330151E16Rik|Gm2	cytochrome b5 domain containing 2	protein-coding
Diff_Nuc17634	chr19	57973042	57973181	+	0	NA	intron (NM_181415, intron 26 of 28)	intron (NM_181415, intron 26 of 28)	-152546	NR_049196	100885835		NR_049196	ENSMUSG00000093757	Mir5623	Gm26068|mir-5623|mmu-mir-5623	microRNA 5623	ncRNA
Diff_Nuc39512	chr9	24948622	24948761	+	0	NA	intron (NM_020586, intron 1 of 7)	intron (NM_020586, intron 1 of 7)	7589	NM_020586	80517	Mm.142843	NM_020586	ENSMUSG00000008429	Herpud2	5031400M07Rik|AB041580	HERPUD family member 2	protein-coding
Diff_Nuc37580	chr1	105402012	105402151	+	0	NA	Intergenic	Lx3_Mus|LINE|L1	-1263315	NM_011800	23836	Mm.103640	NM_011800	ENSMUSG00000050840	Cdh20	Cdh7	cadherin 20	protein-coding
Diff_Nuc23614	chr6	119914062	119914201	+	0	NA	intron (NM_001199084, intron 8 of 27)	intron (NM_001199084, intron 8 of 27)	61415	NM_001166381	19365	Mm.149	NM_011236	ENSMUSG00000030166	Rad52	Rad52yh	RAD52 homolog, DNA repair protein	protein-coding
Diff_Nuc31967	chr3	126309722	126309861	+	0	NA	intron (NM_001346636, intron 2 of 20)	intron (NM_001346636, intron 2 of 20)	9922	NM_023813	108058	Mm.255822	NM_023813	ENSMUSG00000053819	Camk2d	2810011D23Rik|8030469K03Rik|CaMK II|[d]-CaMKII	calcium/calmodulin-dependent protein kinase II, delta	protein-coding
Diff_Nuc9090	chr10	105107412	105107551	+	0	NA	Intergenic	B1F|SINE|Alu	95874	NR_038032	327812	Mm.191660	NR_038032	ENSMUSG00000085282	Gm15663	9330159K06|OTTMUSG00000025047	predicted gene 15663	ncRNA
Diff_Nuc11036	chr17	84805542	84805681	+	0	NA	intron (NM_183021, intron 22 of 37)	L1_Mus1|LINE|L1	59937	NM_183021	240174	Mm.246767	NM_177826	ENSMUSG00000024251	Thada	6530405K19|A930021O22|AU019899|BC052885|GITA	thyroid adenoma associated	protein-coding
Diff_Nuc28260	chr4	83214352	83214491	+	0	NA	intron (NM_001081012, intron 6 of 25)	Lx8|LINE|L1	42972	NM_001081012	320226	Mm.180032	NM_029117	ENSMUSG00000052407	Ccdc171	4930418J05Rik|4930473A06Rik|A330015D16Rik	coiled-coil domain containing 171	protein-coding
Diff_Nuc5960	chr11	81797942	81798081	+	0	NA	Intergenic	Intergenic	-16113	NM_001034013	11418	Mm.234998	NM_007384	ENSMUSG00000020704	Asic2	ACIC2|Accn1|BNC1|BNaC1|BNaC1a|Mdeg	acid-sensing (proton-gated) ion channel 2	protein-coding
Diff_Nuc37769	chr1	121554302	121554441	+	0	NA	TTS (NM_019933)	TTS (NM_019933)	-8794	NM_145506	226352	Mm.253156	NM_145506	ENSMUSG00000026383	Epb41l5	1700030C16Rik|AL022914|BE37|E230025E14Rik|Epb4.1l5|Lulu1|NBL5	erythrocyte membrane protein band 4.1 like 5	protein-coding
Diff_Nuc42234	chr8	60889812	60889951	+	0	NA	intron (NM_175032, intron 4 of 11)	intron (NM_175032, intron 4 of 11)	289712	NM_001177534	100271928	Mm.484123	NM_001177534		Gm15881	OTTMUSG00000027193	predicted gene 15881	protein-coding
Diff_Nuc10586	chr17	58930112	58930251	+	0	NA	Intergenic	L1VL4|LINE|L1	200617	NM_027001	69239	Mm.246732	NM_027001	ENSMUSG00000024227	Pdzph1	2610034M16Rik|AV114557	PDZ and pleckstrin homology domains 1	protein-coding
Diff_Nuc35266	chr2	146368622	146368761	+	0	NA	promoter-TSS (NR_040502)	promoter-TSS (NR_040502)	24	NR_040502	74065	Mm.399508	NR_040502	ENSMUSG00000085796	4933406D12Rik	-	RIKEN cDNA 4933406D12 gene	ncRNA
Diff_Nuc6656	chr11	106473862	106474001	+	0	NA	intron (NM_198292, intron 1 of 11)	CpG	313	NM_198292	21763	Mm.102407	NM_198292	ENSMUSG00000040548	Tex2	4930568E07Rik|AI553404|Def-5|Taz4	testis expressed gene 2	protein-coding
Diff_Nuc18367	chr18	42349422	42349561	+	0	NA	intron (NM_027072, intron 2 of 3)	B4A|SINE|B4	6872	NM_027072	69401	Mm.34841	NM_027072	ENSMUSG00000059455	Plac8l1	1700009N18Rik|1700015M15Rik	PLAC8-like 1	protein-coding
Diff_Nuc26277	chr5	115611062	115611201	+	0	NA	Intergenic	Intergenic	-2946	NM_175403	109154	Mm.153963	NM_175403	ENSMUSG00000048578	Mlec	2410014A08Rik|AI850530|ESTM19|X83352|mKIAA0152	malectin	protein-coding
Diff_Nuc43309	chr8	121729562	121729701	+	0	NA	intron (NM_019707, intron 8 of 13)	MTEa|LTR|MaLR	-138807	NM_024219	68196	Mm.358714	NM_024219	ENSMUSG00000031839	Hsbp1	0610007A03Rik|AA408769|Hsp25	heat shock factor binding protein 1	protein-coding
Diff_Nuc25133	chr5	54571422	54571561	+	0	NA	Intergenic	MLT1H1|LTR|MaLR	-169740	NR_038045	330086	Mm.254449	NM_177871	ENSMUSG00000105912	Gm10440	D130065D13|ENSMUSG00000072936	predicted gene 10440	ncRNA
Diff_Nuc43448	chr8	127006352	127006491	+	0	NA	Intergenic	Intergenic	-38246	NM_029746	76332	Mm.240108	NM_029746	ENSMUSG00000031979	Cog2	1190002B08Rik|2700012E02Rik|C86089|Ldlc	component of oligomeric golgi complex 2	protein-coding
Diff_Nuc42262	chr8	63461102	63461241	+	0	NA	intron (NM_173874, intron 1 of 13)	intron (NM_173874, intron 1 of 13)	937	NM_173873	12725	Mm.25263	NM_007711	ENSMUSG00000004319	Clcn3	Clc3	chloride channel, voltage-sensitive 3	protein-coding
Diff_Nuc36655	chr1	52530862	52531001	+	0	NA	intron (NM_008667, intron 4 of 7)	intron (NM_008667, intron 4 of 7)	26361	NM_008667	17936	Mm.25903	NM_008667	ENSMUSG00000002881	Nab1	-	Ngfi-A binding protein 1	protein-coding
Diff_Nuc26464	chr5	123261872	123262011	+	0	NA	intron (NM_021505, intron 5 of 16)	B3|SINE|B2	9410	NM_021505	59008	Mm.332667	NM_021505	ENSMUSG00000029472	Anapc5	2510006G12Rik|AA408751|AA536819|AA986414|APC5|Anpc5	anaphase-promoting complex subunit 5	protein-coding
Diff_Nuc11082	chr17	87024422	87024561	+	0	NA	intron (NM_011104, intron 12 of 14)	intron (NM_011104, intron 12 of 14)	-128713	NM_010137	13819	Mm.1415	NM_010137	ENSMUSG00000024140	Epas1	HIF-2alpha|HIF2A|HLF|HRF|MOP2|bHLHe73	endothelial PAS domain protein 1	protein-coding
Diff_Nuc136	chrX	110260292	110260431	+	0	NA	intron (NM_018818, intron 2 of 14)	Lx7|LINE|L1	38763	NM_018818	12662	Mm.257316	NM_018818	ENSMUSG00000025531	Chm	Rep-1	choroidermia (RAB escort protein 1)	protein-coding
Diff_Nuc15791	chr14	73652192	73652331	+	0	NA	intron (NM_009029, intron 17 of 26)	intron (NM_009029, intron 17 of 26)	14563	NM_175116	67168	Mm.390681	NM_175116	ENSMUSG00000033446	Lpar6	2610302I02Rik|P2ry5|P2y5	lysophosphatidic acid receptor 6	protein-coding
Diff_Nuc1915	chr13	98601712	98601851	+	0	NA	Intergenic	Intergenic	271826	NR_046157	328314	Mm.138047	NR_046157	ENSMUSG00000110235	Gm5086	B230311A21|EG328314	predicted gene 5086	ncRNA
Diff_Nuc38322	chr1	154543262	154543401	+	0	NA	intron (NM_001346117, intron 1 of 18)	Lx9|LINE|L1	-54350	NM_001081197	71281	Mm.158650	NM_001081197	ENSMUSG00000055547	Apobec4	4933431M11Rik	apolipoprotein B mRNA editing enzyme, catalytic polypeptide-like 4 (putative)	protein-coding
Diff_Nuc3484	chr12	76994182	76994321	+	0	NA	intron (NM_001005510, intron 9 of 115)	(GAAA)n|Simple_repeat|Simple_repeat	-15839	NR_039560	100628610		NR_039560	ENSMUSG00000092922	Mir5101	mmu-mir-5101|mu-mir-5101	microRNA 5101	ncRNA
Diff_Nuc37037	chr1	72010922	72011061	+	0	NA	intron (NR_040454, intron 1 of 2)	intron (NR_040454, intron 1 of 2)	40778	NR_040454	71134	Mm.370574	NR_040454	ENSMUSG00000101848	4933417E11Rik	-	RIKEN cDNA 4933417E11 gene	ncRNA
Diff_Nuc42422	chr8	73065322	73065461	+	0	NA	intron (NM_007924, intron 1 of 11)	(TTTTG)n|Simple_repeat|Simple_repeat	1817	NM_007924	13716	Mm.271973	NM_007924	ENSMUSG00000070002	Ell	Ell1|Men	elongation factor RNA polymerase II	protein-coding
Diff_Nuc25490	chr5	76748922	76749061	+	0	NA	intron (NM_023508, intron 3 of 5)	RMER15|LTR|ERVL	11190	NM_001310637	79455	Mm.143764	NM_023508	ENSMUSG00000029235	Pdcl2	1700010B22Rik|1700016K07Rik|Mgcphlp|Tphlp	phosducin-like 2	protein-coding
Diff_Nuc31834	chr3	119447842	119447981	+	0	NA	intron (NM_001310711, intron 7 of 13)	intron (NM_001310711, intron 7 of 13)	38395	NM_001310711	56195	Mm.29966	NM_019550	ENSMUSG00000028134	Ptbp2	Ptb2|brPTB|nPTB	polypyrimidine tract binding protein 2	protein-coding
Diff_Nuc23247	chr6	99017582	99017721	+	0	NA	intron (NM_001347345, intron 6 of 19)	intron (NM_001347345, intron 6 of 19)	-39359	NM_001197322	108655	Mm.234965	NM_053202	ENSMUSG00000030067	Foxp1	3110052D19Rik|4932443N09Rik|AI461938|AW494214	forkhead box P1	protein-coding
Diff_Nuc5719	chr11	75061182	75061321	+	0	NA	intron (NM_177708, intron 1 of 1)	intron (NM_177708, intron 1 of 1)	53756	NM_177708	237847	Mm.82661	NM_177708	ENSMUSG00000045287	Rtn4rl1	Ngr3|Ngrh2|Ngrl2	reticulon 4 receptor-like 1	protein-coding
Diff_Nuc7614	chr10	31724382	31724521	+	0	NA	intron (NM_001025286, intron 3 of 3)	intron (NM_001025286, intron 3 of 3)	-394920	NM_001146349	268291	Mm.295212	NM_001146349	ENSMUSG00000063760	Rnf217	AU016819|Ibrdc1	ring finger protein 217	protein-coding
Diff_Nuc28799	chr4	111318577	111318716	+	0	NA	intron (NM_001048189, intron 11 of 12)	MER20|DNA|MER1_type	-73969	NM_026470	67946	Mm.275526	NM_026470	ENSMUSG00000034401	Spata6	1700062C23Rik|AI790763|Hash|KRP|Mash	spermatogenesis associated 6	protein-coding
Diff_Nuc21022	chr7	128867232	128867371	+	0	NA	Intergenic	L1M5|LINE|L1	-10692	NM_011326	20278	Mm.35247	NM_011326	ENSMUSG00000000216	Scnn1g	SCNEG	sodium channel, nonvoltage-gated 1 gamma	protein-coding
Diff_Nuc16586	chr19	5934722	5934861	+	0	NA	Intergenic	ID|SINE|ID	-9975	NM_026772	104252	Mm.491103	NM_026772	ENSMUSG00000045664	Cdc42ep2	1110008C05Rik|Borg1|Cep2|D19Bwg1013e	CDC42 effector protein (Rho GTPase binding) 2	protein-coding
Diff_Nuc7330	chr10	17475682	17475821	+	0	NA	Intergenic	Lx7|LINE|L1	32717	NM_010828	17684	Mm.272321	NM_010828	ENSMUSG00000039910	Cited2	AI835299|ER154-like|Mrg1|Msg2|p35srj	Cbp/p300-interacting transactivator, with Glu/Asp-rich carboxy-terminal domain, 2	protein-coding
Diff_Nuc24167	chr6	145240212	145240351	+	0	NA	Intergenic	Intergenic	41209	NR_045598	100039495	Mm.121014	NR_045598	ENSMUSG00000086013	Gm15706	OTTMUSG00000025463	predicted gene 15706	ncRNA
Diff_Nuc28996	chr4	121105382	121105521	+	0	NA	Intergenic	L1Md_F2|LINE|L1	-9747	NM_001144948	666921	Mm.477980	NM_001144948	ENSMUSG00000078576	Gm12886	OTTMUSG00000008908	predicted gene 12886	protein-coding
Diff_Nuc16745	chr19	12567462	12567601	+	0	NA	intron (NM_172442, intron 1 of 8)	intron (NM_172442, intron 1 of 8)	8955	NM_172442	207521	Mm.247695	NM_172442	ENSMUSG00000039982	Dtx4	AI449438|BC044798|D930042H13|RNF155	deltex 4, E3 ubiquitin ligase	protein-coding
Diff_Nuc4080	chr12	105579652	105579791	+	0	NA	intron (NM_011458, intron 2 of 4)	intron (NM_011458, intron 2 of 4)	3025	NM_011458	20714	Mm.291569	NM_011458	ENSMUSG00000058207	Serpina3k	1300001I07Rik|D12Rp54|MMCM2|MMSpi2|RP54|Spi-2|Spi2|contrapsin	serine (or cysteine) peptidase inhibitor, clade A, member 3K	protein-coding
Diff_Nuc21202	chr7	137665942	137666081	+	0	NA	Intergenic	Tigger7|DNA|MER2_type	-2128	NM_001271343	11907	Mm.216321	NM_013799	ENSMUSG00000030850	Ate1	AI225793|AW547406	arginyltransferase 1	protein-coding
Diff_Nuc3957	chr12	100856402	100856541	+	0	NA	intron (NR_136760, intron 2 of 3)	intron (NR_136760, intron 2 of 3)	9713	NR_045288	73457	Mm.383439	NR_045288	ENSMUSG00000100211	1700064M15Rik	-	RIKEN cDNA 1700064M15 gene	ncRNA
Diff_Nuc4144	chr12	110198252	110198391	+	0	NA	intron (NM_177602, intron 2 of 6)	intron (NM_177602, intron 2 of 6)	65839	NM_177602	212198	Mm.342082	NM_177602	ENSMUSG00000040877	Wdr25	B930090D16Rik	WD repeat domain 25	protein-coding
Diff_Nuc35060	chr2	133222062	133222201	+	0	NA	Intergenic	Lx4B|LINE|L1	-155764	NM_007553	12156	Mm.103205	NM_007553	ENSMUSG00000027358	Bmp2	AI467020|Bmp2a	bone morphogenetic protein 2	protein-coding
Diff_Nuc8387	chr10	74902082	74902221	+	0	NA	intron (NM_133995, intron 9 of 9)	intron (NM_133995, intron 9 of 9)	-10104	NR_045841	71125	Mm.399516	NR_045841		4933407G14Rik	-	RIKEN cDNA 4933407G14 gene	ncRNA
Diff_Nuc15515	chr14	61950522	61950661	+	0	NA	Intergenic	Intergenic	22001	NM_177337	219144	Mm.206566	NM_177337	ENSMUSG00000043157	Arl11	ARLTS1|C730007L20Rik	ADP-ribosylation factor-like 11	protein-coding
Diff_Nuc10129	chr17	33694562	33694701	+	0	NA	intron (NM_053214, intron 1 of 27)	intron (NM_053214, intron 1 of 27)	1979	NM_053214	17916	Mm.42019	NM_053214	ENSMUSG00000024300	Myo1f	C330006B10Rik	myosin IF	protein-coding
Diff_Nuc717	chr13	32630732	32630871	+	0	NA	Intergenic	Intergenic	-200388	NM_146041	218138	Mm.247143	NM_146041	ENSMUSG00000038372	Gmds	BC031788|C87208	GDP-mannose 4, 6-dehydratase	protein-coding
Diff_Nuc4590	chr11	18232252	18232391	+	0	NA	Intergenic	Intergenic	236332	NR_131129	327872		NR_131129	ENSMUSG00000085453	Gm12018	OTTMUSG00000005202	predicted gene 12018	ncRNA
Diff_Nuc31566	chr3	106097562	106097701	+	0	NA	Intergenic	L1_Mur2|LINE|L1	-75234	NM_145126	104183	Mm.425140	NM_145126	ENSMUSG00000063779	Chil4	Chi3l4|Ym2	chitinase-like 4	protein-coding
Diff_Nuc12738	chr16	97652182	97652321	+	0	NA	intron (NM_019517, intron 8 of 8)	intron (NM_019517, intron 8 of 8)	32261	NM_010846	17857	Mm.33996	NM_010846	ENSMUSG00000000386	Mx1	AI893580|Mx|Mx-1	MX dynamin-like GTPase 1	protein-coding
Diff_Nuc27645	chr4	44117872	44118011	+	0	NA	Intergenic	Tigger1|DNA|MER2_type	-16824	NR_040414	623796	Mm.490409	NR_040414	ENSMUSG00000084274	Gm12504	OTTMUSG00000007209	prothymosin alpha pseudogene	pseudo
Diff_Nuc26351	chr5	118795252	118795391	+	0	NA	Intergenic	Intergenic	100085	NM_001081236	76792	Mm.103428	NM_001081236	ENSMUSG00000032840	2410131K14Rik	-	RIKEN cDNA 2410131K14 gene	protein-coding
Diff_Nuc12134	chr16	50772842	50772981	+	0	NA	Intergenic	Intergenic	-10611	NR_131006	78639	Mm.160109	NR_131005	ENSMUSG00000092276	1700116B05Rik	-	RIKEN cDNA 1700116B05 gene	ncRNA
Diff_Nuc23606	chr6	119716392	119716531	+	0	NA	intron (NR_104484, intron 8 of 20)	intron (NR_104484, intron 8 of 20)	81707	NM_053204	111173	Mm.288860	NM_053204	ENSMUSG00000030172	Erc1	4930404L01Rik|5033405M01Rik|9630025C19Rik|B430107L16Rik|CAST2|ELKS|Elks1|RAB6IP2A|RAB6IP2B|Rab6ip2|mKIAA1081	ELKS/RAB6-interacting/CAST family member 1	protein-coding
Diff_Nuc40303	chr9	65168592	65168731	+	0	NA	exon (NM_001044389, exon 9 of 13)	exon (NM_001044389, exon 9 of 13)	-25214	NM_016688	50996	Mm.29193	NM_016688	ENSMUSG00000041837	Pdcd7	C80112|ES18	programmed cell death 7	protein-coding
Diff_Nuc15474	chr14	60150362	60150501	+	0	NA	intron (NM_026908, intron 9 of 10)	intron (NM_026908, intron 9 of 10)	66365	NM_001168537	71891	Mm.439850	NM_027986	ENSMUSG00000021982	Cdadc1	2310010M10Rik|AI449174|AI463398|BB130816|NYD-SP15	cytidine and dCMP deaminase domain containing 1	protein-coding
Diff_Nuc25858	chr5	97111762	97111901	+	0	NA	intron (NM_175473, intron 33 of 73)	intron (NM_175473, intron 33 of 73)	-110573	NM_013470	11745	Mm.7214	NM_013470	ENSMUSG00000029484	Anxa3	Anx3	annexin A3	protein-coding
Diff_Nuc19635	chr7	36607282	36607421	+	0	NA	intron (NR_033567, intron 2 of 2)	intron (NR_033567, intron 2 of 2)	-19343	NM_177739	668501	Mm.286296	NM_177739	ENSMUSG00000044452	Zfp507	1810022O10Rik|A230056M16Rik|AL024009|AU021817|BB105092|Gm480|Znf507|mKIAA1084	zinc finger protein 507	protein-coding
Diff_Nuc16910	chr19	23318912	23319051	+	0	NA	intron (NM_153808, intron 8 of 23)	L1_Mus1|LINE|L1	28108	NM_001252685	226026	Mm.23267	NM_153808	ENSMUSG00000024943	Smc5	MLZ-453|SMC-5|Smc5l1|mKIAA0594|mSMC5	structural maintenance of chromosomes 5	protein-coding
Diff_Nuc525	chr13	23017732	23017871	+	0	NA	Intergenic	Lx3_Mus|LINE|L1	-41771	NM_134241	171275	Mm.377227	NM_134241	ENSMUSG00000071490	Vmn1r212	V1rh18	vomeronasal 1 receptor 212	protein-coding
Diff_Nuc34923	chr2	127614752	127614891	+	0	NA	promoter-TSS (NM_001291012)	promoter-TSS (NM_001291012)	-194	NM_001291012	53885	Mm.210766	NM_016902	ENSMUSG00000027378	Nphp1	-	nephronophthisis 1 (juvenile) homolog (human)	protein-coding
Diff_Nuc21309	chr7	142984362	142984501	+	0	NA	Intergenic	Intergenic	-76369	NM_001081117	17345	Mm.4078	NM_001081117	ENSMUSG00000031004	Mki67	D630048A14Rik|Ki-67|Ki67	antigen identified by monoclonal antibody Ki 67	protein-coding
Diff_Nuc24531	chr5	20717942	20718081	+	0	NA	intron (NM_175437, intron 5 of 30)	intron (NM_175437, intron 5 of 30)	25926	NM_175437	212167	Mm.121705	NM_175437	ENSMUSG00000039934	Gsap	A530088I07Rik|Pion	gamma-secretase activating protein	protein-coding
Diff_Nuc20237	chr7	87242772	87242911	+	0	NA	exon (NM_173011, exon 7 of 11)	exon (NM_173011, exon 7 of 11)	17395	NM_173011	269951	Mm.246432	NM_173011	ENSMUSG00000030541	Idh2	E430004F23|IDPm|Idh-2	isocitrate dehydrogenase 2 (NADP+), mitochondrial	protein-coding
Diff_Nuc680	chr13	30441202	30441341	+	0	NA	intron (NM_177322, intron 2 of 2)	intron (NM_177322, intron 2 of 2)	13046	NM_177322	11607	Mm.35062	NM_177322	ENSMUSG00000049115	Agtr1a	1810074K20Rik|AG2S|AI551199|AT1|AT1a|AT2R1|AT2R1A|Agtr-1a|Agtr1|Angtr-1a	angiotensin II receptor, type 1a	protein-coding
Diff_Nuc5825	chr11	77941162	77941301	+	0	NA	intron (NM_001346762, intron 1 of 2)	PB1D7|SINE|Alu	33056	NM_145430	216971	Mm.119387	NM_145430	ENSMUSG00000037750	Fam222b	9630020I17Rik	family with sequence similarity 222, member B	protein-coding
Diff_Nuc299	chr13	9347422	9347561	+	0	NA	intron (NM_001081426, intron 1 of 36)	B2_Mm2|SINE|B2	71720	NM_001081426	208440	Mm.217326	NM_172459	ENSMUSG00000048264	Dip2c	2900024P20Rik|9630044M06|mKIAA0934	disco interacting protein 2 homolog C	protein-coding
Diff_Nuc2650	chr12	25702962	25703101	+	0	NA	intron (NM_001081378, intron 22 of 31)	MIR|SINE|MIR	43234	NM_001081378	77480	Mm.250641	NM_001081378	ENSMUSG00000036333	Kidins220	3110039L19Rik|AI194387|AI316525|C330002I19Rik|mKIAA1250	kinase D-interacting substrate 220	protein-coding
Diff_Nuc4545	chr11	16485322	16485461	+	0	NA	Intergenic	Lx2|LINE|L1	-76904	NM_001109971	20335	Mm.325350	NM_011343	ENSMUSG00000078974	Sec61g	-	SEC61, gamma subunit	protein-coding
Diff_Nuc14770	chr14	22114922	22115061	+	0	NA	intron (NM_001243041, intron 6 of 10)	L1M5|LINE|L1	-204001	NM_001205241	54169	Mm.248967	NM_017479	ENSMUSG00000021767	Kat6b	AI507552|B130044K16Rik|MYST-4|Morf|Myst4|mKIAA0383|qkf|querkopf	K(lysine) acetyltransferase 6B	protein-coding
Diff_Nuc19298	chr7	16564702	16564841	+	0	NA	exon (NM_001081418, exon 7 of 14)	exon (NM_001081418, exon 7 of 14)	-11887	NM_153068	259300	Mm.138215	NM_153068	ENSMUSG00000074364	Ehd2	BC027084|C130052H20Rik	EH-domain containing 2	protein-coding
Diff_Nuc11470	chr16	17769982	17770121	+	0	NA	intron (NM_145479, intron 2 of 6)	B1_Mus1|SINE|Alu	10337	NM_145479	224023	Mm.282807	NM_145479	ENSMUSG00000022750	Klhl22	2610318I18Rik|Kelchl	kelch-like 22	protein-coding
Diff_Nuc14835	chr14	26615362	26615501	+	0	NA	Intergenic	HAL1|LINE|L1	-27089	NM_001101433	71918	Mm.41904	NM_001101433	ENSMUSG00000055538	Zcchc24	2310047A01Rik	zinc finger, CCHC domain containing 24	protein-coding
Diff_Nuc25044	chr5	50423302	50423441	+	0	NA	intron (NM_133911, intron 1 of 18)	intron (NM_133911, intron 1 of 18)	26864	NM_133911	70693	Mm.272974	NM_133911	ENSMUSG00000029090	Adgra3	3830613O22Rik|AU044632|Gpr125|Tem5-like	adhesion G protein-coupled receptor A3	protein-coding
Diff_Nuc34328	chr2	94015962	94016101	+	0	NA	Intergenic	Intergenic	-17965	NM_019657	56348	Mm.22505	NM_019657	ENSMUSG00000027195	Hsd17b12	2610510O05Rik|AI172963|KIK-I|Kik1	hydroxysteroid (17-beta) dehydrogenase 12	protein-coding
Diff_Nuc30701	chr3	63304762	63304901	+	0	NA	Intergenic	L1_Mus4|LINE|L1	204814	NM_001289463	17380	Mm.296022	NM_008604	ENSMUSG00000027820	Mme	6030454K05Rik|C85356|CALLA|CD10|NEP|SFE	membrane metallo endopeptidase	protein-coding
Diff_Nuc8186	chr10	63690022	63690161	+	0	NA	intron (NM_001164519, intron 2 of 12)	intron (NM_001164519, intron 2 of 12)	-137088	NM_178678	216028	Mm.431318	NM_178678	ENSMUSG00000042846	Lrrtm3	9630044H04Rik	leucine rich repeat transmembrane neuronal 3	protein-coding
Diff_Nuc14050	chr15	79377302	79377441	+	0	NA	promoter-TSS (NM_001040187)	promoter-TSS (NM_001040187)	-200	NM_199080	67040	Mm.29644	NM_152806	ENSMUSG00000055065	Ddx17	2610007K22Rik|A430025E01Rik|AI047725|C80929|Gm926|p72	DEAD (Asp-Glu-Ala-Asp) box polypeptide 17	protein-coding
Diff_Nuc29666	chr4	147922072	147922211	+	0	NA	intron (NM_020009, intron 50 of 57)	ID2|SINE|ID	-10395	NM_016699	50912	Mm.266635	NM_016699	ENSMUSG00000017264	Exosc10	PM-Scl|PM/Scl-100|Pmscl2|RRP6|p2|p3|p4	exosome component 10	protein-coding
Diff_Nuc18439	chr18	46770362	46770501	+	0	NA	TTS (NM_010120)	TTS (NM_010120)	13073	NM_010120	13664	Mm.262037	NM_010120	ENSMUSG00000057561	Eif1a	C76390|Ef1a|Eftu|Eif4c|eIF-1A|eIF-4C	eukaryotic translation initiation factor 1A	protein-coding
Diff_Nuc17090	chr19	32607572	32607711	+	0	NA	Intergenic	Intergenic	47382	NM_010799	17330	Mm.255116	NM_010799	ENSMUSG00000024896	Minpp1	AA408516	multiple inositol polyphosphate histidine phosphatase 1	protein-coding
Diff_Nuc14542	chr15	102218912	102219051	+	0	NA	Intergenic	Intergenic	-17766	NM_013672	20683	Mm.4618	NM_013672	ENSMUSG00000001280	Sp1	1110003E12Rik|AA450830|AI845540|Sp1-1	trans-acting transcription factor 1	protein-coding
Diff_Nuc2066	chr13	104985002	104985141	+	0	NA	intron (NM_030731, intron 6 of 9)	intron (NM_030731, intron 6 of 9)	15893	NM_030731	81003	Mm.244190	NM_030731	ENSMUSG00000021712	Trim23	6330516O20Rik|AI450195|Arfd1	tripartite motif-containing 23	protein-coding
Diff_Nuc17789	chr18	7004182	7004321	+	0	NA	intron (NM_177595, intron 1 of 6)	intron (NM_177595, intron 1 of 6)	526	NM_177595	210719	Mm.257186	NM_177595	ENSMUSG00000061013	Mkx	9430023B20Rik|Irxl1	mohawk homeobox	protein-coding
Diff_Nuc37924	chr1	133211902	133212041	+	0	NA	intron (NM_001081011, intron 17 of 22)	intron (NM_001081011, intron 17 of 22)	-35831	NM_019777	56489	Mm.386783	NM_019777	ENSMUSG00000042349	Ikbke	AW558201|IKK-i|IKKepsilon|Ikki	inhibitor of kappaB kinase epsilon	protein-coding
Diff_Nuc21466	chr7	151822932	151823071	+	0	NA	exon (NM_001242349, exon 11 of 25)	exon (NM_001242349, exon 11 of 25)	-54660	NM_010175	14082	Mm.5126	NM_010175	ENSMUSG00000031077	Fadd	Mort1/FADD	Fas (TNFRSF6)-associated via death domain	protein-coding
Diff_Nuc1110	chr13	49702372	49702511	+	0	NA	promoter-TSS (NM_008760)	promoter-TSS (NM_008760)	-999	NM_008760	18295	Mm.4258	NM_008760	ENSMUSG00000021390	Ogn	3110079A16Rik|OG|OIF|SLRR3A|mimecan|mimican	osteoglycin	protein-coding
Diff_Nuc17272	chr19	40494792	40494931	+	0	NA	intron (NM_001034962, intron 1 of 22)	B1_Mus1|SINE|Alu	-18061	NM_001034964	20411	Mm.210815	NM_009166	ENSMUSG00000025006	Sorbs1	2310065E01Rik|9530001P15Rik|CAP|SH3P12|Sh3d5|mKIAA1296	sorbin and SH3 domain containing 1	protein-coding
Diff_Nuc30804	chr3	69049972	69050111	+	0	NA	Intergenic	Intergenic	23700	NM_027843	71619	Mm.98122	NM_027843	ENSMUSG00000098207	Arl14	9130014L17Rik|Arf7	ADP-ribosylation factor-like 14	protein-coding
Diff_Nuc37271	chr1	87544812	87544951	+	0	NA	Intergenic	Intergenic	-1682	NM_001313713	20684	Mm.290906	NM_013673	ENSMUSG00000026222	Sp100	A430075G10Rik	nuclear antigen Sp100	protein-coding
Diff_Nuc23632	chr6	120330802	120330941	+	0	NA	intron (NM_145997, intron 4 of 27)	B3A|SINE|B2	-16484	NR_045558	67200	Mm.45767	NM_026028	ENSMUSG00000030177	Ccdc77	2400002C23Rik|2700091N06Rik|AV168274	coiled-coil domain containing 77	protein-coding
Diff_Nuc24974	chr5	44855652	44855791	+	0	NA	Intergenic	Intergenic	-237876	NM_173764	231225	Mm.30688	NM_173764	ENSMUSG00000046985	Tapt1	4932414K18Rik	transmembrane anterior posterior transformation 1	protein-coding
Diff_Nuc24345	chr5	6946557	6946696	+	0	NA	intron (NM_001163223, intron 1 of 3)	Lx9|LINE|L1	-357538	NM_027603	70920	Mm.158494	NM_027603	ENSMUSG00000040514	4921511H03Rik	-	RIKEN cDNA 4921511H03 gene	protein-coding
Diff_Nuc35344	chr2	150744352	150744491	+	0	NA	intron (NM_027014, intron 4 of 6)	intron (NM_027014, intron 4 of 6)	9091	NM_001163476	69270	Mm.271603	NM_027014	ENSMUSG00000027454	Gins1	2810418N01Rik|Gins4|PSF1|mKIAA0186	GINS complex subunit 1 (Psf1 homolog)	protein-coding
Diff_Nuc43345	chr8	122841822	122841961	+	0	NA	Intergenic	Intergenic	-89761	NR_110496	434353	Mm.411793	NR_110496	ENSMUSG00000097960	A330074K22Rik	-	RIKEN cDNA A330074K22 gene	ncRNA
Diff_Nuc38481	chr1	162266202	162266341	+	0	NA	intron (NM_001038621, intron 2 of 8)	intron (NM_001038621, intron 2 of 8)	15431	NM_001038621	29809	Mm.25833	NM_013862	ENSMUSG00000026721	Rabgap1l	5830411O09Rik|8430421H08Rik|9630005B12Rik|AW049894|HHL|Hh1|mKIAA0471	RAB GTPase activating protein 1-like	protein-coding
Diff_Nuc34931	chr2	128099122	128099261	+	0	NA	Intergenic	Intergenic	145880	NM_001284410	12125	Mm.141083	NM_009754	ENSMUSG00000027381	Bcl2l11	1500006F24Rik|Bim|Bod|bcl2-L-11	BCL2-like 11 (apoptosis facilitator)	protein-coding
Diff_Nuc30148	chr3	27522972	27523111	+	0	NA	intron (NM_173182, intron 2 of 25)	Lx8|LINE|L1	-39124	NR_037275	100526525		NR_037275	ENSMUSG00000092695	Mir3092	mir-3092|mmu-mir-3092	microRNA 3092	ncRNA
Diff_Nuc43140	chr8	111805832	111805971	+	0	NA	Intergenic	Intergenic	58907	NR_002928	384864	Mm.390083	NR_002928		Gm1943	-	WD repeat domain 70 pseudogene	pseudo
Diff_Nuc36753	chr1	58250452	58250591	+	0	NA	intron (NM_023617, intron 33 of 34)	MLT2C1|LTR|ERVL	-16720	NM_023631	71872	Mm.244525	NM_023631	ENSMUSG00000038242	Aox4	2310003G12Rik|Aoh2	aldehyde oxidase 4	protein-coding
Diff_Nuc14878	chr14	28172682	28172821	+	0	NA	intron (NM_001289687, intron 1 of 9)	B3|SINE|B2	-1824	NM_001289688	71704	Mm.248606	NM_027871	ENSMUSG00000021895	Arhgef3	1200004I24Rik|9830169H03Rik|C76747|Xpln	Rho guanine nucleotide exchange factor (GEF) 3	protein-coding
Diff_Nuc39246	chr9	6694172	6694311	+	0	NA	Intergenic	L1_Mus3|LINE|L1	-427694	NM_027942	71829	Mm.141452	NM_027942	ENSMUSG00000047619	Ddi1	1700011N24Rik	DNA-damage inducible 1	protein-coding
Diff_Nuc32075	chr3	132345567	132345706	+	0	NA	intron (NM_007926, intron 1 of 6)	L2|LINE|L2	1207	NM_007926	13722	Mm.235137	NM_007926	ENSMUSG00000028029	Aimp1	9830137A06Rik|AIMP1/p43|EMAPII|Emap2|Scye1|p43	aminoacyl tRNA synthetase complex-interacting multifunctional protein 1	protein-coding
Diff_Nuc34736	chr2	119818192	119818331	+	0	NA	intron (NM_011941, intron 1 of 29)	intron (NM_011941, intron 1 of 29)	19826	NM_011941	26390	Mm.330501	NM_011941	ENSMUSG00000033902	Mapkbp1	2810483F24Rik|AW123212|JNKBP-1|Jnkbp1|mKIAA0596	mitogen-activated protein kinase binding protein 1	protein-coding
Diff_Nuc31990	chr3	127469822	127469961	+	0	NA	intron (NM_027808, intron 1 of 13)	L1M3|LINE|L1	13554	NM_027808	71481	Mm.158704	NM_027808	ENSMUSG00000028028	Alpk1	8430410J10Rik|LAK	alpha-kinase 1	protein-coding
Diff_Nuc35168	chr2	140425702	140425841	+	0	NA	intron (NM_001013802, intron 3 of 18)	MTEa|LTR|MaLR	71441	NM_001172160	71436	Mm.426781	NM_178382	ENSMUSG00000051379	Flrt3	5530600M07Rik|C430047I10Rik|mKIAA1469	fibronectin leucine rich transmembrane protein 3	protein-coding
Diff_Nuc40111	chr9	57609082	57609221	+	0	NA	intron (NM_007713, intron 2 of 12)	intron (NM_007713, intron 2 of 12)	4516	NM_007713	102414	Mm.25720	NM_007713	ENSMUSG00000032316	Clk3	AI256811	CDC-like kinase 3	protein-coding
Diff_Nuc9974	chr17	28051222	28051361	+	0	NA	intron (NM_181413, intron 1 of 24)	intron (NM_181413, intron 1 of 24)	5040	NM_181413	224650	Mm.32556	NM_181413	ENSMUSG00000024219	Anks1	Anks1a|mKIAA0229	ankyrin repeat and SAM domain containing 1	protein-coding
Diff_Nuc3540	chr12	79954592	79954731	+	0	NA	intron (NM_023721, intron 2 of 8)	B4A|SINE|B4	7964	NM_023721	73834	Mm.311549	NM_023721	ENSMUSG00000021114	Atp6v1d	1110004P10Rik|Atp6m|VATD|Vma8	ATPase, H+ transporting, lysosomal V1 subunit D	protein-coding
Diff_Nuc3643	chr12	83039922	83040061	+	0	NA	intron (NM_018814, intron 8 of 35)	intron (NM_018814, intron 8 of 35)	78974	NM_018814	54604	Mm.86584	NM_018814	ENSMUSG00000021140	Pcnx	2900024E21Rik|3526401J03Rik|AF096286|AI327143|AI413187|Pcnx1|Pcnxl1	pecanex homolog (Drosophila)	protein-coding
Diff_Nuc4993	chr11	42851062	42851201	+	0	NA	Intergenic	Intergenic	-112248	NM_176999	319767	Mm.252339	NM_176999	ENSMUSG00000055415	Atp10b	5930426O13Rik|9030605H24Rik	ATPase, class V, type 10B	protein-coding
Diff_Nuc43434	chr8	126545362	126545501	+	0	NA	promoter-TSS (NM_133966)	promoter-TSS (NM_133966)	-222	NM_133966	102162	Mm.291777	NM_133966	ENSMUSG00000038697	Taf5l	1110005N04Rik|AI849020	TATA-box binding protein associated factor 5 like	protein-coding
Diff_Nuc20931	chr7	123489972	123490111	+	0	NA	intron (NM_011083, intron 27 of 32)	intron (NM_011083, intron 27 of 32)	-12337	NM_026533	68052	Mm.14798	NM_026533	ENSMUSG00000090862	Rps13	2700063M04Rik	ribosomal protein S13	protein-coding
Diff_Nuc2513	chr12	11339902	11340041	+	0	NA	intron (NM_012038, intron 2 of 3)	intron (NM_012038, intron 2 of 3)	33278	NR_106136	102465775		NR_106136	ENSMUSG00000098879	Mir7675	Gm27965|mmu-mir-7675	microRNA 7675	ncRNA
Diff_Nuc31119	chr3	87329122	87329261	+	0	NA	promoter-TSS (NM_001083318)	promoter-TSS (NM_001083318)	-309	NM_001083318	27049	Mm.219460	NM_012051	ENSMUSG00000003382	Etv3	AI414410|METS|Pe1	ets variant 3	protein-coding
Diff_Nuc40687	chr9	84301352	84301491	+	0	NA	Intergenic	Intergenic	-366584	NR_040739	75253	Mm.401984	NR_040739	ENSMUSG00000099724	4930554C24Rik	-	RIKEN cDNA 4930554C24 gene	ncRNA
Diff_Nuc13672	chr15	59553832	59553971	+	0	NA	Intergenic	Intergenic	72613	NR_045076	100503021	Mm.402924	NR_045076		Gm19510	-	predicted gene, 19510	ncRNA
Diff_Nuc4733	chr11	23283412	23283551	+	0	NA	intron (NM_001190401, intron 23 of 79)	ID_B1|SINE|B4	76586	NM_001190401	17847	Mm.119155	NM_001190401	ENSMUSG00000056342	Usp34	A530081C03Rik|Murr2	ubiquitin specific peptidase 34	protein-coding
Diff_Nuc16965	chr19	26750402	26750541	+	0	NA	intron (NM_011416, intron 14 of 32)	intron (NM_011416, intron 14 of 32)	70821	NM_011416	67155	Mm.342988	NM_011416	ENSMUSG00000024921	Smarca2	2610209L14Rik|SNF2alpha|Snf2l2|brahma|brm	SWI/SNF related, matrix associated, actin dependent regulator of chromatin, subfamily a, member 2	protein-coding
Diff_Nuc41208	chr9	110285142	110285281	+	0	NA	intron (NM_001103162, intron 18 of 22)	intron (NM_001103162, intron 18 of 22)	25503	NM_001081043	104831	Mm.335477	NM_001081043	ENSMUSG00000036057	Ptpn23	AI462446|PTP-TD14	protein tyrosine phosphatase, non-receptor type 23	protein-coding
Diff_Nuc38093	chr1	140479052	140479191	+	0	NA	intron (NM_021605, intron 1 of 9)	LTR16A|LTR|ERVL	37213	NM_021605	59125	Mm.143817	NM_021605	ENSMUSG00000026393	Nek7	2810460C19Rik|AU020186	NIMA (never in mitosis gene a)-related expressed kinase 7	protein-coding
Diff_Nuc21199	chr7	137608522	137608661	+	0	NA	intron (NM_001029895, intron 9 of 11)	intron (NM_001029895, intron 9 of 11)	54503	NM_001136054	11907	Mm.216321	NM_013799	ENSMUSG00000030850	Ate1	AI225793|AW547406	arginyltransferase 1	protein-coding
Diff_Nuc40753	chr9	89112152	89112291	+	0	NA	intron (NM_026829, intron 2 of 2)	URR1A|DNA|MER1_type	6193	NM_026829	107885	Mm.486274	NM_026829	ENSMUSG00000066442	Mthfs	1110034I12Rik|2310020H23Rik|AI119695	5, 10-methenyltetrahydrofolate synthetase	protein-coding
Diff_Nuc41232	chr9	111046912	111047051	+	0	NA	intron (NM_027742, intron 3 of 13)	Lx8|LINE|L1	26366	NM_001164838	71268	Mm.302287	NM_027742	ENSMUSG00000032497	Lrrfip2	5133400F20Rik|AI850587	leucine rich repeat (in FLII) interacting protein 2	protein-coding
Diff_Nuc17448	chr19	46856522	46856661	+	0	NA	intron (NM_001102471, intron 1 of 6)	MTD|LTR|MaLR	20492	NM_001102471	94219	Mm.306903	NM_033569	ENSMUSG00000064105	Cnnm2	AU015877|AW048635|Acdp2|Clp2	cyclin M2	protein-coding
Diff_Nuc40703	chr9	85621932	85622071	+	0	NA	intron (NM_001081282, intron 8 of 28)	intron (NM_001081282, intron 8 of 28)	20940	NM_001081282	108837	Mm.22315	NM_175371	ENSMUSG00000035941	Ibtk	5430411K16Rik|AA409502|BTKI|mKIAA1417	inhibitor of Bruton agammaglobulinemia tyrosine kinase	protein-coding
Diff_Nuc26683	chr5	136173342	136173481	+	0	NA	intron (NM_008898, intron 1 of 15)	B1_Mur3|SINE|Alu	8396	NM_008898	18984	Mm.3863	NM_008898	ENSMUSG00000005514	Por	4933424M13Rik|CPR|CYPOR|P450R	P450 (cytochrome) oxidoreductase	protein-coding
Diff_Nuc18157	chr18	33656622	33656761	+	0	NA	Intergenic	L1Md_T|LINE|L1	32874	NR_045415	433171	Mm.353332	NR_045415		Gm10549	ENSMUSG00000073610	predicted gene 10549	ncRNA
Diff_Nuc26046	chr5	106118512	106118651	+	0	NA	Intergenic	Intergenic	-10407	NM_001122768	231549	Mm.23837	NM_178701	ENSMUSG00000046079	Lrrc8d	2810473G09Rik|4930525N13Rik|A930019F03|Lrrc5	leucine rich repeat containing 8D	protein-coding
Diff_Nuc1596	chr13	78226472	78226611	+	0	NA	intron (NR_028109, intron 10 of 10)	Lx8|LINE|L1	62378	NM_029315	75507	Mm.443255	NM_029315	ENSMUSG00000093668	Pou5f2	1700013G10Rik|SPRM-1|Sprm1	POU domain class 5, transcription factor 2	protein-coding
Diff_Nuc28807	chr4	111895742	111895881	+	0	NA	Intergenic	Intergenic	-9039	NM_177578	195564	Mm.259652	NM_177578	ENSMUSG00000070868	Skint3	A430090E18Rik|Skint-3	selection and upkeep of intraepithelial T cells 3	protein-coding
Diff_Nuc638	chr13	28592632	28592771	+	0	NA	intron (NR_045054, intron 7 of 7)	RSINE1|SINE|B4	210041	NR_105787	102466635		NR_105787	ENSMUSG00000099158	Mir6368	Gm27800|mmu-mir-6368	microRNA 6368	ncRNA
Diff_Nuc41680	chr8	18514562	18514701	+	0	NA	Intergenic	Intergenic	-80542	NM_173189	244329	Mm.235296	NM_173189	ENSMUSG00000039842	Mcph1	5430437K10Rik|BRIT1|D030046N04Rik|MCT	microcephaly, primary autosomal recessive 1	protein-coding
Diff_Nuc22392	chr6	50063772	50063911	+	0	NA	intron (NM_019939, intron 1 of 12)	B3|SINE|B2	3601	NM_001164733	56524	Mm.41288	NM_008016	ENSMUSG00000038388	Mpp6	P55t|Pals2	membrane protein, palmitoylated 6 (MAGUK p55 subfamily member 6)	protein-coding
Diff_Nuc40570	chr9	75407972	75408111	+	0	NA	promoter-TSS (NM_016963)	promoter-TSS (NM_016963)	-577	NM_016963	50875	Mm.38445	NM_016963	ENSMUSG00000058587	Tmod3	U-Tmod|UTMOD	tropomodulin 3	protein-coding
Diff_Nuc23624	chr6	120125992	120126131	+	0	NA	intron (NM_016718, intron 1 of 3)	B1F1|SINE|Alu	-17780	NM_001347432	29862	Mm.103668	NM_016718	ENSMUSG00000041377	Ninj2	-	ninjurin 2	protein-coding
Diff_Nuc26028	chr5	105353552	105353691	+	0	NA	Intergenic	MURVY-int|LTR|ERV1	58115	NM_030239	27405	Mm.389663	NM_030239	ENSMUSG00000029299	Abcg3	Abcp2|Mxr2	ATP-binding cassette, sub-family G (WHITE), member 3	protein-coding
Diff_Nuc20807	chr7	118234742	118234881	+	0	NA	Intergenic	Lx8|LINE|L1	-8267	NM_013507	13690	Mm.185453	NM_013507	ENSMUSG00000005610	Eif4g2	DAP-5|E130105L11Rik|Nat1|Natm1|p97	eukaryotic translation initiation factor 4, gamma 2	protein-coding
Diff_Nuc14641	chr14	14346932	14347071	+	0	NA	intron (NM_001163032, intron 2 of 4)	MLT1D|LTR|MaLR	60529	NM_001163032	72003	Mm.317515	NM_028052	ENSMUSG00000056296	Synpr	1500003F20Rik|SPO	synaptoporin	protein-coding
Diff_Nuc13485	chr15	51626252	51626391	+	0	NA	intron (NM_080635, intron 5 of 7)	intron (NM_080635, intron 5 of 7)	70686	NM_080635	68135	Mm.289800	NM_080635	ENSMUSG00000022312	Eif3h	1110008A16Rik|40kD|9430017H16Rik|EIF3-P40|EIF3-gamma|Eif3s3	eukaryotic translation initiation factor 3, subunit H	protein-coding
Diff_Nuc38104	chr1	140979902	140980041	+	0	NA	intron (NM_181347, intron 9 of 20)	intron (NM_181347, intron 9 of 20)	105737	NR_108103	78229	Mm.437838	NR_108103	ENSMUSG00000104900	4930596I21Rik	-	RIKEN cDNA 4930596I21 gene	ncRNA
Diff_Nuc5112	chr11	49837022	49837161	+	0	NA	Intergenic	GA-rich|Low_complexity|Low_complexity	-1742	NM_021540	59044	Mm.359004	NM_021540	ENSMUSG00000020376	Rnf130	2510042A13Rik|G1RZFP|G1rp|GOLIATH|GP	ring finger protein 130	protein-coding
Diff_Nuc28305	chr4	86519752	86519891	+	0	NA	promoter-TSS (NM_001290541)	promoter-TSS (NM_001290541)	-497	NM_001290543	230379	Mm.45019	NM_139306	ENSMUSG00000038007	Acer2	2410116I05Rik|Asah3l|CRG-L1|maCER2	alkaline ceramidase 2	protein-coding
Diff_Nuc8163	chr10	62730542	62730681	+	0	NA	intron (NM_030114, intron 4 of 25)	L1M2|LINE|L1	24066	NM_026101	67345	Mm.234437	NM_026101	ENSMUSG00000020064	Herc4	1700056O17Rik|4921531D01Rik|9530080M15Rik|mKIAA1593	hect domain and RLD 4	protein-coding
Diff_Nuc239	chr13	4611302	4611441	+	0	NA	Intergenic	Lx8|LINE|L1	-2961	NM_018859	56043	Mm.251908	NM_018859	ENSMUSG00000045410	Akr1e1	1810061I10Rik|Akr1e2	aldo-keto reductase family 1, member E1	protein-coding
Diff_Nuc36571	chr1	47911602	47911741	+	0	NA	Intergenic	Intergenic	-387702	NR_105768	102466969		NR_105768	ENSMUSG00000098876	Mir6350	Gm27958|mmu-mir-6350	microRNA 6350	ncRNA
Diff_Nuc4890	chr11	32284082	32284221	+	0	NA	intron (NM_177364, intron 3 of 12)	intron (NM_177364, intron 3 of 12)	36340	NM_177364	268396	Mm.227616	NM_177364	ENSMUSG00000040711	Sh3pxd2b	G431001E03Rik|TSK4|fad49	SH3 and PX domains 2B	protein-coding
Diff_Nuc28619	chr4	102859812	102859951	+	0	NA	intron (NM_177732, intron 8 of 9)	intron (NM_177732, intron 8 of 9)	27608	NM_177732	242585	Mm.281800	NM_177732	ENSMUSG00000028521	Slc35d1	AI834976|C330011J09|UGTREL7|mKIAA0260	solute carrier family 35 (UDP-glucuronic acid/UDP-N-acetylgalactosamine dual transporter), member D1	protein-coding
Diff_Nuc30566	chr3	57540252	57540391	+	0	NA	intron (NM_001304454, intron 1 of 9)	intron (NM_001304454, intron 1 of 9)	337	NR_130743	24017	Mm.274360	NM_011883	ENSMUSG00000036503	Rnf13	2010001H16Rik|Rzf	ring finger protein 13	protein-coding
Diff_Nuc40771	chr9	90014872	90015011	+	0	NA	Intergenic	Intergenic	-5283	NM_024431	21761	Mm.426209	NM_024431	ENSMUSG00000062270	Morf4l1	MORFRG15|MRG15|TEG-189|Tex189|mKIAA4002	mortality factor 4 like 1	protein-coding
Diff_Nuc26153	chr5	110654142	110654281	+	0	NA	3' UTR (NM_001347389, exon 24 of 24)	3' UTR (NM_001347389, exon 24 of 24)	-5812	NM_001253814	71782	Mm.288442	NM_027922	ENSMUSG00000029501	Ankle2	1110001J12Rik|AI661024|D5Ertd585e	ankyrin repeat and LEM domain containing 2	protein-coding
Diff_Nuc19213	chr7	6205332	6205471	+	0	NA	intron (NM_001177416, intron 1 of 10)	L2b|LINE|L2	1089	NM_001177416	627821	Mm.99441	NM_001177416	ENSMUSG00000053367	Gm6792	EG627821	predicted gene 6792	protein-coding
Diff_Nuc39490	chr9	23529472	23529611	+	0	NA	Intergenic	Intergenic	-372921	NM_175678	319239	Mm.130824	NM_175678	ENSMUSG00000043659	Npsr1	9330128H10Rik|GPRA|Gpr154|MVTR|PGR14|VRR1	neuropeptide S receptor 1	protein-coding
Diff_Nuc2583	chr12	17272492	17272631	+	0	NA	promoter-TSS (NM_027959)	promoter-TSS (NM_027959)	-840	NM_027959	71853	Mm.222825	NM_027959	ENSMUSG00000020571	Pdia6	1700015E05Rik|AL023058|C77895|CaBP5|P5|Txndc7	protein disulfide isomerase associated 6	protein-coding
Diff_Nuc34240	chr2	90846182	90846321	+	0	NA	intron (NM_001244903, intron 7 of 13)	intron (NM_001244903, intron 7 of 13)	-29533	NM_009023	19400	Mm.1272	NM_009023	ENSMUSG00000002104	Rapsn	43kDa|Nraps|Raps|rapsyn	receptor-associated protein of the synapse	protein-coding
Diff_Nuc14152	chr15	82453842	82453981	+	0	NA	Intergenic	Intergenic	-2574	NM_145474	223706	Mm.436843	NM_145474	ENSMUSG00000094559	Cyp2d34	-	cytochrome P450, family 2, subfamily d, polypeptide 34	protein-coding
Diff_Nuc39711	chr9	38589042	38589181	+	0	NA	Intergenic	Lx7|LINE|L1	8438	NM_146782	258778	Mm.223209	NM_146782	ENSMUSG00000049926	Olfr921	MOR165-8	olfactory receptor 921	protein-coding
Diff_Nuc24021	chr6	139698482	139698621	+	0	NA	intron (NM_207683, intron 15 of 32)	intron (NM_207683, intron 15 of 32)	-91415	NM_011084	18705	Mm.333471	NM_011084	ENSMUSG00000030228	Pik3c2g	C80387|PI3K-C2-gamma	phosphatidylinositol 3-kinase, C2 domain containing, gamma polypeptide	protein-coding
Diff_Nuc20938	chr7	123752282	123752421	+	0	NA	Intergenic	Intergenic	104468	NM_001130479	53322	Mm.9901	NM_016773	ENSMUSG00000030659	Nucb2	AI607786|Calnuc|Nefa|Nesfatin-1	nucleobindin 2	protein-coding
Diff_Nuc2412	chr12	4271822	4271961	+	0	NA	intron (NM_010881, intron 16 of 22)	intron (NM_010881, intron 16 of 22)	-37597	NM_134046	52504	Mm.70546	NM_134046	ENSMUSG00000020652	Cenpo	2810429O05Rik|8430427C03Rik|D12Ertd482e	centromere protein O	protein-coding
Diff_Nuc25864	chr5	97413192	97413331	+	0	NA	Intergenic	Intergenic	-13447	NM_080708	140780	Mm.281490	NM_080708	ENSMUSG00000034663	Bmp2k	4933417M22Rik|AA673486|AV128808|BIKE	BMP2 inducible kinase	protein-coding
Diff_Nuc28698	chr4	106460392	106460531	+	0	NA	intron (NM_001347159, intron 1 of 15)	L3|LINE|CR1	11975	NM_025590	329910	Mm.222956	NM_025590	ENSMUSG00000034853	Acot11	1110020M10Rik|2010309H15Rik|AW060409|BFIT|BFIT1|Thea|Them1|mKIAA0707	acyl-CoA thioesterase 11	protein-coding
Diff_Nuc24744	chr5	31777822	31777961	+	0	NA	intron (NM_172993, intron 11 of 13)	intron (NM_172993, intron 11 of 13)	-10341	NM_026296	67656	Mm.23355	NM_026296	ENSMUSG00000029138	4930548H24Rik	AI427865	RIKEN cDNA 4930548H24 gene	protein-coding
Diff_Nuc6284	chr11	95468242	95468381	+	0	NA	Intergenic	B2_Mm1t|SINE|B2	-19299	NM_033217	18053	Mm.283893	NM_033217	ENSMUSG00000000120	Ngfr	LNGFR|Tnfrsf16|p75|p75NGFR|p75NTR	nerve growth factor receptor (TNFR superfamily, member 16)	protein-coding
Diff_Nuc12436	chr16	78162112	78162251	+	0	NA	Intergenic	L1MB8|LINE|L1	93518	NR_045698	100503619	Mm.387531	NR_045698	ENSMUSG00000109841	E330011O21Rik	-	RIKEN cDNA E330011O21 gene	ncRNA
Diff_Nuc2122	chr13	108607942	108608081	+	0	NA	intron (NM_145456, intron 2 of 14)	intron (NM_145456, intron 2 of 14)	72247	NM_145456	67263	Mm.490418	NM_145456	ENSMUSG00000032846	Zswim6	2900036G02Rik|mKIAA1577	zinc finger SWIM-type containing 6	protein-coding
Diff_Nuc37722	chr1	116875032	116875171	+	0	NA	Intergenic	Intergenic	-706613	NM_001077425	636808	Mm.101576	NM_001077425	ENSMUSG00000070695	Cntnap5a	Caspr5-1|EG636808	contactin associated protein-like 5A	protein-coding
Diff_Nuc19685	chr7	46541322	46541461	+	0	NA	Intergenic	Lx5|LINE|L1	-21487	NR_073038	100861861	Mm.60620	NR_073038		Gm21276	-	predicted gene, 21276	pseudo
Diff_Nuc41944	chr8	37682912	37683051	+	0	NA	intron (NM_001194940, intron 5 of 17)	ID_B1|SINE|B4	-5984	NM_015802	50768	Mm.125155	NM_015802	ENSMUSG00000031523	Dlc1	A730069N07Rik|Arhgap7|HP|STARD12|dlc-1	deleted in liver cancer 1	protein-coding
Diff_Nuc295	chr13	9154622	9154761	+	0	NA	intron (NM_172585, intron 11 of 17)	L1_Rod|LINE|L1	61564	NM_172585	217980	Mm.234944	NM_172585	ENSMUSG00000033499	Larp4b	A630096F19|AI256361|D13Wsu64e|Larp5	La ribonucleoprotein domain family, member 4B	protein-coding
Diff_Nuc34670	chr2	117007212	117007351	+	0	NA	3' UTR (NM_033524, exon 7 of 7)	3' UTR (NM_033524, exon 7 of 7)	-3582	NR_030440	732489		NR_030440	ENSMUSG00000076376	Mir674	Mirn674|mir-674|mmu-mir-674	microRNA 674	ncRNA
Diff_Nuc30012	chr3	18514342	18514481	+	0	NA	Intergenic	Intergenic	-133934	NR_040544	73959	Mm.60616	NR_040544	ENSMUSG00000102699	4930433B08Rik	-	RIKEN cDNA 4930433B08 gene	ncRNA
Diff_Nuc4961	chr11	39048792	39048931	+	0	NA	Intergenic	Lx9|LINE|L1	154866	NR_126439	75315	Mm.461295	NR_126439		4930553C11Rik	-	RIKEN cDNA 4930553C11 gene	ncRNA
Diff_Nuc28326	chr4	87839652	87839791	+	0	NA	intron (NM_001081184, intron 10 of 43)	(TATG)n|Simple_repeat|Simple_repeat	71777	NR_030478	735282		NR_030478	ENSMUSG00000070077	Mir491	Mirn491|mir-491|mmu-mir-491	microRNA 491	ncRNA
Diff_Nuc29495	chr4	140094902	140095041	+	0	NA	intron (NM_001112722, intron 24 of 27)	intron (NM_001112722, intron 24 of 27)	109700	NM_001112723	72754	Mm.29329	NM_172415	ENSMUSG00000040964	Arhgef10l	2810441C07Rik	Rho guanine nucleotide exchange factor (GEF) 10-like	protein-coding
Diff_Nuc14229	chr15	86341952	86342091	+	0	NA	Intergenic	Intergenic	297132	NM_145476	223754	Mm.28904	NM_145476	ENSMUSG00000051864	Tbc1d22a	BC023106|D15Ertd781e	TBC1 domain family, member 22a	protein-coding
Diff_Nuc11643	chr16	24659182	24659321	+	0	NA	intron (NM_001145952, intron 4 of 11)	intron (NM_001145952, intron 4 of 11)	-62690	NM_001145954	210126	Mm.209385	NM_178665	ENSMUSG00000033306	Lpp	9430020K16Rik|AA959454|AU024130|B130055L10Rik|C79715|D630048H16	LIM domain containing preferred translocation partner in lipoma	protein-coding
Diff_Nuc2025	chr13	102932082	102932221	+	0	NA	Intergenic	L1_Mus4|LINE|L1	-393979	NM_001077495	18708	Mm.259333	NM_001024955	ENSMUSG00000041417	Pik3r1	PI3K|p50alpha|p55alpha|p85alpha	phosphatidylinositol 3-kinase, regulatory subunit, polypeptide 1 (p85 alpha)	protein-coding
Diff_Nuc4674	chr11	21849492	21849631	+	0	NA	Intergenic	MTC|LTR|MaLR	52093	NM_011023	18423	Mm.129663	NM_011023	ENSMUSG00000005917	Otx1	A730044F23Rik|jv	orthodenticle homeobox 1	protein-coding
Diff_Nuc31410	chr3	97768762	97768901	+	0	NA	intron (NM_001033779, intron 1 of 1)	intron (NM_001033779, intron 1 of 1)	34735	NM_001033779	433632	Mm.212421	NM_001033779		Gm5544	EG433632	predicted gene 5544	protein-coding
Diff_Nuc30095	chr3	23612162	23612301	+	0	NA	Intergenic	Intergenic	1070697	NM_001326288	635702	Mm.448351	NM_001326288	ENSMUSG00000102758	Naaladl2	2810043G22Rik|EG635702|Gm1021	N-acetylated alpha-linked acidic dipeptidase-like 2	protein-coding
Diff_Nuc35434	chr2	155005842	155005981	+	0	NA	intron (NM_001243712, intron 8 of 25)	intron (NM_001243712, intron 8 of 25)	46694	NM_008395	16396	Mm.208286	NM_008395	ENSMUSG00000027598	Itch	6720481N21Rik|8030492O04Rik|A130065M08|AIP4|C230047C07Rik	itchy, E3 ubiquitin protein ligase	protein-coding
Diff_Nuc6667	chr11	106670962	106671101	+	0	NA	exon (NM_177088, exon 10 of 20)	exon (NM_177088, exon 10 of 20)	20465	NM_001166685	320162	Mm.30524	NM_177088	ENSMUSG00000018372	Cep95	4732496G21Rik|AI118346|AI448335|Ccdc45|D330027A14Rik|F630025I20Rik	centrosomal protein 95	protein-coding
Diff_Nuc42508	chr8	75956392	75956531	+	0	NA	Intergenic	Intergenic	-79022	NM_010687	16795	Mm.324371	NM_010687	ENSMUSG00000004383	Large1	BPFD#36|Gyltl1a|Large|Mbp-1|Mbp1|enr|fg|froggy|myd	LARGE xylosyl- and glucuronyltransferase 1	protein-coding
Diff_Nuc20905	chr7	122384942	122385081	+	0	NA	Intergenic	BGLII_Mus|LTR|ERVK	290223	NR_040319	101786	Mm.395157	NR_040317	ENSMUSG00000108379	A730082K24Rik	AU044236	RIKEN cDNA A730082K24 gene	ncRNA
Diff_Nuc10951	chr17	80868862	80869001	+	0	NA	intron (NM_009231, intron 1 of 21)	intron (NM_009231, intron 1 of 21)	10862	NM_009231	20662	Mm.60975	NM_009231	ENSMUSG00000024241	Sos1	4430401P03Rik|9630010N06|AI449023	son of sevenless homolog 1 (Drosophila)	protein-coding
Diff_Nuc19282	chr7	15131652	15131791	+	0	NA	intron (NR_045120, intron 12 of 12)	intron (NR_045120, intron 12 of 12)	15799	NM_001244031	627280	Mm.372763	NM_001039146	ENSMUSG00000100586	Vmn1r90	B430211C08Rik	vomeronasal 1 receptor 90	protein-coding
Diff_Nuc20784	chr7	117602052	117602191	+	0	NA	intron (NM_177324, intron 6 of 40)	L1_Mus3|LINE|L1	156313	NM_177324	319934	Mm.102970	NM_177324	ENSMUSG00000038371	Sbf2	4833411B01Rik|AA414977|AI317167|B430219L04Rik|Mtmr13|mMTMH1	SET binding factor 2	protein-coding
Diff_Nuc43453	chr8	127368332	127368471	+	0	NA	intron (NM_025615, intron 2 of 6)	intron (NM_025615, intron 2 of 6)	18528	NM_025615	66523	Mm.436864	NM_025615	ENSMUSG00000031984	2810004N23Rik	3110004G14Rik|Ayu21-55|Gt(pU21)55Imeg|GtAyu21-55	RIKEN cDNA 2810004N23 gene	protein-coding
Diff_Nuc29959	chr3	13892782	13892921	+	0	NA	intron (NM_001163328, intron 2 of 8)	L1_Mur1|LINE|L1	-53521	NM_001163329	76897	Mm.422625	NM_178631	ENSMUSG00000039717	Ralyl	0710005M24Rik	RALY RNA binding protein-like	protein-coding
Diff_Nuc42551	chr8	79462992	79463131	+	0	NA	intron (NM_001083906, intron 2 of 8)	L1_Mus3|LINE|L1	36654	NM_001083906	110784	Mm.324393	NM_001083906	ENSMUSG00000031618	Nr3c2	MR|Mlr	nuclear receptor subfamily 3, group C, member 2	protein-coding
Diff_Nuc8075	chr10	58829242	58829381	+	0	NA	intron (NM_001316371, intron 11 of 14)	intron (NM_001316371, intron 11 of 14)	-37122	NM_023530	69836	Mm.30268	NM_023530	ENSMUSG00000009646	Pla2g12b	2010002E04Rik|Fksg71|Pla2g13|hlb218	phospholipase A2, group XIIB	protein-coding
Diff_Nuc37507	chr1	98769702	98769841	+	0	NA	intron (NR_131964, intron 3 of 3)	intron (NR_131964, intron 3 of 3)	-1023	NM_172658	227394	Mm.11662	NM_172658	ENSMUSG00000040693	Slco4c1	9530051F04|C330017E21Rik|OATP-H|OATP-M1|OATP4C1|OATPX|PRO2176|SLC21A20|oatp-R	solute carrier organic anion transporter family, member 4C1	protein-coding
Diff_Nuc29855	chr3	5314162	5314301	+	0	NA	intron (NM_030708, intron 3 of 10)	intron (NM_030708, intron 3 of 10)	-93408	NR_045905	72608	Mm.384359	NR_045905		2700069I18Rik	-	RIKEN cDNA 2700069I18 gene	ncRNA
Diff_Nuc1548	chr13	75789952	75790091	+	0	NA	Intergenic	Intergenic	7527	NR_030451	751556		NR_030451	ENSMUSG00000076236	Mir682	Mirn682|mir-682|mmu-mir-682	microRNA 682	ncRNA
Diff_Nuc880	chr13	39756032	39756171	+	0	NA	Intergenic	Intergenic	627279	NM_172143	218165	Mm.364096	NM_172143	ENSMUSG00000047094	Ofcc1	opo	orofacial cleft 1 candidate 1	protein-coding
Diff_Nuc42976	chr8	103827442	103827581	+	0	NA	Intergenic	L1Md_F2|LINE|L1	1481500	NM_009866	12552	Mm.1571	NM_009866	ENSMUSG00000031673	Cdh11	Cad11|OSF-4	cadherin 11	protein-coding
Diff_Nuc28927	chr4	117966202	117966341	+	0	NA	Intergenic	Intergenic	-2269	NM_011213	19268	Mm.29855	NM_011213	ENSMUSG00000033295	Ptprf	AA591035|LAR|LARS|RPTP-LAR	protein tyrosine phosphatase, receptor type, F	protein-coding
Diff_Nuc25942	chr5	100920082	100920221	+	0	NA	intron (NM_001346583, intron 1 of 12)	intron (NM_001346583, intron 1 of 12)	7441	NM_001115010	231506	Mm.212568	NM_172714	ENSMUSG00000035310	Lin54	AI461788	lin-54 homolog (C. elegans)	protein-coding
Diff_Nuc16126	chr14	100629742	100629881	+	0	NA	Intergenic	B1_Mus2|SINE|Alu	-80796	NM_010636	16597	Mm.396499	NM_010636	ENSMUSG00000072294	Klf12	2700063E05Rik|AI225908|AI315654|AP-2rep|B130052C06Rik|D530033K05Rik	Kruppel-like factor 12	protein-coding
Diff_Nuc28423	chr4	94729322	94729461	+	0	NA	Intergenic	5S|rRNA|rRNA	-10478	NM_010591	16476	Mm.275071	NM_010591	ENSMUSG00000052684	Jun	AP-1|Junc|c-jun	jun proto-oncogene	protein-coding
Diff_Nuc28498	chr4	97459372	97459511	+	0	NA	intron (NM_010905, intron 2 of 10)	B1_Mur1|SINE|Alu	15124	NM_010905	18027	Mm.31274	NM_010905	ENSMUSG00000028565	Nfia	1110047K16Rik|9430022M17Rik|CTF|NF1-A|NF1A	nuclear factor I/A	protein-coding
Diff_Nuc23824	chr6	128755312	128755451	+	0	NA	Intergenic	L1M3|LINE|L1	-16722	NM_001159904	17059	Mm.480764	NM_008527	ENSMUSG00000030325	Klrb1c	AI462337|CD161|Ly-59|Ly55c|Ly59|NK-RP1|NK1.1|NKR-P1.9|NKRP1|NKRP140|Nk-1|Nk-1.2|Nk1|Nk1.2|Nkrp1c|ly-55c	killer cell lectin-like receptor subfamily B member 1C	protein-coding
Diff_Nuc36916	chr1	64492052	64492191	+	0	NA	Intergenic	Intergenic	-87257	NM_133828	12912	Mm.422634	NM_009952	ENSMUSG00000025958	Creb1	2310001E10Rik|3526402H21Rik|AV083133|Creb|Creb-1	cAMP responsive element binding protein 1	protein-coding
Diff_Nuc7845	chr10	44180352	44180491	+	0	NA	Intergenic	Intergenic	-1867	NM_007548	12142	Mm.4800	NM_007548	ENSMUSG00000038151	Prdm1	Blimp-1|Blimp1|PRDI-BF1|ZNFPR1A1|b2b1765Clo	PR domain containing 1, with ZNF domain	protein-coding
Diff_Nuc38694	chr1	171257522	171257661	+	0	NA	Intergenic	Intergenic	204004	NM_023284	66977	Mm.151315	NM_023284	ENSMUSG00000026683	Nuf2	2410003C07Rik|AU044112|C85691|Cdca1|NUF2R	NUF2, NDC80 kinetochore complex component	protein-coding
Diff_Nuc20751	chr7	116684482	116684621	+	0	NA	intron (NM_029811, intron 6 of 18)	intron (NM_029811, intron 6 of 18)	20905	NR_028079	100302499	Mm.482651	NR_028079	ENSMUSG00000065016	Snora3	MBI-28	small nucleolar RNA, H/ACA box 3	snoRNA
Diff_Nuc14911	chr14	29527352	29527491	+	0	NA	Intergenic	Intergenic	202830	NM_001256224	22418	Mm.287544	NM_009524	ENSMUSG00000021994	Wnt5a	8030457G12Rik|Wnt-5a	wingless-type MMTV integration site family, member 5A	protein-coding
Diff_Nuc1825	chr13	94136682	94136821	+	0	NA	3' UTR (NM_001347598, exon 6 of 6)	3' UTR (NM_001347598, exon 6 of 6)	58762	NM_152134	26556	Mm.37533	NM_011982	ENSMUSG00000007617	Homer1	PSD-Zip45|SYN47|Ves-1|homer-1|vesl-1	homer scaffolding protein 1	protein-coding
Diff_Nuc39198	chr1	196523372	196523511	+	0	NA	intron (NM_008882, intron 3 of 31)	MIRm|SINE|MIR	77418	NM_008882	18845	Mm.2251	NM_008882	ENSMUSG00000026640	Plxna2	2810428A13Rik|AA589422|AW457381|OCT|PlexA2|Plxn2|mKIAA0463	plexin A2	protein-coding
Diff_Nuc22771	chr6	72727842	72727981	+	0	NA	intron (NM_001079822, intron 3 of 12)	(CAAA)n|Simple_repeat|Simple_repeat	11128	NM_001079822	21415	Mm.440067	NM_009332	ENSMUSG00000055799	Tcf7l1	Tcf-3|Tcf3|bHLHb21	transcription factor 7 like 1 (T cell specific, HMG box)	protein-coding
Diff_Nuc21445	chr7	150473802	150473941	+	0	NA	non-coding (NR_001461, exon 1 of 1)	non-coding (NR_001461, exon 1 of 1)	8581	NR_001461	63830	Mm.356096	NR_001461	ENSMUSG00000101609	Kcnq1ot1	Kvlqt1-as|Lit1|Tssc8	KCNQ1 overlapping transcript 1	ncRNA
Diff_Nuc12572	chr16	90222852	90222991	+	0	NA	intron (NM_011434, intron 1 of 4)	intron (NM_011434, intron 1 of 4)	1934	NM_011434	20655	Mm.276325	NM_011434	ENSMUSG00000022982	Sod1	B430204E11Rik|Cu/Zn-SOD|CuZnSOD|Ipo-1|Ipo1|SODC|Sod-1	superoxide dismutase 1, soluble	protein-coding
Diff_Nuc19269	chr7	14208742	14208881	+	0	NA	promoter-TSS (NM_001184980)	promoter-TSS (NM_001184980)	-505	NM_001184980	434264	Mm.359414	NM_001184980	ENSMUSG00000078799	Sult2a5	EG434264|Gm15438|OTTMUSG00000021844	sulfotransferase family 2A, dehydroepiandrosterone (DHEA)-preferring, member 5	protein-coding
Diff_Nuc32740	chr2	14028112	14028251	+	0	NA	intron (NM_011484, intron 2 of 13)	B1F|SINE|Alu	32442	NM_011484	20844	Mm.273174	NM_011484	ENSMUSG00000026718	Stam	STAM1	signal transducing adaptor molecule (SH3 domain and ITAM motif) 1	protein-coding
Diff_Nuc19087	chr18	84979002	84979141	+	0	NA	Intergenic	ID_B1|SINE|B4	-41735	NM_025797	109672	Mm.31018	NM_025797	ENSMUSG00000024646	Cyb5a	0610009N12Rik|Cyb5	cytochrome b5 type A (microsomal)	protein-coding
Diff_Nuc16327	chr14	118070232	118070371	+	0	NA	intron (NM_001079844, intron 4 of 9)	intron (NM_001079844, intron 4 of 9)	282768	NR_105747	102465148		NR_105747	ENSMUSG00000098648	Mir6239	Gm28025|mmu-mir-6239	microRNA 6239	ncRNA
Diff_Nuc42393	chr8	72148132	72148271	+	0	NA	intron (NM_172754, intron 1 of 4)	intron (NM_172754, intron 1 of 4)	873	NM_001045553	234362	Mm.458487	NM_172754	ENSMUSG00000060427	Zfp868	AI449175|AW108241|C530032E20|mszf62	zinc finger protein 868	protein-coding
Diff_Nuc27889	chr4	57296792	57296931	+	0	NA	intron (NM_011207, intron 1 of 25)	intron (NM_011207, intron 1 of 25)	17848	NM_011207	545622	Mm.246552	NM_011207	ENSMUSG00000038764	Ptpn3	9530011I20Rik|PTP-H1|PTPCL	protein tyrosine phosphatase, non-receptor type 3	protein-coding
Diff_Nuc9056	chr10	102678192	102678331	+	0	NA	exon (NM_001163559, exon 8 of 26)	exon (NM_001163559, exon 8 of 26)	20695	NM_001163559	74978	Mm.483817	NM_029134	ENSMUSG00000019892	Lrriq1	4930503E15Rik|Gm1557	leucine-rich repeats and IQ motif containing 1	protein-coding
Diff_Nuc29323	chr4	134381912	134382051	+	0	NA	intron (NM_025382, intron 6 of 10)	PB1D9|SINE|Alu	27279	NM_025382	66146	Mm.99793	NM_025382	ENSMUSG00000028826	Tmem57	1110007C24Rik|9230118A01Rik|AI317300|AI606104|C61	transmembrane protein 57	protein-coding
Diff_Nuc18955	chr18	75723552	75723691	+	0	NA	intron (NM_201354, intron 7 of 11)	intron (NM_201354, intron 7 of 11)	49322	NR_045879	100038353	Mm.440724	NR_045879	ENSMUSG00000097712	Gm10532	ENSMUSG00000073534	predicted gene 10532	ncRNA
Diff_Nuc21446	chr7	150538722	150538861	+	0	NA	intron (NM_008434, intron 11 of 15)	RSINE1|SINE|B4	-22236	NR_045842	71153	Mm.398340	NR_045842	ENSMUSG00000101360	4933417O13Rik	-	RIKEN cDNA 4933417O13 gene	ncRNA
Diff_Nuc856	chr13	38156012	38156151	+	0	NA	Intergenic	Intergenic	27223	NM_024242	71340	Mm.297130	NM_024242	ENSMUSG00000021428	Riok1	3110046C13Rik|5430416A05Rik|Ad034	RIO kinase 1 (yeast)	protein-coding
Diff_Nuc8648	chr10	84192842	84192981	+	0	NA	Intergenic	Intergenic	-25882	NM_001024918	71137	Mm.79070	NM_027689	ENSMUSG00000020037	Rfx4	4933412G19Rik|NYD-sp10	regulatory factor X, 4 (influences HLA class II expression)	protein-coding
Diff_Nuc5928	chr11	80017752	80017891	+	0	NA	Intergenic	Intergenic	-4736	NM_001163354	59040	Mm.489674	NM_021536	ENSMUSG00000017686	Rhot1	2210403N23Rik|AA415293|AF244542|AI834919|Arht1|C430039G08Rik|Miro1	ras homolog family member T1	protein-coding
Diff_Nuc27724	chr4	48223412	48223551	+	0	NA	intron (NM_029572, intron 7 of 11)	Lx8|LINE|L1	2606	NR_035484	100316708		NR_035484	ENSMUSG00000087844	Mir1958	mmu-mir-1958	microRNA 1958	ncRNA
Diff_Nuc2478	chr12	8648752	8648891	+	0	NA	Intergenic	Intergenic	-32119	NM_001160221	80913	Mm.341243	NM_030723	ENSMUSG00000020594	Pum2	5730503J23Rik|Pumm2	pumilio RNA-binding family member 2	protein-coding
Diff_Nuc40183	chr9	61229782	61229921	+	0	NA	intron (NM_009389, intron 4 of 19)	intron (NM_009389, intron 4 of 19)	9678	NM_001083927	21887	Mm.24255	NM_009389	ENSMUSG00000032280	Tle3	2610103N05Rik|ESG|Grg3a|Grg3b|mKIAA1547	transducin-like enhancer of split 3	protein-coding
Diff_Nuc17943	chr18	16282902	16283041	+	0	NA	Intergenic	Intergenic	-406416	NM_199055	71367	Mm.329304	NM_199055	ENSMUSG00000047161	Chst9	5430438D01Rik	carbohydrate (N-acetylgalactosamine 4-0) sulfotransferase 9	protein-coding
Diff_Nuc9940	chr17	26897712	26897851	+	0	NA	intron (NM_029870, intron 6 of 8)	L1ME1|LINE|L1	-20243	NM_172149	224630	Mm.21795	NM_172149	ENSMUSG00000024191	Bnip1	2010005M06Rik|5930429G21Rik|Sec20	BCL2/adenovirus E1B interacting protein 1	protein-coding
Diff_Nuc5718	chr11	74999262	74999401	+	0	NA	exon (NM_144491, exon 3 of 13)	exon (NM_144491, exon 3 of 13)	4654	NM_144491	116905	Mm.41496	NM_144491	ENSMUSG00000078789	Dph1	2310011M22Rik|4930488F09Rik|AW551873|Dph2l1|Ovca1	diphthamide biosynthesis 1	protein-coding
Diff_Nuc27458	chr4	33462872	33463011	+	0	NA	intron (NM_001305273, intron 11 of 15)	(TATG)n|Simple_repeat|Simple_repeat	-62115	NR_106198	102465904		NR_106198	ENSMUSG00000098310	Mir8118	Gm27954|mmu-mir-8118	microRNA 8118	ncRNA
Diff_Nuc12864	chr15	8166032	8166171	+	0	NA	intron (NM_001162906, intron 25 of 52)	intron (NM_001162906, intron 25 of 52)	46995	NM_001162906	73692	Mm.164436	NM_001162906	ENSMUSG00000039801	2410089E03Rik	4732468D17Rik|Hug|Jbts17|b2b012Clo	RIKEN cDNA 2410089E03 gene	protein-coding
Diff_Nuc40226	chr9	62913772	62913911	+	0	NA	Intergenic	Intergenic	80946	NM_172446	207667	Mm.36349	NM_172446	ENSMUSG00000022245	Skor1	AV273001|C230094B15Rik|Corl1|Lbxcor1	SKI family transcriptional corepressor 1	protein-coding
Diff_Nuc21934	chr6	29475912	29476051	+	0	NA	promoter-TSS (NM_012057)	promoter-TSS (NM_012057)	-644	NM_001311083	27056	Mm.6479	NM_012057	ENSMUSG00000029771	Irf5	AW491843|mirf5	interferon regulatory factor 5	protein-coding
Diff_Nuc11272	chr16	8518382	8518521	+	0	NA	intron (NM_172961, intron 1 of 15)	intron (NM_172961, intron 1 of 15)	4929	NM_172961	268860	Mm.259315	NM_172961	ENSMUSG00000057880	Abat	9630038C02Rik|AI255750|ENSMUSG00000051226|Gabaat|Gabat|Gm9851|I54|Laibat|X61497	4-aminobutyrate aminotransferase	protein-coding
Diff_Nuc3076	chr12	53045772	53045911	+	0	NA	intron (NM_177171, intron 11 of 35)	intron (NM_177171, intron 11 of 35)	26467	NM_177171	320487	Mm.131941	NM_177171	ENSMUSG00000035181	Heatr5a	C230081H03Rik|D930036F22Rik|mKIAA1316	HEAT repeat containing 5A	protein-coding
Diff_Nuc38187	chr1	144324132	144324271	+	0	NA	Intergenic	L1Md_F2|LINE|L1	-1163626	NM_020025	26878	Mm.285580	NM_020025	ENSMUSG00000033849	B3galt2	-	UDP-Gal:betaGlcNAc beta 1,3-galactosyltransferase, polypeptide 2	protein-coding
Diff_Nuc18402	chr18	44615602	44615741	+	0	NA	intron (NM_001085373, intron 14 of 18)	intron (NM_001085373, intron 14 of 18)	75517	NM_027490	70640	Mm.87629	NM_027490	ENSMUSG00000024472	Dcp2	2410015D23Rik|5730537H01Rik|AL118268	decapping mRNA 2	protein-coding
Diff_Nuc1945	chr13	99725652	99725791	+	0	NA	Intergenic	RMER10A|LTR|ERVL	28799	NM_027064	69382	Mm.45466	NM_027064	ENSMUSG00000045022	1700024P04Rik	H2bl1|Subh2bv	RIKEN cDNA 1700024P04 gene	protein-coding
Diff_Nuc29238	chr4	132088212	132088351	+	0	NA	intron (NM_007512, intron 3 of 3)	B2_Mm1t|SINE|B2	3048	NM_007512	11983	Mm.2171	NM_007512	ENSMUSG00000054428	Atpif1	Atpi|IF(1)|If1	ATPase inhibitory factor 1	protein-coding
Diff_Nuc13105	chr15	27256072	27256211	+	0	NA	Intergenic	Intergenic	80264	NR_029647	723831		NR_029647	ENSMUSG00000094316	Mir297-1	Mir297a-1|Mirn297-1	microRNA 297-1	ncRNA
Diff_Nuc26662	chr5	135554852	135554991	+	0	NA	promoter-TSS (NM_001199677)	promoter-TSS (NM_001199677)	-785	NM_001199677	194309	Mm.44356	NM_177574	ENSMUSG00000043614	Vps37d	Wbscr24	vacuolar protein sorting 37D	protein-coding
Diff_Nuc35456	chr2	155648572	155648711	+	0	NA	exon (NM_010579, exon 5 of 6)	exon (NM_010579, exon 5 of 6)	-3702	NR_015528	613262	Mm.330707	NR_015528	ENSMUSG00000074649	BC029722	-	cDNA sequence BC029722	ncRNA
Diff_Nuc35929	chr2	181314712	181314851	+	0	NA	intron (NR_027290, intron 1 of 1)	intron (NR_027290, intron 1 of 1)	544	NR_027290	100271841	Mm.438007	NR_027289	ENSMUSG00000010492	Uckl1os	Gm16119|OTTMUSG00000030649	uridine-cytidine kinase 1-like 1, opposite strand	ncRNA
Diff_Nuc28314	chr4	87434072	87434211	+	0	NA	intron (NM_027326, intron 8 of 10)	intron (NM_027326, intron 8 of 10)	18086	NM_001286158	70122	Mm.288898	NM_027326	ENSMUSG00000028496	Mllt3	2210011H10Rik|2610012I03Rik|3830408D16Rik|Af9|D4Ertd321e	myeloid/lymphoid or mixed-lineage leukemia; translocated to, 3	protein-coding
Diff_Nuc20432	chr7	97284982	97285121	+	0	NA	intron (NM_001252521, intron 1 of 19)	L1MC1|LINE|L1	6309	NM_001252520	233489	Mm.235175	NM_146194	ENSMUSG00000039361	Picalm	CALM|CLTH|PAP180|fit-1|fit1|mKIAA4114	phosphatidylinositol binding clathrin assembly protein	protein-coding
Diff_Nuc32156	chr3	135549402	135549541	+	0	NA	intron (NM_001135150, intron 8 of 8)	intron (NM_001135150, intron 8 of 8)	-46238	NR_040540	71038	Mm.410798	NR_040540	ENSMUSG00000106306	4933401H06Rik	-	RIKEN cDNA 4933401H06 gene	ncRNA
Diff_Nuc307	chr13	9470902	9471041	+	0	NA	intron (NM_001081426, intron 1 of 36)	intron (NM_001081426, intron 1 of 36)	195200	NM_001081426	208440	Mm.217326	NM_172459	ENSMUSG00000048264	Dip2c	2900024P20Rik|9630044M06|mKIAA0934	disco interacting protein 2 homolog C	protein-coding
Diff_Nuc43471	chr8	129005712	129005851	+	0	NA	Intergenic	Intergenic	-6816	NM_001159907	212728	Mm.482479	NM_001159907	ENSMUSG00000090290	Tarbp1	Gm17296|Gm179	TAR RNA binding protein 1	protein-coding
Diff_Nuc23206	chr6	97160732	97160871	+	0	NA	promoter-TSS (NM_022992)	promoter-TSS (NM_022992)	15	NM_022992	65106	Mm.291014	NM_022992	ENSMUSG00000035199	Arl6ip5	5930404D22Rik|AV001879|Aip-5|Gtrap3-18|addiscin	ADP-ribosylation factor-like 6 interacting protein 5	protein-coding
Diff_Nuc40477	chr9	71953752	71953891	+	0	NA	intron (NM_011544, intron 3 of 20)	intron (NM_011544, intron 3 of 20)	5187	NM_001253862	21406	Mm.171615	NM_011544	ENSMUSG00000032228	Tcf12	A130037E08Rik|ALF1|HEB|HEBAlt|HTF-4|HTF4|ME1|REB|bHLHb20	transcription factor 12	protein-coding
Diff_Nuc21725	chr6	17539082	17539221	+	0	NA	Intergenic	Intergenic	-47947	NM_007604	12343	Mm.392504	NM_007604	ENSMUSG00000015733	Capza2	1110053K06Rik|AW208808|Cappa2	capping protein (actin filament) muscle Z-line, alpha 2	protein-coding
Diff_Nuc6104	chr11	86566972	86567111	+	0	NA	intron (NM_001003908, intron 1 of 31)	B3|SINE|B2	3953	NM_001003908	67300	Mm.254588	NM_001003908	ENSMUSG00000047126	Cltc	3110065L21Rik|CHC|R74732	clathrin, heavy polypeptide (Hc)	protein-coding
Diff_Nuc1524	chr13	74732642	74732781	+	0	NA	Intergenic	L1_Mur3|LINE|L1	-44609	NM_030711	80898	Mm.83526	NM_030711	ENSMUSG00000021583	Erap1	Arts1|ERAAP|PILSA|PILSAP	endoplasmic reticulum aminopeptidase 1	protein-coding
Diff_Nuc36163	chr1	19751332	19751471	+	0	NA	Intergenic	Lx9|LINE|L1	549266	NM_001025305	21419	Mm.137021	NM_009334	ENSMUSG00000025927	Tfap2b	AI606113|AP-2(beta)|E130018K07Rik|Tcfap2b	transcription factor AP-2 beta	protein-coding
Diff_Nuc20879	chr7	121354882	121355021	+	0	NA	Intergenic	Lx8|LINE|L1	43243	NM_033370	70349	Mm.277024	NM_033370	ENSMUSG00000030754	Copb1	2610019B04Rik	coatomer protein complex, subunit beta 1	protein-coding
Diff_Nuc33807	chr2	68271122	68271261	+	0	NA	intron (NM_016866, intron 1 of 17)	intron (NM_016866, intron 1 of 17)	38847	NM_016866	53416	Mm.198414	NM_016866	ENSMUSG00000027030	Stk39	AW227544|AW556857|DCHT|RF005|Rnl5|SPAK	serine/threonine kinase 39	protein-coding
Diff_Nuc13341	chr15	39759532	39759671	+	0	NA	intron (NM_172814, intron 1 of 6)	intron (NM_172814, intron 1 of 6)	15702	NM_172814	239393	Mm.39874	NM_172814	ENSMUSG00000022305	Lrp12	AI848829|C820005L12Rik|LRP-12	low density lipoprotein-related protein 12	protein-coding
Diff_Nuc18210	chr18	35514622	35514761	+	0	NA	intron (NM_030749, intron 3 of 9)	ID_B1|SINE|B4	-140013	NM_178005	107065	Mm.39900	NM_178005	ENSMUSG00000071862	Lrrtm2	AI851755|BB129880|C630011A14Rik|mKIAA0416	leucine rich repeat transmembrane neuronal 2	protein-coding
Diff_Nuc40889	chr9	96710212	96710351	+	0	NA	Intergenic	Intergenic	44300	NR_102296	319707	Mm.392191	NR_102293	ENSMUSG00000101581	C430002N11Rik	-	RIKEN cDNA C430002N11 gene	ncRNA
Diff_Nuc38964	chr1	182982812	182982951	+	0	NA	intron (NM_001033819, intron 1 of 2)	intron (NM_001033819, intron 1 of 2)	1513	NM_001033819	619326	Mm.355174	NM_001033819	ENSMUSG00000038768	9130409I23Rik	-	RIKEN cDNA 9130409I23 gene	protein-coding
Diff_Nuc10874	chr17	76374232	76374371	+	0	NA	Intergenic	Intergenic	113938	NR_033456	100043885	Mm.127562	NR_033456		Gm4710	-	predicted gene 4710	ncRNA
Diff_Nuc19314	chr7	17077412	17077551	+	0	NA	Intergenic	Intergenic	-15352	NM_008718	18142	Mm.145821	NM_008718	ENSMUSG00000001988	Npas1	MOP5|bHLHe11	neuronal PAS domain protein 1	protein-coding
Diff_Nuc35094	chr2	135195752	135195891	+	0	NA	intron (NM_001145830, intron 26 of 31)	intron (NM_001145830, intron 26 of 31)	-154469	NR_040517	78805	Mm.78702	NR_040517	ENSMUSG00000085247	4930545L23Rik	-	RIKEN cDNA 4930545L23 gene	ncRNA
Diff_Nuc766	chr13	34734602	34734741	+	0	NA	intron (NM_025831, intron 1 of 4)	intron (NM_025831, intron 1 of 4)	9879	NM_025831	66895	Mm.28943	NM_025831	ENSMUSG00000021411	Pxdc1	1300014I06Rik	PX domain containing 1	protein-coding
Diff_Nuc27660	chr4	44904622	44904761	+	0	NA	intron (NM_138590, intron 2 of 8)	intron (NM_138590, intron 2 of 8)	-89575	NM_080289	76238	Mm.196574	NM_080289	ENSMUSG00000035637	Grhpr	1110059D05Rik|6430629L09Rik|Glxr	glyoxylate reductase/hydroxypyruvate reductase	protein-coding
Diff_Nuc6655	chr11	106389797	106389936	+	0	NA	intron (NM_198292, intron 7 of 11)	intron (NM_198292, intron 7 of 11)	27561	NR_030703	100216537		NR_030703	ENSMUSG00000065126	Snord104	-	small nucleolar RNA, C/D box 104	snoRNA
Diff_Nuc39774	chr9	42596402	42596541	+	0	NA	intron (NM_175481, intron 3 of 20)	intron (NM_175481, intron 3 of 20)	155983	NM_175481	110637	Mm.370291	NM_175481	ENSMUSG00000032017	Grik4	6330551K01Rik|GluK4|GluRgamma1|KA-1|KA1	glutamate receptor, ionotropic, kainate 4	protein-coding
Diff_Nuc39695	chr9	37182082	37182221	+	0	NA	intron (NM_175189, intron 1 of 6)	intron (NM_175189, intron 1 of 6)	6960	NM_175189	72927	Mm.266133	NM_175189	ENSMUSG00000046240	Hepacam	2900042E01Rik|Glialcam|Hepn1	hepatocyte cell adhesion molecule	protein-coding
Diff_Nuc30743	chr3	65733262	65733401	+	0	NA	Intergenic	Intergenic	28816	NM_019937	56706	Mm.175612	NM_019937	ENSMUSG00000027829	Ccnl1	2610030E23Rik|AU018493|Ccnl|ania-6a	cyclin L1	protein-coding
Diff_Nuc15600	chr14	65292842	65292981	+	0	NA	intron (NM_001081177, intron 2 of 39)	intron (NM_001081177, intron 2 of 39)	21543	NM_001081177	16554	Mm.23611	NM_001081177	ENSMUSG00000060012	Kif13b	5330429L19Rik|6030414C01|AI429803|C130021D12Rik|GAKIN	kinesin family member 13B	protein-coding
Diff_Nuc2075	chr13	105429882	105430021	+	0	NA	intron (NM_026072, intron 13 of 13)	intron (NM_026072, intron 13 of 13)	177082	NM_026072	67285	Mm.235398	NM_026072	ENSMUSG00000021715	Cwc27	3110009E13Rik|NY-CO-10|Sdccag10	CWC27 spliceosome-associated protein	protein-coding
Diff_Nuc17254	chr19	40082472	40082611	+	0	NA	intron (NM_010001, intron 7 of 8)	Lx2B|LINE|L1	15627	NM_010001	13096	Mm.38963	NM_010001	ENSMUSG00000042248	Cyp2c37	-	cytochrome P450, family 2. subfamily c, polypeptide 37	protein-coding
Diff_Nuc3555	chr12	80423527	80423666	+	0	NA	intron (NM_001252562, intron 5 of 7)	B1_Mm|SINE|Alu	25258	NM_001252562	19363	Mm.341756	NM_009014	ENSMUSG00000059060	Rad51b	AI553500|R51H2|Rad51l1|mREC2	RAD51 paralog B	protein-coding
Diff_Nuc10043	chr17	30242852	30242991	+	0	NA	intron (NM_148926, intron 2 of 4)	intron (NM_148926, intron 2 of 4)	100889	NM_148926	21769	Mm.220972	NM_148926	ENSMUSG00000044477	Zfand3	AW539211|TEG-27|Tex27	zinc finger, AN1-type domain 3	protein-coding
Diff_Nuc41278	chr9	113839402	113839541	+	0	NA	promoter-TSS (NM_013699)	promoter-TSS (NM_013699)	-581	NM_001083319	22221	Mm.28052	NM_013699	ENSMUSG00000009741	Ubp1	Cp2b|LBP-1a|LBP-1b|NF2d9	upstream binding protein 1	protein-coding
Diff_Nuc32193	chr3	137526762	137526901	+	0	NA	promoter-TSS (NM_016750)	promoter-TSS (NM_016750)	-620	NM_001316995	51788	Mm.117541	NM_016750	ENSMUSG00000037894	H2afz	H2A.Z|H2a.z-1	H2A histone family, member Z	protein-coding
Diff_Nuc42735	chr8	88843122	88843261	+	0	NA	Intergenic	MIR|SINE|MIR	247298	NM_172912	244562	Mm.67485	NM_172912	ENSMUSG00000036872	Abcc12	4930467B22Rik|MRP9	ATP-binding cassette, sub-family C (CFTR/MRP), member 12	protein-coding
Diff_Nuc16691	chr19	10108492	10108631	+	0	NA	intron (NM_001347429, intron 12 of 12)	intron (NM_001347429, intron 12 of 12)	-7477	NM_021890	60527	Mm.253875	NM_021890	ENSMUSG00000024664	Fads3	AI464531	fatty acid desaturase 3	protein-coding
Diff_Nuc10408	chr17	47464872	47465011	+	0	NA	intron (NM_001097623, intron 13 of 19)	B3|SINE|B2	-40895	NM_001146212	64657	Mm.216250	NM_183086	ENSMUSG00000034729	Mrps10	1110038B19Rik|AW743084|Rpms10	mitochondrial ribosomal protein S10	protein-coding
Diff_Nuc38966	chr1	183045152	183045291	+	0	NA	intron (NM_026171, intron 13 of 22)	B1_Mur4|SINE|Alu	29114	NM_026171	67459	Mm.263464	NM_026171	ENSMUSG00000026516	Nvl	1200009I24Rik	nuclear VCP-like	protein-coding
Diff_Nuc21126	chr7	134244042	134244181	+	0	NA	Intergenic	Intergenic	9161	NM_178901	101602	Mm.490357	NM_178901	ENSMUSG00000045165	AI467606	-	expressed sequence AI467606	protein-coding
Diff_Nuc6351	chr11	97493862	97494001	+	0	NA	Intergenic	B2_Mm2|SINE|B2	-2901	NM_175332	103551	Mm.24506	NM_175332	ENSMUSG00000043439	Epop	AA409164|AI413509|AW539173|E13|E130012A19Rik|esPRC2p48	elongin BC and polycomb repressive complex 2 associated protein	protein-coding
Diff_Nuc41037	chr9	103991622	103991761	+	0	NA	intron (NM_175324, intron 9 of 19)	intron (NM_175324, intron 9 of 19)	25658	NM_175324	102632	Mm.41274	NM_175324	ENSMUSG00000090150	Acad11	5730439E10Rik|AI987948	acyl-Coenzyme A dehydrogenase family, member 11	protein-coding
Diff_Nuc7915	chr10	49336872	49337011	+	0	NA	intron (NM_001111268, intron 2 of 16)	MYSERV16_I-int|LTR|ERVK	171619	NM_010349	14806	Mm.332838	NM_010349	ENSMUSG00000056073	Grik2	AW124492|GluK2|Glur-6|Glur6|Glurbeta2	glutamate receptor, ionotropic, kainate 2 (beta 2)	protein-coding
Diff_Nuc10267	chr17	38749842	38749981	+	0	NA	Intergenic	Lx4A|LINE|L1	-26481	NM_001177586	100126768	Mm.471528	NM_001177586	ENSMUSG00000092342	Esp31	Gm20516	exocrine gland secreted peptide 31	protein-coding
Diff_Nuc41791	chr8	27191062	27191201	+	0	NA	intron (NM_207659, intron 6 of 21)	RMER1C|Other|Other	-1950	NR_110583	76604	Mm.437190	NR_110583	ENSMUSG00000085437	1700047A11Rik	4930554C15Rik	RIKEN cDNA 1700047A11 gene	ncRNA
Diff_Nuc28294	chr4	86230992	86231131	+	0	NA	intron (NM_173400, intron 15 of 16)	intron (NM_173400, intron 15 of 16)	1413	NR_028545	100217448	Mm.453533	NR_028545	ENSMUSG00000088958	Scarna8	MBI-57	small Cajal body-specific RNA 8	ncRNA
Diff_Nuc2523	chr12	12745922	12746061	+	0	NA	Intergenic	(GA)n|Simple_repeat|Simple_repeat	-69268	NR_136889	102637952	Mm.421393	NR_136889		Gm34637	-	predicted gene, 34637	ncRNA
Diff_Nuc2098	chr13	107529242	107529381	+	0	NA	Intergenic	Intergenic	197684	NM_029665	76582	Mm.132208	NM_029665	ENSMUSG00000042590	Ipo11	1700081H05Rik|2510001A17Rik|AI314624|AW555235|E330021B14Rik|Ranbp11	importin 11	protein-coding
Diff_Nuc32834	chr2	20316662	20316801	+	0	NA	intron (NM_001081006, intron 2 of 21)	intron (NM_001081006, intron 2 of 21)	105191	NM_001081006	208618	Mm.237935	NM_029895	ENSMUSG00000036617	Etl4	6620402G01Rik|9430077C05Rik|BC026657|E330027G05Rik|Etl-4|Skt	enhancer trap locus 4	protein-coding
Diff_Nuc29117	chr4	126613722	126613861	+	0	NA	intron (NM_001114399, intron 2 of 29)	intron (NM_001114399, intron 2 of 29)	31376	NM_001114399	67785	Mm.165401	NM_001114399	ENSMUSG00000042446	Zmym4	6330503C17Rik|AI480785|AW493829|CDIR|D630001M21|MYM|Zfp262|Znf262|mKIAA0425	zinc finger, MYM-type 4	protein-coding
Diff_Nuc10806	chr17	73143342	73143481	+	0	NA	Intergenic	Intergenic	-42633	NM_027166	383295	Mm.277533	NM_027166	ENSMUSG00000039770	Ypel5	2310076K21Rik|CGI-127	yippee-like 5 (Drosophila)	protein-coding
Diff_Nuc25541	chr5	81472062	81472201	+	0	NA	intron (NM_198702, intron 1 of 27)	intron (NM_198702, intron 1 of 27)	21513	NM_198702	319387	Mm.273631	NM_198702	ENSMUSG00000037605	Adgrl3	5430402I23Rik|CIRL-3|D130075K09Rik|Gm1379|LEC3|Lphn3|mKIAA0768	adhesion G protein-coupled receptor L3	protein-coding
Diff_Nuc26292	chr5	115956832	115956971	+	0	NA	intron (NM_133915, intron 1 of 11)	CpG	216	NM_133915	19303	Mm.18714	NM_011223	ENSMUSG00000029528	Pxn	AW108311|AW123232|Pax	paxillin	protein-coding
Diff_Nuc349	chr13	12291392	12291531	+	0	NA	intron (NM_001081128, intron 25 of 32)	intron (NM_001081128, intron 25 of 32)	-12706	NR_045170	328186	Mm.188154	NM_183202		Gm10336	B330003H21|ENSMUSG00000071543	predicted gene 10336	ncRNA
Diff_Nuc18714	chr18	63814312	63814451	+	0	NA	Intergenic	Intergenic	37632	NM_016792	53382	Mm.19169	NM_016792	ENSMUSG00000024583	Txnl1	32kDa|TRP32|Txnl	thioredoxin-like 1	protein-coding
Diff_Nuc8727	chr10	87709492	87709631	+	0	NA	TTS (NM_001122960)	TTS (NM_001122960)	45719	NM_027487	67282	Mm.208465	NM_026070	ENSMUSG00000020056	Washc3	2900091E11Rik|5730495F03Rik|Ccdc53	WASH complex subunit 3	protein-coding
Diff_Nuc27783	chr4	52272112	52272251	+	0	NA	Intergenic	Lx3B|LINE|L1	179655	NR_045175	72648	Mm.391869	NR_045175	ENSMUSG00000085763	Smc2os	2700081L22Rik	structural maintenance of chromosomes 2, opposite strand	ncRNA
Diff_Nuc23439	chr6	112678772	112678911	+	0	NA	intron (NM_080448, intron 20 of 21)	intron (NM_080448, intron 20 of 21)	-32177	NM_001167730	58186	Mm.103812	NM_021385	ENSMUSG00000030254	Rad18	2810024C04Rik|Rad18sc	RAD18 E3 ubiquitin protein ligase	protein-coding
Diff_Nuc31895	chr3	121872802	121872941	+	0	NA	exon (NM_007378, exon 45 of 50)	exon (NM_007378, exon 45 of 50)	-75604	NM_008129	14630	Mm.292676	NM_008129	ENSMUSG00000028124	Gclm	AI649393|Gcmc|Glclr	glutamate-cysteine ligase, modifier subunit	protein-coding
Diff_Nuc27653	chr4	44790682	44790821	+	0	NA	intron (NM_138590, intron 2 of 8)	intron (NM_138590, intron 2 of 8)	21320	NM_138590	319885	Mm.331576	NM_138590	ENSMUSG00000035649	Zcchc7	4930572I07Rik|D4Wsu132e	zinc finger, CCHC domain containing 7	protein-coding
Diff_Nuc23363	chr6	108118012	108118151	+	0	NA	intron (NM_145937, intron 3 of 8)	ORR1E|LTR|MaLR	17496	NM_145937	58911	Mm.439876	NM_145937	ENSMUSG00000030101	Sumf1	AA543204|AI463102|AI851573|FGE	sulfatase modifying factor 1	protein-coding
Diff_Nuc43379	chr8	124460902	124461041	+	0	NA	intron (NM_007608, intron 2 of 6)	intron (NM_007608, intron 2 of 6)	7841	NM_007608	12352	Mm.116761	NM_007608	ENSMUSG00000025317	Car5a	CAV|Ca5a|Car5	carbonic anhydrase 5a, mitochondrial	protein-coding
Diff_Nuc11973	chr16	38499152	38499291	+	0	NA	intron (NM_024273, intron 6 of 6)	intron (NM_024273, intron 6 of 6)	23526	NM_024273	76916	Mm.132231	NM_024273	ENSMUSG00000002846	Timmdc1	2810021C21Rik|4930455C21Rik|AV135763	translocase of inner mitochondrial membrane domain containing 1	protein-coding
Diff_Nuc39697	chr9	37317552	37317691	+	0	NA	intron (NM_146222, intron 1 of 3)	L1Md_F2|LINE|L1	-18053	NR_136939	69524	Mm.41751	NM_027102	ENSMUSG00000001946	Esam	2310008D05Rik|Esam1|W117m	endothelial cell-specific adhesion molecule	protein-coding
Diff_Nuc17057	chr19	31506412	31506551	+	0	NA	intron (NM_001013833, intron 2 of 17)	intron (NM_001013833, intron 2 of 17)	-215595	NR_002849	78103	Mm.445198	NR_002849		8430431K14Rik	-	RIKEN cDNA 8430431K14 gene	ncRNA
Diff_Nuc27419	chr4	31928682	31928821	+	0	NA	Intergenic	MTEa|LTR|MaLR	-122331	NM_009316	26409	Mm.258589	NM_009316	ENSMUSG00000028284	Map3k7	B430101B05|C87327|Tak1	mitogen-activated protein kinase kinase kinase 7	protein-coding
Diff_Nuc18824	chr18	67973782	67973921	+	0	NA	intron (NM_027556, intron 8 of 45)	B1F2|SINE|Alu	14090	NM_027556	70799	Mm.30857	NM_027556	ENSMUSG00000024542	Cep192	4631422C13Rik|D430014P18Rik	centrosomal protein 192	protein-coding
Diff_Nuc18134	chr18	32697032	32697171	+	0	NA	intron (NM_001048207, intron 1 of 2)	intron (NM_001048207, intron 1 of 2)	22587	NM_001347610	71683	Mm.292145	NM_027863	ENSMUSG00000090523	Gypc	0610037F22Rik|Cd236r	glycophorin C	protein-coding
Diff_Nuc4969	chr11	40274372	40274511	+	0	NA	Intergenic	Kanga2_a|DNA|Tc2	231743	NM_134017	108645	Mm.293771	NM_134017	ENSMUSG00000042032	Mat2b	1110064C04Rik|2410018D16Rik|AI182287|AU022853|MAT-II|MATIIbeta|TGR	methionine adenosyltransferase II, beta	protein-coding
Diff_Nuc26195	chr5	111770492	111770631	+	0	NA	intron (NM_001301666, intron 3 of 9)	intron (NM_001301666, intron 3 of 9)	10844	NM_001301666	56305	Mm.200516	NM_019640	ENSMUSG00000050017	Pitpnb	PI-TP-beta	phosphatidylinositol transfer protein, beta	protein-coding
Diff_Nuc1886	chr13	97364382	97364521	+	0	NA	intron (NM_001164222, intron 3 of 16)	Lx4A|LINE|L1	51761	NM_023420	68018	Mm.24125	NM_023420	ENSMUSG00000021669	Col4a3bp	2810404O15Rik|9230101K08Rik|AU016711|CERT|GPBP	collagen, type IV, alpha 3 (Goodpasture antigen) binding protein	protein-coding
Diff_Nuc30547	chr3	57094722	57094861	+	0	NA	intron (NM_008536, intron 5 of 6)	MIRm|SINE|MIR	11050	NM_008536	17112	Mm.856	NM_008536	ENSMUSG00000027800	Tm4sf1	L6|M3s1	transmembrane 4 superfamily member 1	protein-coding
Diff_Nuc38417	chr1	158519922	158520061	+	0	NA	intron (NM_009595, intron 1 of 11)	B3|SINE|B2	31073	NM_001136104	11352	Mm.329515	NM_009595	ENSMUSG00000026596	Abl2	AA536808|Abll|Arg	v-abl Abelson murine leukemia viral oncogene 2 (arg, Abelson-related gene)	protein-coding
Diff_Nuc6088	chr11	86308852	86308991	+	0	NA	intron (NM_029788, intron 8 of 8)	intron (NM_029788, intron 8 of 8)	10762	NM_029788	76892	Mm.262707	NM_029788	ENSMUSG00000020521	Rnft1	0610013E23Rik|AV007605	ring finger protein, transmembrane 1	protein-coding
Diff_Nuc31520	chr3	104180202	104180341	+	0	NA	Intergenic	Intergenic	135570	NM_001310698	269473	Mm.34855	NM_001025067	ENSMUSG00000032913	Lrig2	4632419I10Rik|BB096938|LIG-2	leucine-rich repeats and immunoglobulin-like domains 2	protein-coding
Diff_Nuc9720	chr17	13616512	13616651	+	0	NA	Intergenic	Intergenic	69143	NM_001167578	100041352	Mm.490251	NM_001167578	ENSMUSG00000052469	Tcp10c	D17Leh66C|D17Leh66ca|Gm9880|T66C-a|Tcp-10c	t-complex protein 10c	protein-coding
Diff_Nuc42621	chr8	83233542	83233681	+	0	NA	exon (NM_053124, exon 17 of 24)	exon (NM_053124, exon 17 of 24)	29747	NM_053124	93762	Mm.246803	NM_053124	ENSMUSG00000031715	Smarca5	4933427E24Rik|D030040M08Rik|D330027N15Rik|MommeD4|Snf2h	SWI/SNF related, matrix associated, actin dependent regulator of chromatin, subfamily a, member 5	protein-coding
Diff_Nuc4127	chr12	109474162	109474301	+	0	NA	intron (NM_001159910, intron 1 of 5)	intron (NM_001159910, intron 1 of 5)	39396	NM_001159910	668158	Mm.482792	NM_001159910	ENSMUSG00000084883	Ccdc85c	EG668158|Gm265|Gm9010	coiled-coil domain containing 85C	protein-coding
Diff_Nuc33530	chr2	52811342	52811481	+	0	NA	intron (NM_172409, intron 1 of 26)	intron (NM_172409, intron 1 of 26)	94509	NM_172409	71409	Mm.394427	NM_172409	ENSMUSG00000036053	Fmnl2	5430425K04Rik|Man	formin-like 2	protein-coding
Diff_Nuc24836	chr5	35207512	35207651	+	0	NA	intron (NM_010414, intron 39 of 66)	intron (NM_010414, intron 39 of 66)	-50983	NM_207277	403174	Mm.291225	NM_207277	ENSMUSG00000051246	Msantd1	A930005I04Rik|Gm144	Myb/SANT-like DNA-binding domain containing 1	protein-coding
Diff_Nuc38970	chr1	183114382	183114521	+	0	NA	exon (NM_145514, exon 10 of 14)	exon (NM_145514, exon 10 of 14)	27658	NM_145514	226757	Mm.289082	NM_145514	ENSMUSG00000038733	Wdr26	1600024A01Rik|AA693241|AI447817|AU044014|C77982|Gid7	WD repeat domain 26	protein-coding
Diff_Nuc17796	chr18	7893122	7893261	+	0	NA	intron (NM_153085, intron 3 of 13)	intron (NM_153085, intron 3 of 13)	23996	NM_153085	225131	Mm.204524	NM_153085	ENSMUSG00000024283	Wac	1110067P07Rik|A230035H12Rik|AI256735|AI256776|Wwp4	WW domain containing adaptor with coiled-coil	protein-coding
Diff_Nuc43465	chr8	128193302	128193441	+	0	NA	promoter-TSS (NM_028908)	promoter-TSS (NM_028908)	-347	NM_028908	74393	Mm.41709	NM_028908	ENSMUSG00000050930	Map10	4933403G14Rik|AI835009|mKIAA1383	microtubule-associated protein 10	protein-coding
Diff_Nuc31825	chr3	118965622	118965761	+	0	NA	intron (NM_170778, intron 18 of 22)	intron (NM_170778, intron 18 of 22)	520615	NM_001310711	56195	Mm.29966	NM_019550	ENSMUSG00000028134	Ptbp2	Ptb2|brPTB|nPTB	polypyrimidine tract binding protein 2	protein-coding
Diff_Nuc33112	chr2	30953012	30953151	+	0	NA	intron (NM_001038700, intron 2 of 14)	intron (NM_001038700, intron 2 of 14)	-1061	NM_001177650	14269	Mm.52297	NM_019406	ENSMUSG00000075415	Fnbp1	1110057E06Rik|2210010H06Rik|FBP1|Fbp17	formin binding protein 1	protein-coding
Diff_Nuc32185	chr3	137173642	137173781	+	0	NA	Intergenic	B3|SINE|B2	41875	NM_177665	229862	Mm.246591	NM_177665	ENSMUSG00000055138	Gm4861	9230109N16|EG229862	predicted gene 4861	protein-coding
Diff_Nuc12923	chr15	10423722	10423861	+	0	NA	TTS (NM_011232)	TTS (NM_011232)	7998	NM_001289447	19355	Mm.38376	NM_011232	ENSMUSG00000022248	Rad1	mRAD1	RAD1 checkpoint DNA exonuclease	protein-coding
Diff_Nuc7743	chr10	40144852	40144991	+	0	NA	intron (NM_198164, intron 2 of 11)	intron (NM_198164, intron 2 of 11)	75807	NM_001291816	78334	Mm.200924	NM_198164	ENSMUSG00000038481	Cdk19	2700084L06Rik|AI845279|AW228747|CDK11|Cdc2l6|mKIAA1028	cyclin-dependent kinase 19	protein-coding
Diff_Nuc29486	chr4	139800332	139800471	+	0	NA	intron (NM_198610, intron 1 of 9)	CpG	2325	NM_198610	230868	Mm.298731	NM_198610	ENSMUSG00000040972	Igsf21	BC055811|Gm141	immunoglobulin superfamily, member 21	protein-coding
Diff_Nuc24479	chr5	17113672	17113811	+	0	NA	intron (NM_013657, intron 2 of 17)	intron (NM_013657, intron 2 of 17)	33107	NM_013657	20348	Mm.5071	NM_013657	ENSMUSG00000028780	Sema3c	1110036B02Rik|SemE|Semae	sema domain, immunoglobulin domain (Ig), short basic domain, secreted, (semaphorin) 3C	protein-coding
Diff_Nuc32595	chr2	5231092	5231231	+	0	NA	intron (NM_177343, intron 8 of 10)	ORR1E|LTR|MaLR	172339	NM_028804	74186	Mm.274715	NM_028804	ENSMUSG00000026676	Ccdc3	2310045O21Rik	coiled-coil domain containing 3	protein-coding
Diff_Nuc40786	chr9	90607572	90607711	+	0	NA	Intergenic	(GA)n|Simple_repeat|Simple_repeat	-442034	NM_194334	67016	Mm.335347	NM_194334	ENSMUSG00000037410	Tbc1d2b	1810061M12Rik|AI480956|AV021536|AV023399|AW491493|mKIAA1055	TBC1 domain family, member 2B	protein-coding
Diff_Nuc36840	chr1	60661502	60661641	+	0	NA	Intergenic	Intergenic	-37962	NM_001045513	77300	Mm.440325	NM_001045513	ENSMUSG00000026014	Raph1	9430025M21Rik|C730009O10Rik|Lpd	Ras association (RalGDS/AF-6) and pleckstrin homology domains 1	protein-coding
Diff_Nuc2455	chr12	7982062	7982201	+	0	NA	Intergenic	Intergenic	-2352	NM_009693	238055	Mm.221239	NM_009693	ENSMUSG00000020609	Apob	AI315052|Apo B-100|apob-100|apob-48	apolipoprotein B	protein-coding
Diff_Nuc12191	chr16	54897072	54897211	+	0	NA	Intergenic	Lx8|LINE|L1	386209	NM_178720	239852	Mm.245045	NM_178720	ENSMUSG00000064310	Zpld1	9430016A21Rik	zona pellucida like domain containing 1	protein-coding
Diff_Nuc1182	chr13	54166442	54166581	+	0	NA	promoter-TSS (NM_027324)	promoter-TSS (NM_027324)	-703	NM_027324	14057	Mm.134191	NM_027324	ENSMUSG00000021474	Sfxn1	2810002O05Rik|A930015P12Rik|f	sideroflexin 1	protein-coding
Diff_Nuc681	chr13	30446382	30446521	+	0	NA	intron (NM_177322, intron 2 of 2)	RLTR11A2|LTR|ERVK	18226	NM_177322	11607	Mm.35062	NM_177322	ENSMUSG00000049115	Agtr1a	1810074K20Rik|AG2S|AI551199|AT1|AT1a|AT2R1|AT2R1A|Agtr-1a|Agtr1|Angtr-1a	angiotensin II receptor, type 1a	protein-coding
Diff_Nuc16650	chr19	8784782	8784921	+	0	NA	intron (NM_001161413, intron 4 of 9)	intron (NM_001161413, intron 4 of 9)	3536	NM_008577	17254	Mm.4114	NM_008577	ENSMUSG00000010095	Slc3a2	4F2|4F2HC|AI314110|Cd98|Ly-10|Ly-m10|Ly10|Mdu1|Mgp-2hc|NACAE	solute carrier family 3 (activators of dibasic and neutral amino acid transport), member 2	protein-coding
Diff_Nuc3848	chr12	92820442	92820581	+	0	NA	intron (NM_175335, intron 2 of 8)	intron (NM_175335, intron 2 of 8)	7578	NM_031391	83602	Mm.275728	NM_031391	ENSMUSG00000020962	Gtf2a1	6330549H03Rik|AA536742|AA959775|AW060250|TfIIAa/b|Tfiia1	general transcription factor II A, 1	protein-coding
Diff_Nuc7277	chr10	13661852	13661991	+	0	NA	Intergenic	RMER1A|Other|Other	-24264	NM_010437	15273	Mm.42157	NM_010437	ENSMUSG00000015501	Hivep2	Gm20114|MIBP1|Schnurri-2|Shn-2	human immunodeficiency virus type I enhancer binding protein 2	protein-coding
Diff_Nuc42727	chr8	88252042	88252181	+	0	NA	intron (NM_028007, intron 14 of 17)	L1Md_T|LINE|L1	27307	NR_106189	102465898		NR_106189	ENSMUSG00000098388	Mir8109	Gm27495|mmu-mir-8109	microRNA 8109	ncRNA
Diff_Nuc21430	chr7	149426122	149426261	+	0	NA	Intergenic	Intergenic	-10315	NM_001037822	114666	Mm.444495	NM_001037822	ENSMUSG00000073785	Krtap5-5	A030001H12Rik|AI586182|BB149782	keratin associated protein 5-5	protein-coding
Diff_Nuc40987	chr9	102524852	102524991	+	0	NA	intron (NM_001301689, intron 2 of 14)	intron (NM_001301689, intron 2 of 14)	3533	NM_001301689	28135	Mm.38910	NM_001081122	ENSMUSG00000032534	Cep63	4921501M07|AL450317.13gm1|AW107703|CD20R|D9Mgc41|D9Mgc48e|ET2	centrosomal protein 63	protein-coding
Diff_Nuc29183	chr4	129943982	129944121	+	0	NA	intron (NM_172702, intron 1 of 9)	intron (NM_172702, intron 1 of 9)	8413	NM_001253386	230779	Mm.45132	NM_172702	ENSMUSG00000023232	Serinc2	2310004K20Rik|AW121759|FKSG84|TDE2|Tde2l	serine incorporator 2	protein-coding
Diff_Nuc24199	chr6	146439522	146439661	+	0	NA	intron (NM_019923, intron 1 of 56)	RSINE1|SINE|B4	11154	NM_010586	16439	Mm.7800	NM_010586	ENSMUSG00000030287	Itpr2	AI649341|InsP3R-2|InsP3R-5|Ip3r2|Itpr5|insP3R2	inositol 1,4,5-triphosphate receptor 2	protein-coding
Diff_Nuc40956	chr9	100684462	100684601	+	0	NA	intron (NM_009282, intron 6 of 33)	MT2A|LTR|ERVL	140489	NM_009282	20842	Mm.42135	NM_009282	ENSMUSG00000037286	Stag1	AU045003|SA-1|Scc3	stromal antigen 1	protein-coding
Diff_Nuc21911	chr6	28573172	28573311	+	0	NA	intron (NM_019776, intron 10 of 23)	intron (NM_019776, intron 10 of 23)	142893	NM_019776	56463	Mm.439987	NM_019776	ENSMUSG00000001424	Snd1	AL033314|Tudor-SN	staphylococcal nuclease and tudor domain containing 1	protein-coding
Diff_Nuc13863	chr15	72904412	72904551	+	0	NA	Intergenic	Intergenic	-12847	NM_001164643	76510	Mm.158902	NM_029640	ENSMUSG00000047921	Trappc9	1810044A24Rik|2900005P22Rik|4632408O18Rik|Ibp|Nibp|TRS130|mKIAA1882	trafficking protein particle complex 9	protein-coding
Diff_Nuc26632	chr5	134090962	134091101	+	0	NA	Intergenic	Intergenic	-484587	NM_030719	80909	Mm.45218	NM_030719	ENSMUSG00000015944	Gatsl2	7530428J21Rik|AW742413|Gats|Gatsl1	GATS protein-like 2	protein-coding
Diff_Nuc36436	chr1	39428382	39428521	+	0	NA	3' UTR (NM_001252218, exon 4 of 4)	3' UTR (NM_001252218, exon 4 of 4)	3755	NM_001252218	114641	Mm.379302	NM_053257	ENSMUSG00000073702	Rpl31	Dts	ribosomal protein L31	protein-coding
Diff_Nuc18580	chr18	56780202	56780341	+	0	NA	Intergenic	(TTG)n|Simple_repeat|Simple_repeat	32269	NM_026099	67343	Mm.87057	NM_026099	ENSMUSG00000032900	Tex43	1700065I17Rik|Tseg7	testis expressed 43	protein-coding
Diff_Nuc36077	chr1	12064522	12064661	+	0	NA	Intergenic	L1_Mus2|LINE|L1	-351476	NR_105759	102465961		NR_105759	ENSMUSG00000098555	Mir6341	Gm27262|mmu-mir-6341	microRNA 6341	ncRNA
Diff_Nuc26473	chr5	123464442	123464581	+	0	NA	promoter-TSS (NM_175423)	promoter-TSS (NM_175423)	-572	NM_175423	109305	Mm.218582	NM_175423	ENSMUSG00000049686	Orai1	D730049H07Rik|Tmem142a|orai-1	ORAI calcium release-activated calcium modulator 1	protein-coding
Diff_Nuc26881	chr5	144992952	144993091	+	0	NA	Intergenic	B2_Mm2|SINE|B2	-8574	NM_027410	70381	Mm.239412	NM_027410	ENSMUSG00000066621	Tecpr1	2210010N04Rik|mKIAA1358	tectonin beta-propeller repeat containing 1	protein-coding
Diff_Nuc15300	chr14	51700772	51700911	+	0	NA	Intergenic	ORR1D2|LTR|MaLR	-9724	NM_207558	404319	Mm.377276	NM_207558	ENSMUSG00000035932	Olfr750	GA_x5J8B7W5WBF-6267395-6266441|GA_x6K02T2PMLR-6808276-6807281|MOR103-18	olfactory receptor 750	protein-coding
Diff_Nuc20340	chr7	91484132	91484271	+	0	NA	intron (NM_007488, intron 5 of 18)	intron (NM_007488, intron 5 of 18)	74347	NM_007488	11864	Mm.38594	NM_007488	ENSMUSG00000015709	Arnt2	Hif-2b|bHLHe1|mKIAA0307	aryl hydrocarbon receptor nuclear translocator 2	protein-coding
Diff_Nuc40347	chr9	66429482	66429621	+	0	NA	intron (NM_144937, intron 1 of 14)	intron (NM_144937, intron 1 of 14)	11371	NM_144937	235441	Mm.32465	NM_144937	ENSMUSG00000032376	Usp3	AA409661|BC017156	ubiquitin specific peptidase 3	protein-coding
Diff_Nuc26616	chr5	131883542	131883681	+	0	NA	Intergenic	B3A|SINE|B2	-100219	NM_145218	212996	Mm.299204	NM_145218	ENSMUSG00000034040	Wbscr17	AA388321|E330012B09Rik	Williams-Beuren syndrome chromosome region 17 homolog (human)	protein-coding
Diff_Nuc1920	chr13	99036292	99036431	+	0	NA	exon (NM_001271388, exon 2 of 8)	exon (NM_001271388, exon 2 of 8)	3330	NM_001271388	68558	Mm.209642	NM_023472	ENSMUSG00000021661	Ankra2	1110004M18Rik|Ankra	ankyrin repeat, family A (RFXANK-like), 2	protein-coding
Diff_Nuc35838	chr2	174108342	174108481	+	0	NA	intron (NR_002846, intron 4 of 4)	intron (NR_002846, intron 4 of 4)	-1410	NM_019690	14683	Mm.125770	NM_010309	ENSMUSG00000027523	Gnas	5530400H20Rik|A930027G11Rik|C130027O20Rik|GPSA|GSP|Galphas|Gnas1|Gnasxl|Gs-alpha|Gsa|Nesp|Nesp55|Nespl|Oed-Sml|Oedsml|P1|P2|P3|PHP1A|PHP1B|POH|SCG6	GNAS (guanine nucleotide binding protein, alpha stimulating) complex locus	protein-coding
Diff_Nuc29256	chr4	132526222	132526361	+	0	NA	Intergenic	RMER1B|Other|Other	-3719	NM_010208	14191	Mm.271665	NM_010208	ENSMUSG00000028874	Fgr	-	FGR proto-oncogene, Src family tyrosine kinase	protein-coding
Diff_Nuc18342	chr18	39725982	39726121	+	0	NA	Intergenic	MIR|SINE|MIR	-79152	NM_008173	14815	Mm.129481	NM_008173	ENSMUSG00000024431	Nr3c1	GR|Grl-1|Grl1	nuclear receptor subfamily 3, group C, member 1	protein-coding
Diff_Nuc17652	chr19	59099192	59099331	+	0	NA	intron (NM_001114312, intron 8 of 16)	ID_B1|SINE|B4	51298	NM_175172	71653	Mm.37338	NM_175172	ENSMUSG00000041362	Shtn1	4930506M07Rik|Kiaa1598|Shootin1|mKIAA1598	shootin 1	protein-coding
Diff_Nuc30205	chr3	30729812	30729951	+	0	NA	Intergenic	ORR1A2|LTR|MaLR	-24991	NM_001134385	71862	Mm.272019	NM_027965	ENSMUSG00000037661	Gpr160	1700025D19Rik|GPCR150	G protein-coupled receptor 160	protein-coding
Diff_Nuc20651	chr7	109430472	109430611	+	0	NA	intron (NM_009287, intron 1 of 11)	intron (NM_009287, intron 1 of 11)	14203	NM_009287	20866	Mm.645	NM_009287	ENSMUSG00000030987	Stim1	SIM	stromal interaction molecule 1	protein-coding
Diff_Nuc18259	chr18	36830582	36830721	+	0	NA	promoter-TSS (NM_001164406)	promoter-TSS (NM_001164406)	-686	NR_028355	24068	Mm.29058	NM_025291	ENSMUSG00000006050	Sra1	AA959952|Sra|Srap|Straa1|Strra1	steroid receptor RNA activator 1	protein-coding
Diff_Nuc14029	chr15	78745502	78745641	+	0	NA	intron (NM_020271, intron 1 of 1)	MIRm|SINE|MIR	1222	NM_020271	57028	Mm.263169	NM_020271	ENSMUSG00000022436	Pdxp	1600027H05Rik|AB041662|PLPP	pyridoxal (pyridoxine, vitamin B6) phosphatase	protein-coding
Diff_Nuc38853	chr1	177507722	177507861	+	0	NA	Intergenic	Lx5|LINE|L1	47975	NM_010209	14194	Mm.41502	NM_010209	ENSMUSG00000026526	Fh1	Fh|Fh-1	fumarate hydratase 1	protein-coding
Diff_Nuc19610	chr7	35827092	35827231	+	0	NA	intron (NM_008820, intron 13 of 14)	intron (NM_008820, intron 13 of 14)	14424	NM_009884	12611	Mm.273090	NM_009884	ENSMUSG00000056216	Cebpg	C/EBP[g]|C/EBPgamma|GPE1-BP|Gpe1bp|Ig/EBP	CCAAT/enhancer binding protein (C/EBP), gamma	protein-coding
Diff_Nuc32809	chr2	18689592	18689731	+	0	NA	Intergenic	(GGAGA)n|Simple_repeat|Simple_repeat	-7172	NR_126079	100041479	Mm.393659	NR_126079	ENSMUSG00000092353	Gm3363	-	predicted gene 3363	ncRNA
Diff_Nuc20142	chr7	79424672	79424811	+	0	NA	intron (NM_001024703, intron 1 of 22)	intron (NM_001024703, intron 1 of 22)	26740	NM_001024703	244049	Mm.217412	NM_001024703	ENSMUSG00000032776	Mctp2	Gm489	multiple C2 domains, transmembrane 2	protein-coding
Diff_Nuc12205	chr16	55954422	55954561	+	0	NA	Intergenic	LTRIS_Mus|LTR|ERV1	-11897	NM_024218	68193	Mm.29221	NM_024218	ENSMUSG00000098274	Rpl24	0610008L05Rik|Bst	ribosomal protein L24	protein-coding
Diff_Nuc6275	chr11	95193132	95193271	+	0	NA	Intergenic	Intergenic	-5131	NM_172543	215512	Mm.262113	NM_172543	ENSMUSG00000038893	Fam117a	5730593F17Rik|AW548096	family with sequence similarity 117, member A	protein-coding
Diff_Nuc27009	chr5	151024392	151024531	+	0	NA	Intergenic	Intergenic	-38044	NM_172887	320365	Mm.216590	NM_172887	ENSMUSG00000056602	Fry	13CDNA73|9330186A19Rik|AF346502|AI462658|C87180|D930046M03|cg003|mKIAA4143	FRY microtubule binding protein	protein-coding
Diff_Nuc3377	chr12	72395472	72395611	+	0	NA	Intergenic	Intergenic	-15330	NM_021532	59036	Mm.46662	NM_021532	ENSMUSG00000044548	Dact1	4921528D17Rik|AI115603|DAPPER|DAPPER1|FRODO|Frd1|Frodo1|MDpr1|MTNG3|THYEX3	dishevelled-binding antagonist of beta-catenin 1	protein-coding
Diff_Nuc16430	chr14	122507762	122507901	+	0	NA	intron (NM_080556, intron 1 of 16)	intron (NM_080556, intron 1 of 16)	1527	NM_080556	68059	Mm.275191	NM_080556	ENSMUSG00000025544	Tm9sf2	1500001N15Rik|AA536814|D14Ertd64e|P76	transmembrane 9 superfamily member 2	protein-coding
Diff_Nuc10772	chr17	71340812	71340951	+	0	NA	Intergenic	Intergenic	-1025	NM_023402	67938	Mm.261329	NM_023402	ENSMUSG00000034868	Myl12b	1500001M02Rik|C77744|Mylc2b|RLC-B	myosin, light chain 12B, regulatory	protein-coding
Diff_Nuc7360	chr10	18936612	18936751	+	0	NA	Intergenic	Intergenic	49637	NR_038022	100504265	Mm.383417	NR_038021		Gm20139	-	predicted gene, 20139	ncRNA
Diff_Nuc14263	chr15	89061982	89062121	+	0	NA	intron (NM_027805, intron 1 of 7)	intron (NM_027805, intron 1 of 7)	20061	NM_027805	71474	Mm.184055	NM_026813	ENSMUSG00000036561	Ppp6r2	1110033O10Rik|8430411H09Rik|B230107H12Rik|Pp6r2|Saps2	protein phosphatase 6, regulatory subunit 2	protein-coding
Diff_Nuc18059	chr18	24847932	24848071	+	0	NA	intron (NM_026779, intron 11 of 14)	intron (NM_026779, intron 11 of 14)	-19123	NM_001289654	225288	Mm.329322	NM_175276	ENSMUSG00000034295	Fhod3	A930009H06Rik|FHOS2|mKIAA1695	formin homology 2 domain containing 3	protein-coding
Diff_Nuc1139	chr13	51819372	51819511	+	0	NA	intron (NM_013660, intron 3 of 15)	ORR1A4|LTR|MaLR	69675	NM_001281880	20354	Mm.33903	NM_013660	ENSMUSG00000021451	Sema4d	CD100|Semacl2|Semaj|Semcl2|coll-4	sema domain, immunoglobulin domain (Ig), transmembrane domain (TM) and short cytoplasmic domain, (semaphorin) 4D	protein-coding
Diff_Nuc16117	chr14	100294312	100294451	+	0	NA	intron (NM_010636, intron 6 of 6)	URR1B|DNA|MER1_type	254634	NM_010636	16597	Mm.396499	NM_010636	ENSMUSG00000072294	Klf12	2700063E05Rik|AI225908|AI315654|AP-2rep|B130052C06Rik|D530033K05Rik	Kruppel-like factor 12	protein-coding
Diff_Nuc20169	chr7	80803492	80803631	+	0	NA	Intergenic	B4|SINE|B4	27888	NR_033604	244061	Mm.484605	NR_033604	ENSMUSG00000108337	Gm4971	EG244061	Smad nuclear interacting protein 1 pseudogene	pseudo
Diff_Nuc7571	chr10	28757792	28757931	+	0	NA	Intergenic	Intergenic	-51749	NM_026336	67719	Mm.440480	NM_026336	ENSMUSG00000015519	2310057J18Rik	2210414P04Rik|Leg1	RIKEN cDNA 2310057J18 gene	protein-coding
Diff_Nuc40811	chr9	92892492	92892631	+	0	NA	intron (NR_040756, intron 2 of 3)	intron (NR_040756, intron 2 of 3)	8010	NR_040756	78349	Mm.52612	NR_040756	ENSMUSG00000100294	1700034K08Rik	-	RIKEN cDNA 1700034K08 gene	ncRNA
Diff_Nuc11577	chr16	22989632	22989771	+	0	NA	intron (NM_201375, intron 9 of 9)	intron (NM_201375, intron 9 of 9)	38556	NM_053176	94175	Mm.358794	NM_053176	ENSMUSG00000022877	Hrg	AI265597|AW413091|D16jh2|D18020|Hprg|Hrgp	histidine-rich glycoprotein	protein-coding
Diff_Nuc42440	chr8	73326722	73326861	+	0	NA	Intergenic	B2_Mm1a|SINE|B2	4757	NR_106099	102466823		NR_106099	ENSMUSG00000099031	Mir7240	Gm27487|mmu-mir-7240	microRNA 7240	ncRNA
Diff_Nuc37096	chr1	74855972	74856111	+	0	NA	Intergenic	ORR1C1|LTR|MaLR	17448	NM_009518	22409	Mm.5130	NM_009518	ENSMUSG00000026167	Wnt10a	-	wingless-type MMTV integration site family, member 10A	protein-coding
Diff_Nuc32964	chr2	26389892	26390031	+	0	NA	Intergenic	Intergenic	30514	NR_132655	102639736		NR_132655		Gm35978	-	predicted gene, 35978	ncRNA
Diff_Nuc23561	chr6	117398112	117398251	+	0	NA	Intergenic	Intergenic	279628	NM_021704	20315	Mm.303231	NM_013655	ENSMUSG00000061353	Cxcl12	Pbsf|Scyb12|Sdf1|Tlsf|Tpar1	chemokine (C-X-C motif) ligand 12	protein-coding
Diff_Nuc37537	chr1	100435462	100435601	+	0	NA	Intergenic	Lx8|LINE|L1	117830	NM_027584	70866	Mm.389164	NM_027584	ENSMUSG00000026336	Slco6d1	4921511I05Rik	solute carrier organic anion transporter family, member 6d1	protein-coding
Diff_Nuc35428	chr2	154897552	154897691	+	0	NA	intron (NM_016661, intron 1 of 9)	intron (NM_016661, intron 1 of 9)	2612	NM_016661	269378	Mm.330692	NM_016661	ENSMUSG00000027597	Ahcy	AA987153|AL024110|CuBP|SAHH	S-adenosylhomocysteine hydrolase	protein-coding
Diff_Nuc16134	chr14	100813102	100813241	+	0	NA	Intergenic	Intergenic	-264156	NM_010636	16597	Mm.396499	NM_010636	ENSMUSG00000072294	Klf12	2700063E05Rik|AI225908|AI315654|AP-2rep|B130052C06Rik|D530033K05Rik	Kruppel-like factor 12	protein-coding
Diff_Nuc37170	chr1	80331552	80331691	+	0	NA	intron (NM_001313728, intron 1 of 16)	intron (NM_001313728, intron 1 of 16)	5644	NM_001313728	26554	Mm.12665	NM_016716	ENSMUSG00000004364	Cul3	KIAA0617	cullin 3	protein-coding
Diff_Nuc26091	chr5	108124312	108124451	+	0	NA	Intergenic	L1MA6|LINE|L1	8118	NR_045871	654809	Mm.399159	NR_045871	ENSMUSG00000106333	4930428O21Rik	-	RIKEN cDNA 4930428O21 gene	ncRNA
Diff_Nuc38639	chr1	167522002	167522141	+	0	NA	TTS (NM_001083897)	TTS (NM_001083897)	42601	NM_001001880	68481	Mm.46438	NM_001001880	ENSMUSG00000026566	Mpzl1	1110007A10Rik|PZR	myelin protein zero-like 1	protein-coding
Diff_Nuc33576	chr2	56977232	56977371	+	0	NA	promoter-TSS (NM_001139509)	promoter-TSS (NM_001139509)	-887	NM_001139509	18227	Mm.3507	NM_013613	ENSMUSG00000026826	Nr4a2	HZF-3|NOT|Nurr1|RNR-1|TINOR|TINUR	nuclear receptor subfamily 4, group A, member 2	protein-coding
Diff_Nuc20761	chr7	116955162	116955301	+	0	NA	intron (NM_020052, intron 16 of 21)	intron (NM_020052, intron 16 of 21)	-30172	NM_020610	78593	Mm.275374	NM_020610	ENSMUSG00000034825	Nrip3	A330103B05Rik|D7H11orf14|ICRFP703B1614Q5.2	nuclear receptor interacting protein 3	protein-coding
Diff_Nuc34035	chr2	77400732	77400871	+	0	NA	intron (NM_178723, intron 3 of 9)	intron (NM_178723, intron 3 of 9)	-43078	NM_001113400	241494	Mm.490320	NM_178723	ENSMUSG00000027016	Zfp385b	B830010L13Rik|C130013B13Rik|Zfp533|Znf385b	zinc finger protein 385B	protein-coding
Diff_Nuc25074	chr5	52535132	52535271	+	0	NA	Intergenic	Intergenic	-7945	NR_105845	102466648		NR_105845	ENSMUSG00000098726	Mir6417	Gm27334|mmu-mir-6417	microRNA 6417	ncRNA
Diff_Nuc36008	chr1	8349222	8349361	+	0	NA	TTS (NM_001290390)	TTS (NM_001290390)	940667	NM_001290390	71096	Mm.336395	NM_027671	ENSMUSG00000025909	Sntg1	4933426D16Rik|G1SYN|SYN4	syntrophin, gamma 1	protein-coding
Diff_Nuc17177	chr19	36925762	36925901	+	0	NA	intron (NM_001163635, intron 3 of 26)	intron (NM_001163635, intron 3 of 26)	17109	NM_001163635	74493	Mm.249310	NM_001163635	ENSMUSG00000024811	Tnks2	5430432P15Rik|AA517131|AI662480|ARTD6|TNKS-2|Tank2	tankyrase, TRF1-interacting ankyrin-related ADP-ribose polymerase 2	protein-coding
Diff_Nuc2112	chr13	108133942	108134081	+	0	NA	Intergenic	Intergenic	-125891	NR_045083	105120	Mm.417700	NR_045083		AI197445	-	expressed sequence AI197445	ncRNA
Diff_Nuc17392	chr19	45357742	45357881	+	0	NA	Intergenic	Intergenic	-48085	NM_010691	16814	Mm.116815	NM_010691	ENSMUSG00000025216	Lbx1	Lbx1h	ladybird homeobox homolog 1 (Drosophila)	protein-coding
Diff_Nuc38109	chr1	141037742	141037881	+	0	NA	intron (NM_181347, intron 16 of 20)	B4|SINE|B4	163577	NR_108103	78229	Mm.437838	NR_108103	ENSMUSG00000104900	4930596I21Rik	-	RIKEN cDNA 4930596I21 gene	ncRNA
Diff_Nuc40085	chr9	57067932	57068071	+	0	NA	Intergenic	Intergenic	-16362	NM_001014398	541610	Mm.378036	NM_001014398	ENSMUSG00000070298	Trcg1	-	taste receptor cell gene 1	protein-coding
Diff_Nuc26156	chr5	110680212	110680351	+	0	NA	intron (NM_027922, intron 9 of 12)	intron (NM_027922, intron 9 of 12)	18637	NM_028273	72542	Mm.61682	NM_028273	ENSMUSG00000029500	Pgam5	2610528A17Rik	phosphoglycerate mutase family member 5	protein-coding
Diff_Nuc42152	chr8	50100232	50100371	+	0	NA	Intergenic	Intergenic	-340257	NM_011857	23965	Mm.42191	NM_011857	ENSMUSG00000031561	Tenm3	2610100B16Rik|Odz1|Odz3|Ten-m3|mKIAA1455	teneurin transmembrane protein 3	protein-coding
Diff_Nuc38362	chr1	156218132	156218271	+	0	NA	Intergenic	L1MA4A|LINE|L1	-114165	NR_040629	78112	Mm.401935	NR_040629	ENSMUSG00000099933	4930452N14Rik	-	RIKEN cDNA 4930452N14 gene	ncRNA
Diff_Nuc41503	chr8	3544022	3544161	+	0	NA	3' UTR (NM_015801, exon 34 of 34)	3' UTR (NM_015801, exon 34 of 34)	-23907	NM_001024728	546049	Mm.358733	NM_001024728	ENSMUSG00000065952	C330021F23Rik	2610027C06Rik|Rps23r1|Rps23rg1	RIKEN cDNA C330021F23 gene	protein-coding
Diff_Nuc36418	chr1	37954952	37955091	+	0	NA	exon (NM_027098, exon 6 of 6)	exon (NM_027098, exon 6 of 6)	7623	NM_027098	107734	Mm.26614	NM_027098	ENSMUSG00000026087	Mrpl30	2310001L22Rik|MRP-L28|Rpml28	mitochondrial ribosomal protein L30	protein-coding
Diff_Nuc10178	chr17	35040162	35040301	+	0	NA	intron (NM_147151, intron 6 of 26)	intron (NM_147151, intron 6 of 26)	4312	NM_145830	110147	Mm.35345	NM_145830	ENSMUSG00000013787	Ehmt2	Bat8|D17Ertd710e|G9a|KMT1C|NG36	euchromatic histone lysine N-methyltransferase 2	protein-coding
Diff_Nuc14578	chr14	8830182	8830321	+	0	NA	Intergenic	L1MC4|LINE|L1	-3555	NM_007870	13421	Mm.272258	NM_007870	ENSMUSG00000025279	Dnase1l3	DNasegamma|Dhp2|Lsd	deoxyribonuclease 1-like 3	protein-coding
Diff_Nuc32558	chr2	3394812	3394951	+	0	NA	Intergenic	Intergenic	-2623	NR_027509	64707	Mm.23483	NM_022724	ENSMUSG00000026646	Suv39h2	4930507K23Rik|AA536750|D030054H19Rik|D2Ertd544e|KMT1B	suppressor of variegation 3-9 homolog 2 (Drosophila)	protein-coding
Diff_Nuc5744	chr11	75566342	75566481	+	0	NA	intron (NM_009536, intron 2 of 5)	intron (NM_009536, intron 2 of 5)	20022	NM_009536	22627	Mm.234700	NM_009536	ENSMUSG00000020849	Ywhae	AU019196	tyrosine 3-monooxygenase/tryptophan 5-monooxygenase activation protein, epsilon polypeptide	protein-coding
Diff_Nuc9790	chr17	17007492	17007631	+	0	NA	Intergenic	Lx2|LINE|L1	-193506	NM_001005358	449000	Mm.483718	NM_001005358	ENSMUSG00000096696	Zfp960	-	zinc finger protein 960	protein-coding
Diff_Nuc8506	chr10	79886192	79886331	+	0	NA	intron (NM_001164147, intron 3 of 18)	intron (NM_001164147, intron 3 of 18)	10137	NM_001164150	21423	Mm.3406	NM_011548	ENSMUSG00000020167	Tcf3	A1|AA408400|ALF2|AW209082|E12|E12/E47|E2A|E47|KA1|ME2|Pan1|Pan2|TCF-3|Tcfe2a|VDIR|bHLHb21	transcription factor 3	protein-coding
Diff_Nuc21527	chr6	6156952	6157091	+	0	NA	intron (NM_015829, intron 1 of 17)	intron (NM_015829, intron 1 of 17)	10152	NM_015829	50799	Mm.24513	NM_015829	ENSMUSG00000015112	Slc25a13	AI785475|Ctrn	solute carrier family 25 (mitochondrial carrier, adenine nucleotide translocator), member 13	protein-coding
Diff_Nuc40818	chr9	94004902	94005041	+	0	NA	Intergenic	Intergenic	433529	NM_001033145	68861	Mm.258746	NM_001033145	ENSMUSG00000045414	1190002N15Rik	GoPro49|HASF	RIKEN cDNA 1190002N15 gene	protein-coding
Diff_Nuc21138	chr7	134566262	134566401	+	0	NA	promoter-TSS (NM_026999)	promoter-TSS (NM_026999)	-783	NM_026999	69234	Mm.20301	NM_026999	ENSMUSG00000045251	Zfp688	2810407K09Rik|AI326029	zinc finger protein 688	protein-coding
Diff_Nuc17728	chr18	4946242	4946381	+	0	NA	Intergenic	Intergenic	-100276	NM_153153	225115	Mm.136791	NM_153153	ENSMUSG00000024236	Svil	AU024053|B430302E16Rik	supervillin	protein-coding
Diff_Nuc39765	chr9	42049762	42049901	+	0	NA	Intergenic	Intergenic	22552	NM_172769	235293	Mm.32700	NM_172769	ENSMUSG00000032018	Sc5d	A830037K02|A830073K23Rik|Sc5dl	sterol-C5-desaturase	protein-coding
Diff_Nuc7730	chr10	39931912	39932051	+	0	NA	Intergenic	Intergenic	34804	NM_001042556	67239	Mm.11480	NM_023323	ENSMUSG00000038510	Rpf2	2810470K21Rik|AU040229|AU043242|Bxdc1	ribosome production factor 2 homolog	protein-coding
Diff_Nuc11844	chr16	33800462	33800601	+	0	NA	intron (NM_010739, intron 3 of 12)	intron (NM_010739, intron 3 of 12)	6408	NM_010739	17063	Mm.3177	NM_010739	ENSMUSG00000022824	Muc13	114/A10|14/A10|AI159736|Lrrp|Ly64|NJ-1	mucin 13, epithelial transmembrane	protein-coding
Diff_Nuc19928	chr7	65475032	65475171	+	0	NA	Intergenic	Intergenic	-438471	NM_009728	11982	Mm.135129	NM_009728	ENSMUSG00000025324	Atp10a	Atp10c|pfatp	ATPase, class V, type 10A	protein-coding
Diff_Nuc18252	chr18	36761242	36761381	+	0	NA	intron (NM_175375, intron 10 of 33)	ID4_|SINE|ID	41054	NM_175375	108857	Mm.482287	NM_175375	ENSMUSG00000024483	Ankhd1	1110004O12Rik|4933432B13Rik|9130019P20Rik|A530027J04Rik|A630021B20Rik|AA571404|Mask|mFLJ00246|mKIAA1085	ankyrin repeat and KH domain containing 1	protein-coding
Diff_Nuc8752	chr10	89056872	89057011	+	0	NA	intron (NM_001310710, intron 3 of 9)	intron (NM_001310710, intron 3 of 9)	5619	NM_001310710	216227	Mm.233921	NM_182959	ENSMUSG00000019935	Slc17a8	BC042593|Vglut3	solute carrier family 17 (sodium-dependent inorganic phosphate cotransporter), member 8	protein-coding
Diff_Nuc5213	chr11	53507752	53507891	+	0	NA	intron (NM_009012, intron 7 of 24)	RLTR22_Mur|LTR|ERVK	13000	NM_009012	19360	Mm.4888	NM_009012	ENSMUSG00000020380	Rad50	Mrell|Rad50l	RAD50 double strand break repair protein	protein-coding
Diff_Nuc36226	chr1	24739262	24739401	+	0	NA	intron (NM_001310483, intron 1 of 15)	intron (NM_001310483, intron 1 of 15)	53574	NM_001310483	68421	Mm.336563	NM_026719	ENSMUSG00000073725	Lmbrd1	0910001K20Rik|AV347960	LMBR1 domain containing 1	protein-coding
Diff_Nuc4998	chr11	43259227	43259366	+	0	NA	intron (NM_198936, intron 15 of 15)	intron (NM_198936, intron 15 of 15)	12063	NM_198936	193116	Mm.28200	NM_148673	ENSMUSG00000020409	Slu7	AU018913|D11Ertd730e|D3Bwg0878e	SLU7 splicing factor homolog (S. cerevisiae)	protein-coding
Diff_Nuc37711	chr1	115942652	115942791	+	0	NA	Intergenic	Lx5|LINE|L1	-1638993	NM_001077425	636808	Mm.101576	NM_001077425	ENSMUSG00000070695	Cntnap5a	Caspr5-1|EG636808	contactin associated protein-like 5A	protein-coding
Diff_Nuc9113	chr10	107252912	107253051	+	0	NA	intron (NM_001177567, intron 29 of 57)	Charlie1a|DNA|MER1_type	-95898	NM_001081432	237523	Mm.391418	NM_001081432	ENSMUSG00000035916	Ptprq	-	protein tyrosine phosphatase, receptor type, Q	protein-coding
Diff_Nuc19	chrX	8840732	8840871	+	0	NA	intron (NM_173414, intron 4 of 4)	intron (NM_173414, intron 4 of 4)	-9109	NM_023500	22439	Mm.56468	NM_023500	ENSMUSG00000015342	Xk	1810038K19Rik|XRG1|Xkh	X-linked Kx blood group	protein-coding
Diff_Nuc7546	chr10	27938292	27938431	+	0	NA	intron (NM_008983, intron 2 of 31)	B1_Mur3|SINE|Alu	143735	NM_008983	19272	Mm.332303	NM_008983	ENSMUSG00000019889	Ptprk	AI853699|PTPk|RPTPkappa	protein tyrosine phosphatase, receptor type, K	protein-coding
Diff_Nuc37043	chr1	72337082	72337221	+	0	NA	intron (NM_175564, intron 1 of 2)	intron (NM_175564, intron 1 of 2)	6204	NM_175564	271711	Mm.80318	NM_175564	ENSMUSG00000026188	Tmem169	A830020B06Rik	transmembrane protein 169	protein-coding
Diff_Nuc18993	chr18	78011892	78012031	+	0	NA	promoter-TSS (NM_007505)	promoter-TSS (NM_007505)	-546	NM_007505	11946	Mm.276137	NM_007505	ENSMUSG00000025428	Atp5a1	AI035633|AL022851|AL023067|Atpm|D18Ertd206e|Mom2	ATP synthase, H+ transporting, mitochondrial F1 complex, alpha subunit 1	protein-coding
Diff_Nuc43015	chr8	107292782	107292921	+	0	NA	Intergenic	Lx6|LINE|L1	34948	NM_133960	102022	Mm.212983	NM_133960	ENSMUSG00000055730	Ces2a	9130231C15Rik|AI266984|Ces6	carboxylesterase 2A	protein-coding
Diff_Nuc2268	chr13	114294802	114294941	+	0	NA	Intergenic	RMER17A2|LTR|ERVK	-1819	NR_045501	70917	Mm.491036	NR_045501		4921509O07Rik	-	RIKEN cDNA 4921509O07 gene	ncRNA
Diff_Nuc14362	chr15	95251692	95251831	+	0	NA	intron (NM_001289653, intron 10 of 20)	B3|SINE|B2	106922	NM_001289653	54003	Mm.3959	NM_016743	ENSMUSG00000022454	Nell2	A330108N19Rik|R75516|mel91	NEL-like 2	protein-coding
Diff_Nuc38482	chr1	162272972	162273111	+	0	NA	intron (NM_013862, intron 18 of 20)	L1_Mus3|LINE|L1	8661	NM_001038621	29809	Mm.25833	NM_013862	ENSMUSG00000026721	Rabgap1l	5830411O09Rik|8430421H08Rik|9630005B12Rik|AW049894|HHL|Hh1|mKIAA0471	RAB GTPase activating protein 1-like	protein-coding
Diff_Nuc40029	chr9	54565322	54565461	+	0	NA	intron (NM_023191, intron 10 of 10)	intron (NM_023191, intron 10 of 10)	9271	NR_049206	100885845		NR_049206	ENSMUSG00000093441	Mir5710	Gm22872|mir-5710|mmu-mir-5710	microRNA 5710	ncRNA
Diff_Nuc25418	chr5	73697712	73697851	+	0	NA	intron (NM_023429, intron 6 of 8)	intron (NM_023429, intron 6 of 8)	13748	NM_001159888	68095	Mm.247039	NM_023429	ENSMUSG00000029152	Ociad1	6030432N09Rik|AI481327|AW557942|Asrij|B230209J16Rik|BB021357|Emi2|Imi2|OCIA|TPA018	OCIA domain containing 1	protein-coding
Diff_Nuc13085	chr15	25795262	25795401	+	0	NA	intron (NM_001034851, intron 1 of 8)	intron (NM_001034851, intron 1 of 8)	22278	NM_001034851	66270	Mm.25311	NM_025459	ENSMUSG00000022270	Fam134b	1810015C04Rik|AU015349	family with sequence similarity 134, member B	protein-coding
Diff_Nuc25766	chr5	93084942	93085081	+	0	NA	intron (NM_177230, intron 9 of 24)	intron (NM_177230, intron 9 of 24)	19142	NM_177230	320696	Mm.209991	NM_177230	ENSMUSG00000050050	Ccdc158	4932413O14Rik	coiled-coil domain containing 158	protein-coding
Diff_Nuc759	chr13	34623002	34623141	+	0	NA	Intergenic	Intergenic	121479	NM_025831	66895	Mm.28943	NM_025831	ENSMUSG00000021411	Pxdc1	1300014I06Rik	PX domain containing 1	protein-coding
Diff_Nuc21631	chr6	12839542	12839681	+	0	NA	Intergenic	Intergenic	-140358	NM_001164805	330267	Mm.11989	NM_001164805	ENSMUSG00000032625	Thsd7a	Gm837	thrombospondin, type I, domain containing 7A	protein-coding
Diff_Nuc16657	chr19	8917362	8917501	+	0	NA	intron (NM_001290823, intron 2 of 10)	intron (NM_001290823, intron 2 of 10)	2438	NM_001290823	14705	Mm.345134	NM_008144	ENSMUSG00000071657	Bscl2	2900097C17Rik|AI046355|Gng3lg	Berardinelli-Seip congenital lipodystrophy 2 (seipin)	protein-coding
Diff_Nuc37231	chr1	84349282	84349421	+	0	NA	Intergenic	Intergenic	-68131	NM_001003948	98496	Mm.187470	NM_001003948	ENSMUSG00000045658	Pid1	5033414K04Rik|NYGGF4	phosphotyrosine interaction domain containing 1	protein-coding
Diff_Nuc34270	chr2	91646312	91646451	+	0	NA	intron (NM_172669, intron 8 of 17)	intron (NM_172669, intron 8 of 17)	76086	NM_001080754	228361	Mm.436667	NM_172669	ENSMUSG00000040506	Ambra1	2310079H06Rik|A130023A14|AA474864|AV021921|D030051N19Rik|mKIAA1736	autophagy/beclin 1 regulator 1	protein-coding
Diff_Nuc38609	chr1	166537462	166537601	+	0	NA	Intergenic	Intergenic	-149045	NM_009721	11931	Mm.4550	NM_009721	ENSMUSG00000026576	Atp1b1	Atp4b|Atpb|Atpb-1|NKbeta1	ATPase, Na+/K+ transporting, beta 1 polypeptide	protein-coding
Diff_Nuc42954	chr8	101453622	101453761	+	0	NA	Intergenic	RLTR15|LTR|ERVK	-82096	NR_110579	100873092	Mm.414599	NR_110579	ENSMUSG00000089819	Gm15679	OTTMUSG00000025218	predicted gene 15679	ncRNA
Diff_Nuc23520	chr6	115814892	115815031	+	0	NA	intron (NM_031177, intron 3 of 28)	intron (NM_031177, intron 3 of 28)	11415	NM_031177	81896	Mm.333335	NM_031177	ENSMUSG00000030323	Ift122	C86139|Wdr10|sopb	intraflagellar transport 122	protein-coding
Diff_Nuc42900	chr8	97255462	97255601	+	0	NA	Intergenic	RLTR9A|LTR|ERVK	-14053	NM_009137	20299	Mm.12895	NM_009137	ENSMUSG00000031779	Ccl22	ABCD-1|DCBCK|MDC|Scya22	chemokine (C-C motif) ligand 22	protein-coding
Diff_Nuc9971	chr17	28007772	28007911	+	0	NA	intron (NM_001080769, intron 1 of 20)	B3|SINE|B2	14389	NM_001080769	224648	Mm.291291	NM_001080769	ENSMUSG00000039512	Uhrf1bp1	1110020K19Rik|AA408674|F830021D11Rik|mKIAA4127	UHRF1 (ICBP90) binding protein 1	protein-coding
Diff_Nuc2255	chr13	113702652	113702791	+	0	NA	intron (NM_028151, intron 7 of 26)	B1_Mur4|SINE|Alu	14867	NM_028151	72198	Mm.291029	NM_028151	ENSMUSG00000016018	Skiv2l2	2610528A15Rik|mKIAA0052	superkiller viralicidic activity 2-like 2 (S. cerevisiae)	protein-coding
Diff_Nuc26033	chr5	105711042	105711181	+	0	NA	intron (NM_194336, intron 3 of 10)	L1_Mur3|LINE|L1	11607	NM_194336	100702	Mm.491210	NM_194336	ENSMUSG00000079362	Gbp6	AI595338|Mpa2l	guanylate binding protein 6	protein-coding
Diff_Nuc28701	chr4	106518122	106518261	+	0	NA	Intergenic	Intergenic	-40579	NM_001347159	329910	Mm.222956	NM_025590	ENSMUSG00000034853	Acot11	1110020M10Rik|2010309H15Rik|AW060409|BFIT|BFIT1|Thea|Them1|mKIAA0707	acyl-CoA thioesterase 11	protein-coding
Diff_Nuc5128	chr11	50253572	50253711	+	0	NA	Intergenic	B3A|SINE|B2	-9028	NM_172557	216724	Mm.390400	NM_172557	ENSMUSG00000020375	Rufy1	3000002E04Rik|Rabip4|ZFYVE12	RUN and FYVE domain containing 1	protein-coding
Diff_Nuc8231	chr10	66588872	66589011	+	0	NA	Intergenic	Intergenic	-1065	NM_207221	108829	Mm.23846	NM_207221	ENSMUSG00000037876	Jmjd1c	5430433L24Rik|D630035I23Rik|Jmjdic|TRIP8	jumonji domain containing 1C	protein-coding
Diff_Nuc23500	chr6	115367582	115367721	+	0	NA	intron (NM_001127330, intron 2 of 7)	L1_Mus2|LINE|L1	-4433	NM_011146	19016	Mm.3020	NM_011146	ENSMUSG00000000440	Pparg	Nr1c3|PPAR-gamma|PPAR-gamma2|PPARgamma|PPARgamma2	peroxisome proliferator activated receptor gamma	protein-coding
Diff_Nuc18769	chr18	65370052	65370191	+	0	NA	intron (NM_031881, intron 29 of 29)	B3|SINE|B2	-38394	NR_029600	387231		NR_029600	ENSMUSG00000065402	Mir122	Mir122a|Mirn122a|mir-122|mmu-mir-122	microRNA 122	ncRNA
Diff_Nuc17420	chr19	46171642	46171781	+	0	NA	Intergenic	MurERV4_19-int|LTR|ERVK	21374	NM_001039351	70769	Mm.402190	NM_053086	ENSMUSG00000015176	Nolc1	NOPP130|NOPP140|P130	nucleolar and coiled-body phosphoprotein 1	protein-coding
Diff_Nuc10609	chr17	60948882	60949021	+	0	NA	Intergenic	Intergenic	-1796206	NM_026497	67993	Mm.36507	NM_026497	ENSMUSG00000024228	Nudt12	0610016O18Rik	nudix (nucleoside diphosphate linked moiety X)-type motif 12	protein-coding
Diff_Nuc5752	chr11	75994782	75994921	+	0	NA	Intergenic	PB1D10|SINE|Alu	-1719	NM_026664	68299	Mm.46397	NM_026664	ENSMUSG00000017288	Vps53	2010002A08Rik|2310040I21Rik|3100002B05Rik|Hccs1	VPS53 GARP complex subunit	protein-coding
Diff_Nuc15945	chr14	82781212	82781351	+	0	NA	Intergenic	Intergenic	-2062089	NM_001013753	219228	Mm.153643	NM_001013753	ENSMUSG00000035566	Pcdh17	C030033F14Rik|Gm78	protocadherin 17	protein-coding
Diff_Nuc22854	chr6	82204982	82205121	+	0	NA	Intergenic	Intergenic	-147418	NM_009313	21336	Mm.8055	NM_009313	ENSMUSG00000030043	Tacr1	Nk1r|Spr|Tac1r	tachykinin receptor 1	protein-coding
Diff_Nuc14140	chr15	82249012	82249151	+	0	NA	Intergenic	Intergenic	-11457	NM_010005	13101	Mm.174372	NM_010005	ENSMUSG00000094806	Cyp2d10	AI303445|Cyp2d|P450-2D	cytochrome P450, family 2, subfamily d, polypeptide 10	protein-coding
Diff_Nuc28683	chr4	106062062	106062201	+	0	NA	intron (NM_183225, intron 35 of 67)	B4|SINE|B4	73313	NM_183225	329908	Mm.234544	NM_183225	ENSMUSG00000028514	Usp24	2700066K03Rik|2810030C21Rik|AI414051|B130021E18|C79851	ubiquitin specific peptidase 24	protein-coding
Diff_Nuc21638	chr6	13240772	13240911	+	0	NA	Intergenic	Intergenic	-65876	NM_001013757	232585	Mm.389082	NM_001013757	ENSMUSG00000079679	Vwde	Gm467	von Willebrand factor D and EGF domains	protein-coding
Diff_Nuc30787	chr3	68261842	68261981	+	0	NA	intron (NM_001113420, intron 1 of 6)	Lx5|LINE|L1	-10194	NM_001282045	30953	Mm.331064	NM_013928	ENSMUSG00000027777	Schip1	Nf2ip|Schip-1	schwannomin interacting protein 1	protein-coding
Diff_Nuc43404	chr8	125470902	125471041	+	0	NA	intron (NR_037865, intron 2 of 13)	intron (NR_037865, intron 2 of 13)	95213	NR_037865	77087	Mm.31567	NM_001081379	ENSMUSG00000035569	Ankrd11	2410104C19Rik|3010027A04Rik|6330578C09Rik|9530048I21Rik|AA930108|Gm176|Yod	ankyrin repeat domain 11	protein-coding
Diff_Nuc8662	chr10	84811112	84811251	+	0	NA	Intergenic	Intergenic	-38378	NM_028709	74007	Mm.36544	NM_028709	ENSMUSG00000020042	Btbd11	6330404E16Rik	BTB (POZ) domain containing 11	protein-coding
Diff_Nuc37224	chr1	84132582	84132721	+	0	NA	intron (NM_001003948, intron 2 of 2)	intron (NM_001003948, intron 2 of 2)	82885	NR_105771	102465181		NR_105771	ENSMUSG00000098851	Mir6353	Gm27391|mmu-mir-6353	microRNA 6353	ncRNA
Diff_Nuc6958	chr11	117965852	117965991	+	0	NA	exon (NM_001167746, exon 19 of 81)	exon (NM_001167746, exon 19 of 81)	24612	NM_001167746	69926	Mm.473893	NM_001167746	ENSMUSG00000033987	Dnah17	2810003K23Rik|Dnahc17|Dnahcl1|Gm1178|mKIAA3028	dynein, axonemal, heavy chain 17	protein-coding
Diff_Nuc27628	chr4	43680392	43680531	+	0	NA	intron (NM_175517, intron 1 of 6)	intron (NM_175517, intron 1 of 6)	1270	NM_175517	242408	Mm.440423	NM_175517	ENSMUSG00000043633	Fam221b	4930412F15Rik	family with sequence similarity 221, member B	protein-coding
Diff_Nuc41437	chr9	122751622	122751761	+	0	NA	Intergenic	Intergenic	23433	NM_173364	235682	Mm.326477	NM_173364	ENSMUSG00000047036	Zfp445	AW610627|ZNF168|Znf445|mszf29|mszf50	zinc finger protein 445	protein-coding
Diff_Nuc14834	chr14	26614672	26614811	+	0	NA	Intergenic	HAL1|LINE|L1	-26399	NM_001101433	71918	Mm.41904	NM_001101433	ENSMUSG00000055538	Zcchc24	2310047A01Rik	zinc finger, CCHC domain containing 24	protein-coding
Diff_Nuc8841	chr10	93478022	93478161	+	0	NA	intron (NM_001304720, intron 1 of 11)	intron (NM_001304720, intron 1 of 11)	20396	NM_001304720	215008	Mm.124177	NM_172538	ENSMUSG00000036099	Vezt	A630071D13Rik|AI848282	vezatin, adherens junctions transmembrane protein	protein-coding
Diff_Nuc30609	chr3	58968692	58968831	+	0	NA	intron (NM_177855, intron 15 of 43)	L1_Rod|LINE|L1	-11211	NR_045641	320463	Mm.484506	NR_045641	ENSMUSG00000036381	F630111L10Rik	-	RIKEN cDNA F630111L10 gene	ncRNA
Diff_Nuc29639	chr4	146899362	146899501	+	0	NA	Intergenic	Intergenic	-27955	NM_001014397	433804	Mm.332047	NM_001014397	ENSMUSG00000065999	Zfp985	Gm13154|OTTMUSG00000010673	zinc finger protein 985	protein-coding
Diff_Nuc11258	chr16	7090542	7090681	+	0	NA	intron (NM_183188, intron 1 of 12)	intron (NM_183188, intron 1 of 12)	20683	NM_183188	268859	Mm.370334	NM_021477	ENSMUSG00000008658	Rbfox1	A2bp|A2bp1|Hrnbp1|fox-1	RNA binding protein, fox-1 homolog (C. elegans) 1	protein-coding
Diff_Nuc42025	chr8	42559502	42559641	+	0	NA	Intergenic	Intergenic	-57099	NM_013522	14300	Mm.217312	NM_013522	ENSMUSG00000031590	Frg1	-	FSHD region gene 1	protein-coding
Diff_Nuc23224	chr6	97795612	97795751	+	0	NA	intron (NM_001113198, intron 1 of 9)	intron (NM_001113198, intron 1 of 9)	38629	NM_001113198	17342	Mm.333284	NM_008601	ENSMUSG00000035158	Mitf	BCC2|Bhlhe32|Gsfbcc2|Vitiligo|Wh|bw|mi|vit	microphthalmia-associated transcription factor	protein-coding
Diff_Nuc31037	chr3	84400092	84400231	+	0	NA	3' UTR (NM_207278, exon 1 of 1)	3' UTR (NM_207278, exon 1 of 1)	2665	NM_207278	403175	Mm.83086	NM_207278	ENSMUSG00000047819	Tigd4	C130063O11Rik|Gm418	tigger transposable element derived 4	protein-coding
Diff_Nuc41136	chr9	107993242	107993381	+	0	NA	intron (NM_146226, intron 11 of 21)	intron (NM_146226, intron 11 of 21)	3500	NM_146226	235606	Mm.219639	NM_146226	ENSMUSG00000032590	Apeh	-	acylpeptide hydrolase	protein-coding
Diff_Nuc4859	chr11	30393782	30393921	+	0	NA	Intergenic	Intergenic	-22022	NM_001100394	75087	Mm.159422	NM_001100394	ENSMUSG00000040919	4930505A04Rik	-	RIKEN cDNA 4930505A04 gene	protein-coding
Diff_Nuc18434	chr18	46633682	46633821	+	0	NA	Intergenic	MLT1L|LTR|MaLR	-8281	NR_045438	72076	Mm.82766	NM_028086		Mospd4	2010013H21Rik	motile sperm domain containing 4	pseudo
Diff_Nuc13625	chr15	58599402	58599541	+	0	NA	Intergenic	Intergenic	55511	NM_175212	74868	Mm.293754	NM_175212	ENSMUSG00000062373	Tmem65	2610029O13Rik|4930438D12Rik	transmembrane protein 65	protein-coding
Diff_Nuc37655	chr1	109976632	109976771	+	0	NA	Intergenic	L1Md_F2|LINE|L1	162865	NR_102307	319596	Mm.136054	NR_102306	ENSMUSG00000100457	D830032E09Rik	-	RIKEN cDNA D830032E09 gene	ncRNA
Diff_Nuc31130	chr3	87955142	87955281	+	0	NA	intron (NM_133665, intron 1 of 10)	intron (NM_133665, intron 1 of 10)	8917	NM_001310593	17261	Mm.28184	NM_133665	ENSMUSG00000001419	Mef2d	C80750	myocyte enhancer factor 2D	protein-coding
Diff_Nuc4480	chr11	8444942	8445081	+	0	NA	intron (NM_001083587, intron 8 of 30)	intron (NM_001083587, intron 8 of 30)	119527	NM_001083587	319939	Mm.337820	NM_001083587	ENSMUSG00000020422	Tns3	BC023928|F830010I22Rik|TEM6|Tens1	tensin 3	protein-coding
Diff_Nuc6548	chr11	103259602	103259741	+	0	NA	intron (NM_183034, intron 2 of 11)	intron (NM_183034, intron 2 of 11)	14307	NM_183034	353047	Mm.18556	NM_183034	ENSMUSG00000034247	Plekhm1	AP162|B2|BC038943|D330036J23Rik	pleckstrin homology domain containing, family M (with RUN domain) member 1	protein-coding
Diff_Nuc13759	chr15	65093972	65094111	+	0	NA	Intergenic	Intergenic	-340183	NM_009623	11514	Mm.1425	NM_009623	ENSMUSG00000022376	Adcy8	AC8|AW060868	adenylate cyclase 8	protein-coding
Diff_Nuc16602	chr19	6331412	6331551	+	0	NA	Intergenic	B1_Mus1|SINE|Alu	-3498	NM_001168488	17283	Mm.12917	NM_008583	ENSMUSG00000024947	Men1	AW045611	multiple endocrine neoplasia 1	protein-coding
Diff_Nuc35131	chr2	137582262	137582401	+	0	NA	Intergenic	Intergenic	-499989	NM_001025431	228662	Mm.153405	NM_145534	ENSMUSG00000062098	Btbd3	mKIAA0952	BTB (POZ) domain containing 3	protein-coding
Diff_Nuc10146	chr17	34138842	34138981	+	0	NA	Intergenic	B1_Mur3|SINE|Alu	-1619	NM_001347346	14972	Mm.422886	NM_001001892	ENSMUSG00000061232	H2-K1	H-2K|H-2K(d)|H2-K|K-f	histocompatibility 2, K1, K region	protein-coding
Diff_Nuc42786	chr8	91836512	91836651	+	0	NA	Intergenic	Intergenic	-268520	NM_021390	58198	Mm.214361	NM_021390	ENSMUSG00000031665	Sall1	Msal-3	sal-like 1 (Drosophila)	protein-coding
Diff_Nuc40838	chr9	94962122	94962261	+	0	NA	intron (NM_177909, intron 12 of 15)	intron (NM_177909, intron 12 of 15)	309943	NR_106116	102465763		NR_106116	ENSMUSG00000098251	Mir7656	Gm27614|mmu-mir-7656	microRNA 7656	ncRNA
Diff_Nuc27090	chr4	6342122	6342261	+	0	NA	exon (NM_010945, exon 22 of 31)	exon (NM_010945, exon 22 of 31)	39227	NM_010945	18201	Mm.3059	NM_010945	ENSMUSG00000028245	Nsmaf	AA959567|C630007J05|Fan	neutral sphingomyelinase (N-SMase) activation associated factor	protein-coding
Diff_Nuc3136	chr12	55823192	55823331	+	0	NA	Intergenic	MMERVK10C-int|LTR|ERVK	-26380	NM_025456	66266	Mm.156440	NM_025456	ENSMUSG00000054302	Eapp	1810011O16Rik	E2F-associated phosphoprotein	protein-coding
Diff_Nuc30883	chr3	75355952	75356091	+	0	NA	intron (NM_019745, intron 1 of 7)	intron (NM_019745, intron 1 of 7)	4753	NM_019745	56426	Mm.316473	NM_019745	ENSMUSG00000027835	Pdcd10	2410003B13Rik|Ccm3|Tfa15|Tfar15	programmed cell death 10	protein-coding
Diff_Nuc22970	chr6	86662792	86662931	+	0	NA	intron (NM_011818, intron 7 of 13)	intron (NM_011818, intron 7 of 13)	20511	NM_011818	23885	Mm.321452	NM_011818	ENSMUSG00000001157	Gmcl1	2810049L19Rik|Btbd13|DIP|Gcl|Gcl-1|glc-1|mglc-1	germ cell-less, spermatogenesis associated 1	protein-coding
Diff_Nuc8819	chr10	92565922	92566061	+	0	NA	Intergenic	MTA_Mm|LTR|MaLR	-21650	NM_001347060	380654	Mm.34980	NM_001347060	ENSMUSG00000020014	Cfap54	4930485B16Rik|Gm872	cilia and flagella associated protein 54	protein-coding
Diff_Nuc7470	chr10	24263422	24263561	+	0	NA	Intergenic	Intergenic	-51757	NM_010217	14219	Mm.390287	NM_010217	ENSMUSG00000019997	Ctgf	Ccn2|Fisp12|Hcs24|fisp-12	connective tissue growth factor	protein-coding
Diff_Nuc35099	chr2	135272212	135272351	+	0	NA	intron (NM_019677, intron 32 of 32)	L1M5|LINE|L1	136675	NR_015544	320684	Mm.421433	NR_015544	ENSMUSG00000085631	9630028H03Rik	-	RIKEN cDNA 9630028H03 gene	ncRNA
Diff_Nuc25476	chr5	76139922	76140061	+	0	NA	Intergenic	Intergenic	168975	NM_021099	16590	Mm.247073	NM_021099	ENSMUSG00000005672	Kit	Bs|CD117|Fdc|Gsfsco1|Gsfsco5|Gsfsow3|SCO1|SCO5|SOW3|Ssm|Tr-kit|W|c-KIT	KIT proto-oncogene receptor tyrosine kinase	protein-coding
Diff_Nuc10922	chr17	79999962	80000101	+	0	NA	Intergenic	Intergenic	-14209	NM_201361	381110	Mm.209801	NM_201361	ENSMUSG00000036368	Rmdn2	AW061290|Fam82a1|RMD-2|mRMD-2	regulator of microtubule dynamics 2	protein-coding
Diff_Nuc39924	chr9	48584812	48584951	+	0	NA	intron (NM_001033324, intron 2 of 6)	intron (NM_001033324, intron 2 of 6)	59169	NM_001033324	235320	Mm.457803	NM_001033324	ENSMUSG00000066687	Zbtb16	AI467657|PLZF|Zfp145|lu	zinc finger and BTB domain containing 16	protein-coding
Diff_Nuc23747	chr6	125053132	125053271	+	0	NA	intron (NM_001346610, intron 10 of 38)	intron (NM_001346610, intron 10 of 38)	6159	NR_106012	102466272		NR_106012	ENSMUSG00000098762	Mir7045	Gm27758|mmu-mir-7045	microRNA 7045	ncRNA
Diff_Nuc31585	chr3	107103192	107103331	+	0	NA	intron (NM_146136, intron 5 of 8)	intron (NM_146136, intron 5 of 8)	9051	NM_146136	229699	Mm.38384	NM_146136	ENSMUSG00000027896	Slc16a4	AW146050|MCT 5	solute carrier family 16 (monocarboxylic acid transporters), member 4	protein-coding
Diff_Nuc30495	chr3	52796582	52796721	+	0	NA	intron (NM_026225, intron 15 of 18)	intron (NM_026225, intron 15 of 18)	24494	NM_026225	67542	Mm.249548	NM_026225	ENSMUSG00000027742	Cog6	4933405E16Rik|AU018618|mKIAA1134	component of oligomeric golgi complex 6	protein-coding
Diff_Nuc39535	chr9	26803582	26803721	+	0	NA	intron (NM_025862, intron 1 of 10)	intron (NM_025862, intron 1 of 10)	3483	NM_025862	66948	Mm.289244	NM_025862	ENSMUSG00000031969	Acad8	2310016C19Rik|AI786953	acyl-Coenzyme A dehydrogenase family, member 8	protein-coding
Diff_Nuc30073	chr3	21779112	21779251	+	0	NA	Intergenic	Tigger12c|DNA|MER2_type	-196393	NM_030732	81004	Mm.202966	NM_030732	ENSMUSG00000027630	Tbl1xr1	8030499H02Rik|A630076E03Rik|AW539987|C21|C230089I12Rik|DC42|Ira1|TBLR1	transducin (beta)-like 1X-linked receptor 1	protein-coding
Diff_Nuc11512	chr16	20108392	20108531	+	0	NA	intron (NM_029436, intron 3 of 7)	RSINE1|SINE|B4	10834	NM_029436	75785	Mm.392450	NM_029436	ENSMUSG00000062901	Klhl24	1110046J11Rik|4930429H24Rik|6530402O20Rik|C85082	kelch-like 24	protein-coding
Diff_Nuc7389	chr10	20181122	20181261	+	0	NA	intron (NM_013875, intron 3 of 12)	intron (NM_013875, intron 3 of 12)	86943	NM_001347366	29863	Mm.425617	NM_013875	ENSMUSG00000019990	Pde7b	-	phosphodiesterase 7B	protein-coding
Diff_Nuc37734	chr1	118529952	118530091	+	0	NA	Intergenic	L1VL2|LINE|L1	948307	NM_001077425	636808	Mm.101576	NM_001077425	ENSMUSG00000070695	Cntnap5a	Caspr5-1|EG636808	contactin associated protein-like 5A	protein-coding
Diff_Nuc7149	chr10	6750352	6750491	+	0	NA	Intergenic	(CAA)n|Simple_repeat|Simple_repeat	55841	NM_027391	70337	Mm.24153	NM_027391	ENSMUSG00000019762	Iyd	0610009A07Rik|AI265638|Dehal1	iodotyrosine deiodinase	protein-coding
Diff_Nuc43007	chr8	107059182	107059321	+	0	NA	promoter-TSS (NM_144931)	promoter-TSS (NM_144931)	651	NM_001301164	12354	Mm.129265	NM_053070	ENSMUSG00000031883	Car7	AV343731|Ca7	carbonic anhydrase 7	protein-coding
Diff_Nuc42452	chr8	73959262	73959401	+	0	NA	Intergenic	Intergenic	28225	NM_022419	64296	Mm.276383	NM_022419	ENSMUSG00000007950	Abhd8	0910001L24Rik|AB030191	abhydrolase domain containing 8	protein-coding
Diff_Nuc41763	chr8	26366012	26366151	+	0	NA	Intergenic	Intergenic	50661	NR_040352	74489	Mm.256468	NR_040352	ENSMUSG00000110140	5430421F17Rik	-	RIKEN cDNA 5430421F17 gene	ncRNA
Diff_Nuc22530	chr6	56744962	56745101	+	0	NA	intron (NM_145958, intron 1 of 3)	intron (NM_145958, intron 1 of 3)	2776	NM_145958	210973	Mm.57295	NM_145958	ENSMUSG00000059486	Kbtbd2	BC022962|Bklhd1|mKIAA1489	kelch repeat and BTB (POZ) domain containing 2	protein-coding
Diff_Nuc15708	chr14	69939642	69939781	+	0	NA	Intergenic	Intergenic	15483	NR_045091	100504477	Mm.396396	NR_045091		Gm16677	-	predicted gene, 16677	ncRNA
Diff_Nuc36871	chr1	61893462	61893601	+	0	NA	intron (NM_001081050, intron 2 of 22)	Lx9|LINE|L1	208133	NM_001081050	72823	Mm.35153	NM_001081050	ENSMUSG00000052062	Pard3b	1810008K04Rik|2010002N16Rik|2810455B10Rik|Als2cr19|PAR3B|PAR3L|PAR3beta	par-3 family cell polarity regulator beta	protein-coding
Diff_Nuc26309	chr5	116304192	116304331	+	0	NA	intron (NM_007708, intron 2 of 46)	ORR1E|LTR|MaLR	8596	NM_007708	12704	Mm.8321	NM_007708	ENSMUSG00000029516	Cit	C030025P15Rik|CRIK|CRIK-SK|Cit-k	citron	protein-coding
Diff_Nuc24081	chr6	141746202	141746341	+	0	NA	Intergenic	RLTR6-int|LTR|ERV1	58421	NM_030687	28250	Mm.255586	NM_030687	ENSMUSG00000030237	Slco1a4	AI785519|Oatp1a4|Oatp2|Slc21a5	solute carrier organic anion transporter family, member 1a4	protein-coding
Diff_Nuc7987	chr10	53303652	53303791	+	0	NA	intron (NM_027830, intron 8 of 13)	Lx7|LINE|L1	-13046	NM_025541	66403	Mm.272989	NM_025541	ENSMUSG00000019857	Asf1a	2310079C17Rik|C79052	anti-silencing function 1A histone chaperone	protein-coding
Diff_Nuc20192	chr7	82884362	82884501	+	0	NA	exon (NM_029332, exon 30 of 37)	exon (NM_029332, exon 30 of 37)	-108793	NM_001122780	207952	Mm.206223	NM_029652	ENSMUSG00000055652	Klhl25	2810402K13Rik|BC027373|Enc-1	kelch-like 25	protein-coding
Diff_Nuc37984	chr1	135177412	135177551	+	0	NA	intron (NM_001160268, intron 10 of 22)	intron (NM_001160268, intron 10 of 22)	-11096	NR_037984	100502933	Mm.487491	NR_037984	ENSMUSG00000101693	Gm19461	-	predicted gene, 19461	ncRNA
Diff_Nuc42009	chr8	42158452	42158591	+	0	NA	intron (NM_001005863, intron 3 of 13)	B1F2|SINE|Alu	-18371	NM_001005864	102103	Mm.149438	NM_001005863	ENSMUSG00000045636	Mtus1	AI481402|ATBP135|Atip1|B430010I23Rik|B430305I03Rik|C85752|Cctsg1-440|MD44|MTSG1|mKIAA1288	mitochondrial tumor suppressor 1	protein-coding
Diff_Nuc22177	chr6	38938392	38938531	+	0	NA	intron (NM_011539, intron 4 of 12)	intron (NM_011539, intron 4 of 12)	69476	NM_011539	21391	Mm.4054	NM_011539	ENSMUSG00000029925	Tbxas1	CYP5|CYP5A1|THAS|TS|TXAS|TXS	thromboxane A synthase 1, platelet	protein-coding
Diff_Nuc3043	chr12	52220172	52220311	+	0	NA	Intergenic	Intergenic	114098	NR_126468	75494	Mm.416848	NR_126468		1700008C04Rik	-	RIKEN cDNA 1700008C04 gene	ncRNA
Diff_Nuc28808	chr4	112110672	112110811	+	0	NA	Intergenic	L1Md_F|LINE|L1	-4151	NM_177864	329918	Mm.246783	NM_177864	ENSMUSG00000049972	Skint9	A030013N09Rik|Skint-9	selection and upkeep of intraepithelial T cells 9	protein-coding
Diff_Nuc6266	chr11	94988022	94988161	+	0	NA	Intergenic	GA-rich|Low_complexity|Low_complexity	6660	NM_010055	13393	Mm.5194	NM_010055	ENSMUSG00000001510	Dlx3	AV237891|Dlx-3	distal-less homeobox 3	protein-coding
Diff_Nuc37764	chr1	121433182	121433321	+	0	NA	promoter-TSS (NR_126486)	promoter-TSS (NR_126486)	-509	NR_126486	320069	Mm.406320	NR_126486	ENSMUSG00000101731	3830432H09Rik	-	RIKEN cDNA 3830432H09 gene	ncRNA
Diff_Nuc23499	chr6	115332972	115333111	+	0	NA	intron (NM_001308354, intron 1 of 7)	intron (NM_001308354, intron 1 of 7)	20674	NM_001308354	19016	Mm.3020	NM_011146	ENSMUSG00000000440	Pparg	Nr1c3|PPAR-gamma|PPAR-gamma2|PPARgamma|PPARgamma2	peroxisome proliferator activated receptor gamma	protein-coding
Diff_Nuc7988	chr10	53313762	53313901	+	0	NA	intron (NM_027830, intron 8 of 13)	RSINE1|SINE|B4	-2936	NM_025541	66403	Mm.272989	NM_025541	ENSMUSG00000019857	Asf1a	2310079C17Rik|C79052	anti-silencing function 1A histone chaperone	protein-coding
Diff_Nuc10805	chr17	73141422	73141561	+	0	NA	Intergenic	Intergenic	-44553	NM_027166	383295	Mm.277533	NM_027166	ENSMUSG00000039770	Ypel5	2310076K21Rik|CGI-127	yippee-like 5 (Drosophila)	protein-coding
Diff_Nuc19950	chr7	68259292	68259431	+	0	NA	Intergenic	L1_Mus3|LINE|L1	500852	NR_045727	319752	Mm.294476	NR_045727		B230209E15Rik	-	RIKEN cDNA B230209E15 gene	ncRNA
Diff_Nuc38302	chr1	153312372	153312511	+	0	NA	Intergenic	RMER20A|LTR|ERVK	22918	NR_106150	102466847		NR_106150	ENSMUSG00000106406	Mir7682	mmu-mir-7682	microRNA 7682	ncRNA
Diff_Nuc40045	chr9	55195462	55195601	+	0	NA	intron (NM_172923, intron 1 of 10)	intron (NM_172923, intron 1 of 10)	20775	NM_172923	244886	Mm.24361	NM_172923	ENSMUSG00000032313	Tmem266	9630029F15|AI118078|HVRP1	transmembrane protein 266	protein-coding
Diff_Nuc2134	chr13	109234492	109234631	+	0	NA	Intergenic	Intergenic	128030	NM_178683	218581	Mm.32318	NM_178683	ENSMUSG00000021697	Depdc1b	9830132O03|AW260467|XTP1	DEP domain containing 1B	protein-coding
Diff_Nuc35425	chr2	154709032	154709171	+	0	NA	intron (NM_026030, intron 4 of 8)	MYSERV6-int|LTR|ERVK	9541	NM_026030	67204	Mm.377134	NM_026030	ENSMUSG00000074656	Eif2s2	2810026E11Rik|38kDa|AA408636|AA571381|AA986487|AW822225|D2Ertd303e|EIF2|EIF2B	eukaryotic translation initiation factor 2, subunit 2 (beta)	protein-coding
Diff_Nuc16465	chr14	124755522	124755661	+	0	NA	intron (NM_207667, intron 1 of 4)	intron (NM_207667, intron 1 of 4)	-163823	NM_010201	14169	Mm.206362	NM_010201	ENSMUSG00000025551	Fgf14	FHF-4|Fhf4|mFHF-4(1B)	fibroblast growth factor 14	protein-coding
Diff_Nuc9993	chr17	28621872	28622011	+	0	NA	intron (NM_010220, intron 1 of 10)	intron (NM_010220, intron 1 of 10)	1153	NM_010220	14229	Mm.276405	NM_010220	ENSMUSG00000024222	Fkbp5	D17Ertd592e|Dit1|FKBP-5|FKBP51	FK506 binding protein 5	protein-coding
Diff_Nuc16076	chr14	96003292	96003431	+	0	NA	Intergenic	Intergenic	-277124	NM_025733	66732	Mm.75060	NM_025733	ENSMUSG00000034689	4921530L21Rik	-	RIKEN cDNA 4921530L21 gene	protein-coding
Diff_Nuc30365	chr3	40895622	40895761	+	0	NA	Intergenic	Intergenic	-8723	NM_027558	70804	Mm.40321	NM_027558	ENSMUSG00000049940	Pgrmc2	4631434O19Rik|5730409G06Rik|DG6|PMBP	progesterone receptor membrane component 2	protein-coding
Diff_Nuc27357	chr4	25190392	25190531	+	0	NA	intron (NM_026194, intron 10 of 18)	intron (NM_026194, intron 10 of 18)	18507	NM_026194	67490	Mm.226295	NM_026194	ENSMUSG00000040359	Ufl1	1810074P20Rik|AI429228|Kiaa0776|Maxer|Rcad|mKIAA0776	UFM1 specific ligase 1	protein-coding
Diff_Nuc29873	chr3	7440552	7440691	+	0	NA	intron (NM_008862, intron 2 of 2)	L1_Mus2|LINE|L1	-62805	NM_173181	67306	Mm.332366	NM_173181	ENSMUSG00000043542	Zc2hc1a	3110050N22Rik|AI790358|AU023959|Fam164a	zinc finger, C2HC-type containing 1A	protein-coding
Diff_Nuc24869	chr5	37103472	37103611	+	0	NA	Intergenic	Intergenic	-16281	NM_001081232	320661	Mm.26480	NM_177221	ENSMUSG00000029190	D5Ertd579e	9030221A05Rik|A930018H20Rik|Kiaa0232	DNA segment, Chr 5, ERATO Doi 579, expressed	protein-coding
Diff_Nuc13608	chr15	57809542	57809681	+	0	NA	Intergenic	Intergenic	-7847	NM_173862	239463	Mm.221241	NM_173862	ENSMUSG00000051225	Fam83a	-	family with sequence similarity 83, member A	protein-coding
Diff_Nuc34756	chr2	120349242	120349381	+	0	NA	intron (NM_011743, intron 11 of 21)	intron (NM_011743, intron 11 of 21)	40256	NM_011743	20402	Mm.485295	NM_011743	ENSMUSG00000027288	Zfp106	Cd-1|D2Dcr28|H3a|Sh3bp3|Znf106|sirm	zinc finger protein 106	protein-coding
Diff_Nuc29674	chr4	148221402	148221541	+	0	NA	intron (NM_001159344, intron 2 of 20)	ID_B1|SINE|B4	42970	NM_027195	69743	Mm.233879	NM_027195	ENSMUSG00000028977	Casz1	2410019P08Rik|AV096627|BC040081|Cst|D4Ertd432e	castor zinc finger 1	protein-coding
Diff_Nuc16850	chr19	20482242	20482381	+	0	NA	intron (NR_045817, intron 1 of 2)	intron (NR_045817, intron 1 of 2)	2533	NR_045817	68994	Mm.261028	NM_183277	ENSMUSG00000094732	1500015L24Rik	-	RIKEN cDNA 1500015L24 gene	ncRNA
Diff_Nuc902	chr13	41489232	41489371	+	0	NA	intron (NM_001111324, intron 2 of 7)	intron (NM_001111324, intron 2 of 7)	-34931	NM_017464	18003	Mm.288980	NM_017464	ENSMUSG00000021365	Nedd9	Cas-L|CasL|HEF1|MEF1|Nedd-9|p105	neural precursor cell expressed, developmentally down-regulated gene 9	protein-coding
Diff_Nuc2061	chr13	104841652	104841791	+	0	NA	intron (NM_029447, intron 7 of 12)	B4A|SINE|B4	57973	NM_029447	75805	Mm.127692	NM_029447	ENSMUSG00000021710	Nln	4930472G13Rik|C79345	neurolysin (metallopeptidase M3 family)	protein-coding
Diff_Nuc40560	chr9	74990362	74990501	+	0	NA	intron (NM_010864, intron 8 of 40)	RMER20B|LTR|ERVK	71418	NM_010864	17918	Mm.3645	NM_010864	ENSMUSG00000034593	Myo5a	9630007J19Rik|AI413174|AI661011|Dbv|MVa|Myo5|MyoVA|Sev-1|d|d-120J|flail|flr	myosin VA	protein-coding
Diff_Nuc20742	chr7	115991142	115991281	+	0	NA	Intergenic	Intergenic	-1689	NM_146725	258720	Mm.377654	NM_146725	ENSMUSG00000062434	Olfr516	MOR268-2	olfactory receptor 516	protein-coding
Diff_Nuc22896	chr6	83882352	83882491	+	0	NA	intron (NM_008717, intron 2 of 26)	B4|SINE|B4	18074	NM_008717	18139	Mm.132392	NM_008717	ENSMUSG00000030016	Zfp638	AI323587|Np220|Zfml|Znf638|mNP220	zinc finger protein 638	protein-coding
Diff_Nuc31146	chr3	88510532	88510671	+	0	NA	intron (NM_028814, intron 10 of 13)	intron (NM_028814, intron 10 of 13)	-10175	NM_009069	19769	Mm.4009	NM_009069	ENSMUSG00000028057	Rit1	RIBB|ROC1|Rit	Ras-like without CAAX 1	protein-coding
Diff_Nuc37557	chr1	103218772	103218911	+	0	NA	Intergenic	Intergenic	166496	NR_037989	100504525	Mm.87065	NR_037989	ENSMUSG00000100684	Gm20268	-	predicted gene, 20268	ncRNA
Diff_Nuc1153	chr13	52278442	52278581	+	0	NA	Intergenic	Intergenic	86401	NR_045061	74050	Mm.84860	NR_045061		4921525O09Rik	-	RIKEN cDNA 4921525O09 gene	ncRNA
Diff_Nuc30920	chr3	78981902	78982041	+	0	NA	Intergenic	L1MB8|LINE|L1	-32174	NM_001099624	76089	Mm.31220	NM_001099624	ENSMUSG00000062232	Rapgef2	5830453M24Rik|CNRasGEF|Pdzgef1|RA-GEF-1|mKIAA0313|nRapGEP	Rap guanine nucleotide exchange factor (GEF) 2	protein-coding
Diff_Nuc37132	chr1	78137472	78137611	+	0	NA	intron (NM_008781, intron 4 of 7)	intron (NM_008781, intron 4 of 7)	56170	NM_008781	18505	Mm.1371	NM_008781	ENSMUSG00000004872	Pax3	Pax-3|Sp|Splchl2|splotch	paired box 3	protein-coding
Diff_Nuc7760	chr10	41043712	41043851	+	0	NA	Intergenic	ORR1B1|LTR|MaLR	-20734	NM_133999	103199	Mm.277242	NM_133999	ENSMUSG00000038417	Fig4	A530089I17Rik|AI326867|Sac3	FIG4 phosphoinositide 5-phosphatase	protein-coding
Diff_Nuc7486	chr10	24625162	24625301	+	0	NA	intron (NM_027347, intron 22 of 28)	intron (NM_027347, intron 22 of 28)	-5239	NR_105870	102465545		NR_105870	ENSMUSG00000099181	Mir6905	Gm27879|mmu-mir-6905	microRNA 6905	ncRNA
Diff_Nuc6061	chr11	85305652	85305791	+	0	NA	intron (NM_138681, intron 14 of 25)	intron (NM_138681, intron 14 of 25)	139055	NM_001166643	192197	Mm.209989	NM_138681	ENSMUSG00000059439	Bcas3	1500019F07Rik|2610028P08Rik|AU021018|BC028339|K20D4|rudhira	breast carcinoma amplified sequence 3	protein-coding
Diff_Nuc7714	chr10	39764982	39765121	+	0	NA	intron (NM_001114332, intron 4 of 5)	L1Md_F3|LINE|L1	-19977	NM_144821	215929	Mm.55513	NM_144821	ENSMUSG00000038522	Mfsd4b1	AI317395|AI482555|Naglt1a	major facilitator superfamily domain containing 4B1	protein-coding
Diff_Nuc3212	chr12	59445472	59445611	+	0	NA	Intergenic	L1_Rod|LINE|L1	-75296	NM_025809	66864	Mm.280563	NM_025809	ENSMUSG00000045930	Clec14a	1200003C23Rik|AI642649	C-type lectin domain family 14, member a	protein-coding
Diff_Nuc940	chr13	42820062	42820201	+	0	NA	intron (NM_001005740, intron 1 of 12)	intron (NM_001005740, intron 1 of 12)	15181	NM_001005740	218194	Mm.160124	NM_198419	ENSMUSG00000054728	Phactr1	9630030F18Rik|Rpel1	phosphatase and actin regulator 1	protein-coding
Diff_Nuc4744	chr11	23669712	23669851	+	0	NA	intron (NM_009044, intron 1 of 9)	intron (NM_009044, intron 1 of 9)	1189	NM_009044	19696	Mm.4869	NM_009044	ENSMUSG00000020275	Rel	c-Rel	reticuloendotheliosis oncogene	protein-coding
Diff_Nuc24694	chr5	29935522	29935661	+	0	NA	intron (NM_133907, intron 10 of 22)	intron (NM_133907, intron 10 of 22)	39809	NM_133907	100763	Mm.137746	NM_133907	ENSMUSG00000039000	Ube3c	AI853514|mKIAA0010	ubiquitin protein ligase E3C	protein-coding
Diff_Nuc7105	chr10	4830032	4830171	+	0	NA	intron (NM_001347732, intron 2 of 145)	B4A|SINE|B4	-28126	NM_001347711	64009	Mm.331626	NM_022027	ENSMUSG00000096054	Syne1	8B|A330049M09Rik|BE692247|C130039F11Rik|CPG2|Myne1|mKIAA1756|myne-1	spectrin repeat containing, nuclear envelope 1	protein-coding
Diff_Nuc3541	chr12	79971232	79971371	+	0	NA	intron (NM_026114, intron 2 of 7)	B1_Mus1|SINE|Alu	8242	NM_026114	13665	Mm.196220	NM_026114	ENSMUSG00000021116	Eif2s1	0910001O23Rik|2410026C18Rik|35kDa|Eif2a|eIF2alpha	eukaryotic translation initiation factor 2, subunit 1 alpha	protein-coding
Diff_Nuc11289	chr16	10000722	10000861	+	0	NA	Intergenic	Intergenic	-8165	NM_008170	14811	Mm.2953	NM_008170	ENSMUSG00000059003	Grin2a	GluN2A|NMDAR2A|NR2A	glutamate receptor, ionotropic, NMDA2A (epsilon 1)	protein-coding
Diff_Nuc4438	chr11	5912287	5912426	+	0	NA	intron (NM_007595, intron 3 of 20)	(TC)n|Simple_repeat|Simple_repeat	53395	NM_001174054	12323	Mm.439733	NM_007595	ENSMUSG00000057897	Camk2b	CaMKII	calcium/calmodulin-dependent protein kinase II, beta	protein-coding
Diff_Nuc39684	chr9	36633802	36633941	+	0	NA	Intergenic	Intergenic	-17373	NM_183171	235180	Mm.5264	NM_183171	ENSMUSG00000032118	Fez1	UNC-76|UNC76	fasciculation and elongation protein zeta 1 (zygin I)	protein-coding
Diff_Nuc30950	chr3	79827992	79828131	+	0	NA	Intergenic	Lx6|LINE|L1	138209	NM_133187	68659	Mm.427274	NM_133187	ENSMUSG00000027955	Fam198b	1110032E23Rik|2210419I08Rik|AV011458|Ened	family with sequence similarity 198, member B	protein-coding
Diff_Nuc30925	chr3	78998142	78998281	+	0	NA	Intergenic	Intergenic	-18630	NR_045502	70924	Mm.444622	NR_045502	ENSMUSG00000104585	4921511C10Rik	-	RIKEN cDNA 4921511C10 gene	ncRNA
Diff_Nuc16624	chr19	7136182	7136321	+	0	NA	intron (NM_134147, intron 1 of 10)	intron (NM_134147, intron 1 of 10)	4993	NM_134147	107227	Mm.439977	NM_134147	ENSMUSG00000036278	Macrod1	AI604841|AW743046|D930010J01Rik|Lrp16	MACRO domain containing 1	protein-coding
Diff_Nuc26930	chr5	146798782	146798921	+	0	NA	intron (NR_030782, intron 8 of 11)	B3|SINE|B2	22342	NM_019792	56388	Mm.301900	NM_019792	ENSMUSG00000029630	Cyp3a25	AI327008	cytochrome P450, family 3, subfamily a, polypeptide 25	protein-coding
Diff_Nuc36509	chr1	43950272	43950411	+	0	NA	Intergenic	Lx2|LINE|L1	-40498	NM_001310540	22019	Mm.401675	NM_009418	ENSMUSG00000041763	Tpp2	TPP-2|TppII	tripeptidyl peptidase II	protein-coding
Diff_Nuc37148	chr1	79644172	79644311	+	0	NA	intron (NM_183027, intron 1 of 4)	intron (NM_183027, intron 1 of 4)	24306	NM_183027	252903	Mm.32409	NM_183027	ENSMUSG00000054702	Ap1s3	1190009B22|Jr2|[s]3A	adaptor-related protein complex AP-1, sigma 3	protein-coding
Diff_Nuc20042	chr7	74398392	74398531	+	0	NA	intron (NM_001291196, intron 8 of 11)	intron (NM_001291196, intron 8 of 11)	30959	NM_001191051	75099	Mm.121691	NM_175215	ENSMUSG00000043831	Lysmd4	4930506D23Rik	LysM, putative peptidoglycan-binding, domain containing 4	protein-coding
Diff_Nuc38573	chr1	164951802	164951941	+	0	NA	Intergenic	L1_Mus3|LINE|L1	-37212	NM_008030	14262	Mm.2900	NM_008030	ENSMUSG00000026691	Fmo3	AW111792	flavin containing monooxygenase 3	protein-coding
Diff_Nuc4511	chr11	11928082	11928221	+	0	NA	promoter-TSS (NM_001177629)	promoter-TSS (NM_001177629)	-177	NM_001177629	14783	Mm.273117	NM_010345	ENSMUSG00000020176	Grb10	5730571D09Rik|AI325020|Meg1|mKIAA0207	growth factor receptor bound protein 10	protein-coding
Diff_Nuc32465	chr3	152424582	152424721	+	0	NA	intron (NM_178016, intron 10 of 11)	B4|SINE|B4	47587	NM_025662	329777	Mm.331447	NM_025662	ENSMUSG00000039047	Pigk	3000001O05Rik	phosphatidylinositol glycan anchor biosynthesis, class K	protein-coding
Diff_Nuc23465	chr6	113275982	113276121	+	0	NA	promoter-TSS (NM_010957)	promoter-TSS (NM_010957)	-919	NM_010957	18294	Mm.43612	NM_010957	ENSMUSG00000030271	Ogg1	Mmh	8-oxoguanine DNA-glycosylase 1	protein-coding
Diff_Nuc559	chr13	23894622	23894761	+	0	NA	Intergenic	Intergenic	-4205	NM_144836	218103	Mm.24030	NM_144836	ENSMUSG00000036110	Slc17a2	C730032N17Rik|NPT3	solute carrier family 17 (sodium phosphate), member 2	protein-coding
Diff_Nuc30876	chr3	74819132	74819271	+	0	NA	Intergenic	Intergenic	128493	NM_001310529	213234	Mm.80075	NM_172515	ENSMUSG00000034151	Zbbx	4931432L23	zinc finger, B-box domain containing	protein-coding
Diff_Nuc39589	chr9	31061862	31062001	+	0	NA	Intergenic	Intergenic	-17055	NM_001101597	638580	Mm.373655	NM_001101597		Gm7244	EG638580	predicted gene 7244	protein-coding
Diff_Nuc26089	chr5	108060842	108060981	+	0	NA	intron (NR_046195, intron 1 of 2)	L1_Mm|LINE|L1	1958	NR_046195	78443	Mm.490703	NR_046195	ENSMUSG00000085900	A930041C12Rik	-	RIKEN cDNA A930041C12 gene	ncRNA
Diff_Nuc24249	chr6	148788282	148788421	+	0	NA	Intergenic	MIRc|SINE|MIR	-8362	NM_001081113	320727	Mm.260105	NM_001081113	ENSMUSG00000040029	Ipo8	6230418K12Rik|Abcc10|C130009K11Rik|MRP7|OM-1|Om1|Ranbp8	importin 8	protein-coding
Diff_Nuc30011	chr3	18381092	18381231	+	0	NA	promoter-TSS (NR_040544)	promoter-TSS (NR_040544)	-684	NR_040544	73959	Mm.60616	NR_040544	ENSMUSG00000102699	4930433B08Rik	-	RIKEN cDNA 4930433B08 gene	ncRNA
Diff_Nuc27744	chr4	49098342	49098481	+	0	NA	intron (NM_178756, intron 1 of 7)	Lx3C|LINE|L1	26077	NM_178756	272031	Mm.299460	NM_178756	ENSMUSG00000063446	Plppr1	E130309F12Rik|Lppr1|PRG-3|mKIAA4247	phospholipid phosphatase related 1	protein-coding
Diff_Nuc8051	chr10	57731852	57731991	+	0	NA	intron (NM_027375, intron 5 of 22)	intron (NM_027375, intron 5 of 22)	13647	NM_027375	70297	Mm.25531	NM_027375	ENSMUSG00000038039	Gcc2	0610043A03Rik|2210420P05Rik|2600014C01Rik|AW112121|mKIAA0336	GRIP and coiled-coil domain containing 2	protein-coding
Diff_Nuc16312	chr14	116857152	116857291	+	0	NA	intron (NM_175500, intron 7 of 7)	intron (NM_175500, intron 7 of 7)	-467298	NM_001079844	23888	Mm.440025	NM_011821	ENSMUSG00000058571	Gpc6	-	glypican 6	protein-coding
Diff_Nuc24149	chr6	144313282	144313421	+	0	NA	Intergenic	Intergenic	-155263	NM_001243163	20678	Mm.1752	NM_011444	ENSMUSG00000041540	Sox5	A730017D01Rik|AI528773	SRY (sex determining region Y)-box 5	protein-coding
Diff_Nuc26817	chr5	141744752	141744891	+	0	NA	intron (NM_177879, intron 1 of 44)	intron (NM_177879, intron 1 of 44)	27333	NM_177879	330222	Mm.151931	NM_177879	ENSMUSG00000039683	Sdk1	5330440E10|6720466O15Rik	sidekick cell adhesion molecule 1	protein-coding
Diff_Nuc38114	chr1	141442732	141442871	+	0	NA	TTS (NM_015780)	TTS (NM_015780)	13998	NM_015780	50702	Mm.220362	NM_015780	ENSMUSG00000057037	Cfhr1	AI194696|CFHRB|Cfhl1	complement factor H-related 1	protein-coding
Diff_Nuc33214	chr2	34987382	34987521	+	0	NA	promoter-TSS (NM_001290635)	promoter-TSS (NM_001290635)	-303	NM_001290635	26920	Mm.231332	NM_012018	ENSMUSG00000057110	Cntrl	6720467O09Rik|AA968343|Cep1|Cep110|IB3/5|Ma2a8|b2b1468.1Clo|b2b1468Clo	centriolin	protein-coding
Diff_Nuc250	chr13	5810362	5810501	+	0	NA	Intergenic	MURVY-LTR|LTR|ERV1	46907	NR_045891	71867	Mm.179181	NR_045891	ENSMUSG00000100625	1700016G22Rik	-	RIKEN cDNA 1700016G22 gene	ncRNA
Diff_Nuc41135	chr9	107982962	107983101	+	0	NA	promoter-TSS (NR_106056)	promoter-TSS (NR_106056)	264	NM_008243	15235	Mm.8369	NM_008243	ENSMUSG00000032591	Mst1	D3F15S2h|D9H3F15S2|DNF15S2h|Hgfl	macrophage stimulating 1 (hepatocyte growth factor-like)	protein-coding
Diff_Nuc3023	chr12	51057702	51057841	+	0	NA	Intergenic	B1F2|SINE|Alu	-475922	NR_045472	69054	Mm.417838	NR_045472	ENSMUSG00000100844	1810007C17Rik	-	RIKEN cDNA 1810007C17 gene	ncRNA
Diff_Nuc29616	chr4	146433042	146433181	+	0	NA	exon (NM_001177767, exon 5 of 5).2	exon (NM_001177767, exon 5 of 5).2	9434	NR_045446	71270	Mm.460830	NR_045446	ENSMUSG00000093617	4933438K21Rik	-	RIKEN cDNA 4933438K21 gene	ncRNA
Diff_Nuc37848	chr1	129869802	129869941	+	0	NA	intron (NM_001285945, intron 13 of 20)	intron (NM_001285945, intron 13 of 20)	104521	NM_178690	226407	Mm.489713	NM_178690	ENSMUSG00000036104	Rab3gap1	1700003B17Rik|4732493F09Rik|AL117896|Rab3gap|p130	RAB3 GTPase activating protein subunit 1	protein-coding
Diff_Nuc837	chr13	37597192	37597331	+	0	NA	Intergenic	B4|SINE|B4	160047	NM_010745	17084	Mm.2639	NM_010745	ENSMUSG00000021423	Ly86	MD-1|MD1|ly86_tv2	lymphocyte antigen 86	protein-coding
Diff_Nuc8754	chr10	89100152	89100291	+	0	NA	Intergenic	B4|SINE|B4	-16227	NM_182959	216227	Mm.233921	NM_182959	ENSMUSG00000019935	Slc17a8	BC042593|Vglut3	solute carrier family 17 (sodium-dependent inorganic phosphate cotransporter), member 8	protein-coding
Diff_Nuc35091	chr2	135091662	135091801	+	0	NA	intron (NM_001145830, intron 9 of 31)	intron (NM_001145830, intron 9 of 31)	-50379	NR_040517	78805	Mm.78702	NR_040517	ENSMUSG00000085247	4930545L23Rik	-	RIKEN cDNA 4930545L23 gene	ncRNA
Diff_Nuc7234	chr10	11809692	11809831	+	0	NA	Intergenic	Intergenic	480739	NM_013898	30058	Mm.214504	NM_013898	ENSMUSG00000048007	Timm8a1	DXHXS1274E|Ddp1|Fci-12|Tim8a|Timm8a	translocase of inner mitochondrial membrane 8A1	protein-coding
Diff_Nuc13128	chr15	28020902	28021041	+	0	NA	Intergenic	RMER1C|Other|Other	-65368	NM_001081302	223435	Mm.485422	NM_001081302	ENSMUSG00000022263	Trio	6720464I07Rik|AA408740|Solo	triple functional domain (PTPRF interacting)	protein-coding
Diff_Nuc22322	chr6	47808452	47808591	+	0	NA	intron (NM_027477, intron 2 of 5)	B1_Mus2|SINE|Alu	-19033	NM_146175	101095	Mm.440186	NM_146175	ENSMUSG00000025821	Zfp282	AI449432|C81429|E430019K09Rik|HUB1	zinc finger protein 282	protein-coding
Diff_Nuc27163	chr4	11081142	11081281	+	0	NA	Intergenic	MLT1G1|LTR|MaLR	-2377	NM_001199105	60599	Mm.393018	NM_021897	ENSMUSG00000028211	Trp53inp1	2700057G22Rik|SIP|SIP18|SIP27|Stinp|Teap	transformation related protein 53 inducible nuclear protein 1	protein-coding
Diff_Nuc9287	chr10	117358062	117358201	+	0	NA	Intergenic	(TG)n|Simple_repeat|Simple_repeat	-4384	NR_045342	71067	Mm.410793	NR_045342		4933411E08Rik	-	RIKEN cDNA 4933411E08 gene	ncRNA
Diff_Nuc39714	chr9	39183672	39183811	+	0	NA	Intergenic	(CCCTAA)n|Simple_repeat|Simple_repeat	-17637	NM_001011812	258046	Mm.377338	NM_001011812	ENSMUSG00000094269	Olfr951	MOR171-33P|MOR171-49	olfactory receptor 951	protein-coding
Diff_Nuc23932	chr6	134706422	134706561	+	0	NA	intron (NM_001048054, intron 3 of 6)	L1_Mus4|LINE|L1	36155	NM_130447	70686	Mm.491182	NM_130447	ENSMUSG00000030203	Dusp16	3830417M17Rik|AW558566|D6Ertd213e|MKP-7|MKP7|Mkpm	dual specificity phosphatase 16	protein-coding
Diff_Nuc36299	chr1	31043532	31043671	+	0	NA	Intergenic	Intergenic	-37001	NM_011200	19243	Mm.491181	NM_011200	ENSMUSG00000026064	Ptp4a1	AA415290|AU019864|C130021B01|Prl-1	protein tyrosine phosphatase 4a1	protein-coding
Diff_Nuc12413	chr16	76760642	76760781	+	0	NA	Intergenic	Intergenic	250415	NR_040573	76601	Mm.396217	NR_040573	ENSMUSG00000100857	1700041M19Rik	-	RIKEN cDNA 1700041M19 gene	ncRNA
Diff_Nuc17984	chr18	20369632	20369771	+	0	NA	Intergenic	Intergenic	-36140	NM_181680	211924	Mm.391118	NM_181680	ENSMUSG00000034774	Dsg1c	Dsg1gamma|Dsg6|dsg1g	desmoglein 1 gamma	protein-coding
Diff_Nuc39956	chr9	50657292	50657431	+	0	NA	Intergenic	Intergenic	-7668	NM_001034085	73699	Mm.7726	NM_028614	ENSMUSG00000032058	Ppp2r1b	2410091N08Rik|AI790395	protein phosphatase 2, regulatory subunit A, beta	protein-coding
Diff_Nuc14623	chr14	12724752	12724891	+	0	NA	intron (NM_008981, intron 2 of 29)	intron (NM_008981, intron 2 of 29)	-297636	NM_001347593	19270	Mm.431266	NM_008981	ENSMUSG00000021745	Ptprg	5430405N12Rik|AW046354|AW549872|RPTPgamma	protein tyrosine phosphatase, receptor type, G	protein-coding
Diff_Nuc32605	chr2	5565362	5565501	+	0	NA	intron (NM_177343, intron 1 of 10)	intron (NM_177343, intron 1 of 10)	31661	NM_001290376	227541	Mm.191949	NM_177343	ENSMUSG00000039145	Camk1d	A630059D12Rik|CKLiK|CaMKIdelta|E030025C11Rik|mCKLiK	calcium/calmodulin-dependent protein kinase ID	protein-coding
Diff_Nuc229	chr13	4230812	4230951	+	0	NA	Intergenic	Intergenic	-2105	NM_001013785	432720	Mm.22832	NM_001013785	ENSMUSG00000071551	Akr1c19	1810010N06Rik	aldo-keto reductase family 1, member C19	protein-coding
Diff_Nuc40208	chr9	62213162	62213301	+	0	NA	intron (NM_009672, intron 1 of 6)	intron (NM_009672, intron 1 of 6)	24081	NM_009672	11737	Mm.269088	NM_009672	ENSMUSG00000032249	Anp32a	Anp32|I1PP2A|LANP|PHAP1|W91701|pp32	acidic (leucine-rich) nuclear phosphoprotein 32 family, member A	protein-coding
Diff_Nuc34053	chr2	79042672	79042811	+	0	NA	Intergenic	Intergenic	-52842	NM_010576	16401	Mm.31903	NM_010576	ENSMUSG00000027009	Itga4	CD49D|Itga4B	integrin alpha 4	protein-coding
Diff_Nuc7603	chr10	30556892	30557031	+	0	NA	intron (NM_013904, intron 4 of 4)	intron (NM_013904, intron 4 of 4)	5628	NM_013904	15214	Mm.103573	NM_013904	ENSMUSG00000019789	Hey2	CHF1|Herp1|Hrt2|bHLHb32|hesr2	hairy/enhancer-of-split related with YRPW motif 2	protein-coding
Diff_Nuc11968	chr16	38394832	38394971	+	0	NA	Intergenic	Intergenic	32625	NM_022318	64082	Mm.390856	NM_022318	ENSMUSG00000022803	Popdc2	AV006127|Pop2	popeye domain containing 2	protein-coding
Diff_Nuc12967	chr15	12124432	12124571	+	0	NA	Intergenic	Intergenic	-10348	NM_172958	268783	Mm.54460	NM_172958	ENSMUSG00000039458	Mtmr12	3Pap|4932703C11|C730015A02Rik|Pip3ap|mKIAA1682	myotubularin related protein 12	protein-coding
Diff_Nuc33094	chr2	30568072	30568211	+	0	NA	Intergenic	ID_B1|SINE|B4	-8589	NR_037272	100526499		NR_037272	ENSMUSG00000093091	Mir3089	mir-3089|mmu-mir-3089	microRNA 3089	ncRNA
Diff_Nuc43422	chr8	126002172	126002311	+	0	NA	intron (NR_028260, intron 1 of 15)	intron (NR_028260, intron 1 of 15)	479	NR_028260	114896	Mm.287475	NM_054070	ENSMUSG00000031967	Afg3l1	1700047G05Rik|3110061K15Rik	AFG3-like AAA ATPase 1	protein-coding
Diff_Nuc29438	chr4	138018422	138018561	+	0	NA	Intergenic	ID_B1|SINE|B4	7428	NM_025451	66259	Mm.41603	NM_025451	ENSMUSG00000046447	Camk2n1	1810006K23Rik|AI848599|AI891706	calcium/calmodulin-dependent protein kinase II inhibitor 1	protein-coding
Diff_Nuc19338	chr7	19338902	19339041	+	0	NA	Intergenic	ETnERV2-int|LTR|ERVK	-32680	NR_024208	20958	Mm.423480	NR_024208	ENSMUSG00000109116	Sycp1-ps1	Sycp1-rs	synaptonemal complex protein 1, pseudogene 1	pseudo
Diff_Nuc10394	chr17	46809932	46810071	+	0	NA	intron (NM_144857, intron 1 of 6)	RSINE1|SINE|B4	1203	NM_144857	224823	Mm.45101	NM_144857	ENSMUSG00000023971	Rrp36	-	ribosomal RNA processing 36 homolog (S. cerevisiae)	protein-coding
Diff_Nuc18630	chr18	60040312	60040451	+	0	NA	Intergenic	MT2A|LTR|ERVL	301097	NR_105773	102465182		NR_105773	ENSMUSG00000098287	Mir6355	Gm27473|mmu-mir-6355	microRNA 6355	ncRNA
Diff_Nuc35564	chr2	160420832	160420971	+	0	NA	Intergenic	Intergenic	-50732	NM_009408	21969	Mm.217233	NM_009408	ENSMUSG00000070544	Top1	AI467334|D130064I21Rik|Top-1	topoisomerase (DNA) I	protein-coding
Diff_Nuc26205	chr5	112504802	112504941	+	0	NA	Intergenic	L1MA7|LINE|L1	-130912	NR_045377	75569	Mm.243721	NR_045377	ENSMUSG00000101683	1700028D13Rik	-	RIKEN cDNA 1700028D13 gene	ncRNA
Diff_Nuc40640	chr9	80015602	80015741	+	0	NA	intron (NM_001039546, intron 1 of 32)	intron (NM_001039546, intron 1 of 32)	2830	NM_001039546	17920	Mm.4040	NM_008662	ENSMUSG00000033577	Myo6	BC029719|Tlc|sv	myosin VI	protein-coding
Diff_Nuc39334	chr9	14085912	14086051	+	0	NA	intron (NM_030261, intron 1 of 9)	intron (NM_030261, intron 1 of 9)	5236	NM_030261	75747	Mm.325126	NM_030261	ENSMUSG00000032009	Sesn3	5630400E15Rik|BC003348|SEST3	sestrin 3	protein-coding
Diff_Nuc12064	chr16	45162992	45163131	+	0	NA	intron (NM_026402, intron 2 of 11)	intron (NM_026402, intron 2 of 11)	4119	NM_026402	67841	Mm.41775	NM_026402	ENSMUSG00000022663	Atg3	2610016C12Rik|APG3|Apg3l|Atg3l|PC3-96	autophagy related 3	protein-coding
Diff_Nuc19133	chr18	90135862	90136001	+	0	NA	Intergenic	IAPEY2_LTR|LTR|ERVK	-197403	NM_001039173	623279	Mm.447164	NM_001039173	ENSMUSG00000073514	Dok6	Dok-6	docking protein 6	protein-coding
Diff_Nuc1056	chr13	47208402	47208541	+	0	NA	Intergenic	MTE2b-int|LTR|MaLR	-6882	NM_025900	110052	Mm.131150	NM_025900	ENSMUSG00000021377	Dek	1810019E15Rik|D13H6S231E	DEK oncogene (DNA binding)	protein-coding
Diff_Nuc28796	chr4	110823372	110823511	+	0	NA	intron (NM_001048189, intron 5 of 12)	intron (NM_001048189, intron 5 of 12)	-264170	NR_033793	67621	Mm.45533	NM_026279	ENSMUSG00000028545	Bend5	2310026E23Rik	BEN domain containing 5	protein-coding
Diff_Nuc14525	chr15	101912212	101912351	+	0	NA	intron (NM_145625, intron 1 of 14)	intron (NM_145625, intron 1 of 14)	8077	NM_145625	75705	Mm.290022	NM_145625	ENSMUSG00000058655	Eif4b	2310046H11Rik|AL024095|C85189|Eif4a2	eukaryotic translation initiation factor 4B	protein-coding
Diff_Nuc35830	chr2	173844912	173845051	+	0	NA	Intergenic	Intergenic	-57571	NM_172675	228960	Mm.277977	NM_172675	ENSMUSG00000027522	Stx16	4930401D03|5430410K23Rik|6330500A18Rik|AI648908|AW553605|Syn16	syntaxin 16	protein-coding
Diff_Nuc8450	chr10	77363522	77363661	+	0	NA	exon (NM_145152, exon 2 of 2)	exon (NM_145152, exon 2 of 2)	1690	NM_145152	237387	Mm.133301	NM_145152	ENSMUSG00000051652	Lrrc3	1300011L04Rik|C21orf102	leucine rich repeat containing 3	protein-coding
Diff_Nuc224	chr13	4050672	4050811	+	0	NA	Intergenic	Intergenic	-8096	NM_134072	105387	Mm.26838	NM_134072	ENSMUSG00000033715	Akr1c14	9030611N15Rik|AW557061	aldo-keto reductase family 1, member C14	protein-coding
Diff_Nuc27095	chr4	6713202	6713341	+	0	NA	intron (NM_145711, intron 3 of 8)	intron (NM_145711, intron 3 of 8)	204599	NM_145711	252838	Mm.435828	NM_145711	ENSMUSG00000041272	Tox	1700007F02Rik	thymocyte selection-associated high mobility group box	protein-coding
Diff_Nuc4226	chr12	113361182	113361321	+	0	NA	intron (NM_001081169, intron 11 of 14)	intron (NM_001081169, intron 11 of 14)	-7840	NR_029590	387199		NR_029590	ENSMUSG00000065574	Mir203	Mirn203|mir-203|mmu-mir-203	microRNA 203	ncRNA
Diff_Nuc14131	chr15	82049912	82050051	+	0	NA	Intergenic	RSINE1|SINE|B4	4785	NM_028075	72049	Mm.240047	NM_028075	ENSMUSG00000068105	Tnfrsf13c	2010006P15Rik|BAFF-R|Baffr|Bcmd|Bcmd-1|Bcmd1|Lvis22	tumor necrosis factor receptor superfamily, member 13c	protein-coding
Diff_Nuc31293	chr3	94805292	94805431	+	0	NA	intron (NM_175356, intron 8 of 10)	B3|SINE|B2	-2729	NR_105980	102465613		NR_105980	ENSMUSG00000099033	Mir7013	Gm27488|mmu-mir-7013	microRNA 7013	ncRNA
Diff_Nuc32215	chr3	138197712	138197851	+	0	NA	intron (NM_001313980, intron 2 of 7)	B3|SINE|B2	7549	NM_001313980	13684	Mm.3941	NM_007917	ENSMUSG00000028156	Eif4e	EG668879|Eif4e-ps|If4e|eIF-4E	eukaryotic translation initiation factor 4E	protein-coding
Diff_Nuc1453	chr13	69136682	69136821	+	0	NA	intron (NM_153534, intron 1 of 24)	intron (NM_153534, intron 1 of 24)	1668	NM_153534	210044	Mm.390617	NM_153534	ENSMUSG00000021536	Adcy2	mKIAA1060	adenylate cyclase 2	protein-coding
Diff_Nuc9051	chr10	102438422	102438561	+	0	NA	Intergenic	Intergenic	52920	NM_172553	216285	Mm.19287	NM_172553	ENSMUSG00000036602	Alx1	AI314867|C130005I02|Cart1	ALX homeobox 1	protein-coding
Diff_Nuc41870	chr8	34492122	34492261	+	0	NA	intron (NM_001122822, intron 1 of 33)	L1MB4|LINE|L1	3808	NM_001122822	22427	Mm.228805	NM_011721	ENSMUSG00000031583	Wrn	AI846146	Werner syndrome homolog (human)	protein-coding
Diff_Nuc31051	chr3	84922832	84922971	+	0	NA	Intergenic	B2_Mm2|SINE|B2	166768	NM_080428	50754	Mm.196475	NM_080428	ENSMUSG00000028086	Fbxw7	1110001A17Rik|AGO|Cdc4|Fbw7|Fbwd6|Fbx30|Fbxo30|Fbxw6|SEL-10	F-box and WD-40 domain protein 7	protein-coding
Diff_Nuc26927	chr5	146693292	146693431	+	0	NA	Intergenic	Lx9|LINE|L1	-1931	NM_007818	13112	Mm.332844	NM_007818	ENSMUSG00000056035	Cyp3a11	AI256190|Cyp3a|IIIAm1|Pcn	cytochrome P450, family 3, subfamily a, polypeptide 11	protein-coding
Diff_Nuc22629	chr6	63400422	63400561	+	0	NA	intron (NM_008167, intron 1 of 15)	Lx9|LINE|L1	193640	NM_008167	14804	Mm.439651	NM_008167	ENSMUSG00000071424	Grid2	B230104L07Rik|GluD2|GluRdelta2|Lc|Lc<J>|MMS10-AC|Ms10ac|cpr|ho|nmf408|tpr	glutamate receptor, ionotropic, delta 2	protein-coding
Diff_Nuc1703	chr13	86028672	86028811	+	0	NA	Intergenic	Intergenic	157659	NM_007749	12867	Mm.378898	NM_007749	ENSMUSG00000017778	Cox7c	COXVIIc|Cox7c1	cytochrome c oxidase subunit VIIc	protein-coding
Diff_Nuc1528	chr13	74769802	74769941	+	0	NA	Intergenic	Intergenic	-7449	NM_030711	80898	Mm.83526	NM_030711	ENSMUSG00000021583	Erap1	Arts1|ERAAP|PILSA|PILSAP	endoplasmic reticulum aminopeptidase 1	protein-coding
Diff_Nuc33911	chr2	71850572	71850711	+	0	NA	intron (NM_019688, intron 1 of 29)	GA-rich|Low_complexity|Low_complexity	31369	NM_019688	56508	Mm.196153	NM_019688	ENSMUSG00000049044	Rapgef4	1300003D15Rik|5730402K07Rik|6330581N18Rik|EPAC 2|Epac-2|Epac2|mKIAA4040	Rap guanine nucleotide exchange factor (GEF) 4	protein-coding
Diff_Nuc5819	chr11	77798552	77798691	+	0	NA	intron (NM_174852, intron 2 of 14)	intron (NM_174852, intron 2 of 14)	2303	NM_174852	268448	Mm.274329	NM_174852	ENSMUSG00000037791	Phf12	2410142K10Rik|F630045O13|PF1|mKIAA1523	PHD finger protein 12	protein-coding
Diff_Nuc33424	chr2	47956002	47956141	+	0	NA	Intergenic	Intergenic	-713558	NM_007396	11480	Mm.314338	NM_007396	ENSMUSG00000052155	Acvr2a	ActrIIa|Acvr2|TactrII	activin receptor IIA	protein-coding
Diff_Nuc37452	chr1	95311632	95311771	+	0	NA	intron (NM_133808, intron 20 of 27)	intron (NM_133808, intron 20 of 27)	30577	NM_001301364	110611	Mm.30012	NM_133808	ENSMUSG00000034088	Hdlbp	1110005P14Rik|AA960365|AI118566|D1Ertd101e	high density lipoprotein (HDL) binding protein	protein-coding
Diff_Nuc13512	chr15	53212242	53212381	+	0	NA	Intergenic	Intergenic	-34573	NM_010162	14042	Mm.309395	NM_010162	ENSMUSG00000061731	Ext1	AA409028	exostoses (multiple) 1	protein-coding
Diff_Nuc19711	chr7	47160702	47160841	+	0	NA	Intergenic	MTC|LTR|MaLR	387635	NM_001004139	70227	Mm.333800	NM_001004139	ENSMUSG00000068959	Zfp619	3000002G13Rik	zinc finger protein 619	protein-coding
Diff_Nuc18545	chr18	55038532	55038671	+	0	NA	Intergenic	Intergenic	111233	NM_175751	269023	Mm.192984	NM_175751	ENSMUSG00000052713	Zfp608	4932417D18Rik|D430007A19Rik|Znf608	zinc finger protein 608	protein-coding
Diff_Nuc2337	chr13	117051562	117051701	+	0	NA	Intergenic	Intergenic	48265	NM_021459	16392	Mm.42242	NM_021459	ENSMUSG00000042258	Isl1	-	ISL1 transcription factor, LIM/homeodomain	protein-coding
Diff_Nuc34447	chr2	103608512	103608651	+	0	NA	exon (NM_001111289, exon 17 of 18)	exon (NM_001111289, exon 17 of 18)	-7174	NM_153126	98956	Mm.288005	NM_153126	ENSMUSG00000027185	Nat10	AI429152	N-acetyltransferase 10	protein-coding
Diff_Nuc26282	chr5	115708272	115708411	+	0	NA	intron (NM_001302449, intron 2 of 16)	intron (NM_001302449, intron 2 of 16)	14563	NM_001302448	50849	Mm.30051	NM_016698	ENSMUSG00000041740	Rnf10	AA675014|RIE2|mKIAA0262	ring finger protein 10	protein-coding
Diff_Nuc35242	chr2	145432692	145432831	+	0	NA	intron (NM_053195, intron 12 of 16)	intron (NM_053195, intron 12 of 16)	-52043	NM_001037929	627302	Mm.445953	NM_001037929		Gm14092	OTTMUSG00000015643	predicted gene 14092	protein-coding
Diff_Nuc34214	chr2	90377512	90377651	+	0	NA	intron (NM_008982, intron 1 of 23)	intron (NM_008982, intron 1 of 23)	43223	NM_008982	19271	Mm.330393	NM_008982	ENSMUSG00000025314	Ptprj	AI450271|BET|Byp|CD148|DEP-1|PTPbeta2|Ptpb2|RPTPJ|Scc-1|Scc1	protein tyrosine phosphatase, receptor type, J	protein-coding
Diff_Nuc1952	chr13	100145822	100145961	+	0	NA	intron (NM_173757, intron 4 of 10)	intron (NM_173757, intron 4 of 10)	31150	NM_173757	218506	Mm.30208	NM_173757	ENSMUSG00000041632	Mrps27	2610028H14Rik	mitochondrial ribosomal protein S27	protein-coding
Diff_Nuc29472	chr4	139153562	139153701	+	0	NA	intron (NM_001205173, intron 1 of 8)	intron (NM_001205173, intron 1 of 8)	22996	NM_001205173	212632	Mm.30464	NM_183148	ENSMUSG00000041025	Iffo2	C79267	intermediate filament family orphan 2	protein-coding
Diff_Nuc24948	chr5	43680942	43681081	+	0	NA	TTS (NM_175937)	TTS (NM_175937)	-54418	NR_028417	665934	Mm.381491	NR_028417	ENSMUSG00000085720	Gm7854	EG665934|ENSMUSG00000054483	predicted gene 7854	ncRNA
Diff_Nuc12426	chr16	77374722	77374861	+	0	NA	intron (NR_015543, intron 2 of 4)	intron (NR_015543, intron 2 of 4)	45218	NR_015543	77994	Mm.394688	NR_015543	ENSMUSG00000090386	Mir99ahg	2810055G20Rik|D730043B02Rik	Mir99a and Mirlet7c-1 host gene (non-protein coding)	ncRNA
Diff_Nuc28601	chr4	102114482	102114621	+	0	NA	intron (NM_019840, intron 1 of 14)	intron (NM_019840, intron 1 of 14)	-128114	NM_001177980	18578	Mm.20181	NM_019840	ENSMUSG00000028525	Pde4b	Dpde4|R74983|dunce	phosphodiesterase 4B, cAMP specific	protein-coding
Diff_Nuc233	chr13	4262072	4262211	+	0	NA	Intergenic	Lx6|LINE|L1	14160	NR_028405	111002	Mm.482672	NR_028405		Marcksl1-ps4	Gm16264|Mlp-rs4|Mrp-rs4|OTTMUSG00000032901	MARCKS-like 1, pseudogene 4	pseudo
Diff_Nuc40079	chr9	56902692	56902831	+	0	NA	intron (NM_019651, intron 9 of 12)	PB1D9|SINE|Alu	17012	NR_045886	100038566	Mm.361900	NR_045886		Gm10658	ENSMUSG00000074284	predicted gene 10658	ncRNA
Diff_Nuc4613	chr11	19986442	19986581	+	0	NA	intron (NM_146243, intron 4 of 8)	B3|SINE|B2	26443	NM_146243	66713	Mm.259045	NM_146243	ENSMUSG00000020152	Actr2	4921510D23Rik|AA409782|Arp2|D6Ertd746e	ARP2 actin-related protein 2	protein-coding
Diff_Nuc1343	chr13	63096972	63097111	+	0	NA	intron (NM_001289924, intron 1 of 16)	intron (NM_001289924, intron 1 of 16)	30788	NM_001289924	72061	Mm.188105	NM_028079	ENSMUSG00000021458	2010111I01Rik	2300006M17Rik|AP-O|AW742919|Aopep|ApO|mir-23b|mir-24-1|mir-27b	RIKEN cDNA 2010111I01 gene	protein-coding
Diff_Nuc10640	chr17	63613862	63614001	+	0	NA	intron (NM_015794, intron 6 of 8)	intron (NM_015794, intron 6 of 8)	48391	NR_130176	414079	Mm.444282	NR_130176	ENSMUSG00000090565	4930405O22Rik	-	RIKEN cDNA 4930405O22 gene	ncRNA
Diff_Nuc43107	chr8	109826592	109826731	+	0	NA	intron (NM_018823, intron 2 of 14)	RSINE1|SINE|B4	9291	NM_133957	54446	Mm.390057	NM_018823	ENSMUSG00000003847	Nfat5	AI225870|B130038B15Rik|CAG-8|CAG80|NFATL1|OREBP|TonEBP|mKIAA0827|nfatz	nuclear factor of activated T cells 5	protein-coding
Diff_Nuc21461	chr7	151405752	151405891	+	0	NA	intron (NM_001113373, intron 4 of 15)	MTEa|LTR|MaLR	44396	NM_001113373	210274	Mm.483624	NM_001081370	ENSMUSG00000037541	Shank2	ProSAP1|mKIAA1022	SH3/ankyrin domain gene 2	protein-coding
Diff_Nuc20155	chr7	80544342	80544481	+	0	NA	intron (NM_177740, intron 2 of 3)	intron (NM_177740, intron 2 of 3)	-23751	NR_040324	319783	Mm.349813	NR_040324	ENSMUSG00000097756	A730056A06Rik	C76391	RIKEN cDNA A730056A06 gene	ncRNA
Diff_Nuc13678	chr15	60141802	60141941	+	0	NA	Intergenic	Intergenic	-293698	NM_027668	71088	Mm.425950	NM_027668	ENSMUSG00000071749	4933412E24Rik	-	RIKEN cDNA 4933412E24 gene	protein-coding
Diff_Nuc27669	chr4	45293292	45293431	+	0	NA	intron (NM_001081172, intron 15 of 15)	intron (NM_001081172, intron 15 of 15)	-16679	NM_027266	69934	Mm.46761	NM_027266	ENSMUSG00000035601	Trmt10b	2610042J10Rik|Rg9mtd3|Rnmtd3	tRNA methyltransferase 10B	protein-coding
Diff_Nuc5829	chr11	77965442	77965581	+	0	NA	intron (NM_001346762, intron 2 of 2)	intron (NM_001346762, intron 2 of 2)	13541	NM_009423	22032	Mm.390418	NM_009423	ENSMUSG00000017386	Traf4	A530032M13Rik|CART1|msp2	TNF receptor associated factor 4	protein-coding
Diff_Nuc16842	chr19	18646912	18647051	+	0	NA	Intergenic	Lx8|LINE|L1	59322	NM_017375	20409	Mm.172222	NM_017375	ENSMUSG00000024725	Ostf1	C78236|SH3P2|Sh3d3	osteoclast stimulating factor 1	protein-coding
Diff_Nuc2284	chr13	114731672	114731811	+	0	NA	intron (NM_172595, intron 3 of 4)	intron (NM_172595, intron 3 of 4)	147025	NM_172595	218639	Mm.79837	NM_172595	ENSMUSG00000042348	Arl15	A430036I03|Arfrp2|C230032K13Rik	ADP-ribosylation factor-like 15	protein-coding
Diff_Nuc14083	chr15	80834292	80834431	+	0	NA	intron (NM_134091, intron 4 of 21)	intron (NM_134091, intron 4 of 21)	26166	NM_134091	105835	Mm.274943	NM_134091	ENSMUSG00000042303	Sgsm3	1810012I01Rik|AI428557|BB175482|Cip85|R75178|RUSC3|Rutbc3	small G protein signaling modulator 3	protein-coding
Diff_Nuc21740	chr6	18079112	18079251	+	0	NA	Intergenic	Lx3C|LINE|L1	-20120	NM_023729	74068	Mm.73091	NM_023729	ENSMUSG00000010796	Asz1	4933400N19Rik|Gasz|ORF3	ankyrin repeat, SAM and basic leucine zipper domain containing 1	protein-coding
Diff_Nuc37525	chr1	99674882	99675021	+	0	NA	intron (NM_001310773, intron 3 of 7)	B1_Mus1|SINE|Alu	8202	NM_026250	252876	Mm.86090	NM_026250	ENSMUSG00000026333	Gin1	4930429M06Rik|8430411H10Rik|Gin-1|Zh2c2	gypsy retrotransposon integrase 1	protein-coding
Diff_Nuc27304	chr4	21616232	21616371	+	0	NA	Intergenic	CpG	-3191	NM_001080771	230025	Mm.208541	NM_001080771	ENSMUSG00000040478	Prdm13	-	PR domain containing 13	protein-coding
Diff_Nuc17273	chr19	40504012	40504151	+	0	NA	intron (NM_001034962, intron 1 of 22)	MIRb|SINE|MIR	21807	NM_001034962	20411	Mm.210815	NM_009166	ENSMUSG00000025006	Sorbs1	2310065E01Rik|9530001P15Rik|CAP|SH3P12|Sh3d5|mKIAA1296	sorbin and SH3 domain containing 1	protein-coding
Diff_Nuc40973	chr9	100996242	100996381	+	0	NA	intron (NM_001100451, intron 1 of 1)	B2_Mm2|SINE|B2	17825	NM_001100451	77853	Mm.326206	NM_001100451	ENSMUSG00000066415	Msl2	E130103E02Rik|Msl2l1|Rnf184	male-specific lethal 2 homolog (Drosophila)	protein-coding
Diff_Nuc26476	chr5	123619632	123619771	+	0	NA	Intergenic	Intergenic	12994	NM_008277	15445	Mm.439709	NM_008277	ENSMUSG00000029445	Hpd	Fla|Flp|Hppd|Laf	4-hydroxyphenylpyruvic acid dioxygenase	protein-coding
Diff_Nuc19619	chr7	36057822	36057961	+	0	NA	Intergenic	B3A|SINE|B2	45568	NM_026181	67471	Mm.358705	NM_026181	ENSMUSG00000063808	Gpatch1	1300003A17Rik|ECGP|Gpatc1	G patch domain containing 1	protein-coding
Diff_Nuc9557	chr17	5172972	5173111	+	0	NA	intron (NM_001085355, intron 4 of 19)	intron (NM_001085355, intron 4 of 19)	177967	NM_001085355	239985	Mm.133401	NM_001085355	ENSMUSG00000069729	Arid1b	8030481M12|9330189K18Rik|AI836955|Ardi1b|B230217J03Rik|mKIAA1235	AT rich interactive domain 1B (SWI-like)	protein-coding
Diff_Nuc9278	chr10	117173252	117173391	+	0	NA	intron (NM_029875, intron 4 of 4)	intron (NM_029875, intron 4 of 4)	10093	NM_029875	215436	Mm.256753	NM_029875	ENSMUSG00000060181	Slc35e3	9330166G04Rik|AI481200	solute carrier family 35, member E3	protein-coding
Diff_Nuc25164	chr5	57316642	57316781	+	0	NA	Intergenic	URR1B|DNA|MER1_type	792447	NR_015588	319216	Mm.332387	NR_015588	ENSMUSG00000097216	4932441J04Rik	-	RIKEN cDNA 4932441J04 gene	ncRNA
Diff_Nuc17462	chr19	47081292	47081431	+	0	NA	intron (NM_001164363, intron 1 of 17)	intron (NM_001164363, intron 1 of 17)	-7827	NM_146100	226180	Mm.276251	NM_146100	ENSMUSG00000034336	Ina	AV028420|NF-66|NF66	internexin neuronal intermediate filament protein, alpha	protein-coding
Diff_Nuc12677	chr16	94720042	94720181	+	0	NA	3' UTR (NM_007834, exon 8 of 8)	3' UTR (NM_007834, exon 8 of 8)	28125	NM_007834	13185	Mm.7472	NM_007834	ENSMUSG00000022898	Dscr3	AW538125|Dcra	Down syndrome critical region gene 3	protein-coding
Diff_Nuc33622	chr2	59449652	59449791	+	0	NA	promoter-TSS (NM_198294)	promoter-TSS (NM_198294)	-378	NM_198294	66860	Mm.27917	NM_198294	ENSMUSG00000035168	Tanc1	1200003E16Rik|Tanc|mKIAA1728	tetratricopeptide repeat, ankyrin repeat and coiled-coil containing 1	protein-coding
Diff_Nuc8399	chr10	75196412	75196551	+	0	NA	exon (NM_172549, exon 18 of 37)	exon (NM_172549, exon 18 of 37)	30621	NM_172549	104248	Mm.257404	NM_172549	ENSMUSG00000020196	Cabin1	A330070M20Rik|Cain|Ppp3in	calcineurin binding protein 1	protein-coding
Diff_Nuc31986	chr3	127381782	127381921	+	0	NA	intron (NM_027808, intron 10 of 13)	intron (NM_027808, intron 10 of 13)	45788	NM_009718	11924	Mm.42017	NM_009718	ENSMUSG00000027967	Neurog2	Atoh4|Math4A|bHLHa8|ngn-2|ngn2	neurogenin 2	protein-coding
Diff_Nuc29768	chr4	151381692	151381831	+	0	NA	Intergenic	Intergenic	-1239	NM_001033352	242785	Mm.22306	NM_001033352	ENSMUSG00000073700	Klhl21	1810045K06Rik|D330008A20|mKIAA0469	kelch-like 21	protein-coding
Diff_Nuc33418	chr2	47310022	47310161	+	0	NA	Intergenic	L1Md_F2|LINE|L1	-1359538	NM_007396	11480	Mm.314338	NM_007396	ENSMUSG00000052155	Acvr2a	ActrIIa|Acvr2|TactrII	activin receptor IIA	protein-coding
Diff_Nuc11592	chr16	23406232	23406371	+	0	NA	Intergenic	Lx7|LINE|L1	-22905	NM_001004151	239766	Mm.208751	NM_001004151	ENSMUSG00000033383	Rtp1	Gm1766|Gm604	receptor transporter protein 1	protein-coding
Diff_Nuc26422	chr5	122211402	122211541	+	0	NA	intron (NM_009125, intron 5 of 24)	RSINE1|SINE|B4	49853	NM_009125	20239	Mm.260900	NM_009125	ENSMUSG00000042605	Atxn2	9630045M23Rik|ATX2|AW544490|Sca2	ataxin 2	protein-coding
Diff_Nuc16593	chr19	6234752	6234891	+	0	NA	exon (NM_198168, exon 2 of 14)	exon (NM_198168, exon 2 of 14)	1019	NM_198168	225849	Mm.118076	NM_198168	ENSMUSG00000024777	Ppp2r5b	B'beta|BC026670	protein phosphatase 2, regulatory subunit B', beta	protein-coding
Diff_Nuc16144	chr14	101901852	101901991	+	0	NA	intron (NM_001081278, intron 3 of 18)	MTD|LTR|MaLR	106487	NM_001081278	210789	Mm.320639	NM_173380	ENSMUSG00000033083	Tbc1d4	5930406J04Rik|A930035N22|AV295684|As160	TBC1 domain family, member 4	protein-coding
Diff_Nuc1512	chr13	74451002	74451141	+	0	NA	intron (NM_011051, intron 2 of 5)	intron (NM_011051, intron 2 of 5)	3703	NM_011051	18570	Mm.24254	NM_011051	ENSMUSG00000021576	Pdcd6	AV299538|Alg2|MA-3|PS2|alg-2	programmed cell death 6	protein-coding
Diff_Nuc3113	chr12	54607522	54607661	+	0	NA	intron (NM_013780, intron 3 of 11)	intron (NM_013780, intron 3 of 11)	257927	NM_013780	27386	Mm.247044	NM_013780	ENSMUSG00000021010	Npas3	4930423H22Rik|bHLHe12	neuronal PAS domain protein 3	protein-coding
Diff_Nuc42086	chr8	47180472	47180611	+	0	NA	intron (NM_207213, intron 4 of 17)	B4A|SINE|B4	28959	NM_207213	102141	Mm.267258	NM_207213	ENSMUSG00000038291	Snx25	AI661919|Gm1699|Gm173|Sbbi31	sorting nexin 25	protein-coding
Diff_Nuc35986	chr1	6473442	6473581	+	0	NA	Intergenic	Intergenic	-3801	NM_001244693	240690	Mm.234612	NM_173868	ENSMUSG00000033740	St18	AV348974|Myt3|NZF-3|Nzf3|mKIAA0535	suppression of tumorigenicity 18	protein-coding
Diff_Nuc25652	chr5	89029932	89030071	+	0	NA	intron (NM_001289777, intron 3 of 14)	L1M4|LINE|L1	17463	NM_027530	52822	Mm.270469	NM_027530	ENSMUSG00000029291	Rufy3	2810428M05Rik|6330416M07Rik|AW455998|AW538594|D5Bwg0860e|Ripx|Rpipx	RUN and FYVE domain containing 3	protein-coding
Diff_Nuc23379	chr6	108483112	108483251	+	0	NA	intron (NM_010585, intron 60 of 61)	intron (NM_010585, intron 60 of 61)	43444	NR_106121	102465766		NR_106121	ENSMUSG00000105697	Mir7661	mmu-mir-7661	microRNA 7661	ncRNA
Diff_Nuc24040	chr6	140366912	140367051	+	0	NA	Intergenic	B1_Mur1|SINE|Alu	-5639	NM_144920	109135	Mm.247670	NM_144920	ENSMUSG00000030231	Plekha5	2810431N21Rik|AI428202|AK129423|AMH-Cre|Ayu21-9|Gt(pU21)9Imeg|Pepp2|Tg(AMH-cre)1Flor	pleckstrin homology domain containing, family A member 5	protein-coding
Diff_Nuc39967	chr9	50922842	50922981	+	0	NA	Intergenic	Intergenic	-1195	NM_019493	56057	Mm.431317	NM_019493	ENSMUSG00000032056	Btg4	C86116|PC3B	B cell translocation gene 4	protein-coding
Diff_Nuc23598	chr6	119422492	119422631	+	0	NA	intron (NM_009525, intron 1 of 4)	ERVL-int|LTR|ERVL	-5332	NM_001271758	22419	Mm.321818	NM_009525	ENSMUSG00000030170	Wnt5b	AW545702|Wnt-5b	wingless-type MMTV integration site family, member 5B	protein-coding
Diff_Nuc35207	chr2	143246882	143247021	+	0	NA	Intergenic	Intergenic	-124918	NM_008792	18549	Mm.294493	NM_008792	ENSMUSG00000027419	Pcsk2	6330411F23Rik|AI839700|Nec-2|Nec2|PC2|Phpp-2|SPC2	proprotein convertase subtilisin/kexin type 2	protein-coding
Diff_Nuc34433	chr2	103286172	103286311	+	0	NA	intron (NM_010125, intron 4 of 6)	L2a|LINE|L2	22016	NM_010125	13711	Mm.20888	NM_010125	ENSMUSG00000027186	Elf5	ESE-2|ESE-5|ESE-5.	E74-like factor 5	protein-coding
Diff_Nuc22622	chr6	63066672	63066811	+	0	NA	Intergenic	Lx2B|LINE|L1	-140110	NM_008167	14804	Mm.439651	NM_008167	ENSMUSG00000071424	Grid2	B230104L07Rik|GluD2|GluRdelta2|Lc|Lc<J>|MMS10-AC|Ms10ac|cpr|ho|nmf408|tpr	glutamate receptor, ionotropic, delta 2	protein-coding
Diff_Nuc19979	chr7	71069542	71069681	+	0	NA	intron (NM_021366, intron 1 of 1)	intron (NM_021366, intron 1 of 1)	7868	NM_001256311	381994	Mm.425466	NM_001256311	ENSMUSG00000095061	E030018B13Rik	Gm1697	RIKEN cDNA E030018B13 gene	protein-coding
Diff_Nuc20460	chr7	99579072	99579211	+	0	NA	intron (NM_001243046, intron 11 of 14)	intron (NM_001243046, intron 11 of 14)	-130518	NM_025515	66365	Mm.21173	NM_025515	ENSMUSG00000030613	Ccdc90b	2310015N07Rik|C86558	coiled-coil domain containing 90B	protein-coding
Diff_Nuc4245	chr12	114226372	114226511	+	0	NA	intron (NM_028193, intron 2 of 17)	B1F|SINE|Alu	11667	NM_201646	399566	Mm.440140	NM_201646	ENSMUSG00000002803	Btbd6	-	BTB (POZ) domain containing 6	protein-coding
Diff_Nuc8664	chr10	84832972	84833111	+	0	NA	Intergenic	Intergenic	-16518	NM_028709	74007	Mm.36544	NM_028709	ENSMUSG00000020042	Btbd11	6330404E16Rik	BTB (POZ) domain containing 11	protein-coding
Diff_Nuc16060	chr14	94108512	94108651	+	0	NA	intron (NM_001346722, intron 2 of 4)	intron (NM_001346722, intron 2 of 4)	179526	NM_001271800	211712	Mm.37126	NM_001081377	ENSMUSG00000055421	Pcdh9	-	protocadherin 9	protein-coding
[truncated: 4,075 more rows]
