# Supplementary material for: Remodeling of epigenome and transcriptome landscapes with aging in mice reveals widespread induction of inflammatory responses
Source: HighWire-hosted journal article supplement (doi:10.1101/gr.240093.118), 2019-03-11
Supplement: Supplemental_Code_Figure3_Machine_learning.zip [file HOMER_dposREF_Liver_DiNUP_DANPOS_LOST.xls]

PeakID (cmd=annotatePeaks.pl dposREF_Liver_DiNUP_DANPOS_LOST.bed mm9)	Chr	Start	End	Strand	Peak Score	Focus Ratio/Region Size	Annotation	Detailed Annotation	Distance to TSS	Nearest PromoterID	Entrez ID	Nearest Unigene	Nearest Refseq	Nearest Ensembl	Gene Name	Gene Alias	Gene Description	Gene Type
Diff_Nuc31852	chr7	147232772	147232911	+	0	NA	3' UTR (NM_010836, exon 2 of 2)	3' UTR (NM_010836, exon 2 of 2)	2146	NM_010836	17703	Mm.4816	NM_010836	ENSMUSG00000025469	Msx3	AI323377	msh homeobox 3	protein-coding
Diff_Nuc42106	chr4	80925442	80925581	+	0	NA	3' UTR (NM_001305284, exon 48 of 48)	3' UTR (NM_001305284, exon 48 of 48)	163208	NM_010820	17475	Mm.153039	NM_010820	ENSMUSG00000028402	Mpdz	AI225843|B930003D11Rik|MUPP1	multiple PDZ domain protein	protein-coding
Diff_Nuc8438	chr11	72026442	72026581	+	0	NA	intron (NM_026068, intron 3 of 3)	B1_Mur1|SINE|Alu	-2129	NM_001163728	75304	Mm.340776	NM_001163728		4930563E22Rik	-	RIKEN cDNA 4930563E22 gene	protein-coding
Diff_Nuc50178	chr2	52697532	52697671	+	0	NA	Intergenic	Intergenic	-19301	NM_172409	71409	Mm.394427	NM_172409	ENSMUSG00000036053	Fmnl2	5430425K04Rik|Man	formin-like 2	protein-coding
Diff_Nuc48527	chr3	150424562	150424701	+	0	NA	Intergenic	Intergenic	262195	NR_039540	100628568		NR_039540	ENSMUSG00000092830	Mir3963	mmu-mir-3963|mu-mir-3963	microRNA 3963	ncRNA
Diff_Nuc32883	chr6	35318312	35318451	+	0	NA	Intergenic	L1_Mur2|LINE|L1	37535	NR_040526	73409	Mm.69443	NR_040526	ENSMUSG00000107341	1700065J11Rik	-	RIKEN cDNA 1700065J11 gene	ncRNA
Diff_Nuc982	chr13	17934507	17934646	+	0	NA	Intergenic	RLTR41|LTR|ERV1	-37645	NM_027118	69562	Mm.193924	NM_027118	ENSMUSG00000041297	Cdk13	2310015O17Rik|Cdc2l5	cyclin-dependent kinase 13	protein-coding
Diff_Nuc54498	chr1	27279922	27280061	+	0	NA	Intergenic	Lx8|LINE|L1	-535686	NM_001033764	210940	Mm.297614	NM_001033764	ENSMUSG00000073722	4931408C20Rik	-	RIKEN cDNA 4931408C20 gene	protein-coding
Diff_Nuc37230	chr5	49558282	49558421	+	0	NA	intron (NM_001199244, intron 1 of 7)	intron (NM_001199244, intron 1 of 7)	118547	NM_001199244	80334	Mm.160172	NM_030265	ENSMUSG00000029088	Kcnip4	AV032399|Calp|Calp250|KChIP4|KChIP4a	Kv channel interacting protein 4	protein-coding
Diff_Nuc53564	chr2	166266152	166266291	+	0	NA	Intergenic	Intergenic	-6730	NR_015558	319684	Mm.399746	NR_015558		5031425F14Rik	-	RIKEN cDNA 5031425F14 gene	ncRNA
Diff_Nuc37081	chr5	43962102	43962241	+	0	NA	intron (NM_001135172, intron 1 of 2)	intron (NM_001135172, intron 1 of 2)	-30990	NM_175425	109323	Mm.275553	NM_175425	ENSMUSG00000061535	C1qtnf7	5530401N20Rik|8430425G24Rik|Ctrp7	C1q and tumor necrosis factor related protein 7	protein-coding
Diff_Nuc35754	chr6	140569572	140569711	+	0	NA	Intergenic	LTR88b|LTR|Gypsy?	-1543	NM_178803	11569	Mm.86453	NM_009637	ENSMUSG00000030232	Aebp2	AU023766|B230313N05Rik	AE binding protein 2	protein-coding
Diff_Nuc20821	chr15	81474612	81474751	+	0	NA	intron (NM_177821, intron 28 of 30)	B1_Mus1|SINE|Alu	-19638	NM_001289712	214669	Mm.280768	NM_145993	ENSMUSG00000022394	L3mbtl2	4732493N06Rik|M4mbt	l(3)mbt-like 2 (Drosophila)	protein-coding
Diff_Nuc53838	chr2	179600592	179600731	+	0	NA	intron (NM_009867, intron 7 of 15)	ORR1A2|LTR|MaLR	110690	NM_001081092	228980	Mm.235542	NM_001081092	ENSMUSG00000039117	Taf4	135kDa|AI450312|TAFII130|TAFII135|Taf2c1|Taf4a	TATA-box binding protein associated factor 4	protein-coding
Diff_Nuc28243	chr18	77924982	77925121	+	0	NA	intron (NM_178670, intron 1 of 4)	intron (NM_178670, intron 1 of 4)	27698	NM_178670	212163	Mm.23293	NM_178670	ENSMUSG00000047466	8030462N17Rik	Akd2|Ark2N	RIKEN cDNA 8030462N17 gene	protein-coding
Diff_Nuc8325	chr11	68632772	68632911	+	0	NA	Intergenic	Intergenic	33792	NM_023668	83431	Mm.31979	NM_023668	ENSMUSG00000018736	Ndel1	2600006O07Rik|MITAP1|NUDEL|mNudel	nudE neurodevelopment protein 1 like 1	protein-coding
Diff_Nuc3515	chr13	113598922	113599061	+	0	NA	intron (NM_008903, intron 1 of 5)	intron (NM_008903, intron 1 of 5)	8006	NM_008247	19012	Mm.291029	NM_008247	ENSMUSG00000021759	Plpp1	Hic53|Hpic53|LPP-1|LPP1|PAP-2a|PAP2-alpha|PAP2a|Ppap2a|mPAP	phospholipid phosphatase 1	protein-coding
Diff_Nuc1514	chr13	36528052	36528191	+	0	NA	intron (NM_024274, intron 6 of 6)	intron (NM_024274, intron 6 of 6)	298225	NM_153529	68404	Mm.232930	NM_153529	ENSMUSG00000039114	Nrn1	0710008J23Rik|Cpg15|Nrn	neuritin 1	protein-coding
Diff_Nuc37925	chr5	76882962	76883101	+	0	NA	Intergenic	Intergenic	-30071	NR_033501	639545	Mm.478255	NR_033501	ENSMUSG00000091204	Gm7271	EG639545	predicted gene 7271	pseudo
Diff_Nuc14678	chr17	35138382	35138521	+	0	NA	promoter-TSS (NM_033075)	promoter-TSS (NM_033075)	599	NM_011690	22321	Mm.28420	NM_011690	ENSMUSG00000007029	Vars	Bat6|D17H6S56E|G7a|Vars2	valyl-tRNA synthetase	protein-coding
Diff_Nuc9816	chr11	109912872	109913011	+	0	NA	intron (NM_153145, intron 25 of 38)	intron (NM_153145, intron 25 of 38)	44310	NM_153145	217258	Mm.344148	NM_153145	ENSMUSG00000041828	Abca8a	-	ATP-binding cassette, sub-family A (ABC1), member 8a	protein-coding
Diff_Nuc1686	chr13	41861042	41861181	+	0	NA	intron (NM_175417, intron 6 of 6)	L1_Mus4|LINE|L1	81746	NM_175417	109254	Mm.25195	NM_175417	ENSMUSG00000058022	Adtrp	9530008L14Rik	androgen dependent TFPI regulating protein	protein-coding
Diff_Nuc15327	chr17	60517222	60517361	+	0	NA	Intergenic	Intergenic	-1364546	NM_026497	67993	Mm.36507	NM_026497	ENSMUSG00000024228	Nudt12	0610016O18Rik	nudix (nucleoside diphosphate linked moiety X)-type motif 12	protein-coding
Diff_Nuc64788	chr8	90686002	90686141	+	0	NA	intron (NM_172757, intron 12 of 14)	intron (NM_172757, intron 12 of 14)	23966	NR_106039	102465649		NR_106039	ENSMUSG00000099080	Mir7071	Gm27623|mmu-mir-7071	microRNA 7071	ncRNA
Diff_Nuc56325	chr1	93310842	93310981	+	0	NA	Intergenic	CpG	-1112	NM_019479	55927	Mm.280029	NM_019479	ENSMUSG00000067071	Hes6	AI326893|bHLHb41	hairy and enhancer of split 6	protein-coding
Diff_Nuc54472	chr1	25332862	25333001	+	0	NA	TTS (NM_001204913)	TTS (NM_001204913)	1868	NM_001204913	100504323	Mm.484176	NM_001204913		Gm20172	-	predicted gene, 20172	protein-coding
Diff_Nuc46092	chr3	68921842	68921981	+	0	NA	intron (NM_008467, intron 1 of 16)	intron (NM_008467, intron 1 of 16)	9103	NM_008467	16649	Mm.30601	NM_008467	ENSMUSG00000027782	Kpna4	1110058D08Rik|IPOA3	karyopherin (importin) alpha 4	protein-coding
Diff_Nuc49202	chr2	20655312	20655451	+	0	NA	intron (NM_001177631, intron 5 of 19)	intron (NM_001177631, intron 5 of 19)	214241	NM_001177631	208618	Mm.237935	NM_029895	ENSMUSG00000036617	Etl4	6620402G01Rik|9430077C05Rik|BC026657|E330027G05Rik|Etl-4|Skt	enhancer trap locus 4	protein-coding
Diff_Nuc34725	chr6	102468102	102468241	+	0	NA	Intergenic	Intergenic	-53510	NM_008779	18488	Mm.435479	NM_008779	ENSMUSG00000030075	Cntn3	Pang	contactin 3	protein-coding
Diff_Nuc34370	chr6	91170882	91171021	+	0	NA	intron (NM_007992, intron 1 of 17)	intron (NM_007992, intron 1 of 17)	8193	NM_007992	14115	Mm.249146	NM_007992	ENSMUSG00000064080	Fbln2	5730577E14Rik|FIBL-2	fibulin 2	protein-coding
Diff_Nuc30127	chr7	84733202	84733341	+	0	NA	Intergenic	Intergenic	989453	NM_008746	18213	Mm.33496	NM_008746	ENSMUSG00000059146	Ntrk3	AW125844|Ntrk3_tv3|TrkC	neurotrophic tyrosine kinase, receptor, type 3	protein-coding
Diff_Nuc44802	chr3	20136182	20136321	+	0	NA	intron (NM_007753, intron 3 of 10)	RLTR18|LTR|ERVK	5829	NM_007753	12873	Mm.1135	NM_007753	ENSMUSG00000001865	Cpa3	MC-CPA	carboxypeptidase A3, mast cell	protein-coding
Diff_Nuc22633	chr14	52521702	52521841	+	0	NA	Intergenic	Intergenic	8486	NM_001039676	214922	Mm.281343	NM_001039676	ENSMUSG00000072572	Slc39a2	F730005G13Rik|Gm1789|Gm289|Zip2	solute carrier family 39 (zinc transporter), member 2	protein-coding
Diff_Nuc59830	chr9	25120252	25120391	+	0	NA	Intergenic	Intergenic	60281	NM_001205367	235072	Mm.270259	NM_009859	ENSMUSG00000001833	Sept7	Cdc10|E430034N22	septin 7	protein-coding
Diff_Nuc28677	chr7	14806142	14806281	+	0	NA	Intergenic	L1Md_F3|LINE|L1	34008	NM_001081325	629219	Mm.439627	NM_001081325	ENSMUSG00000070810	Sult2a6	EG629219|Gm6957	sulfotransferase family 2A, dehydroepiandrosterone (DHEA)-preferring, member 6	protein-coding
Diff_Nuc47043	chr3	100057852	100057991	+	0	NA	Intergenic	Intergenic	91535	NR_104341	14547	Mm.279228	NM_010269	ENSMUSG00000027865	Gdap2	C77050|D3Ertd801e	ganglioside-induced differentiation-associated-protein 2	protein-coding
Diff_Nuc26879	chr18	29430372	29430511	+	0	NA	Intergenic	Intergenic	-171413	NR_045395	78199	Mm.243850	NR_045395		4930527G23Rik	-	RIKEN cDNA 4930527G23 gene	ncRNA
Diff_Nuc25249	chr19	29345842	29345981	+	0	NA	exon (NM_001048177, exon 3 of 24)	exon (NM_001048177, exon 3 of 24)	19618	NM_008413	16452	Mm.275839	NM_008413	ENSMUSG00000024789	Jak2	Fd17	Janus kinase 2	protein-coding
Diff_Nuc49127	chr2	17923412	17923551	+	0	NA	Intergenic	B4A|SINE|B4	-4896	NM_026627	68231	Mm.23887	NM_026627	ENSMUSG00000062651	H2afb1	1700113O17Rik|H2A.Bbd|H2al2|TSEG-1|Tseg1	H2A histone family, member B1	protein-coding
Diff_Nuc50415	chr2	61870232	61870371	+	0	NA	Intergenic	B1_Mur3|SINE|Alu	-14271	NM_001242382	94229	Mm.314497	NM_033552	ENSMUSG00000026904	Slc4a10	NCBE|mKIAA4136	solute carrier family 4, sodium bicarbonate cotransporter-like, member 10	protein-coding
Diff_Nuc64852	chr8	93455452	93455591	+	0	NA	promoter-TSS (NM_001310530)	promoter-TSS (NM_001310530)	-627	NM_001310530	109151	Mm.100615	NM_177224	ENSMUSG00000056608	Chd9	1810014J18Rik|9030205D12Rik|A330063D19Rik|AD013|PRIC320|mKIAA0308	chromodomain helicase DNA binding protein 9	protein-coding
Diff_Nuc53684	chr2	169981052	169981191	+	0	NA	Intergenic	Intergenic	-12946	NM_001159683	228913	Mm.22858	NM_001033299	ENSMUSG00000052056	Zfp217	4933431C08Rik|AW987152|Gm562|ZABC1|Znf217	zinc finger protein 217	protein-coding
Diff_Nuc45477	chr3	46527602	46527741	+	0	NA	Intergenic	Intergenic	177033	NR_105800	102465199		NR_105800	ENSMUSG00000098417	Mir6379	Gm27730|mmu-mir-6379	microRNA 6379	ncRNA
Diff_Nuc39325	chr5	124991712	124991851	+	0	NA	intron (NM_019770, intron 1 of 3)	intron (NM_019770, intron 1 of 3)	981	NM_019770	56334	Mm.325307	NM_019770	ENSMUSG00000029390	Tmed2	1110032D12Rik|1810020N21Rik|Rnp24|Sid394|p24beta1	transmembrane p24 trafficking protein 2	protein-coding
Diff_Nuc27432	chr18	47778752	47778891	+	0	NA	intron (NR_033454, intron 1 of 5)	ID_B1|SINE|B4	81432	NR_033454	328953	Mm.246768	NR_033454		Gm5095	A730092B10	predicted gene 5095	ncRNA
Diff_Nuc11321	chr10	42178662	42178801	+	0	NA	intron (NM_145743, intron 1 of 12)	MIR|SINE|MIR	19640	NM_145743	215951	Mm.89646	NM_145743	ENSMUSG00000038302	Lace1	CG8520	lactation elevated 1	protein-coding
Diff_Nuc49485	chr2	29610052	29610191	+	0	NA	Intergenic	B2_Mm2|SINE|B2	-6927	NM_001177392	433416	Mm.330112	NM_001034887	ENSMUSG00000075425	Gm13547	OTTMUSG00000012686	predicted gene 13547	protein-coding
Diff_Nuc37740	chr5	70310772	70310911	+	0	NA	Intergenic	Intergenic	-327298	NM_001347363	67980	Mm.33830	NM_027681	ENSMUSG00000029209	Gnpda2	4921523I18Rik|4933412A11Rik|BB189630|GNPDA|Gnp2|Sb52|mKIAA4008	glucosamine-6-phosphate deaminase 2	protein-coding
Diff_Nuc13319	chr10	114892792	114892931	+	0	NA	intron (NM_010195, intron 16 of 17)	intron (NM_010195, intron 16 of 17)	70846	NM_001033261	216345	Mm.207621	NM_001033261	ENSMUSG00000034163	Zfc3h1	BC033596|Ccdc131|Psrc2	zinc finger, C3H1-type containing	protein-coding
Diff_Nuc21321	chr15	99182232	99182371	+	0	NA	intron (NM_011711, intron 1 of 26)	intron (NM_011711, intron 1 of 26)	18612	NM_001310623	22379	Mm.29043	NM_011711	ENSMUSG00000023008	Fmnl3	2700073B04Rik|FBP11|Wbp3|mKIAA2014	formin-like 3	protein-coding
Diff_Nuc47695	chr3	121425422	121425561	+	0	NA	promoter-TSS (NM_010171)	promoter-TSS (NM_010171)	-964	NM_010171	14066	Mm.273188	NM_010171	ENSMUSG00000028128	F3	AA409063|CD142|Cf-3|Cf3|TF	coagulation factor III	protein-coding
Diff_Nuc43319	chr4	120724752	120724891	+	0	NA	intron (NM_007741, intron 22 of 31)	intron (NM_007741, intron 22 of 31)	12650	NM_007741	12840	Mm.269384	NM_007741	ENSMUSG00000028626	Col9a2	AI427499|Col9a-2	collagen, type IX, alpha 2	protein-coding
Diff_Nuc33075	chr6	41697192	41697331	+	0	NA	Intergenic	L1_Mus1|LINE|L1	25035	NM_146576	258569	Mm.377571	NM_146576	ENSMUSG00000045479	Olfr459	MOR120-1	olfactory receptor 459	protein-coding
Diff_Nuc20664	chr15	76600872	76601011	+	0	NA	intron (NM_198420, intron 1 of 10)	Lx7|LINE|L1	-46666	NM_176828	223665	Mm.291713	NM_145472	ENSMUSG00000033707	C030006K11Rik	1110033I13Rik	RIKEN cDNA C030006K11 gene	protein-coding
Diff_Nuc38088	chr5	85649682	85649821	+	0	NA	Intergenic	Intergenic	-803344	NM_007937	13839	Mm.137991	NM_007937	ENSMUSG00000029245	Epha5	AI854630|AW125296|Cek7|Ehk1|Els1|Hek7|Rek7|bsk	Eph receptor A5	protein-coding
Diff_Nuc59340	chr9	5390552	5390691	+	0	NA	Intergenic	L1_Mus3|LINE|L1	45145	NM_009808	12364	Mm.42163	NM_009808	ENSMUSG00000025887	Casp12	-	caspase 12	protein-coding
Diff_Nuc31179	chr7	121635412	121635551	+	0	NA	intron (NM_011055, intron 2 of 15)	L1ME3A|LINE|L1	71005	NR_110407	244209	Mm.108037	NM_177382	ENSMUSG00000030670	Cyp2r1	-	cytochrome P450, family 2, subfamily r, polypeptide 1	protein-coding
Diff_Nuc2869	chr13	90915212	90915351	+	0	NA	Intergenic	Lx8|LINE|L1	129679	NM_001145879	435376	Mm.292579	NM_001145879	ENSMUSG00000078958	Atp6ap1l	EG435376	ATPase, H+ transporting, lysosomal accessory protein 1-like	protein-coding
Diff_Nuc60963	chr9	67170782	67170921	+	0	NA	exon (NM_001081242, exon 28 of 58)	exon (NM_001081242, exon 28 of 58)	-86318	NR_029576	387185		NR_029576	ENSMUSG00000076379	Mir190a	Mir190|Mirn190|mir-190|mir-190a|mmu-mir-190|mmu-mir-190a	microRNA 190a	ncRNA
Diff_Nuc14224	chr17	22175842	22175981	+	0	NA	Intergenic	Intergenic	76385	NM_001025373	74670	Mm.26540	NM_001025373	ENSMUSG00000053347	Zfp943	4930432O21Rik	zinc finger prtoein 943	protein-coding
Diff_Nuc44470	chr3	6486702	6486841	+	0	NA	Intergenic	L1_Mm|LINE|L1	133672	NM_027048	69347	Mm.45822	NM_027048	ENSMUSG00000069118	1700008P02Rik	-	RIKEN cDNA 1700008P02 gene	protein-coding
Diff_Nuc26446	chr18	10016932	10017071	+	0	NA	intron (NM_001038589, intron 3 of 14)	PB1D10|SINE|Alu	13146	NM_021522	59025	Mm.329277	NM_021522	ENSMUSG00000047879	Usp14	2610005K12Rik|2610037B11Rik|AW107924|C78769|ax|nmf375	ubiquitin specific peptidase 14	protein-coding
Diff_Nuc28518	chr7	3287032	3287171	+	0	NA	Intergenic	Intergenic	-1938	NM_001093764	50918	Mm.29874	NM_016969	ENSMUSG00000068566	Myadm	D7Wsu62e	myeloid-associated differentiation marker	protein-coding
Diff_Nuc26718	chr18	21294322	21294461	+	0	NA	intron (NM_001033445, intron 4 of 5)	intron (NM_001033445, intron 4 of 5)	63546	NM_008586	17288	Mm.2682	NM_008586	ENSMUSG00000024313	Mep1b	Mep-1b	meprin 1 beta	protein-coding
Diff_Nuc38092	chr5	86035102	86035241	+	0	NA	Intergenic	ORR1A0|LTR|MaLR	459437	NM_001345902	12617	Mm.4649	NM_007683	ENSMUSG00000029253	Cenpc1	CENP-C|Cenpc	centromere protein C1	protein-coding
Diff_Nuc61831	chr9	99044502	99044641	+	0	NA	Intergenic	B1_Mus1|SINE|Alu	-3941	NM_029094	74769	Mm.213128	NM_029094	ENSMUSG00000032462	Pik3cb	1110001J02Rik|AI447572|p110beta	phosphatidylinositol 3-kinase, catalytic, beta polypeptide	protein-coding
Diff_Nuc47158	chr3	103720142	103720281	+	0	NA	intron (NM_172684, intron 1 of 6)	intron (NM_172684, intron 1 of 6)	2168	NM_172684	229675	Mm.29366	NM_172684	ENSMUSG00000044098	Rsbn1	C230004D03Rik|E330004N01|Rosbin|Rsbn|Rsbp|mKIAA3002	rosbin, round spermatid basic protein 1	protein-coding
Diff_Nuc10816	chr10	23541552	23541691	+	0	NA	intron (NM_183116, intron 9 of 13)	RSINE1|SINE|B4	24829	NM_183116	76306	Mm.294271	NM_183116	ENSMUSG00000037455	Slc18b1	1110021L09Rik	solute carrier family 18, subfamily B, member 1	protein-coding
Diff_Nuc35254	chr6	121091592	121091731	+	0	NA	Intergenic	Intergenic	-10621	NM_001270475	194401	Mm.122399	NM_153396	ENSMUSG00000051586	Mical3	C130040D16Rik|Mical-3|mKIAA1364	microtubule associated monooxygenase, calponin and LIM domain containing 3	protein-coding
Diff_Nuc34043	chr6	80111222	80111361	+	0	NA	intron (NM_001347261, intron 2 of 2)	Lx8|LINE|L1	141654	NM_178731	243499	Mm.483425	NM_178731	ENSMUSG00000052581	Lrrtm4	7530419J18Rik|A230052N11	leucine rich repeat transmembrane neuronal 4	protein-coding
Diff_Nuc32348	chr6	17231212	17231351	+	0	NA	promoter-TSS (NM_001277756)	promoter-TSS (NM_001277756)	96	NM_016900	12390	Mm.396075	NM_016900	ENSMUSG00000000058	Cav2	AI447843	caveolin 2	protein-coding
Diff_Nuc7982	chr11	56647442	56647581	+	0	NA	Intergenic	L2c|LINE|L2	-177609	NM_001113325	14799	Mm.4920	NM_008165	ENSMUSG00000020524	Gria1	2900051M01Rik|Glr-1|Glr1|GluA1|GluR-A|GluRA|Glur-1|Glur1|HIPA1|gluR-K1	glutamate receptor, ionotropic, AMPA1 (alpha 1)	protein-coding
Diff_Nuc43548	chr4	129534562	129534701	+	0	NA	Intergenic	B3|SINE|B2	36679	NM_001164745	19244	Mm.193688	NM_008974	ENSMUSG00000028788	Ptp4a2	Prl-2	protein tyrosine phosphatase 4a2	protein-coding
Diff_Nuc36114	chr5	3750512	3750651	+	0	NA	intron (NM_001289527, intron 4 of 19)	MTA_Mm|LTR|MaLR	22206	NM_001289529	70797	Mm.130148	NM_001003909	ENSMUSG00000040351	Ankib1	2310061P20Rik|4631416I11Rik|AW494740|C80642|mKIAA1386	ankyrin repeat and IBR domain containing 1	protein-coding
Diff_Nuc49189	chr2	19648232	19648371	+	0	NA	Intergenic	MER34A|LTR|ERV1	68612	NM_027715	71198	Mm.83981	NM_027715	ENSMUSG00000043415	Otud1	4933428L19Rik	OTU domain containing 1	protein-coding
Diff_Nuc34148	chr6	84894952	84895091	+	0	NA	intron (NM_177077, intron 6 of 21)	L1MD1|LINE|L1	124486	NM_177077	75914	Mm.159621	NM_177077	ENSMUSG00000033769	Exoc6b	4930569O18Rik|G430127E12Rik|Sec15b|Sec15l2|mKIAA0919	exocyst complex component 6B	protein-coding
Diff_Nuc37378	chr5	54519822	54519961	+	0	NA	Intergenic	L1MA8|LINE|L1	130129	NM_001081103	116873	Mm.265985	NM_054083	ENSMUSG00000039156	Stim2	-	stromal interaction molecule 2	protein-coding
Diff_Nuc30357	chr7	93369042	93369181	+	0	NA	Intergenic	L1_Mus2|LINE|L1	25600	NM_001102580	675969	Mm.469834	NM_001102580	ENSMUSG00000091239	Vmn2r76	-	vomeronasal 2, receptor 76	protein-coding
Diff_Nuc18462	chr16	84753322	84753461	+	0	NA	Intergenic	Lx8|LINE|L1	-17844	NM_017404	27393	Mm.103655	NM_017404	ENSMUSG00000022889	Mrpl39	C21orf8|MRP-L5|ORF22|Rpml5	mitochondrial ribosomal protein L39	protein-coding
Diff_Nuc64066	chr8	64542962	64543101	+	0	NA	exon (NM_001136089, exon 8 of 12)	exon (NM_001136089, exon 8 of 12)	58959	NM_001136089	26359	Mm.42179	NM_011922	ENSMUSG00000031635	Anxa10	-	annexin A10	protein-coding
Diff_Nuc61655	chr9	91411632	91411771	+	0	NA	Intergenic	B1_Mur1|SINE|Alu	147891	NM_009576	22774	Mm.8062	NM_009576	ENSMUSG00000036972	Zic4	-	zinc finger protein of the cerebellum 4	protein-coding
Diff_Nuc60341	chr9	48336692	48336831	+	0	NA	Intergenic	RLTR42-int|LTR|ERVK	33313	NM_001004191	434402	Mm.386950	NM_001004191	ENSMUSG00000042293	Gm5617	EG434402	predicted gene 5617	protein-coding
Diff_Nuc24728	chr19	7502742	7502881	+	0	NA	intron (NM_001003933, intron 7 of 7)	intron (NM_001003933, intron 7 of 7)	5748	NR_105957	102466781		NR_105957	ENSMUSG00000098293	Mir6991	Gm27966|mmu-mir-6991	microRNA 6991	ncRNA
Diff_Nuc10339	chr10	5780272	5780411	+	0	NA	Intergenic	Intergenic	-45789	NM_007956	13982	Mm.9213	NM_007956	ENSMUSG00000019768	Esr1	ER|ER-alpha|ERa|ERalpha|ESR|Estr|Estra|Nr3a1	estrogen receptor 1 (alpha)	protein-coding
Diff_Nuc9647	chr11	105515492	105515631	+	0	NA	intron (NM_181071, intron 2 of 25)	MTC|LTR|MaLR	64261	NM_181071	77097	Mm.22501	NM_175492	ENSMUSG00000053580	Tanc2	3526402J09Rik|5730590C14Rik	tetratricopeptide repeat, ankyrin repeat and coiled-coil containing 2	protein-coding
Diff_Nuc23882	chr14	99173672	99173811	+	0	NA	Intergenic	Intergenic	271614	NM_175245	76789	Mm.38912	NM_175245	ENSMUSG00000033186	Mzt1	2410129H14Rik|AI120158|Mozart1	mitotic spindle organizing protein 1	protein-coding
Diff_Nuc18290	chr16	77358922	77359061	+	0	NA	intron (NR_015543, intron 1 of 4)	intron (NR_015543, intron 1 of 4)	29418	NR_015543	77994	Mm.394688	NR_015543	ENSMUSG00000090386	Mir99ahg	2810055G20Rik|D730043B02Rik	Mir99a and Mirlet7c-1 host gene (non-protein coding)	ncRNA
Diff_Nuc44238	chr4	149969272	149969411	+	0	NA	intron (NM_001085492, intron 12 of 22)	intron (NM_001085492, intron 12 of 22)	56942	NM_173774	242773	Mm.29280	NM_173774	ENSMUSG00000039838	Slc45a1	C230078B22|Dnb5	solute carrier family 45, member 1	protein-coding
Diff_Nuc63430	chr8	39341942	39342081	+	0	NA	intron (NM_145841, intron 1 of 7)	L1_Mus3|LINE|L1	-26755	NR_029884	723860		NR_029884	ENSMUSG00000065457	Mir383	Mirn383|mir-383|mmu-mir-383	microRNA 383	ncRNA
Diff_Nuc63087	chr8	26770442	26770581	+	0	NA	intron (NM_001081269, intron 4 of 22)	B1_Mur1|SINE|Alu	19462	NM_001081269	234135	Mm.217337	NM_001001735	ENSMUSG00000054823	Whsc1l1	6720429E03|A530023P05|AI528490|NSD3|WHISTLE	Wolf-Hirschhorn syndrome candidate 1-like 1 (human)	protein-coding
Diff_Nuc52876	chr2	144322392	144322531	+	0	NA	intron (NM_172859, intron 10 of 20)	B1_Mm|SINE|Alu	30673	NM_172859	241688	Mm.442156	NM_172859	ENSMUSG00000037259	Dzank1	2810039F03Rik|6330439K17Rik|6430408C01|AI851115|Ankrd64	double zinc ribbon and ankyrin repeat domains 1	protein-coding
Diff_Nuc1775	chr13	45090102	45090241	+	0	NA	intron (NM_025772, intron 1 of 9)	RMER17C|LTR|ERVK	7294	NM_025772	94245	Mm.352311	NM_025772	ENSMUSG00000057531	Dtnbp1	5430437B18Rik|AW048963|Bloc1s8|dysbindin|sdy	dystrobrevin binding protein 1	protein-coding
Diff_Nuc41710	chr4	62996012	62996151	+	0	NA	TTS (NM_025685)	TTS (NM_025685)	-9509	NM_008768	18405	Mm.4777	NM_008768	ENSMUSG00000039196	Orm1	Agp-1|Agp-2|Orm-1	orosomucoid 1	protein-coding
Diff_Nuc15031	chr17	48093332	48093471	+	0	NA	Intergenic	B1_Mus1|SINE|Alu	-31820	NM_001110825	74123	Mm.240062	NM_028767	ENSMUSG00000023991	Foxp4	1200010K03Rik|2310007G05Rik|mFKHLA	forkhead box P4	protein-coding
Diff_Nuc56588	chr1	105575852	105575991	+	0	NA	Intergenic	L1Md_F2|LINE|L1	-1089475	NM_011800	23836	Mm.103640	NM_011800	ENSMUSG00000050840	Cdh20	Cdh7	cadherin 20	protein-coding
Diff_Nuc21879	chr14	23443952	23444091	+	0	NA	intron (NM_028275, intron 5 of 6)	(CATG)n|Simple_repeat|Simple_repeat	-82001	NR_046307	74896	Mm.444661	NR_046307		4930405A10Rik	4930456G20Rik	RIKEN cDNA 4930405A10 gene	ncRNA
Diff_Nuc44949	chr3	26164052	26164191	+	0	NA	intron (NM_138666, intron 1 of 7)	Lx3_Mus|LINE|L1	66710	NM_138666	192167	Mm.316080	NM_138666	ENSMUSG00000063887	Nlgn1	6330415N05Rik|BB179718|NL1|Nlg1|mKIAA1070	neuroligin 1	protein-coding
Diff_Nuc19770	chr15	39629362	39629501	+	0	NA	non-coding (NR_045788, exon 2 of 3)	non-coding (NR_045788, exon 2 of 3)	840	NR_045788	100503072	Mm.446661	NR_045788	ENSMUSG00000087695	Gm16291	OTTMUSG00000033244	predicted gene 16291	ncRNA
Diff_Nuc2784	chr13	86186432	86186571	+	0	NA	promoter-TSS (NM_007749)	promoter-TSS (NM_007749)	-101	NM_007749	12867	Mm.378898	NM_007749	ENSMUSG00000017778	Cox7c	COXVIIc|Cox7c1	cytochrome c oxidase subunit VIIc	protein-coding
Diff_Nuc52874	chr2	144236372	144236511	+	0	NA	Intergenic	Intergenic	41670	NM_181417	228714	Mm.227925	NM_181417	ENSMUSG00000027425	Csrp2bp	2510008M08Rik|ATAC2|AU023459|D2Ertd473e|D2Wsu131e|E430020F17|Kat14	cysteine and glycine-rich protein 2 binding protein	protein-coding
Diff_Nuc17485	chr16	43480842	43480981	+	0	NA	intron (NM_181058, intron 3 of 6)	intron (NM_181058, intron 3 of 6)	-60602	NR_046026	626693	Mm.447083	NR_046026	ENSMUSG00000085499	Gm15713	OTTMUSG00000025617	predicted gene 15713	ncRNA
Diff_Nuc42957	chr4	108509952	108510091	+	0	NA	intron (NM_025334, intron 1 of 6)	intron (NM_025334, intron 1 of 6)	2738	NM_025334	66073	Mm.159965	NM_025334	ENSMUSG00000028567	Txndc12	0610040B21Rik|ERp16|ERp19	thioredoxin domain containing 12 (endoplasmic reticulum)	protein-coding
Diff_Nuc53879	chr2	180803322	180803461	+	0	NA	Intergenic	MTD|LTR|MaLR	-29509	NM_015730	11438	Mm.252369	NM_015730	ENSMUSG00000027577	Chrna4	Acra-4|Acra4|EBN1|ENFL1	cholinergic receptor, nicotinic, alpha polypeptide 4	protein-coding
Diff_Nuc43312	chr4	120653972	120654111	+	0	NA	intron (NM_133716, intron 4 of 9)	intron (NM_133716, intron 4 of 9)	-8114	NR_105982	102465614		NR_105982	ENSMUSG00000106436	Mir7015	mmu-mir-7015	microRNA 7015	ncRNA
Diff_Nuc42118	chr4	81255492	81255631	+	0	NA	Intergenic	L1M2|LINE|L1	-166842	NM_001305284	17475	Mm.153039	NM_010820	ENSMUSG00000028402	Mpdz	AI225843|B930003D11Rik|MUPP1	multiple PDZ domain protein	protein-coding
Diff_Nuc59414	chr9	8844742	8844881	+	0	NA	Intergenic	L1_Mus3|LINE|L1	-55022	NM_008829	18667	Mm.12798	NM_008829	ENSMUSG00000031870	Pgr	9930019P03Rik|BB114106|ENSMUSG00000074510|NR3C3|PR|PR-A|PR-B	progesterone receptor	protein-coding
Diff_Nuc25846	chr19	46238972	46239111	+	0	NA	intron (NM_178930, intron 2 of 39)	B3|SINE|B2	11993	NM_178930	107338	Mm.271620	NM_178930	ENSMUSG00000025224	Gbf1	1700083E03Rik|AI035702|AW049900|mKIAA0248	golgi-specific brefeldin A-resistance factor 1	protein-coding
Diff_Nuc13223	chr10	111091982	111092121	+	0	NA	Intergenic	Intergenic	-60722	NR_045344	71321	Mm.410785	NR_045344	ENSMUSG00000097082	4933440J02Rik	-	RIKEN cDNA 4933440J02 gene	ncRNA
Diff_Nuc5723	chr12	85576262	85576401	+	0	NA	Intergenic	Intergenic	-16500	NM_001163501	238317	Mm.31256	NM_001163501	ENSMUSG00000042507	Elmsan1	9430029N19Rik|C130039O16Rik|Gm260	ELM2 and Myb/SANT-like domain containing 1	protein-coding
Diff_Nuc64592	chr8	83534332	83534471	+	0	NA	intron (NM_027554, intron 2 of 9)	Tigger5|DNA|MER2_type	4404	NM_027554	74841	Mm.246018	NM_027554	ENSMUSG00000038250	Usp38	4631402N15Rik|4833420O05Rik|AA536967|AU044701|AW544820|mKIAA1891	ubiquitin specific peptidase 38	protein-coding
Diff_Nuc17594	chr16	46577272	46577411	+	0	NA	Intergenic	MTE2a|LTR|MaLR	-80261	NM_021497	58998	Mm.40477	NM_021495	ENSMUSG00000022656	Nectin3	2610301B19Rik|3000002N23Rik|4921513D19Rik|AA407785|AU016832|AW538082|CD113|Pvrl3	nectin cell adhesion molecule 3	protein-coding
Diff_Nuc62054	chr9	107533602	107533741	+	0	NA	intron (NM_008138, intron 1 of 8)	B3|SINE|B2	4002	NM_008138	14678	Mm.196464	NM_008138	ENSMUSG00000032562	Gnai2	C76432|Galphai2|Gia|Gnai-2	guanine nucleotide binding protein (G protein), alpha inhibiting 2	protein-coding
Diff_Nuc47955	chr3	130105452	130105591	+	0	NA	intron (NM_198711, intron 4 of 34)	intron (NM_198711, intron 4 of 34)	-214845	NM_001163587	71760	Mm.29125	NM_027907	ENSMUSG00000019232	Etnppl	1300019H02Rik|AI195447|Agxt2l1	ethanolamine phosphate phospholyase	protein-coding
Diff_Nuc17499	chr16	43678712	43678851	+	0	NA	Intergenic	Intergenic	-14484	NM_001146325	100043314	Mm.390896	NM_001146325	ENSMUSG00000071552	Tigit	ENSMUSG00000071552|Vstm3	T cell immunoreceptor with Ig and ITIM domains	protein-coding
Diff_Nuc49894	chr2	41895232	41895371	+	0	NA	intron (NM_053011, intron 2 of 90)	intron (NM_053011, intron 2 of 90)	407787	NR_105754	102465171		NR_105754	ENSMUSG00000098660	Mir6336	Gm27584|mmu-mir-6336	microRNA 6336	ncRNA
Diff_Nuc7121	chr11	20363992	20364131	+	0	NA	Intergenic	Intergenic	-79195	NM_021372	58172	Mm.339676	NM_021372	ENSMUSG00000049800	Sertad2	AB041541|AU021878|Kiaa0127|MNCb-1504|SEI-2|Sei2|TRIP-Br2|mKIAA0127	SERTA domain containing 2	protein-coding
Diff_Nuc27492	chr18	50809752	50809891	+	0	NA	Intergenic	L1VL1|LINE|L1	-81468	NM_026108	67365	Mm.158150	NM_026108	ENSMUSG00000048875	Hdhd1a	1700121L12Rik|GS1|Hdhd1|Pudp	haloacid dehalogenase-like hydrolase domain containing 1A	protein-coding
Diff_Nuc46392	chr3	81788972	81789111	+	0	NA	Intergenic	MTE2b|LTR|MaLR	-9391	NM_019911	56720	Mm.258622	NM_019911	ENSMUSG00000028011	Tdo2	AA407491|TDO|TO|chky	tryptophan 2,3-dioxygenase	protein-coding
Diff_Nuc49193	chr2	20359002	20359141	+	0	NA	intron (NM_001081006, intron 2 of 21)	B4A|SINE|B4	-72603	NM_029895	208618	Mm.237935	NM_029895	ENSMUSG00000036617	Etl4	6620402G01Rik|9430077C05Rik|BC026657|E330027G05Rik|Etl-4|Skt	enhancer trap locus 4	protein-coding
Diff_Nuc29781	chr7	71310152	71310291	+	0	NA	intron (NM_001039104, intron 1 of 26)	intron (NM_001039104, intron 1 of 26)	11500	NM_001039104	17364	Mm.38875	NM_018752	ENSMUSG00000030523	Trpm1	4732499L03Rik|AI606771|Ltrpc1|Mlsn1	transient receptor potential cation channel, subfamily M, member 1	protein-coding
Diff_Nuc1852	chr13	46997042	46997181	+	0	NA	intron (NM_010617, intron 2 of 37)	B1_Mus1|SINE|Alu	27976	NM_010617	16553	Mm.342703	NM_010617	ENSMUSG00000021375	Kif13a	4930505I07Rik|mKIAA4109	kinesin family member 13A	protein-coding
Diff_Nuc3089	chr13	97562762	97562901	+	0	NA	Intergenic	Lx9|LINE|L1	-121940	NM_008255	15357	Mm.316652	NM_008255	ENSMUSG00000021670	Hmgcr	HMG-CoAR|Red	3-hydroxy-3-methylglutaryl-Coenzyme A reductase	protein-coding
Diff_Nuc60700	chr9	59961602	59961741	+	0	NA	intron (NM_001040426, intron 7 of 17)	Charlie18a|DNA|MER1_type	27356	NM_172444	207596	Mm.28791	NM_172444	ENSMUSG00000032289	Thsd4	ADAMTSL-6|ADAMTSL6|AI585901|Adamtsl4|B230114P05Rik	thrombospondin, type I, domain containing 4	protein-coding
Diff_Nuc40953	chr4	36203932	36204071	+	0	NA	intron (NM_001165999, intron 4 of 7)	Lx7|LINE|L1	388485	NR_030545	100124458		NR_030545	ENSMUSG00000077851	Mir876	Mirn876|mir-876|mmu-mir-876	microRNA 876	ncRNA
Diff_Nuc5034	chr12	63952302	63952441	+	0	NA	Intergenic	Lx|LINE|L1	163597	NR_131949	73309	Mm.276558	NR_131949		Spanxn4	1700047L15Rik	SPANX family, member N4	ncRNA
Diff_Nuc54600	chr1	32205632	32205771	+	0	NA	Intergenic	Lx7|LINE|L1	-23950	NM_133235	170771	Mm.336594	NM_133235	ENSMUSG00000026058	Khdrbs2	6330586C16Rik|Slim1|Slm-1|Slm1|mSLM-1	KH domain containing, RNA binding, signal transduction associated 2	protein-coding
Diff_Nuc52911	chr2	145574572	145574711	+	0	NA	intron (NR_033220, intron 3 of 3)	MTD|LTR|MaLR	-37211	NM_028724	74030	Mm.228799	NM_028724	ENSMUSG00000001768	Rin2	2010003K16Rik|4632403N06Rik|AW821980|RASSF4	Ras and Rab interactor 2	protein-coding
Diff_Nuc31567	chr7	135225332	135225471	+	0	NA	intron (NM_001082960, intron 8 of 29)	intron (NM_001082960, intron 8 of 29)	19247	NM_008401	16409	Mm.262106	NM_008401	ENSMUSG00000030786	Itgam	CD11b/CD18|CR3|CR3A|Cd11b|F730045J24Rik|Ly-40|MAC1|Mac-1|Mac-1a	integrin alpha M	protein-coding
Diff_Nuc17684	chr16	50648082	50648221	+	0	NA	intron (NR_040566, intron 4 of 4)	intron (NR_040566, intron 4 of 4)	-56884	NM_027046	69339	Mm.422869	NM_027046	ENSMUSG00000050685	Ccdc54	1700007N18Rik|AI644412|BB013989|NYD-SP17	coiled-coil domain containing 54	protein-coding
Diff_Nuc65454	chr8	114223172	114223311	+	0	NA	Intergenic	RMER4B|LTR|ERVK	-8331	NM_025583	66473	Mm.34374	NM_025583	ENSMUSG00000031957	Ctrb1	2200008D09Rik|AI504462|Ctrb|Prt-2	chymotrypsinogen B1	protein-coding
Diff_Nuc63877	chr8	58129402	58129541	+	0	NA	Intergenic	Lx5|LINE|L1	256290	NM_175939	244486	Mm.67684	NM_175939	ENSMUSG00000046258	Adam29	-	a disintegrin and metallopeptidase domain 29	protein-coding
Diff_Nuc18354	chr16	79990672	79990811	+	0	NA	Intergenic	Intergenic	-899399	NM_178855	19146	Mm.5184	NM_008941	ENSMUSG00000022857	Tmprss15	Entk|Prss7	transmembrane protease, serine 15	protein-coding
Diff_Nuc29377	chr7	52140572	52140711	+	0	NA	intron (NM_029365, intron 6 of 17)	intron (NM_029365, intron 6 of 17)	7153	NM_001331208	75613	Mm.157778	NM_029365	ENSMUSG00000002968	Med25	2610034E13Rik|2610529E18Rik|ESTM2	mediator complex subunit 25	protein-coding
Diff_Nuc22832	chr14	59824252	59824391	+	0	NA	intron (NM_027764, intron 1 of 11)	intron (NM_027764, intron 1 of 11)	4256	NM_027764	71330	Mm.234195	NM_027764	ENSMUSG00000035469	Rcbtb1	5430409I18Rik|AW111883|CLLD7|CLLL7	regulator of chromosome condensation (RCC1) and BTB (POZ) domain containing protein 1	protein-coding
Diff_Nuc18945	chr15	4750042	4750181	+	0	NA	intron (NM_016704, intron 15 of 15)	intron (NM_016704, intron 15 of 15)	72901	NM_016704	12274	Mm.20247	NM_016704	ENSMUSG00000022181	C6	AW111623	complement component 6	protein-coding
Diff_Nuc21069	chr15	89301882	89302021	+	0	NA	TTS (NM_009713)	TTS (NM_009713)	-4732	NR_077233	100532730	Mm.461541	NR_077233		C230037L18Rik	-	RIKEN cDNA C230037L18 gene	ncRNA
Diff_Nuc18129	chr16	70313152	70313291	+	0	NA	promoter-TSS (NM_028803)	promoter-TSS (NM_028803)	-973	NM_028803	74185	Mm.396102	NM_028803	ENSMUSG00000022707	Gbe1	2310045H19Rik|2810426P10Rik|D16Ertd536e	glucan (1,4-alpha-), branching enzyme 1	protein-coding
Diff_Nuc63831	chr8	54731562	54731701	+	0	NA	Intergenic	Intergenic	-7212	NM_146208	234258	Mm.281749	NM_146208	ENSMUSG00000039396	Neil3	AI449477|BC034753|C85903	nei like 3 (E. coli)	protein-coding
Diff_Nuc31767	chr7	143028242	143028381	+	0	NA	Intergenic	Intergenic	-120249	NM_001081117	17345	Mm.4078	NM_001081117	ENSMUSG00000031004	Mki67	D630048A14Rik|Ki-67|Ki67	antigen identified by monoclonal antibody Ki 67	protein-coding
Diff_Nuc52349	chr2	127404892	127405031	+	0	NA	intron (NM_028141, intron 4 of 5)	intron (NM_028141, intron 4 of 5)	5452	NM_001111029	72180	Mm.46715	NM_028141	ENSMUSG00000034800	Zfp661	2810405K07Rik|A1-5|Znf2	zinc finger protein 661	protein-coding
Diff_Nuc49542	chr2	31356502	31356641	+	0	NA	intron (NM_007494, intron 11 of 15)	intron (NM_007494, intron 11 of 15)	30781	NM_007494	11898	Mm.3217	NM_007494	ENSMUSG00000076441	Ass1	AA408052|ASS|Ass-1|fold	argininosuccinate synthetase 1	protein-coding
Diff_Nuc35953	chr6	146121852	146121991	+	0	NA	exon (NM_010586, exon 49 of 56)	exon (NM_010586, exon 49 of 56)	239254	NM_010656	16651	Mm.49689	NM_010656	ENSMUSG00000030255	Sspn	Krag	sarcospan	protein-coding
Diff_Nuc3703	chr12	3669722	3669861	+	0	NA	intron (NM_001162465, intron 8 of 17)	intron (NM_001162465, intron 8 of 17)	96750	NM_007886	13528	Mm.286202	NM_007886	ENSMUSG00000071454	Dtnb	-	dystrobrevin, beta	protein-coding
Diff_Nuc43119	chr4	115575772	115575911	+	0	NA	Intergenic	Intergenic	18836	NM_001320545	654462	Mm.388913	NM_001039124	ENSMUSG00000073774	Kncn	Kino|L5	kinocilin	protein-coding
Diff_Nuc6666	chr12	120697762	120697901	+	0	NA	intron (NM_001163136, intron 3 of 3)	L1Md_F2|LINE|L1	15948	NM_001163136	238455	Mm.31376	NM_001163136	ENSMUSG00000041886	Macc1	4732474O15Rik|Gm267	metastasis associated in colon cancer 1	protein-coding
Diff_Nuc17523	chr16	44179552	44179691	+	0	NA	intron (NM_001029889, intron 1 of 7)	intron (NM_001029889, intron 1 of 7)	6111	NM_001029889	207806	Mm.310566	NM_001029889	ENSMUSG00000068284	Usf3	5530400K22Rik|Gm1779|Gm608|mKIAA2018	upstream transcription factor family member 3	protein-coding
Diff_Nuc37955	chr5	77761202	77761341	+	0	NA	exon (NM_153798, exon 13 of 25)	exon (NM_153798, exon 13 of 25)	21762	NM_153798	231329	Mm.273217	NM_153798	ENSMUSG00000029250	Polr2b	Pol2rb|Rpb140|Rpb2	polymerase (RNA) II (DNA directed) polypeptide B	protein-coding
Diff_Nuc22160	chr14	32690182	32690321	+	0	NA	Intergenic	MLT1B|LTR|MaLR	-46650	NM_001024604	105522	Mm.37660	NM_001024604	ENSMUSG00000014496	Ankrd28	AI465466|AI604979|E430019N21Rik|mKIAA0379	ankyrin repeat domain 28	protein-coding
Diff_Nuc48574	chr3	152388972	152389111	+	0	NA	intron (NM_178016, intron 3 of 11)	intron (NM_178016, intron 3 of 11)	11977	NM_025662	329777	Mm.331447	NM_025662	ENSMUSG00000039047	Pigk	3000001O05Rik	phosphatidylinositol glycan anchor biosynthesis, class K	protein-coding
Diff_Nuc47219	chr3	104993202	104993341	+	0	NA	Intergenic	B4A|SINE|B4	123509	NM_029228	75269	Mm.307994	NM_029228	ENSMUSG00000051788	4930564D02Rik	-	RIKEN cDNA 4930564D02 gene	protein-coding
Diff_Nuc17015	chr16	29072972	29073111	+	0	NA	Intergenic	Intergenic	-136740	NM_013751	27281	Mm.103650	NM_013751	ENSMUSG00000022525	Hrasls	2810012B06Rik|A-C1|HRSL1|Hrasrs	HRAS-like suppressor	protein-coding
Diff_Nuc36515	chr5	22313122	22313261	+	0	NA	intron (NM_029990, intron 1 of 2)	RLTR40|LTR|ERVK	-60489	NR_027362	330052	Mm.459265	NR_027362	ENSMUSG00000105076	A930003O13Rik	-	RIKEN cDNA A930003O13 gene	ncRNA
Diff_Nuc37798	chr5	72955142	72955281	+	0	NA	Intergenic	MMERGLN-int|LTR|ERV1	-4327	NM_133921	100978	Mm.187453	NM_133921	ENSMUSG00000072889	Nfxl1	1700012H24Rik|AW538212|D430033A06Rik|DNABF|GCF|Gm1058|TCF9	nuclear transcription factor, X-box binding-like 1	protein-coding
Diff_Nuc18219	chr16	74663632	74663771	+	0	NA	Intergenic	Intergenic	-252544	NM_175549	268902	Mm.171736	NM_175549	ENSMUSG00000052516	Robo2	2600013A04Rik|9430089E08Rik|BB097918|D230004I22Rik|mKIAA1568	roundabout guidance receptor 2	protein-coding
Diff_Nuc12865	chr10	98258642	98258781	+	0	NA	Intergenic	Intergenic	-119075	NM_026482	67972	Mm.166944	NM_026482	ENSMUSG00000019943	Atp2b1	2810442I22Rik|E130111D10Rik|Pmca1	ATPase, Ca++ transporting, plasma membrane 1	protein-coding
Diff_Nuc6327	chr12	106867232	106867371	+	0	NA	intron (NM_029654, intron 34 of 41)	IAPEz-int|LTR|ERVK	25000	NM_007539	12061	Mm.377078	NM_007539	ENSMUSG00000041347	Bdkrb1	B1BKR|B1R|BKR1|BRADYB1|Bdkrb	bradykinin receptor, beta 1	protein-coding
Diff_Nuc46700	chr3	90135162	90135301	+	0	NA	Intergenic	B1_Mur2|SINE|Alu	-10345	NM_139304	229542	Mm.270999	NM_139304	ENSMUSG00000042390	Gatad2b	AL118180|C430014D17Rik|P66beta|mKIAA1150	GATA zinc finger domain containing 2B	protein-coding
Diff_Nuc2123	chr13	56796172	56796311	+	0	NA	Intergenic	B4A|SINE|B4	-8130	NM_008541	17129	Mm.272920	NM_008541	ENSMUSG00000021540	Smad5	1110051M15Rik|AI451355|Dwf-C|Madh5|MusMLP	SMAD family member 5	protein-coding
Diff_Nuc41224	chr4	46617282	46617421	+	0	NA	TTS (NM_198664)	TTS (NM_198664)	-2550	NM_001164804	107684	Mm.416311	NM_178893	ENSMUSG00000028337	Coro2a	9030208C03Rik|AI563590|IR10	coronin, actin binding protein 2A	protein-coding
Diff_Nuc39007	chr5	116009542	116009681	+	0	NA	intron (NM_007475, intron 1 of 6)	CpG	135	NM_007475	11837	Mm.5286	NM_007475	ENSMUSG00000067274	Rplp0	36B4|Arbp|L10E	ribosomal protein, large, P0	protein-coding
Diff_Nuc25562	chr19	38499482	38499621	+	0	NA	Intergenic	B1_Mus2|SINE|Alu	29081	NM_175507	240660	Mm.262085	NM_175507	ENSMUSG00000044026	Slc35g1	AA590464|D330039I19Rik|Tmem20	solute carrier family 35, member G1	protein-coding
Diff_Nuc31800	chr7	144629712	144629851	+	0	NA	intron (NR_033611, intron 1 of 10)	CpG	424	NR_033611	620016	Mm.388932	NR_033611	ENSMUSG00000100863	Gm12669	OTTMUSG00000007920	glutaredoxin 3 pseudogene	pseudo
Diff_Nuc18538	chr16	86595402	86595541	+	0	NA	Intergenic	Intergenic	-694101	NM_011782	23794	Mm.112933	NM_011782	ENSMUSG00000022894	Adamts5	9530092O11Rik|ADAM-TS5|ADAMTS1|ADAMTS11|ADMP-2|AI481094|ASMP-2	a disintegrin-like and metallopeptidase (reprolysin type) with thrombospondin type 1 motif, 5 (aggrecanase-2)	protein-coding
Diff_Nuc63774	chr8	51917022	51917161	+	0	NA	Intergenic	L1Md_A|LINE|L1	463625	NR_046067	100039954	Mm.400419	NR_046067	ENSMUSG00000110281	Gm2516	-	predicted gene 2516	ncRNA
Diff_Nuc52966	chr2	146853202	146853341	+	0	NA	intron (NM_011917, intron 7 of 29)	intron (NM_011917, intron 7 of 29)	14475	NM_011917	24128	Mm.3065	NM_011917	ENSMUSG00000027433	Xrn2	-	5'-3' exoribonuclease 2	protein-coding
Diff_Nuc42921	chr4	107881642	107881781	+	0	NA	intron (NM_001167936, intron 2 of 13)	Lx8|LINE|L1	8816	NM_001167936	230590	Mm.301798	NM_001167936	ENSMUSG00000034645	Zyg11a	BC022150	zyg-11 family member A, cell cycle regulator	protein-coding
Diff_Nuc21780	chr14	21116592	21116731	+	0	NA	intron (NM_026341, intron 1 of 8)	B1_Mus2|SINE|Alu	2749	NM_026341	67725	Mm.317636	NM_026341	ENSMUSG00000021809	Nudt13	4933433B15Rik	nudix (nucleoside diphosphate linked moiety X)-type motif 13	protein-coding
Diff_Nuc6055	chr12	99147092	99147231	+	0	NA	Intergenic	RMER17C|LTR|ERVK	350508	NM_008079	14420	Mm.5120	NM_008079	ENSMUSG00000021003	Galc	2310068B06Rik|A930008M05Rik|AW212969|AW413532|Gacy|twi|twitcher	galactosylceramidase	protein-coding
Diff_Nuc64846	chr8	93280992	93281131	+	0	NA	Intergenic	B3A|SINE|B2	-71673	NM_177224	109151	Mm.100615	NM_177224	ENSMUSG00000056608	Chd9	1810014J18Rik|9030205D12Rik|A330063D19Rik|AD013|PRIC320|mKIAA0308	chromodomain helicase DNA binding protein 9	protein-coding
Diff_Nuc11610	chr10	53330062	53330201	+	0	NA	intron (NM_027830, intron 8 of 13)	intron (NM_027830, intron 8 of 13)	13364	NM_025541	66403	Mm.272989	NM_025541	ENSMUSG00000019857	Asf1a	2310079C17Rik|C79052	anti-silencing function 1A histone chaperone	protein-coding
Diff_Nuc65810	chr8	125735262	125735401	+	0	NA	intron (NM_145606, intron 1 of 6)	intron (NM_145606, intron 1 of 6)	1357	NM_145606	234852	Mm.41596	NM_145606	ENSMUSG00000000743	Chmp1a	2900018H07Rik|Pcoln3	charged multivesicular body protein 1A	protein-coding
Diff_Nuc61412	chr9	80892242	80892381	+	0	NA	Intergenic	L1Md_F2|LINE|L1	-533266	NM_022016	63859	Mm.422780	NM_022016	ENSMUSG00000032343	Impg1	A930015H12Rik|IMP150|SPACR	interphotoreceptor matrix proteoglycan 1	protein-coding
Diff_Nuc35101	chr6	117239942	117240081	+	0	NA	Intergenic	L1MA8|LINE|L1	121458	NM_021704	20315	Mm.303231	NM_013655	ENSMUSG00000061353	Cxcl12	Pbsf|Scyb12|Sdf1|Tlsf|Tpar1	chemokine (C-X-C motif) ligand 12	protein-coding
Diff_Nuc3859	chr12	9751932	9752071	+	0	NA	Intergenic	ORR1E|LTR|MaLR	170753	NM_011859	23967	Mm.45055	NM_011859	ENSMUSG00000048387	Osr1	Odd1|Osr	odd-skipped related 1 (Drosophila)	protein-coding
Diff_Nuc36718	chr5	30967902	30968041	+	0	NA	Intergenic	Intergenic	-1288	NM_007681	12615	Mm.290563	NM_007681	ENSMUSG00000029177	Cenpa	Cenp-A	centromere protein A	protein-coding
Diff_Nuc53880	chr2	180923402	180923541	+	0	NA	TTS (NM_025598)	TTS (NM_025598)	1423	NM_025598	66496	Mm.213943	NM_025598	ENSMUSG00000016344	Ppdpf	0610012G23Rik|2610317A05Rik|2700038C09Rik|3110053G12Rik	pancreatic progenitor cell differentiation and proliferation factor	protein-coding
Diff_Nuc61905	chr9	102563712	102563851	+	0	NA	Intergenic	Intergenic	35155	NM_181394	69010	Mm.2000	NM_181394	ENSMUSG00000035048	Anapc13	1810004D07Rik|APC13|SWM1	anaphase promoting complex subunit 13	protein-coding
Diff_Nuc7384	chr11	30074952	30075091	+	0	NA	intron (NM_175836, intron 1 of 34)	Lx2|LINE|L1	23236	NM_009260	20742	Mm.123110	NM_009260	ENSMUSG00000020315	Sptbn1	9930031C03Rik|AL033301|SPTB2|Spnb-2|Spnb2|elf1|elf3|mKIAA4049	spectrin beta, non-erythrocytic 1	protein-coding
Diff_Nuc14004	chr17	12612042	12612181	+	0	NA	TTS (NM_011395)	TTS (NM_011395)	40636	NM_008877	18815	Mm.971	NM_008877	ENSMUSG00000059481	Plg	AI649309|Pg	plasminogen	protein-coding
Diff_Nuc24802	chr19	9076792	9076931	+	0	NA	exon (NM_009643, exon 5 of 5)	exon (NM_009643, exon 5 of 5)	13087	NM_001286518	66395	Mm.203866	NM_009643	ENSMUSG00000069833	Ahnak	DY6	AHNAK nucleoprotein (desmoyokin)	protein-coding
Diff_Nuc13488	chr10	120462232	120462371	+	0	NA	Intergenic	B2_Mm2|SINE|B2	-8759	NM_011915	24117	Mm.32831	NM_011915	ENSMUSG00000020218	Wif1	AW107799|WIF-1	Wnt inhibitory factor 1	protein-coding
Diff_Nuc20275	chr15	59377542	59377681	+	0	NA	intron (NM_026746, intron 4 of 6)	MIRb|SINE|MIR	-102598	NM_144549	211770	Mm.40298	NM_144549	ENSMUSG00000032501	Trib1	A530090O15Rik|TRB-1|Trb1	tribbles pseudokinase 1	protein-coding
Diff_Nuc13254	chr10	112363922	112364061	+	0	NA	3' UTR (NM_001033474, exon 1 of 1)	3' UTR (NM_001033474, exon 1 of 1)	2091	NM_001033474	382423	Mm.431239	NM_001033474	ENSMUSG00000074748	Atxn7l3b	4921506J03Rik|6230409E21Rik|AI315132|ENSMUSG00000074747	ataxin 7-like 3B	protein-coding
Diff_Nuc5082	chr12	66021092	66021231	+	0	NA	intron (NM_001025605, intron 1 of 4)	intron (NM_001025605, intron 1 of 4)	2263	NM_001025605	217648	Mm.341586	NM_001025605	ENSMUSG00000047227	Gm527	-	predicted gene 527	protein-coding
Diff_Nuc17712	chr16	52127822	52127961	+	0	NA	intron (NM_001033238, intron 4 of 17)	intron (NM_001033238, intron 4 of 17)	96229	NM_001033238	208650	Mm.328206	NM_001033238	ENSMUSG00000022637	Cblb	AI429560|AI851073|Cbl-b	Casitas B-lineage lymphoma b	protein-coding
Diff_Nuc6905	chr11	11719402	11719541	+	0	NA	intron (NM_001190448, intron 12 of 14)	intron (NM_001190448, intron 12 of 14)	-10506	NM_001163360	60530	Mm.236114	NM_021891	ENSMUSG00000035455	Fignl1	-	fidgetin-like 1	protein-coding
Diff_Nuc60926	chr9	66325252	66325391	+	0	NA	intron (NM_145617, intron 57 of 77)	RCHARR1|DNA|MER1_type	37079	NM_175206	74165	Mm.297998	NM_175206	ENSMUSG00000050503	Fbxl22	1110004B15Rik	F-box and leucine-rich repeat protein 22	protein-coding
Diff_Nuc19603	chr15	34835712	34835851	+	0	NA	intron (NM_019635, intron 10 of 10)	intron (NM_019635, intron 10 of 10)	67977	NM_001271704	16539	Mm.71045	NM_181317	ENSMUSG00000050963	Kcns2	E130006J24Rik|Kv9.2	K+ voltage-gated channel, subfamily S, 2	protein-coding
Diff_Nuc43033	chr4	111458242	111458381	+	0	NA	intron (NM_026470, intron 9 of 12)	intron (NM_026470, intron 9 of 12)	65696	NM_026470	67946	Mm.275526	NM_026470	ENSMUSG00000034401	Spata6	1700062C23Rik|AI790763|Hash|KRP|Mash	spermatogenesis associated 6	protein-coding
Diff_Nuc17688	chr16	50905112	50905251	+	0	NA	Intergenic	Intergenic	121659	NR_131005	78639	Mm.160109	NR_131005	ENSMUSG00000092276	1700116B05Rik	-	RIKEN cDNA 1700116B05 gene	ncRNA
Diff_Nuc45680	chr3	54415282	54415421	+	0	NA	Intergenic	Intergenic	-81676	NM_019995	56790	Mm.486375	NM_019995	ENSMUSG00000027751	Supt20	AA667204|AI450544|D3Ertd300e|Fam48a|Supt20h|p38IP	suppressor of Ty 20	protein-coding
Diff_Nuc20534	chr15	71823072	71823211	+	0	NA	intron (NM_027174, intron 3 of 63)	intron (NM_027174, intron 3 of 63)	41516	NM_027174	69700	Mm.322500	NM_027174	ENSMUSG00000079022	Col22a1	2310067L16Rik|C80743	collagen, type XXII, alpha 1	protein-coding
Diff_Nuc62231	chr9	111913512	111913651	+	0	NA	Intergenic	(CAAA)n|Simple_repeat|Simple_repeat	107634	NR_029823	723815		NR_029823	ENSMUSG00000065441	Mir128-2	Mirn128-2|Mirn128b|mir-128-2|mir-128b	microRNA 128-2	ncRNA
Diff_Nuc10837	chr10	24060302	24060441	+	0	NA	Intergenic	Intergenic	117048	NM_021509	59012	Mm.285934	NM_021509	ENSMUSG00000020000	Moxd1	3230402N08Rik|MNCb-5203	monooxygenase, DBH-like 1	protein-coding
Diff_Nuc2733	chr13	83587852	83587991	+	0	NA	Intergenic	Intergenic	-55112	NM_001347572	17260	Mm.24001	NM_025282	ENSMUSG00000005583	Mef2c	5430401D19Rik|9930028G15Rik|AV011172|Mef2	myocyte enhancer factor 2C	protein-coding
Diff_Nuc8890	chr11	83832522	83832661	+	0	NA	intron (NM_194341, intron 13 of 19)	B1_Mur2|SINE|Alu	49268	NM_019819	56405	Mm.240885	NM_019819	ENSMUSG00000018648	Dusp14	1110014C10Rik|2310042C07Rik|D11Ertd395e|MKP-L|Mkp6	dual specificity phosphatase 14	protein-coding
Diff_Nuc17575	chr16	46126702	46126841	+	0	NA	Intergenic	Lx6|LINE|L1	-6410	NM_032465	84544	Mm.29204	NM_032465	ENSMUSG00000022657	Cd96	1700109I12Rik|Tactile	CD96 antigen	protein-coding
Diff_Nuc47562	chr3	117967362	117967501	+	0	NA	Intergenic	Intergenic	-169344	NR_029551	387155		NR_029551	ENSMUSG00000065569	Mir137	Mirn137|mir-137|mmu-mir-137	microRNA 137	ncRNA
Diff_Nuc18897	chr15	3313582	3313721	+	0	NA	intron (NM_001048178, intron 3 of 8)	RLTR10|LTR|ERVK	-60125	NM_001166063	100039139	Mm.455610	NM_001166063	ENSMUSG00000091119	Ccdc152	ENSMUSG00000071814	coiled-coil domain containing 152	protein-coding
Diff_Nuc39896	chr5	145979612	145979751	+	0	NA	exon (NM_001167944, exon 3 of 4)	exon (NM_001167944, exon 3 of 4)	-12903	NM_001083958	72611	Mm.206555	NM_028298	ENSMUSG00000007812	Zfp655	2700038I16Rik|9030409O18Rik|mKIAA4222	zinc finger protein 655	protein-coding
Diff_Nuc24180	chr14	111021752	111021891	+	0	NA	Intergenic	Lx6|LINE|L1	132550	NM_175499	239250	Mm.49728	NM_175499	ENSMUSG00000045871	Slitrk6	4832410J21Rik|Sltk6	SLIT and NTRK-like family, member 6	protein-coding
Diff_Nuc59326	chr9	4348722	4348861	+	0	NA	Intergenic	Intergenic	-34746	NM_145609	78100	Mm.206549	NM_145609	ENSMUSG00000041124	Msantd4	8430410K20Rik|Mysantd4	Myb/SANT-like DNA-binding domain containing 4 with coiled-coils	protein-coding
Diff_Nuc42490	chr4	96073322	96073461	+	0	NA	Intergenic	L1_Mus4|LINE|L1	-58020	NM_001004141	100066	Mm.26915	NM_001004141	ENSMUSG00000066097	Cyp2j11	AI314783|Cyp2j11-ps	cytochrome P450, family 2, subfamily j, polypeptide 11	protein-coding
Diff_Nuc16889	chr16	24289482	24289621	+	0	NA	Intergenic	Intergenic	-103885	NM_178665	210126	Mm.209385	NM_178665	ENSMUSG00000033306	Lpp	9430020K16Rik|AA959454|AU024130|B130055L10Rik|C79715|D630048H16	LIM domain containing preferred translocation partner in lipoma	protein-coding
Diff_Nuc28120	chr18	74529442	74529581	+	0	NA	Intergenic	RLTR12B|LTR|ERVK	-72762	NM_201600	17919	Mm.260098	NM_008661	ENSMUSG00000025885	Myo5b	AI661750|mKIAA1119	myosin VB	protein-coding
Diff_Nuc58397	chr1	168930562	168930701	+	0	NA	promoter-TSS (NR_037988)	promoter-TSS (NR_037988)	-770	NR_037988	100503962	Mm.216842	NR_037988	ENSMUSG00000102548	Gm16701	-	predicted gene, 16701	ncRNA
Diff_Nuc31809	chr7	145507632	145507771	+	0	NA	intron (NM_183289, intron 4 of 11)	intron (NM_183289, intron 4 of 11)	81712	NM_183289	70571	Mm.334297	NM_183289	ENSMUSG00000091002	Tcerg1l	5730476P14Rik	transcription elongation regulator 1-like	protein-coding
Diff_Nuc54936	chr1	44842902	44843041	+	0	NA	intron (NM_028450, intron 9 of 10)	ORR1B1-int|LTR|MaLR	-41177	NR_040602	75066	Mm.416932	NR_040602	ENSMUSG00000101701	4930521E06Rik	-	RIKEN cDNA 4930521E06 gene	ncRNA
Diff_Nuc54720	chr1	36881782	36881921	+	0	NA	intron (NM_018872, intron 17 of 40)	intron (NM_018872, intron 17 of 40)	46022	NM_001289612	22637	Mm.8038	NM_009539	ENSMUSG00000026117	Zap70	Srk|ZAP-70|mrtle|mur	zeta-chain (TCR) associated protein kinase	protein-coding
Diff_Nuc50660	chr2	69574372	69574511	+	0	NA	intron (NM_001081086, intron 9 of 13)	intron (NM_001081086, intron 9 of 13)	13296	NM_001081086	228005	Mm.11815	NM_001081086	ENSMUSG00000042133	Ppig	AU019516|AU022200|B230312B02Rik|CYP|SRCyp	peptidyl-prolyl isomerase G (cyclophilin G)	protein-coding
Diff_Nuc49317	chr2	24994482	24994621	+	0	NA	Intergenic	MTC|LTR|MaLR	-41727	NM_025980	67122	Mm.46539	NM_025980	ENSMUSG00000078202	Nrarp	2700054M22Rik	Notch-regulated ankyrin repeat protein	protein-coding
Diff_Nuc35108	chr6	117363562	117363701	+	0	NA	Intergenic	B4A|SINE|B4	245078	NM_021704	20315	Mm.303231	NM_013655	ENSMUSG00000061353	Cxcl12	Pbsf|Scyb12|Sdf1|Tlsf|Tpar1	chemokine (C-X-C motif) ligand 12	protein-coding
Diff_Nuc19958	chr15	48525342	48525481	+	0	NA	intron (NM_001081391, intron 1 of 70)	intron (NM_001081391, intron 1 of 70)	98124	NM_001081391	239420	Mm.309363	NM_001081391	ENSMUSG00000022311	Csmd3	4930500N14Rik|mKIAA1894	CUB and Sushi multiple domains 3	protein-coding
Diff_Nuc57270	chr1	133344932	133345071	+	0	NA	intron (NM_001081011, intron 2 of 22)	intron (NM_001081011, intron 2 of 22)	78937	NM_001081011	14270	Mm.276259	NM_019520	ENSMUSG00000026425	Srgap2	9930124L22Rik|AI448945|FBP2|Fnbp2|srGAP3	SLIT-ROBO Rho GTPase activating protein 2	protein-coding
Diff_Nuc43921	chr4	140792962	140793101	+	0	NA	Intergenic	Intergenic	-5768	NM_172520	213649	Mm.134460	NM_172520	ENSMUSG00000028919	Arhgef19	6030432F23|6430573B13Rik|WGEF	Rho guanine nucleotide exchange factor (GEF) 19	protein-coding
Diff_Nuc16244	chr17	92112002	92112141	+	0	NA	Intergenic	L1Md_F2|LINE|L1	-619929	NM_020252	18189	Mm.478418	NM_020252	ENSMUSG00000024109	Nrxn1	1700062G21Rik|9330127H16Rik|A230068P09Rik|mKIAA0578	neurexin I	protein-coding
Diff_Nuc52636	chr2	135600462	135600601	+	0	NA	intron (NM_013829, intron 1 of 36)	URR1B|DNA|MER1_type	32965	NM_013829	18798	Mm.38009	NM_013829	ENSMUSG00000039943	Plcb4	A930039J07Rik|AI854601|C230058B11Rik	phospholipase C, beta 4	protein-coding
Diff_Nuc57263	chr1	133130762	133130901	+	0	NA	intron (NM_001313731, intron 1 of 5)	intron (NM_001313731, intron 1 of 5)	10924	NM_018750	54354	Mm.248291	NM_018750	ENSMUSG00000026430	Rassf5	1300019G20Rik|Maxp1|Nore1|Nore1A|Nore1B|Rapl	Ras association (RalGDS/AF-6) domain family member 5	protein-coding
Diff_Nuc53052	chr2	149552642	149552781	+	0	NA	Intergenic	B3A|SINE|B2	-103808	NM_001085521	433485	Mm.330649	NM_001085521	ENSMUSG00000074736	Syndig1	AW123113|DSPC2|Gm14134|H2C20orf39|OTTMUSG00000015750|Tmem90b	synapse differentiation inducing 1	protein-coding
Diff_Nuc22127	chr14	32066842	32066981	+	0	NA	intron (NM_027088, intron 5 of 16)	intron (NM_027088, intron 5 of 16)	2236	NM_027088	104416	Mm.3779	NM_027088	ENSMUSG00000021901	Bap1	2300006C11Rik|AA989761|AW553466|mKIAA0272|uch-x4	Brca1 associated protein 1	protein-coding
Diff_Nuc52691	chr2	137143822	137143961	+	0	NA	Intergenic	L1_Mus1|LINE|L1	-201635	NM_013822	16449	Mm.22398	NM_013822	ENSMUSG00000027276	Jag1	ABE2|Gsfabe2|Htu|Ozz|Ser-1	jagged 1	protein-coding
Diff_Nuc31111	chr7	119956422	119956561	+	0	NA	intron (NM_001166585, intron 1 of 10)	intron (NM_001166585, intron 1 of 10)	53593	NM_001166585	21676	Mm.24685	NM_009346	ENSMUSG00000055320	Tead1	2610024B07Rik|B230114H05Rik|Gtrgeo5|TEAD-1|TEF-1|Tcf13|mTEF-1	TEA domain family member 1	protein-coding
Diff_Nuc32444	chr6	21796132	21796271	+	0	NA	intron (NM_173007, intron 3 of 8)	intron (NM_173007, intron 3 of 8)	6314	NM_173007	269831	Mm.21950	NM_173007	ENSMUSG00000029669	Tspan12	9030619E17|AI426782|AI663988|AW111457|Tm4sf12	tetraspanin 12	protein-coding
Diff_Nuc441	chrX	126757052	126757191	+	0	NA	intron (NM_172493, intron 23 of 26)	Lx3_Mus|LINE|L1	472843	NM_172493	54004	Mm.10763	NM_017398	ENSMUSG00000034480	Diaph2	Dia3|Diap2|Drf2|E430022I22Rik	diaphanous related formin 2	protein-coding
Diff_Nuc21829	chr14	21909782	21909921	+	0	NA	intron (NM_001243041, intron 1 of 10)	ORR1D2|LTR|MaLR	14477	NM_001243041	11534	Mm.188734	NM_134079	ENSMUSG00000039197	Adk	2310026J05Rik|5033405D03Rik|AI255373|AI987814|Ak	adenosine kinase	protein-coding
Diff_Nuc11015	chr10	30416502	30416641	+	0	NA	intron (NM_172495, intron 6 of 15)	L1Md_F2|LINE|L1	-40898	NM_001111267	211329	Mm.297903	NM_172495	ENSMUSG00000039697	Ncoa7	9030406N13Rik	nuclear receptor coactivator 7	protein-coding
Diff_Nuc54930	chr1	44320252	44320391	+	0	NA	Intergenic	L1VL4|LINE|L1	-44545	NM_207281	403183	Mm.336176	NM_207281	ENSMUSG00000046828	Mettl21e	4832428D23Rik|Gm991	methyltransferase like 21E	protein-coding
Diff_Nuc19484	chr15	30002312	30002451	+	0	NA	Intergenic	RLTR9A|LTR|ERVK	-99967	NM_008729	18163	Mm.321648	NM_008729	ENSMUSG00000022240	Ctnnd2	Catnd2|Nprap|neurojugin	catenin (cadherin associated protein), delta 2	protein-coding
Diff_Nuc62786	chr8	11640762	11640901	+	0	NA	Intergenic	Intergenic	-5074	NM_001281974	102334	Mm.12459	NM_133971	ENSMUSG00000031508	Ankrd10	4833425P12Rik|AW549277	ankyrin repeat domain 10	protein-coding
Diff_Nuc34699	chr6	100893072	100893211	+	0	NA	Intergenic	Intergenic	109509	NM_182939	232314	Mm.27223	NM_182939	ENSMUSG00000052144	Ppp4r2	BE691708|C230060M08Rik	protein phosphatase 4, regulatory subunit 2	protein-coding
Diff_Nuc22143	chr14	32425732	32425871	+	0	NA	intron (NM_019975, intron 15 of 16)	ORR1A4|LTR|MaLR	28350	NM_019975	56794	Mm.38887	NM_019975	ENSMUSG00000021884	Hacl1	1600020H07Rik|Hpcl|Phyh2	2-hydroxyacyl-CoA lyase 1	protein-coding
Diff_Nuc56581	chr1	105289622	105289761	+	0	NA	Intergenic	B4|SINE|B4	-1375705	NM_011800	23836	Mm.103640	NM_011800	ENSMUSG00000050840	Cdh20	Cdh7	cadherin 20	protein-coding
Diff_Nuc25736	chr19	43628632	43628771	+	0	NA	Intergenic	Intergenic	-29606	NM_010324	14718	Mm.19039	NM_010324	ENSMUSG00000025190	Got1	AI789014|Got-1|cAspAT|cCAT	glutamic-oxaloacetic transaminase 1, soluble	protein-coding
Diff_Nuc33680	chr6	63701872	63702011	+	0	NA	intron (NM_008167, intron 2 of 15)	intron (NM_008167, intron 2 of 15)	495090	NM_008167	14804	Mm.439651	NM_008167	ENSMUSG00000071424	Grid2	B230104L07Rik|GluD2|GluRdelta2|Lc|Lc<J>|MMS10-AC|Ms10ac|cpr|ho|nmf408|tpr	glutamate receptor, ionotropic, delta 2	protein-coding
Diff_Nuc34856	chr6	108877652	108877791	+	0	NA	Intergenic	Intergenic	99086	NM_138677	192193	Mm.21596	NM_138677	ENSMUSG00000030104	Edem1	A130059K23Rik|EDEM|mKIAA0212	ER degradation enhancer, mannosidase alpha-like 1	protein-coding
Diff_Nuc20073	chr15	53069092	53069231	+	0	NA	intron (NM_010162, intron 1 of 10)	intron (NM_010162, intron 1 of 10)	108577	NM_010162	14042	Mm.309395	NM_010162	ENSMUSG00000061731	Ext1	AA409028	exostoses (multiple) 1	protein-coding
Diff_Nuc6455	chr12	112436802	112436941	+	0	NA	intron (NM_001286122, intron 1 of 9)	CT-rich|Low_complexity|Low_complexity	-14169	NR_130987	78062	Mm.427248	NR_130987	ENSMUSG00000083193	4930595D18Rik	-	RIKEN cDNA 4930595D18 gene	ncRNA
Diff_Nuc46967	chr3	97917532	97917671	+	0	NA	intron (NM_010928, intron 14 of 33)	intron (NM_010928, intron 14 of 33)	-46956	NM_027665	71078	Mm.50711	NM_027665	ENSMUSG00000043468	Adam30	4933424D07Rik|svph4	a disintegrin and metallopeptidase domain 30	protein-coding
Diff_Nuc33216	chr6	47827872	47828011	+	0	NA	intron (NM_146175, intron 1 of 7)	CpG	387	NM_146175	101095	Mm.440186	NM_146175	ENSMUSG00000025821	Zfp282	AI449432|C81429|E430019K09Rik|HUB1	zinc finger protein 282	protein-coding
Diff_Nuc13594	chr10	123928472	123928611	+	0	NA	intron (NR_028310, intron 2 of 3)	intron (NR_028310, intron 2 of 3)	22411	NR_028310	75030	Mm.159403	NR_028310		4930503E24Rik	-	eukaryotic translation initiation factor 3, subunit I pseudogene	pseudo
Diff_Nuc3147	chr13	99940392	99940531	+	0	NA	Intergenic	Intergenic	-14317	NM_001004149	238803	Mm.343207	NM_001004149	ENSMUSG00000050919	Zfp366	DC-SCRIPT|Znf366	zinc finger protein 366	protein-coding
Diff_Nuc39200	chr5	122269752	122269891	+	0	NA	promoter-TSS (NR_105998)	promoter-TSS (NR_105998)	-539	NR_105998	102465624		NR_105998	ENSMUSG00000099063	Mir7031	Gm27859|mmu-mir-7031	microRNA 7031	ncRNA
Diff_Nuc17589	chr16	46485512	46485651	+	0	NA	intron (NM_021495, intron 1 of 5)	ID_B1|SINE|B4	11499	NM_021496	58998	Mm.40477	NM_021495	ENSMUSG00000022656	Nectin3	2610301B19Rik|3000002N23Rik|4921513D19Rik|AA407785|AU016832|AW538082|CD113|Pvrl3	nectin cell adhesion molecule 3	protein-coding
Diff_Nuc5843	chr12	88700002	88700141	+	0	NA	intron (NM_011479, intron 2 of 11)	RLTR11B|LTR|ERVK	29234	NM_011479	20773	Mm.565	NM_011479	ENSMUSG00000021036	Sptlc2	LCB2|LCB2a|Spt2	serine palmitoyltransferase, long chain base subunit 2	protein-coding
Diff_Nuc15117	chr17	51666022	51666161	+	0	NA	Intergenic	Intergenic	-78497	NR_046166	328837	Mm.236143	NR_046166		C330011F03Rik	C330011F03	RIKEN cDNA C330011F03 gene	ncRNA
Diff_Nuc51356	chr2	92616112	92616251	+	0	NA	Intergenic	RLTR15|LTR|ERVK	-139077	NM_030725	80976	Mm.33490	NM_030725	ENSMUSG00000027220	Syt13	5730409J20Rik|AI549909|mKIAA1427	synaptotagmin XIII	protein-coding
Diff_Nuc47742	chr3	122274782	122274921	+	0	NA	intron (NM_153118, intron 2 of 13)	B4A|SINE|B4	-30252	NR_106117	102465764		NR_106117	ENSMUSG00000104773	Mir7657	mmu-mir-7657	microRNA 7657	ncRNA
Diff_Nuc31681	chr7	139802302	139802441	+	0	NA	promoter-TSS (NM_029609)	promoter-TSS (NM_029609)	45	NM_029609	76429	Mm.276721	NM_029609	ENSMUSG00000030946	Lhpp	2310007H09Rik	phospholysine phosphohistidine inorganic pyrophosphate phosphatase	protein-coding
Diff_Nuc57610	chr1	142987952	142988091	+	0	NA	Intergenic	Intergenic	-435042	NR_040604	75910	Mm.483845	NR_040604	ENSMUSG00000102368	4930590L20Rik	-	RIKEN cDNA 4930590L20 gene	ncRNA
Diff_Nuc56415	chr1	96577012	96577151	+	0	NA	Intergenic	Intergenic	-116938	NR_040473	74689	Mm.399187	NR_040473	ENSMUSG00000100518	4930440C22Rik	-	RIKEN cDNA 4930440C22 gene	ncRNA
Diff_Nuc27978	chr18	68405332	68405471	+	0	NA	intron (NM_172631, intron 4 of 5)	MTD|LTR|MaLR	15226	NR_106078	102465702		NR_106078	ENSMUSG00000098253	Mir7219	Gm27613|mmu-mir-7219	microRNA 7219	ncRNA
Diff_Nuc1947	chr13	50062292	50062431	+	0	NA	Intergenic	Intergenic	283316	NM_001033438	380882	Mm.425809	NM_001033438	ENSMUSG00000095300	Gm906	-	predicted gene 906	protein-coding
Diff_Nuc41230	chr4	46963052	46963191	+	0	NA	intron (NM_001081141, intron 1 of 18)	Lx8|LINE|L1	41465	NM_001081141	242425	Mm.101909	NM_001081141	ENSMUSG00000039809	Gabbr2	GABABR2|Gb2|Gm425|Gpr51	gamma-aminobutyric acid (GABA) B receptor, 2	protein-coding
Diff_Nuc43933	chr4	141092192	141092331	+	0	NA	intron (NM_001347235, intron 1 of 14)	CpG	2251	NM_001347235	56381	Mm.299906	NM_019763	ENSMUSG00000040761	Spen	Mint|mKIAA0929	SPEN homolog, transcriptional regulator (Drosophila)	protein-coding
Diff_Nuc62985	chr8	23544902	23545041	+	0	NA	Intergenic	Intergenic	23159	NM_020560	57312	Mm.289402	NM_020560	ENSMUSG00000031533	Mrps31	1500002D03Rik|AA960481|Imogen38|Imogen44	mitochondrial ribosomal protein S31	protein-coding
Diff_Nuc5446	chr12	78398202	78398341	+	0	NA	intron (NM_001252614, intron 3 of 12)	intron (NM_001252614, intron 3 of 12)	58545	NR_045554	53618	Mm.35628	NM_016893	ENSMUSG00000021065	Fut8	-	fucosyltransferase 8	protein-coding
Diff_Nuc57116	chr1	127984002	127984141	+	0	NA	intron (NM_001081756, intron 10 of 16)	intron (NM_001081756, intron 10 of 16)	-174566	NM_001311089	72585	Mm.490405	NM_145100	ENSMUSG00000026344	Lypd1	2700050C12Rik|AI853408|C530008O16Rik|Lynx2|Lypdc1	Ly6/Plaur domain containing 1	protein-coding
Diff_Nuc55617	chr1	67139532	67139671	+	0	NA	Intergenic	Intergenic	-30000	NM_001080809	227231	Mm.343942	NM_001080809	ENSMUSG00000025991	Cps1	4732433M03Rik|CPS|D1Ucla3	carbamoyl-phosphate synthetase 1	protein-coding
Diff_Nuc19939	chr15	47152462	47152601	+	0	NA	Intergenic	Intergenic	697680	NR_045811	75281	Mm.159487	NR_045811	ENSMUSG00000051198	4930548G14Rik	-	RIKEN cDNA 4930548G14 gene	ncRNA
Diff_Nuc9686	chr11	106387152	106387291	+	0	NA	intron (NM_198292, intron 7 of 11)	intron (NM_198292, intron 7 of 11)	24916	NR_030703	100216537		NR_030703	ENSMUSG00000065126	Snord104	-	small nucleolar RNA, C/D box 104	snoRNA
Diff_Nuc43141	chr4	116110922	116111061	+	0	NA	intron (NM_008641, intron 1 of 28)	intron (NM_008641, intron 1 of 28)	25795	NM_001042743	17776	Mm.9287	NM_008641	ENSMUSG00000003810	Mast2	MAST205|Mtssk	microtubule associated serine/threonine kinase 2	protein-coding
Diff_Nuc2193	chr13	60502342	60502481	+	0	NA	Intergenic	Intergenic	195579	NR_036449	100503759	Mm.38101	NM_177810		Gm5084	A030007L22|EG328264	predicted gene 5084	ncRNA
Diff_Nuc32930	chr6	37487622	37487761	+	0	NA	intron (NM_145364, intron 3 of 8)	B3A|SINE|B2	7518	NM_145364	208665	Mm.262635	NM_145364	ENSMUSG00000038641	Akr1d1	-	aldo-keto reductase family 1, member D1	protein-coding
Diff_Nuc59146	chr1	193178402	193178541	+	0	NA	exon (NM_144880, exon 11 of 13)	exon (NM_144880, exon 11 of 13)	28627	NM_025864	66950	Mm.236300	NM_025864	ENSMUSG00000026627	Tmem206	2310028N02Rik|AI118576	transmembrane protein 206	protein-coding
Diff_Nuc12445	chr10	84099292	84099431	+	0	NA	intron (NM_027423, intron 7 of 27)	MTD-int|LTR|MaLR	14179	NM_027423	70428	Mm.335007	NM_027423	ENSMUSG00000034453	Polr3b	2700078H01Rik|A330032P03Rik|C85372|RPC2	polymerase (RNA) III (DNA directed) polypeptide B	protein-coding
Diff_Nuc19011	chr15	7114472	7114611	+	0	NA	exon (NM_001113386, exon 6 of 17)	exon (NM_001113386, exon 6 of 17)	23999	NM_013584	16880	Mm.149720	NM_013584	ENSMUSG00000054263	Lifr	A230075M04Rik|AW061234|LIF	leukemia inhibitory factor receptor	protein-coding
Diff_Nuc5067	chr12	65473062	65473201	+	0	NA	Intergenic	RLTR11A2|LTR|ERVK	102754	NM_001163271	623046	Mm.189552	NM_001163271	ENSMUSG00000043060	Fscb	EG623046	fibrous sheath CABYR binding protein	protein-coding
Diff_Nuc10434	chr10	9615272	9615411	+	0	NA	intron (NM_001081344, intron 2 of 25)	intron (NM_001081344, intron 2 of 25)	5497	NM_001081344	78808	Mm.331751	NM_030191	ENSMUSG00000019790	Stxbp5	0710001E20Rik|4930565N16Rik|AW742610|LGL3|mKIAA1006	syntaxin binding protein 5 (tomosyn)	protein-coding
Diff_Nuc54913	chr1	44145582	44145721	+	0	NA	intron (NM_029368, intron 5 of 7)	intron (NM_029368, intron 5 of 7)	13582	NM_029368	75623	Mm.348017	NM_029368	ENSMUSG00000026049	Tex30	1700029F09Rik|3110030D08Rik	testis expressed 30	protein-coding
Diff_Nuc22481	chr14	46983122	46983261	+	0	NA	Intergenic	Intergenic	-16008	NR_037981	100041724	Mm.383311	NM_001099324	ENSMUSG00000079261	Gm15217	OTTMUSG00000019524	predicted gene 15217	ncRNA
Diff_Nuc36488	chr5	21199972	21200111	+	0	NA	intron (NM_178728, intron 1 of 4)	intron (NM_178728, intron 1 of 4)	7122	NM_178728	242864	Mm.153292	NM_178728	ENSMUSG00000044968	Napepld	A530089G06|Mbldc1|NAPE-PLD	N-acyl phosphatidylethanolamine phospholipase D	protein-coding
Diff_Nuc31287	chr7	125645052	125645191	+	0	NA	Intergenic	L1Md_A|LINE|L1	-9632	NM_001033380	319622	Mm.323386	NM_001033380	ENSMUSG00000095115	Itpripl2	C130081G24|E030018N11Rik	inositol 1,4,5-triphosphate receptor interacting protein-like 2	protein-coding
Diff_Nuc27851	chr18	64799542	64799681	+	0	NA	intron (NM_001001488, intron 1 of 27)	L1_Mus3|LINE|L1	21043	NM_001001488	54670	Mm.270043	NM_001001488	ENSMUSG00000039529	Atp8b1	AI451886|FIC1|Ic	ATPase, class I, type 8B, member 1	protein-coding
Diff_Nuc12924	chr10	100218322	100218461	+	0	NA	Intergenic	Intergenic	163371	NM_001081246	66605	Mm.72646	NM_001081246	ENSMUSG00000056912	1700017N19Rik	-	RIKEN cDNA 1700017N19 gene	protein-coding
Diff_Nuc52737	chr2	139544632	139544771	+	0	NA	intron (NM_001276489, intron 1 of 5)	intron (NM_001276489, intron 1 of 5)	40787	NM_001276489	319909	Mm.41113	NM_001126490	ENSMUSG00000074766	Ism1	5430433G21Rik|Ism	isthmin 1, angiogenesis inhibitor	protein-coding
Diff_Nuc27425	chr18	47633132	47633271	+	0	NA	Intergenic	Intergenic	20879	NR_033453	77668	Mm.98433	NR_033453		9130209A04Rik	-	RIKEN cDNA 9130209A04 gene	ncRNA
Diff_Nuc24880	chr19	12005402	12005541	+	0	NA	intron (NM_172635, intron 10 of 18)	ID_B1|SINE|B4	7253	NR_105960	102465601		NR_105960	ENSMUSG00000104979	Mir6994	mmu-mir-6994	microRNA 6994	ncRNA
Diff_Nuc9735	chr11	107194742	107194881	+	0	NA	intron (NM_145823, intron 2 of 9)	intron (NM_145823, intron 2 of 9)	137223	NM_145823	71795	Mm.397413	NM_145823	ENSMUSG00000040430	Pitpnc1	1110020B03Rik|5830436L09Rik|AI662802|AI851387|C330017I21Rik|Dnr411|RDGBB|RDGBB1|rdgB-beta	phosphatidylinositol transfer protein, cytoplasmic 1	protein-coding
Diff_Nuc36752	chr5	31670172	31670311	+	0	NA	Intergenic	URR1B|DNA|MER1_type	70287	NM_144909	231103	Mm.100043	NM_144909	ENSMUSG00000059434	Gckr	GKRP	glucokinase regulatory protein	protein-coding
Diff_Nuc64253	chr8	72001342	72001481	+	0	NA	Intergenic	Intergenic	-81968	NR_038043	378466	Mm.37846	NM_194351	ENSMUSG00000110444	Gm10033	9330175B10Rik|ENSMUSG00000057924|Gm10311	predicted gene 10033	ncRNA
Diff_Nuc31034	chr7	117786002	117786141	+	0	NA	Intergenic	(TG)n|Simple_repeat|Simple_repeat	14888	NM_009627	11535	Mm.1408	NM_009627	ENSMUSG00000030790	Adm	AM	adrenomedullin	protein-coding
Diff_Nuc1111	chr13	22644862	22645001	+	0	NA	Intergenic	Intergenic	-3139	NM_001045544	632793	Mm.432450	NM_001045544	ENSMUSG00000094637	Vmn1r204	Gm11301|OTTMUSG00000000494	vomeronasal 1 receptor 204	protein-coding
Diff_Nuc26954	chr18	32328472	32328611	+	0	NA	intron (NM_011946, intron 1 of 16)	ORR1D2-int|LTR|MaLR	5798	NM_011946	26405	Mm.211762	NM_011946	ENSMUSG00000024383	Map3k2	9630061B06Rik|AI585793|Mekk2|Mekk2b	mitogen-activated protein kinase kinase kinase 2	protein-coding
Diff_Nuc36045	chr6	148262102	148262241	+	0	NA	intron (NM_001347518, intron 8 of 18)	intron (NM_001347518, intron 8 of 18)	-41007	NR_003634	66184	Mm.391542	NM_025405	ENSMUSG00000063171	Rps4l	1110033J19Rik|AA407494|Rps4y2	ribosomal protein S4-like	pseudo
Diff_Nuc2880	chr13	91187042	91187181	+	0	NA	intron (NM_025770, intron 3 of 7)	intron (NM_025770, intron 3 of 7)	124384	NM_024175	66475	Mm.306302	NM_024175	ENSMUSG00000049517	Rps23	2410044J15Rik	ribosomal protein S23	protein-coding
Diff_Nuc26651	chr18	17297272	17297411	+	0	NA	Intergenic	MIR|SINE|MIR	96650	NR_033607	664619	Mm.250005	NR_033607		4921533I20Rik	-	PRP18 pre-mRNA processing factor 18 homolog pseudogene	pseudo
Diff_Nuc57292	chr1	133917782	133917921	+	0	NA	intron (NM_007923, intron 4 of 4)	B1_Mus1|SINE|Alu	13669	NM_007923	13714	Mm.254233	NM_007923	ENSMUSG00000026436	Elk4	2310011G17Rik|A130026I01Rik|BB162516|SAP-1|Sap1	ELK4, member of ETS oncogene family	protein-coding
Diff_Nuc31358	chr7	128190062	128190201	+	0	NA	intron (NM_021554, intron 1 of 4)	MIRb|SINE|MIR	12172	NM_021554	59052	Mm.29122	NM_021554	ENSMUSG00000030876	Mettl9	0610012D09Rik|AA517660|Drev|MNCb-5680	methyltransferase like 9	protein-coding
Diff_Nuc63282	chr8	35092682	35092821	+	0	NA	Intergenic	B2_Mm2|SINE|B2	-52416	NM_001042675	19663	Mm.323997	NM_019733	ENSMUSG00000031586	Rbpms	2010300K22Rik|2700019M19Rik|AU017537|RBP-MS|hermes	RNA binding protein gene with multiple splicing	protein-coding
Diff_Nuc22041	chr14	29206162	29206301	+	0	NA	intron (NM_001347497, intron 19 of 19)	intron (NM_001347497, intron 19 of 19)	-112428	NM_009524	22418	Mm.287544	NM_009524	ENSMUSG00000021994	Wnt5a	8030457G12Rik|Wnt-5a	wingless-type MMTV integration site family, member 5A	protein-coding
Diff_Nuc11654	chr10	55536802	55536941	+	0	NA	Intergenic	Intergenic	-289852	NM_001163833	73390	Mm.181475	NM_133751	ENSMUSG00000047669	Msl3l2	1700060H10Rik	male-specific lethal 3-like 2 (Drosophila)	protein-coding
Diff_Nuc47986	chr3	130964992	130965131	+	0	NA	intron (NM_008212, intron 1 of 7)	B2_Mm2|SINE|B2	9958	NM_008212	15107	Mm.260164	NM_008212	ENSMUSG00000027984	Hadh	AA409008|AU019341|AW742602|HCDH|Hadhsc|Schad	hydroxyacyl-Coenzyme A dehydrogenase	protein-coding
Diff_Nuc49662	chr2	34394542	34394681	+	0	NA	intron (NM_001290625, intron 7 of 11)	intron (NM_001290625, intron 7 of 11)	132240	NM_001290626	227743	Mm.270866	NM_177345	ENSMUSG00000038696	Mapkap1	AI591529|D230039K05Rik|Sin1	mitogen-activated protein kinase associated protein 1	protein-coding
Diff_Nuc53008	chr2	147856712	147856851	+	0	NA	Intergenic	Intergenic	14419	NM_001291067	15376	Mm.938	NM_010446	ENSMUSG00000037025	Foxa2	HNF3-beta|HNF3beta|Hnf-3b|Hnf3b|Tcf-3b|Tcf3b	forkhead box A2	protein-coding
Diff_Nuc23503	chr14	80520842	80520981	+	0	NA	Intergenic	Intergenic	120802	NM_001030294	380924	Mm.26456	NM_001030294	ENSMUSG00000022026	Olfm4	GC1|GW112|Gm296|Gm913|OlfD|pPD4	olfactomedin 4	protein-coding
Diff_Nuc23293	chr14	73908482	73908621	+	0	NA	Intergenic	Intergenic	-1305	NM_026119	67381	Mm.282888	NM_026119	ENSMUSG00000022109	Med4	2410046H15Rik|DRIP36|HSPC126|TRAP36|Vdirp|Vdrip	mediator complex subunit 4	protein-coding
Diff_Nuc8398	chr11	70572402	70572541	+	0	NA	Intergenic	MTD|LTR|MaLR	-5478	NM_177565	193043	Mm.40966	NM_177565	ENSMUSG00000043602	Zfp3	AI854635|B230309J24|Fnp-1|Zfp-3	zinc finger protein 3	protein-coding
Diff_Nuc62971	chr8	23174222	23174361	+	0	NA	intron (NR_040650, intron 2 of 3)	intron (NR_040650, intron 2 of 3)	3098	NM_183142	207958	Mm.267439	NM_183142	ENSMUSG00000063362	Alg11	AI849156|AW492253|B230397C21|Mmat-4(5)	asparagine-linked glycosylation 11 (alpha-1,2-mannosyltransferase)	protein-coding
Diff_Nuc28806	chr7	19948502	19948641	+	0	NA	intron (NM_001010836, intron 1 of 12)	intron (NM_001010836, intron 1 of 12)	2006	NM_001010836	333654	Mm.333640	NM_001010836	ENSMUSG00000040734	Ppp1r13l	AV260376|IASPP|Nkip1|wa3	protein phosphatase 1, regulatory (inhibitor) subunit 13 like	protein-coding
Diff_Nuc49324	chr2	25112432	25112571	+	0	NA	TTS (NM_177344)	TTS (NM_177344)	1542	NM_177344	227615	Mm.213925	NM_177344	ENSMUSG00000078201	Tmem203	C730025P13Rik|Hbebp1	transmembrane protein 203	protein-coding
Diff_Nuc34784	chr6	106027372	106027511	+	0	NA	intron (NM_001109749, intron 3 of 25)	intron (NM_001109749, intron 3 of 25)	-41318	NM_001109751	269784	Mm.321683	NM_173004	ENSMUSG00000064293	Cntn4	9630050B05|Axcam|BIG-2	contactin 4	protein-coding
Diff_Nuc35406	chr6	125541102	125541241	+	0	NA	exon (NM_011708, exon 9 of 52)	exon (NM_011708, exon 9 of 52)	38205	NM_011708	22371	Mm.22339	NM_011708	ENSMUSG00000001930	Vwf	6820430P06Rik|AI551257|B130011O06Rik|C630030D09|F8VWF|VWD	Von Willebrand factor	protein-coding
Diff_Nuc24078	chr14	105784482	105784621	+	0	NA	Intergenic	B4A|SINE|B4	-42225	NR_045859	71362	Mm.410781	NR_045859		5430440P10Rik	-	RIKEN cDNA 5430440P10 gene	ncRNA
Diff_Nuc28232	chr18	77394782	77394921	+	0	NA	TTS (NM_001164168)	TTS (NM_001164168)	-29735	NM_153124	225742	Mm.365178	NM_013666	ENSMUSG00000025425	St8sia5	ST8SiaV|Siat8e	ST8 alpha-N-acetyl-neuraminide alpha-2,8-sialyltransferase 5	protein-coding
Diff_Nuc46423	chr3	83037032	83037171	+	0	NA	Intergenic	Intergenic	177641	NM_016784	53317	Mm.286349	NM_016784	ENSMUSG00000027998	Plrg1	AA958940|C80566|Tango4	pleiotropic regulator 1	protein-coding
Diff_Nuc14514	chr17	30396502	30396641	+	0	NA	intron (NM_172618, intron 9 of 11)	intron (NM_172618, intron 9 of 11)	136554	NR_030688	623169	Mm.440508	NR_030688		Gm6402	EG623169	ribosomal protein S17 pseudogene	pseudo
Diff_Nuc53486	chr2	163544782	163544921	+	0	NA	intron (NM_011106, intron 2 of 3)	L2a|LINE|L2	25078	NM_011106	18769	Mm.10091	NM_011106	ENSMUSG00000035268	Pkig	PKIgamma	protein kinase inhibitor, gamma	protein-coding
Diff_Nuc50941	chr2	77783692	77783831	+	0	NA	intron (NM_030560, intron 1 of 20)	intron (NM_030560, intron 1 of 20)	652	NM_001290740	80744	Mm.288151	NM_030560	ENSMUSG00000027014	Cwc22	AA684037|AI173004|AL022752|B230213M24|mKIAA1604	CWC22 spliceosome-associated protein	protein-coding
Diff_Nuc55416	chr1	60432812	60432951	+	0	NA	intron (NM_030013, intron 8 of 12)	intron (NM_030013, intron 8 of 12)	32737	NM_001313721	77951	Mm.197640	NM_030013	ENSMUSG00000049439	Cyp20a1	A930011N14Rik|Cypm	cytochrome P450, family 20, subfamily a, polypeptide 1	protein-coding
Diff_Nuc48092	chr3	134440762	134440901	+	0	NA	Intergenic	RLTR13C2|LTR|ERVK	-51140	NM_021382	21338	Mm.103810	NM_021382	ENSMUSG00000028172	Tacr3	Nk3r|Nkr|Tac3r	tachykinin receptor 3	protein-coding
Diff_Nuc16274	chr17	93861662	93861801	+	0	NA	Intergenic	MLT1D|LTR|MaLR	263223	NM_009625	11516	Mm.3407	NM_009625	ENSMUSG00000024256	Adcyap1	PACAP	adenylate cyclase activating polypeptide 1	protein-coding
Diff_Nuc32927	chr6	37448952	37449091	+	0	NA	Intergenic	RMER16-int|LTR|ERVK	-31152	NM_145364	208665	Mm.262635	NM_145364	ENSMUSG00000038641	Akr1d1	-	aldo-keto reductase family 1, member D1	protein-coding
Diff_Nuc5739	chr12	85829862	85830001	+	0	NA	intron (NM_173756, intron 5 of 5)	intron (NM_173756, intron 5 of 5)	37473	NM_173756	217708	Mm.311904	NM_173756	ENSMUSG00000085793	Lin52	5830457H20Rik	lin-52 homolog (C. elegans)	protein-coding
Diff_Nuc59195	chr1	194619172	194619311	+	0	NA	Intergenic	Intergenic	-21828	NM_144881	226861	Mm.145857	NM_144881	ENSMUSG00000037375	Hhat	2810432O22Rik|AI462858|AP-2CRE|Skn|Tg(TFAP2A-cre)1Will	hedgehog acyltransferase	protein-coding
Diff_Nuc39960	chr5	147469162	147469301	+	0	NA	Intergenic	B4|SINE|B4	-72416	NM_001010941	14738	Mm.153539	NM_008151	ENSMUSG00000041468	Gpr12	Gpcr01|Gpcr12|Gpcr20|Gpcr21	G-protein coupled receptor 12	protein-coding
Diff_Nuc47956	chr3	130106652	130106791	+	0	NA	intron (NM_198711, intron 4 of 34)	L1_Mus4|LINE|L1	-213645	NM_001163587	71760	Mm.29125	NM_027907	ENSMUSG00000019232	Etnppl	1300019H02Rik|AI195447|Agxt2l1	ethanolamine phosphate phospholyase	protein-coding
Diff_Nuc13157	chr10	109344302	109344441	+	0	NA	intron (NM_001081035, intron 1 of 38)	intron (NM_001081035, intron 1 of 38)	92904	NM_001081035	260315	Mm.225050	NM_177797	ENSMUSG00000020181	Nav3	4732483H20Rik|9630020C08Rik|POMFIL1|Pomfil1p|mKIAA0938|unc53H3	neuron navigator 3	protein-coding
Diff_Nuc47761	chr3	122942252	122942391	+	0	NA	Intergenic	MLT1A0|LTR|MaLR	-3254	NM_080451	118449	Mm.34359	NM_080451	ENSMUSG00000050315	Synpo2	1110069I04Rik|2310068J10Rik|9530006G20Rik|AI848603|Myo	synaptopodin 2	protein-coding
Diff_Nuc17456	chr16	42952692	42952831	+	0	NA	intron (NM_001285805, intron 1 of 10)	B3|SINE|B2	-2932	NR_002445	170658	Mm.375824	NR_002445		BC002163	-	NADH dehydrogenase Fe-S protein 5 pseudogene	pseudo
Diff_Nuc41016	chr4	39076232	39076371	+	0	NA	Intergenic	Intergenic	-321025	NM_001081095	75471	Mm.23522	NM_001081095	ENSMUSG00000028287	1700009N14Rik	AI429145	RIKEN cDNA 1700009N14 gene	protein-coding
Diff_Nuc36339	chr5	14990012	14990151	+	0	NA	intron (NM_001310450, intron 4 of 5)	intron (NM_001310450, intron 4 of 5)	-11182	NM_001281514	100503549	Mm.491086	NM_001281514	ENSMUSG00000072188	Gm10354	ENSMUSG00000072188	predicted gene 10354	protein-coding
Diff_Nuc27687	chr18	59451012	59451151	+	0	NA	intron (NM_001081328, intron 2 of 2)	L1_Mus3|LINE|L1	116087	NM_001081328	78923	Mm.84007	NM_001081328	ENSMUSG00000058152	Chsy3	4833446K15Rik|AI662215	chondroitin sulfate synthase 3	protein-coding
Diff_Nuc46378	chr3	81255502	81255641	+	0	NA	Intergenic	Lx8|LINE|L1	-350376	NR_138586	320566	Mm.208417	NR_138586	ENSMUSG00000103695	A830029E22Rik	-	RIKEN cDNA A830029E22 gene	ncRNA
Diff_Nuc25251	chr19	29367922	29368061	+	0	NA	intron (NM_008413, intron 13 of 24)	intron (NM_008413, intron 13 of 24)	31817	NM_013754	27356	Mm.306511	NM_013754	ENSMUSG00000050957	Insl6	RIF1	insulin-like 6	protein-coding
Diff_Nuc33805	chr6	69768482	69768621	+	0	NA	Intergenic	RLTR20B3|LTR|ERVK	-491383	NR_004434	19783		NR_004434	ENSMUSG00000106222	Rprl1	Rmrp2|Rpr|Rprh2	ribonuclease P RNA-like 1	ncRNA
Diff_Nuc18455	chr16	84389102	84389241	+	0	NA	Intergenic	Intergenic	17783	NR_040567	75247	Mm.417813	NR_040567		4930553E22Rik	-	RIKEN cDNA 4930553E22 gene	ncRNA
Diff_Nuc29669	chr7	63874892	63875031	+	0	NA	Intergenic	L1Md_F|LINE|L1	379820	NM_021879	18431	Mm.137052	NM_021879	ENSMUSG00000030450	Oca2	D7H15S12|D7Icr28RN|D7Nic1|p|p<cas>	oculocutaneous albinism II	protein-coding
Diff_Nuc25619	chr19	40133682	40133821	+	0	NA	intron (NM_206537, intron 5 of 8)	L1VL4|LINE|L1	14552	NM_206537	404195	Mm.379575	NM_206537	ENSMUSG00000067225	Cyp2c54	EG404195	cytochrome P450, family 2, subfamily c, polypeptide 54	protein-coding
Diff_Nuc24692	chr19	6267732	6267871	+	0	NA	Intergenic	Intergenic	2957	NR_029720	387187		NR_029720	ENSMUSG00000065523	Mir192	Mirn192|mir-192|mmu-mir-192	microRNA 192	ncRNA
Diff_Nuc23123	chr14	68334262	68334401	+	0	NA	promoter-TSS (NM_001110162)	promoter-TSS (NM_001110162)	176	NM_001285933	105440	Mm.6720	NM_134073	ENSMUSG00000034327	Kctd9	-	potassium channel tetramerisation domain containing 9	protein-coding
Diff_Nuc16569	chr16	13809362	13809501	+	0	NA	intron (NM_001039521, intron 15 of 17)	intron (NM_001039521, intron 15 of 17)	-9913	NM_010946	18203	Mm.380410	NM_010946	ENSMUSG00000022681	Ntan1	PNAA|PNAD	N-terminal Asn amidase	protein-coding
Diff_Nuc51315	chr2	91505812	91505951	+	0	NA	intron (NM_146124, intron 4 of 12)	intron (NM_146124, intron 4 of 12)	12516	NM_146124	228359	Mm.22413	NM_146124	ENSMUSG00000027247	Arhgap1	B230365D05Rik|C76222|Cdc42GAP|p50rhoGAP	Rho GTPase activating protein 1	protein-coding
Diff_Nuc29779	chr7	71149102	71149241	+	0	NA	Intergenic	B4A|SINE|B4	-65370	NM_021366	50794	Mm.240473	NM_021366	ENSMUSG00000052040	Klf13	0610043C13Rik|9430029L20Rik|Bteb3|FKLF-2|FKLF2|NSLP1|RFLAT-1|RFLAT1	Kruppel-like factor 13	protein-coding
Diff_Nuc14829	chr17	42108772	42108911	+	0	NA	Intergenic	Lx5|LINE|L1	-344055	NM_028474	627626	Mm.390999	NM_028474	ENSMUSG00000042256	Ptchd4	3110082D06Rik|Gm321	patched domain containing 4	protein-coding
Diff_Nuc13321	chr10	114935822	114935961	+	0	NA	intron (NM_010195, intron 3 of 17)	intron (NM_010195, intron 3 of 17)	-71151	NM_029982	77798	Mm.446685	NM_029982	ENSMUSG00000092210	A930009A15Rik	-	RIKEN cDNA A930009A15 gene	protein-coding
Diff_Nuc4384	chr12	36783872	36784011	+	0	NA	Intergenic	B1_Mur1|SINE|Alu	-14876	NM_025359	66109	Mm.254663	NM_025359	ENSMUSG00000020577	Tspan13	1100001I23Rik|NET-6|Tm4sf13	tetraspanin 13	protein-coding
Diff_Nuc3422	chr13	110040922	110041061	+	0	NA	intron (NM_011056, intron 3 of 16)	intron (NM_011056, intron 3 of 16)	-73947	NR_030644	100124489		NR_030644	ENSMUSG00000076946	Mir582	Mirn582|mir-582|mmu-mir-582	microRNA 582	ncRNA
Diff_Nuc65499	chr8	116264472	116264611	+	0	NA	intron (NM_172466, intron 13 of 22)	intron (NM_172466, intron 13 of 22)	-64183	NR_136914	102631810	Mm.412563	NR_136914	ENSMUSG00000110582	Gm30052	-	predicted gene, 30052	ncRNA
Diff_Nuc58533	chr1	173351812	173351951	+	0	NA	Intergenic	RMER19A|LTR|ERVK	2717	NM_001164525	226654	Mm.46366	NM_001164525	ENSMUSG00000103711	Tstd1	AV065366|EG226654|Gm4848|KAT	thiosulfate sulfurtransferase (rhodanese)-like domain containing 1	protein-coding
Diff_Nuc4699	chr12	50507782	50507921	+	0	NA	non-coding (NR_026733, exon 3 of 3)	non-coding (NR_026733, exon 3 of 3)	17212	NR_026733	67293	Mm.185800	NR_026733	ENSMUSG00000104861	3110039M20Rik	-	RIKEN cDNA 3110039M20 gene	ncRNA
Diff_Nuc969	chr13	17754592	17754731	+	0	NA	intron (NM_138654, intron 3 of 13)	intron (NM_138654, intron 3 of 13)	31938	NM_138654	192136	Mm.364180	NM_138654	ENSMUSG00000055137	Sugct	5033411D12Rik|D17907	succinyl-CoA glutarate-CoA transferase	protein-coding
Diff_Nuc8420	chr11	70953272	70953411	+	0	NA	intron (NM_001004142, intron 2 of 13)	L1_Rod|LINE|L1	4865	NM_001004142	195046	Mm.240227	NM_001004142	ENSMUSG00000069830	Nlrp1a	CARD7|DEFCAP|Gm14|Gm15|NAC|Nalp1|Nalp1a|Nlrp1|PP1044	NLR family, pyrin domain containing 1A	protein-coding
Diff_Nuc10424	chr10	9354752	9354891	+	0	NA	intron (NM_177271, intron 1 of 1)	MLT1C|LTR|MaLR	40185	NM_177271	320825	Mm.101115	NM_177271	ENSMUSG00000060487	Samd5	E130306M17Rik	sterile alpha motif domain containing 5	protein-coding
Diff_Nuc20943	chr15	84051422	84051561	+	0	NA	Intergenic	Intergenic	-10982	NM_133167	170736	Mm.323892	NM_133167	ENSMUSG00000022438	Parvb	AI595373|AW742462|D15Gsk1|affixin	parvin, beta	protein-coding
Diff_Nuc16928	chr16	25092302	25092441	+	0	NA	Intergenic	Intergenic	32646	NR_040374	319487	Mm.137341	NR_040374	ENSMUSG00000096960	A230028O05Rik	-	RIKEN cDNA A230028O05 gene	ncRNA
Diff_Nuc226	chrX	64583612	64583751	+	0	NA	Intergenic	Intergenic	363056	NM_001126317	382217	Mm.422933	NM_001126317	ENSMUSG00000079578	Gm1140	-	predicted gene 1140	protein-coding
Diff_Nuc55066	chr1	51136392	51136531	+	0	NA	intron (NM_019790, intron 5 of 9)	intron (NM_019790, intron 5 of 9)	152094	NM_019790	56363	Mm.245154	NM_019790	ENSMUSG00000026109	Tmeff2	4832418D20Rik|7630402F16Rik|TR-2	transmembrane protein with EGF-like and two follistatin-like domains 2	protein-coding
Diff_Nuc46685	chr3	89923842	89923981	+	0	NA	exon (NM_029937, exon 5 of 40)	exon (NM_029937, exon 5 of 40)	15857	NM_029937	77595	Mm.159949	NM_029937	ENSMUSG00000027939	Nup210l	4930548O11Rik|R26-EGFP|Tg(Gt(ROSA)26Sor-EGFP)130910Eps	nucleoporin 210-like	protein-coding
Diff_Nuc12393	chr10	82069552	82069691	+	0	NA	Intergenic	Lx6|LINE|L1	16352	NM_001135569	544717	Mm.334867	NM_001135567	ENSMUSG00000063320	1190007I07Rik	-	RIKEN cDNA 1190007I07 gene	protein-coding
Diff_Nuc62694	chr8	7064992	7065131	+	0	NA	Intergenic	L1_Mur1|LINE|L1	1595712	NM_010111	13642	Mm.209813	NM_010111	ENSMUSG00000001300	Efnb2	ELF-2|Epl5|Eplg5|Htk-L|LERK-5|Lerk5|NLERK-1	ephrin B2	protein-coding
Diff_Nuc48730	chr3	159396492	159396631	+	0	NA	Intergenic	Intergenic	-106098	NR_037590	68151	Mm.6766	NM_026582	ENSMUSG00000028173	Wls	5031439A09Rik|AI173978|AI987742|Gpr177	wntless homolog (Drosophila)	protein-coding
Diff_Nuc32470	chr6	22213972	22214111	+	0	NA	Intergenic	RMER19C|LTR|ERVK	-24186	NM_053116	93735	Mm.137403	NM_053116	ENSMUSG00000029671	Wnt16	E130309I19Rik	wingless-type MMTV integration site family, member 16	protein-coding
Diff_Nuc6320	chr12	106293292	106293431	+	0	NA	Intergenic	Intergenic	22533	NM_028419	73046	Mm.29128	NM_028419	ENSMUSG00000021102	Glrx5	-	glutaredoxin 5	protein-coding
Diff_Nuc3557	chr13	114757372	114757511	+	0	NA	intron (NM_172595, intron 3 of 4)	intron (NM_172595, intron 3 of 4)	172725	NM_172595	218639	Mm.79837	NM_172595	ENSMUSG00000042348	Arl15	A430036I03|Arfrp2|C230032K13Rik	ADP-ribosylation factor-like 15	protein-coding
Diff_Nuc45069	chr3	29865512	29865651	+	0	NA	exon (NM_007963, exon 9 of 15)	exon (NM_007963, exon 9 of 15)	46545	NM_007963	14013	Mm.56965	NM_007963	ENSMUSG00000027684	Mecom	D630039M04Rik|Evi-1|Evi1|Jbo|Mds|Mds1|Mds1-Evi1|Prdm3|Znfpr1b1	MDS1 and EVI1 complex locus	protein-coding
Diff_Nuc12229	chr10	76971642	76971781	+	0	NA	intron (NM_133998, intron 2 of 5)	intron (NM_133998, intron 2 of 5)	6847	NM_133998	108707	Mm.259547	NM_133998	ENSMUSG00000032977	Fam207a	1810008A18Rik|AI303072	family with sequence similarity 207, member A	protein-coding
Diff_Nuc7484	chr11	34695002	34695141	+	0	NA	Intergenic	Intergenic	-47928	NM_027411	70385	Mm.194368	NM_027411	ENSMUSG00000069910	Spdl1	1700018I02Rik|2600001J17Rik|2810049B11Rik|AA409762|Ccdc99	spindle apparatus coiled-coil protein 1	protein-coding
Diff_Nuc49853	chr2	40196352	40196491	+	0	NA	Intergenic	Intergenic	-1114563	NM_024209	67857	Mm.389242	NM_024209	ENSMUSG00000026753	Ppp6c	2310003C10Rik	protein phosphatase 6, catalytic subunit	protein-coding
Diff_Nuc38858	chr5	110560852	110560991	+	0	NA	Intergenic	RLTR9D|LTR|ERVK	-3928	NM_172717	231600	Mm.30264	NM_172717	ENSMUSG00000014668	Chfr	5730484M20Rik|C230082M18|RNF116	checkpoint with forkhead and ring finger domains	protein-coding
Diff_Nuc21945	chr14	26528382	26528521	+	0	NA	Intergenic	Intergenic	-7683	NR_028021	68173	Mm.444727	NM_026595		Ppifos	4930520F12Rik|Ppifs	peptidylprolyl isomerase F, opposite strand	ncRNA
Diff_Nuc6197	chr12	103568252	103568391	+	0	NA	intron (NM_001161365, intron 3 of 9)	intron (NM_001161365, intron 3 of 9)	46470	NM_001161365	217835	Mm.24145	NM_177620	ENSMUSG00000044456	Rin3	6430500K07|C86933	Ras and Rab interactor 3	protein-coding
Diff_Nuc3495	chr13	113157092	113157231	+	0	NA	intron (NM_029898, intron 8 of 10)	RMER5|LTR|ERV1	78435	NM_001168404	77318	Mm.159895	NM_029898	ENSMUSG00000049985	Ankrd55	C030011J08Rik	ankyrin repeat domain 55	protein-coding
Diff_Nuc55441	chr1	61293702	61293841	+	0	NA	Intergenic	Intergenic	-141505	NR_040483	77341	Mm.402964	NR_040483	ENSMUSG00000085447	9530026F06Rik	-	RIKEN cDNA 9530026F06 gene	ncRNA
Diff_Nuc41103	chr4	42994492	42994631	+	0	NA	intron (NM_009503, intron 15 of 16)	B1_Mus2|SINE|Alu	11743	NM_026088	67317	Mm.478018	NM_026088	ENSMUSG00000028451	1700022I11Rik	-	RIKEN cDNA 1700022I11 gene	protein-coding
Diff_Nuc27084	chr18	35858312	35858451	+	0	NA	intron (NM_029669, intron 2 of 7)	PB1D9|SINE|Alu	4417	NM_029669	76594	Mm.108596	NM_029669	ENSMUSG00000024350	Dnajc18	2700075B01Rik|AU041129	DnaJ heat shock protein family (Hsp40) member C18	protein-coding
Diff_Nuc3590	chr13	115642982	115643121	+	0	NA	intron (NM_008396, intron 23 of 29)	intron (NM_008396, intron 23 of 29)	34606	NM_001113374	17434	Mm.19027	NM_013826	ENSMUSG00000015536	Mocs2	AI415403	molybdenum cofactor synthesis 2	protein-coding
Diff_Nuc62283	chr9	113760422	113760561	+	0	NA	intron (NM_001114347, intron 14 of 39)	intron (NM_001114347, intron 14 of 39)	38787	NM_001081960	76499	Mm.222272	NM_029633	ENSMUSG00000033392	Clasp2	1500004F14Rik|8030404L10Rik|C77448|CLASP2beta|mKIAA0627	CLIP associating protein 2	protein-coding
Diff_Nuc30805	chr7	109170052	109170191	+	0	NA	intron (NM_029211, intron 8 of 8)	intron (NM_029211, intron 8 of 8)	-3452	NM_010531	16068	Mm.422756	NM_010531	ENSMUSG00000070427	Il18bp	IL-18BP|Igifbp|MC54L	interleukin 18 binding protein	protein-coding
Diff_Nuc7932	chr11	54284082	54284221	+	0	NA	intron (NM_173753, intron 2 of 17)	Lx8|LINE|L1	32470	NM_173753	216742	Mm.34087	NM_173753	ENSMUSG00000035992	Fnip1	A730024A03Rik|AI838773|AW557298	folliculin interacting protein 1	protein-coding
Diff_Nuc48947	chr2	10016632	10016771	+	0	NA	intron (NM_010582, intron 20 of 20)	intron (NM_010582, intron 20 of 20)	14462	NM_025280	16588	Mm.35498	NM_025280	ENSMUSG00000037262	Kin	Kin17	Kin17 DNA and RNA binding protein	protein-coding
Diff_Nuc8611	chr11	76787682	76787821	+	0	NA	intron (NM_178645, intron 11 of 11)	intron (NM_178645, intron 11 of 11)	-24348	NM_010484	15567	Mm.300318	NM_010484	ENSMUSG00000020838	Slc6a4	5-HTT|AI323329|Htt|Sert	solute carrier family 6 (neurotransmitter transporter, serotonin), member 4	protein-coding
Diff_Nuc35441	chr6	127965092	127965231	+	0	NA	intron (NM_175414, intron 3 of 8)	intron (NM_175414, intron 3 of 8)	127521	NM_026743	68498	Mm.174368	NM_026743	ENSMUSG00000030351	Tspan11	1110014F12Rik|AU067806	tetraspanin 11	protein-coding
Diff_Nuc16154	chr17	88059032	88059171	+	0	NA	Intergenic	Intergenic	-12796	NM_008628	17685	Mm.4619	NM_008628	ENSMUSG00000024151	Msh2	AI788990	mutS homolog 2	protein-coding
Diff_Nuc27531	chr18	53375472	53375611	+	0	NA	intron (NM_026386, intron 11 of 14)	intron (NM_026386, intron 11 of 14)	-29775	NM_029394	69226	Mm.32414	NM_029394	ENSMUSG00000024535	Snx24	2810011K15Rik|5730433I16Rik|AI451341	sorting nexing 24	protein-coding
Diff_Nuc4784	chr12	53616132	53616271	+	0	NA	promoter-TSS (NM_009706)	promoter-TSS (NM_009706)	-863	NM_009706	11855	Mm.35059	NM_009706	ENSMUSG00000035133	Arhgap5	p190-B|p190B	Rho GTPase activating protein 5	protein-coding
Diff_Nuc25949	chr19	49860832	49860971	+	0	NA	Intergenic	MLT1E1A|LTR|MaLR	892235	NM_001252501	58178	Mm.313672	NM_021377	ENSMUSG00000043531	Sorcs1	Sorcs|mSorCS	sortilin-related VPS10 domain containing receptor 1	protein-coding
Diff_Nuc5730	chr12	85702092	85702231	+	0	NA	promoter-TSS (NM_172582)	promoter-TSS (NM_172582)	610	NM_172581	217705	Mm.259468	NM_172581	ENSMUSG00000021234	Fam161b	9330169D17|9830169C18Rik	family with sequence similarity 161, member B	protein-coding
Diff_Nuc65548	chr8	117595682	117595821	+	0	NA	intron (NM_019573, intron 8 of 8)	intron (NM_019573, intron 8 of 8)	632199	NM_019573	80707	Mm.440420	NM_019573	ENSMUSG00000004637	Wwox	5330426P09Rik|9030416C10Rik|WOX1	WW domain-containing oxidoreductase	protein-coding
Diff_Nuc38849	chr5	110431352	110431491	+	0	NA	intron (NM_145563, intron 1 of 3)	Lx6|LINE|L1	5875	NM_145563	69504	Mm.441438	NM_145563	ENSMUSG00000066613	Zfp932	2310001H12Rik|Znf431	zinc finger protein 932	protein-coding
Diff_Nuc64345	chr8	74365392	74365531	+	0	NA	Intergenic	L1Md_F2|LINE|L1	-40506	NM_145624	236193	Mm.290790	NM_145624	ENSMUSG00000056019	Zfp709	BC021921|GIOT-4|HIT-40	zinc finger protein 709	protein-coding
Diff_Nuc57840	chr1	152828322	152828461	+	0	NA	intron (NM_001024720, intron 1 of 106)	B3|SINE|B2	12174	NM_001024720	545370	Mm.379425	NM_001024720	ENSMUSG00000066842	Hmcn1	EG545370|FIBL-6|Gm201	hemicentin 1	protein-coding
Diff_Nuc22095	chr14	31362962	31363101	+	0	NA	intron (NM_009388, intron 1 of 13)	intron (NM_009388, intron 1 of 13)	714	NM_009388	21881	Mm.290692	NM_009388	ENSMUSG00000021957	Tkt	p68	transketolase	protein-coding
Diff_Nuc64632	chr8	85004162	85004301	+	0	NA	Intergenic	Lx9|LINE|L1	-77746	NM_008357	16168	Mm.4392	NM_008357	ENSMUSG00000031712	Il15	AI503618|IL-15	interleukin 15	protein-coding
Diff_Nuc42257	chr4	86481362	86481501	+	0	NA	intron (NM_184088, intron 25 of 31)	B3|SINE|B2	21840	NM_009096	20104	Mm.379007	NM_009096	ENSMUSG00000028495	Rps6	S6R	ribosomal protein S6	protein-coding
Diff_Nuc1324	chr13	30471222	30471361	+	0	NA	intron (NM_177322, intron 2 of 2)	intron (NM_177322, intron 2 of 2)	43066	NM_177322	11607	Mm.35062	NM_177322	ENSMUSG00000049115	Agtr1a	1810074K20Rik|AG2S|AI551199|AT1|AT1a|AT2R1|AT2R1A|Agtr-1a|Agtr1|Angtr-1a	angiotensin II receptor, type 1a	protein-coding
Diff_Nuc49931	chr2	43422712	43422851	+	0	NA	intron (NM_027552, intron 2 of 13)	RMER6A|LTR|ERVK	11936	NM_027552	70789	Mm.105278	NM_027552	ENSMUSG00000026866	Kynu	4432411A05Rik	kynureninase (L-kynurenine hydrolase)	protein-coding
Diff_Nuc19177	chr15	12744432	12744571	+	0	NA	intron (NM_029998, intron 6 of 8)	MTC-int|LTR|MaLR	9911	NM_029998	77877	Mm.207311	NM_029998	ENSMUSG00000022195	6030458C11Rik	-	RIKEN cDNA 6030458C11 gene	protein-coding
Diff_Nuc23119	chr14	68162032	68162171	+	0	NA	Intergenic	ORR1D2-int|LTR|MaLR	-145522	NR_045961	73977	Mm.414915	NR_045961	ENSMUSG00000093472	4930438E09Rik	-	RIKEN cDNA 4930438E09 gene	ncRNA
Diff_Nuc47207	chr3	104643622	104643761	+	0	NA	intron (NM_009797, intron 4 of 9)	intron (NM_009797, intron 4 of 9)	-22210	NM_001163440	17454	Mm.1597	NM_008619	ENSMUSG00000002227	Mov10	C77703|Mov-10	Moloney leukemia virus 10	protein-coding
Diff_Nuc46892	chr3	96052942	96053081	+	0	NA	Intergenic	Intergenic	2388	NM_054045	97114	Mm.358797	NM_054045	ENSMUSG00000081058	Hist2h3c2	H3-614|H3.2-614|Hist2h3c2-ps|Hist2h3ca1|M32461	histone cluster 2, H3c2	protein-coding
Diff_Nuc56926	chr1	120319882	120320021	+	0	NA	intron (NM_029709, intron 2 of 36)	intron (NM_029709, intron 2 of 36)	34316	NM_001293301	76707	Mm.138740	NM_029709	ENSMUSG00000064302	Clasp1	1700030C23Rik|5730583A19Rik|B130045P17Rik|CLASP1alpha	CLIP associating protein 1	protein-coding
Diff_Nuc19039	chr15	8042842	8042981	+	0	NA	intron (NM_001081402, intron 3 of 17)	intron (NM_001081402, intron 3 of 17)	6298	NM_001081402	545085	Mm.321312	NM_198413	ENSMUSG00000039828	Wdr70	4833422F06Rik	WD repeat domain 70	protein-coding
Diff_Nuc61668	chr9	92122312	92122451	+	0	NA	Intergenic	Intergenic	-22651	NM_011636	22038	Mm.421956	NM_011636	ENSMUSG00000032369	Plscr1	MmTRA1a|MmTRA1b|Nor1|Tra1|Tra1a|Tra1b|Tras1|Tras2	phospholipid scramblase 1	protein-coding
Diff_Nuc57989	chr1	157180212	157180351	+	0	NA	intron (NM_011273, intron 3 of 14)	L1MB7|LINE|L1	84293	NM_011273	19775	Mm.266215	NM_011273	ENSMUSG00000026469	Xpr1	Rmc-1|Rmc1|Sxv|Syg1|XR	xenotropic and polytropic retrovirus receptor 1	protein-coding
Diff_Nuc27466	chr18	49886042	49886181	+	0	NA	intron (NM_026854, intron 2 of 5)	intron (NM_026854, intron 2 of 5)	29144	NM_026854	68857	Mm.96010	NM_026854	ENSMUSG00000024505	Dtwd2	1190002H09Rik|8030470C17Rik|AI414673|BB115449	DTW domain containing 2	protein-coding
Diff_Nuc60496	chr9	54183762	54183901	+	0	NA	intron (NM_177350, intron 9 of 9)	intron (NM_177350, intron 9 of 9)	-34454	NR_045805	73567	Mm.211290	NM_001033169	ENSMUSG00000074343	Gldnos	1700104A03Rik	gliomedin, opposite strand	ncRNA
Diff_Nuc6115	chr12	100815772	100815911	+	0	NA	intron (NR_136760, intron 2 of 3)	L2|LINE|L2	13790	NR_136760	102639404	Mm.396324	NR_136760	ENSMUSG00000097917	Gm26839	-	predicted gene, 26839	ncRNA
Diff_Nuc6019	chr12	96817762	96817901	+	0	NA	Intergenic	L1Md_T|LINE|L1	-112605	NM_201518	399558	Mm.341948	NM_201518	ENSMUSG00000047414	Flrt2	-	fibronectin leucine rich transmembrane protein 2	protein-coding
Diff_Nuc15239	chr17	56789012	56789151	+	0	NA	intron (NM_175350, intron 8 of 21)	intron (NM_175350, intron 8 of 21)	21515	NM_175350	106757	Mm.23401	NM_175350	ENSMUSG00000040828	Catsperd	4921529N20Rik|4933402B14Rik|619718|AW045609|Gm6095|Tmem146	catsper channel auxiliary subunit delta	protein-coding
Diff_Nuc19513	chr15	31434112	31434251	+	0	NA	intron (NM_172606, intron 3 of 25)	B4A|SINE|B4	26611	NM_172606	223455	Mm.272185	NM_172606	ENSMUSG00000039100	March6	3830408G03|F830029L24Rik|mKIAA0597	membrane-associated ring finger (C3HC4) 6	protein-coding
Diff_Nuc45887	chr3	60804712	60804851	+	0	NA	Intergenic	Intergenic	-1926	NM_008772	18441	Mm.281452	NM_008772	ENSMUSG00000027765	P2ry1	P2Y1	purinergic receptor P2Y, G-protein coupled 1	protein-coding
Diff_Nuc30255	chr7	88735612	88735751	+	0	NA	intron (NM_001004185, intron 6 of 9)	intron (NM_001004185, intron 6 of 9)	19503	NM_001004185	434204	Mm.181641	NM_001004185	ENSMUSG00000045795	Whamm	BB081391|Whdc1|mKIAA1971	WAS protein homolog associated with actin, golgi membranes and microtubules	protein-coding
Diff_Nuc18080	chr16	68570262	68570401	+	0	NA	Intergenic	B1_Mus1|SINE|Alu	-949178	NM_178721	239857	Mm.394300	NM_178721	ENSMUSG00000064115	Cadm2	2900078E11Rik|9330131D06|A830029E02Rik|Igdf4d|Igsf4d|NECL3|SynCAM 2|SynCAM2	cell adhesion molecule 2	protein-coding
Diff_Nuc47400	chr3	112018872	112019011	+	0	NA	Intergenic	Intergenic	334120	NR_045362	625585	Mm.389497	NR_045362	ENSMUSG00000104543	Gm6602	-	predicted gene 6602	ncRNA
Diff_Nuc27160	chr18	38549732	38549871	+	0	NA	Intergenic	Intergenic	-28828	NM_022996	65113	Mm.102496	NM_022996	ENSMUSG00000024425	Ndfip1	0610010M22Rik|N4wbp5	Nedd4 family interacting protein 1	protein-coding
Diff_Nuc35031	chr6	115711182	115711321	+	0	NA	intron (NM_001168257, intron 1 of 10)	intron (NM_001168257, intron 1 of 10)	1233	NM_001168256	94346	Mm.29739	NM_144805	ENSMUSG00000059900	Tmem40	9030407H20Rik|AV091463|W64236	transmembrane protein 40	protein-coding
Diff_Nuc8332	chr11	68842962	68843101	+	0	NA	intron (NM_001281465, intron 10 of 22)	B1_Mur1|SINE|Alu	13618	NM_001013256	68964	Mm.285785	NM_001013256	ENSMUSG00000020898	Ctc1	1500010J02Rik|AAF-132|AAF132	CTS telomere maintenance complex component 1	protein-coding
Diff_Nuc16770	chr16	20659852	20659991	+	0	NA	intron (NR_027485, intron 14 of 20)	intron (NR_027485, intron 14 of 20)	8196	NM_134101	21762	Mm.243234	NM_134101	ENSMUSG00000006998	Psmd2	9430095H01Rik|AA407121|TEG-190|Tex190	proteasome (prosome, macropain) 26S subunit, non-ATPase, 2	protein-coding
Diff_Nuc9424	chr11	99243942	99244081	+	0	NA	Intergenic	Intergenic	6667	NM_010660	16661	Mm.22662	NM_010660	ENSMUSG00000019761	Krt10	D130054E02Rik|K10|K1C1|Krt-1.10|Krt1-10	keratin 10	protein-coding
Diff_Nuc64560	chr8	82216212	82216351	+	0	NA	intron (NM_015751, intron 10 of 17)	RSINE1|SINE|B4	19358	NM_015751	24015	Mm.5831	NM_015751	ENSMUSG00000058355	Abce1	C79080|Oabp|RLI|RNS41|Rnaseli	ATP-binding cassette, sub-family E (OABP), member 1	protein-coding
Diff_Nuc835	chr13	12815672	12815811	+	0	NA	Intergenic	Intergenic	-73079	NR_003568	664862	Mm.415635	NR_003568		Gpr137b-ps	2310041G17Rik|ENSMUSG00000075118	G protein-coupled receptor 137B, pseudogene	pseudo
Diff_Nuc50152	chr2	51710912	51711051	+	0	NA	Intergenic	Intergenic	79183	NM_001141982	71684	Mm.28309	NM_030243	ENSMUSG00000036249	Rbm43	0610033I05Rik	RNA binding motif protein 43	protein-coding
Diff_Nuc39184	chr5	122114142	122114281	+	0	NA	intron (NM_028227, intron 3 of 11)	intron (NM_028227, intron 3 of 11)	3333	NM_001289544	72399	Mm.153372	NM_028227	ENSMUSG00000029458	Brap	3010002G07Rik|BRAP2|IMP	BRCA1 associated protein	protein-coding
Diff_Nuc11031	chr10	31190412	31190551	+	0	NA	Intergenic	Lx|LINE|L1	-24754	NM_009413	21987	Mm.439966	NM_009413	ENSMUSG00000000296	Tpd52l1	D53	tumor protein D52-like 1	protein-coding
Diff_Nuc23030	chr14	65684482	65684621	+	0	NA	intron (NM_018788, intron 4 of 6)	intron (NM_018788, intron 4 of 6)	32392	NM_018788	54616	Mm.103748	NM_018788	ENSMUSG00000021978	Extl3	2900009G18Rik|AU040105|Ext1l|mKIAA0519	exostoses (multiple)-like 3	protein-coding
Diff_Nuc59818	chr9	24917452	24917591	+	0	NA	intron (NM_020586, intron 5 of 7)	L1_Mus1|LINE|L1	38759	NM_020586	80517	Mm.142843	NM_020586	ENSMUSG00000008429	Herpud2	5031400M07Rik|AB041580	HERPUD family member 2	protein-coding
Diff_Nuc55357	chr1	59493662	59493801	+	0	NA	Intergenic	Intergenic	-45260	NM_008057	14369	Mm.297906	NM_008057	ENSMUSG00000041075	Fzd7	Fz7	frizzled class receptor 7	protein-coding
Diff_Nuc1441	chr13	34682262	34682401	+	0	NA	Intergenic	RLTR1B-int|LTR|ERV1	62219	NM_025831	66895	Mm.28943	NM_025831	ENSMUSG00000021411	Pxdc1	1300014I06Rik	PX domain containing 1	protein-coding
Diff_Nuc44032	chr4	144869542	144869681	+	0	NA	intron (NM_009401, intron 10 of 12)	L1MC3|LINE|L1	-32838	NM_011610	21938	Mm.235328	NM_011610	ENSMUSG00000028599	Tnfrsf1b	CD120b|TNF-R-II|TNF-R2|TNF-R75|TNF-alphaR2|TNFBR|TNFR80|TNFRII|TNFalpha-R2|Tnfr-1|Tnfr2|p75	tumor necrosis factor receptor superfamily, member 1b	protein-coding
Diff_Nuc34409	chr6	92367292	92367431	+	0	NA	intron (NM_001081146, intron 6 of 8)	intron (NM_001081146, intron 6 of 8)	64025	NM_001134460	243548	Mm.248820	NM_001081146	ENSMUSG00000030020	Prickle2	6230400G14Rik|6720451F06Rik|mpk2	prickle planar cell polarity protein 2	protein-coding
Diff_Nuc34239	chr6	87708742	87708881	+	0	NA	Intergenic	L1MCa|LINE|L1	-19319	NM_018762	54368	Mm.12897	NM_018762	ENSMUSG00000030054	Gp9	Cd42|GPIX	glycoprotein 9 (platelet)	protein-coding
Diff_Nuc50089	chr2	49078122	49078261	+	0	NA	intron (NM_029924, intron 6 of 16)	Lx5|LINE|L1	-23229	NM_001290656	109241	Mm.440436	NM_029924	ENSMUSG00000036792	Mbd5	9430004D19Rik|AA536666|AI426407|C030040A15Rik|Gm1630|OTTMUSG00000012483	methyl-CpG binding domain protein 5	protein-coding
Diff_Nuc6960	chr11	14156292	14156431	+	0	NA	Intergenic	Lx2|LINE|L1	-77317	NR_131011	75280	Mm.108492	NR_131011	ENSMUSG00000085452	4930554G24Rik	-	RIKEN cDNA 4930554G24 gene	ncRNA
Diff_Nuc55088	chr1	51901962	51902101	+	0	NA	intron (NM_010863, intron 3 of 29)	intron (NM_010863, intron 3 of 29)	70791	NM_001290982	17912	Mm.3390	NM_010863	ENSMUSG00000018417	Myo1b	AA406997|MIH-L|MMIa	myosin IB	protein-coding
Diff_Nuc8998	chr11	86299402	86299541	+	0	NA	intron (NM_029788, intron 1 of 8)	intron (NM_029788, intron 1 of 8)	1312	NM_029788	76892	Mm.262707	NM_029788	ENSMUSG00000020521	Rnft1	0610013E23Rik|AV007605	ring finger protein, transmembrane 1	protein-coding
Diff_Nuc2393	chr13	68682577	68682716	+	0	NA	Intergenic	B1_Mus1|SINE|Alu	38335	NM_001308475	210009	Mm.205514	NM_172480	ENSMUSG00000034617	Mtrr	4732420G08|MSR	5-methyltetrahydrofolate-homocysteine methyltransferase reductase	protein-coding
Diff_Nuc39467	chr5	131281182	131281321	+	0	NA	intron (NM_021371, intron 4 of 5)	intron (NM_021371, intron 4 of 5)	356589	NM_021371	140904	Mm.40875	NM_021371	ENSMUSG00000060371	Caln1	9630012C17Rik|Cabp8|MNCb-0849	calneuron 1	protein-coding
Diff_Nuc37874	chr5	75010292	75010431	+	0	NA	intron (NM_001159577, intron 6 of 10)	intron (NM_001159577, intron 6 of 10)	63536	NM_001159580	16924	Mm.440403	NM_010727	ENSMUSG00000029228	Lnx1	Lnx	ligand of numb-protein X 1	protein-coding
Diff_Nuc41026	chr4	39766632	39766771	+	0	NA	Intergenic	MLT1G|LTR|MaLR	-323597	NM_007386	11428	Mm.331547	NM_007386	ENSMUSG00000028405	Aco1	Aco-1|Irebp|Irp1	aconitase 1	protein-coding
Diff_Nuc3966	chr12	15604342	15604481	+	0	NA	Intergenic	Intergenic	203496	NR_105809	102465204		NR_105809	ENSMUSG00000098480	Mir6387	Gm27281|mmu-mir-6387	microRNA 6387	ncRNA
Diff_Nuc53420	chr2	160673382	160673521	+	0	NA	intron (NM_177263, intron 1 of 3)	intron (NM_177263, intron 1 of 3)	25275	NM_177263	320799	Mm.436734	NM_177263	ENSMUSG00000035877	Zhx3	1810059C13Rik|4932418O04Rik|9530010N21Rik|Tix1|mKIAA0395	zinc fingers and homeoboxes 3	protein-coding
Diff_Nuc1359	chr13	32121382	32121521	+	0	NA	intron (NM_146041, intron 7 of 10)	intron (NM_146041, intron 7 of 10)	222936	NM_008592	17300	Mm.12949	NM_008592	ENSMUSG00000050295	Foxc1	FREAC3|Fkh1|Mf1|Mf4|ch|fkh-1|frkhda	forkhead box C1	protein-coding
Diff_Nuc44490	chr3	7502162	7502301	+	0	NA	Intergenic	Intergenic	-1195	NM_173181	67306	Mm.332366	NM_173181	ENSMUSG00000043542	Zc2hc1a	3110050N22Rik|AI790358|AU023959|Fam164a	zinc finger, C2HC-type containing 1A	protein-coding
Diff_Nuc24327	chr14	117472322	117472461	+	0	NA	intron (NM_001079844, intron 1 of 9)	MIRc|SINE|MIR	147872	NM_011821	23888	Mm.440025	NM_011821	ENSMUSG00000058571	Gpc6	-	glypican 6	protein-coding
Diff_Nuc36073	chr6	149205002	149205141	+	0	NA	Intergenic	Intergenic	-52865	NM_001289661	67246	Mm.333515	NM_026054	ENSMUSG00000032712	2810474O19Rik	6720435I21Rik|AA536804|AU020969|GET|Kiaa1551	RIKEN cDNA 2810474O19 gene	protein-coding
Diff_Nuc37761	chr5	71526612	71526751	+	0	NA	Intergenic	Intergenic	-39593	NM_008066	14395	Mm.5304	NM_008066	ENSMUSG00000000560	Gabra2	C630048P16Rik|Gabra-2	gamma-aminobutyric acid (GABA) A receptor, subunit alpha 2	protein-coding
Diff_Nuc13016	chr10	104761882	104762021	+	0	NA	intron (NM_177368, intron 4 of 11)	intron (NM_177368, intron 4 of 11)	249584	NM_177368	278279	Mm.25225	NM_177368	ENSMUSG00000036019	Tmtc2	8430438D04Rik|D330034A10Rik	transmembrane and tetratricopeptide repeat containing 2	protein-coding
Diff_Nuc23605	chr14	85763932	85764071	+	0	NA	Intergenic	Lx8|LINE|L1	-881776	NR_040457	75155	Mm.399239	NR_040457		4930529K09Rik	4930507G21Rik	RIKEN cDNA 4930529K09 gene	ncRNA
Diff_Nuc49405	chr2	27155182	27155321	+	0	NA	intron (NM_009500, intron 5 of 27)	intron (NM_009500, intron 5 of 27)	-52428	NM_138665	192166	Mm.278467	NM_138665	ENSMUSG00000009614	Sardh	-	sarcosine dehydrogenase	protein-coding
Diff_Nuc7807	chr11	49962642	49962781	+	0	NA	intron (NM_029745, intron 6 of 20)	intron (NM_029745, intron 6 of 20)	17849	NM_029745	76795	Mm.290975	NM_029745	ENSMUSG00000036644	Tbc1d9b	-	TBC1 domain family, member 9B	protein-coding
Diff_Nuc18637	chr16	90536182	90536321	+	0	NA	Intergenic	MTB_Mm|LTR|MaLR	149609	NM_015755	26559	Mm.125874	NM_015755	ENSMUSG00000053414	Hunk	Bstk1|Mak-v	hormonally upregulated Neu-associated kinase	protein-coding
Diff_Nuc49240	chr2	22483332	22483471	+	0	NA	intron (NM_008078, intron 4 of 15)	intron (NM_008078, intron 4 of 15)	5554	NM_008078	14417	Mm.4784	NM_008078	ENSMUSG00000026787	Gad2	6330404F12Rik|GAD(65)|GAD65|Gad-2	glutamic acid decarboxylase 2	protein-coding
Diff_Nuc47473	chr3	115678022	115678161	+	0	NA	intron (NM_023214, intron 8 of 10)	intron (NM_023214, intron 8 of 10)	-4729	NR_130332	100316705		NR_130332	ENSMUSG00000089261	Mir669n	mmu-mir-669n	microRNA 669n	ncRNA
Diff_Nuc47963	chr3	130279102	130279241	+	0	NA	intron (NM_198711, intron 29 of 34)	intron (NM_198711, intron 29 of 34)	-41195	NM_001163587	71760	Mm.29125	NM_027907	ENSMUSG00000019232	Etnppl	1300019H02Rik|AI195447|Agxt2l1	ethanolamine phosphate phospholyase	protein-coding
Diff_Nuc14552	chr17	31526342	31526481	+	0	NA	intron (NM_008804, intron 1 of 18)	intron (NM_008804, intron 1 of 18)	3232	NM_001163748	18585	Mm.10812	NM_008804	ENSMUSG00000041119	Pde9a	PDE9A1	phosphodiesterase 9A	protein-coding
Diff_Nuc24990	chr19	17361422	17361561	+	0	NA	Intergenic	Intergenic	52504	NM_001136484	14537	Mm.244825	NM_010265	ENSMUSG00000038843	Gcnt1	5630400D21Rik|B130048E03|C2 GlcNAcT|C2GNT|IGnT	glucosaminyl (N-acetyl) transferase 1, core 2	protein-coding
Diff_Nuc641	chr13	3886442	3886581	+	0	NA	intron (NM_019671, intron 8 of 11)	intron (NM_019671, intron 8 of 11)	6316	NM_001047159	56349	Mm.22261	NM_019671	ENSMUSG00000021215	Net1	Net1a|mNET1	neuroepithelial cell transforming gene 1	protein-coding
Diff_Nuc58384	chr1	168306372	168306511	+	0	NA	Intergenic	RLTR11B|LTR|ERVK	-2857	NM_030245	27878	Mm.100665	NM_030245	ENSMUSG00000026563	Tada1	2900026B15Rik|D1Ertd251e|Staf42|Tada1l	transcriptional adaptor 1	protein-coding
Diff_Nuc39983	chr5	148018142	148018281	+	0	NA	Intergenic	B1_Mur4|SINE|Alu	17939	NM_008178	14842	Mm.4797	NM_008178	ENSMUSG00000053129	Gsx1	Gsh-1|Gsh1	GS homeobox 1	protein-coding
Diff_Nuc20157	chr15	55722882	55723021	+	0	NA	intron (NM_016667, intron 1 of 6)	intron (NM_016667, intron 1 of 6)	15553	NM_016667	20649	Mm.309425	NM_016667	ENSMUSG00000060429	Sntb1	-	syntrophin, basic 1	protein-coding
Diff_Nuc34667	chr6	99952532	99952671	+	0	NA	Intergenic	B1_Mus1|SINE|Alu	-276215	NM_001170419	50501	Mm.87365	NM_015768	ENSMUSG00000030069	Prok2	Bv8|PK2|Prok1	prokineticin 2	protein-coding
Diff_Nuc51866	chr2	111422182	111422321	+	0	NA	Intergenic	L1Md_F2|LINE|L1	-16652	NM_146403	258398	Mm.271329	NM_146403	ENSMUSG00000108919	Olfr1295	MOR248-10	olfactory receptor 1295	protein-coding
Diff_Nuc32845	chr6	34223702	34223841	+	0	NA	Intergenic	L2b|LINE|L2	43672	NR_037965	626009	Mm.451	NR_028277		Gm6644	Akr1b3p|EG626009	Akr1b3 pseudogene	pseudo
Diff_Nuc24822	chr19	10165652	10165791	+	0	NA	intron (NM_019699, intron 2 of 11)	intron (NM_019699, intron 2 of 11)	10272	NM_019699	56473	Mm.38901	NM_019699	ENSMUSG00000024665	Fads2	2900042M13Rik|Fadsd2	fatty acid desaturase 2	protein-coding
Diff_Nuc28077	chr18	72698602	72698741	+	0	NA	Intergenic	Intergenic	-187948	NM_007831	13176	Mm.167882	NM_007831	ENSMUSG00000060534	Dcc	C030036D22Rik|Igdcc1	deleted in colorectal carcinoma	protein-coding
Diff_Nuc39432	chr5	130452242	130452381	+	0	NA	intron (NM_001001327, intron 1 of 1)	intron (NM_001001327, intron 1 of 1)	26387	NM_010368	110006	Mm.3317	NM_010368	ENSMUSG00000025534	Gusb	AI747421|Gur|Gus|Gus-r|Gus-s|Gus-t|Gus-u|Gut|asd|g	glucuronidase, beta	protein-coding
Diff_Nuc8963	chr11	85495522	85495661	+	0	NA	intron (NM_138681, intron 24 of 25)	intron (NM_138681, intron 24 of 25)	37655	NR_045875	71489	Mm.442482	NR_045875	ENSMUSG00000086199	Bcas3os1	8430403D17Rik	breast carcinoma amplified sequence 3, opposite strand 1	ncRNA
Diff_Nuc5438	chr12	78039022	78039161	+	0	NA	3' UTR (NM_001146176, exon 4 of 4)	3' UTR (NM_001146176, exon 4 of 4)	24144	NM_008558	17187	Mm.268548	NM_008558	ENSMUSG00000059436	Max	AA960152|AI875693|bHLHd4|bHLHd5|bHLHd6|bHLHd7|bHLHd8	Max protein	protein-coding
Diff_Nuc22345	chr14	40296572	40296711	+	0	NA	Intergenic	Lx2|LINE|L1	-10265	NM_008734	18183	Mm.258705	NM_008734	ENSMUSG00000041014	Nrg3	ska	neuregulin 3	protein-coding
Diff_Nuc17556	chr16	45652912	45653051	+	0	NA	intron (NM_145389, intron 1 of 5)	intron (NM_145389, intron 1 of 5)	1250	NM_145389	212998	Mm.97511	NM_145389	ENSMUSG00000033187	BC016579	-	cDNA sequence, BC016579	protein-coding
Diff_Nuc56400	chr1	95610072	95610211	+	0	NA	intron (NM_025920, intron 5 of 5)	intron (NM_025920, intron 5 of 5)	18362	NM_001310761	67026	Mm.272356	NM_025920	ENSMUSG00000026279	Thap4	2010320B01Rik	THAP domain containing 4	protein-coding
Diff_Nuc64478	chr8	79540882	79541021	+	0	NA	intron (NM_001083906, intron 2 of 8)	intron (NM_001083906, intron 2 of 8)	114544	NM_001083906	110784	Mm.324393	NM_001083906	ENSMUSG00000031618	Nr3c2	MR|Mlr	nuclear receptor subfamily 3, group C, member 2	protein-coding
Diff_Nuc34758	chr6	104536182	104536321	+	0	NA	intron (NM_017383, intron 2 of 22)	Lx|LINE|L1	93213	NM_017383	53870	Mm.321671	NM_017383	ENSMUSG00000030092	Cntn6	NB-3	contactin 6	protein-coding
Diff_Nuc4306	chr12	34030172	34030311	+	0	NA	intron (NM_001033436, intron 4 of 7)	intron (NM_001033436, intron 4 of 7)	42861	NM_001033436	380753	Mm.41540	NM_028139	ENSMUSG00000020564	Atxn7l1	2810423G08Rik|Atxn7l4	ataxin 7-like 1	protein-coding
Diff_Nuc48960	chr2	10627742	10627881	+	0	NA	Intergenic	Intergenic	188029	NR_035418	100316831		NR_035418	ENSMUSG00000080594	Mir669h	Mirn669h|mir-669h|mmu-mir-669h	microRNA 669h	ncRNA
Diff_Nuc48436	chr3	147250252	147250391	+	0	NA	Intergenic	Intergenic	734990	NM_001302958	70892	Mm.187793	NM_027594	ENSMUSG00000036745	Ttll7	1110049N09Rik|4921517B04Rik|C630030B20|mTTLL7	tubulin tyrosine ligase-like family, member 7	protein-coding
Diff_Nuc50830	chr2	74176592	74176731	+	0	NA	Intergenic	RMER19C|LTR|ERVK	-30887	NR_040501	73962	Mm.50289	NR_040501	ENSMUSG00000085405	4930441J16Rik	Astx1a|Astx1b|Astx1c	RIKEN cDNA 4930441J16 gene	ncRNA
Diff_Nuc13164	chr10	109455742	109455881	+	0	NA	Intergenic	L1Md_F2|LINE|L1	-18536	NM_001081035	260315	Mm.225050	NM_177797	ENSMUSG00000020181	Nav3	4732483H20Rik|9630020C08Rik|POMFIL1|Pomfil1p|mKIAA0938|unc53H3	neuron navigator 3	protein-coding
Diff_Nuc10737	chr10	20762782	20762921	+	0	NA	intron (NM_001177776, intron 2 of 6)	intron (NM_001177776, intron 2 of 6)	2225	NM_001177776	52906	Mm.253280	NM_026203	ENSMUSG00000019986	Ahi1	1700015F03Rik|Ahi-1|D10Bwg0629e	Abelson helper integration site 1	protein-coding
Diff_Nuc1084	chr13	21666142	21666281	+	0	NA	exon (NM_146540, exon 1 of 1)	exon (NM_146540, exon 1 of 1)	112	NM_146540	258533	Mm.271445	NM_146540	ENSMUSG00000046016	Olfr1364	MOR256-13	olfactory receptor 1364	protein-coding
Diff_Nuc2058	chr13	54820192	54820331	+	0	NA	intron (NM_001033364, intron 12 of 31)	intron (NM_001033364, intron 12 of 31)	17437	NM_001033364	268663	Mm.315382	NM_001033364	ENSMUSG00000034918	Cdhr2	Gm624|PC-LKC|Pcdh24	cadherin-related family member 2	protein-coding
Diff_Nuc54851	chr1	41866612	41866751	+	0	NA	Intergenic	Intergenic	-628584	NR_040475	74897	Mm.243822	NR_040475	ENSMUSG00000104072	4930448I06Rik	-	RIKEN cDNA 4930448I06 gene	ncRNA
Diff_Nuc40634	chr4	22165732	22165871	+	0	NA	Intergenic	Intergenic	-118889	NR_104379	269514	Mm.40708	NM_172988	ENSMUSG00000040410	Fbxl4	AI836810|FBL4|FBL5	F-box and leucine-rich repeat protein 4	protein-coding
Diff_Nuc10473	chr10	11125372	11125511	+	0	NA	intron (NM_010146, intron 2 of 3)	L1Md_F2|LINE|L1	62198	NM_010146	13853	Mm.89946	NM_010146	ENSMUSG00000055493	Epm2a	TG-B|Tg(TcraK,TcrbK)TG-BFlv	epilepsy, progressive myoclonic epilepsy, type 2 gene alpha	protein-coding
Diff_Nuc63631	chr8	46844302	46844441	+	0	NA	intron (NM_172752, intron 6 of 22)	intron (NM_172752, intron 6 of 22)	60280	NR_045739	319940	Mm.441720	NR_045739	ENSMUSG00000085440	Sorbs2os	D330022K07Rik	sorbin and SH3 domain containing 2, opposite strand	ncRNA
Diff_Nuc53102	chr2	152159102	152159241	+	0	NA	promoter-TSS (NM_019705)	promoter-TSS (NM_019705)	-796	NM_019705	24105	Mm.182145	NM_019705	ENSMUSG00000027466	Rbck1	AL033326|HOIL-1|HOIL-1L|UIP28|Ubce7ip3	RanBP-type and C3HC4-type zinc finger containing 1	protein-coding
Diff_Nuc17587	chr16	46437002	46437141	+	0	NA	intron (NM_021497, intron 6 of 6)	intron (NM_021497, intron 6 of 6)	60009	NM_021496	58998	Mm.40477	NM_021495	ENSMUSG00000022656	Nectin3	2610301B19Rik|3000002N23Rik|4921513D19Rik|AA407785|AU016832|AW538082|CD113|Pvrl3	nectin cell adhesion molecule 3	protein-coding
Diff_Nuc12553	chr10	87178662	87178801	+	0	NA	Intergenic	Intergenic	-142279	NM_001314010	16000	Mm.268521	NM_010512	ENSMUSG00000020053	Igf1	C730016P09Rik|Igf-1|Igf-I	insulin-like growth factor 1	protein-coding
Diff_Nuc53016	chr2	148218712	148218851	+	0	NA	Intergenic	B3|SINE|B2	-2332	NM_009219	20608	Mm.35324	NM_009219	ENSMUSG00000037014	Sstr4	Smstr4|sst4	somatostatin receptor 4	protein-coding
Diff_Nuc32276	chr6	14712662	14712801	+	0	NA	Intergenic	Intergenic	-7457	NM_080464	140491	Mm.209429	NM_080464	ENSMUSG00000042717	Ppp1r3a	GM|RG1|RGL	protein phosphatase 1, regulatory (inhibitor) subunit 3A	protein-coding
Diff_Nuc29289	chr7	47955122	47955261	+	0	NA	Intergenic	Intergenic	25084	NR_045504	71029	Mm.399496	NR_045504	ENSMUSG00000102004	4933402C06Rik	-	RIKEN cDNA 4933402C06 gene	ncRNA
Diff_Nuc60109	chr9	38602702	38602841	+	0	NA	Intergenic	RMER16|LTR|ERVK	-20222	NM_146781	258777	Mm.223208	NM_146781	ENSMUSG00000043911	Olfr922	MOR161-3	olfactory receptor 922	protein-coding
Diff_Nuc26226	chr19	60246182	60246321	+	0	NA	Intergenic	Intergenic	25673	NR_026942	107376	Mm.245813	NR_026942	ENSMUSG00000053117	E330013P04Rik	9930018I18Rik|AW492152	RIKEN cDNA E330013P04 gene	ncRNA
Diff_Nuc5328	chr12	74122482	74122621	+	0	NA	Intergenic	Intergenic	25148	NM_009189	20471	Mm.4645	NM_009189	ENSMUSG00000051367	Six1	BB138287	sine oculis-related homeobox 1	protein-coding
Diff_Nuc45397	chr3	42292392	42292531	+	0	NA	Intergenic	L1Md_F2|LINE|L1	745921	NM_027271	73852	Mm.29006	NM_027271	ENSMUSG00000025766	D3Ertd751e	2810009O15Rik|4930415G15Rik	DNA segment, Chr 3, ERATO Doi 751, expressed	protein-coding
Diff_Nuc35361	chr6	124425652	124425791	+	0	NA	Intergenic	B2_Mm2|SINE|B2	-10919	NM_153508	232370	Mm.193701	NM_153508	ENSMUSG00000008153	Clstn3	CSTN3|Cs3|Cst-3|alc-beta	calsyntenin 3	protein-coding
Diff_Nuc57412	chr1	136753562	136753701	+	0	NA	intron (NM_001081307, intron 13 of 23)	intron (NM_001081307, intron 13 of 23)	-53333	NR_015606	329251	Mm.188709	NM_001081307	ENSMUSG00000073557	Ppp1r12b	1810037O03Rik|9530009M10Rik|AI132431|Mypt2	protein phosphatase 1, regulatory (inhibitor) subunit 12B	protein-coding
Diff_Nuc4284	chr12	33173362	33173501	+	0	NA	Intergenic	MER57E1|LTR|ERV1	109777	NM_001162903	72123	Mm.341352	NM_028111	ENSMUSG00000090946	Ccdc71l	2010109K11Rik|AV375874	coiled-coil domain containing 71 like	protein-coding
Diff_Nuc29267	chr7	46781642	46781781	+	0	NA	intron (NM_001004139, intron 1 of 3)	intron (NM_001004139, intron 1 of 3)	8575	NM_001004139	70227	Mm.333800	NM_001004139	ENSMUSG00000068959	Zfp619	3000002G13Rik	zinc finger protein 619	protein-coding
Diff_Nuc49534	chr2	31041702	31041841	+	0	NA	intron (NM_178760, intron 12 of 17)	intron (NM_178760, intron 12 of 17)	33935	NM_178760	277463	Mm.236074	NM_178760	ENSMUSG00000000194	Gpr107	9930033D15Rik|AI790205|C530034M11|mKIAA1624	G protein-coupled receptor 107	protein-coding
Diff_Nuc50895	chr2	76349772	76349911	+	0	NA	intron (NM_001290735, intron 2 of 4)	L1MB3|LINE|L1	12778	NM_001290735	99031	Mm.240435	NM_145525	ENSMUSG00000042359	Osbpl6	1110062M20Rik|AI596402|ORP-6|mKIAA4128	oxysterol binding protein-like 6	protein-coding
Diff_Nuc11703	chr10	57741502	57741641	+	0	NA	exon (NM_027375, exon 11 of 23)	exon (NM_027375, exon 11 of 23)	23297	NM_027375	70297	Mm.25531	NM_027375	ENSMUSG00000038039	Gcc2	0610043A03Rik|2210420P05Rik|2600014C01Rik|AW112121|mKIAA0336	GRIP and coiled-coil domain containing 2	protein-coding
Diff_Nuc51961	chr2	114931172	114931311	+	0	NA	Intergenic	Intergenic	238775	NR_040516	78193	Mm.189508	NR_040516	ENSMUSG00000087309	4930528P14Rik	-	RIKEN cDNA 4930528P14 gene	ncRNA
Diff_Nuc46212	chr3	74949622	74949761	+	0	NA	Intergenic	Intergenic	-1997	NM_172515	213234	Mm.80075	NM_172515	ENSMUSG00000034151	Zbbx	4931432L23	zinc finger, B-box domain containing	protein-coding
Diff_Nuc40260	chr4	8071822	8071961	+	0	NA	3' UTR (NM_007592, exon 9 of 9)	3' UTR (NM_007592, exon 9 of 9)	94297	NM_007592	12319	Mm.119320	NM_007592	ENSMUSG00000041261	Car8	AW546993|Ca8|Cals|Cals1|Carp|wdl	carbonic anhydrase 8	protein-coding
Diff_Nuc38138	chr5	87508902	87509041	+	0	NA	intron (NM_001029867, intron 5 of 5)	intron (NM_001029867, intron 5 of 5)	12609	NM_001029867	231396	Mm.439851	NM_001029867	ENSMUSG00000070704	Ugt2b36	-	UDP glucuronosyltransferase 2 family, polypeptide B36	protein-coding
Diff_Nuc64762	chr8	89261272	89261411	+	0	NA	intron (NM_009172, intron 1 of 1)	intron (NM_009172, intron 1 of 1)	-8257	NR_027829	666945	Mm.391806	NR_027829		Gm10638	ENSMUSG00000074178	predicted gene 10638	ncRNA
Diff_Nuc29330	chr7	50075982	50076121	+	0	NA	intron (NR_046214, intron 3 of 3)	MurSatRep1|Unknown|Unknown	-27185	NM_001105059	546964	Mm.469898	NM_001105059	ENSMUSG00000091926	Vmn2r62	-	vomeronasal 2, receptor 62	protein-coding
Diff_Nuc25317	chr19	31635092	31635231	+	0	NA	intron (NM_001013833, intron 2 of 17)	intron (NM_001013833, intron 2 of 17)	103699	NM_011160	19091	Mm.381170	NM_011160	ENSMUSG00000052920	Prkg1	AW125416|CGKI|Gm19690|Prkg1b|Prkgr1b	protein kinase, cGMP-dependent, type I	protein-coding
Diff_Nuc61011	chr9	69095552	69095691	+	0	NA	intron (NM_013646, intron 2 of 10)	intron (NM_013646, intron 2 of 10)	-42027	NM_001289916	19883	Mm.378450	NM_013646	ENSMUSG00000032238	Rora	9530021D13Rik|Nr1f1|ROR1|ROR2|ROR3|nmf267|sg|staggerer|tmgc26	RAR-related orphan receptor alpha	protein-coding
Diff_Nuc30818	chr7	109463032	109463171	+	0	NA	intron (NM_009287, intron 1 of 11)	intron (NM_009287, intron 1 of 11)	46763	NM_009287	20866	Mm.645	NM_009287	ENSMUSG00000030987	Stim1	SIM	stromal interaction molecule 1	protein-coding
Diff_Nuc25097	chr19	23061202	23061341	+	0	NA	intron (NM_177341, intron 25 of 26)	intron (NM_177341, intron 25 of 26)	-154445	NM_010638	16601	Mm.291595	NM_010638	ENSMUSG00000033863	Klf9	2310051E17Rik|AA589643|BTEB-1|Bteb1|ENSMUSG00000055440|Gm9971	Kruppel-like factor 9	protein-coding
Diff_Nuc14686	chr17	35305082	35305221	+	0	NA	Intergenic	ID_B1|SINE|B4	-3329	NM_020027	53761	Mm.272462	NM_020027	ENSMUSG00000024393	Prrc2a	3110039B05Rik|Bat-2|Bat2|D17H6S51E|G2|Wbp12|mKIAA4178	proline-rich coiled-coil 2A	protein-coding
Diff_Nuc49541	chr2	31347762	31347901	+	0	NA	intron (NM_007494, intron 7 of 15)	intron (NM_007494, intron 7 of 15)	22041	NM_007494	11898	Mm.3217	NM_007494	ENSMUSG00000076441	Ass1	AA408052|ASS|Ass-1|fold	argininosuccinate synthetase 1	protein-coding
Diff_Nuc40910	chr4	34914532	34914671	+	0	NA	intron (NM_178061, intron 3 of 3)	MER47B|DNA|MER2_type	-55871	NR_040652	73696	Mm.1361	NR_040652	ENSMUSG00000085824	Platr9	2410114N07Rik	pluripotency associated transcript 9	ncRNA
Diff_Nuc11724	chr10	58785202	58785341	+	0	NA	promoter-TSS (NM_011030)	promoter-TSS (NM_011030)	-773	NM_001316371	18451	Mm.2212	NM_011030	ENSMUSG00000019916	P4ha1	AL022634|P4ha	procollagen-proline, 2-oxoglutarate 4-dioxygenase (proline 4-hydroxylase), alpha 1 polypeptide	protein-coding
Diff_Nuc46831	chr3	94921442	94921581	+	0	NA	intron (NM_009336, intron 1 of 5)	ID_B1|SINE|B4	6547	NM_009336	21427	Mm.133919	NM_009336	ENSMUSG00000008958	Vps72	Tcfl1|YL-1	vacuolar protein sorting 72	protein-coding
Diff_Nuc15096	chr17	51106932	51107071	+	0	NA	intron (NM_001285991, intron 5 of 22)	intron (NM_001285991, intron 5 of 22)	191702	NM_001285993	72238	Mm.120650	NM_028162	ENSMUSG00000023923	Tbc1d5	1600014N05Rik	TBC1 domain family, member 5	protein-coding
Diff_Nuc11331	chr10	42430202	42430341	+	0	NA	Intergenic	Intergenic	31549	NM_172416	14628	Mm.46636	NM_172416	ENSMUSG00000038280	Ostm1	1200002H13Rik|HSPC019|gl	osteopetrosis associated transmembrane protein 1	protein-coding
Diff_Nuc8784	chr11	80331492	80331631	+	0	NA	intron (NM_177390, intron 21 of 21)	B4|SINE|B4	-8953	NR_126552	77417	Mm.437510	NR_126552	ENSMUSG00000085078	C030013C21Rik	-	RIKEN cDNA C030013C21 gene	ncRNA
Diff_Nuc33209	chr6	47737322	47737461	+	0	NA	Intergenic	Intergenic	16260	NR_030485	735289		NR_030485	ENSMUSG00000076060	Mir704	Mirn704|mir-704|mmu-mir-704	microRNA 704	ncRNA
Diff_Nuc12992	chr10	103018802	103018941	+	0	NA	Intergenic	Intergenic	188429	NM_175328	103098	Mm.458408	NM_175328	ENSMUSG00000019894	Slc6a15	AA536730|AI326450|AI326451|v7-3	solute carrier family 6 (neurotransmitter transporter), member 15	protein-coding
Diff_Nuc53664	chr2	169353952	169354091	+	0	NA	Intergenic	Intergenic	-105125	NM_080455	228911	Mm.315789	NM_080455	ENSMUSG00000047907	Tshz2	2900073F20Rik|B830045G17|Mtsh2|Sdccag33l|Tsh2|Zfp218|mKIAA4248|teashirt2	teashirt zinc finger family member 2	protein-coding
Diff_Nuc36132	chr5	4091972	4092111	+	0	NA	intron (NM_020010, intron 6 of 9)	intron (NM_020010, intron 6 of 9)	12656	NM_020010	13121	Mm.140158	NM_020010	ENSMUSG00000001467	Cyp51	AI426508|CYPLI|Cyp51a1|Ldm|P450-14DM|P450LI	cytochrome P450, family 51	protein-coding
Diff_Nuc5864	chr12	89600792	89600931	+	0	NA	intron (NM_028105, intron 1 of 10)	intron (NM_028105, intron 1 of 10)	1635	NM_028105	72113	Mm.181387	NM_028105	ENSMUSG00000021044	Adck1	2610005A10Rik	aarF domain containing kinase 1	protein-coding
Diff_Nuc56107	chr1	84402632	84402771	+	0	NA	intron (NM_152915, intron 9 of 12)	intron (NM_152915, intron 9 of 12)	-121481	NM_001003948	98496	Mm.187470	NM_001003948	ENSMUSG00000045658	Pid1	5033414K04Rik|NYGGF4	phosphotyrosine interaction domain containing 1	protein-coding
Diff_Nuc45776	chr3	57662112	57662251	+	0	NA	Intergenic	Lx4A|LINE|L1	-10502	NM_019410	18645	Mm.271744	NM_019410	ENSMUSG00000027805	Pfn2	Pfn	profilin 2	protein-coding
Diff_Nuc41031	chr4	40087512	40087651	+	0	NA	Intergenic	Intergenic	-2717	NM_007386	11428	Mm.331547	NM_007386	ENSMUSG00000028405	Aco1	Aco-1|Irebp|Irp1	aconitase 1	protein-coding
Diff_Nuc56274	chr1	90894762	90894901	+	0	NA	Intergenic	MER46C|DNA|MER2_type	-17857	NR_040471	73475	Mm.491040	NR_040471	ENSMUSG00000099378	1700067G17Rik	-	RIKEN cDNA 1700067G17 gene	ncRNA
Diff_Nuc3786	chr12	7721422	7721561	+	0	NA	Intergenic	Intergenic	-262992	NM_009693	238055	Mm.221239	NM_009693	ENSMUSG00000020609	Apob	AI315052|Apo B-100|apob-100|apob-48	apolipoprotein B	protein-coding
Diff_Nuc17230	chr16	35102252	35102391	+	0	NA	intron (NM_023587, intron 6 of 6)	intron (NM_023587, intron 6 of 6)	-53401	NM_001012765	224129	Mm.41137	NM_001012765	ENSMUSG00000022840	Adcy5	AW121902|Ac5	adenylate cyclase 5	protein-coding
Diff_Nuc7219	chr11	23354442	23354581	+	0	NA	intron (NM_001190401, intron 61 of 79)	intron (NM_001190401, intron 61 of 79)	43528	NM_001290655	268390	Mm.13148	NM_172391	ENSMUSG00000020288	Ahsa2	-	AHA1, activator of heat shock protein ATPase 2	protein-coding
Diff_Nuc5765	chr12	86559822	86559961	+	0	NA	promoter-TSS (NM_145445)	promoter-TSS (NM_145445)	-540	NM_145445	217715	Mm.29041	NM_145445	ENSMUSG00000004788	Eif2b2	EIF-2Bbeta|EIF2B	eukaryotic translation initiation factor 2B, subunit 2 beta	protein-coding
Diff_Nuc55341	chr1	59252842	59252981	+	0	NA	intron (NM_146109, intron 11 of 12)	intron (NM_146109, intron 11 of 12)	-32678	NM_001164682	227157	Mm.474049	NM_145143	ENSMUSG00000079550	Mpp4	Dlg6	membrane protein, palmitoylated 4 (MAGUK p55 subfamily member 4)	protein-coding
Diff_Nuc46458	chr3	84347297	84347436	+	0	NA	intron (NM_001293801, intron 2 of 7)	intron (NM_001293801, intron 2 of 7)	39181	NM_001081093	99889	Mm.316536	NM_001081093	ENSMUSG00000074513	Arfip1	2310030I10Rik|Arfaptin|D3Ertd598e	ADP-ribosylation factor interacting protein 1	protein-coding
Diff_Nuc9505	chr11	101523042	101523181	+	0	NA	Intergenic	Intergenic	-3744	NM_025404	80981	Mm.266840	NM_025404	ENSMUSG00000034936	Arl4d	1110036H21Rik|ARL6|AW456149|Arf4l|Arfl4|Arl5	ADP-ribosylation factor-like 4D	protein-coding
Diff_Nuc10509	chr10	12529842	12529981	+	0	NA	intron (NM_011682, intron 1 of 73)	intron (NM_011682, intron 1 of 73)	51622	NM_011682	22288	Mm.331784	NM_011682	ENSMUSG00000019820	Utrn	AA589569|DRP|Dmdl	utrophin	protein-coding
Diff_Nuc17322	chr16	37501202	37501341	+	0	NA	Intergenic	L1_Mur3|LINE|L1	38584	NM_028812	74197	Mm.287795	NM_028812	ENSMUSG00000022828	Gtf2e1	2610024P03Rik|56kDa|AI303800|FE|TFIIE-A	general transcription factor II E, polypeptide 1 (alpha subunit)	protein-coding
Diff_Nuc21196	chr15	95243742	95243881	+	0	NA	intron (NM_001289653, intron 10 of 20)	intron (NM_001289653, intron 10 of 20)	114872	NM_001289653	54003	Mm.3959	NM_016743	ENSMUSG00000022454	Nell2	A330108N19Rik|R75516|mel91	NEL-like 2	protein-coding
Diff_Nuc12045	chr10	69664602	69664741	+	0	NA	Intergenic	MTEa|LTR|MaLR	-2741	NM_001304739	69563	Mm.64672	NM_001304739	ENSMUSG00000019933	Mrln	2310015B20Rik|Mln	myoregulin	protein-coding
Diff_Nuc3174	chr13	100940462	100940601	+	0	NA	intron (NM_010872, intron 8 of 15)	L1Md_F2|LINE|L1	31546	NM_001126182	17948	Mm.89961	NM_010872	ENSMUSG00000078945	Naip2	Birc1b|Naip-rs6	NLR family, apoptosis inhibitory protein 2	protein-coding
Diff_Nuc46005	chr3	66000302	66000441	+	0	NA	intron (NM_145820, intron 6 of 13)	MTE2b|LTR|MaLR	-23438	NM_008987	19288	Mm.276776	NM_008987	ENSMUSG00000027832	Ptx3	AI607804|TSG-14	pentraxin related gene	protein-coding
Diff_Nuc36848	chr5	34161202	34161341	+	0	NA	Intergenic	Intergenic	-24490	NM_175231	107823	Mm.19892	NM_175231	ENSMUSG00000057406	Whsc1	5830445G22Rik|9430010A17Rik|AW555663|C130020C13Rik|D030027O06Rik|D930023B08Rik|MMSET|NSD2|Whsc1l|mKIAA1090	Wolf-Hirschhorn syndrome candidate 1 (human)	protein-coding
Diff_Nuc4567	chr12	43382772	43382911	+	0	NA	Intergenic	RLTR21|LTR|ERVK	-1170197	NM_010733	16981	Mm.404786	NM_010733	ENSMUSG00000036295	Lrrn3	NLRR-3	leucine rich repeat protein 3, neuronal	protein-coding
Diff_Nuc55370	chr1	59688792	59688931	+	0	NA	intron (NM_001013771, intron 17 of 19)	intron (NM_001013771, intron 17 of 19)	38817	NM_009460	22218	Mm.362118	NM_009460	ENSMUSG00000026021	Sumo1	GMP1|PIC1|SENTRIN|SMT3|SMT3H3|SMTP3|SUMO-1|Smt3C|Ubl1	small ubiquitin-like modifier 1	protein-coding
Diff_Nuc24991	chr19	17469202	17469341	+	0	NA	intron (NM_019437, intron 1 of 3)	intron (NM_019437, intron 1 of 3)	738	NM_019437	54391	Mm.7013	NM_019437	ENSMUSG00000024712	Rfk	0610038L10Rik|AF031381|KOI-4	riboflavin kinase	protein-coding
Diff_Nuc56579	chr1	105280492	105280631	+	0	NA	Intergenic	L1Md_F2|LINE|L1	-1384835	NM_011800	23836	Mm.103640	NM_011800	ENSMUSG00000050840	Cdh20	Cdh7	cadherin 20	protein-coding
Diff_Nuc46188	chr3	73870832	73870971	+	0	NA	Intergenic	RLTR20A|LTR|ERVK	-49702	NR_040450	100504692	Mm.394454	NR_040450	ENSMUSG00000104096	Gm20356	-	predicted gene, 20356	ncRNA
Diff_Nuc43051	chr4	112683072	112683211	+	0	NA	intron (NM_001103199, intron 22 of 48)	MYSERV16_I-int|LTR|ERVK	-235675	NM_177668	230613	Mm.122553	NM_177668	ENSMUSG00000048766	Skint10	A030001H23Rik|Gm570	selection and upkeep of intraepithelial T cells 10	protein-coding
Diff_Nuc8490	chr11	73757972	73758111	+	0	NA	Intergenic	L1_Mus3|LINE|L1	4291	NM_010970	18321	Mm.246529	NM_010970	ENSMUSG00000069816	Olfr23	MOR135-27|MTPCR50	olfactory receptor 23	protein-coding
Diff_Nuc5547	chr12	80750682	80750821	+	0	NA	intron (NM_009014, intron 7 of 10)	intron (NM_009014, intron 7 of 10)	274969	NR_131075	77290	Mm.395042	NR_131073		9430078K24Rik	-	RIKEN cDNA 9430078K24 gene	ncRNA
Diff_Nuc13848	chr17	5046242	5046381	+	0	NA	intron (NM_001085355, intron 2 of 19)	intron (NM_001085355, intron 2 of 19)	51237	NM_001085355	239985	Mm.133401	NM_001085355	ENSMUSG00000069729	Arid1b	8030481M12|9330189K18Rik|AI836955|Ardi1b|B230217J03Rik|mKIAA1235	AT rich interactive domain 1B (SWI-like)	protein-coding
Diff_Nuc52336	chr2	127104972	127105111	+	0	NA	intron (NM_139308, intron 1 of 7)	intron (NM_139308, intron 1 of 7)	9076	NM_139308	99138	Mm.41271	NM_139308	ENSMUSG00000027367	Stard7	AI852671|AL022671|AW544915	START domain containing 7	protein-coding
Diff_Nuc15180	chr17	54458242	54458381	+	0	NA	Intergenic	HAL1-3A_ME|LINE|L1	-19952	NM_022025	63993	Mm.155241	NM_022025	ENSMUSG00000023945	Slc5a7	CHT1	solute carrier family 5 (choline transporter), member 7	protein-coding
Diff_Nuc33905	chr6	72785572	72785711	+	0	NA	Intergenic	RSINE1|SINE|B4	-46602	NM_009332	21415	Mm.440067	NM_009332	ENSMUSG00000055799	Tcf7l1	Tcf-3|Tcf3|bHLHb21	transcription factor 7 like 1 (T cell specific, HMG box)	protein-coding
Diff_Nuc33828	chr6	70796672	70796811	+	0	NA	intron (NM_001313918, intron 1 of 2)	intron (NM_001313918, intron 1 of 2)	2232	NM_001313918	13666	Mm.247167	NM_010121	ENSMUSG00000031668	Eif2ak3	Pek|Perk	eukaryotic translation initiation factor 2 alpha kinase 3	protein-coding
Diff_Nuc27216	chr18	39624782	39624921	+	0	NA	intron (NM_008173, intron 1 of 7)	Lx9|LINE|L1	22048	NM_008173	14815	Mm.129481	NM_008173	ENSMUSG00000024431	Nr3c1	GR|Grl-1|Grl1	nuclear receptor subfamily 3, group C, member 1	protein-coding
Diff_Nuc20396	chr15	64507932	64508071	+	0	NA	Intergenic	L1Md_F2|LINE|L1	245857	NM_001331075	11514	Mm.1425	NM_009623	ENSMUSG00000022376	Adcy8	AC8|AW060868	adenylate cyclase 8	protein-coding
Diff_Nuc20156	chr15	55713512	55713651	+	0	NA	intron (NM_016667, intron 1 of 6)	PB1D10|SINE|Alu	24923	NM_016667	20649	Mm.309425	NM_016667	ENSMUSG00000060429	Sntb1	-	syntrophin, basic 1	protein-coding
Diff_Nuc49354	chr2	25924952	25925091	+	0	NA	intron (NM_026495, intron 2 of 5)	intron (NM_026495, intron 2 of 5)	22895	NM_001037098	67991	Mm.131074	NM_026495	ENSMUSG00000026932	Nacc2	0610020I02Rik|AI448087|Btbd14a|C030048H19Rik	nucleus accumbens associated 2, BEN and BTB (POZ) domain containing	protein-coding
Diff_Nuc49683	chr2	34773922	34774061	+	0	NA	Intergenic	ORR1A4|LTR|MaLR	-4495	NM_028716	74016	Mm.65691	NM_028716	ENSMUSG00000026873	Phf19	3110009G19Rik|3321402G02Rik	PHD finger protein 19	protein-coding
Diff_Nuc34536	chr6	95826652	95826791	+	0	NA	Intergenic	Intergenic	-157881	NM_011507	20917	Mm.371585	NM_011507	ENSMUSG00000061838	Suclg2	AF171077|AW556404|D6Wsu120e|G-SCS|GTPSCS|SCS-betaG	succinate-Coenzyme A ligase, GDP-forming, beta subunit	protein-coding
Diff_Nuc2456	chr13	72003112	72003251	+	0	NA	Intergenic	Intergenic	97990	NM_010573	16371	Mm.316056	NM_010573	ENSMUSG00000060969	Irx1	-	Iroquois related homeobox 1 (Drosophila)	protein-coding
Diff_Nuc15359	chr17	62083062	62083201	+	0	NA	Intergenic	L1Md_F2|LINE|L1	1147535	NM_207654	13640	Mm.7978	NM_010109	ENSMUSG00000048915	Efna5	AL-1|AV158822|EFL-5|Ephrin-A5|Epl7|LERK-7|RAGS	ephrin A5	protein-coding
Diff_Nuc50404	chr2	61414332	61414471	+	0	NA	Intergenic	Intergenic	-2242	NM_011529	21353	Mm.244393	NM_011529	ENSMUSG00000064289	Tank	C86182|E430026L09Rik|I-TRAF	TRAF family member-associated Nf-kappa B activator	protein-coding
Diff_Nuc6920	chr11	12233172	12233311	+	0	NA	intron (NM_172496, intron 7 of 14)	B4|SINE|B4	78902	NM_001282994	12808	Mm.22847	NM_172496	ENSMUSG00000020173	Cobl	-	cordon-bleu WH2 repeat	protein-coding
Diff_Nuc2519	chr13	74627522	74627661	+	0	NA	intron (NM_146231, intron 1 of 3)	intron (NM_146231, intron 1 of 3)	3807	NM_146231	235956	Mm.296909	NM_146231	ENSMUSG00000069208	Zfp825	-	zinc finger protein 825	protein-coding
Diff_Nuc63786	chr8	52431142	52431281	+	0	NA	Intergenic	Lx2|LINE|L1	977745	NR_046067	100039954	Mm.400419	NR_046067	ENSMUSG00000110281	Gm2516	-	predicted gene 2516	ncRNA
Diff_Nuc63360	chr8	37011302	37011441	+	0	NA	Intergenic	MER34|LTR|ERV1	-65360	NR_046181	330737	Mm.381743	NR_046181	ENSMUSG00000109761	5430403N17Rik	5430403N17	RIKEN cDNA 5430403N17 gene	ncRNA
Diff_Nuc28620	chr7	11280722	11280861	+	0	NA	intron (NM_172481, intron 2 of 8)	Lx3B|LINE|L1	7649	NM_172481	210045	Mm.95244	NM_172481	ENSMUSG00000034087	Nlrp4b	AU022726|E330024M09|Nalp-gamma|Nalp4b	NLR family, pyrin domain containing 4B	protein-coding
Diff_Nuc57397	chr1	136392882	136393021	+	0	NA	intron (NM_145510, intron 1 of 1)	PB1D9|SINE|Alu	1714	NM_145510	98710	Mm.198119	NM_145510	ENSMUSG00000042229	Rabif	AI842864|AW549708|E130318E12Rik|MSS4|RASGFR3	RAB interacting factor	protein-coding
Diff_Nuc56088	chr1	83933522	83933661	+	0	NA	Intergenic	L1Md_T|LINE|L1	281945	NR_105771	102465181		NR_105771	ENSMUSG00000098851	Mir6353	Gm27391|mmu-mir-6353	microRNA 6353	ncRNA
Diff_Nuc19554	chr15	33355332	33355471	+	0	NA	intron (NM_176073, intron 5 of 7)	MTEa-int|LTR|MaLR	-19707	NR_033608	73486	Mm.483393	NM_028551	ENSMUSG00000058101	1700084J12Rik	-	ribosomal protein L7-like 1 pseudogene	pseudo
Diff_Nuc10416	chr10	8770492	8770631	+	0	NA	Intergenic	Intergenic	-164693	NM_175155	70097	Mm.338275	NM_175155	ENSMUSG00000015305	Sash1	1100001C18Rik|2500002E12Rik|A330076K04Rik|mKIAA0790	SAM and SH3 domain containing 1	protein-coding
Diff_Nuc61744	chr9	95403862	95404001	+	0	NA	intron (NM_026476, intron 1 of 26)	B1_Mus1|SINE|Alu	8484	NM_026476	67958	Mm.292742	NM_026476	ENSMUSG00000032407	U2surp	2610101N10Rik|AU023006|Sr140	U2 snRNP-associated SURP domain containing	protein-coding
Diff_Nuc20171	chr15	56273462	56273601	+	0	NA	Intergenic	MER5A|DNA|MER1_type	-247968	NR_002874	594843	Mm.484850	NR_002874	ENSMUSG00000086541	Has2os	EG594843|Has2as|Hasnt	hyaluronan synthase 2, opposite strand	ncRNA
Diff_Nuc44389	chr4	155475682	155475821	+	0	NA	Intergenic	Lx4B|LINE|L1	-8356	NM_145557	230996	Mm.318925	NM_145557	ENSMUSG00000059939	9430015G10Rik	-	RIKEN cDNA 9430015G10 gene	protein-coding
Diff_Nuc33957	chr6	74914682	74914821	+	0	NA	Intergenic	Intergenic	-1493736	NR_108032	73408	Mm.233629	NR_108032	ENSMUSG00000107408	1700065L07Rik	-	RIKEN cDNA 1700065L07 gene	ncRNA
Diff_Nuc2352	chr13	67147272	67147411	+	0	NA	intron (NM_001166218, intron 2 of 3)	Lx8|LINE|L1	-14000	NR_045851	71226	Mm.399574	NR_045851		4933433G19Rik	-	RIKEN cDNA 4933433G19 gene	ncRNA
Diff_Nuc46697	chr3	90088342	90088481	+	0	NA	Intergenic	B2_Mm2|SINE|B2	14340	NR_105979	102465612		NR_105979	ENSMUSG00000099199	Mir7012	Gm27370|mmu-mir-7012	microRNA 7012	ncRNA
Diff_Nuc25111	chr19	23292442	23292581	+	0	NA	intron (NM_001252684, intron 18 of 24)	intron (NM_001252684, intron 18 of 24)	54578	NM_001252685	226026	Mm.23267	NM_153808	ENSMUSG00000024943	Smc5	MLZ-453|SMC-5|Smc5l1|mKIAA0594|mSMC5	structural maintenance of chromosomes 5	protein-coding
Diff_Nuc47700	chr3	121478332	121478471	+	0	NA	exon (NM_008991, exon 13 of 23)	exon (NM_008991, exon 13 of 23)	39732	NM_008991	19299	Mm.399042	NM_008991	ENSMUSG00000028127	Abcd3	AI313901|AU018866|AW146054|PMP68|PMP70|Pxmp1	ATP-binding cassette, sub-family D (ALD), member 3	protein-coding
Diff_Nuc37363	chr5	54306112	54306251	+	0	NA	Intergenic	Intergenic	-83581	NM_001081103	116873	Mm.265985	NM_054083	ENSMUSG00000039156	Stim2	-	stromal interaction molecule 2	protein-coding
Diff_Nuc55687	chr1	69387972	69388111	+	0	NA	Intergenic	Intergenic	-233408	NM_010154	13869	Mm.442420	NM_010154	ENSMUSG00000062209	Erbb4	Her4|c-erbB-4	erb-b2 receptor tyrosine kinase 4	protein-coding
Diff_Nuc4009	chr12	16961512	16961651	+	0	NA	intron (NM_009072, intron 9 of 32)	intron (NM_009072, intron 9 of 32)	45343	NM_172574	217430	Mm.379451	NM_172574	ENSMUSG00000045679	Pqlc3	C78076|E030024M05Rik	PQ loop repeat containing	protein-coding
Diff_Nuc47129	chr3	102958072	102958211	+	0	NA	intron (NM_177857, intron 10 of 18)	intron (NM_177857, intron 10 of 18)	-17493	NM_026602	68183	Mm.104919	NM_026602	ENSMUSG00000005687	Bcas2	6430539P16Rik|AI132645|C76366|C80030	breast carcinoma amplified sequence 2	protein-coding
Diff_Nuc11251	chr10	39840932	39841071	+	0	NA	intron (NM_001114332, intron 1 of 5)	intron (NM_001114332, intron 1 of 5)	21059	NM_028247	72472	Mm.186778	NM_028247	ENSMUSG00000019838	Slc16a10	2610103N14Rik|9830169E08|Mct10|PRO0813|TAT1	solute carrier family 16 (monocarboxylic acid transporters), member 10	protein-coding
Diff_Nuc35114	chr6	117486132	117486271	+	0	NA	Intergenic	L1MA4|LINE|L1	215586	NR_045731	72263	Mm.443289	NR_045731	ENSMUSG00000099869	1700030F04Rik	-	RIKEN cDNA 1700030F04 gene	ncRNA
Diff_Nuc51499	chr2	99542482	99542621	+	0	NA	Intergenic	Intergenic	-1922354	NM_009020	19374	Mm.4988	NM_009020	ENSMUSG00000032864	Rag2	Rag-2	recombination activating gene 2	protein-coding
Diff_Nuc65816	chr8	125892482	125892621	+	0	NA	intron (NM_172287, intron 13 of 14)	intron (NM_172287, intron 13 of 14)	-5060	NM_001037877	66855	Mm.178818	NM_025804	ENSMUSG00000001472	Tcf25	1100001J13Rik|1810041K11Rik|D8Ertd325e|Nulp1|mKIAA1049	transcription factor 25 (basic helix-loop-helix)	protein-coding
Diff_Nuc38205	chr5	89655262	89655401	+	0	NA	intron (NM_018760, intron 22 of 25)	intron (NM_018760, intron 22 of 25)	231592	NM_008096	14473	Mm.196595	NM_008096	ENSMUSG00000035540	Gc	DBP|VDB	group specific component	protein-coding
Diff_Nuc53030	chr2	148642352	148642491	+	0	NA	Intergenic	Intergenic	-3414	NM_027024	69294	Mm.46167	NM_027024	ENSMUSG00000036924	Cst13	1700006C19Rik|Cymg1|Mtcg1	cystatin 13	protein-coding
Diff_Nuc49474	chr2	29298772	29298911	+	0	NA	intron (NM_026896, intron 3 of 7)	intron (NM_026896, intron 3 of 7)	31973	NR_105753	102465170		NR_105753	ENSMUSG00000098539	Mir133c	Gm27865|mmu-mir-133c	microRNA 133c	ncRNA
Diff_Nuc6252	chr12	104974392	104974531	+	0	NA	intron (NM_009244, intron 1 of 4)	intron (NM_009244, intron 1 of 4)	1938	NM_009244	20701	Mm.439692	NM_009244	ENSMUSG00000071178	Serpina1b	D12Ucla2|Dom2|PI2|Spi1-2	serine (or cysteine) preptidase inhibitor, clade A, member 1B	protein-coding
Diff_Nuc55936	chr1	77874462	77874601	+	0	NA	Intergenic	Intergenic	319180	NM_008781	18505	Mm.1371	NM_008781	ENSMUSG00000004872	Pax3	Pax-3|Sp|Splchl2|splotch	paired box 3	protein-coding
Diff_Nuc24010	chr14	103550302	103550441	+	0	NA	intron (NM_207215, intron 61 of 84)	intron (NM_207215, intron 61 of 84)	-51588	NM_001347600	50789	Mm.214746	NM_015822	ENSMUSG00000022124	Fbxl3	AU041772|AW212966|FBK|Fbl3a|Fbxl3a|Ovtm|Play68	F-box and leucine-rich repeat protein 3	protein-coding
Diff_Nuc62528	chr9	122759562	122759701	+	0	NA	3' UTR (NM_173364, exon 7 of 7)	3' UTR (NM_173364, exon 7 of 7)	15493	NM_173364	235682	Mm.326477	NM_173364	ENSMUSG00000047036	Zfp445	AW610627|ZNF168|Znf445|mszf29|mszf50	zinc finger protein 445	protein-coding
Diff_Nuc40067	chr5	150801982	150802121	+	0	NA	Intergenic	Intergenic	-19199	NM_001289564	140498	Mm.444643	NM_080468	ENSMUSG00000053368	Rxfp2	Gpr106|Great|Lgr8	relaxin/insulin-like family peptide receptor 2	protein-coding
Diff_Nuc13569	chr10	123287502	123287641	+	0	NA	Intergenic	L2c|LINE|L2	586439	NM_001252387	268354	Mm.51939	NM_182807	ENSMUSG00000044071	Fam19a2	6330575M02|FAM19A2 TAFA-2|TAFA2|Tafa-2	family with sequence similarity 19, member A2	protein-coding
Diff_Nuc28459	chr18	88541552	88541691	+	0	NA	Intergenic	Intergenic	521978	NM_018821	54607	Mm.91920	NM_018821	ENSMUSG00000056153	Socs6	1500012M23Rik|5830401B18Rik|AI447482|Cis4|Cish4|HSPC060|SOCS-4|SOCS-6|SSI4|STAI4|STATI4|Socs4	suppressor of cytokine signaling 6	protein-coding
Diff_Nuc18653	chr16	91358862	91359001	+	0	NA	Intergenic	MLT1B|LTR|MaLR	-14097	NM_010509	15976	Mm.6834	NM_010509	ENSMUSG00000022971	Ifnar2	AI747302|Ifnar-2	interferon (alpha and beta) receptor 2	protein-coding
Diff_Nuc3370	chr13	108549722	108549861	+	0	NA	intron (NM_145456, intron 5 of 14)	intron (NM_145456, intron 5 of 14)	72314	NR_045900	72257	Mm.234155	NR_045900	ENSMUSG00000102000	1700006H21Rik	-	RIKEN cDNA 1700006H21 gene	ncRNA
Diff_Nuc37166	chr5	46570832	46570971	+	0	NA	Intergenic	Intergenic	-247253	NR_110478	78106	Mm.243807	NR_110478	ENSMUSG00000106602	4930405L22Rik	-	RIKEN cDNA 4930405L22 gene	ncRNA
Diff_Nuc13614	chr10	124725832	124725971	+	0	NA	intron (NM_011391, intron 4 of 6)	intron (NM_011391, intron 4 of 6)	39690	NM_011391	20503	Mm.29161	NM_011391	ENSMUSG00000020102	Slc16a7	4921534N07Rik|Mct2	solute carrier family 16 (monocarboxylic acid transporters), member 7	protein-coding
Diff_Nuc17621	chr16	47876842	47876981	+	0	NA	Intergenic	B3A|SINE|B2	-406937	NM_028610	73693	Mm.35597	NM_028610	ENSMUSG00000058550	Dppa4	2410091M23Rik|C76608|ECAT15-1	developmental pluripotency associated 4	protein-coding
Diff_Nuc55920	chr1	77348852	77348991	+	0	NA	Intergenic	(TTTG)n|Simple_repeat|Simple_repeat	144422	NR_105770	102465180		NR_105770	ENSMUSG00000099141	Mir6352	Gm27481|mmu-mir-6352	microRNA 6352	ncRNA
Diff_Nuc14189	chr17	20297592	20297731	+	0	NA	Intergenic	L1_Mus2|LINE|L1	22400	NM_177316	321020	Mm.377882	NM_177316	ENSMUSG00000071275	Fpr-rs6	-	formyl peptide receptor, related sequence 6	protein-coding
Diff_Nuc50642	chr2	69120892	69121031	+	0	NA	intron (NM_021022, intron 16 of 27)	intron (NM_021022, intron 16 of 27)	59712	NM_021022	27413	Mm.439855	NM_021022	ENSMUSG00000027048	Abcb11	ABC16|Bsep|Lith1|PFIC2|PGY4|SPGP	ATP-binding cassette, sub-family B (MDR/TAP), member 11	protein-coding
Diff_Nuc61829	chr9	99038862	99039001	+	0	NA	intron (NM_029094, intron 1 of 23)	intron (NM_029094, intron 1 of 23)	1699	NM_029094	74769	Mm.213128	NM_029094	ENSMUSG00000032462	Pik3cb	1110001J02Rik|AI447572|p110beta	phosphatidylinositol 3-kinase, catalytic, beta polypeptide	protein-coding
Diff_Nuc43259	chr4	118957722	118957861	+	0	NA	intron (NM_011732, intron 2 of 7)	intron (NM_011732, intron 2 of 7)	9327	NM_011732	22608	Mm.258204	NM_011732	ENSMUSG00000028639	Ybx1	1700102N10Rik|C79409|EF1A|MSY1|Nsep1|YB-1|dbpB|mYB-1a	Y box protein 1	protein-coding
Diff_Nuc65062	chr8	100570952	100571091	+	0	NA	Intergenic	Intergenic	-964766	NR_110579	100873092	Mm.414599	NR_110579	ENSMUSG00000089819	Gm15679	OTTMUSG00000025218	predicted gene 15679	ncRNA
Diff_Nuc9986	chr11	115140982	115141121	+	0	NA	Intergenic	Lx8|LINE|L1	-2768	NM_007997	14149	Mm.4719	NM_007997	ENSMUSG00000018861	Fdxr	-	ferredoxin reductase	protein-coding
Diff_Nuc53366	chr2	158171802	158171941	+	0	NA	Intergenic	Intergenic	15374	NR_015463	68108	Mm.119198	NR_015463		Snhg17	9430008C03Rik	small nucleolar RNA host gene 17	ncRNA
Diff_Nuc46012	chr3	66248182	66248321	+	0	NA	Intergenic	Intergenic	-147492	NM_145820	72789	Mm.443526	NM_028357	ENSMUSG00000027831	Veph1	2810471M23Rik|Veph	ventricular zone expressed PH domain-containing 1	protein-coding
Diff_Nuc59115	chr1	192356382	192356521	+	0	NA	Intergenic	Intergenic	-361892	NM_008937	19130	Mm.132579	NM_008937	ENSMUSG00000010175	Prox1	A230003G05Rik	prospero homeobox 1	protein-coding
Diff_Nuc42575	chr4	98618472	98618611	+	0	NA	intron (NM_026082, intron 41 of 47)	intron (NM_026082, intron 41 of 47)	28040	NM_146144	230484	Mm.371692	NM_146144	ENSMUSG00000028560	Usp1	-	ubiquitin specific peptidase 1	protein-coding
Diff_Nuc15491	chr17	66129462	66129601	+	0	NA	Intergenic	Intergenic	-3164	NM_001114131	70351	Mm.48686	NM_146081	ENSMUSG00000061950	Ppp4r1	3110001J10Rik|Pp4r1	protein phosphatase 4, regulatory subunit 1	protein-coding
Diff_Nuc52659	chr2	136563552	136563691	+	0	NA	intron (NM_011428, intron 1 of 7)	intron (NM_011428, intron 1 of 7)	24435	NM_001291056	20614	Mm.45953	NM_011428	ENSMUSG00000027273	Snap25	Bdr|GENA70|SNAP-25|SUP|sp	synaptosomal-associated protein 25	protein-coding
Diff_Nuc26631	chr18	16765222	16765361	+	0	NA	intron (NM_007664, intron 14 of 15)	L2a|LINE|L2	202464	NM_007664	12558	Mm.257437	NM_007664	ENSMUSG00000024304	Cdh2	CDHN|N-CAD|Ncad	cadherin 2	protein-coding
Diff_Nuc65065	chr8	100913382	100913521	+	0	NA	Intergenic	L1_Mus1|LINE|L1	-622336	NR_110579	100873092	Mm.414599	NR_110579	ENSMUSG00000089819	Gm15679	OTTMUSG00000025218	predicted gene 15679	ncRNA
Diff_Nuc35677	chr6	137116602	137116741	+	0	NA	intron (NM_181988, intron 1 of 4)	intron (NM_181988, intron 1 of 4)	1568	NM_001164214	232441	Mm.46233	NM_181988	ENSMUSG00000030222	Rerg	-	RAS-like, estrogen-regulated, growth-inhibitor	protein-coding
Diff_Nuc28322	chr18	81677852	81677991	+	0	NA	Intergenic	L1MC3|LINE|L1	-494604	NM_178280	20689	Mm.215917	NM_178280	ENSMUSG00000024565	Sall3	B130022O04Rik|Msal|Msal-1|Sal|Salt|Spalt	sal-like 3 (Drosophila)	protein-coding
Diff_Nuc37479	chr5	59273002	59273141	+	0	NA	Intergenic	B3A|SINE|B2	-428834	NR_046190	78163	Mm.243828	NR_046190	ENSMUSG00000105234	4930459L07Rik	-	RIKEN cDNA 4930459L07 gene	ncRNA
Diff_Nuc28655	chr7	13640172	13640311	+	0	NA	promoter-TSS (NM_001290452)	promoter-TSS (NM_001290452)	-128	NM_145819	109889	Mm.10103	NM_145819	ENSMUSG00000030380	Mzf1	Mzf-2|Mzf2|Zfp121|Zfp98|Znf42	myeloid zinc finger 1	protein-coding
Diff_Nuc61186	chr9	74352712	74352851	+	0	NA	Intergenic	Intergenic	-343463	NR_045284	100503019	Mm.482658	NR_045284	ENSMUSG00000066477	Gm16551	-	predicted gene 16551	ncRNA
Diff_Nuc59972	chr9	32287312	32287451	+	0	NA	intron (NM_008026, intron 1 of 8)	intron (NM_008026, intron 1 of 8)	61656	NM_008026	14247	Mm.258908	NM_008026	ENSMUSG00000016087	Fli1	EWSR2|Fli-1|SIC-1|Sic1	Friend leukemia integration 1	protein-coding
Diff_Nuc11575	chr10	52080312	52080451	+	0	NA	intron (NM_053187, intron 1 of 7)	B4|SINE|B4	21549	NM_053187	94221	Mm.390258	NM_053187	ENSMUSG00000019861	Gopc	2210402P09Rik|AI844555|CAL|FIG|GOPC1|PIST	golgi associated PDZ and coiled-coil motif containing	protein-coding
Diff_Nuc62284	chr9	113765352	113765491	+	0	NA	intron (NM_001114347, intron 18 of 39)	B4A|SINE|B4	43717	NM_001081960	76499	Mm.222272	NM_029633	ENSMUSG00000033392	Clasp2	1500004F14Rik|8030404L10Rik|C77448|CLASP2beta|mKIAA0627	CLIP associating protein 2	protein-coding
Diff_Nuc26713	chr18	21135262	21135401	+	0	NA	intron (NM_026301, intron 2 of 5)	intron (NM_026301, intron 2 of 5)	-24470	NM_019706	56515	Mm.253542	NM_019706	ENSMUSG00000024317	Rnf138	2410015A17Rik|2810480D20Rik|STRIN|Trif|Trif-d	ring finger protein 138	protein-coding
Diff_Nuc63575	chr8	45022592	45022731	+	0	NA	Intergenic	Lx4B|LINE|L1	-237816	NM_001079931	384814	Mm.491652	NM_001079931		Gm5347	EG384814	predicted gene 5347	protein-coding
Diff_Nuc58037	chr1	158551012	158551151	+	0	NA	intron (NM_009595, intron 2 of 11)	intron (NM_009595, intron 2 of 11)	53389	NM_023141	30935	Mm.206737	NM_023141	ENSMUSG00000060519	Tor3a	Adir	torsin family 3, member A	protein-coding
Diff_Nuc33139	chr6	44826072	44826211	+	0	NA	Intergenic	L1_Mus1|LINE|L1	-183919	NM_001004357	66797	Mm.440084	NM_025771	ENSMUSG00000039419	Cntnap2	5430425M22Rik|Caspr2|mKIAA0868	contactin associated protein-like 2	protein-coding
Diff_Nuc57943	chr1	155577662	155577801	+	0	NA	intron (NR_046171, intron 2 of 2)	intron (NR_046171, intron 2 of 2)	7228	NR_046171	329271	Mm.384841	NR_046171	ENSMUSG00000100334	C230024C17Rik	C230024C17	RIKEN cDNA C230024C17 gene	ncRNA
Diff_Nuc48600	chr3	153584672	153584811	+	0	NA	TTS (NM_007382)	TTS (NM_007382)	-8811	NR_028094	19352	Mm.277831	NM_011231	ENSMUSG00000038975	Rabggtb	-	Rab geranylgeranyl transferase, b subunit	protein-coding
Diff_Nuc36586	chr5	24351602	24351741	+	0	NA	Intergenic	ORR1B1|LTR|MaLR	-3492	NM_053075	19744	Mm.319175	NM_053075	ENSMUSG00000028945	Rheb	Rheb1	Ras homolog enriched in brain	protein-coding
Diff_Nuc2797	chr13	87145592	87145731	+	0	NA	Intergenic	MTA_Mm|LTR|MaLR	-959261	NM_007749	12867	Mm.378898	NM_007749	ENSMUSG00000017778	Cox7c	COXVIIc|Cox7c1	cytochrome c oxidase subunit VIIc	protein-coding
Diff_Nuc22241	chr14	35144772	35144911	+	0	NA	intron (NM_008133, intron 5 of 12)	intron (NM_008133, intron 5 of 12)	-13400	NR_027380	100041231	Mm.425871	NR_027380		Gm3219	-	B-cell CLL/lymphoma 7C pseudogene	pseudo
Diff_Nuc12223	chr10	76840982	76841121	+	0	NA	intron (NM_001024837, intron 1 of 10)	L1MC1|LINE|L1	39967	NM_130895	110532	Mm.276815	NM_130895	ENSMUSG00000020262	Adarb1	1700057H01Rik|AW124433|AW558573|Adar2|BB220382|D10Bwg0447e|Red1	adenosine deaminase, RNA-specific, B1	protein-coding
Diff_Nuc1772	chr13	45051492	45051631	+	0	NA	intron (NM_025772, intron 6 of 9)	ORR1C2|LTR|MaLR	45904	NM_025772	94245	Mm.352311	NM_025772	ENSMUSG00000057531	Dtnbp1	5430437B18Rik|AW048963|Bloc1s8|dysbindin|sdy	dystrobrevin binding protein 1	protein-coding
Diff_Nuc20033	chr15	51696542	51696681	+	0	NA	intron (NM_080635, intron 1 of 7)	intron (NM_080635, intron 1 of 7)	396	NM_080635	68135	Mm.289800	NM_080635	ENSMUSG00000022312	Eif3h	1110008A16Rik|40kD|9430017H16Rik|EIF3-P40|EIF3-gamma|Eif3s3	eukaryotic translation initiation factor 3, subunit H	protein-coding
Diff_Nuc10128	chr11	118619362	118619501	+	0	NA	intron (NM_001039167, intron 2 of 14)	(TG)n|Simple_repeat|Simple_repeat	2924	NM_001285438	52897	Mm.341103	NM_001024931	ENSMUSG00000025576	Rbfox3	Fox-3|Hrnbp3|NeuN|Neuna60	RNA binding protein, fox-1 homolog (C. elegans) 3	protein-coding
Diff_Nuc9417	chr11	99069162	99069301	+	0	NA	Intergenic	Intergenic	23100	NM_020618	57376	Mm.379086	NM_020618	ENSMUSG00000037935	Smarce1	2810417B20Rik|5830412H02Rik|9030408N19Rik|Baf27	SWI/SNF related, matrix associated, actin dependent regulator of chromatin, subfamily e, member 1	protein-coding
Diff_Nuc54238	chr1	16226062	16226201	+	0	NA	intron (NM_025303, intron 12 of 13)	intron (NM_025303, intron 12 of 13)	130168	NM_133832	98711	Mm.274376	NM_133832	ENSMUSG00000025921	Rdh10	3110069K09Rik|4921506A21Rik|AI875664|AW549993|D1Ertd762e|m366Asp	retinol dehydrogenase 10 (all-trans)	protein-coding
Diff_Nuc34811	chr6	107242682	107242821	+	0	NA	Intergenic	Intergenic	-236969	NM_008516	16979	Mm.428543	NM_008516	ENSMUSG00000034648	Lrrn1	2810047E21Rik|NLRR-1	leucine rich repeat protein 1, neuronal	protein-coding
Diff_Nuc35938	chr6	145696192	145696331	+	0	NA	Intergenic	Intergenic	-60642	NM_027760	71323	Mm.158669	NM_027760	ENSMUSG00000030259	Rassf8	5133400D11Rik|AA815821|AW123240|Hoj1|mHoj-1	Ras association (RalGDS/AF-6) domain family (N-terminal) member 8	protein-coding
Diff_Nuc38729	chr5	107446392	107446531	+	0	NA	Intergenic	Lx2|LINE|L1	52881	NM_001271566	12545	Mm.20842	NM_009863	ENSMUSG00000029283	Cdc7	AI597260|Cdc7l1|muCdc7	cell division cycle 7 (S. cerevisiae)	protein-coding
Diff_Nuc21743	chr14	19562542	19562681	+	0	NA	intron (NM_144839, intron 3 of 5)	intron (NM_144839, intron 3 of 5)	163530	NM_144839	218793	Mm.23551	NM_144839	ENSMUSG00000058317	Ube2e2	BC016265	ubiquitin-conjugating enzyme E2E 2	protein-coding
Diff_Nuc20355	chr15	63100822	63100961	+	0	NA	Intergenic	Intergenic	210272	NR_045279	432958	Mm.255105	NR_045279		Gm20740	-	predicted gene, 20740	ncRNA
Diff_Nuc57452	chr1	138320857	138320996	+	0	NA	intron (NM_026500, intron 3 of 7)	L2c|LINE|L2	-8830	NR_024328	320054	Mm.208000	NR_024328	ENSMUSG00000097403	9230116N13Rik	-	RIKEN cDNA 9230116N13 gene	ncRNA
Diff_Nuc32538	chr6	24552142	24552281	+	0	NA	intron (NM_053098, intron 1 of 2)	intron (NM_053098, intron 1 of 2)	4440	NM_053098	93677	Mm.332941	NM_053098	ENSMUSG00000029683	Lmod2	C-Lmod	leiomodin 2 (cardiac)	protein-coding
Diff_Nuc30710	chr7	107226062	107226201	+	0	NA	Intergenic	B4A|SINE|B4	43879	NM_133692	67967	Mm.37562	NM_133692	ENSMUSG00000030726	Pold3	2410142G14Rik|C85233|P66|P68	polymerase (DNA-directed), delta 3, accessory subunit	protein-coding
Diff_Nuc10705	chr10	19688252	19688391	+	0	NA	intron (NM_008580, intron 1 of 29)	intron (NM_008580, intron 1 of 29)	33989	NM_008580	26408	Mm.6595	NM_008580	ENSMUSG00000071369	Map3k5	7420452D20Rik|ASK|ASK1|MAPKKK5|Mekk5	mitogen-activated protein kinase kinase kinase 5	protein-coding
Diff_Nuc5652	chr12	83305142	83305281	+	0	NA	intron (NM_001167983, intron 1 of 23)	RSINE1|SINE|B4	34208	NM_001167983	217692	Mm.261333	NM_172579	ENSMUSG00000042700	Sipa1l1	4931426N11Rik|AW213287|Spar|mKIAA0440	signal-induced proliferation-associated 1 like 1	protein-coding
Diff_Nuc4971	chr12	60237832	60237971	+	0	NA	intron (NM_001329047, intron 7 of 29)	(T)n|Simple_repeat|Simple_repeat	5461	NM_001165253	338320	Mm.213215	NM_146034	ENSMUSG00000021000	Mia2	Ctage5|D12Bwg0579e|Mea6|Mgea|Mgea6	melanoma inhibitory activity 2	protein-coding
Diff_Nuc43837	chr4	137735882	137736021	+	0	NA	intron (NM_172703, intron 24 of 34)	intron (NM_172703, intron 24 of 34)	16827	NR_105825	102466907		NR_105825	ENSMUSG00000098513	Mir6399	Gm27667|mir-6399|mmu-mir-6399	microRNA 6399	ncRNA
Diff_Nuc31085	chr7	119389882	119390021	+	0	NA	intron (NM_177282, intron 2 of 19)	intron (NM_177282, intron 2 of 19)	20601	NM_001193305	320878	Mm.52312	NM_177282	ENSMUSG00000038244	Mical2	5330438E18Rik|9530064J02|MICAL-2|mKIAA0750	microtubule associated monooxygenase, calponin and LIM domain containing 2	protein-coding
Diff_Nuc20283	chr15	59519032	59519171	+	0	NA	Intergenic	Lx5|LINE|L1	38892	NM_144549	211770	Mm.40298	NM_144549	ENSMUSG00000032501	Trib1	A530090O15Rik|TRB-1|Trb1	tribbles pseudokinase 1	protein-coding
Diff_Nuc53309	chr2	156667492	156667631	+	0	NA	intron (NM_173396, intron 1 of 2)	intron (NM_173396, intron 1 of 2)	1818	NM_173396	228839	Mm.315625	NM_173396	ENSMUSG00000062175	Tgif2	4921501K24|5730599O09Rik|C80753|C81206	TGFB-induced factor homeobox 2	protein-coding
Diff_Nuc16326	chr16	4153242	4153381	+	0	NA	intron (NM_001025432, intron 3 of 30)	intron (NM_001025432, intron 3 of 30)	60093	NM_001025432	12914	Mm.132238	NM_001025432	ENSMUSG00000022521	Crebbp	AW558298|CBP|CBP/p300|KAT3A|p300/CBP	CREB binding protein	protein-coding
Diff_Nuc33742	chr6	66981002	66981141	+	0	NA	Intergenic	Intergenic	-5522	NR_040278	320172	Mm.449039	NR_040278	ENSMUSG00000087231	E230016M11Rik	-	RIKEN cDNA E230016M11 gene	ncRNA
Diff_Nuc23835	chr14	96416672	96416811	+	0	NA	Intergenic	Intergenic	136256	NM_025733	66732	Mm.75060	NM_025733	ENSMUSG00000034689	4921530L21Rik	-	RIKEN cDNA 4921530L21 gene	protein-coding
Diff_Nuc62627	chr8	4051882	4052021	+	0	NA	Intergenic	B4A|SINE|B4	53813	NM_026956	69142	Mm.171061	NM_026956	ENSMUSG00000051906	Cd209f	1810029C22Rik|AI647041|SIGNR8	CD209f antigen	protein-coding
Diff_Nuc51063	chr2	82974342	82974481	+	0	NA	Intergenic	L1Md_T|LINE|L1	-510324	NM_026934	69082	Mm.27804	NM_026934	ENSMUSG00000027091	Zc3h15	1700006A17Rik|1810012H02Rik|2610312B22Rik|FM22|Ierepo4	zinc finger CCCH-type containing 15	protein-coding
Diff_Nuc17001	chr16	28269612	28269751	+	0	NA	intron (NM_010199, intron 4 of 5)	intron (NM_010199, intron 4 of 5)	176480	NM_183064	14167	Mm.7996	NM_010199	ENSMUSG00000022523	Fgf12	AV114868|B230343J05Rik|FGF-12|FHF-1|Fhf1	fibroblast growth factor 12	protein-coding
Diff_Nuc50310	chr2	58759642	58759781	+	0	NA	intron (NM_001001178, intron 11 of 14)	intron (NM_001001178, intron 11 of 14)	152116	NM_029692	76654	Mm.200370	NM_029692	ENSMUSG00000026839	Upp2	1700124F02Rik|AI266885|UDRPASE2|UP2|UPASE2	uridine phosphorylase 2	protein-coding
Diff_Nuc1435	chr13	34594382	34594521	+	0	NA	Intergenic	Intergenic	150099	NM_025831	66895	Mm.28943	NM_025831	ENSMUSG00000021411	Pxdc1	1300014I06Rik	PX domain containing 1	protein-coding
Diff_Nuc62483	chr9	121629122	121629261	+	0	NA	intron (NM_010918, intron 2 of 16)	intron (NM_010918, intron 2 of 16)	892	NM_010918	18087	Mm.32842	NM_010918	ENSMUSG00000032525	Nktr	5330401F18Rik|D9Wsu172e	natural killer tumor recognition sequence	protein-coding
Diff_Nuc12673	chr10	91991792	91991931	+	0	NA	Intergenic	Intergenic	-153743	NR_046027	627800	Mm.391417	NR_046027	ENSMUSG00000098040	Gm20757	-	predicted gene, 20757	ncRNA
Diff_Nuc54469	chr1	25283902	25284041	+	0	NA	intron (NM_175642, intron 17 of 30)	intron (NM_175642, intron 17 of 30)	50828	NM_001204913	100504323	Mm.484176	NM_001204913		Gm20172	-	predicted gene, 20172	protein-coding
Diff_Nuc40554	chr4	19065082	19065221	+	0	NA	Intergenic	RLTR9E|LTR|ERVK	-142846	NM_013927	30952	Mm.445778	NM_013927	ENSMUSG00000056494	Cngb3	CCNC2|CNG6|Cngbeta2	cyclic nucleotide gated channel beta 3	protein-coding
Diff_Nuc20181	chr15	56546722	56546861	+	0	NA	Intergenic	Intergenic	-20690	NM_008216	15117	Mm.5148	NM_008216	ENSMUSG00000022367	Has2	-	hyaluronan synthase 2	protein-coding
Diff_Nuc45110	chr3	31340572	31340711	+	0	NA	Intergenic	Intergenic	-131400	NM_172861	241919	Mm.285366	NM_172861	ENSMUSG00000069072	Slc7a14	A930013N06|BC061928	solute carrier family 7 (cationic amino acid transporter, y+ system), member 14	protein-coding
Diff_Nuc58370	chr1	167809732	167809871	+	0	NA	intron (NM_198932, intron 14 of 15)	Lx8|LINE|L1	55278	NM_198933	18986	Mm.245261	NM_011137	ENSMUSG00000026565	Pou2f1	2810482H01Rik|NF-A1|Oct-1|Oct1|Otf-1|Otf1	POU domain, class 2, transcription factor 1	protein-coding
Diff_Nuc43268	chr4	119206392	119206531	+	0	NA	intron (NM_001004178, intron 1 of 3)	B1_Mus2|SINE|Alu	4913	NM_001004178	433752	Mm.425205	NM_001004178	ENSMUSG00000087385	AA415398	-	expressed sequence AA415398	protein-coding
Diff_Nuc35182	chr6	119944072	119944211	+	0	NA	intron (NM_198703, intron 2 of 27)	L1_Mus1|LINE|L1	40188	NR_030487	735290		NR_030487	ENSMUSG00000076217	Mir706	Mirn706|mir-706|mmu-mir-706	microRNA 706	ncRNA
Diff_Nuc21935	chr14	26349072	26349211	+	0	NA	intron (NM_183208, intron 2 of 23)	intron (NM_183208, intron 2 of 23)	-4784	NR_037236	100526533		NR_037236	ENSMUSG00000093081	Mir3075	mir-3075|mmu-mir-3075	microRNA 3075	ncRNA
Diff_Nuc47324	chr3	108670952	108671091	+	0	NA	intron (NM_177091, intron 8 of 12)	intron (NM_177091, intron 8 of 12)	21905	NM_177091	320181	Mm.244233	NM_177091	ENSMUSG00000045326	Fndc7	E230011A21Rik	fibronectin type III domain containing 7	protein-coding
Diff_Nuc1190	chr13	24799102	24799241	+	0	NA	intron (NM_029679, intron 15 of 22)	intron (NM_029679, intron 15 of 22)	54635	NM_020567	57441	Mm.12239	NM_020567	ENSMUSG00000006715	Gmnn	AW546347|Gem	geminin	protein-coding
Diff_Nuc47293	chr3	107931572	107931711	+	0	NA	intron (NM_010306, intron 1 of 8)	intron (NM_010306, intron 1 of 8)	17429	NM_010306	14679	Mm.271703	NM_010306	ENSMUSG00000000001	Gnai3	AI158965|AW537698|Galphai3|Gnai-3	guanine nucleotide binding protein (G protein), alpha inhibiting 3	protein-coding
Diff_Nuc4201	chr12	29733432	29733571	+	0	NA	Intergenic	Intergenic	296808	NM_201357	380752	Mm.273724	NM_201357	ENSMUSG00000036613	Tssc1	D12Ertd604e|Eipr1	tumor suppressing subtransferable candidate 1	protein-coding
Diff_Nuc12917	chr10	99544692	99544831	+	0	NA	intron (NM_013598, intron 6 of 9)	intron (NM_013598, intron 6 of 9)	66306	NM_013598	17311	Mm.45124	NM_013598	ENSMUSG00000019966	Kitl	Clo|Con|Gb|Kitlg|Mgf|SCF|SF|SLF|Sl|blz|contrasted	kit ligand	protein-coding
Diff_Nuc39772	chr5	141258612	141258751	+	0	NA	intron (NM_010302, intron 2 of 3)	intron (NM_010302, intron 2 of 3)	47704	NM_010302	14673	Mm.370185	NM_010302	ENSMUSG00000000149	Gna12	AI414047|AI504261|Galpha12	guanine nucleotide binding protein, alpha 12	protein-coding
Diff_Nuc45577	chr3	51230642	51230781	+	0	NA	intron (NM_053089, intron 1 of 19)	intron (NM_053089, intron 1 of 19)	10773	NM_053089	74838	Mm.275281	NM_053089	ENSMUSG00000063273	Naa15	5730450D16Rik|6330400I15|ASTBDN|Narg1|Tbdn-1|mNAT1	N(alpha)-acetyltransferase 15, NatA auxiliary subunit	protein-coding
Diff_Nuc53655	chr2	168958452	168958591	+	0	NA	Intergenic	RLTR27|LTR|ERVK	154752	NR_040326	75508	Mm.271256	NR_040326	ENSMUSG00000086348	1700017J07Rik	-	RIKEN cDNA 1700017J07 gene	ncRNA
Diff_Nuc5636	chr12	82882592	82882731	+	0	NA	promoter-TSS (NM_177395)	promoter-TSS (NM_177395)	-504	NM_001174107	338372	Mm.35284	NM_177395	ENSMUSG00000042724	Map3k9	E130314H24Rik|Mlk1|Prke1	mitogen-activated protein kinase kinase kinase 9	protein-coding
Diff_Nuc55043	chr1	50384082	50384221	+	0	NA	Intergenic	L1VL4|LINE|L1	-600216	NM_019790	56363	Mm.245154	NM_019790	ENSMUSG00000026109	Tmeff2	4832418D20Rik|7630402F16Rik|TR-2	transmembrane protein with EGF-like and two follistatin-like domains 2	protein-coding
Diff_Nuc16659	chr16	16968732	16968871	+	0	NA	Intergenic	Intergenic	-14674	NM_011949	26413	Mm.196581	NM_011949	ENSMUSG00000063358	Mapk1	9030612K14Rik|AA407128|AU018647|C78273|ERK|Erk2|MAPK2|PRKM2|Prkm1|p41mapk|p42mapk	mitogen-activated protein kinase 1	protein-coding
Diff_Nuc55485	chr1	63059272	63059411	+	0	NA	Intergenic	ORR1A2-int|LTR|MaLR	101500	NM_001081436	227195	Mm.74718	NM_001081436	ENSMUSG00000040865	Ino80d	7330405I11|A430093A21Rik|BC010584|OTTMUSG00000002594	INO80 complex subunit D	protein-coding
Diff_Nuc15112	chr17	51624802	51624941	+	0	NA	Intergenic	L1_Mus1|LINE|L1	-37277	NR_046166	328837	Mm.236143	NR_046166		C330011F03Rik	C330011F03	RIKEN cDNA C330011F03 gene	ncRNA
Diff_Nuc14412	chr17	27979332	27979471	+	0	NA	intron (NM_011432, intron 3 of 5)	intron (NM_011432, intron 3 of 5)	2369	NM_011432	20630	Mm.103949	NM_011432	ENSMUSG00000024217	Snrpc	Snrp1c|U1-C|U1C	U1 small nuclear ribonucleoprotein C	protein-coding
Diff_Nuc37674	chr5	66834682	66834821	+	0	NA	intron (NM_001201414, intron 5 of 15)	intron (NM_001201414, intron 5 of 15)	-105847	NM_001201416	11787	Mm.5159	NM_009686	ENSMUSG00000029207	Apbb2	2310007D03Rik|FE65L1|Rirl1|TR2L|Zfra	amyloid beta (A4) precursor protein-binding, family B, member 2	protein-coding
Diff_Nuc54232	chr1	16102062	16102201	+	0	NA	intron (NM_133832, intron 2 of 5)	intron (NM_133832, intron 2 of 5)	6168	NM_133832	98711	Mm.274376	NM_133832	ENSMUSG00000025921	Rdh10	3110069K09Rik|4921506A21Rik|AI875664|AW549993|D1Ertd762e|m366Asp	retinol dehydrogenase 10 (all-trans)	protein-coding
Diff_Nuc38267	chr5	91313812	91313951	+	0	NA	Intergenic	Intergenic	-6390	NM_008176	14825	Mm.21013	NM_008176	ENSMUSG00000029380	Cxcl1	Fsp|Gro1|KC|Mgsa|N51|Scyb1|gro	chemokine (C-X-C motif) ligand 1	protein-coding
Diff_Nuc8769	chr11	80008032	80008171	+	0	NA	intron (NM_028019, intron 3 of 4)	RMER19B|LTR|ERVK	10727	NM_028019	71956	Mm.22985	NM_028019	ENSMUSG00000020707	Rnf135	0610037N03Rik|2410006N06Rik	ring finger protein 135	protein-coding
Diff_Nuc8606	chr11	76710292	76710431	+	0	NA	Intergenic	RMER19B|LTR|ERVK	-7686	NM_025655	66601	Mm.25138	NM_025655	ENSMUSG00000020839	Tmigd1	2010002A20Rik|Tmigd	transmembrane and immunoglobulin domain containing 1	protein-coding
Diff_Nuc6868	chr11	9022852	9022991	+	0	NA	intron (NM_001159402, intron 2 of 8)	ORR1E|LTR|MaLR	4411	NM_001159402	22271	Mm.4610	NM_009477	ENSMUSG00000020407	Upp1	AI325217|UPase|UdRPase|Up|Upp	uridine phosphorylase 1	protein-coding
Diff_Nuc57448	chr1	138224352	138224491	+	0	NA	intron (NM_001347110, intron 1 of 16)	B1_Mur3|SINE|Alu	18260	NM_001081360	67886	Mm.144143	NM_001081360	ENSMUSG00000041570	Camsap2	1600013L13Rik|4930541M15Rik|Camsap1l1|mKIAA1078	calmodulin regulated spectrin-associated protein family, member 2	protein-coding
Diff_Nuc40899	chr4	34547062	34547201	+	0	NA	intron (NM_015824, intron 4 of 19)	intron (NM_015824, intron 4 of 19)	15060	NM_001159563	50793	Mm.399624	NM_015824	ENSMUSG00000040044	Orc3	Orc3l	origin recognition complex, subunit 3	protein-coding
Diff_Nuc25517	chr19	37420662	37420801	+	0	NA	Intergenic	Intergenic	-15628	NM_031156	15925	Mm.28366	NM_031156	ENSMUSG00000056999	Ide	1300012G03Rik|4833415K22Rik|AA675336|AI507533	insulin degrading enzyme	protein-coding
Diff_Nuc64557	chr8	82200102	82200241	+	0	NA	3' UTR (NM_001081164, exon 21 of 21)	3' UTR (NM_001081164, exon 21 of 21)	35468	NM_015751	24015	Mm.5831	NM_015751	ENSMUSG00000058355	Abce1	C79080|Oabp|RLI|RNS41|Rnaseli	ATP-binding cassette, sub-family E (OABP), member 1	protein-coding
Diff_Nuc27483	chr18	50336062	50336201	+	0	NA	intron (NM_008292, intron 17 of 23)	intron (NM_008292, intron 17 of 23)	48276	NM_008292	15488	Mm.277857	NM_008292	ENSMUSG00000024507	Hsd17b4	17-beta-HSD|17[b]-HSD|DBP|MFE-2|MFP2|MPF-2|Mfp-2|perMFE-2	hydroxysteroid (17-beta) dehydrogenase 4	protein-coding
Diff_Nuc35475	chr6	128769612	128769751	+	0	NA	intron (NM_030599, intron 3 of 5)	ORR1C1|LTR|MaLR	6652	NM_030599	80782	Mm.6180	NM_030599	ENSMUSG00000079298	Klrb1b	Klrb1d|Ly55b|Ly55d|NKR-P1B|NKR-P1D|Nkrp1-b|Nkrp1d|ly-55b|ly-55d	killer cell lectin-like receptor subfamily B member 1B	protein-coding
Diff_Nuc19652	chr15	36259842	36259981	+	0	NA	Intergenic	Intergenic	-47009	NM_013923	30945	Mm.5181	NM_013923	ENSMUSG00000022280	Rnf19a	AA032313|Dorfin|Rnf19|UIP117|Ubce7ip2|XYbp	ring finger protein 19A	protein-coding
Diff_Nuc49203	chr2	20697632	20697771	+	0	NA	intron (NM_001177631, intron 8 of 19)	intron (NM_001177631, intron 8 of 19)	191647	NM_001081364	71435	Mm.28507	NM_001081364	ENSMUSG00000036591	Arhgap21	5530401C11Rik|AA416458|ARHGAP10	Rho GTPase activating protein 21	protein-coding
Diff_Nuc30416	chr7	95637602	95637741	+	0	NA	intron (NM_028238, intron 2 of 2)	intron (NM_028238, intron 2 of 2)	58888	NM_028238	72433	Mm.276669	NM_028238	ENSMUSG00000030559	Rab38	2310011F14Rik|AU043391|cht	RAB38, member RAS oncogene family	protein-coding
Diff_Nuc3357	chr13	108230552	108230691	+	0	NA	Intergenic	(CA)n|Simple_repeat|Simple_repeat	-29281	NR_045083	105120	Mm.417700	NR_045083		AI197445	-	expressed sequence AI197445	ncRNA
Diff_Nuc23849	chr14	97349982	97350121	+	0	NA	Intergenic	BGLII_Mus|LTR|ERVK	-431798	NM_053105	93688	Mm.308735	NM_053105	ENSMUSG00000022076	Klhl1	mKIAA1490	kelch-like 1	protein-coding
Diff_Nuc23544	chr14	82638962	82639101	+	0	NA	Intergenic	MuRRS4-int|LTR|ERV1	-2204339	NM_001013753	219228	Mm.153643	NM_001013753	ENSMUSG00000035566	Pcdh17	C030033F14Rik|Gm78	protocadherin 17	protein-coding
Diff_Nuc2094	chr13	55776422	55776561	+	0	NA	intron (NM_001282055, intron 19 of 22)	intron (NM_001282055, intron 19 of 22)	-17994	NM_181278	78521	Mm.28449	NM_181278	ENSMUSG00000045767	B230219D22Rik	AA119856|D530037I19Rik	RIKEN cDNA B230219D22 gene	protein-coding
Diff_Nuc63539	chr8	42522602	42522741	+	0	NA	Intergenic	Intergenic	-20199	NM_013522	14300	Mm.217312	NM_013522	ENSMUSG00000031590	Frg1	-	FSHD region gene 1	protein-coding
Diff_Nuc54331	chr1	20439742	20439881	+	0	NA	intron (NM_153179, intron 36 of 66)	intron (NM_153179, intron 36 of 66)	93276	NR_045734	75028	Mm.417820	NR_045734	ENSMUSG00000089914	4930486I03Rik	-	RIKEN cDNA 4930486I03 gene	ncRNA
Diff_Nuc61269	chr9	76436502	76436641	+	0	NA	Intergenic	Intergenic	-42960	NM_001045518	208994	Mm.256929	NM_001045518	ENSMUSG00000032358	Fam83b	C530008M07Rik|Gm516	family with sequence similarity 83, member B	protein-coding
Diff_Nuc13350	chr10	115919012	115919151	+	0	NA	Intergenic	Intergenic	-8502	NM_021452	58802	Mm.440652	NM_021452	ENSMUSG00000054934	Kcnmb4	1700058G18Rik|2900045G12Rik	potassium large conductance calcium-activated channel, subfamily M, beta member 4	protein-coding
Diff_Nuc47115	chr3	102415322	102415461	+	0	NA	Intergenic	Intergenic	-123302	NM_027533	70747	Mm.27469	NM_027533	ENSMUSG00000027858	Tspan2	6330415F13Rik|B230119D02Rik|tspan-2	tetraspanin 2	protein-coding
Diff_Nuc50306	chr2	58587532	58587671	+	0	NA	intron (NM_001289660, intron 1 of 7)	intron (NM_001289660, intron 1 of 7)	-19994	NM_001289659	76654	Mm.200370	NM_029692	ENSMUSG00000026839	Upp2	1700124F02Rik|AI266885|UDRPASE2|UP2|UPASE2	uridine phosphorylase 2	protein-coding
Diff_Nuc52786	chr2	141115432	141115571	+	0	NA	intron (NM_001013802, intron 5 of 18)	intron (NM_001013802, intron 5 of 18)	-618289	NM_178382	71436	Mm.426781	NM_178382	ENSMUSG00000051379	Flrt3	5530600M07Rik|C430047I10Rik|mKIAA1469	fibronectin leucine rich transmembrane protein 3	protein-coding
Diff_Nuc57711	chr1	147574562	147574701	+	0	NA	Intergenic	L1_Mus4|LINE|L1	-768165	NM_153539	215378	Mm.441817	NM_153539	ENSMUSG00000035131	Brinp3	B830045N13Rik|Fam5c	bone morphogenetic protein/retinoic acid inducible neural specific 3	protein-coding
Diff_Nuc56905	chr1	119416392	119416531	+	0	NA	Intergenic	Intergenic	791248	NM_011650	22099	Mm.426637	NM_011650	ENSMUSG00000026374	Tsn	2610034C24Rik|AU040286|C3PO|TB-RBP	translin	protein-coding
Diff_Nuc16838	chr16	23047132	23047271	+	0	NA	Intergenic	Intergenic	-11172	NM_023125	16644	Mm.2160	NM_023125	ENSMUSG00000022875	Kng1	Kng	kininogen 1	protein-coding
Diff_Nuc51174	chr2	86077082	86077221	+	0	NA	promoter-TSS (NM_147014)	promoter-TSS (NM_147014)	-161	NM_147014	259016	Mm.223403	NM_147014	ENSMUSG00000075195	Olfr1048	MOR187-2	olfactory receptor 1048	protein-coding
Diff_Nuc34076	chr6	81874242	81874381	+	0	NA	intron (NM_177884, intron 1 of 16)	intron (NM_177884, intron 1 of 16)	648	NM_177884	330361	Mm.474487	NM_177884	ENSMUSG00000035125	Gcfc2	A130099G21|AW146020|GCF2|Tcf9	GC-rich sequence DNA binding factor 2	protein-coding
Diff_Nuc5159	chr12	70305682	70305821	+	0	NA	intron (NM_011133, intron 16 of 18)	intron (NM_011133, intron 16 of 18)	-6335	NM_027269	109065	Mm.107180	NM_027269	ENSMUSG00000020973	Dnaaf2	Ktu|TU54|kintoun|mknt	dynein, axonemal assembly factor 2	protein-coding
Diff_Nuc13945	chr17	9915002	9915141	+	0	NA	Intergenic	Intergenic	-52502	NM_001163836	67543	Mm.26987	NM_026226	ENSMUSG00000046173	Pabpc6	4932702K14Rik|AI428050|Pabpc3	poly(A) binding protein, cytoplasmic 6	protein-coding
Diff_Nuc39817	chr5	143170592	143170731	+	0	NA	Intergenic	ZP3AR|Satellite|Satellite	-7394	NM_146257	243328	Mm.125942	NM_146257	ENSMUSG00000050822	Slc29a4	ENT4|mPMAT	solute carrier family 29 (nucleoside transporters), member 4	protein-coding
Diff_Nuc20591	chr15	74805662	74805801	+	0	NA	Intergenic	RMER2|LTR|ERV1	8129	NM_020498	57248	Mm.358339	NM_020498	ENSMUSG00000022586	Ly6i	AI789751|Ly-6I|Ly-6M	lymphocyte antigen 6 complex, locus I	protein-coding
Diff_Nuc2349	chr13	67097682	67097821	+	0	NA	TTS (NR_045851)	TTS (NR_045851)	35590	NR_045851	71226	Mm.399574	NR_045851		4933433G19Rik	-	RIKEN cDNA 4933433G19 gene	ncRNA
Diff_Nuc3996	chr12	16641802	16641941	+	0	NA	Intergenic	Intergenic	-18405	NM_008747	18217	Mm.281715	NM_008747	ENSMUSG00000020591	Ntsr2	NT2R|NTRL	neurotensin receptor 2	protein-coding
Diff_Nuc61715	chr9	94244702	94244841	+	0	NA	Intergenic	MTB_Mm|LTR|MaLR	193729	NM_001033145	68861	Mm.258746	NM_001033145	ENSMUSG00000045414	1190002N15Rik	GoPro49|HASF	RIKEN cDNA 1190002N15 gene	protein-coding
Diff_Nuc61443	chr9	82670822	82670961	+	0	NA	Intergenic	L1Md_F2|LINE|L1	-52522	NM_001168240	65099	Mm.41415	NM_022986	ENSMUSG00000032251	Irak1bp1	4921528N06Rik|AI851240|Aabp3|Aip70|Simpl	interleukin-1 receptor-associated kinase 1 binding protein 1	protein-coding
Diff_Nuc50570	chr2	67303382	67303521	+	0	NA	intron (NM_001024618, intron 1 of 8)	(CATG)n|Simple_repeat|Simple_repeat	19392	NM_001024618	241431	Mm.261043	NM_001024618	ENSMUSG00000027022	Xirp2	2310003D02Rik|2310008C07Rik|A530024P18Rik|AI452089|Cmya3|Gm352|Xin2	xin actin-binding repeat containing 2	protein-coding
Diff_Nuc39487	chr5	132897632	132897771	+	0	NA	intron (NM_177047, intron 1 of 19)	intron (NM_177047, intron 1 of 19)	120512	NM_177047	319974	Mm.409595	NM_177047	ENSMUSG00000029673	Auts2	2700063G02Rik|A730011F23Rik|D830032G16Rik	autism susceptibility candidate 2	protein-coding
Diff_Nuc24368	chr14	119074412	119074551	+	0	NA	intron (NM_001163676, intron 1 of 29)	ID_B1|SINE|B4	1672	NM_001163675	239273	Mm.40537	NM_001033336	ENSMUSG00000032849	Abcc4	ABCC4-N1|D630049P08Rik|MOATB|MRP4	ATP-binding cassette, sub-family C (CFTR/MRP), member 4	protein-coding
Diff_Nuc64432	chr8	77547552	77547691	+	0	NA	intron (NM_178017, intron 8 of 10)	intron (NM_178017, intron 8 of 10)	7500	NM_001316754	70823	Mm.261739	NM_178017	ENSMUSG00000034518	Hmgxb4	4733401K04Rik|AI316803|Hmgb2l1	HMG box domain containing 4	protein-coding
Diff_Nuc35592	chr6	134445112	134445251	+	0	NA	intron (NM_008514, intron 7 of 22)	intron (NM_008514, intron 7 of 22)	71750	NM_008514	16974	Mm.321990	NM_008514	ENSMUSG00000030201	Lrp6	C030016K15Rik|Cd|Gw|ska26|ska<m26Jus>|skax26	low density lipoprotein receptor-related protein 6	protein-coding
Diff_Nuc56201	chr1	89279162	89279301	+	0	NA	intron (NM_001110212, intron 8 of 28)	B1_Mur4|SINE|Alu	12073	NM_001110227	100040591	Mm.443539	NM_001110227	ENSMUSG00000079436	Kcnj13	-	potassium inwardly-rectifying channel, subfamily J, member 13	protein-coding
Diff_Nuc37823	chr5	73699962	73700101	+	0	NA	3' UTR (NM_001159889, exon 7 of 7)	3' UTR (NM_001159889, exon 7 of 7)	15998	NM_001159888	68095	Mm.247039	NM_023429	ENSMUSG00000029152	Ociad1	6030432N09Rik|AI481327|AW557942|Asrij|B230209J16Rik|BB021357|Emi2|Imi2|OCIA|TPA018	OCIA domain containing 1	protein-coding
Diff_Nuc52192	chr2	122087912	122088051	+	0	NA	intron (NM_146126, intron 7 of 8)	intron (NM_146126, intron 7 of 8)	27406	NM_146126	20322	Mm.371580	NM_146126	ENSMUSG00000027227	Sord	Sdh-1|Sdh1|Sodh-1	sorbitol dehydrogenase	protein-coding
Diff_Nuc64924	chr8	95693422	95693561	+	0	NA	intron (NM_053200, intron 13 of 13)	intron (NM_053200, intron 13 of 13)	28212	NM_053200	104158	Mm.292803	NM_053200	ENSMUSG00000056973	Ces1d	Ces3|TGH	carboxylesterase 1D	protein-coding
Diff_Nuc61037	chr9	69968932	69969071	+	0	NA	intron (NM_029784, intron 3 of 8)	L1MC|LINE|L1	20363	NM_029784	76886	Mm.44355	NM_029784	ENSMUSG00000032224	Fam81a	6430514L14Rik	family with sequence similarity 81, member A	protein-coding
Diff_Nuc52624	chr2	135240852	135240991	+	0	NA	intron (NM_019677, intron 32 of 32)	intron (NM_019677, intron 32 of 32)	168035	NR_015544	320684	Mm.421433	NR_015544	ENSMUSG00000085631	9630028H03Rik	-	RIKEN cDNA 9630028H03 gene	ncRNA
Diff_Nuc42811	chr4	104819602	104819741	+	0	NA	Intergenic	Intergenic	-10281	NM_080555	67916	Mm.348326	NM_080555	ENSMUSG00000028517	Plpp3	1110003O22Rik|2610002D05Rik|AV025606|D4Bwg0538e|D4Bwg1535e|Lpp3|Ppab2b|Ppap2b	phospholipid phosphatase 3	protein-coding
Diff_Nuc16259	chr17	92997302	92997441	+	0	NA	Intergenic	L1_Mus3|LINE|L1	-600986	NM_001315503	11516	Mm.3407	NM_009625	ENSMUSG00000024256	Adcyap1	PACAP	adenylate cyclase activating polypeptide 1	protein-coding
Diff_Nuc44066	chr4	145738572	145738711	+	0	NA	intron (NM_001085522, intron 1 of 3)	Lx8|LINE|L1	10368	NM_001085522	433791	Mm.276881	NM_001085522	ENSMUSG00000070605	Zfp992	Gm13251|OTTMUSG00000011097	zinc finger protein 992	protein-coding
Diff_Nuc43635	chr4	132455982	132456121	+	0	NA	3' UTR (NM_001163792, exon 8 of 8)	3' UTR (NM_001163792, exon 8 of 8)	-15678	NM_133887	100226	Mm.28237	NM_133887	ENSMUSG00000028879	Stx12	AI850350|AU041521|Stx13	syntaxin 12	protein-coding
Diff_Nuc26160	chr19	57739242	57739381	+	0	NA	intron (NM_181415, intron 9 of 28)	RMER17A|LTR|ERVK	53787	NM_181415	226255	Mm.245340	NM_181415	ENSMUSG00000054843	Atrnl1	AI504415|AW555641|Alp|Atrnl|Atrnlp	attractin like 1	protein-coding
Diff_Nuc18689	chr16	92392202	92392341	+	0	NA	TTS (NM_019466)	TTS (NM_019466)	8052	NM_019466	54720	Mm.265744	NM_019466	ENSMUSG00000022951	Rcan1	Adapt78|CALP1L|CSP1|DSC1|Dscr1|MCIP1|RCN1	regulator of calcineurin 1	protein-coding
Diff_Nuc13299	chr10	114251902	114252041	+	0	NA	Intergenic	Intergenic	-13545	NM_146241	237553	Mm.445550	NM_146241	ENSMUSG00000050663	Trhde	9330155P21Rik	TRH-degrading enzyme	protein-coding
Diff_Nuc26346	chr18	6133322	6133461	+	0	NA	intron (NM_029277, intron 1 of 17)	intron (NM_029277, intron 1 of 17)	2705	NM_029277	75415	Mm.239675	NM_029277	ENSMUSG00000041225	Arhgap12	2810011M08Rik	Rho GTPase activating protein 12	protein-coding
Diff_Nuc20841	chr15	81825542	81825681	+	0	NA	intron (NM_134095, intron 5 of 5)	Lx8|LINE|L1	14641	NM_025503	66346	Mm.54292	NM_025503	ENSMUSG00000061633	1700029P11Rik	-	RIKEN cDNA 1700029P11 gene	protein-coding
Diff_Nuc7000	chr11	16504552	16504691	+	0	NA	Intergenic	Intergenic	-96134	NM_001109971	20335	Mm.325350	NM_011343	ENSMUSG00000078974	Sec61g	-	SEC61, gamma subunit	protein-coding
Diff_Nuc7773	chr11	48876912	48877051	+	0	NA	intron (NM_001145164, intron 1 of 1)	intron (NM_001145164, intron 1 of 1)	733	NM_001145164	100039796	Mm.482363	NM_001145164	ENSMUSG00000078921	Tgtp2	OTTMUSG00000005537|TGTP	T cell specific GTPase 2	protein-coding
Diff_Nuc57014	chr1	123211712	123211851	+	0	NA	intron (NM_001271532, intron 1 of 4)	intron (NM_001271532, intron 1 of 4)	12474	NM_001271531	72999	Mm.27136	NM_133748	ENSMUSG00000003721	Insig2	2900053I11Rik|C730043J18Rik|Insig-2	insulin induced gene 2	protein-coding
Diff_Nuc27984	chr18	68467802	68467941	+	0	NA	intron (NM_026440, intron 3 of 10)	intron (NM_026440, intron 3 of 10)	7862	NM_001170953	67897	Mm.27544	NM_026440	ENSMUSG00000009535	Rnmt	2610002P10Rik|AI848273|Rg7mt1|mKIAA0398	RNA (guanine-7-) methyltransferase	protein-coding
Diff_Nuc12852	chr10	97459002	97459141	+	0	NA	Intergenic	L1MD1|LINE|L1	-29347	NR_033537	100038699	Mm.467933	NR_033537		Gm10754	ENSMUSG00000074776	predicted gene 10754	ncRNA
Diff_Nuc29056	chr7	30747252	30747391	+	0	NA	Intergenic	RLTR1B|LTR|ERV1	-10409	NM_178384	72723	Mm.371648	NM_178384	ENSMUSG00000059975	Zfp74	2810054M15Rik|KRAB8|Zfp66|Znf569|mszf21|mszf77	zinc finger protein 74	protein-coding
Diff_Nuc28206	chr18	76479522	76479661	+	0	NA	Intergenic	Intergenic	57492	NM_001311070	17126	Mm.152699	NM_010754	ENSMUSG00000024563	Smad2	7120426M23Rik|Madh2|Madr2|Smad-2|mMad2	SMAD family member 2	protein-coding
Diff_Nuc36036	chr6	148130142	148130281	+	0	NA	exon (NM_001286560, exon 13 of 13)	exon (NM_001286560, exon 13 of 13)	-30599	NR_015615	320737	Mm.137858	NR_015615		4732416N19Rik	-	RIKEN cDNA 4732416N19 gene	ncRNA
Diff_Nuc370	chrX	103180072	103180211	+	0	NA	intron (NM_025952, intron 5 of 10)	B1_Mm|SINE|Alu	27097	NM_001190409	67075	Mm.275943	NM_025952	ENSMUSG00000031232	Magt1	2410001C15Rik|2610529C04Rik|2810482I07Rik|IAG2|IAP	magnesium transporter 1	protein-coding
Diff_Nuc57200	chr1	130851902	130852041	+	0	NA	Intergenic	Lx6|LINE|L1	-317910	NM_172485	210417	Mm.380518	NM_172485	ENSMUSG00000042581	Thsd7b	1700074E13Rik|B930082A18|D130067I03Rik	thrombospondin, type I, domain containing 7B	protein-coding
Diff_Nuc42693	chr4	101686062	101686201	+	0	NA	Intergenic	Intergenic	26686	NM_001085520	381536	Mm.297685	NM_001085520	ENSMUSG00000078625	Gm12789	OTTMUSG00000008445	predicted gene 12789	protein-coding
Diff_Nuc33569	chr6	58433232	58433371	+	0	NA	Intergenic	RMER5|LTR|ERV1	-10429	NM_001166729	626828	Mm.480268	NM_001166729	ENSMUSG00000093379	Vmn1r31	EG626828|Gm6709	vomeronasal 1 receptor 31	protein-coding
Diff_Nuc33403	chr6	52907472	52907611	+	0	NA	intron (NM_173406, intron 1 of 4)	intron (NM_173406, intron 1 of 4)	-47927	NM_001168277	231986	Mm.386865	NM_173406	ENSMUSG00000063568	Jazf1	AI591476|C820002C15|Jaz1|Tip27	JAZF zinc finger 1	protein-coding
Diff_Nuc42507	chr4	96681962	96682101	+	0	NA	Intergenic	Lx6|LINE|L1	-230180	NM_001081284	620779	Mm.439625	NM_001081284	ENSMUSG00000078639	Gm12695	OTTMUSG00000008003	predicted gene 12695	protein-coding
Diff_Nuc35581	chr6	134212662	134212801	+	0	NA	intron (NM_007961, intron 6 of 7)	intron (NM_007961, intron 6 of 7)	-133616	NM_025778	66813	Mm.474472	NM_025778	ENSMUSG00000030200	Bcl2l14	4930452K23Rik|4933405K19Rik|9030625M01Rik|AI429211|Bclg	BCL2-like 14 (apoptosis facilitator)	protein-coding
Diff_Nuc5810	chr12	87943392	87943531	+	0	NA	Intergenic	Intergenic	-76189	NM_177354	238328	Mm.216101	NM_177354	ENSMUSG00000021256	Vash1	AI834978|D930046M13Rik|G630009D10Rik	vasohibin 1	protein-coding
Diff_Nuc20365	chr15	63740632	63740771	+	0	NA	intron (NM_028992, intron 1 of 11)	intron (NM_028992, intron 1 of 11)	3151	NM_028992	74548	Mm.273185	NM_028992	ENSMUSG00000055748	Gsdmc4	9030605I04Rik	gasdermin C4	protein-coding
Diff_Nuc129	chrX	32011952	32012091	+	0	NA	Intergenic	Lx4A|LINE|L1	119679	NM_001270667	100861966	Mm.443264	NM_001270667	ENSMUSG00000100249	Btbd35f23	Gm21950|Mgclh	BTB domain containing 35, family member 23	protein-coding
Diff_Nuc50836	chr2	74386682	74386821	+	0	NA	intron (NM_001110209, intron 6 of 13)	intron (NM_001110209, intron 6 of 13)	30254	NM_001110209	69605	Mm.156113	NM_027133	ENSMUSG00000009207	Lnpk	2310011O18Rik|4921514L11Rik|9530051D01Rik|AI666268|Lnp|Lnpk1|Ul|ulnaless	lunapark, ER junction formation factor	protein-coding
Diff_Nuc20897	chr15	82829352	82829491	+	0	NA	3' UTR (NM_001271414, exon 6 of 6)	3' UTR (NM_001271414, exon 6 of 6)	24147	NM_028728	74039	Mm.32584	NM_028728	ENSMUSG00000058099	Nfam1	4921501M20Rik|Cnaip	Nfat activating molecule with ITAM motif 1	protein-coding
Diff_Nuc51314	chr2	91505682	91505821	+	0	NA	intron (NM_146124, intron 4 of 12)	B1_Mur4|SINE|Alu	12386	NM_146124	228359	Mm.22413	NM_146124	ENSMUSG00000027247	Arhgap1	B230365D05Rik|C76222|Cdc42GAP|p50rhoGAP	Rho GTPase activating protein 1	protein-coding
Diff_Nuc31588	chr7	135902882	135903021	+	0	NA	intron (NM_001029982, intron 6 of 18)	MER58A|DNA|MER1_type	14567	NM_001029982	207352	Mm.297105	NM_001029982	ENSMUSG00000055319	Sec23ip	D7Ertd373e|p125	Sec23 interacting protein	protein-coding
Diff_Nuc26915	chr18	30814132	30814271	+	0	NA	Intergenic	ORR1C1|LTR|MaLR	381651	NM_181414	225326	Mm.194127	NM_181414	ENSMUSG00000033628	Pik3c3	5330434F23Rik|Vps34	phosphoinositide-3-kinase, class 3	protein-coding
Diff_Nuc28910	chr7	26499852	26499991	+	0	NA	exon (NM_028771, exon 3 of 5)	exon (NM_028771, exon 3 of 5)	4151	NM_028771	52132	Mm.278798	NM_028771	ENSMUSG00000002608	Ccdc97	1200014H14Rik|2810446P04Rik|AA545218|D7Ertd462e	coiled-coil domain containing 97	protein-coding
Diff_Nuc34313	chr6	89875972	89876111	+	0	NA	Intergenic	Intergenic	14460	NM_011684	22297	Mm.431981	NM_011684	ENSMUSG00000044248	Vmn1r45	V1RA9|V1r2|V1ra11|V1ra2|mV1R2	vomeronasal 1 receptor 45	protein-coding
Diff_Nuc27087	chr18	35943932	35944071	+	0	NA	intron (NM_019912, intron 1 of 6)	intron (NM_019912, intron 1 of 6)	12788	NM_019912	56550	Mm.180052	NM_019912	ENSMUSG00000091896	Ube2d2a	1500034D03Rik|Ubc2e|Ube2d2|ubc4	ubiquitin-conjugating enzyme E2D 2A	protein-coding
Diff_Nuc56853	chr1	116677762	116677901	+	0	NA	Intergenic	ORR1B1|LTR|MaLR	-903883	NM_001077425	636808	Mm.101576	NM_001077425	ENSMUSG00000070695	Cntnap5a	Caspr5-1|EG636808	contactin associated protein-like 5A	protein-coding
Diff_Nuc41106	chr4	43018102	43018241	+	0	NA	intron (NM_053081, intron 8 of 13)	intron (NM_053081, intron 8 of 13)	-4792	NM_009503	269523	Mm.245976	NM_009503	ENSMUSG00000028452	Vcp	3110001E05|CDC48|p97|p97/VCP	valosin containing protein	protein-coding
Diff_Nuc36560	chr5	23646922	23647061	+	0	NA	exon (NM_001161800, exon 7 of 10)	exon (NM_001161800, exon 7 of 10)	-23790	NM_153092	231042	Mm.45513	NM_153092	ENSMUSG00000048439	Nupl2	AV116043|CG1|NLP-1|Nlp1	nucleoporin like 2	protein-coding
Diff_Nuc17069	chr16	31175492	31175631	+	0	NA	intron (NM_030138, intron 1 of 22)	intron (NM_030138, intron 1 of 22)	25763	NM_030138	78618	Mm.274646	NM_030138	ENSMUSG00000049076	Acap2	4832442G16|9530039J15Rik|CNT-B2|Centb2|mKIAA0041	ArfGAP with coiled-coil, ankyrin repeat and PH domains 2	protein-coding
Diff_Nuc21984	chr14	27761802	27761941	+	0	NA	intron (NM_145221, intron 11 of 21)	intron (NM_145221, intron 11 of 21)	21866	NM_145221	72993	Mm.202322	NM_145221	ENSMUSG00000040760	Appl1	2900057D21Rik|7330406P05Rik|AI585782|AW209077|BB022931|C88264|DIP13	adaptor protein, phosphotyrosine interaction, PH domain and leucine zipper containing 1	protein-coding
Diff_Nuc13072	chr10	106863952	106864091	+	0	NA	Intergenic	Intergenic	59169	NM_008656	17877	Mm.4984	NM_008656	ENSMUSG00000000435	Myf5	B130010J22Rik|Myf-5|bHLHc2	myogenic factor 5	protein-coding
Diff_Nuc51757	chr2	107709472	107709611	+	0	NA	Intergenic	Intergenic	578795	NM_021275	16492	Mm.142718	NM_021275	ENSMUSG00000042604	Kcna4	Kv1.4	potassium voltage-gated channel, shaker-related subfamily, member 4	protein-coding
Diff_Nuc22728	chr14	56290422	56290561	+	0	NA	promoter-TSS (NM_177992)	promoter-TSS (NM_177992)	252	NM_008683	18002	Mm.296566	NM_008683	ENSMUSG00000010376	Nedd8	Rub1	neural precursor cell expressed, developmentally down-regulated gene 8	protein-coding
Diff_Nuc3572	chr13	115051192	115051331	+	0	NA	Intergenic	L1MB4|LINE|L1	-109461	NR_045836	319803	Mm.386896	NM_177004		A430090L17Rik	-	RIKEN cDNA A430090L17 gene	ncRNA
Diff_Nuc56729	chr1	110823022	110823161	+	0	NA	Intergenic	Lx3_Mus|LINE|L1	1009255	NR_102307	319596	Mm.136054	NR_102306	ENSMUSG00000100457	D830032E09Rik	-	RIKEN cDNA D830032E09 gene	ncRNA
Diff_Nuc44961	chr3	26557612	26557751	+	0	NA	intron (NM_029150, intron 1 of 10)	B1_Mur4|SINE|Alu	21128	NM_027583	70862	Mm.330943	NM_027583	ENSMUSG00000039335	Spata16	4921511F01Rik|4930503K02Rik|Nyd-sp12	spermatogenesis associated 16	protein-coding
Diff_Nuc36330	chr5	14795482	14795621	+	0	NA	3' UTR (NM_001110796, exon 20 of 20)	3' UTR (NM_001110796, exon 20 of 20)	119338	NM_198666	381714	Mm.368256	NM_198666	ENSMUSG00000033219	Gm9758	ENSMUSG00000033219	predicted gene 9758	protein-coding
Diff_Nuc25236	chr19	29183452	29183591	+	0	NA	intron (NM_021525, intron 1 of 8)	intron (NM_021525, intron 1 of 8)	7656	NM_021525	59028	Mm.28630	NM_021525	ENSMUSG00000024785	Rcl1	2310040A02Rik|AI789745|C76567|RPCL1|Rnac	RNA terminal phosphate cyclase-like 1	protein-coding
Diff_Nuc19332	chr15	22991382	22991521	+	0	NA	intron (NM_001081299, intron 1 of 11)	Lx2B|LINE|L1	25233	NM_001081299	320865	Mm.241965	NM_001081299	ENSMUSG00000040420	Cdh18	B230220E17Rik|Cdh14l	cadherin 18	protein-coding
Diff_Nuc22737	chr14	56467882	56468021	+	0	NA	Intergenic	ID_B1|SINE|B4	-5001	NM_001040072	277154	Mm.319347	NM_001040072	ENSMUSG00000075592	Nynrin	AA409373|C80530|mKIAA1305	NYN domain and retroviral integrase containing	protein-coding
Diff_Nuc10261	chr10	3102572	3102711	+	0	NA	Intergenic	IAPLTR2b|LTR|ERVK	-31663	NM_172546	215748	Mm.37984	NM_172546	ENSMUSG00000015202	Cnksr3	6820402C05|BC024086|Magi1	Cnksr family member 3	protein-coding
Diff_Nuc60269	chr9	44680322	44680461	+	0	NA	intron (NM_001081049, intron 1 of 35)	intron (NM_001081049, intron 1 of 35)	8966	NM_001081049	214162	Mm.2389	NM_001081049	ENSMUSG00000002028	Kmt2a	6430520K01|ALL-1|All1|Cxxc7|HRX|HTRX1|Mll|Mll1|mKIAA4050	lysine (K)-specific methyltransferase 2A	protein-coding
Diff_Nuc54004	chr1	6630232	6630371	+	0	NA	intron (NM_001244693, intron 2 of 22)	intron (NM_001244693, intron 2 of 22)	-89831	NR_045189	240690	Mm.234612	NM_173868	ENSMUSG00000033740	St18	AV348974|Myt3|NZF-3|Nzf3|mKIAA0535	suppression of tumorigenicity 18	protein-coding
Diff_Nuc4477	chr12	40139232	40139371	+	0	NA	Intergenic	L1_Mur3|LINE|L1	624662	NM_007487	11861	Mm.12723	NM_007487	ENSMUSG00000047446	Arl4a	AI467555|Arl4	ADP-ribosylation factor-like 4A	protein-coding
Diff_Nuc14280	chr17	24299172	24299311	+	0	NA	intron (NM_172935, intron 3 of 10)	intron (NM_172935, intron 3 of 10)	1459	NM_172935	245847	Mm.87319	NM_172935	ENSMUSG00000036820	Amdhd2	5730457F11Rik	amidohydrolase domain containing 2	protein-coding
Diff_Nuc45706	chr3	55519322	55519461	+	0	NA	intron (NM_030595, intron 44 of 57)	intron (NM_030595, intron 44 of 57)	-67041	NM_010750	17116	Mm.440209	NM_010750	ENSMUSG00000056947	Mab21l1	AW047968	mab-21-like 1 (C. elegans)	protein-coding
Diff_Nuc4210	chr12	30081132	30081271	+	0	NA	Intergenic	Intergenic	-132048	NM_001093775	17933	Mm.253067	NM_008666	ENSMUSG00000061911	Myt1l	2900046C06Rik|2900093J19Rik|C630034G21Rik|Nztf1|Pmng1|Png-1|mKIAA1106	myelin transcription factor 1-like	protein-coding
Diff_Nuc49249	chr2	22803702	22803841	+	0	NA	intron (NM_001077193, intron 6 of 7)	intron (NM_001077193, intron 6 of 7)	52729	NM_019501	56075	Mm.249752	NM_019501	ENSMUSG00000026784	Pdss1	2610203G20Rik|2700031G06Rik|TPT|TPT 1|Tprt|mDLP1|mSPS1	prenyl (solanesyl) diphosphate synthase, subunit 1	protein-coding
Diff_Nuc45638	chr3	53014922	53015061	+	0	NA	intron (NM_175386, intron 2 of 3)	intron (NM_175386, intron 2 of 3)	169522	NM_175386	108927	Mm.118617	NM_175386	ENSMUSG00000048332	Lhfp	2810489O06Rik|AI194968	lipoma HMGIC fusion partner	protein-coding
Diff_Nuc41567	chr4	59092462	59092601	+	0	NA	Intergenic	Intergenic	44503	NM_025277	14700	Mm.41780	NM_025277	ENSMUSG00000038607	Gng10	AV006524	guanine nucleotide binding protein (G protein), gamma 10	protein-coding
Diff_Nuc27388	chr18	46618052	46618191	+	0	NA	Intergenic	Intergenic	7349	NR_045438	72076	Mm.82766	NM_028086		Mospd4	2010013H21Rik	motile sperm domain containing 4	pseudo
Diff_Nuc8372	chr11	69883292	69883431	+	0	NA	Intergenic	Intergenic	15504	NM_001291132	11889	Mm.6559	NM_009714	ENSMUSG00000020884	Asgr1	ASGPR1|Asgr|Asgr-1|HL-1	asialoglycoprotein receptor 1	protein-coding
Diff_Nuc61191	chr9	74527662	74527801	+	0	NA	Intergenic	Lx9|LINE|L1	-168513	NR_045284	100503019	Mm.482658	NR_045284	ENSMUSG00000066477	Gm16551	-	predicted gene 16551	ncRNA
Diff_Nuc49316	chr2	24992512	24992651	+	0	NA	Intergenic	RMER1B|Other|Other	-41856	NM_172204	241275	Mm.218774	NM_172204	ENSMUSG00000036805	Noxa1	NY-CO-31|SDCCAG31	NADPH oxidase activator 1	protein-coding
Diff_Nuc28745	chr7	17386152	17386291	+	0	NA	Intergenic	Lx5|LINE|L1	-15017	NM_133789	97387	Mm.21612	NM_133789	ENSMUSG00000030374	Strn4	C80611|ZIN|zinedin	striatin, calmodulin binding protein 4	protein-coding
Diff_Nuc55104	chr1	52205242	52205381	+	0	NA	intron (NM_001205313, intron 17 of 24)	MER82|DNA|MER2_type	28845	NM_001205313	20846	Mm.277406	NM_009283	ENSMUSG00000026104	Stat1	2010005J02Rik|AA408197	signal transducer and activator of transcription 1	protein-coding
Diff_Nuc38547	chr5	101133362	101133501	+	0	NA	intron (NM_152803, intron 3 of 11)	B3|SINE|B2	15304	NM_152803	15442	Mm.265786	NM_152803	ENSMUSG00000035273	Hpse	HSE1|Hpa|Hpr1	heparanase	protein-coding
Diff_Nuc21320	chr15	99130932	99131071	+	0	NA	intron (NM_018786, intron 1 of 25)	B3|SINE|B2	5161	NM_018786	54614	Mm.358668	NM_018786	ENSMUSG00000023007	Prpf40b	2610317D23Rik|Hypc	pre-mRNA processing factor 40B	protein-coding
Diff_Nuc15915	chr17	81776462	81776601	+	0	NA	non-coding (NR_104580, exon 9 of 9)	non-coding (NR_104580, exon 9 of 9)	-312106	NM_028138	72167	Mm.273257	NM_028138	ENSMUSG00000024246	Thumpd2	2810025A12Rik	THUMP domain containing 2	protein-coding
Diff_Nuc36730	chr5	31250232	31250371	+	0	NA	Intergenic	B1F2|SINE|Alu	-2138	NR_003522	57742	Mm.389615	NM_021304	ENSMUSG00000006638	Abhd1	LABH-1|LABH1	abhydrolase domain containing 1	protein-coding
Diff_Nuc32672	chr6	29099062	29099201	+	0	NA	intron (NM_133925, intron 9 of 18)	ORR1A2-int|LTR|MaLR	15593	NM_133925	68272	Mm.40802	NM_026650	ENSMUSG00000029701	Rbm28	2810480G15Rik|AI503051	RNA binding motif protein 28	protein-coding
Diff_Nuc21420	chr15	102223792	102223931	+	0	NA	Intergenic	B2_Mm1t|SINE|B2	-12886	NM_013672	20683	Mm.4618	NM_013672	ENSMUSG00000001280	Sp1	1110003E12Rik|AA450830|AI845540|Sp1-1	trans-acting transcription factor 1	protein-coding
Diff_Nuc63530	chr8	42336632	42336771	+	0	NA	intron (NM_023662, intron 1 of 37)	intron (NM_023662, intron 1 of 37)	11588	NM_023662	18536	Mm.117896	NM_023662	ENSMUSG00000031592	Pcm1	2600002H09Rik|9430077F19Rik|C030044G17Rik	pericentriolar material 1	protein-coding
Diff_Nuc27091	chr18	35979552	35979691	+	0	NA	Intergenic	Intergenic	-9851	NM_133687	67393	Mm.94560	NM_133687	ENSMUSG00000046668	Cxxc5	4930415K17Rik	CXXC finger 5	protein-coding
Diff_Nuc33871	chr6	71791462	71791601	+	0	NA	intron (NM_029673, intron 1 of 14)	Lx8|LINE|L1	10217	NM_001253688	76614	Mm.235123	NM_029673	ENSMUSG00000052337	Immt	1700082C19Rik|D830041H16Rik|HMP|P87|P87/89|P89	inner membrane protein, mitochondrial	protein-coding
Diff_Nuc57369	chr1	135651532	135651671	+	0	NA	Intergenic	Intergenic	-1277	NM_213616	381290	Mm.188617	NM_213616	ENSMUSG00000026463	Atp2b4	Pmca4	ATPase, Ca++ transporting, plasma membrane 4	protein-coding
Diff_Nuc56804	chr1	114456382	114456521	+	0	NA	Intergenic	Intergenic	-694956	NM_001081316	319901	Mm.103468	NM_001081316	ENSMUSG00000038702	Dsel	9330132E09Rik|DS-epi2	dermatan sulfate epimerase-like	protein-coding
Diff_Nuc32565	chr6	25231202	25231341	+	0	NA	Intergenic	Intergenic	-325146	NM_177013	319832	Mm.127446	NM_177013	ENSMUSG00000048022	Tmem229a	6332401O19Rik	transmembrane protein 229A	protein-coding
Diff_Nuc42033	chr4	77330602	77330741	+	0	NA	intron (NM_011211, intron 2 of 39)	Lx5|LINE|L1	527128	NM_011211	19266	Mm.184021	NM_011211	ENSMUSG00000028399	Ptprd	1110002J03Rik|3000002J10Rik|B230219D21Rik|R-PTP-delta	protein tyrosine phosphatase, receptor type, D	protein-coding
Diff_Nuc9137	chr11	90391742	90391881	+	0	NA	intron (NM_011505, intron 16 of 17)	Lx3A|LINE|L1	107611	NM_011505	20913	Mm.207203	NM_011505	ENSMUSG00000020546	Stxbp4	6030470M02Rik|Synip	syntaxin binding protein 4	protein-coding
Diff_Nuc5002	chr12	62061692	62061831	+	0	NA	Intergenic	Intergenic	561046	NR_045049	100504101	Mm.235026	NR_045049		Gm20063	-	predicted gene, 20063	ncRNA
Diff_Nuc57290	chr1	133845812	133845951	+	0	NA	Intergenic	L1MD1|LINE|L1	-13611	NM_001177628	212980	Mm.200307	NM_145977	ENSMUSG00000026435	Slc45a3	2210413P12Rik|AU023994|AU043764|IPCA-6|PRST|Pcanap6	solute carrier family 45, member 3	protein-coding
Diff_Nuc8557	chr11	75364632	75364771	+	0	NA	promoter-TSS (NR_039553)	promoter-TSS (NR_039553)	-230	NR_039553	100628624		NR_039553	ENSMUSG00000093100	Mir3971	mmu-mir-3971|mu-mir-3971	microRNA 3971	ncRNA
Diff_Nuc494	chrX	139217922	139218061	+	0	NA	intron (NM_001199360, intron 4 of 6)	intron (NM_001199360, intron 4 of 6)	44448	NR_030523	723976		NR_030523	ENSMUSG00000076011	Mir652	Mirn652|miRX|mmu-mir-652	microRNA 652	ncRNA
Diff_Nuc16618	chr16	16140522	16140661	+	0	NA	intron (NM_146068, intron 2 of 19)	intron (NM_146068, intron 2 of 19)	6353	NM_146068	224008	Mm.244703	NM_146068	ENSMUSG00000041974	Spidr	2310008H04Rik|Kiaa0146	scaffolding protein involved in DNA repair	protein-coding
Diff_Nuc13885	chr17	6424502	6424641	+	0	NA	Intergenic	Intergenic	-4689	NM_009342	21648	Mm.1948	NM_009342	ENSMUSG00000096255	Dynlt1b	AGS2|Dynlt1|Tctex-1|Tctex1	dynein light chain Tctex-type 1B	protein-coding
Diff_Nuc49754	chr2	37318072	37318211	+	0	NA	intron (NM_001033960, intron 1 of 18)	intron (NM_001033960, intron 1 of 18)	10367	NM_001033960	227800	Mm.383192	NM_146121	ENSMUSG00000035437	Rabgap1	Gapcena|mKIAA4104	RAB GTPase activating protein 1	protein-coding
Diff_Nuc36872	chr5	34688462	34688601	+	0	NA	intron (NM_001304270, intron 2 of 7)	RCHARR1|DNA|MER1_type	8950	NM_001304270	19822	Mm.21281	NM_011278	ENSMUSG00000029110	Rnf4	AU018689|Gtrgeo8|SNURF	ring finger protein 4	protein-coding
Diff_Nuc12139	chr10	74346322	74346461	+	0	NA	Intergenic	Intergenic	-83585	NM_010311	14687	Mm.32595	NM_010311	ENSMUSG00000040009	Gnaz	AI847979|Gz	guanine nucleotide binding protein, alpha z subunit	protein-coding
Diff_Nuc41236	chr4	47257062	47257201	+	0	NA	intron (NM_009928, intron 2 of 39)	intron (NM_009928, intron 2 of 39)	36247	NM_009928	12819	Mm.233547	NM_009928	ENSMUSG00000028339	Col15a1	-	collagen, type XV, alpha 1	protein-coding
Diff_Nuc65912	chr8	128406562	128406701	+	0	NA	intron (NM_175561, intron 5 of 33)	RMER19A|LTR|ERVK	15586	NM_175561	270109	Mm.145535	NM_175561	ENSMUSG00000060212	Pcnx2	A830048P05|AU067631|E330039K12Rik|Pcnxl2|mKIAA0435	pecanex homolog 2	protein-coding
Diff_Nuc3928	chr12	13550632	13550771	+	0	NA	intron (NM_027706, intron 48 of 51)	intron (NM_027706, intron 48 of 51)	83751	NR_136761	102639399	Mm.122052	NR_136761		Gm35725	-	predicted gene, 35725	ncRNA
Diff_Nuc30611	chr7	104308812	104308951	+	0	NA	intron (NM_001162477, intron 1 of 9)	ORR1B1|LTR|MaLR	78620	NM_010248	14389	Mm.42033	NM_010248	ENSMUSG00000004508	Gab2	AI463667|D130058I17Rik|p97	growth factor receptor bound protein 2-associated protein 2	protein-coding
Diff_Nuc17511	chr16	44064222	44064361	+	0	NA	Intergenic	B3A|SINE|B2	-36233	NM_001172107	207798	Mm.19316	NM_153528	ENSMUSG00000036292	Gramd1c	4921521N14Rik	GRAM domain containing 1C	protein-coding
Diff_Nuc17043	chr16	30433622	30433761	+	0	NA	Intergenic	ORR1A3|LTR|MaLR	-45075	NM_001128096	224088	Mm.8924	NM_001128094	ENSMUSG00000022533	Atp13a3	AU022875|Gm1745|Gm541|Gm542	ATPase type 13A3	protein-coding
Diff_Nuc40689	chr4	24543892	24544031	+	0	NA	TTS (NM_001033531)	TTS (NM_001033531)	120352	NM_199467	212377	Mm.120919	NM_199467	ENSMUSG00000045751	Mms22l	F730047E07Rik|Gm134	MMS22-like, DNA repair protein	protein-coding
Diff_Nuc15164	chr17	53786272	53786411	+	0	NA	intron (NM_001190846, intron 8 of 17)	B4A|SINE|B4	42299	NM_028232	72415	Mm.153202	NM_028232	ENSMUSG00000023940	Sgol1	3300001M08Rik|C81037|Sgo1	shugoshin-like 1 (S. pombe)	protein-coding
Diff_Nuc50479	chr2	63870492	63870631	+	0	NA	intron (NM_001267846, intron 2 of 3)	intron (NM_001267846, intron 2 of 3)	65534	NM_001267846	60344	Mm.130769	NM_021716	ENSMUSG00000075324	Fign	fi|fidget	fidgetin	protein-coding
Diff_Nuc24435	chr14	121560412	121560551	+	0	NA	intron (NM_134082, intron 2 of 26)	intron (NM_134082, intron 2 of 26)	125685	NM_134082	223254	Mm.223980	NM_134082	ENSMUSG00000025555	Farp1	AW228844|BC030329|Cdep	FERM, RhoGEF (Arhgef) and pleckstrin domain protein 1 (chondrocyte-derived)	protein-coding
Diff_Nuc48808	chr2	5284532	5284671	+	0	NA	intron (NM_001290374, intron 2 of 9)	intron (NM_001290374, intron 2 of 9)	225779	NM_028804	74186	Mm.274715	NM_028804	ENSMUSG00000026676	Ccdc3	2310045O21Rik	coiled-coil domain containing 3	protein-coding
Diff_Nuc58582	chr1	174687322	174687461	+	0	NA	Intergenic	HAL1|LINE|L1	59204	NM_007768	12944	Mm.28767	NM_007768	ENSMUSG00000037942	Crp	AI255847	C-reactive protein, pentraxin-related	protein-coding
Diff_Nuc20684	chr15	77544612	77544751	+	0	NA	intron (NM_001134802, intron 2 of 4)	intron (NM_001134802, intron 2 of 4)	-14821	NM_173743	71898	Mm.422856	NM_173743	ENSMUSG00000068246	Apol9b	2310016F22Rik	apolipoprotein L 9b	protein-coding
Diff_Nuc58019	chr1	157875582	157875721	+	0	NA	intron (NM_144791, intron 4 of 6)	intron (NM_144791, intron 4 of 6)	6296	NM_001160019	208263	Mm.211654	NM_144791	ENSMUSG00000026466	Tor1aip1	LAP1|Lap1B	torsin A interacting protein 1	protein-coding
Diff_Nuc10741	chr10	20875652	20875791	+	0	NA	intron (NM_010848, intron 2 of 14)	L2c|LINE|L2	5069	NM_001198914	17863	Mm.52109	NM_010848	ENSMUSG00000019982	Myb	AI550390|M16449|c-myb	myeloblastosis oncogene	protein-coding
Diff_Nuc18364	chr16	80493522	80493661	+	0	NA	Intergenic	Intergenic	-707351	NM_001113208	17968	Mm.433941	NM_010954	ENSMUSG00000022762	Ncam2	Ncam-2|Ocam|RNCAM	neural cell adhesion molecule 2	protein-coding
Diff_Nuc33721	chr6	66378512	66378651	+	0	NA	Intergenic	Intergenic	-106881	NM_019499	56150	Mm.489653	NM_019499	ENSMUSG00000029910	Mad2l1	AA673185|MAD2	MAD2 mitotic arrest deficient-like 1	protein-coding
Diff_Nuc38571	chr5	102216772	102216911	+	0	NA	intron (NM_173370, intron 2 of 12)	intron (NM_173370, intron 2 of 12)	22692	NM_173370	74596	Mm.46764	NM_173370	ENSMUSG00000029330	Cds1	4833409J18Rik|AI314024|AW125888	CDP-diacylglycerol synthase 1	protein-coding
Diff_Nuc20522	chr15	71020482	71020621	+	0	NA	Intergenic	Intergenic	537717	NM_177819	70363	Mm.126450	NM_177819	ENSMUSG00000036800	Fam135b	1700010C24Rik|A830008O07Rik	family with sequence similarity 135, member B	protein-coding
Diff_Nuc35921	chr6	145288312	145288451	+	0	NA	Intergenic	Intergenic	-47764	NR_003625	381827	Mm.179075	NM_001001987		1700073E17Rik	-	ribosomal protein L7 pseudogene	pseudo
Diff_Nuc63906	chr8	58963642	58963781	+	0	NA	promoter-TSS (NR_131020)	promoter-TSS (NR_131020)	54	NR_131020	75123	Mm.72666	NR_131020	ENSMUSG00000110310	4930518J21Rik	-	RIKEN cDNA 4930518J21 gene	ncRNA
Diff_Nuc38582	chr5	102452532	102452671	+	0	NA	intron (NM_172882, intron 2 of 66)	intron (NM_172882, intron 2 of 66)	46339	NM_172882	72145	Mm.332522	NM_172882	ENSMUSG00000043940	Wdfy3	2610509D04Rik|ALFY|AW319683|B930017C24|BWF1|Bchs|D5Ertd66e|Ggtb3|ZFYVE25|mKIAA0993	WD repeat and FYVE domain containing 3	protein-coding
Diff_Nuc26312	chr18	5180432	5180571	+	0	NA	Intergenic	Intergenic	133914	NM_001347449	225115	Mm.136791	NM_153153	ENSMUSG00000024236	Svil	AU024053|B430302E16Rik	supervillin	protein-coding
Diff_Nuc16160	chr17	88322272	88322411	+	0	NA	Intergenic	RMER4B|LTR|ERVK	-52049	NM_010830	17688	Mm.18210	NM_010830	ENSMUSG00000005370	Msh6	AU044881|AW550279|GTBP|Gtmbp	mutS homolog 6	protein-coding
Diff_Nuc42392	chr4	92743982	92744121	+	0	NA	Intergenic	ORR1D2|LTR|MaLR	258151	NM_026954	69136	Mm.171558	NM_026954	ENSMUSG00000054000	Tusc1	2200001D17Rik|TSG-9	tumor suppressor candidate 1	protein-coding
Diff_Nuc25932	chr19	49030592	49030731	+	0	NA	Intergenic	L1Md_F|LINE|L1	750146	NM_025696	66673	Mm.70980	NM_025696	ENSMUSG00000063434	Sorcs3	6330404A12Rik|AW045579	sortilin-related VPS10 domain containing receptor 3	protein-coding
Diff_Nuc44156	chr4	148365882	148366021	+	0	NA	intron (NM_019781, intron 3 of 8)	B2_Mm2|SINE|B2	107970	NM_019781	56273	Mm.184172	NM_019781	ENSMUSG00000028975	Pex14	Pex14p|R75137	peroxisomal biogenesis factor 14	protein-coding
Diff_Nuc56128	chr1	87407712	87407851	+	0	NA	Intergenic	ORR1B2|LTR|MaLR	87604	NM_030194	109032	Mm.335802	NM_030194	ENSMUSG00000070034	Sp110	5031415C07Rik|52kDa|5830484A20Rik|ENSMUSG00000075603|Ifi75|Ipr1	Sp110 nuclear body protein	protein-coding
Diff_Nuc44948	chr3	25944392	25944531	+	0	NA	intron (NM_138666, intron 3 of 7)	URR1A|DNA|MER1_type	107768	NM_001163387	192167	Mm.316080	NM_138666	ENSMUSG00000063887	Nlgn1	6330415N05Rik|BB179718|NL1|Nlg1|mKIAA1070	neuroligin 1	protein-coding
Diff_Nuc24105	chr14	106813572	106813711	+	0	NA	Intergenic	Intergenic	72096	NR_045938	73631	Mm.48862	NR_045938	ENSMUSG00000099794	1700128A07Rik	-	RIKEN cDNA 1700128A07 gene	ncRNA
Diff_Nuc9112	chr11	89488652	89488791	+	0	NA	intron (NM_001327810, intron 2 of 19)	intron (NM_001327810, intron 2 of 19)	69529	NM_001327810	382543	Mm.60997	NM_172534	ENSMUSG00000047773	Ankfn1	4932411E22Rik|Gm1175|nmf9	ankyrin-repeat and fibronectin type III domain containing 1	protein-coding
Diff_Nuc48328	chr3	142785002	142785141	+	0	NA	Intergenic	Intergenic	-120948	NR_040551	320072	Mm.136397	NR_040551	ENSMUSG00000105923	A830019L24Rik	-	RIKEN cDNA A830019L24 gene	ncRNA
Diff_Nuc50735	chr2	71639992	71640131	+	0	NA	intron (NM_008397, intron 1 of 25)	intron (NM_008397, intron 1 of 25)	15065	NM_001277970	16403	Mm.225096	NM_008397	ENSMUSG00000027111	Itga6	5033401O05Rik|AI115430|Cd49f|VLA-6	integrin alpha 6	protein-coding
Diff_Nuc44346	chr4	154575542	154575681	+	0	NA	intron (NM_011385, intron 1 of 6)	intron (NM_011385, intron 1 of 6)	21033	NM_011385	20481	Mm.28520	NM_011385	ENSMUSG00000029050	Ski	2310012I02Rik|2610001A11Rik|AA062172|AA589460|BC004088	ski sarcoma viral oncogene homolog (avian)	protein-coding
Diff_Nuc10735	chr10	20558152	20558291	+	0	NA	Intergenic	B4|SINE|B4	-113337	NM_013875	29863	Mm.425617	NM_013875	ENSMUSG00000019990	Pde7b	-	phosphodiesterase 7B	protein-coding
Diff_Nuc37387	chr5	54753832	54753971	+	0	NA	Intergenic	Intergenic	12670	NR_038045	330086	Mm.254449	NM_177871	ENSMUSG00000105912	Gm10440	D130065D13|ENSMUSG00000072936	predicted gene 10440	ncRNA
Diff_Nuc31138	chr7	120558837	120558976	+	0	NA	Intergenic	Intergenic	-26819	NM_020623	19226	Mm.284168	NM_020623	ENSMUSG00000059077	Pth	Pthp	parathyroid hormone	protein-coding
Diff_Nuc27886	chr18	65485242	65485381	+	0	NA	intron (NM_001037294, intron 4 of 12)	intron (NM_001037294, intron 4 of 12)	68231	NM_001037294	225638	Mm.296528	NM_001037294	ENSMUSG00000032845	Alpk2	Gm549|Hak	alpha-kinase 2	protein-coding
Diff_Nuc27443	chr18	48266962	48267101	+	0	NA	non-coding (NR_045404, exon 4 of 4)	non-coding (NR_045404, exon 4 of 4)	62042	NM_001025388	433182	Mm.70666	NM_001025388	ENSMUSG00000059040	Eno1b	EG433182|Eno1|Gm5506	enolase 1B, retrotransposed	protein-coding
Diff_Nuc709	chr13	6579302	6579441	+	0	NA	TTS (NM_145131)	TTS (NM_145131)	31968	NM_145131	69617	Mm.41933	NM_145131	ENSMUSG00000021193	Pitrm1	2310012C15Rik|AA410010|MP-1|MP1|Ntup1|PreP|mKIAA1104	pitrilysin metallepetidase 1	protein-coding
Diff_Nuc32503	chr6	23264292	23264431	+	0	NA	intron (NM_153163, intron 24 of 29)	intron (NM_153163, intron 24 of 29)	-66097	NM_028462	73191	Mm.55115	NM_028462	ENSMUSG00000029697	Fezf1	3110069A13Rik|Fez|Zfp312-like|fez-like	Fez family zinc finger 1	protein-coding
Diff_Nuc23943	chr14	100776792	100776931	+	0	NA	Intergenic	RMER19B|LTR|ERVK	-227846	NM_010636	16597	Mm.396499	NM_010636	ENSMUSG00000072294	Klf12	2700063E05Rik|AI225908|AI315654|AP-2rep|B130052C06Rik|D530033K05Rik	Kruppel-like factor 12	protein-coding
Diff_Nuc19848	chr15	42463472	42463611	+	0	NA	intron (NM_001286062, intron 1 of 8)	intron (NM_001286062, intron 1 of 8)	44982	NM_001286062	11600	Mm.309336	NM_009640	ENSMUSG00000022309	Angpt1	1110046O21Rik|Ang-1|Ang1	angiopoietin 1	protein-coding
Diff_Nuc11296	chr10	41405872	41406011	+	0	NA	Intergenic	B1_Mus2|SINE|Alu	-79540	NM_001303469	75973	Mm.228517	NM_029493	ENSMUSG00000075225	Ccdc162	5033413D22Rik|Ccdc162p|Gm29096|Gm61|Gm6976	coiled-coil domain containing 162	protein-coding
Diff_Nuc31884	chr7	148352382	148352521	+	0	NA	intron (NM_001172101, intron 2 of 9)	intron (NM_001172101, intron 2 of 9)	2134	NM_001172101	107702	Mm.197493	NM_145135	ENSMUSG00000038650	Rnh1	AW546468|C80305|RNH	ribonuclease/angiogenin inhibitor 1	protein-coding
Diff_Nuc26730	chr18	21710312	21710451	+	0	NA	3' UTR (NM_001081403, exon 8 of 8)	3' UTR (NM_001081403, exon 8 of 8)	-99685	NM_001271580	74644	Mm.329311	NM_001271580		4930426D05Rik	-	RIKEN cDNA 4930426D05 gene	protein-coding
Diff_Nuc23451	chr14	79267672	79267811	+	0	NA	intron (NM_027906, intron 1 of 44)	intron (NM_027906, intron 1 of 44)	18756	NM_173758	219189	Mm.159651	NM_027906	ENSMUSG00000058997	Vwa8	1300010F03Rik|4932416F07Rik|AI957255|Kiaa0564|mKIAA0564	von Willebrand factor A domain containing 8	protein-coding
Diff_Nuc64704	chr8	87537002	87537141	+	0	NA	intron (NM_001130194, intron 3 of 9)	intron (NM_001130194, intron 3 of 9)	1236	NM_001130194	212989	Mm.215154	NM_001130194	ENSMUSG00000052819	Best2	Vmd2l1	bestrophin 2	protein-coding
Diff_Nuc44646	chr3	14779902	14780041	+	0	NA	intron (NM_009799, intron 1 of 7)	intron (NM_009799, intron 1 of 7)	-1511	NM_001083957	12346	Mm.273195	NM_009799	ENSMUSG00000027556	Car1	AW555628|Ca1|Car-1	carbonic anhydrase 1	protein-coding
Diff_Nuc18345	chr16	79488032	79488171	+	0	NA	Intergenic	L1Md_F2|LINE|L1	-396759	NM_178855	19146	Mm.5184	NM_008941	ENSMUSG00000022857	Tmprss15	Entk|Prss7	transmembrane protease, serine 15	protein-coding
Diff_Nuc56080	chr1	83590892	83591031	+	0	NA	Intergenic	RMER15|LTR|ERVL	-186186	NM_172430	77629	Mm.154303	NM_172430	ENSMUSG00000026163	Sphkap	4930544G21Rik|A930009L15Rik|AI852220|SKIP|mKIAA1678	SPHK1 interactor, AKAP domain containing	protein-coding
Diff_Nuc55518	chr1	64029572	64029711	+	0	NA	Intergenic	Intergenic	18340	NR_027824	433315	Mm.342696	NM_001013800	ENSMUSG00000044689	Gm13749	OTTMUSG00000013918	predicted gene 13749	ncRNA
Diff_Nuc12192	chr10	76207302	76207441	+	0	NA	Intergenic	Intergenic	-18582	NM_009933	12833	Mm.2509	NM_009933	ENSMUSG00000001119	Col6a1	AI747156|Col6a-1	collagen, type VI, alpha 1	protein-coding
Diff_Nuc2133	chr13	57408692	57408831	+	0	NA	Intergenic	Intergenic	-411611	NM_001302373	26946	Mm.62409	NM_012035	ENSMUSG00000021541	Trpc7	TRP7|Trrp8	transient receptor potential cation channel, subfamily C, member 7	protein-coding
Diff_Nuc43532	chr4	129022442	129022581	+	0	NA	intron (NM_025970, intron 6 of 6)	intron (NM_025970, intron 6 of 6)	9241	NM_025970	67106	Mm.36575	NM_025970	ENSMUSG00000057572	Zbtb8os	2010001H09Rik|2310028N13Rik|AI851226|Arch|Archm	zinc finger and BTB domain containing 8 opposite strand	protein-coding
Diff_Nuc58311	chr1	166305522	166305661	+	0	NA	intron (NM_138314, intron 9 of 13)	B3|SINE|B2	67788	NM_178071	171567	Mm.219428	NM_138314	ENSMUSG00000026575	Nme7	D530024H21Rik|Nm23-M7|Nm23-r7	NME/NM23 family member 7	protein-coding
Diff_Nuc29820	chr7	72818632	72818771	+	0	NA	intron (NM_172310, intron 10 of 18)	(GAAAA)n|Simple_repeat|Simple_repeat	-19602	NM_178056	68634	Mm.476828	NM_026795	ENSMUSG00000078681	Tm2d3	1110025I09Rik|5930422O05Rik|Blp2	TM2 domain containing 3	protein-coding
Diff_Nuc49076	chr2	15195212	15195351	+	0	NA	Intergenic	MusHAL1|LINE|L1	218292	NM_029466	75869	Mm.174068	NM_029466	ENSMUSG00000017418	Arl5b	4930587A11Rik|AW146430|Arl8	ADP-ribosylation factor-like 5B	protein-coding
Diff_Nuc60893	chr9	65471892	65472031	+	0	NA	Intergenic	Intergenic	-6428	NM_028030	71973	Mm.29148	NM_028030	ENSMUSG00000032387	Rbpms2	2400008B06Rik|AI316523	RNA binding protein with multiple splicing 2	protein-coding
Diff_Nuc39020	chr5	116467732	116467871	+	0	NA	intron (NM_031869, intron 5 of 6)	intron (NM_031869, intron 5 of 6)	6636	NM_031869	19079	Mm.458152	NM_031869	ENSMUSG00000029513	Prkab1	1300015D22Rik|AU021155|E430008F22	protein kinase, AMP-activated, beta 1 non-catalytic subunit	protein-coding
Diff_Nuc32103	chr6	7438042	7438181	+	0	NA	Intergenic	L1_Mm|LINE|L1	-66774	NM_001311060	21333	Mm.1440	NM_009311	ENSMUSG00000061762	Tac1	4930528L02Rik|NK-1|NK1|Nkna|PPT-A|PPTA|SP	tachykinin 1	protein-coding
Diff_Nuc60865	chr9	64831612	64831751	+	0	NA	intron (NM_175153, intron 11 of 12)	intron (NM_175153, intron 11 of 12)	22944	NM_175153	69882	Mm.272616	NM_175153	ENSMUSG00000034263	Vwa9	2010321M09Rik	von Willebrand factor A domain containing 9	protein-coding
Diff_Nuc63245	chr8	34590022	34590161	+	0	NA	Intergenic	ORR1A2|LTR|MaLR	-4692	NR_033589	628431	Mm.376526	NR_033589		Hmgb1-rs17	Hmg1-rs17	high mobility group box 1, related sequence 17	pseudo
Diff_Nuc34643	chr6	99227222	99227361	+	0	NA	intron (NM_001347345, intron 3 of 19)	intron (NM_001347345, intron 3 of 19)	-10782	NM_001197321	108655	Mm.234965	NM_053202	ENSMUSG00000030067	Foxp1	3110052D19Rik|4932443N09Rik|AI461938|AW494214	forkhead box P1	protein-coding
Diff_Nuc43120	chr4	115617192	115617331	+	0	NA	Intergenic	Intergenic	-4730	NM_130865	140477	Mm.213206	NM_130865	ENSMUSG00000028707	Dmbx1	Atx|Cdmx|Mbx|Otx3	diencephalon/mesencephalon homeobox 1	protein-coding
Diff_Nuc7878	chr11	52067712	52067851	+	0	NA	intron (NM_001313981, intron 10 of 10)	intron (NM_001313981, intron 10 of 10)	22284	NM_011543	21402	Mm.42944	NM_011543	ENSMUSG00000036309	Skp1a	15kDa|2610043E24Rik|2610206H23Rik|EMC19|OCP-II|OCP2|SKP1|Tceb1l|p19A|p19Skp1	S-phase kinase-associated protein 1A	protein-coding
Diff_Nuc22004	chr14	28162662	28162801	+	0	NA	intron (NM_001289687, intron 1 of 9)	(CA)n|Simple_repeat|Simple_repeat	-11844	NM_001289688	71704	Mm.248606	NM_027871	ENSMUSG00000021895	Arhgef3	1200004I24Rik|9830169H03Rik|C76747|Xpln	Rho guanine nucleotide exchange factor (GEF) 3	protein-coding
Diff_Nuc43304	chr4	120340252	120340391	+	0	NA	3' UTR (NM_019563, exon 1 of 1)	3' UTR (NM_019563, exon 1 of 1)	1153	NM_019563	56222	Mm.272646	NM_019563	ENSMUSG00000070803	Cited4	MRG-2|Mrg2	Cbp/p300-interacting transactivator, with Glu/Asp-rich carboxy-terminal domain, 4	protein-coding
Diff_Nuc29348	chr7	50681742	50681881	+	0	NA	Intergenic	B3A|SINE|B2	-3660	NM_177693	233187	Mm.267027	NM_177693	ENSMUSG00000004613	Lim2	19kDa|4833403J20|MP19|To3	lens intrinsic membrane protein 2	protein-coding
Diff_Nuc41072	chr4	40982912	40983051	+	0	NA	intron (NM_007473, intron 4 of 7)	intron (NM_007473, intron 4 of 7)	12188	NM_007473	11832	Mm.8728	NM_007473	ENSMUSG00000028427	Aqp7	AQP7L|AQPap	aquaporin 7	protein-coding
Diff_Nuc40271	chr4	8217182	8217321	+	0	NA	Intergenic	Intergenic	-51063	NM_007592	12319	Mm.119320	NM_007592	ENSMUSG00000041261	Car8	AW546993|Ca8|Cals|Cals1|Carp|wdl	carbonic anhydrase 8	protein-coding
Diff_Nuc29395	chr7	52568952	52569091	+	0	NA	intron (NM_175130, intron 16 of 24)	B4A|SINE|B4	-11307	NR_110499	100040970	Mm.289810	NR_110499	ENSMUSG00000046721	Rpl14-ps1	ENSMUSG00000046721|Gm9811	ribosomal protein L14, pseudogene 1	pseudo
Diff_Nuc26772	chr18	24140552	24140691	+	0	NA	Intergenic	IAPLTR2b|LTR|ERVK	-7514	NM_011755	22694	Mm.290596	NM_011755	ENSMUSG00000063281	Zfp35	Zfp-35|Znf271|mszf13|mszf20-1|mszf28|mszf68	zinc finger protein 35	protein-coding
Diff_Nuc3979	chr12	16402622	16402761	+	0	NA	Intergenic	Intergenic	193885	NM_015763	14245	Mm.153625	NM_015763	ENSMUSG00000020593	Lpin1	4631420P06|Kiaa0188|Lipin1|fld|mKIAA0188	lipin 1	protein-coding
Diff_Nuc55917	chr1	77251132	77251271	+	0	NA	Intergenic	Intergenic	242142	NR_105770	102465180		NR_105770	ENSMUSG00000099141	Mir6352	Gm27481|mmu-mir-6352	microRNA 6352	ncRNA
Diff_Nuc16082	chr17	86767192	86767331	+	0	NA	intron (NM_011104, intron 2 of 14)	intron (NM_011104, intron 2 of 14)	-80743	NR_045435	72104	Mm.443401	NR_045435	ENSMUSG00000100738	2010106C02Rik	-	RIKEN cDNA 2010106C02 gene	ncRNA
Diff_Nuc18275	chr16	76733642	76733781	+	0	NA	Intergenic	Intergenic	277415	NR_040573	76601	Mm.396217	NR_040573	ENSMUSG00000100857	1700041M19Rik	-	RIKEN cDNA 1700041M19 gene	ncRNA
Diff_Nuc8152	chr11	61747342	61747481	+	0	NA	Intergenic	ORR1E|LTR|MaLR	-3652	NM_019921	56697	Mm.274404	NM_019921	ENSMUSG00000047804	Akap10	1500031L16Rik|B130049N18Rik|D-AKAP-2|D-AKAP2|PRKA10	A kinase (PRKA) anchor protein 10	protein-coding
Diff_Nuc17969	chr16	63571782	63571921	+	0	NA	intron (NM_010140, intron 13 of 16)	intron (NM_010140, intron 13 of 16)	292132	NM_010140	13837	Mm.1977	NM_010140	ENSMUSG00000052504	Epha3	AW492086|Cek4|ETK1|End3|Hek|Hek4|Mek4|Tyro4	Eph receptor A3	protein-coding
Diff_Nuc2035	chr13	54177192	54177331	+	0	NA	intron (NM_027324, intron 1 of 10)	intron (NM_027324, intron 1 of 10)	10047	NM_027324	14057	Mm.134191	NM_027324	ENSMUSG00000021474	Sfxn1	2810002O05Rik|A930015P12Rik|f	sideroflexin 1	protein-coding
Diff_Nuc14999	chr17	47382232	47382371	+	0	NA	intron (NM_001097623, intron 4 of 19)	intron (NM_001097623, intron 4 of 19)	15122	NM_172622	224829	Mm.260989	NM_172622		Trerf1	9430096I18Rik|AI429294|B830015H24|RAPA|Trep-132|Trep132	transcriptional regulating factor 1	protein-coding
Diff_Nuc12653	chr10	90629492	90629631	+	0	NA	intron (NM_011605, intron 1 of 3)	intron (NM_011605, intron 1 of 3)	3734	NM_001283048	21917	Mm.159684	NM_011605	ENSMUSG00000019961	Tmpo	5630400D24Rik|AI195756|AI606875|AW214352|AW547477|LAP2|TP	thymopoietin	protein-coding
Diff_Nuc44256	chr4	150264552	150264691	+	0	NA	Intergenic	Intergenic	19409	NM_020569	57320	Mm.277349	NM_020569	ENSMUSG00000028964	Park7	DJ-1|Dj1	Parkinson disease (autosomal recessive, early onset) 7	protein-coding
Diff_Nuc1665	chr13	41283442	41283581	+	0	NA	intron (NM_001311121, intron 5 of 7)	intron (NM_001311121, intron 5 of 7)	32020	NM_001311121	54326	Mm.2567	NM_019423	ENSMUSG00000021364	Elovl2	AI317360|Ssc2	elongation of very long chain fatty acids (FEN1/Elo2, SUR4/Elo3, yeast)-like 2	protein-coding
Diff_Nuc5197	chr12	70993772	70993911	+	0	NA	promoter-TSS (NM_178628)	promoter-TSS (NM_178628)	-251	NM_178628	73991	Mm.474462	NM_178628	ENSMUSG00000021066	Atl1	4930435M24Rik|Adfsp|Fsp1|Spg3|Spg3a	atlastin GTPase 1	protein-coding
Diff_Nuc62898	chr8	17725122	17725261	+	0	NA	Intergenic	Intergenic	-189806	NM_053171	94109	Mm.436988	NM_053171	ENSMUSG00000060924	Csmd1	B930082H09|mKIAA1890	CUB and Sushi multiple domains 1	protein-coding
Diff_Nuc34146	chr6	84877672	84877811	+	0	NA	intron (NM_177077, intron 6 of 21)	MTD|LTR|MaLR	141766	NM_177077	75914	Mm.159621	NM_177077	ENSMUSG00000033769	Exoc6b	4930569O18Rik|G430127E12Rik|Sec15b|Sec15l2|mKIAA0919	exocyst complex component 6B	protein-coding
Diff_Nuc24581	chr19	4111792	4111931	+	0	NA	intron (NM_008851, intron 18 of 22)	intron (NM_008851, intron 18 of 22)	9714	NM_001276284	11632	Mm.10433	NM_016666	ENSMUSG00000024847	Aip	AA408703|AW476050|Ara9|D19Bwg1412e|Fkbp16|Xap2	aryl-hydrocarbon receptor-interacting protein	protein-coding
Diff_Nuc38082	chr5	85276092	85276231	+	0	NA	Intergenic	Intergenic	-429754	NM_007937	13839	Mm.137991	NM_007937	ENSMUSG00000029245	Epha5	AI854630|AW125296|Cek7|Ehk1|Els1|Hek7|Rek7|bsk	Eph receptor A5	protein-coding
Diff_Nuc50399	chr2	61072092	61072231	+	0	NA	Intergenic	B1_Mus1|SINE|Alu	-258953	NR_045335	100038493	Mm.388076	NR_045335	ENSMUSG00000075325	Gm13582	ENSMUSG00000075325|OTTMUSG00000012844	predicted gene 13582	ncRNA
Diff_Nuc54696	chr1	36113682	36113821	+	0	NA	Intergenic	Intergenic	-11494	NM_015818	50785	Mm.213566	NM_015818	ENSMUSG00000045216	Hs6st1	6Ost1	heparan sulfate 6-O-sulfotransferase 1	protein-coding
Diff_Nuc57627	chr1	143763742	143763881	+	0	NA	Intergenic	L1Md_F2|LINE|L1	-1210832	NR_040604	75910	Mm.483845	NR_040604	ENSMUSG00000102368	4930590L20Rik	-	RIKEN cDNA 4930590L20 gene	ncRNA
Diff_Nuc44681	chr3	16326952	16327091	+	0	NA	Intergenic	B4|SINE|B4	243838	NM_001145919	229096	Mm.23834	NM_172677	ENSMUSG00000047213	Ythdf3	9130022A11Rik	YTH domain family 3	protein-coding
Diff_Nuc54064	chr1	9407972	9408111	+	0	NA	Intergenic	Lx3_Mus|LINE|L1	-118083	NM_001290392	71096	Mm.336395	NM_027671	ENSMUSG00000025909	Sntg1	4933426D16Rik|G1SYN|SYN4	syntrophin, gamma 1	protein-coding
Diff_Nuc43600	chr4	131804702	131804841	+	0	NA	intron (NM_001122992, intron 3 of 10)	intron (NM_001122992, intron 3 of 10)	12693	NM_020273	56809	Mm.103489	NM_020273	ENSMUSG00000028901	Gmeb1	1110050A04Rik|AI256615|AI481278	glucocorticoid modulatory element binding protein 1	protein-coding
Diff_Nuc11246	chr10	39811722	39811861	+	0	NA	intron (NM_001114332, intron 1 of 5)	intron (NM_001114332, intron 1 of 5)	50269	NM_028247	72472	Mm.186778	NM_028247	ENSMUSG00000019838	Slc16a10	2610103N14Rik|9830169E08|Mct10|PRO0813|TAT1	solute carrier family 16 (monocarboxylic acid transporters), member 10	protein-coding
Diff_Nuc20814	chr15	81413372	81413511	+	0	NA	Intergenic	Intergenic	-3203	NM_177821	328572	Mm.258397	NM_177821	ENSMUSG00000055024	Ep300	A430090G16|A730011L11|KAT3B|p300|p300 HAT	E1A binding protein p300	protein-coding
Diff_Nuc6080	chr12	99980432	99980571	+	0	NA	Intergenic	B4A|SINE|B4	-4677	NM_001160107	75553	Mm.25549	NM_029334	ENSMUSG00000021012	Zc3h14	1010001P15Rik|1700016A15Rik|2700069A02Rik|AU014748	zinc finger CCCH type containing 14	protein-coding
Diff_Nuc45573	chr3	51216512	51216651	+	0	NA	Intergenic	Intergenic	-3357	NM_053089	74838	Mm.275281	NM_053089	ENSMUSG00000063273	Naa15	5730450D16Rik|6330400I15|ASTBDN|Narg1|Tbdn-1|mNAT1	N(alpha)-acetyltransferase 15, NatA auxiliary subunit	protein-coding
Diff_Nuc36609	chr5	24876742	24876881	+	0	NA	intron (NM_001081383, intron 14 of 58)	intron (NM_001081383, intron 14 of 58)	127790	NM_001081383	231051	Mm.332268	NM_001081383	ENSMUSG00000038056	Kmt2c	E330008K23Rik|HALR|Mll3|mKIAA1506	lysine (K)-specific methyltransferase 2C	protein-coding
Diff_Nuc5347	chr12	74435332	74435471	+	0	NA	intron (NM_001037717, intron 6 of 15)	intron (NM_001037717, intron 6 of 15)	47566	NM_001037717	625098	Mm.32075	NM_001037717	ENSMUSG00000044712	Slc38a6	AW322671|EG625098	solute carrier family 38, member 6	protein-coding
Diff_Nuc30196	chr7	87515132	87515271	+	0	NA	intron (NM_172903, intron 2 of 23)	intron (NM_172903, intron 2 of 23)	1060	NM_172903	140481	Mm.269245	NM_172903	ENSMUSG00000038886	Man2a2	1700052O22Rik|4931438M07Rik|AI480988|MX|Man IIx	mannosidase 2, alpha 2	protein-coding
Diff_Nuc7456	chr11	32565332	32565471	+	0	NA	intron (NM_001271349, intron 1 of 11)	intron (NM_001271349, intron 1 of 11)	22846	NM_001271347	103583	Mm.28017	NM_134015	ENSMUSG00000020271	Fbxw11	2310065A07Rik|AA536858|BTRC2|BTRCP2|Fbxw1b|HOS	F-box and WD-40 domain protein 11	protein-coding
Diff_Nuc44542	chr3	9824532	9824671	+	0	NA	intron (NM_001195031, intron 1 of 8)	intron (NM_001195031, intron 1 of 8)	9078	NM_053182	94212	Mm.23897	NM_053182	ENSMUSG00000027508	Pag1	Cbp|F730007C19Rik|Pag	phosphoprotein associated with glycosphingolipid microdomains 1	protein-coding
Diff_Nuc33762	chr6	67385682	67385821	+	0	NA	intron (NM_144548, intron 7 of 10)	intron (NM_144548, intron 7 of 10)	56098	NM_144548	209590	Mm.221227	NM_144548	ENSMUSG00000049093	Il23r	IL-23R	interleukin 23 receptor	protein-coding
Diff_Nuc59061	chr1	190256042	190256181	+	0	NA	intron (NM_021408, intron 14 of 70)	intron (NM_021408, intron 14 of 70)	169394	NM_021408	22283	Mm.331238	NM_021408	ENSMUSG00000026609	Ush2a	A930011D15Rik|A930037M10Rik|Gm676|Gm983|Mush2a|Usherin|Ushrn	Usher syndrome 2A	protein-coding
Diff_Nuc60211	chr9	43433172	43433311	+	0	NA	Intergenic	Intergenic	-119418	NM_021424	58235	Mm.335096	NM_021424	ENSMUSG00000032012	Nectin1	AI835281|AW549174|Cd111|HIgR|HveC|PRR|PRR1|Pvrl1|nectin-1	nectin cell adhesion molecule 1	protein-coding
Diff_Nuc30730	chr7	107709512	107709651	+	0	NA	intron (NR_003559, intron 4 of 7)	intron (NR_003559, intron 4 of 7)	22063	NM_198831	52443	Mm.473730	NM_198831	ENSMUSG00000030706	Mrpl48	1810030E20Rik|2610028L11Rik|CGI-118|D4Ertd786e	mitochondrial ribosomal protein L48	protein-coding
Diff_Nuc53610	chr2	167730732	167730871	+	0	NA	Intergenic	Intergenic	-27026	NM_011201	19246	Mm.277916	NM_011201	ENSMUSG00000027540	Ptpn1	PTP-1B|PTP-HA2|PTP1B	protein tyrosine phosphatase, non-receptor type 1	protein-coding
Diff_Nuc43734	chr4	134948832	134948971	+	0	NA	intron (NM_145555, intron 1 of 4)	ORR1D1|LTR|MaLR	5241	NM_001243306	230822	Mm.35548	NM_145555	ENSMUSG00000043924	Ncmap	A330049M08Rik|AA545175|Mp11	noncompact myelin associated protein	protein-coding
Diff_Nuc49491	chr2	29876592	29876731	+	0	NA	intron (NM_001309460, intron 43 of 57)	intron (NM_001309460, intron 43 of 57)	25191	NR_105963	102465603		NR_105963	ENSMUSG00000098453	Mir6997	Gm27310|mmu-mir-6997	microRNA 6997	ncRNA
Diff_Nuc25480	chr19	37003532	37003671	+	0	NA	intron (NM_001080706, intron 1 of 37)	B1_Mm|SINE|Alu	3032	NM_001080706	107182	Mm.295062	NM_001080706	ENSMUSG00000040565	Btaf1	AI414500|AI447930|E430027O22Rik|TAF170	B-TFIID TATA-box binding protein associated factor 1	protein-coding
Diff_Nuc30909	chr7	112937862	112938001	+	0	NA	Intergenic	Kanga2_a|DNA|Tc2	-1867	NM_001162943	233651	Mm.334108	NM_001162943	ENSMUSG00000036862	Dchs1	3110041P15Rik|C130033F22Rik|CDH25|FIB1|Gm165|PCDH16	dachsous 1 (Drosophila)	protein-coding
Diff_Nuc17918	chr16	61150342	61150481	+	0	NA	Intergenic	Intergenic	-545054	NM_007938	13840	Mm.455790	NM_007938	ENSMUSG00000055540	Epha6	Ehk2|Hek12|m-ehk2	Eph receptor A6	protein-coding
Diff_Nuc9412	chr11	98912722	98912861	+	0	NA	exon (NM_010517, exon 4 of 4)	exon (NM_010517, exon 4 of 4)	10217	NM_010517	16010	Mm.233799	NM_010517	ENSMUSG00000017493	Igfbp4	AI875747|Deb2|IGFBP-4	insulin-like growth factor binding protein 4	protein-coding
Diff_Nuc13730	chr10	127851292	127851431	+	0	NA	intron (NR_104290, intron 1 of 7)	intron (NR_104290, intron 1 of 7)	2689	NM_026259	67588	Mm.294120	NM_026259	ENSMUSG00000025373	Rnf41	2210404G21Rik|4930511A05Rik|4933415P08Rik|D10Ertd722e|FLRF|Nrdp1	ring finger protein 41	protein-coding
Diff_Nuc57600	chr1	142391942	142392081	+	0	NA	intron (NM_001081027, intron 14 of 27)	L1Md_F2|LINE|L1	160968	NR_040604	75910	Mm.483845	NR_040604	ENSMUSG00000102368	4930590L20Rik	-	RIKEN cDNA 4930590L20 gene	ncRNA
Diff_Nuc33289	chr6	49700042	49700181	+	0	NA	Intergenic	Intergenic	-72598	NM_023456	109648	Mm.154796	NM_023456	ENSMUSG00000029819	Npy	0710005A05Rik	neuropeptide Y	protein-coding
Diff_Nuc3903	chr12	12511422	12511561	+	0	NA	Intergenic	MLT1B|LTR|MaLR	-112210	NR_045829	70858	Mm.410838	NR_045829		4921511I17Rik	-	RIKEN cDNA 4921511I17 gene	ncRNA
Diff_Nuc30941	chr7	114645522	114645661	+	0	NA	intron (NM_021889, intron 3 of 6)	intron (NM_021889, intron 3 of 6)	-65356	NM_172907	244198	Mm.77425	NM_172907	ENSMUSG00000051041	Olfml1	6720478C22|AV321997|BC047207|MVAL564|ONT2|mONT2	olfactomedin-like 1	protein-coding
Diff_Nuc65651	chr8	120633032	120633171	+	0	NA	Intergenic	Intergenic	-174410	NM_019707	12554	Mm.334841	NM_019707	ENSMUSG00000031841	Cdh13	4932416G01Rik|Cdht|Tcad	cadherin 13	protein-coding
Diff_Nuc39073	chr5	118431862	118432001	+	0	NA	intron (NM_145564, intron 3 of 11)	intron (NM_145564, intron 3 of 11)	5152	NM_001346588	231670	Mm.21912	NM_145564	ENSMUSG00000032898	Fbxo21	2810425J22Rik|AU016673	F-box protein 21	protein-coding
Diff_Nuc4391	chr12	36869202	36869341	+	0	NA	intron (NM_025840, intron 1 of 11)	B3|SINE|B2	14141	NM_025840	66912	Mm.288669	NM_025840	ENSMUSG00000020547	Bzw2	1110001I24Rik|Bdm2|HSPC028	basic leucine zipper and W2 domains 2	protein-coding
Diff_Nuc28512	chr18	90736852	90736991	+	0	NA	Intergenic	L1_Mus1|LINE|L1	57375	NM_198295	67988	Mm.268041	NM_198295	ENSMUSG00000024614	Tmx3	6430411B10Rik|A730024F05Rik|AV259382|Txndc10|mKIAA1830	thioredoxin-related transmembrane protein 3	protein-coding
Diff_Nuc65274	chr8	109191692	109191831	+	0	NA	intron (NM_009864, intron 15 of 15)	B1_Mus1|SINE|Alu	-15207	NM_173037	272538	Mm.87151	NM_173037	ENSMUSG00000041949	Tango6	AW413431|E330010G16|Tmco7	transport and golgi organization 6	protein-coding
Diff_Nuc37901	chr5	75629252	75629391	+	0	NA	Intergenic	Lx|LINE|L1	56465	NR_105992	102465620		NR_105992	ENSMUSG00000099060	Mir7025	Gm27860|mmu-mir-7025	microRNA 7025	ncRNA
Diff_Nuc19415	chr15	27007162	27007301	+	0	NA	Intergenic	Intergenic	-168646	NR_029647	723831		NR_029647	ENSMUSG00000094316	Mir297-1	Mir297a-1|Mirn297-1	microRNA 297-1	ncRNA
Diff_Nuc15583	chr17	70223682	70223821	+	0	NA	Intergenic	L1Md_F3|LINE|L1	-94662	NM_001347412	224997	Mm.311840	NM_027712	ENSMUSG00000003279	Dlgap1	4933422O14Rik|9630002F18|AI845682|AI848168|BB075781|D17Bwg0511e|GKAP/SAPAP|GKPA/SAPAP|Gkap|Sapap1|mKIAA4162	discs, large (Drosophila) homolog-associated protein 1	protein-coding
Diff_Nuc13739	chr10	128000092	128000231	+	0	NA	exon (NM_011119, exon 4 of 12)	exon (NM_011119, exon 4 of 12)	2829	NM_011119	18813	Mm.4742	NM_011119	ENSMUSG00000025364	Pa2g4	38kDa|AA672939|Ebp1|Plfap	proliferation-associated 2G4	protein-coding
Diff_Nuc12378	chr10	81492852	81492991	+	0	NA	Intergenic	MYSERV16_I-int|LTR|ERVK	-17947	NM_001319203	408062	Mm.391409	NM_001024626	ENSMUSG00000061371	Zfp873	-	zinc finger protein 873	protein-coding
Diff_Nuc22197	chr14	33604092	33604231	+	0	NA	intron (NM_001163616, intron 1 of 4)	intron (NM_001163616, intron 1 of 4)	5012	NM_001163616	69069	Mm.261609	NM_001163616	ENSMUSG00000041707	1810011H11Rik	4733401I05Rik	RIKEN cDNA 1810011H11 gene	protein-coding
Diff_Nuc53540	chr2	165683312	165683451	+	0	NA	intron (NM_001252587, intron 2 of 11)	intron (NM_001252587, intron 2 of 11)	292	NM_001252585	228880	Mm.227598	NM_027230	ENSMUSG00000039671	Zmynd8	1110013E22Rik|2010005I16Rik|3632413B07Rik|AI316811|AL024039|Prkcbp1|RACK7	zinc finger, MYND-type containing 8	protein-coding
Diff_Nuc40084	chr5	151428062	151428201	+	0	NA	Intergenic	B2_Mm1a|SINE|B2	-31031	NM_133898	100637	Mm.279932	NM_133898	ENSMUSG00000041132	N4bp2l1	2410024N18Rik|AI428195|B230342M21Rik	NEDD4 binding protein 2-like 1	protein-coding
Diff_Nuc63082	chr8	26621392	26621531	+	0	NA	Intergenic	Intergenic	-7770	NM_001079909	14182	Mm.265716	NM_010206	ENSMUSG00000031565	Fgfr1	AW208770|Eask|FGFR-I|FLG|Fgfr-1|Flt-2|Hspy|MFR|bFGF-R-1|c-fgr	fibroblast growth factor receptor 1	protein-coding
Diff_Nuc60368	chr9	48953312	48953451	+	0	NA	Intergenic	RMER1B|Other|Other	42497	NM_030709	80893	Mm.72799	NM_030709	ENSMUSG00000032268	Tmprss5	spinesin	transmembrane protease, serine 5 (spinesin)	protein-coding
Diff_Nuc1540	chr13	37581102	37581241	+	0	NA	Intergenic	Intergenic	143957	NM_010745	17084	Mm.2639	NM_010745	ENSMUSG00000021423	Ly86	MD-1|MD1|ly86_tv2	lymphocyte antigen 86	protein-coding
Diff_Nuc58714	chr1	179492402	179492541	+	0	NA	Intergenic	Intergenic	80603	NR_037994	75589	Mm.86666	NR_037994	ENSMUSG00000101746	2310043L19Rik	-	RIKEN cDNA 2310043L19 gene	ncRNA
Diff_Nuc49817	chr2	38650322	38650461	+	0	NA	intron (NM_010264, intron 3 of 10)	intron (NM_010264, intron 3 of 10)	-10356	NM_001159549	14536	Mm.439703	NM_010264	ENSMUSG00000063972	Nr6a1	1700113M01Rik|Gcnf|NCNF|RTR	nuclear receptor subfamily 6, group A, member 1	protein-coding
Diff_Nuc60385	chr9	50192362	50192501	+	0	NA	Intergenic	Intergenic	-110199	NM_029639	76509	Mm.29959	NM_029639	ENSMUSG00000032068	Plet1	0610037B23Rik|1600029D21Rik|AA407923|AU043048	placenta expressed transcript 1	protein-coding
Diff_Nuc36906	chr5	35729452	35729591	+	0	NA	Intergenic	Intergenic	-2245	NM_010445	15371	Mm.358606	NM_010445	ENSMUSG00000067438	Hmx1	Nkx5-3	H6 homeobox 1	protein-coding
Diff_Nuc63678	chr8	47921862	47922001	+	0	NA	intron (NM_008391, intron 6 of 8)	L1MD2|LINE|L1	96832	NM_008391	16363	Mm.1149	NM_008391	ENSMUSG00000031627	Irf2	9830146E22Rik|AI646973|Irf-2	interferon regulatory factor 2	protein-coding
Diff_Nuc49556	chr2	31870192	31870331	+	0	NA	intron (NM_172268, intron 21 of 35)	intron (NM_172268, intron 21 of 35)	-36205	NR_106135	102466844		NR_106135	ENSMUSG00000099075	Mir7674	Gm27563|mmu-mir-7674	microRNA 7674	ncRNA
Diff_Nuc11117	chr10	35039932	35040071	+	0	NA	Intergenic	Intergenic	836795	NM_010237	14302	Mm.332432	NM_010237	ENSMUSG00000019779	Frk	BSK|BSK/IYK|C85044|GTK|RAK	fyn-related kinase	protein-coding
Diff_Nuc37698	chr5	68005342	68005481	+	0	NA	TTS (NM_001033415)	TTS (NM_001033415)	6289	NM_001033415	330096	Mm.442747	NM_001033415	ENSMUSG00000050010	Shisa3	D830007B15Rik	shisa family member 3	protein-coding
Diff_Nuc60731	chr9	61161782	61161921	+	0	NA	Intergenic	Intergenic	-20235	NR_045334	622037	Mm.126243	NR_045334	ENSMUSG00000111658	B930092H01Rik	-	RIKEN cDNA B930092H01 gene	ncRNA
Diff_Nuc37090	chr5	44145962	44146101	+	0	NA	intron (NM_001159963, intron 9 of 10)	B3|SINE|B2	27357	NM_001159963	242960	Mm.25794	NM_178729	ENSMUSG00000039753	Fbxl5	Fbl4|Fir4	F-box and leucine-rich repeat protein 5	protein-coding
Diff_Nuc12869	chr10	98394062	98394201	+	0	NA	intron (NM_026482, intron 1 of 20)	intron (NM_026482, intron 1 of 20)	16345	NM_026482	67972	Mm.166944	NM_026482	ENSMUSG00000019943	Atp2b1	2810442I22Rik|E130111D10Rik|Pmca1	ATPase, Ca++ transporting, plasma membrane 1	protein-coding
Diff_Nuc47290	chr3	107879872	107880011	+	0	NA	exon (NM_001289719, exon 13 of 19)	exon (NM_001289719, exon 13 of 19)	8379	NM_001346665	109674	Mm.274335	NM_028779	ENSMUSG00000027889	Ampd2	1200014F01Rik|AI552571|Ampd-2|m4521Dajl	adenosine monophosphate deaminase 2	protein-coding
Diff_Nuc42339	chr4	90305212	90305351	+	0	NA	Intergenic	Intergenic	-277276	NR_033610	619842	Mm.484218	NR_033610	ENSMUSG00000080756	Gm12633	OTTMUSG00000007790	zinc finger protein 352 pseudogene	pseudo
Diff_Nuc33868	chr6	71616332	71616471	+	0	NA	Intergenic	Lx|LINE|L1	-33490	NM_001038695	104263	Mm.260479	NM_173001	ENSMUSG00000053470	Kdm3a	1700105C21Rik|C230043E16Rik|JHDM2a|Jmjd1|Jmjd1a|KDM2A|TGSA|Tsga	lysine (K)-specific demethylase 3A	protein-coding
Diff_Nuc32903	chr6	36054042	36054181	+	0	NA	Intergenic	Intergenic	-283973	NM_203491	243764	Mm.448632	NM_203491	ENSMUSG00000045613	Chrm2	AChR-M2|Chrm-2|M2	cholinergic receptor, muscarinic 2, cardiac	protein-coding
Diff_Nuc5485	chr12	79433417	79433556	+	0	NA	intron (NM_172952, intron 1 of 23)	intron (NM_172952, intron 1 of 23)	105844	NM_145965	268566	Mm.341742	NM_145965	ENSMUSG00000047454	Gphn	5730552E08Rik|AI662856|BC027112|C230040D23|GPH|GPHRYN|geph	gephyrin	protein-coding
Diff_Nuc42866	chr4	106643052	106643191	+	0	NA	intron (NM_198438, intron 4 of 16)	intron (NM_198438, intron 4 of 16)	59046	NM_023672	72475	Mm.195635	NM_023672	ENSMUSG00000061887	Ssbp3	2610021L12Rik|2610200M23Rik|5730488C10Rik|AI854733|AW551939|LAST|SSDP1	single-stranded DNA binding protein 3	protein-coding
Diff_Nuc1697	chr13	42176532	42176671	+	0	NA	intron (NM_007772, intron 2 of 8)	intron (NM_007772, intron 2 of 8)	29211	NM_007772	110521	Mm.4808	NM_007772	ENSMUSG00000021366	Hivep1	Cryabp1	human immunodeficiency virus type I enhancer binding protein 1	protein-coding
Diff_Nuc3490	chr13	112921792	112921931	+	0	NA	Intergenic	Intergenic	-156798	NM_001168403	77318	Mm.159895	NM_029898	ENSMUSG00000049985	Ankrd55	C030011J08Rik	ankyrin repeat domain 55	protein-coding
Diff_Nuc59682	chr9	21048382	21048521	+	0	NA	exon (NM_053190, exon 3 of 3)	exon (NM_053190, exon 3 of 3)	4436	NM_053190	94226	Mm.190619	NM_053190	ENSMUSG00000045087	S1pr5	Edg8|S1P5|lpB4	sphingosine-1-phosphate receptor 5	protein-coding
Diff_Nuc27326	chr18	44645472	44645611	+	0	NA	intron (NM_001085373, intron 8 of 18)	B3A|SINE|B2	105387	NM_027490	70640	Mm.87629	NM_027490	ENSMUSG00000024472	Dcp2	2410015D23Rik|5730537H01Rik|AL118268	decapping mRNA 2	protein-coding
Diff_Nuc26257	chr19	61077222	61077361	+	0	NA	intron (NM_018869, intron 2 of 15)	intron (NM_018869, intron 2 of 15)	111639	NM_018869	14773	Mm.279400	NM_018869	ENSMUSG00000003228	Grk5	Gprk5	G protein-coupled receptor kinase 5	protein-coding
Diff_Nuc52025	chr2	117580422	117580561	+	0	NA	Intergenic	Lx3_Mus|LINE|L1	58047	NR_126427	100504728	Mm.413174	NR_126427		Gm13985	OTTMUSG00000015235	predicted gene 13985	ncRNA
Diff_Nuc38848	chr5	110367592	110367731	+	0	NA	intron (NR_040366, intron 1 of 2)	RLTR23|LTR|ERV1	5079	NR_040366	100642166		NR_040366	ENSMUSG00000090015	Gm15446	OTTMUSG00000022004	predicted gene 15446	ncRNA
Diff_Nuc51957	chr2	114801922	114802061	+	0	NA	Intergenic	Intergenic	-321327	NM_025675	66632	Mm.117809	NM_025675	ENSMUSG00000057147	Dph6	5730421E18Rik|Atpbd4	diphthamine biosynthesis 6	protein-coding
Diff_Nuc8625	chr11	77054672	77054811	+	0	NA	intron (NM_177710, intron 1 of 14)	intron (NM_177710, intron 1 of 14)	24814	NM_177710	237860	Mm.440381	NM_177710	ENSMUSG00000037926	Ssh2	SSH-2|SSH-2L|mSSH-2L	slingshot homolog 2 (Drosophila)	protein-coding
Diff_Nuc34395	chr6	92031252	92031391	+	0	NA	Intergenic	RMER12|LTR|ERVK	-10091	NM_011630	22026	Mm.87062	NM_011630	ENSMUSG00000005893	Nr2c2	TAK1|Tr4|mKIAA4145	nuclear receptor subfamily 2, group C, member 2	protein-coding
Diff_Nuc34315	chr6	89909562	89909701	+	0	NA	Intergenic	L1Md_F2|LINE|L1	-16534	NM_053229	113856	Mm.377153	NM_053229	ENSMUSG00000061653	Vmn1r46	V1rb8	vomeronasal 1 receptor 46	protein-coding
Diff_Nuc5319	chr12	73860452	73860591	+	0	NA	Intergenic	PB1D9|SINE|Alu	-1677	NM_008910	19042	Mm.261045	NM_008910	ENSMUSG00000021096	Ppm1a	2310003C21Rik|2900017D14Rik|AI427932|AU017636|MMPa-2|MPPa-1	protein phosphatase 1A, magnesium dependent, alpha isoform	protein-coding
Diff_Nuc14933	chr17	45834612	45834751	+	0	NA	intron (NM_026732, intron 2 of 2)	PB1D10|SINE|Alu	11360	NM_026732	68463	Mm.379158	NM_026732	ENSMUSG00000023939	Mrpl14	1110006I11Rik|AI846816|MRP-L32|Rpml32	mitochondrial ribosomal protein L14	protein-coding
Diff_Nuc9604	chr11	104216452	104216591	+	0	NA	intron (NM_001081045, intron 6 of 13)	B3|SINE|B2	87084	NM_001081045	76719	Mm.136418	NM_001081045	ENSMUSG00000018412	Kansl1	1700081L11Rik|9430041J06Rik|mKIAA1267	KAT8 regulatory NSL complex subunit 1	protein-coding
Diff_Nuc54321	chr1	20054152	20054291	+	0	NA	intron (NM_153179, intron 66 of 66)	intron (NM_153179, intron 66 of 66)	-292314	NR_045734	75028	Mm.417820	NR_045734	ENSMUSG00000089914	4930486I03Rik	-	RIKEN cDNA 4930486I03 gene	ncRNA
Diff_Nuc47354	chr3	110234052	110234191	+	0	NA	Intergenic	Intergenic	-180204	NR_024139	99890	Mm.36115	NM_178891	ENSMUSG00000049300	Prmt6	AW124876|BB233495|Hrmt1l6	protein arginine N-methyltransferase 6	protein-coding
Diff_Nuc13435	chr10	118442412	118442551	+	0	NA	Intergenic	Intergenic	-78282	NR_110482	216377	Mm.208936	NR_110482		Gm38403	C230029M16	predicted gene, 38403	ncRNA
Diff_Nuc64201	chr8	70355262	70355401	+	0	NA	intron (NM_177698, intron 8 of 14)	L1_Mur3|LINE|L1	-13137	NM_027626	234353	Mm.32525	NM_027626	ENSMUSG00000030465	Psd3	4931420C21Rik|AI661273|BC003498|D430018P08|EFA6D	pleckstrin and Sec7 domain containing 3	protein-coding
Diff_Nuc61640	chr9	90432802	90432941	+	0	NA	Intergenic	MMVL30-int|LTR|ERV1	-267264	NM_194334	67016	Mm.335347	NM_194334	ENSMUSG00000037410	Tbc1d2b	1810061M12Rik|AI480956|AV021536|AV023399|AW491493|mKIAA1055	TBC1 domain family, member 2B	protein-coding
Diff_Nuc60234	chr9	44144772	44144911	+	0	NA	TTS (NM_010436)	TTS (NM_010436)	2043	NM_010436	15270	Mm.245931	NM_010436	ENSMUSG00000049932	H2afx	AW228881|H2A.X|H2ax|Hist5-2ax|gammaH2ax	H2A histone family, member X	protein-coding
Diff_Nuc40162	chr4	3858482	3858621	+	0	NA	intron (NM_019969, intron 1 of 5)	intron (NM_019969, intron 1 of 5)	7001	NM_019969	56711	Mm.331467	NM_019969	ENSMUSG00000003282	Plag1	-	pleiomorphic adenoma gene 1	protein-coding
Diff_Nuc35394	chr6	125206882	125207021	+	0	NA	Intergenic	Intergenic	-8592	NR_015527	73870	Mm.440681	NR_015527	ENSMUSG00000108129	4930417O13Rik	-	RIKEN cDNA 4930417O13 gene	ncRNA
Diff_Nuc64669	chr8	86530272	86530411	+	0	NA	TTS (NR_106191)	TTS (NR_106191)	814	NR_106191	102466886		NR_106191	ENSMUSG00000098823	Mir8111	Gm27823|mmu-mir-8111	microRNA 8111	ncRNA
Diff_Nuc58978	chr1	187253702	187253841	+	0	NA	non-coding (NR_038006, exon 2 of 2)	non-coding (NR_038006, exon 2 of 2)	11927	NR_038006	319562	Mm.184335	NM_176943	ENSMUSG00000051295	9630028B13Rik	-	RIKEN cDNA 9630028B13 gene	ncRNA
Diff_Nuc16984	chr16	27235542	27235681	+	0	NA	Intergenic	L1_Mus2|LINE|L1	-72116	NM_198112	239790	Mm.390880	NM_198112	ENSMUSG00000052276	Ostn	Ostc	osteocrin	protein-coding
Diff_Nuc46557	chr3	86612542	86612681	+	0	NA	intron (NM_027539, intron 8 of 15)	intron (NM_027539, intron 8 of 15)	112195	NM_001195496	70762	Mm.44490	NM_027539	ENSMUSG00000028078	Dclk2	6330415M09Rik|AU044875|CL2|CLICK2|Click-II|Dcamkl2	doublecortin-like kinase 2	protein-coding
Diff_Nuc20217	chr15	58250252	58250391	+	0	NA	intron (NM_145959, intron 1 of 23)	intron (NM_145959, intron 1 of 23)	3298	NM_145959	210998	Mm.3224	NM_145959	ENSMUSG00000037119	Fam91a1	AV220772|BC033609|D15Ertd621e|SKIN|mKIAA0493	family with sequence similarity 91, member A1	protein-coding
Diff_Nuc57282	chr1	133641372	133641511	+	0	NA	intron (NM_177243, intron 1 of 20)	intron (NM_177243, intron 1 of 20)	842	NM_177243	320718	Mm.482704	NM_177243	ENSMUSG00000042268	Slc26a9	E030002L01Rik	solute carrier family 26, member 9	protein-coding
Diff_Nuc50088	chr2	49067472	49067611	+	0	NA	intron (NM_029924, intron 6 of 16)	B3|SINE|B2	-33879	NM_001290656	109241	Mm.440436	NM_029924	ENSMUSG00000036792	Mbd5	9430004D19Rik|AA536666|AI426407|C030040A15Rik|Gm1630|OTTMUSG00000012483	methyl-CpG binding domain protein 5	protein-coding
Diff_Nuc61951	chr9	103977512	103977651	+	0	NA	intron (NM_175324, intron 2 of 19)	intron (NM_175324, intron 2 of 19)	11548	NM_175324	102632	Mm.41274	NM_175324	ENSMUSG00000090150	Acad11	5730439E10Rik|AI987948	acyl-Coenzyme A dehydrogenase family, member 11	protein-coding
Diff_Nuc28461	chr18	88602932	88603071	+	0	NA	Intergenic	Intergenic	460598	NM_018821	54607	Mm.91920	NM_018821	ENSMUSG00000056153	Socs6	1500012M23Rik|5830401B18Rik|AI447482|Cis4|Cish4|HSPC060|SOCS-4|SOCS-6|SSI4|STAI4|STATI4|Socs4	suppressor of cytokine signaling 6	protein-coding
Diff_Nuc18539	chr16	86606602	86606741	+	0	NA	Intergenic	Intergenic	-705301	NM_011782	23794	Mm.112933	NM_011782	ENSMUSG00000022894	Adamts5	9530092O11Rik|ADAM-TS5|ADAMTS1|ADAMTS11|ADMP-2|AI481094|ASMP-2	a disintegrin-like and metallopeptidase (reprolysin type) with thrombospondin type 1 motif, 5 (aggrecanase-2)	protein-coding
Diff_Nuc52351	chr2	127434562	127434701	+	0	NA	Intergenic	Intergenic	21469	NM_029963	77721	Mm.274601	NM_029963	ENSMUSG00000027374	Mrps5	1620401I16Rik|AI850294	mitochondrial ribosomal protein S5	protein-coding
Diff_Nuc41718	chr4	63381762	63381901	+	0	NA	Intergenic	MIRb|SINE|MIR	24316	NM_177371	326623	Mm.208152	NM_177371	ENSMUSG00000050395	Tnfsf15	Tl1|Tl1a|Tnlg1b|Vegi	tumor necrosis factor (ligand) superfamily, member 15	protein-coding
Diff_Nuc2450	chr13	71556922	71557061	+	0	NA	Intergenic	Intergenic	311024	NR_130325	100316804		NR_130325	ENSMUSG00000080580	Mir466f-4	Mirn466f-4|mmu-mir-466f-4	microRNA 466f-4	ncRNA
Diff_Nuc38282	chr5	91606812	91606951	+	0	NA	Intergenic	L1M3|LINE|L1	38256	NM_009704	11839	Mm.8039	NM_009704	ENSMUSG00000029378	Areg	AR|Mcub|Sdgf	amphiregulin	protein-coding
Diff_Nuc65848	chr8	126718532	126718671	+	0	NA	Intergenic	Intergenic	-36693	NM_139272	108148	Mm.33808	NM_139272	ENSMUSG00000089704	Galnt2	AI480629	UDP-N-acetyl-alpha-D-galactosamine:polypeptide N-acetylgalactosaminyltransferase 2	protein-coding
Diff_Nuc11949	chr10	66715202	66715341	+	0	NA	intron (NM_001242396, intron 23 of 24)	intron (NM_001242396, intron 23 of 24)	32758	NM_001036293	641340	Mm.136223	NM_001036293	ENSMUSG00000075000	Nrbf2	NRBF-2	nuclear receptor binding factor 2	protein-coding
Diff_Nuc56759	chr1	112177902	112178041	+	0	NA	Intergenic	Intergenic	297671	NM_172853	241201	Mm.213407	NM_172853	ENSMUSG00000026312	Cdh7	9330156F07Rik|CDH7L1	cadherin 7, type 2	protein-coding
Diff_Nuc40555	chr4	19137162	19137301	+	0	NA	Intergenic	Lx4A|LINE|L1	-70766	NM_013927	30952	Mm.445778	NM_013927	ENSMUSG00000056494	Cngb3	CCNC2|CNG6|Cngbeta2	cyclic nucleotide gated channel beta 3	protein-coding
Diff_Nuc9990	chr11	115310882	115311021	+	0	NA	Intergenic	Intergenic	-1577	NR_039549	100628623		NR_039549	ENSMUSG00000093096	Mir3968	mmu-mir-3968|mu-mir-3968	microRNA 3968	ncRNA
Diff_Nuc30633	chr7	104914912	104915051	+	0	NA	Intergenic	ORR1B2|LTR|MaLR	-28224	NM_175105	66333	Mm.29756	NM_175105	ENSMUSG00000042797	Aqp11	1700015P13Rik|AI648923|sjds	aquaporin 11	protein-coding
Diff_Nuc17188	chr16	33798222	33798361	+	0	NA	intron (NM_010739, intron 2 of 12)	intron (NM_010739, intron 2 of 12)	4168	NM_010739	17063	Mm.3177	NM_010739	ENSMUSG00000022824	Muc13	114/A10|14/A10|AI159736|Lrrp|Ly64|NJ-1	mucin 13, epithelial transmembrane	protein-coding
Diff_Nuc48677	chr3	156827542	156827681	+	0	NA	intron (NM_001039094, intron 6 of 6)	intron (NM_001039094, intron 6 of 6)	-369750	NM_017381	53861	Mm.259036	NM_017381	ENSMUSG00000028180	Zranb2	AI227013|Zfp265|Zis|Znf265	zinc finger, RAN-binding domain containing 2	protein-coding
Diff_Nuc21676	chr14	17189042	17189181	+	0	NA	Intergenic	Intergenic	-8609	NM_009409	21974	Mm.130362	NM_009409	ENSMUSG00000017485	Top2b	D230016L12Rik|Top-2	topoisomerase (DNA) II beta	protein-coding
Diff_Nuc11928	chr10	66467992	66468131	+	0	NA	intron (NR_110511, intron 1 of 6)	intron (NR_110511, intron 1 of 6)	238	NR_110511	102634101	Mm.445258	NR_110511		Gm31763	-	predicted gene, 31763	ncRNA
Diff_Nuc39215	chr5	122702132	122702271	+	0	NA	intron (NR_104441, intron 5 of 12)	intron (NR_104441, intron 5 of 12)	12268	NR_104441	654470	Mm.28804	NM_001039153	ENSMUSG00000038593	Tctn1	G730031O11Rik|Tect1	tectonic family member 1	protein-coding
Diff_Nuc44	chrX	10615332	10615471	+	0	NA	Intergenic	Intergenic	-260982	NM_001111037	100042922	Mm.374311	NM_001111037	ENSMUSG00000100626	H2al1a	Gm14483|OTTMUSG00000016789	H2A histone family member L1A	protein-coding
Diff_Nuc15141	chr17	53159882	53160021	+	0	NA	Intergenic	Intergenic	-38621	NM_001031811	211468	Mm.399068	NM_001031811	ENSMUSG00000035580	Kcnh8	C130090D05Rik|ELK|ELK1|ELK3|Kv12.1	potassium voltage-gated channel, subfamily H (eag-related), member 8	protein-coding
Diff_Nuc27236	chr18	39876662	39876801	+	0	NA	Intergenic	Intergenic	-56420	NM_011033	18459	Mm.9493	NM_011033	ENSMUSG00000051732	Pabpc2	Pabp|Pabp+|Pabp2	poly(A) binding protein, cytoplasmic 2	protein-coding
Diff_Nuc65821	chr8	125959742	125959881	+	0	NA	Intergenic	RMER10B|LTR|ERVL	-7045	NM_001253784	23854	Mm.275127	NM_054046	ENSMUSG00000001482	Def8	AI449518|D8Ertd713e|DEF-8	differentially expressed in FDCP 8	protein-coding
Diff_Nuc1258	chr13	28158412	28158551	+	0	NA	Intergenic	Intergenic	50389	NM_011165	19110	Mm.18607	NM_011165	ENSMUSG00000005891	Prl4a1	AA409771|Ghd23|PLP-A|Prlpa	prolactin family 4, subfamily a, member 1	protein-coding
Diff_Nuc40863	chr4	32826422	32826561	+	0	NA	intron (NM_001081392, intron 65 of 101)	intron (NM_001081392, intron 65 of 101)	-60743	NM_175364	108755	Mm.1182	NM_175364	ENSMUSG00000045854	Lyrm2	2610208E05Rik	LYR motif containing 2	protein-coding
Diff_Nuc10492	chr10	12176842	12176981	+	0	NA	intron (NM_011682, intron 59 of 73)	intron (NM_011682, intron 59 of 73)	404622	NM_011682	22288	Mm.331784	NM_011682	ENSMUSG00000019820	Utrn	AA589569|DRP|Dmdl	utrophin	protein-coding
Diff_Nuc50959	chr2	78641772	78641911	+	0	NA	Intergenic	MTB|LTR|MaLR	-67363	NM_009454	22193	Mm.1485	NM_009454	ENSMUSG00000027011	Ube2e3	Ubce4|ubcM2	ubiquitin-conjugating enzyme E2E 3	protein-coding
Diff_Nuc32587	chr6	26043882	26044021	+	0	NA	Intergenic	Lx9|LINE|L1	162525	NR_040771	626904	Mm.126787	NR_040771	ENSMUSG00000106799	Gm20756	-	predicted gene, 20756	ncRNA
Diff_Nuc57278	chr1	133509432	133509571	+	0	NA	TTS (NM_011924)	TTS (NM_011924)	13810	NM_011924	26361	Mm.89986	NM_011924	ENSMUSG00000026432	Avpr1b	AVPR3|V3/V1b|VIBR|VPR3	arginine vasopressin receptor 1B	protein-coding
Diff_Nuc6026	chr12	97127922	97128061	+	0	NA	Intergenic	Lx4A|LINE|L1	157441	NR_103800	69423	Mm.46121	NM_027076		1700019M22Rik	-	NFX-like protein	pseudo
Diff_Nuc5909	chr12	92002222	92002361	+	0	NA	Intergenic	Lx9|LINE|L1	-24814	NM_010050	13371	Mm.21389	NM_010050	ENSMUSG00000007682	Dio2	5DII|AI324267|DIOII	deiodinase, iodothyronine, type II	protein-coding
Diff_Nuc45487	chr3	47013732	47013871	+	0	NA	Intergenic	RMER17D|LTR|ERVK	-309097	NR_105800	102465199		NR_105800	ENSMUSG00000098417	Mir6379	Gm27730|mmu-mir-6379	microRNA 6379	ncRNA
Diff_Nuc35144	chr6	118804522	118804661	+	0	NA	intron (NM_009781, intron 3 of 46)	intron (NM_009781, intron 3 of 46)	-25585	NR_046053	74363	Mm.399403	NR_046053		4931430N09Rik	-	RIKEN cDNA 4931430N09 gene	ncRNA
Diff_Nuc3611	chr13	116334752	116334891	+	0	NA	Intergenic	B3A|SINE|B2	-442649	NM_001033228	109700	Mm.317280	NM_001033228	ENSMUSG00000042284	Itga1	CD49A|E130012M19Rik|Vla1	integrin alpha 1	protein-coding
Diff_Nuc38836	chr5	109909202	109909341	+	0	NA	Intergenic	Intergenic	60239	NM_001104628	384221	Mm.469879	NM_001104628	ENSMUSG00000091879	Vmn2r17	EG384221	vomeronasal 2, receptor 17	protein-coding
Diff_Nuc3002	chr13	95094832	95094971	+	0	NA	Intergenic	ID_B1|SINE|B4	33977	NR_045619	328309	Mm.174191	NM_183205		Gm9776	A530089L17|ENSMUSG00000042857	predicted gene 9776	ncRNA
Diff_Nuc8579	chr11	75791342	75791481	+	0	NA	Intergenic	Intergenic	-22003	NM_198637	74230	Mm.271247	NM_198637	ENSMUSG00000053783	1700016K19Rik	Liat1	RIKEN cDNA 1700016K19 gene	protein-coding
Diff_Nuc4858	chr12	56475282	56475421	+	0	NA	intron (NM_025373, intron 4 of 6)	intron (NM_025373, intron 4 of 6)	-9858	NM_001310583	26443	Mm.30210	NM_011968	ENSMUSG00000021024	Psma6	IOTA	proteasome (prosome, macropain) subunit, alpha type 6	protein-coding
Diff_Nuc52376	chr2	127999202	127999341	+	0	NA	Intergenic	Intergenic	45960	NM_001284410	12125	Mm.141083	NM_009754	ENSMUSG00000027381	Bcl2l11	1500006F24Rik|Bim|Bod|bcl2-L-11	BCL2-like 11 (apoptosis facilitator)	protein-coding
Diff_Nuc64149	chr8	67925962	67926101	+	0	NA	Intergenic	Intergenic	-215908	NM_001293784	72925	Mm.380457	NM_175188	ENSMUSG00000036469	March1	2900024D24Rik|BB085186	membrane-associated ring finger (C3HC4) 1	protein-coding
Diff_Nuc14005	chr17	12612302	12612441	+	0	NA	TTS (NM_008877)	TTS (NM_008877)	40896	NM_008877	18815	Mm.971	NM_008877	ENSMUSG00000059481	Plg	AI649309|Pg	plasminogen	protein-coding
Diff_Nuc6191	chr12	103212177	103212316	+	0	NA	Intergenic	Intergenic	-1938	NM_016856	51786	Mm.716	NM_016856	ENSMUSG00000041781	Cpsf2	100kDa|2610024B04Rik|AI662483|Cpsf|MCPSF|mKIAA1367	cleavage and polyadenylation specific factor 2	protein-coding
Diff_Nuc6705	chr11	3937962	3938101	+	0	NA	intron (NM_146013, intron 2 of 11)	intron (NM_146013, intron 2 of 11)	6246	NM_146013	103655	Mm.337476	NM_146013	ENSMUSG00000019368	Sec14l4	AI256582|AW536553|SPF|TAP	SEC14-like lipid binding 4	protein-coding
Diff_Nuc55079	chr1	51555452	51555591	+	0	NA	Intergenic	RMER15-int|LTR|ERVL	-20278	NM_001310549	109019	Mm.196290	NM_028696	ENSMUSG00000026107	Nabp1	4930434H03Rik|4930442A21Rik|4930488J04Rik|4933440J18Rik|5830411E10Rik|AI852561|Nbp1|Obfc2a|Ssb2	nucleic acid binding protein 1	protein-coding
Diff_Nuc50383	chr2	60643112	60643251	+	0	NA	intron (NM_001141931, intron 2 of 13)	intron (NM_001141931, intron 2 of 13)	76314	NM_001141932	56878	Mm.259667	NM_020296	ENSMUSG00000026970	Rbms1	2600014B10Rik|AI255215|MSSP-1|MSSP-2|MSSP-3|YC1	RNA binding motif, single stranded interacting protein 1	protein-coding
Diff_Nuc60322	chr9	47446112	47446251	+	0	NA	intron (NM_207676, intron 1 of 9)	MER5B|DNA|MER1_type	107746	NM_018770	54725	Mm.234832	NM_018770	ENSMUSG00000032076	Cadm1	2900073G06Rik|3100001I08Rik|AI987920|Bl2|Igsf4|Igsf4a|Necl2|RA175|RA175A|RA175B|RA175C|RA175N|ST17|SgIGSF|SynCam|Tslc1	cell adhesion molecule 1	protein-coding
Diff_Nuc31234	chr7	123389802	123389941	+	0	NA	intron (NM_001305185, intron 3 of 26)	intron (NM_001305185, intron 3 of 26)	-8581	NM_001305186	233765	Mm.3741	NM_172743	ENSMUSG00000045659	Plekha7	A430081P20Rik|AI414265	pleckstrin homology domain containing, family A member 7	protein-coding
Diff_Nuc51837	chr2	110160462	110160601	+	0	NA	Intergenic	Intergenic	-14649	NM_130452	170442	Mm.27335	NM_130452	ENSMUSG00000041660	Bbox1	AI874739	butyrobetaine (gamma), 2-oxoglutarate dioxygenase 1 (gamma-butyrobetaine hydroxylase)	protein-coding
Diff_Nuc52183	chr2	121919502	121919641	+	0	NA	intron (NM_145531, intron 12 of 39)	intron (NM_145531, intron 12 of 39)	24551	NM_145531	214585	Mm.222303	NM_145531	ENSMUSG00000033396	Spg11	6030465E24Rik|A330015I11|C530005A01Rik	spastic paraplegia 11	protein-coding
Diff_Nuc47490	chr3	116038832	116038971	+	0	NA	intron (NM_001173553, intron 5 of 13)	intron (NM_001173553, intron 5 of 13)	-82499	NM_022427	64378	Mm.40025	NM_022427	ENSMUSG00000068696	Gpr88	AW061286|Strg	G-protein coupled receptor 88	protein-coding
Diff_Nuc42578	chr4	98642352	98642491	+	0	NA	intron (NM_026082, intron 30 of 47)	intron (NM_026082, intron 30 of 47)	51920	NM_146144	230484	Mm.371692	NM_146144	ENSMUSG00000028560	Usp1	-	ubiquitin specific peptidase 1	protein-coding
Diff_Nuc9472	chr11	100926632	100926771	+	0	NA	Intergenic	Intergenic	-4707	NM_013792	27419	Mm.95452	NM_013792	ENSMUSG00000001751	Naglu	-	alpha-N-acetylglucosaminidase (Sanfilippo disease IIIB)	protein-coding
Diff_Nuc11839	chr10	62404852	62404991	+	0	NA	intron (NM_175194, intron 7 of 8)	MTB_Mm|LTR|MaLR	-4856	NM_177372	327762	Mm.21492	NM_177372	ENSMUSG00000036875	Dna2	Dna2l|E130315B21Rik	DNA replication helicase/nuclease 2	protein-coding
Diff_Nuc5013	chr12	62667942	62668081	+	0	NA	intron (NM_001310586, intron 1 of 5)	intron (NM_001310586, intron 1 of 5)	43857	NM_001310586	238205	Mm.28802	NM_178714	ENSMUSG00000035653	Lrfn5	AI427653|AI604817|C130061B21|mKIAA4208	leucine rich repeat and fibronectin type III domain containing 5	protein-coding
Diff_Nuc21009	chr15	86189852	86189991	+	0	NA	intron (NM_145476, intron 9 of 12)	intron (NM_145476, intron 9 of 12)	145032	NM_145476	223754	Mm.28904	NM_145476	ENSMUSG00000051864	Tbc1d22a	BC023106|D15Ertd781e	TBC1 domain family, member 22a	protein-coding
Diff_Nuc15672	chr17	74149682	74149821	+	0	NA	Intergenic	Intergenic	-4430	NM_020578	57440	Mm.18526	NM_020578	ENSMUSG00000024065	Ehd3	Ehd2	EH-domain containing 3	protein-coding
Diff_Nuc58005	chr1	157572542	157572681	+	0	NA	intron (NM_010712, intron 1 of 5)	intron (NM_010712, intron 1 of 5)	16546	NM_010712	16872	Mm.103624	NM_010712	ENSMUSG00000026468	Lhx4	A330062J17Rik|Gsh-4|Gsh4	LIM homeobox protein 4	protein-coding
Diff_Nuc43326	chr4	120860062	120860201	+	0	NA	intron (NM_001346660, intron 3 of 7)	intron (NM_001346660, intron 3 of 7)	27558	NM_001346660	109263	Mm.215745	NM_001081013	ENSMUSG00000049878	Rlf	9230110M18Rik|AI195322|MommeD8	rearranged L-myc fusion sequence	protein-coding
Diff_Nuc33009	chr6	39261182	39261321	+	0	NA	Intergenic	B2_Mm1a|SINE|B2	66455	NM_028123	72144	Mm.482167	NM_028123	ENSMUSG00000029924	Slc37a3	2610507O21Rik|AU044904	solute carrier family 37 (glycerol-3-phosphate transporter), member 3	protein-coding
Diff_Nuc28224	chr18	77231462	77231601	+	0	NA	TTS (NM_027721)	TTS (NM_027721)	48374	NM_001039201	76987	Mm.236127	NM_029826	ENSMUSG00000025421	Hdhd2	0610039H12Rik|3110052N05Rik	haloacid dehalogenase-like hydrolase domain containing 2	protein-coding
Diff_Nuc53121	chr2	152531032	152531171	+	0	NA	3' UTR (NM_001159551, exon 13 of 13)	3' UTR (NM_001159551, exon 13 of 13)	18217	NM_025543	66405	Mm.440291	NM_025543	ENSMUSG00000042814	Mcts2	2400002F11Rik|MCT-2	malignant T cell amplified sequence 2	protein-coding
Diff_Nuc32884	chr6	35381802	35381941	+	0	NA	Intergenic	Intergenic	101025	NR_040526	73409	Mm.69443	NR_040526	ENSMUSG00000107341	1700065J11Rik	-	RIKEN cDNA 1700065J11 gene	ncRNA
Diff_Nuc28919	chr7	26744332	26744471	+	0	NA	Intergenic	Lx|LINE|L1	61724	NM_009999	13088	Mm.218749	NM_009999	ENSMUSG00000030483	Cyp2b10	Cyp2b|Cyp2b20|p16	cytochrome P450, family 2, subfamily b, polypeptide 10	protein-coding
Diff_Nuc29899	chr7	74884842	74884981	+	0	NA	intron (NM_207663, intron 2 of 4)	intron (NM_207663, intron 2 of 4)	19717	NM_183312	233335	Mm.60526	NM_183312	ENSMUSG00000030554	Synm	4930412K21Rik|AI852401|Dmn|E130104F11|Syn|Synemin	synemin, intermediate filament protein	protein-coding
Diff_Nuc14394	chr17	27076012	27076151	+	0	NA	intron (NM_026948, intron 1 of 5)	intron (NM_026948, intron 1 of 5)	322	NR_104458	67675	Mm.439919	NM_026307	ENSMUSG00000024194	Cuta	0610039D01Rik|1810022E02Rik|1810060C03Rik|2700094G22Rik|AI326454	cutA divalent cation tolerance homolog	protein-coding
Diff_Nuc17595	chr16	46589532	46589671	+	0	NA	Intergenic	Lx8|LINE|L1	-92521	NM_021497	58998	Mm.40477	NM_021495	ENSMUSG00000022656	Nectin3	2610301B19Rik|3000002N23Rik|4921513D19Rik|AA407785|AU016832|AW538082|CD113|Pvrl3	nectin cell adhesion molecule 3	protein-coding
Diff_Nuc22002	chr14	28159912	28160051	+	0	NA	intron (NM_001289687, intron 1 of 9)	intron (NM_001289687, intron 1 of 9)	10758	NM_001289687	71704	Mm.248606	NM_027871	ENSMUSG00000021895	Arhgef3	1200004I24Rik|9830169H03Rik|C76747|Xpln	Rho guanine nucleotide exchange factor (GEF) 3	protein-coding
Diff_Nuc54415	chr1	23379882	23380021	+	0	NA	intron (NM_001081079, intron 6 of 6)	intron (NM_001081079, intron 6 of 6)	10063	NM_001081079	70155	Mm.28013	NM_001081079	ENSMUSG00000026158	Ogfrl1	2210417C17Rik	opioid growth factor receptor-like 1	protein-coding
Diff_Nuc54189	chr1	14295322	14295461	+	0	NA	intron (NM_010164, intron 1 of 17)	intron (NM_010164, intron 1 of 17)	4889	NM_001310459	14048	Mm.250185	NM_010164	ENSMUSG00000025932	Eya1	bor	EYA transcriptional coactivator and phosphatase 1	protein-coding
Diff_Nuc35755	chr6	140634272	140634411	+	0	NA	Intergenic	RSINE1|SINE|B4	58935	NM_001309436	11569	Mm.86453	NM_009637	ENSMUSG00000030232	Aebp2	AU023766|B230313N05Rik	AE binding protein 2	protein-coding
Diff_Nuc47844	chr3	126746052	126746191	+	0	NA	intron (NM_001327938, intron 9 of 47)	intron (NM_001327938, intron 9 of 47)	-44751	NM_178655	109676	Mm.220242	NM_178655	ENSMUSG00000032826	Ank2	100043364|AI835472|AW491075|Ank-2|Gm4392	ankyrin 2, brain	protein-coding
Diff_Nuc21187	chr15	94561522	94561661	+	0	NA	intron (NM_178789, intron 3 of 7)	intron (NM_178789, intron 3 of 7)	101975	NM_178789	320709	Mm.74873	NM_178789	ENSMUSG00000063296	Tmem117	B930062P21Rik	transmembrane protein 117	protein-coding
Diff_Nuc15295	chr17	59049152	59049291	+	0	NA	intron (NM_027001, intron 8 of 12)	RCHARR1|DNA|MER1_type	81577	NM_027001	69239	Mm.246732	NM_027001	ENSMUSG00000024227	Pdzph1	2610034M16Rik|AV114557	PDZ and pleckstrin homology domains 1	protein-coding
Diff_Nuc52859	chr2	143839272	143839411	+	0	NA	Intergenic	MER2|DNA|MER2_type	-2342	NM_024281	81910	Mm.13705	NM_024281	ENSMUSG00000027422	Rrbp1	1700087N07Rik|5730465C04Rik|ES/130|mKIAA1398|mRRp0|mRRp1.8|mRRp10|mRRp15a|mRRp15b|mRRp16.8|mRRp2|mRRp41|mRRp47|mRRp5.4|p180	ribosome binding protein 1	protein-coding
Diff_Nuc35292	chr6	122109382	122109521	+	0	NA	Intergenic	Intergenic	-16620	NR_027619	17835	Mm.422976	NR_027619	ENSMUSG00000101397	Mug-ps1	Mug3	murinoglobulin, pseudogene 1	pseudo
Diff_Nuc31243	chr7	123533232	123533371	+	0	NA	intron (NM_011083, intron 6 of 32)	intron (NM_011083, intron 6 of 32)	53671	NM_011083	18704	Mm.3810	NM_011083	ENSMUSG00000030660	Pik3c2a	Cpk-m|PI3KC2	phosphatidylinositol 3-kinase, C2 domain containing, alpha polypeptide	protein-coding
Diff_Nuc64996	chr8	97311992	97312131	+	0	NA	Intergenic	Intergenic	15981	NM_009142	20312	Mm.103711	NM_009142	ENSMUSG00000031778	Cx3cl1	AB030188|ABCD-3|AI848747|CX3C|Cxc3|D8Bwg0439e|Scyd1	chemokine (C-X3-C motif) ligand 1	protein-coding
Diff_Nuc13506	chr10	120911812	120911951	+	0	NA	intron (NM_138956, intron 1 of 4)	intron (NM_138956, intron 1 of 4)	1425	NM_138956	192678	Mm.41265	NM_138956	ENSMUSG00000025795	Rassf3	AW212023|AW322379	Ras association (RalGDS/AF-6) domain family member 3	protein-coding
Diff_Nuc20754	chr15	79906862	79907001	+	0	NA	Intergenic	Intergenic	2078	NR_028282	100302601		NR_028282	ENSMUSG00000077734	Snord83b	MBII-10	small nucleolar RNA, C/D box 83B	snoRNA
Diff_Nuc19712	chr15	37960852	37960991	+	0	NA	intron (NM_001112721, intron 9 of 58)	intron (NM_001112721, intron 9 of 58)	47688	NM_001112721	70790	Mm.476840	NM_027553	ENSMUSG00000037487	Ubr5	Edd|Edd1	ubiquitin protein ligase E3 component n-recognin 5	protein-coding
Diff_Nuc24122	chr14	107918332	107918471	+	0	NA	Intergenic	Intergenic	-1032664	NR_045938	73631	Mm.48862	NR_045938	ENSMUSG00000099794	1700128A07Rik	-	RIKEN cDNA 1700128A07 gene	ncRNA
Diff_Nuc65574	chr8	118354392	118354531	+	0	NA	Intergenic	Intergenic	-123667	NM_001025577	17132	Mm.275549	NM_001025577	ENSMUSG00000055435	Maf	2810401A20Rik|A230108G15Rik|AW047063|c-maf	avian musculoaponeurotic fibrosarcoma oncogene homolog	protein-coding
Diff_Nuc14599	chr17	32638412	32638551	+	0	NA	Intergenic	MTEa-int|LTR|MaLR	-4926	NM_001101445	208285	Mm.311422	NM_001101445	ENSMUSG00000091586	Cyp4f17	EG208285	cytochrome P450, family 4, subfamily f, polypeptide 17	protein-coding
Diff_Nuc57189	chr1	130146477	130146616	+	0	NA	intron (NM_026390, intron 1 of 12)	intron (NM_026390, intron 1 of 12)	5788	NM_026390	67812	Mm.293321	NM_026390	ENSMUSG00000026353	Ubxn4	1300013G12Rik|Ubxd2|mKIAA0242	UBX domain protein 4	protein-coding
Diff_Nuc48883	chr2	6958272	6958411	+	0	NA	intron (NM_001110231, intron 3 of 15)	intron (NM_001110231, intron 3 of 15)	44007	NM_001110230	14007	Mm.398543	NM_010160	ENSMUSG00000002107	Celf2	B230218O03|B230345P09Rik|C88023|CELF-2|CUG-BP2|Cugbp2|D230046B21Rik|Etr-3|Napor|Napor-2|mETR-3	CUGBP, Elav-like family member 2	protein-coding
Diff_Nuc45947	chr3	63111282	63111421	+	0	NA	intron (NM_001289463, intron 3 of 22)	intron (NM_001289463, intron 3 of 22)	11334	NM_001289463	17380	Mm.296022	NM_008604	ENSMUSG00000027820	Mme	6030454K05Rik|C85356|CALLA|CD10|NEP|SFE	membrane metallo endopeptidase	protein-coding
Diff_Nuc62204	chr9	111049982	111050121	+	0	NA	intron (NM_027742, intron 3 of 13)	intron (NM_027742, intron 3 of 13)	29436	NM_001164838	71268	Mm.302287	NM_027742	ENSMUSG00000032497	Lrrfip2	5133400F20Rik|AI850587	leucine rich repeat (in FLII) interacting protein 2	protein-coding
Diff_Nuc48463	chr3	148466832	148466971	+	0	NA	Intergenic	MTD|LTR|MaLR	150698	NM_001081298	99633	Mm.9776	NM_001081298	ENSMUSG00000028184	Adgrl2	AI450192|CIRL-2|Gm619|Lec1|Lphh1|Lphn2|mKIAA0786	adhesion G protein-coupled receptor L2	protein-coding
Diff_Nuc59589	chr9	17462332	17462471	+	0	NA	Intergenic	Intergenic	-634310	NM_025844	66917	Mm.103534	NM_025844	ENSMUSG00000001774	Chordc1	1110001O09Rik|AA409036|Chp-1|morgana	cysteine and histidine-rich domain (CHORD)-containing, zinc-binding protein 1	protein-coding
Diff_Nuc3179	chr13	101255472	101255611	+	0	NA	intron (NM_022011, intron 7 of 15)	intron (NM_022011, intron 7 of 15)	7023	NM_022011	23894	Mm.272533	NM_022011	ENSMUSG00000021639	Gtf2h2	44kDa|BTF2 p44|BTF2-p44|Btf2p44|p44	general transcription factor II H, polypeptide 2	protein-coding
Diff_Nuc35626	chr6	135026632	135026771	+	0	NA	intron (NM_181444, intron 1 of 3)	RMER13B|LTR|ERVK	11021	NM_181444	232431	Mm.23575	NM_181444	ENSMUSG00000046733	Gprc5a	Rai3|Raig1	G protein-coupled receptor, family C, group 5, member A	protein-coding
Diff_Nuc1478	chr13	35596902	35597041	+	0	NA	Intergenic	Intergenic	-154760	NM_009881	12593	Mm.29002	NM_009881	ENSMUSG00000059288	Cdyl	AI325931	chromodomain protein, Y chromosome-like	protein-coding
Diff_Nuc17025	chr16	29653682	29653821	+	0	NA	3' UTR (NM_001199177, exon 30 of 30)	3' UTR (NM_001199177, exon 30 of 30)	74331	NM_001199177	74143	Mm.274285	NM_133752	ENSMUSG00000038084	Opa1	1200011N24Rik|AI225888|AI847218|lilr3|mKIAA0567	OPA1, mitochondrial dynamin like GTPase	protein-coding
Diff_Nuc21195	chr15	95224162	95224301	+	0	NA	intron (NM_001289653, intron 10 of 20)	intron (NM_001289653, intron 10 of 20)	134452	NM_001289653	54003	Mm.3959	NM_016743	ENSMUSG00000022454	Nell2	A330108N19Rik|R75516|mel91	NEL-like 2	protein-coding
Diff_Nuc27380	chr18	46394572	46394711	+	0	NA	Intergenic	Intergenic	-22380	NM_178872	28105	Mm.277382	NM_178872	ENSMUSG00000033949	Trim36	D18Wsu100e|haprin	tripartite motif-containing 36	protein-coding
Diff_Nuc10965	chr10	28817472	28817611	+	0	NA	Intergenic	Lx2|LINE|L1	-46261	NM_026138	67412	Mm.390264	NM_026138	ENSMUSG00000038916	Soga3	6330407J23Rik	SOGA family member 3	protein-coding
Diff_Nuc2688	chr13	81451582	81451721	+	0	NA	intron (NM_054053, intron 83 of 89)	intron (NM_054053, intron 83 of 89)	320492	NM_054053	110789	Mm.288694	NM_054053	ENSMUSG00000069170	Adgrv1	Frings|Gpr98|Mass1|Mgr1|VLGR1	adhesion G protein-coupled receptor V1	protein-coding
Diff_Nuc25696	chr19	42066637	42066776	+	0	NA	intron (NM_145500, intron 1 of 2)	intron (NM_145500, intron 1 of 2)	10453	NM_145500	226122	Mm.22948	NM_145500	ENSMUSG00000025171	Ubtd1	BC016129	ubiquitin domain containing 1	protein-coding
Diff_Nuc9126	chr11	90116092	90116231	+	0	NA	intron (NM_026178, intron 1 of 6)	intron (NM_026178, intron 1 of 6)	5371	NM_026178	67468	Mm.277518	NM_026178	ENSMUSG00000003948	Mmd	1200017E07Rik|1810073C06Rik|AA690185	monocyte to macrophage differentiation-associated	protein-coding
Diff_Nuc51387	chr2	94032412	94032551	+	0	NA	Intergenic	Intergenic	-34415	NM_019657	56348	Mm.22505	NM_019657	ENSMUSG00000027195	Hsd17b12	2610510O05Rik|AI172963|KIK-I|Kik1	hydroxysteroid (17-beta) dehydrogenase 12	protein-coding
Diff_Nuc37123	chr5	44976312	44976451	+	0	NA	intron (NM_001347349, intron 2 of 7)	intron (NM_001347349, intron 2 of 7)	214604	NM_001347349	16826	Mm.25785	NM_010698	ENSMUSG00000039706	Ldb2	AI035351|AW146358|CLIM1|CLP-36|Ldb3	LIM domain binding 2	protein-coding
Diff_Nuc14607	chr17	32905952	32906091	+	0	NA	3' UTR (NM_172458, exon 4 of 4)	3' UTR (NM_172458, exon 4 of 4)	18471	NM_001346705	208292	Mm.38813	NM_172458	ENSMUSG00000024298	Zfp871	4732483N19|9030612M13Rik|AI118577|AI265322|mKIAA3006	zinc finger protein 871	protein-coding
Diff_Nuc42899	chr4	107569802	107569941	+	0	NA	3' UTR (NM_028754, exon 7 of 7)	3' UTR (NM_028754, exon 7 of 7)	7367	NM_028754	74098	Mm.274853	NM_028754	ENSMUSG00000028608	0610037L13Rik	1110008H16Rik	RIKEN cDNA 0610037L13 gene	protein-coding
Diff_Nuc31248	chr7	123915902	123916041	+	0	NA	Intergenic	MTA_Mm|LTR|MaLR	268088	NM_001130479	53322	Mm.9901	NM_016773	ENSMUSG00000030659	Nucb2	AI607786|Calnuc|Nefa|Nesfatin-1	nucleobindin 2	protein-coding
Diff_Nuc12403	chr10	82265462	82265601	+	0	NA	Intergenic	Intergenic	-9337	NR_038042	70003	Mm.48789	NR_038042	ENSMUSG00000056821	1700028I16Rik	-	RIKEN cDNA 1700028I16 gene	ncRNA
Diff_Nuc26615	chr18	15760702	15760841	+	0	NA	intron (NM_199055, intron 2 of 3)	IAPLTR1a_Mm|LTR|ERVK	115784	NM_199055	71367	Mm.329304	NM_199055	ENSMUSG00000047161	Chst9	5430438D01Rik	carbohydrate (N-acetylgalactosamine 4-0) sulfotransferase 9	protein-coding
Diff_Nuc48497	chr3	149343862	149344001	+	0	NA	Intergenic	Intergenic	406230	NR_040591	381482	Mm.393866	NR_040591		Gm1653	-	predicted gene 1653	ncRNA
Diff_Nuc53511	chr2	164467022	164467161	+	0	NA	Intergenic	Intergenic	-2789	NM_001012723	277345	Mm.247244	NM_001012723	ENSMUSG00000070530	Wfdc16	BC043944|WAP16	WAP four-disulfide core domain 16	protein-coding
Diff_Nuc49347	chr2	25814532	25814671	+	0	NA	intron (NM_001276361, intron 3 of 17)	intron (NM_001276361, intron 3 of 17)	24201	NM_001276360	227634	Mm.36834	NM_001115076	ENSMUSG00000026933	Camsap1	9530003A05Rik|C77823|PRO2405	calmodulin regulated spectrin-associated protein 1	protein-coding
Diff_Nuc37822	chr5	73631742	73631881	+	0	NA	intron (NM_028194, intron 1 of 62)	intron (NM_028194, intron 1 of 62)	16046	NM_028194	72313	Mm.260594	NM_028194	ENSMUSG00000070733	Fryl	2010313D22Rik|2310004H21Rik|2510002A14Rik|9030227G01Rik|mKIAA0826	FRY like transcription coactivator	protein-coding
Diff_Nuc24507	chr14	124017452	124017591	+	0	NA	intron (NM_177393, intron 1 of 43)	intron (NM_177393, intron 1 of 43)	8845	NM_177393	338370	Mm.255348	NM_177393	ENSMUSG00000000197	Nalcn	A530023G15Rik|AI849508|Vgcnl1	sodium leak channel, non-selective	protein-coding
Diff_Nuc54959	chr1	45904262	45904401	+	0	NA	Intergenic	L1_Mur3|LINE|L1	51985	NM_028599	73674	Mm.270376	NM_028599	ENSMUSG00000025995	Wdr75	1300003A18Rik|2410118I19Rik|C77608	WD repeat domain 75	protein-coding
Diff_Nuc35100	chr6	117238522	117238661	+	0	NA	Intergenic	Intergenic	120038	NM_021704	20315	Mm.303231	NM_013655	ENSMUSG00000061353	Cxcl12	Pbsf|Scyb12|Sdf1|Tlsf|Tpar1	chemokine (C-X-C motif) ligand 12	protein-coding
Diff_Nuc27567	chr18	54460792	54460931	+	0	NA	Intergenic	Intergenic	-121088	NR_040338	77433	Mm.159919	NR_040338		Redrum	9430076G02Rik	Redrum, erythroid developmental long intergenic non-protein coding transcript	ncRNA
Diff_Nuc46154	chr3	71814927	71815066	+	0	NA	Intergenic	Lx3C|LINE|L1	955792	NM_001081137	69983	Mm.261054	NM_001081137	ENSMUSG00000027790	Sis	2010204N08Rik|SI|Si-s	sucrase isomaltase (alpha-glucosidase)	protein-coding
Diff_Nuc11812	chr10	61783602	61783741	+	0	NA	intron (NM_010438, intron 4 of 21)	intron (NM_010438, intron 4 of 21)	19498	NM_001146100	15275	Mm.196605	NM_010438	ENSMUSG00000037012	Hk1	BB404130|Hk-1|Hk1-s|dea|mHk1-s	hexokinase 1	protein-coding
Diff_Nuc64075	chr8	64797422	64797561	+	0	NA	Intergenic	L1_Mur2|LINE|L1	-195501	NM_011922	26359	Mm.42179	NM_011922	ENSMUSG00000031635	Anxa10	-	annexin A10	protein-coding
Diff_Nuc6098	chr12	100582542	100582681	+	0	NA	intron (NM_183186, intron 2 of 5)	intron (NM_183186, intron 2 of 5)	105673	NM_183186	71375	Mm.341972	NM_183186	ENSMUSG00000033713	Foxn3	5430426H20Rik|AA589593|AW556347|Ches1|Ches1l|HTLFL1	forkhead box N3	protein-coding
Diff_Nuc62074	chr9	107936552	107936691	+	0	NA	intron (NM_013785, intron 3 of 5)	RLTR19-int|LTR|ERVK	-15000	NM_177910	331026	Mm.22554	NM_177910	ENSMUSG00000070284	Gmppb	AI317178|E430010H19	GDP-mannose pyrophosphorylase B	protein-coding
Diff_Nuc32769	chr6	31137932	31138071	+	0	NA	intron (NR_110470, intron 1 of 2)	B4|SINE|B4	30473	NR_110470	232685	Mm.443019	NM_144555	ENSMUSG00000044471	Lncpint	Lincpint|MNCb-1768|Pint|linc-Pint	long non-protein coding RNA, Trp53 induced transcript	ncRNA
Diff_Nuc12005	chr10	68255172	68255311	+	0	NA	Intergenic	Intergenic	68747	NM_177794	327766	Mm.2479	NM_177794	ENSMUSG00000060044	Tmem26	3230401A06|AI195372	transmembrane protein 26	protein-coding
Diff_Nuc58971	chr1	187159952	187160091	+	0	NA	intron (NM_001347212, intron 1 of 7)	B1_Mus2|SINE|Alu	3983	NM_001347210	23827	Mm.227549	NM_011794	ENSMUSG00000026617	Bpnt1	BPntase	bisphosphate 3'-nucleotidase 1	protein-coding
Diff_Nuc55337	chr1	59239152	59239291	+	0	NA	intron (NM_028717, intron 21 of 33)	ID_B1|SINE|B4	-18988	NM_001164682	227157	Mm.474049	NM_145143	ENSMUSG00000079550	Mpp4	Dlg6	membrane protein, palmitoylated 4 (MAGUK p55 subfamily member 4)	protein-coding
Diff_Nuc27549	chr18	53986092	53986231	+	0	NA	Intergenic	MTB|LTR|MaLR	-35606	NM_152809	70425	Mm.368668	NM_152809	ENSMUSG00000073563	Csnk1g3	3300002K07Rik|C330049O21Rik	casein kinase 1, gamma 3	protein-coding
Diff_Nuc61701	chr9	93833392	93833531	+	0	NA	Intergenic	(TTCC)n|Simple_repeat|Simple_repeat	605039	NM_001033145	68861	Mm.258746	NM_001033145	ENSMUSG00000045414	1190002N15Rik	GoPro49|HASF	RIKEN cDNA 1190002N15 gene	protein-coding
Diff_Nuc58727	chr1	179833402	179833541	+	0	NA	Intergenic	RLTR11A|LTR|ERVK	-88095	NM_001034899	545391	Mm.442974	NM_001034899	ENSMUSG00000091476	Gm16432	EG545391|EG666250	predicted gene 16432	protein-coding
Diff_Nuc53866	chr2	180522032	180522171	+	0	NA	Intergenic	Intergenic	-10496	NM_080641	140489	Mm.134062	NM_080641	ENSMUSG00000045493	Bhlhe23	A930001L02Rik|BETA4|Beta3b|Bhlhb4	basic helix-loop-helix family, member e23	protein-coding
Diff_Nuc2439	chr13	70730272	70730411	+	0	NA	intron (NM_144837, intron 18 of 18)	intron (NM_144837, intron 18 of 18)	18222	NR_045934	73584	Mm.442491	NR_045934	ENSMUSG00000101051	1700100L14Rik	-	RIKEN cDNA 1700100L14 gene	ncRNA
Diff_Nuc10819	chr10	23569922	23570061	+	0	NA	Intergenic	Lx5|LINE|L1	-1277	NM_011979	26464	Mm.27334	NM_011979	ENSMUSG00000020010	Vnn3	-	vanin 3	protein-coding
Diff_Nuc37323	chr5	53238712	53238851	+	0	NA	intron (NM_024213, intron 10 of 27)	intron (NM_024213, intron 10 of 27)	13407	NM_024213	52206	Mm.272568	NM_024213	ENSMUSG00000029176	Anapc4	2610306D21Rik|APC4|D5Ertd249e	anaphase promoting complex subunit 4	protein-coding
Diff_Nuc56655	chr1	107960532	107960671	+	0	NA	Intergenic	Intergenic	73618	NM_001122675	227449	Mm.210188	NM_001122675	ENSMUSG00000038866	Zcchc2	9930114B20Rik|AW212015	zinc finger, CCHC domain containing 2	protein-coding
Diff_Nuc34718	chr6	101861082	101861221	+	0	NA	Intergenic	Lx5|LINE|L1	136908	NR_027989	207157	Mm.57632	NM_177579	ENSMUSG00000052236	Gm9871	0610005I04|EG207157|ENSMUSG00000052236	predicted gene 9871	ncRNA
Diff_Nuc31278	chr7	125461902	125462041	+	0	NA	Intergenic	MLT1K|LTR|MaLR	74550	NR_027879	67745	Mm.483404	NM_183267	ENSMUSG00000055159	4930583K01Rik	-	RIKEN cDNA 4930583K01 gene	ncRNA
Diff_Nuc21797	chr14	21395752	21395891	+	0	NA	exon (NM_030180, exon 13 of 21)	exon (NM_030180, exon 13 of 21)	-30026	NM_008914	19056	Mm.274432	NM_008914	ENSMUSG00000021816	Ppp3cb	1110063J16Rik|Calnb|CnAbeta|Cnab	protein phosphatase 3, catalytic subunit, beta isoform	protein-coding
Diff_Nuc45903	chr3	61388462	61388601	+	0	NA	Intergenic	Intergenic	220102	NM_028712	74012	Mm.422674	NM_028712	ENSMUSG00000036894	Rap2b	4021402C18Rik|AA408554	RAP2B, member of RAS oncogene family	protein-coding
Diff_Nuc37080	chr5	43903982	43904121	+	0	NA	Intergenic	Intergenic	-2757	NM_001135172	109323	Mm.275553	NM_175425	ENSMUSG00000061535	C1qtnf7	5530401N20Rik|8430425G24Rik|Ctrp7	C1q and tumor necrosis factor related protein 7	protein-coding
Diff_Nuc12213	chr10	76673072	76673211	+	0	NA	Intergenic	RMER17C|LTR|ERVK	-43866	NM_009929	12822	Mm.4352	NM_009929	ENSMUSG00000001435	Col18a1	-	collagen, type XVIII, alpha 1	protein-coding
Diff_Nuc53359	chr2	157973012	157973151	+	0	NA	promoter-TSS (NM_009373)	promoter-TSS (NM_009373)	-953	NM_009373	21817	Mm.330731	NM_009373	ENSMUSG00000037820	Tgm2	G[a]h|TG2|TGase2|tTG|tTGas	transglutaminase 2, C polypeptide	protein-coding
Diff_Nuc50590	chr2	67772522	67772661	+	0	NA	Intergenic	B1_Mus1|SINE|Alu	153491	NR_105752	102466627		NR_105752	ENSMUSG00000098734	Mir6335	Gm27836|mmu-mir-6335	microRNA 6335	ncRNA
Diff_Nuc7938	chr11	54359922	54360061	+	0	NA	intron (NM_001252494, intron 3 of 28)	intron (NM_001252494, intron 3 of 28)	23644	NM_001252496	192786	Mm.254404	NM_175258	ENSMUSG00000037533	Rapgef6	A530068K01|AI844632|BB085664|C030018K18Rik|PDZ-GEF2|Pdzgef2|RA-GEF-2|Ragef2|mKIAA4052	Rap guanine nucleotide exchange factor (GEF) 6	protein-coding
Diff_Nuc24336	chr14	117796182	117796321	+	0	NA	intron (NM_001079844, intron 2 of 9)	intron (NM_001079844, intron 2 of 9)	471732	NM_011821	23888	Mm.440025	NM_011821	ENSMUSG00000058571	Gpc6	-	glypican 6	protein-coding
Diff_Nuc40509	chr4	16555812	16555951	+	0	NA	Intergenic	Lx9|LINE|L1	464624	NR_045765	100415915	Mm.387180	NR_045765	ENSMUSG00000085112	A530072M11Rik	-	RIKEN cDNA gene A530072M11	ncRNA
Diff_Nuc22055	chr14	29798792	29798931	+	0	NA	intron (NM_009785, intron 27 of 37)	intron (NM_009785, intron 27 of 37)	-32533	NM_176920	319476	Mm.95780	NM_176920	ENSMUSG00000045776	Lrtm1	A930016D02Rik	leucine-rich repeats and transmembrane domains 1	protein-coding
Diff_Nuc59732	chr9	22031132	22031271	+	0	NA	intron (NM_001164624, intron 1 of 4)	RLTR1|LTR|ERV1	1045	NM_001164624	235047	Mm.290849	NM_172763	ENSMUSG00000057982	Zfp809	BB114266|C330026E23	zinc finger protein 809	protein-coding
Diff_Nuc53607	chr2	167690782	167690921	+	0	NA	Intergenic	PB1|SINE|Alu	-66976	NM_011201	19246	Mm.277916	NM_011201	ENSMUSG00000027540	Ptpn1	PTP-1B|PTP-HA2|PTP1B	protein tyrosine phosphatase, non-receptor type 1	protein-coding
Diff_Nuc50456	chr2	63028112	63028251	+	0	NA	Intergenic	Intergenic	-5837	NM_133207	170738	Mm.242532	NM_133207	ENSMUSG00000059742	Kcnh7	9330137I11Rik|Kv11.3|erg3	potassium voltage-gated channel, subfamily H (eag-related), member 7	protein-coding
Diff_Nuc50946	chr2	78014272	78014411	+	0	NA	intron (NR_108098, intron 2 of 6)	Lx8|LINE|L1	-63363	NM_177843	329436	Mm.235448	NM_177843		Gm14461	A830093M07|OTTMUSG00000016703	predicted gene 14461	protein-coding
Diff_Nuc45616	chr3	52482632	52482771	+	0	NA	Intergenic	Lx7|LINE|L1	-60945	NR_038079	329639	Mm.131245	NR_038079	ENSMUSG00000102785	Gm2447	100039832|A530017F20	predicted gene 2447	ncRNA
Diff_Nuc21311	chr15	98787452	98787591	+	0	NA	Intergenic	B1_Mur4|SINE|Alu	-3589	NM_011653	22142	Mm.405359	NM_011653	ENSMUSG00000072235	Tuba1a	Tuba-1|Tuba1	tubulin, alpha 1A	protein-coding
Diff_Nuc47335	chr3	109289902	109290041	+	0	NA	intron (NM_020505, intron 2 of 26)	intron (NM_020505, intron 2 of 26)	-86954	NM_146139	57257	Mm.282257	NM_020505	ENSMUSG00000033721	Vav3	A530094I06Rik|AA986410|Idd18.1	vav 3 oncogene	protein-coding
Diff_Nuc4798	chr12	54190182	54190321	+	0	NA	intron (NM_198111, intron 11 of 13)	intron (NM_198111, intron 11 of 13)	-159413	NM_013780	27386	Mm.247044	NM_013780	ENSMUSG00000021010	Npas3	4930423H22Rik|bHLHe12	neuronal PAS domain protein 3	protein-coding
Diff_Nuc60592	chr9	57008942	57009081	+	0	NA	Intergenic	Intergenic	-2905	NM_025417	66199	Mm.41687	NM_025417	ENSMUSG00000032299	Commd4	1110039H05Rik	COMM domain containing 4	protein-coding
Diff_Nuc24850	chr19	10919682	10919821	+	0	NA	intron (NM_023044, intron 1 of 7)	B1_Mus1|SINE|Alu	2717	NM_023044	65221	Mm.27387	NM_023044	ENSMUSG00000024737	Slc15a3	Ci1|cI-1	solute carrier family 15, member 3	protein-coding
Diff_Nuc37804	chr5	73169692	73169831	+	0	NA	intron (NM_001113461, intron 8 of 17)	intron (NM_001113461, intron 8 of 17)	-25745	NM_001122754	22165	Mm.3264	NM_013698	ENSMUSG00000054892	Txk	A130089B16Rik|Btkl|PTK-RL-18|PTK4|Rlk	TXK tyrosine kinase	protein-coding
Diff_Nuc279	chrX	81490632	81490771	+	0	NA	intron (NM_007868, intron 44 of 78)	L1Md_F2|LINE|L1	-757438	NM_021898	100502723	Mm.383210	NM_021898	ENSMUSG00000035522	Tsga8	Halap-X|Halapx	testis specific gene A8	protein-coding
Diff_Nuc35636	chr6	135477422	135477561	+	0	NA	Intergenic	Intergenic	-131440	NR_126088	75024	Mm.399147	NR_126088	ENSMUSG00000107396	4930425L21Rik	4930473P14Rik	RIKEN cDNA 4930425L21 gene	ncRNA
Diff_Nuc19365	chr15	24800992	24801131	+	0	NA	Intergenic	B1_Mur1|SINE|Alu	542458	NM_027395	70350	Mm.29586	NM_027395	ENSMUSG00000045763	Basp1	2610024P12Rik|CAP-23|CAP23|Ckap3|NAP-22|NAP22	brain abundant, membrane attached signal protein 1	protein-coding
Diff_Nuc56589	chr1	105649062	105649201	+	0	NA	Intergenic	Intergenic	-1016265	NM_011800	23836	Mm.103640	NM_011800	ENSMUSG00000050840	Cdh20	Cdh7	cadherin 20	protein-coding
Diff_Nuc26765	chr18	23940622	23940761	+	0	NA	intron (NM_001162941, intron 2 of 7)	intron (NM_001162941, intron 2 of 7)	-7201	NR_105778	102465185		NR_105778	ENSMUSG00000098607	Mir6360	Gm27296|mmu-mir-6360	microRNA 6360	ncRNA
Diff_Nuc4493	chr12	40764652	40764791	+	0	NA	promoter-TSS (NM_007487)	promoter-TSS (NM_007487)	-147	NM_001039515	11861	Mm.12723	NM_007487	ENSMUSG00000047446	Arl4a	AI467555|Arl4	ADP-ribosylation factor-like 4A	protein-coding
Diff_Nuc62102	chr9	108377682	108377821	+	0	NA	Intergenic	Intergenic	-4442	NM_008483	16779	Mm.27560	NM_008483	ENSMUSG00000052911	Lamb2	AW211941|Lamb-2|Lams|npht	laminin, beta 2	protein-coding
Diff_Nuc31269	chr7	125266452	125266591	+	0	NA	intron (NM_019419, intron 3 of 5)	intron (NM_019419, intron 3 of 5)	6618	NM_019419	54208	Mm.29924	NM_019419	ENSMUSG00000030654	Arl6ip1	AIP-6|AL022945|ARMER|AU042858|Aip-1|Arl6ip|C85138|mKIAA0069	ADP-ribosylation factor-like 6 interacting protein 1	protein-coding
Diff_Nuc56043	chr1	82190202	82190341	+	0	NA	Intergenic	Charlie4a|DNA|MER1_type	61780	NR_105762	102466629		NR_105762	ENSMUSG00000098797	Mir6344	Gm27840|mmu-mir-6344	microRNA 6344	ncRNA
Diff_Nuc55209	chr1	55748622	55748761	+	0	NA	intron (NM_001114663, intron 1 of 5)	RSINE1|SINE|B4	-239394	NR_045837	329159	Mm.98697	NR_045837	ENSMUSG00000099950	9130227L01Rik	-	RIKEN cDNA 9130227L01 gene	ncRNA
Diff_Nuc64035	chr8	63776202	63776341	+	0	NA	intron (NM_021506, intron 2 of 11)	intron (NM_021506, intron 2 of 11)	-8602	NR_045475	69279	Mm.417857	NR_045475	ENSMUSG00000099419	1700001D01Rik	-	RIKEN cDNA 1700001D01 gene	ncRNA
Diff_Nuc52356	chr2	127569042	127569181	+	0	NA	intron (NM_016902, intron 18 of 19)	intron (NM_016902, intron 18 of 19)	-13478	NM_145532	228576	Mm.133036	NM_145532	ENSMUSG00000027377	Mall	BC012256|BENE	mal, T cell differentiation protein-like	protein-coding
Diff_Nuc46816	chr3	94737602	94737741	+	0	NA	intron (NM_009150, intron 1 of 11)	intron (NM_009150, intron 1 of 11)	666	NM_009150	20341	Mm.196558	NM_009150	ENSMUSG00000068874	Selenbp1	Lp56|Lpsb|SBP56	selenium binding protein 1	protein-coding
Diff_Nuc15030	chr17	48045202	48045341	+	0	NA	intron (NM_028767, intron 1 of 16)	intron (NM_028767, intron 1 of 16)	16310	NM_028767	74123	Mm.240062	NM_028767	ENSMUSG00000023991	Foxp4	1200010K03Rik|2310007G05Rik|mFKHLA	forkhead box P4	protein-coding
Diff_Nuc17588	chr16	46474402	46474541	+	0	NA	intron (NM_021495, intron 1 of 5)	L1Md_F2|LINE|L1	22609	NM_021496	58998	Mm.40477	NM_021495	ENSMUSG00000022656	Nectin3	2610301B19Rik|3000002N23Rik|4921513D19Rik|AA407785|AU016832|AW538082|CD113|Pvrl3	nectin cell adhesion molecule 3	protein-coding
Diff_Nuc10789	chr10	22192892	22193031	+	0	NA	Intergenic	(CA)n|Simple_repeat|Simple_repeat	70342	NR_028580	100038752	Mm.392859	NR_028580	ENSMUSG00000096937	Gm10825	ENSMUSG00000075295	predicted gene 10825	ncRNA
Diff_Nuc32643	chr6	28496372	28496511	+	0	NA	intron (NM_019776, intron 10 of 23)	intron (NM_019776, intron 10 of 23)	66093	NM_019776	56463	Mm.439987	NM_019776	ENSMUSG00000001424	Snd1	AL033314|Tudor-SN	staphylococcal nuclease and tudor domain containing 1	protein-coding
Diff_Nuc63022	chr8	24396052	24396191	+	0	NA	Intergenic	MTE2a|LTR|MaLR	-28569	NM_001042484	57437	Mm.196269	NM_020585	ENSMUSG00000015341	Golga7	AB041568|C130038N16Rik|GCP16|GOLGA3AP1|HSPC041|R75586	golgi autoantigen, golgin subfamily a, 7	protein-coding
Diff_Nuc60878	chr9	65073252	65073391	+	0	NA	intron (NM_177460, intron 2 of 6)	RSINE1|SINE|B4	10824	NM_177460	214424	Mm.31129	NM_177460	ENSMUSG00000032392	Parp16	ARTD15|BC055447|C79952|PARP-16	poly (ADP-ribose) polymerase family, member 16	protein-coding
Diff_Nuc58242	chr1	164625972	164626111	+	0	NA	intron (NM_001081290, intron 20 of 34)	intron (NM_001081290, intron 20 of 34)	-37691	NM_001177581	100038657	Mm.416999	NM_001177581	ENSMUSG00000091060	7420461P10Rik	ENSMUSG00000073516	RIKEN cDNA 7420461P10 gene	protein-coding
Diff_Nuc17141	chr16	32875362	32875501	+	0	NA	Intergenic	B1_Mus2|SINE|Alu	-2439	NM_027226	69823	Mm.12831	NM_027226	ENSMUSG00000022800	Fyttd1	2010005M05Rik|3830411L18Rik|3830421F13Rik|4933423A17Rik|AI098218|AW539567|C85190	forty-two-three domain containing 1	protein-coding
Diff_Nuc9824	chr11	110040702	110040841	+	0	NA	intron (NM_147218, intron 36 of 38)	intron (NM_147218, intron 36 of 38)	-11304	NM_147220	217262	Mm.291459	NM_147220	ENSMUSG00000041797	Abca9	D630040K07Rik	ATP-binding cassette, sub-family A (ABC1), member 9	protein-coding
Diff_Nuc25385	chr19	33462742	33462881	+	0	NA	intron (NM_001146342, intron 1 of 4)	L1_Mus4|LINE|L1	3974	NM_001167818	67795	Mm.204591	NM_001146342	ENSMUSG00000071573	Rnls	6530404N21Rik|AI452315|AW060440|C10orf59	renalase, FAD-dependent amine oxidase	protein-coding
Diff_Nuc23323	chr14	75336932	75337071	+	0	NA	intron (NM_001252132, intron 1 of 18)	MER44D|DNA|MER2_type	10683	NM_001252132	380916	Mm.288868	NM_001033439	ENSMUSG00000068015	Lrch1	4832412D13Rik|AI552548|AW215503|Chdc1|mKIAA1016	leucine-rich repeats and calponin homology (CH) domain containing 1	protein-coding
Diff_Nuc19388	chr15	25586452	25586591	+	0	NA	intron (NM_019472, intron 1 of 40)	B1_Mus2|SINE|Alu	34216	NM_019472	17909	Mm.60590	NM_019472	ENSMUSG00000022272	Myo10	AW048724|D15Ertd600e|mKIAA0799|myosin-X	myosin X	protein-coding
Diff_Nuc4163	chr12	27989362	27989501	+	0	NA	Intergenic	(TATATG)n|Simple_repeat|Simple_repeat	38152	NM_009234	20666	Mm.41702	NM_009234	ENSMUSG00000063632	Sox11	1110038H03Rik|6230403H02Rik|AI836553|end1	SRY (sex determining region Y)-box 11	protein-coding
Diff_Nuc42787	chr4	104495602	104495741	+	0	NA	intron (NM_001316667, intron 9 of 11)	intron (NM_001316667, intron 9 of 11)	53332	NM_001290645	230558	Mm.197638	NM_146148	ENSMUSG00000035031	C8a	-	complement component 8, alpha polypeptide	protein-coding
Diff_Nuc65762	chr8	124485782	124485921	+	0	NA	intron (NM_016812, intron 1 of 13)	Charlie1a|DNA|MER1_type	11459	NM_001285983	53325	Mm.287163	NM_016812	ENSMUSG00000025316	Banp	AA408158|SMAR1	BTG3 associated nuclear protein	protein-coding
Diff_Nuc18994	chr15	6515452	6515591	+	0	NA	Intergenic	Intergenic	-14326	NM_001278269	23880	Mm.170905	NM_011815	ENSMUSG00000022148	Fyb	ADAP|B630013F22Rik|FYB-120/130|Slap130|p120/130|p120/p130	FYN binding protein	protein-coding
Diff_Nuc44689	chr3	16814732	16814871	+	0	NA	Intergenic	Intergenic	731618	NM_001145919	229096	Mm.23834	NM_172677	ENSMUSG00000047213	Ythdf3	9130022A11Rik	YTH domain family 3	protein-coding
Diff_Nuc30696	chr7	106882072	106882211	+	0	NA	Intergenic	L1MEg2|LINE|L1	-1514	NM_147063	259066	Mm.377818	NM_147063	ENSMUSG00000073998	Olfr520	MOR101-1	olfactory receptor 520	protein-coding
Diff_Nuc24473	chr14	122890382	122890521	+	0	NA	Intergenic	Intergenic	15845	NM_009574	22772	Mm.308936	NM_009574	ENSMUSG00000061524	Zic2	HPE5|Ku	zinc finger protein of the cerebellum 2	protein-coding
Diff_Nuc61077	chr9	70701362	70701501	+	0	NA	intron (NM_001324473, intron 1 of 8)	intron (NM_001324473, intron 1 of 8)	81184	NM_008280	15450	Mm.390187	NM_008280	ENSMUSG00000032207	Lipc	AI256194|HL|Hpl	lipase, hepatic	protein-coding
Diff_Nuc56410	chr1	96179832	96179971	+	0	NA	Intergenic	Intergenic	-230771	NM_008798	18566	Mm.5024	NM_008798	ENSMUSG00000026285	Pdcd1	Ly101|PD-1|Pdc1	programmed cell death 1	protein-coding
Diff_Nuc43949	chr4	141304872	141305011	+	0	NA	intron (NM_001081408, intron 1 of 6)	B1F|SINE|Alu	2351	NM_001081408	75986	Mm.30032	NM_001081408	ENSMUSG00000040706	Agmat	5033405N08Rik	agmatine ureohydrolase (agmatinase)	protein-coding
Diff_Nuc12758	chr10	94069252	94069391	+	0	NA	Intergenic	Intergenic	-20377	NR_106070	102466817		NR_106070	ENSMUSG00000098544	Mir7211	Gm27536|mmu-mir-7211	microRNA 7211	ncRNA
Diff_Nuc515	chrX	146730652	146730791	+	0	NA	Intergenic	L1Md_F2|LINE|L1	17186	NM_001101501	333588	Mm.159296	NM_001101501		Gm15104	OTTMUSG00000018998	predicted gene 15104	protein-coding
Diff_Nuc36863	chr5	34496282	34496421	+	0	NA	TTS (NM_146159)	TTS (NM_146159)	15722	NM_146159	231123	Mm.319286	NM_146159	ENSMUSG00000079555	Haus3	D4S43h|D5H4S43|D5H4S43E	HAUS augmin-like complex, subunit 3	protein-coding
Diff_Nuc29029	chr7	30260812	30260951	+	0	NA	intron (NM_001081028, intron 2 of 22)	intron (NM_001081028, intron 2 of 22)	29598	NM_001081028	74206	Mm.447042	NM_001081028	ENSMUSG00000030583	Sipa1l3	2610511M17Rik	signal-induced proliferation-associated 1 like 3	protein-coding
Diff_Nuc59263	chr1	196826092	196826231	+	0	NA	Intergenic	Intergenic	-17432	NR_015566	320977	Mm.99905	NR_015566	ENSMUSG00000096929	A330023F24Rik	C030002C11Rik	RIKEN cDNA A330023F24 gene	ncRNA
Diff_Nuc4321	chr12	34794232	34794371	+	0	NA	intron (NM_001271386, intron 24 of 27)	intron (NM_001271386, intron 24 of 27)	151765	NM_011658	22160	Mm.3280	NM_011658	ENSMUSG00000035799	Twist1	M-Twist|Pde|Ska10|Ska<m10Jus>|Twist|bHLHa38|pdt	twist basic helix-loop-helix transcription factor 1	protein-coding
Diff_Nuc42498	chr4	96250332	96250471	+	0	NA	intron (NM_028979, intron 3 of 8)	intron (NM_028979, intron 3 of 8)	7775	NM_028979	74519	Mm.458387	NM_028979	ENSMUSG00000015224	Cyp2j9	8430417E17Rik	cytochrome P450, family 2, subfamily j, polypeptide 9	protein-coding
Diff_Nuc19178	chr15	12771712	12771851	+	0	NA	intron (NM_026799, intron 5 of 34)	intron (NM_026799, intron 5 of 34)	17211	NM_001130149	14000	Mm.293142	NM_026799	ENSMUSG00000022191	Drosha	1110013A17Rik|AI874853|Etohi2|Rn3|Rnasen	drosha, ribonuclease type III	protein-coding
Diff_Nuc46203	chr3	74323862	74324001	+	0	NA	Intergenic	Intergenic	-502732	NR_040450	100504692	Mm.394454	NR_040450	ENSMUSG00000104096	Gm20356	-	predicted gene, 20356	ncRNA
Diff_Nuc31661	chr7	138939222	138939361	+	0	NA	Intergenic	Intergenic	-218852	NM_173410	233919	Mm.208740	NM_173410	ENSMUSG00000040125	Gpr26	9630036A11Rik|A730021D22	G protein-coupled receptor 26	protein-coding
Diff_Nuc10896	chr10	26494802	26494941	+	0	NA	intron (NM_176837, intron 1 of 14)	intron (NM_176837, intron 1 of 14)	2553	NM_176837	73910	Mm.356496	NM_176837	ENSMUSG00000039031	Arhgap18	4833419J07Rik|AI314906|AI843501	Rho GTPase activating protein 18	protein-coding
Diff_Nuc36655	chr5	28598362	28598501	+	0	NA	Intergenic	Intergenic	-26103	NM_001310512	269637	Mm.68286	NM_175651	ENSMUSG00000044681	Cnpy1	1500012D20Rik|9630008K15Rik|AI853839	canopy FGF signaling regulator 1	protein-coding
Diff_Nuc1885	chr13	47752092	47752231	+	0	NA	Intergenic	(CA)n|Simple_repeat|Simple_repeat	-253643	NR_045156	619327	Mm.412752	NR_045156		G630093K05Rik	-	RIKEN cDNA G630093K05 gene	ncRNA
Diff_Nuc58869	chr1	183892502	183892641	+	0	NA	intron (NM_010135, intron 1 of 14)	B3A|SINE|B2	57540	NM_008680	13800	Mm.87759	NM_008680	ENSMUSG00000022995	Enah	Mena|NDPP-1|Ndpp1|WBP8	enabled homolog (Drosophila)	protein-coding
Diff_Nuc51971	chr2	115344992	115345131	+	0	NA	Intergenic	Intergenic	-7124	NR_030712	100043232	Mm.240112	NR_030712	ENSMUSG00000085582	3110099E03Rik	-	RIKEN cDNA 3110099E03 gene	ncRNA
Diff_Nuc47689	chr3	121359642	121359781	+	0	NA	Intergenic	L2|LINE|L2	-10340	NR_036458	100503044	Mm.65320	NM_176992	ENSMUSG00000044522	A730020M07Rik	-	RIKEN cDNA A730020M07 gene	ncRNA
Diff_Nuc41352	chr4	51764422	51764561	+	0	NA	Intergenic	Intergenic	299491	NR_040668	329844	Mm.128934	NR_040668	ENSMUSG00000085515	C630028M04Rik	-	RIKEN cDNA C630028M04 gene	ncRNA
Diff_Nuc16943	chr16	25874752	25874891	+	0	NA	intron (NM_001127262, intron 8 of 10)	intron (NM_001127262, intron 8 of 10)	72819	NM_001127264	22061	Mm.20894	NM_011641	ENSMUSG00000022510	Trp63	AI462811|Ket|P51/P63|P63|P73l|Tp63|Trp53rp1	transformation related protein 63	protein-coding
Diff_Nuc15835	chr17	80000632	80000771	+	0	NA	Intergenic	MIR|SINE|MIR	-13539	NM_201361	381110	Mm.209801	NM_201361	ENSMUSG00000036368	Rmdn2	AW061290|Fam82a1|RMD-2|mRMD-2	regulator of microtubule dynamics 2	protein-coding
Diff_Nuc34170	chr6	85853462	85853601	+	0	NA	intron (NM_029331, intron 1 of 3)	intron (NM_029331, intron 1 of 3)	-1004	NM_001145895	75541	Mm.24454	NM_029331	ENSMUSG00000068299	Nat8f4	1700019G17Rik	N-acetyltransferase 8 (GCN5-related) family member 4	protein-coding
Diff_Nuc2831	chr13	89351852	89351991	+	0	NA	intron (NM_010103, intron 8 of 9)	intron (NM_010103, intron 8 of 9)	-328320	NM_013500	12950	Mm.266790	NM_013500	ENSMUSG00000021613	Hapln1	BB099155|CLP|Crtl1|Crtl1l|LP|LP-1	hyaluronan and proteoglycan link protein 1	protein-coding
Diff_Nuc42422	chr4	94202212	94202351	+	0	NA	intron (NM_026368, intron 4 of 5)	intron (NM_026368, intron 4 of 5)	21206	NM_026368	67770	Mm.35170	NM_026368	ENSMUSG00000028578	Caap1	5830433M19Rik|AI536248|CAAP	caspase activity and apoptosis inhibitor 1	protein-coding
Diff_Nuc28736	chr7	17216912	17217051	+	0	NA	intron (NR_136929, intron 2 of 2)	RMER17C|LTR|ERVK	-16639	NM_172739	232906	Mm.28646	NM_172739	ENSMUSG00000058230	Arhgap35	6430596G11Rik|AI841135|Grlf1|mKIAA1722|p190A|p190RhoGAP	Rho GTPase activating protein 35	protein-coding
Diff_Nuc16269	chr17	93534932	93535071	+	0	NA	Intergenic	L1_Mus3|LINE|L1	-63356	NM_001315503	11516	Mm.3407	NM_009625	ENSMUSG00000024256	Adcyap1	PACAP	adenylate cyclase activating polypeptide 1	protein-coding
Diff_Nuc10470	chr10	10999812	10999951	+	0	NA	Intergenic	Intergenic	-1247	NM_027968	71865	Mm.276229	NM_027968	ENSMUSG00000047648	Fbxo30	1700026A16Rik|MUSA1	F-box protein 30	protein-coding
Diff_Nuc19719	chr15	38034862	38035001	+	0	NA	Intergenic	Intergenic	-26322	NM_001081359	70790	Mm.476840	NM_027553	ENSMUSG00000037487	Ubr5	Edd|Edd1	ubiquitin protein ligase E3 component n-recognin 5	protein-coding
Diff_Nuc7415	chr11	31068602	31068741	+	0	NA	Intergenic	Intergenic	-182306	NM_001290667	68044	Mm.32656	NM_026527	ENSMUSG00000020309	Chac2	-	ChaC, cation transport regulator 2	protein-coding
Diff_Nuc44535	chr3	9581332	9581471	+	0	NA	intron (NM_133218, intron 1 of 8)	intron (NM_133218, intron 1 of 8)	28684	NM_133218	170753	Mm.212908	NM_133218	ENSMUSG00000040209	Zfp704	C030026M03|C030034L19Rik|Gig1|Znf704	zinc finger protein 704	protein-coding
Diff_Nuc12490	chr10	85563812	85563951	+	0	NA	intron (NR_038024, intron 1 of 2)	L2a|LINE|L2	5282	NR_038024	78170	Mm.444790	NR_038024		4930486F22Rik	-	RIKEN cDNA 4930486F22 gene	ncRNA
Diff_Nuc8337	chr11	68901722	68901861	+	0	NA	promoter-TSS (NM_009497)	promoter-TSS (NM_009497)	-239	NM_009497	22318	Mm.28643	NM_009497	ENSMUSG00000020894	Vamp2	Syb-2|Syb2|sybII	vesicle-associated membrane protein 2	protein-coding
Diff_Nuc44662	chr3	15178972	15179111	+	0	NA	Intergenic	Intergenic	153261	NM_001076679	751864	Mm.431296	NM_001076679	ENSMUSG00000078783	Gm9733	-	predicted gene 9733	protein-coding
Diff_Nuc43282	chr4	119358182	119358321	+	0	NA	Intergenic	Intergenic	-26701	NM_008191	14916	Mm.278	NM_008191	ENSMUSG00000032978	Guca2b	AV066530|Gcap2|Ugn	guanylate cyclase activator 2b (retina)	protein-coding
Diff_Nuc24167	chr14	110123872	110124011	+	0	NA	Intergenic	Lx8|LINE|L1	-810485	NM_199065	76965	Mm.257268	NM_199065	ENSMUSG00000075478	Slitrk1	3200001I04Rik	SLIT and NTRK-like family, member 1	protein-coding
Diff_Nuc24716	chr19	7281592	7281731	+	0	NA	promoter-TSS (NM_134150)	promoter-TSS (NM_134150)	-887	NM_134150	107260	Mm.203921	NM_134150	ENSMUSG00000024767	Otub1	AI850305	OTU domain, ubiquitin aldehyde binding 1	protein-coding
Diff_Nuc46806	chr3	94555212	94555351	+	0	NA	Intergenic	RLTR27|LTR|ERVK	35156	NM_001293727	70737	Mm.87634	NM_001037711	ENSMUSG00000068876	Cgn	6330408J11Rik	cingulin	protein-coding
Diff_Nuc22099	chr14	31469722	31469861	+	0	NA	intron (NM_177815, intron 1 of 12)	B1_Mur1|SINE|Alu	2230	NM_177815	328370	Mm.259657	NM_177815	ENSMUSG00000052395	Rft1	D930025H04	RFT1 homolog	protein-coding
Diff_Nuc6497	chr12	113365012	113365151	+	0	NA	3' UTR (NM_001081169, exon 15 of 15)	3' UTR (NM_001081169, exon 15 of 15)	-4010	NR_029590	387199		NR_029590	ENSMUSG00000065574	Mir203	Mirn203|mir-203|mmu-mir-203	microRNA 203	ncRNA
Diff_Nuc44033	chr4	144876272	144876411	+	0	NA	intron (NM_009401, intron 8 of 12)	intron (NM_009401, intron 8 of 12)	28709	NM_009401	21941	Mm.12810	NM_009401	ENSMUSG00000028602	Tnfrsf8	Cd30|D1S166E|Ki|Ki-1	tumor necrosis factor receptor superfamily, member 8	protein-coding
Diff_Nuc35485	chr6	129199652	129199791	+	0	NA	Intergenic	B1_Mur4|SINE|Alu	-11221	NR_040266	76432	Mm.261738	NR_040265	ENSMUSG00000097354	2310001H17Rik	AI646108	RIKEN cDNA 2310001H17 gene	ncRNA
Diff_Nuc5097	chr12	66337092	66337231	+	0	NA	Intergenic	Lx9|LINE|L1	10657	NM_027614	70948	Mm.219475	NM_027614	ENSMUSG00000035560	Wdr20rt	4921538B03Rik|4930427E19Rik|Wdr20|Wdr20b	WD repeat domain 20, retrogene	protein-coding
Diff_Nuc23116	chr14	68127992	68128131	+	0	NA	Intergenic	Lx9|LINE|L1	-111482	NR_045961	73977	Mm.414915	NR_045961	ENSMUSG00000093472	4930438E09Rik	-	RIKEN cDNA 4930438E09 gene	ncRNA
Diff_Nuc32066	chr6	5602452	5602591	+	0	NA	Intergenic	L1Md_F2|LINE|L1	-73118	NM_001191023	13426	Mm.20893	NM_010063	ENSMUSG00000029757	Dync1i1	DH IC-1|DHIC-1|DIC|Dncic1|IC74	dynein cytoplasmic 1 intermediate chain 1	protein-coding
Diff_Nuc7806	chr11	49954152	49954291	+	0	NA	intron (NM_029745, intron 3 of 20)	intron (NM_029745, intron 3 of 20)	9359	NM_029745	76795	Mm.290975	NM_029745	ENSMUSG00000036644	Tbc1d9b	-	TBC1 domain family, member 9B	protein-coding
Diff_Nuc19283	chr15	19984222	19984361	+	0	NA	Intergenic	Lx5|LINE|L1	612214	NM_022816	64833	Mm.352763	NM_022816	ENSMUSG00000047565	Acot10	Acate3|MT-ACT48|p48	acyl-CoA thioesterase 10	protein-coding
Diff_Nuc13877	chr17	5976412	5976551	+	0	NA	intron (NM_001113352, intron 2 of 25)	intron (NM_001113352, intron 2 of 25)	895	NM_011523	20975	Mm.236068	NM_011523	ENSMUSG00000023805	Synj2	AI481647|SJ2|mKIAA0348	synaptojanin 2	protein-coding
Diff_Nuc56783	chr1	113078532	113078671	+	0	NA	Intergenic	L1_Mur3|LINE|L1	-204652	NM_001081386	227485	Mm.322070	NM_001081386	ENSMUSG00000047216	Cdh19	-	cadherin 19, type 2	protein-coding
Diff_Nuc6869	chr11	9124952	9125091	+	0	NA	intron (NM_178259, intron 3 of 61)	RMER17C|LTR|ERVK	33076	NM_178259	268379	Mm.39270	NM_178259	ENSMUSG00000004668	Abca13	9830132L24|A930002G16Rik|AI956815	ATP-binding cassette, sub-family A (ABC1), member 13	protein-coding
Diff_Nuc12738	chr10	93583192	93583331	+	0	NA	intron (NM_053072, intron 9 of 20)	intron (NM_053072, intron 9 of 20)	-27415	NM_011629	22025	Mm.107483	NM_011629	ENSMUSG00000005897	Nr2c1	4831444H07Rik|80.3|Eenr|TR2|Tr2-11	nuclear receptor subfamily 2, group C, member 1	protein-coding
Diff_Nuc56750	chr1	111573082	111573221	+	0	NA	Intergenic	Lx3C|LINE|L1	-306326	NM_001316743	241201	Mm.213407	NM_172853	ENSMUSG00000026312	Cdh7	9330156F07Rik|CDH7L1	cadherin 7, type 2	protein-coding
Diff_Nuc37279	chr5	51857652	51857791	+	0	NA	intron (NR_132764, intron 10 of 12)	intron (NR_132764, intron 10 of 12)	87439	NR_027710	19017	Mm.259072	NM_008904	ENSMUSG00000029167	Ppargc1a	A830037N07Rik|ENSMUSG00000079510|Gm11133|PGC-1|PPARGC-1-alpha|Pgc-1alpha|Pgc1|Pgco1|Ppargc1	peroxisome proliferative activated receptor, gamma, coactivator 1 alpha	protein-coding
Diff_Nuc26788	chr18	24673842	24673981	+	0	NA	intron (NM_144861, intron 1 of 6)	intron (NM_144861, intron 1 of 6)	14794	NM_144861	225283	Mm.28427	NM_144861	ENSMUSG00000040446	Rprd1a	C77387|mKIAA4077	regulation of nuclear pre-mRNA domain containing 1A	protein-coding
Diff_Nuc27224	chr18	39699562	39699701	+	0	NA	Intergenic	L1MEf|LINE|L1	-52732	NM_008173	14815	Mm.129481	NM_008173	ENSMUSG00000024431	Nr3c1	GR|Grl-1|Grl1	nuclear receptor subfamily 3, group C, member 1	protein-coding
Diff_Nuc59604	chr9	18111772	18111911	+	0	NA	intron (NM_025844, intron 6 of 10)	B2_Mm2|SINE|B2	15130	NM_025844	66917	Mm.103534	NM_025844	ENSMUSG00000001774	Chordc1	1110001O09Rik|AA409036|Chp-1|morgana	cysteine and histidine-rich domain (CHORD)-containing, zinc-binding protein 1	protein-coding
Diff_Nuc13047	chr10	105880352	105880491	+	0	NA	Intergenic	Intergenic	-26945	NM_177373	327814	Mm.391424	NM_177373	ENSMUSG00000053825	Ppfia2	5330438O12|B230207K17Rik|E130120L08Rik|mKIAA4112	protein tyrosine phosphatase, receptor type, f polypeptide (PTPRF), interacting protein (liprin), alpha 2	protein-coding
Diff_Nuc9079	chr11	88204692	88204831	+	0	NA	intron (NM_054043, intron 9 of 13)	intron (NM_054043, intron 9 of 13)	38486	NR_039545	100628571		NR_039545	ENSMUSG00000092985	Mir378b	mir-378b|mmu-mir-378b	microRNA 378b	ncRNA
Diff_Nuc47962	chr3	130273672	130273811	+	0	NA	intron (NM_001244952, intron 30 of 35)	intron (NM_001244952, intron 30 of 35)	-46625	NM_001163587	71760	Mm.29125	NM_027907	ENSMUSG00000019232	Etnppl	1300019H02Rik|AI195447|Agxt2l1	ethanolamine phosphate phospholyase	protein-coding
Diff_Nuc32115	chr6	7939092	7939231	+	0	NA	Intergenic	Intergenic	143937	NM_052993	94192	Mm.102752	NM_052993	ENSMUSG00000042460	C1galt1	2210410E06Rik|AV284120|T-synthase	core 1 synthase, glycoprotein-N-acetylgalactosamine 3-beta-galactosyltransferase, 1	protein-coding
Diff_Nuc57666	chr1	145674212	145674351	+	0	NA	Intergenic	Lx2B|LINE|L1	49873	NM_019562	56207	Mm.261004	NM_019562	ENSMUSG00000018189	Uchl5	5830413B11Rik|Uch37	ubiquitin carboxyl-terminal esterase L5	protein-coding
Diff_Nuc51258	chr2	90357472	90357611	+	0	NA	intron (NM_008982, intron 1 of 23)	intron (NM_008982, intron 1 of 23)	-38210	NM_001135657	19271	Mm.330393	NM_008982	ENSMUSG00000025314	Ptprj	AI450271|BET|Byp|CD148|DEP-1|PTPbeta2|Ptpb2|RPTPJ|Scc-1|Scc1	protein tyrosine phosphatase, receptor type, J	protein-coding
Diff_Nuc49808	chr2	38525372	38525511	+	0	NA	Intergenic	Intergenic	-26015	NM_011187	19177	Mm.389251	NM_011187	ENSMUSG00000026750	Psmb7	AU020723|MC14	proteasome (prosome, macropain) subunit, beta type 7	protein-coding
Diff_Nuc42051	chr4	78142232	78142371	+	0	NA	Intergenic	RLTR13C2|LTR|ERVK	-97650	NR_131142	623726		NR_131142		A430085M09Rik	EG623726	RIKEN cDNA A430085M09 gene	ncRNA
Diff_Nuc45170	chr3	33997742	33997881	+	0	NA	Intergenic	Intergenic	-17535	NM_026332	67713	Mm.274266	NM_026332	ENSMUSG00000027679	Dnajc19	1810055D05Rik|AA959924|Tim14	DnaJ heat shock protein family (Hsp40) member C19	protein-coding
Diff_Nuc29703	chr7	66489682	66489821	+	0	NA	intron (NM_001033962, intron 1 of 10)	intron (NM_001033962, intron 1 of 10)	5629	NM_011668	22215	Mm.9002	NM_011668	ENSMUSG00000025326	Ube3a	4732496B02|5830462N02Rik|A130086L21Rik|Hpve6a|mKIAA4216	ubiquitin protein ligase E3A	protein-coding
Diff_Nuc60688	chr9	59565912	59566051	+	0	NA	Intergenic	Intergenic	10410	NM_001033498	546134	Mm.297580	NM_001033498	ENSMUSG00000074259	Gramd2	BC064463	GRAM domain containing 2	protein-coding
Diff_Nuc57059	chr1	125038422	125038561	+	0	NA	Intergenic	Lx2B|LINE|L1	903645	NM_199021	269109	Mm.417716	NM_199021	ENSMUSG00000036815	Dpp10	6430601K09Rik|DPP X|Dprp3	dipeptidylpeptidase 10	protein-coding
Diff_Nuc54549	chr1	29299382	29299521	+	0	NA	Intergenic	Intergenic	-178882	NR_105760	102465174		NR_105760	ENSMUSG00000099257	Mir6342	Gm27268|mmu-mir-6342	microRNA 6342	ncRNA
Diff_Nuc38414	chr5	96217892	96218031	+	0	NA	intron (NM_001122668, intron 1 of 3)	L1_Mur2|LINE|L1	-3697	NM_001122678	100041354	Mm.422721	NM_001122678	ENSMUSG00000079423	Gm3286	-	predicted gene 3286	protein-coding
Diff_Nuc39391	chr5	128071432	128071571	+	0	NA	Intergenic	Intergenic	26261	NM_133895	100561	Mm.28506	NM_133895	ENSMUSG00000029416	Slc15a4	AA987064|AW742963|C130069N12Rik|PHT1|PTR4	solute carrier family 15, member 4	protein-coding
Diff_Nuc34640	chr6	99190422	99190561	+	0	NA	intron (NM_001347345, intron 4 of 19)	intron (NM_001347345, intron 4 of 19)	26018	NM_001197321	108655	Mm.234965	NM_053202	ENSMUSG00000030067	Foxp1	3110052D19Rik|4932443N09Rik|AI461938|AW494214	forkhead box P1	protein-coding
Diff_Nuc525	chrX	148462072	148462211	+	0	NA	intron (NM_019710, intron 5 of 24)	intron (NM_019710, intron 5 of 24)	11170	NM_019710	24061	Mm.482095	NM_019710	ENSMUSG00000041133	Smc1a	5830426I24Rik|SMC-1A|Sb1.8|Smc1|Smc1alpha|Smc1l1|Smcb|mKIAA0178	structural maintenance of chromosomes 1A	protein-coding
Diff_Nuc37183	chr5	47173922	47174061	+	0	NA	Intergenic	ORR1D2|LTR|MaLR	-850343	NR_110478	78106	Mm.243807	NR_110478	ENSMUSG00000106602	4930405L22Rik	-	RIKEN cDNA 4930405L22 gene	ncRNA
Diff_Nuc15002	chr17	47470232	47470371	+	0	NA	intron (NM_001097623, intron 14 of 19)	intron (NM_001097623, intron 14 of 19)	-35535	NM_001146212	64657	Mm.216250	NM_183086	ENSMUSG00000034729	Mrps10	1110038B19Rik|AW743084|Rpms10	mitochondrial ribosomal protein S10	protein-coding
Diff_Nuc14551	chr17	31515142	31515281	+	0	NA	Intergenic	Intergenic	-7968	NM_008804	18585	Mm.10812	NM_008804	ENSMUSG00000041119	Pde9a	PDE9A1	phosphodiesterase 9A	protein-coding
Diff_Nuc44895	chr3	24189972	24190111	+	0	NA	intron (NM_001326288, intron 5 of 13)	L1Md_F2|LINE|L1	492887	NM_001326288	635702	Mm.448351	NM_001326288	ENSMUSG00000102758	Naaladl2	2810043G22Rik|EG635702|Gm1021	N-acetylated alpha-linked acidic dipeptidase-like 2	protein-coding
Diff_Nuc56570	chr1	104820032	104820171	+	0	NA	Intergenic	MTEa|LTR|MaLR	1767756	NR_037989	100504525	Mm.87065	NR_037989	ENSMUSG00000100684	Gm20268	-	predicted gene, 20268	ncRNA
Diff_Nuc42258	chr4	86519192	86519331	+	0	NA	Intergenic	Intergenic	-1057	NM_001290543	230379	Mm.45019	NM_139306	ENSMUSG00000038007	Acer2	2410116I05Rik|Asah3l|CRG-L1|maCER2	alkaline ceramidase 2	protein-coding
Diff_Nuc42082	chr4	79891252	79891391	+	0	NA	Intergenic	L1Md_A|LINE|L1	-588796	NM_031202	22178	Mm.30438	NM_031202	ENSMUSG00000005994	Tyrp1	Oca3|TRP-1|TRP1|Tyrp|b|brown|isa	tyrosinase-related protein 1	protein-coding
Diff_Nuc47463	chr3	115384462	115384601	+	0	NA	Intergenic	Intergenic	33442	NM_007901	13609	Mm.982	NM_007901	ENSMUSG00000045092	S1pr1	AI849002|Edg1|Lpb1|S1p|S1p1	sphingosine-1-phosphate receptor 1	protein-coding
Diff_Nuc5825	chr12	88264002	88264141	+	0	NA	Intergenic	Intergenic	-23920	NM_001289431	217732	Mm.22337	NM_173735	ENSMUSG00000034157	Cipc	2310044G17Rik|AI842544|AI853744|Kiaa1737|mKIAA1737	CLOCK interacting protein, circadian	protein-coding
Diff_Nuc4545	chr12	42145392	42145531	+	0	NA	intron (NM_053122, intron 4 of 6)	intron (NM_053122, intron 4 of 6)	67183	NM_001271708	16981	Mm.404786	NM_010733	ENSMUSG00000036295	Lrrn3	NLRR-3	leucine rich repeat protein 3, neuronal	protein-coding
Diff_Nuc65605	chr8	119305992	119306131	+	0	NA	intron (NR_046193, intron 3 of 3)	L1_Mus3|LINE|L1	19251	NR_046193	78213	Mm.402039	NR_046193		4930563M20Rik	-	RIKEN cDNA 4930563M20 gene	ncRNA
Diff_Nuc53873	chr2	180675762	180675901	+	0	NA	intron (NM_021426, intron 4 of 6)	B2_Mm1a|SINE|B2	12103	NM_001163247	329581	Mm.187879	NM_001163247	ENSMUSG00000038840	Birc7	E130019N06|KIAP|Livin|ML-IAP	baculoviral IAP repeat-containing 7 (livin)	protein-coding
Diff_Nuc38723	chr5	107120372	107120511	+	0	NA	intron (NM_026856, intron 1 of 6)	B4A|SINE|B4	5408	NM_026856	52397	Mm.249474	NM_026856	ENSMUSG00000049606	Zfp644	1110068L01Rik|AA408882|BM-005|D5Ertd689e|Zep-2	zinc finger protein 644	protein-coding
Diff_Nuc3081	chr13	97334942	97335081	+	0	NA	intron (NM_001164222, intron 2 of 16)	intron (NM_001164222, intron 2 of 16)	22321	NM_023420	68018	Mm.24125	NM_023420	ENSMUSG00000021669	Col4a3bp	2810404O15Rik|9230101K08Rik|AU016711|CERT|GPBP	collagen, type IV, alpha 3 (Goodpasture antigen) binding protein	protein-coding
Diff_Nuc29022	chr7	29946442	29946581	+	0	NA	3' UTR (NM_182927, exon 6 of 6)	3' UTR (NM_182927, exon 6 of 6)	-5282	NM_001146023	73833	Mm.260890	NM_028661	ENSMUSG00000030590	Fam98c	1110006G06Rik|AI836081|AV026483|B230110F21Rik	family with sequence similarity 98, member C	protein-coding
Diff_Nuc60718	chr9	60757802	60757941	+	0	NA	Intergenic	ORR1D2|LTR|MaLR	-107005	NR_040767	330956	Mm.207985	NR_040767	ENSMUSG00000111290	Gm5122	A430102L10	predicted gene 5122	ncRNA
Diff_Nuc8887	chr11	83803842	83803981	+	0	NA	intron (NM_194341, intron 8 of 19)	intron (NM_194341, intron 8 of 19)	25978	NM_194341	217030	Mm.82680	NM_194341	ENSMUSG00000034940	Synrg	Ap1gbp1|SYNG	synergin, gamma	protein-coding
Diff_Nuc16714	chr16	18443152	18443291	+	0	NA	intron (NM_013711, intron 7 of 17)	intron (NM_013711, intron 7 of 17)	-16412	NM_001111062	12846	Mm.100940	NM_007744	ENSMUSG00000000326	Comt	Comt1|D16Wsu103e|D330014B15Rik	catechol-O-methyltransferase	protein-coding
Diff_Nuc24116	chr14	107695142	107695281	+	0	NA	Intergenic	L1_Mus1|LINE|L1	-809474	NR_045938	73631	Mm.48862	NR_045938	ENSMUSG00000099794	1700128A07Rik	-	RIKEN cDNA 1700128A07 gene	ncRNA
Diff_Nuc53065	chr2	150408982	150409121	+	0	NA	3' UTR (NM_027977, exon 9 of 9)	3' UTR (NM_027977, exon 9 of 9)	12900	NM_009977	13011	Mm.12965	NM_009977	ENSMUSG00000068129	Cst7	Cmap	cystatin F (leukocystatin)	protein-coding
Diff_Nuc28139	chr18	74973102	74973241	+	0	NA	Intergenic	B1_Mus1|SINE|Alu	34305	NM_177470	52538	Mm.245724	NM_177470	ENSMUSG00000036880	Acaa2	0610011L04Rik|AI255831|AI265397|D18Ertd240e	acetyl-Coenzyme A acyltransferase 2 (mitochondrial 3-oxoacyl-Coenzyme A thiolase)	protein-coding
Diff_Nuc47319	chr3	108555042	108555181	+	0	NA	exon (NM_177859, exon 2 of 12)	exon (NM_177859, exon 2 of 12)	12535	NM_177859	329738	Mm.72322	NM_177859	ENSMUSG00000049565	Aknad1	4921525H12Rik	AKNA domain containing 1	protein-coding
Diff_Nuc35050	chr6	116013452	116013591	+	0	NA	intron (NM_177412, intron 3 of 5)	MT2B|LTR|ERVL	-68498	NM_026376	67784	Mm.3085	NM_026376	ENSMUSG00000030123	Plxnd1	6230425C21Rik|b2b1863Clo|b2b553Clo	plexin D1	protein-coding
Diff_Nuc34882	chr6	110182242	110182381	+	0	NA	Intergenic	MTE2b|LTR|MaLR	-413195	NM_001346640	108073	Mm.240881	NM_177328	ENSMUSG00000056755	Grm7	6330570A01Rik|BB176677|C030018L03|E130018M02Rik|Gpr1g|Gprc1g|SMN2|Tg(SMN2)89Ahmb|mGluR7	glutamate receptor, metabotropic 7	protein-coding
Diff_Nuc29666	chr7	63632562	63632701	+	0	NA	intron (NM_021879, intron 19 of 23)	ORR1A2|LTR|MaLR	137490	NM_021879	18431	Mm.137052	NM_021879	ENSMUSG00000030450	Oca2	D7H15S12|D7Icr28RN|D7Nic1|p|p<cas>	oculocutaneous albinism II	protein-coding
Diff_Nuc56989	chr1	122008632	122008771	+	0	NA	Intergenic	Intergenic	8795	NM_001037999	13167	Mm.2785	NM_007830	ENSMUSG00000026385	Dbi	ACBD1|Acbp|EP|endozepine	diazepam binding inhibitor	protein-coding
Diff_Nuc2066	chr13	55127152	55127291	+	0	NA	Intergenic	ORR1A4|LTR|MaLR	-4475	NM_001033245	212032	Mm.267479	NM_001033245	ENSMUSG00000025877	Hk3	HK III|HK-III	hexokinase 3	protein-coding
Diff_Nuc52569	chr2	133933362	133933501	+	0	NA	Intergenic	LTR16C|LTR|ERVL	446657	NM_010403	15112	Mm.26634	NM_010403	ENSMUSG00000027261	Hao1	GOX|Gox1|Hao-1	hydroxyacid oxidase 1, liver	protein-coding
Diff_Nuc48207	chr3	138063702	138063841	+	0	NA	Intergenic	Lx|LINE|L1	-14690	NM_011996	26876	Mm.158750	NM_011996	ENSMUSG00000037797	Adh4	Adh2	alcohol dehydrogenase 4 (class II), pi polypeptide	protein-coding
Diff_Nuc35286	chr6	122028602	122028741	+	0	NA	exon (NM_008646, exon 27 of 35)	exon (NM_008646, exon 27 of 35)	-57975	NR_003624	381806	Mm.482418	NM_001013775	ENSMUSG00000071204	Gm10319	EG381806|ENSMUSG00000071204	murinoglobulin pseudogene	pseudo
Diff_Nuc24841	chr19	10679632	10679771	+	0	NA	promoter-TSS (NM_145496)	promoter-TSS (NM_145496)	-414	NM_015735	13194	Mm.289915	NM_015735	ENSMUSG00000024740	Ddb1	127kDa|AA408517|p127-Ddb1	damage specific DNA binding protein 1	protein-coding
Diff_Nuc20917	chr15	83245252	83245391	+	0	NA	intron (NM_001159509, intron 1 of 10)	intron (NM_001159509, intron 1 of 10)	17959	NM_011862	23970	Mm.23978	NM_011862	ENSMUSG00000016664	Pacsin2	AI197433	protein kinase C and casein kinase substrate in neurons 2	protein-coding
Diff_Nuc51590	chr2	102886902	102887041	+	0	NA	exon (NM_175094, exon 3 of 11)	exon (NM_175094, exon 3 of 11)	26699	NM_175094	27402	Mm.315011	NM_175094	ENSMUSG00000010914	Pdhx	AI481367|E3bp|Pdx1	pyruvate dehydrogenase complex, component X	protein-coding
Diff_Nuc44844	chr3	21893962	21894101	+	0	NA	Intergenic	ID_B1|SINE|B4	-81543	NM_030732	81004	Mm.202966	NM_030732	ENSMUSG00000027630	Tbl1xr1	8030499H02Rik|A630076E03Rik|AW539987|C21|C230089I12Rik|DC42|Ira1|TBLR1	transducin (beta)-like 1X-linked receptor 1	protein-coding
Diff_Nuc25737	chr19	43668792	43668931	+	0	NA	Intergenic	B1_Mur4|SINE|Alu	-17954	NM_008699	18089	Mm.56994	NM_008699	ENSMUSG00000044220	Nkx2-3	Nkx-2.3|Nkx2.3|tinman	NK2 homeobox 3	protein-coding
Diff_Nuc50167	chr2	52435852	52435991	+	0	NA	intron (NM_001037099, intron 2 of 13)	B4A|SINE|B4	-21790	NM_001285427	12298	Mm.330223	NM_146123	ENSMUSG00000017412	Cacnb4	3110038O15Rik|Cchb4|lh	calcium channel, voltage-dependent, beta 4 subunit	protein-coding
Diff_Nuc58079	chr1	159334072	159334211	+	0	NA	intron (NM_177644, intron 1 of 17)	intron (NM_177644, intron 1 of 17)	-8342	NR_027984	69953	Mm.286863	NM_027274	ENSMUSG00000049881	2810025M15Rik	AI429618	RIKEN cDNA 2810025M15 gene	ncRNA
Diff_Nuc26333	chr18	5722762	5722901	+	0	NA	intron (NM_011546, intron 2 of 7)	L1MD2|LINE|L1	-130396	NR_033552	791318	Mm.84339	NR_033552	ENSMUSG00000063087	Gm10125	ENSMUSG00000063087|Zeb1os	predicted gene 10125	ncRNA
Diff_Nuc9473	chr11	100942462	100942601	+	0	NA	TTS (NM_010475)	TTS (NM_010475)	-1348	NM_001305982	71743	Mm.182271	NM_027896	ENSMUSG00000001755	Coasy	1300003G02Rik|Dpck|Ppat|Ukr1	Coenzyme A synthase	protein-coding
Diff_Nuc58020	chr1	157884672	157884811	+	0	NA	intron (NM_001160182, intron 1 of 2)	intron (NM_001160182, intron 1 of 2)	-1131	NM_001160018	208263	Mm.211654	NM_144791	ENSMUSG00000026466	Tor1aip1	LAP1|Lap1B	torsin A interacting protein 1	protein-coding
Diff_Nuc29937	chr7	76774592	76774731	+	0	NA	Intergenic	L1_Mur1|LINE|L1	133681	NR_045940	73796	Mm.410832	NR_045940	ENSMUSG00000108885	4930402F11Rik	-	RIKEN cDNA 4930402F11 gene	ncRNA
Diff_Nuc21433	chr15	102376382	102376521	+	0	NA	intron (NM_001310070, intron 9 of 11)	B2_Mm1a|SINE|B2	-21399	NM_018787	54615	Mm.445915	NM_018787	ENSMUSG00000023052	Npff	-	neuropeptide FF-amide peptide precursor	protein-coding
Diff_Nuc54228	chr1	15970982	15971121	+	0	NA	Intergenic	B3|SINE|B2	-88248	NM_001033288	226866	Mm.131665	NM_001033288	ENSMUSG00000032719	Sbspon	Gm106|Rpesp	somatomedin B and thrombospondin, type 1 domain containing	protein-coding
Diff_Nuc6198	chr12	103597812	103597951	+	0	NA	intron (NM_001161365, intron 5 of 9)	MT2A|LTR|ERVL	76030	NM_001161365	217835	Mm.24145	NM_177620	ENSMUSG00000044456	Rin3	6430500K07|C86933	Ras and Rab interactor 3	protein-coding
Diff_Nuc48530	chr3	150469292	150469431	+	0	NA	Intergenic	Lx5|LINE|L1	217465	NR_039540	100628568		NR_039540	ENSMUSG00000092830	Mir3963	mmu-mir-3963|mu-mir-3963	microRNA 3963	ncRNA
Diff_Nuc9769	chr11	108295892	108296031	+	0	NA	intron (NM_029606, intron 3 of 27)	intron (NM_029606, intron 3 of 27)	9381	NM_029606	76380	Mm.344071	NM_029586	ENSMUSG00000020728	Cep112	1700001M19Rik|1700029K01Rik|8430407H02Rik|AV043680|AV207351|Ccdc46|Macoco	centrosomal protein 112	protein-coding
Diff_Nuc55435	chr1	60914522	60914661	+	0	NA	Intergenic	Intergenic	-51278	NM_009843	12477	Mm.390	NM_009843	ENSMUSG00000026011	Ctla4	Cd152|Ctla-4|Ly-56	cytotoxic T-lymphocyte-associated protein 4	protein-coding
Diff_Nuc43810	chr4	137282752	137282891	+	0	NA	intron (NM_001256218, intron 20 of 24)	intron (NM_001256218, intron 20 of 24)	2445	NR_138592	110351	Mm.180763	NM_029563	ENSMUSG00000041351	Rap1gap	1300019I11Rik|2310004O14Rik|AI427470|ARPP-90|Gap|Rap1GAP1|Rap1ga1	Rap1 GTPase-activating protein	protein-coding
Diff_Nuc6533	chr12	114954732	114954871	+	0	NA	Intergenic	Intergenic	172682	NM_174885	238406	Mm.188683	NM_174885	ENSMUSG00000043945	Adam6a	Adam6|tMDCIV	a disintegrin and metallopeptidase domain 6A	protein-coding
Diff_Nuc62595	chr8	3300102	3300241	+	0	NA	Intergenic	B4A|SINE|B4	-20554	NM_001330056	16337	Mm.268003	NM_010568	ENSMUSG00000005534	Insr	4932439J01Rik|CD220|D630014A15Rik|IR|IR-A|IR-B	insulin receptor	protein-coding
Diff_Nuc17507	chr16	43979052	43979191	+	0	NA	promoter-TSS (NM_001007460)	promoter-TSS (NM_001007460)	42	NM_001007460	332175	Mm.327852	NM_001007460	ENSMUSG00000036304	Zdhhc23	Gm1751|Gm779|nidd	zinc finger, DHHC domain containing 23	protein-coding
Diff_Nuc2728	chr13	83284432	83284571	+	0	NA	Intergenic	Intergenic	-358532	NM_001347572	17260	Mm.24001	NM_025282	ENSMUSG00000005583	Mef2c	5430401D19Rik|9930028G15Rik|AV011172|Mef2	myocyte enhancer factor 2C	protein-coding
Diff_Nuc56910	chr1	119887152	119887291	+	0	NA	Intergenic	IAPEz-int|LTR|ERVK	320488	NM_011650	22099	Mm.426637	NM_011650	ENSMUSG00000026374	Tsn	2610034C24Rik|AU040286|C3PO|TB-RBP	translin	protein-coding
Diff_Nuc56334	chr1	93656592	93656731	+	0	NA	Intergenic	Intergenic	-41377	NM_007855	13345	Mm.9474	NM_007855	ENSMUSG00000007805	Twist2	Dermo1|bHLHa39	twist basic helix-loop-helix transcription factor 2	protein-coding
Diff_Nuc46690	chr3	90024652	90024791	+	0	NA	promoter-TSS (NM_026677)	promoter-TSS (NM_026677)	15	NM_026677	68328	Mm.29355	NM_026677	ENSMUSG00000027935	Rab13	0610007N03Rik|B230212B15Rik	RAB13, member RAS oncogene family	protein-coding
Diff_Nuc60508	chr9	54428752	54428891	+	0	NA	Intergenic	Intergenic	-5497	NM_029573	67834	Mm.279195	NM_029573	ENSMUSG00000032279	Idh3a	1110003P10Rik|1500012E04Rik|AA407078|AI316514	isocitrate dehydrogenase 3 (NAD+) alpha	protein-coding
Diff_Nuc27335	chr18	44758772	44758911	+	0	NA	intron (NM_001085373, intron 3 of 18)	intron (NM_001085373, intron 3 of 18)	-62478	NR_026853	626275	Mm.427116	NR_026853	ENSMUSG00000097610	A930012L18Rik	-	RIKEN cDNA A930012L18 gene	ncRNA
Diff_Nuc47600	chr3	118722882	118723021	+	0	NA	intron (NM_170778, intron 13 of 22)	L1_Mur2|LINE|L1	457855	NM_170778	99586	Mm.27907	NM_170778	ENSMUSG00000033308	Dpyd	AI315208|DPD|E330028L06Rik	dihydropyrimidine dehydrogenase	protein-coding
Diff_Nuc23906	chr14	99951002	99951141	+	0	NA	Intergenic	Intergenic	253161	NM_009769	12224	Mm.30262	NM_009769	ENSMUSG00000005148	Klf5	4930520J07Rik|Bteb2|CKLF|IKLF	Kruppel-like factor 5	protein-coding
Diff_Nuc42133	chr4	81849142	81849281	+	0	NA	Intergenic	ORR1B1|LTR|MaLR	137927	NR_040659	545641	Mm.216028	NR_040659	ENSMUSG00000085022	Gm5860	EG545641	predicted gene 5860	ncRNA
Diff_Nuc40716	chr4	25398732	25398871	+	0	NA	Intergenic	L1_Mur3|LINE|L1	-189833	NM_026194	67490	Mm.226295	NM_026194	ENSMUSG00000040359	Ufl1	1810074P20Rik|AI429228|Kiaa0776|Maxer|Rcad|mKIAA0776	UFM1 specific ligase 1	protein-coding
Diff_Nuc28231	chr18	77380012	77380151	+	0	NA	intron (NM_001164167, intron 11 of 13)	intron (NM_001164167, intron 11 of 13)	-44505	NM_153124	225742	Mm.365178	NM_013666	ENSMUSG00000025425	St8sia5	ST8SiaV|Siat8e	ST8 alpha-N-acetyl-neuraminide alpha-2,8-sialyltransferase 5	protein-coding
Diff_Nuc54090	chr1	10112422	10112561	+	0	NA	intron (NM_026493, intron 23 of 29)	L1VL1|LINE|L1	84192	NM_026493	211660	Mm.244046	NM_026493	ENSMUSG00000056763	Cspp1	2310020J12Rik|4930413O22Rik|AA387550|BC055915|Cspp2|Cspp3	centrosome and spindle pole associated protein 1	protein-coding
Diff_Nuc38885	chr5	111793492	111793631	+	0	NA	intron (NM_001301644, intron 7 of 11)	intron (NM_001301644, intron 7 of 11)	33844	NM_001301666	56305	Mm.200516	NM_019640	ENSMUSG00000050017	Pitpnb	PI-TP-beta	phosphatidylinositol transfer protein, beta	protein-coding
Diff_Nuc13212	chr10	110849102	110849241	+	0	NA	Intergenic	Intergenic	-61077	NM_015781	53605	Mm.290407	NM_015781	ENSMUSG00000058799	Nap1l1	AA407126|AI256722|D10Ertd68e|NAP-1	nucleosome assembly protein 1-like 1	protein-coding
Diff_Nuc18798	chr16	96211052	96211191	+	0	NA	exon (NM_019537, exon 2 of 7)	exon (NM_019537, exon 2 of 7)	1389	NM_019537	56088	Mm.396248	NM_019537	ENSMUSG00000022913	Psmg1	AW552102|Dscr2	proteasome (prosome, macropain) assembly chaperone 1	protein-coding
Diff_Nuc20729	chr15	78955407	78955546	+	0	NA	intron (NM_177461, intron 7 of 15)	intron (NM_177461, intron 7 of 15)	16063	NM_177461	27008	Mm.196480	NM_177461	ENSMUSG00000033039	Micall1	AI448246|D15Mit260|D15N2e|EST573322|EST820961|MIRab13|mKIAA1668	microtubule associated monooxygenase, calponin and LIM domain containing -like 1	protein-coding
Diff_Nuc12686	chr10	92534222	92534361	+	0	NA	intron (NM_001347060, intron 1 of 67)	B4|SINE|B4	10050	NM_001347060	380654	Mm.34980	NM_001347060	ENSMUSG00000020014	Cfap54	4930485B16Rik|Gm872	cilia and flagella associated protein 54	protein-coding
Diff_Nuc17300	chr16	36805022	36805161	+	0	NA	intron (NM_001113405, intron 2 of 3)	intron (NM_001113405, intron 2 of 3)	3700	NM_001113405	106389	Mm.432078	NM_134111	ENSMUSG00000022838	Eaf2	AW048865|FESTA-L|FESTA-S|Festa|Traits|U19	ELL associated factor 2	protein-coding
Diff_Nuc35143	chr6	118722352	118722491	+	0	NA	intron (NM_009781, intron 5 of 46)	intron (NM_009781, intron 5 of 46)	-14429	NM_001290335	12288	Mm.41628	NM_009781	ENSMUSG00000051331	Cacna1c	Cav1.2|Cchl1a1|D930026N18Rik|MBC|MELC-CC	calcium channel, voltage-dependent, L type, alpha 1C subunit	protein-coding
Diff_Nuc27883	chr18	65408562	65408701	+	0	NA	TTS (NR_029600)	TTS (NR_029600)	116	NR_029600	387231		NR_029600	ENSMUSG00000065402	Mir122	Mir122a|Mirn122a|mir-122|mmu-mir-122	microRNA 122	ncRNA
Diff_Nuc38811	chr5	109137072	109137211	+	0	NA	Intergenic	Intergenic	13893	NM_054071	116701	Mm.35691	NM_054071	ENSMUSG00000008090	Fgfrl1	FGFR5|FGFR5beta|FGFR5gamma	fibroblast growth factor receptor-like 1	protein-coding
Diff_Nuc30136	chr7	85448102	85448241	+	0	NA	intron (NM_182809, intron 13 of 13)	intron (NM_182809, intron 13 of 13)	274553	NM_008746	18213	Mm.33496	NM_008746	ENSMUSG00000059146	Ntrk3	AW125844|Ntrk3_tv3|TrkC	neurotrophic tyrosine kinase, receptor, type 3	protein-coding
Diff_Nuc43393	chr4	123595602	123595741	+	0	NA	intron (NM_017475, intron 1 of 6)	intron (NM_017475, intron 1 of 6)	995	NM_017475	54170	Mm.220922	NM_017475	ENSMUSG00000028646	Rragc	AU041672|Gtr2|RAGC|TIB929|YGR163W	Ras-related GTP binding C	protein-coding
Diff_Nuc29848	chr7	73449072	73449211	+	0	NA	intron (NM_146191, intron 10 of 33)	intron (NM_146191, intron 10 of 33)	77469	NR_106024	102465640		NR_106024	ENSMUSG00000098353	Mir7057	Gm27550|mmu-mir-7057	microRNA 7057	ncRNA
Diff_Nuc23853	chr14	97503222	97503361	+	0	NA	Intergenic	Lx2|LINE|L1	-585038	NM_053105	93688	Mm.308735	NM_053105	ENSMUSG00000022076	Klhl1	mKIAA1490	kelch-like 1	protein-coding
Diff_Nuc18328	chr16	78996502	78996641	+	0	NA	intron (NM_178855, intron 18 of 26)	Lx8|LINE|L1	65378	NM_139134	246048	Mm.77895	NM_139134	ENSMUSG00000022860	Chodl	3110074E07Rik|MT75|PRED12	chondrolectin	protein-coding
Diff_Nuc34439	chr6	93849752	93849891	+	0	NA	intron (NM_001286785, intron 2 of 24)	L1_Mm|LINE|L1	13136	NR_104594	14924	Mm.217216	NM_010367	ENSMUSG00000045095	Magi1	AIP3|BAP1|Baiap1|Gukmi1|MAGI1c|Magi-1|TNRC19|WWP3|mKIAA4129	membrane associated guanylate kinase, WW and PDZ domain containing 1	protein-coding
Diff_Nuc63105	chr8	27179192	27179331	+	0	NA	intron (NM_207659, intron 11 of 21)	tRNA-Ala-GCY_|tRNA|tRNA	-13820	NR_110583	76604	Mm.437190	NR_110583	ENSMUSG00000085437	1700047A11Rik	4930554C15Rik	RIKEN cDNA 1700047A11 gene	ncRNA
Diff_Nuc41208	chr4	46175662	46175801	+	0	NA	intron (NM_001033201, intron 14 of 22)	intron (NM_001033201, intron 14 of 22)	24348	NM_001033201	433702	Mm.389536	NM_001033201	ENSMUSG00000028330	Ncbp1	AU014645|AW538051|CBP80	nuclear cap binding protein subunit 1	protein-coding
Diff_Nuc8586	chr11	76137522	76137661	+	0	NA	intron (NM_008750, intron 1 of 7)	intron (NM_008750, intron 1 of 7)	75052	NM_008750	18230	Mm.27915	NM_008750	ENSMUSG00000020844	Nxn	l11Jus13	nucleoredoxin	protein-coding
Diff_Nuc37849	chr5	74414352	74414491	+	0	NA	intron (NM_177561, intron 4 of 8)	intron (NM_177561, intron 4 of 8)	50015	NM_177561	69727	Mm.48795	NM_177561	ENSMUSG00000054814	Usp46	1190009E20Rik|2410018I08Rik|AI451644	ubiquitin specific peptidase 46	protein-coding
Diff_Nuc14883	chr17	44209702	44209841	+	0	NA	Intergenic	MLT1B|LTR|MaLR	-5980	NM_001168620	83965	Mm.30145	NM_032003	ENSMUSG00000023960	Enpp5	AW061004|D17Abb1e|E-NPP 5	ectonucleotide pyrophosphatase/phosphodiesterase 5	protein-coding
Diff_Nuc30762	chr7	108254962	108255101	+	0	NA	Intergenic	Intergenic	-2258	NM_001146010	207278	Mm.263041	NM_199012	ENSMUSG00000030691	Fchsd2	BC034086|R74866|Sh3md3|mKIAA0769	FCH and double SH3 domains 2	protein-coding
Diff_Nuc20074	chr15	53069382	53069521	+	0	NA	intron (NM_010162, intron 1 of 10)	intron (NM_010162, intron 1 of 10)	108287	NM_010162	14042	Mm.309395	NM_010162	ENSMUSG00000061731	Ext1	AA409028	exostoses (multiple) 1	protein-coding
Diff_Nuc37902	chr5	75629452	75629591	+	0	NA	Intergenic	Lx|LINE|L1	56665	NR_105992	102465620		NR_105992	ENSMUSG00000099060	Mir7025	Gm27860|mmu-mir-7025	microRNA 7025	ncRNA
Diff_Nuc7487	chr11	34721852	34721991	+	0	NA	Intergenic	Intergenic	-74778	NM_027411	70385	Mm.194368	NM_027411	ENSMUSG00000069910	Spdl1	1700018I02Rik|2600001J17Rik|2810049B11Rik|AA409762|Ccdc99	spindle apparatus coiled-coil protein 1	protein-coding
Diff_Nuc63927	chr8	59905042	59905181	+	0	NA	Intergenic	Intergenic	-29609	NM_009136	20284	Mm.12886	NM_009136	ENSMUSG00000031610	Scrg1	AW124307	scrapie responsive gene 1	protein-coding
Diff_Nuc25486	chr19	37034592	37034731	+	0	NA	intron (NM_001080706, intron 6 of 37)	intron (NM_001080706, intron 6 of 37)	34092	NM_001080706	107182	Mm.295062	NM_001080706	ENSMUSG00000040565	Btaf1	AI414500|AI447930|E430027O22Rik|TAF170	B-TFIID TATA-box binding protein associated factor 1	protein-coding
Diff_Nuc46819	chr3	94766742	94766881	+	0	NA	Intergenic	BGLII_Mus|LTR|ERVK	7874	NM_017395	53970	Mm.24308	NM_017395	ENSMUSG00000005774	Rfx5	-	regulatory factor X, 5 (influences HLA class II expression)	protein-coding
Diff_Nuc39300	chr5	124491402	124491541	+	0	NA	Intergenic	Intergenic	-9202	NM_177876	330192	Mm.4079	NM_177876	ENSMUSG00000066278	Vps37b	2300007F24Rik|AI415429|BC026744	vacuolar protein sorting 37B	protein-coding
Diff_Nuc12068	chr10	70742452	70742591	+	0	NA	intron (NM_145420, intron 1 of 6)	intron (NM_145420, intron 1 of 6)	5489	NM_145420	216080	Mm.270530	NM_145420	ENSMUSG00000019927	Ube2d1	UBCH5	ubiquitin-conjugating enzyme E2D 1	protein-coding
Diff_Nuc15374	chr17	63202432	63202571	+	0	NA	intron (NM_207654, intron 1 of 4)	intron (NM_207654, intron 1 of 4)	28165	NM_207654	13640	Mm.7978	NM_010109	ENSMUSG00000048915	Efna5	AL-1|AV158822|EFL-5|Ephrin-A5|Epl7|LERK-7|RAGS	ephrin A5	protein-coding
Diff_Nuc51821	chr2	109846752	109846891	+	0	NA	intron (NM_172671, intron 14 of 17)	intron (NM_172671, intron 14 of 17)	-11153	NM_026613	68201	Mm.181767	NM_026613	ENSMUSG00000027160	Ccdc34	2810027O19Rik|4930522P10Rik|AI596202	coiled-coil domain containing 34	protein-coding
Diff_Nuc3055	chr13	96548402	96548541	+	0	NA	intron (NM_027711, intron 2 of 35)	intron (NM_027711, intron 2 of 35)	81596	NM_010170	14064	Mm.440952	NM_010170	ENSMUSG00000021675	F2rl2	F730031A08|PAR3	coagulation factor II (thrombin) receptor-like 2	protein-coding
Diff_Nuc41898	chr4	71711882	71712021	+	0	NA	Intergenic	Intergenic	149976	NM_011599	21885	Mm.278444	NM_011599	ENSMUSG00000008305	Tle1	C230057C06Rik|Estm14|Grg-1|Grg1|Tle4l	transducin-like enhancer of split 1	protein-coding
Diff_Nuc638	chr13	3764712	3764851	+	0	NA	Intergenic	Intergenic	38783	NM_027416	70405	Mm.20079	NM_027416	ENSMUSG00000063130	Calml3	2310068O22Rik|AI326174	calmodulin-like 3	protein-coding
Diff_Nuc44698	chr3	17138692	17138831	+	0	NA	Intergenic	RLTR9A|LTR|ERVK	-551160	NR_033490	70441	Mm.458192	NR_033490	ENSMUSG00000100252	Mir124-2hg	100040120|2610100L16Rik|6430547I21Rik|A930005K07Rik|AW125202|Gm2612	Mir124-2 host gene (non-protein coding)	ncRNA
Diff_Nuc14073	chr17	15189642	15189781	+	0	NA	promoter-TSS (NM_001034891)	promoter-TSS (NM_001034891)	-312	NM_001034891	381062	Mm.393767	NM_183133	ENSMUSG00000036552	Ermard	2210404J11Rik|2410011O22Rik|AI448938	ER membrane associated RNA degradation	protein-coding
Diff_Nuc12838	chr10	96350452	96350591	+	0	NA	Intergenic	L1Md_F2|LINE|L1	-147881	NR_045358	75301	Mm.108650	NR_045358		4930556N09Rik	-	RIKEN cDNA 4930556N09 gene	ncRNA
Diff_Nuc9795	chr11	109474752	109474891	+	0	NA	Intergenic	Intergenic	-2118	NM_145940	52639	Mm.35817	NM_145940	ENSMUSG00000041895	Wipi1	4930533H01Rik|AW411817|D11Ertd498e	WD repeat domain, phosphoinositide interacting 1	protein-coding
Diff_Nuc41680	chr4	62127832	62127971	+	0	NA	intron (NM_023597, intron 2 of 10)	Charlie1a|DNA|MER1_type	4028	NM_001290522	71354	Mm.155573	NM_023597	ENSMUSG00000028391	Wdr31	5430402I10Rik|spWD	WD repeat domain 31	protein-coding
Diff_Nuc41009	chr4	38626592	38626731	+	0	NA	Intergenic	L1Md_A|LINE|L1	-770665	NM_001081095	75471	Mm.23522	NM_001081095	ENSMUSG00000028287	1700009N14Rik	AI429145	RIKEN cDNA 1700009N14 gene	protein-coding
Diff_Nuc13324	chr10	114955112	114955251	+	0	NA	intron (NM_010195, intron 2 of 17)	intron (NM_010195, intron 2 of 17)	-51861	NM_029982	77798	Mm.446685	NM_029982	ENSMUSG00000092210	A930009A15Rik	-	RIKEN cDNA A930009A15 gene	protein-coding
Diff_Nuc57195	chr1	130286292	130286431	+	0	NA	intron (NM_177445, intron 5 of 15)	intron (NM_177445, intron 5 of 15)	27632	NM_177445	226414	Mm.28693	NM_145507	ENSMUSG00000026356	Dars	5730439G15Rik	aspartyl-tRNA synthetase	protein-coding
Diff_Nuc17706	chr16	51929952	51930091	+	0	NA	Intergenic	RMER19C|LTR|ERVK	-101641	NM_001033238	208650	Mm.328206	NM_001033238	ENSMUSG00000022637	Cblb	AI429560|AI851073|Cbl-b	Casitas B-lineage lymphoma b	protein-coding
Diff_Nuc50122	chr2	50589592	50589731	+	0	NA	Intergenic	B1_Mur2|SINE|Alu	-175543	NR_033595	227885	Mm.301654	NR_033595	ENSMUSG00000083270	Gm13498	OTTMUSG00000012426	heat shock protein 90 alpha (cytosolic), class B member 1 pseudogene	pseudo
Diff_Nuc45537	chr3	49721302	49721441	+	0	NA	Intergenic	Intergenic	-160133	NM_130448	73173	Mm.87246	NM_130448	ENSMUSG00000037892	Pcdh18	3110038E07Rik|BB095589|PCDH68L	protocadherin 18	protein-coding
Diff_Nuc24550	chr19	3597462	3597601	+	0	NA	intron (NM_008513, intron 17 of 22)	intron (NM_008513, intron 17 of 22)	-21782	NM_028999	52036	Mm.284686	NM_028999	ENSMUSG00000024908	Ppp6r3	4930528G08Rik|9130026N02Rik|D19Bwg1430e|D19Ertd703e|Pp6r3|Ppcs3|Pptcs3|Sapl|Saps3|mKIAA1558	protein phosphatase 6, regulatory subunit 3	protein-coding
Diff_Nuc52085	chr2	119455752	119455891	+	0	NA	intron (NM_001042652, intron 3 of 9)	intron (NM_001042652, intron 3 of 9)	-11580	NM_001042653	70645	Mm.246412	NM_001042653	ENSMUSG00000072980	Oip5	5730547N13Rik|Lint-25|Ms18b	Opa interacting protein 5	protein-coding
Diff_Nuc48129	chr3	135498992	135499131	+	0	NA	intron (NR_040540, intron 3 of 4)	intron (NR_040540, intron 3 of 4)	4172	NR_040540	71038	Mm.410798	NR_040540	ENSMUSG00000106306	4933401H06Rik	-	RIKEN cDNA 4933401H06 gene	ncRNA
Diff_Nuc24693	chr19	6293302	6293441	+	0	NA	intron (NM_010119, intron 2 of 4)	ID_B1|SINE|B4	-13086	NM_001033342	240505	Mm.329622	NM_001033342	ENSMUSG00000024769	Cdc42bpg	BC046418|MRCKgamma	CDC42 binding protein kinase gamma (DMPK-like)	protein-coding
Diff_Nuc64527	chr8	81204542	81204681	+	0	NA	intron (NM_001009981, intron 6 of 10)	intron (NM_001009981, intron 6 of 10)	140440	NM_001191004	78651	Mm.28694	NM_030145	ENSMUSG00000031683	Lsm6	1500031N17Rik|2410088K19Rik|AI747288	LSM6 homolog, U6 small nuclear RNA and mRNA degradation associated	protein-coding
Diff_Nuc60412	chr9	51120332	51120471	+	0	NA	intron (NM_027217, intron 2 of 4)	intron (NM_027217, intron 2 of 4)	16621	NM_027217	69809	Mm.75315	NM_027217	ENSMUSG00000036027	1810046K07Rik	-	RIKEN cDNA 1810046K07 gene	protein-coding
Diff_Nuc53644	chr2	168712652	168712791	+	0	NA	Intergenic	Intergenic	68366	NM_009564	22722	Mm.2095	NM_009564	ENSMUSG00000027551	Zfp64	-	zinc finger protein 64	protein-coding
Diff_Nuc1225	chr13	26418042	26418181	+	0	NA	Intergenic	Intergenic	-13836	NR_045933	73576	Mm.45473	NR_045933		1700092E19Rik	-	RIKEN cDNA 1700092E19 gene	ncRNA
Diff_Nuc60373	chr9	49205842	49205981	+	0	NA	intron (NM_010077, intron 2 of 7)	intron (NM_010077, intron 2 of 7)	29215	NM_172922	244859	Mm.119994	NM_172922	ENSMUSG00000032257	Ankk1	9930020N01Rik	ankyrin repeat and kinase domain containing 1	protein-coding
Diff_Nuc5107	chr12	66928802	66928941	+	0	NA	Intergenic	Lx7|LINE|L1	456517	NM_001162933	238217	Mm.188575	NM_001162933	ENSMUSG00000060499	Rpl10l	EG238217	ribosomal protein L10-like	protein-coding
Diff_Nuc51756	chr2	107616442	107616581	+	0	NA	Intergenic	Lx3C|LINE|L1	485765	NM_021275	16492	Mm.142718	NM_021275	ENSMUSG00000042604	Kcna4	Kv1.4	potassium voltage-gated channel, shaker-related subfamily, member 4	protein-coding
Diff_Nuc54095	chr1	10245262	10245401	+	0	NA	Intergenic	L2b|LINE|L2	-22580	NM_001102430	211673	Mm.229141	NM_001102430	ENSMUSG00000067851	Arfgef1	ARFGEP1|BIG1|D130059B05Rik|D730028O18Rik|P200	ADP-ribosylation factor guanine nucleotide-exchange factor 1(brefeldin A-inhibited)	protein-coding
Diff_Nuc64981	chr8	97020442	97020581	+	0	NA	intron (NM_001033207, intron 21 of 48)	intron (NM_001033207, intron 21 of 48)	-8435	NR_106040	102466800		NR_106040	ENSMUSG00000098511	Mir7072	Gm27665|mmu-mir-7072	microRNA 7072	ncRNA
Diff_Nuc34240	chr6	87723762	87723901	+	0	NA	Intergenic	RSINE1|SINE|B4	-4299	NM_018762	54368	Mm.12897	NM_018762	ENSMUSG00000030054	Gp9	Cd42|GPIX	glycoprotein 9 (platelet)	protein-coding
Diff_Nuc40968	chr4	36837682	36837821	+	0	NA	intron (NM_001165999, intron 1 of 7)	intron (NM_001165999, intron 1 of 7)	61026	NM_001165999	242384	Mm.132507	NM_175516	ENSMUSG00000045083	Lingo2	B230217C06Rik|Lern3|Lrrn6c	leucine rich repeat and Ig domain containing 2	protein-coding
Diff_Nuc2412	chr13	69518032	69518171	+	0	NA	Intergenic	Intergenic	154641	NM_198600	210106	Mm.315959	NM_198600	ENSMUSG00000034575	Papd7	LAK-1|POLK|Pols|TRF4|TRF4-1	PAP associated domain containing 7	protein-coding
Diff_Nuc46026	chr3	66910342	66910481	+	0	NA	intron (NM_025822, intron 4 of 9)	L1_Mur3|LINE|L1	120817	NM_025822	66880	Mm.316418	NM_025822	ENSMUSG00000034544	Rsrc1	1200013F24Rik|SRrp53	arginine/serine-rich coiled-coil 1	protein-coding
Diff_Nuc44354	chr4	154732142	154732281	+	0	NA	intron (NM_008860, intron 1 of 17)	intron (NM_008860, intron 1 of 17)	3326	NM_008860	18762	Mm.28561	NM_008860	ENSMUSG00000029053	Prkcz	AI098070|C80388|Pkcz|R74924|aPKCzeta|nPKC-zeta|zetaPKC	protein kinase C, zeta	protein-coding
Diff_Nuc22412	chr14	44110002	44110141	+	0	NA	Intergenic	Intergenic	75607	NM_001098269	100042342	Mm.429750	NM_001098269	ENSMUSG00000095528	Gm10375	ENSMUSG00000072602	predicted gene 10375	protein-coding
Diff_Nuc24744	chr19	7851052	7851191	+	0	NA	Intergenic	L1_Mm|LINE|L1	26036	NM_146232	236149	Mm.207060	NM_146232	ENSMUSG00000053303	Slc22a26	-	solute carrier family 22 (organic cation transporter), member 26	protein-coding
Diff_Nuc12436	chr10	83910322	83910461	+	0	NA	Intergenic	L2c|LINE|L2	-7175	NM_001004363	77976	Mm.25874	NM_001004363	ENSMUSG00000020032	Nuak1	AU014801|AW494241|B230104P22Rik|Omphk1	NUAK family, SNF1-like kinase, 1	protein-coding
Diff_Nuc41366	chr4	52387212	52387351	+	0	NA	Intergenic	Intergenic	64555	NR_045175	72648	Mm.391869	NR_045175	ENSMUSG00000085763	Smc2os	2700081L22Rik	structural maintenance of chromosomes 2, opposite strand	ncRNA
Diff_Nuc15962	chr17	83693432	83693571	+	0	NA	Intergenic	(TG)n|Simple_repeat|Simple_repeat	-56770	NM_001114361	78798	Mm.295565	NM_199466	ENSMUSG00000032624	Eml4	4930443C24Rik|AI644019	echinoderm microtubule associated protein like 4	protein-coding
Diff_Nuc37722	chr5	69184432	69184571	+	0	NA	Intergenic	Intergenic	548447	NM_175519	243043	Mm.234821	NM_175519	ENSMUSG00000037653	Kctd8	A730087N02Rik	potassium channel tetramerisation domain containing 8	protein-coding
Diff_Nuc50853	chr2	75161532	75161671	+	0	NA	Intergenic	Intergenic	120635	NR_040635	77269	Mm.389278	NR_040635		9430019J16Rik	-	RIKEN cDNA 9430019J16 gene	ncRNA
Diff_Nuc48260	chr3	140497132	140497271	+	0	NA	Intergenic	Charlie1a|DNA|MER1_type	378118	NM_008811	18598	Mm.4223	NM_008811	ENSMUSG00000047674	Pdha2	Pdhal	pyruvate dehydrogenase E1 alpha 2	protein-coding
Diff_Nuc32471	chr6	22247902	22248041	+	0	NA	exon (NM_053116, exon 4 of 4)	exon (NM_053116, exon 4 of 4)	9744	NM_053116	93735	Mm.137403	NM_053116	ENSMUSG00000029671	Wnt16	E130309I19Rik	wingless-type MMTV integration site family, member 16	protein-coding
Diff_Nuc62282	chr9	113708062	113708201	+	0	NA	intron (NM_001286603, intron 1 of 4)	PB1D7|SINE|Alu	5683	NM_001286603	76499	Mm.222272	NM_029633	ENSMUSG00000033392	Clasp2	1500004F14Rik|8030404L10Rik|C77448|CLASP2beta|mKIAA0627	CLIP associating protein 2	protein-coding
Diff_Nuc37247	chr5	50448402	50448541	+	0	NA	intron (NM_133911, intron 1 of 18)	intron (NM_133911, intron 1 of 18)	1764	NM_133911	70693	Mm.272974	NM_133911	ENSMUSG00000029090	Adgra3	3830613O22Rik|AU044632|Gpr125|Tem5-like	adhesion G protein-coupled receptor A3	protein-coding
Diff_Nuc49766	chr2	37480592	37480731	+	0	NA	intron (NM_009261, intron 7 of 16)	intron (NM_009261, intron 7 of 16)	22144	NM_009261	20744	Mm.237095	NM_009261	ENSMUSG00000026915	Strbp	6430510M02Rik|AI852513|C230082I21Rik|C86322|Spnr	spermatid perinuclear RNA binding protein	protein-coding
Diff_Nuc30976	chr7	116091252	116091391	+	0	NA	Intergenic	Intergenic	13392	NM_025344	66085	Mm.182962	NM_025344	ENSMUSG00000031029	Eif3f	0610037M02Rik|AA409853|Eif3s5	eukaryotic translation initiation factor 3, subunit F	protein-coding
Diff_Nuc11643	chr10	54803102	54803241	+	0	NA	Intergenic	Intergenic	1007443	NR_038016	100502920	Mm.403982	NR_038016	ENSMUSG00000097069	Gm16998	-	predicted gene, 16998	ncRNA
Diff_Nuc1584	chr13	38326892	38327031	+	0	NA	Intergenic	MTD|LTR|MaLR	30153	NM_026382	67797	Mm.250783	NM_026382	ENSMUSG00000021431	Snrnp48	1110050F08Rik|6530403A03Rik|C6orf151	small nuclear ribonucleoprotein 48 (U11/U12)	protein-coding
Diff_Nuc8421	chr11	70997002	70997141	+	0	NA	intron (NM_001162414, intron 1 of 13)	intron (NM_001162414, intron 1 of 13)	17887	NM_001162414	637515	Mm.390402	NM_001039680	ENSMUSG00000070390	Nlrp1b	ENSMUSG00000070390|Nalp1b|OTTMUSG00000006087|OTTMUSG00000006089	NLR family, pyrin domain containing 1B	protein-coding
Diff_Nuc39095	chr5	119101072	119101211	+	0	NA	intron (NM_001347445, intron 2 of 30)	intron (NM_001347445, intron 2 of 30)	90413	NM_172424	76199	Mm.206238	NM_172424	ENSMUSG00000018076	Med13l	2210413I17Rik|6330591G05Rik|9030618F05Rik|Thrap2|Trap240L|mKIAA1025	mediator complex subunit 13-like	protein-coding
Diff_Nuc17592	chr16	46550282	46550421	+	0	NA	Intergenic	Intergenic	-53271	NM_021497	58998	Mm.40477	NM_021495	ENSMUSG00000022656	Nectin3	2610301B19Rik|3000002N23Rik|4921513D19Rik|AA407785|AU016832|AW538082|CD113|Pvrl3	nectin cell adhesion molecule 3	protein-coding
Diff_Nuc33217	chr6	47865032	47865171	+	0	NA	Intergenic	Intergenic	-5466	NM_145576	232784	Mm.196782	NM_145576	ENSMUSG00000052763	Zfp212	Znf212|mKIAA3011	Zinc finger protein 212	protein-coding
Diff_Nuc41561	chr4	58913142	58913281	+	0	NA	intron (NM_172381, intron 1 of 48)	intron (NM_172381, intron 1 of 48)	12386	NM_172381	230249	Mm.234801	NM_172381	ENSMUSG00000050812	AI314180	AW558785|BB181316|mKIAA0368	expressed sequence AI314180	protein-coding
Diff_Nuc33808	chr6	69881602	69881741	+	0	NA	Intergenic	L1Md_F2|LINE|L1	-604503	NR_004434	19783		NR_004434	ENSMUSG00000106222	Rprl1	Rmrp2|Rpr|Rprh2	ribonuclease P RNA-like 1	ncRNA
Diff_Nuc12953	chr10	101176952	101177091	+	0	NA	intron (NM_001205098, intron 1 of 7)	L1Md_F2|LINE|L1	32900	NM_001205098	67569	Mm.25252	NM_026243	ENSMUSG00000019888	Mgat4c	9130411I17Rik|GntIVh	MGAT4 family, member C	protein-coding
Diff_Nuc38550	chr5	101210562	101210701	+	0	NA	intron (NM_001081107, intron 9 of 17)	intron (NM_001081107, intron 9 of 17)	16988	NM_001081107	191578	Mm.21469	NM_180984	ENSMUSG00000035266	Helq	AU021725|D430018E21Rik|Hel308	helicase, POLQ-like	protein-coding
Diff_Nuc31410	chr7	130209572	130209711	+	0	NA	Intergenic	Charlie5|DNA|MER1_type	-57758	NM_144925	233833	Mm.102305	NM_144925	ENSMUSG00000052707	Tnrc6a	2010321I05Rik|3110054G10Rik|AW557223|CAGH26|D130023A07Rik|GW182|Tnrc6	trinucleotide repeat containing 6a	protein-coding
Diff_Nuc52292	chr2	126448712	126448851	+	0	NA	Intergenic	Intergenic	-4367	NM_008230	15186	Mm.18603	NM_008230	ENSMUSG00000027360	Hdc	AW108189|Hdc-a|Hdc-c|Hdc-e|Hdc-s	histidine decarboxylase	protein-coding
Diff_Nuc50746	chr2	71985162	71985301	+	0	NA	intron (NM_019688, intron 6 of 29)	intron (NM_019688, intron 6 of 29)	92557	NM_001204166	56508	Mm.196153	NM_019688	ENSMUSG00000049044	Rapgef4	1300003D15Rik|5730402K07Rik|6330581N18Rik|EPAC 2|Epac-2|Epac2|mKIAA4040	Rap guanine nucleotide exchange factor (GEF) 4	protein-coding
Diff_Nuc46104	chr3	69322712	69322851	+	0	NA	intron (NM_178726, intron 2 of 3)	intron (NM_178726, intron 2 of 3)	80101	NM_020026	26879	Mm.153710	NM_020026	ENSMUSG00000043300	B3galnt1	B3galt3|b3GT3	UDP-GalNAc:betaGlcNAc beta 1,3-galactosaminyltransferase, polypeptide 1	protein-coding
Diff_Nuc53336	chr2	157284882	157285021	+	0	NA	intron (NM_009271, intron 6 of 14)	intron (NM_009271, intron 6 of 14)	34922	NM_001025395	20779	Mm.22845	NM_009271	ENSMUSG00000027646	Src	AW259666|pp60c-src	Rous sarcoma oncogene	protein-coding
Diff_Nuc23126	chr14	68402622	68402761	+	0	NA	intron (NM_177780, intron 34 of 51)	intron (NM_177780, intron 34 of 51)	39453	NR_133010	14714	Mm.358309	NM_008145	ENSMUSG00000015812	Gnrh1	Gnrh|Gnrh2|LHRH|Lhrh1|Lnrh|hpg	gonadotropin releasing hormone 1	protein-coding
Diff_Nuc62427	chr9	119854282	119854421	+	0	NA	intron (NM_028735, intron 7 of 28)	(CCCCAG)n|Simple_repeat|Simple_repeat	7627	NM_028735	74052	Mm.189573	NM_028735	ENSMUSG00000032514	Ttc21a	4921538N17Rik|AA387572|Thm2	tetratricopeptide repeat domain 21A	protein-coding
Diff_Nuc8764	chr11	79953802	79953941	+	0	NA	intron (NM_183275, intron 1 of 3)	intron (NM_183275, intron 1 of 3)	1784	NM_183275	68550	Mm.18466	NM_183275	ENSMUSG00000046909	Tefm	1110002N22Rik	transcription elongation factor, mitochondrial	protein-coding
Diff_Nuc17539	chr16	44719562	44719701	+	0	NA	Intergenic	Intergenic	-4783	NM_145972	212547	Mm.310573	NM_145972	ENSMUSG00000036208	Nepro	-	nucleolus and neural progenitor protein	protein-coding
Diff_Nuc8995	chr11	86289032	86289171	+	0	NA	Intergenic	Intergenic	-9058	NM_029788	76892	Mm.262707	NM_029788	ENSMUSG00000020521	Rnft1	0610013E23Rik|AV007605	ring finger protein, transmembrane 1	protein-coding
Diff_Nuc4509	chr12	41220322	41220461	+	0	NA	intron (NM_172803, intron 1 of 52)	intron (NM_172803, intron 1 of 52)	47751	NM_172803	238130	Mm.341423	NM_172803	ENSMUSG00000035954	Dock4	5330406C03|6330411N01Rik|AF263288|C030023J22|mKIAA0716	dedicator of cytokinesis 4	protein-coding
Diff_Nuc38064	chr5	84373862	84374001	+	0	NA	Intergenic	Lx8|LINE|L1	472476	NM_007937	13839	Mm.137991	NM_007937	ENSMUSG00000029245	Epha5	AI854630|AW125296|Cek7|Ehk1|Els1|Hek7|Rek7|bsk	Eph receptor A5	protein-coding
Diff_Nuc31415	chr7	130282012	130282151	+	0	NA	intron (NM_144925, intron 2 of 23)	B1_Mur3|SINE|Alu	14682	NM_144925	233833	Mm.102305	NM_144925	ENSMUSG00000052707	Tnrc6a	2010321I05Rik|3110054G10Rik|AW557223|CAGH26|D130023A07Rik|GW182|Tnrc6	trinucleotide repeat containing 6a	protein-coding
Diff_Nuc16835	chr16	22912282	22912421	+	0	NA	Intergenic	B4A|SINE|B4	-6104	NM_001083905	59083	Mm.28461	NM_021564	ENSMUSG00000022871	Fetub	2310011O17Rik|AI255764|D17980|Gugu	fetuin beta	protein-coding
Diff_Nuc46025	chr3	66822472	66822611	+	0	NA	intron (NM_025822, intron 3 of 9)	Lx5|LINE|L1	32947	NM_025822	66880	Mm.316418	NM_025822	ENSMUSG00000034544	Rsrc1	1200013F24Rik|SRrp53	arginine/serine-rich coiled-coil 1	protein-coding
Diff_Nuc42508	chr4	96689922	96690061	+	0	NA	Intergenic	Intergenic	-238140	NM_001081284	620779	Mm.439625	NM_001081284	ENSMUSG00000078639	Gm12695	OTTMUSG00000008003	predicted gene 12695	protein-coding
Diff_Nuc33282	chr6	49451082	49451221	+	0	NA	Intergenic	Intergenic	105548	NM_029916	77485	Mm.128054	NM_029916	ENSMUSG00000023403	Stk31	C330007K24Rik	serine threonine kinase 31	protein-coding
Diff_Nuc20905	chr15	82978222	82978361	+	0	NA	intron (NM_001347082, intron 1 of 7)	intron (NM_001347082, intron 1 of 7)	1475	NM_178627	73826	Mm.23758	NM_178627	ENSMUSG00000041815	Poldip3	1110008P04Rik|AA408269|AL022852|C77954|PDIP46|SKAR|mKIAA1649	polymerase (DNA-directed), delta interacting protein 3	protein-coding
Diff_Nuc44714	chr3	17987052	17987191	+	0	NA	intron (NM_007825, intron 4 of 5)	Lx6|LINE|L1	32796	NM_021560	59058	Mm.149938	NM_021560	ENSMUSG00000025128	Bhlhe22	Beta3|Beta3a|Bhlhb5	basic helix-loop-helix family, member e22	protein-coding
Diff_Nuc20517	chr15	70665372	70665511	+	0	NA	Intergenic	Intergenic	892827	NM_177819	70363	Mm.126450	NM_177819	ENSMUSG00000036800	Fam135b	1700010C24Rik|A830008O07Rik	family with sequence similarity 135, member B	protein-coding
Diff_Nuc13615	chr10	124752512	124752651	+	0	NA	intron (NM_011391, intron 1 of 6)	intron (NM_011391, intron 1 of 6)	13010	NM_011391	20503	Mm.29161	NM_011391	ENSMUSG00000020102	Slc16a7	4921534N07Rik|Mct2	solute carrier family 16 (monocarboxylic acid transporters), member 7	protein-coding
Diff_Nuc4893	chr12	57601352	57601491	+	0	NA	intron (NR_045082, intron 5 of 6)	B1_Mur4|SINE|Alu	28986	NR_045082	104798	Mm.310950	NR_045082		E030019B13Rik	AI413669	RIKEN cDNA E030019B13 gene	ncRNA
Diff_Nuc65127	chr8	104596052	104596191	+	0	NA	Intergenic	B1_Mm|SINE|Alu	712890	NM_009866	12552	Mm.1571	NM_009866	ENSMUSG00000031673	Cdh11	Cad11|OSF-4	cadherin 11	protein-coding
Diff_Nuc37249	chr5	50621312	50621451	+	0	NA	Intergenic	Intergenic	-22620	NR_106197	102465903		NR_106197	ENSMUSG00000099124	Mir8117	Gm27323|mmu-mir-8117	microRNA 8117	ncRNA
Diff_Nuc54864	chr1	42516822	42516961	+	0	NA	Intergenic	L1_Mus1|LINE|L1	234779	NR_027826	66297	Mm.45203	NM_183252	ENSMUSG00000060424	Pantr1	2610017I09Rik|Pou3f3os|linc-Brn1a	POU domain, class 3, transcription factor 3 adjacent noncoding transcript 1	ncRNA
Diff_Nuc1672	chr13	41346992	41347131	+	0	NA	intron (NM_001135577, intron 1 of 1)	intron (NM_001135577, intron 1 of 1)	1848	NM_001135577	108934	Mm.38578	NM_001135577	ENSMUSG00000091264	Smim13	2900036K02Rik	small integral membrane protein 13	protein-coding
Diff_Nuc52232	chr2	123851332	123851471	+	0	NA	Intergenic	Intergenic	-64304	NM_001290997	214968	Mm.330536	NM_172537	ENSMUSG00000027200	Sema6d	1110067B02Rik|AA409156|D330011G23|mKIAA1479	sema domain, transmembrane domain (TM), and cytoplasmic domain, (semaphorin) 6D	protein-coding
Diff_Nuc39539	chr5	135418142	135418281	+	0	NA	3' UTR (NM_024479, exon 6 of 6)	3' UTR (NM_024479, exon 6 of 6)	4593	NM_009903	12740	Mm.7339	NM_009903	ENSMUSG00000047501	Cldn4	Cep-r|Cpetr|Cpetr1	claudin 4	protein-coding
Diff_Nuc64633	chr8	85064922	85065061	+	0	NA	Intergenic	MTA_Mm|LTR|MaLR	-138506	NM_008357	16168	Mm.4392	NM_008357	ENSMUSG00000031712	Il15	AI503618|IL-15	interleukin 15	protein-coding
Diff_Nuc45578	chr3	51333182	51333321	+	0	NA	intron (NM_080793, intron 6 of 7)	B4|SINE|B4	-30428	NR_033624	100039684	Mm.387178	NR_033624		5031434O11Rik	AI481280|Gm2370	RIKEN cDNA 5031434O11 gene	ncRNA
Diff_Nuc40456	chr4	14688272	14688411	+	0	NA	intron (NM_028499, intron 4 of 7)	L1Md_F2|LINE|L1	34858	NM_028499	73314	Mm.52613	NM_028499	ENSMUSG00000023151	Lrrc69	1700034K16Rik	leucine rich repeat containing 69	protein-coding
Diff_Nuc10866	chr10	25158192	25158331	+	0	NA	intron (NM_013511, intron 1 of 19)	intron (NM_013511, intron 1 of 19)	30087	NM_013511	13822	Mm.306026	NM_013511	ENSMUSG00000019978	Epb41l2	4.1G|AW555191|D10Ertd398e|Epb4.1l2|NBL2	erythrocyte membrane protein band 4.1 like 2	protein-coding
Diff_Nuc60753	chr9	61889022	61889161	+	0	NA	Intergenic	B4|SINE|B4	-14494	NM_028748	74090	Mm.273267	NM_028748	ENSMUSG00000032278	Paqr5	0610010I15Rik|AV002411|BB115488|mPRg	progestin and adipoQ receptor family member V	protein-coding
Diff_Nuc30310	chr7	91342952	91343091	+	0	NA	Intergenic	L1MA5|LINE|L1	-42618	NM_133722	70178	Mm.23914	NM_133722	ENSMUSG00000038459	Abhd17c	2210412D01Rik|AL023007|Fam108c|Fam108c1	abhydrolase domain containing 17C	protein-coding
Diff_Nuc10943	chr10	28143372	28143511	+	0	NA	intron (NM_008983, intron 7 of 31)	intron (NM_008983, intron 7 of 31)	-244725	NM_001305663	210757	Mm.123021	NM_178666	ENSMUSG00000049109	Themis	E430004N04Rik|Gasp|Spot|Tsepa|thylex	thymocyte selection associated	protein-coding
Diff_Nuc20015	chr15	50971562	50971701	+	0	NA	Intergenic	Intergenic	-250044	NM_032000	83925	Mm.30466	NM_032000	ENSMUSG00000038679	Trps1	AI115454|AI447310|D15Ertd586e	trichorhinophalangeal syndrome I (human)	protein-coding
Diff_Nuc8075	chr11	59983142	59983281	+	0	NA	intron (NM_001037764, intron 1 of 4)	intron (NM_001037764, intron 1 of 4)	29627	NM_001037764	19377	Mm.296366	NM_009021	ENSMUSG00000062115	Rai1	Gt1	retinoic acid induced 1	protein-coding
Diff_Nuc7337	chr11	28589452	28589591	+	0	NA	intron (NR_045906, intron 2 of 2)	MIRb|SINE|MIR	7957	NR_045906	72818	Mm.410846	NR_045906	ENSMUSG00000084966	2810471M01Rik	-	RIKEN cDNA 2810471M01 gene	ncRNA
Diff_Nuc11304	chr10	41734872	41735011	+	0	NA	intron (NM_001034858, intron 1 of 17)	intron (NM_001034858, intron 1 of 17)	3247	NM_001034858	213402	Mm.211320	NM_001034858	ENSMUSG00000071324	Armc2	2610018I05Rik	armadillo repeat containing 2	protein-coding
Diff_Nuc3269	chr13	104630452	104630591	+	0	NA	intron (NM_001005868, intron 19 of 26)	intron (NM_001005868, intron 19 of 26)	-75859	NM_172592	218543	Mm.458176	NM_172592	ENSMUSG00000032621	Srek1	8430401B01|AI450757|AI462342|SRrp508|SRrp86|Sfrs12|Srsf12	splicing regulatory glutamine/lysine-rich protein 1	protein-coding
Diff_Nuc65144	chr8	105929272	105929411	+	0	NA	Intergenic	Intergenic	-57907	NR_036588	69794	Mm.396139	NR_036588	ENSMUSG00000110340	1600027J07Rik	-	RIKEN cDNA 1600027J07 gene	ncRNA
Diff_Nuc62760	chr8	10892562	10892701	+	0	NA	Intergenic	Intergenic	-7291	NR_102285	71624	Mm.139075	NR_102285	ENSMUSG00000109089	4833411C07Rik	-	RIKEN cDNA 4833411C07 gene	ncRNA
Diff_Nuc48327	chr3	142783802	142783941	+	0	NA	Intergenic	Lx8|LINE|L1	-122148	NR_040551	320072	Mm.136397	NR_040551	ENSMUSG00000105923	A830019L24Rik	-	RIKEN cDNA A830019L24 gene	ncRNA
Diff_Nuc1548	chr13	37687222	37687361	+	0	NA	Intergenic	Intergenic	-230616	NM_026830	68750	Mm.491109	NM_026830	ENSMUSG00000039087	Rreb1	1110037N09Rik|AA414966|B930013M22Rik	ras responsive element binding protein 1	protein-coding
Diff_Nuc7132	chr11	20599542	20599681	+	0	NA	intron (NM_181411, intron 6 of 8)	intron (NM_181411, intron 6 of 8)	41948	NM_001290545	216549	Mm.356580	NM_181411	ENSMUSG00000049659	Aftph	-	aftiphilin	protein-coding
Diff_Nuc7326	chr11	28313992	28314131	+	0	NA	intron (NM_001346759, intron 3 of 5)	intron (NM_001346759, intron 3 of 5)	170263	NM_001166661	216613	Mm.93759	NM_181577	ENSMUSG00000032878	Ccdc85a	-	coiled-coil domain containing 85A	protein-coding
Diff_Nuc42976	chr4	109058242	109058381	+	0	NA	3' UTR (NM_007943, exon 25 of 25)	3' UTR (NM_007943, exon 25 of 25)	20551	NR_131195	102635290	Mm.427859	NR_131195		Ttc39aos1	Gm12750|OTTMUSG00000008290|lincRNA-EPS	Ttc39a opposite strand RNA 1	ncRNA
Diff_Nuc16535	chr16	12663042	12663181	+	0	NA	Intergenic	Intergenic	-148372	NR_040507	75493	Mm.396146	NR_040507	ENSMUSG00000101565	1700003L19Rik	-	RIKEN cDNA 1700003L19 gene	ncRNA
Diff_Nuc60693	chr9	59693392	59693531	+	0	NA	intron (NM_173018, intron 16 of 43)	ORR1C1|LTR|MaLR	94480	NM_173018	270163	Mm.249545	NM_173018	ENSMUSG00000039585	Myo9a	4732465J09Rik|C130068I12Rik|C230003M11	myosin IXa	protein-coding
Diff_Nuc11757	chr10	59724362	59724501	+	0	NA	Intergenic	Intergenic	-15945	NM_001146123	19156	Mm.29978	NM_011179	ENSMUSG00000004207	Psap	AI037048|SGP-1	prosaposin	protein-coding
Diff_Nuc25942	chr19	49443502	49443641	+	0	NA	Intergenic	L1_Mur3|LINE|L1	1163056	NM_025696	66673	Mm.70980	NM_025696	ENSMUSG00000063434	Sorcs3	6330404A12Rik|AW045579	sortilin-related VPS10 domain containing receptor 3	protein-coding
Diff_Nuc9044	chr11	87321282	87321421	+	0	NA	intron (NM_001199293, intron 10 of 30)	intron (NM_001199293, intron 10 of 30)	-70540	NM_001284398	18952	Mm.2214	NM_011129	ENSMUSG00000020486	Sept4	ARTS|Bh5|OTTMUSG00000001265|Pnutl2	septin 4	protein-coding
Diff_Nuc1663	chr13	41254312	41254451	+	0	NA	intron (NM_001324525, intron 22 of 27)	RMER1C|Other|Other	41001	NM_001324525	637277		NM_001324525		Sycp2l	EG621792|Gm268|Gm40956	synaptonemal complex protein 2-like	protein-coding
Diff_Nuc66003	chr8	130570572	130570711	+	0	NA	Intergenic	Intergenic	231484	NR_105822	102465212		NR_105822	ENSMUSG00000099326	Mir21c	Gm28013|mmu-mir-21c	microRNA 21c	ncRNA
Diff_Nuc65141	chr8	105775972	105776111	+	0	NA	Intergenic	L1Md_F2|LINE|L1	95393	NR_036588	69794	Mm.396139	NR_036588	ENSMUSG00000110340	1600027J07Rik	-	RIKEN cDNA 1600027J07 gene	ncRNA
Diff_Nuc23824	chr14	95749852	95749991	+	0	NA	Intergenic	Lx7|LINE|L1	-530564	NM_025733	66732	Mm.75060	NM_025733	ENSMUSG00000034689	4921530L21Rik	-	RIKEN cDNA 4921530L21 gene	protein-coding
Diff_Nuc19818	chr15	41517312	41517451	+	0	NA	intron (NM_001130166, intron 3 of 16)	intron (NM_001130166, intron 3 of 16)	-103199	NM_001130165	170719	Mm.254267	NM_130885	ENSMUSG00000022307	Oxr1	2210416C20Rik|C7|C7B	oxidation resistance 1	protein-coding
Diff_Nuc61199	chr9	74715222	74715361	+	0	NA	intron (NM_008262, intron 1 of 1)	intron (NM_008262, intron 1 of 1)	5563	NM_008262	15379	Mm.303355	NM_008262	ENSMUSG00000043013	Onecut1	D9Ertd423e|HNF-6|Hfh12|Hnf6|Hnf6b|OC-1|Oc1	one cut domain, family member 1	protein-coding
Diff_Nuc44786	chr3	19795102	19795241	+	0	NA	non-coding (NR_027985, exon 1 of 1)	non-coding (NR_027985, exon 1 of 1)	300	NR_027985	70808	Mm.427103	NR_027985	ENSMUSG00000048106	4632415L05Rik	AI662792	RRS1 ribosome biogenesis regulator homolog pseudogene	pseudo
Diff_Nuc16706	chr16	18304332	18304471	+	0	NA	intron (NM_138583, intron 6 of 8)	intron (NM_138583, intron 6 of 8)	-15140	NM_033324	94223	Mm.447352	NM_033324	ENSMUSG00000022718	Dgcr8	D16H22S1742E|D16H22S788E|D16Wis2|Gy1|N41|Vo59c07|mir-1306	DiGeorge syndrome critical region gene 8	protein-coding
Diff_Nuc62551	chr9	123205062	123205201	+	0	NA	Intergenic	ERVL-E-int|LTR|ERVL	-35224	NM_001002267	72309	Mm.8569	NM_001002267	ENSMUSG00000054871	Tmem158	2310037P21Rik|Ris1	transmembrane protein 158	protein-coding
Diff_Nuc48612	chr3	154140442	154140581	+	0	NA	Intergenic	RMER17A|LTR|ERVK	-119164	NM_009968	12972	Mm.374855	NM_009968	ENSMUSG00000028199	Cryz	Sez9	crystallin, zeta	protein-coding
Diff_Nuc40239	chr4	7182652	7182791	+	0	NA	Intergenic	Intergenic	-264851	NM_145711	252838	Mm.435828	NM_145711	ENSMUSG00000041272	Tox	1700007F02Rik	thymocyte selection-associated high mobility group box	protein-coding
Diff_Nuc22242	chr14	35192992	35193131	+	0	NA	intron (NM_153127, intron 1 of 6)	intron (NM_153127, intron 1 of 6)	4371	NM_153127	105450	Mm.272673	NM_153127	ENSMUSG00000041445	Mmrn2	AA986839|ENDOGLYX1|Emilin3|EndoGlyx-1	multimerin 2	protein-coding
Diff_Nuc61684	chr9	92965812	92965951	+	0	NA	Intergenic	BGLII_A|LTR|ERVK	-65310	NR_040756	78349	Mm.52612	NR_040756	ENSMUSG00000100294	1700034K08Rik	-	RIKEN cDNA 1700034K08 gene	ncRNA
Diff_Nuc12222	chr10	76837372	76837511	+	0	NA	intron (NM_001024837, intron 1 of 10)	intron (NM_001024837, intron 1 of 10)	43577	NM_130895	110532	Mm.276815	NM_130895	ENSMUSG00000020262	Adarb1	1700057H01Rik|AW124433|AW558573|Adar2|BB220382|D10Bwg0447e|Red1	adenosine deaminase, RNA-specific, B1	protein-coding
Diff_Nuc8605	chr11	76673962	76674101	+	0	NA	Intergenic	RLTR11B|LTR|ERVK	-13521	NM_007754	12874	Mm.276736	NM_007754	ENSMUSG00000020841	Cpd	AA960140|AW322530|D830034L15Rik	carboxypeptidase D	protein-coding
Diff_Nuc43672	chr4	133305142	133305281	+	0	NA	intron (NM_001080819, intron 1 of 19)	intron (NM_001080819, intron 1 of 19)	4315	NM_001080819	93760	Mm.22478	NM_001080819	ENSMUSG00000007880	Arid1a	1110030E03Rik|BAF250a|Osa1|Smarcf1	AT rich interactive domain 1A (SWI-like)	protein-coding
Diff_Nuc20354	chr15	63100722	63100861	+	0	NA	Intergenic	Intergenic	210372	NR_045279	432958	Mm.255105	NR_045279		Gm20740	-	predicted gene, 20740	ncRNA
Diff_Nuc36916	chr5	36395522	36395661	+	0	NA	intron (NM_030889, intron 9 of 26)	MLT1D-int|LTR|MaLR	-151079	NM_175249	76943	Mm.44242	NM_175249	ENSMUSG00000043430	Psapl1	2310020A21Rik	prosaposin-like 1	protein-coding
Diff_Nuc25516	chr19	37417522	37417661	+	0	NA	Intergenic	Intergenic	-12488	NM_031156	15925	Mm.28366	NM_031156	ENSMUSG00000056999	Ide	1300012G03Rik|4833415K22Rik|AA675336|AI507533	insulin degrading enzyme	protein-coding
Diff_Nuc46853	chr3	95310822	95310961	+	0	NA	exon (NM_007802, exon 7 of 8)	exon (NM_007802, exon 7 of 8)	7759	NM_007802	13038	Mm.272085	NM_007802	ENSMUSG00000028111	Ctsk	AI323530|MMS10-Q|Ms10q|catK	cathepsin K	protein-coding
Diff_Nuc49218	chr2	21083812	21083951	+	0	NA	Intergenic	RLTR15|LTR|ERVK	43111	NM_027728	71233	Mm.27658	NM_027728	ENSMUSG00000026679	Enkur	4933434I06Rik|AU016229	enkurin, TRPC channel interacting protein	protein-coding
Diff_Nuc20751	chr15	79758512	79758651	+	0	NA	intron (NM_144811, intron 2 of 6)	intron (NM_144811, intron 2 of 6)	4495	NM_144811	52609	Mm.323442	NM_144811	ENSMUSG00000053411	Cbx7	1600014J01Rik|AI851678|D15Ertd417e	chromobox 7	protein-coding
Diff_Nuc1825	chr13	46227362	46227501	+	0	NA	Intergenic	Intergenic	-141659	NM_001005422	380842	Mm.188108	NM_001005422	ENSMUSG00000063529	Stmnd1	Gm1574	stathmin domain containing 1	protein-coding
Diff_Nuc23769	chr14	92947262	92947401	+	0	NA	Intergenic	Lx9|LINE|L1	1340776	NM_001271800	211712	Mm.37126	NM_001081377	ENSMUSG00000055421	Pcdh9	-	protocadherin 9	protein-coding
Diff_Nuc19269	chr15	18964212	18964351	+	0	NA	Intergenic	MTB_Mm|LTR|MaLR	214197	NM_009865	320873	Mm.117794	NM_009865	ENSMUSG00000022321	Cdh10	A830016G23Rik|C030003B10Rik|C030011H18Rik	cadherin 10	protein-coding
Diff_Nuc32740	chr6	30224642	30224781	+	0	NA	intron (NM_009459, intron 1 of 6)	intron (NM_009459, intron 1 of 6)	29828	NM_009459	22214	Mm.332967	NM_009459	ENSMUSG00000039159	Ube2h	1500009C23Rik|AI181839|AI326965|AI462483|AW227540|E2-20K|Gid3|N28148|Ubc8	ubiquitin-conjugating enzyme E2H	protein-coding
Diff_Nuc30605	chr7	104132202	104132341	+	0	NA	intron (NM_153591, intron 5 of 13)	intron (NM_153591, intron 5 of 13)	32234	NM_153591	244141	Mm.274864	NM_153591	ENSMUSG00000018995	Nars2	AI875199	asparaginyl-tRNA synthetase 2 (mitochondrial)(putative)	protein-coding
Diff_Nuc19087	chr15	9661672	9661811	+	0	NA	intron (NM_001305044, intron 2 of 8)	intron (NM_001305044, intron 2 of 8)	16882	NM_177123	320277	Mm.127822	NM_177123	ENSMUSG00000072663	Spef2	C230086A09Rik	sperm flagellar 2	protein-coding
Diff_Nuc31375	chr7	128883802	128883941	+	0	NA	exon (NM_011326, exon 3 of 13)	exon (NM_011326, exon 3 of 13)	5878	NM_011326	20278	Mm.35247	NM_011326	ENSMUSG00000000216	Scnn1g	SCNEG	sodium channel, nonvoltage-gated 1 gamma	protein-coding
Diff_Nuc7361	chr11	29241442	29241581	+	0	NA	Intergenic	RLTR16|LTR|ERVK	-32661	NM_176841	108686	Mm.338284	NM_176841	ENSMUSG00000032740	Ccdc88a	A430106J12Rik|AI848406|Ape|C130096N06Rik|C330012F17Rik|D130005J21Rik|Girdin|Giv|Grdn|Hkrp1	coiled coil domain containing 88A	protein-coding
Diff_Nuc26126	chr19	57170192	57170331	+	0	NA	intron (NM_178688, intron 6 of 24)	L1M5|LINE|L1	23253	NM_001347459	226251	Mm.217161	NM_178688	ENSMUSG00000025085	Ablim1	2210411C18Rik|2610209L21Rik|4833406P10Rik|9330196J19Rik|AV079770|AW060987|AW215784|Limab1|mKIAA0059	actin-binding LIM protein 1	protein-coding
Diff_Nuc37240	chr5	50232902	50233041	+	0	NA	Intergenic	L1_Mus2|LINE|L1	217264	NM_133911	70693	Mm.272974	NM_133911	ENSMUSG00000029090	Adgra3	3830613O22Rik|AU044632|Gpr125|Tem5-like	adhesion G protein-coupled receptor A3	protein-coding
Diff_Nuc22976	chr14	64498152	64498291	+	0	NA	intron (NM_028228, intron 6 of 6)	intron (NM_028228, intron 6 of 6)	19072	NM_028228	72400	Mm.379214	NM_028228	ENSMUSG00000021958	Pinx1	2210403I16Rik|2610028A01Rik|67-11-3|AU024023|LPTS|LPTS1	PIN2/TERF1 interacting, telomerase inhibitor 1	protein-coding
Diff_Nuc40380	chr4	11364602	11364741	+	0	NA	Intergenic	MMERVK10C-int|LTR|ERVK	-48434	NM_001081183	66185	Mm.331487	NM_001081183	ENSMUSG00000040720	1110037F02Rik	4930422M05Rik|Kiaa1429|mKIAA1429	RIKEN cDNA 1110037F02 gene	protein-coding
Diff_Nuc54505	chr1	27556592	27556731	+	0	NA	Intergenic	Intergenic	-812356	NM_001033764	210940	Mm.297614	NM_001033764	ENSMUSG00000073722	4931408C20Rik	-	RIKEN cDNA 4931408C20 gene	protein-coding
Diff_Nuc13884	chr17	6212812	6212951	+	0	NA	intron (NM_054040, intron 6 of 13)	intron (NM_054040, intron 6 of 13)	-57589	NM_001033178	77106	Mm.381893	NM_001033178	ENSMUSG00000038141	Tmem181a	5930418K15Rik|C76977|Gpr178|Tmem181|mKIAA1423	transmembrane protein 181A	protein-coding
Diff_Nuc2483	chr13	73740072	73740211	+	0	NA	Intergenic	Intergenic	-1309	NM_146047	218335	Mm.30099	NM_146047	ENSMUSG00000021610	Clptm1l	C130052I12Rik|Crr9	CLPTM1-like	protein-coding
Diff_Nuc22576	chr14	49900722	49900861	+	0	NA	Intergenic	Intergenic	-35688	NM_025956	67082	Mm.87439	NM_025956	ENSMUSG00000021850	1700011H14Rik	-	RIKEN cDNA 1700011H14 gene	protein-coding
Diff_Nuc43143	chr4	116119912	116120051	+	0	NA	intron (NM_008641, intron 1 of 28)	intron (NM_008641, intron 1 of 28)	16805	NM_001042743	17776	Mm.9287	NM_008641	ENSMUSG00000003810	Mast2	MAST205|Mtssk	microtubule associated serine/threonine kinase 2	protein-coding
Diff_Nuc45373	chr3	41169392	41169531	+	0	NA	Intergenic	Intergenic	127660	NR_040385	78706	Mm.366094	NR_040385	ENSMUSG00000097639	Platr4	C430002E04Rik	pluripotency associated transcript 4	ncRNA
Diff_Nuc34402	chr6	92152532	92152671	+	0	NA	exon (NM_030081, exon 4 of 12)	exon (NM_030081, exon 4 of 12)	12204	NM_030081	78287	Mm.290734	NM_030081	ENSMUSG00000014550	Rbsn	5330426D11Rik|Zfyve20	rabenosyn, RAB effector	protein-coding
Diff_Nuc29763	chr7	70126732	70126871	+	0	NA	Intergenic	Intergenic	230611	NM_007390	11441	Mm.113464	NM_007390	ENSMUSG00000030525	Chrna7	Acra7|alpha7|nAchR	cholinergic receptor, nicotinic, alpha polypeptide 7	protein-coding
Diff_Nuc57431	chr1	137347832	137347971	+	0	NA	intron (NM_173437, intron 23 of 28)	intron (NM_173437, intron 23 of 28)	3359	NR_049188	100885827		NR_049188	ENSMUSG00000093515	Mir1231	Gm23720|mir-1231|mmu-mir-1231	microRNA 1231	ncRNA
Diff_Nuc49111	chr2	17219212	17219351	+	0	NA	Intergenic	MLT1J|LTR|MaLR	-265860	NR_105847	102465964		NR_105847	ENSMUSG00000099161	Mir6419	Gm27713|mmu-mir-6419	microRNA 6419	ncRNA
Diff_Nuc24286	chr14	115347002	115347141	+	0	NA	Intergenic	L1_Mus4|LINE|L1	-1901	NR_126548	74982		NR_126548		1700100I10Rik	1700085D13Rik|4930481K08Rik	RIKEN cDNA 1700100I10 gene	ncRNA
Diff_Nuc1445	chr13	34696792	34696931	+	0	NA	Intergenic	(CA)n|Simple_repeat|Simple_repeat	47689	NM_025831	66895	Mm.28943	NM_025831	ENSMUSG00000021411	Pxdc1	1300014I06Rik	PX domain containing 1	protein-coding
Diff_Nuc57977	chr1	156756292	156756431	+	0	NA	Intergenic	L1MC5|LINE|L1	-183311	NM_009782	12290	Mm.267517	NM_009782	ENSMUSG00000004110	Cacna1e	A430040I15|BII|Cach6|Cacnl1a6|Cav2.3|Cchra1|alpha1E	calcium channel, voltage-dependent, R type, alpha 1E subunit	protein-coding
Diff_Nuc36884	chr5	35015992	35016131	+	0	NA	intron (NM_019497, intron 2 of 15)	intron (NM_019497, intron 2 of 15)	13033	NM_019497	14772	Mm.117076	NM_019497	ENSMUSG00000052783	Grk4	A830025H08Rik|GRK|Gprk2l|Gprk4	G protein-coupled receptor kinase 4	protein-coding
Diff_Nuc29046	chr7	30615052	30615191	+	0	NA	exon (NM_001145880, exon 5 of 5)	exon (NM_001145880, exon 5 of 5)	14030	NM_001145880	233056	Mm.224766	NM_146185	ENSMUSG00000011427	Zfp790	6330581L23Rik	zinc finger protein 790	protein-coding
Diff_Nuc49064	chr2	14977462	14977601	+	0	NA	intron (NM_029466, intron 1 of 5)	intron (NM_029466, intron 1 of 5)	542	NM_029466	75869	Mm.174068	NM_029466	ENSMUSG00000017418	Arl5b	4930587A11Rik|AW146430|Arl8	ADP-ribosylation factor-like 5B	protein-coding
Diff_Nuc38821	chr5	109427912	109428051	+	0	NA	exon (NM_009491, exon 4 of 6)	exon (NM_009491, exon 4 of 6)	7474	NM_009491	22307	Mm.261598	NM_009491	ENSMUSG00000067010	Vmn2r10	V2r16|VR16	vomeronasal 2, receptor 10	protein-coding
Diff_Nuc37815	chr5	73526962	73527101	+	0	NA	intron (NM_028194, intron 5 of 62)	PB1D7|SINE|Alu	120826	NM_028194	72313	Mm.260594	NM_028194	ENSMUSG00000070733	Fryl	2010313D22Rik|2310004H21Rik|2510002A14Rik|9030227G01Rik|mKIAA0826	FRY like transcription coactivator	protein-coding
Diff_Nuc65096	chr8	103015062	103015201	+	0	NA	Intergenic	L1Md_F3|LINE|L1	1074557	NR_132435	234624	Mm.124595	NM_175479	ENSMUSG00000052479	A330008L17Rik	-	RIKEN cDNA A330008L17 gene	ncRNA
Diff_Nuc63883	chr8	58540612	58540751	+	0	NA	intron (NM_080438, intron 4 of 9)	L1_Mus4|LINE|L1	121059	NM_080438	110304	Mm.307061	NM_080438	ENSMUSG00000038257	Glra3	-	glycine receptor, alpha 3 subunit	protein-coding
Diff_Nuc21603	chr14	12914472	12914611	+	0	NA	intron (NM_008981, intron 5 of 29)	intron (NM_008981, intron 5 of 29)	-107916	NM_001347593	19270	Mm.431266	NM_008981	ENSMUSG00000021745	Ptprg	5430405N12Rik|AW046354|AW549872|RPTPgamma	protein tyrosine phosphatase, receptor type, G	protein-coding
Diff_Nuc48471	chr3	148549312	148549451	+	0	NA	intron (NM_001081298, intron 2 of 23)	intron (NM_001081298, intron 2 of 23)	68218	NM_001081298	99633	Mm.9776	NM_001081298	ENSMUSG00000028184	Adgrl2	AI450192|CIRL-2|Gm619|Lec1|Lphh1|Lphn2|mKIAA0786	adhesion G protein-coupled receptor L2	protein-coding
Diff_Nuc9030	chr11	86996742	86996881	+	0	NA	intron (NM_197987, intron 14 of 23)	RSINE1|SINE|B4	56234	NM_197987	68729	Mm.17436	NM_197987	ENSMUSG00000018548	Trim37	1110032A10Rik|2810004E07Rik|AI848587|AU043018|MUL|TEF3|mKIAA0898	tripartite motif-containing 37	protein-coding
Diff_Nuc1945	chr13	49855632	49855771	+	0	NA	Intergenic	B2_Mm2|SINE|B2	78202	NM_172015	105148	Mm.21118	NM_172015	ENSMUSG00000037851	Iars	2510016L12Rik|AI327140|AU044614|E430001P04Rik|ILRS	isoleucine-tRNA synthetase	protein-coding
Diff_Nuc63426	chr8	39210982	39211121	+	0	NA	intron (NM_145841, intron 1 of 7)	Lx6|LINE|L1	104205	NR_029884	723860		NR_029884	ENSMUSG00000065457	Mir383	Mirn383|mir-383|mmu-mir-383	microRNA 383	ncRNA
Diff_Nuc53213	chr2	154697442	154697581	+	0	NA	3' UTR (NM_026030, exon 9 of 9)	3' UTR (NM_026030, exon 9 of 9)	21131	NM_026030	67204	Mm.377134	NM_026030	ENSMUSG00000074656	Eif2s2	2810026E11Rik|38kDa|AA408636|AA571381|AA986487|AW822225|D2Ertd303e|EIF2|EIF2B	eukaryotic translation initiation factor 2, subunit 2 (beta)	protein-coding
Diff_Nuc21858	chr14	22343212	22343351	+	0	NA	intron (NM_017479, intron 2 of 16)	intron (NM_017479, intron 2 of 16)	24274	NM_017479	54169	Mm.248967	NM_017479	ENSMUSG00000021767	Kat6b	AI507552|B130044K16Rik|MYST-4|Morf|Myst4|mKIAA0383|qkf|querkopf	K(lysine) acetyltransferase 6B	protein-coding
Diff_Nuc19949	chr15	48052222	48052361	+	0	NA	intron (NM_001081391, intron 10 of 70)	intron (NM_001081391, intron 10 of 70)	571244	NM_001081391	239420	Mm.309363	NM_001081391	ENSMUSG00000022311	Csmd3	4930500N14Rik|mKIAA1894	CUB and Sushi multiple domains 3	protein-coding
Diff_Nuc55010	chr1	48638072	48638211	+	0	NA	Intergenic	Lx5|LINE|L1	-1114172	NR_105768	102466969		NR_105768	ENSMUSG00000098876	Mir6350	Gm27958|mmu-mir-6350	microRNA 6350	ncRNA
Diff_Nuc6448	chr12	112183432	112183571	+	0	NA	intron (NM_175336, intron 15 of 20)	B4A|SINE|B4	33730	NM_175207	74251	Mm.250989	NM_175207	ENSMUSG00000037904	Ankrd9	2500003O20Rik	ankyrin repeat domain 9	protein-coding
Diff_Nuc45925	chr3	62183662	62183801	+	0	NA	intron (NM_001081295, intron 4 of 13)	intron (NM_001081295, intron 4 of 13)	41032	NM_001081295	622434	Mm.153974	NM_001081295	ENSMUSG00000036885	Arhgef26	4631416L12Rik|8430436L14Rik|AI303572|AW491953|SGEF	Rho guanine nucleotide exchange factor (GEF) 26	protein-coding
Diff_Nuc33756	chr6	67205002	67205141	+	0	NA	Intergenic	Intergenic	-11902	NM_001113564	66870	Mm.240490	NM_025814	ENSMUSG00000036371	Serbp1	1200009K13Rik|9330147J08Rik|AL022786|Pairbp1	serpine1 mRNA binding protein 1	protein-coding
Diff_Nuc55391	chr1	60030212	60030351	+	0	NA	intron (NM_001037725, intron 6 of 7)	B3|SINE|B2	60431	NM_001037725	72750	Mm.258250	NM_001037725	ENSMUSG00000041040	Fam117b	2810425F24Rik|6330416D14Rik|Als2cr13	family with sequence similarity 117, member B	protein-coding
Diff_Nuc1524	chr13	36820042	36820181	+	0	NA	intron (NM_153529, intron 2 of 2)	intron (NM_153529, intron 2 of 2)	6235	NM_153529	68404	Mm.232930	NM_153529	ENSMUSG00000039114	Nrn1	0710008J23Rik|Cpg15|Nrn	neuritin 1	protein-coding
Diff_Nuc63934	chr8	60011382	60011521	+	0	NA	exon (NM_001167981, exon 10 of 12)	exon (NM_001167981, exon 10 of 12)	20811	NM_008252	97165	Mm.276881	NM_008252	ENSMUSG00000054717	Hmgb2	C80539|HMG-2|Hmg2	high mobility group box 2	protein-coding
Diff_Nuc12307	chr10	79594332	79594471	+	0	NA	TTS (NR_126043)	TTS (NR_126043)	5731	NM_001195268	100503659	Mm.485395	NM_015761	ENSMUSG00000035640	Cbarp	9630008F14|Dos|R29144/1	calcium channel, voltage-dependent, beta subunit associated regulatory protein	protein-coding
Diff_Nuc5414	chr12	77299262	77299401	+	0	NA	TTS (NM_019784)	TTS (NM_019784)	-21085	NR_104386	13983	Mm.2561	NM_010157	ENSMUSG00000021055	Esr2	ER[b]|ERbeta|Estrb	estrogen receptor 2 (beta)	protein-coding
Diff_Nuc63352	chr8	36673242	36673381	+	0	NA	intron (NM_001081279, intron 1 of 2)	intron (NM_001081279, intron 1 of 2)	-21237	NR_040376	100504714	Mm.381744	NR_040376	ENSMUSG00000097357	Gm16793	-	predicted gene, 16793	ncRNA
Diff_Nuc37912	chr5	76289292	76289431	+	0	NA	Intergenic	Intergenic	85092	NM_010612	16542	Mm.285	NM_010612	ENSMUSG00000062960	Kdr	6130401C07|Flk-1|Flk1|Krd-1|Ly73|VEGFR-2|VEGFR2|sVEGFR-2	kinase insert domain protein receptor	protein-coding
Diff_Nuc64315	chr8	73435132	73435271	+	0	NA	intron (NM_173013, intron 2 of 6)	intron (NM_173013, intron 2 of 6)	5328	NM_173013	270058	Mm.248559	NM_173013	ENSMUSG00000019261	Map1s	6430517J16Rik|Bpy2ip1|Map8|Mtap1s|VCY2IP1	microtubule-associated protein 1S	protein-coding
Diff_Nuc18210	chr16	74266862	74267001	+	0	NA	intron (NM_175549, intron 2 of 27)	intron (NM_175549, intron 2 of 27)	75381	NR_030464	751561		NR_030464	ENSMUSG00000104758	Mir691	Mirn691|mir-691|mmu-mir-691	microRNA 691	ncRNA
Diff_Nuc42679	chr4	101149192	101149331	+	0	NA	Intergenic	ORR1C1|LTR|MaLR	-19992	NM_198412	72685	Mm.76494	NM_198412	ENSMUSG00000028528	Dnajc6	2810027M23Rik|mKIAA0473	DnaJ heat shock protein family (Hsp40) member C6	protein-coding
Diff_Nuc56378	chr1	95226452	95226591	+	0	NA	intron (NM_080850, intron 6 of 17)	MLT2B3|LTR|ERVL	12844	NM_080850	269224	Mm.379454	NM_080850	ENSMUSG00000026274	Pask	mKIAA0135	PAS domain containing serine/threonine kinase	protein-coding
Diff_Nuc62079	chr9	108011372	108011511	+	0	NA	intron (NM_007567, intron 5 of 11)	intron (NM_007567, intron 5 of 11)	-14630	NM_146226	235606	Mm.219639	NM_146226	ENSMUSG00000032590	Apeh	-	acylpeptide hydrolase	protein-coding
Diff_Nuc20673	chr15	77073942	77074081	+	0	NA	intron (NM_175387, intron 1 of 12)	intron (NM_175387, intron 1 of 12)	63472	NM_001110827	93686	Mm.202774	NM_053104	ENSMUSG00000033565	Rbfox2	Fbm2|Fxh|Hrnbp2|Rbm9	RNA binding protein, fox-1 homolog (C. elegans) 2	protein-coding
Diff_Nuc37673	chr5	66830722	66830861	+	0	NA	intron (NM_001201414, intron 5 of 15)	PB1D10|SINE|Alu	-101887	NM_001201416	11787	Mm.5159	NM_009686	ENSMUSG00000029207	Apbb2	2310007D03Rik|FE65L1|Rirl1|TR2L|Zfra	amyloid beta (A4) precursor protein-binding, family B, member 2	protein-coding
Diff_Nuc57505	chr1	140004042	140004181	+	0	NA	intron (NM_011210, intron 9 of 29)	intron (NM_011210, intron 9 of 29)	67592	NM_001111316	19264	Mm.391573	NM_011210	ENSMUSG00000026395	Ptprc	B220|CD45R|Cd45|L-CA|Ly-5|Lyt-4|T200|loc	protein tyrosine phosphatase, receptor type, C	protein-coding
Diff_Nuc6655	chr12	120230502	120230641	+	0	NA	Intergenic	Lx7|LINE|L1	-25677	NM_029961	77706	Mm.261496	NM_029961	ENSMUSG00000072791	Abcb5	9230106F14Rik	ATP-binding cassette, sub-family B (MDR/TAP), member 5	protein-coding
Diff_Nuc35704	chr6	138416312	138416451	+	0	NA	intron (NM_207222, intron 2 of 4)	(TCTA)n|Simple_repeat|Simple_repeat	23887	NR_126082	102632192	Mm.417247	NR_126082	ENSMUSG00000107675	Gm30332	-	predicted gene, 30332	ncRNA
Diff_Nuc24449	chr14	121997282	121997421	+	0	NA	intron (NM_001347596, intron 34 of 52)	intron (NM_001347596, intron 34 of 52)	-92875	NM_053079	56643	Mm.155618	NM_053079	ENSMUSG00000025557	Slc15a1	D630032F02|PECT1|PEPT1	solute carrier family 15 (oligopeptide transporter), member 1	protein-coding
Diff_Nuc38369	chr5	93726622	93726761	+	0	NA	Intergenic	B1_Mus1|SINE|Alu	30092	NM_007635	12452	Mm.3527	NM_007635	ENSMUSG00000029385	Ccng2	-	cyclin G2	protein-coding
Diff_Nuc40936	chr4	35424687	35424826	+	0	NA	Intergenic	Intergenic	-251627	NM_001081343	73205	Mm.331544	NM_001081343	ENSMUSG00000028300	3110043O21Rik	AI840585	RIKEN cDNA 3110043O21 gene	protein-coding
Diff_Nuc39193	chr5	122170762	122170901	+	0	NA	intron (NM_009125, intron 1 of 24)	B3|SINE|B2	9213	NM_009125	20239	Mm.260900	NM_009125	ENSMUSG00000042605	Atxn2	9630045M23Rik|ATX2|AW544490|Sca2	ataxin 2	protein-coding
Diff_Nuc10944	chr10	28147632	28147771	+	0	NA	intron (NM_008983, intron 7 of 31)	intron (NM_008983, intron 7 of 31)	-240465	NM_001305663	210757	Mm.123021	NM_178666	ENSMUSG00000049109	Themis	E430004N04Rik|Gasp|Spot|Tsepa|thylex	thymocyte selection associated	protein-coding
Diff_Nuc46477	chr3	84731792	84731931	+	0	NA	intron (NM_001177774, intron 3 of 12)	intron (NM_001177774, intron 3 of 12)	-24272	NM_080428	50754	Mm.196475	NM_080428	ENSMUSG00000028086	Fbxw7	1110001A17Rik|AGO|Cdc4|Fbw7|Fbwd6|Fbx30|Fbxo30|Fbxw6|SEL-10	F-box and WD-40 domain protein 7	protein-coding
Diff_Nuc26213	chr19	59093842	59093981	+	0	NA	intron (NM_001114312, intron 9 of 16)	B3|SINE|B2	56648	NM_175172	71653	Mm.37338	NM_175172	ENSMUSG00000041362	Shtn1	4930506M07Rik|Kiaa1598|Shootin1|mKIAA1598	shootin 1	protein-coding
Diff_Nuc43613	chr4	132047522	132047661	+	0	NA	Intergenic	Intergenic	18780	NM_144907	230784	Mm.23608	NM_144907	ENSMUSG00000028893	Sesn2	HI95|SEST2|Ses2	sestrin 2	protein-coding
Diff_Nuc15600	chr17	71072542	71072681	+	0	NA	intron (NM_001347411, intron 9 of 14)	RSINE1|SINE|B4	123506	NM_001164077	21815	Mm.101034	NM_009372	ENSMUSG00000047407	Tgif1	AA959811|AI462167|Tgif	TGFB-induced factor homeobox 1	protein-coding
Diff_Nuc15355	chr17	61681162	61681301	+	0	NA	Intergenic	B1_Mm|SINE|Alu	1549435	NM_207654	13640	Mm.7978	NM_010109	ENSMUSG00000048915	Efna5	AL-1|AV158822|EFL-5|Ephrin-A5|Epl7|LERK-7|RAGS	ephrin A5	protein-coding
Diff_Nuc3442	chr13	110513792	110513931	+	0	NA	intron (NM_011056, intron 3 of 16)	ORR1A4|LTR|MaLR	-180156	NR_035442	100316683		NR_035442	ENSMUSG00000084651	Mir1904	Mirn1904|mmu-mir-1904	microRNA 1904	ncRNA
Diff_Nuc9825	chr11	110040822	110040961	+	0	NA	intron (NM_147218, intron 36 of 38)	intron (NM_147218, intron 36 of 38)	-11424	NM_147220	217262	Mm.291459	NM_147220	ENSMUSG00000041797	Abca9	D630040K07Rik	ATP-binding cassette, sub-family A (ABC1), member 9	protein-coding
Diff_Nuc33743	chr6	66985902	66986041	+	0	NA	promoter-TSS (NR_040278)	promoter-TSS (NR_040278)	-622	NR_040278	320172	Mm.449039	NR_040278	ENSMUSG00000087231	E230016M11Rik	-	RIKEN cDNA E230016M11 gene	ncRNA
Diff_Nuc10043	chr11	116319932	116320071	+	0	NA	Intergenic	Intergenic	-4340	NM_001033267	217341	Mm.387352	NM_001033267	ENSMUSG00000070331	Qrich2	Gm66	glutamine rich 2	protein-coding
Diff_Nuc62983	chr8	23495152	23495291	+	0	NA	intron (NM_181325, intron 3 of 6)	RMER20B|LTR|ERVK	13872	NM_181325	18408	Mm.200907	NM_181325	ENSMUSG00000031482	Slc25a15	D630044L02Rik|Ornt1	solute carrier family 25 (mitochondrial carrier ornithine transporter), member 15	protein-coding
Diff_Nuc59730	chr9	21994822	21994961	+	0	NA	intron (NM_001033813, intron 1 of 3)	(CTCA)n|Simple_repeat|Simple_repeat	2281	NM_001033813	619310	Mm.335016	NM_001033813	ENSMUSG00000074472	Zfp872	9530015I07Rik	zinc finger protein 872	protein-coding
Diff_Nuc59725	chr9	21948632	21948771	+	0	NA	Intergenic	MTD|LTR|MaLR	-8511	NM_001102405	11433	Mm.46354	NM_007388	ENSMUSG00000001348	Acp5	TRACP|TRAP	acid phosphatase 5, tartrate resistant	protein-coding
Diff_Nuc38229	chr5	90483762	90483901	+	0	NA	Intergenic	Intergenic	169190	NR_028088	231430	Mm.319697	NM_001033310	ENSMUSG00000035505	Cox18	BC038311	cytochrome c oxidase assembly protein 18	protein-coding
Diff_Nuc4982	chr12	60529502	60529641	+	0	NA	Intergenic	L1Md_F2|LINE|L1	-209101	NM_001033156	70611	Mm.311026	NM_001033156	ENSMUSG00000035329	Fbxo33	5730501N20Rik|AI642135	F-box protein 33	protein-coding
Diff_Nuc63368	chr8	37435852	37435991	+	0	NA	Intergenic	Intergenic	-116324	NM_176952	319582	Mm.180924	NM_176952	ENSMUSG00000039620	6430573F11Rik	Kiaa1456|TRM9L	RIKEN cDNA 6430573F11 gene	protein-coding
Diff_Nuc44082	chr4	146523882	146524021	+	0	NA	intron (NM_001083918, intron 3 of 6)	intron (NM_001083918, intron 3 of 6)	9765	NR_040355	70005	Mm.276881	NM_027285		Znf41-ps	1700029I01Rik	ZNF41, pseudogene	pseudo
Diff_Nuc37967	chr5	78637202	78637341	+	0	NA	Intergenic	Intergenic	742758	NR_131050	69370	Mm.426881	NR_131050	ENSMUSG00000107232	1700017L05Rik	-	RIKEN cDNA 1700017L05 gene	ncRNA
Diff_Nuc34372	chr6	91265982	91266121	+	0	NA	Intergenic	MTD|LTR|MaLR	95312	NM_009527	22421	Mm.56964	NM_009527	ENSMUSG00000030093	Wnt7a	AI849442|Wnt-7a|px|tw	wingless-type MMTV integration site family, member 7A	protein-coding
Diff_Nuc13078	chr10	107055152	107055291	+	0	NA	intron (NM_001081432, intron 25 of 44)	RLTRETN_Mm|LTR|ERVK	101862	NM_001081432	237523	Mm.391418	NM_001081432	ENSMUSG00000035916	Ptprq	-	protein tyrosine phosphatase, receptor type, Q	protein-coding
Diff_Nuc5433	chr12	77877512	77877651	+	0	NA	intron (NM_206534, intron 3 of 3)	L1Md_F2|LINE|L1	11021	NM_206534	211151	Mm.80970	NM_206534	ENSMUSG00000090258	Churc1	1700030P15Rik|My015|chch	churchill domain containing 1	protein-coding
Diff_Nuc36992	chr5	40893692	40893831	+	0	NA	Intergenic	Intergenic	-857891	NM_010474	15476	Mm.12559	NM_010474	ENSMUSG00000051022	Hs3st1	3-Ost|D5Wsu110e|Hsg3ost	heparan sulfate (glucosamine) 3-O-sulfotransferase 1	protein-coding
Diff_Nuc3585	chr13	115457322	115457461	+	0	NA	intron (NR_045976, intron 3 of 6)	Lx4A|LINE|L1	59955	NR_045976	75161	Mm.50406	NM_175218	ENSMUSG00000051758	4930544M13Rik	-	RIKEN cDNA 4930544M13 gene	ncRNA
Diff_Nuc54780	chr1	39057532	39057671	+	0	NA	Intergenic	Lx5|LINE|L1	12942	NM_026850	68833	Mm.28121	NM_026850	ENSMUSG00000026078	Pdcl3	1110061A19Rik|C80025|Viaf1	phosducin-like 3	protein-coding
Diff_Nuc64406	chr8	76410292	76410431	+	0	NA	Intergenic	Intergenic	-532922	NM_010687	16795	Mm.324371	NM_010687	ENSMUSG00000004383	Large1	BPFD#36|Gyltl1a|Large|Mbp-1|Mbp1|enr|fg|froggy|myd	LARGE xylosyl- and glucuronyltransferase 1	protein-coding
Diff_Nuc36312	chr5	13843772	13843911	+	0	NA	Intergenic	Intergenic	52222	NM_027650	71026	Mm.158536	NM_027650	ENSMUSG00000067855	Speer3	4933405P08Rik|SPEER-3	spermatogenesis associated glutamate (E)-rich protein 3	protein-coding
Diff_Nuc16159	chr17	88321937	88322076	+	0	NA	Intergenic	RMER15|LTR|ERVL	-52384	NM_010830	17688	Mm.18210	NM_010830	ENSMUSG00000005370	Msh6	AU044881|AW550279|GTBP|Gtmbp	mutS homolog 6	protein-coding
Diff_Nuc60047	chr9	35998942	35999081	+	0	NA	Intergenic	Lx7|LINE|L1	-55796	NR_030729	100041618	Mm.484847	NR_030729	ENSMUSG00000098390	Gm3434	-	predicted gene 3434	ncRNA
Diff_Nuc3203	chr13	101718792	101718931	+	0	NA	Intergenic	URR1A|DNA|MER1_type	-115479	NM_022885	69048	Mm.402215	NM_022885	ENSMUSG00000021629	Slc30a5	1810010K08Rik|AF233321|ZNT5|ZTL1|ZnT-5|Zntl1	solute carrier family 30 (zinc transporter), member 5	protein-coding
Diff_Nuc32802	chr6	32415172	32415311	+	0	NA	intron (NM_175750, intron 3 of 31)	MTEa-int|LTR|MaLR	-45900	NR_040277	319849	Mm.440860	NR_040277	ENSMUSG00000086763	Plxna4os1	B230378P21Rik	plexin A4, opposite strand 1	ncRNA
Diff_Nuc50326	chr2	59288872	59289011	+	0	NA	Intergenic	RSINE1|SINE|B4	-33769	NM_029723	76747	Mm.275769	NM_029723	ENSMUSG00000026989	Dapl1	2310032F03Rik|EEDA	death associated protein-like 1	protein-coding
Diff_Nuc12180	chr10	75843172	75843311	+	0	NA	intron (NM_008787, intron 30 of 41)	intron (NM_008787, intron 30 of 41)	-8519	NR_040580	67523	Mm.437833	NR_040580	ENSMUSG00000101695	1700094J05Rik	-	RIKEN cDNA 1700094J05 gene	ncRNA
Diff_Nuc41821	chr4	68097882	68098021	+	0	NA	Intergenic	L1_Mus4|LINE|L1	517480	NM_019967	56710	Mm.248788	NM_019967	ENSMUSG00000028351	Brinp1	BRINP|Dbc1|Dbccr1|Fam5a	bone morphogenic protein/retinoic acid inducible neural specific 1	protein-coding
Diff_Nuc27880	chr18	65345052	65345191	+	0	NA	intron (NM_031881, intron 17 of 29)	intron (NM_031881, intron 17 of 29)	-63394	NR_029600	387231		NR_029600	ENSMUSG00000065402	Mir122	Mir122a|Mirn122a|mir-122|mmu-mir-122	microRNA 122	ncRNA
Diff_Nuc51880	chr2	112122652	112122791	+	0	NA	intron (NM_133649, intron 1 of 24)	intron (NM_133649, intron 1 of 24)	-2124	NM_133648	107723	Mm.491155	NM_133648	ENSMUSG00000027130	Slc12a6	9530023I19Rik|KCC3|gaxp	solute carrier family 12, member 6	protein-coding
Diff_Nuc23923	chr14	100498052	100498191	+	0	NA	intron (NM_010636, intron 2 of 6)	intron (NM_010636, intron 2 of 6)	50894	NM_010636	16597	Mm.396499	NM_010636	ENSMUSG00000072294	Klf12	2700063E05Rik|AI225908|AI315654|AP-2rep|B130052C06Rik|D530033K05Rik	Kruppel-like factor 12	protein-coding
Diff_Nuc14754	chr17	38304772	38304911	+	0	NA	Intergenic	Lx2|LINE|L1	-7190	NM_146832	258829	Mm.451665	NM_146832	ENSMUSG00000096009	Olfr134	MOR256-5	olfactory receptor 134	protein-coding
Diff_Nuc17378	chr16	39434292	39434431	+	0	NA	Intergenic	L1Md_F2|LINE|L1	531903	NM_170599	207683	Mm.245564	NM_170599	ENSMUSG00000022790	Igsf11	1700025L02Rik|BT-IgSF|Igsf13	immunoglobulin superfamily, member 11	protein-coding
Diff_Nuc16041	chr17	85715202	85715341	+	0	NA	intron (NM_028576, intron 3 of 10)	intron (NM_028576, intron 3 of 10)	225231	NM_028576	73582	Mm.260753	NM_028576	ENSMUSG00000071037	Camkmt	1700106N22Rik|AI480743|AV099781|CLNMT|CaM KMT	calmodulin-lysine N-methyltransferase	protein-coding
Diff_Nuc14996	chr17	47310012	47310151	+	0	NA	intron (NM_001097623, intron 3 of 19)	B3|SINE|B2	32190	NM_001097623	224829	Mm.260989	NM_172622		Trerf1	9430096I18Rik|AI429294|B830015H24|RAPA|Trep-132|Trep132	transcriptional regulating factor 1	protein-coding
Diff_Nuc42694	chr4	101753392	101753531	+	0	NA	Intergenic	L1_Mus1|LINE|L1	94016	NM_001085520	381536	Mm.297685	NM_001085520	ENSMUSG00000078625	Gm12789	OTTMUSG00000008445	predicted gene 12789	protein-coding
Diff_Nuc29401	chr7	52667002	52667141	+	0	NA	TTS (NM_010596)	TTS (NM_010596)	-1994	NM_198190	78405	Mm.20344	NM_198190	ENSMUSG00000074121	Ntf5	2900040K06Rik|AI462899|NT-4|NT-5|NT4|NT4/5|Ntf-5|Ntf4	neurotrophin 5	protein-coding
Diff_Nuc64031	chr8	63718712	63718851	+	0	NA	intron (NM_021506, intron 2 of 11)	MTEa|LTR|MaLR	15813	NM_021506	59009	Mm.27949	NM_021506	ENSMUSG00000031642	Sh3rf1	2200003J05Rik|Posh|R75531|Sh3md2	SH3 domain containing ring finger 1	protein-coding
Diff_Nuc47271	chr3	107027562	107027701	+	0	NA	Intergenic	ORR1C2|LTR|MaLR	-2981	NM_001111143	229697	Mm.297051	NM_001111143	ENSMUSG00000046213	Cym	Gm131	chymosin	protein-coding
Diff_Nuc24823	chr19	10167852	10167991	+	0	NA	intron (NM_019699, intron 1 of 11)	ID_B1|SINE|B4	8072	NM_019699	56473	Mm.38901	NM_019699	ENSMUSG00000024665	Fads2	2900042M13Rik|Fadsd2	fatty acid desaturase 2	protein-coding
Diff_Nuc55313	chr1	58739672	58739811	+	0	NA	intron (NM_001347056, intron 3 of 13)	Lx|LINE|L1	9548	NM_001347056	108812	Mm.442063	NM_175370	ENSMUSG00000047528	Als2cr12	4933405P16Rik|4933425F06Rik	amyotrophic lateral sclerosis 2 (juvenile) chromosome region, candidate 12 (human)	protein-coding
Diff_Nuc12840	chr10	96712302	96712441	+	0	NA	Intergenic	Intergenic	-173741	NR_039547	100628616		NR_039547	ENSMUSG00000105557	Mir3966	mmu-mir-3966|mu-mir-3966	microRNA 3966	ncRNA
Diff_Nuc3799	chr12	7996922	7997061	+	0	NA	intron (NM_009693, intron 12 of 28)	intron (NM_009693, intron 12 of 28)	12508	NM_009693	238055	Mm.221239	NM_009693	ENSMUSG00000020609	Apob	AI315052|Apo B-100|apob-100|apob-48	apolipoprotein B	protein-coding
Diff_Nuc56917	chr1	120219052	120219191	+	0	NA	intron (NM_026472, intron 1 of 6)	ID_B1|SINE|B4	701	NM_026472	67949	Mm.280311	NM_026472	ENSMUSG00000026377	Nifk	AI852665|C130020J04Rik|Mki67ip	nucleolar protein interacting with the FHA domain of MKI67	protein-coding
Diff_Nuc4279	chr12	32929372	32929511	+	0	NA	Intergenic	Intergenic	-35927	NM_001146200	30955	Mm.101369	NM_020272	ENSMUSG00000020573	Pik3cg	5830428L06Rik|PI3Kgamma|p110gamma	phosphoinositide-3-kinase, catalytic, gamma polypeptide	protein-coding
Diff_Nuc1576	chr13	38143722	38143861	+	0	NA	intron (NM_024242, intron 10 of 16)	B1_Mus2|SINE|Alu	14933	NM_024242	71340	Mm.297130	NM_024242	ENSMUSG00000021428	Riok1	3110046C13Rik|5430416A05Rik|Ad034	RIO kinase 1 (yeast)	protein-coding
Diff_Nuc53598	chr2	167390102	167390241	+	0	NA	Intergenic	Intergenic	26476	NM_011427	20613	Mm.2093	NM_011427	ENSMUSG00000042821	Snai1	Sna|Sna1|Snail|Snail1	snail family zinc finger 1	protein-coding
Diff_Nuc61766	chr9	96132802	96132941	+	0	NA	intron (NM_001184708, intron 3 of 9)	intron (NM_001184708, intron 3 of 9)	-26253	NM_001184709	211586	Mm.17977	NM_178667	ENSMUSG00000032411	Tfdp2	1110029I05Rik|A330080J22Rik|DP-3|DP3	transcription factor Dp 2	protein-coding
Diff_Nuc65108	chr8	103611452	103611591	+	0	NA	Intergenic	Lx3B|LINE|L1	1670947	NR_132435	234624	Mm.124595	NM_175479	ENSMUSG00000052479	A330008L17Rik	-	RIKEN cDNA A330008L17 gene	ncRNA
Diff_Nuc49512	chr2	30294662	30294801	+	0	NA	intron (NM_138748, intron 7 of 9)	intron (NM_138748, intron 7 of 9)	23161	NM_138748	110854	Mm.275393	NM_138748	ENSMUSG00000039515	Ptpa	2610042B21Rik|C77440|N28142|PR53|Ppp2r4	protein phosphatase 2 protein activator	protein-coding
Diff_Nuc24766	chr19	8406002	8406141	+	0	NA	Intergenic	L1Md_A|LINE|L1	73524	NM_177002	319800	Mm.426083	NM_177002	ENSMUSG00000052562	Slc22a30	AA986766|C730048C13Rik|UST1R	solute carrier family 22, member 30	protein-coding
Diff_Nuc26292	chr18	4393072	4393211	+	0	NA	intron (NM_026157, intron 6 of 8)	RLTR13D3|LTR|ERVK	17551	NM_026157	67440	Mm.49826	NM_026157	ENSMUSG00000024234	Mtpap	0610027A18Rik|AW551379|Papd1	mitochondrial poly(A) polymerase	protein-coding
Diff_Nuc16152	chr17	88008272	88008411	+	0	NA	Intergenic	Intergenic	-26978	NM_008532	17075	Mm.4259	NM_008532	ENSMUSG00000045394	Epcam	CD326|EGP|EGP-2|Egp314|Ep-CAM|EpCAM1|GA733-2|Ly74|TROP1|Tacsd1|Tacstd1|gp40	epithelial cell adhesion molecule	protein-coding
Diff_Nuc13824	chr17	4479102	4479241	+	0	NA	Intergenic	Intergenic	-155809	NR_130984	75117	Mm.429393	NR_130984		4930517M08Rik	-	RIKEN cDNA 4930517M08 gene	ncRNA
Diff_Nuc46830	chr3	94916402	94916541	+	0	NA	intron (NM_009336, intron 1 of 5)	intron (NM_009336, intron 1 of 5)	1507	NM_009336	21427	Mm.133919	NM_009336	ENSMUSG00000008958	Vps72	Tcfl1|YL-1	vacuolar protein sorting 72	protein-coding
Diff_Nuc26062	chr19	55637122	55637261	+	0	NA	intron (NM_001293686, intron 7 of 7)	L2b|LINE|L2	139503	NR_045318	77594	Mm.329924	NR_045318	ENSMUSG00000097632	4930552P12Rik	-	RIKEN cDNA 4930552P12 gene	ncRNA
Diff_Nuc10860	chr10	24894722	24894861	+	0	NA	intron (NM_018747, intron 7 of 7)	intron (NM_018747, intron 7 of 7)	25185	NM_001347460	432442	Mm.485937	NM_018747	ENSMUSG00000039166	Akap7	6430401D08|AI662165|AKAP15|Akap18|BB170514	A kinase (PRKA) anchor protein 7	protein-coding
Diff_Nuc24795	chr19	9033552	9033691	+	0	NA	exon (NM_197993, exon 3 of 9)	exon (NM_197993, exon 3 of 9)	5299	NM_197993	70044	Mm.165979	NM_197993	ENSMUSG00000071645	Tut1	2700038E08Rik|PAPD2|Rbm21|TUTase6|U6-TUTase|star-PAP	terminal uridylyl transferase 1, U6 snRNA-specific	protein-coding
Diff_Nuc55096	chr1	52079912	52080051	+	0	NA	intron (NM_001308266, intron 4 of 24)	Lx8|LINE|L1	14897	NM_011487	20849	Mm.1550	NM_011487	ENSMUSG00000062939	Stat4	-	signal transducer and activator of transcription 4	protein-coding
Diff_Nuc63589	chr8	45775532	45775671	+	0	NA	Intergenic	Intergenic	-259961	NM_001081286	14107	Mm.27365	NM_001081286	ENSMUSG00000070047	Fat1	2310038E12Rik|AU023433|Fath|mFat1	FAT atypical cadherin 1	protein-coding
Diff_Nuc40579	chr4	19730802	19730941	+	0	NA	Intergenic	Lx8|LINE|L1	-15003	NM_028746	74087	Mm.173833	NM_028746	ENSMUSG00000041052	Slc7a13	0610009O04Rik|AGT-1|AGT1|XAT2	solute carrier family 7, (cationic amino acid transporter, y+ system) member 13	protein-coding
Diff_Nuc34452	chr6	93961322	93961461	+	0	NA	intron (NM_001286785, intron 1 of 24)	intron (NM_001286785, intron 1 of 24)	-97707	NM_001083320	14924	Mm.217216	NM_010367	ENSMUSG00000045095	Magi1	AIP3|BAP1|Baiap1|Gukmi1|MAGI1c|Magi-1|TNRC19|WWP3|mKIAA4129	membrane associated guanylate kinase, WW and PDZ domain containing 1	protein-coding
Diff_Nuc43760	chr4	135681257	135681396	+	0	NA	Intergenic	B1_Mus1|SINE|Alu	-18411	NM_008321	15903	Mm.110	NM_008321	ENSMUSG00000007872	Id3	Hlh462|Idb3|bHLHb25	inhibitor of DNA binding 3	protein-coding
Diff_Nuc31440	chr7	131332232	131332371	+	0	NA	intron (NM_001252072, intron 1 of 1)	intron (NM_001252072, intron 1 of 1)	205606	NM_001252072	628779	Mm.40210	NM_001252072	ENSMUSG00000078591	Hs3st4	EG628779|Gm6915	heparan sulfate (glucosamine) 3-O-sulfotransferase 4	protein-coding
Diff_Nuc398	chrX	108951622	108951761	+	0	NA	Intergenic	Intergenic	-141003	NM_001290459	245596	Mm.246623	NM_001080549	ENSMUSG00000034551	Hdx	D030011N01Rik|Gm380	highly divergent homeobox	protein-coding
Diff_Nuc61322	chr9	77991712	77991851	+	0	NA	intron (NM_019987, intron 5 of 13)	intron (NM_019987, intron 5 of 13)	30736	NM_019987	56542	Mm.288719	NM_019987	ENSMUSG00000009828	Ick	2210420N10Rik|AI848300|Mrk	intestinal cell kinase	protein-coding
Diff_Nuc27653	chr18	57521832	57521971	+	0	NA	intron (NM_028447, intron 1 of 8)	B3A|SINE|B2	7514	NM_028447	73137	Mm.29889	NM_028447	ENSMUSG00000024594	Prrc1	1190002C06Rik|2310058D16Rik|3110038B19Rik|9430085A19Rik	proline-rich coiled-coil 1	protein-coding
Diff_Nuc47659	chr3	120864002	120864141	+	0	NA	intron (NM_028456, intron 1 of 4)	(GA)n|Simple_repeat|Simple_repeat	10542	NM_028456	66568	Mm.263163	NM_025637	ENSMUSG00000028133	Rwdd3	2510027J23Rik|3110037C01Rik|AI035684|AI662458|Rsume|X2CR1	RWD domain containing 3	protein-coding
Diff_Nuc1236	chr13	27083642	27083781	+	0	NA	Intergenic	RMER15|LTR|ERVL	-65728	NM_001163530	19109	Mm.1270	NM_011164	ENSMUSG00000021342	Prl	AV290867|Gha1|Prl1a1	prolactin	protein-coding
Diff_Nuc33591	chr6	59080332	59080471	+	0	NA	Intergenic	Lx8|LINE|L1	-78463	NM_001081145	68140	Mm.25843	NM_001081145	ENSMUSG00000049232	Tigd2	3632410O17Rik	tigger transposable element derived 2	protein-coding
Diff_Nuc21704	chr14	18386792	18386931	+	0	NA	Intergenic	L1Md_F2|LINE|L1	-106613	NM_001113417	21834	Mm.32563	NM_009380	ENSMUSG00000021779	Thrb	Nr1a2|T3R[b]|T3Rbeta|Thrb1|Thrb2|c-erbAbeta	thyroid hormone receptor beta	protein-coding
Diff_Nuc58391	chr1	168634372	168634511	+	0	NA	Intergenic	Intergenic	-22465	NM_001347135	240894	Mm.246610	NM_172844	ENSMUSG00000026560	Fmo9	4831428F09Rik	flavin containing monooxygenase 9	protein-coding
Diff_Nuc55417	chr1	60466242	60466381	+	0	NA	promoter-TSS (NM_198127)	promoter-TSS (NM_198127)	-152	NM_001198571	329165	Mm.212066	NM_198127	ENSMUSG00000026782	Abi2	8430425M24Rik|AI839867|C130078H13	abl-interactor 2	protein-coding
Diff_Nuc1990	chr13	52100652	52100791	+	0	NA	Intergenic	L1_Mus3|LINE|L1	-91389	NR_045061	74050	Mm.84860	NR_045061		4921525O09Rik	-	RIKEN cDNA 4921525O09 gene	ncRNA
Diff_Nuc25602	chr19	39692832	39692971	+	0	NA	intron (NM_001024719, intron 6 of 8)	intron (NM_001024719, intron 6 of 8)	30631	NM_001024719	545288	Mm.297048	NM_001024719	ENSMUSG00000062624	Cyp2c67	C730004C24Rik	cytochrome P450, family 2, subfamily c, polypeptide 67	protein-coding
Diff_Nuc10417	chr10	8803922	8804061	+	0	NA	Intergenic	B3|SINE|B2	-198123	NM_175155	70097	Mm.338275	NM_175155	ENSMUSG00000015305	Sash1	1100001C18Rik|2500002E12Rik|A330076K04Rik|mKIAA0790	SAM and SH3 domain containing 1	protein-coding
Diff_Nuc14125	chr17	17005542	17005681	+	0	NA	Intergenic	Intergenic	-195456	NM_001005358	449000	Mm.483718	NM_001005358	ENSMUSG00000096696	Zfp960	-	zinc finger protein 960	protein-coding
Diff_Nuc24434	chr14	121560282	121560421	+	0	NA	intron (NM_134082, intron 2 of 26)	intron (NM_134082, intron 2 of 26)	125555	NM_134082	223254	Mm.223980	NM_134082	ENSMUSG00000025555	Farp1	AW228844|BC030329|Cdep	FERM, RhoGEF (Arhgef) and pleckstrin domain protein 1 (chondrocyte-derived)	protein-coding
Diff_Nuc11622	chr10	53819232	53819371	+	0	NA	Intergenic	(CAAAA)n|Simple_repeat|Simple_repeat	23573	NR_038016	100502920	Mm.403982	NR_038016	ENSMUSG00000097069	Gm16998	-	predicted gene, 16998	ncRNA
Diff_Nuc54536	chr1	28953492	28953631	+	0	NA	Intergenic	Intergenic	-116464	NM_001013750	210962	Mm.214178	NM_001013750	ENSMUSG00000048411	Gm597	-	predicted gene 597	protein-coding
Diff_Nuc27054	chr18	35398052	35398191	+	0	NA	intron (NM_009818, intron 10 of 17)	intron (NM_009818, intron 10 of 17)	-23443	NM_178005	107065	Mm.39900	NM_178005	ENSMUSG00000071862	Lrrtm2	AI851755|BB129880|C630011A14Rik|mKIAA0416	leucine rich repeat transmembrane neuronal 2	protein-coding
Diff_Nuc24255	chr14	114545462	114545601	+	0	NA	Intergenic	Intergenic	-685656	NR_045661	75822	Mm.410813	NR_045661		4930524C18Rik	-	RIKEN cDNA 4930524C18 gene	ncRNA
Diff_Nuc45948	chr3	63141422	63141561	+	0	NA	intron (NM_001289463, intron 8 of 22)	L1_Mus3|LINE|L1	41474	NM_001289463	17380	Mm.296022	NM_008604	ENSMUSG00000027820	Mme	6030454K05Rik|C85356|CALLA|CD10|NEP|SFE	membrane metallo endopeptidase	protein-coding
Diff_Nuc3120	chr13	98710192	98710331	+	0	NA	intron (NM_012026, intron 30 of 35)	intron (NM_012026, intron 30 of 35)	265859	NM_012026	110596	Mm.252718	NM_012026	ENSMUSG00000021662	Arhgef28	9230110L08Rik|AI323540|D13Bwg1089e|RIP2|Rgnef|RhoGEF|Rhoip2|p190RhoGEF	Rho guanine nucleotide exchange factor (GEF) 28	protein-coding
Diff_Nuc58486	chr1	172342122	172342261	+	0	NA	intron (NM_027528, intron 2 of 7)	intron (NM_027528, intron 2 of 7)	103199	NM_001039593	76925	Mm.33631	NM_001039593	ENSMUSG00000042800	1700015E13Rik	-	RIKEN cDNA 1700015E13 gene	protein-coding
Diff_Nuc17316	chr16	37344062	37344201	+	0	NA	intron (NM_172440, intron 3 of 27)	Lx2|LINE|L1	40913	NM_001114613	207227	Mm.80170	NM_172440	ENSMUSG00000022829	Stxbp5l	9430094L02|A830015P08Rik|LLGL4|T2dm1|t2md1|tomosyn-2	syntaxin binding protein 5-like	protein-coding
Diff_Nuc41083	chr4	41280912	41281051	+	0	NA	Intergenic	B3|SINE|B2	-15048	NM_001290454	67123	Mm.289795	NM_023305	ENSMUSG00000028437	Ubap1	2700092A01Rik|NAG20|UBAP-1|Ubap	ubiquitin-associated protein 1	protein-coding
Diff_Nuc42628	chr4	100041992	100042131	+	0	NA	intron (NM_013845, intron 4 of 8)	intron (NM_013845, intron 4 of 8)	-109411	NM_001033773	381534	Mm.318133	NM_001033773	ENSMUSG00000069733	Ube2u	-	ubiquitin-conjugating enzyme E2U (putative)	protein-coding
Diff_Nuc47418	chr3	112793892	112794031	+	0	NA	Intergenic	MTEb|LTR|MaLR	165684	NM_001190404	545562	Mm.462977	NM_001190403		Amy2b	Amy-X|Amy2-2|OTTMUSG00000022462|mAmy2-1	amylase 2b	protein-coding
Diff_Nuc54819	chr1	40211142	40211281	+	0	NA	Intergenic	ORR1A3|LTR|MaLR	-68515	NR_037980	100047133	Mm.447052	NR_037980	ENSMUSG00000097899	Gm16894	-	predicted gene, 16894	ncRNA
Diff_Nuc52585	chr2	134469492	134469631	+	0	NA	intron (NM_029148, intron 1 of 7)	CpG	296	NM_029148	52837	Mm.264096	NM_029148	ENSMUSG00000034723	Tmx4	2810417D04Rik|4930500L08Rik|AI843224|AW046784|D2Bwg1356e|Txndc13|mKIAA1162	thioredoxin-related transmembrane protein 4	protein-coding
Diff_Nuc38970	chr5	115158712	115158851	+	0	NA	exon (NM_029992, exon 2 of 13)	exon (NM_029992, exon 2 of 13)	993	NM_029992	77832	Mm.239698	NM_029992	ENSMUSG00000002486	Tchp	A930031F18Rik|AV279199	trichoplein, keratin filament binding	protein-coding
Diff_Nuc61129	chr9	72013362	72013501	+	0	NA	Intergenic	Intergenic	-53805	NM_001253865	21406	Mm.171615	NM_011544	ENSMUSG00000032228	Tcf12	A130037E08Rik|ALF1|HEB|HEBAlt|HTF-4|HTF4|ME1|REB|bHLHb20	transcription factor 12	protein-coding
Diff_Nuc15086	chr17	50918172	50918311	+	0	NA	intron (NM_001285991, intron 19 of 22)	LTRIS_Mm|LTR|ERV1	80235	NM_001297747	12228	Mm.392910	NM_009770	ENSMUSG00000022863	Btg3	ANA|tob5	B cell translocation gene 3	protein-coding
Diff_Nuc34480	chr6	94449912	94450051	+	0	NA	promoter-TSS (NM_026255)	promoter-TSS (NM_026255)	-327	NM_026255	67582	Mm.280725	NM_026255	ENSMUSG00000045100	Slc25a26	4930433D19Rik|4933433F13Rik|AW557176|D6Bwg0781e|Slc25a6	solute carrier family 25 (mitochondrial carrier, phosphate carrier), member 26	protein-coding
Diff_Nuc33112	chr6	43470472	43470611	+	0	NA	intron (NM_013861, intron 5 of 8)	intron (NM_013861, intron 5 of 8)	78113	NR_045988	319812	Mm.446393	NR_045988		9430018G01Rik	-	RIKEN cDNA 9430018G01 gene	ncRNA
Diff_Nuc29775	chr7	70869362	70869501	+	0	NA	intron (NM_130880, intron 6 of 13)	LTR40b|LTR|ERVL	-192312	NM_001256311	381994	Mm.425466	NM_001256311	ENSMUSG00000095061	E030018B13Rik	Gm1697	RIKEN cDNA E030018B13 gene	protein-coding
Diff_Nuc13789	chr17	3206152	3206291	+	0	NA	Intergenic	Intergenic	91249	NM_134123	106583	Mm.124373	NM_134123	ENSMUSG00000046201	Scaf8	A630086M08Rik|A930036P18Rik|AA408306|AI447644|AI448652|AU015035|Rbm16|mKIAA1116	SR-related CTD-associated factor 8	protein-coding
Diff_Nuc7533	chr11	36920502	36920641	+	0	NA	Intergenic	Intergenic	-162828	NM_011856	23964	Mm.439889	NM_011856	ENSMUSG00000049336	Tenm2	Odz2|Odz3|Ten-2|Ten-m2	teneurin transmembrane protein 2	protein-coding
Diff_Nuc15736	chr17	75735512	75735651	+	0	NA	intron (NM_001331236, intron 20 of 28)	intron (NM_001331236, intron 20 of 28)	-99664	NM_001166493	240168	Mm.329203	NM_207246	ENSMUSG00000071042	Rasgrp3	BC066069|Gm327	RAS, guanyl releasing protein 3	protein-coding
Diff_Nuc14458	chr17	29124122	29124261	+	0	NA	intron (NM_134115, intron 5 of 13)	intron (NM_134115, intron 5 of 13)	20691	NM_134115	106504	Mm.439986	NM_134115	ENSMUSG00000024006	Stk38	5830476G13Rik|9530097A09Rik|AA617404|Ndr1	serine/threonine kinase 38	protein-coding
Diff_Nuc7187	chr11	22461392	22461531	+	0	NA	Intergenic	Intergenic	49175	NM_153596	103765	Mm.221274	NM_153596	ENSMUSG00000049904	Tmem17	AI503894|AW049890	transmembrane protein 17	protein-coding
Diff_Nuc28993	chr7	29122932	29123071	+	0	NA	intron (NM_013676, intron 2 of 29)	intron (NM_013676, intron 2 of 29)	737	NM_013676	20924	Mm.285906	NM_013676	ENSMUSG00000003435	Supt5	AL033283|AL033321|AU019549|Spt5|Supt5h	suppressor of Ty 5	protein-coding
Diff_Nuc33904	chr6	72782502	72782641	+	0	NA	Intergenic	Intergenic	-43532	NM_009332	21415	Mm.440067	NM_009332	ENSMUSG00000055799	Tcf7l1	Tcf-3|Tcf3|bHLHb21	transcription factor 7 like 1 (T cell specific, HMG box)	protein-coding
Diff_Nuc44647	chr3	14787922	14788061	+	0	NA	intron (NM_009799, intron 1 of 7)	intron (NM_009799, intron 1 of 7)	-9531	NM_001083957	12346	Mm.273195	NM_009799	ENSMUSG00000027556	Car1	AW555628|Ca1|Car-1	carbonic anhydrase 1	protein-coding
Diff_Nuc38206	chr5	89667242	89667381	+	0	NA	3' UTR (NM_001136260, exon 25 of 25)	3' UTR (NM_001136260, exon 25 of 25)	219612	NM_008096	14473	Mm.196595	NM_008096	ENSMUSG00000035540	Gc	DBP|VDB	group specific component	protein-coding
Diff_Nuc18295	chr16	77423012	77423151	+	0	NA	intron (NR_015543, intron 2 of 4)	intron (NR_015543, intron 2 of 4)	93508	NR_015543	77994	Mm.394688	NR_015543	ENSMUSG00000090386	Mir99ahg	2810055G20Rik|D730043B02Rik	Mir99a and Mirlet7c-1 host gene (non-protein coding)	ncRNA
Diff_Nuc14338	chr17	25422862	25423001	+	0	NA	Intergenic	Intergenic	-11676	NM_011665	22196	Mm.240044	NM_011665	ENSMUSG00000015120	Ube2i	5830467E05Rik|F830028O17Rik|UBC9|Ubce2i|Ubce9	ubiquitin-conjugating enzyme E2I	protein-coding
Diff_Nuc6806	chr11	5920422	5920561	+	0	NA	intron (NM_007595, intron 2 of 20)	intron (NM_007595, intron 2 of 20)	45260	NM_001174054	12323	Mm.439733	NM_007595	ENSMUSG00000057897	Camk2b	CaMKII	calcium/calmodulin-dependent protein kinase II, beta	protein-coding
Diff_Nuc16650	chr16	16829582	16829721	+	0	NA	promoter-TSS (NM_015773)	promoter-TSS (NM_015773)	-195	NM_015773	50525	Mm.31701	NM_015773	ENSMUSG00000022783	Spag6l	PF16|Spag6|Spag6l1	sperm associated antigen 6-like	protein-coding
Diff_Nuc3573	chr13	115053032	115053171	+	0	NA	Intergenic	RMER3D-int|LTR|ERVK	-111301	NR_045836	319803	Mm.386896	NM_177004		A430090L17Rik	-	RIKEN cDNA A430090L17 gene	ncRNA
Diff_Nuc63813	chr8	53785782	53785921	+	0	NA	Intergenic	Lx5|LINE|L1	-811205	NM_001205054	11593	Mm.334535	NM_001005847	ENSMUSG00000031521	Aga	AW060726	aspartylglucosaminidase	protein-coding
Diff_Nuc18114	chr16	69913332	69913471	+	0	NA	Intergenic	B4A|SINE|B4	-49412	NM_173069	224318	Mm.212743	NM_173069	ENSMUSG00000063163	Speer2	SPEER-2	spermatogenesis associated glutamate (E)-rich protein 2	protein-coding
Diff_Nuc12761	chr10	94194392	94194531	+	0	NA	intron (NM_029852, intron 5 of 15)	intron (NM_029852, intron 5 of 15)	42926	NM_029852	77048	Mm.296971	NM_029852	ENSMUSG00000020024	Cep83	2600001G24Rik|4921537D05Rik|5730513H21Rik|Ccdc41	centrosomal protein 83	protein-coding
Diff_Nuc7007	chr11	16661062	16661201	+	0	NA	intron (NM_207655, intron 1 of 27)	intron (NM_207655, intron 1 of 27)	8925	NM_007912	13649	Mm.8534	NM_007912	ENSMUSG00000020122	Egfr	9030024J15Rik|AI552599|Erbb|Errb1|Errp|Wa5|wa-2|wa2	epidermal growth factor receptor	protein-coding
Diff_Nuc64949	chr8	96396572	96396711	+	0	NA	intron (NM_001113384, intron 2 of 7)	intron (NM_001113384, intron 2 of 7)	-59186	NR_026888	75809	Mm.443272	NM_029449		4930488L21Rik	4930452J22Rik	RIKEN cDNA 4930488L21 gene	ncRNA
Diff_Nuc56273	chr1	90884132	90884271	+	0	NA	Intergenic	B4|SINE|B4	-28487	NR_040471	73475	Mm.491040	NR_040471	ENSMUSG00000099378	1700067G17Rik	-	RIKEN cDNA 1700067G17 gene	ncRNA
Diff_Nuc51408	chr2	94835092	94835231	+	0	NA	Intergenic	L1_Mur2|LINE|L1	-556818	NM_001305258	11800	Mm.181824	NM_007466	ENSMUSG00000027193	Api5	AAC-11|AI196452|API-5	apoptosis inhibitor 5	protein-coding
Diff_Nuc42727	chr4	102500702	102500841	+	0	NA	intron (NM_144906, intron 1 of 23)	intron (NM_144906, intron 1 of 23)	68031	NM_001285859	73094	Mm.54201	NM_144906	ENSMUSG00000028524	Sgip1	3110007P09Rik|SGIP1alpha|gag	SH3-domain GRB2-like (endophilin) interacting protein 1	protein-coding
Diff_Nuc50912	chr2	77015572	77015711	+	0	NA	Intergenic	Intergenic	-6949	NM_001025576	545428	Mm.26579	NM_001025576	ENSMUSG00000044033	Ccdc141	2610301F02Rik|CAMDI|ENSMUSG00000075261	coiled-coil domain containing 141	protein-coding
Diff_Nuc24053	chr14	105113872	105114011	+	0	NA	intron (NR_015593, intron 1 of 5)	intron (NR_015593, intron 1 of 5)	75577	NR_015593	320249	Mm.320725	NR_015593		D130009I18Rik	-	RIKEN cDNA D130009I18 gene	ncRNA
Diff_Nuc20323	chr15	61745532	61745671	+	0	NA	Intergenic	Intergenic	-71295	NM_001177354	17869	Mm.2444	NM_010849	ENSMUSG00000022346	Myc	AU016757|Myc2|Niard|Nird|bHLHe39	myelocytomatosis oncogene	protein-coding
Diff_Nuc4246	chr12	32107152	32107291	+	0	NA	Intergenic	MLT1D|LTR|MaLR	-15863	NM_021353	13487	Mm.490454	NM_021353	ENSMUSG00000001225	Slc26a3	9030623B18Rik|9130013M11Rik|AV376035|Dra	solute carrier family 26, member 3	protein-coding
Diff_Nuc48512	chr3	149821952	149822091	+	0	NA	Intergenic	L1Md_A|LINE|L1	864805	NR_039540	100628568		NR_039540	ENSMUSG00000092830	Mir3963	mmu-mir-3963|mu-mir-3963	microRNA 3963	ncRNA
Diff_Nuc12521	chr10	86457252	86457391	+	0	NA	intron (NM_138673, intron 3 of 68)	intron (NM_138673, intron 3 of 68)	13366	NM_138673	192188	Mm.279611	NM_138673	ENSMUSG00000035459	Stab2	FEEL-2|FELL|MFEEL-2|STAB-2	stabilin 2	protein-coding
Diff_Nuc8781	chr11	80269862	80270001	+	0	NA	exon (NM_178616, exon 6 of 14)	exon (NM_178616, exon 6 of 14)	-20617	NM_009871	12569	Mm.142275	NM_009871	ENSMUSG00000048895	Cdk5r1	Cdk5r|D11Bwg0379e|p25|p35	cyclin-dependent kinase 5, regulatory subunit 1 (p35)	protein-coding
Diff_Nuc43246	chr4	118629562	118629701	+	0	NA	Intergenic	RLTR21|LTR|ERVK	-2107	NR_137285	100038571	Mm.426714	NR_137285	ENSMUSG00000073765	Gm12863	OTTMUSG00000008822	predicted gene 12863	ncRNA
Diff_Nuc59805	chr9	24572392	24572531	+	0	NA	intron (NM_194263, intron 3 of 7)	intron (NM_194263, intron 3 of 7)	6286	NM_020496	57246	Mm.31452	NM_020496	ENSMUSG00000031965	Tbx20	9430010M06Rik|AL022859|Tbx12	T-box 20	protein-coding
Diff_Nuc36436	chr5	19699012	19699151	+	0	NA	intron (NM_001170745, intron 2 of 20)	intron (NM_001170745, intron 2 of 20)	285745	NM_015823	50791	Mm.332231	NM_015823	ENSMUSG00000040003	Magi2	AIP-1|Acvri1|Acvrinp1|Acvrip1|Magi-2|S-SCAM|mKIAA0705	membrane associated guanylate kinase, WW and PDZ domain containing 2	protein-coding
Diff_Nuc5995	chr12	95775572	95775711	+	0	NA	Intergenic	Lx7|LINE|L1	610143	NR_106175	102465890		NR_106175	ENSMUSG00000098498	Mir8099-1	Gm27917|mmu-mir-8099-1	microRNA 8099-1	ncRNA
Diff_Nuc8745	chr11	79551892	79552031	+	0	NA	Intergenic	CT-rich|Low_complexity|Low_complexity	12059	NR_029959	723853		NR_029959	ENSMUSG00000065489	Mir365-2	Mirn365-2|mir-365-2	microRNA 365-2	ncRNA
Diff_Nuc33506	chr6	55925562	55925701	+	0	NA	exon (NM_001081665, exon 12 of 14)	exon (NM_001081665, exon 12 of 14)	-41878	NM_011153	19051	Mm.42096	NM_011153	ENSMUSG00000002930	Ppp1r17	G-substrate|Gsbs|Ppp1r2	protein phosphatase 1, regulatory subunit 17	protein-coding
Diff_Nuc46823	chr3	94794462	94794601	+	0	NA	intron (NM_001293715, intron 3 of 11)	intron (NM_001293715, intron 3 of 11)	-13559	NR_105980	102465613		NR_105980	ENSMUSG00000099033	Mir7013	Gm27488|mmu-mir-7013	microRNA 7013	ncRNA
Diff_Nuc24546	chr19	3560132	3560271	+	0	NA	intron (NM_029456, intron 1 of 22)	Lx2|LINE|L1	15548	NM_001164159	52036	Mm.284686	NM_028999	ENSMUSG00000024908	Ppp6r3	4930528G08Rik|9130026N02Rik|D19Bwg1430e|D19Ertd703e|Pp6r3|Ppcs3|Pptcs3|Sapl|Saps3|mKIAA1558	protein phosphatase 6, regulatory subunit 3	protein-coding
Diff_Nuc15300	chr17	59205452	59205591	+	0	NA	Intergenic	Intergenic	-52776	NM_026497	67993	Mm.36507	NM_026497	ENSMUSG00000024228	Nudt12	0610016O18Rik	nudix (nucleoside diphosphate linked moiety X)-type motif 12	protein-coding
Diff_Nuc50436	chr2	62476742	62476881	+	0	NA	intron (NM_027835, intron 2 of 15)	Lx9|LINE|L1	7501	NM_027835	71586	Mm.136224	NM_027835	ENSMUSG00000026896	Ifih1	9130009C22Rik|Helicard|Hlcd|MDA5|RLR-2	interferon induced with helicase C domain 1	protein-coding
Diff_Nuc41818	chr4	67797362	67797501	+	0	NA	Intergenic	Intergenic	818000	NM_019967	56710	Mm.248788	NM_019967	ENSMUSG00000028351	Brinp1	BRINP|Dbc1|Dbccr1|Fam5a	bone morphogenic protein/retinoic acid inducible neural specific 1	protein-coding
Diff_Nuc36619	chr5	25098072	25098211	+	0	NA	Intergenic	ORR1B1-int|LTR|MaLR	62305	NR_027388	73571	Mm.105263	NR_027388	ENSMUSG00000101856	1700096K18Rik	-	RIKEN cDNA 1700096K18 gene	ncRNA
Diff_Nuc29278	chr7	47294962	47295101	+	0	NA	Intergenic	Intergenic	521895	NM_001004139	70227	Mm.333800	NM_001004139	ENSMUSG00000068959	Zfp619	3000002G13Rik	zinc finger protein 619	protein-coding
Diff_Nuc18967	chr15	5372702	5372841	+	0	NA	Intergenic	B1F2|SINE|Alu	-73547	NR_045274	71432	Mm.291087	NR_045274		5430437J10Rik	-	RIKEN cDNA 5430437J10 gene	ncRNA
Diff_Nuc56127	chr1	87397862	87398001	+	0	NA	Intergenic	Intergenic	97454	NM_030194	109032	Mm.335802	NM_030194	ENSMUSG00000070034	Sp110	5031415C07Rik|52kDa|5830484A20Rik|ENSMUSG00000075603|Ifi75|Ipr1	Sp110 nuclear body protein	protein-coding
Diff_Nuc53252	chr2	155268522	155268661	+	0	NA	Intergenic	B4|SINE|B4	-2072	NM_019825	56406	Mm.27592	NM_019825	ENSMUSG00000038369	Ncoa6	AIB3|ASC-2|ASC2|NRC|Ncoa7|PRIP|RAP250|mKIAA0181	nuclear receptor coactivator 6	protein-coding
Diff_Nuc40926	chr4	35272142	35272281	+	0	NA	Intergenic	ORR1D2|LTR|MaLR	-99082	NM_001081343	73205	Mm.331544	NM_001081343	ENSMUSG00000028300	3110043O21Rik	AI840585	RIKEN cDNA 3110043O21 gene	protein-coding
Diff_Nuc9989	chr11	115306592	115306731	+	0	NA	exon (NM_001033775, exon 5 of 8)	exon (NM_001033775, exon 5 of 8)	2713	NR_039549	100628623		NR_039549	ENSMUSG00000093096	Mir3968	mmu-mir-3968|mu-mir-3968	microRNA 3968	ncRNA
Diff_Nuc20651	chr15	76405742	76405881	+	0	NA	promoter-TSS (NM_172960)	promoter-TSS (NM_172960)	-978	NM_172960	268822	Mm.181624	NM_172960	ENSMUSG00000022550	Adck5	A230108P17	aarF domain containing kinase 5	protein-coding
Diff_Nuc20954	chr15	84660032	84660171	+	0	NA	intron (NR_030731, intron 2 of 11)	intron (NR_030731, intron 2 of 11)	26458	NM_001081166	271305	Mm.101022	NM_001081166	ENSMUSG00000016624	Phf21b	A730032D07Rik	PHD finger protein 21B	protein-coding
Diff_Nuc15438	chr17	64790612	64790751	+	0	NA	TTS (NR_105848)	TTS (NR_105848)	535	NR_105848	102465228		NR_105848	ENSMUSG00000098984	Mir6420	Gm28007|mmu-mir-6420	microRNA 6420	ncRNA
Diff_Nuc62183	chr9	110589872	110590011	+	0	NA	intron (NM_028312, intron 1 of 6)	intron (NM_028312, intron 1 of 6)	30934	NM_028312	72654	Mm.249115	NM_028312	ENSMUSG00000019659	Ccdc12	2700094L05Rik|C76605	coiled-coil domain containing 12	protein-coding
Diff_Nuc21804	chr14	21530702	21530841	+	0	NA	exon (NM_001252081, exon 4 of 26)	exon (NM_001252081, exon 4 of 26)	3997	NM_001252082	268721	Mm.275082	NM_027996	ENSMUSG00000021819	Zswim8	2310021P13Rik|4832404P21Rik|Kiaa0913|mKIAA0913	zinc finger SWIM-type containing 8	protein-coding
Diff_Nuc9026	chr11	86959792	86959931	+	0	NA	intron (NM_197987, intron 6 of 23)	B1_Mus1|SINE|Alu	19284	NM_197987	68729	Mm.17436	NM_197987	ENSMUSG00000018548	Trim37	1110032A10Rik|2810004E07Rik|AI848587|AU043018|MUL|TEF3|mKIAA0898	tripartite motif-containing 37	protein-coding
Diff_Nuc34090	chr6	82287182	82287321	+	0	NA	Intergenic	Intergenic	-65218	NM_009313	21336	Mm.8055	NM_009313	ENSMUSG00000030043	Tacr1	Nk1r|Spr|Tac1r	tachykinin receptor 1	protein-coding
Diff_Nuc60866	chr9	64831932	64832071	+	0	NA	intron (NM_175153, intron 12 of 12)	intron (NM_175153, intron 12 of 12)	23264	NM_175153	69882	Mm.272616	NM_175153	ENSMUSG00000034263	Vwa9	2010321M09Rik	von Willebrand factor A domain containing 9	protein-coding
Diff_Nuc55879	chr1	75557102	75557241	+	0	NA	Intergenic	Intergenic	14330	NM_009208	20536	Mm.5053	NM_009208	ENSMUSG00000006576	Slc4a3	A930038D23Rik|Ae3	solute carrier family 4 (anion exchanger), member 3	protein-coding
[truncated: 6,072 more rows]
