# Supplementary material for: Remodeling of epigenome and transcriptome landscapes with aging in mice reveals widespread induction of inflammatory responses
Source: HighWire-hosted journal article supplement (doi:10.1101/gr.240093.118), 2019-03-11
Supplement: Supplemental_Code_Figure3_Machine_learning.zip [file HOMER_dposREF_NPCs_DiNUP_DANPOS_GAINED.xls]

PeakID (cmd=annotatePeaks.pl dposREF_NPCs_DiNUP_DANPOS_GAINED.bed mm9)	Chr	Start	End	Strand	Peak Score	Focus Ratio/Region Size	Annotation	Detailed Annotation	Distance to TSS	Nearest PromoterID	Entrez ID	Nearest Unigene	Nearest Refseq	Nearest Ensembl	Gene Name	Gene Alias	Gene Description	Gene Type
Diff_Nuc11210	chr6	92696352	92696491	+	0	NA	Intergenic	MLT1J2|LTR|MaLR	-40243	NM_001081146	243548	Mm.248820	NM_001081146	ENSMUSG00000030020	Prickle2	6230400G14Rik|6720451F06Rik|mpk2	prickle planar cell polarity protein 2	protein-coding
Diff_Nuc20462	chr8	80009062	80009201	+	0	NA	intron (NM_030113, intron 1 of 22)	intron (NM_030113, intron 1 of 22)	-31824	NR_028125	70345	Mm.411813	NR_028125	ENSMUSG00000097882	0610038B21Rik	-	RIKEN cDNA 0610038B21 gene	ncRNA
Diff_Nuc16907	chr2	156546152	156546291	+	0	NA	promoter-TSS (NM_001042488)	promoter-TSS (NM_001042488)	424	NR_040505	74846	Mm.443946	NR_040505	ENSMUSG00000086638	4930405A21Rik	-	RIKEN cDNA 4930405A21 gene	ncRNA
Diff_Nuc16223	chr2	71737132	71737271	+	0	NA	intron (NM_172665, intron 10 of 10)	intron (NM_172665, intron 10 of 10)	25920	NM_172665	228026	Mm.34411	NM_172665	ENSMUSG00000006494	Pdk1	B830012B01|D530020C15Rik	pyruvate dehydrogenase kinase, isoenzyme 1	protein-coding
Diff_Nuc2803	chr11	76155782	76155921	+	0	NA	intron (NM_008750, intron 1 of 7)	intron (NM_008750, intron 1 of 7)	56792	NM_008750	18230	Mm.27915	NM_008750	ENSMUSG00000020844	Nxn	l11Jus13	nucleoredoxin	protein-coding
Diff_Nuc15292	chr3	112897842	112897981	+	0	NA	Intergenic	IAPLTR3-int|LTR|ERVK	61734	NM_001190404	545562	Mm.462977	NM_001190403		Amy2b	Amy-X|Amy2-2|OTTMUSG00000022462|mAmy2-1	amylase 2b	protein-coding
Diff_Nuc982	chr13	103027942	103028081	+	0	NA	Intergenic	Intergenic	-455627	NM_008533	17079	Mm.373974	NM_008533	ENSMUSG00000021624	Cd180	F630107B15|Ly78|RP105	CD180 antigen	protein-coding
Diff_Nuc15308	chr3	115829682	115829821	+	0	NA	intron (NM_011693, intron 2 of 8)	intron (NM_011693, intron 2 of 8)	2855	NM_011693	22329	Mm.76649	NM_011693	ENSMUSG00000027962	Vcam1	CD106|Vcam-1	vascular cell adhesion molecule 1	protein-coding
Diff_Nuc17428	chr1	37170472	37170611	+	0	NA	Intergenic	Intergenic	-104582	NM_001282010	12790	Mm.214224	NM_009918	ENSMUSG00000026114	Cnga3	CNG3	cyclic nucleotide gated channel alpha 3	protein-coding
Diff_Nuc13880	chr4	117699912	117700051	+	0	NA	intron (NM_009176, intron 4 of 11)	intron (NM_009176, intron 4 of 11)	-97613	NM_001284192	11876	Mm.56897	NM_009711	ENSMUSG00000028539	Artn	neublastin	artemin	protein-coding
Diff_Nuc9945	chr7	100887622	100887761	+	0	NA	Intergenic	RMER10A|LTR|ERVL	659302	NM_021427	58238	Mm.113787	NM_021427	ENSMUSG00000051515	Fam181b	A830059I20Rik|AB041569	family with sequence similarity 181, member B	protein-coding
Diff_Nuc9066	chr18	82936082	82936221	+	0	NA	Intergenic	Intergenic	-7720	NR_045389	76961	Mm.396392	NR_045389	ENSMUSG00000101773	2210420H20Rik	-	RIKEN cDNA 2210420H20 gene	ncRNA
Diff_Nuc19424	chr9	77638412	77638551	+	0	NA	intron (NM_010295, intron 12 of 15)	intron (NM_010295, intron 12 of 15)	36139	NM_010295	14629	Mm.89888	NM_010295	ENSMUSG00000032350	Gclc	D9Wsu168e|GLCL-H|Ggcs-hs|Glclc	glutamate-cysteine ligase, catalytic subunit	protein-coding
Diff_Nuc18647	chr1	188936282	188936421	+	0	NA	intron (NM_028848, intron 8 of 9)	intron (NM_028848, intron 8 of 9)	-12666	NR_040554	69308	Mm.490882	NR_040554	ENSMUSG00000089730	1700007P06Rik	-	RIKEN cDNA 1700007P06 gene	ncRNA
Diff_Nuc16164	chr2	61677032	61677171	+	0	NA	Intergenic	Lx|LINE|L1	34591	NM_009322	21375	Mm.308525	NM_009322	ENSMUSG00000035033	Tbr1	-	T-box brain gene 1	protein-coding
Diff_Nuc2363	chr11	40511332	40511471	+	0	NA	Intergenic	Intergenic	-2696	NM_001199274	108645	Mm.293771	NM_134017	ENSMUSG00000042032	Mat2b	1110064C04Rik|2410018D16Rik|AI182287|AU022853|MAT-II|MATIIbeta|TGR	methionine adenosyltransferase II, beta	protein-coding
Diff_Nuc5136	chr17	57774192	57774331	+	0	NA	Intergenic	Intergenic	-89524	NM_001104591	224916	Mm.469889	NM_001104591	ENSMUSG00000090655	Vmn2r120	EG224916	vomeronasal 2, receptor 120	protein-coding
Diff_Nuc7226	chr14	35014512	35014651	+	0	NA	intron (NM_183209, intron 1 of 1)	CpG	238	NM_183209	432839	Mm.294643	NM_183209	ENSMUSG00000071531	Gprin2	C130040D06Rik|C230073P13|Gm286|mKIAA0514	G protein regulated inducer of neurite outgrowth 2	protein-coding
Diff_Nuc4054	chr10	77204612	77204751	+	0	NA	intron (NM_001287074, intron 1 of 11)	intron (NM_001287074, intron 1 of 11)	15450	NM_001205033	100502953	Mm.486157	NM_001205033	ENSMUSG00000096421	Gm10100	ENSMUSG00000061452	predicted gene 10100	protein-coding
Diff_Nuc4239	chr10	93296862	93297001	+	0	NA	intron (NM_001206851, intron 1 of 6)	CpG	2631	NM_001206851	327799	Mm.491598	NM_183199	ENSMUSG00000020020	Usp44	E430004F17Rik	ubiquitin specific peptidase 44	protein-coding
Diff_Nuc19591	chr9	103021282	103021421	+	0	NA	intron (NM_173781, intron 1 of 7)	intron (NM_173781, intron 1 of 7)	6947	NM_173781	270192	Mm.490252	NM_173781	ENSMUSG00000032549	Rab6b	9630015C03|AI844641|C330006L04Rik|D9Bwg0185e	RAB6B, member RAS oncogene family	protein-coding
Diff_Nuc8805	chr18	55346882	55347021	+	0	NA	Intergenic	Intergenic	-197117	NM_175751	269023	Mm.192984	NM_175751	ENSMUSG00000052713	Zfp608	4932417D18Rik|D430007A19Rik|Znf608	zinc finger protein 608	protein-coding
Diff_Nuc8216	chr19	38651882	38652021	+	0	NA	intron (NM_019588, intron 1 of 31)	intron (NM_019588, intron 1 of 31)	53264	NM_019588	74055	Mm.34031	NM_019588	ENSMUSG00000024998	Plce1	4933403A21Rik|PLCepsilon|Plce|mKIAA1516	phospholipase C, epsilon 1	protein-coding
Diff_Nuc6190	chr15	15327022	15327161	+	0	NA	Intergenic	L1Md_F2|LINE|L1	-1380765	NM_009869	12565	Mm.439758	NM_009869	ENSMUSG00000025370	Cdh9	-	cadherin 9	protein-coding
Diff_Nuc20176	chr8	36515392	36515531	+	0	NA	Intergenic	Intergenic	43126	NM_026067	67276	Mm.207534	NM_026067	ENSMUSG00000031527	Eri1	3'hexo|3110010F15Rik|Thex1|eri-1	exoribonuclease 1	protein-coding
Diff_Nuc18137	chr1	133865242	133865381	+	0	NA	intron (NM_001177628, intron 1 of 4)	intron (NM_001177628, intron 1 of 4)	-1875	NM_145977	212980	Mm.200307	NM_145977	ENSMUSG00000026435	Slc45a3	2210413P12Rik|AU023994|AU043764|IPCA-6|PRST|Pcanap6	solute carrier family 45, member 3	protein-coding
Diff_Nuc8139	chr19	28587982	28588121	+	0	NA	intron (NM_175459, intron 4 of 10)	intron (NM_175459, intron 4 of 10)	-164663	NR_045330	320176	Mm.406716	NR_045330	ENSMUSG00000097735	D930032P07Rik	-	RIKEN cDNA D930032P07 gene	ncRNA
Diff_Nuc2942	chr11	86949677	86949816	+	0	NA	intron (NM_197987, intron 2 of 23)	B2_Mm1a|SINE|B2	9169	NM_197987	68729	Mm.17436	NM_197987	ENSMUSG00000018548	Trim37	1110032A10Rik|2810004E07Rik|AI848587|AU043018|MUL|TEF3|mKIAA0898	tripartite motif-containing 37	protein-coding
Diff_Nuc11130	chr6	88048422	88048561	+	0	NA	intron (NM_133933, intron 5 of 9)	intron (NM_133933, intron 5 of 9)	5761	NR_105795	102465196		NR_105795	ENSMUSG00000099095	Mir6376	Gm27778|mmu-mir-6376	microRNA 6376	ncRNA
Diff_Nuc8487	chr18	10764692	10764831	+	0	NA	intron (NM_144860, intron 9 of 20)	B1_Mus2|SINE|Alu	18213	NR_029547	387151		NR_029547	ENSMUSG00000065399	Mir133a-1	Mirn133|Mirn133a-1|mir-133a-1	microRNA 133a-1	ncRNA
Diff_Nuc4887	chr17	34129512	34129651	+	0	NA	Intergenic	Intergenic	7697	NM_001001892	14972	Mm.422886	NM_001001892	ENSMUSG00000061232	H2-K1	H-2K|H-2K(d)|H2-K|K-f	histocompatibility 2, K1, K region	protein-coding
Diff_Nuc11069	chr6	83652492	83652631	+	0	NA	TTS (NR_075095)	TTS (NR_075095)	8239	NR_075094	574519	Mm.487605	NR_002871	ENSMUSG00000085794	Vax2os	Vas2os|Vax2os1|Vax2os2	ventral anterior homeobox 2, opposite strand	ncRNA
Diff_Nuc14300	chr4	141411272	141411411	+	0	NA	Intergenic	Intergenic	-9067	NM_001033875	76701	Mm.489680	NM_001033875	ENSMUSG00000062478	Ctrc	1810044E12Rik	chymotrypsin C (caldecrin)	protein-coding
Diff_Nuc10518	chr7	151544272	151544411	+	0	NA	intron (NM_001113373, intron 7 of 15)	MLT1B|LTR|MaLR	74051	NM_001081370	210274	Mm.483624	NM_001081370	ENSMUSG00000037541	Shank2	ProSAP1|mKIAA1022	SH3/ankyrin domain gene 2	protein-coding
Diff_Nuc13443	chr4	56859517	56859656	+	0	NA	intron (NM_018761, intron 2 of 18)	intron (NM_018761, intron 2 of 18)	18497	NM_018761	54366	Mm.218891	NM_018761	ENSMUSG00000038816	Ctnnal1	ACRP|AI616177|AW545119|C86009|Catnal1	catenin (cadherin associated protein), alpha-like 1	protein-coding
Diff_Nuc9348	chr7	28591232	28591371	+	0	NA	promoter-TSS (NM_027703)	promoter-TSS (NM_027703)	-914	NM_027703	71163	Mm.440493	NM_027703	ENSMUSG00000030604	Zfp626	4833408D11Rik|4933426I21Rik|7630402I04Rik	zinc finger protein 626	protein-coding
Diff_Nuc391	chr13	35963882	35964021	+	0	NA	intron (NM_001123386, intron 6 of 6)	intron (NM_001123386, intron 6 of 6)	34265	NM_145938	208366	Mm.35545	NM_145938	ENSMUSG00000021418	Rpp40	D8Bwg1265e|Rnasep1	ribonuclease P 40 subunit	protein-coding
Diff_Nuc5633	chr16	22514852	22514991	+	0	NA	intron (NR_130988, intron 1 of 1)	intron (NR_130988, intron 1 of 1)	3368	NR_130988	78082	Mm.243927	NR_130988	ENSMUSG00000089874	9230117E06Rik	-	RIKEN cDNA 9230117E06 gene	ncRNA
Diff_Nuc3536	chr11	121332332	121332471	+	0	NA	intron (NM_029878, intron 6 of 38)	RMER21A|LTR|ERV1	19138	NM_029878	108903	Mm.23686	NM_029878	ENSMUSG00000039230	Tbcd	2310057L06Rik|A030005L14Rik|mKIAA0988	tubulin-specific chaperone d	protein-coding
Diff_Nuc9164	chr7	11884302	11884441	+	0	NA	Intergenic	Intergenic	-98893	NM_001110316	665902	Mm.425380	NM_001110316	ENSMUSG00000070828	Zscan4f	C330039H09Rik	zinc finger and SCAN domain containing 4F	protein-coding
Diff_Nuc5144	chr17	59178012	59178151	+	0	NA	Intergenic	MTD|LTR|MaLR	-25336	NM_026497	67993	Mm.36507	NM_026497	ENSMUSG00000024228	Nudt12	0610016O18Rik	nudix (nucleoside diphosphate linked moiety X)-type motif 12	protein-coding
Diff_Nuc18703	chr1	193029312	193029451	+	0	NA	Intergenic	Intergenic	-22169	NM_007498	11910	Mm.2706	NM_007498	ENSMUSG00000026628	Atf3	LRG-21	activating transcription factor 3	protein-coding
Diff_Nuc10857	chr6	52024522	52024661	+	0	NA	Intergenic	RMER19C|LTR|ERVK	-28357	NR_110440	102635415	Mm.333063	NR_110440	ENSMUSG00000085412	Halr1	Gm15055|Haunt|Linchoxa1|OTTMUSG00000018881|linc-Evx1|linc-Hoxa1|linc1547	Hoxa adjacent long noncoding RNA 1	ncRNA
Diff_Nuc3435	chr11	118567772	118567911	+	0	NA	intron (NM_001039167, intron 2 of 14)	MTEb|LTR|MaLR	54514	NM_001285438	52897	Mm.341103	NM_001024931	ENSMUSG00000025576	Rbfox3	Fox-3|Hrnbp3|NeuN|Neuna60	RNA binding protein, fox-1 homolog (C. elegans) 3	protein-coding
Diff_Nuc19869	chr9	122982962	122983101	+	0	NA	3' UTR (NM_026917, exon 7 of 7)	3' UTR (NM_026917, exon 7 of 7)	39172	NM_177911	331046	Mm.195309	NM_177911	ENSMUSG00000025787	Tgm4	9530008N10Rik|Eapa1|TGP	transglutaminase 4 (prostate)	protein-coding
Diff_Nuc7842	chr14	123384492	123384631	+	0	NA	Intergenic	Intergenic	-2078	NM_028651	70551	Mm.271988	NM_028651	ENSMUSG00000041594	Tmtc4	4930403J22Rik|5730419O14Rik	transmembrane and tetratricopeptide repeat containing 4	protein-coding
Diff_Nuc2568	chr11	59785212	59785351	+	0	NA	intron (NM_001290014, intron 3 of 4)	intron (NM_001290014, intron 3 of 4)	-6835	NM_009026	19416	Mm.3903	NM_009026	ENSMUSG00000049892	Rasd1	Dexras1	RAS, dexamethasone-induced 1	protein-coding
Diff_Nuc1766	chr12	88728002	88728141	+	0	NA	intron (NM_011479, intron 1 of 11)	intron (NM_011479, intron 1 of 11)	1234	NM_011479	20773	Mm.565	NM_011479	ENSMUSG00000021036	Sptlc2	LCB2|LCB2a|Spt2	serine palmitoyltransferase, long chain base subunit 2	protein-coding
Diff_Nuc20870	chr8	122341602	122341741	+	0	NA	intron (NM_028071, intron 3 of 3)	intron (NM_028071, intron 3 of 3)	22808	NM_028071	72042	Mm.393405	NM_028071	ENSMUSG00000031827	Cotl1	1810074P22Rik|2010004C08Rik|Clp	coactosin-like 1 (Dictyostelium)	protein-coding
Diff_Nuc16056	chr2	43318252	43318391	+	0	NA	Intergenic	Lx5|LINE|L1	-92524	NM_001289593	70789	Mm.105278	NM_027552	ENSMUSG00000026866	Kynu	4432411A05Rik	kynureninase (L-kynurenine hydrolase)	protein-coding
Diff_Nuc908	chr13	97857292	97857431	+	0	NA	intron (NM_001100458, intron 1 of 12)	intron (NM_001100458, intron 1 of 12)	15763	NM_001100458	320557	Mm.458280	NM_001100458	ENSMUSG00000041817	Fam169a	B230112C05Rik|SLAP75	family with sequence similarity 169, member A	protein-coding
Diff_Nuc6163	chr15	11136332	11136471	+	0	NA	intron (NM_175501, intron 3 of 23)	RLTR11A|LTR|ERVK	141873	NM_175501	239337	Mm.224825	NM_175501	ENSMUSG00000047497	Adamts12	ADAMTS-12|AI605170	a disintegrin-like and metallopeptidase (reprolysin type) with thrombospondin type 1 motif, 12	protein-coding
Diff_Nuc12493	chr5	112824382	112824521	+	0	NA	Intergenic	Intergenic	-3218	NM_028386	72898	Mm.151745	NM_028386	ENSMUSG00000029348	Asphd2	2900006N09Rik|9230106G13Rik	aspartate beta-hydroxylase domain containing 2	protein-coding
Diff_Nuc5431	chr16	4082342	4082481	+	0	NA	Intergenic	Intergenic	-4601	NM_026508	68015	Mm.123366	NM_026508	ENSMUSG00000005981	Trap1	2410002K23Rik|HSP75	TNF receptor-associated protein 1	protein-coding
Diff_Nuc3698	chr10	28038112	28038251	+	0	NA	intron (NM_008983, intron 3 of 31)	intron (NM_008983, intron 3 of 31)	243555	NM_008983	19272	Mm.332303	NM_008983	ENSMUSG00000019889	Ptprk	AI853699|PTPk|RPTPkappa	protein tyrosine phosphatase, receptor type, K	protein-coding
Diff_Nuc2670	chr11	68380692	68380831	+	0	NA	Intergenic	Intergenic	11073	NM_146004	215723	Mm.131205	NM_146004	ENSMUSG00000048329	Mfsd6l	-	major facilitator superfamily domain containing 6-like	protein-coding
Diff_Nuc9611	chr7	56218502	56218641	+	0	NA	intron (NM_001111016, intron 1 of 38)	intron (NM_001111016, intron 1 of 38)	4128	NM_001111016	78286	Mm.333881	NM_175272	ENSMUSG00000052512	Nav2	5330421F07Rik|AU067780|BQ960892|HELAD1|POMFIL2|RAINB1|RAINB2|Unc53H2|mKIAA3015	neuron navigator 2	protein-coding
Diff_Nuc19483	chr9	87923232	87923371	+	0	NA	Intergenic	B3|SINE|B2	-297206	NM_023814	76365	Mm.158789	NM_023814	ENSMUSG00000032419	Tbx18	2810012F10Rik|2810404D13Rik	T-box18	protein-coding
Diff_Nuc13777	chr4	106706162	106706301	+	0	NA	intron (NM_198438, intron 8 of 16)	ORR1C2|LTR|MaLR	33240	NM_025500	56280	Mm.29517	NM_025500	ENSMUSG00000028622	Mrpl37	2300004O14Rik|AI132596|MRP-L2|Rpml2	mitochondrial ribosomal protein L37	protein-coding
Diff_Nuc13575	chr4	79602052	79602191	+	0	NA	Intergenic	L1Md_F2|LINE|L1	-877996	NM_031202	22178	Mm.30438	NM_031202	ENSMUSG00000005994	Tyrp1	Oca3|TRP-1|TRP1|Tyrp|b|brown|isa	tyrosinase-related protein 1	protein-coding
Diff_Nuc9197	chr7	16588992	16589131	+	0	NA	Intergenic	Intergenic	-4217	NM_001081418	243842	Mm.440249	NM_001081418	ENSMUSG00000070808	Gltscr1	-	glioma tumor suppressor candidate region gene 1	protein-coding
Diff_Nuc5180	chr17	65933192	65933331	+	0	NA	intron (NM_013933, intron 4 of 5)	MTEa|LTR|MaLR	29634	NM_013933	30960	Mm.266767	NM_013933	ENSMUSG00000024091	Vapa	33kDa|VAP33	vesicle-associated membrane protein, associated protein A	protein-coding
Diff_Nuc10816	chr6	48185342	48185481	+	0	NA	Intergenic	L1Md_T|LINE|L1	-148819	NM_001163475	69228	Mm.207555	NM_001163475	ENSMUSG00000057691	Zfp746	2810407L07Rik|AI317225|Znf746	zinc finger protein 746	protein-coding
Diff_Nuc6695	chr15	81180232	81180371	+	0	NA	intron (NM_011399, intron 1 of 8)	intron (NM_011399, intron 1 of 8)	10894	NM_011399	20524	Mm.222536	NM_011399	ENSMUSG00000022404	Slc25a17	34kDa|47kDa|PMP34|Pmp47	solute carrier family 25 (mitochondrial carrier, peroxisomal membrane protein), member 17	protein-coding
Diff_Nuc18324	chr1	153340902	153341041	+	0	NA	intron (NM_011277, intron 1 of 6)	RLTR12B|LTR|ERVK	6982	NM_011277	19821	Mm.474038	NM_011277	ENSMUSG00000026484	Rnf2	AI326319|AI450156|AU019207|Ring1B|dinG	ring finger protein 2	protein-coding
Diff_Nuc18462	chr1	167998322	167998461	+	0	NA	Intergenic	ORR1A2|LTR|MaLR	59638	NM_001033344	240892	Mm.35315	NM_001033344	ENSMUSG00000026564	Dusp27	C130085G02Rik|Gm209	dual specificity phosphatase 27 (putative)	protein-coding
Diff_Nuc18036	chr1	119922682	119922821	+	0	NA	Intergenic	L1Md_F2|LINE|L1	284958	NM_011650	22099	Mm.426637	NM_011650	ENSMUSG00000026374	Tsn	2610034C24Rik|AU040286|C3PO|TB-RBP	translin	protein-coding
Diff_Nuc18290	chr1	148332912	148333051	+	0	NA	Intergenic	RMER20B|LTR|ERVK	-9815	NM_153539	215378	Mm.441817	NM_153539	ENSMUSG00000035131	Brinp3	B830045N13Rik|Fam5c	bone morphogenetic protein/retinoic acid inducible neural specific 3	protein-coding
Diff_Nuc5146	chr17	59359142	59359281	+	0	NA	Intergenic	L1_Mus1|LINE|L1	-206466	NM_026497	67993	Mm.36507	NM_026497	ENSMUSG00000024228	Nudt12	0610016O18Rik	nudix (nucleoside diphosphate linked moiety X)-type motif 12	protein-coding
Diff_Nuc11943	chr5	36549542	36549681	+	0	NA	TTS (NM_175249)	TTS (NM_175249)	2941	NM_175249	76943	Mm.44242	NM_175249	ENSMUSG00000043430	Psapl1	2310020A21Rik	prosaposin-like 1	protein-coding
Diff_Nuc17216	chr2	179672942	179673081	+	0	NA	intron (NM_001081092, intron 3 of 14)	intron (NM_001081092, intron 3 of 14)	38340	NM_001081092	228980	Mm.235542	NM_001081092	ENSMUSG00000039117	Taf4	135kDa|AI450312|TAFII130|TAFII135|Taf2c1|Taf4a	TATA-box binding protein associated factor 4	protein-coding
Diff_Nuc720	chr13	65116052	65116191	+	0	NA	Intergenic	Intergenic	-18245	NM_001083890	238683	Mm.295543	NM_001083890	ENSMUSG00000074849	Spata31d1c	4932441B19Rik|Fam75d1c	spermatogenesis associated 31 subfamily D, member 1C	protein-coding
Diff_Nuc10522	chr7	151656802	151656941	+	0	NA	promoter-TSS (NM_001252572)	promoter-TSS (NM_001252572)	-31	NM_001252572	13043	Mm.205601	NM_007803	ENSMUSG00000031078	Cttn	1110020L01Rik|Ems1	cortactin	protein-coding
Diff_Nuc2079	chr11	3044162	3044301	+	0	NA	exon (NM_030207, exon 18 of 33)	exon (NM_030207, exon 18 of 33)	20201	NR_003518	66776	Mm.247625	NR_003518		Pisd-ps3	4933439C20Rik	phosphatidylserine decarboxylase, pseudogene 3	pseudo
Diff_Nuc11175	chr6	90939232	90939371	+	0	NA	Intergenic	Intergenic	127519	NM_018815	54563	Mm.28162	NM_018815	ENSMUSG00000030091	Nup210	9830001L10|AI836801|Pom210|gp190|gp210	nucleoporin 210	protein-coding
Diff_Nuc4677	chr17	19376162	19376301	+	0	NA	Intergenic	ORR1A2-int|LTR|MaLR	-122868	NM_001104551	665376	Mm.469859	NM_001104551	ENSMUSG00000090304	Vmn2r99	EG665376	vomeronasal 2, receptor 99	protein-coding
Diff_Nuc15143	chr3	95461092	95461231	+	0	NA	Intergenic	MTC|LTR|MaLR	-1482	NM_008562	17210	Mm.1639	NM_008562	ENSMUSG00000038612	Mcl1	AW556805|Mcl-1	myeloid cell leukemia sequence 1	protein-coding
Diff_Nuc15067	chr3	88455862	88456001	+	0	NA	exon (NM_181817, exon 1 of 1)	exon (NM_181817, exon 1 of 1)	1133	NM_181817	242093	Mm.269130	NM_181817	ENSMUSG00000049741	Rxfp4	GPCR142|Gpr100|Rln3r2|SALPR	relaxin family peptide receptor 4	protein-coding
Diff_Nuc16146	chr2	59943972	59944111	+	0	NA	intron (NM_001001182, intron 1 of 35)	B4A|SINE|B4	19756	NM_001001182	407823	Mm.228071	NM_001001182	ENSMUSG00000026987	Baz2b	5830435C13Rik|BC053917|D2Ertd794e	bromodomain adjacent to zinc finger domain, 2B	protein-coding
Diff_Nuc8390	chr19	56664722	56664861	+	0	NA	intron (NM_025811, intron 6 of 10)	intron (NM_025811, intron 6 of 10)	42040	NM_025811	66866	Mm.46346	NM_025811	ENSMUSG00000025078	Nhlrc2	1200003G01Rik|AI835049|AV002846|AW496455	NHL repeat containing 2	protein-coding
Diff_Nuc6657	chr15	79163652	79163791	+	0	NA	Intergenic	RMER10A|LTR|ERVL	-4920	NM_001199023	53357	Mm.155620	NM_016915	ENSMUSG00000042632	Pla2g6	BB112799|PNPLA9|iPLA(2)beta|iPLA2|iPLA2beta	phospholipase A2, group VI	protein-coding
Diff_Nuc13223	chr4	32950532	32950671	+	0	NA	intron (NM_001012451, intron 1 of 15)	intron (NM_001012451, intron 1 of 15)	59879	NM_080471	140577	Mm.214766	NM_080471	ENSMUSG00000040183	Ankrd6	-	ankyrin repeat domain 6	protein-coding
Diff_Nuc3187	chr11	103241202	103241341	+	0	NA	intron (NM_183034, intron 6 of 11)	intron (NM_183034, intron 6 of 11)	-16265	NM_001205236	544817	Mm.259113	NM_133715	ENSMUSG00000034255	Arhgap27	2310069I04Rik|5730442P18Rik|Gm21552|Sh3d20	Rho GTPase activating protein 27	protein-coding
Diff_Nuc12270	chr5	86411622	86411761	+	0	NA	Intergenic	B3|SINE|B2	82917	NM_001345902	12617	Mm.4649	NM_007683	ENSMUSG00000029253	Cenpc1	CENP-C|Cenpc	centromere protein C1	protein-coding
Diff_Nuc10219	chr7	129161022	129161161	+	0	NA	intron (NM_028758, intron 1 of 16)	B4A|SINE|B4	3621	NM_028758	74105	Mm.29619	NM_028758	ENSMUSG00000030872	Gga2	1200007E24Rik|mKIAA1080	golgi associated, gamma adaptin ear containing, ARF binding protein 2	protein-coding
Diff_Nuc12694	chr5	125757962	125758101	+	0	NA	3' UTR (NM_001205082, exon 12 of 12)	3' UTR (NM_001205082, exon 12 of 12)	63433	NM_016741	20778	Mm.282242	NM_016741	ENSMUSG00000037936	Scarb1	AI120173|CD36|Cd36l1|Chohd1|Cla-1|Cla1|D5Ertd460e|Hdlq1|Hlb398|SR-B1|SR-BI|SRBI|Srb1|mSR-BI	scavenger receptor class B, member 1	protein-coding
Diff_Nuc13557	chr4	73309022	73309161	+	0	NA	Intergenic	L1Md_F2|LINE|L1	-2831	NM_001277531	100862015		NM_001277531	ENSMUSG00000096700	Gm11236	OTTMUSG00000000280	predicted gene 11236	protein-coding
Diff_Nuc2711	chr11	69845542	69845681	+	0	NA	intron (NM_007864, intron 8 of 19)	B1_Mur4|SINE|Alu	13504	NM_007864	13385	Mm.27256	NM_007864	ENSMUSG00000020886	Dlg4	Dlgh4|PSD-95|PSD95|SAP90|SAP90A	discs, large homolog 4 (Drosophila)	protein-coding
Diff_Nuc544	chr13	51423762	51423901	+	0	NA	Intergenic	Intergenic	-80156	NM_010101	13610	Mm.136736	NM_010101	ENSMUSG00000067586	S1pr3	AI132464|Edg3|Lpb3|S1p3	sphingosine-1-phosphate receptor 3	protein-coding
Diff_Nuc8870	chr18	60891962	60892101	+	0	NA	Intergenic	Intergenic	-18988	NM_008306	15531	Mm.181862	NM_008306	ENSMUSG00000054008	Ndst1	1200015G06Rik|HSNST|HSNST 1|Hsst|N-HSST|N-HSST 1|NDST-1|b2b2230Clo	N-deacetylase/N-sulfotransferase (heparan glucosaminyl) 1	protein-coding
Diff_Nuc3386	chr11	116978252	116978391	+	0	NA	intron (NM_028777, intron 1 of 16)	intron (NM_028777, intron 1 of 16)	1835	NM_001166506	74136	Mm.272312	NM_028777	ENSMUSG00000020823	Sec14l1	1200017E04Rik|2810012L19Rik|Naa-35	SEC14-like lipid binding 1	protein-coding
Diff_Nuc1555	chr12	70547082	70547221	+	0	NA	Intergenic	Intergenic	29386	NR_038060	76062	Mm.380755	NR_038060		5830428M24Rik	100040862|Gm3007	RIKEN cDNA 5830428M24 gene	ncRNA
Diff_Nuc293	chr13	21942042	21942181	+	0	NA	Intergenic	Intergenic	16499	NM_001313880	665596	Mm.371766	NM_001097979	ENSMUSG00000069307	Hist1h2bq	Gm13646|OTTMUSG00000013203	histone cluster 1, H2bq	protein-coding
Diff_Nuc2090	chr11	3093462	3093601	+	0	NA	promoter-TSS (NM_030207)	promoter-TSS (NM_030207)	-65	NM_030207	78887	Mm.394071	NM_030207	ENSMUSG00000023764	Sfi1	-	Sfi1 homolog, spindle assembly associated (yeast)	protein-coding
Diff_Nuc1936	chr12	109592702	109592841	+	0	NA	intron (NM_010010, intron 9 of 14)	intron (NM_010010, intron 9 of 14)	-16592	NM_001286346	68519	Mm.236645	NM_001043335	ENSMUSG00000058070	Eml1	1110008N23Rik|A930030P13Rik|AA171013|AI847476|AI853955|ELP79|EMAP|EMAPL|heco	echinoderm microtubule associated protein like 1	protein-coding
Diff_Nuc19832	chr9	120593462	120593601	+	0	NA	Intergenic	Intergenic	107083	NR_073359	76100	Mm.48212	NR_073359	ENSMUSG00000052658	5830454E08Rik	-	RIKEN cDNA 5830454E08 gene	ncRNA
Diff_Nuc5094	chr17	54293602	54293741	+	0	NA	Intergenic	L1VL4|LINE|L1	144688	NM_022025	63993	Mm.155241	NM_022025	ENSMUSG00000023945	Slc5a7	CHT1	solute carrier family 5 (choline transporter), member 7	protein-coding
Diff_Nuc18807	chr9	15348682	15348821	+	0	NA	intron (NM_133214, intron 2 of 2)	intron (NM_133214, intron 2 of 2)	38812	NM_133214	170748	Mm.86572	NM_133214	ENSMUSG00000058173	Smco4	Fn5	single-pass membrane protein with coiled-coil domains 4	protein-coding
Diff_Nuc3491	chr11	120165812	120165951	+	0	NA	Intergenic	LTR33|LTR|ERVL	42846	NR_105900	102465564		NR_105900	ENSMUSG00000098955	Mir6935	Gm27344|mmu-mir-6935	microRNA 6935	ncRNA
Diff_Nuc3871	chr10	58511122	58511261	+	0	NA	intron (NM_172788, intron 3 of 9)	B3A|SINE|B2	173404	NM_001024911	103080	Mm.346842	NM_001024910	ENSMUSG00000019917	Sept10	4921515A04Rik|9430099J10Rik|AA408298|AI874685	septin 10	protein-coding
Diff_Nuc15732	chr2	20665782	20665921	+	0	NA	exon (NM_001081006, exon 7 of 22)	exon (NM_001081006, exon 7 of 22)	223497	NM_001081364	71435	Mm.28507	NM_001081364	ENSMUSG00000036591	Arhgap21	5530401C11Rik|AA416458|ARHGAP10	Rho GTPase activating protein 21	protein-coding
Diff_Nuc4727	chr17	25387062	25387201	+	0	NA	exon (NM_001163270, exon 8 of 34)	exon (NM_001163270, exon 8 of 34)	-4548	NR_105931	102465583		NR_105931	ENSMUSG00000093202	Mir3547	Gm22410|mmu-mir-3547	microRNA 3547	ncRNA
Diff_Nuc17779	chr1	85108502	85108641	+	0	NA	Intergenic	Intergenic	-2143	NM_213615	381287	Mm.487565	NM_213615	ENSMUSG00000089844	A530032D15Rik	Gm1888	RIKEN cDNA A530032D15Rik gene	protein-coding
Diff_Nuc6201	chr15	18660632	18660771	+	0	NA	Intergenic	L1Md_A|LINE|L1	-88001	NM_001316758	320873	Mm.117794	NM_009865	ENSMUSG00000022321	Cdh10	A830016G23Rik|C030003B10Rik|C030011H18Rik	cadherin 10	protein-coding
Diff_Nuc15682	chr2	13043812	13043951	+	0	NA	intron (NM_009105, intron 8 of 8)	intron (NM_009105, intron 8 of 8)	-111390	NM_153155	227580	Mm.229322	NM_153155	ENSMUSG00000049630	C1ql3	1110065A22Rik|AI661623|C1ql|C1qtnf13|CTRP13|K100	C1q-like 3	protein-coding
Diff_Nuc16303	chr2	84712842	84712981	+	0	NA	intron (NM_199223, intron 2 of 2)	intron (NM_199223, intron 2 of 2)	13938	NM_199223	269295	Mm.86447	NM_199223	ENSMUSG00000050896	Rtn4rl2	Ngr2|Ngrh1|Ngrl3	reticulon 4 receptor-like 2	protein-coding
Diff_Nuc5106	chr17	56263502	56263641	+	0	NA	exon (NM_001130456, exon 17 of 17)	exon (NM_001130456, exon 17 of 17)	-2202	NM_029796	76905	Mm.348025	NM_029796	ENSMUSG00000037095	Lrg1	1300008B03Rik|2310031E04Rik|Lrg|Lrhg	leucine-rich alpha-2-glycoprotein 1	protein-coding
Diff_Nuc13240	chr4	34585212	34585351	+	0	NA	intron (NM_181406, intron 7 of 19)	RLTR15|LTR|ERVK	23074	NM_181406	109093	Mm.22363	NM_181406	ENSMUSG00000028292	Rars2	1500002I10Rik|PRO1992|Rarsl	arginyl-tRNA synthetase 2, mitochondrial	protein-coding
Diff_Nuc5832	chr16	44979642	44979781	+	0	NA	intron (NM_029018, intron 5 of 5)	intron (NM_029018, intron 5 of 5)	35920	NM_001128132	74603	Mm.297337	NM_027578	ENSMUSG00000036172	Cd200r3	4733401I18Rik|4833409J19Rik|AI505817|BB106877|mCD200RLb	CD200 receptor 3	protein-coding
Diff_Nuc7654	chr14	80187872	80188011	+	0	NA	Intergenic	Intergenic	-16822	NM_021543	18530	Mm.390715	NM_021543	ENSMUSG00000036422	Pcdh8	1700080P15Rik|Papc	protocadherin 8	protein-coding
Diff_Nuc6528	chr15	73547332	73547471	+	0	NA	Intergenic	Intergenic	-6174	NM_001166390	19245	Mm.390807	NM_008975	ENSMUSG00000059895	Ptp4a3	AV088979|Prl-3|pPtp4a3	protein tyrosine phosphatase 4a3	protein-coding
Diff_Nuc267	chr13	15896052	15896191	+	0	NA	Intergenic	Intergenic	-1658	NR_045507	71071	Mm.380845	NR_045507		4933412O06Rik	-	RIKEN cDNA 4933412O06 gene	ncRNA
Diff_Nuc6666	chr15	79762772	79762911	+	0	NA	intron (NM_144811, intron 1 of 6)	CpG	235	NM_144811	52609	Mm.323442	NM_144811	ENSMUSG00000053411	Cbx7	1600014J01Rik|AI851678|D15Ertd417e	chromobox 7	protein-coding
Diff_Nuc10487	chr7	148784412	148784551	+	0	NA	intron (NM_007459, intron 3 of 21)	intron (NM_007459, intron 3 of 21)	15165	NR_040337	100036523	Mm.398994	NR_040337	ENSMUSG00000097170	Gm16982	-	predicted gene, 16982	ncRNA
Diff_Nuc4382	chr10	117671512	117671651	+	0	NA	Intergenic	MTA_Mm-int|LTR|MaLR	29561	NM_016971	50929	Mm.103585	NM_016971	ENSMUSG00000074695	Il22	IL-22|IL-22a|ILTIFa|Iltif	interleukin 22	protein-coding
Diff_Nuc2543	chr11	58641882	58642021	+	0	NA	Intergenic	Intergenic	-2707	NM_001011819	258065	Mm.377273	NM_001011819	ENSMUSG00000096806	Olfr312	GA_x5J8B7W3UM0-1747565-1747342|MOR222-4P	olfactory receptor 312	protein-coding
Diff_Nuc20066	chr8	23110502	23110641	+	0	NA	exon (NM_007511, exon 16 of 21)	exon (NM_007511, exon 16 of 21)	29503	NM_026459	67929	Mm.60688	NM_026459	ENSMUSG00000017049	Ccdc70	1700112P19Rik	coiled-coil domain containing 70	protein-coding
Diff_Nuc14260	chr4	139639922	139640061	+	0	NA	intron (NM_198610, intron 3 of 9)	intron (NM_198610, intron 3 of 9)	-116050	NM_173427	242721	Mm.60400	NM_173427	ENSMUSG00000078234	Klhdc7a	B230308G19Rik	kelch domain containing 7A	protein-coding
Diff_Nuc10690	chr6	31712702	31712841	+	0	NA	Intergenic	L1Md_F2|LINE|L1	-198834	NM_013723	27205	Mm.89918	NM_013723	ENSMUSG00000025608	Podxl	AW121214|Ly102|PC|PCLP-1|Pclp1	podocalyxin-like	protein-coding
Diff_Nuc2696	chr11	69495992	69496131	+	0	NA	promoter-TSS (NM_030702)	promoter-TSS (NM_030702)	-475	NM_001163571	80886	Mm.284592	NM_030702	ENSMUSG00000005204	Senp3	AA408656|Smt3ip|Smt3ip1	SUMO/sentrin specific peptidase 3	protein-coding
Diff_Nuc10315	chr7	136776012	136776151	+	0	NA	intron (NM_172255, intron 26 of 28)	intron (NM_172255, intron 26 of 28)	40704	NM_172255	207425	Mm.229323	NM_172255	ENSMUSG00000042055	Wdr11	2900055P10Rik|AW489876|Brwd2|mKIAA1351	WD repeat domain 11	protein-coding
Diff_Nuc8279	chr19	44355522	44355661	+	0	NA	Intergenic	Intergenic	-12575	NM_009128	20250	Mm.487021	NM_009128	ENSMUSG00000025203	Scd2	Mir5114|Scd-2|mir-5114|swty	stearoyl-Coenzyme A desaturase 2	protein-coding
Diff_Nuc5966	chr16	83210982	83211121	+	0	NA	Intergenic	MusHAL1|LINE|L1	-1160337	NR_040567	75247	Mm.417813	NR_040567		4930553E22Rik	-	RIKEN cDNA 4930553E22 gene	ncRNA
Diff_Nuc7252	chr14	39051262	39051401	+	0	NA	Intergenic	L1_Mus4|LINE|L1	-660259	NR_045713	75170	Mm.372967	NR_045713	ENSMUSG00000093528	Nrg3os	4930529F24Rik	neuregulin 3, opposite strand	ncRNA
Diff_Nuc19092	chr9	46121192	46121331	+	0	NA	intron (NM_183104, intron 3 of 12)	intron (NM_183104, intron 3 of 12)	6808	NM_183104	74361	Mm.159169	NM_183104	ENSMUSG00000056617	4931429L15Rik	-	RIKEN cDNA 4931429L15 gene	protein-coding
Diff_Nuc18538	chr1	176835112	176835251	+	0	NA	intron (NM_011825, intron 1 of 1)	ID_B1|SINE|B4	16769	NM_011825	23893	Mm.25760	NM_011825	ENSMUSG00000050069	Grem2	Gremlin2|Prdc	gremlin 2, DAN family BMP antagonist	protein-coding
Diff_Nuc10730	chr6	36796522	36796661	+	0	NA	3' UTR (NM_001081206, exon 34 of 34)	3' UTR (NM_001081206, exon 34 of 34)	-35230	NM_008973	19242	Mm.279690	NM_008973	ENSMUSG00000029838	Ptn	HARP|HB-GAM|HBBN|HBGF-8|HBNF|OSF|Osf-1|Osf1	pleiotrophin	protein-coding
Diff_Nuc5158	chr17	62360932	62361071	+	0	NA	Intergenic	Lx|LINE|L1	869665	NM_207654	13640	Mm.7978	NM_010109	ENSMUSG00000048915	Efna5	AL-1|AV158822|EFL-5|Ephrin-A5|Epl7|LERK-7|RAGS	ephrin A5	protein-coding
Diff_Nuc10937	chr6	61450422	61450561	+	0	NA	intron (NM_183310, intron 5 of 10)	L1Md_F2|LINE|L1	-319687	NR_040287	100504262	Mm.438066	NR_040287		A730020E08Rik	-	RIKEN cDNA A730020E08 gene	ncRNA
Diff_Nuc11838	chr5	28920282	28920421	+	0	NA	intron (NR_015562, intron 2 of 6)	L1Md_T|LINE|L1	-126710	NM_009170	20423	Mm.57202	NM_009170	ENSMUSG00000002633	Shh	9530036O11Rik|Dsh|Hhg1|Hx|Hxl3|M100081	sonic hedgehog	protein-coding
Diff_Nuc6571	chr15	75417432	75417571	+	0	NA	Intergenic	Intergenic	-9587	NM_026730	68453	Mm.46367	NM_026730	ENSMUSG00000022579	Gpihbp1	1110002J19Rik|GPI-HBP1	GPI-anchored HDL-binding protein 1	protein-coding
Diff_Nuc7191	chr14	32522592	32522731	+	0	NA	intron (NM_001024604, intron 21 of 27)	intron (NM_001024604, intron 21 of 27)	68418	NM_025295	26363	Mm.282679	NM_025295	ENSMUSG00000021900	Btd	-	biotinidase	protein-coding
Diff_Nuc19333	chr9	66082782	66082921	+	0	NA	intron (NM_010019, intron 4 of 11)	intron (NM_010019, intron 4 of 11)	76818	NM_010019	13143	Mm.304472	NM_010019	ENSMUSG00000032380	Dapk2	-	death-associated protein kinase 2	protein-coding
Diff_Nuc13669	chr4	95480022	95480161	+	0	NA	intron (NM_001113412, intron 10 of 15)	B1_Mus1|SINE|Alu	153635	NR_045777	319247	Mm.473527	NM_175680	ENSMUSG00000044125	9530080O11Rik	-	RIKEN cDNA 9530080O11 gene	ncRNA
Diff_Nuc6819	chr15	88396832	88396971	+	0	NA	Intergenic	Intergenic	-33831	NM_027306	70073	Mm.45306	NM_027306	ENSMUSG00000054117	Zdhhc25	1700030J15Rik	zinc finger, DHHC domain containing 25	protein-coding
Diff_Nuc1115	chr13	120283912	120284051	+	0	NA	exon (NM_001177666, exon 3 of 3)	exon (NM_001177666, exon 3 of 3)	6314	NM_001177666	633640	Mm.46679	NM_001039244	ENSMUSG00000074634	Tmem267	EG633640|Gm7120	transmembrane protein 267	protein-coding
Diff_Nuc19784	chr9	117545842	117545981	+	0	NA	Intergenic	B3A|SINE|B2	-6880	NM_001172121	207181	Mm.326411	NM_178660	ENSMUSG00000039607	Rbms3	6720477E09Rik|8430436O14Rik	RNA binding motif, single stranded interacting protein	protein-coding
Diff_Nuc18671	chr1	191386552	191386691	+	0	NA	Intergenic	RMER20B|LTR|ERVK	125344	NM_001081363	108000	Mm.129746	NM_001081363	ENSMUSG00000026605	Cenpf	6530404A22Rik|AI325968|CENF|Lek1|PRO1779|mitosin	centromere protein F	protein-coding
Diff_Nuc20486	chr8	83297702	83297841	+	0	NA	intron (NM_021356, intron 8 of 9)	intron (NM_021356, intron 8 of 9)	-34413	NM_053124	93762	Mm.246803	NM_053124	ENSMUSG00000031715	Smarca5	4933427E24Rik|D030040M08Rik|D330027N15Rik|MommeD4|Snf2h	SWI/SNF related, matrix associated, actin dependent regulator of chromatin, subfamily a, member 5	protein-coding
Diff_Nuc15883	chr2	30458642	30458781	+	0	NA	intron (NM_030137, intron 1 of 1)	intron (NM_030137, intron 1 of 1)	8147	NM_030137	78617	Mm.40413	NM_030137	ENSMUSG00000047363	Cstad	9530039B02Rik	CSA-conditional, T cell activation-dependent protein	protein-coding
Diff_Nuc9964	chr7	104571822	104571961	+	0	NA	Intergenic	MLT1D|LTR|MaLR	-5831	NM_009381	21835	Mm.28585	NM_009381	ENSMUSG00000035686	Thrsp	S14|SPOT14	thyroid hormone responsive	protein-coding
Diff_Nuc3673	chr10	24035252	24035391	+	0	NA	Intergenic	MTE-int|LTR|MaLR	91998	NM_021509	59012	Mm.285934	NM_021509	ENSMUSG00000020000	Moxd1	3230402N08Rik|MNCb-5203	monooxygenase, DBH-like 1	protein-coding
Diff_Nuc19900	chr8	6086272	6086411	+	0	NA	Intergenic	Intergenic	-981054	NM_011388	20494	Mm.3500	NM_011388	ENSMUSG00000023073	Slc10a2	9130221J18Rik|AI605518|ASBT|IBAT|ISBT	solute carrier family 10, member 2	protein-coding
Diff_Nuc1830	chr12	100581242	100581381	+	0	NA	intron (NM_183186, intron 2 of 5)	intron (NM_183186, intron 2 of 5)	106973	NM_183186	71375	Mm.341972	NM_183186	ENSMUSG00000033713	Foxn3	5430426H20Rik|AA589593|AW556347|Ches1|Ches1l|HTLFL1	forkhead box N3	protein-coding
Diff_Nuc19176	chr9	55265902	55266041	+	0	NA	intron (NM_172923, intron 8 of 10)	intron (NM_172923, intron 8 of 10)	91215	NM_172923	244886	Mm.24361	NM_172923	ENSMUSG00000032313	Tmem266	9630029F15|AI118078|HVRP1	transmembrane protein 266	protein-coding
Diff_Nuc8475	chr18	8077662	8077801	+	0	NA	Intergenic	Intergenic	208536	NM_153085	225131	Mm.204524	NM_153085	ENSMUSG00000024283	Wac	1110067P07Rik|A230035H12Rik|AI256735|AI256776|Wwp4	WW domain containing adaptor with coiled-coil	protein-coding
Diff_Nuc12625	chr5	121906282	121906421	+	0	NA	intron (NM_029912, intron 1 of 9)	intron (NM_029912, intron 1 of 9)	3633	NM_029912	77462	Mm.358781	NM_029912	ENSMUSG00000029452	Tmem116	4930406A18Rik|4930513P12Rik|C030022K24Rik	transmembrane protein 116	protein-coding
Diff_Nuc3779	chr10	42279732	42279871	+	0	NA	Intergenic	ORR1B1|LTR|MaLR	23593	NM_152229	21907	Mm.287100	NM_152229	ENSMUSG00000019803	Nr2e1	Mtl1|Mtll|TLL|Tlx|XTLL|fierce|frc|tailless	nuclear receptor subfamily 2, group E, member 1	protein-coding
Diff_Nuc20503	chr8	86421742	86421881	+	0	NA	Intergenic	Intergenic	-2186	NM_181039	330814	Mm.260733	NM_181039	ENSMUSG00000013033	Adgrl1	2900070I05Rik|AI182398|CLIBA|Lec2|Lphn1|mKIAA0821	adhesion G protein-coupled receptor L1	protein-coding
Diff_Nuc14725	chr3	34631692	34631831	+	0	NA	Intergenic	Intergenic	-16177	NR_038348	100041108	Mm.24764	NR_038347	ENSMUSG00000105153	Gm3143	-	predicted gene 3143	ncRNA
Diff_Nuc3791	chr10	43274012	43274151	+	0	NA	Intergenic	B2_Mm1a|SINE|B2	-13281	NM_026411	67851	Mm.209953	NM_026411	ENSMUSG00000019797	1700021F05Rik	-	RIKEN cDNA 1700021F05 gene	protein-coding
Diff_Nuc10660	chr6	29066492	29066631	+	0	NA	Intergenic	Intergenic	48163	NM_133925	68272	Mm.40802	NM_026650	ENSMUSG00000029701	Rbm28	2810480G15Rik|AI503051	RNA binding motif protein 28	protein-coding
Diff_Nuc3163	chr11	102065632	102065771	+	0	NA	intron (NM_010412, intron 11 of 26)	intron (NM_010412, intron 11 of 26)	14688	NM_175935	68401	Mm.22385	NM_175935	ENSMUSG00000034793	G6pc3	0710001K01Rik|AU019276|AU045429|AV128920|AW545836|UGRP	glucose 6 phosphatase, catalytic, 3	protein-coding
Diff_Nuc10847	chr6	50904632	50904771	+	0	NA	Intergenic	Lx|LINE|L1	178587	NR_045984	319981	Mm.131454	NR_045984	ENSMUSG00000107667	C530044C16Rik	-	RIKEN cDNA C530044C16 gene	ncRNA
Diff_Nuc19968	chr8	12608892	12609031	+	0	NA	Intergenic	Intergenic	35912	NM_024279	78634	Mm.116871	NM_024279	ENSMUSG00000010435	Spaca7	1700094C09Rik	sperm acrosome associated 7	protein-coding
Diff_Nuc17124	chr2	168927032	168927171	+	0	NA	Intergenic	ID_B1|SINE|B4	123332	NR_040326	75508	Mm.271256	NR_040326	ENSMUSG00000086348	1700017J07Rik	-	RIKEN cDNA 1700017J07 gene	ncRNA
Diff_Nuc16432	chr2	102526822	102526961	+	0	NA	intron (NM_001077514, intron 1 of 10)	intron (NM_001077514, intron 1 of 10)	-19704	NM_011393	20511	Mm.267547	NM_011393	ENSMUSG00000005089	Slc1a2	1700091C19Rik|2900019G14Rik|AI159670|Eaat2|GLT-1|GLT1|MGLT1	solute carrier family 1 (glial high affinity glutamate transporter), member 2	protein-coding
Diff_Nuc15797	chr2	26333652	26333791	+	0	NA	exon (NM_008714, exon 11 of 34)	exon (NM_008714, exon 11 of 34)	-8082	NR_105962	102465602		NR_105962	ENSMUSG00000098548	Mir6996	Gm27531|mmu-mir-6996	microRNA 6996	ncRNA
Diff_Nuc10375	chr7	141423412	141423551	+	0	NA	Intergenic	Intergenic	-6701	NM_007400	11489	Mm.439714	NM_007400	ENSMUSG00000054555	Adam12	Mltna	a disintegrin and metallopeptidase domain 12 (meltrin alpha)	protein-coding
Diff_Nuc1510	chr12	60265977	60266116	+	0	NA	intron (NM_001329047, intron 19 of 29)	B3A|SINE|B2	33606	NM_001165253	338320	Mm.213215	NM_146034	ENSMUSG00000021000	Mia2	Ctage5|D12Bwg0579e|Mea6|Mgea|Mgea6	melanoma inhibitory activity 2	protein-coding
Diff_Nuc7198	chr14	32826252	32826391	+	0	NA	Intergenic	MLT1A|LTR|MaLR	-15968	NM_030166	78754	Mm.40681	NM_030166	ENSMUSG00000021903	Galnt15	4631401E18Rik|Galntl2|mpp-GalNAc-T15	UDP-N-acetyl-alpha-D-galactosamine:polypeptide N-acetylgalactosaminyltransferase 15	protein-coding
Diff_Nuc4240	chr10	93369982	93370121	+	0	NA	Intergenic	Intergenic	-16104	NM_019648	56307	Mm.289329	NM_019648	ENSMUSG00000036112	Metap2	4930584B20Rik|A930035J23Rik|AI047573|AL024412|AU014659|Amp2|Mnpep|p67|p67eIF2	methionine aminopeptidase 2	protein-coding
Diff_Nuc16383	chr2	93619412	93619551	+	0	NA	intron (NM_010163, intron 7 of 13)	intron (NM_010163, intron 7 of 13)	43244	NM_010163	14043	Mm.4336	NM_010163	ENSMUSG00000027198	Ext2	AI893565	exostoses (multiple) 2	protein-coding
Diff_Nuc11400	chr6	115923882	115924021	+	0	NA	intron (NM_026376, intron 8 of 35)	intron (NM_026376, intron 8 of 35)	21072	NM_026376	67784	Mm.3085	NM_026376	ENSMUSG00000030123	Plxnd1	6230425C21Rik|b2b1863Clo|b2b553Clo	plexin D1	protein-coding
Diff_Nuc7884	chr19	4485542	4485681	+	0	NA	Intergenic	Intergenic	-8468	NM_134164	171180	Mm.262270	NM_134164	ENSMUSG00000049303	Syt12	-	synaptotagmin XII	protein-coding
Diff_Nuc6476	chr15	64125982	64126121	+	0	NA	intron (NM_010026, intron 3 of 30)	intron (NM_010026, intron 3 of 30)	18184	NM_001276462	13196	Mm.277236	NM_010026	ENSMUSG00000022377	Asap1	AV239055|DEF-1|Ddef1|PAP|mKIAA1249|s19	ArfGAP with SH3 domain, ankyrin repeat and PH domain1	protein-coding
Diff_Nuc13588	chr4	82256722	82256861	+	0	NA	Intergenic	Intergenic	102898	NR_137202	102635783	Mm.41666	NR_137202		Gm11266	OTTMUSG00000000396	predicted gene 11266	ncRNA
Diff_Nuc18524	chr1	174181882	174182021	+	0	NA	intron (NM_013734, intron 5 of 22)	Lx5|LINE|L1	6604	NM_013734	27222	Mm.482392	NM_013734	ENSMUSG00000007107	Atp1a4	-	ATPase, Na+/K+ transporting, alpha 4 polypeptide	protein-coding
Diff_Nuc17019	chr2	164922932	164923071	+	0	NA	Intergenic	Intergenic	-6751	NR_033448	72211	Mm.482899	NR_033448	ENSMUSG00000078935	1700025C18Rik	-	RIKEN cDNA 1700025C18 gene	ncRNA
Diff_Nuc12806	chr5	134752902	134753041	+	0	NA	intron (NM_001080747, intron 9 of 33)	intron (NM_001080747, intron 9 of 33)	37659	NM_001080746	14886	Mm.261570	NM_010365	ENSMUSG00000060261	Gtf2i	6030441I21Rik|BAP-135|Diws1t|GtfII-I|Spin|TFII-I|WBSCR6	general transcription factor II I	protein-coding
Diff_Nuc14862	chr3	54650342	54650481	+	0	NA	Intergenic	LTR16D|LTR|ERVL	-38698	NM_133231	170767	Mm.185735	NM_133231	ENSMUSG00000036615	Rfxap	5730495K23Rik	regulatory factor X-associated protein	protein-coding
Diff_Nuc13337	chr4	45327402	45327541	+	0	NA	intron (NM_027266, intron 8 of 8)	intron (NM_027266, intron 8 of 8)	6004	NM_025513	66362	Mm.275788	NM_025513	ENSMUSG00000028322	Exosc3	2310005D06Rik|AI593501|Rrp40	exosome component 3	protein-coding
Diff_Nuc12067	chr5	52984362	52984501	+	0	NA	Intergenic	Intergenic	25819	NR_045738	211001	Mm.261581	NR_045738	ENSMUSG00000052295	8030423F21Rik	-	RIKEN cDNA 8030423F21 gene	ncRNA
Diff_Nuc18933	chr9	32776782	32776921	+	0	NA	Intergenic	Intergenic	-40300	NR_131058	330917	Mm.488283	NR_131058		Gm27162	A430016B06	predicted gene 27162	ncRNA
Diff_Nuc6595	chr15	76603132	76603271	+	0	NA	intron (NM_198420, intron 1 of 10)	L1MD|LINE|L1	45399	NM_001168288	223666	Mm.322931	NM_198420	ENSMUSG00000033697	Arhgap39	9530053N22|AI843066|D15Wsu169e|Kiaa1688|Porf-2	Rho GTPase activating protein 39	protein-coding
Diff_Nuc4157	chr10	82090452	82090591	+	0	NA	Intergenic	Lx5|LINE|L1	-2062	NM_011561	21665	Mm.284252	NM_011561	ENSMUSG00000034674	Tdg	E130317C12Rik|JZA-3|Jza1	thymine DNA glycosylase	protein-coding
Diff_Nuc8452	chr18	5067912	5068051	+	0	NA	intron (NM_001347449, intron 9 of 30)	B4A|SINE|B4	21394	NM_001347449	225115	Mm.136791	NM_153153	ENSMUSG00000024236	Svil	AU024053|B430302E16Rik	supervillin	protein-coding
Diff_Nuc287	chr13	20911652	20911791	+	0	NA	intron (NM_012054, intron 2 of 20)	RMER17A2|LTR|ERVK	25739	NM_012054	27052	Mm.314046	NM_012054	ENSMUSG00000021322	Aoah	4930433E13Rik	acyloxyacyl hydrolase	protein-coding
Diff_Nuc650	chr13	58176242	58176381	+	0	NA	intron (NM_001195075, intron 5 of 16)	intron (NM_001195075, intron 5 of 16)	27478	NM_001195075	100503085	Mm.379256	NM_001195075	ENSMUSG00000014164	Klhl3	7530408C15Rik|AI430941|EG627648	kelch-like 3	protein-coding
Diff_Nuc7863	chr19	3563192	3563331	+	0	NA	intron (NM_029456, intron 1 of 22)	L2a|LINE|L2	12488	NM_001164159	52036	Mm.284686	NM_028999	ENSMUSG00000024908	Ppp6r3	4930528G08Rik|9130026N02Rik|D19Bwg1430e|D19Ertd703e|Pp6r3|Ppcs3|Pptcs3|Sapl|Saps3|mKIAA1558	protein phosphatase 6, regulatory subunit 3	protein-coding
Diff_Nuc19940	chr8	10975942	10976081	+	0	NA	Intergenic	Intergenic	-31839	NR_046017	619321	Mm.403007	NR_046017	ENSMUSG00000096938	9530052E02Rik	-	RIKEN cDNA 9530052E02 gene	ncRNA
Diff_Nuc10114	chr7	119197522	119197661	+	0	NA	intron (NM_177249, intron 3 of 28)	intron (NM_177249, intron 3 of 28)	30571	NM_177249	74996	Mm.16974	NM_133758	ENSMUSG00000059263	Usp47	4930502N04Rik|A630020C16Rik	ubiquitin specific peptidase 47	protein-coding
Diff_Nuc4800	chr17	28327252	28327391	+	0	NA	intron (NM_172617, intron 3 of 14)	MER53|DNA|hAT	12958	NM_172617	224656	Mm.267359	NM_172617	ENSMUSG00000024220	Zfp523	2810027J07|BC025615|Znf76	zinc finger protein 523	protein-coding
Diff_Nuc5446	chr16	5357532	5357671	+	0	NA	Intergenic	Intergenic	-101552	NM_027446	70511	Mm.45780	NM_027446	ENSMUSG00000022544	Eef2kmt	5730409G15Rik|Fam86|Fam86a|eEF2-KMT	eukaryotic elongation factor 2 lysine methyltransferase	protein-coding
Diff_Nuc18818	chr9	20248772	20248911	+	0	NA	intron (NM_011753, intron 4 of 9)	intron (NM_011753, intron 4 of 9)	15763	NM_011753	22688	Mm.107441	NM_011753	ENSMUSG00000063108	Zfp26	5033428C05Rik|KRAB15|Zfp-26|Zfp70|Zfp81-rs1|mKIAA4196|mkr-3|mszf14|mszf52	zinc finger protein 26	protein-coding
Diff_Nuc2490	chr11	54081532	54081671	+	0	NA	promoter-TSS (NM_010556)	promoter-TSS (NM_010556)	-820	NM_010556	16187	Mm.983	NM_010556	ENSMUSG00000018914	Il3	BPA|Csfmu|HCGF|Il-3|MCGF|PSF	interleukin 3	protein-coding
Diff_Nuc17261	chr1	5643152	5643291	+	0	NA	Intergenic	L1_Mus1|LINE|L1	64647	NM_001204371	18387	Mm.7977	NM_011011	ENSMUSG00000025905	Oprk1	K-OR-1|KOR|KOR-1|MSL-1|Oprk2|R21	opioid receptor, kappa 1	protein-coding
Diff_Nuc15230	chr3	104769752	104769891	+	0	NA	Intergenic	Intergenic	-5194	NM_009520	22414	Mm.10740	NM_009520	ENSMUSG00000027840	Wnt2b	Wnt13	wingless-type MMTV integration site family, member 2B	protein-coding
Diff_Nuc12445	chr5	110916832	110916971	+	0	NA	Intergenic	L2a|LINE|L2	-27041	NR_102290	231603	Mm.22836	NM_173766	ENSMUSG00000048215	A630023P12Rik	-	RIKEN cDNA A630023P12 gene	ncRNA
Diff_Nuc10434	chr7	146032992	146033131	+	0	NA	intron (NM_001045483, intron 1 of 1)	intron (NM_001045483, intron 1 of 1)	4889	NM_001045483	69546	Mm.31598	NM_027115	ENSMUSG00000041775	Mapk1ip1	2310009E07Rik|AU043776|MISS	mitogen-activated protein kinase 1 interacting protein 1	protein-coding
Diff_Nuc1201	chr12	14408312	14408451	+	0	NA	Intergenic	L1_Mus3|LINE|L1	140041	NR_045003	791361	Mm.217963	NR_045003		Gm16497	ENSMUSG00000066623	predicted gene 16497	ncRNA
Diff_Nuc3759	chr10	40676412	40676551	+	0	NA	Intergenic	LTR40b|LTR|ERVL	73141	NM_031877	83767	Mm.41353	NM_031877	ENSMUSG00000019831	Wasf1	AI195380|AI838537|Scar|WAVE|WAVE-1	WAS protein family, member 1	protein-coding
Diff_Nuc1655	chr12	80919642	80919781	+	0	NA	Intergenic	Intergenic	106009	NR_131075	77290	Mm.395042	NR_131073		9430078K24Rik	-	RIKEN cDNA 9430078K24 gene	ncRNA
Diff_Nuc19661	chr9	107552402	107552541	+	0	NA	Intergenic	Intergenic	-14798	NM_008138	14678	Mm.196464	NM_008138	ENSMUSG00000032562	Gnai2	C76432|Galphai2|Gia|Gnai-2	guanine nucleotide binding protein (G protein), alpha inhibiting 2	protein-coding
Diff_Nuc6567	chr15	75154132	75154271	+	0	NA	Intergenic	RMER17C|LTR|ERVK	55350	NM_008530	17071	Mm.377095	NM_008530	ENSMUSG00000022583	Ly6f	-	lymphocyte antigen 6 complex, locus F	protein-coding
Diff_Nuc12859	chr5	137721782	137721921	+	0	NA	Intergenic	Intergenic	-7631	NM_009599	11423	Mm.255464	NM_009599	ENSMUSG00000023328	Ache	-	acetylcholinesterase	protein-coding
Diff_Nuc19521	chr9	95492502	95492641	+	0	NA	Intergenic	Intergenic	32335	NM_198414	75552	Mm.151485	NM_198414	ENSMUSG00000064225	Paqr9	1700020G04Rik	progestin and adipoQ receptor family member IX	protein-coding
Diff_Nuc15696	chr2	15603622	15603761	+	0	NA	intron (NM_001310455, intron 13 of 38)	L1_Mus3|LINE|L1	155585	NM_001310455	102635496		NM_001310455	ENSMUSG00000075520	Malrd1	-	MAM and LDL receptor class A domain containing 1	protein-coding
Diff_Nuc5498	chr16	11193442	11193581	+	0	NA	3' UTR (NM_025546, exon 9 of 9)	3' UTR (NM_025546, exon 9 of 9)	9874	NM_025546	66409	Mm.28291	NM_025546	ENSMUSG00000005846	Rsl1d1	2410005K20Rik|C76439|pBK1	ribosomal L1 domain containing 1	protein-coding
Diff_Nuc8922	chr18	65934832	65934971	+	0	NA	Intergenic	Intergenic	-25331	NM_025468	66286	Mm.27800	NM_025468	ENSMUSG00000024516	Sec11c	1810029G24Rik|Sec11l3	SEC11 homolog C, signal peptidase complex subunit	protein-coding
Diff_Nuc6987	chr14	4958732	4958871	+	0	NA	Intergenic	CpG	-15380	NM_001242945	100041306	Mm.396155	NM_001242945	ENSMUSG00000094132	Gm3264	-	predicted gene 3264	protein-coding
Diff_Nuc721	chr13	65323732	65323871	+	0	NA	Intergenic	L1_Mus3|LINE|L1	-16777	NM_175290	97895	Mm.315815	NM_175290	ENSMUSG00000032999	Nlrp4f	C330026N02Rik|C86045|Nalp-kappa|Nalp4f	NLR family, pyrin domain containing 4F	protein-coding
Diff_Nuc9847	chr7	87281992	87282131	+	0	NA	Intergenic	Intergenic	-21825	NM_173011	269951	Mm.246432	NM_173011	ENSMUSG00000030541	Idh2	E430004F23|IDPm|Idh-2	isocitrate dehydrogenase 2 (NADP+), mitochondrial	protein-coding
Diff_Nuc15606	chr3	157647712	157647851	+	0	NA	intron (NM_001013806, intron 6 of 12)	ORR1A0-int|LTR|MaLR	37351	NM_001013806	433667	Mm.265806	NM_001013806	ENSMUSG00000039988	Ankrd13c	AI505652|AU022220	ankyrin repeat domain 13c	protein-coding
Diff_Nuc1234	chr12	17812482	17812621	+	0	NA	Intergenic	MTA_Mm-int|LTR|MaLR	114931	NM_016677	53602	Mm.313619	NM_016677	ENSMUSG00000071379	Hpcal1	NVP-3|Nvp3|VILIP3|Vnsl3|Vsnl3	hippocalcin-like 1	protein-coding
Diff_Nuc312	chr13	24505212	24505351	+	0	NA	intron (NM_001284519, intron 3 of 17)	RMER1C|Other|Other	-1710	NM_007717	12763	Mm.8396	NM_007717	ENSMUSG00000016756	Cmah	-	cytidine monophospho-N-acetylneuraminic acid hydroxylase	protein-coding
Diff_Nuc8658	chr18	36143782	36143921	+	0	NA	intron (NR_110349, intron 4 of 14)	intron (NR_110349, intron 4 of 14)	19367	NR_110349	74002	Mm.196944	NM_028707	ENSMUSG00000024347	Psd2	6330404E20Rik|AW125584|EFA6C	pleckstrin and Sec7 domain containing 2	protein-coding
Diff_Nuc603	chr13	55346162	55346301	+	0	NA	intron (NM_008739, intron 4 of 22)	B1_Mus2|SINE|Alu	35088	NM_008739	18193	Mm.12964	NM_008739	ENSMUSG00000021488	Nsd1	AI528500|KMT3B	nuclear receptor-binding SET-domain protein 1	protein-coding
Diff_Nuc14655	chr3	22791842	22791981	+	0	NA	Intergenic	Intergenic	641619	NR_004439	19784		NR_004439		Rprl2	RPRH3|Rmrp3	ribonuclease P RNA-like 2	ncRNA
Diff_Nuc14640	chr3	21040162	21040301	+	0	NA	Intergenic	L1Md_F2|LINE|L1	-774132	NM_175086	11608	Mm.134863	NM_175086	ENSMUSG00000054988	Agtr1b	AT1B|AT2R1B|Agtr-1b|Angtr-1b	angiotensin II receptor, type 1b	protein-coding
Diff_Nuc16274	chr2	79150002	79150141	+	0	NA	intron (NM_010576, intron 17 of 27)	intron (NM_010576, intron 17 of 27)	54488	NM_010576	16401	Mm.31903	NM_010576	ENSMUSG00000027009	Itga4	CD49D|Itga4B	integrin alpha 4	protein-coding
Diff_Nuc4778	chr17	27344412	27344551	+	0	NA	Intergenic	Intergenic	-3098	NM_146075	224640	Mm.29689	NM_146075	ENSMUSG00000044857	Lemd2	BC026588|Lem2|NET25	LEM domain containing 2	protein-coding
Diff_Nuc5571	chr16	17891512	17891651	+	0	NA	5' UTR (NM_001109750, exon 1 of 10)	5' UTR (NM_001109750, exon 1 of 10)	240	NM_010048	13356	Mm.254515	NM_010048	ENSMUSG00000003166	Dgcr2	9930034O06Rik|DGS-C|Dgsc|Idd|Lan|Sez12|mKIAA0163	DiGeorge syndrome critical region gene 2	protein-coding
Diff_Nuc20974	chr8	126554572	126554711	+	0	NA	exon (NM_001029876, exon 3 of 9)	exon (NM_001029876, exon 3 of 9)	7268	NM_001029876	382038	Mm.334891	NM_001029876	ENSMUSG00000031976	Urb2	C77575|mKIAA0133	URB2 ribosome biogenesis 2 homolog (S. cerevisiae)	protein-coding
Diff_Nuc19932	chr8	10585942	10586081	+	0	NA	intron (NM_001319151, intron 32 of 34)	intron (NM_001319151, intron 32 of 34)	296443	NR_040705	320014	Mm.403203	NR_040705	ENSMUSG00000109473	B930025P03Rik	-	RIKEN cDNA B930025P03 gene	ncRNA
Diff_Nuc1500	chr12	58011822	58011961	+	0	NA	intron (NM_172577, intron 2 of 9)	intron (NM_172577, intron 2 of 9)	215433	NM_011041	18511	Mm.5035	NM_011041	ENSMUSG00000001497	Pax9	Pax-9	paired box 9	protein-coding
Diff_Nuc8194	chr19	36857722	36857861	+	0	NA	Intergenic	RMER1A|Other|Other	-46697	NM_016854	53412	Mm.24724	NM_016854	ENSMUSG00000067279	Ppp1r3c	PTG|Ppp1r5	protein phosphatase 1, regulatory (inhibitor) subunit 3C	protein-coding
Diff_Nuc14829	chr3	51389332	51389471	+	0	NA	Intergenic	Intergenic	-24656	NM_080793	73251	Mm.192111	NM_080793	ENSMUSG00000037111	Setd7	1600028F23Rik|H3K4MT|KMT7|Set7|Set7/9|mKIAA1717	SET domain containing (lysine methyltransferase) 7	protein-coding
Diff_Nuc173	chrX	166446792	166446931	+	0	NA	Intergenic	Intergenic	-30012	NR_029457	654820	Mm.34441	NM_001039559	ENSMUSG00000072844	G530011O06Rik	-	RIKEN cDNA G530011O06 gene	ncRNA
Diff_Nuc14838	chr3	52190092	52190231	+	0	NA	Intergenic	Intergenic	117902	NM_019739	56458	Mm.29891	NM_019739	ENSMUSG00000044167	Foxo1	AI876417|Afxh|FKHR|Fkhr1|Foxo1a	forkhead box O1	protein-coding
Diff_Nuc3691	chr10	26626472	26626611	+	0	NA	intron (NM_176837, intron 12 of 14)	L1VL2|LINE|L1	134223	NM_176837	73910	Mm.356496	NM_176837	ENSMUSG00000039031	Arhgap18	4833419J07Rik|AI314906|AI843501	Rho GTPase activating protein 18	protein-coding
Diff_Nuc969	chr13	101663102	101663241	+	0	NA	Intergenic	Intergenic	-59789	NM_022885	69048	Mm.402215	NM_022885	ENSMUSG00000021629	Slc30a5	1810010K08Rik|AF233321|ZNT5|ZTL1|ZnT-5|Zntl1	solute carrier family 30 (zinc transporter), member 5	protein-coding
Diff_Nuc12314	chr5	94050442	94050581	+	0	NA	Intergenic	RodERV21-int|LTR|ERV1	49978	NM_001164284	381654	Mm.326591	NM_001164284	ENSMUSG00000070686	C87414	-	expressed sequence C87414	protein-coding
Diff_Nuc19291	chr9	63566562	63566701	+	0	NA	intron (NM_016769, intron 1 of 8)	intron (NM_016769, intron 1 of 8)	39170	NM_016769	17127	Mm.7320	NM_016769	ENSMUSG00000032402	Smad3	AU022421|Madh3	SMAD family member 3	protein-coding
Diff_Nuc11389	chr6	115038132	115038271	+	0	NA	Intergenic	Intergenic	46652	NR_132436	100503783	Mm.102390	NR_132436	ENSMUSG00000097486	Gm17733	-	predicted gene, 17733	ncRNA
Diff_Nuc10424	chr7	144668132	144668271	+	0	NA	Intergenic	Intergenic	38844	NR_033611	620016	Mm.388932	NR_033611	ENSMUSG00000100863	Gm12669	OTTMUSG00000007920	glutaredoxin 3 pseudogene	pseudo
Diff_Nuc8919	chr18	65502382	65502521	+	0	NA	intron (NM_001037294, intron 4 of 12)	intron (NM_001037294, intron 4 of 12)	51091	NM_001037294	225638	Mm.296528	NM_001037294	ENSMUSG00000032845	Alpk2	Gm549|Hak	alpha-kinase 2	protein-coding
Diff_Nuc20407	chr8	73673082	73673221	+	0	NA	intron (NM_001324526, intron 3 of 10)	L1Md_F2|LINE|L1	8883	NM_001324526	665858	Mm.411658	NM_001324526		Gm7827	EG665858	predicted gene 7827	protein-coding
Diff_Nuc11912	chr5	34973142	34973281	+	0	NA	exon (NM_001331080, exon 16 of 16)	exon (NM_001331080, exon 16 of 16)	6552	NM_026660	68294	Mm.34564	NM_026660	ENSMUSG00000001082	Mfsd10	0610009O03Rik|Tetran	major facilitator superfamily domain containing 10	protein-coding
Diff_Nuc11774	chr5	23212182	23212321	+	0	NA	intron (NR_015554, intron 3 of 4)	MuLV-int|LTR|ERV1	6234	NR_038090	433855	Mm.205125	NR_015554	ENSMUSG00000105987	AI506816	-	expressed sequence AI506816	ncRNA
Diff_Nuc20456	chr8	79488752	79488891	+	0	NA	intron (NM_001083906, intron 2 of 8)	intron (NM_001083906, intron 2 of 8)	62414	NM_001083906	110784	Mm.324393	NM_001083906	ENSMUSG00000031618	Nr3c2	MR|Mlr	nuclear receptor subfamily 3, group C, member 2	protein-coding
Diff_Nuc7484	chr14	63063502	63063641	+	0	NA	intron (NM_172810, intron 3 of 16)	MTEa|LTR|MaLR	11555	NM_001204340	239134	Mm.236557	NM_172810	ENSMUSG00000021933	Gucy1b2	B930025B03|GC-SB2	guanylate cyclase 1, soluble, beta 2	protein-coding
Diff_Nuc19732	chr9	111541282	111541421	+	0	NA	intron (NM_016853, intron 1 of 10)	RMER1A|Other|Other	51501	NM_016853	20840	Mm.1414	NM_016853	ENSMUSG00000032502	Stac	-	src homology three (SH3) and cysteine rich domain	protein-coding
Diff_Nuc19727	chr9	110928362	110928501	+	0	NA	intron (NM_008522, intron 8 of 16)	intron (NM_008522, intron 8 of 16)	6635	NM_008522	17002	Mm.282359	NM_008522	ENSMUSG00000032496	Ltf	Csp82|Lf|MMS10R|Ms10r	lactotransferrin	protein-coding
Diff_Nuc11451	chr6	120471132	120471271	+	0	NA	intron (NM_144815, intron 3 of 7)	intron (NM_144815, intron 3 of 7)	10116	NM_144815	214932	Mm.255322	NM_144815	ENSMUSG00000058979	Cecr5	A930002G03Rik	cat eye syndrome chromosome region, candidate 5	protein-coding
Diff_Nuc19562	chr9	99143862	99144001	+	0	NA	promoter-TSS (NM_023873)	promoter-TSS (NM_023873)	44	NM_023873	68121	Mm.288739	NM_023873	ENSMUSG00000056267	Cep70	6720484E09Rik|Bite|C030018L16Rik	centrosomal protein 70	protein-coding
Diff_Nuc6034	chr16	92704162	92704301	+	0	NA	intron (NM_001111021, intron 2 of 7)	(CA)n|Simple_repeat|Simple_repeat	-6657	NM_009821	12394	Mm.4081	NM_009821	ENSMUSG00000022952	Runx1	AML1|CBF-alpha-2|Cbfa2|Pebp2a2|Pebpa2b	runt related transcription factor 1	protein-coding
Diff_Nuc17382	chr1	28633302	28633441	+	0	NA	Intergenic	Lx2|LINE|L1	203726	NM_001013750	210962	Mm.214178	NM_001013750	ENSMUSG00000048411	Gm597	-	predicted gene 597	protein-coding
Diff_Nuc5241	chr17	71929752	71929891	+	0	NA	intron (NM_029254, intron 6 of 6)	RSINE1|SINE|B4	17800	NR_027953	68789	Mm.75202	NR_015549	ENSMUSG00000085492	Trmt61b	1110039F03Rik|623451|Gm6431	tRNA methyltransferase 61B	ncRNA
Diff_Nuc14427	chr4	149623212	149623351	+	0	NA	TTS (NM_023119)	TTS (NM_023119)	11848	NM_001025388	433182	Mm.70666	NM_001025388	ENSMUSG00000059040	Eno1b	EG433182|Eno1|Gm5506	enolase 1B, retrotransposed	protein-coding
Diff_Nuc3590	chr10	9949652	9949791	+	0	NA	Intergenic	Intergenic	242391	NM_001127353	215772	Mm.246573	NM_172547	ENSMUSG00000050994	Adgb	9130014G24Rik	androglobin	protein-coding
Diff_Nuc3051	chr11	95889522	95889661	+	0	NA	intron (NM_008119, intron 3 of 5)	RMER4B|LTR|ERVK	3732	NM_008119	14607	Mm.248452	NM_008119	ENSMUSG00000014351	Gip	-	gastric inhibitory polypeptide	protein-coding
Diff_Nuc4538	chr17	8229292	8229431	+	0	NA	Intergenic	Intergenic	64732	NM_001033442	381059	Mm.490353	NM_001033442	ENSMUSG00000095720	Gm1604b	ENSMUSG00000073470|Gm1604	predicted gene 1604b	protein-coding
Diff_Nuc3990	chr10	70756682	70756821	+	0	NA	Intergenic	RLTR20B2|LTR|ERVK	-8741	NM_145420	216080	Mm.270530	NM_145420	ENSMUSG00000019927	Ube2d1	UBCH5	ubiquitin-conjugating enzyme E2D 1	protein-coding
Diff_Nuc16154	chr2	60419972	60420111	+	0	NA	Intergenic	ORR1D2|LTR|MaLR	-28676	NM_008867	18779	Mm.5092	NM_008867	ENSMUSG00000054580	Pla2r1	Pla2-r|Pla2g1br|Pla2r	phospholipase A2 receptor 1	protein-coding
Diff_Nuc13828	chr4	111712412	111712551	+	0	NA	Intergenic	L1Md_F2|LINE|L1	-32140	NM_001347180	320640	Mm.253775	NM_178786	ENSMUSG00000055960	Skint4	9530098N22Rik	selection and upkeep of intraepithelial T cells 4	protein-coding
Diff_Nuc2411	chr11	47957062	47957201	+	0	NA	Intergenic	Intergenic	-656731	NM_008143	14694	Mm.5305	NM_008143	ENSMUSG00000020372	Rack1	AL033335|GB-like|Gnb2-rs1|Gnb2l1|p205	receptor for activated C kinase 1	protein-coding
Diff_Nuc4619	chr17	13652132	13652271	+	0	NA	Intergenic	B1_Mus1|SINE|Alu	-62121	NR_030763	272667	Mm.444718	NR_030763	ENSMUSG00000079711	Smok4a	4930513D10Rik|Smok2c	sperm motility kinase 4A	pseudo
Diff_Nuc13483	chr4	61474712	61474851	+	0	NA	Intergenic	L1_Mur2|LINE|L1	21433	NM_008649	17844	Mm.445286	NM_008649	ENSMUSG00000058523	Mup5	Mup18	major urinary protein 5	protein-coding
Diff_Nuc19445	chr9	80037952	80038091	+	0	NA	intron (NM_001039546, intron 1 of 32)	MTA_Mm|LTR|MaLR	25180	NM_001039546	17920	Mm.4040	NM_008662	ENSMUSG00000033577	Myo6	BC029719|Tlc|sv	myosin VI	protein-coding
Diff_Nuc19102	chr9	47100682	47100821	+	0	NA	Intergenic	Intergenic	-237502	NM_001310841	54725	Mm.234832	NM_018770	ENSMUSG00000032076	Cadm1	2900073G06Rik|3100001I08Rik|AI987920|Bl2|Igsf4|Igsf4a|Necl2|RA175|RA175A|RA175B|RA175C|RA175N|ST17|SgIGSF|SynCam|Tslc1	cell adhesion molecule 1	protein-coding
Diff_Nuc12600	chr5	119975852	119975991	+	0	NA	Intergenic	Intergenic	54446	NR_045702	100993	Mm.381453	NR_045702	ENSMUSG00000087516	AW549542	-	expressed sequence AW549542	ncRNA
Diff_Nuc13598	chr4	83444692	83444831	+	0	NA	intron (NM_001081012, intron 24 of 25)	intron (NM_001081012, intron 24 of 25)	246022	NR_130998	78238	Mm.243903	NR_130998	ENSMUSG00000085217	6030471H07Rik	-	RIKEN cDNA 6030471H07 gene	ncRNA
Diff_Nuc7626	chr14	76341822	76341961	+	0	NA	intron (NM_026816, intron 5 of 7)	Lx4A|LINE|L1	-12919	NM_026214	67516	Mm.390712	NM_026214	ENSMUSG00000046523	Kctd4	2210017A09Rik|AU017169	potassium channel tetramerisation domain containing 4	protein-coding
Diff_Nuc13864	chr4	116720722	116720861	+	0	NA	intron (NM_001111277, intron 4 of 11)	B4|SINE|B4	28778	NM_001111277	108067	Mm.34612	NM_175135	ENSMUSG00000028683	Eif2b3	1190002P15Rik	eukaryotic translation initiation factor 2B, subunit 3	protein-coding
Diff_Nuc10540	chr7	152242012	152242151	+	0	NA	Intergenic	Intergenic	-116251	NM_007631	12443	Mm.273049	NM_007631	ENSMUSG00000070348	Ccnd1	AI327039|CycD1|Cyl-1|PRAD1|bcl-1|cD1	cyclin D1	protein-coding
Diff_Nuc10505	chr7	150605712	150605851	+	0	NA	intron (NM_008434, intron 15 of 15)	intron (NM_008434, intron 15 of 15)	41174	NM_009876	12577	Mm.168789	NM_009876	ENSMUSG00000037664	Cdkn1c	AL024410|CDKI|Kip2|p57(kip2)|p57Kip2	cyclin-dependent kinase inhibitor 1C (P57)	protein-coding
Diff_Nuc10600	chr6	17232812	17232951	+	0	NA	TTS (NM_001277756)	TTS (NM_001277756)	1696	NM_016900	12390	Mm.396075	NM_016900	ENSMUSG00000000058	Cav2	AI447843	caveolin 2	protein-coding
Diff_Nuc16934	chr2	157924152	157924291	+	0	NA	Intergenic	Intergenic	-6688	NR_040609	72340	Mm.443395	NR_040609	ENSMUSG00000100860	2010009K17Rik	-	RIKEN cDNA 2010009K17 gene	ncRNA
Diff_Nuc14344	chr4	145230432	145230571	+	0	NA	Intergenic	CpG	-30099	NM_001103158	100041379	Mm.276881	NM_001103158	ENSMUSG00000058186	Zfp980	Gm13242|OTTMUSG00000011070	zinc finger protein 980	protein-coding
Diff_Nuc9531	chr7	51545672	51545811	+	0	NA	Intergenic	RodERV21-int|LTR|ERV1	16588	NM_009131	20256	Mm.20428	NM_009131	ENSMUSG00000004473	Clec11a	AW457320|Clecsf3|Scgf	C-type lectin domain family 11, member a	protein-coding
Diff_Nuc18050	chr1	121162712	121162851	+	0	NA	Intergenic	Intergenic	156044	NM_008381	16324	Mm.3092	NM_008381	ENSMUSG00000037035	Inhbb	-	inhibin beta-B	protein-coding
Diff_Nuc17231	chr2	180699862	180700001	+	0	NA	Intergenic	Intergenic	-1999	NM_145760	228998	Mm.33765	NM_145760	ENSMUSG00000027575	Arfgap1	AI115377|Arf1gap	ADP-ribosylation factor GTPase activating protein 1	protein-coding
Diff_Nuc14886	chr3	58912962	58913101	+	0	NA	intron (NM_177855, intron 15 of 43)	RMER17B|LTR|ERVK	-7288	NM_173398	229323	Mm.123648	NM_173398	ENSMUSG00000050075	Gpr171	A630006E05|F730001G15Rik|H963	G protein-coupled receptor 171	protein-coding
Diff_Nuc9116	chr7	4337632	4337771	+	0	NA	intron (NM_001163014, intron 3 of 7)	Lx|LINE|L1	11645	NM_001163014	243816	Mm.248662	NM_001163014	ENSMUSG00000078810	Gp6	9830166G18Rik|Gm469|Gpvi	glycoprotein 6 (platelet)	protein-coding
Diff_Nuc1043	chr13	111245602	111245741	+	0	NA	Intergenic	Intergenic	60419	NM_152804	20620	Mm.380	NM_152804	ENSMUSG00000021701	Plk2	Snk	polo-like kinase 2	protein-coding
Diff_Nuc20926	chr8	124611502	124611641	+	0	NA	Intergenic	Intergenic	109647	NR_106096	102466915		NR_106096	ENSMUSG00000099140	Mir7237	Gm27482|mmu-mir-7237	microRNA 7237	ncRNA
Diff_Nuc16770	chr2	146978702	146978841	+	0	NA	Intergenic	MLT2B1|LTR|ERVL	-31048	NR_030769	100313531	Mm.405189	NR_030769	ENSMUSG00000086509	Nkx2-2os	Gm14112|Nkx2-2as|Nkx2.2AS|OTTMUSG00000015691	NK2 homeobox 2, opposite strand	ncRNA
Diff_Nuc19862	chr9	122478822	122478961	+	0	NA	Intergenic	CpG	-2728	NR_015610	319626	Mm.186748	NR_015610	ENSMUSG00000097736	9530059O14Rik	-	RIKEN cDNA 9530059O14 gene	ncRNA
Diff_Nuc19828	chr9	120342802	120342941	+	0	NA	intron (NM_144557, intron 10 of 16)	MTD|LTR|MaLR	-58853	NM_026892	68969	Mm.28753	NM_026892	ENSMUSG00000006941	Eif1b	1500010M16Rik|3110001N14Rik|Gc20	eukaryotic translation initiation factor 1B	protein-coding
Diff_Nuc13872	chr4	117181432	117181571	+	0	NA	Intergenic	Intergenic	-11844	NM_025739	66743	Mm.318331	NM_025739	ENSMUSG00000028677	Rnf220	4732477A13|4931406I20Rik|5730503K05Rik|AV302541	ring finger protein 220	protein-coding
Diff_Nuc14631	chr3	19090802	19090941	+	0	NA	intron (NR_045575, intron 1 of 8)	RLTR11B|LTR|ERVK	2650	NR_045575	67472	Mm.45125	NM_026182	ENSMUSG00000027601	Mtfr1	1300002C08Rik|1700080D04Rik|2810026O10Rik|4930579E05Rik|Chppr|Fam54a2	mitochondrial fission regulator 1	protein-coding
Diff_Nuc17692	chr1	74361442	74361581	+	0	NA	intron (NM_001039509, intron 2 of 9)	MTD|LTR|MaLR	-10601	NM_027154	69660	Mm.261182	NM_027154	ENSMUSG00000006301	Tmbim1	2310061B02Rik|AA960455|AU024746|C78899|RECS1|Tmbib1|mKIAA4161	transmembrane BAX inhibitor motif containing 1	protein-coding
Diff_Nuc9684	chr7	70258012	70258151	+	0	NA	intron (NM_007390, intron 4 of 9)	B4A|SINE|B4	99331	NM_007390	11441	Mm.113464	NM_007390	ENSMUSG00000030525	Chrna7	Acra7|alpha7|nAchR	cholinergic receptor, nicotinic, alpha polypeptide 7	protein-coding
Diff_Nuc2754	chr11	72651012	72651151	+	0	NA	intron (NM_001045536, intron 9 of 54)	B3|SINE|B2	41353	NM_001045536	195018	Mm.272030	NM_001045536	ENSMUSG00000055670	Zzef1	8430405D05Rik|BC051585|C130099L13Rik|C85424|NSPA|mKIAA0399	zinc finger, ZZ-type with EF hand domain 1	protein-coding
Diff_Nuc16216	chr2	70816672	70816811	+	0	NA	intron (NM_001110512, intron 4 of 8)	intron (NM_001110512, intron 4 of 8)	39690	NM_001110512	228019	Mm.490343	NM_145524	ENSMUSG00000041975	Mettl8	BC004636|Tip	methyltransferase like 8	protein-coding
Diff_Nuc15135	chr3	94840332	94840471	+	0	NA	intron (NM_001282017, intron 2 of 9)	intron (NM_001282017, intron 2 of 9)	6135	NM_001282017	19185	Mm.2261	NM_008951	ENSMUSG00000005625	Psmd4	Af1|Mcb1|angiocidin	proteasome (prosome, macropain) 26S subunit, non-ATPase, 4	protein-coding
Diff_Nuc2834	chr11	77974702	77974841	+	0	NA	intron (NM_009423, intron 4 of 6)	intron (NM_009423, intron 4 of 6)	4281	NM_009423	22032	Mm.390418	NM_009423	ENSMUSG00000017386	Traf4	A530032M13Rik|CART1|msp2	TNF receptor associated factor 4	protein-coding
Diff_Nuc20868	chr8	122325442	122325581	+	0	NA	Intergenic	Intergenic	-23195	NM_028883	74347	Mm.358759	NM_028883	ENSMUSG00000034105	Tldc1	4632415K11Rik|Kiaa1609	TBC/LysM associated domain containing 1	protein-coding
Diff_Nuc13182	chr4	23080842	23080981	+	0	NA	Intergenic	L1Md_F2|LINE|L1	663216	NR_131335	105500046		NR_131335	ENSMUSG00000107859	Gm30731	Pnky|lnc-pou3f2	predicted gene, 30731	ncRNA
Diff_Nuc8998	chr18	75863092	75863231	+	0	NA	Intergenic	(TG)n|Simple_repeat|Simple_repeat	-5811	NM_201354	269037	Mm.36745	NM_201354	ENSMUSG00000052928	Ctif	Gm672	CBP80/20-dependent translation initiation factor	protein-coding
Diff_Nuc12971	chr5	144735772	144735911	+	0	NA	Intergenic	ORR1A2|LTR|MaLR	39881	NM_177682	231874	Mm.320432	NM_177682	ENSMUSG00000029617	Ccz1	AU022870	CCZ1 vacuolar protein trafficking and biogenesis associated	protein-coding
Diff_Nuc6232	chr15	25707962	25708101	+	0	NA	intron (NM_019472, intron 22 of 40)	intron (NM_019472, intron 22 of 40)	-65022	NM_001034851	66270	Mm.25311	NM_025459	ENSMUSG00000022270	Fam134b	1810015C04Rik|AU015349	family with sequence similarity 134, member B	protein-coding
Diff_Nuc18201	chr1	136576042	136576181	+	0	NA	intron (NM_009307, intron 2 of 9)	intron (NM_009307, intron 2 of 9)	32853	NM_009307	20980	Mm.5102	NM_009307	ENSMUSG00000026452	Syt2	IP4BP|R74640|mKIAA4194	synaptotagmin II	protein-coding
Diff_Nuc5285	chr17	79068152	79068291	+	0	NA	intron (NM_011500, intron 9 of 17)	intron (NM_011500, intron 9 of 17)	67679	NM_011500	268980	Mm.311915	NM_011500	ENSMUSG00000024077	Strn	AU022939|D130055P19	striatin, calmodulin binding protein	protein-coding
Diff_Nuc13432	chr4	55914052	55914191	+	0	NA	Intergenic	Intergenic	-368774	NM_010637	16600	Mm.4325	NM_010637	ENSMUSG00000003032	Klf4	EZF|Gklf|Zie	Kruppel-like factor 4 (gut)	protein-coding
Diff_Nuc7991	chr19	10407252	10407391	+	0	NA	Intergenic	Intergenic	-27954	NM_198114	269060	Mm.329718	NM_198114	ENSMUSG00000035735	Dagla	Nsddr	diacylglycerol lipase, alpha	protein-coding
Diff_Nuc14602	chr3	12246422	12246561	+	0	NA	Intergenic	Intergenic	-402132	NR_040751	100038545	Mm.388494	NR_040751	ENSMUSG00000104015	Gm10745	ENSMUSG00000074696	predicted gene 10745	ncRNA
Diff_Nuc1095	chr13	116063562	116063701	+	0	NA	Intergenic	L1_Mus2|LINE|L1	-171459	NM_001033228	109700	Mm.317280	NM_001033228	ENSMUSG00000042284	Itga1	CD49A|E130012M19Rik|Vla1	integrin alpha 1	protein-coding
Diff_Nuc20390	chr8	73119312	73119451	+	0	NA	exon (NM_023627, exon 5 of 11)	exon (NM_023627, exon 5 of 11)	1001	NM_023627	71780	Mm.29357	NM_023627	ENSMUSG00000019139	Isyna1	1300017C10Rik|AU018670	myo-inositol 1-phosphate synthase A1	protein-coding
Diff_Nuc6029	chr16	92245142	92245281	+	0	NA	Intergenic	B4A|SINE|B4	-47423	NM_134110	246133	Mm.156736	NM_134110	ENSMUSG00000039672	Kcne2	2200002I16Rik|AW048273|MiRP1	potassium voltage-gated channel, Isk-related subfamily, gene 2	protein-coding
Diff_Nuc19207	chr9	57492722	57492861	+	0	NA	intron (NM_001304761, intron 2 of 14)	intron (NM_001304761, intron 2 of 14)	669	NM_007783	12988	Mm.21974	NM_007783	ENSMUSG00000032312	Csk	AW212630|p50CSK	c-src tyrosine kinase	protein-coding
Diff_Nuc12796	chr5	134378572	134378711	+	0	NA	Intergenic	ORR1A4|LTR|MaLR	-196977	NM_030719	80909	Mm.45218	NM_030719	ENSMUSG00000015944	Gatsl2	7530428J21Rik|AW742413|Gats|Gatsl1	GATS protein-like 2	protein-coding
Diff_Nuc15579	chr3	153138572	153138711	+	0	NA	intron (NM_011372, intron 2 of 4)	intron (NM_011372, intron 2 of 4)	-177028	NR_126464	75489	Mm.443252	NR_126464	ENSMUSG00000105023	1700012D16Rik	-	RIKEN cDNA 1700012D16 gene	ncRNA
Diff_Nuc14921	chr3	65140432	65140571	+	0	NA	intron (NR_040390, intron 2 of 3)	RMER13A|LTR|ERVK	12850	NR_040390	319798	Mm.445698	NR_040390		A730090N16Rik	-	RIKEN cDNA A730090N16 gene	ncRNA
Diff_Nuc15897	chr2	31221342	31221481	+	0	NA	Intergenic	Intergenic	-104379	NM_007494	11898	Mm.3217	NM_007494	ENSMUSG00000076441	Ass1	AA408052|ASS|Ass-1|fold	argininosuccinate synthetase 1	protein-coding
Diff_Nuc15049	chr3	87488362	87488501	+	0	NA	exon (NM_001003912, exon 3 of 40)	exon (NM_001003912, exon 3 of 40)	64114	NM_028971	74485	Mm.474494	NM_028971	ENSMUSG00000023084	Lrrc71	4933430H15Rik	leucine rich repeat containing 71	protein-coding
Diff_Nuc7511	chr14	65625262	65625401	+	0	NA	intron (NM_153414, intron 6 of 16)	B1_Mus1|SINE|Alu	56449	NM_001253731	210925	Mm.71332	NM_153414	ENSMUSG00000021975	Ints9	BC028953|D14Ertd231e	integrator complex subunit 9	protein-coding
Diff_Nuc6031	chr16	92508732	92508871	+	0	NA	intron (NM_172469, intron 1 of 5)	intron (NM_172469, intron 1 of 5)	10409	NM_172469	209195	Mm.44747	NM_172469	ENSMUSG00000022949	Clic6	5730466J16Rik|AL022908|AW045520|CLIC1L	chloride intracellular channel 6	protein-coding
Diff_Nuc16911	chr2	156716812	156716951	+	0	NA	Intergenic	RMER17C|LTR|ERVK	-4067	NM_029983	77799	Mm.29264	NM_029983	ENSMUSG00000027636	Sla2	A930009E21Rik|AI430952|SLAP-2|SLAP2	Src-like-adaptor 2	protein-coding
Diff_Nuc352	chr13	30418462	30418601	+	0	NA	Intergenic	MTA_Mm|LTR|MaLR	-9694	NM_177322	11607	Mm.35062	NM_177322	ENSMUSG00000049115	Agtr1a	1810074K20Rik|AG2S|AI551199|AT1|AT1a|AT2R1|AT2R1A|Agtr-1a|Agtr1|Angtr-1a	angiotensin II receptor, type 1a	protein-coding
Diff_Nuc14682	chr3	28234292	28234431	+	0	NA	intron (NM_001163008, intron 1 of 30)	intron (NM_001163008, intron 1 of 30)	72225	NM_001163009	665113	Mm.126193	NM_026910	ENSMUSG00000027692	Tnik	1500031A17Rik|4831440I19Rik|AI451411|C530008O15Rik|C630040K21Rik	TRAF2 and NCK interacting kinase	protein-coding
Diff_Nuc9642	chr7	59041442	59041581	+	0	NA	Intergenic	Intergenic	-75874	NM_001330608	14453	Mm.207360	NM_008087	ENSMUSG00000030498	Gas2	Gas-2	growth arrest specific 2	protein-coding
Diff_Nuc7281	chr14	43986632	43986771	+	0	NA	Intergenic	RLTR1B|LTR|ERV1	39643	NM_027940	71826	Mm.335855	NM_027940	ENSMUSG00000095384	1700001F09Rik	Gm10377	RIKEN cDNA 1700001F09 gene	protein-coding
Diff_Nuc9524	chr7	51091162	51091301	+	0	NA	Intergenic	Intergenic	-6408	NM_026806	68668	Mm.458122	NM_026806	ENSMUSG00000074155	Klk5	1110030O19Rik	kallikrein related-peptidase 5	protein-coding
Diff_Nuc9877	chr7	89227772	89227911	+	0	NA	Intergenic	Intergenic	12568	NR_045744	434205	Mm.333986	NR_045744	ENSMUSG00000109145	Gm20744	-	predicted gene, 20744	ncRNA
Diff_Nuc5438	chr16	4549312	4549451	+	0	NA	exon (NM_031182, exon 5 of 7)	exon (NM_031182, exon 5 of 7)	10339	NM_031182	83383	Mm.273210	NM_031182	ENSMUSG00000005718	Tfap4	AI642933|AP-4|D930048N17Rik|Tcfap4|bHLHc41	transcription factor AP4	protein-coding
Diff_Nuc13371	chr4	47062092	47062231	+	0	NA	exon (NM_001024136, exon 2 of 15)	exon (NM_001024136, exon 2 of 15)	8017	NM_001024136	75691	Mm.86866	NM_001024136	ENSMUSG00000066191	Anks6	2210417J20Rik|Ankrd14|Gm635|SamCystin|Samd6|b2b1801.1Clo	ankyrin repeat and sterile alpha motif domain containing 6	protein-coding
Diff_Nuc10210	chr7	128440892	128441031	+	0	NA	Intergenic	L1MA4|LINE|L1	-94849	NM_001081327	195646	Mm.247449	NM_177575	ENSMUSG00000046321	Hs3st2	6430516N12Rik|A830061E14Rik|AW491345	heparan sulfate (glucosamine) 3-O-sulfotransferase 2	protein-coding
Diff_Nuc5479	chr16	9827392	9827531	+	0	NA	intron (NM_008170, intron 1 of 11)	RMER15|LTR|ERVL	165165	NM_008170	14811	Mm.2953	NM_008170	ENSMUSG00000059003	Grin2a	GluN2A|NMDAR2A|NR2A	glutamate receptor, ionotropic, NMDA2A (epsilon 1)	protein-coding
Diff_Nuc11440	chr6	119397892	119398031	+	0	NA	intron (NM_009525, intron 2 of 4)	intron (NM_009525, intron 2 of 4)	1443	NM_001271757	22419	Mm.321818	NM_009525	ENSMUSG00000030170	Wnt5b	AW545702|Wnt-5b	wingless-type MMTV integration site family, member 5B	protein-coding
Diff_Nuc15823	chr2	27611702	27611841	+	0	NA	exon (NM_011305, exon 8 of 10)	exon (NM_011305, exon 8 of 10)	45668	NM_001290482	20181	Mm.24624	NM_011305	ENSMUSG00000015846	Rxra	9530071D11Rik|Nr2b1|RXRalpha1	retinoid X receptor alpha	protein-coding
Diff_Nuc10493	chr7	149426232	149426371	+	0	NA	Intergenic	(CAG)n|Simple_repeat|Simple_repeat	-10425	NM_001037822	114666	Mm.444495	NM_001037822	ENSMUSG00000073785	Krtap5-5	A030001H12Rik|AI586182|BB149782	keratin associated protein 5-5	protein-coding
Diff_Nuc4844	chr17	31070142	31070281	+	0	NA	intron (NM_021332, intron 12 of 12)	intron (NM_021332, intron 12 of 12)	-21417	NM_177465	52020	Mm.25923	NM_177465	ENSMUSG00000054134	Umodl1	D17Ertd488e	uromodulin-like 1	protein-coding
Diff_Nuc9192	chr7	16190962	16191101	+	0	NA	Intergenic	MuRRS4-int|LTR|ERV1	34095	NM_145707	246791	Mm.425362	NM_145707	ENSMUSG00000066772	Obox3	Ohx	oocyte specific homeobox 3	protein-coding
Diff_Nuc10376	chr7	141440152	141440291	+	0	NA	Intergenic	Lx6|LINE|L1	-23441	NM_007400	11489	Mm.439714	NM_007400	ENSMUSG00000054555	Adam12	Mltna	a disintegrin and metallopeptidase domain 12 (meltrin alpha)	protein-coding
Diff_Nuc9936	chr7	99851312	99851451	+	0	NA	Intergenic	(CAGG)n|Simple_repeat|Simple_repeat	-32959	NM_029078	74737	Mm.288645	NM_029078	ENSMUSG00000041328	Pcf11	2500001H09Rik|5730417B17Rik|C77803	PCF11 cleavage and polyadenylation factor subunit	protein-coding
Diff_Nuc19329	chr9	65796872	65797011	+	0	NA	intron (NM_173185, intron 1 of 13)	RSINE1|SINE|B4	40124	NM_173185	214897	Mm.325816	NM_173185	ENSMUSG00000032384	Csnk1g1	9130020E21Rik	casein kinase 1, gamma 1	protein-coding
Diff_Nuc10495	chr7	149572657	149572796	+	0	NA	intron (NM_009983, intron 1 of 8)	intron (NM_009983, intron 1 of 8)	1049	NM_009983	13033	Mm.231395	NM_009983	ENSMUSG00000007891	Ctsd	CD|CatD	cathepsin D	protein-coding
Diff_Nuc5661	chr16	24660422	24660561	+	0	NA	intron (NM_001145952, intron 4 of 11)	intron (NM_001145952, intron 4 of 11)	-61450	NM_001145954	210126	Mm.209385	NM_178665	ENSMUSG00000033306	Lpp	9430020K16Rik|AA959454|AU024130|B130055L10Rik|C79715|D630048H16	LIM domain containing preferred translocation partner in lipoma	protein-coding
Diff_Nuc20286	chr8	57984402	57984541	+	0	NA	Intergenic	Intergenic	401290	NM_175939	244486	Mm.67684	NM_175939	ENSMUSG00000046258	Adam29	-	a disintegrin and metallopeptidase domain 29	protein-coding
Diff_Nuc17625	chr1	64055162	64055301	+	0	NA	Intergenic	Intergenic	33844	NR_105864	102466760		NR_105864	ENSMUSG00000098487	Mir6899	Gm27384|mmu-mir-6899	microRNA 6899	ncRNA
Diff_Nuc19794	chr9	118458762	118458901	+	0	NA	intron (NM_018748, intron 12 of 23)	B4A|SINE|B4	43395	NM_018748	54214	Mm.10409	NM_018748	ENSMUSG00000038708	Golga4	AI225887|AU019508|Olp-1	golgi autoantigen, golgin subfamily a, 4	protein-coding
Diff_Nuc9328	chr7	28038422	28038561	+	0	NA	intron (NM_133770, intron 13 of 14)	L2b|LINE|L2	-5289	NM_010950	18223	Mm.458153	NM_010950	ENSMUSG00000063160	Numbl	nbl	numb-like	protein-coding
Diff_Nuc19634	chr9	106323502	106323641	+	0	NA	Intergenic	Intergenic	-8171	NM_001324533	19944	Mm.288696	NM_009082	ENSMUSG00000048758	Rpl29	Rpl43	ribosomal protein L29	protein-coding
Diff_Nuc8008	chr19	12112512	12112651	+	0	NA	Intergenic	(CAGAGA)n|Simple_repeat|Simple_repeat	-1351	NM_146680	258675	Mm.271517	NM_146680	ENSMUSG00000067529	Olfr1423	MOR239-3	olfactory receptor 1423	protein-coding
Diff_Nuc7851	chr19	3155132	3155271	+	0	NA	intron (NR_045304, intron 2 of 2)	intron (NR_045304, intron 2 of 2)	42502	NR_045304	70011	Mm.393871	NR_045304	ENSMUSG00000100969	1700030N03Rik	1700087C08Rik	RIKEN cDNA 1700030N03 gene	ncRNA
Diff_Nuc7908	chr19	5525512	5525651	+	0	NA	Intergenic	Intergenic	-15092	NM_001024560	225861	Mm.20071	NM_001024560	ENSMUSG00000056185	Snx32	B930037P14Rik|Snx6b	sorting nexin 32	protein-coding
Diff_Nuc10188	chr7	125999882	126000021	+	0	NA	promoter-TSS (NM_023197)	promoter-TSS (NM_023197)	-439	NM_023197	66356	Mm.482278	NM_023197	ENSMUSG00000030980	Knop1	2310008H09Rik|Tsg118	lysine rich nucleolar protein 1	protein-coding
Diff_Nuc5697	chr16	30146652	30146791	+	0	NA	Intergenic	Intergenic	81278	NM_008235	15205	Mm.390859	NM_008235	ENSMUSG00000022528	Hes1	Hry|bHLHb39	hairy and enhancer of split 1 (Drosophila)	protein-coding
Diff_Nuc9954	chr7	103460372	103460511	+	0	NA	intron (NM_001310760, intron 1 of 32)	intron (NM_001310760, intron 1 of 32)	6264	NR_105818	102465210		NR_105818	ENSMUSG00000099030	Mir6394	Gm27929|mmu-mir-6394	microRNA 6394	ncRNA
Diff_Nuc6591	chr15	76427132	76427271	+	0	NA	TTS (NM_172960)	TTS (NM_172960)	10820	NM_053193	94230	Mm.45141	NM_053193	ENSMUSG00000034022	Cpsf1	-	cleavage and polyadenylation specific factor 1	protein-coding
Diff_Nuc11144	chr6	88761032	88761171	+	0	NA	intron (NM_001166251, intron 5 of 7)	intron (NM_001166251, intron 5 of 7)	30828	NM_030251	80283	Mm.166858	NM_030251	ENSMUSG00000030083	Abtb1	AI847549|BC003234|BPOZ|EF1ABP	ankyrin repeat and BTB (POZ) domain containing 1	protein-coding
Diff_Nuc1377	chr12	34175062	34175201	+	0	NA	Intergenic	L1Md_F2|LINE|L1	60642	NM_172253	28071	Mm.196472	NM_172253	ENSMUSG00000020561	Twistnb	2410173G11|2810024J17Rik|D16Wsu83e	twist basic helix-loop-helix transcription factor 1 neighbor	protein-coding
Diff_Nuc15887	chr2	30584762	30584901	+	0	NA	Intergenic	B4|SINE|B4	8101	NR_037272	100526499		NR_037272	ENSMUSG00000093091	Mir3089	mir-3089|mmu-mir-3089	microRNA 3089	ncRNA
Diff_Nuc12265	chr5	85853832	85853971	+	0	NA	Intergenic	L1_Mus3|LINE|L1	640707	NM_001345902	12617	Mm.4649	NM_007683	ENSMUSG00000029253	Cenpc1	CENP-C|Cenpc	centromere protein C1	protein-coding
Diff_Nuc4668	chr17	17195522	17195661	+	0	NA	Intergenic	RLTR25A|LTR|ERVK	-5476	NM_001005358	449000	Mm.483718	NM_001005358	ENSMUSG00000096696	Zfp960	-	zinc finger protein 960	protein-coding
Diff_Nuc4284	chr10	98956652	98956791	+	0	NA	Intergenic	Lx2B|LINE|L1	-115084	NR_038019	100504202	Mm.403801	NR_038019		Gm20110	-	predicted gene, 20110	ncRNA
Diff_Nuc16999	chr2	163819792	163819931	+	0	NA	Intergenic	Intergenic	-1072	NM_018753	54401	Mm.34319	NM_018753	ENSMUSG00000018326	Ywhab	1300003C17Rik|14-3-3b	tyrosine 3-monooxygenase/tryptophan 5-monooxygenase activation protein, beta polypeptide	protein-coding
Diff_Nuc13401	chr4	49678092	49678231	+	0	NA	exon (NM_001033351, exon 9 of 9)	exon (NM_001033351, exon 9 of 9)	16694	NM_001004025	19059	Mm.46125	NM_001004025	ENSMUSG00000028310	Ppp3r2	CaNB2|CnB2	protein phosphatase 3, regulatory subunit B, alpha isoform (calcineurin B, type II)	protein-coding
Diff_Nuc11816	chr5	25224342	25224481	+	0	NA	Intergenic	Intergenic	-12796	NM_020570	57434	Mm.143767	NM_020570	ENSMUSG00000028933	Xrcc2	4921524O04Rik|8030409M04Rik|RAD51|RecA	X-ray repair complementing defective repair in Chinese hamster cells 2	protein-coding
Diff_Nuc6993	chr14	8756622	8756761	+	0	NA	exon (NM_001081427, exon 32 of 46)	exon (NM_001081427, exon 32 of 46)	70005	NM_007870	13421	Mm.272258	NM_007870	ENSMUSG00000025279	Dnase1l3	DNasegamma|Dhp2|Lsd	deoxyribonuclease 1-like 3	protein-coding
Diff_Nuc8011	chr19	12773422	12773561	+	0	NA	intron (NM_029550, intron 1 of 5)	Lx2|LINE|L1	3211	NM_029550	64697	Mm.218561	NM_029550	ENSMUSG00000024694	Keg1	0610008P16Rik|AI316519|GS4059	kidney expressed gene 1	protein-coding
Diff_Nuc8463	chr18	6404252	6404391	+	0	NA	Intergenic	Intergenic	86323	NR_035446	100316773		NR_035446	ENSMUSG00000084514	Mir1893	Mirn1893|mmu-mir-1893	microRNA 1893	ncRNA
Diff_Nuc3304	chr11	113480912	113481051	+	0	NA	intron (NM_009217, intron 1 of 2)	CpG	186	NM_001042606	20606		NM_009217	ENSMUSG00000047904	Sstr2	SRIF-1|SS2R|SSTR-2|Smstr-2|Smstr2|sst2	somatostatin receptor 2	protein-coding
Diff_Nuc10679	chr6	30645242	30645381	+	0	NA	Intergenic	RMER19B|LTR|ERVK	-1562	NR_130781	83922	Mm.65389	NM_031998	ENSMUSG00000029790	Cep41	1700017E11Rik|2810431D15Rik|Tsga14	centrosomal protein 41	protein-coding
Diff_Nuc1962	chr12	111484572	111484711	+	0	NA	Intergenic	B3A|SINE|B2	31637	NR_002866	353504	Mm.442720	NR_002866		Dio3os	AW556460|Dio3as	deiodinase, iodothyronine type III, opposite strand	ncRNA
Diff_Nuc9891	chr7	90999342	90999481	+	0	NA	Intergenic	RMER19C|LTR|ERVK	33440	NM_030705	80889	Mm.272998	NM_030705	ENSMUSG00000070462	Mesdc1	AW061151	mesoderm development candidate 1	protein-coding
Diff_Nuc6636	chr15	78608342	78608481	+	0	NA	exon (NM_130859, exon 19 of 21)	exon (NM_130859, exon 19 of 21)	-4536	NM_008595	17305	Mm.149235	NM_008595	ENSMUSG00000018169	Mfng	AW546563	MFNG O-fucosylpeptide 3-beta-N-acetylglucosaminyltransferase	protein-coding
Diff_Nuc2203	chr11	16976022	16976161	+	0	NA	intron (NM_029861, intron 2 of 2)	intron (NM_029861, intron 2 of 2)	24154	NM_029861	380686	Mm.425666	NM_029861	ENSMUSG00000044629	Cnrip1	1500041B16Rik|3110054C06Rik|5330437A18Rik|AI854501|C2orf32	cannabinoid receptor interacting protein 1	protein-coding
Diff_Nuc19168	chr9	54612582	54612721	+	0	NA	promoter-TSS (NM_001284507)	promoter-TSS (NM_001284507)	96	NM_013496	12903	Mm.34797	NM_013496	ENSMUSG00000032291	Crabp1	AI326249|CRABP-I|Crabp-1|CrabpI|Rbp-5	cellular retinoic acid binding protein I	protein-coding
Diff_Nuc10154	chr7	122653652	122653791	+	0	NA	intron (NM_001025560, intron 13 of 15)	intron (NM_001025560, intron 13 of 15)	291402	NM_001277328	20679	Mm.323365	NM_011445	ENSMUSG00000051910	Sox6	AI987981|SOX-LZ	SRY (sex determining region Y)-box 6	protein-coding
Diff_Nuc11185	chr6	91254252	91254391	+	0	NA	Intergenic	Intergenic	91563	NM_007992	14115	Mm.249146	NM_007992	ENSMUSG00000064080	Fbln2	5730577E14Rik|FIBL-2	fibulin 2	protein-coding
Diff_Nuc1609	chr12	75424912	75425051	+	0	NA	Intergenic	Intergenic	26520	NM_198866	386753	Mm.341686	NM_198866	ENSMUSG00000029878	Dbpht2	Spot2	DNA binding protein with his-thr domain	protein-coding
Diff_Nuc3891	chr10	60067132	60067271	+	0	NA	intron (NR_045556, intron 4 of 68)	intron (NR_045556, intron 4 of 68)	92037	NM_001252635	22295	Mm.440327	NM_023370	ENSMUSG00000012819	Cdh23	4930542A03Rik|USH1D|ahl|ahl1|bob|bus|mdfw|nmf112|nmf181|nmf252|sals|v	cadherin 23 (otocadherin)	protein-coding
Diff_Nuc2807	chr11	76276202	76276341	+	0	NA	intron (NM_001346670, intron 7 of 21)	(CAGCC)n|Simple_repeat|Simple_repeat	5696	NM_001291186	109934	Mm.258939	NM_198018	ENSMUSG00000017631	Abr	-	active BCR-related gene	protein-coding
Diff_Nuc11924	chr5	36017712	36017851	+	0	NA	intron (NM_001042615, intron 1 of 6)	intron (NM_001042615, intron 1 of 6)	4648	NM_001042615	78558	Mm.274255	NM_030127	ENSMUSG00000029096	Htra3	2210021K23Rik|9530081K03Rik|Prsp|Tasp	HtrA serine peptidase 3	protein-coding
Diff_Nuc13535	chr4	69132112	69132251	+	0	NA	Intergenic	Intergenic	-516750	NM_019967	56710	Mm.248788	NM_019967	ENSMUSG00000028351	Brinp1	BRINP|Dbc1|Dbccr1|Fam5a	bone morphogenic protein/retinoic acid inducible neural specific 1	protein-coding
Diff_Nuc1753	chr12	88201912	88202051	+	0	NA	Intergenic	Intergenic	23783	NM_145836	238330	Mm.248358	NM_145836	ENSMUSG00000034168	Irf2bpl	6430527G18Rik|Eap1	interferon regulatory factor 2 binding protein-like	protein-coding
Diff_Nuc6347	chr15	41995692	41995831	+	0	NA	Intergenic	Lx3B|LINE|L1	-294495	NM_175456	223513	Mm.148913	NM_175456	ENSMUSG00000042895	Abra	C130068O12Rik|STARS	actin-binding Rho activating protein	protein-coding
Diff_Nuc12225	chr5	76657232	76657371	+	0	NA	intron (NM_001305222, intron 20 of 21)	intron (NM_001305222, intron 20 of 21)	44396	NM_011626	21982	Mm.790	NM_011626	ENSMUSG00000029234	Tmem165	AV026557|Tpardl|Tparl|pFT27	transmembrane protein 165	protein-coding
Diff_Nuc8569	chr18	24004432	24004571	+	0	NA	intron (NM_153058, intron 2 of 6)	intron (NM_153058, intron 2 of 6)	42030	NM_153058	212307	Mm.132237	NM_153058	ENSMUSG00000024277	Mapre2	AI314113|C820009F03Rik|D18Abb1e|EB1|EB2|RP1	microtubule-associated protein, RP/EB family, member 2	protein-coding
Diff_Nuc16885	chr2	155450002	155450141	+	0	NA	intron (NM_001085378, intron 21 of 41)	PB1D10|SINE|Alu	1455	NR_030757	735275		NR_030757	ENSMUSG00000076312	Mir499	Mirn499|mir-499|mmu-mir-499	microRNA 499	ncRNA
Diff_Nuc15096	chr3	90179392	90179531	+	0	NA	Intergenic	B2_Mm2|SINE|B2	14399	NM_001316688	26568	Mm.45519	NM_011988	ENSMUSG00000027932	Slc27a3	Acsvl3|FATP-3|FATP3|Vlcs-3	solute carrier family 27 (fatty acid transporter), member 3	protein-coding
Diff_Nuc11596	chr6	138603292	138603431	+	0	NA	Intergenic	Lx5|LINE|L1	3604	NM_015777	50540	Mm.84043	NM_015777	ENSMUSG00000046717	Igbp1b	alpha4-b	immunoglobulin (CD79A) binding protein 1b	protein-coding
Diff_Nuc2877	chr11	81096222	81096361	+	0	NA	intron (NM_001034013, intron 1 of 9)	intron (NM_001034013, intron 1 of 9)	-129886	NM_007384	11418	Mm.234998	NM_007384	ENSMUSG00000020704	Asic2	ACIC2|Accn1|BNC1|BNaC1|BNaC1a|Mdeg	acid-sensing (proton-gated) ion channel 2	protein-coding
Diff_Nuc17010	chr2	164313182	164313321	+	0	NA	promoter-TSS (NM_001048229)	promoter-TSS (NM_001048229)	-360	NM_001048229	52840	Mm.256927	NM_026797	ENSMUSG00000017734	Dbndd2	1110017A21Rik|2900022J10Rik|AU041050|AW048677|D2Bwg0891e|Nkip|R74724	dysbindin (dystrobrevin binding protein 1) domain containing 2	protein-coding
Diff_Nuc8531	chr18	17954302	17954441	+	0	NA	Intergenic	Lx|LINE|L1	-214872	NR_045374	75162	Mm.60874	NR_045374		4930545E07Rik	-	RIKEN cDNA 4930545E07 gene	ncRNA
Diff_Nuc6928	chr15	99506352	99506491	+	0	NA	intron (NM_009597, intron 3 of 11)	intron (NM_009597, intron 3 of 11)	5272	NM_009597	11419	Mm.440107	NM_009597	ENSMUSG00000023017	Asic1	AI843610|ASIC|ASIC1a|Accn2|B530003N02Rik|BNaC2	acid-sensing (proton-gated) ion channel 1	protein-coding
Diff_Nuc4978	chr17	40592082	40592221	+	0	NA	Intergenic	RMER1C|Other|Other	-64820	NM_001177584	100126778	Mm.422023	NM_001177584	ENSMUSG00000090747	Esp8	Gm17495	exocrine gland secreted peptide 8	protein-coding
Diff_Nuc3786	chr10	42800672	42800811	+	0	NA	intron (NM_175407, intron 4 of 6)	intron (NM_175407, intron 4 of 6)	93595	NM_175407	109205	Mm.153750	NM_175407	ENSMUSG00000038248	Sobp	2900009C16Rik|5330439J01Rik|JXC1|jc	sine oculis-binding protein homolog (Drosophila)	protein-coding
Diff_Nuc13935	chr4	120545502	120545641	+	0	NA	Intergenic	Intergenic	-4903	NM_182929	242662	Mm.192502	NM_182929	ENSMUSG00000032890	Rims3	A730060M23Rik|Nim3|Rim3|mKIAA0237	regulating synaptic membrane exocytosis 3	protein-coding
Diff_Nuc15025	chr3	84765752	84765891	+	0	NA	intron (NM_080428, intron 3 of 10)	MTB_Mm|LTR|MaLR	9688	NM_080428	50754	Mm.196475	NM_080428	ENSMUSG00000028086	Fbxw7	1110001A17Rik|AGO|Cdc4|Fbw7|Fbwd6|Fbx30|Fbxo30|Fbxw6|SEL-10	F-box and WD-40 domain protein 7	protein-coding
Diff_Nuc8553	chr18	21580962	21581101	+	0	NA	Intergenic	Intergenic	-122391	NM_001033445	381126	Mm.312276	NM_001033445	ENSMUSG00000042680	Garem1	C86169|Fam59a|Garem|Gm944|mKIAA4238	GRB2 associated regulator of MAPK1 subtype 1	protein-coding
Diff_Nuc282	chr13	20141432	20141571	+	0	NA	Intergenic	RMER17C|LTR|ERVK	-40875	NM_080288	140580	Mm.342392	NM_080288	ENSMUSG00000041112	Elmo1	6330578D22Rik|C230095H21Rik|CED-12	engulfment and cell motility 1	protein-coding
Diff_Nuc3860	chr10	57695032	57695171	+	0	NA	exon (NM_001081954, exon 1 of 1)	exon (NM_001081954, exon 1 of 1)	322	NM_001081954	664783	Mm.482575	NM_001081954		Dux	AW822073|Dux4|Duxbl|EG664783	double homeobox	protein-coding
Diff_Nuc745	chr13	69526372	69526511	+	0	NA	Intergenic	Lx9|LINE|L1	146301	NM_198600	210106	Mm.315959	NM_198600	ENSMUSG00000034575	Papd7	LAK-1|POLK|Pols|TRF4|TRF4-1	PAP associated domain containing 7	protein-coding
Diff_Nuc18833	chr9	21035632	21035771	+	0	NA	exon (NM_001110305, exon 5 of 6)	exon (NM_001110305, exon 5 of 6)	8075	NM_016679	50868	Mm.248266	NM_016679	ENSMUSG00000003308	Keap1	INRF2|mKIAA0132	kelch-like ECH-associated protein 1	protein-coding
Diff_Nuc17313	chr1	16204282	16204421	+	0	NA	Intergenic	Intergenic	108388	NM_133832	98711	Mm.274376	NM_133832	ENSMUSG00000025921	Rdh10	3110069K09Rik|4921506A21Rik|AI875664|AW549993|D1Ertd762e|m366Asp	retinol dehydrogenase 10 (all-trans)	protein-coding
Diff_Nuc12124	chr5	64615132	64615271	+	0	NA	intron (NM_001310611, intron 2 of 21)	ORR1C1|LTR|MaLR	-6395	NM_001289514	57915	Mm.286353	NM_019636	ENSMUSG00000029174	Tbc1d1	1110062G02Rik|AI385682|AW555803|Nob1|Nobq1|Tbc1|mKIAA1108	TBC1 domain family, member 1	protein-coding
Diff_Nuc3198	chr11	103956272	103956411	+	0	NA	Intergenic	(CAAG)n|Simple_repeat|Simple_repeat	-37754	NM_001313928	12921	Mm.1892	NM_007762	ENSMUSG00000018634	Crhr1	CRF1R|CRFR1|Crhr	corticotropin releasing hormone receptor 1	protein-coding
Diff_Nuc9187	chr7	15952422	15952561	+	0	NA	Intergenic	Lx3A|LINE|L1	-21709	NM_145708	246792	Mm.26391	NM_145708	ENSMUSG00000074369	Obox2	-	oocyte specific homeobox 2	protein-coding
Diff_Nuc9710	chr7	72356902	72357041	+	0	NA	Intergenic	Intergenic	-55557	NM_183087	70638	Mm.441986	NM_183087	ENSMUSG00000030518	Fam189a1	5730507A09Rik|AW047451	family with sequence similarity 189, member A1	protein-coding
Diff_Nuc2085	chr11	3065482	3065621	+	0	NA	intron (NM_030207, intron 8 of 32)	intron (NM_030207, intron 8 of 32)	27915	NM_030207	78887	Mm.394071	NM_030207	ENSMUSG00000023764	Sfi1	-	Sfi1 homolog, spindle assembly associated (yeast)	protein-coding
Diff_Nuc20373	chr8	72734972	72735111	+	0	NA	intron (NM_001007570, intron 1 of 7)	intron (NM_001007570, intron 1 of 7)	1139	NM_001007570	73095	Mm.185413	NM_001007570	ENSMUSG00000002346	Slc25a42	2900084M01Rik	solute carrier family 25, member 42	protein-coding
Diff_Nuc14777	chr3	40881602	40881741	+	0	NA	intron (NM_027558, intron 1 of 2)	intron (NM_027558, intron 1 of 2)	5297	NM_027558	70804	Mm.40321	NM_027558	ENSMUSG00000049940	Pgrmc2	4631434O19Rik|5730409G06Rik|DG6|PMBP	progesterone receptor membrane component 2	protein-coding
Diff_Nuc9065	chr18	82775772	82775911	+	0	NA	intron (NM_177832, intron 26 of 29)	intron (NM_177832, intron 26 of 29)	51941	NM_001025254	17196	Mm.252063	NM_010777	ENSMUSG00000041607	Mbp	C76307|Hmbpr|R75289|golli-mbp|jve|mld|shi	myelin basic protein	protein-coding
Diff_Nuc9173	chr7	13122032	13122171	+	0	NA	intron (NM_028434, intron 3 of 5)	L1Md_T|LINE|L1	24201	NM_028434	73090	Mm.84622	NM_028434	ENSMUSG00000030385	2900092C05Rik	-	RIKEN cDNA 2900092C05 gene	protein-coding
Diff_Nuc6803	chr15	86844922	86845061	+	0	NA	Intergenic	Lx|LINE|L1	-529738	NM_001252310	106014	Mm.244319	NM_134096	ENSMUSG00000054863	Fam19a5	TAFA5|Tafa-5|Tara-5	family with sequence similarity 19, member A5	protein-coding
Diff_Nuc2935	chr11	86399942	86400081	+	0	NA	exon (NM_029478, exon 11 of 12)	exon (NM_029478, exon 11 of 12)	-2351	NR_029738	387140		NR_029738	ENSMUSG00000065455	Mir21a	Mir21|Mirn21|mmu-mir-21|mmu-mir-21a	microRNA 21a	ncRNA
Diff_Nuc9677	chr7	67416922	67417061	+	0	NA	Intergenic	Intergenic	-131886	NM_001082962	20646	Mm.274995	NM_013670	ENSMUSG00000102252	Snrpn	2410045I01Rik|HCERN3|Peg4|Pwcr1|SMN	small nuclear ribonucleoprotein N	protein-coding
Diff_Nuc15152	chr3	96064242	96064381	+	0	NA	Intergenic	RMER19A|LTR|ERVK	2929	NM_033596	97122	Mm.227295	NM_033596	ENSMUSG00000091405	Hist2h4	H4|X04652	histone cluster 2, H4	protein-coding
Diff_Nuc13052	chr4	3153162	3153301	+	0	NA	Intergenic	MER90a|LTR|ERV1	-40779	NM_001167535	100312471	Mm.377218	NM_001167535	ENSMUSG00000095982	Vmn1r3	Gm11778|OTTMUSG00000004181	vomeronasal 1 receptor 3	protein-coding
Diff_Nuc3176	chr11	102819232	102819371	+	0	NA	TTS (NR_037963)	TTS (NR_037963)	6167	NR_037963	69739	Mm.276539	NR_037963	ENSMUSG00000085338	2410004I01Rik	-	RIKEN cDNA 2410004I01 gene	ncRNA
Diff_Nuc4768	chr17	27108432	27108571	+	0	NA	TTS (NM_001281491)	TTS (NM_001281491)	-1623	NM_001005916	474156	Mm.328890	NM_001005916	ENSMUSG00000079605	Zbtb9	3930402F13Rik	zinc finger and BTB domain containing 9	protein-coding
Diff_Nuc16222	chr2	71730772	71730911	+	0	NA	intron (NM_172665, intron 8 of 10)	intron (NM_172665, intron 8 of 10)	19560	NM_172665	228026	Mm.34411	NM_172665	ENSMUSG00000006494	Pdk1	B830012B01|D530020C15Rik	pyruvate dehydrogenase kinase, isoenzyme 1	protein-coding
Diff_Nuc20171	chr8	35574842	35574981	+	0	NA	Intergenic	Intergenic	128459	NR_040706	330734	Mm.149998	NR_040706	ENSMUSG00000109819	B930018H19Rik	B930018H19	RIKEN cDNA B930018H19 gene	ncRNA
Diff_Nuc107	chrX	166429142	166429281	+	0	NA	TTS (NM_001290512)	TTS (NM_001290512)	-12362	NR_029457	654820	Mm.34441	NM_001039559	ENSMUSG00000072844	G530011O06Rik	-	RIKEN cDNA G530011O06 gene	ncRNA
Diff_Nuc19048	chr9	43935632	43935771	+	0	NA	Intergenic	FAM|SINE|Alu	-7040	NM_023061	84004	Mm.275003	NM_023061	ENSMUSG00000032135	Mcam	1-gicerin|AV025631|CD146|CD149|Muc18|s-endo|s-gicerin	melanoma cell adhesion molecule	protein-coding
Diff_Nuc1230	chr12	17581242	17581381	+	0	NA	Intergenic	Intergenic	29632	NM_013614	18263	Mm.34102	NM_013614	ENSMUSG00000011179	Odc1	ODC	ornithine decarboxylase, structural 1	protein-coding
Diff_Nuc11251	chr6	96383112	96383251	+	0	NA	intron (NM_182808, intron 2 of 4)	intron (NM_182808, intron 2 of 4)	-266982	NR_003643	78482	Mm.391486	NM_030107	ENSMUSG00000072878	1700123L14Rik	-	nucleoporin 50 pseudogene	pseudo
Diff_Nuc18572	chr1	181417122	181417261	+	0	NA	intron (NM_027188, intron 1 of 11)	B4|SINE|B4	30943	NM_027188	69726	Mm.222338	NM_027188	ENSMUSG00000055067	Smyd3	2410008A19Rik|Zmynd1	SET and MYND domain containing 3	protein-coding
Diff_Nuc5016	chr17	46254572	46254711	+	0	NA	intron (NM_026768, intron 1 of 5)	intron (NM_026768, intron 1 of 5)	6688	NM_026768	68565	Mm.287443	NM_026768	ENSMUSG00000023967	Mrps18a	1110004O20Rik|C79712	mitochondrial ribosomal protein S18A	protein-coding
Diff_Nuc13333	chr4	45259722	45259861	+	0	NA	intron (NM_001081172, intron 4 of 15)	intron (NM_001081172, intron 4 of 15)	-2929	NR_040666	78508	Mm.416908	NR_040666	ENSMUSG00000086284	Frmpd1os	2900093L17Rik	FERM and PDZ domain containing 1, opposite strand	ncRNA
Diff_Nuc4525	chr17	6994322	6994461	+	0	NA	Intergenic	Intergenic	-7262	NM_009510	22350	Mm.277812	NM_009510	ENSMUSG00000052397	Ezr	AW146364|R75297|Vil2|p81	ezrin	protein-coding
Diff_Nuc10926	chr6	58781972	58782111	+	0	NA	Intergenic	Intergenic	-1653	NM_028705	73998	Mm.191892	NM_028705	ENSMUSG00000029804	Herc3	5730409F18Rik|AI646603|mKIAA0032	hect domain and RLD 3	protein-coding
Diff_Nuc10909	chr6	55543942	55544081	+	0	NA	Intergenic	Lx5|LINE|L1	87246	NM_009717	11922	Mm.5106	NM_009717	ENSMUSG00000037984	Neurod6	Atoh2|Math-2|Math2|Nex|Nex1m|bHLHa2	neurogenic differentiation 6	protein-coding
Diff_Nuc13922	chr4	119841862	119842001	+	0	NA	Intergenic	Intergenic	8120	NM_007902	13615	Mm.284855	NM_007902	ENSMUSG00000028635	Edn2	ET-2|PPET2|VIC	endothelin 2	protein-coding
Diff_Nuc2040	chr12	117315832	117315971	+	0	NA	promoter-TSS (NM_009511)	promoter-TSS (NM_009511)	-295	NM_009511	22355	Mm.395245	NM_009511	ENSMUSG00000011171	Vipr2	VPAC2|VPAC2R|Vip2	vasoactive intestinal peptide receptor 2	protein-coding
Diff_Nuc16347	chr2	92020882	92021021	+	0	NA	Intergenic	B1_Mus1|SINE|Alu	-3388	NM_138755	192285	Mm.330408	NM_138755	ENSMUSG00000058318	Phf21a	80kDa|Bhc|Bhc80|D030065N23Rik|PFTF1	PHD finger protein 21A	protein-coding
Diff_Nuc2484	chr11	53672782	53672921	+	0	NA	promoter-TSS (NR_033332)	promoter-TSS (NR_033332)	-93	NR_033332	622459	Mm.479656	NR_033332	ENSMUSG00000081769	Gm12216	602-19-115|OTTMUSG00000005650	predicted gene 12216	ncRNA
Diff_Nuc13655	chr4	93282342	93282481	+	0	NA	Intergenic	Lx3_Mus|LINE|L1	-280209	NM_026954	69136	Mm.171558	NM_026954	ENSMUSG00000054000	Tusc1	2200001D17Rik|TSG-9	tumor suppressor candidate 1	protein-coding
Diff_Nuc11408	chr6	116405822	116405961	+	0	NA	intron (NM_009662, intron 1 of 13)	intron (NM_009662, intron 1 of 13)	5305	NM_009662	11689	Mm.41072	NM_009662	ENSMUSG00000025701	Alox5	5-LO|5-LOX|5LO|5LX|AI850497|F730011J02	arachidonate 5-lipoxygenase	protein-coding
Diff_Nuc14349	chr4	145616692	145616831	+	0	NA	Intergenic	(TTTA)n|Simple_repeat|Simple_repeat	-34405	NR_045468	67524	Mm.444300	NR_045468	ENSMUSG00000086046	1700095A21Rik	-	RIKEN cDNA 1700095A21 gene	ncRNA
Diff_Nuc9674	chr7	67033032	67033171	+	0	NA	Intergenic	Intergenic	-11191	NR_033779	64245		NR_033779	ENSMUSG00000096759	Snord116l2	Pwcr1l2	small nucleolar RNA, C/D box 116-like 2	snoRNA
Diff_Nuc12770	chr5	131433492	131433631	+	0	NA	intron (NM_145218, intron 6 of 10)	ORR1C1|LTR|MaLR	349831	NM_145218	212996	Mm.299204	NM_145218	ENSMUSG00000034040	Wbscr17	AA388321|E330012B09Rik	Williams-Beuren syndrome chromosome region 17 homolog (human)	protein-coding
Diff_Nuc2731	chr11	71073852	71073991	+	0	NA	non-coding (NR_027858, exon 4 of 13)	non-coding (NR_027858, exon 4 of 13)	24813	NR_027858	627984	Mm.390378	NM_001039234	ENSMUSG00000092528	Nlrp1c-ps	Nalp1c|Nlrp1c|OTTMUSG00000006090	NLR family, pyrin domain containing 1C, pseudogene	pseudo
Diff_Nuc12596	chr5	119399172	119399311	+	0	NA	Intergenic	Intergenic	-3107	NR_040694	74627	Mm.410828	NR_040694	ENSMUSG00000107144	4930413E15Rik	-	RIKEN cDNA 4930413E15 gene	ncRNA
Diff_Nuc9986	chr7	106440232	106440371	+	0	NA	intron (NM_001048167, intron 1 of 2)	intron (NM_001048167, intron 1 of 2)	23445	NM_001043355	17760	Mm.154087	NM_010837	ENSMUSG00000055407	Map6	2810411E12Rik|Map-6|Mtap6|STOP	microtubule-associated protein 6	protein-coding
Diff_Nuc8432	chr19	60781662	60781801	+	0	NA	Intergenic	Lx5|LINE|L1	-50159	NM_178421	332397	Mm.186390	NM_178421	ENSMUSG00000072437	Nanos1	NOS-1	nanos homolog 1 (Drosophila)	protein-coding
Diff_Nuc1716	chr12	86039372	86039511	+	0	NA	intron (NM_001033334, intron 1 of 3)	CpG	316	NM_001033334	627191	Mm.152484	NM_001033334	ENSMUSG00000071234	Syndig1l	DSPC1|Gm261|Tmem90a	synapse differentiation inducing 1 like	protein-coding
Diff_Nuc1551	chr12	70194412	70194551	+	0	NA	Intergenic	Intergenic	65692	NM_009093	20090	Mm.379006	NM_009093	ENSMUSG00000034892	Rps29	-	ribosomal protein S29	protein-coding
Diff_Nuc20149	chr8	32764892	32765031	+	0	NA	Intergenic	Lx7|LINE|L1	263714	NM_178591	211323	Mm.153432	NM_178591	ENSMUSG00000062991	Nrg1	6030402G23Rik|ARIA|D230005F13Rik|GGF|GGFII|HRG|HRGalpha|Hgl|NDF|SMDF	neuregulin 1	protein-coding
Diff_Nuc11955	chr5	37099472	37099611	+	0	NA	Intergenic	Intergenic	-12281	NM_001081232	320661	Mm.26480	NM_177221	ENSMUSG00000029190	D5Ertd579e	9030221A05Rik|A930018H20Rik|Kiaa0232	DNA segment, Chr 5, ERATO Doi 579, expressed	protein-coding
Diff_Nuc11614	chr6	142322102	142322241	+	0	NA	intron (NM_023042, intron 5 of 14)	RSINE1|SINE|B4	13436	NM_001204906	19691	Mm.27407	NM_023042	ENSMUSG00000030243	Recql	RecQ1	RecQ protein-like	protein-coding
Diff_Nuc17255	chr1	4838242	4838381	+	0	NA	Intergenic	ORR1D2|LTR|MaLR	-9464	NM_001159750	21399	Mm.207263	NM_011541	ENSMUSG00000033813	Tcea1	S-II	transcription elongation factor A (SII) 1	protein-coding
Diff_Nuc2580	chr11	60327562	60327701	+	0	NA	intron (NM_010862, intron 55 of 64)	intron (NM_010862, intron 55 of 64)	-23554	NM_172943	268420	Mm.262056	NM_172943	ENSMUSG00000042650	Alkbh5	AW050020|AW215868|Abh5|E130207K11|Ofoxd	alkB homolog 5, RNA demethylase	protein-coding
Diff_Nuc14302	chr4	141467182	141467321	+	0	NA	intron (NM_177868, intron 24 of 31)	L2a|LINE|L2	-36416	NM_025994	27984	Mm.395598	NM_025994	ENSMUSG00000040659	Efhd2	2600015J22Rik|AA408606|D4Wsu27e	EF hand domain containing 2	protein-coding
Diff_Nuc18208	chr1	136982792	136982931	+	0	NA	intron (NM_001033409, intron 1 of 17)	intron (NM_001033409, intron 1 of 17)	18992	NM_001033409	329252	Mm.279594	NM_001033409	ENSMUSG00000042793	Lgr6	A530037C04Rik|D830026M09	leucine-rich repeat-containing G protein-coupled receptor 6	protein-coding
Diff_Nuc13474	chr4	59824472	59824611	+	0	NA	intron (NM_172468, intron 1 of 8)	MLT1K|LTR|MaLR	6019	NM_172468	209131	Mm.259705	NM_172468	ENSMUSG00000028385	Snx30	4732481H14Rik|C030041J06Rik	sorting nexin family member 30	protein-coding
Diff_Nuc1081	chr13	114600542	114600681	+	0	NA	intron (NM_172595, intron 1 of 4)	MLT1H1|LTR|MaLR	15895	NM_172595	218639	Mm.79837	NM_172595	ENSMUSG00000042348	Arl15	A430036I03|Arfrp2|C230032K13Rik	ADP-ribosylation factor-like 15	protein-coding
Diff_Nuc18444	chr1	165305692	165305831	+	0	NA	Intergenic	CT-rich|Low_complexity|Low_complexity	28039	NM_001313738	98376	Mm.32901	NM_178883	ENSMUSG00000040124	Gorab	NTKL-BP1|SCYL1-BP1|Scyl1bp1	golgin, RAB6-interacting	protein-coding
Diff_Nuc14698	chr3	30143502	30143641	+	0	NA	intron (NM_021442, intron 1 of 2)	intron (NM_021442, intron 1 of 2)	-231445	NM_007963	14013	Mm.56965	NM_007963	ENSMUSG00000027684	Mecom	D630039M04Rik|Evi-1|Evi1|Jbo|Mds|Mds1|Mds1-Evi1|Prdm3|Znfpr1b1	MDS1 and EVI1 complex locus	protein-coding
Diff_Nuc12931	chr5	141569342	141569481	+	0	NA	Intergenic	ZP3AR|Satellite|Satellite	-92861	NM_175362	108723	Mm.46187	NM_175362	ENSMUSG00000036526	Card11	0610008L17Rik|2410011D02Rik|BIMP3|CARMA1	caspase recruitment domain family, member 11	protein-coding
Diff_Nuc14961	chr3	71185392	71185531	+	0	NA	Intergenic	L1Md_F2|LINE|L1	-574248	NR_040556	625901	Mm.366028	NR_040556	ENSMUSG00000097252	Gm6634	EG625901	predicted gene 6634	ncRNA
Diff_Nuc3065	chr11	97009772	97009911	+	0	NA	intron (NM_198100, intron 3 of 8)	intron (NM_198100, intron 3 of 8)	1185	NM_198100	73174	Mm.27882	NM_198100	ENSMUSG00000038517	Tbkbp1	3110043L15Rik|ProSAPiP2|SINTBAD	TBK1 binding protein 1	protein-coding
Diff_Nuc2415	chr11	49027702	49027841	+	0	NA	intron (NM_009562, intron 3 of 3)	intron (NM_009562, intron 3 of 3)	10769	NM_009562	22720	Mm.16650	NM_009562	ENSMUSG00000046311	Zfp62	-	zinc finger protein 62	protein-coding
Diff_Nuc18160	chr1	135057142	135057281	+	0	NA	Intergenic	Intergenic	29468	NM_133819	108954	Mm.293628	NM_133819	ENSMUSG00000046062	Ppp1r15b	1810033K10Rik|AI606441|C530022L24Rik|CReP	protein phosphatase 1, regulatory (inhibitor) subunit 15b	protein-coding
Diff_Nuc18145	chr1	134309442	134309581	+	0	NA	Intergenic	RSINE1|SINE|B4	-4519	NM_172516	213452	Mm.257120	NM_172516	ENSMUSG00000042046	Dstyk	A930019K20Rik|C430014H23Rik|C820013G01|Ripk5	dual serine/threonine and tyrosine protein kinase	protein-coding
Diff_Nuc4900	chr17	34842292	34842431	+	0	NA	intron (NM_031176, intron 16 of 32)	RMER15-int|LTR|ERVL	34881	NM_031176	81877	Mm.290527	NM_031176	ENSMUSG00000033327	Tnxb	Tn-mhc|Tnx	tenascin XB	protein-coding
Diff_Nuc8524	chr18	16496262	16496401	+	0	NA	Intergenic	Intergenic	471424	NM_007664	12558	Mm.257437	NM_007664	ENSMUSG00000024304	Cdh2	CDHN|N-CAD|Ncad	cadherin 2	protein-coding
Diff_Nuc16032	chr2	38386292	38386431	+	0	NA	intron (NM_001159631, intron 1 of 9)	intron (NM_001159631, intron 1 of 9)	18965	NM_001159631	59126	Mm.143818	NM_021606	ENSMUSG00000026749	Nek6	1300007C09Rik	NIMA (never in mitosis gene a)-related expressed kinase 6	protein-coding
Diff_Nuc1809	chr12	99237922	99238061	+	0	NA	Intergenic	Intergenic	259678	NM_008079	14420	Mm.5120	NM_008079	ENSMUSG00000021003	Galc	2310068B06Rik|A930008M05Rik|AW212969|AW413532|Gacy|twi|twitcher	galactosylceramidase	protein-coding
Diff_Nuc20012	chr8	14989982	14990121	+	0	NA	intron (NM_172751, intron 26 of 28)	L1M3|LINE|L1	-20974	NM_029116	74901	Mm.46675	NM_029116	ENSMUSG00000055675	Kbtbd11	2900016B01Rik|4930465M17Rik|mKIAA0711	kelch repeat and BTB (POZ) domain containing 11	protein-coding
Diff_Nuc12871	chr5	138288872	138289011	+	0	NA	Intergenic	Intergenic	10336	NM_133209	170741	Mm.347593	NM_133209	ENSMUSG00000066684	Pilrb1	FDFACT|Fdact|Pilrb	paired immunoglobin-like type 2 receptor beta 1	protein-coding
Diff_Nuc10901	chr6	54924912	54925051	+	0	NA	Intergenic	Intergenic	-2375	NM_172729	107607	Mm.28498	NM_172729	ENSMUSG00000038058	Nod1	C230079P11|Card4|F830007N14Rik|Nlrc1	nucleotide-binding oligomerization domain containing 1	protein-coding
Diff_Nuc10705	chr6	33407762	33407901	+	0	NA	intron (NM_009148, intron 9 of 17)	MLT2B1|LTR|ERVL	208681	NM_009148	20336	Mm.265512	NM_009148	ENSMUSG00000029763	Exoc4	C78892|Sec8|Sec8l1	exocyst complex component 4	protein-coding
Diff_Nuc7843	chr14	123464492	123464631	+	0	NA	Intergenic	Intergenic	-82078	NM_028651	70551	Mm.271988	NM_028651	ENSMUSG00000041594	Tmtc4	4930403J22Rik|5730419O14Rik	transmembrane and tetratricopeptide repeat containing 4	protein-coding
Diff_Nuc3277	chr11	111524862	111525001	+	0	NA	Intergenic	Intergenic	597453	NM_008425	16518	Mm.4951	NM_008425	ENSMUSG00000041695	Kcnj2	IRK1|Kcnf1|Kir2.1	potassium inwardly-rectifying channel, subfamily J, member 2	protein-coding
Diff_Nuc12482	chr5	112563962	112564101	+	0	NA	Intergenic	Intergenic	-71752	NR_045377	75569	Mm.243721	NR_045377	ENSMUSG00000101683	1700028D13Rik	-	RIKEN cDNA 1700028D13 gene	ncRNA
Diff_Nuc11316	chr6	106233622	106233761	+	0	NA	intron (NM_001109749, intron 5 of 25)	intron (NM_001109749, intron 5 of 25)	164932	NM_001109751	269784	Mm.321683	NM_173004	ENSMUSG00000064293	Cntn4	9630050B05|Axcam|BIG-2	contactin 4	protein-coding
Diff_Nuc4647	chr17	15219362	15219501	+	0	NA	Intergenic	RLTR31_Mm|LTR|ERVK	29408	NM_001034891	381062	Mm.393767	NM_183133	ENSMUSG00000036552	Ermard	2210404J11Rik|2410011O22Rik|AI448938	ER membrane associated RNA degradation	protein-coding
Diff_Nuc11608	chr6	141187672	141187811	+	0	NA	Intergenic	Intergenic	-10049	NM_018779	54611	Mm.103728	NM_018779	ENSMUSG00000041741	Pde3a	A930022O17Rik|C87899	phosphodiesterase 3A, cGMP inhibited	protein-coding
Diff_Nuc12548	chr5	115403572	115403711	+	0	NA	intron (NM_009327, intron 5 of 9)	intron (NM_009327, intron 5 of 9)	11430	NM_028211	72357	Mm.292672	NM_028211	ENSMUSG00000029559	2210016L21Rik	-	RIKEN cDNA 2210016L21 gene	protein-coding
Diff_Nuc3115	chr11	100019572	100019711	+	0	NA	Intergenic	Intergenic	-12401	NM_008471	16669	Mm.439699	NM_008471	ENSMUSG00000020911	Krt19	AI663979|CK-19|EndoC|K19|Krt-1.19|Krt1-19	keratin 19	protein-coding
Diff_Nuc15999	chr2	35833342	35833481	+	0	NA	intron (NM_029774, intron 1 of 9)	intron (NM_029774, intron 1 of 9)	1733	NM_029774	74410	Mm.21591	NM_028921	ENSMUSG00000026885	Ttll11	4932702F08Rik|4933424A20Rik|AU043211|D2Ertd624e	tubulin tyrosine ligase-like family, member 11	protein-coding
Diff_Nuc11097	chr6	85382057	85382196	+	0	NA	intron (NM_144918, intron 1 of 12)	CpG	156	NM_144918	232187	Mm.219946	NM_144918	ENSMUSG00000033706	Smyd5	AW536703|NN8-4AG|Rai15|Rrg1	SET and MYND domain containing 5	protein-coding
Diff_Nuc3507	chr11	120480552	120480691	+	0	NA	intron (NM_153056, intron 9 of 9)	intron (NM_153056, intron 9 of 9)	-1362	NM_001347615	68671	Mm.21439	NM_024229	ENSMUSG00000025137	Pcyt2	1110033E03Rik|ET	phosphate cytidylyltransferase 2, ethanolamine	protein-coding
Diff_Nuc15209	chr3	101910222	101910361	+	0	NA	intron (NM_009814, intron 1 of 10)	MTA_Mm-int|LTR|MaLR	19913	NM_009814	12373	Mm.15343	NM_009814	ENSMUSG00000027861	Casq2	AA033488|AW146219|Csq2|ESTM52|cCSQ	calsequestrin 2	protein-coding
Diff_Nuc8180	chr19	35841682	35841821	+	0	NA	Intergenic	RLTR12A|LTR|ERVK	290099	NM_001347442	15566	Mm.254266	NM_008315	ENSMUSG00000024798	Htr7	5-HT7	5-hydroxytryptamine (serotonin) receptor 7	protein-coding
Diff_Nuc6447	chr15	59623142	59623281	+	0	NA	intron (NR_045076, intron 1 of 3)	intron (NR_045076, intron 1 of 3)	3303	NR_045076	100503021	Mm.402924	NR_045076		Gm19510	-	predicted gene, 19510	ncRNA
Diff_Nuc5576	chr16	18179292	18179431	+	0	NA	Intergenic	Intergenic	-14098	NR_105785	102465189		NR_105785	ENSMUSG00000099293	Mir6366	Gm27720|mmu-mir-6366	microRNA 6366	ncRNA
Diff_Nuc20393	chr8	73213772	73213911	+	0	NA	Intergenic	Intergenic	-7797	NM_010592	16478	Mm.419851	NM_010592	ENSMUSG00000071076	Jund	Jund1	jun D proto-oncogene	protein-coding
Diff_Nuc12199	chr5	74038992	74039131	+	0	NA	promoter-TSS (NM_011890)	promoter-TSS (NM_011890)	-91	NM_011890	24051	Mm.89310	NM_011890	ENSMUSG00000029156	Sgcb	43kDa|AI747103|AI844814|beta-SG	sarcoglycan, beta (dystrophin-associated glycoprotein)	protein-coding
Diff_Nuc6720	chr15	82648242	82648381	+	0	NA	intron (NM_001114140, intron 3 of 5)	intron (NM_001114140, intron 3 of 5)	-23636	NM_029562	76279	Mm.439931	NM_029562	ENSMUSG00000022445	Cyp2d26	1300006E06Rik	cytochrome P450, family 2, subfamily d, polypeptide 26	protein-coding
Diff_Nuc4292	chr10	100667022	100667161	+	0	NA	Intergenic	Lx2B|LINE|L1	-477030	NM_001205098	67569	Mm.25252	NM_026243	ENSMUSG00000019888	Mgat4c	9130411I17Rik|GntIVh	MGAT4 family, member C	protein-coding
Diff_Nuc19807	chr9	118970532	118970671	+	0	NA	exon (NM_001164567, exon 6 of 20)	exon (NM_001164567, exon 6 of 20)	8705	NM_001164567	22351	Mm.83817	NM_011700	ENSMUSG00000038775	Vill	Villp	villin-like	protein-coding
Diff_Nuc3156	chr11	101702302	101702441	+	0	NA	Intergenic	PB1D10|SINE|Alu	53297	NM_010791	17285	Mm.3404	NM_010791	ENSMUSG00000001493	Meox1	AI385561|D330041M02Rik|Mox-1|Mox1	mesenchyme homeobox 1	protein-coding
Diff_Nuc184	chr13	4135542	4135681	+	0	NA	intron (NM_001346535, intron 6 of 7)	intron (NM_001346535, intron 6 of 7)	14266	NM_134066	105349	Mm.41337	NM_134066	ENSMUSG00000021214	Akr1c18	AW146047	aldo-keto reductase family 1, member C18	protein-coding
Diff_Nuc17120	chr2	168525792	168525931	+	0	NA	intron (NM_015731, intron 4 of 27)	intron (NM_015731, intron 4 of 27)	33978	NM_001289445	11981	Mm.330819	NM_015731	ENSMUSG00000027546	Atp9a	IIa	ATPase, class II, type 9A	protein-coding
Diff_Nuc3317	chr11	113835652	113835791	+	0	NA	intron (NM_172800, intron 1 of 44)	intron (NM_172800, intron 1 of 44)	91544	NM_172800	237979	Mm.130504	NM_172800	ENSMUSG00000041592	Sdk2	4632412F08Rik|5330435L01Rik|Sdk-2|mKIAA1514	sidekick cell adhesion molecule 2	protein-coding
Diff_Nuc10215	chr7	128842112	128842251	+	0	NA	intron (NM_001033173, intron 1 of 15)	intron (NM_001033173, intron 1 of 15)	8586	NM_001033173	76179	Mm.122538	NM_001033173	ENSMUSG00000063317	Usp31	6330567E21Rik|mKIAA1203	ubiquitin specific peptidase 31	protein-coding
Diff_Nuc19598	chr9	103452862	103453001	+	0	NA	intron (NM_178638, intron 3 of 5)	intron (NM_178638, intron 3 of 5)	-6489	NR_040764	319215	Mm.425597	NR_040764	ENSMUSG00000099616	4932413F04Rik	-	RIKEN cDNA 4932413F04 gene	ncRNA
Diff_Nuc9639	chr7	58685292	58685431	+	0	NA	Intergenic	MTA_Mm-int|LTR|MaLR	-81038	NR_073508	233246	Mm.254431	NM_177694	ENSMUSG00000055489	Ano5	9330162L24|Gdd1|Tmem16e	anoctamin 5	protein-coding
Diff_Nuc8983	chr18	75115322	75115461	+	0	NA	intron (NM_010720, intron 2 of 9)	intron (NM_010720, intron 2 of 9)	5526	NM_010720	16891	Mm.299647	NM_010720	ENSMUSG00000053846	Lipg	3110013K01Rik|EL|lipase|mEDL	lipase, endothelial	protein-coding
Diff_Nuc8975	chr18	74286792	74286931	+	0	NA	Intergenic	Intergenic	-62258	NM_172632	225724	Mm.254517	NM_172632	ENSMUSG00000024558	Mapk4	A330097D03Rik|Erk3|Prkm4|p63Mapk	mitogen-activated protein kinase 4	protein-coding
Diff_Nuc10209	chr7	128410652	128410791	+	0	NA	Intergenic	L1M2|LINE|L1	-125089	NM_001081327	195646	Mm.247449	NM_177575	ENSMUSG00000046321	Hs3st2	6430516N12Rik|A830061E14Rik|AW491345	heparan sulfate (glucosamine) 3-O-sulfotransferase 2	protein-coding
Diff_Nuc13129	chr4	12921072	12921211	+	0	NA	Intergenic	L1_Mus2|LINE|L1	87157	NM_001171801	208820	Mm.12057	NM_173746	ENSMUSG00000055963	Triqk	C130086A10|Gm11818|OTTMUSG00000004461	triple QxxK/R motif containing	protein-coding
Diff_Nuc3880	chr10	58995002	58995141	+	0	NA	intron (NM_001033259, intron 1 of 7)	intron (NM_001033259, intron 1 of 7)	84369	NM_001033259	215999	Mm.296470	NM_001033259	ENSMUSG00000009647	Mcu	2010012O16Rik|AV064928|C10orf42|Ccdc109a|D130073L02Rik|Gm64	mitochondrial calcium uniporter	protein-coding
Diff_Nuc8769	chr18	50500512	50500651	+	0	NA	Intergenic	RMER13A|LTR|ERVK	62558	NM_001004061	225497	Mm.329435	NM_001004061	ENSMUSG00000035420	Fam170a	Gm93|Znfd	family with sequence similarity 170, member A	protein-coding
Diff_Nuc10886	chr6	53555292	53555431	+	0	NA	intron (NM_172728, intron 2 of 6)	intron (NM_172728, intron 2 of 6)	31993	NM_172728	231991	Mm.227444	NM_172728	ENSMUSG00000053007	Creb5	9430076C15Rik|CRE-BPa|Crebpa|D430026C09Rik	cAMP responsive element binding protein 5	protein-coding
Diff_Nuc11795	chr5	24242922	24243061	+	0	NA	Intergenic	ORR1B1|LTR|MaLR	-6493	NM_001081441	269633	Mm.392539	NM_026621	ENSMUSG00000055235	Wdr86	2810046M22Rik|BC059069	WD repeat domain 86	protein-coding
Diff_Nuc2219	chr11	20110242	20110381	+	0	NA	intron (NM_008996, intron 1 of 5)	ID_B1|SINE|B4	8706	NM_008996	19324	Mm.271944	NM_008996	ENSMUSG00000020149	Rab1a	Gtbp|Rab-1|Rab1|Ypt1|mKIAA3012	RAB1A, member RAS oncogene family	protein-coding
Diff_Nuc14048	chr4	128366612	128366751	+	0	NA	intron (NM_018774, intron 1 of 14)	(TG)n|Simple_repeat|Simple_repeat	699	NM_018774	54383	Mm.473738	NM_018774	ENSMUSG00000028796	Phc2	A3galt2|AA415044|D130050K19Rik|D4Ertd810e|Edr2|Mph2|p36	polyhomeotic-like 2 (Drosophila)	protein-coding
Diff_Nuc9252	chr7	20007642	20007781	+	0	NA	promoter-TSS (NR_073014)	promoter-TSS (NR_073014)	-945	NR_073015	100503495	Mm.410762	NR_073014	ENSMUSG00000040705	A930016O22Rik	-	RIKEN cDNA A930016O22 gene	ncRNA
Diff_Nuc8086	chr19	23883682	23883821	+	0	NA	intron (NM_177034, intron 1 of 12)	intron (NM_177034, intron 1 of 12)	50385	NM_177034	319924	Mm.22879	NM_177034	ENSMUSG00000024897	Apba1	6430513E09Rik|Lin-10|Mint|Mint1|Urop11|X11|X11alpha	amyloid beta (A4) precursor protein binding, family A, member 1	protein-coding
Diff_Nuc2094	chr11	3304297	3304436	+	0	NA	intron (NM_010718, intron 1 of 15)	intron (NM_010718, intron 1 of 15)	4875	NM_010718	16886	Mm.124176	NM_010718	ENSMUSG00000020451	Limk2	Limk-2|whe	LIM motif-containing protein kinase 2	protein-coding
Diff_Nuc15243	chr3	106900802	106900941	+	0	NA	Intergenic	Intergenic	-3614	NM_008417	16490	Mm.39285	NM_008417	ENSMUSG00000040724	Kcna2	Akr6a4|ENSMUSG00000074335|Gm10672|Kca1-2|Kv1.2|Mk-2	potassium voltage-gated channel, shaker-related subfamily, member 2	protein-coding
Diff_Nuc16029	chr2	38368932	38369071	+	0	NA	intron (NM_001159631, intron 1 of 9)	intron (NM_001159631, intron 1 of 9)	1605	NM_001159631	59126	Mm.143818	NM_021606	ENSMUSG00000026749	Nek6	1300007C09Rik	NIMA (never in mitosis gene a)-related expressed kinase 6	protein-coding
Diff_Nuc17674	chr1	72639082	72639221	+	0	NA	intron (NM_018817, intron 5 of 16)	intron (NM_018817, intron 5 of 16)	9326	NM_018817	54380	Mm.274232	NM_018817	ENSMUSG00000039354	Smarcal1	6030401P21Rik|AI851716|Mharp	SWI/SNF related matrix associated, actin dependent regulator of chromatin, subfamily a-like 1	protein-coding
Diff_Nuc8067	chr19	21598952	21599091	+	0	NA	Intergenic	RNLTR23|LTR|ERVK	-51870	NM_010266	14544	Mm.45054	NM_010266	ENSMUSG00000058624	Gda	AU015411|AW047581|GAH	guanine deaminase	protein-coding
Diff_Nuc6624	chr15	78255452	78255591	+	0	NA	Intergenic	Intergenic	-3473	NM_001289672	72844	Mm.390816	NM_001081367	ENSMUSG00000033287	Kctd17	2900008M13Rik|AA414907|AW742389|N28155	potassium channel tetramerisation domain containing 17	protein-coding
Diff_Nuc4275	chr10	96015782	96015921	+	0	NA	Intergenic	Intergenic	-63784	NM_007569	12226	Mm.23811	NM_007569	ENSMUSG00000036478	Btg1	AI426953|AW546738	B cell translocation gene 1, anti-proliferative	protein-coding
Diff_Nuc2757	chr11	72739722	72739861	+	0	NA	3' UTR (NM_001045536, exon 55 of 55)	3' UTR (NM_001045536, exon 55 of 55)	-34880	NM_016745	53313	Mm.6306	NM_016745	ENSMUSG00000020788	Atp2a3	SERCA3b|Serca3	ATPase, Ca++ transporting, ubiquitous	protein-coding
Diff_Nuc20659	chr8	97702052	97702191	+	0	NA	Intergenic	Intergenic	-35681	NM_001145831	16582	Mm.378951	NM_010631	ENSMUSG00000031788	Kifc3	AI325457|BB123200	kinesin family member C3	protein-coding
Diff_Nuc7818	chr14	121153352	121153491	+	0	NA	Intergenic	RMER17B|LTR|ERVK	-156995	NM_023579	70572	Mm.221452	NM_023579	ENSMUSG00000030662	Ipo5	1110011C18Rik|5730478E03Rik|AA409333|C76941|IMB3|Kpnb3|Ranbp5	importin 5	protein-coding
Diff_Nuc19990	chr8	13559402	13559541	+	0	NA	intron (NM_025601, intron 2 of 8)	intron (NM_025601, intron 2 of 8)	2990	NM_025601	66501	Mm.46136	NM_025601	ENSMUSG00000031452	1700029H14Rik	-	RIKEN cDNA 1700029H14 gene	protein-coding
Diff_Nuc7394	chr14	55607222	55607361	+	0	NA	exon (NM_080728, exon 16 of 41)	exon (NM_080728, exon 16 of 41)	6095	NM_080728	140781	Mm.457983	NM_080728	ENSMUSG00000053093	Myh7	B-MHC|MyHC-I|Myhc-b|Myhcb|beta-MHC	myosin, heavy polypeptide 7, cardiac muscle, beta	protein-coding
Diff_Nuc13945	chr4	121793932	121794071	+	0	NA	Intergenic	L1Md_F2|LINE|L1	-499271	NM_001099309	666927	Mm.465133	NM_001099309	ENSMUSG00000078575	Gm12887	OTTMUSG00000008910	predicted gene 12887	protein-coding
Diff_Nuc18024	chr1	118361662	118361801	+	0	NA	intron (NM_001077425, intron 19 of 23)	intron (NM_001077425, intron 19 of 23)	780017	NM_001077425	636808	Mm.101576	NM_001077425	ENSMUSG00000070695	Cntnap5a	Caspr5-1|EG636808	contactin associated protein-like 5A	protein-coding
Diff_Nuc17224	chr2	180387222	180387361	+	0	NA	Intergenic	B1_Mus2|SINE|Alu	-9895	NM_178254	277353	Mm.473700	NM_178254	ENSMUSG00000038932	Tcfl5	AV260129|Figlb|Sosf1	transcription factor-like 5 (basic helix-loop-helix)	protein-coding
Diff_Nuc4498	chr17	5014642	5014781	+	0	NA	intron (NM_001085355, intron 1 of 19)	intron (NM_001085355, intron 1 of 19)	19637	NM_001085355	239985	Mm.133401	NM_001085355	ENSMUSG00000069729	Arid1b	8030481M12|9330189K18Rik|AI836955|Ardi1b|B230217J03Rik|mKIAA1235	AT rich interactive domain 1B (SWI-like)	protein-coding
Diff_Nuc10170	chr7	125458502	125458641	+	0	NA	Intergenic	RLTRETN_Mm|LTR|ERVK	71150	NR_027879	67745	Mm.483404	NM_183267	ENSMUSG00000055159	4930583K01Rik	-	RIKEN cDNA 4930583K01 gene	ncRNA
Diff_Nuc6250	chr15	28125852	28125991	+	0	NA	Intergenic	Intergenic	-7600	NM_133365	110082	Mm.248464	NM_133365	ENSMUSG00000022262	Dnah5	AU022615|Dnahc5|Mdnah5|b2b1134Clo|b2b1154Clo|b2b1537Clo|b2b1565Clo|b2b601Clo|mKIAA1603	dynein, axonemal, heavy chain 5	protein-coding
Diff_Nuc14381	chr4	147565032	147565171	+	0	NA	Intergenic	Intergenic	30324	NM_176848	230904	Mm.262287	NM_176848	ENSMUSG00000041556	Fbxo2	FBG1|FBX2|Fbs1|Fbs2|NFB42|Prpl4	F-box protein 2	protein-coding
Diff_Nuc1389	chr12	36836212	36836351	+	0	NA	intron (NM_025840, intron 8 of 11)	intron (NM_025840, intron 8 of 11)	19315	NR_003649	432649	Mm.347860	NM_001014396	ENSMUSG00000059301	Gm5434	EG432649	ubiquitin-conjugating enzyme E2F (putative) pseudogene	pseudo
Diff_Nuc8801	chr18	55057232	55057371	+	0	NA	exon (NM_175751, exon 5 of 10)	exon (NM_175751, exon 5 of 10)	92533	NM_175751	269023	Mm.192984	NM_175751	ENSMUSG00000052713	Zfp608	4932417D18Rik|D430007A19Rik|Znf608	zinc finger protein 608	protein-coding
Diff_Nuc894	chr13	95814262	95814401	+	0	NA	intron (NM_001346782, intron 14 of 21)	intron (NM_001346782, intron 14 of 21)	68032	NM_172590	218460	Mm.33856	NM_172590	ENSMUSG00000042015	Wdr41	B830029I03Rik|MSTP048	WD repeat domain 41	protein-coding
Diff_Nuc797	chr13	76518532	76518671	+	0	NA	Intergenic	Intergenic	-3808	NM_030174	78771	Mm.316249	NM_030174	ENSMUSG00000021596	Mctp1	2810465F10Rik	multiple C2 domains, transmembrane 1	protein-coding
Diff_Nuc12780	chr5	132133652	132133791	+	0	NA	intron (NM_177047, intron 5 of 19)	intron (NM_177047, intron 5 of 19)	-222418	NR_040704	75369	Mm.389696	NR_040704	ENSMUSG00000105773	4930563F08Rik	-	RIKEN cDNA 4930563F08 gene	ncRNA
Diff_Nuc12891	chr5	139908172	139908311	+	0	NA	intron (NM_028469, intron 2 of 4)	intron (NM_028469, intron 2 of 4)	9108	NM_029771	76854	Mm.389706	NM_029771	ENSMUSG00000053647	Gper1	6330420K13Rik|CMKRL2|Ceprl|FEG-1|GPCR-Br|Gper|Gpr30	G protein-coupled estrogen receptor 1	protein-coding
Diff_Nuc7180	chr14	31997982	31998121	+	0	NA	intron (NM_001347583, intron 13 of 13)	intron (NM_001347583, intron 13 of 13)	-16224	NM_138672	192187	Mm.220821	NM_138672	ENSMUSG00000042286	Stab1	FEEL-1|FELE-1|MFEEL-1|MS-1|STAB-1|mKIAA0246	stabilin 1	protein-coding
Diff_Nuc19943	chr8	11300822	11300961	+	0	NA	intron (NR_133670, intron 1 of 52)	intron (NR_133670, intron 1 of 52)	-11914	NM_009932	12827	Mm.181021	NM_009932	ENSMUSG00000031503	Col4a2	Col4a-2	collagen, type IV, alpha 2	protein-coding
Diff_Nuc7488	chr14	63601332	63601471	+	0	NA	intron (NM_001037751, intron 1 of 1)	L2|LINE|L2	1946	NM_001037751	432867	Mm.99387	NM_001037751	ENSMUSG00000075574	Defb48	Defb42|EG432867	defensin beta 48	protein-coding
Diff_Nuc18689	chr1	192271372	192271511	+	0	NA	Intergenic	Intergenic	-276882	NM_008937	19130	Mm.132579	NM_008937	ENSMUSG00000010175	Prox1	A230003G05Rik	prospero homeobox 1	protein-coding
Diff_Nuc3792	chr10	43347022	43347161	+	0	NA	intron (NR_033558, intron 2 of 2)	MLT2B5|LTR|ERVL	33858	NR_033558	414125	Mm.244305	NR_033558	ENSMUSG00000075184	F830002L21Rik	F930017D23Rik	RIKEN cDNA F830002L21 gene	ncRNA
Diff_Nuc8840	chr18	58525512	58525651	+	0	NA	Intergenic	L1Md_A|LINE|L1	-156001	NM_010181	14119	Mm.20271	NM_010181	ENSMUSG00000024598	Fbn2	BC063774|Fib-2|mKIAA4226|sne|sy	fibrillin 2	protein-coding
Diff_Nuc5572	chr16	17926372	17926511	+	0	NA	intron (NM_153150, intron 6 of 8)	intron (NM_153150, intron 6 of 8)	1871	NM_153150	13358	Mm.229291	NM_153150	ENSMUSG00000003528	Slc25a1	1300019P08Rik|2610100G11Rik|AI194714|Ctp|Dgsj|Slc20a3	solute carrier family 25 (mitochondrial carrier, citrate transporter), member 1	protein-coding
Diff_Nuc18976	chr9	38194272	38194411	+	0	NA	Intergenic	L1_Mus2|LINE|L1	8873	NM_207553	404313	Mm.377731	NM_207553	ENSMUSG00000096757	Olfr251	MOR170-15	olfactory receptor 251	protein-coding
Diff_Nuc15429	chr3	132905432	132905571	+	0	NA	Intergenic	Intergenic	-7648	NM_029953	77669	Mm.98630	NM_029953	ENSMUSG00000040969	Arhgef38	9130221D24Rik|D630013G24Rik	Rho guanine nucleotide exchange factor (GEF) 38	protein-coding
Diff_Nuc15248	chr3	107256172	107256311	+	0	NA	intron (NM_145922, intron 1 of 3)	intron (NM_145922, intron 1 of 3)	5575	NM_145922	99738	Mm.101976	NM_145922	ENSMUSG00000027895	Kcnc4	AI850292|KSHIIIC|Kcr2-4|Kv3.4	potassium voltage gated channel, Shaw-related subfamily, member 4	protein-coding
Diff_Nuc14636	chr3	19918432	19918571	+	0	NA	intron (NM_001146324, intron 8 of 8)	intron (NM_001146324, intron 8 of 8)	16809	NM_001146323	12807	Mm.291533	NM_080634	ENSMUSG00000027615	Hps3	coa	Hermansky-Pudlak syndrome 3	protein-coding
Diff_Nuc15210	chr3	102134442	102134581	+	0	NA	Intergenic	Intergenic	68183	NR_040391	319951	Mm.225196	NR_040391	ENSMUSG00000105891	A230001M10Rik	-	RIKEN cDNA A230001M10 gene	ncRNA
Diff_Nuc9224	chr7	18353652	18353791	+	0	NA	Intergenic	RLTR10-int|LTR|ERVK	-44310	NM_025957	67084	Mm.33709	NM_025957	ENSMUSG00000023185	Ceacam14	1600021E03Rik|1600025E09Rik|AV033953	carcinoembryonic antigen-related cell adhesion molecule 14	protein-coding
Diff_Nuc19820	chr9	119852892	119853031	+	0	NA	exon (NM_028735, exon 6 of 29)	exon (NM_028735, exon 6 of 29)	6237	NM_028735	74052	Mm.189573	NM_028735	ENSMUSG00000032514	Ttc21a	4921538N17Rik|AA387572|Thm2	tetratricopeptide repeat domain 21A	protein-coding
Diff_Nuc7567	chr14	69986732	69986871	+	0	NA	Intergenic	Intergenic	-22482	NM_033325	94352	Mm.116714	NM_033325	ENSMUSG00000034205	Loxl2	1110004B06Rik|4930526G11Rik|9430067E15Rik	lysyl oxidase-like 2	protein-coding
Diff_Nuc16782	chr2	147957342	147957481	+	0	NA	Intergenic	Lx2|LINE|L1	-84706	NM_010446	15376	Mm.938	NM_010446	ENSMUSG00000037025	Foxa2	HNF3-beta|HNF3beta|Hnf-3b|Hnf3b|Tcf-3b|Tcf3b	forkhead box A2	protein-coding
Diff_Nuc19264	chr9	62175122	62175261	+	0	NA	Intergenic	ORR1A3-int|LTR|MaLR	-13959	NM_009672	11737	Mm.269088	NM_009672	ENSMUSG00000032249	Anp32a	Anp32|I1PP2A|LANP|PHAP1|W91701|pp32	acidic (leucine-rich) nuclear phosphoprotein 32 family, member A	protein-coding
Diff_Nuc14056	chr4	128702402	128702541	+	0	NA	Intergenic	Intergenic	32003	NM_001033966	11637	Mm.29460	NM_016895	ENSMUSG00000028792	Ak2	Ak-2|D4Ertd220e	adenylate kinase 2	protein-coding
Diff_Nuc6091	chr16	97130972	97131111	+	0	NA	intron (NM_031174, intron 3 of 32)	L1Md_F2|LINE|L1	261301	NM_031174	13508	Mm.102437	NM_031174	ENSMUSG00000050272	Dscam	4932410A21Rik	Down syndrome cell adhesion molecule	protein-coding
Diff_Nuc12955	chr5	143188802	143188941	+	0	NA	exon (NM_146257, exon 4 of 11)	exon (NM_146257, exon 4 of 11)	10816	NM_146257	243328	Mm.125942	NM_146257	ENSMUSG00000050822	Slc29a4	ENT4|mPMAT	solute carrier family 29 (nucleoside transporters), member 4	protein-coding
Diff_Nuc14301	chr4	141425662	141425801	+	0	NA	intron (NM_025994, intron 1 of 3)	intron (NM_025994, intron 1 of 3)	5104	NM_025994	27984	Mm.395598	NM_025994	ENSMUSG00000040659	Efhd2	2600015J22Rik|AA408606|D4Wsu27e	EF hand domain containing 2	protein-coding
Diff_Nuc4975	chr17	39985312	39985451	+	0	NA	non-coding (NR_046233, exon 1 of 1)	non-coding (NR_046233, exon 1 of 1)	5439	NR_046233	100861531		NR_046233		Rn45s	-	45S pre-ribosomal RNA	rRNA
Diff_Nuc17821	chr1	89046282	89046421	+	0	NA	intron (NM_001277925, intron 13 of 17)	intron (NM_001277925, intron 13 of 17)	6360	NM_001277925	13599	Mm.140765	NM_021306	ENSMUSG00000026247	Ecel1	DINE|xce	endothelin converting enzyme-like 1	protein-coding
Diff_Nuc5015	chr17	46178922	46179061	+	0	NA	Intergenic	Intergenic	-9665	NM_001287057	22339	Mm.282184	NM_009505	ENSMUSG00000023951	Vegfa	Vegf|Vpf	vascular endothelial growth factor A	protein-coding
Diff_Nuc19864	chr9	122492962	122493101	+	0	NA	Intergenic	Intergenic	11412	NR_015610	319626	Mm.186748	NR_015610	ENSMUSG00000097736	9530059O14Rik	-	RIKEN cDNA 9530059O14 gene	ncRNA
Diff_Nuc9258	chr7	20174832	20174971	+	0	NA	intron (NR_125836, intron 6 of 17)	B4A|SINE|B4	12265	NM_022409	63872	Mm.23310	NM_022409	ENSMUSG00000011267	Zfp296	2210018A16Rik|Znf296	zinc finger protein 296	protein-coding
Diff_Nuc8850	chr18	59148552	59148691	+	0	NA	exon (NM_175506, exon 16 of 23)	exon (NM_175506, exon 16 of 23)	-73414	NR_033764	225583	Mm.209711	NM_173759	ENSMUSG00000050875	A730017C20Rik	-	RIKEN cDNA A730017C20 gene	protein-coding
Diff_Nuc8458	chr18	6042342	6042481	+	0	NA	intron (NM_029277, intron 9 of 17)	intron (NM_029277, intron 9 of 17)	93685	NM_029277	75415	Mm.239675	NM_029277	ENSMUSG00000041225	Arhgap12	2810011M08Rik	Rho GTPase activating protein 12	protein-coding
Diff_Nuc3499	chr11	120319952	120320091	+	0	NA	promoter-TSS (NM_025560)	promoter-TSS (NM_025560)	578	NM_152807	67291	Mm.103384	NM_152807	ENSMUSG00000049957	Ccdc137	3110023B02Rik	coiled-coil domain containing 137	protein-coding
Diff_Nuc13601	chr4	83840282	83840421	+	0	NA	Intergenic	Intergenic	-149568	NR_130998	78238	Mm.243903	NR_130998	ENSMUSG00000085217	6030471H07Rik	-	RIKEN cDNA 6030471H07 gene	ncRNA
Diff_Nuc7811	chr14	120725092	120725231	+	0	NA	intron (NM_207515, intron 2 of 7)	intron (NM_207515, intron 2 of 7)	50270	NM_175341	105559	Mm.238266	NM_175341	ENSMUSG00000022139	Mbnl2	1110002M11Rik|AI047808|AI837313|AI849185|AL118326|MBLL|R75232|mKIAA4072	muscleblind-like 2	protein-coding
Diff_Nuc20269	chr8	54264302	54264441	+	0	NA	Intergenic	Lx3A|LINE|L1	-332685	NM_001205054	11593	Mm.334535	NM_001005847	ENSMUSG00000031521	Aga	AW060726	aspartylglucosaminidase	protein-coding
Diff_Nuc6498	chr15	67365062	67365201	+	0	NA	Intergenic	L1Md_F2|LINE|L1	306800	NR_045140	69334	Mm.63770	NR_045140	ENSMUSG00000102069	1700012I11Rik	-	RIKEN cDNA 1700012I11 gene	ncRNA
Diff_Nuc1916	chr12	107339282	107339421	+	0	NA	Intergenic	Intergenic	90878	NM_001029843	22367	Mm.2981	NM_011705	ENSMUSG00000021115	Vrk1	51PK	vaccinia related kinase 1	protein-coding
Diff_Nuc5936	chr16	75259107	75259246	+	0	NA	Intergenic	L1_Mus2|LINE|L1	327130	NM_001252513	320355	Mm.99517	NM_177142	ENSMUSG00000032948	Lipi	D930038D03Rik|lpd1	lipase, member I	protein-coding
Diff_Nuc5771	chr16	35838952	35839091	+	0	NA	intron (NM_001039530, intron 15 of 16)	Lx|LINE|L1	32447	NM_001039530	547253	Mm.244406	NM_001039530	ENSMUSG00000034422	Parp14	1600029O10Rik|ARTD8|BC021340|CoaSt6|mKIAA1268	poly (ADP-ribose) polymerase family, member 14	protein-coding
Diff_Nuc13139	chr4	14577782	14577921	+	0	NA	Intergenic	L1VL4|LINE|L1	-28926	NM_145947	208890	Mm.483839	NM_145947	ENSMUSG00000040569	Slc26a7	-	solute carrier family 26, member 7	protein-coding
Diff_Nuc9093	chr18	88520202	88520341	+	0	NA	Intergenic	L1_Mus4|LINE|L1	543328	NM_018821	54607	Mm.91920	NM_018821	ENSMUSG00000056153	Socs6	1500012M23Rik|5830401B18Rik|AI447482|Cis4|Cish4|HSPC060|SOCS-4|SOCS-6|SSI4|STAI4|STATI4|Socs4	suppressor of cytokine signaling 6	protein-coding
Diff_Nuc6079	chr16	96000932	96001071	+	0	NA	Intergenic	Intergenic	76987	NM_011809	23872	Mm.290207	NM_011809	ENSMUSG00000022895	Ets2	AU022856|Ets-2	E26 avian leukemia oncogene 2, 3' domain	protein-coding
Diff_Nuc17264	chr1	6309812	6309951	+	0	NA	Intergenic	L1_Mus2|LINE|L1	-39531	NM_001195732	620393	Mm.388992	NM_001195732	ENSMUSG00000087247	Fam150a	EG620393	family with sequence similarity 150, member A	protein-coding
Diff_Nuc9270	chr7	20446332	20446471	+	0	NA	intron (NM_001033419, intron 1 of 5)	intron (NM_001033419, intron 1 of 5)	247	NM_001033419	330483	Mm.260192	NM_001033419	ENSMUSG00000014686	Ceacam16	Gm769	carcinoembryonic antigen-related cell adhesion molecule 16	protein-coding
Diff_Nuc19929	chr8	10409092	10409231	+	0	NA	intron (NM_001319151, intron 15 of 34)	Lx6|LINE|L1	255250	NM_001319151	244281	Mm.422761	NM_001081397	ENSMUSG00000039057	Myo16	BM140241|C230040D10Rik|Gm1105|NYAP3|mKIAA0865	myosin XVI	protein-coding
Diff_Nuc13885	chr4	117834982	117835121	+	0	NA	exon (NM_172382, exon 9 of 19)	exon (NM_172382, exon 9 of 19)	17597	NM_172382	230674	Mm.234234	NM_172382	ENSMUSG00000033326	Kdm4a	D4Ertd222e|JHDM3A|Jmjd2|Jmjd2a|mKIAA0677	lysine (K)-specific demethylase 4A	protein-coding
Diff_Nuc11412	chr6	116727112	116727251	+	0	NA	Intergenic	Intergenic	-60405	NM_178768	319776	Mm.133120	NM_178768	ENSMUSG00000048108	Tmem72	C230095G01Rik	transmembrane protein 72	protein-coding
Diff_Nuc5248	chr17	72629602	72629741	+	0	NA	intron (NM_007439, intron 3 of 28)	MTC|LTR|MaLR	323976	NM_007439	11682	Mm.311854	NM_007439	ENSMUSG00000055471	Alk	CD246|Tcrz	anaplastic lymphoma kinase	protein-coding
Diff_Nuc19191	chr9	56529222	56529361	+	0	NA	intron (NM_181074, intron 1 of 3)	intron (NM_181074, intron 1 of 3)	3769	NM_181074	235402	Mm.246605	NM_181074	ENSMUSG00000049556	Lingo1	4930471K13Rik|AV148400|LERN1|LINGO-1|Lrrn6a|UNQ201	leucine rich repeat and Ig domain containing 1	protein-coding
Diff_Nuc384	chr13	34838952	34839091	+	0	NA	exon (NM_138746, exon 2 of 2)	exon (NM_138746, exon 2 of 2)	7510	NM_138746	108161	Mm.41991	NM_138746	ENSMUSG00000038246	Fam50b	D0H6S2654E|X5L|XAP-5-like	family with sequence similarity 50, member B	protein-coding
Diff_Nuc17511	chr1	48177802	48177941	+	0	NA	Intergenic	Lx4B|LINE|L1	-653902	NR_105768	102466969		NR_105768	ENSMUSG00000098876	Mir6350	Gm27958|mmu-mir-6350	microRNA 6350	ncRNA
Diff_Nuc12702	chr5	126144652	126144791	+	0	NA	intron (NM_001190352, intron 3 of 8)	intron (NM_001190352, intron 3 of 8)	131933	NM_001190352	208151	Mm.40397	NM_001190352	ENSMUSG00000070498	Tmem132b	AK220418|mKIAA1786	transmembrane protein 132B	protein-coding
Diff_Nuc16264	chr2	77233512	77233651	+	0	NA	Intergenic	Intergenic	-67120	NR_040368	100503106	Mm.443215	NR_040368	ENSMUSG00000085845	Gm13944	OTTMUSG00000015155	predicted gene 13944	ncRNA
Diff_Nuc11128	chr6	87936552	87936691	+	0	NA	Intergenic	Intergenic	4944	NR_026990	434064	Mm.371796	NR_026990	ENSMUSG00000084950	Gm5577	EG434064	predicted gene 5577	ncRNA
Diff_Nuc12812	chr5	135063352	135063491	+	0	NA	intron (NM_020022, intron 2 of 10)	L1_Mus4|LINE|L1	4861	NM_020022	19718	Mm.332739	NM_020022	ENSMUSG00000023104	Rfc2	2610008M13Rik|40kDa|AI326953|Recc2	replication factor C (activator 1) 2	protein-coding
Diff_Nuc9854	chr7	87498852	87498991	+	0	NA	intron (NM_172903, intron 21 of 23)	intron (NM_172903, intron 21 of 23)	10898	NM_026812	68695	Mm.21171	NM_026812	ENSMUSG00000030532	Hddc3	1110033O09Rik|C86475|MESH1	HD domain containing 3	protein-coding
Diff_Nuc4194	chr10	84937022	84937161	+	0	NA	intron (NM_028709, intron 1 of 16)	intron (NM_028709, intron 1 of 16)	87532	NM_028709	74007	Mm.36544	NM_028709	ENSMUSG00000020042	Btbd11	6330404E16Rik	BTB (POZ) domain containing 11	protein-coding
Diff_Nuc18364	chr1	156914002	156914141	+	0	NA	Intergenic	RLTR11B|LTR|ERVK	32695	NM_010500	15939	Mm.12246	NM_010500	ENSMUSG00000056708	Ier5	-	immediate early response 5	protein-coding
Diff_Nuc5183	chr17	66160632	66160771	+	0	NA	exon (NM_001114131, exon 6 of 20)	exon (NM_001114131, exon 6 of 20)	28006	NR_104465	70351	Mm.48686	NM_146081	ENSMUSG00000061950	Ppp4r1	3110001J10Rik|Pp4r1	protein phosphatase 4, regulatory subunit 1	protein-coding
Diff_Nuc834	chr13	85068282	85068421	+	0	NA	Intergenic	L1_Mus2|LINE|L1	-260639	NM_001347587	66671	Mm.18474	NM_023243	ENSMUSG00000021548	Ccnh	6330408H09Rik|AI661354|AV102684|AW538719	cyclin H	protein-coding
Diff_Nuc19616	chr9	105159942	105160081	+	0	NA	intron (NM_172461, intron 12 of 15)	intron (NM_172461, intron 12 of 15)	-112599	NM_028562	73532	Mm.23516	NM_028562	ENSMUSG00000032566	1700080E11Rik	AI429110|Tseg8	RIKEN cDNA 1700080E11 gene	protein-coding
Diff_Nuc6698	chr15	81525352	81525491	+	0	NA	exon (NM_001164320, exon 3 of 6)	exon (NM_001164320, exon 3 of 6)	2296	NM_001164320	214685	Mm.393287	NM_001164320	ENSMUSG00000063765	Chadl	AY100452|D930017K21Rik	chondroadherin-like	protein-coding
Diff_Nuc6685	chr15	80800282	80800421	+	0	NA	3' UTR (NM_009634, exon 13 of 13)	3' UTR (NM_009634, exon 13 of 13)	-7844	NM_134091	105835	Mm.274943	NM_134091	ENSMUSG00000042303	Sgsm3	1810012I01Rik|AI428557|BB175482|Cip85|R75178|RUSC3|Rutbc3	small G protein signaling modulator 3	protein-coding
Diff_Nuc3707	chr10	30904872	30905011	+	0	NA	Intergenic	Intergenic	-128270	NM_027168	69692	Mm.245537	NM_027168	ENSMUSG00000000295	Hddc2	2310057G13Rik	HD domain containing 2	protein-coding
Diff_Nuc17357	chr1	23704402	23704541	+	0	NA	Intergenic	RLTR1C|LTR|ERV1	-64294	NM_172124	280645	Mm.471661	NM_172124	ENSMUSG00000026156	B3gat2	GlcAT-S|Glcats	beta-1,3-glucuronyltransferase 2 (glucuronosyltransferase S)	protein-coding
Diff_Nuc6416	chr15	55865512	55865651	+	0	NA	Intergenic	MuRRS-int|LTR|ERV1	-127077	NM_016667	20649	Mm.309425	NM_016667	ENSMUSG00000060429	Sntb1	-	syntrophin, basic 1	protein-coding
Diff_Nuc16340	chr2	91487982	91488121	+	0	NA	intron (NM_001347175, intron 3 of 4)	intron (NM_001347175, intron 3 of 4)	1884	NM_001347175	381410	Mm.330401	NM_001033451	ENSMUSG00000075040	Zfp408	Gm1011	zinc finger protein 408	protein-coding
Diff_Nuc12897	chr5	140059282	140059421	+	0	NA	Intergenic	RSINE1|SINE|B4	39499	NM_013702	22255	Mm.42190	NM_013702	ENSMUSG00000029546	Uncx	Chx4|Uncx4.1	UNC homeobox	protein-coding
Diff_Nuc378	chr13	34447232	34447371	+	0	NA	Intergenic	Intergenic	-10250	NM_001033167	73102	Mm.23932	NM_001033167	ENSMUSG00000038267	Slc22a23	3110004L20Rik	solute carrier family 22, member 23	protein-coding
Diff_Nuc3822	chr10	51460542	51460681	+	0	NA	Intergenic	L1Md_F2|LINE|L1	16389	NR_045158	71090	Mm.72588	NM_027670	ENSMUSG00000062224	4933411G06Rik	-	Sumo1 pseudogene	pseudo
Diff_Nuc3101	chr11	98779372	98779511	+	0	NA	intron (NM_011799, intron 9 of 11)	intron (NM_011799, intron 9 of 11)	9976	NM_011799	23834	Mm.20912	NM_011799	ENSMUSG00000017499	Cdc6	CDC18L	cell division cycle 6	protein-coding
Diff_Nuc10427	chr7	144997882	144998021	+	0	NA	Intergenic	Lx4A|LINE|L1	368594	NR_033611	620016	Mm.388932	NR_033611	ENSMUSG00000100863	Gm12669	OTTMUSG00000007920	glutaredoxin 3 pseudogene	pseudo
Diff_Nuc5591	chr16	18649112	18649251	+	0	NA	Intergenic	Intergenic	-19150	NM_213614	18951	Mm.20365	NM_213614	ENSMUSG00000072214	Sept5	Cdcrel-1|Cdcrel1|Pnutl1	septin 5	protein-coding
Diff_Nuc10764	chr6	39412612	39412751	+	0	NA	3' UTR (NM_172477, exon 19 of 19)	3' UTR (NM_172477, exon 19 of 19)	-42313	NM_018810	54484	Mm.270484	NM_018810	ENSMUSG00000029922	Mkrn1	RFP	makorin, ring finger protein, 1	protein-coding
Diff_Nuc13707	chr4	100508002	100508141	+	0	NA	intron (NM_198037, intron 1 of 26)	MTD|LTR|MaLR	58787	NM_198037	320508	Mm.151962	NM_198037	ENSMUSG00000028532	Cachd1	1190007F10Rik|AI852726|B430218L07Rik|Vwcd1|mKIAA1573	cache domain containing 1	protein-coding
Diff_Nuc2800	chr11	76062722	76062861	+	0	NA	intron (NM_183263, intron 3 of 3)	intron (NM_183263, intron 3 of 3)	5553	NM_183263	67390	Mm.24886	NM_183263	ENSMUSG00000038046	Rnmtl1	4833420N02Rik|AI255153|HC90|Mrm3	RNA methyltransferase like 1	protein-coding
Diff_Nuc12486	chr5	112685562	112685701	+	0	NA	intron (NM_001312894, intron 1 of 5)	intron (NM_001312894, intron 1 of 5)	791	NM_001312893	12960	Mm.29488	NM_023695	ENSMUSG00000029343	Crybb1	3110006K12Rik|BB1CRY	crystallin, beta B1	protein-coding
Diff_Nuc5608	chr16	20700242	20700381	+	0	NA	intron (NM_133778, intron 5 of 5)	intron (NM_133778, intron 5 of 5)	5181	NM_133778	78408	Mm.196512	NM_133778	ENSMUSG00000050821	Fam131a	2900046G09Rik	family with sequence similarity 131, member A	protein-coding
Diff_Nuc20872	chr8	122356012	122356151	+	0	NA	intron (NM_028071, intron 2 of 3)	LTR16E1|LTR|ERVL	8398	NM_028071	72042	Mm.393405	NM_028071	ENSMUSG00000031827	Cotl1	1810074P22Rik|2010004C08Rik|Clp	coactosin-like 1 (Dictyostelium)	protein-coding
Diff_Nuc19390	chr9	72820232	72820371	+	0	NA	3' UTR (NM_001163725, exon 7 of 7)	3' UTR (NM_001163725, exon 7 of 7)	12882	NM_001198789	546143	Mm.260946	NM_001198789	ENSMUSG00000086158	Ccpg1os	EG546143|Gm5918	cell cycle progression 1, opposite strand	protein-coding
Diff_Nuc7951	chr19	7053722	7053861	+	0	NA	intron (NM_008020, intron 1 of 5)	intron (NM_008020, intron 1 of 5)	1139	NM_008020	14227	Mm.4234	NM_008020	ENSMUSG00000056629	Fkbp2	13kDa|FKBP-2|mFKBP13|mFKBP2	FK506 binding protein 2	protein-coding
Diff_Nuc1515	chr12	60924652	60924791	+	0	NA	Intergenic	Intergenic	-604251	NM_001033156	70611	Mm.311026	NM_001033156	ENSMUSG00000035329	Fbxo33	5730501N20Rik|AI642135	F-box protein 33	protein-coding
Diff_Nuc20298	chr8	59752512	59752651	+	0	NA	Intergenic	Intergenic	47075	NR_110474	102636514		NR_110474	ENSMUSG00000100510	Uph	-	upperhand	ncRNA
Diff_Nuc6354	chr15	44427172	44427311	+	0	NA	intron (NM_138674, intron 76 of 76)	Lx5|LINE|L1	-23946	NM_019480	55960	Mm.287896	NM_019480	ENSMUSG00000022339	Ebag9	AI835379|Rcas1	estrogen receptor-binding fragment-associated gene 9	protein-coding
Diff_Nuc15842	chr2	28383112	28383251	+	0	NA	intron (NM_009058, intron 1 of 17)	intron (NM_009058, intron 1 of 17)	-5803	NM_001145835	19730	Mm.5236	NM_009058	ENSMUSG00000026821	Ralgds	Gnds|Rgds|mKIAA1308	ral guanine nucleotide dissociation stimulator	protein-coding
Diff_Nuc8818	chr18	57043802	57043941	+	0	NA	intron (NM_177115, intron 1 of 4)	intron (NM_177115, intron 1 of 4)	41331	NM_177115	320253	Mm.312623	NM_177115	ENSMUSG00000032656	March3	6330411I15Rik|A530081L18Rik|AI843639|MARCH-III	membrane-associated ring finger (C3HC4) 3	protein-coding
Diff_Nuc5209	chr17	68326032	68326171	+	0	NA	intron (NM_172964, intron 1 of 17)	intron (NM_172964, intron 1 of 17)	-25821	NM_001347410	268970	Mm.9935	NM_172964	ENSMUSG00000024043	Arhgap28	AU044757|AW550892|E130310N06	Rho GTPase activating protein 28	protein-coding
Diff_Nuc3308	chr11	113557842	113557981	+	0	NA	Intergenic	Intergenic	12185	NM_177777	276852	Mm.239566	NM_177777	ENSMUSG00000041623	D11Wsu47e	-	DNA segment, Chr 11, Wayne State University 47, expressed	protein-coding
Diff_Nuc19007	chr9	41651772	41651911	+	0	NA	Intergenic	Intergenic	261832	NR_029822	387236		NR_029822	ENSMUSG00000093354	Mir125b-1	Mirn125b|Mirn125b-1|mir-125b-1	microRNA 125b-1	ncRNA
Diff_Nuc15652	chr2	6651982	6652121	+	0	NA	intron (NM_001110231, intron 4 of 15)	intron (NM_001110231, intron 4 of 15)	-9343	NM_001310447	14007	Mm.398543	NM_010160	ENSMUSG00000002107	Celf2	B230218O03|B230345P09Rik|C88023|CELF-2|CUG-BP2|Cugbp2|D230046B21Rik|Etr-3|Napor|Napor-2|mETR-3	CUGBP, Elav-like family member 2	protein-coding
Diff_Nuc14781	chr3	41179202	41179341	+	0	NA	Intergenic	Intergenic	117850	NR_040385	78706	Mm.366094	NR_040385	ENSMUSG00000097639	Platr4	C430002E04Rik	pluripotency associated transcript 4	ncRNA
Diff_Nuc3747	chr10	39919982	39920121	+	0	NA	Intergenic	B1_Mus1|SINE|Alu	46734	NM_001042556	67239	Mm.11480	NM_023323	ENSMUSG00000038510	Rpf2	2810470K21Rik|AU040229|AU043242|Bxdc1	ribosome production factor 2 homolog	protein-coding
Diff_Nuc3481	chr11	119990382	119990521	+	0	NA	intron (NM_024249, intron 9 of 16)	intron (NM_024249, intron 9 of 16)	22214	NM_001164799	72055	Mm.253403	NM_024249	ENSMUSG00000061306	Slc38a10	1810073N04Rik	solute carrier family 38, member 10	protein-coding
Diff_Nuc11951	chr5	36890182	36890321	+	0	NA	intron (NM_133910, intron 2 of 13)	intron (NM_133910, intron 2 of 13)	-16979	NM_001113364	100855	Mm.486203	NM_133910	ENSMUSG00000029192	Tbc1d14	2810413P16Rik|AU043625|C86258|D5Ertd110e|mKIAA1322	TBC1 domain family, member 14	protein-coding
Diff_Nuc13314	chr4	44036422	44036561	+	0	NA	intron (NM_001080385, intron 3 of 6)	RSINE1|SINE|B4	10969	NM_001290470	12757	Mm.298875	NM_016760	ENSMUSG00000028478	Clta	AV026556|Lca	clathrin, light polypeptide (Lca)	protein-coding
Diff_Nuc4730	chr17	25648262	25648401	+	0	NA	Intergenic	Intergenic	-14098	NM_001191008	20609	Mm.353282	NM_011425	ENSMUSG00000050824	Sstr5	Smstr5|sst5	somatostatin receptor 5	protein-coding
Diff_Nuc7206	chr14	33267502	33267641	+	0	NA	intron (NM_009891, intron 4 of 15)	intron (NM_009891, intron 4 of 15)	10465	NM_021712	20508	Mm.190503	NM_021712	ENSMUSG00000100241	Slc18a3	VAChT|VAT	solute carrier family 18 (vesicular monoamine), member 3	protein-coding
Diff_Nuc3238	chr11	107016672	107016811	+	0	NA	Intergenic	RMER19A|LTR|ERVK	-1981	NM_001308498	105734734		NM_001308498		Gm11715	OTTMUSG00000003631	predicted gene 11715	protein-coding
Diff_Nuc15509	chr3	144301532	144301671	+	0	NA	Intergenic	B4|SINE|B4	68210	NM_053102	93684	Mm.29812	NM_053102	ENSMUSG00000037072	Selenof	9430015P09Rik|Sep15	selenoprotein F	protein-coding
Diff_Nuc9130	chr7	4964182	4964321	+	0	NA	intron (NM_011813, intron 2 of 2)	intron (NM_011813, intron 2 of 2)	593	NM_001110330	23877	Mm.38911	NM_011813	ENSMUSG00000061374	Fiz1	AI790204|mFLJ00416	Flt3 interacting zinc finger protein 1	protein-coding
Diff_Nuc6153	chr15	8469232	8469371	+	0	NA	Intergenic	Intergenic	-74838	NM_201232	71175	Mm.240329	NM_027707	ENSMUSG00000022141	Nipbl	Idn3	Nipped-B homolog (Drosophila)	protein-coding
Diff_Nuc931	chr13	99342902	99343041	+	0	NA	Intergenic	CpG	64394	NM_026685	68344	Mm.28766	NM_026685	ENSMUSG00000046082	Tmem174	0610009B10Rik|AA986094	transmembrane protein 174	protein-coding
Diff_Nuc19679	chr9	108443682	108443821	+	0	NA	intron (NM_175143, intron 3 of 9)	RSINE1|SINE|B4	-19081	NM_011830	23918	Mm.6065	NM_011830	ENSMUSG00000062867	Impdh2	IMPD	inosine 5'-phosphate dehydrogenase 2	protein-coding
Diff_Nuc4828	chr17	29771452	29771591	+	0	NA	intron (NR_132314, intron 5 of 27)	intron (NR_132314, intron 5 of 27)	19787	NM_021419	58230	Mm.305994	NM_021419	ENSMUSG00000090083	Rnf8	3830404E21Rik|AIP37|laXp180	ring finger protein 8	protein-coding
Diff_Nuc20704	chr8	107577072	107577211	+	0	NA	intron (NM_198672, intron 6 of 12)	intron (NM_198672, intron 6 of 12)	4642	NM_198672	382053	Mm.295534	NM_198672	ENSMUSG00000069922	Ces3a	Ces3|Ces31|Es31	carboxylesterase 3A	protein-coding
Diff_Nuc17969	chr1	105264222	105264361	+	0	NA	Intergenic	B4|SINE|B4	-1401105	NM_011800	23836	Mm.103640	NM_011800	ENSMUSG00000050840	Cdh20	Cdh7	cadherin 20	protein-coding
Diff_Nuc4359	chr10	115121842	115121981	+	0	NA	Intergenic	L2a|LINE|L2	-97075	NM_010195	14160	Mm.42103	NM_010195	ENSMUSG00000020140	Lgr5	FEX|Gpr49	leucine rich repeat containing G protein coupled receptor 5	protein-coding
Diff_Nuc13062	chr4	3747692	3747831	+	0	NA	Intergenic	RMER5|LTR|ERV1	15041	NM_026147	67427	Mm.21938	NM_026147	ENSMUSG00000028234	Rps20	4632426K06Rik|Dsk4	ribosomal protein S20	protein-coding
Diff_Nuc19659	chr9	107521602	107521741	+	0	NA	intron (NM_008138, intron 4 of 8)	intron (NM_008138, intron 4 of 8)	-10099	NM_001291539	20347	Mm.4083	NM_009153	ENSMUSG00000057969	Sema3b	SemA|Semaa|sema5|semaV	sema domain, immunoglobulin domain (Ig), short basic domain, secreted, (semaphorin) 3B	protein-coding
Diff_Nuc1328	chr12	29553302	29553441	+	0	NA	Intergenic	Intergenic	116678	NM_201357	380752	Mm.273724	NM_201357	ENSMUSG00000036613	Tssc1	D12Ertd604e|Eipr1	tumor suppressing subtransferable candidate 1	protein-coding
Diff_Nuc2838	chr11	78184182	78184321	+	0	NA	intron (NM_008238, intron 3 of 8)	intron (NM_008238, intron 3 of 8)	15859	NM_008238	15218	Mm.4496	NM_008238	ENSMUSG00000002057	Foxn1	D11Bhm185e|Fkh19|HFH-11|Hfh11|Whn|nu|nude	forkhead box N1	protein-coding
Diff_Nuc7088	chr14	23386012	23386151	+	0	NA	intron (NM_028275, intron 2 of 6)	intron (NM_028275, intron 2 of 6)	-24061	NR_046307	74896	Mm.444661	NR_046307		4930405A10Rik	4930456G20Rik	RIKEN cDNA 4930405A10 gene	ncRNA
Diff_Nuc9841	chr7	87078732	87078871	+	0	NA	intron (NM_027420, intron 1 of 5)	intron (NM_027420, intron 1 of 5)	1349	NM_027420	70420	Mm.34266	NM_027420	ENSMUSG00000039043	Arpin	2610034B18Rik	actin-related protein 2/3 complex inhibitor	protein-coding
Diff_Nuc1665	chr12	81780622	81780761	+	0	NA	exon (NM_026244, exon 7 of 7)	exon (NM_026244, exon 7 of 7)	12762	NR_037995	68354	Mm.46194	NR_037995		Plekhd1os	0610009B14Rik	pleckstrin homology domain containing, family D (with coiled-coil domains) member 1, opposite strand	ncRNA
Diff_Nuc5197	chr17	67166142	67166281	+	0	NA	intron (NM_008984, intron 15 of 30)	intron (NM_008984, intron 15 of 30)	209364	NR_049205	100885844		NR_049205	ENSMUSG00000093508	Mir5709	Gm22041|mir-5709|mmu-mir-5709	microRNA 5709	ncRNA
Diff_Nuc964	chr13	101432912	101433051	+	0	NA	intron (NM_027592, intron 2 of 4)	B1_Mur4|SINE|Alu	-6455	NM_183115	76041	Mm.23977	NM_183115	ENSMUSG00000048924	Ccdc125	5830436D01Rik|AL023012	coiled-coil domain containing 125	protein-coding
Diff_Nuc20153	chr8	34075992	34076131	+	0	NA	Intergenic	MTEa|LTR|MaLR	-15563	NM_001177589	100042715	Mm.291093	NM_001177589		Gm3985	-	predicted gene 3985	protein-coding
Diff_Nuc8403	chr19	57569442	57569581	+	0	NA	Intergenic	B3A|SINE|B2	-13543	NR_040306	78073	Mm.12411	NR_040306		6720468P15Rik	-	RIKEN cDNA 6720468P15 gene	ncRNA
Diff_Nuc4143	chr10	80862452	80862591	+	0	NA	3' UTR (NM_008688, exon 10 of 10)	3' UTR (NM_008688, exon 10 of 10)	6712	NM_001099917	72273	Mm.253147	NM_001099917	ENSMUSG00000078439	Smim24	2210404O07Rik	small integral membrane protein 24	protein-coding
Diff_Nuc18733	chr1	196395962	196396101	+	0	NA	Intergenic	Intergenic	-49992	NM_008882	18845	Mm.2251	NM_008882	ENSMUSG00000026640	Plxna2	2810428A13Rik|AA589422|AW457381|OCT|PlexA2|Plxn2|mKIAA0463	plexin A2	protein-coding
Diff_Nuc5152	chr17	60089012	60089151	+	0	NA	Intergenic	Intergenic	-936336	NM_026497	67993	Mm.36507	NM_026497	ENSMUSG00000024228	Nudt12	0610016O18Rik	nudix (nucleoside diphosphate linked moiety X)-type motif 12	protein-coding
Diff_Nuc6418	chr15	56313732	56313871	+	0	NA	Intergenic	L1_Mus3|LINE|L1	-207698	NR_002874	594843	Mm.484850	NR_002874	ENSMUSG00000086541	Has2os	EG594843|Has2as|Hasnt	hyaluronan synthase 2, opposite strand	ncRNA
Diff_Nuc1726	chr12	86543682	86543821	+	0	NA	Intergenic	Intergenic	-16680	NM_145445	217715	Mm.29041	NM_145445	ENSMUSG00000004788	Eif2b2	EIF-2Bbeta|EIF2B	eukaryotic translation initiation factor 2B, subunit 2 beta	protein-coding
Diff_Nuc10775	chr6	40372732	40372871	+	0	NA	exon (NM_175528, exon 3 of 8)	exon (NM_175528, exon 3 of 8)	13331	NM_175528	243780	Mm.333006	NM_175528	ENSMUSG00000037172	E330009J07Rik	AI841796|Lchn|mKIAA1147	RIKEN cDNA E330009J07 gene	protein-coding
Diff_Nuc6564	chr15	74917102	74917241	+	0	NA	Intergenic	Intergenic	25208	NM_001099217	100041546	Mm.482110	NM_001099217	ENSMUSG00000022584	Ly6c2	Ly-6C.2|Ly-6C2	lymphocyte antigen 6 complex, locus C2	protein-coding
Diff_Nuc20692	chr8	106559652	106559791	+	0	NA	Intergenic	MTA_Mm|LTR|MaLR	-65804	NM_009868	12562	Mm.21767	NM_009868	ENSMUSG00000031871	Cdh5	7B4|AA408225|Cd144|VE-Cad|VECD|VEcad|Vec	cadherin 5	protein-coding
Diff_Nuc11199	chr6	91634172	91634311	+	0	NA	5' UTR (NM_009320, exon 1 of 15)	5' UTR (NM_009320, exon 1 of 15)	180	NM_009320	21366	Mm.395650	NM_009320	ENSMUSG00000030096	Slc6a6	AA589629|C80501|Taut	solute carrier family 6 (neurotransmitter transporter, taurine), member 6	protein-coding
Diff_Nuc7455	chr14	60431192	60431331	+	0	NA	intron (NM_015803, intron 26 of 35)	intron (NM_015803, intron 26 of 35)	187143	NM_145463	219134	Mm.275409	NM_145463	ENSMUSG00000044461	Shisa2	9430059P22Rik|MAd2|Tmem46|mShisa|shisa	shisa family member 2	protein-coding
Diff_Nuc13088	chr4	8743332	8743471	+	0	NA	intron (NM_001277149, intron 7 of 37)	intron (NM_001277149, intron 7 of 37)	125848	NM_001277149	320790	Mm.138792	NM_001033395	ENSMUSG00000041235	Chd7	A730019I05Rik|Cycn|Cyn|Dz|Edy|Flo|GENA 47|GENA 60|Gena 52|Lda|Mt|Obt|Todo|WBE1|Whi|metis	chromodomain helicase DNA binding protein 7	protein-coding
Diff_Nuc5513	chr16	11843572	11843711	+	0	NA	intron (NM_146067, intron 2 of 3)	RMER13B|LTR|ERVK	-57816	NR_033509	791359	Mm.227592	NR_033509	ENSMUSG00000055015	Gm9961	ENSMUSG00000055015	predicted gene 9961	ncRNA
Diff_Nuc4328	chr10	110668002	110668141	+	0	NA	intron (NM_175489, intron 3 of 23)	ORR1A2|LTR|MaLR	66213	NM_175489	237542	Mm.220204	NM_175489	ENSMUSG00000020189	Osbpl8	AA536976|AA536995|C730029P18Rik|D330025H14Rik|ORP-8	oxysterol binding protein-like 8	protein-coding
Diff_Nuc20772	chr8	113227752	113227891	+	0	NA	intron (NM_146216, intron 14 of 18)	intron (NM_146216, intron 14 of 18)	-17555	NM_198625	244654	Mm.490385	NM_198625	ENSMUSG00000033763	Mtss1l	ABBA	metastasis suppressor 1-like	protein-coding
Diff_Nuc3807	chr10	45266532	45266671	+	0	NA	Intergenic	Intergenic	-31034	NM_172473	209462	Mm.458633	NM_172473	ENSMUSG00000038822	Hace1	1700042J16Rik|A730034A22Rik|BC025474	HECT domain and ankyrin repeat containing, E3 ubiquitin protein ligase 1	protein-coding
Diff_Nuc3903	chr10	60658482	60658621	+	0	NA	Intergenic	Intergenic	20541	NM_023064	65971	Mm.30227	NM_023064	ENSMUSG00000020096	Tbata	1700021K02Rik|AI428928|Spatial|Titest	thymus, brain and testes associated	protein-coding
Diff_Nuc3933	chr10	63051692	63051831	+	0	NA	intron (NM_001164376, intron 5 of 17)	(TCTG)n|Simple_repeat|Simple_repeat	131502	NM_001164376	216033	Mm.444692	NM_177612	ENSMUSG00000060843	Ctnna3	4930429L08Rik|4933408A16|Catna3|Vr22	catenin (cadherin associated protein), alpha 3	protein-coding
Diff_Nuc10168	chr7	125230442	125230581	+	0	NA	Intergenic	Intergenic	29150	NM_170669	267019	Mm.288212	NM_170669	ENSMUSG00000008683	Rps15a	A630031B11Rik	ribosomal protein S15A	protein-coding
Diff_Nuc20935	chr8	124927012	124927151	+	0	NA	exon (NM_001310650, exon 9 of 18)	exon (NM_001310650, exon 9 of 18)	-18904	NM_145834	234836	Mm.222808	NM_145834	ENSMUSG00000046108	Il17c	IL-17C	interleukin 17C	protein-coding
Diff_Nuc2076	chr11	3041862	3042001	+	0	NA	intron (NM_030207, intron 21 of 32)	intron (NM_030207, intron 21 of 32)	17901	NR_003518	66776	Mm.247625	NR_003518		Pisd-ps3	4933439C20Rik	phosphatidylserine decarboxylase, pseudogene 3	pseudo
Diff_Nuc16158	chr2	61031252	61031391	+	0	NA	Intergenic	Intergenic	-218113	NR_045335	100038493	Mm.388076	NR_045335	ENSMUSG00000075325	Gm13582	ENSMUSG00000075325|OTTMUSG00000012844	predicted gene 13582	ncRNA
Diff_Nuc15968	chr2	33922212	33922351	+	0	NA	intron (NR_130173, intron 1 of 3)	intron (NR_130173, intron 1 of 3)	40974	NR_130173	329387	Mm.125817	NR_130173	ENSMUSG00000087461	C230014O12Rik	-	RIKEN cDNA C230014O12 gene	ncRNA
Diff_Nuc16628	chr2	127084032	127084171	+	0	NA	3' UTR (NM_175145, exon 4 of 4)	3' UTR (NM_175145, exon 4 of 4)	10390	NM_175145	69470	Mm.200889	NM_175145	ENSMUSG00000034850	Tmem127	2310003P10Rik|AI314202|AI317350	transmembrane protein 127	protein-coding
Diff_Nuc4763	chr17	26802602	26802741	+	0	NA	Intergenic	Intergenic	-10670	NM_025272	11974	Mm.22602	NM_025272	ENSMUSG00000015575	Atp6v0e	Atp6k|Atp6v0e1|M9.2	ATPase, H+ transporting, lysosomal V0 subunit E	protein-coding
Diff_Nuc2302	chr11	32444072	32444211	+	0	NA	intron (NM_009288, intron 1 of 18)	intron (NM_009288, intron 1 of 18)	10875	NM_009288	20868	Mm.8235	NM_009288	ENSMUSG00000020272	Stk10	Gek1|Lok|mKIAA4026	serine/threonine kinase 10	protein-coding
Diff_Nuc15092	chr3	90071392	90071531	+	0	NA	exon (NM_201407, exon 2 of 28)	exon (NM_201407, exon 2 of 28)	1025	NM_201407	229541	Mm.30571	NM_201407	ENSMUSG00000042404	Dennd4b	-	DENN/MADD domain containing 4B	protein-coding
Diff_Nuc9117	chr7	4491602	4491741	+	0	NA	3' UTR (NM_016908, exon 8 of 8)	3' UTR (NM_016908, exon 8 of 8)	6498	NM_016908	53420	Mm.358663	NM_016908	ENSMUSG00000004961	Syt5	SytV	synaptotagmin V	protein-coding
Diff_Nuc9809	chr7	83747392	83747531	+	0	NA	intron (NM_001199224, intron 18 of 22)	intron (NM_001199224, intron 18 of 22)	372688	NM_001199224	244071	Mm.322829	NM_172902	ENSMUSG00000025754	Agbl1	Ccp4|D430020F16|EG244071|Nna1-l1	ATP/GTP binding protein-like 1	protein-coding
Diff_Nuc3490	chr11	120155872	120156011	+	0	NA	Intergenic	Intergenic	52786	NR_105900	102465564		NR_105900	ENSMUSG00000098955	Mir6935	Gm27344|mmu-mir-6935	microRNA 6935	ncRNA
Diff_Nuc1129	chr12	3868262	3868401	+	0	NA	intron (NM_001271753, intron 4 of 22)	intron (NM_001271753, intron 4 of 22)	-6087	NR_045884	100038522	Mm.417270	NR_045884	ENSMUSG00000073242	Dnmt3aos	ENSMUSG00000073242|Gm10485	DNA methyltransferase 3A, opposite strand	ncRNA
Diff_Nuc3095	chr11	98444652	98444791	+	0	NA	intron (NM_025661, intron 2 of 3)	intron (NM_025661, intron 2 of 3)	3838	NM_025661	66612	Mm.180546	NM_025661	ENSMUSG00000038150	Ormdl3	2810011N17Rik|AI315223	ORM1-like 3 (S. cerevisiae)	protein-coding
Diff_Nuc9294	chr7	25363052	25363191	+	0	NA	Intergenic	Intergenic	-9441	NM_023154	66071	Mm.29553	NM_023154	ENSMUSG00000064254	Ethe1	0610025L15Rik|Hsco	ethylmalonic encephalopathy 1	protein-coding
Diff_Nuc5048	chr17	47924902	47925041	+	0	NA	intron (NM_011549, intron 3 of 7)	intron (NM_011549, intron 3 of 7)	2278	NM_011549	21425	Mm.2305	NM_011549	ENSMUSG00000023990	Tfeb	Tcfeb|bHLHe35	transcription factor EB	protein-coding
Diff_Nuc19354	chr9	68817602	68817741	+	0	NA	intron (NM_013646, intron 1 of 10)	B4A|SINE|B4	204518	NR_033299	320440	Mm.483129	NM_177159		9530091C08Rik	-	RIKEN cDNA 9530091C08 gene	ncRNA
Diff_Nuc7268	chr14	42149842	42149981	+	0	NA	Intergenic	Intergenic	-151424	NM_009160	20390	Mm.1321	NM_009160	ENSMUSG00000021795	Sftpd	AI573415|SP-D|Sfpd|Sftp4	surfactant associated protein D	protein-coding
Diff_Nuc6764	chr15	85060952	85061091	+	0	NA	intron (NM_001347088, intron 5 of 14)	intron (NM_001347088, intron 5 of 14)	24583	NM_010180	14114	Mm.297992	NM_010180	ENSMUSG00000006369	Fbln1	-	fibulin 1	protein-coding
Diff_Nuc2145	chr11	6452472	6452611	+	0	NA	intron (NM_001190343, intron 1 of 8)	B3|SINE|B2	5651	NM_001190343	216527	Mm.221271	NM_146014	ENSMUSG00000000378	Ccm2	BC029157	cerebral cavernous malformation 2	protein-coding
Diff_Nuc2489	chr11	53972682	53972821	+	0	NA	Intergenic	Intergenic	54039	NR_045506	71056	Mm.56332	NR_045506	ENSMUSG00000086209	4933405E24Rik	-	RIKEN cDNA 4933405E24 gene	ncRNA
Diff_Nuc5319	chr17	83613682	83613821	+	0	NA	promoter-TSS (NM_134117)	promoter-TSS (NM_134117)	-872	NM_134117	106522	Mm.311974	NM_134117	ENSMUSG00000024247	Pkdcc	AI115348|AW548124|Adtk1|ESTM17|MAd1|Sgk493|Vlk|X83346	protein kinase domain containing, cytoplasmic	protein-coding
Diff_Nuc18709	chr1	193631932	193632071	+	0	NA	Intergenic	Intergenic	-13351	NM_010892	18005	Mm.33773	NM_010892	ENSMUSG00000026622	Nek2	AA617254|C77054	NIMA (never in mitosis gene a)-related expressed kinase 2	protein-coding
Diff_Nuc16700	chr2	136008302	136008441	+	0	NA	intron (NM_172858, intron 2 of 9)	Lx4B|LINE|L1	124708	NM_029530	76161	Mm.41638	NM_029530	ENSMUSG00000027270	Lamp5	3110035N03Rik|6330527O06Rik|BAD-LAMP|LAMP-5	lysosomal-associated membrane protein family, member 5	protein-coding
Diff_Nuc11978	chr5	38507742	38507881	+	0	NA	intron (NM_026959, intron 6 of 10)	intron (NM_026959, intron 6 of 10)	42895	NM_010942	18196	Mm.7414	NM_010942	ENSMUSG00000029126	Nsg1	Neep21|m234|p21	neuron specific gene family member 1	protein-coding
Diff_Nuc11517	chr6	127516582	127516721	+	0	NA	Intergenic	Intergenic	-11342	NM_001033464	381812	Mm.296093	NM_001033464	ENSMUSG00000061414	Cracr2a	Efcab4b|Gm1073|Gm462	calcium release activated channel regulator 2A	protein-coding
Diff_Nuc9362	chr7	29251932	29252071	+	0	NA	exon (NM_001141921, exon 5 of 5)	exon (NM_001141921, exon 5 of 5)	14744	NM_001141921	80749	Mm.483073	NM_030562	ENSMUSG00000030600	Lrfn1	BC004018|SALM2|Semo1	leucine rich repeat and fibronectin type III domain containing 1	protein-coding
Diff_Nuc4432	chr10	125578962	125579101	+	0	NA	Intergenic	L2a|LINE|L2	175756	NM_177152	320398	Mm.275586	NM_177152	ENSMUSG00000020105	Lrig3	9030421L11Rik|9130004I02Rik|9430095K15Rik|mKIAA3016	leucine-rich repeats and immunoglobulin-like domains 3	protein-coding
Diff_Nuc10917	chr6	56887482	56887621	+	0	NA	Intergenic	L1Md_F|LINE|L1	-13625	NM_026004	107569	Mm.158936	NM_026004	ENSMUSG00000029780	Nt5c3	1600024P05Rik|2610206B05Rik|3110004A18Rik|AI842776|Nt5c3a|Nt5y|PN-1|PN-I|PSN1|UMPH|Umph-1|Umph1|cN-III|lupin|p36	5'-nucleotidase, cytosolic III	protein-coding
Diff_Nuc5338	chr17	84785642	84785781	+	0	NA	intron (NM_183021, intron 26 of 37)	intron (NM_183021, intron 26 of 37)	79837	NM_183021	240174	Mm.246767	NM_177826	ENSMUSG00000024251	Thada	6530405K19|A930021O22|AU019899|BC052885|GITA	thyroid adenoma associated	protein-coding
Diff_Nuc20899	chr8	123381492	123381631	+	0	NA	Intergenic	Intergenic	119022	NM_001301811	15900	Mm.334861	NM_008320	ENSMUSG00000041515	Irf8	AI893568|ICSBP|IRF-8|Icsbp1|Myls	interferon regulatory factor 8	protein-coding
Diff_Nuc8493	chr18	12005542	12005681	+	0	NA	intron (NM_022021, intron 1 of 8)	intron (NM_022021, intron 1 of 8)	-6664	NR_035447	100316686		NR_035447	ENSMUSG00000084565	Mir1901	Mirn1901|mmu-mir-1901	microRNA 1901	ncRNA
Diff_Nuc3676	chr10	24214992	24215131	+	0	NA	Intergenic	MTA_Mm|LTR|MaLR	-100187	NM_010217	14219	Mm.390287	NM_010217	ENSMUSG00000019997	Ctgf	Ccn2|Fisp12|Hcs24|fisp-12	connective tissue growth factor	protein-coding
Diff_Nuc18674	chr1	191463562	191463701	+	0	NA	TTS (NM_001081363)	TTS (NM_001081363)	48334	NM_001081363	108000	Mm.129746	NM_001081363	ENSMUSG00000026605	Cenpf	6530404A22Rik|AI325968|CENF|Lek1|PRO1779|mitosin	centromere protein F	protein-coding
Diff_Nuc3528	chr11	120879212	120879351	+	0	NA	Intergenic	Intergenic	21511	NM_009854	12516	Mm.4100	NM_009854	ENSMUSG00000025163	Cd7	-	CD7 antigen	protein-coding
Diff_Nuc3677	chr10	24340152	24340291	+	0	NA	Intergenic	Intergenic	24973	NM_010217	14219	Mm.390287	NM_010217	ENSMUSG00000019997	Ctgf	Ccn2|Fisp12|Hcs24|fisp-12	connective tissue growth factor	protein-coding
Diff_Nuc541	chr13	51168252	51168391	+	0	NA	Intergenic	ID_B1|SINE|B4	27775	NR_029463	77428	Mm.405630	NR_029463		9430083A17Rik	-	RIKEN cDNA 9430083A17 gene	ncRNA
Diff_Nuc18184	chr1	135598572	135598711	+	0	NA	TTS (NM_001167949)	TTS (NM_001167949)	-11956	NM_001159649	240754	Mm.36534	NM_172842	ENSMUSG00000051998	Lax1	A530029E09|E430019B13Rik	lymphocyte transmembrane adaptor 1	protein-coding
Diff_Nuc12033	chr5	46249312	46249451	+	0	NA	promoter-TSS (NM_001163073)	promoter-TSS (NM_001163073)	-602	NM_178142	209707	Mm.71498	NM_172153	ENSMUSG00000015882	Lcorl	Mlr1	ligand dependent nuclear receptor corepressor-like	protein-coding
Diff_Nuc5782	chr16	38052642	38052781	+	0	NA	intron (NR_040565, intron 3 of 3)	intron (NR_040565, intron 3 of 3)	35302	NR_040565	75175	Mm.399335	NR_040565		4930542C21Rik	-	RIKEN cDNA 4930542C21 gene	ncRNA
Diff_Nuc11263	chr6	98206382	98206521	+	0	NA	intron (NM_001128092, intron 2 of 3)	ORR1A3-int|LTR|MaLR	86297	NM_001128092	330390	Mm.484161	NM_001128092	ENSMUSG00000090667	Gm765	-	predicted gene 765	protein-coding
Diff_Nuc9990	chr7	106544912	106545051	+	0	NA	intron (NM_201352, intron 2 of 17)	intron (NM_201352, intron 2 of 17)	14922	NM_201352	233552	Mm.286317	NM_201352	ENSMUSG00000035314	Gdpd5	BC024955|Gde2	glycerophosphodiester phosphodiesterase domain containing 5	protein-coding
Diff_Nuc4147	chr10	80874702	80874841	+	0	NA	intron (NM_026756, intron 2 of 8)	intron (NM_026756, intron 2 of 8)	4271	NR_106141	102465778		NR_106141	ENSMUSG00000105379	Mir1191b	mmu-mir-1191b	microRNA 1191b	ncRNA
Diff_Nuc4379	chr10	117536392	117536531	+	0	NA	Intergenic	Intergenic	-42382	NM_001162904	17245	Mm.101191	NM_010785	ENSMUSG00000020212	Mdm1	Arrd2|Mdm-1	transformed mouse 3T3 cell double minute 1	protein-coding
Diff_Nuc6114	chr15	4592992	4593131	+	0	NA	Intergenic	Intergenic	-84149	NM_016704	12274	Mm.20247	NM_016704	ENSMUSG00000022181	C6	AW111623	complement component 6	protein-coding
Diff_Nuc11403	chr6	116125382	116125521	+	0	NA	intron (NM_177412, intron 1 of 5)	L1_Mus4|LINE|L1	17941	NM_177412	330401	Mm.425352	NM_177412	ENSMUSG00000030126	Tmcc1	3632431M01Rik|mKIAA0779	transmembrane and coiled coil domains 1	protein-coding
Diff_Nuc15830	chr2	27942062	27942201	+	0	NA	Intergenic	ORR1D1|LTR|MaLR	-1733	NM_010190	14134	Mm.182935	NM_010190	ENSMUSG00000026835	Fcnb	Fcn2	ficolin B	protein-coding
Diff_Nuc580	chr13	53986362	53986501	+	0	NA	Intergenic	Lx8|LINE|L1	163718	NM_001291801	13488	Mm.54161	NM_010076	ENSMUSG00000021478	Drd1	C030036C15Rik|Drd-1|Drd1a|Gpcr15	dopamine receptor D1	protein-coding
Diff_Nuc11887	chr5	33785792	33785931	+	0	NA	Intergenic	CpG	-9122	NM_011320	672284		NM_011320	ENSMUSG00000029112	Nkx1-1	Nkx-1.1|Sax2	NK1 transcription factor related, locus 1 (Drosophila)	protein-coding
Diff_Nuc18528	chr1	174284782	174284921	+	0	NA	intron (NM_001039484, intron 1 of 1)	intron (NM_001039484, intron 1 of 1)	13510	NM_001039484	16513	Mm.254563	NM_020269	ENSMUSG00000044708	Kcnj10	BIR10|BIRK-1|Kir1.2|Kir4.1	potassium inwardly-rectifying channel, subfamily J, member 10	protein-coding
Diff_Nuc853	chr13	88222342	88222481	+	0	NA	Intergenic	MERVK26-int|LTR|ERVK	-738666	NM_010103	13612	Mm.125580	NM_010103	ENSMUSG00000034488	Edil3	Del-1|Del1	EGF-like repeats and discoidin I-like domains 3	protein-coding
Diff_Nuc12385	chr5	104122552	104122691	+	0	NA	Intergenic	Intergenic	-37870	NM_001163550	74218	Mm.159141	NM_028824	ENSMUSG00000029320	1700016H13Rik	-	RIKEN cDNA 1700016H13 gene	protein-coding
Diff_Nuc3611	chr10	16512952	16513091	+	0	NA	Intergenic	Lx2A|LINE|L1	302567	NR_038020	100504235	Mm.84044	NR_038020	ENSMUSG00000101969	Gm20125	-	predicted gene, 20125	ncRNA
Diff_Nuc7218	chr14	34260702	34260841	+	0	NA	promoter-TSS (NM_001310453)	promoter-TSS (NM_001310453)	-427	NM_016700	26419	Mm.21495	NM_016700	ENSMUSG00000021936	Mapk8	AI849689|JNK|JNK1|Prkm8|SAPK1	mitogen-activated protein kinase 8	protein-coding
Diff_Nuc5265	chr17	74712532	74712671	+	0	NA	intron (NM_024428, intron 3 of 4)	Lx8|LINE|L1	2950	NM_001146224	66310	Mm.28536	NM_024428	ENSMUSG00000024067	Dpy30	2810410M20Rik|C87842	dpy-30, histone methyltransferase complex regulatory subunit	protein-coding
Diff_Nuc5350	chr17	85925732	85925871	+	0	NA	Intergenic	Intergenic	91935	NR_038084	100043902	Mm.150838	NR_015385	ENSMUSG00000093460	Six3os1	D17Mgi26|E130112H22Rik|Rncr1|Six3os	SIX homeobox 3, opposite strand 1	ncRNA
Diff_Nuc2264	chr11	26569402	26569541	+	0	NA	Intergenic	L1Md_T|LINE|L1	-75551	NM_001252447	69922	Mm.285351	NM_027260	ENSMUSG00000064090	Vrk2	2810003O05Rik|AI447698	vaccinia related kinase 2	protein-coding
Diff_Nuc2479	chr11	53548982	53549121	+	0	NA	Intergenic	Intergenic	14755	NM_010558	16191	Mm.4461	NM_010558	ENSMUSG00000036117	Il5	Il-5	interleukin 5	protein-coding
Diff_Nuc18382	chr1	158661272	158661411	+	0	NA	Intergenic	LTR41|LTR|ERVL	-12300	NM_145413	215015	Mm.229107	NM_145413	ENSMUSG00000033557	Fam20b	C530043G21Rik|mKIAA0475	family with sequence similarity 20, member B	protein-coding
Diff_Nuc8453	chr18	5129792	5129931	+	0	NA	Intergenic	Lx|LINE|L1	83274	NM_001347449	225115	Mm.136791	NM_153153	ENSMUSG00000024236	Svil	AU024053|B430302E16Rik	supervillin	protein-coding
Diff_Nuc4728	chr17	25481892	25482031	+	0	NA	intron (NR_033521, intron 2 of 4)	intron (NR_033521, intron 2 of 4)	546	NM_031187	100503895	Mm.3301	NM_031187	ENSMUSG00000024173	Tpsab1	MMCP-7|Mcp-7|Mcp7|Mcpt7	tryptase alpha/beta 1	protein-coding
Diff_Nuc6875	chr15	95520892	95521031	+	0	NA	Intergenic	PB1D7|SINE|Alu	-35759	NM_207533	223843	Mm.152937	NM_207533	ENSMUSG00000045608	Dbx2	9430056A22Rik|9630005K15|AI846217|Gm1229	developing brain homeobox 2	protein-coding
Diff_Nuc8171	chr19	33046082	33046221	+	0	NA	Intergenic	Intergenic	-185451	NR_039552	100628575		NR_039552	ENSMUSG00000106278	Mir3970	mmu-mir-3970|mu-mir-3970	microRNA 3970	ncRNA
Diff_Nuc11698	chr5	6747422	6747561	+	0	NA	Intergenic	Lx2|LINE|L1	-556673	NM_027603	70920	Mm.158494	NM_027603	ENSMUSG00000040514	4921511H03Rik	-	RIKEN cDNA 4921511H03 gene	protein-coding
Diff_Nuc6974	chr15	102583292	102583431	+	0	NA	Intergenic	Intergenic	-6021	NR_104334	102216269		NR_104334		Gm38436	Cistr|Cistr-act	predicted gene, 38436	ncRNA
Diff_Nuc19951	chr8	11644702	11644841	+	0	NA	Intergenic	RLTR1B|LTR|ERV1	-9014	NM_001281974	102334	Mm.12459	NM_133971	ENSMUSG00000031508	Ankrd10	4833425P12Rik|AW549277	ankyrin repeat domain 10	protein-coding
Diff_Nuc5768	chr16	35689862	35690001	+	0	NA	Intergenic	RMER13B|LTR|ERVK	79511	NM_153550	224132	Mm.24094	NM_153550	ENSMUSG00000022848	Dirc2	RCC4	disrupted in renal carcinoma 2 (human)	protein-coding
Diff_Nuc7691	chr14	92339882	92340021	+	0	NA	Intergenic	Lx5|LINE|L1	1813253	NR_045712	74967	Mm.390704	NR_045712		4930474H20Rik	-	RIKEN cDNA 4930474H20 gene	ncRNA
Diff_Nuc5840	chr16	46926742	46926881	+	0	NA	Intergenic	Intergenic	-429731	NM_021497	58998	Mm.40477	NM_021495	ENSMUSG00000022656	Nectin3	2610301B19Rik|3000002N23Rik|4921513D19Rik|AA407785|AU016832|AW538082|CD113|Pvrl3	nectin cell adhesion molecule 3	protein-coding
Diff_Nuc3162	chr11	102057452	102057591	+	0	NA	intron (NM_010412, intron 25 of 26)	intron (NM_010412, intron 25 of 26)	6508	NM_175935	68401	Mm.22385	NM_175935	ENSMUSG00000034793	G6pc3	0710001K01Rik|AU019276|AU045429|AV128920|AW545836|UGRP	glucose 6 phosphatase, catalytic, 3	protein-coding
Diff_Nuc20982	chr8	126988862	126989001	+	0	NA	Intergenic	B4|SINE|B4	-31095	NM_171824	209966	Mm.234233	NM_171824	ENSMUSG00000050751	Pgbd5	2900019M05Rik|AI854313	piggyBac transposable element derived 5	protein-coding
Diff_Nuc3894	chr10	60185622	60185761	+	0	NA	intron (NM_023596, intron 4 of 5)	intron (NM_023596, intron 4 of 5)	-26453	NM_023370	22295	Mm.440327	NM_023370	ENSMUSG00000012819	Cdh23	4930542A03Rik|USH1D|ahl|ahl1|bob|bus|mdfw|nmf112|nmf181|nmf252|sals|v	cadherin 23 (otocadherin)	protein-coding
Diff_Nuc3965	chr10	68379862	68380001	+	0	NA	Intergenic	Intergenic	193437	NM_177794	327766	Mm.2479	NM_177794	ENSMUSG00000060044	Tmem26	3230401A06|AI195372	transmembrane protein 26	protein-coding
Diff_Nuc19263	chr9	62041412	62041551	+	0	NA	Intergenic	Intergenic	50426	NR_040769	330958	Mm.411888	NR_040769	ENSMUSG00000111232	A730043L09Rik	A730043L09	RIKEN cDNA A730043L09 gene	ncRNA
Diff_Nuc7374	chr14	54420922	54421061	+	0	NA	Intergenic	Intergenic	452613	NM_001113358	13135	Mm.319038	NM_010015	ENSMUSG00000022174	Dad1	AI323713	defender against cell death 1	protein-coding
Diff_Nuc16825	chr2	152328812	152328951	+	0	NA	Intergenic	Intergenic	8591	NM_001039120	654457	Mm.389363	NM_001039120	ENSMUSG00000074680	Defb26	EG654457	defensin beta 26	protein-coding
Diff_Nuc2084	chr11	3055242	3055381	+	0	NA	intron (NM_030207, intron 13 of 32)	B1_Mur2|SINE|Alu	31281	NR_003518	66776	Mm.247625	NR_003518		Pisd-ps3	4933439C20Rik	phosphatidylserine decarboxylase, pseudogene 3	pseudo
Diff_Nuc11657	chr6	146184242	146184381	+	0	NA	intron (NM_019923, intron 39 of 56)	intron (NM_019923, intron 39 of 56)	266434	NM_010586	16439	Mm.7800	NM_010586	ENSMUSG00000030287	Itpr2	AI649341|InsP3R-2|InsP3R-5|Ip3r2|Itpr5|insP3R2	inositol 1,4,5-triphosphate receptor 2	protein-coding
Diff_Nuc15892	chr2	30893322	30893461	+	0	NA	intron (NM_001038700, intron 10 of 14)	B1_Mus1|SINE|Alu	55592	NM_028846	74270	Mm.346654	NM_028846	ENSMUSG00000026854	Usp20	1700055M05Rik|AI467231|Vdu2	ubiquitin specific peptidase 20	protein-coding
Diff_Nuc14648	chr3	21679682	21679821	+	0	NA	Intergenic	Intergenic	-295823	NM_030732	81004	Mm.202966	NM_030732	ENSMUSG00000027630	Tbl1xr1	8030499H02Rik|A630076E03Rik|AW539987|C21|C230089I12Rik|DC42|Ira1|TBLR1	transducin (beta)-like 1X-linked receptor 1	protein-coding
Diff_Nuc9919	chr7	95035012	95035151	+	0	NA	intron (NM_001081414, intron 4 of 9)	intron (NM_001081414, intron 4 of 9)	302403	NM_001143834	108071	Mm.235018	NM_001033224	ENSMUSG00000049583	Grm5	6430542K11Rik|AI850523|Glu5R|Gprc1e|mGluR5|mGluR5b	glutamate receptor, metabotropic 5	protein-coding
Diff_Nuc16063	chr2	44722432	44722571	+	0	NA	Intergenic	MTD|LTR|MaLR	-5359	NM_172662	227835	Mm.314312	NM_172662	ENSMUSG00000036890	Gtdc1	E330008O22Rik	glycosyltransferase-like domain containing 1	protein-coding
Diff_Nuc11166	chr6	90642052	90642191	+	0	NA	intron (NM_001134384, intron 2 of 13)	intron (NM_001134384, intron 2 of 13)	24402	NM_001134383	232227	Mm.196943	NM_182784	ENSMUSG00000034312	Iqsec1	AW561907|BC026481|BRAG2|D6Ertd349e|cI-43	IQ motif and Sec7 domain 1	protein-coding
Diff_Nuc5064	chr17	48990252	48990391	+	0	NA	Intergenic	RLTR20B3|LTR|ERVK	-81586	NM_027452	70530	Mm.133607	NM_027452	ENSMUSG00000040490	Lrfn2	5730420O05Rik|SALM1|mKIAA1246	leucine rich repeat and fibronectin type III domain containing 2	protein-coding
Diff_Nuc17586	chr1	59253352	59253491	+	0	NA	intron (NM_146109, intron 10 of 12)	intron (NM_146109, intron 10 of 12)	-33188	NM_001164682	227157	Mm.474049	NM_145143	ENSMUSG00000079550	Mpp4	Dlg6	membrane protein, palmitoylated 4 (MAGUK p55 subfamily member 4)	protein-coding
Diff_Nuc2113	chr11	4825942	4826081	+	0	NA	intron (NM_172438, intron 18 of 19)	intron (NM_172438, intron 18 of 19)	7492	NR_102683	100359413		NR_102683	ENSMUSG00000084381	AA413626	-	ribosomal protein L17 pseudogene	pseudo
Diff_Nuc16511	chr2	116701162	116701301	+	0	NA	Intergenic	MTA_Mm|LTR|MaLR	-3196	NM_026104	67356	Mm.131623	NM_026104	ENSMUSG00000027355	Tmco5	1700095F04Rik|Tmco5a	transmembrane and coiled-coil domains 5	protein-coding
Diff_Nuc12345	chr5	97772812	97772951	+	0	NA	Intergenic	Intergenic	48468	NM_001033191	97243	Mm.11746	NM_001033191	ENSMUSG00000046000	Naa11	Ard1b|Ard2|C80008	N(alpha)-acetyltransferase 11, NatA catalytic subunit	protein-coding
Diff_Nuc9694	chr7	71132852	71132991	+	0	NA	Intergenic	Intergenic	-49120	NM_021366	50794	Mm.240473	NM_021366	ENSMUSG00000052040	Klf13	0610043C13Rik|9430029L20Rik|Bteb3|FKLF-2|FKLF2|NSLP1|RFLAT-1|RFLAT1	Kruppel-like factor 13	protein-coding
Diff_Nuc1769	chr12	89135792	89135931	+	0	NA	TTS (NM_001177574)	TTS (NM_001177574)	4583	NM_001177574	100039052	Mm.431321	NM_001177574		Gm2022	-	predicted pseudogene 2022	protein-coding
Diff_Nuc13292	chr4	42978842	42978981	+	0	NA	Intergenic	Intergenic	-3907	NM_026088	67317	Mm.478018	NM_026088	ENSMUSG00000028451	1700022I11Rik	-	RIKEN cDNA 1700022I11 gene	protein-coding
Diff_Nuc6651	chr15	78994072	78994211	+	0	NA	exon (NM_011437, exon 2 of 4)	exon (NM_011437, exon 2 of 4)	779	NM_011437	20665	Mm.276739	NM_011437	ENSMUSG00000033006	Sox10	Dom|Sox21|gt	SRY (sex determining region Y)-box 10	protein-coding
Diff_Nuc14613	chr3	16426102	16426241	+	0	NA	Intergenic	Lx3C|LINE|L1	342988	NM_001145919	229096	Mm.23834	NM_172677	ENSMUSG00000047213	Ythdf3	9130022A11Rik	YTH domain family 3	protein-coding
Diff_Nuc12051	chr5	50534402	50534541	+	0	NA	Intergenic	L1VL2|LINE|L1	-8101	NR_040696	73965	Mm.243823	NR_040696	ENSMUSG00000104870	4930448I18Rik	-	RIKEN cDNA 4930448I18 gene	ncRNA
Diff_Nuc2688	chr11	69185112	69185251	+	0	NA	Intergenic	Intergenic	-2253	NM_146019	216848	Mm.178246	NM_146019	ENSMUSG00000018474	Chd3	2600010P09Rik|AF020312|Chd7|Prp7|Prp9-1	chromodomain helicase DNA binding protein 3	protein-coding
Diff_Nuc2943	chr11	87060322	87060461	+	0	NA	intron (NM_177167, intron 2 of 6)	intron (NM_177167, intron 2 of 6)	112105	NM_177167	320472	Mm.341988	NM_177167	ENSMUSG00000046442	Ppm1e	AW049266|B930008A12Rik|POPX1|PP2CH|mKIAA1072	protein phosphatase 1E (PP2C domain containing)	protein-coding
Diff_Nuc14407	chr4	148747292	148747431	+	0	NA	intron (NM_022022, intron 6 of 26)	intron (NM_022022, intron 6 of 26)	38613	NR_131918	74310	Mm.440455	NR_131918	ENSMUSG00000085286	Ube4bos3	1700121F15Rik	ubiquitination factor E4B, opposite strand 3	ncRNA
Diff_Nuc11057	chr6	83311922	83312061	+	0	NA	TTS (NM_183138)	TTS (NM_183138)	12513	NM_175277	78653	Mm.391470	NM_175277	ENSMUSG00000045160	Bola3	1810056O20Rik	bolA-like 3 (E. coli)	protein-coding
Diff_Nuc20258	chr8	51417352	51417491	+	0	NA	Intergenic	L1Md_F3|LINE|L1	-36045	NR_046067	100039954	Mm.400419	NR_046067	ENSMUSG00000110281	Gm2516	-	predicted gene 2516	ncRNA
Diff_Nuc13471	chr4	59224502	59224641	+	0	NA	intron (NM_011673, intron 2 of 8)	B1_Mus2|SINE|Alu	22149	NM_011673	22234	Mm.198803	NM_011673	ENSMUSG00000028381	Ugcg	AU043821|C80537|Epcs21|GlcT-1|Ugcgl	UDP-glucose ceramide glucosyltransferase	protein-coding
Diff_Nuc4053	chr10	77158742	77158881	+	0	NA	intron (NM_001287074, intron 1 of 11)	intron (NM_001287074, intron 1 of 11)	-5309	NM_001205032	100502831	Mm.486158	NM_001205032	ENSMUSG00000095970	Gm19402	-	predicted gene, 19402	protein-coding
Diff_Nuc11529	chr6	128177202	128177341	+	0	NA	3' UTR (NM_011567, exon 12 of 12)	3' UTR (NM_011567, exon 12 of 12)	-43450	NR_077223	330427	Mm.426356	NR_077223	ENSMUSG00000107879	9330102E08Rik	-	RIKEN cDNA 9330102E08 gene	ncRNA
Diff_Nuc11444	chr6	119774942	119775081	+	0	NA	exon (NM_053204, exon 3 of 21)	exon (NM_053204, exon 3 of 21)	23157	NM_053204	111173	Mm.288860	NM_053204	ENSMUSG00000030172	Erc1	4930404L01Rik|5033405M01Rik|9630025C19Rik|B430107L16Rik|CAST2|ELKS|Elks1|RAB6IP2A|RAB6IP2B|Rab6ip2|mKIAA1081	ELKS/RAB6-interacting/CAST family member 1	protein-coding
Diff_Nuc9248	chr7	19922582	19922721	+	0	NA	Intergenic	Intergenic	-7769	NM_001127324	13870	Mm.280913	NM_007948	ENSMUSG00000003549	Ercc1	Ercc-1	excision repair cross-complementing rodent repair deficiency, complementation group 1	protein-coding
Diff_Nuc9004	chr18	76164822	76164961	+	0	NA	intron (NM_145356, intron 2 of 4)	intron (NM_145356, intron 2 of 4)	93234	NR_045365	73009	Mm.443541	NR_045365		2900057B20Rik	-	RIKEN cDNA 2900057B20 gene	ncRNA
Diff_Nuc616	chr13	55903602	55903741	+	0	NA	intron (NM_001252487, intron 3 of 7)	ORR1C2-int|LTR|MaLR	17731	NM_001252487	76856	Mm.159795	NM_029772	ENSMUSG00000021499	Catsper3	4921522D01Rik|CACRC	cation channel, sperm associated 3	protein-coding
Diff_Nuc10840	chr6	50576642	50576781	+	0	NA	Intergenic	Lx|LINE|L1	27681	NM_021892	60531	Mm.157158	NM_021892	ENSMUSG00000029831	Npvf	Rfrp	neuropeptide VF precursor	protein-coding
Diff_Nuc3211	chr11	105288972	105289111	+	0	NA	intron (NM_001039242, intron 4 of 5)	intron (NM_001039242, intron 4 of 5)	29008	NM_172568	632687	Mm.121570	NM_172568	ENSMUSG00000078627	March10	4933417C16Rik|AV039223|OTTMUSG00000002847|Rnf190	membrane-associated ring finger (C3HC4) 10	protein-coding
Diff_Nuc16908	chr2	156557712	156557851	+	0	NA	intron (NM_001042487, intron 1 of 6)	intron (NM_001042487, intron 1 of 6)	10766	NM_001042487	228836	Mm.22094	NM_146128	ENSMUSG00000061689	Dlgap4	AI225853|BC024558|DAP-4|DAP4|SAPAP-4|Sapap4|WBP16	discs, large homolog-associated protein 4 (Drosophila)	protein-coding
Diff_Nuc1046	chr13	111357252	111357391	+	0	NA	Intergenic	Lx7|LINE|L1	172069	NM_152804	20620	Mm.380	NM_152804	ENSMUSG00000021701	Plk2	Snk	polo-like kinase 2	protein-coding
Diff_Nuc5835	chr16	46085882	46086021	+	0	NA	intron (NM_032465, intron 5 of 14)	intron (NM_032465, intron 5 of 14)	34410	NM_032465	84544	Mm.29204	NM_032465	ENSMUSG00000022657	Cd96	1700109I12Rik|Tactile	CD96 antigen	protein-coding
Diff_Nuc7122	chr14	26428142	26428281	+	0	NA	intron (NM_183208, intron 6 of 23)	intron (NM_183208, intron 6 of 23)	5212	NM_001309430	100188919	Mm.473810	NM_001309430		Israa	-	immune system released activating agent	protein-coding
Diff_Nuc4942	chr17	38089582	38089721	+	0	NA	exon (NM_001011829, exon 1 of 1)	exon (NM_001011829, exon 1 of 1)	316	NM_001011829	258094	Mm.377348	NM_001011829	ENSMUSG00000109376	Olfr761	MOR218-12|MOR218-5P|MOR218-6P|Olfr1552-ps1	olfactory receptor 761	protein-coding
Diff_Nuc14215	chr4	137393962	137394101	+	0	NA	Intergenic	Intergenic	-24121	NM_199307	230857	Mm.401062	NM_199307	ENSMUSG00000057530	Ece1	AW322500|ECE-1|ECE-1a|ECE-1b|ECE-1d	endothelin converting enzyme 1	protein-coding
Diff_Nuc11692	chr5	3829222	3829361	+	0	NA	intron (NM_030675, intron 12 of 16)	L1VL2|LINE|L1	-15882	NM_172879	242838	Mm.482273	NM_172879	ENSMUSG00000040367	Lrrd1	4932412H11Rik	leucine rich repeats and death domain containing 1	protein-coding
Diff_Nuc13763	chr4	106135342	106135481	+	0	NA	intron (NM_153565, intron 1 of 11)	intron (NM_153565, intron 1 of 11)	1519	NM_153565	100102	Mm.133268	NM_153565	ENSMUSG00000044254	Pcsk9	AI415265|AI747682|FH3|HCHOLA3|Narc1|PC9	proprotein convertase subtilisin/kexin type 9	protein-coding
Diff_Nuc4777	chr17	27338562	27338701	+	0	NA	intron (NM_146075, intron 1 of 8)	intron (NM_146075, intron 1 of 8)	2752	NM_146075	224640	Mm.29689	NM_146075	ENSMUSG00000044857	Lemd2	BC026588|Lem2|NET25	LEM domain containing 2	protein-coding
Diff_Nuc14767	chr3	39009422	39009561	+	0	NA	Intergenic	Intergenic	223629	NM_183221	329628	Mm.316210	NM_183221	ENSMUSG00000046743	Fat4	6030410K14Rik|9430004M15	FAT atypical cadherin 4	protein-coding
Diff_Nuc2996	chr11	92517272	92517411	+	0	NA	Intergenic	Intergenic	-443263	NM_028296	72605	Mm.342160	NM_028296	ENSMUSG00000056158	Car10	2700029L05Rik|BB085816|Ca10	carbonic anhydrase 10	protein-coding
Diff_Nuc4628	chr17	14084562	14084701	+	0	NA	promoter-TSS (NM_001122977)	promoter-TSS (NM_001122977)	-749	NM_001122977	635895	Mm.388844	NM_001122977	ENSMUSG00000067941	Gm7168	EG635895	predicted gene 7168	protein-coding
Diff_Nuc6696	chr15	81227432	81227571	+	0	NA	intron (NM_133726, intron 1 of 11)	PB1|SINE|Alu	2623	NM_133726	70356	Mm.180337	NM_133726	ENSMUSG00000022403	St13	1110007I03Rik|3110002K08Rik|AW555194|HIP|HOP|HSPABP|HSPABP1|PRO0786|SNC6|p48	suppression of tumorigenicity 13	protein-coding
Diff_Nuc5790	chr16	38615432	38615571	+	0	NA	intron (NM_020260, intron 8 of 11)	intron (NM_020260, intron 8 of 11)	52574	NM_026407	67846	Mm.310476	NM_026407	ENSMUSG00000002845	Tmem39a	2610033C09Rik	transmembrane protein 39a	protein-coding
Diff_Nuc20055	chr8	19987272	19987411	+	0	NA	intron (NR_028428, intron 5 of 5)	L1MB7|LINE|L1	-28561	NM_001177408	100040599	Mm.491087	NM_001177408	ENSMUSG00000074449	Gm15319	OTTMUSG00000020118	predicted gene 15319	protein-coding
Diff_Nuc17155	chr2	172171132	172171271	+	0	NA	exon (NM_025912, exon 1 of 3)	exon (NM_025912, exon 1 of 3)	124	NM_025912	67017	Mm.30013	NM_025912	ENSMUSG00000027495	Fam210b	2010011I20Rik|AI430961|AV108736	family with sequence similarity 210, member B	protein-coding
Diff_Nuc5323	chr17	84092422	84092561	+	0	NA	Intergenic	MTE2a|LTR|MaLR	-13012	NM_001171054	116871	Mm.277668	NM_054082	ENSMUSG00000055817	Mta3	1110002J22Rik|mKIAA1266	metastasis associated 3	protein-coding
Diff_Nuc13162	chr4	20292702	20292841	+	0	NA	intron (NM_172987, intron 3 of 4)	intron (NM_172987, intron 3 of 4)	323572	NM_010281	14590	Mm.20461	NM_010281	ENSMUSG00000073987	Ggh	gamma-GH	gamma-glutamyl hydrolase	protein-coding
Diff_Nuc1166	chr12	8779162	8779301	+	0	NA	intron (NM_011519, intron 1 of 4)	CpG	1029	NM_011519	20969	Mm.2580	NM_011519	ENSMUSG00000020592	Sdc1	AA408134|AA409076|CD138|Sstn|Synd|Synd1|syn-1	syndecan 1	protein-coding
Diff_Nuc6957	chr15	101096342	101096481	+	0	NA	promoter-TSS (NM_010444)	promoter-TSS (NM_010444)	-866	NM_010444	15370	Mm.119	NM_010444	ENSMUSG00000023034	Nr4a1	GFRP1|Gfrp|Hbr-1|Hbr1|Hmr|N10|NGFI-B|NGFIB|NP10|TIS1|TR3|nur77	nuclear receptor subfamily 4, group A, member 1	protein-coding
Diff_Nuc16186	chr2	66901192	66901331	+	0	NA	Intergenic	L1Md_F2|LINE|L1	-110630	NM_001033477	383709	Mm.244520	NM_001033477		Gm1322	-	predicted gene 1322	protein-coding
Diff_Nuc5783	chr16	38141632	38141771	+	0	NA	intron (NM_001347232, intron 1 of 11)	intron (NM_001347232, intron 1 of 11)	-52355	NR_033221	414072	Mm.483602	NR_033221		BC031361	-	cDNA sequence BC031361	ncRNA
Diff_Nuc12886	chr5	139526772	139526911	+	0	NA	intron (NM_001253890, intron 6 of 10)	intron (NM_001253890, intron 6 of 10)	-55934	NM_008808	18590	Mm.2675	NM_008808	ENSMUSG00000025856	Pdgfa	-	platelet derived growth factor, alpha	protein-coding
Diff_Nuc5443	chr16	5100852	5100991	+	0	NA	intron (NM_008909, intron 12 of 21)	intron (NM_008909, intron 12 of 21)	31653	NM_008909	19041	Mm.266875	NM_008909	ENSMUSG00000039457	Ppl	AW553870	periplakin	protein-coding
Diff_Nuc14758	chr3	37969162	37969301	+	0	NA	Intergenic	MT2B|LTR|ERVL	137810	NR_040541	71342	Mm.410782	NR_040541	ENSMUSG00000106002	5430434I15Rik	-	RIKEN cDNA 5430434I15 gene	ncRNA
Diff_Nuc10421	chr7	144541222	144541361	+	0	NA	Intergenic	Intergenic	-35163	NM_010096	13593	Mm.258708	NM_010096	ENSMUSG00000010476	Ebf3	3110018A08Rik|O/E-2|mKIAA4201	early B cell factor 3	protein-coding
Diff_Nuc11819	chr5	26331062	26331201	+	0	NA	exon (NM_001281519, exon 1 of 5)	exon (NM_001281519, exon 1 of 5)	136	NM_001281519	100038949		NM_001281519	ENSMUSG00000091049	Gm1979	-	predicted gene 1979	protein-coding
Diff_Nuc18556	chr1	179869847	179869986	+	0	NA	Intergenic	MT2A|LTR|ERVL	-51650	NM_001034899	545391	Mm.442974	NM_001034899	ENSMUSG00000091476	Gm16432	EG545391|EG666250	predicted gene 16432	protein-coding
Diff_Nuc14460	chr4	151616212	151616351	+	0	NA	intron (NM_001146058, intron 6 of 8)	intron (NM_001146058, intron 6 of 8)	-32190	NM_178406	100129	Mm.23235	NM_178406	ENSMUSG00000042804	Gpr153	1110065N12Rik|AI449320|PGR1	G protein-coupled receptor 153	protein-coding
Diff_Nuc1252	chr12	19976352	19976491	+	0	NA	Intergenic	Lx4B|LINE|L1	845219	NR_015521	69513	Mm.273972	NR_015521	ENSMUSG00000099759	1700030C10Rik	-	RIKEN cDNA 1700030C10 gene	ncRNA
Diff_Nuc13747	chr4	104400172	104400311	+	0	NA	exon (NM_177259, exon 12 of 15)	exon (NM_177259, exon 12 of 15)	-38681	NM_133882	110382	Mm.87072	NM_133882	ENSMUSG00000029656	C8b	4930439B20Rik|AI595927	complement component 8, beta polypeptide	protein-coding
Diff_Nuc11617	chr6	142519917	142520056	+	0	NA	5' UTR (NM_008428, exon 1 of 3)	5' UTR (NM_008428, exon 1 of 3)	148	NM_001330363	16523	Mm.1482	NM_008428	ENSMUSG00000030247	Kcnj8	AI448900|Kir6.1|gnite|slmbr|sltr|uKATP-1	potassium inwardly-rectifying channel, subfamily J, member 8	protein-coding
Diff_Nuc18314	chr1	152652672	152652811	+	0	NA	intron (NM_001024720, intron 9 of 106)	intron (NM_001024720, intron 9 of 106)	187824	NM_001024720	545370	Mm.379425	NM_001024720	ENSMUSG00000066842	Hmcn1	EG545370|FIBL-6|Gm201	hemicentin 1	protein-coding
Diff_Nuc3295	chr11	113042362	113042501	+	0	NA	intron (NR_015556, intron 1 of 2)	intron (NR_015556, intron 1 of 2)	20721	NR_015556	72386	Mm.266961	NR_015556	ENSMUSG00000087259	2610035D17Rik	-	RIKEN cDNA 2610035D17 gene	ncRNA
Diff_Nuc11944	chr5	36549812	36549951	+	0	NA	TTS (NM_175249)	TTS (NM_175249)	3211	NM_175249	76943	Mm.44242	NM_175249	ENSMUSG00000043430	Psapl1	2310020A21Rik	prosaposin-like 1	protein-coding
Diff_Nuc20134	chr8	29870862	29871001	+	0	NA	intron (NM_001347498, intron 5 of 14)	intron (NM_001347498, intron 5 of 14)	459177	NM_001347499	210801	Mm.248433	NM_153135	ENSMUSG00000063626	Unc5d	D930029E11Rik|Unc5h4|mKIAA1777	unc-5 netrin receptor D	protein-coding
Diff_Nuc13444	chr4	56956212	56956351	+	0	NA	intron (NM_175518, intron 1 of 17)	intron (NM_175518, intron 1 of 17)	4020	NM_175518	242474	Mm.296632	NM_175518	ENSMUSG00000055296	Tmem245	A630051L19Rik|AI957324|D730040F13Rik	transmembrane protein 245	protein-coding
Diff_Nuc5111	chr17	56390812	56390951	+	0	NA	Intergenic	Intergenic	-5335	NM_010192	14154	Mm.290813	NM_010192	ENSMUSG00000043683	Fem1a	AW611390|Fem1aa	feminization 1 homolog a (C. elegans)	protein-coding
Diff_Nuc18092	chr1	128151422	128151561	+	0	NA	intron (NM_176957, intron 6 of 12)	intron (NM_176957, intron 6 of 12)	238013	NM_172484	210356	Mm.377234	NM_172484	ENSMUSG00000049690	Nckap5	8430408F21|D130011D22Rik|E030049G20Rik|Erih1|Erih2|Gm1548|Nap5	NCK-associated protein 5	protein-coding
Diff_Nuc15036	chr3	86536162	86536301	+	0	NA	intron (NM_030695, intron 48 of 56)	intron (NM_030695, intron 48 of 56)	-184026	NM_011839	23937	Mm.389466	NM_011839	ENSMUSG00000057777	Mab21l2	-	mab-21-like 2 (C. elegans)	protein-coding
Diff_Nuc5722	chr16	31957422	31957561	+	0	NA	3' UTR (NM_026554, exon 4 of 4)	3' UTR (NM_026554, exon 4 of 4)	8859	NM_026554	68092	Mm.290027	NM_026554	ENSMUSG00000022774	Ncbp2	20kDa|5930413E18Rik|AA536802|AI843301|C79367	nuclear cap binding protein subunit 2	protein-coding
Diff_Nuc19783	chr9	117491872	117492011	+	0	NA	intron (NM_001172121, intron 1 of 14)	RSINE1|SINE|B4	47090	NM_001172121	207181	Mm.326411	NM_178660	ENSMUSG00000039607	Rbms3	6720477E09Rik|8430436O14Rik	RNA binding motif, single stranded interacting protein	protein-coding
Diff_Nuc8166	chr19	32631672	32631811	+	0	NA	Intergenic	Lx5|LINE|L1	-38464	NM_001201470	23972	Mm.203916	NM_011864	ENSMUSG00000024899	Papss2	1810018P12Rik|AI159688|AtpsU2|Atpsk2|Sk2|bm	3'-phosphoadenosine 5'-phosphosulfate synthase 2	protein-coding
Diff_Nuc15030	chr3	85674612	85674751	+	0	NA	3' UTR (NM_177130, exon 2 of 2)	3' UTR (NM_177130, exon 2 of 2)	16759	NM_177130	320302	Mm.482978	NM_177130	ENSMUSG00000031286	Glt28d2	4732486J07Rik|Glt28d1l	glycosyltransferase 28 domain containing 2	protein-coding
Diff_Nuc1439	chr12	50449632	50449771	+	0	NA	Intergenic	L1Md_F2|LINE|L1	-34169	NM_001160112	15228	Mm.4704	NM_008241	ENSMUSG00000020950	Foxg1	2900064B05Rik|BF-1|Bf1|Hfh9|Hfhbf1	forkhead box G1	protein-coding
Diff_Nuc5685	chr16	28452102	28452241	+	0	NA	intron (NM_010199, intron 2 of 5)	intron (NM_010199, intron 2 of 5)	-6010	NM_001276420	14167	Mm.7996	NM_010199	ENSMUSG00000022523	Fgf12	AV114868|B230343J05Rik|FGF-12|FHF-1|Fhf1	fibroblast growth factor 12	protein-coding
Diff_Nuc12844	chr5	136772372	136772511	+	0	NA	intron (NM_009986, intron 20 of 23)	intron (NM_009986, intron 20 of 23)	-51631	NM_018825	23921	Mm.425294	NM_018825	ENSMUSG00000005057	Sh2b2	Aps	SH2B adaptor protein 2	protein-coding
Diff_Nuc14509	chr4	154196542	154196681	+	0	NA	Intergenic	Intergenic	-33698	NM_172878	242800	Mm.72944	NM_172878	ENSMUSG00000046637	Ttc34	4932418L02|B230396O12Rik	tetratricopeptide repeat domain 34	protein-coding
Diff_Nuc6193	chr15	16392982	16393121	+	0	NA	Intergenic	MTB-int|LTR|MaLR	-314805	NM_009869	12565	Mm.439758	NM_009869	ENSMUSG00000025370	Cdh9	-	cadherin 9	protein-coding
Diff_Nuc480	chr13	45284052	45284191	+	0	NA	Intergenic	Intergenic	-186656	NM_025772	94245	Mm.352311	NM_025772	ENSMUSG00000057531	Dtnbp1	5430437B18Rik|AW048963|Bloc1s8|dysbindin|sdy	dystrobrevin binding protein 1	protein-coding
Diff_Nuc9946	chr7	101049402	101049541	+	0	NA	Intergenic	L1Md_F2|LINE|L1	821082	NM_021427	58238	Mm.113787	NM_021427	ENSMUSG00000051515	Fam181b	A830059I20Rik|AB041569	family with sequence similarity 181, member B	protein-coding
Diff_Nuc1513	chr12	60548822	60548961	+	0	NA	Intergenic	Lx7|LINE|L1	-228421	NM_001033156	70611	Mm.311026	NM_001033156	ENSMUSG00000035329	Fbxo33	5730501N20Rik|AI642135	F-box protein 33	protein-coding
Diff_Nuc1017	chr13	108459632	108459771	+	0	NA	Intergenic	Intergenic	-17776	NR_045900	72257	Mm.234155	NR_045900	ENSMUSG00000102000	1700006H21Rik	-	RIKEN cDNA 1700006H21 gene	ncRNA
Diff_Nuc16378	chr2	93465772	93465911	+	0	NA	Intergenic	Intergenic	-16750	NM_007442	11695	Mm.389389	NM_007442	ENSMUSG00000040310	Alx4	lst	aristaless-like homeobox 4	protein-coding
Diff_Nuc4300	chr10	103476432	103476571	+	0	NA	Intergenic	MTB_Mm|LTR|MaLR	-129068	NM_001270898	100861880	Mm.441727	NM_001270898	ENSMUSG00000091779	Gm21293	-	predicted gene, 21293	protein-coding
Diff_Nuc10955	chr6	65564192	65564331	+	0	NA	intron (NM_001001495, intron 6 of 7)	MTD|LTR|MaLR	23869	NM_001001495	414084	Mm.117558	NM_001001495	ENSMUSG00000044162	Tnip3	9030611K07Rik|ABIN-3|LIND	TNFAIP3 interacting protein 3	protein-coding
Diff_Nuc4252	chr10	94104082	94104221	+	0	NA	Intergenic	MTEa|LTR|MaLR	47207	NR_015524	67723	Mm.116284	NR_015524	ENSMUSG00000097164	Cep83os	4932415G12Rik|Ccdc41os1	centrosomal protein 83, opposite strand	ncRNA
Diff_Nuc8373	chr19	55589272	55589411	+	0	NA	intron (NM_001293686, intron 7 of 7)	intron (NM_001293686, intron 7 of 7)	187353	NR_045318	77594	Mm.329924	NR_045318	ENSMUSG00000097632	4930552P12Rik	-	RIKEN cDNA 4930552P12 gene	ncRNA
Diff_Nuc9029	chr18	79318282	79318421	+	0	NA	Intergenic	Intergenic	-12221	NM_053099	240427	Mm.312871	NM_053099	ENSMUSG00000024548	Setbp1	C130092E12|Seb|mKIAA0437	SET binding protein 1	protein-coding
Diff_Nuc18612	chr1	184391092	184391231	+	0	NA	intron (NM_173378, intron 17 of 17)	intron (NM_173378, intron 17 of 17)	51863	NM_173378	209456	Mm.287450	NM_173378	ENSMUSG00000026510	Trp53bp2	53BP2|AI746547|ASPP2|PPP1R13A|Tp53bp2|X98550	transformation related protein 53 binding protein 2	protein-coding
Diff_Nuc14683	chr3	28635782	28635921	+	0	NA	Intergenic	Intergenic	39026	NM_031197	20526	Mm.18443	NM_031197	ENSMUSG00000027690	Slc2a2	AI266973|Glut-2|Glut2	solute carrier family 2 (facilitated glucose transporter), member 2	protein-coding
Diff_Nuc2857	chr11	79185232	79185371	+	0	NA	intron (NM_010897, intron 1 of 57)	intron (NM_010897, intron 1 of 57)	31907	NM_010897	18015	Mm.255596	NM_010897	ENSMUSG00000020716	Nf1	AW494271|Dsk9|E030030H24Rik|Mhdadsk9|Nf-1	neurofibromin 1	protein-coding
Diff_Nuc1637	chr12	78158012	78158151	+	0	NA	Intergenic	Intergenic	-94846	NM_001146176	17187	Mm.268548	NM_008558	ENSMUSG00000059436	Max	AA960152|AI875693|bHLHd4|bHLHd5|bHLHd6|bHLHd7|bHLHd8	Max protein	protein-coding
Diff_Nuc1452	chr12	51974342	51974481	+	0	NA	Intergenic	Intergenic	-131732	NR_126468	75494	Mm.416848	NR_126468		1700008C04Rik	-	RIKEN cDNA 1700008C04 gene	ncRNA
Diff_Nuc13433	chr4	56119832	56119971	+	0	NA	Intergenic	L2c|LINE|L2	-574554	NM_010637	16600	Mm.4325	NM_010637	ENSMUSG00000003032	Klf4	EZF|Gklf|Zie	Kruppel-like factor 4 (gut)	protein-coding
Diff_Nuc3873	chr10	58589622	58589761	+	0	NA	intron (NM_172788, intron 8 of 9)	intron (NM_172788, intron 8 of 9)	94904	NM_001024911	103080	Mm.346842	NM_001024910	ENSMUSG00000019917	Sept10	4921515A04Rik|9430099J10Rik|AA408298|AI874685	septin 10	protein-coding
Diff_Nuc8755	chr18	47903042	47903181	+	0	NA	Intergenic	L1Md_T|LINE|L1	-179384	NR_045404	414127	Mm.450768	NR_045404		G630055G22Rik	-	RIKEN cDNA G630055G22 gene	ncRNA
Diff_Nuc16206	chr2	69839562	69839701	+	0	NA	intron (NM_177783, intron 30 of 38)	intron (NM_177783, intron 30 of 38)	-37552	NM_177376	329421	Mm.99648	NM_177376	ENSMUSG00000042064	Myo3b	A430065P19Rik	myosin IIIB	protein-coding
Diff_Nuc15437	chr3	134243332	134243471	+	0	NA	Intergenic	RMER1B|Other|Other	-156802	NR_040600	75208	Mm.84580	NR_040600	ENSMUSG00000105765	4930539C22Rik	-	RIKEN cDNA 4930539C22 gene	ncRNA
Diff_Nuc1457	chr12	53339052	53339191	+	0	NA	intron (NM_029760, intron 6 of 10)	intron (NM_029760, intron 6 of 10)	140388	NM_029760	76826	Mm.244781	NM_029760	ENSMUSG00000035142	Nubpl	2410170E07Rik	nucleotide binding protein-like	protein-coding
Diff_Nuc18890	chr9	27226222	27226361	+	0	NA	Intergenic	Intergenic	21494	NM_001305058	75469	Mm.45824	NM_029299	ENSMUSG00000031991	Spata19	1700001L23Rik|AV047838|spergen-1	spermatogenesis associated 19	protein-coding
Diff_Nuc18367	chr1	156989782	156989921	+	0	NA	intron (NM_008209, intron 1 of 5)	L2a|LINE|L2	4059	NM_008209	15064	Mm.7580	NM_008209	ENSMUSG00000026471	Mr1	H2ls	major histocompatibility complex, class I-related	protein-coding
Diff_Nuc4217	chr10	88113722	88113861	+	0	NA	Intergenic	IAPLTR1a_Mm|LTR|ERVK	31977	NM_011461	20728	Mm.21642	NM_011461	ENSMUSG00000004359	Spic	AU019198|C76795|Prf|Spi-C	Spi-C transcription factor (Spi-1/PU.1 related)	protein-coding
Diff_Nuc5799	chr16	40240172	40240311	+	0	NA	Intergenic	Intergenic	-1292698	NM_001347236	268890	Mm.310524	NM_175548	ENSMUSG00000061080	Lsamp	5430428I19|AW046674|B130007O04Rik|D930023J12Rik|Lam|Lamp	limbic system-associated membrane protein	protein-coding
Diff_Nuc12970	chr5	144671932	144672071	+	0	NA	intron (NM_008886, intron 1 of 14)	intron (NM_008886, intron 1 of 14)	1131	NM_008886	18861	Mm.2950	NM_008886	ENSMUSG00000075569	Pms2	AW555130|Pmsl2	postmeiotic segregation increased 2 (S. cerevisiae)	protein-coding
Diff_Nuc11032	chr6	79518082	79518221	+	0	NA	Intergenic	Lx4B|LINE|L1	-249874	NM_001190732	100463512	Mm.461086	NM_001190732	ENSMUSG00000096887	Gm20594	Mtrnr2l	predicted gene, 20594	protein-coding
Diff_Nuc7369	chr14	53671122	53671261	+	0	NA	Intergenic	RMER19B|LTR|ERVK	-555821	NM_001170918	57269	Mm.88822	NM_020512	ENSMUSG00000059887	Olfr1507	MOR244-1|Mor28|Or28	olfactory receptor 1507	protein-coding
Diff_Nuc17657	chr1	68216692	68216831	+	0	NA	intron (NM_010154, intron 20 of 26)	Lx2B|LINE|L1	937872	NM_010154	13869	Mm.442420	NM_010154	ENSMUSG00000062209	Erbb4	Her4|c-erbB-4	erb-b2 receptor tyrosine kinase 4	protein-coding
Diff_Nuc16215	chr2	70801002	70801141	+	0	NA	Intergenic	Intergenic	55360	NM_001110512	228019	Mm.490343	NM_145524	ENSMUSG00000041975	Mettl8	BC004636|Tip	methyltransferase like 8	protein-coding
Diff_Nuc7962	chr19	7466982	7467121	+	0	NA	Intergenic	Intergenic	-9535	NM_001167831	68229	Mm.34766	NM_001033139	ENSMUSG00000024970	AI846148	1700105P06Rik	expressed sequence AI846148	protein-coding
Diff_Nuc3474	chr11	119866272	119866411	+	0	NA	intron (NM_001037755, intron 13 of 13)	intron (NM_001037755, intron 13 of 13)	-9740	NR_037225	100526518		NR_037225	ENSMUSG00000105524	Mir3065	mir-3065|mmu-mir-3065	microRNA 3065	ncRNA
Diff_Nuc4606	chr17	13428932	13429071	+	0	NA	exon (NM_001167913, exon 2 of 3)	exon (NM_001167913, exon 2 of 3)	5872	NM_001167913	236574		NM_001167913	ENSMUSG00000073457	Smok2b	Gm1847|Smok+129	sperm motility kinase 2B	protein-coding
Diff_Nuc19004	chr9	41413322	41413461	+	0	NA	intron (NR_131930, intron 3 of 3)	intron (NR_131930, intron 3 of 3)	23382	NR_029822	387236		NR_029822	ENSMUSG00000093354	Mir125b-1	Mirn125b|Mirn125b-1|mir-125b-1	microRNA 125b-1	ncRNA
Diff_Nuc1380	chr12	34282912	34283051	+	0	NA	Intergenic	Lx2|LINE|L1	168492	NM_172253	28071	Mm.196472	NM_172253	ENSMUSG00000020561	Twistnb	2410173G11|2810024J17Rik|D16Wsu83e	twist basic helix-loop-helix transcription factor 1 neighbor	protein-coding
Diff_Nuc3795	chr10	43843332	43843471	+	0	NA	Intergenic	Lx5|LINE|L1	-46852	NR_001582	70365	Mm.87073	NR_001582	ENSMUSG00000091358	Speer5-ps1	1700007C10Rik|SPEER-5|Speer5-ps	spermatogenesis associated glutamate (E)-rich protein 5, pseudogene 1	pseudo
Diff_Nuc593	chr13	54782512	54782651	+	0	NA	non-coding (NR_027395, exon 11 of 11)	non-coding (NR_027395, exon 11 of 11)	6588	NM_001146025	105239	Mm.25366	NM_134064	ENSMUSG00000034928	Rnf44	AI854545|mKIAA1100	ring finger protein 44	protein-coding
Diff_Nuc16292	chr2	83682612	83682751	+	0	NA	intron (NM_175514, intron 1 of 7)	intron (NM_175514, intron 1 of 7)	29796	NM_175514	241520	Mm.330351	NM_175514	ENSMUSG00000048388	Fam171b	D430039N05Rik	family with sequence similarity 171, member B	protein-coding
Diff_Nuc14345	chr4	145259412	145259551	+	0	NA	Intergenic	(TTCC)n|Simple_repeat|Simple_repeat	-1119	NM_001103158	100041379	Mm.276881	NM_001103158	ENSMUSG00000058186	Zfp980	Gm13242|OTTMUSG00000011070	zinc finger protein 980	protein-coding
Diff_Nuc11936	chr5	36255702	36255841	+	0	NA	intron (NM_027373, intron 1 of 16)	MTD-int|LTR|MaLR	19803	NM_027373	70292	Mm.125167	NM_027373	ENSMUSG00000029094	Afap1	2600003E23Rik|9630044L16Rik|AI848729|Afap|mKIAA3018	actin filament associated protein 1	protein-coding
Diff_Nuc15203	chr3	101620372	101620511	+	0	NA	intron (NM_172295, intron 6 of 6)	B1F2|SINE|Alu	19705	NM_172295	242125	Mm.32900	NM_172295	ENSMUSG00000044313	Mab21l3	-	mab-21-like 3 (C. elegans)	protein-coding
Diff_Nuc7602	chr14	72931822	72931961	+	0	NA	Intergenic	CpG	177919	NM_207636	319448	Mm.205421	NM_207636	ENSMUSG00000033487	Fndc3a	1700094E19Rik|D14Ertd453e|F730017H24Rik|Fndc3|sys	fibronectin type III domain containing 3A	protein-coding
Diff_Nuc6497	chr15	67238942	67239081	+	0	NA	Intergenic	Intergenic	180680	NR_045140	69334	Mm.63770	NR_045140	ENSMUSG00000102069	1700012I11Rik	-	RIKEN cDNA 1700012I11 gene	ncRNA
Diff_Nuc8290	chr19	45615152	45615291	+	0	NA	Intergenic	Intergenic	19833	NM_001330506	56626	Mm.46509	NM_020032	ENSMUSG00000025218	Poll	1110003P06Rik|AV007317	polymerase (DNA directed), lambda	protein-coding
Diff_Nuc16637	chr2	128243792	128243931	+	0	NA	intron (NR_028591, intron 1 of 1)	intron (NR_028591, intron 1 of 1)	11226	NR_028591	100043424	Mm.297222	NR_028589		Gm14005	OTTMUSG00000015351	predicted gene 14005	ncRNA
Diff_Nuc4144	chr10	80863362	80863501	+	0	NA	3' UTR (NM_008688, exon 10 of 10)	3' UTR (NM_008688, exon 10 of 10)	7622	NM_001099917	72273	Mm.253147	NM_001099917	ENSMUSG00000078439	Smim24	2210404O07Rik	small integral membrane protein 24	protein-coding
Diff_Nuc16841	chr2	152896352	152896491	+	0	NA	exon (NM_145536, exon 3 of 9)	exon (NM_145536, exon 3 of 9)	4730	NM_145536	228788	Mm.299979	NM_145536	ENSMUSG00000027474	Ccm2l	-	cerebral cavernous malformation 2-like	protein-coding
Diff_Nuc16250	chr2	75384262	75384401	+	0	NA	Intergenic	Intergenic	-102095	NR_040635	77269	Mm.389278	NR_040635		9430019J16Rik	-	RIKEN cDNA 9430019J16 gene	ncRNA
Diff_Nuc6032	chr16	92579732	92579871	+	0	NA	Intergenic	Intergenic	81409	NM_172469	209195	Mm.44747	NM_172469	ENSMUSG00000022949	Clic6	5730466J16Rik|AL022908|AW045520|CLIC1L	chloride intracellular channel 6	protein-coding
Diff_Nuc8612	chr18	30789802	30789941	+	0	NA	Intergenic	Intergenic	357321	NM_181414	225326	Mm.194127	NM_181414	ENSMUSG00000033628	Pik3c3	5330434F23Rik|Vps34	phosphoinositide-3-kinase, class 3	protein-coding
Diff_Nuc13877	chr4	117609912	117610051	+	0	NA	intron (NM_009176, intron 11 of 11)	intron (NM_009176, intron 11 of 11)	-7613	NM_001284192	11876	Mm.56897	NM_009711	ENSMUSG00000028539	Artn	neublastin	artemin	protein-coding
Diff_Nuc11992	chr5	39743182	39743321	+	0	NA	Intergenic	Intergenic	251562	NR_045416	75095	Mm.332354	NR_045416	ENSMUSG00000106741	4930513D17Rik	-	RIKEN cDNA 4930513D17 gene	ncRNA
Diff_Nuc1625	chr12	77718652	77718791	+	0	NA	intron (NM_013675, intron 15 of 35)	intron (NM_013675, intron 15 of 35)	-69809	NR_046044	100504549	Mm.440349	NR_046044		AI463170	-	expressed sequence AI463170	ncRNA
Diff_Nuc6352	chr15	43833932	43834071	+	0	NA	Intergenic	Intergenic	-132426	NM_175502	239408	Mm.41219	NM_175502	ENSMUSG00000054409	Tmem74	AA549547|B230382K22Rik	transmembrane protein 74	protein-coding
Diff_Nuc19440	chr9	79701502	79701641	+	0	NA	exon (NM_001081243, exon 4 of 6)	exon (NM_001081243, exon 4 of 6)	60123	NR_040734	74633	Mm.262175	NR_040734	ENSMUSG00000086918	4930429F24Rik	-	RIKEN cDNA 4930429F24 gene	ncRNA
Diff_Nuc19117	chr9	48620252	48620391	+	0	NA	intron (NM_001033324, intron 2 of 6)	intron (NM_001033324, intron 2 of 6)	23729	NM_001033324	235320	Mm.457803	NM_001033324	ENSMUSG00000066687	Zbtb16	AI467657|PLZF|Zfp145|lu	zinc finger and BTB domain containing 16	protein-coding
Diff_Nuc12719	chr5	128287832	128287971	+	0	NA	intron (NM_172885, intron 5 of 8)	MIR|SINE|MIR	175269	NM_177005	319804	Mm.237888	NM_177005	ENSMUSG00000049971	Glt1d1	5730455A04Rik	glycosyltransferase 1 domain containing 1	protein-coding
Diff_Nuc7427	chr14	58086512	58086651	+	0	NA	intron (NM_009376, intron 14 of 25)	MTB_Mm|LTR|MaLR	43673	NM_009376	21821	Mm.4653	NM_009376	ENSMUSG00000040040	Ift88	AW552028|Tg737|Tg737Rpw|TgN737Rpw|Ttc10|flexo|fxo|orpk|polaris	intraflagellar transport 88	protein-coding
Diff_Nuc13704	chr4	100171892	100172031	+	0	NA	intron (NM_001033773, intron 5 of 9)	RLTR9D|LTR|ERVK	20489	NM_001033773	381534	Mm.318133	NM_001033773	ENSMUSG00000069733	Ube2u	-	ubiquitin-conjugating enzyme E2U (putative)	protein-coding
Diff_Nuc12618	chr5	121147542	121147681	+	0	NA	intron (NM_008052, intron 2 of 9)	L2b|LINE|L2	14067	NM_008052	14357	Mm.1645	NM_008052	ENSMUSG00000029603	Dtx1	Fxit1|mKIAA4160	deltex 1, E3 ubiquitin ligase	protein-coding
Diff_Nuc2571	chr11	59844992	59845131	+	0	NA	intron (NM_001290013, intron 2 of 6)	intron (NM_001290013, intron 2 of 6)	5446	NM_008819	18618	Mm.2731	NM_008819	ENSMUSG00000000301	Pemt	PEAMT|PEMT2|PLMT|Pempt|Pempt2	phosphatidylethanolamine N-methyltransferase	protein-coding
Diff_Nuc9743	chr7	74633092	74633231	+	0	NA	Intergenic	Intergenic	-115417	NM_001291195	17258	Mm.132788	NM_001033713	ENSMUSG00000030557	Mef2a	A430079H05Rik	myocyte enhancer factor 2A	protein-coding
Diff_Nuc2816	chr11	76801012	76801151	+	0	NA	TTS (NM_178645)	TTS (NM_178645)	-11018	NM_010484	15567	Mm.300318	NM_010484	ENSMUSG00000020838	Slc6a4	5-HTT|AI323329|Htt|Sert	solute carrier family 6 (neurotransmitter transporter, serotonin), member 4	protein-coding
Diff_Nuc151	chrX	166440182	166440321	+	0	NA	Intergenic	Intergenic	-23402	NR_029457	654820	Mm.34441	NM_001039559	ENSMUSG00000072844	G530011O06Rik	-	RIKEN cDNA G530011O06 gene	ncRNA
Diff_Nuc4327	chr10	110656612	110656751	+	0	NA	intron (NM_001003717, intron 2 of 22)	intron (NM_001003717, intron 2 of 22)	54823	NM_175489	237542	Mm.220204	NM_175489	ENSMUSG00000020189	Osbpl8	AA536976|AA536995|C730029P18Rik|D330025H14Rik|ORP-8	oxysterol binding protein-like 8	protein-coding
Diff_Nuc10999	chr6	72467392	72467531	+	0	NA	Intergenic	Intergenic	-26924	NM_007599	12332	Mm.18626	NM_007599	ENSMUSG00000056737	Capg	gCap39|mbh1	capping protein (actin filament), gelsolin-like	protein-coding
Diff_Nuc19635	chr9	106333632	106333771	+	0	NA	exon (NM_001324533, exon 4 of 4)	exon (NM_001324533, exon 4 of 4)	1959	NM_009082	19944	Mm.288696	NM_009082	ENSMUSG00000048758	Rpl29	Rpl43	ribosomal protein L29	protein-coding
Diff_Nuc12973	chr5	144762492	144762631	+	0	NA	intron (NM_177682, intron 7 of 14)	ID_B1|SINE|B4	13161	NM_177682	231874	Mm.320432	NM_177682	ENSMUSG00000029617	Ccz1	AU022870	CCZ1 vacuolar protein trafficking and biogenesis associated	protein-coding
Diff_Nuc1938	chr12	109633922	109634061	+	0	NA	intron (NM_001286346, intron 1 of 21)	intron (NM_001286346, intron 1 of 21)	-14852	NM_001043336	68519	Mm.236645	NM_001043335	ENSMUSG00000058070	Eml1	1110008N23Rik|A930030P13Rik|AA171013|AI847476|AI853955|ELP79|EMAP|EMAPL|heco	echinoderm microtubule associated protein like 1	protein-coding
Diff_Nuc9425	chr7	33297742	33297881	+	0	NA	Intergenic	Intergenic	71251	NM_001256066	384589	Mm.454021	NM_001256066	ENSMUSG00000078757	Scgb1b29	Abpa29|Abpa29_a7|EG384589|Gm5326	secretoglobin, family 1B, member 29	protein-coding
Diff_Nuc7543	chr14	67765342	67765481	+	0	NA	Intergenic	Intergenic	-74103	NM_001205188	71978	Mm.273997	NM_028032	ENSMUSG00000022052	Ppp2r2a	2410004D02Rik|mKIAA1541	protein phosphatase 2, regulatory subunit B, alpha	protein-coding
Diff_Nuc16722	chr2	140832142	140832281	+	0	NA	intron (NM_001013802, intron 4 of 18)	intron (NM_001013802, intron 4 of 18)	-334999	NM_178382	71436	Mm.426781	NM_178382	ENSMUSG00000051379	Flrt3	5530600M07Rik|C430047I10Rik|mKIAA1469	fibronectin leucine rich transmembrane protein 3	protein-coding
Diff_Nuc18541	chr1	177657192	177657331	+	0	NA	intron (NM_029453, intron 6 of 27)	intron (NM_029453, intron 6 of 27)	28537	NM_029453	75820	Mm.50361	NM_029453	ENSMUSG00000026523	Wdr64	4930415O10Rik|4930511H01Rik	WD repeat domain 64	protein-coding
Diff_Nuc12944	chr5	142939372	142939511	+	0	NA	promoter-TSS (NM_172725)	promoter-TSS (NM_172725)	-444	NM_172725	231855	Mm.78250	NM_172725	ENSMUSG00000039623	Ap5z1	C330006K01Rik	adaptor-related protein complex 5, zeta 1 subunit	protein-coding
Diff_Nuc299	chr13	22477082	22477221	+	0	NA	Intergenic	Intergenic	2744	NM_134213	171247	Mm.377203	NM_134213	ENSMUSG00000069292	Vmn1r199	V1rh4	vomeronasal 1 receptor 199	protein-coding
Diff_Nuc17328	chr1	18161242	18161381	+	0	NA	Intergenic	RLTR13D5|LTR|ERVK	-25328	NM_001347048	78081	Mm.319913	NM_030033	ENSMUSG00000025774	Crisp4	9230112K08Rik	cysteine-rich secretory protein 4	protein-coding
Diff_Nuc10196	chr7	126486222	126486361	+	0	NA	Intergenic	Intergenic	116495	NM_025989	67133	Mm.46403	NM_025989	ENSMUSG00000030954	Gp2	2310037I18Rik|AV060639	glycoprotein 2 (zymogen granule membrane)	protein-coding
Diff_Nuc9405	chr7	31357262	31357401	+	0	NA	intron (NM_029274, intron 30 of 36)	intron (NM_029274, intron 30 of 36)	6885	NM_145580	101883	Mm.333757	NM_145580	ENSMUSG00000036826	Igflr1	F630003I17Rik|Tmem149	IGF-like family receptor 1	protein-coding
Diff_Nuc4545	chr17	8534652	8534791	+	0	NA	non-coding (NR_028280, exon 2 of 2)	non-coding (NR_028280, exon 2 of 2)	1117	NM_178774	320111	Mm.442510	NM_178774	ENSMUSG00000055945	Prr18	9630019K15Rik	proline rich 18	protein-coding
Diff_Nuc19888	chr8	3857132	3857271	+	0	NA	Intergenic	MIR|SINE|MIR	-2915	NM_130905	170780	Mm.52281	NM_130905	ENSMUSG00000040197	Cd209e	SIGNR4|mSIGNR4	CD209e antigen	protein-coding
Diff_Nuc18309	chr1	152283822	152283961	+	0	NA	exon (NM_133780, exon 39 of 52)	exon (NM_133780, exon 39 of 52)	29404	NM_021400	96875	Mm.174256	NM_021400	ENSMUSG00000006014	Prg4	CACP|DOL54|JCAP|MSF|SZP|lubricin	proteoglycan 4 (megakaryocyte stimulating factor, articular superficial zone protein)	protein-coding
Diff_Nuc7385	chr14	55193532	55193671	+	0	NA	intron (NM_010590, intron 1 of 7)	intron (NM_010590, intron 1 of 7)	2897	NM_010590	16475	Mm.100253	NM_010590	ENSMUSG00000022178	Ajuba	Jub	ajuba LIM protein	protein-coding
Diff_Nuc9926	chr7	96976532	96976671	+	0	NA	intron (NM_181407, intron 6 of 13)	intron (NM_181407, intron 6 of 13)	75538	NM_001162979	70884	Mm.252823	NM_001162979	ENSMUSG00000039391	Ccdc81	4921513D09Rik	coiled-coil domain containing 81	protein-coding
Diff_Nuc7366	chr14	53460682	53460821	+	0	NA	Intergenic	MTE-int|LTR|MaLR	-345381	NM_001170918	57269	Mm.88822	NM_020512	ENSMUSG00000059887	Olfr1507	MOR244-1|Mor28|Or28	olfactory receptor 1507	protein-coding
Diff_Nuc14050	chr4	128421652	128421791	+	0	NA	intron (NM_001195083, intron 2 of 6)	intron (NM_001195083, intron 2 of 6)	-14781	NM_001009819	215493	Mm.300900	NM_001009819	ENSMUSG00000028794	A3galt2	Gm433|iGb3|iGb3S	alpha 1,3-galactosyltransferase 2 (isoglobotriaosylceramide synthase)	protein-coding
Diff_Nuc6792	chr15	86050852	86050991	+	0	NA	intron (NM_145476, intron 1 of 12)	intron (NM_145476, intron 1 of 12)	6032	NM_145476	223754	Mm.28904	NM_145476	ENSMUSG00000051864	Tbc1d22a	BC023106|D15Ertd781e	TBC1 domain family, member 22a	protein-coding
Diff_Nuc2795	chr11	75630782	75630921	+	0	NA	intron (NR_136933, intron 1 of 3)	intron (NR_136933, intron 1 of 3)	-21289	NM_007873	13447	Mm.5137	NM_007873	ENSMUSG00000020848	Doc2b	-	double C2, beta	protein-coding
Diff_Nuc17656	chr1	68185152	68185291	+	0	NA	intron (NM_010154, intron 20 of 26)	intron (NM_010154, intron 20 of 26)	969412	NM_010154	13869	Mm.442420	NM_010154	ENSMUSG00000062209	Erbb4	Her4|c-erbB-4	erb-b2 receptor tyrosine kinase 4	protein-coding
Diff_Nuc16923	chr2	157232402	157232541	+	0	NA	Intergenic	Intergenic	-17558	NM_009271	20779	Mm.22845	NM_009271	ENSMUSG00000027646	Src	AW259666|pp60c-src	Rous sarcoma oncogene	protein-coding
Diff_Nuc9435	chr7	35114782	35114921	+	0	NA	Intergenic	Intergenic	-44223	NM_172741	233103	Mm.491097	NM_172741	ENSMUSG00000066571	4931406P16Rik	AA553327|mKIAA0355	RIKEN cDNA 4931406P16 gene	protein-coding
Diff_Nuc1110	chr13	119494152	119494291	+	0	NA	Intergenic	Intergenic	-9285	NM_008002	14165	Mm.317323	NM_008002	ENSMUSG00000021732	Fgf10	AEY17|BB213776|Fgf-10|Gsfaey17	fibroblast growth factor 10	protein-coding
Diff_Nuc2665	chr11	68198982	68199121	+	0	NA	exon (NM_008744, exon 2 of 7)	exon (NM_008744, exon 2 of 7)	1277	NM_008744	18208	Mm.39095	NM_008744	ENSMUSG00000020902	Ntn1	AI561871|BC019633|Netrin-1	netrin 1	protein-coding
Diff_Nuc12425	chr5	108863902	108864041	+	0	NA	promoter-TSS (NM_007507)	promoter-TSS (NM_007507)	-574	NM_007507	11958	Mm.136093	NM_007507	ENSMUSG00000050856	Atp5k	2610008D24Rik|Atp5i|Lfm1	ATP synthase, H+ transporting, mitochondrial F1F0 complex, subunit E	protein-coding
Diff_Nuc7321	chr14	48508242	48508381	+	0	NA	Intergenic	Intergenic	-10228	NR_045959	73961	Mm.390702	NR_045959		4930447J18Rik	4930425M13Rik	RIKEN cDNA 4930447J18 gene	ncRNA
Diff_Nuc3020	chr11	94405682	94405821	+	0	NA	exon (NM_001013381, exon 4 of 9)	exon (NM_001013381, exon 4 of 9)	4770	NM_001013381	237926	Mm.342275	NM_001013381	ENSMUSG00000039096	Rsad1	B430319G23|BC056485	radical S-adenosyl methionine domain containing 1	protein-coding
Diff_Nuc17453	chr1	38969642	38969781	+	0	NA	Intergenic	L1_Mur2|LINE|L1	-14706	NM_145142	98388	Mm.260054	NM_145142	ENSMUSG00000026080	Chst10	AI507003|AU041319|Hnk-1st|ST	carbohydrate sulfotransferase 10	protein-coding
Diff_Nuc7221	chr14	34772912	34773051	+	0	NA	intron (NM_015745, intron 2 of 3)	intron (NM_015745, intron 2 of 3)	5773	NM_015745	19661	Mm.436622	NM_015745	ENSMUSG00000041534	Rbp3	Irbp|Rbp-3	retinol binding protein 3, interstitial	protein-coding
Diff_Nuc19963	chr8	12273542	12273681	+	0	NA	Intergenic	Intergenic	-112160	NR_027975	434280	Mm.447484	NM_001013812	ENSMUSG00000047935	Gm5607	EG434280	predicted gene 5607	ncRNA
Diff_Nuc8632	chr18	34082392	34082531	+	0	NA	intron (NM_013512, intron 2 of 23)	RMER1B|Other|Other	84399	NM_013512	13824	Mm.3465	NM_013512	ENSMUSG00000024376	Epb41l4a	Epb4.1l4|Epb4.1l4a|NBL4	erythrocyte membrane protein band 4.1 like 4a	protein-coding
Diff_Nuc19988	chr8	13484572	13484711	+	0	NA	intron (NM_019521, intron 3 of 14)	intron (NM_019521, intron 3 of 14)	9894	NM_019521	14456	Mm.3982	NM_019521	ENSMUSG00000031451	Gas6	Gas-6	growth arrest specific 6	protein-coding
Diff_Nuc3886	chr10	59218262	59218401	+	0	NA	intron (NM_144822, intron 5 of 11)	intron (NM_144822, intron 5 of 11)	53020	NM_001291443	216001	Mm.27199	NM_144822	ENSMUSG00000020111	Micu1	C730016L05Rik|Calc|Cbara1	mitochondrial calcium uptake 1	protein-coding
Diff_Nuc14908	chr3	62869442	62869581	+	0	NA	Intergenic	L1Md_F|LINE|L1	-229846	NM_001289462	17380	Mm.296022	NM_008604	ENSMUSG00000027820	Mme	6030454K05Rik|C85356|CALLA|CD10|NEP|SFE	membrane metallo endopeptidase	protein-coding
Diff_Nuc6828	chr15	88652582	88652721	+	0	NA	intron (NM_029720, intron 5 of 9)	intron (NM_029720, intron 5 of 9)	2575	NM_029720	76737	Mm.292567	NM_029720	ENSMUSG00000023272	Creld2	5730592L21Rik|C85758	cysteine-rich with EGF-like domains 2	protein-coding
Diff_Nuc19330	chr9	65802062	65802201	+	0	NA	intron (NM_173185, intron 2 of 13)	intron (NM_173185, intron 2 of 13)	45314	NM_173185	214897	Mm.325816	NM_173185	ENSMUSG00000032384	Csnk1g1	9130020E21Rik	casein kinase 1, gamma 1	protein-coding
Diff_Nuc1946	chr12	110198052	110198191	+	0	NA	intron (NM_177602, intron 2 of 6)	intron (NM_177602, intron 2 of 6)	65639	NM_177602	212198	Mm.342082	NM_177602	ENSMUSG00000040877	Wdr25	B930090D16Rik	WD repeat domain 25	protein-coding
Diff_Nuc12525	chr5	114425412	114425551	+	0	NA	intron (NM_198109, intron 2 of 14)	intron (NM_198109, intron 2 of 14)	18285	NM_198109	231637	Mm.389682	NM_198109	ENSMUSG00000042121	Ssh1	AW551225|Gm1394|Gm1395|SSH-1|SSH-1L	slingshot homolog 1 (Drosophila)	protein-coding
Diff_Nuc15118	chr3	93872232	93872371	+	0	NA	Intergenic	Intergenic	4265	NM_207273	399676	Mm.454051	NM_207273	ENSMUSG00000094163	Tdpoz5	-	TD and POZ domain containing 5	protein-coding
Diff_Nuc3310	chr11	113611942	113612081	+	0	NA	intron (NM_001163346, intron 1 of 1)	intron (NM_001163346, intron 1 of 1)	463	NM_020006	56699	Mm.293378	NM_020006	ENSMUSG00000041598	Cdc42ep4	1500041M20Rik|Borg4|CEP4	CDC42 effector protein (Rho GTPase binding) 4	protein-coding
Diff_Nuc4166	chr10	82576822	82576961	+	0	NA	intron (NM_021439, intron 2 of 2)	intron (NM_021439, intron 2 of 2)	128649	NM_021439	58250	Mm.360747	NM_021439	ENSMUSG00000034612	Chst11	1110020P09Rik|C4ST|C4ST-1|C4ST1|C4s	carbohydrate sulfotransferase 11	protein-coding
Diff_Nuc11254	chr6	97310952	97311091	+	0	NA	intron (NM_001346639, intron 5 of 22)	RLTR30|LTR|ERV1	98259	NM_001346639	232288	Mm.27789	NM_145148	ENSMUSG00000030064	Frmd4b	6030440G05Rik|C87375|GOBLIN|GRSP1|R74720	FERM domain containing 4B	protein-coding
Diff_Nuc20026	chr8	16602872	16603011	+	0	NA	intron (NM_053171, intron 5 of 69)	MTEa|LTR|MaLR	-434103	NR_037214	100526464		NR_037214	ENSMUSG00000093142	Mir3106	mir-3106|mmu-mir-3106	microRNA 3106	ncRNA
Diff_Nuc788	chr13	75216212	75216351	+	0	NA	Intergenic	Lx3A|LINE|L1	-11154	NM_013628	18548	Mm.1333	NM_013628	ENSMUSG00000021587	Pcsk1	Nec-1|Nec1|PC1|PC3|Phpp-1|SPC3	proprotein convertase subtilisin/kexin type 1	protein-coding
Diff_Nuc8572	chr18	24270622	24270761	+	0	NA	intron (NM_172625, intron 3 of 4)	intron (NM_172625, intron 3 of 4)	9629	NM_172625	225280	Mm.258973	NM_172625	ENSMUSG00000047989	Ino80c	D030070L09Rik	INO80 complex subunit C	protein-coding
Diff_Nuc17939	chr1	95940242	95940381	+	0	NA	intron (NM_008798, intron 1 of 4)	intron (NM_008798, intron 1 of 4)	8819	NM_008798	18566	Mm.5024	NM_008798	ENSMUSG00000026285	Pdcd1	Ly101|PD-1|Pdc1	programmed cell death 1	protein-coding
Diff_Nuc13632	chr4	87900752	87900891	+	0	NA	intron (NM_001081184, intron 15 of 43)	RLTR10|LTR|ERVK	132877	NR_030478	735282		NR_030478	ENSMUSG00000070077	Mir491	Mirn491|mir-491|mmu-mir-491	microRNA 491	ncRNA
Diff_Nuc10115	chr7	119277522	119277661	+	0	NA	intron (NM_015814, intron 4 of 7)	B4A|SINE|B4	24980	NM_015814	50781	Mm.55143	NM_015814	ENSMUSG00000030772	Dkk3	AW061014|C87148	dickkopf WNT signaling pathway inhibitor 3	protein-coding
Diff_Nuc10094	chr7	117441552	117441691	+	0	NA	Intergenic	Intergenic	76404	NM_009302	20947	Mm.334144	NM_009302	ENSMUSG00000031015	Swap70	70kDa|AV235546	SWA-70 protein	protein-coding
Diff_Nuc7205	chr14	33240772	33240911	+	0	NA	intron (NM_009891, intron 8 of 15)	intron (NM_009891, intron 8 of 15)	37195	NM_021712	20508	Mm.190503	NM_021712	ENSMUSG00000100241	Slc18a3	VAChT|VAT	solute carrier family 18 (vesicular monoamine), member 3	protein-coding
Diff_Nuc15163	chr3	97157792	97157931	+	0	NA	Intergenic	RMER17A2|LTR|ERVK	57241	NM_146275	258272	Mm.377406	NM_146275	ENSMUSG00000051392	Olfr1402	MOR217-1	olfactory receptor 1402	protein-coding
Diff_Nuc4099	chr10	79688762	79688901	+	0	NA	promoter-TSS (NM_023431)	promoter-TSS (NM_023431)	-512	NM_023431	68114	Mm.273418	NM_023431	ENSMUSG00000020156	Mum1	2610019J09|9430059D04Rik|UBE-1C2	melanoma associated antigen (mutated) 1	protein-coding
Diff_Nuc11484	chr6	125066042	125066181	+	0	NA	intron (NM_001346610, intron 25 of 38)	ID_B1|SINE|B4	-15790	NM_138747	110109	Mm.29203	NM_138747	ENSMUSG00000038279	Nop2	120kDa|A530002O17|Nol1	NOP2 nucleolar protein	protein-coding
Diff_Nuc6996	chr14	8836842	8836981	+	0	NA	intron (NM_001331064, intron 1 of 8)	intron (NM_001331064, intron 1 of 8)	1431	NM_001331064	66082	Mm.181473	NM_025341	ENSMUSG00000025277	Abhd6	0610041D24Rik|AA673485|AV065425	abhydrolase domain containing 6	protein-coding
Diff_Nuc15741	chr2	21867432	21867571	+	0	NA	Intergenic	MTA_Mm|LTR|MaLR	-281629	NM_148413	667663	Mm.330033	NM_148413	ENSMUSG00000025716	Myo3a	9030416P08Rik	myosin IIIA	protein-coding
Diff_Nuc12848	chr5	136970892	136971031	+	0	NA	intron (NM_009986, intron 1 of 23)	MTE2a|LTR|MaLR	70890	NM_001291239	13047	Mm.320317	NM_009986	ENSMUSG00000029705	Cux1	CDP|Cutl1|Cux|Cux-1	cut-like homeobox 1	protein-coding
Diff_Nuc12447	chr5	111032072	111032211	+	0	NA	promoter-TSS (NM_001122639)	promoter-TSS (NM_001122639)	-383	NM_001122639	231605	Mm.275748	NM_198306	ENSMUSG00000033316	Galnt9	GalNAc-T9	UDP-N-acetyl-alpha-D-galactosamine:polypeptide N-acetylgalactosaminyltransferase 9	protein-coding
Diff_Nuc2167	chr11	10441282	10441421	+	0	NA	Intergenic	Lx3C|LINE|L1	-572668	NM_177033	319922	Mm.337851	NM_177033	ENSMUSG00000050830	Vwc2	A930041G11Rik|G11|PSST739|UNQ739|cradin	von Willebrand factor C domain containing 2	protein-coding
Diff_Nuc15710	chr2	18124392	18124531	+	0	NA	intron (NR_045539, intron 18 of 24)	B1_Mus2|SINE|Alu	138249	NM_001252561	17354	Mm.209175	NM_010804	ENSMUSG00000026743	Mllt10	Af10|B130021D15Rik|D630001B22Rik|mKIAA4140	myeloid/lymphoid or mixed-lineage leukemia; translocated to, 10	protein-coding
Diff_Nuc20096	chr8	26140162	26140301	+	0	NA	intron (NM_001081187, intron 7 of 8)	intron (NM_001081187, intron 7 of 8)	9203	NM_001081187	330723	Mm.334452	NM_001081187	ENSMUSG00000037406	Htra4	B430206E18Rik	HtrA serine peptidase 4	protein-coding
Diff_Nuc3539	chr11	121796242	121796381	+	0	NA	Intergenic	RLTR45|LTR|ERVK	104779	NM_029049	74675	Mm.61213	NM_029049	ENSMUSG00000039198	Ptchd3	4930451E13Rik|4933440L20Rik|RNDEu-3	patched domain containing 3	protein-coding
Diff_Nuc20080	chr8	23889792	23889931	+	0	NA	intron (NM_008872, intron 12 of 13)	(CACAG)n|Simple_repeat|Simple_repeat	21667	NM_008872	18791	Mm.154660	NM_008872	ENSMUSG00000031538	Plat	AU020998|AW212668|D8Ertd2e|tPA	plasminogen activator, tissue	protein-coding
Diff_Nuc15374	chr3	125778662	125778801	+	0	NA	Intergenic	L1_Mus3|LINE|L1	-137263	NM_011674	22239	Mm.306021	NM_011674	ENSMUSG00000032854	Ugt8a	AI850488|AW455908|Cgt|Ugt8|mCerGT	UDP galactosyltransferase 8A	protein-coding
Diff_Nuc9060	chr18	82479042	82479181	+	0	NA	Intergenic	Intergenic	97058	NM_008082	14427	Mm.6219	NM_008082	ENSMUSG00000024553	Galr1	Galnr1	galanin receptor 1	protein-coding
Diff_Nuc3055	chr11	96683352	96683491	+	0	NA	exon (NM_001130453, exon 2 of 4)	exon (NM_001130453, exon 2 of 4)	1906	NM_001130453	18023	Mm.6743	NM_008686	ENSMUSG00000038615	Nfe2l1	AA408798|AW212678|LCR-F1|Lcrf1|NRF1|TCF-11|TCF11	nuclear factor, erythroid derived 2,-like 1	protein-coding
Diff_Nuc12360	chr5	100251462	100251601	+	0	NA	Intergenic	L1_Rod|LINE|L1	-68539	NR_131054	330133	Mm.447264	NR_131054	ENSMUSG00000105218	Gm38413	A830083F22	predicted gene, 38413	ncRNA
Diff_Nuc5974	chr16	84716772	84716911	+	0	NA	TTS (NM_017404)	TTS (NM_017404)	2456	NR_029565	387173		NR_029565	ENSMUSG00000065397	Mir155	Mirn155|mir-155|mmu-mir-155	microRNA 155	ncRNA
Diff_Nuc19274	chr9	62416872	62417011	+	0	NA	Intergenic	Intergenic	-32090	NM_175484	235431	Mm.335229	NM_175484	ENSMUSG00000041729	Coro2b	CLIPINC|E130012P22Rik	coronin, actin binding protein, 2B	protein-coding
Diff_Nuc5672	chr16	25381092	25381231	+	0	NA	intron (NM_175165, intron 4 of 5)	intron (NM_175165, intron 4 of 5)	94258	NM_175165	71338	Mm.126851	NM_175165	ENSMUSG00000048399	Tprg	5430420C16Rik|Tprg1	transformation related protein 63 regulated	protein-coding
Diff_Nuc14995	chr3	80356782	80356921	+	0	NA	Intergenic	Intergenic	249862	NM_013540	14800	Mm.220224	NM_013540	ENSMUSG00000033981	Gria2	GluA2|GluR-B|Glur-2|Glur2	glutamate receptor, ionotropic, AMPA2 (alpha 2)	protein-coding
Diff_Nuc14124	chr4	132752562	132752701	+	0	NA	TTS (NR_105984)	TTS (NR_105984)	1061	NR_105984	102466215		NR_105984	ENSMUSG00000099202	Mir7017	Gm27945|mmu-mir-7017	microRNA 7017	ncRNA
Diff_Nuc10485	chr7	148619872	148620011	+	0	NA	intron (NM_026646, intron 2 of 9)	intron (NM_026646, intron 2 of 9)	552	NM_001177576	68267	Mm.33729	NM_026646	ENSMUSG00000019082	Slc25a22	1300006L01Rik|AI060884|Gc1	solute carrier family 25 (mitochondrial carrier, glutamate), member 22	protein-coding
Diff_Nuc872	chr13	93171942	93172081	+	0	NA	Intergenic	Intergenic	-23913	NM_175455	218440	Mm.213623	NM_175455	ENSMUSG00000045034	Ankrd34b	6430502M16Rik|DP58	ankyrin repeat domain 34B	protein-coding
Diff_Nuc5714	chr16	31571722	31571861	+	0	NA	Intergenic	Intergenic	-91738	NM_001252435	13383	Mm.382	NM_007862	ENSMUSG00000022770	Dlg1	B130052P05Rik|Dlgh1|E-dlg/SAP97|SAP-97|SAP97|mKIAA4187	discs, large homolog 1 (Drosophila)	protein-coding
Diff_Nuc16851	chr2	153286052	153286191	+	0	NA	intron (NM_001134300, intron 4 of 10)	intron (NM_001134300, intron 4 of 10)	-15906	NM_001001986	329540	Mm.50600	NM_001001986	ENSMUSG00000061411	Nol4l	4931410H15|8430427H17Rik|AI429157|Gm1636	nucleolar protein 4-like	protein-coding
Diff_Nuc3022	chr11	94500602	94500741	+	0	NA	intron (NM_133807, intron 5 of 6)	intron (NM_133807, intron 5 of 6)	9533	NM_133807	98238	Mm.172720	NM_133807	ENSMUSG00000020869	Lrrc59	AA959742|C78668	leucine rich repeat containing 59	protein-coding
Diff_Nuc15245	chr3	107034222	107034361	+	0	NA	intron (NM_001256174, intron 1 of 2)	intron (NM_001256174, intron 1 of 2)	759	NM_001256174	319929	Mm.30453	NM_001256174	ENSMUSG00000094613	A630076J17Rik	-	RIKEN cDNA A630076J17 gene	protein-coding
Diff_Nuc10028	chr7	108662672	108662811	+	0	NA	Intergenic	Intergenic	38851	NR_029791	387157		NR_029791	ENSMUSG00000065446	Mir139	Mirn139|mir-139|mmu-mir-139	microRNA 139	ncRNA
Diff_Nuc20691	chr8	106209962	106210101	+	0	NA	Intergenic	Intergenic	82332	NR_045730	71058	Mm.67707	NR_045730	ENSMUSG00000110336	4933400L20Rik	-	RIKEN cDNA 4933400L20 gene	ncRNA
Diff_Nuc12063	chr5	52526742	52526881	+	0	NA	TTS (NR_105845)	TTS (NR_105845)	445	NR_105845	102466648		NR_105845	ENSMUSG00000098726	Mir6417	Gm27334|mmu-mir-6417	microRNA 6417	ncRNA
Diff_Nuc9342	chr7	28341462	28341601	+	0	NA	exon (NM_175107, exon 2 of 10)	exon (NM_175107, exon 2 of 10)	3222	NM_175107	66367	Mm.29831	NM_175107	ENSMUSG00000049643	2310022A10Rik	-	RIKEN cDNA 2310022A10 gene	protein-coding
Diff_Nuc172	chrX	166446512	166446651	+	0	NA	Intergenic	Intergenic	-29732	NR_029457	654820	Mm.34441	NM_001039559	ENSMUSG00000072844	G530011O06Rik	-	RIKEN cDNA G530011O06 gene	ncRNA
Diff_Nuc16931	chr2	157385662	157385801	+	0	NA	promoter-TSS (NM_001291128)	promoter-TSS (NM_001291128)	-83	NM_001291129	18111	Mm.34330	NM_010923	ENSMUSG00000067786	Nnat	5730414I02Rik|AW107673|Peg5	neuronatin	protein-coding
Diff_Nuc14102	chr4	131218882	131219021	+	0	NA	Intergenic	Intergenic	175242	NM_011214	19273	Mm.4860	NM_011214	ENSMUSG00000028909	Ptpru	Ftp-1|PCP-2|PTP|PTP-lambda|PTPlambda|Pcp2|Ptpf|Ptprl|R-PTP-U|R-PTP-psi|RPTPlambda	protein tyrosine phosphatase, receptor type, U	protein-coding
Diff_Nuc17781	chr1	85164282	85164421	+	0	NA	Intergenic	Intergenic	-31835	NM_001081746	665378	Mm.440912	NM_001081746		Gm7609	EG665378	predicted pseudogene 7609	protein-coding
Diff_Nuc991	chr13	104663972	104664111	+	0	NA	intron (NM_001005868, intron 4 of 26)	intron (NM_001005868, intron 4 of 26)	46625	NM_001289473	59079	Mm.277354	NM_021563	ENSMUSG00000021709	Erbin	1700028E05Rik|Erbb2ip|mKIAA1225	Erbb2 interacting protein	protein-coding
Diff_Nuc14652	chr3	22054872	22055011	+	0	NA	intron (NM_030732, intron 2 of 15)	MTA_Mm|LTR|MaLR	79367	NM_030732	81004	Mm.202966	NM_030732	ENSMUSG00000027630	Tbl1xr1	8030499H02Rik|A630076E03Rik|AW539987|C21|C230089I12Rik|DC42|Ira1|TBLR1	transducin (beta)-like 1X-linked receptor 1	protein-coding
Diff_Nuc19206	chr9	57492202	57492341	+	0	NA	intron (NM_001304761, intron 2 of 14)	intron (NM_001304761, intron 2 of 14)	1189	NM_007783	12988	Mm.21974	NM_007783	ENSMUSG00000032312	Csk	AW212630|p50CSK	c-src tyrosine kinase	protein-coding
Diff_Nuc6284	chr15	33430482	33430621	+	0	NA	intron (NM_176073, intron 7 of 7)	intron (NM_176073, intron 7 of 7)	-94857	NR_033608	73486	Mm.483393	NM_028551	ENSMUSG00000058101	1700084J12Rik	-	ribosomal protein L7-like 1 pseudogene	pseudo
Diff_Nuc16664	chr2	130843722	130843861	+	0	NA	intron (NM_009730, intron 25 of 28)	MT2A|LTR|ERVL	22343	NR_105969	102465606		NR_105969	ENSMUSG00000098686	Mir6973b	Gm27815|mmu-mir-6973b	microRNA 6973b	ncRNA
Diff_Nuc2661	chr11	67923902	67924041	+	0	NA	intron (NM_018768, intron 7 of 7)	intron (NM_018768, intron 7 of 7)	-110423	NR_105833	102465219		NR_105833	ENSMUSG00000099174	Mir6406	Gm27981|mmu-mir-6406	microRNA 6406	ncRNA
Diff_Nuc19660	chr9	107539542	107539681	+	0	NA	Intergenic	Intergenic	-1938	NM_008138	14678	Mm.196464	NM_008138	ENSMUSG00000032562	Gnai2	C76432|Galphai2|Gia|Gnai-2	guanine nucleotide binding protein (G protein), alpha inhibiting 2	protein-coding
Diff_Nuc14229	chr4	137937122	137937261	+	0	NA	Intergenic	Intergenic	-13321	NM_028176	72269	Mm.46182	NM_028176	ENSMUSG00000028755	Cda	2210401N16Rik	cytidine deaminase	protein-coding
Diff_Nuc4854	chr17	31565092	31565231	+	0	NA	intron (NM_008804, intron 4 of 18)	intron (NM_008804, intron 4 of 18)	41982	NM_001163748	18585	Mm.10812	NM_008804	ENSMUSG00000041119	Pde9a	PDE9A1	phosphodiesterase 9A	protein-coding
Diff_Nuc18461	chr1	167810432	167810571	+	0	NA	exon (NM_198933, exon 14 of 16)	exon (NM_198933, exon 14 of 16)	54578	NM_198933	18986	Mm.245261	NM_011137	ENSMUSG00000026565	Pou2f1	2810482H01Rik|NF-A1|Oct-1|Oct1|Otf-1|Otf1	POU domain, class 2, transcription factor 1	protein-coding
Diff_Nuc19061	chr9	44631272	44631411	+	0	NA	exon (NM_001081049, exon 25 of 36)	exon (NM_001081049, exon 25 of 36)	-20307	NM_138951	192653	Mm.325487	NM_138951	ENSMUSG00000039438	Ttc36	-	tetratricopeptide repeat domain 36	protein-coding
Diff_Nuc17539	chr1	52705752	52705891	+	0	NA	intron (NM_001142647, intron 8 of 8)	intron (NM_001142647, intron 8 of 8)	18272	NM_001142647	227094	Mm.83541	NM_172654	ENSMUSG00000043015	Nemp2	5330401P04Rik|9830163O08|Tmem194b	nuclear envelope integral membrane protein 2	protein-coding
Diff_Nuc673	chr13	59731392	59731531	+	0	NA	exon (NM_030153, exon 20 of 23)	exon (NM_030153, exon 20 of 23)	44767	NM_030153	78689	Mm.253902	NM_030153	ENSMUSG00000021555	Naa35	A330021G12Rik|A330027C19Rik|AI158944|C030004C14Rik|Mak10	N(alpha)-acetyltransferase 35, NatC auxiliary subunit	protein-coding
Diff_Nuc2923	chr11	85182662	85182801	+	0	NA	intron (NM_138681, intron 5 of 25)	RSINE1|SINE|B4	16065	NM_001166643	192197	Mm.209989	NM_138681	ENSMUSG00000059439	Bcas3	1500019F07Rik|2610028P08Rik|AU021018|BC028339|K20D4|rudhira	breast carcinoma amplified sequence 3	protein-coding
Diff_Nuc4974	chr17	39985172	39985311	+	0	NA	non-coding (NR_046233, exon 1 of 1)	non-coding (NR_046233, exon 1 of 1)	5299	NR_046233	100861531		NR_046233		Rn45s	-	45S pre-ribosomal RNA	rRNA
Diff_Nuc15453	chr3	136610242	136610381	+	0	NA	Intergenic	MTA_Mm|LTR|MaLR	277281	NM_001293622	19055	Mm.331389	NM_008913	ENSMUSG00000028161	Ppp3ca	2900074D19Rik|CN|Caln|Calna|CnA	protein phosphatase 3, catalytic subunit, alpha isoform	protein-coding
Diff_Nuc5264	chr17	74613722	74613861	+	0	NA	intron (NM_133771, intron 7 of 8)	intron (NM_133771, intron 7 of 8)	80412	NM_133771	76890	Mm.311874	NM_133771	ENSMUSG00000058704	Memo1	0610016J10Rik|D930048L02Rik	mediator of cell motility 1	protein-coding
Diff_Nuc7031	chr14	13884982	13885121	+	0	NA	Intergenic	Lx|LINE|L1	-229458	NM_012061	27062	Mm.260881	NM_012061	ENSMUSG00000054423	Cadps	AU067781|CAPS|CAPS1|mKIAA1121	Ca2+-dependent secretion activator	protein-coding
Diff_Nuc17412	chr1	36016752	36016891	+	0	NA	Intergenic	Intergenic	-108424	NM_015818	50785	Mm.213566	NM_015818	ENSMUSG00000045216	Hs6st1	6Ost1	heparan sulfate 6-O-sulfotransferase 1	protein-coding
Diff_Nuc3715	chr10	34264522	34264661	+	0	NA	intron (NM_010237, intron 2 of 8)	intron (NM_010237, intron 2 of 8)	61385	NM_010237	14302	Mm.332432	NM_010237	ENSMUSG00000019779	Frk	BSK|BSK/IYK|C85044|GTK|RAK	fyn-related kinase	protein-coding
Diff_Nuc19690	chr9	108858712	108858851	+	0	NA	intron (NM_007738, intron 9 of 117)	intron (NM_007738, intron 9 of 117)	2991	NM_007738	12836	Mm.6200	NM_007738	ENSMUSG00000025650	Col7a1	AW209154	collagen, type VII, alpha 1	protein-coding
Diff_Nuc12115	chr5	62843262	62843401	+	0	NA	Intergenic	RMER10A|LTR|ERVL	314085	NM_178407	212285	Mm.244403	NM_178407	ENSMUSG00000037999	Arap2	Centd1|Gm148|mKIAA0580	ArfGAP with RhoGAP domain, ankyrin repeat and PH domain 2	protein-coding
Diff_Nuc1672	chr12	82526472	82526611	+	0	NA	intron (NM_001309810, intron 3 of 4)	MMERGLN-int|LTR|ERV1	-3515	NM_009620	11498	Mm.408462	NM_009620	ENSMUSG00000072972	Adam4	AV274654|tMDCV	a disintegrin and metallopeptidase domain 4	protein-coding
Diff_Nuc6007	chr16	90439762	90439901	+	0	NA	intron (NM_015755, intron 2 of 10)	intron (NM_015755, intron 2 of 10)	53189	NM_015755	26559	Mm.125874	NM_015755	ENSMUSG00000053414	Hunk	Bstk1|Mak-v	hormonally upregulated Neu-associated kinase	protein-coding
Diff_Nuc3547	chr10	4847312	4847451	+	0	NA	intron (NM_001347732, intron 2 of 145)	Lx8|LINE|L1	-10846	NM_001347711	64009	Mm.331626	NM_022027	ENSMUSG00000096054	Syne1	8B|A330049M09Rik|BE692247|C130039F11Rik|CPG2|Myne1|mKIAA1756|myne-1	spectrin repeat containing, nuclear envelope 1	protein-coding
Diff_Nuc918	chr13	98159092	98159231	+	0	NA	Intergenic	Intergenic	-45764	NR_110432	100039691	Mm.219358	NR_110430	ENSMUSG00000078952	Lncenc1	ENSMUSG00000078952|Gm11019|Gm2373|Lincenc1|Platr18|linc-Enc1	long non-coding RNA, embryonic stem cells expressed 1	ncRNA
Diff_Nuc9360	chr7	29167382	29167521	+	0	NA	Intergenic	Intergenic	-3204	NM_011756	22695	Mm.389856	NM_011756	ENSMUSG00000044786	Zfp36	Gos24|Nup475|TIS11D|TISII|Tis11|Ttp|Zfp-36	zinc finger protein 36	protein-coding
Diff_Nuc11871	chr5	32407942	32408081	+	0	NA	Intergenic	Intergenic	-30834	NM_008037	14284	Mm.24684	NM_008037	ENSMUSG00000029135	Fosl2	Fra-2	fos-like antigen 2	protein-coding
Diff_Nuc2372	chr11	42892012	42892151	+	0	NA	Intergenic	B4|SINE|B4	-71298	NM_176999	319767	Mm.252339	NM_176999	ENSMUSG00000055415	Atp10b	5930426O13Rik|9030605H24Rik	ATPase, class V, type 10B	protein-coding
Diff_Nuc17432	chr1	37257762	37257901	+	0	NA	Intergenic	Intergenic	-17292	NM_001282010	12790	Mm.214224	NM_009918	ENSMUSG00000026114	Cnga3	CNG3	cyclic nucleotide gated channel alpha 3	protein-coding
Diff_Nuc16258	chr2	76518107	76518246	+	0	NA	intron (NM_031256, intron 1 of 7)	intron (NM_031256, intron 1 of 7)	4804	NM_031256	83435	Mm.41636	NM_031256	ENSMUSG00000002733	Plekha3	FAPP1	pleckstrin homology domain-containing, family A (phosphoinositide binding specific) member 3	protein-coding
Diff_Nuc10223	chr7	129462952	129463091	+	0	NA	intron (NM_008855, intron 2 of 16)	intron (NM_008855, intron 2 of 16)	30382	NM_008855	18751	Mm.207496	NM_008855	ENSMUSG00000052889	Prkcb	PKC-B|PKC-Beta|Pkcb|Prkcb1|Prkcb2	protein kinase C, beta	protein-coding
Diff_Nuc12874	chr5	138717692	138717831	+	0	NA	intron (NM_172412, intron 5 of 9)	intron (NM_172412, intron 5 of 9)	3404	NM_172412	71951	Mm.77066	NM_172412	ENSMUSG00000029510	Gpc2	2410016G05Rik	glypican 2 (cerebroglycan)	protein-coding
Diff_Nuc8146	chr19	29751402	29751541	+	0	NA	Intergenic	Intergenic	-20960	NM_029993	77836	Mm.138437	NM_029993	ENSMUSG00000024806	Mlana	A930034P04Rik|Mart1	melan-A	protein-coding
Diff_Nuc4439	chr10	126424362	126424501	+	0	NA	intron (NM_001113470, intron 1 of 7)	intron (NM_001113470, intron 1 of 7)	-8155	NR_029803	723962		NR_029803	ENSMUSG00000065430	Mir26a-2	Mirn26a-2|mir-26a-2	microRNA 26a-2	ncRNA
Diff_Nuc19454	chr9	82066322	82066461	+	0	NA	Intergenic	L1Md_F2|LINE|L1	309040	NM_175213	75033	Mm.335329	NM_175213	ENSMUSG00000043289	Mei4	4930486G11Rik	meiotic double-stranded break formation protein 4	protein-coding
Diff_Nuc15586	chr3	154261632	154261771	+	0	NA	intron (NM_009968, intron 1 of 8)	intron (NM_009968, intron 1 of 8)	-1639	NM_172474	209584	Mm.347513	NM_172474	ENSMUSG00000047583	Tyw3	5230400J09Rik	tRNA-yW synthesizing protein 3 homolog (S. cerevisiae)	protein-coding
Diff_Nuc9916	chr7	94634842	94634981	+	0	NA	intron (NM_011661, intron 1 of 4)	intron (NM_011661, intron 1 of 4)	7111	NM_011661	22173	Mm.238127	NM_011661	ENSMUSG00000004651	Tyr	Oca1|albino|c|skc35	tyrosinase	protein-coding
Diff_Nuc3815	chr10	48734892	48735031	+	0	NA	Intergenic	Lx3C|LINE|L1	80688	NR_046212	100418235	Mm.185993	NR_046212		C130030K03Rik	-	proteasome (prosome, macropain) subunit, alpha type 6 pseudogene	pseudo
Diff_Nuc12056	chr5	51036972	51037111	+	0	NA	Intergenic	Lx5|LINE|L1	393040	NR_106197	102465903		NR_106197	ENSMUSG00000099124	Mir8117	Gm27323|mmu-mir-8117	microRNA 8117	ncRNA
Diff_Nuc2296	chr11	32280682	32280821	+	0	NA	intron (NM_177364, intron 2 of 12)	intron (NM_177364, intron 2 of 12)	32940	NM_177364	268396	Mm.227616	NM_177364	ENSMUSG00000040711	Sh3pxd2b	G431001E03Rik|TSK4|fad49	SH3 and PX domains 2B	protein-coding
Diff_Nuc20718	chr8	108320722	108320861	+	0	NA	intron (NM_145824, intron 3 of 13)	intron (NM_145824, intron 3 of 13)	30459	NM_145824	74334	Mm.4206	NM_145824	ENSMUSG00000037415	Ranbp10	4432417N03Rik	RAN binding protein 10	protein-coding
Diff_Nuc10645	chr6	27806712	27806851	+	0	NA	intron (NM_008174, intron 3 of 10)	RMER12|LTR|ERVK	79969	NR_030420	735266		NR_030420	ENSMUSG00000076067	Mir592	Mirn592|mir-592|mmu-mir-592	microRNA 592	ncRNA
Diff_Nuc911	chr13	97942452	97942591	+	0	NA	exon (NM_001271463, exon 18 of 21)	exon (NM_001271463, exon 18 of 21)	25791	NM_010422	15212	Mm.27816	NM_010422	ENSMUSG00000021665	Hexb	-	hexosaminidase B	protein-coding
Diff_Nuc16896	chr2	155992212	155992351	+	0	NA	intron (NM_001291114, intron 6 of 16)	B3|SINE|B2	13035	NM_001291115	170791	Mm.392436	NM_133242	ENSMUSG00000027620	Rbm39	1500012C14Rik|2310040E03Rik|B330012G18Rik|C79248|R75070|Rnpc2|caper	RNA binding motif protein 39	protein-coding
Diff_Nuc12222	chr5	76147662	76147801	+	0	NA	Intergenic	Intergenic	176715	NM_021099	16590	Mm.247073	NM_021099	ENSMUSG00000005672	Kit	Bs|CD117|Fdc|Gsfsco1|Gsfsco5|Gsfsow3|SCO1|SCO5|SOW3|Ssm|Tr-kit|W|c-KIT	KIT proto-oncogene receptor tyrosine kinase	protein-coding
Diff_Nuc10121	chr7	119541222	119541361	+	0	NA	intron (NM_027587, intron 7 of 9)	B3|SINE|B2	29469	NM_027587	100504195	Mm.291129	NM_027587	ENSMUSG00000030771	Micalcl	4921517J23Rik	MICAL C-terminal like	protein-coding
Diff_Nuc3084	chr11	97881842	97881981	+	0	NA	intron (NM_031173, intron 1 of 12)	intron (NM_031173, intron 1 of 12)	2030	NM_001282977	12295	Mm.41252	NM_031173	ENSMUSG00000020882	Cacnb1	CAB1|Cchb1|Cchlb1	calcium channel, voltage-dependent, beta 1 subunit	protein-coding
Diff_Nuc19870	chr9	123109812	123109951	+	0	NA	intron (NM_133974, intron 1 of 8)	intron (NM_133974, intron 1 of 8)	15275	NM_133974	109332	Mm.27519	NM_133974	ENSMUSG00000035498	Cdcp1	9030022E12Rik|AA409659|E030027H19Rik	CUB domain containing protein 1	protein-coding
Diff_Nuc20052	chr8	19970912	19971051	+	0	NA	Intergenic	L1VL1|LINE|L1	-12201	NM_001177408	100040599	Mm.491087	NM_001177408	ENSMUSG00000074449	Gm15319	OTTMUSG00000020118	predicted gene 15319	protein-coding
Diff_Nuc13724	chr4	101856802	101856941	+	0	NA	Intergenic	L1Md_F2|LINE|L1	-70476	NM_001177983	18578	Mm.20181	NM_019840	ENSMUSG00000028525	Pde4b	Dpde4|R74983|dunce	phosphodiesterase 4B, cAMP specific	protein-coding
Diff_Nuc14532	chr4	154927362	154927501	+	0	NA	exon (NM_001160016, exon 9 of 12)	exon (NM_001160016, exon 9 of 12)	-9070	NM_138671	192185	Mm.28347	NM_138671	ENSMUSG00000029063	Nadk	4432404C02Rik|BC004012	NAD kinase	protein-coding
Diff_Nuc12572	chr5	117657902	117658041	+	0	NA	intron (NM_183306, intron 8 of 20)	intron (NM_183306, intron 8 of 20)	74374	NM_183306	330177	Mm.24343	NM_183306	ENSMUSG00000061288	Taok3	2900006A08Rik|A130052D22|A430105I05Rik	TAO kinase 3	protein-coding
Diff_Nuc491	chr13	46573632	46573771	+	0	NA	Intergenic	MTEa|LTR|MaLR	-23571	NM_026056	67252	Mm.44529	NM_026056	ENSMUSG00000021373	Cap2	2810452G09Rik|AV045235	CAP, adenylate cyclase-associated protein, 2 (yeast)	protein-coding
Diff_Nuc6401	chr15	53034657	53034796	+	0	NA	intron (NM_010162, intron 1 of 10)	intron (NM_010162, intron 1 of 10)	143012	NM_010162	14042	Mm.309395	NM_010162	ENSMUSG00000061731	Ext1	AA409028	exostoses (multiple) 1	protein-coding
Diff_Nuc19847	chr9	121671322	121671461	+	0	NA	intron (NM_001166644, intron 1 of 5)	intron (NM_001166644, intron 1 of 5)	2240	NM_001166644	270210	Mm.473702	NM_001166644	ENSMUSG00000013419	Zfp651	4732420M22Rik|BC030045|R74626	zinc finger protein 651	protein-coding
Diff_Nuc2540	chr11	58502422	58502561	+	0	NA	Intergenic	Intergenic	5114	NM_207230	216783	Mm.377240	NM_207230	ENSMUSG00000107711	Olfr320	GA_x6K02T2NKPP-730312-729392|MOR285-4|MOR285-5|Olfr321-ps1	olfactory receptor 320	protein-coding
Diff_Nuc16754	chr2	145699062	145699201	+	0	NA	intron (NM_028724, intron 9 of 12)	L1ME2|LINE|L1	-29846	NM_026425	67877	Mm.151168	NM_026425	ENSMUSG00000002728	Naa20	1500004D14Rik|2900026I01Rik|AU041458|D2Ertd186e|Nat5	N(alpha)-acetyltransferase 20, NatB catalytic subunit	protein-coding
Diff_Nuc9056	chr18	82027622	82027761	+	0	NA	Intergenic	Intergenic	161128	NR_039589	100628596		NR_039589	ENSMUSG00000093036	Mir5127	mmu-mir-5127|mu-mir-5127	microRNA 5127	ncRNA
Diff_Nuc3945	chr10	66559912	66560051	+	0	NA	promoter-TSS (NM_001204915)	promoter-TSS (NM_001204915)	-245	NM_178606	28193	Mm.41272	NM_178606	ENSMUSG00000019873	Reep3	D10Ucla1	receptor accessory protein 3	protein-coding
Diff_Nuc6834	chr15	89042172	89042311	+	0	NA	intron (NM_027805, intron 1 of 7)	CpG	251	NM_027805	71474	Mm.184055	NM_026813	ENSMUSG00000036561	Ppp6r2	1110033O10Rik|8430411H09Rik|B230107H12Rik|Pp6r2|Saps2	protein phosphatase 6, regulatory subunit 2	protein-coding
Diff_Nuc14904	chr3	62271072	62271211	+	0	NA	Intergenic	Intergenic	39769	NM_028136	72162	Mm.224233	NM_028136	ENSMUSG00000027770	Dhx36	2810407E23Rik|AI452301|AU022184|Ddx36|mKIAA1488	DEAH (Asp-Glu-Ala-His) box polypeptide 36	protein-coding
Diff_Nuc11407	chr6	116340382	116340521	+	0	NA	intron (NM_027920, intron 2 of 6)	RMER10A|LTR|ERVL	52411	NM_027920	71779	Mm.27064	NM_027920	ENSMUSG00000025702	March8	1300017E09Rik|MARCH-VIII|Mir	membrane-associated ring finger (C3HC4) 8	protein-coding
Diff_Nuc10503	chr7	150526432	150526571	+	0	NA	intron (NM_008434, intron 11 of 15)	intron (NM_008434, intron 11 of 15)	-9946	NR_045842	71153	Mm.398340	NR_045842	ENSMUSG00000101360	4933417O13Rik	-	RIKEN cDNA 4933417O13 gene	ncRNA
Diff_Nuc19751	chr9	114375742	114375881	+	0	NA	intron (NR_108102, intron 14 of 14)	intron (NR_108102, intron 14 of 14)	29851	NM_009916	12773	Mm.1337	NM_009916	ENSMUSG00000047898	Ccr4	C-C CKR-4|CHEMR1|Cmkbr4|LESTR|Sdf1r	chemokine (C-C motif) receptor 4	protein-coding
Diff_Nuc2478	chr11	53449792	53449931	+	0	NA	Intergenic	CpG	-1657	NM_008355	16163	Mm.1284	NM_008355	ENSMUSG00000020383	Il13	Il-13	interleukin 13	protein-coding
Diff_Nuc11272	chr6	99349892	99350031	+	0	NA	intron (NM_001347345, intron 2 of 19)	intron (NM_001347345, intron 2 of 19)	35378	NM_053202	108655	Mm.234965	NM_053202	ENSMUSG00000030067	Foxp1	3110052D19Rik|4932443N09Rik|AI461938|AW494214	forkhead box P1	protein-coding
Diff_Nuc3076	chr11	97362132	97362271	+	0	NA	promoter-TSS (NM_001289118)	promoter-TSS (NM_001289118)	-547	NM_001289118	100141474	Mm.482426	NM_001289118	ENSMUSG00000047988	4933428G20Rik	-	RIKEN cDNA 4933428G20 gene	protein-coding
Diff_Nuc3166	chr11	102148582	102148721	+	0	NA	exon (NM_001302505, exon 2 of 3)	exon (NM_001302505, exon 2 of 3)	2398	NM_001302505	72053	Mm.101274	NM_028076	ENSMUSG00000034757	Tmub2	2010008E23Rik	transmembrane and ubiquitin-like domain containing 2	protein-coding
Diff_Nuc20180	chr8	36837832	36837971	+	0	NA	Intergenic	Intergenic	51712	NM_027998	71908	Mm.37817	NM_027998	ENSMUSG00000055976	Cldn23	2310014B08Rik	claudin 23	protein-coding
Diff_Nuc14658	chr3	23603662	23603801	+	0	NA	Intergenic	(GAAA)n|Simple_repeat|Simple_repeat	1079197	NM_001326288	635702	Mm.448351	NM_001326288	ENSMUSG00000102758	Naaladl2	2810043G22Rik|EG635702|Gm1021	N-acetylated alpha-linked acidic dipeptidase-like 2	protein-coding
Diff_Nuc2087	chr11	3076772	3076911	+	0	NA	intron (NM_030207, intron 6 of 32)	B1_Mus1|SINE|Alu	16625	NM_030207	78887	Mm.394071	NM_030207	ENSMUSG00000023764	Sfi1	-	Sfi1 homolog, spindle assembly associated (yeast)	protein-coding
Diff_Nuc8590	chr18	25802462	25802601	+	0	NA	intron (NM_001146293, intron 2 of 12)	intron (NM_001146293, intron 2 of 12)	109953	NM_133195	108013	Mm.266435	NM_133195	ENSMUSG00000024268	Celf4	A230070D14Rik|BRUNOL-4|Brul4|Brunol4|C130060B05Rik	CUGBP, Elav-like family member 4	protein-coding
Diff_Nuc2156	chr11	7942792	7942931	+	0	NA	Intergenic	Intergenic	621677	NM_001083587	319939	Mm.337820	NM_001083587	ENSMUSG00000020422	Tns3	BC023928|F830010I22Rik|TEM6|Tens1	tensin 3	protein-coding
Diff_Nuc307	chr13	23747312	23747451	+	0	NA	Intergenic	Intergenic	28447	NM_178189	319164	Mm.261973	NM_178189	ENSMUSG00000069270	Hist1h2ac	-	histone cluster 1, H2ac	protein-coding
Diff_Nuc9863	chr7	88139132	88139271	+	0	NA	intron (NM_178707, intron 1 of 9)	intron (NM_178707, intron 1 of 9)	631	NM_178707	233410	Mm.29525	NM_178707	ENSMUSG00000005621	Zfp592	8430405N24|A730014M16Rik|Znf592|mKIAA0211	zinc finger protein 592	protein-coding
Diff_Nuc17901	chr1	93931952	93932091	+	0	NA	intron (NM_207225, intron 3 of 26)	intron (NM_207225, intron 3 of 26)	144897	NM_207225	208727	Mm.318567	NM_207225	ENSMUSG00000026313	Hdac4	4932408F19Rik|HD4	histone deacetylase 4	protein-coding
Diff_Nuc7778	chr14	117025572	117025711	+	0	NA	Intergenic	Intergenic	-298878	NM_001079844	23888	Mm.440025	NM_011821	ENSMUSG00000058571	Gpc6	-	glypican 6	protein-coding
Diff_Nuc11387	chr6	114839602	114839741	+	0	NA	intron (NM_177683, intron 2 of 4)	GA-rich|Low_complexity|Low_complexity	32099	NM_177683	232334	Mm.268357	NM_177683	ENSMUSG00000030315	Vgll4	BC048841|VGL-4	vestigial like family member 4	protein-coding
Diff_Nuc8220	chr19	39120712	39120851	+	0	NA	Intergenic	L1Md_F|LINE|L1	-14715	NM_028191	72303	Mm.482578	NM_028191	ENSMUSG00000067231	Cyp2c65	2210009K14Rik	cytochrome P450, family 2, subfamily c, polypeptide 65	protein-coding
Diff_Nuc2420	chr11	49311702	49311841	+	0	NA	Intergenic	Intergenic	3734	NM_001011805	258027	Mm.377333	NM_001011805	ENSMUSG00000059729	Olfr1385	MOR256-41P|MOR256-42P|Olfr1549-ps1	olfactory receptor 1385	protein-coding
Diff_Nuc15022	chr3	84411912	84412051	+	0	NA	Intergenic	Intergenic	14485	NM_207278	403175	Mm.83086	NM_207278	ENSMUSG00000047819	Tigd4	C130063O11Rik|Gm418	tigger transposable element derived 4	protein-coding
Diff_Nuc11509	chr6	126964802	126964941	+	0	NA	promoter-TSS (NM_010204)	promoter-TSS (NM_010204)	-689	NM_010204	14177	Mm.3403	NM_010204	ENSMUSG00000000183	Fgf6	Fgf-6|HSTF-2	fibroblast growth factor 6	protein-coding
Diff_Nuc659	chr13	58766032	58766171	+	0	NA	Intergenic	RLTR18B|LTR|ERVK	-53863	NM_022317	114304	Mm.18188	NM_022317	ENSMUSG00000021553	Slc28a3	Cnt3	solute carrier family 28 (sodium-coupled nucleoside transporter), member 3	protein-coding
Diff_Nuc6147	chr15	8104122	8104261	+	0	NA	intron (NM_133227, intron 32 of 34)	PB1D10|SINE|Alu	-14915	NM_001162906	73692	Mm.164436	NM_001162906	ENSMUSG00000039801	2410089E03Rik	4732468D17Rik|Hug|Jbts17|b2b012Clo	RIKEN cDNA 2410089E03 gene	protein-coding
Diff_Nuc14421	chr4	149365002	149365141	+	0	NA	intron (NM_173371, intron 3 of 4)	intron (NM_173371, intron 3 of 4)	12274	NM_001291004	100198	Mm.22183	NM_173371	ENSMUSG00000028980	H6pd	AI785303|G6pd1|Gpd-1|Gpd1	hexose-6-phosphate dehydrogenase (glucose 1-dehydrogenase)	protein-coding
Diff_Nuc18260	chr1	140888292	140888431	+	0	NA	intron (NM_181347, intron 1 of 20)	intron (NM_181347, intron 1 of 20)	14127	NR_108103	78229	Mm.437838	NR_108103	ENSMUSG00000104900	4930596I21Rik	-	RIKEN cDNA 4930596I21 gene	ncRNA
Diff_Nuc10369	chr7	141238182	141238321	+	0	NA	intron (NM_007400, intron 3 of 22)	intron (NM_007400, intron 3 of 22)	178529	NM_007400	11489	Mm.439714	NM_007400	ENSMUSG00000054555	Adam12	Mltna	a disintegrin and metallopeptidase domain 12 (meltrin alpha)	protein-coding
Diff_Nuc4360	chr10	115201212	115201351	+	0	NA	Intergenic	Intergenic	-53059	NM_001168680	216350	Mm.22270	NM_146010	ENSMUSG00000034127	Tspan8	C76990|E330007O21Rik|Tm4sf3	tetraspanin 8	protein-coding
Diff_Nuc29	chrX	30529252	30529391	+	0	NA	Intergenic	RLTR1B|LTR|ERV1	-68990	NM_001168334	100040482	Mm.479861	NM_001168334	ENSMUSG00000096194	Btbd35f2	Gm2799	BTB domain containing 35, family member 2	protein-coding
Diff_Nuc10944	chr6	63354272	63354411	+	0	NA	intron (NM_008167, intron 1 of 15)	L1_Mus2|LINE|L1	147490	NM_008167	14804	Mm.439651	NM_008167	ENSMUSG00000071424	Grid2	B230104L07Rik|GluD2|GluRdelta2|Lc|Lc<J>|MMS10-AC|Ms10ac|cpr|ho|nmf408|tpr	glutamate receptor, ionotropic, delta 2	protein-coding
Diff_Nuc1598	chr12	74154792	74154931	+	0	NA	Intergenic	CpG	-7162	NM_009189	20471	Mm.4645	NM_009189	ENSMUSG00000051367	Six1	BB138287	sine oculis-related homeobox 1	protein-coding
Diff_Nuc19054	chr9	44310602	44310741	+	0	NA	intron (NM_030256, intron 4 of 8)	intron (NM_030256, intron 4 of 8)	3452	NM_030256	80288	Mm.370270	NM_030256	ENSMUSG00000063382	Bcl9l	B9L|BC003321|BCL9-2|DLNB11	B cell CLL/lymphoma 9-like	protein-coding
Diff_Nuc6469	chr15	63477862	63478001	+	0	NA	Intergenic	Lx3A|LINE|L1	162363	NM_031378	83492	Mm.335619	NM_031378	ENSMUSG00000079025	Gsdmc	Gsdmc1|Mlze	gasdermin C	protein-coding
Diff_Nuc19658	chr9	107503542	107503681	+	0	NA	intron (NM_001042779, intron 13 of 19)	intron (NM_001042779, intron 13 of 19)	4122	NM_009153	20347	Mm.4083	NM_009153	ENSMUSG00000057969	Sema3b	SemA|Semaa|sema5|semaV	sema domain, immunoglobulin domain (Ig), short basic domain, secreted, (semaphorin) 3B	protein-coding
Diff_Nuc18918	chr9	30938362	30938501	+	0	NA	intron (NM_011176, intron 1 of 18)	intron (NM_011176, intron 1 of 18)	953	NM_011176	19143	Mm.243926	NM_011176	ENSMUSG00000031995	St14	Epithin|MT-SP1|Prss14|Tmprss14|mCAP3|matriptase	suppression of tumorigenicity 14 (colon carcinoma)	protein-coding
Diff_Nuc2070	chr11	3033482	3033621	+	0	NA	intron (NM_030207, intron 29 of 32)	intron (NM_030207, intron 29 of 32)	9521	NR_003518	66776	Mm.247625	NR_003518		Pisd-ps3	4933439C20Rik	phosphatidylserine decarboxylase, pseudogene 3	pseudo
Diff_Nuc15600	chr3	156958552	156958691	+	0	NA	intron (NM_001039094, intron 6 of 6)	intron (NM_001039094, intron 6 of 6)	-238740	NM_017381	53861	Mm.259036	NM_017381	ENSMUSG00000028180	Zranb2	AI227013|Zfp265|Zis|Znf265	zinc finger, RAN-binding domain containing 2	protein-coding
Diff_Nuc3221	chr11	105910252	105910391	+	0	NA	intron (NM_027946, intron 4 of 6)	intron (NM_027946, intron 4 of 6)	12135	NM_027946	71833	Mm.307455	NM_027946	ENSMUSG00000049354	Dcaf7	1700012F10Rik|2610037L01Rik|C86529|HAN11|Wdr68	DDB1 and CUL4 associated factor 7	protein-coding
Diff_Nuc1829	chr12	100557012	100557151	+	0	NA	intron (NM_183186, intron 3 of 5)	intron (NM_183186, intron 3 of 5)	131203	NM_183186	71375	Mm.341972	NM_183186	ENSMUSG00000033713	Foxn3	5430426H20Rik|AA589593|AW556347|Ches1|Ches1l|HTLFL1	forkhead box N3	protein-coding
Diff_Nuc5637	chr16	22576752	22576891	+	0	NA	exon (NM_138650, exon 10 of 25)	exon (NM_138650, exon 10 of 25)	-28578	NR_105781	102465962		NR_105781	ENSMUSG00000098448	Mir6362	Gm27812|mmu-mir-6362	microRNA 6362	ncRNA
Diff_Nuc4982	chr17	42452602	42452741	+	0	NA	promoter-TSS (NM_028474)	promoter-TSS (NM_028474)	-225	NM_028474	627626	Mm.390999	NM_028474	ENSMUSG00000042256	Ptchd4	3110082D06Rik|Gm321	patched domain containing 4	protein-coding
Diff_Nuc12334	chr5	96263902	96264041	+	0	NA	Intergenic	Intergenic	42313	NM_001167793	100041354	Mm.422721	NM_001122678	ENSMUSG00000079423	Gm3286	-	predicted gene 3286	protein-coding
Diff_Nuc13934	chr4	120490612	120490751	+	0	NA	intron (NM_001048168, intron 1 of 9)	ID_B1|SINE|B4	7665	NM_001277095	18046	Mm.435590	NM_008692	ENSMUSG00000032897	Nfyc	-	nuclear transcription factor-Y gamma	protein-coding
Diff_Nuc20858	chr8	122075042	122075181	+	0	NA	intron (NM_019709, intron 1 of 23)	intron (NM_019709, intron 1 of 23)	7550	NM_001167910	56453	Mm.206934	NM_019709	ENSMUSG00000031835	Mbtps1	0610038M03Rik|AV003995|S1P|SKI-1|Ski1|mKIAA0091	membrane-bound transcription factor peptidase, site 1	protein-coding
Diff_Nuc12914	chr5	140500962	140501101	+	0	NA	intron (NM_010752, intron 17 of 17)	intron (NM_010752, intron 17 of 17)	117134	NM_175522	243312	Mm.237102	NM_175522	ENSMUSG00000048988	Elfn1	A930017N06Rik|AI197272|Ppp1r28	leucine rich repeat and fibronectin type III, extracellular 1	protein-coding
Diff_Nuc14880	chr3	58016142	58016281	+	0	NA	Intergenic	Intergenic	-48482	NR_040538	67850	Mm.416968	NR_040538	ENSMUSG00000100666	1700007F19Rik	-	RIKEN cDNA 1700007F19 gene	ncRNA
Diff_Nuc10475	chr7	148267832	148267971	+	0	NA	intron (NM_001162924, intron 2 of 13)	intron (NM_001162924, intron 2 of 13)	2233	NM_019762	56460	Mm.350037	NM_019762	ENSMUSG00000054065	Pkp3	2310056L12Rik	plakophilin 3	protein-coding
Diff_Nuc10465	chr7	147224012	147224151	+	0	NA	intron (NM_027201, intron 4 of 5)	B4|SINE|B4	-1508	NM_001286009	74237	Mm.40888	NM_133755	ENSMUSG00000025474	Tubgcp2	1700022B05Rik	tubulin, gamma complex associated protein 2	protein-coding
Diff_Nuc4749	chr17	26195162	26195301	+	0	NA	intron (NM_001162869, intron 1 of 14)	B3A|SINE|B2	10891	NM_001162868	215445	Mm.41191	NM_153140	ENSMUSG00000037098	Rab11fip3	Cart1|D030060O14Rik|Rab11-FIP3|mKIAA0665	RAB11 family interacting protein 3 (class II)	protein-coding
Diff_Nuc7866	chr19	3700132	3700271	+	0	NA	Intergenic	Intergenic	-8132	NM_028077	72056	Mm.23780	NM_028077	ENSMUSG00000035372	1810055G02Rik	AI256204	RIKEN cDNA 1810055G02 gene	protein-coding
Diff_Nuc18855	chr9	21813972	21814111	+	0	NA	intron (NM_008925, intron 7 of 17)	intron (NM_008925, intron 7 of 17)	6609	NM_008925	19089	Mm.214593	NM_008925	ENSMUSG00000003402	Prkcsh	80K-H|PKCSH	protein kinase C substrate 80K-H	protein-coding
Diff_Nuc19839	chr9	121456612	121456751	+	0	NA	Intergenic	Intergenic	-39457	NR_040740	75384	Mm.445955	NR_040740	ENSMUSG00000084995	Lyzl4os	4930589B17Rik|4930596M17Rik	lysozyme-like 4, opposite strand	ncRNA
Diff_Nuc17106	chr2	167861422	167861561	+	0	NA	Intergenic	Intergenic	-25398	NM_001080708	69553	Mm.68454	NM_001080708	ENSMUSG00000074577	Fam65c	2310033K02Rik|Gm124	family with sequence similarity 65, member C	protein-coding
Diff_Nuc7165	chr14	30518822	30518961	+	0	NA	intron (NM_009785, intron 2 of 37)	intron (NM_009785, intron 2 of 37)	16159	NM_009785	12294	Mm.386754	NM_009785	ENSMUSG00000021991	Cacna2d3	Cacnad3|alapha2delta3	calcium channel, voltage-dependent, alpha2/delta subunit 3	protein-coding
Diff_Nuc11593	chr6	138151652	138151791	+	0	NA	Intergenic	RMER20B|LTR|ERVK	61606	NM_001347489	56615	Mm.14796	NM_019946	ENSMUSG00000008540	Mgst1	1500002K10Rik|Gst	microsomal glutathione S-transferase 1	protein-coding
Diff_Nuc1347	chr12	31234882	31235021	+	0	NA	Intergenic	ORR1A4|LTR|MaLR	-34357	NM_172049	211986	Mm.34035	NM_172049	ENSMUSG00000043061	Tmem18	BC024093	transmembrane protein 18	protein-coding
Diff_Nuc1165	chr12	8636422	8636561	+	0	NA	Intergenic	MTA_Mm|LTR|MaLR	-30619	NM_177802	328059	Mm.46326	NM_177802	ENSMUSG00000020600	Slc7a15	Arpat	solute carrier family 7 (cationic amino acid transporter, y+ system), member 15	protein-coding
Diff_Nuc12840	chr5	136649702	136649841	+	0	NA	Intergenic	Intergenic	-3245	NM_178751	269717	Mm.308396	NM_178751	ENSMUSG00000039747	Orai2	A730041O15Rik|Tmem142b	ORAI calcium release-activated calcium modulator 2	protein-coding
Diff_Nuc356	chr13	31266072	31266211	+	0	NA	Intergenic	L1_Mus2|LINE|L1	66814	NR_045957	73924	Mm.417825	NR_045957	ENSMUSG00000087460	4930401O12Rik	-	RIKEN cDNA 4930401O12 gene	ncRNA
Diff_Nuc13206	chr4	30178722	30178861	+	0	NA	Intergenic	MTA_Mm|LTR|MaLR	-412955	NR_040655	75332	Mm.108636	NR_040655		4930556G01Rik	-	RIKEN cDNA 4930556G01 gene	ncRNA
Diff_Nuc19944	chr8	11380232	11380371	+	0	NA	intron (NM_009932, intron 4 of 47)	intron (NM_009932, intron 4 of 47)	-67475	NM_009931	12826	Mm.738	NM_009931	ENSMUSG00000031502	Col4a1	Bru|Col4a-1|Raw|Svc	collagen, type IV, alpha 1	protein-coding
Diff_Nuc3456	chr11	119388462	119388601	+	0	NA	Intergenic	B1_Mur4|SINE|Alu	20603	NM_008730	18164	Mm.5142	NM_008730	ENSMUSG00000025582	Nptx1	D11Bwg1004e|Np1	neuronal pentraxin 1	protein-coding
Diff_Nuc1563	chr12	70918642	70918781	+	0	NA	intron (NM_201519, intron 24 of 30)	intron (NM_201519, intron 24 of 30)	-25962	NR_038173	70934	Mm.440427	NR_038172		4931403G20Rik	-	RIKEN cDNA 4931403G20 gene	ncRNA
Diff_Nuc19118	chr9	48829852	48829991	+	0	NA	intron (NM_175482, intron 12 of 23)	intron (NM_175482, intron 12 of 23)	-33765	NM_012039	26951	Mm.24791	NM_012039	ENSMUSG00000032264	Zw10	6330566F14Rik|MmZw10	zw10 kinetochore protein	protein-coding
Diff_Nuc1704	chr12	84915752	84915891	+	0	NA	exon (NM_183154, exon 3 of 12)	exon (NM_183154, exon 3 of 12)	22276	NM_183154	217695	Mm.59257	NM_183154	ENSMUSG00000042628	Zfyve1	DFCP1|G630053K23|TAFF1|ZNFN2A1|mKIAA1589	zinc finger, FYVE domain containing 1	protein-coding
Diff_Nuc3408	chr11	117808242	117808381	+	0	NA	Intergenic	Intergenic	22369	NM_007707	12702	Mm.3468	NM_007707	ENSMUSG00000053113	Socs3	Cis3|Cish3|EF-10|Ef10|SSI-3|Ssi3	suppressor of cytokine signaling 3	protein-coding
Diff_Nuc857	chr13	90051352	90051491	+	0	NA	intron (NM_028012, intron 7 of 7)	MLT2C1|LTR|ERVL	-169304	NM_001134475	13003	Mm.158700	NM_019389	ENSMUSG00000021614	Vcan	5430420N07Rik|9430051N09|Cspg2|DPEAAE|NG2|PG-M|PG-M(V0)|PG-M(V1)|hdf	versican	protein-coding
Diff_Nuc15146	chr3	95697932	95698071	+	0	NA	5' UTR (NM_146104, exon 1 of 6)	5' UTR (NM_146104, exon 1 of 6)	157	NM_146134	226548	Mm.306954	NM_146104	ENSMUSG00000015750	Aph1a	6530402N02Rik|APH-1a	aph1 homolog A, gamma secretase subunit	protein-coding
Diff_Nuc20091	chr8	25297112	25297251	+	0	NA	Intergenic	Intergenic	252237	NM_026931	69068	Mm.25775	NM_026931	ENSMUSG00000056313	1810011O10Rik	1110065B09Rik|AW121743|AW321058	RIKEN cDNA 1810011O10 gene	protein-coding
Diff_Nuc9899	chr7	91670592	91670731	+	0	NA	Intergenic	MIR|SINE|MIR	-6803	NR_045098	100039239	Mm.44882	NR_045098		Gm2115	C77713	predicted gene 2115	ncRNA
Diff_Nuc13283	chr4	41676942	41677081	+	0	NA	exon (NM_001017362, exon 2 of 8)	exon (NM_001017362, exon 2 of 8)	1163	NM_001017362	550619	Mm.425179	NM_001017362	ENSMUSG00000066224	Arid3c	OTTMUSG00000006683	AT rich interactive domain 3C (BRIGHT-like)	protein-coding
Diff_Nuc8464	chr18	6449292	6449431	+	0	NA	intron (NM_007935, intron 9 of 13)	intron (NM_007935, intron 9 of 13)	41283	NR_035446	100316773		NR_035446	ENSMUSG00000084514	Mir1893	Mirn1893|mmu-mir-1893	microRNA 1893	ncRNA
Diff_Nuc1980	chr12	112492732	112492871	+	0	NA	intron (NM_011632, intron 9 of 11)	intron (NM_011632, intron 9 of 11)	-16506	NM_033603	93835	Mm.197639	NM_033603	ENSMUSG00000021278	Amn	-	amnionless	protein-coding
Diff_Nuc19853	chr9	121948482	121948621	+	0	NA	Intergenic	Intergenic	-43407	NM_153540	215494	Mm.402151	NM_153540	ENSMUSG00000066235	Pomgnt2	Ago61|C85492|Gtdc2	protein O-linked mannose beta 1,4-N-acetylglucosaminyltransferase 2	protein-coding
Diff_Nuc19077	chr9	45626812	45626951	+	0	NA	intron (NM_001081373, intron 2 of 29)	intron (NM_001081373, intron 2 of 29)	9840	NM_001081373	214552	Mm.260103	NM_172531	ENSMUSG00000043987	Cep164	AI450905|BC027092|D030051D21|mKIAA1052	centrosomal protein 164	protein-coding
Diff_Nuc16002	chr2	35897442	35897581	+	0	NA	intron (NM_026703, intron 2 of 3)	intron (NM_026703, intron 2 of 3)	7301	NM_026703	68375	Mm.19834	NM_026703	ENSMUSG00000026895	Ndufa8	0610033L03Rik|AW261656	NADH dehydrogenase (ubiquinone) 1 alpha subcomplex, 8	protein-coding
Diff_Nuc1782	chr12	91653312	91653451	+	0	NA	Intergenic	L1_Mus3|LINE|L1	324096	NM_010050	13371	Mm.21389	NM_010050	ENSMUSG00000007682	Dio2	5DII|AI324267|DIOII	deiodinase, iodothyronine, type II	protein-coding
Diff_Nuc5090	chr17	52682302	52682441	+	0	NA	Intergenic	L1Md_Gf|LINE|L1	-59663	NM_001031811	211468	Mm.399068	NM_001031811	ENSMUSG00000035580	Kcnh8	C130090D05Rik|ELK|ELK1|ELK3|Kv12.1	potassium voltage-gated channel, subfamily H (eag-related), member 8	protein-coding
Diff_Nuc5259	chr17	73721832	73721971	+	0	NA	intron (NM_001033444, intron 2 of 22)	L1_Mur2|LINE|L1	26735	NM_001033444	381122	Mm.81496	NM_001033444	ENSMUSG00000043705	Capn13	CANP 13|Gm943	calpain 13	protein-coding
Diff_Nuc8184	chr19	36164812	36164951	+	0	NA	intron (NM_019428, intron 5 of 10)	intron (NM_019428, intron 5 of 10)	6675	NM_019428	54364	Mm.277891	NM_019428	ENSMUSG00000024800	Rpp30	Rnasep2|TSG15	ribonuclease P/MRP 30 subunit	protein-coding
Diff_Nuc9240	chr7	19750542	19750681	+	0	NA	intron (NM_001080815, intron 1 of 13)	intron (NM_001080815, intron 1 of 13)	865	NM_001080815	381853	Mm.333633	NM_001080815	ENSMUSG00000030406	Gipr	GIP-R|Gm1081|Gm160	gastric inhibitory polypeptide receptor	protein-coding
Diff_Nuc4136	chr10	80709912	80710051	+	0	NA	exon (NM_001034895, exon 12 of 18)	exon (NM_001034895, exon 12 of 18)	-5699	NM_001285855	17179	Mm.2918	NM_010768	ENSMUSG00000004933	Matk	CHK|HYL|Ntk|p56ntk	megakaryocyte-associated tyrosine kinase	protein-coding
Diff_Nuc5003	chr17	45186172	45186311	+	0	NA	intron (NM_178652, intron 11 of 11)	intron (NM_178652, intron 11 of 11)	-168407	NM_029257	75341	Mm.386821	NM_029257		4930564C03Rik	-	RIKEN cDNA 4930564C03 gene	protein-coding
Diff_Nuc9720	chr7	73306772	73306911	+	0	NA	intron (NM_001081163, intron 2 of 2)	intron (NM_001081163, intron 2 of 2)	52440	NM_001081163	269941	Mm.333916	NM_001081163	ENSMUSG00000032640	Chsy1	mKIAA0990	chondroitin sulfate synthase 1	protein-coding
Diff_Nuc1387	chr12	35743812	35743951	+	0	NA	intron (NM_001014973, intron 1 of 25)	Lx3_Mus|LINE|L1	12020	NM_001014973	217463	Mm.213991	NM_001014973	ENSMUSG00000020590	Snx13	Rgs-px1|mKIAA0713	sorting nexin 13	protein-coding
Diff_Nuc5862	chr16	53213342	53213481	+	0	NA	Intergenic	Intergenic	-397554	NR_040495	73820	Mm.60493	NR_040495		4930404A05Rik	-	RIKEN cDNA 4930404A05 gene	ncRNA
Diff_Nuc10723	chr6	35192162	35192301	+	0	NA	intron (NM_027513, intron 38 of 42)	intron (NM_027513, intron 38 of 42)	-10468	NR_015608	67705	Mm.228046	NR_015608	ENSMUSG00000073155	1810058I24Rik	AI414869|AI848234	RIKEN cDNA 1810058I24 gene	ncRNA
Diff_Nuc9322	chr7	27391552	27391691	+	0	NA	Intergenic	L1Md_F|LINE|L1	5476	NM_134231	171265	Mm.377217	NM_134231	ENSMUSG00000091924	Vmn1r185	V1re12	vomeronasal 1 receptor 185	protein-coding
Diff_Nuc9174	chr7	13454022	13454161	+	0	NA	Intergenic	B1_Mus1|SINE|Alu	-12436	NM_153802	243833	Mm.293823	NM_153802	ENSMUSG00000060397	Zfp128	9630016P15Rik|Znf8|mZnf8	zinc finger protein 128	protein-coding
Diff_Nuc6851	chr15	92004382	92004521	+	0	NA	intron (NM_001159647, intron 1 of 23)	intron (NM_001159647, intron 1 of 23)	12663	NM_001159647	12805	Mm.4911	NM_007727	ENSMUSG00000055022	Cntn1	AW495098|CNTN|F3cam|usl	contactin 1	protein-coding
Diff_Nuc2288	chr11	31957322	31957461	+	0	NA	intron (NM_008741, intron 4 of 4)	intron (NM_008741, intron 4 of 4)	43837	NR_130637	104692	Mm.414035	NR_130637	ENSMUSG00000086386	Gm12108	BB052462|OTTMUSG00000005365	predicted gene 12108	ncRNA
Diff_Nuc19553	chr9	98500202	98500341	+	0	NA	intron (NM_025485, intron 1 of 7)	(A)n|Simple_repeat|Simple_repeat	1827	NM_025485	64655	Mm.17949	NM_025485	ENSMUSG00000032459	Mrps22	3100002P07Rik|Rpms22	mitochondrial ribosomal protein S22	protein-coding
Diff_Nuc14158	chr4	134323472	134323611	+	0	NA	intron (NM_145554, intron 1 of 8)	CpG	378	NM_145554	100017	Mm.27486	NM_145554	ENSMUSG00000037295	Ldlrap1	AA691260|ARH2|Arh|Arh1|FHCB1|FHCB2	low density lipoprotein receptor adaptor protein 1	protein-coding
Diff_Nuc15748	chr2	22910012	22910151	+	0	NA	Intergenic	B1_Mur1|SINE|Alu	-13640	NM_028793	74159	Mm.181973	NM_028793	ENSMUSG00000026781	Acbd5	1300014E15Rik	acyl-Coenzyme A binding domain containing 5	protein-coding
Diff_Nuc12923	chr5	141057552	141057691	+	0	NA	Intergenic	Intergenic	-16600	NM_030022	77998	Mm.160040	NM_030022	ENSMUSG00000036586	Grifin	E130101O17Rik	galectin-related inter-fiber protein	protein-coding
Diff_Nuc6921	chr15	99175802	99175941	+	0	NA	intron (NM_011711, intron 1 of 26)	intron (NM_011711, intron 1 of 26)	25042	NM_001310623	22379	Mm.29043	NM_011711	ENSMUSG00000023008	Fmnl3	2700073B04Rik|FBP11|Wbp3|mKIAA2014	formin-like 3	protein-coding
Diff_Nuc13901	chr4	118404782	118404921	+	0	NA	Intergenic	Intergenic	-2285	NM_146852	258851	Mm.377719	NM_146852	ENSMUSG00000070820	Olfr1339	MOR258-2	olfactory receptor 1339	protein-coding
Diff_Nuc7187	chr14	32276072	32276211	+	0	NA	Intergenic	MLT1B|LTR|MaLR	-26855	NM_011894	24056	Mm.383198	NM_011894	ENSMUSG00000021892	Sh3bp5	AI606498|SH3BP-5|Sab	SH3-domain binding protein 5 (BTK-associated)	protein-coding
Diff_Nuc8276	chr19	44044532	44044671	+	0	NA	exon (NM_030703, exon 4 of 9)	exon (NM_030703, exon 4 of 9)	16409	NM_030703	93721	Mm.206774	NM_030703	ENSMUSG00000025196	Cpn1	0610011F20Rik|CPN	carboxypeptidase N, polypeptide 1	protein-coding
Diff_Nuc14331	chr4	142968802	142968941	+	0	NA	Intergenic	Intergenic	-15473	NM_031377	83491	Mm.190607	NM_031377	ENSMUSG00000041805	Pramel1	-	preferentially expressed antigen in melanoma-like 1	protein-coding
Diff_Nuc9565	chr7	52694782	52694921	+	0	NA	exon (NM_030678, exon 4 of 16)	exon (NM_030678, exon 4 of 16)	4642	NM_030678	14936	Mm.275654	NM_030678	ENSMUSG00000003865	Gys1	Gys3|MGS	glycogen synthase 1, muscle	protein-coding
Diff_Nuc8678	chr18	37854132	37854271	+	0	NA	promoter-TSS (NM_033588)	promoter-TSS (NM_033588)	46	NM_033588	93713	Mm.247203	NM_033588	ENSMUSG00000103567	Pcdhga5	-	protocadherin gamma subfamily A, 5	protein-coding
Diff_Nuc17839	chr1	90151782	90151921	+	0	NA	exon (NM_001281466, exon 33 of 42)	exon (NM_001281466, exon 33 of 42)	14132	NR_040291	78605	Mm.384762	NR_040291		6430706D22Rik	-	RIKEN cDNA 6430706D22 gene	ncRNA
Diff_Nuc4632	chr17	14328792	14328931	+	0	NA	Intergenic	Intergenic	11977	NM_172826	240025	Mm.79993	NM_172826	ENSMUSG00000048826	Dact2	2900084M21Rik|A630024E20|Dpr2|Frd2|dapper2	dishevelled-binding antagonist of beta-catenin 2	protein-coding
Diff_Nuc2492	chr11	54323762	54323901	+	0	NA	intron (NM_173753, intron 16 of 17)	MLT1A0|LTR|MaLR	-12516	NM_001252494	192786	Mm.254404	NM_175258	ENSMUSG00000037533	Rapgef6	A530068K01|AI844632|BB085664|C030018K18Rik|PDZ-GEF2|Pdzgef2|RA-GEF-2|Ragef2|mKIAA4052	Rap guanine nucleotide exchange factor (GEF) 6	protein-coding
Diff_Nuc15344	chr3	121004242	121004381	+	0	NA	intron (NM_024178, intron 2 of 3)	intron (NM_024178, intron 2 of 3)	9576	NM_024178	66789	Mm.269881	NM_024178	ENSMUSG00000039887	Alg14	5430428G01Rik|AI854024	asparagine-linked glycosylation 14	protein-coding
Diff_Nuc7732	chr14	103406992	103407131	+	0	NA	intron (NR_045657, intron 2 of 2)	Lx9|LINE|L1	-25207	NM_177715	239217	Mm.246466	NM_177715	ENSMUSG00000098557	Kctd12	AU046135|AW538430|Pfet1|Pfetin	potassium channel tetramerisation domain containing 12	protein-coding
Diff_Nuc7269	chr14	42198132	42198271	+	0	NA	Intergenic	Intergenic	-199714	NM_009160	20390	Mm.1321	NM_009160	ENSMUSG00000021795	Sftpd	AI573415|SP-D|Sfpd|Sftp4	surfactant associated protein D	protein-coding
Diff_Nuc20323	chr8	64903422	64903561	+	0	NA	Intergenic	L1_Mus4|LINE|L1	-301501	NM_011922	26359	Mm.42179	NM_011922	ENSMUSG00000031635	Anxa10	-	annexin A10	protein-coding
Diff_Nuc7734	chr14	103919612	103919751	+	0	NA	intron (NM_022886, intron 1 of 30)	intron (NM_022886, intron 1 of 30)	7123	NM_022886	64929	Mm.244003	NM_022886	ENSMUSG00000022123	Scel	9230114I02Rik	sciellin	protein-coding
Diff_Nuc9305	chr7	26132302	26132441	+	0	NA	exon (NM_001160400, exon 27 of 41)	exon (NM_001160400, exon 27 of 41)	22372	NM_001081375	72383	Mm.34382	NM_028219	ENSMUSG00000063651	Cnfn	2210418J09Rik	cornifelin	protein-coding
Diff_Nuc13863	chr4	116439732	116439871	+	0	NA	intron (NM_146151, intron 3 of 10)	intron (NM_146151, intron 3 of 10)	40363	NM_026654	68276	Mm.30534	NM_026654	ENSMUSG00000028688	Toe1	4930584N22Rik|4933424D16Rik|AI413517	target of EGR1, member 1 (nuclear)	protein-coding
Diff_Nuc11065	chr6	83525502	83525641	+	0	NA	non-coding (NR_078345, exon 2 of 8)	non-coding (NR_078345, exon 2 of 8)	-3073	NM_024239	70527	Mm.32801	NM_024239	ENSMUSG00000006906	Stambp	5330424L14Rik|5730422L11Rik|AW107289|Amsh|mKIAA4198	STAM binding protein	protein-coding
Diff_Nuc9663	chr7	63307842	63307981	+	0	NA	intron (NM_010418, intron 2 of 92)	intron (NM_010418, intron 2 of 92)	2386	NM_010418	15204	Mm.20929	NM_010418	ENSMUSG00000030451	Herc2	D15F32S1h|D7H15F32S1|D7H15F37S1|jdf2|mKIAA0393|rjs	HECT and RLD domain containing E3 ubiquitin protein ligase 2	protein-coding
Diff_Nuc2648	chr11	67284322	67284461	+	0	NA	Intergenic	Lx9|LINE|L1	-62109	NM_008088	14457	Mm.40338	NM_008088	ENSMUSG00000033066	Gas7	AW124766|B230343A10Rik|Gas7-cb	growth arrest specific 7	protein-coding
Diff_Nuc10171	chr7	125463002	125463141	+	0	NA	Intergenic	B4A|SINE|B4	75650	NR_027879	67745	Mm.483404	NM_183267	ENSMUSG00000055159	4930583K01Rik	-	RIKEN cDNA 4930583K01 gene	ncRNA
Diff_Nuc12491	chr5	112801742	112801881	+	0	NA	intron (NM_138646, intron 11 of 13)	intron (NM_138646, intron 11 of 13)	-16758	NM_001039228	625424	Mm.389677	NM_001039228	ENSMUSG00000051503	Gm6583	EG625424	predicted gene 6583	protein-coding
Diff_Nuc518	chr13	49060362	49060501	+	0	NA	intron (NM_001033268, intron 1 of 17)	B3|SINE|B2	2766	NM_001033268	218236	Mm.426571	NM_001033268	ENSMUSG00000038014	Fam120a	C9orf10|Ossa	family with sequence similarity 120, member A	protein-coding
Diff_Nuc13115	chr4	10929072	10929211	+	0	NA	intron (NM_175175, intron 1 of 1)	Lx9|LINE|L1	5625	NM_175175	71801	Mm.34351	NM_175175	ENSMUSG00000049969	Plekhf2	1110070J07Rik|AA673237|ZFYVE18	pleckstrin homology domain containing, family F (with FYVE domain) member 2	protein-coding
Diff_Nuc2283	chr11	31693962	31694101	+	0	NA	Intergenic	RMER17A2|LTR|ERVK	30516	NR_102310	414116	Mm.150222	NR_102310	ENSMUSG00000085772	D630024D03Rik	-	RIKEN cDNA D630024D03 gene	ncRNA
Diff_Nuc14701	chr3	30403302	30403441	+	0	NA	intron (NM_021442, intron 1 of 2)	intron (NM_021442, intron 1 of 2)	5038	NM_021442	14013	Mm.56965	NM_007963	ENSMUSG00000027684	Mecom	D630039M04Rik|Evi-1|Evi1|Jbo|Mds|Mds1|Mds1-Evi1|Prdm3|Znfpr1b1	MDS1 and EVI1 complex locus	protein-coding
Diff_Nuc7500	chr14	64482392	64482531	+	0	NA	intron (NM_028228, intron 1 of 6)	RMER1A|Other|Other	3312	NM_028228	72400	Mm.379214	NM_028228	ENSMUSG00000021958	Pinx1	2210403I16Rik|2610028A01Rik|67-11-3|AU024023|LPTS|LPTS1	PIN2/TERF1 interacting, telomerase inhibitor 1	protein-coding
Diff_Nuc14029	chr4	126899812	126899951	+	0	NA	intron (NM_001302081, intron 8 of 11)	intron (NM_001302081, intron 8 of 11)	-21147	NM_030252	80284	Mm.139607	NM_030252	ENSMUSG00000042380	Smim12	BC003266	small integral membrane protein 12	protein-coding
Diff_Nuc15438	chr3	134770702	134770841	+	0	NA	Intergenic	L1_Mus3|LINE|L1	-104756	NM_173762	229841	Mm.161470	NM_173762	ENSMUSG00000045328	Cenpe	312kDa|AU019344|BC049989|C530022J18|CENP-E|Kif10	centromere protein E	protein-coding
Diff_Nuc16678	chr2	131429102	131429241	+	0	NA	Intergenic	ORR1C1|LTR|MaLR	-41150	NM_013460	11550	Mm.389380	NM_013460	ENSMUSG00000027335	Adra1d	Adra-1|Adra1|Adra1a|Gpcr8|Spr8|[a]1d|alpha1D-AR	adrenergic receptor, alpha 1d	protein-coding
Diff_Nuc12667	chr5	124427782	124427921	+	0	NA	intron (NM_145070, intron 1 of 31)	intron (NM_145070, intron 1 of 31)	4214	NM_145070	29816	Mm.149954	NM_145070	ENSMUSG00000000915	Hip1r	AA410023|mKIAA0655	huntingtin interacting protein 1 related	protein-coding
Diff_Nuc1196	chr12	13707752	13707891	+	0	NA	Intergenic	MTB_Mm|LTR|MaLR	-73369	NR_136761	102639399	Mm.122052	NR_136761		Gm35725	-	predicted gene, 35725	ncRNA
Diff_Nuc16430	chr2	102305842	102305981	+	0	NA	Intergenic	PB1D10|SINE|Alu	-13962	NM_010218	14221	Mm.29730	NM_010218	ENSMUSG00000075012	Fjx1	-	four jointed box 1 (Drosophila)	protein-coding
Diff_Nuc2887	chr11	82127492	82127631	+	0	NA	Intergenic	MTC|LTR|MaLR	-74841	NM_001304439	270893	Mm.341593	NM_023438	ENSMUSG00000020701	Tmem132e	Gm644	transmembrane protein 132E	protein-coding
Diff_Nuc18221	chr1	137654902	137655041	+	0	NA	Intergenic	RCHARR1|DNA|MER1_type	-7691	NM_013750	27280	Mm.34346	NM_013750	ENSMUSG00000041801	Phlda3	Tih1	pleckstrin homology like domain, family A, member 3	protein-coding
Diff_Nuc2054	chr12	118642342	118642481	+	0	NA	Intergenic	Intergenic	-66926	NR_044987	432713	Mm.459210	NR_044987	ENSMUSG00000101930	Gm5441	-	predicted gene 5441	ncRNA
Diff_Nuc8212	chr19	38453042	38453181	+	0	NA	Intergenic	RLTR4_MM-int|LTR|ERV1	-17359	NM_175507	240660	Mm.262085	NM_175507	ENSMUSG00000044026	Slc35g1	AA590464|D330039I19Rik|Tmem20	solute carrier family 35, member G1	protein-coding
Diff_Nuc784	chr13	74278312	74278451	+	0	NA	intron (NM_001081060, intron 1 of 15)	intron (NM_001081060, intron 1 of 15)	19418	NM_001081060	105243	Mm.261564	NM_001081060	ENSMUSG00000036123	Slc9a3	9030624O13Rik|AI930210|NHE-3|NHE3	solute carrier family 9 (sodium/hydrogen exchanger), member 3	protein-coding
Diff_Nuc6601	chr15	77188842	77188981	+	0	NA	Intergenic	Intergenic	40629	NM_029419	75761	Mm.232636	NM_029419	ENSMUSG00000010601	Apol7a	9130022K13Rik|Apol3	apolipoprotein L 7a	protein-coding
Diff_Nuc364	chr13	32329192	32329331	+	0	NA	intron (NM_146041, intron 1 of 10)	intron (NM_146041, intron 1 of 10)	101152	NM_146041	218138	Mm.247143	NM_146041	ENSMUSG00000038372	Gmds	BC031788|C87208	GDP-mannose 4, 6-dehydratase	protein-coding
Diff_Nuc17551	chr1	54134132	54134271	+	0	NA	intron (NM_001001883, intron 1 of 28)	intron (NM_001001883, intron 1 of 28)	117677	NM_001001883	329152	Mm.132150	NM_172655	ENSMUSG00000042807	Hecw2	A730039N16Rik|D030049F17Rik|Gm971|Nedl2|mKIAA1301	HECT, C2 and WW domain containing E3 ubiquitin protein ligase 2	protein-coding
Diff_Nuc3062	chr11	96975942	96976081	+	0	NA	exon (NM_019507, exon 1 of 6)	exon (NM_019507, exon 1 of 6)	634	NM_019507	57765	Mm.94519	NM_019507	ENSMUSG00000001444	Tbx21	TBT1|Tbet|Tblym	T-box 21	protein-coding
Diff_Nuc1055	chr13	112108462	112108601	+	0	NA	Intergenic	L1_Mus1|LINE|L1	63310	NM_175497	238880	Mm.107293	NM_175497	ENSMUSG00000055194	Actbl2	4732495G21Rik	actin, beta-like 2	protein-coding
Diff_Nuc14163	chr4	134547972	134548111	+	0	NA	Intergenic	MIR3|SINE|MIR	61146	NM_026780	68592	Mm.29989	NM_026780	ENSMUSG00000028821	Syf2	1110018L13Rik|Cbpin|D4Bwg1551e|Gcipip|Ntc31|mp29|p29	SYF2 homolog, RNA splicing factor (S. cerevisiae)	protein-coding
Diff_Nuc16420	chr2	101741872	101742011	+	0	NA	TTS (NM_029635)	TTS (NM_029635)	15522	NM_029635	76501	Mm.330424	NM_029635	ENSMUSG00000027163	Commd9	1810029F08Rik|AA409293	COMM domain containing 9	protein-coding
Diff_Nuc14537	chr4	155211882	155212021	+	0	NA	Intergenic	Intergenic	-1838	NM_024263	74761	Mm.159028	NM_024263	ENSMUSG00000029070	Mxra8	1200013A08Rik|1700095D18Rik|AI131686|Asp3|Dicam	matrix-remodelling associated 8	protein-coding
Diff_Nuc9586	chr7	53593682	53593821	+	0	NA	Intergenic	LTR16E1|LTR|ERVL	-33022	NR_131190	105447647		NR_131190		Munc	DRReRNA	MyoD upstream noncoding	ncRNA
Diff_Nuc1666	chr12	81803252	81803391	+	0	NA	intron (NM_001177503, intron 1 of 12)	intron (NM_001177503, intron 1 of 12)	9733	NM_001177503	217682	Mm.154541	NM_001177503	ENSMUSG00000066438	Plekhd1	3830431G21Rik	pleckstrin homology domain containing, family D (with coiled-coil domains) member 1	protein-coding
Diff_Nuc17631	chr1	64687082	64687221	+	0	NA	Intergenic	MTE2a|LTR|MaLR	-23409	NM_025964	67099	Mm.46394	NM_025964	ENSMUSG00000025956	Mettl21a	2310038H17Rik|AI464204|Fam119a	methyltransferase like 21A	protein-coding
Diff_Nuc20909	chr8	123730527	123730666	+	0	NA	Intergenic	(CA)n|Simple_repeat|Simple_repeat	79011	NM_008024	14241	Mm.5111	NM_008024	ENSMUSG00000097084	Foxl1	FREAC7|Fkh6|fkh-6	forkhead box L1	protein-coding
Diff_Nuc16806	chr2	151338092	151338231	+	0	NA	Intergenic	Intergenic	18243	NM_198326	386649	Mm.419479	NM_198326	ENSMUSG00000027455	Nsfl1c	Munc-18c|Stxbp3a|p47	NSFL1 (p97) cofactor (p47)	protein-coding
Diff_Nuc18453	chr1	166453762	166453901	+	0	NA	Intergenic	Intergenic	-65345	NM_009721	11931	Mm.4550	NM_009721	ENSMUSG00000026576	Atp1b1	Atp4b|Atpb|Atpb-1|NKbeta1	ATPase, Na+/K+ transporting, beta 1 polypeptide	protein-coding
Diff_Nuc2628	chr11	64618472	64618611	+	0	NA	Intergenic	Intergenic	-173996	NM_023479	68626	Mm.157711	NM_023479	ENSMUSG00000020549	Elac2	1110017O07Rik|D11Wsu80e|Hpc2	elaC ribonuclease Z 2	protein-coding
Diff_Nuc1325	chr12	29383262	29383401	+	0	NA	intron (NM_178811, intron 8 of 11)	intron (NM_178811, intron 8 of 11)	19141	NR_105902	102465980		NR_105902	ENSMUSG00000098579	Mir6937	Gm27448|mmu-mir-6937	microRNA 6937	ncRNA
Diff_Nuc15519	chr3	146193382	146193521	+	0	NA	Intergenic	RSINE1|SINE|B4	-9064	NM_027371	70285	Mm.28128	NM_027332	ENSMUSG00000028187	Rpf1	2210420E24Rik|2310066N05Rik|Bxdc5	ribosome production factor 1 homolog	protein-coding
Diff_Nuc10395	chr7	142664292	142664431	+	0	NA	Intergenic	Intergenic	55976	NM_178669	212070	Mm.39721	NM_178669	ENSMUSG00000050866	Clrn3	AI649392|Tmem12	clarin 3	protein-coding
Diff_Nuc7170	chr14	31366782	31366921	+	0	NA	intron (NM_009388, intron 1 of 13)	intron (NM_009388, intron 1 of 13)	4534	NM_009388	21881	Mm.290692	NM_009388	ENSMUSG00000021957	Tkt	p68	transketolase	protein-coding
Diff_Nuc16338	chr2	91448912	91449051	+	0	NA	intron (NM_029437, intron 36 of 42)	Lx3_Mus|LINE|L1	12743	NR_028553	100217458		NR_028553	ENSMUSG00000077221	Snord67	MBII-166	small nucleolar RNA, C/D box 67	snoRNA
Diff_Nuc9110	chr7	3336522	3336661	+	0	NA	promoter-TSS (NM_133189)	promoter-TSS (NM_133189)	-94	NM_133189	81904	Mm.214994	NM_133189	ENSMUSG00000069806	Cacng7	-	calcium channel, voltage-dependent, gamma subunit 7	protein-coding
Diff_Nuc10982	chr6	71342072	71342211	+	0	NA	3' UTR (NM_024288, exon 9 of 9)	3' UTR (NM_024288, exon 9 of 9)	18720	NM_001081110	12525	Mm.1858	NM_009857	ENSMUSG00000053977	Cd8a	BB154331|Ly-2|Ly-35|Ly-B|Lyt-2	CD8 antigen, alpha chain	protein-coding
Diff_Nuc2779	chr11	75105382	75105521	+	0	NA	Intergenic	Intergenic	56434	NM_001164223	68275	Mm.102574	NM_026653	ENSMUSG00000000751	Rpa1	5031405K23Rik|70kDa|AA589576|AW557552|RF-A|RP-A|Rpa	replication protein A1	protein-coding
Diff_Nuc8830	chr18	57859812	57859951	+	0	NA	intron (NM_029290, intron 6 of 6)	Lx8|LINE|L1	-61642	NR_045360	70157	Mm.490532	NR_045360		2210409D07Rik	-	RIKEN cDNA 2210409D07 gene	ncRNA
Diff_Nuc324	chr13	25773642	25773781	+	0	NA	Intergenic	(CTG)n|Simple_repeat|Simple_repeat	284474	NR_045062	100503530	Mm.86763	NR_045062	ENSMUSG00000086531	Gm11351	OTTMUSG00000000620	predicted gene 11351	ncRNA
Diff_Nuc15848	chr2	28813572	28813711	+	0	NA	intron (NM_001166705, intron 4 of 5)	intron (NM_001166705, intron 4 of 5)	-41681	NM_001164186	54422	Mm.21390	NM_019446	ENSMUSG00000026805	Barhl1	Dres115|MBH2	BarH-like 1 (Drosophila)	protein-coding
Diff_Nuc8506	chr18	13350762	13350901	+	0	NA	Intergenic	L1VL1|LINE|L1	185332	NM_153087	225192	Mm.207073	NM_153087	ENSMUSG00000037346	Hrh4	AXOR35|BG26|GPCR105|GPRv53|H4|H4R|HH4R	histamine receptor H4	protein-coding
Diff_Nuc14919	chr3	65043002	65043141	+	0	NA	intron (NM_001289450, intron 2 of 14)	L1_Mus4|LINE|L1	51046	NM_001289450	16497	Mm.316402	NM_010597	ENSMUSG00000027827	Kcnab1	Akr8a8|Kvbeta1.1|mKv(beta)1	potassium voltage-gated channel, shaker-related subfamily, beta member 1	protein-coding
Diff_Nuc16522	chr2	117465172	117465311	+	0	NA	Intergenic	B3A|SINE|B2	173297	NR_126427	100504728	Mm.413174	NR_126427		Gm13985	OTTMUSG00000015235	predicted gene 13985	ncRNA
Diff_Nuc4462	chr10	127803852	127803991	+	0	NA	intron (NM_001081040, intron 2 of 4)	intron (NM_001081040, intron 2 of 4)	3172	NM_001081040	210582	Mm.296876	NM_001081040	ENSMUSG00000039914	Coq10a	Gm1	coenzyme Q10A	protein-coding
Diff_Nuc13965	chr4	123427062	123427201	+	0	NA	intron (NM_023423, intron 1 of 4)	CpG	411	NM_023423	68050	Mm.27903	NM_023423	ENSMUSG00000023075	Akirin1	6330407G11Rik	akirin 1	protein-coding
Diff_Nuc4707	chr17	24650982	24651121	+	0	NA	intron (NM_153792, intron 6 of 20)	intron (NM_153792, intron 6 of 20)	13832	NM_153792	224619	Mm.275150	NM_153792	ENSMUSG00000052752	Traf7	RFWD1	TNF receptor-associated factor 7	protein-coding
Diff_Nuc12241	chr5	78320322	78320461	+	0	NA	Intergenic	Intergenic	425878	NR_131050	69370	Mm.426881	NR_131050	ENSMUSG00000107232	1700017L05Rik	-	RIKEN cDNA 1700017L05 gene	ncRNA
Diff_Nuc3432	chr11	118559737	118559876	+	0	NA	intron (NM_001039167, intron 2 of 14)	intron (NM_001039167, intron 2 of 14)	62549	NM_001285438	52897	Mm.341103	NM_001024931	ENSMUSG00000025576	Rbfox3	Fox-3|Hrnbp3|NeuN|Neuna60	RNA binding protein, fox-1 homolog (C. elegans) 3	protein-coding
Diff_Nuc20641	chr8	96872602	96872741	+	0	NA	intron (NM_019415, intron 18 of 24)	intron (NM_019415, intron 18 of 24)	19563	NM_001205311	20497	Mm.25804	NM_019415	ENSMUSG00000031766	Slc12a3	AI035291|NCC|NCCT|TSC	solute carrier family 12, member 3	protein-coding
Diff_Nuc11386	chr6	114834542	114834681	+	0	NA	intron (NM_177683, intron 2 of 4)	intron (NM_177683, intron 2 of 4)	37159	NM_177683	232334	Mm.268357	NM_177683	ENSMUSG00000030315	Vgll4	BC048841|VGL-4	vestigial like family member 4	protein-coding
Diff_Nuc9460	chr7	36810112	36810251	+	0	NA	Intergenic	ZP3AR|Satellite|Satellite	-222173	NM_177739	668501	Mm.286296	NM_177739	ENSMUSG00000044452	Zfp507	1810022O10Rik|A230056M16Rik|AL024009|AU021817|BB105092|Gm480|Znf507|mKIAA1084	zinc finger protein 507	protein-coding
Diff_Nuc7927	chr19	6060602	6060741	+	0	NA	promoter-TSS (NM_013859)	promoter-TSS (NM_013859)	-536	NM_013859	29805	Mm.2310	NM_013859	ENSMUSG00000075227	Znhit2	C11orf5|Fon|ORF6|Znhit2-ps	zinc finger, HIT domain containing 2	protein-coding
Diff_Nuc17898	chr1	93651062	93651201	+	0	NA	Intergenic	Intergenic	-46907	NM_007855	13345	Mm.9474	NM_007855	ENSMUSG00000007805	Twist2	Dermo1|bHLHa39	twist basic helix-loop-helix transcription factor 2	protein-coding
Diff_Nuc2533	chr11	57518392	57518531	+	0	NA	intron (NM_134189, intron 1 of 11)	RMER19C|LTR|ERVK	59517	NM_134189	171212	Mm.271670	NM_134189	ENSMUSG00000020520	Galnt10	AU018154|C330012K04Rik|GalNAc-T10|GalNAc-T9|Galnt9|ppGaNTase	UDP-N-acetyl-alpha-D-galactosamine:polypeptide N-acetylgalactosaminyltransferase 10	protein-coding
Diff_Nuc12623	chr5	121888232	121888371	+	0	NA	intron (NM_172722, intron 21 of 23)	B3|SINE|B2	14182	NM_026129	67397	Mm.154570	NM_026129	ENSMUSG00000029616	Erp29	1200015M03Rik|2810446M09Rik|AW209030|Erp28|Erp31|PDI-Db	endoplasmic reticulum protein 29	protein-coding
Diff_Nuc13610	chr4	85011642	85011781	+	0	NA	intron (NM_019535, intron 3 of 8)	intron (NM_019535, intron 3 of 8)	160351	NM_019535	20404	Mm.143603	NM_019535	ENSMUSG00000028488	Sh3gl2	9530001L19Rik|AI120490|AW555077|B930049H17Rik|EEN-B1|SH3PA|Sh3d2a	SH3-domain GRB2-like 2	protein-coding
Diff_Nuc4602	chr17	13407092	13407231	+	0	NA	Intergenic	Intergenic	-6893	NM_013741	27263	Mm.371809	NM_013741	ENSMUSG00000073458	Smok2a	Smok2	sperm motility kinase 2A	protein-coding
Diff_Nuc17139	chr2	170423602	170423741	+	0	NA	intron (NR_027825, intron 1 of 1)	intron (NR_027825, intron 1 of 1)	3846	NR_027825	67637	Mm.158163	NM_026287	ENSMUSG00000043583	4930470P17Rik	-	RIKEN cDNA 4930470P17 gene	ncRNA
Diff_Nuc387	chr13	35049412	35049551	+	0	NA	intron (NM_026947, intron 3 of 8)	intron (NM_026947, intron 3 of 8)	6197	NM_026947	69123	Mm.482475	NM_026947	ENSMUSG00000021416	Eci3	1810022C23Rik|Kseg2	enoyl-Coenzyme A delta isomerase 3	protein-coding
Diff_Nuc8142	chr19	29197592	29197731	+	0	NA	intron (NM_021525, intron 5 of 8)	intron (NM_021525, intron 5 of 8)	-12108	NR_029778	724062		NR_029778	ENSMUSG00000065556	Mir101b	Mirn101b|mir-101b	microRNA 101b	ncRNA
Diff_Nuc6773	chr15	85456562	85456701	+	0	NA	Intergenic	Intergenic	-44380	NM_009528	22422	Mm.306946	NM_009528	ENSMUSG00000022382	Wnt7b	Wnt-7b	wingless-type MMTV integration site family, member 7B	protein-coding
Diff_Nuc11453	chr6	120738732	120738871	+	0	NA	intron (NM_001081048, intron 5 of 9)	intron (NM_001081048, intron 5 of 9)	15015	NM_001081048	71803	Mm.425340	NM_001081048	ENSMUSG00000004902	Slc25a18	1500015I14Rik|AW125787	solute carrier family 25 (mitochondrial carrier), member 18	protein-coding
Diff_Nuc17495	chr1	43787652	43787791	+	0	NA	5' UTR (NM_024283, exon 1 of 4)	5' UTR (NM_024283, exon 1 of 4)	274	NM_024283	78896	Mm.50109	NM_024283	ENSMUSG00000026051	1500015O10Rik	Ecrg4	RIKEN cDNA 1500015O10 gene	protein-coding
Diff_Nuc4098	chr10	79682842	79682981	+	0	NA	Intergenic	RMER17B|LTR|ERVK	-6432	NM_023431	68114	Mm.273418	NM_023431	ENSMUSG00000020156	Mum1	2610019J09|9430059D04Rik|UBE-1C2	melanoma associated antigen (mutated) 1	protein-coding
Diff_Nuc14897	chr3	60399572	60399711	+	0	NA	exon (NM_001253713, exon 3 of 10)	exon (NM_001253713, exon 3 of 10)	94540	NM_001253708	56758	Mm.255723	NM_020007	ENSMUSG00000027763	Mbnl1	Mbnl|mKIAA0428	muscleblind-like 1 (Drosophila)	protein-coding
Diff_Nuc17445	chr1	38317982	38318121	+	0	NA	intron (NM_001290814, intron 9 of 21)	intron (NM_001290814, intron 9 of 21)	-131544	NM_019570	56210	Mm.389103	NM_019570	ENSMUSG00000026082	Rev1	1110027I23Rik|AU022044|Rev1l	REV1, DNA directed polymerase	protein-coding
Diff_Nuc8012	chr19	12944877	12945016	+	0	NA	Intergenic	L1_Mus1|LINE|L1	8679	NM_146702	258697	Mm.223132	NM_146702	ENSMUSG00000046272	Olfr1444	MOR202-4	olfactory receptor 1444	protein-coding
Diff_Nuc4088	chr10	79426962	79427101	+	0	NA	intron (NM_175450, intron 2 of 9)	intron (NM_175450, intron 2 of 9)	4134	NM_175450	216156	Mm.35828	NM_175450	ENSMUSG00000035754	Wdr18	2310012I10Rik|AU044733|AW122032	WD repeat domain 18	protein-coding
Diff_Nuc2036	chr12	116867172	116867311	+	0	NA	Intergenic	L1VL1|LINE|L1	66764	NR_105810	102465205		NR_105810	ENSMUSG00000098336	Mir6388	Gm27925|mmu-mir-6388	microRNA 6388	ncRNA
Diff_Nuc2933	chr11	86285082	86285221	+	0	NA	Intergenic	B1_Mm|SINE|Alu	-13008	NM_029788	76892	Mm.262707	NM_029788	ENSMUSG00000020521	Rnft1	0610013E23Rik|AV007605	ring finger protein, transmembrane 1	protein-coding
Diff_Nuc791	chr13	76067862	76068001	+	0	NA	intron (NM_028493, intron 3 of 11)	intron (NM_028493, intron 3 of 11)	13341	NM_028493	73296	Mm.276200	NM_028493	ENSMUSG00000021589	Rhobtb3	1700040C17Rik|2610033K01Rik|4930503C18Rik|AI317148|AW208826|mKIAA0878	Rho-related BTB domain containing 3	protein-coding
Diff_Nuc2223	chr11	20498252	20498391	+	0	NA	intron (NM_021372, intron 1 of 1)	Lx8|LINE|L1	-33659	NM_001038625	58172	Mm.339676	NM_021372	ENSMUSG00000049800	Sertad2	AB041541|AU021878|Kiaa0127|MNCb-1504|SEI-2|Sei2|TRIP-Br2|mKIAA0127	SERTA domain containing 2	protein-coding
Diff_Nuc15290	chr3	112831212	112831351	+	0	NA	Intergenic	MTA_Mm|LTR|MaLR	128364	NM_001190404	545562	Mm.462977	NM_001190403		Amy2b	Amy-X|Amy2-2|OTTMUSG00000022462|mAmy2-1	amylase 2b	protein-coding
Diff_Nuc4198	chr10	85228752	85228891	+	0	NA	Intergenic	Intergenic	-105755	NM_133993	103136	Mm.18834	NM_133993	ENSMUSG00000001785	Pwp1	2310058A11Rik|2610205J09Rik|AI098170|AL022879|AV083409|AW550690	PWP1 homolog, endonuclein	protein-coding
Diff_Nuc18193	chr1	136048652	136048791	+	0	NA	TTS (NM_001284524)	TTS (NM_001284524)	-30260	NM_007695	12654	Mm.38274	NM_007695	ENSMUSG00000064246	Chil1	AW208766|Brp39|Chi3l1|Gp39	chitinase-like 1	protein-coding
Diff_Nuc20552	chr8	89650962	89651101	+	0	NA	Intergenic	RMER17B|LTR|ERVK	72718	NR_040697	100038706	Mm.334690	NR_040697	ENSMUSG00000099207	Gm10637	ENSMUSG00000074176	predicted gene 10637	ncRNA
Diff_Nuc10124	chr7	119788482	119788621	+	0	NA	Intergenic	Intergenic	-34283	NM_001166584	21676	Mm.24685	NM_009346	ENSMUSG00000055320	Tead1	2610024B07Rik|B230114H05Rik|Gtrgeo5|TEAD-1|TEF-1|Tcf13|mTEF-1	TEA domain family member 1	protein-coding
Diff_Nuc2	chrY	2022472	2022611	+	0	NA	Intergenic	Intergenic	-45957	NM_001113395	100042840	Mm.472681	NM_001113395	ENSMUSG00000095573	H2al2b	ENSMUSG00000069034|Gm16501|H2al2y	H2A histone family member L2B	protein-coding
Diff_Nuc8411	chr19	58267462	58267601	+	0	NA	Intergenic	Intergenic	-103163	NR_040449	791347	Mm.452208	NR_040449		Gm10007	ENSMUSG00000056739	predicted gene 10007	ncRNA
Diff_Nuc15175	chr3	98231672	98231811	+	0	NA	exon (NM_172863, exon 3 of 3)	exon (NM_172863, exon 3 of 3)	45337	NM_172863	242109	Mm.358911	NM_172863	ENSMUSG00000050064	Zfp697	9430053K19|AI467503|Znf697	zinc finger protein 697	protein-coding
Diff_Nuc19858	chr9	122153162	122153301	+	0	NA	intron (NM_133979, intron 11 of 12)	MTEa|LTR|MaLR	29915	NR_106185	102465896		NR_106185	ENSMUSG00000098922	Mir8106	Gm27594|mmu-mir-8106	microRNA 8106	ncRNA
Diff_Nuc10167	chr7	124878072	124878211	+	0	NA	Intergenic	ORR1B1|LTR|MaLR	353648	NM_175645	233781	Mm.461427	NM_175645	ENSMUSG00000030657	Xylt1	8030490L12	xylosyltransferase 1	protein-coding
Diff_Nuc13385	chr4	48241542	48241681	+	0	NA	intron (NM_029572, intron 4 of 11)	intron (NM_029572, intron 4 of 11)	-15524	NR_035484	100316708		NR_035484	ENSMUSG00000087844	Mir1958	mmu-mir-1958	microRNA 1958	ncRNA
Diff_Nuc14472	chr4	152254702	152254841	+	0	NA	Intergenic	(CA)n|Simple_repeat|Simple_repeat	183122	NR_033138	330004	Mm.291863	NM_001033414		Gm833	-	predicted gene 833	ncRNA
Diff_Nuc7557	chr14	69561262	69561401	+	0	NA	Intergenic	Lx5|LINE|L1	-86015	NM_009285	20855	Mm.20911	NM_009285	ENSMUSG00000014813	Stc1	Stc	stanniocalcin 1	protein-coding
Diff_Nuc16574	chr2	121407482	121407621	+	0	NA	intron (NM_172673, intron 4 of 14)	RSINE1|SINE|B4	75092	NM_001290986	241627	Mm.293284	NM_030234	ENSMUSG00000027242	Wdr76	5830411K18Rik|6030457D09|AA517836	WD repeat domain 76	protein-coding
Diff_Nuc9645	chr7	59260972	59261111	+	0	NA	promoter-TSS (NR_027704)	promoter-TSS (NR_027704)	43	NR_027704	75744	Mm.386823	NM_001160345	ENSMUSG00000074093	Svip	1700006C13Rik|6620401M08Rik	small VCP/p97-interacting protein	protein-coding
Diff_Nuc6743	chr15	84025082	84025221	+	0	NA	intron (NM_178614, intron 1 of 14)	intron (NM_178614, intron 1 of 14)	2488	NM_178614	68653	Mm.290725	NM_178614	ENSMUSG00000022437	Samm50	1110030L07Rik	SAMM50 sorting and assembly machinery component	protein-coding
Diff_Nuc10341	chr7	138757872	138758011	+	0	NA	Intergenic	Intergenic	53933	NM_001317350	12237	Mm.927	NM_009774	ENSMUSG00000066979	Bub3	AU019800|AU021329|AU043350|AW146323|C78067	BUB3 mitotic checkpoint protein	protein-coding
Diff_Nuc12958	chr5	143635342	143635481	+	0	NA	intron (NM_001033312, intron 4 of 4)	intron (NM_001033312, intron 4 of 4)	21506	NM_001033312	231863	Mm.89753	NM_001033312	ENSMUSG00000066640	Fbxl18	AI427077|B130019G13Rik|C330021B20Rik	F-box and leucine-rich repeat protein 18	protein-coding
Diff_Nuc16861	chr2	153793482	153793621	+	0	NA	Intergenic	Intergenic	-7130	NM_001080811	545477	Mm.379973	NM_001080811	ENSMUSG00000078998	Bpifa6	EG545477|Gm5840|Splunc6	BPI fold containing family A, member 6	protein-coding
Diff_Nuc8609	chr18	30448622	30448761	+	0	NA	intron (NM_181414, intron 5 of 24)	intron (NM_181414, intron 5 of 24)	16141	NM_181414	225326	Mm.194127	NM_181414	ENSMUSG00000033628	Pik3c3	5330434F23Rik|Vps34	phosphoinositide-3-kinase, class 3	protein-coding
Diff_Nuc11906	chr5	34655412	34655551	+	0	NA	Intergenic	MER21B|LTR|ERV1	-23418	NM_011278	19822	Mm.21281	NM_011278	ENSMUSG00000029110	Rnf4	AU018689|Gtrgeo8|SNURF	ring finger protein 4	protein-coding
Diff_Nuc6557	chr15	74419522	74419661	+	0	NA	3' UTR (NM_174991, exon 31 of 31)	3' UTR (NM_174991, exon 31 of 31)	47157	NM_001177437	69439	Mm.263708	NM_001177437	ENSMUSG00000022603	Mroh4	1700016M24Rik	maestro heat-like repeat family member 4	protein-coding
Diff_Nuc3460	chr11	119435352	119435491	+	0	NA	Intergenic	Intergenic	25477	NR_045099	100503830	Mm.428077	NR_045099	ENSMUSG00000087675	Gm11762	OTTMUSG00000004029	predicted gene 11762	ncRNA
Diff_Nuc12062	chr5	52517702	52517841	+	0	NA	Intergenic	Intergenic	9485	NR_105845	102466648		NR_105845	ENSMUSG00000098726	Mir6417	Gm27334|mmu-mir-6417	microRNA 6417	ncRNA
Diff_Nuc5679	chr16	27141252	27141391	+	0	NA	Intergenic	Lx5|LINE|L1	-149583	NM_001285918	239789	Mm.326909	NM_001013761	ENSMUSG00000068428	Gmnc	Gemc1|Gm1778|Gm606	geminin coiled-coil domain containing	protein-coding
Diff_Nuc7207	chr14	33317032	33317171	+	0	NA	Intergenic	B3|SINE|B2	-9606	NM_001081221	319955	Mm.318310	NM_177043	ENSMUSG00000054051	Ercc6	4732403I04|C130058G22Rik|CSB	excision repair cross-complementing rodent repair deficiency, complementation group 6	protein-coding
Diff_Nuc529	chr13	49475402	49475541	+	0	NA	intron (NM_029791, intron 5 of 7)	intron (NM_029791, intron 5 of 7)	38553	NM_001039180	76895	Mm.197387	NM_029791	ENSMUSG00000037933	Bicd2	-	bicaudal D homolog 2 (Drosophila)	protein-coding
Diff_Nuc5949	chr16	78139272	78139411	+	0	NA	Intergenic	RLTR13B1|LTR|ERVK	116358	NR_045698	100503619	Mm.387531	NR_045698	ENSMUSG00000109841	E330011O21Rik	-	RIKEN cDNA E330011O21 gene	ncRNA
Diff_Nuc15405	chr3	130567522	130567661	+	0	NA	Intergenic	RMER1B|Other|Other	-134275	NM_001005859	68436	Mm.140568	NM_026724	ENSMUSG00000062006	Rpl34	1100001I22Rik	ribosomal protein L34	protein-coding
Diff_Nuc14406	chr4	148718992	148719131	+	0	NA	intron (NM_022022, intron 20 of 26)	Lx3_Mus|LINE|L1	10313	NR_131918	74310	Mm.440455	NR_131918	ENSMUSG00000085286	Ube4bos3	1700121F15Rik	ubiquitination factor E4B, opposite strand 3	ncRNA
Diff_Nuc20579	chr8	91101562	91101701	+	0	NA	intron (NM_001163660, intron 2 of 7)	intron (NM_001163660, intron 2 of 7)	50099	NM_001163660	93960	Mm.30219	NM_027280	ENSMUSG00000031661	Nkd1	2810434J10Rik|9030215G15Rik|Nkd	naked cuticle 1 homolog (Drosophila)	protein-coding
Diff_Nuc7799	chr14	119030972	119031111	+	0	NA	intron (NM_001163676, intron 4 of 29)	intron (NM_001163676, intron 4 of 29)	-39347	NR_105815	102465208		NR_105815	ENSMUSG00000098433	Mir6391	Gm27914|mmu-mir-6391	microRNA 6391	ncRNA
Diff_Nuc16602	chr2	124498902	124499041	+	0	NA	Intergenic	Intergenic	19654	NM_199239	214968	Mm.330536	NM_172537	ENSMUSG00000027200	Sema6d	1110067B02Rik|AA409156|D330011G23|mKIAA1479	sema domain, transmembrane domain (TM), and cytoplasmic domain, (semaphorin) 6D	protein-coding
Diff_Nuc2295	chr11	32274802	32274941	+	0	NA	intron (NM_177364, intron 2 of 12)	intron (NM_177364, intron 2 of 12)	27060	NM_177364	268396	Mm.227616	NM_177364	ENSMUSG00000040711	Sh3pxd2b	G431001E03Rik|TSK4|fad49	SH3 and PX domains 2B	protein-coding
Diff_Nuc12753	chr5	130143832	130143971	+	0	NA	Intergenic	Intergenic	32062	NM_172462	22648	Mm.135067	NM_172462	ENSMUSG00000051034	Zfp11	6720465D24|Krox-6|Zfp-11	zinc finger protein 11	protein-coding
Diff_Nuc15706	chr2	17702582	17702721	+	0	NA	Intergenic	Intergenic	-49956	NM_028757	74103	Mm.120298	NM_028757	ENSMUSG00000053702	Nebl	1200007O21Rik|A630080F05Rik|BB140644|D830029A09Rik|Lnebl	nebulette	protein-coding
Diff_Nuc13203	chr4	29624072	29624211	+	0	NA	Intergenic	Lx8|LINE|L1	883846	NM_001122889	13841	Mm.257266	NM_010141	ENSMUSG00000028289	Epha7	Cek11|Ebk|Ehk3|Hek11|Mdk1	Eph receptor A7	protein-coding
Diff_Nuc15966	chr2	33705842	33705981	+	0	NA	intron (NM_175184, intron 2 of 9)	intron (NM_175184, intron 2 of 9)	37555	NM_175184	72543	Mm.254914	NM_175184	ENSMUSG00000038740	Mvb12b	2610200O14Rik|2610528K11Rik|AI414895|Fam125b	multivesicular body subunit 12B	protein-coding
Diff_Nuc11267	chr6	98563882	98564021	+	0	NA	Intergenic	Intergenic	-271203	NM_001128092	330390	Mm.484161	NM_001128092	ENSMUSG00000090667	Gm765	-	predicted gene 765	protein-coding
Diff_Nuc14055	chr4	128693022	128693161	+	0	NA	Intergenic	RCHARR1|DNA|MER1_type	22623	NM_001033966	11637	Mm.29460	NM_016895	ENSMUSG00000028792	Ak2	Ak-2|D4Ertd220e	adenylate kinase 2	protein-coding
Diff_Nuc12364	chr5	100924862	100925001	+	0	NA	intron (NM_001346583, intron 1 of 12)	intron (NM_001346583, intron 1 of 12)	2661	NM_001115010	231506	Mm.212568	NM_172714	ENSMUSG00000035310	Lin54	AI461788	lin-54 homolog (C. elegans)	protein-coding
Diff_Nuc5108	chr17	56288592	56288731	+	0	NA	Intergenic	Intergenic	-8895	NM_001130456	20359	Mm.8029	NM_013662	ENSMUSG00000001227	Sema6b	Sema|Seman|VIb|semaZ	sema domain, transmembrane domain (TM), and cytoplasmic domain, (semaphorin) 6B	protein-coding
Diff_Nuc14713	chr3	32983742	32983881	+	0	NA	intron (NR_040595, intron 5 of 7)	intron (NR_040595, intron 5 of 7)	-1829	NM_001289505	58869	Mm.151332	NM_021483	ENSMUSG00000027674	Pex5l	1700016J08Rik|PXR2|Pex2|TRIP8b|pex5Rp	peroxisomal biogenesis factor 5-like	protein-coding
Diff_Nuc6897	chr15	97983212	97983351	+	0	NA	intron (NM_001170711, intron 1 of 3)	MTC|LTR|MaLR	-7148	NM_001170710	78541	Mm.200766	NM_030121	ENSMUSG00000048175	Asb8	4930539L19Rik|AI788835|C430011H06Rik	ankyrin repeat and SOCS box-containing 8	protein-coding
Diff_Nuc12357	chr5	100073202	100073341	+	0	NA	intron (NR_030692, intron 1 of 3)	intron (NR_030692, intron 1 of 3)	84808	NR_030692	319818	Mm.295233	NR_030692	ENSMUSG00000089809	A930011G23Rik	-	RIKEN cDNA A930011G23 gene	ncRNA
Diff_Nuc4406	chr10	120321322	120321461	+	0	NA	intron (NM_177092, intron 1 of 6)	intron (NM_177092, intron 1 of 6)	14636	NM_177092	320183	Mm.169755	NM_177092	ENSMUSG00000051236	Msrb3	D430026P16Rik|I-8-23|MsrB2	methionine sulfoxide reductase B3	protein-coding
Diff_Nuc6599	chr15	76940902	76941041	+	0	NA	intron (NM_175387, intron 5 of 12)	intron (NM_175387, intron 5 of 12)	26143	NR_108037	74303	Mm.444304	NR_108037	ENSMUSG00000097267	1700109K24Rik	4933425G21Rik	RIKEN cDNA 1700109K24 gene	ncRNA
Diff_Nuc13178	chr4	22733382	22733521	+	0	NA	Intergenic	Intergenic	315756	NR_131335	105500046		NR_131335	ENSMUSG00000107859	Gm30731	Pnky|lnc-pou3f2	predicted gene, 30731	ncRNA
Diff_Nuc8906	chr18	63976052	63976191	+	0	NA	intron (NM_001014981, intron 19 of 27)	intron (NM_001014981, intron 19 of 27)	107772	NM_001014981	104082	Mm.30850	NM_001014981	ENSMUSG00000040560	Wdr7	AI462727|TRAG|mKIAA0541	WD repeat domain 7	protein-coding
Diff_Nuc15279	chr3	109293462	109293601	+	0	NA	intron (NM_020505, intron 2 of 26)	intron (NM_020505, intron 2 of 26)	-83394	NM_146139	57257	Mm.282257	NM_020505	ENSMUSG00000033721	Vav3	A530094I06Rik|AA986410|Idd18.1	vav 3 oncogene	protein-coding
Diff_Nuc7987	chr19	10101912	10102051	+	0	NA	intron (NM_001347429, intron 6 of 12)	intron (NM_001347429, intron 6 of 12)	9263	NM_144538	74760	Mm.281969	NM_144538	ENSMUSG00000024663	Rab3il1	1200014K04Rik|AI115013|C76746|Rab3ail1	RAB3A interacting protein (rabin3)-like 1	protein-coding
Diff_Nuc17585	chr1	59192772	59192911	+	0	NA	intron (NM_001164682, intron 15 of 22)	B4A|SINE|B4	-15901	NM_001033449	381259	Mm.261275	NM_001033449	ENSMUSG00000038079	Tmem237	AI853305|Als2cr4|Gm972	transmembrane protein 237	protein-coding
Diff_Nuc4536	chr17	7807822	7807961	+	0	NA	Intergenic	Intergenic	189948	NM_001081416	68655	Mm.379161	NM_001081416	ENSMUSG00000071984	Fndc1	1110027O12Rik|1110051A18Rik|mKIAA1866	fibronectin type III domain containing 1	protein-coding
Diff_Nuc14425	chr4	149486682	149486821	+	0	NA	Intergenic	B1F1|SINE|Alu	-6702	NM_019741	56485	Mm.260220	NM_019741	ENSMUSG00000028976	Slc2a5	AI526984|Glut5|Slc5a	solute carrier family 2 (facilitated glucose transporter), member 5	protein-coding
Diff_Nuc15057	chr3	87975242	87975381	+	0	NA	TTS (NR_045997)	TTS (NR_045997)	6396	NR_045997	76642	Mm.424420	NR_045997	ENSMUSG00000096935	1700113A16Rik	2210408E11Rik|AA408983	RIKEN cDNA 1700113A16 gene	ncRNA
Diff_Nuc5834	chr16	45552142	45552281	+	0	NA	intron (NM_198106, intron 7 of 27)	(CCTG)n|Simple_repeat|Simple_repeat	16832	NM_198106	208169	Mm.277437	NM_198106	ENSMUSG00000033210	Slc9c1	Gm610|NHE-10|Slc9a10|sNHE|spermNHE	solute carrier family 9, subfamily C (Na+-transporting carboxylic acid decarboxylase), member 1	protein-coding
Diff_Nuc14094	chr4	130425602	130425741	+	0	NA	Intergenic	BGLII_B|LTR|ERVK	-43578	NM_010686	16792	Mm.271868	NM_010686	ENSMUSG00000028581	Laptm5	E3	lysosomal-associated protein transmembrane 5	protein-coding
Diff_Nuc17655	chr1	67862532	67862671	+	0	NA	Intergenic	ORR1A3|LTR|MaLR	693000	NM_001080809	227231	Mm.343942	NM_001080809	ENSMUSG00000025991	Cps1	4732433M03Rik|CPS|D1Ucla3	carbamoyl-phosphate synthetase 1	protein-coding
Diff_Nuc12657	chr5	123857002	123857141	+	0	NA	intron (NM_177582, intron 1 of 8)	intron (NM_177582, intron 1 of 8)	12264	NM_177582	208104	Mm.83277	NM_133917	ENSMUSG00000038342	Mlxip	AW228700|Mir|bHLHe36	MLX interacting protein	protein-coding
Diff_Nuc16419	chr2	101639442	101639581	+	0	NA	intron (NM_001110849, intron 2 of 9)	intron (NM_001110849, intron 2 of 9)	-1647	NM_001083810	72446	Mm.24138	NM_175181	ENSMUSG00000032841	Prr5l	2600010E01Rik|4833411O04Rik|Protor-2|Protor2	proline rich 5 like	protein-coding
Diff_Nuc20415	chr8	74209642	74209781	+	0	NA	exon (NM_001190830, exon 20 of 24)	exon (NM_001190830, exon 20 of 24)	-3440	NM_013564	16336	Mm.476857	NM_013564	ENSMUSG00000079019	Insl3	Rlf|Rlnl	insulin-like 3	protein-coding
Diff_Nuc13511	chr4	63339942	63340081	+	0	NA	Intergenic	MTE2a|LTR|MaLR	-56548	NM_029324	75524	Mm.38543	NM_029324	ENSMUSG00000058935	1700018C11Rik	bM230C2.3	RIKEN cDNA 1700018C11 gene	protein-coding
Diff_Nuc4357	chr10	115046192	115046331	+	0	NA	Intergenic	Lx7|LINE|L1	-21425	NM_010195	14160	Mm.42103	NM_010195	ENSMUSG00000020140	Lgr5	FEX|Gpr49	leucine rich repeat containing G protein coupled receptor 5	protein-coding
Diff_Nuc16465	chr2	106471502	106471641	+	0	NA	Intergenic	Intergenic	18950	NR_137201	102640562	Mm.404175	NR_137201	ENSMUSG00000085218	BB218582	-	expressed sequence BB218582	ncRNA
Diff_Nuc9993	chr7	106700682	106700821	+	0	NA	promoter-TSS (NR_029760)	promoter-TSS (NR_029760)	-28	NR_029760	723840		NR_029760	ENSMUSG00000065571	Mir326	Mirn326|mir-326|mmu-mir-326	microRNA 326	ncRNA
Diff_Nuc6041	chr16	93637902	93638041	+	0	NA	Intergenic	Lx9|LINE|L1	29889	NM_007620	12408	Mm.26940	NM_007620	ENSMUSG00000051483	Cbr1	AW261796|CR|Cbr	carbonyl reductase 1	protein-coding
Diff_Nuc15821	chr2	27567202	27567341	+	0	NA	intron (NM_001290482, intron 1 of 9)	intron (NM_001290482, intron 1 of 9)	1168	NM_001290482	20181	Mm.24624	NM_011305	ENSMUSG00000015846	Rxra	9530071D11Rik|Nr2b1|RXRalpha1	retinoid X receptor alpha	protein-coding
Diff_Nuc20071	chr8	23374272	23374411	+	0	NA	Intergenic	Intergenic	-19572	NM_199257	234129	Mm.450553	NM_181851	ENSMUSG00000031481	Tpte	Pten2	transmembrane phosphatase with tensin homology	protein-coding
Diff_Nuc1113	chr13	119804492	119804631	+	0	NA	Intergenic	ORR1B2|LTR|MaLR	301055	NM_008002	14165	Mm.317323	NM_008002	ENSMUSG00000021732	Fgf10	AEY17|BB213776|Fgf-10|Gsfaey17	fibroblast growth factor 10	protein-coding
Diff_Nuc17677	chr1	72959762	72959901	+	0	NA	Intergenic	Intergenic	-38392	NM_010518	16011	Mm.405761	NM_010518	ENSMUSG00000026185	Igfbp5	AI256729|AW208790|IGFBP-5|IGFBP-5P	insulin-like growth factor binding protein 5	protein-coding
Diff_Nuc17533	chr1	51908912	51909051	+	0	NA	intron (NM_010863, intron 3 of 29)	intron (NM_010863, intron 3 of 29)	63841	NM_001290982	17912	Mm.3390	NM_010863	ENSMUSG00000018417	Myo1b	AA406997|MIH-L|MMIa	myosin IB	protein-coding
Diff_Nuc5524	chr16	12710432	12710571	+	0	NA	Intergenic	Intergenic	-100982	NR_040507	75493	Mm.396146	NR_040507	ENSMUSG00000101565	1700003L19Rik	-	RIKEN cDNA 1700003L19 gene	ncRNA
Diff_Nuc20248	chr8	49206762	49206901	+	0	NA	intron (NM_001161515, intron 3 of 5)	intron (NM_001161515, intron 3 of 5)	11464	NM_001161515	320685	Mm.121549	NM_178788	ENSMUSG00000031562	Dctd	6030466N05Rik	dCMP deaminase	protein-coding
Diff_Nuc3831	chr10	52410982	52411121	+	0	NA	intron (NM_178675, intron 1 of 7)	CpG	744	NM_178675	215085	Mm.338690	NM_178675	ENSMUSG00000038602	Slc35f1	Duf6|E130016L02	solute carrier family 35, member F1	protein-coding
Diff_Nuc18692	chr1	192487792	192487931	+	0	NA	Intergenic	Intergenic	247788	NM_178775	320119	Mm.220912	NM_178775	ENSMUSG00000089872	Rps6kc1	AA682037|B130003F20Rik|C80612|Rpk118	ribosomal protein S6 kinase polypeptide 1	protein-coding
Diff_Nuc2155	chr11	7794062	7794201	+	0	NA	Intergenic	Intergenic	-680205	NM_008343	16009	Mm.29254	NM_008343	ENSMUSG00000020427	Igfbp3	AI649005|IGFBP-3|IGgfbp3	insulin-like growth factor binding protein 3	protein-coding
Diff_Nuc902	chr13	96602092	96602231	+	0	NA	intron (NM_027711, intron 2 of 35)	intron (NM_027711, intron 2 of 35)	59716	NM_027711	544963	Mm.38878	NM_027711	ENSMUSG00000021676	Iqgap2	4933417J23Rik|A630053O10|AI788777	IQ motif containing GTPase activating protein 2	protein-coding
Diff_Nuc3766	chr10	41304962	41305101	+	0	NA	intron (NM_001303469, intron 6 of 20)	intron (NM_001303469, intron 6 of 20)	17209	NR_045341	70538	Mm.399807	NR_045341	ENSMUSG00000091370	5730435O14Rik	-	RIKEN cDNA 5730435O14 gene	ncRNA
Diff_Nuc15775	chr2	25160752	25160891	+	0	NA	exon (NM_001177656, exon 6 of 20)	exon (NM_001177656, exon 6 of 20)	13886	NM_008169	14810	Mm.278672	NM_008169	ENSMUSG00000026959	Grin1	GluN1|GluRdelta1|GluRzeta1|M100174|NMD-R1|NMDAR1|NR1|Nmdar|Rgsc174	glutamate receptor, ionotropic, NMDA1 (zeta 1)	protein-coding
Diff_Nuc20164	chr8	35304292	35304431	+	0	NA	Intergenic	MLT1K|LTR|MaLR	-74595	NR_105820	102465211		NR_105820	ENSMUSG00000098785	Mir6395	Gm27561|mmu-mir-6395	microRNA 6395	ncRNA
Diff_Nuc2904	chr11	83845052	83845191	+	0	NA	intron (NM_194341, intron 18 of 19)	B4|SINE|B4	36738	NM_019819	56405	Mm.240885	NM_019819	ENSMUSG00000018648	Dusp14	1110014C10Rik|2310042C07Rik|D11Ertd395e|MKP-L|Mkp6	dual specificity phosphatase 14	protein-coding
Diff_Nuc7447	chr14	59101572	59101711	+	0	NA	Intergenic	Lx8|LINE|L1	410118	NM_013518	14180	Mm.8846	NM_013518	ENSMUSG00000021974	Fgf9	Eks	fibroblast growth factor 9	protein-coding
Diff_Nuc20742	chr8	110017762	110017901	+	0	NA	intron (NM_025830, intron 6 of 23)	B3|SINE|B2	-57313	NR_029553	387158		NR_029553	ENSMUSG00000065439	Mir140	Mirn140|mir-140|mmu-mir-140	microRNA 140	ncRNA
Diff_Nuc2121	chr11	5088262	5088401	+	0	NA	Intergenic	Intergenic	-36106	NM_080595	140703	Mm.840	NM_080595	ENSMUSG00000034164	Emid1	AW122071|CO-5|Emu1	EMI domain containing 1	protein-coding
Diff_Nuc17864	chr1	91478512	91478651	+	0	NA	intron (NM_001037136, intron 1 of 16)	intron (NM_001037136, intron 1 of 16)	101886	NR_015540	74403	Mm.444291	NR_015540		4933400F21Rik	1700091C04Rik|4930565K10Rik	RIKEN cDNA 4933400F21 gene	ncRNA
Diff_Nuc15452	chr3	136514592	136514731	+	0	NA	intron (NM_008913, intron 2 of 13)	intron (NM_008913, intron 2 of 13)	181631	NM_001293622	19055	Mm.331389	NM_008913	ENSMUSG00000028161	Ppp3ca	2900074D19Rik|CN|Caln|Calna|CnA	protein phosphatase 3, catalytic subunit, alpha isoform	protein-coding
Diff_Nuc601	chr13	55304082	55304221	+	0	NA	Intergenic	B1_Mur4|SINE|Alu	-6992	NM_008739	18193	Mm.12964	NM_008739	ENSMUSG00000021488	Nsd1	AI528500|KMT3B	nuclear receptor-binding SET-domain protein 1	protein-coding
Diff_Nuc3563	chr10	6307142	6307281	+	0	NA	intron (NM_172308, intron 16 of 27)	intron (NM_172308, intron 16 of 27)	66255	NM_001170786	270685	Mm.184752	NM_172308	ENSMUSG00000040675	Mthfd1l	2410004L15Rik|AI647056|Fthfsdc1	methylenetetrahydrofolate dehydrogenase (NADP+ dependent) 1-like	protein-coding
Diff_Nuc14320	chr4	142201662	142201801	+	0	NA	Intergenic	MTB_Mm|LTR|MaLR	-406415	NM_001109685	71529	Mm.255986	NM_144531	ENSMUSG00000040606	Kazn	2310007B04Rik|9030409G11Rik|AI256607|AI666764|AW061099|Kaz|Kazrin	kazrin, periplakin interacting protein	protein-coding
Diff_Nuc1153	chr12	6515862	6516001	+	0	NA	Intergenic	Intergenic	871205	NR_045045	73575	Mm.179463	NR_045045	ENSMUSG00000102096	1700101O22Rik	-	RIKEN cDNA 1700101O22 gene	ncRNA
Diff_Nuc2272	chr11	30099372	30099511	+	0	NA	intron (NM_175836, intron 1 of 34)	intron (NM_175836, intron 1 of 34)	-1184	NM_009260	20742	Mm.123110	NM_009260	ENSMUSG00000020315	Sptbn1	9930031C03Rik|AL033301|SPTB2|Spnb-2|Spnb2|elf1|elf3|mKIAA4049	spectrin beta, non-erythrocytic 1	protein-coding
Diff_Nuc8847	chr18	59023312	59023451	+	0	NA	intron (NM_175506, intron 2 of 22)	L1_Mus2|LINE|L1	27364	NM_175506	240322	Mm.71963	NM_175506	ENSMUSG00000053441	Adamts19	4831407I23Rik|AU015154|D230034E10Rik	a disintegrin-like and metallopeptidase (reprolysin type) with thrombospondin type 1 motif, 19	protein-coding
Diff_Nuc15761	chr2	24754702	24754841	+	0	NA	intron (NM_172545, intron 1 of 26)	intron (NM_172545, intron 1 of 26)	20358	NM_172545	77683	Mm.24176	NM_172545	ENSMUSG00000036893	Ehmt1	9230102N17Rik|D330003E03|Eu-HMTase1|GLP|GLP1|KMT1D|mKIAA1876	euchromatic histone methyltransferase 1	protein-coding
Diff_Nuc3609	chr10	14776362	14776501	+	0	NA	Intergenic	Intergenic	296336	NM_008703	18101	Mm.487342	NM_008703	ENSMUSG00000019865	Nmbr	BB182387	neuromedin B receptor	protein-coding
Diff_Nuc2403	chr11	46356712	46356851	+	0	NA	Intergenic	Intergenic	-5134	NM_001163353	675689	Mm.478806	NM_001163353		Gm12171	OTTMUSG00000005499	predicted gene 12171	protein-coding
Diff_Nuc18972	chr9	37358492	37358631	+	0	NA	intron (NM_022029, intron 1 of 3)	intron (NM_022029, intron 1 of 3)	1769	NM_022029	64011	Mm.335065	NM_022029	ENSMUSG00000053310	Nrgn	0710001B06Rik|AI838505|NG|NG/RC3|Pss1|R75334|RC3	neurogranin	protein-coding
Diff_Nuc6457	chr15	61951562	61951701	+	0	NA	intron (NR_132746, intron 2 of 6)	intron (NR_132746, intron 2 of 6)	80819	NR_132746	19296	Mm.4608	NM_011222	ENSMUSG00000097039	Pvt1	Ayu21-84Imeg|Gt(pU21)84Imeg|Mis-1|Mlvi-1|Pvt-1	plasmacytoma variant translocation 1	ncRNA
Diff_Nuc12182	chr5	73082572	73082711	+	0	NA	Intergenic	ORR1B2|LTR|MaLR	43606	NM_001081205	70701	Mm.38884	NM_001081205	ENSMUSG00000067219	Nipal1	3830408G10Rik|Npal1	NIPA-like domain containing 1	protein-coding
Diff_Nuc8273	chr19	43722062	43722201	+	0	NA	Intergenic	MIRb|SINE|MIR	27240	NM_145156	246696	Mm.23827	NM_145156	ENSMUSG00000040414	Slc25a28	2210403D18Rik|Mfrn2|Mrs3/4	solute carrier family 25, member 28	protein-coding
Diff_Nuc11262	chr6	98054202	98054341	+	0	NA	Intergenic	MT2A|LTR|ERVL	112494	NM_008601	17342	Mm.333284	NM_008601	ENSMUSG00000035158	Mitf	BCC2|Bhlhe32|Gsfbcc2|Vitiligo|Wh|bw|mi|vit	microphthalmia-associated transcription factor	protein-coding
Diff_Nuc5380	chr17	87416652	87416791	+	0	NA	intron (NM_008838, intron 4 of 5)	intron (NM_008838, intron 4 of 5)	8020	NM_008838	18701	Mm.219685	NM_008838	ENSMUSG00000024145	Pigf	-	phosphatidylinositol glycan anchor biosynthesis, class F	protein-coding
Diff_Nuc11784	chr5	23931402	23931541	+	0	NA	intron (NM_009207, intron 1 of 22)	CpG	421	NM_009207	20535	Mm.4580	NM_009207	ENSMUSG00000028962	Slc4a2	Ae2|B3RP	solute carrier family 4 (anion exchanger), member 2	protein-coding
Diff_Nuc3345	chr11	115475782	115475921	+	0	NA	3' UTR (NM_001252384, exon 8 of 8)	3' UTR (NM_001252384, exon 8 of 8)	-1568	NM_001243587	69674	Mm.390387	NM_027162	ENSMUSG00000020743	Mif4gd	1110014L05Rik|2310075G12Rik	MIF4G domain containing	protein-coding
Diff_Nuc7105	chr14	25615212	25615351	+	0	NA	Intergenic	Intergenic	305378	NM_011297	20088	Mm.16775	NM_011297	ENSMUSG00000025290	Rps24	-	ribosomal protein S24	protein-coding
Diff_Nuc3541	chr10	3164342	3164481	+	0	NA	intron (NM_172546, intron 1 of 12)	intron (NM_172546, intron 1 of 12)	30107	NM_172546	215748	Mm.37984	NM_172546	ENSMUSG00000015202	Cnksr3	6820402C05|BC024086|Magi1	Cnksr family member 3	protein-coding
Diff_Nuc11289	chr6	100329592	100329731	+	0	NA	Intergenic	RMER15|LTR|ERVL	-92309	NM_019743	56353	Mm.321633	NM_019743	ENSMUSG00000072872	Rybp	2410018J24Rik|DEDAF|YEAF1	RING1 and YY1 binding protein	protein-coding
Diff_Nuc9660	chr7	62957742	62957881	+	0	NA	Intergenic	RLTR25B|LTR|ERVK	-65743	NM_001310740	233274	Mm.44425	NM_178706	ENSMUSG00000051504	Siglech	6430529G09Rik|Siglec-H	sialic acid binding Ig-like lectin H	protein-coding
Diff_Nuc15422	chr3	131843732	131843871	+	0	NA	TTS (NM_020265)	TTS (NM_020265)	95545	NM_020265	56811	Mm.103593	NM_020265	ENSMUSG00000028031	Dkk2	-	dickkopf WNT signaling pathway inhibitor 2	protein-coding
Diff_Nuc8821	chr18	57201172	57201311	+	0	NA	Intergenic	B4A|SINE|B4	-66208	NM_029909	77422	Mm.256874	NM_029909	ENSMUSG00000024592	C330018D20Rik	AU018666	RIKEN cDNA C330018D20 gene	protein-coding
Diff_Nuc14858	chr3	54482412	54482551	+	0	NA	Intergenic	Intergenic	-14546	NM_019995	56790	Mm.486375	NM_019995	ENSMUSG00000027751	Supt20	AA667204|AI450544|D3Ertd300e|Fam48a|Supt20h|p38IP	suppressor of Ty 20	protein-coding
Diff_Nuc11954	chr5	36959132	36959271	+	0	NA	intron (NM_001081232, intron 4 of 7)	intron (NM_001081232, intron 4 of 7)	-30326	NM_001113362	100855	Mm.486203	NM_133910	ENSMUSG00000029192	Tbc1d14	2810413P16Rik|AU043625|C86258|D5Ertd110e|mKIAA1322	TBC1 domain family, member 14	protein-coding
Diff_Nuc6534	chr15	73650322	73650461	+	0	NA	intron (NM_001033365, intron 1 of 10)	MIRb|SINE|MIR	19710	NM_001033365	268816	Mm.440635	NM_001033365	ENSMUSG00000072487	Mroh5	Gm628	maestro heat-like repeat family member 5	protein-coding
Diff_Nuc19125	chr9	49335482	49335621	+	0	NA	intron (NM_001311065, intron 13 of 17)	intron (NM_001311065, intron 13 of 17)	9158	NR_029465	100036537	Mm.437541	NR_029465	ENSMUSG00000079564	Gm11149	ENSMUSG00000060603|ENSMUSG00000079564	predicted gene 11149	ncRNA
Diff_Nuc2551	chr11	59074042	59074181	+	0	NA	intron (NM_009522, intron 2 of 3)	intron (NM_009522, intron 2 of 3)	30142	NM_009522	22416	Mm.1367	NM_009522	ENSMUSG00000009900	Wnt3a	Wnt-3a|vt	wingless-type MMTV integration site family, member 3A	protein-coding
Diff_Nuc19673	chr9	107984182	107984321	+	0	NA	TTS (NR_106056)	TTS (NR_106056)	422	NR_106056	102466914		NR_106056	ENSMUSG00000098787	Mir7088	Gm27577|mmu-mir-7088	microRNA 7088	ncRNA
Diff_Nuc8735	chr18	45055812	45055951	+	0	NA	Intergenic	Intergenic	67562	NM_001163013	240255	Mm.244482	NM_001163013	ENSMUSG00000034653	Ythdc2	3010002F02Rik|BC037178	YTH domain containing 2	protein-coding
Diff_Nuc3592	chr10	11050802	11050941	+	0	NA	Intergenic	Intergenic	-12372	NM_010146	13853	Mm.89946	NM_010146	ENSMUSG00000055493	Epm2a	TG-B|Tg(TcraK,TcrbK)TG-BFlv	epilepsy, progressive myoclonic epilepsy, type 2 gene alpha	protein-coding
Diff_Nuc12560	chr5	116053222	116053361	+	0	NA	exon (NM_172719, exon 35 of 58)	exon (NM_172719, exon 35 of 58)	22333	NR_105996	102466790		NR_105996	ENSMUSG00000099047	Mir7029	Gm27293|mmu-mir-7029	microRNA 7029	ncRNA
Diff_Nuc13723	chr4	101628752	101628891	+	0	NA	Intergenic	(GGAA)n|Simple_repeat|Simple_repeat	15809	NM_001085516	332923	Mm.473672	NM_001085516	ENSMUSG00000070890	Gm12794	OTTMUSG00000008450	predicted gene 12794	protein-coding
Diff_Nuc10068	chr7	115953622	115953761	+	0	NA	Intergenic	L1Md_F|LINE|L1	15820	NM_146726	258721	Mm.377655	NM_146726	ENSMUSG00000066241	Olfr514	MOR268-1	olfactory receptor 514	protein-coding
Diff_Nuc17140	chr2	170510352	170510491	+	0	NA	Intergenic	L1MC4a|LINE|L1	-46886	NM_029761	76829	Mm.41633	NM_029761	ENSMUSG00000027560	Dok5	2700055C10Rik	docking protein 5	protein-coding
Diff_Nuc15312	chr3	116175552	116175691	+	0	NA	Intergenic	(TATATG)n|Simple_repeat|Simple_repeat	35472	NM_025517	66368	Mm.251228	NM_025517	ENSMUSG00000000339	Rtca	2310009A18Rik|AI450277|RPC|Rtcd1	RNA 3'-terminal phosphate cyclase	protein-coding
Diff_Nuc7930	chr19	6109952	6110091	+	0	NA	intron (NM_001009546, intron 8 of 17)	intron (NM_001009546, intron 8 of 17)	4223	NM_001009546	381204	Mm.359041	NM_001009546	ENSMUSG00000054999	Naaladl1	Gm964|Naaladasel	N-acetylated alpha-linked acidic dipeptidase-like 1	protein-coding
Diff_Nuc3023	chr11	94686462	94686601	+	0	NA	intron (NM_001163172, intron 1 of 4)	intron (NM_001163172, intron 1 of 4)	6785	NM_001163172	544806	Mm.379774	NM_001034896	ENSMUSG00000075610	Tmem92	AU016430|Tmem92-ps	transmembrane protein 92	protein-coding
Diff_Nuc9368	chr7	29536322	29536461	+	0	NA	intron (NM_023637, intron 12 of 15)	intron (NM_023637, intron 12 of 15)	-4802	NM_001195091	100504112	Mm.379654	NM_001195091	ENSMUSG00000096257	Ccer2	EG624918|Gm6537	coiled-coil glutamate-rich protein 2	protein-coding
Diff_Nuc19451	chr9	81155862	81156001	+	0	NA	Intergenic	MTB|LTR|MaLR	-369606	NR_040394	319405	Mm.246494	NR_040393	ENSMUSG00000097466	D430036J16Rik	-	RIKEN cDNA D430036J16 gene	ncRNA
Diff_Nuc6199	chr15	17815452	17815591	+	0	NA	Intergenic	RLTR9E|LTR|ERVK	483861	NR_045711	70886	Mm.399021	NR_045711		4921515E04Rik	-	RIKEN cDNA 4921515E04 gene	ncRNA
Diff_Nuc1579	chr12	72117392	72117531	+	0	NA	promoter-TSS (NR_045055)	promoter-TSS (NR_045055)	507	NM_001081195	238247	Mm.241601	NM_001081195	ENSMUSG00000048118	Arid4a	A630009N03|A630067N03Rik|MmRBBP1|Rbbp1	AT rich interactive domain 4A (RBP1-like)	protein-coding
Diff_Nuc8754	chr18	47826702	47826841	+	0	NA	intron (NR_033454, intron 1 of 5)	B2_Mm2|SINE|B2	129382	NR_033454	328953	Mm.246768	NR_033454		Gm5095	A730092B10	predicted gene 5095	ncRNA
Diff_Nuc9400	chr7	31080172	31080311	+	0	NA	intron (NM_001081114, intron 2 of 13)	L2b|LINE|L2	3469	NM_001081114	76686	Mm.159258	NM_001081114	ENSMUSG00000013921	Clip3	1500005P14Rik|AI844915|Clipr-59	CAP-GLY domain containing linker protein 3	protein-coding
Diff_Nuc16798	chr2	150610892	150611031	+	0	NA	Intergenic	Intergenic	-1571	NM_153781	110078	Mm.222584	NM_153781	ENSMUSG00000033059	Pygb	-	brain glycogen phosphorylase	protein-coding
Diff_Nuc4418	chr10	121440022	121440161	+	0	NA	intron (NM_001081037, intron 1 of 21)	intron (NM_001081037, intron 1 of 21)	44280	NM_001242411	117600	Mm.288698	NM_001081037	ENSMUSG00000020121	Srgap1	4930572H05Rik|Arhgap13	SLIT-ROBO Rho GTPase activating protein 1	protein-coding
Diff_Nuc7503	chr14	64637832	64637971	+	0	NA	intron (NM_146246, intron 1 of 3)	intron (NM_146246, intron 1 of 3)	26633	NM_146246	271209	Mm.300655	NM_146246	ENSMUSG00000046049	Rp1l1	BC031365|BE983540|Dcdc4|Rp1hl1	retinitis pigmentosa 1 homolog like 1	protein-coding
Diff_Nuc13128	chr4	12487502	12487641	+	0	NA	Intergenic	Intergenic	-346413	NM_173746	208820	Mm.12057	NM_173746	ENSMUSG00000055963	Triqk	C130086A10|Gm11818|OTTMUSG00000004461	triple QxxK/R motif containing	protein-coding
Diff_Nuc8391	chr19	56728612	56728751	+	0	NA	Intergenic	Intergenic	-68181	NM_007419	11554	Mm.46797	NM_007419	ENSMUSG00000035283	Adrb1	Adrb-1|beta-AR	adrenergic receptor, beta 1	protein-coding
Diff_Nuc19852	chr9	121933722	121933861	+	0	NA	Intergenic	Intergenic	-28647	NM_153540	215494	Mm.402151	NM_153540	ENSMUSG00000066235	Pomgnt2	Ago61|C85492|Gtdc2	protein O-linked mannose beta 1,4-N-acetylglucosaminyltransferase 2	protein-coding
Diff_Nuc19403	chr9	74989472	74989611	+	0	NA	intron (NM_010864, intron 8 of 40)	L1MB7|LINE|L1	70528	NM_010864	17918	Mm.3645	NM_010864	ENSMUSG00000034593	Myo5a	9630007J19Rik|AI413174|AI661011|Dbv|MVa|Myo5|MyoVA|Sev-1|d|d-120J|flail|flr	myosin VA	protein-coding
Diff_Nuc11052	chr6	83092912	83093051	+	0	NA	intron (NM_133641, intron 1 of 11)	intron (NM_133641, intron 1 of 11)	5903	NM_009106	20166	Mm.4139	NM_009106	ENSMUSG00000034930	Rtkn	-	rhotekin	protein-coding
Diff_Nuc17658	chr1	68269772	68269911	+	0	NA	intron (NM_010154, intron 19 of 26)	intron (NM_010154, intron 19 of 26)	884792	NM_010154	13869	Mm.442420	NM_010154	ENSMUSG00000062209	Erbb4	Her4|c-erbB-4	erb-b2 receptor tyrosine kinase 4	protein-coding
Diff_Nuc8907	chr18	64054062	64054201	+	0	NA	intron (NM_001014981, intron 21 of 27)	intron (NM_001014981, intron 21 of 27)	185782	NM_001014981	104082	Mm.30850	NM_001014981	ENSMUSG00000040560	Wdr7	AI462727|TRAG|mKIAA0541	WD repeat domain 7	protein-coding
Diff_Nuc7217	chr14	34241972	34242111	+	0	NA	intron (NM_016700, intron 1 of 11)	intron (NM_016700, intron 1 of 11)	-17831	NM_001310452	26419	Mm.21495	NM_016700	ENSMUSG00000021936	Mapk8	AI849689|JNK|JNK1|Prkm8|SAPK1	mitogen-activated protein kinase 8	protein-coding
Diff_Nuc6009	chr16	90589962	90590101	+	0	NA	Intergenic	Intergenic	137585	NM_025642	66578	Mm.180363	NM_025642	ENSMUSG00000022978	Mis18a	2610039C10Rik|2810018N07Rik	MIS18 kinetochore protein A	protein-coding
Diff_Nuc7003	chr14	9222052	9222191	+	0	NA	Intergenic	Intergenic	-10844	NM_146050	18300	Mm.25351	NM_146050	ENSMUSG00000021749	Oit1	2310076N21Rik|AV067083|EF-7|Fam3d	oncoprotein induced transcript 1	protein-coding
Diff_Nuc17623	chr1	63905912	63906051	+	0	NA	Intergenic	L1Md_A|LINE|L1	-90140	NM_001256158	74426	Mm.159197	NM_001256158	ENSMUSG00000025961	4933402D24Rik	-	RIKEN cDNA 4933402D24 gene	protein-coding
Diff_Nuc10778	chr6	40762682	40762821	+	0	NA	Intergenic	L1_Mus3|LINE|L1	74742	NM_139296	194357	Mm.207087	NM_139296	ENSMUSG00000029885	Moxd2	Dbhl1	monooxygenase, DBH-like 2	protein-coding
Diff_Nuc13050	chr4	3142642	3142781	+	0	NA	Intergenic	L1_Mus2|LINE|L1	-30259	NM_001167535	100312471	Mm.377218	NM_001167535	ENSMUSG00000095982	Vmn1r3	Gm11778|OTTMUSG00000004181	vomeronasal 1 receptor 3	protein-coding
Diff_Nuc19655	chr9	107363722	107363861	+	0	NA	intron (NM_001174050, intron 2 of 37)	intron (NM_001174050, intron 2 of 37)	61580	NM_020263	56808	Mm.273084	NM_020263	ENSMUSG00000010066	Cacna2d2	Cacna2d|a2d2|du|mKIAA0558|td|torpid	calcium channel, voltage-dependent, alpha 2/delta subunit 2	protein-coding
Diff_Nuc11968	chr5	37616442	37616581	+	0	NA	Intergenic	Intergenic	-16786	NM_001136058	12933	Mm.290995	NM_007765	ENSMUSG00000029121	Crmp1	CRMP-1|DRP-1|Dpysl1|ULIP-3|Ulip3	collapsin response mediator protein 1	protein-coding
Diff_Nuc18867	chr9	23200572	23200711	+	0	NA	intron (NM_028472, intron 11 of 14)	intron (NM_028472, intron 11 of 14)	173121	NM_028472	73230	Mm.335020	NM_028472	ENSMUSG00000031963	Bmper	3110056H04Rik|CV-2|Crim3|Cv2	BMP-binding endothelial regulator	protein-coding
Diff_Nuc171	chrX	166446162	166446301	+	0	NA	Intergenic	Intergenic	-29382	NR_029457	654820	Mm.34441	NM_001039559	ENSMUSG00000072844	G530011O06Rik	-	RIKEN cDNA G530011O06 gene	ncRNA
Diff_Nuc14827	chr3	51384332	51384471	+	0	NA	Intergenic	RMER20A|LTR|ERVK	-19656	NM_080793	73251	Mm.192111	NM_080793	ENSMUSG00000037111	Setd7	1600028F23Rik|H3K4MT|KMT7|Set7|Set7/9|mKIAA1717	SET domain containing (lysine methyltransferase) 7	protein-coding
Diff_Nuc16948	chr2	158469482	158469621	+	0	NA	Intergenic	Intergenic	5232	NR_037312	100499529		NR_037312	ENSMUSG00000093120	Mir3474	mir-3474|mmu-mir-3474	microRNA 3474	ncRNA
Diff_Nuc9934	chr7	98963542	98963681	+	0	NA	intron (NM_011807, intron 4 of 22)	intron (NM_011807, intron 4 of 22)	-247293	NM_001243046	23859	Mm.147213	NM_011807	ENSMUSG00000052572	Dlg2	A330103J02Rik|B230218P12Rik|B330007M19Rik|Dlgh2|Gm1197|Gm21505|PSD93	discs, large homolog 2 (Drosophila)	protein-coding
Diff_Nuc10394	chr7	142556882	142557021	+	0	NA	Intergenic	B4A|SINE|B4	-45099	NM_183193	270004	Mm.132547	NM_183193	ENSMUSG00000048377	Foxi2	B130055A05Rik	forkhead box I2	protein-coding
Diff_Nuc939	chr13	99862042	99862181	+	0	NA	Intergenic	Intergenic	-4235	NR_045495	69603	Mm.390632	NR_045495	ENSMUSG00000100410	2310020H05Rik	-	RIKEN cDNA 2310020H05 gene	ncRNA
Diff_Nuc1319	chr12	28475332	28475471	+	0	NA	Intergenic	Intergenic	-447818	NM_009234	20666	Mm.41702	NM_009234	ENSMUSG00000063632	Sox11	1110038H03Rik|6230403H02Rik|AI836553|end1	SRY (sex determining region Y)-box 11	protein-coding
Diff_Nuc12206	chr5	74612512	74612651	+	0	NA	intron (NM_001114660, intron 7 of 8)	RLTR8|LTR|ERVK	21230	NM_026878	68939	Mm.293316	NM_026878	ENSMUSG00000049907	Rasl11b	1190017B18Rik	RAS-like, family 11, member B	protein-coding
Diff_Nuc12735	chr5	129367422	129367561	+	0	NA	intron (NM_001081388, intron 1 of 21)	B4|SINE|B4	91870	NM_001081388	231760	Mm.233996	NM_001081388	ENSMUSG00000029420	Rimbp2	A930033C01Rik|mKIAA0318	RIMS binding protein 2	protein-coding
Diff_Nuc11449	chr6	120179172	120179311	+	0	NA	intron (NM_198884, intron 3 of 19)	B1_Mur4|SINE|Alu	35400	NM_001347432	29862	Mm.103668	NM_016718	ENSMUSG00000041377	Ninj2	-	ninjurin 2	protein-coding
Diff_Nuc381	chr13	34679002	34679141	+	0	NA	Intergenic	ORR1A2|LTR|MaLR	65479	NM_025831	66895	Mm.28943	NM_025831	ENSMUSG00000021411	Pxdc1	1300014I06Rik	PX domain containing 1	protein-coding
Diff_Nuc899	chr13	96116222	96116361	+	0	NA	Intergenic	Intergenic	15725	NR_034043	100217450	Mm.442313	NR_034043	ENSMUSG00000088108	Snora47	MBI-115	small nucleolar RNA, H/ACA box 47	snoRNA
Diff_Nuc18333	chr1	154253022	154253161	+	0	NA	intron (NM_177756, intron 1 of 11)	intron (NM_177756, intron 1 of 11)	6094	NM_177756	269132	Mm.23782	NM_177756	ENSMUSG00000032649	Colgalt2	AI427652|D730024P12|Glt25d2	collagen beta(1-O)galactosyltransferase 2	protein-coding
Diff_Nuc5754	chr16	34650052	34650191	+	0	NA	Intergenic	Intergenic	-1176	NM_030744	76378	Mm.23515	NM_030744	ENSMUSG00000022832	Ropn1	1700008N21Rik|ODF6|RHPNAP1|Rppn|ropporin	ropporin, rhophilin associated protein 1	protein-coding
Diff_Nuc4226	chr10	90592432	90592571	+	0	NA	Intergenic	MT2A|LTR|ERVL	-5793	NM_133668	18674	Mm.298	NM_133668	ENSMUSG00000061904	Slc25a3	5730556H19Rik|PTP|Phc	solute carrier family 25 (mitochondrial carrier, phosphate carrier), member 3	protein-coding
Diff_Nuc10011	chr7	107569092	107569231	+	0	NA	intron (NM_001017985, intron 16 of 33)	B4|SINE|B4	48418	NM_001017985	277939	Mm.276374	NM_001017985	ENSMUSG00000047248	C2cd3	AU020772	C2 calcium-dependent domain containing 3	protein-coding
Diff_Nuc17885	chr1	92444112	92444251	+	0	NA	Intergenic	Intergenic	-55819	NM_133805	108679	Mm.119177	NM_133805	ENSMUSG00000034432	Cops8	9430009J09Rik|AA408242|Csn8|Sgn8	COP9 signalosome subunit 8	protein-coding
Diff_Nuc17794	chr1	87428112	87428251	+	0	NA	Intergenic	Intergenic	67204	NM_030194	109032	Mm.335802	NM_030194	ENSMUSG00000070034	Sp110	5031415C07Rik|52kDa|5830484A20Rik|ENSMUSG00000075603|Ifi75|Ipr1	Sp110 nuclear body protein	protein-coding
Diff_Nuc15341	chr3	120825772	120825911	+	0	NA	Intergenic	PB1D10|SINE|Alu	48772	NM_028456	66568	Mm.263163	NM_025637	ENSMUSG00000028133	Rwdd3	2510027J23Rik|3110037C01Rik|AI035684|AI662458|Rsume|X2CR1	RWD domain containing 3	protein-coding
Diff_Nuc20367	chr8	72441782	72441921	+	0	NA	exon (NM_001113346, exon 4 of 13)	exon (NM_001113346, exon 4 of 13)	-15394	NM_023312	67184	Mm.21162	NM_023312	ENSMUSG00000036199	Ndufa13	2700054G14Rik|AU022060|CDA016|CGI-39|GRIM-19|Grim19	NADH dehydrogenase (ubiquinone) 1 alpha subcomplex, 13	protein-coding
Diff_Nuc12325	chr5	95302142	95302281	+	0	NA	intron (NM_001031622, intron 1 of 3)	RLTR45|LTR|ERVK	7659	NM_001031622	545762	Mm.425309	NM_001031622	ENSMUSG00000096550	Gm16367	-	predicted gene 16367	protein-coding
Diff_Nuc4000	chr10	73141272	73141411	+	0	NA	Intergenic	L1Md_T|LINE|L1	-143274	NM_001142760	11994	Mm.338933	NM_023115	ENSMUSG00000052613	Pcdh15	BB078305|ENSMUSG00000046980|Gm9815|Ush1f|av|nmf19|roda	protocadherin 15	protein-coding
Diff_Nuc14971	chr3	74281592	74281731	+	0	NA	Intergenic	RLTR10D|LTR|ERVK	-460462	NR_040450	100504692	Mm.394454	NR_040450	ENSMUSG00000104096	Gm20356	-	predicted gene, 20356	ncRNA
Diff_Nuc3798	chr10	44194882	44195021	+	0	NA	Intergenic	Intergenic	-16397	NM_007548	12142	Mm.4800	NM_007548	ENSMUSG00000038151	Prdm1	Blimp-1|Blimp1|PRDI-BF1|ZNFPR1A1|b2b1765Clo	PR domain containing 1, with ZNF domain	protein-coding
Diff_Nuc9764	chr7	78599512	78599651	+	0	NA	Intergenic	Intergenic	-455000	NR_130995	78156	Mm.243818	NR_130995	ENSMUSG00000108669	4930441H08Rik	-	RIKEN cDNA 4930441H08 gene	ncRNA
Diff_Nuc12528	chr5	114436802	114436941	+	0	NA	intron (NM_198109, intron 2 of 14)	intron (NM_198109, intron 2 of 14)	6895	NM_198109	231637	Mm.389682	NM_198109	ENSMUSG00000042121	Ssh1	AW551225|Gm1394|Gm1395|SSH-1|SSH-1L	slingshot homolog 1 (Drosophila)	protein-coding
Diff_Nuc19613	chr9	104211302	104211441	+	0	NA	intron (NM_019807, intron 8 of 10)	intron (NM_019807, intron 8 of 10)	28681	NM_019807	56318	Mm.19941	NM_019807	ENSMUSG00000032561	Acpp	5'-NT|A030005E02Rik|FRAP|Lap|PAP|Ppal	acid phosphatase, prostate	protein-coding
Diff_Nuc8070	chr19	21904502	21904641	+	0	NA	intron (NM_031997, intron 17 of 24)	intron (NM_031997, intron 17 of 24)	51741	NM_031997	83921	Mm.329776	NM_031997	ENSMUSG00000024754	Tmem2	-	transmembrane protein 2	protein-coding
Diff_Nuc19246	chr9	61070502	61070641	+	0	NA	Intergenic	Intergenic	71045	NR_045334	622037	Mm.126243	NR_045334	ENSMUSG00000111658	B930092H01Rik	-	RIKEN cDNA B930092H01 gene	ncRNA
Diff_Nuc2772	chr11	74466562	74466701	+	0	NA	intron (NM_001081158, intron 1 of 25)	intron (NM_001081158, intron 1 of 25)	3634	NM_001081158	74148	Mm.214574	NM_001081158	ENSMUSG00000020741	Cluh	1300001I01Rik|Kiaa0664|mKIAA0664	clustered mitochondria (cluA/CLU1) homolog	protein-coding
Diff_Nuc11896	chr5	34325732	34325871	+	0	NA	promoter-TSS (NM_001310546)	promoter-TSS (NM_001310546)	-281	NM_001033458	381633	Mm.4923	NM_001033458	ENSMUSG00000070858	Gm1673	-	predicted gene 1673	protein-coding
Diff_Nuc7082	chr14	22569842	22569981	+	0	NA	exon (NM_026283, exon 1 of 6)	exon (NM_026283, exon 1 of 6)	158	NM_026283	67630	Mm.102765	NM_026283	ENSMUSG00000021770	Samd8	1110053F04Rik|1700010P07Rik|SMSr	sterile alpha motif domain containing 8	protein-coding
Diff_Nuc11308	chr6	103451782	103451921	+	0	NA	Intergenic	Intergenic	-9019	NM_007697	12661	Mm.251288	NM_007697	ENSMUSG00000030077	Chl1	A530023M13Rik|AI465420|CALL|LICAM2	cell adhesion molecule L1-like	protein-coding
Diff_Nuc20942	chr8	125198422	125198561	+	0	NA	intron (NM_009824, intron 1 of 11)	intron (NM_009824, intron 1 of 11)	3584	NM_001109873	12398	Mm.194339	NM_009824	ENSMUSG00000006362	Cbfa2t3	A630044F12Rik|AI465270|AW229127|Cbfa2t3h|ETO-2|Eto2|MTGR2	core-binding factor, runt domain, alpha subunit 2, translocated to, 3 (human)	protein-coding
Diff_Nuc10491	chr7	149130062	149130201	+	0	NA	Intergenic	Intergenic	-5525	NM_001009930	75770	Mm.274868	NM_029426	ENSMUSG00000053046	Brsk2	4833424K13Rik|SAD-A|SADA	BR serine/threonine kinase 2	protein-coding
Diff_Nuc727	chr13	65998062	65998201	+	0	NA	Intergenic	Intergenic	-216258	NM_001177832	628709	Mm.390595	NM_001177832	ENSMUSG00000095909	Gm10324	ENSMUSG00000071302	predicted gene 10324	protein-coding
Diff_Nuc20113	chr8	27600722	27600861	+	0	NA	Intergenic	Intergenic	332150	NM_199042	73754	Mm.383241	NM_199042	ENSMUSG00000037214	Thap1	4833431A01Rik|AW490810	THAP domain containing, apoptosis associated protein 1	protein-coding
Diff_Nuc9184	chr7	15252742	15252881	+	0	NA	Intergenic	Lx3A|LINE|L1	7754	NM_001038676	194588	Mm.389816	NM_001038676	ENSMUSG00000055942	Obox7	EG194588|Gm4745	oocyte specific homeobox 7	protein-coding
Diff_Nuc17778	chr1	85028402	85028541	+	0	NA	Intergenic	Intergenic	77957	NM_213615	381287	Mm.487565	NM_213615	ENSMUSG00000089844	A530032D15Rik	Gm1888	RIKEN cDNA A530032D15Rik gene	protein-coding
Diff_Nuc15091	chr3	89806122	89806261	+	0	NA	TTS (NR_045749)	TTS (NR_045749)	3509	NR_045749	100503469	Mm.440636	NR_045749	ENSMUSG00000105552	Gm19710	-	predicted gene, 19710	ncRNA
Diff_Nuc202	chr13	7879832	7879971	+	0	NA	Intergenic	RMER17B|LTR|ERVK	-322211	NM_001289530	94191	Mm.425794	NM_052977	ENSMUSG00000052551	Adarb2	Adar3|RED2	adenosine deaminase, RNA-specific, B2	protein-coding
Diff_Nuc4920	chr17	35574982	35575121	+	0	NA	Intergenic	Tigger7|DNA|MER2_type	-1049	NM_010394	15018	Mm.431282	NM_010394	ENSMUSG00000060550	H2-Q7	H-2Q7|Ped|Q9|Qa-2|Qa-7|Qa7	histocompatibility 2, Q region locus 7	protein-coding
Diff_Nuc7055	chr14	18937152	18937291	+	0	NA	Intergenic	L1_Mm|LINE|L1	123063	NM_009380	21834	Mm.32563	NM_009380	ENSMUSG00000021779	Thrb	Nr1a2|T3R[b]|T3Rbeta|Thrb1|Thrb2|c-erbAbeta	thyroid hormone receptor beta	protein-coding
Diff_Nuc4072	chr10	78919392	78919531	+	0	NA	Intergenic	L1VL4|LINE|L1	-12242	NM_001104537	625029	Mm.469865	NM_001104537	ENSMUSG00000091381	Vmn2r83	EG625029	vomeronasal 2, receptor 83	protein-coding
Diff_Nuc15671	chr2	10974602	10974741	+	0	NA	Intergenic	ORR1E|LTR|MaLR	-119338	NM_008859	18761	Mm.329993	NM_008859	ENSMUSG00000026778	Prkcq	A130035A12Rik|AW494342|PKC-0|PKC-theta|PKCtheta|Pkcq	protein kinase C, theta	protein-coding
Diff_Nuc4608	chr17	13523362	13523501	+	0	NA	Intergenic	Intergenic	-24007	NM_001167578	100041352	Mm.490251	NM_001167578	ENSMUSG00000052469	Tcp10c	D17Leh66C|D17Leh66ca|Gm9880|T66C-a|Tcp-10c	t-complex protein 10c	protein-coding
Diff_Nuc9078	chr18	84516282	84516421	+	0	NA	intron (NM_001033341, intron 6 of 8)	intron (NM_001033341, intron 6 of 8)	242545	NM_001033341	240476	Mm.329575	NM_001033341	ENSMUSG00000048410	Zfp407	6430585N13Rik|Gm333|Gm334|Gm948|ZNF407	zinc finger protein 407	protein-coding
Diff_Nuc9278	chr7	22911232	22911371	+	0	NA	Intergenic	Lx|LINE|L1	-8037	NM_001167148	620401	Mm.484999	NM_001167148	ENSMUSG00000096152	Gm16442	EG667071|Vmn1r92	predicted gene 16442	protein-coding
Diff_Nuc18251	chr1	138558152	138558291	+	0	NA	Intergenic	Intergenic	-21752	NR_045324	100503460	Mm.30630	NR_045324	ENSMUSG00000097113	Gm19705	-	predicted gene, 19705	ncRNA
Diff_Nuc8580	chr18	25071382	25071521	+	0	NA	intron (NM_175276, intron 5 of 26)	intron (NM_175276, intron 5 of 26)	204327	NM_001289655	225288	Mm.329322	NM_175276	ENSMUSG00000034295	Fhod3	A930009H06Rik|FHOS2|mKIAA1695	formin homology 2 domain containing 3	protein-coding
Diff_Nuc12677	chr5	125079862	125080001	+	0	NA	intron (NM_011596, intron 1 of 19)	CpG	298	NM_011596	21871	Mm.1158	NM_011596	ENSMUSG00000038023	Atp6v0a2	8430408C20Rik|AI385560|ATP6a2|AW489264|Atp6n1d|Atp6n2|C76904|ISF|J6B7|SHIF|Stv1|TJ6M|TJ6s|Tj6|V-ATPase 116 kDa|V-ATPase a2	ATPase, H+ transporting, lysosomal V0 subunit A2	protein-coding
Diff_Nuc12709	chr5	126965092	126965231	+	0	NA	Intergenic	B4A|SINE|B4	-545998	NR_040685	71247	Mm.399586	NR_040685	ENSMUSG00000105490	4933438B17Rik	-	RIKEN cDNA 4933438B17 gene	ncRNA
Diff_Nuc1477	chr12	55834192	55834331	+	0	NA	Intergenic	B2_Mm2|SINE|B2	-37380	NM_025456	66266	Mm.156440	NM_025456	ENSMUSG00000054302	Eapp	1810011O16Rik	E2F-associated phosphoprotein	protein-coding
Diff_Nuc16144	chr2	59695972	59696111	+	0	NA	intron (NM_001159636, intron 10 of 10)	L1ME2z|LINE|L1	24622	NM_001159636	72137	Mm.288734	NM_028118	ENSMUSG00000026988	Wdsub1	1700048E19Rik|2610014F08Rik	WD repeat, SAM and U-box domain containing 1	protein-coding
Diff_Nuc5358	chr17	86361932	86362071	+	0	NA	Intergenic	Intergenic	182514	NM_030133	78586	Mm.146236	NM_030133	ENSMUSG00000024135	Srbd1	AI461933|C85414|D530025C17Rik	S1 RNA binding domain 1	protein-coding
Diff_Nuc10220	chr7	129300492	129300631	+	0	NA	Intergenic	Intergenic	-2388	NM_011121	18817	Mm.16525	NM_011121	ENSMUSG00000030867	Plk1	Plk|STPK13	polo-like kinase 1	protein-coding
Diff_Nuc15065	chr3	88396782	88396921	+	0	NA	Intergenic	Intergenic	13258	NM_025448	66256	Mm.7091	NM_025448	ENSMUSG00000041355	Ssr2	1500032E05Rik|AI315033|AU020133|TLAP|TRAPB|TRAPbeta	signal sequence receptor, beta	protein-coding
Diff_Nuc14893	chr3	59652702	59652841	+	0	NA	Intergenic	Lx3A|LINE|L1	-12202	NM_001243003	666803	Mm.389443	NM_001243003	ENSMUSG00000095522	Gm8298	EG666803	predicted gene 8298	protein-coding
Diff_Nuc15033	chr3	85947372	85947511	+	0	NA	promoter-TSS (NM_016959)	promoter-TSS (NM_016959)	-851	NM_016959	20091	Mm.391785	NM_016959	ENSMUSG00000028081	Rps3a1	Rps3a	ribosomal protein S3A1	protein-coding
Diff_Nuc9123	chr7	4734932	4735071	+	0	NA	promoter-TSS (NM_001290423)	promoter-TSS (NM_001290423)	459	NM_030028	78052	Mm.160043	NM_030028	ENSMUSG00000013091	Tmem190	4930572D21Rik	transmembrane protein 190	protein-coding
Diff_Nuc18154	chr1	134654652	134654791	+	0	NA	Intergenic	Intergenic	-16347	NM_001160317	269116	Mm.326702	NM_182716	ENSMUSG00000026442	Nfasc	AA387016|D430023G06Rik|NF|mKIAA0756	neurofascin	protein-coding
Diff_Nuc405	chr13	37138542	37138681	+	0	NA	intron (NM_001166391, intron 2 of 14)	intron (NM_001166391, intron 2 of 14)	2471	NM_028784	74145	Mm.235105	NM_028784	ENSMUSG00000039109	F13a1	1200014I03Rik|AI462306|F13a	coagulation factor XIII, A1 subunit	protein-coding
Diff_Nuc18301	chr1	150755332	150755471	+	0	NA	Intergenic	MER44C|DNA|MER2_type	1014168	NM_001305632	18783	Mm.4186	NM_008869	ENSMUSG00000056220	Pla2g4a	Pla2g4|cPLA2|cPLA2-alpha|cPLA2alpha	phospholipase A2, group IVA (cytosolic, calcium-dependent)	protein-coding
Diff_Nuc3080	chr11	97489522	97489661	+	0	NA	exon (NM_175332, exon 1 of 1)	exon (NM_175332, exon 1 of 1)	1439	NM_175332	103551	Mm.24506	NM_175332	ENSMUSG00000043439	Epop	AA409164|AI413509|AW539173|E13|E130012A19Rik|esPRC2p48	elongin BC and polycomb repressive complex 2 associated protein	protein-coding
Diff_Nuc16815	chr2	151817822	151817961	+	0	NA	Intergenic	Intergenic	-4356	NM_027172	69698	Mm.258262	NM_027172	ENSMUSG00000027463	Slc52a3	2310046K01Rik|RFT2	solute carrier protein family 52, member 3	protein-coding
Diff_Nuc11075	chr6	84009972	84010111	+	0	NA	intron (NM_021469, intron 4 of 54)	intron (NM_021469, intron 4 of 54)	40661	NM_021469	26903	Mm.220982	NM_021469	ENSMUSG00000033788	Dysf	2310004N10Rik|AI604795|D6Pas3	dysferlin	protein-coding
Diff_Nuc19801	chr9	118742552	118742691	+	0	NA	intron (NM_001113514, intron 5 of 13)	intron (NM_001113514, intron 5 of 13)	-93033	NM_133710	69274	Mm.439928	NM_133710	ENSMUSG00000047409	Ctdspl	2810418J22Rik|AI426263|HYA22|SCP3	CTD (carboxy-terminal domain, RNA polymerase II, polypeptide A) small phosphatase-like	protein-coding
Diff_Nuc5182	chr17	66054362	66054501	+	0	NA	intron (NM_133685, intron 3 of 6)	intron (NM_133685, intron 3 of 6)	-62887	NM_001146002	213272	Mm.255732	NM_153519	ENSMUSG00000050612	Txndc2	AU021712|Sptrx-1|Sptrx1|Trx4	thioredoxin domain containing 2 (spermatozoa)	protein-coding
Diff_Nuc17132	chr2	169365752	169365891	+	0	NA	Intergenic	Intergenic	-93325	NM_080455	228911	Mm.315789	NM_080455	ENSMUSG00000047907	Tshz2	2900073F20Rik|B830045G17|Mtsh2|Sdccag33l|Tsh2|Zfp218|mKIAA4248|teashirt2	teashirt zinc finger family member 2	protein-coding
Diff_Nuc2078	chr11	3043652	3043791	+	0	NA	exon (NM_030207, exon 19 of 33)	exon (NM_030207, exon 19 of 33)	19691	NR_003518	66776	Mm.247625	NR_003518		Pisd-ps3	4933439C20Rik	phosphatidylserine decarboxylase, pseudogene 3	pseudo
Diff_Nuc16227	chr2	72254122	72254261	+	0	NA	intron (NM_023057, intron 14 of 19)	intron (NM_023057, intron 14 of 19)	-60085	NM_025866	66953	Mm.270676	NM_025866	ENSMUSG00000055612	Cdca7	2310021G01Rik|AU044109|JPO1	cell division cycle associated 7	protein-coding
Diff_Nuc13183	chr4	23199112	23199251	+	0	NA	Intergenic	Intergenic	781486	NR_131335	105500046		NR_131335	ENSMUSG00000107859	Gm30731	Pnky|lnc-pou3f2	predicted gene, 30731	ncRNA
Diff_Nuc12258	chr5	84388812	84388951	+	0	NA	Intergenic	RLTR10D|LTR|ERVK	457526	NM_007937	13839	Mm.137991	NM_007937	ENSMUSG00000029245	Epha5	AI854630|AW125296|Cek7|Ehk1|Els1|Hek7|Rek7|bsk	Eph receptor A5	protein-coding
Diff_Nuc2918	chr11	84766842	84766981	+	0	NA	Intergenic	B3|SINE|B2	-4345	NM_007607	12351	Mm.1641	NM_007607	ENSMUSG00000000805	Car4	AW456718|Ca4	carbonic anhydrase 4	protein-coding
Diff_Nuc3267	chr11	109421672	109421811	+	0	NA	intron (NM_001166177, intron 3 of 4)	intron (NM_001166177, intron 3 of 4)	16716	NM_001166177	74008	Mm.482224	NM_028710	ENSMUSG00000020604	Arsg	6330406P08Rik|AI846872	arylsulfatase G	protein-coding
Diff_Nuc20965	chr8	126218922	126219061	+	0	NA	Intergenic	Intergenic	-38867	NR_040702	234863	Mm.246601	NR_040702	ENSMUSG00000110599	6030466F02Rik	-	RIKEN cDNA 6030466F02 gene	ncRNA
Diff_Nuc13765	chr4	106193882	106194021	+	0	NA	Intergenic	ORR1B1-int|LTR|MaLR	-29103	NM_080458	140475	Mm.135448	NM_080458	ENSMUSG00000025418	Bsnd	-	Bartter syndrome, infantile, with sensorineural deafness (Barttin)	protein-coding
Diff_Nuc9172	chr7	13092422	13092561	+	0	NA	Intergenic	RMER21B|LTR|ERV1	-5409	NM_028434	73090	Mm.84622	NM_028434	ENSMUSG00000030385	2900092C05Rik	-	RIKEN cDNA 2900092C05 gene	protein-coding
Diff_Nuc8815	chr18	56878162	56878301	+	0	NA	intron (NM_010721, intron 1 of 10)	B4A|SINE|B4	10764	NM_010721	16906	Mm.4105	NM_010721	ENSMUSG00000024590	Lmnb1	-	lamin B1	protein-coding
Diff_Nuc18964	chr9	36659452	36659591	+	0	NA	intron (NM_183171, intron 2 of 8)	MLT1A0|LTR|MaLR	8277	NM_183171	235180	Mm.5264	NM_183171	ENSMUSG00000032118	Fez1	UNC-76|UNC76	fasciculation and elongation protein zeta 1 (zygin I)	protein-coding
Diff_Nuc18076	chr1	124919602	124919741	+	0	NA	Intergenic	RMER17C|LTR|ERVK	1022465	NM_199021	269109	Mm.417716	NM_199021	ENSMUSG00000036815	Dpp10	6430601K09Rik|DPP X|Dprp3	dipeptidylpeptidase 10	protein-coding
Diff_Nuc10880	chr6	53234762	53234901	+	0	NA	Intergenic	Intergenic	-2466	NM_001327821	231991	Mm.227444	NM_172728	ENSMUSG00000053007	Creb5	9430076C15Rik|CRE-BPa|Crebpa|D430026C09Rik	cAMP responsive element binding protein 5	protein-coding
Diff_Nuc17112	chr2	168156872	168157011	+	0	NA	Intergenic	Intergenic	-62110	NM_001081134	241794	Mm.425102	NM_001081134	ENSMUSG00000074575	Kcng1	AW536275|OTTMUSG00000016048	potassium voltage-gated channel, subfamily G, member 1	protein-coding
Diff_Nuc7835	chr14	122545782	122545921	+	0	NA	intron (NM_080556, intron 10 of 16)	intron (NM_080556, intron 10 of 16)	-35065	NM_029556	69634	Mm.34608	NM_029556	ENSMUSG00000025545	Clybl	0610033J05Rik|2310014M14Rik|AI256068|Clb	citrate lyase beta like	protein-coding
Diff_Nuc15329	chr3	119380052	119380191	+	0	NA	Intergenic	L1_Mus3|LINE|L1	106185	NM_001310711	56195	Mm.29966	NM_019550	ENSMUSG00000028134	Ptbp2	Ptb2|brPTB|nPTB	polypyrimidine tract binding protein 2	protein-coding
Diff_Nuc11177	chr6	91080592	91080731	+	0	NA	Intergenic	Intergenic	-13841	NM_018815	54563	Mm.28162	NM_018815	ENSMUSG00000030091	Nup210	9830001L10|AI836801|Pom210|gp190|gp210	nucleoporin 210	protein-coding
Diff_Nuc3180	chr11	102967242	102967381	+	0	NA	intron (NM_025988, intron 9 of 10)	intron (NM_025988, intron 9 of 10)	4309	NM_025988	67131	Mm.390367	NM_025988	ENSMUSG00000056938	Acbd4	2010009P05Rik|2010015A21Rik|AI849317	acyl-Coenzyme A binding domain containing 4	protein-coding
Diff_Nuc18464	chr1	168304412	168304551	+	0	NA	Intergenic	RLTR10C|LTR|ERVK	-4817	NM_030245	27878	Mm.100665	NM_030245	ENSMUSG00000026563	Tada1	2900026B15Rik|D1Ertd251e|Staf42|Tada1l	transcriptional adaptor 1	protein-coding
Diff_Nuc9768	chr7	78849022	78849161	+	0	NA	Intergenic	Intergenic	-205490	NR_130995	78156	Mm.243818	NR_130995	ENSMUSG00000108669	4930441H08Rik	-	RIKEN cDNA 4930441H08 gene	ncRNA
Diff_Nuc17797	chr1	87482142	87482281	+	0	NA	intron (NM_175397, intron 8 of 12)	intron (NM_175397, intron 8 of 12)	13174	NM_030194	109032	Mm.335802	NM_030194	ENSMUSG00000070034	Sp110	5031415C07Rik|52kDa|5830484A20Rik|ENSMUSG00000075603|Ifi75|Ipr1	Sp110 nuclear body protein	protein-coding
Diff_Nuc18085	chr1	127101652	127101791	+	0	NA	Intergenic	L1Md_F|LINE|L1	230583	NM_023735	74117	Mm.183102	NM_023735	ENSMUSG00000026341	Actr3	1200003A09Rik|Arp3	ARP3 actin-related protein 3	protein-coding
Diff_Nuc7492	chr14	63838852	63838991	+	0	NA	intron (NM_001310610, intron 2 of 6)	intron (NM_001310610, intron 2 of 6)	25187	NM_008092	14463	Mm.247669	NM_008092	ENSMUSG00000021944	Gata4	Gata-4	GATA binding protein 4	protein-coding
Diff_Nuc14768	chr3	39363352	39363491	+	0	NA	Intergenic	MTE2a|LTR|MaLR	577559	NM_183221	329628	Mm.316210	NM_183221	ENSMUSG00000046743	Fat4	6030410K14Rik|9430004M15	FAT atypical cadherin 4	protein-coding
Diff_Nuc9063	chr18	82695162	82695301	+	0	NA	intron (NM_010777, intron 3 of 6)	intron (NM_010777, intron 3 of 6)	-28624	NM_001025256	17196	Mm.252063	NM_010777	ENSMUSG00000041607	Mbp	C76307|Hmbpr|R75289|golli-mbp|jve|mld|shi	myelin basic protein	protein-coding
Diff_Nuc10081	chr7	116838312	116838451	+	0	NA	Intergenic	RMER17A2|LTR|ERVK	-8870	NM_020616	57373	Mm.334138	NM_020616	ENSMUSG00000031023	Akip1	BCA3|C11orf17|D7H11orf17|D930014E17Rik|ICRFP703B1614Q5.6|ORF27	A kinase (PRKA) interacting protein 1	protein-coding
Diff_Nuc4230	chr10	91309672	91309811	+	0	NA	Intergenic	Intergenic	225189	NR_029812	723955		NR_029812	ENSMUSG00000065524	Mir135a-2	Mirn135a-2|mir-135a-2	microRNA 135a-2	ncRNA
Diff_Nuc14461	chr4	151657602	151657741	+	0	NA	exon (NM_178406, exon 6 of 6)	exon (NM_178406, exon 6 of 6)	8100	NM_008237	15207	Mm.3516	NM_008237	ENSMUSG00000028946	Hes3	Hes-3|bHLHb43	hairy and enhancer of split 3 (Drosophila)	protein-coding
Diff_Nuc15294	chr3	113302242	113302381	+	0	NA	Intergenic	Lx|LINE|L1	-21643	NM_001110505	11722	Mm.439727	NM_007446	ENSMUSG00000074264	Amy1	Amy-1|Amy1a|C030014B17Rik	amylase 1, salivary	protein-coding
Diff_Nuc5935	chr16	75158412	75158551	+	0	NA	Intergenic	L1Md_F2|LINE|L1	427825	NM_001252513	320355	Mm.99517	NM_177142	ENSMUSG00000032948	Lipi	D930038D03Rik|lpd1	lipase, member I	protein-coding
Diff_Nuc8359	chr19	54194812	54194951	+	0	NA	Intergenic	Intergenic	75209	NM_007417	11551	Mm.235195	NM_007417	ENSMUSG00000033717	Adra2a	AW122659|Adra-2|Adra-2a|alpha(2A)AR|alpha2-C10|alpha2A|alpha2A-AR	adrenergic receptor, alpha 2a	protein-coding
Diff_Nuc9256	chr7	20109252	20109391	+	0	NA	exon (NM_027116, exon 4 of 4)	exon (NM_027116, exon 4 of 4)	5241	NM_027116	69547	Mm.77325	NM_027116	ENSMUSG00000060621	Nkpd1	2310015G09Rik	NTPase, KAP family P-loop domain containing 1	protein-coding
Diff_Nuc10217	chr7	128968732	128968871	+	0	NA	Intergenic	MTEb|LTR|MaLR	-39751	NM_001272023	20277	Mm.7709	NM_011325	ENSMUSG00000030873	Scnn1b	-	sodium channel, nonvoltage-gated 1 beta	protein-coding
Diff_Nuc6604	chr15	77234332	77234471	+	0	NA	3' UTR (NM_173786, exon 3 of 3)	3' UTR (NM_173786, exon 3 of 3)	-4861	NM_001164640	75761	Mm.232636	NM_029419	ENSMUSG00000010601	Apol7a	9130022K13Rik|Apol3	apolipoprotein L 7a	protein-coding
Diff_Nuc17035	chr2	165146052	165146191	+	0	NA	intron (NM_207706, intron 1 of 21)	intron (NM_207706, intron 1 of 21)	205	NM_001302752	140579	Mm.35064	NM_080287	ENSMUSG00000017670	Elmo2	1190002F24Rik|CED-12	engulfment and cell motility 2	protein-coding
Diff_Nuc17620	chr1	63608742	63608881	+	0	NA	intron (NM_011780, intron 18 of 25)	intron (NM_011780, intron 18 of 25)	116346	NM_011780	23792	Mm.124892	NM_011780	ENSMUSG00000025964	Adam23	AW046396|MDC3	a disintegrin and metallopeptidase domain 23	protein-coding
Diff_Nuc10245	chr7	132081092	132081231	+	0	NA	Intergenic	Intergenic	-228712	NR_045907	73076	Mm.417827	NR_045907	ENSMUSG00000086254	3100003L05Rik	-	RIKEN cDNA 3100003L05 gene	ncRNA
Diff_Nuc13228	chr4	33672862	33673001	+	0	NA	Intergenic	Intergenic	147875	NR_106198	102465904		NR_106198	ENSMUSG00000098310	Mir8118	Gm27954|mmu-mir-8118	microRNA 8118	ncRNA
Diff_Nuc19201	chr9	57110502	57110641	+	0	NA	promoter-TSS (NM_028820)	promoter-TSS (NM_028820)	-165	NM_028820	74211	Mm.428905	NM_028820	ENSMUSG00000032300	1700017B05Rik	AA682102|D9Ertd278e	RIKEN cDNA 1700017B05 gene	protein-coding
Diff_Nuc11929	chr5	36110182	36110321	+	0	NA	intron (NM_177678, intron 1 of 19)	intron (NM_177678, intron 1 of 19)	9722	NM_001177698	231148	Mm.254446	NM_177678	ENSMUSG00000029095	Ablim2	AI606905|C230091L11	actin-binding LIM protein 2	protein-coding
Diff_Nuc18550	chr1	178943442	178943581	+	0	NA	intron (NM_029756, intron 17 of 17)	intron (NM_029756, intron 17 of 17)	-177247	NR_037996	15365	Mm.441435	NR_037996		Hmga2-ps1	EG666235|Gm7996|Hmgic-ps1|[y]i-c	high mobility group AT-hook 2, pseudogene 1	pseudo
Diff_Nuc14258	chr4	139579572	139579711	+	0	NA	Intergenic	Intergenic	-55700	NM_173427	242721	Mm.60400	NM_173427	ENSMUSG00000078234	Klhdc7a	B230308G19Rik	kelch domain containing 7A	protein-coding
Diff_Nuc4132	chr10	80689352	80689491	+	0	NA	intron (NM_178662, intron 1 of 12)	MurERV4-int|LTR|ERVK	4103	NM_178662	16467	Mm.127681	NM_178662	ENSMUSG00000034958	Atcay	3322401A10Rik|BB077577|BNIP-H|CLAC|hes|ji	ataxia, cerebellar, Cayman type	protein-coding
Diff_Nuc6550	chr15	74314692	74314831	+	0	NA	intron (NR_144499, intron 1 of 3)	intron (NR_144499, intron 1 of 3)	3315	NR_144499	102634630		NR_144499		Gm32168	-	predicted gene, 32168	ncRNA
Diff_Nuc10467	chr7	147313412	147313551	+	0	NA	exon (NM_153783, exon 3 of 7)	exon (NM_153783, exon 3 of 7)	1897	NM_153783	212503	Mm.486735	NM_153783	ENSMUSG00000025464	Paox	2410012F02Rik|AI118225|Pao	polyamine oxidase (exo-N4-amino)	protein-coding
Diff_Nuc17931	chr1	95258432	95258571	+	0	NA	intron (NM_023200, intron 9 of 9)	MTEa|LTR|MaLR	9766	NR_105763	102466630		NR_105763	ENSMUSG00000098689	Mir6345	Gm27819|mmu-mir-6345	microRNA 6345	ncRNA
Diff_Nuc10281	chr7	134358732	134358871	+	0	NA	TTS (NM_016754)	TTS (NM_016754)	3158	NM_017461	54204	Mm.18	NM_017461	ENSMUSG00000000486	Sept1	Diff6|Pnutl3	septin 1	protein-coding
Diff_Nuc13812	chr4	109062402	109062541	+	0	NA	Intergenic	Intergenic	16391	NR_131195	102635290	Mm.427859	NR_131195		Ttc39aos1	Gm12750|OTTMUSG00000008290|lincRNA-EPS	Ttc39a opposite strand RNA 1	ncRNA
Diff_Nuc12540	chr5	115018932	115019071	+	0	NA	intron (NM_001004180, intron 1 of 2)	intron (NM_001004180, intron 1 of 2)	741	NM_001004180	433940	Mm.194212	NM_001004180	ENSMUSG00000041930	Fam222a	-	family with sequence similarity 222, member A	protein-coding
Diff_Nuc3683	chr10	25257562	25257701	+	0	NA	intron (NR_136909, intron 2 of 3)	intron (NR_136909, intron 2 of 3)	1439	NR_136909	102640597	Mm.412041	NR_136909	ENSMUSG00000101537	Gm29571	-	predicted gene 29571	ncRNA
Diff_Nuc15669	chr2	10157192	10157331	+	0	NA	intron (NM_172471, intron 8 of 13)	B3A|SINE|B2	82091	NM_172471	209378	Mm.313876	NM_172471	ENSMUSG00000025780	Itih5	4631408O11Rik|5430408M01Rik|E130106B02	inter-alpha (globulin) inhibitor H5	protein-coding
Diff_Nuc14816	chr3	49564212	49564351	+	0	NA	Intergenic	Intergenic	-3043	NM_130448	73173	Mm.87246	NM_130448	ENSMUSG00000037892	Pcdh18	3110038E07Rik|BB095589|PCDH68L	protocadherin 18	protein-coding
Diff_Nuc19370	chr9	70504112	70504251	+	0	NA	exon (NM_172772, exon 1 of 9)	exon (NM_172772, exon 1 of 9)	800	NM_172772	235461	Mm.170855	NM_172772	ENSMUSG00000042444	Fam63b	AI465301|B230380D07Rik|mKIAA1164	family with sequence similarity 63, member B	protein-coding
Diff_Nuc7649	chr14	79395472	79395611	+	0	NA	intron (NM_027906, intron 16 of 44)	intron (NM_027906, intron 16 of 44)	146556	NM_173758	219189	Mm.159651	NM_027906	ENSMUSG00000058997	Vwa8	1300010F03Rik|4932416F07Rik|AI957255|Kiaa0564|mKIAA0564	von Willebrand factor A domain containing 8	protein-coding
Diff_Nuc5174	chr17	64970002	64970141	+	0	NA	intron (NM_008549, intron 1 of 21)	intron (NM_008549, intron 1 of 21)	19082	NM_008549	17158	Mm.2433	NM_008549	ENSMUSG00000024085	Man2a1	Mana-2|Mana2|Map-2	mannosidase 2, alpha 1	protein-coding
Diff_Nuc2141	chr11	6257472	6257611	+	0	NA	3' UTR (NM_001252282, exon 24 of 24)	3' UTR (NM_001252282, exon 24 of 24)	-37587	NM_001005867	52915	Mm.1144	NM_028601	ENSMUSG00000041164	Zmiz2	Zimp7	zinc finger, MIZ-type containing 2	protein-coding
Diff_Nuc11632	chr6	143931762	143931901	+	0	NA	intron (NM_001113559, intron 6 of 13)	ORR1E|LTR|MaLR	-36205	NM_001347506	20678	Mm.1752	NM_011444	ENSMUSG00000041540	Sox5	A730017D01Rik|AI528773	SRY (sex determining region Y)-box 5	protein-coding
Diff_Nuc15734	chr2	20982752	20982891	+	0	NA	Intergenic	Intergenic	92320	NR_033225	433408	Mm.386941	NR_033225		Gm13375	OTTMUSG00000011664	predicted gene 13375	ncRNA
Diff_Nuc3728	chr10	36654602	36654741	+	0	NA	Intergenic	Intergenic	-39679	NM_008229	15182	Mm.19806	NM_008229	ENSMUSG00000019777	Hdac2	D10Wsu179e|YAF1|Yy1bp|mRPD3	histone deacetylase 2	protein-coding
Diff_Nuc10792	chr6	43295332	43295471	+	0	NA	3' UTR (NM_001311111, exon 8 of 8)	3' UTR (NM_001311111, exon 8 of 8)	-35848	NM_130869	18291	Mm.17715	NM_130869	ENSMUSG00000029736	Nobox	OG2|Og2x	NOBOX oogenesis homeobox	protein-coding
Diff_Nuc5830	chr16	44765832	44765971	+	0	NA	promoter-TSS (NM_021325)	promoter-TSS (NM_021325)	52	NM_021325	57781	Mm.416152	NM_021325	ENSMUSG00000022667	Cd200r1	CD200R|Mox2r|OX2R	CD200 receptor 1	protein-coding
Diff_Nuc10694	chr6	32170572	32170711	+	0	NA	intron (NM_175750, intron 10 of 31)	intron (NM_175750, intron 10 of 31)	170353	NM_029587	76382	Mm.23510	NM_029587	ENSMUSG00000029766	1700012A03Rik	AI429084	RIKEN cDNA 1700012A03 gene	protein-coding
Diff_Nuc12697	chr5	125977162	125977301	+	0	NA	intron (NM_030210, intron 5 of 17)	intron (NM_030210, intron 5 of 17)	20988	NM_030210	78894	Mm.431573	NM_030210	ENSMUSG00000029482	Aacs	2210408B16Rik|SUR5	acetoacetyl-CoA synthetase	protein-coding
Diff_Nuc16349	chr2	92190202	92190341	+	0	NA	intron (NM_001109690, intron 11 of 15)	intron (NM_001109690, intron 11 of 15)	20943	NM_001290774	228366	Mm.31158	NM_172670	ENSMUSG00000040434	Large2	5730485C17Rik|AI891893|Gyltl1b|Largel|mKIAA4105	LARGE xylosyl- and glucuronyltransferase 2	protein-coding
Diff_Nuc2972	chr11	89369832	89369971	+	0	NA	intron (NM_001327810, intron 5 of 19)	intron (NM_001327810, intron 5 of 19)	-89639	NM_172534	382543	Mm.60997	NM_172534	ENSMUSG00000047773	Ankfn1	4932411E22Rik|Gm1175|nmf9	ankyrin-repeat and fibronectin type III domain containing 1	protein-coding
Diff_Nuc15769	chr2	25021752	25021891	+	0	NA	Intergenic	Intergenic	-14457	NM_025980	67122	Mm.46539	NM_025980	ENSMUSG00000078202	Nrarp	2700054M22Rik	Notch-regulated ankyrin repeat protein	protein-coding
Diff_Nuc11319	chr6	106736122	106736261	+	0	NA	intron (NM_175357, intron 5 of 10)	intron (NM_175357, intron 5 of 10)	13890	NM_021449	58799	Mm.290085	NM_021449	ENSMUSG00000005362	Crbn	2610203G15Rik|2900045O07Rik|AF229032|AW108261|piL	cereblon	protein-coding
Diff_Nuc12170	chr5	69958922	69959061	+	0	NA	intron (NM_172711, intron 13 of 16)	intron (NM_172711, intron 13 of 16)	10828	NM_001310631	231279	Mm.21105	NM_172711	ENSMUSG00000029208	Guf1	4631409J12|AA407526|EF-4	GUF1 homolog, GTPase	protein-coding
Diff_Nuc6626	chr15	78380212	78380351	+	0	NA	Intergenic	RMER1A|Other|Other	-5506	NM_009218	20607	Mm.211411	NM_009218	ENSMUSG00000044933	Sstr3	Smstr-3|Smstr3|sst3	somatostatin receptor 3	protein-coding
Diff_Nuc20885	chr8	122843702	122843841	+	0	NA	Intergenic	MIR|SINE|MIR	-91641	NR_110496	434353	Mm.411793	NR_110496	ENSMUSG00000097960	A330074K22Rik	-	RIKEN cDNA A330074K22 gene	ncRNA
Diff_Nuc12234	chr5	77387652	77387791	+	0	NA	intron (NM_025939, intron 2 of 8)	B1_Mus2|SINE|Alu	-7118	NM_172146	231327	Mm.202337	NM_172146	ENSMUSG00000029246	Ppat	5730454C12Rik|AA408689|AA675351|AI507113|C79945	phosphoribosyl pyrophosphate amidotransferase	protein-coding
Diff_Nuc14282	chr4	140753862	140754001	+	0	NA	intron (NM_172518, intron 7 of 9)	intron (NM_172518, intron 7 of 9)	-15940	NM_001081174	76166	Mm.271064	NM_001081174	ENSMUSG00000073733	Rsg1	6330545A04Rik|Gm723	REM2 and RAB-like small GTPase 1	protein-coding
Diff_Nuc18233	chr1	137972412	137972551	+	0	NA	intron (NM_014193, intron 7 of 42)	Charlie4a|DNA|MER1_type	23003	NM_014193	12292	Mm.4418	NM_014193	ENSMUSG00000026407	Cacna1s	AW493108|Cav1.1|Cchl1a3|fmd|mdg|sj	calcium channel, voltage-dependent, L type, alpha 1S subunit	protein-coding
Diff_Nuc884	chr13	94957722	94957861	+	0	NA	intron (NM_172589, intron 3 of 3)	B4A|SINE|B4	97445	NM_029153	107767	Mm.201455	NM_029153	ENSMUSG00000021687	Scamp1	4930505M11Rik|AI415563|AW122395	secretory carrier membrane protein 1	protein-coding
Diff_Nuc14948	chr3	68615712	68615851	+	0	NA	Intergenic	Lx8|LINE|L1	-57727	NM_001167996	68725	Mm.45741	NM_001167996	ENSMUSG00000046999	1110032F04Rik	AI115547	RIKEN cDNA 1110032F04 gene	protein-coding
Diff_Nuc2802	chr11	76105502	76105641	+	0	NA	intron (NM_008750, intron 1 of 7)	intron (NM_008750, intron 1 of 7)	48333	NM_183263	67390	Mm.24886	NM_183263	ENSMUSG00000038046	Rnmtl1	4833420N02Rik|AI255153|HC90|Mrm3	RNA methyltransferase like 1	protein-coding
Diff_Nuc13107	chr4	9974442	9974581	+	0	NA	Intergenic	Intergenic	-129967	NR_004448	74662	Mm.483401	NR_004448	ENSMUSG00000082843	4930448K20Rik	1700009K09Rik	glyceraldehyde-3-phosphate dehydrogenase pseudogene	pseudo
Diff_Nuc16005	chr2	35936762	35936901	+	0	NA	TTS (NM_001083126)	TTS (NM_001083126)	22749	NM_001083126	16874	Mm.12881	NM_008500	ENSMUSG00000026890	Lhx6	Lhx6.1	LIM homeobox protein 6	protein-coding
Diff_Nuc2598	chr11	61263682	61263821	+	0	NA	intron (NM_009548, intron 12 of 14)	intron (NM_009548, intron 12 of 14)	3743	NM_009548	22671	Mm.89201	NM_009548	ENSMUSG00000010086	Rnf112	ZNF179|Zfp179|bfp|neurolastin	ring finger protein 112	protein-coding
Diff_Nuc1810	chr12	99329432	99329571	+	0	NA	Intergenic	Lx3C|LINE|L1	168168	NM_008079	14420	Mm.5120	NM_008079	ENSMUSG00000021003	Galc	2310068B06Rik|A930008M05Rik|AW212969|AW413532|Gacy|twi|twitcher	galactosylceramidase	protein-coding
Diff_Nuc643	chr13	57789792	57789931	+	0	NA	intron (NM_001166466, intron 4 of 11)	intron (NM_001166466, intron 4 of 11)	219832	NM_009262	20745	Mm.379020	NM_009262	ENSMUSG00000056222	Spock1	Spock|Ticn1|testican	sparc/osteonectin, cwcv and kazal-like domains proteoglycan 1	protein-coding
Diff_Nuc8298	chr19	46024342	46024481	+	0	NA	intron (NM_198296, intron 14 of 25)	Lx4B|LINE|L1	48567	NM_198296	71617	Mm.210949	NM_198296	ENSMUSG00000039901	9130011E15Rik	AI431055|AW050122	RIKEN cDNA 9130011E15 gene	protein-coding
Diff_Nuc16629	chr2	127107082	127107221	+	0	NA	intron (NM_139308, intron 1 of 7)	L1MB7|LINE|L1	11186	NM_139308	99138	Mm.41271	NM_139308	ENSMUSG00000027367	Stard7	AI852671|AL022671|AW544915	START domain containing 7	protein-coding
Diff_Nuc746	chr13	69606352	69606491	+	0	NA	Intergenic	RLTR13D2|LTR|ERVK	66321	NM_198600	210106	Mm.315959	NM_198600	ENSMUSG00000034575	Papd7	LAK-1|POLK|Pols|TRF4|TRF4-1	PAP associated domain containing 7	protein-coding
Diff_Nuc3124	chr11	100255122	100255261	+	0	NA	intron (NM_010593, intron 1 of 13)	intron (NM_010593, intron 1 of 13)	3913	NM_010593	16480	Mm.299774	NM_010593	ENSMUSG00000001552	Jup	Ctnng|D930025P04Rik|PG	junction plakoglobin	protein-coding
Diff_Nuc19060	chr9	44545462	44545601	+	0	NA	Intergenic	Intergenic	-2250	NM_153537	102693	Mm.28639	NM_153537	ENSMUSG00000048537	Phldb1	AU041016|D330037A14Rik|Ll5a	pleckstrin homology like domain, family B, member 1	protein-coding
Diff_Nuc8716	chr18	42383662	42383801	+	0	NA	intron (NM_134137, intron 22 of 31)	RMER15-int|LTR|ERVL	-27368	NM_027072	69401	Mm.34841	NM_027072	ENSMUSG00000059455	Plac8l1	1700009N18Rik|1700015M15Rik	PLAC8-like 1	protein-coding
Diff_Nuc9560	chr7	52428732	52428871	+	0	NA	TTS (NR_106022)	TTS (NR_106022)	128	NR_106022	102465638		NR_106022	ENSMUSG00000106470	Mir7055	mmu-mir-7055	microRNA 7055	ncRNA
Diff_Nuc16391	chr2	94084132	94084271	+	0	NA	Intergenic	Intergenic	-2591	NR_029752	723953		NR_029752	ENSMUSG00000065511	Mir129-2	Mirn129-2|mir-129-2	microRNA 129-2	ncRNA
Diff_Nuc8981	chr18	75039332	75039471	+	0	NA	Intergenic	Intergenic	81516	NM_010720	16891	Mm.299647	NM_010720	ENSMUSG00000053846	Lipg	3110013K01Rik|EL|lipase|mEDL	lipase, endothelial	protein-coding
Diff_Nuc9985	chr7	106408302	106408441	+	0	NA	TTS (NR_103487)	TTS (NR_103487)	7357	NR_103487	381967	Mm.261763	NR_103487	ENSMUSG00000097015	Gm26705	-	predicted gene, 26705	ncRNA
Diff_Nuc16759	chr2	146281882	146282021	+	0	NA	intron (NM_001033348, intron 4 of 40)	intron (NM_001033348, intron 4 of 40)	55789	NM_001033348	241694	Mm.222310	NM_001033348	ENSMUSG00000037110	Ralgapa2	A230067G21Rik|AS250|BC053994|RGC2|pp250	Ral GTPase activating protein, alpha subunit 2 (catalytic)	protein-coding
Diff_Nuc683	chr13	60168792	60168931	+	0	NA	intron (NR_046142, intron 1 of 2)	intron (NR_046142, intron 1 of 2)	37789	NR_046142	328263	Mm.123405	NR_046142		A530065N20Rik	A530065N20	RIKEN cDNA A530046M15 gene	ncRNA
Diff_Nuc12594	chr5	119260502	119260641	+	0	NA	Intergenic	Intergenic	-141777	NR_040694	74627	Mm.410828	NR_040694	ENSMUSG00000107144	4930413E15Rik	-	RIKEN cDNA 4930413E15 gene	ncRNA
Diff_Nuc19905	chr8	7163612	7163751	+	0	NA	Intergenic	IAPEY3_LTR|LTR|ERVK	1497092	NM_010111	13642	Mm.209813	NM_010111	ENSMUSG00000001300	Efnb2	ELF-2|Epl5|Eplg5|Htk-L|LERK-5|Lerk5|NLERK-1	ephrin B2	protein-coding
Diff_Nuc17565	chr1	55229162	55229301	+	0	NA	intron (NM_028713, intron 8 of 8)	intron (NM_028713, intron 8 of 8)	41142	NM_025283	19070	Mm.291037	NM_025283	ENSMUSG00000025979	Mob4	2610109B12Rik|Mobkl3|Phocn|Prei3	MOB family member 4, phocein	protein-coding
Diff_Nuc6028	chr16	92238202	92238341	+	0	NA	Intergenic	Intergenic	-54363	NM_134110	246133	Mm.156736	NM_134110	ENSMUSG00000039672	Kcne2	2200002I16Rik|AW048273|MiRP1	potassium voltage-gated channel, Isk-related subfamily, gene 2	protein-coding
Diff_Nuc1259	chr12	20840532	20840671	+	0	NA	Intergenic	MTC|LTR|MaLR	-18961	NR_015521	69513	Mm.273972	NR_015521	ENSMUSG00000099759	1700030C10Rik	-	RIKEN cDNA 1700030C10 gene	ncRNA
Diff_Nuc20266	chr8	53635992	53636131	+	0	NA	Intergenic	L1_Mus1|LINE|L1	-960995	NM_001205054	11593	Mm.334535	NM_001005847	ENSMUSG00000031521	Aga	AW060726	aspartylglucosaminidase	protein-coding
Diff_Nuc10332	chr7	137921352	137921491	+	0	NA	intron (NM_001081038, intron 2 of 15)	(CA)n|Simple_repeat|Simple_repeat	3838	NM_001081038	330660	Mm.271550	NM_001081038	ENSMUSG00000040298	Btbd16	E330040A16Rik	BTB (POZ) domain containing 16	protein-coding
Diff_Nuc17251	chr1	4454322	4454461	+	0	NA	Intergenic	L1VL2|LINE|L1	33044	NM_001289464	20671	Mm.279103	NM_011441	ENSMUSG00000025902	Sox17	-	SRY (sex determining region Y)-box 17	protein-coding
Diff_Nuc12730	chr5	129173552	129173691	+	0	NA	Intergenic	Intergenic	66640	NM_175284	93897	Mm.197628	NM_175284	ENSMUSG00000081683	Fzd10	Fz-10	frizzled class receptor 10	protein-coding
Diff_Nuc8743	chr18	46625242	46625381	+	0	NA	non-coding (NR_045438, exon 1 of 1)	non-coding (NR_045438, exon 1 of 1)	159	NR_045438	72076	Mm.82766	NM_028086		Mospd4	2010013H21Rik	motile sperm domain containing 4	pseudo
Diff_Nuc12135	chr5	65533662	65533801	+	0	NA	intron (NM_001347355, intron 2 of 10)	intron (NM_001347355, intron 2 of 10)	11261	NM_175174	71778	Mm.10281	NM_175174	ENSMUSG00000054920	Klhl5	1300013C10Rik	kelch-like 5	protein-coding
Diff_Nuc16351	chr2	92245952	92246091	+	0	NA	intron (NM_009963, intron 11 of 11)	intron (NM_009963, intron 11 of 11)	-3028	NR_040621	320507	Mm.448214	NR_040621	ENSMUSG00000084781	D930015M05Rik	-	RIKEN cDNA D930015M05 gene	ncRNA
Diff_Nuc16985	chr2	162725252	162725391	+	0	NA	Intergenic	LTR31|LTR|ERV1	-31923	NM_026499	67996	Mm.24042	NM_026499	ENSMUSG00000016921	Srsf6	1210001E11Rik|AI314910|AW146126|Sfrs6	serine/arginine-rich splicing factor 6	protein-coding
Diff_Nuc1032	chr13	109478242	109478381	+	0	NA	intron (NM_011056, intron 1 of 16)	intron (NM_011056, intron 1 of 16)	33940	NM_011056	238871	Mm.434429	NM_011056	ENSMUSG00000021699	Pde4d	9630011N22Rik|Dpde3	phosphodiesterase 4D, cAMP specific	protein-coding
Diff_Nuc16712	chr2	138670582	138670721	+	0	NA	Intergenic	ORR1A2|LTR|MaLR	24986	NR_035477	100316816		NR_035477	ENSMUSG00000088983	Mir1952	mmu-mir-1952	microRNA 1952	ncRNA
Diff_Nuc2379	chr11	43407552	43407691	+	0	NA	Intergenic	Intergenic	7443	NM_008375	16204	Mm.142716	NM_008375	ENSMUSG00000020405	Fabp6	GT|I-15P|I-BABP|ILBP|ILBP3|Illbp	fatty acid binding protein 6, ileal (gastrotropin)	protein-coding
Diff_Nuc14290	chr4	140857782	140857921	+	0	NA	intron (NM_010139, intron 1 of 16)	intron (NM_010139, intron 1 of 16)	715	NM_010139	13836	Mm.2581	NM_010139	ENSMUSG00000006445	Epha2	AW545284|Eck|Myk2|Sek-2|Sek2	Eph receptor A2	protein-coding
Diff_Nuc3274	chr11	110239562	110239701	+	0	NA	Intergenic	RLTR10B2|LTR|ERVK	-20805	NM_011943	26399	Mm.14487	NM_011943	ENSMUSG00000020623	Map2k6	MEK6|MKK6|Prkmk6|SAPKK3	mitogen-activated protein kinase kinase 6	protein-coding
Diff_Nuc13374	chr4	47210142	47210281	+	0	NA	Intergenic	Intergenic	-10673	NM_009928	12819	Mm.233547	NM_009928	ENSMUSG00000028339	Col15a1	-	collagen, type XV, alpha 1	protein-coding
Diff_Nuc6430	chr15	58045942	58046081	+	0	NA	intron (NM_026346, intron 1 of 8)	intron (NM_026346, intron 1 of 8)	436	NM_026346	67731	Mm.25683	NM_026346	ENSMUSG00000022358	Fbxo32	4833442G10Rik|AI430017|ATROGIN1|Gm20361|MAFbx	F-box protein 32	protein-coding
Diff_Nuc11059	chr6	83409182	83409321	+	0	NA	Intergenic	Intergenic	-2865	NM_001347313	194388	Mm.211030	NM_183138	ENSMUSG00000034832	Tet3	B430006D22Rik|BC037432|D230004J03Rik	tet methylcytosine dioxygenase 3	protein-coding
Diff_Nuc18768	chr9	10719842	10719981	+	0	NA	intron (NM_001033359, intron 1 of 20)	Lx3_Mus|LINE|L1	184815	NM_001033359	244682	Mm.187021	NM_001033359	ENSMUSG00000039488	Cntn5	6720426O10Rik|A830025P08Rik|Gm507|NB-2	contactin 5	protein-coding
Diff_Nuc12893	chr5	140006812	140006951	+	0	NA	intron (NR_040701, intron 2 of 3)	B4|SINE|B4	7176	NR_040701	74973	Mm.141282	NR_040701	ENSMUSG00000106056	4930500L23Rik	-	RIKEN cDNA 4930500L23 gene	ncRNA
Diff_Nuc7952	chr19	7060712	7060851	+	0	NA	exon (NM_001185164, exon 3 of 7)	exon (NM_001185164, exon 3 of 7)	1360	NM_001185164	22340	Mm.15607	NM_011697	ENSMUSG00000024962	Vegfb	VEGF-B|Vrf	vascular endothelial growth factor B	protein-coding
Diff_Nuc12007	chr5	42013032	42013171	+	0	NA	Intergenic	Intergenic	85829	NM_001310592	100972	Mm.41555	NM_027295	ENSMUSG00000029128	Rab28	2700023P08Rik|AW496496	RAB28, member RAS oncogene family	protein-coding
Diff_Nuc1360	chr12	32428922	32429061	+	0	NA	intron (NM_001163126, intron 6 of 22)	L1_Mur1|LINE|L1	-30200	NM_175191	73010	Mm.441517	NM_175191	ENSMUSG00000044067	Gpr22	2900068K05Rik|AW061316	G protein-coupled receptor 22	protein-coding
Diff_Nuc1087	chr13	115348102	115348241	+	0	NA	Intergenic	RLTR16|LTR|ERVK	-49265	NR_045976	75161	Mm.50406	NM_175218	ENSMUSG00000051758	4930544M13Rik	-	RIKEN cDNA 4930544M13 gene	ncRNA
Diff_Nuc6615	chr15	77927182	77927321	+	0	NA	intron (NM_007583, intron 1 of 3)	intron (NM_007583, intron 1 of 3)	22459	NM_007583	12300	Mm.277338	NM_007583	ENSMUSG00000019146	Cacng2	AW060990|B230105C07Rik|B930041E13Rik|stargazer|stargazin|stg|wag|waggler	calcium channel, voltage-dependent, gamma subunit 2	protein-coding
Diff_Nuc4870	chr17	32464512	32464651	+	0	NA	intron (NM_017476, intron 12 of 13)	intron (NM_017476, intron 12 of 13)	-6398	NR_131218	56399	Mm.328945	NM_019774	ENSMUSG00000024045	Akap8	1200016A02Rik|AA673585|AKAP-8|AKAP95|AU015639	A kinase (PRKA) anchor protein 8	protein-coding
Diff_Nuc10226	chr7	129721522	129721661	+	0	NA	intron (NM_008855, intron 10 of 16)	intron (NM_008855, intron 10 of 16)	-93667	NM_019430	54376	Mm.444212	NM_019430	ENSMUSG00000066189	Cacng3	-	calcium channel, voltage-dependent, gamma subunit 3	protein-coding
Diff_Nuc7848	chr14	124746462	124746601	+	0	NA	intron (NM_207667, intron 1 of 4)	Lx5|LINE|L1	-154763	NM_010201	14169	Mm.206362	NM_010201	ENSMUSG00000025551	Fgf14	FHF-4|Fhf4|mFHF-4(1B)	fibroblast growth factor 14	protein-coding
Diff_Nuc1640	chr12	78479202	78479341	+	0	NA	intron (NM_001252614, intron 7 of 12)	MTEa|LTR|MaLR	-10580	NM_001252615	53618	Mm.35628	NM_016893	ENSMUSG00000021065	Fut8	-	fucosyltransferase 8	protein-coding
Diff_Nuc6823	chr15	88517212	88517351	+	0	NA	TTS (NM_001033274)	TTS (NM_001033274)	47368	NM_001033274	223770	Mm.254438	NM_001033274	ENSMUSG00000022387	Brd1	1110059H06Rik|AI316859|mKIAA4191	bromodomain containing 1	protein-coding
Diff_Nuc9080	chr18	84690482	84690621	+	0	NA	intron (NM_001033341, intron 3 of 8)	intron (NM_001033341, intron 3 of 8)	68345	NM_001033341	240476	Mm.329575	NM_001033341	ENSMUSG00000048410	Zfp407	6430585N13Rik|Gm333|Gm334|Gm948|ZNF407	zinc finger protein 407	protein-coding
Diff_Nuc17490	chr1	43443552	43443691	+	0	NA	Intergenic	MLT1A1|LTR|MaLR	-58975	NM_010879	17974	Mm.389903	NM_010879	ENSMUSG00000066877	Nck2	4833426I10Rik|Grb4|NCKbeta|Nck-2	non-catalytic region of tyrosine kinase adaptor protein 2	protein-coding
Diff_Nuc3222	chr11	106070052	106070191	+	0	NA	intron (NM_026009, intron 4 of 12)	intron (NM_026009, intron 4 of 12)	7560	NM_026009	67163	Mm.22109	NM_026009	ENSMUSG00000078622	Ccdc47	2610204L23Rik|C88307|asp4|calumin	coiled-coil domain containing 47	protein-coding
Diff_Nuc17517	chr1	49059882	49060021	+	0	NA	Intergenic	Lx3_Mus|LINE|L1	-1535982	NR_105768	102466969		NR_105768	ENSMUSG00000098876	Mir6350	Gm27958|mmu-mir-6350	microRNA 6350	ncRNA
Diff_Nuc6332	chr15	38851972	38852111	+	0	NA	intron (NM_001162494, intron 2 of 6)	L1_Mur3|LINE|L1	14162	NM_008056	14368	Mm.4769	NM_008056	ENSMUSG00000022297	Fzd6	Fz6	frizzled class receptor 6	protein-coding
Diff_Nuc3523	chr11	120794672	120794811	+	0	NA	promoter-TSS (NM_027745)	promoter-TSS (NM_027745)	-555	NM_027745	71276	Mm.275751	NM_027745	ENSMUSG00000048445	Ccdc57	4933434G05Rik	coiled-coil domain containing 57	protein-coding
Diff_Nuc7320	chr14	48466772	48466911	+	0	NA	Intergenic	ORR1A2|LTR|MaLR	-51698	NR_045959	73961	Mm.390702	NR_045959		4930447J18Rik	4930425M13Rik	RIKEN cDNA 4930447J18 gene	ncRNA
Diff_Nuc17209	chr2	179173662	179173801	+	0	NA	Intergenic	Lx5|LINE|L1	-3405	NM_001316723	12561	Mm.184711	NM_009867	ENSMUSG00000000305	Cdh4	AW120700|R-CAD|R-Cadh|Rcad	cadherin 4	protein-coding
Diff_Nuc15442	chr3	135014902	135015041	+	0	NA	intron (NM_028946, intron 2 of 12)	MYSERV16_I-int|LTR|ERVK	3970	NM_028946	74446	Mm.85000	NM_028946	ENSMUSG00000050150	Slc9b1	1700094G20Rik|4933424B12Rik|4933425K02Rik|Nhedc1|mtsNHE	solute carrier family 9, subfamily B (NHA1, cation proton antiporter 1), member 1	protein-coding
Diff_Nuc10166	chr7	124764622	124764761	+	0	NA	intron (NM_175645, intron 5 of 11)	L2a|LINE|L2	240198	NM_175645	233781	Mm.461427	NM_175645	ENSMUSG00000030657	Xylt1	8030490L12	xylosyltransferase 1	protein-coding
Diff_Nuc18165	chr1	135112282	135112421	+	0	NA	Intergenic	Intergenic	-30323	NM_001160268	240753	Mm.253559	NM_182930	ENSMUSG00000041757	Plekha6	9530028L01Rik|AU042621|Pepp3	pleckstrin homology domain containing, family A member 6	protein-coding
Diff_Nuc4706	chr17	24643702	24643841	+	0	NA	exon (NM_027937, exon 19 of 20)	exon (NM_027937, exon 19 of 20)	18043	NM_027937	268932	Mm.70989	NM_027937	ENSMUSG00000033597	Caskin1	3300002N10Rik|C130061I24|C630036E02Rik|mKIAA1306	CASK interacting protein 1	protein-coding
Diff_Nuc12991	chr5	146370362	146370501	+	0	NA	Intergenic	RLTR45-int|LTR|ERVK	-24832	NM_001105159	100041375	Mm.489591	NM_001105159	ENSMUSG00000075552	Cyp3a41b	-	cytochrome P450, family 3, subfamily a, polypeptide 41B	protein-coding
Diff_Nuc5009	chr17	45711002	45711141	+	0	NA	promoter-TSS (NM_008302)	promoter-TSS (NM_008302)	-861	NM_008302	15516	Mm.2180	NM_008302	ENSMUSG00000023944	Hsp90ab1	90kDa|AL022974|C81438|Hsp84|Hsp84-1|Hsp90|Hspcb	heat shock protein 90 alpha (cytosolic), class B member 1	protein-coding
Diff_Nuc9335	chr7	28141377	28141516	+	0	NA	promoter-TSS (NM_138676)	promoter-TSS (NM_138676)	-419	NM_138676	192192	Mm.21297	NM_138676	ENSMUSG00000089832	Shkbp1	B930062H15Rik|Sb1	Sh3kbp1 binding protein 1	protein-coding
Diff_Nuc577	chr13	53539332	53539471	+	0	NA	intron (NR_037991, intron 6 of 7)	intron (NR_037991, intron 6 of 7)	28748	NM_013601	17702	Mm.1763	NM_013601	ENSMUSG00000021469	Msx2	BB122635|Hox-8|Hox8|Hox8.1	msh homeobox 2	protein-coding
Diff_Nuc11100	chr6	85816672	85816811	+	0	NA	3' UTR (NM_053096, exon 3 of 3)	3' UTR (NM_053096, exon 3 of 3)	2390	NM_053096	93673	Mm.24251	NM_053096	ENSMUSG00000033634	Nat8f2	Cml2	N-acetyltransferase 8 (GCN5-related) family member 2	protein-coding
Diff_Nuc4820	chr17	29300282	29300421	+	0	NA	intron (NM_153166, intron 15 of 20)	RLTR21|LTR|ERVK	28350	NM_001002786	442827	Mm.440341	NM_001002786	ENSMUSG00000064147	Rab44	9830134C10Rik	RAB44, member RAS oncogene family	protein-coding
Diff_Nuc16836	chr2	152726302	152726441	+	0	NA	Intergenic	A-rich|Low_complexity|Low_complexity	-10717	NM_001081044	228785	Mm.250604	NM_001081044	ENSMUSG00000027470	Mylk2	9830004H17Rik|BB138278	myosin, light polypeptide kinase 2, skeletal muscle	protein-coding
Diff_Nuc261	chr13	15044542	15044681	+	0	NA	Intergenic	Intergenic	322086	NM_134067	105351	Mm.41450	NM_134067	ENSMUSG00000039182	AW209491	-	expressed sequence AW209491	protein-coding
Diff_Nuc5455	chr16	6448402	6448541	+	0	NA	intron (NM_021477, intron 2 of 16)	intron (NM_021477, intron 2 of 16)	472791	NR_045799	68238	Mm.434605	NR_045799	ENSMUSG00000101481	1700123O21Rik	-	RIKEN cDNA 1700123O21 gene	ncRNA
Diff_Nuc20614	chr8	94043302	94043441	+	0	NA	intron (NM_011936, intron 7 of 8)	intron (NM_011936, intron 7 of 8)	205947	NM_011936	26383	Mm.4375	NM_011936	ENSMUSG00000055932	Fto	AW743446|mKIAA1752	fat mass and obesity associated	protein-coding
Diff_Nuc20362	chr8	72100732	72100871	+	0	NA	Intergenic	Intergenic	48273	NM_001045553	234362	Mm.458487	NM_172754	ENSMUSG00000060427	Zfp868	AI449175|AW108241|C530032E20|mszf62	zinc finger protein 868	protein-coding
Diff_Nuc18253	chr1	138826892	138827031	+	0	NA	intron (NM_030676, intron 6 of 8)	intron (NM_030676, intron 6 of 8)	23246	NM_001159769	26424	Mm.16794	NM_030676	ENSMUSG00000026398	Nr5a2	AU020803|D1Ertd308e|Ftf|LRH-1|UF2-H3B	nuclear receptor subfamily 5, group A, member 2	protein-coding
Diff_Nuc19417	chr9	76191532	76191671	+	0	NA	Intergenic	MTD|LTR|MaLR	-20216	NM_198962	387285	Mm.335300	NM_198962	ENSMUSG00000032360	Hcrtr2	OX2R|mOX2aR|mOX2bR|mOXR2	hypocretin (orexin) receptor 2	protein-coding
Diff_Nuc9410	chr7	31606872	31607011	+	0	NA	promoter-TSS (NM_001168510)	promoter-TSS (NM_001168510)	-274	NM_001168509	233079	Mm.97338	NM_146187	ENSMUSG00000051314	Ffar2	GPCR43|Gpr43	free fatty acid receptor 2	protein-coding
Diff_Nuc9001	chr18	76079752	76079891	+	0	NA	intron (NM_145356, intron 2 of 4)	intron (NM_145356, intron 2 of 4)	99989	NM_145356	207259	Mm.159332	NM_145356	ENSMUSG00000044646	Zbtb7c	B230208J24Rik|Kr-pok|Zbtb36	zinc finger and BTB domain containing 7C	protein-coding
Diff_Nuc9962	chr7	104162492	104162631	+	0	NA	intron (NM_153591, intron 6 of 13)	Lx3C|LINE|L1	62524	NM_153591	244141	Mm.274864	NM_153591	ENSMUSG00000018995	Nars2	AI875199	asparaginyl-tRNA synthetase 2 (mitochondrial)(putative)	protein-coding
Diff_Nuc10536	chr7	152208702	152208841	+	0	NA	Intergenic	MTB-int|LTR|MaLR	-82941	NM_007631	12443	Mm.273049	NM_007631	ENSMUSG00000070348	Ccnd1	AI327039|CycD1|Cyl-1|PRAD1|bcl-1|cD1	cyclin D1	protein-coding
Diff_Nuc13516	chr4	63693162	63693301	+	0	NA	intron (NM_011607, intron 1 of 25)	ORR1E|LTR|MaLR	14818	NM_011607	21923	Mm.980	NM_011607	ENSMUSG00000028364	Tnc	AI528729|C130033P17Rik|Hxb|TN|TN-C|Ten|cytotactin|tenascin-C	tenascin C	protein-coding
Diff_Nuc15555	chr3	151815502	151815641	+	0	NA	intron (NM_016867, intron 1 of 5)	intron (NM_016867, intron 1 of 5)	13293	NM_016867	54120	Mm.97	NM_016867	ENSMUSG00000039131	Gipc2	2200002N01Rik|AU021850|Semcap2	GIPC PDZ domain containing family, member 2	protein-coding
Diff_Nuc17340	chr1	20755032	20755171	+	0	NA	Intergenic	Lx8|LINE|L1	19250	NM_145856	257630	Mm.222807	NM_145856	ENSMUSG00000041872	Il17f	C87042|IL-17F	interleukin 17F	protein-coding
Diff_Nuc18329	chr1	153846752	153846891	+	0	NA	intron (NM_197990, intron 2 of 5)	intron (NM_197990, intron 2 of 5)	90629	NM_197990	69399	Mm.278031	NM_197990	ENSMUSG00000032666	1700025G04Rik	2610510E02Rik|2900042O04Rik|ENSMUSG00000073540	RIKEN cDNA 1700025G04 gene	protein-coding
Diff_Nuc4614	chr17	13572822	13572961	+	0	NA	Intergenic	Intergenic	25453	NM_001167578	100041352	Mm.490251	NM_001167578	ENSMUSG00000052469	Tcp10c	D17Leh66C|D17Leh66ca|Gm9880|T66C-a|Tcp-10c	t-complex protein 10c	protein-coding
Diff_Nuc9537	chr7	51652662	51652801	+	0	NA	intron (NM_016663, intron 9 of 10)	B4A|SINE|B4	13235	NM_016663	20981	Mm.4824	NM_016663	ENSMUSG00000030731	Syt3	AI385753|sytIII	synaptotagmin III	protein-coding
Diff_Nuc15414	chr3	131249132	131249271	+	0	NA	intron (NM_001289477, intron 6 of 12)	intron (NM_001289477, intron 6 of 12)	20205	NM_001289477	23971	Mm.244912	NM_011863	ENSMUSG00000028032	Papss1	AI325286|Asapk|SK1	3'-phosphoadenosine 5'-phosphosulfate synthase 1	protein-coding
Diff_Nuc14096	chr4	130799432	130799571	+	0	NA	Intergenic	Intergenic	-233112	NR_130167	77835	Mm.348412	NR_130167	ENSMUSG00000086262	A930031H19Rik	A930004I12Rik	RIKEN cDNA A930031H19 gene	ncRNA
Diff_Nuc11942	chr5	36504002	36504141	+	0	NA	intron (NM_030889, intron 2 of 26)	intron (NM_030889, intron 2 of 26)	-42599	NM_175249	76943	Mm.44242	NM_175249	ENSMUSG00000043430	Psapl1	2310020A21Rik	prosaposin-like 1	protein-coding
Diff_Nuc13353	chr4	46357832	46357971	+	0	NA	exon (NM_183298, exon 1 of 1)	exon (NM_183298, exon 1 of 1)	835	NM_183298	110805	Mm.354634	NM_183298	ENSMUSG00000070990	Foxe1	Titf2	forkhead box E1	protein-coding
Diff_Nuc2195	chr11	15405912	15406051	+	0	NA	Intergenic	L1_Mus4|LINE|L1	-751746	NM_001290539	211739	Mm.284015	NM_145967	ENSMUSG00000048834	Vstm2a	Vstm2	V-set and transmembrane domain containing 2A	protein-coding
Diff_Nuc17980	chr1	107036602	107036741	+	0	NA	Intergenic	L1Md_F3|LINE|L1	216616	NM_178779	320311	Mm.389162	NM_178779	ENSMUSG00000047496	Rnf152	A930029B02Rik	ring finger protein 152	protein-coding
Diff_Nuc15904	chr2	31308542	31308681	+	0	NA	Intergenic	Intergenic	-17179	NM_007494	11898	Mm.3217	NM_007494	ENSMUSG00000076441	Ass1	AA408052|ASS|Ass-1|fold	argininosuccinate synthetase 1	protein-coding
Diff_Nuc17751	chr1	82024462	82024601	+	0	NA	Intergenic	LTR16A|LTR|ERVL	-103960	NR_105762	102466629		NR_105762	ENSMUSG00000098797	Mir6344	Gm27840|mmu-mir-6344	microRNA 6344	ncRNA
Diff_Nuc18359	chr1	156494752	156494891	+	0	NA	intron (NM_009782, intron 3 of 46)	intron (NM_009782, intron 3 of 46)	78229	NM_009782	12290	Mm.267517	NM_009782	ENSMUSG00000004110	Cacna1e	A430040I15|BII|Cach6|Cacnl1a6|Cav2.3|Cchra1|alpha1E	calcium channel, voltage-dependent, R type, alpha 1E subunit	protein-coding
Diff_Nuc12760	chr5	130635672	130635811	+	0	NA	Intergenic	Intergenic	-11948	NM_001199059	56715	Mm.288639	NM_019983	ENSMUSG00000025340	Rabgef1	Rab5ef|Rabex5|Rin2	RAB guanine nucleotide exchange factor (GEF) 1	protein-coding
Diff_Nuc14375	chr4	147257432	147257571	+	0	NA	intron (NM_001285923, intron 12 of 18)	intron (NM_001285923, intron 12 of 18)	14413	NM_010244	14349	Mm.422607	NM_010244	ENSMUSG00000070583	Fv1	Fv-1|Rv-1|Rv1	Friend virus susceptibility 1	protein-coding
Diff_Nuc1900	chr12	106115142	106115281	+	0	NA	Intergenic	Intergenic	-11925	NR_104435	94040	Mm.244078	NM_053155	ENSMUSG00000021097	Clmn	9330188N17Rik|AI428889|AI788815|mKIAA1188	calmin	protein-coding
Diff_Nuc13379	chr4	47883772	47883911	+	0	NA	Intergenic	Intergenic	-174336	NM_015743	18124	Mm.247261	NM_015743	ENSMUSG00000028341	Nr4a3	AI573420|CHN|CSMF|MINOR|NOR-1|Nor1|TEC	nuclear receptor subfamily 4, group A, member 3	protein-coding
Diff_Nuc9188	chr7	15964202	15964341	+	0	NA	Intergenic	Lx2B|LINE|L1	-9929	NM_145708	246792	Mm.26391	NM_145708	ENSMUSG00000074369	Obox2	-	oocyte specific homeobox 2	protein-coding
Diff_Nuc19523	chr9	95752212	95752351	+	0	NA	Intergenic	Intergenic	5655	NR_073361	73410	Mm.443314	NM_028533	ENSMUSG00000096655	1700065D16Rik	-	RIKEN cDNA 1700065D16 gene	protein-coding
Diff_Nuc9924	chr7	96665592	96665731	+	0	NA	intron (NM_029614, intron 1 of 1)	intron (NM_029614, intron 1 of 1)	435	NM_029614	76453	Mm.250438	NM_029614	ENSMUSG00000039405	Prss23	2310046G15Rik|4930479H08Rik|AI790574|Spuve	protease, serine 23	protein-coding
Diff_Nuc11631	chr6	143881072	143881211	+	0	NA	intron (NM_011444, intron 8 of 14)	intron (NM_011444, intron 8 of 14)	14485	NM_001347506	20678	Mm.1752	NM_011444	ENSMUSG00000041540	Sox5	A730017D01Rik|AI528773	SRY (sex determining region Y)-box 5	protein-coding
Diff_Nuc7186	chr14	32137672	32137811	+	0	NA	promoter-TSS (NM_001033668)	promoter-TSS (NM_001033668)	-659	NM_001033668	110084	Mm.101811	NM_001033668	ENSMUSG00000019027	Dnah1	B230373P09Rik|Dnahc1|E030034C22Rik|MDHC7	dynein, axonemal, heavy chain 1	protein-coding
Diff_Nuc6136	chr15	7017802	7017941	+	0	NA	Intergenic	Intergenic	-61701	NM_001113386	16880	Mm.149720	NM_013584	ENSMUSG00000054263	Lifr	A230075M04Rik|AW061234|LIF	leukemia inhibitory factor receptor	protein-coding
Diff_Nuc8437	chr18	3009082	3009221	+	0	NA	Intergenic	RLTR30|LTR|ERV1	114261	NM_001167539	100312476	Mm.480293	NM_001167539	ENSMUSG00000091539	Vmn1r238	-	vomeronasal 1 receptor, 238	protein-coding
Diff_Nuc230	chr13	11288052	11288191	+	0	NA	Intergenic	L1Md_F2|LINE|L1	-326198	NR_027813	664793	Mm.410565	NR_027813		Zp4-ps	EG664793|Zp4|Zpb	zona pellucida glycoprotein 4, pseudogene	pseudo
Diff_Nuc3574	chr10	7104982	7105121	+	0	NA	Intergenic	Intergenic	26281	NM_001204916	670558	Mm.398582	NM_001204916	ENSMUSG00000091618	H60c	4632413I24Rik|Gm9491	histocompatibility 60c	protein-coding
Diff_Nuc2507	chr11	55262202	55262341	+	0	NA	intron (NM_009720, intron 3 of 3)	intron (NM_009720, intron 3 of 3)	12369	NM_009720	11927	Mm.217759	NM_009720	ENSMUSG00000018585	Atox1	AI256639|Atx1	antioxidant 1 copper chaperone	protein-coding
Diff_Nuc4894	chr17	34457452	34457591	+	0	NA	Intergenic	RLTR20D|LTR|ERVK	-5099	NM_001033978	381091	Mm.139204	NM_001033978	ENSMUSG00000067341	H2-Eb2	A130038H09Rik|H-2Eb2|Ia-5|Ia5|Iebeta2	histocompatibility 2, class II antigen E beta2	protein-coding
Diff_Nuc4526	chr17	7171092	7171231	+	0	NA	Intergenic	B4A|SINE|B4	-5656	NM_147155	380608	Mm.371734	NM_147155	ENSMUSG00000052031	Tagap1	2610315E15Rik|AA415005|FKSG15	T cell activation GTPase activating protein 1	protein-coding
Diff_Nuc8961	chr18	72972492	72972631	+	0	NA	Intergenic	Intergenic	-461838	NM_007831	13176	Mm.167882	NM_007831	ENSMUSG00000060534	Dcc	C030036D22Rik|Igdcc1	deleted in colorectal carcinoma	protein-coding
Diff_Nuc16536	chr2	118514482	118514621	+	0	NA	exon (NM_001033254, exon 4 of 11)	exon (NM_001033254, exon 4 of 11)	11569	NM_001145854	214230	Mm.241857	NM_001033254	ENSMUSG00000074923	Pak6	4732456M09	p21 protein (Cdc42/Rac)-activated kinase 6	protein-coding
Diff_Nuc3628	chr10	18706912	18707051	+	0	NA	Intergenic	Intergenic	24788	NM_001166402	21929	Mm.116683	NM_009397	ENSMUSG00000019850	Tnfaip3	A20|Tnfip3	tumor necrosis factor, alpha-induced protein 3	protein-coding
Diff_Nuc15977	chr2	34649112	34649251	+	0	NA	intron (NM_145522, intron 3 of 7)	L2c|LINE|L2	6251	NM_145522	227746	Mm.158705	NM_145522	ENSMUSG00000070953	Rabepk	8430412M01Rik|9530020D24Rik|AV073337|C87311|Rab9p40	Rab9 effector protein with kelch motifs	protein-coding
Diff_Nuc8872	chr18	60963482	60963621	+	0	NA	promoter-TSS (NM_001042605)	promoter-TSS (NM_001042605)	48	NM_010545	16149	Mm.439737	NM_010545	ENSMUSG00000024610	Cd74	CLIP|DHLAG|HLADG|Ia-GAMMA|Ii	CD74 antigen (invariant polypeptide of major histocompatibility complex, class II antigen-associated)	protein-coding
Diff_Nuc14159	chr4	134323592	134323731	+	0	NA	intron (NM_145554, intron 1 of 8)	CpG	258	NM_145554	100017	Mm.27486	NM_145554	ENSMUSG00000037295	Ldlrap1	AA691260|ARH2|Arh|Arh1|FHCB1|FHCB2	low density lipoprotein receptor adaptor protein 1	protein-coding
Diff_Nuc12356	chr5	100070472	100070611	+	0	NA	intron (NR_030692, intron 1 of 3)	intron (NR_030692, intron 1 of 3)	87538	NR_030692	319818	Mm.295233	NR_030692	ENSMUSG00000089809	A930011G23Rik	-	RIKEN cDNA A930011G23 gene	ncRNA
Diff_Nuc12895	chr5	140023602	140023741	+	0	NA	exon (NM_013702, exon 3 of 3)	exon (NM_013702, exon 3 of 3)	3819	NM_013702	22255	Mm.42190	NM_013702	ENSMUSG00000029546	Uncx	Chx4|Uncx4.1	UNC homeobox	protein-coding
Diff_Nuc13527	chr4	65394592	65394731	+	0	NA	intron (NM_207109, intron 12 of 22)	MTD|LTR|MaLR	128641	NM_001161782	69807	Mm.22786	NM_053084	ENSMUSG00000051675	Trim32	1810045E12Rik|3f3|BBS11|Zfp117	tripartite motif-containing 32	protein-coding
Diff_Nuc9792	chr7	81495532	81495671	+	0	NA	intron (NM_023908, intron 3 of 9)	intron (NM_023908, intron 3 of 9)	204065	NM_023908	108116	Mm.425467	NM_023908	ENSMUSG00000025790	Slco3a1	5830414C08Rik|Anr1|MJAM|OATP-D|R75096|Slc21a11	solute carrier organic anion transporter family, member 3a1	protein-coding
Diff_Nuc11743	chr5	19468622	19468761	+	0	NA	intron (NM_001170745, intron 1 of 20)	L1Md_T|LINE|L1	55355	NM_015823	50791	Mm.332231	NM_015823	ENSMUSG00000040003	Magi2	AIP-1|Acvri1|Acvrinp1|Acvrip1|Magi-2|S-SCAM|mKIAA0705	membrane associated guanylate kinase, WW and PDZ domain containing 2	protein-coding
Diff_Nuc9808	chr7	83339962	83340101	+	0	NA	Intergenic	Intergenic	-34742	NM_001199224	244071	Mm.322829	NM_172902	ENSMUSG00000025754	Agbl1	Ccp4|D430020F16|EG244071|Nna1-l1	ATP/GTP binding protein-like 1	protein-coding
Diff_Nuc12501	chr5	113297202	113297341	+	0	NA	exon (NM_028901, exon 8 of 44)	exon (NM_028901, exon 8 of 44)	28111	NM_028901	74376	Mm.441903	NM_028901	ENSMUSG00000072720	Myo18b	4932408L24Rik|4933411E19Rik|Gm448	myosin XVIIIb	protein-coding
Diff_Nuc4330	chr10	111015712	111015851	+	0	NA	Intergenic	Intergenic	15548	NR_045344	71321	Mm.410785	NR_045344	ENSMUSG00000097082	4933440J02Rik	-	RIKEN cDNA 4933440J02 gene	ncRNA
Diff_Nuc305	chr13	23520242	23520381	+	0	NA	intron (NR_015492, intron 2 of 3)	intron (NR_015492, intron 2 of 3)	2575	NR_015492	320842	Mm.487476	NR_015492	ENSMUSG00000085024	C230035I16Rik	-	RIKEN cDNA C230035I16 gene	ncRNA
Diff_Nuc17067	chr2	166421522	166421661	+	0	NA	intron (NM_177782, intron 15 of 39)	intron (NM_177782, intron 15 of 39)	117741	NM_177782	277360	Mm.34420	NM_177782	ENSMUSG00000039621	Prex1	G630042G04|P-REX1|Setd6	phosphatidylinositol-3,4,5-trisphosphate-dependent Rac exchange factor 1	protein-coding
Diff_Nuc10589	chr6	14653982	14654121	+	0	NA	Intergenic	Lx3A|LINE|L1	51223	NM_080464	140491	Mm.209429	NM_080464	ENSMUSG00000042717	Ppp1r3a	GM|RG1|RGL	protein phosphatase 1, regulatory (inhibitor) subunit 3A	protein-coding
Diff_Nuc176	chrX	166584962	166585101	+	0	NA	Intergenic	Intergenic	-168182	NR_029457	654820	Mm.34441	NM_001039559	ENSMUSG00000072844	G530011O06Rik	-	RIKEN cDNA G530011O06 gene	ncRNA
Diff_Nuc14409	chr4	148889762	148889901	+	0	NA	Intergenic	Lx8|LINE|L1	-2519	NM_023465	67087	Mm.299735	NM_023465	ENSMUSG00000028988	Ctnnbip1	1110008O09Rik|2310001I19Rik|AW457332|Catnbip1|Icat	catenin beta interacting protein 1	protein-coding
Diff_Nuc3268	chr11	109597062	109597201	+	0	NA	Intergenic	Intergenic	-13561	NM_153782	208659	Mm.208662	NM_153782	ENSMUSG00000020614	Fam20a	AI606893	family with sequence similarity 20, member A	protein-coding
Diff_Nuc12814	chr5	135151692	135151831	+	0	NA	intron (NM_010717, intron 2 of 15)	intron (NM_010717, intron 2 of 15)	2357	NM_001305875	16885	Mm.15409	NM_010717	ENSMUSG00000029674	Limk1	KIZ-1|LIMK-1|Limk	LIM-domain containing, protein kinase	protein-coding
Diff_Nuc4454	chr10	127142102	127142241	+	0	NA	promoter-TSS (NM_001081219)	promoter-TSS (NM_001081219)	-141	NM_001081219	432516	Mm.90450	NM_001081219	ENSMUSG00000025401	Myo1a	BBM-I|Myhl	myosin IA	protein-coding
Diff_Nuc3513	chr11	120582152	120582291	+	0	NA	promoter-TSS (NM_133223)	promoter-TSS (NM_133223)	-561	NM_133223	170758	Mm.34008	NM_133223	ENSMUSG00000018012	Rac3	Rac1B	RAS-related C3 botulinum substrate 3	protein-coding
Diff_Nuc15863	chr2	29692312	29692451	+	0	NA	intron (NM_026615, intron 2 of 4)	B1_Mm|SINE|Alu	-8786	NR_106110	102466839		NR_106110	ENSMUSG00000105010	Mir219b	mmu-mir-219b	microRNA 219b	ncRNA
Diff_Nuc20379	chr8	72885562	72885701	+	0	NA	Intergenic	Intergenic	-8453	NM_001122829	19704	Mm.258280	NM_030680	ENSMUSG00000058301	Upf1	B430202H16Rik|NORF1|PNORF-1|Rent1|Upflp	UPF1 regulator of nonsense transcripts homolog (yeast)	protein-coding
Diff_Nuc15529	chr3	147707352	147707491	+	0	NA	Intergenic	Lx2|LINE|L1	910178	NM_001081298	99633	Mm.9776	NM_001081298	ENSMUSG00000028184	Adgrl2	AI450192|CIRL-2|Gm619|Lec1|Lphh1|Lphn2|mKIAA0786	adhesion G protein-coupled receptor L2	protein-coding
Diff_Nuc4140	chr10	80787932	80788071	+	0	NA	exon (NM_027381, exon 8 of 9)	exon (NM_027381, exon 8 of 9)	-3447	NM_009325	21390	Mm.4545	NM_009325	ENSMUSG00000034881	Tbxa2r	TP|TXA2-R	thromboxane A2 receptor	protein-coding
Diff_Nuc421	chr13	38038012	38038151	+	0	NA	intron (NM_001177869, intron 10 of 11)	intron (NM_001177869, intron 10 of 11)	47978	NM_025965	107513	Mm.426670	NM_025965	ENSMUSG00000021427	Ssr1	2510001K09Rik|6330400D04|AI159733|AI452176|SSR|TRAPA	signal sequence receptor, alpha	protein-coding
Diff_Nuc2135	chr11	5826222	5826361	+	0	NA	intron (NM_010292, intron 1 of 9)	intron (NM_010292, intron 1 of 9)	-11153	NM_001287386	103988	Mm.220358	NM_010292	ENSMUSG00000041798	Gck	GLK|Gk|Gls006|HK4|HKIV|HXKP|Hlb62|MODY2	glucokinase	protein-coding
Diff_Nuc18891	chr9	27283112	27283251	+	0	NA	Intergenic	Intergenic	78384	NM_001305058	75469	Mm.45824	NM_029299	ENSMUSG00000031991	Spata19	1700001L23Rik|AV047838|spergen-1	spermatogenesis associated 19	protein-coding
Diff_Nuc16026	chr2	38318862	38319001	+	0	NA	Intergenic	Intergenic	-48286	NM_021606	59126	Mm.143818	NM_021606	ENSMUSG00000026749	Nek6	1300007C09Rik	NIMA (never in mitosis gene a)-related expressed kinase 6	protein-coding
Diff_Nuc20937	chr8	124989732	124989871	+	0	NA	TTS (NM_001033142)	TTS (NM_001033142)	-5209	NM_013914	30927	Mm.103673	NM_013914	ENSMUSG00000006587	Snai3	AI643946|Smuc|Zfp293	snail family zinc finger 3	protein-coding
Diff_Nuc12148	chr5	66703302	66703441	+	0	NA	intron (NM_001201413, intron 13 of 16)	GA-rich|Low_complexity|Low_complexity	25533	NM_001201416	11787	Mm.5159	NM_009686	ENSMUSG00000029207	Apbb2	2310007D03Rik|FE65L1|Rirl1|TR2L|Zfra	amyloid beta (A4) precursor protein-binding, family B, member 2	protein-coding
Diff_Nuc2269	chr11	29148442	29148581	+	0	NA	Intergenic	RMER21A|LTR|ERV1	-1239	NM_025740	216618	Mm.128663	NM_025740	ENSMUSG00000020462	Cfap36	2300003H10|4931428D14Rik|Ccdc104	cilia and flagella associated protein 36	protein-coding
Diff_Nuc9055	chr18	82000862	82001001	+	0	NA	Intergenic	Intergenic	187888	NR_039589	100628596		NR_039589	ENSMUSG00000093036	Mir5127	mmu-mir-5127|mu-mir-5127	microRNA 5127	ncRNA
Diff_Nuc4850	chr17	31350732	31350871	+	0	NA	exon (NM_177823, exon 3 of 14)	exon (NM_177823, exon 3 of 14)	5790	NM_177823	328795	Mm.387930	NM_177823	ENSMUSG00000042345	Ubash3a	5830413C03Rik|C330001M22|Sts-2|TULA|TULA-1	ubiquitin associated and SH3 domain containing, A	protein-coding
Diff_Nuc1820	chr12	100154382	100154521	+	0	NA	Intergenic	Intergenic	-4333	NM_029553	76260	Mm.282660	NM_029553	ENSMUSG00000021013	Ttc8	0610012F22Rik|AV001447|BBS8	tetratricopeptide repeat domain 8	protein-coding
Diff_Nuc19145	chr9	52175452	52175591	+	0	NA	Intergenic	Intergenic	-199305	NM_001162921	244871	Mm.295686	NM_001162921	ENSMUSG00000035164	Zc3h12c	A230108E06|C230027N18Rik|mKIAA1726	zinc finger CCCH type containing 12C	protein-coding
Diff_Nuc3024	chr11	94728402	94728541	+	0	NA	Intergenic	Intergenic	-17564	NM_001205037	432591	Mm.370372	NM_001205037		Gm11544	OTTMUSG00000002042	predicted gene 11544	protein-coding
Diff_Nuc14113	chr4	131991252	131991391	+	0	NA	Intergenic	B4A|SINE|B4	-12960	NM_175306	100169	Mm.158361	NM_175306	ENSMUSG00000066043	Phactr4	3110001B12Rik|AI527228|AW495572|C330013F19Rik|N28169|mKIAA4120	phosphatase and actin regulator 4	protein-coding
Diff_Nuc18535	chr1	175386302	175386441	+	0	NA	intron (NM_001013779, intron 5 of 8)	intron (NM_001013779, intron 5 of 8)	35636	NM_001013779	383619	Mm.131453	NM_001013779	ENSMUSG00000037860	Aim2	Gm1313|Ifi210	absent in melanoma 2	protein-coding
Diff_Nuc11681	chr6	148771722	148771861	+	0	NA	intron (NM_001081113, intron 2 of 24)	GA-rich|Low_complexity|Low_complexity	8198	NM_001081113	320727	Mm.260105	NM_001081113	ENSMUSG00000040029	Ipo8	6230418K12Rik|Abcc10|C130009K11Rik|MRP7|OM-1|Om1|Ranbp8	importin 8	protein-coding
Diff_Nuc15718	chr2	19142932	19143071	+	0	NA	intron (NM_001271565, intron 2 of 17)	L1Md_F2|LINE|L1	22256	NM_001081083	70882	Mm.276696	NM_001081083	ENSMUSG00000037683	Armc3	4921513G22Rik	armadillo repeat containing 3	protein-coding
Diff_Nuc3731	chr10	38677102	38677241	+	0	NA	Intergenic	L1Md_A|LINE|L1	-8150	NM_010681	16775	Mm.258065	NM_010681	ENSMUSG00000019846	Lama4	-	laminin, alpha 4	protein-coding
Diff_Nuc8626	chr18	33654642	33654781	+	0	NA	Intergenic	MLT2B4|LTR|ERVL	30894	NR_045415	433171	Mm.353332	NR_045415		Gm10549	ENSMUSG00000073610	predicted gene 10549	ncRNA
Diff_Nuc12329	chr5	95636442	95636581	+	0	NA	Intergenic	L1Md_F|LINE|L1	24857	NM_001031622	545762	Mm.425309	NM_001031622	ENSMUSG00000096550	Gm16367	-	predicted gene 16367	protein-coding
Diff_Nuc14445	chr4	150670802	150670941	+	0	NA	intron (NM_001081557, intron 5 of 23)	intron (NM_001081557, intron 5 of 23)	207192	NM_001308446	105704528	Mm.415128	NM_001308446	ENSMUSG00000078491	Gm13090	OTTMUSG00000010356	predicted gene 13090	protein-coding
Diff_Nuc2428	chr11	50026982	50027121	+	0	NA	Intergenic	Intergenic	-2729	NM_011018	18412	Mm.40828	NM_011018	ENSMUSG00000015837	Sqstm1	A170|OSF-6|Osi|STAP|STONE14|p62	sequestosome 1	protein-coding
Diff_Nuc469	chr13	44202732	44202871	+	0	NA	Intergenic	Intergenic	-13735	NR_045285	328235	Mm.188356	NR_045285	ENSMUSG00000089815	Gm5083	A730030A06	predicted gene 5083	ncRNA
Diff_Nuc18026	chr1	118523162	118523301	+	0	NA	Intergenic	Lx3_Mus|LINE|L1	941517	NM_001077425	636808	Mm.101576	NM_001077425	ENSMUSG00000070695	Cntnap5a	Caspr5-1|EG636808	contactin associated protein-like 5A	protein-coding
Diff_Nuc1928	chr12	109133692	109133831	+	0	NA	Intergenic	Intergenic	107863	NM_001079883	58208	Mm.392694	NM_021399	ENSMUSG00000048251	Bcl11b	9130430L19Rik|AI604821|B630002E05Rik|BCL-11B|Ctip2|Rit1	B cell leukemia/lymphoma 11B	protein-coding
Diff_Nuc12200	chr5	74060812	74060951	+	0	NA	exon (NM_178387, exon 7 of 13)	exon (NM_178387, exon 7 of 13)	18262	NM_178387	73472	Mm.87067	NM_178387	ENSMUSG00000029155	Spata18	1700067I02Rik	spermatogenesis associated 18	protein-coding
Diff_Nuc13097	chr4	8992292	8992431	+	0	NA	Intergenic	Tigger7|DNA|MER2_type	-204103	NM_028940	74438	Mm.473368	NM_028940	ENSMUSG00000041216	Clvs1	4933402J24Rik|Clvl1|Rlbp1l1	clavesin 1	protein-coding
Diff_Nuc2555	chr11	59180202	59180341	+	0	NA	Intergenic	Intergenic	8884	NM_001045521	216797	Mm.339586	NM_001045521	ENSMUSG00000049291	Prss38	Gm249|Mpn2	protease, serine 38	protein-coding
Diff_Nuc6995	chr14	8812722	8812861	+	0	NA	intron (NM_007870, intron 4 of 7)	intron (NM_007870, intron 4 of 7)	13905	NM_007870	13421	Mm.272258	NM_007870	ENSMUSG00000025279	Dnase1l3	DNasegamma|Dhp2|Lsd	deoxyribonuclease 1-like 3	protein-coding
Diff_Nuc7213	chr14	33971132	33971271	+	0	NA	intron (NM_001146022, intron 2 of 58)	intron (NM_001146022, intron 2 of 58)	27051	NM_001146022	545030	Mm.318345	NM_001146022	ENSMUSG00000051506	Wdfy4	Gm18810	WD repeat and FYVE domain containing 4	protein-coding
Diff_Nuc7203	chr14	33135252	33135391	+	0	NA	intron (NM_001081130, intron 1 of 23)	CpG	116	NM_001081130	239017	Mm.318302	NM_001081130	ENSMUSG00000021913	Ogdhl	-	oxoglutarate dehydrogenase-like	protein-coding
Diff_Nuc8951	chr18	70183212	70183351	+	0	NA	intron (NM_001082553, intron 2 of 6)	intron (NM_001082553, intron 2 of 6)	29961	NM_001302798	80718	Mm.246753	NM_030554	ENSMUSG00000024511	Rab27b	2310021G14Rik|B130064M09Rik	RAB27B, member RAS oncogene family	protein-coding
Diff_Nuc9875	chr7	88953582	88953721	+	0	NA	intron (NM_146193, intron 3 of 7)	Lx6|LINE|L1	-19312	NM_026077	67290	Mm.248391	NM_026077	ENSMUSG00000025102	3110040N11Rik	AI851475	RIKEN cDNA 3110040N11 gene	protein-coding
Diff_Nuc13603	chr4	83911142	83911281	+	0	NA	Intergenic	Intergenic	-220428	NR_130998	78238	Mm.243903	NR_130998	ENSMUSG00000085217	6030471H07Rik	-	RIKEN cDNA 6030471H07 gene	ncRNA
Diff_Nuc447	chr13	42381242	42381381	+	0	NA	Intergenic	Intergenic	-15534	NM_010104	13614	Mm.14543	NM_010104	ENSMUSG00000021367	Edn1	ET-1|PPET1|preproET	endothelin 1	protein-coding
Diff_Nuc9517	chr7	50541952	50542091	+	0	NA	Intergenic	RMER15|LTR|ERVL	26610	NM_027264	69930	Mm.45367	NM_027264	ENSMUSG00000012640	Zfp715	2610041B18Rik|mszf15	zinc finger protein 715	protein-coding
Diff_Nuc10425	chr7	144827552	144827691	+	0	NA	Intergenic	ORR1A2|LTR|MaLR	198264	NR_033611	620016	Mm.388932	NR_033611	ENSMUSG00000100863	Gm12669	OTTMUSG00000007920	glutaredoxin 3 pseudogene	pseudo
Diff_Nuc15352	chr3	121750392	121750531	+	0	NA	intron (NM_007378, intron 1 of 49)	intron (NM_007378, intron 1 of 49)	3083	NM_007378	11304	Mm.3918	NM_007378	ENSMUSG00000028125	Abca4	AW050280|Abc10|Abcr|D430003I15Rik|RmP	ATP-binding cassette, sub-family A (ABC1), member 4	protein-coding
Diff_Nuc3143	chr11	101176042	101176181	+	0	NA	Intergenic	B2_Mm2|SINE|B2	-1454	NM_011192	19192	Mm.288477	NM_011192	ENSMUSG00000078652	Psme3	AA410043|AU020960|Ki|PA28gamma|REGgamma|pa28g	proteaseome (prosome, macropain) activator subunit 3 (PA28 gamma, Ki)	protein-coding
Diff_Nuc1799	chr12	96712142	96712281	+	0	NA	Intergenic	B4|SINE|B4	-218225	NM_201518	399558	Mm.341948	NM_201518	ENSMUSG00000047414	Flrt2	-	fibronectin leucine rich transmembrane protein 2	protein-coding
Diff_Nuc6214	chr15	22047682	22047821	+	0	NA	Intergenic	Intergenic	596988	NM_001165971	545091	Mm.475598	NM_001165971		Gm5803	EG545091	predicted gene 5803	protein-coding
Diff_Nuc3856	chr10	57687992	57688131	+	0	NA	Intergenic	Intergenic	7362	NM_001081954	664783	Mm.482575	NM_001081954		Dux	AW822073|Dux4|Duxbl|EG664783	double homeobox	protein-coding
Diff_Nuc18701	chr1	192987872	192988011	+	0	NA	exon (NM_001109759, exon 1 of 1)	exon (NM_001109759, exon 1 of 1)	755	NM_001109759	619288	Mm.61148	NM_001109759	ENSMUSG00000091017	Fam71a	4933417M04Rik|GARI-L4	family with sequence similarity 71, member A	protein-coding
Diff_Nuc6164	chr15	11205592	11205731	+	0	NA	intron (NM_175501, intron 13 of 23)	Lx2B|LINE|L1	123752	NM_033074	110960	Mm.286061	NM_033074	ENSMUSG00000022241	Tars	D15Wsu59e|ThrRS	threonyl-tRNA synthetase	protein-coding
Diff_Nuc3586	chr10	9032192	9032331	+	0	NA	Intergenic	Lx8|LINE|L1	362745	NM_177271	320825	Mm.101115	NM_177271	ENSMUSG00000060487	Samd5	E130306M17Rik	sterile alpha motif domain containing 5	protein-coding
Diff_Nuc7094	chr14	25071462	25071601	+	0	NA	Intergenic	B3|SINE|B2	-6389	NM_027726	71228	Mm.68971	NM_027726	ENSMUSG00000021782	Dlg5	4933429D20Rik|T25557|mKIAA0583	discs, large homolog 5 (Drosophila)	protein-coding
Diff_Nuc18731	chr1	196075582	196075721	+	0	NA	Intergenic	ORR1E|LTR|MaLR	-26698	NR_040477	74942	Mm.60689	NR_040477	ENSMUSG00000103692	4930503O07Rik	-	RIKEN cDNA 4930503O07 gene	ncRNA
Diff_Nuc12745	chr5	129920572	129920711	+	0	NA	Intergenic	Intergenic	-86465	NM_172276	231769	Mm.288714	NM_172276	ENSMUSG00000029439	Sfswap	1190005N23Rik|6330437E22Rik|AI197402|AW212079|SWAP|Sfrs8|Srsf8	splicing factor, suppressor of white-apricot homolog (Drosophila)	protein-coding
Diff_Nuc12396	chr5	105649882	105650021	+	0	NA	exon (NM_001039646, exon 7 of 11)	exon (NM_001039646, exon 7 of 11)	18601	NM_001039646	626578	Mm.275893	NM_001039646	ENSMUSG00000105096	Gbp10	-	guanylate-binding protein 10	protein-coding
Diff_Nuc7485	chr14	63167442	63167581	+	0	NA	Intergenic	Intergenic	-7063	NM_001243857	629059	Mm.291864	NM_001243857	ENSMUSG00000035184	Fam124a	EG629059	family with sequence similarity 124, member A	protein-coding
Diff_Nuc5468	chr16	8409692	8409831	+	0	NA	exon (NM_029070, exon 4 of 4)	exon (NM_029070, exon 4 of 4)	15468	NM_029070	74720	Mm.159318	NM_029070	ENSMUSG00000022715	Tmem114	4930511J11Rik|Cldn26	transmembrane protein 114	protein-coding
Diff_Nuc1300	chr12	25946842	25946981	+	0	NA	Intergenic	Intergenic	132872	NR_045844	432641	Mm.112955	NR_045844		Gm17746	-	predicted gene, 17746	ncRNA
Diff_Nuc4286	chr10	99267842	99267981	+	0	NA	Intergenic	L1_Mus3|LINE|L1	-45619	NM_027945	71832	Mm.483162	NM_027945	ENSMUSG00000046934	Csl	1700007H16Rik	citrate synthase like	protein-coding
Diff_Nuc2890	chr11	82483012	82483151	+	0	NA	Intergenic	Intergenic	36226	NR_033582	791422	Mm.341562	NR_033582	ENSMUSG00000069796	Gm11426	OTTMUSG00000000913	predicted gene 11426	ncRNA
Diff_Nuc15668	chr2	10106042	10106181	+	0	NA	intron (NM_172471, intron 2 of 13)	intron (NM_172471, intron 2 of 13)	30941	NM_172471	209378	Mm.313876	NM_172471	ENSMUSG00000025780	Itih5	4631408O11Rik|5430408M01Rik|E130106B02	inter-alpha (globulin) inhibitor H5	protein-coding
Diff_Nuc3154	chr11	101606252	101606391	+	0	NA	intron (NM_144831, intron 10 of 22)	B1_Mur3|SINE|Alu	12051	NM_144831	217207	Mm.28186	NM_144831	ENSMUSG00000034931	Dhx8	Ddx8|mDEAH6|mKIAA4096	DEAH (Asp-Glu-Ala-His) box polypeptide 8	protein-coding
Diff_Nuc13216	chr4	32299032	32299171	+	0	NA	Intergenic	Intergenic	-205309	NM_001109661	12014	Mm.491223	NM_007521	ENSMUSG00000040270	Bach2	E030004N02Rik	BTB and CNC homology, basic leucine zipper transcription factor 2	protein-coding
Diff_Nuc15951	chr2	33028892	33029031	+	0	NA	intron (NM_175211, intron 9 of 19)	intron (NM_175211, intron 9 of 19)	-42520	NM_011923	26360	Mm.208919	NM_011923	ENSMUSG00000004105	Angptl2	AI593246|AW260363|Arp2	angiopoietin-like 2	protein-coding
Diff_Nuc16110	chr2	52450162	52450301	+	0	NA	intron (NM_001037099, intron 2 of 13)	intron (NM_001037099, intron 2 of 13)	-36100	NM_001285427	12298	Mm.330223	NM_146123	ENSMUSG00000017412	Cacnb4	3110038O15Rik|Cchb4|lh	calcium channel, voltage-dependent, beta 4 subunit	protein-coding
Diff_Nuc3103	chr11	98821462	98821601	+	0	NA	promoter-TSS (NM_001176528)	promoter-TSS (NM_001176528)	-254	NM_001176528	19401	Mm.439744	NM_009024	ENSMUSG00000037992	Rara	Nr1b1|RAR|RARalpha1	retinoic acid receptor, alpha	protein-coding
Diff_Nuc12376	chr5	102422312	102422451	+	0	NA	intron (NM_172882, intron 3 of 66)	intron (NM_172882, intron 3 of 66)	76559	NM_172882	72145	Mm.332522	NM_172882	ENSMUSG00000043940	Wdfy3	2610509D04Rik|ALFY|AW319683|B930017C24|BWF1|Bchs|D5Ertd66e|Ggtb3|ZFYVE25|mKIAA0993	WD repeat and FYVE domain containing 3	protein-coding
Diff_Nuc5177	chr17	65423292	65423431	+	0	NA	Intergenic	L1_Mus1|LINE|L1	-237950	NM_030031	78057	Mm.109380	NM_030031	ENSMUSG00000024088	4930583I09Rik	-	RIKEN cDNA 4930583I09 gene	protein-coding
Diff_Nuc11722	chr5	15024332	15024471	+	0	NA	intron (NM_001310450, intron 4 of 5)	intron (NM_001310450, intron 4 of 5)	8606	NM_182957	66773	Mm.368256	NM_182957	ENSMUSG00000091897	Gm17019	-	predicted gene 17019	protein-coding
Diff_Nuc17144	chr2	170902422	170902561	+	0	NA	Intergenic	Intergenic	345184	NM_001163686	76829	Mm.41633	NM_029761	ENSMUSG00000027560	Dok5	2700055C10Rik	docking protein 5	protein-coding
Diff_Nuc18836	chr9	21078022	21078161	+	0	NA	3' UTR (NM_145416, exon 19 of 19)	3' UTR (NM_145416, exon 19 of 19)	8362	NM_153583	235040	Mm.440165	NM_153583	ENSMUSG00000002820	Atg4d	9830134P12Rik|APG4-D|Apg4d|Atg4dl|Autl4	autophagy related 4D, cysteine peptidase	protein-coding
Diff_Nuc4924	chr17	35688232	35688371	+	0	NA	promoter-TSS (NM_001008424)	promoter-TSS (NM_001008424)	-772	NM_001008424	386463	Mm.426664	NM_001008424	ENSMUSG00000039518	Cdsn	AI747712	corneodesmosin	protein-coding
Diff_Nuc574	chr13	53381212	53381351	+	0	NA	5' UTR (NM_013846, exon 1 of 9)	5' UTR (NM_013846, exon 1 of 9)	197	NM_013846	26564	Mm.342774	NM_013846	ENSMUSG00000021464	Ror2	Ntrkr2|mRor2	receptor tyrosine kinase-like orphan receptor 2	protein-coding
Diff_Nuc14365	chr4	146657922	146658061	+	0	NA	intron (NM_001039209, intron 1 of 2)	intron (NM_001039209, intron 1 of 2)	108016	NM_001039209	195531	Mm.270762	NM_001039209	ENSMUSG00000078496	Zfp982	Gm13152|OTTMUSG00000010671	zinc finger protein 982	protein-coding
Diff_Nuc15021	chr3	84389092	84389231	+	0	NA	Intergenic	RMER1B|Other|Other	-2614	NM_001293801	99889	Mm.316536	NM_001081093	ENSMUSG00000074513	Arfip1	2310030I10Rik|Arfaptin|D3Ertd598e	ADP-ribosylation factor interacting protein 1	protein-coding
Diff_Nuc19313	chr9	64998632	64998771	+	0	NA	intron (NM_008988, intron 2 of 13)	intron (NM_008988, intron 2 of 13)	9705	NM_008988	19289	Mm.41529	NM_008988	ENSMUSG00000032394	Igdcc3	2810401C09Rik|AI851425|Punc|WI-14920	immunoglobulin superfamily, DCC subclass, member 3	protein-coding
Diff_Nuc91	chrX	166423842	166423981	+	0	NA	exon (NM_001290512, exon 8 of 10)	exon (NM_001290512, exon 8 of 10)	-7062	NR_029457	654820	Mm.34441	NM_001039559	ENSMUSG00000072844	G530011O06Rik	-	RIKEN cDNA G530011O06 gene	ncRNA
Diff_Nuc4669	chr17	17469592	17469731	+	0	NA	Intergenic	Intergenic	38254	NM_001324550	100862203	Mm.484235	NM_001324550		Gm6712	EG626854	predicted gene 6712	protein-coding
Diff_Nuc20647	chr8	97203152	97203291	+	0	NA	intron (NM_026385, intron 2 of 3)	intron (NM_026385, intron 2 of 3)	12230	NM_024269	107566	Mm.393247	NM_024191	ENSMUSG00000031776	Arl2bp	1700010P10Rik|1700027H16Rik|6330544B05Rik|AI482273|AI849834|BART|Bart1	ADP-ribosylation factor-like 2 binding protein	protein-coding
Diff_Nuc17995	chr1	109397122	109397261	+	0	NA	Intergenic	RMER15|LTR|ERVL	-10809	NM_001174170	18788	Mm.271870	NM_011111	ENSMUSG00000062345	Serpinb2	PAI-2|Planh2|ovalbumin	serine (or cysteine) peptidase inhibitor, clade B, member 2	protein-coding
Diff_Nuc12267	chr5	86314812	86314951	+	0	NA	Intergenic	L1_Mus2|LINE|L1	179727	NM_001345902	12617	Mm.4649	NM_007683	ENSMUSG00000029253	Cenpc1	CENP-C|Cenpc	centromere protein C1	protein-coding
Diff_Nuc17189	chr2	174791362	174791501	+	0	NA	Intergenic	L1Md_F|LINE|L1	101839	NM_001085546	664987		NM_001085546	ENSMUSG00000078905	Gm14393	OTTMUSG00000016546	predicted gene 14393	protein-coding
Diff_Nuc8022	chr19	15002862	15003001	+	0	NA	Intergenic	Lx9|LINE|L1	-330258	NM_001302947	21888	Mm.103638	NM_011600	ENSMUSG00000024642	Tle4	5730411M05Rik|AA792082|Bce-1|Bce1|ESTM13|ESTM14|Grg4|X83332|X83333|grg-4	transducin-like enhancer of split 4	protein-coding
Diff_Nuc10181	chr7	125720642	125720781	+	0	NA	intron (NM_172476, intron 1 of 15)	B3|SINE|B2	7489	NM_172476	209760	Mm.69380	NM_172476	ENSMUSG00000042246	Tmc7	1700030H01Rik|C230064B05|C630024K23Rik	transmembrane channel-like gene family 7	protein-coding
Diff_Nuc10636	chr6	25908642	25908781	+	0	NA	intron (NR_040771, intron 7 of 8)	Lx|LINE|L1	27285	NR_040771	626904	Mm.126787	NR_040771	ENSMUSG00000106799	Gm20756	-	predicted gene, 20756	ncRNA
Diff_Nuc4902	chr17	34950472	34950611	+	0	NA	intron (NM_011413, intron 29 of 40)	intron (NM_011413, intron 29 of 40)	-9170	NM_009995	13079	Mm.440407	NM_009995	ENSMUSG00000024365	Cyp21a1	21-OH|21OH|21OHA|21OHB|CYP21OH-A|Cyp21|Cyp21-ps1|Cyp21B|Cyp21a2-ps|Cyp21a2ps|Oh21-1|Oh21-2	cytochrome P450, family 21, subfamily a, polypeptide 1	protein-coding
Diff_Nuc7744	chr14	106332842	106332981	+	0	NA	Intergenic	L1Md_A|LINE|L1	-36875	NM_011897	24064	Mm.89982	NM_011897	ENSMUSG00000022114	Spry2	sprouty2	sprouty homolog 2 (Drosophila)	protein-coding
Diff_Nuc20634	chr8	96446282	96446421	+	0	NA	intron (NM_001113384, intron 3 of 7)	intron (NM_001113384, intron 3 of 7)	90189	NM_011787	23802	Mm.34641	NM_011787	ENSMUSG00000031751	Amfr	gp78	autocrine motility factor receptor	protein-coding
Diff_Nuc5518	chr16	12207092	12207231	+	0	NA	intron (NM_028277, intron 2 of 4)	Lx9|LINE|L1	222955	NM_001174086	72555	Mm.310139	NM_028277	ENSMUSG00000022494	Shisa9	2700045P11Rik|Ckamp44	shisa family member 9	protein-coding
Diff_Nuc3559	chr10	6157262	6157401	+	0	NA	Intergenic	Intergenic	-77119	NM_031185	83397	Mm.27481	NM_031185	ENSMUSG00000038587	Akap12	AI317366|SSeCKS|Srcs5|Tsga12	A kinase (PRKA) anchor protein (gravin) 12	protein-coding
Diff_Nuc10156	chr7	122781902	122782041	+	0	NA	intron (NM_001025559, intron 7 of 15)	intron (NM_001025559, intron 7 of 15)	163152	NM_001277328	20679	Mm.323365	NM_011445	ENSMUSG00000051910	Sox6	AI987981|SOX-LZ	SRY (sex determining region Y)-box 6	protein-coding
Diff_Nuc20573	chr8	90913752	90913891	+	0	NA	Intergenic	Intergenic	-27731	NM_012047	26992	Mm.5400	NM_012047	ENSMUSG00000031660	Brd7	BP75|CELTIX1|Ptpn13ip	bromodomain containing 7	protein-coding
Diff_Nuc1575	chr12	71718442	71718581	+	0	NA	Intergenic	Intergenic	164370	NM_028339	72736	Mm.204670	NM_028339	ENSMUSG00000021072	Tmx1	2810425A04Rik|AI465319|Txndc1	thioredoxin-related transmembrane protein 1	protein-coding
Diff_Nuc11814	chr5	25117512	25117651	+	0	NA	Intergenic	MLT1F|LTR|MaLR	81745	NR_027388	73571	Mm.105263	NR_027388	ENSMUSG00000101856	1700096K18Rik	-	RIKEN cDNA 1700096K18 gene	ncRNA
Diff_Nuc5303	chr17	80713032	80713171	+	0	NA	intron (NM_001145452, intron 1 of 17)	B4A|SINE|B4	6354	NM_001145452	381112	Mm.360004	NM_001145452	ENSMUSG00000054901	Arhgef33	Gm941	Rho guanine nucleotide exchange factor (GEF) 33	protein-coding
Diff_Nuc18460	chr1	167810172	167810311	+	0	NA	intron (NM_198932, intron 14 of 15)	intron (NM_198932, intron 14 of 15)	54838	NM_198933	18986	Mm.245261	NM_011137	ENSMUSG00000026565	Pou2f1	2810482H01Rik|NF-A1|Oct-1|Oct1|Otf-1|Otf1	POU domain, class 2, transcription factor 1	protein-coding
Diff_Nuc9760	chr7	75740842	75740981	+	0	NA	Intergenic	Intergenic	-22431	NR_003648	384639	Mm.261760	NM_001013781		Gm5334	EG384639	tetraspanin 7 pseudogene	pseudo
Diff_Nuc8410	chr19	58146482	58146621	+	0	NA	intron (NM_181415, intron 28 of 28)	intron (NM_181415, intron 28 of 28)	20894	NR_049196	100885835		NR_049196	ENSMUSG00000093757	Mir5623	Gm26068|mir-5623|mmu-mir-5623	microRNA 5623	ncRNA
Diff_Nuc17757	chr1	82704172	82704311	+	0	NA	intron (NM_007734, intron 43 of 51)	intron (NM_007734, intron 43 of 51)	-17224	NM_001310697	75734	Mm.396863	NM_029409	ENSMUSG00000026150	Mff	5230400G24Rik|AI314724	mitochondrial fission factor	protein-coding
Diff_Nuc6022	chr16	91812052	91812191	+	0	NA	intron (NM_010587, intron 8 of 38)	intron (NM_010587, intron 8 of 38)	82505	NM_010587	16443	Mm.40546	NM_010587	ENSMUSG00000022957	Itsn1	AA517634|AA545208|AI316805|AI839402|AI848451|Ehsh1|Ese1|Itsn|Sh3p17	intersectin 1 (SH3 domain protein 1A)	protein-coding
Diff_Nuc16692	chr2	132576252	132576391	+	0	NA	exon (NM_028637, exon 3 of 3)	exon (NM_028637, exon 3 of 3)	-30693	NM_007694	12653	Mm.255241	NM_007694	ENSMUSG00000027350	Chgb	Scg-1	chromogranin B	protein-coding
Diff_Nuc7638	chr14	78145377	78145516	+	0	NA	Intergenic	RLTR18B|LTR|ERVK	53329	NM_001033440	380920	Mm.297771	NM_001033440	ENSMUSG00000075512	Gm1587	-	predicted gene 1587	protein-coding
[truncated: 727 more rows]
