# Supplementary material for: Remodeling of epigenome and transcriptome landscapes with aging in mice reveals widespread induction of inflammatory responses
Source: HighWire-hosted journal article supplement (doi:10.1101/gr.240093.118), 2019-03-11
Supplement: Supplemental_Code_Figure3_Machine_learning.zip [file HOMER_dposREF_NPCs_DiNUP_DANPOS_LOST.xls]

PeakID (cmd=annotatePeaks.pl dposREF_NPCs_DiNUP_DANPOS_LOST.bed mm9)	Chr	Start	End	Strand	Peak Score	Focus Ratio/Region Size	Annotation	Detailed Annotation	Distance to TSS	Nearest PromoterID	Entrez ID	Nearest Unigene	Nearest Refseq	Nearest Ensembl	Gene Name	Gene Alias	Gene Description	Gene Type
Diff_Nuc9253	chr1	160336902	160337041	+	0	NA	intron (NM_007495, intron 1 of 22)	intron (NM_007495, intron 1 of 22)	44536	NM_001205204	11899	Mm.329586	NM_007495	ENSMUSG00000026587	Astn1	Astn|GC14|mKIAA0289	astrotactin 1	protein-coding
Diff_Nuc9241	chr1	158232992	158233131	+	0	NA	intron (NM_001277730, intron 1 of 18)	intron (NM_001277730, intron 1 of 18)	418	NM_001134741	214575	Mm.252800	NM_001134741	ENSMUSG00000060985	Tdrd5	Gm103	tudor domain containing 5	protein-coding
Diff_Nuc3936	chr19	5371792	5371931	+	0	NA	TTS (NM_027236)	TTS (NM_027236)	-4985	NM_011793	23825	Mm.358649	NM_011793	ENSMUSG00000024844	Banf1	Baf|Bcrp1|L2bp1/Baf	barrier to autointegration factor 1	protein-coding
Diff_Nuc1212	chr11	17847772	17847911	+	0	NA	exon (NM_026576, exon 4 of 6)	exon (NM_026576, exon 4 of 6)	6037	NM_026576	68145	Mm.178684	NM_026576	ENSMUSG00000016984	Etaa1	5730466H23Rik|AA672646	Ewing tumor-associated antigen 1	protein-coding
Diff_Nuc9127	chr1	131499762	131499901	+	0	NA	intron (NM_172485, intron 3 of 27)	L1M2|LINE|L1	329950	NM_172485	210417	Mm.380518	NM_172485	ENSMUSG00000042581	Thsd7b	1700074E13Rik|B930082A18|D130067I03Rik	thrombospondin, type I, domain containing 7B	protein-coding
Diff_Nuc2718	chr16	30397502	30397641	+	0	NA	Intergenic	Intergenic	-8955	NM_001128096	224088	Mm.8924	NM_001128094	ENSMUSG00000022533	Atp13a3	AU022875|Gm1745|Gm541|Gm542	ATPase type 13A3	protein-coding
Diff_Nuc1132	chr12	116770452	116770591	+	0	NA	Intergenic	Intergenic	163484	NR_105810	102465205		NR_105810	ENSMUSG00000098336	Mir6388	Gm27925|mmu-mir-6388	microRNA 6388	ncRNA
Diff_Nuc8783	chr1	53512942	53513081	+	0	NA	intron (NM_001252070, intron 52 of 65)	RLTR28|LTR|ERVL	-103415	NM_133728	70396	Mm.285783	NM_133728	ENSMUSG00000026095	Asnsd1	2210409M21Rik	asparagine synthetase domain containing 1	protein-coding
Diff_Nuc4121	chr19	47845472	47845611	+	0	NA	intron (NM_027559, intron 21 of 37)	intron (NM_027559, intron 21 of 37)	-15894	NR_106165	102465883		NR_106165	ENSMUSG00000099069	Mir8090	Gm27862|mmu-mir-8090	microRNA 8090	ncRNA
Diff_Nuc9351	chr1	177425712	177425851	+	0	NA	Intergenic	L2a|LINE|L2	-3105	NM_001347195	24012	Mm.7956	NM_011880	ENSMUSG00000026527	Rgs7	-	regulator of G protein signaling 7	protein-coding
Diff_Nuc8248	chr2	102547262	102547401	+	0	NA	intron (NM_001077515, intron 1 of 10)	intron (NM_001077515, intron 1 of 10)	736	NM_001077515	20511	Mm.267547	NM_011393	ENSMUSG00000005089	Slc1a2	1700091C19Rik|2900019G14Rik|AI159670|Eaat2|GLT-1|GLT1|MGLT1	solute carrier family 1 (glial high affinity glutamate transporter), member 2	protein-coding
Diff_Nuc7208	chr3	27022882	27023021	+	0	NA	intron (NM_001177625, intron 16 of 23)	intron (NM_001177625, intron 16 of 23)	29825	NM_007900	13605	Mm.261453	NM_007900	ENSMUSG00000027699	Ect2	AI528536|mKIAA4037	ect2 oncogene	protein-coding
Diff_Nuc1162	chr11	4734732	4734871	+	0	NA	intron (NM_010898, intron 1 of 15)	PB1D7|SINE|Alu	-1663	NM_001252253	18016	Mm.297109	NM_010898	ENSMUSG00000009073	Nf2	merlin	neurofibromin 2	protein-coding
Diff_Nuc2114	chr10	108407972	108408111	+	0	NA	intron (NM_001252342, intron 1 of 10)	intron (NM_001252342, intron 1 of 10)	39990	NM_009306	20979	Mm.289702	NM_009306	ENSMUSG00000035864	Syt1	AW124717|G630098F17Rik|SytI	synaptotagmin I	protein-coding
Diff_Nuc1967	chr10	76170042	76170181	+	0	NA	Intergenic	Intergenic	18678	NM_009933	12833	Mm.2509	NM_009933	ENSMUSG00000001119	Col6a1	AI747156|Col6a-1	collagen, type VI, alpha 1	protein-coding
Diff_Nuc5673	chr6	113104582	113104721	+	0	NA	Intergenic	Intergenic	40727	NM_177763	269788	Mm.37943	NM_177763	ENSMUSG00000042873	Lhfpl4	1190004M23Rik|AI604880|B230384L07|mKIAA4027	lipoma HMGIC fusion partner-like protein 4	protein-coding
Diff_Nuc5117	chr7	126969002	126969141	+	0	NA	exon (NM_028129, exon 7 of 14)	exon (NM_028129, exon 7 of 14)	31370	NM_001004187	434234	Mm.38237	NM_028129	ENSMUSG00000030924	2610020H08Rik	-	RIKEN cDNA 2610020H08 gene	protein-coding
Diff_Nuc4357	chr18	37757552	37757691	+	0	NA	intron (NM_001301259, intron 1 of 3)	Lx3A|LINE|L1	40756	NM_001159275	83885	Mm.193029	NM_001159275	ENSMUSG00000050304	Slc25a2	Ornt2	solute carrier family 25 (mitochondrial carrier, ornithine transporter) member 2	protein-coding
Diff_Nuc10532	chr8	130477372	130477511	+	0	NA	Intergenic	Intergenic	324684	NR_105822	102465212		NR_105822	ENSMUSG00000099326	Mir21c	Gm28013|mmu-mir-21c	microRNA 21c	ncRNA
Diff_Nuc100	chr13	7210932	7211071	+	0	NA	Intergenic	Intergenic	-562984	NM_001291071	56421	Mm.273874	NM_019703	ENSMUSG00000021196	Pfkp	1200015H23Rik|9330125N24Rik|ATP-PFK|PFK-C|PFK-P	phosphofructokinase, platelet	protein-coding
Diff_Nuc1949	chr10	71331142	71331281	+	0	NA	Intergenic	MTB|LTR|MaLR	112227	NR_003644	108950	Mm.212793	NM_175390	ENSMUSG00000043859	1700049L16Rik	-	hematological and neurological expressed 1-like pseudogene	pseudo
Diff_Nuc8805	chr1	59056062	59056201	+	0	NA	Intergenic	Intergenic	25716	NM_172656	227154	Mm.286006	NM_172656	ENSMUSG00000026027	Stradb	AA792893|Als2cr2|B830008M19|D1Ucla2|ILPIP|ILPIPA|PRO1038|Papk|Syradb	STE20-related kinase adaptor beta	protein-coding
Diff_Nuc2668	chr16	19960082	19960221	+	0	NA	intron (NM_183390, intron 2 of 6)	intron (NM_183390, intron 2 of 6)	22971	NM_183390	239743	Mm.86699	NM_183390	ENSMUSG00000043008	Klhl6	-	kelch-like 6	protein-coding
Diff_Nuc5524	chr6	77070472	77070611	+	0	NA	intron (NM_009819, intron 8 of 18)	intron (NM_009819, intron 8 of 18)	-122170	NM_028880	74342	Mm.292568	NM_028880	ENSMUSG00000060780	Lrrtm1	4632401D06Rik|AW125451	leucine rich repeat transmembrane neuronal 1	protein-coding
Diff_Nuc8216	chr2	98502482	98502621	+	0	NA	Intergenic	GSAT_MM|Satellite|Satellite	1194737	NM_178725	241568	Mm.241682	NM_178725	ENSMUSG00000050587	Lrrc4c	6430556C10Rik|NGL-1	leucine rich repeat containing 4C	protein-coding
Diff_Nuc6190	chr5	83407862	83408001	+	0	NA	Intergenic	L1Md_F2|LINE|L1	-179841	NR_035415	100316803		NR_035415	ENSMUSG00000080586	Mir1187	Mirn1187|mir-1187|mmu-mir-1187	microRNA 1187	ncRNA
Diff_Nuc2155	chr10	116828462	116828601	+	0	NA	Intergenic	ORR1B2|LTR|MaLR	-14502	NM_001310609	432508	Mm.478881	NM_001013391	ENSMUSG00000055531	Cpsf6	4733401N12Rik|AI256641|CFIM|CFIM68|HPBRII-4|HPBRII-7	cleavage and polyadenylation specific factor 6	protein-coding
Diff_Nuc9131	chr1	133522212	133522351	+	0	NA	Intergenic	Intergenic	-12610	NM_007799	13034	Mm.230249	NM_007799	ENSMUSG00000004552	Ctse	A430072O03Rik|C920004C08Rik|CE|CatE	cathepsin E	protein-coding
Diff_Nuc3766	chr14	84258282	84258421	+	0	NA	Intergenic	RLTR44-int|LTR|ERVK	-585019	NM_001013753	219228	Mm.153643	NM_001013753	ENSMUSG00000035566	Pcdh17	C030033F14Rik|Gm78	protocadherin 17	protein-coding
Diff_Nuc7479	chr3	83975262	83975401	+	0	NA	intron (NM_001271726, intron 10 of 11)	intron (NM_001271726, intron 10 of 11)	-3229	NR_036654	624713	Mm.442604	NR_036654		Gm6525	EG624713	ribosomal protein L36a pseudogene	pseudo
Diff_Nuc2101	chr10	104581342	104581481	+	0	NA	Intergenic	Intergenic	430124	NM_177368	278279	Mm.25225	NM_177368	ENSMUSG00000036019	Tmtc2	8430438D04Rik|D330034A10Rik	transmembrane and tetratricopeptide repeat containing 2	protein-coding
Diff_Nuc1502	chr11	85744552	85744691	+	0	NA	Intergenic	Intergenic	34354	NM_172798	21387	Mm.275336	NM_011536	ENSMUSG00000000094	Tbx4	3930401C23	T-box 4	protein-coding
Diff_Nuc3503	chr14	20818232	20818371	+	0	NA	Intergenic	RLTR20B3|LTR|ERVK	-21830	NM_001285909	14702	Mm.41737	NM_010315	ENSMUSG00000043004	Gng2	-	guanine nucleotide binding protein (G protein), gamma 2	protein-coding
Diff_Nuc7060	chr4	145680002	145680141	+	0	NA	intron (NM_001243138, intron 2 of 4)	intron (NM_001243138, intron 2 of 4)	3048	NM_001243139	100041433	Mm.441741	NM_001243138	ENSMUSG00000056300	Zfp981	Gm13247|OTTMUSG00000011075	zinc finger protein 981	protein-coding
Diff_Nuc127	chr13	11867942	11868081	+	0	NA	intron (NM_023868, intron 25 of 104)	MTA_Mm|LTR|MaLR	253692	NR_027813	664793	Mm.410565	NR_027813		Zp4-ps	EG664793|Zp4|Zpb	zona pellucida glycoprotein 4, pseudogene	pseudo
Diff_Nuc3190	chr15	44655932	44656071	+	0	NA	Intergenic	Intergenic	-36392	NM_001032727	319613	Mm.207715	NM_176998	ENSMUSG00000022340	Sybu	Golsyn	syntabulin (syntaxin-interacting)	protein-coding
Diff_Nuc1725	chr10	18687942	18688081	+	0	NA	Intergenic	Intergenic	43758	NM_001166402	21929	Mm.116683	NM_009397	ENSMUSG00000019850	Tnfaip3	A20|Tnfip3	tumor necrosis factor, alpha-induced protein 3	protein-coding
Diff_Nuc3325	chr15	72520392	72520531	+	0	NA	intron (NM_180662, intron 19 of 21)	intron (NM_180662, intron 19 of 21)	120293	NR_002864	353342	Mm.440245	NR_002864	ENSMUSG00000106847	Peg13	-	paternally expressed 13	ncRNA
Diff_Nuc601	chr13	112135842	112135981	+	0	NA	Intergenic	Intergenic	90690	NM_175497	238880	Mm.107293	NM_175497	ENSMUSG00000055194	Actbl2	4732495G21Rik	actin, beta-like 2	protein-coding
Diff_Nuc534	chr13	98052262	98052401	+	0	NA	Intergenic	L2a|LINE|L2	41271	NM_007930	13803	Mm.241073	NM_007930	ENSMUSG00000041773	Enc1	Nrpb|PIG10	ectodermal-neural cortex 1	protein-coding
Diff_Nuc8578	chr1	3778102	3778241	+	0	NA	Intergenic	Intergenic	-116592	NM_001011874	497097	Mm.454496	NM_001011874	ENSMUSG00000051951	Xkr4	AY534250|Gm210|XRG4|mKIAA1889	X-linked Kx blood group related 4	protein-coding
Diff_Nuc6808	chr4	86086242	86086381	+	0	NA	Intergenic	Intergenic	117896	NM_001081096	75811	Mm.56451	NM_001081096	ENSMUSG00000028492	Saxo1	4930500O09Rik|Fam154a	stabilizer of axonemal microtubules 1	protein-coding
Diff_Nuc5633	chr6	101078032	101078171	+	0	NA	Intergenic	Intergenic	249790	NM_018884	55983	Mm.321654	NM_018884	ENSMUSG00000035357	Pdzrn3	1110020C07Rik|AI429718|AL023082|LNX3|SEMACAP3|Semcap3	PDZ domain containing RING finger 3	protein-coding
Diff_Nuc4056	chr19	32369082	32369221	+	0	NA	intron (NM_144792, intron 2 of 9)	intron (NM_144792, intron 2 of 9)	54655	NM_001168525	208449	Mm.329810	NM_144792	ENSMUSG00000040451	Sgms1	9530058O11Rik|AI841905|C80702|Mob|Sms1|Sor1|Tmem23	sphingomyelin synthase 1	protein-coding
Diff_Nuc1449	chr11	72473242	72473381	+	0	NA	intron (NM_025985, intron 1 of 5)	intron (NM_025985, intron 1 of 5)	-30193	NM_009671	11736	Mm.10313	NM_009671	ENSMUSG00000020790	Ankfy1	Ankhzn|ZFYVE14|mKIAA1255	ankyrin repeat and FYVE domain containing 1	protein-coding
Diff_Nuc3145	chr15	35450472	35450611	+	0	NA	intron (NM_177151, intron 17 of 61)	intron (NM_177151, intron 17 of 61)	140132	NR_035527	100316736		NR_035527	ENSMUSG00000076333	Mir599	mmu-mir-599	microRNA 599	ncRNA
Diff_Nuc1153	chr11	3098002	3098141	+	0	NA	Intergenic	Intergenic	-4285	NM_001166548	74203	Mm.255649	NM_023743	ENSMUSG00000020454	Eif4enif1	2610509L04Rik|A930019J01Rik|AA410001|AU021239|Clast4|D11Ertd166e	eukaryotic translation initiation factor 4E nuclear import factor 1	protein-coding
Diff_Nuc8948	chr1	89010002	89010141	+	0	NA	Intergenic	MER57A-int|LTR|ERV1	-11512	NM_007432	11648	Mm.377076	NM_007432	ENSMUSG00000036500	Akp3	Akp-3|IAP|dIAP	alkaline phosphatase 3, intestine, not Mn requiring	protein-coding
Diff_Nuc4675	chr7	17758642	17758781	+	0	NA	Intergenic	Intergenic	22962	NM_054059	384557	Mm.486145	NM_054059	ENSMUSG00000053228	Ceacam3	EG384557|Psg24|cea12	carcinoembryonic antigen-related cell adhesion molecule 3	protein-coding
Diff_Nuc5333	chr6	31139002	31139141	+	0	NA	intron (NR_110470, intron 1 of 2)	intron (NR_110470, intron 1 of 2)	29403	NR_110470	232685	Mm.443019	NM_144555	ENSMUSG00000044471	Lncpint	Lincpint|MNCb-1768|Pint|linc-Pint	long non-protein coding RNA, Trp53 induced transcript	ncRNA
Diff_Nuc7897	chr2	20818222	20818361	+	0	NA	intron (NM_001128084, intron 3 of 24)	B1F|SINE|Alu	71057	NM_001081364	71435	Mm.28507	NM_001081364	ENSMUSG00000036591	Arhgap21	5530401C11Rik|AA416458|ARHGAP10	Rho GTPase activating protein 21	protein-coding
Diff_Nuc7513	chr3	90402002	90402141	+	0	NA	Intergenic	MIR|SINE|MIR	-2066	NM_011310	20197	Mm.440044	NM_011310	ENSMUSG00000001021	S100a3	S100E	S100 calcium binding protein A3	protein-coding
Diff_Nuc930	chr12	72844012	72844151	+	0	NA	Intergenic	Intergenic	-87974	NM_026102	208846	Mm.87417	NM_026102	ENSMUSG00000034574	Daam1	-	dishevelled associated activator of morphogenesis 1	protein-coding
Diff_Nuc7105	chr4	151951852	151951991	+	0	NA	Intergenic	Intergenic	99670	NM_153424	260305	Mm.302496	NM_153424	ENSMUSG00000039577	Nphp4	4930564O18Rik|nmf192	nephronophthisis 4 (juvenile) homolog (human)	protein-coding
Diff_Nuc5464	chr6	63266082	63266221	+	0	NA	intron (NM_008167, intron 1 of 15)	intron (NM_008167, intron 1 of 15)	59300	NM_008167	14804	Mm.439651	NM_008167	ENSMUSG00000071424	Grid2	B230104L07Rik|GluD2|GluRdelta2|Lc|Lc<J>|MMS10-AC|Ms10ac|cpr|ho|nmf408|tpr	glutamate receptor, ionotropic, delta 2	protein-coding
Diff_Nuc1327	chr11	45597402	45597541	+	0	NA	Intergenic	Intergenic	-24114	NR_045876	100009664	Mm.415439	NR_045876		F630206G17Rik	-	RIKEN cDNA F630206G17 gene	ncRNA
Diff_Nuc6109	chr5	62088482	62088621	+	0	NA	Intergenic	L1Md_F2|LINE|L1	-111531	NM_019468	14380	Mm.347430	NM_019468	ENSMUSG00000089992	G6pd2	G6pdx-ps1|Gpd-2|Gpd2	glucose-6-phosphate dehydrogenase 2	protein-coding
Diff_Nuc753	chr12	33949372	33949511	+	0	NA	Intergenic	PB1D10|SINE|Alu	-37939	NM_001033436	380753	Mm.41540	NM_028139	ENSMUSG00000020564	Atxn7l1	2810423G08Rik|Atxn7l4	ataxin 7-like 1	protein-coding
Diff_Nuc5130	chr7	129234882	129235021	+	0	NA	intron (NM_028177, intron 4 of 4)	intron (NM_028177, intron 4 of 4)	10411	NM_028177	70316	Mm.3014	NM_028177	ENSMUSG00000030869	Ndufab1	2210401F17Rik|2310039H15Rik|2610003B19Rik|8kDa|9130423F15Rik|ACP|CI-SDAP|SDAP	NADH dehydrogenase (ubiquinone) 1, alpha/beta subcomplex, 1	protein-coding
Diff_Nuc4084	chr19	37829052	37829191	+	0	NA	Intergenic	Intergenic	56823	NM_007811	13082	Mm.42230	NM_007811	ENSMUSG00000024987	Cyp26a1	Cyp26|P450RA|P450RAI|RAH	cytochrome P450, family 26, subfamily a, polypeptide 1	protein-coding
Diff_Nuc9441	chr9	3000552	3000691	+	0	NA	Intergenic	GSAT_MM|Satellite|Satellite	38122	NR_039546	100628572		NR_039546	ENSMUSG00000106183	Mir101c	mir-101c|mmu-mir-101c	microRNA 101c	ncRNA
Diff_Nuc4457	chr18	58564602	58564741	+	0	NA	Intergenic	Intergenic	-151223	NM_001081072	225579	Mm.258517	NM_001081072	ENSMUSG00000024600	Slc27a6	4732438L20Rik|FACVL2|FATP6|VLCS-H1	solute carrier family 27 (fatty acid transporter), member 6	protein-coding
Diff_Nuc6863	chr4	97012352	97012491	+	0	NA	Intergenic	Intergenic	-236213	NM_001122952	18027	Mm.31274	NM_010905	ENSMUSG00000028565	Nfia	1110047K16Rik|9430022M17Rik|CTF|NF1-A|NF1A	nuclear factor I/A	protein-coding
Diff_Nuc8585	chr1	4632962	4633101	+	0	NA	Intergenic	BGLII_B|LTR|ERVK	142776	NR_033530	27395	Mm.182927	NM_025300	ENSMUSG00000033845	Mrpl15	HSPC145|MRP-L7|Rpml7	mitochondrial ribosomal protein L15	protein-coding
Diff_Nuc6695	chr4	61689212	61689351	+	0	NA	Intergenic	Intergenic	25870	NM_001012323	381530	Mm.460005	NM_001012323	ENSMUSG00000078672	Mup20	Gm12560|Mup24|OTTMUSG00000007485|darcin	major urinary protein 20	protein-coding
Diff_Nuc10130	chr8	30785632	30785771	+	0	NA	Intergenic	Intergenic	-455593	NM_001347498	210801	Mm.248433	NM_153135	ENSMUSG00000063626	Unc5d	D930029E11Rik|Unc5h4|mKIAA1777	unc-5 netrin receptor D	protein-coding
Diff_Nuc1173	chr11	8726372	8726511	+	0	NA	Intergenic	Intergenic	-161903	NM_001083587	319939	Mm.337820	NM_001083587	ENSMUSG00000020422	Tns3	BC023928|F830010I22Rik|TEM6|Tens1	tensin 3	protein-coding
Diff_Nuc559	chr13	102824022	102824161	+	0	NA	Intergenic	B1F1|SINE|Alu	-285919	NM_001077495	18708	Mm.259333	NM_001024955	ENSMUSG00000041417	Pik3r1	PI3K|p50alpha|p55alpha|p85alpha	phosphatidylinositol 3-kinase, regulatory subunit, polypeptide 1 (p85 alpha)	protein-coding
Diff_Nuc4664	chr7	16499582	16499721	+	0	NA	Intergenic	L1MC1|LINE|L1	8069	NM_009156	20364	Mm.42829	NM_009156	ENSMUSG00000041571	Selenow	Sepw1|selW	selenoprotein W	protein-coding
Diff_Nuc8924	chr1	83872782	83872921	+	0	NA	Intergenic	Intergenic	342685	NR_105771	102465181		NR_105771	ENSMUSG00000098851	Mir6353	Gm27391|mmu-mir-6353	microRNA 6353	ncRNA
Diff_Nuc1908	chr10	62268432	62268571	+	0	NA	3' UTR (NM_001253857, exon 12 of 12)	3' UTR (NM_001253857, exon 12 of 12)	-13385	NM_026201	67500	Mm.196371	NM_026201	ENSMUSG00000020074	Ccar1	2610511G16Rik|9430036H15Rik|Carp1	cell division cycle and apoptosis regulator 1	protein-coding
Diff_Nuc4658	chr7	15533842	15533981	+	0	NA	Intergenic	Intergenic	288854	NM_001038676	194588	Mm.389816	NM_001038676	ENSMUSG00000055942	Obox7	EG194588|Gm4745	oocyte specific homeobox 7	protein-coding
Diff_Nuc3346	chr15	75513002	75513141	+	0	NA	Intergenic	Intergenic	-3851	NM_028404	72960	Mm.182401	NM_028404	ENSMUSG00000000934	Top1mt	2900052H09Rik	DNA topoisomerase 1, mitochondrial	protein-coding
Diff_Nuc8760	chr1	49133072	49133211	+	0	NA	Intergenic	Intergenic	-1609172	NR_105768	102466969		NR_105768	ENSMUSG00000098876	Mir6350	Gm27958|mmu-mir-6350	microRNA 6350	ncRNA
Diff_Nuc4506	chr18	68371492	68371631	+	0	NA	intron (NM_172631, intron 3 of 5)	intron (NM_172631, intron 3 of 5)	49066	NR_106078	102465702		NR_106078	ENSMUSG00000098253	Mir7219	Gm27613|mmu-mir-7219	microRNA 7219	ncRNA
Diff_Nuc8345	chr2	125839542	125839681	+	0	NA	intron (NM_029455, intron 11 of 16)	L1_Mur3|LINE|L1	-20783	NM_008008	14178	Mm.330557	NM_008008	ENSMUSG00000027208	Fgf7	Kgf	fibroblast growth factor 7	protein-coding
Diff_Nuc5429	chr6	52083752	52083891	+	0	NA	Intergenic	B1F|SINE|Alu	24495	NM_010449	15394	Mm.197	NM_010449	ENSMUSG00000029844	Hoxa1	ERA1|Hox-1.6	homeobox A1	protein-coding
Diff_Nuc9115	chr1	129004422	129004561	+	0	NA	Intergenic	Intergenic	-97072	NM_145128	107895	Mm.214682	NM_145128	ENSMUSG00000036155	Mgat5	4930471A21Rik|5330407H02Rik|AI480971|GlcNAc-TV	mannoside acetylglucosaminyltransferase 5	protein-coding
Diff_Nuc6672	chr4	55688962	55689101	+	0	NA	Intergenic	Intergenic	-143684	NM_010637	16600	Mm.4325	NM_010637	ENSMUSG00000003032	Klf4	EZF|Gklf|Zie	Kruppel-like factor 4 (gut)	protein-coding
Diff_Nuc8334	chr2	123752232	123752371	+	0	NA	Intergenic	Intergenic	-163404	NM_001290997	214968	Mm.330536	NM_172537	ENSMUSG00000027200	Sema6d	1110067B02Rik|AA409156|D330011G23|mKIAA1479	sema domain, transmembrane domain (TM), and cytoplasmic domain, (semaphorin) 6D	protein-coding
Diff_Nuc4	chrY	2781982	2782121	+	0	NA	Intergenic	Intergenic	394793	NM_001270512	100041505	Mm.491824	NM_001270512	ENSMUSG00000096520	Gm3376	Rbmy1b	predicted gene 3376	protein-coding
Diff_Nuc7112	chr4	153581362	153581501	+	0	NA	intron (NM_001162977, intron 3 of 36)	intron (NM_001162977, intron 3 of 36)	36609	NM_001162977	230971	Mm.275216	NM_172273	ENSMUSG00000057751	Megf6	2600001P17Rik|Egfl3	multiple EGF-like-domains 6	protein-coding
Diff_Nuc1240	chr11	22697282	22697421	+	0	NA	Intergenic	RLTR20B2|LTR|ERVK	62384	NM_016888	53625	Mm.395495	NM_016888	ENSMUSG00000051650	B3gnt2	AA408337|AA409404|AW260308|B3Galt6|B3gnt1|BGnT-1|BGnT-2|BGnT1|BGnT2|Beta3gnt	UDP-GlcNAc:betaGal beta-1,3-N-acetylglucosaminyltransferase 2	protein-coding
Diff_Nuc5805	chr6	145381142	145381281	+	0	NA	intron (NM_028742, intron 3 of 9)	intron (NM_028742, intron 3 of 9)	2234	NM_028742	74071	Mm.441497	NM_028742	ENSMUSG00000054966	Lmntd1	4933403M22Rik|AI482300|Ifltd1|Lmna-rs1|Lmna1|OTTMUSG00000022798	lamin tail domain containing 1	protein-coding
Diff_Nuc1579	chr11	104136722	104136861	+	0	NA	intron (NM_010838, intron 1 of 9)	(CA)n|Simple_repeat|Simple_repeat	44041	NM_001285454	17762	Mm.1287	NM_010838	ENSMUSG00000018411	Mapt	AI413597|AW045860|Mtapt|Tau	microtubule-associated protein tau	protein-coding
Diff_Nuc3241	chr15	56114552	56114691	+	0	NA	Intergenic	RMER19B|LTR|ERVK	-376117	NM_016667	20649	Mm.309425	NM_016667	ENSMUSG00000060429	Sntb1	-	syntrophin, basic 1	protein-coding
Diff_Nuc273	chr13	38621272	38621411	+	0	NA	promoter-TSS (NM_145367)	promoter-TSS (NM_145367)	-648	NM_001289598	105245	Mm.28622	NM_145367	ENSMUSG00000038991	Txndc5	AL022641|ERp46|PC-TRP	thioredoxin domain containing 5	protein-coding
Diff_Nuc8293	chr2	113065702	113065841	+	0	NA	Intergenic	Intergenic	-8531	NM_001319156	20192	Mm.436657	NM_177652	ENSMUSG00000057378	Ryr3	AI851294|C230090H21|RYR-3	ryanodine receptor 3	protein-coding
Diff_Nuc10429	chr8	103906772	103906911	+	0	NA	Intergenic	L1Md_F2|LINE|L1	1402170	NM_009866	12552	Mm.1571	NM_009866	ENSMUSG00000031673	Cdh11	Cad11|OSF-4	cadherin 11	protein-coding
Diff_Nuc6711	chr4	65077712	65077851	+	0	NA	intron (NM_207109, intron 20 of 22)	intron (NM_207109, intron 20 of 22)	-188239	NM_053084	69807	Mm.22786	NM_053084	ENSMUSG00000051675	Trim32	1810045E12Rik|3f3|BBS11|Zfp117	tripartite motif-containing 32	protein-coding
Diff_Nuc7503	chr3	89235192	89235331	+	0	NA	intron (NM_001293766, intron 1 of 1)	intron (NM_001293766, intron 1 of 1)	319	NM_001293766	68911	Mm.22521	NM_026869	ENSMUSG00000047824	Pygo2	1190004M21Rik	pygopus 2	protein-coding
Diff_Nuc7471	chr3	82886012	82886151	+	0	NA	Intergenic	MTEa|LTR|MaLR	26621	NM_016784	53317	Mm.286349	NM_016784	ENSMUSG00000027998	Plrg1	AA958940|C80566|Tango4	pleiotropic regulator 1	protein-coding
Diff_Nuc2376	chr17	39474562	39474701	+	0	NA	Intergenic	L1_Mus2|LINE|L1	-68673	NM_001244763	100126774	Mm.350534	NM_001244763	ENSMUSG00000094024	Esp18	Gm20579	exocrine gland secreted peptide 18	protein-coding
Diff_Nuc7407	chr3	67690512	67690651	+	0	NA	Intergenic	Intergenic	-5561	NM_001113419	100505386	Mm.331064	NM_001113419	ENSMUSG00000102422	Gm21949	Iqcj-schip1|Schip-1-iqcj|Schip1	predicted gene, 21949	protein-coding
Diff_Nuc4479	chr18	61405842	61405981	+	0	NA	intron (NM_146086, intron 6 of 21)	intron (NM_146086, intron 6 of 21)	25758	NM_146086	225600	Mm.391106	NM_146086	ENSMUSG00000024575	Pde6a	Pdea|nmf282	phosphodiesterase 6A, cGMP-specific, rod, alpha	protein-coding
Diff_Nuc3386	chr15	90356352	90356491	+	0	NA	intron (NM_025815, intron 13 of 19)	intron (NM_025815, intron 13 of 19)	153398	NM_025815	66871	Mm.290991	NM_025815	ENSMUSG00000052560	Cpne8	1200003E11Rik|1500031E20Rik	copine VIII	protein-coding
Diff_Nuc1555	chr11	98143672	98143811	+	0	NA	Intergenic	Intergenic	19821	NR_039579	100628613		NR_039579	ENSMUSG00000093176	Mir5119	mmu-mir-5119|mu-mir-5119	microRNA 5119	ncRNA
Diff_Nuc2235	chr17	8363532	8363671	+	0	NA	intron (NM_201230, intron 5 of 11)	intron (NM_201230, intron 5 of 11)	5218	NM_201230	75296	Mm.227250	NM_201230	ENSMUSG00000069135	Fgfr1op	4930553O10Rik|FOP	Fgfr1 oncogene partner	protein-coding
Diff_Nuc4443	chr18	55343262	55343401	+	0	NA	Intergenic	MER34|LTR|ERV1	-193497	NM_175751	269023	Mm.192984	NM_175751	ENSMUSG00000052713	Zfp608	4932417D18Rik|D430007A19Rik|Znf608	zinc finger protein 608	protein-coding
Diff_Nuc484	chr13	86498182	86498321	+	0	NA	Intergenic	Lx|LINE|L1	-311851	NM_007749	12867	Mm.378898	NM_007749	ENSMUSG00000017778	Cox7c	COXVIIc|Cox7c1	cytochrome c oxidase subunit VIIc	protein-coding
Diff_Nuc3491	chr14	18667532	18667671	+	0	NA	intron (NM_001113417, intron 2 of 9)	ORR1D2|LTR|MaLR	-146557	NM_009380	21834	Mm.32563	NM_009380	ENSMUSG00000021779	Thrb	Nr1a2|T3R[b]|T3Rbeta|Thrb1|Thrb2|c-erbAbeta	thyroid hormone receptor beta	protein-coding
Diff_Nuc5484	chr6	69227082	69227221	+	0	NA	Intergenic	Intergenic	50017	NR_004434	19783		NR_004434	ENSMUSG00000106222	Rprl1	Rmrp2|Rpr|Rprh2	ribonuclease P RNA-like 1	ncRNA
Diff_Nuc6215	chr5	87667582	87667721	+	0	NA	Intergenic	L1Md_F2|LINE|L1	16162	NM_053215	112417	Mm.160362	NM_053215	ENSMUSG00000057425	Ugt2b37	0610033E06Rik	UDP glucuronosyltransferase 2 family, polypeptide B37	protein-coding
Diff_Nuc4281	chr18	23539702	23539841	+	0	NA	intron (NM_001285813, intron 1 of 21)	intron (NM_001285813, intron 1 of 21)	-34139	NM_010087	13527	Mm.94371	NM_010087	ENSMUSG00000024302	Dtna	2210407P21Rik|DTN-A|Dtn|Gm19389|a-DB-1|adbn	dystrobrevin alpha	protein-coding
Diff_Nuc9409	chr1	190733242	190733381	+	0	NA	intron (NM_021408, intron 61 of 70)	Tigger5|DNA|MER2_type	98408	NM_172650	226823	Mm.209880	NM_172650	ENSMUSG00000026608	Kctd3	4930438A20Rik|9330185B06|E330032J19Rik|NY-REN-45	potassium channel tetramerisation domain containing 3	protein-coding
Diff_Nuc5004	chr7	102172092	102172231	+	0	NA	Intergenic	Intergenic	-1147593	NM_001310762	23966	Mm.254610	NM_011858	ENSMUSG00000048078	Tenm4	Doc4|ELM2|Odz4|R75022|Ten-m4|l(7)-3Rn|l7Rn3|mKIAA1302	teneurin transmembrane protein 4	protein-coding
Diff_Nuc5910	chr5	21797852	21797991	+	0	NA	intron (NM_011261, intron 1 of 63)	intron (NM_011261, intron 1 of 63)	52602	NM_011261	19699	Mm.425236	NM_011261	ENSMUSG00000042453	Reln	reeler|rl	reelin	protein-coding
Diff_Nuc4476	chr18	61058772	61058911	+	0	NA	Intergenic	Intergenic	-13053	NM_001038499	545260	Mm.20147	NM_001038499	ENSMUSG00000036412	Arsi	BC020108	arylsulfatase i	protein-coding
Diff_Nuc6181	chr5	82187132	82187271	+	0	NA	intron (NM_001347367, intron 23 of 27)	intron (NM_001347367, intron 23 of 27)	366537	NR_138557	67327	Mm.87058	NR_138557		1700031L13Rik	-	RIKEN cDNA 1700031L13 gene	ncRNA
Diff_Nuc4153	chr19	55235602	55235741	+	0	NA	Intergenic	Intergenic	-19704	NM_009348	21684	Mm.42139	NM_009348	ENSMUSG00000024979	Tectb	Tctnb	tectorin beta	protein-coding
Diff_Nuc7826	chr2	3350912	3351051	+	0	NA	intron (NM_175683, intron 3 of 15)	intron (NM_175683, intron 3 of 15)	9578	NM_001302684	227525	Mm.23483	NM_146114	ENSMUSG00000026648	Dclre1c	9930121L06Rik|AI661365|Art|Snm1l	DNA cross-link repair 1C	protein-coding
Diff_Nuc10498	chr8	120086692	120086831	+	0	NA	intron (NM_172285, intron 5 of 32)	intron (NM_172285, intron 5 of 32)	64586	NM_172285	234779	Mm.192699	NM_172285	ENSMUSG00000034330	Plcg2	PLC-gamma-2|PLCgamma2|Plcg-2	phospholipase C, gamma 2	protein-coding
Diff_Nuc1105	chr12	110887852	110887991	+	0	NA	promoter-TSS (NR_046304)	promoter-TSS (NR_046304)	94	NR_046304	100861570		NR_046304	ENSMUSG00000084549	DQ267100	-	snoRNA DQ267100	snoRNA
Diff_Nuc94	chr13	4890892	4891031	+	0	NA	Intergenic	L1Md_F2|LINE|L1	-282551	NM_018859	56043	Mm.251908	NM_018859	ENSMUSG00000045410	Akr1e1	1810061I10Rik|Akr1e2	aldo-keto reductase family 1, member E1	protein-coding
Diff_Nuc1630	chr11	114811572	114811711	+	0	NA	Intergenic	ETnERV2-int|LTR|ERVK	10090	NM_199225	387565	Mm.351450	NM_199225	ENSMUSG00000058728	Cd300c	Clm6	CD300C molecule	protein-coding
Diff_Nuc171	chr13	20321012	20321151	+	0	NA	intron (NM_080288, intron 4 of 21)	intron (NM_080288, intron 4 of 21)	138705	NM_080288	140580	Mm.342392	NM_080288	ENSMUSG00000041112	Elmo1	6330578D22Rik|C230095H21Rik|CED-12	engulfment and cell motility 1	protein-coding
Diff_Nuc6528	chr4	20332202	20332341	+	0	NA	intron (NM_172987, intron 3 of 4)	intron (NM_172987, intron 3 of 4)	363072	NM_010281	14590	Mm.20461	NM_010281	ENSMUSG00000073987	Ggh	gamma-GH	gamma-glutamyl hydrolase	protein-coding
Diff_Nuc10487	chr8	117941022	117941161	+	0	NA	Intergenic	Intergenic	289703	NM_001025577	17132	Mm.275549	NM_001025577	ENSMUSG00000055435	Maf	2810401A20Rik|A230108G15Rik|AW047063|c-maf	avian musculoaponeurotic fibrosarcoma oncogene homolog	protein-coding
Diff_Nuc8741	chr1	42948642	42948781	+	0	NA	intron (NM_023514, intron 5 of 10)	intron (NM_023514, intron 5 of 10)	40633	NM_023514	69527	Mm.252982	NM_023514	ENSMUSG00000060679	Mrps9	2310002A08Rik|AW322516|Mrp-S9|S9mt|mg637	mitochondrial ribosomal protein S9	protein-coding
Diff_Nuc403	chr13	66867812	66867951	+	0	NA	Intergenic	L1_Mus2|LINE|L1	138405	NM_026219	67530	Mm.379136	NM_026219	ENSMUSG00000021520	Uqcrb	2210415M14Rik|QP-C|QPC|UQBC|UQBP|UQPC	ubiquinol-cytochrome c reductase binding protein	protein-coding
Diff_Nuc354	chr13	57985872	57986011	+	0	NA	intron (NM_001166466, intron 2 of 11)	intron (NM_001166466, intron 2 of 11)	23752	NM_009262	20745	Mm.379020	NM_009262	ENSMUSG00000056222	Spock1	Spock|Ticn1|testican	sparc/osteonectin, cwcv and kazal-like domains proteoglycan 1	protein-coding
Diff_Nuc9835	chr9	81948302	81948441	+	0	NA	Intergenic	RMER21A|LTR|ERV1	191020	NM_175213	75033	Mm.335329	NM_175213	ENSMUSG00000043289	Mei4	4930486G11Rik	meiotic double-stranded break formation protein 4	protein-coding
Diff_Nuc10315	chr8	77828372	77828511	+	0	NA	Intergenic	L1Md_F2|LINE|L1	90598	NM_029182	75141	Mm.179267	NM_029182	ENSMUSG00000034472	Rasd2	4930526B11Rik|AU045414|Rhes|TEM-2|TEM2	RASD family, member 2	protein-coding
Diff_Nuc10096	chr8	19947782	19947921	+	0	NA	intron (NM_001270553, intron 6 of 9).2	Lx5|LINE|L1	10929	NM_001270553	100861668	Mm.491087	NM_001270553	ENSMUSG00000095294	Gm21119	-	predicted gene, 21119	protein-coding
Diff_Nuc8002	chr2	44696552	44696691	+	0	NA	intron (NM_172662, intron 2 of 10)	L1Md_F2|LINE|L1	20521	NM_172662	227835	Mm.314312	NM_172662	ENSMUSG00000036890	Gtdc1	E330008O22Rik	glycosyltransferase-like domain containing 1	protein-coding
Diff_Nuc1861	chr10	49295392	49295531	+	0	NA	intron (NM_001111268, intron 3 of 16)	intron (NM_001111268, intron 3 of 16)	213099	NM_010349	14806	Mm.332838	NM_010349	ENSMUSG00000056073	Grik2	AW124492|GluK2|Glur-6|Glur6|Glurbeta2	glutamate receptor, ionotropic, kainate 2 (beta 2)	protein-coding
Diff_Nuc10400	chr8	96114762	96114901	+	0	NA	Intergenic	Intergenic	-55224	NM_001003951	67935	Mm.65457	NM_001003951	ENSMUSG00000058019	Ces5a	1700081L16Rik|1700122C07Rik|BB081581|Ces7|Gm503|cauxin	carboxylesterase 5A	protein-coding
Diff_Nuc7597	chr3	107144572	107144711	+	0	NA	Intergenic	Intergenic	-8434	NM_001045807	229700	Mm.27966	NM_001045807	ENSMUSG00000048109	Rbm15	C230088J01Rik|mKIAA1438	RNA binding motif protein 15	protein-coding
Diff_Nuc5908	chr5	21661172	21661311	+	0	NA	intron (NM_011261, intron 4 of 63)	intron (NM_011261, intron 4 of 63)	189282	NM_011261	19699	Mm.425236	NM_011261	ENSMUSG00000042453	Reln	reeler|rl	reelin	protein-coding
Diff_Nuc1755	chr10	25123742	25123881	+	0	NA	intron (NM_001199265, intron 1 of 19)	intron (NM_001199265, intron 1 of 19)	-4363	NM_013511	13822	Mm.306026	NM_013511	ENSMUSG00000019978	Epb41l2	4.1G|AW555191|D10Ertd398e|Epb4.1l2|NBL2	erythrocyte membrane protein band 4.1 like 2	protein-coding
Diff_Nuc10404	chr8	97296682	97296821	+	0	NA	intron (NM_009142, intron 1 of 2)	intron (NM_009142, intron 1 of 2)	671	NM_009142	20312	Mm.103711	NM_009142	ENSMUSG00000031778	Cx3cl1	AB030188|ABCD-3|AI848747|CX3C|Cxc3|D8Bwg0439e|Scyd1	chemokine (C-X3-C motif) ligand 1	protein-coding
Diff_Nuc4311	chr18	30577112	30577251	+	0	NA	Intergenic	Intergenic	144631	NM_181414	225326	Mm.194127	NM_181414	ENSMUSG00000033628	Pik3c3	5330434F23Rik|Vps34	phosphoinositide-3-kinase, class 3	protein-coding
Diff_Nuc2148	chr10	116023927	116024066	+	0	NA	Intergenic	Intergenic	-5429	NM_001037846	72068	Mm.351553	NM_028082	ENSMUSG00000020166	Cnot2	2600016M12Rik|2810470K03Rik|AA537049|AA959607|AW557563|C79650	CCR4-NOT transcription complex, subunit 2	protein-coding
Diff_Nuc2836	chr16	52653982	52654121	+	0	NA	Intergenic	Intergenic	161806	NR_040495	73820	Mm.60493	NR_040495		4930404A05Rik	-	RIKEN cDNA 4930404A05 gene	ncRNA
Diff_Nuc4226	chr18	11952452	11952591	+	0	NA	Intergenic	RSINE1|SINE|B4	-45262	NM_022021	63955	Mm.40717	NM_022021	ENSMUSG00000040957	Cables1	Cables|ik3-1	CDK5 and Abl enzyme substrate 1	protein-coding
Diff_Nuc6168	chr5	77252942	77253081	+	0	NA	Intergenic	Intergenic	-16613	NM_001163793	320827	Mm.101504	NM_001163793	ENSMUSG00000036377	C530008M17Rik	2810489J07Rik|4930529A19Rik|4931405B09Rik|Kiaa1211|mKIAA1211	RIKEN cDNA C530008M17 gene	protein-coding
Diff_Nuc3638	chr14	54880772	54880911	+	0	NA	intron (NM_134076, intron 1 of 6)	intron (NM_134076, intron 1 of 6)	1934	NM_134076	105501	Mm.28771	NM_134076	ENSMUSG00000040997	Abhd4	1110035H23Rik|AI429574|Abh4	abhydrolase domain containing 4	protein-coding
Diff_Nuc7648	chr3	119765842	119765981	+	0	NA	Intergenic	Intergenic	-279605	NM_019550	56195	Mm.29966	NM_019550	ENSMUSG00000028134	Ptbp2	Ptb2|brPTB|nPTB	polypyrimidine tract binding protein 2	protein-coding
Diff_Nuc7139	chr3	8164402	8164541	+	0	NA	Intergenic	RodERV21-int|LTR|ERV1	-209584	NR_040587	75476	Mm.491752	NR_040587	ENSMUSG00000100010	1700010I02Rik	-	RIKEN cDNA 1700010I02 gene	ncRNA
Diff_Nuc4000	chr19	21534502	21534641	+	0	NA	intron (NM_010266, intron 1 of 13)	intron (NM_010266, intron 1 of 13)	12580	NM_010266	14544	Mm.45054	NM_010266	ENSMUSG00000058624	Gda	AU015411|AW047581|GAH	guanine deaminase	protein-coding
Diff_Nuc2301	chr17	19925432	19925571	+	0	NA	intron (NM_001104565, intron 1 of 5)	L1Md_F3|LINE|L1	15174	NM_001104565	627636	Mm.469855	NM_001104565	ENSMUSG00000091771	Vmn2r103	EG627636|Vmn103	vomeronasal 2, receptor 103	protein-coding
Diff_Nuc3798	chr14	94181432	94181571	+	0	NA	intron (NM_001346722, intron 2 of 4)	Lx|LINE|L1	106606	NM_001271800	211712	Mm.37126	NM_001081377	ENSMUSG00000055421	Pcdh9	-	protocadherin 9	protein-coding
Diff_Nuc5082	chr7	117629582	117629721	+	0	NA	intron (NM_177324, intron 3 of 40)	intron (NM_177324, intron 3 of 40)	128783	NM_177324	319934	Mm.102970	NM_177324	ENSMUSG00000038371	Sbf2	4833411B01Rik|AA414977|AI317167|B430219L04Rik|Mtmr13|mMTMH1	SET binding factor 2	protein-coding
Diff_Nuc1115	chr12	112795307	112795446	+	0	NA	Intergenic	Intergenic	16219	NR_033168	100316932	Mm.484709	NR_033168	ENSMUSG00000064493	Snora28	MBI-13	small nucleolar RNA, H/ACA box 28	snoRNA
Diff_Nuc8986	chr1	97589732	97589871	+	0	NA	Intergenic	Intergenic	23294	NR_040479	75381	Mm.417807	NR_040479	ENSMUSG00000100777	4930598F16Rik	-	RIKEN cDNA 4930598F16 gene	ncRNA
Diff_Nuc8070	chr2	58981862	58982001	+	0	NA	intron (NM_001001178, intron 1 of 14)	intron (NM_001001178, intron 1 of 14)	16753	NM_001001178	227933	Mm.330234	NM_177650	ENSMUSG00000036641	Ccdc148	5830402J09	coiled-coil domain containing 148	protein-coding
Diff_Nuc915	chr12	69666122	69666261	+	0	NA	Intergenic	Lx9|LINE|L1	593982	NM_009093	20090	Mm.379006	NM_009093	ENSMUSG00000034892	Rps29	-	ribosomal protein S29	protein-coding
Diff_Nuc2041	chr10	92974302	92974441	+	0	NA	intron (NM_010401, intron 17 of 19)	Lx7|LINE|L1	22858	NM_010401	15109	Mm.13000	NM_010401	ENSMUSG00000020017	Hal	Hsd|his|histidase	histidine ammonia lyase	protein-coding
Diff_Nuc7737	chr3	141577542	141577681	+	0	NA	intron (NM_001277220, intron 1 of 11)	intron (NM_001277220, intron 1 of 11)	16941	NM_001277218	12167	Mm.39089	NM_007560	ENSMUSG00000052430	Bmpr1b	AI385617|ALK-6|AV355320|Acvrlk6|Alk6|BMPR-1B|BMPR-IB|CFK-43a|SKR6	bone morphogenetic protein receptor, type 1B	protein-coding
Diff_Nuc1521	chr11	89879712	89879851	+	0	NA	Intergenic	MLT1G1|LTR|MaLR	-11881	NM_026433	67888	Mm.212428	NM_026433	ENSMUSG00000069763	Tmem100	1810057C19Rik|AV011897	transmembrane protein 100	protein-coding
Diff_Nuc1247	chr11	23419232	23419371	+	0	NA	promoter-TSS (NM_026105)	promoter-TSS (NM_026105)	-106	NM_026105	67358	Mm.87328	NM_026105	ENSMUSG00000020286	1700093K21Rik	-	RIKEN cDNA 1700093K21 gene	protein-coding
Diff_Nuc3878	chr14	115571372	115571511	+	0	NA	intron (NM_175500, intron 2 of 7)	Lx6|LINE|L1	80004	NM_175500	103978	Mm.320791	NM_175500	ENSMUSG00000022112	Gpc5	A230034F01Rik	glypican 5	protein-coding
Diff_Nuc7082	chr4	146938592	146938731	+	0	NA	intron (NM_001014397, intron 3 of 5)	intron (NM_001014397, intron 3 of 5)	11275	NM_001014397	433804	Mm.332047	NM_001014397	ENSMUSG00000065999	Zfp985	Gm13154|OTTMUSG00000010673	zinc finger protein 985	protein-coding
Diff_Nuc5508	chr6	73217852	73217991	+	0	NA	intron (NM_019879, intron 5 of 8)	intron (NM_019879, intron 5 of 8)	19422	NM_019879	56451	Mm.29845	NM_019879	ENSMUSG00000052738	Suclg1	1500000I01Rik|Sucla1	succinate-CoA ligase, GDP-forming, alpha subunit	protein-coding
Diff_Nuc5126	chr7	128781412	128781551	+	0	NA	Intergenic	PB1D9|SINE|Alu	48064	NR_131051	69407		NR_131051	ENSMUSG00000108409	1700025J12Rik	-	RIKEN cDNA 1700025J12 gene	ncRNA
Diff_Nuc849	chr12	55578942	55579081	+	0	NA	Intergenic	L1ME3|LINE|L1	-86706	NR_033689	665239	Mm.26856	NR_033689		Gm7550	EG665239|Gm666	predicted gene 7550	ncRNA
Diff_Nuc7694	chr3	130725082	130725221	+	0	NA	Intergenic	Intergenic	-88064	NM_010703	16842	Mm.255219	NM_010703	ENSMUSG00000027985	Lef1	3000002B05|AI451430|Lef-1	lymphoid enhancer binding factor 1	protein-coding
Diff_Nuc727	chr12	27755962	27756101	+	0	NA	Intergenic	Intergenic	43829	NR_045052	100504347	Mm.130500	NR_045052		Gm20187	-	predicted gene, 20187	ncRNA
Diff_Nuc4937	chr7	88368912	88369051	+	0	NA	intron (NM_008803, intron 1 of 21)	RMER19A|LTR|ERVK	10291	NM_008803	18584	Mm.371577	NM_008803	ENSMUSG00000025584	Pde8a	AI551852|Pde8	phosphodiesterase 8A	protein-coding
Diff_Nuc4344	chr18	35745362	35745501	+	0	NA	intron (NM_010771, intron 12 of 14)	B4|SINE|B4	-12890	NM_026420	67869	Mm.126534	NM_026420	ENSMUSG00000037058	Paip2	2310050K10Rik|AU045972	polyadenylate-binding protein-interacting protein 2	protein-coding
Diff_Nuc8729	chr1	40484342	40484481	+	0	NA	Intergenic	MTD|LTR|MaLR	-2004	NM_001294171	17082	Mm.289824	NM_010743	ENSMUSG00000026069	Il1rl1	DER4|Fit-1|Ly84|ST2L|St2|St2-rs1|T1|T1/ST2	interleukin 1 receptor-like 1	protein-coding
Diff_Nuc10375	chr8	90627382	90627521	+	0	NA	Intergenic	ID_B1|SINE|B4	-15207	NM_029074	382030	Mm.216574	NM_029074	ENSMUSG00000036810	Cnep1r1	5033428A16Rik|NEP1-R1|Tmem188	CTD nuclear envelope phosphatase 1 regulatory subunit 1	protein-coding
Diff_Nuc4240	chr18	14461502	14461641	+	0	NA	Intergenic	Intergenic	70756	NR_045373	74529	Mm.400519	NR_045373		8430422H06Rik	-	RIKEN cDNA 8430422H06 gene	ncRNA
Diff_Nuc9991	chr9	118955372	118955511	+	0	NA	Intergenic	Intergenic	-6455	NM_011700	22351	Mm.83817	NM_011700	ENSMUSG00000038775	Vill	Villp	villin-like	protein-coding
Diff_Nuc9228	chr1	155783152	155783291	+	0	NA	Intergenic	Intergenic	36162	NM_008131	14645	Mm.210745	NM_008131	ENSMUSG00000026473	Glul	GS|Glns	glutamate-ammonia ligase (glutamine synthetase)	protein-coding
Diff_Nuc4907	chr7	82472902	82473041	+	0	NA	intron (NR_045814, intron 2 of 2)	intron (NR_045814, intron 2 of 2)	-18823	NM_153579	64176	Mm.273082	NM_153579	ENSMUSG00000053025	Sv2b	A830038F04Rik|AI850768|mKIAA0735	synaptic vesicle glycoprotein 2 b	protein-coding
Diff_Nuc2917	chr16	69701702	69701841	+	0	NA	Intergenic	L1Md_T|LINE|L1	98855	NR_130991	78110	Mm.211406	NR_130991	ENSMUSG00000107073	4930428D20Rik	-	RIKEN cDNA 4930428D20 gene	ncRNA
Diff_Nuc8399	chr2	135823742	135823881	+	0	NA	intron (NM_013829, intron 31 of 36)	intron (NM_013829, intron 31 of 36)	-59852	NM_029530	76161	Mm.41638	NM_029530	ENSMUSG00000027270	Lamp5	3110035N03Rik|6330527O06Rik|BAD-LAMP|LAMP-5	lysosomal-associated membrane protein family, member 5	protein-coding
Diff_Nuc5526	chr6	77315912	77316051	+	0	NA	intron (NM_009819, intron 7 of 18)	intron (NM_009819, intron 7 of 18)	16488	NR_045141	70753	Mm.490700	NR_045141	ENSMUSG00000108077	6330415B21Rik	-	RIKEN cDNA 6330415B21 gene	ncRNA
Diff_Nuc5221	chr7	150403032	150403171	+	0	NA	non-coding (NR_001461, exon 1 of 1)	non-coding (NR_001461, exon 1 of 1)	79351	NR_001461	63830	Mm.356096	NR_001461	ENSMUSG00000101609	Kcnq1ot1	Kvlqt1-as|Lit1|Tssc8	KCNQ1 overlapping transcript 1	ncRNA
Diff_Nuc1491	chr11	81359032	81359171	+	0	NA	intron (NM_001034013, intron 1 of 9)	IAPLTR1_Mm|LTR|ERVK	27940	NM_001033765	237880	Mm.435528	NM_001033765		1700071K01Rik	-	RIKEN cDNA 1700071K01 gene	protein-coding
Diff_Nuc6293	chr5	105430442	105430581	+	0	NA	Intergenic	Intergenic	-18775	NM_030239	27405	Mm.389663	NM_030239	ENSMUSG00000029299	Abcg3	Abcp2|Mxr2	ATP-binding cassette, sub-family G (WHITE), member 3	protein-coding
Diff_Nuc3113	chr15	27911912	27912051	+	0	NA	intron (NM_001081302, intron 1 of 56)	intron (NM_001081302, intron 1 of 56)	43622	NM_001081302	223435	Mm.485422	NM_001081302	ENSMUSG00000022263	Trio	6720464I07Rik|AA408740|Solo	triple functional domain (PTPRF interacting)	protein-coding
Diff_Nuc1512	chr11	88554282	88554421	+	0	NA	intron (NM_001201341, intron 5 of 7)	(GA)n|Simple_repeat|Simple_repeat	25192	NM_054043	76626	Mm.400451	NM_054043	ENSMUSG00000069769	Msi2	1700105C15Rik|AI451722|AI563628|AW489193|Msi2h	musashi RNA-binding protein 2	protein-coding
Diff_Nuc9123	chr1	131097662	131097801	+	0	NA	Intergenic	MTE2a|LTR|MaLR	-72150	NM_172485	210417	Mm.380518	NM_172485	ENSMUSG00000042581	Thsd7b	1700074E13Rik|B930082A18|D130067I03Rik	thrombospondin, type I, domain containing 7B	protein-coding
Diff_Nuc3331	chr15	73028622	73028761	+	0	NA	Intergenic	Lx6|LINE|L1	-13314	NM_153178	239528	Mm.23095	NM_153178	ENSMUSG00000036698	Ago2	1110029L17Rik|2310051F07Rik|AI225898|AL022874|AW546247|ENSMUSG00000072493|Eif2c2|Gerp95|Gm10365|mKIAA4215	argonaute RISC catalytic subunit 2	protein-coding
Diff_Nuc405	chr13	67144112	67144251	+	0	NA	intron (NM_001166218, intron 3 of 3)	intron (NM_001166218, intron 3 of 3)	-10840	NR_045851	71226	Mm.399574	NR_045851		4933433G19Rik	-	RIKEN cDNA 4933433G19 gene	ncRNA
Diff_Nuc2662	chr16	18423362	18423501	+	0	NA	intron (NM_007744, intron 1 of 4)	ID_B1|SINE|B4	-3079	NM_013711	26462	Mm.390906	NM_013711	ENSMUSG00000075704	Txnrd2	AA118373|ESTM573010|TGR|Tr3|Trxr2|Trxrd2	thioredoxin reductase 2	protein-coding
Diff_Nuc9140	chr1	135013932	135014071	+	0	NA	Intergenic	RMER6A|LTR|ERVK	-13742	NM_133819	108954	Mm.293628	NM_133819	ENSMUSG00000046062	Ppp1r15b	1810033K10Rik|AI606441|C530022L24Rik|CReP	protein phosphatase 1, regulatory (inhibitor) subunit 15b	protein-coding
Diff_Nuc3066	chr15	15225762	15225901	+	0	NA	Intergenic	Lx3A|LINE|L1	-1482025	NM_009869	12565	Mm.439758	NM_009869	ENSMUSG00000025370	Cdh9	-	cadherin 9	protein-coding
Diff_Nuc2706	chr16	27091492	27091631	+	0	NA	Intergenic	Lx8|LINE|L1	-99823	NM_001285918	239789	Mm.326909	NM_001013761	ENSMUSG00000068428	Gmnc	Gemc1|Gm1778|Gm606	geminin coiled-coil domain containing	protein-coding
Diff_Nuc1947	chr10	70838602	70838741	+	0	NA	intron (NM_027184, intron 4 of 5)	(TCTA)n|Simple_repeat|Simple_repeat	28160	NM_027184	69718	Mm.245867	NM_027184	ENSMUSG00000060733	Ipmk	2410017C19Rik|AA408208|Impk	inositol polyphosphate multikinase	protein-coding
Diff_Nuc9374	chr1	182514932	182515071	+	0	NA	intron (NM_007415, intron 7 of 22)	L1MC1|LINE|L1	-2331	NR_105869	102466761		NR_105869	ENSMUSG00000098926	Mir6904	Gm27426|mmu-mir-6904	microRNA 6904	ncRNA
Diff_Nuc3577	chr14	38957682	38957821	+	0	NA	Intergenic	Intergenic	-753839	NR_045713	75170	Mm.372967	NR_045713	ENSMUSG00000093528	Nrg3os	4930529F24Rik	neuregulin 3, opposite strand	ncRNA
Diff_Nuc3246	chr15	57397422	57397561	+	0	NA	Intergenic	Intergenic	-88311	NM_172378	210463	Mm.26555	NM_172378	ENSMUSG00000022366	Slc22a22	oat-pg	solute carrier family 22 (organic cation transporter), member 22	protein-coding
Diff_Nuc2624	chr16	10360182	10360321	+	0	NA	intron (NM_001291001, intron 6 of 6)	ID|SINE|ID	-28873	NR_126064	381033	Mm.263108	NR_126064		Gm1600	Gm1776	predicted gene 1600	ncRNA
Diff_Nuc8377	chr2	131964412	131964551	+	0	NA	intron (NM_018824, intron 1 of 15)	intron (NM_018824, intron 1 of 15)	6363	NM_018824	54338	Mm.103581	NM_018824	ENSMUSG00000027340	Slc23a2	AI844736|NBTL1|SVCT2|Slc23a1|YSPL2|YSPL3|mKIAA0238	solute carrier family 23 (nucleobase transporters), member 2	protein-coding
Diff_Nuc6304	chr5	108583142	108583281	+	0	NA	intron (NM_028481, intron 6 of 28)	intron (NM_028481, intron 6 of 28)	21278	NM_028481	73254	Mm.441231	NM_028481	ENSMUSG00000056531	Ccdc18	1700021E15Rik|4932411G06Rik|NY-SAR-41	coiled-coil domain containing 18	protein-coding
Diff_Nuc1656	chr11	120893812	120893951	+	0	NA	Intergenic	Intergenic	6911	NM_009854	12516	Mm.4100	NM_009854	ENSMUSG00000025163	Cd7	-	CD7 antigen	protein-coding
Diff_Nuc4423	chr18	50233282	50233421	+	0	NA	intron (NM_134131, intron 1 of 1)	intron (NM_134131, intron 1 of 1)	20415	NM_134131	106869	Mm.27740	NM_134131	ENSMUSG00000062210	Tnfaip8	AA987150|E130304C20Rik|ENSMUSG00000073567|Gg2-1|Gm10539|Nded|Ssc-2|Tipe	tumor necrosis factor, alpha-induced protein 8	protein-coding
Diff_Nuc5866	chr5	13414767	13414906	+	0	NA	intron (NM_009152, intron 1 of 16)	intron (NM_009152, intron 1 of 16)	15527	NM_009152	20346	Mm.372039	NM_009152	ENSMUSG00000028883	Sema3a	Hsema-I|SEMA1|SemD|Semad|coll-1	sema domain, immunoglobulin domain (Ig), short basic domain, secreted, (semaphorin) 3A	protein-coding
Diff_Nuc6248	chr5	95226042	95226181	+	0	NA	Intergenic	L1_Mus1|LINE|L1	-68430	NM_001200055	100041253	Mm.422705	NM_001200055	ENSMUSG00000095996	Gm16513	-	predicted gene, Gm16513	protein-coding
Diff_Nuc2918	chr16	69744912	69745051	+	0	NA	Intergenic	RMER17D2|LTR|ERVK	55645	NR_130991	78110	Mm.211406	NR_130991	ENSMUSG00000107073	4930428D20Rik	-	RIKEN cDNA 4930428D20 gene	ncRNA
Diff_Nuc9212	chr1	153339587	153339726	+	0	NA	intron (NM_011277, intron 1 of 6)	intron (NM_011277, intron 1 of 6)	8297	NM_011277	19821	Mm.474038	NM_011277	ENSMUSG00000026484	Rnf2	AI326319|AI450156|AU019207|Ring1B|dinG	ring finger protein 2	protein-coding
Diff_Nuc9543	chr9	20656202	20656341	+	0	NA	Intergenic	Intergenic	-16815	NM_175687	319278	Mm.249932	NM_175687	ENSMUSG00000038884	A230050P20Rik	RyDEN	RIKEN cDNA A230050P20 gene	protein-coding
Diff_Nuc2166	chr10	119812872	119813011	+	0	NA	intron (NM_010441, intron 3 of 4)	L1MB7|LINE|L1	-13638	NR_040626	320626	Mm.446091	NR_040626	ENSMUSG00000090191	9230105E05Rik	-	RIKEN cDNA 9230105E05 gene	ncRNA
Diff_Nuc10301	chr8	73704452	73704591	+	0	NA	intron (NR_131056, intron 2 of 4)	RLTR45-int|LTR|ERVK	26326	NR_131056	330796	Mm.258257	NR_131056		Gm38415	E230016D10	predicted gene, 38415	ncRNA
Diff_Nuc8318	chr2	119450552	119450691	+	0	NA	intron (NM_001042652, intron 2 of 9)	intron (NM_001042652, intron 2 of 9)	-6380	NM_001042653	70645	Mm.246412	NM_001042653	ENSMUSG00000072980	Oip5	5730547N13Rik|Lint-25|Ms18b	Opa interacting protein 5	protein-coding
Diff_Nuc7707	chr3	134578372	134578511	+	0	NA	intron (NM_021382, intron 3 of 4)	L1_Mur3|LINE|L1	86470	NM_021382	21338	Mm.103810	NM_021382	ENSMUSG00000028172	Tacr3	Nk3r|Nkr|Tac3r	tachykinin receptor 3	protein-coding
Diff_Nuc1731	chr10	20099582	20099721	+	0	NA	Intergenic	Intergenic	32026	NM_027930	71804	Mm.262151	NM_027930	ENSMUSG00000019992	Mtfr2	2610016C23Rik|4933412C16Rik|Dufd1|Fam54a	mitochondrial fission regulator 2	protein-coding
Diff_Nuc8473	chr2	152062032	152062171	+	0	NA	intron (NM_007788, intron 1 of 12)	PB1D9|SINE|Alu	9525	NM_007788	12995	Mm.23692	NM_007788	ENSMUSG00000074698	Csnk2a1	Csnk2a1-rs4	casein kinase 2, alpha 1 polypeptide	protein-coding
Diff_Nuc8224	chr2	98506792	98506931	+	0	NA	Intergenic	GSAT_MM|Satellite|Satellite	1199047	NM_178725	241568	Mm.241682	NM_178725	ENSMUSG00000050587	Lrrc4c	6430556C10Rik|NGL-1	leucine rich repeat containing 4C	protein-coding
Diff_Nuc8922	chr1	83771642	83771781	+	0	NA	Intergenic	ORR1A2|LTR|MaLR	-366936	NM_172430	77629	Mm.154303	NM_172430	ENSMUSG00000026163	Sphkap	4930544G21Rik|A930009L15Rik|AI852220|SKIP|mKIAA1678	SPHK1 interactor, AKAP domain containing	protein-coding
Diff_Nuc6987	chr4	125354602	125354741	+	0	NA	intron (NM_001081097, intron 10 of 15)	intron (NM_001081097, intron 10 of 15)	172678	NR_035409	100124641		NR_035409	ENSMUSG00000076033	Mir692-3	Mir692-2b|Mirn692-2b|mmu-mir-692-3	microRNA 692-3	ncRNA
Diff_Nuc1338	chr11	46980902	46981041	+	0	NA	intron (NM_011891, intron 3 of 7)	intron (NM_011891, intron 3 of 7)	211833	NM_011891	24052	Mm.338890	NM_011891	ENSMUSG00000020354	Sgcd	35kDa|delta-SG	sarcoglycan, delta (dystrophin-associated glycoprotein)	protein-coding
Diff_Nuc2018	chr10	88367992	88368131	+	0	NA	intron (NM_145423, intron 6 of 14)	intron (NM_145423, intron 6 of 14)	19324	NM_145423	216225	Mm.77381	NM_145423	ENSMUSG00000020062	Slc5a8	Ait|SMCT	solute carrier family 5 (iodide transporter), member 8	protein-coding
Diff_Nuc8485	chr2	154896352	154896491	+	0	NA	intron (NM_016661, intron 1 of 9)	intron (NM_016661, intron 1 of 9)	3812	NM_016661	269378	Mm.330692	NM_016661	ENSMUSG00000027597	Ahcy	AA987153|AL024110|CuBP|SAHH	S-adenosylhomocysteine hydrolase	protein-coding
Diff_Nuc242	chr13	31215662	31215801	+	0	NA	Intergenic	Intergenic	117224	NR_045957	73924	Mm.417825	NR_045957	ENSMUSG00000087460	4930401O12Rik	-	RIKEN cDNA 4930401O12 gene	ncRNA
Diff_Nuc4808	chr7	57815272	57815411	+	0	NA	intron (NR_045928, intron 2 of 3)	intron (NR_045928, intron 2 of 3)	15913	NR_045928	73515	Mm.437440	NR_045928	ENSMUSG00000085265	Nell1os	1700081H22Rik	NEL-like 1, opposite strand	ncRNA
Diff_Nuc5694	chr6	117897302	117897441	+	0	NA	Intergenic	Intergenic	-10018	NM_001173372	108017	Mm.250392	NM_033648	ENSMUSG00000004988	Fxyd4	0610008I02Rik|AI267073|Chif	FXYD domain-containing ion transport regulator 4	protein-coding
Diff_Nuc5384	chr6	40431062	40431201	+	0	NA	3' UTR (NM_212468, exon 7 of 7)	3' UTR (NM_212468, exon 7 of 7)	9664	NM_001286663	381760	Mm.276356	NM_028358	ENSMUSG00000029911	Ssbp1	2810480P10Rik|G630031O20Rik|MtSSB|mtDBP	single-stranded DNA binding protein 1	protein-coding
Diff_Nuc3944	chr19	8220912	8221051	+	0	NA	Intergenic	L1_Mus3|LINE|L1	-14509	NM_001013820	434674	Mm.24053	NM_001013820	ENSMUSG00000063590	Slc22a28	EG434674|Gm5631	solute carrier family 22, member 28	protein-coding
Diff_Nuc2978	chr16	87505882	87506021	+	0	NA	Intergenic	B1_Mus1|SINE|Alu	9633	NR_040375	414095	Mm.166361	NR_040375	ENSMUSG00000093606	B130034C11Rik	-	RIKEN cDNA B130034C11 gene	ncRNA
Diff_Nuc8624	chr1	14827082	14827221	+	0	NA	Intergenic	Lx7|LINE|L1	-81104	NM_010827	17681	Mm.5820	NM_010827	ENSMUSG00000025930	Msc	MyoR|bHLHa22	musculin	protein-coding
Diff_Nuc2634	chr16	13257572	13257711	+	0	NA	intron (NM_001122667, intron 1 of 16)	intron (NM_001122667, intron 1 of 16)	1067	NM_001122667	239719	Mm.270643	NM_153588	ENSMUSG00000009569	Mkl2	ENSMUSG00000075401|Gt4-1|MRTF-B|Mrtfb|mKIAA1243	MKL/myocardin-like 2	protein-coding
Diff_Nuc734	chr12	29273062	29273201	+	0	NA	Intergenic	Intergenic	-5783	NM_053156	94041	Mm.84927	NM_053156	ENSMUSG00000020636	Allc	1700012B22Rik|Alc	allantoicase	protein-coding
Diff_Nuc3828	chr14	102959702	102959841	+	0	NA	Intergenic	L1Md_T|LINE|L1	422078	NR_039592	100628599		NR_039592	ENSMUSG00000092901	Mir5130	mir-5130|mmu-mir-5130|mu-mir-5130	microRNA 5130	ncRNA
Diff_Nuc8966	chr1	91638332	91638471	+	0	NA	intron (NM_001037136, intron 10 of 16)	intron (NM_001037136, intron 10 of 16)	-57934	NR_015540	74403	Mm.444291	NR_015540		4933400F21Rik	1700091C04Rik|4930565K10Rik	RIKEN cDNA 4933400F21 gene	ncRNA
Diff_Nuc8044	chr2	51350882	51351021	+	0	NA	Intergenic	L1_Mur3|LINE|L1	-57531	NR_130155	73375	Mm.396227	NR_130155	ENSMUSG00000086007	1700057H21Rik	-	RIKEN cDNA 1700057H21 gene	ncRNA
Diff_Nuc10361	chr8	87597622	87597761	+	0	NA	intron (NM_001039514, intron 5 of 8)	intron (NM_001039514, intron 5 of 8)	2035	NM_001039514	330817	Mm.193086	NM_201408	ENSMUSG00000060038	Dhps	Dhs	deoxyhypusine synthase	protein-coding
Diff_Nuc9768	chr9	67909552	67909691	+	0	NA	Intergenic	Lx|LINE|L1	-36100	NR_045745	434412	Mm.490707	NR_045745	ENSMUSG00000111841	Gm20745	-	predicted gene, 20745	ncRNA
Diff_Nuc10200	chr8	47914442	47914581	+	0	NA	intron (NM_008391, intron 6 of 8)	intron (NM_008391, intron 6 of 8)	89412	NM_008391	16363	Mm.1149	NM_008391	ENSMUSG00000031627	Irf2	9830146E22Rik|AI646973|Irf-2	interferon regulatory factor 2	protein-coding
Diff_Nuc9749	chr9	63905202	63905341	+	0	NA	Intergenic	Intergenic	7635	NR_040713	68697	Mm.491042	NR_040713	ENSMUSG00000097036	1110036E04Rik	-	RIKEN cDNA 1110036E04 gene	ncRNA
Diff_Nuc10081	chr8	18934582	18934721	+	0	NA	intron (NM_176951, intron 6 of 6)	intron (NM_176951, intron 6 of 6)	16220	NM_001286469	319581	Mm.111354	NM_176951	ENSMUSG00000039814	Xkr5	5430438H03Rik|XRG5	X-linked Kx blood group related 5	protein-coding
Diff_Nuc9063	chr1	113878702	113878841	+	0	NA	Intergenic	Intergenic	-117276	NM_001081316	319901	Mm.103468	NM_001081316	ENSMUSG00000038702	Dsel	9330132E09Rik|DS-epi2	dermatan sulfate epimerase-like	protein-coding
Diff_Nuc6129	chr5	66111642	66111781	+	0	NA	Intergenic	Intergenic	-22616	NM_001081321	71521	Mm.278974	NM_027818	ENSMUSG00000029202	Pds5a	9030416H16Rik|E230024D05Rik|mKIAA0648	PDS5 cohesin associated factor A	protein-coding
Diff_Nuc3838	chr14	106088302	106088441	+	0	NA	Intergenic	Intergenic	-65384	NR_105814	102465207		NR_105814	ENSMUSG00000098780	Mir6390	Gm27562|mmu-mir-6390	microRNA 6390	ncRNA
Diff_Nuc4262	chr18	17910332	17910471	+	0	NA	Intergenic	(TC)n|Simple_repeat|Simple_repeat	-170902	NR_045374	75162	Mm.60874	NR_045374		4930545E07Rik	-	RIKEN cDNA 4930545E07 gene	ncRNA
Diff_Nuc4384	chr18	41622052	41622191	+	0	NA	Intergenic	L1ME2z|LINE|L1	488727	NM_029942	77619	Mm.30649	NM_029942	ENSMUSG00000056671	Prelid2	1700003A01Rik|C330008K14Rik	PRELI domain containing 2	protein-coding
Diff_Nuc2006	chr10	85562702	85562841	+	0	NA	intron (NR_038024, intron 1 of 2)	intron (NR_038024, intron 1 of 2)	4172	NR_038024	78170	Mm.444790	NR_038024		4930486F22Rik	-	RIKEN cDNA 4930486F22 gene	ncRNA
Diff_Nuc1505	chr11	87224062	87224201	+	0	NA	intron (NM_031386, intron 1 of 30)	B1_Mur1|SINE|Alu	5564	NM_031386	83560	Mm.440758	NM_031386	ENSMUSG00000010342	Tex14	C85585	testis expressed gene 14	protein-coding
Diff_Nuc969	chr12	80453452	80453591	+	0	NA	intron (NM_009014, intron 7 of 10)	intron (NM_009014, intron 7 of 10)	55183	NM_001252562	19363	Mm.341756	NM_009014	ENSMUSG00000059060	Rad51b	AI553500|R51H2|Rad51l1|mREC2	RAD51 paralog B	protein-coding
Diff_Nuc5134	chr7	129693912	129694051	+	0	NA	intron (NM_008855, intron 9 of 16)	B1_Mm|SINE|Alu	-121277	NM_019430	54376	Mm.444212	NM_019430	ENSMUSG00000066189	Cacng3	-	calcium channel, voltage-dependent, gamma subunit 3	protein-coding
Diff_Nuc536	chr13	99484242	99484381	+	0	NA	Intergenic	B1_Mm|SINE|Alu	-19525	NM_001025606	380863	Mm.28264	NM_001025606	ENSMUSG00000052485	Tmem171	Gm905	transmembrane protein 171	protein-coding
Diff_Nuc1224	chr11	20112312	20112451	+	0	NA	intron (NM_008996, intron 1 of 5)	B2_Mm2|SINE|B2	10776	NM_008996	19324	Mm.271944	NM_008996	ENSMUSG00000020149	Rab1a	Gtbp|Rab-1|Rab1|Ypt1|mKIAA3012	RAB1A, member RAS oncogene family	protein-coding
Diff_Nuc5239	chr6	5327642	5327781	+	0	NA	Intergenic	Intergenic	-5675	NM_023048	65255	Mm.51340	NM_023048	ENSMUSG00000042607	Asb4	8430401O13Rik|AV117194|AW060255	ankyrin repeat and SOCS box-containing 4	protein-coding
Diff_Nuc7069	chr4	146468712	146468851	+	0	NA	Intergenic	L1VL4|LINE|L1	-26236	NR_045446	71270	Mm.460830	NR_045446	ENSMUSG00000093617	4933438K21Rik	-	RIKEN cDNA 4933438K21 gene	ncRNA
Diff_Nuc5800	chr6	144243332	144243471	+	0	NA	Intergenic	Intergenic	-85313	NM_001243163	20678	Mm.1752	NM_011444	ENSMUSG00000041540	Sox5	A730017D01Rik|AI528773	SRY (sex determining region Y)-box 5	protein-coding
Diff_Nuc10526	chr8	129266632	129266771	+	0	NA	Intergenic	B4A|SINE|B4	-149365	NM_001164598	270110	Mm.334918	NM_001164598	ENSMUSG00000051495	Irf2bp2	E130305N23Rik|IRF-2BP2	interferon regulatory factor 2 binding protein 2	protein-coding
Diff_Nuc6197	chr5	84571382	84571521	+	0	NA	intron (NM_007937, intron 5 of 15)	intron (NM_007937, intron 5 of 15)	274956	NM_007937	13839	Mm.137991	NM_007937	ENSMUSG00000029245	Epha5	AI854630|AW125296|Cek7|Ehk1|Els1|Hek7|Rek7|bsk	Eph receptor A5	protein-coding
Diff_Nuc9787	chr9	70395032	70395171	+	0	NA	intron (NM_026337, intron 2 of 20)	intron (NM_026337, intron 2 of 20)	4424	NM_025690	66660	Mm.22379	NM_025690	ENSMUSG00000032212	Sltm	5730455C01Rik|5730555F13Rik|9130215G10Rik|Met	SAFB-like, transcription modulator	protein-coding
Diff_Nuc3463	chr14	13270882	13271021	+	0	NA	intron (NM_001042617, intron 27 of 30)	intron (NM_001042617, intron 27 of 30)	-92572	NM_080433	54713	Mm.34644	NM_080433	ENSMUSG00000021743	Fezf2	AI451466|AI852056|Fez|Fezl|Zfp312	Fez family zinc finger 2	protein-coding
Diff_Nuc7629	chr3	115566652	115566791	+	0	NA	Intergenic	Intergenic	24256	NR_027894	68161	Mm.392043	NR_015487	ENSMUSG00000054426	A930005H10Rik	-	RIKEN cDNA A930005H10 gene	ncRNA
Diff_Nuc2771	chr16	38506462	38506601	+	0	NA	intron (NM_024273, intron 4 of 6)	ID_B1|SINE|B4	16216	NM_024273	76916	Mm.132231	NM_024273	ENSMUSG00000002846	Timmdc1	2810021C21Rik|4930455C21Rik|AV135763	translocase of inner mitochondrial membrane domain containing 1	protein-coding
Diff_Nuc6378	chr5	132128402	132128541	+	0	NA	intron (NM_177047, intron 5 of 19)	RMER15|LTR|ERVL	-227668	NR_040704	75369	Mm.389696	NR_040704	ENSMUSG00000105773	4930563F08Rik	-	RIKEN cDNA 4930563F08 gene	ncRNA
Diff_Nuc4962	chr7	92318332	92318471	+	0	NA	Intergenic	Lx|LINE|L1	-13989	NM_001102579	620672	Mm.469836	NM_001102579	ENSMUSG00000095664	Vmn2r67	EG620672	vomeronasal 2, receptor 67	protein-coding
Diff_Nuc620	chr13	117134552	117134691	+	0	NA	Intergenic	Lx8|LINE|L1	-34725	NM_021459	16392	Mm.42242	NM_021459	ENSMUSG00000042258	Isl1	-	ISL1 transcription factor, LIM/homeodomain	protein-coding
Diff_Nuc627	chr12	3109862	3110001	+	0	NA	Intergenic	GSAT_MM|Satellite|Satellite	-125860	NR_015551	74173	Mm.309774	NM_028796	ENSMUSG00000079179	Rab10os	1700012B15Rik|1810036A22Rik	RAB10, member RAS oncogene family, opposite strand	ncRNA
Diff_Nuc6918	chr4	109728052	109728191	+	0	NA	Intergenic	L1Md_F3|LINE|L1	77491	NM_172296	242620	Mm.32825	NM_172296	ENSMUSG00000047143	Dmrta2	Dmrt5	doublesex and mab-3 related transcription factor like family A2	protein-coding
Diff_Nuc5244	chr6	5968292	5968431	+	0	NA	intron (NM_010063, intron 16 of 16)	B1_Mur3|SINE|Alu	-40968	NR_040255	72249	Mm.443268	NR_040255	ENSMUSG00000085416	1700019G24Rik	-	RIKEN cDNA 1700019G24 gene	ncRNA
Diff_Nuc3683	chr14	64995592	64995731	+	0	NA	intron (NM_026322, intron 6 of 10)	intron (NM_026322, intron 6 of 10)	40132	NM_001253716	110265	Mm.26713	NM_026322	ENSMUSG00000054733	Msra	2310045J23Rik|6530413P12Rik|MSR-A	methionine sulfoxide reductase A	protein-coding
Diff_Nuc5629	chr6	100473812	100473951	+	0	NA	Intergenic	L2b|LINE|L2	-3513	NR_040525	73395	Mm.69413	NR_040525	ENSMUSG00000101553	1700049E22Rik	-	RIKEN cDNA 1700049E22 gene	ncRNA
Diff_Nuc4784	chr7	52964252	52964391	+	0	NA	TTS (NM_020011)	TTS (NM_020011)	3704	NM_016974	13170	Mm.24222	NM_016974	ENSMUSG00000059824	Dbp	-	D site albumin promoter binding protein	protein-coding
Diff_Nuc7649	chr3	119783702	119783841	+	0	NA	Intergenic	ORR1B2-int|LTR|MaLR	-297465	NM_019550	56195	Mm.29966	NM_019550	ENSMUSG00000028134	Ptbp2	Ptb2|brPTB|nPTB	polypyrimidine tract binding protein 2	protein-coding
Diff_Nuc4474	chr18	60739682	60739821	+	0	NA	intron (NM_133363, intron 3 of 6)	ID_B1|SINE|B4	11619	NM_133363	170947	Mm.159257	NM_133363	ENSMUSG00000049173	Myoz3	4833419K08Rik|Fatz-3	myozenin 3	protein-coding
Diff_Nuc4619	chr7	5493692	5493831	+	0	NA	Intergenic	L1_Mur2|LINE|L1	2940	NM_001166732	636697	Mm.480267	NM_001166732	ENSMUSG00000090794	Vmn1r60	EG636697|Gm7184	vomeronasal 1 receptor 60	protein-coding
Diff_Nuc4228	chr18	12077742	12077881	+	0	NA	intron (NM_001146287, intron 4 of 9)	intron (NM_001146287, intron 4 of 9)	-78864	NR_035447	100316686		NR_035447	ENSMUSG00000084565	Mir1901	Mirn1901|mmu-mir-1901	microRNA 1901	ncRNA
Diff_Nuc2313	chr17	25595902	25596041	+	0	NA	Intergenic	Intergenic	-12564	NM_027951	71840	Mm.282330	NM_027951	ENSMUSG00000024175	Tekt4	1700010L19Rik	tektin 4	protein-coding
Diff_Nuc5657	chr6	107778982	107779121	+	0	NA	Intergenic	RMER15|LTR|ERVL	-235988	NM_001276356	74729	Mm.56539	NM_178391	ENSMUSG00000034639	Setmar	5830404F24Rik|Etet2	SET domain without mariner transposase fusion	protein-coding
Diff_Nuc9263	chr1	162105772	162105911	+	0	NA	Intergenic	Intergenic	-19505	NM_025474	64659	Mm.29599	NM_025474	ENSMUSG00000058267	Mrps14	1810032L21Rik|AL022847|Rpms14	mitochondrial ribosomal protein S14	protein-coding
Diff_Nuc9209	chr1	152868042	152868181	+	0	NA	Intergenic	Intergenic	-27546	NM_001024720	545370	Mm.379425	NM_001024720	ENSMUSG00000066842	Hmcn1	EG545370|FIBL-6|Gm201	hemicentin 1	protein-coding
Diff_Nuc963	chr12	79425302	79425441	+	0	NA	intron (NM_172952, intron 1 of 23)	intron (NM_172952, intron 1 of 23)	97729	NM_145965	268566	Mm.341742	NM_145965	ENSMUSG00000047454	Gphn	5730552E08Rik|AI662856|BC027112|C230040D23|GPH|GPHRYN|geph	gephyrin	protein-coding
Diff_Nuc417	chr13	69712212	69712351	+	0	NA	TTS (NM_175283)	TTS (NM_175283)	38060	NM_175283	78925	Mm.451912	NM_175283	ENSMUSG00000021594	Srd5a1	0610031P22Rik|4930435F02Rik|S5AR 1|Srd5a-1	steroid 5 alpha-reductase 1	protein-coding
Diff_Nuc1803	chr10	36979962	36980101	+	0	NA	Intergenic	Intergenic	-121299	NM_008538	17118	Mm.30059	NM_008538	ENSMUSG00000069662	Marcks	Macs|PKCSL	myristoylated alanine rich protein kinase C substrate	protein-coding
Diff_Nuc8640	chr1	20501452	20501591	+	0	NA	intron (NM_153179, intron 33 of 66)	intron (NM_153179, intron 33 of 66)	106617	NM_153179	241035	Mm.249253	NM_153179	ENSMUSG00000043760	Pkhd1	AI118496|AI182499|FPC|Tigm1	polycystic kidney and hepatic disease 1	protein-coding
Diff_Nuc3485	chr14	17526262	17526401	+	0	NA	intron (NM_001289760, intron 2 of 9)	intron (NM_001289760, intron 2 of 9)	-118341	NM_001289762	218772	Mm.259318	NM_011243	ENSMUSG00000017491	Rarb	A830025K23|Hap|Nr1b2	retinoic acid receptor, beta	protein-coding
Diff_Nuc5907	chr5	21453352	21453491	+	0	NA	intron (NM_011261, intron 44 of 63)	intron (NM_011261, intron 44 of 63)	-81999	NM_030727	80979	Mm.160370	NM_030727	ENSMUSG00000029015	Slc26a5	Pres|prestin	solute carrier family 26, member 5	protein-coding
Diff_Nuc1408	chr11	63544962	63545101	+	0	NA	Intergenic	Intergenic	190755	NM_018805	54710	Mm.274426	NM_018805	ENSMUSG00000070407	Hs3st3b1	3-OST-3B|3OST3B1|3Ost3b|AU041882|AW536289|Hs3st3b|m3-OST-3B	heparan sulfate (glucosamine) 3-O-sulfotransferase 3B1	protein-coding
Diff_Nuc9599	chr9	31386462	31386601	+	0	NA	Intergenic	Intergenic	-114708	NM_144936	235135	Mm.390134	NM_144936	ENSMUSG00000041737	Tmem45b	BC018222	transmembrane protein 45b	protein-coding
Diff_Nuc3562	chr14	34996152	34996291	+	0	NA	Intergenic	Intergenic	18598	NM_183209	432839	Mm.294643	NM_183209	ENSMUSG00000071531	Gprin2	C130040D06Rik|C230073P13|Gm286|mKIAA0514	G protein regulated inducer of neurite outgrowth 2	protein-coding
Diff_Nuc8774	chr1	52143442	52143581	+	0	NA	intron (NM_001308266, intron 15 of 24)	intron (NM_001308266, intron 15 of 24)	-32771	NM_009283	20846	Mm.277406	NM_009283	ENSMUSG00000026104	Stat1	2010005J02Rik|AA408197	signal transducer and activator of transcription 1	protein-coding
Diff_Nuc4499	chr18	67461942	67462081	+	0	NA	intron (NM_053261, intron 2 of 7)	intron (NM_053261, intron 2 of 7)	13134	NM_053261	114663	Mm.34079	NM_053261	ENSMUSG00000024525	Impa2	2210415D20Rik|AI326924|AW259601	inositol (myo)-1(or 4)-monophosphatase 2	protein-coding
Diff_Nuc1279	chr11	32188962	32189101	+	0	NA	Intergenic	Intergenic	2067	NM_001033981	544763	Mm.450958	NM_001033981	ENSMUSG00000073063	Hbq1b	F830116E18Rik|Hbqt1	hemoglobin, theta 1B	protein-coding
Diff_Nuc9980	chr9	117113962	117114101	+	0	NA	intron (NM_001172126, intron 1 of 12)	intron (NM_001172126, intron 1 of 12)	47570	NM_001172123	207181	Mm.326411	NM_178660	ENSMUSG00000039607	Rbms3	6720477E09Rik|8430436O14Rik	RNA binding motif, single stranded interacting protein	protein-coding
Diff_Nuc8298	chr2	114935422	114935561	+	0	NA	Intergenic	ORR1E|LTR|MaLR	234525	NR_040516	78193	Mm.189508	NR_040516	ENSMUSG00000087309	4930528P14Rik	-	RIKEN cDNA 4930528P14 gene	ncRNA
Diff_Nuc6406	chr5	138542642	138542781	+	0	NA	3' UTR (NM_029869, exon 4 of 4)	3' UTR (NM_029869, exon 4 of 4)	-15422	NM_001044703	22697	Mm.2760	NM_011757	ENSMUSG00000037017	Zscan21	AI326272|CTfin51|RU49|Zfp-38|Zfp38|Zipro1	zinc finger and SCAN domain containing 21	protein-coding
Diff_Nuc3465	chr14	13353612	13353751	+	0	NA	intron (NM_001042617, intron 11 of 30)	intron (NM_001042617, intron 11 of 30)	-175302	NM_080433	54713	Mm.34644	NM_080433	ENSMUSG00000021743	Fezf2	AI451466|AI852056|Fez|Fezl|Zfp312	Fez family zinc finger 2	protein-coding
Diff_Nuc6536	chr4	21989362	21989501	+	0	NA	Intergenic	MLT1D|LTR|MaLR	130958	NM_175234	76132	Mm.159689	NM_175234	ENSMUSG00000028246	Faxc	6230409E13Rik|AW742931	failed axon connections homolog	protein-coding
Diff_Nuc9830	chr9	81030202	81030341	+	0	NA	Intergenic	B3|SINE|B2	-495266	NR_040394	319405	Mm.246494	NR_040393	ENSMUSG00000097466	D430036J16Rik	-	RIKEN cDNA D430036J16 gene	ncRNA
Diff_Nuc9014	chr1	104605692	104605831	+	0	NA	Intergenic	Intergenic	1553416	NR_037989	100504525	Mm.87065	NR_037989	ENSMUSG00000100684	Gm20268	-	predicted gene, 20268	ncRNA
Diff_Nuc6465	chr4	4938852	4938991	+	0	NA	Intergenic	Intergenic	-218468	NM_177730	242291	Mm.218889	NM_177730	ENSMUSG00000066324	Impad1	1110001C20Rik|AA408880|AI451589|AL022796|B230207P20|Jaws|gPAPP	inositol monophosphatase domain containing 1	protein-coding
Diff_Nuc1062	chr12	101275622	101275761	+	0	NA	intron (NM_146037, intron 2 of 2)	MLT2B3|LTR|ERVL	72982	NM_001164427	217826	Mm.312335	NM_146037	ENSMUSG00000045404	Kcnk13	BB085247|F730021E22Rik|Gm1570|Gm1685	potassium channel, subfamily K, member 13	protein-coding
Diff_Nuc150	chr13	14971642	14971781	+	0	NA	Intergenic	Intergenic	249186	NM_134067	105351	Mm.41450	NM_134067	ENSMUSG00000039182	AW209491	-	expressed sequence AW209491	protein-coding
Diff_Nuc9684	chr9	49775222	49775361	+	0	NA	Intergenic	Intergenic	-167793	NM_001311065	17967	Mm.4974	NM_010875	ENSMUSG00000039542	Ncam1	CD56|E-NCAM|NCAM-1|Ncam	neural cell adhesion molecule 1	protein-coding
Diff_Nuc598	chr13	111236892	111237031	+	0	NA	Intergenic	Intergenic	51709	NM_152804	20620	Mm.380	NM_152804	ENSMUSG00000021701	Plk2	Snk	polo-like kinase 2	protein-coding
Diff_Nuc8716	chr1	36980192	36980331	+	0	NA	intron (NM_018872, intron 1 of 40)	intron (NM_018872, intron 1 of 40)	16111	NM_018872	56030	Mm.186943	NM_018872	ENSMUSG00000026116	Tmem131	2610524E03Rik|CC28|D1Bwg0491e|Neg|RW1|YR-23|mKIAA0257	transmembrane protein 131	protein-coding
Diff_Nuc4687	chr7	23244332	23244471	+	0	NA	Intergenic	L1_Mur2|LINE|L1	4693	NM_001167161	100042971	Mm.389840	NM_001167161	ENSMUSG00000094762	Gm10670	ENSMUSG00000074330|Vmn1r102	predicted gene 10670	protein-coding
Diff_Nuc3420	chr15	98521112	98521251	+	0	NA	Intergenic	Intergenic	-13289	NM_172612	223881	Mm.274010	NM_172612	ENSMUSG00000054855	Rnd1	A830014L09Rik|Arhs	Rho family GTPase 1	protein-coding
Diff_Nuc2525	chr17	79272842	79272981	+	0	NA	intron (NM_011163, intron 4 of 15)	RLTR31B_Mm|LTR|ERVK	9001	NM_011163	19106	Mm.378990	NM_011163	ENSMUSG00000024079	Eif2ak2	2310047A08Rik|4732414G15Rik|AI467567|AI747578|Pkr|Prkr|Tik	eukaryotic translation initiation factor 2-alpha kinase 2	protein-coding
Diff_Nuc10018	chr8	3591912	3592051	+	0	NA	intron (NM_001347112, intron 1 of 17)	ID_B1|SINE|B4	4531	NM_001347111	69697	Mm.390010	NM_027171	ENSMUSG00000044433	Camsap3	2310057J16Rik|Kiaa1543|Nezha	calmodulin regulated spectrin-associated protein family, member 3	protein-coding
Diff_Nuc4243	chr18	14645922	14646061	+	0	NA	Intergenic	Intergenic	195432	NM_001161369	268996	Mm.31761	NM_009280	ENSMUSG00000037013	Ss18	D130059H17|Ssxt|Syt	SS18, nBAF chromatin remodeling complex subunit	protein-coding
Diff_Nuc3410	chr15	95251052	95251191	+	0	NA	intron (NM_001289653, intron 10 of 20)	intron (NM_001289653, intron 10 of 20)	107562	NM_001289653	54003	Mm.3959	NM_016743	ENSMUSG00000022454	Nell2	A330108N19Rik|R75516|mel91	NEL-like 2	protein-coding
Diff_Nuc2809	chr16	45608622	45608761	+	0	NA	Intergenic	Intergenic	-1862	NM_008099	14525	Mm.4799	NM_008099	ENSMUSG00000022659	Gcsam	Gcet|Gcet2|M17|M17-L	germinal center associated, signaling and motility	protein-coding
Diff_Nuc9454	chr9	3024362	3024501	+	0	NA	Intergenic	GSAT_MM|Satellite|Satellite	14312	NR_039546	100628572		NR_039546	ENSMUSG00000106183	Mir101c	mir-101c|mmu-mir-101c	microRNA 101c	ncRNA
Diff_Nuc5285	chr6	19524832	19524971	+	0	NA	Intergenic	Intergenic	19559	NR_105789	102465192		NR_105789	ENSMUSG00000099149	Mir6370	Gm27480|mmu-mir-6370	microRNA 6370	ncRNA
Diff_Nuc110	chr13	9390422	9390561	+	0	NA	intron (NM_001081426, intron 1 of 36)	B1_Mus1|SINE|Alu	114720	NM_001081426	208440	Mm.217326	NM_172459	ENSMUSG00000048264	Dip2c	2900024P20Rik|9630044M06|mKIAA0934	disco interacting protein 2 homolog C	protein-coding
Diff_Nuc7182	chr3	17265362	17265501	+	0	NA	Intergenic	Lx|LINE|L1	-424490	NR_033490	70441	Mm.458192	NR_033490	ENSMUSG00000100252	Mir124-2hg	100040120|2610100L16Rik|6430547I21Rik|A930005K07Rik|AW125202|Gm2612	Mir124-2 host gene (non-protein coding)	ncRNA
Diff_Nuc4003	chr19	22535962	22536101	+	0	NA	intron (NM_177341, intron 1 of 26)	Lx5|LINE|L1	13333	NM_177341	226025	Mm.131943	NM_177341	ENSMUSG00000052387	Trpm3	6330504P12Rik|9330180E14|AU018608|B930001P07Rik|LTRPC3|MLSN2	transient receptor potential cation channel, subfamily M, member 3	protein-coding
Diff_Nuc8849	chr1	67628812	67628951	+	0	NA	Intergenic	MTA_Mm-int|LTR|MaLR	459280	NM_001080809	227231	Mm.343942	NM_001080809	ENSMUSG00000025991	Cps1	4732433M03Rik|CPS|D1Ucla3	carbamoyl-phosphate synthetase 1	protein-coding
Diff_Nuc4190	chr18	3135862	3136001	+	0	NA	Intergenic	L1_Mus2|LINE|L1	-12519	NM_001167539	100312476	Mm.480293	NM_001167539	ENSMUSG00000091539	Vmn1r238	-	vomeronasal 1 receptor, 238	protein-coding
Diff_Nuc6185	chr5	82928272	82928411	+	0	NA	Intergenic	Intergenic	299749	NR_035415	100316803		NR_035415	ENSMUSG00000080586	Mir1187	Mirn1187|mir-1187|mmu-mir-1187	microRNA 1187	ncRNA
Diff_Nuc4450	chr18	56609952	56610091	+	0	NA	intron (NM_026240, intron 1 of 13)	intron (NM_026240, intron 1 of 13)	18235	NM_026240	107022	Mm.24356	NM_026240	ENSMUSG00000001700	Gramd3	9030613F08Rik|9130427A09Rik|AW061306|NS3TP2	GRAM domain containing 3	protein-coding
Diff_Nuc6028	chr5	43854342	43854481	+	0	NA	Intergenic	Intergenic	-52397	NM_001135172	109323	Mm.275553	NM_175425	ENSMUSG00000061535	C1qtnf7	5530401N20Rik|8430425G24Rik|Ctrp7	C1q and tumor necrosis factor related protein 7	protein-coding
Diff_Nuc1107	chr12	111373992	111374131	+	0	NA	Intergenic	Intergenic	22222	NR_045466	67280	Mm.390495	NR_045466		3110009F21Rik	-	RIKEN cDNA 3110009F21 gene	ncRNA
Diff_Nuc1095	chr12	108207722	108207861	+	0	NA	Intergenic	MTE2b|LTR|MaLR	-253257	NR_015512	71033	Mm.159404	NR_015512	ENSMUSG00000085820	4933406K04Rik	4930426M03Rik|4930485I22Rik|4933427G14Rik	RIKEN cDNA 4933406K04 gene	ncRNA
Diff_Nuc7644	chr3	119004872	119005011	+	0	NA	intron (NM_170778, intron 19 of 22)	intron (NM_170778, intron 19 of 22)	481365	NM_001310711	56195	Mm.29966	NM_019550	ENSMUSG00000028134	Ptbp2	Ptb2|brPTB|nPTB	polypyrimidine tract binding protein 2	protein-coding
Diff_Nuc10332	chr8	82912092	82912231	+	0	NA	Intergenic	Intergenic	-105783	NM_010369	14934	Mm.13123	NM_010369	ENSMUSG00000051839	Gypa	AI853584|CD235a|GPA	glycophorin A	protein-coding
Diff_Nuc9826	chr9	79491102	79491241	+	0	NA	intron (NM_001290308, intron 39 of 65)	RLTR11A2|LTR|ERVK	75358	NM_001290308	12816	Mm.3819	NM_007730	ENSMUSG00000032332	Col12a1	-	collagen, type XII, alpha 1	protein-coding
Diff_Nuc7807	chr3	155131152	155131291	+	0	NA	Intergenic	Intergenic	374823	NM_028938	74435	Mm.195711	NM_028938	ENSMUSG00000028182	Lrriq3	4930438B07Rik|4930511J15Rik|4933403H06Rik|BB020367|Lrrc44	leucine-rich repeats and IQ motif containing 3	protein-coding
Diff_Nuc5164	chr7	135493642	135493781	+	0	NA	Intergenic	Intergenic	-52066	NM_145590	233913	Mm.220880	NM_145590	ENSMUSG00000030780	BC017158	-	cDNA sequence BC017158	protein-coding
Diff_Nuc6317	chr5	111608502	111608641	+	0	NA	intron (NM_001267622, intron 5 of 23)	intron (NM_001267622, intron 5 of 23)	-151146	NM_001301644	56305	Mm.200516	NM_019640	ENSMUSG00000050017	Pitpnb	PI-TP-beta	phosphatidylinositol transfer protein, beta	protein-coding
Diff_Nuc4074	chr19	36967812	36967951	+	0	NA	TTS (NM_001163635)	TTS (NM_001163635)	26208	NM_028263	72514	Mm.41674	NM_028263	ENSMUSG00000047632	Fgfbp3	2610306H15Rik|Fgf-bp3	fibroblast growth factor binding protein 3	protein-coding
Diff_Nuc2212	chr10	129770202	129770341	+	0	NA	intron (NM_183264, intron 1 of 8)	(GAGAA)n|Simple_repeat|Simple_repeat	10363	NM_183264	67596	Mm.131264	NM_183264	ENSMUSG00000034833	Tespa1	5830405N20Rik|A430001F24Rik|AI450549	thymocyte expressed, positive selection associated 1	protein-coding
Diff_Nuc8743	chr1	43386302	43386441	+	0	NA	Intergenic	Intergenic	-116225	NM_010879	17974	Mm.389903	NM_010879	ENSMUSG00000066877	Nck2	4833426I10Rik|Grb4|NCKbeta|Nck-2	non-catalytic region of tyrosine kinase adaptor protein 2	protein-coding
Diff_Nuc3721	chr14	72619882	72620021	+	0	NA	Intergenic	Intergenic	363435	NR_046274	74667	Mm.159286	NR_046274		4930434J06Rik	-	RIKEN cDNA 4930434J06 gene	ncRNA
Diff_Nuc641	chr12	4428362	4428501	+	0	NA	intron (NM_010881, intron 1 of 22)	ORR1D1|LTR|MaLR	55629	NM_010881	17977	Mm.301039	NM_010881	ENSMUSG00000020647	Ncoa1	KAT13A|NCoA-1|NRC-1|SRC-1|SRC-a|SRC1|bHLHe74|mNRC-1	nuclear receptor coactivator 1	protein-coding
Diff_Nuc7210	chr3	27279172	27279311	+	0	NA	Intergenic	RLTR31_Mur|LTR|ERVK	8968	NM_177330	208188	Mm.194721	NM_177330	ENSMUSG00000051136	Ghsr	C530020I22Rik|Ghsr1a	growth hormone secretagogue receptor	protein-coding
Diff_Nuc1281	chr11	33853162	33853301	+	0	NA	intron (NM_001190886, intron 1 of 7)	intron (NM_001190886, intron 1 of 7)	-9782	NM_031169	16533	Mm.6206	NM_031169	ENSMUSG00000020155	Kcnmb1	BKbeta1	potassium large conductance calcium-activated channel, subfamily M, beta member 1	protein-coding
Diff_Nuc4196	chr18	4606712	4606851	+	0	NA	Intergenic	Intergenic	-28146	NM_001081963	240185	Mm.33179	NM_001081963	ENSMUSG00000033960	9430020K01Rik	1110056P05Rik|Gm328|Jcad|mKIAA1462	RIKEN cDNA 9430020K01 gene	protein-coding
Diff_Nuc2870	chr16	62841872	62842011	+	0	NA	intron (NM_026577, intron 1 of 9)	intron (NM_026577, intron 1 of 9)	4925	NM_026577	68146	Mm.96833	NM_026577	ENSMUSG00000022911	Arl13b	A530097K21Rik|A930014M17Rik|Arl2l1|C530009C10Rik|hnn	ADP-ribosylation factor-like 13B	protein-coding
Diff_Nuc262	chr13	36036482	36036621	+	0	NA	Intergenic	RLTR21|LTR|ERVK	-23224	NM_029628	76487	Mm.44745	NM_029628	ENSMUSG00000050423	Ppp1r3g	1600032L17Rik	protein phosphatase 1, regulatory (inhibitor) subunit 3G	protein-coding
Diff_Nuc6031	chr5	45224302	45224441	+	0	NA	Intergenic	B2_Mm2|SINE|B2	-33386	NM_001077398	16826	Mm.25785	NM_010698	ENSMUSG00000039706	Ldb2	AI035351|AW146358|CLIM1|CLP-36|Ldb3	LIM domain binding 2	protein-coding
Diff_Nuc10239	chr8	59983572	59983711	+	0	NA	promoter-TSS (NR_126556)	promoter-TSS (NR_126556)	-971	NR_126556	78353	Mm.426240	NR_126553	ENSMUSG00000096917	2500002B13Rik	-	RIKEN cDNA 2500002B13 gene	ncRNA
Diff_Nuc7972	chr2	38059392	38059531	+	0	NA	intron (NM_146122, intron 2 of 21)	intron (NM_146122, intron 2 of 21)	83443	NM_146122	227801	Mm.314245	NM_146122	ENSMUSG00000035392	Dennd1a	6030446I19Rik|connecdenn	DENN/MADD domain containing 1A	protein-coding
Diff_Nuc3007	chr16	97521602	97521741	+	0	NA	Intergenic	Intergenic	-56664	NM_019517	56175	Mm.97885	NM_019517	ENSMUSG00000040605	Bace2	1110059C24Rik|AEPLC|AI850424|ALP56|ARP1|ASP1|ASP21|BAE2|CDA13|CEAP1|DRAP	beta-site APP-cleaving enzyme 2	protein-coding
Diff_Nuc1602	chr11	108326882	108327021	+	0	NA	intron (NM_029606, intron 5 of 27)	RLTR15|LTR|ERVK	40371	NM_029606	76380	Mm.344071	NM_029586	ENSMUSG00000020728	Cep112	1700001M19Rik|1700029K01Rik|8430407H02Rik|AV043680|AV207351|Ccdc46|Macoco	centrosomal protein 112	protein-coding
Diff_Nuc581	chr13	108111762	108111901	+	0	NA	Intergenic	Intergenic	-148071	NR_045083	105120	Mm.417700	NR_045083		AI197445	-	expressed sequence AI197445	ncRNA
Diff_Nuc9415	chr1	191231152	191231291	+	0	NA	Intergenic	Intergenic	-5069	NM_001281848	16526	Mm.33304	NM_010607	ENSMUSG00000037624	Kcnk2	A430027H14Rik|AI848635|TREK-1	potassium channel, subfamily K, member 2	protein-coding
Diff_Nuc9524	chr9	15566882	15567021	+	0	NA	Intergenic	Intergenic	52738	NM_172289	234967	Mm.138815	NM_172289	ENSMUSG00000043885	Slc36a4	6330573I15Rik|PAT4	solute carrier family 36 (proton/amino acid symporter), member 4	protein-coding
Diff_Nuc3340	chr15	75071352	75071491	+	0	NA	Intergenic	Intergenic	-27430	NM_008530	17071	Mm.377095	NM_008530	ENSMUSG00000022583	Ly6f	-	lymphocyte antigen 6 complex, locus F	protein-coding
Diff_Nuc9877	chr9	91538852	91538991	+	0	NA	Intergenic	L1Md_A|LINE|L1	275111	NM_009576	22774	Mm.8062	NM_009576	ENSMUSG00000036972	Zic4	-	zinc finger protein of the cerebellum 4	protein-coding
Diff_Nuc5438	chr6	54291022	54291161	+	0	NA	intron (NR_033635, intron 3 of 13)	intron (NR_033635, intron 3 of 13)	14085	NM_030024	78004	Mm.41984	NM_030024	ENSMUSG00000045725	Prr15	E130201N16Rik|G90	proline rich 15	protein-coding
Diff_Nuc1151	chr11	3001702	3001841	+	0	NA	Intergenic	GSAT_MM|Satellite|Satellite	-22253	NR_003517	236604	Mm.247625	NM_001004146		Pisd-ps1	-	phosphatidylserine decarboxylase, pseudogene 1	pseudo
Diff_Nuc10444	chr8	107875192	107875331	+	0	NA	intron (NM_001081332, intron 1 of 15)	MIRb|SINE|MIR	3103	NM_001081332	277973	Mm.334766	NM_001081332	ENSMUSG00000014786	Slc9a5	Gm696	solute carrier family 9 (sodium/hydrogen exchanger), member 5	protein-coding
Diff_Nuc1360	chr11	52083382	52083521	+	0	NA	intron (NM_001313981, intron 3 of 10)	intron (NM_001313981, intron 3 of 10)	12646	NM_009331	21414	Mm.31630	NM_009331	ENSMUSG00000000782	Tcf7	AI465550|TCF-1|Tcf1	transcription factor 7, T cell specific	protein-coding
Diff_Nuc3929	chr19	4760722	4760861	+	0	NA	intron (NM_025717, intron 2 of 3)	intron (NM_025717, intron 2 of 3)	4266	NM_025717	66704	Mm.396734	NM_025717	ENSMUSG00000033760	Rbm4b	4921506I22Rik|AI504630|AI506404|Lark2|Neosin	RNA binding motif protein 4B	protein-coding
Diff_Nuc4306	chr18	29389122	29389261	+	0	NA	Intergenic	MTC|LTR|MaLR	-212663	NR_045395	78199	Mm.243850	NR_045395		4930527G23Rik	-	RIKEN cDNA 4930527G23 gene	ncRNA
Diff_Nuc934	chr12	73510582	73510721	+	0	NA	promoter-TSS (NM_153457)	promoter-TSS (NM_153457)	-610	NM_153457	104001	Mm.221275	NM_153457	ENSMUSG00000021087	Rtn1	Nsp	reticulon 1	protein-coding
Diff_Nuc3141	chr15	34845192	34845331	+	0	NA	intron (NM_019635, intron 10 of 10)	intron (NM_019635, intron 10 of 10)	77457	NM_001271704	16539	Mm.71045	NM_181317	ENSMUSG00000050963	Kcns2	E130006J24Rik|Kv9.2	K+ voltage-gated channel, subfamily S, 2	protein-coding
Diff_Nuc10368	chr8	88405422	88405561	+	0	NA	intron (NM_199446, intron 5 of 31)	RMER15|LTR|ERVL	40590	NM_199446	102093	Mm.237296	NM_199446	ENSMUSG00000036879	Phkb	AI463271	phosphorylase kinase beta	protein-coding
Diff_Nuc3161	chr15	40100432	40100571	+	0	NA	Intergenic	L1Md_F2|LINE|L1	134590	NM_001256056	328531	Mm.60703	NM_001256056	ENSMUSG00000094112	9330182O14Rik	-	RIKEN cDNA 9330182O14 gene	protein-coding
Diff_Nuc4062	chr19	33772012	33772151	+	0	NA	Intergenic	Lx3B|LINE|L1	64360	NM_001322338	101055671		NM_001322338	ENSMUSG00000087303	Lipo2	EG668114|Gm8981	lipase, member O2	protein-coding
Diff_Nuc3666	chr14	62147222	62147361	+	0	NA	Intergenic	Intergenic	28432	NM_025697	66674	Mm.282706	NM_025697	ENSMUSG00000021930	Spryd7	6330409N04Rik|Clld6	SPRY domain containing 7	protein-coding
Diff_Nuc7081	chr4	146917132	146917271	+	0	NA	Intergenic	RLTR18|LTR|ERVK	-10185	NM_001014397	433804	Mm.332047	NM_001014397	ENSMUSG00000065999	Zfp985	Gm13154|OTTMUSG00000010673	zinc finger protein 985	protein-coding
Diff_Nuc1790	chr10	33347812	33347951	+	0	NA	Intergenic	Lx7|LINE|L1	-3475	NM_175448	215890	Mm.94461	NM_175448	ENSMUSG00000019785	Clvs2	A330019N05Rik|Rlbp1l2	clavesin 2	protein-coding
Diff_Nuc1640	chr11	117018562	117018701	+	0	NA	3' UTR (NM_001166506, exon 16 of 16)	3' UTR (NM_001166506, exon 16 of 16)	42145	NM_001166506	74136	Mm.272312	NM_028777	ENSMUSG00000020823	Sec14l1	1200017E04Rik|2810012L19Rik|Naa-35	SEC14-like lipid binding 1	protein-coding
Diff_Nuc9080	chr1	118741832	118741971	+	0	NA	Intergenic	ORR1B1|LTR|MaLR	1160187	NM_001077425	636808	Mm.101576	NM_001077425	ENSMUSG00000070695	Cntnap5a	Caspr5-1|EG636808	contactin associated protein-like 5A	protein-coding
Diff_Nuc9328	chr1	173493792	173493931	+	0	NA	intron (NM_018729, intron 1 of 8)	B1_Mur4|SINE|Alu	4537	NM_018729	18106	Mm.2299	NM_018729	ENSMUSG00000004709	Cd244	2B4|C9.1|F730046O15Rik|Ly90|NAIL|NKR2B4|Nmrk|SLAMF4	CD244 natural killer cell receptor 2B4	protein-coding
Diff_Nuc5595	chr6	93736082	93736221	+	0	NA	intron (NM_001083321, intron 3 of 21)	Lx8|LINE|L1	126806	NR_104594	14924	Mm.217216	NM_010367	ENSMUSG00000045095	Magi1	AIP3|BAP1|Baiap1|Gukmi1|MAGI1c|Magi-1|TNRC19|WWP3|mKIAA4129	membrane associated guanylate kinase, WW and PDZ domain containing 1	protein-coding
Diff_Nuc7908	chr2	23488442	23488581	+	0	NA	Intergenic	MTC-int|LTR|MaLR	-60887	NM_001165997	76857	Mm.276415	NM_029773	ENSMUSG00000026771	Spopl	4921517N04Rik|AU014935|BB233739|E430033K04Rik	speckle-type POZ protein-like	protein-coding
Diff_Nuc9449	chr9	3020172	3020311	+	0	NA	Intergenic	GSAT_MM|Satellite|Satellite	18502	NR_039546	100628572		NR_039546	ENSMUSG00000106183	Mir101c	mir-101c|mmu-mir-101c	microRNA 101c	ncRNA
Diff_Nuc6591	chr4	34866722	34866861	+	0	NA	Intergenic	Intergenic	-8061	NR_040652	73696	Mm.1361	NR_040652	ENSMUSG00000085824	Platr9	2410114N07Rik	pluripotency associated transcript 9	ncRNA
Diff_Nuc7829	chr2	4580772	4580911	+	0	NA	Intergenic	Intergenic	-7709	NM_026045	67229	Mm.38529	NM_026045	ENSMUSG00000039449	Prpf18	2810441A10Rik	pre-mRNA processing factor 18	protein-coding
Diff_Nuc3416	chr15	97138872	97139011	+	0	NA	intron (NM_172293, intron 3 of 5)	MIRc|SINE|MIR	-61223	NM_001164602	105827	Mm.24005	NM_178114	ENSMUSG00000048218	Amigo2	AI415330|AMIGO-2|AW208913|Ali1	adhesion molecule with Ig like domain 2	protein-coding
Diff_Nuc7320	chr3	49291752	49291891	+	0	NA	Intergenic	Intergenic	269417	NM_130448	73173	Mm.87246	NM_130448	ENSMUSG00000037892	Pcdh18	3110038E07Rik|BB095589|PCDH68L	protocadherin 18	protein-coding
Diff_Nuc4668	chr7	16643592	16643731	+	0	NA	Intergenic	Intergenic	-13533	NM_001347559	666528	Mm.290718	NM_001099277	ENSMUSG00000078796	Zfp541	EG666528|Znf541	zinc finger protein 541	protein-coding
Diff_Nuc10166	chr8	37652132	37652271	+	0	NA	intron (NM_001194940, intron 7 of 17)	intron (NM_001194940, intron 7 of 17)	24796	NM_015802	50768	Mm.125155	NM_015802	ENSMUSG00000031523	Dlc1	A730069N07Rik|Arhgap7|HP|STARD12|dlc-1	deleted in liver cancer 1	protein-coding
Diff_Nuc5664	chr6	108921092	108921231	+	0	NA	Intergenic	MLT1L|LTR|MaLR	142526	NM_138677	192193	Mm.21596	NM_138677	ENSMUSG00000030104	Edem1	A130059K23Rik|EDEM|mKIAA0212	ER degradation enhancer, mannosidase alpha-like 1	protein-coding
Diff_Nuc2882	chr16	64363602	64363741	+	0	NA	Intergenic	MER5A|DNA|MER1_type	115289	NM_173861	224291	Mm.246580	NM_173861	ENSMUSG00000068167	Csnka2ip	Ckt2	casein kinase 2, alpha prime interacting protein	protein-coding
Diff_Nuc6295	chr5	105821142	105821281	+	0	NA	Intergenic	RLTR8|LTR|ERVK	-23583	NM_001033550	433926	Mm.439781	NM_001033550	ENSMUSG00000070639	Lrrc8b	R75581|Ta-lrrp|mKIAA0231	leucine rich repeat containing 8 family, member B	protein-coding
Diff_Nuc8335	chr2	124159592	124159731	+	0	NA	intron (NM_001290997, intron 3 of 20)	intron (NM_001290997, intron 3 of 20)	-111567	NR_040612	75946	Mm.415059	NR_040612	ENSMUSG00000086954	4930583P06Rik	-	RIKEN cDNA 4930583P06 gene	ncRNA
Diff_Nuc6556	chr4	25872082	25872221	+	0	NA	Intergenic	L1_Mus3|LINE|L1	-145001	NM_010243	14348	Mm.39101	NM_010243	ENSMUSG00000055373	Fut9	AI746471|AU067636|mFUT9|mFuc-TIX	fucosyltransferase 9	protein-coding
Diff_Nuc9200	chr1	151099642	151099781	+	0	NA	Intergenic	Intergenic	669858	NM_001305632	18783	Mm.4186	NM_008869	ENSMUSG00000056220	Pla2g4a	Pla2g4|cPLA2|cPLA2-alpha|cPLA2alpha	phospholipase A2, group IVA (cytosolic, calcium-dependent)	protein-coding
Diff_Nuc8836	chr1	64925302	64925441	+	0	NA	intron (NM_001039493, intron 5 of 7)	intron (NM_001039493, intron 5 of 7)	78027	NM_001039493	241075	Mm.239534	NM_175509	ENSMUSG00000051344	Plekhm3	9430067K14Rik|A230102O09Rik|AI449570|DAPR|Plekhm1l	pleckstrin homology domain containing, family M, member 3	protein-coding
Diff_Nuc5427	chr6	51304312	51304451	+	0	NA	Intergenic	MT2A|LTR|ERVL	-25328	NR_110455	625167	Mm.389772	NR_110455	ENSMUSG00000107660	Gm6559	EG625167	predicted gene 6559	ncRNA
Diff_Nuc4638	chr7	11736582	11736721	+	0	NA	Intergenic	ORR1A2-int|LTR|MaLR	14846	NM_001100186	545913	Mm.380086	NM_001100186	ENSMUSG00000090714	Zscan4d	EG545913	zinc finger and SCAN domain containing 4D	protein-coding
Diff_Nuc4425	chr18	50457242	50457381	+	0	NA	Intergenic	ORR1E-int|LTR|MaLR	19288	NM_001004061	225497	Mm.329435	NM_001004061	ENSMUSG00000035420	Fam170a	Gm93|Znfd	family with sequence similarity 170, member A	protein-coding
Diff_Nuc4488	chr18	64943352	64943491	+	0	NA	Intergenic	AT_rich|Low_complexity|Low_complexity	-103989	NM_001114386	83814	Mm.98668	NM_031881	ENSMUSG00000024589	Nedd4l	1300012C07Rik|Nedd4-2|Nedd4b	neural precursor cell expressed, developmentally down-regulated gene 4-like	protein-coding
Diff_Nuc3887	chr14	117147562	117147701	+	0	NA	Intergenic	Intergenic	-176888	NM_001079844	23888	Mm.440025	NM_011821	ENSMUSG00000058571	Gpc6	-	glypican 6	protein-coding
Diff_Nuc2267	chr17	14109922	14110061	+	0	NA	Intergenic	Intergenic	24611	NM_001122977	635895	Mm.388844	NM_001122977	ENSMUSG00000067941	Gm7168	EG635895	predicted gene 7168	protein-coding
Diff_Nuc2764	chr16	37813332	37813471	+	0	NA	intron (NM_008047, intron 2 of 10)	intron (NM_008047, intron 2 of 10)	36260	NM_008047	14314	Mm.182434	NM_008047	ENSMUSG00000022816	Fstl1	AI316791|AW107808|Fstl|TSC-36	follistatin-like 1	protein-coding
Diff_Nuc9550	chr9	21770652	21770791	+	0	NA	Intergenic	Intergenic	-2701	NM_010149	13857	Mm.2653	NM_010149	ENSMUSG00000006235	Epor	-	erythropoietin receptor	protein-coding
Diff_Nuc7822	chr3	159438692	159438831	+	0	NA	Intergenic	L1_Rod|LINE|L1	-63898	NR_037590	68151	Mm.6766	NM_026582	ENSMUSG00000028173	Wls	5031439A09Rik|AI173978|AI987742|Gpr177	wntless homolog (Drosophila)	protein-coding
Diff_Nuc5715	chr6	123016542	123016681	+	0	NA	intron (NM_001190310, intron 3 of 5)	intron (NM_001190310, intron 3 of 5)	16631	NM_001190310	69810	Mm.333374	NM_027218	ENSMUSG00000030147	Clec4b1	1810046I24Rik|Aplra2|Clec4b|DCAR|DCARbeta|Dcar2	C-type lectin domain family 4, member b1	protein-coding
Diff_Nuc6524	chr4	19668442	19668581	+	0	NA	Intergenic	Intergenic	-32360	NR_074090	107568	Mm.78312	NM_177327	ENSMUSG00000041058	Wwp1	8030445B08Rik|AIP5|SDRP1|Tiul1	WW domain containing E3 ubiquitin protein ligase 1	protein-coding
Diff_Nuc6350	chr5	123147662	123147801	+	0	NA	Intergenic	B1_Mur1|SINE|Alu	-9822	NM_001310720	18438	Mm.290884	NM_011026	ENSMUSG00000029470	P2rx4	AI504491|AW555605|D5Ertd444e|P2X4	purinergic receptor P2X, ligand-gated ion channel 4	protein-coding
Diff_Nuc7075	chr4	146784592	146784731	+	0	NA	intron (NM_001039209, intron 1 of 2)	Lx2|LINE|L1	-142725	NM_001014397	433804	Mm.332047	NM_001014397	ENSMUSG00000065999	Zfp985	Gm13154|OTTMUSG00000010673	zinc finger protein 985	protein-coding
Diff_Nuc1750	chr10	23832562	23832701	+	0	NA	Intergenic	RLTR28|LTR|ERVL	-3291	NM_001010831	503558	Mm.300923	NM_001010831	ENSMUSG00000037424	Taar9	Gm231|taR-9	trace amine-associated receptor 9	protein-coding
Diff_Nuc8229	chr2	98507402	98507541	+	0	NA	Intergenic	GSAT_MM|Satellite|Satellite	1199657	NM_178725	241568	Mm.241682	NM_178725	ENSMUSG00000050587	Lrrc4c	6430556C10Rik|NGL-1	leucine rich repeat containing 4C	protein-coding
Diff_Nuc2346	chr17	32885902	32886041	+	0	NA	Intergenic	Intergenic	38521	NM_001346705	208292	Mm.38813	NM_172458	ENSMUSG00000024298	Zfp871	4732483N19|9030612M13Rik|AI118577|AI265322|mKIAA3006	zinc finger protein 871	protein-coding
Diff_Nuc4280	chr18	22597652	22597791	+	0	NA	intron (NM_001167777, intron 6 of 12)	intron (NM_001167777, intron 6 of 12)	94131	NM_001167777	211961	Mm.392310	NM_001167777	ENSMUSG00000045215	Asxl3	C230079D11Rik|D430002O22Rik|D930044O18Rik|Gm329|Gm945	additional sex combs like 3 (Drosophila)	protein-coding
Diff_Nuc3204	chr15	48370322	48370461	+	0	NA	intron (NM_001081391, intron 4 of 70)	Lx8|LINE|L1	253144	NM_001081391	239420	Mm.309363	NM_001081391	ENSMUSG00000022311	Csmd3	4930500N14Rik|mKIAA1894	CUB and Sushi multiple domains 3	protein-coding
Diff_Nuc789	chr12	40973452	40973591	+	0	NA	Intergenic	Intergenic	23570	NR_045157	629820	Mm.435540	NR_045157	ENSMUSG00000035983	Gm7008	EG629820	predicted gene 7008	ncRNA
Diff_Nuc9734	chr9	59986542	59986681	+	0	NA	intron (NM_001040426, intron 7 of 17)	intron (NM_001040426, intron 7 of 17)	2416	NM_172444	207596	Mm.28791	NM_172444	ENSMUSG00000032289	Thsd4	ADAMTSL-6|ADAMTSL6|AI585901|Adamtsl4|B230114P05Rik	thrombospondin, type I, domain containing 4	protein-coding
Diff_Nuc9410	chr1	190818402	190818541	+	0	NA	intron (NM_172650, intron 8 of 17)	intron (NM_172650, intron 8 of 17)	13248	NM_172650	226823	Mm.209880	NM_172650	ENSMUSG00000026608	Kctd3	4930438A20Rik|9330185B06|E330032J19Rik|NY-REN-45	potassium channel tetramerisation domain containing 3	protein-coding
Diff_Nuc1981	chr10	80450382	80450521	+	0	NA	intron (NM_010319, intron 2 of 3)	intron (NM_010319, intron 2 of 3)	13659	NM_001038655	14708	Mm.222496	NM_010319	ENSMUSG00000048240	Gng7	AI840417	guanine nucleotide binding protein (G protein), gamma 7	protein-coding
Diff_Nuc6750	chr4	74768742	74768881	+	0	NA	Intergenic	ORR1D1|LTR|MaLR	155379	NM_025849	66928	Mm.24332	NM_025849	ENSMUSG00000028398	Tmem261	1700027K24Rik|3110001D03Rik	transmembrane protein 261	protein-coding
Diff_Nuc6540	chr4	23114802	23114941	+	0	NA	Intergenic	RMER17A|LTR|ERVK	697176	NR_131335	105500046		NR_131335	ENSMUSG00000107859	Gm30731	Pnky|lnc-pou3f2	predicted gene, 30731	ncRNA
Diff_Nuc2170	chr10	120741282	120741421	+	0	NA	intron (NM_029057, intron 4 of 11)	intron (NM_029057, intron 4 of 11)	6894	NM_029057	74694	Mm.233833	NM_029057	ENSMUSG00000052302	Tbc1d30	4930505D03Rik	TBC1 domain family, member 30	protein-coding
Diff_Nuc4605	chr18	88437752	88437891	+	0	NA	Intergenic	L1Md_F3|LINE|L1	625778	NM_018821	54607	Mm.91920	NM_018821	ENSMUSG00000056153	Socs6	1500012M23Rik|5830401B18Rik|AI447482|Cis4|Cish4|HSPC060|SOCS-4|SOCS-6|SSI4|STAI4|STATI4|Socs4	suppressor of cytokine signaling 6	protein-coding
Diff_Nuc4839	chr7	66404512	66404651	+	0	NA	Intergenic	RMER21A|LTR|ERV1	-79539	NM_173010	22215	Mm.9002	NM_011668	ENSMUSG00000025326	Ube3a	4732496B02|5830462N02Rik|A130086L21Rik|Hpve6a|mKIAA4216	ubiquitin protein ligase E3A	protein-coding
Diff_Nuc9452	chr9	3023432	3023571	+	0	NA	Intergenic	GSAT_MM|Satellite|Satellite	15242	NR_039546	100628572		NR_039546	ENSMUSG00000106183	Mir101c	mir-101c|mmu-mir-101c	microRNA 101c	ncRNA
Diff_Nuc5755	chr6	132806122	132806261	+	0	NA	exon (NM_053212, exon 1 of 1)	exon (NM_053212, exon 1 of 1)	735	NM_053212	112408	Mm.261566	NM_053212	ENSMUSG00000030194	Tas2r116	T2R16|TRB1|TRB4|Tas2r14|Tas2r16|Tas2r7|mGR16|mt2r56	taste receptor, type 2, member 116	protein-coding
Diff_Nuc8038	chr2	50729697	50729836	+	0	NA	Intergenic	L1_Mm|LINE|L1	-35438	NR_033595	227885	Mm.301654	NR_033595	ENSMUSG00000083270	Gm13498	OTTMUSG00000012426	heat shock protein 90 alpha (cytosolic), class B member 1 pseudogene	pseudo
Diff_Nuc57	chrX	120755862	120756001	+	0	NA	Intergenic	L1_Mur3|LINE|L1	493588	NR_038052	22314	Mm.458976	NM_009494	ENSMUSG00000057021	Vmn2r-ps159	V2r8|V2r9|Vmn2r-ps160	vomeronasal 2, receptor, pseudogene 159	pseudo
Diff_Nuc962	chr12	79299832	79299971	+	0	NA	Intergenic	Intergenic	-27741	NM_172952	268566	Mm.341742	NM_145965	ENSMUSG00000047454	Gphn	5730552E08Rik|AI662856|BC027112|C230040D23|GPH|GPHRYN|geph	gephyrin	protein-coding
Diff_Nuc10509	chr8	122869742	122869881	+	0	NA	Intergenic	Intergenic	-117681	NR_110496	434353	Mm.411793	NR_110496	ENSMUSG00000097960	A330074K22Rik	-	RIKEN cDNA A330074K22 gene	ncRNA
Diff_Nuc282	chr13	40591842	40591981	+	0	NA	Intergenic	Intergenic	-208531	NM_172143	218165	Mm.364096	NM_172143	ENSMUSG00000047094	Ofcc1	opo	orofacial cleft 1 candidate 1	protein-coding
Diff_Nuc2195	chr10	125759672	125759811	+	0	NA	Intergenic	Intergenic	356466	NM_177152	320398	Mm.275586	NM_177152	ENSMUSG00000020105	Lrig3	9030421L11Rik|9130004I02Rik|9430095K15Rik|mKIAA3016	leucine-rich repeats and immunoglobulin-like domains 3	protein-coding
Diff_Nuc6141	chr5	68421642	68421781	+	0	NA	Intergenic	Lx8|LINE|L1	-1363	NM_001018019	433899	Mm.332422	NM_001018019	ENSMUSG00000068082	Grxcr1	Tg(Eno2-Gabrb3)0370Brll|pi|tde	glutaredoxin, cysteine rich 1	protein-coding
Diff_Nuc4229	chr18	12138892	12139031	+	0	NA	TTS (NM_001289667)	TTS (NM_001289667)	-140014	NR_035447	100316686		NR_035447	ENSMUSG00000084565	Mir1901	Mirn1901|mmu-mir-1901	microRNA 1901	ncRNA
Diff_Nuc168	chr13	20209522	20209661	+	0	NA	intron (NM_080288, intron 1 of 21)	MER57D|LTR|ERV1	27215	NM_080288	140580	Mm.342392	NM_080288	ENSMUSG00000041112	Elmo1	6330578D22Rik|C230095H21Rik|CED-12	engulfment and cell motility 1	protein-coding
Diff_Nuc7733	chr3	139806732	139806871	+	0	NA	Intergenic	Intergenic	115588	NR_105798	102465198		NR_105798	ENSMUSG00000099169	Mir7j	Gm27716|Mirlet7j|mmu-let-7j	microRNA 7j	ncRNA
Diff_Nuc1991	chr10	82822112	82822251	+	0	NA	promoter-TSS (NM_026579)	promoter-TSS (NM_026579)	-785	NM_026579	28109	Mm.196210	NM_026579	ENSMUSG00000020255	D10Wsu102e	AI747614|C430041I18Rik	DNA segment, Chr 10, Wayne State University 102, expressed	protein-coding
Diff_Nuc7711	chr3	135322912	135323051	+	0	NA	intron (NM_008689, intron 4 of 24)	B1_Mur1|SINE|Alu	31530	NM_008689	18033	Mm.256765	NM_008689	ENSMUSG00000028163	Nfkb1	NF-KB1|NF-kappaB|NF-kappaB1|p105|p50|p50/p105	nuclear factor of kappa light polypeptide gene enhancer in B cells 1, p105	protein-coding
Diff_Nuc438	chr13	76284392	76284531	+	0	NA	intron (NM_001081352, intron 31 of 43)	B3|SINE|B2	48279	NM_001081352	218343	Mm.277964	NM_001081352	ENSMUSG00000033991	Ttc37	mKIAA0372	tetratricopeptide repeat domain 37	protein-coding
Diff_Nuc8490	chr2	155598332	155598471	+	0	NA	Intergenic	B1_Mus2|SINE|Alu	-2677	NM_010808	17391	Mm.389325	NM_010808	ENSMUSG00000027612	Mmp24	AU040325|MMP-21|MT5-MMP|MT5MMP|MTMMP5	matrix metallopeptidase 24	protein-coding
Diff_Nuc8389	chr2	134809722	134809861	+	0	NA	intron (NM_001145830, intron 2 of 31)	intron (NM_001145830, intron 2 of 31)	197891	NM_001145830	18795	Mm.330607	NM_019677	ENSMUSG00000051177	Plcb1	3110043I21Rik|AI132408|Plcb|mKIAA0581	phospholipase C, beta 1	protein-coding
Diff_Nuc5547	chr6	82594612	82594751	+	0	NA	Intergenic	MYSERV16_I-int|LTR|ERVK	8178	NM_025882	66979	Mm.195753	NM_025882	ENSMUSG00000030042	Pole4	2400007P05Rik|5830430F06Rik	polymerase (DNA-directed), epsilon 4 (p12 subunit)	protein-coding
Diff_Nuc7490	chr3	87486782	87486921	+	0	NA	intron (NM_001003912, intron 1 of 39)	intron (NM_001003912, intron 1 of 39)	64178	NM_001003912	213498	Mm.287267	NM_001003912	ENSMUSG00000041977	Arhgef11	B930073M02|E130307F09|PDZ-RhoGEF|Prg|RhoGEF|mKIAA0380	Rho guanine nucleotide exchange factor (GEF) 11	protein-coding
Diff_Nuc2014	chr10	87002772	87002911	+	0	NA	intron (NM_008777, intron 3 of 12)	L1MC2|LINE|L1	18301	NM_008777	18478	Mm.263539	NM_008777	ENSMUSG00000020051	Pah	AW106920	phenylalanine hydroxylase	protein-coding
Diff_Nuc4008	chr19	23627092	23627231	+	0	NA	Intergenic	MTD|LTR|MaLR	100141	NM_026188	67483	Mm.443287	NM_026188	ENSMUSG00000033053	1700028P14Rik	AV209940	RIKEN cDNA 1700028P14 gene	protein-coding
Diff_Nuc1078	chr12	104212282	104212421	+	0	NA	intron (NM_001081017, intron 1 of 48)	intron (NM_001081017, intron 1 of 48)	25282	NM_001081017	217843	Mm.387073	NM_177621	ENSMUSG00000021198	Unc79	9030205A07Rik|Mlca3	unc-79 homolog (C. elegans)	protein-coding
Diff_Nuc7413	chr3	68193852	68193991	+	0	NA	intron (NM_001113420, intron 1 of 6)	intron (NM_001113420, intron 1 of 6)	-78184	NM_001282045	30953	Mm.331064	NM_013928	ENSMUSG00000027777	Schip1	Nf2ip|Schip-1	schwannomin interacting protein 1	protein-coding
Diff_Nuc7158	chr3	12592382	12592521	+	0	NA	Intergenic	L1_Mus3|LINE|L1	-748092	NR_040751	100038545	Mm.388494	NR_040751	ENSMUSG00000104015	Gm10745	ENSMUSG00000074696	predicted gene 10745	ncRNA
Diff_Nuc2597	chr16	3250032	3250171	+	0	NA	Intergenic	MERVL-int|LTR|ERVL	-342297	NM_146860	258859	Mm.377723	NM_146860	ENSMUSG00000051003	Olfr161	MOR131-1|OR912-47M6	olfactory receptor 161	protein-coding
Diff_Nuc2085	chr10	101392792	101392931	+	0	NA	intron (NM_001205098, intron 2 of 7)	Lx8|LINE|L1	157535	NR_037211	100526516		NR_037211	ENSMUSG00000092952	Mir3059	mir-3059|mmu-mir-3059	microRNA 3059	ncRNA
Diff_Nuc9571	chr9	26874152	26874291	+	0	NA	intron (NM_178113, intron 20 of 35)	intron (NM_178113, intron 20 of 35)	36461	NM_178113	78658	Mm.251777	NM_178113	ENSMUSG00000035024	Ncapd3	2810487N22Rik|4632407J06Rik|AI195468|AU018739|B130055D15Rik|mKIAA0056	non-SMC condensin II complex, subunit D3	protein-coding
Diff_Nuc7742	chr3	142205872	142206011	+	0	NA	exon (NM_001083312, exon 7 of 11)	exon (NM_001083312, exon 7 of 11)	12641	NM_145545	229900	Mm.45740	NM_145545	ENSMUSG00000040253	Gbp7	9830147J24Rik	guanylate binding protein 7	protein-coding
Diff_Nuc8407	chr2	137754252	137754391	+	0	NA	Intergenic	Intergenic	-327999	NM_001025431	228662	Mm.153405	NM_145534	ENSMUSG00000062098	Btbd3	mKIAA0952	BTB (POZ) domain containing 3	protein-coding
Diff_Nuc7846	chr2	8521282	8521421	+	0	NA	Intergenic	Intergenic	-589791	NR_038180	73438	Mm.23558	NR_038180	ENSMUSG00000085580	1700061F12Rik	-	RIKEN cDNA 1700061F12 gene	ncRNA
Diff_Nuc9799	chr9	72124582	72124721	+	0	NA	intron (NM_146224, intron 1 of 21)	intron (NM_146224, intron 1 of 21)	1956	NM_001311105	235469	Mm.242791	NM_146224	ENSMUSG00000038535	Zfp280d	A930005F02Rik|BC027163|Suhw4|ZNF634|Znf280d	zinc finger protein 280D	protein-coding
Diff_Nuc1334	chr11	46083292	46083431	+	0	NA	intron (NM_001252460, intron 11 of 30)	intron (NM_001252460, intron 11 of 30)	34302	NM_177075	320116	Mm.39600	NM_177075	ENSMUSG00000048721	Fndc9	C030019I05Rik	fibronectin type III domain containing 9	protein-coding
Diff_Nuc9577	chr9	27481872	27482011	+	0	NA	Intergenic	Intergenic	-116913	NM_177906	330908	Mm.379474	NM_177906	ENSMUSG00000062257	Opcml	2900075O15Rik|3732419F12|AI844366|B930023M13Rik|C230027C17|Gm181|Obcam	opioid binding protein/cell adhesion molecule-like	protein-coding
Diff_Nuc3836	chr14	104809952	104810091	+	0	NA	Intergenic	Intergenic	57195	NM_011143	18996	Mm.246550	NM_011143	ENSMUSG00000048349	Pou4f1	Brn-3|Brn-3.0|Brn3|Brn3.0|Brn3a|E130119J07Rik	POU domain, class 4, transcription factor 1	protein-coding
Diff_Nuc9173	chr1	142647052	142647191	+	0	NA	Intergenic	Intergenic	-94142	NR_040604	75910	Mm.483845	NR_040604	ENSMUSG00000102368	4930590L20Rik	-	RIKEN cDNA 4930590L20 gene	ncRNA
Diff_Nuc6127	chr5	65485032	65485171	+	0	NA	Intergenic	Intergenic	-13706	NM_001347355	71778	Mm.10281	NM_175174	ENSMUSG00000054920	Klhl5	1300013C10Rik	kelch-like 5	protein-coding
Diff_Nuc6920	chr4	110716142	110716281	+	0	NA	intron (NM_001048189, intron 4 of 12)	intron (NM_001048189, intron 4 of 12)	-371400	NR_033793	67621	Mm.45533	NM_026279	ENSMUSG00000028545	Bend5	2310026E23Rik	BEN domain containing 5	protein-coding
Diff_Nuc7066	chr4	146143302	146143441	+	0	NA	intron (NM_001177545, intron 2 of 4)	intron (NM_001177545, intron 2 of 4)	18280	NM_001177545	667666	Mm.459230	NM_001177545	ENSMUSG00000066007	Zfp600	Gm13164|OTTMUSG00000010694	zinc finger protein 600	protein-coding
Diff_Nuc3574	chr14	38056322	38056461	+	0	NA	Intergenic	MamGypLTR1c|LTR|Gypsy	-107883	NM_078478	66092	Mm.182912	NM_078478	ENSMUSG00000041028	Ghitm	1010001P14Rik|C77840|MICS1|PTD010|Tmbim5	growth hormone inducible transmembrane protein	protein-coding
Diff_Nuc840	chr12	54277042	54277181	+	0	NA	Intergenic	Intergenic	-72553	NM_013780	27386	Mm.247044	NM_013780	ENSMUSG00000021010	Npas3	4930423H22Rik|bHLHe12	neuronal PAS domain protein 3	protein-coding
Diff_Nuc4894	chr7	80181502	80181641	+	0	NA	Intergenic	Intergenic	65383	NR_046024	625243	Mm.261798	NR_046024	ENSMUSG00000108383	Gm6567	-	predicted gene 6567	ncRNA
Diff_Nuc8550	chr2	172894102	172894241	+	0	NA	Intergenic	IAP-d-int|LTR|ERVK	46768	NM_019547	56190	Mm.485782	NM_019547	ENSMUSG00000027510	Rbm38	Rnpc1|Seb4|Seb4l	RNA binding motif protein 38	protein-coding
Diff_Nuc2736	chr16	33675082	33675221	+	0	NA	Intergenic	B3|SINE|B2	-9401	NM_175256	77446	Mm.245741	NM_172934	ENSMUSG00000075254	Heg1	4632417D23Rik|5530401I02Rik|9530025L16Rik|BC038614|Gm629|OTTMUSG00000027315	heart development protein with EGF-like domains 1	protein-coding
Diff_Nuc3105	chr15	26321602	26321741	+	0	NA	intron (NM_177597, intron 3 of 3)	intron (NM_177597, intron 3 of 3)	82868	NM_001310774	211147	Mm.54257	NM_177597	ENSMUSG00000022269	March11	9630025C22	membrane-associated ring finger (C3HC4) 11	protein-coding
Diff_Nuc5548	chr6	82601442	82601581	+	0	NA	intron (NM_025882, intron 2 of 3)	intron (NM_025882, intron 2 of 3)	1348	NM_025882	66979	Mm.195753	NM_025882	ENSMUSG00000030042	Pole4	2400007P05Rik|5830430F06Rik	polymerase (DNA-directed), epsilon 4 (p12 subunit)	protein-coding
Diff_Nuc2352	chr17	33913592	33913731	+	0	NA	intron (NM_020581, intron 6 of 6)	intron (NM_020581, intron 6 of 6)	4859	NM_020581	57875	Mm.196189	NM_020581	ENSMUSG00000002289	Angptl4	Arp4|Bk89|Fiaf|Hfarp|Ng27|Pgar|Pgarg|Pp1158	angiopoietin-like 4	protein-coding
Diff_Nuc1316	chr11	42418952	42419091	+	0	NA	intron (NM_001347314, intron 9 of 9)	intron (NM_001347314, intron 9 of 9)	184169	NM_001347314	14401	Mm.338723	NM_008070	ENSMUSG00000007653	Gabrb2	AI834970|C030002O17Rik|C030021G16Rik|Gabrab2|Gabrb-2	gamma-aminobutyric acid (GABA) A receptor, subunit beta 2	protein-coding
Diff_Nuc6691	chr4	59459252	59459391	+	0	NA	Intergenic	Intergenic	-7816	NM_001163288	634731	Mm.483589	NM_001163288	ENSMUSG00000038578	Susd1	A530080P10|Gm12528|OTTMUSG00000007332	sushi domain containing 1	protein-coding
Diff_Nuc5179	chr7	138954382	138954521	+	0	NA	Intergenic	Intergenic	-203692	NM_173410	233919	Mm.208740	NM_173410	ENSMUSG00000040125	Gpr26	9630036A11Rik|A730021D22	G protein-coupled receptor 26	protein-coding
Diff_Nuc2172	chr10	120909302	120909441	+	0	NA	intron (NM_138956, intron 1 of 4)	intron (NM_138956, intron 1 of 4)	3935	NM_138956	192678	Mm.41265	NM_138956	ENSMUSG00000025795	Rassf3	AW212023|AW322379	Ras association (RalGDS/AF-6) domain family member 3	protein-coding
Diff_Nuc9559	chr9	23459502	23459641	+	0	NA	Intergenic	Intergenic	432051	NM_028472	73230	Mm.335020	NM_028472	ENSMUSG00000031963	Bmper	3110056H04Rik|CV-2|Crim3|Cv2	BMP-binding endothelial regulator	protein-coding
Diff_Nuc4655	chr7	15429392	15429531	+	0	NA	Intergenic	L1Md_F|LINE|L1	184404	NM_001038676	194588	Mm.389816	NM_001038676	ENSMUSG00000055942	Obox7	EG194588|Gm4745	oocyte specific homeobox 7	protein-coding
Diff_Nuc8304	chr2	115772642	115772781	+	0	NA	intron (NM_001346047, intron 9 of 13)	B3|SINE|B2	117644	NM_001346044	17536	Mm.247566	NM_010825	ENSMUSG00000027210	Meis2	A430109D20Rik|Mrg1|Stra10	Meis homeobox 2	protein-coding
Diff_Nuc7969	chr2	37963272	37963411	+	0	NA	intron (NM_146122, intron 5 of 21)	intron (NM_146122, intron 5 of 21)	179563	NM_146122	227801	Mm.314245	NM_146122	ENSMUSG00000035392	Dennd1a	6030446I19Rik|connecdenn	DENN/MADD domain containing 1A	protein-coding
Diff_Nuc10000	chr9	121655952	121656091	+	0	NA	intron (NM_010918, intron 12 of 16)	intron (NM_010918, intron 12 of 16)	13040	NR_033503	320301	Mm.373883	NR_033503		E530011L22Rik	-	RIKEN cDNA E530011L22 gene	ncRNA
Diff_Nuc10336	chr8	83419902	83420041	+	0	NA	Intergenic	PB1|SINE|Alu	-15553	NM_001301298	14388	Mm.277409	NM_021356	ENSMUSG00000031714	Gab1	AA408973|AW107238	growth factor receptor bound protein 2-associated protein 1	protein-coding
Diff_Nuc7525	chr3	92476142	92476281	+	0	NA	Intergenic	MTD|LTR|MaLR	-1974	NM_028625	73722	Mm.279773	NM_028625	ENSMUSG00000068890	Lce1a2	1110004E04Rik|Sprrl2	late cornified envelope 1A2	protein-coding
Diff_Nuc6252	chr5	95558152	95558291	+	0	NA	Intergenic	L1_Mus1|LINE|L1	-53422	NM_001200055	100041253	Mm.422705	NM_001200055	ENSMUSG00000095996	Gm16513	-	predicted gene, Gm16513	protein-coding
Diff_Nuc9439	chr9	3000232	3000371	+	0	NA	Intergenic	GSAT_MM|Satellite|Satellite	38442	NR_039546	100628572		NR_039546	ENSMUSG00000106183	Mir101c	mir-101c|mmu-mir-101c	microRNA 101c	ncRNA
Diff_Nuc6914	chr4	108896732	108896871	+	0	NA	intron (NM_001285895, intron 1 of 8)	ID_B1|SINE|B4	5783	NM_001285895	108802	Mm.318248	NM_001033226	ENSMUSG00000028558	Calr4	4933403L16Rik|AU017583	calreticulin 4	protein-coding
Diff_Nuc6734	chr4	71413472	71413611	+	0	NA	Intergenic	Lx6|LINE|L1	448386	NM_011599	21885	Mm.278444	NM_011599	ENSMUSG00000008305	Tle1	C230057C06Rik|Estm14|Grg-1|Grg1|Tle4l	transducin-like enhancer of split 1	protein-coding
Diff_Nuc317	chr13	51063042	51063181	+	0	NA	Intergenic	RLTR25A|LTR|ERVK	132985	NR_029463	77428	Mm.405630	NR_029463		9430083A17Rik	-	RIKEN cDNA 9430083A17 gene	ncRNA
Diff_Nuc3400	chr15	92405972	92406111	+	0	NA	intron (NM_001164593, intron 3 of 9)	intron (NM_001164593, intron 3 of 9)	-21499	NM_001164594	239618	Mm.309826	NM_001164593	ENSMUSG00000036218	Pdzrn4	1110017D07Rik|LNX4|SAMCAP3L|mKIAA3027	PDZ domain containing RING finger 4	protein-coding
Diff_Nuc1971	chr10	76876922	76877061	+	0	NA	intron (NM_001024837, intron 1 of 10)	intron (NM_001024837, intron 1 of 10)	4027	NM_130895	110532	Mm.276815	NM_130895	ENSMUSG00000020262	Adarb1	1700057H01Rik|AW124433|AW558573|Adar2|BB220382|D10Bwg0447e|Red1	adenosine deaminase, RNA-specific, B1	protein-coding
Diff_Nuc2484	chr17	68214322	68214461	+	0	NA	intron (NM_172964, intron 10 of 17)	intron (NM_172964, intron 10 of 17)	85889	NM_001347410	268970	Mm.9935	NM_172964	ENSMUSG00000024043	Arhgap28	AU044757|AW550892|E130310N06	Rho GTPase activating protein 28	protein-coding
Diff_Nuc2399	chr17	45760982	45761121	+	0	NA	Intergenic	B3|SINE|B2	-22000	NM_001177469	653016	Mm.45676	NM_001177468	ENSMUSG00000079471	Gm7325	EG653016|Esgp	predicted gene 7325	protein-coding
Diff_Nuc2465	chr17	60803692	60803831	+	0	NA	Intergenic	L1_Mus1|LINE|L1	-1651016	NM_026497	67993	Mm.36507	NM_026497	ENSMUSG00000024228	Nudt12	0610016O18Rik	nudix (nucleoside diphosphate linked moiety X)-type motif 12	protein-coding
Diff_Nuc4399	chr18	43936982	43937121	+	0	NA	3' UTR (NM_001033280, exon 4 of 4)	3' UTR (NM_001033280, exon 4 of 4)	13096	NM_001289644	117158	Mm.210437	NM_054038	ENSMUSG00000038791	Scgb3a2	LuLeu1|Pnsp1|UGRP1|Utgrp1	secretoglobin, family 3A, member 2	protein-coding
Diff_Nuc3114	chr15	28711302	28711441	+	0	NA	Intergenic	Lx5|LINE|L1	577850	NM_133365	110082	Mm.248464	NM_133365	ENSMUSG00000022262	Dnah5	AU022615|Dnahc5|Mdnah5|b2b1134Clo|b2b1154Clo|b2b1537Clo|b2b1565Clo|b2b601Clo|mKIAA1603	dynein, axonemal, heavy chain 5	protein-coding
Diff_Nuc9566	chr9	25723282	25723421	+	0	NA	Intergenic	Intergenic	434169	NM_026189	67484	Mm.112977	NM_026189	ENSMUSG00000036611	Eepd1	2310005P05Rik|AI481005	endonuclease/exonuclease/phosphatase family domain containing 1	protein-coding
Diff_Nuc5872	chr5	14348602	14348741	+	0	NA	Intergenic	Intergenic	-166247	NM_011995	26875	Mm.146275	NM_011995	ENSMUSG00000061601	Pclo	Acz|Pico	piccolo (presynaptic cytomatrix protein)	protein-coding
Diff_Nuc10232	chr8	58724422	58724561	+	0	NA	Intergenic	L1Md_F2|LINE|L1	-48858	NM_008278	15446	Mm.18832	NM_008278	ENSMUSG00000031613	Hpgd	15-PGDH|AV026552	hydroxyprostaglandin dehydrogenase 15 (NAD)	protein-coding
Diff_Nuc9594	chr9	29985532	29985671	+	0	NA	Intergenic	Lx9|LINE|L1	-214887	NM_172290	235106	Mm.283138	NM_172290	ENSMUSG00000059974	Ntm	6230410L23Rik|B230210G24Rik|Hnt|Igdcc2|R75390	neurotrimin	protein-coding
Diff_Nuc3910	chr14	122196112	122196251	+	0	NA	intron (NM_134074, intron 1 of 52)	intron (NM_134074, intron 1 of 52)	775	NM_134074	105445	Mm.378591	NM_134074	ENSMUSG00000025558	Dock9	AA959601|AW538057|B230309H04Rik|D14Wsu89e|Zizimin1|mKIAA1058	dedicator of cytokinesis 9	protein-coding
Diff_Nuc5072	chr7	116578282	116578421	+	0	NA	intron (NM_054103, intron 1 of 13)	intron (NM_054103, intron 1 of 13)	4216	NM_054103	117229	Mm.389950	NM_054103	ENSMUSG00000031027	Stk33	4921505G21Rik|AW061264	serine/threonine kinase 33	protein-coding
Diff_Nuc723	chr12	26262042	26262181	+	0	NA	Intergenic	Intergenic	448072	NR_045844	432641	Mm.112955	NR_045844		Gm17746	-	predicted gene, 17746	ncRNA
Diff_Nuc176	chr13	20992572	20992711	+	0	NA	intron (NM_012054, intron 5 of 20)	intron (NM_012054, intron 5 of 20)	106659	NM_012054	27052	Mm.314046	NM_012054	ENSMUSG00000021322	Aoah	4930433E13Rik	acyloxyacyl hydrolase	protein-coding
Diff_Nuc3228	chr15	53772402	53772541	+	0	NA	Intergenic	Lx7|LINE|L1	-38480	NM_177225	320679	Mm.442455	NM_177225	ENSMUSG00000058656	Samd12	A830094I09Rik	sterile alpha motif domain containing 12	protein-coding
Diff_Nuc1867	chr10	51883352	51883491	+	0	NA	intron (NM_011282, intron 10 of 43)	intron (NM_011282, intron 10 of 43)	31629	NM_011282	19886	Mm.236163	NM_011282	ENSMUSG00000019893	Ros1	Ros-1|c-ros	Ros1 proto-oncogene	protein-coding
Diff_Nuc4875	chr7	75348982	75349121	+	0	NA	intron (NM_010513, intron 15 of 20)	B1F|SINE|Alu	60068	NM_030101	78444	Mm.425468	NM_030101	ENSMUSG00000030553	Pgpep1l	C330024D12Rik	pyroglutamyl-peptidase I-like	protein-coding
Diff_Nuc1550	chr11	96645062	96645201	+	0	NA	Intergenic	RMER10A|LTR|ERVL	-5319	NM_007622	12412	Mm.29055	NM_007622	ENSMUSG00000018666	Cbx1	Cbx|Cbx-rs2|E430007M08Rik|HP1B|Hp1beta|M31|MOD1	chromobox 1	protein-coding
Diff_Nuc2247	chr17	10488967	10489106	+	0	NA	intron (NM_001159516, intron 1 of 6)	intron (NM_001159516, intron 1 of 6)	23190	NM_021881	19317	Mm.130694	NM_021881	ENSMUSG00000062078	Qk	1110003F05Rik|1500005P18|QkI|l(17)-1Wis|l17Wis1	quaking	protein-coding
Diff_Nuc3445	chr15	103218212	103218351	+	0	NA	Intergenic	Intergenic	-21059	NM_001314041	16402	Mm.16234	NM_010577	ENSMUSG00000000555	Itga5	Cd49e|Fnra|VLA5	integrin alpha 5 (fibronectin receptor alpha)	protein-coding
Diff_Nuc9624	chr9	36829932	36830071	+	0	NA	intron (NM_001029838, intron 2 of 12)	ID4_|SINE|ID	124906	NM_148950	208076	Mm.260335	NM_148950	ENSMUSG00000035934	Pknox2	D230005H23Rik|Prep2	Pbx/knotted 1 homeobox 2	protein-coding
Diff_Nuc2748	chr16	34466722	34466861	+	0	NA	intron (NM_001164268, intron 1 of 33)	MER5C|DNA|MER1_type	47322	NM_001164268	545156	Mm.82274	NM_177357	ENSMUSG00000061751	Kalrn	2210407G14Rik|AV235988|DUET|E530005C20Rik|Gm539|Hapip|TRAD	kalirin, RhoGEF kinase	protein-coding
Diff_Nuc7800	chr3	153777462	153777601	+	0	NA	intron (NM_001081263, intron 1 of 21)	L1_Mus4|LINE|L1	141131	NM_001081263	242259	Mm.239962	NM_001081263	ENSMUSG00000028360	Slc44a5	AA117069|Gm422	solute carrier family 44, member 5	protein-coding
Diff_Nuc4617	chr7	5110782	5110921	+	0	NA	Intergenic	L1Md_T|LINE|L1	-11827	NM_001166706	384522	Mm.480286	NM_001166706	ENSMUSG00000074402	Vmn1r55	Gm1422|Gm403|V1rd5	vomeronasal 1 receptor 55	protein-coding
Diff_Nuc3774	chr14	86947932	86948071	+	0	NA	Intergenic	L1Md_F2|LINE|L1	302224	NR_040457	75155	Mm.399239	NR_040457		4930529K09Rik	4930507G21Rik	RIKEN cDNA 4930529K09 gene	ncRNA
Diff_Nuc8820	chr1	62492522	62492661	+	0	NA	intron (NM_001081050, intron 19 of 22)	intron (NM_001081050, intron 19 of 22)	-257300	NM_001077406	18187	Mm.266341	NM_010939	ENSMUSG00000025969	Nrp2	1110048P06Rik|Np-2|Np2|Npn-2|Npn2	neuropilin 2	protein-coding
Diff_Nuc1654	chr11	120528732	120528871	+	0	NA	Intergenic	RMER12|LTR|ERVK	-5486	NM_026877	68938	Mm.294020	NM_026877	ENSMUSG00000025142	Aspscr1	1190006K01Rik|ASPC|ASPCR1|ASPL|ASPS|RCC17|TUG	alveolar soft part sarcoma chromosome region, candidate 1 (human)	protein-coding
Diff_Nuc4034	chr19	28600522	28600661	+	0	NA	intron (NM_175459, intron 4 of 10)	intron (NM_175459, intron 4 of 10)	-152123	NR_045330	320176	Mm.406716	NR_045330	ENSMUSG00000097735	D930032P07Rik	-	RIKEN cDNA D930032P07 gene	ncRNA
Diff_Nuc726	chr12	26781372	26781511	+	0	NA	intron (NR_131149, intron 4 of 4)	intron (NR_131149, intron 4 of 4)	113929	NR_131149	629481	Mm.390460	NR_131149		Gm29687	-	predicted gene, 29687	ncRNA
Diff_Nuc7858	chr2	12141422	12141561	+	0	NA	intron (NM_001001309, intron 13 of 29)	intron (NM_001001309, intron 13 of 29)	-81382	NR_040353	338535	Mm.483275	NR_040353	ENSMUSG00000086843	E030013I19Rik	-	RIKEN cDNA E030013I19 gene	ncRNA
Diff_Nuc9148	chr1	136911842	136911981	+	0	NA	intron (NM_001033409, intron 6 of 17)	intron (NM_001033409, intron 6 of 17)	52769	NM_001278115	67196	Mm.284587	NM_026024	ENSMUSG00000026429	Ube2t	2700084L22Rik|C80607	ubiquitin-conjugating enzyme E2T	protein-coding
Diff_Nuc1271	chr11	30695577	30695716	+	0	NA	intron (NM_134013, intron 3 of 46)	A-rich|Low_complexity|Low_complexity	23871	NM_134013	103554	Mm.240066	NM_134013	ENSMUSG00000040850	Psme4	AA409398|AU041366|TEMO|mKIAA0077	proteasome (prosome, macropain) activator subunit 4	protein-coding
Diff_Nuc9141	chr1	135046372	135046511	+	0	NA	Intergenic	B2_Mm1a|SINE|B2	18698	NM_133819	108954	Mm.293628	NM_133819	ENSMUSG00000046062	Ppp1r15b	1810033K10Rik|AI606441|C530022L24Rik|CReP	protein phosphatase 1, regulatory (inhibitor) subunit 15b	protein-coding
Diff_Nuc7582	chr3	104474822	104474961	+	0	NA	Intergenic	Intergenic	32304	NM_009196	20501	Mm.9086	NM_009196	ENSMUSG00000032902	Slc16a1	AL022710|Mct1	solute carrier family 16 (monocarboxylic acid transporters), member 1	protein-coding
Diff_Nuc2826	chr16	48746332	48746471	+	0	NA	intron (NM_198297, intron 3 of 5)	Lx7|LINE|L1	25668	NM_198297	77647	Mm.167298	NM_198297	ENSMUSG00000030775	Trat1	C030046M14Rik|Tcrim|Trim	T cell receptor associated transmembrane adaptor 1	protein-coding
Diff_Nuc9981	chr9	117119812	117119951	+	0	NA	intron (NM_001172126, intron 1 of 12)	URR1B|DNA|MER1_type	41720	NM_001172123	207181	Mm.326411	NM_178660	ENSMUSG00000039607	Rbms3	6720477E09Rik|8430436O14Rik	RNA binding motif, single stranded interacting protein	protein-coding
Diff_Nuc5961	chr5	31834052	31834191	+	0	NA	intron (NM_001347328, intron 3 of 13)	intron (NM_001347328, intron 3 of 13)	4753	NM_001347328	20534	Mm.352407	NM_009206	ENSMUSG00000029141	Slc4a1ap	kanadaptin	solute carrier family 4 (anion exchanger), member 1, adaptor protein	protein-coding
Diff_Nuc6300	chr5	107463522	107463661	+	0	NA	Intergenic	Intergenic	70011	NM_001271566	12545	Mm.20842	NM_009863	ENSMUSG00000029283	Cdc7	AI597260|Cdc7l1|muCdc7	cell division cycle 7 (S. cerevisiae)	protein-coding
Diff_Nuc5998	chr5	38638852	38638991	+	0	NA	Intergenic	Intergenic	-12693	NM_025480	66309	Mm.256185	NM_025480	ENSMUSG00000067365	Tmem128	2810021O14Rik	transmembrane protein 128	protein-coding
Diff_Nuc1435	chr11	69524652	69524791	+	0	NA	Intergenic	Intergenic	-15121	NM_001159503	619441	Mm.8983	NM_001034097	ENSMUSG00000018752	Tnfsfm13	Tnfsf12-Tnfsf13|Tnfsf12Tnfsf13|Tnfsf12tnfsf13|Twe-pril	tumor necrosis factor (ligand) superfamily, membrane-bound member 13	protein-coding
Diff_Nuc2269	chr17	14506212	14506351	+	0	NA	intron (NM_022315, intron 8 of 12)	intron (NM_022315, intron 8 of 12)	29668	NR_027986	74917	Mm.32228	NM_183107		4930474M22Rik	-	RIKEN cDNA 4930474M22 gene	ncRNA
Diff_Nuc2618	chr16	8797272	8797411	+	0	NA	Intergenic	B2_Mm2|SINE|B2	-32852	NM_001081400	69053	Mm.390868	NM_001081400	ENSMUSG00000022507	1810013L24Rik	1110017P05Rik|3010002C02Rik|AA792997|AW124177|Gm19906|R74903	RIKEN cDNA 1810013L24 gene	protein-coding
Diff_Nuc3115	chr15	29009182	29009321	+	0	NA	Intergenic	Intergenic	633908	NR_039542	100628607		NR_039542	ENSMUSG00000092639	Mir3964	mmu-mir-3964|mu-mir-3964	microRNA 3964	ncRNA
Diff_Nuc199	chr13	25041572	25041711	+	0	NA	intron (NM_008156, intron 3 of 25)	intron (NM_008156, intron 3 of 25)	6620	NM_008156	14756	Mm.291831	NM_008156	ENSMUSG00000021340	Gpld1	6330541J12Rik|AW546131	glycosylphosphatidylinositol specific phospholipase D1	protein-coding
Diff_Nuc10053	chr8	10353882	10354021	+	0	NA	intron (NM_001319151, intron 4 of 34)	MLT1A0|LTR|MaLR	200040	NM_001319151	244281	Mm.422761	NM_001081397	ENSMUSG00000039057	Myo16	BM140241|C230040D10Rik|Gm1105|NYAP3|mKIAA0865	myosin XVI	protein-coding
Diff_Nuc9183	chr1	145751022	145751161	+	0	NA	Intergenic	Intergenic	100188	NM_009061	19735	Mm.28262	NM_009061	ENSMUSG00000026360	Rgs2	GOS8	regulator of G-protein signaling 2	protein-coding
Diff_Nuc2116	chr10	108729082	108729221	+	0	NA	Intergenic	Intergenic	-281120	NM_001252341	20979	Mm.289702	NM_009306	ENSMUSG00000035864	Syt1	AW124717|G630098F17Rik|SytI	synaptotagmin I	protein-coding
Diff_Nuc6584	chr4	33697752	33697891	+	0	NA	Intergenic	Intergenic	172765	NR_106198	102465904		NR_106198	ENSMUSG00000098310	Mir8118	Gm27954|mmu-mir-8118	microRNA 8118	ncRNA
Diff_Nuc8997	chr1	99794242	99794381	+	0	NA	intron (NM_013626, intron 8 of 25)	CT-rich|Low_complexity|Low_complexity	127562	NM_026250	252876	Mm.86090	NM_026250	ENSMUSG00000026333	Gin1	4930429M06Rik|8430411H10Rik|Gin-1|Zh2c2	gypsy retrotransposon integrase 1	protein-coding
Diff_Nuc4994	chr7	99836682	99836821	+	0	NA	Intergenic	L2a|LINE|L2	-18329	NM_029078	74737	Mm.288645	NM_029078	ENSMUSG00000041328	Pcf11	2500001H09Rik|5730417B17Rik|C77803	PCF11 cleavage and polyadenylation factor subunit	protein-coding
Diff_Nuc5576	chr6	89383132	89383271	+	0	NA	intron (NM_001167736, intron 4 of 6)	intron (NM_001167736, intron 4 of 6)	-70594	NM_008881	18844	Mm.3789	NM_008881	ENSMUSG00000030084	Plxna1	2600013D04Rik|NOV|PlexA1|Plxn1|mKIAA4053	plexin A1	protein-coding
Diff_Nuc8967	chr1	91717392	91717531	+	0	NA	intron (NM_001037136, intron 12 of 16)	intron (NM_001037136, intron 12 of 16)	110290	NM_010262	14472	Mm.204730	NM_010262	ENSMUSG00000034486	Gbx2	D130058E05Rik|Gbx-2|MMoxA|Stra7	gastrulation brain homeobox 2	protein-coding
Diff_Nuc9231	chr1	156434652	156434791	+	0	NA	intron (NM_009782, intron 6 of 46)	intron (NM_009782, intron 6 of 46)	138329	NM_009782	12290	Mm.267517	NM_009782	ENSMUSG00000004110	Cacna1e	A430040I15|BII|Cach6|Cacnl1a6|Cav2.3|Cchra1|alpha1E	calcium channel, voltage-dependent, R type, alpha 1E subunit	protein-coding
Diff_Nuc539	chr13	100026502	100026641	+	0	NA	Intergenic	ID_B1|SINE|B4	71793	NM_001004149	238803	Mm.343207	NM_001004149	ENSMUSG00000050919	Zfp366	DC-SCRIPT|Znf366	zinc finger protein 366	protein-coding
Diff_Nuc3482	chr14	17231602	17231741	+	0	NA	intron (NM_009409, intron 13 of 35)	intron (NM_009409, intron 13 of 35)	33951	NM_009409	21974	Mm.130362	NM_009409	ENSMUSG00000017485	Top2b	D230016L12Rik|Top-2	topoisomerase (DNA) II beta	protein-coding
Diff_Nuc184	chr13	22509672	22509811	+	0	NA	Intergenic	RodERV21-int|LTR|ERV1	22843	NM_134212	171246	Mm.377202	NM_134212	ENSMUSG00000101073	Vmn1r200	V1rh3	vomeronasal 1 receptor 200	protein-coding
Diff_Nuc9613	chr9	35112852	35112991	+	0	NA	Intergenic	GSAT_MM|Satellite|Satellite	24231	NR_040715	71133	Mm.158577	NR_040715	ENSMUSG00000111746	4933422A05Rik	-	RIKEN cDNA 4933422A05 gene	ncRNA
Diff_Nuc9151	chr1	137581092	137581231	+	0	NA	Intergenic	L1M3|LINE|L1	-44613	NM_007791	13007	Mm.196484	NM_007791	ENSMUSG00000026421	Csrp1	AA408841|AA959891|AW545626|CRP1|Csrp	cysteine and glycine-rich protein 1	protein-coding
Diff_Nuc2244	chr17	10236802	10236941	+	0	NA	Intergenic	MLT1A|LTR|MaLR	-268140	NR_045433	71092	Mm.243827	NR_045433		4930452A19Rik	4933424P20Rik	RIKEN cDNA 4930452A19 gene	ncRNA
Diff_Nuc10009	chr9	123014152	123014291	+	0	NA	intron (NM_026917, intron 1 of 6)	intron (NM_026917, intron 1 of 6)	8102	NM_026917	69035	Mm.28300	NM_026917	ENSMUSG00000025786	Zdhhc3	1110020O22Rik|1810006O10Rik|2210017C02Rik|DHHC-3|GODZ|Gramp1|Zfp373	zinc finger, DHHC domain containing 3	protein-coding
Diff_Nuc7203	chr3	25441272	25441411	+	0	NA	intron (NM_001163387, intron 3 of 5)	intron (NM_001163387, intron 3 of 5)	610888	NM_001163387	192167	Mm.316080	NM_138666	ENSMUSG00000063887	Nlgn1	6330415N05Rik|BB179718|NL1|Nlg1|mKIAA1070	neuroligin 1	protein-coding
Diff_Nuc760	chr12	35630592	35630731	+	0	NA	Intergenic	B1_Mus1|SINE|Alu	-28894	NM_001271386	79221	Mm.310551	NM_024124	ENSMUSG00000004698	Hdac9	AV022454|D030072B18Rik|HD7B|HD9|HDRP|Hdac7b|Mitr|mKIAA0744	histone deacetylase 9	protein-coding
Diff_Nuc7469	chr3	82717762	82717901	+	0	NA	intron (NR_040381, intron 1 of 3)	intron (NR_040381, intron 1 of 3)	9432	NR_040381	78212	Mm.399202	NR_040381	ENSMUSG00000086273	Rbm46os	4930444E23Rik|4930564K09Rik|Lratos	RNA binding motif protein 46, opposite strand	ncRNA
Diff_Nuc8708	chr1	35045442	35045581	+	0	NA	Intergenic	Intergenic	138707	NM_145516	226971	Mm.292751	NM_145516	ENSMUSG00000026123	Plekhb2	2310009M15Rik|AU018239|Evt2|Phdc|evt-2	pleckstrin homology domain containing, family B (evectins) member 2	protein-coding
Diff_Nuc7255	chr3	36724072	36724211	+	0	NA	Intergenic	Intergenic	-37887	NM_172679	229227	Mm.207907	NM_172679	ENSMUSG00000037270	4932438A13Rik	4732443H21|B830039D19Rik|D630029K19Rik|FSA|Kiaa1109|Tweek	RIKEN cDNA 4932438A13 gene	protein-coding
Diff_Nuc5500	chr6	71813772	71813911	+	0	NA	intron (NM_001253687, intron 9 of 12)	intron (NM_001253687, intron 9 of 12)	32527	NM_001253688	76614	Mm.235123	NM_029673	ENSMUSG00000052337	Immt	1700082C19Rik|D830041H16Rik|HMP|P87|P87/89|P89	inner membrane protein, mitochondrial	protein-coding
Diff_Nuc1464	chr11	75261162	75261301	+	0	NA	intron (NM_138950, intron 6 of 9)	ID_B1|SINE|B4	6988	NM_138950	192652	Mm.340378	NM_138950	ENSMUSG00000045374	Wdr81	BC054822|Gm883|mFLJ00182|nur5	WD repeat domain 81	protein-coding
Diff_Nuc8769	chr1	51098222	51098361	+	0	NA	intron (NM_019790, intron 4 of 9)	intron (NM_019790, intron 4 of 9)	113924	NM_019790	56363	Mm.245154	NM_019790	ENSMUSG00000026109	Tmeff2	4832418D20Rik|7630402F16Rik|TR-2	transmembrane protein with EGF-like and two follistatin-like domains 2	protein-coding
Diff_Nuc731	chr12	28512122	28512261	+	0	NA	Intergenic	Intergenic	-484608	NM_009234	20666	Mm.41702	NM_009234	ENSMUSG00000063632	Sox11	1110038H03Rik|6230403H02Rik|AI836553|end1	SRY (sex determining region Y)-box 11	protein-coding
Diff_Nuc8086	chr2	63729392	63729531	+	0	NA	Intergenic	B1_Mus2|SINE|Alu	206634	NM_001267846	60344	Mm.130769	NM_021716	ENSMUSG00000075324	Fign	fi|fidget	fidgetin	protein-coding
Diff_Nuc2003	chr10	84302822	84302961	+	0	NA	exon (NM_001024918, exon 6 of 18)	exon (NM_001024918, exon 6 of 18)	1998	NM_027689	71137	Mm.79070	NM_027689	ENSMUSG00000020037	Rfx4	4933412G19Rik|NYD-sp10	regulatory factor X, 4 (influences HLA class II expression)	protein-coding
Diff_Nuc8777	chr1	52514772	52514911	+	0	NA	3' UTR (NM_008667, exon 8 of 8)	3' UTR (NM_008667, exon 8 of 8)	42451	NM_008667	17936	Mm.25903	NM_008667	ENSMUSG00000002881	Nab1	-	Ngfi-A binding protein 1	protein-coding
Diff_Nuc8321	chr2	119980562	119980701	+	0	NA	promoter-TSS (NM_133838)	promoter-TSS (NM_133838)	-320	NM_133838	98878	Mm.132226	NM_133838	ENSMUSG00000027293	Ehd4	2210022F10Rik|AI197390|AI846352|AV006278|Past2	EH-domain containing 4	protein-coding
Diff_Nuc10016	chr9	123761712	123761851	+	0	NA	promoter-TSS (NM_148925)	promoter-TSS (NM_148925)	-761	NM_001110253	17281	Mm.252941	NM_148925	ENSMUSG00000025241	Fyco1	2810409M01Rik|Mem2|RUFY3|ZFYVE7	FYVE and coiled-coil domain containing 1	protein-coding
Diff_Nuc7639	chr3	118402072	118402211	+	0	NA	intron (NM_170778, intron 3 of 22)	intron (NM_170778, intron 3 of 22)	137045	NM_170778	99586	Mm.27907	NM_170778	ENSMUSG00000033308	Dpyd	AI315208|DPD|E330028L06Rik	dihydropyrimidine dehydrogenase	protein-coding
Diff_Nuc9010	chr1	104123912	104124051	+	0	NA	Intergenic	Intergenic	1071636	NR_037989	100504525	Mm.87065	NR_037989	ENSMUSG00000100684	Gm20268	-	predicted gene, 20268	ncRNA
Diff_Nuc4025	chr19	27342032	27342171	+	0	NA	Intergenic	MMERGLN-int|LTR|ERV1	50591	NM_001161420	22359	Mm.4141	NM_013703	ENSMUSG00000024924	Vldlr	AA408956|AI451093|AW047288	very low density lipoprotein receptor	protein-coding
Diff_Nuc2349	chr17	33242552	33242691	+	0	NA	exon (NM_001024950, exon 4 of 4)	exon (NM_001024950, exon 4 of 4)	16309	NM_001024950	240068	Mm.121392	NM_001024950	ENSMUSG00000067424	Zfp563	D10628|D130054H01|NTfin7|Zfp413	zinc finger protein 563	protein-coding
Diff_Nuc10007	chr9	122917422	122917561	+	0	NA	intron (NM_010620, intron 27 of 34)	L1MA7|LINE|L1	-12953	NM_025339	66079	Mm.482265	NM_025339	ENSMUSG00000066233	Tmem42	0610027O18Rik|4933429E06Rik|AV003444|D9Ertd662e	transmembrane protein 42	protein-coding
Diff_Nuc4809	chr7	57925652	57925791	+	0	NA	intron (NM_001037906, intron 14 of 19)	B4|SINE|B4	71161	NM_172901	243996	Mm.443270	NM_172901	ENSMUSG00000084234	4933405O20Rik	-	RIKEN cDNA 4933405O20 gene	protein-coding
Diff_Nuc412	chr13	68604182	68604321	+	0	NA	Intergenic	Intergenic	116730	NM_001308475	210009	Mm.205514	NM_172480	ENSMUSG00000034617	Mtrr	4732420G08|MSR	5-methyltetrahydrofolate-homocysteine methyltransferase reductase	protein-coding
Diff_Nuc2759	chr16	36621572	36621711	+	0	NA	intron (NM_019388, intron 2 of 7)	intron (NM_019388, intron 2 of 7)	44522	NM_019388	12524	Mm.1452	NM_019388	ENSMUSG00000022901	Cd86	B7|B7-2|B7.2|B70|CLS1|Cd28l2|ETC-1|Ly-58|Ly58|MB7|MB7-2|TS/A-2	CD86 antigen	protein-coding
Diff_Nuc5177	chr7	138892292	138892431	+	0	NA	Intergenic	Intergenic	188353	NM_001317350	12237	Mm.927	NM_009774	ENSMUSG00000066979	Bub3	AU019800|AU021329|AU043350|AW146323|C78067	BUB3 mitotic checkpoint protein	protein-coding
Diff_Nuc9587	chr9	28718282	28718421	+	0	NA	intron (NM_177906, intron 7 of 7)	MIRc|SINE|MIR	1052363	NM_172290	235106	Mm.283138	NM_172290	ENSMUSG00000059974	Ntm	6230410L23Rik|B230210G24Rik|Hnt|Igdcc2|R75390	neurotrimin	protein-coding
Diff_Nuc2262	chr17	13381032	13381171	+	0	NA	Intergenic	Intergenic	-16807	NR_033458	100038394	Mm.401677	NR_033458		Gm10512	ENSMUSG00000073459	predicted gene 10512	ncRNA
Diff_Nuc632	chr12	3650182	3650321	+	0	NA	intron (NM_001162465, intron 8 of 17)	L1Md_F2|LINE|L1	77210	NM_007886	13528	Mm.286202	NM_007886	ENSMUSG00000071454	Dtnb	-	dystrobrevin, beta	protein-coding
Diff_Nuc5491	chr6	70736932	70737071	+	0	NA	intron (NM_009075, intron 1 of 8)	URR1A|DNA|MER1_type	5168	NM_009075	19895	Mm.17905	NM_009075	ENSMUSG00000053604	Rpia	RPI	ribose 5-phosphate isomerase A	protein-coding
Diff_Nuc9100	chr1	125795552	125795691	+	0	NA	intron (NM_199021, intron 2 of 25)	Lx8|LINE|L1	146515	NM_199021	269109	Mm.417716	NM_199021	ENSMUSG00000036815	Dpp10	6430601K09Rik|DPP X|Dprp3	dipeptidylpeptidase 10	protein-coding
Diff_Nuc3206	chr15	48875432	48875571	+	0	NA	Intergenic	RMER17B|LTR|ERVK	-251966	NM_001081391	239420	Mm.309363	NM_001081391	ENSMUSG00000022311	Csmd3	4930500N14Rik|mKIAA1894	CUB and Sushi multiple domains 3	protein-coding
Diff_Nuc6766	chr4	78029372	78029511	+	0	NA	Intergenic	L1M5|LINE|L1	-171642	NM_011211	19266	Mm.184021	NM_011211	ENSMUSG00000028399	Ptprd	1110002J03Rik|3000002J10Rik|B230219D21Rik|R-PTP-delta	protein tyrosine phosphatase, receptor type, D	protein-coding
Diff_Nuc4695	chr7	25601732	25601871	+	0	NA	Intergenic	L1_Mur3|LINE|L1	-2013	NR_045096	545936	Mm.376228	NR_045096	ENSMUSG00000011350	Gm5893	EG545936|Gm477	predicted gene 5893	pseudo
Diff_Nuc5137	chr7	130341872	130342011	+	0	NA	Intergenic	Intergenic	-16439	NM_146198	233836	Mm.211838	NM_146198	ENSMUSG00000030769	Slc5a11	2010013B02Rik|Kst1|RKST2|SMIT2|Slc5a10	solute carrier family 5 (sodium/glucose cotransporter), member 11	protein-coding
Diff_Nuc5413	chr6	47888142	47888281	+	0	NA	Intergenic	Intergenic	-4963	NR_027963	232785	Mm.482185	NR_027963	ENSMUSG00000072653	Zfp783	A230106D06Rik|ENSMUSG00000072653|Gm20494	zinc finger protein 783	ncRNA
Diff_Nuc9381	chr1	183492032	183492171	+	0	NA	Intergenic	Intergenic	-50519	NM_207280	403180	Mm.220754	NM_207280	ENSMUSG00000050625	Ccdc121	6530421E24Rik|Gm755	coiled-coil domain containing 121	protein-coding
Diff_Nuc9498	chr9	10880432	10880571	+	0	NA	intron (NM_001033359, intron 1 of 20)	RSINE1|SINE|B4	24225	NM_001033359	244682	Mm.187021	NM_001033359	ENSMUSG00000039488	Cntn5	6720426O10Rik|A830025P08Rik|Gm507|NB-2	contactin 5	protein-coding
Diff_Nuc7220	chr3	28796062	28796201	+	0	NA	intron (NM_001033479, intron 2 of 14)	intron (NM_001033479, intron 2 of 14)	4592	NM_001033479	385263	Mm.60893	NM_001033479	ENSMUSG00000074655	Gm1527	Gm1136	predicted gene 1527	protein-coding
Diff_Nuc7058	chr4	145668642	145668781	+	0	NA	intron (NM_001243138, intron 2 of 4)	B3|SINE|B2	14408	NM_001243139	100041433	Mm.441741	NM_001243138	ENSMUSG00000056300	Zfp981	Gm13247|OTTMUSG00000011075	zinc finger protein 981	protein-coding
Diff_Nuc370	chr13	60556132	60556271	+	0	NA	Intergenic	Intergenic	-147107	NM_001285917	69635	Mm.24103	NM_029653	ENSMUSG00000021559	Dapk1	D13Ucla1|DAP-Kinase	death associated protein kinase 1	protein-coding
Diff_Nuc9894	chr9	96731522	96731661	+	0	NA	intron (NM_153420, intron 5 of 6)	intron (NM_153420, intron 5 of 6)	58302	NM_001289646	235534	Mm.233031	NM_153420	ENSMUSG00000043587	Pxylp1	9430094M07Rik|Acpl2|BB177120|C130099A20Rik	2-phosphoxylose phosphatase 1	protein-coding
Diff_Nuc5896	chr5	19920292	19920431	+	0	NA	intron (NM_001170745, intron 8 of 20)	B1F2|SINE|Alu	467581	NM_172992	68770	Mm.86410	NM_172992	ENSMUSG00000039987	Phtf2	1110054G21Rik|9530062N20Rik|AI447096|C77923	putative homeodomain transcription factor 2	protein-coding
Diff_Nuc329	chr13	53320452	53320591	+	0	NA	intron (NM_013846, intron 1 of 8)	intron (NM_013846, intron 1 of 8)	60957	NM_013846	26564	Mm.342774	NM_013846	ENSMUSG00000021464	Ror2	Ntrkr2|mRor2	receptor tyrosine kinase-like orphan receptor 2	protein-coding
Diff_Nuc8969	chr1	92472202	92472341	+	0	NA	Intergenic	Intergenic	-27729	NM_133805	108679	Mm.119177	NM_133805	ENSMUSG00000034432	Cops8	9430009J09Rik|AA408242|Csn8|Sgn8	COP9 signalosome subunit 8	protein-coding
Diff_Nuc129	chr13	12653762	12653901	+	0	NA	Intergenic	B4A|SINE|B4	-4319	NM_026184	67475	Mm.358706	NM_026184	ENSMUSG00000057069	Ero1lb	1300013B24Rik|1700065B09Rik|AI447560|Ero1b|ero1-beta	ERO1-like beta (S. cerevisiae)	protein-coding
Diff_Nuc8405	chr2	137028422	137028561	+	0	NA	Intergenic	LTR33|LTR|ERVL	-86235	NM_013822	16449	Mm.22398	NM_013822	ENSMUSG00000027276	Jag1	ABE2|Gsfabe2|Htu|Ozz|Ser-1	jagged 1	protein-coding
Diff_Nuc8241	chr2	101055562	101055701	+	0	NA	Intergenic	Intergenic	-409274	NM_009020	19374	Mm.4988	NM_009020	ENSMUSG00000032864	Rag2	Rag-2	recombination activating gene 2	protein-coding
Diff_Nuc5474	chr6	66251322	66251461	+	0	NA	Intergenic	L1_Mus4|LINE|L1	28892	NR_136927	102633773	Mm.272086	NR_136927	ENSMUSG00000107653	Gm31520	-	sterol-C5-desaturase pseudogene	pseudo
Diff_Nuc232	chr13	30315352	30315491	+	0	NA	intron (NM_153546, intron 6 of 12)	intron (NM_153546, intron 6 of 12)	87062	NM_153546	218121	Mm.89682	NM_153546	ENSMUSG00000038732	Mboat1	9130215M02Rik|BC023845|LPEAT1|Moact1|Oact1	membrane bound O-acyltransferase domain containing 1	protein-coding
Diff_Nuc9760	chr9	66132542	66132681	+	0	NA	Intergenic	PB1D9|SINE|Alu	-65646	NM_145617	235439	Mm.244179	NM_145617	ENSMUSG00000038664	Herc1	2810449H11Rik|B230218H07|D130015N03Rik|tbl	HECT and RLD domain containing E3 ubiquitin protein ligase family member 1	protein-coding
Diff_Nuc2304	chr17	20815062	20815201	+	0	NA	Intergenic	Lx2|LINE|L1	-9341	NM_134191	171225	Mm.377184	NM_134191	ENSMUSG00000042848	Vmn1r226	V1re2	vomeronasal 1 receptor 226	protein-coding
Diff_Nuc8880	chr1	75880592	75880731	+	0	NA	Intergenic	MER5B|DNA|MER1_type	337820	NM_009208	20536	Mm.5053	NM_009208	ENSMUSG00000006576	Slc4a3	A930038D23Rik|Ae3	solute carrier family 4 (anion exchanger), member 3	protein-coding
Diff_Nuc8410	chr2	138052992	138053131	+	0	NA	Intergenic	RSINE1|SINE|B4	-29259	NM_001025431	228662	Mm.153405	NM_145534	ENSMUSG00000062098	Btbd3	mKIAA0952	BTB (POZ) domain containing 3	protein-coding
Diff_Nuc8278	chr2	109576482	109576621	+	0	NA	Intergenic	Intergenic	13473	NM_001285422	12064	Mm.1442	NM_007540	ENSMUSG00000048482	Bdnf	-	brain derived neurotrophic factor	protein-coding
Diff_Nuc2875	chr16	63469212	63469351	+	0	NA	Intergenic	Intergenic	394702	NM_010140	13837	Mm.1977	NM_010140	ENSMUSG00000052504	Epha3	AW492086|Cek4|ETK1|End3|Hek|Hek4|Mek4|Tyro4	Eph receptor A3	protein-coding
Diff_Nuc3135	chr15	33761442	33761581	+	0	NA	Intergenic	RLTR45-int|LTR|ERVK	-143873	NM_001085421	239364	Mm.60794	NM_001085421	ENSMUSG00000038984	Tspyl5	6330530B20|E130308C19Rik	testis-specific protein, Y-encoded-like 5	protein-coding
Diff_Nuc3454	chr14	9499012	9499151	+	0	NA	promoter-TSS (NM_028934)	promoter-TSS (NM_028934)	177	NR_045968	74859	Mm.84041	NR_045968	ENSMUSG00000097898	4930455B14Rik	1700027C12Rik	RIKEN cDNA 4930455B14 gene	ncRNA
Diff_Nuc10141	chr8	32847242	32847381	+	0	NA	Intergenic	Intergenic	181364	NM_178591	211323	Mm.153432	NM_178591	ENSMUSG00000062991	Nrg1	6030402G23Rik|ARIA|D230005F13Rik|GGF|GGFII|HRG|HRGalpha|Hgl|NDF|SMDF	neuregulin 1	protein-coding
Diff_Nuc10198	chr8	47136722	47136861	+	0	NA	intron (NM_207213, intron 9 of 17)	B4A|SINE|B4	40835	NM_026278	67620	Mm.383914	NM_026278	ENSMUSG00000031637	Lrp2bp	1700113N17Rik|2310006J04Rik|4930479L12Rik|MegBP	Lrp2 binding protein	protein-coding
Diff_Nuc3407	chr15	94436292	94436431	+	0	NA	Intergenic	B4A|SINE|B4	-16106	NM_008971	19230	Mm.490250	NM_008971	ENSMUSG00000022451	Twf1	A6|Ptk9|twinfilin	twinfilin actin binding protein 1	protein-coding
Diff_Nuc5803	chr6	145090162	145090301	+	0	NA	intron (NM_008511, intron 3 of 18)	intron (NM_008511, intron 3 of 18)	19972	NM_008511	16970	Mm.843	NM_008511	ENSMUSG00000030263	Lrmp	D6Int3|D6Int4|D6Int5|D6Int7|D6Int8|Jaw1	lymphoid-restricted membrane protein	protein-coding
Diff_Nuc2946	chr16	80866132	80866271	+	0	NA	Intergenic	Intergenic	-334741	NM_001113208	17968	Mm.433941	NM_010954	ENSMUSG00000022762	Ncam2	Ncam-2|Ocam|RNCAM	neural cell adhesion molecule 2	protein-coding
Diff_Nuc3550	chr14	32974052	32974191	+	0	NA	intron (NM_001033988, intron 1 of 9)	intron (NM_001033988, intron 1 of 9)	1048	NM_001033988	27057	Mm.371598	NM_019744	ENSMUSG00000056234	Ncoa4	ARA70|Rfg	nuclear receptor coactivator 4	protein-coding
Diff_Nuc8520	chr2	163272092	163272231	+	0	NA	intron (NM_144891, intron 2 of 5)	intron (NM_144891, intron 2 of 5)	7958	NM_144891	228858	Mm.102080	NM_144891	ENSMUSG00000017943	Gdap1l1	Gdap1l	ganglioside-induced differentiation-associated protein 1-like 1	protein-coding
Diff_Nuc3689	chr14	66136702	66136841	+	0	NA	Intergenic	L1_Mus2|LINE|L1	75178	NM_001253812	74195	Mm.29719	NM_028811	ENSMUSG00000022031	Elp3	2610507P14Rik|KAT9	elongator acetyltransferase complex subunit 3	protein-coding
Diff_Nuc8713	chr1	36353582	36353721	+	0	NA	Intergenic	MIRb|SINE|MIR	-10927	NM_001290727	214855	Mm.34316	NM_145996	ENSMUSG00000037447	Arid5a	D430024K22Rik|Mrf1	AT rich interactive domain 5A (MRF1-like)	protein-coding
Diff_Nuc9377	chr1	183248492	183248631	+	0	NA	Intergenic	Intergenic	-34198	NM_028408	72978	Mm.338083	NM_028408	ENSMUSG00000026514	Cnih3	2900075G08Rik|CNIH-3	cornichon family AMPA receptor auxiliary protein 3	protein-coding
Diff_Nuc4210	chr18	7268012	7268151	+	0	NA	intron (NM_001081393, intron 9 of 20)	intron (NM_001081393, intron 9 of 20)	29818	NM_001081393	74934	Mm.107918	NM_001081393	ENSMUSG00000061802	Armc4	4930463I21Rik|b2b227.1Clo|b2b643Clo	armadillo repeat containing 4	protein-coding
Diff_Nuc822	chr12	49171992	49172131	+	0	NA	Intergenic	MTE2b|LTR|MaLR	-1252299	NM_021361	664883	Mm.247195	NM_021361	ENSMUSG00000021047	Nova1	9430099M15Rik|G630039L02|Nova-1	neuro-oncological ventral antigen 1	protein-coding
Diff_Nuc9865	chr9	89212362	89212501	+	0	NA	Intergenic	Intergenic	106403	NM_026829	107885	Mm.486274	NM_026829	ENSMUSG00000066442	Mthfs	1110034I12Rik|2310020H23Rik|AI119695	5, 10-methenyltetrahydrofolate synthetase	protein-coding
Diff_Nuc9921	chr9	102135812	102135951	+	0	NA	intron (NM_173447, intron 1 of 15)	intron (NM_173447, intron 1 of 15)	71424	NR_106163	102466241		NR_106163	ENSMUSG00000098521	Mir7243	Gm27363|mmu-mir-7243	microRNA 7243	ncRNA
Diff_Nuc1831	chr10	43008112	43008251	+	0	NA	intron (NM_001168289, intron 1 of 7)	intron (NM_001168289, intron 1 of 7)	66889	NM_001168289	71365	Mm.490430	NM_027772	ENSMUSG00000038240	Pdss2	5430420P03Rik|Gm60|Plmp|kd|mDLP1	prenyl (solanesyl) diphosphate synthase, subunit 2	protein-coding
Diff_Nuc2577	chr17	90985392	90985531	+	0	NA	intron (NM_001346957, intron 12 of 18)	(TAAA)n|Simple_repeat|Simple_repeat	-130241	NM_001346959	18189	Mm.478418	NM_020252	ENSMUSG00000024109	Nrxn1	1700062G21Rik|9330127H16Rik|A230068P09Rik|mKIAA0578	neurexin I	protein-coding
Diff_Nuc6805	chr4	85532092	85532231	+	0	NA	Intergenic	Intergenic	-167658	NM_029967	77739	Mm.331690	NM_029967	ENSMUSG00000066113	Adamtsl1	5930437A14Rik|6720426B09Rik|ADAMTSL-1	ADAMTS-like 1	protein-coding
Diff_Nuc9556	chr9	23134752	23134891	+	0	NA	intron (NM_028472, intron 6 of 14)	B4A|SINE|B4	107301	NM_028472	73230	Mm.335020	NM_028472	ENSMUSG00000031963	Bmper	3110056H04Rik|CV-2|Crim3|Cv2	BMP-binding endothelial regulator	protein-coding
Diff_Nuc5688	chr6	116067682	116067821	+	0	NA	intron (NM_177412, intron 3 of 5)	intron (NM_177412, intron 3 of 5)	75641	NM_177412	330401	Mm.425352	NM_177412	ENSMUSG00000030126	Tmcc1	3632431M01Rik|mKIAA0779	transmembrane and coiled coil domains 1	protein-coding
Diff_Nuc8190	chr2	91285942	91286081	+	0	NA	Intergenic	Intergenic	-1140	NM_001311144	228356	Mm.386861	NM_175123	ENSMUSG00000040591	1110051M20Rik	AI586322	RIKEN cDNA 1110051M20 gene	protein-coding
Diff_Nuc5936	chr5	26919482	26919621	+	0	NA	Intergenic	Intergenic	-99697	NR_029445	75942	Mm.50087	NR_029445	ENSMUSG00000029044	4930584F24Rik	1700001J09Rik|4930522C06Rik	RIKEN cDNA 4930584F24 gene	ncRNA
Diff_Nuc2012	chr10	86497102	86497241	+	0	NA	Intergenic	Intergenic	-23620	NM_029685	76640	Mm.78423	NM_029685	ENSMUSG00000047129	1700113H08Rik	-	RIKEN cDNA 1700113H08 gene	protein-coding
Diff_Nuc2294	chr17	18452582	18452721	+	0	NA	intron (NM_001104542, intron 4 of 5)	Lx2|LINE|L1	17406	NM_001104542	627132	Mm.469862	NM_001104542	ENSMUSG00000079698	Vmn2r93	EG627132	vomeronasal 2, receptor 93	protein-coding
Diff_Nuc8211	chr2	96589422	96589561	+	0	NA	intron (NM_001289743, intron 2 of 6)	intron (NM_001289743, intron 2 of 6)	431165	NM_001289743	241568	Mm.241682	NM_178725	ENSMUSG00000050587	Lrrc4c	6430556C10Rik|NGL-1	leucine rich repeat containing 4C	protein-coding
Diff_Nuc8227	chr2	98507182	98507321	+	0	NA	Intergenic	GSAT_MM|Satellite|Satellite	1199437	NM_178725	241568	Mm.241682	NM_178725	ENSMUSG00000050587	Lrrc4c	6430556C10Rik|NGL-1	leucine rich repeat containing 4C	protein-coding
Diff_Nuc7445	chr3	75231042	75231181	+	0	NA	Intergenic	Intergenic	129663	NM_019745	56426	Mm.316473	NM_019745	ENSMUSG00000027835	Pdcd10	2410003B13Rik|Ccm3|Tfa15|Tfar15	programmed cell death 10	protein-coding
Diff_Nuc7024	chr4	135711992	135712131	+	0	NA	Intergenic	Intergenic	12324	NM_008321	15903	Mm.110	NM_008321	ENSMUSG00000007872	Id3	Hlh462|Idb3|bHLHb25	inhibitor of DNA binding 3	protein-coding
Diff_Nuc7308	chr3	47560042	47560181	+	0	NA	Intergenic	Intergenic	270570	NR_040408	666202	Mm.465057	NR_040408	ENSMUSG00000103257	Gm7977	EG666202	tyrosine 3-monooxygenase/tryptophan 5-monooxygenase activation protein, theta polypeptide pseudogene	pseudo
Diff_Nuc2491	chr17	71540972	71541111	+	0	NA	intron (NM_022882, intron 1 of 19)	intron (NM_022882, intron 1 of 19)	7723	NM_022882	64898	Mm.227924	NM_022882	ENSMUSG00000024052	Lpin2	2610511G02Rik|AI481352|AW742896	lipin 2	protein-coding
Diff_Nuc8557	chr2	174384392	174384531	+	0	NA	Intergenic	(CA)n|Simple_repeat|Simple_repeat	-84574	NM_001099328	100043757	Mm.48711	NM_001099328	ENSMUSG00000050600	Zfp831	ENSMUSG00000050600|OTTMUSG00000017459	zinc finger protein 831	protein-coding
Diff_Nuc494	chr13	88362952	88363091	+	0	NA	Intergenic	Intergenic	-598056	NM_010103	13612	Mm.125580	NM_010103	ENSMUSG00000034488	Edil3	Del-1|Del1	EGF-like repeats and discoidin I-like domains 3	protein-coding
Diff_Nuc4609	chr18	90405902	90406041	+	0	NA	Intergenic	L1_Mus2|LINE|L1	-273575	NM_198295	67988	Mm.268041	NM_198295	ENSMUSG00000024614	Tmx3	6430411B10Rik|A730024F05Rik|AV259382|Txndc10|mKIAA1830	thioredoxin-related transmembrane protein 3	protein-coding
Diff_Nuc2252	chr17	11091432	11091571	+	0	NA	intron (NM_016694, intron 1 of 11)	intron (NM_016694, intron 1 of 11)	58276	NM_016694	50873	Mm.311110	NM_016694	ENSMUSG00000023826	Park2	PRKN	Parkinson disease (autosomal recessive, juvenile) 2, parkin	protein-coding
Diff_Nuc2672	chr16	20908742	20908881	+	0	NA	Intergenic	Intergenic	-174227	NM_009379	21832	Mm.3943	NM_009379	ENSMUSG00000022847	Thpo	Mgdf|Ml|Mpllg|Tpo	thrombopoietin	protein-coding
Diff_Nuc1557	chr11	99068742	99068881	+	0	NA	Intergenic	Intergenic	23520	NM_020618	57376	Mm.379086	NM_020618	ENSMUSG00000037935	Smarce1	2810417B20Rik|5830412H02Rik|9030408N19Rik|Baf27	SWI/SNF related, matrix associated, actin dependent regulator of chromatin, subfamily e, member 1	protein-coding
Diff_Nuc2053	chr10	95184622	95184761	+	0	NA	Intergenic	Intergenic	-157890	NM_027722	71207	Mm.24397	NM_027722	ENSMUSG00000020029	Nudt4	4933436C10Rik|DIPP2|DIPP2alpha|DIPP2beta|HDCMB47P	nudix (nucleoside diphosphate linked moiety X)-type motif 4	protein-coding
Diff_Nuc1837	chr10	44536002	44536141	+	0	NA	Intergenic	MT2_Mm|LTR|ERVL	-250949	NM_011156	19072	Mm.10281	NM_011156	ENSMUSG00000019849	Prep	AI047692|AI450383|D10Wsu136e|PEP|Pop	prolyl endopeptidase	protein-coding
Diff_Nuc9443	chr9	3000922	3001061	+	0	NA	Intergenic	GSAT_MM|Satellite|Satellite	37752	NR_039546	100628572		NR_039546	ENSMUSG00000106183	Mir101c	mir-101c|mmu-mir-101c	microRNA 101c	ncRNA
Diff_Nuc3580	chr14	40210062	40210201	+	0	NA	intron (NM_008734, intron 1 of 9)	Lx3B|LINE|L1	-75586	NR_131973	432842	Mm.352566	NR_131973		LOC432842	-	uncharacterized LOC432842	ncRNA
Diff_Nuc2271	chr17	15086802	15086941	+	0	NA	intron (NM_024250, intron 9 of 11)	intron (NM_024250, intron 9 of 11)	-1043	NR_027905	106740	Mm.475379	NR_027905		LOC106740	-	uncharacterized LOC106740	ncRNA
Diff_Nuc8121	chr2	71825052	71825191	+	0	NA	intron (NM_019688, intron 1 of 29)	(TCTA)n|Simple_repeat|Simple_repeat	5849	NM_019688	56508	Mm.196153	NM_019688	ENSMUSG00000049044	Rapgef4	1300003D15Rik|5730402K07Rik|6330581N18Rik|EPAC 2|Epac-2|Epac2|mKIAA4040	Rap guanine nucleotide exchange factor (GEF) 4	protein-coding
Diff_Nuc6778	chr4	81452542	81452681	+	0	NA	Intergenic	L1Md_F2|LINE|L1	-258673	NR_040659	545641	Mm.216028	NR_040659	ENSMUSG00000085022	Gm5860	EG545641	predicted gene 5860	ncRNA
Diff_Nuc10388	chr8	93341622	93341761	+	0	NA	Intergenic	Intergenic	-11043	NM_177224	109151	Mm.100615	NM_177224	ENSMUSG00000056608	Chd9	1810014J18Rik|9030205D12Rik|A330063D19Rik|AD013|PRIC320|mKIAA0308	chromodomain helicase DNA binding protein 9	protein-coding
Diff_Nuc4682	chr7	20812662	20812801	+	0	NA	Intergenic	L1Md_F2|LINE|L1	6446	NM_001167151	100043523	Mm.482055	NM_001167151	ENSMUSG00000094757	Gm4498	Vmn1r97	predicted gene 4498	protein-coding
Diff_Nuc2488	chr17	70087132	70087271	+	0	NA	Intergenic	Intergenic	-231212	NM_001347412	224997	Mm.311840	NM_027712	ENSMUSG00000003279	Dlgap1	4933422O14Rik|9630002F18|AI845682|AI848168|BB075781|D17Bwg0511e|GKAP/SAPAP|GKPA/SAPAP|Gkap|Sapap1|mKIAA4162	discs, large (Drosophila) homolog-associated protein 1	protein-coding
Diff_Nuc1969	chr10	76379852	76379991	+	0	NA	intron (NM_001347216, intron 1 of 15)	Lx9|LINE|L1	44771	NM_001347216	59093	Mm.272803	NM_021568	ENSMUSG00000001120	Pcbp3	AlphaCP-3	poly(rC) binding protein 3	protein-coding
Diff_Nuc5030	chr7	106767022	106767161	+	0	NA	Intergenic	Intergenic	8522	NM_001195529	100503386	Mm.180719	NM_001195529	ENSMUSG00000096606	Tpbgl	EG245190|Gm4980	trophoblast glycoprotein-like	protein-coding
Diff_Nuc7530	chr3	93923342	93923481	+	0	NA	Intergenic	L1_Mur2|LINE|L1	-46845	NM_001163731	100042761	Mm.484910	NM_001163731	ENSMUSG00000095251	Gm10697	ENSMUSG00000074425	predicted gene 10697	protein-coding
Diff_Nuc1536	chr11	92840802	92840941	+	0	NA	Intergenic	Lx3C|LINE|L1	-119733	NM_028296	72605	Mm.342160	NM_028296	ENSMUSG00000056158	Car10	2700029L05Rik|BB085816|Ca10	carbonic anhydrase 10	protein-coding
Diff_Nuc3017	chr15	4172262	4172401	+	0	NA	Intergenic	Intergenic	-153160	NM_177355	239318	Mm.308996	NM_177355	ENSMUSG00000049148	Plcxd3	B130016O10Rik	phosphatidylinositol-specific phospholipase C, X domain containing 3	protein-coding
Diff_Nuc8084	chr2	63480052	63480191	+	0	NA	Intergenic	L1Md_F3|LINE|L1	455974	NM_001267846	60344	Mm.130769	NM_021716	ENSMUSG00000075324	Fign	fi|fidget	fidgetin	protein-coding
Diff_Nuc4010	chr19	23799482	23799621	+	0	NA	Intergenic	Intergenic	-33815	NM_177034	319924	Mm.22879	NM_177034	ENSMUSG00000024897	Apba1	6430513E09Rik|Lin-10|Mint|Mint1|Urop11|X11|X11alpha	amyloid beta (A4) precursor protein binding, family A, member 1	protein-coding
Diff_Nuc6578	chr4	32510872	32511011	+	0	NA	intron (NM_001109661, intron 1 of 4)	intron (NM_001109661, intron 1 of 4)	6531	NM_001109661	12014	Mm.491223	NM_007521	ENSMUSG00000040270	Bach2	E030004N02Rik	BTB and CNC homology, basic leucine zipper transcription factor 2	protein-coding
Diff_Nuc6574	chr4	31145762	31145901	+	0	NA	Intergenic	RMER13B|LTR|ERVK	554085	NR_040655	75332	Mm.108636	NR_040655		4930556G01Rik	-	RIKEN cDNA 4930556G01 gene	ncRNA
Diff_Nuc378	chr13	63000292	63000431	+	0	NA	Intergenic	Lx8|LINE|L1	-10719	NM_019395	14121	Mm.423078	NM_019395	ENSMUSG00000069805	Fbp1	Fbp-2|Fbp2|Fbp3	fructose bisphosphatase 1	protein-coding
Diff_Nuc2146	chr10	115341122	115341261	+	0	NA	Intergenic	Intergenic	86851	NM_001168679	216350	Mm.22270	NM_146010	ENSMUSG00000034127	Tspan8	C76990|E330007O21Rik|Tm4sf3	tetraspanin 8	protein-coding
Diff_Nuc5734	chr6	128162402	128162541	+	0	NA	Intergenic	Intergenic	-28650	NR_077223	330427	Mm.426356	NR_077223	ENSMUSG00000107879	9330102E08Rik	-	RIKEN cDNA 9330102E08 gene	ncRNA
Diff_Nuc5261	chr6	10821282	10821421	+	0	NA	Intergenic	L1_Mus1|LINE|L1	103027	NR_033776	57866	Mm.4397	NR_033776		AA545190	-	EST AA545190	ncRNA
Diff_Nuc3001	chr16	93591562	93591701	+	0	NA	intron (NM_145482, intron 6 of 11)	intron (NM_145482, intron 6 of 11)	12429	NM_145482	224440	Mm.10628	NM_145482	ENSMUSG00000022948	Setd4	AY037804|C21orf18|ORF21	SET domain containing 4	protein-coding
Diff_Nuc3101	chr15	25490262	25490401	+	0	NA	Intergenic	PB1D10|SINE|Alu	-61974	NM_019472	17909	Mm.60590	NM_019472	ENSMUSG00000022272	Myo10	AW048724|D15Ertd600e|mKIAA0799|myosin-X	myosin X	protein-coding
Diff_Nuc5591	chr6	92852592	92852731	+	0	NA	Intergenic	Intergenic	-1226	NM_175314	101401	Mm.158235	NM_175314	ENSMUSG00000030022	Adamts9	1810011L16Rik|8430403M15Rik|AW743315|E030027K14Rik	a disintegrin-like and metallopeptidase (reprolysin type) with thrombospondin type 1 motif, 9	protein-coding
Diff_Nuc1795	chr10	34549772	34549911	+	0	NA	Intergenic	L1Md_F2|LINE|L1	346635	NM_010237	14302	Mm.332432	NM_010237	ENSMUSG00000019779	Frk	BSK|BSK/IYK|C85044|GTK|RAK	fyn-related kinase	protein-coding
Diff_Nuc1940	chr10	69327502	69327641	+	0	NA	intron (NM_170729, intron 8 of 40)	intron (NM_170729, intron 8 of 40)	-60709	NM_170687	11735	Mm.235960	NM_009670	ENSMUSG00000069601	Ank3	2900054D09Rik|AI314020|Ank-3|AnkG|Ankyrin-3|Ankyrin-G	ankyrin 3, epithelial	protein-coding
Diff_Nuc9233	chr1	156774512	156774651	+	0	NA	Intergenic	RCHARR1|DNA|MER1_type	172185	NM_010500	15939	Mm.12246	NM_010500	ENSMUSG00000056708	Ier5	-	immediate early response 5	protein-coding
Diff_Nuc4790	chr7	54932792	54932931	+	0	NA	Intergenic	Intergenic	-76119	NM_153067	233222	Mm.240142	NM_153067	ENSMUSG00000078698	Mrgpra3	Mrga3	MAS-related GPR, member A3	protein-coding
Diff_Nuc9514	chr9	13755982	13756121	+	0	NA	Intergenic	Intergenic	123880	NM_176836	72826	Mm.246174	NM_176836	ENSMUSG00000037808	Fam76b	2810485I05Rik|C78303	family with sequence similarity 76, member B	protein-coding
Diff_Nuc4164	chr19	57683182	57683321	+	0	NA	Intergenic	Intergenic	-2273	NM_181415	226255	Mm.245340	NM_181415	ENSMUSG00000054843	Atrnl1	AI504415|AW555641|Alp|Atrnl|Atrnlp	attractin like 1	protein-coding
Diff_Nuc10274	chr8	70352592	70352731	+	0	NA	intron (NM_177698, intron 8 of 14)	MIRb|SINE|MIR	-10467	NM_027626	234353	Mm.32525	NM_027626	ENSMUSG00000030465	Psd3	4931420C21Rik|AI661273|BC003498|D430018P08|EFA6D	pleckstrin and Sec7 domain containing 3	protein-coding
Diff_Nuc7325	chr3	50644002	50644141	+	0	NA	Intergenic	Intergenic	-384298	NM_009834	12457	Mm.86541	NM_009834	ENSMUSG00000023087	Noct	AU043840|Ccr4|Ccrn4l	nocturnin	protein-coding
Diff_Nuc5078	chr7	117117222	117117361	+	0	NA	3' UTR (NM_153525, exon 7 of 7)	3' UTR (NM_153525, exon 7 of 7)	12453	NM_153525	233724	Mm.43212	NM_153525	ENSMUSG00000047554	Tmem41b	1500015G02Rik|1500031M19Rik|AU018901|D7Ertd70e|D7Ertd743e	transmembrane protein 41B	protein-coding
Diff_Nuc2686	chr16	23277312	23277451	+	0	NA	intron (NM_145933, intron 2 of 7)	L1_Mm|LINE|L1	-13162	NM_001252506	20440	Mm.149029	NM_145933	ENSMUSG00000022885	St6gal1	AW742324|Siat1|St6Gal-I|St6gal|St6galI	beta galactoside alpha 2,6 sialyltransferase 1	protein-coding
Diff_Nuc9869	chr9	89803002	89803141	+	0	NA	Intergenic	PB1D10|SINE|Alu	-1542	NM_011245	19417	Mm.44561	NM_011245	ENSMUSG00000032356	Rasgrf1	AI844718|CDC25|CDC25Mm|Gnrp|Grf1|Grfbeta|P190-A|Ras-GRF1|p190|p190RhoGEF	RAS protein-specific guanine nucleotide-releasing factor 1	protein-coding
Diff_Nuc6325	chr5	112867152	112867291	+	0	NA	intron (NM_019982, intron 11 of 16)	MER102c|DNA|MER1_type	-11225	NM_001177504	625464	Mm.389676	NM_001177504	ENSMUSG00000072722	Gm6588	EG625464	predicted gene 6588	protein-coding
Diff_Nuc4881	chr7	77014122	77014261	+	0	NA	Intergenic	Lx6|LINE|L1	373211	NR_045940	73796	Mm.410832	NR_045940	ENSMUSG00000108885	4930402F11Rik	-	RIKEN cDNA 4930402F11 gene	ncRNA
Diff_Nuc2133	chr10	112522392	112522531	+	0	NA	Intergenic	Lx9|LINE|L1	-156379	NM_001033474	382423	Mm.431239	NM_001033474	ENSMUSG00000074748	Atxn7l3b	4921506J03Rik|6230409E21Rik|AI315132|ENSMUSG00000074747	ataxin 7-like 3B	protein-coding
Diff_Nuc6309	chr5	109002572	109002711	+	0	NA	intron (NM_001282052, intron 23 of 26)	L1MD|LINE|L1	-23595	NM_007756	12889	Mm.5195	NM_007756	ENSMUSG00000033615	Cplx1	921-S	complexin 1	protein-coding
Diff_Nuc5853	chr5	9143622	9143761	+	0	NA	intron (NM_011806, intron 4 of 17)	L1_Mm|LINE|L1	18085	NM_001110327	23857	Mm.22480	NM_011806	ENSMUSG00000042508	Dmtf1	Dimp|Dmp1	cyclin D binding myb-like transcription factor 1	protein-coding
Diff_Nuc9445	chr9	3002002	3002141	+	0	NA	Intergenic	GSAT_MM|Satellite|Satellite	36672	NR_039546	100628572		NR_039546	ENSMUSG00000106183	Mir101c	mir-101c|mmu-mir-101c	microRNA 101c	ncRNA
Diff_Nuc8939	chr1	87385992	87386131	+	0	NA	Intergenic	Intergenic	109324	NM_030194	109032	Mm.335802	NM_030194	ENSMUSG00000070034	Sp110	5031415C07Rik|52kDa|5830484A20Rik|ENSMUSG00000075603|Ifi75|Ipr1	Sp110 nuclear body protein	protein-coding
Diff_Nuc881	chr12	62218362	62218501	+	0	NA	Intergenic	Intergenic	404376	NR_045049	100504101	Mm.235026	NR_045049		Gm20063	-	predicted gene, 20063	ncRNA
Diff_Nuc10257	chr8	65430782	65430921	+	0	NA	intron (NM_001252620, intron 2 of 11)	intron (NM_001252620, intron 2 of 11)	709	NM_023689	72902	Mm.334552	NM_023689	ENSMUSG00000054162	Spock3	2900045C01Rik|AI428471|mKIAA4039	sparc/osteonectin, cwcv and kazal-like domains proteoglycan 3	protein-coding
Diff_Nuc4397	chr18	43769502	43769641	+	0	NA	intron (NM_001163637, intron 1 of 21)	Lx3_Mus|LINE|L1	77856	NM_001163637	76217	Mm.134602	NM_001163637	ENSMUSG00000024502	Jakmip2	6430702L21Rik|AI850334|D930046L20Rik	janus kinase and microtubule interacting protein 2	protein-coding
Diff_Nuc71	chrX	139917502	139917641	+	0	NA	Intergenic	SYNREP_MM|Satellite|Satellite	-35563	NM_001195048	18481	Mm.40035	NM_008778	ENSMUSG00000031284	Pak3	PAK-3|Pak65alpha|Pak65beta|Stk4	p21 protein (Cdc42/Rac)-activated kinase 3	protein-coding
Diff_Nuc9699	chr9	52910482	52910621	+	0	NA	intron (NM_029936, intron 17 of 17)	MTEa|LTR|MaLR	145666	NM_029936	77591	Mm.133560	NM_029936	ENSMUSG00000053289	Ddx10	4632415A01Rik|AI646054	DEAD (Asp-Glu-Ala-Asp) box polypeptide 10	protein-coding
Diff_Nuc291	chr13	45070932	45071071	+	0	NA	intron (NM_025772, intron 5 of 9)	intron (NM_025772, intron 5 of 9)	26464	NM_025772	94245	Mm.352311	NM_025772	ENSMUSG00000057531	Dtnbp1	5430437B18Rik|AW048963|Bloc1s8|dysbindin|sdy	dystrobrevin binding protein 1	protein-coding
Diff_Nuc8795	chr1	57593222	57593361	+	0	NA	Intergenic	MIRb|SINE|MIR	-129773	NM_001302963	68736	Mm.288490	NM_001037742	ENSMUSG00000048495	Tyw5	1110034B05Rik	tRNA-yW synthesizing protein 5	protein-coding
Diff_Nuc5325	chr6	29445002	29445141	+	0	NA	intron (NM_001029985, intron 21 of 37)	intron (NM_001029985, intron 21 of 37)	12881	NM_001029985	333088	Mm.332961	NM_001029985	ENSMUSG00000059022	Kcp	AW060220|CRIM-2|Crim2|Gm793|KCP-1	kielin/chordin-like protein	protein-coding
Diff_Nuc14	chrY	2883802	2883941	+	0	NA	Intergenic	Intergenic	496613	NM_001270512	100041505	Mm.491824	NM_001270512	ENSMUSG00000096520	Gm3376	Rbmy1b	predicted gene 3376	protein-coding
Diff_Nuc830	chr12	52013202	52013341	+	0	NA	Intergenic	L1Md_F2|LINE|L1	-92872	NR_126468	75494	Mm.416848	NR_126468		1700008C04Rik	-	RIKEN cDNA 1700008C04 gene	ncRNA
Diff_Nuc3987	chr19	16891572	16891711	+	0	NA	Intergenic	Intergenic	-36218	NM_173028	271564	Mm.211963	NM_173028	ENSMUSG00000046230	Vps13a	4930425F11|4930516E05Rik|4930543C13Rik|9930023P20|Chac|Chorein|D330038K10Rik|mKIAA0986	vacuolar protein sorting 13A	protein-coding
Diff_Nuc7359	chr3	56493032	56493171	+	0	NA	Intergenic	Intergenic	-505478	NM_030595	26422	Mm.384353	NM_030595	ENSMUSG00000027799	Nbea	Lyst2|mKIAA1544	neurobeachin	protein-coding
Diff_Nuc5630	chr6	100579662	100579801	+	0	NA	intron (NM_181590, intron 9 of 10)	intron (NM_181590, intron 9 of 10)	41420	NM_181590	72171	Mm.256022	NM_181590	ENSMUSG00000035378	Shq1	2810403P18Rik|Grim-1	SHQ1 homolog (S. cerevisiae)	protein-coding
Diff_Nuc1328	chr11	45625032	45625171	+	0	NA	intron (NR_045876, intron 1 of 3)	intron (NR_045876, intron 1 of 3)	3516	NR_045876	100009664	Mm.415439	NR_045876		F630206G17Rik	-	RIKEN cDNA F630206G17 gene	ncRNA
Diff_Nuc9628	chr9	37197682	37197821	+	0	NA	Intergenic	Intergenic	-11731	NM_028783	74144	Mm.485070	NM_028783	ENSMUSG00000032125	Robo4	1200012D01Rik|AI593217	roundabout guidance receptor 4	protein-coding
Diff_Nuc6629	chr4	46152402	46152541	+	0	NA	intron (NM_001033201, intron 1 of 22)	intron (NM_001033201, intron 1 of 22)	1088	NM_001033201	433702	Mm.389536	NM_001033201	ENSMUSG00000028330	Ncbp1	AU014645|AW538051|CBP80	nuclear cap binding protein subunit 1	protein-coding
Diff_Nuc1001	chr12	86334272	86334411	+	0	NA	Intergenic	Intergenic	-2930	NM_001347421	56531	Mm.153183	NM_178363	ENSMUSG00000021244	Ylpm1	A930013E17Rik|ZAP|Zap3	YLP motif containing 1	protein-coding
Diff_Nuc10030	chr8	6629767	6629906	+	0	NA	Intergenic	L1Md_F2|LINE|L1	-1524549	NM_011388	20494	Mm.3500	NM_011388	ENSMUSG00000023073	Slc10a2	9130221J18Rik|AI605518|ASBT|IBAT|ISBT	solute carrier family 10, member 2	protein-coding
Diff_Nuc9689	chr9	50672342	50672481	+	0	NA	intron (NM_001286553, intron 5 of 16)	intron (NM_001286553, intron 5 of 16)	7382	NM_001286553	73699	Mm.7726	NM_028614	ENSMUSG00000032058	Ppp2r1b	2410091N08Rik|AI790395	protein phosphatase 2, regulatory subunit A, beta	protein-coding
Diff_Nuc10523	chr8	128215432	128215571	+	0	NA	Intergenic	Intergenic	21783	NM_028908	74393	Mm.41709	NM_028908	ENSMUSG00000050930	Map10	4933403G14Rik|AI835009|mKIAA1383	microtubule-associated protein 10	protein-coding
Diff_Nuc10506	chr8	121709522	121709661	+	0	NA	intron (NM_019707, intron 7 of 13)	intron (NM_019707, intron 7 of 13)	-158847	NM_024219	68196	Mm.358714	NM_024219	ENSMUSG00000031839	Hsbp1	0610007A03Rik|AA408769|Hsp25	heat shock factor binding protein 1	protein-coding
Diff_Nuc2157	chr10	117886692	117886831	+	0	NA	Intergenic	Intergenic	8659	NM_008337	15978	Mm.240327	NM_008337	ENSMUSG00000055170	Ifng	IFN-g|Ifg	interferon gamma	protein-coding
Diff_Nuc2031	chr10	91037482	91037621	+	0	NA	Intergenic	Intergenic	-403187	NM_001080130	21917	Mm.159684	NM_011605	ENSMUSG00000019961	Tmpo	5630400D24Rik|AI195756|AI606875|AW214352|AW547477|LAP2|TP	thymopoietin	protein-coding
Diff_Nuc6407	chr5	138625522	138625661	+	0	NA	exon (NM_009315, exon 2 of 15)	exon (NM_009315, exon 2 of 15)	2823	NM_009315	21343	Mm.248517	NM_009315	ENSMUSG00000036980	Taf6	80kDa|AW549759|TAF(II)80|TAFII70|Taf2e|p80	TATA-box binding protein associated factor 6	protein-coding
Diff_Nuc2532	chr17	80326202	80326341	+	0	NA	Intergenic	Intergenic	-30808	NM_001286647	56298	Mm.175403	NM_019717	ENSMUSG00000059811	Atl2	2010110I21Rik|AA407293|AV334690|Aip-2|Arl6ip2	atlastin GTPase 2	protein-coding
Diff_Nuc4411	chr18	47179682	47179821	+	0	NA	intron (NM_178377, intron 5 of 6)	intron (NM_178377, intron 5 of 6)	61221	NM_178377	69456	Mm.210734	NM_178377	ENSMUSG00000042705	Commd10	2310003A05Rik|AU019438|DRWMS2	COMM domain containing 10	protein-coding
Diff_Nuc7519	chr3	92029902	92030041	+	0	NA	Intergenic	B3A|SINE|B2	10214	NM_011468	20755	Mm.6853	NM_011468	ENSMUSG00000078664	Sprr2a1	Sprr2a|Sprr2a3	small proline-rich protein 2A1	protein-coding
Diff_Nuc1168	chr11	6504942	6505081	+	0	NA	intron (NM_001081652, intron 1 of 7)	intron (NM_001081652, intron 1 of 7)	1046	NM_001081652	192950	Mm.337771	NM_001081652	ENSMUSG00000041073	Nacad	D230024G13Rik|mKIAA0363	NAC alpha domain containing	protein-coding
Diff_Nuc9766	chr9	67768552	67768691	+	0	NA	intron (NM_177184, intron 38 of 84)	intron (NM_177184, intron 38 of 84)	80418	NM_177184	320528	Mm.241454	NM_177184	ENSMUSG00000035284	Vps13c	AI552542|AV026040|C230055H22Rik|W51662|chorein	vacuolar protein sorting 13C	protein-coding
Diff_Nuc5785	chr6	140254132	140254271	+	0	NA	Intergenic	Intergenic	-118419	NM_144920	109135	Mm.247670	NM_144920	ENSMUSG00000030231	Plekha5	2810431N21Rik|AI428202|AK129423|AMH-Cre|Ayu21-9|Gt(pU21)9Imeg|Pepp2|Tg(AMH-cre)1Flor	pleckstrin homology domain containing, family A member 5	protein-coding
Diff_Nuc5152	chr7	133898152	133898291	+	0	NA	Intergenic	Intergenic	-4919	NM_011952	26417	Mm.8385	NM_011952	ENSMUSG00000063065	Mapk3	Erk-1|Erk1|Ert2|Esrk1|Mnk1|Mtap2k|Prkm3|p44|p44erk1|p44mapk	mitogen-activated protein kinase 3	protein-coding
Diff_Nuc8681	chr1	29233642	29233781	+	0	NA	Intergenic	Lx3B|LINE|L1	-244622	NR_105760	102465174		NR_105760	ENSMUSG00000099257	Mir6342	Gm27268|mmu-mir-6342	microRNA 6342	ncRNA
Diff_Nuc8170	chr2	84636072	84636211	+	0	NA	Intergenic	B1_Mur1|SINE|Alu	-2844	NM_019949	56791	Mm.38261	NM_019949	ENSMUSG00000027078	Ube2l6	2810489I21Rik|RIG-B|UBCH8|Ubce8|Ubcm8	ubiquitin-conjugating enzyme E2L 6	protein-coding
Diff_Nuc8323	chr2	120205262	120205401	+	0	NA	exon (NM_001110496, exon 9 of 20)	exon (NM_001110496, exon 9 of 20)	-24301	NM_172672	76051	Mm.38851	NM_172672	ENSMUSG00000062646	Ganc	5830445O15Rik|9330160A12|mFLJ00088	glucosidase, alpha; neutral C	protein-coding
Diff_Nuc4708	chr7	30708392	30708531	+	0	NA	Intergenic	L2a|LINE|L2	14925	NM_001243908	73729	Mm.333743	NM_001243908	ENSMUSG00000099689	Zfp383	1110003H10Rik	zinc finger protein 383	protein-coding
Diff_Nuc1024	chr12	93795992	93796131	+	0	NA	Intergenic	Intergenic	-708464	NM_011344	20338	Mm.250605	NM_011344	ENSMUSG00000020964	Sel1l	AW493766|Sel1h|mKIAA4137	sel-1 suppressor of lin-12-like (C. elegans)	protein-coding
Diff_Nuc5513	chr6	74402892	74403031	+	0	NA	Intergenic	MER67C|LTR|ERV1	-981946	NR_108032	73408	Mm.233629	NR_108032	ENSMUSG00000107408	1700065L07Rik	-	RIKEN cDNA 1700065L07 gene	ncRNA
Diff_Nuc4343	chr18	35485722	35485861	+	0	NA	intron (NM_030749, intron 5 of 9)	intron (NM_030749, intron 5 of 9)	-111113	NM_178005	107065	Mm.39900	NM_178005	ENSMUSG00000071862	Lrrtm2	AI851755|BB129880|C630011A14Rik|mKIAA0416	leucine rich repeat transmembrane neuronal 2	protein-coding
Diff_Nuc1895	chr10	58480182	58480321	+	0	NA	intron (NM_172788, intron 3 of 9)	Lx8|LINE|L1	204144	NM_172788	237353	Mm.333078	NM_172788	ENSMUSG00000037990	Sh3rf3	4831416G18Rik|Igfbp5-ip|Sh3md4|Sh3rf31	SH3 domain containing ring finger 3	protein-coding
Diff_Nuc8885	chr1	77504932	77505071	+	0	NA	intron (NM_007936, intron 2 of 17)	intron (NM_007936, intron 2 of 17)	6662	NM_007936	13838	Mm.400747	NM_007936	ENSMUSG00000026235	Epha4	2900005C20Rik|AI385584|Cek8|Hek8|Sek|Sek1|Tyro1|rb	Eph receptor A4	protein-coding
Diff_Nuc8218	chr2	98502722	98502861	+	0	NA	Intergenic	SYNREP_MM|Satellite|Satellite	1194977	NM_178725	241568	Mm.241682	NM_178725	ENSMUSG00000050587	Lrrc4c	6430556C10Rik|NGL-1	leucine rich repeat containing 4C	protein-coding
Diff_Nuc3807	chr14	98273452	98273591	+	0	NA	intron (NM_007826, intron 7 of 11)	Lx9|LINE|L1	295463	NM_001038610	13134	Mm.320593	NM_007826	ENSMUSG00000055639	Dach1	Dac|Dach	dachshund 1 (Drosophila)	protein-coding
Diff_Nuc7880	chr2	17609722	17609861	+	0	NA	intron (NM_028757, intron 2 of 6)	intron (NM_028757, intron 2 of 6)	42904	NM_028757	74103	Mm.120298	NM_028757	ENSMUSG00000053702	Nebl	1200007O21Rik|A630080F05Rik|BB140644|D830029A09Rik|Lnebl	nebulette	protein-coding
Diff_Nuc9750	chr9	63990822	63990961	+	0	NA	intron (NM_026507, intron 17 of 18)	intron (NM_026507, intron 17 of 18)	25937	NM_145835	235435	Mm.436581	NM_145835	ENSMUSG00000032401	Lctl	E130104I05Rik|KLPH	lactase-like	protein-coding
Diff_Nuc3903	chr14	120693212	120693351	+	0	NA	intron (NM_207515, intron 1 of 7)	intron (NM_207515, intron 1 of 7)	18390	NM_175341	105559	Mm.238266	NM_175341	ENSMUSG00000022139	Mbnl2	1110002M11Rik|AI047808|AI837313|AI849185|AL118326|MBLL|R75232|mKIAA4072	muscleblind-like 2	protein-coding
Diff_Nuc10373	chr8	90275782	90275921	+	0	NA	intron (NM_033327, intron 5 of 7)	intron (NM_033327, intron 5 of 7)	52487	NM_001310520	94187	Mm.23452	NM_033327	ENSMUSG00000045333	Zfp423	Ebfaz|Roaz|Zfp104|Znf423|ataxia1|mKIAA0760|nur12	zinc finger protein 423	protein-coding
Diff_Nuc10252	chr8	64303182	64303321	+	0	NA	intron (NM_001081390, intron 2 of 19)	intron (NM_001081390, intron 2 of 19)	-64356	NM_001293773	72333	Mm.29933	NM_001081390	ENSMUSG00000058056	Palld	2410003B16Rik|6030492A02	palladin, cytoskeletal associated protein	protein-coding
Diff_Nuc6279	chr5	103146042	103146181	+	0	NA	intron (NM_029270, intron 3 of 9)	intron (NM_029270, intron 3 of 9)	-51718	NM_001286468	231532	Mm.440191	NM_029270	ENSMUSG00000057315	Arhgap24	0610025G21Rik	Rho GTPase activating protein 24	protein-coding
Diff_Nuc2125	chr10	110392982	110393121	+	0	NA	intron (NM_172554, intron 9 of 16)	intron (NM_172554, intron 9 of 16)	35819	NM_007792	13008	Mm.2020	NM_007792	ENSMUSG00000020186	Csrp2	AW551867|Crp2|SmLim	cysteine and glycine-rich protein 2	protein-coding
Diff_Nuc4391	chr18	42728052	42728191	+	0	NA	exon (NM_001289526, exon 18 of 22)	exon (NM_001289526, exon 18 of 22)	11185	NM_181543	240239	Mm.186779	NM_181543	ENSMUSG00000042816	Gpr151	C130082O03Rik|GalRL|PGR7|nGPCR-2037	G protein-coupled receptor 151	protein-coding
Diff_Nuc7588	chr3	105668042	105668181	+	0	NA	Intergenic	Intergenic	-5665	NM_027025	69296	Mm.235024	NM_027025	ENSMUSG00000000562	Tmigd3	1700001d09rik|4930578J19Rik	transmembrane and immunoglobulin domain containing 3	protein-coding
Diff_Nuc5080	chr7	117286152	117286291	+	0	NA	3' UTR (NM_009516, exon 11 of 11)	3' UTR (NM_009516, exon 11 of 11)	20648	NM_009516	22390	Mm.287173	NM_009516	ENSMUSG00000031016	Wee1	Wee1A	WEE 1 homolog 1 (S. pombe)	protein-coding
Diff_Nuc1652	chr11	119691172	119691311	+	0	NA	intron (NR_045313, intron 1 of 2)	intron (NR_045313, intron 1 of 2)	4438	NR_045313	319454	Mm.442144	NR_045312	ENSMUSG00000085081	Rptoros	A430071A18Rik	regulatory associated protein of MTOR, complex 1, opposite strand	ncRNA
Diff_Nuc9049	chr1	109437912	109438051	+	0	NA	intron (NM_198028, intron 6 of 7)	intron (NM_198028, intron 6 of 7)	12401	NM_198028	241197	Mm.123919	NM_198028	ENSMUSG00000092572	Serpinb10	9830131G07|BB233602|Serpinb10-ps	serine (or cysteine) peptidase inhibitor, clade B (ovalbumin), member 10	protein-coding
Diff_Nuc7201	chr3	25102532	25102671	+	0	NA	Intergenic	Intergenic	-419673	NM_001326288	635702	Mm.448351	NM_001326288	ENSMUSG00000102758	Naaladl2	2810043G22Rik|EG635702|Gm1021	N-acetylated alpha-linked acidic dipeptidase-like 2	protein-coding
Diff_Nuc34	chrX	68259552	68259691	+	0	NA	Intergenic	Intergenic	-43810	NM_001256048	333639	Mm.371730	NM_001081354	ENSMUSG00000059401	Mamld1	G630014P10Rik	mastermind-like domain containing 1	protein-coding
Diff_Nuc2015	chr10	87114492	87114631	+	0	NA	Intergenic	Intergenic	130021	NM_008777	18478	Mm.263539	NM_008777	ENSMUSG00000020051	Pah	AW106920	phenylalanine hydroxylase	protein-coding
Diff_Nuc1496	chr11	82213192	82213331	+	0	NA	intron (NM_001304439, intron 1 of 8)	intron (NM_001304439, intron 1 of 8)	10859	NM_001304439	270893	Mm.341593	NM_023438	ENSMUSG00000020701	Tmem132e	Gm644	transmembrane protein 132E	protein-coding
Diff_Nuc2647	chr16	16633022	16633161	+	0	NA	Intergenic	RMER17C-int|LTR|ERVK	-33020	NM_001301817	224014	Mm.256131	NM_139232	ENSMUSG00000022788	Fgd4	9030023J02Rik|9330209B17Rik|Frabp|ZFYVE6	FYVE, RhoGEF and PH domain containing 4	protein-coding
Diff_Nuc10409	chr8	98086572	98086711	+	0	NA	intron (NM_027640, intron 4 of 4)	MER104|DNA|Tc2	12456	NM_027640	70993	Mm.486561	NM_027640	ENSMUSG00000048400	Prss54	4931432M23Rik|Klkbl4	protease, serine 54	protein-coding
Diff_Nuc289	chr13	44791832	44791971	+	0	NA	Intergenic	Intergenic	-34242	NM_021878	16468	Mm.25059	NM_021878	ENSMUSG00000038518	Jarid2	Jmj|jumonji	jumonji, AT rich interactive domain 2	protein-coding
Diff_Nuc3718	chr14	71711852	71711991	+	0	NA	Intergenic	Intergenic	60841	NR_046076	100043132	Mm.399336	NR_046075		Gm4251	-	predicted gene 4251	ncRNA
Diff_Nuc5406	chr6	46738202	46738341	+	0	NA	intron (NM_001004357, intron 14 of 23)	intron (NM_001004357, intron 14 of 23)	-456124	NM_025771	66797	Mm.440084	NM_025771	ENSMUSG00000039419	Cntnap2	5430425M22Rik|Caspr2|mKIAA0868	contactin associated protein-like 2	protein-coding
Diff_Nuc8173	chr2	85693312	85693451	+	0	NA	Intergenic	Lx2B|LINE|L1	3804	NM_146580	258573	Mm.223101	NM_146580	ENSMUSG00000046975	Olfr1020	MOR201-2	olfactory receptor 1020	protein-coding
Diff_Nuc961	chr12	79079752	79079891	+	0	NA	Intergenic	Intergenic	-247821	NM_172952	268566	Mm.341742	NM_145965	ENSMUSG00000047454	Gphn	5730552E08Rik|AI662856|BC027112|C230040D23|GPH|GPHRYN|geph	gephyrin	protein-coding
Diff_Nuc4112	chr19	44333272	44333411	+	0	NA	Intergenic	B1_Mur1|SINE|Alu	-34825	NM_009128	20250	Mm.487021	NM_009128	ENSMUSG00000025203	Scd2	Mir5114|Scd-2|mir-5114|swty	stearoyl-Coenzyme A desaturase 2	protein-coding
Diff_Nuc2207	chr10	128447822	128447961	+	0	NA	promoter-TSS (NM_146862)	promoter-TSS (NM_146862)	-452	NM_146862	258861	Mm.377724	NM_146862	ENSMUSG00000063374	Olfr763	MOR269-2	olfactory receptor 763	protein-coding
Diff_Nuc3839	chr14	106098552	106098691	+	0	NA	Intergenic	Intergenic	-75634	NR_105814	102465207		NR_105814	ENSMUSG00000098780	Mir6390	Gm27562|mmu-mir-6390	microRNA 6390	ncRNA
Diff_Nuc3015	chr15	4094932	4095071	+	0	NA	intron (NM_024188, intron 15 of 16)	intron (NM_024188, intron 15 of 16)	-117595	NR_028266	414066	Mm.394461	NR_028266		BC037032	-	cDNA Sequence BC037032	ncRNA
Diff_Nuc8392	chr2	134878752	134878891	+	0	NA	intron (NM_001145830, intron 3 of 31)	MLT1B|LTR|MaLR	162531	NR_040517	78805	Mm.78702	NR_040517	ENSMUSG00000085247	4930545L23Rik	-	RIKEN cDNA 4930545L23 gene	ncRNA
Diff_Nuc9755	chr9	64748082	64748221	+	0	NA	intron (NM_001162917, intron 24 of 34)	MTD|LTR|MaLR	51263	NM_144813	214111	Mm.156124	NM_144813	ENSMUSG00000034452	Slc24a1	-	solute carrier family 24 (sodium/potassium/calcium exchanger), member 1	protein-coding
Diff_Nuc2873	chr16	63238222	63238361	+	0	NA	Intergenic	Lx8|LINE|L1	384158	NM_011173	19128	Mm.127156	NM_011173	ENSMUSG00000022912	Pros1	AW214361	protein S (alpha)	protein-coding
Diff_Nuc6923	chr4	111307492	111307631	+	0	NA	intron (NM_001048189, intron 11 of 12)	intron (NM_001048189, intron 11 of 12)	-85054	NM_026470	67946	Mm.275526	NM_026470	ENSMUSG00000034401	Spata6	1700062C23Rik|AI790763|Hash|KRP|Mash	spermatogenesis associated 6	protein-coding
Diff_Nuc8722	chr1	38699212	38699351	+	0	NA	Intergenic	Intergenic	-15192	NM_001290814	16764	Mm.336679	NM_010678	ENSMUSG00000037138	Aff3	3222402O04Rik|A730046J16|LAF-4|Laf4	AF4/FMR2 family, member 3	protein-coding
Diff_Nuc1883	chr10	55892692	55892831	+	0	NA	intron (NM_001033385, intron 14 of 32)	intron (NM_001033385, intron 14 of 32)	55734	NM_001033385	544696	Mm.411188	NM_001033385	ENSMUSG00000038122	Tbc1d32	Bromi|D630037F22Rik|b2b2284Clo	TBC1 domain family, member 32	protein-coding
Diff_Nuc1048	chr12	99310572	99310711	+	0	NA	Intergenic	ERVL-B4-int|LTR|ERVL	187028	NM_008079	14420	Mm.5120	NM_008079	ENSMUSG00000021003	Galc	2310068B06Rik|A930008M05Rik|AW212969|AW413532|Gacy|twi|twitcher	galactosylceramidase	protein-coding
Diff_Nuc5733	chr6	128017772	128017911	+	0	NA	intron (NM_175414, intron 2 of 8)	intron (NM_175414, intron 2 of 8)	75755	NM_175414	109246	Mm.21814	NM_175414	ENSMUSG00000030352	Tspan9	6720474K14Rik|9430079M16Rik|AU018597	tetraspanin 9	protein-coding
Diff_Nuc1821	chr10	40706552	40706691	+	0	NA	Intergenic	Intergenic	84769	NM_199058	140741	Mm.290693	NM_199058	ENSMUSG00000046922	Gpr6	AI852874|Gm233	G protein-coupled receptor 6	protein-coding
Diff_Nuc7332	chr3	51457052	51457191	+	0	NA	Intergenic	Intergenic	-7980	NM_174995	211666	Mm.24679	NM_174995	ENSMUSG00000074604	Mgst2	GST2|MGST-II	microsomal glutathione S-transferase 2	protein-coding
Diff_Nuc9479	chr9	5754722	5754861	+	0	NA	Intergenic	Intergenic	409315	NM_009808	12364	Mm.42163	NM_009808	ENSMUSG00000025887	Casp12	-	caspase 12	protein-coding
Diff_Nuc3392	chr15	91339312	91339451	+	0	NA	intron (NM_001033633, intron 2 of 9)	intron (NM_001033633, intron 2 of 9)	64311	NM_001033633	239606	Mm.360596	NM_001033633	ENSMUSG00000036298	Slc2a13	6530403A04|A630029G22Rik|AI505012|Gm308	solute carrier family 2 (facilitated glucose transporter), member 13	protein-coding
Diff_Nuc9493	chr9	9746452	9746591	+	0	NA	intron (NM_001033359, intron 13 of 20)	intron (NM_001033359, intron 13 of 20)	-147910	NR_105745	102466147		NR_105745	ENSMUSG00000098408	Mir6237	Gm27411|mmu-mir-6237	microRNA 6237	ncRNA
Diff_Nuc2145	chr10	115101972	115102111	+	0	NA	Intergenic	Intergenic	-77205	NM_010195	14160	Mm.42103	NM_010195	ENSMUSG00000020140	Lgr5	FEX|Gpr49	leucine rich repeat containing G protein coupled receptor 5	protein-coding
Diff_Nuc5085	chr7	118096092	118096231	+	0	NA	intron (NM_194464, intron 1 of 20)	intron (NM_194464, intron 1 of 20)	-6460	NM_010826	17540	Mm.250023	NM_010826	ENSMUSG00000005611	Mrvi1	BB115629|Irag|Ris1	MRV integration site 1	protein-coding
Diff_Nuc9643	chr9	42285902	42286041	+	0	NA	Intergenic	B4A|SINE|B4	-5662	NM_173038	272589	Mm.34483	NM_173038	ENSMUSG00000037287	Tbcel	D330014K23|E130107N23Rik|Lrrc35	tubulin folding cofactor E-like	protein-coding
Diff_Nuc7502	chr3	89218122	89218261	+	0	NA	Intergenic	PB1D9|SINE|Alu	-2406	NM_177041	319945	Mm.258142	NM_177041	ENSMUSG00000042642	Flad1	A930017E24Rik|Pp591	flavin adenine dinucleotide synthetase 1	protein-coding
Diff_Nuc3726	chr14	73544272	73544411	+	0	NA	intron (NR_033185, intron 1 of 15)	intron (NR_033185, intron 1 of 15)	1749	NR_033185	105670	Mm.280068	NM_134083	ENSMUSG00000022106	Rcbtb2	2610028E02Rik|2810420M18Rik|AI448345|AW240694|Chc1l|RC/BTB2	regulator of chromosome condensation (RCC1) and BTB (POZ) domain containing protein 2	protein-coding
Diff_Nuc6233	chr5	93733432	93733571	+	0	NA	Intergenic	MT2B|LTR|ERVL	36902	NM_007635	12452	Mm.3527	NM_007635	ENSMUSG00000029385	Ccng2	-	cyclin G2	protein-coding
Diff_Nuc9972	chr9	115753992	115754131	+	0	NA	Intergenic	MTEb|LTR|MaLR	-64512	NM_028638	73748	Mm.485018	NM_028638	ENSMUSG00000056880	Gadl1	1110027M19Rik|ADC|CSADC	glutamate decarboxylase-like 1	protein-coding
Diff_Nuc2375	chr17	39449182	39449321	+	0	NA	Intergenic	L1_Mur1|LINE|L1	-94053	NM_001244763	100126774	Mm.350534	NM_001244763	ENSMUSG00000094024	Esp18	Gm20579	exocrine gland secreted peptide 18	protein-coding
Diff_Nuc9401	chr1	188485012	188485151	+	0	NA	intron (NM_009367, intron 1 of 6)	intron (NM_009367, intron 1 of 6)	44787	NM_009367	21808	Mm.18213	NM_009367	ENSMUSG00000039239	Tgfb2	BB105277|Tgf-beta2|Tgfb-2	transforming growth factor, beta 2	protein-coding
Diff_Nuc1737	chr10	21752962	21753101	+	0	NA	Intergenic	Intergenic	34854	NM_053264	114671	Mm.288194	NM_053264	ENSMUSG00000069712	4930444G20Rik	-	RIKEN cDNA 4930444G20 gene	protein-coding
Diff_Nuc5621	chr6	98704002	98704141	+	0	NA	Intergenic	B3|SINE|B2	274221	NM_001197322	108655	Mm.234965	NM_053202	ENSMUSG00000030067	Foxp1	3110052D19Rik|4932443N09Rik|AI461938|AW494214	forkhead box P1	protein-coding
Diff_Nuc5338	chr6	32768832	32768971	+	0	NA	intron (NM_025336, intron 6 of 7)	intron (NM_025336, intron 6 of 7)	-230709	NM_175750	243743	Mm.444029	NM_175750	ENSMUSG00000029765	Plxna4	9330117B14|Plxa4|mKIAA1550	plexin A4	protein-coding
Diff_Nuc1982	chr10	80681902	80682041	+	0	NA	intron (NM_178662, intron 2 of 12)	intron (NM_178662, intron 2 of 12)	11553	NM_178662	16467	Mm.127681	NM_178662	ENSMUSG00000034958	Atcay	3322401A10Rik|BB077577|BNIP-H|CLAC|hes|ji	ataxia, cerebellar, Cayman type	protein-coding
Diff_Nuc3709	chr14	70461692	70461831	+	0	NA	Intergenic	Intergenic	-15491	NM_018781	13655	Mm.103737	NM_018781	ENSMUSG00000033730	Egr3	Pilot	early growth response 3	protein-coding
Diff_Nuc9982	chr9	117131972	117132111	+	0	NA	intron (NM_001172126, intron 1 of 12)	intron (NM_001172126, intron 1 of 12)	29560	NM_001172123	207181	Mm.326411	NM_178660	ENSMUSG00000039607	Rbms3	6720477E09Rik|8430436O14Rik	RNA binding motif, single stranded interacting protein	protein-coding
Diff_Nuc4381	chr18	40348682	40348821	+	0	NA	Intergenic	Lx8|LINE|L1	30302	NM_023311	67180	Mm.270382	NM_023311	ENSMUSG00000024487	Yipf5	2610311I19Rik|AA408236|Yip1a	Yip1 domain family, member 5	protein-coding
Diff_Nuc1276	chr11	31760892	31761031	+	0	NA	Intergenic	Intergenic	-9979	NM_001290676	67579	Mm.339792	NM_026252	ENSMUSG00000020300	Cpeb4	Cpe-bp4|Cpeb-4|mCPEB-4	cytoplasmic polyadenylation element binding protein 4	protein-coding
Diff_Nuc2434	chr17	52581952	52582091	+	0	NA	Intergenic	Intergenic	-160013	NM_001031811	211468	Mm.399068	NM_001031811	ENSMUSG00000035580	Kcnh8	C130090D05Rik|ELK|ELK1|ELK3|Kv12.1	potassium voltage-gated channel, subfamily H (eag-related), member 8	protein-coding
Diff_Nuc9938	chr9	107707072	107707211	+	0	NA	intron (NM_029169, intron 6 of 20)	intron (NM_029169, intron 6 of 20)	-33808	NM_148930	83486	Mm.259197	NM_148930	ENSMUSG00000032580	Rbm5	D030069N10Rik	RNA binding motif protein 5	protein-coding
Diff_Nuc9012	chr1	104504952	104505091	+	0	NA	Intergenic	Intergenic	1452676	NR_037989	100504525	Mm.87065	NR_037989	ENSMUSG00000100684	Gm20268	-	predicted gene, 20268	ncRNA
Diff_Nuc8547	chr2	171940392	171940531	+	0	NA	Intergenic	Intergenic	-71495	NM_175631	228942	Mm.40555	NM_175631	ENSMUSG00000067578	Cbln4	AI848962	cerebellin 4 precursor protein	protein-coding
Diff_Nuc6810	chr4	86610052	86610191	+	0	NA	Intergenic	RMER15|LTR|ERVL	89803	NM_139306	230379	Mm.45019	NM_139306	ENSMUSG00000038007	Acer2	2410116I05Rik|Asah3l|CRG-L1|maCER2	alkaline ceramidase 2	protein-coding
Diff_Nuc5704	chr6	120345622	120345761	+	0	NA	intron (NM_145997, intron 12 of 27)	RSINE1|SINE|B4	-31304	NR_045558	67200	Mm.45767	NM_026028	ENSMUSG00000030177	Ccdc77	2400002C23Rik|2700091N06Rik|AV168274	coiled-coil domain containing 77	protein-coding
Diff_Nuc9562	chr9	23866042	23866181	+	0	NA	Intergenic	Intergenic	-36351	NM_175678	319239	Mm.130824	NM_175678	ENSMUSG00000043659	Npsr1	9330128H10Rik|GPRA|Gpr154|MVTR|PGR14|VRR1	neuropeptide S receptor 1	protein-coding
Diff_Nuc5398	chr6	45049022	45049161	+	0	NA	intron (NM_001004357, intron 1 of 23)	L1_Mus3|LINE|L1	39031	NM_001004357	66797	Mm.440084	NM_025771	ENSMUSG00000039419	Cntnap2	5430425M22Rik|Caspr2|mKIAA0868	contactin associated protein-like 2	protein-coding
Diff_Nuc9234	chr1	156853032	156853171	+	0	NA	Intergenic	Intergenic	93665	NM_010500	15939	Mm.12246	NM_010500	ENSMUSG00000056708	Ier5	-	immediate early response 5	protein-coding
Diff_Nuc5403	chr6	46132602	46132741	+	0	NA	intron (NM_001004357, intron 9 of 23)	intron (NM_001004357, intron 9 of 23)	-1061724	NM_025771	66797	Mm.440084	NM_025771	ENSMUSG00000039419	Cntnap2	5430425M22Rik|Caspr2|mKIAA0868	contactin associated protein-like 2	protein-coding
Diff_Nuc7188	chr3	21170692	21170831	+	0	NA	Intergenic	YREP_Mm|Unknown|Unknown	-804813	NM_030732	81004	Mm.202966	NM_030732	ENSMUSG00000027630	Tbl1xr1	8030499H02Rik|A630076E03Rik|AW539987|C21|C230089I12Rik|DC42|Ira1|TBLR1	transducin (beta)-like 1X-linked receptor 1	protein-coding
Diff_Nuc6336	chr5	117193912	117194051	+	0	NA	Intergenic	L2c|LINE|L2	-152155	NM_026886	68955	Mm.146779	NM_026886	ENSMUSG00000063919	Srrm4	1500001A10Rik|B230202K19Rik|bv|mKIAA1853|nSR100	serine/arginine repetitive matrix 4	protein-coding
Diff_Nuc4863	chr7	72242932	72243071	+	0	NA	intron (NM_183087, intron 1 of 9)	intron (NM_183087, intron 1 of 9)	58413	NM_183087	70638	Mm.441986	NM_183087	ENSMUSG00000030518	Fam189a1	5730507A09Rik|AW047451	family with sequence similarity 189, member A1	protein-coding
Diff_Nuc5167	chr7	135887232	135887371	+	0	NA	Intergenic	Intergenic	-1083	NM_001029982	207352	Mm.297105	NM_001029982	ENSMUSG00000055319	Sec23ip	D7Ertd373e|p125	Sec23 interacting protein	protein-coding
Diff_Nuc10036	chr8	7733952	7734091	+	0	NA	Intergenic	Lx2|LINE|L1	926752	NM_010111	13642	Mm.209813	NM_010111	ENSMUSG00000001300	Efnb2	ELF-2|Epl5|Eplg5|Htk-L|LERK-5|Lerk5|NLERK-1	ephrin B2	protein-coding
Diff_Nuc1382	chr11	56867062	56867201	+	0	NA	intron (NM_001252403, intron 2 of 15)	intron (NM_001252403, intron 2 of 15)	40583	NM_001252403	14799	Mm.4920	NM_008165	ENSMUSG00000020524	Gria1	2900051M01Rik|Glr-1|Glr1|GluA1|GluR-A|GluRA|Glur-1|Glur1|HIPA1|gluR-K1	glutamate receptor, ionotropic, AMPA1 (alpha 1)	protein-coding
Diff_Nuc4086	chr19	38917502	38917641	+	0	NA	intron (NM_145952, intron 1 of 12)	RLTR11B|LTR|ERVK	6502	NM_145952	209478	Mm.391153	NM_145952	ENSMUSG00000048720	Tbc1d12	BC033574	TBC1D12: TBC1 domain family, member 12	protein-coding
Diff_Nuc6477	chr4	7036292	7036431	+	0	NA	Intergenic	Intergenic	-118491	NM_145711	252838	Mm.435828	NM_145711	ENSMUSG00000041272	Tox	1700007F02Rik	thymocyte selection-associated high mobility group box	protein-coding
Diff_Nuc2632	chr16	12673132	12673271	+	0	NA	Intergenic	MIR|SINE|MIR	-138282	NR_040507	75493	Mm.396146	NR_040507	ENSMUSG00000101565	1700003L19Rik	-	RIKEN cDNA 1700003L19 gene	ncRNA
Diff_Nuc9955	chr9	112082402	112082541	+	0	NA	TTS (NM_001177615)	TTS (NM_001177615)	5982	NM_001177618	74100	Mm.297444	NM_028755	ENSMUSG00000032503	Arpp21	0710001E13Rik|AI853636|ARPP-21|D9Bwg1012e|R3hdm3|Tarpp	cyclic AMP-regulated phosphoprotein, 21	protein-coding
Diff_Nuc4504	chr18	68155092	68155231	+	0	NA	intron (NM_172631, intron 1 of 5)	intron (NM_172631, intron 1 of 5)	62250	NM_172631	52662	Mm.440183	NM_172631	ENSMUSG00000024544	Ldlrad4	8230401C20Rik|A430083H02|A430108L08Rik|C18orf1|D18Ertd653e|D330030L18Rik	low density lipoprotein receptor class A domain containing 4	protein-coding
Diff_Nuc6026	chr5	43701902	43702041	+	0	NA	Intergenic	MTE-int|LTR|MaLR	-75378	NR_028417	665934	Mm.381491	NR_028417	ENSMUSG00000085720	Gm7854	EG665934|ENSMUSG00000054483	predicted gene 7854	ncRNA
Diff_Nuc2813	chr16	46248672	46248811	+	0	NA	Intergenic	Intergenic	-93551	NM_001304528	11615	Mm.330692	NM_001304528	ENSMUSG00000048087	Gm4737	AL024110|EG11615|ENSMUSG00000048087	predicted gene 4737	protein-coding
Diff_Nuc5509	chr6	73469062	73469201	+	0	NA	Intergenic	Intergenic	-48116	NR_108032	73408	Mm.233629	NR_108032	ENSMUSG00000107408	1700065L07Rik	-	RIKEN cDNA 1700065L07 gene	ncRNA
Diff_Nuc5265	chr6	12074452	12074591	+	0	NA	Intergenic	Intergenic	-14941	NR_003631	625347	Mm.389084	NM_001039041	ENSMUSG00000057223	Gm6578	EG625347	mitochondrial ribosomal protein L32 pseudogene	pseudo
Diff_Nuc8300	chr2	115073622	115073761	+	0	NA	Intergenic	Intergenic	96325	NR_040516	78193	Mm.189508	NR_040516	ENSMUSG00000087309	4930528P14Rik	-	RIKEN cDNA 4930528P14 gene	ncRNA
Diff_Nuc2612	chr16	6273572	6273711	+	0	NA	intron (NM_021477, intron 2 of 16)	RodERV21-int|LTR|ERV1	297961	NR_045799	68238	Mm.434605	NR_045799	ENSMUSG00000101481	1700123O21Rik	-	RIKEN cDNA 1700123O21 gene	ncRNA
Diff_Nuc5262	chr6	11277392	11277531	+	0	NA	Intergenic	Intergenic	-353083	NR_033776	57866	Mm.4397	NR_033776		AA545190	-	EST AA545190	ncRNA
Diff_Nuc9542	chr9	20262342	20262481	+	0	NA	intron (NM_011753, intron 2 of 9)	B3A|SINE|B2	2193	NM_011753	22688	Mm.107441	NM_011753	ENSMUSG00000063108	Zfp26	5033428C05Rik|KRAB15|Zfp-26|Zfp70|Zfp81-rs1|mKIAA4196|mkr-3|mszf14|mszf52	zinc finger protein 26	protein-coding
Diff_Nuc7769	chr3	148019492	148019631	+	0	NA	Intergenic	Intergenic	598038	NM_001081298	99633	Mm.9776	NM_001081298	ENSMUSG00000028184	Adgrl2	AI450192|CIRL-2|Gm619|Lec1|Lphh1|Lphn2|mKIAA0786	adhesion G protein-coupled receptor L2	protein-coding
Diff_Nuc2387	chr17	42452202	42452341	+	0	NA	promoter-TSS (NM_028474)	promoter-TSS (NM_028474)	-625	NM_028474	627626	Mm.390999	NM_028474	ENSMUSG00000042256	Ptchd4	3110082D06Rik|Gm321	patched domain containing 4	protein-coding
Diff_Nuc5125	chr7	128757652	128757791	+	0	NA	Intergenic	Intergenic	24304	NR_131051	69407		NR_131051	ENSMUSG00000108409	1700025J12Rik	-	RIKEN cDNA 1700025J12 gene	ncRNA
Diff_Nuc6340	chr5	119004572	119004711	+	0	NA	Intergenic	ID_B1|SINE|B4	-6087	NM_001347445	76199	Mm.206238	NM_172424	ENSMUSG00000018076	Med13l	2210413I17Rik|6330591G05Rik|9030618F05Rik|Thrap2|Trap240L|mKIAA1025	mediator complex subunit 13-like	protein-coding
Diff_Nuc735	chr12	29570962	29571101	+	0	NA	Intergenic	Intergenic	134338	NM_201357	380752	Mm.273724	NM_201357	ENSMUSG00000036613	Tssc1	D12Ertd604e|Eipr1	tumor suppressing subtransferable candidate 1	protein-coding
Diff_Nuc624	chr13	119213792	119213931	+	0	NA	Intergenic	Intergenic	-37802	NM_021556	59054	Mm.143810	NM_021556	ENSMUSG00000021731	Mrps30	2610020A16Rik|AA968347|PAP|Pdcd9	mitochondrial ribosomal protein S30	protein-coding
Diff_Nuc9534	chr9	18413872	18414011	+	0	NA	Intergenic	Intergenic	131102	NM_028557	73503	Mm.160088	NM_028557	ENSMUSG00000038691	Mbd3l1	1700070G05Rik|1700095H13Rik|Mbd3l	methyl-CpG binding domain protein 3-like 1	protein-coding
Diff_Nuc2699	chr16	25695352	25695491	+	0	NA	intron (NM_001127261, intron 1 of 10)	Lx3_Mus|LINE|L1	11570	NM_001127260	22061	Mm.20894	NM_011641	ENSMUSG00000022510	Trp63	AI462811|Ket|P51/P63|P63|P73l|Tp63|Trp53rp1	transformation related protein 63	protein-coding
Diff_Nuc4931	chr7	85904982	85905121	+	0	NA	Intergenic	Intergenic	22924	NM_023331	67308	Mm.193181	NM_023331	ENSMUSG00000030612	Mrpl46	3110052F15Rik|C15orf4|C80107|LIECG2|P2ECSL	mitochondrial ribosomal protein L46	protein-coding
Diff_Nuc8217	chr2	98502622	98502761	+	0	NA	Intergenic	SYNREP_MM|Satellite|Satellite	1194877	NM_178725	241568	Mm.241682	NM_178725	ENSMUSG00000050587	Lrrc4c	6430556C10Rik|NGL-1	leucine rich repeat containing 4C	protein-coding
Diff_Nuc1213	chr11	18025602	18025741	+	0	NA	Intergenic	Intergenic	29682	NR_131129	327872		NR_131129	ENSMUSG00000085453	Gm12018	OTTMUSG00000005202	predicted gene 12018	ncRNA
Diff_Nuc1102	chr12	110178352	110178491	+	0	NA	intron (NM_177602, intron 2 of 6)	intron (NM_177602, intron 2 of 6)	45939	NM_177602	212198	Mm.342082	NM_177602	ENSMUSG00000040877	Wdr25	B930090D16Rik	WD repeat domain 25	protein-coding
Diff_Nuc9114	chr1	128786212	128786351	+	0	NA	Intergenic	Lx7|LINE|L1	-59072	NM_176957	210356	Mm.377234	NM_172484	ENSMUSG00000049690	Nckap5	8430408F21|D130011D22Rik|E030049G20Rik|Erih1|Erih2|Gm1548|Nap5	NCK-associated protein 5	protein-coding
Diff_Nuc3146	chr15	36159742	36159881	+	0	NA	intron (NM_012031, intron 16 of 18)	intron (NM_012031, intron 16 of 18)	10108	NR_106173	102465888		NR_106173	ENSMUSG00000098457	Mir8097	Gm27497|mmu-mir-8097	microRNA 8097	ncRNA
Diff_Nuc1311	chr11	41398702	41398841	+	0	NA	Intergenic	Intergenic	415445	NM_177408	14406	Mm.5309	NM_008073	ENSMUSG00000020436	Gabrg2	GABAA-R|Gabrg-2|gamma2	gamma-aminobutyric acid (GABA) A receptor, subunit gamma 2	protein-coding
Diff_Nuc5227	chr6	3337552	3337691	+	0	NA	intron (NM_010156, intron 1 of 1)	Lx9|LINE|L1	11950	NM_010156	209086	Mm.196013	NM_010156	ENSMUSG00000047735	Samd9l	AA175286|ESTM25|mKIAA2005	sterile alpha motif domain containing 9-like	protein-coding
Diff_Nuc9325	chr1	173096222	173096361	+	0	NA	Intergenic	Intergenic	10642	NM_001315500	17528	Mm.9986	NM_008623	ENSMUSG00000056569	Mpz	Mpp|P-zero|P0	myelin protein zero	protein-coding
Diff_Nuc8064	chr2	56165782	56165921	+	0	NA	Intergenic	Intergenic	-472371	NR_105751	102465169		NR_105751	ENSMUSG00000098437	Mir195b	Gm27491|mmu-mir-195b	microRNA 195b	ncRNA
Diff_Nuc9679	chr9	49409022	49409161	+	0	NA	intron (NM_001311065, intron 1 of 17)	(GA)n|Simple_repeat|Simple_repeat	82698	NR_029465	100036537	Mm.437541	NR_029465	ENSMUSG00000079564	Gm11149	ENSMUSG00000060603|ENSMUSG00000079564	predicted gene 11149	ncRNA
Diff_Nuc5203	chr7	143215792	143215931	+	0	NA	Intergenic	Intergenic	-244146	NR_102277	77383	Mm.227745	NR_102277	ENSMUSG00000110027	C030029H02Rik	-	RIKEN cDNA C030029H02 gene	ncRNA
Diff_Nuc5371	chr6	38429072	38429211	+	0	NA	exon (NM_177185, exon 8 of 17)	exon (NM_177185, exon 8 of 17)	-28184	NR_106130	102466843		NR_106130	ENSMUSG00000098285	Mir7670	Gm27707|mmu-mir-7670	microRNA 7670	ncRNA
Diff_Nuc3107	chr15	26633662	26633801	+	0	NA	intron (NM_176959, intron 2 of 3)	intron (NM_176959, intron 2 of 3)	191588	NM_176959	448987	Mm.253378	NM_176959	ENSMUSG00000043556	Fbxl7	AL023057|D230018M15Rik|FBL7|Fbl6	F-box and leucine-rich repeat protein 7	protein-coding
Diff_Nuc3275	chr15	62035142	62035281	+	0	NA	intron (NR_132746, intron 3 of 6)	L1MA6|LINE|L1	15795	NR_003523	67552	Mm.484027	NM_026230		H2afy3	4933432H23Rik	H2A histone family, member Y3	pseudo
Diff_Nuc1948	chr10	70893172	70893311	+	0	NA	Intergenic	Intergenic	82730	NM_027184	69718	Mm.245867	NM_027184	ENSMUSG00000060733	Ipmk	2410017C19Rik|AA408208|Impk	inositol polyphosphate multikinase	protein-coding
Diff_Nuc2626	chr16	10705792	10705931	+	0	NA	intron (NM_177562, intron 21 of 22)	intron (NM_177562, intron 21 of 22)	79768	NM_009896	12703	Mm.130	NM_009896	ENSMUSG00000038037	Socs1	Cish1|Cish7|JAB|SOCS-1|SSI-1	suppressor of cytokine signaling 1	protein-coding
Diff_Nuc1612	chr11	110031332	110031471	+	0	NA	Intergenic	L1_Mus3|LINE|L1	-1934	NM_147220	217262	Mm.291459	NM_147220	ENSMUSG00000041797	Abca9	D630040K07Rik	ATP-binding cassette, sub-family A (ABC1), member 9	protein-coding
Diff_Nuc8225	chr2	98506892	98507031	+	0	NA	Intergenic	GSAT_MM|Satellite|Satellite	1199147	NM_178725	241568	Mm.241682	NM_178725	ENSMUSG00000050587	Lrrc4c	6430556C10Rik|NGL-1	leucine rich repeat containing 4C	protein-coding
Diff_Nuc3455	chr14	10055072	10055211	+	0	NA	Intergenic	Intergenic	556237	NR_045968	74859	Mm.84041	NR_045968	ENSMUSG00000097898	4930455B14Rik	1700027C12Rik	RIKEN cDNA 4930455B14 gene	ncRNA
Diff_Nuc8891	chr1	78883022	78883161	+	0	NA	Intergenic	Lx|LINE|L1	69567	NM_021342	57814	Mm.24386	NM_021342	ENSMUSG00000047330	Kcne4	AW487937|MiRP3	potassium voltage-gated channel, Isk-related subfamily, gene 4	protein-coding
Diff_Nuc511	chr13	93179952	93180091	+	0	NA	Intergenic	Intergenic	-15903	NM_175455	218440	Mm.213623	NM_175455	ENSMUSG00000045034	Ankrd34b	6430502M16Rik|DP58	ankyrin repeat domain 34B	protein-coding
Diff_Nuc4234	chr18	13944012	13944151	+	0	NA	intron (NM_145492, intron 5 of 7)	intron (NM_145492, intron 5 of 7)	187161	NM_145492	225207	Mm.40325	NM_145492	ENSMUSG00000024420	Zfp521	B930086A16Rik|Evi3|Znf521	zinc finger protein 521	protein-coding
Diff_Nuc7401	chr3	66196382	66196521	+	0	NA	Intergenic	L1_Mus4|LINE|L1	-95692	NM_145820	72789	Mm.443526	NM_028357	ENSMUSG00000027831	Veph1	2810471M23Rik|Veph	ventricular zone expressed PH domain-containing 1	protein-coding
Diff_Nuc1075	chr12	103516312	103516451	+	0	NA	Intergenic	Intergenic	-4903	NM_177620	217835	Mm.24145	NM_177620	ENSMUSG00000044456	Rin3	6430500K07|C86933	Ras and Rab interactor 3	protein-coding
Diff_Nuc1741	chr10	22201162	22201301	+	0	NA	Intergenic	Intergenic	78612	NR_028580	100038752	Mm.392859	NR_028580	ENSMUSG00000096937	Gm10825	ENSMUSG00000075295	predicted gene 10825	ncRNA
Diff_Nuc2905	chr16	67559752	67559891	+	0	NA	intron (NM_178721, intron 1 of 9)	L1Md_F2|LINE|L1	61332	NM_001347247	239857	Mm.394300	NM_178721	ENSMUSG00000064115	Cadm2	2900078E11Rik|9330131D06|A830029E02Rik|Igdf4d|Igsf4d|NECL3|SynCAM 2|SynCAM2	cell adhesion molecule 2	protein-coding
Diff_Nuc3446	chr15	103383197	103383336	+	0	NA	Intergenic	Intergenic	12246	NM_001289587	14663	Mm.219621	NM_008134	ENSMUSG00000022491	Glycam1	MC26|Sgp50|glyCAM-1	glycosylation dependent cell adhesion molecule 1	protein-coding
Diff_Nuc9617	chr9	35333322	35333461	+	0	NA	Intergenic	L1VL4|LINE|L1	32664	NM_013932	30959	Mm.291723	NM_013932	ENSMUSG00000032101	Ddx25	AW047046|GRTH	DEAD (Asp-Glu-Ala-Asp) box polypeptide 25	protein-coding
Diff_Nuc6396	chr5	135731742	135731881	+	0	NA	Intergenic	MT2B|LTR|ERVL	-4894	NM_010246	14371	Mm.6256	NM_010246	ENSMUSG00000049551	Fzd9	mfz9	frizzled class receptor 9	protein-coding
Diff_Nuc862	chr12	58329442	58329581	+	0	NA	Intergenic	MTE-int|LTR|MaLR	-1888	NM_001037746	328099	Mm.268180	NM_001037746	ENSMUSG00000079104	Prps1l3	AU021838|AW536152|Gm5081	phosphoribosyl pyrophosphate synthetase 1-like 3	protein-coding
Diff_Nuc2322	chr17	27930962	27931101	+	0	NA	intron (NM_001271511, intron 1 of 3)	intron (NM_001271511, intron 1 of 3)	26456	NM_001033279	224647	Mm.196577	NM_001033279	ENSMUSG00000056692	D17Wsu92e	AU020189|C030010A15|C80239	DNA segment, Chr 17, Wayne State University 92, expressed	protein-coding
Diff_Nuc3210	chr15	49471692	49471831	+	0	NA	Intergenic	Intergenic	-848226	NM_001081391	239420	Mm.309363	NM_001081391	ENSMUSG00000022311	Csmd3	4930500N14Rik|mKIAA1894	CUB and Sushi multiple domains 3	protein-coding
Diff_Nuc670	chr12	11556512	11556651	+	0	NA	Intergenic	B3A|SINE|B2	93696	NM_001111118	209550	Mm.341257	NM_001111118	ENSMUSG00000086022	Rad51ap2	EG209550	RAD51 associated protein 2	protein-coding
Diff_Nuc302	chr13	47196732	47196871	+	0	NA	intron (NM_025900, intron 4 of 10)	intron (NM_025900, intron 4 of 10)	4788	NM_025900	110052	Mm.131150	NM_025900	ENSMUSG00000021377	Dek	1810019E15Rik|D13H6S231E	DEK oncogene (DNA binding)	protein-coding
Diff_Nuc9661	chr9	46501192	46501331	+	0	NA	Intergenic	L1MA5|LINE|L1	-220425	NR_015605	73040	Mm.265384	NR_015605	ENSMUSG00000099696	2900052N01Rik	AU067665	RIKEN cDNA 2900052N01 gene	ncRNA
Diff_Nuc5859	chr5	10854722	10854861	+	0	NA	Intergenic	Lx7|LINE|L1	-10238	NR_003596	623849	Mm.335888	NR_003596	ENSMUSG00000091422	Gm6455	EG623849	predicted gene 6455	pseudo
Diff_Nuc1974	chr10	78579672	78579811	+	0	NA	Intergenic	ORR1A2|LTR|MaLR	-19396	NM_001004362	72128	Mm.297854	NM_001004362	ENSMUSG00000060301	2610008E11Rik	-	RIKEN cDNA 2610008E11 gene	protein-coding
Diff_Nuc4456	chr18	58339152	58339291	+	0	NA	intron (NM_010181, intron 5 of 64)	intron (NM_010181, intron 5 of 64)	30359	NM_010181	14119	Mm.20271	NM_010181	ENSMUSG00000024598	Fbn2	BC063774|Fib-2|mKIAA4226|sne|sy	fibrillin 2	protein-coding
Diff_Nuc6931	chr4	112866352	112866491	+	0	NA	intron (NM_001103199, intron 5 of 48)	RMER15-int|LTR|ERVL	93157	NM_001103199	230622	Mm.291107	NM_001103199	ENSMUSG00000087194	Skint6	OTTMUSG00000008519	selection and upkeep of intraepithelial T cells 6	protein-coding
Diff_Nuc9248	chr1	159344892	159345031	+	0	NA	intron (NR_027984, intron 2 of 2)	intron (NR_027984, intron 2 of 2)	-2235	NM_177644	226525	Mm.235028	NM_177644	ENSMUSG00000070565	Rasal2	6530401P13|A330066M24Rik	RAS protein activator like 2	protein-coding
Diff_Nuc9738	chr9	61111752	61111891	+	0	NA	intron (NR_045334, intron 3 of 4)	intron (NR_045334, intron 3 of 4)	29795	NR_045334	622037	Mm.126243	NR_045334	ENSMUSG00000111658	B930092H01Rik	-	RIKEN cDNA B930092H01 gene	ncRNA
Diff_Nuc2175	chr10	121783932	121784071	+	0	NA	Intergenic	L1Md_F2|LINE|L1	-101554	NM_016847	54140	Mm.4351	NM_016847	ENSMUSG00000020123	Avpr1a	AVPR|Avpr1|V1a|V1aR	arginine vasopressin receptor 1A	protein-coding
Diff_Nuc1489	chr11	81059712	81059851	+	0	NA	intron (NM_001034013, intron 1 of 9)	intron (NM_001034013, intron 1 of 9)	-93376	NM_007384	11418	Mm.234998	NM_007384	ENSMUSG00000020704	Asic2	ACIC2|Accn1|BNC1|BNaC1|BNaC1a|Mdeg	acid-sensing (proton-gated) ion channel 2	protein-coding
Diff_Nuc6665	chr4	53160612	53160751	+	0	NA	intron (NM_013454, intron 1 of 49)	intron (NM_013454, intron 1 of 49)	12086	NM_013454	11303	Mm.277376	NM_013454	ENSMUSG00000015243	Abca1	ABC-1|Abc1	ATP-binding cassette, sub-family A (ABC1), member 1	protein-coding
Diff_Nuc390	chr13	64221302	64221441	+	0	NA	intron (NM_001001321, intron 3 of 11)	intron (NM_001001321, intron 3 of 11)	9267	NM_001001321	70484	Mm.133731	NM_001001321	ENSMUSG00000033114	Slc35d2	5730408I21Rik|SQV7L|UGTrel8|hfrc|mUGTrel8	solute carrier family 35, member D2	protein-coding
Diff_Nuc6098	chr5	60521522	60521661	+	0	NA	Intergenic	RMER6-int|LTR|ERVK	-144350	NR_040682	71057	Mm.50817	NR_040682	ENSMUSG00000106013	4933402J10Rik	-	RIKEN cDNA 4933402J10 gene	ncRNA
Diff_Nuc6535	chr4	21766952	21767091	+	0	NA	Intergenic	MT2C_Mm|LTR|ERVL	-7709	NM_025669	66625	Mm.100117	NM_025669	ENSMUSG00000028248	Pnisr	5730406M06Rik|AA673174|Pinsr|Sfrs18|Srsf18	PNN interacting serine/arginine-rich	protein-coding
Diff_Nuc7303	chr3	46057742	46057881	+	0	NA	Intergenic	Intergenic	194052	NM_001101479	241989	Mm.119234	NM_001101479	ENSMUSG00000090919	Pabpc4l	C330050A14Rik|EG241989	poly(A) binding protein, cytoplasmic 4-like	protein-coding
Diff_Nuc2601	chr16	4704022	4704161	+	0	NA	intron (NM_001135112, intron 10 of 10)	intron (NM_001135112, intron 10 of 10)	15265	NM_001290763	67824	Mm.28451	NM_026393	ENSMUSG00000063445	Nmral1	1110025F24Rik|AI256624	NmrA-like family domain containing 1	protein-coding
Diff_Nuc5	chrY	2782242	2782381	+	0	NA	Intergenic	Intergenic	395053	NM_001270512	100041505	Mm.491824	NM_001270512	ENSMUSG00000096520	Gm3376	Rbmy1b	predicted gene 3376	protein-coding
Diff_Nuc2663	chr16	18996322	18996461	+	0	NA	Intergenic	L1_Mus3|LINE|L1	119548	NM_010435	15260	Mm.15694	NM_010435	ENSMUSG00000022702	Hira	AA138857|D16Ertd95e|Gm15797|N28177|OTTMUSG00000026264|Tuple1	histone cell cycle regulator	protein-coding
Diff_Nuc5632	chr6	100803202	100803341	+	0	NA	intron (NM_182939, intron 3 of 8)	intron (NM_182939, intron 3 of 8)	19639	NM_182939	232314	Mm.27223	NM_182939	ENSMUSG00000052144	Ppp4r2	BE691708|C230060M08Rik	protein phosphatase 4, regulatory subunit 2	protein-coding
Diff_Nuc9239	chr1	157314262	157314401	+	0	NA	Intergenic	LTR78|LTR|ERV1	-49757	NM_011273	19775	Mm.266215	NM_011273	ENSMUSG00000026469	Xpr1	Rmc-1|Rmc1|Sxv|Syg1|XR	xenotropic and polytropic retrovirus receptor 1	protein-coding
Diff_Nuc1838	chr10	44608942	44609081	+	0	NA	Intergenic	MLT1F2|LTR|MaLR	-178009	NM_011156	19072	Mm.10281	NM_011156	ENSMUSG00000019849	Prep	AI047692|AI450383|D10Wsu136e|PEP|Pop	prolyl endopeptidase	protein-coding
Diff_Nuc10042	chr8	8601652	8601791	+	0	NA	Intergenic	PB1|SINE|Alu	59052	NM_010111	13642	Mm.209813	NM_010111	ENSMUSG00000001300	Efnb2	ELF-2|Epl5|Eplg5|Htk-L|LERK-5|Lerk5|NLERK-1	ephrin B2	protein-coding
Diff_Nuc933	chr12	73504532	73504671	+	0	NA	intron (NM_153457, intron 1 of 8)	intron (NM_153457, intron 1 of 8)	5440	NM_001286448	104001	Mm.221275	NM_153457	ENSMUSG00000021087	Rtn1	Nsp	reticulon 1	protein-coding
Diff_Nuc2911	chr16	68687432	68687571	+	0	NA	Intergenic	Lx7|LINE|L1	-1066348	NM_178721	239857	Mm.394300	NM_178721	ENSMUSG00000064115	Cadm2	2900078E11Rik|9330131D06|A830029E02Rik|Igdf4d|Igsf4d|NECL3|SynCAM 2|SynCAM2	cell adhesion molecule 2	protein-coding
Diff_Nuc4769	chr7	50394072	50394211	+	0	NA	Intergenic	Lx3B|LINE|L1	-38817	NM_001034893	668620	Mm.388871	NM_001034893	ENSMUSG00000064194	Zfp936	EG435970|EG668620|Gm9272|I1C0022H11Rik	zinc finger protein 936	protein-coding
Diff_Nuc6838	chr4	93327452	93327591	+	0	NA	Intergenic	Intergenic	-325319	NM_026954	69136	Mm.171558	NM_026954	ENSMUSG00000054000	Tusc1	2200001D17Rik|TSG-9	tumor suppressor candidate 1	protein-coding
Diff_Nuc7104	chr4	150301142	150301281	+	0	NA	promoter-TSS (NM_001077509)	promoter-TSS (NM_001077509)	-897	NM_001077509	21942	Mm.244187	NM_011612	ENSMUSG00000028965	Tnfrsf9	4-1BB|A930040I11Rik|AA408498|AI325004|CDw137|Cd137|ILA|Ly63	tumor necrosis factor receptor superfamily, member 9	protein-coding
Diff_Nuc4751	chr7	46511782	46511921	+	0	NA	TTS (NR_073038)	TTS (NR_073038)	8053	NR_073038	100861861	Mm.60620	NR_073038		Gm21276	-	predicted gene, 21276	pseudo
Diff_Nuc9610	chr9	34553612	34553751	+	0	NA	intron (NM_001190912, intron 1 of 15)	intron (NM_001190912, intron 1 of 15)	257365	NM_001190911	67703	Mm.220710	NM_026324	ENSMUSG00000032036	Kirrel3	1500010O20Rik|2900036G11Rik|NEPH2|SST4|mKIAA1867	kin of IRRE like 3 (Drosophila)	protein-coding
Diff_Nuc928	chr12	71891712	71891851	+	0	NA	Intergenic	MIRb|SINE|MIR	-34720	NM_028127	319710	Mm.2962	NM_028127	ENSMUSG00000048285	Frmd6	2610019M19Rik|4930488L10Rik|AW212977|Willin	FERM domain containing 6	protein-coding
Diff_Nuc8637	chr1	19476832	19476971	+	0	NA	Intergenic	L1_Mus2|LINE|L1	274766	NM_001025305	21419	Mm.137021	NM_009334	ENSMUSG00000025927	Tfap2b	AI606113|AP-2(beta)|E130018K07Rik|Tcfap2b	transcription factor AP-2 beta	protein-coding
Diff_Nuc297	chr13	46452042	46452181	+	0	NA	Intergenic	MTD|LTR|MaLR	-61558	NM_001081425	666794	Mm.38269	NM_001081425	ENSMUSG00000038132	Rbm24	6330546B05Rik|AI606861	RNA binding motif protein 24	protein-coding
Diff_Nuc9859	chr9	88280252	88280391	+	0	NA	intron (NM_172926, intron 20 of 27)	intron (NM_172926, intron 20 of 27)	53468	NM_172926	244962	Mm.439873	NM_172926	ENSMUSG00000032422	Snx14	B830022K16|C330035N22Rik|YR-14	sorting nexin 14	protein-coding
Diff_Nuc3940	chr19	7611132	7611271	+	0	NA	3' UTR (NM_001163505, exon 13 of 13)	3' UTR (NM_001163505, exon 13 of 13)	-20748	NM_139269	225845	Mm.274810	NM_139269	ENSMUSG00000060675	Pla2g16	C78643|HRSL3|Hrasls3|Hrev107|MLP-3	phospholipase A2, group XVI	protein-coding
Diff_Nuc5790	chr6	141279572	141279711	+	0	NA	intron (NM_018779, intron 1 of 15)	AT_rich|Low_complexity|Low_complexity	-9433	NR_033555	100093700	Mm.483778	NR_033555	ENSMUSG00000107456	Gm10400	ENSMUSG00000072690	predicted gene 10400	ncRNA
Diff_Nuc729	chr12	28249372	28249511	+	0	NA	Intergenic	Intergenic	-221858	NM_009234	20666	Mm.41702	NM_009234	ENSMUSG00000063632	Sox11	1110038H03Rik|6230403H02Rik|AI836553|end1	SRY (sex determining region Y)-box 11	protein-coding
Diff_Nuc9442	chr9	3000822	3000961	+	0	NA	Intergenic	GSAT_MM|Satellite|Satellite	37852	NR_039546	100628572		NR_039546	ENSMUSG00000106183	Mir101c	mir-101c|mmu-mir-101c	microRNA 101c	ncRNA
Diff_Nuc6919	chr4	109876062	109876201	+	0	NA	TTS (NM_010488)	TTS (NM_010488)	83308	NM_010488	15572	Mm.3970	NM_010488	ENSMUSG00000028546	Elavl4	Elav|Hud|PNEM	ELAV (embryonic lethal, abnormal vision, Drosophila)-like 4 (Hu antigen D)	protein-coding
Diff_Nuc6864	chr4	97069462	97069601	+	0	NA	Intergenic	Intergenic	-179103	NM_001122952	18027	Mm.31274	NM_010905	ENSMUSG00000028565	Nfia	1110047K16Rik|9430022M17Rik|CTF|NF1-A|NF1A	nuclear factor I/A	protein-coding
Diff_Nuc10525	chr8	128441292	128441431	+	0	NA	intron (NM_145608, intron 1 of 9)	intron (NM_145608, intron 1 of 9)	7011	NM_145608	234878	Mm.216458	NM_145608	ENSMUSG00000031853	Map3k21	Mlk4|mKIAA1804	mitogen-activated protein kinase kinase kinase 21	protein-coding
Diff_Nuc3518	chr14	24005522	24005661	+	0	NA	Intergenic	Kanga1d|DNA|Tc2	-91798	NR_033550	791307	Mm.364384	NR_033550	ENSMUSG00000068680	Gm10248	ENSMUSG00000068680	predicted gene 10248	ncRNA
Diff_Nuc4883	chr7	77950482	77950621	+	0	NA	Intergenic	Intergenic	-438919	NM_183261	11819	Mm.158143	NM_009697	ENSMUSG00000030551	Nr2f2	2700033K02Rik|9430015G03Rik|ARP-1|Aporp1|COUP-TF2|COUP-TFII|COUPTFB|EAR3|SVP40|Tcfcoup2	nuclear receptor subfamily 2, group F, member 2	protein-coding
Diff_Nuc7113	chr4	153958212	153958351	+	0	NA	intron (NM_001291029, intron 1 of 15)	intron (NM_001291029, intron 1 of 15)	52195	NR_045643	320939	Mm.436738	NR_045643		5930403L14Rik	-	RIKEN cDNA 5930403L14 gene	ncRNA
Diff_Nuc5430	chr6	52757922	52758061	+	0	NA	intron (NM_173406, intron 3 of 4)	intron (NM_173406, intron 3 of 4)	94268	NM_025816	52440	Mm.389757	NM_025816	ENSMUSG00000004535	Tax1bp1	1200003J11Rik|1700069J21Rik|AA930106|D6Ertd404e|D6Ertd772e|T6bp|TXBP151	Tax1 (human T cell leukemia virus type I) binding protein 1	protein-coding
Diff_Nuc5976	chr5	33990932	33991071	+	0	NA	intron (NM_001289725, intron 2 of 6)	intron (NM_001289725, intron 2 of 6)	4222	NM_001289725	20492	Mm.4172	NM_009193	ENSMUSG00000004642	Slbp	-	stem-loop binding protein	protein-coding
Diff_Nuc2192	chr10	124714982	124715121	+	0	NA	intron (NM_011391, intron 4 of 6)	L1Md_A|LINE|L1	50540	NM_011391	20503	Mm.29161	NM_011391	ENSMUSG00000020102	Slc16a7	4921534N07Rik|Mct2	solute carrier family 16 (monocarboxylic acid transporters), member 7	protein-coding
Diff_Nuc7981	chr2	39359432	39359571	+	0	NA	Intergenic	L1_Mus1|LINE|L1	-277643	NM_024209	67857	Mm.389242	NM_024209	ENSMUSG00000026753	Ppp6c	2310003C10Rik	protein phosphatase 6, catalytic subunit	protein-coding
Diff_Nuc979	chr12	81305552	81305691	+	0	NA	intron (NM_001346669, intron 3 of 20)	B1_Mur2|SINE|Alu	55737	NM_134156	109711	Mm.253564	NM_134156	ENSMUSG00000015143	Actn1	3110023F10Rik|Actn1a	actinin, alpha 1	protein-coding
Diff_Nuc2071	chr10	98234472	98234611	+	0	NA	Intergenic	Intergenic	-143245	NM_026482	67972	Mm.166944	NM_026482	ENSMUSG00000019943	Atp2b1	2810442I22Rik|E130111D10Rik|Pmca1	ATPase, Ca++ transporting, plasma membrane 1	protein-coding
Diff_Nuc2139	chr10	113683022	113683161	+	0	NA	Intergenic	Intergenic	555335	NM_146241	237553	Mm.445550	NM_146241	ENSMUSG00000050663	Trhde	9330155P21Rik	TRH-degrading enzyme	protein-coding
Diff_Nuc6451	chr5	151348192	151348331	+	0	NA	intron (NM_009765, intron 12 of 26)	(TTTG)n|Simple_repeat|Simple_repeat	23065	NM_001081001	12190	Mm.236256	NM_009765	ENSMUSG00000041147	Brca2	Fancd1|RAB163	breast cancer 2, early onset	protein-coding
Diff_Nuc237	chr13	30844212	30844351	+	0	NA	intron (NM_013674, intron 3 of 8)	intron (NM_013674, intron 3 of 8)	3179	NM_013674	16364	Mm.4677	NM_013674	ENSMUSG00000021356	Irf4	AI385587|IRF-4|LSIRF|NF-EM5|Spip	interferon regulatory factor 4	protein-coding
Diff_Nuc7796	chr3	153046732	153046871	+	0	NA	intron (NM_011372, intron 3 of 4)	intron (NM_011372, intron 3 of 4)	-85188	NR_126464	75489	Mm.443252	NR_126464	ENSMUSG00000105023	1700012D16Rik	-	RIKEN cDNA 1700012D16 gene	ncRNA
Diff_Nuc9797	chr9	71731202	71731341	+	0	NA	intron (NM_011544, intron 10 of 20)	intron (NM_011544, intron 10 of 20)	12632	NM_001253864	21406	Mm.171615	NM_011544	ENSMUSG00000032228	Tcf12	A130037E08Rik|ALF1|HEB|HEBAlt|HTF-4|HTF4|ME1|REB|bHLHb20	transcription factor 12	protein-coding
Diff_Nuc948	chr12	77457122	77457261	+	0	NA	intron (NM_028356, intron 1 of 2)	intron (NM_028356, intron 1 of 2)	13260	NM_001172104	109929	Mm.41880	NM_028356	ENSMUSG00000056459	Zbtb25	2810462M08Rik|2900064P18Rik|AI842128|Kup|Zfp-50|Zfp50	zinc finger and BTB domain containing 25	protein-coding
Diff_Nuc6896	chr4	103468872	103469011	+	0	NA	Intergenic	Intergenic	413836	NR_040673	622167	Mm.244115	NR_040673	ENSMUSG00000086136	Gm12718	OTTMUSG00000008109	predicted gene 12718	ncRNA
Diff_Nuc8287	chr2	111460032	111460171	+	0	NA	Intergenic	L1M2|LINE|L1	2128	NM_146888	258890	Mm.472596	NM_146888	ENSMUSG00000094858	Olfr1297	MOR248-4	olfactory receptor 1297	protein-coding
Diff_Nuc9746	chr9	63104622	63104761	+	0	NA	intron (NM_011840, intron 16 of 21)	intron (NM_011840, intron 16 of 21)	-107923	NM_001163758	207667	Mm.36349	NM_172446	ENSMUSG00000022245	Skor1	AV273001|C230094B15Rik|Corl1|Lbxcor1	SKI family transcriptional corepressor 1	protein-coding
Diff_Nuc6938	chr4	114175712	114175851	+	0	NA	intron (NM_001085549, intron 2 of 6)	RMER13A|LTR|ERVK	96452	NM_001085549	666048	Mm.331779	NM_001085549	ENSMUSG00000070867	Trabd2b	Gm12824|Hkat|OTTMUSG00000008561	TraB domain containing 2B	protein-coding
Diff_Nuc8166	chr2	84126092	84126231	+	0	NA	Intergenic	ID_B1|SINE|B4	139262	NM_018782	54598	Mm.75467	NM_018782	ENSMUSG00000059588	Calcrl	AV071593|CRLR	calcitonin receptor-like	protein-coding
Diff_Nuc5504	chr6	72677872	72678011	+	0	NA	intron (NM_001079822, intron 3 of 12)	intron (NM_001079822, intron 3 of 12)	61098	NM_001079822	21415	Mm.440067	NM_009332	ENSMUSG00000055799	Tcf7l1	Tcf-3|Tcf3|bHLHb21	transcription factor 7 like 1 (T cell specific, HMG box)	protein-coding
Diff_Nuc10521	chr8	127586212	127586351	+	0	NA	intron (NM_174854, intron 1 of 12)	intron (NM_174854, intron 1 of 12)	8186	NM_174854	244667	Mm.233504	NM_170596	ENSMUSG00000043051	Disc1	-	disrupted in schizophrenia 1	protein-coding
Diff_Nuc10069	chr8	14373792	14373931	+	0	NA	intron (NM_172910, intron 3 of 15)	intron (NM_172910, intron 3 of 15)	277986	NM_172910	244310	Mm.404697	NM_172910	ENSMUSG00000047495	Dlgap2	6430596N04Rik|Dap-2|Dap2|Sapap2	discs, large (Drosophila) homolog-associated protein 2	protein-coding
Diff_Nuc1439	chr11	70340302	70340441	+	0	NA	intron (NM_008946, intron 4 of 5)	B4A|SINE|B4	1512	NM_008946	19175	Mm.98	NM_008946	ENSMUSG00000018286	Psmb6	Lmp19|Mpnd	proteasome (prosome, macropain) subunit, beta type 6	protein-coding
Diff_Nuc5685	chr6	115668852	115668991	+	0	NA	Intergenic	B4A|SINE|B4	40096	NM_144805	94346	Mm.29739	NM_144805	ENSMUSG00000059900	Tmem40	9030407H20Rik|AV091463|W64236	transmembrane protein 40	protein-coding
Diff_Nuc5369	chr6	37882002	37882141	+	0	NA	intron (NM_001272064, intron 7 of 18)	MTB|LTR|MaLR	31584	NM_001272076	21848	Mm.41063	NM_145076	ENSMUSG00000029833	Trim24	A130082H20Rik|AI447469|D430004I05Rik|TIF1|TIF1-alpha|TIF1alpha|Tif1a	tripartite motif-containing 24	protein-coding
Diff_Nuc3182	chr15	42512482	42512621	+	0	NA	Intergenic	Intergenic	-4028	NM_009640	11600	Mm.309336	NM_009640	ENSMUSG00000022309	Angpt1	1110046O21Rik|Ang-1|Ang1	angiopoietin 1	protein-coding
Diff_Nuc7138	chr3	8020242	8020381	+	0	NA	Intergenic	RLTR44-int|LTR|ERVK	-65424	NR_040587	75476	Mm.491752	NR_040587	ENSMUSG00000100010	1700010I02Rik	-	RIKEN cDNA 1700010I02 gene	ncRNA
Diff_Nuc7780	chr3	149692912	149693051	+	0	NA	Intergenic	Lx3C|LINE|L1	755280	NR_040591	381482	Mm.393866	NR_040591		Gm1653	-	predicted gene 1653	ncRNA
Diff_Nuc4376	chr18	39444882	39445021	+	0	NA	intron (NM_175164, intron 17 of 22)	intron (NM_175164, intron 17 of 22)	201948	NM_008173	14815	Mm.129481	NM_008173	ENSMUSG00000024431	Nr3c1	GR|Grl-1|Grl1	nuclear receptor subfamily 3, group C, member 1	protein-coding
Diff_Nuc6627	chr4	45901792	45901931	+	0	NA	Intergenic	B1_Mus2|SINE|Alu	-1314	NM_198660	381522	Mm.54220	NM_198660	ENSMUSG00000035539	Ccdc180	E230008N13Rik|Gm1025	coiled-coil domain containing 180	protein-coding
Diff_Nuc6096	chr5	60359772	60359911	+	0	NA	intron (NR_040683, intron 2 of 2)	intron (NR_040683, intron 2 of 2)	17400	NR_040683	71057	Mm.50817	NR_040682	ENSMUSG00000106013	4933402J10Rik	-	RIKEN cDNA 4933402J10 gene	ncRNA
Diff_Nuc8328	chr2	121557492	121557631	+	0	NA	intron (NM_172673, intron 1 of 14)	intron (NM_172673, intron 1 of 14)	75232	NM_172673	228564	Mm.121514	NM_172673	ENSMUSG00000027238	Frmd5	1500032A09Rik|5830442F04|A930004K21Rik|R75430	FERM domain containing 5	protein-coding
Diff_Nuc444	chr13	77381682	77381821	+	0	NA	intron (NM_001145676, intron 4 of 19)	L1_Mus2|LINE|L1	106954	NM_001145676	72371	Mm.81475	NM_028215	ENSMUSG00000071252	2210408I21Rik	-	RIKEN cDNA 2210408I21 gene	protein-coding
Diff_Nuc9807	chr9	74874642	74874781	+	0	NA	intron (NM_153584, intron 11 of 11)	L1Md_F2|LINE|L1	-10710	NM_001142655	59046	Mm.247837	NM_021548	ENSMUSG00000007656	Arpp19	19kDa|2700024H10Rik|ARPP-19|AW559096|Arpp12	cAMP-regulated phosphoprotein 19	protein-coding
Diff_Nuc3923	chr19	3711222	3711361	+	0	NA	intron (NM_028077, intron 1 of 3)	CT-rich|Low_complexity|Low_complexity	2958	NM_028077	72056	Mm.23780	NM_028077	ENSMUSG00000035372	1810055G02Rik	AI256204	RIKEN cDNA 1810055G02 gene	protein-coding
Diff_Nuc276	chr13	39094972	39095111	+	0	NA	Intergenic	Intergenic	-42297	NM_001170431	108652	Mm.255506	NM_134060	ENSMUSG00000021432	Slc35b3	4921526O06Rik|AI428480|CGI-19|PABST2|PAPST2	solute carrier family 35, member B3	protein-coding
Diff_Nuc2994	chr16	91750232	91750371	+	0	NA	intron (NM_010587, intron 1 of 38)	intron (NM_010587, intron 1 of 38)	20685	NM_010587	16443	Mm.40546	NM_010587	ENSMUSG00000022957	Itsn1	AA517634|AA545208|AI316805|AI839402|AI848451|Ehsh1|Ese1|Itsn|Sh3p17	intersectin 1 (SH3 domain protein 1A)	protein-coding
Diff_Nuc3601	chr14	45546282	45546421	+	0	NA	Intergenic	Intergenic	20835	NR_030556	100124437		NR_030556	ENSMUSG00000105372	Mir327	Mirn327|mmu-mir-327	microRNA 327	ncRNA
Diff_Nuc4726	chr7	34639602	34639741	+	0	NA	Intergenic	Intergenic	90333	NM_178308	110187	Mm.155750	NM_178308	ENSMUSG00000066586	Scgb2b26	Abpbg26|Abpbg4|Abpg|C2d|Scgb2b4	secretoglobin, family 2B, member 26	protein-coding
Diff_Nuc9881	chr9	93128632	93128771	+	0	NA	Intergenic	Intergenic	-228130	NR_040756	78349	Mm.52612	NR_040756	ENSMUSG00000100294	1700034K08Rik	-	RIKEN cDNA 1700034K08 gene	ncRNA
Diff_Nuc4321	chr18	32164362	32164501	+	0	NA	intron (NM_032394, intron 8 of 46)	intron (NM_032394, intron 8 of 46)	32154	NM_032394	17922	Mm.440013	NM_032394	ENSMUSG00000024388	Myo7b	-	myosin VIIB	protein-coding
Diff_Nuc3809	chr14	98938532	98938671	+	0	NA	Intergenic	Intergenic	-369617	NM_007826	13134	Mm.320593	NM_007826	ENSMUSG00000055639	Dach1	Dac|Dach	dachshund 1 (Drosophila)	protein-coding
Diff_Nuc1418	chr11	65994182	65994321	+	0	NA	Intergenic	Intergenic	-12198	NM_001099633	237806	Mm.264210	NM_001099633	ENSMUSG00000056752	Dnah9	9030022M04|A230091C01|C230051G16|D11Ertd686e|Dnahc9|mKIAA0357	dynein, axonemal, heavy chain 9	protein-coding
Diff_Nuc9032	chr1	107761242	107761381	+	0	NA	Intergenic	Intergenic	84011	NM_009399	21934	Mm.6251	NM_009399	ENSMUSG00000026321	Tnfrsf11a	Ly109|ODFR|OFE|Rank|TRANCE-R|mRANK	tumor necrosis factor receptor superfamily, member 11a, NFKB activator	protein-coding
Diff_Nuc9195	chr1	149716752	149716891	+	0	NA	Intergenic	Lx9|LINE|L1	1372004	NM_001145807	215378	Mm.441817	NM_153539	ENSMUSG00000035131	Brinp3	B830045N13Rik|Fam5c	bone morphogenetic protein/retinoic acid inducible neural specific 3	protein-coding
Diff_Nuc3258	chr15	59432702	59432841	+	0	NA	intron (NM_026746, intron 6 of 6)	(TTG)n|Simple_repeat|Simple_repeat	-47438	NM_144549	211770	Mm.40298	NM_144549	ENSMUSG00000032501	Trib1	A530090O15Rik|TRB-1|Trb1	tribbles pseudokinase 1	protein-coding
Diff_Nuc3484	chr14	17413802	17413941	+	0	NA	intron (NM_001289761, intron 2 of 8)	intron (NM_001289761, intron 2 of 8)	-5881	NM_001289762	218772	Mm.259318	NM_011243	ENSMUSG00000017491	Rarb	A830025K23|Hap|Nr1b2	retinoic acid receptor, beta	protein-coding
Diff_Nuc3151	chr15	37252182	37252321	+	0	NA	intron (NM_026496, intron 8 of 15)	intron (NM_026496, intron 8 of 15)	89460	NM_026496	252973	Mm.244612	NM_026496	ENSMUSG00000022286	Grhl2	0610015A08Rik|BOM|Tcfcp2l3|clft3	grainyhead-like 2 (Drosophila)	protein-coding
Diff_Nuc9507	chr9	12649212	12649351	+	0	NA	Intergenic	Intergenic	456574	NR_040755	78219	Mm.414868	NR_040755	ENSMUSG00000111830	4930568E12Rik	-	RIKEN cDNA 4930568E12 gene	ncRNA
Diff_Nuc9717	chr9	56108402	56108541	+	0	NA	5' UTR (NM_172924, exon 4 of 7)	5' UTR (NM_172924, exon 4 of 7)	-99594	NM_019793	56434	Mm.28484	NM_019793	ENSMUSG00000032324	Tspan3	1700055K04Rik|TM4-A|Tm4sf8	tetraspanin 3	protein-coding
Diff_Nuc8337	chr2	124208202	124208341	+	0	NA	intron (NM_001290997, intron 3 of 20)	intron (NM_001290997, intron 3 of 20)	-160177	NR_040612	75946	Mm.415059	NR_040612	ENSMUSG00000086954	4930583P06Rik	-	RIKEN cDNA 4930583P06 gene	ncRNA
Diff_Nuc7330	chr3	51307992	51308131	+	0	NA	Intergenic	MTD|LTR|MaLR	20173	NM_016858	19338	Mm.1664	NM_016858	ENSMUSG00000027739	Rab33b	-	RAB33B, member RAS oncogene family	protein-coding
Diff_Nuc1131	chr12	116637052	116637191	+	0	NA	Intergenic	Intergenic	296884	NR_105810	102465205		NR_105810	ENSMUSG00000098336	Mir6388	Gm27925|mmu-mir-6388	microRNA 6388	ncRNA
Diff_Nuc5883	chr5	16008652	16008791	+	0	NA	Intergenic	ID_B1|SINE|B4	-50592	NM_001289460	15234	Mm.267078	NM_010427	ENSMUSG00000028864	Hgf	C230052L06Rik|HGF/SF|NK1|NK2|SF|SF/HGF	hepatocyte growth factor	protein-coding
Diff_Nuc58	chrX	120760842	120760981	+	0	NA	Intergenic	RLTR22_Mur|LTR|ERVK	488608	NR_038052	22314	Mm.458976	NM_009494	ENSMUSG00000057021	Vmn2r-ps159	V2r8|V2r9|Vmn2r-ps160	vomeronasal 2, receptor, pseudogene 159	pseudo
Diff_Nuc1285	chr11	35019912	35020051	+	0	NA	intron (NM_011412, intron 3 of 35)	intron (NM_011412, intron 3 of 35)	85023	NM_011412	20564	Mm.478604	NM_011412	ENSMUSG00000056427	Slit3	Slil2|Slit1|b2b2362.1Clo	slit homolog 3 (Drosophila)	protein-coding
Diff_Nuc2358	chr17	35467292	35467431	+	0	NA	Intergenic	MYSERV6-int|LTR|ERVK	9858	NM_010390	15006	Mm.466882	NM_010390	ENSMUSG00000079507	H2-Q1	H-2Q1|Q1|Q1b|Q1d|Q1k|Qa-1|Qa1|Qed-1	histocompatibility 2, Q region locus 1	protein-coding
Diff_Nuc5206	chr7	143571842	143571981	+	0	NA	Intergenic	Intergenic	-30813	NR_040459	330664	Mm.127762	NR_040459	ENSMUSG00000109633	C230079O03Rik	C230079O03	RIKEN cDNA C230079O03 gene	ncRNA
Diff_Nuc10299	chr8	73665072	73665211	+	0	NA	intron (NM_001324526, intron 1 of 10)	intron (NM_001324526, intron 1 of 10)	873	NM_001324526	665858	Mm.411658	NM_001324526		Gm7827	EG665858	predicted gene 7827	protein-coding
Diff_Nuc8812	chr1	60474962	60475101	+	0	NA	intron (NM_001198571, intron 1 of 10)	L1MA9|LINE|L1	8568	NM_001198570	329165	Mm.212066	NM_198127	ENSMUSG00000026782	Abi2	8430425M24Rik|AI839867|C130078H13	abl-interactor 2	protein-coding
Diff_Nuc5580	chr6	90537642	90537781	+	0	NA	intron (NM_027406, intron 16 of 22)	RMER4B|LTR|ERVK	-17163	NM_027868	71699	Mm.272633	NM_027868	ENSMUSG00000030089	Slc41a3	1010001P06Rik|AI480742|SLC41A1-L2	solute carrier family 41, member 3	protein-coding
Diff_Nuc6486	chr4	10055702	10055841	+	0	NA	Intergenic	L1_Mus1|LINE|L1	-211227	NR_004448	74662	Mm.483401	NR_004448	ENSMUSG00000082843	4930448K20Rik	1700009K09Rik	glyceraldehyde-3-phosphate dehydrogenase pseudogene	pseudo
Diff_Nuc5731	chr6	127159342	127159481	+	0	NA	intron (NR_040273, intron 2 of 2)	intron (NR_040273, intron 2 of 2)	-58345	NM_009829	12444	Mm.333406	NM_009829	ENSMUSG00000000184	Ccnd2	2600016F06Rik|AI256817|BF642806|C86853|Vin-1|Vin1|cD2	cyclin D2	protein-coding
Diff_Nuc4144	chr19	52927332	52927471	+	0	NA	Intergenic	Intergenic	-70270	NR_030678	100043450	Mm.145594	NR_030678		AA387883	-	expressed sequence AA387883	ncRNA
Diff_Nuc1811	chr10	39036262	39036401	+	0	NA	Intergenic	Intergenic	-53274	NM_001122892	14360	Mm.4848	NM_008054	ENSMUSG00000019843	Fyn	AI448320|AW552119	Fyn proto-oncogene	protein-coding
Diff_Nuc1098	chr12	108917012	108917151	+	0	NA	Intergenic	L1MB2|LINE|L1	56617	NR_045973	74968	Mm.359821	NR_045973	ENSMUSG00000085641	4930465M20Rik	4930431H15Rik	RIKEN cDNA 4930465M20 gene	ncRNA
Diff_Nuc4590	chr18	85300262	85300401	+	0	NA	Intergenic	Intergenic	-179415	NM_025969	67105	Mm.250617	NM_025969	ENSMUSG00000024645	Timm21	1700034H14Rik|2700002I20Rik	tranlocase of inner mitochondrial membrane 21	protein-coding
Diff_Nuc6138	chr5	67878312	67878451	+	0	NA	Intergenic	ID_B1|SINE|B4	23244	NR_015582	320479	Mm.387187	NR_015582	ENSMUSG00000107385	C330024D21Rik	-	RIKEN cDNA C330024D21 gene	ncRNA
Diff_Nuc3338	chr15	74685382	74685521	+	0	NA	intron (NM_009991, intron 2 of 8)	intron (NM_009991, intron 2 of 8)	1297	NM_009991	13072	Mm.377079	NM_009991	ENSMUSG00000022589	Cyp11b2	Cpn2|Cyp11b|Cyp11b-2	cytochrome P450, family 11, subfamily b, polypeptide 2	protein-coding
Diff_Nuc8271	chr2	108960832	108960971	+	0	NA	intron (NM_029790, intron 5 of 5)	RMER6D|LTR|ERVK	157546	NM_029790	76894	Mm.330451	NM_029790	ENSMUSG00000057234	Mettl15	0610027B03Rik|AI303697|AW049952|Mett5d1	methyltransferase like 15	protein-coding
Diff_Nuc1183	chr11	10561152	10561291	+	0	NA	Intergenic	RMER19B|LTR|ERVK	-452798	NM_177033	319922	Mm.337851	NM_177033	ENSMUSG00000050830	Vwc2	A930041G11Rik|G11|PSST739|UNQ739|cradin	von Willebrand factor C domain containing 2	protein-coding
Diff_Nuc9673	chr9	48423342	48423481	+	0	NA	Intergenic	Lx|LINE|L1	-10183	NM_010924	18113	Mm.8362	NM_010924	ENSMUSG00000032271	Nnmt	-	nicotinamide N-methyltransferase	protein-coding
Diff_Nuc8719	chr1	37615092	37615231	+	0	NA	Intergenic	Intergenic	-17300	NM_173870	269181	Mm.25861	NM_173870	ENSMUSG00000026110	Mgat4a	9530018I07Rik|GnT-IVa|glcNAc-T-IVa	mannoside acetylglucosaminyltransferase 4, isoenzyme A	protein-coding
Diff_Nuc7199	chr3	25012082	25012221	+	0	NA	Intergenic	Intergenic	-329223	NM_001326288	635702	Mm.448351	NM_001326288	ENSMUSG00000102758	Naaladl2	2810043G22Rik|EG635702|Gm1021	N-acetylated alpha-linked acidic dipeptidase-like 2	protein-coding
Diff_Nuc15	chrX	3200992	3201131	+	0	NA	Intergenic	L1Md_F|LINE|L1	42523	NM_001270667	100861966	Mm.443264	NM_001270667	ENSMUSG00000100249	Btbd35f23	Gm21950|Mgclh	BTB domain containing 35, family member 23	protein-coding
Diff_Nuc9827	chr9	79714032	79714171	+	0	NA	intron (NM_001081243, intron 2 of 5)	intron (NM_001081243, intron 2 of 5)	72653	NR_040734	74633	Mm.262175	NR_040734	ENSMUSG00000086918	4930429F24Rik	-	RIKEN cDNA 4930429F24 gene	ncRNA
Diff_Nuc9821	chr9	78634852	78634991	+	0	NA	Intergenic	Intergenic	171568	NM_153098	235505	Mm.32955	NM_153098	ENSMUSG00000046186	Cd109	9930012E15Rik|AI480638|GARP	CD109 antigen	protein-coding
Diff_Nuc5814	chr6	146875052	146875191	+	0	NA	intron (NM_026221, intron 1 of 26)	intron (NM_026221, intron 1 of 26)	27822	NM_001164236	73344	Mm.391543	NM_028509	ENSMUSG00000040163	1700034J05Rik	-	RIKEN cDNA 1700034J05 gene	protein-coding
Diff_Nuc6209	chr5	86014192	86014331	+	0	NA	Intergenic	Intergenic	480347	NM_001345902	12617	Mm.4649	NM_007683	ENSMUSG00000029253	Cenpc1	CENP-C|Cenpc	centromere protein C1	protein-coding
Diff_Nuc290	chr13	45044772	45044911	+	0	NA	intron (NM_025772, intron 7 of 9)	intron (NM_025772, intron 7 of 9)	52624	NM_025772	94245	Mm.352311	NM_025772	ENSMUSG00000057531	Dtnbp1	5430437B18Rik|AW048963|Bloc1s8|dysbindin|sdy	dystrobrevin binding protein 1	protein-coding
Diff_Nuc8911	chr1	82247862	82248001	+	0	NA	intron (NM_010570, intron 1 of 1)	intron (NM_010570, intron 1 of 1)	40083	NM_010570	16367	Mm.4952	NM_010570	ENSMUSG00000055980	Irs1	G972R|IRS-1	insulin receptor substrate 1	protein-coding
Diff_Nuc452	chr13	79342942	79343081	+	0	NA	Intergenic	MusHAL1|LINE|L1	-1004877	NM_010151	13865	Mm.439653	NM_010151	ENSMUSG00000069171	Nr2f1	COUP-TF1|COUP-TFI|COUPTFA|EAR-3|EAR3|Erbal3|SVP44|Tcfcoup1	nuclear receptor subfamily 2, group F, member 1	protein-coding
Diff_Nuc339	chr13	55166302	55166441	+	0	NA	intron (NR_121592, intron 6 of 13)	B2_Mm2|SINE|B2	35285	NM_011307	20184	Mm.259301	NM_011307	ENSMUSG00000025878	Uimc1	9430016E08Rik|D330018D10Rik|D630032M02Rik|RIP110|Rxrip110	ubiquitin interaction motif containing 1	protein-coding
Diff_Nuc3341	chr15	75125282	75125421	+	0	NA	Intergenic	Intergenic	26500	NM_008530	17071	Mm.377095	NM_008530	ENSMUSG00000022583	Ly6f	-	lymphocyte antigen 6 complex, locus F	protein-coding
Diff_Nuc4083	chr19	37605572	37605711	+	0	NA	Intergenic	Intergenic	-19267	NM_175353	107371	Mm.24865	NM_175353	ENSMUSG00000053799	Exoc6	4833405E05Rik|AW413330|C430002C19|Sec15|Sec15l1|hbd|msec15	exocyst complex component 6	protein-coding
Diff_Nuc9935	chr9	106914772	106914911	+	0	NA	intron (NM_153413, intron 12 of 52)	Lx5|LINE|L1	-120572	NM_029103	74840	Mm.29778	NM_029103	ENSMUSG00000032575	Manf	3230402M22Rik|AA407711|AA408789|AA673178|Armet|D17914|D18Mgi17	mesencephalic astrocyte-derived neurotrophic factor	protein-coding
Diff_Nuc6460	chr4	3834112	3834251	+	0	NA	intron (NM_019969, intron 4 of 5)	URR1A|DNA|MER1_type	31371	NM_019969	56711	Mm.331467	NM_019969	ENSMUSG00000003282	Plag1	-	pleiomorphic adenoma gene 1	protein-coding
Diff_Nuc6902	chr4	104232422	104232561	+	0	NA	intron (NR_104385, intron 2 of 15)	intron (NR_104385, intron 2 of 15)	192348	NM_177259	13131	Mm.289682	NM_010014	ENSMUSG00000028519	Dab1	AI956902|C630028C02Rik|scm|scr|scrambler|yot	disabled 1	protein-coding
Diff_Nuc1759	chr10	25822282	25822421	+	0	NA	Intergenic	Intergenic	-23493	NM_029881	77220	Mm.266260	NM_029881	ENSMUSG00000049420	Tmem200a	C030003D03Rik	transmembrane protein 200A	protein-coding
Diff_Nuc5985	chr5	34520812	34520951	+	0	NA	intron (NM_010753, intron 4 of 5)	intron (NM_010753, intron 4 of 5)	-8706	NM_001289803	272158	Mm.319286	NM_181857	ENSMUSG00000045102	Poln	POL4P	DNA polymerase N	protein-coding
Diff_Nuc3337	chr15	74484422	74484561	+	0	NA	Intergenic	Intergenic	-17743	NM_001177437	69439	Mm.263708	NM_001177437	ENSMUSG00000022603	Mroh4	1700016M24Rik	maestro heat-like repeat family member 4	protein-coding
Diff_Nuc6316	chr5	111042472	111042611	+	0	NA	intron (NR_104449, intron 1 of 5)	ORR1D2|LTR|MaLR	10017	NR_104449	231605	Mm.275748	NM_198306	ENSMUSG00000033316	Galnt9	GalNAc-T9	UDP-N-acetyl-alpha-D-galactosamine:polypeptide N-acetylgalactosaminyltransferase 9	protein-coding
Diff_Nuc4639	chr7	12248932	12249071	+	0	NA	Intergenic	Lx3C|LINE|L1	6867	NM_145843	252905	Mm.377264	NM_145843	ENSMUSG00000095430	Vmn1r72	V1rg1	vomeronasal 1 receptor 72	protein-coding
Diff_Nuc6570	chr4	29469002	29469141	+	0	NA	Intergenic	Intergenic	728776	NM_001122889	13841	Mm.257266	NM_010141	ENSMUSG00000028289	Epha7	Cek11|Ebk|Ehk3|Hek11|Mdk1	Eph receptor A7	protein-coding
Diff_Nuc7748	chr3	143107092	143107231	+	0	NA	Intergenic	Intergenic	201142	NR_040551	320072	Mm.136397	NR_040551	ENSMUSG00000105923	A830019L24Rik	-	RIKEN cDNA A830019L24 gene	ncRNA
Diff_Nuc2609	chr16	6074382	6074521	+	0	NA	intron (NM_021477, intron 1 of 16)	intron (NM_021477, intron 1 of 16)	98771	NR_045799	68238	Mm.434605	NR_045799	ENSMUSG00000101481	1700123O21Rik	-	RIKEN cDNA 1700123O21 gene	ncRNA
Diff_Nuc7276	chr3	39574782	39574921	+	0	NA	Intergenic	Intergenic	788989	NM_183221	329628	Mm.316210	NM_183221	ENSMUSG00000046743	Fat4	6030410K14Rik|9430004M15	FAT atypical cadherin 4	protein-coding
Diff_Nuc697	chr12	16181032	16181171	+	0	NA	Intergenic	Intergenic	-357510	NM_144551	217410	Mm.491136	NM_144551	ENSMUSG00000020601	Trib2	AW319517|TRB-2|TRB2	tribbles pseudokinase 2	protein-coding
Diff_Nuc7577	chr3	103611762	103611901	+	0	NA	intron (NM_001025312, intron 1 of 2)	B1_Mur3|SINE|Alu	1479	NM_133865	140917	Mm.374850	NM_133865	ENSMUSG00000027845	Dclre1b	AI452214|Apollo|SNMIB|mSNM1B	DNA cross-link repair 1B	protein-coding
Diff_Nuc2066	chr10	97678072	97678211	+	0	NA	Intergenic	Intergenic	136360	NR_045179	667438	Mm.414522	NR_045179		Gm8633	EG667438	predicted gene 8633	ncRNA
Diff_Nuc4385	chr18	41725522	41725661	+	0	NA	Intergenic	ORR1C2-int|LTR|MaLR	385257	NM_029942	77619	Mm.30649	NM_029942	ENSMUSG00000056671	Prelid2	1700003A01Rik|C330008K14Rik	PRELI domain containing 2	protein-coding
Diff_Nuc2227	chr17	5674172	5674311	+	0	NA	intron (NM_146073, intron 2 of 8)	intron (NM_146073, intron 2 of 8)	-124416	NR_045081	78512	Mm.23696	NR_045079	ENSMUSG00000096965	3300005D01Rik	-	RIKEN cDNA 3300005D01 gene	ncRNA
Diff_Nuc7321	chr3	49302682	49302821	+	0	NA	Intergenic	Lx3_Mus|LINE|L1	258487	NM_130448	73173	Mm.87246	NM_130448	ENSMUSG00000037892	Pcdh18	3110038E07Rik|BB095589|PCDH68L	protocadherin 18	protein-coding
Diff_Nuc848	chr12	55521852	55521991	+	0	NA	Intergenic	ORR1A4|LTR|MaLR	-29616	NR_033689	665239	Mm.26856	NR_033689		Gm7550	EG665239|Gm666	predicted gene 7550	ncRNA
Diff_Nuc3020	chr15	4450352	4450491	+	0	NA	intron (NM_177355, intron 1 of 2)	intron (NM_177355, intron 1 of 2)	124930	NM_177355	239318	Mm.308996	NM_177355	ENSMUSG00000049148	Plcxd3	B130016O10Rik	phosphatidylinositol-specific phospholipase C, X domain containing 3	protein-coding
Diff_Nuc3696	chr14	67308362	67308501	+	0	NA	intron (NM_001271761, intron 2 of 2)	Lx8|LINE|L1	54343	NM_001271760	11549	Mm.57064	NM_013461	ENSMUSG00000045875	Adra1a	Adra1c	adrenergic receptor, alpha 1a	protein-coding
Diff_Nuc4884	chr7	78473872	78474011	+	0	NA	Intergenic	L1_Mus3|LINE|L1	-580640	NR_130995	78156	Mm.243818	NR_130995	ENSMUSG00000108669	4930441H08Rik	-	RIKEN cDNA 4930441H08 gene	ncRNA
Diff_Nuc5857	chr5	9974372	9974511	+	0	NA	Intergenic	L1Md_F2|LINE|L1	-249089	NM_181850	108069	Mm.318966	NM_181850	ENSMUSG00000003974	Grm3	0710001G23Rik|Gprc1c|mGlu3|mGluR3	glutamate receptor, metabotropic 3	protein-coding
Diff_Nuc4709	chr7	30874662	30874801	+	0	NA	intron (NM_152814, intron 1 of 3)	Lx5|LINE|L1	798	NM_152814	72556	Mm.441512	NM_152814	ENSMUSG00000078768	Zfp566	2700043M03Rik|mszf4	zinc finger protein 566	protein-coding
Diff_Nuc8632	chr1	17827572	17827711	+	0	NA	Intergenic	Intergenic	-109914	NR_130314	102634913	Mm.319094	NR_130314	ENSMUSG00000085125	Gm16070	OTTMUSG00000029756	predicted gene 16070	ncRNA
Diff_Nuc5225	chr7	152030432	152030571	+	0	NA	Intergenic	Intergenic	5984	NM_008007	14174	Mm.4947	NM_008007	ENSMUSG00000031074	Fgf3	Fgf-3|Int-2|Int-P	fibroblast growth factor 3	protein-coding
Diff_Nuc1125	chr12	115552752	115552891	+	0	NA	Intergenic	Intergenic	154856	NR_106062	102465663		NR_106062	ENSMUSG00000105438	Mir7094-1	mmu-mir-7094-1	microRNA 7094-1	ncRNA
Diff_Nuc3670	chr14	62666752	62666891	+	0	NA	Intergenic	MTEa|LTR|MaLR	244995	NM_173419	239133	Mm.127330	NM_173419	ENSMUSG00000048281	Dleu7	BC038059	deleted in lymphocytic leukemia, 7	protein-coding
Diff_Nuc3886	chr14	117134802	117134941	+	0	NA	Intergenic	MMERVK10C-int|LTR|ERVK	-189648	NM_001079844	23888	Mm.440025	NM_011821	ENSMUSG00000058571	Gpc6	-	glypican 6	protein-coding
Diff_Nuc4032	chr19	28474642	28474781	+	0	NA	intron (NM_175459, intron 4 of 10)	intron (NM_175459, intron 4 of 10)	-278003	NR_045330	320176	Mm.406716	NR_045330	ENSMUSG00000097735	D930032P07Rik	-	RIKEN cDNA D930032P07 gene	ncRNA
Diff_Nuc5855	chr5	9747672	9747811	+	0	NA	Intergenic	MTC|LTR|MaLR	-22389	NM_181850	108069	Mm.318966	NM_181850	ENSMUSG00000003974	Grm3	0710001G23Rik|Gprc1c|mGlu3|mGluR3	glutamate receptor, metabotropic 3	protein-coding
Diff_Nuc6198	chr5	84574262	84574401	+	0	NA	intron (NM_007937, intron 5 of 15)	intron (NM_007937, intron 5 of 15)	272076	NM_007937	13839	Mm.137991	NM_007937	ENSMUSG00000029245	Epha5	AI854630|AW125296|Cek7|Ehk1|Els1|Hek7|Rek7|bsk	Eph receptor A5	protein-coding
Diff_Nuc6828	chr4	90493632	90493771	+	0	NA	Intergenic	Lx6|LINE|L1	-465696	NR_033610	619842	Mm.484218	NR_033610	ENSMUSG00000080756	Gm12633	OTTMUSG00000007790	zinc finger protein 352 pseudogene	pseudo
Diff_Nuc7758	chr3	145905932	145906071	+	0	NA	intron (NM_022983, intron 2 of 2)	intron (NM_022983, intron 2 of 2)	22076	NM_022983	65086	Mm.155520	NM_022983	ENSMUSG00000036832	Lpar3	Edg7|lpA3	lysophosphatidic acid receptor 3	protein-coding
Diff_Nuc9733	chr9	59016482	59016621	+	0	NA	Intergenic	B4A|SINE|B4	-122828	NM_028121	72141	Mm.22456	NM_028121	ENSMUSG00000025236	Adpgk	2610017G09Rik|Adp-gk|C77577	ADP-dependent glucokinase	protein-coding
Diff_Nuc5874	chr5	14723652	14723791	+	0	NA	intron (NM_011995, intron 9 of 24)	intron (NM_011995, intron 9 of 24)	191168	NM_198666	381714	Mm.368256	NM_198666	ENSMUSG00000033219	Gm9758	ENSMUSG00000033219	predicted gene 9758	protein-coding
Diff_Nuc10300	chr8	73677702	73677841	+	0	NA	intron (NM_001324526, intron 5 of 10)	intron (NM_001324526, intron 5 of 10)	13503	NM_001324526	665858	Mm.411658	NM_001324526		Gm7827	EG665858	predicted gene 7827	protein-coding
Diff_Nuc4166	chr19	57778312	57778451	+	0	NA	intron (NM_181415, intron 17 of 28)	L1_Mur3|LINE|L1	92857	NM_181415	226255	Mm.245340	NM_181415	ENSMUSG00000054843	Atrnl1	AI504415|AW555641|Alp|Atrnl|Atrnlp	attractin like 1	protein-coding
Diff_Nuc3540	chr14	30294222	30294361	+	0	NA	intron (NM_009785, intron 3 of 37)	intron (NM_009785, intron 3 of 37)	240759	NM_009785	12294	Mm.386754	NM_009785	ENSMUSG00000021991	Cacna2d3	Cacnad3|alapha2delta3	calcium channel, voltage-dependent, alpha2/delta subunit 3	protein-coding
Diff_Nuc351	chr13	57808382	57808521	+	0	NA	intron (NM_001166466, intron 2 of 11)	intron (NM_001166466, intron 2 of 11)	201242	NM_009262	20745	Mm.379020	NM_009262	ENSMUSG00000056222	Spock1	Spock|Ticn1|testican	sparc/osteonectin, cwcv and kazal-like domains proteoglycan 1	protein-coding
Diff_Nuc9761	chr9	66172682	66172821	+	0	NA	Intergenic	Intergenic	-25506	NM_145617	235439	Mm.244179	NM_145617	ENSMUSG00000038664	Herc1	2810449H11Rik|B230218H07|D130015N03Rik|tbl	HECT and RLD domain containing E3 ubiquitin protein ligase family member 1	protein-coding
Diff_Nuc2865	chr16	62061352	62061491	+	0	NA	Intergenic	Intergenic	725121	NM_178925	106338	Mm.26321	NM_178925	ENSMUSG00000050312	Nsun3	6720484A09Rik|AU022521	NOL1/NOP2/Sun domain family member 3	protein-coding
Diff_Nuc10094	chr8	19938202	19938341	+	0	NA	intron (NM_001270553, intron 7 of 9).2	intron (NM_001270553, intron 7 of 9).2	20509	NM_001270553	100861668	Mm.491087	NM_001270553	ENSMUSG00000095294	Gm21119	-	predicted gene, 21119	protein-coding
Diff_Nuc8979	chr1	95494562	95494701	+	0	NA	intron (NM_145519, intron 13 of 26)	intron (NM_145519, intron 13 of 26)	37673	NM_021537	59041	Mm.28761	NM_021537	ENSMUSG00000026277	Stk25	1500019J11Rik|AU018434|C86992|Ste20-like|Ysk1	serine/threonine kinase 25 (yeast)	protein-coding
Diff_Nuc5682	chr6	115410622	115410761	+	0	NA	intron (NM_001127330, intron 5 of 7)	Lx8|LINE|L1	38607	NM_011146	19016	Mm.3020	NM_011146	ENSMUSG00000000440	Pparg	Nr1c3|PPAR-gamma|PPAR-gamma2|PPARgamma|PPARgamma2	peroxisome proliferator activated receptor gamma	protein-coding
Diff_Nuc7598	chr3	107278782	107278921	+	0	NA	intron (NM_001293689, intron 8 of 11)	intron (NM_001293689, intron 8 of 11)	-17035	NM_145922	99738	Mm.101976	NM_145922	ENSMUSG00000027895	Kcnc4	AI850292|KSHIIIC|Kcr2-4|Kv3.4	potassium voltage gated channel, Shaw-related subfamily, member 4	protein-coding
Diff_Nuc3148	chr15	36289302	36289441	+	0	NA	Intergenic	L1_Mus3|LINE|L1	-76469	NM_013923	30945	Mm.5181	NM_013923	ENSMUSG00000022280	Rnf19a	AA032313|Dorfin|Rnf19|UIP117|Ubce7ip2|XYbp	ring finger protein 19A	protein-coding
Diff_Nuc9211	chr1	153095372	153095511	+	0	NA	Intergenic	ORR1A2|LTR|MaLR	-96187	NM_001039512	117198	Mm.33764	NM_028582	ENSMUSG00000023150	Ivns1abp	1190004M08Rik|1700126I16Rik|AA960440|HSPC068|ND1|NS-1|NS1-BP|Nd1-L|Nd1-S|mKIAA0850	influenza virus NS1A binding protein	protein-coding
Diff_Nuc2656	chr16	17441362	17441501	+	0	NA	Intergenic	IAPEY3-int|LTR|ERVK	-10647	NM_001277231	12929	Mm.21048	NM_007764	ENSMUSG00000006134	Crkl	1110025F07Rik|AA589403|AI325100|Crkol	v-crk avian sarcoma virus CT10 oncogene homolog-like	protein-coding
Diff_Nuc4733	chr7	36125362	36125501	+	0	NA	intron (NM_027897, intron 1 of 14)	intron (NM_027897, intron 1 of 14)	6175	NM_027897	52428	Mm.286600	NM_027897	ENSMUSG00000030494	Rhpn2	1300002E07Rik|AA536890|C85860|D7Ertd784e	rhophilin, Rho GTPase binding protein 2	protein-coding
Diff_Nuc9999	chr9	121431372	121431511	+	0	NA	Intergenic	Intergenic	-26629	NM_031161	12424	Mm.2619	NM_031161	ENSMUSG00000032532	Cck	-	cholecystokinin	protein-coding
Diff_Nuc983	chr12	82008352	82008491	+	0	NA	Intergenic	ORR1B1|LTR|MaLR	17013	NR_033786	67340	Mm.386790	NR_033786	ENSMUSG00000101912	1700052I22Rik	-	RIKEN cDNA 1700052I22 gene	ncRNA
Diff_Nuc3412	chr15	95593092	95593231	+	0	NA	Intergenic	Intergenic	-11139	NR_131148	629300	Mm.247258	NR_131148		Gm6961	EG629300	predicted gene 6961	ncRNA
Diff_Nuc4442	chr18	55065362	55065501	+	0	NA	intron (NM_175751, intron 3 of 9)	intron (NM_175751, intron 3 of 9)	84403	NM_175751	269023	Mm.192984	NM_175751	ENSMUSG00000052713	Zfp608	4932417D18Rik|D430007A19Rik|Znf608	zinc finger protein 608	protein-coding
Diff_Nuc6240	chr5	94444932	94445071	+	0	NA	Intergenic	ID_B1|SINE|B4	54570	NM_001270457	666203	Mm.380154	NM_001270457	ENSMUSG00000096139	Gm7978	EG666203	predicted gene 7978	protein-coding
Diff_Nuc8676	chr1	27629712	27629851	+	0	NA	Intergenic	Intergenic	-885476	NM_001033764	210940	Mm.297614	NM_001033764	ENSMUSG00000073722	4931408C20Rik	-	RIKEN cDNA 4931408C20 gene	protein-coding
Diff_Nuc5946	chr5	29340242	29340381	+	0	NA	Intergenic	Intergenic	-182222	NM_001289757	56874	Mm.87352	NM_021470	ENSMUSG00000029130	Rnf32	1700009J01Rik|2700025B22Rik|4930542N22Rik|Lmbr2	ring finger protein 32	protein-coding
Diff_Nuc6776	chr4	81090942	81091081	+	0	NA	Intergenic	MER5A|DNA|MER1_type	-2292	NM_001305284	17475	Mm.153039	NM_010820	ENSMUSG00000028402	Mpdz	AI225843|B930003D11Rik|MUPP1	multiple PDZ domain protein	protein-coding
Diff_Nuc1497	chr11	82797682	82797821	+	0	NA	TTS (NR_106144)	TTS (NR_106144)	816	NR_106144	102466846		NR_106144	ENSMUSG00000098840	Mir7679	Gm27908|mmu-mir-7679	microRNA 7679	ncRNA
Diff_Nuc8901	chr1	80335552	80335691	+	0	NA	intron (NM_001313728, intron 1 of 16)	intron (NM_001313728, intron 1 of 16)	1644	NM_001313728	26554	Mm.12665	NM_016716	ENSMUSG00000004364	Cul3	KIAA0617	cullin 3	protein-coding
Diff_Nuc2557	chr17	86570082	86570221	+	0	NA	intron (NM_011104, intron 1 of 14)	intron (NM_011104, intron 1 of 14)	3026	NM_011104	18754	Mm.24614	NM_011104	ENSMUSG00000045038	Prkce	5830406C15Rik|PKC[e]|PKCepsilon|Pkce|R75156	protein kinase C, epsilon	protein-coding
Diff_Nuc423	chr13	71575422	71575561	+	0	NA	Intergenic	Intergenic	329524	NR_130325	100316804		NR_130325	ENSMUSG00000080580	Mir466f-4	Mirn466f-4|mmu-mir-466f-4	microRNA 466f-4	ncRNA
Diff_Nuc8317	chr2	119342512	119342651	+	0	NA	Intergenic	Intergenic	30782	NM_172857	241624	Mm.212773	NM_172857	ENSMUSG00000048647	Exd1	4932702D22Rik|Exdl1|mExd1	exonuclease 3'-5' domain containing 1	protein-coding
Diff_Nuc7594	chr3	106851842	106851981	+	0	NA	non-coding (NR_033498, exon 2 of 2)	non-coding (NR_033498, exon 2 of 2)	9489	NR_033498	229694	Mm.347584	NM_173787	ENSMUSG00000056145	AI504432	A230102G19	expressed sequence AI504432	ncRNA
Diff_Nuc1955	chr10	73618512	73618651	+	0	NA	intron (NM_001142748, intron 3 of 25)	L1Md_T|LINE|L1	333966	NM_001142735	11994	Mm.338933	NM_023115	ENSMUSG00000052613	Pcdh15	BB078305|ENSMUSG00000046980|Gm9815|Ush1f|av|nmf19|roda	protocadherin 15	protein-coding
Diff_Nuc2353	chr17	34036502	34036641	+	0	NA	Intergenic	Intergenic	-5509	NR_040470	474160	Mm.206186	NR_040470	ENSMUSG00000092349	Platr17	-	pluripotency associated transcript 17	ncRNA
Diff_Nuc5317	chr6	26425032	26425171	+	0	NA	Intergenic	Lx3A|LINE|L1	543675	NR_040771	626904	Mm.126787	NR_040771	ENSMUSG00000106799	Gm20756	-	predicted gene, 20756	ncRNA
Diff_Nuc3497	chr14	19185302	19185441	+	0	NA	Intergenic	Intergenic	-21013	NM_009455	22194	Mm.4429	NM_009455	ENSMUSG00000021774	Ube2e1	UbcM3|Ubce5|ubcM2	ubiquitin-conjugating enzyme E2E 1	protein-coding
Diff_Nuc9440	chr9	3000442	3000581	+	0	NA	Intergenic	GSAT_MM|Satellite|Satellite	38232	NR_039546	100628572		NR_039546	ENSMUSG00000106183	Mir101c	mir-101c|mmu-mir-101c	microRNA 101c	ncRNA
Diff_Nuc1902	chr10	61005842	61005981	+	0	NA	intron (NM_153542, intron 3 of 4)	RSINE1|SINE|B4	-52321	NM_001177511	237362	Mm.131297	NM_001177511	ENSMUSG00000020090	Npffr1	Gm236|Gpr147|NPFF1|NPFF1R|OT7T022	neuropeptide FF receptor 1	protein-coding
Diff_Nuc2725	chr16	31749742	31749881	+	0	NA	intron (NR_045516, intron 5 of 24)	Lx8|LINE|L1	-4625	NM_001252436	13383	Mm.382	NM_007862	ENSMUSG00000022770	Dlg1	B130052P05Rik|Dlgh1|E-dlg/SAP97|SAP-97|SAP97|mKIAA4187	discs, large homolog 1 (Drosophila)	protein-coding
Diff_Nuc4889	chr7	79582362	79582501	+	0	NA	Intergenic	Intergenic	-130950	NM_001024703	244049	Mm.217412	NM_001024703	ENSMUSG00000032776	Mctp2	Gm489	multiple C2 domains, transmembrane 2	protein-coding
Diff_Nuc5702	chr6	119840632	119840771	+	0	NA	Intergenic	B1_Mus1|SINE|Alu	-12015	NM_001166382	19365	Mm.149	NM_011236	ENSMUSG00000030166	Rad52	Rad52yh	RAD52 homolog, DNA repair protein	protein-coding
Diff_Nuc10153	chr8	34799922	34800061	+	0	NA	intron (NM_010344, intron 10 of 12)	intron (NM_010344, intron 10 of 12)	36281	NM_010344	14782	Mm.283573	NM_010344	ENSMUSG00000031584	Gsr	AI325518|D8Ertd238e|Gr-1|Gr1	glutathione reductase	protein-coding
Diff_Nuc1518	chr11	89609852	89609991	+	0	NA	Intergenic	Intergenic	-51671	NM_001327810	382543	Mm.60997	NM_172534	ENSMUSG00000047773	Ankfn1	4932411E22Rik|Gm1175|nmf9	ankyrin-repeat and fibronectin type III domain containing 1	protein-coding
Diff_Nuc7068	chr4	146355172	146355311	+	0	NA	Intergenic	Intergenic	-40718	NM_001177767	100043034	Mm.422606	NM_001177767	ENSMUSG00000067919	Rex2	Gm13138|OTTMUSG00000010655	reduced expression 2	protein-coding
Diff_Nuc9635	chr9	38635872	38636011	+	0	NA	exon (NM_146816, exon 1 of 1)	exon (NM_146816, exon 1 of 1)	741	NM_146816	258812	Mm.377702	NM_146816	ENSMUSG00000044798	Olfr923	MOR164-2	olfactory receptor 923	protein-coding
Diff_Nuc9208	chr1	152733892	152734031	+	0	NA	intron (NM_001024720, intron 1 of 106)	intron (NM_001024720, intron 1 of 106)	106604	NM_001024720	545370	Mm.379425	NM_001024720	ENSMUSG00000066842	Hmcn1	EG545370|FIBL-6|Gm201	hemicentin 1	protein-coding
Diff_Nuc5627	chr6	100170912	100171051	+	0	NA	Intergenic	Intergenic	66371	NM_019743	56353	Mm.321633	NM_019743	ENSMUSG00000072872	Rybp	2410018J24Rik|DEDAF|YEAF1	RING1 and YY1 binding protein	protein-coding
Diff_Nuc7661	chr3	122606202	122606341	+	0	NA	intron (NR_046036, intron 3 of 5)	intron (NR_046036, intron 3 of 5)	8281	NM_007980	14079	Mm.28398	NM_007980	ENSMUSG00000023057	Fabp2	Fabpi|I-FABP	fatty acid binding protein 2, intestinal	protein-coding
Diff_Nuc5381	chr6	40065792	40065931	+	0	NA	intron (NM_001004182, intron 1 of 2)	intron (NM_001004182, intron 1 of 2)	5609	NM_001004182	434008	Mm.130209	NM_001004182	ENSMUSG00000057716	Tmem178b	EG434008|Gm5567	transmembrane protein 178B	protein-coding
Diff_Nuc8684	chr1	29838352	29838491	+	0	NA	Intergenic	Intergenic	360088	NR_105760	102465174		NR_105760	ENSMUSG00000099257	Mir6342	Gm27268|mmu-mir-6342	microRNA 6342	ncRNA
Diff_Nuc7054	chr4	145447992	145448131	+	0	NA	Intergenic	MYSERV16_I-int|LTR|ERVK	20939	NR_033612	236069	Mm.276881	NR_033612	ENSMUSG00000096233	Gm13238	OTTMUSG00000011065	carnitine deficiency-associated gene expressed in ventricle 3 pseudogene	pseudo
Diff_Nuc9163	chr1	140356052	140356191	+	0	NA	Intergenic	Intergenic	160213	NM_021605	59125	Mm.143817	NM_021605	ENSMUSG00000026393	Nek7	2810460C19Rik|AU020186	NIMA (never in mitosis gene a)-related expressed kinase 7	protein-coding
Diff_Nuc2583	chr17	92204562	92204701	+	0	NA	Intergenic	MYSERV16_I-int|LTR|ERVK	-712489	NM_020252	18189	Mm.478418	NM_020252	ENSMUSG00000024109	Nrxn1	1700062G21Rik|9330127H16Rik|A230068P09Rik|mKIAA0578	neurexin I	protein-coding
Diff_Nuc8215	chr2	98502362	98502501	+	0	NA	Intergenic	GSAT_MM|Satellite|Satellite	1194617	NM_178725	241568	Mm.241682	NM_178725	ENSMUSG00000050587	Lrrc4c	6430556C10Rik|NGL-1	leucine rich repeat containing 4C	protein-coding
Diff_Nuc2701	chr16	25915202	25915341	+	0	NA	Intergenic	Intergenic	113269	NM_001127264	22061	Mm.20894	NM_011641	ENSMUSG00000022510	Trp63	AI462811|Ket|P51/P63|P63|P73l|Tp63|Trp53rp1	transformation related protein 63	protein-coding
Diff_Nuc1511	chr11	88268192	88268331	+	0	NA	intron (NM_054043, intron 7 of 13)	intron (NM_054043, intron 7 of 13)	101986	NR_039545	100628571		NR_039545	ENSMUSG00000092985	Mir378b	mir-378b|mmu-mir-378b	microRNA 378b	ncRNA
Diff_Nuc9794	chr9	71462742	71462881	+	0	NA	Intergenic	CT-rich|Low_complexity|Low_complexity	-22644	NM_001033208	102371	Mm.27585	NM_001033208	ENSMUSG00000041361	Myzap	AA407270|AV006038|Gcom1|Gm640|Grinl1a7|Myozap	myocardial zonula adherens protein	protein-coding
Diff_Nuc8077	chr2	60242042	60242181	+	0	NA	Intergenic	Intergenic	-7471	NR_046065	100039176	Mm.261790	NR_046065	ENSMUSG00000087283	Gm13580	OTTMUSG00000012842	predicted gene 13580	ncRNA
Diff_Nuc1353	chr11	51259462	51259601	+	0	NA	intron (NM_153393, intron 2 of 28)	B1F1|SINE|Alu	-138728	NM_028398	72947	Mm.256875	NM_028398	ENSMUSG00000020359	Phykpl	2900006B13Rik|Agxt2l2	5-phosphohydroxy-L-lysine phospholyase	protein-coding
Diff_Nuc2661	chr16	18284502	18284641	+	0	NA	promoter-TSS (NR_035467)	promoter-TSS (NR_035467)	159	NR_128565	104795666		NR_128565	ENSMUSG00000093246	Gm24572	Mir3618|mmu-mir-3618	predicted gene, 24572	ncRNA
Diff_Nuc6948	chr4	116022482	116022621	+	0	NA	intron (NM_008641, intron 5 of 28)	intron (NM_008641, intron 5 of 28)	114235	NM_001042743	17776	Mm.9287	NM_008641	ENSMUSG00000003810	Mast2	MAST205|Mtssk	microtubule associated serine/threonine kinase 2	protein-coding
Diff_Nuc8923	chr1	83802862	83803001	+	0	NA	Intergenic	Intergenic	-398156	NM_172430	77629	Mm.154303	NM_172430	ENSMUSG00000026163	Sphkap	4930544G21Rik|A930009L15Rik|AI852220|SKIP|mKIAA1678	SPHK1 interactor, AKAP domain containing	protein-coding
Diff_Nuc3448	chr14	4362102	4362241	+	0	NA	Intergenic	L1_Mus3|LINE|L1	-75631	NM_001309398	554327	Mm.460196	NM_001309398	ENSMUSG00000079388	2610042L04Rik	Tksn|takusan	RIKEN cDNA 2610042L04 gene	protein-coding
Diff_Nuc4282	chr18	23720082	23720221	+	0	NA	intron (NM_001285817, intron 3 of 19)	intron (NM_001285817, intron 3 of 19)	64168	NM_001285810	13527	Mm.94371	NM_010087	ENSMUSG00000024302	Dtna	2210407P21Rik|DTN-A|Dtn|Gm19389|a-DB-1|adbn	dystrobrevin alpha	protein-coding
Diff_Nuc6494	chr4	11868602	11868741	+	0	NA	Intergenic	ORR1E|LTR|MaLR	24189	NM_001098231	381511	Mm.331489	NM_001033453	ENSMUSG00000049225	Pdp1	Gm1024|Ppm2c	pyruvate dehyrogenase phosphatase catalytic subunit 1	protein-coding
Diff_Nuc7015	chr4	133246617	133246756	+	0	NA	intron (NM_001080819, intron 11 of 19)	intron (NM_001080819, intron 11 of 19)	-18124	NM_001145956	230801	Mm.217004	NM_178698	ENSMUSG00000043257	Pigv	B330013B03|D430024F16Rik	phosphatidylinositol glycan anchor biosynthesis, class V	protein-coding
Diff_Nuc2463	chr17	60546412	60546551	+	0	NA	Intergenic	L1_Mus4|LINE|L1	-1393736	NM_026497	67993	Mm.36507	NM_026497	ENSMUSG00000024228	Nudt12	0610016O18Rik	nudix (nucleoside diphosphate linked moiety X)-type motif 12	protein-coding
Diff_Nuc330	chr13	53495902	53496041	+	0	NA	intron (NR_037991, intron 4 of 7)	intron (NR_037991, intron 4 of 7)	6913	NR_037991	100040421	Mm.83967	NR_037991	ENSMUSG00000107008	Gm2762	1700025I17Rik	predicted gene 2762	ncRNA
Diff_Nuc7931	chr2	28483222	28483361	+	0	NA	Intergenic	B4A|SINE|B4	-5789	NM_001160406	14582	Mm.373385	NM_008114	ENSMUSG00000026815	Gfi1b	Gfi-1B	growth factor independent 1B	protein-coding
Diff_Nuc3598	chr14	44071022	44071161	+	0	NA	Intergenic	Intergenic	-44747	NM_027940	71826	Mm.335855	NM_027940	ENSMUSG00000095384	1700001F09Rik	Gm10377	RIKEN cDNA 1700001F09 gene	protein-coding
Diff_Nuc8246	chr2	102154177	102154316	+	0	NA	intron (NM_020267, intron 4 of 4)	intron (NM_020267, intron 4 of 4)	86811	NM_020267	80985	Mm.315002	NM_020267	ENSMUSG00000027189	Trim44	Dipb|Mc7	tripartite motif-containing 44	protein-coding
Diff_Nuc1174	chr11	8892342	8892481	+	0	NA	TTS (NM_001303532)	TTS (NM_001303532)	18783	NM_001303610	15574	Mm.42201	NM_008316	ENSMUSG00000020413	Hus1	-	HUS1 checkpoint clamp component	protein-coding
Diff_Nuc3558	chr14	34169042	34169181	+	0	NA	intron (NM_153800, intron 5 of 10)	Lx3_Mus|LINE|L1	55099	NM_001310452	26419	Mm.21495	NM_016700	ENSMUSG00000021936	Mapk8	AI849689|JNK|JNK1|Prkm8|SAPK1	mitogen-activated protein kinase 8	protein-coding
Diff_Nuc8078	chr2	60525832	60525971	+	0	NA	intron (NM_001159564, intron 1 of 17)	intron (NM_001159564, intron 1 of 17)	-14151	NM_021359	16420	Mm.98193	NM_021359	ENSMUSG00000026971	Itgb6	2210409C20Rik|4831415H04Rik	integrin beta 6	protein-coding
Diff_Nuc4620	chr7	5706992	5707131	+	0	NA	Intergenic	L1VL1|LINE|L1	48172	NM_001167568	100039499	Mm.160382	NM_001167568	ENSMUSG00000096244	Vmn1r187	-	vomeronasal 1 receptor Vmn1r187	protein-coding
Diff_Nuc8995	chr1	99533142	99533281	+	0	NA	Intergenic	Intergenic	25384	NM_133825	52392	Mm.12309	NM_133825	ENSMUSG00000044768	D1Ertd622e	AI987691|AW047450	DNA segment, Chr 1, ERATO Doi 622, expressed	protein-coding
Diff_Nuc8987	chr1	97759112	97759251	+	0	NA	Intergenic	L1Md_F2|LINE|L1	-146086	NR_040479	75381	Mm.417807	NR_040479	ENSMUSG00000100777	4930598F16Rik	-	RIKEN cDNA 4930598F16 gene	ncRNA
Diff_Nuc6732	chr4	71114652	71114791	+	0	NA	Intergenic	MIRb|SINE|MIR	747206	NM_011599	21885	Mm.278444	NM_011599	ENSMUSG00000008305	Tle1	C230057C06Rik|Estm14|Grg-1|Grg1|Tle4l	transducin-like enhancer of split 1	protein-coding
Diff_Nuc10142	chr8	33206152	33206291	+	0	NA	Intergenic	Intergenic	-56146	NR_046039	666589	Mm.367675	NR_046039		Gm8179	EG666589	predicted gene 8179	ncRNA
Diff_Nuc8511	chr2	160834692	160834831	+	0	NA	intron (NM_173368, intron 16 of 36)	intron (NM_173368, intron 16 of 36)	-96686	NM_182840	280635	Mm.330747	NM_182840	ENSMUSG00000050700	Emilin3	1110013O17Rik|EMILIN-3|EMILIN-5|EMILIN-T|Emilin5	elastin microfibril interfacer 3	protein-coding
Diff_Nuc5527	chr6	77430662	77430801	+	0	NA	intron (NM_009819, intron 7 of 18)	B3A|SINE|B2	-98262	NR_045141	70753	Mm.490700	NR_045141	ENSMUSG00000108077	6330415B21Rik	-	RIKEN cDNA 6330415B21 gene	ncRNA
Diff_Nuc9429	chr1	194872862	194873001	+	0	NA	Intergenic	MTEb|LTR|MaLR	-10962	NM_181546	329324	Mm.76710	NM_181546	ENSMUSG00000016200	Syt14	B230320I09Rik|sytXIV	synaptotagmin XIV	protein-coding
Diff_Nuc6344	chr5	119911052	119911191	+	0	NA	Intergenic	B4A|SINE|B4	119246	NR_045702	100993	Mm.381453	NR_045702	ENSMUSG00000087516	AW549542	-	expressed sequence AW549542	ncRNA
Diff_Nuc7398	chr3	65972482	65972621	+	0	NA	intron (NM_145820, intron 7 of 13)	RCHARR1|DNA|MER1_type	-51258	NM_008987	19288	Mm.276776	NM_008987	ENSMUSG00000027832	Ptx3	AI607804|TSG-14	pentraxin related gene	protein-coding
Diff_Nuc9296	chr1	168045412	168045551	+	0	NA	intron (NM_001160049, intron 2 of 5)	ORR1D2|LTR|MaLR	12548	NM_001033344	240892	Mm.35315	NM_001033344	ENSMUSG00000026564	Dusp27	C130085G02Rik|Gm209	dual specificity phosphatase 27 (putative)	protein-coding
Diff_Nuc2504	chr17	74279302	74279441	+	0	NA	intron (NM_011723, intron 6 of 35)	L1_Mus3|LINE|L1	20165	NM_011723	22436	Mm.11223	NM_011723	ENSMUSG00000024066	Xdh	XO|Xor|Xox-1|Xox1	xanthine dehydrogenase	protein-coding
Diff_Nuc9929	chr9	105557682	105557821	+	0	NA	intron (NM_001081309, intron 6 of 19)	intron (NM_001081309, intron 6 of 19)	12426	NM_001081309	75669	Mm.274830	NM_029380	ENSMUSG00000032571	Pik3r4	2210010O15Rik|C730038E05Rik|C85833|D9Ertd418e	phosphatidylinositol 3 kinase, regulatory subunit, polypeptide 4, p150	protein-coding
Diff_Nuc9214	chr1	153664372	153664511	+	0	NA	intron (NM_001311165, intron 20 of 20)	intron (NM_001311165, intron 20 of 20)	61937	NM_001311166	66967	Mm.337691	NM_001039644	ENSMUSG00000043019	Edem3	2310050N11Rik	ER degradation enhancer, mannosidase alpha-like 3	protein-coding
Diff_Nuc3982	chr19	15900102	15900241	+	0	NA	Intergenic	Lx9|LINE|L1	98941	NM_001205339	107272	Mm.289936	NM_177420	ENSMUSG00000024640	Psat1	D8Ertd814e|EPIP|PSA|Psat	phosphoserine aminotransferase 1	protein-coding
Diff_Nuc3777	chr14	88050712	88050851	+	0	NA	Intergenic	Intergenic	234391	NM_001253755	219249	Mm.35168	NM_172605	ENSMUSG00000022019	Tdrd3	4732418C03Rik|6720468N18	tudor domain containing 3	protein-coding
Diff_Nuc8404	chr2	136869822	136869961	+	0	NA	intron (NM_028201, intron 4 of 5)	intron (NM_028201, intron 4 of 5)	72365	NM_013822	16449	Mm.22398	NM_013822	ENSMUSG00000027276	Jag1	ABE2|Gsfabe2|Htu|Ozz|Ser-1	jagged 1	protein-coding
Diff_Nuc1672	chr10	5802122	5802261	+	0	NA	intron (NM_001195672, intron 7 of 10)	intron (NM_001195672, intron 7 of 10)	34478	NM_001195672	100504234	Mm.291807	NM_001195672	ENSMUSG00000019767	Ccdc170	Gm221	coiled-coil domain containing 170	protein-coding
Diff_Nuc1083	chr12	105611632	105611771	+	0	NA	Intergenic	L1_Mus4|LINE|L1	-13673	NM_009253	20717	Mm.395085	NM_009253	ENSMUSG00000079012	Serpina3m	3e46|AI195004|MMCM7|MMSPi2.4|Spi-2l|Spi-2rs1|Spi2-rs1|Spi2.4|spi2	serine (or cysteine) peptidase inhibitor, clade A, member 3M	protein-coding
Diff_Nuc121	chr13	10737872	10738011	+	0	NA	Intergenic	Intergenic	-377892	NM_033269	12671	Mm.342315	NM_033269	ENSMUSG00000046159	Chrm3	Chrm-3|M3|M3R	cholinergic receptor, muscarinic 3, cardiac	protein-coding
Diff_Nuc2211	chr10	129565522	129565661	+	0	NA	Intergenic	Intergenic	-1480	NM_146674	258669	Mm.377631	NM_146674	ENSMUSG00000095804	Olfr824	MOR210-3	olfactory receptor 824	protein-coding
Diff_Nuc1462	chr11	75006152	75006291	+	0	NA	Intergenic	Intergenic	-1274	NM_177708	237847	Mm.82661	NM_177708	ENSMUSG00000045287	Rtn4rl1	Ngr3|Ngrh2|Ngrl2	reticulon 4 receptor-like 1	protein-coding
Diff_Nuc1209	chr11	17188862	17189001	+	0	NA	Intergenic	Intergenic	31240	NM_001330649	57316	Mm.287982	NM_020558	ENSMUSG00000000581	C1d	1110036E10Rik|AI875855|SUN-CoR	C1D nuclear receptor co-repressor	protein-coding
Diff_Nuc72	chrX	140342982	140343121	+	0	NA	intron (NM_010025, intron 3 of 6)	intron (NM_010025, intron 3 of 6)	24616	NM_001110222	13193	Mm.12871	NM_010025	ENSMUSG00000031285	Dcx	Dbct	doublecortin	protein-coding
Diff_Nuc195	chr13	24614822	24614961	+	0	NA	Intergenic	Intergenic	-59167	NM_001286100	193385	Mm.217319	NM_029679	ENSMUSG00000036006	Fam65b	-	family with sequence similarity 65, member B	protein-coding
Diff_Nuc5367	chr6	37515462	37515601	+	0	NA	intron (NM_145364, intron 8 of 8)	intron (NM_145364, intron 8 of 8)	35358	NM_145364	208665	Mm.262635	NM_145364	ENSMUSG00000038641	Akr1d1	-	aldo-keto reductase family 1, member D1	protein-coding
Diff_Nuc2530	chr17	80054132	80054271	+	0	NA	intron (NM_201361, intron 4 of 10)	L1Md_F2|LINE|L1	39961	NM_201361	381110	Mm.209801	NM_201361	ENSMUSG00000036368	Rmdn2	AW061290|Fam82a1|RMD-2|mRMD-2	regulator of microtubule dynamics 2	protein-coding
Diff_Nuc786	chr12	40644002	40644141	+	0	NA	Intergenic	Intergenic	119892	NM_007487	11861	Mm.12723	NM_007487	ENSMUSG00000047446	Arl4a	AI467555|Arl4	ADP-ribosylation factor-like 4A	protein-coding
Diff_Nuc5880	chr5	15185642	15185781	+	0	NA	promoter-TSS (NR_001585)	promoter-TSS (NR_001585)	-817	NR_001585	75858	Mm.359463	NR_001585	ENSMUSG00000089871	Speer4cos	4930568L21Rik|SPEER-7|Speer7-ps|Speer7-ps1	spermatogenesis associated glutamate (E)-rich protein 4C, opposite strand transcript	pseudo
Diff_Nuc2296	chr17	19035302	19035441	+	0	NA	Intergenic	MMERGLN-int|LTR|ERV1	-15915	NM_001104549	627367	Mm.384131	NM_001104549	ENSMUSG00000091491	Vmn2r97	EG627367|Vn2r97	vomeronasal 2, receptor 97	protein-coding
Diff_Nuc6408	chr5	138854752	138854891	+	0	NA	Intergenic	MTD|LTR|MaLR	-27883	NM_028130	72154	Mm.20263	NM_028130	ENSMUSG00000036898	Zfp157	2610020C11Rik|A630094N24Rik|AI327407|mszf12|mszf23-1	zinc finger protein 157	protein-coding
Diff_Nuc8006	chr2	44906112	44906251	+	0	NA	intron (NM_015753, intron 2 of 9)	intron (NM_015753, intron 2 of 9)	-27484	NR_039591	100628598		NR_039591	ENSMUSG00000092679	Mir5129	mir-5129|mmu-mir-5129|mu-mir-5129	microRNA 5129	ncRNA
Diff_Nuc5681	chr6	115292072	115292211	+	0	NA	Intergenic	Intergenic	-18828	NM_001127330	19016	Mm.3020	NM_011146	ENSMUSG00000000440	Pparg	Nr1c3|PPAR-gamma|PPAR-gamma2|PPARgamma|PPARgamma2	peroxisome proliferator activated receptor gamma	protein-coding
Diff_Nuc3842	chr14	106309342	106309481	+	0	NA	Intergenic	L1_Mus1|LINE|L1	-13375	NM_011897	24064	Mm.89982	NM_011897	ENSMUSG00000022114	Spry2	sprouty2	sprouty homolog 2 (Drosophila)	protein-coding
Diff_Nuc1926	chr10	66545622	66545761	+	0	NA	intron (NM_178606, intron 1 of 7)	intron (NM_178606, intron 1 of 7)	14045	NM_001204915	28193	Mm.41272	NM_178606	ENSMUSG00000019873	Reep3	D10Ucla1	receptor accessory protein 3	protein-coding
Diff_Nuc652	chr12	7519552	7519691	+	0	NA	Intergenic	Intergenic	-132485	NR_045045	73575	Mm.179463	NR_045045	ENSMUSG00000102096	1700101O22Rik	-	RIKEN cDNA 1700101O22 gene	ncRNA
Diff_Nuc4257	chr18	16742422	16742561	+	0	NA	Intergenic	Intergenic	225264	NM_007664	12558	Mm.257437	NM_007664	ENSMUSG00000024304	Cdh2	CDHN|N-CAD|Ncad	cadherin 2	protein-coding
Diff_Nuc228	chr13	30133102	30133241	+	0	NA	Intergenic	Intergenic	-55239	NM_010093	13557	Mm.268356	NM_010093	ENSMUSG00000016477	E2f3	E2F3b|E2f3a	E2F transcription factor 3	protein-coding
Diff_Nuc2183	chr10	122850692	122850831	+	0	NA	intron (NR_045514, intron 1 of 5)	MTEb|LTR|MaLR	149629	NM_001252387	268354	Mm.51939	NM_182807	ENSMUSG00000044071	Fam19a2	6330575M02|FAM19A2 TAFA-2|TAFA2|Tafa-2	family with sequence similarity 19, member A2	protein-coding
Diff_Nuc9700	chr9	53117712	53117851	+	0	NA	intron (NM_176846, intron 1 of 5)	B2_Mm2|SINE|B2	8006	NM_176846	320051	Mm.277540	NM_176846	ENSMUSG00000034584	Exph5	AC079869.22gm5|B130009M24Rik|E030050P12|Kiaa0624|Slac2b|slac2-b	exophilin 5	protein-coding
Diff_Nuc8615	chr1	13301882	13302021	+	0	NA	intron (NM_008678, intron 1 of 22)	intron (NM_008678, intron 1 of 22)	60559	NM_001302702	17978	Mm.2537	NM_008678	ENSMUSG00000005886	Ncoa2	D1Ertd433e|GRIP-1|Grip1|KAT13C|NCoA-2|SRC-2|TIF2|bHLHe75	nuclear receptor coactivator 2	protein-coding
Diff_Nuc863	chr12	58466462	58466601	+	0	NA	intron (NM_001164370, intron 8 of 9)	(CA)n|Simple_repeat|Simple_repeat	135119	NM_001164370	73490	Mm.268180	NM_001164370	ENSMUSG00000047022	Mipol1	1700081O04Rik|6030439O22Rik|AU021838|AW536152|D12Ertd19e	mirror-image polydactyly 1	protein-coding
Diff_Nuc9286	chr1	166008152	166008291	+	0	NA	intron (NM_011346, intron 8 of 8)	MIR|SINE|MIR	16014	NM_001164059	20343	Mm.1461	NM_011346	ENSMUSG00000026581	Sell	AI528707|CD62L|L-selectin|LECAM-1|Lnhr|Ly-22|Ly-m22|Lyam-1|Lyam1	selectin, lymphocyte	protein-coding
Diff_Nuc9292	chr1	167426522	167426661	+	0	NA	intron (NM_173029, intron 1 of 33)	intron (NM_173029, intron 1 of 33)	11277	NM_173029	271639	Mm.66952	NM_173029	ENSMUSG00000026567	Adcy10	4930431D04Rik|4931412F17|Sacy|sAC	adenylate cyclase 10	protein-coding
Diff_Nuc2997	chr16	92639202	92639341	+	0	NA	intron (NM_009821, intron 3 of 4)	intron (NM_009821, intron 3 of 4)	58303	NM_001111023	12394	Mm.4081	NM_009821	ENSMUSG00000022952	Runx1	AML1|CBF-alpha-2|Cbfa2|Pebp2a2|Pebpa2b	runt related transcription factor 1	protein-coding
Diff_Nuc2540	chr17	82408292	82408431	+	0	NA	Intergenic	L1_Rod|LINE|L1	-270634	NM_011406	20541	Mm.265834	NM_011406	ENSMUSG00000054640	Slc8a1	AI852629|AV344025|D930008O12Rik|Ncx1	solute carrier family 8 (sodium/calcium exchanger), member 1	protein-coding
Diff_Nuc6669	chr4	54484302	54484441	+	0	NA	Intergenic	Intergenic	-476446	NM_172867	242466	Mm.102904	NM_172867	ENSMUSG00000060206	Zfp462	6030417H05|9430078C22Rik|Gt4-2|Zfpip	zinc finger protein 462	protein-coding
Diff_Nuc9304	chr1	169289382	169289521	+	0	NA	intron (NM_019993, intron 6 of 10)	B1_Mus1|SINE|Alu	9329	NM_019993	56752	Mm.292539	NM_019993	ENSMUSG00000026687	Aldh9a1	AA139417|Abaldh|ESTM40|TMABA-DH|Tmabadh	aldehyde dehydrogenase 9, subfamily A1	protein-coding
Diff_Nuc4131	chr19	50108442	50108581	+	0	NA	Intergenic	L1MC3|LINE|L1	644625	NM_001252501	58178	Mm.313672	NM_021377	ENSMUSG00000043531	Sorcs1	Sorcs|mSorCS	sortilin-related VPS10 domain containing receptor 1	protein-coding
Diff_Nuc9056	chr1	112101312	112101451	+	0	NA	Intergenic	L1_Mur1|LINE|L1	221081	NM_172853	241201	Mm.213407	NM_172853	ENSMUSG00000026312	Cdh7	9330156F07Rik|CDH7L1	cadherin 7, type 2	protein-coding
Diff_Nuc9994	chr9	119430762	119430901	+	0	NA	intron (NM_001253860, intron 14 of 26)	intron (NM_001253860, intron 14 of 26)	40965	NM_001253860	20271	Mm.103584	NM_021544	ENSMUSG00000032511	Scn5a	Nav1.5|Nav1.5c|SkM1|SkM2|mH1	sodium channel, voltage-gated, type V, alpha	protein-coding
Diff_Nuc2483	chr17	68194102	68194241	+	0	NA	3' UTR (NM_172964, exon 18 of 18)	3' UTR (NM_172964, exon 18 of 18)	106109	NM_001347410	268970	Mm.9935	NM_172964	ENSMUSG00000024043	Arhgap28	AU044757|AW550892|E130310N06	Rho GTPase activating protein 28	protein-coding
Diff_Nuc6834	chr4	91849082	91849221	+	0	NA	Intergenic	L1Md_F3|LINE|L1	-35239	NM_027034	69314	Mm.55891	NM_027034	ENSMUSG00000028533	Izumo3	1700011H22Rik	IZUMO family member 3	protein-coding
Diff_Nuc4833	chr7	64904182	64904321	+	0	NA	intron (NM_001038701, intron 3 of 8)	intron (NM_001038701, intron 3 of 8)	57708	NM_008071	14402	Mm.8004	NM_008071	ENSMUSG00000033676	Gabrb3	A230092K12Rik|AW049585|Cp1|Gabrb-3|beta3	gamma-aminobutyric acid (GABA) A receptor, subunit beta 3	protein-coding
Diff_Nuc5893	chr5	18452412	18452551	+	0	NA	Intergenic	Intergenic	279892	NR_102341	70832	Mm.398993	NR_102341	ENSMUSG00000097626	4921504A21Rik	-	RIKEN cDNA 4921504A21 gene	ncRNA
Diff_Nuc5042	chr7	109367612	109367751	+	0	NA	intron (NM_001291358, intron 1 of 6)	intron (NM_001291358, intron 1 of 6)	-3861	NR_111938	233575	Mm.302013	NM_145583	ENSMUSG00000030990	Pgap2	1810006G21Rik|C76649|Frag1	post-GPI attachment to proteins 2	protein-coding
Diff_Nuc5670	chr6	112207022	112207161	+	0	NA	Intergenic	Intergenic	-16661	NM_144799	30937	Mm.234441	NM_144799	ENSMUSG00000057604	Lmcd1	AW455500|AW553074|dyxin	LIM and cysteine-rich domains 1	protein-coding
Diff_Nuc7397	chr3	65725822	65725961	+	0	NA	Intergenic	MTEb|LTR|MaLR	36256	NM_019937	56706	Mm.175612	NM_019937	ENSMUSG00000027829	Ccnl1	2610030E23Rik|AU018493|Ccnl|ania-6a	cyclin L1	protein-coding
Diff_Nuc9269	chr1	163330162	163330301	+	0	NA	intron (NM_009452, intron 1 of 2)	L2|LINE|L2	4662	NM_009452	22164	Mm.4994	NM_009452	ENSMUSG00000026700	Tnfsf4	Ath-1|Ath1|CD134L|OX-40L|Ox40l|TXGP1|Tnlg2b|Txgp1l|gp34	tumor necrosis factor (ligand) superfamily, member 4	protein-coding
Diff_Nuc7311	chr3	48118272	48118411	+	0	NA	Intergenic	ORR1A3|LTR|MaLR	-287660	NR_040408	666202	Mm.465057	NR_040408	ENSMUSG00000103257	Gm7977	EG666202	tyrosine 3-monooxygenase/tryptophan 5-monooxygenase activation protein, theta polypeptide pseudogene	pseudo
Diff_Nuc8897	chr1	79827192	79827331	+	0	NA	intron (NM_009255, intron 1 of 8)	intron (NM_009255, intron 1 of 8)	27979	NM_009255	20720	Mm.3093	NM_009255	ENSMUSG00000026249	Serpine2	B230326M24Rik|PAI-1|PI-7|PI7|PN-1|Spi4	serine (or cysteine) peptidase inhibitor, clade E, member 2	protein-coding
Diff_Nuc8313	chr2	117699882	117700021	+	0	NA	intron (NR_126479, intron 8 of 9)	MTD|LTR|MaLR	52287	NR_040631	73938	Mm.399107	NR_040631	ENSMUSG00000086221	4930412B13Rik	-	RIKEN cDNA 4930412B13 gene	ncRNA
Diff_Nuc8808	chr1	59781262	59781401	+	0	NA	Intergenic	B1_Mus2|SINE|Alu	19679	NR_028521	100217421		NR_028521		Snord11	MBII-95	small nucleolar RNA, C/D box 11	snoRNA
Diff_Nuc96	chr13	5512392	5512531	+	0	NA	Intergenic	Intergenic	344877	NR_045891	71867	Mm.179181	NR_045891	ENSMUSG00000100625	1700016G22Rik	-	RIKEN cDNA 1700016G22 gene	ncRNA
Diff_Nuc2866	chr16	62436627	62436766	+	0	NA	Intergenic	URR1B|DNA|MER1_type	349846	NM_178925	106338	Mm.26321	NM_178925	ENSMUSG00000050312	Nsun3	6720484A09Rik|AU022521	NOL1/NOP2/Sun domain family member 3	protein-coding
Diff_Nuc4202	chr18	5639322	5639461	+	0	NA	intron (NM_011546, intron 1 of 7)	Lx8|LINE|L1	-46956	NR_033552	791318	Mm.84339	NR_033552	ENSMUSG00000063087	Gm10125	ENSMUSG00000063087|Zeb1os	predicted gene 10125	ncRNA
Diff_Nuc5997	chr5	38626842	38626981	+	0	NA	Intergenic	Intergenic	15190	NM_025281	17089	Mm.28560	NM_025281	ENSMUSG00000067367	Lyar	MLZ-264	Ly1 antibody reactive clone	protein-coding
Diff_Nuc6895	chr4	103345522	103345661	+	0	NA	Intergenic	Intergenic	290486	NR_040673	622167	Mm.244115	NR_040673	ENSMUSG00000086136	Gm12718	OTTMUSG00000008109	predicted gene 12718	ncRNA
Diff_Nuc8650	chr1	23441662	23441801	+	0	NA	Intergenic	(TC)n|Simple_repeat|Simple_repeat	-51717	NM_001081079	70155	Mm.28013	NM_001081079	ENSMUSG00000026158	Ogfrl1	2210417C17Rik	opioid growth factor receptor-like 1	protein-coding
Diff_Nuc6206	chr5	85525432	85525571	+	0	NA	Intergenic	Intergenic	-679094	NM_007937	13839	Mm.137991	NM_007937	ENSMUSG00000029245	Epha5	AI854630|AW125296|Cek7|Ehk1|Els1|Hek7|Rek7|bsk	Eph receptor A5	protein-coding
Diff_Nuc1099	chr12	108965052	108965191	+	0	NA	intron (NR_045973, intron 2 of 2)	intron (NR_045973, intron 2 of 2)	8577	NR_045973	74968	Mm.359821	NR_045973	ENSMUSG00000085641	4930465M20Rik	4930431H15Rik	RIKEN cDNA 4930465M20 gene	ncRNA
Diff_Nuc122	chr13	10747212	10747351	+	0	NA	Intergenic	L1Md_F|LINE|L1	-387232	NM_033269	12671	Mm.342315	NM_033269	ENSMUSG00000046159	Chrm3	Chrm-3|M3|M3R	cholinergic receptor, muscarinic 3, cardiac	protein-coding
Diff_Nuc9453	chr9	3024052	3024191	+	0	NA	Intergenic	GSAT_MM|Satellite|Satellite	14622	NR_039546	100628572		NR_039546	ENSMUSG00000106183	Mir101c	mir-101c|mmu-mir-101c	microRNA 101c	ncRNA
Diff_Nuc3121	chr15	30160682	30160821	+	0	NA	intron (NM_008729, intron 1 of 22)	intron (NM_008729, intron 1 of 22)	58403	NM_008729	18163	Mm.321648	NM_008729	ENSMUSG00000022240	Ctnnd2	Catnd2|Nprap|neurojugin	catenin (cadherin associated protein), delta 2	protein-coding
Diff_Nuc8223	chr2	98506672	98506811	+	0	NA	Intergenic	GSAT_MM|Satellite|Satellite	1198927	NM_178725	241568	Mm.241682	NM_178725	ENSMUSG00000050587	Lrrc4c	6430556C10Rik|NGL-1	leucine rich repeat containing 4C	protein-coding
Diff_Nuc3725	chr14	73335662	73335801	+	0	NA	Intergenic	Intergenic	-89679	NR_027860	668489	Mm.158324	NR_027860		Gm9199	EG668489	glycine cleavage system protein H (aminomethyl carrier) pseudogene	pseudo
Diff_Nuc6489	chr4	11215432	11215571	+	0	NA	intron (NM_001081201, intron 11 of 18)	(TC)n|Simple_repeat|Simple_repeat	33777	NM_001081201	381510	Mm.331486	NM_001081201	ENSMUSG00000045205	Dpy19l4	Gm1023|Narg3	dpy-19-like 4 (C. elegans)	protein-coding
Diff_Nuc5444	chr6	56419582	56419721	+	0	NA	Intergenic	Lx7|LINE|L1	-100023	NM_001159955	18575	Mm.5145	NM_011054	ENSMUSG00000004347	Pde1c	-	phosphodiesterase 1C	protein-coding
Diff_Nuc2156	chr10	117449032	117449171	+	0	NA	Intergenic	Intergenic	86586	NR_045342	71067	Mm.410793	NR_045342		4933411E08Rik	-	RIKEN cDNA 4933411E08 gene	ncRNA
Diff_Nuc3566	chr14	35850822	35850961	+	0	NA	intron (NM_008166, intron 4 of 15)	intron (NM_008166, intron 4 of 15)	143096	NR_029774	723847		NR_029774	ENSMUSG00000065481	Mir346	Mirn346|mir-346|mmu-mir-346	microRNA 346	ncRNA
Diff_Nuc3588	chr14	43638272	43638411	+	0	NA	Intergenic	Intergenic	55768	NM_001244671	100042055	Mm.429109	NM_001244671	ENSMUSG00000095226	Gm10377	ENSMUSG00000072606	predicted gene 10377	protein-coding
Diff_Nuc763	chr12	35966122	35966261	+	0	NA	Intergenic	L1_Rod|LINE|L1	-86622	NR_030449	751520		NR_030449	ENSMUSG00000076253	Mir680-3	Mirn680-3	microRNA 680-3	ncRNA
Diff_Nuc2407	chr17	46783872	46784011	+	0	NA	intron (NM_025302, intron 1 of 6)	intron (NM_025302, intron 1 of 6)	763	NM_025302	27398	Mm.391007	NM_025302	ENSMUSG00000002767	Mrpl2	CGI-22|L2mt|MRP-L14|MRP-L2|Rpml14	mitochondrial ribosomal protein L2	protein-coding
Diff_Nuc8220	chr2	98505152	98505291	+	0	NA	Intergenic	SYNREP_MM|Satellite|Satellite	1197407	NM_178725	241568	Mm.241682	NM_178725	ENSMUSG00000050587	Lrrc4c	6430556C10Rik|NGL-1	leucine rich repeat containing 4C	protein-coding
Diff_Nuc1002	chr12	86549192	86549331	+	0	NA	Intergenic	Intergenic	-11170	NM_145445	217715	Mm.29041	NM_145445	ENSMUSG00000004788	Eif2b2	EIF-2Bbeta|EIF2B	eukaryotic translation initiation factor 2B, subunit 2 beta	protein-coding
Diff_Nuc8996	chr1	99584062	99584201	+	0	NA	Intergenic	B4|SINE|B4	-25536	NM_133825	52392	Mm.12309	NM_133825	ENSMUSG00000044768	D1Ertd622e	AI987691|AW047450	DNA segment, Chr 1, ERATO Doi 622, expressed	protein-coding
Diff_Nuc2622	chr16	9499102	9499241	+	0	NA	Intergenic	L1_Rod|LINE|L1	493455	NM_008170	14811	Mm.2953	NM_008170	ENSMUSG00000059003	Grin2a	GluN2A|NMDAR2A|NR2A	glutamate receptor, ionotropic, NMDA2A (epsilon 1)	protein-coding
Diff_Nuc9776	chr9	68641392	68641531	+	0	NA	intron (NM_013646, intron 1 of 10)	intron (NM_013646, intron 1 of 10)	28308	NR_033299	320440	Mm.483129	NM_177159		9530091C08Rik	-	RIKEN cDNA 9530091C08 gene	ncRNA
Diff_Nuc6867	chr4	97224452	97224591	+	0	NA	Intergenic	MurERV4-int|LTR|ERVK	-24113	NM_001122952	18027	Mm.31274	NM_010905	ENSMUSG00000028565	Nfia	1110047K16Rik|9430022M17Rik|CTF|NF1-A|NF1A	nuclear factor I/A	protein-coding
Diff_Nuc6513	chr4	16635802	16635941	+	0	NA	Intergenic	L1Md_F2|LINE|L1	544614	NR_045765	100415915	Mm.387180	NR_045765	ENSMUSG00000085112	A530072M11Rik	-	RIKEN cDNA gene A530072M11	ncRNA
Diff_Nuc7993	chr2	42028422	42028561	+	0	NA	intron (NM_053011, intron 2 of 90)	Lx4A|LINE|L1	274597	NR_105754	102465171		NR_105754	ENSMUSG00000098660	Mir6336	Gm27584|mmu-mir-6336	microRNA 6336	ncRNA
Diff_Nuc4265	chr18	18150222	18150361	+	0	NA	Intergenic	Lx2|LINE|L1	-410792	NR_045374	75162	Mm.60874	NR_045374		4930545E07Rik	-	RIKEN cDNA 4930545E07 gene	ncRNA
Diff_Nuc9245	chr1	159063822	159063961	+	0	NA	Intergenic	Intergenic	-25080	NM_001305063	73435	Mm.116705	NM_028540	ENSMUSG00000026592	Tex35	1700057K13Rik	testis expressed 35	protein-coding
Diff_Nuc4360	chr18	38447162	38447301	+	0	NA	Intergenic	B1_Mus1|SINE|Alu	-3176	NM_017378	53601	Mm.12862	NM_017378	ENSMUSG00000024440	Pcdh12	Pcdh14|VE-cad-2	protocadherin 12	protein-coding
Diff_Nuc9235	chr1	156858572	156858711	+	0	NA	Intergenic	Intergenic	88125	NM_010500	15939	Mm.12246	NM_010500	ENSMUSG00000056708	Ier5	-	immediate early response 5	protein-coding
Diff_Nuc6148	chr5	70249452	70249591	+	0	NA	Intergenic	L1_Mus1|LINE|L1	-265978	NM_001347363	67980	Mm.33830	NM_027681	ENSMUSG00000029209	Gnpda2	4921523I18Rik|4933412A11Rik|BB189630|GNPDA|Gnp2|Sb52|mKIAA4008	glucosamine-6-phosphate deaminase 2	protein-coding
Diff_Nuc9327	chr1	173394442	173394581	+	0	NA	3' UTR (NM_172647, exon 10 of 10)	3' UTR (NM_172647, exon 10 of 10)	26819	NM_172647	16456	Mm.294882	NM_172647	ENSMUSG00000038235	F11r	9130004G24|AA638916|ESTM33|JAM|JAM-1|JAM-A|Jcam|Jcam1|Ly106	F11 receptor	protein-coding
Diff_Nuc8106	chr2	69113492	69113631	+	0	NA	intron (NM_021022, intron 18 of 27)	intron (NM_021022, intron 18 of 27)	55555	NM_001289857	14378	Mm.140768	NM_021331	ENSMUSG00000005232	G6pc2	G6pc-rs|IGRP	glucose-6-phosphatase, catalytic, 2	protein-coding
Diff_Nuc9265	chr1	162465422	162465561	+	0	NA	intron (NM_013862, intron 13 of 20)	intron (NM_013862, intron 13 of 20)	42393	NM_001146330	620246	Mm.478780	NM_001146330		Gpr52	EG620246	G protein-coupled receptor 52	protein-coding
Diff_Nuc3555	chr14	33727662	33727801	+	0	NA	intron (NM_178791, intron 5 of 7)	ORR1B1|LTR|MaLR	57789	NM_178791	320736	Mm.187910	NM_178791	ENSMUSG00000050666	Vstm4	E130203B14Rik	V-set and transmembrane domain containing 4	protein-coding
Diff_Nuc799	chr12	43107352	43107491	+	0	NA	Intergenic	Intergenic	-894777	NM_010733	16981	Mm.404786	NM_010733	ENSMUSG00000036295	Lrrn3	NLRR-3	leucine rich repeat protein 3, neuronal	protein-coding
Diff_Nuc2685	chr16	22876092	22876231	+	0	NA	non-coding (NR_110508, exon 4 of 4)	non-coding (NR_110508, exon 4 of 4)	-15927	NR_075099	11625	Mm.197554	NM_013465	ENSMUSG00000022868	Ahsg	-	alpha-2-HS-glycoprotein	protein-coding
Diff_Nuc2765	chr16	37866522	37866661	+	0	NA	Intergenic	Intergenic	-1895	NM_177093	320184	Mm.390882	NM_177093	ENSMUSG00000034158	Lrrc58	1810012N18Rik|C330018J07Rik	leucine rich repeat containing 58	protein-coding
Diff_Nuc1963	chr10	75298702	75298841	+	0	NA	Intergenic	Intergenic	-1145	NM_010361	14872	Mm.24118	NM_010361	ENSMUSG00000033318	Gstt2	AI266894|Yrs|mGSTT2	glutathione S-transferase, theta 2	protein-coding
Diff_Nuc7792	chr3	152188242	152188381	+	0	NA	intron (NM_001081277, intron 8 of 13)	intron (NM_001081277, intron 8 of 13)	128663	NM_001287139	108946	Mm.379292	NM_198416	ENSMUSG00000039068	Zzz3	3110065C23Rik|6430567E01Rik|AA408566|AI481057|AW556059|R75514	zinc finger, ZZ domain containing 3	protein-coding
Diff_Nuc8365	chr2	130111552	130111691	+	0	NA	Intergenic	MTEb|LTR|MaLR	-1434	NM_130884	170718	Mm.29590	NM_130884	ENSMUSG00000027406	Idh3b	C78231	isocitrate dehydrogenase 3 (NAD+) beta	protein-coding
Diff_Nuc8099	chr2	67371922	67372061	+	0	NA	Intergenic	Intergenic	87932	NM_001024618	241431	Mm.261043	NM_001024618	ENSMUSG00000027022	Xirp2	2310003D02Rik|2310008C07Rik|A530024P18Rik|AI452089|Cmya3|Gm352|Xin2	xin actin-binding repeat containing 2	protein-coding
Diff_Nuc8196	chr2	91897252	91897391	+	0	NA	Intergenic	Intergenic	-32994	NM_011957	26427	Mm.10353	NM_011957	ENSMUSG00000027230	Creb3l1	Oasis	cAMP responsive element binding protein 3-like 1	protein-coding
Diff_Nuc9448	chr9	3006702	3006841	+	0	NA	Intergenic	GSAT_MM|Satellite|Satellite	31972	NR_039546	100628572		NR_039546	ENSMUSG00000106183	Mir101c	mir-101c|mmu-mir-101c	microRNA 101c	ncRNA
Diff_Nuc6417	chr5	142469482	142469621	+	0	NA	intron (NM_177879, intron 14 of 44)	(TATG)n|Simple_repeat|Simple_repeat	-407900	NM_199068	17425	Mm.24214	NM_010812	ENSMUSG00000056493	Foxk1	A630048H08Rik|AI463295|ENSMUSG00000075577|Gm10868|Mnf	forkhead box K1	protein-coding
Diff_Nuc6952	chr4	118106932	118107071	+	0	NA	intron (NM_023223, intron 8 of 9)	intron (NM_023223, intron 8 of 9)	2947	NM_023223	107995	Mm.261764	NM_023223	ENSMUSG00000006398	Cdc20	2310042N09Rik|C87100|p55CDC	cell division cycle 20	protein-coding
Diff_Nuc10465	chr8	112156372	112156511	+	0	NA	exon (NM_001286454, exon 10 of 33)	exon (NM_001286454, exon 10 of 33)	18024	NM_181544	244646	Mm.436810	NM_181544	ENSMUSG00000048827	Pkd1l3	-	polycystic kidney disease 1 like 3	protein-coding
Diff_Nuc2604	chr16	5528312	5528451	+	0	NA	Intergenic	Intergenic	-272332	NM_027446	70511	Mm.45780	NM_027446	ENSMUSG00000022544	Eef2kmt	5730409G15Rik|Fam86|Fam86a|eEF2-KMT	eukaryotic elongation factor 2 lysine methyltransferase	protein-coding
Diff_Nuc1961	chr10	74935952	74936091	+	0	NA	Intergenic	Intergenic	23766	NR_045841	71125	Mm.399516	NR_045841		4933407G14Rik	-	RIKEN cDNA 4933407G14 gene	ncRNA
Diff_Nuc6963	chr4	121771282	121771421	+	0	NA	Intergenic	RLTR45-int|LTR|ERVK	-476621	NM_001099309	666927	Mm.465133	NM_001099309	ENSMUSG00000078575	Gm12887	OTTMUSG00000008910	predicted gene 12887	protein-coding
Diff_Nuc4836	chr7	65919972	65920111	+	0	NA	intron (NM_009728, intron 1 of 20)	RLTR42-int|LTR|ERVK	6469	NM_009728	11982	Mm.135129	NM_009728	ENSMUSG00000025324	Atp10a	Atp10c|pfatp	ATPase, class V, type 10A	protein-coding
Diff_Nuc6870	chr4	97727632	97727771	+	0	NA	intron (NM_010905, intron 7 of 10)	intron (NM_010905, intron 7 of 10)	283384	NM_010905	18027	Mm.31274	NM_010905	ENSMUSG00000028565	Nfia	1110047K16Rik|9430022M17Rik|CTF|NF1-A|NF1A	nuclear factor I/A	protein-coding
Diff_Nuc7615	chr3	111226542	111226681	+	0	NA	Intergenic	Intergenic	-458210	NR_045362	625585	Mm.389497	NR_045362	ENSMUSG00000104543	Gm6602	-	predicted gene 6602	ncRNA
Diff_Nuc240	chr13	31071112	31071251	+	0	NA	Intergenic	Intergenic	-5265	NM_025588	66482	Mm.293510	NM_025588	ENSMUSG00000021357	Exoc2	2410030I24Rik|AI648199|Sec5|Sec5l1	exocyst complex component 2	protein-coding
Diff_Nuc3653	chr14	60500692	60500831	+	0	NA	intron (NM_015803, intron 24 of 35)	intron (NM_015803, intron 24 of 35)	204910	NM_015803	50769	Mm.319599	NM_015803	ENSMUSG00000021983	Atp8a2	AI415030|Atpc1b|agil|wl	ATPase, aminophospholipid transporter-like, class I, type 8A, member 2	protein-coding
Diff_Nuc3289	chr15	64916252	64916391	+	0	NA	Intergenic	Intergenic	-162463	NM_009623	11514	Mm.1425	NM_009623	ENSMUSG00000022376	Adcy8	AC8|AW060868	adenylate cyclase 8	protein-coding
Diff_Nuc2279	chr17	16570042	16570181	+	0	NA	Intergenic	Lx6|LINE|L1	-606561	NM_178615	68799	Mm.293466	NM_178615	ENSMUSG00000048027	Rgmb	1110059F19Rik|DRAGON	repulsive guidance molecule family member B	protein-coding
Diff_Nuc4713	chr7	31186322	31186461	+	0	NA	Intergenic	L1ME3B|LINE|L1	-12416	NM_011662	22177	Mm.46301	NM_011662	ENSMUSG00000030579	Tyrobp	DAP12|KARAP|Ly83	TYRO protein tyrosine kinase binding protein	protein-coding
Diff_Nuc3835	chr14	104798572	104798711	+	0	NA	Intergenic	(TTTTG)n|Simple_repeat|Simple_repeat	68575	NM_011143	18996	Mm.246550	NM_011143	ENSMUSG00000048349	Pou4f1	Brn-3|Brn-3.0|Brn3|Brn3.0|Brn3a|E130119J07Rik	POU domain, class 4, transcription factor 1	protein-coding
Diff_Nuc8546	chr2	171099052	171099191	+	0	NA	Intergenic	Intergenic	541814	NM_001163686	76829	Mm.41633	NM_029761	ENSMUSG00000027560	Dok5	2700055C10Rik	docking protein 5	protein-coding
Diff_Nuc1773	chr10	29819732	29819871	+	0	NA	Intergenic	Lx2|LINE|L1	100545	NM_001109747	66311	Mm.251779	NM_001109747	ENSMUSG00000075266	Cenpw	2610036L11Rik|Cug2	centromere protein W	protein-coding
Diff_Nuc6759	chr4	76740052	76740191	+	0	NA	intron (NM_011211, intron 7 of 39)	ORR1E|LTR|MaLR	1117678	NM_011211	19266	Mm.184021	NM_011211	ENSMUSG00000028399	Ptprd	1110002J03Rik|3000002J10Rik|B230219D21Rik|R-PTP-delta	protein tyrosine phosphatase, receptor type, D	protein-coding
Diff_Nuc9949	chr9	109916702	109916841	+	0	NA	intron (NM_008633, intron 3 of 18)	ERVL-E-int|LTR|ERVL	-37754	NM_001311163	17758	Mm.217318	NM_008633	ENSMUSG00000032479	Map4	AA407148|MAP-4|Mtap-4|Mtap4	microtubule-associated protein 4	protein-coding
Diff_Nuc9568	chr9	26037972	26038111	+	0	NA	Intergenic	Lx8|LINE|L1	-503352	NM_001310766	76898	Mm.218788	NM_029792	ENSMUSG00000045994	B3gat1	0710007K08Rik|AI846286|GlcAT-P|Glcatp|Hnk1	beta-1,3-glucuronyltransferase 1 (glucuronosyltransferase P)	protein-coding
Diff_Nuc3456	chr14	10877172	10877311	+	0	NA	intron (NM_010210, intron 4 of 8)	intron (NM_010210, intron 4 of 8)	160632	NR_030680	100042415	Mm.235938	NR_030680		Mnd1-ps	Gm3833	Mnd1 retrotransposed pseudogene	pseudo
Diff_Nuc6716	chr4	65972202	65972341	+	0	NA	intron (NM_207109, intron 1 of 22)	MTE2b|LTR|MaLR	93246	NM_019514	56079	Mm.445312	NM_019514	ENSMUSG00000028373	Astn2	1d8|Astnl|bM452J22.1	astrotactin 2	protein-coding
Diff_Nuc8680	chr1	29156862	29157001	+	0	NA	Intergenic	Intergenic	-319834	NM_001013750	210962	Mm.214178	NM_001013750	ENSMUSG00000048411	Gm597	-	predicted gene 597	protein-coding
Diff_Nuc1563	chr11	100455342	100455481	+	0	NA	intron (NM_019795, intron 5 of 13)	intron (NM_019795, intron 5 of 13)	18206	NM_001146318	12799	Mm.15711	NM_009923	ENSMUSG00000006782	Cnp	CNPase|Cnp-1|Cnp1	2',3'-cyclic nucleotide 3' phosphodiesterase	protein-coding
Diff_Nuc8530	chr2	166571792	166571931	+	0	NA	Intergenic	L1MB3|LINE|L1	-32529	NM_177782	277360	Mm.34420	NM_177782	ENSMUSG00000039621	Prex1	G630042G04|P-REX1|Setd6	phosphatidylinositol-3,4,5-trisphosphate-dependent Rac exchange factor 1	protein-coding
Diff_Nuc7074	chr4	146728762	146728901	+	0	NA	intron (NM_001039209, intron 1 of 2)	intron (NM_001039209, intron 1 of 2)	178856	NM_001039209	195531	Mm.270762	NM_001039209	ENSMUSG00000078496	Zfp982	Gm13152|OTTMUSG00000010671	zinc finger protein 982	protein-coding
Diff_Nuc1719	chr10	16408672	16408811	+	0	NA	Intergenic	Intergenic	406847	NR_038020	100504235	Mm.84044	NR_038020	ENSMUSG00000101969	Gm20125	-	predicted gene, 20125	ncRNA
Diff_Nuc4370	chr18	38930762	38930901	+	0	NA	Intergenic	MTD-int|LTR|MaLR	-121279	NM_001033789	545253	Mm.244585	NM_001033789	ENSMUSG00000036452	Gm5820	EG545253	predicted gene 5820	protein-coding
Diff_Nuc3011	chr15	3158612	3158751	+	0	NA	Intergenic	Intergenic	-62086	NM_001042613	20363	Mm.392203	NM_009155	ENSMUSG00000064373	Selenop	AU018766|D15Ucla1|Se-P|Sepp1|selp	selenoprotein P	protein-coding
Diff_Nuc5887	chr5	17025832	17025971	+	0	NA	Intergenic	Intergenic	43961	NM_027609	70935	Mm.332225	NM_027609	ENSMUSG00000058643	Speer4f1	4922502J04Rik|SPEER-4F|Speer4f	spermatogenesis associated glutamate (E)-rich protein 4F1	protein-coding
Diff_Nuc8927	chr1	84471272	84471411	+	0	NA	intron (NM_152915, intron 7 of 12)	RMER4A|LTR|ERVK	-190121	NM_001003948	98496	Mm.187470	NM_001003948	ENSMUSG00000045658	Pid1	5033414K04Rik|NYGGF4	phosphotyrosine interaction domain containing 1	protein-coding
Diff_Nuc8219	chr2	98502922	98503061	+	0	NA	Intergenic	GSAT_MM|Satellite|Satellite	1195177	NM_178725	241568	Mm.241682	NM_178725	ENSMUSG00000050587	Lrrc4c	6430556C10Rik|NGL-1	leucine rich repeat containing 4C	protein-coding
Diff_Nuc9392	chr1	186723212	186723351	+	0	NA	intron (NM_145515, intron 17 of 17)	intron (NM_145515, intron 17 of 17)	-16366	NM_178692	226777	Mm.169542	NM_178692	ENSMUSG00000039349	C130074G19Rik	-	RIKEN cDNA C130074G19 gene	protein-coding
Diff_Nuc8607	chr1	11286592	11286731	+	0	NA	intron (NM_001033636, intron 5 of 5)	URR1A|DNA|MER1_type	32617	NM_001033636	109294	Mm.123247	NM_029525	ENSMUSG00000048960	Prex2	6230420N16Rik|AI316880|AI553603|C030045D06Rik|D430013K02|Depdc2|P-Rex2	phosphatidylinositol-3,4,5-trisphosphate-dependent Rac exchange factor 2	protein-coding
Diff_Nuc371	chr13	60675782	60675921	+	0	NA	Intergenic	Intergenic	-27457	NM_001285917	69635	Mm.24103	NM_029653	ENSMUSG00000021559	Dapk1	D13Ucla1|DAP-Kinase	death associated protein kinase 1	protein-coding
Diff_Nuc10155	chr8	35284652	35284791	+	0	NA	Intergenic	Intergenic	-54955	NR_105820	102465211		NR_105820	ENSMUSG00000098785	Mir6395	Gm27561|mmu-mir-6395	microRNA 6395	ncRNA
Diff_Nuc1896	chr10	58539632	58539771	+	0	NA	intron (NM_172788, intron 5 of 9)	intron (NM_172788, intron 5 of 9)	144894	NM_001024911	103080	Mm.346842	NM_001024910	ENSMUSG00000019917	Sept10	4921515A04Rik|9430099J10Rik|AA408298|AI874685	septin 10	protein-coding
Diff_Nuc956	chr12	78836772	78836911	+	0	NA	Intergenic	Intergenic	325713	NM_001252616	53618	Mm.35628	NM_016893	ENSMUSG00000021065	Fut8	-	fucosyltransferase 8	protein-coding
Diff_Nuc9682	chr9	49749962	49750101	+	0	NA	Intergenic	Intergenic	-142533	NM_001311065	17967	Mm.4974	NM_010875	ENSMUSG00000039542	Ncam1	CD56|E-NCAM|NCAM-1|Ncam	neural cell adhesion molecule 1	protein-coding
Diff_Nuc1685	chr10	8244262	8244401	+	0	NA	Intergenic	L1_Mus1|LINE|L1	-5708	NM_177387	338362	Mm.41163	NM_177387	ENSMUSG00000047712	Ust	D930010O20Rik|UA2OST	uronyl-2-sulfotransferase	protein-coding
Diff_Nuc7784	chr3	150626452	150626591	+	0	NA	Intergenic	Intergenic	60305	NR_039540	100628568		NR_039540	ENSMUSG00000092830	Mir3963	mmu-mir-3963|mu-mir-3963	microRNA 3963	ncRNA
Diff_Nuc6002	chr5	39347222	39347361	+	0	NA	Intergenic	ORR1D1|LTR|MaLR	-79359	NM_013748	27278	Mm.440845	NM_013748	ENSMUSG00000039315	Clnk	MIST	cytokine-dependent hematopoietic cell linker	protein-coding
Diff_Nuc4575	chr18	80765692	80765831	+	0	NA	Intergenic	Intergenic	-24476	NR_028424	100039348	Mm.254722	NR_028424		Gm2176	A430076E10Rik	glucosamine-6-phosphate deaminase 1 pseudogene	pseudo
Diff_Nuc8228	chr2	98507302	98507441	+	0	NA	Intergenic	GSAT_MM|Satellite|Satellite	1199557	NM_178725	241568	Mm.241682	NM_178725	ENSMUSG00000050587	Lrrc4c	6430556C10Rik|NGL-1	leucine rich repeat containing 4C	protein-coding
Diff_Nuc6907	chr4	105845322	105845461	+	0	NA	Intergenic	Intergenic	-143427	NM_183225	329908	Mm.234544	NM_183225	ENSMUSG00000028514	Usp24	2700066K03Rik|2810030C21Rik|AI414051|B130021E18|C79851	ubiquitin specific peptidase 24	protein-coding
Diff_Nuc1050	chr12	99976662	99976801	+	0	NA	Intergenic	Intergenic	-1116	NM_001146199	24000	Mm.4420	NM_011877	ENSMUSG00000021009	Ptpn21	PTPD1|PTPRL10	protein tyrosine phosphatase, non-receptor type 21	protein-coding
Diff_Nuc4193	chr18	4338102	4338241	+	0	NA	intron (NM_007746, intron 5 of 7)	intron (NM_007746, intron 5 of 7)	14780	NM_007746	26410	Mm.3275	NM_007746	ENSMUSG00000024235	Map3k8	Cot|Cot/Tpl2|Est|Estf|Tpl-2|Tpl2|c-COT	mitogen-activated protein kinase kinase kinase 8	protein-coding
Diff_Nuc8396	chr2	135325092	135325231	+	0	NA	Intergenic	Intergenic	83795	NR_015544	320684	Mm.421433	NR_015544	ENSMUSG00000085631	9630028H03Rik	-	RIKEN cDNA 9630028H03 gene	ncRNA
Diff_Nuc7067	chr4	146348122	146348261	+	0	NA	Intergenic	Intergenic	-47768	NM_001177767	100043034	Mm.422606	NM_001177767	ENSMUSG00000067919	Rex2	Gm13138|OTTMUSG00000010655	reduced expression 2	protein-coding
Diff_Nuc8843	chr1	66250552	66250691	+	0	NA	intron (NM_008632, intron 2 of 13)	intron (NM_008632, intron 2 of 13)	28718	NM_001039934	17756	Mm.256966	NM_008632	ENSMUSG00000015222	Map2	G1-397-34|MAP-2|Mtap-2|Mtap2|repro4	microtubule-associated protein 2	protein-coding
Diff_Nuc6825	chr4	89844932	89845071	+	0	NA	Intergenic	L1_Mus3|LINE|L1	-40510	NM_153102	236537	Mm.214642	NM_153102	ENSMUSG00000070902	Zfp352	2czf48	zinc finger protein 352	protein-coding
Diff_Nuc132	chr13	12894972	12895111	+	0	NA	Intergenic	MTEa|LTR|MaLR	-2695	NM_011118	18812	Mm.457984	NM_011118	ENSMUSG00000056457	Prl2c3	Ghd1|MRP-2|MRP-3|Mrpplf3|PLF-2|PLF-3|Plf2|Prl2c4|mrp/plf3	prolactin family 2, subfamily c, member 3	protein-coding
Diff_Nuc7108	chr4	152861872	152862011	+	0	NA	Intergenic	Intergenic	-5002	NM_001099299	230959	Mm.318874	NM_001099299	ENSMUSG00000039546	Ajap1	Gm573	adherens junction associated protein 1	protein-coding
Diff_Nuc1100	chr12	109418522	109418661	+	0	NA	intron (NM_009832, intron 1 of 11)	intron (NM_009832, intron 1 of 11)	643	NM_009832	12454	Mm.474441	NM_009832	ENSMUSG00000021258	Ccnk	AW123198|AW413594|CPR4|CycK	cyclin K	protein-coding
Diff_Nuc9720	chr9	56639072	56639211	+	0	NA	Intergenic	Intergenic	60629	NM_198673	382075	Mm.335177	NM_198673	ENSMUSG00000045620	Odf3l1	BC049697|Gm1116	outer dense fiber of sperm tails 3-like 1	protein-coding
Diff_Nuc1835	chr10	44373222	44373361	+	0	NA	Intergenic	Intergenic	-194737	NM_007548	12142	Mm.4800	NM_007548	ENSMUSG00000038151	Prdm1	Blimp-1|Blimp1|PRDI-BF1|ZNFPR1A1|b2b1765Clo	PR domain containing 1, with ZNF domain	protein-coding
Diff_Nuc6692	chr4	61140352	61140491	+	0	NA	Intergenic	L1Md_F2|LINE|L1	-39685	NM_001200004	100039150	Mm.237772	NM_001200004	ENSMUSG00000096674	Mup15	Gm2068|Mup13	major urinary protein 15	protein-coding
Diff_Nuc4127	chr19	48947552	48947691	+	0	NA	Intergenic	Intergenic	667106	NM_025696	66673	Mm.70980	NM_025696	ENSMUSG00000063434	Sorcs3	6330404A12Rik|AW045579	sortilin-related VPS10 domain containing receptor 3	protein-coding
Diff_Nuc2637	chr16	13879692	13879831	+	0	NA	intron (NM_053181, intron 4 of 22)	intron (NM_053181, intron 4 of 22)	23477	NM_001039533	94184	Mm.171484	NM_053181	ENSMUSG00000022680	Pdxdc1	2210010A19Rik|AA415817|Kiaa0251-hp	pyridoxal-dependent decarboxylase domain containing 1	protein-coding
Diff_Nuc7713	chr3	135757602	135757741	+	0	NA	intron (NM_001033350, intron 9 of 16)	intron (NM_001033350, intron 9 of 16)	231359	NM_001310749	242248	Mm.30832	NM_001033350	ENSMUSG00000037922	Bank1	A530094C12Rik|AI451642|AVIEF|BANK	B cell scaffold protein with ankyrin repeats 1	protein-coding
Diff_Nuc7704	chr3	133880052	133880191	+	0	NA	Intergenic	Intergenic	-19338	NM_001004367	319478	Mm.224814	NM_001004367	ENSMUSG00000044365	Cxxc4	9330210J02Rik|C030003J12Rik|Idax	CXXC finger 4	protein-coding
Diff_Nuc8558	chr2	174456372	174456511	+	0	NA	Intergenic	Intergenic	-12594	NM_001099328	100043757	Mm.48711	NM_001099328	ENSMUSG00000050600	Zfp831	ENSMUSG00000050600|OTTMUSG00000017459	zinc finger protein 831	protein-coding
Diff_Nuc4304	chr18	29293892	29294031	+	0	NA	Intergenic	Intergenic	-307893	NR_045395	78199	Mm.243850	NR_045395		4930527G23Rik	-	RIKEN cDNA 4930527G23 gene	ncRNA
Diff_Nuc8214	chr2	98502242	98502381	+	0	NA	Intergenic	Intergenic	1194497	NM_178725	241568	Mm.241682	NM_178725	ENSMUSG00000050587	Lrrc4c	6430556C10Rik|NGL-1	leucine rich repeat containing 4C	protein-coding
Diff_Nuc7533	chr3	94599042	94599181	+	0	NA	Intergenic	Intergenic	-8674	NM_001037711	70737	Mm.87634	NM_001037711	ENSMUSG00000068876	Cgn	6330408J11Rik	cingulin	protein-coding
Diff_Nuc4734	chr7	36253632	36253771	+	0	NA	Intergenic	B1_Mus1|SINE|Alu	19503	NM_021291	30962	Mm.45874	NM_021291	ENSMUSG00000030492	Slc7a9	CSNU3	solute carrier family 7 (cationic amino acid transporter, y+ system), member 9	protein-coding
Diff_Nuc2842	chr16	54132732	54132871	+	0	NA	Intergenic	Intergenic	1150549	NM_178720	239852	Mm.245045	NM_178720	ENSMUSG00000064310	Zpld1	9430016A21Rik	zona pellucida like domain containing 1	protein-coding
Diff_Nuc10514	chr8	124449402	124449541	+	0	NA	intron (NM_007608, intron 3 of 6)	intron (NM_007608, intron 3 of 6)	17738	NM_001033485	407789	Mm.436576	NM_001033485		BC048644	-	cDNA sequence BC048644	protein-coding
Diff_Nuc7018	chr4	134290842	134290981	+	0	NA	Intergenic	Intergenic	-30706	NM_207237	230815	Mm.18905	NM_207237	ENSMUSG00000037306	Man1c1	AI593348	mannosidase, alpha, class 1C, member 1	protein-coding
Diff_Nuc8960	chr1	90845282	90845421	+	0	NA	Intergenic	MTE2a-int|LTR|MaLR	-67337	NR_040471	73475	Mm.491040	NR_040471	ENSMUSG00000099378	1700067G17Rik	-	RIKEN cDNA 1700067G17 gene	ncRNA
Diff_Nuc8749	chr1	44149822	44149961	+	0	NA	intron (NM_029368, intron 4 of 7)	Lx3A|LINE|L1	9342	NM_029368	75623	Mm.348017	NM_029368	ENSMUSG00000026049	Tex30	1700029F09Rik|3110030D08Rik	testis expressed 30	protein-coding
Diff_Nuc2492	chr17	71557442	71557581	+	0	NA	intron (NM_001164885, intron 1 of 19)	L1MC4a|LINE|L1	3517	NM_001164885	64898	Mm.227924	NM_022882	ENSMUSG00000024052	Lpin2	2610511G02Rik|AI481352|AW742896	lipin 2	protein-coding
Diff_Nuc2348	chr17	33058952	33059091	+	0	NA	Intergenic	RLTR11A2|LTR|ERVK	-4734	NM_001204336	64385	Mm.486449	NM_022434	ENSMUSG00000024292	Cyp4f14	1300014O15Rik|cyp4f-14	cytochrome P450, family 4, subfamily f, polypeptide 14	protein-coding
Diff_Nuc7007	chr4	129855212	129855351	+	0	NA	Intergenic	ID_B1|SINE|B4	-2915	NM_023476	94242	Mm.15801	NM_023476	ENSMUSG00000028776	Tinagl1	1110021J17Rik|AZ-1|AZ1|Arg1|Lcn7|TARP|Tinagl	tubulointerstitial nephritis antigen-like 1	protein-coding
Diff_Nuc7732	chr3	139365762	139365901	+	0	NA	intron (NM_198659, intron 13 of 13)	L1MEe|LINE|L1	-325382	NR_105798	102465198		NR_105798	ENSMUSG00000099169	Mir7j	Gm27716|Mirlet7j|mmu-let-7j	microRNA 7j	ncRNA
Diff_Nuc7269	chr3	38677702	38677841	+	0	NA	Intergenic	MT2A|LTR|ERVL	-108091	NM_183221	329628	Mm.316210	NM_183221	ENSMUSG00000046743	Fat4	6030410K14Rik|9430004M15	FAT atypical cadherin 4	protein-coding
Diff_Nuc3553	chr14	33112422	33112561	+	0	NA	Intergenic	Intergenic	-22714	NM_001081130	239017	Mm.318302	NM_001081130	ENSMUSG00000021913	Ogdhl	-	oxoglutarate dehydrogenase-like	protein-coding
Diff_Nuc9144	chr1	136128662	136128801	+	0	NA	intron (NM_001291930, intron 1 of 1)	intron (NM_001291930, intron 1 of 1)	2702	NM_001291928	11539	Mm.298908	NM_009629	ENSMUSG00000042429	Adora1	A1-AR|A1AR|A1R|AA1R|AI848715|BB176431|Ri	adenosine A1 receptor	protein-coding
Diff_Nuc4249	chr18	15363662	15363801	+	0	NA	Intergenic	Intergenic	-53776	NM_134112	106931	Mm.329299	NM_134112	ENSMUSG00000036225	Kctd1	4933402K10Rik|AI661543|AW553000	potassium channel tetramerisation domain containing 1	protein-coding
Diff_Nuc1633	chr11	116218392	116218531	+	0	NA	intron (NM_027258, intron 8 of 18)	intron (NM_027258, intron 8 of 18)	-21793	NM_008240	15223	Mm.378938	NM_008240	ENSMUSG00000034227	Foxj1	FKHL-13|HFH-4|Hfh4	forkhead box J1	protein-coding
Diff_Nuc7340	chr3	54009382	54009521	+	0	NA	intron (NR_046161, intron 2 of 10)	ORR1A4|LTR|MaLR	49472	NM_001253682	22066	Mm.10100	NM_016984	ENSMUSG00000027748	Trpc4	CCE1|STRPC4|Trp4|Trrp4	transient receptor potential cation channel, subfamily C, member 4	protein-coding
Diff_Nuc9663	chr9	47030522	47030661	+	0	NA	Intergenic	B4A|SINE|B4	223767	NM_001243258	215467	Mm.246572	NM_001243258	ENSMUSG00000094893	Gm4791	D930036J05	predicted gene 4791	protein-coding
Diff_Nuc2687	chr16	23349632	23349771	+	0	NA	intron (NM_145933, intron 5 of 7)	intron (NM_145933, intron 5 of 7)	59158	NM_001252506	20440	Mm.149029	NM_145933	ENSMUSG00000022885	St6gal1	AW742324|Siat1|St6Gal-I|St6gal|St6galI	beta galactoside alpha 2,6 sialyltransferase 1	protein-coding
Diff_Nuc4200	chr18	5570942	5571081	+	0	NA	intron (NR_033552, intron 3 of 6)	PB1D10|SINE|Alu	-20847	NM_011546	21417	Mm.3929	NM_011546	ENSMUSG00000024238	Zeb1	3110032K11Rik|AREB6|BZP|MEB1|Nil2|TCF-8|Tcf18|Tcf8|Tw|ZEB|Zfhep|Zfhx1a|Zfx1a|Zfx1ha|[delta]EF1	zinc finger E-box binding homeobox 1	protein-coding
Diff_Nuc5275	chr6	15865622	15865761	+	0	NA	Intergenic	Intergenic	195030	NM_175088	16543	Mm.1314	NM_175088	ENSMUSG00000041390	Mdfic	Kdt1|Mdfid	MyoD family inhibitor domain containing	protein-coding
Diff_Nuc8257	chr2	104355192	104355331	+	0	NA	Intergenic	ORR1D1|LTR|MaLR	-20615	NM_001145824	15259	Mm.257925	NM_010434	ENSMUSG00000027177	Hipk3	DYRK6|FIST3|PKY|mir-1902	homeodomain interacting protein kinase 3	protein-coding
Diff_Nuc2056	chr10	95912032	95912171	+	0	NA	Intergenic	Lx5|LINE|L1	-167534	NM_007569	12226	Mm.23811	NM_007569	ENSMUSG00000036478	Btg1	AI426953|AW546738	B cell translocation gene 1, anti-proliferative	protein-coding
Diff_Nuc4148	chr19	53824982	53825121	+	0	NA	intron (NM_001170847, intron 1 of 13)	intron (NM_001170847, intron 1 of 13)	73255	NM_001170847	73713	Mm.313695	NM_001170847	ENSMUSG00000043639	Rbm20	1110018J23Rik|2010003H22Rik|AI646761	RNA binding motif protein 20	protein-coding
Diff_Nuc7045	chr4	144746922	144747061	+	0	NA	intron (NM_001276465, intron 18 of 69)	intron (NM_001276465, intron 18 of 69)	33578	NM_001276502	230895	Mm.240310	NM_001033190	ENSMUSG00000020220	Vps13d	-	vacuolar protein sorting 13D	protein-coding
Diff_Nuc3821	chr14	101491312	101491451	+	0	NA	Intergenic	Helitron3Na_Mam|RC|Helitron	107905	NM_029680	76627	Mm.31415	NM_029680	ENSMUSG00000042888	Prr30	1700110M21Rik	proline rich 30	protein-coding
Diff_Nuc8489	chr2	155591292	155591431	+	0	NA	Intergenic	Intergenic	-9717	NM_010808	17391	Mm.389325	NM_010808	ENSMUSG00000027612	Mmp24	AU040325|MMP-21|MT5-MMP|MT5MMP|MTMMP5	matrix metallopeptidase 24	protein-coding
Diff_Nuc8617	chr1	13587022	13587161	+	0	NA	Intergenic	ORR1A2|LTR|MaLR	-7100	NM_028173	72265	Mm.28765	NM_028173	ENSMUSG00000025935	Tram1	1810049E02Rik|TRAMP	translocating chain-associating membrane protein 1	protein-coding
Diff_Nuc2360	chr17	36682882	36683021	+	0	NA	Intergenic	Intergenic	-1069	NM_177635	224754	Mm.246582	NM_177635	ENSMUSG00000037537	H2-M11	-	histocompatibility 2, M region locus 11	protein-coding
Diff_Nuc8759	chr1	48712542	48712681	+	0	NA	Intergenic	MMETn-int|LTR|ERVK	-1188642	NR_105768	102466969		NR_105768	ENSMUSG00000098876	Mir6350	Gm27958|mmu-mir-6350	microRNA 6350	ncRNA
Diff_Nuc7419	chr3	69144682	69144821	+	0	NA	intron (NM_178726, intron 1 of 3)	intron (NM_178726, intron 1 of 3)	23911	NM_178726	242083	Mm.40577	NM_178726	ENSMUSG00000027784	Ppm1l	3222401G13|5930404J21Rik|AI481720|AW045850|PP2C|PP2Cepsilon|Pp2ce|Ppp2ce|mKIAA4175	protein phosphatase 1 (formerly 2C)-like	protein-coding
Diff_Nuc10428	chr8	103828262	103828401	+	0	NA	Intergenic	L1Md_F2|LINE|L1	1480680	NM_009866	12552	Mm.1571	NM_009866	ENSMUSG00000031673	Cdh11	Cad11|OSF-4	cadherin 11	protein-coding
Diff_Nuc2476	chr17	65138252	65138391	+	0	NA	Intergenic	Intergenic	21870	NR_105051	101202683	Mm.393309	NR_105051		Dreh	-	down-regulated in hepatocellular carcinoma	ncRNA
Diff_Nuc334	chr13	54437442	54437581	+	0	NA	Intergenic	Intergenic	-35202	NM_009946	12890	Mm.268902	NM_009946	ENSMUSG00000025867	Cplx2	921-L|AI413745|AW492120	complexin 2	protein-coding
Diff_Nuc4116	chr19	45844142	45844281	+	0	NA	intron (NM_023799, intron 8 of 15)	B1_Mur4|SINE|Alu	13570	NM_023799	76055	Mm.122725	NM_023799	ENSMUSG00000025220	Mgea5	2810009A20Rik|4833427O07Rik|5830447M11Rik|AA408215|Hy5|Ncoat|OGA|mKIAA0679	meningioma expressed antigen 5 (hyaluronidase)	protein-coding
Diff_Nuc6779	chr4	81598682	81598821	+	0	NA	Intergenic	Intergenic	-112533	NR_040659	545641	Mm.216028	NR_040659	ENSMUSG00000085022	Gm5860	EG545641	predicted gene 5860	ncRNA
Diff_Nuc5607	chr6	96395322	96395461	+	0	NA	intron (NM_182808, intron 2 of 4)	L1M3|LINE|L1	-279192	NR_003643	78482	Mm.391486	NM_030107	ENSMUSG00000072878	1700123L14Rik	-	nucleoporin 50 pseudogene	pseudo
Diff_Nuc9873	chr9	90603282	90603421	+	0	NA	Intergenic	Lx2|LINE|L1	-437744	NM_194334	67016	Mm.335347	NM_194334	ENSMUSG00000037410	Tbc1d2b	1810061M12Rik|AI480956|AV021536|AV023399|AW491493|mKIAA1055	TBC1 domain family, member 2B	protein-coding
Diff_Nuc1320	chr11	43132652	43132791	+	0	NA	Intergenic	B2_Mm1t|SINE|B2	55242	NR_029558	387164		NR_029558	ENSMUSG00000065601	Mir146	Mirn146|miR-146a|mmu-mir-146	microRNA 146	ncRNA
Diff_Nuc2497	chr17	72211942	72212081	+	0	NA	intron (NM_001271483, intron 16 of 16)	Lx5|LINE|L1	80724	NM_030179	78785	Mm.196382	NM_030179	ENSMUSG00000024059	Clip4	1700024K14Rik|1700074B05Rik|4833417L20Rik|5830409B12Rik|Rsnl2	CAP-GLY domain containing linker protein family, member 4	protein-coding
Diff_Nuc8103	chr2	68550832	68550971	+	0	NA	intron (NM_183113, intron 16 of 28)	Lx8|LINE|L1	54960	NM_183113	75721	Mm.65456	NM_183113	ENSMUSG00000079324	4932414N04Rik	-	RIKEN cDNA 4932414N04 gene	protein-coding
Diff_Nuc5408	chr6	46770522	46770661	+	0	NA	intron (NM_001004357, intron 14 of 23)	L1Md_T|LINE|L1	-423804	NM_025771	66797	Mm.440084	NM_025771	ENSMUSG00000039419	Cntnap2	5430425M22Rik|Caspr2|mKIAA0868	contactin associated protein-like 2	protein-coding
Diff_Nuc2539	chr17	82193012	82193151	+	0	NA	Intergenic	Lx7|LINE|L1	-55354	NM_011406	20541	Mm.265834	NM_011406	ENSMUSG00000054640	Slc8a1	AI852629|AV344025|D930008O12Rik|Ncx1	solute carrier family 8 (sodium/calcium exchanger), member 1	protein-coding
Diff_Nuc7474	chr3	83210392	83210531	+	0	NA	Intergenic	L1_Mus3|LINE|L1	167579	NR_036591	69460	Mm.389464	NR_036591	ENSMUSG00000101334	1700028M03Rik	-	RIKEN cDNA 1700028M03 gene	ncRNA
Diff_Nuc9317	chr1	171504452	171504591	+	0	NA	Intergenic	L1MB8|LINE|L1	-42926	NM_023284	66977	Mm.151315	NM_023284	ENSMUSG00000026683	Nuf2	2410003C07Rik|AU044112|C85691|Cdca1|NUF2R	NUF2, NDC80 kinetochore complex component	protein-coding
Diff_Nuc6493	chr4	11860582	11860721	+	0	NA	Intergenic	ORR1A3|LTR|MaLR	32209	NM_001098231	381511	Mm.331489	NM_001033453	ENSMUSG00000049225	Pdp1	Gm1024|Ppm2c	pyruvate dehyrogenase phosphatase catalytic subunit 1	protein-coding
Diff_Nuc1409	chr11	64011492	64011631	+	0	NA	Intergenic	Intergenic	118575	NR_033780	66456	Mm.124828	NR_033780	ENSMUSG00000087497	2810001G20Rik	AW045514	RIKEN cDNA 2810001G20 gene	ncRNA
Diff_Nuc4634	chr7	11183722	11183861	+	0	NA	Intergenic	L1_Mus1|LINE|L1	-16955	NM_145842	252904	Mm.222635	NM_145842	ENSMUSG00000091662	Vmn1r69	V1re9	vomeronasal 1 receptor 69	protein-coding
Diff_Nuc1055	chr12	100574932	100575071	+	0	NA	intron (NM_183186, intron 3 of 5)	L1MC3|LINE|L1	113283	NM_183186	71375	Mm.341972	NM_183186	ENSMUSG00000033713	Foxn3	5430426H20Rik|AA589593|AW556347|Ches1|Ches1l|HTLFL1	forkhead box N3	protein-coding
Diff_Nuc4401	chr18	44224152	44224291	+	0	NA	Intergenic	Intergenic	-6826	NM_001013797	433180	Mm.57302	NM_001013797	ENSMUSG00000055095	Spink6	EG433180	serine peptidase inhibitor, Kazal type 6	protein-coding
Diff_Nuc6145	chr5	69218582	69218721	+	0	NA	Intergenic	Intergenic	514297	NM_175519	243043	Mm.234821	NM_175519	ENSMUSG00000037653	Kctd8	A730087N02Rik	potassium channel tetramerisation domain containing 8	protein-coding
Diff_Nuc2892	chr16	66228532	66228671	+	0	NA	Intergenic	Intergenic	412723	NM_028572	73569	Mm.25670	NM_028572	ENSMUSG00000091243	Vgll3	1700110N18Rik|4832416J22|C80713|Vgl-3|Vito-2	vestigial like family member 3	protein-coding
Diff_Nuc5640	chr6	102467922	102468061	+	0	NA	Intergenic	MLT1E1A|LTR|MaLR	-53330	NM_008779	18488	Mm.435479	NM_008779	ENSMUSG00000030075	Cntn3	Pang	contactin 3	protein-coding
Diff_Nuc2383	chr17	41537442	41537581	+	0	NA	Intergenic	Intergenic	465877	NM_008650	17850	Mm.259884	NM_008650	ENSMUSG00000023921	Mut	D230010K02Rik|Mcm	methylmalonyl-Coenzyme A mutase	protein-coding
Diff_Nuc2251	chr17	10966302	10966441	+	0	NA	intron (NM_027032, intron 2 of 4)	intron (NM_027032, intron 2 of 4)	66686	NM_027032	69310	Mm.18889	NM_027032	ENSMUSG00000037196	Pacrg	1700008H23Rik	PARK2 co-regulated	protein-coding
Diff_Nuc1267	chr11	29643162	29643301	+	0	NA	3' UTR (NM_194052, exon 7 of 7)	3' UTR (NM_194052, exon 7 of 7)	24668	NM_024226	68585	Mm.192580	NM_024226	ENSMUSG00000020458	Rtn4	1110020G17Rik|AA407876|AA409940|AA960376|ASY|C130026I10Rik|NOGO|NSP-CL|NgA|Nogo-A|Nogo-B|Nogo-C|mKIAA0886|mKIAA4153	reticulon 4	protein-coding
Diff_Nuc1307	chr11	40515742	40515881	+	0	NA	3' UTR (NM_013552, exon 18 of 18)	3' UTR (NM_013552, exon 18 of 18)	-7106	NM_001199274	108645	Mm.293771	NM_134017	ENSMUSG00000042032	Mat2b	1110064C04Rik|2410018D16Rik|AI182287|AU022853|MAT-II|MATIIbeta|TGR	methionine adenosyltransferase II, beta	protein-coding
Diff_Nuc9444	chr9	3001332	3001471	+	0	NA	Intergenic	GSAT_MM|Satellite|Satellite	37342	NR_039546	100628572		NR_039546	ENSMUSG00000106183	Mir101c	mir-101c|mmu-mir-101c	microRNA 101c	ncRNA
Diff_Nuc7939	chr2	29712832	29712971	+	0	NA	Intergenic	Intergenic	-11654	NR_029838	723904		NR_029838	ENSMUSG00000065485	Mir219a-2	Mir219-2|Mirn219-2|mir-219a-2|mmu-mir-219a-2	microRNA 219a-2	ncRNA
Diff_Nuc2956	chr16	84016182	84016321	+	0	NA	Intergenic	Lx2A1|LINE|L1	-355137	NR_040567	75247	Mm.417813	NR_040567		4930553E22Rik	-	RIKEN cDNA 4930553E22 gene	ncRNA
Diff_Nuc6608	chr4	38062292	38062431	+	0	NA	Intergenic	L1VL4|LINE|L1	-1163584	NM_001165999	242384	Mm.132507	NM_175516	ENSMUSG00000045083	Lingo2	B230217C06Rik|Lern3|Lrrn6c	leucine rich repeat and Ig domain containing 2	protein-coding
Diff_Nuc2949	chr16	82074632	82074771	+	0	NA	Intergenic	Intergenic	873759	NM_010954	17968	Mm.433941	NM_010954	ENSMUSG00000022762	Ncam2	Ncam-2|Ocam|RNCAM	neural cell adhesion molecule 2	protein-coding
Diff_Nuc9389	chr1	186146842	186146981	+	0	NA	Intergenic	Intergenic	234659	NR_040472	73590	Mm.82792	NR_040472	ENSMUSG00000101574	1700112H15Rik	-	RIKEN cDNA 1700112H15 gene	ncRNA
Diff_Nuc2112	chr10	107606162	107606301	+	0	NA	intron (NM_027892, intron 1 of 25)	PB1D9|SINE|Alu	6775	NM_027892	17931	Mm.422959	NM_027892	ENSMUSG00000019907	Ppp1r12a	1200015F06Rik|5730577I22Rik|AA792106|AV099298|D10Ertd625e|Mypt1	protein phosphatase 1, regulatory (inhibitor) subunit 12A	protein-coding
Diff_Nuc1666	chr10	4242852	4242991	+	0	NA	Intergenic	B1_Mm|SINE|Alu	-181220	NM_001161822	56533	Mm.44606	NM_019958	ENSMUSG00000019775	Rgs17	6430507P11Rik|Rgsz2	regulator of G-protein signaling 17	protein-coding
Diff_Nuc6427	chr5	144281522	144281661	+	0	NA	intron (NM_001347530, intron 1 of 6)	intron (NM_001347530, intron 1 of 6)	7270	NM_009007	19353	Mm.292510	NM_009007	ENSMUSG00000001847	Rac1	AL023026|D5Ertd559e	RAS-related C3 botulinum substrate 1	protein-coding
Diff_Nuc10139	chr8	32733822	32733961	+	0	NA	Intergenic	Intergenic	255670	NR_046272	74517	Mm.390001	NR_046272	ENSMUSG00000109915	7420700N18Rik	-	RIKEN cDNA 7420700N18 gene	ncRNA
Diff_Nuc2275	chr17	15428142	15428281	+	0	NA	Intergenic	Intergenic	-50464	NR_046164	328747	Mm.256835	NR_046164	ENSMUSG00000097624	Gm5091	C330048F19	predicted gene 5091	ncRNA
Diff_Nuc4772	chr7	50474922	50475061	+	0	NA	intron (NM_001177525, intron 1 of 3)	intron (NM_001177525, intron 1 of 3)	5582	NM_001177525	100170401		NM_001177525		EU599041	TU7	expressed sequence EU599041	protein-coding
Diff_Nuc2124	chr10	110293002	110293141	+	0	NA	intron (NR_045979, intron 2 of 2)	ETnERV2-int|LTR|ERVK	40492	NR_045979	75630	Mm.392786	NR_045979	ENSMUSG00000101801	1700020G17Rik	4930480D05Rik	RIKEN cDNA 1700020G17 gene	ncRNA
Diff_Nuc1465	chr11	75782022	75782161	+	0	NA	Intergenic	Intergenic	-31323	NM_198637	74230	Mm.271247	NM_198637	ENSMUSG00000053783	1700016K19Rik	Liat1	RIKEN cDNA 1700016K19 gene	protein-coding
Diff_Nuc6753	chr4	75271482	75271621	+	0	NA	Intergenic	Intergenic	-347361	NM_025849	66928	Mm.24332	NM_025849	ENSMUSG00000028398	Tmem261	1700027K24Rik|3110001D03Rik	transmembrane protein 261	protein-coding
Diff_Nuc5674	chr6	113790762	113790901	+	0	NA	intron (NM_001347365, intron 3 of 23)	intron (NM_001347365, intron 3 of 23)	50702	NM_001036684	11941	Mm.321755	NM_009723	ENSMUSG00000030302	Atp2b2	D6Abb2e|Gena300|PMCA2|Tmy|dfw|jog|wms|wri	ATPase, Ca++ transporting, plasma membrane 2	protein-coding
Diff_Nuc2630	chr16	12147802	12147941	+	0	NA	intron (NM_028277, intron 2 of 4)	MLT1K|LTR|MaLR	163665	NM_001174086	72555	Mm.310139	NM_028277	ENSMUSG00000022494	Shisa9	2700045P11Rik|Ckamp44	shisa family member 9	protein-coding
Diff_Nuc7254	chr3	36582422	36582561	+	0	NA	intron (NM_019510, intron 1 of 11)	L1_Mus3|LINE|L1	6598	NM_019510	22065	Mm.74363	NM_019510	ENSMUSG00000027716	Trpc3	Mwk|Trcp3|Trp3|Trrp3	transient receptor potential cation channel, subfamily C, member 3	protein-coding
Diff_Nuc1274	chr11	31636662	31636801	+	0	NA	Intergenic	Intergenic	-64869	NM_001024919	69556	Mm.34183	NM_001024919	ENSMUSG00000044502	Bod1	2310022M17Rik|BOD2.1|Fam44b	biorientation of chromosomes in cell division 1	protein-coding
Diff_Nuc6632	chr4	46997462	46997601	+	0	NA	intron (NM_001081141, intron 1 of 18)	intron (NM_001081141, intron 1 of 18)	7055	NM_001081141	242425	Mm.101909	NM_001081141	ENSMUSG00000039809	Gabbr2	GABABR2|Gb2|Gm425|Gpr51	gamma-aminobutyric acid (GABA) B receptor, 2	protein-coding
Diff_Nuc6818	chr4	88537132	88537271	+	0	NA	Intergenic	Intergenic	-11096	NM_177348	230405	Mm.246593	NM_177348	ENSMUSG00000045364	Ifne	Ifn-tau-1|Ifne1|Ifnt1|Infe1	interferon epsilon	protein-coding
Diff_Nuc1923	chr10	65905822	65905961	+	0	NA	Intergenic	Intergenic	297847	NR_131070	77198	Mm.107617	NR_131070		4930407I19Rik	-	RIKEN cDNA 4930407I19 gene	ncRNA
Diff_Nuc4561	chr18	76085862	76086001	+	0	NA	intron (NM_145356, intron 2 of 4)	intron (NM_145356, intron 2 of 4)	106099	NM_145356	207259	Mm.159332	NM_145356	ENSMUSG00000044646	Zbtb7c	B230208J24Rik|Kr-pok|Zbtb36	zinc finger and BTB domain containing 7C	protein-coding
Diff_Nuc806	chr12	46018212	46018351	+	0	NA	intron (NM_144552, intron 2 of 5)	Lx3B|LINE|L1	157189	NM_144552	217517	Mm.285400	NM_144552	ENSMUSG00000046314	Stxbp6	BC024598|C85317	syntaxin binding protein 6 (amisyn)	protein-coding
Diff_Nuc4831	chr7	64443032	64443171	+	0	NA	intron (NM_008074, intron 3 of 9)	L1_Mus3|LINE|L1	199140	NM_008074	14407	Mm.434343	NM_008074	ENSMUSG00000055026	Gabrg3	B230362M20Rik|Gabrg-3	gamma-aminobutyric acid (GABA) A receptor, subunit gamma 3	protein-coding
Diff_Nuc8858	chr1	69907032	69907171	+	0	NA	intron (NM_029160, intron 5 of 16)	intron (NM_029160, intron 5 of 16)	33557	NM_001271533	66722	Mm.440554	NM_025728	ENSMUSG00000053153	Spag16	4921511D23Rik|4930524F24Rik|4930585K05Rik|AV261009|Pf20|Wdr29	sperm associated antigen 16	protein-coding
Diff_Nuc13	chrY	2878862	2879001	+	0	NA	Intergenic	L1_Mm|LINE|L1	491673	NM_001270512	100041505	Mm.491824	NM_001270512	ENSMUSG00000096520	Gm3376	Rbmy1b	predicted gene 3376	protein-coding
Diff_Nuc2521	chr17	78520242	78520381	+	0	NA	Intergenic	L1M4b|LINE|L1	-79277	NM_015800	50766	Mm.311912	NM_015800	ENSMUSG00000024074	Crim1	AU015004	cysteine rich transmembrane BMP regulator 1 (chordin like)	protein-coding
Diff_Nuc2341	chr17	32320872	32321011	+	0	NA	3' UTR (NM_001033163, exon 7 of 7)	3' UTR (NM_001033163, exon 7 of 7)	5467	NM_001033163	71932	Mm.176240	NM_001033163	ENSMUSG00000037577	Ephx3	2310063B19Rik|Abhd9	epoxide hydrolase 3	protein-coding
Diff_Nuc1404	chr11	62443932	62444071	+	0	NA	intron (NM_198861, intron 1 of 3)	intron (NM_198861, intron 1 of 3)	18024	NM_198861	192976	Mm.339972	NM_198861	ENSMUSG00000046417	Lrrc75a	Fam211a	leucine rich repeat containing 75A	protein-coding
Diff_Nuc6972	chr4	123206332	123206471	+	0	NA	intron (NM_001199137, intron 5 of 92)	ID4|SINE|ID	-87262	NR_105824	102465214		NR_105824	ENSMUSG00000099005	Mir6398	Gm27657|mmu-mir-6398	microRNA 6398	ncRNA
Diff_Nuc7313	chr3	48483352	48483491	+	0	NA	Intergenic	Intergenic	-70399	NR_003617	66332	Mm.46124	NM_025493		1700018B24Rik	-	enhancer of rudimentary homolog pseudogene	pseudo
Diff_Nuc3667	chr14	62462742	62462881	+	0	NA	Intergenic	L1_Mus4|LINE|L1	-161601	NR_028264	668253	Mm.32886	NR_028264	ENSMUSG00000097589	Dleu2	1810047A16Rik|4932411A06Rik|7730401J12Rik|AI197277|AI788824|Alt1|Gm9069|Leu2	deleted in lymphocytic leukemia, 2	ncRNA
Diff_Nuc6473	chr4	6609842	6609981	+	0	NA	Intergenic	Intergenic	-228493	NM_010945	18201	Mm.3059	NM_010945	ENSMUSG00000028245	Nsmaf	AA959567|C630007J05|Fan	neutral sphingomyelinase (N-SMase) activation associated factor	protein-coding
Diff_Nuc8061	chr2	55149822	55149961	+	0	NA	Intergenic	Intergenic	-138490	NM_001304810	16519	Mm.5127	NM_008426	ENSMUSG00000026824	Kcnj3	GIRK-1|GIRK1|Kcnf3|Kir3.1	potassium inwardly-rectifying channel, subfamily J, member 3	protein-coding
Diff_Nuc409	chr13	67819052	67819191	+	0	NA	intron (NM_145622, intron 1 of 3)	L1Md_F|LINE|L1	10989	NM_145622	235907	Mm.440123	NM_145622	ENSMUSG00000071281	Zfp65	KRAB5|Zfp71-rs1|pz114	zinc finger protein 65	protein-coding
Diff_Nuc7929	chr2	27612362	27612501	+	0	NA	intron (NM_001290482, intron 8 of 9)	intron (NM_001290482, intron 8 of 9)	46328	NM_001290482	20181	Mm.24624	NM_011305	ENSMUSG00000015846	Rxra	9530071D11Rik|Nr2b1|RXRalpha1	retinoid X receptor alpha	protein-coding
Diff_Nuc1822	chr10	40716762	40716901	+	0	NA	Intergenic	(CATA)n|Simple_repeat|Simple_repeat	74559	NM_199058	140741	Mm.290693	NM_199058	ENSMUSG00000046922	Gpr6	AI852874|Gm233	G protein-coupled receptor 6	protein-coding
Diff_Nuc4603	chr18	87923552	87923691	+	0	NA	Intergenic	Intergenic	1042164	NM_172633	12405	Mm.70775	NM_172633	ENSMUSG00000024647	Cbln2	6330593N19Rik|A730004O05	cerebellin 2 precursor protein	protein-coding
Diff_Nuc6787	chr4	82762152	82762291	+	0	NA	Intergenic	Intergenic	-64150	NM_001198811	329872	Mm.242337	NM_177863	ENSMUSG00000059049	Frem1	BC037594|D430009N09|D630008K06|crf11|eye<m02Jus>|eyes2|heb|qbrick	Fras1 related extracellular matrix protein 1	protein-coding
Diff_Nuc2204	chr10	127944692	127944831	+	0	NA	Intergenic	B1F1|SINE|Alu	4325	NR_105881	102465552		NR_105881	ENSMUSG00000099292	Mir6916	Gm27721|mmu-mir-6916	microRNA 6916	ncRNA
Diff_Nuc7548	chr3	97809972	97810111	+	0	NA	Intergenic	Intergenic	-7420	NM_010928	18129	Mm.485843	NM_010928	ENSMUSG00000027878	Notch2	AI853703|N2	notch 2	protein-coding
Diff_Nuc9411	chr1	190841812	190841951	+	0	NA	Intergenic	Intergenic	-10162	NM_172650	226823	Mm.209880	NM_172650	ENSMUSG00000026608	Kctd3	4930438A20Rik|9330185B06|E330032J19Rik|NY-REN-45	potassium channel tetramerisation domain containing 3	protein-coding
Diff_Nuc1647	chr11	117619562	117619701	+	0	NA	intron (NM_198022, intron 19 of 21)	intron (NM_198022, intron 19 of 21)	22304	NM_181321	217353	Mm.286963	NM_145439	ENSMUSG00000025572	Tmc6	D11Ertd204e|EVER1	transmembrane channel-like gene family 6	protein-coding
Diff_Nuc3952	chr19	10212632	10212771	+	0	NA	Intergenic	Intergenic	-36708	NM_019699	56473	Mm.38901	NM_019699	ENSMUSG00000024665	Fads2	2900042M13Rik|Fadsd2	fatty acid desaturase 2	protein-coding
Diff_Nuc1248	chr11	23685522	23685661	+	0	NA	Intergenic	L1MB8|LINE|L1	-14621	NM_009044	19696	Mm.4869	NM_009044	ENSMUSG00000020275	Rel	c-Rel	reticuloendotheliosis oncogene	protein-coding
Diff_Nuc3841	chr14	106275092	106275231	+	0	NA	Intergenic	Intergenic	20875	NM_011897	24064	Mm.89982	NM_011897	ENSMUSG00000022114	Spry2	sprouty2	sprouty homolog 2 (Drosophila)	protein-coding
Diff_Nuc4578	chr18	81946542	81946681	+	0	NA	Intergenic	RLTR31_Mm|LTR|ERVK	242208	NR_039589	100628596		NR_039589	ENSMUSG00000093036	Mir5127	mmu-mir-5127|mu-mir-5127	microRNA 5127	ncRNA
Diff_Nuc7263	chr3	38173492	38173631	+	0	NA	Intergenic	L1Md_F2|LINE|L1	-66520	NR_040541	71342	Mm.410782	NR_040541	ENSMUSG00000106002	5430434I15Rik	-	RIKEN cDNA 5430434I15 gene	ncRNA
Diff_Nuc6826	chr4	90088522	90088661	+	0	NA	Intergenic	Lx9|LINE|L1	-60586	NR_033610	619842	Mm.484218	NR_033610	ENSMUSG00000080756	Gm12633	OTTMUSG00000007790	zinc finger protein 352 pseudogene	pseudo
Diff_Nuc2533	chr17	80411092	80411231	+	0	NA	Intergenic	Intergenic	50447	NM_144802	72692	Mm.64579	NM_144802	ENSMUSG00000024095	Hnrnpll	2510028H02Rik|2810036L13Rik|AI256697|AI852082|Hnrpll	heterogeneous nuclear ribonucleoprotein L-like	protein-coding
Diff_Nuc1424	chr11	67490182	67490321	+	0	NA	intron (NM_001277080, intron 10 of 12)	intron (NM_001277080, intron 10 of 12)	-18577	NM_009038	19674	Mm.439726	NM_009038	ENSMUSG00000020907	Rcvrn	CAR|S-modulin	recoverin	protein-coding
Diff_Nuc4026	chr19	27506532	27506671	+	0	NA	non-coding (NR_027987, exon 1 of 1)	non-coding (NR_027987, exon 1 of 1)	2074	NR_027987	107372	Mm.17942	NM_175354		C030016D13Rik	AW413347	RIKEN cDNA C030016D13 gene	ncRNA
Diff_Nuc10533	chr8	131217932	131218071	+	0	NA	intron (NM_010578, intron 1 of 15)	intron (NM_010578, intron 1 of 15)	8447	NM_010578	16412	Mm.263396	NM_010578	ENSMUSG00000025809	Itgb1	4633401G24Rik|AA409975|AA960159|CD29|ENSMUSG00000051907|Fnrb|Gm9863|gpIIa	integrin beta 1 (fibronectin receptor beta)	protein-coding
Diff_Nuc9191	chr1	148510072	148510211	+	0	NA	intron (NM_001145807, intron 2 of 7)	Lx3A|LINE|L1	165324	NM_001145807	215378	Mm.441817	NM_153539	ENSMUSG00000035131	Brinp3	B830045N13Rik|Fam5c	bone morphogenetic protein/retinoic acid inducible neural specific 3	protein-coding
Diff_Nuc4602	chr18	87905612	87905751	+	0	NA	Intergenic	Intergenic	1024224	NM_172633	12405	Mm.70775	NM_172633	ENSMUSG00000024647	Cbln2	6330593N19Rik|A730004O05	cerebellin 2 precursor protein	protein-coding
Diff_Nuc10251	chr8	64137712	64137851	+	0	NA	intron (NM_001293772, intron 10 of 21)	intron (NM_001293772, intron 10 of 21)	-67815	NM_001293774	72333	Mm.29933	NM_001081390	ENSMUSG00000058056	Palld	2410003B16Rik|6030492A02	palladin, cytoskeletal associated protein	protein-coding
Diff_Nuc9614	chr9	35112972	35113111	+	0	NA	Intergenic	GSAT_MM|Satellite|Satellite	24351	NR_040715	71133	Mm.158577	NR_040715	ENSMUSG00000111746	4933422A05Rik	-	RIKEN cDNA 4933422A05 gene	ncRNA
Diff_Nuc3164	chr15	40555582	40555721	+	0	NA	intron (NM_011766, intron 1 of 7)	B1_Mm|SINE|Alu	69063	NM_011766	22762	Mm.39496	NM_011766	ENSMUSG00000022306	Zfpm2	B330005D23Rik|FOG-2|FOG2	zinc finger protein, multitype 2	protein-coding
Diff_Nuc3458	chr14	11913692	11913831	+	0	NA	intron (NM_001308285, intron 2 of 9)	intron (NM_001308285, intron 2 of 9)	80788	NM_010210	14198	Mm.397619	NM_010210	ENSMUSG00000060579	Fhit	AW045638|Fra14A2	fragile histidine triad gene	protein-coding
Diff_Nuc1608	chr11	109498852	109498991	+	0	NA	Intergenic	ORR1A2|LTR|MaLR	-11798	NM_001313973	19084	Mm.30039	NM_021880	ENSMUSG00000020612	Prkar1a	1300018C22Rik|RIalpha|Tse-1|Tse1	protein kinase, cAMP dependent regulatory, type I, alpha	protein-coding
Diff_Nuc7669	chr3	124842842	124842981	+	0	NA	Intergenic	Lx6|LINE|L1	-264098	NM_022565	64580	Mm.444289	NM_022565	ENSMUSG00000027971	Ndst4	4930439H17Rik	N-deacetylase/N-sulfotransferase (heparin glucosaminyl) 4	protein-coding
Diff_Nuc3383	chr15	90015752	90015891	+	0	NA	Intergenic	Intergenic	-38921	NM_001033441	380959	Mm.17853	NM_001033441	ENSMUSG00000075470	Alg10b	AA469671|AU045404|AW123895|C85569|Deaf1|Gm917|nse5	asparagine-linked glycosylation 10B (alpha-1,2-glucosyltransferase)	protein-coding
Diff_Nuc3806	chr14	98252472	98252611	+	0	NA	intron (NM_007826, intron 7 of 11)	intron (NM_007826, intron 7 of 11)	316443	NM_001038610	13134	Mm.320593	NM_007826	ENSMUSG00000055639	Dach1	Dac|Dach	dachshund 1 (Drosophila)	protein-coding
Diff_Nuc8222	chr2	98506552	98506691	+	0	NA	Intergenic	SYNREP_MM|Satellite|Satellite	1198807	NM_178725	241568	Mm.241682	NM_178725	ENSMUSG00000050587	Lrrc4c	6430556C10Rik|NGL-1	leucine rich repeat containing 4C	protein-coding
Diff_Nuc1448	chr11	71986502	71986641	+	0	NA	intron (NM_028963, intron 12 of 18)	ORR1D1|LTR|MaLR	30302	NM_028963	74477	Mm.289697	NM_028963	ENSMUSG00000020807	4933427D14Rik	C85113|Kiaa0753|MNR	RIKEN cDNA 4933427D14 gene	protein-coding
Diff_Nuc2602	chr16	4785852	4785991	+	0	NA	intron (NM_025670, intron 1 of 5)	intron (NM_025670, intron 1 of 5)	4014	NM_025670	66626	Mm.157648	NM_025670	ENSMUSG00000004071	Cdip1	2700048O17Rik|5730403B10Rik|AU018521|AW742692|CDIP	cell death inducing Trp53 target 1	protein-coding
Diff_Nuc7855	chr2	11452832	11452971	+	0	NA	intron (NM_001177758, intron 1 of 14)	(GAAA)n|Simple_repeat|Simple_repeat	22655	NM_001177758	170768	Mm.19669	NM_133232	ENSMUSG00000026773	Pfkfb3	E330010H22Rik|iPFK-2|uPFK-2	6-phosphofructo-2-kinase/fructose-2,6-biphosphatase 3	protein-coding
Diff_Nuc3285	chr15	63807262	63807401	+	0	NA	intron (NM_144846, intron 1 of 11)	Lx|LINE|L1	61315	NR_029414	74460	Mm.390801	NR_029414	ENSMUSG00000100127	Gsdmcl-ps	4933426G20Rik	gasdermin C-like, pseudogene	pseudo
Diff_Nuc9691	chr9	51295072	51295211	+	0	NA	Intergenic	Intergenic	-158119	NM_027217	69809	Mm.75315	NM_027217	ENSMUSG00000036027	1810046K07Rik	-	RIKEN cDNA 1810046K07 gene	protein-coding
Diff_Nuc8012	chr2	46614692	46614831	+	0	NA	Intergenic	MTD|LTR|MaLR	1062636	NR_040497	69405	Mm.396184	NR_040497	ENSMUSG00000086202	1700019E08Rik	-	RIKEN cDNA 1700019E08 gene	ncRNA
Diff_Nuc3074	chr15	18418522	18418661	+	0	NA	Intergenic	Intergenic	-119209	NR_045711	70886	Mm.399021	NR_045711		4921515E04Rik	-	RIKEN cDNA 4921515E04 gene	ncRNA
Diff_Nuc1966	chr10	75843772	75843911	+	0	NA	intron (NM_008787, intron 30 of 41)	intron (NM_008787, intron 30 of 41)	-7919	NR_040580	67523	Mm.437833	NR_040580	ENSMUSG00000101695	1700094J05Rik	-	RIKEN cDNA 1700094J05 gene	ncRNA
Diff_Nuc4901	chr7	81361652	81361791	+	0	NA	Intergenic	L1MD|LINE|L1	-203153	NM_009181	20450	Mm.4954	NM_009181	ENSMUSG00000025789	St8sia2	AI323367|ST8SiaII|STX|Siat8b	ST8 alpha-N-acetyl-neuraminide alpha-2,8-sialyltransferase 2	protein-coding
Diff_Nuc5786	chr6	140393042	140393181	+	0	NA	intron (NM_144920, intron 3 of 30)	B3A|SINE|B2	20491	NM_144920	109135	Mm.247670	NM_144920	ENSMUSG00000030231	Plekha5	2810431N21Rik|AI428202|AK129423|AMH-Cre|Ayu21-9|Gt(pU21)9Imeg|Pepp2|Tg(AMH-cre)1Flor	pleckstrin homology domain containing, family A member 5	protein-coding
Diff_Nuc10350	chr8	85106247	85106386	+	0	NA	Intergenic	Intergenic	-179831	NM_008357	16168	Mm.4392	NM_008357	ENSMUSG00000031712	Il15	AI503618|IL-15	interleukin 15	protein-coding
Diff_Nuc286	chr13	42370082	42370221	+	0	NA	Intergenic	Lx8|LINE|L1	-26694	NM_010104	13614	Mm.14543	NM_010104	ENSMUSG00000021367	Edn1	ET-1|PPET1|preproET	endothelin 1	protein-coding
Diff_Nuc4214	chr18	9307972	9308111	+	0	NA	Intergenic	MTB_Mm|LTR|MaLR	-25234	NM_153086	225152	Mm.119273	NM_153086	ENSMUSG00000036855	Gjd4	9430022F06Rik|Cx39	gap junction protein, delta 4	protein-coding
Diff_Nuc2424	chr17	50655002	50655141	+	0	NA	intron (NM_013880, intron 1 of 5)	intron (NM_013880, intron 1 of 5)	6199	NM_013880	224860	Mm.217362	NM_013880	ENSMUSG00000038910	Plcl2	PLC-L2|PRIP-2|Plce2|mKIAA1092	phospholipase C-like 2	protein-coding
Diff_Nuc9394	chr1	186849962	186850101	+	0	NA	Intergenic	Charlie14a|DNA|MER1_type	-26603	NM_145515	226778	Mm.7445	NM_145515	ENSMUSG00000026620	Mark1	AW491150|B930025N23Rik|Emk3|Par-1c|mKIAA1477|mPar-1c	MAP/microtubule affinity regulating kinase 1	protein-coding
Diff_Nuc8231	chr2	99159532	99159671	+	0	NA	Intergenic	L1Md_T|LINE|L1	1851787	NM_178725	241568	Mm.241682	NM_178725	ENSMUSG00000050587	Lrrc4c	6430556C10Rik|NGL-1	leucine rich repeat containing 4C	protein-coding
Diff_Nuc8881	chr1	75952572	75952711	+	0	NA	Intergenic	B3|SINE|B2	409800	NM_009208	20536	Mm.5053	NM_009208	ENSMUSG00000006576	Slc4a3	A930038D23Rik|Ae3	solute carrier family 4 (anion exchanger), member 3	protein-coding
Diff_Nuc2	chrY	1791792	1791931	+	0	NA	Intergenic	Intergenic	-63148	NM_001177569	547210	Mm.472681	NM_001177569	ENSMUSG00000094881	H2al2c	Gm6026|H2al2y	H2A histone family member L2C	protein-coding
Diff_Nuc7279	chr3	40564732	40564871	+	0	NA	exon (NM_011020, exon 6 of 19)	exon (NM_011020, exon 6 of 19)	15266	NM_011020	18415	Mm.39330	NM_011020	ENSMUSG00000025757	Hspa4l	94kDa|AI461691|APG-1|Osp94	heat shock protein 4 like	protein-coding
Diff_Nuc10167	chr8	37972612	37972751	+	0	NA	intron (NM_001194940, intron 2 of 17)	intron (NM_001194940, intron 2 of 17)	42815	NM_001194940	50768	Mm.125155	NM_015802	ENSMUSG00000031523	Dlc1	A730069N07Rik|Arhgap7|HP|STARD12|dlc-1	deleted in liver cancer 1	protein-coding
Diff_Nuc2610	chr16	6129362	6129501	+	0	NA	intron (NM_021477, intron 1 of 16)	(TG)n|Simple_repeat|Simple_repeat	153751	NR_045799	68238	Mm.434605	NR_045799	ENSMUSG00000101481	1700123O21Rik	-	RIKEN cDNA 1700123O21 gene	ncRNA
Diff_Nuc2186	chr10	123040582	123040721	+	0	NA	intron (NR_045514, intron 2 of 5)	intron (NR_045514, intron 2 of 5)	339519	NM_001252387	268354	Mm.51939	NM_182807	ENSMUSG00000044071	Fam19a2	6330575M02|FAM19A2 TAFA-2|TAFA2|Tafa-2	family with sequence similarity 19, member A2	protein-coding
Diff_Nuc9478	chr9	5540662	5540801	+	0	NA	Intergenic	L1_Mur3|LINE|L1	195255	NM_009808	12364	Mm.42163	NM_009808	ENSMUSG00000025887	Casp12	-	caspase 12	protein-coding
Diff_Nuc7966	chr2	37409542	37409681	+	0	NA	intron (NM_146121, intron 19 of 25)	RMER4B|LTR|ERVK	37465	NM_177383	338346	Mm.445325	NM_177383	ENSMUSG00000053164	Gpr21	C230004C13Rik	G protein-coupled receptor 21	protein-coding
Diff_Nuc3344	chr15	75328112	75328251	+	0	NA	Intergenic	MTB|LTR|MaLR	48299	NM_001347049	102637705		NM_001347049	ENSMUSG00000093626	Ly6l	Gm20654	lymphocyte antigen 6 complex, locus L	protein-coding
Diff_Nuc575	chr13	106832212	106832351	+	0	NA	Intergenic	Intergenic	598508	NM_008308	15550	Mm.4716	NM_008308	ENSMUSG00000021721	Htr1a	Gpcr18	5-hydroxytryptamine (serotonin) receptor 1A	protein-coding
Diff_Nuc5302	chr6	22710352	22710491	+	0	NA	Intergenic	Intergenic	-115081	NM_001311064	19283	Mm.41639	NM_011219	ENSMUSG00000068748	Ptprz1	AI850339|DSD-1-PG|PTPbeta|PTPzeta|Ptprz|Ptpz|R-PTP-zeta|RPTPz|Rptpbeta	protein tyrosine phosphatase, receptor type Z, polypeptide 1	protein-coding
Diff_Nuc10063	chr8	13580502	13580641	+	0	NA	intron (NM_009025, intron 17 of 23)	intron (NM_009025, intron 17 of 23)	-18110	NM_001080781	66501	Mm.46136	NM_025601	ENSMUSG00000031452	1700029H14Rik	-	RIKEN cDNA 1700029H14 gene	protein-coding
Diff_Nuc903	chr12	67838372	67838511	+	0	NA	intron (NM_207010, intron 3 of 15)	Lx8|LINE|L1	-453053	NM_001162933	238217	Mm.188575	NM_001162933	ENSMUSG00000060499	Rpl10l	EG238217	ribosomal protein L10-like	protein-coding
Diff_Nuc9907	chr9	99195872	99196011	+	0	NA	intron (NM_023873, intron 13 of 17)	B3|SINE|B2	52054	NM_023873	68121	Mm.288739	NM_023873	ENSMUSG00000056267	Cep70	6720484E09Rik|Bite|C030018L16Rik	centrosomal protein 70	protein-coding
Diff_Nuc2176	chr10	121792872	121793011	+	0	NA	Intergenic	Intergenic	-92614	NM_016847	54140	Mm.4351	NM_016847	ENSMUSG00000020123	Avpr1a	AVPR|Avpr1|V1a|V1aR	arginine vasopressin receptor 1A	protein-coding
Diff_Nuc1694	chr10	10216382	10216521	+	0	NA	Intergenic	Lx5|LINE|L1	-24339	NM_001127353	215772	Mm.246573	NM_172547	ENSMUSG00000050994	Adgb	9130014G24Rik	androglobin	protein-coding
Diff_Nuc3787	chr14	90525162	90525301	+	0	NA	Intergenic	Intergenic	-1467	NR_045712	74967	Mm.390704	NR_045712		4930474H20Rik	-	RIKEN cDNA 4930474H20 gene	ncRNA
Diff_Nuc2526	chr17	79691812	79691951	+	0	NA	Intergenic	L1_Rod|LINE|L1	62550	NM_026514	260409	Mm.140601	NM_026514	ENSMUSG00000036533	Cdc42ep3	3200001F04Rik|AA986861|Borg2|Cep3|UB1	CDC42 effector protein (Rho GTPase binding) 3	protein-coding
Diff_Nuc977	chr12	81033612	81033751	+	0	NA	intron (NR_131074, intron 1 of 3)	B2_Mm2|SINE|B2	3570	NR_131074	77290	Mm.395042	NR_131073		9430078K24Rik	-	RIKEN cDNA 9430078K24 gene	ncRNA
Diff_Nuc9199	chr1	150987842	150987981	+	0	NA	Intergenic	L1Md_F2|LINE|L1	781658	NM_001305632	18783	Mm.4186	NM_008869	ENSMUSG00000056220	Pla2g4a	Pla2g4|cPLA2|cPLA2-alpha|cPLA2alpha	phospholipase A2, group IVA (cytosolic, calcium-dependent)	protein-coding
Diff_Nuc3846	chr14	107050862	107051001	+	0	NA	Intergenic	Intergenic	-165194	NR_045938	73631	Mm.48862	NR_045938	ENSMUSG00000099794	1700128A07Rik	-	RIKEN cDNA 1700128A07 gene	ncRNA
Diff_Nuc1152	chr11	3090462	3090601	+	0	NA	intron (NM_030207, intron 1 of 32)	MTC|LTR|MaLR	2935	NM_030207	78887	Mm.394071	NM_030207	ENSMUSG00000023764	Sfi1	-	Sfi1 homolog, spindle assembly associated (yeast)	protein-coding
Diff_Nuc5310	chr6	23815792	23815931	+	0	NA	Intergenic	Intergenic	-26440	NM_001252105	320405	Mm.259632	NM_153163	ENSMUSG00000017978	Cadps2	A230044C21Rik|Caps-2|Caps2|Cpd2	Ca2+-dependent activator protein for secretion 2	protein-coding
Diff_Nuc6342	chr5	119417442	119417581	+	0	NA	Intergenic	MIR|SINE|MIR	15163	NR_040694	74627	Mm.410828	NR_040694	ENSMUSG00000107144	4930413E15Rik	-	RIKEN cDNA 4930413E15 gene	ncRNA
Diff_Nuc6548	chr4	24073382	24073521	+	0	NA	Intergenic	L1_Mus1|LINE|L1	-350158	NM_199467	212377	Mm.120919	NM_199467	ENSMUSG00000045751	Mms22l	F730047E07Rik|Gm134	MMS22-like, DNA repair protein	protein-coding
Diff_Nuc4862	chr7	71954332	71954471	+	0	NA	intron (NM_183087, intron 4 of 9)	intron (NM_183087, intron 4 of 9)	63525	NM_023239	66647	Mm.19944	NM_023239	ENSMUSG00000070520	Ndnl2	5730494G16Rik|AI642138|BB044375|HCA4|Mageg1|Nsmce3|mage-g1	necdin-like 2	protein-coding
Diff_Nuc7496	chr3	88114122	88114261	+	0	NA	intron (NM_009836, intron 7 of 13)	MT2A|LTR|ERVL	13134	NM_009836	12462	Mm.256034	NM_009836	ENSMUSG00000001416	Cct3	AL024092|Cctg|Tcp1-rs3|TriC-P5	chaperonin containing Tcp1, subunit 3 (gamma)	protein-coding
Diff_Nuc8226	chr2	98507022	98507161	+	0	NA	Intergenic	GSAT_MM|Satellite|Satellite	1199277	NM_178725	241568	Mm.241682	NM_178725	ENSMUSG00000050587	Lrrc4c	6430556C10Rik|NGL-1	leucine rich repeat containing 4C	protein-coding
Diff_Nuc749	chr12	33753992	33754131	+	0	NA	intron (NM_001024478, intron 4 of 19)	RMER4B|LTR|ERVK	23679	NM_001024478	68764	Mm.60083	NM_001024478	ENSMUSG00000035860	Cdhr3	1110049B09Rik|BB172694|Cdh28	cadherin-related family member 3	protein-coding
Diff_Nuc3333	chr15	73123442	73123581	+	0	NA	intron (NM_001130409, intron 14 of 29)	intron (NM_001130409, intron 14 of 29)	-38199	NR_029561	387169		NR_029561	ENSMUSG00000065612	Mir151	Mirn151|mir-151|mmu-mir-151	microRNA 151	ncRNA
Diff_Nuc4856	chr7	69964792	69964931	+	0	NA	Intergenic	Lx2B|LINE|L1	-355465	NM_013788	27412	Mm.422745	NM_013788	ENSMUSG00000070526	Peg12	Frat3	paternally expressed 12	protein-coding
Diff_Nuc3793	chr14	92501662	92501801	+	0	NA	Intergenic	L1_Mur1|LINE|L1	1786376	NM_001271800	211712	Mm.37126	NM_001081377	ENSMUSG00000055421	Pcdh9	-	protocadherin 9	protein-coding
Diff_Nuc7057	chr4	145561622	145561761	+	0	NA	Intergenic	Intergenic	-89475	NR_045468	67524	Mm.444300	NR_045468	ENSMUSG00000086046	1700095A21Rik	-	RIKEN cDNA 1700095A21 gene	ncRNA
Diff_Nuc8111	chr2	69956322	69956461	+	0	NA	intron (NM_177376, intron 7 of 34)	intron (NM_177376, intron 7 of 34)	79208	NM_177376	329421	Mm.99648	NM_177376	ENSMUSG00000042064	Myo3b	A430065P19Rik	myosin IIIB	protein-coding
Diff_Nuc9469	chr9	4179902	4180041	+	0	NA	Intergenic	Intergenic	129523	NR_136941	67618	Mm.33970	NM_026276	ENSMUSG00000025894	Aasdhppt	2010309J24Rik|2810407B07Rik|AASD-PPT|CGI-80|LYS2|LYS5	aminoadipate-semialdehyde dehydrogenase-phosphopantetheinyl transferase	protein-coding
Diff_Nuc431	chr13	74700192	74700331	+	0	NA	Intergenic	Lx2B|LINE|L1	-68863	NM_146231	235956	Mm.296909	NM_146231	ENSMUSG00000069208	Zfp825	-	zinc finger protein 825	protein-coding
Diff_Nuc8072	chr2	59222962	59223101	+	0	NA	intron (NR_040510, intron 1 of 2)	MER20|DNA|MER1_type	1708	NR_040510	76676	Mm.110038	NR_040510	ENSMUSG00000087455	5330411J11Rik	-	RIKEN cDNA 5330411J11 gene	ncRNA
Diff_Nuc8127	chr2	72738442	72738581	+	0	NA	Intergenic	Intergenic	78827	NM_001098425	20687	Mm.124328	NM_011450	ENSMUSG00000027109	Sp3	D130027J01Rik	trans-acting transcription factor 3	protein-coding
Diff_Nuc7774	chr3	148663812	148663951	+	0	NA	Intergenic	Intergenic	-46282	NM_001081298	99633	Mm.9776	NM_001081298	ENSMUSG00000028184	Adgrl2	AI450192|CIRL-2|Gm619|Lec1|Lphh1|Lphn2|mKIAA0786	adhesion G protein-coupled receptor L2	protein-coding
Diff_Nuc1431	chr11	68614822	68614961	+	0	NA	intron (NM_175260, intron 29 of 40)	intron (NM_175260, intron 29 of 40)	51742	NM_023668	83431	Mm.31979	NM_023668	ENSMUSG00000018736	Ndel1	2600006O07Rik|MITAP1|NUDEL|mNudel	nudE neurodevelopment protein 1 like 1	protein-coding
Diff_Nuc10110	chr8	24015012	24015151	+	0	NA	intron (NM_001081149, intron 4 of 17)	intron (NM_001081149, intron 4 of 17)	45070	NM_001081149	244349	Mm.182776	NM_001081149	ENSMUSG00000031540	Kat6a	1500036M03|9930021N24Rik|MOZ|Myst3|Zfp220	K(lysine) acetyltransferase 6A	protein-coding
Diff_Nuc106	chr13	8970452	8970591	+	0	NA	Intergenic	L1M3|LINE|L1	18412	NM_177197	320581	Mm.313743	NM_177197	ENSMUSG00000033520	Idi2	4833405L16Rik|IPPI2	isopentenyl-diphosphate delta isomerase 2	protein-coding
Diff_Nuc4801	chr7	57005912	57006051	+	0	NA	Intergenic	Intergenic	-8495	NM_001146053	53415	Mm.20801	NM_016865	ENSMUSG00000039745	Htatip2	AW111545|Cc3|Tip30	HIV-1 Tat interactive protein 2	protein-coding
Diff_Nuc177	chr13	21324182	21324321	+	0	NA	Intergenic	Intergenic	52451	NM_009054	19720	Mm.314056	NM_009054	ENSMUSG00000021326	Trim27	AW538890|Gm19403|Rfp	tripartite motif-containing 27	protein-coding
Diff_Nuc889	chr12	63846522	63846661	+	0	NA	Intergenic	L1_Mus1|LINE|L1	57817	NR_131949	73309	Mm.276558	NR_131949		Spanxn4	1700047L15Rik	SPANX family, member N4	ncRNA
Diff_Nuc4455	chr18	58199482	58199621	+	0	NA	intron (NM_010181, intron 49 of 64)	intron (NM_010181, intron 49 of 64)	161219	NM_009194	20496	Mm.399997	NM_009194	ENSMUSG00000024597	Slc12a2	9330166H04Rik|Nkcc1|mBSC2|sy-ns	solute carrier family 12, member 2	protein-coding
Diff_Nuc2356	chr17	34650422	34650561	+	0	NA	intron (NM_030747, intron 6 of 8)	intron (NM_030747, intron 6 of 8)	3806	NM_030747	624681	Mm.471592	NM_030747	ENSMUSG00000092618	Btnl6	EG624681|Gm6519|NG13	butyrophilin-like 6	protein-coding
Diff_Nuc2480	chr17	67370702	67370841	+	0	NA	intron (NM_008984, intron 7 of 30)	intron (NM_008984, intron 7 of 30)	4804	NR_049205	100885844		NR_049205	ENSMUSG00000093508	Mir5709	Gm22041|mir-5709|mmu-mir-5709	microRNA 5709	ncRNA
Diff_Nuc2581	chr17	91639852	91639991	+	0	NA	Intergenic	MERVL_2A-int|LTR|ERVL	-147779	NM_020252	18189	Mm.478418	NM_020252	ENSMUSG00000024109	Nrxn1	1700062G21Rik|9330127H16Rik|A230068P09Rik|mKIAA0578	neurexin I	protein-coding
Diff_Nuc5334	chr6	31372192	31372331	+	0	NA	intron (NM_013791, intron 2 of 17)	intron (NM_013791, intron 2 of 17)	23433	NM_013791	27418	Mm.238038	NM_013791	ENSMUSG00000025609	Mkln1	A130067F06Rik|AU015903|BB154892	muskelin 1, intracellular mediator containing kelch motifs	protein-coding
Diff_Nuc4331	chr18	33680832	33680971	+	0	NA	Intergenic	Intergenic	57084	NR_045415	433171	Mm.353332	NR_045415		Gm10549	ENSMUSG00000073610	predicted gene 10549	ncRNA
