# Supplementary material for: Remodeling of epigenome and transcriptome landscapes with aging in mice reveals widespread induction of inflammatory responses
Source: HighWire-hosted journal article supplement (doi:10.1101/gr.240093.118), 2019-03-11
Supplement: Supplemental_Code_Figure3_Machine_learning.zip [file HOMER_dposREF_OlfactoryBulb_DiNUP_DANPOS_GAINED.xls]

PeakID (cmd=annotatePeaks.pl dposREF_OlfactoryBulb_DiNUP_DANPOS_GAINED.bed mm9)	Chr	Start	End	Strand	Peak Score	Focus Ratio/Region Size	Annotation	Detailed Annotation	Distance to TSS	Nearest PromoterID	Entrez ID	Nearest Unigene	Nearest Refseq	Nearest Ensembl	Gene Name	Gene Alias	Gene Description	Gene Type
Diff_Nuc52126	chr8	111691942	111692081	+	0	NA	intron (NR_126329, intron 2 of 9)	L1_Mur1|LINE|L1	92889	NR_126329	628686	Mm.203332	NR_126329	ENSMUSG00000097393	D030068K23Rik	-	RIKEN cDNA D030068K23 gene	ncRNA
Diff_Nuc30462	chr5	66913062	66913201	+	0	NA	intron (NM_001201413, intron 2 of 16)	intron (NM_001201413, intron 2 of 16)	96925	NM_009686	11787	Mm.5159	NM_009686	ENSMUSG00000029207	Apbb2	2310007D03Rik|FE65L1|Rirl1|TR2L|Zfra	amyloid beta (A4) precursor protein-binding, family B, member 2	protein-coding
Diff_Nuc7590	chr11	91820262	91820401	+	0	NA	Intergenic	ORR1C2|LTR|MaLR	-381462	NM_028547	73470	Mm.67677	NM_028547	ENSMUSG00000046755	Kif2b	1700063D03Rik	kinesin family member 2B	protein-coding
Diff_Nuc43543	chr1	27179402	27179541	+	0	NA	Intergenic	Lx8|LINE|L1	-435166	NM_001033764	210940	Mm.297614	NM_001033764	ENSMUSG00000073722	4931408C20Rik	-	RIKEN cDNA 4931408C20 gene	protein-coding
Diff_Nuc6139	chr11	22914372	22914511	+	0	NA	intron (NM_028672, intron 1 of 3)	intron (NM_028672, intron 1 of 3)	1054	NM_028672	73873	Mm.252406	NM_028672	ENSMUSG00000049811	Fam161a	4930430E16Rik	family with sequence similarity 161, member A	protein-coding
Diff_Nuc49939	chr8	9353032	9353171	+	0	NA	intron (NM_001347127, intron 1 of 3)	L1Md_T|LINE|L1	208432	NR_073360	74688	Mm.159298	NR_073360	ENSMUSG00000109215	4930453L07Rik	-	RIKEN cDNA 4930453L07 gene	ncRNA
Diff_Nuc46994	chr1	188133742	188133881	+	0	NA	Intergenic	Intergenic	-192622	NM_146106	226791	Mm.257116	NM_146106	ENSMUSG00000039246	Lyplal1	BC027340|Q96AVO	lysophospholipase-like 1	protein-coding
Diff_Nuc32690	chr4	29033632	29033771	+	0	NA	Intergenic	MTD|LTR|MaLR	293406	NM_001122889	13841	Mm.257266	NM_010141	ENSMUSG00000028289	Epha7	Cek11|Ebk|Ehk3|Hek11|Mdk1	Eph receptor A7	protein-coding
Diff_Nuc1583	chr13	53582782	53582921	+	0	NA	Intergenic	T-rich|Low_complexity|Low_complexity	-14702	NM_013601	17702	Mm.1763	NM_013601	ENSMUSG00000021469	Msx2	BB122635|Hox-8|Hox8|Hox8.1	msh homeobox 2	protein-coding
Diff_Nuc48527	chr9	65188052	65188191	+	0	NA	Intergenic	Intergenic	-5754	NM_016688	50996	Mm.29193	NM_016688	ENSMUSG00000041837	Pdcd7	C80112|ES18	programmed cell death 7	protein-coding
Diff_Nuc39397	chr2	30022542	30022681	+	0	NA	Intergenic	Intergenic	-4433	NM_007931	13804	Mm.474473	NM_007931	ENSMUSG00000015337	Endog	-	endonuclease G	protein-coding
Diff_Nuc15292	chr15	5130482	5130621	+	0	NA	3' UTR (NM_001013367, exon 9 of 9)	3' UTR (NM_001013367, exon 9 of 9)	-5009	NM_026213	67515	Mm.254979	NM_026213	ENSMUSG00000022151	Ttc33	2410099M07Rik|2900001O04Rik|AI507072|AW538342|Osrf	tetratricopeptide repeat domain 33	protein-coding
Diff_Nuc39466	chr2	33813132	33813271	+	0	NA	Intergenic	B4|SINE|B4	-69735	NM_175184	72543	Mm.254914	NM_175184	ENSMUSG00000038740	Mvb12b	2610200O14Rik|2610528K11Rik|AI414895|Fam125b	multivesicular body subunit 12B	protein-coding
Diff_Nuc51951	chr8	102134202	102134341	+	0	NA	intron (NR_132435, intron 1 of 4)	L1_Mur2|LINE|L1	193697	NR_132435	234624	Mm.124595	NM_175479	ENSMUSG00000052479	A330008L17Rik	-	RIKEN cDNA A330008L17 gene	ncRNA
Diff_Nuc40683	chr2	78478652	78478791	+	0	NA	Intergenic	(TAGA)n|Simple_repeat|Simple_repeat	-230483	NM_009454	22193	Mm.1485	NM_009454	ENSMUSG00000027011	Ube2e3	Ubce4|ubcM2	ubiquitin-conjugating enzyme E2E 3	protein-coding
Diff_Nuc34593	chr4	119293452	119293591	+	0	NA	intron (NM_172699, intron 9 of 12)	intron (NM_172699, intron 9 of 12)	-16816	NM_008190	14915	Mm.2614	NM_008190	ENSMUSG00000023247	Guca2a	Guca2	guanylate cyclase activator 2a (guanylin)	protein-coding
Diff_Nuc27926	chr6	93840812	93840951	+	0	NA	intron (NM_001286785, intron 2 of 24)	ORR1A3|LTR|MaLR	22076	NR_104594	14924	Mm.217216	NM_010367	ENSMUSG00000045095	Magi1	AIP3|BAP1|Baiap1|Gukmi1|MAGI1c|Magi-1|TNRC19|WWP3|mKIAA4129	membrane associated guanylate kinase, WW and PDZ domain containing 1	protein-coding
Diff_Nuc27675	chr6	81773522	81773661	+	0	NA	Intergenic	B3A|SINE|B2	72066	NR_106091	102465711		NR_106091	ENSMUSG00000106154	Mir7232	mmu-mir-7232	microRNA 7232	ncRNA
Diff_Nuc17611	chr14	19173972	19174111	+	0	NA	Intergenic	Lx8|LINE|L1	-9683	NM_009455	22194	Mm.4429	NM_009455	ENSMUSG00000021774	Ube2e1	UbcM3|Ubce5|ubcM2	ubiquitin-conjugating enzyme E2E 1	protein-coding
Diff_Nuc41828	chr2	126049762	126049901	+	0	NA	Intergenic	RMER6D|LTR|ERVK	71954	NM_026981	69185	Mm.29019	NM_026981	ENSMUSG00000023330	Dtwd1	1810033A06Rik	DTW domain containing 1	protein-coding
Diff_Nuc1425	chr13	44984982	44985121	+	0	NA	intron (NM_001205043, intron 5 of 17)	intron (NM_001205043, intron 5 of 17)	112414	NM_025772	94245	Mm.352311	NM_025772	ENSMUSG00000057531	Dtnbp1	5430437B18Rik|AW048963|Bloc1s8|dysbindin|sdy	dystrobrevin binding protein 1	protein-coding
Diff_Nuc3515	chr12	31062382	31062521	+	0	NA	Intergenic	Intergenic	-4210	NR_136915	268534	Mm.279765	NM_172951	ENSMUSG00000020672	Sntg2	2210008K22Rik|9530013L23|BB121248|G2syn|Syn5	syntrophin, gamma 2	protein-coding
Diff_Nuc1385	chr13	43066392	43066531	+	0	NA	intron (NM_001302636, intron 2 of 12)	intron (NM_001302636, intron 2 of 12)	104845	NM_001302636	218194	Mm.160124	NM_198419	ENSMUSG00000054728	Phactr1	9630030F18Rik|Rpel1	phosphatase and actin regulator 1	protein-coding
Diff_Nuc20649	chr19	35786372	35786511	+	0	NA	Intergenic	Intergenic	345409	NM_001347442	15566	Mm.254266	NM_008315	ENSMUSG00000024798	Htr7	5-HT7	5-hydroxytryptamine (serotonin) receptor 7	protein-coding
Diff_Nuc41442	chr2	111171082	111171221	+	0	NA	Intergenic	Intergenic	2573	NM_001005568	257979	Mm.377322	NM_001005568	ENSMUSG00000095156	Olfr1281	MOR248-14P|MOR248-18	olfactory receptor 1281	protein-coding
Diff_Nuc2363	chr13	89476712	89476851	+	0	NA	Intergenic	Intergenic	-203460	NM_013500	12950	Mm.266790	NM_013500	ENSMUSG00000021613	Hapln1	BB099155|CLP|Crtl1|Crtl1l|LP|LP-1	hyaluronan and proteoglycan link protein 1	protein-coding
Diff_Nuc34145	chr4	98249632	98249771	+	0	NA	intron (NM_001005787, intron 2 of 15)	Tigger7|DNA|MER2_type	36376	NM_001005787	12695	Mm.90218	NM_007704	ENSMUSG00000061859	Patj	Cipp|Inadl	PATJ, crumbs cell polarity complex component	protein-coding
Diff_Nuc22003	chr18	40134612	40134751	+	0	NA	Intergenic	Lx3A|LINE|L1	201530	NM_011033	18459	Mm.9493	NM_011033	ENSMUSG00000051732	Pabpc2	Pabp|Pabp+|Pabp2	poly(A) binding protein, cytoplasmic 2	protein-coding
Diff_Nuc8972	chr10	35930632	35930771	+	0	NA	Intergenic	Lx6|LINE|L1	-295912	NM_001253355	319415	Mm.332442	NM_001081208	ENSMUSG00000044499	Hs3st5	D930005L05Rik|Gm1151|Hs3ost5	heparan sulfate (glucosamine) 3-O-sulfotransferase 5	protein-coding
Diff_Nuc8254	chr10	5308882	5309021	+	0	NA	intron (NM_001347732, intron 140 of 145)	B4|SINE|B4	31473	NM_022027	64009	Mm.331626	NM_022027	ENSMUSG00000096054	Syne1	8B|A330049M09Rik|BE692247|C130039F11Rik|CPG2|Myne1|mKIAA1756|myne-1	spectrin repeat containing, nuclear envelope 1	protein-coding
Diff_Nuc13509	chr16	25790032	25790171	+	0	NA	intron (NM_001127261, intron 3 of 10)	intron (NM_001127261, intron 3 of 10)	-11901	NM_001127263	22061	Mm.20894	NM_011641	ENSMUSG00000022510	Trp63	AI462811|Ket|P51/P63|P63|P73l|Tp63|Trp53rp1	transformation related protein 63	protein-coding
Diff_Nuc41358	chr2	107936682	107936821	+	0	NA	Intergenic	Intergenic	806005	NM_021275	16492	Mm.142718	NM_021275	ENSMUSG00000042604	Kcna4	Kv1.4	potassium voltage-gated channel, shaker-related subfamily, member 4	protein-coding
Diff_Nuc30465	chr5	67076042	67076181	+	0	NA	intron (NM_011670, intron 8 of 8)	intron (NM_011670, intron 8 of 8)	-8375	NR_102714	101202684	Mm.381468	NR_102714	ENSMUSG00000087601	Uchl1os	Gm16832|Uchl1as	ubiquitin carboxy-terminal hydrolase L1, opposite strand	ncRNA
Diff_Nuc25857	chr6	4700032	4700171	+	0	NA	intron (NM_001040611, intron 1 of 1)	intron (NM_001040611, intron 1 of 1)	2795	NM_130877	170676	Mm.320575	NM_130877	ENSMUSG00000092035	Peg10	AA407948|Edr|HB-1|MEF3L|Mar2|Mart2|MyEF-3	paternally expressed 10	protein-coding
Diff_Nuc36591	chr3	64176842	64176981	+	0	NA	Intergenic	B3A|SINE|B2	37068	NM_001104615	637053	Mm.425135	NM_001104615	ENSMUSG00000092049	Vmn2r4	AW742767|EG637053	vomeronasal 2, receptor 4	protein-coding
Diff_Nuc6742	chr11	49837742	49837881	+	0	NA	Intergenic	Intergenic	-1022	NM_021540	59044	Mm.359004	NM_021540	ENSMUSG00000020376	Rnf130	2510042A13Rik|G1RZFP|G1rp|GOLIATH|GP	ring finger protein 130	protein-coding
Diff_Nuc43297	chr1	16027452	16027591	+	0	NA	Intergenic	Intergenic	55885	NM_001305227	75799	Mm.78557	NM_001243238	ENSMUSG00000067795	4930444P10Rik	-	RIKEN cDNA 4930444P10 gene	protein-coding
Diff_Nuc30127	chr5	51547142	51547281	+	0	NA	Intergenic	L2c|LINE|L2	397949	NR_027710	19017	Mm.259072	NM_008904	ENSMUSG00000029167	Ppargc1a	A830037N07Rik|ENSMUSG00000079510|Gm11133|PGC-1|PPARGC-1-alpha|Pgc-1alpha|Pgc1|Pgco1|Ppargc1	peroxisome proliferative activated receptor, gamma, coactivator 1 alpha	protein-coding
Diff_Nuc6190	chr11	24675002	24675141	+	0	NA	Intergenic	Intergenic	-44349	NR_033491	100038617	Mm.387376	NR_033491	ENSMUSG00000073103	Gm10466	ENSMUSG00000073103	predicted gene 10466	ncRNA
Diff_Nuc16064	chr15	39123162	39123301	+	0	NA	intron (NM_053271, intron 3 of 26)	intron (NM_053271, intron 3 of 26)	93399	NM_053271	116838	Mm.309296	NM_053271	ENSMUSG00000037386	Rims2	2810036I15Rik|AW048769|RIM2|Rab3ip2|Rim2(+40A)|Rim2(+44A)|Rim2(+4A)|Serg2|Syt3-rs|mKIAA0751	regulating synaptic membrane exocytosis 2	protein-coding
Diff_Nuc23042	chr18	87686212	87686351	+	0	NA	Intergenic	MTD|LTR|MaLR	804824	NM_172633	12405	Mm.70775	NM_172633	ENSMUSG00000024647	Cbln2	6330593N19Rik|A730004O05	cerebellin 2 precursor protein	protein-coding
Diff_Nuc32756	chr4	32584142	32584281	+	0	NA	intron (NM_001109661, intron 1 of 4)	Lx8|LINE|L1	74426	NR_026843	414068	Mm.389550	NR_026843	ENSMUSG00000086150	Bach2os	-	BTB and CNC homology 2, opposite strand	ncRNA
Diff_Nuc44585	chr1	72310752	72310891	+	0	NA	intron (NM_023523, intron 6 of 7)	L1_Mus3|LINE|L1	20067	NM_023523	111175	Mm.281738	NM_023523	ENSMUSG00000026189	Pecr	2400003B18Rik|TERP	peroxisomal trans-2-enoyl-CoA reductase	protein-coding
Diff_Nuc38760	chr3	158912252	158912391	+	0	NA	intron (NR_040750, intron 4 of 4)	L1Md_F2|LINE|L1	172993	NR_040750	624759	Mm.491054	NR_040750	ENSMUSG00000106053	Gm20752	-	predicted gene, 20752	ncRNA
Diff_Nuc6236	chr11	26055262	26055401	+	0	NA	intron (NR_027973, intron 1 of 5)	Lx|LINE|L1	-46909	NR_105791	102466154		NR_105791	ENSMUSG00000099015	Mir6372	Gm27358|mmu-mir-6372	microRNA 6372	ncRNA
Diff_Nuc24508	chr7	88506872	88507011	+	0	NA	intron (NM_001252526, intron 3 of 11)	intron (NM_001252526, intron 3 of 11)	-16821	NM_009092	20068	Mm.42767	NM_009092	ENSMUSG00000061787	Rps17	-	ribosomal protein S17	protein-coding
Diff_Nuc3503	chr12	30602712	30602851	+	0	NA	intron (NM_001093775, intron 23 of 24)	intron (NM_001093775, intron 23 of 24)	-20120	NM_181395	69675	Mm.251774	NM_181395	ENSMUSG00000020674	Pxdn	2310075M15Rik|C85409|E330004E07|VPO1|mKIAA0230	peroxidasin	protein-coding
Diff_Nuc2367	chr13	89704907	89705046	+	0	NA	intron (NM_013500, intron 1 of 4)	intron (NM_013500, intron 1 of 4)	24735	NM_013500	12950	Mm.266790	NM_013500	ENSMUSG00000021613	Hapln1	BB099155|CLP|Crtl1|Crtl1l|LP|LP-1	hyaluronan and proteoglycan link protein 1	protein-coding
Diff_Nuc17715	chr14	24283142	24283281	+	0	NA	intron (NM_001253373, intron 13 of 27)	(TG)n|Simple_repeat|Simple_repeat	-369418	NR_033550	791307	Mm.364384	NR_033550	ENSMUSG00000068680	Gm10248	ENSMUSG00000068680	predicted gene 10248	ncRNA
Diff_Nuc34109	chr4	96160632	96160771	+	0	NA	intron (NM_001104927, intron 4 of 8)	Lx9|LINE|L1	13376	NM_001104927	665095	Mm.331717	NM_001104927	ENSMUSG00000082932	Cyp2j8	Cyp2j8-ps|OTTMUSG00000007938	cytochrome P450, family 2, subfamily j, polypeptide 8	protein-coding
Diff_Nuc20867	chr19	46329272	46329411	+	0	NA	intron (NM_178930, intron 7 of 39)	intron (NM_178930, intron 7 of 39)	-49886	NM_001177369	18034	Mm.102365	NM_019408	ENSMUSG00000025225	Nfkb2	NF-kappaB2|lyt|p49|p49/p100|p50B|p52	nuclear factor of kappa light polypeptide gene enhancer in B cells 2, p49/p100	protein-coding
Diff_Nuc23207	chr7	7219552	7219691	+	0	NA	intron (NR_003555, intron 4 of 6)	RMER6A|LTR|ERVK	11379	NR_003555	76229	Mm.387947	NM_001113468	ENSMUSG00000095730	Vmn2r29	6430701C03Rik	vomeronasal 2, receptor 29	protein-coding
Diff_Nuc7573	chr11	90758242	90758381	+	0	NA	Intergenic	L1_Mus1|LINE|L1	92306	NR_045956	73922	Mm.233289	NR_045956	ENSMUSG00000085940	4930405D11Rik	-	RIKEN cDNA 4930405D11 gene	ncRNA
Diff_Nuc32434	chr4	17394432	17394571	+	0	NA	Intergenic	Lx|LINE|L1	-385539	NR_135158	17389	Mm.187315	NM_019724	ENSMUSG00000028226	Mmp16	MT-MMP 3|MT3-MMP|Mt3mmp	matrix metallopeptidase 16	protein-coding
Diff_Nuc43691	chr1	34215282	34215421	+	0	NA	intron (NM_134448, intron 11 of 97)	intron (NM_134448, intron 11 of 97)	-1824	NM_010081	13518	Mm.336625	NM_010081	ENSMUSG00000026131	Dst	2310001O04Rik|A830042E19Rik|AW554249|BP230|BPAG1-n|Bpag|Bpag1|Macf2|ah|athetoid|dt|mKIAA0728|nmf203|nmf339	dystonin	protein-coding
Diff_Nuc51388	chr8	74595642	74595781	+	0	NA	Intergenic	Lx2A1|LINE|L1	14152	NM_207555	404315	Mm.377936	NM_207555	ENSMUSG00000069998	Olfr372	MOR282-1	olfactory receptor 372	protein-coding
Diff_Nuc39260	chr2	22031562	22031701	+	0	NA	Intergenic	Intergenic	-117499	NM_148413	667663	Mm.330033	NM_148413	ENSMUSG00000025716	Myo3a	9030416P08Rik	myosin IIIA	protein-coding
Diff_Nuc27432	chr6	71878562	71878701	+	0	NA	intron (NM_009088, intron 9 of 33)	intron (NM_009088, intron 9 of 33)	19584	NM_009088	20019	Mm.135581	NM_009088	ENSMUSG00000049553	Polr1a	194kDa|3010014K16Rik|RPA194|Rpo1-4|mRPA1	polymerase (RNA) I polypeptide A	protein-coding
Diff_Nuc17024	chr15	84115132	84115271	+	0	NA	intron (NM_133167, intron 4 of 12)	L2|LINE|L2	-39949	NM_022321	64099	Mm.251356	NM_022321	ENSMUSG00000022439	Parvg	AI413459	parvin, gamma	protein-coding
Diff_Nuc42213	chr2	140400022	140400161	+	0	NA	intron (NM_001013802, intron 3 of 18)	intron (NM_001013802, intron 3 of 18)	97121	NM_001172160	71436	Mm.426781	NM_178382	ENSMUSG00000051379	Flrt3	5530600M07Rik|C430047I10Rik|mKIAA1469	fibronectin leucine rich transmembrane protein 3	protein-coding
Diff_Nuc39478	chr2	34137612	34137751	+	0	NA	intron (NM_016768, intron 2 of 8)	intron (NM_016768, intron 2 of 8)	89884	NM_001290576	18516	Mm.239941	NM_016768	ENSMUSG00000038718	Pbx3	-	pre B cell leukemia homeobox 3	protein-coding
Diff_Nuc37740	chr3	113734982	113735121	+	0	NA	intron (NM_007729, intron 1 of 66)	intron (NM_007729, intron 1 of 66)	1593	NM_007729	12814	Mm.209715	NM_007729	ENSMUSG00000027966	Col11a1	C530001D20Rik|cho	collagen, type XI, alpha 1	protein-coding
Diff_Nuc21321	chr18	10774812	10774951	+	0	NA	intron (NM_144860, intron 10 of 20)	B1_Mur4|SINE|Alu	8093	NR_029547	387151		NR_029547	ENSMUSG00000065399	Mir133a-1	Mirn133|Mirn133a-1|mir-133a-1	microRNA 133a-1	ncRNA
Diff_Nuc4904	chr12	83037172	83037311	+	0	NA	intron (NM_018814, intron 8 of 35)	MIR|SINE|MIR	76224	NM_018814	54604	Mm.86584	NM_018814	ENSMUSG00000021140	Pcnx	2900024E21Rik|3526401J03Rik|AF096286|AI327143|AI413187|Pcnx1|Pcnxl1	pecanex homolog (Drosophila)	protein-coding
Diff_Nuc50510	chr8	37933982	37934121	+	0	NA	intron (NM_001194940, intron 2 of 17)	intron (NM_001194940, intron 2 of 17)	81445	NM_001194940	50768	Mm.125155	NM_015802	ENSMUSG00000031523	Dlc1	A730069N07Rik|Arhgap7|HP|STARD12|dlc-1	deleted in liver cancer 1	protein-coding
Diff_Nuc36295	chr3	51948462	51948601	+	0	NA	Intergenic	(CA)n|Simple_repeat|Simple_repeat	-39603	NM_001004176	433586	Mm.234972	NM_001004176	ENSMUSG00000061143	Maml3	AV234550|BC049812|Mam-2|mKIAA1816	mastermind like 3 (Drosophila)	protein-coding
Diff_Nuc20599	chr19	33280262	33280401	+	0	NA	intron (NM_001167818, intron 4 of 6)	intron (NM_001167818, intron 4 of 6)	48729	NR_039552	100628575		NR_039552	ENSMUSG00000106278	Mir3970	mmu-mir-3970|mu-mir-3970	microRNA 3970	ncRNA
Diff_Nuc26538	chr6	32509282	32509421	+	0	NA	intron (NM_175750, intron 1 of 31)	intron (NM_175750, intron 1 of 31)	28841	NM_175750	243743	Mm.444029	NM_175750	ENSMUSG00000029765	Plxna4	9330117B14|Plxa4|mKIAA1550	plexin A4	protein-coding
Diff_Nuc20338	chr19	21504802	21504941	+	0	NA	intron (NM_010266, intron 2 of 13)	intron (NM_010266, intron 2 of 13)	42280	NM_010266	14544	Mm.45054	NM_010266	ENSMUSG00000058624	Gda	AU015411|AW047581|GAH	guanine deaminase	protein-coding
Diff_Nuc908	chr13	21345092	21345231	+	0	NA	Intergenic	B1F|SINE|Alu	39394	NM_010343	14780	Mm.1332	NM_010343	ENSMUSG00000004344	Gpx5	AV379049|Arep	glutathione peroxidase 5	protein-coding
Diff_Nuc17478	chr14	12770912	12771051	+	0	NA	intron (NM_008981, intron 2 of 29)	intron (NM_008981, intron 2 of 29)	-251476	NM_001347593	19270	Mm.431266	NM_008981	ENSMUSG00000021745	Ptprg	5430405N12Rik|AW046354|AW549872|RPTPgamma	protein tyrosine phosphatase, receptor type, G	protein-coding
Diff_Nuc33235	chr4	55326302	55326441	+	0	NA	Intergenic	RLTR45-int|LTR|ERVK	-36543	NM_009011	19359	Mm.196846	NM_009011	ENSMUSG00000028426	Rad23b	0610007D13Rik|AV001138|HR23B|mHR23B|p58	RAD23 homolog B, nucleotide excision repair protein	protein-coding
Diff_Nuc14606	chr16	69657262	69657401	+	0	NA	Intergenic	Intergenic	143295	NR_130991	78110	Mm.211406	NR_130991	ENSMUSG00000107073	4930428D20Rik	-	RIKEN cDNA 4930428D20 gene	ncRNA
Diff_Nuc5431	chr12	107060982	107061121	+	0	NA	intron (NM_011112, intron 15 of 21)	intron (NM_011112, intron 15 of 21)	38144	NM_001347440	18789	Mm.255877	NM_011112	ENSMUSG00000021111	Papola	Pap|PapIII|Plap	poly (A) polymerase alpha	protein-coding
Diff_Nuc51229	chr8	68290062	68290201	+	0	NA	intron (NM_175188, intron 1 of 7)	intron (NM_175188, intron 1 of 7)	147707	NM_175188	72925	Mm.380457	NM_175188	ENSMUSG00000036469	March1	2900024D24Rik|BB085186	membrane-associated ring finger (C3HC4) 1	protein-coding
Diff_Nuc45855	chr1	138390252	138390391	+	0	NA	intron (NM_001287179, intron 13 of 28)	intron (NM_001287179, intron 13 of 28)	25896	NM_001287179	381293	Mm.458468	NM_001081258	ENSMUSG00000041498	Kif14	D1Ertd367e|E130203M01	kinesin family member 14	protein-coding
Diff_Nuc34897	chr4	134543122	134543261	+	0	NA	Intergenic	Intergenic	56296	NM_026780	68592	Mm.29989	NM_026780	ENSMUSG00000028821	Syf2	1110018L13Rik|Cbpin|D4Bwg1551e|Gcipip|Ntc31|mp29|p29	SYF2 homolog, RNA splicing factor (S. cerevisiae)	protein-coding
Diff_Nuc23298	chr7	16670792	16670931	+	0	NA	intron (NM_001347559, intron 6 of 13)	intron (NM_001347559, intron 6 of 13)	-13131	NM_025898	108124	Mm.104540	NM_025898	ENSMUSG00000006024	Napa	1500039N14Rik|AW209189|RA81|SNAPA|SNARE|a-SNAP|hyh	N-ethylmaleimide sensitive fusion protein attachment protein alpha	protein-coding
Diff_Nuc14224	chr16	55973052	55973191	+	0	NA	promoter-TSS (NM_173026)	promoter-TSS (NM_173026)	-796	NM_173026	271377	Mm.282814	NM_173026	ENSMUSG00000022601	Zbtb11	9230110G02Rik|ZNF-U69274	zinc finger and BTB domain containing 11	protein-coding
Diff_Nuc7959	chr11	108929272	108929411	+	0	NA	Intergenic	Intergenic	76342	NR_037978	268498	Mm.227970	NM_001085512	ENSMUSG00000078605	E030025P04Rik	Gm664	RIKEN cDNA E030025P04 gene	ncRNA
Diff_Nuc2670	chr13	103092352	103092491	+	0	NA	Intergenic	Intergenic	-391217	NM_008533	17079	Mm.373974	NM_008533	ENSMUSG00000021624	Cd180	F630107B15|Ly78|RP105	CD180 antigen	protein-coding
Diff_Nuc43848	chr1	43795402	43795541	+	0	NA	exon (NM_024283, exon 3 of 4)	exon (NM_024283, exon 3 of 4)	8024	NM_024283	78896	Mm.50109	NM_024283	ENSMUSG00000026051	1500015O10Rik	Ecrg4	RIKEN cDNA 1500015O10 gene	protein-coding
Diff_Nuc26916	chr6	47563382	47563521	+	0	NA	Intergenic	Intergenic	-18422	NM_001146689	14056	Mm.246688	NM_007971	ENSMUSG00000029687	Ezh2	Enx-1|Enx1h|KMT6|mKIAA4065	enhancer of zeste 2 polycomb repressive complex 2 subunit	protein-coding
Diff_Nuc36249	chr3	49715502	49715641	+	0	NA	Intergenic	Intergenic	-154333	NM_130448	73173	Mm.87246	NM_130448	ENSMUSG00000037892	Pcdh18	3110038E07Rik|BB095589|PCDH68L	protocadherin 18	protein-coding
Diff_Nuc16085	chr15	39802152	39802291	+	0	NA	Intergenic	Intergenic	8026	NR_045719	105976	Mm.394885	NR_045719		AU022793	-	expressed sequence AU022793	ncRNA
Diff_Nuc10130	chr10	92056182	92056321	+	0	NA	Intergenic	Intergenic	128912	NM_008682	17997	Mm.2998	NM_008682	ENSMUSG00000019988	Nedd1	-	neural precursor cell expressed, developmentally down-regulated gene 1	protein-coding
Diff_Nuc49533	chr9	110337502	110337641	+	0	NA	intron (NM_177771, intron 7 of 9)	intron (NM_177771, intron 7 of 9)	15259	NM_008694	18054	Mm.236225	NM_008694	ENSMUSG00000032484	Ngp	bectenecin	neutrophilic granule protein	protein-coding
Diff_Nuc47847	chr9	33192122	33192261	+	0	NA	Intergenic	Intergenic	-455640	NR_131058	330917	Mm.488283	NR_131058		Gm27162	A430016B06	predicted gene 27162	ncRNA
Diff_Nuc44567	chr1	71018572	71018711	+	0	NA	Intergenic	L1_Mus3|LINE|L1	130905	NM_007525	12021	Mm.10764	NM_007525	ENSMUSG00000026196	Bard1	ENSMUSG00000060893|ENSMUSG00000073653	BRCA1 associated RING domain 1	protein-coding
Diff_Nuc25242	chr7	120312732	120312871	+	0	NA	Intergenic	(GA)n|Simple_repeat|Simple_repeat	-27272	NR_045978	75239	Mm.381688	NR_045978	ENSMUSG00000110009	4930543E12Rik	4930545H14Rik	RIKEN cDNA 4930543E12 gene	ncRNA
Diff_Nuc29743	chr5	32226822	32226961	+	0	NA	intron (NM_181282, intron 7 of 11)	intron (NM_181282, intron 7 of 11)	-211954	NM_008037	14284	Mm.24684	NM_008037	ENSMUSG00000029135	Fosl2	Fra-2	fos-like antigen 2	protein-coding
Diff_Nuc24728	chr7	97802572	97802711	+	0	NA	Intergenic	Lx6|LINE|L1	-178136	NM_026734	68472	Mm.289791	NM_026734	ENSMUSG00000030614	Tmem126b	1110001A23Rik	transmembrane protein 126B	protein-coding
Diff_Nuc16747	chr15	69284502	69284641	+	0	NA	Intergenic	RLTR25A|LTR|ERVK	183608	NR_130983	75076		NR_130983		4930504C09Rik	-	RIKEN cDNA 4930504C09 gene	ncRNA
Diff_Nuc5146	chr12	93473632	93473771	+	0	NA	Intergenic	Intergenic	-386104	NM_011344	20338	Mm.250605	NM_011344	ENSMUSG00000020964	Sel1l	AW493766|Sel1h|mKIAA4137	sel-1 suppressor of lin-12-like (C. elegans)	protein-coding
Diff_Nuc757	chr13	14405002	14405141	+	0	NA	intron (NM_001081348, intron 10 of 28)	intron (NM_001081348, intron 10 of 28)	210422	NM_001081348	94253	Mm.125298	NM_153130	ENSMUSG00000021301	Hecw1	9330116H24Rik|AV273951|E130207I19Rik|Nedl1	HECT, C2 and WW domain containing E3 ubiquitin protein ligase 1	protein-coding
Diff_Nuc19389	chr14	100331962	100332101	+	0	NA	intron (NM_010636, intron 5 of 6)	intron (NM_010636, intron 5 of 6)	216984	NM_010636	16597	Mm.396499	NM_010636	ENSMUSG00000072294	Klf12	2700063E05Rik|AI225908|AI315654|AP-2rep|B130052C06Rik|D530033K05Rik	Kruppel-like factor 12	protein-coding
Diff_Nuc16440	chr15	53617522	53617661	+	0	NA	intron (NM_177225, intron 2 of 4)	Lx8|LINE|L1	116400	NM_177225	320679	Mm.442455	NM_177225	ENSMUSG00000058656	Samd12	A830094I09Rik	sterile alpha motif domain containing 12	protein-coding
Diff_Nuc39572	chr2	38089442	38089581	+	0	NA	intron (NM_146122, intron 2 of 21)	intron (NM_146122, intron 2 of 21)	53393	NM_146122	227801	Mm.314245	NM_146122	ENSMUSG00000035392	Dennd1a	6030446I19Rik|connecdenn	DENN/MADD domain containing 1A	protein-coding
Diff_Nuc34137	chr4	97880692	97880831	+	0	NA	Intergenic	RMER13A|LTR|ERVK	169195	NM_053157	94043	Mm.331719	NM_053157	ENSMUSG00000028563	Tm2d1	2310026L18Rik|AA990549|Bbp	TM2 domain containing 1	protein-coding
Diff_Nuc21798	chr18	32042522	32042661	+	0	NA	intron (NM_028866, intron 11 of 21)	L1M2|LINE|L1	28966	NM_026006	67158	Mm.31537	NM_026006	ENSMUSG00000044982	Sft2d3	2610206C24Rik|AI847965|AW046173	SFT2 domain containing 3	protein-coding
Diff_Nuc15031	chr16	87178632	87178771	+	0	NA	Intergenic	Intergenic	-175729	NM_001159331	67768	Mm.296532	NM_026366	ENSMUSG00000044442	N6amt1	5830445C04Rik|Hemk2|Pred28	N-6 adenine-specific DNA methyltransferase 1 (putative)	protein-coding
Diff_Nuc993	chr13	24790412	24790551	+	0	NA	intron (NM_029679, intron 13 of 22)	intron (NM_029679, intron 13 of 22)	59964	NM_029679	193385	Mm.217319	NM_029679	ENSMUSG00000036006	Fam65b	-	family with sequence similarity 65, member B	protein-coding
Diff_Nuc25817	chr6	3475522	3475661	+	0	NA	intron (NM_024260, intron 9 of 27)	intron (NM_024260, intron 9 of 27)	27198	NM_001167750	73288	Mm.45539	NM_024260	ENSMUSG00000001376	Vps50	1700034M03Rik|8430415E05Rik|BLM|C87205|Ccdc132|mKIAA1861	VPS50 EARP/GARPII complex subunit	protein-coding
Diff_Nuc24937	chr7	105127422	105127561	+	0	NA	intron (NM_177696, intron 10 of 17)	MTEb|LTR|MaLR	59023	NM_177696	233537	Mm.375772	NM_177696	ENSMUSG00000035582	Gdpd4	4921513O04	glycerophosphodiester phosphodiesterase domain containing 4	protein-coding
Diff_Nuc21879	chr18	35092812	35092951	+	0	NA	Intergenic	Intergenic	-1224	NM_144866	225363	Mm.329353	NM_144866	ENSMUSG00000024360	Etf1	AI463371|D6Ertd109e|ERF|ERF1|SUP45L1|TB3-1	eukaryotic translation termination factor 1	protein-coding
Diff_Nuc11175	chr17	7780672	7780811	+	0	NA	Intergenic	Intergenic	-191087	NM_001142539	667055	Mm.327371	NM_001142539	ENSMUSG00000056133	Gm9992	ENSMUSG00000056133	predicted gene 9992	protein-coding
Diff_Nuc43968	chr1	48719952	48720091	+	0	NA	Intergenic	Intergenic	-1196052	NR_105768	102466969		NR_105768	ENSMUSG00000098876	Mir6350	Gm27958|mmu-mir-6350	microRNA 6350	ncRNA
Diff_Nuc35197	chr4	149796112	149796251	+	0	NA	intron (NM_001085492, intron 2 of 22)	intron (NM_001085492, intron 2 of 22)	140156	NM_001085492	68703	Mm.291274	NM_001085492	ENSMUSG00000039852	Rere	1110033A15Rik|AI414665|ARG|ARP|ATN1L|AW742570|Atr2|DNB1|eye<m03Jus>|eyes3|mKIAA0458	arginine glutamic acid dipeptide (RE) repeats	protein-coding
Diff_Nuc15067	chr16	89022232	89022371	+	0	NA	Intergenic	Intergenic	6779	NM_001199334	100040201	Mm.436873	NM_001199334	ENSMUSG00000068075	Gm10229	ENSMUSG00000068075	predicted gene 10229	protein-coding
Diff_Nuc26757	chr6	41127552	41127691	+	0	NA	Intergenic	(TAA)n|Simple_repeat|Simple_repeat	-124650	NM_011646	22074	Mm.383263	NM_011646	ENSMUSG00000054106	Try4	0910001B19Rik|Td	trypsin 4	protein-coding
Diff_Nuc42223	chr2	140813292	140813431	+	0	NA	intron (NM_001013802, intron 4 of 18)	intron (NM_001013802, intron 4 of 18)	-316149	NM_178382	71436	Mm.426781	NM_178382	ENSMUSG00000051379	Flrt3	5530600M07Rik|C430047I10Rik|mKIAA1469	fibronectin leucine rich transmembrane protein 3	protein-coding
Diff_Nuc27106	chr6	56097602	56097741	+	0	NA	intron (NM_001159957, intron 11 of 16)	intron (NM_001159957, intron 11 of 16)	130162	NM_011153	19051	Mm.42096	NM_011153	ENSMUSG00000002930	Ppp1r17	G-substrate|Gsbs|Ppp1r2	protein phosphatase 1, regulatory subunit 17	protein-coding
Diff_Nuc17828	chr14	30776762	30776901	+	0	NA	Intergenic	Intergenic	-4735	NM_019979	80795	Mm.104491	NM_019979	ENSMUSG00000042682	Selenok	1110001C03Rik|AA673253|HSPC030|Hsp30|Selk	selenoprotein K	protein-coding
Diff_Nuc14959	chr16	84733412	84733551	+	0	NA	intron (NM_017404, intron 2 of 9)	MTB_Mm|LTR|MaLR	2066	NM_017404	27393	Mm.103655	NM_017404	ENSMUSG00000022889	Mrpl39	C21orf8|MRP-L5|ORF22|Rpml5	mitochondrial ribosomal protein L39	protein-coding
Diff_Nuc13223	chr16	12283792	12283931	+	0	NA	Intergenic	Intergenic	299655	NM_001174086	72555	Mm.310139	NM_028277	ENSMUSG00000022494	Shisa9	2700045P11Rik|Ckamp44	shisa family member 9	protein-coding
Diff_Nuc13282	chr16	14978942	14979081	+	0	NA	Intergenic	MERVL_2A-int|LTR|ERVL	72272	NM_025769	66793	Mm.100270	NM_025769	ENSMUSG00000068617	Efcab1	4930449A16Rik|5430404L10Rik	EF hand calcium binding domain 1	protein-coding
Diff_Nuc50627	chr8	42087072	42087211	+	0	NA	intron (NM_001005863, intron 8 of 13)	ORR1A2|LTR|MaLR	-15681	NR_015457	78849	Mm.440930	NR_015457	ENSMUSG00000084960	B430010I23Rik	-	RIKEN cDNA B430010I23 gene	ncRNA
Diff_Nuc2968	chr13	116615402	116615541	+	0	NA	Intergenic	Intergenic	484425	NM_021459	16392	Mm.42242	NM_021459	ENSMUSG00000042258	Isl1	-	ISL1 transcription factor, LIM/homeodomain	protein-coding
Diff_Nuc2689	chr13	103905412	103905551	+	0	NA	intron (NM_175171, intron 3 of 28)	intron (NM_175171, intron 3 of 28)	219091	NM_175171	328329	Mm.202606	NM_175171	ENSMUSG00000034751	Mast4	4930420O11Rik|AI642422|mKIAA0303	microtubule associated serine/threonine kinase family member 4	protein-coding
Diff_Nuc8685	chr10	24018012	24018151	+	0	NA	intron (NM_021509, intron 10 of 11)	intron (NM_021509, intron 10 of 11)	74758	NM_021509	59012	Mm.285934	NM_021509	ENSMUSG00000020000	Moxd1	3230402N08Rik|MNCb-5203	monooxygenase, DBH-like 1	protein-coding
Diff_Nuc10774	chr10	115452742	115452881	+	0	NA	Intergenic	Intergenic	-2608	NM_011217	19279	Mm.336316	NM_011217	ENSMUSG00000020151	Ptprr	Gmcp1|PTP-SL|PTPBR7|RPTPRR|mPTP213	protein tyrosine phosphatase, receptor type, R	protein-coding
Diff_Nuc28213	chr6	108388472	108388611	+	0	NA	intron (NM_010585, intron 43 of 61)	intron (NM_010585, intron 43 of 61)	-51196	NR_106121	102465766		NR_106121	ENSMUSG00000105697	Mir7661	mmu-mir-7661	microRNA 7661	ncRNA
Diff_Nuc47918	chr9	36552202	36552341	+	0	NA	intron (NM_008408, intron 11 of 17)	B3A|SINE|B2	-18028	NM_007691	12649	Mm.16753	NM_007691	ENSMUSG00000032113	Chek1	C85740|Chk1|rad27	checkpoint kinase 1	protein-coding
Diff_Nuc37573	chr3	105825832	105825971	+	0	NA	intron (NM_001080816, intron 5 of 10)	intron (NM_001080816, intron 5 of 10)	-8337	NM_001200028	100503311	Mm.386825	NM_029604	ENSMUSG00000010136	Pifo	1700027A23Rik	primary cilia formation	protein-coding
Diff_Nuc26379	chr6	26930112	26930251	+	0	NA	Intergenic	Lx2|LINE|L1	956569	NR_030420	735266		NR_030420	ENSMUSG00000076067	Mir592	Mirn592|mir-592|mmu-mir-592	microRNA 592	ncRNA
Diff_Nuc48018	chr9	41367652	41367791	+	0	NA	intron (NR_131930, intron 3 of 3)	ORR1E|LTR|MaLR	-21615	NR_015483	73144	Mm.38166	NM_001033153	ENSMUSG00000074415	3110039I08Rik	2610203C20Rik|AI848448|D230004N17Rik|D3Mgi9|Mir100hg	RIKEN cDNA 3110039I08 gene	ncRNA
Diff_Nuc30368	chr5	62085012	62085151	+	0	NA	Intergenic	L1Md_F2|LINE|L1	-115001	NM_019468	14380	Mm.347430	NM_019468	ENSMUSG00000089992	G6pd2	G6pdx-ps1|Gpd-2|Gpd2	glucose-6-phosphate dehydrogenase 2	protein-coding
Diff_Nuc38399	chr3	143446112	143446251	+	0	NA	Intergenic	Intergenic	-71074	NR_040405	621809	Mm.360134	NR_040405	ENSMUSG00000105279	Gm6260	EG621809	predicted gene 6260	ncRNA
Diff_Nuc14688	chr16	73608062	73608201	+	0	NA	Intergenic	Intergenic	734181	NR_030464	751561		NR_030464	ENSMUSG00000104758	Mir691	Mirn691|mir-691|mmu-mir-691	microRNA 691	ncRNA
Diff_Nuc49550	chr9	111018312	111018451	+	0	NA	Intergenic	B3A|SINE|B2	-2234	NM_027742	71268	Mm.302287	NM_027742	ENSMUSG00000032497	Lrrfip2	5133400F20Rik|AI850587	leucine rich repeat (in FLII) interacting protein 2	protein-coding
Diff_Nuc3089	chr12	4154452	4154591	+	0	NA	intron (NM_138305, intron 1 of 20)	intron (NM_138305, intron 1 of 20)	20368	NM_138305	104111	Mm.489807	NM_138305	ENSMUSG00000020654	Adcy3	AC3|mKIAA0511	adenylate cyclase 3	protein-coding
Diff_Nuc10642	chr10	110514232	110514371	+	0	NA	Intergenic	RMER4B|LTR|ERVK	-67179	NM_172554	320150	Mm.339281	NM_172554	ENSMUSG00000035798	Zdhhc17	A230053P19Rik|BB187739|D130071N24Rik|Hip14	zinc finger, DHHC domain containing 17	protein-coding
Diff_Nuc23306	chr7	16950342	16950481	+	0	NA	intron (NM_019748, intron 5 of 8)	intron (NM_019748, intron 5 of 8)	22834	NM_001285892	56459	Mm.258530	NM_019748	ENSMUSG00000052833	Sae1	2400010M20Rik|2610044L12Rik|AL033372|AOS1|AW743391|D7Ertd177e|HSPC140|Sua1|Uble1a	SUMO1 activating enzyme subunit 1	protein-coding
Diff_Nuc2711	chr13	104941752	104941891	+	0	NA	intron (NM_001093760, intron 7 of 11)	intron (NM_001093760, intron 7 of 11)	26725	NM_025879	66975	Mm.272541	NM_025879	ENSMUSG00000021711	Trappc13	2410002O22Rik|2610524F24Rik|AI451892|AU017229	trafficking protein particle complex 13	protein-coding
Diff_Nuc28392	chr6	116184692	116184831	+	0	NA	intron (NM_026585, intron 17 of 30)	Lx|LINE|L1	26710	NM_026585	28006	Mm.28524	NM_026585	ENSMUSG00000024104	Washc2	A130095H06|C530005J20Rik|D6Wsu116e|Fam21	WASH complex subunit 2	protein-coding
Diff_Nuc27213	chr6	61101402	61101541	+	0	NA	Intergenic	RCHARR1|DNA|MER1_type	-28848	NM_001164316	232035	Mm.150324	NM_183310	ENSMUSG00000039578	Ccser1	6230405M12Rik|C130092O11Rik|Fam190a	coiled-coil serine rich 1	protein-coding
Diff_Nuc12358	chr17	65807112	65807251	+	0	NA	intron (NM_001289486, intron 8 of 14)	L1Md_F3|LINE|L1	82941	NM_001008973	381107	Mm.141275	NM_001008973	ENSMUSG00000045036	Tmem232	E130009J12Rik|Gm940|Tes13-L|Tes13-S	transmembrane protein 232	protein-coding
Diff_Nuc13330	chr16	16487142	16487281	+	0	NA	intron (NM_001301817, intron 3 of 16)	L1Md_F2|LINE|L1	40293	NM_001301818	224014	Mm.256131	NM_139232	ENSMUSG00000022788	Fgd4	9030023J02Rik|9330209B17Rik|Frabp|ZFYVE6	FYVE, RhoGEF and PH domain containing 4	protein-coding
Diff_Nuc14311	chr16	59547812	59547951	+	0	NA	intron (NM_174848, intron 4 of 18)	intron (NM_174848, intron 4 of 18)	7697	NM_174848	224273	Mm.246424	NM_174848	ENSMUSG00000022723	Crybg3	5031404N19|AU022790|Gm9581	beta-gamma crystallin domain containing 3	protein-coding
Diff_Nuc51831	chr8	96689442	96689581	+	0	NA	Intergenic	Intergenic	-7007	NM_008630	17750	Mm.147226	NM_008630	ENSMUSG00000031762	Mt2	AA409533|MT-II|Mt-2	metallothionein 2	protein-coding
Diff_Nuc47174	chr1	196762822	196762961	+	0	NA	Intergenic	Intergenic	-2124	NM_133654	12490	Mm.29798	NM_133654	ENSMUSG00000016494	Cd34	AU040960	CD34 antigen	protein-coding
Diff_Nuc18591	chr14	68344712	68344851	+	0	NA	intron (NM_001285933, intron 3 of 11)	intron (NM_001285933, intron 3 of 11)	10626	NM_001285933	105440	Mm.6720	NM_134073	ENSMUSG00000034327	Kctd9	-	potassium channel tetramerisation domain containing 9	protein-coding
Diff_Nuc23809	chr7	58002412	58002551	+	0	NA	intron (NM_001037906, intron 15 of 19)	Lx8|LINE|L1	147921	NM_172901	243996	Mm.443270	NM_172901	ENSMUSG00000084234	4933405O20Rik	-	RIKEN cDNA 4933405O20 gene	protein-coding
Diff_Nuc35009	chr4	141255582	141255721	+	0	NA	intron (NM_001017966, intron 5 of 9)	ID_B1|SINE|B4	-14020	NM_023544	69994	Mm.441022	NM_023544	ENSMUSG00000040715	Rsc1a1	1700027M01Rik|OTTMUSG00000010365|Rs1	regulatory solute carrier protein, family 1, member 1	protein-coding
Diff_Nuc21888	chr18	35530022	35530161	+	0	NA	intron (NM_030749, intron 3 of 9)	intron (NM_030749, intron 3 of 9)	128488	NM_030749	81500	Mm.291482	NM_030749	ENSMUSG00000024357	Sil1	1810057E01Rik|AI042831|wz	endoplasmic reticulum chaperone SIL1 homolog (S. cerevisiae)	protein-coding
Diff_Nuc3096	chr12	4503092	4503231	+	0	NA	Intergenic	RMER1C|Other|Other	-19101	NM_010881	17977	Mm.301039	NM_010881	ENSMUSG00000020647	Ncoa1	KAT13A|NCoA-1|NRC-1|SRC-1|SRC-a|SRC1|bHLHe74|mNRC-1	nuclear receptor coactivator 1	protein-coding
Diff_Nuc23262	chr7	13621292	13621431	+	0	NA	intron (NM_001168469, intron 5 of 6)	intron (NM_001168469, intron 5 of 6)	-1235	NM_026885	68953	Mm.295670	NM_026885	ENSMUSG00000033916	Chmp2a	1500016L11Rik	charged multivesicular body protein 2A	protein-coding
Diff_Nuc22251	chr18	51457062	51457201	+	0	NA	intron (NM_001081224, intron 1 of 1)	intron (NM_001081224, intron 1 of 1)	179579	NM_001081224	71373	Mm.63546	NM_001081224	ENSMUSG00000073565	Prr16	5430406M13Rik|AI607429	proline rich 16	protein-coding
Diff_Nuc26944	chr6	48550632	48550771	+	0	NA	Intergenic	ID_B1|SINE|B4	6819	NM_001079904	58887	Mm.219183	NM_175099	ENSMUSG00000052751	Repin1	AI425994|Ap4|E430037F08Rik|Zfp-464|Zfp464	replication initiator 1	protein-coding
Diff_Nuc37498	chr3	103045032	103045171	+	0	NA	Intergenic	PB1|SINE|Alu	-38115	NM_053170	94093	Mm.195036	NM_053170	ENSMUSG00000033014	Trim33	8030451N04Rik|AI413936|Ecto|Tif1g	tripartite motif-containing 33	protein-coding
Diff_Nuc2822	chr13	109771292	109771431	+	0	NA	intron (NM_011056, intron 2 of 16)	Lx7|LINE|L1	326990	NM_011056	238871	Mm.434429	NM_011056	ENSMUSG00000021699	Pde4d	9630011N22Rik|Dpde3	phosphodiesterase 4D, cAMP specific	protein-coding
Diff_Nuc52258	chr8	117026592	117026731	+	0	NA	intron (NM_019573, intron 5 of 8)	intron (NM_019573, intron 5 of 8)	63109	NM_019573	80707	Mm.440420	NM_019573	ENSMUSG00000004637	Wwox	5330426P09Rik|9030416C10Rik|WOX1	WW domain-containing oxidoreductase	protein-coding
Diff_Nuc5668	chr11	3027512	3027651	+	0	NA	non-coding (NR_003517, exon 3 of 7)	non-coding (NR_003517, exon 3 of 7)	3551	NR_003518	66776	Mm.247625	NR_003518		Pisd-ps3	4933439C20Rik	phosphatidylserine decarboxylase, pseudogene 3	pseudo
Diff_Nuc20678	chr19	36920022	36920161	+	0	NA	exon (NM_001163635, exon 2 of 27)	exon (NM_001163635, exon 2 of 27)	11369	NM_001163635	74493	Mm.249310	NM_001163635	ENSMUSG00000024811	Tnks2	5430432P15Rik|AA517131|AI662480|ARTD6|TNKS-2|Tank2	tankyrase, TRF1-interacting ankyrin-related ADP-ribose polymerase 2	protein-coding
Diff_Nuc17543	chr14	15468802	15468941	+	0	NA	Intergenic	Intergenic	-66668	NM_001033270	218756	Mm.258893	NM_001033270	ENSMUSG00000021733	Slc4a7	E430014N10Rik|NBC3|NBCn1|NBCn1-G	solute carrier family 4, sodium bicarbonate cotransporter, member 7	protein-coding
Diff_Nuc13377	chr16	18264092	18264231	+	0	NA	intron (NM_033324, intron 9 of 13)	B1_Mur1|SINE|Alu	15185	NM_001081000	15547	Mm.271798	NM_008307	ENSMUSG00000022721	Trmt2a	Htf9c	TRM2 tRNA methyltransferase 2A	protein-coding
Diff_Nuc41190	chr2	101479122	101479261	+	0	NA	3' UTR (NM_009019, exon 2 of 2)	3' UTR (NM_009019, exon 2 of 2)	-10048	NM_026592	68170	Mm.31263	NM_026592	ENSMUSG00000027165	B230118H07Rik	NWC	RIKEN cDNA B230118H07 gene	protein-coding
Diff_Nuc34393	chr4	109452492	109452631	+	0	NA	intron (NM_007983, intron 7 of 18)	(CAAA)n|Simple_repeat|Simple_repeat	103329	NM_007983	14084	Mm.318259	NM_007983	ENSMUSG00000010517	Faf1	AA408698|Dffrx|Fam	Fas-associated factor 1	protein-coding
Diff_Nuc22801	chr18	74271092	74271231	+	0	NA	Intergenic	L1_Mur3|LINE|L1	-46558	NM_172632	225724	Mm.254517	NM_172632	ENSMUSG00000024558	Mapk4	A330097D03Rik|Erk3|Prkm4|p63Mapk	mitogen-activated protein kinase 4	protein-coding
Diff_Nuc14715	chr16	74576112	74576251	+	0	NA	Intergenic	Intergenic	-165024	NM_175549	268902	Mm.171736	NM_175549	ENSMUSG00000052516	Robo2	2600013A04Rik|9430089E08Rik|BB097918|D230004I22Rik|mKIAA1568	roundabout guidance receptor 2	protein-coding
Diff_Nuc46320	chr1	158334922	158335061	+	0	NA	intron (NM_001346967, intron 4 of 25)	intron (NM_001346967, intron 4 of 25)	-4870	NM_001198597	77352	Mm.428709	NM_001033180	ENSMUSG00000026601	Axdnd1	9430070O13Rik|Gm979	axonemal dynein light chain domain containing 1	protein-coding
Diff_Nuc38673	chr3	156563182	156563321	+	0	NA	intron (NM_001039094, intron 2 of 6)	intron (NM_001039094, intron 2 of 6)	338493	NM_001039094	320840	Mm.317293	NM_177274	ENSMUSG00000040037	Negr1	5330422G01Rik|KILON|Ntra	neuronal growth regulator 1	protein-coding
Diff_Nuc12133	chr17	54499662	54499801	+	0	NA	intron (NR_045825, intron 1 of 2)	MER2|DNA|MER2_type	9668	NR_045825	69418	Mm.391004	NR_045825	ENSMUSG00000099747	1700025K24Rik	-	RIKEN cDNA 1700025K24 gene	ncRNA
Diff_Nuc17779	chr14	27749102	27749241	+	0	NA	intron (NM_145221, intron 16 of 21)	MYSERV16_I-int|LTR|ERVK	34566	NM_145221	72993	Mm.202322	NM_145221	ENSMUSG00000040760	Appl1	2900057D21Rik|7330406P05Rik|AI585782|AW209077|BB022931|C88264|DIP13	adaptor protein, phosphotyrosine interaction, PH domain and leucine zipper containing 1	protein-coding
Diff_Nuc27341	chr6	67248672	67248811	+	0	NA	intron (NM_008354, intron 13 of 15)	intron (NM_008354, intron 13 of 15)	31768	NM_025814	66870	Mm.240490	NM_025814	ENSMUSG00000036371	Serbp1	1200009K13Rik|9330147J08Rik|AL022786|Pairbp1	serpine1 mRNA binding protein 1	protein-coding
Diff_Nuc45387	chr1	113327202	113327341	+	0	NA	Intergenic	L1Md_T|LINE|L1	434224	NM_001081316	319901	Mm.103468	NM_001081316	ENSMUSG00000038702	Dsel	9330132E09Rik|DS-epi2	dermatan sulfate epimerase-like	protein-coding
Diff_Nuc8446	chr10	13627972	13628111	+	0	NA	Intergenic	Lx8|LINE|L1	-39278	NM_001347362	66253	Mm.45755	NM_025446	ENSMUSG00000019806	Aig1	1500031O19Rik|AV064870|AW413422|CGI-103	androgen-induced 1	protein-coding
Diff_Nuc9178	chr10	44935632	44935771	+	0	NA	Intergenic	B2_Mm2|SINE|B2	-73410	NM_024286	78977	Mm.24748	NM_024286	ENSMUSG00000019848	Popdc3	AA682104|Pop3	popeye domain containing 3	protein-coding
Diff_Nuc28416	chr6	117385812	117385951	+	0	NA	Intergenic	Intergenic	267328	NM_021704	20315	Mm.303231	NM_013655	ENSMUSG00000061353	Cxcl12	Pbsf|Scyb12|Sdf1|Tlsf|Tpar1	chemokine (C-X-C motif) ligand 12	protein-coding
Diff_Nuc5581	chr12	118155512	118155651	+	0	NA	intron (NM_011215, intron 11 of 22)	intron (NM_011215, intron 11 of 22)	234161	NR_033538	100038689	Mm.445351	NR_033538	ENSMUSG00000099907	Gm10421	ENSMUSG00000072792	predicted gene 10421	ncRNA
Diff_Nuc28052	chr6	100632052	100632191	+	0	NA	Intergenic	Intergenic	-10970	NM_181590	72171	Mm.256022	NM_181590	ENSMUSG00000035378	Shq1	2810403P18Rik|Grim-1	SHQ1 homolog (S. cerevisiae)	protein-coding
Diff_Nuc41516	chr2	113987662	113987801	+	0	NA	intron (NM_001290788, intron 4 of 33)	MTEa|LTR|MaLR	-11425	NR_105968	102465982		NR_105968	ENSMUSG00000098464	Mir7002	Gm27429|mmu-mir-7002	microRNA 7002	ncRNA
Diff_Nuc15281	chr15	4262942	4263081	+	0	NA	Intergenic	MuRRS4-int|LTR|ERV1	-62480	NM_177355	239318	Mm.308996	NM_177355	ENSMUSG00000049148	Plcxd3	B130016O10Rik	phosphatidylinositol-specific phospholipase C, X domain containing 3	protein-coding
Diff_Nuc24172	chr7	72235502	72235641	+	0	NA	intron (NM_183087, intron 1 of 9)	RMER15|LTR|ERVL	65843	NM_183087	70638	Mm.441986	NM_183087	ENSMUSG00000030518	Fam189a1	5730507A09Rik|AW047451	family with sequence similarity 189, member A1	protein-coding
Diff_Nuc37682	chr3	110949062	110949201	+	0	NA	Intergenic	L1Md_F|LINE|L1	-735690	NR_045362	625585	Mm.389497	NR_045362	ENSMUSG00000104543	Gm6602	-	predicted gene 6602	ncRNA
Diff_Nuc14260	chr16	57293582	57293721	+	0	NA	promoter-TSS (NM_027651)	promoter-TSS (NM_027651)	-687	NM_027651	71027	Mm.158563	NM_027651	ENSMUSG00000022753	Tmem30c	4933401B01Rik|4933409A18Rik|Cdc50c	transmembrane protein 30C	protein-coding
Diff_Nuc9359	chr10	53707892	53708031	+	0	NA	intron (NM_008548, intron 5 of 12)	L1Md_F2|LINE|L1	87641	NM_008548	17155	Mm.117294	NM_008548	ENSMUSG00000003746	Man1a	Man1a1|PCR1	mannosidase 1, alpha	protein-coding
Diff_Nuc29696	chr5	30087902	30088041	+	0	NA	intron (NM_001127367, intron 5 of 7)	intron (NM_001127367, intron 5 of 7)	-25495	NR_028426	332993	Mm.473746	NR_028426		Gm5129	EG332993|ENSMUSG00000053121	predicted gene 5129	ncRNA
Diff_Nuc30652	chr5	74849722	74849861	+	0	NA	intron (NM_001286437, intron 4 of 7)	intron (NM_001286437, intron 4 of 7)	77976	NM_178672	212986	Mm.134147	NM_178672	ENSMUSG00000062110	Scfd2	E430013M20Rik|STXBP1L1	Sec1 family domain containing 2	protein-coding
Diff_Nuc3525	chr12	31637642	31637781	+	0	NA	intron (NR_110343, intron 9 of 10)	Lx9|LINE|L1	41177	NM_013709	24057	Mm.218624	NM_013709	ENSMUSG00000020669	Sh3yl1	AI314953|Ray|YSC84	Sh3 domain YSC-like 1	protein-coding
Diff_Nuc27908	chr6	93343602	93343741	+	0	NA	Intergenic	Intergenic	453095	NR_015530	330385	Mm.483472	NR_015530	ENSMUSG00000097462	9530026P05Rik	B430306B02	RIKEN cDNA 9530026P05 gene	ncRNA
Diff_Nuc27933	chr6	94118432	94118571	+	0	NA	intron (NR_130996, intron 1 of 1)	intron (NR_130996, intron 1 of 1)	68935	NR_130996	78178	Mm.452749	NR_130996	ENSMUSG00000045095	4930511A08Rik	-	RIKEN cDNA 4930511A08 gene	ncRNA
Diff_Nuc27399	chr6	70769212	70769351	+	0	NA	Intergenic	MLT2D|LTR|ERVL	-25228	NM_010121	13666	Mm.247167	NM_010121	ENSMUSG00000031668	Eif2ak3	Pek|Perk	eukaryotic translation initiation factor 2 alpha kinase 3	protein-coding
Diff_Nuc49416	chr9	104303512	104303651	+	0	NA	Intergenic	B1_Mus1|SINE|Alu	-24862	NR_035516	100316725		NR_035516	ENSMUSG00000089406	Mir2136	mmu-mir-2136	microRNA 2136	ncRNA
Diff_Nuc11838	chr17	39578152	39578291	+	0	NA	Intergenic	L1_Mur2|LINE|L1	34917	NM_001244763	100126774	Mm.350534	NM_001244763	ENSMUSG00000094024	Esp18	Gm20579	exocrine gland secreted peptide 18	protein-coding
Diff_Nuc49656	chr9	116509942	116510081	+	0	NA	intron (NM_001172126, intron 11 of 12)	intron (NM_001172126, intron 11 of 12)	-425530	NM_009371	21813	Mm.172346	NM_009371	ENSMUSG00000032440	Tgfbr2	1110020H15Rik|AU042018|DNIIR|RIIDN|TBR-II|TbetaR-II|TbetaRII	transforming growth factor, beta receptor II	protein-coding
Diff_Nuc28017	chr6	98756982	98757121	+	0	NA	Intergenic	Intergenic	221241	NM_001197322	108655	Mm.234965	NM_053202	ENSMUSG00000030067	Foxp1	3110052D19Rik|4932443N09Rik|AI461938|AW494214	forkhead box P1	protein-coding
Diff_Nuc649	chr13	11553412	11553551	+	0	NA	Intergenic	Lx3C|LINE|L1	-60838	NR_027813	664793	Mm.410565	NR_027813		Zp4-ps	EG664793|Zp4|Zpb	zona pellucida glycoprotein 4, pseudogene	pseudo
Diff_Nuc32315	chr4	12949432	12949571	+	0	NA	Intergenic	Intergenic	115517	NM_001171801	208820	Mm.12057	NM_173746	ENSMUSG00000055963	Triqk	C130086A10|Gm11818|OTTMUSG00000004461	triple QxxK/R motif containing	protein-coding
Diff_Nuc7648	chr11	95463732	95463871	+	0	NA	Intergenic	RMER16-int|LTR|ERVK	-14789	NM_033217	18053	Mm.283893	NM_033217	ENSMUSG00000000120	Ngfr	LNGFR|Tnfrsf16|p75|p75NGFR|p75NTR	nerve growth factor receptor (TNFR superfamily, member 16)	protein-coding
Diff_Nuc2210	chr13	83408122	83408261	+	0	NA	Intergenic	Intergenic	-234842	NM_001347572	17260	Mm.24001	NM_025282	ENSMUSG00000005583	Mef2c	5430401D19Rik|9930028G15Rik|AV011172|Mef2	myocyte enhancer factor 2C	protein-coding
Diff_Nuc18562	chr14	66791492	66791631	+	0	NA	intron (NM_172498, intron 15 of 29)	CT-rich|Low_complexity|Low_complexity	31764	NM_144803	110902	Mm.57350	NM_144803	ENSMUSG00000022041	Chrna2	Acra-2|Acra2|BC011490	cholinergic receptor, nicotinic, alpha polypeptide 2 (neuronal)	protein-coding
Diff_Nuc13488	chr16	24905572	24905711	+	0	NA	intron (NM_001145954, intron 5 of 7)	LTR48|LTR|ERV1	-154084	NR_040374	319487	Mm.137341	NR_040374	ENSMUSG00000096960	A230028O05Rik	-	RIKEN cDNA A230028O05 gene	ncRNA
Diff_Nuc11347	chr17	15349562	15349701	+	0	NA	Intergenic	RMER6A|LTR|ERVK	28116	NR_046164	328747	Mm.256835	NR_046164	ENSMUSG00000097624	Gm5091	C330048F19	predicted gene 5091	ncRNA
Diff_Nuc12637	chr17	79489592	79489731	+	0	NA	TTS (NM_001316729)	TTS (NM_001316729)	38415	NM_001316729	70536	Mm.293870	NM_027455	ENSMUSG00000024084	Qpct	5730422A13Rik	glutaminyl-peptide cyclotransferase (glutaminyl cyclase)	protein-coding
Diff_Nuc7191	chr11	74735122	74735261	+	0	NA	intron (NM_013761, intron 1 of 8)	intron (NM_013761, intron 1 of 8)	4109	NM_013761	27364	Mm.131443	NM_013761	ENSMUSG00000001323	Srr	M100034|Rgsc34|Srs	serine racemase	protein-coding
Diff_Nuc1970	chr13	74192872	74193011	+	0	NA	intron (NM_028959, intron 3 of 11)	intron (NM_028959, intron 3 of 11)	6792	NM_028959	74470	Mm.73234	NM_028959	ENSMUSG00000021572	Cep72	2610029E11Rik|4933440J22Rik	centrosomal protein 72	protein-coding
Diff_Nuc39644	chr2	40516482	40516621	+	0	NA	intron (NM_053011, intron 82 of 90)	intron (NM_053011, intron 82 of 90)	-1434693	NM_024209	67857	Mm.389242	NM_024209	ENSMUSG00000026753	Ppp6c	2310003C10Rik	protein phosphatase 6, catalytic subunit	protein-coding
Diff_Nuc37642	chr3	108436002	108436141	+	0	NA	exon (NM_181400, exon 10 of 15)	exon (NM_181400, exon 10 of 15)	-20760	NM_145543	229725	Mm.214545	NM_145543	ENSMUSG00000027884	Clcc1	Mclc	chloride channel CLIC-like 1	protein-coding
Diff_Nuc15570	chr15	17906182	17906321	+	0	NA	Intergenic	L1MCa|LINE|L1	393131	NR_045711	70886	Mm.399021	NR_045711		4921515E04Rik	-	RIKEN cDNA 4921515E04 gene	ncRNA
Diff_Nuc5937	chr11	15447092	15447231	+	0	NA	Intergenic	Intergenic	-710566	NM_001290539	211739	Mm.284015	NM_145967	ENSMUSG00000048834	Vstm2a	Vstm2	V-set and transmembrane domain containing 2A	protein-coding
Diff_Nuc23368	chr7	24892302	24892441	+	0	NA	3' UTR (NM_001045486, exon 5 of 5)	3' UTR (NM_001045486, exon 5 of 5)	-4968	NM_021307	57745	Mm.82678	NM_021307	ENSMUSG00000052675	Zfp112	Znf112|Znf228	zinc finger protein 112	protein-coding
Diff_Nuc19784	chr14	119465652	119465791	+	0	NA	intron (NM_001081252, intron 11 of 38)	L1_Mus3|LINE|L1	32935	NM_001081252	66435	Mm.213406	NM_025561	ENSMUSG00000042104	Uggt2	1810064L21Rik|3110001A05Rik|3110027P15Rik|A230065J02Rik|AW047562|Ugcgl2	UDP-glucose glycoprotein glucosyltransferase 2	protein-coding
Diff_Nuc19603	chr14	109635242	109635381	+	0	NA	Intergenic	Intergenic	-321855	NM_199065	76965	Mm.257268	NM_199065	ENSMUSG00000075478	Slitrk1	3200001I04Rik	SLIT and NTRK-like family, member 1	protein-coding
Diff_Nuc17933	chr14	35299202	35299341	+	0	NA	intron (NM_009758, intron 1 of 12)	intron (NM_009758, intron 1 of 12)	16461	NM_009758	12166	Mm.237825	NM_009758	ENSMUSG00000021796	Bmpr1a	1110037I22Rik|ALK3|AU045487|BMPR-IA|Bmpr	bone morphogenetic protein receptor, type 1A	protein-coding
Diff_Nuc40510	chr2	71923542	71923681	+	0	NA	intron (NM_001204166, intron 1 of 27)	L1MEb|LINE|L1	30937	NM_001204166	56508	Mm.196153	NM_019688	ENSMUSG00000049044	Rapgef4	1300003D15Rik|5730402K07Rik|6330581N18Rik|EPAC 2|Epac-2|Epac2|mKIAA4040	Rap guanine nucleotide exchange factor (GEF) 4	protein-coding
Diff_Nuc38341	chr3	140728582	140728721	+	0	NA	Intergenic	L1Md_F2|LINE|L1	146668	NM_008811	18598	Mm.4223	NM_008811	ENSMUSG00000047674	Pdha2	Pdhal	pyruvate dehydrogenase E1 alpha 2	protein-coding
Diff_Nuc26883	chr6	46312302	46312441	+	0	NA	intron (NM_001004357, intron 11 of 23)	intron (NM_001004357, intron 11 of 23)	-882024	NM_025771	66797	Mm.440084	NM_025771	ENSMUSG00000039419	Cntnap2	5430425M22Rik|Caspr2|mKIAA0868	contactin associated protein-like 2	protein-coding
Diff_Nuc26136	chr6	16687562	16687701	+	0	NA	Intergenic	Intergenic	160810	NM_031198	21426	Mm.36217	NM_031198	ENSMUSG00000029553	Tfec	BB107417|Tcfec|bHLHe34	transcription factor EC	protein-coding
Diff_Nuc41846	chr2	126840262	126840401	+	0	NA	intron (NM_175550, intron 3 of 20)	intron (NM_175550, intron 3 of 20)	5884	NM_175550	108011	Mm.134045	NM_175550	ENSMUSG00000001998	Ap4e1	2310033A20Rik|9930028M04Rik|AV087807	adaptor-related protein complex AP-4, epsilon 1	protein-coding
Diff_Nuc45680	chr1	130008542	130008681	+	0	NA	intron (NM_181750, intron 1 of 26)	intron (NM_181750, intron 1 of 26)	8728	NM_181750	226412	Mm.221041	NM_181750	ENSMUSG00000056211	R3hdm1	R3hdm	R3H domain containing 1	protein-coding
Diff_Nuc35393	chr3	7395572	7395711	+	0	NA	intron (NM_008862, intron 1 of 2)	ETnERV2-int|LTR|ERVK	29037	NM_008862	18767	Mm.3193	NM_008862	ENSMUSG00000027499	Pkia	AI415001|PKIalpha	protein kinase inhibitor, alpha	protein-coding
Diff_Nuc51220	chr8	67349072	67349211	+	0	NA	intron (NM_178633, intron 2 of 14)	intron (NM_178633, intron 2 of 14)	24681	NM_178633	77113	Mm.350347	NM_178633	ENSMUSG00000031605	Klhl2	6030411N21Rik|ABP-KELCH|AU020744|Mav	kelch-like 2, Mayven	protein-coding
Diff_Nuc9789	chr10	74113792	74113931	+	0	NA	Intergenic	(TA)n|Simple_repeat|Simple_repeat	-316115	NM_010311	14687	Mm.32595	NM_010311	ENSMUSG00000040009	Gnaz	AI847979|Gz	guanine nucleotide binding protein, alpha z subunit	protein-coding
Diff_Nuc22736	chr18	71649922	71650061	+	0	NA	intron (NM_007831, intron 12 of 28)	intron (NM_007831, intron 12 of 28)	860732	NM_007831	13176	Mm.167882	NM_007831	ENSMUSG00000060534	Dcc	C030036D22Rik|Igdcc1	deleted in colorectal carcinoma	protein-coding
Diff_Nuc8890	chr10	32514272	32514411	+	0	NA	intron (NM_001025286, intron 1 of 3)	MLT2B1|LTR|ERVL	95380	NM_001013411	432450	Mm.49665	NM_001013411	ENSMUSG00000069670	Nkain2	6330571D19Rik|AW455467|Tcba1	Na+/K+ transporting ATPase interacting 2	protein-coding
Diff_Nuc36702	chr3	68877942	68878081	+	0	NA	exon (NM_008467, exon 17 of 17)	exon (NM_008467, exon 17 of 17)	-29347	NM_025863	66949	Mm.176695	NM_025863	ENSMUSG00000034317	Trim59	2310035M22Rik|2700022F13Rik|Mrf1|TSBF1	tripartite motif-containing 59	protein-coding
Diff_Nuc19176	chr14	92092472	92092611	+	0	NA	Intergenic	L1Md_F2|LINE|L1	1565843	NR_045712	74967	Mm.390704	NR_045712		4930474H20Rik	-	RIKEN cDNA 4930474H20 gene	ncRNA
Diff_Nuc28482	chr6	120466842	120466981	+	0	NA	intron (NM_144815, intron 5 of 7)	intron (NM_144815, intron 5 of 7)	14406	NM_144815	214932	Mm.255322	NM_144815	ENSMUSG00000058979	Cecr5	A930002G03Rik	cat eye syndrome chromosome region, candidate 5	protein-coding
Diff_Nuc5055	chr12	90514302	90514441	+	0	NA	intron (NM_001198587, intron 7 of 19)	intron (NM_001198587, intron 7 of 19)	322537	NM_172544	18191	Mm.425766	NM_172544	ENSMUSG00000066392	Nrxn3	-	neurexin III	protein-coding
Diff_Nuc37690	chr3	111140412	111140551	+	0	NA	Intergenic	Lx9|LINE|L1	-544340	NR_045362	625585	Mm.389497	NR_045362	ENSMUSG00000104543	Gm6602	-	predicted gene 6602	ncRNA
Diff_Nuc32252	chr4	9076622	9076761	+	0	NA	Intergenic	(TAAAA)n|Simple_repeat|Simple_repeat	-119773	NM_028940	74438	Mm.473368	NM_028940	ENSMUSG00000041216	Clvs1	4933402J24Rik|Clvl1|Rlbp1l1	clavesin 1	protein-coding
Diff_Nuc48009	chr9	40865352	40865491	+	0	NA	intron (NM_176860, intron 1 of 13)	intron (NM_176860, intron 1 of 13)	-52710	NM_019465	54698	Mm.42791	NM_019465	ENSMUSG00000032021	Crtam	-	cytotoxic and regulatory T cell molecule	protein-coding
Diff_Nuc28059	chr6	100995962	100996101	+	0	NA	Intergenic	Intergenic	212399	NM_182939	232314	Mm.27223	NM_182939	ENSMUSG00000052144	Ppp4r2	BE691708|C230060M08Rik	protein phosphatase 4, regulatory subunit 2	protein-coding
Diff_Nuc33001	chr4	44916322	44916461	+	0	NA	intron (NM_138590, intron 5 of 8)	PB1D10|SINE|Alu	-77875	NM_080289	76238	Mm.196574	NM_080289	ENSMUSG00000035637	Grhpr	1110059D05Rik|6430629L09Rik|Glxr	glyoxylate reductase/hydroxypyruvate reductase	protein-coding
Diff_Nuc18017	chr14	39161162	39161301	+	0	NA	Intergenic	Intergenic	-550359	NR_045713	75170	Mm.372967	NR_045713	ENSMUSG00000093528	Nrg3os	4930529F24Rik	neuregulin 3, opposite strand	ncRNA
Diff_Nuc38711	chr3	157827692	157827831	+	0	NA	intron (NM_001291453, intron 19 of 25)	intron (NM_001291453, intron 19 of 25)	128115	NM_001289524	67144	Mm.358704	NM_024194	ENSMUSG00000063052	Lrrc40	2610040E16Rik|AI837674	leucine rich repeat containing 40	protein-coding
Diff_Nuc14475	chr16	65407632	65407771	+	0	NA	Intergenic	Lx2|LINE|L1	-113263	NM_008849	18736	Mm.355440	NM_008849	ENSMUSG00000004842	Pou1f1	GHF-1|Hmp1|Pit-1|Pit1|Pit1-rs1|dw|dwarf	POU domain, class 1, transcription factor 1	protein-coding
Diff_Nuc3791	chr12	40669072	40669211	+	0	NA	Intergenic	tRNA-Ala-GCY_|tRNA|tRNA	94822	NM_007487	11861	Mm.12723	NM_007487	ENSMUSG00000047446	Arl4a	AI467555|Arl4	ADP-ribosylation factor-like 4A	protein-coding
Diff_Nuc47342	chr9	8313972	8314111	+	0	NA	Intergenic	L1_Mus3|LINE|L1	67255	NR_035437	100316772		NR_035437	ENSMUSG00000084747	Mir1899	Mirn1899|mmu-mir-1899	microRNA 1899	ncRNA
Diff_Nuc7694	chr11	97655112	97655251	+	0	NA	Intergenic	Lx9|LINE|L1	-5805	NM_010688	16796	Mm.271967	NM_010688	ENSMUSG00000038366	Lasp1	AA408629|Def-4|SH3P6|Tg(Col1a1-lacZ)1Ngma	LIM and SH3 protein 1	protein-coding
Diff_Nuc40643	chr2	77127262	77127401	+	0	NA	Intergenic	Intergenic	-8682	NM_175465	228071	Mm.27120	NM_175465	ENSMUSG00000042272	Sestd1	1500031J16Rik|A930010O20|Solo/Trio8	SEC14 and spectrin domains 1	protein-coding
Diff_Nuc16889	chr15	76916242	76916381	+	0	NA	intron (NM_175387, intron 11 of 12)	intron (NM_175387, intron 11 of 12)	1483	NR_108037	74303	Mm.444304	NR_108037	ENSMUSG00000097267	1700109K24Rik	4933425G21Rik	RIKEN cDNA 1700109K24 gene	ncRNA
Diff_Nuc14160	chr16	53215432	53215571	+	0	NA	Intergenic	Lx7|LINE|L1	-399644	NR_040495	73820	Mm.60493	NR_040495		4930404A05Rik	-	RIKEN cDNA 4930404A05 gene	ncRNA
Diff_Nuc13841	chr16	39975222	39975361	+	0	NA	Intergenic	Intergenic	1072833	NM_170599	207683	Mm.245564	NM_170599	ENSMUSG00000022790	Igsf11	1700025L02Rik|BT-IgSF|Igsf13	immunoglobulin superfamily, member 11	protein-coding
Diff_Nuc40573	chr2	74066252	74066391	+	0	NA	Intergenic	Intergenic	79453	NR_040501	73962	Mm.50289	NR_040501	ENSMUSG00000085405	4930441J16Rik	Astx1a|Astx1b|Astx1c	RIKEN cDNA 4930441J16 gene	ncRNA
Diff_Nuc28770	chr6	136753412	136753551	+	0	NA	promoter-TSS (NM_175652)	promoter-TSS (NM_175652)	-529	NM_175652	320332	Mm.246720	NM_175652	ENSMUSG00000096010	Hist4h4	B130044J01Rik	histone cluster 4, H4	protein-coding
Diff_Nuc10144	chr10	92740072	92740211	+	0	NA	intron (NM_001322265, intron 2 of 4)	intron (NM_001322265, intron 2 of 4)	33763	NM_001322268	13713	Mm.4454	NM_013508	ENSMUSG00000008398	Elk3	D430049E23Rik|Erp|Etrp|Net|Sap-2	ELK3, member of ETS oncogene family	protein-coding
Diff_Nuc45486	chr1	118925512	118925651	+	0	NA	Intergenic	(GAAA)n|Simple_repeat|Simple_repeat	1282128	NM_011650	22099	Mm.426637	NM_011650	ENSMUSG00000026374	Tsn	2610034C24Rik|AU040286|C3PO|TB-RBP	translin	protein-coding
Diff_Nuc821	chr13	17346222	17346361	+	0	NA	intron (NM_138654, intron 11 of 13)	intron (NM_138654, intron 11 of 13)	440308	NM_138654	192136	Mm.364180	NM_138654	ENSMUSG00000055137	Sugct	5033411D12Rik|D17907	succinyl-CoA glutarate-CoA transferase	protein-coding
Diff_Nuc41992	chr2	133152622	133152761	+	0	NA	Intergenic	Intergenic	-225204	NM_007553	12156	Mm.103205	NM_007553	ENSMUSG00000027358	Bmp2	AI467020|Bmp2a	bone morphogenetic protein 2	protein-coding
Diff_Nuc52012	chr8	104910862	104911001	+	0	NA	Intergenic	ID2|SINE|ID	398080	NM_009866	12552	Mm.1571	NM_009866	ENSMUSG00000031673	Cdh11	Cad11|OSF-4	cadherin 11	protein-coding
Diff_Nuc43921	chr1	47039912	47040051	+	0	NA	Intergenic	Intergenic	-129627	NM_172653	227059	Mm.233889	NM_172653	ENSMUSG00000025986	Slc39a10	2900042E17Rik|5430433I10|mKIAA1265	solute carrier family 39 (zinc transporter), member 10	protein-coding
Diff_Nuc45938	chr1	142291372	142291511	+	0	NA	intron (NM_001081027, intron 8 of 27)	ORR1A4|LTR|MaLR	148607	NM_001081027	240776	Mm.483845	NM_001081027	ENSMUSG00000052726	Kcnt2	E330038N15Rik|Slick	potassium channel, subfamily T, member 2	protein-coding
Diff_Nuc9228	chr10	47784702	47784841	+	0	NA	Intergenic	L1_Mus3|LINE|L1	1030878	NR_046212	100418235	Mm.185993	NR_046212		C130030K03Rik	-	proteasome (prosome, macropain) subunit, alpha type 6 pseudogene	pseudo
Diff_Nuc36173	chr3	45983692	45983831	+	0	NA	Intergenic	Intergenic	268102	NM_001101479	241989	Mm.119234	NM_001101479	ENSMUSG00000090919	Pabpc4l	C330050A14Rik|EG241989	poly(A) binding protein, cytoplasmic 4-like	protein-coding
Diff_Nuc17019	chr15	83850262	83850401	+	0	NA	intron (NM_029946, intron 4 of 31)	L1MA4A|LINE|L1	45448	NM_029946	77627	Mm.196288	NM_029946	ENSMUSG00000022441	Efcab6	4931407K02Rik|4932408N08Rik|bM150J22.2|mKIAA1672	EF-hand calcium binding domain 6	protein-coding
Diff_Nuc152	chrX	60493312	60493451	+	0	NA	Intergenic	Lx2B|LINE|L1	-713195	NR_045442	75545	Mm.391270	NR_045442	ENSMUSG00000085757	1700019B21Rik	-	RIKEN cDNA 1700019B21 gene	ncRNA
Diff_Nuc11933	chr17	44132642	44132781	+	0	NA	intron (NM_030598, intron 1 of 3)	intron (NM_030598, intron 1 of 3)	42571	NM_030598	53901	Mm.251242	NM_030598	ENSMUSG00000039601	Rcan2	Csp2|Dscr1l1|MCIP2|ZAKI-4	regulator of calcineurin 2	protein-coding
Diff_Nuc16519	chr15	58188192	58188331	+	0	NA	intron (NM_027211, intron 2 of 8)	L1MB8|LINE|L1	-32537	NM_177755	268807	Mm.124498	NM_177755	ENSMUSG00000022357	Klhl38	8230402K04Rik	kelch-like 38	protein-coding
Diff_Nuc31657	chr5	125423002	125423141	+	0	NA	Intergenic	(TG)n|Simple_repeat|Simple_repeat	-60774	NM_028443	73121	Mm.296138	NM_028443	ENSMUSG00000037962	Rflna	3110032G18Rik|Fam101a|cfm|cfm2	refilin A	protein-coding
Diff_Nuc6268	chr11	27635852	27635991	+	0	NA	Intergenic	L1_Mus3|LINE|L1	848403	NM_001166661	216613	Mm.93759	NM_181577	ENSMUSG00000032878	Ccdc85a	-	coiled-coil domain containing 85A	protein-coding
Diff_Nuc9555	chr10	64138372	64138511	+	0	NA	intron (NM_001164519, intron 7 of 12)	intron (NM_001164519, intron 7 of 12)	-585438	NM_178678	216028	Mm.431318	NM_178678	ENSMUSG00000042846	Lrrtm3	9630044H04Rik	leucine rich repeat transmembrane neuronal 3	protein-coding
Diff_Nuc51872	chr8	98501542	98501681	+	0	NA	Intergenic	Intergenic	-89346	NM_010325	14719	Mm.230169	NM_010325	ENSMUSG00000031672	Got2	AL022787|FABP-pm|Got-2|Kyat4|mAspAT	glutamatic-oxaloacetic transaminase 2, mitochondrial	protein-coding
Diff_Nuc15902	chr15	32601142	32601281	+	0	NA	intron (NM_009154, intron 17 of 22)	intron (NM_009154, intron 17 of 22)	-249267	NM_008304	15529	Mm.234266	NM_008304	ENSMUSG00000022261	Sdc2	4833414L08Rik|AA960457|Hspg1|Synd2|syndecan-2	syndecan 2	protein-coding
Diff_Nuc6595	chr11	41362162	41362301	+	0	NA	Intergenic	L1_Mus1|LINE|L1	451985	NM_177408	14406	Mm.5309	NM_008073	ENSMUSG00000020436	Gabrg2	GABAA-R|Gabrg-2|gamma2	gamma-aminobutyric acid (GABA) A receptor, subunit gamma 2	protein-coding
Diff_Nuc26334	chr6	24688742	24688881	+	0	NA	intron (NM_028920, intron 2 of 3)	L1_Mur1|LINE|L1	5566	NM_028920	74409	Mm.87331	NM_028920	ENSMUSG00000029679	Hyal6	4932701A20Rik|Hyal-ps1|Hyalp1	hyaluronoglucosaminidase 6	protein-coding
Diff_Nuc13594	chr16	29643172	29643311	+	0	NA	intron (NM_133752, intron 27 of 28)	intron (NM_133752, intron 27 of 28)	63821	NM_001199177	74143	Mm.274285	NM_133752	ENSMUSG00000038084	Opa1	1200011N24Rik|AI225888|AI847218|lilr3|mKIAA0567	OPA1, mitochondrial dynamin like GTPase	protein-coding
Diff_Nuc8452	chr10	13907382	13907521	+	0	NA	Intergenic	Intergenic	221266	NM_010437	15273	Mm.42157	NM_010437	ENSMUSG00000015501	Hivep2	Gm20114|MIBP1|Schnurri-2|Shn-2	human immunodeficiency virus type I enhancer binding protein 2	protein-coding
Diff_Nuc2616	chr13	100819972	100820111	+	0	NA	intron (NM_001081061, intron 24 of 38)	intron (NM_001081061, intron 24 of 38)	-34447	NM_030026	78038	Mm.137327	NM_030026	ENSMUSG00000021646	Mccc2	4930552N12Rik|MCCB	methylcrotonoyl-Coenzyme A carboxylase 2 (beta)	protein-coding
Diff_Nuc19999	chr19	4779252	4779391	+	0	NA	Intergenic	Intergenic	14580	NM_009032	19653	Mm.426069	NM_009032	ENSMUSG00000094936	Rbm4	4921506I22Rik|Lark1|Mlark|Rbm4a|lark	RNA binding motif protein 4	protein-coding
Diff_Nuc11419	chr17	17398842	17398981	+	0	NA	Intergenic	RLTR12B|LTR|ERVK	-32496	NM_001324550	100862203	Mm.484235	NM_001324550		Gm6712	EG626854	predicted gene 6712	protein-coding
Diff_Nuc41218	chr2	102288922	102289061	+	0	NA	TTS (NM_010218)	TTS (NM_010218)	2958	NM_010218	14221	Mm.29730	NM_010218	ENSMUSG00000075012	Fjx1	-	four jointed box 1 (Drosophila)	protein-coding
Diff_Nuc13919	chr16	42698032	42698171	+	0	NA	Intergenic	Intergenic	177599	NR_040521	75722	Mm.243747	NR_040521	ENSMUSG00000075070	4932412D23Rik	ENSMUSG00000075070|Gm10809	RIKEN cDNA 4932412D23 gene	ncRNA
Diff_Nuc10841	chr10	118161632	118161771	+	0	NA	Intergenic	RLTR28B|LTR|ERVL	144258	NM_001014390	69181	Mm.45565	NM_001014390	ENSMUSG00000028630	Dyrk2	1810038L18Rik	dual-specificity tyrosine-(Y)-phosphorylation regulated kinase 2	protein-coding
Diff_Nuc11602	chr17	26544952	26545091	+	0	NA	Intergenic	B4A|SINE|B4	-6889	NM_001081656	240055	Mm.133211	NM_001081656	ENSMUSG00000034413	Neurl1b	C230078M08Rik|EG240055	neuralized E3 ubiquitin protein ligase 1B	protein-coding
Diff_Nuc48819	chr9	77451382	77451521	+	0	NA	Intergenic	L1_Rod|LINE|L1	-33088	NM_172925	244923	Mm.138238	NM_172925	ENSMUSG00000044938	Klhl31	9830147P19Rik|D930047P17Rik|Kbtbd1	kelch-like 31	protein-coding
Diff_Nuc9290	chr10	50456912	50457051	+	0	NA	intron (NM_198007, intron 30 of 41)	intron (NM_198007, intron 30 of 41)	144506	NM_198007	77987	Mm.222497	NM_198007	ENSMUSG00000038774	Ascc3	ASC1p200|B630009I04Rik|BC023451|D430001L07Rik|D630041L21|Helic1|RNAH	activating signal cointegrator 1 complex subunit 3	protein-coding
Diff_Nuc1947	chr13	72157842	72157981	+	0	NA	Intergenic	ORR1D1-int|LTR|MaLR	-56740	NM_010573	16371	Mm.316056	NM_010573	ENSMUSG00000060969	Irx1	-	Iroquois related homeobox 1 (Drosophila)	protein-coding
Diff_Nuc38551	chr3	150899572	150899711	+	0	NA	Intergenic	Lx|LINE|L1	-201205	NM_133222	170757	Mm.317261	NM_133222	ENSMUSG00000039167	Adgrl4	1110033N21Rik|ETL1|Eltd1|Etl	adhesion G protein-coupled receptor L4	protein-coding
Diff_Nuc37519	chr3	103690952	103691091	+	0	NA	intron (NM_008979, intron 13 of 20)	intron (NM_008979, intron 13 of 20)	26821	NM_008979	19260	Mm.395	NM_008979	ENSMUSG00000027843	Ptpn22	70zpep|PEP|Ptpn8	protein tyrosine phosphatase, non-receptor type 22 (lymphoid)	protein-coding
Diff_Nuc49636	chr9	114534222	114534361	+	0	NA	intron (NM_153585, intron 7 of 19)	intron (NM_153585, intron 7 of 19)	15027	NM_153585	78893	Mm.283708	NM_153585	ENSMUSG00000056167	Cnot10	2600001P13Rik	CCR4-NOT transcription complex, subunit 10	protein-coding
Diff_Nuc34605	chr4	119828112	119828251	+	0	NA	Intergenic	Intergenic	-5630	NM_007902	13615	Mm.284855	NM_007902	ENSMUSG00000028635	Edn2	ET-2|PPET2|VIC	endothelin 2	protein-coding
Diff_Nuc33467	chr4	67388782	67388921	+	0	NA	Intergenic	URR1B|DNA|MER1_type	900266	NM_021297	21898	Mm.38049	NM_021297	ENSMUSG00000039005	Tlr4	Lps|Ly87|Ran/M1|Rasl2-8	toll-like receptor 4	protein-coding
Diff_Nuc32869	chr4	37187882	37188021	+	0	NA	Intergenic	Intergenic	-289174	NM_001165999	242384	Mm.132507	NM_175516	ENSMUSG00000045083	Lingo2	B230217C06Rik|Lern3|Lrrn6c	leucine rich repeat and Ig domain containing 2	protein-coding
Diff_Nuc29847	chr5	37774192	37774331	+	0	NA	intron (NM_145920, intron 10 of 19)	intron (NM_145920, intron 10 of 19)	44544	NM_145920	68525	Mm.25506	NM_145920	ENSMUSG00000050248	Evc2	1110017L09Rik|Lbn|limbin	Ellis van Creveld syndrome 2	protein-coding
Diff_Nuc24365	chr7	81989202	81989341	+	0	NA	Intergenic	Intergenic	-185826	NR_131122	75205	Mm.399304	NR_131122	ENSMUSG00000108803	4930533N22Rik	-	RIKEN cDNA 4930533N22 gene	ncRNA
Diff_Nuc12071	chr17	51219192	51219331	+	0	NA	intron (NM_001285991, intron 2 of 22)	L1VL4|LINE|L1	79442	NM_001285993	72238	Mm.120650	NM_028162	ENSMUSG00000023923	Tbc1d5	1600014N05Rik	TBC1 domain family, member 5	protein-coding
Diff_Nuc5067	chr12	90842162	90842301	+	0	NA	intron (NM_001198587, intron 14 of 19)	MIR|SINE|MIR	-208692	NM_001252074	18191	Mm.425766	NM_172544	ENSMUSG00000066392	Nrxn3	-	neurexin III	protein-coding
Diff_Nuc2174	chr13	82253542	82253681	+	0	NA	Intergenic	Lx6|LINE|L1	331320	NM_007684	12626	Mm.12481	NM_007684	ENSMUSG00000021537	Cetn3	MmCEN3	centrin 3	protein-coding
Diff_Nuc5228	chr12	97714972	97715111	+	0	NA	Intergenic	Intergenic	-429609	NR_103800	69423	Mm.46121	NM_027076		1700019M22Rik	-	NFX-like protein	pseudo
Diff_Nuc22481	chr18	60437282	60437421	+	0	NA	Intergenic	Lx2A1|LINE|L1	-4430	NM_001034859	225594	Mm.329460	NM_001034859	ENSMUSG00000068606	Gm4841	EG225594|Ifgga3	predicted gene 4841	protein-coding
Diff_Nuc14741	chr16	76144762	76144901	+	0	NA	intron (NR_040575, intron 1 of 2)	Lx8|LINE|L1	21973	NR_040575	78215	Mm.243885	NR_040575		4930578N18Rik	-	RIKEN cDNA 4930578N18 gene	ncRNA
Diff_Nuc40923	chr2	90395532	90395671	+	0	NA	intron (NM_008982, intron 1 of 23)	intron (NM_008982, intron 1 of 23)	25203	NM_008982	19271	Mm.330393	NM_008982	ENSMUSG00000025314	Ptprj	AI450271|BET|Byp|CD148|DEP-1|PTPbeta2|Ptpb2|RPTPJ|Scc-1|Scc1	protein tyrosine phosphatase, receptor type, J	protein-coding
Diff_Nuc21041	chr19	56033432	56033571	+	0	NA	Intergenic	Intergenic	63690	NM_001142924	21416	Mm.139815	NM_009333	ENSMUSG00000024985	Tcf7l2	TCF4B|TCF4E|Tcf-4|Tcf4	transcription factor 7 like 2, T cell specific, HMG box	protein-coding
Diff_Nuc45692	chr1	130219112	130219251	+	0	NA	intron (NM_001081078, intron 1 of 16)	MTC|LTR|MaLR	5714	NM_001081078	226413	Mm.26930	NM_001081078	ENSMUSG00000026354	Lct	Gm100|LAC|LPH|Lphl	lactase	protein-coding
Diff_Nuc7892	chr11	106372112	106372251	+	0	NA	intron (NM_198292, intron 10 of 11)	intron (NM_198292, intron 10 of 11)	9876	NR_030703	100216537		NR_030703	ENSMUSG00000065126	Snord104	-	small nucleolar RNA, C/D box 104	snoRNA
Diff_Nuc36752	chr3	70729482	70729621	+	0	NA	Intergenic	L1_Mus2|LINE|L1	-118338	NR_040556	625901	Mm.366028	NR_040556	ENSMUSG00000097252	Gm6634	EG625901	predicted gene 6634	ncRNA
Diff_Nuc17008	chr15	82732682	82732821	+	0	NA	intron (NR_045068, intron 3 of 3)	PB1D10|SINE|Alu	3241	NR_045068	100504637	Mm.440928	NR_045068	ENSMUSG00000100199	Gm20324	-	predicted gene, 20324	ncRNA
Diff_Nuc37634	chr3	108307602	108307741	+	0	NA	intron (NM_001346518, intron 1 of 21)	intron (NM_001346518, intron 1 of 21)	31769	NM_001033304	229722	Mm.316890	NM_001033304	ENSMUSG00000040412	5330417C22Rik	BB183350	RIKEN cDNA 5330417C22 gene	protein-coding
Diff_Nuc5973	chr11	16973402	16973541	+	0	NA	intron (NM_029861, intron 2 of 2)	L1VL2|LINE|L1	21534	NM_029861	380686	Mm.425666	NM_029861	ENSMUSG00000044629	Cnrip1	1500041B16Rik|3110054C06Rik|5330437A18Rik|AI854501|C2orf32	cannabinoid receptor interacting protein 1	protein-coding
Diff_Nuc51077	chr8	61280232	61280371	+	0	NA	intron (NM_175032, intron 1 of 11)	Lx8|LINE|L1	-100708	NM_001177534	100271928	Mm.484123	NM_001177534		Gm15881	OTTMUSG00000027193	predicted gene 15881	protein-coding
Diff_Nuc40517	chr2	72168172	72168311	+	0	NA	intron (NM_178084, intron 2 of 9)	intron (NM_178084, intron 2 of 9)	44483	NM_178084	65964	Mm.304143	NM_023057	ENSMUSG00000004085	Map3k20	AV006891|B230120H23Rik|MLTK|MLTKalpha|MLTKbeta|Zak	mitogen-activated protein kinase kinase kinase 20	protein-coding
Diff_Nuc13929	chr16	43043342	43043481	+	0	NA	intron (NM_001285805, intron 2 of 10)	RMER6D|LTR|ERVK	87718	NR_002445	170658	Mm.375824	NR_002445		BC002163	-	NADH dehydrogenase Fe-S protein 5 pseudogene	pseudo
Diff_Nuc4211	chr12	55422012	55422151	+	0	NA	Intergenic	(TTA)n|Simple_repeat|Simple_repeat	70224	NR_033689	665239	Mm.26856	NR_033689		Gm7550	EG665239|Gm666	predicted gene 7550	ncRNA
Diff_Nuc22041	chr18	41597332	41597471	+	0	NA	Intergenic	Intergenic	513447	NM_029942	77619	Mm.30649	NM_029942	ENSMUSG00000056671	Prelid2	1700003A01Rik|C330008K14Rik	PRELI domain containing 2	protein-coding
Diff_Nuc12422	chr17	68710872	68711011	+	0	NA	intron (NM_177278, intron 3 of 20)	intron (NM_177278, intron 3 of 20)	87804	NM_177278	320858	Mm.137356	NM_177278	ENSMUSG00000041565	L3mbtl4	A730037L19Rik|D930040M24Rik	l(3)mbt-like 4 (Drosophila)	protein-coding
Diff_Nuc15696	chr15	23133972	23134111	+	0	NA	intron (NM_001081299, intron 2 of 11)	L1_Mm|LINE|L1	167823	NM_001081299	320865	Mm.241965	NM_001081299	ENSMUSG00000040420	Cdh18	B230220E17Rik|Cdh14l	cadherin 18	protein-coding
Diff_Nuc37930	chr3	122169762	122169901	+	0	NA	intron (NM_013867, intron 3 of 11)	intron (NM_013867, intron 3 of 11)	47133	NM_013867	29815	Mm.45815	NM_013867	ENSMUSG00000028121	Bcar3	AI131758|AND-34	breast cancer anti-estrogen resistance 3	protein-coding
Diff_Nuc45538	chr1	123327412	123327551	+	0	NA	promoter-TSS (NM_001025156)	promoter-TSS (NM_001025156)	-163	NM_029955	70829	Mm.25788	NM_027567	ENSMUSG00000026339	Ccdc93	4633402D15Rik|9230102M16Rik	coiled-coil domain containing 93	protein-coding
Diff_Nuc932	chr13	22285312	22285451	+	0	NA	Intergenic	ETnERV2-int|LTR|ERVK	-5464	NM_145845	252907	Mm.435548	NM_145845	ENSMUSG00000099787	Vmn1r192	V1ri1	vomeronasal 1 receptor 192	protein-coding
Diff_Nuc22022	chr18	40859002	40859141	+	0	NA	Intergenic	Intergenic	441056	NM_026135	383348	Mm.76366	NM_026135	ENSMUSG00000051401	Kctd16	4930434H12Rik|Gm1267	potassium channel tetramerisation domain containing 16	protein-coding
Diff_Nuc8141	chr11	119480492	119480631	+	0	NA	intron (NM_028898, intron 1 of 33)	L1MEe|LINE|L1	16342	NM_028898	74370	Mm.209933	NM_028898	ENSMUSG00000025583	Rptor	4932417H02Rik|Rap|Raptor|mKIAA1303	regulatory associated protein of MTOR, complex 1	protein-coding
Diff_Nuc33169	chr4	52850032	52850171	+	0	NA	Intergenic	RMER20B|LTR|ERVK	11830	NM_146858	258857	Mm.484340	NM_146858	ENSMUSG00000089717	Olfr275	MOR262-2	olfactory receptor 275	protein-coding
Diff_Nuc46448	chr1	162867912	162868051	+	0	NA	intron (NM_001024952, intron 2 of 19)	L1MB8|LINE|L1	31439	NM_001024952	381305	Mm.329667	NM_001024952	ENSMUSG00000040423	Rc3h1	5730557L09Rik|Gm551|N28103|mKIAA2025	RING CCCH (C3H) domains 1	protein-coding
Diff_Nuc38103	chr3	131003452	131003591	+	0	NA	intron (NM_027816, intron 1 of 4)	PB1D7|SINE|Alu	2624	NM_027816	71519	Mm.473179	NM_027816	ENSMUSG00000027983	Cyp2u1	8430436A10Rik	cytochrome P450, family 2, subfamily u, polypeptide 1	protein-coding
Diff_Nuc33090	chr4	49097322	49097461	+	0	NA	intron (NM_178756, intron 1 of 7)	intron (NM_178756, intron 1 of 7)	25057	NM_178756	272031	Mm.299460	NM_178756	ENSMUSG00000063446	Plppr1	E130309F12Rik|Lppr1|PRG-3|mKIAA4247	phospholipid phosphatase related 1	protein-coding
Diff_Nuc8702	chr10	24563722	24563861	+	0	NA	Intergenic	MLT2C1|LTR|ERVL	-7790	NM_134005	209558	Mm.338425	NM_134005	ENSMUSG00000019989	Enpp3	AI876438|CD203c	ectonucleotide pyrophosphatase/phosphodiesterase 3	protein-coding
Diff_Nuc30977	chr5	87785592	87785731	+	0	NA	Intergenic	Intergenic	-19441	NM_028094	72094	Mm.482739	NM_028094	ENSMUSG00000035780	Ugt2a3	2010321J07Rik	UDP glucuronosyltransferase 2 family, polypeptide A3	protein-coding
Diff_Nuc3944	chr12	45946202	45946341	+	0	NA	Intergenic	Intergenic	229199	NM_144552	217517	Mm.285400	NM_144552	ENSMUSG00000046314	Stxbp6	BC024598|C85317	syntaxin binding protein 6 (amisyn)	protein-coding
Diff_Nuc46718	chr1	174566042	174566181	+	0	NA	Intergenic	Intergenic	-3006	NM_026725	68440	Mm.33024	NM_026725	ENSMUSG00000026544	Dusp23	1300005N15Rik|LDP-3	dual specificity phosphatase 23	protein-coding
Diff_Nuc33676	chr4	75605362	75605501	+	0	NA	intron (NM_011211, intron 33 of 39)	intron (NM_011211, intron 33 of 39)	-681241	NM_025849	66928	Mm.24332	NM_025849	ENSMUSG00000028398	Tmem261	1700027K24Rik|3110001D03Rik	transmembrane protein 261	protein-coding
Diff_Nuc27184	chr6	59632972	59633111	+	0	NA	Intergenic	RLTR13D5|LTR|ERVK	-256757	NM_183183	243385	Mm.138080	NM_183183	ENSMUSG00000045441	Gprin3	C030038J10Rik|C730021L23	GPRIN family member 3	protein-coding
Diff_Nuc50941	chr8	53573792	53573931	+	0	NA	Intergenic	Intergenic	-1023195	NM_001205054	11593	Mm.334535	NM_001005847	ENSMUSG00000031521	Aga	AW060726	aspartylglucosaminidase	protein-coding
Diff_Nuc28769	chr6	136718672	136718811	+	0	NA	intron (NM_001127318, intron 2 of 26)	intron (NM_001127318, intron 2 of 26)	11522	NM_145067	14917	Mm.222729	NM_145067	ENSMUSG00000042638	Gucy2c	AI893437|GC-C|Gcc	guanylate cyclase 2c	protein-coding
Diff_Nuc13725	chr16	35365962	35366101	+	0	NA	Intergenic	Intergenic	-2027	NM_133704	317717	Mm.259164	NM_133704	ENSMUSG00000034473	Sec22a	1810005C06Rik|Sec22l2	SEC22 homolog A, vesicle trafficking protein	protein-coding
Diff_Nuc8118	chr11	117503832	117503971	+	0	NA	Intergenic	Intergenic	-11702	NM_198022	217351	Mm.40272	NM_198022	ENSMUSG00000025571	Tnrc6c	9930033H14Rik|mKIAA1582	trinucleotide repeat containing 6C	protein-coding
Diff_Nuc32927	chr4	40705852	40705991	+	0	NA	Intergenic	B1_Mur3|SINE|Alu	-1003	NM_021535	74255	Mm.289929	NM_021535	ENSMUSG00000028409	Smu1	2600001O03Rik|2610203K23Rik|AB044414|AI845086|AW556129|Bwd	smu-1 suppressor of mec-8 and unc-52 homolog (C. elegans)	protein-coding
Diff_Nuc27071	chr6	54203872	54204011	+	0	NA	intron (NM_001163640, intron 6 of 12)	intron (NM_001163640, intron 6 of 12)	-10911	NM_001311133	69993	Mm.321147	NM_023543	ENSMUSG00000004633	Chn2	1700026N20Rik|4930557O16Rik|ARHGAP3|Bch	chimerin 2	protein-coding
Diff_Nuc7689	chr11	97351152	97351291	+	0	NA	TTS (NM_001289118)	TTS (NM_001289118)	10433	NM_001289118	100141474	Mm.482426	NM_001289118	ENSMUSG00000047988	4933428G20Rik	-	RIKEN cDNA 4933428G20 gene	protein-coding
Diff_Nuc41755	chr2	122986582	122986721	+	0	NA	Intergenic	Intergenic	378916	NM_021507	59010	Mm.28986	NM_021507	ENSMUSG00000005803	Sqrdl	0610039J17Rik|4930557M22Rik|SQOR	sulfide quinone reductase-like (yeast)	protein-coding
Diff_Nuc26865	chr6	45741532	45741671	+	0	NA	intron (NM_001004357, intron 3 of 23)	intron (NM_001004357, intron 3 of 23)	731541	NM_001004357	66797	Mm.440084	NM_025771	ENSMUSG00000039419	Cntnap2	5430425M22Rik|Caspr2|mKIAA0868	contactin associated protein-like 2	protein-coding
Diff_Nuc17456	chr14	11822472	11822611	+	0	NA	intron (NM_001308285, intron 2 of 9)	intron (NM_001308285, intron 2 of 9)	172008	NM_010210	14198	Mm.397619	NM_010210	ENSMUSG00000060579	Fhit	AW045638|Fra14A2	fragile histidine triad gene	protein-coding
Diff_Nuc4673	chr12	74657612	74657751	+	0	NA	Intergenic	Intergenic	8211	NR_044985	73644	Mm.369885	NR_044985		2210039B01Rik	-	RIKEN cDNA 2210039B01 gene	ncRNA
Diff_Nuc43926	chr1	47110172	47110311	+	0	NA	Intergenic	RMER2|LTR|ERV1	-199887	NM_172653	227059	Mm.233889	NM_172653	ENSMUSG00000025986	Slc39a10	2900042E17Rik|5430433I10|mKIAA1265	solute carrier family 39 (zinc transporter), member 10	protein-coding
Diff_Nuc46378	chr1	160451912	160452051	+	0	NA	intron (NM_007495, intron 8 of 22)	intron (NM_007495, intron 8 of 22)	16225	NR_030441	735253		NR_030441	ENSMUSG00000070103	Mir488	Mirn488|mir-488|mmu-mir-488	microRNA 488	ncRNA
Diff_Nuc50745	chr8	46129992	46130131	+	0	NA	intron (NM_001081286, intron 24 of 25)	intron (NM_001081286, intron 24 of 25)	20711	NR_033588	434310	Mm.334512	NR_033588	ENSMUSG00000066158	AY512931	-	cDNA sequence AY512931	ncRNA
Diff_Nuc30081	chr5	49421672	49421811	+	0	NA	intron (NM_001199244, intron 1 of 7)	intron (NM_001199244, intron 1 of 7)	-140945	NM_030265	80334	Mm.160172	NM_030265	ENSMUSG00000029088	Kcnip4	AV032399|Calp|Calp250|KChIP4|KChIP4a	Kv channel interacting protein 4	protein-coding
Diff_Nuc32988	chr4	44185532	44185671	+	0	NA	Intergenic	Intergenic	-4446	NM_001038993	73469	Mm.262859	NM_175201	ENSMUSG00000035696	Rnf38	1700065B19Rik|2610202O07Rik|AA673263|Oip1	ring finger protein 38	protein-coding
Diff_Nuc41945	chr2	131133842	131133981	+	0	NA	intron (NM_178607, intron 3 of 5)	intron (NM_178607, intron 3 of 5)	20123	NR_029755	723825		NR_029755	ENSMUSG00000065563	Mir103-2	Mirn103-2|mir-103-2	microRNA 103-2	ncRNA
Diff_Nuc4950	chr12	85178602	85178741	+	0	NA	intron (NR_073564, intron 4 of 12)	RMER6C|LTR|ERVK	4637	NM_001272055	18222	Mm.4390	NM_010949	ENSMUSG00000021224	Numb	Nb	numb homolog (Drosophila)	protein-coding
Diff_Nuc30444	chr5	65967372	65967511	+	0	NA	intron (NR_144566, intron 2 of 5)	intron (NR_144566, intron 2 of 5)	38957	NM_001310619	53323	Mm.319512	NM_016786	ENSMUSG00000029203	Ube2k	AW492011|D5Ertd601e|E2-25k|HIP-2|Hip2|Hypg|Lig	ubiquitin-conjugating enzyme E2K	protein-coding
Diff_Nuc23959	chr7	63635442	63635581	+	0	NA	intron (NM_021879, intron 19 of 23)	Lx9|LINE|L1	140370	NM_021879	18431	Mm.137052	NM_021879	ENSMUSG00000030450	Oca2	D7H15S12|D7Icr28RN|D7Nic1|p|p<cas>	oculocutaneous albinism II	protein-coding
Diff_Nuc10587	chr10	108772372	108772511	+	0	NA	Intergenic	Intergenic	-324410	NM_001252341	20979	Mm.289702	NM_009306	ENSMUSG00000035864	Syt1	AW124717|G630098F17Rik|SytI	synaptotagmin I	protein-coding
Diff_Nuc50058	chr8	15818772	15818911	+	0	NA	Intergenic	Intergenic	349997	NR_037214	100526464		NR_037214	ENSMUSG00000093142	Mir3106	mir-3106|mmu-mir-3106	microRNA 3106	ncRNA
Diff_Nuc36240	chr3	49476432	49476571	+	0	NA	Intergenic	Intergenic	84737	NM_130448	73173	Mm.87246	NM_130448	ENSMUSG00000037892	Pcdh18	3110038E07Rik|BB095589|PCDH68L	protocadherin 18	protein-coding
Diff_Nuc12837	chr17	87550102	87550241	+	0	NA	Intergenic	Intergenic	43152	NM_019654	56468	Mm.126885	NM_019654	ENSMUSG00000037104	Socs5	1810018L08Rik|Cish5|mKIAA0671	suppressor of cytokine signaling 5	protein-coding
Diff_Nuc28670	chr6	131168952	131169091	+	0	NA	TTS (NM_008462)	TTS (NM_008462)	28359	NM_001170851	16633	Mm.4783	NM_008462	ENSMUSG00000030187	Klra2	Klra30|Ly49b	killer cell lectin-like receptor, subfamily A, member 2	protein-coding
Diff_Nuc24237	chr7	75119142	75119281	+	0	NA	intron (NM_010513, intron 1 of 20)	intron (NM_010513, intron 1 of 20)	22068	NM_010513	16001	Mm.275742	NM_010513	ENSMUSG00000005533	Igf1r	A330103N21Rik|CD221|D930020L01|IGF-1R|hyft	insulin-like growth factor I receptor	protein-coding
Diff_Nuc38698	chr3	157570182	157570321	+	0	NA	intron (NM_145953, intron 8 of 11)	intron (NM_145953, intron 8 of 11)	17776	NM_145953	107869	Mm.28301	NM_145953	ENSMUSG00000028179	Cth	0610010I13Rik|AI314617|BC019483|CSE|Cys3	cystathionase (cystathionine gamma-lyase)	protein-coding
Diff_Nuc51326	chr8	72032902	72033041	+	0	NA	Intergenic	L1_Mur2|LINE|L1	-113528	NR_038043	378466	Mm.37846	NM_194351	ENSMUSG00000110444	Gm10033	9330175B10Rik|ENSMUSG00000057924|Gm10311	predicted gene 10033	ncRNA
Diff_Nuc37508	chr3	103421712	103421851	+	0	NA	intron (NM_001276679, intron 3 of 6)	intron (NM_001276679, intron 3 of 6)	41732	NM_001276681	54524	Mm.88818	NM_018800	ENSMUSG00000027849	Syt6	3110037A08Rik|AW048930|sytVI	synaptotagmin VI	protein-coding
Diff_Nuc37208	chr3	88740092	88740231	+	0	NA	exon (NM_022994, exon 3 of 13)	exon (NM_022994, exon 3 of 13)	14043	NM_022994	65111	Mm.29028	NM_022994	ENSMUSG00000068921	Dap3	4921514D13Rik|DAP-3|MRP-S29|S29mt	death associated protein 3	protein-coding
Diff_Nuc3422	chr12	26329112	26329251	+	0	NA	Intergenic	Intergenic	515142	NR_045844	432641	Mm.112955	NR_045844		Gm17746	-	predicted gene, 17746	ncRNA
Diff_Nuc48487	chr9	63335882	63336021	+	0	NA	intron (NM_030068, intron 15 of 21)	intron (NM_030068, intron 15 of 21)	-88900	NM_027090	69478	Mm.113942	NM_027090	ENSMUSG00000032403	2300009A05Rik	-	RIKEN cDNA 2300009A05 gene	protein-coding
Diff_Nuc23862	chr7	60361912	60362051	+	0	NA	Intergenic	(TTTG)n|Simple_repeat|Simple_repeat	785278	NR_105746	102466619		NR_105746	ENSMUSG00000099176	Mir6238	Gm27982|mmu-mir-6238	microRNA 6238	ncRNA
Diff_Nuc4699	chr12	75720252	75720391	+	0	NA	Intergenic	MYSERV6-int|LTR|ERVK	321860	NM_198866	386753	Mm.341686	NM_198866	ENSMUSG00000029878	Dbpht2	Spot2	DNA binding protein with his-thr domain	protein-coding
Diff_Nuc37346	chr3	94847212	94847351	+	0	NA	promoter-TSS (NM_008951)	promoter-TSS (NM_008951)	-745	NM_008951	19185	Mm.2261	NM_008951	ENSMUSG00000005625	Psmd4	Af1|Mcb1|angiocidin	proteasome (prosome, macropain) 26S subunit, non-ATPase, 4	protein-coding
Diff_Nuc22523	chr18	62439842	62439981	+	0	NA	Intergenic	L1_Mus3|LINE|L1	-43947	NM_008313	15562	Mm.20440	NM_008313	ENSMUSG00000026322	Htr4	5-HT-4|5-HT4|5-HT<4L>|5HTR4	5 hydroxytryptamine (serotonin) receptor 4	protein-coding
Diff_Nuc22898	chr18	79814912	79815051	+	0	NA	Intergenic	L1M2|LINE|L1	-428653	NM_053117	93737	Mm.24678	NM_053117	ENSMUSG00000056214	Pard6g	2410049N21Rik|Par6a	par-6 family cell polarity regulator gamma	protein-coding
Diff_Nuc50215	chr8	24875042	24875181	+	0	NA	intron (NM_001277239, intron 2 of 7)	L1MCa|LINE|L1	94978	NM_177086	320158	Mm.121274	NM_177086	ENSMUSG00000037492	Zmat4	9630048M01Rik	zinc finger, matrin type 4	protein-coding
Diff_Nuc22411	chr18	58081892	58082031	+	0	NA	intron (NM_009194, intron 17 of 26)	intron (NM_009194, intron 17 of 26)	43629	NM_009194	20496	Mm.399997	NM_009194	ENSMUSG00000024597	Slc12a2	9330166H04Rik|Nkcc1|mBSC2|sy-ns	solute carrier family 12, member 2	protein-coding
Diff_Nuc13135	chr16	7248682	7248821	+	0	NA	intron (NM_183188, intron 2 of 12)	intron (NM_183188, intron 2 of 12)	178823	NM_183188	268859	Mm.370334	NM_021477	ENSMUSG00000008658	Rbfox1	A2bp|A2bp1|Hrnbp1|fox-1	RNA binding protein, fox-1 homolog (C. elegans) 1	protein-coding
Diff_Nuc47163	chr1	196433032	196433171	+	0	NA	Intergenic	Intergenic	-12922	NM_008882	18845	Mm.2251	NM_008882	ENSMUSG00000026640	Plxna2	2810428A13Rik|AA589422|AW457381|OCT|PlexA2|Plxn2|mKIAA0463	plexin A2	protein-coding
Diff_Nuc51130	chr8	63611232	63611371	+	0	NA	Intergenic	Intergenic	-91667	NM_021506	59009	Mm.27949	NM_021506	ENSMUSG00000031642	Sh3rf1	2200003J05Rik|Posh|R75531|Sh3md2	SH3 domain containing ring finger 1	protein-coding
Diff_Nuc46685	chr1	172973952	172974091	+	0	NA	Intergenic	B2_Mm2|SINE|B2	15513	NM_010188	14131	Mm.22119	NM_010188	ENSMUSG00000059498	Fcgr3	CD16	Fc receptor, IgG, low affinity III	protein-coding
Diff_Nuc21867	chr18	34752562	34752701	+	0	NA	exon (NM_177773, exon 2 of 6)	exon (NM_177773, exon 2 of 6)	4491	NM_177773	271508	Mm.417609	NM_177773	ENSMUSG00000049357	4933408B17Rik	-	RIKEN cDNA 4933408B17 gene	protein-coding
Diff_Nuc24424	chr7	84728882	84729021	+	0	NA	Intergenic	Intergenic	993773	NM_008746	18213	Mm.33496	NM_008746	ENSMUSG00000059146	Ntrk3	AW125844|Ntrk3_tv3|TrkC	neurotrophic tyrosine kinase, receptor, type 3	protein-coding
Diff_Nuc49253	chr9	95820002	95820141	+	0	NA	intron (NM_019864, intron 30 of 46)	intron (NM_019864, intron 30 of 46)	-35108	NM_011916	24127	Mm.291179	NM_011916	ENSMUSG00000032410	Xrn1	Dhm2|exo|mXrn1	5'-3' exoribonuclease 1	protein-coding
Diff_Nuc44353	chr1	62396072	62396211	+	0	NA	intron (NM_001081050, intron 18 of 22)	intron (NM_001081050, intron 18 of 22)	-353750	NM_001077406	18187	Mm.266341	NM_010939	ENSMUSG00000025969	Nrp2	1110048P06Rik|Np-2|Np2|Npn-2|Npn2	neuropilin 2	protein-coding
Diff_Nuc12006	chr17	47476212	47476351	+	0	NA	intron (NM_001097623, intron 15 of 19)	intron (NM_001097623, intron 15 of 19)	-29555	NM_001146212	64657	Mm.216250	NM_183086	ENSMUSG00000034729	Mrps10	1110038B19Rik|AW743084|Rpms10	mitochondrial ribosomal protein S10	protein-coding
Diff_Nuc45833	chr1	137201612	137201751	+	0	NA	intron (NM_011590, intron 4 of 5)	B1_Mur2|SINE|Alu	8633	NM_011590	21854	Mm.2368	NM_011590	ENSMUSG00000062580	Timm17a	17kDa|mTim17a	translocase of inner mitochondrial membrane 17a	protein-coding
Diff_Nuc23527	chr7	35162572	35162711	+	0	NA	intron (NM_025948, intron 1 of 10)	intron (NM_025948, intron 1 of 10)	11918	NM_025948	67070	Mm.276503	NM_025948	ENSMUSG00000066568	Lsm14a	2700023B17Rik|AA407828|AU017544|Tral	LSM14A mRNA processing body assembly factor	protein-coding
Diff_Nuc33080	chr4	48667992	48668131	+	0	NA	intron (NM_021436, intron 8 of 9)	L1MB8|LINE|L1	-8325	NM_026509	68016	Mm.133444	NM_026509	ENSMUSG00000028348	Murc	2310039E09Rik	muscle-related coiled-coil protein	protein-coding
Diff_Nuc41267	chr2	104456512	104456651	+	0	NA	intron (NM_145529, intron 3 of 20)	RMER6A|LTR|ERVK	25940	NM_001037326	228410	Mm.259876	NM_145529	ENSMUSG00000027176	Cstf3	4732468G05Rik|C79532|CstF-77	cleavage stimulation factor, 3' pre-RNA, subunit 3	protein-coding
Diff_Nuc9759	chr10	73014902	73015041	+	0	NA	Intergenic	RMER19B|LTR|ERVK	-269644	NM_001142760	11994	Mm.338933	NM_023115	ENSMUSG00000052613	Pcdh15	BB078305|ENSMUSG00000046980|Gm9815|Ush1f|av|nmf19|roda	protocadherin 15	protein-coding
Diff_Nuc3495	chr12	30285852	30285991	+	0	NA	intron (NM_001093775, intron 2 of 24)	intron (NM_001093775, intron 2 of 24)	66151	NM_001093776	17933	Mm.253067	NM_008666	ENSMUSG00000061911	Myt1l	2900046C06Rik|2900093J19Rik|C630034G21Rik|Nztf1|Pmng1|Png-1|mKIAA1106	myelin transcription factor 1-like	protein-coding
Diff_Nuc6673	chr11	46034332	46034471	+	0	NA	intron (NM_001252460, intron 26 of 30)	intron (NM_001252460, intron 26 of 30)	-14658	NM_177075	320116	Mm.39600	NM_177075	ENSMUSG00000048721	Fndc9	C030019I05Rik	fibronectin type III domain containing 9	protein-coding
Diff_Nuc29480	chr5	20571852	20571991	+	0	NA	Intergenic	Intergenic	-10306	NM_011203	19248	Mm.319117	NM_011203	ENSMUSG00000028771	Ptpn12	P19-PTP|PTP-P19|PTP-PEST|PTPG1	protein tyrosine phosphatase, non-receptor type 12	protein-coding
Diff_Nuc15266	chr15	3690542	3690681	+	0	NA	Intergenic	L1_Mur1|LINE|L1	-157259	NM_010284	14600	Mm.3986	NM_010284	ENSMUSG00000055737	Ghr	GHBP|GHR/BP	growth hormone receptor	protein-coding
Diff_Nuc50932	chr8	53144562	53144701	+	0	NA	Intergenic	Intergenic	-1452425	NM_001205054	11593	Mm.334535	NM_001005847	ENSMUSG00000031521	Aga	AW060726	aspartylglucosaminidase	protein-coding
Diff_Nuc40787	chr2	82524882	82525021	+	0	NA	Intergenic	L1_Mus1|LINE|L1	631136	NM_175513	241514	Mm.119383	NM_175513	ENSMUSG00000070866	Zfp804a	C630007C17Rik|Znf804a	zinc finger protein 804A	protein-coding
Diff_Nuc18668	chr14	71471002	71471141	+	0	NA	Intergenic	Intergenic	-180009	NR_046075	100043132	Mm.399336	NR_046075		Gm4251	-	predicted gene 4251	ncRNA
Diff_Nuc3975	chr12	46899352	46899491	+	0	NA	Intergenic	MT2A|LTR|ERVL	-723951	NM_144552	217517	Mm.285400	NM_144552	ENSMUSG00000046314	Stxbp6	BC024598|C85317	syntaxin binding protein 6 (amisyn)	protein-coding
Diff_Nuc23179	chr7	5439792	5439931	+	0	NA	exon (NM_001081405, exon 3 of 6)	exon (NM_001081405, exon 3 of 6)	5592	NM_001081405	665255	Mm.425373	NM_001081405	ENSMUSG00000066820	Vmn2r28	EG665255	vomeronasal 2, receptor 28	protein-coding
Diff_Nuc34702	chr4	124424842	124424981	+	0	NA	intron (NR_126474, intron 6 of 24)	MIRb|SINE|MIR	3886	NR_030480	735263		NR_030480	ENSMUSG00000076119	Mir698	Mirn698|mir-698|mmu-mir-698	microRNA 698	ncRNA
Diff_Nuc51780	chr8	93712512	93712651	+	0	NA	Intergenic	Intergenic	-53188	NM_010241	14339	Mm.324588	NM_010241	ENSMUSG00000031667	Aktip	AL023020|Fif|Ft|Ft1|Fts	thymoma viral proto-oncogene 1 interacting protein	protein-coding
Diff_Nuc20322	chr19	20855722	20855861	+	0	NA	Intergenic	Intergenic	-53745	NM_011921	26358	Mm.14609	NM_011921	ENSMUSG00000024747	Aldh1a7	AI987940|Ahd2-like|Aldh-pb|Aldh1a4|Aldhpb	aldehyde dehydrogenase family 1, subfamily A7	protein-coding
Diff_Nuc14170	chr16	53540732	53540871	+	0	NA	Intergenic	Intergenic	-724944	NR_040495	73820	Mm.60493	NR_040495		4930404A05Rik	-	RIKEN cDNA 4930404A05 gene	ncRNA
Diff_Nuc42634	chr2	158419022	158419161	+	0	NA	Intergenic	Intergenic	17368	NR_040358	100045469	Mm.143404	NR_040358	ENSMUSG00000086496	Gm14204	OTTMUSG00000015935	predicted gene 14204	ncRNA
Diff_Nuc49924	chr8	8185852	8185991	+	0	NA	Intergenic	Intergenic	474852	NM_010111	13642	Mm.209813	NM_010111	ENSMUSG00000001300	Efnb2	ELF-2|Epl5|Eplg5|Htk-L|LERK-5|Lerk5|NLERK-1	ephrin B2	protein-coding
Diff_Nuc40173	chr2	59771072	59771211	+	0	NA	intron (NM_001001182, intron 18 of 35)	intron (NM_001001182, intron 18 of 35)	-50478	NM_028118	72137	Mm.288734	NM_028118	ENSMUSG00000026988	Wdsub1	1700048E19Rik|2610014F08Rik	WD repeat, SAM and U-box domain containing 1	protein-coding
Diff_Nuc34216	chr4	101896232	101896371	+	0	NA	Intergenic	Intergenic	-31046	NM_001177983	18578	Mm.20181	NM_019840	ENSMUSG00000028525	Pde4b	Dpde4|R74983|dunce	phosphodiesterase 4B, cAMP specific	protein-coding
Diff_Nuc22095	chr18	44928582	44928721	+	0	NA	intron (NM_001085373, intron 1 of 18)	Lx4A|LINE|L1	43185	NM_001085373	328949	Mm.312511	NM_001033406	ENSMUSG00000071856	Mcc	D18Ertd451e|E330037C19	mutated in colorectal cancers	protein-coding
Diff_Nuc4792	chr12	79066032	79066171	+	0	NA	Intergenic	Intergenic	-261541	NM_172952	268566	Mm.341742	NM_145965	ENSMUSG00000047454	Gphn	5730552E08Rik|AI662856|BC027112|C230040D23|GPH|GPHRYN|geph	gephyrin	protein-coding
Diff_Nuc29402	chr5	17617242	17617381	+	0	NA	Intergenic	L1_Mus3|LINE|L1	148923	NM_001081143	242851	Mm.332230	NM_001081143	ENSMUSG00000028777	Gnat3	Ggust|Gtn	guanine nucleotide binding protein, alpha transducing 3	protein-coding
Diff_Nuc45082	chr1	98466102	98466241	+	0	NA	Intergenic	(GAAA)n|Simple_repeat|Simple_repeat	92979	NR_040478	75159	Mm.243854	NR_040478	ENSMUSG00000100589	4930533P14Rik	-	RIKEN cDNA 4930533P14 gene	ncRNA
Diff_Nuc42257	chr2	141821242	141821381	+	0	NA	intron (NM_001013802, intron 8 of 18)	intron (NM_001013802, intron 8 of 18)	905889	NM_001081133	16558	Mm.251934	NM_001081133	ENSMUSG00000038844	Kif16b	8430434E15Rik|AA623607|AI789011|C80253|C80902|mKIAA1590	kinesin family member 16B	protein-coding
Diff_Nuc30210	chr5	55300802	55300941	+	0	NA	Intergenic	Intergenic	559640	NR_038045	330086	Mm.254449	NM_177871	ENSMUSG00000105912	Gm10440	D130065D13|ENSMUSG00000072936	predicted gene 10440	ncRNA
Diff_Nuc7812	chr11	102908072	102908211	+	0	NA	intron (NM_008707, intron 3 of 11)	intron (NM_008707, intron 3 of 11)	18265	NM_008707	18107	Mm.10265	NM_008707	ENSMUSG00000020936	Nmt1	AW536594	N-myristoyltransferase 1	protein-coding
Diff_Nuc7626	chr11	93647972	93648111	+	0	NA	Intergenic	RMER1B|Other|Other	99039	NM_001013375	217109	Mm.379350	NM_001013375	ENSMUSG00000054079	Utp18	6230425C22Rik|6430513M13|Wdr50	UTP18 small subunit processome component	protein-coding
Diff_Nuc14907	chr16	82401402	82401541	+	0	NA	Intergenic	L1Md_F2|LINE|L1	1200529	NM_010954	17968	Mm.433941	NM_010954	ENSMUSG00000022762	Ncam2	Ncam-2|Ocam|RNCAM	neural cell adhesion molecule 2	protein-coding
Diff_Nuc46641	chr1	171186402	171186541	+	0	NA	Intergenic	Intergenic	-237251	NR_105772	102466632		NR_105772	ENSMUSG00000098829	Mir6354	Gm27282|mmu-mir-6354	microRNA 6354	ncRNA
Diff_Nuc33159	chr4	52070322	52070461	+	0	NA	Intergenic	Intergenic	-6409	NR_040668	329844	Mm.128934	NR_040668	ENSMUSG00000085515	C630028M04Rik	-	RIKEN cDNA C630028M04 gene	ncRNA
Diff_Nuc19039	chr14	86090252	86090391	+	0	NA	Intergenic	Intergenic	-555456	NR_040457	75155	Mm.399239	NR_040457		4930529K09Rik	4930507G21Rik	RIKEN cDNA 4930529K09 gene	ncRNA
Diff_Nuc13864	chr16	40533452	40533591	+	0	NA	Intergenic	Intergenic	-999418	NM_001347236	268890	Mm.310524	NM_175548	ENSMUSG00000061080	Lsamp	5430428I19|AW046674|B130007O04Rik|D930023J12Rik|Lam|Lamp	limbic system-associated membrane protein	protein-coding
Diff_Nuc28180	chr6	106739952	106740091	+	0	NA	intron (NM_175357, intron 5 of 10)	intron (NM_175357, intron 5 of 10)	10060	NM_021449	58799	Mm.290085	NM_021449	ENSMUSG00000005362	Crbn	2610203G15Rik|2900045O07Rik|AF229032|AW108261|piL	cereblon	protein-coding
Diff_Nuc15313	chr15	5991042	5991181	+	0	NA	Intergenic	Intergenic	-258678	NM_001008702	13132	Mm.240830	NM_023118	ENSMUSG00000022150	Dab2	5730435J12Rik|AA960054|AI957090|D15Wsu122e|D630005B22Rik|Doc-2|Doc2|p96	disabled 2, mitogen-responsive phosphoprotein	protein-coding
Diff_Nuc35495	chr3	12655772	12655911	+	0	NA	Intergenic	RMER19B|LTR|ERVK	-811482	NR_040751	100038545	Mm.388494	NR_040751	ENSMUSG00000104015	Gm10745	ENSMUSG00000074696	predicted gene 10745	ncRNA
Diff_Nuc6315	chr11	29124302	29124441	+	0	NA	intron (NM_025740, intron 7 of 9)	intron (NM_025740, intron 7 of 9)	22901	NM_025740	216618	Mm.128663	NM_025740	ENSMUSG00000020462	Cfap36	2300003H10|4931428D14Rik|Ccdc104	cilia and flagella associated protein 36	protein-coding
Diff_Nuc11214	chr17	9753372	9753511	+	0	NA	Intergenic	Lx5|LINE|L1	109128	NM_001163836	67543	Mm.26987	NM_026226	ENSMUSG00000046173	Pabpc6	4932702K14Rik|AI428050|Pabpc3	poly(A) binding protein, cytoplasmic 6	protein-coding
Diff_Nuc3485	chr12	29821202	29821341	+	0	NA	Intergenic	Intergenic	384578	NM_201357	380752	Mm.273724	NM_201357	ENSMUSG00000036613	Tssc1	D12Ertd604e|Eipr1	tumor suppressing subtransferable candidate 1	protein-coding
Diff_Nuc42841	chr2	172001392	172001531	+	0	NA	Intergenic	Intergenic	-72531	NM_008561	17201	Mm.57183	NM_008561	ENSMUSG00000038537	Mc3r	MC3-R	melanocortin 3 receptor	protein-coding
Diff_Nuc45887	chr1	140086712	140086851	+	0	NA	Intergenic	CT-rich|Low_complexity|Low_complexity	-14899	NM_001268286	19264	Mm.391573	NM_011210	ENSMUSG00000026395	Ptprc	B220|CD45R|Cd45|L-CA|Ly-5|Lyt-4|T200|loc	protein tyrosine phosphatase, receptor type, C	protein-coding
Diff_Nuc30255	chr5	56977292	56977431	+	0	NA	Intergenic	L1_Mus1|LINE|L1	1131797	NR_015588	319216	Mm.332387	NR_015588	ENSMUSG00000097216	4932441J04Rik	-	RIKEN cDNA 4932441J04 gene	ncRNA
Diff_Nuc28383	chr6	116008912	116009051	+	0	NA	intron (NM_177412, intron 3 of 5)	Lx|LINE|L1	-63958	NM_026376	67784	Mm.3085	NM_026376	ENSMUSG00000030123	Plxnd1	6230425C21Rik|b2b1863Clo|b2b553Clo	plexin D1	protein-coding
Diff_Nuc14886	chr16	81611302	81611441	+	0	NA	intron (NM_001113208, intron 15 of 17)	B1_Mus1|SINE|Alu	410429	NM_010954	17968	Mm.433941	NM_010954	ENSMUSG00000022762	Ncam2	Ncam-2|Ocam|RNCAM	neural cell adhesion molecule 2	protein-coding
Diff_Nuc35066	chr4	145254512	145254651	+	0	NA	Intergenic	Intergenic	-6019	NM_001103158	100041379	Mm.276881	NM_001103158	ENSMUSG00000058186	Zfp980	Gm13242|OTTMUSG00000011070	zinc finger protein 980	protein-coding
Diff_Nuc27160	chr6	58747352	58747491	+	0	NA	Intergenic	Lx7|LINE|L1	-36273	NM_028705	73998	Mm.191892	NM_028705	ENSMUSG00000029804	Herc3	5730409F18Rik|AI646603|mKIAA0032	hect domain and RLD 3	protein-coding
Diff_Nuc24702	chr7	96974802	96974941	+	0	NA	intron (NM_181407, intron 6 of 13)	intron (NM_181407, intron 6 of 13)	77268	NM_001162979	70884	Mm.252823	NM_001162979	ENSMUSG00000039391	Ccdc81	4921513D09Rik	coiled-coil domain containing 81	protein-coding
Diff_Nuc10230	chr10	95784332	95784471	+	0	NA	Intergenic	Intergenic	95560	NR_110448	74881	Mm.410819	NR_110448		4930459C07Rik	-	RIKEN cDNA 4930459C07 gene	ncRNA
Diff_Nuc36019	chr3	38694742	38694881	+	0	NA	Intergenic	Intergenic	-91051	NM_183221	329628	Mm.316210	NM_183221	ENSMUSG00000046743	Fat4	6030410K14Rik|9430004M15	FAT atypical cadherin 4	protein-coding
Diff_Nuc35031	chr4	142787212	142787351	+	0	NA	intron (NM_001256380, intron 1 of 7)	intron (NM_001256380, intron 1 of 7)	15331	NM_001081355	110593	Mm.332020	NM_001081355	ENSMUSG00000057637	Prdm2	4833427P12Rik|E330024L24Rik|Gm1033|Gm19732|KMT8|Riz|Riz1|Znfpr1c1	PR domain containing 2, with ZNF domain	protein-coding
Diff_Nuc39500	chr2	35176662	35176801	+	0	NA	intron (NM_013515, intron 5 of 6)	intron (NM_013515, intron 5 of 6)	15798	NM_013515	13830	Mm.295284	NM_013515	ENSMUSG00000026880	Stom	Epb7.2	stomatin	protein-coding
Diff_Nuc520	chr13	6619542	6619681	+	0	NA	intron (NM_019703, intron 5 of 21)	intron (NM_019703, intron 5 of 21)	28406	NM_019703	56421	Mm.273874	NM_019703	ENSMUSG00000021196	Pfkp	1200015H23Rik|9330125N24Rik|ATP-PFK|PFK-C|PFK-P	phosphofructokinase, platelet	protein-coding
Diff_Nuc20546	chr19	31110792	31110931	+	0	NA	intron (NM_001013833, intron 3 of 17)	MLT1A|LTR|MaLR	-46470	NM_031249	83410	Mm.22031	NM_031249	ENSMUSG00000053536	Cstf2t	64kDa|C77975|tCstF-64|tauCstF-64	cleavage stimulation factor, 3' pre-RNA subunit 2, tau	protein-coding
Diff_Nuc15531	chr15	16504222	16504361	+	0	NA	Intergenic	Intergenic	-203565	NM_009869	12565	Mm.439758	NM_009869	ENSMUSG00000025370	Cdh9	-	cadherin 9	protein-coding
Diff_Nuc38910	chr2	7730542	7730681	+	0	NA	Intergenic	Intergenic	-412786	NM_001110231	14007	Mm.398543	NM_010160	ENSMUSG00000002107	Celf2	B230218O03|B230345P09Rik|C88023|CELF-2|CUG-BP2|Cugbp2|D230046B21Rik|Etr-3|Napor|Napor-2|mETR-3	CUGBP, Elav-like family member 2	protein-coding
Diff_Nuc23876	chr7	60980922	60981061	+	0	NA	Intergenic	URR1A|DNA|MER1_type	166268	NR_105746	102466619		NR_105746	ENSMUSG00000099176	Mir6238	Gm27982|mmu-mir-6238	microRNA 6238	ncRNA
Diff_Nuc16461	chr15	54812672	54812811	+	0	NA	Intergenic	GA-rich|Low_complexity|Low_complexity	-61040	NM_001285994	18606	Mm.250256	NM_015744	ENSMUSG00000022425	Enpp2	ATX|E-NPP 2|Npps2|PD-Ialpha|Pdnp2|lysoPLD	ectonucleotide pyrophosphatase/phosphodiesterase 2	protein-coding
Diff_Nuc35454	chr3	10622592	10622731	+	0	NA	Intergenic	Lx|LINE|L1	-182531	NM_001127191	74718	Mm.440548	NM_029068	ENSMUSG00000027534	Snx16	4930522N22Rik|AI117577|AI747675	sorting nexin 16	protein-coding
Diff_Nuc50152	chr8	19735072	19735211	+	0	NA	intron (NM_001039553, intron 4 of 9)	intron (NM_001039553, intron 4 of 9)	5565	NM_001039553	626415	Mm.425517	NM_001039553	ENSMUSG00000096265	4930467E23Rik	ENSMUSG00000074453|OTTMUSG00000018948|TSAP	RIKEN cDNA 4930467E23 gene	protein-coding
Diff_Nuc46767	chr1	176681532	176681671	+	0	NA	intron (NM_019445, intron 15 of 17)	intron (NM_019445, intron 15 of 17)	170349	NM_011825	23893	Mm.25760	NM_011825	ENSMUSG00000050069	Grem2	Gremlin2|Prdc	gremlin 2, DAN family BMP antagonist	protein-coding
Diff_Nuc37322	chr3	93267312	93267451	+	0	NA	Intergenic	Intergenic	-5295	NM_027762	71325	Mm.68064	NM_027762	ENSMUSG00000027908	Tchhl1	5430400H23Rik|AA589420|S100a17|Thhl1	trichohyalin-like 1	protein-coding
Diff_Nuc30966	chr5	86983542	86983681	+	0	NA	intron (NM_178730, intron 3 of 10)	L1M5|LINE|L1	-35986	NM_177162	320454	Mm.184522	NM_177162	ENSMUSG00000079451	Tmprss11g	9930032O22Rik|Desc4	transmembrane protease, serine 11g	protein-coding
Diff_Nuc9830	chr10	75973492	75973631	+	0	NA	intron (NM_019434, intron 26 of 28)	intron (NM_019434, intron 26 of 28)	-20789	NM_146006	16987	Mm.55075	NM_146006	ENSMUSG00000033105	Lss	2810025N20Rik|D10Ertd116e|Osc	lanosterol synthase	protein-coding
Diff_Nuc22487	chr18	60656382	60656521	+	0	NA	intron (NM_134133, intron 1 of 1)	MLT1E2|LTR|MaLR	5186	NM_134133	106878	Mm.273197	NM_134133	ENSMUSG00000038059	Smim3	2010002N04Rik|AI195350|AW561905|Nid67|cI-41	small integral membrane protein 3	protein-coding
Diff_Nuc19538	chr14	106676232	106676371	+	0	NA	Intergenic	Intergenic	170886	NR_073203	212085	Mm.78128	NM_198601	ENSMUSG00000022113	Trim52	4921513B05Rik	tripartite motif-containing 52	protein-coding
Diff_Nuc27796	chr6	87109982	87110121	+	0	NA	intron (NM_054041, intron 17 of 17)	intron (NM_054041, intron 17 of 17)	55311	NM_001167937	52372	Mm.282851	NM_001167937	ENSMUSG00000090891	D6Ertd527e	AU043841	DNA segment, Chr 6, ERATO Doi 527, expressed	protein-coding
Diff_Nuc10120	chr10	91315112	91315251	+	0	NA	Intergenic	Intergenic	219749	NR_029812	723955		NR_029812	ENSMUSG00000065524	Mir135a-2	Mirn135a-2|mir-135a-2	microRNA 135a-2	ncRNA
Diff_Nuc1373	chr13	42508822	42508961	+	0	NA	Intergenic	Intergenic	112046	NM_010104	13614	Mm.14543	NM_010104	ENSMUSG00000021367	Edn1	ET-1|PPET1|preproET	endothelin 1	protein-coding
Diff_Nuc28711	chr6	133233862	133234001	+	0	NA	Intergenic	Lx|LINE|L1	-8303	NM_027784	232426	Mm.158689	NM_027784	ENSMUSG00000055594	5530400C23Rik	GRP	RIKEN cDNA 5530400C23 gene	protein-coding
Diff_Nuc11008	chr10	126600562	126600701	+	0	NA	Intergenic	B3A|SINE|B2	-1581	NR_045166	14421	Mm.386762	NM_008080	ENSMUSG00000006731	B4galnt1	4933429D13Rik|Gal-NAc-T|GalNAc-T|GalNAcT|Galgt1|Ggm-2|Ggm2	beta-1,4-N-acetyl-galactosaminyl transferase 1	protein-coding
Diff_Nuc22181	chr18	48512572	48512711	+	0	NA	Intergenic	Intergenic	307652	NM_001025388	433182	Mm.70666	NM_001025388	ENSMUSG00000059040	Eno1b	EG433182|Eno1|Gm5506	enolase 1B, retrotransposed	protein-coding
Diff_Nuc38321	chr3	139782412	139782551	+	0	NA	Intergenic	Intergenic	91268	NR_105798	102465198		NR_105798	ENSMUSG00000099169	Mir7j	Gm27716|Mirlet7j|mmu-let-7j	microRNA 7j	ncRNA
Diff_Nuc4834	chr12	80261092	80261231	+	0	NA	intron (NM_016800, intron 4 of 5)	intron (NM_016800, intron 4 of 5)	12284	NM_016800	53612	Mm.265929	NM_016800	ENSMUSG00000021124	Vti1b	AU015348|GES30|MVti1b|SNARE|Vti1-rp1	vesicle transport through interaction with t-SNAREs 1B	protein-coding
Diff_Nuc25383	chr7	127410022	127410161	+	0	NA	intron (NM_026458, intron 19 of 30)	Lx|LINE|L1	-62107	NM_177213	320631	Mm.78330	NM_177213	ENSMUSG00000054746	Abca15	4930500I12Rik	ATP-binding cassette, sub-family A (ABC1), member 15	protein-coding
Diff_Nuc37523	chr3	103732712	103732851	+	0	NA	exon (NM_172684, exon 2 of 7)	exon (NM_172684, exon 2 of 7)	14738	NM_172684	229675	Mm.29366	NM_172684	ENSMUSG00000044098	Rsbn1	C230004D03Rik|E330004N01|Rosbin|Rsbn|Rsbp|mKIAA3002	rosbin, round spermatid basic protein 1	protein-coding
Diff_Nuc4591	chr12	71575092	71575231	+	0	NA	Intergenic	(TC)n|Simple_repeat|Simple_repeat	21020	NM_028339	72736	Mm.204670	NM_028339	ENSMUSG00000021072	Tmx1	2810425A04Rik|AI465319|Txndc1	thioredoxin-related transmembrane protein 1	protein-coding
Diff_Nuc4450	chr12	66106282	66106421	+	0	NA	intron (NM_177805, intron 11 of 19)	intron (NM_177805, intron 11 of 19)	-30970	NM_177806	328110	Mm.283339	NM_177806	ENSMUSG00000035597	Prpf39	Srcs1	pre-mRNA processing factor 39	protein-coding
Diff_Nuc23737	chr7	53835992	53836131	+	0	NA	intron (NM_013789, intron 9 of 10)	L2|LINE|L2	59116	NM_013789	27414	Mm.76659	NM_013789	ENSMUSG00000030839	Sergef	DelGEF|Gef|Gnef|Gnefr	secretion regulating guanine nucleotide exchange factor	protein-coding
Diff_Nuc13754	chr16	36579302	36579441	+	0	NA	Intergenic	RMER4B|LTR|ERVK	-17151	NM_013803	12374	Mm.103619	NM_013803	ENSMUSG00000051980	Casr	CaR|Gprc2a	calcium-sensing receptor	protein-coding
Diff_Nuc30238	chr5	56638892	56639031	+	0	NA	Intergenic	L1MA5|LINE|L1	1470197	NR_015588	319216	Mm.332387	NR_015588	ENSMUSG00000097216	4932441J04Rik	-	RIKEN cDNA 4932441J04 gene	ncRNA
Diff_Nuc19207	chr14	93564112	93564251	+	0	NA	intron (NM_001346722, intron 4 of 4)	intron (NM_001346722, intron 4 of 4)	723926	NM_001271800	211712	Mm.37126	NM_001081377	ENSMUSG00000055421	Pcdh9	-	protocadherin 9	protein-coding
Diff_Nuc35488	chr3	12189782	12189921	+	0	NA	Intergenic	L1M2|LINE|L1	-345492	NR_040751	100038545	Mm.388494	NR_040751	ENSMUSG00000104015	Gm10745	ENSMUSG00000074696	predicted gene 10745	ncRNA
Diff_Nuc48919	chr9	82793752	82793891	+	0	NA	intron (NM_001081216, intron 23 of 39)	intron (NM_001081216, intron 23 of 39)	70408	NM_022986	65099	Mm.41415	NM_022986	ENSMUSG00000032251	Irak1bp1	4921528N06Rik|AI851240|Aabp3|Aip70|Simpl	interleukin-1 receptor-associated kinase 1 binding protein 1	protein-coding
Diff_Nuc7682	chr11	97169582	97169721	+	0	NA	Intergenic	B2_Mm1a|SINE|B2	-7379	NM_025927	67036	Mm.5381	NM_025927	ENSMUSG00000018882	Mrpl45	2600005P05Rik|AU043542|R75241	mitochondrial ribosomal protein L45	protein-coding
Diff_Nuc44979	chr1	93166352	93166491	+	0	NA	intron (NM_026454, intron 4 of 9)	RLTR22_Mur|LTR|ERVK	19525	NM_026454	67921	Mm.337238	NM_026454	ENSMUSG00000034343	Ube2f	2510010F15Rik|AI851109	ubiquitin-conjugating enzyme E2F (putative)	protein-coding
Diff_Nuc5824	chr11	10304692	10304831	+	0	NA	Intergenic	Intergenic	-709258	NM_177033	319922	Mm.337851	NM_177033	ENSMUSG00000050830	Vwc2	A930041G11Rik|G11|PSST739|UNQ739|cradin	von Willebrand factor C domain containing 2	protein-coding
Diff_Nuc47839	chr9	32977342	32977481	+	0	NA	Intergenic	L1MA6|LINE|L1	-240860	NR_131058	330917	Mm.488283	NR_131058		Gm27162	A430016B06	predicted gene 27162	ncRNA
Diff_Nuc30590	chr5	72363282	72363421	+	0	NA	intron (NM_008069, intron 4 of 8)	intron (NM_008069, intron 4 of 8)	196071	NM_178599	27784	Mm.44223	NM_178599	ENSMUSG00000029213	Commd8	C77770|D5Buc26e	COMM domain containing 8	protein-coding
Diff_Nuc8958	chr10	35185292	35185431	+	0	NA	Intergenic	Lx5|LINE|L1	982155	NM_010237	14302	Mm.332432	NM_010237	ENSMUSG00000019779	Frk	BSK|BSK/IYK|C85044|GTK|RAK	fyn-related kinase	protein-coding
Diff_Nuc19111	chr14	89228632	89228771	+	0	NA	Intergenic	Lx8|LINE|L1	-357498	NM_178685	219257	Mm.128861	NM_178685	ENSMUSG00000050505	Pcdh20	C630015B17Rik|Pcdh13	protocadherin 20	protein-coding
Diff_Nuc39983	chr2	52472862	52473001	+	0	NA	intron (NM_001037099, intron 2 of 13)	L1_Mur2|LINE|L1	58447	NM_001285428	12298	Mm.330223	NM_146123	ENSMUSG00000017412	Cacnb4	3110038O15Rik|Cchb4|lh	calcium channel, voltage-dependent, beta 4 subunit	protein-coding
Diff_Nuc24715	chr7	97475052	97475191	+	0	NA	intron (NM_031394, intron 1 of 18)	intron (NM_031394, intron 1 of 18)	24256	NR_110348	83671	Mm.26751	NM_031394	ENSMUSG00000030616	Sytl2	AI266830|Slp2|mKIAA1597	synaptotagmin-like 2	protein-coding
Diff_Nuc1074	chr13	27638392	27638531	+	0	NA	Intergenic	Lx9|LINE|L1	18014	NM_001316721	67310	Mm.46091	NM_023332	ENSMUSG00000006490	Prl8a9	1600019F10Rik|Ghd15|PLP-C2|PLP-Cbeta|Prlpc2	prolactin family8, subfamily a, member 9	protein-coding
Diff_Nuc34667	chr4	122489552	122489691	+	0	NA	Intergenic	Intergenic	-23849	NM_008917	19063	Mm.277719	NM_008917	ENSMUSG00000028657	Ppt1	9530043G02Rik|AA960502|C77813|CLN1|D4Ertd184e|INCL|PPT	palmitoyl-protein thioesterase 1	protein-coding
Diff_Nuc39003	chr2	12280972	12281111	+	0	NA	intron (NM_024185, intron 11 of 14)	ORR1A2-int|LTR|MaLR	-57470	NM_001001309	241226	Mm.329997	NM_001001309	ENSMUSG00000026768	Itga8	AI447669	integrin alpha 8	protein-coding
Diff_Nuc28147	chr6	105399372	105399511	+	0	NA	Intergenic	RMER6C|LTR|ERVK	43221	NR_040297	100503536	Mm.366960	NR_040297	ENSMUSG00000108237	Gm19757	-	predicted gene, 19757	ncRNA
Diff_Nuc24822	chr7	100334312	100334451	+	0	NA	Intergenic	L1MA4|LINE|L1	105992	NM_021427	58238	Mm.113787	NM_021427	ENSMUSG00000051515	Fam181b	A830059I20Rik|AB041569	family with sequence similarity 181, member B	protein-coding
Diff_Nuc19284	chr14	96365552	96365691	+	0	NA	Intergenic	Intergenic	85136	NM_025733	66732	Mm.75060	NM_025733	ENSMUSG00000034689	4921530L21Rik	-	RIKEN cDNA 4921530L21 gene	protein-coding
Diff_Nuc14051	chr16	48029112	48029251	+	0	NA	Intergenic	Intergenic	-254667	NM_028610	73693	Mm.35597	NM_028610	ENSMUSG00000058550	Dppa4	2410091M23Rik|C76608|ECAT15-1	developmental pluripotency associated 4	protein-coding
Diff_Nuc13289	chr16	15400872	15401011	+	0	NA	Intergenic	Intergenic	193670	NM_001159351	70620	Mm.235407	NM_023585	ENSMUSG00000022674	Ube2v2	1110021H13Rik|4632410D19Rik|5730524P06Rik|6820402M05|AI848315|C81524|MMS2	ubiquitin-conjugating enzyme E2 variant 2	protein-coding
Diff_Nuc26901	chr6	47120302	47120441	+	0	NA	intron (NM_001004357, intron 20 of 23)	MER44D|DNA|MER2_type	-74024	NM_025771	66797	Mm.440084	NM_025771	ENSMUSG00000039419	Cntnap2	5430425M22Rik|Caspr2|mKIAA0868	contactin associated protein-like 2	protein-coding
Diff_Nuc22674	chr18	69034962	69035101	+	0	NA	Intergenic	PB1|SINE|Alu	76151	NR_038051	78931	Mm.160155	NR_038051		4930546C10Rik	-	RIKEN cDNA 4930546C10 gene	ncRNA
Diff_Nuc904	chr13	21284682	21284821	+	0	NA	3' UTR (NM_009054, exon 8 of 8)	3' UTR (NM_009054, exon 8 of 8)	12951	NM_009054	19720	Mm.314056	NM_009054	ENSMUSG00000021326	Trim27	AW538890|Gm19403|Rfp	tripartite motif-containing 27	protein-coding
Diff_Nuc25396	chr7	127901512	127901651	+	0	NA	intron (NM_177697, intron 3 of 33)	MER89|LTR|ERV1	18510	NM_177697	233813	Mm.389939	NM_177697	ENSMUSG00000030889	Vwa3a	E030013G06Rik	von Willebrand factor A domain containing 3A	protein-coding
Diff_Nuc22345	chr18	55405672	55405811	+	0	NA	Intergenic	Intergenic	-255907	NM_175751	269023	Mm.192984	NM_175751	ENSMUSG00000052713	Zfp608	4932417D18Rik|D430007A19Rik|Znf608	zinc finger protein 608	protein-coding
Diff_Nuc2884	chr13	112518322	112518461	+	0	NA	Intergenic	MurERV4-int|LTR|ERVK	42005	NM_172593	218613	Mm.31012	NM_172593	ENSMUSG00000032727	Mier3	5730509D14|AU015422|D130064H19Rik	MIER family member 3	protein-coding
Diff_Nuc47090	chr1	193396652	193396791	+	0	NA	intron (NM_029766, intron 1 of 14)	intron (NM_029766, intron 1 of 14)	2702	NM_001305233	76843	Mm.189102	NM_029766	ENSMUSG00000037474	Dtl	2810047L02Rik|5730564G15Rik|L2dtl|Ramp	denticleless E3 ubiquitin protein ligase	protein-coding
Diff_Nuc19935	chr14	124448242	124448381	+	0	NA	intron (NM_207667, intron 3 of 4)	Lx4A|LINE|L1	61454	NR_045479	69393	Mm.491348	NR_045479	ENSMUSG00000099994	1700024B18Rik	-	RIKEN cDNA 1700024B18 gene	ncRNA
Diff_Nuc2907	chr13	113814712	113814851	+	0	NA	Intergenic	B1_Mus2|SINE|Alu	-10806	NM_001281487	238896		NM_001281487	ENSMUSG00000078926	Cdc20b	EG238896|EG622422	cell division cycle 20B	protein-coding
Diff_Nuc33663	chr4	75023602	75023741	+	0	NA	Intergenic	L1Md_F2|LINE|L1	-99481	NM_025849	66928	Mm.24332	NM_025849	ENSMUSG00000028398	Tmem261	1700027K24Rik|3110001D03Rik	transmembrane protein 261	protein-coding
Diff_Nuc28323	chr6	112928902	112929041	+	0	NA	Intergenic	MER34|LTR|ERV1	-31711	NM_080448	259302	Mm.236401	NM_080448	ENSMUSG00000030257	Srgap3	AI452337|Arhgap14|D130026O08Rik|Gbi|MEGAP|WRP|mKIAA0411	SLIT-ROBO Rho GTPase activating protein 3	protein-coding
Diff_Nuc15932	chr15	33977942	33978081	+	0	NA	Intergenic	MER53|DNA|hAT	-34463	NM_026002	67154	Mm.130883	NM_026002	ENSMUSG00000022255	Mtdh	2610103J23Rik|3D3|3D3/Lyric|AEG-1|AV353288|D8Bwg1112e|Lyric	metadherin	protein-coding
Diff_Nuc12587	chr17	76743722	76743861	+	0	NA	Intergenic	Intergenic	483428	NR_033456	100043885	Mm.127562	NR_033456		Gm4710	-	predicted gene 4710	ncRNA
Diff_Nuc22745	chr18	71901702	71901841	+	0	NA	intron (NM_007831, intron 5 of 28)	intron (NM_007831, intron 5 of 28)	608952	NM_007831	13176	Mm.167882	NM_007831	ENSMUSG00000060534	Dcc	C030036D22Rik|Igdcc1	deleted in colorectal carcinoma	protein-coding
Diff_Nuc30249	chr5	56855832	56855971	+	0	NA	Intergenic	RMER6A|LTR|ERVK	1253257	NR_015588	319216	Mm.332387	NR_015588	ENSMUSG00000097216	4932441J04Rik	-	RIKEN cDNA 4932441J04 gene	ncRNA
Diff_Nuc32052	chr5	149441522	149441661	+	0	NA	Intergenic	Intergenic	-77227	NM_011908	24109	Mm.21846	NM_011908	ENSMUSG00000001687	Ubl3	AW108023|HCG	ubiquitin-like 3	protein-coding
Diff_Nuc13084	chr16	5039622	5039761	+	0	NA	intron (NM_028720, intron 3 of 15)	intron (NM_028720, intron 3 of 15)	10312	NM_001079814	74022	Mm.21652	NM_028720	ENSMUSG00000022536	Glyr1	2810419J22Rik|3930401K13Rik|AW545332|Npac	glyoxylate reductase 1 homolog (Arabidopsis)	protein-coding
Diff_Nuc49818	chr9	124068622	124068761	+	0	NA	Intergenic	L1Md_F2|LINE|L1	32409	NM_009917	12774	Mm.14302	NM_009917	ENSMUSG00000079227	Ccr5	AM4-7|CD195|Cmkbr5	chemokine (C-C motif) receptor 5	protein-coding
Diff_Nuc34379	chr4	108837612	108837751	+	0	NA	intron (NM_001346502, intron 2 of 23)	PB1D10|SINE|Alu	37196	NM_133885	100273	Mm.366315	NM_133885	ENSMUSG00000028559	Osbpl9	2600011I06Rik|AU015843|Orp-9	oxysterol binding protein-like 9	protein-coding
Diff_Nuc52397	chr8	128871282	128871421	+	0	NA	intron (NM_175434, intron 2 of 6)	intron (NM_175434, intron 2 of 6)	48872	NM_175434	210027	Mm.405238	NM_175434	ENSMUSG00000057060	Slc35f3	B230375D17Rik	solute carrier family 35, member F3	protein-coding
Diff_Nuc34906	chr4	135421352	135421491	+	0	NA	3' UTR (NM_001080387, exon 6 of 6)	3' UTR (NM_001080387, exon 6 of 6)	8340	NM_026383	52830	Mm.29159	NM_026383	ENSMUSG00000028675	Pnrc2	0610011E17Rik|D4Bwg0593e	proline-rich nuclear receptor coactivator 2	protein-coding
Diff_Nuc50402	chr8	33268282	33268421	+	0	NA	intron (NR_046039, intron 1 of 2)	AT_rich|Low_complexity|Low_complexity	5984	NR_046039	666589	Mm.367675	NR_046039		Gm8179	EG666589	predicted gene 8179	ncRNA
Diff_Nuc20286	chr19	18973782	18973921	+	0	NA	Intergenic	Intergenic	101756	NM_146095	225998	Mm.234641	NM_146095	ENSMUSG00000036192	Rorb	Nr1f2|RZR-beta|RZRB|Rorbeta|hstp	RAR-related orphan receptor beta	protein-coding
Diff_Nuc16918	chr15	78925582	78925721	+	0	NA	TTS (NM_145139)	TTS (NM_145139)	-13762	NM_177461	27008	Mm.196480	NM_177461	ENSMUSG00000033039	Micall1	AI448246|D15Mit260|D15N2e|EST573322|EST820961|MIRab13|mKIAA1668	microtubule associated monooxygenase, calponin and LIM domain containing -like 1	protein-coding
Diff_Nuc15253	chr15	3415742	3415881	+	0	NA	intron (NM_001048178, intron 1 of 8)	intron (NM_001048178, intron 1 of 8)	116031	NM_001286370	14600	Mm.3986	NM_010284	ENSMUSG00000055737	Ghr	GHBP|GHR/BP	growth hormone receptor	protein-coding
Diff_Nuc40634	chr2	76950352	76950491	+	0	NA	intron (NM_001025576, intron 5 of 23)	intron (NM_001025576, intron 5 of 23)	58271	NM_001025576	545428	Mm.26579	NM_001025576	ENSMUSG00000044033	Ccdc141	2610301F02Rik|CAMDI|ENSMUSG00000075261	coiled-coil domain containing 141	protein-coding
Diff_Nuc31560	chr5	119359202	119359341	+	0	NA	Intergenic	RLTR11B|LTR|ERVK	-43077	NR_040694	74627	Mm.410828	NR_040694	ENSMUSG00000107144	4930413E15Rik	-	RIKEN cDNA 4930413E15 gene	ncRNA
Diff_Nuc19794	chr14	119891642	119891781	+	0	NA	intron (NM_015820, intron 1 of 1)	MIR|SINE|MIR	-256738	NR_045621	75432	Mm.443277	NR_045621	ENSMUSG00000100274	1700006F04Rik	-	RIKEN cDNA 1700006F04 gene	ncRNA
Diff_Nuc39239	chr2	21474642	21474781	+	0	NA	intron (NM_001004761, intron 2 of 10)	intron (NM_001004761, intron 2 of 10)	185517	NM_001004761	241263	Mm.166647	NM_175706	ENSMUSG00000045967	Gpr158	5330427M13Rik|mKIAA1136	G protein-coupled receptor 158	protein-coding
Diff_Nuc50939	chr8	53486382	53486521	+	0	NA	Intergenic	L1Md_F2|LINE|L1	-1110605	NM_001205054	11593	Mm.334535	NM_001005847	ENSMUSG00000031521	Aga	AW060726	aspartylglucosaminidase	protein-coding
Diff_Nuc12553	chr17	74941242	74941381	+	0	NA	intron (NM_007566, intron 1 of 72)	intron (NM_007566, intron 1 of 72)	13676	NM_007566	12211	Mm.442564	NM_007566	ENSMUSG00000024073	Birc6	A430032G04Rik|A430040A19Rik|AA501170|Bruce|D630005A10Rik|mKIAA1289	baculoviral IAP repeat-containing 6	protein-coding
Diff_Nuc29208	chr5	8400622	8400761	+	0	NA	intron (NM_013726, intron 10 of 11)	B1_Mus1|SINE|Alu	22025	NM_013726	27214	Mm.292470	NM_013726	ENSMUSG00000002297	Dbf4	AA545217|Ask	DBF4 zinc finger	protein-coding
Diff_Nuc45125	chr1	100258502	100258641	+	0	NA	Intergenic	RLTR17|LTR|ERVK	-59130	NM_001164233	70866	Mm.389164	NM_027584	ENSMUSG00000026336	Slco6d1	4921511I05Rik	solute carrier organic anion transporter family, member 6d1	protein-coding
Diff_Nuc4347	chr12	61347282	61347421	+	0	NA	Intergenic	Intergenic	-1026881	NM_001033156	70611	Mm.311026	NM_001033156	ENSMUSG00000035329	Fbxo33	5730501N20Rik|AI642135	F-box protein 33	protein-coding
Diff_Nuc14329	chr16	60110782	60110921	+	0	NA	intron (NM_007938, intron 5 of 17)	intron (NM_007938, intron 5 of 17)	-471616	NM_001347244	56297	Mm.392505	NM_019665	ENSMUSG00000022722	Arl6	1110018H24Rik|2210411E14Rik|BBS3	ADP-ribosylation factor-like 6	protein-coding
Diff_Nuc3335	chr12	16185662	16185801	+	0	NA	Intergenic	Lx2|LINE|L1	-362140	NM_144551	217410	Mm.491136	NM_144551	ENSMUSG00000020601	Trib2	AW319517|TRB-2|TRB2	tribbles pseudokinase 2	protein-coding
Diff_Nuc43872	chr1	44729012	44729151	+	0	NA	intron (NM_028450, intron 1 of 10)	L1_Mur1|LINE|L1	72713	NR_040602	75066	Mm.416932	NR_040602	ENSMUSG00000101701	4930521E06Rik	-	RIKEN cDNA 4930521E06 gene	ncRNA
Diff_Nuc24303	chr7	78832812	78832951	+	0	NA	Intergenic	Intergenic	-221700	NR_130995	78156	Mm.243818	NR_130995	ENSMUSG00000108669	4930441H08Rik	-	RIKEN cDNA 4930441H08 gene	ncRNA
Diff_Nuc49534	chr9	110368762	110368901	+	0	NA	intron (NM_177771, intron 1 of 9)	intron (NM_177771, intron 1 of 9)	10367	NM_177771	270201	Mm.41744	NM_177771	ENSMUSG00000054792	Klhl18	A930041K15|AW545966	kelch-like 18	protein-coding
Diff_Nuc6556	chr11	39461892	39462031	+	0	NA	Intergenic	Intergenic	-258234	NR_126439	75315	Mm.461295	NR_126439		4930553C11Rik	-	RIKEN cDNA 4930553C11 gene	ncRNA
Diff_Nuc40562	chr2	73583092	73583231	+	0	NA	intron (NM_001166603, intron 1 of 11)	intron (NM_001166603, intron 1 of 11)	30242	NM_001166603	108699	Mm.257073	NM_029716	ENSMUSG00000056486	Chn1	0610007I19Rik|0710001E19Rik|1700112L09Rik|2900046J01Rik|AI413815|ARHGAP2	chimerin 1	protein-coding
Diff_Nuc27156	chr6	58541842	58541981	+	0	NA	Intergenic	Intergenic	-4755	NM_011920	26357	Mm.333096	NM_011920	ENSMUSG00000029802	Abcg2	ABC15|ABCP|AI428558|BCRP|Bcrp1|MXR|MXR1	ATP-binding cassette, sub-family G (WHITE), member 2	protein-coding
Diff_Nuc29870	chr5	39012972	39013111	+	0	NA	Intergenic	Intergenic	-60207	NM_011715	22388	Mm.2654	NM_011715	ENSMUSG00000005103	Wdr1	Aip1|D5Wsu185e|rede	WD repeat domain 1	protein-coding
Diff_Nuc21316	chr18	10447362	10447501	+	0	NA	intron (NM_001083628, intron 1 of 32)	intron (NM_001083628, intron 1 of 32)	122254	NM_001083628	381157	Mm.261535	NM_001083628	ENSMUSG00000042942	Greb1l	mKIAA4095	growth regulation by estrogen in breast cancer-like	protein-coding
Diff_Nuc4638	chr12	73189672	73189811	+	0	NA	intron (NM_001205067, intron 1 of 6)	intron (NM_001205067, intron 1 of 6)	2915	NM_024205	104771	Mm.258935	NM_024205	ENSMUSG00000005078	Jkamp	1200003C05Rik|2310047L11Rik|Jamp	JNK1/MAPK8-associated membrane protein	protein-coding
Diff_Nuc16901	chr15	77612512	77612651	+	0	NA	intron (NM_022410, intron 15 of 40)	intron (NM_022410, intron 15 of 40)	-26922	NM_001081970	239552	Mm.125650	NM_001081970	ENSMUSG00000056656	Apol8	9830006J20Rik|APOL-II|Apol2	apolipoprotein L 8	protein-coding
Diff_Nuc49272	chr9	96461662	96461801	+	0	NA	intron (NM_053268, intron 15 of 23)	intron (NM_053268, intron 15 of 23)	70191	NM_053268	114713	Mm.124502	NM_053268	ENSMUSG00000032413	Rasa2	5430433H21Rik|AA517451|AU023900|GAP1m	RAS p21 protein activator 2	protein-coding
Diff_Nuc40450	chr2	69751702	69751841	+	0	NA	intron (NM_177783, intron 1 of 38)	intron (NM_177783, intron 1 of 38)	16468	NM_177783	68795	Mm.314576	NM_177783	ENSMUSG00000044308	Ubr3	1110059H15Rik|4833421P10Rik|A130030D10Rik|AA409735|AA414972|AA422631|AI646861|AU016126|Zfp650|Znf650	ubiquitin protein ligase E3 component n-recognin 3	protein-coding
Diff_Nuc41125	chr2	98502342	98502481	+	0	NA	Intergenic	GSAT_MM|Satellite|Satellite	1194597	NM_178725	241568	Mm.241682	NM_178725	ENSMUSG00000050587	Lrrc4c	6430556C10Rik|NGL-1	leucine rich repeat containing 4C	protein-coding
Diff_Nuc23859	chr7	60270692	60270831	+	0	NA	Intergenic	Intergenic	876498	NR_105746	102466619		NR_105746	ENSMUSG00000099176	Mir6238	Gm27982|mmu-mir-6238	microRNA 6238	ncRNA
Diff_Nuc37050	chr3	81864952	81865091	+	0	NA	exon (NM_001161796, exon 3 of 14)	exon (NM_001161796, exon 3 of 14)	13612	NM_017469	54195	Mm.9445	NM_017469	ENSMUSG00000028005	Gucy1b3	GC-S-beta-1|GCbeta1	guanylate cyclase 1, soluble, beta 3	protein-coding
Diff_Nuc12382	chr17	66723392	66723531	+	0	NA	intron (NM_172963, intron 6 of 13)	intron (NM_172963, intron 6 of 13)	75629	NM_172963	68617	Mm.33421	NM_172963	ENSMUSG00000052105	Mtcl1	1110012J17Rik|Ccdc165|D130071O13|Kiaa0802|Soga2|mKIAA0802|t8219b25	microtubule crosslinking factor 1	protein-coding
Diff_Nuc3891	chr12	44479322	44479461	+	0	NA	Intergenic	Intergenic	831664	NM_013760	27362	Mm.27432	NM_013760	ENSMUSG00000014905	Dnajb9	AA408011|AA673251|AA673481|AW556981|ERdj4|Mdg1|mDj7	DnaJ heat shock protein family (Hsp40) member B9	protein-coding
Diff_Nuc22096	chr18	45003392	45003531	+	0	NA	intron (NM_001163013, intron 7 of 29)	intron (NM_001163013, intron 7 of 29)	15142	NM_001163013	240255	Mm.244482	NM_001163013	ENSMUSG00000034653	Ythdc2	3010002F02Rik|BC037178	YTH domain containing 2	protein-coding
Diff_Nuc22283	chr18	52714182	52714321	+	0	NA	Intergenic	L1_Mus4|LINE|L1	-24730	NM_001286182	16948	Mm.172	NM_010728	ENSMUSG00000024529	Lox	AI893619|TSC-160|rrg	lysyl oxidase	protein-coding
Diff_Nuc25525	chr7	134022332	134022471	+	0	NA	intron (NM_001163775, intron 7 of 15)	intron (NM_001163775, intron 7 of 15)	6080	NM_001163775	381921	Mm.259634	NM_001163774	ENSMUSG00000059981	Taok2	1110033K02Rik|B230344N16|MAP3K17|PSK|PSK1|TAO1|TAO2|mKIAA0881	TAO kinase 2	protein-coding
Diff_Nuc4348	chr12	61397792	61397931	+	0	NA	Intergenic	Intergenic	-1077391	NM_001033156	70611	Mm.311026	NM_001033156	ENSMUSG00000035329	Fbxo33	5730501N20Rik|AI642135	F-box protein 33	protein-coding
Diff_Nuc41279	chr2	104682702	104682841	+	0	NA	intron (NM_178695, intron 3 of 5)	intron (NM_178695, intron 3 of 5)	7236	NM_178695	228413	Mm.259609	NM_178695	ENSMUSG00000027171	Prrg4	9930111I18Rik|TMG4	proline rich Gla (G-carboxyglutamic acid) 4 (transmembrane)	protein-coding
Diff_Nuc30818	chr5	82089202	82089341	+	0	NA	intron (NM_001347367, intron 12 of 27)	intron (NM_001347367, intron 12 of 27)	464467	NR_138557	67327	Mm.87058	NR_138557		1700031L13Rik	-	RIKEN cDNA 1700031L13 gene	ncRNA
Diff_Nuc29107	chr5	4751982	4752121	+	0	NA	Intergenic	Intergenic	6165	NM_021457	14362	Mm.246003	NM_021457	ENSMUSG00000044674	Fzd1	AW227548|FZ-1|Fz1	frizzled class receptor 1	protein-coding
Diff_Nuc14440	chr16	64154982	64155121	+	0	NA	Intergenic	Intergenic	-291068	NM_010140	13837	Mm.1977	NM_010140	ENSMUSG00000052504	Epha3	AW492086|Cek4|ETK1|End3|Hek|Hek4|Mek4|Tyro4	Eph receptor A3	protein-coding
Diff_Nuc47564	chr9	18738532	18738671	+	0	NA	Intergenic	Intergenic	-10493	NM_001011824	258075	Mm.377343	NM_001011824	ENSMUSG00000095957	Olfr832	MOR153-1	olfactory receptor 832	protein-coding
Diff_Nuc14686	chr16	73520612	73520751	+	0	NA	Intergenic	Intergenic	821631	NR_030464	751561		NR_030464	ENSMUSG00000104758	Mir691	Mirn691|mir-691|mmu-mir-691	microRNA 691	ncRNA
Diff_Nuc4179	chr12	54177932	54178071	+	0	NA	intron (NM_198111, intron 11 of 13)	intron (NM_198111, intron 11 of 13)	-171663	NM_013780	27386	Mm.247044	NM_013780	ENSMUSG00000021010	Npas3	4930423H22Rik|bHLHe12	neuronal PAS domain protein 3	protein-coding
Diff_Nuc11724	chr17	33031742	33031881	+	0	NA	Intergenic	Intergenic	-3263	NM_207245	240066	Mm.26636	NM_207245	ENSMUSG00000095325	Zfp870	AI173952	zinc finger protein 870	protein-coding
Diff_Nuc15975	chr15	35374062	35374201	+	0	NA	intron (NM_177151, intron 8 of 61)	intron (NM_177151, intron 8 of 61)	72830	NM_177151	666173	Mm.309250	NM_177151	ENSMUSG00000037646	Vps13b	1810042B05Rik|2310042E16Rik|4732488H20|C330002D13Rik|C87206|Coh1|D230005K13|mKIAA0532|mKIAA5032	vacuolar protein sorting 13B	protein-coding
Diff_Nuc8784	chr10	28120832	28120971	+	0	NA	intron (NM_008983, intron 7 of 31)	intron (NM_008983, intron 7 of 31)	-267265	NM_001305663	210757	Mm.123021	NM_178666	ENSMUSG00000049109	Themis	E430004N04Rik|Gasp|Spot|Tsepa|thylex	thymocyte selection associated	protein-coding
Diff_Nuc44486	chr1	67806432	67806571	+	0	NA	Intergenic	Intergenic	636900	NM_001080809	227231	Mm.343942	NM_001080809	ENSMUSG00000025991	Cps1	4732433M03Rik|CPS|D1Ucla3	carbamoyl-phosphate synthetase 1	protein-coding
Diff_Nuc20301	chr19	19620232	19620371	+	0	NA	Intergenic	MLT1B|LTR|MaLR	-434615	NM_001043354	225998	Mm.234641	NM_146095	ENSMUSG00000036192	Rorb	Nr1f2|RZR-beta|RZRB|Rorbeta|hstp	RAR-related orphan receptor beta	protein-coding
Diff_Nuc4922	chr12	83823132	83823271	+	0	NA	intron (NM_001282061, intron 2 of 16)	intron (NM_001282061, intron 2 of 16)	104715	NM_001282061	50779	Mm.126176	NM_015812	ENSMUSG00000021219	Rgs6	-	regulator of G-protein signaling 6	protein-coding
Diff_Nuc2877	chr13	112224352	112224491	+	0	NA	intron (NM_028487, intron 11 of 12)	intron (NM_028487, intron 11 of 12)	55828	NM_028487	73274	Mm.57286	NM_028487	ENSMUSG00000032745	Gpbp1	1700034P14Rik|AU019836|D230035M11Rik|Gpbp|mGPBP	GC-rich promoter binding protein 1	protein-coding
Diff_Nuc38863	chr2	6347312	6347451	+	0	NA	intron (NM_181399, intron 9 of 13)	intron (NM_181399, intron 9 of 13)	73599	NM_181399	98910	Mm.40673	NM_181399	ENSMUSG00000039046	Usp6nl	AI316785|RNTRE|TRE2NL|mKIAA0019	USP6 N-terminal like	protein-coding
Diff_Nuc4984	chr12	86528902	86529041	+	0	NA	Intergenic	B4A|SINE|B4	-10708	NM_008827	18654	Mm.4809	NM_008827	ENSMUSG00000004791	Pgf	AI854365|PIGF|Plgf	placental growth factor	protein-coding
Diff_Nuc24920	chr7	104666392	104666531	+	0	NA	intron (NM_027256, intron 14 of 22)	PB1D10|SINE|Alu	36995	NM_027256	101861	Mm.27383	NM_027256	ENSMUSG00000025133	Ints4	2610034N24Rik|AA692684|AW493223	integrator complex subunit 4	protein-coding
Diff_Nuc52200	chr8	114765192	114765331	+	0	NA	Intergenic	RSINE1|SINE|B4	230002	NM_020584	57321	Mm.213064	NM_020584	ENSMUSG00000033430	Terf2ip	Rap1	telomeric repeat binding factor 2, interacting protein	protein-coding
Diff_Nuc38522	chr3	149224862	149225001	+	0	NA	Intergenic	Intergenic	287230	NR_040591	381482	Mm.393866	NR_040591		Gm1653	-	predicted gene 1653	ncRNA
Diff_Nuc32658	chr4	27738512	27738651	+	0	NA	Intergenic	Intergenic	-1001700	NM_001290434	13841	Mm.257266	NM_010141	ENSMUSG00000028289	Epha7	Cek11|Ebk|Ehk3|Hek11|Mdk1	Eph receptor A7	protein-coding
Diff_Nuc31198	chr5	99930572	99930711	+	0	NA	intron (NR_030692, intron 2 of 3)	intron (NR_030692, intron 2 of 3)	227438	NR_030692	319818	Mm.295233	NR_030692	ENSMUSG00000089809	A930011G23Rik	-	RIKEN cDNA A930011G23 gene	ncRNA
Diff_Nuc4978	chr12	86383972	86384111	+	0	NA	intron (NM_178363, intron 10 of 20)	intron (NM_178363, intron 10 of 20)	46770	NM_178363	56531	Mm.153183	NM_178363	ENSMUSG00000021244	Ylpm1	A930013E17Rik|ZAP|Zap3	YLP motif containing 1	protein-coding
Diff_Nuc24796	chr7	99485962	99486101	+	0	NA	intron (NM_001243046, intron 5 of 14)	intron (NM_001243046, intron 5 of 14)	102551	NM_001243047	23859	Mm.147213	NM_011807	ENSMUSG00000052572	Dlg2	A330103J02Rik|B230218P12Rik|B330007M19Rik|Dlgh2|Gm1197|Gm21505|PSD93	discs, large homolog 2 (Drosophila)	protein-coding
Diff_Nuc20111	chr19	10642822	10642961	+	0	NA	Intergenic	Intergenic	8685	NM_001302218	72982	Mm.391194	NM_028411	ENSMUSG00000024666	Tmem138	1700113I01Rik|2900055D14Rik	transmembrane protein 138	protein-coding
Diff_Nuc1893	chr13	69551652	69551791	+	0	NA	Intergenic	Intergenic	121021	NM_198600	210106	Mm.315959	NM_198600	ENSMUSG00000034575	Papd7	LAK-1|POLK|Pols|TRF4|TRF4-1	PAP associated domain containing 7	protein-coding
Diff_Nuc33335	chr4	59896322	59896461	+	0	NA	intron (NM_172468, intron 4 of 8)	RLTR15|LTR|ERVK	31537	NM_021053	30936	Mm.284433	NM_021053	ENSMUSG00000028386	Slc46a2	5430429N04Rik|Ly110|TSO-1C12|Tscot	solute carrier family 46, member 2	protein-coding
Diff_Nuc9505	chr10	62024302	62024441	+	0	NA	intron (NM_028197, intron 6 of 6)	intron (NM_028197, intron 6 of 6)	16834	NM_028197	72320	Mm.258955	NM_028197	ENSMUSG00000036955	Kif1bp	0710007C18Rik|2510003E04Rik|KBP|mKIAA1279	KIF1 binding protein	protein-coding
Diff_Nuc37999	chr3	125353772	125353911	+	0	NA	intron (NM_022565, intron 6 of 13)	L1MCa|LINE|L1	246832	NM_022565	64580	Mm.444289	NM_022565	ENSMUSG00000027971	Ndst4	4930439H17Rik	N-deacetylase/N-sulfotransferase (heparin glucosaminyl) 4	protein-coding
Diff_Nuc22015	chr18	40480082	40480221	+	0	NA	intron (NM_026135, intron 1 of 1)	(TG)n|Simple_repeat|Simple_repeat	62136	NM_026135	383348	Mm.76366	NM_026135	ENSMUSG00000051401	Kctd16	4930434H12Rik|Gm1267	potassium channel tetramerisation domain containing 16	protein-coding
Diff_Nuc44822	chr1	84738372	84738511	+	0	NA	intron (NM_133975, intron 30 of 40)	MTC|LTR|MaLR	-45645	NM_152915	227325	Mm.292560	NM_152915	ENSMUSG00000036766	Dner	A930026D19Rik|BET|Bret	delta/notch-like EGF repeat containing	protein-coding
Diff_Nuc48718	chr9	72888792	72888931	+	0	NA	intron (NM_001308425, intron 1 of 1)	intron (NM_001308425, intron 1 of 1)	1336	NM_001308425	66364	Mm.392089	NM_001308425		2310009A05Rik	5031420N21Rik	RIKEN cDNA 2310009A05 gene	protein-coding
Diff_Nuc32493	chr4	19774722	19774861	+	0	NA	Intergenic	Intergenic	28917	NM_028746	74087	Mm.173833	NM_028746	ENSMUSG00000041052	Slc7a13	0610009O04Rik|AGT-1|AGT1|XAT2	solute carrier family 7, (cationic amino acid transporter, y+ system) member 13	protein-coding
Diff_Nuc18716	chr14	73071922	73072061	+	0	NA	intron (NM_207636, intron 2 of 25)	intron (NM_207636, intron 2 of 25)	37819	NM_207636	319448	Mm.205421	NM_207636	ENSMUSG00000033487	Fndc3a	1700094E19Rik|D14Ertd453e|F730017H24Rik|Fndc3|sys	fibronectin type III domain containing 3A	protein-coding
Diff_Nuc8496	chr10	15765162	15765301	+	0	NA	Intergenic	L1_Rod|LINE|L1	253648	NR_131087	77538	Mm.128235	NR_131087		C330004P14Rik	-	RIKEN cDNA C330004P14 gene	ncRNA
Diff_Nuc8119	chr11	117536392	117536531	+	0	NA	intron (NM_198022, intron 1 of 21)	L1MEg|LINE|L1	20858	NM_198022	217351	Mm.40272	NM_198022	ENSMUSG00000025571	Tnrc6c	9930033H14Rik|mKIAA1582	trinucleotide repeat containing 6C	protein-coding
Diff_Nuc33182	chr4	53325282	53325421	+	0	NA	Intergenic	Intergenic	-42247	NR_033139	381524	Mm.23351	NM_001033454	ENSMUSG00000086712	AI427809	Gm1659	expressed sequence AI427809	ncRNA
Diff_Nuc10776	chr10	115487062	115487201	+	0	NA	intron (NM_011217, intron 2 of 13)	intron (NM_011217, intron 2 of 13)	31712	NM_011217	19279	Mm.336316	NM_011217	ENSMUSG00000020151	Ptprr	Gmcp1|PTP-SL|PTPBR7|RPTPRR|mPTP213	protein tyrosine phosphatase, receptor type, R	protein-coding
Diff_Nuc39704	chr2	42310852	42310991	+	0	NA	intron (NM_053011, intron 1 of 90)	L1Md_A|LINE|L1	-7833	NR_105754	102465171		NR_105754	ENSMUSG00000098660	Mir6336	Gm27584|mmu-mir-6336	microRNA 6336	ncRNA
Diff_Nuc11000	chr10	125807522	125807661	+	0	NA	Intergenic	Intergenic	339856	NR_105841	102465224		NR_105841	ENSMUSG00000098756	Mir378d	Gm27650|mmu-mir-378d	microRNA 378d	ncRNA
Diff_Nuc24405	chr7	83855152	83855291	+	0	NA	intron (NM_001199224, intron 19 of 22)	intron (NM_001199224, intron 19 of 22)	480448	NM_001199224	244071	Mm.322829	NM_172902	ENSMUSG00000025754	Agbl1	Ccp4|D430020F16|EG244071|Nna1-l1	ATP/GTP binding protein-like 1	protein-coding
Diff_Nuc8780	chr10	27951102	27951241	+	0	NA	intron (NM_008983, intron 2 of 31)	intron (NM_008983, intron 2 of 31)	156545	NM_008983	19272	Mm.332303	NM_008983	ENSMUSG00000019889	Ptprk	AI853699|PTPk|RPTPkappa	protein tyrosine phosphatase, receptor type, K	protein-coding
Diff_Nuc38685	chr3	156903882	156904021	+	0	NA	intron (NM_001039094, intron 6 of 6)	intron (NM_001039094, intron 6 of 6)	-293410	NM_017381	53861	Mm.259036	NM_017381	ENSMUSG00000028180	Zranb2	AI227013|Zfp265|Zis|Znf265	zinc finger, RAN-binding domain containing 2	protein-coding
Diff_Nuc44020	chr1	50999622	50999761	+	0	NA	intron (NM_019790, intron 3 of 9)	intron (NM_019790, intron 3 of 9)	15324	NM_019790	56363	Mm.245154	NM_019790	ENSMUSG00000026109	Tmeff2	4832418D20Rik|7630402F16Rik|TR-2	transmembrane protein with EGF-like and two follistatin-like domains 2	protein-coding
Diff_Nuc22757	chr18	72130752	72130891	+	0	NA	intron (NM_007831, intron 1 of 28)	intron (NM_007831, intron 1 of 28)	379902	NM_007831	13176	Mm.167882	NM_007831	ENSMUSG00000060534	Dcc	C030036D22Rik|Igdcc1	deleted in colorectal carcinoma	protein-coding
Diff_Nuc14146	chr16	52712132	52712271	+	0	NA	Intergenic	Intergenic	103656	NR_040495	73820	Mm.60493	NR_040495		4930404A05Rik	-	RIKEN cDNA 4930404A05 gene	ncRNA
Diff_Nuc30848	chr5	82953472	82953611	+	0	NA	Intergenic	L1_Mur3|LINE|L1	274549	NR_035415	100316803		NR_035415	ENSMUSG00000080586	Mir1187	Mirn1187|mir-1187|mmu-mir-1187	microRNA 1187	ncRNA
Diff_Nuc47417	chr9	11623392	11623531	+	0	NA	Intergenic	Lx6|LINE|L1	-718686	NM_001170787	244682	Mm.187021	NM_001033359	ENSMUSG00000039488	Cntn5	6720426O10Rik|A830025P08Rik|Gm507|NB-2	contactin 5	protein-coding
Diff_Nuc20124	chr19	11376992	11377131	+	0	NA	Intergenic	Intergenic	-18758	NM_183190	269063	Mm.268940	NM_183190	ENSMUSG00000054523	Ms4a5	-	membrane-spanning 4-domains, subfamily A, member 5	protein-coding
Diff_Nuc39293	chr2	23398192	23398331	+	0	NA	intron (NM_001165998, intron 4 of 10)	intron (NM_001165998, intron 4 of 10)	29363	NM_029773	76857	Mm.276415	NM_029773	ENSMUSG00000026771	Spopl	4921517N04Rik|AU014935|BB233739|E430033K04Rik	speckle-type POZ protein-like	protein-coding
Diff_Nuc37492	chr3	102630682	102630821	+	0	NA	intron (NM_011516, intron 30 of 32)	intron (NM_011516, intron 30 of 32)	-44114	NM_001165940	22094	Mm.110730	NM_009432	ENSMUSG00000027857	Tshb	-	thyroid stimulating hormone, beta subunit	protein-coding
Diff_Nuc48083	chr9	45257262	45257401	+	0	NA	intron (NM_001081270, intron 2 of 32)	intron (NM_001081270, intron 2 of 32)	-18016	NR_040732	74602	Mm.394117	NR_040732	ENSMUSG00000097074	4833428L15Rik	-	RIKEN cDNA 4833428L15 gene	ncRNA
Diff_Nuc34493	chr4	115520102	115520241	+	0	NA	intron (NM_001285488, intron 2 of 13)	intron (NM_001285488, intron 2 of 13)	8368	NM_001285487	17346	Mm.209327	NM_021461	ENSMUSG00000028708	Mknk1	2410048M24Rik|Mnk1	MAP kinase-interacting serine/threonine kinase 1	protein-coding
Diff_Nuc47858	chr9	33638722	33638861	+	0	NA	Intergenic	L1M4b|LINE|L1	-211165	NR_040744	77119	Mm.367930	NR_040744	ENSMUSG00000098758	7630403G23Rik	-	RIKEN cDNA 7630403G23 gene	ncRNA
Diff_Nuc1138	chr13	30916842	30916981	+	0	NA	intron (NM_025588, intron 24 of 27)	intron (NM_025588, intron 24 of 27)	75809	NM_013674	16364	Mm.4677	NM_013674	ENSMUSG00000021356	Irf4	AI385587|IRF-4|LSIRF|NF-EM5|Spip	interferon regulatory factor 4	protein-coding
Diff_Nuc46989	chr1	187613932	187614071	+	0	NA	Intergenic	MT2A|LTR|ERVL	292816	NR_033600	114668	Mm.379303	NR_033600	ENSMUSG00000102185	5033404E19Rik	-	NSA2 ribosome biogenesis homolog pseudogene	pseudo
Diff_Nuc22848	chr18	77112812	77112951	+	0	NA	intron (NM_001109743, intron 4 of 8)	intron (NM_001109743, intron 4 of 8)	17737	NM_001109743	664805	Mm.329543	NM_001109743	ENSMUSG00000091519	Skor2	Corl2|EG664805|Fussel18|Gm7348	SKI family transcriptional corepressor 2	protein-coding
Diff_Nuc8407	chr10	12166712	12166851	+	0	NA	intron (NM_011682, intron 61 of 73)	intron (NM_011682, intron 61 of 73)	414752	NM_011682	22288	Mm.331784	NM_011682	ENSMUSG00000019820	Utrn	AA589569|DRP|Dmdl	utrophin	protein-coding
Diff_Nuc27418	chr6	71575692	71575831	+	0	NA	exon (NM_173001, exon 3 of 26)	exon (NM_173001, exon 3 of 26)	6919	NM_173001	104263	Mm.260479	NM_173001	ENSMUSG00000053470	Kdm3a	1700105C21Rik|C230043E16Rik|JHDM2a|Jmjd1|Jmjd1a|KDM2A|TGSA|Tsga	lysine (K)-specific demethylase 3A	protein-coding
Diff_Nuc35617	chr3	18892662	18892801	+	0	NA	Intergenic	Intergenic	170334	NM_028840	74252	Mm.200383	NM_028840	ENSMUSG00000027599	Armc1	2310016N05Rik|2900046P06Rik|3110009G21Rik|AA409258|AW048872|Arcp|C330014L16Rik	armadillo repeat containing 1	protein-coding
Diff_Nuc20373	chr19	22853852	22853991	+	0	NA	intron (NM_001035244, intron 8 of 20)	intron (NM_001035244, intron 8 of 20)	28826	NR_029591	387200		NR_029591	ENSMUSG00000065507	Mir204	Mirn204|mir-204|mmu-mir-204	microRNA 204	ncRNA
Diff_Nuc3836	chr12	41962492	41962631	+	0	NA	intron (NM_053122, intron 4 of 6)	intron (NM_053122, intron 4 of 6)	211884	NM_053122	93757	Mm.363813	NM_053122	ENSMUSG00000056899	Immp2l	AI853880|IMP2	IMP2 inner mitochondrial membrane peptidase-like (S. cerevisiae)	protein-coding
Diff_Nuc27812	chr6	87724292	87724431	+	0	NA	Intergenic	B3|SINE|B2	-3769	NM_018762	54368	Mm.12897	NM_018762	ENSMUSG00000030054	Gp9	Cd42|GPIX	glycoprotein 9 (platelet)	protein-coding
Diff_Nuc24654	chr7	95411902	95412041	+	0	NA	Intergenic	MTE2b-int|LTR|MaLR	-14624	NM_009982	13032	Mm.89295	NM_009982	ENSMUSG00000030560	Ctsc	AI047818|CatC|DPP1|DPPI	cathepsin C	protein-coding
Diff_Nuc2935	chr13	115186772	115186911	+	0	NA	Intergenic	Intergenic	-8539	NM_010887	17993	Mm.253142	NM_010887	ENSMUSG00000021764	Ndufs4	6720411N02Rik|C1-18k	NADH dehydrogenase (ubiquinone) Fe-S protein 4	protein-coding
Diff_Nuc44365	chr1	63215652	63215791	+	0	NA	intron (NM_145518, intron 4 of 18)	intron (NM_145518, intron 4 of 18)	7675	NM_145518	227197	Mm.290791	NM_145518	ENSMUSG00000025968	Ndufs1	5830412M15Rik|9930026A05Rik	NADH dehydrogenase (ubiquinone) Fe-S protein 1	protein-coding
Diff_Nuc37803	chr3	116336712	116336851	+	0	NA	exon (NM_008246, exon 11 of 12)	exon (NM_008246, exon 11 of 12)	-19276	NM_030016	229780	Mm.259648	NM_030016	ENSMUSG00000033439	Trmt13	4631408H19Rik|A330067P21|A930028L21Rik|Ccdc76	tRNA methyltransferase 13	protein-coding
Diff_Nuc33590	chr4	71730732	71730871	+	0	NA	Intergenic	Intergenic	131126	NM_011599	21885	Mm.278444	NM_011599	ENSMUSG00000008305	Tle1	C230057C06Rik|Estm14|Grg-1|Grg1|Tle4l	transducin-like enhancer of split 1	protein-coding
Diff_Nuc2519	chr13	96143172	96143311	+	0	NA	intron (NM_025630, intron 1 of 13)	intron (NM_025630, intron 1 of 13)	2071	NM_025630	66549	Mm.36785	NM_025630	ENSMUSG00000021681	Aggf1	2010009L17Rik|2310029P06Rik|AW112072|Peg3|VG5Q	angiogenic factor with G patch and FHA domains 1	protein-coding
Diff_Nuc45202	chr1	104527962	104528101	+	0	NA	Intergenic	L1_Mm|LINE|L1	1475686	NR_037989	100504525	Mm.87065	NR_037989	ENSMUSG00000100684	Gm20268	-	predicted gene, 20268	ncRNA
Diff_Nuc9102	chr10	41499122	41499261	+	0	NA	intron (NM_001243074, intron 2 of 10)	RNERVK23-int|LTR|ERVK	30278	NM_001243075	103268	Mm.338605	NM_026643	ENSMUSG00000019813	Cep57l1	2410017P07Rik|4930484D11Rik|AI607327|cep57R	centrosomal protein 57-like 1	protein-coding
Diff_Nuc4768	chr12	78318022	78318161	+	0	NA	Intergenic	Intergenic	-21000	NM_001252614	53618	Mm.35628	NM_016893	ENSMUSG00000021065	Fut8	-	fucosyltransferase 8	protein-coding
Diff_Nuc3231	chr12	11321562	11321701	+	0	NA	intron (NM_001324476, intron 24 of 25)	intron (NM_001324476, intron 24 of 25)	14938	NR_106136	102465775		NR_106136	ENSMUSG00000098879	Mir7675	Gm27965|mmu-mir-7675	microRNA 7675	ncRNA
Diff_Nuc18646	chr14	70358062	70358201	+	0	NA	intron (NM_028560, intron 3 of 6)	intron (NM_028560, intron 3 of 6)	117917	NM_028526	73523	Mm.23509	NM_028526	ENSMUSG00000022085	Pebp4	PEBP-4	phosphatidylethanolamine binding protein 4	protein-coding
Diff_Nuc44605	chr1	73020322	73020461	+	0	NA	Intergenic	LTR82A|LTR|ERVL	42082	NM_009407	21958	Mm.425024	NM_009407	ENSMUSG00000026182	Tnp1	Stp-1|TP1|Tp-1	transition protein 1	protein-coding
Diff_Nuc29304	chr5	14356932	14357071	+	0	NA	Intergenic	L1_Mur3|LINE|L1	-157917	NM_011995	26875	Mm.146275	NM_011995	ENSMUSG00000061601	Pclo	Acz|Pico	piccolo (presynaptic cytomatrix protein)	protein-coding
Diff_Nuc25172	chr7	117091572	117091711	+	0	NA	intron (NM_021494, intron 1 of 22)	MLT1A1|LTR|MaLR	12295	NM_021494	19347	Mm.21904	NM_021494	ENSMUSG00000035901	Dennd5a	1500012B19Rik|AJ245569|AW496491|ORF37|Rab6ip1|mKIAA1091	DENN/MADD domain containing 5A	protein-coding
Diff_Nuc13077	chr16	4895742	4895881	+	0	NA	intron (NM_029657, intron 1 of 16)	intron (NM_029657, intron 1 of 16)	9711	NM_001252437	17237	Mm.291326	NM_029657	ENSMUSG00000022517	Mgrn1	2610042J20Rik|mKIAA0544|md|nc	mahogunin, ring finger 1	protein-coding
Diff_Nuc51004	chr8	58342722	58342861	+	0	NA	Intergenic	Intergenic	42970	NM_175939	244486	Mm.67684	NM_175939	ENSMUSG00000046258	Adam29	-	a disintegrin and metallopeptidase domain 29	protein-coding
Diff_Nuc37032	chr3	81178842	81178981	+	0	NA	Intergenic	RMER19B|LTR|ERVK	338573	NM_019971	54635	Mm.331089	NM_019971	ENSMUSG00000028019	Pdgfc	1110064L01Rik|AI647969|PDGF-C	platelet-derived growth factor, C polypeptide	protein-coding
Diff_Nuc24759	chr7	98722742	98722881	+	0	NA	intron (NM_011807, intron 2 of 22)	intron (NM_011807, intron 2 of 22)	483515	NM_011807	23859	Mm.147213	NM_011807	ENSMUSG00000052572	Dlg2	A330103J02Rik|B230218P12Rik|B330007M19Rik|Dlgh2|Gm1197|Gm21505|PSD93	discs, large homolog 2 (Drosophila)	protein-coding
Diff_Nuc12508	chr17	72599132	72599271	+	0	NA	intron (NM_007439, intron 3 of 28)	intron (NM_007439, intron 3 of 28)	354446	NM_007439	11682	Mm.311854	NM_007439	ENSMUSG00000055471	Alk	CD246|Tcrz	anaplastic lymphoma kinase	protein-coding
Diff_Nuc11251	chr17	10994692	10994831	+	0	NA	intron (NM_027032, intron 1 of 4)	intron (NM_027032, intron 1 of 4)	38296	NM_027032	69310	Mm.18889	NM_027032	ENSMUSG00000037196	Pacrg	1700008H23Rik	PARK2 co-regulated	protein-coding
Diff_Nuc6809	chr11	53960012	53960151	+	0	NA	Intergenic	MTE2a|LTR|MaLR	45655	NM_011031	18452	Mm.3705	NM_011031	ENSMUSG00000018906	P4ha2	AA407196|C76437|P4hl	procollagen-proline, 2-oxoglutarate 4-dioxygenase (proline 4-hydroxylase), alpha II polypeptide	protein-coding
Diff_Nuc45582	chr1	125332762	125332901	+	0	NA	intron (NM_199021, intron 8 of 25)	intron (NM_199021, intron 8 of 25)	609305	NM_199021	269109	Mm.417716	NM_199021	ENSMUSG00000036815	Dpp10	6430601K09Rik|DPP X|Dprp3	dipeptidylpeptidase 10	protein-coding
Diff_Nuc4170	chr12	53984432	53984571	+	0	NA	intron (NM_198111, intron 3 of 13)	intron (NM_198111, intron 3 of 13)	184131	NM_198111	238161	Mm.310822	NM_198111	ENSMUSG00000061603	Akap6	AI482140|Akapalpha|Akapbeta|PRKA	A kinase (PRKA) anchor protein 6	protein-coding
Diff_Nuc41455	chr2	111895092	111895231	+	0	NA	Intergenic	L1Md_T|LINE|L1	-11974	NM_146362	258359	Mm.377456	NM_146362	ENSMUSG00000074947	Olfr1312	MOR245-20	olfactory receptor 1312	protein-coding
Diff_Nuc46273	chr1	156521537	156521676	+	0	NA	intron (NM_009782, intron 3 of 46)	intron (NM_009782, intron 3 of 46)	51444	NM_009782	12290	Mm.267517	NM_009782	ENSMUSG00000004110	Cacna1e	A430040I15|BII|Cach6|Cacnl1a6|Cav2.3|Cchra1|alpha1E	calcium channel, voltage-dependent, R type, alpha 1E subunit	protein-coding
Diff_Nuc18675	chr14	71680612	71680751	+	0	NA	Intergenic	URR1A|DNA|MER1_type	29601	NR_046076	100043132	Mm.399336	NR_046075		Gm4251	-	predicted gene 4251	ncRNA
Diff_Nuc49035	chr9	87622962	87623101	+	0	NA	intron (NM_023814, intron 2 of 7)	intron (NM_023814, intron 2 of 7)	3064	NM_023814	76365	Mm.158789	NM_023814	ENSMUSG00000032419	Tbx18	2810012F10Rik|2810404D13Rik	T-box18	protein-coding
Diff_Nuc41314	chr2	106414442	106414581	+	0	NA	Intergenic	Intergenic	-51251	NR_040637	329483	Mm.246777	NR_040637	ENSMUSG00000087226	Gm14015	9330126M15|OTTMUSG00000015366	predicted gene 14015	ncRNA
Diff_Nuc40331	chr2	65519452	65519591	+	0	NA	intron (NM_001099298, intron 4 of 26)	intron (NM_001099298, intron 4 of 26)	12778	NM_001346680	110876	Mm.220329	NM_001099298	ENSMUSG00000075318	Scn2a	6430408L10|A230052E19Rik|Nav1.2|Scn2a1	sodium channel, voltage-gated, type II, alpha	protein-coding
Diff_Nuc24010	chr7	65183042	65183181	+	0	NA	Intergenic	L1Md_Gf|LINE|L1	336568	NM_008071	14402	Mm.8004	NM_008071	ENSMUSG00000033676	Gabrb3	A230092K12Rik|AW049585|Cp1|Gabrb-3|beta3	gamma-aminobutyric acid (GABA) A receptor, subunit beta 3	protein-coding
Diff_Nuc19346	chr14	98540942	98541081	+	0	NA	intron (NM_007826, intron 1 of 11)	intron (NM_007826, intron 1 of 11)	27973	NM_001038610	13134	Mm.320593	NM_007826	ENSMUSG00000055639	Dach1	Dac|Dach	dachshund 1 (Drosophila)	protein-coding
Diff_Nuc42250	chr2	141458402	141458541	+	0	NA	intron (NM_001013802, intron 6 of 18)	Lx3_Mus|LINE|L1	-961259	NM_178382	71436	Mm.426781	NM_178382	ENSMUSG00000051379	Flrt3	5530600M07Rik|C430047I10Rik|mKIAA1469	fibronectin leucine rich transmembrane protein 3	protein-coding
Diff_Nuc11557	chr17	23677522	23677661	+	0	NA	Intergenic	Intergenic	-10175	NR_126485	320020	Mm.445111	NR_126484		6330415G19Rik	-	RIKEN cDNA 6330415G19 gene	ncRNA
Diff_Nuc28459	chr6	119395792	119395931	+	0	NA	intron (NM_009525, intron 3 of 4)	intron (NM_009525, intron 3 of 4)	3543	NM_001271757	22419	Mm.321818	NM_009525	ENSMUSG00000030170	Wnt5b	AW545702|Wnt-5b	wingless-type MMTV integration site family, member 5B	protein-coding
Diff_Nuc5534	chr12	115242282	115242421	+	0	NA	Intergenic	L1Md_F2|LINE|L1	460232	NM_174885	238406	Mm.188683	NM_174885	ENSMUSG00000043945	Adam6a	Adam6|tMDCIV	a disintegrin and metallopeptidase domain 6A	protein-coding
Diff_Nuc3370	chr12	18309812	18309951	+	0	NA	Intergenic	ETnERV3-int|LTR|ERVK	-211435	NM_001033157	236366	Mm.352227	NM_001033157	ENSMUSG00000073197	5730507C01Rik	-	RIKEN cDNA 5730507C01 gene	protein-coding
Diff_Nuc37166	chr3	86697022	86697161	+	0	NA	intron (NM_027539, intron 2 of 15)	B2_Mm1a|SINE|B2	27715	NM_001195496	70762	Mm.44490	NM_027539	ENSMUSG00000028078	Dclk2	6330415M09Rik|AU044875|CL2|CLICK2|Click-II|Dcamkl2	doublecortin-like kinase 2	protein-coding
Diff_Nuc8260	chr10	5578792	5578931	+	0	NA	intron (NM_007956, intron 3 of 8)	L1Md_F2|LINE|L1	57522	NM_001302531	13982	Mm.9213	NM_007956	ENSMUSG00000019768	Esr1	ER|ER-alpha|ERa|ERalpha|ESR|Estr|Estra|Nr3a1	estrogen receptor 1 (alpha)	protein-coding
Diff_Nuc3439	chr12	27149992	27150131	+	0	NA	Intergenic	ORR1D2|LTR|MaLR	-4019	NM_020557	22169	Mm.271839	NM_020557	ENSMUSG00000020638	Cmpk2	1200004E04Rik|TDKI|Tyki	cytidine monophosphate (UMP-CMP) kinase 2, mitochondrial	protein-coding
Diff_Nuc50056	chr8	15775372	15775511	+	0	NA	Intergenic	Lx9|LINE|L1	393397	NR_037214	100526464		NR_037214	ENSMUSG00000093142	Mir3106	mir-3106|mmu-mir-3106	microRNA 3106	ncRNA
Diff_Nuc26167	chr6	17755062	17755201	+	0	NA	intron (NM_022332, intron 1 of 15)	intron (NM_022332, intron 1 of 15)	55961	NM_022332	64213	Mm.12051	NM_022332	ENSMUSG00000029534	St7	9430001H04Rik|Fam4a2|HELG|RAY1|SEN4|TSG7	suppression of tumorigenicity 7	protein-coding
Diff_Nuc20506	chr19	29654152	29654291	+	0	NA	intron (NM_001081319, intron 11 of 25)	intron (NM_001081319, intron 11 of 25)	57449	NM_001081319	226089	Mm.353838	NM_177641	ENSMUSG00000038658	Ric1	C030046E11Rik|C130057E09Rik|Kiaa1432	RAB6A GEF complex partner 1	protein-coding
Diff_Nuc11135	chr17	5133692	5133831	+	0	NA	intron (NM_001085355, intron 4 of 19)	intron (NM_001085355, intron 4 of 19)	138687	NM_001085355	239985	Mm.133401	NM_001085355	ENSMUSG00000069729	Arid1b	8030481M12|9330189K18Rik|AI836955|Ardi1b|B230217J03Rik|mKIAA1235	AT rich interactive domain 1B (SWI-like)	protein-coding
Diff_Nuc20438	chr19	26863862	26864001	+	0	NA	intron (NR_045306, intron 1 of 3)	intron (NR_045306, intron 1 of 3)	34466	NR_045306	70942	Mm.411548	NR_045306	ENSMUSG00000093772	4931403E22Rik	-	RIKEN cDNA 4931403E22 gene	ncRNA
Diff_Nuc12176	chr17	56835372	56835511	+	0	NA	intron (NM_001252466, intron 3 of 16)	intron (NM_001252466, intron 3 of 16)	20903	NM_178926	106639	Mm.37290	NM_178926	ENSMUSG00000054723	Vmac	AI662250	vimentin-type intermediate filament associated coiled-coil protein	protein-coding
Diff_Nuc11960	chr17	45131782	45131921	+	0	NA	intron (NM_178652, intron 5 of 11)	intron (NM_178652, intron 5 of 11)	-114017	NM_029257	75341	Mm.386821	NM_029257		4930564C03Rik	-	RIKEN cDNA 4930564C03 gene	protein-coding
Diff_Nuc2446	chr13	93268012	93268151	+	0	NA	intron (NM_173392, intron 14 of 17)	L1MA5|LINE|L1	-14095	NM_001163627	73942	Mm.85935	NM_001163627	ENSMUSG00000034334	Fam151b	4930405M20Rik	family with sequence similarity 151, member B	protein-coding
Diff_Nuc40013	chr2	53659852	53659991	+	0	NA	Intergenic	Intergenic	278042	NM_023396	67874	Mm.27086	NM_023396	ENSMUSG00000075334	Rprm	2410012A13Rik|Reprimo	reprimo, TP53 dependent G2 arrest mediator candidate	protein-coding
Diff_Nuc31435	chr5	111264432	111264571	+	0	NA	intron (NM_153571, intron 3 of 5)	PB1D7|SINE|Alu	4295	NM_153571	100900	Mm.200231	NM_153571	ENSMUSG00000043510	Hscb	AI325508|AW049829|Hsc20	HscB iron-sulfur cluster co-chaperone	protein-coding
Diff_Nuc6267	chr11	27617712	27617851	+	0	NA	Intergenic	ORR1A3-int|LTR|MaLR	866543	NM_001166661	216613	Mm.93759	NM_181577	ENSMUSG00000032878	Ccdc85a	-	coiled-coil domain containing 85A	protein-coding
Diff_Nuc50909	chr8	51941952	51942091	+	0	NA	Intergenic	Intergenic	488555	NR_046067	100039954	Mm.400419	NR_046067	ENSMUSG00000110281	Gm2516	-	predicted gene 2516	ncRNA
Diff_Nuc40457	chr2	70080642	70080781	+	0	NA	intron (NM_177376, intron 15 of 34)	RMER6C|LTR|ERVK	203528	NM_177376	329421	Mm.99648	NM_177376	ENSMUSG00000042064	Myo3b	A430065P19Rik	myosin IIIB	protein-coding
Diff_Nuc21513	chr18	20215462	20215601	+	0	NA	intron (NM_001317365, intron 1 of 15)	intron (NM_001317365, intron 1 of 15)	2524	NM_013505	13506	Mm.280547	NM_013505	ENSMUSG00000024331	Dsc2	AW228162	desmocollin 2	protein-coding
Diff_Nuc25940	chr6	8317842	8317981	+	0	NA	intron (NM_001302354, intron 2 of 3)	MLT1A0|LTR|MaLR	108623	NM_001302353	100036521	Mm.446106	NM_001302353	ENSMUSG00000089862	Umad1	Gm16039|OTTMUSG00000029336	UMAP1-MVP12 associated (UMA) domain containing 1	protein-coding
Diff_Nuc13560	chr16	28175022	28175161	+	0	NA	intron (NM_010199, intron 5 of 5)	L1Md_T|LINE|L1	271070	NM_183064	14167	Mm.7996	NM_010199	ENSMUSG00000022523	Fgf12	AV114868|B230343J05Rik|FGF-12|FHF-1|Fhf1	fibroblast growth factor 12	protein-coding
Diff_Nuc3036	chr13	119488712	119488851	+	0	NA	Intergenic	L1M5|LINE|L1	-14725	NM_008002	14165	Mm.317323	NM_008002	ENSMUSG00000021732	Fgf10	AEY17|BB213776|Fgf-10|Gsfaey17	fibroblast growth factor 10	protein-coding
Diff_Nuc35517	chr3	13728822	13728961	+	0	NA	intron (NM_178631, intron 2 of 9)	intron (NM_178631, intron 2 of 9)	-76026	NR_040598	75203	Mm.490940	NR_040598		4930539N22Rik	-	RIKEN cDNA 4930539N22 gene	ncRNA
Diff_Nuc26133	chr6	16606702	16606841	+	0	NA	Intergenic	L1_Mus1|LINE|L1	241670	NM_031198	21426	Mm.36217	NM_031198	ENSMUSG00000029553	Tfec	BB107417|Tcfec|bHLHe34	transcription factor EC	protein-coding
Diff_Nuc29350	chr5	15528872	15529011	+	0	NA	intron (NM_001110843, intron 2 of 38)	intron (NM_001110843, intron 2 of 38)	88432	NM_001110844	12293	Mm.159842	NM_009784	ENSMUSG00000040118	Cacna2d1	Ca(v)alpha2delta1|Cacna2|Cchl2a	calcium channel, voltage-dependent, alpha2/delta subunit 1	protein-coding
Diff_Nuc50991	chr8	56140032	56140171	+	0	NA	intron (NM_153581, intron 4 of 6)	intron (NM_153581, intron 4 of 6)	100020	NM_001253756	234267	Mm.241700	NM_153581	ENSMUSG00000031517	Gpm6a	Gpm6|M6A	glycoprotein m6a	protein-coding
Diff_Nuc28645	chr6	129505532	129505671	+	0	NA	Intergenic	RLTR22_Mur|LTR|ERVK	-22299	NR_045270	100504641	Mm.398286	NR_045270	ENSMUSG00000097675	1700101I11Rik	-	RIKEN cDNA 1700101I11 gene	ncRNA
Diff_Nuc23583	chr7	39151492	39151631	+	0	NA	Intergenic	Intergenic	-95194	NM_025390	66161	Mm.22284	NM_025390	ENSMUSG00000030423	Pop4	1110023P21Rik|Rpp29	processing of precursor 4, ribonuclease P/MRP family, (S. cerevisiae)	protein-coding
Diff_Nuc2930	chr13	115077972	115078111	+	0	NA	TTS (NM_010887)	TTS (NM_010887)	100261	NM_010887	17993	Mm.253142	NM_010887	ENSMUSG00000021764	Ndufs4	6720411N02Rik|C1-18k	NADH dehydrogenase (ubiquinone) Fe-S protein 4	protein-coding
Diff_Nuc9540	chr10	63546592	63546731	+	0	NA	intron (NM_178678, intron 2 of 2)	intron (NM_178678, intron 2 of 2)	6342	NM_178678	216028	Mm.431318	NM_178678	ENSMUSG00000042846	Lrrtm3	9630044H04Rik	leucine rich repeat transmembrane neuronal 3	protein-coding
Diff_Nuc10663	chr10	111010842	111010981	+	0	NA	Intergenic	Intergenic	20418	NR_045344	71321	Mm.410785	NR_045344	ENSMUSG00000097082	4933440J02Rik	-	RIKEN cDNA 4933440J02 gene	ncRNA
Diff_Nuc2748	chr13	106162302	106162441	+	0	NA	Intergenic	Lx9|LINE|L1	-71402	NM_008308	15550	Mm.4716	NM_008308	ENSMUSG00000021721	Htr1a	Gpcr18	5-hydroxytryptamine (serotonin) receptor 1A	protein-coding
Diff_Nuc46982	chr1	187226832	187226971	+	0	NA	intron (NM_029735, intron 18 of 31)	MTEa|LTR|MaLR	38797	NR_038006	319562	Mm.184335	NM_176943	ENSMUSG00000051295	9630028B13Rik	-	RIKEN cDNA 9630028B13 gene	ncRNA
Diff_Nuc30318	chr5	59723512	59723651	+	0	NA	Intergenic	Intergenic	653660	NR_040683	71057	Mm.50817	NR_040682	ENSMUSG00000106013	4933402J10Rik	-	RIKEN cDNA 4933402J10 gene	ncRNA
Diff_Nuc22770	chr18	72934292	72934431	+	0	NA	Intergenic	Intergenic	-423638	NM_007831	13176	Mm.167882	NM_007831	ENSMUSG00000060534	Dcc	C030036D22Rik|Igdcc1	deleted in colorectal carcinoma	protein-coding
Diff_Nuc9213	chr10	46801572	46801711	+	0	NA	Intergenic	Lx5|LINE|L1	1274131	NR_040624	320363	Mm.123343	NR_040624	ENSMUSG00000110874	D030045P18Rik	-	RIKEN cDNA D030045P18 gene	ncRNA
Diff_Nuc20459	chr19	27434102	27434241	+	0	NA	Intergenic	ORR1E|LTR|MaLR	37062	NM_183179	240595	Mm.269759	NM_183179	ENSMUSG00000047298	Kcnv2	KV11.1	potassium channel, subfamily V, member 2	protein-coding
Diff_Nuc42719	chr2	163427152	163427291	+	0	NA	promoter-TSS (NM_029512)	promoter-TSS (NM_029512)	-829	NM_181734	76080	Mm.89828	NM_029512	ENSMUSG00000017679	Ttpal	3110080A02Rik|5830472M02Rik	tocopherol (alpha) transfer protein-like	protein-coding
Diff_Nuc43472	chr1	24812422	24812561	+	0	NA	intron (NM_001310483, intron 14 of 15)	L2|LINE|L2	126734	NM_001310483	68421	Mm.336563	NM_026719	ENSMUSG00000073725	Lmbrd1	0910001K20Rik|AV347960	LMBR1 domain containing 1	protein-coding
Diff_Nuc36586	chr3	63957662	63957801	+	0	NA	Intergenic	Intergenic	-16329	NM_001104592	100125586	Mm.469888	NM_001104592	ENSMUSG00000043897	Vmn2r2	ENSMUSG00000043897	vomeronasal 2, receptor 2	protein-coding
Diff_Nuc23258	chr7	13508202	13508341	+	0	NA	intron (NM_009095, intron 1 of 5)	intron (NM_009095, intron 1 of 5)	611	NM_009095	20103	Mm.5291	NM_009095	ENSMUSG00000012848	Rps5	AA617411	ribosomal protein S5	protein-coding
Diff_Nuc18527	chr14	65380272	65380411	+	0	NA	intron (NM_001081177, intron 24 of 39)	RSINE1|SINE|B4	108973	NM_001081177	16554	Mm.23611	NM_001081177	ENSMUSG00000060012	Kif13b	5330429L19Rik|6030414C01|AI429803|C130021D12Rik|GAKIN	kinesin family member 13B	protein-coding
Diff_Nuc11303	chr17	13385812	13385951	+	0	NA	Intergenic	RLTR10A|LTR|ERVK	-12027	NR_033458	100038394	Mm.401677	NR_033458		Gm10512	ENSMUSG00000073459	predicted gene 10512	ncRNA
Diff_Nuc4070	chr12	50792672	50792811	+	0	NA	Intergenic	L1_Mus3|LINE|L1	-210892	NR_045472	69054	Mm.417838	NR_045472	ENSMUSG00000100844	1810007C17Rik	-	RIKEN cDNA 1810007C17 gene	ncRNA
Diff_Nuc13914	chr16	42365952	42366091	+	0	NA	Intergenic	Intergenic	-25257	NM_008083	14432	Mm.1222	NM_008083	ENSMUSG00000047261	Gap43	B-50|Basp2|GAP-43	growth associated protein 43	protein-coding
Diff_Nuc43941	chr1	47682612	47682751	+	0	NA	Intergenic	L1Md_F2|LINE|L1	-158712	NR_105768	102466969		NR_105768	ENSMUSG00000098876	Mir6350	Gm27958|mmu-mir-6350	microRNA 6350	ncRNA
Diff_Nuc27100	chr6	55483802	55483941	+	0	NA	Intergenic	Intergenic	81899	NM_007407	11517	Mm.44245	NM_007407	ENSMUSG00000029778	Adcyap1r1	2900024I10Rik|AI846590|PAC1|PAC1R|PACAP1-R	adenylate cyclase activating polypeptide 1 receptor 1	protein-coding
Diff_Nuc34811	chr4	129547872	129548011	+	0	NA	Intergenic	Intergenic	-35529	NR_045190	319894	Mm.59196	NR_045190	ENSMUSG00000086369	E330017L17Rik	-	RIKEN cDNA E330017L17 gene	ncRNA
Diff_Nuc6941	chr11	60695822	60695961	+	0	NA	Intergenic	MTE-int|LTR|MaLR	-3351	NM_001168507	216821	Mm.28063	NM_173453	ENSMUSG00000043284	Tmem11	5730466P16Rik|AA409091	transmembrane protein 11	protein-coding
Diff_Nuc35938	chr3	35355382	35355521	+	0	NA	Intergenic	L1MD3|LINE|L1	209634	NR_040748	625963	Mm.251506	NR_040748	ENSMUSG00000105662	Gm6639	-	predicted gene 6639	ncRNA
Diff_Nuc8524	chr10	16459622	16459761	+	0	NA	Intergenic	ORR1E|LTR|MaLR	355897	NR_038020	100504235	Mm.84044	NR_038020	ENSMUSG00000101969	Gm20125	-	predicted gene, 20125	ncRNA
Diff_Nuc50990	chr8	55952582	55952721	+	0	NA	intron (NM_001253754, intron 1 of 6)	intron (NM_001253754, intron 1 of 6)	-87430	NM_153581	234267	Mm.241700	NM_153581	ENSMUSG00000031517	Gpm6a	Gpm6|M6A	glycoprotein m6a	protein-coding
Diff_Nuc42552	chr2	155198382	155198521	+	0	NA	Intergenic	Intergenic	-9141	NM_178111	68728	Mm.293605	NM_178111	ENSMUSG00000038375	Trp53inp2	1110029F20Rik|Tp53inp2	transformation related protein 53 inducible nuclear protein 2	protein-coding
Diff_Nuc25624	chr7	138589572	138589711	+	0	NA	TTS (NM_025826)	TTS (NM_025826)	35526	NM_025826	66885	Mm.334274	NM_025826	ENSMUSG00000030861	Acadsb	1300003O09Rik|2-MEBCAD|BB066609|SBCAD	acyl-Coenzyme A dehydrogenase, short/branched chain	protein-coding
Diff_Nuc17295	chr15	98781412	98781551	+	0	NA	intron (NM_011653, intron 3 of 3)	intron (NM_011653, intron 3 of 3)	2451	NM_011653	22142	Mm.405359	NM_011653	ENSMUSG00000072235	Tuba1a	Tuba-1|Tuba1	tubulin, alpha 1A	protein-coding
Diff_Nuc12871	chr17	88926402	88926541	+	0	NA	Intergenic	MER82|DNA|MER2_type	-2993	NM_028658	73825	Mm.271817	NM_028658	ENSMUSG00000034709	Ppp1r21	1110018J12Rik|AI426045|AW550781|Ccdc128|Klraq1	protein phosphatase 1, regulatory subunit 21	protein-coding
Diff_Nuc2256	chr13	84790252	84790391	+	0	NA	Intergenic	Intergenic	428420	NM_175187	72745	Mm.295063	NM_175187	ENSMUSG00000035762	Tmem161b	2810446P07Rik|AI843389	transmembrane protein 161B	protein-coding
Diff_Nuc49878	chr8	6426012	6426151	+	0	NA	Intergenic	Intergenic	-1320794	NM_011388	20494	Mm.3500	NM_011388	ENSMUSG00000023073	Slc10a2	9130221J18Rik|AI605518|ASBT|IBAT|ISBT	solute carrier family 10, member 2	protein-coding
Diff_Nuc31310	chr5	105014612	105014751	+	0	NA	Intergenic	Intergenic	13990	NM_001346671	69623	Mm.69919	NM_027142		Zfp33b	2310012P17Rik	zinc finger protein 33B	protein-coding
Diff_Nuc48061	chr9	43861532	43861671	+	0	NA	Intergenic	Intergenic	10134	NM_009382	21838	Mm.3951	NM_009382	ENSMUSG00000032011	Thy1	CD90|T25|Thy-1|Thy-1.2|Thy1.1|Thy1.2	thymus cell antigen 1, theta	protein-coding
Diff_Nuc45926	chr1	141857832	141857971	+	0	NA	Intergenic	Intergenic	-102625	NM_001025575	545366	Mm.439660	NM_001025575	ENSMUSG00000033898	Cfhr2	Cfhrb_4/2	complement factor H-related 2	protein-coding
Diff_Nuc45724	chr1	131932592	131932731	+	0	NA	intron (NM_172485, intron 15 of 27)	L1Md_A|LINE|L1	386959	NM_007827	13137	Mm.436759	NM_007827	ENSMUSG00000026401	Cd55b	AI323748|Daf|Daf-TM|Daf2|TM-DAF	CD55 molecule, decay accelerating factor for complement B	protein-coding
Diff_Nuc33033	chr4	46398592	46398731	+	0	NA	intron (NM_001347095, intron 3 of 4)	intron (NM_001347095, intron 3 of 4)	3634	NM_029086	74753	Mm.45973	NM_029086	ENSMUSG00000028331	Trmo	5830415F09Rik|AV014846|Nap1	tRNA methyltransferase O	protein-coding
Diff_Nuc28328	chr6	113238372	113238511	+	0	NA	intron (NM_170673, intron 6 of 19)	RSINE1|SINE|B4	6140	NM_170673	211232	Mm.65597	NM_170673	ENSMUSG00000030270	Cpne9	A730016F12Rik|mKIAA4217	copine family member IX	protein-coding
Diff_Nuc16326	chr15	48770182	48770321	+	0	NA	Intergenic	Intergenic	-146716	NM_001081391	239420	Mm.309363	NM_001081391	ENSMUSG00000022311	Csmd3	4930500N14Rik|mKIAA1894	CUB and Sushi multiple domains 3	protein-coding
Diff_Nuc20567	chr19	32085442	32085581	+	0	NA	intron (NM_018830, intron 17 of 23)	intron (NM_018830, intron 17 of 23)	92119	NM_018830	54447	Mm.491229	NM_018830	ENSMUSG00000024887	Asah2	AI585898	N-acylsphingosine amidohydrolase 2	protein-coding
Diff_Nuc18420	chr14	60179902	60180041	+	0	NA	intron (NM_001168538, intron 9 of 9)	intron (NM_001168538, intron 9 of 9)	36825	NM_001168537	71891	Mm.439850	NM_027986	ENSMUSG00000021982	Cdadc1	2310010M10Rik|AI449174|AI463398|BB130816|NYD-SP15	cytidine and dCMP deaminase domain containing 1	protein-coding
Diff_Nuc51063	chr8	60853722	60853861	+	0	NA	intron (NM_175032, intron 4 of 11)	RMER15|LTR|ERVL	325802	NM_001177534	100271928	Mm.484123	NM_001177534		Gm15881	OTTMUSG00000027193	predicted gene 15881	protein-coding
Diff_Nuc4647	chr12	73483152	73483291	+	0	NA	intron (NM_153457, intron 1 of 8)	B4A|SINE|B4	26820	NM_001286448	104001	Mm.221275	NM_153457	ENSMUSG00000021087	Rtn1	Nsp	reticulon 1	protein-coding
Diff_Nuc1435	chr13	45164192	45164331	+	0	NA	Intergenic	B3A|SINE|B2	-66796	NM_025772	94245	Mm.352311	NM_025772	ENSMUSG00000057531	Dtnbp1	5430437B18Rik|AW048963|Bloc1s8|dysbindin|sdy	dystrobrevin binding protein 1	protein-coding
Diff_Nuc44305	chr1	60606252	60606391	+	0	NA	intron (NM_001045513, intron 1 of 13)	intron (NM_001045513, intron 1 of 13)	17288	NM_001045513	77300	Mm.440325	NM_001045513	ENSMUSG00000026014	Raph1	9430025M21Rik|C730009O10Rik|Lpd	Ras association (RalGDS/AF-6) and pleckstrin homology domains 1	protein-coding
Diff_Nuc26247	chr6	21092832	21092971	+	0	NA	Intergenic	Intergenic	-73208	NM_019697	16508	Mm.425316	NM_019697	ENSMUSG00000060882	Kcnd2	AI839615|AW555701|Kv4.2|R75121|mKIAA1044	potassium voltage-gated channel, Shal-related family, member 2	protein-coding
Diff_Nuc47867	chr9	33953942	33954081	+	0	NA	Intergenic	Lx2B|LINE|L1	104055	NR_040744	77119	Mm.367930	NR_040744	ENSMUSG00000098758	7630403G23Rik	-	RIKEN cDNA 7630403G23 gene	ncRNA
Diff_Nuc16331	chr15	48978382	48978521	+	0	NA	Intergenic	Intergenic	-354916	NM_001081391	239420	Mm.309363	NM_001081391	ENSMUSG00000022311	Csmd3	4930500N14Rik|mKIAA1894	CUB and Sushi multiple domains 3	protein-coding
Diff_Nuc14451	chr16	64490222	64490361	+	0	NA	Intergenic	Intergenic	-11331	NM_173861	224291	Mm.246580	NM_173861	ENSMUSG00000068167	Csnka2ip	Ckt2	casein kinase 2, alpha prime interacting protein	protein-coding
Diff_Nuc41335	chr2	107261202	107261341	+	0	NA	Intergenic	Lx7|LINE|L1	130525	NM_021275	16492	Mm.142718	NM_021275	ENSMUSG00000042604	Kcna4	Kv1.4	potassium voltage-gated channel, shaker-related subfamily, member 4	protein-coding
Diff_Nuc23705	chr7	52324302	52324441	+	0	NA	intron (NM_025533, intron 1 of 8)	intron (NM_025533, intron 1 of 8)	6572	NM_025533	66394	Mm.272139	NM_025533	ENSMUSG00000003421	Nosip	2310061K06Rik|CGI-25	nitric oxide synthase interacting protein	protein-coding
Diff_Nuc12673	chr17	80769752	80769891	+	0	NA	intron (NM_001145452, intron 13 of 17)	intron (NM_001145452, intron 13 of 17)	3061	NR_028385	791338	Mm.204722	NR_028385		Gm10190	ENSMUSG00000066938	predicted gene 10190	ncRNA
Diff_Nuc2620	chr13	101081082	101081221	+	0	NA	intron (NM_021545, intron 3 of 14)	L1Md_A|LINE|L1	5420	NM_010871	17952	Mm.218759	NM_010871	ENSMUSG00000078942	Naip6	Birc1f|Naip-rs4|Naip-rs4A	NLR family, apoptosis inhibitory protein 6	protein-coding
Diff_Nuc24189	chr7	73010932	73011071	+	0	NA	intron (NM_011048, intron 1 of 21)	intron (NM_011048, intron 1 of 21)	3979	NM_011048	18553	Mm.294007	NM_011048	ENSMUSG00000030513	Pcsk6	C86343|Pace4|SPC4	proprotein convertase subtilisin/kexin type 6	protein-coding
Diff_Nuc41840	chr2	126753102	126753241	+	0	NA	intron (NM_023220, intron 2 of 14)	B1_Mur1|SINE|Alu	5800	NM_023220	66552	Mm.269928	NM_023220	ENSMUSG00000027366	Sppl2a	2010106G01Rik|C130089K23Rik	signal peptide peptidase like 2A	protein-coding
Diff_Nuc34455	chr4	112777552	112777691	+	0	NA	intron (NM_001103199, intron 14 of 48)	RMER17B|LTR|ERVK	181957	NM_001103199	230622	Mm.291107	NM_001103199	ENSMUSG00000087194	Skint6	OTTMUSG00000008519	selection and upkeep of intraepithelial T cells 6	protein-coding
Diff_Nuc28035	chr6	99748032	99748171	+	0	NA	Intergenic	Intergenic	-71715	NM_001170419	50501	Mm.87365	NM_015768	ENSMUSG00000030069	Prok2	Bv8|PK2|Prok1	prokineticin 2	protein-coding
Diff_Nuc25676	chr7	141659192	141659331	+	0	NA	Intergenic	ORR1E|LTR|MaLR	-90750	NM_001081331	71007	Mm.334285	NM_001081331	ENSMUSG00000030994	D7Ertd443e	4933400E14Rik|FATS|Gm497	DNA segment, Chr 7, ERATO Doi 443, expressed	protein-coding
Diff_Nuc28803	chr6	137940342	137940481	+	0	NA	intron (NM_177787, intron 7 of 8)	intron (NM_177787, intron 7 of 8)	88026	NM_177787	277898	Mm.269823	NM_177787	ENSMUSG00000044378	Slc15a5	9830102E05Rik	solute carrier family 15, member 5	protein-coding
Diff_Nuc14450	chr16	64449942	64450081	+	0	NA	Intergenic	Intergenic	28949	NM_173861	224291	Mm.246580	NM_173861	ENSMUSG00000068167	Csnka2ip	Ckt2	casein kinase 2, alpha prime interacting protein	protein-coding
Diff_Nuc43885	chr1	45082532	45082671	+	0	NA	Intergenic	L1VL4|LINE|L1	-280807	NR_040602	75066	Mm.416932	NR_040602	ENSMUSG00000101701	4930521E06Rik	-	RIKEN cDNA 4930521E06 gene	ncRNA
Diff_Nuc32826	chr4	35421982	35422121	+	0	NA	Intergenic	Intergenic	-248922	NM_001081343	73205	Mm.331544	NM_001081343	ENSMUSG00000028300	3110043O21Rik	AI840585	RIKEN cDNA 3110043O21 gene	protein-coding
Diff_Nuc36242	chr3	49495882	49496021	+	0	NA	Intergenic	AT_rich|Low_complexity|Low_complexity	65287	NM_130448	73173	Mm.87246	NM_130448	ENSMUSG00000037892	Pcdh18	3110038E07Rik|BB095589|PCDH68L	protocadherin 18	protein-coding
Diff_Nuc38254	chr3	137027022	137027161	+	0	NA	intron (NM_016885, intron 1 of 10)	intron (NM_016885, intron 1 of 10)	23049	NM_016885	59308	Mm.27343	NM_016885	ENSMUSG00000054690	Emcn	0610012K22Rik|AI315669|Muc14	endomucin	protein-coding
Diff_Nuc21220	chr18	5697502	5697641	+	0	NA	intron (NM_011546, intron 1 of 7)	intron (NM_011546, intron 1 of 7)	-105136	NR_033552	791318	Mm.84339	NR_033552	ENSMUSG00000063087	Gm10125	ENSMUSG00000063087|Zeb1os	predicted gene 10125	ncRNA
Diff_Nuc14598	chr16	69335632	69335771	+	0	NA	Intergenic	Lx5|LINE|L1	464925	NR_130991	78110	Mm.211406	NR_130991	ENSMUSG00000107073	4930428D20Rik	-	RIKEN cDNA 4930428D20 gene	ncRNA
Diff_Nuc2088	chr13	78509372	78509511	+	0	NA	Intergenic	Lx3A|LINE|L1	-171307	NM_010151	13865	Mm.439653	NM_010151	ENSMUSG00000069171	Nr2f1	COUP-TF1|COUP-TFI|COUPTFA|EAR-3|EAR3|Erbal3|SVP44|Tcfcoup1	nuclear receptor subfamily 2, group F, member 1	protein-coding
Diff_Nuc35012	chr4	141346992	141347131	+	0	NA	promoter-TSS (NM_172338)	promoter-TSS (NM_172338)	-502	NM_172338	214063	Mm.39102	NM_172338	ENSMUSG00000040697	Dnajc16	2900037O03Rik|4732437J24Rik|D030060M24|mKIAA0962	DnaJ heat shock protein family (Hsp40) member C16	protein-coding
Diff_Nuc34194	chr4	100957412	100957551	+	0	NA	Intergenic	Intergenic	-19594	NM_146145	16451	Mm.289657	NM_146145	ENSMUSG00000028530	Jak1	AA960307|BAP004|C130039L05Rik	Janus kinase 1	protein-coding
Diff_Nuc28432	chr6	118175532	118175671	+	0	NA	Intergenic	Intergenic	22871	NR_040527	73531	Mm.396245	NR_040527	ENSMUSG00000107637	1700069P05Rik	-	RIKEN cDNA 1700069P05 gene	ncRNA
Diff_Nuc9423	chr10	56705422	56705561	+	0	NA	Intergenic	Intergenic	500668	NR_045353	74928	Mm.416643	NR_045353	ENSMUSG00000097370	4930467K11Rik	-	RIKEN cDNA 4930467K11 gene	ncRNA
Diff_Nuc15432	chr15	11436592	11436731	+	0	NA	Intergenic	Intergenic	-107248	NM_033074	110960	Mm.286061	NM_033074	ENSMUSG00000022241	Tars	D15Wsu59e|ThrRS	threonyl-tRNA synthetase	protein-coding
Diff_Nuc35090	chr4	145732302	145732441	+	0	NA	intron (NM_001085522, intron 3 of 3)	Lx2|LINE|L1	16638	NM_001085522	433791	Mm.276881	NM_001085522	ENSMUSG00000070605	Zfp992	Gm13251|OTTMUSG00000011097	zinc finger protein 992	protein-coding
Diff_Nuc30311	chr5	59216272	59216411	+	0	NA	Intergenic	Intergenic	-372104	NR_046190	78163	Mm.243828	NR_046190	ENSMUSG00000105234	4930459L07Rik	-	RIKEN cDNA 4930459L07 gene	ncRNA
Diff_Nuc16883	chr15	76406322	76406461	+	0	NA	promoter-TSS (NM_172960)	promoter-TSS (NM_172960)	-398	NM_172960	268822	Mm.181624	NM_172960	ENSMUSG00000022550	Adck5	A230108P17	aarF domain containing kinase 5	protein-coding
Diff_Nuc38963	chr2	10248092	10248231	+	0	NA	Intergenic	Intergenic	-43917	NM_001198808	353282	Mm.329991	NM_177386	ENSMUSG00000061186	Sfmbt2	D2Wsu23e|D330030P06Rik	Scm-like with four mbt domains 2	protein-coding
Diff_Nuc8343	chr10	9390482	9390621	+	0	NA	intron (NM_177271, intron 1 of 1)	intron (NM_177271, intron 1 of 1)	4455	NM_177271	320825	Mm.101115	NM_177271	ENSMUSG00000060487	Samd5	E130306M17Rik	sterile alpha motif domain containing 5	protein-coding
Diff_Nuc31699	chr5	129361012	129361151	+	0	NA	intron (NM_001081388, intron 1 of 21)	intron (NM_001081388, intron 1 of 21)	98280	NM_001081388	231760	Mm.233996	NM_001081388	ENSMUSG00000029420	Rimbp2	A930033C01Rik|mKIAA0318	RIMS binding protein 2	protein-coding
Diff_Nuc15112	chr16	91463772	91463911	+	0	NA	Intergenic	Lx7|LINE|L1	-1508	NR_077219	100503120	Mm.387130	NR_077219	ENSMUSG00000084866	A930006K02Rik	-	RIKEN cDNA A930006K02 gene	ncRNA
Diff_Nuc38820	chr2	4616332	4616471	+	0	NA	Intergenic	Lx5|LINE|L1	-22476	NM_001190400	209645	Mm.149539	NM_178663	ENSMUSG00000048186	Bend7	1110017O21Rik|E130319B15Rik	BEN domain containing 7	protein-coding
Diff_Nuc14412	chr16	63159202	63159341	+	0	NA	Intergenic	Intergenic	305138	NM_011173	19128	Mm.127156	NM_011173	ENSMUSG00000022912	Pros1	AW214361	protein S (alpha)	protein-coding
Diff_Nuc16181	chr15	43557402	43557541	+	0	NA	Intergenic	L1VL2|LINE|L1	144104	NM_175502	239408	Mm.41219	NM_175502	ENSMUSG00000054409	Tmem74	AA549547|B230382K22Rik	transmembrane protein 74	protein-coding
Diff_Nuc73	chrX	35901442	35901581	+	0	NA	intron (NM_028288, intron 12 of 22)	B3|SINE|B2	27862	NM_028288	72584	Mm.327675	NM_028288	ENSMUSG00000031095	Cul4b	2700050M05Rik|AA409770|CUL-4B|mKIAA0695	cullin 4B	protein-coding
Diff_Nuc49063	chr9	88822822	88822961	+	0	NA	Intergenic	Intergenic	-28867	NM_009742	12044	Mm.425593	NM_009742	ENSMUSG00000102037	Bcl2a1a	A1|BB218357|Bcl2a1|Bfl-1|Hbpa1	B cell leukemia/lymphoma 2 related protein A1a	protein-coding
Diff_Nuc3714	chr12	38952272	38952411	+	0	NA	intron (NM_178681, intron 18 of 24)	L1Md_F2|LINE|L1	345049	NM_178681	217480	Mm.126525	NM_178681	ENSMUSG00000036095	Dgkb	6430574F24|90kda|C630029D13Rik|DAGK2|DGK|DGK-beta|mKIAA0718	diacylglycerol kinase, beta	protein-coding
Diff_Nuc37674	chr3	110070432	110070571	+	0	NA	Intergenic	RLTR25B|LTR|ERVK	-16584	NR_024139	99890	Mm.36115	NM_178891	ENSMUSG00000049300	Prmt6	AW124876|BB233495|Hrmt1l6	protein arginine N-methyltransferase 6	protein-coding
Diff_Nuc32530	chr4	21982462	21982601	+	0	NA	Intergenic	Lx8|LINE|L1	124058	NM_175234	76132	Mm.159689	NM_175234	ENSMUSG00000028246	Faxc	6230409E13Rik|AW742931	failed axon connections homolog	protein-coding
Diff_Nuc2326	chr13	88246422	88246561	+	0	NA	Intergenic	L1_Mus3|LINE|L1	-714586	NM_010103	13612	Mm.125580	NM_010103	ENSMUSG00000034488	Edil3	Del-1|Del1	EGF-like repeats and discoidin I-like domains 3	protein-coding
Diff_Nuc21692	chr18	27318082	27318221	+	0	NA	Intergenic	Intergenic	-1400514	NR_045398	320624	Mm.50107	NR_045398		4930474G06Rik	-	RIKEN cDNA 4930474G06 gene	ncRNA
Diff_Nuc36594	chr3	64209602	64209741	+	0	NA	intron (NM_001104615, intron 2 of 4)	intron (NM_001104615, intron 2 of 4)	4308	NM_001104615	637053	Mm.425135	NM_001104615	ENSMUSG00000092049	Vmn2r4	AW742767|EG637053	vomeronasal 2, receptor 4	protein-coding
Diff_Nuc42768	chr2	166960692	166960831	+	0	NA	intron (NM_008420, intron 1 of 1)	L1MB8|LINE|L1	53557	NM_008420	16500	Mm.205341	NM_008420	ENSMUSG00000050556	Kcnb1	Kcr1-1|Kv2.1|Shab	potassium voltage gated channel, Shab-related subfamily, member 1	protein-coding
Diff_Nuc3479	chr12	29539542	29539681	+	0	NA	intron (NM_201357, intron 5 of 8)	intron (NM_201357, intron 5 of 8)	102918	NM_201357	380752	Mm.273724	NM_201357	ENSMUSG00000036613	Tssc1	D12Ertd604e|Eipr1	tumor suppressing subtransferable candidate 1	protein-coding
Diff_Nuc40469	chr2	70430152	70430291	+	0	NA	intron (NM_008077, intron 12 of 16)	intron (NM_008077, intron 12 of 16)	-28807	NR_040496	68986	Mm.437697	NR_040496	ENSMUSG00000087264	Gad1os	1500002O10Rik	glutamate decarboxylase 1, opposite strand	ncRNA
Diff_Nuc11232	chr17	10470922	10471061	+	0	NA	intron (NM_001159516, intron 2 of 6)	intron (NM_001159516, intron 2 of 6)	41235	NM_021881	19317	Mm.130694	NM_021881	ENSMUSG00000062078	Qk	1110003F05Rik|1500005P18|QkI|l(17)-1Wis|l17Wis1	quaking	protein-coding
Diff_Nuc30219	chr5	55794772	55794911	+	0	NA	Intergenic	Intergenic	1053610	NR_038045	330086	Mm.254449	NM_177871	ENSMUSG00000105912	Gm10440	D130065D13|ENSMUSG00000072936	predicted gene 10440	ncRNA
Diff_Nuc23544	chr7	36539702	36539841	+	0	NA	promoter-TSS (NM_178704)	promoter-TSS (NM_178704)	-298	NM_178704	233115	Mm.257808	NM_178704	ENSMUSG00000043671	Dpy19l3	6030410G08|9330164H19Rik	dpy-19-like 3 (C. elegans)	protein-coding
Diff_Nuc2094	chr13	78617952	78618091	+	0	NA	Intergenic	MTD|LTR|MaLR	-279887	NM_010151	13865	Mm.439653	NM_010151	ENSMUSG00000069171	Nr2f1	COUP-TF1|COUP-TFI|COUPTFA|EAR-3|EAR3|Erbal3|SVP44|Tcfcoup1	nuclear receptor subfamily 2, group F, member 1	protein-coding
Diff_Nuc16971	chr15	81338722	81338861	+	0	NA	Intergenic	Lx2A1|LINE|L1	42045	NM_019712	56438	Mm.29405	NM_019712	ENSMUSG00000022400	Rbx1	1500002P15Rik|AA517855|ROC1	ring-box 1	protein-coding
Diff_Nuc31936	chr5	143021822	143021961	+	0	NA	promoter-TSS (NM_001310752)	promoter-TSS (NM_001310752)	-910	NM_001310752	231858	Mm.33766	NM_178702	ENSMUSG00000029576	Radil	AI536456|D930005D10Rik	Ras association and DIL domains	protein-coding
Diff_Nuc7251	chr11	77132862	77133001	+	0	NA	intron (NM_177710, intron 1 of 14)	intron (NM_177710, intron 1 of 14)	-28851	NM_001291190	237860	Mm.440381	NM_177710	ENSMUSG00000037926	Ssh2	SSH-2|SSH-2L|mSSH-2L	slingshot homolog 2 (Drosophila)	protein-coding
Diff_Nuc51275	chr8	70463732	70463871	+	0	NA	intron (NM_177698, intron 3 of 14)	intron (NM_177698, intron 3 of 14)	-28956	NM_030263	234353	Mm.32525	NM_027626	ENSMUSG00000030465	Psd3	4931420C21Rik|AI661273|BC003498|D430018P08|EFA6D	pleckstrin and Sec7 domain containing 3	protein-coding
Diff_Nuc18163	chr14	48654552	48654691	+	0	NA	Intergenic	Lx|LINE|L1	-85923	NM_033602	93834	Mm.296457	NM_033602	ENSMUSG00000021846	Peli2	AW047589|BB129927	pellino 2	protein-coding
Diff_Nuc48653	chr9	70348272	70348411	+	0	NA	intron (NM_033604, intron 2 of 14)	intron (NM_033604, intron 2 of 14)	3191	NM_033604	93836	Mm.29783	NM_033604	ENSMUSG00000032217	Rnf111	ARK|Arkadia	ring finger 111	protein-coding
Diff_Nuc49144	chr9	92473212	92473351	+	0	NA	intron (NM_011961, intron 3 of 18)	intron (NM_011961, intron 3 of 18)	-35574	NR_029474	78575	Mm.407669	NR_029474	ENSMUSG00000103622	B430319G15Rik	D530025C14Rik	RIKEN cDNA B430319G15 gene	ncRNA
Diff_Nuc47304	chr9	6373272	6373411	+	0	NA	intron (NM_027924, intron 6 of 6)	intron (NM_027924, intron 6 of 6)	-106794	NM_027942	71829	Mm.141452	NM_027942	ENSMUSG00000047619	Ddi1	1700011N24Rik	DNA-damage inducible 1	protein-coding
Diff_Nuc51174	chr8	65696002	65696141	+	0	NA	intron (NM_001252620, intron 5 of 11)	intron (NM_001252620, intron 5 of 11)	265929	NM_023689	72902	Mm.334552	NM_023689	ENSMUSG00000054162	Spock3	2900045C01Rik|AI428471|mKIAA4039	sparc/osteonectin, cwcv and kazal-like domains proteoglycan 3	protein-coding
Diff_Nuc7352	chr11	81236102	81236241	+	0	NA	intron (NM_001034013, intron 1 of 9)	MLT1H|LTR|MaLR	150870	NM_001033765	237880	Mm.435528	NM_001033765		1700071K01Rik	-	RIKEN cDNA 1700071K01 gene	protein-coding
Diff_Nuc37610	chr3	107115832	107115971	+	0	NA	TTS (NM_146136)	TTS (NM_146136)	20306	NM_001045807	229700	Mm.27966	NM_001045807	ENSMUSG00000048109	Rbm15	C230088J01Rik|mKIAA1438	RNA binding motif protein 15	protein-coding
Diff_Nuc7077	chr11	67960772	67960911	+	0	NA	intron (NM_018768, intron 7 of 7)	intron (NM_018768, intron 7 of 7)	-73553	NR_105833	102465219		NR_105833	ENSMUSG00000099174	Mir6406	Gm27981|mmu-mir-6406	microRNA 6406	ncRNA
Diff_Nuc50570	chr8	40067082	40067221	+	0	NA	Intergenic	L1Md_F|LINE|L1	-1770	NM_030254	80286	Mm.272722	NM_030254	ENSMUSG00000039530	Tusc3	AU022242|BC003311|N33	tumor suppressor candidate 3	protein-coding
Diff_Nuc25497	chr7	132912492	132912631	+	0	NA	intron (NM_001081022, intron 5 of 27)	intron (NM_001081022, intron 5 of 27)	61171	NM_001081022	233865	Mm.274389	NM_001081022	ENSMUSG00000032743	D430042O09Rik	Kiaa0556	RIKEN cDNA D430042O09 gene	protein-coding
Diff_Nuc35592	chr3	17564652	17564791	+	0	NA	Intergenic	Intergenic	-125200	NR_033490	70441	Mm.458192	NR_033490	ENSMUSG00000100252	Mir124-2hg	100040120|2610100L16Rik|6430547I21Rik|A930005K07Rik|AW125202|Gm2612	Mir124-2 host gene (non-protein coding)	ncRNA
Diff_Nuc52192	chr8	114270282	114270421	+	0	NA	Intergenic	Intergenic	-2602	NM_009954	12927	Mm.3758	NM_009954	ENSMUSG00000031955	Bcar1	AI385681|Cas|Crkas	breast cancer anti-estrogen resistance 1	protein-coding
Diff_Nuc8926	chr10	33767572	33767711	+	0	NA	intron (NM_001162937, intron 1 of 6)	intron (NM_001162937, intron 1 of 6)	-3522	NM_001081165	270711	Mm.303077	NM_001081165	ENSMUSG00000039508	Fam26d	4732454E20Rik|AI586164|Gm643	family with sequence similarity 26, member D	protein-coding
Diff_Nuc4809	chr12	79704272	79704411	+	0	NA	intron (NM_172952, intron 12 of 23)	Lx3C|LINE|L1	-88181	NM_027597	70897	Mm.56514	NM_027597	ENSMUSG00000056987	Fam71d	4921509E07Rik|4930516C23Rik|GARI-L2	family with sequence similarity 71, member D	protein-coding
Diff_Nuc30180	chr5	54009642	54009781	+	0	NA	intron (NM_001277116, intron 3 of 12)	intron (NM_001277116, intron 3 of 12)	27986	NM_001080927	19664	Mm.209292	NM_009035	ENSMUSG00000039191	Rbpj	AI843960|CBF1|Igkjrb|Igkrsbp|RBP-J|RBP-J kappa|RBP-Jkappa|RBPjk|Rbpsuh	recombination signal binding protein for immunoglobulin kappa J region	protein-coding
Diff_Nuc632	chr13	10646862	10647001	+	0	NA	Intergenic	Lx8|LINE|L1	-286882	NM_033269	12671	Mm.342315	NM_033269	ENSMUSG00000046159	Chrm3	Chrm-3|M3|M3R	cholinergic receptor, muscarinic 3, cardiac	protein-coding
Diff_Nuc38468	chr3	146624032	146624171	+	0	NA	intron (NM_001302957, intron 19 of 21)	intron (NM_001302957, intron 19 of 21)	108770	NM_001302958	70892	Mm.187793	NM_027594	ENSMUSG00000036745	Ttll7	1110049N09Rik|4921517B04Rik|C630030B20|mTTLL7	tubulin tyrosine ligase-like family, member 7	protein-coding
Diff_Nuc27629	chr6	80002272	80002411	+	0	NA	intron (NM_001347261, intron 2 of 2)	intron (NM_001347261, intron 2 of 2)	32704	NM_178731	243499	Mm.483425	NM_178731	ENSMUSG00000052581	Lrrtm4	7530419J18Rik|A230052N11	leucine rich repeat transmembrane neuronal 4	protein-coding
Diff_Nuc19526	chr14	106264332	106264471	+	0	NA	Intergenic	Intergenic	31635	NM_011897	24064	Mm.89982	NM_011897	ENSMUSG00000022114	Spry2	sprouty2	sprouty homolog 2 (Drosophila)	protein-coding
Diff_Nuc3247	chr12	12240472	12240611	+	0	NA	Intergenic	MTD|LTR|MaLR	-28404	NM_029758	76820	Mm.440802	NM_029758	ENSMUSG00000020589	Fam49a	2410157M17Rik|9630047E15|D12Ertd553e	family with sequence similarity 49, member A	protein-coding
Diff_Nuc7000	chr11	63612112	63612251	+	0	NA	Intergenic	L1_Mur3|LINE|L1	123605	NM_018805	54710	Mm.274426	NM_018805	ENSMUSG00000070407	Hs3st3b1	3-OST-3B|3OST3B1|3Ost3b|AU041882|AW536289|Hs3st3b|m3-OST-3B	heparan sulfate (glucosamine) 3-O-sulfotransferase 3B1	protein-coding
Diff_Nuc5413	chr12	105608012	105608151	+	0	NA	Intergenic	Intergenic	-17293	NM_009253	20717	Mm.395085	NM_009253	ENSMUSG00000079012	Serpina3m	3e46|AI195004|MMCM7|MMSPi2.4|Spi-2l|Spi-2rs1|Spi2-rs1|Spi2.4|spi2	serine (or cysteine) peptidase inhibitor, clade A, member 3M	protein-coding
Diff_Nuc21272	chr18	8518022	8518161	+	0	NA	Intergenic	L1Md_F2|LINE|L1	648896	NM_153085	225131	Mm.204524	NM_153085	ENSMUSG00000024283	Wac	1110067P07Rik|A230035H12Rik|AI256735|AI256776|Wwp4	WW domain containing adaptor with coiled-coil	protein-coding
Diff_Nuc3882	chr12	44109052	44109191	+	0	NA	Intergenic	Intergenic	1201934	NM_013760	27362	Mm.27432	NM_013760	ENSMUSG00000014905	Dnajb9	AA408011|AA673251|AA673481|AW556981|ERdj4|Mdg1|mDj7	DnaJ heat shock protein family (Hsp40) member B9	protein-coding
Diff_Nuc18760	chr14	74914322	74914461	+	0	NA	Intergenic	ORR1C2|LTR|MaLR	-126256	NM_172812	15558	Mm.214351	NM_172812	ENSMUSG00000034997	Htr2a	E030013E04|Htr-2|Htr2	5-hydroxytryptamine (serotonin) receptor 2A	protein-coding
Diff_Nuc20452	chr19	27278522	27278661	+	0	NA	Intergenic	Intergenic	-12383	NM_001347441	22359	Mm.4141	NM_013703	ENSMUSG00000024924	Vldlr	AA408956|AI451093|AW047288	very low density lipoprotein receptor	protein-coding
Diff_Nuc19733	chr14	117031972	117032111	+	0	NA	Intergenic	Intergenic	-292478	NM_001079844	23888	Mm.440025	NM_011821	ENSMUSG00000058571	Gpc6	-	glypican 6	protein-coding
Diff_Nuc49112	chr9	90908832	90908971	+	0	NA	Intergenic	Intergenic	351736	NM_009573	22771	Mm.335350	NM_009573	ENSMUSG00000032368	Zic1	ZIC|ZNF201	zinc finger protein of the cerebellum 1	protein-coding
Diff_Nuc42291	chr2	142684432	142684571	+	0	NA	intron (NM_001081133, intron 3 of 25)	intron (NM_001081133, intron 3 of 25)	42699	NM_001081133	16558	Mm.251934	NM_001081133	ENSMUSG00000038844	Kif16b	8430434E15Rik|AA623607|AI789011|C80253|C80902|mKIAA1590	kinesin family member 16B	protein-coding
Diff_Nuc1350	chr13	41447992	41448131	+	0	NA	intron (NM_001111324, intron 2 of 7)	intron (NM_001111324, intron 2 of 7)	6309	NM_017464	18003	Mm.288980	NM_017464	ENSMUSG00000021365	Nedd9	Cas-L|CasL|HEF1|MEF1|Nedd-9|p105	neural precursor cell expressed, developmentally down-regulated gene 9	protein-coding
Diff_Nuc32894	chr4	38430872	38431011	+	0	NA	Intergenic	Intergenic	-966385	NM_001081095	75471	Mm.23522	NM_001081095	ENSMUSG00000028287	1700009N14Rik	AI429145	RIKEN cDNA 1700009N14 gene	protein-coding
Diff_Nuc39901	chr2	49192262	49192401	+	0	NA	Intergenic	Intergenic	90911	NM_001290656	109241	Mm.440436	NM_029924	ENSMUSG00000036792	Mbd5	9430004D19Rik|AA536666|AI426407|C030040A15Rik|Gm1630|OTTMUSG00000012483	methyl-CpG binding domain protein 5	protein-coding
Diff_Nuc5896	chr11	14060122	14060261	+	0	NA	intron (NR_131011, intron 1 of 3)	ORR1E|LTR|MaLR	18853	NR_131011	75280	Mm.108492	NR_131011	ENSMUSG00000085452	4930554G24Rik	-	RIKEN cDNA 4930554G24 gene	ncRNA
Diff_Nuc15429	chr15	11360672	11360811	+	0	NA	Intergenic	Intergenic	-31328	NM_033074	110960	Mm.286061	NM_033074	ENSMUSG00000022241	Tars	D15Wsu59e|ThrRS	threonyl-tRNA synthetase	protein-coding
Diff_Nuc14636	chr16	70763012	70763151	+	0	NA	Intergenic	Intergenic	146411	NR_040474	52645	Mm.188475	NR_040474		D16Ertd519e	-	DNA segment, Chr 16, ERATO Doi 519, expressed	ncRNA
Diff_Nuc35581	chr3	17096462	17096601	+	0	NA	Intergenic	L1Md_F2|LINE|L1	-593390	NR_033490	70441	Mm.458192	NR_033490	ENSMUSG00000100252	Mir124-2hg	100040120|2610100L16Rik|6430547I21Rik|A930005K07Rik|AW125202|Gm2612	Mir124-2 host gene (non-protein coding)	ncRNA
Diff_Nuc5810	chr11	9356042	9356181	+	0	NA	intron (NM_178259, intron 39 of 61)	L1Md_F3|LINE|L1	264166	NM_178259	268379	Mm.39270	NM_178259	ENSMUSG00000004668	Abca13	9830132L24|A930002G16Rik|AI956815	ATP-binding cassette, sub-family A (ABC1), member 13	protein-coding
Diff_Nuc2380	chr13	90142222	90142361	+	0	NA	intron (NM_028012, intron 3 of 7)	intron (NM_028012, intron 3 of 7)	86922	NM_028012	108138	Mm.37531	NM_028012	ENSMUSG00000021615	Xrcc4	2310057B22Rik|AW413319|AW545101	X-ray repair complementing defective repair in Chinese hamster cells 4	protein-coding
Diff_Nuc31827	chr5	135645732	135645871	+	0	NA	intron (NM_009745, intron 1 of 5)	intron (NM_009745, intron 1 of 5)	1559	NM_009745	12054	Mm.405834	NM_009745	ENSMUSG00000029681	Bcl7b	-	B cell CLL/lymphoma 7B	protein-coding
Diff_Nuc43680	chr1	33925212	33925351	+	0	NA	intron (NM_001310484, intron 2 of 5)	intron (NM_001310484, intron 2 of 5)	-29522	NM_001161816	433287	Mm.383632	NM_001161816		Gm15455	AA692849|OTTMUSG00000022109	predicted gene 15455	protein-coding
Diff_Nuc21241	chr18	6440552	6440691	+	0	NA	intron (NM_007935, intron 11 of 13)	intron (NM_007935, intron 11 of 13)	50023	NR_035446	100316773		NR_035446	ENSMUSG00000084514	Mir1893	Mirn1893|mmu-mir-1893	microRNA 1893	ncRNA
Diff_Nuc35137	chr4	146948022	146948161	+	0	NA	intron (NM_001014397, intron 3 of 5)	Lx3A|LINE|L1	20705	NM_001014397	433804	Mm.332047	NM_001014397	ENSMUSG00000065999	Zfp985	Gm13154|OTTMUSG00000010673	zinc finger protein 985	protein-coding
Diff_Nuc33739	chr4	77728642	77728781	+	0	NA	intron (NM_011211, intron 1 of 39)	intron (NM_011211, intron 1 of 39)	129088	NM_011211	19266	Mm.184021	NM_011211	ENSMUSG00000028399	Ptprd	1110002J03Rik|3000002J10Rik|B230219D21Rik|R-PTP-delta	protein tyrosine phosphatase, receptor type, D	protein-coding
Diff_Nuc2423	chr13	91574782	91574921	+	0	NA	Intergenic	Intergenic	-25851	NM_024272	66970	Mm.343095	NM_024186	ENSMUSG00000003992	Ssbp2	1500004K09Rik|2310079I02Rik|9330163K02Rik|A830008M03Rik|AU067692|AW558684|Hspc116|SSDP2	single-stranded DNA binding protein 2	protein-coding
Diff_Nuc33013	chr4	45489912	45490051	+	0	NA	intron (NM_001033306, intron 2 of 5)	intron (NM_001033306, intron 2 of 5)	53719	NM_001033306	230126	Mm.251716	NM_001033306	ENSMUSG00000044813	Shb	BC028832	src homology 2 domain-containing transforming protein B	protein-coding
Diff_Nuc24758	chr7	98662352	98662491	+	0	NA	intron (NM_011807, intron 2 of 22)	intron (NM_011807, intron 2 of 22)	423125	NM_011807	23859	Mm.147213	NM_011807	ENSMUSG00000052572	Dlg2	A330103J02Rik|B230218P12Rik|B330007M19Rik|Dlgh2|Gm1197|Gm21505|PSD93	discs, large homolog 2 (Drosophila)	protein-coding
Diff_Nuc50559	chr8	39487762	39487901	+	0	NA	intron (NM_145841, intron 1 of 7)	intron (NM_145841, intron 1 of 7)	-172575	NR_029884	723860		NR_029884	ENSMUSG00000065457	Mir383	Mirn383|mir-383|mmu-mir-383	microRNA 383	ncRNA
Diff_Nuc8663	chr10	23066502	23066641	+	0	NA	intron (NM_010167, intron 1 of 18)	intron (NM_010167, intron 1 of 18)	3125	NM_001347372	14051	Mm.332128	NM_010167	ENSMUSG00000010461	Eya4	B130023L16Rik	EYA transcriptional coactivator and phosphatase 4	protein-coding
Diff_Nuc45633	chr1	128147682	128147821	+	0	NA	intron (NM_176957, intron 6 of 12)	intron (NM_176957, intron 6 of 12)	241753	NM_172484	210356	Mm.377234	NM_172484	ENSMUSG00000049690	Nckap5	8430408F21|D130011D22Rik|E030049G20Rik|Erih1|Erih2|Gm1548|Nap5	NCK-associated protein 5	protein-coding
Diff_Nuc653	chr13	11648652	11648791	+	0	NA	intron (NM_023868, intron 103 of 104)	intron (NM_023868, intron 103 of 104)	34402	NR_027813	664793	Mm.410565	NR_027813		Zp4-ps	EG664793|Zp4|Zpb	zona pellucida glycoprotein 4, pseudogene	pseudo
Diff_Nuc48973	chr9	84820422	84820561	+	0	NA	Intergenic	(CA)n|Simple_repeat|Simple_repeat	152486	NR_040739	75253	Mm.401984	NR_040739	ENSMUSG00000099724	4930554C24Rik	-	RIKEN cDNA 4930554C24 gene	ncRNA
Diff_Nuc32299	chr4	11882092	11882231	+	0	NA	Intergenic	Intergenic	10699	NM_001098231	381511	Mm.331489	NM_001033453	ENSMUSG00000049225	Pdp1	Gm1024|Ppm2c	pyruvate dehyrogenase phosphatase catalytic subunit 1	protein-coding
Diff_Nuc14035	chr16	47461472	47461611	+	0	NA	Intergenic	Lx8|LINE|L1	-822307	NM_028610	73693	Mm.35597	NM_028610	ENSMUSG00000058550	Dppa4	2410091M23Rik|C76608|ECAT15-1	developmental pluripotency associated 4	protein-coding
Diff_Nuc11567	chr17	24240552	24240691	+	0	NA	intron (NM_001080773, intron 4 of 13)	intron (NM_001080773, intron 4 of 13)	-30169	NM_027008	69259	Mm.28171	NM_027008	ENSMUSG00000016946	Kctd5	2610030N08Rik|mKIAA0176	potassium channel tetramerisation domain containing 5	protein-coding
Diff_Nuc23071	chr18	88724822	88724961	+	0	NA	Intergenic	Intergenic	338708	NM_018821	54607	Mm.91920	NM_018821	ENSMUSG00000056153	Socs6	1500012M23Rik|5830401B18Rik|AI447482|Cis4|Cish4|HSPC060|SOCS-4|SOCS-6|SSI4|STAI4|STATI4|Socs4	suppressor of cytokine signaling 6	protein-coding
Diff_Nuc18071	chr14	43917492	43917631	+	0	NA	Intergenic	Intergenic	108783	NM_027940	71826	Mm.335855	NM_027940	ENSMUSG00000095384	1700001F09Rik	Gm10377	RIKEN cDNA 1700001F09 gene	protein-coding
Diff_Nuc3135	chr12	6322732	6322871	+	0	NA	Intergenic	Lx7|LINE|L1	939493	NR_015579	72669	Mm.10434	NM_028318		2810032G03Rik	AI461720	RIKEN cDNA 2810032G03 gene	ncRNA
Diff_Nuc39566	chr2	37957782	37957921	+	0	NA	intron (NM_146122, intron 5 of 21)	intron (NM_146122, intron 5 of 21)	185053	NM_146122	227801	Mm.314245	NM_146122	ENSMUSG00000035392	Dennd1a	6030446I19Rik|connecdenn	DENN/MADD domain containing 1A	protein-coding
Diff_Nuc37814	chr3	116732422	116732561	+	0	NA	Intergenic	B3|SINE|B2	48192	NR_038029	433646	Mm.158997	NR_038029	ENSMUSG00000028009	1700061I17Rik	-	RIKEN cDNA 1700061I17 gene	ncRNA
Diff_Nuc21051	chr19	56665012	56665151	+	0	NA	intron (NM_025811, intron 6 of 10)	intron (NM_025811, intron 6 of 10)	42330	NM_025811	66866	Mm.46346	NM_025811	ENSMUSG00000025078	Nhlrc2	1200003G01Rik|AI835049|AV002846|AW496455	NHL repeat containing 2	protein-coding
Diff_Nuc36330	chr3	53760092	53760231	+	0	NA	Intergenic	L3|LINE|CR1	-92432	NM_026435	67890	Mm.23067	NM_026435	ENSMUSG00000027746	Ufm1	1810045K17Rik|AI132708|AI463323|ENSMUSG00000074598|Gm10726	ubiquitin-fold modifier 1	protein-coding
Diff_Nuc25236	chr7	119616532	119616671	+	0	NA	intron (NM_020606, intron 1 of 12)	intron (NM_020606, intron 1 of 12)	45381	NM_020606	57342	Mm.143763	NM_020606	ENSMUSG00000030770	Parva	2010012A22Rik|5430400F08Rik|AI225929|AU042898|Actp|CH-ILKBP|Parvin	parvin, alpha	protein-coding
Diff_Nuc19332	chr14	98234002	98234141	+	0	NA	intron (NM_007826, intron 8 of 11)	intron (NM_007826, intron 8 of 11)	334913	NM_001038610	13134	Mm.320593	NM_007826	ENSMUSG00000055639	Dach1	Dac|Dach	dachshund 1 (Drosophila)	protein-coding
Diff_Nuc11851	chr17	40077812	40077951	+	0	NA	Intergenic	Lx3B|LINE|L1	-9584	NM_001256051	100126775	Mm.471585	NM_001256051	ENSMUSG00000095886	Esp38	Gm21946	exocrine gland secreted peptide 38	protein-coding
Diff_Nuc5615	chr12	119300402	119300541	+	0	NA	intron (NM_010060, intron 32 of 81)	intron (NM_010060, intron 32 of 81)	137045	NM_010060	13411	Mm.390540	NM_010060	ENSMUSG00000018581	Dnah11	Dnahc11|b2b1203Clo|b2b1279Clo|b2b1289Clo|b2b1727Clo|b2b598Clo|iv|lrd	dynein, axonemal, heavy chain 11	protein-coding
Diff_Nuc48188	chr9	50486122	50486261	+	0	NA	intron (NM_001311069, intron 17 of 19)	ID_B1|SINE|B4	-18306	NM_145614	235339	Mm.285076	NM_145614	ENSMUSG00000000168	Dlat	6332404G05Rik|DLTA|PDC-E2	dihydrolipoamide S-acetyltransferase (E2 component of pyruvate dehydrogenase complex)	protein-coding
Diff_Nuc40853	chr2	86324912	86325051	+	0	NA	Intergenic	L1Md_F2|LINE|L1	-1084	NM_146405	258400	Mm.357298	NM_146405	ENSMUSG00000111772	Olfr228	GA_x6K02T0101M-139-669|MOR189-3|Olfr228-ps1	olfactory receptor 228	protein-coding
Diff_Nuc18791	chr14	76189802	76189941	+	0	NA	Intergenic	B3|SINE|B2	-3027	NM_026232	67554	Mm.46067	NM_026232	ENSMUSG00000022003	Slc25a30	4933433D23Rik|AV025504|AV221431|AW319655|KMCP1	solute carrier family 25, member 30	protein-coding
Diff_Nuc15674	chr15	22635832	22635971	+	0	NA	Intergenic	Intergenic	8838	NM_001165971	545091	Mm.475598	NM_001165971		Gm5803	EG545091	predicted gene 5803	protein-coding
Diff_Nuc1366	chr13	42231512	42231651	+	0	NA	intron (NM_007772, intron 3 of 8)	intron (NM_007772, intron 3 of 8)	84191	NM_007772	110521	Mm.4808	NM_007772	ENSMUSG00000021366	Hivep1	Cryabp1	human immunodeficiency virus type I enhancer binding protein 1	protein-coding
Diff_Nuc9158	chr10	44098802	44098941	+	0	NA	Intergenic	ID_B1|SINE|B4	19389	NR_035450	100316688		NR_035450	ENSMUSG00000089260	Mir1929	mir-1929|mmu-mir-1929	microRNA 1929	ncRNA
Diff_Nuc2547	chr13	97418362	97418501	+	0	NA	TTS (NM_008255)	TTS (NM_008255)	22460	NM_008255	15357	Mm.316652	NM_008255	ENSMUSG00000021670	Hmgcr	HMG-CoAR|Red	3-hydroxy-3-methylglutaryl-Coenzyme A reductase	protein-coding
Diff_Nuc49633	chr9	114492412	114492551	+	0	NA	Intergenic	Intergenic	-18994	NM_001042503	636931	Mm.17857	NM_001042503	ENSMUSG00000079259	Trim71	2610206G21Rik|AL022943|Gm1127|Lin41|lin-41|mLin41|mlin-41	tripartite motif-containing 71	protein-coding
Diff_Nuc40904	chr2	89420472	89420611	+	0	NA	Intergenic	Intergenic	-4611	NM_146788	258784	Mm.377688	NM_146788	ENSMUSG00000111456	Olfr1245	MOR23112	olfactory receptor 1245	protein-coding
Diff_Nuc17821	chr14	30410002	30410141	+	0	NA	intron (NM_009785, intron 2 of 37)	Lx8|LINE|L1	124979	NM_009785	12294	Mm.386754	NM_009785	ENSMUSG00000021991	Cacna2d3	Cacnad3|alapha2delta3	calcium channel, voltage-dependent, alpha2/delta subunit 3	protein-coding
Diff_Nuc5015	chr12	88526282	88526421	+	0	NA	intron (NM_001033475, intron 1 of 5)	intron (NM_001033475, intron 1 of 5)	14828	NM_001033475	382620	Mm.374912	NM_001033475	ENSMUSG00000034111	Tmed8	6430595O10Rik|AI447224|Gm1184|Mem1	transmembrane p24 trafficking protein 8	protein-coding
Diff_Nuc50671	chr8	43115452	43115591	+	0	NA	intron (NR_045497, intron 4 of 5)	intron (NR_045497, intron 4 of 5)	202900	NR_045497	69966	Mm.416903	NR_045497	ENSMUSG00000102046	2810404M03Rik	-	RIKEN cDNA 2810404M03 gene	ncRNA
Diff_Nuc45638	chr1	128299452	128299591	+	0	NA	intron (NM_176957, intron 4 of 12)	B4|SINE|B4	89983	NM_172484	210356	Mm.377234	NM_172484	ENSMUSG00000049690	Nckap5	8430408F21|D130011D22Rik|E030049G20Rik|Erih1|Erih2|Gm1548|Nap5	NCK-associated protein 5	protein-coding
Diff_Nuc31382	chr5	108920352	108920491	+	0	NA	intron (NM_172716, intron 8 of 10)	Lx5|LINE|L1	30070	NM_172716	69587	Mm.261218	NM_172716	ENSMUSG00000033623	Pcgf3	2310035N15Rik|AI662857|D630042K08Rik|DONG1|E430039C14|RNF3A|Rnf3	polycomb group ring finger 3	protein-coding
Diff_Nuc46045	chr1	146114572	146114711	+	0	NA	Intergenic	Lx|LINE|L1	-18407	NM_015811	50778	Mm.103701	NM_015811	ENSMUSG00000026358	Rgs1	BL34	regulator of G-protein signaling 1	protein-coding
Diff_Nuc25500	chr7	133005942	133006081	+	0	NA	intron (NM_001081022, intron 19 of 27)	L1MA4|LINE|L1	154621	NM_001081022	233865	Mm.274389	NM_001081022	ENSMUSG00000032743	D430042O09Rik	Kiaa0556	RIKEN cDNA D430042O09 gene	protein-coding
Diff_Nuc36914	chr3	77211882	77212021	+	0	NA	Intergenic	L1_Mur3|LINE|L1	1332446	NM_001253719	213262	Mm.379337	NM_178673	ENSMUSG00000034098	Fstl5	9130207J01Rik	follistatin-like 5	protein-coding
Diff_Nuc51400	chr8	75333282	75333421	+	0	NA	Intergenic	MER31B|LTR|ERV1	47793	NM_007975	14065	Mm.12948	NM_007975	ENSMUSG00000050147	F2rl3	PAR4	coagulation factor II (thrombin) receptor-like 3	protein-coding
Diff_Nuc49752	chr9	121632452	121632591	+	0	NA	intron (NM_010918, intron 2 of 16)	intron (NM_010918, intron 2 of 16)	4222	NM_010918	18087	Mm.32842	NM_010918	ENSMUSG00000032525	Nktr	5330401F18Rik|D9Wsu172e	natural killer tumor recognition sequence	protein-coding
Diff_Nuc34357	chr4	108211822	108211961	+	0	NA	intron (NM_175472, intron 21 of 30)	B4|SINE|B4	40050	NM_172697	230596	Mm.157534	NM_172697	ENSMUSG00000063800	Prpf38a	2410002M20Rik	PRP38 pre-mRNA processing factor 38 (yeast) domain containing A	protein-coding
Diff_Nuc18425	chr14	60344362	60344501	+	0	NA	intron (NM_015803, intron 32 of 35)	intron (NM_015803, intron 32 of 35)	100313	NM_145463	219134	Mm.275409	NM_145463	ENSMUSG00000044461	Shisa2	9430059P22Rik|MAd2|Tmem46|mShisa|shisa	shisa family member 2	protein-coding
Diff_Nuc43032	chr1	5866992	5867131	+	0	NA	Intergenic	ORR1A4-int|LTR|MaLR	40418	NM_010342	226304	Mm.291110	NM_010342	ENSMUSG00000033774	Npbwr1	Gpr7|Nbpwr1	neuropeptides B/W receptor 1	protein-coding
Diff_Nuc2023	chr13	76439382	76439521	+	0	NA	Intergenic	Intergenic	-82958	NM_030174	78771	Mm.316249	NM_030174	ENSMUSG00000021596	Mctp1	2810465F10Rik	multiple C2 domains, transmembrane 1	protein-coding
Diff_Nuc748	chr13	14238442	14238581	+	0	NA	intron (NM_198122, intron 9 of 22)	CT-rich|Low_complexity|Low_complexity	82460	NM_198122	94246	Mm.439784	NM_194262	ENSMUSG00000039219	Arid4b	BCAA|BRCAA1|RBBP1L1|Rbp1l1|SAP180	AT rich interactive domain 4B (RBP1-like)	protein-coding
Diff_Nuc48345	chr9	56897852	56897991	+	0	NA	intron (NM_019651, intron 9 of 12)	B1_Mus1|SINE|Alu	21852	NR_045886	100038566	Mm.361900	NR_045886		Gm10658	ENSMUSG00000074284	predicted gene 10658	ncRNA
Diff_Nuc40692	chr2	78931822	78931961	+	0	NA	Intergenic	B4A|SINE|B4	-163692	NM_010576	16401	Mm.31903	NM_010576	ENSMUSG00000027009	Itga4	CD49D|Itga4B	integrin alpha 4	protein-coding
Diff_Nuc7751	chr11	100365152	100365291	+	0	NA	intron (NM_001199296, intron 13 of 28)	intron (NM_001199296, intron 13 of 28)	24093	NM_134037	104112	Mm.282039	NM_134037	ENSMUSG00000020917	Acly	A730098H14Rik|AW538652	ATP citrate lyase	protein-coding
Diff_Nuc47061	chr1	191857702	191857841	+	0	NA	Intergenic	Intergenic	-111604	NM_026796	226830	Mm.156895	NM_026796	ENSMUSG00000026603	Smyd2	1110020E07Rik|4930402C15|KMT3C|Zmynd14	SET and MYND domain containing 2	protein-coding
Diff_Nuc35997	chr3	37433532	37433671	+	0	NA	intron (NM_001310473, intron 16 of 16)	L1_Mur3|LINE|L1	-75212	NR_130162	75947	Mm.109620	NR_130161	ENSMUSG00000085677	4930594O21Rik	-	RIKEN cDNA 4930594O21 gene	ncRNA
Diff_Nuc27939	chr6	94654422	94654561	+	0	NA	Intergenic	B4A|SINE|B4	-4352	NM_008377	16206	Mm.245210	NM_008377	ENSMUSG00000030029	Lrig1	D6Bwg0781e|Img|LIG-1	leucine-rich repeats and immunoglobulin-like domains 1	protein-coding
Diff_Nuc11915	chr17	43019142	43019281	+	0	NA	Intergenic	L1M2|LINE|L1	-5838	NM_009847	12488	Mm.218637	NM_009847	ENSMUSG00000061665	Cd2ap	AL024079|C78928|METS-1|Mets1	CD2-associated protein	protein-coding
Diff_Nuc9137	chr10	43007662	43007801	+	0	NA	intron (NM_001168289, intron 1 of 7)	intron (NM_001168289, intron 1 of 7)	66439	NM_001168289	71365	Mm.490430	NM_027772	ENSMUSG00000038240	Pdss2	5430420P03Rik|Gm60|Plmp|kd|mDLP1	prenyl (solanesyl) diphosphate synthase, subunit 2	protein-coding
Diff_Nuc26336	chr6	24789252	24789391	+	0	NA	Intergenic	L1_Rod|LINE|L1	-18676	NM_028957	74468	Mm.251601	NM_028957	ENSMUSG00000029678	Hyal5	4933439A12Rik	hyaluronoglucosaminidase 5	protein-coding
Diff_Nuc7227	chr11	76563072	76563211	+	0	NA	intron (NM_016810, intron 5 of 8)	intron (NM_016810, intron 5 of 8)	13916	NM_016810	53334	Mm.20931	NM_016810	ENSMUSG00000010392	Gosr1	AI414660|AI426320|BB145494|GOS-28|GOSRI|GS28	golgi SNAP receptor complex member 1	protein-coding
Diff_Nuc6824	chr11	54424202	54424341	+	0	NA	intron (NM_001252497, intron 1 of 11)	intron (NM_001252497, intron 1 of 11)	14623	NM_001252497	192786	Mm.254404	NM_175258	ENSMUSG00000037533	Rapgef6	A530068K01|AI844632|BB085664|C030018K18Rik|PDZ-GEF2|Pdzgef2|RA-GEF-2|Ragef2|mKIAA4052	Rap guanine nucleotide exchange factor (GEF) 6	protein-coding
Diff_Nuc33440	chr4	66255982	66256121	+	0	NA	Intergenic	Intergenic	-190534	NM_207109	56079	Mm.445312	NM_019514	ENSMUSG00000028373	Astn2	1d8|Astnl|bM452J22.1	astrotactin 2	protein-coding
Diff_Nuc13885	chr16	41103992	41104131	+	0	NA	Intergenic	Intergenic	-428878	NM_001347236	268890	Mm.310524	NM_175548	ENSMUSG00000061080	Lsamp	5430428I19|AW046674|B130007O04Rik|D930023J12Rik|Lam|Lamp	limbic system-associated membrane protein	protein-coding
Diff_Nuc28159	chr6	105999942	106000081	+	0	NA	intron (NM_001109749, intron 3 of 25)	intron (NM_001109749, intron 3 of 25)	-68748	NM_001109751	269784	Mm.321683	NM_173004	ENSMUSG00000064293	Cntn4	9630050B05|Axcam|BIG-2	contactin 4	protein-coding
Diff_Nuc36872	chr3	75862552	75862691	+	0	NA	Intergenic	Intergenic	-15862	NM_178673	213262	Mm.379337	NM_178673	ENSMUSG00000034098	Fstl5	9130207J01Rik	follistatin-like 5	protein-coding
Diff_Nuc27755	chr6	85007912	85008051	+	0	NA	intron (NM_177077, intron 1 of 21)	intron (NM_177077, intron 1 of 21)	11526	NM_177077	75914	Mm.159621	NM_177077	ENSMUSG00000033769	Exoc6b	4930569O18Rik|G430127E12Rik|Sec15b|Sec15l2|mKIAA0919	exocyst complex component 6B	protein-coding
Diff_Nuc44635	chr1	74894422	74894561	+	0	NA	Intergenic	MTC|LTR|MaLR	-7112	NM_009872	12570	Mm.153833	NM_009872	ENSMUSG00000090071	Cdk5r2	B230310J22Rik|p39	cyclin-dependent kinase 5, regulatory subunit 2 (p39)	protein-coding
Diff_Nuc39024	chr2	13070822	13070961	+	0	NA	intron (NM_009105, intron 8 of 8)	L1_Mus1|LINE|L1	122151	NM_009105	20163	Mm.905	NM_009105	ENSMUSG00000026727	Rsu1	RsuI|rsp-1	Ras suppressor protein 1	protein-coding
Diff_Nuc5815	chr11	9686312	9686451	+	0	NA	Intergenic	L1M2|LINE|L1	594436	NM_178259	268379	Mm.39270	NM_178259	ENSMUSG00000004668	Abca13	9830132L24|A930002G16Rik|AI956815	ATP-binding cassette, sub-family A (ABC1), member 13	protein-coding
Diff_Nuc29487	chr5	20950722	20950861	+	0	NA	intron (NM_177869, intron 4 of 7)	intron (NM_177869, intron 4 of 7)	20070	NM_177869	330050	Mm.40655	NM_177869	ENSMUSG00000047221	Fam185a	4631428I10|AI847670	family with sequence similarity 185, member A	protein-coding
Diff_Nuc47514	chr9	15517622	15517761	+	0	NA	intron (NM_172289, intron 1 of 10)	intron (NM_172289, intron 1 of 10)	3478	NM_172289	234967	Mm.138815	NM_172289	ENSMUSG00000043885	Slc36a4	6330573I15Rik|PAT4	solute carrier family 36 (proton/amino acid symporter), member 4	protein-coding
Diff_Nuc44334	chr1	61918522	61918661	+	0	NA	intron (NM_001081050, intron 2 of 22)	intron (NM_001081050, intron 2 of 22)	233193	NM_001081050	72823	Mm.35153	NM_001081050	ENSMUSG00000052062	Pard3b	1810008K04Rik|2010002N16Rik|2810455B10Rik|Als2cr19|PAR3B|PAR3L|PAR3beta	par-3 family cell polarity regulator beta	protein-coding
Diff_Nuc37005	chr3	80423712	80423851	+	0	NA	Intergenic	MTEb|LTR|MaLR	182932	NM_013540	14800	Mm.220224	NM_013540	ENSMUSG00000033981	Gria2	GluA2|GluR-B|Glur-2|Glur2	glutamate receptor, ionotropic, AMPA2 (alpha 2)	protein-coding
Diff_Nuc4657	chr12	73898502	73898641	+	0	NA	Intergenic	Intergenic	36373	NM_008910	19042	Mm.261045	NM_008910	ENSMUSG00000021096	Ppm1a	2310003C21Rik|2900017D14Rik|AI427932|AU017636|MMPa-2|MPPa-1	protein phosphatase 1A, magnesium dependent, alpha isoform	protein-coding
Diff_Nuc17511	chr14	14199212	14199351	+	0	NA	intron (NM_028052, intron 2 of 5)	intron (NM_028052, intron 2 of 5)	81987	NM_028052	72003	Mm.317515	NM_028052	ENSMUSG00000056296	Synpr	1500003F20Rik|SPO	synaptoporin	protein-coding
Diff_Nuc24547	chr7	90454342	90454481	+	0	NA	Intergenic	Intergenic	157431	NM_177895	330578	Mm.5796	NM_177895	ENSMUSG00000053528	A530021J07Rik	-	Riken cDNA A530021J07 gene	protein-coding
Diff_Nuc13450	chr16	22385692	22385831	+	0	NA	intron (NM_023794, intron 12 of 12)	intron (NM_023794, intron 12 of 12)	53882	NM_023794	104156	Mm.155708	NM_023794	ENSMUSG00000013089	Etv5	1110005E01Rik|8430401F14Rik|ERM	ets variant 5	protein-coding
Diff_Nuc11204	chr17	9364442	9364581	+	0	NA	Intergenic	Intergenic	-3624	NR_027881	67791	Mm.158175	NR_027881	ENSMUSG00000097049	6530411M01Rik	-	RIKEN cDNA 6530411M01 gene	ncRNA
Diff_Nuc50479	chr8	36827752	36827891	+	0	NA	Intergenic	Intergenic	61792	NM_027998	71908	Mm.37817	NM_027998	ENSMUSG00000055976	Cldn23	2310014B08Rik	claudin 23	protein-coding
Diff_Nuc28666	chr6	131084192	131084331	+	0	NA	Intergenic	Lx3B|LINE|L1	113119	NM_001170851	16633	Mm.4783	NM_008462	ENSMUSG00000030187	Klra2	Klra30|Ly49b	killer cell lectin-like receptor, subfamily A, member 2	protein-coding
Diff_Nuc8148	chr11	120163152	120163291	+	0	NA	Intergenic	L2b|LINE|L2	45506	NR_105900	102465564		NR_105900	ENSMUSG00000098955	Mir6935	Gm27344|mmu-mir-6935	microRNA 6935	ncRNA
Diff_Nuc1058	chr13	26916692	26916831	+	0	NA	Intergenic	ORR1D2-int|LTR|MaLR	-54727	NM_008232	15192	Mm.7411	NM_008232	ENSMUSG00000045835	Hdgfl1	4921520N01Rik|HRP-1|Hdgfrp1|Pwwp1	hepatoma derived growth factor-like 1	protein-coding
Diff_Nuc843	chr13	18447792	18447931	+	0	NA	intron (NM_175006, intron 2 of 7)	Lx|LINE|L1	26012	NM_175006	218030	Mm.352263	NM_175006	ENSMUSG00000009734	Pou6f2	D130006K24Rik|RPF-1	POU domain, class 6, transcription factor 2	protein-coding
Diff_Nuc36273	chr3	51085072	51085211	+	0	NA	intron (NM_023502, intron 4 of 9)	intron (NM_023502, intron 4 of 9)	-3705	NM_001291063	69257	Mm.131038	NM_023502	ENSMUSG00000037174	Elf2	2610036A20Rik|A230104O07Rik|AW111824|BB183398|EU32|NERF|NERF-1A|NERF-1B|NERF-2	E74-like factor 2	protein-coding
Diff_Nuc35747	chr3	25447422	25447561	+	0	NA	intron (NM_001163387, intron 3 of 5)	intron (NM_001163387, intron 3 of 5)	604738	NM_001163387	192167	Mm.316080	NM_138666	ENSMUSG00000063887	Nlgn1	6330415N05Rik|BB179718|NL1|Nlg1|mKIAA1070	neuroligin 1	protein-coding
Diff_Nuc18223	chr14	51394522	51394661	+	0	NA	TTS (NM_177625)	TTS (NM_177625)	10604	NM_177625	219022	Mm.276362	NM_177625	ENSMUSG00000006288	Ttc5	-	tetratricopeptide repeat domain 5	protein-coding
Diff_Nuc5044	chr12	90200332	90200471	+	0	NA	intron (NM_172544, intron 2 of 19)	intron (NM_172544, intron 2 of 19)	8567	NM_172544	18191	Mm.425766	NM_172544	ENSMUSG00000066392	Nrxn3	-	neurexin III	protein-coding
Diff_Nuc11489	chr17	20637032	20637171	+	0	NA	Intergenic	Intergenic	-2162	NM_134194	171228	Mm.377186	NM_134194	ENSMUSG00000043537	Vmn1r225	V1re5	vomeronasal 1 receptor 225	protein-coding
Diff_Nuc5952	chr11	16009642	16009781	+	0	NA	Intergenic	RMER16-int|LTR|ERVK	-148016	NM_001290539	211739	Mm.284015	NM_145967	ENSMUSG00000048834	Vstm2a	Vstm2	V-set and transmembrane domain containing 2A	protein-coding
Diff_Nuc22362	chr18	55987192	55987331	+	0	NA	Intergenic	Lx7|LINE|L1	-604525	NM_026240	107022	Mm.24356	NM_026240	ENSMUSG00000001700	Gramd3	9030613F08Rik|9130427A09Rik|AW061306|NS3TP2	GRAM domain containing 3	protein-coding
Diff_Nuc14666	chr16	72310582	72310721	+	0	NA	Intergenic	MTEa|LTR|MaLR	-76079	NR_131115	319533	Mm.373754	NR_131115		8030451O07Rik	-	RIKEN cDNA 8030451O07 gene	ncRNA
Diff_Nuc2667	chr13	103073862	103074001	+	0	NA	Intergenic	Intergenic	-409707	NM_008533	17079	Mm.373974	NM_008533	ENSMUSG00000021624	Cd180	F630107B15|Ly78|RP105	CD180 antigen	protein-coding
Diff_Nuc18887	chr14	79788712	79788851	+	0	NA	intron (NM_025832, intron 1 of 19)	RSINE1|SINE|B4	1694	NM_025832	66897	Mm.24425	NM_025832	ENSMUSG00000022020	Naa16	1300019C06Rik|Narg1l	N(alpha)-acetyltransferase 16, NatA auxiliary subunit	protein-coding
Diff_Nuc14697	chr16	74052492	74052631	+	0	NA	intron (NM_175549, intron 2 of 27)	intron (NM_175549, intron 2 of 27)	289751	NR_030464	751561		NR_030464	ENSMUSG00000104758	Mir691	Mirn691|mir-691|mmu-mir-691	microRNA 691	ncRNA
Diff_Nuc51719	chr8	90883852	90883991	+	0	NA	intron (NM_012047, intron 2 of 16)	intron (NM_012047, intron 2 of 16)	2169	NM_012047	26992	Mm.5400	NM_012047	ENSMUSG00000031660	Brd7	BP75|CELTIX1|Ptpn13ip	bromodomain containing 7	protein-coding
Diff_Nuc10147	chr10	92897462	92897601	+	0	NA	Intergenic	MIR|SINE|MIR	1679	NR_106161	102465791		NR_106161	ENSMUSG00000098679	Mir7688	Gm27874|mmu-mir-7688	microRNA 7688	ncRNA
Diff_Nuc42119	chr2	137388122	137388261	+	0	NA	Intergenic	Intergenic	-445935	NM_013822	16449	Mm.22398	NM_013822	ENSMUSG00000027276	Jag1	ABE2|Gsfabe2|Htu|Ozz|Ser-1	jagged 1	protein-coding
Diff_Nuc25932	chr6	8051902	8052041	+	0	NA	intron (NM_001037865, intron 15 of 34)	(TG)n|Simple_repeat|Simple_repeat	90646	NM_001037865	213945	Mm.297404	NM_001037865	ENSMUSG00000068794	Col28a1	Col28|Gm466	collagen, type XXVIII, alpha 1	protein-coding
Diff_Nuc28928	chr6	144809012	144809151	+	0	NA	Intergenic	Intergenic	187693	NR_040519	66760	Mm.233631	NR_040519	ENSMUSG00000085785	Sox5os3	4933425H06Rik	SRY (sex determining region Y)-box 5, opposite strand 3	ncRNA
Diff_Nuc32362	chr4	14738962	14739101	+	0	NA	intron (NM_152812, intron 6 of 6)	intron (NM_152812, intron 6 of 6)	14703	NM_152812	72201	Mm.387724	NM_152812	ENSMUSG00000040550	Otud6b	2600013N14Rik|AU015433	OTU domain containing 6B	protein-coding
Diff_Nuc18005	chr14	38523762	38523901	+	0	NA	Intergenic	Intergenic	-575323	NM_078478	66092	Mm.182912	NM_078478	ENSMUSG00000041028	Ghitm	1010001P14Rik|C77840|MICS1|PTD010|Tmbim5	growth hormone inducible transmembrane protein	protein-coding
Diff_Nuc40259	chr2	62653512	62653651	+	0	NA	intron (NM_133207, intron 6 of 15)	intron (NM_133207, intron 6 of 15)	151197	NM_145523	227960	Mm.219877	NM_145523	ENSMUSG00000026893	Gca	5133401E04Rik|AI573844	grancalcin	protein-coding
Diff_Nuc35689	chr3	22695952	22696091	+	0	NA	Intergenic	Lx7|LINE|L1	545729	NR_004439	19784		NR_004439		Rprl2	RPRH3|Rmrp3	ribonuclease P RNA-like 2	ncRNA
Diff_Nuc23155	chr7	4086102	4086241	+	0	NA	3' UTR (NM_001001454, exon 13 of 13)	3' UTR (NM_001001454, exon 13 of 13)	2357	NR_033548	100037396	Mm.447887	NR_033548	ENSMUSG00000085886	D030047H15Rik	Gm15924|OTTMUSG00000027889	RIKEN cDNA D030047H15 gene	ncRNA
Diff_Nuc7338	chr11	80304032	80304171	+	0	NA	intron (NM_177390, intron 21 of 21)	intron (NM_177390, intron 21 of 21)	13553	NM_009871	12569	Mm.142275	NM_009871	ENSMUSG00000048895	Cdk5r1	Cdk5r|D11Bwg0379e|p25|p35	cyclin-dependent kinase 5, regulatory subunit 1 (p35)	protein-coding
Diff_Nuc13537	chr16	27521322	27521461	+	0	NA	Intergenic	Intergenic	132349	NM_001289436	67501	Mm.258985	NM_026202	ENSMUSG00000038127	Ccdc50	C3orf6	coiled-coil domain containing 50	protein-coding
Diff_Nuc11755	chr17	34385592	34385731	+	0	NA	Intergenic	(TCTCTG)n|Simple_repeat|Simple_repeat	9811	NM_010389	15002	Mm.327358	NM_010389	ENSMUSG00000041538	H2-Ob	A-beta-2|A-beta2|H-2Ab|H-2I|H-2Ob|H2-Ab|H2-Ab2|H2-IAb2|Ob	histocompatibility 2, O region beta locus	protein-coding
Diff_Nuc48328	chr9	55906052	55906191	+	0	NA	3' UTR (NM_011992, exon 7 of 7)	3' UTR (NM_011992, exon 7 of 7)	16469	NM_011992	26611	Mm.1782	NM_011992	ENSMUSG00000032320	Rcn2	AA408742|Tcbp49	reticulocalbin 2	protein-coding
Diff_Nuc47766	chr9	29583672	29583811	+	0	NA	intron (NM_172290, intron 1 of 7)	intron (NM_172290, intron 1 of 7)	186973	NM_172290	235106	Mm.283138	NM_172290	ENSMUSG00000059974	Ntm	6230410L23Rik|B230210G24Rik|Hnt|Igdcc2|R75390	neurotrimin	protein-coding
Diff_Nuc45245	chr1	106733672	106733811	+	0	NA	intron (NM_011800, intron 1 of 11)	MTD|LTR|MaLR	68345	NM_011800	23836	Mm.103640	NM_011800	ENSMUSG00000050840	Cdh20	Cdh7	cadherin 20	protein-coding
Diff_Nuc27518	chr6	75673582	75673721	+	0	NA	Intergenic	Intergenic	-1519060	NM_028880	74342	Mm.292568	NM_028880	ENSMUSG00000060780	Lrrtm1	4632401D06Rik|AW125451	leucine rich repeat transmembrane neuronal 1	protein-coding
Diff_Nuc3958	chr12	46301172	46301311	+	0	NA	Intergenic	L1Md_F2|LINE|L1	-125771	NM_144552	217517	Mm.285400	NM_144552	ENSMUSG00000046314	Stxbp6	BC024598|C85317	syntaxin binding protein 6 (amisyn)	protein-coding
Diff_Nuc44346	chr1	62257312	62257451	+	0	NA	intron (NM_001081050, intron 11 of 22)	intron (NM_001081050, intron 11 of 22)	-492510	NM_001077406	18187	Mm.266341	NM_010939	ENSMUSG00000025969	Nrp2	1110048P06Rik|Np-2|Np2|Npn-2|Npn2	neuropilin 2	protein-coding
Diff_Nuc10365	chr10	101680842	101680981	+	0	NA	intron (NM_001162369, intron 1 of 5)	B1_Mm|SINE|Alu	59198	NM_001162369	67569	Mm.25252	NM_026243	ENSMUSG00000019888	Mgat4c	9130411I17Rik|GntIVh	MGAT4 family, member C	protein-coding
Diff_Nuc40378	chr2	67103412	67103551	+	0	NA	Intergenic	Intergenic	91590	NM_001033477	383709	Mm.244520	NM_001033477		Gm1322	-	predicted gene 1322	protein-coding
Diff_Nuc16131	chr15	41480692	41480831	+	0	NA	intron (NM_001130166, intron 2 of 16)	L1_Mur3|LINE|L1	-139819	NM_001130165	170719	Mm.254267	NM_130885	ENSMUSG00000022307	Oxr1	2210416C20Rik|C7|C7B	oxidation resistance 1	protein-coding
Diff_Nuc21699	chr18	27760692	27760831	+	0	NA	Intergenic	L1Md_A|LINE|L1	-957904	NR_045398	320624	Mm.50107	NR_045398		4930474G06Rik	-	RIKEN cDNA 4930474G06 gene	ncRNA
Diff_Nuc4134	chr12	52953482	52953621	+	0	NA	Intergenic	MT2B|LTR|ERVL	-23028	NM_144788	207304	Mm.249391	NM_144788	ENSMUSG00000035247	Hectd1	A630086P08Rik|AI844876|b2b327Clo|opm	HECT domain containing 1	protein-coding
Diff_Nuc42326	chr2	144298182	144298321	+	0	NA	3' UTR (NM_172859, exon 21 of 21)	3' UTR (NM_172859, exon 21 of 21)	7339	NR_038065	171588	Mm.450554	NR_038065	ENSMUSG00000083674	Gm38402	-	zinc finger protein pseudogene	pseudo
Diff_Nuc32092	chr5	151543832	151543971	+	0	NA	intron (NM_001346503, intron 9 of 34)	intron (NM_001346503, intron 9 of 34)	67499	NM_001346503	100710	Mm.32959	NM_175310	ENSMUSG00000034021	Pds5b	AI646570|AS3|AW212954|Aprin|Tg(Wap-ERBB2)229Wzw|WAP-Her-2|mKIAA0979	PDS5 cohesin associated factor B	protein-coding
Diff_Nuc5608	chr12	119062352	119062491	+	0	NA	Intergenic	ORR1B1|LTR|MaLR	-19913	NM_146040	217946	Mm.281149	NM_146040	ENSMUSG00000021175	Cdca7l	BC006933|JPO2	cell division cycle associated 7 like	protein-coding
Diff_Nuc4050	chr12	50046032	50046171	+	0	NA	Intergenic	Lx3C|LINE|L1	-437769	NM_001160112	15228	Mm.4704	NM_008241	ENSMUSG00000020950	Foxg1	2900064B05Rik|BF-1|Bf1|Hfh9|Hfhbf1	forkhead box G1	protein-coding
Diff_Nuc23943	chr7	63272672	63272811	+	0	NA	intron (NM_153578, intron 1 of 4)	intron (NM_153578, intron 1 of 4)	2202	NM_153578	233280	Mm.389901	NM_153578	ENSMUSG00000047037	Nipa1	1110027G09Rik|A830014A18Rik|FSP3|Spg6	non imprinted in Prader-Willi/Angelman syndrome 1 homolog (human)	protein-coding
Diff_Nuc30356	chr5	61487952	61488091	+	0	NA	Intergenic	B4A|SINE|B4	-712061	NM_019468	14380	Mm.347430	NM_019468	ENSMUSG00000089992	G6pd2	G6pdx-ps1|Gpd-2|Gpd2	glucose-6-phosphate dehydrogenase 2	protein-coding
Diff_Nuc5996	chr11	17897122	17897261	+	0	NA	Intergenic	L1M5|LINE|L1	43218	NR_131915	102633673	Mm.396603	NR_131915	ENSMUSG00000086468	Etaa1os	2900053O20Rik|4930542E09Rik	Ewing tumor-associated antigen 1, opposite strand	ncRNA
Diff_Nuc47523	chr9	16085752	16085891	+	0	NA	intron (NM_001080814, intron 1 of 24)	intron (NM_001080814, intron 1 of 24)	96854	NM_001080814	270120	Mm.195010	NM_001080814	ENSMUSG00000074505	Fat3	9430076A06Rik|D430038H04Rik|Gm1132|Gm510|MFAT3F	FAT atypical cadherin 3	protein-coding
Diff_Nuc15223	chr16	97435182	97435321	+	0	NA	Intergenic	Intergenic	-42909	NM_031174	13508	Mm.102437	NM_031174	ENSMUSG00000050272	Dscam	4932410A21Rik	Down syndrome cell adhesion molecule	protein-coding
Diff_Nuc43998	chr1	49897482	49897621	+	0	NA	Intergenic	Intergenic	-1086816	NM_019790	56363	Mm.245154	NM_019790	ENSMUSG00000026109	Tmeff2	4832418D20Rik|7630402F16Rik|TR-2	transmembrane protein with EGF-like and two follistatin-like domains 2	protein-coding
Diff_Nuc37972	chr3	123960092	123960231	+	0	NA	Intergenic	CT-rich|Low_complexity|Low_complexity	-63794	NM_146140	229801	Mm.165810	NM_146140	ENSMUSG00000044528	Tram1l1	A830091N21Rik	translocation associated membrane protein 1-like 1	protein-coding
Diff_Nuc21775	chr18	31172682	31172821	+	0	NA	intron (NM_009065, intron 4 of 4)	B1_Mus1|SINE|Alu	304031	NM_009065	19762	Mm.5163	NM_009065	ENSMUSG00000057455	Rit2	RIBA|Rin|Roc2	Ras-like without CAAX 2	protein-coding
Diff_Nuc31884	chr5	138822022	138822161	+	0	NA	Intergenic	L1_Mur2|LINE|L1	-60613	NM_028130	72154	Mm.20263	NM_028130	ENSMUSG00000036898	Zfp157	2610020C11Rik|A630094N24Rik|AI327407|mszf12|mszf23-1	zinc finger protein 157	protein-coding
Diff_Nuc30625	chr5	73530932	73531071	+	0	NA	intron (NM_028194, intron 4 of 62)	MLT2B3|LTR|ERVL	116856	NM_028194	72313	Mm.260594	NM_028194	ENSMUSG00000070733	Fryl	2010313D22Rik|2310004H21Rik|2510002A14Rik|9030227G01Rik|mKIAA0826	FRY like transcription coactivator	protein-coding
Diff_Nuc37785	chr3	115403682	115403821	+	0	NA	Intergenic	(TTTG)n|Simple_repeat|Simple_repeat	14222	NM_007901	13609	Mm.982	NM_007901	ENSMUSG00000045092	S1pr1	AI849002|Edg1|Lpb1|S1p|S1p1	sphingosine-1-phosphate receptor 1	protein-coding
Diff_Nuc32767	chr4	33014812	33014951	+	0	NA	intron (NM_001012451, intron 1 of 15)	PB1D7|SINE|Alu	-4401	NM_001012450	140577	Mm.214766	NM_080471	ENSMUSG00000040183	Ankrd6	-	ankyrin repeat domain 6	protein-coding
Diff_Nuc120	chrX	52958452	52958591	+	0	NA	Intergenic	L1_Mus3|LINE|L1	153748	NM_001220497	100039055	Mm.380174	NM_001220497		Gm16404	EG625711	predicted gene 16404	protein-coding
Diff_Nuc47494	chr9	14620572	14620711	+	0	NA	intron (NM_001310728, intron 11 of 18)	MLT1D|LTR|MaLR	31543	NM_018736	17535	Mm.149071	NM_018736	ENSMUSG00000031928	Mre11a	Mre11|Mre11b	MRE11A homolog A, double strand break repair nuclease	protein-coding
Diff_Nuc44646	chr1	76141482	76141621	+	0	NA	Intergenic	Intergenic	-344157	NR_038012	620079	Mm.378379	NR_038012	ENSMUSG00000100553	Gm17751	-	predicted gene, 17751	ncRNA
Diff_Nuc46265	chr1	156368262	156368401	+	0	NA	intron (NM_009782, intron 7 of 46)	L1MC1|LINE|L1	204719	NM_009782	12290	Mm.267517	NM_009782	ENSMUSG00000004110	Cacna1e	A430040I15|BII|Cach6|Cacnl1a6|Cav2.3|Cchra1|alpha1E	calcium channel, voltage-dependent, R type, alpha 1E subunit	protein-coding
Diff_Nuc19336	chr14	98319782	98319921	+	0	NA	intron (NM_007826, intron 3 of 11)	intron (NM_007826, intron 3 of 11)	249133	NM_001038610	13134	Mm.320593	NM_007826	ENSMUSG00000055639	Dach1	Dac|Dach	dachshund 1 (Drosophila)	protein-coding
Diff_Nuc40269	chr2	62838602	62838741	+	0	NA	intron (NM_133207, intron 2 of 15)	intron (NM_133207, intron 2 of 15)	183673	NM_133207	170738	Mm.242532	NM_133207	ENSMUSG00000059742	Kcnh7	9330137I11Rik|Kv11.3|erg3	potassium voltage-gated channel, subfamily H (eag-related), member 7	protein-coding
Diff_Nuc30204	chr5	54880312	54880451	+	0	NA	Intergenic	MLT1G-int|LTR|MaLR	139150	NR_038045	330086	Mm.254449	NM_177871	ENSMUSG00000105912	Gm10440	D130065D13|ENSMUSG00000072936	predicted gene 10440	ncRNA
Diff_Nuc751	chr13	14290102	14290241	+	0	NA	3' UTR (NM_194262, exon 24 of 24)	3' UTR (NM_194262, exon 24 of 24)	134120	NM_198122	94246	Mm.439784	NM_194262	ENSMUSG00000039219	Arid4b	BCAA|BRCAA1|RBBP1L1|Rbp1l1|SAP180	AT rich interactive domain 4B (RBP1-like)	protein-coding
Diff_Nuc32103	chr5	152490612	152490751	+	0	NA	Intergenic	Intergenic	-36898	NM_027009	69263	Mm.12553	NM_027009	ENSMUSG00000033970	Rfc3	2810416I22Rik|38kDa|AU022547|Recc3	replication factor C (activator 1) 3	protein-coding
Diff_Nuc30172	chr5	53507682	53507821	+	0	NA	intron (NM_172710, intron 21 of 23)	intron (NM_172710, intron 21 of 23)	67159	NM_011402	20531	Mm.284891	NM_011402	ENSMUSG00000029188	Slc34a2	AA536683|D5Ertd227e|NaPi-2b|Npt2b	solute carrier family 34 (sodium phosphate), member 2	protein-coding
Diff_Nuc17195	chr15	93788052	93788191	+	0	NA	Intergenic	PB1D7|SINE|Alu	-30579	NR_045737	77248	Mm.410768	NR_045737		9430014N10Rik	-	RIKEN cDNA 9430014N10 gene	ncRNA
Diff_Nuc42107	chr2	136883712	136883851	+	0	NA	intron (NM_001038641, intron 6 of 7)	intron (NM_001038641, intron 6 of 7)	58475	NM_013822	16449	Mm.22398	NM_013822	ENSMUSG00000027276	Jag1	ABE2|Gsfabe2|Htu|Ozz|Ser-1	jagged 1	protein-coding
Diff_Nuc22098	chr18	45026842	45026981	+	0	NA	intron (NM_001163013, intron 23 of 29)	Lx2B|LINE|L1	38592	NM_001163013	240255	Mm.244482	NM_001163013	ENSMUSG00000034653	Ythdc2	3010002F02Rik|BC037178	YTH domain containing 2	protein-coding
Diff_Nuc47715	chr9	27871512	27871651	+	0	NA	intron (NM_177906, intron 1 of 7)	intron (NM_177906, intron 1 of 7)	272727	NM_177906	330908	Mm.379474	NM_177906	ENSMUSG00000062257	Opcml	2900075O15Rik|3732419F12|AI844366|B930023M13Rik|C230027C17|Gm181|Obcam	opioid binding protein/cell adhesion molecule-like	protein-coding
Diff_Nuc36270	chr3	51073882	51074021	+	0	NA	intron (NM_023502, intron 4 of 9)	intron (NM_023502, intron 4 of 9)	-6732	NR_073429	67746	Mm.441177	NR_073429	ENSMUSG00000087440	4930577N17Rik	-	RIKEN cDNA 4930577N17 gene	ncRNA
Diff_Nuc20721	chr19	38637022	38637161	+	0	NA	intron (NM_019588, intron 1 of 31)	intron (NM_019588, intron 1 of 31)	38404	NM_019588	74055	Mm.34031	NM_019588	ENSMUSG00000024998	Plce1	4933403A21Rik|PLCepsilon|Plce|mKIAA1516	phospholipase C, epsilon 1	protein-coding
Diff_Nuc31394	chr5	109634382	109634521	+	0	NA	Intergenic	L1Md_F|LINE|L1	-13325	NM_001104624	231589	Mm.469883	NM_001104624	ENSMUSG00000091635	Vmn2r13	EG231589|Gm4867	vomeronasal 2, receptor 13	protein-coding
Diff_Nuc38121	chr3	131945382	131945521	+	0	NA	Intergenic	Intergenic	197195	NM_020265	56811	Mm.103593	NM_020265	ENSMUSG00000028031	Dkk2	-	dickkopf WNT signaling pathway inhibitor 2	protein-coding
Diff_Nuc44280	chr1	60158702	60158841	+	0	NA	intron (NM_139150, intron 1 of 15)	intron (NM_139150, intron 1 of 15)	-3427	NM_001199060	57750	Mm.281079	NM_021312	ENSMUSG00000026019	Wdr12	4933402C23Rik|Ytm1|Ytm1p	WD repeat domain 12	protein-coding
Diff_Nuc40271	chr2	62942302	62942441	+	0	NA	intron (NM_133207, intron 2 of 15)	intron (NM_133207, intron 2 of 15)	79973	NM_133207	170738	Mm.242532	NM_133207	ENSMUSG00000059742	Kcnh7	9330137I11Rik|Kv11.3|erg3	potassium voltage-gated channel, subfamily H (eag-related), member 7	protein-coding
Diff_Nuc25908	chr6	6940162	6940301	+	0	NA	intron (NM_001077713, intron 1 of 1)	L1_Mur2|LINE|L1	34213	NM_001077713	71238	Mm.389086	NM_001077713	ENSMUSG00000042505	Sdhaf3	0610005M07Rik|4933430A16Rik|Acn9	succinate dehydrogenase complex assembly factor 3	protein-coding
Diff_Nuc7206	chr11	75567812	75567951	+	0	NA	intron (NM_009536, intron 2 of 5)	intron (NM_009536, intron 2 of 5)	21492	NM_009536	22627	Mm.234700	NM_009536	ENSMUSG00000020849	Ywhae	AU019196	tyrosine 3-monooxygenase/tryptophan 5-monooxygenase activation protein, epsilon polypeptide	protein-coding
Diff_Nuc3238	chr12	11735322	11735461	+	0	NA	Intergenic	Lx|LINE|L1	154314	NR_003964	627110	Mm.194735	NR_003964		Tubb2a-ps2	C79445	tubulin, beta 2a, pseudogene 2	pseudo
Diff_Nuc51142	chr8	64018017	64018156	+	0	NA	intron (NM_001081390, intron 10 of 19)	intron (NM_001081390, intron 10 of 19)	51555	NM_145595	234309	Mm.29059	NM_145595	ENSMUSG00000031641	Cbr4	A730083J17Rik|BC009118	carbonyl reductase 4	protein-coding
Diff_Nuc40348	chr2	66058842	66058981	+	0	NA	intron (NM_001290669, intron 18 of 27)	(TA)n|Simple_repeat|Simple_repeat	35763	NM_001047604	73668	Mm.250868	NM_001047604	ENSMUSG00000034848	Ttc21b	2410066K11Rik|Thm1|aln|mKIAA1992	tetratricopeptide repeat domain 21B	protein-coding
Diff_Nuc35663	chr3	21231132	21231271	+	0	NA	Intergenic	(CA)n|Simple_repeat|Simple_repeat	-744373	NM_030732	81004	Mm.202966	NM_030732	ENSMUSG00000027630	Tbl1xr1	8030499H02Rik|A630076E03Rik|AW539987|C21|C230089I12Rik|DC42|Ira1|TBLR1	transducin (beta)-like 1X-linked receptor 1	protein-coding
Diff_Nuc33529	chr4	69236632	69236771	+	0	NA	Intergenic	Intergenic	-621270	NM_019967	56710	Mm.248788	NM_019967	ENSMUSG00000028351	Brinp1	BRINP|Dbc1|Dbccr1|Fam5a	bone morphogenic protein/retinoic acid inducible neural specific 1	protein-coding
Diff_Nuc51046	chr8	60264402	60264541	+	0	NA	intron (NM_175032, intron 11 of 11)	intron (NM_175032, intron 11 of 11)	-132619	NM_144731	108150	Mm.62886	NM_144731	ENSMUSG00000031608	Galnt7	AI225872	UDP-N-acetyl-alpha-D-galactosamine: polypeptide N-acetylgalactosaminyltransferase 7	protein-coding
Diff_Nuc4828	chr12	79976082	79976221	+	0	NA	intron (NM_026114, intron 3 of 7)	B3|SINE|B2	13092	NM_026114	13665	Mm.196220	NM_026114	ENSMUSG00000021116	Eif2s1	0910001O23Rik|2410026C18Rik|35kDa|Eif2a|eIF2alpha	eukaryotic translation initiation factor 2, subunit 1 alpha	protein-coding
Diff_Nuc49219	chr9	94880952	94881091	+	0	NA	intron (NM_177909, intron 9 of 15)	intron (NM_177909, intron 9 of 15)	228773	NR_106116	102465763		NR_106116	ENSMUSG00000098251	Mir7656	Gm27614|mmu-mir-7656	microRNA 7656	ncRNA
Diff_Nuc42996	chr1	4379742	4379881	+	0	NA	intron (NM_001195662, intron 1 of 3)	L1_Mus2|LINE|L1	19511	NM_001195662	19888	Mm.294263	NM_011283	ENSMUSG00000025900	Rp1	Dcdc3|Orp1|Rp1h|mG145	retinitis pigmentosa 1 (human)	protein-coding
Diff_Nuc26435	chr6	28443252	28443391	+	0	NA	intron (NM_019776, intron 1 of 23)	B1_Mus1|SINE|Alu	12973	NM_019776	56463	Mm.439987	NM_019776	ENSMUSG00000001424	Snd1	AL033314|Tudor-SN	staphylococcal nuclease and tudor domain containing 1	protein-coding
Diff_Nuc12653	chr17	80272422	80272561	+	0	NA	intron (NM_001286647, intron 1 of 12)	intron (NM_001286647, intron 1 of 12)	22972	NM_178050	56298	Mm.175403	NM_019717	ENSMUSG00000059811	Atl2	2010110I21Rik|AA407293|AV334690|Aip-2|Arl6ip2	atlastin GTPase 2	protein-coding
Diff_Nuc38839	chr2	5439522	5439661	+	0	NA	intron (NM_177343, intron 2 of 10)	intron (NM_177343, intron 2 of 10)	157501	NM_001290376	227541	Mm.191949	NM_177343	ENSMUSG00000039145	Camk1d	A630059D12Rik|CKLiK|CaMKIdelta|E030025C11Rik|mCKLiK	calcium/calmodulin-dependent protein kinase ID	protein-coding
Diff_Nuc1665	chr13	58511052	58511191	+	0	NA	non-coding (NR_031761, exon 3 of 3)	non-coding (NR_031761, exon 3 of 3)	-6417	NM_001301341	15387	Mm.142872	NM_025279	ENSMUSG00000021546	Hnrnpk	Hnrpk|KBBP|NOVA	heterogeneous nuclear ribonucleoprotein K	protein-coding
Diff_Nuc42174	chr2	139056902	139057041	+	0	NA	Intergenic	RMER4B|LTR|ERVK	-262685	NM_175467	228677	Mm.100450	NM_175467	ENSMUSG00000039092	Sptlc3	C130053K05Rik	serine palmitoyltransferase, long chain base subunit 3	protein-coding
Diff_Nuc32686	chr4	28995062	28995201	+	0	NA	Intergenic	Intergenic	254836	NM_001122889	13841	Mm.257266	NM_010141	ENSMUSG00000028289	Epha7	Cek11|Ebk|Ehk3|Hek11|Mdk1	Eph receptor A7	protein-coding
Diff_Nuc5197	chr12	95743252	95743391	+	0	NA	Intergenic	Intergenic	577823	NR_106175	102465890		NR_106175	ENSMUSG00000098498	Mir8099-1	Gm27917|mmu-mir-8099-1	microRNA 8099-1	ncRNA
Diff_Nuc11541	chr17	22592047	22592186	+	0	NA	exon (NM_001331197, exon 6 of 6)	exon (NM_001331197, exon 6 of 6)	30947	NM_001331198	74149	Mm.30767	NM_198003	ENSMUSG00000071266	Zfp946	1300003B13Rik	zinc finger protein 946	protein-coding
Diff_Nuc517	chr13	6415912	6416051	+	0	NA	Intergenic	MTEb|LTR|MaLR	-131422	NM_145131	69617	Mm.41933	NM_145131	ENSMUSG00000021193	Pitrm1	2310012C15Rik|AA410010|MP-1|MP1|Ntup1|PreP|mKIAA1104	pitrilysin metallepetidase 1	protein-coding
Diff_Nuc39051	chr2	14120332	14120471	+	0	NA	intron (NM_001081310, intron 3 of 3)	intron (NM_001081310, intron 3 of 3)	24250	NM_001081310	625286	Mm.158781	NM_001081310	ENSMUSG00000061531	Tmem236	2010003H20Rik|Fam23a|Gm613	transmembrane protein 236	protein-coding
Diff_Nuc14765	chr16	76959382	76959521	+	0	NA	Intergenic	Intergenic	51675	NR_040573	76601	Mm.396217	NR_040573	ENSMUSG00000100857	1700041M19Rik	-	RIKEN cDNA 1700041M19 gene	ncRNA
Diff_Nuc2031	chr13	76570792	76570931	+	0	NA	intron (NM_030174, intron 1 of 20)	intron (NM_030174, intron 1 of 20)	48452	NM_030174	78771	Mm.316249	NM_030174	ENSMUSG00000021596	Mctp1	2810465F10Rik	multiple C2 domains, transmembrane 1	protein-coding
Diff_Nuc44210	chr1	57953712	57953851	+	0	NA	intron (NM_001164566, intron 5 of 11)	L1M5|LINE|L1	51366	NM_001164566	67198	Mm.159989	NM_144882	ENSMUSG00000038305	Spats2l	2810022L02Rik|A230104H11Rik|AA987173|AI480531|AI842453|AW413586	spermatogenesis associated, serine-rich 2-like	protein-coding
Diff_Nuc1242	chr13	36305862	36306001	+	0	NA	intron (NM_024274, intron 2 of 6)	intron (NM_024274, intron 2 of 6)	96419	NM_001039189	69955	Mm.70690	NM_024274	ENSMUSG00000021420	Fars2	Fars1|pheRS	phenylalanine-tRNA synthetase 2 (mitochondrial)	protein-coding
Diff_Nuc15226	chr16	97503372	97503511	+	0	NA	Intergenic	Intergenic	-74894	NM_019517	56175	Mm.97885	NM_019517	ENSMUSG00000040605	Bace2	1110059C24Rik|AEPLC|AI850424|ALP56|ARP1|ASP1|ASP21|BAE2|CDA13|CEAP1|DRAP	beta-site APP-cleaving enzyme 2	protein-coding
Diff_Nuc18733	chr14	73626812	73626951	+	0	NA	intron (NM_009029, intron 17 of 26)	intron (NM_009029, intron 17 of 26)	-10817	NM_175116	67168	Mm.390681	NM_175116	ENSMUSG00000033446	Lpar6	2610302I02Rik|P2ry5|P2y5	lysophosphatidic acid receptor 6	protein-coding
Diff_Nuc8651	chr10	22557732	22557871	+	0	NA	Intergenic	Intergenic	-17867	NM_011545	21412	Mm.16497	NM_011545	ENSMUSG00000045680	Tcf21	Pod-1|Pod1|bHLHa23|capsulin|epc|epicardin	transcription factor 21	protein-coding
Diff_Nuc1273	chr13	37835922	37836061	+	0	NA	Intergenic	B4A|SINE|B4	-81916	NM_026830	68750	Mm.491109	NM_026830	ENSMUSG00000039087	Rreb1	1110037N09Rik|AA414966|B930013M22Rik	ras responsive element binding protein 1	protein-coding
Diff_Nuc46169	chr1	152672822	152672961	+	0	NA	intron (NM_001024720, intron 4 of 106)	intron (NM_001024720, intron 4 of 106)	167674	NM_001024720	545370	Mm.379425	NM_001024720	ENSMUSG00000066842	Hmcn1	EG545370|FIBL-6|Gm201	hemicentin 1	protein-coding
Diff_Nuc31750	chr5	132212362	132212501	+	0	NA	intron (NM_177047, intron 5 of 19)	intron (NM_177047, intron 5 of 19)	-143708	NR_040704	75369	Mm.389696	NR_040704	ENSMUSG00000105773	4930563F08Rik	-	RIKEN cDNA 4930563F08 gene	ncRNA
Diff_Nuc27478	chr6	74120772	74120911	+	0	NA	Intergenic	L1_Mus2|LINE|L1	-699826	NR_108032	73408	Mm.233629	NR_108032	ENSMUSG00000107408	1700065L07Rik	-	RIKEN cDNA 1700065L07 gene	ncRNA
Diff_Nuc20953	chr19	51143722	51143861	+	0	NA	Intergenic	Intergenic	-390655	NM_001290356	58178	Mm.313672	NM_021377	ENSMUSG00000043531	Sorcs1	Sorcs|mSorCS	sortilin-related VPS10 domain containing receptor 1	protein-coding
Diff_Nuc16404	chr15	51953862	51954001	+	0	NA	Intergenic	RMER6A|LTR|ERVK	82278	NM_175503	239435	Mm.24204	NM_175503	ENSMUSG00000068522	Aard	A5D3|AV328152	alanine and arginine rich domain containing protein	protein-coding
Diff_Nuc13143	chr16	7526372	7526511	+	0	NA	Intergenic	Intergenic	456513	NM_183188	268859	Mm.370334	NM_021477	ENSMUSG00000008658	Rbfox1	A2bp|A2bp1|Hrnbp1|fox-1	RNA binding protein, fox-1 homolog (C. elegans) 1	protein-coding
Diff_Nuc8499	chr10	15880932	15881071	+	0	NA	Intergenic	Intergenic	369418	NR_131087	77538	Mm.128235	NR_131087		C330004P14Rik	-	RIKEN cDNA C330004P14 gene	ncRNA
Diff_Nuc20814	chr19	43772052	43772191	+	0	NA	intron (NM_053103, intron 3 of 12)	intron (NM_053103, intron 3 of 12)	7942	NM_053103	93685	Mm.248237	NM_053103	ENSMUSG00000025192	Entpd7	1810012B13Rik|1810020C02Rik|2810003F23Rik|LALP1|Lysal2	ectonucleoside triphosphate diphosphohydrolase 7	protein-coding
Diff_Nuc6080	chr11	21029872	21030011	+	0	NA	intron (NM_023324, intron 1 of 6)	L1_Mus4|LINE|L1	38614	NM_023324	67245	Mm.28957	NM_023324	ENSMUSG00000020134	Peli1	2810468L03Rik|A930031K15Rik|AA409794|AI586297|D11Ertd676e	pellino 1	protein-coding
Diff_Nuc45966	chr1	143190072	143190211	+	0	NA	Intergenic	Intergenic	-637162	NR_040604	75910	Mm.483845	NR_040604	ENSMUSG00000102368	4930590L20Rik	-	RIKEN cDNA 4930590L20 gene	ncRNA
Diff_Nuc45573	chr1	124806972	124807111	+	0	NA	Intergenic	Intergenic	1135095	NM_199021	269109	Mm.417716	NM_199021	ENSMUSG00000036815	Dpp10	6430601K09Rik|DPP X|Dprp3	dipeptidylpeptidase 10	protein-coding
Diff_Nuc44047	chr1	52031102	52031241	+	0	NA	Intergenic	Intergenic	-12821	NM_001308266	20849	Mm.1550	NM_011487	ENSMUSG00000062939	Stat4	-	signal transducer and activator of transcription 4	protein-coding
Diff_Nuc11533	chr17	22352362	22352501	+	0	NA	intron (NM_001205095, intron 2 of 4)	L1_Mus1|LINE|L1	10150	NM_001205095	240038	Mm.227945	NM_001205095	ENSMUSG00000096433	Zfp994	EG240038|Gm4944	zinc finger protein 994	protein-coding
Diff_Nuc51478	chr8	79052022	79052161	+	0	NA	Intergenic	Intergenic	371981	NR_028579	100039211	Mm.367571	NR_028579	ENSMUSG00000074235	Gm10649	ENSMUSG00000074235	predicted gene 10649	ncRNA
Diff_Nuc31261	chr5	102599502	102599641	+	0	NA	Intergenic	(GA)n|Simple_repeat|Simple_repeat	-100631	NM_172882	72145	Mm.332522	NM_172882	ENSMUSG00000043940	Wdfy3	2610509D04Rik|ALFY|AW319683|B930017C24|BWF1|Bchs|D5Ertd66e|Ggtb3|ZFYVE25|mKIAA0993	WD repeat and FYVE domain containing 3	protein-coding
Diff_Nuc7456	chr11	86106112	86106251	+	0	NA	intron (NR_130959, intron 6 of 6)	L1MB8|LINE|L1	-35111	NM_027421	70422	Mm.171304	NM_027421	ENSMUSG00000018068	Ints2	2810417D08Rik|AA408260|AI987735|mKIAA1287	integrator complex subunit 2	protein-coding
Diff_Nuc40810	chr2	83567052	83567191	+	0	NA	intron (NM_008402, intron 1 of 29)	intron (NM_008402, intron 1 of 29)	2567	NM_008402	16410	Mm.227	NM_008402	ENSMUSG00000027087	Itgav	1110004F14Rik|2610028E01Rik|CD51|D430040G12Rik	integrin alpha V	protein-coding
Diff_Nuc20471	chr19	27965712	27965851	+	0	NA	intron (NM_011265, intron 2 of 16)	intron (NM_011265, intron 2 of 16)	91657	NM_001166414	19726	Mm.313321	NM_011265	ENSMUSG00000040929	Rfx3	C230093O12Rik|MRFX3	regulatory factor X, 3 (influences HLA class II expression)	protein-coding
Diff_Nuc6564	chr11	39955812	39955951	+	0	NA	Intergenic	L1_Mur1|LINE|L1	550303	NM_134017	108645	Mm.293771	NM_134017	ENSMUSG00000042032	Mat2b	1110064C04Rik|2410018D16Rik|AI182287|AU022853|MAT-II|MATIIbeta|TGR	methionine adenosyltransferase II, beta	protein-coding
Diff_Nuc30730	chr5	78786802	78786941	+	0	NA	Intergenic	L3|LINE|CR1	892358	NR_131050	69370	Mm.426881	NR_131050	ENSMUSG00000107232	1700017L05Rik	-	RIKEN cDNA 1700017L05 gene	ncRNA
Diff_Nuc48011	chr9	40909862	40910001	+	0	NA	intron (NM_176860, intron 1 of 13)	intron (NM_176860, intron 1 of 13)	55646	NM_176860	72828	Mm.133615	NM_176860	ENSMUSG00000032020	Ubash3b	2810457I06Rik|BB125008|TULA-2|p70	ubiquitin associated and SH3 domain containing, B	protein-coding
Diff_Nuc36435	chr3	57491772	57491911	+	0	NA	intron (NM_001033349, intron 2 of 3)	B1_Mur3|SINE|Alu	4618	NM_001033349	242037	Mm.291091	NM_001033349	ENSMUSG00000074591	Ankub1	Gm410	ankrin repeat and ubiquitin domain containing 1	protein-coding
Diff_Nuc29338	chr5	15201822	15201961	+	0	NA	intron (NR_001585, intron 1 of 4)	L1Md_F2|LINE|L1	15363	NR_001585	75858	Mm.359463	NR_001585	ENSMUSG00000089871	Speer4cos	4930568L21Rik|SPEER-7|Speer7-ps|Speer7-ps1	spermatogenesis associated glutamate (E)-rich protein 4C, opposite strand transcript	pseudo
Diff_Nuc7120	chr11	70504012	70504151	+	0	NA	intron (NM_213729, intron 2 of 6)	intron (NM_213729, intron 2 of 6)	-2474	NM_001190379	216874	Mm.473726	NM_178116	ENSMUSG00000040712	Camta2	Kiaa0909-hp|mKIAA0909	calmodulin binding transcription activator 2	protein-coding
Diff_Nuc49491	chr9	108140902	108141041	+	0	NA	intron (NM_001276485, intron 1 of 2)	intron (NM_001276485, intron 1 of 2)	25175	NM_010017	13138	Mm.7524	NM_010017	ENSMUSG00000039952	Dag1	D9Wsu13e|DG|Dp427|Dp71	dystroglycan 1	protein-coding
Diff_Nuc18658	chr14	70841792	70841931	+	0	NA	intron (NM_025945, intron 3 of 8)	intron (NM_025945, intron 3 of 8)	1173	NM_001164082	67065	Mm.20420	NM_025945	ENSMUSG00000000776	Polr3d	2810426M17Rik|44kDa|AI326118|AW489084|BN51T|RPC4|TSBN51	polymerase (RNA) III (DNA directed) polypeptide D	protein-coding
Diff_Nuc9412	chr10	55942562	55942701	+	0	NA	intron (NM_001033385, intron 2 of 32)	L1_Rod|LINE|L1	5864	NM_001033385	544696	Mm.411188	NM_001033385	ENSMUSG00000038122	Tbc1d32	Bromi|D630037F22Rik|b2b2284Clo	TBC1 domain family, member 32	protein-coding
Diff_Nuc28269	chr6	110612152	110612291	+	0	NA	intron (NM_001346640, intron 1 of 10)	intron (NM_001346640, intron 1 of 10)	16629	NM_177328	108073	Mm.240881	NM_177328	ENSMUSG00000056755	Grm7	6330570A01Rik|BB176677|C030018L03|E130018M02Rik|Gpr1g|Gprc1g|SMN2|Tg(SMN2)89Ahmb|mGluR7	glutamate receptor, metabotropic 7	protein-coding
Diff_Nuc23565	chr7	37696852	37696991	+	0	NA	Intergenic	L1M5|LINE|L1	213784	NM_172298	243931	Mm.44141	NM_172298	ENSMUSG00000021217	Tshz3	A630038G13Rik|Tsh3|Zfp537|mKIAA1474|teashirt3	teashirt zinc finger family member 3	protein-coding
Diff_Nuc26127	chr6	16406152	16406291	+	0	NA	Intergenic	L1_Mus1|LINE|L1	442220	NM_031198	21426	Mm.36217	NM_031198	ENSMUSG00000029553	Tfec	BB107417|Tcfec|bHLHe34	transcription factor EC	protein-coding
Diff_Nuc50281	chr8	27272922	27273061	+	0	NA	exon (NM_199042, exon 3 of 3)	exon (NM_199042, exon 3 of 3)	4350	NM_199042	73754	Mm.383241	NM_199042	ENSMUSG00000037214	Thap1	4833431A01Rik|AW490810	THAP domain containing, apoptosis associated protein 1	protein-coding
Diff_Nuc39073	chr2	14971942	14972081	+	0	NA	intron (NM_001165941, intron 1 of 11)	intron (NM_001165941, intron 1 of 11)	-1072	NM_028950	74455	Mm.478923	NM_028950	ENSMUSG00000026707	Nsun6	4933403D21Rik|4933414E04Rik|NOPD1	NOL1/NOP2/Sun domain family member 6	protein-coding
Diff_Nuc16446	chr15	53967042	53967181	+	0	NA	Intergenic	L1Md_F2|LINE|L1	142928	NM_008764	18383	Mm.15383	NM_008764	ENSMUSG00000063727	Tnfrsf11b	OCIF|Opg|TR1	tumor necrosis factor receptor superfamily, member 11b (osteoprotegerin)	protein-coding
Diff_Nuc13892	chr16	41262032	41262171	+	0	NA	Intergenic	L1Md_F2|LINE|L1	-270838	NM_001347236	268890	Mm.310524	NM_175548	ENSMUSG00000061080	Lsamp	5430428I19|AW046674|B130007O04Rik|D930023J12Rik|Lam|Lamp	limbic system-associated membrane protein	protein-coding
Diff_Nuc23739	chr7	53845532	53845671	+	0	NA	intron (NM_013789, intron 9 of 10)	intron (NM_013789, intron 9 of 10)	49576	NM_013789	27414	Mm.76659	NM_013789	ENSMUSG00000030839	Sergef	DelGEF|Gef|Gnef|Gnefr	secretion regulating guanine nucleotide exchange factor	protein-coding
Diff_Nuc4415	chr12	64903922	64904061	+	0	NA	Intergenic	Intergenic	671894	NM_001163271	623046	Mm.189552	NM_001163271	ENSMUSG00000043060	Fscb	EG623046	fibrous sheath CABYR binding protein	protein-coding
Diff_Nuc52227	chr8	115478852	115478991	+	0	NA	Intergenic	Intergenic	-112241	NR_033584	791378	Mm.350576	NR_033584	ENSMUSG00000110541	Gm10280	ENSMUSG00000069883	predicted gene 10280	ncRNA
Diff_Nuc50435	chr8	34515242	34515381	+	0	NA	intron (NM_001098233, intron 1 of 1)	(GGAAA)n|Simple_repeat|Simple_repeat	18514	NM_001098233	75029	Mm.159402	NM_152821	ENSMUSG00000049184	Purg	4930486B15Rik	purine-rich element binding protein G	protein-coding
Diff_Nuc7588	chr11	91589912	91590051	+	0	NA	Intergenic	L1MA8|LINE|L1	-151112	NM_028547	73470	Mm.67677	NM_028547	ENSMUSG00000046755	Kif2b	1700063D03Rik	kinesin family member 2B	protein-coding
Diff_Nuc40494	chr2	71248592	71248731	+	0	NA	intron (NM_026115, intron 4 of 10)	B1_Mus2|SINE|Alu	21344	NM_026115	107435	Mm.272472	NM_026115	ENSMUSG00000027018	Hat1	2410071B14Rik|AA536933|Hat-1|KAT1	histone aminotransferase 1	protein-coding
Diff_Nuc38589	chr3	152860022	152860161	+	0	NA	Intergenic	Intergenic	-45019	NR_108044	75001		NR_108044		4930482G09Rik	-	RIKEN cDNA 4930482G09 gene	ncRNA
Diff_Nuc12561	chr17	75165622	75165761	+	0	NA	intron (NM_152817, intron 9 of 19)	intron (NM_152817, intron 9 of 19)	48601	NM_152817	74196	Mm.209503	NM_152817	ENSMUSG00000024078	Ttc27	2610511O17Rik	tetratricopeptide repeat domain 27	protein-coding
Diff_Nuc23056	chr18	88188882	88189021	+	0	NA	Intergenic	Intergenic	874648	NM_018821	54607	Mm.91920	NM_018821	ENSMUSG00000056153	Socs6	1500012M23Rik|5830401B18Rik|AI447482|Cis4|Cish4|HSPC060|SOCS-4|SOCS-6|SSI4|STAI4|STATI4|Socs4	suppressor of cytokine signaling 6	protein-coding
Diff_Nuc16623	chr15	63467072	63467211	+	0	NA	Intergenic	Intergenic	-155978	NR_045279	432958	Mm.255105	NR_045279		Gm20740	-	predicted gene, 20740	ncRNA
Diff_Nuc41817	chr2	125589492	125589631	+	0	NA	intron (NM_177608, intron 7 of 17)	intron (NM_177608, intron 7 of 17)	19045	NM_177608	70354	Mm.138091	NM_133725	ENSMUSG00000035093	Secisbp2l	3110001I20Rik|AI504340|C630011I23	SECIS binding protein 2-like	protein-coding
Diff_Nuc47934	chr9	37313552	37313691	+	0	NA	intron (NM_146222, intron 1 of 3)	intron (NM_146222, intron 1 of 3)	16715	NM_146222	235184	Mm.127892	NM_146222	ENSMUSG00000042138	Msantd2	2810450G17Rik|9530092B10Rik	Myb/SANT-like DNA-binding domain containing 2	protein-coding
Diff_Nuc38942	chr2	9048552	9048691	+	0	NA	Intergenic	Intergenic	-62521	NR_038180	73438	Mm.23558	NR_038180	ENSMUSG00000085580	1700061F12Rik	-	RIKEN cDNA 1700061F12 gene	ncRNA
Diff_Nuc7037	chr11	65598522	65598661	+	0	NA	intron (NM_001316368, intron 1 of 10)	MIRb|SINE|MIR	3270	NM_009157	26398	Mm.412922	NM_009157	ENSMUSG00000033352	Map2k4	JNKK1|MEK4|MKK4|PRKMK4|Sek1|Serk1	mitogen-activated protein kinase kinase 4	protein-coding
Diff_Nuc2915	chr13	114341372	114341511	+	0	NA	Intergenic	Intergenic	-48389	NR_045501	70917	Mm.491036	NR_045501		4921509O07Rik	-	RIKEN cDNA 4921509O07 gene	ncRNA
Diff_Nuc51570	chr8	83763742	83763881	+	0	NA	Intergenic	L1_Mus2|LINE|L1	-102650	NM_001024617	234515	Mm.324468	NM_001024617	ENSMUSG00000037940	Inpp4b	E130107I17Rik	inositol polyphosphate-4-phosphatase, type II	protein-coding
Diff_Nuc1651	chr13	57702642	57702781	+	0	NA	intron (NM_001166466, intron 4 of 11)	intron (NM_001166466, intron 4 of 11)	306982	NM_009262	20745	Mm.379020	NM_009262	ENSMUSG00000056222	Spock1	Spock|Ticn1|testican	sparc/osteonectin, cwcv and kazal-like domains proteoglycan 1	protein-coding
Diff_Nuc47983	chr9	39505962	39506101	+	0	NA	Intergenic	Lx7|LINE|L1	4321	NM_207138	235256	Mm.377253	NM_207138	ENSMUSG00000062121	Olfr149	M31|MOR224-8	olfactory receptor 149	protein-coding
Diff_Nuc37090	chr3	83730562	83730701	+	0	NA	intron (NM_172681, intron 21 of 34)	ID_B1|SINE|B4	-85101	NM_011905	24088	Mm.87596	NM_011905	ENSMUSG00000027995	Tlr2	Ly105	toll-like receptor 2	protein-coding
Diff_Nuc52240	chr8	115931452	115931591	+	0	NA	Intergenic	Intergenic	-109661	NR_110476	78048	Mm.252797	NR_110476		4930571O06Rik	-	RIKEN cDNA 4930571O06 gene	ncRNA
Diff_Nuc51624	chr8	85871672	85871811	+	0	NA	promoter-TSS (NM_026233)	promoter-TSS (NM_026233)	-630	NM_026233	67555	Mm.84115	NM_026233	ENSMUSG00000035057	Mgat4d	4933434I20Rik|GnT1IP|GnT1IP-L	MGAT4 family, member C	protein-coding
Diff_Nuc7762	chr11	100810342	100810481	+	0	NA	Intergenic	Lx9|LINE|L1	-9557	NM_011486	20848	Mm.249934	NM_011486	ENSMUSG00000004040	Stat3	1110034C02Rik|AW109958|Aprf	signal transducer and activator of transcription 3	protein-coding
Diff_Nuc46190	chr1	153435342	153435481	+	0	NA	intron (NM_022018, intron 1 of 13)	B3|SINE|B2	16908	NM_022018	63913	Mm.157700	NM_022018	ENSMUSG00000026483	Fam129a	AI256368|AU019833|Niban	family with sequence similarity 129, member A	protein-coding
Diff_Nuc33556	chr4	70189492	70189631	+	0	NA	intron (NM_172694, intron 1 of 5)	MIRb|SINE|MIR	6401	NM_172694	230316	Mm.251188	NM_172694	ENSMUSG00000039270	Megf9	4933405H16Rik|9630025C07|Egfl5|mKIAA0818	multiple EGF-like-domains 9	protein-coding
Diff_Nuc26674	chr6	38129772	38129911	+	0	NA	intron (NM_194061, intron 6 of 19)	intron (NM_194061, intron 6 of 19)	-55255	NM_080467	140494	Mm.462308	NM_080467	ENSMUSG00000038600	Atp6v0a4	Atp6n1b|a4	ATPase, H+ transporting, lysosomal V0 subunit A4	protein-coding
Diff_Nuc41807	chr2	124826062	124826201	+	0	NA	Intergenic	MT2A|LTR|ERVL	-67732	NM_175034	317750	Mm.330538	NM_175034	ENSMUSG00000035183	Slc24a5	F630045L20Rik|JSX|NCKX5|NCX5|Oca6	solute carrier family 24, member 5	protein-coding
Diff_Nuc2051	chr13	77144322	77144461	+	0	NA	intron (NM_030174, intron 17 of 20)	intron (NM_030174, intron 17 of 20)	130338	NM_134071	105377	Mm.209730	NM_134071	ENSMUSG00000021597	Slf1	2700017A04Rik|AW545819|Ankrd32|Brctd1|Brctx|C730024G01Rik	SMC5-SMC6 complex localization factor 1	protein-coding
Diff_Nuc3490	chr12	30141372	30141511	+	0	NA	Intergenic	Intergenic	-71808	NM_001093775	17933	Mm.253067	NM_008666	ENSMUSG00000061911	Myt1l	2900046C06Rik|2900093J19Rik|C630034G21Rik|Nztf1|Pmng1|Png-1|mKIAA1106	myelin transcription factor 1-like	protein-coding
Diff_Nuc49110	chr9	90780342	90780481	+	0	NA	Intergenic	Intergenic	480226	NM_009573	22771	Mm.335350	NM_009573	ENSMUSG00000032368	Zic1	ZIC|ZNF201	zinc finger protein of the cerebellum 1	protein-coding
Diff_Nuc17351	chr15	102117632	102117771	+	0	NA	Intergenic	B2_Mm2|SINE|B2	7814	NM_134100	106073	Mm.287740	NM_134100	ENSMUSG00000045665	Mfsd5	AA409375|AW556797|D15Mgi27	major facilitator superfamily domain containing 5	protein-coding
Diff_Nuc5582	chr12	118233492	118233631	+	0	NA	intron (NM_011215, intron 11 of 22)	MTEa|LTR|MaLR	156181	NR_033538	100038689	Mm.445351	NR_033538	ENSMUSG00000099907	Gm10421	ENSMUSG00000072792	predicted gene 10421	ncRNA
Diff_Nuc45553	chr1	123978222	123978361	+	0	NA	Intergenic	Intergenic	-513734	NM_025860	66942	Mm.44219	NM_025860	ENSMUSG00000001674	Ddx18	2310005B10Rik	DEAD (Asp-Glu-Ala-Asp) box polypeptide 18	protein-coding
Diff_Nuc10211	chr10	95420052	95420191	+	0	NA	intron (NM_001001932, intron 1 of 28)	intron (NM_001001932, intron 1 of 28)	16824	NM_001001932	216238	Mm.210035	NM_001001932	ENSMUSG00000036499	Eea1	A430109M19Rik|B230358H09Rik|ZFYVE2	early endosome antigen 1	protein-coding
Diff_Nuc37728	chr3	113296432	113296571	+	0	NA	Intergenic	Lx9|LINE|L1	-15833	NM_001110505	11722	Mm.439727	NM_007446	ENSMUSG00000074264	Amy1	Amy-1|Amy1a|C030014B17Rik	amylase 1, salivary	protein-coding
Diff_Nuc3858	chr12	43222212	43222351	+	0	NA	Intergenic	MIR|SINE|MIR	-1009637	NM_010733	16981	Mm.404786	NM_010733	ENSMUSG00000036295	Lrrn3	NLRR-3	leucine rich repeat protein 3, neuronal	protein-coding
Diff_Nuc52025	chr8	105444542	105444681	+	0	NA	Intergenic	Intergenic	-135600	NM_009866	12552	Mm.1571	NM_009866	ENSMUSG00000031673	Cdh11	Cad11|OSF-4	cadherin 11	protein-coding
Diff_Nuc38848	chr2	5884992	5885131	+	0	NA	intron (NM_001081132, intron 3 of 21)	B2_Mm2|SINE|B2	12546	NM_001081132	326622	Mm.31102	NM_001081132	ENSMUSG00000043241	Upf2	-	UPF2 regulator of nonsense transcripts homolog (yeast)	protein-coding
Diff_Nuc47341	chr9	8246382	8246521	+	0	NA	promoter-TSS (NR_035437)	promoter-TSS (NR_035437)	-335	NR_035437	100316772		NR_035437	ENSMUSG00000084747	Mir1899	Mirn1899|mmu-mir-1899	microRNA 1899	ncRNA
Diff_Nuc36219	chr3	48364832	48364971	+	0	NA	Intergenic	L1Md_F2|LINE|L1	48121	NR_003617	66332	Mm.46124	NM_025493		1700018B24Rik	-	enhancer of rudimentary homolog pseudogene	pseudo
Diff_Nuc9965	chr10	84177892	84178031	+	0	NA	intron (NM_027423, intron 25 of 27)	L2b|LINE|L2	-40832	NM_001024918	71137	Mm.79070	NM_027689	ENSMUSG00000020037	Rfx4	4933412G19Rik|NYD-sp10	regulatory factor X, 4 (influences HLA class II expression)	protein-coding
Diff_Nuc28846	chr6	140401842	140401981	+	0	NA	intron (NM_144920, intron 3 of 30)	intron (NM_144920, intron 3 of 30)	29291	NM_144920	109135	Mm.247670	NM_144920	ENSMUSG00000030231	Plekha5	2810431N21Rik|AI428202|AK129423|AMH-Cre|Ayu21-9|Gt(pU21)9Imeg|Pepp2|Tg(AMH-cre)1Flor	pleckstrin homology domain containing, family A member 5	protein-coding
Diff_Nuc37866	chr3	118855432	118855571	+	0	NA	intron (NM_170778, intron 16 of 22)	intron (NM_170778, intron 16 of 22)	590405	NM_170778	99586	Mm.27907	NM_170778	ENSMUSG00000033308	Dpyd	AI315208|DPD|E330028L06Rik	dihydropyrimidine dehydrogenase	protein-coding
Diff_Nuc17522	chr14	14454242	14454381	+	0	NA	Intergenic	Intergenic	-49079	NM_177624	218739	Mm.39919	NM_177624	ENSMUSG00000044772	Sntn	A430083B19Rik	sentan, cilia apical structure protein	protein-coding
Diff_Nuc36707	chr3	69050402	69050541	+	0	NA	Intergenic	Intergenic	24130	NM_027843	71619	Mm.98122	NM_027843	ENSMUSG00000098207	Arl14	9130014L17Rik|Arf7	ADP-ribosylation factor-like 14	protein-coding
Diff_Nuc33475	chr4	67619162	67619301	+	0	NA	Intergenic	Intergenic	996200	NM_019967	56710	Mm.248788	NM_019967	ENSMUSG00000028351	Brinp1	BRINP|Dbc1|Dbccr1|Fam5a	bone morphogenic protein/retinoic acid inducible neural specific 1	protein-coding
Diff_Nuc10017	chr10	86574412	86574551	+	0	NA	intron (NM_029685, intron 2 of 5)	intron (NM_029685, intron 2 of 5)	53690	NM_029685	76640	Mm.78423	NM_029685	ENSMUSG00000047129	1700113H08Rik	-	RIKEN cDNA 1700113H08 gene	protein-coding
Diff_Nuc5319	chr12	101040112	101040251	+	0	NA	intron (NM_030172, intron 5 of 5)	MLT2D|LTR|ERVL	81471	NM_030172	78767	Mm.235920	NM_030172	ENSMUSG00000021176	Efcab11	2610021K21Rik|2610110A13Rik	EF-hand calcium binding domain 11	protein-coding
Diff_Nuc14933	chr16	83440402	83440541	+	0	NA	Intergenic	Intergenic	-930917	NR_040567	75247	Mm.417813	NR_040567		4930553E22Rik	-	RIKEN cDNA 4930553E22 gene	ncRNA
Diff_Nuc50116	chr8	17930302	17930441	+	0	NA	Intergenic	RLTR19-int|LTR|ERVK	-394986	NM_053171	94109	Mm.436988	NM_053171	ENSMUSG00000060924	Csmd1	B930082H09|mKIAA1890	CUB and Sushi multiple domains 1	protein-coding
Diff_Nuc43817	chr1	42173702	42173841	+	0	NA	Intergenic	Intergenic	577899	NR_027826	66297	Mm.45203	NM_183252	ENSMUSG00000060424	Pantr1	2610017I09Rik|Pou3f3os|linc-Brn1a	POU domain, class 3, transcription factor 3 adjacent noncoding transcript 1	ncRNA
Diff_Nuc25958	chr6	8743412	8743551	+	0	NA	Intergenic	ORR1E|LTR|MaLR	-14997	NM_010492	15893	Mm.275683	NM_010492	ENSMUSG00000062995	Ica1	69kDa|ICA69	islet cell autoantigen 1	protein-coding
Diff_Nuc40764	chr2	81135957	81136096	+	0	NA	Intergenic	Lx6|LINE|L1	656605	NM_001190179	69482	Mm.29200	NM_027091	ENSMUSG00000026999	Nup35	2310006I24Rik|35kDa|5330402E05Rik|MP44|NO44	nucleoporin 35	protein-coding
Diff_Nuc44912	chr1	89289232	89289371	+	0	NA	intron (NM_001110227, intron 1 of 2)	intron (NM_001110227, intron 1 of 2)	2003	NM_001110227	100040591	Mm.443539	NM_001110227	ENSMUSG00000079436	Kcnj13	-	potassium inwardly-rectifying channel, subfamily J, member 13	protein-coding
Diff_Nuc2375	chr13	90001122	90001261	+	0	NA	intron (NM_028012, intron 7 of 7)	MusHAL1|LINE|L1	-119074	NM_001134475	13003	Mm.158700	NM_019389	ENSMUSG00000021614	Vcan	5430420N07Rik|9430051N09|Cspg2|DPEAAE|NG2|PG-M|PG-M(V0)|PG-M(V1)|hdf	versican	protein-coding
Diff_Nuc14634	chr16	70595642	70595781	+	0	NA	Intergenic	Lx2|LINE|L1	-20959	NR_040474	52645	Mm.188475	NR_040474		D16Ertd519e	-	DNA segment, Chr 16, ERATO Doi 519, expressed	ncRNA
Diff_Nuc31997	chr5	145968082	145968221	+	0	NA	intron (NM_016683, intron 1 of 5)	intron (NM_016683, intron 1 of 5)	2723	NM_001167944	22757	Mm.332842	NM_016683	ENSMUSG00000055991	Zkscan5	AI132486|AI326970|Zfp95|hKraba1	zinc finger with KRAB and SCAN domains 5	protein-coding
Diff_Nuc31643	chr5	124972722	124972861	+	0	NA	intron (NM_021430, intron 1 of 6)	intron (NM_021430, intron 1 of 6)	8609	NM_021430	75695	Mm.41180	NM_021430	ENSMUSG00000029392	Rilpl1	2900002H16Rik|6330559I19Rik|GOSPEL	Rab interacting lysosomal protein-like 1	protein-coding
Diff_Nuc51053	chr8	60561852	60561991	+	0	NA	intron (NM_175032, intron 4 of 11)	intron (NM_175032, intron 4 of 11)	-430069	NM_144731	108150	Mm.62886	NM_144731	ENSMUSG00000031608	Galnt7	AI225872	UDP-N-acetyl-alpha-D-galactosamine: polypeptide N-acetylgalactosaminyltransferase 7	protein-coding
Diff_Nuc4274	chr12	58171952	58172091	+	0	NA	intron (NM_172577, intron 1 of 9)	intron (NM_172577, intron 1 of 9)	89609	NM_001167976	217593	Mm.32835	NM_172577	ENSMUSG00000035472	Slc25a21	9930033G19Rik|A630030I10|BB158148	solute carrier family 25 (mitochondrial oxodicarboxylate carrier), member 21	protein-coding
Diff_Nuc32899	chr4	38672702	38672841	+	0	NA	Intergenic	Intergenic	-724555	NM_001081095	75471	Mm.23522	NM_001081095	ENSMUSG00000028287	1700009N14Rik	AI429145	RIKEN cDNA 1700009N14 gene	protein-coding
Diff_Nuc14133	chr16	52297432	52297571	+	0	NA	intron (NM_001331110, intron 3 of 14)	intron (NM_001331110, intron 3 of 14)	155693	NM_009655	11658	Mm.288282	NM_009655	ENSMUSG00000022636	Alcam	AI853494|BEN|CD166|DM-GRASP|MuSC|SC1	activated leukocyte cell adhesion molecule	protein-coding
Diff_Nuc37676	chr3	110245382	110245521	+	0	NA	Intergenic	Intergenic	-191534	NR_024139	99890	Mm.36115	NM_178891	ENSMUSG00000049300	Prmt6	AW124876|BB233495|Hrmt1l6	protein arginine N-methyltransferase 6	protein-coding
Diff_Nuc18674	chr14	71680332	71680471	+	0	NA	Intergenic	Intergenic	29321	NR_046076	100043132	Mm.399336	NR_046075		Gm4251	-	predicted gene 4251	ncRNA
Diff_Nuc2450	chr13	93398652	93398791	+	0	NA	intron (NM_172588, intron 1 of 11)	intron (NM_172588, intron 1 of 11)	17628	NM_172588	218442	Mm.297970	NM_172588	ENSMUSG00000021703	Serinc5	A130038L21Rik|AIGP3|C86123|TPO1	serine incorporator 5	protein-coding
Diff_Nuc39976	chr2	52346612	52346751	+	0	NA	intron (NM_001037099, intron 2 of 13)	(TTTC)n|Simple_repeat|Simple_repeat	-66287	NM_182994	75423	Mm.314378	NM_182994	ENSMUSG00000036093	Arl5a	2410015N24Rik|2810410P22Rik|AA408731|AW610751|Arl5|T25534	ADP-ribosylation factor-like 5A	protein-coding
Diff_Nuc24988	chr7	107451232	107451371	+	0	NA	intron (NM_177161, intron 5 of 12)	B3|SINE|B2	17271	NM_177161	320452	Mm.150294	NM_177161	ENSMUSG00000051048	P4ha3	D930031A02Rik	procollagen-proline, 2-oxoglutarate 4-dioxygenase (proline 4-hydroxylase), alpha polypeptide III	protein-coding
Diff_Nuc34392	chr4	109419242	109419381	+	0	NA	intron (NM_007983, intron 6 of 18)	intron (NM_007983, intron 6 of 18)	70079	NM_007983	14084	Mm.318259	NM_007983	ENSMUSG00000010517	Faf1	AA408698|Dffrx|Fam	Fas-associated factor 1	protein-coding
Diff_Nuc49157	chr9	92917352	92917491	+	0	NA	Intergenic	L1MDa|LINE|L1	-16850	NR_040756	78349	Mm.52612	NR_040756	ENSMUSG00000100294	1700034K08Rik	-	RIKEN cDNA 1700034K08 gene	ncRNA
Diff_Nuc29309	chr5	14435862	14436001	+	0	NA	Intergenic	L1Md_F2|LINE|L1	-78987	NM_011995	26875	Mm.146275	NM_011995	ENSMUSG00000061601	Pclo	Acz|Pico	piccolo (presynaptic cytomatrix protein)	protein-coding
Diff_Nuc23955	chr7	63446922	63447061	+	0	NA	intron (NM_010418, intron 67 of 92)	intron (NM_010418, intron 67 of 92)	-48150	NM_021879	18431	Mm.137052	NM_021879	ENSMUSG00000030450	Oca2	D7H15S12|D7Icr28RN|D7Nic1|p|p<cas>	oculocutaneous albinism II	protein-coding
Diff_Nuc47930	chr9	37248602	37248741	+	0	NA	Intergenic	Lx9|LINE|L1	-7911	NM_001164767	19649	Mm.212826	NM_011248	ENSMUSG00000032128	Robo3	Rbig1|Rig-1|Rig1|Robo3a|Robo3b	roundabout guidance receptor 3	protein-coding
Diff_Nuc12033	chr17	49260802	49260941	+	0	NA	Intergenic	PB1D10|SINE|Alu	-8013	NR_038144	69311	Mm.46140	NR_038141	ENSMUSG00000101012	1700008K24Rik	-	RIKEN cDNA 1700008K24 gene	ncRNA
Diff_Nuc49773	chr9	122619912	122620051	+	0	NA	Intergenic	MER46C|DNA|MER2_type	27987	NR_029819	387156		NR_029819	ENSMUSG00000065414	Mir138-1	Mirn138|Mirn138-1|mir-138-1	microRNA 138-1	ncRNA
Diff_Nuc28413	chr6	117029932	117030071	+	0	NA	Intergenic	Intergenic	-88552	NM_001012477	20315	Mm.303231	NM_013655	ENSMUSG00000061353	Cxcl12	Pbsf|Scyb12|Sdf1|Tlsf|Tpar1	chemokine (C-X-C motif) ligand 12	protein-coding
Diff_Nuc7196	chr11	74963702	74963841	+	0	NA	intron (NM_001002764, intron 15 of 18)	PB1|SINE|Alu	17883	NM_001098203	15248	Mm.57250	NM_010430	ENSMUSG00000043099	Hic1	AA408311|HIC-1	hypermethylated in cancer 1	protein-coding
Diff_Nuc24985	chr7	107369832	107369971	+	0	NA	Intergenic	L1MEd|LINE|L1	-6216	NM_027629	70974	Mm.440524	NM_027629	ENSMUSG00000030729	Pgm2l1	4931406N15Rik|AI553438|BM32A	phosphoglucomutase 2-like 1	protein-coding
Diff_Nuc15996	chr15	36176902	36177041	+	0	NA	exon (NM_013923, exon 7 of 10)	exon (NM_013923, exon 7 of 10)	-7052	NR_106173	102465888		NR_106173	ENSMUSG00000098457	Mir8097	Gm27497|mmu-mir-8097	microRNA 8097	ncRNA
Diff_Nuc50461	chr8	35710582	35710721	+	0	NA	Intergenic	RMER15|LTR|ERVL	-7281	NR_040706	330734	Mm.149998	NR_040706	ENSMUSG00000109819	B930018H19Rik	B930018H19	RIKEN cDNA B930018H19 gene	ncRNA
Diff_Nuc39272	chr2	22618202	22618341	+	0	NA	Intergenic	Intergenic	-11576	NM_019456	54519	Mm.14255	NM_019456	ENSMUSG00000026786	Apbb1ip	9930118P07Rik|Prp48	amyloid beta (A4) precursor protein-binding, family B, member 1 interacting protein	protein-coding
Diff_Nuc16079	chr15	39586852	39586991	+	0	NA	intron (NM_001289512, intron 2 of 2)	intron (NM_001289512, intron 2 of 2)	9445	NM_001289508	75766	Mm.159563	NM_029422	ENSMUSG00000022303	Dcstamp	4833414I07Rik|DC-STAMP|FIND|Tm7sf4|mDC-STAMP	dendrocyte expressed seven transmembrane protein	protein-coding
Diff_Nuc21676	chr18	26619922	26620061	+	0	NA	Intergenic	Lx3B|LINE|L1	-707507	NM_001174074	108013	Mm.266435	NM_133195	ENSMUSG00000024268	Celf4	A230070D14Rik|BRUNOL-4|Brul4|Brunol4|C130060B05Rik	CUGBP, Elav-like family member 4	protein-coding
Diff_Nuc4724	chr12	76220132	76220271	+	0	NA	intron (NM_172805, intron 5 of 10)	(TGGA)n|Simple_repeat|Simple_repeat	58118	NM_172805	238271	Mm.44465	NM_172805	ENSMUSG00000034402	Kcnh5	Eag2	potassium voltage-gated channel, subfamily H (eag-related), member 5	protein-coding
Diff_Nuc8852	chr10	31560442	31560581	+	0	NA	intron (NM_001013411, intron 4 of 6)	intron (NM_001013411, intron 4 of 6)	-230980	NM_001146349	268291	Mm.295212	NM_001146349	ENSMUSG00000063760	Rnf217	AU016819|Ibrdc1	ring finger protein 217	protein-coding
Diff_Nuc36697	chr3	68825772	68825911	+	0	NA	intron (NM_133786, intron 10 of 23)	intron (NM_133786, intron 10 of 23)	12017	NR_029735	723949		NR_029735	ENSMUSG00000065606	Mir16-2	Mirn16-2|mir-16-2	microRNA 16-2	ncRNA
Diff_Nuc1413	chr13	44311322	44311461	+	0	NA	intron (NR_045088, intron 2 of 3)	intron (NR_045088, intron 2 of 3)	465	NR_045088	100503592	Mm.184925	NR_045088		A330076C08Rik	-	RIKEN cDNA A330076C08 gene	ncRNA
Diff_Nuc50039	chr8	14748902	14749041	+	0	NA	intron (NM_172910, intron 7 of 15)	intron (NM_172910, intron 7 of 15)	-139565	NM_012000	26889	Mm.254027	NM_012000	ENSMUSG00000026317	Cln8	mnd	ceroid-lipofuscinosis, neuronal 8	protein-coding
Diff_Nuc44	chrX	16440732	16440871	+	0	NA	Intergenic	L1_Mus3|LINE|L1	-46309	NM_172778	109731	Mm.241656	NM_172778	ENSMUSG00000040147	Maob	6330414K01Rik|MAO-B	monoamine oxidase B	protein-coding
Diff_Nuc51131	chr8	63661992	63662131	+	0	NA	Intergenic	Intergenic	-40907	NM_021506	59009	Mm.27949	NM_021506	ENSMUSG00000031642	Sh3rf1	2200003J05Rik|Posh|R75531|Sh3md2	SH3 domain containing ring finger 1	protein-coding
Diff_Nuc41247	chr2	103630472	103630611	+	0	NA	intron (NM_001111290, intron 1 of 17)	intron (NM_001111290, intron 1 of 17)	6694	NM_001111290	53872	Mm.427589	NM_016739	ENSMUSG00000027184	Caprin1	AL022980|Caprin-1|Gpiap|Gpiap1|Mmgpip137|P137|rng105	cell cycle associated protein 1	protein-coding
Diff_Nuc15141	chr16	93177302	93177441	+	0	NA	Intergenic	Intergenic	176063	NR_040486	69857	Mm.81192	NR_040486	ENSMUSG00000100277	1810053B23Rik	1810008L18Rik|1810056K14Rik	RIKEN cDNA 1810053B23 gene	ncRNA
Diff_Nuc20441	chr19	26923642	26923781	+	0	NA	Intergenic	Intergenic	-25314	NR_045306	70942	Mm.411548	NR_045306	ENSMUSG00000093772	4931403E22Rik	-	RIKEN cDNA 4931403E22 gene	ncRNA
Diff_Nuc13484	chr16	24721992	24722131	+	0	NA	5' UTR (NM_001145954, exon 1 of 8)	5' UTR (NM_001145954, exon 1 of 8)	120	NM_001145954	210126	Mm.209385	NM_178665	ENSMUSG00000033306	Lpp	9430020K16Rik|AA959454|AU024130|B130055L10Rik|C79715|D630048H16	LIM domain containing preferred translocation partner in lipoma	protein-coding
Diff_Nuc10079	chr10	89572562	89572701	+	0	NA	intron (NM_001128086, intron 8 of 24)	intron (NM_001128086, intron 8 of 24)	236377	NM_001128086	77531	Mm.440605	NM_181398	ENSMUSG00000058589	Anks1b	AIDA-1b|C030032C09Rik|E530015N03Rik|ENSMUSG00000078431|Gm10937|Gm1555	ankyrin repeat and sterile alpha motif domain containing 1B	protein-coding
Diff_Nuc33777	chr4	79682382	79682521	+	0	NA	Intergenic	Intergenic	-797666	NM_031202	22178	Mm.30438	NM_031202	ENSMUSG00000005994	Tyrp1	Oca3|TRP-1|TRP1|Tyrp|b|brown|isa	tyrosinase-related protein 1	protein-coding
Diff_Nuc21567	chr18	22313792	22313931	+	0	NA	intron (NM_027616, intron 2 of 22)	B3A|SINE|B2	16036	NM_027616	70950	Mm.235716	NM_027616	ENSMUSG00000024306	Ccdc178	4921528I01Rik	coiled coil domain containing 178	protein-coding
Diff_Nuc10492	chr10	106233132	106233271	+	0	NA	intron (NM_177373, intron 6 of 31)	intron (NM_177373, intron 6 of 31)	-193665	NR_131026	75833	Mm.159596	NR_131026		4930532I03Rik	-	RIKEN cDNA 4930532I03 gene	ncRNA
Diff_Nuc17574	chr14	17125632	17125771	+	0	NA	intron (NM_021504, intron 9 of 11)	intron (NM_021504, intron 9 of 11)	-43379	NM_027695	71147	Mm.197960	NM_027695	ENSMUSG00000021786	Oxsm	4933425A18Rik|C80494	3-oxoacyl-ACP synthase, mitochondrial	protein-coding
Diff_Nuc50072	chr8	16508777	16508916	+	0	NA	intron (NM_053171, intron 5 of 69)	intron (NM_053171, intron 5 of 69)	-340008	NR_037214	100526464		NR_037214	ENSMUSG00000093142	Mir3106	mir-3106|mmu-mir-3106	microRNA 3106	ncRNA
Diff_Nuc1426	chr13	44993412	44993551	+	0	NA	intron (NM_001205043, intron 6 of 17)	intron (NM_001205043, intron 6 of 17)	103984	NM_025772	94245	Mm.352311	NM_025772	ENSMUSG00000057531	Dtnbp1	5430437B18Rik|AW048963|Bloc1s8|dysbindin|sdy	dystrobrevin binding protein 1	protein-coding
Diff_Nuc16922	chr15	79072272	79072411	+	0	NA	intron (NM_001045558, intron 5 of 12)	ORR1B1|LTR|MaLR	12529	NM_001045558	18693	Mm.259464	NM_008837	ENSMUSG00000068206	Pick1	Prkcabp	protein interacting with C kinase 1	protein-coding
Diff_Nuc10318	chr10	99647622	99647761	+	0	NA	Intergenic	Intergenic	-150619	NM_001166636	100043247	Mm.478257	NM_001166636	ENSMUSG00000096640	Gm4312	-	predicted gene 4312	protein-coding
Diff_Nuc7190	chr11	74728572	74728711	+	0	NA	intron (NM_001163311, intron 1 of 7)	intron (NM_001163311, intron 1 of 7)	9693	NR_028562	100217469		NR_028562		Snord91a	MBII-296	small nucleolar RNA, C/D box 91A	snoRNA
Diff_Nuc40671	chr2	78095422	78095561	+	0	NA	intron (NM_177843, intron 2 of 5)	intron (NM_177843, intron 2 of 5)	17787	NM_177843	329436	Mm.235448	NM_177843		Gm14461	A830093M07|OTTMUSG00000016703	predicted gene 14461	protein-coding
Diff_Nuc38719	chr3	157995882	157996021	+	0	NA	intron (NM_001291453, intron 4 of 25)	L1Md_F|LINE|L1	229234	NM_001291453	242274	Mm.132162	NM_001081358	ENSMUSG00000028176	Lrrc7	AK122498|densin|mKIAA1365	leucine rich repeat containing 7	protein-coding
Diff_Nuc573	chr13	8969282	8969421	+	0	NA	Intergenic	MT2B|LTR|ERVL	17242	NM_177197	320581	Mm.313743	NM_177197	ENSMUSG00000033520	Idi2	4833405L16Rik|IPPI2	isopentenyl-diphosphate delta isomerase 2	protein-coding
Diff_Nuc39284	chr2	22990182	22990321	+	0	NA	intron (NM_025979, intron 7 of 11)	ID_B1|SINE|B4	21293	NM_025979	67121	Mm.253721	NM_025979	ENSMUSG00000026779	Mastl	2700091H24Rik|C88295|GW|GWL|MAST-L|THC2	microtubule associated serine/threonine kinase-like	protein-coding
Diff_Nuc34472	chr4	114047522	114047661	+	0	NA	Intergenic	L1Md_F2|LINE|L1	-31738	NM_001085549	666048	Mm.331779	NM_001085549	ENSMUSG00000070867	Trabd2b	Gm12824|Hkat|OTTMUSG00000008561	TraB domain containing 2B	protein-coding
Diff_Nuc23380	chr7	25771702	25771841	+	0	NA	TTS (NR_106014)	TTS (NR_106014)	915	NR_106014	102465634		NR_106014	ENSMUSG00000099258	Mir7047	Gm27270|mmu-mir-7047	microRNA 7047	ncRNA
Diff_Nuc27349	chr6	67800682	67800821	+	0	NA	Intergenic	L1Md_F2|LINE|L1	-285058	NR_003100	75070	Mm.463364	NR_003100		4930515G16Rik	-	myc induced nuclear antigen pseudogene	pseudo
Diff_Nuc24612	chr7	94067672	94067811	+	0	NA	intron (NM_001105189, intron 1 of 5)	intron (NM_001105189, intron 1 of 5)	3882	NM_001105189	637896	Mm.389957	NM_001105189	ENSMUSG00000091962	Vmn2r78	-	vomeronasal 2, receptor 78	protein-coding
Diff_Nuc3729	chr12	39182822	39182961	+	0	NA	intron (NM_178681, intron 22 of 24)	L2a|LINE|L2	158217	NR_045943	73867	Mm.78933	NR_045943		4930428E07Rik	-	RIKEN cDNA 4930428E07 gene	ncRNA
Diff_Nuc27947	chr6	95109647	95109786	+	0	NA	Intergenic	Lx|LINE|L1	41842	NM_001008785	243574	Mm.333275	NM_001008785	ENSMUSG00000030031	Kbtbd8	AU040152|SSEC-51|SSEC51|Takrp|mKIAA1842	kelch repeat and BTB (POZ) domain containing 8	protein-coding
Diff_Nuc44606	chr1	73158372	73158511	+	0	NA	Intergenic	Intergenic	87281	NR_038002	69449	Mm.250447	NR_038001	ENSMUSG00000101968	1700027A15Rik	-	RIKEN cDNA 1700027A15 gene	ncRNA
Diff_Nuc21102	chr19	59914942	59915081	+	0	NA	Intergenic	MLT2B1|LTR|ERVL	104256	NM_001033172	74998	Mm.24167	NM_001033172	ENSMUSG00000040022	Rab11fip2	4930470G04Rik|A830046J09Rik|AW558126|Nrip11	RAB11 family interacting protein 2 (class I)	protein-coding
Diff_Nuc36701	chr3	68844042	68844181	+	0	NA	intron (NM_025863, intron 2 of 2)	ORR1D2|LTR|MaLR	4553	NM_025863	66949	Mm.176695	NM_025863	ENSMUSG00000034317	Trim59	2310035M22Rik|2700022F13Rik|Mrf1|TSBF1	tripartite motif-containing 59	protein-coding
Diff_Nuc50482	chr8	36965342	36965481	+	0	NA	Intergenic	L1MC1|LINE|L1	-19400	NR_046181	330737	Mm.381743	NR_046181	ENSMUSG00000109761	5430403N17Rik	5430403N17	RIKEN cDNA 5430403N17 gene	ncRNA
Diff_Nuc14702	chr16	74246012	74246151	+	0	NA	intron (NM_175549, intron 2 of 27)	intron (NM_175549, intron 2 of 27)	96231	NR_030464	751561		NR_030464	ENSMUSG00000104758	Mir691	Mirn691|mir-691|mmu-mir-691	microRNA 691	ncRNA
Diff_Nuc25020	chr7	108710362	108710501	+	0	NA	Intergenic	Intergenic	-1052	NR_033804	11871	Mm.439746	NM_007490	ENSMUSG00000092517	Art2a-ps	ARTC2|Art2a|Ly92a|Rt-6|Rt6|Rt6-1	ADP-ribosyltransferase 2a, pseudogene	protein-coding
Diff_Nuc46035	chr1	145796552	145796691	+	0	NA	Intergenic	LTR16C|LTR|ERVL	54658	NM_009061	19735	Mm.28262	NM_009061	ENSMUSG00000026360	Rgs2	GOS8	regulator of G-protein signaling 2	protein-coding
Diff_Nuc19396	chr14	100487432	100487571	+	0	NA	intron (NM_010636, intron 2 of 6)	intron (NM_010636, intron 2 of 6)	61514	NM_010636	16597	Mm.396499	NM_010636	ENSMUSG00000072294	Klf12	2700063E05Rik|AI225908|AI315654|AP-2rep|B130052C06Rik|D530033K05Rik	Kruppel-like factor 12	protein-coding
Diff_Nuc26504	chr6	31138482	31138621	+	0	NA	intron (NR_110470, intron 1 of 2)	intron (NR_110470, intron 1 of 2)	29923	NR_110470	232685	Mm.443019	NM_144555	ENSMUSG00000044471	Lncpint	Lincpint|MNCb-1768|Pint|linc-Pint	long non-protein coding RNA, Trp53 induced transcript	ncRNA
Diff_Nuc9193	chr10	45631142	45631281	+	0	NA	Intergenic	Intergenic	103701	NR_040624	320363	Mm.123343	NR_040624	ENSMUSG00000110874	D030045P18Rik	-	RIKEN cDNA D030045P18 gene	ncRNA
Diff_Nuc38834	chr2	5255312	5255451	+	0	NA	intron (NM_177343, intron 6 of 10)	L1_Mus1|LINE|L1	196559	NM_028804	74186	Mm.274715	NM_028804	ENSMUSG00000026676	Ccdc3	2310045O21Rik	coiled-coil domain containing 3	protein-coding
Diff_Nuc6875	chr11	57031542	57031681	+	0	NA	intron (NM_001252403, intron 6 of 15)	MLT1J|LTR|MaLR	205063	NM_001252403	14799	Mm.4920	NM_008165	ENSMUSG00000020524	Gria1	2900051M01Rik|Glr-1|Glr1|GluA1|GluR-A|GluRA|Glur-1|Glur1|HIPA1|gluR-K1	glutamate receptor, ionotropic, AMPA1 (alpha 1)	protein-coding
Diff_Nuc51154	chr8	64827042	64827181	+	0	NA	Intergenic	Intergenic	-225121	NM_011922	26359	Mm.42179	NM_011922	ENSMUSG00000031635	Anxa10	-	annexin A10	protein-coding
Diff_Nuc36281	chr3	51472302	51472441	+	0	NA	intron (NM_174995, intron 2 of 4)	intron (NM_174995, intron 2 of 4)	7270	NM_001310482	211666	Mm.24679	NM_174995	ENSMUSG00000074604	Mgst2	GST2|MGST-II	microsomal glutathione S-transferase 2	protein-coding
Diff_Nuc33701	chr4	76129542	76129681	+	0	NA	intron (NM_011211, intron 10 of 39)	intron (NM_011211, intron 10 of 39)	-1205421	NM_025849	66928	Mm.24332	NM_025849	ENSMUSG00000028398	Tmem261	1700027K24Rik|3110001D03Rik	transmembrane protein 261	protein-coding
Diff_Nuc30248	chr5	56855732	56855871	+	0	NA	Intergenic	RMER6A|LTR|ERVK	1253357	NR_015588	319216	Mm.332387	NR_015588	ENSMUSG00000097216	4932441J04Rik	-	RIKEN cDNA 4932441J04 gene	ncRNA
Diff_Nuc25118	chr7	114500992	114501131	+	0	NA	Intergenic	Intergenic	-13243	NM_021889	60510	Mm.302793	NM_021889	ENSMUSG00000062542	Syt9	-	synaptotagmin IX	protein-coding
Diff_Nuc11362	chr17	15800332	15800471	+	0	NA	Intergenic	RMER19C|LTR|ERVK	31649	NR_045431	71008	Mm.399492	NR_045431		4933401D09Rik	-	RIKEN cDNA 4933401D09 gene	ncRNA
Diff_Nuc3626	chr12	35741822	35741961	+	0	NA	intron (NM_001014973, intron 1 of 25)	intron (NM_001014973, intron 1 of 25)	10030	NM_001014973	217463	Mm.213991	NM_001014973	ENSMUSG00000020590	Snx13	Rgs-px1|mKIAA0713	sorting nexin 13	protein-coding
Diff_Nuc41599	chr2	116296692	116296831	+	0	NA	Intergenic	L1Md_F3|LINE|L1	-394929	NR_033447	69974	Mm.440293	NR_033447		2810405F15Rik	-	RIKEN cDNA 2810405F15 gene	ncRNA
Diff_Nuc40257	chr2	62611022	62611161	+	0	NA	intron (NM_133207, intron 8 of 15)	intron (NM_133207, intron 8 of 15)	108707	NM_145523	227960	Mm.219877	NM_145523	ENSMUSG00000026893	Gca	5133401E04Rik|AI573844	grancalcin	protein-coding
Diff_Nuc36814	chr3	73368852	73368991	+	0	NA	non-coding (NR_040557, exon 4 of 5)	non-coding (NR_040557, exon 4 of 5)	-83348	NR_040547	74693	Mm.292227	NR_040547	ENSMUSG00000102362	4930509J09Rik	-	RIKEN cDNA 4930509J09 gene	ncRNA
Diff_Nuc48646	chr9	70189652	70189791	+	0	NA	intron (NM_181072, intron 13 of 27)	intron (NM_181072, intron 13 of 27)	63839	NR_049200	100885839		NR_049200	ENSMUSG00000093763	Mir5626	Gm25590|mir-5626|mmu-mir-5626	microRNA 5626	ncRNA
Diff_Nuc16888	chr15	76911782	76911921	+	0	NA	3' UTR (NM_001110828, exon 13 of 13)	3' UTR (NM_001110828, exon 13 of 13)	-2977	NR_108037	74303	Mm.444304	NR_108037	ENSMUSG00000097267	1700109K24Rik	4933425G21Rik	RIKEN cDNA 1700109K24 gene	ncRNA
Diff_Nuc22437	chr18	59137082	59137221	+	0	NA	intron (NM_175506, intron 14 of 22)	Lx8|LINE|L1	-84884	NR_033764	225583	Mm.209711	NM_173759	ENSMUSG00000050875	A730017C20Rik	-	RIKEN cDNA A730017C20 gene	protein-coding
Diff_Nuc4931	chr12	84860492	84860631	+	0	NA	promoter-TSS (NM_030246)	promoter-TSS (NM_030246)	-855	NM_030246	73828	Mm.38238	NM_030246	ENSMUSG00000021222	Dcaf4	1110018E21Rik|Wdr21	DDB1 and CUL4 associated factor 4	protein-coding
Diff_Nuc48725	chr9	73615982	73616121	+	0	NA	intron (NM_001081153, intron 3 of 30)	intron (NM_001081153, intron 3 of 30)	165323	NM_001081153	208898	Mm.41035	NM_001081153	ENSMUSG00000062151	Unc13c	1500037O19Rik|AU019458|D9Ertd414e|Munc13-3|Unc13h3	unc-13 homolog C (C. elegans)	protein-coding
Diff_Nuc11481	chr17	20045002	20045141	+	0	NA	Intergenic	L1_Mur3|LINE|L1	134744	NM_001104565	627636	Mm.469855	NM_001104565	ENSMUSG00000091771	Vmn2r103	EG627636|Vmn103	vomeronasal 2, receptor 103	protein-coding
Diff_Nuc662	chr13	11865332	11865471	+	0	NA	intron (NM_023868, intron 25 of 104)	B3A|SINE|B2	251082	NR_027813	664793	Mm.410565	NR_027813		Zp4-ps	EG664793|Zp4|Zpb	zona pellucida glycoprotein 4, pseudogene	pseudo
Diff_Nuc49619	chr9	113775932	113776071	+	0	NA	intron (NM_001286600, intron 17 of 34)	intron (NM_001286600, intron 17 of 34)	54297	NM_001081960	76499	Mm.222272	NM_029633	ENSMUSG00000033392	Clasp2	1500004F14Rik|8030404L10Rik|C77448|CLASP2beta|mKIAA0627	CLIP associating protein 2	protein-coding
Diff_Nuc45348	chr1	111183882	111184021	+	0	NA	Intergenic	Intergenic	-695526	NM_001316743	241201	Mm.213407	NM_172853	ENSMUSG00000026312	Cdh7	9330156F07Rik|CDH7L1	cadherin 7, type 2	protein-coding
Diff_Nuc40591	chr2	75072882	75073021	+	0	NA	Intergenic	Intergenic	209285	NR_040635	77269	Mm.389278	NR_040635		9430019J16Rik	-	RIKEN cDNA 9430019J16 gene	ncRNA
Diff_Nuc37370	chr3	95663832	95663971	+	0	NA	Intergenic	B4|SINE|B4	-4096	NM_001316751	70767	Mm.279872	NM_027541	ENSMUSG00000015748	Prpf3	3632413F13Rik	pre-mRNA processing factor 3	protein-coding
Diff_Nuc12689	chr17	81367862	81368001	+	0	NA	intron (NM_026516, intron 1 of 3)	intron (NM_026516, intron 1 of 3)	23959	NM_026516	68027	Mm.357108	NM_026516	ENSMUSG00000024245	Tmem178	2810417M05Rik|Tmem178a	transmembrane protein 178	protein-coding
Diff_Nuc2184	chr13	82527772	82527911	+	0	NA	Intergenic	Intergenic	309491	NR_039537	100628621		NR_039537	ENSMUSG00000106655	Mir3961	mmu-mir-3961	microRNA 3961	ncRNA
Diff_Nuc29649	chr5	28102432	28102571	+	0	NA	intron (NM_018878, intron 4 of 20)	ID4|SINE|ID	15589	NM_018878	55982	Mm.277190	NM_018878	ENSMUSG00000002221	Paxip1	D5Ertd149e|PTIP	PAX interacting (with transcription-activation domain) protein 1	protein-coding
Diff_Nuc33485	chr4	67945632	67945771	+	0	NA	Intergenic	L1_Mus1|LINE|L1	669730	NM_019967	56710	Mm.248788	NM_019967	ENSMUSG00000028351	Brinp1	BRINP|Dbc1|Dbccr1|Fam5a	bone morphogenic protein/retinoic acid inducible neural specific 1	protein-coding
Diff_Nuc19492	chr14	104862472	104862611	+	0	NA	3' UTR (NM_011143, exon 3 of 3)	3' UTR (NM_011143, exon 3 of 3)	4675	NM_011143	18996	Mm.246550	NM_011143	ENSMUSG00000048349	Pou4f1	Brn-3|Brn-3.0|Brn3|Brn3.0|Brn3a|E130119J07Rik	POU domain, class 4, transcription factor 1	protein-coding
Diff_Nuc47844	chr9	33090282	33090421	+	0	NA	Intergenic	Intergenic	-353800	NR_131058	330917	Mm.488283	NR_131058		Gm27162	A430016B06	predicted gene 27162	ncRNA
Diff_Nuc37998	chr3	125329682	125329821	+	0	NA	intron (NM_022565, intron 6 of 13)	intron (NM_022565, intron 6 of 13)	222742	NM_022565	64580	Mm.444289	NM_022565	ENSMUSG00000027971	Ndst4	4930439H17Rik	N-deacetylase/N-sulfotransferase (heparin glucosaminyl) 4	protein-coding
Diff_Nuc5203	chr12	96127692	96127831	+	0	NA	Intergenic	Intergenic	-802675	NM_201518	399558	Mm.341948	NM_201518	ENSMUSG00000047414	Flrt2	-	fibronectin leucine rich transmembrane protein 2	protein-coding
Diff_Nuc27872	chr6	91639202	91639341	+	0	NA	intron (NM_009320, intron 1 of 14)	intron (NM_009320, intron 1 of 14)	5210	NM_009320	21366	Mm.395650	NM_009320	ENSMUSG00000030096	Slc6a6	AA589629|C80501|Taut	solute carrier family 6 (neurotransmitter transporter, taurine), member 6	protein-coding
Diff_Nuc27684	chr6	82225482	82225621	+	0	NA	Intergenic	Intergenic	-126918	NM_009313	21336	Mm.8055	NM_009313	ENSMUSG00000030043	Tacr1	Nk1r|Spr|Tac1r	tachykinin receptor 1	protein-coding
Diff_Nuc16592	chr15	61957862	61958001	+	0	NA	intron (NR_132746, intron 2 of 6)	intron (NR_132746, intron 2 of 6)	87119	NR_132746	19296	Mm.4608	NM_011222	ENSMUSG00000097039	Pvt1	Ayu21-84Imeg|Gt(pU21)84Imeg|Mis-1|Mlvi-1|Pvt-1	plasmacytoma variant translocation 1	ncRNA
Diff_Nuc2002	chr13	75506592	75506731	+	0	NA	Intergenic	L1VL1|LINE|L1	-275833	NR_030451	751556		NR_030451	ENSMUSG00000076236	Mir682	Mirn682|mir-682|mmu-mir-682	microRNA 682	ncRNA
Diff_Nuc33176	chr4	53080502	53080641	+	0	NA	intron (NM_013454, intron 28 of 49)	intron (NM_013454, intron 28 of 49)	55819	NM_025623	66536	Mm.38244	NM_025623	ENSMUSG00000015247	Nipsnap3b	2700063N13Rik|Nipsnap3a	nipsnap homolog 3B (C. elegans)	protein-coding
Diff_Nuc30579	chr5	71833092	71833231	+	0	NA	TTS (NM_030052)	TTS (NM_030052)	106283	NM_030052	78174	Mm.60690	NM_030052	ENSMUSG00000049387	Cox7b2	4930503B16Rik	cytochrome c oxidase subunit VIIb2	protein-coding
Diff_Nuc4693	chr12	75416542	75416681	+	0	NA	Intergenic	Intergenic	18150	NM_198866	386753	Mm.341686	NM_198866	ENSMUSG00000029878	Dbpht2	Spot2	DNA binding protein with his-thr domain	protein-coding
Diff_Nuc26878	chr6	46145912	46146051	+	0	NA	intron (NM_001004357, intron 9 of 23)	intron (NM_001004357, intron 9 of 23)	-1048414	NM_025771	66797	Mm.440084	NM_025771	ENSMUSG00000039419	Cntnap2	5430425M22Rik|Caspr2|mKIAA0868	contactin associated protein-like 2	protein-coding
Diff_Nuc18106	chr14	46093072	46093211	+	0	NA	intron (NM_146054, intron 6 of 14)	intron (NM_146054, intron 6 of 14)	56599	NM_146054	218952	Mm.210018	NM_146054	ENSMUSG00000037712	Fermt2	AA960555|Kindlin-2|Mig2|Plekhc1	fermitin family member 2	protein-coding
Diff_Nuc39398	chr2	30082952	30083091	+	0	NA	Intergenic	MYSERV16_I-int|LTR|ERVK	10130	NR_028299	67350	Mm.402683	NR_028299		1700084E18Rik	-	RIKEN cDNA 1700084E18 gene	ncRNA
Diff_Nuc24061	chr7	67140252	67140391	+	0	NA	5' UTR (NM_013670, exon 3 of 10)	5' UTR (NM_013670, exon 3 of 10)	9721	NM_013670	20646	Mm.274995	NM_013670	ENSMUSG00000102252	Snrpn	2410045I01Rik|HCERN3|Peg4|Pwcr1|SMN	small nuclear ribonucleoprotein N	protein-coding
Diff_Nuc38353	chr3	141399292	141399431	+	0	NA	intron (NM_009472, intron 4 of 15)	intron (NM_009472, intron 4 of 15)	195191	NM_001277218	12167	Mm.39089	NM_007560	ENSMUSG00000052430	Bmpr1b	AI385617|ALK-6|AV355320|Acvrlk6|Alk6|BMPR-1B|BMPR-IB|CFK-43a|SKR6	bone morphogenetic protein receptor, type 1B	protein-coding
Diff_Nuc2325	chr13	88244682	88244821	+	0	NA	Intergenic	L1_Mus3|LINE|L1	-716326	NM_010103	13612	Mm.125580	NM_010103	ENSMUSG00000034488	Edil3	Del-1|Del1	EGF-like repeats and discoidin I-like domains 3	protein-coding
Diff_Nuc39355	chr2	27412532	27412671	+	0	NA	Intergenic	MTEa-int|LTR|MaLR	41934	NM_080848	140858	Mm.28265	NM_080848	ENSMUSG00000026917	Wdr5	2410008O07Rik|AA408785|AA960360|Big|Big-3	WD repeat domain 5	protein-coding
Diff_Nuc36241	chr3	49484092	49484231	+	0	NA	Intergenic	Intergenic	77077	NM_130448	73173	Mm.87246	NM_130448	ENSMUSG00000037892	Pcdh18	3110038E07Rik|BB095589|PCDH68L	protocadherin 18	protein-coding
Diff_Nuc16065	chr15	39127652	39127791	+	0	NA	intron (NM_053271, intron 4 of 26)	Lx8|LINE|L1	97889	NM_053271	116838	Mm.309296	NM_053271	ENSMUSG00000037386	Rims2	2810036I15Rik|AW048769|RIM2|Rab3ip2|Rim2(+40A)|Rim2(+44A)|Rim2(+4A)|Serg2|Syt3-rs|mKIAA0751	regulating synaptic membrane exocytosis 2	protein-coding
Diff_Nuc11320	chr17	13742012	13742151	+	0	NA	intron (NR_045437, intron 1 of 3)	B1F|SINE|Alu	4879	NR_045436	72578	Mm.46549	NR_045436	ENSMUSG00000038347	2700054A10Rik	-	RIKEN cDNA 2700054A10 gene	ncRNA
Diff_Nuc7179	chr11	74394432	74394571	+	0	NA	intron (NM_001015046, intron 1 of 24)	intron (NM_001015046, intron 1 of 24)	9159	NM_001015046	380711	Mm.425690	NM_001015046	ENSMUSG00000038807	Rap1gap2	AU067654|Garnl4|Gm1561|mKIAA1039	RAP1 GTPase activating protein 2	protein-coding
Diff_Nuc51548	chr8	82683662	82683801	+	0	NA	Intergenic	L1MEg2|LINE|L1	-101824	NM_020259	15245	Mm.254493	NM_020259	ENSMUSG00000064325	Hhip	Hhip1	Hedgehog-interacting protein	protein-coding
Diff_Nuc40732	chr2	80154312	80154451	+	0	NA	Intergenic	B3|SINE|B2	-1242	NM_024181	66861	Mm.21762	NM_024181	ENSMUSG00000027006	Dnajc10	1200006L06Rik|D2Ertd706e|ERdj5|JPDI	DnaJ heat shock protein family (Hsp40) member C10	protein-coding
Diff_Nuc19132	chr14	90041352	90041491	+	0	NA	Intergenic	Intergenic	-254610	NR_002862	328451	Mm.320571	NR_002862		Gm5088	EG328451|Pabpc4l	poly(A)-binding protein, cytoplasmic pseudogene	pseudo
Diff_Nuc31248	chr5	102193162	102193301	+	0	NA	promoter-TSS (NM_173370)	promoter-TSS (NM_173370)	-918	NM_173370	74596	Mm.46764	NM_173370	ENSMUSG00000029330	Cds1	4833409J18Rik|AI314024|AW125888	CDP-diacylglycerol synthase 1	protein-coding
Diff_Nuc32211	chr4	7351392	7351531	+	0	NA	Intergenic	Intergenic	-136374	NR_040645	71510	Mm.410775	NR_040645	ENSMUSG00000086070	8430436N08Rik	-	RIKEN cDNA 8430436N08 gene	ncRNA
Diff_Nuc21646	chr18	24924542	24924681	+	0	NA	intron (NM_175276, intron 2 of 26)	intron (NM_175276, intron 2 of 26)	57487	NM_001289655	225288	Mm.329322	NM_175276	ENSMUSG00000034295	Fhod3	A930009H06Rik|FHOS2|mKIAA1695	formin homology 2 domain containing 3	protein-coding
Diff_Nuc13448	chr16	22376962	22377101	+	0	NA	Intergenic	Intergenic	62612	NM_023794	104156	Mm.155708	NM_023794	ENSMUSG00000013089	Etv5	1110005E01Rik|8430401F14Rik|ERM	ets variant 5	protein-coding
Diff_Nuc43717	chr1	35861412	35861551	+	0	NA	Intergenic	Intergenic	-263764	NM_015818	50785	Mm.213566	NM_015818	ENSMUSG00000045216	Hs6st1	6Ost1	heparan sulfate 6-O-sulfotransferase 1	protein-coding
Diff_Nuc17735	chr14	24729552	24729691	+	0	NA	intron (NM_001253376, intron 1 of 26)	intron (NM_001253376, intron 1 of 26)	93806	NM_001253375	16531	Mm.343607	NM_010610	ENSMUSG00000063142	Kcnma1	5730414M22Rik|BKCa|MaxiK|Slo|Slo1|mSlo|mSlo1	potassium large conductance calcium-activated channel, subfamily M, alpha member 1	protein-coding
Diff_Nuc17197	chr15	93846862	93847001	+	0	NA	Intergenic	Lx2|LINE|L1	-89389	NR_045737	77248	Mm.410768	NR_045737		9430014N10Rik	-	RIKEN cDNA 9430014N10 gene	ncRNA
Diff_Nuc6931	chr11	60178032	60178171	+	0	NA	intron (NM_029044, intron 4 of 13)	intron (NM_029044, intron 4 of 13)	11219	NM_029044	74665	Mm.133570	NM_029044	ENSMUSG00000056598	Lrrc48	4930449E07Rik|Drc3	leucine rich repeat containing 48	protein-coding
Diff_Nuc44584	chr1	72278602	72278741	+	0	NA	Intergenic	MTA_Mm|LTR|MaLR	-19790	NM_001005423	381269	Mm.422636	NM_001005423	ENSMUSG00000039395	Mreg	Gm974|Wdt2|dsu	melanoregulin	protein-coding
Diff_Nuc33623	chr4	73654692	73654831	+	0	NA	Intergenic	ORR1D1-int|LTR|MaLR	-4746	NM_001163732	242506	Mm.221597	NM_172869	ENSMUSG00000049122	Frmd3	4.1O|9430066I12Rik|EPB41L4O|P410	FERM domain containing 3	protein-coding
Diff_Nuc29128	chr5	5258542	5258681	+	0	NA	intron (NM_011074, intron 2 of 14)	intron (NM_011074, intron 2 of 14)	7457	NM_001310448	18647	Mm.389061	NM_011074	ENSMUSG00000028926	Cdk14	Pftk1|mKIAA0834	cyclin-dependent kinase 14	protein-coding
Diff_Nuc20619	chr19	34172122	34172261	+	0	NA	Intergenic	Intergenic	-3242	NM_023903	78753	Mm.195937	NM_023903	ENSMUSG00000056078	Lipm	4632427C23Rik|AW227514|Lipl3	lipase, family member M	protein-coding
Diff_Nuc34538	chr4	116575462	116575601	+	0	NA	intron (NM_001029912, intron 1 of 13)	intron (NM_001029912, intron 1 of 13)	25524	NM_001029912	74464	Mm.218946	NM_001029912	ENSMUSG00000033948	Zswim5	4933426E21Rik|AI503093|mKIAA1511	zinc finger SWIM-type containing 5	protein-coding
Diff_Nuc38078	chr3	129340132	129340271	+	0	NA	3' UTR (NM_130450, exon 5 of 5)	3' UTR (NM_130450, exon 5 of 5)	87803	NM_001310737	13645	Mm.252481	NM_010113	ENSMUSG00000028017	Egf	AI790464	epidermal growth factor	protein-coding
Diff_Nuc24803	chr7	99595002	99595141	+	0	NA	3' UTR (NM_001243047, exon 11 of 11)	3' UTR (NM_001243047, exon 11 of 11)	-114588	NM_025515	66365	Mm.21173	NM_025515	ENSMUSG00000030613	Ccdc90b	2310015N07Rik|C86558	coiled-coil domain containing 90B	protein-coding
Diff_Nuc29789	chr5	34194782	34194921	+	0	NA	intron (NM_175231, intron 2 of 20)	intron (NM_175231, intron 2 of 20)	9090	NM_001177884	107823	Mm.19892	NM_175231	ENSMUSG00000057406	Whsc1	5830445G22Rik|9430010A17Rik|AW555663|C130020C13Rik|D030027O06Rik|D930023B08Rik|MMSET|NSD2|Whsc1l|mKIAA1090	Wolf-Hirschhorn syndrome candidate 1 (human)	protein-coding
Diff_Nuc49348	chr9	100377312	100377451	+	0	NA	intron (NM_001033543, intron 1 of 6)	RMER6D|LTR|ERVK	9511	NM_001033543	213208	Mm.242896	NM_001033543	ENSMUSG00000044244	Il20rb	AV228068|Fndc6|Gm186|Il20R2	interleukin 20 receptor beta	protein-coding
Diff_Nuc35891	chr3	32693482	32693621	+	0	NA	Intergenic	Lx8|LINE|L1	-22997	NM_001013024	72607	Mm.316153	NM_001013024	ENSMUSG00000056900	Usp13	2700071E21Rik|AI848077|ISOT3|IsoT-3	ubiquitin specific peptidase 13 (isopeptidase T-3)	protein-coding
Diff_Nuc39477	chr2	34132552	34132691	+	0	NA	intron (NM_016768, intron 2 of 8)	intron (NM_016768, intron 2 of 8)	94944	NM_001290576	18516	Mm.239941	NM_016768	ENSMUSG00000038718	Pbx3	-	pre B cell leukemia homeobox 3	protein-coding
Diff_Nuc17875	chr14	32543472	32543611	+	0	NA	intron (NM_001024604, intron 12 of 27)	RLTR11A|LTR|ERVK	89298	NM_025295	26363	Mm.282679	NM_025295	ENSMUSG00000021900	Btd	-	biotinidase	protein-coding
Diff_Nuc40608	chr2	75768572	75768711	+	0	NA	3' UTR (NM_172666, exon 20 of 20)	3' UTR (NM_172666, exon 20 of 20)	7878	NM_028235	72421	Mm.275109	NM_028235	ENSMUSG00000075273	Ttc30b	2510042P03Rik|Tcc30b	tetratricopeptide repeat domain 30B	protein-coding
Diff_Nuc43524	chr1	26491082	26491221	+	0	NA	Intergenic	L1Md_F2|LINE|L1	253154	NM_001033764	210940	Mm.297614	NM_001033764	ENSMUSG00000073722	4931408C20Rik	-	RIKEN cDNA 4931408C20 gene	protein-coding
Diff_Nuc6098	chr11	21622072	21622211	+	0	NA	intron (NM_145425, intron 11 of 17)	intron (NM_145425, intron 11 of 17)	149857	NM_145425	216560	Mm.138090	NM_145425	ENSMUSG00000020319	Wdpcp	AV249152	WD repeat containing planar cell polarity effector	protein-coding
Diff_Nuc10163	chr10	93266832	93266971	+	0	NA	Intergenic	RLTR25A|LTR|ERVK	-27399	NM_183199	327799	Mm.491598	NM_183199	ENSMUSG00000020020	Usp44	E430004F17Rik	ubiquitin specific peptidase 44	protein-coding
Diff_Nuc9487	chr10	60115112	60115251	+	0	NA	intron (NR_045556, intron 3 of 68)	ORR1A2-int|LTR|MaLR	44057	NM_001252635	22295	Mm.440327	NM_023370	ENSMUSG00000012819	Cdh23	4930542A03Rik|USH1D|ahl|ahl1|bob|bus|mdfw|nmf112|nmf181|nmf252|sals|v	cadherin 23 (otocadherin)	protein-coding
Diff_Nuc9395	chr10	55409052	55409191	+	0	NA	Intergenic	Intergenic	-417602	NM_001163833	73390	Mm.181475	NM_133751	ENSMUSG00000047669	Msl3l2	1700060H10Rik	male-specific lethal 3-like 2 (Drosophila)	protein-coding
Diff_Nuc39683	chr2	41579632	41579771	+	0	NA	intron (NM_053011, intron 6 of 90)	MTA_Mm|LTR|MaLR	723387	NR_105754	102465171		NR_105754	ENSMUSG00000098660	Mir6336	Gm27584|mmu-mir-6336	microRNA 6336	ncRNA
Diff_Nuc4333	chr12	60936872	60937011	+	0	NA	Intergenic	MTC|LTR|MaLR	-616471	NM_001033156	70611	Mm.311026	NM_001033156	ENSMUSG00000035329	Fbxo33	5730501N20Rik|AI642135	F-box protein 33	protein-coding
Diff_Nuc44250	chr1	59550682	59550821	+	0	NA	Intergenic	Lx9|LINE|L1	11760	NM_008057	14369	Mm.297906	NM_008057	ENSMUSG00000041075	Fzd7	Fz7	frizzled class receptor 7	protein-coding
Diff_Nuc10904	chr10	121411492	121411631	+	0	NA	intron (NM_001081037, intron 1 of 21)	intron (NM_001081037, intron 1 of 21)	72810	NM_001242411	117600	Mm.288698	NM_001081037	ENSMUSG00000020121	Srgap1	4930572H05Rik|Arhgap13	SLIT-ROBO Rho GTPase activating protein 1	protein-coding
Diff_Nuc19775	chr14	119247662	119247801	+	0	NA	intron (NM_023878, intron 1 of 4)	intron (NM_023878, intron 1 of 4)	-6441	NM_021386	58187	Mm.390755	NM_021386	ENSMUSG00000022132	Cldn10	6720456I16Rik|Cldn10a|Cldn10b|D14Ertd728e	claudin 10	protein-coding
Diff_Nuc30149	chr5	52544292	52544431	+	0	NA	TTS (NM_001042620)	TTS (NM_001042620)	-17105	NR_105845	102466648		NR_105845	ENSMUSG00000098726	Mir6417	Gm27334|mmu-mir-6417	microRNA 6417	ncRNA
Diff_Nuc48804	chr9	76986432	76986571	+	0	NA	intron (NM_027150, intron 7 of 7)	intron (NM_027150, intron 7 of 7)	-92913	NM_012033	26944	Mm.23199	NM_012033	ENSMUSG00000032357	Tinag	AI452335|TIN-ag	tubulointerstitial nephritis antigen	protein-coding
Diff_Nuc36415	chr3	56616822	56616961	+	0	NA	Intergenic	Intergenic	488950	NM_008536	17112	Mm.856	NM_008536	ENSMUSG00000027800	Tm4sf1	L6|M3s1	transmembrane 4 superfamily member 1	protein-coding
Diff_Nuc1724	chr13	61845872	61846011	+	0	NA	Intergenic	MMSAT4|Satellite|Satellite	-26999	NR_028430	432812	Mm.317358	NR_028430		BC052688	-	cDNA sequence BC052688	pseudo
Diff_Nuc4471	chr12	67144032	67144171	+	0	NA	Intergenic	MTB|LTR|MaLR	241287	NM_001162933	238217	Mm.188575	NM_001162933	ENSMUSG00000060499	Rpl10l	EG238217	ribosomal protein L10-like	protein-coding
Diff_Nuc4738	chr12	76826402	76826541	+	0	NA	intron (NM_030750, intron 1 of 2)	B1_Mus2|SINE|Alu	10245	NM_030750	81535	Mm.280199	NM_030750	ENSMUSG00000021054	Sgpp1	AI463453|SPP|SPP1|Spph1	sphingosine-1-phosphate phosphatase 1	protein-coding
Diff_Nuc49264	chr9	96125072	96125211	+	0	NA	intron (NM_001184708, intron 3 of 9)	intron (NM_001184708, intron 3 of 9)	28447	NM_001184706	211586	Mm.17977	NM_178667	ENSMUSG00000032411	Tfdp2	1110029I05Rik|A330080J22Rik|DP-3|DP3	transcription factor Dp 2	protein-coding
Diff_Nuc35621	chr3	19045482	19045621	+	0	NA	intron (NM_028840, intron 3 of 6)	intron (NM_028840, intron 3 of 6)	17514	NM_028840	74252	Mm.200383	NM_028840	ENSMUSG00000027599	Armc1	2310016N05Rik|2900046P06Rik|3110009G21Rik|AA409258|AW048872|Arcp|C330014L16Rik	armadillo repeat containing 1	protein-coding
Diff_Nuc43743	chr1	37601462	37601601	+	0	NA	Intergenic	Intergenic	-3670	NM_173870	269181	Mm.25861	NM_173870	ENSMUSG00000026110	Mgat4a	9530018I07Rik|GnT-IVa|glcNAc-T-IVa	mannoside acetylglucosaminyltransferase 4, isoenzyme A	protein-coding
Diff_Nuc43265	chr1	14836862	14837001	+	0	NA	Intergenic	RSINE1|SINE|B4	72012	NM_177781	277328	Mm.186329	NM_177781	ENSMUSG00000032769	Trpa1	Anktm1|TRPA1b	transient receptor potential cation channel, subfamily A, member 1	protein-coding
Diff_Nuc22996	chr18	85762552	85762691	+	0	NA	Intergenic	MTB|LTR|MaLR	-641705	NM_025969	67105	Mm.250617	NM_025969	ENSMUSG00000024645	Timm21	1700034H14Rik|2700002I20Rik	tranlocase of inner mitochondrial membrane 21	protein-coding
Diff_Nuc28878	chr6	142223722	142223861	+	0	NA	intron (NM_130861, intron 2 of 15)	intron (NM_130861, intron 2 of 15)	3603	NM_001267707	108096	Mm.206599	NM_130861	ENSMUSG00000063975	Slco1a5	Oatp-3|Oatp3|Slc21a7	solute carrier organic anion transporter family, member 1a5	protein-coding
Diff_Nuc38816	chr2	4445362	4445501	+	0	NA	intron (NM_001347086, intron 8 of 24)	intron (NM_001347086, intron 8 of 24)	-35369	NM_001177844	209630	Mm.37932	NM_172475	ENSMUSG00000026657	Frmd4a	2700017I06Rik|5330420J21|AI594879|C230040M21Rik|Frmd4|Gm13190|OTTMUSG00000010806|mKIAA1294	FERM domain containing 4A	protein-coding
Diff_Nuc20224	chr19	16239162	16239301	+	0	NA	non-coding (NR_033228, exon 1 of 1)	non-coding (NR_033228, exon 1 of 1)	643	NR_033228	595139	Mm.405662	NR_033228		E030024N20Rik	9030417F11Rik|Ppia-ps8	peptidylprolyl isomerase A pseudogene 8	pseudo
Diff_Nuc51776	chr8	93507402	93507541	+	0	NA	intron (NM_001310530, intron 8 of 37)	B3|SINE|B2	51323	NM_001310530	109151	Mm.100615	NM_177224	ENSMUSG00000056608	Chd9	1810014J18Rik|9030205D12Rik|A330063D19Rik|AD013|PRIC320|mKIAA0308	chromodomain helicase DNA binding protein 9	protein-coding
Diff_Nuc26650	chr6	37157582	37157721	+	0	NA	intron (NM_001347104, intron 1 of 32)	intron (NM_001347104, intron 1 of 32)	92325	NM_001081206	320127	Mm.119469	NM_001081206	ENSMUSG00000038665	Dgki	C130010K08Rik	diacylglycerol kinase, iota	protein-coding
Diff_Nuc1337	chr13	41094702	41094841	+	0	NA	Intergenic	B1_Mm|SINE|Alu	-1608	NM_026550	68083	Mm.24789	NM_026550	ENSMUSG00000038683	Pak1ip1	5830431I15Rik|5930415H02Rik|AA419825|AI314040|AW556169|Gdpd1|PIP1	PAK1 interacting protein 1	protein-coding
Diff_Nuc34322	chr4	106633422	106633561	+	0	NA	intron (NM_198438, intron 4 of 16)	intron (NM_198438, intron 4 of 16)	49416	NM_023672	72475	Mm.195635	NM_023672	ENSMUSG00000061887	Ssbp3	2610021L12Rik|2610200M23Rik|5730488C10Rik|AI854733|AW551939|LAST|SSDP1	single-stranded DNA binding protein 3	protein-coding
Diff_Nuc18492	chr14	63532642	63532781	+	0	NA	intron (NM_175546, intron 3 of 11)	intron (NM_175546, intron 3 of 11)	48332	NR_105860	102465311		NR_105860	ENSMUSG00000098858	Mir6541	Gm27311|mmu-mir-6541	microRNA 6541	ncRNA
Diff_Nuc51747	chr8	92114192	92114331	+	0	NA	Intergenic	L1_Mur3|LINE|L1	-546200	NM_021390	58198	Mm.214361	NM_021390	ENSMUSG00000031665	Sall1	Msal-3	sal-like 1 (Drosophila)	protein-coding
Diff_Nuc10525	chr10	107302512	107302651	+	0	NA	intron (NM_001177567, intron 19 of 57)	intron (NM_001177567, intron 19 of 57)	46609	NM_001177567	628870	Mm.336090	NM_001177567	ENSMUSG00000091455	Otogl	EG628870|Gm6924	otogelin-like	protein-coding
Diff_Nuc4903	chr12	83000362	83000501	+	0	NA	intron (NM_018814, intron 2 of 35)	intron (NM_018814, intron 2 of 35)	39414	NM_018814	54604	Mm.86584	NM_018814	ENSMUSG00000021140	Pcnx	2900024E21Rik|3526401J03Rik|AF096286|AI327143|AI413187|Pcnx1|Pcnxl1	pecanex homolog (Drosophila)	protein-coding
Diff_Nuc44624	chr1	74599582	74599721	+	0	NA	intron (NM_148937, intron 6 of 17)	intron (NM_148937, intron 6 of 17)	8717	NM_148937	18802	Mm.290731	NM_148937	ENSMUSG00000026173	Plcd4	4921507K24Rik	phospholipase C, delta 4	protein-coding
Diff_Nuc26017	chr6	11493822	11493961	+	0	NA	Intergenic	RLTR1B|LTR|ERV1	363555	NM_010886	17992	Mm.415865	NM_010886	ENSMUSG00000029632	Ndufa4	MLRQ	NADH dehydrogenase (ubiquinone) 1 alpha subcomplex, 4	protein-coding
Diff_Nuc7958	chr11	108855922	108856061	+	0	NA	Intergenic	Intergenic	74328	NM_015732	12006	Mm.71710	NM_015732	ENSMUSG00000000142	Axin2	Axi1|Axil|Conductin	axin 2	protein-coding
Diff_Nuc36266	chr3	50837252	50837391	+	0	NA	Intergenic	Intergenic	-191048	NM_009834	12457	Mm.86541	NM_009834	ENSMUSG00000023087	Noct	AU043840|Ccr4|Ccrn4l	nocturnin	protein-coding
Diff_Nuc23235	chr7	11481642	11481781	+	0	NA	Intergenic	L1Md_F3|LINE|L1	8688	NM_001185173	665780	Mm.482067	NM_001185173	ENSMUSG00000095339	Zscan4b	EG665780	zinc finger and SCAN domain containing 4B	protein-coding
Diff_Nuc31383	chr5	108924692	108924831	+	0	NA	intron (NM_172716, intron 8 of 10)	intron (NM_172716, intron 8 of 10)	34410	NM_172716	69587	Mm.261218	NM_172716	ENSMUSG00000033623	Pcgf3	2310035N15Rik|AI662857|D630042K08Rik|DONG1|E430039C14|RNF3A|Rnf3	polycomb group ring finger 3	protein-coding
Diff_Nuc2782	chr13	107857957	107858096	+	0	NA	Intergenic	L1_Mur3|LINE|L1	45376	NR_015471	100040322	Mm.133867	NR_015471		3830408C21Rik	-	RIKEN cDNA 3830408C21 gene	ncRNA
Diff_Nuc25818	chr6	3482532	3482671	+	0	NA	intron (NM_024260, intron 10 of 27)	intron (NM_024260, intron 10 of 27)	34208	NM_001167750	73288	Mm.45539	NM_024260	ENSMUSG00000001376	Vps50	1700034M03Rik|8430415E05Rik|BLM|C87205|Ccdc132|mKIAA1861	VPS50 EARP/GARPII complex subunit	protein-coding
Diff_Nuc21464	chr18	17659782	17659921	+	0	NA	Intergenic	Intergenic	79648	NR_045374	75162	Mm.60874	NR_045374		4930545E07Rik	-	RIKEN cDNA 4930545E07 gene	ncRNA
Diff_Nuc50942	chr8	53595552	53595691	+	0	NA	Intergenic	Lx5|LINE|L1	-1001435	NM_001205054	11593	Mm.334535	NM_001005847	ENSMUSG00000031521	Aga	AW060726	aspartylglucosaminidase	protein-coding
Diff_Nuc35636	chr3	19423842	19423981	+	0	NA	intron (NM_025489, intron 1 of 4)	intron (NM_025489, intron 1 of 4)	-7336	NM_001163537	66326	Mm.45615	NM_025489	ENSMUSG00000027606	Dnajc5b	1700008A05Rik	DnaJ heat shock protein family (Hsp40) member C5 beta	protein-coding
Diff_Nuc27159	chr6	58624682	58624821	+	0	NA	exon (NM_011920, exon 9 of 16)	exon (NM_011920, exon 9 of 16)	78085	NM_011920	26357	Mm.333096	NM_011920	ENSMUSG00000029802	Abcg2	ABC15|ABCP|AI428558|BCRP|Bcrp1|MXR|MXR1	ATP-binding cassette, sub-family G (WHITE), member 2	protein-coding
Diff_Nuc2364	chr13	89500912	89501051	+	0	NA	Intergenic	Intergenic	-179260	NM_013500	12950	Mm.266790	NM_013500	ENSMUSG00000021613	Hapln1	BB099155|CLP|Crtl1|Crtl1l|LP|LP-1	hyaluronan and proteoglycan link protein 1	protein-coding
Diff_Nuc51212	chr8	67011142	67011281	+	0	NA	Intergenic	L1MEf|LINE|L1	-17973	NR_030491	735270		NR_030491	ENSMUSG00000076042	Mir710	Mirn710|mmu-mir-710	microRNA 710	ncRNA
Diff_Nuc26765	chr6	41390322	41390461	+	0	NA	Intergenic	L1Md_F2|LINE|L1	5705	NM_001103153	100040233	Mm.297485	NM_001103153	ENSMUSG00000071517	Gm10334	ENSMUSG00000071517	predicted gene 10334	protein-coding
Diff_Nuc4493	chr12	67990352	67990491	+	0	NA	intron (NM_207010, intron 1 of 15)	intron (NM_207010, intron 1 of 15)	333115	NM_001193266	320772	Mm.227680	NM_207010	ENSMUSG00000034912	Mdga2	6720489L24Rik|9330209L04Rik|Adp|Mamdc1	MAM domain containing glycosylphosphatidylinositol anchor 2	protein-coding
Diff_Nuc39625	chr2	39894802	39894941	+	0	NA	Intergenic	Intergenic	-813013	NM_024209	67857	Mm.389242	NM_024209	ENSMUSG00000026753	Ppp6c	2310003C10Rik	protein phosphatase 6, catalytic subunit	protein-coding
Diff_Nuc3220	chr12	10058992	10059131	+	0	NA	Intergenic	B4A|SINE|B4	-317716	NM_027588	70881	Mm.272843	NM_027588	ENSMUSG00000020622	Nt5c1b	4921514H13Rik|AIRP|CN-IB|cN1B	5'-nucleotidase, cytosolic IB	protein-coding
Diff_Nuc40779	chr2	82198382	82198521	+	0	NA	Intergenic	Intergenic	304636	NM_175513	241514	Mm.119383	NM_175513	ENSMUSG00000070866	Zfp804a	C630007C17Rik|Znf804a	zinc finger protein 804A	protein-coding
Diff_Nuc22829	chr18	75871812	75871951	+	0	NA	Intergenic	L1MC5|LINE|L1	-14531	NM_201354	269037	Mm.36745	NM_201354	ENSMUSG00000052928	Ctif	Gm672	CBP80/20-dependent translation initiation factor	protein-coding
Diff_Nuc10221	chr10	95507432	95507571	+	0	NA	3' UTR (NM_001001932, exon 29 of 29)	3' UTR (NM_001001932, exon 29 of 29)	104204	NM_001001932	216238	Mm.210035	NM_001001932	ENSMUSG00000036499	Eea1	A430109M19Rik|B230358H09Rik|ZFYVE2	early endosome antigen 1	protein-coding
Diff_Nuc38928	chr2	8412872	8413011	+	0	NA	Intergenic	Lx5|LINE|L1	-698201	NR_038180	73438	Mm.23558	NR_038180	ENSMUSG00000085580	1700061F12Rik	-	RIKEN cDNA 1700061F12 gene	ncRNA
Diff_Nuc52356	chr8	125442882	125443021	+	0	NA	intron (NR_037865, intron 2 of 13)	B1_Mm|SINE|Alu	70677	NM_007662	12555	Mm.1976	NM_007662	ENSMUSG00000031962	Cdh15	AI323380|Cdh14|Mcad	cadherin 15	protein-coding
Diff_Nuc9161	chr10	44240462	44240601	+	0	NA	Intergenic	Intergenic	-61977	NM_007548	12142	Mm.4800	NM_007548	ENSMUSG00000038151	Prdm1	Blimp-1|Blimp1|PRDI-BF1|ZNFPR1A1|b2b1765Clo	PR domain containing 1, with ZNF domain	protein-coding
Diff_Nuc9203	chr10	46243882	46244021	+	0	NA	Intergenic	L1Md_F2|LINE|L1	716441	NR_040624	320363	Mm.123343	NR_040624	ENSMUSG00000110874	D030045P18Rik	-	RIKEN cDNA D030045P18 gene	ncRNA
Diff_Nuc38521	chr3	149149842	149149981	+	0	NA	Intergenic	Intergenic	212210	NR_040591	381482	Mm.393866	NR_040591		Gm1653	-	predicted gene 1653	ncRNA
Diff_Nuc31729	chr5	130677342	130677481	+	0	NA	intron (NM_019983, intron 3 of 7)	intron (NM_019983, intron 3 of 7)	14361	NM_019983	56715	Mm.288639	NM_019983	ENSMUSG00000025340	Rabgef1	Rab5ef|Rabex5|Rin2	RAB guanine nucleotide exchange factor (GEF) 1	protein-coding
Diff_Nuc32718	chr4	30395612	30395751	+	0	NA	Intergenic	RMER1C|Other|Other	-196065	NR_040655	75332	Mm.108636	NR_040655		4930556G01Rik	-	RIKEN cDNA 4930556G01 gene	ncRNA
Diff_Nuc18551	chr14	66162092	66162231	+	0	NA	intron (NM_028811, intron 14 of 14)	intron (NM_028811, intron 14 of 14)	49788	NM_001253812	74195	Mm.29719	NM_028811	ENSMUSG00000022031	Elp3	2610507P14Rik|KAT9	elongator acetyltransferase complex subunit 3	protein-coding
Diff_Nuc7138	chr11	71328552	71328691	+	0	NA	Intergenic	Intergenic	-229887	NR_027858	627984	Mm.390378	NM_001039234	ENSMUSG00000092528	Nlrp1c-ps	Nalp1c|Nlrp1c|OTTMUSG00000006090	NLR family, pyrin domain containing 1C, pseudogene	pseudo
Diff_Nuc25542	chr7	134737152	134737291	+	0	NA	intron (NM_172281, intron 10 of 19)	intron (NM_172281, intron 10 of 19)	5009	NM_172281	233900	Mm.41122	NM_172281	ENSMUSG00000030816	Rnf40	AI848422|mKIAA0661	ring finger protein 40	protein-coding
Diff_Nuc4252	chr12	56828312	56828451	+	0	NA	intron (NM_001003719, intron 16 of 39)	Lx2B|LINE|L1	94122	NM_019994	56784	Mm.292180	NM_019994	ENSMUSG00000021027	Ralgapa1	2310003F20Rik|4930400K19Rik|AI563624|GRIPE|Garnl1|Tulip1|mKIAA0884	Ral GTPase activating protein, alpha subunit 1	protein-coding
Diff_Nuc12556	chr17	75036422	75036561	+	0	NA	intron (NM_007566, intron 43 of 72)	Lx5|LINE|L1	-80599	NM_152817	74196	Mm.209503	NM_152817	ENSMUSG00000024078	Ttc27	2610511O17Rik	tetratricopeptide repeat domain 27	protein-coding
Diff_Nuc40695	chr2	78980862	78981001	+	0	NA	Intergenic	Intergenic	-114652	NM_010576	16401	Mm.31903	NM_010576	ENSMUSG00000027009	Itga4	CD49D|Itga4B	integrin alpha 4	protein-coding
Diff_Nuc18452	chr14	62040042	62040181	+	0	NA	intron (NM_008466, intron 1 of 16)	intron (NM_008466, intron 1 of 16)	18673	NM_008466	16648	Mm.25548	NM_008466	ENSMUSG00000021929	Kpna3	IPOA4	karyopherin (importin) alpha 3	protein-coding
Diff_Nuc45261	chr1	107183772	107183911	+	0	NA	intron (NM_001160368, intron 1 of 1)	intron (NM_001160368, intron 1 of 1)	69446	NM_178779	320311	Mm.389162	NM_178779	ENSMUSG00000047496	Rnf152	A930029B02Rik	ring finger protein 152	protein-coding
Diff_Nuc8755	chr10	27419692	27419831	+	0	NA	Intergenic	L2a|LINE|L2	-83013	NM_008481	16773	Mm.256087	NM_008481	ENSMUSG00000019899	Lama2	5830440B04|dy|mKIAA4087|mer|merosin	laminin, alpha 2	protein-coding
Diff_Nuc11036	chr10	127786922	127787061	+	0	NA	intron (NM_026444, intron 2 of 10)	intron (NM_026444, intron 2 of 10)	12208	NM_026444	12974	Mm.58836	NM_026444	ENSMUSG00000005683	Cs	2610511A05Rik|9030605P22Rik|Ahl4|BB234005|Cis	citrate synthase	protein-coding
Diff_Nuc27035	chr6	52703892	52704031	+	0	NA	intron (NM_025816, intron 14 of 17)	intron (NM_025816, intron 14 of 17)	40238	NM_025816	52440	Mm.389757	NM_025816	ENSMUSG00000004535	Tax1bp1	1200003J11Rik|1700069J21Rik|AA930106|D6Ertd404e|D6Ertd772e|T6bp|TXBP151	Tax1 (human T cell leukemia virus type I) binding protein 1	protein-coding
Diff_Nuc16917	chr15	78910922	78911061	+	0	NA	intron (NM_145139, intron 5 of 12)	B1_Mus2|SINE|Alu	5338	NM_145139	223691	Mm.206404	NM_145139	ENSMUSG00000033047	Eif3l	0610011H21Rik|D15N1e|Eif3eip|Eif3ip|Eif3s6ip|HSP-66Y|PAF67	eukaryotic translation initiation factor 3, subunit L	protein-coding
Diff_Nuc15753	chr15	25202862	25203001	+	0	NA	Intergenic	Intergenic	140588	NM_027395	70350	Mm.29586	NM_027395	ENSMUSG00000045763	Basp1	2610024P12Rik|CAP-23|CAP23|Ckap3|NAP-22|NAP22	brain abundant, membrane attached signal protein 1	protein-coding
Diff_Nuc5960	chr11	16275842	16275981	+	0	NA	Intergenic	Intergenic	118184	NM_145967	211739	Mm.284015	NM_145967	ENSMUSG00000048834	Vstm2a	Vstm2	V-set and transmembrane domain containing 2A	protein-coding
Diff_Nuc44566	chr1	71014822	71014961	+	0	NA	Intergenic	Intergenic	134655	NM_007525	12021	Mm.10764	NM_007525	ENSMUSG00000026196	Bard1	ENSMUSG00000060893|ENSMUSG00000073653	BRCA1 associated RING domain 1	protein-coding
Diff_Nuc37769	chr3	114831712	114831851	+	0	NA	Intergenic	Intergenic	47898	NM_153157	229759	Mm.54183	NM_153157	ENSMUSG00000027965	Olfm3	B230206G02Rik	olfactomedin 3	protein-coding
Diff_Nuc35414	chr3	8571322	8571461	+	0	NA	Intergenic	L1_Mus2|LINE|L1	61864	NM_025285	20257	Mm.29580	NM_025285	ENSMUSG00000027500	Stmn2	AI159727|SCG10|Scgn10|Stmb2	stathmin-like 2	protein-coding
Diff_Nuc36068	chr3	41451462	41451601	+	0	NA	exon (NM_001081411, exon 18 of 21)	exon (NM_001081411, exon 18 of 21)	82729	NM_001130186	269424	Mm.286285	NM_172303	ENSMUSG00000025764	Jade1	AU041499|D530048A03Rik|Phf17|mKIAA1807	jade family PHD finger 1	protein-coding
Diff_Nuc8591	chr10	18944692	18944831	+	0	NA	Intergenic	(CATA)n|Simple_repeat|Simple_repeat	57717	NR_038022	100504265	Mm.383417	NR_038021		Gm20139	-	predicted gene, 20139	ncRNA
Diff_Nuc48036	chr9	42262092	42262231	+	0	NA	intron (NM_173038, intron 1 of 7)	B3|SINE|B2	18148	NM_173038	272589	Mm.34483	NM_173038	ENSMUSG00000037287	Tbcel	D330014K23|E130107N23Rik|Lrrc35	tubulin folding cofactor E-like	protein-coding
Diff_Nuc26177	chr6	18047642	18047781	+	0	NA	intron (NM_023729, intron 4 of 12)	intron (NM_023729, intron 4 of 12)	11350	NM_023729	74068	Mm.73091	NM_023729	ENSMUSG00000010796	Asz1	4933400N19Rik|Gasz|ORF3	ankyrin repeat, SAM and basic leucine zipper domain containing 1	protein-coding
Diff_Nuc11586	chr17	25769592	25769731	+	0	NA	intron (NR_045520, intron 3 of 8)	intron (NR_045520, intron 3 of 8)	53542	NR_045520	76483	Mm.12787	NM_029624	ENSMUSG00000002279	Lmf1	2400010G15Rik|AW822050|Tmem112|cld	lipase maturation factor 1	protein-coding
Diff_Nuc36108	chr3	43554412	43554551	+	0	NA	Intergenic	Lx8|LINE|L1	1627701	NR_045172	72511	Mm.140700	NR_045172	ENSMUSG00000097040	2610316D01Rik	-	RIKEN cDNA 2610316D01 gene	ncRNA
Diff_Nuc31760	chr5	132460572	132460711	+	0	NA	intron (NM_177047, intron 4 of 19)	MTEa|LTR|MaLR	104502	NR_040704	75369	Mm.389696	NR_040704	ENSMUSG00000105773	4930563F08Rik	-	RIKEN cDNA 4930563F08 gene	ncRNA
Diff_Nuc41352	chr2	107710432	107710571	+	0	NA	Intergenic	MTEa|LTR|MaLR	579755	NM_021275	16492	Mm.142718	NM_021275	ENSMUSG00000042604	Kcna4	Kv1.4	potassium voltage-gated channel, shaker-related subfamily, member 4	protein-coding
Diff_Nuc25408	chr7	128299912	128300051	+	0	NA	exon (NM_139310, exon 27 of 29)	exon (NM_139310, exon 27 of 29)	73029	NM_139310	246190	Mm.221073	NM_139310	ENSMUSG00000034990	Otoa	-	otoancorin	protein-coding
Diff_Nuc38322	chr3	139834902	139835041	+	0	NA	Intergenic	Intergenic	143758	NR_105798	102465198		NR_105798	ENSMUSG00000099169	Mir7j	Gm27716|Mirlet7j|mmu-let-7j	microRNA 7j	ncRNA
Diff_Nuc3484	chr12	29810242	29810381	+	0	NA	Intergenic	Intergenic	373618	NM_201357	380752	Mm.273724	NM_201357	ENSMUSG00000036613	Tssc1	D12Ertd604e|Eipr1	tumor suppressing subtransferable candidate 1	protein-coding
Diff_Nuc39740	chr2	43721582	43721721	+	0	NA	intron (NM_001301831, intron 5 of 14)	L1_Mur3|LINE|L1	117307	NM_001301831	76117	Mm.217350	NM_153820	ENSMUSG00000049744	Arhgap15	5830480G12Rik	Rho GTPase activating protein 15	protein-coding
Diff_Nuc25301	chr7	122935152	122935291	+	0	NA	intron (NM_001025560, intron 3 of 15)	intron (NM_001025560, intron 3 of 15)	9902	NM_001277328	20679	Mm.323365	NM_011445	ENSMUSG00000051910	Sox6	AI987981|SOX-LZ	SRY (sex determining region Y)-box 6	protein-coding
Diff_Nuc10470	chr10	105702512	105702651	+	0	NA	Intergenic	Intergenic	-204785	NM_177373	327814	Mm.391424	NM_177373	ENSMUSG00000053825	Ppfia2	5330438O12|B230207K17Rik|E130120L08Rik|mKIAA4112	protein tyrosine phosphatase, receptor type, f polypeptide (PTPRF), interacting protein (liprin), alpha 2	protein-coding
Diff_Nuc46728	chr1	175079552	175079691	+	0	NA	Intergenic	Lx|LINE|L1	-18275	NM_146764	258759	Mm.389211	NM_146764	ENSMUSG00000062527	Olfr1408	MOR267-4	olfactory receptor 1408	protein-coding
Diff_Nuc46084	chr1	148484162	148484301	+	0	NA	intron (NM_001145807, intron 2 of 7)	B3|SINE|B2	139414	NM_001145807	215378	Mm.441817	NM_153539	ENSMUSG00000035131	Brinp3	B830045N13Rik|Fam5c	bone morphogenetic protein/retinoic acid inducible neural specific 3	protein-coding
Diff_Nuc23875	chr7	60974722	60974861	+	0	NA	Intergenic	MIR|SINE|MIR	172468	NR_105746	102466619		NR_105746	ENSMUSG00000099176	Mir6238	Gm27982|mmu-mir-6238	microRNA 6238	ncRNA
Diff_Nuc25343	chr7	125356212	125356351	+	0	NA	intron (NM_001031814, intron 2 of 62)	intron (NM_001031814, intron 2 of 62)	30870	NM_001031814	233789	Mm.309053	NM_177180	ENSMUSG00000030655	Smg1	2610207I05Rik|5430435M13Rik|C130002K18Rik|mKIAA0421	SMG1 homolog, phosphatidylinositol 3-kinase-related kinase (C. elegans)	protein-coding
Diff_Nuc30800	chr5	81532792	81532931	+	0	NA	intron (NM_001347367, intron 2 of 27)	URR1B|DNA|MER1_type	82243	NM_198702	319387	Mm.273631	NM_198702	ENSMUSG00000037605	Adgrl3	5430402I23Rik|CIRL-3|D130075K09Rik|Gm1379|LEC3|Lphn3|mKIAA0768	adhesion G protein-coupled receptor L3	protein-coding
Diff_Nuc12353	chr17	65492342	65492481	+	0	NA	Intergenic	L1_Mur3|LINE|L1	-307000	NM_030031	78057	Mm.109380	NM_030031	ENSMUSG00000024088	4930583I09Rik	-	RIKEN cDNA 4930583I09 gene	protein-coding
Diff_Nuc15719	chr15	23814302	23814441	+	0	NA	Intergenic	L1Md_F2|LINE|L1	848153	NM_001081299	320865	Mm.241965	NM_001081299	ENSMUSG00000040420	Cdh18	B230220E17Rik|Cdh14l	cadherin 18	protein-coding
Diff_Nuc44662	chr1	76781562	76781701	+	0	NA	Intergenic	Intergenic	275496	NR_105761	102465175		NR_105761	ENSMUSG00000098611	Mir6343	Gm27304|mmu-mir-6343	microRNA 6343	ncRNA
Diff_Nuc26834	chr6	44637642	44637781	+	0	NA	Intergenic	L1MC3|LINE|L1	-372349	NM_001004357	66797	Mm.440084	NM_025771	ENSMUSG00000039419	Cntnap2	5430425M22Rik|Caspr2|mKIAA0868	contactin associated protein-like 2	protein-coding
Diff_Nuc7827	chr11	103829512	103829651	+	0	NA	intron (NM_007477, intron 1 of 4)	B2_Mm1a|SINE|B2	1396	NM_007477	11841	Mm.5061	NM_007477	ENSMUSG00000062421	Arf2	-	ADP-ribosylation factor 2	protein-coding
Diff_Nuc38911	chr2	7746392	7746531	+	0	NA	Intergenic	B4|SINE|B4	-428636	NM_001110231	14007	Mm.398543	NM_010160	ENSMUSG00000002107	Celf2	B230218O03|B230345P09Rik|C88023|CELF-2|CUG-BP2|Cugbp2|D230046B21Rik|Etr-3|Napor|Napor-2|mETR-3	CUGBP, Elav-like family member 2	protein-coding
Diff_Nuc28996	chr6	147460382	147460521	+	0	NA	intron (NM_025911, intron 3 of 12)	intron (NM_025911, intron 3 of 12)	36058	NM_025911	67015	Mm.209774	NM_025911	ENSMUSG00000030301	Ccdc91	1700086G08Rik|1810060J02Rik|AU045683|AW555238|p56	coiled-coil domain containing 91	protein-coding
Diff_Nuc23263	chr7	13672882	13673021	+	0	NA	Intergenic	Intergenic	-2387	NM_145847	252909	Mm.377268	NM_145847	ENSMUSG00000070817	Vmn1r85	V1rj3	vomeronasal 1 receptor 85	protein-coding
Diff_Nuc22137	chr18	46408672	46408811	+	0	NA	intron (NM_172627, intron 6 of 8)	intron (NM_172627, intron 6 of 8)	31763	NM_172627	225467	Mm.262096	NM_172627	ENSMUSG00000024477	Pggt1b	2010207C17Rik|2610100E13|AI451237|AI551093|BGG1|GGT1	protein geranylgeranyltransferase type I, beta subunit	protein-coding
Diff_Nuc33234	chr4	55250362	55250501	+	0	NA	Intergenic	Intergenic	-112483	NM_009011	19359	Mm.196846	NM_009011	ENSMUSG00000028426	Rad23b	0610007D13Rik|AV001138|HR23B|mHR23B|p58	RAD23 homolog B, nucleotide excision repair protein	protein-coding
Diff_Nuc15012	chr16	86698172	86698311	+	0	NA	Intergenic	L1M2|LINE|L1	-656189	NM_001159331	67768	Mm.296532	NM_026366	ENSMUSG00000044442	N6amt1	5830445C04Rik|Hemk2|Pred28	N-6 adenine-specific DNA methyltransferase 1 (putative)	protein-coding
Diff_Nuc18035	chr14	40115862	40116001	+	0	NA	intron (NM_008734, intron 1 of 9)	L1_Rod|LINE|L1	-169786	NR_131973	432842	Mm.352566	NR_131973		LOC432842	-	uncharacterized LOC432842	ncRNA
Diff_Nuc48380	chr9	58740072	58740211	+	0	NA	intron (NM_008684, intron 23 of 28)	intron (NM_008684, intron 23 of 28)	68822	NM_001081192	330953	Mm.151967	NM_001081192	ENSMUSG00000032338	Hcn4	Bcng3|Hcn3	hyperpolarization-activated, cyclic nucleotide-gated K+ 4	protein-coding
Diff_Nuc23722	chr7	53164122	53164261	+	0	NA	intron (NM_144801, intron 5 of 7)	MT2A|LTR|ERVL	11752	NM_144801	70209	Mm.163766	NM_144801	ENSMUSG00000002781	Tmem143	2310076O21Rik|AI481604	transmembrane protein 143	protein-coding
Diff_Nuc9846	chr10	76768672	76768811	+	0	NA	intron (NM_001024837, intron 8 of 10)	intron (NM_001024837, intron 8 of 10)	46696	NM_030262	80294	Mm.203556	NM_030262	ENSMUSG00000020260	Pofut2	2310011G23Rik|AI256847|BC003494|C21orf80|FUT13	protein O-fucosyltransferase 2	protein-coding
Diff_Nuc5731	chr11	5309192	5309331	+	0	NA	intron (NM_001080924, intron 1 of 8)	B3|SINE|B2	-27518	NM_001290501	407821	Mm.216313	NM_001080924	ENSMUSG00000041961	Znrf3	Gm1167	zinc and ring finger 3	protein-coding
Diff_Nuc36074	chr3	41566012	41566151	+	0	NA	Intergenic	MER70A|LTR|ERVL	19541	NM_027271	73852	Mm.29006	NM_027271	ENSMUSG00000025766	D3Ertd751e	2810009O15Rik|4930415G15Rik	DNA segment, Chr 3, ERATO Doi 751, expressed	protein-coding
Diff_Nuc10129	chr10	91810562	91810701	+	0	NA	intron (NR_046027, intron 2 of 8)	intron (NR_046027, intron 2 of 8)	27487	NR_046027	627800	Mm.391417	NR_046027	ENSMUSG00000098040	Gm20757	-	predicted gene, 20757	ncRNA
Diff_Nuc40765	chr2	81246032	81246171	+	0	NA	Intergenic	Intergenic	-647714	NM_175513	241514	Mm.119383	NM_175513	ENSMUSG00000070866	Zfp804a	C630007C17Rik|Znf804a	zinc finger protein 804A	protein-coding
Diff_Nuc6032	chr11	19187402	19187541	+	0	NA	Intergenic	Intergenic	222193	NR_046037	74059	Mm.292321	NR_046037	ENSMUSG00000086025	4933406G16Rik	-	RIKEN cDNA 4933406G16 gene	ncRNA
Diff_Nuc32066	chr5	150080092	150080231	+	0	NA	intron (NM_009663, intron 1 of 4)	intron (NM_009663, intron 1 of 4)	3581	NM_009663	11690	Mm.19844	NM_009663	ENSMUSG00000060063	Alox5ap	Flap	arachidonate 5-lipoxygenase activating protein	protein-coding
Diff_Nuc25119	chr7	114511792	114511931	+	0	NA	Intergenic	Intergenic	-2443	NM_021889	60510	Mm.302793	NM_021889	ENSMUSG00000062542	Syt9	-	synaptotagmin IX	protein-coding
Diff_Nuc7806	chr11	102779222	102779361	+	0	NA	intron (NM_197959, intron 1 of 15)	PB1D9|SINE|Alu	7147	NM_197959	70218	Mm.32084	NM_197959	ENSMUSG00000051378	Kif18b	3000004C01Rik	kinesin family member 18B	protein-coding
Diff_Nuc23595	chr7	46481342	46481481	+	0	NA	Intergenic	Intergenic	38493	NR_073038	100861861	Mm.60620	NR_073038		Gm21276	-	predicted gene, 21276	pseudo
Diff_Nuc6869	chr11	56811582	56811721	+	0	NA	Intergenic	MER20|DNA|MER1_type	-13469	NM_001113325	14799	Mm.4920	NM_008165	ENSMUSG00000020524	Gria1	2900051M01Rik|Glr-1|Glr1|GluA1|GluR-A|GluRA|Glur-1|Glur1|HIPA1|gluR-K1	glutamate receptor, ionotropic, AMPA1 (alpha 1)	protein-coding
Diff_Nuc25528	chr7	134084332	134084471	+	0	NA	intron (NM_172747, intron 2 of 5)	intron (NM_172747, intron 2 of 5)	8694	NM_001347657	233879	Mm.444143	NM_001039645	ENSMUSG00000046378	Asphd1	A830007L07Rik|Gm168	aspartate beta-hydroxylase domain containing 1	protein-coding
Diff_Nuc50615	chr8	41603322	41603461	+	0	NA	intron (NM_033560, intron 1 of 11)	intron (NM_033560, intron 1 of 11)	-2190	NM_001271542	18983	Mm.272551	NM_011135	ENSMUSG00000031601	Cnot7	AU022737|CAF-1|Caf1|Pop2	CCR4-NOT transcription complex, subunit 7	protein-coding
Diff_Nuc25923	chr6	7809662	7809801	+	0	NA	intron (NM_052993, intron 1 of 3)	intron (NM_052993, intron 1 of 3)	14507	NM_052993	94192	Mm.102752	NM_052993	ENSMUSG00000042460	C1galt1	2210410E06Rik|AV284120|T-synthase	core 1 synthase, glycoprotein-N-acetylgalactosamine 3-beta-galactosyltransferase, 1	protein-coding
Diff_Nuc7427	chr11	85244332	85244471	+	0	NA	intron (NM_138681, intron 8 of 25)	intron (NM_138681, intron 8 of 25)	77735	NM_001166643	192197	Mm.209989	NM_138681	ENSMUSG00000059439	Bcas3	1500019F07Rik|2610028P08Rik|AU021018|BC028339|K20D4|rudhira	breast carcinoma amplified sequence 3	protein-coding
Diff_Nuc27645	chr6	80525062	80525201	+	0	NA	intron (NM_001347261, intron 2 of 2)	intron (NM_001347261, intron 2 of 2)	555494	NM_178731	243499	Mm.483425	NM_178731	ENSMUSG00000052581	Lrrtm4	7530419J18Rik|A230052N11	leucine rich repeat transmembrane neuronal 4	protein-coding
Diff_Nuc27224	chr6	61329722	61329861	+	0	NA	intron (NM_183310, intron 4 of 10)	intron (NM_183310, intron 4 of 10)	-198987	NR_040287	100504262	Mm.438066	NR_040287		A730020E08Rik	-	RIKEN cDNA A730020E08 gene	ncRNA
Diff_Nuc32938	chr4	41177962	41178101	+	0	NA	intron (NM_026872, intron 4 of 28)	intron (NM_026872, intron 4 of 28)	44137	NM_026872	68926	Mm.41864	NM_026872	ENSMUSG00000028433	Ubap2	1190005K07Rik|AA408600|AU045235|UBAP-2|mKIAA1491	ubiquitin-associated protein 2	protein-coding
Diff_Nuc23606	chr7	46559882	46560021	+	0	NA	Intergenic	ORR1A1-int|LTR|MaLR	-40047	NR_073038	100861861	Mm.60620	NR_073038		Gm21276	-	predicted gene, 21276	pseudo
Diff_Nuc36721	chr3	69538092	69538231	+	0	NA	intron (NM_133787, intron 7 of 15)	RMER15|LTR|ERVL	12184	NM_133787	97112	Mm.21062	NM_133787	ENSMUSG00000027787	Nmd3	C87860	NMD3 ribosome export adaptor	protein-coding
Diff_Nuc2816	chr13	109372602	109372741	+	0	NA	Intergenic	ORR1D1-int|LTR|MaLR	-71700	NM_011056	238871	Mm.434429	NM_011056	ENSMUSG00000021699	Pde4d	9630011N22Rik|Dpde3	phosphodiesterase 4D, cAMP specific	protein-coding
Diff_Nuc49808	chr9	123728992	123729131	+	0	NA	intron (NM_001110253, intron 13 of 17)	intron (NM_001110253, intron 13 of 17)	13466	NM_030712	80901	Mm.124289	NM_030712	ENSMUSG00000048521	Cxcr6	BB217514|BONZO|STRL33	chemokine (C-X-C motif) receptor 6	protein-coding
Diff_Nuc43302	chr1	16242397	16242536	+	0	NA	intron (NM_025303, intron 12 of 13)	intron (NM_025303, intron 12 of 13)	146503	NM_133832	98711	Mm.274376	NM_133832	ENSMUSG00000025921	Rdh10	3110069K09Rik|4921506A21Rik|AI875664|AW549993|D1Ertd762e|m366Asp	retinol dehydrogenase 10 (all-trans)	protein-coding
Diff_Nuc38342	chr3	140793492	140793631	+	0	NA	Intergenic	Lx5|LINE|L1	81758	NM_008811	18598	Mm.4223	NM_008811	ENSMUSG00000047674	Pdha2	Pdhal	pyruvate dehydrogenase E1 alpha 2	protein-coding
Diff_Nuc1204	chr13	34694592	34694731	+	0	NA	Intergenic	RLTR18|LTR|ERVK	49889	NM_025831	66895	Mm.28943	NM_025831	ENSMUSG00000021411	Pxdc1	1300014I06Rik	PX domain containing 1	protein-coding
Diff_Nuc47470	chr9	13601412	13601551	+	0	NA	intron (NM_023858, intron 9 of 14)	intron (NM_023858, intron 9 of 14)	30016	NR_037622	74360	Mm.157212	NM_026665	ENSMUSG00000031922	Cep57	3110002L15Rik|4921510P06Rik|4931428M20Rik|AI467480|Tsp57|mKIAA0092	centrosomal protein 57	protein-coding
Diff_Nuc46772	chr1	177071932	177072071	+	0	NA	intron (NM_001347195, intron 6 of 17)	L1MCa|LINE|L1	-220051	NM_011825	23893	Mm.25760	NM_011825	ENSMUSG00000050069	Grem2	Gremlin2|Prdc	gremlin 2, DAN family BMP antagonist	protein-coding
Diff_Nuc30372	chr5	62148742	62148881	+	0	NA	Intergenic	Intergenic	-51271	NM_019468	14380	Mm.347430	NM_019468	ENSMUSG00000089992	G6pd2	G6pdx-ps1|Gpd-2|Gpd2	glucose-6-phosphate dehydrogenase 2	protein-coding
Diff_Nuc15386	chr15	8950862	8951001	+	0	NA	intron (NM_198024, intron 2 of 11)	intron (NM_198024, intron 2 of 11)	32982	NM_198024	223332	Mm.321371	NM_198024	ENSMUSG00000048424	Ranbp3l	C130037N17Rik	RAN binding protein 3-like	protein-coding
Diff_Nuc30921	chr5	85577502	85577641	+	0	NA	Intergenic	L1_Mm|LINE|L1	-731164	NM_007937	13839	Mm.137991	NM_007937	ENSMUSG00000029245	Epha5	AI854630|AW125296|Cek7|Ehk1|Els1|Hek7|Rek7|bsk	Eph receptor A5	protein-coding
Diff_Nuc16910	chr15	78252702	78252841	+	0	NA	Intergenic	Intergenic	-6223	NM_001289672	72844	Mm.390816	NM_001081367	ENSMUSG00000033287	Kctd17	2900008M13Rik|AA414907|AW742389|N28155	potassium channel tetramerisation domain containing 17	protein-coding
Diff_Nuc16722	chr15	67651902	67652041	+	0	NA	Intergenic	Lx7|LINE|L1	438447	NM_001145888	380993	Mm.309526	NM_198644	ENSMUSG00000022335	Zfat	Gm922|Zfat1|Zfp406	zinc finger and AT hook domain containing	protein-coding
Diff_Nuc40426	chr2	68870702	68870841	+	0	NA	intron (NM_172856, intron 4 of 9)	intron (NM_172856, intron 4 of 9)	-103086	NM_181547	329416	Mm.90047	NM_181547	ENSMUSG00000034738	Nostrin	Daip2|mDaIP2	nitric oxide synthase trafficker	protein-coding
Diff_Nuc26362	chr6	25928072	25928211	+	0	NA	TTS (NR_040771)	TTS (NR_040771)	46715	NR_040771	626904	Mm.126787	NR_040771	ENSMUSG00000106799	Gm20756	-	predicted gene, 20756	ncRNA
Diff_Nuc22441	chr18	59393882	59394021	+	0	NA	intron (NM_001081328, intron 2 of 2)	intron (NM_001081328, intron 2 of 2)	58957	NM_001081328	78923	Mm.84007	NM_001081328	ENSMUSG00000058152	Chsy3	4833446K15Rik|AI662215	chondroitin sulfate synthase 3	protein-coding
Diff_Nuc21309	chr18	10122832	10122971	+	0	NA	intron (NM_009071, intron 9 of 32)	PB1|SINE|Alu	58889	NM_009071	19877	Mm.6710	NM_009071	ENSMUSG00000024290	Rock1	1110055K06Rik|Rock-I	Rho-associated coiled-coil containing protein kinase 1	protein-coding
Diff_Nuc2103	chr13	79077322	79077461	+	0	NA	Intergenic	Intergenic	-739257	NM_010151	13865	Mm.439653	NM_010151	ENSMUSG00000069171	Nr2f1	COUP-TF1|COUP-TFI|COUPTFA|EAR-3|EAR3|Erbal3|SVP44|Tcfcoup1	nuclear receptor subfamily 2, group F, member 1	protein-coding
Diff_Nuc50637	chr8	42343902	42344041	+	0	NA	intron (NM_023662, intron 3 of 37)	intron (NM_023662, intron 3 of 37)	18858	NM_023662	18536	Mm.117896	NM_023662	ENSMUSG00000031592	Pcm1	2600002H09Rik|9430077F19Rik|C030044G17Rik	pericentriolar material 1	protein-coding
Diff_Nuc47474	chr9	13734232	13734371	+	0	NA	Intergenic	L1MEg|LINE|L1	102130	NM_176836	72826	Mm.246174	NM_176836	ENSMUSG00000037808	Fam76b	2810485I05Rik|C78303	family with sequence similarity 76, member B	protein-coding
Diff_Nuc47463	chr9	13460592	13460731	+	0	NA	intron (NM_001013813, intron 1 of 3)	MTE2a|LTR|MaLR	-6243	NM_173776	270118	Mm.116898	NM_173776	ENSMUSG00000031925	Maml2	5930431H10|BC032967	mastermind like 2 (Drosophila)	protein-coding
Diff_Nuc51236	chr8	68461562	68461701	+	0	NA	intron (NM_001166372, intron 2 of 7)	intron (NM_001166372, intron 2 of 7)	319207	NM_175188	72925	Mm.380457	NM_175188	ENSMUSG00000036469	March1	2900024D24Rik|BB085186	membrane-associated ring finger (C3HC4) 1	protein-coding
Diff_Nuc29096	chr5	4312842	4312981	+	0	NA	Intergenic	Intergenic	120544	NM_001042670	208595	Mm.129815	NM_001042670	ENSMUSG00000053178	Mterf1b	ENSMUSG00000053178|Gm9897	mitochondrial transcription termination factor 1b	protein-coding
Diff_Nuc299	chrX	110633162	110633301	+	0	NA	intron (NM_033605, intron 2 of 12)	L1_Mus1|LINE|L1	221366	NM_001142570	93837	Mm.79760	NM_033605	ENSMUSG00000025592	Dach2	9430028N04Rik	dachshund 2 (Drosophila)	protein-coding
Diff_Nuc47249	chr9	4758702	4758841	+	0	NA	intron (NM_001113180, intron 3 of 16)	intron (NM_001113180, intron 3 of 16)	37463	NM_001113180	14802	Mm.209263	NM_019691	ENSMUSG00000025892	Gria4	GluA4|GluR-D|Glur-4|Glur4|Gluralpha4|spkw1	glutamate receptor, ionotropic, AMPA4 (alpha 4)	protein-coding
Diff_Nuc16452	chr15	54179732	54179871	+	0	NA	Intergenic	Intergenic	-62528	NM_173422	239447	Mm.82400	NM_173422	ENSMUSG00000038591	Colec10	CL-L1	collectin sub-family member 10	protein-coding
Diff_Nuc44677	chr1	77829512	77829651	+	0	NA	Intergenic	Intergenic	-317918	NM_007936	13838	Mm.400747	NM_007936	ENSMUSG00000026235	Epha4	2900005C20Rik|AI385584|Cek8|Hek8|Sek|Sek1|Tyro1|rb	Eph receptor A4	protein-coding
Diff_Nuc14770	chr16	77204012	77204151	+	0	NA	Intergenic	Intergenic	-125492	NR_015543	77994	Mm.394688	NR_015543	ENSMUSG00000090386	Mir99ahg	2810055G20Rik|D730043B02Rik	Mir99a and Mirlet7c-1 host gene (non-protein coding)	ncRNA
Diff_Nuc7012	chr11	64130262	64130401	+	0	NA	Intergenic	Intergenic	-118503	NM_178870	15478	Mm.340214	NM_178870	ENSMUSG00000047759	Hs3st3a1	3Ost3a|Hs3st3a	heparan sulfate (glucosamine) 3-O-sulfotransferase 3A1	protein-coding
Diff_Nuc18169	chr14	48780582	48780721	+	0	NA	intron (NM_033602, intron 1 of 5)	intron (NM_033602, intron 1 of 5)	-37740	NR_003630	624367	Mm.445185	NM_001037921	ENSMUSG00000063885	Gm6498	EG624367	glyceraldehyde-3-phosphate dehydrogenase pseudogene	pseudo
Diff_Nuc46606	chr1	169679672	169679811	+	0	NA	intron (NM_033652, intron 2 of 7)	intron (NM_033652, intron 2 of 7)	60052	NM_033652	110648	Mm.330081	NM_033652	ENSMUSG00000026686	Lmx1a	Lmx1.1|dr|dreher|sst	LIM homeobox transcription factor 1 alpha	protein-coding
Diff_Nuc31959	chr5	144175742	144175881	+	0	NA	intron (NM_025841, intron 2 of 4)	B3A|SINE|B2	10312	NM_025841	66913	Mm.181880	NM_025841	ENSMUSG00000079111	Kdelr2	1110007A14Rik	KDEL (Lys-Asp-Glu-Leu) endoplasmic reticulum protein retention receptor 2	protein-coding
Diff_Nuc11470	chr17	19549222	19549361	+	0	NA	Intergenic	Intergenic	50192	NM_001104551	665376	Mm.469859	NM_001104551	ENSMUSG00000090304	Vmn2r99	EG665376	vomeronasal 2, receptor 99	protein-coding
Diff_Nuc5593	chr12	118520042	118520181	+	0	NA	intron (NR_044987, intron 1 of 2)	L1M2|LINE|L1	30821	NR_029563	387171		NR_029563	ENSMUSG00000065538	Mir153	Mirn153|mir-153|mmu-mir-153	microRNA 153	ncRNA
Diff_Nuc6394	chr11	32140922	32141061	+	0	NA	intron (NR_104306, intron 7 of 13)	B1_Mus1|SINE|Alu	14486	NM_010822	268395	Mm.263161	NM_010822	ENSMUSG00000020287	Mpg	9830006D05|AI326268|APNG|Aag|Mid1	N-methylpurine-DNA glycosylase	protein-coding
Diff_Nuc25044	chr7	109422452	109422591	+	0	NA	intron (NM_009287, intron 1 of 11)	ID_B1|SINE|B4	6183	NM_009287	20866	Mm.645	NM_009287	ENSMUSG00000030987	Stim1	SIM	stromal interaction molecule 1	protein-coding
Diff_Nuc44101	chr1	53725622	53725761	+	0	NA	intron (NM_001252070, intron 6 of 65)	RLTR13A|LTR|ERVK	37937	NM_001252070	627872	Mm.184692	NM_001252070	ENSMUSG00000096141	Dnah7a	Dnahc7|Dnahc7a|Gm992	dynein, axonemal, heavy chain 7A	protein-coding
Diff_Nuc37314	chr3	92940832	92940971	+	0	NA	Intergenic	B1_Mm|SINE|Alu	-7808	NM_001081200	381457	Mm.458570	NM_001081200	ENSMUSG00000078657	Crnn	Gm1015	cornulin	protein-coding
Diff_Nuc16372	chr15	50632682	50632821	+	0	NA	intron (NM_001310485, intron 5 of 7)	intron (NM_001310485, intron 5 of 7)	87844	NM_001310481	83925	Mm.30466	NM_032000	ENSMUSG00000038679	Trps1	AI115454|AI447310|D15Ertd586e	trichorhinophalangeal syndrome I (human)	protein-coding
Diff_Nuc50276	chr8	27121652	27121791	+	0	NA	intron (NM_008033, intron 2 of 8)	intron (NM_008033, intron 2 of 8)	4352	NM_008033	14272	Mm.3496	NM_008033	ENSMUSG00000015994	Fnta	FTA	farnesyltransferase, CAAX box, alpha	protein-coding
Diff_Nuc48052	chr9	43098802	43098941	+	0	NA	Intergenic	B3|SINE|B2	-19975	NM_023655	72169	Mm.273277	NM_023655	ENSMUSG00000032013	Trim29	1110047J21Rik|2810431N19Rik|4732461M22Rik|AI119726	tripartite motif-containing 29	protein-coding
Diff_Nuc30793	chr5	81215672	81215811	+	0	NA	Intergenic	Intergenic	-233855	NM_001347367	319387	Mm.273631	NM_198702	ENSMUSG00000037605	Adgrl3	5430402I23Rik|CIRL-3|D130075K09Rik|Gm1379|LEC3|Lphn3|mKIAA0768	adhesion G protein-coupled receptor L3	protein-coding
Diff_Nuc26262	chr6	21472342	21472481	+	0	NA	intron (NM_019697, intron 1 of 5)	intron (NM_019697, intron 1 of 5)	306302	NM_019697	16508	Mm.425316	NM_019697	ENSMUSG00000060882	Kcnd2	AI839615|AW555701|Kv4.2|R75121|mKIAA1044	potassium voltage-gated channel, Shal-related family, member 2	protein-coding
Diff_Nuc2775	chr13	107650542	107650681	+	0	NA	intron (NM_029665, intron 22 of 29)	intron (NM_029665, intron 22 of 29)	76384	NM_029665	76582	Mm.132208	NM_029665	ENSMUSG00000042590	Ipo11	1700081H05Rik|2510001A17Rik|AI314624|AW555235|E330021B14Rik|Ranbp11	importin 11	protein-coding
Diff_Nuc9926	chr10	82089412	82089551	+	0	NA	Intergenic	RMER10B|LTR|ERVL	-3102	NM_011561	21665	Mm.284252	NM_011561	ENSMUSG00000034674	Tdg	E130317C12Rik|JZA-3|Jza1	thymine DNA glycosylase	protein-coding
Diff_Nuc51071	chr8	61122122	61122261	+	0	NA	intron (NM_175032, intron 1 of 11)	intron (NM_175032, intron 1 of 11)	57402	NM_001177534	100271928	Mm.484123	NM_001177534		Gm15881	OTTMUSG00000027193	predicted gene 15881	protein-coding
Diff_Nuc44063	chr1	52604792	52604931	+	0	NA	Intergenic	Intergenic	-47569	NM_008667	17936	Mm.25903	NM_008667	ENSMUSG00000002881	Nab1	-	Ngfi-A binding protein 1	protein-coding
Diff_Nuc39468	chr2	33901362	33901501	+	0	NA	intron (NR_130173, intron 1 of 3)	ORR1E|LTR|MaLR	61824	NR_130173	329387	Mm.125817	NR_130173	ENSMUSG00000087461	C230014O12Rik	-	RIKEN cDNA C230014O12 gene	ncRNA
Diff_Nuc7510	chr11	87826822	87826961	+	0	NA	Intergenic	Intergenic	-15091	NM_001168471	68097	Mm.246436	NM_026556	ENSMUSG00000020483	Dynll2	1700064A15Rik|6720463E02Rik|C87222|DLC8|DLC8b|Dlc2	dynein light chain LC8-type 2	protein-coding
Diff_Nuc52172	chr8	113685092	113685231	+	0	NA	intron (NM_009149, intron 23 of 25)	intron (NM_009149, intron 23 of 25)	-15763	NR_040364	434350	Mm.442061	NR_040363		9430091E24Rik	-	RIKEN cDNA 9430091E24 gene	ncRNA
Diff_Nuc17805	chr14	29144972	29145111	+	0	NA	intron (NM_001347497, intron 19 of 19)	intron (NM_001347497, intron 19 of 19)	-173618	NM_009524	22418	Mm.287544	NM_009524	ENSMUSG00000021994	Wnt5a	8030457G12Rik|Wnt-5a	wingless-type MMTV integration site family, member 5A	protein-coding
Diff_Nuc12399	chr17	67523602	67523741	+	0	NA	intron (NM_008984, intron 2 of 30)	intron (NM_008984, intron 2 of 30)	-148096	NR_049205	100885844		NR_049205	ENSMUSG00000093508	Mir5709	Gm22041|mir-5709|mmu-mir-5709	microRNA 5709	ncRNA
Diff_Nuc7294	chr11	78467022	78467161	+	0	NA	intron (NM_008702, intron 1 of 10)	intron (NM_008702, intron 1 of 10)	43836	NM_008702	18099	Mm.9001	NM_008702	ENSMUSG00000017376	Nlk	AI194375	nemo like kinase	protein-coding
Diff_Nuc6729	chr11	49184642	49184781	+	0	NA	Intergenic	L1_Mus2|LINE|L1	30675	NM_147065	259068	Mm.377819	NM_147065	ENSMUSG00000045421	Olfr1390	MOR256-2	olfactory receptor 1390	protein-coding
Diff_Nuc28657	chr6	130400982	130401121	+	0	NA	Intergenic	L1Md_F3|LINE|L1	-64159	NM_016659	16627	Mm.24399	NM_016659	ENSMUSG00000079853	Klra1	A1|CH29-493D4.3|Klra22|Ly49a|Ly49o<129>|Ly49v	killer cell lectin-like receptor, subfamily A, member 1	protein-coding
Diff_Nuc15641	chr15	21136812	21136951	+	0	NA	intron (NM_001008420, intron 1 of 11)	intron (NM_001008420, intron 1 of 11)	95674	NM_001008420	215654	Mm.300909	NM_001008420	ENSMUSG00000040452	Cdh12	Cdhb	cadherin 12	protein-coding
Diff_Nuc30804	chr5	81692892	81693031	+	0	NA	intron (NM_001347367, intron 3 of 27)	intron (NM_001347367, intron 3 of 27)	242343	NM_198702	319387	Mm.273631	NM_198702	ENSMUSG00000037605	Adgrl3	5430402I23Rik|CIRL-3|D130075K09Rik|Gm1379|LEC3|Lphn3|mKIAA0768	adhesion G protein-coupled receptor L3	protein-coding
Diff_Nuc2227	chr13	83931322	83931461	+	0	NA	Intergenic	RLTR28|LTR|ERVL	52972	NR_029545	723967		NR_029545	ENSMUSG00000065424	Mir9-2	Mirn9-2|mir-9-2|mmu-mir-9-2	microRNA 9-2	ncRNA
Diff_Nuc2615	chr13	100806082	100806221	+	0	NA	intron (NM_001081061, intron 32 of 38)	intron (NM_001081061, intron 32 of 38)	-20557	NM_030026	78038	Mm.137327	NM_030026	ENSMUSG00000021646	Mccc2	4930552N12Rik|MCCB	methylcrotonoyl-Coenzyme A carboxylase 2 (beta)	protein-coding
Diff_Nuc40220	chr2	61672362	61672501	+	0	NA	Intergenic	Intergenic	29921	NM_009322	21375	Mm.308525	NM_009322	ENSMUSG00000035033	Tbr1	-	T-box brain gene 1	protein-coding
Diff_Nuc52407	chr8	129501742	129501881	+	0	NA	Intergenic	RSINE1|SINE|B4	-6832	NM_172762	52202	Mm.28199	NM_172762	ENSMUSG00000033931	Rbm34	4930547K05Rik|6330444B11|D8Ertd233e	RNA binding motif protein 34	protein-coding
Diff_Nuc50167	chr8	22085852	22085991	+	0	NA	Intergenic	RLTR10-int|LTR|ERVK	-1494	NM_001012640	100503970	Mm.490241	NM_001012640	ENSMUSG00000079120	AY761185	-	cDNA sequence AY761185	protein-coding
Diff_Nuc37271	chr3	91179902	91180041	+	0	NA	Intergenic	Intergenic	-285244	NM_001101461	229550	Mm.98335	NM_001101461	ENSMUSG00000091175	9130204L05Rik	Gm127	RIKEN cDNA 9130204L05 gene	protein-coding
Diff_Nuc26333	chr6	24589972	24590111	+	0	NA	intron (NM_001167745, intron 1 of 4)	intron (NM_001167745, intron 1 of 4)	24954	NM_001167745	73178	Mm.1574	NM_028459	ENSMUSG00000029684	Wasl	2900021I12Rik|3110031I02Rik|N-WASP	Wiskott-Aldrich syndrome-like (human)	protein-coding
Diff_Nuc10295	chr10	98529412	98529551	+	0	NA	Intergenic	L1ME1|LINE|L1	-40324	NM_027740	382406	Mm.440656	NM_027740	ENSMUSG00000019952	Poc1b	4933430F16Rik|Wdr51b	POC1 centriolar protein B	protein-coding
Diff_Nuc49650	chr9	115938352	115938491	+	0	NA	intron (NM_028638, intron 13 of 14)	LTR41|LTR|ERVL	119848	NM_028638	73748	Mm.485018	NM_028638	ENSMUSG00000056880	Gadl1	1110027M19Rik|ADC|CSADC	glutamate decarboxylase-like 1	protein-coding
Diff_Nuc19963	chr19	3467672	3467811	+	0	NA	intron (NM_029456, intron 18 of 22)	intron (NM_029456, intron 18 of 22)	-53197	NM_010253	14419	Mm.4655	NM_010253	ENSMUSG00000024907	Gal	Galn	galanin	protein-coding
Diff_Nuc26955	chr6	49138172	49138311	+	0	NA	intron (NM_023670, intron 2 of 14)	intron (NM_023670, intron 2 of 14)	26712	NM_023670	140488	Mm.281018	NM_023670	ENSMUSG00000029814	Igf2bp3	2610101N11Rik|AA522010|AL022933|AU045931|IMP-3|IMP3|Koc13|Neilsen|mimp3	insulin-like growth factor 2 mRNA binding protein 3	protein-coding
Diff_Nuc21433	chr18	16405012	16405151	+	0	NA	Intergenic	L1Md_F2|LINE|L1	-528526	NM_199055	71367	Mm.329304	NM_199055	ENSMUSG00000047161	Chst9	5430438D01Rik	carbohydrate (N-acetylgalactosamine 4-0) sulfotransferase 9	protein-coding
Diff_Nuc8312	chr10	7771852	7771991	+	0	NA	Intergenic	L1_Mur3|LINE|L1	-96000	NM_138667	68652	Mm.193041	NM_138667	ENSMUSG00000015755	Tab2	1110030N06Rik|A530078N03Rik|Map3k7ip2|mKIAA0733	TGF-beta activated kinase 1/MAP3K7 binding protein 2	protein-coding
Diff_Nuc6590	chr11	41100202	41100341	+	0	NA	Intergenic	Lx5|LINE|L1	-531483	NM_009831	12450	Mm.2103	NM_009831	ENSMUSG00000020326	Ccng1	AI314029	cyclin G1	protein-coding
Diff_Nuc23418	chr7	28191852	28191991	+	0	NA	intron (NM_032610, intron 15 of 35)	B1_Mus1|SINE|Alu	-10349	NM_001199236	80297	Mm.459123	NM_032610	ENSMUSG00000011751	Sptbn4	1700022P15Rik|5830426A08Rik|ROSA62|SpbIV|Spnb4|dyn|lnd|nmf261|nmf379|qv	spectrin beta, non-erythrocytic 4	protein-coding
Diff_Nuc43345	chr1	18201592	18201731	+	0	NA	intron (NR_002879, intron 1 of 1)	ID4_|SINE|ID	11984	NR_002879	654454	Mm.383637	NR_002879	ENSMUSG00000070977	Defb44-ps	Defb44|Defb49|Defb49-ps|EG574082	defensin beta 44, pseudogene	pseudo
Diff_Nuc36044	chr3	39787042	39787181	+	0	NA	Intergenic	Intergenic	634723	NR_040445	100040882	Mm.272869	NR_040445	ENSMUSG00000037884	1700017G19Rik	-	RIKEN cDNA 1700017G19 gene	ncRNA
Diff_Nuc26423	chr6	28033612	28033751	+	0	NA	intron (NM_008174, intron 2 of 10)	(GAAA)n|Simple_repeat|Simple_repeat	42745	NM_001311072	14823	Mm.320732	NM_008174	ENSMUSG00000024211	Grm8	A230002O04|Gprc1h|mGluR8	glutamate receptor, metabotropic 8	protein-coding
Diff_Nuc8362	chr10	9981352	9981491	+	0	NA	Intergenic	Lx5|LINE|L1	210691	NM_001127353	215772	Mm.246573	NM_172547	ENSMUSG00000050994	Adgb	9130014G24Rik	androglobin	protein-coding
Diff_Nuc46356	chr1	159703482	159703621	+	0	NA	Intergenic	Intergenic	247250	NM_001159986	89867	Mm.87114	NM_033354	ENSMUSG00000026589	Sec16b	Lztr2|Rgpr|Rgpr-p117	SEC16 homolog B (S. cerevisiae)	protein-coding
Diff_Nuc43222	chr1	12890582	12890721	+	0	NA	intron (NM_172841, intron 4 of 8)	L1_Mus1|LINE|L1	90565	NM_172841	240726	Mm.24481	NM_172841	ENSMUSG00000025938	Slco5a1	4732454B15|A630033C23Rik|AA407151	solute carrier organic anion transporter family, member 5A1	protein-coding
Diff_Nuc30148	chr5	52512302	52512441	+	0	NA	Intergenic	L1_Mus2|LINE|L1	14885	NR_105845	102466648		NR_105845	ENSMUSG00000098726	Mir6417	Gm27334|mmu-mir-6417	microRNA 6417	ncRNA
Diff_Nuc33419	chr4	65363142	65363281	+	0	NA	intron (NM_207109, intron 13 of 22)	intron (NM_207109, intron 13 of 22)	97191	NM_001161782	69807	Mm.22786	NM_053084	ENSMUSG00000051675	Trim32	1810045E12Rik|3f3|BBS11|Zfp117	tripartite motif-containing 32	protein-coding
Diff_Nuc26413	chr6	27849497	27849636	+	0	NA	intron (NM_008174, intron 3 of 10)	intron (NM_008174, intron 3 of 10)	37184	NR_030420	735266		NR_030420	ENSMUSG00000076067	Mir592	Mirn592|mir-592|mmu-mir-592	microRNA 592	ncRNA
Diff_Nuc38931	chr2	8578362	8578501	+	0	NA	Intergenic	Intergenic	-532711	NR_038180	73438	Mm.23558	NR_038180	ENSMUSG00000085580	1700061F12Rik	-	RIKEN cDNA 1700061F12 gene	ncRNA
Diff_Nuc1657	chr13	58213122	58213261	+	0	NA	Intergenic	URR1B|DNA|MER1_type	-9402	NM_001195075	100503085	Mm.379256	NM_001195075	ENSMUSG00000014164	Klhl3	7530408C15Rik|AI430941|EG627648	kelch-like 3	protein-coding
Diff_Nuc13451	chr16	22402502	22402641	+	0	NA	intron (NM_023794, intron 7 of 12)	intron (NM_023794, intron 7 of 12)	37072	NM_023794	104156	Mm.155708	NM_023794	ENSMUSG00000013089	Etv5	1110005E01Rik|8430401F14Rik|ERM	ets variant 5	protein-coding
Diff_Nuc39246	chr2	21560202	21560341	+	0	NA	intron (NM_001004761, intron 4 of 10)	L1_Mur1|LINE|L1	271077	NM_001004761	241263	Mm.166647	NM_175706	ENSMUSG00000045967	Gpr158	5330427M13Rik|mKIAA1136	G protein-coupled receptor 158	protein-coding
Diff_Nuc20457	chr19	27336582	27336721	+	0	NA	Intergenic	Intergenic	45141	NM_001161420	22359	Mm.4141	NM_013703	ENSMUSG00000024924	Vldlr	AA408956|AI451093|AW047288	very low density lipoprotein receptor	protein-coding
Diff_Nuc40169	chr2	59595382	59595521	+	0	NA	intron (NM_001290659, intron 3 of 25)	intron (NM_001290659, intron 3 of 25)	110625	NM_001290659	66860	Mm.27917	NM_198294	ENSMUSG00000035168	Tanc1	1200003E16Rik|Tanc|mKIAA1728	tetratricopeptide repeat, ankyrin repeat and coiled-coil containing 1	protein-coding
Diff_Nuc9974	chr10	84457542	84457681	+	0	NA	intron (NM_001013441, intron 8 of 8)	B1F1|SINE|Alu	77253	NM_183172	237422	Mm.18936	NM_183172	ENSMUSG00000035620	Ric8b	BC051080|Ric-8|Ric-8b	RIC8 guanine nucleotide exchange factor B	protein-coding
Diff_Nuc3902	chr12	44952482	44952621	+	0	NA	Intergenic	Intergenic	358504	NM_013760	27362	Mm.27432	NM_013760	ENSMUSG00000014905	Dnajb9	AA408011|AA673251|AA673481|AW556981|ERdj4|Mdg1|mDj7	DnaJ heat shock protein family (Hsp40) member B9	protein-coding
Diff_Nuc35107	chr4	146364942	146365081	+	0	NA	Intergenic	MMSAT4|Satellite|Satellite	-30948	NM_001177767	100043034	Mm.422606	NM_001177767	ENSMUSG00000067919	Rex2	Gm13138|OTTMUSG00000010655	reduced expression 2	protein-coding
Diff_Nuc32864	chr4	36983882	36984021	+	0	NA	Intergenic	L1M5|LINE|L1	-85174	NM_001165999	242384	Mm.132507	NM_175516	ENSMUSG00000045083	Lingo2	B230217C06Rik|Lern3|Lrrn6c	leucine rich repeat and Ig domain containing 2	protein-coding
Diff_Nuc22489	chr18	60681192	60681331	+	0	NA	Intergenic	Intergenic	-4614	NM_026302	67665	Mm.272801	NM_026302	ENSMUSG00000024603	Dctn4	1110001K06Rik|4930547K17Rik|C130039E17Rik|p62	dynactin 4	protein-coding
Diff_Nuc20026	chr19	6297202	6297341	+	0	NA	intron (NM_010119, intron 3 of 4)	B1_Mus1|SINE|Alu	-9186	NM_001033342	240505	Mm.329622	NM_001033342	ENSMUSG00000024769	Cdc42bpg	BC046418|MRCKgamma	CDC42 binding protein kinase gamma (DMPK-like)	protein-coding
Diff_Nuc4993	chr12	86822472	86822611	+	0	NA	Intergenic	Intergenic	7690	NM_010234	14281	Mm.246513	NM_010234	ENSMUSG00000021250	Fos	D12Rfj1|c-fos|cFos	FBJ osteosarcoma oncogene	protein-coding
Diff_Nuc41457	chr2	111962852	111962991	+	0	NA	Intergenic	L1_Mus3|LINE|L1	8051	NM_146742	258737	Mm.377665	NM_146742	ENSMUSG00000109801	Olfr1316	MOR245-1|MOR245-26	olfactory receptor 1316	protein-coding
Diff_Nuc63	chrX	30378372	30378511	+	0	NA	Intergenic	L1_Mus3|LINE|L1	-85410	NM_001085552	668960		NM_001085552	ENSMUSG00000095716	Btbd35f10	Gm14351|OTTMUSG00000016411	BTB domain containing 35, family member 10	protein-coding
Diff_Nuc256	chrX	97338192	97338331	+	0	NA	intron (NM_010099, intron 1 of 7)	Lx6|LINE|L1	167316	NM_001177943	13607	Mm.328086	NM_010099	ENSMUSG00000059327	Eda	EDA1|Ed1|Eda-A1|Eda-A2|HED|Ta|Tnlg7c|XLHED|tabby	ectodysplasin-A	protein-coding
Diff_Nuc27883	chr6	92119332	92119471	+	0	NA	TTS (NM_025578)	TTS (NM_025578)	14616	NM_025578	64658	Mm.87062	NM_025578	ENSMUSG00000014551	Mrps25	2810429N01Rik|Rpms25	mitochondrial ribosomal protein S25	protein-coding
Diff_Nuc26680	chr6	38371432	38371571	+	0	NA	intron (NM_153600, intron 15 of 17)	intron (NM_153600, intron 15 of 17)	-12424	NM_177185	320538	Mm.302831	NM_177185	ENSMUSG00000038538	Ubn2	2900060J04Rik|6030408G03Rik|BC060116|D130059P03Rik|mKIAA2030	ubinuclein 2	protein-coding
Diff_Nuc38793	chr2	3945562	3945701	+	0	NA	intron (NM_001347086, intron 2 of 24)	intron (NM_001347086, intron 2 of 24)	6902	NM_001347086	209630	Mm.37932	NM_172475	ENSMUSG00000026657	Frmd4a	2700017I06Rik|5330420J21|AI594879|C230040M21Rik|Frmd4|Gm13190|OTTMUSG00000010806|mKIAA1294	FERM domain containing 4A	protein-coding
Diff_Nuc9211	chr10	46682962	46683101	+	0	NA	Intergenic	B1_Mm|SINE|Alu	1155521	NR_040624	320363	Mm.123343	NR_040624	ENSMUSG00000110874	D030045P18Rik	-	RIKEN cDNA D030045P18 gene	ncRNA
Diff_Nuc43393	chr1	21493882	21494021	+	0	NA	intron (NM_023872, intron 5 of 13)	intron (NM_023872, intron 5 of 13)	120314	NM_001113187	98582	Mm.326336	NM_001113187	ENSMUSG00000085079	Khdc1b	AU014713|AU015226|AU024076|AY238603|C85331|C86372|C88118|Khdc1|Khdc1c	KH domain containing 1B	protein-coding
Diff_Nuc35069	chr4	145270172	145270311	+	0	NA	intron (NM_001103158, intron 2 of 4)	intron (NM_001103158, intron 2 of 4)	9641	NM_001103158	100041379	Mm.276881	NM_001103158	ENSMUSG00000058186	Zfp980	Gm13242|OTTMUSG00000011070	zinc finger protein 980	protein-coding
Diff_Nuc48234	chr9	52457992	52458131	+	0	NA	Intergenic	Lx8|LINE|L1	29481	NM_178906	330941	Mm.335160	NM_177907	ENSMUSG00000078307	AI593442	E130102D23	expressed sequence AI593442	protein-coding
Diff_Nuc41208	chr2	102078462	102078601	+	0	NA	Intergenic	Intergenic	-51914	NM_001290784	241576	Mm.489740	NM_178886	ENSMUSG00000048058	Ldlrad3	6430500P08|AI194318|Lrad3	low density lipoprotein receptor class A domain containing 3	protein-coding
Diff_Nuc19892	chr14	123313152	123313291	+	0	NA	promoter-TSS (NM_145466)	promoter-TSS (NM_145466)	-834	NM_145466	223267	Mm.379358	NM_145466	ENSMUSG00000041625	Ggact	A2ld1	gamma-glutamylamine cyclotransferase	protein-coding
Diff_Nuc51325	chr8	71991082	71991221	+	0	NA	Intergenic	L1VL1|LINE|L1	-71708	NR_038043	378466	Mm.37846	NM_194351	ENSMUSG00000110444	Gm10033	9330175B10Rik|ENSMUSG00000057924|Gm10311	predicted gene 10033	ncRNA
Diff_Nuc11564	chr17	23978052	23978191	+	0	NA	intron (NM_027644, intron 5 of 6)	L1MB7|LINE|L1	3002	NM_027644	71003	Mm.328839	NM_027644	ENSMUSG00000024114	Prss41	4931440B09Rik|Tessp-1|Tessp1	protease, serine 41	protein-coding
Diff_Nuc41494	chr2	113332162	113332301	+	0	NA	intron (NM_001285459, intron 3 of 16)	URR1A|DNA|MER1_type	51010	NM_001285459	14260	Mm.4938	NM_010230	ENSMUSG00000044042	Fmn1	Fmn|formin-1|ld	formin 1	protein-coding
Diff_Nuc29384	chr5	16957292	16957431	+	0	NA	Intergenic	L1_Mus3|LINE|L1	-24579	NM_027609	70935	Mm.332225	NM_027609	ENSMUSG00000058643	Speer4f1	4922502J04Rik|SPEER-4F|Speer4f	spermatogenesis associated glutamate (E)-rich protein 4F1	protein-coding
Diff_Nuc983	chr13	24387182	24387321	+	0	NA	Intergenic	RLTR14|LTR|ERV1	-14592	NM_026825	68732	Mm.211047	NM_026825	ENSMUSG00000021338	Carmil1	1110037D04Rik|AI425970|CARMIL|CARML1|D130057M20|Lrrc16|Lrrc16a	capping protein regulator and myosin 1 linker 1	protein-coding
Diff_Nuc30762	chr5	80098582	80098721	+	0	NA	Intergenic	(TC)n|Simple_repeat|Simple_repeat	-1350945	NM_001347367	319387	Mm.273631	NM_198702	ENSMUSG00000037605	Adgrl3	5430402I23Rik|CIRL-3|D130075K09Rik|Gm1379|LEC3|Lphn3|mKIAA0768	adhesion G protein-coupled receptor L3	protein-coding
Diff_Nuc16873	chr15	75678462	75678601	+	0	NA	Intergenic	B2_Mm2|SINE|B2	-6193	NM_172121	223642	Mm.209800	NM_172121	ENSMUSG00000075600	Zc3h3	BC049953|Kiaa0150|Smicl|Zc3hdc3	zinc finger CCCH type containing 3	protein-coding
Diff_Nuc30888	chr5	84553482	84553621	+	0	NA	intron (NM_007937, intron 6 of 15)	intron (NM_007937, intron 6 of 15)	292856	NM_007937	13839	Mm.137991	NM_007937	ENSMUSG00000029245	Epha5	AI854630|AW125296|Cek7|Ehk1|Els1|Hek7|Rek7|bsk	Eph receptor A5	protein-coding
Diff_Nuc1444	chr13	45843292	45843431	+	0	NA	intron (NM_009124, intron 4 of 7)	intron (NM_009124, intron 4 of 7)	216999	NM_001199304	20238	Mm.342683	NM_009124	ENSMUSG00000046876	Atxn1	2900016G23Rik|Atx1|C85907|ENSMUSG00000074917|Gm10786|Sca1	ataxin 1	protein-coding
Diff_Nuc17100	chr15	89424642	89424781	+	0	NA	Intergenic	RLTR20B3|LTR|ERVK	-2357	NM_026817	68708	Mm.23258	NM_026817	ENSMUSG00000022621	Rabl2	1110031N17Rik|AW549303|Rabl2a	RAB, member RAS oncogene family-like 2	protein-coding
Diff_Nuc12818	chr17	86468252	86468391	+	0	NA	intron (NM_030133, intron 14 of 20)	intron (NM_030133, intron 14 of 20)	76194	NM_030133	78586	Mm.146236	NM_030133	ENSMUSG00000024135	Srbd1	AI461933|C85414|D530025C17Rik	S1 RNA binding domain 1	protein-coding
Diff_Nuc49804	chr9	123546292	123546431	+	0	NA	intron (NM_139142, intron 10 of 10)	intron (NM_139142, intron 10 of 10)	-4678	NM_011731	22599	Mm.41963	NM_011731	ENSMUSG00000025243	Slc6a20b	AA986306|Sit1|Slc6a20|XT3|Xtrp3	solute carrier family 6 (neurotransmitter transporter), member 20B	protein-coding
Diff_Nuc11645	chr17	28850412	28850551	+	0	NA	intron (NM_001168514, intron 2 of 12)	intron (NM_001168514, intron 2 of 12)	20968	NM_001168513	26416	Mm.311337	NM_011951	ENSMUSG00000053436	Mapk14	CSBP2|Crk1|Csbp1|Mxi2|PRKM14|PRKM15|p38|p38-alpha|p38MAPK|p38a|p38alpha	mitogen-activated protein kinase 14	protein-coding
Diff_Nuc47703	chr9	27396272	27396411	+	0	NA	Intergenic	L1_Mus3|LINE|L1	191544	NM_001305058	75469	Mm.45824	NM_029299	ENSMUSG00000031991	Spata19	1700001L23Rik|AV047838|spergen-1	spermatogenesis associated 19	protein-coding
Diff_Nuc3055	chr13	120229052	120229191	+	0	NA	intron (NM_001079849, intron 3 of 10)	intron (NM_001079849, intron 3 of 10)	11412	NM_145457	218693	Mm.490243	NM_145457	ENSMUSG00000025451	Paip1	PAIP-1	polyadenylate binding protein-interacting protein 1	protein-coding
Diff_Nuc41898	chr2	128912227	128912366	+	0	NA	intron (NM_027192, intron 5 of 6)	intron (NM_027192, intron 5 of 6)	-14436	NM_009086	20017	Mm.259078	NM_009086	ENSMUSG00000027395	Polr1b	128kDa|D630020H17Rik|RPA116|RPA135|RPA2|Rpo1-2	polymerase (RNA) I polypeptide B	protein-coding
Diff_Nuc13853	chr16	40170052	40170191	+	0	NA	Intergenic	Intergenic	1267663	NM_170599	207683	Mm.245564	NM_170599	ENSMUSG00000022790	Igsf11	1700025L02Rik|BT-IgSF|Igsf13	immunoglobulin superfamily, member 11	protein-coding
Diff_Nuc48226	chr9	52029402	52029541	+	0	NA	Intergenic	Lx5|LINE|L1	-53255	NM_001162921	244871	Mm.295686	NM_001162921	ENSMUSG00000035164	Zc3h12c	A230108E06|C230027N18Rik|mKIAA1726	zinc finger CCCH type containing 12C	protein-coding
Diff_Nuc46409	chr1	161451672	161451811	+	0	NA	Intergenic	Intergenic	-2159	NM_022312	21960	Mm.44701	NM_022312	ENSMUSG00000015829	Tnr	J1-tenascin|TN-R|janusin|restrictin	tenascin R	protein-coding
Diff_Nuc23624	chr7	47047822	47047961	+	0	NA	Intergenic	Intergenic	274755	NM_001004139	70227	Mm.333800	NM_001004139	ENSMUSG00000068959	Zfp619	3000002G13Rik	zinc finger protein 619	protein-coding
Diff_Nuc33091	chr4	49101222	49101361	+	0	NA	intron (NM_178756, intron 1 of 7)	intron (NM_178756, intron 1 of 7)	28957	NM_178756	272031	Mm.299460	NM_178756	ENSMUSG00000063446	Plppr1	E130309F12Rik|Lppr1|PRG-3|mKIAA4247	phospholipid phosphatase related 1	protein-coding
Diff_Nuc26028	chr6	11867532	11867671	+	0	NA	Intergenic	L1M3e|LINE|L1	-8280	NM_029404	75725	Mm.212411	NM_029404	ENSMUSG00000029629	Phf14	1110001C23Rik|4932409F11Rik|5730446A07Rik|AA623952|AV297001|mKIAA0783	PHD finger protein 14	protein-coding
Diff_Nuc14225	chr16	55983412	55983551	+	0	NA	intron (NM_173026, intron 3 of 10)	B2_Mm2|SINE|B2	-8751	NR_027965	66391	Mm.472722	NM_133677	ENSMUSG00000102101	Zbtb11os1	2310061J03Rik	zinc finger and BTB domain containing 11, opposite strand 1	ncRNA
Diff_Nuc13485	chr16	24743217	24743356	+	0	NA	intron (NM_001145954, intron 2 of 7)	intron (NM_001145954, intron 2 of 7)	21345	NM_001145954	210126	Mm.209385	NM_178665	ENSMUSG00000033306	Lpp	9430020K16Rik|AA959454|AU024130|B130055L10Rik|C79715|D630048H16	LIM domain containing preferred translocation partner in lipoma	protein-coding
Diff_Nuc38117	chr3	131627212	131627351	+	0	NA	Intergenic	Intergenic	-120975	NM_020265	56811	Mm.103593	NM_020265	ENSMUSG00000028031	Dkk2	-	dickkopf WNT signaling pathway inhibitor 2	protein-coding
Diff_Nuc50122	chr8	18055642	18055781	+	0	NA	Intergenic	Intergenic	-520326	NM_053171	94109	Mm.436988	NM_053171	ENSMUSG00000060924	Csmd1	B930082H09|mKIAA1890	CUB and Sushi multiple domains 1	protein-coding
Diff_Nuc3704	chr12	38754242	38754381	+	0	NA	intron (NM_178681, intron 2 of 24)	intron (NM_178681, intron 2 of 24)	147019	NM_178681	217480	Mm.126525	NM_178681	ENSMUSG00000036095	Dgkb	6430574F24|90kda|C630029D13Rik|DAGK2|DGK|DGK-beta|mKIAA0718	diacylglycerol kinase, beta	protein-coding
Diff_Nuc21038	chr19	55990352	55990491	+	0	NA	intron (NM_001142924, intron 4 of 11)	intron (NM_001142924, intron 4 of 11)	20610	NM_001142924	21416	Mm.139815	NM_009333	ENSMUSG00000024985	Tcf7l2	TCF4B|TCF4E|Tcf-4|Tcf4	transcription factor 7 like 2, T cell specific, HMG box	protein-coding
Diff_Nuc48129	chr9	47661412	47661551	+	0	NA	TTS (NM_001310841)	TTS (NM_001310841)	-35190	NR_046048	100038460	Mm.447649	NR_046048		Gm10677	ENSMUSG00000074363	predicted gene 10677	ncRNA
Diff_Nuc28305	chr6	111931452	111931591	+	0	NA	Intergenic	Intergenic	-229181	NR_027865	67336	Mm.378014	NR_027865	ENSMUSG00000100219	1700054K19Rik	-	RIKEN cDNA 1700054K19 gene	ncRNA
Diff_Nuc8163	chr11	120832012	120832151	+	0	NA	intron (NM_139059, intron 6 of 8)	B3|SINE|B2	20566	NM_139059	104318	Mm.216227	NM_027874	ENSMUSG00000025162	Csnk1d	1200006A05Rik|AA409348|D930010H05Rik	casein kinase 1, delta	protein-coding
Diff_Nuc2903	chr13	113678452	113678591	+	0	NA	intron (NM_028151, intron 18 of 26)	B1F|SINE|Alu	39067	NM_028151	72198	Mm.291029	NM_028151	ENSMUSG00000016018	Skiv2l2	2610528A15Rik|mKIAA0052	superkiller viralicidic activity 2-like 2 (S. cerevisiae)	protein-coding
Diff_Nuc48597	chr9	67657512	67657651	+	0	NA	Intergenic	Intergenic	22556	NM_001163143	244911	Mm.325849	NM_001163143	ENSMUSG00000047990	C2cd4a	EG244911|Fam148a	C2 calcium-dependent domain containing 4A	protein-coding
Diff_Nuc48091	chr9	45638032	45638171	+	0	NA	Intergenic	Intergenic	-1380	NM_001081373	214552	Mm.260103	NM_172531	ENSMUSG00000043987	Cep164	AI450905|BC027092|D030051D21|mKIAA1052	centrosomal protein 164	protein-coding
Diff_Nuc11900	chr17	42163762	42163901	+	0	NA	Intergenic	L1M2|LINE|L1	-289065	NM_028474	627626	Mm.390999	NM_028474	ENSMUSG00000042256	Ptchd4	3110082D06Rik|Gm321	patched domain containing 4	protein-coding
Diff_Nuc7834	chr11	104234362	104234501	+	0	NA	intron (NM_001081045, intron 3 of 13)	B1F1|SINE|Alu	69174	NM_001081045	76719	Mm.136418	NM_001081045	ENSMUSG00000018412	Kansl1	1700081L11Rik|9430041J06Rik|mKIAA1267	KAT8 regulatory NSL complex subunit 1	protein-coding
Diff_Nuc47453	chr9	12987432	12987571	+	0	NA	Intergenic	MYSERV16_I-int|LTR|ERVK	118354	NR_040755	78219	Mm.414868	NR_040755	ENSMUSG00000111830	4930568E12Rik	-	RIKEN cDNA 4930568E12 gene	ncRNA
Diff_Nuc24171	chr7	72182442	72182581	+	0	NA	intron (NM_183087, intron 1 of 9)	Lx8|LINE|L1	118903	NM_183087	70638	Mm.441986	NM_183087	ENSMUSG00000030518	Fam189a1	5730507A09Rik|AW047451	family with sequence similarity 189, member A1	protein-coding
Diff_Nuc21688	chr18	27072002	27072141	+	0	NA	Intergenic	Intergenic	-1159587	NM_001174074	108013	Mm.266435	NM_133195	ENSMUSG00000024268	Celf4	A230070D14Rik|BRUNOL-4|Brul4|Brunol4|C130060B05Rik	CUGBP, Elav-like family member 4	protein-coding
Diff_Nuc14384	chr16	62011922	62012061	+	0	NA	Intergenic	L1Md_F2|LINE|L1	774551	NM_178925	106338	Mm.26321	NM_178925	ENSMUSG00000050312	Nsun3	6720484A09Rik|AU022521	NOL1/NOP2/Sun domain family member 3	protein-coding
Diff_Nuc18362	chr14	58132592	58132731	+	0	NA	intron (NM_009376, intron 24 of 25)	intron (NM_009376, intron 24 of 25)	-11005	NM_145837	239114	Mm.390726	NM_145837	ENSMUSG00000050222	Il17d	AI462269|IL-17D	interleukin 17D	protein-coding
Diff_Nuc28144	chr6	105232632	105232771	+	0	NA	Intergenic	Intergenic	209961	NR_040297	100503536	Mm.366960	NR_040297	ENSMUSG00000108237	Gm19757	-	predicted gene, 19757	ncRNA
Diff_Nuc51498	chr8	79732912	79733051	+	0	NA	intron (NM_001083906, intron 6 of 8)	B3A|SINE|B2	306574	NM_001083906	110784	Mm.324393	NM_001083906	ENSMUSG00000031618	Nr3c2	MR|Mlr	nuclear receptor subfamily 3, group C, member 2	protein-coding
Diff_Nuc10028	chr10	87351502	87351641	+	0	NA	intron (NM_001314010, intron 3 of 4)	intron (NM_001314010, intron 3 of 4)	27715	NM_001111276	16000	Mm.268521	NM_010512	ENSMUSG00000020053	Igf1	C730016P09Rik|Igf-1|Igf-I	insulin-like growth factor 1	protein-coding
Diff_Nuc51756	chr8	92573842	92573981	+	0	NA	Intergenic	Lx5|LINE|L1	298240	NM_172913	244579	Mm.302755	NM_172913	ENSMUSG00000043668	Tox3	500-9|BC052044|C230068E13|CAGF9|Tnrc9	TOX high mobility group box family member 3	protein-coding
Diff_Nuc42188	chr2	139787332	139787471	+	0	NA	intron (NR_110352, intron 7 of 12)	intron (NR_110352, intron 7 of 12)	105140	NM_001159640	75812	Mm.293449	NM_175225	ENSMUSG00000039033	Tasp1	4930485D02Rik|AW986064	taspase, threonine aspartase 1	protein-coding
Diff_Nuc47169	chr1	196630932	196631071	+	0	NA	intron (NM_008882, intron 26 of 31)	intron (NM_008882, intron 26 of 31)	-17194	NR_039539	100628615		NR_039539	ENSMUSG00000092633	Mir3962	mmu-mir-3962|mu-mir-3962	microRNA 3962	ncRNA
Diff_Nuc41283	chr2	104912922	104913061	+	0	NA	Intergenic	Intergenic	53676	NR_015462	329480	Mm.246679	NR_015462	ENSMUSG00000074987	Wt1os	6030498F17|AI314831|Wt1-as	Wilms tumor 1 homolog, opposite strand	ncRNA
Diff_Nuc48814	chr9	77250102	77250241	+	0	NA	Intergenic	MT2_Mm|LTR|ERVL	-2948	NR_040378	70487	Mm.58958	NR_040378	ENSMUSG00000099170	5730403I07Rik	-	RIKEN cDNA 5730403I07 gene	ncRNA
Diff_Nuc24666	chr7	95841572	95841711	+	0	NA	Intergenic	Intergenic	262858	NM_028238	72433	Mm.276669	NM_028238	ENSMUSG00000030559	Rab38	2310011F14Rik|AU043391|cht	RAB38, member RAS oncogene family	protein-coding
Diff_Nuc40623	chr2	76502732	76502871	+	0	NA	intron (NM_010222, intron 3 of 3)	intron (NM_010222, intron 3 of 3)	8354	NM_010222	14231	Mm.24720	NM_010222	ENSMUSG00000002732	Fkbp7	23kDa|FKBP-7|FKBP23	FK506 binding protein 7	protein-coding
Diff_Nuc41944	chr2	131078532	131078671	+	0	NA	Intergenic	RLTR9A|LTR|ERVK	-9635	NM_153501	74450	Mm.101264	NM_153501	ENSMUSG00000037514	Pank2	4933409I19Rik|AI642621	pantothenate kinase 2	protein-coding
Diff_Nuc16664	chr15	65063082	65063221	+	0	NA	Intergenic	Lx5|LINE|L1	-309293	NM_009623	11514	Mm.1425	NM_009623	ENSMUSG00000022376	Adcy8	AC8|AW060868	adenylate cyclase 8	protein-coding
Diff_Nuc1200	chr13	34393672	34393811	+	0	NA	intron (NM_001033167, intron 2 of 10)	intron (NM_001033167, intron 2 of 10)	43310	NM_001033167	73102	Mm.23932	NM_001033167	ENSMUSG00000038267	Slc22a23	3110004L20Rik	solute carrier family 22, member 23	protein-coding
Diff_Nuc30012	chr5	46216392	46216531	+	0	NA	intron (NM_178142, intron 1 of 6)	L1_Mur3|LINE|L1	31330	NM_172153	209707	Mm.71498	NM_172153	ENSMUSG00000015882	Lcorl	Mlr1	ligand dependent nuclear receptor corepressor-like	protein-coding
Diff_Nuc14229	chr16	56103742	56103881	+	0	NA	intron (NM_025483, intron 4 of 23)	intron (NM_025483, intron 4 of 23)	28218	NM_001304503	66315	Mm.255784	NM_025483	ENSMUSG00000052917	Senp7	2410152H17Rik|2810413I22Rik|2900036C23Rik|6030449K19Rik|AI790676	SUMO1/sentrin specific peptidase 7	protein-coding
Diff_Nuc2708	chr13	104862762	104862901	+	0	NA	intron (NM_029447, intron 2 of 12)	intron (NM_029447, intron 2 of 12)	36863	NM_029447	75805	Mm.127692	NM_029447	ENSMUSG00000021710	Nln	4930472G13Rik|C79345	neurolysin (metallopeptidase M3 family)	protein-coding
Diff_Nuc4674	chr12	74745022	74745161	+	0	NA	intron (NM_001313977, intron 2 of 14)	intron (NM_001313977, intron 2 of 14)	59308	NM_008856	18755	Mm.341677	NM_008856	ENSMUSG00000021108	Prkch	Pkch	protein kinase C, eta	protein-coding
Diff_Nuc38550	chr3	150859382	150859521	+	0	NA	Intergenic	Intergenic	-172625	NR_039540	100628568		NR_039540	ENSMUSG00000092830	Mir3963	mmu-mir-3963|mu-mir-3963	microRNA 3963	ncRNA
Diff_Nuc52292	chr8	119711972	119712111	+	0	NA	intron (NM_001081151, intron 3 of 10)	intron (NM_001081151, intron 3 of 10)	30006	NM_001081151	209239	Mm.132992	NM_001081151	ENSMUSG00000052557	Gan	A330045G18|gigaxonin	giant axonal neuropathy	protein-coding
Diff_Nuc37160	chr3	86507132	86507271	+	0	NA	intron (NM_030695, intron 47 of 56)	intron (NM_030695, intron 47 of 56)	-154996	NM_011839	23937	Mm.389466	NM_011839	ENSMUSG00000057777	Mab21l2	-	mab-21-like 2 (C. elegans)	protein-coding
Diff_Nuc14487	chr16	65813782	65813921	+	0	NA	Intergenic	Intergenic	-2027	NM_028572	73569	Mm.25670	NM_028572	ENSMUSG00000091243	Vgll3	1700110N18Rik|4832416J22|C80713|Vgl-3|Vito-2	vestigial like family member 3	protein-coding
Diff_Nuc16195	chr15	44049972	44050111	+	0	NA	intron (NM_013696, intron 2 of 3)	PB1D10|SINE|Alu	22360	NM_013696	22045	Mm.309350	NM_013696	ENSMUSG00000038760	Trhr	TRH-R1	thyrotropin releasing hormone receptor	protein-coding
Diff_Nuc29303	chr5	14340792	14340931	+	0	NA	Intergenic	Intergenic	-174057	NM_011995	26875	Mm.146275	NM_011995	ENSMUSG00000061601	Pclo	Acz|Pico	piccolo (presynaptic cytomatrix protein)	protein-coding
Diff_Nuc46576	chr1	168280562	168280701	+	0	NA	Intergenic	Intergenic	-28667	NM_030245	27878	Mm.100665	NM_030245	ENSMUSG00000026563	Tada1	2900026B15Rik|D1Ertd251e|Staf42|Tada1l	transcriptional adaptor 1	protein-coding
Diff_Nuc36794	chr3	72497632	72497771	+	0	NA	Intergenic	L1Md_T|LINE|L1	273087	NM_001081137	69983	Mm.261054	NM_001081137	ENSMUSG00000027790	Sis	2010204N08Rik|SI|Si-s	sucrase isomaltase (alpha-glucosidase)	protein-coding
Diff_Nuc33282	chr4	57718582	57718721	+	0	NA	intron (NM_001304544, intron 5 of 8)	intron (NM_001304544, intron 5 of 8)	137531	NM_172868	242481	Mm.331630	NM_172868	ENSMUSG00000090053	Palm2	53-H12|B130066I24|R75368|pEN70	paralemmin 2	protein-coding
Diff_Nuc37014	chr3	80567552	80567691	+	0	NA	intron (NM_001039195, intron 2 of 12)	intron (NM_001039195, intron 2 of 12)	39092	NM_013540	14800	Mm.220224	NM_013540	ENSMUSG00000033981	Gria2	GluA2|GluR-B|Glur-2|Glur2	glutamate receptor, ionotropic, AMPA2 (alpha 2)	protein-coding
Diff_Nuc49727	chr9	120420302	120420441	+	0	NA	Intergenic	ORR1E|LTR|MaLR	18647	NM_026892	68969	Mm.28753	NM_026892	ENSMUSG00000006941	Eif1b	1500010M16Rik|3110001N14Rik|Gc20	eukaryotic translation initiation factor 1B	protein-coding
Diff_Nuc44714	chr1	79504412	79504551	+	0	NA	Intergenic	Intergenic	-67816	NM_001310680	20254	Mm.5038	NM_009129	ENSMUSG00000050711	Scg2	Chgc|SgII	secretogranin II	protein-coding
Diff_Nuc20517	chr19	29885942	29886081	+	0	NA	exon (NM_177721, exon 1 of 1)	exon (NM_177721, exon 1 of 1)	1453	NM_177721	240614	Mm.125503	NM_177721	ENSMUSG00000074909	Ranbp6	C630001B19	RAN binding protein 6	protein-coding
Diff_Nuc24840	chr7	100930032	100930171	+	0	NA	Intergenic	L1_Mur1|LINE|L1	701712	NM_021427	58238	Mm.113787	NM_021427	ENSMUSG00000051515	Fam181b	A830059I20Rik|AB041569	family with sequence similarity 181, member B	protein-coding
Diff_Nuc40947	chr2	91277712	91277851	+	0	NA	intron (NM_175123, intron 1 of 8)	intron (NM_175123, intron 1 of 8)	7018	NM_175123	228356	Mm.386861	NM_175123	ENSMUSG00000040591	1110051M20Rik	AI586322	RIKEN cDNA 1110051M20 gene	protein-coding
Diff_Nuc1672	chr13	58919672	58919811	+	0	NA	intron (NM_001025074, intron 2 of 17)	intron (NM_001025074, intron 2 of 17)	10683	NM_001025074	18212	Mm.130054	NM_008745	ENSMUSG00000055254	Ntrk2	GP145-TrkB/GP95-TrkB|Tkrb|trk-B|trkB	neurotrophic tyrosine kinase, receptor, type 2	protein-coding
Diff_Nuc47488	chr9	14325602	14325741	+	0	NA	Intergenic	Intergenic	20608	NM_023153	66070	Mm.245938	NM_023153	ENSMUSG00000004096	Cwc15	0610040D20Rik|2900052N06Rik|Ed1|c11orf5|mED1	CWC15 spliceosome-associated protein	protein-coding
Diff_Nuc45578	chr1	125236032	125236171	+	0	NA	intron (NM_199021, intron 24 of 25)	intron (NM_199021, intron 24 of 25)	706035	NM_199021	269109	Mm.417716	NM_199021	ENSMUSG00000036815	Dpp10	6430601K09Rik|DPP X|Dprp3	dipeptidylpeptidase 10	protein-coding
Diff_Nuc30310	chr5	59194572	59194711	+	0	NA	Intergenic	Intergenic	-350404	NR_046190	78163	Mm.243828	NR_046190	ENSMUSG00000105234	4930459L07Rik	-	RIKEN cDNA 4930459L07 gene	ncRNA
Diff_Nuc17867	chr14	32159872	32160011	+	0	NA	intron (NM_009796, intron 4 of 20)	intron (NM_009796, intron 4 of 20)	10031	NM_009796	12339	Mm.201535	NM_009796	ENSMUSG00000021893	Capn7	AU022319|PalBH	calpain 7	protein-coding
Diff_Nuc7222	chr11	76284992	76285131	+	0	NA	intron (NM_001346670, intron 4 of 21)	B2_Mm2|SINE|B2	-3094	NM_001291186	109934	Mm.258939	NM_198018	ENSMUSG00000017631	Abr	-	active BCR-related gene	protein-coding
Diff_Nuc49975	chr8	10949982	10950121	+	0	NA	Intergenic	Intergenic	-21594	NR_135302	665306	Mm.358758	NR_030715	ENSMUSG00000038917	3930402G23Rik	-	RIKEN cDNA 3930402G23 gene	ncRNA
Diff_Nuc8075	chr11	115254652	115254791	+	0	NA	exon (NM_001080929, exon 5 of 5)	exon (NM_001080929, exon 5 of 5)	-10345	NM_001347645	68572	Mm.271062	NM_026729	ENSMUSG00000018858	Mrpl58	1110001A02Rik|1110002E03Rik|Ict1|MRP-L58	mitochondrial ribosomal protein L58	protein-coding
Diff_Nuc50776	chr8	47299332	47299471	+	0	NA	Intergenic	Intergenic	-3038	NM_007450	11739	Mm.16228	NM_007450	ENSMUSG00000031633	Slc25a4	AU019225|Ant1	solute carrier family 25 (mitochondrial carrier, adenine nucleotide translocator), member 4	protein-coding
Diff_Nuc4544	chr12	70291832	70291971	+	0	NA	intron (NM_027269, intron 2 of 2)	intron (NM_027269, intron 2 of 2)	-6297	NR_033222	414085	Mm.256223	NR_033222	ENSMUSG00000097061	9330151L19Rik	-	RIKEN cDNA 9330151L19 gene	ncRNA
Diff_Nuc24733	chr7	98147792	98147931	+	0	NA	Intergenic	Intergenic	-91435	NM_011807	23859	Mm.147213	NM_011807	ENSMUSG00000052572	Dlg2	A330103J02Rik|B230218P12Rik|B330007M19Rik|Dlgh2|Gm1197|Gm21505|PSD93	discs, large homolog 2 (Drosophila)	protein-coding
Diff_Nuc3269	chr12	13522992	13523131	+	0	NA	intron (NM_027706, intron 45 of 51)	Lx|LINE|L1	111391	NR_136761	102639399	Mm.122052	NR_136761		Gm35725	-	predicted gene, 35725	ncRNA
Diff_Nuc44094	chr1	53487172	53487311	+	0	NA	intron (NM_001252070, intron 58 of 65)	intron (NM_001252070, intron 58 of 65)	-77645	NM_133728	70396	Mm.285783	NM_133728	ENSMUSG00000026095	Asnsd1	2210409M21Rik	asparagine synthetase domain containing 1	protein-coding
Diff_Nuc23781	chr7	56812872	56813011	+	0	NA	intron (NM_175272, intron 18 of 37)	intron (NM_175272, intron 18 of 37)	79264	NM_001005232	13172	Mm.307176	NM_001005232	ENSMUSG00000030507	Dbx1	AI426026|Dbx	developing brain homeobox 1	protein-coding
Diff_Nuc31621	chr5	123861452	123861591	+	0	NA	intron (NM_177582, intron 1 of 8)	intron (NM_177582, intron 1 of 8)	16714	NM_177582	208104	Mm.83277	NM_133917	ENSMUSG00000038342	Mlxip	AW228700|Mir|bHLHe36	MLX interacting protein	protein-coding
Diff_Nuc29855	chr5	38269092	38269231	+	0	NA	Intergenic	MTA_Mm-int|LTR|MaLR	-53337	NM_010835	17701	Mm.256509	NM_010835	ENSMUSG00000048450	Msx1	AA675338|AI324650|Hox-7|Hox7|Hox7.1|msh	msh homeobox 1	protein-coding
Diff_Nuc14877	chr16	81373152	81373291	+	0	NA	intron (NM_001113208, intron 1 of 17)	Lx9|LINE|L1	172279	NM_010954	17968	Mm.433941	NM_010954	ENSMUSG00000022762	Ncam2	Ncam-2|Ocam|RNCAM	neural cell adhesion molecule 2	protein-coding
Diff_Nuc11106	chr17	3840602	3840741	+	0	NA	Intergenic	Intergenic	-144410	NM_198958	224480	Mm.328756	NM_198958	ENSMUSG00000023802	Nox3	GP91-3|het|nmf250	NADPH oxidase 3	protein-coding
Diff_Nuc5073	chr12	90987122	90987261	+	0	NA	intron (NM_001198587, intron 14 of 19)	intron (NM_001198587, intron 14 of 19)	-63732	NM_001252074	18191	Mm.425766	NM_172544	ENSMUSG00000066392	Nrxn3	-	neurexin III	protein-coding
Diff_Nuc22189	chr18	48995972	48996111	+	0	NA	Intergenic	Intergenic	-686902	NR_033785	67321	Mm.245802	NR_033785	ENSMUSG00000100297	1700044K03Rik	-	RIKEN cDNA 1700044K03 gene	ncRNA
Diff_Nuc21691	chr18	27210412	27210551	+	0	NA	Intergenic	L1_Mm|LINE|L1	-1297997	NM_001174074	108013	Mm.266435	NM_133195	ENSMUSG00000024268	Celf4	A230070D14Rik|BRUNOL-4|Brul4|Brunol4|C130060B05Rik	CUGBP, Elav-like family member 4	protein-coding
Diff_Nuc5880	chr11	13036552	13036691	+	0	NA	Intergenic	Lx|LINE|L1	-671658	NM_001282993	12808	Mm.22847	NM_172496	ENSMUSG00000020173	Cobl	-	cordon-bleu WH2 repeat	protein-coding
Diff_Nuc6841	chr11	55322952	55323091	+	0	NA	Intergenic	Intergenic	8293	NR_106112	102465760		NR_106112	ENSMUSG00000098906	Mir7652	Gm27932|mmu-mir-7652	microRNA 7652	ncRNA
Diff_Nuc34794	chr4	128987072	128987211	+	0	NA	3' UTR (NM_009030, exon 12 of 12)	3' UTR (NM_009030, exon 12 of 12)	22276	NM_023485	68828	Mm.132243	NM_023485	ENSMUSG00000001333	Sync	1110057H03Rik|SNIP4	syncoilin	protein-coding
Diff_Nuc28498	chr6	121241242	121241381	+	0	NA	Intergenic	Intergenic	-9003	NM_144512	14412	Mm.258596	NM_144512	ENSMUSG00000030108	Slc6a13	GAT3|Gabt3|Gat2	solute carrier family 6 (neurotransmitter transporter, GABA), member 13	protein-coding
Diff_Nuc44508	chr1	69025302	69025441	+	0	NA	intron (NM_010154, intron 1 of 26)	intron (NM_010154, intron 1 of 26)	129262	NM_010154	13869	Mm.442420	NM_010154	ENSMUSG00000062209	Erbb4	Her4|c-erbB-4	erb-b2 receptor tyrosine kinase 4	protein-coding
Diff_Nuc41308	chr2	106161192	106161331	+	0	NA	Intergenic	Lx8|LINE|L1	201999	NR_040637	329483	Mm.246777	NR_040637	ENSMUSG00000087226	Gm14015	9330126M15|OTTMUSG00000015366	predicted gene 14015	ncRNA
Diff_Nuc5681	chr11	3539712	3539851	+	0	NA	TTS (NR_002322)	TTS (NR_002322)	7758	NR_110490	544752	Mm.390314	NR_002321	ENSMUSG00000056579	Tug1	AI316828	taurine upregulated gene 1	ncRNA
Diff_Nuc20970	chr19	52111282	52111421	+	0	NA	Intergenic	Intergenic	-227436	NM_008386	16333	Mm.46269	NM_008386	ENSMUSG00000035804	Ins1	Ins-1|Ins2-rs1	insulin I	protein-coding
Diff_Nuc44386	chr1	63883862	63884001	+	0	NA	Intergenic	Intergenic	-68090	NM_001256158	74426	Mm.159197	NM_001256158	ENSMUSG00000025961	4933402D24Rik	-	RIKEN cDNA 4933402D24 gene	protein-coding
Diff_Nuc34463	chr4	113656172	113656311	+	0	NA	intron (NM_001167878, intron 2 of 57)	L1_Mus2|LINE|L1	15867	NM_001167878	242627	Mm.484115	NM_001167876	ENSMUSG00000078598	Skint5	OTTMUSG00000008560|Skint-5	selection and upkeep of intraepithelial T cells 5	protein-coding
Diff_Nuc23798	chr7	57395552	57395691	+	0	NA	intron (NM_001037906, intron 4 of 19)	intron (NM_001037906, intron 4 of 19)	164901	NM_001037906	338352	Mm.383528	NM_001037906	ENSMUSG00000055409	Nell1	B230343H07Rik|l7R6	NEL-like 1	protein-coding
Diff_Nuc12222	chr17	59516302	59516441	+	0	NA	Intergenic	AT_rich|Low_complexity|Low_complexity	-363626	NM_026497	67993	Mm.36507	NM_026497	ENSMUSG00000024228	Nudt12	0610016O18Rik	nudix (nucleoside diphosphate linked moiety X)-type motif 12	protein-coding
Diff_Nuc612	chr13	9966902	9967041	+	0	NA	intron (NM_033269, intron 4 of 4)	Lx7|LINE|L1	-202404	NM_144516	66505	Mm.397307	NM_144516	ENSMUSG00000021156	Zmynd11	2210402G22Rik|BS69	zinc finger, MYND domain containing 11	protein-coding
Diff_Nuc44930	chr1	90129322	90129461	+	0	NA	intron (NM_001281466, intron 6 of 41)	MTD|LTR|MaLR	5796	NM_001281466	100040766	Mm.386915	NM_001177364	ENSMUSG00000079429	Mroh2a	ENSMUSG00000044873|Heatr7b1|OTTMUSG00000020804	maestro heat-like repeat family member 2A	protein-coding
Diff_Nuc20160	chr19	13088542	13088681	+	0	NA	Intergenic	Intergenic	14206	NM_146700	258695	Mm.223130	NM_146700	ENSMUSG00000094755	Olfr1453	MOR202-6	olfactory receptor 1453	protein-coding
Diff_Nuc19870	chr14	122789862	122790001	+	0	NA	intron (NR_033326, intron 1 of 3)	intron (NR_033326, intron 1 of 3)	60406	NR_033325	328479	Mm.86095	NR_033325	ENSMUSG00000064052	Gm5089	6530402A20|C030005G22Rik|EG328479	predicted gene 5089	ncRNA
Diff_Nuc13724	chr16	35337912	35338051	+	0	NA	intron (NM_133704, intron 4 of 6)	intron (NM_133704, intron 4 of 6)	26023	NM_133704	317717	Mm.259164	NM_133704	ENSMUSG00000034473	Sec22a	1810005C06Rik|Sec22l2	SEC22 homolog A, vesicle trafficking protein	protein-coding
Diff_Nuc9249	chr10	48846042	48846181	+	0	NA	intron (NM_001111268, intron 15 of 16)	L1MC1|LINE|L1	-30462	NR_046212	100418235	Mm.185993	NR_046212		C130030K03Rik	-	proteasome (prosome, macropain) subunit, alpha type 6 pseudogene	pseudo
Diff_Nuc20751	chr19	40409382	40409521	+	0	NA	intron (NM_001034962, intron 14 of 22)	intron (NM_001034962, intron 14 of 22)	-63345	NM_016861	54132	Mm.5567	NM_016861	ENSMUSG00000055044	Pdlim1	CLP36|Clim1|mClim1	PDZ and LIM domain 1 (elfin)	protein-coding
Diff_Nuc44757	chr1	81503432	81503571	+	0	NA	Intergenic	Intergenic	429609	NM_172849	241134	Mm.313904	NM_172849	ENSMUSG00000054976	Nyap2	9430031J16Rik|Jr6|Kiaa1486	neuronal tyrosine-phophorylated phosphoinositide 3-kinase adaptor 2	protein-coding
Diff_Nuc21445	chr18	16743002	16743141	+	0	NA	Intergenic	Intergenic	224684	NM_007664	12558	Mm.257437	NM_007664	ENSMUSG00000024304	Cdh2	CDHN|N-CAD|Ncad	cadherin 2	protein-coding
Diff_Nuc12572	chr17	75687262	75687401	+	0	NA	intron (NM_206958, intron 11 of 29)	L1Md_F3|LINE|L1	109210	NM_001331235	268977	Mm.269747	NM_019919	ENSMUSG00000001870	Ltbp1	9430031G15Rik|9830146M04|Ltbp-1|Ltbp1L|TGF-beta1-BP-1|Tgfb|b2b1000Clo	latent transforming growth factor beta binding protein 1	protein-coding
Diff_Nuc8101	chr11	116349352	116349491	+	0	NA	intron (NM_026364, intron 2 of 9)	intron (NM_026364, intron 2 of 9)	2239	NM_026364	67763	Mm.25125	NM_026364	ENSMUSG00000015869	Prpsap1	5730409F23Rik|PAP39	phosphoribosyl pyrophosphate synthetase-associated protein 1	protein-coding
Diff_Nuc19087	chr14	88188642	88188781	+	0	NA	Intergenic	Lx9|LINE|L1	372321	NM_001253755	219249	Mm.35168	NM_172605	ENSMUSG00000022019	Tdrd3	4732418C03Rik|6720468N18	tudor domain containing 3	protein-coding
Diff_Nuc31743	chr5	131772182	131772321	+	0	NA	intron (NM_145218, intron 1 of 10)	B3A|SINE|B2	11141	NM_145218	212996	Mm.299204	NM_145218	ENSMUSG00000034040	Wbscr17	AA388321|E330012B09Rik	Williams-Beuren syndrome chromosome region 17 homolog (human)	protein-coding
Diff_Nuc45990	chr1	144160522	144160661	+	0	NA	Intergenic	Intergenic	-1327236	NM_020025	26878	Mm.285580	NM_020025	ENSMUSG00000033849	B3galt2	-	UDP-Gal:betaGlcNAc beta 1,3-galactosyltransferase, polypeptide 2	protein-coding
Diff_Nuc37240	chr3	89868982	89869121	+	0	NA	intron (NM_028567, intron 3 of 3)	PB1D7|SINE|Alu	2333	NM_028567	73545	Mm.482512	NM_028567	ENSMUSG00000027942	1700094D03Rik	-	RIKEN cDNA 1700094D03 gene	protein-coding
Diff_Nuc42956	chr2	181446592	181446731	+	0	NA	Intergenic	RLTR18B|LTR|ERVK	-3060	NM_001318922	18389	Mm.285075	NM_011012	ENSMUSG00000027584	Oprl1	KOR-3|KOR3|LC132|MOR-C|NOP|ORGC|ORL1|Oprl|XOR1|morc	opioid receptor-like 1	protein-coding
Diff_Nuc37413	chr3	98034842	98034981	+	0	NA	intron (NM_026328, intron 3 of 5)	intron (NM_026328, intron 3 of 5)	8832	NM_026328	67709	Mm.46306	NM_026328	ENSMUSG00000027876	Reg4	2010002L15Rik|GISP|RELP	regenerating islet-derived family, member 4	protein-coding
Diff_Nuc2483	chr13	94539312	94539451	+	0	NA	Intergenic	Intergenic	-2253	NM_009712	11881	Mm.300178	NM_009712	ENSMUSG00000042082	Arsb	1110007C02Rik|AI480648|As-1|As-1r|As-1s|As-1t|As1|As1-r|As1-s|As1-t|Asr-1|Ast-1	arylsulfatase B	protein-coding
Diff_Nuc32649	chr4	27060722	27060861	+	0	NA	Intergenic	Lx6|LINE|L1	-428195	NR_040656	75360	Mm.67233	NR_040656	ENSMUSG00000086257	4930548K13Rik	-	RIKEN cDNA 4930548K13 gene	ncRNA
Diff_Nuc12727	chr17	82662872	82663011	+	0	NA	Intergenic	Intergenic	-525214	NM_011406	20541	Mm.265834	NM_011406	ENSMUSG00000054640	Slc8a1	AI852629|AV344025|D930008O12Rik|Ncx1	solute carrier family 8 (sodium/calcium exchanger), member 1	protein-coding
Diff_Nuc21446	chr18	16762982	16763121	+	0	NA	intron (NM_007664, intron 14 of 15)	ORR1C1|LTR|MaLR	204704	NM_007664	12558	Mm.257437	NM_007664	ENSMUSG00000024304	Cdh2	CDHN|N-CAD|Ncad	cadherin 2	protein-coding
Diff_Nuc856	chr13	19166192	19166331	+	0	NA	intron (NM_175007, intron 2 of 20)	intron (NM_175007, intron 2 of 20)	126041	NM_001289546	218038	Mm.101650	NM_175007	ENSMUSG00000021314	Amph	-	amphiphysin	protein-coding
Diff_Nuc34089	chr4	95248842	95248981	+	0	NA	intron (NM_029347, intron 1 of 10)	intron (NM_029347, intron 1 of 10)	2799	NM_029347	75578	Mm.276098	NM_029347	ENSMUSG00000028573	Fggy	2310009E04Rik	FGGY carbohydrate kinase domain containing	protein-coding
Diff_Nuc5928	chr11	15177192	15177331	+	0	NA	Intergenic	Lx3C|LINE|L1	678018	NM_001164166	432536	Mm.33646	NM_001164166	ENSMUSG00000084135	Pom121l12	1700054H16Rik	POM121 membrane glycoprotein-like 12	protein-coding
Diff_Nuc14744	chr16	76200852	76200991	+	0	NA	Intergenic	Intergenic	78063	NR_040575	78215	Mm.243885	NR_040575		4930578N18Rik	-	RIKEN cDNA 4930578N18 gene	ncRNA
Diff_Nuc28364	chr6	115124142	115124281	+	0	NA	intron (NM_001111015, intron 1 of 12)	ID2|SINE|ID	39291	NM_001111015	20965	Mm.441431	NM_013681	ENSMUSG00000009394	Syn2	2900074L19Rik|AI836018|AI841723	synapsin II	protein-coding
Diff_Nuc13234	chr16	12813662	12813801	+	0	NA	intron (NR_040507, intron 1 of 4)	intron (NR_040507, intron 1 of 4)	2248	NR_040507	75493	Mm.396146	NR_040507	ENSMUSG00000101565	1700003L19Rik	-	RIKEN cDNA 1700003L19 gene	ncRNA
Diff_Nuc1336	chr13	41082852	41082991	+	0	NA	Intergenic	CT-rich|Low_complexity|Low_complexity	-13458	NM_026550	68083	Mm.24789	NM_026550	ENSMUSG00000038683	Pak1ip1	5830431I15Rik|5930415H02Rik|AA419825|AI314040|AW556169|Gdpd1|PIP1	PAK1 interacting protein 1	protein-coding
Diff_Nuc47683	chr9	26181242	26181381	+	0	NA	Intergenic	Intergenic	-360082	NM_001310766	76898	Mm.218788	NM_029792	ENSMUSG00000045994	B3gat1	0710007K08Rik|AI846286|GlcAT-P|Glcatp|Hnk1	beta-1,3-glucuronyltransferase 1 (glucuronosyltransferase P)	protein-coding
Diff_Nuc13515	chr16	26236592	26236731	+	0	NA	Intergenic	Intergenic	-130791	NM_173379	210530	Mm.326869	NM_173379	ENSMUSG00000038168	P3h2	4832416N06|AW553532|Leprel1|Mlat4	prolyl 3-hydroxylase 2	protein-coding
Diff_Nuc36736	chr3	70153602	70153741	+	0	NA	Intergenic	MTEa-int|LTR|MaLR	342136	NM_001018031	229389	Mm.331071	NM_001018031	ENSMUSG00000027788	Otol1	Gm414	otolin 1	protein-coding
Diff_Nuc10760	chr10	114936982	114937121	+	0	NA	intron (NM_010195, intron 3 of 17)	intron (NM_010195, intron 3 of 17)	-69991	NM_029982	77798	Mm.446685	NM_029982	ENSMUSG00000092210	A930009A15Rik	-	RIKEN cDNA A930009A15 gene	protein-coding
Diff_Nuc37513	chr3	103604952	103605091	+	0	NA	3' UTR (NM_001025312, exon 3 of 3)	3' UTR (NM_001025312, exon 3 of 3)	-2031	NR_040412	100503157	Mm.445554	NR_040412	ENSMUSG00000084997	Gm15471	OTTMUSG00000022448	predicted gene 15471	ncRNA
Diff_Nuc29509	chr5	21901202	21901341	+	0	NA	Intergenic	Intergenic	-50748	NM_001310464	19699	Mm.425236	NM_011261	ENSMUSG00000042453	Reln	reeler|rl	reelin	protein-coding
Diff_Nuc21934	chr18	37187562	37187701	+	0	NA	intron (NM_138663, intron 1 of 3)	Lx5|LINE|L1	7747	NM_138663	192164	Mm.308500	NM_138663	ENSMUSG00000103310	Pcdha12	Cnr5|Crnr5|Pcdha13	protocadherin alpha 12	protein-coding
Diff_Nuc31550	chr5	118694292	118694431	+	0	NA	promoter-TSS (NM_001081236)	promoter-TSS (NM_001081236)	509	NM_172998	269695	Mm.320042	NM_172998	ENSMUSG00000032850	Rnft2	AW049082|B830028P19Rik|Tmem118	ring finger protein, transmembrane 2	protein-coding
Diff_Nuc38187	chr3	135095072	135095211	+	0	NA	Intergenic	Intergenic	6488	NR_030689	319587	Mm.358971	NR_030689	ENSMUSG00000097032	4930539J05Rik	8030475D13Rik	RIKEN cDNA 4930539J05 gene	ncRNA
Diff_Nuc51277	chr8	70491342	70491481	+	0	NA	intron (NM_177698, intron 1 of 14)	intron (NM_177698, intron 1 of 14)	7062	NM_177698	234353	Mm.32525	NM_027626	ENSMUSG00000030465	Psd3	4931420C21Rik|AI661273|BC003498|D430018P08|EFA6D	pleckstrin and Sec7 domain containing 3	protein-coding
Diff_Nuc48842	chr9	78424172	78424311	+	0	NA	intron (NM_172773, intron 3 of 10)	B3|SINE|B2	11611	NM_172773	235504	Mm.46932	NM_172773	ENSMUSG00000049624	Slc17a5	4631416G20Rik|4732491M05|AST|ISSD|NSD|SD|SIALIN|SIASD|SLD	solute carrier family 17 (anion/sugar transporter), member 5	protein-coding
Diff_Nuc935	chr13	22598012	22598151	+	0	NA	Intergenic	Lx7|LINE|L1	-3967	NM_134224	171258	Mm.377212	NM_134224	ENSMUSG00000094379	Vmn1r202	V1ri7	vomeronasal 1 receptor 202	protein-coding
Diff_Nuc35456	chr3	10722702	10722841	+	0	NA	Intergenic	Lx|LINE|L1	-282641	NM_001127191	74718	Mm.440548	NM_029068	ENSMUSG00000027534	Snx16	4930522N22Rik|AI117577|AI747675	sorting nexin 16	protein-coding
Diff_Nuc5844	chr11	11211372	11211511	+	0	NA	intron (NM_015785, intron 7 of 7)	intron (NM_015785, intron 7 of 7)	150981	NM_015785	53604	Mm.9500	NM_015785	ENSMUSG00000020193	Zpbp	4930486K01Rik|Iam38|Sp38	zona pellucida binding protein	protein-coding
Diff_Nuc2087	chr13	78453672	78453811	+	0	NA	Intergenic	Lx|LINE|L1	-115607	NM_010151	13865	Mm.439653	NM_010151	ENSMUSG00000069171	Nr2f1	COUP-TF1|COUP-TFI|COUPTFA|EAR-3|EAR3|Erbal3|SVP44|Tcfcoup1	nuclear receptor subfamily 2, group F, member 1	protein-coding
Diff_Nuc40468	chr2	70417412	70417551	+	0	NA	intron (NM_008077, intron 6 of 16)	intron (NM_008077, intron 6 of 16)	-16067	NR_040496	68986	Mm.437697	NR_040496	ENSMUSG00000087264	Gad1os	1500002O10Rik	glutamate decarboxylase 1, opposite strand	ncRNA
Diff_Nuc11983	chr17	46508452	46508591	+	0	NA	Intergenic	MYSERV6-int|LTR|ERVK	-12194	NM_207671	57908	Mm.439916	NM_021346	ENSMUSG00000015597	Zfp318	2610034E08Rik|D530032D06Rik|TZF|Znf318	zinc finger protein 318	protein-coding
Diff_Nuc50919	chr8	52345552	52345691	+	0	NA	Intergenic	Intergenic	892155	NR_046067	100039954	Mm.400419	NR_046067	ENSMUSG00000110281	Gm2516	-	predicted gene 2516	ncRNA
Diff_Nuc19949	chr14	124881552	124881691	+	0	NA	intron (NM_207667, intron 1 of 4)	intron (NM_207667, intron 1 of 4)	194728	NM_207667	14169	Mm.206362	NM_010201	ENSMUSG00000025551	Fgf14	FHF-4|Fhf4|mFHF-4(1B)	fibroblast growth factor 14	protein-coding
Diff_Nuc43471	chr1	24793762	24793901	+	0	NA	intron (NM_001310483, intron 9 of 15)	intron (NM_001310483, intron 9 of 15)	108074	NM_001310483	68421	Mm.336563	NM_026719	ENSMUSG00000073725	Lmbrd1	0910001K20Rik|AV347960	LMBR1 domain containing 1	protein-coding
Diff_Nuc25677	chr7	141743922	141744061	+	0	NA	Intergenic	Intergenic	-118379	NM_001033420	330662	Mm.436572	NM_001033420	ENSMUSG00000058325	Dock1	9130006G06Rik|AI854900|D630004B07Rik	dedicator of cytokinesis 1	protein-coding
Diff_Nuc6104	chr11	21740242	21740381	+	0	NA	intron (NM_145425, intron 14 of 17)	L1Md_F2|LINE|L1	161343	NM_011023	18423	Mm.129663	NM_011023	ENSMUSG00000005917	Otx1	A730044F23Rik|jv	orthodenticle homeobox 1	protein-coding
Diff_Nuc3722	chr12	39073702	39073841	+	0	NA	intron (NM_178681, intron 20 of 24)	L1Md_F2|LINE|L1	267337	NR_045943	73867	Mm.78933	NR_045943		4930428E07Rik	-	RIKEN cDNA 4930428E07 gene	ncRNA
Diff_Nuc36163	chr3	45623832	45623971	+	0	NA	Intergenic	Intergenic	-380670	NR_040594	72274	Mm.396202	NR_040594	ENSMUSG00000100799	1700027H10Rik	-	RIKEN cDNA 1700027H10 gene	ncRNA
Diff_Nuc30584	chr5	72118142	72118281	+	0	NA	intron (NM_008069, intron 3 of 8)	intron (NM_008069, intron 3 of 8)	26956	NM_008069	14400	Mm.38567	NM_008069	ENSMUSG00000029212	Gabrb1	AW061132|B230208N19Rik|Gabrb-1	gamma-aminobutyric acid (GABA) A receptor, subunit beta 1	protein-coding
Diff_Nuc4963	chr12	85605352	85605491	+	0	NA	Intergenic	B1_Mus1|SINE|Alu	-20825	NM_029880	77219	Mm.246127	NM_029880	ENSMUSG00000072946	Ptgr2	1810016I24Rik|9130222H03Rik|9630002F03Rik|AI838763|B830026H24Rik|PGR-2|PRG-2|Zadh1	prostaglandin reductase 2	protein-coding
Diff_Nuc1601	chr13	54360872	54361011	+	0	NA	Intergenic	Intergenic	73443	NM_008286	15466	Mm.57243	NM_008286	ENSMUSG00000034987	Hrh2	-	histamine receptor H2	protein-coding
Diff_Nuc21784	chr18	31492902	31493041	+	0	NA	Intergenic	Intergenic	-16189	NM_009065	19762	Mm.5163	NM_009065	ENSMUSG00000057455	Rit2	RIBA|Rin|Roc2	Ras-like without CAAX 2	protein-coding
Diff_Nuc5556	chr12	117142752	117142891	+	0	NA	Intergenic	L1Md_F2|LINE|L1	-143114	NM_001004066	56220	Mm.254997	NM_019565	ENSMUSG00000042063	Zfp386	Kzf1|mKIAA4205	zinc finger protein 386 (Kruppel-like)	protein-coding
Diff_Nuc51425	chr8	76181602	76181741	+	0	NA	Intergenic	Intergenic	-304232	NM_010687	16795	Mm.324371	NM_010687	ENSMUSG00000004383	Large1	BPFD#36|Gyltl1a|Large|Mbp-1|Mbp1|enr|fg|froggy|myd	LARGE xylosyl- and glucuronyltransferase 1	protein-coding
Diff_Nuc32544	chr4	22876162	22876301	+	0	NA	Intergenic	Intergenic	458536	NR_131335	105500046		NR_131335	ENSMUSG00000107859	Gm30731	Pnky|lnc-pou3f2	predicted gene, 30731	ncRNA
Diff_Nuc1219	chr13	35283582	35283721	+	0	NA	Intergenic	Intergenic	10159	NR_045616	100503727	Mm.32214	NR_045616	ENSMUSG00000102099	1700011B04Rik	-	RIKEN cDNA 1700011B04 gene	ncRNA
Diff_Nuc23585	chr7	39235252	39235391	+	0	NA	Intergenic	Intergenic	77891	NM_001013810	434171	Mm.60990	NM_001013810	ENSMUSG00000060565	Gm5591	EG434171	predicted gene 5591	protein-coding
Diff_Nuc16669	chr15	65282932	65283071	+	0	NA	Intergenic	Lx9|LINE|L1	-335602	NM_133766	76740	Mm.260647	NM_133766	ENSMUSG00000015002	Efr3a	A130089M23Rik|BB071175|C76891|C920006C10Rik|D030063F01Rik|mKIAA0143	EFR3 homolog A	protein-coding
Diff_Nuc27914	chr6	93638382	93638521	+	0	NA	intron (NM_010367, intron 16 of 21)	intron (NM_010367, intron 16 of 21)	224506	NR_104594	14924	Mm.217216	NM_010367	ENSMUSG00000045095	Magi1	AIP3|BAP1|Baiap1|Gukmi1|MAGI1c|Magi-1|TNRC19|WWP3|mKIAA4129	membrane associated guanylate kinase, WW and PDZ domain containing 1	protein-coding
Diff_Nuc25910	chr6	6965762	6965901	+	0	NA	intron (NM_001077713, intron 1 of 1)	RMER15|LTR|ERVL	59813	NM_001077713	71238	Mm.389086	NM_001077713	ENSMUSG00000042505	Sdhaf3	0610005M07Rik|4933430A16Rik|Acn9	succinate dehydrogenase complex assembly factor 3	protein-coding
Diff_Nuc3686	chr12	38024052	38024191	+	0	NA	intron (NM_178767, intron 3 of 12)	intron (NM_178767, intron 3 of 12)	55895	NM_178767	319660	Mm.485540	NM_178767	ENSMUSG00000050103	Agmo	A530016O06Rik|AI790538|Tmem195	alkylglycerol monooxygenase	protein-coding
Diff_Nuc11383	chr17	16414022	16414161	+	0	NA	Intergenic	L1_Mus1|LINE|L1	-450541	NM_178615	68799	Mm.293466	NM_178615	ENSMUSG00000048027	Rgmb	1110059F19Rik|DRAGON	repulsive guidance molecule family member B	protein-coding
Diff_Nuc39774	chr2	44587412	44587551	+	0	NA	intron (NM_172662, intron 5 of 10)	intron (NM_172662, intron 5 of 10)	129661	NM_172662	227835	Mm.314312	NM_172662	ENSMUSG00000036890	Gtdc1	E330008O22Rik	glycosyltransferase-like domain containing 1	protein-coding
Diff_Nuc39695	chr2	41995872	41996011	+	0	NA	intron (NM_053011, intron 2 of 90)	L1MC1|LINE|L1	307147	NR_105754	102465171		NR_105754	ENSMUSG00000098660	Mir6336	Gm27584|mmu-mir-6336	microRNA 6336	ncRNA
Diff_Nuc7650	chr11	95617312	95617451	+	0	NA	intron (NM_201609, intron 4 of 4)	intron (NM_201609, intron 4 of 4)	7000	NM_201609	268469	Mm.389038	NM_201609	ENSMUSG00000075595	Zfp652	9530033F24Rik|ZNF652	zinc finger protein 652	protein-coding
Diff_Nuc38369	chr3	142125382	142125521	+	0	NA	Intergenic	Intergenic	-34447	NM_153564	229898	Mm.459245	NM_153564	ENSMUSG00000105504	Gbp5	5330409J06Rik|Gbp5a	guanylate binding protein 5	protein-coding
Diff_Nuc26232	chr6	20514882	20515021	+	0	NA	Intergenic	Intergenic	-651158	NM_019697	16508	Mm.425316	NM_019697	ENSMUSG00000060882	Kcnd2	AI839615|AW555701|Kv4.2|R75121|mKIAA1044	potassium voltage-gated channel, Shal-related family, member 2	protein-coding
Diff_Nuc48537	chr9	65632942	65633081	+	0	NA	intron (NM_172536, intron 2 of 9)	intron (NM_172536, intron 2 of 9)	42360	NM_172536	214812	Mm.139231	NM_172536	ENSMUSG00000040524	Zfp609	9830165N24|BC016271|Znf609|mKIAA0295	zinc finger protein 609	protein-coding
Diff_Nuc17225	chr15	95573062	95573201	+	0	NA	Intergenic	Intergenic	8891	NR_131148	629300	Mm.247258	NR_131148		Gm6961	EG629300	predicted gene 6961	ncRNA
Diff_Nuc13794	chr16	37898482	37898621	+	0	NA	Intergenic	Intergenic	-18031	NM_153394	239845	Mm.228018	NM_153394	ENSMUSG00000046961	Gpr156	Gababl	G protein-coupled receptor 156	protein-coding
Diff_Nuc26065	chr6	13485962	13486101	+	0	NA	Intergenic	Intergenic	72067	NM_001347059	101118	Mm.254845	NM_028990	ENSMUSG00000029569	Tmem168	5730526F17Rik|8430437G11Rik|AI462344|AI504145	transmembrane protein 168	protein-coding
Diff_Nuc8106	chr11	116753722	116753861	+	0	NA	Intergenic	Intergenic	-26386	NM_172948	268510	Mm.35141	NM_172948	ENSMUSG00000043857	Mgat5b	C330018B01|GnT-IX|mGnTVB	mannoside acetylglucosaminyltransferase 5, isoenzyme B	protein-coding
Diff_Nuc14108	chr16	50967232	50967371	+	0	NA	Intergenic	RMER12B|LTR|ERVK	183779	NR_131005	78639	Mm.160109	NR_131005	ENSMUSG00000092276	1700116B05Rik	-	RIKEN cDNA 1700116B05 gene	ncRNA
Diff_Nuc44720	chr1	79702642	79702781	+	0	NA	intron (NM_001111279, intron 11 of 11)	intron (NM_001111279, intron 11 of 11)	-34164	NM_183027	252903	Mm.32409	NM_183027	ENSMUSG00000054702	Ap1s3	1190009B22|Jr2|[s]3A	adaptor-related protein complex AP-1, sigma 3	protein-coding
Diff_Nuc33869	chr4	84689332	84689471	+	0	NA	intron (NM_175275, intron 13 of 25)	intron (NM_175275, intron 13 of 25)	159188	NM_177385	338349	Mm.440562	NM_175275	ENSMUSG00000038070	Cntln	AI448092|B430108F07Rik|D530005L17Rik	centlein, centrosomal protein	protein-coding
Diff_Nuc30216	chr5	55520372	55520511	+	0	NA	Intergenic	Intergenic	779210	NR_038045	330086	Mm.254449	NM_177871	ENSMUSG00000105912	Gm10440	D130065D13|ENSMUSG00000072936	predicted gene 10440	ncRNA
Diff_Nuc2765	chr13	107210772	107210911	+	0	NA	Intergenic	Lx2B|LINE|L1	516154	NM_029665	76582	Mm.132208	NM_029665	ENSMUSG00000042590	Ipo11	1700081H05Rik|2510001A17Rik|AI314624|AW555235|E330021B14Rik|Ranbp11	importin 11	protein-coding
Diff_Nuc44818	chr1	84553512	84553651	+	0	NA	intron (NM_152915, intron 4 of 12)	intron (NM_152915, intron 4 of 12)	-138833	NR_039588	100628595		NR_039588	ENSMUSG00000093254	Mir5126	mir-5126|mmu-mir-5126|mu-mir-5126	microRNA 5126	ncRNA
Diff_Nuc16902	chr15	77723252	77723391	+	0	NA	Intergenic	Intergenic	36103	NM_019913	56551	Mm.291917	NM_019913	ENSMUSG00000005354	Txn2	2510006J11Rik|AI788873|Trx2	thioredoxin 2	protein-coding
Diff_Nuc13078	chr16	4921492	4921631	+	0	NA	intron (NM_029657, intron 9 of 16)	B1F2|SINE|Alu	-17550	NM_001316715	66911	Mm.428698	NM_025839	ENSMUSG00000022516	Nudt16l1	1110001K21Rik|5330437I08Rik|Sdos	nudix (nucleoside diphosphate linked moiety X)-type motif 16-like 1	protein-coding
Diff_Nuc4349	chr12	61406402	61406541	+	0	NA	Intergenic	L1VL2|LINE|L1	-1086001	NM_001033156	70611	Mm.311026	NM_001033156	ENSMUSG00000035329	Fbxo33	5730501N20Rik|AI642135	F-box protein 33	protein-coding
Diff_Nuc25350	chr7	125756572	125756711	+	0	NA	intron (NM_001105252, intron 2 of 21)	intron (NM_001105252, intron 2 of 21)	15830	NM_001105252	74424	Mm.11068	NM_028930	ENSMUSG00000030650	Tmc5	4932443L08Rik|AU016085	transmembrane channel-like gene family 5	protein-coding
Diff_Nuc32659	chr4	27845422	27845561	+	0	NA	Intergenic	Intergenic	-894790	NM_001290434	13841	Mm.257266	NM_010141	ENSMUSG00000028289	Epha7	Cek11|Ebk|Ehk3|Hek11|Mdk1	Eph receptor A7	protein-coding
Diff_Nuc47563	chr9	18692572	18692711	+	0	NA	Intergenic	Intergenic	12868	NM_146566	258559	Mm.377568	NM_146566	ENSMUSG00000062868	Olfr830	MOR152-1	olfactory receptor 830	protein-coding
Diff_Nuc45294	chr1	108698552	108698691	+	0	NA	Intergenic	L1_Mus2|LINE|L1	-5319	NM_009190	20479	Mm.18705	NM_009190	ENSMUSG00000009907	Vps4b	8030489C12Rik|Skd1	vacuolar protein sorting 4B	protein-coding
Diff_Nuc50326	chr8	29308762	29308901	+	0	NA	Intergenic	Intergenic	-113506	NR_033590	666422	Mm.484413	NR_033590	ENSMUSG00000110372	Gm8096	EG666422	3-phosphoglycerate dehydrogenase pseudogene	pseudo
Diff_Nuc26744	chr6	40510472	40510611	+	0	NA	Intergenic	Intergenic	-10846	NM_146383	258381	Mm.377469	NM_146383	ENSMUSG00000045514	Olfr460	MOR120-2	olfactory receptor 460	protein-coding
Diff_Nuc25192	chr7	117713642	117713781	+	0	NA	intron (NM_177324, intron 1 of 40)	L1MD3|LINE|L1	44723	NM_177324	319934	Mm.102970	NM_177324	ENSMUSG00000038371	Sbf2	4833411B01Rik|AA414977|AI317167|B430219L04Rik|Mtmr13|mMTMH1	SET binding factor 2	protein-coding
Diff_Nuc41821	chr2	125672872	125673011	+	0	NA	intron (NM_009939, intron 3 of 12)	intron (NM_009939, intron 3 of 12)	11877	NM_009939	12848	Mm.3596	NM_009939	ENSMUSG00000027206	Cops2	AI315723|C85265|Csn2|Sgn2|TRIP-15|Trip15	COP9 signalosome subunit 2	protein-coding
Diff_Nuc34318	chr4	106396882	106397021	+	0	NA	intron (NM_001126487, intron 1 of 23)	intron (NM_001126487, intron 1 of 23)	3584	NM_001126487	381538	Mm.318201	NM_001126487	ENSMUSG00000047502	Mroh7	Gm1027|Heatr8	maestro heat-like repeat family member 7	protein-coding
Diff_Nuc30709	chr5	77511082	77511221	+	0	NA	Intergenic	Intergenic	13141	NM_001159901	74318	Mm.181852	NM_175606	ENSMUSG00000059325	Hopx	1110018K11Rik|1200015P04Rik|2300002F06Rik|AI848177|AW490897|Cameo|Hdop|Hod|Hop|Ob1|Obl|Toto	HOP homeobox	protein-coding
Diff_Nuc44420	chr1	65232592	65232731	+	0	NA	promoter-TSS (NM_001310624)	promoter-TSS (NM_001310624)	392	NM_001111320	15926	Mm.9925	NM_010497	ENSMUSG00000025950	Idh1	AI314845|AI788952|E030024J03Rik|Id-1|Idh-1|Idpc	isocitrate dehydrogenase 1 (NADP+), soluble	protein-coding
Diff_Nuc33954	chr4	88001552	88001691	+	0	NA	intron (NM_001081184, intron 29 of 43)	intron (NM_001081184, intron 29 of 43)	83209	NM_025760	66775	Mm.386788	NM_025760	ENSMUSG00000028497	Hacd4	4933428I03Rik|Hcad4|Ptplad2	3-hydroxyacyl-CoA dehydratase 4	protein-coding
Diff_Nuc20349	chr19	22194242	22194381	+	0	NA	Intergenic	Intergenic	-19296	NM_001035239	226025	Mm.131943	NM_177341	ENSMUSG00000052387	Trpm3	6330504P12Rik|9330180E14|AU018608|B930001P07Rik|LTRPC3|MLSN2	transient receptor potential cation channel, subfamily M, member 3	protein-coding
Diff_Nuc8955	chr10	35111042	35111181	+	0	NA	Intergenic	Intergenic	907905	NM_010237	14302	Mm.332432	NM_010237	ENSMUSG00000019779	Frk	BSK|BSK/IYK|C85044|GTK|RAK	fyn-related kinase	protein-coding
Diff_Nuc14583	chr16	68778102	68778241	+	0	NA	Intergenic	Lx7|LINE|L1	1022455	NR_130991	78110	Mm.211406	NR_130991	ENSMUSG00000107073	4930428D20Rik	-	RIKEN cDNA 4930428D20 gene	ncRNA
Diff_Nuc51332	chr8	72090722	72090861	+	0	NA	Intergenic	Intergenic	58283	NM_001045553	234362	Mm.458487	NM_172754	ENSMUSG00000060427	Zfp868	AI449175|AW108241|C530032E20|mszf62	zinc finger protein 868	protein-coding
Diff_Nuc38212	chr3	135798412	135798551	+	0	NA	intron (NM_001033350, intron 7 of 16)	L1Md_F3|LINE|L1	190549	NM_001310749	242248	Mm.30832	NM_001033350	ENSMUSG00000037922	Bank1	A530094C12Rik|AI451642|AVIEF|BANK	B cell scaffold protein with ankyrin repeats 1	protein-coding
Diff_Nuc9890	chr10	79870452	79870591	+	0	NA	promoter-TSS (NM_025650)	promoter-TSS (NM_025650)	-955	NM_025650	66594	Mm.379119	NM_025650	ENSMUSG00000020163	Uqcr11	0710008D09Rik|AL022707|Uqcr	ubiquinol-cytochrome c reductase, complex III subunit XI	protein-coding
Diff_Nuc47698	chr9	26954132	26954271	+	0	NA	intron (NM_023277, intron 1 of 8)	intron (NM_023277, intron 1 of 8)	8805	NM_023277	83964	Mm.28770	NM_023277	ENSMUSG00000031990	Jam3	1110002N23Rik|JAM-3|JAM-C|Jcam3	junction adhesion molecule 3	protein-coding
Diff_Nuc30663	chr5	74976472	74976611	+	0	NA	intron (NM_001159574, intron 11 of 15)	MusHAL1|LINE|L1	45034	NM_001159574	66899	Mm.272468	NM_024183	ENSMUSG00000029227	Fip1l1	1300019H17Rik|Rje	FIP1 like 1 (S. cerevisiae)	protein-coding
Diff_Nuc487	chr13	5241862	5242001	+	0	NA	Intergenic	Intergenic	615407	NR_045891	71867	Mm.179181	NR_045891	ENSMUSG00000100625	1700016G22Rik	-	RIKEN cDNA 1700016G22 gene	ncRNA
Diff_Nuc13674	chr16	33161022	33161161	+	0	NA	Intergenic	Intergenic	-24066	NM_176840	106326	Mm.486405	NM_176840	ENSMUSG00000022807	Osbpl11	9430097N02Rik|AI132306|AU019795|ORP-11	oxysterol binding protein-like 11	protein-coding
Diff_Nuc38457	chr3	145968222	145968361	+	0	NA	Intergenic	ORR1D2|LTR|MaLR	73617	NR_033542	100038607	Mm.365888	NR_033542	ENSMUSG00000105602	Gm10636	ENSMUSG00000074175	predicted gene 10636	ncRNA
Diff_Nuc27061	chr6	53731922	53732061	+	0	NA	Intergenic	Lx8|LINE|L1	38828	NM_025817	66873	Mm.422727	NM_025817	ENSMUSG00000043496	Tril	1200009O22Rik|AI316813|mKIAA0644	TLR4 interactor with leucine-rich repeats	protein-coding
Diff_Nuc36854	chr3	75138942	75139081	+	0	NA	Intergenic	Intergenic	-65011	NM_026460	67931	Mm.259446	NM_026460	ENSMUSG00000034139	Serpini2	Spi14	serine (or cysteine) peptidase inhibitor, clade I, member 2	protein-coding
Diff_Nuc12046	chr17	50401832	50401971	+	0	NA	Intergenic	B3|SINE|B2	23368	NR_131975	446210	Mm.378184	NM_001004437	ENSMUSG00000067103	AY702103	STDP2	cDNA sequence AY702103	ncRNA
Diff_Nuc42585	chr2	156195932	156196071	+	0	NA	intron (NM_027585, intron 11 of 12)	B3A|SINE|B2	22714	NR_024329	347740	Mm.324242	NR_024329		2900097C17Rik	1810005K14Rik|4930563C06Rik	RIKEN cDNA 2900097C17 gene	ncRNA
Diff_Nuc46830	chr1	179543302	179543441	+	0	NA	Intergenic	Intergenic	29703	NR_037994	75589	Mm.86666	NR_037994	ENSMUSG00000101746	2310043L19Rik	-	RIKEN cDNA 2310043L19 gene	ncRNA
Diff_Nuc32791	chr4	34311872	34312011	+	0	NA	Intergenic	L1MC2|LINE|L1	-174899	NM_026293	67652	Mm.55848	NM_026293	ENSMUSG00000028264	Spaca1	1700124L11Rik|4930540L03Rik	sperm acrosome associated 1	protein-coding
Diff_Nuc857	chr13	19193722	19193861	+	0	NA	intron (NM_175007, intron 9 of 20)	intron (NM_175007, intron 9 of 20)	153571	NM_001289546	218038	Mm.101650	NM_175007	ENSMUSG00000021314	Amph	-	amphiphysin	protein-coding
Diff_Nuc46386	chr1	160601042	160601181	+	0	NA	intron (NM_007495, intron 20 of 22)	intron (NM_007495, intron 20 of 22)	165355	NR_030441	735253		NR_030441	ENSMUSG00000070103	Mir488	Mirn488|mir-488|mmu-mir-488	microRNA 488	ncRNA
Diff_Nuc37272	chr3	91183132	91183271	+	0	NA	Intergenic	Intergenic	-288474	NM_001101461	229550	Mm.98335	NM_001101461	ENSMUSG00000091175	9130204L05Rik	Gm127	RIKEN cDNA 9130204L05 gene	protein-coding
Diff_Nuc52145	chr8	112604172	112604311	+	0	NA	intron (NM_175480, intron 1 of 4)	intron (NM_175480, intron 1 of 4)	607	NM_175480	234725	Mm.87487	NM_175480	ENSMUSG00000044676	Zfp612	B230354B21Rik	zinc finger protein 612	protein-coding
Diff_Nuc31909	chr5	140337862	140338001	+	0	NA	Intergenic	Intergenic	-35134	NM_025604	66506	Mm.29070	NM_025604	ENSMUSG00000029551	Psmg3	1810042K04Rik|4930403H09Rik|AI303239	proteasome (prosome, macropain) assembly chaperone 3	protein-coding
Diff_Nuc31895	chr5	139406252	139406391	+	0	NA	Intergenic	Intergenic	64586	NM_008808	18590	Mm.2675	NM_008808	ENSMUSG00000025856	Pdgfa	-	platelet derived growth factor, alpha	protein-coding
Diff_Nuc49180	chr9	93786832	93786971	+	0	NA	Intergenic	RLTR20C|LTR|ERVK	651599	NM_001033145	68861	Mm.258746	NM_001033145	ENSMUSG00000045414	1190002N15Rik	GoPro49|HASF	RIKEN cDNA 1190002N15 gene	protein-coding
Diff_Nuc36013	chr3	38349232	38349371	+	0	NA	3' UTR (NM_001167883, exon 4 of 4)	3' UTR (NM_001167883, exon 4 of 4)	34437	NM_001167883	99696	Mm.290937	NM_001033198	ENSMUSG00000044864	Ankrd50	AI662170|E430012K20Rik|mKIAA1223|mKIAA3019	ankyrin repeat domain 50	protein-coding
Diff_Nuc51309	chr8	71380262	71380401	+	0	NA	Intergenic	Intergenic	-24123	NM_008509	16956	Mm.1514	NM_008509	ENSMUSG00000015568	Lpl	-	lipoprotein lipase	protein-coding
Diff_Nuc3173	chr12	7794252	7794391	+	0	NA	Intergenic	B2_Mm1a|SINE|B2	-190162	NM_009693	238055	Mm.221239	NM_009693	ENSMUSG00000020609	Apob	AI315052|Apo B-100|apob-100|apob-48	apolipoprotein B	protein-coding
Diff_Nuc47659	chr9	24887012	24887151	+	0	NA	Intergenic	Lx4B|LINE|L1	69199	NM_020586	80517	Mm.142843	NM_020586	ENSMUSG00000008429	Herpud2	5031400M07Rik|AB041580	HERPUD family member 2	protein-coding
Diff_Nuc31368	chr5	108321722	108321861	+	0	NA	Intergenic	Intergenic	-7756	NM_016980	100503670	Mm.277897	NM_016980	ENSMUSG00000058558	Rpl5	U21RNA	ribosomal protein L5	protein-coding
Diff_Nuc25357	chr7	126023112	126023251	+	0	NA	intron (NM_001081446, intron 4 of 8)	intron (NM_001081446, intron 4 of 8)	-23669	NM_023197	66356	Mm.482278	NM_023197	ENSMUSG00000030980	Knop1	2310008H09Rik|Tsg118	lysine rich nucleolar protein 1	protein-coding
Diff_Nuc43735	chr1	36963262	36963401	+	0	NA	intron (NM_018872, intron 1 of 40)	intron (NM_018872, intron 1 of 40)	33041	NM_018872	56030	Mm.186943	NM_018872	ENSMUSG00000026116	Tmem131	2610524E03Rik|CC28|D1Bwg0491e|Neg|RW1|YR-23|mKIAA0257	transmembrane protein 131	protein-coding
Diff_Nuc6688	chr11	46992032	46992171	+	0	NA	intron (NM_011891, intron 3 of 7)	intron (NM_011891, intron 3 of 7)	200703	NM_011891	24052	Mm.338890	NM_011891	ENSMUSG00000020354	Sgcd	35kDa|delta-SG	sarcoglycan, delta (dystrophin-associated glycoprotein)	protein-coding
Diff_Nuc6002	chr11	18139402	18139541	+	0	NA	Intergenic	L1_Mus2|LINE|L1	143482	NR_131129	327872		NR_131129	ENSMUSG00000085453	Gm12018	OTTMUSG00000005202	predicted gene 12018	ncRNA
Diff_Nuc39697	chr2	42058562	42058701	+	0	NA	intron (NM_053011, intron 2 of 90)	intron (NM_053011, intron 2 of 90)	244457	NR_105754	102465171		NR_105754	ENSMUSG00000098660	Mir6336	Gm27584|mmu-mir-6336	microRNA 6336	ncRNA
Diff_Nuc25602	chr7	137362332	137362471	+	0	NA	intron (NM_001347638, intron 4 of 15)	intron (NM_001347638, intron 4 of 15)	47921	NM_010207	14183	Mm.16340	NM_010207	ENSMUSG00000030849	Fgfr2	AU043015|AW556123|Bek|Fgfr-2|Fgfr-7|Fgfr7|KGFR|KGFRTr|svs	fibroblast growth factor receptor 2	protein-coding
Diff_Nuc16397	chr15	51661182	51661321	+	0	NA	intron (NM_080635, intron 2 of 7)	PB1D10|SINE|Alu	35756	NM_080635	68135	Mm.289800	NM_080635	ENSMUSG00000022312	Eif3h	1110008A16Rik|40kD|9430017H16Rik|EIF3-P40|EIF3-gamma|Eif3s3	eukaryotic translation initiation factor 3, subunit H	protein-coding
Diff_Nuc27419	chr6	71649602	71649741	+	0	NA	Intergenic	L1ME1|LINE|L1	-8004	NM_178608	52250	Mm.146332	NM_178608	ENSMUSG00000052852	Reep1	D6Ertd253e	receptor accessory protein 1	protein-coding
Diff_Nuc50999	chr8	58184942	58185081	+	0	NA	Intergenic	Intergenic	200750	NM_175939	244486	Mm.67684	NM_175939	ENSMUSG00000046258	Adam29	-	a disintegrin and metallopeptidase domain 29	protein-coding
Diff_Nuc43126	chr1	9247862	9248001	+	0	NA	intron (NM_027671, intron 1 of 20)	intron (NM_027671, intron 1 of 20)	42027	NM_001290390	71096	Mm.336395	NM_027671	ENSMUSG00000025909	Sntg1	4933426D16Rik|G1SYN|SYN4	syntrophin, gamma 1	protein-coding
Diff_Nuc50512	chr8	38003182	38003321	+	0	NA	intron (NM_001194940, intron 1 of 17)	intron (NM_001194940, intron 1 of 17)	12245	NM_001194940	50768	Mm.125155	NM_015802	ENSMUSG00000031523	Dlc1	A730069N07Rik|Arhgap7|HP|STARD12|dlc-1	deleted in liver cancer 1	protein-coding
Diff_Nuc42480	chr2	152515672	152515811	+	0	NA	intron (NM_010376, intron 7 of 11)	intron (NM_010376, intron 7 of 11)	2857	NM_025543	66405	Mm.440291	NM_025543	ENSMUSG00000042814	Mcts2	2400002F11Rik|MCT-2	malignant T cell amplified sequence 2	protein-coding
Diff_Nuc40251	chr2	62527752	62527891	+	0	NA	intron (NM_145523, intron 5 of 7)	BC1_Mm|scRNA|scRNA	25437	NM_145523	227960	Mm.219877	NM_145523	ENSMUSG00000026893	Gca	5133401E04Rik|AI573844	grancalcin	protein-coding
Diff_Nuc33227	chr4	55069372	55069511	+	0	NA	intron (NM_172867, intron 9 of 12)	B1F|SINE|Alu	108624	NM_172867	242466	Mm.102904	NM_172867	ENSMUSG00000060206	Zfp462	6030417H05|9430078C22Rik|Gt4-2|Zfpip	zinc finger protein 462	protein-coding
Diff_Nuc21880	chr18	35093112	35093251	+	0	NA	Intergenic	MER21B|LTR|ERV1	-1524	NM_144866	225363	Mm.329353	NM_144866	ENSMUSG00000024360	Etf1	AI463371|D6Ertd109e|ERF|ERF1|SUP45L1|TB3-1	eukaryotic translation termination factor 1	protein-coding
Diff_Nuc11622	chr17	27616032	27616171	+	0	NA	intron (NM_001291045, intron 1 of 9)	ORR1D1|LTR|MaLR	24377	NM_001013385	268934	Mm.358940	NM_001013385	ENSMUSG00000063239	Grm4	Gprc1d|mGluR4	glutamate receptor, metabotropic 4	protein-coding
Diff_Nuc37418	chr3	98465872	98466011	+	0	NA	Intergenic	L1Md_Gf|LINE|L1	-16484	NM_008295	15496	Mm.17910	NM_008295	ENSMUSG00000038092	Hsd3b5	-	hydroxy-delta-5-steroid dehydrogenase, 3 beta- and steroid delta-isomerase 5	protein-coding
Diff_Nuc3120	chr12	5399742	5399881	+	0	NA	intron (NR_015579, intron 1 of 1)	Lx8|LINE|L1	16503	NR_015579	72669	Mm.10434	NM_028318		2810032G03Rik	AI461720	RIKEN cDNA 2810032G03 gene	ncRNA
Diff_Nuc37040	chr3	81479762	81479901	+	0	NA	Intergenic	Intergenic	-126116	NR_138586	320566	Mm.208417	NR_138586	ENSMUSG00000103695	A830029E22Rik	-	RIKEN cDNA A830029E22 gene	ncRNA
Diff_Nuc42628	chr2	158272562	158272701	+	0	NA	intron (NM_001291137, intron 15 of 30)	L1Md_F2|LINE|L1	37042	NM_001291138	228850	Mm.398185	NM_177227	ENSMUSG00000027652	Ralgapb	AI507211|B230339M05Rik|p170	Ral GTPase activating protein, beta subunit (non-catalytic)	protein-coding
Diff_Nuc30964	chr5	86949022	86949161	+	0	NA	Intergenic	Intergenic	-1466	NM_177162	320454	Mm.184522	NM_177162	ENSMUSG00000079451	Tmprss11g	9930032O22Rik|Desc4	transmembrane protease, serine 11g	protein-coding
Diff_Nuc7538	chr11	89079512	89079651	+	0	NA	Intergenic	(TCTA)n|Simple_repeat|Simple_repeat	84292	NM_008711	18121	Mm.135266	NM_008711	ENSMUSG00000048616	Nog	-	noggin	protein-coding
Diff_Nuc45986	chr1	144046542	144046681	+	0	NA	Intergenic	Lx|LINE|L1	-1441216	NM_020025	26878	Mm.285580	NM_020025	ENSMUSG00000033849	B3galt2	-	UDP-Gal:betaGlcNAc beta 1,3-galactosyltransferase, polypeptide 2	protein-coding
Diff_Nuc39934	chr2	50643962	50644101	+	0	NA	Intergenic	Intergenic	-121173	NR_033595	227885	Mm.301654	NR_033595	ENSMUSG00000083270	Gm13498	OTTMUSG00000012426	heat shock protein 90 alpha (cytosolic), class B member 1 pseudogene	pseudo
Diff_Nuc24836	chr7	100824172	100824311	+	0	NA	Intergenic	Lx3B|LINE|L1	595852	NM_021427	58238	Mm.113787	NM_021427	ENSMUSG00000051515	Fam181b	A830059I20Rik|AB041569	family with sequence similarity 181, member B	protein-coding
Diff_Nuc51237	chr8	68481082	68481221	+	0	NA	intron (NM_001166372, intron 2 of 7)	intron (NM_001166372, intron 2 of 7)	338727	NM_175188	72925	Mm.380457	NM_175188	ENSMUSG00000036469	March1	2900024D24Rik|BB085186	membrane-associated ring finger (C3HC4) 1	protein-coding
Diff_Nuc2637	chr13	101874352	101874491	+	0	NA	Intergenic	RMER15|LTR|ERVL	-127661	NR_046158	328324	Mm.402274	NR_046158		5930438M14Rik	5930438M14	RIKEN cDNA 5930438M14 gene	ncRNA
Diff_Nuc13958	chr16	44224822	44224961	+	0	NA	3' UTR (NM_001029889, exon 8 of 8)	3' UTR (NM_001029889, exon 8 of 8)	51381	NM_001029889	207806	Mm.310566	NM_001029889	ENSMUSG00000068284	Usf3	5530400K22Rik|Gm1779|Gm608|mKIAA2018	upstream transcription factor family member 3	protein-coding
Diff_Nuc50896	chr8	51577912	51578051	+	0	NA	Intergenic	Intergenic	124515	NR_046067	100039954	Mm.400419	NR_046067	ENSMUSG00000110281	Gm2516	-	predicted gene 2516	ncRNA
Diff_Nuc43465	chr1	24514932	24515071	+	0	NA	intron (NM_007733, intron 11 of 50)	intron (NM_007733, intron 11 of 50)	79275	NM_007733	12823	Mm.329196	NM_007733	ENSMUSG00000026141	Col19a1	-	collagen, type XIX, alpha 1	protein-coding
Diff_Nuc3334	chr12	16151002	16151141	+	0	NA	Intergenic	Intergenic	-327480	NM_144551	217410	Mm.491136	NM_144551	ENSMUSG00000020601	Trib2	AW319517|TRB-2|TRB2	tribbles pseudokinase 2	protein-coding
Diff_Nuc20011	chr19	5270542	5270681	+	0	NA	intron (NM_153129, intron 1 of 23)	intron (NM_153129, intron 1 of 23)	2508	NM_153129	107975	Mm.234923	NM_153129	ENSMUSG00000024855	Pacs1	AI325977	phosphofurin acidic cluster sorting protein 1	protein-coding
Diff_Nuc4304	chr12	60058592	60058731	+	0	NA	TTS (NM_009147)	TTS (NM_009147)	54343	NM_009147	20334	Mm.491137	NM_009147	ENSMUSG00000020986	Sec23a	Msec23|Sec23r	SEC23 homolog A, COPII coat complex component	protein-coding
Diff_Nuc47444	chr9	12825512	12825651	+	0	NA	Intergenic	Lx6|LINE|L1	280274	NR_040755	78219	Mm.414868	NR_040755	ENSMUSG00000111830	4930568E12Rik	-	RIKEN cDNA 4930568E12 gene	ncRNA
Diff_Nuc33100	chr4	49522542	49522681	+	0	NA	Intergenic	Intergenic	-3181	NM_007519	12012	Mm.2859	NM_007519	ENSMUSG00000039653	Baat	AI118337|AI158864|BAT	bile acid-Coenzyme A: amino acid N-acyltransferase	protein-coding
Diff_Nuc22876	chr18	78732492	78732631	+	0	NA	intron (NM_030683, intron 2 of 11)	intron (NM_030683, intron 2 of 11)	61128	NM_207651	27411	Mm.44158	NM_030683	ENSMUSG00000024552	Slc14a2	UT-A1|UT-A3	solute carrier family 14 (urea transporter), member 2	protein-coding
Diff_Nuc37294	chr3	92045962	92046101	+	0	NA	Intergenic	L1Md_F3|LINE|L1	-8538	NM_001164787	100303744	Mm.429851	NM_001164787	ENSMUSG00000068893	Sprr2a2	-	small proline-rich protein 2A2	protein-coding
Diff_Nuc6921	chr11	59577582	59577721	+	0	NA	intron (NM_012027, intron 15 of 23)	intron (NM_012027, intron 15 of 23)	23073	NR_110894	194908	Mm.344651	NM_183139	ENSMUSG00000043648	Pld6	4933433K01Rik|Gm10|Zuc|mZuc|mitoPLD	phospholipase D family, member 6	protein-coding
Diff_Nuc30718	chr5	77878472	77878611	+	0	NA	Intergenic	Intergenic	-15972	NR_131050	69370	Mm.426881	NR_131050	ENSMUSG00000107232	1700017L05Rik	-	RIKEN cDNA 1700017L05 gene	ncRNA
Diff_Nuc42160	chr2	138569902	138570041	+	0	NA	Intergenic	Lx4B|LINE|L1	-75694	NR_035477	100316816		NR_035477	ENSMUSG00000088983	Mir1952	mmu-mir-1952	microRNA 1952	ncRNA
Diff_Nuc32232	chr4	8035522	8035661	+	0	NA	Intergenic	B3|SINE|B2	130597	NM_007592	12319	Mm.119320	NM_007592	ENSMUSG00000041261	Car8	AW546993|Ca8|Cals|Cals1|Carp|wdl	carbonic anhydrase 8	protein-coding
Diff_Nuc51891	chr8	99503842	99503981	+	0	NA	Intergenic	Intergenic	-1091646	NM_010325	14719	Mm.230169	NM_010325	ENSMUSG00000031672	Got2	AL022787|FABP-pm|Got-2|Kyat4|mAspAT	glutamatic-oxaloacetic transaminase 2, mitochondrial	protein-coding
Diff_Nuc38383	chr3	142824492	142824631	+	0	NA	Intergenic	Intergenic	-81458	NR_040551	320072	Mm.136397	NR_040551	ENSMUSG00000105923	A830019L24Rik	-	RIKEN cDNA A830019L24 gene	ncRNA
Diff_Nuc25171	chr7	117088987	117089126	+	0	NA	intron (NM_021494, intron 1 of 22)	(TG)n|Simple_repeat|Simple_repeat	14880	NM_021494	19347	Mm.21904	NM_021494	ENSMUSG00000035901	Dennd5a	1500012B19Rik|AJ245569|AW496491|ORF37|Rab6ip1|mKIAA1091	DENN/MADD domain containing 5A	protein-coding
Diff_Nuc24771	chr7	98909972	98910111	+	0	NA	intron (NM_011807, intron 3 of 22)	intron (NM_011807, intron 3 of 22)	-300863	NM_001243046	23859	Mm.147213	NM_011807	ENSMUSG00000052572	Dlg2	A330103J02Rik|B230218P12Rik|B330007M19Rik|Dlgh2|Gm1197|Gm21505|PSD93	discs, large homolog 2 (Drosophila)	protein-coding
Diff_Nuc9565	chr10	64367532	64367671	+	0	NA	intron (NM_001164519, intron 10 of 12)	intron (NM_001164519, intron 10 of 12)	-814598	NM_178678	216028	Mm.431318	NM_178678	ENSMUSG00000042846	Lrrtm3	9630044H04Rik	leucine rich repeat transmembrane neuronal 3	protein-coding
Diff_Nuc681	chr13	12392952	12393091	+	0	NA	intron (NM_033268, intron 7 of 20)	intron (NM_033268, intron 7 of 20)	39978	NM_033268	11472	Mm.37638	NM_033268	ENSMUSG00000052374	Actn2	1110008F24Rik	actinin alpha 2	protein-coding
Diff_Nuc48427	chr9	60385062	60385201	+	0	NA	intron (NR_040463, intron 2 of 4)	B4|SINE|B4	8558	NR_040464	100504561	Mm.410770	NR_040463	ENSMUSG00000111761	9230112J17Rik	-	RIKEN cDNA 9230112J17 gene	ncRNA
Diff_Nuc47506	chr9	15150862	15151001	+	0	NA	intron (NM_176976, intron 6 of 26)	intron (NM_176976, intron 6 of 26)	11301	NM_176976	319675	Mm.218317	NM_176976	ENSMUSG00000046111	Cep295	5830418K08Rik|5832426L23Rik|Gm1131|Kiaa1731	centrosomal protein 295	protein-coding
Diff_Nuc12761	chr17	83909572	83909711	+	0	NA	intron (NM_009187, intron 1 of 2)	L1M4|LINE|L1	4032	NM_009187	20463	Mm.30072	NM_009187	ENSMUSG00000024248	Cox7a2l	COX7AR|COX7RP|EB1|SIG-81|SIG81|Silg81	cytochrome c oxidase subunit VIIa polypeptide 2-like	protein-coding
Diff_Nuc46050	chr1	146502712	146502851	+	0	NA	Intergenic	Intergenic	-87984	NR_110891	624910	Mm.389199	NM_001290269	ENSMUSG00000098509	Rgs21	EG624910	regulator of G-protein signalling 21	protein-coding
Diff_Nuc25931	chr6	8041842	8041981	+	0	NA	intron (NM_001037865, intron 17 of 34)	intron (NM_001037865, intron 17 of 34)	100706	NM_001037865	213945	Mm.297404	NM_001037865	ENSMUSG00000068794	Col28a1	Col28|Gm466	collagen, type XXVIII, alpha 1	protein-coding
Diff_Nuc8912	chr10	33320982	33321121	+	0	NA	intron (NM_175448, intron 2 of 5)	intron (NM_175448, intron 2 of 5)	23355	NM_175448	215890	Mm.94461	NM_175448	ENSMUSG00000019785	Clvs2	A330019N05Rik|Rlbp1l2	clavesin 2	protein-coding
Diff_Nuc50102	chr8	17513792	17513931	+	0	NA	intron (NM_053171, intron 1 of 69)	intron (NM_053171, intron 1 of 69)	21524	NM_053171	94109	Mm.436988	NM_053171	ENSMUSG00000060924	Csmd1	B930082H09|mKIAA1890	CUB and Sushi multiple domains 1	protein-coding
Diff_Nuc26405	chr6	27532302	27532441	+	0	NA	intron (NM_008174, intron 7 of 10)	intron (NM_008174, intron 7 of 10)	354379	NR_030420	735266		NR_030420	ENSMUSG00000076067	Mir592	Mirn592|mir-592|mmu-mir-592	microRNA 592	ncRNA
Diff_Nuc4946	chr12	85166942	85167081	+	0	NA	intron (NR_073564, intron 5 of 12)	intron (NR_073564, intron 5 of 12)	16297	NM_001272055	18222	Mm.4390	NM_010949	ENSMUSG00000021224	Numb	Nb	numb homolog (Drosophila)	protein-coding
Diff_Nuc42616	chr2	157685922	157686061	+	0	NA	intron (NM_025680, intron 11 of 15)	intron (NM_025680, intron 11 of 15)	-54398	NM_198627	277432	Mm.441156	NM_198627	ENSMUSG00000037843	Vstm2l	Gm691	V-set and transmembrane domain containing 2-like	protein-coding
[truncated: 6,232 more rows]
