# Supplementary material for: Remodeling of epigenome and transcriptome landscapes with aging in mice reveals widespread induction of inflammatory responses
Source: HighWire-hosted journal article supplement (doi:10.1101/gr.240093.118), 2019-03-11
Supplement: Supplemental_Code_Figure3_Machine_learning.zip [file HOMER_dposREF_OlfactoryBulb_DiNUP_DANPOS_LOST.xls]

PeakID (cmd=annotatePeaks.pl dposREF_OlfactoryBulb_DiNUP_DANPOS_LOST.bed mm9)	Chr	Start	End	Strand	Peak Score	Focus Ratio/Region Size	Annotation	Detailed Annotation	Distance to TSS	Nearest PromoterID	Entrez ID	Nearest Unigene	Nearest Refseq	Nearest Ensembl	Gene Name	Gene Alias	Gene Description	Gene Type
Diff_Nuc36072	chr7	90703092	90703231	+	0	NA	Intergenic	Intergenic	-30280	NM_177695	233424	Mm.486619	NM_177695	ENSMUSG00000038540	Tmc3	9030203A06	transmembrane channel-like gene family 3	protein-coding
Diff_Nuc46753	chr5	138636982	138637121	+	0	NA	TTS (NM_177878)	TTS (NM_177878)	1509	NM_177878	330216	Mm.19719	NM_177878	ENSMUSG00000049285	Mblac1	-	metallo-beta-lactamase domain containing 1	protein-coding
Diff_Nuc12052	chr10	5213562	5213701	+	0	NA	intron (NM_001347732, intron 106 of 145)	MIR|SINE|MIR	61797	NM_001079686	64009	Mm.331626	NM_022027	ENSMUSG00000096054	Syne1	8B|A330049M09Rik|BE692247|C130039F11Rik|CPG2|Myne1|mKIAA1756|myne-1	spectrin repeat containing, nuclear envelope 1	protein-coding
Diff_Nuc22479	chr15	6507622	6507761	+	0	NA	Intergenic	Intergenic	-22156	NM_001278269	23880	Mm.170905	NM_011815	ENSMUSG00000022148	Fyb	ADAP|B630013F22Rik|FYB-120/130|Slap130|p120/130|p120/p130	FYN binding protein	protein-coding
Diff_Nuc16766	chr17	18612872	18613011	+	0	NA	Intergenic	L1_Mur2|LINE|L1	51873	NM_001102581	328759	Mm.469839	NM_001102581	ENSMUSG00000091631	Vmn2r95	-	vomeronasal 2, receptor 95	protein-coding
Diff_Nuc410	chrX	71368162	71368301	+	0	NA	Intergenic	B3|SINE|B2	-4574	NM_008106	14539	Mm.284825	NM_008106	ENSMUSG00000031394	Opn1mw	Gcp	opsin 1 (cone pigments), medium-wave-sensitive (color blindness, deutan)	protein-coding
Diff_Nuc63196	chr1	15583902	15584041	+	0	NA	intron (NM_001098528, intron 1 of 1)	intron (NM_001098528, intron 1 of 1)	-211756	NM_009352	21749	Mm.4306	NM_009352	ENSMUSG00000025925	Terf1	Pin2|Trbf1|Trf1	telomeric repeat binding factor 1	protein-coding
Diff_Nuc73362	chr8	14636112	14636251	+	0	NA	intron (NM_172910, intron 4 of 15)	intron (NM_172910, intron 4 of 15)	-252355	NM_012000	26889	Mm.254027	NM_012000	ENSMUSG00000026317	Cln8	mnd	ceroid-lipofuscinosis, neuronal 8	protein-coding
Diff_Nuc4364	chr13	109410092	109410231	+	0	NA	Intergenic	Lx|LINE|L1	-34210	NM_011056	238871	Mm.434429	NM_011056	ENSMUSG00000021699	Pde4d	9630011N22Rik|Dpde3	phosphodiesterase 4D, cAMP specific	protein-coding
Diff_Nuc41828	chr6	120955162	120955301	+	0	NA	intron (NM_001270475, intron 17 of 31)	intron (NM_001270475, intron 17 of 31)	46369	NR_138099	215458	Mm.122399	NR_138099		LOC215458	-	uncharacterized LOC215458	ncRNA
Diff_Nuc57707	chr2	27477952	27478091	+	0	NA	Intergenic	B1_Mur1|SINE|Alu	-54700	NM_011305	20181	Mm.24624	NM_011305	ENSMUSG00000015846	Rxra	9530071D11Rik|Nr2b1|RXRalpha1	retinoid X receptor alpha	protein-coding
Diff_Nuc31728	chr18	21739052	21739191	+	0	NA	intron (NM_001081403, intron 2 of 7)	intron (NM_001081403, intron 2 of 7)	-70945	NM_001271580	74644	Mm.329311	NM_001271580		4930426D05Rik	-	RIKEN cDNA 4930426D05 gene	protein-coding
Diff_Nuc41442	chr6	108710622	108710761	+	0	NA	Intergenic	L1_Mur3|LINE|L1	-22362	NM_026011	67166	Mm.271178	NM_026011	ENSMUSG00000030105	Arl8b	2610313E07Rik|3100002J04Rik|Arl10c|gie1	ADP-ribosylation factor-like 8B	protein-coding
Diff_Nuc46569	chr5	130798162	130798301	+	0	NA	intron (NM_001015876, intron 13 of 15)	intron (NM_001015876, intron 13 of 15)	-47097	NM_181045	140904	Mm.40875	NM_021371	ENSMUSG00000060371	Caln1	9630012C17Rik|Cabp8|MNCb-0849	calneuron 1	protein-coding
Diff_Nuc38035	chr6	7684252	7684391	+	0	NA	Intergenic	MTB_Mm|LTR|MaLR	-41139	NM_012055	27053	Mm.2942	NM_012055	ENSMUSG00000029752	Asns	-	asparagine synthetase	protein-coding
Diff_Nuc57619	chr2	23382842	23382981	+	0	NA	intron (NM_029773, intron 7 of 10)	Lx|LINE|L1	44713	NM_029773	76857	Mm.276415	NM_029773	ENSMUSG00000026771	Spopl	4921517N04Rik|AU014935|BB233739|E430033K04Rik	speckle-type POZ protein-like	protein-coding
Diff_Nuc54738	chr3	95953102	95953241	+	0	NA	intron (NM_001025614, intron 6 of 11)	intron (NM_001025614, intron 6 of 11)	-12722	NM_181409	194126	Mm.268536	NM_181409	ENSMUSG00000045934	Mtmr11	AI035306|BC051083|Cra	myotubularin related protein 11	protein-coding
Diff_Nuc58228	chr2	44185972	44186111	+	0	NA	intron (NM_001301831, intron 13 of 14)	intron (NM_001301831, intron 13 of 14)	-265197	NR_040622	320872	Mm.445023	NR_040622	ENSMUSG00000085089	Arhgap15os	A430092G05Rik	Rho GTPase activating protein 15, opposite strand	ncRNA
Diff_Nuc26809	chr14	49544102	49544241	+	0	NA	Intergenic	Intergenic	45623	NR_033783	66770	Mm.136954	NR_033783		4933429O19Rik	1700031B11Rik	RIKEN cDNA 4933429O19 gene	ncRNA
Diff_Nuc13509	chr10	45710062	45710201	+	0	NA	Intergenic	Intergenic	182621	NR_040624	320363	Mm.123343	NR_040624	ENSMUSG00000110874	D030045P18Rik	-	RIKEN cDNA D030045P18 gene	ncRNA
Diff_Nuc51147	chr4	133751252	133751391	+	0	NA	exon (NM_001080712, exon 4 of 8)	exon (NM_001080712, exon 4 of 8)	7598	NM_001080712	665186	Mm.318615	NM_001080712	ENSMUSG00000073747	Gm7534	EG665186	predicted gene 7534	protein-coding
Diff_Nuc40427	chr6	75023932	75024071	+	0	NA	Intergenic	AT_rich|Low_complexity|Low_complexity	-1602986	NR_108032	73408	Mm.233629	NR_108032	ENSMUSG00000107408	1700065L07Rik	-	RIKEN cDNA 1700065L07 gene	ncRNA
Diff_Nuc59567	chr2	80298002	80298141	+	0	NA	Intergenic	RSINE1|SINE|B4	-10518	NM_011356	20378	Mm.427436	NM_011356	ENSMUSG00000027004	Frzb	Frp|Sfrp3|frezzled|fritz|frzb-1	frizzled-related protein	protein-coding
Diff_Nuc10242	chr11	58074822	58074961	+	0	NA	Intergenic	Intergenic	-45680	NM_182996	103836	Mm.41440	NM_182996	ENSMUSG00000037243	Zfp692	AI746306|AI839920|Zfp692-ps|Znf692	zinc finger protein 692	protein-coding
Diff_Nuc33351	chr18	67782682	67782821	+	0	NA	intron (NM_001081073, intron 10 of 11)	intron (NM_001081073, intron 10 of 11)	18239	NM_001081073	225659	Mm.111928	NM_001081073	ENSMUSG00000073542	Cep76	6230425F05Rik|9630013E05	centrosomal protein 76	protein-coding
Diff_Nuc72309	chr9	99568372	99568511	+	0	NA	3' UTR (NM_028258, exon 16 of 16)	3' UTR (NM_028258, exon 16 of 16)	38444	NM_001311142	72507	Mm.221455	NM_028258	ENSMUSG00000037784	Dzip1l	2610524A10Rik|AI663976	DAZ interacting protein 1-like	protein-coding
Diff_Nuc63160	chr1	14693682	14693821	+	0	NA	Intergenic	L1_Mus2|LINE|L1	52296	NM_010827	17681	Mm.5820	NM_010827	ENSMUSG00000025930	Msc	MyoR|bHLHa22	musculin	protein-coding
Diff_Nuc17118	chr17	31847482	31847621	+	0	NA	Intergenic	Intergenic	32675	NM_001278570	12954	Mm.1228	NM_013501	ENSMUSG00000024041	Cryaa	Acry-1|Crya-1|Crya1|DAcry-1|lop18	crystallin, alpha A	protein-coding
Diff_Nuc50415	chr4	104891892	104892031	+	0	NA	exon (NM_080555, exon 5 of 6)	exon (NM_080555, exon 5 of 6)	62009	NM_080555	67916	Mm.348326	NM_080555	ENSMUSG00000028517	Plpp3	1110003O22Rik|2610002D05Rik|AV025606|D4Bwg0538e|D4Bwg1535e|Lpp3|Ppab2b|Ppap2b	phospholipid phosphatase 3	protein-coding
Diff_Nuc64110	chr1	42507762	42507901	+	0	NA	Intergenic	L1MDa|LINE|L1	243839	NR_027826	66297	Mm.45203	NM_183252	ENSMUSG00000060424	Pantr1	2610017I09Rik|Pou3f3os|linc-Brn1a	POU domain, class 3, transcription factor 3 adjacent noncoding transcript 1	ncRNA
Diff_Nuc13443	chr10	43901372	43901511	+	0	NA	intron (NR_001582, intron 2 of 6)	intron (NR_001582, intron 2 of 6)	11188	NR_001582	70365	Mm.87073	NR_001582	ENSMUSG00000091358	Speer5-ps1	1700007C10Rik|SPEER-5|Speer5-ps	spermatogenesis associated glutamate (E)-rich protein 5, pseudogene 1	pseudo
Diff_Nuc23207	chr15	25236702	25236841	+	0	NA	Intergenic	L1_Mus4|LINE|L1	106748	NM_027395	70350	Mm.29586	NM_027395	ENSMUSG00000045763	Basp1	2610024P12Rik|CAP-23|CAP23|Ckap3|NAP-22|NAP22	brain abundant, membrane attached signal protein 1	protein-coding
Diff_Nuc9348	chr11	29803732	29803871	+	0	NA	intron (NM_146016, intron 3 of 41)	intron (NM_146016, intron 3 of 41)	-78133	NM_176829	216622	Mm.443260	NM_176829	ENSMUSG00000078157	4931440F15Rik	Fem1ab	RIKEN cDNA 4931440F15 gene	protein-coding
Diff_Nuc5202	chr12	17134182	17134321	+	0	NA	Intergenic	IAPEz-int|LTR|ERVK	49443	NM_201531	382571	Mm.40173	NM_201531	ENSMUSG00000051726	Kcnf1	Gm1182|Kv5.1	potassium voltage-gated channel, subfamily F, member 1	protein-coding
Diff_Nuc45477	chr5	86430872	86431011	+	0	NA	Intergenic	L1Md_F3|LINE|L1	63667	NM_001345902	12617	Mm.4649	NM_007683	ENSMUSG00000029253	Cenpc1	CENP-C|Cenpc	centromere protein C1	protein-coding
Diff_Nuc17182	chr17	34318802	34318941	+	0	NA	TTS (NM_013585)	TTS (NM_013585)	5404	NM_013585	16912	Mm.390983	NM_013585	ENSMUSG00000096727	Psmb9	Lmp-2|Lmp2	proteasome (prosome, macropain) subunit, beta type 9 (large multifunctional peptidase 2)	protein-coding
Diff_Nuc13319	chr10	39583172	39583311	+	0	NA	intron (NM_011264, intron 28 of 31)	intron (NM_011264, intron 28 of 31)	35803	NR_033628	213332	Mm.484359	NR_033628		Mfsd4b4	AA474331	major facilitator superfamily domain containing 4B4	pseudo
Diff_Nuc25216	chr15	91199042	91199181	+	0	NA	intron (NM_001033633, intron 4 of 9)	intron (NM_001033633, intron 4 of 9)	-176873	NM_011994	26874	Mm.295456	NM_011994	ENSMUSG00000055782	Abcd2	ABC39|ALDL1|ALDR|ALDRP	ATP-binding cassette, sub-family D (ALD), member 2	protein-coding
Diff_Nuc36295	chr7	96730352	96730491	+	0	NA	Intergenic	MIRb|SINE|MIR	-50907	NM_181407	109264	Mm.334011	NM_181407	ENSMUSG00000030621	Me3	1700020C08Rik|B230207H15Rik	malic enzyme 3, NADP(+)-dependent, mitochondrial	protein-coding
Diff_Nuc21182	chr16	66305262	66305401	+	0	NA	Intergenic	RLTR27|LTR|ERVK	-352032	NR_040512	75501	Mm.394300	NR_040512	ENSMUSG00000092599	1700010K23Rik	-	RIKEN cDNA 1700010K23 gene	ncRNA
Diff_Nuc48199	chr4	36309982	36310121	+	0	NA	intron (NM_001165999, intron 3 of 7)	intron (NM_001165999, intron 3 of 7)	282435	NR_030545	100124458		NR_030545	ENSMUSG00000077851	Mir876	Mirn876|mir-876|mmu-mir-876	microRNA 876	ncRNA
Diff_Nuc72894	chr9	119178322	119178461	+	0	NA	intron (NR_045693, intron 6 of 18)	intron (NR_045693, intron 6 of 18)	-37581	NR_033303	109280	Mm.261557	NM_175420	ENSMUSG00000092212	Slc22a13b-ps	9330176C04Rik|Slc22a13b	solute carrier family 22 (organic cation transporter), member 13b, pseudogene	pseudo
Diff_Nuc14230	chr10	67918392	67918531	+	0	NA	intron (NM_028491, intron 5 of 7)	intron (NM_028491, intron 5 of 7)	86162	NM_028491	73287	Mm.141830	NM_028491	ENSMUSG00000019945	1700040L02Rik	-	RIKEN cDNA 1700040L02 gene	protein-coding
Diff_Nuc66701	chr1	119483252	119483391	+	0	NA	Intergenic	L1_Mm|LINE|L1	724388	NM_011650	22099	Mm.426637	NM_011650	ENSMUSG00000026374	Tsn	2610034C24Rik|AU040286|C3PO|TB-RBP	translin	protein-coding
Diff_Nuc27370	chr14	68230612	68230751	+	0	NA	Intergenic	B1F|SINE|Alu	102986	NM_001110162	108912	Mm.33831	NM_175384	ENSMUSG00000048922	Cdca2	2610311M19Rik|AI586158	cell division cycle associated 2	protein-coding
Diff_Nuc20932	chr16	59976532	59976671	+	0	NA	intron (NM_007938, intron 7 of 17)	intron (NM_007938, intron 7 of 17)	-337366	NM_001347244	56297	Mm.392505	NM_019665	ENSMUSG00000022722	Arl6	1110018H24Rik|2210411E14Rik|BBS3	ADP-ribosylation factor-like 6	protein-coding
Diff_Nuc48986	chr4	64168042	64168181	+	0	NA	Intergenic	Lx6|LINE|L1	-460062	NM_011607	21923	Mm.980	NM_011607	ENSMUSG00000028364	Tnc	AI528729|C130033P17Rik|Hxb|TN|TN-C|Ten|cytotactin|tenascin-C	tenascin C	protein-coding
Diff_Nuc43525	chr5	30280222	30280361	+	0	NA	Intergenic	Intergenic	-59363	NM_001314054	16193	Mm.1019	NM_031168	ENSMUSG00000025746	Il6	Il-6	interleukin 6	protein-coding
Diff_Nuc63490	chr1	23781882	23782021	+	0	NA	intron (NM_172124, intron 1 of 3)	intron (NM_172124, intron 1 of 3)	13186	NM_172124	280645	Mm.471661	NM_172124	ENSMUSG00000026156	B3gat2	GlcAT-S|Glcats	beta-1,3-glucuronyltransferase 2 (glucuronosyltransferase S)	protein-coding
Diff_Nuc42807	chr5	8615872	8616011	+	0	NA	intron (NM_001347311, intron 1 of 10)	L1M5|LINE|L1	7011	NM_001347311	242819	Mm.332192	NM_198620	ENSMUSG00000040570	Rundc3b	Gm440	RUN domain containing 3B	protein-coding
Diff_Nuc38036	chr6	7689982	7690121	+	0	NA	Intergenic	Intergenic	-46869	NM_012055	27053	Mm.2942	NM_012055	ENSMUSG00000029752	Asns	-	asparagine synthetase	protein-coding
Diff_Nuc26916	chr14	52840582	52840721	+	0	NA	exon (NM_201637, exon 12 of 37)	exon (NM_201637, exon 12 of 37)	-11092	NR_028542	100217445		NR_028542	ENSMUSG00000093044	Snord8	MBII-28	small nucleolar RNA, C/D box 8	snoRNA
Diff_Nuc68138	chr1	162501562	162501701	+	0	NA	intron (NM_013862, intron 13 of 20)	intron (NM_013862, intron 13 of 20)	6253	NM_001146330	620246	Mm.478780	NM_001146330		Gpr52	EG620246	G protein-coupled receptor 52	protein-coding
Diff_Nuc28518	chr14	99951312	99951451	+	0	NA	Intergenic	Intergenic	253471	NM_009769	12224	Mm.30262	NM_009769	ENSMUSG00000005148	Klf5	4930520J07Rik|Bteb2|CKLF|IKLF	Kruppel-like factor 5	protein-coding
Diff_Nuc27381	chr14	68758962	68759101	+	0	NA	Intergenic	Intergenic	-15970	NM_008691	18040	Mm.242832	NM_008691	ENSMUSG00000022054	Nefm	NF-M|NF160|NF165|Nef3|Nfm	neurofilament, medium polypeptide	protein-coding
Diff_Nuc65753	chr1	90202872	90203011	+	0	NA	promoter-TSS (NM_134252)	promoter-TSS (NM_134252)	-346	NM_134252	171382	Mm.218753	NM_134252	ENSMUSG00000036251	Trpm8	CMR1|LTRPC6|LTrpC-6|TRPP8|Trp-p8	transient receptor potential cation channel, subfamily M, member 8	protein-coding
Diff_Nuc60170	chr2	97485822	97485961	+	0	NA	Intergenic	RMER16-int|LTR|ERVK	178077	NM_178725	241568	Mm.241682	NM_178725	ENSMUSG00000050587	Lrrc4c	6430556C10Rik|NGL-1	leucine rich repeat containing 4C	protein-coding
Diff_Nuc36114	chr7	92144692	92144831	+	0	NA	intron (NM_001033878, intron 5 of 5)	Lx|LINE|L1	15769	NM_001033878	233437	Mm.424396	NM_001033878	ENSMUSG00000094950	Vmn2r66	F830104D24Rik	vomeronasal 2, receptor 66	protein-coding
Diff_Nuc27764	chr14	81055492	81055631	+	0	NA	Intergenic	Intergenic	655452	NM_001030294	380924	Mm.26456	NM_001030294	ENSMUSG00000022026	Olfm4	GC1|GW112|Gm296|Gm913|OlfD|pPD4	olfactomedin 4	protein-coding
Diff_Nuc2862	chr13	62307892	62308031	+	0	NA	Intergenic	MMSAT4|Satellite|Satellite	76711	NM_001039239	630579	Mm.440905	NM_001039239	ENSMUSG00000074867	Zfp808	EG630579|Gm7036	zinc finger protein 80	protein-coding
Diff_Nuc51543	chr4	152999942	153000081	+	0	NA	Intergenic	L1_Mur2|LINE|L1	-143072	NM_001099299	230959	Mm.318874	NM_001099299	ENSMUSG00000039546	Ajap1	Gm573	adherens junction associated protein 1	protein-coding
Diff_Nuc22275	chr16	96304672	96304811	+	0	NA	promoter-TSS (NM_145125)	promoter-TSS (NM_145125)	-706	NM_145125	93871	Mm.240871	NM_145125	ENSMUSG00000022914	Brwd1	5330419I02Rik|D530019K20Rik|G1-403-16|Wdr9|repro5	bromodomain and WD repeat domain containing 1	protein-coding
Diff_Nuc75288	chr8	74075782	74075921	+	0	NA	Intergenic	Intergenic	6919	NM_001100462	434325	Mm.33613	NM_001100462	ENSMUSG00000043664	Tmem221	-	transmembrane protein 221	protein-coding
Diff_Nuc52876	chr3	41797592	41797731	+	0	NA	Intergenic	L1Md_F2|LINE|L1	251121	NM_027271	73852	Mm.29006	NM_027271	ENSMUSG00000025766	D3Ertd751e	2810009O15Rik|4930415G15Rik	DNA segment, Chr 3, ERATO Doi 751, expressed	protein-coding
Diff_Nuc74077	chr8	40042042	40042181	+	0	NA	Intergenic	Intergenic	-26810	NM_030254	80286	Mm.272722	NM_030254	ENSMUSG00000039530	Tusc3	AU022242|BC003311|N33	tumor suppressor candidate 3	protein-coding
Diff_Nuc69148	chr1	196510302	196510441	+	0	NA	intron (NM_008882, intron 3 of 31)	intron (NM_008882, intron 3 of 31)	64348	NM_008882	18845	Mm.2251	NM_008882	ENSMUSG00000026640	Plxna2	2810428A13Rik|AA589422|AW457381|OCT|PlexA2|Plxn2|mKIAA0463	plexin A2	protein-coding
Diff_Nuc28023	chr14	87617612	87617751	+	0	NA	Intergenic	B4A|SINE|B4	-76760	NM_019670	56419	Mm.440585	NM_019670	ENSMUSG00000022021	Diaph3	4930417P13Rik|Dia2|Diap3|Drf3|mDia2|mKIAA4117|p134MDia2	diaphanous related formin 3	protein-coding
Diff_Nuc69560	chr9	11992832	11992971	+	0	NA	Intergenic	L1Md_F2|LINE|L1	-1088126	NM_001170787	244682	Mm.187021	NM_001033359	ENSMUSG00000039488	Cntn5	6720426O10Rik|A830025P08Rik|Gm507|NB-2	contactin 5	protein-coding
Diff_Nuc56745	chr3	155583922	155584061	+	0	NA	Intergenic	Lx9|LINE|L1	-55327	NR_040553	329780	Mm.119000	NR_040553	ENSMUSG00000104553	9330178D15Rik	9330178D15	RIKEN cDNA 9330178D15 gene	ncRNA
Diff_Nuc24937	chr15	78903192	78903331	+	0	NA	Intergenic	Arthur1|DNA|Tip100	-2392	NM_145139	223691	Mm.206404	NM_145139	ENSMUSG00000033047	Eif3l	0610011H21Rik|D15N1e|Eif3eip|Eif3ip|Eif3s6ip|HSP-66Y|PAF67	eukaryotic translation initiation factor 3, subunit L	protein-coding
Diff_Nuc61392	chr2	131951632	131951771	+	0	NA	intron (NM_018824, intron 1 of 15)	intron (NM_018824, intron 1 of 15)	19143	NM_018824	54338	Mm.103581	NM_018824	ENSMUSG00000027340	Slc23a2	AI844736|NBTL1|SVCT2|Slc23a1|YSPL2|YSPL3|mKIAA0238	solute carrier family 23 (nucleobase transporters), member 2	protein-coding
Diff_Nuc42790	chr5	8341632	8341771	+	0	NA	intron (NM_001007221, intron 2 of 27)	intron (NM_001007221, intron 2 of 27)	26459	NM_001007221	11496	Mm.275895	NM_001007220	ENSMUSG00000040537	Adam22	2900022I03Rik|AI854032|MDC2	a disintegrin and metallopeptidase domain 22	protein-coding
Diff_Nuc64055	chr1	40604472	40604611	+	0	NA	intron (NM_010553, intron 11 of 12)	intron (NM_010553, intron 11 of 12)	32334	NM_010553	16174	Mm.20466	NM_010553	ENSMUSG00000026068	Il18rap	AcPL|IL-18R-beta|IL-18RAcP|IL-18Rbeta|IL-1RAcPL	interleukin 18 receptor accessory protein	protein-coding
Diff_Nuc63327	chr1	19202052	19202191	+	0	NA	promoter-TSS (NM_001025305)	promoter-TSS (NM_001025305)	-14	NM_001025305	21419	Mm.137021	NM_009334	ENSMUSG00000025927	Tfap2b	AI606113|AP-2(beta)|E130018K07Rik|Tcfap2b	transcription factor AP-2 beta	protein-coding
Diff_Nuc73735	chr8	29903002	29903141	+	0	NA	intron (NM_001347498, intron 4 of 14)	intron (NM_001347498, intron 4 of 14)	427037	NM_001347499	210801	Mm.248433	NM_153135	ENSMUSG00000063626	Unc5d	D930029E11Rik|Unc5h4|mKIAA1777	unc-5 netrin receptor D	protein-coding
Diff_Nuc66442	chr1	111413292	111413431	+	0	NA	Intergenic	Intergenic	-466116	NM_001316743	241201	Mm.213407	NM_172853	ENSMUSG00000026312	Cdh7	9330156F07Rik|CDH7L1	cadherin 7, type 2	protein-coding
Diff_Nuc23596	chr15	37885802	37885941	+	0	NA	intron (NM_199476, intron 1 of 8)	intron (NM_199476, intron 1 of 8)	4939	NM_199476	382985	Mm.24738	NM_199476	ENSMUSG00000022292	Rrm2b	p53R2	ribonucleotide reductase M2 B (TP53 inducible)	protein-coding
Diff_Nuc49894	chr4	89919292	89919431	+	0	NA	Intergenic	Lx3B|LINE|L1	33850	NM_153102	236537	Mm.214642	NM_153102	ENSMUSG00000070902	Zfp352	2czf48	zinc finger protein 352	protein-coding
Diff_Nuc35343	chr7	65686202	65686341	+	0	NA	Intergenic	Intergenic	-227301	NM_009728	11982	Mm.135129	NM_009728	ENSMUSG00000025324	Atp10a	Atp10c|pfatp	ATPase, class V, type 10A	protein-coding
Diff_Nuc29681	chr19	14052752	14052891	+	0	NA	Intergenic	Lx4B|LINE|L1	59309	NM_001011850	258151	Mm.377361	NM_001011850	ENSMUSG00000062314	Olfr1505	MOR211-4P	olfactory receptor 1505	protein-coding
Diff_Nuc43196	chr5	19152682	19152821	+	0	NA	intron (NM_001170746, intron 1 of 22)	L1_Mur2|LINE|L1	-260585	NM_001170745	50791	Mm.332231	NM_015823	ENSMUSG00000040003	Magi2	AIP-1|Acvri1|Acvrinp1|Acvrip1|Magi-2|S-SCAM|mKIAA0705	membrane associated guanylate kinase, WW and PDZ domain containing 2	protein-coding
Diff_Nuc69311	chr9	4541732	4541871	+	0	NA	intron (NM_001113180, intron 4 of 16)	intron (NM_001113180, intron 4 of 16)	158264	NM_145609	78100	Mm.206549	NM_145609	ENSMUSG00000041124	Msantd4	8430410K20Rik|Mysantd4	Myb/SANT-like DNA-binding domain containing 4 with coiled-coils	protein-coding
Diff_Nuc65794	chr1	92483032	92483171	+	0	NA	Intergenic	Intergenic	-16899	NM_133805	108679	Mm.119177	NM_133805	ENSMUSG00000034432	Cops8	9430009J09Rik|AA408242|Csn8|Sgn8	COP9 signalosome subunit 8	protein-coding
Diff_Nuc36222	chr7	95091862	95092001	+	0	NA	intron (NM_001081414, intron 4 of 9)	intron (NM_001081414, intron 4 of 9)	-334664	NM_009982	13032	Mm.89295	NM_009982	ENSMUSG00000030560	Ctsc	AI047818|CatC|DPP1|DPPI	cathepsin C	protein-coding
Diff_Nuc12358	chr10	14737652	14737791	+	0	NA	Intergenic	Intergenic	257626	NM_008703	18101	Mm.487342	NM_008703	ENSMUSG00000019865	Nmbr	BB182387	neuromedin B receptor	protein-coding
Diff_Nuc76815	chr8	127779272	127779411	+	0	NA	intron (NM_174854, intron 12 of 12)	intron (NM_174854, intron 12 of 12)	201246	NM_174854	244667	Mm.233504	NM_170596	ENSMUSG00000043051	Disc1	-	disrupted in schizophrenia 1	protein-coding
Diff_Nuc76214	chr8	103201502	103201641	+	0	NA	Intergenic	Intergenic	1260997	NR_132435	234624	Mm.124595	NM_175479	ENSMUSG00000052479	A330008L17Rik	-	RIKEN cDNA A330008L17 gene	ncRNA
Diff_Nuc18507	chr17	79075672	79075811	+	0	NA	intron (NM_011500, intron 7 of 17)	intron (NM_011500, intron 7 of 17)	60159	NM_011500	268980	Mm.311915	NM_011500	ENSMUSG00000024077	Strn	AU022939|D130055P19	striatin, calmodulin binding protein	protein-coding
Diff_Nuc48852	chr4	58825482	58825621	+	0	NA	exon (NM_172381, exon 38 of 49)	exon (NM_172381, exon 38 of 49)	-26959	NM_146920	258922	Mm.223327	NM_146920	ENSMUSG00000043385	Olfr267	MOR262-1	olfactory receptor 267	protein-coding
Diff_Nuc64503	chr1	52968442	52968581	+	0	NA	intron (NM_146108, intron 11 of 13)	intron (NM_146108, intron 11 of 13)	41173	NM_144953	67080	Mm.236287	NM_144953	ENSMUSG00000043629	1700019D03Rik	2410136C24Rik|AA410151|smAKAP	RIKEN cDNA 1700019D03 gene	protein-coding
Diff_Nuc65454	chr1	80198132	80198271	+	0	NA	intron (NM_173425, intron 1 of 1)	Lx8|LINE|L1	12318	NM_173425	241128	Mm.145511	NM_173425	ENSMUSG00000043230	Fam124b	A830043J08Rik	family with sequence similarity 124, member B	protein-coding
Diff_Nuc23887	chr15	45474322	45474461	+	0	NA	Intergenic	Intergenic	-527911	NM_026200	67498	Mm.300079	NM_026200	ENSMUSG00000022342	Kcnv1	2700023A03Rik|vibe	potassium channel, subfamily V, member 1	protein-coding
Diff_Nuc53474	chr3	59003402	59003541	+	0	NA	intron (NM_177855, intron 15 of 43)	RSINE1|SINE|B4	-4445	NM_001302203	84111	Mm.60267	NM_032399	ENSMUSG00000051431	Gpr87	-	G protein-coupled receptor 87	protein-coding
Diff_Nuc37485	chr7	135188372	135188511	+	0	NA	Intergenic	Lx9|LINE|L1	-17713	NM_001082960	16409	Mm.262106	NM_008401	ENSMUSG00000030786	Itgam	CD11b/CD18|CR3|CR3A|Cd11b|F730045J24Rik|Ly-40|MAC1|Mac-1|Mac-1a	integrin alpha M	protein-coding
Diff_Nuc13377	chr10	41555352	41555491	+	0	NA	intron (NM_001162908, intron 1 of 9)	intron (NM_001162908, intron 1 of 9)	25041	NM_001162908	140742	Mm.139418	NM_001013370	ENSMUSG00000038332	Sesn1	1110002G11Rik|AU044290|Pa26|Sest1	sestrin 1	protein-coding
Diff_Nuc31102	chr19	59969882	59970021	+	0	NA	Intergenic	Intergenic	49316	NM_001033172	74998	Mm.24167	NM_001033172	ENSMUSG00000040022	Rab11fip2	4930470G04Rik|A830046J09Rik|AW558126|Nrip11	RAB11 family interacting protein 2 (class I)	protein-coding
Diff_Nuc52428	chr3	28933282	28933421	+	0	NA	Intergenic	Intergenic	-48148	NM_001167748	75740	Mm.330948	NM_029412	ENSMUSG00000063600	Egfem1	6130401L20Rik|Efcab11	EGF-like and EMI domain containing 1	protein-coding
Diff_Nuc76395	chr8	108195512	108195651	+	0	NA	intron (NM_181322, intron 7 of 11)	intron (NM_181322, intron 7 of 11)	-19225	NM_001033320	234695	Mm.471640	NM_001033320	ENSMUSG00000050357	Carmil2	CG1399-PB|D130029J02Rik|Gm585|Rltpr	capping protein regulator and myosin 1 linker 2	protein-coding
Diff_Nuc69074	chr1	193649162	193649301	+	0	NA	intron (NM_010892, intron 3 of 7)	ID_B1|SINE|B4	3879	NM_010892	18005	Mm.33773	NM_010892	ENSMUSG00000026622	Nek2	AA617254|C77054	NIMA (never in mitosis gene a)-related expressed kinase 2	protein-coding
Diff_Nuc43901	chr5	43086102	43086241	+	0	NA	Intergenic	Intergenic	-538531	NM_175937	231207	Mm.7233	NM_175937	ENSMUSG00000039782	Cpeb2	A630055H10Rik|Cpe-bp2	cytoplasmic polyadenylation element binding protein 2	protein-coding
Diff_Nuc17729	chr17	55645272	55645411	+	0	NA	intron (NM_001347403, intron 5 of 5)	Lx3_Mus|LINE|L1	60326	NM_172829	240119	Mm.311687	NM_172829	ENSMUSG00000024172	St6gal2	C230064G14Rik|St6galII|mKIAA1877	beta galactoside alpha 2,6 sialyltransferase 2	protein-coding
Diff_Nuc56218	chr3	140147742	140147881	+	0	NA	Intergenic	Lx4A|LINE|L1	456598	NR_105798	102465198		NR_105798	ENSMUSG00000099169	Mir7j	Gm27716|Mirlet7j|mmu-let-7j	microRNA 7j	ncRNA
Diff_Nuc52444	chr3	29395672	29395811	+	0	NA	intron (NM_029412, intron 5 of 14)	intron (NM_029412, intron 5 of 14)	79996	NR_030422	791072		NR_030422	ENSMUSG00000076120	Mir551b	Mirn551b|mir-551b	microRNA 551b	ncRNA
Diff_Nuc3703	chr13	88675092	88675231	+	0	NA	Intergenic	Lx5|LINE|L1	-285916	NM_010103	13612	Mm.125580	NM_010103	ENSMUSG00000034488	Edil3	Del-1|Del1	EGF-like repeats and discoidin I-like domains 3	protein-coding
Diff_Nuc65058	chr1	67615132	67615271	+	0	NA	Intergenic	Intergenic	445600	NM_001080809	227231	Mm.343942	NM_001080809	ENSMUSG00000025991	Cps1	4732433M03Rik|CPS|D1Ucla3	carbamoyl-phosphate synthetase 1	protein-coding
Diff_Nuc37658	chr7	141910152	141910291	+	0	NA	intron (NM_001033420, intron 1 of 51)	intron (NM_001033420, intron 1 of 51)	47851	NM_001033420	330662	Mm.436572	NM_001033420	ENSMUSG00000058325	Dock1	9130006G06Rik|AI854900|D630004B07Rik	dedicator of cytokinesis 1	protein-coding
Diff_Nuc61441	chr2	133377352	133377491	+	0	NA	promoter-TSS (NM_007553)	promoter-TSS (NM_007553)	-474	NM_007553	12156	Mm.103205	NM_007553	ENSMUSG00000027358	Bmp2	AI467020|Bmp2a	bone morphogenetic protein 2	protein-coding
Diff_Nuc16303	chr17	3138412	3138551	+	0	NA	intron (NM_134123, intron 1 of 19)	intron (NM_134123, intron 1 of 19)	23509	NM_134123	106583	Mm.124373	NM_134123	ENSMUSG00000046201	Scaf8	A630086M08Rik|A930036P18Rik|AA408306|AI447644|AI448652|AU015035|Rbm16|mKIAA1116	SR-related CTD-associated factor 8	protein-coding
Diff_Nuc23160	chr15	23949462	23949601	+	0	NA	Intergenic	Intergenic	983313	NM_001081299	320865	Mm.241965	NM_001081299	ENSMUSG00000040420	Cdh18	B230220E17Rik|Cdh14l	cadherin 18	protein-coding
Diff_Nuc30533	chr19	39852112	39852251	+	0	NA	intron (NM_010004, intron 7 of 8)	intron (NM_010004, intron 7 of 8)	35123	NM_010004	13099	Mm.353875	NM_010004	ENSMUSG00000025004	Cyp2c40	AI265721|AI662255	cytochrome P450, family 2, subfamily c, polypeptide 40	protein-coding
Diff_Nuc9033	chr11	20760392	20760531	+	0	NA	Intergenic	Charlie1b|DNA|MER1_type	-29350	NM_173752	216551	Mm.76694	NM_173752	ENSMUSG00000042363	Lgalsl	1110067D22Rik|A530071M23|Grpa|Hspc159|Lgalsla	lectin, galactoside binding-like	protein-coding
Diff_Nuc60199	chr2	98170922	98171061	+	0	NA	Intergenic	IAPLTR3-int|LTR|ERVK	863177	NM_178725	241568	Mm.241682	NM_178725	ENSMUSG00000050587	Lrrc4c	6430556C10Rik|NGL-1	leucine rich repeat containing 4C	protein-coding
Diff_Nuc27904	chr14	84859762	84859901	+	0	NA	non-coding (NR_015539, exon 6 of 6)	non-coding (NR_015539, exon 6 of 6)	16400	NR_015539	319903	Mm.440481	NR_015539		9630013A20Rik	-	RIKEN cDNA 9630013A20 gene	ncRNA
Diff_Nuc25691	chr14	11667292	11667431	+	0	NA	intron (NM_001308285, intron 2 of 9)	MER44D|DNA|MER2_type	96294	NR_131139	547334	Mm.434606	NR_131139	ENSMUSG00000089833	Fhitos	Gm16542	fragile histidine triad gene, opposite strand	ncRNA
Diff_Nuc12865	chr10	28600712	28600851	+	0	NA	exon (NM_001305663, exon 6 of 6)	exon (NM_001305663, exon 6 of 6)	42532	NR_033601	114676	Mm.390292	NR_033601		4930519F09Rik	-	pyruvate dehydrogenase E1 alpha 1 pseudogene	pseudo
Diff_Nuc46700	chr5	135544892	135545031	+	0	NA	Intergenic	B1_Mur4|SINE|Alu	-4425	NM_025375	66138	Mm.439878	NM_025375	ENSMUSG00000005378	Wbscr22	1110003N24Rik	Williams Beuren syndrome chromosome region 22	protein-coding
Diff_Nuc2123	chr13	34309812	34309951	+	0	NA	intron (NM_001033167, intron 4 of 10)	B2_Mm1a|SINE|B2	55048	NM_001110515	69666	Mm.24788	NM_001101430	ENSMUSG00000071451	Psmg4	PAC-4|mPAC4	proteasome (prosome, macropain) assembly chaperone 4	protein-coding
Diff_Nuc72566	chr9	107681352	107681491	+	0	NA	intron (NM_029169, intron 18 of 20)	B1_Mus2|SINE|Alu	-8088	NM_148930	83486	Mm.259197	NM_148930	ENSMUSG00000032580	Rbm5	D030069N10Rik	RNA binding motif protein 5	protein-coding
Diff_Nuc61295	chr2	128777112	128777251	+	0	NA	Intergenic	L1VL2|LINE|L1	-7425	NM_020594	57432	Mm.11675	NM_020594	ENSMUSG00000027387	Zc3h8	AU020882|E130108N08Rik|Fliz1|Zc3hdc8	zinc finger CCCH type containing 8	protein-coding
Diff_Nuc2148	chr13	35248352	35248491	+	0	NA	Intergenic	Intergenic	-25071	NR_045616	100503727	Mm.32214	NR_045616	ENSMUSG00000102099	1700011B04Rik	-	RIKEN cDNA 1700011B04 gene	ncRNA
Diff_Nuc24335	chr15	57313172	57313311	+	0	NA	Intergenic	MTEa|LTR|MaLR	-4061	NM_172378	210463	Mm.26555	NM_172378	ENSMUSG00000022366	Slc22a22	oat-pg	solute carrier family 22 (organic cation transporter), member 22	protein-coding
Diff_Nuc64546	chr1	54028952	54029091	+	0	NA	intron (NM_001001883, intron 2 of 28)	intron (NM_001001883, intron 2 of 28)	122753	NR_106149	102465783		NR_106149	ENSMUSG00000098443	Mir7681	Gm27806|mmu-mir-7681	microRNA 7681	ncRNA
Diff_Nuc35101	chr7	58954972	58955111	+	0	NA	Intergenic	Intergenic	77841	NM_080853	140919	Mm.256618	NM_080853	ENSMUSG00000030500	Slc17a6	2900073D12Rik|DNPI|VGLUT2	solute carrier family 17 (sodium-dependent inorganic phosphate cotransporter), member 6	protein-coding
Diff_Nuc64584	chr1	54778262	54778401	+	0	NA	intron (NM_001081433, intron 16 of 27)	PB1D10|SINE|Alu	-163803	NM_001163314	241062	Mm.103539	NM_175508	ENSMUSG00000073678	Pgap1	5033403E17Rik|9030223K07Rik|A530084K22|D230012E17Rik|oto	post-GPI attachment to proteins 1	protein-coding
Diff_Nuc29862	chr19	19708822	19708961	+	0	NA	Intergenic	L1ME3|LINE|L1	-523205	NM_001043354	225998	Mm.234641	NM_146095	ENSMUSG00000036192	Rorb	Nr1f2|RZR-beta|RZRB|Rorbeta|hstp	RAR-related orphan receptor beta	protein-coding
Diff_Nuc3638	chr13	86907412	86907551	+	0	NA	Intergenic	L1_Mus2|LINE|L1	-721081	NM_007749	12867	Mm.378898	NM_007749	ENSMUSG00000017778	Cox7c	COXVIIc|Cox7c1	cytochrome c oxidase subunit VIIc	protein-coding
Diff_Nuc18628	chr17	82171692	82171831	+	0	NA	Intergenic	Intergenic	-34034	NM_011406	20541	Mm.265834	NM_011406	ENSMUSG00000054640	Slc8a1	AI852629|AV344025|D930008O12Rik|Ncx1	solute carrier family 8 (sodium/calcium exchanger), member 1	protein-coding
Diff_Nuc19882	chr16	29992512	29992651	+	0	NA	Intergenic	Intergenic	-13371	NR_037689	328657	Mm.425982	NM_001033403		Gm1968	-	predicted gene 1968	ncRNA
Diff_Nuc47023	chr5	151510592	151510731	+	0	NA	intron (NM_001346503, intron 1 of 34)	U6|snRNA|snRNA	34259	NM_001346503	100710	Mm.32959	NM_175310	ENSMUSG00000034021	Pds5b	AI646570|AS3|AW212954|Aprin|Tg(Wap-ERBB2)229Wzw|WAP-Her-2|mKIAA0979	PDS5 cohesin associated factor B	protein-coding
Diff_Nuc61635	chr2	137954722	137954861	+	0	NA	Intergenic	RMER20A|LTR|ERVK	-127529	NM_001025431	228662	Mm.153405	NM_145534	ENSMUSG00000062098	Btbd3	mKIAA0952	BTB (POZ) domain containing 3	protein-coding
Diff_Nuc69156	chr1	196663942	196664081	+	0	NA	Intergenic	Intergenic	15816	NR_039539	100628615		NR_039539	ENSMUSG00000092633	Mir3962	mmu-mir-3962|mu-mir-3962	microRNA 3962	ncRNA
Diff_Nuc56974	chr2	4955402	4955541	+	0	NA	intron (NM_181848, intron 8 of 14)	intron (NM_181848, intron 8 of 14)	-21634	NM_027290	70024	Mm.23828	NM_027290	ENSMUSG00000026669	Mcm10	2410041F14Rik|AU018508|C330019M07Rik|C79164	minichromosome maintenance 10 replication initiation factor	protein-coding
Diff_Nuc2301	chr13	40539942	40540081	+	0	NA	Intergenic	MLT1A0-int|LTR|MaLR	-156631	NM_172143	218165	Mm.364096	NM_172143	ENSMUSG00000047094	Ofcc1	opo	orofacial cleft 1 candidate 1	protein-coding
Diff_Nuc19333	chr16	13055302	13055441	+	0	NA	Intergenic	Intergenic	-54458	NM_015769	50505	Mm.287837	NM_015769	ENSMUSG00000022545	Ercc4	AI606920|Xpf	excision repair cross-complementing rodent repair deficiency, complementation group 4	protein-coding
Diff_Nuc6819	chr12	67320212	67320351	+	0	NA	Intergenic	Intergenic	65107	NM_001162933	238217	Mm.188575	NM_001162933	ENSMUSG00000060499	Rpl10l	EG238217	ribosomal protein L10-like	protein-coding
Diff_Nuc6905	chr12	69271722	69271861	+	0	NA	Intergenic	GA-rich|Low_complexity|Low_complexity	-948255	NM_207010	320772	Mm.227680	NM_207010	ENSMUSG00000034912	Mdga2	6720489L24Rik|9330209L04Rik|Adp|Mamdc1	MAM domain containing glycosylphosphatidylinositol anchor 2	protein-coding
Diff_Nuc29101	chr14	115397982	115398121	+	0	NA	Intergenic	Intergenic	-44842	NR_029785	723905		NR_029785	ENSMUSG00000065508	Mir17	Mirn17|mir-17|mmu-mir-17	microRNA 17	ncRNA
Diff_Nuc55894	chr3	130643252	130643391	+	0	NA	Intergenic	Intergenic	-169894	NM_010703	16842	Mm.255219	NM_010703	ENSMUSG00000027985	Lef1	3000002B05|AI451430|Lef-1	lymphoid enhancer binding factor 1	protein-coding
Diff_Nuc25599	chr14	9034762	9034901	+	0	NA	Intergenic	B1_Mus2|SINE|Alu	-11764	NM_027782	71393	Mm.292712	NM_027782	ENSMUSG00000021752	Kctd6	5430433B02Rik|AU044285	potassium channel tetramerisation domain containing 6	protein-coding
Diff_Nuc25272	chr15	92269542	92269681	+	0	NA	intron (NM_001164593, intron 3 of 9)	intron (NM_001164593, intron 3 of 9)	42370	NM_001164593	239618	Mm.309826	NM_001164593	ENSMUSG00000036218	Pdzrn4	1110017D07Rik|LNX4|SAMCAP3L|mKIAA3027	PDZ domain containing RING finger 4	protein-coding
Diff_Nuc75820	chr8	91399142	91399281	+	0	NA	Intergenic	MIRb|SINE|MIR	-149423	NR_106190	102465899		NR_106190	ENSMUSG00000099078	Mir8110	Gm27571|mmu-mir-8110	microRNA 8110	ncRNA
Diff_Nuc35393	chr7	67082312	67082451	+	0	NA	Intergenic	L1MC4|LINE|L1	36936	NR_015456	52480	Mm.482346	NR_015456	ENSMUSG00000100826	Snhg14	AU018661|D7Ertd715e|Lncat	small nucleolar RNA host gene 14	ncRNA
Diff_Nuc7022	chr12	72400912	72401051	+	0	NA	Intergenic	Intergenic	-9890	NM_021532	59036	Mm.46662	NM_021532	ENSMUSG00000044548	Dact1	4921528D17Rik|AI115603|DAPPER|DAPPER1|FRODO|Frd1|Frodo1|MDpr1|MTNG3|THYEX3	dishevelled-binding antagonist of beta-catenin 1	protein-coding
Diff_Nuc72965	chr9	122135952	122136091	+	0	NA	intron (NM_133979, intron 11 of 12)	B4A|SINE|B4	47125	NR_106185	102465896		NR_106185	ENSMUSG00000098922	Mir8106	Gm27594|mmu-mir-8106	microRNA 8106	ncRNA
Diff_Nuc48009	chr4	30488132	30488271	+	0	NA	Intergenic	Intergenic	-103545	NR_040655	75332	Mm.108636	NR_040655		4930556G01Rik	-	RIKEN cDNA 4930556G01 gene	ncRNA
Diff_Nuc58923	chr2	62149652	62149791	+	0	NA	intron (NM_033552, intron 22 of 25)	intron (NM_033552, intron 22 of 25)	100567	NM_010074	13482	Mm.1151	NM_010074	ENSMUSG00000035000	Dpp4	Cd26|Dpp-4|THAM	dipeptidylpeptidase 4	protein-coding
Diff_Nuc52300	chr3	25511692	25511831	+	0	NA	intron (NM_001163387, intron 3 of 5)	intron (NM_001163387, intron 3 of 5)	540468	NM_001163387	192167	Mm.316080	NM_138666	ENSMUSG00000063887	Nlgn1	6330415N05Rik|BB179718|NL1|Nlg1|mKIAA1070	neuroligin 1	protein-coding
Diff_Nuc62857	chr1	5165492	5165631	+	0	NA	Intergenic	RMER10A|LTR|ERVL	92394	NM_001310442	108664	Mm.27082	NM_133826	ENSMUSG00000033793	Atp6v1h	0710001F19Rik|AU022349|CGI-11|SFD|SFDalpha|SFDbeta|VMA13	ATPase, H+ transporting, lysosomal V1 subunit H	protein-coding
Diff_Nuc13038	chr10	32392142	32392281	+	0	NA	intron (NM_001025286, intron 1 of 3)	Lx3A|LINE|L1	217510	NM_001013411	432450	Mm.49665	NM_001013411	ENSMUSG00000069670	Nkain2	6330571D19Rik|AW455467|Tcba1	Na+/K+ transporting ATPase interacting 2	protein-coding
Diff_Nuc7694	chr12	92818062	92818201	+	0	NA	intron (NM_175335, intron 2 of 8)	Tigger7|DNA|MER2_type	9958	NM_031391	83602	Mm.275728	NM_031391	ENSMUSG00000020962	Gtf2a1	6330549H03Rik|AA536742|AA959775|AW060250|TfIIAa/b|Tfiia1	general transcription factor II A, 1	protein-coding
Diff_Nuc49960	chr4	92135492	92135631	+	0	NA	Intergenic	MLT2B1|LTR|ERVL	-321649	NM_027034	69314	Mm.55891	NM_027034	ENSMUSG00000028533	Izumo3	1700011H22Rik	IZUMO family member 3	protein-coding
Diff_Nuc42132	chr6	134007967	134008106	+	0	NA	intron (NM_007961, intron 1 of 7)	intron (NM_007961, intron 1 of 7)	22318	NM_007961	14011	Mm.269995	NM_007961	ENSMUSG00000030199	Etv6	AW123102|AW557856|Tel	ets variant 6	protein-coding
Diff_Nuc62018	chr2	149035352	149035491	+	0	NA	Intergenic	Intergenic	-195564	NM_021405	58214	Mm.117117	NM_021405	ENSMUSG00000033156	Cst10	DD72	cystatin 10 (chondrocytes)	protein-coding
Diff_Nuc23625	chr15	38715062	38715201	+	0	NA	Intergenic	Intergenic	-50324	NM_080640	118452	Mm.233837	NM_080640		Baalc	2810457D07Rik	brain and acute leukemia, cytoplasmic	protein-coding
Diff_Nuc21835	chr16	81762872	81763011	+	0	NA	Intergenic	Intergenic	561999	NM_010954	17968	Mm.433941	NM_010954	ENSMUSG00000022762	Ncam2	Ncam-2|Ocam|RNCAM	neural cell adhesion molecule 2	protein-coding
Diff_Nuc18598	chr17	81499062	81499201	+	0	NA	Intergenic	(TCTG)n|Simple_repeat|Simple_repeat	-34706	NM_028138	72167	Mm.273257	NM_028138	ENSMUSG00000024246	Thumpd2	2810025A12Rik	THUMP domain containing 2	protein-coding
Diff_Nuc71361	chr9	71720482	71720621	+	0	NA	intron (NM_011544, intron 13 of 20)	intron (NM_011544, intron 13 of 20)	23352	NM_001253864	21406	Mm.171615	NM_011544	ENSMUSG00000032228	Tcf12	A130037E08Rik|ALF1|HEB|HEBAlt|HTF-4|HTF4|ME1|REB|bHLHb20	transcription factor 12	protein-coding
Diff_Nuc74201	chr8	43271042	43271181	+	0	NA	Intergenic	Intergenic	358490	NR_045497	69966	Mm.416903	NR_045497	ENSMUSG00000102046	2810404M03Rik	-	RIKEN cDNA 2810404M03 gene	ncRNA
Diff_Nuc17110	chr17	31456542	31456681	+	0	NA	intron (NM_001242427, intron 6 of 19)	intron (NM_001242427, intron 6 of 19)	23442	NM_001242427	224674	Mm.311395	NM_153062	ENSMUSG00000024036	Slc37a1	G3PP	solute carrier family 37 (glycerol-3-phosphate transporter), member 1	protein-coding
Diff_Nuc72374	chr9	100853152	100853291	+	0	NA	intron (NM_009282, intron 30 of 33)	intron (NM_009282, intron 30 of 33)	82082	NM_001311149	66904	Mm.335385	NM_025835	ENSMUSG00000032527	Pccb	1300012P06Rik|AI314687|R74805	propionyl Coenzyme A carboxylase, beta polypeptide	protein-coding
Diff_Nuc35108	chr7	59207342	59207481	+	0	NA	intron (NM_008087, intron 6 of 7)	intron (NM_008087, intron 6 of 7)	53673	NR_027704	75744	Mm.386823	NM_001160345	ENSMUSG00000074093	Svip	1700006C13Rik|6620401M08Rik	small VCP/p97-interacting protein	protein-coding
Diff_Nuc66932	chr1	126696022	126696161	+	0	NA	Intergenic	Intergenic	636213	NM_023735	74117	Mm.183102	NM_023735	ENSMUSG00000026341	Actr3	1200003A09Rik|Arp3	ARP3 actin-related protein 3	protein-coding
Diff_Nuc45938	chr5	102425332	102425471	+	0	NA	intron (NM_172882, intron 3 of 66)	intron (NM_172882, intron 3 of 66)	73539	NM_172882	72145	Mm.332522	NM_172882	ENSMUSG00000043940	Wdfy3	2610509D04Rik|ALFY|AW319683|B930017C24|BWF1|Bchs|D5Ertd66e|Ggtb3|ZFYVE25|mKIAA0993	WD repeat and FYVE domain containing 3	protein-coding
Diff_Nuc74943	chr8	63773952	63774091	+	0	NA	intron (NM_021506, intron 2 of 11)	B4A|SINE|B4	-6352	NR_045475	69279	Mm.417857	NR_045475	ENSMUSG00000099419	1700001D01Rik	-	RIKEN cDNA 1700001D01 gene	ncRNA
Diff_Nuc62992	chr1	9419662	9419801	+	0	NA	Intergenic	Lx7|LINE|L1	-115758	NM_021511	59014	Mm.29061	NM_021511	ENSMUSG00000061024	Rrs1	5730466A07Rik|AA415037|D1Ertd701e|Rrr	ribosome biogenesis regulator 1	protein-coding
Diff_Nuc61464	chr2	134043242	134043381	+	0	NA	Intergenic	Intergenic	336777	NM_010403	15112	Mm.26634	NM_010403	ENSMUSG00000027261	Hao1	GOX|Gox1|Hao-1	hydroxyacid oxidase 1, liver	protein-coding
Diff_Nuc53263	chr3	52055272	52055411	+	0	NA	Intergenic	Intergenic	-16918	NM_019739	56458	Mm.29891	NM_019739	ENSMUSG00000044167	Foxo1	AI876417|Afxh|FKHR|Fkhr1|Foxo1a	forkhead box O1	protein-coding
Diff_Nuc19973	chr16	33282992	33283131	+	0	NA	intron (NM_080557, intron 7 of 13)	L3|LINE|CR1	31519	NM_080557	69150	Mm.28196	NM_080557	ENSMUSG00000022808	Snx4	1810036H14Rik|AI037066	sorting nexin 4	protein-coding
Diff_Nuc17019	chr17	27913802	27913941	+	0	NA	intron (NM_001044719, intron 3 of 4)	intron (NM_001044719, intron 3 of 4)	43616	NM_001033279	224647	Mm.196577	NM_001033279	ENSMUSG00000056692	D17Wsu92e	AU020189|C030010A15|C80239	DNA segment, Chr 17, Wayne State University 92, expressed	protein-coding
Diff_Nuc21319	chr16	69153282	69153421	+	0	NA	Intergenic	ORR1E|LTR|MaLR	647275	NR_130991	78110	Mm.211406	NR_130991	ENSMUSG00000107073	4930428D20Rik	-	RIKEN cDNA 4930428D20 gene	ncRNA
Diff_Nuc41598	chr6	112540052	112540191	+	0	NA	Intergenic	L1_Mus2|LINE|L1	-100319	NM_001081147	18430	Mm.333310	NM_001081147	ENSMUSG00000049112	Oxtr	OTR	oxytocin receptor	protein-coding
Diff_Nuc43938	chr5	44026442	44026581	+	0	NA	Intergenic	Intergenic	-27107	NM_172274	231214	Mm.44434	NM_172274	ENSMUSG00000039765	Cc2d2a	5730509K17Rik|b2b1035Clo	coiled-coil and C2 domain containing 2A	protein-coding
Diff_Nuc36696	chr7	107441422	107441561	+	0	NA	intron (NM_177161, intron 2 of 12)	intron (NM_177161, intron 2 of 12)	7461	NM_177161	320452	Mm.150294	NM_177161	ENSMUSG00000051048	P4ha3	D930031A02Rik	procollagen-proline, 2-oxoglutarate 4-dioxygenase (proline 4-hydroxylase), alpha polypeptide III	protein-coding
Diff_Nuc48564	chr4	49657852	49657991	+	0	NA	intron (NM_182999, intron 8 of 20)	Lx8|LINE|L1	12989	NM_182999	109331	Mm.24765	NM_182999	ENSMUSG00000028309	Rnf20	4833430L21Rik|AW540162|C79397|mKIAA4116	ring finger protein 20	protein-coding
Diff_Nuc34809	chr7	46774902	46775041	+	0	NA	intron (NM_001004139, intron 1 of 3)	RSINE1|SINE|B4	1835	NM_001004139	70227	Mm.333800	NM_001004139	ENSMUSG00000068959	Zfp619	3000002G13Rik	zinc finger protein 619	protein-coding
Diff_Nuc47993	chr4	30019912	30020051	+	0	NA	Intergenic	Intergenic	-571765	NR_040655	75332	Mm.108636	NR_040655		4930556G01Rik	-	RIKEN cDNA 4930556G01 gene	ncRNA
Diff_Nuc66618	chr1	116605902	116606041	+	0	NA	Intergenic	Intergenic	-975743	NM_001077425	636808	Mm.101576	NM_001077425	ENSMUSG00000070695	Cntnap5a	Caspr5-1|EG636808	contactin associated protein-like 5A	protein-coding
Diff_Nuc70128	chr9	30179142	30179281	+	0	NA	Intergenic	L1MEc|LINE|L1	-55703	NM_028874	102607	Mm.35084	NM_028874	ENSMUSG00000031993	Snx19	3526401K03Rik|AI195321|AI848208|mKIAA0254	sorting nexin 19	protein-coding
Diff_Nuc67965	chr1	158550022	158550161	+	0	NA	intron (NM_009595, intron 1 of 11)	intron (NM_009595, intron 1 of 11)	54379	NM_023141	30935	Mm.206737	NM_023141	ENSMUSG00000060519	Tor3a	Adir	torsin family 3, member A	protein-coding
Diff_Nuc21970	chr16	85202652	85202791	+	0	NA	Intergenic	Intergenic	-28769	NM_001198826	11820	Mm.277585	NM_007471	ENSMUSG00000022892	App	Abeta|Abpp|Adap|Ag|Cvap|E030013M08Rik|betaApp	amyloid beta (A4) precursor protein	protein-coding
Diff_Nuc12987	chr10	31354692	31354831	+	0	NA	Intergenic	MLT-int|LTR|MaLR	-25230	NM_001146349	268291	Mm.295212	NM_001146349	ENSMUSG00000063760	Rnf217	AU016819|Ibrdc1	ring finger protein 217	protein-coding
Diff_Nuc13594	chr10	47901172	47901311	+	0	NA	Intergenic	L1MC4|LINE|L1	914408	NR_046212	100418235	Mm.185993	NR_046212		C130030K03Rik	-	proteasome (prosome, macropain) subunit, alpha type 6 pseudogene	pseudo
Diff_Nuc42040	chr6	130501322	130501461	+	0	NA	Intergenic	L1Md_F2|LINE|L1	-164499	NM_016659	16627	Mm.24399	NM_016659	ENSMUSG00000079853	Klra1	A1|CH29-493D4.3|Klra22|Ly49a|Ly49o<129>|Ly49v	killer cell lectin-like receptor, subfamily A, member 1	protein-coding
Diff_Nuc13919	chr10	56418312	56418451	+	0	NA	Intergenic	ORR1E|LTR|MaLR	321275	NM_010288	14609	Mm.378921	NM_010288	ENSMUSG00000050953	Gja1	AU042049|AW546267|Cnx43|Cx43|Cx43alpha1|Gja-1|Npm1|connexin43	gap junction protein, alpha 1	protein-coding
Diff_Nuc65588	chr1	83721862	83722001	+	0	NA	Intergenic	Intergenic	-317156	NM_172430	77629	Mm.154303	NM_172430	ENSMUSG00000026163	Sphkap	4930544G21Rik|A930009L15Rik|AI852220|SKIP|mKIAA1678	SPHK1 interactor, AKAP domain containing	protein-coding
Diff_Nuc64323	chr1	48051182	48051321	+	0	NA	Intergenic	Lx6|LINE|L1	-527282	NR_105768	102466969		NR_105768	ENSMUSG00000098876	Mir6350	Gm27958|mmu-mir-6350	microRNA 6350	ncRNA
Diff_Nuc47742	chr4	22354462	22354601	+	0	NA	exon (NM_172988, exon 8 of 9)	exon (NM_172988, exon 8 of 9)	60982	NM_008899	18992	Mm.129387	NM_008899	ENSMUSG00000095139	Pou3f2	9430075J19Rik|A230098E07Rik|Brn-2|Brn2|OTF-7|Otf7|oct-7	POU domain, class 3, transcription factor 2	protein-coding
Diff_Nuc13477	chr10	44880782	44880921	+	0	NA	Intergenic	Intergenic	93831	NM_011156	19072	Mm.10281	NM_011156	ENSMUSG00000019849	Prep	AI047692|AI450383|D10Wsu136e|PEP|Pop	prolyl endopeptidase	protein-coding
Diff_Nuc10781	chr11	78479822	78479961	+	0	NA	intron (NM_008702, intron 1 of 10)	MER2|DNA|MER2_type	31036	NM_008702	18099	Mm.9001	NM_008702	ENSMUSG00000017376	Nlk	AI194375	nemo like kinase	protein-coding
Diff_Nuc27776	chr14	81424912	81425051	+	0	NA	Intergenic	L1Md_F2|LINE|L1	1024872	NM_001030294	380924	Mm.26456	NM_001030294	ENSMUSG00000022026	Olfm4	GC1|GW112|Gm296|Gm913|OlfD|pPD4	olfactomedin 4	protein-coding
Diff_Nuc74967	chr8	64666952	64667091	+	0	NA	Intergenic	Intergenic	-65031	NM_011922	26359	Mm.42179	NM_011922	ENSMUSG00000031635	Anxa10	-	annexin A10	protein-coding
Diff_Nuc34605	chr7	30244972	30245111	+	0	NA	intron (NM_001081028, intron 2 of 22)	L1MA8|LINE|L1	45438	NM_001081028	74206	Mm.447042	NM_001081028	ENSMUSG00000030583	Sipa1l3	2610511M17Rik	signal-induced proliferation-associated 1 like 3	protein-coding
Diff_Nuc23684	chr15	40189802	40189941	+	0	NA	Intergenic	Intergenic	168952	NR_046185	432945	Mm.321981	NR_046185	ENSMUSG00000056332	Gm16294	EG432945|OTTMUSG00000033304	predicted gene 16294	ncRNA
Diff_Nuc19939	chr16	32285372	32285511	+	0	NA	intron (NM_027355, intron 2 of 5)	intron (NM_027355, intron 2 of 5)	7894	NM_027355	70238	Mm.228263	NM_027355	ENSMUSG00000014074	Rnf168	3110001H15Rik	ring finger protein 168	protein-coding
Diff_Nuc62913	chr1	6978562	6978701	+	0	NA	Intergenic	L1_Mus3|LINE|L1	-100370	NM_183028	319263	Mm.21539	NM_183028	ENSMUSG00000051285	Pcmtd1	8430411F12Rik|A030012M09Rik	protein-L-isoaspartate (D-aspartate) O-methyltransferase domain containing 1	protein-coding
Diff_Nuc58988	chr2	64262142	64262281	+	0	NA	Intergenic	Intergenic	-326116	NM_001267847	60344	Mm.130769	NM_021716	ENSMUSG00000075324	Fign	fi|fidget	fidgetin	protein-coding
Diff_Nuc45093	chr5	77494012	77494151	+	0	NA	Intergenic	RMER4B|LTR|ERVK	30211	NM_001159901	74318	Mm.181852	NM_175606	ENSMUSG00000059325	Hopx	1110018K11Rik|1200015P04Rik|2300002F06Rik|AI848177|AW490897|Cameo|Hdop|Hod|Hop|Ob1|Obl|Toto	HOP homeobox	protein-coding
Diff_Nuc43770	chr5	39824502	39824641	+	0	NA	Intergenic	Intergenic	170242	NR_045416	75095	Mm.332354	NR_045416	ENSMUSG00000106741	4930513D17Rik	-	RIKEN cDNA 4930513D17 gene	ncRNA
Diff_Nuc26294	chr14	31330282	31330421	+	0	NA	intron (NM_133761, intron 6 of 9)	intron (NM_133761, intron 6 of 9)	-26009	NM_028981	12289	Mm.9772	NM_028981	ENSMUSG00000015968	Cacna1d	8430418G19Rik|C79217|Cach3|Cacn4|Cacnl1a2|Cav1.3|Cchl1a|Cchl1a2|D-LTCC	calcium channel, voltage-dependent, L type, alpha 1D subunit	protein-coding
Diff_Nuc76633	chr8	117388922	117389061	+	0	NA	intron (NM_019573, intron 8 of 8)	ID_B1|SINE|B4	425439	NM_019573	80707	Mm.440420	NM_019573	ENSMUSG00000004637	Wwox	5330426P09Rik|9030416C10Rik|WOX1	WW domain-containing oxidoreductase	protein-coding
Diff_Nuc61133	chr2	123455772	123455911	+	0	NA	Intergenic	Intergenic	-459864	NM_001290997	214968	Mm.330536	NM_172537	ENSMUSG00000027200	Sema6d	1110067B02Rik|AA409156|D330011G23|mKIAA1479	sema domain, transmembrane domain (TM), and cytoplasmic domain, (semaphorin) 6D	protein-coding
Diff_Nuc56887	chr3	158670882	158671021	+	0	NA	Intergenic	Intergenic	-68377	NR_040750	624759	Mm.491054	NR_040750	ENSMUSG00000106053	Gm20752	-	predicted gene, 20752	ncRNA
Diff_Nuc38162	chr6	11309062	11309201	+	0	NA	Intergenic	MT2A|LTR|ERVL	-384753	NR_033776	57866	Mm.4397	NR_033776		AA545190	-	EST AA545190	ncRNA
Diff_Nuc40861	chr6	89758372	89758511	+	0	NA	Intergenic	MTD-int|LTR|MaLR	37168	NM_053221	113848	Mm.349358	NM_053221	ENSMUSG00000068232	Vmn1r42	V1ra1|V1ra3|V1ra6	vomeronasal 1 receptor 42	protein-coding
Diff_Nuc68842	chr1	183922282	183922421	+	0	NA	intron (NM_010135, intron 1 of 14)	intron (NM_010135, intron 1 of 14)	27760	NM_008680	13800	Mm.87759	NM_008680	ENSMUSG00000022995	Enah	Mena|NDPP-1|Ndpp1|WBP8	enabled homolog (Drosophila)	protein-coding
Diff_Nuc37621	chr7	140184282	140184421	+	0	NA	intron (NM_001347623, intron 4 of 8)	MT2B|LTR|ERVL	22579	NM_001170744	13017	Mm.246240	NM_009980	ENSMUSG00000030970	Ctbp2	AA407280|D7Ertd45e|Gtrgeo6|Ribeye	C-terminal binding protein 2	protein-coding
Diff_Nuc34995	chr7	54250372	54250511	+	0	NA	intron (NM_175318, intron 4 of 5)	intron (NM_175318, intron 4 of 5)	13343	NM_175318	101685	Mm.155687	NM_175318	ENSMUSG00000049516	Spty2d1	5830435K17Rik|AI852426|P16H6	SPT2, Suppressor of Ty, domain containing 1 (S. cerevisiae)	protein-coding
Diff_Nuc32917	chr18	53430222	53430361	+	0	NA	intron (NM_029394, intron 1 of 6)	intron (NM_029394, intron 1 of 6)	24975	NM_029394	69226	Mm.32414	NM_029394	ENSMUSG00000024535	Snx24	2810011K15Rik|5730433I16Rik|AI451341	sorting nexing 24	protein-coding
Diff_Nuc48082	chr4	32848092	32848231	+	0	NA	intron (NM_001081392, intron 89 of 101)	intron (NM_001081392, intron 89 of 101)	-39073	NM_175364	108755	Mm.1182	NM_175364	ENSMUSG00000045854	Lyrm2	2610208E05Rik	LYR motif containing 2	protein-coding
Diff_Nuc24929	chr15	78414472	78414611	+	0	NA	Intergenic	L1MA9|LINE|L1	-11328	NM_009008	19354	Mm.1972	NM_009008	ENSMUSG00000033220	Rac2	AI323801|AI452260	RAS-related C3 botulinum substrate 2	protein-coding
Diff_Nuc56938	chr2	3719292	3719431	+	0	NA	Intergenic	Intergenic	88631	NM_025626	66540	Mm.277864	NM_025626	ENSMUSG00000026655	Fam107b	3110001A13Rik|AA589595|AA959793|AI132312	family with sequence similarity 107, member B	protein-coding
Diff_Nuc3736	chr13	89207522	89207661	+	0	NA	intron (NM_010103, intron 3 of 9)	Lx6|LINE|L1	246514	NM_001037987	13612	Mm.125580	NM_010103	ENSMUSG00000034488	Edil3	Del-1|Del1	EGF-like repeats and discoidin I-like domains 3	protein-coding
Diff_Nuc57292	chr2	13705512	13705651	+	0	NA	intron (NM_145838, intron 2 of 7)	ORR1B2|LTR|MaLR	9566	NM_145838	241230	Mm.330004	NM_145838	ENSMUSG00000003418	St8sia6	1700007J08Rik|AI314453|AI875066|ST8SiaVI|Siat8f	ST8 alpha-N-acetyl-neuraminide alpha-2,8-sialyltransferase 6	protein-coding
Diff_Nuc22041	chr16	87398992	87399131	+	0	NA	exon (NM_001081068, exon 22 of 30)	exon (NM_001081068, exon 22 of 30)	33790	NM_001081068	78913	Mm.249005	NM_001081068	ENSMUSG00000052299	Ltn1	4930528H02Rik|AV266914|C87237|Listerin|Rnf160|Zfp294	listerin E3 ubiquitin protein ligase 1	protein-coding
Diff_Nuc49912	chr4	90742092	90742231	+	0	NA	Intergenic	Intergenic	296585	NM_010486	15569	Mm.318042	NM_010486	ENSMUSG00000008489	Elavl2	Hub|mel-N1	ELAV (embryonic lethal, abnormal vision, Drosophila)-like 2 (Hu antigen B)	protein-coding
Diff_Nuc39123	chr6	37062102	37062241	+	0	NA	intron (NM_001347104, intron 3 of 32)	intron (NM_001347104, intron 3 of 32)	187805	NM_001081206	320127	Mm.119469	NM_001081206	ENSMUSG00000038665	Dgki	C130010K08Rik	diacylglycerol kinase, iota	protein-coding
Diff_Nuc8141	chr12	107255512	107255651	+	0	NA	intron (NM_001029843, intron 1 of 13)	intron (NM_001029843, intron 1 of 13)	7108	NM_001029843	22367	Mm.2981	NM_011705	ENSMUSG00000021115	Vrk1	51PK	vaccinia related kinase 1	protein-coding
Diff_Nuc3054	chr13	68989872	68990011	+	0	NA	intron (NM_153534, intron 3 of 24)	intron (NM_153534, intron 3 of 24)	148478	NM_153534	210044	Mm.390617	NM_153534	ENSMUSG00000021536	Adcy2	mKIAA1060	adenylate cyclase 2	protein-coding
Diff_Nuc33090	chr18	58494552	58494691	+	0	NA	Intergenic	(TCTA)n|Simple_repeat|Simple_repeat	-125041	NM_010181	14119	Mm.20271	NM_010181	ENSMUSG00000024598	Fbn2	BC063774|Fib-2|mKIAA4226|sne|sy	fibrillin 2	protein-coding
Diff_Nuc73100	chr8	6295052	6295191	+	0	NA	Intergenic	RLTR31_Mm|LTR|ERVK	-1189834	NM_011388	20494	Mm.3500	NM_011388	ENSMUSG00000023073	Slc10a2	9130221J18Rik|AI605518|ASBT|IBAT|ISBT	solute carrier family 10, member 2	protein-coding
Diff_Nuc14514	chr10	78166122	78166261	+	0	NA	Intergenic	Lx|LINE|L1	14847	NM_009809	12365	Mm.20940	NM_009809	ENSMUSG00000005355	Casp14	MICE|mini-ICE	caspase 14	protein-coding
Diff_Nuc13239	chr10	37331392	37331531	+	0	NA	Intergenic	Intergenic	-472729	NM_008538	17118	Mm.30059	NM_008538	ENSMUSG00000069662	Marcks	Macs|PKCSL	myristoylated alanine rich protein kinase C substrate	protein-coding
Diff_Nuc66730	chr1	120423812	120423951	+	0	NA	intron (NM_029709, intron 21 of 36)	intron (NM_029709, intron 21 of 36)	-68039	NR_027901	68204	Mm.443536	NR_027901	ENSMUSG00000107722	2900060B14Rik	-	RIKEN cDNA 2900060B14 gene	ncRNA
Diff_Nuc18622	chr17	82043012	82043151	+	0	NA	intron (NR_104580, intron 2 of 8)	intron (NR_104580, intron 2 of 8)	94646	NM_001286684	20541	Mm.265834	NM_011406	ENSMUSG00000054640	Slc8a1	AI852629|AV344025|D930008O12Rik|Ncx1	solute carrier family 8 (sodium/calcium exchanger), member 1	protein-coding
Diff_Nuc20146	chr16	39077302	39077441	+	0	NA	Intergenic	L1ME1|LINE|L1	174913	NM_170599	207683	Mm.245564	NM_170599	ENSMUSG00000022790	Igsf11	1700025L02Rik|BT-IgSF|Igsf13	immunoglobulin superfamily, member 11	protein-coding
Diff_Nuc47956	chr4	28832742	28832881	+	0	NA	intron (NM_001122889, intron 5 of 9)	intron (NM_001122889, intron 5 of 9)	92516	NM_001122889	13841	Mm.257266	NM_010141	ENSMUSG00000028289	Epha7	Cek11|Ebk|Ehk3|Hek11|Mdk1	Eph receptor A7	protein-coding
Diff_Nuc17891	chr17	60279972	60280111	+	0	NA	Intergenic	L1VL1|LINE|L1	-1127296	NM_026497	67993	Mm.36507	NM_026497	ENSMUSG00000024228	Nudt12	0610016O18Rik	nudix (nucleoside diphosphate linked moiety X)-type motif 12	protein-coding
Diff_Nuc68941	chr1	188161402	188161541	+	0	NA	Intergenic	Intergenic	-220282	NM_146106	226791	Mm.257116	NM_146106	ENSMUSG00000039246	Lyplal1	BC027340|Q96AVO	lysophospholipase-like 1	protein-coding
Diff_Nuc18455	chr17	77561702	77561841	+	0	NA	Intergenic	Lx9|LINE|L1	-1037817	NM_015800	50766	Mm.311912	NM_015800	ENSMUSG00000024074	Crim1	AU015004	cysteine rich transmembrane BMP regulator 1 (chordin like)	protein-coding
Diff_Nuc34051	chr18	89432502	89432641	+	0	NA	intron (NM_001039149, intron 3 of 5)	intron (NM_001039149, intron 3 of 5)	65752	NM_001039149	225825	Mm.139293	NM_178687	ENSMUSG00000034028	Cd226	BC051526|DNAM-1|DNAM1|Pta1|TLiSA1	CD226 antigen	protein-coding
Diff_Nuc29779	chr19	17173252	17173391	+	0	NA	intron (NM_181348, intron 6 of 19)	MIRb|SINE|MIR	142713	NM_181348	353211	Mm.257354	NM_181348	ENSMUSG00000039126	Prune2	6330414G02Rik|A230083H22Rik|A330102H22Rik|Bmcc1|mKIAA0367	prune homolog 2	protein-coding
Diff_Nuc23345	chr15	29714782	29714921	+	0	NA	Intergenic	Intergenic	-71692	NR_039542	100628607		NR_039542	ENSMUSG00000092639	Mir3964	mmu-mir-3964|mu-mir-3964	microRNA 3964	ncRNA
Diff_Nuc22107	chr16	89889352	89889491	+	0	NA	intron (NM_009384, intron 4 of 27)	intron (NM_009384, intron 4 of 27)	-70824	NM_001145887	21844	Mm.310902	NM_009384	ENSMUSG00000002489	Tiam1	AI847750|D16Ium10|D16Ium10e	T cell lymphoma invasion and metastasis 1	protein-coding
Diff_Nuc36214	chr7	94989892	94990031	+	0	NA	intron (NM_001081414, intron 4 of 9)	intron (NM_001081414, intron 4 of 9)	257283	NM_001143834	108071	Mm.235018	NM_001033224	ENSMUSG00000049583	Grm5	6430542K11Rik|AI850523|Glu5R|Gprc1e|mGluR5|mGluR5b	glutamate receptor, metabotropic 5	protein-coding
Diff_Nuc48227	chr4	36953252	36953391	+	0	NA	Intergenic	L1Md_F3|LINE|L1	-54544	NM_001165999	242384	Mm.132507	NM_175516	ENSMUSG00000045083	Lingo2	B230217C06Rik|Lern3|Lrrn6c	leucine rich repeat and Ig domain containing 2	protein-coding
Diff_Nuc8045	chr12	102919892	102920031	+	0	NA	intron (NM_001082976, intron 7 of 11)	L1MA5A|LINE|L1	29822	NM_028924	74413	Mm.275939	NM_028924	ENSMUSG00000021187	Tc2n	4933406D09Rik|Mtac2d1|Tac2-N	tandem C2 domains, nuclear	protein-coding
Diff_Nuc60190	chr2	97936472	97936611	+	0	NA	Intergenic	Intergenic	628727	NM_178725	241568	Mm.241682	NM_178725	ENSMUSG00000050587	Lrrc4c	6430556C10Rik|NGL-1	leucine rich repeat containing 4C	protein-coding
Diff_Nuc12952	chr10	30408002	30408141	+	0	NA	intron (NM_172495, intron 10 of 15)	intron (NM_172495, intron 10 of 15)	-32398	NM_001111267	211329	Mm.297903	NM_172495	ENSMUSG00000039697	Ncoa7	9030406N13Rik	nuclear receptor coactivator 7	protein-coding
Diff_Nuc5113	chr12	14368532	14368671	+	0	NA	Intergenic	Intergenic	100261	NR_045003	791361	Mm.217963	NR_045003		Gm16497	ENSMUSG00000066623	predicted gene 16497	ncRNA
Diff_Nuc16752	chr17	18242792	18242931	+	0	NA	intron (NM_001104540, intron 2 of 5)	intron (NM_001104540, intron 2 of 5)	20840	NM_001104540	665210	Mm.469864	NM_001104540	ENSMUSG00000091206	Vmn2r91	EG665210	vomeronasal 2, receptor 91	protein-coding
Diff_Nuc10594	chr11	72510002	72510141	+	0	NA	intron (NM_009671, intron 1 of 24)	intron (NM_009671, intron 1 of 24)	6567	NM_009671	11736	Mm.10313	NM_009671	ENSMUSG00000020790	Ankfy1	Ankhzn|ZFYVE14|mKIAA1255	ankyrin repeat and FYVE domain containing 1	protein-coding
Diff_Nuc61354	chr2	130472142	130472281	+	0	NA	Intergenic	B3|SINE|B2	-3631	NM_001291027	241638	Mm.440130	NM_197945	ENSMUSG00000037703	Lzts3	Prosapip1	leucine zipper, putative tumor suppressor family member 3	protein-coding
Diff_Nuc36358	chr7	98308852	98308991	+	0	NA	intron (NM_011807, intron 1 of 22)	B4A|SINE|B4	69625	NM_011807	23859	Mm.147213	NM_011807	ENSMUSG00000052572	Dlg2	A330103J02Rik|B230218P12Rik|B330007M19Rik|Dlgh2|Gm1197|Gm21505|PSD93	discs, large homolog 2 (Drosophila)	protein-coding
Diff_Nuc47163	chr4	6701262	6701401	+	0	NA	intron (NM_145711, intron 3 of 8)	intron (NM_145711, intron 3 of 8)	216539	NM_145711	252838	Mm.435828	NM_145711	ENSMUSG00000041272	Tox	1700007F02Rik	thymocyte selection-associated high mobility group box	protein-coding
Diff_Nuc58497	chr2	50161932	50162071	+	0	NA	intron (NR_040362, intron 1 of 2)	intron (NR_040362, intron 1 of 2)	9671	NR_040362	100502624	Mm.382825	NR_040361	ENSMUSG00000085862	Gm13483	OTTMUSG00000012382	predicted gene 13483	ncRNA
Diff_Nuc12393	chr10	15558702	15558841	+	0	NA	Intergenic	L1_Mm|LINE|L1	47188	NR_131087	77538	Mm.128235	NR_131087		C330004P14Rik	-	RIKEN cDNA C330004P14 gene	ncRNA
Diff_Nuc32470	chr18	41125212	41125351	+	0	NA	Intergenic	Intergenic	707266	NM_026135	383348	Mm.76366	NM_026135	ENSMUSG00000051401	Kctd16	4930434H12Rik|Gm1267	potassium channel tetramerisation domain containing 16	protein-coding
Diff_Nuc19918	chr16	31701042	31701181	+	0	NA	intron (NR_045516, intron 4 of 24)	B1F2|SINE|Alu	37090	NM_001252434	13383	Mm.382	NM_007862	ENSMUSG00000022770	Dlg1	B130052P05Rik|Dlgh1|E-dlg/SAP97|SAP-97|SAP97|mKIAA4187	discs, large homolog 1 (Drosophila)	protein-coding
Diff_Nuc72103	chr9	93379372	93379511	+	0	NA	Intergenic	Intergenic	-478870	NR_040756	78349	Mm.52612	NR_040756	ENSMUSG00000100294	1700034K08Rik	-	RIKEN cDNA 1700034K08 gene	ncRNA
Diff_Nuc9086	chr11	22161322	22161461	+	0	NA	intron (NM_153078, intron 2 of 24)	L1VL1|LINE|L1	25407	NM_153078	216565	Mm.491265	NM_153078	ENSMUSG00000042302	Ehbp1	AF424697|Flj21950|NACSIN	EH domain binding protein 1	protein-coding
Diff_Nuc2950	chr13	64770652	64770791	+	0	NA	Intergenic	Intergenic	-171621	NM_001195435	68880	Mm.390594	NM_001195435	ENSMUSG00000096537	1190003K10Rik	-	RIKEN cDNA 1190003K10 gene	protein-coding
Diff_Nuc13822	chr10	53882142	53882281	+	0	NA	Intergenic	Intergenic	86483	NR_038016	100502920	Mm.403982	NR_038016	ENSMUSG00000097069	Gm16998	-	predicted gene, 16998	ncRNA
Diff_Nuc2245	chr13	38865212	38865351	+	0	NA	Intergenic	Intergenic	-114384	NM_025380	66143	Mm.490319	NM_025380	ENSMUSG00000001707	Eef1e1	1110003A02Rik	eukaryotic translation elongation factor 1 epsilon 1	protein-coding
Diff_Nuc55441	chr3	116666202	116666341	+	0	NA	intron (NM_023245, intron 1 of 7)	intron (NM_023245, intron 1 of 7)	-4914	NR_040596	74654	Mm.410820	NR_040596	ENSMUSG00000080907	4930455H04Rik	-	RIKEN cDNA 4930455H04 gene	ncRNA
Diff_Nuc7299	chr12	80634912	80635051	+	0	NA	intron (NM_009014, intron 7 of 10)	intron (NM_009014, intron 7 of 10)	236643	NM_001252562	19363	Mm.341756	NM_009014	ENSMUSG00000059060	Rad51b	AI553500|R51H2|Rad51l1|mREC2	RAD51 paralog B	protein-coding
Diff_Nuc25659	chr14	11007282	11007421	+	0	NA	intron (NM_010210, intron 4 of 8)	MLT1J2|LTR|MaLR	278621	NM_001308286	14198	Mm.397619	NM_010210	ENSMUSG00000060579	Fhit	AW045638|Fra14A2	fragile histidine triad gene	protein-coding
Diff_Nuc17868	chr17	59845952	59846091	+	0	NA	Intergenic	Intergenic	-693276	NM_026497	67993	Mm.36507	NM_026497	ENSMUSG00000024228	Nudt12	0610016O18Rik	nudix (nucleoside diphosphate linked moiety X)-type motif 12	protein-coding
Diff_Nuc64771	chr1	60310322	60310461	+	0	NA	intron (NM_173444, intron 23 of 54)	intron (NM_173444, intron 23 of 54)	72948	NM_173444	269198	Mm.205224	NM_173444	ENSMUSG00000073664	Nbeal1	2310076G13Rik|A530050O19Rik|A530083I02Rik|AI662228|ALS2CR17	neurobeachin like 1	protein-coding
Diff_Nuc18668	chr17	83041622	83041761	+	0	NA	Intergenic	Lx5|LINE|L1	435874	NR_045094	100503434	Mm.187281	NR_045094		Gm19689	-	predicted gene, 19689	ncRNA
Diff_Nuc74167	chr8	42583547	42583686	+	0	NA	Intergenic	RLTR41|LTR|ERV1	-81144	NM_013522	14300	Mm.217312	NM_013522	ENSMUSG00000031590	Frg1	-	FSHD region gene 1	protein-coding
Diff_Nuc29222	chr14	119333592	119333731	+	0	NA	Intergenic	Intergenic	-3493	NM_008929	100037258	Mm.12616	NM_008929	ENSMUSG00000022136	Dnajc3	AA408985|AU067833|Dnajc3a|Dnajc3b|Prkri|mp58|p58|p58IPK	DnaJ heat shock protein family (Hsp40) member C3	protein-coding
Diff_Nuc2411	chr13	43964892	43965031	+	0	NA	Intergenic	RMER12|LTR|ERVK	84480	NM_001289915	12522	Mm.57175	NM_009856	ENSMUSG00000015396	Cd83	-	CD83 antigen	protein-coding
Diff_Nuc54484	chr3	87293982	87294121	+	0	NA	intron (NM_001113238, intron 11 of 11)	L1M2|LINE|L1	-35449	NM_001083318	27049	Mm.219460	NM_012051	ENSMUSG00000003382	Etv3	AI414410|METS|Pe1	ets variant 3	protein-coding
Diff_Nuc40990	chr6	94374532	94374671	+	0	NA	Intergenic	ORR1E|LTR|MaLR	-75707	NM_026255	67582	Mm.280725	NM_026255	ENSMUSG00000045100	Slc25a26	4930433D19Rik|4933433F13Rik|AW557176|D6Bwg0781e|Slc25a6	solute carrier family 25 (mitochondrial carrier, phosphate carrier), member 26	protein-coding
Diff_Nuc23361	chr15	30315022	30315161	+	0	NA	intron (NM_008729, intron 2 of 22)	RLTR11A2|LTR|ERVK	212743	NM_008729	18163	Mm.321648	NM_008729	ENSMUSG00000022240	Ctnnd2	Catnd2|Nprap|neurojugin	catenin (cadherin associated protein), delta 2	protein-coding
Diff_Nuc64345	chr1	48662412	48662551	+	0	NA	Intergenic	Intergenic	-1138512	NR_105768	102466969		NR_105768	ENSMUSG00000098876	Mir6350	Gm27958|mmu-mir-6350	microRNA 6350	ncRNA
Diff_Nuc15657	chr10	109800402	109800541	+	0	NA	Intergenic	Intergenic	-237235	NR_028438	109335	Mm.367727	NR_028438		9230102K24Rik	-	RIKEN cDNA 9230102K24 gene	ncRNA
Diff_Nuc49931	chr4	91394112	91394251	+	0	NA	Intergenic	Lx8|LINE|L1	-327506	NM_207685	15569	Mm.318042	NM_010486	ENSMUSG00000008489	Elavl2	Hub|mel-N1	ELAV (embryonic lethal, abnormal vision, Drosophila)-like 2 (Hu antigen B)	protein-coding
Diff_Nuc46892	chr5	145894762	145894901	+	0	NA	intron (NM_001033313, intron 3 of 5)	intron (NM_001033313, intron 3 of 5)	6127	NM_001033313	231887	Mm.188851	NM_001033313	ENSMUSG00000029623	Pdap1	HASPP28|PAP|PAP1	PDGFA associated protein 1	protein-coding
Diff_Nuc33326	chr18	67294332	67294471	+	0	NA	intron (NM_010307, intron 2 of 11)	MER2|DNA|MER2_type	1187	NM_010307	14680	Mm.440746	NM_010307	ENSMUSG00000024524	Gnal	2610011C15Rik|9630020G10Rik|Galphaolf|Gna10|Golf	guanine nucleotide binding protein, alpha stimulating, olfactory type	protein-coding
Diff_Nuc70631	chr9	47371482	47371621	+	0	NA	intron (NM_207676, intron 1 of 9)	intron (NM_207676, intron 1 of 9)	33116	NM_018770	54725	Mm.234832	NM_018770	ENSMUSG00000032076	Cadm1	2900073G06Rik|3100001I08Rik|AI987920|Bl2|Igsf4|Igsf4a|Necl2|RA175|RA175A|RA175B|RA175C|RA175N|ST17|SgIGSF|SynCam|Tslc1	cell adhesion molecule 1	protein-coding
Diff_Nuc49432	chr4	76393342	76393481	+	0	NA	intron (NM_011211, intron 9 of 39)	intron (NM_011211, intron 9 of 39)	1464388	NM_011211	19266	Mm.184021	NM_011211	ENSMUSG00000028399	Ptprd	1110002J03Rik|3000002J10Rik|B230219D21Rik|R-PTP-delta	protein tyrosine phosphatase, receptor type, D	protein-coding
Diff_Nuc22324	chr16	97708252	97708391	+	0	NA	intron (NM_020622, intron 2 of 7)	L1MA8|LINE|L1	18222	NM_020622	52793	Mm.327932	NM_020622	ENSMUSG00000022938	Fam3b	2-21|9030624C24Rik|D16Jhu19e|ORF9|Pander	family with sequence similarity 3, member B	protein-coding
Diff_Nuc63113	chr1	12951982	12952121	+	0	NA	intron (NM_172841, intron 1 of 8)	intron (NM_172841, intron 1 of 8)	29165	NM_172841	240726	Mm.24481	NM_172841	ENSMUSG00000025938	Slco5a1	4732454B15|A630033C23Rik|AA407151	solute carrier organic anion transporter family, member 5A1	protein-coding
Diff_Nuc13040	chr10	32446652	32446791	+	0	NA	intron (NM_001025286, intron 1 of 3)	intron (NM_001025286, intron 1 of 3)	163000	NM_001013411	432450	Mm.49665	NM_001013411	ENSMUSG00000069670	Nkain2	6330571D19Rik|AW455467|Tcba1	Na+/K+ transporting ATPase interacting 2	protein-coding
Diff_Nuc58093	chr2	41460872	41461011	+	0	NA	intron (NM_053011, intron 7 of 90)	intron (NM_053011, intron 7 of 90)	842147	NR_105754	102465171		NR_105754	ENSMUSG00000098660	Mir6336	Gm27584|mmu-mir-6336	microRNA 6336	ncRNA
Diff_Nuc40446	chr6	75472332	75472471	+	0	NA	Intergenic	RMER1B|Other|Other	-1720310	NM_028880	74342	Mm.292568	NM_028880	ENSMUSG00000060780	Lrrtm1	4632401D06Rik|AW125451	leucine rich repeat transmembrane neuronal 1	protein-coding
Diff_Nuc39496	chr6	46393812	46393951	+	0	NA	intron (NM_001004357, intron 12 of 23)	L1Md_F|LINE|L1	-800514	NM_025771	66797	Mm.440084	NM_025771	ENSMUSG00000039419	Cntnap2	5430425M22Rik|Caspr2|mKIAA0868	contactin associated protein-like 2	protein-coding
Diff_Nuc7828	chr12	96530822	96530961	+	0	NA	Intergenic	RMER19C|LTR|ERVK	-399545	NM_201518	399558	Mm.341948	NM_201518	ENSMUSG00000047414	Flrt2	-	fibronectin leucine rich transmembrane protein 2	protein-coding
Diff_Nuc26098	chr14	24640012	24640151	+	0	NA	intron (NM_001253376, intron 1 of 26)	intron (NM_001253376, intron 1 of 26)	183346	NM_001253375	16531	Mm.343607	NM_010610	ENSMUSG00000063142	Kcnma1	5730414M22Rik|BKCa|MaxiK|Slo|Slo1|mSlo|mSlo1	potassium large conductance calcium-activated channel, subfamily M, alpha member 1	protein-coding
Diff_Nuc6115	chr12	48997322	48997461	+	0	NA	Intergenic	Intergenic	-1077629	NM_021361	664883	Mm.247195	NM_021361	ENSMUSG00000021047	Nova1	9430099M15Rik|G630039L02|Nova-1	neuro-oncological ventral antigen 1	protein-coding
Diff_Nuc7163	chr12	76845992	76846131	+	0	NA	Intergenic	Intergenic	-9345	NM_030750	81535	Mm.280199	NM_030750	ENSMUSG00000021054	Sgpp1	AI463453|SPP|SPP1|Spph1	sphingosine-1-phosphate phosphatase 1	protein-coding
Diff_Nuc53222	chr3	51077722	51077861	+	0	NA	intron (NM_023502, intron 4 of 9)	intron (NM_023502, intron 4 of 9)	-2892	NR_073429	67746	Mm.441177	NR_073429	ENSMUSG00000087440	4930577N17Rik	-	RIKEN cDNA 4930577N17 gene	ncRNA
Diff_Nuc24702	chr15	69362372	69362511	+	0	NA	Intergenic	Intergenic	261478	NR_130983	75076		NR_130983		4930504C09Rik	-	RIKEN cDNA 4930504C09 gene	ncRNA
Diff_Nuc70990	chr9	59294252	59294391	+	0	NA	intron (NM_019927, intron 2 of 13)	intron (NM_019927, intron 2 of 13)	35227	NR_045640	100504377	Mm.446631	NR_045640		Gm20199	-	predicted gene, 20199	ncRNA
Diff_Nuc61723	chr2	140170432	140170571	+	0	NA	intron (NM_001033296, intron 1 of 19)	L1_Mus1|LINE|L1	44945	NM_001033296	228684	Mm.486585	NM_001033296	ENSMUSG00000074764	Sel1l2	Gm118	sel-1 suppressor of lin-12-like 2 (C. elegans)	protein-coding
Diff_Nuc23876	chr15	45215222	45215361	+	0	NA	Intergenic	Intergenic	-268811	NM_026200	67498	Mm.300079	NM_026200	ENSMUSG00000022342	Kcnv1	2700023A03Rik|vibe	potassium channel, subfamily V, member 1	protein-coding
Diff_Nuc55772	chr3	126581372	126581511	+	0	NA	Intergenic	RLTR22_Mur|LTR|ERVK	64863	NM_001034168	109676	Mm.220242	NM_178655	ENSMUSG00000032826	Ank2	100043364|AI835472|AW491075|Ank-2|Gm4392	ankyrin 2, brain	protein-coding
Diff_Nuc7840	chr12	96787682	96787821	+	0	NA	Intergenic	Intergenic	-142685	NM_201518	399558	Mm.341948	NM_201518	ENSMUSG00000047414	Flrt2	-	fibronectin leucine rich transmembrane protein 2	protein-coding
Diff_Nuc44032	chr5	46979372	46979511	+	0	NA	Intergenic	Intergenic	-655793	NR_110478	78106	Mm.243807	NR_110478	ENSMUSG00000106602	4930405L22Rik	-	RIKEN cDNA 4930405L22 gene	ncRNA
Diff_Nuc50089	chr4	95284092	95284231	+	0	NA	intron (NM_001113412, intron 4 of 15)	intron (NM_001113412, intron 4 of 15)	38049	NM_029347	75578	Mm.276098	NM_029347	ENSMUSG00000028573	Fggy	2310009E04Rik	FGGY carbohydrate kinase domain containing	protein-coding
Diff_Nuc47120	chr4	5128852	5128991	+	0	NA	Intergenic	L1_Mus2|LINE|L1	-408468	NM_177730	242291	Mm.218889	NM_177730	ENSMUSG00000066324	Impad1	1110001C20Rik|AA408880|AI451589|AL022796|B230207P20|Jaws|gPAPP	inositol monophosphatase domain containing 1	protein-coding
Diff_Nuc38150	chr6	11131082	11131221	+	0	NA	Intergenic	L1Md_F|LINE|L1	-206773	NR_033776	57866	Mm.4397	NR_033776		AA545190	-	EST AA545190	ncRNA
Diff_Nuc510	chrX	84762542	84762681	+	0	NA	intron (NM_001160403, intron 2 of 10)	RMER6C|LTR|ERVK	598351	NM_001160403	331461	Mm.121680	NM_001160403	ENSMUSG00000052372	Il1rapl1	6330532G10Rik|C030039N24|IL1R8|IL1RAPL|MRX34|OPHN4|TIGIRR-2	interleukin 1 receptor accessory protein-like 1	protein-coding
Diff_Nuc61700	chr2	139748292	139748431	+	0	NA	intron (NR_110352, intron 9 of 12)	intron (NR_110352, intron 9 of 12)	144180	NM_001159640	75812	Mm.293449	NM_175225	ENSMUSG00000039033	Tasp1	4930485D02Rik|AW986064	taspase, threonine aspartase 1	protein-coding
Diff_Nuc45977	chr5	103932202	103932341	+	0	NA	intron (NM_011204, intron 7 of 47)	B3A|SINE|B2	78060	NM_011204	19249	Mm.3414	NM_011204	ENSMUSG00000034573	Ptpn13	AI324989|PTP-BL|PTPL1|Ptpri|RIP	protein tyrosine phosphatase, non-receptor type 13	protein-coding
Diff_Nuc31075	chr19	58683412	58683551	+	0	NA	intron (NR_038136, intron 1 of 2)	L1_Mus1|LINE|L1	2662	NR_038136	69055	Mm.396318	NR_038136	ENSMUSG00000100001	1810007D17Rik	-	RIKEN cDNA 1810007D17 gene	ncRNA
Diff_Nuc2963	chr13	65109642	65109781	+	0	NA	Intergenic	MLT2B2|LTR|ERVL	-24655	NM_001083890	238683	Mm.295543	NM_001083890	ENSMUSG00000074849	Spata31d1c	4932441B19Rik|Fam75d1c	spermatogenesis associated 31 subfamily D, member 1C	protein-coding
Diff_Nuc76911	chr8	131117592	131117731	+	0	NA	Intergenic	Intergenic	-91893	NM_010578	16412	Mm.263396	NM_010578	ENSMUSG00000025809	Itgb1	4633401G24Rik|AA409975|AA960159|CD29|ENSMUSG00000051907|Fnrb|Gm9863|gpIIa	integrin beta 1 (fibronectin receptor beta)	protein-coding
Diff_Nuc59966	chr2	92169182	92169321	+	0	NA	intron (NM_001346704, intron 9 of 18)	intron (NM_001346704, intron 9 of 18)	41963	NM_001290774	228366	Mm.31158	NM_172670	ENSMUSG00000040434	Large2	5730485C17Rik|AI891893|Gyltl1b|Largel|mKIAA4105	LARGE xylosyl- and glucuronyltransferase 2	protein-coding
Diff_Nuc74399	chr8	48501952	48502091	+	0	NA	Intergenic	L1MC4|LINE|L1	-64319	NM_175162	71069	Mm.23973	NM_175162	ENSMUSG00000038143	Stox2	4933409N07Rik|AI449080|AI835114|mKIAA1392	storkhead box 2	protein-coding
Diff_Nuc40754	chr6	84978942	84979081	+	0	NA	intron (NM_177077, intron 1 of 21)	MIR|SINE|MIR	40496	NM_177077	75914	Mm.159621	NM_177077	ENSMUSG00000033769	Exoc6b	4930569O18Rik|G430127E12Rik|Sec15b|Sec15l2|mKIAA0919	exocyst complex component 6B	protein-coding
Diff_Nuc26284	chr14	30974512	30974651	+	0	NA	intron (NM_028981, intron 8 of 46)	intron (NM_028981, intron 8 of 46)	138762	NM_175343	218865	Mm.259916	NM_172264	ENSMUSG00000015970	Chdh	AU041472|D630034H06Rik	choline dehydrogenase	protein-coding
Diff_Nuc12146	chr10	8536552	8536691	+	0	NA	intron (NM_175155, intron 2 of 19)	intron (NM_175155, intron 2 of 19)	69247	NM_175155	70097	Mm.338275	NM_175155	ENSMUSG00000015305	Sash1	1100001C18Rik|2500002E12Rik|A330076K04Rik|mKIAA0790	SAM and SH3 domain containing 1	protein-coding
Diff_Nuc24327	chr15	57073422	57073561	+	0	NA	Intergenic	MYSERV-int|LTR|ERVK	235689	NM_172378	210463	Mm.26555	NM_172378	ENSMUSG00000022366	Slc22a22	oat-pg	solute carrier family 22 (organic cation transporter), member 22	protein-coding
Diff_Nuc44441	chr5	58334852	58334991	+	0	NA	intron (NM_001310608, intron 3 of 3)	intron (NM_001310608, intron 3 of 3)	225601	NM_018764	54216	Mm.332387	NM_018764	ENSMUSG00000029108	Pcdh7	-	protocadherin 7	protein-coding
Diff_Nuc33137	chr18	59858162	59858301	+	0	NA	Intergenic	Intergenic	118947	NR_105773	102465182		NR_105773	ENSMUSG00000098287	Mir6355	Gm27473|mmu-mir-6355	microRNA 6355	ncRNA
Diff_Nuc12066	chr10	5877682	5877821	+	0	NA	Intergenic	Intergenic	36185	NM_024261	73419	Mm.346733	NM_024261	ENSMUSG00000061759	Armt1	1700052N19Rik|AW320013|AW536799	acidic residue methyltransferase 1	protein-coding
Diff_Nuc21306	chr16	68942662	68942801	+	0	NA	Intergenic	Lx3C|LINE|L1	857895	NR_130991	78110	Mm.211406	NR_130991	ENSMUSG00000107073	4930428D20Rik	-	RIKEN cDNA 4930428D20 gene	ncRNA
Diff_Nuc32201	chr18	33611642	33611781	+	0	NA	intron (NM_001267717, intron 3 of 4)	intron (NM_001267717, intron 3 of 4)	11577	NM_001267717	27528	Mm.407415	NM_053078	ENSMUSG00000042834	Nrep	AI325076|D0H4S114|Harp|P311|PTZ17|SEZ17	neuronal regeneration related protein	protein-coding
Diff_Nuc11605	chr11	106585742	106585881	+	0	NA	Intergenic	RLTR11B|LTR|ERVK	-9216	NM_001305157	18613	Mm.343951	NM_008816	ENSMUSG00000020717	Pecam1	C85791|Cd31|PECAM-1|Pecam	platelet/endothelial cell adhesion molecule 1	protein-coding
Diff_Nuc41965	chr6	127795912	127796051	+	0	NA	Intergenic	MTE2b|LTR|MaLR	-41659	NM_026743	68498	Mm.174368	NM_026743	ENSMUSG00000030351	Tspan11	1110014F12Rik|AU067806	tetraspanin 11	protein-coding
Diff_Nuc15556	chr10	107768262	107768401	+	0	NA	promoter-TSS (NM_054056)	promoter-TSS (NM_054056)	-914	NM_054056	114774	Mm.391419	NM_054056	ENSMUSG00000035873	Pawr	2310001G03Rik|PAR4|Par-4	PRKC, apoptosis, WT1, regulator	protein-coding
Diff_Nuc30238	chr19	31005492	31005631	+	0	NA	promoter-TSS (NR_033643)	promoter-TSS (NR_033643)	-109	NR_033643	625995	Mm.454508	NR_033643		Gm6642	EG625995	ubiquitin-like 5 pseudogene	pseudo
Diff_Nuc17675	chr17	53231412	53231551	+	0	NA	Intergenic	Lx4B|LINE|L1	-110151	NM_001031811	211468	Mm.399068	NM_001031811	ENSMUSG00000035580	Kcnh8	C130090D05Rik|ELK|ELK1|ELK3|Kv12.1	potassium voltage-gated channel, subfamily H (eag-related), member 8	protein-coding
Diff_Nuc76203	chr8	103007912	103008051	+	0	NA	Intergenic	Intergenic	1067407	NR_132435	234624	Mm.124595	NM_175479	ENSMUSG00000052479	A330008L17Rik	-	RIKEN cDNA A330008L17 gene	ncRNA
Diff_Nuc73933	chr8	36732542	36732681	+	0	NA	intron (NM_001081279, intron 2 of 2)	Lx8|LINE|L1	-80537	NR_040376	100504714	Mm.381744	NR_040376	ENSMUSG00000097357	Gm16793	-	predicted gene, 16793	ncRNA
Diff_Nuc45914	chr5	101680892	101681031	+	0	NA	Intergenic	L1MEf|LINE|L1	405713	NM_172715	231510	Mm.271911	NM_172715	ENSMUSG00000029314	Agpat9	1-AGPAT|1-AGPAT 9|4933407I02Rik|4933408F15|A230097K15Rik|GPAT-3|Gpat3|mGPAT3	1-acylglycerol-3-phosphate O-acyltransferase 9	protein-coding
Diff_Nuc48919	chr4	61502502	61502641	+	0	NA	Intergenic	RMER16-int|LTR|ERVK	-6357	NM_008649	17844	Mm.445286	NM_008649	ENSMUSG00000058523	Mup5	Mup18	major urinary protein 5	protein-coding
Diff_Nuc32114	chr18	31358052	31358191	+	0	NA	intron (NM_009065, intron 3 of 4)	Lx2A1|LINE|L1	118661	NM_009065	19762	Mm.5163	NM_009065	ENSMUSG00000057455	Rit2	RIBA|Rin|Roc2	Ras-like without CAAX 2	protein-coding
Diff_Nuc6391	chr12	56406682	56406821	+	0	NA	intron (NM_025373, intron 1 of 6)	intron (NM_025373, intron 1 of 6)	-2764	NM_021529	59032	Mm.427307	NM_021529	ENSMUSG00000021022	Ppp2r3c	4930511A21Rik|5730412A08Rik|G4-1|G5pr	protein phosphatase 2, regulatory subunit B'', gamma	protein-coding
Diff_Nuc67855	chr1	154823322	154823461	+	0	NA	intron (NM_175460, intron 1 of 10)	LTRIS2|LTR|ERV1	21160	NM_175460	226518	Mm.40548	NM_175460	ENSMUSG00000042751	Nmnat2	AI843915|D030041I09Rik|PNAT1|PNAT2	nicotinamide nucleotide adenylyltransferase 2	protein-coding
Diff_Nuc70999	chr9	59405552	59405691	+	0	NA	intron (NM_010421, intron 5 of 13)	intron (NM_010421, intron 5 of 13)	18274	NM_010421	15211	Mm.2284	NM_010421	ENSMUSG00000025232	Hexa	Hex-1	hexosaminidase A	protein-coding
Diff_Nuc62250	chr2	155981902	155982041	+	0	NA	intron (NM_133242, intron 12 of 16)	intron (NM_133242, intron 12 of 16)	12002	NM_025946	67067	Mm.371623	NM_025946	ENSMUSG00000067847	Romo1	2010100O12Rik|AI853864	reactive oxygen species modulator 1	protein-coding
Diff_Nuc51866	chr3	11964152	11964291	+	0	NA	Intergenic	Intergenic	-119862	NR_040751	100038545	Mm.388494	NR_040751	ENSMUSG00000104015	Gm10745	ENSMUSG00000074696	predicted gene 10745	ncRNA
Diff_Nuc31735	chr18	22042892	22043031	+	0	NA	intron (NM_027616, intron 21 of 22)	intron (NM_027616, intron 21 of 22)	-232092	NM_001081403	225266	Mm.436836	NM_001081403	ENSMUSG00000042514	Klhl14	6330403N15Rik|AI785250|printor	kelch-like 14	protein-coding
Diff_Nuc26901	chr14	52073972	52074111	+	0	NA	intron (NR_104384, intron 1 of 2)	intron (NR_104384, intron 1 of 2)	2404	NM_009486	22301	Mm.482572	NM_009486	ENSMUSG00000070448	Vmn2r89	V2r10|V2r11	vomeronasal 2, receptor 89	protein-coding
Diff_Nuc14677	chr10	84378402	84378541	+	0	NA	Intergenic	Intergenic	-1887	NM_001013441	237422	Mm.18936	NM_183172	ENSMUSG00000035620	Ric8b	BC051080|Ric-8|Ric-8b	RIC8 guanine nucleotide exchange factor B	protein-coding
Diff_Nuc60786	chr2	113797412	113797551	+	0	NA	Intergenic	RMER19B|LTR|ERVK	-41820	NR_028423	320846	Mm.441458	NR_028423	ENSMUSG00000087694	A530058N18Rik	-	RIKEN cDNA A530058N18 gene	ncRNA
Diff_Nuc65803	chr1	93149972	93150111	+	0	NA	intron (NM_026454, intron 1 of 9)	intron (NM_026454, intron 1 of 9)	3145	NM_026454	67921	Mm.337238	NM_026454	ENSMUSG00000034343	Ube2f	2510010F15Rik|AI851109	ubiquitin-conjugating enzyme E2F (putative)	protein-coding
Diff_Nuc15481	chr10	106090142	106090281	+	0	NA	intron (NM_177373, intron 3 of 31)	intron (NM_177373, intron 3 of 31)	-50675	NR_131026	75833	Mm.159596	NR_131026		4930532I03Rik	-	RIKEN cDNA 4930532I03 gene	ncRNA
Diff_Nuc15932	chr10	118027042	118027181	+	0	NA	Intergenic	ORR1A2|LTR|MaLR	-33530	NR_104123	103214	Mm.30529	NR_104123		Tmevpg1	AI447422	Theiler's murine encephalomyelitis virus persistence candidate gene 1	ncRNA
Diff_Nuc57075	chr2	7724292	7724431	+	0	NA	Intergenic	Intergenic	-406536	NM_001110231	14007	Mm.398543	NM_010160	ENSMUSG00000002107	Celf2	B230218O03|B230345P09Rik|C88023|CELF-2|CUG-BP2|Cugbp2|D230046B21Rik|Etr-3|Napor|Napor-2|mETR-3	CUGBP, Elav-like family member 2	protein-coding
Diff_Nuc70788	chr9	52388242	52388381	+	0	NA	Intergenic	Intergenic	99231	NM_178906	330941	Mm.335160	NM_177907	ENSMUSG00000078307	AI593442	E130102D23	expressed sequence AI593442	protein-coding
Diff_Nuc4512	chr13	113422812	113422951	+	0	NA	intron (NM_010029, intron 5 of 20)	intron (NM_010029, intron 5 of 20)	19637	NM_010029	13206	Mm.12818	NM_010029	ENSMUSG00000021758	Ddx4	AV206478|Mvh|VASA	DEAD (Asp-Glu-Ala-Asp) box polypeptide 4	protein-coding
Diff_Nuc4062	chr13	100414982	100415121	+	0	NA	Intergenic	Intergenic	-128494	NM_008634	17755	Mm.4173	NM_008634	ENSMUSG00000052727	Map1b	A230055D22|AI843217|LC1|MAP5|Mtap-5|Mtap1b|Mtap5	microtubule-associated protein 1B	protein-coding
Diff_Nuc70734	chr9	50890802	50890941	+	0	NA	intron (NM_177702, intron 5 of 5)	intron (NM_177702, intron 5 of 5)	-5672	NM_001033534	244864	Mm.335152	NM_001033534	ENSMUSG00000060594	Layn	E030012M19Rik|Gm511	layilin	protein-coding
Diff_Nuc9822	chr11	42865132	42865271	+	0	NA	Intergenic	Intergenic	-98178	NM_176999	319767	Mm.252339	NM_176999	ENSMUSG00000055415	Atp10b	5930426O13Rik|9030605H24Rik	ATPase, class V, type 10B	protein-coding
Diff_Nuc62205	chr2	154943962	154944101	+	0	NA	Intergenic	Intergenic	-15186	NM_001243712	16396	Mm.208286	NM_008395	ENSMUSG00000027598	Itch	6720481N21Rik|8030492O04Rik|A130065M08|AIP4|C230047C07Rik	itchy, E3 ubiquitin protein ligase	protein-coding
Diff_Nuc70903	chr9	56638842	56638981	+	0	NA	Intergenic	Intergenic	60859	NM_198673	382075	Mm.335177	NM_198673	ENSMUSG00000045620	Odf3l1	BC049697|Gm1116	outer dense fiber of sperm tails 3-like 1	protein-coding
Diff_Nuc16918	chr17	22922842	22922981	+	0	NA	non-coding (NR_030709, exon 3 of 5)	non-coding (NR_030709, exon 3 of 5)	31803	NR_030709	100042679	Mm.484007	NR_030709		Gm16386	EG545191|ENSMUSG00000073442|Gm21017	zinc finger protein 946 pseudogene	pseudo
Diff_Nuc10473	chr11	67940272	67940411	+	0	NA	intron (NM_018768, intron 7 of 7)	intron (NM_018768, intron 7 of 7)	-94053	NR_105833	102465219		NR_105833	ENSMUSG00000099174	Mir6406	Gm27981|mmu-mir-6406	microRNA 6406	ncRNA
Diff_Nuc41627	chr6	113734992	113735131	+	0	NA	intron (NM_001347365, intron 13 of 23)	B1_Mus2|SINE|Alu	-44386	NM_024206	110379	Mm.29296	NM_024206	ENSMUSG00000030298	Sec13	1110003H02Rik|Sec13l1|Sec13r	SEC13 homolog, nuclear pore and COPII coat complex component	protein-coding
Diff_Nuc37748	chr7	145919222	145919361	+	0	NA	Intergenic	Intergenic	118659	NM_001045483	69546	Mm.31598	NM_027115	ENSMUSG00000041775	Mapk1ip1	2310009E07Rik|AU043776|MISS	mitogen-activated protein kinase 1 interacting protein 1	protein-coding
Diff_Nuc1574	chr13	18944912	18945051	+	0	NA	intron (NM_172120, intron 23 of 28)	intron (NM_172120, intron 23 of 28)	-95239	NM_175007	218038	Mm.101650	NM_175007	ENSMUSG00000021314	Amph	-	amphiphysin	protein-coding
Diff_Nuc70181	chr9	31967492	31967631	+	0	NA	intron (NM_001195632, intron 4 of 21)	intron (NM_001195632, intron 4 of 21)	43840	NM_001195632	330914	Mm.46683	NM_177379	ENSMUSG00000041444	Arhgap32	3426406O18Rik|Gc-gap|Grit|Px-rics|Rics|mKIAA0712|p200Rhogap|p250Gap	Rho GTPase activating protein 32	protein-coding
Diff_Nuc62157	chr2	153879632	153879771	+	0	NA	Intergenic	Intergenic	45689	NM_008953	19194	Mm.29197	NM_008953	ENSMUSG00000042459	Bpifa2	Bpifa2e|Psp	BPI fold containing family A, member 2	protein-coding
Diff_Nuc41885	chr6	124063042	124063181	+	0	NA	Intergenic	L1_Mus1|LINE|L1	88335	NM_019917	56552	Mm.23795	NM_019917	ENSMUSG00000096630	Vmn2r26	V2R1|V2r1b	vomeronasal 2, receptor 26	protein-coding
Diff_Nuc7695	chr12	92830372	92830511	+	0	NA	Intergenic	B1_Mus2|SINE|Alu	-1514	NM_175335	83602	Mm.275728	NM_031391	ENSMUSG00000020962	Gtf2a1	6330549H03Rik|AA536742|AA959775|AW060250|TfIIAa/b|Tfiia1	general transcription factor II A, 1	protein-coding
Diff_Nuc12900	chr10	29241842	29241981	+	0	NA	intron (NM_028351, intron 1 of 4)	intron (NM_028351, intron 1 of 4)	13762	NM_028351	72780	Mm.45191	NM_028351	ENSMUSG00000019880	Rspo3	2810459H04Rik|AW742308|Cristin1|Thsd2	R-spondin 3	protein-coding
Diff_Nuc48956	chr4	63103622	63103761	+	0	NA	intron (NM_001008792, intron 3 of 11)	RLTR13D3|LTR|ERVK	-39212	NM_001045514	100182	Mm.387725	NM_001045514	ENSMUSG00000039158	Akna	AI597013	AT-hook transcription factor	protein-coding
Diff_Nuc71240	chr9	67924212	67924351	+	0	NA	Intergenic	PB1D10|SINE|Alu	-50760	NR_045745	434412	Mm.490707	NR_045745	ENSMUSG00000111841	Gm20745	-	predicted gene, 20745	ncRNA
Diff_Nuc63978	chr1	37928747	37928886	+	0	NA	promoter-TSS (NM_001037918)	promoter-TSS (NM_001037918)	-235	NM_001037918	623661	Mm.138000	NM_001037918	ENSMUSG00000037216	Lipt1	EG623661	lipoyltransferase 1	protein-coding
Diff_Nuc11703	chr11	109834392	109834531	+	0	NA	intron (NM_013851, intron 9 of 38)	intron (NM_013851, intron 9 of 38)	22669	NM_013851	27404	Mm.341004	NM_013851	ENSMUSG00000020620	Abca8b	Abca8	ATP-binding cassette, sub-family A (ABC1), member 8b	protein-coding
Diff_Nuc49272	chr4	72358222	72358361	+	0	NA	Intergenic	MER121|Unknown|Unknown	155377	NM_001199270	353204	Mm.317892	NM_001199270	ENSMUSG00000059343	Aldoart1	4921524E03Rik|Aldo1-ps|Aldo1-ps2|Aldoa-ps2	aldolase 1 A, retrogene 1	protein-coding
Diff_Nuc38561	chr6	21713882	21714021	+	0	NA	Intergenic	L1MEc|LINE|L1	88564	NM_173007	269831	Mm.21950	NM_173007	ENSMUSG00000029669	Tspan12	9030619E17|AI426782|AI663988|AW111457|Tm4sf12	tetraspanin 12	protein-coding
Diff_Nuc1609	chr13	19842742	19842881	+	0	NA	3' UTR (NM_181754, exon 5 of 5)	3' UTR (NM_181754, exon 5 of 5)	-17991	NM_175688	319293	Mm.246657	NM_175688	ENSMUSG00000047462	A530099J19Rik	-	RIKEN cDNA A530099J19 gene	protein-coding
Diff_Nuc52006	chr3	17063462	17063601	+	0	NA	Intergenic	Intergenic	-626390	NR_033490	70441	Mm.458192	NR_033490	ENSMUSG00000100252	Mir124-2hg	100040120|2610100L16Rik|6430547I21Rik|A930005K07Rik|AW125202|Gm2612	Mir124-2 host gene (non-protein coding)	ncRNA
Diff_Nuc10748	chr11	77364412	77364551	+	0	NA	exon (NM_144825, exon 15 of 20)	exon (NM_144825, exon 15 of 20)	35862	NM_026185	67477	Mm.432526	NM_026185	ENSMUSG00000000686	Abhd15	1300007F04Rik	abhydrolase domain containing 15	protein-coding
Diff_Nuc25097	chr15	86830562	86830701	+	0	NA	Intergenic	Intergenic	-544098	NM_001252310	106014	Mm.244319	NM_134096	ENSMUSG00000054863	Fam19a5	TAFA5|Tafa-5|Tara-5	family with sequence similarity 19, member A5	protein-coding
Diff_Nuc21894	chr16	83003182	83003321	+	0	NA	Intergenic	Intergenic	-1368137	NR_040567	75247	Mm.417813	NR_040567		4930553E22Rik	-	RIKEN cDNA 4930553E22 gene	ncRNA
Diff_Nuc29116	chr14	115816722	115816861	+	0	NA	intron (NM_175500, intron 4 of 7)	intron (NM_175500, intron 4 of 7)	-8017	NR_045761	75088	Mm.444706	NR_045761	ENSMUSG00000093551	4930505G20Rik	-	RIKEN cDNA 4930505G20 gene	ncRNA
Diff_Nuc6278	chr12	53266752	53266891	+	0	NA	intron (NM_029760, intron 4 of 10)	L1MA8|LINE|L1	68088	NM_029760	76826	Mm.244781	NM_029760	ENSMUSG00000035142	Nubpl	2410170E07Rik	nucleotide binding protein-like	protein-coding
Diff_Nuc4799	chr12	4895002	4895141	+	0	NA	intron (NM_145441, intron 4 of 6)	Lx4B|LINE|L1	-13906	NM_001033488	432628	Mm.154078	NM_001033488	ENSMUSG00000037336	Mfsd2b	Gm1964	major facilitator superfamily domain containing 2B	protein-coding
Diff_Nuc55306	chr3	112888312	112888451	+	0	NA	Intergenic	Intergenic	71264	NM_001190404	545562	Mm.462977	NM_001190403		Amy2b	Amy-X|Amy2-2|OTTMUSG00000022462|mAmy2-1	amylase 2b	protein-coding
Diff_Nuc3204	chr13	75272492	75272631	+	0	NA	Intergenic	Intergenic	45126	NM_013628	18548	Mm.1333	NM_013628	ENSMUSG00000021587	Pcsk1	Nec-1|Nec1|PC1|PC3|Phpp-1|SPC3	proprotein convertase subtilisin/kexin type 1	protein-coding
Diff_Nuc40486	chr6	76833202	76833341	+	0	NA	intron (NM_145732, intron 18 of 18)	intron (NM_145732, intron 18 of 18)	-359440	NM_028880	74342	Mm.292568	NM_028880	ENSMUSG00000060780	Lrrtm1	4632401D06Rik|AW125451	leucine rich repeat transmembrane neuronal 1	protein-coding
Diff_Nuc61627	chr2	137789832	137789971	+	0	NA	Intergenic	Intergenic	-292419	NM_001025431	228662	Mm.153405	NM_145534	ENSMUSG00000062098	Btbd3	mKIAA0952	BTB (POZ) domain containing 3	protein-coding
Diff_Nuc12992	chr10	31452522	31452661	+	0	NA	intron (NM_001013411, intron 5 of 6)	L1_Mus2|LINE|L1	-123060	NM_001146349	268291	Mm.295212	NM_001146349	ENSMUSG00000063760	Rnf217	AU016819|Ibrdc1	ring finger protein 217	protein-coding
Diff_Nuc73895	chr8	34840572	34840711	+	0	NA	Intergenic	ORR1A2|LTR|MaLR	-1745	NM_001167921	68153	Mm.286104	NM_026584	ENSMUSG00000031585	Gtf2e2	34kDa|AI462509|C330006J08Rik	general transcription factor II E, polypeptide 2 (beta subunit)	protein-coding
Diff_Nuc53664	chr3	64861852	64861991	+	0	NA	Intergenic	L1_Mur3|LINE|L1	-51369	NM_010597	16497	Mm.316402	NM_010597	ENSMUSG00000027827	Kcnab1	Akr8a8|Kvbeta1.1|mKv(beta)1	potassium voltage-gated channel, shaker-related subfamily, beta member 1	protein-coding
Diff_Nuc72921	chr9	120342352	120342491	+	0	NA	intron (NM_144557, intron 10 of 16)	B4|SINE|B4	-59303	NM_026892	68969	Mm.28753	NM_026892	ENSMUSG00000006941	Eif1b	1500010M16Rik|3110001N14Rik|Gc20	eukaryotic translation initiation factor 1B	protein-coding
Diff_Nuc4984	chr12	10148862	10149001	+	0	NA	Intergenic	Lx7|LINE|L1	-227846	NM_027588	70881	Mm.272843	NM_027588	ENSMUSG00000020622	Nt5c1b	4921514H13Rik|AIRP|CN-IB|cN1B	5'-nucleotidase, cytosolic IB	protein-coding
Diff_Nuc4605	chr13	116564062	116564201	+	0	NA	Intergenic	Lx3_Mus|LINE|L1	535765	NM_021459	16392	Mm.42242	NM_021459	ENSMUSG00000042258	Isl1	-	ISL1 transcription factor, LIM/homeodomain	protein-coding
Diff_Nuc56107	chr3	137166072	137166211	+	0	NA	Intergenic	L1Md_F2|LINE|L1	49445	NM_177665	229862	Mm.246591	NM_177665	ENSMUSG00000055138	Gm4861	9230109N16|EG229862	predicted gene 4861	protein-coding
Diff_Nuc70383	chr9	38043472	38043611	+	0	NA	Intergenic	MYSERV16_I-int|LTR|ERVK	17138	NM_146868	258868	Mm.377728	NM_146868	ENSMUSG00000070311	Olfr894	MOR170-5	olfactory receptor 894	protein-coding
Diff_Nuc60212	chr2	98499882	98500021	+	0	NA	Intergenic	L1_Mm|LINE|L1	1192137	NM_178725	241568	Mm.241682	NM_178725	ENSMUSG00000050587	Lrrc4c	6430556C10Rik|NGL-1	leucine rich repeat containing 4C	protein-coding
Diff_Nuc38522	chr6	20882542	20882681	+	0	NA	Intergenic	Lx3B|LINE|L1	-283498	NM_019697	16508	Mm.425316	NM_019697	ENSMUSG00000060882	Kcnd2	AI839615|AW555701|Kv4.2|R75121|mKIAA1044	potassium voltage-gated channel, Shal-related family, member 2	protein-coding
Diff_Nuc32658	chr18	46911302	46911441	+	0	NA	intron (NM_009681, intron 1 of 5)	HAL1|LINE|L1	9841	NM_001303015	11777	Mm.312536	NM_009681	ENSMUSG00000024480	Ap3s1	-	adaptor-related protein complex 3, sigma 1 subunit	protein-coding
Diff_Nuc76289	chr8	105100842	105100981	+	0	NA	Intergenic	Intergenic	208100	NM_009866	12552	Mm.1571	NM_009866	ENSMUSG00000031673	Cdh11	Cad11|OSF-4	cadherin 11	protein-coding
Diff_Nuc63540	chr1	24870822	24870961	+	0	NA	Intergenic	ORR1C2|LTR|MaLR	185134	NM_001310483	68421	Mm.336563	NM_026719	ENSMUSG00000073725	Lmbrd1	0910001K20Rik|AV347960	LMBR1 domain containing 1	protein-coding
Diff_Nuc70597	chr9	45877532	45877671	+	0	NA	intron (NM_027498, intron 1 of 24)	intron (NM_027498, intron 1 of 24)	56698	NM_027498	70661	Mm.219459	NM_027498	ENSMUSG00000034135	Sik3	5730525O22Rik|9030204A07Rik|AI447252|AI846254|AI849445|Qsk|SIK-3|mKIAA0999	SIK family kinase 3	protein-coding
Diff_Nuc33640	chr18	75400762	75400901	+	0	NA	intron (NM_027727, intron 15 of 16)	intron (NM_027727, intron 15 of 16)	56140	NR_045394	100503117	Mm.250517	NR_045393	ENSMUSG00000102047	2010010A06Rik	5033420E22Rik	RIKEN cDNA 2010010A06 gene	ncRNA
Diff_Nuc37267	chr7	127622862	127623001	+	0	NA	intron (NM_001278944, intron 14 of 29)	intron (NM_001278944, intron 14 of 29)	57716	NM_001278944	233810		NM_001278943	ENSMUSG00000051900	Abca16	AY243472	ATP-binding cassette, sub-family A (ABC1), member 16	protein-coding
Diff_Nuc73615	chr8	25526782	25526921	+	0	NA	Intergenic	Intergenic	22567	NM_026931	69068	Mm.25775	NM_026931	ENSMUSG00000056313	1810011O10Rik	1110065B09Rik|AW121743|AW321058	RIKEN cDNA 1810011O10 gene	protein-coding
Diff_Nuc58620	chr2	53912562	53912701	+	0	NA	Intergenic	Intergenic	25332	NM_023396	67874	Mm.27086	NM_023396	ENSMUSG00000075334	Rprm	2410012A13Rik|Reprimo	reprimo, TP53 dependent G2 arrest mediator candidate	protein-coding
Diff_Nuc41834	chr6	121361962	121362101	+	0	NA	intron (NR_110358, intron 3 of 13)	intron (NR_110358, intron 3 of 13)	61665	NM_001033354	243621	Mm.299442	NM_001033354	ENSMUSG00000040797	Iqsec3	AK122446|BRAG3|mKIAA1110|synarfGEF	IQ motif and Sec7 domain 3	protein-coding
Diff_Nuc34875	chr7	48844932	48845071	+	0	NA	Intergenic	Intergenic	-43900	NM_023363	67607	Mm.384626	NM_023363	ENSMUSG00000074165	Zfp788	2810426N06Rik|AI256342|AI605193	zinc finger protein 788	protein-coding
Diff_Nuc50211	chr4	98686192	98686331	+	0	NA	intron (NM_026082, intron 16 of 47)	intron (NM_026082, intron 16 of 47)	-11384	NM_013913	30924	Mm.28341	NM_013913	ENSMUSG00000028553	Angptl3	hypl	angiopoietin-like 3	protein-coding
Diff_Nuc51516	chr4	151159142	151159281	+	0	NA	intron (NM_001081557, intron 3 of 23)	intron (NM_001081557, intron 3 of 23)	76666	NM_001081557	100072	Mm.318846	NM_001081557	ENSMUSG00000014592	Camta1	1810059M14Rik|2310058O09Rik|AI316882|AW987475|mKIAA0833	calmodulin binding transcription activator 1	protein-coding
Diff_Nuc8496	chr11	3089342	3089481	+	0	NA	intron (NM_030207, intron 1 of 32)	MTC|LTR|MaLR	4055	NM_030207	78887	Mm.394071	NM_030207	ENSMUSG00000023764	Sfi1	-	Sfi1 homolog, spindle assembly associated (yeast)	protein-coding
Diff_Nuc64552	chr1	54154072	54154211	+	0	NA	intron (NM_001001883, intron 1 of 28)	intron (NM_001001883, intron 1 of 28)	97737	NM_001001883	329152	Mm.132150	NM_172655	ENSMUSG00000042807	Hecw2	A730039N16Rik|D030049F17Rik|Gm971|Nedl2|mKIAA1301	HECT, C2 and WW domain containing E3 ubiquitin protein ligase 2	protein-coding
Diff_Nuc76699	chr8	119493422	119493561	+	0	NA	TTS (NM_027103)	TTS (NM_027103)	9352	NM_027103	69528	Mm.272846	NM_027103	ENSMUSG00000031847	1700030J22Rik	-	RIKEN cDNA 1700030J22 gene	protein-coding
Diff_Nuc70074	chr9	28792592	28792731	+	0	NA	Intergenic	Intergenic	978053	NM_172290	235106	Mm.283138	NM_172290	ENSMUSG00000059974	Ntm	6230410L23Rik|B230210G24Rik|Hnt|Igdcc2|R75390	neurotrimin	protein-coding
Diff_Nuc27364	chr14	68109612	68109751	+	0	NA	Intergenic	B3A|SINE|B2	-93102	NR_045961	73977	Mm.414915	NR_045961	ENSMUSG00000093472	4930438E09Rik	-	RIKEN cDNA 4930438E09 gene	ncRNA
Diff_Nuc21204	chr16	66738002	66738141	+	0	NA	intron (NM_001347247, intron 7 of 9)	intron (NM_001347247, intron 7 of 9)	80708	NR_040512	75501	Mm.394300	NR_040512	ENSMUSG00000092599	1700010K23Rik	-	RIKEN cDNA 1700010K23 gene	ncRNA
Diff_Nuc5022	chr12	11020972	11021111	+	0	NA	Intergenic	L1Md_F|LINE|L1	-33578	NR_045860	71457	Mm.95280	NR_045860		7420701I03Rik	-	RIKEN cDNA 7420701I03 gene	ncRNA
Diff_Nuc48813	chr4	57629902	57630041	+	0	NA	intron (NM_172868, intron 1 of 5)	intron (NM_172868, intron 1 of 5)	48851	NM_172868	242481	Mm.331630	NM_172868	ENSMUSG00000090053	Palm2	53-H12|B130066I24|R75368|pEN70	paralemmin 2	protein-coding
Diff_Nuc56719	chr3	154894882	154895021	+	0	NA	Intergenic	B1F|SINE|Alu	138553	NM_028938	74435	Mm.195711	NM_028938	ENSMUSG00000028182	Lrriq3	4930438B07Rik|4930511J15Rik|4933403H06Rik|BB020367|Lrrc44	leucine-rich repeats and IQ motif containing 3	protein-coding
Diff_Nuc50511	chr4	108402622	108402761	+	0	NA	intron (NM_001347163, intron 1 of 18)	intron (NM_001347163, intron 1 of 18)	-6210	NM_183300	230597	Mm.196776	NM_183300	ENSMUSG00000034557	Zfyve9	Madhip|NSP|SARA|SMADIP	zinc finger, FYVE domain containing 9	protein-coding
Diff_Nuc18051	chr17	64882752	64882891	+	0	NA	intron (NR_045899, intron 1 of 3)	intron (NR_045899, intron 1 of 3)	22109	NR_045899	100043582	Mm.11170	NR_045899	ENSMUSG00000073377	AU016765	-	expressed sequence AU016765	ncRNA
Diff_Nuc15180	chr10	98777082	98777221	+	0	NA	Intergenic	Intergenic	51286	NM_026268	67603	Mm.1791	NM_026268	ENSMUSG00000019960	Dusp6	1300019I03Rik|MKP-3|MKP3|PYST1	dual specificity phosphatase 6	protein-coding
Diff_Nuc39552	chr6	47564762	47564901	+	0	NA	Intergenic	Intergenic	-19802	NM_001146689	14056	Mm.246688	NM_007971	ENSMUSG00000029687	Ezh2	Enx-1|Enx1h|KMT6|mKIAA4065	enhancer of zeste 2 polycomb repressive complex 2 subunit	protein-coding
Diff_Nuc50443	chr4	105995402	105995541	+	0	NA	intron (NM_183225, intron 1 of 67)	intron (NM_183225, intron 1 of 67)	6653	NM_183225	329908	Mm.234544	NM_183225	ENSMUSG00000028514	Usp24	2700066K03Rik|2810030C21Rik|AI414051|B130021E18|C79851	ubiquitin specific peptidase 24	protein-coding
Diff_Nuc27418	chr14	69904752	69904891	+	0	NA	Intergenic	Intergenic	-1661	NM_026331	67712	Mm.293635	NM_026331	ENSMUSG00000034248	Slc25a37	1700020E22Rik|4930513O14Rik|4930526G11Rik|AI848481|C330015G08Rik|Mfrn|Mfrn1|Mscp|frascati|mitoferrin	solute carrier family 25, member 37	protein-coding
Diff_Nuc16458	chr17	9706772	9706911	+	0	NA	Intergenic	Intergenic	155728	NM_001163836	67543	Mm.26987	NM_026226	ENSMUSG00000046173	Pabpc6	4932702K14Rik|AI428050|Pabpc3	poly(A) binding protein, cytoplasmic 6	protein-coding
Diff_Nuc54625	chr3	92077622	92077761	+	0	NA	Intergenic	Lx9|LINE|L1	-11535	NM_001309382	100042514	Mm.6853	NM_001309382	ENSMUSG00000074445	Sprr2a3	-	small proline-rich protein 2A3	protein-coding
Diff_Nuc49608	chr4	81011022	81011161	+	0	NA	intron (NM_010820, intron 13 of 46)	intron (NM_010820, intron 13 of 46)	77628	NM_010820	17475	Mm.153039	NM_010820	ENSMUSG00000028402	Mpdz	AI225843|B930003D11Rik|MUPP1	multiple PDZ domain protein	protein-coding
Diff_Nuc38374	chr6	17127682	17127821	+	0	NA	Intergenic	Intergenic	-20000	NR_102305	319682	Mm.136046	NR_102304	ENSMUSG00000085171	D830026I12Rik	-	RIKEN cDNA D830026I12 gene	ncRNA
Diff_Nuc37908	chr6	4094712	4094851	+	0	NA	Intergenic	Intergenic	-57854	NM_009748	12068	Mm.286457	NM_009748	ENSMUSG00000032757	Bet1	AW555236|Bet-1	Bet1 golgi vesicular membrane trafficking protein	protein-coding
Diff_Nuc57607	chr2	22815092	22815231	+	0	NA	intron (NM_001077190, intron 6 of 10)	intron (NM_001077190, intron 6 of 10)	64119	NM_019501	56075	Mm.249752	NM_019501	ENSMUSG00000026784	Pdss1	2610203G20Rik|2700031G06Rik|TPT|TPT 1|Tprt|mDLP1|mSPS1	prenyl (solanesyl) diphosphate synthase, subunit 1	protein-coding
Diff_Nuc36839	chr7	112587722	112587861	+	0	NA	Intergenic	Intergenic	13546	NM_007627	12426	Mm.44513	NM_007627	ENSMUSG00000030898	Cckbr	CCK-BR|CCK2-R|CCK2R|CCKR-2	cholecystokinin B receptor	protein-coding
Diff_Nuc66268	chr1	106870822	106870961	+	0	NA	intron (NM_011800, intron 8 of 11)	B3|SINE|B2	205495	NM_011800	23836	Mm.103640	NM_011800	ENSMUSG00000050840	Cdh20	Cdh7	cadherin 20	protein-coding
Diff_Nuc6803	chr12	66952862	66953001	+	0	NA	Intergenic	L1_Mur3|LINE|L1	432457	NM_001162933	238217	Mm.188575	NM_001162933	ENSMUSG00000060499	Rpl10l	EG238217	ribosomal protein L10-like	protein-coding
Diff_Nuc6920	chr12	69626882	69627021	+	0	NA	Intergenic	Intergenic	633222	NM_009093	20090	Mm.379006	NM_009093	ENSMUSG00000034892	Rps29	-	ribosomal protein S29	protein-coding
Diff_Nuc32186	chr18	33146712	33146851	+	0	NA	intron (NM_009793, intron 1 of 10)	Lx7|LINE|L1	48086	NM_009793	12326	Mm.222329	NM_009793	ENSMUSG00000038128	Camk4	A430110E23Rik|AI666733|CaMKIV|CaMKIV/Gr|D18Bwg0362e	calcium/calmodulin-dependent protein kinase IV	protein-coding
Diff_Nuc69701	chr9	16440832	16440971	+	0	NA	Intergenic	Intergenic	-258226	NM_001080814	270120	Mm.195010	NM_001080814	ENSMUSG00000074505	Fat3	9430076A06Rik|D430038H04Rik|Gm1132|Gm510|MFAT3F	FAT atypical cadherin 3	protein-coding
Diff_Nuc58950	chr2	63156112	63156251	+	0	NA	Intergenic	B1_Mus2|SINE|Alu	-133837	NM_133207	170738	Mm.242532	NM_133207	ENSMUSG00000059742	Kcnh7	9330137I11Rik|Kv11.3|erg3	potassium voltage-gated channel, subfamily H (eag-related), member 7	protein-coding
Diff_Nuc43068	chr5	16097832	16097971	+	0	NA	intron (NM_001289461, intron 7 of 17)	intron (NM_001289461, intron 7 of 17)	38182	NM_001289461	15234	Mm.267078	NM_010427	ENSMUSG00000028864	Hgf	C230052L06Rik|HGF/SF|NK1|NK2|SF|SF/HGF	hepatocyte growth factor	protein-coding
Diff_Nuc36777	chr7	110218732	110218871	+	0	NA	Intergenic	RLTR31_Mm|LTR|ERVK	-15233	NM_147054	259056	Mm.377813	NM_147054	ENSMUSG00000073959	Olfr584	MOR30-2	olfactory receptor 584	protein-coding
Diff_Nuc10416	chr11	65572852	65572991	+	0	NA	intron (NM_009157, intron 1 of 10)	Lx7|LINE|L1	-24587	NR_030417	791070		NR_030417	ENSMUSG00000076460	Mir744	Mirn744|mir-744|mmu-mir-744	microRNA 744	ncRNA
Diff_Nuc29304	chr14	121342232	121342371	+	0	NA	intron (NM_023579, intron 22 of 25)	intron (NM_023579, intron 22 of 25)	31885	NM_023579	70572	Mm.221452	NM_023579	ENSMUSG00000030662	Ipo5	1110011C18Rik|5730478E03Rik|AA409333|C76941|IMB3|Kpnb3|Ranbp5	importin 5	protein-coding
Diff_Nuc71777	chr9	83968062	83968201	+	0	NA	intron (NM_199195, intron 9 of 10)	MTA_Mm|LTR|MaLR	125743	NM_199195	12040	Mm.12819	NM_199195	ENSMUSG00000032263	Bckdhb	BCKDE1B|BCKDH E1-beta	branched chain ketoacid dehydrogenase E1, beta polypeptide	protein-coding
Diff_Nuc37032	chr7	119217932	119218071	+	0	NA	exon (NM_133758, exon 9 of 28)	exon (NM_133758, exon 9 of 28)	50981	NM_177249	74996	Mm.16974	NM_133758	ENSMUSG00000059263	Usp47	4930502N04Rik|A630020C16Rik	ubiquitin specific peptidase 47	protein-coding
Diff_Nuc76509	chr8	112557142	112557281	+	0	NA	intron (NM_011998, intron 1 of 1)	intron (NM_011998, intron 1 of 1)	6023	NM_011998	26887	Mm.89207	NM_011998	ENSMUSG00000035930	Chst4	GST-3|Gn6st-2|HEC-GlcNAc6ST	carbohydrate (chondroitin 6/keratan) sulfotransferase 4	protein-coding
Diff_Nuc74887	chr8	62115402	62115541	+	0	NA	Intergenic	Intergenic	-188975	NR_126087	75017	Mm.60775	NR_126087	ENSMUSG00000110406	4930470O06Rik	-	RIKEN cDNA 4930470O06 gene	ncRNA
Diff_Nuc42145	chr6	134597872	134598011	+	0	NA	intron (NM_026371, intron 2 of 3)	intron (NM_026371, intron 2 of 3)	6983	NM_026371	67774	Mm.41892	NM_026371	ENSMUSG00000042992	Borcs5	5830457J20Rik|AW124643|Loh12cr1	BLOC-1 related complex subunit 5	protein-coding
Diff_Nuc66197	chr1	105064622	105064761	+	0	NA	Intergenic	Intergenic	-1600705	NM_011800	23836	Mm.103640	NM_011800	ENSMUSG00000050840	Cdh20	Cdh7	cadherin 20	protein-coding
Diff_Nuc62222	chr2	155210572	155210711	+	0	NA	intron (NM_178111, intron 1 of 3)	L2c|LINE|L2	3049	NM_178111	68728	Mm.293605	NM_178111	ENSMUSG00000038375	Trp53inp2	1110029F20Rik|Tp53inp2	transformation related protein 53 inducible nuclear protein 2	protein-coding
Diff_Nuc10000	chr11	49309212	49309351	+	0	NA	TTS (NM_001011805)	TTS (NM_001011805)	1244	NM_001011805	258027	Mm.377333	NM_001011805	ENSMUSG00000059729	Olfr1385	MOR256-41P|MOR256-42P|Olfr1549-ps1	olfactory receptor 1385	protein-coding
Diff_Nuc46427	chr5	124068652	124068791	+	0	NA	intron (NM_001347468, intron 13 of 24)	B3|SINE|B2	-45697	NM_029929	77573	Mm.41372	NM_029929	ENSMUSG00000029434	Vps33a	3830421M04Rik|AI503300|AW048546|AW554476|bf	VPS33A CORVET/HOPS core subunit	protein-coding
Diff_Nuc38205	chr6	12636842	12636981	+	0	NA	intron (NM_001164805, intron 1 of 26)	RLTR15|LTR|ERVK	62342	NM_001164805	330267	Mm.11989	NM_001164805	ENSMUSG00000032625	Thsd7a	Gm837	thrombospondin, type I, domain containing 7A	protein-coding
Diff_Nuc4336	chr13	108282952	108283091	+	0	NA	Intergenic	Intergenic	23119	NR_045084	105120	Mm.417700	NR_045083		AI197445	-	expressed sequence AI197445	ncRNA
Diff_Nuc45808	chr5	97412872	97413011	+	0	NA	Intergenic	Intergenic	-13767	NM_080708	140780	Mm.281490	NM_080708	ENSMUSG00000034663	Bmp2k	4933417M22Rik|AA673486|AV128808|BIKE	BMP2 inducible kinase	protein-coding
Diff_Nuc56411	chr3	145139492	145139631	+	0	NA	intron (NM_027770, intron 39 of 59)	intron (NM_027770, intron 39 of 59)	-99611	NM_001081094	229937	Mm.24586	NM_001081094	ENSMUSG00000074182	Znhit6	2410019A14Rik	zinc finger, HIT type 6	protein-coding
Diff_Nuc22578	chr15	9238792	9238931	+	0	NA	intron (NM_207216, intron 4 of 6)	L1M4|LINE|L1	-26492	NM_144845	223337	Mm.422853	NM_144845	ENSMUSG00000049152	Ugt3a2	AI313915	UDP glycosyltransferases 3 family, polypeptide A2	protein-coding
Diff_Nuc72702	chr9	112582102	112582241	+	0	NA	Intergenic	Intergenic	423093	NR_033433	620760	Mm.259863	NR_015468	ENSMUSG00000087038	2900079G21Rik	C130083B14|Gm6179	RIKEN cDNA 2900079G21 gene	ncRNA
Diff_Nuc38298	chr6	14876262	14876401	+	0	NA	intron (NM_053242, intron 1 of 18)	MLT1H2|LTR|MaLR	24982	NM_053242	114142	Mm.332919	NM_053242	ENSMUSG00000029563	Foxp2	2810043D05Rik|AI449000|CAG-16|D0Kist7	forkhead box P2	protein-coding
Diff_Nuc5534	chr12	33551982	33552121	+	0	NA	Intergenic	Lx4B|LINE|L1	43070	NR_045032	100504486	Mm.440246	NR_045032		Gdap10	Gdap-ps	ganglioside-induced differentiation-associated-protein 10	ncRNA
Diff_Nuc19211	chr16	9001772	9001911	+	0	NA	Intergenic	RLTR11A2|LTR|ERVK	171648	NM_001081400	69053	Mm.390868	NM_001081400	ENSMUSG00000022507	1810013L24Rik	1110017P05Rik|3010002C02Rik|AA792997|AW124177|Gm19906|R74903	RIKEN cDNA 1810013L24 gene	protein-coding
Diff_Nuc74135	chr8	41578872	41579011	+	0	NA	3' UTR (NM_001271542, exon 7 of 7)	3' UTR (NM_001271542, exon 7 of 7)	18167	NM_001271543	18983	Mm.272551	NM_011135	ENSMUSG00000031601	Cnot7	AU022737|CAF-1|Caf1|Pop2	CCR4-NOT transcription complex, subunit 7	protein-coding
Diff_Nuc42068	chr6	131579842	131579981	+	0	NA	TTS (NM_199156)	TTS (NM_199156)	937	NM_199156	387355	Mm.377916	NM_199156	ENSMUSG00000054497	Tas2r130	STC74|T2R30|Tas2r30|Tas2r7|mt2r42	taste receptor, type 2, member 130	protein-coding
Diff_Nuc37166	chr7	123920192	123920331	+	0	NA	Intergenic	B4A|SINE|B4	272378	NM_001130479	53322	Mm.9901	NM_016773	ENSMUSG00000030659	Nucb2	AI607786|Calnuc|Nefa|Nesfatin-1	nucleobindin 2	protein-coding
Diff_Nuc13614	chr10	48375622	48375761	+	0	NA	Intergenic	Intergenic	439958	NR_046212	100418235	Mm.185993	NR_046212		C130030K03Rik	-	proteasome (prosome, macropain) subunit, alpha type 6 pseudogene	pseudo
Diff_Nuc17621	chr17	51662652	51662791	+	0	NA	Intergenic	Intergenic	-75127	NR_046166	328837	Mm.236143	NR_046166		C330011F03Rik	C330011F03	RIKEN cDNA C330011F03 gene	ncRNA
Diff_Nuc38260	chr6	13917182	13917321	+	0	NA	Intergenic	MER67D|LTR|ERV1	95682	NR_045995	76311	Mm.367129	NR_045995	ENSMUSG00000097616	1110019D14Rik	-	RIKEN cDNA 1110019D14 gene	ncRNA
Diff_Nuc75100	chr8	68470952	68471091	+	0	NA	intron (NM_001166372, intron 2 of 7)	L1M5|LINE|L1	328597	NM_175188	72925	Mm.380457	NM_175188	ENSMUSG00000036469	March1	2900024D24Rik|BB085186	membrane-associated ring finger (C3HC4) 1	protein-coding
Diff_Nuc43988	chr5	45842322	45842461	+	0	NA	promoter-TSS (NM_024236)	promoter-TSS (NM_024236)	-923	NM_024236	110391	Mm.30204	NM_024236	ENSMUSG00000015806	Qdpr	2610008L04Rik|D5Ertd371e|Dhpr|PKU2	quinoid dihydropteridine reductase	protein-coding
Diff_Nuc42913	chr5	12509602	12509741	+	0	NA	intron (NM_028882, intron 7 of 17)	intron (NM_028882, intron 7 of 17)	126505	NM_028882	108151	Mm.89313	NM_028882	ENSMUSG00000040254	Sema3d	4631426B19Rik	sema domain, immunoglobulin domain (Ig), short basic domain, secreted, (semaphorin) 3D	protein-coding
Diff_Nuc72638	chr9	110450932	110451071	+	0	NA	exon (NM_001081340, exon 3 of 21)	exon (NM_001081340, exon 3 of 21)	15900	NM_001081340	235626	Mm.288949	NM_001081340	ENSMUSG00000044791	Setd2	4921524K10Rik|BC031601|KMT3A	SET domain containing 2	protein-coding
Diff_Nuc1826	chr13	26008652	26008791	+	0	NA	Intergenic	Lx7|LINE|L1	49464	NR_045062	100503530	Mm.86763	NR_045062	ENSMUSG00000086531	Gm11351	OTTMUSG00000000620	predicted gene 11351	ncRNA
Diff_Nuc46244	chr5	113773382	113773521	+	0	NA	Intergenic	Intergenic	-6786	NR_106089	102466821		NR_106089	ENSMUSG00000104840	Mir7230	mmu-mir-7230	microRNA 7230	ncRNA
Diff_Nuc5072	chr12	13237722	13237861	+	0	NA	intron (NM_134040, intron 15 of 25)	intron (NM_134040, intron 15 of 25)	18189	NM_134040	104721	Mm.251255	NM_134040	ENSMUSG00000037149	Ddx1	AA409185|DBP-RB	DEAD (Asp-Glu-Ala-Asp) box polypeptide 1	protein-coding
Diff_Nuc76089	chr8	100232822	100232961	+	0	NA	Intergenic	Lx8|LINE|L1	-1302896	NR_110579	100873092	Mm.414599	NR_110579	ENSMUSG00000089819	Gm15679	OTTMUSG00000025218	predicted gene 15679	ncRNA
Diff_Nuc76900	chr8	130787012	130787151	+	0	NA	Intergenic	Intergenic	15044	NR_105822	102465212		NR_105822	ENSMUSG00000099326	Mir21c	Gm28013|mmu-mir-21c	microRNA 21c	ncRNA
Diff_Nuc76448	chr8	110128402	110128541	+	0	NA	Intergenic	Intergenic	-16089	NM_010817	17463	Mm.18347	NM_010817	ENSMUSG00000039067	Psmd7	AW107203|Mov-34|Mov34	proteasome (prosome, macropain) 26S subunit, non-ATPase, 7	protein-coding
Diff_Nuc14317	chr10	71180782	71180921	+	0	NA	Intergenic	MTC|LTR|MaLR	262587	NR_003644	108950	Mm.212793	NM_175390	ENSMUSG00000043859	1700049L16Rik	-	hematological and neurological expressed 1-like pseudogene	pseudo
Diff_Nuc2748	chr13	58246522	58246661	+	0	NA	Intergenic	MMERVK10C-int|LTR|ERVK	-1719	NR_126543	67339	Mm.121929	NR_126543		1700066J03Rik	-	RIKEN cDNA 1700066J03 gene	ncRNA
Diff_Nuc20459	chr16	46781412	46781551	+	0	NA	Intergenic	Intergenic	-284401	NM_021497	58998	Mm.40477	NM_021495	ENSMUSG00000022656	Nectin3	2610301B19Rik|3000002N23Rik|4921513D19Rik|AA407785|AU016832|AW538082|CD113|Pvrl3	nectin cell adhesion molecule 3	protein-coding
Diff_Nuc19817	chr16	27953782	27953921	+	0	NA	Intergenic	Intergenic	103835	NR_033475	100038623	Mm.387135	NR_033475		Gm10823	ENSMUSG00000075290	predicted gene 10823	ncRNA
Diff_Nuc24320	chr15	56918942	56919081	+	0	NA	Intergenic	Intergenic	390169	NM_172378	210463	Mm.26555	NM_172378	ENSMUSG00000022366	Slc22a22	oat-pg	solute carrier family 22 (organic cation transporter), member 22	protein-coding
Diff_Nuc54920	chr3	103495732	103495871	+	0	NA	Intergenic	Intergenic	46123	NM_133859	99543	Mm.211535	NM_133859	ENSMUSG00000027848	Olfml3	2810002E22Rik|AI115209|AW550633|HNOEL-iso|ONT3|mONT3	olfactomedin-like 3	protein-coding
Diff_Nuc40942	chr6	93094782	93094921	+	0	NA	Intergenic	Intergenic	204275	NR_015530	330385	Mm.483472	NR_015530	ENSMUSG00000097462	9530026P05Rik	B430306B02	RIKEN cDNA 9530026P05 gene	ncRNA
Diff_Nuc32947	chr18	54547652	54547791	+	0	NA	Intergenic	L1_Mus1|LINE|L1	-34228	NR_040338	77433	Mm.159919	NR_040338		Redrum	9430076G02Rik	Redrum, erythroid developmental long intergenic non-protein coding transcript	ncRNA
Diff_Nuc41906	chr6	125075122	125075261	+	0	NA	intron (NM_001346610, intron 37 of 38)	MER58B|DNA|MER1_type	-6710	NM_138747	110109	Mm.29203	NM_138747	ENSMUSG00000038279	Nop2	120kDa|A530002O17|Nol1	NOP2 nucleolar protein	protein-coding
Diff_Nuc22241	chr16	94874902	94875041	+	0	NA	intron (NM_001347731, intron 1 of 10)	intron (NM_001347731, intron 1 of 10)	41945	NM_001347731	13548	Mm.310973	NM_007890	ENSMUSG00000022897	Dyrk1a	2310043O08Rik|D16Ertd272e|D16Ertd493e|Dyrk|ENSMUSG00000074897|Gm10783|Mnbh|Mp86|mmb	dual-specificity tyrosine-(Y)-phosphorylation regulated kinase 1a	protein-coding
Diff_Nuc55670	chr3	123781512	123781651	+	0	NA	Intergenic	L1_Mur3|LINE|L1	-242374	NM_146140	229801	Mm.165810	NM_146140	ENSMUSG00000044528	Tram1l1	A830091N21Rik	translocation associated membrane protein 1-like 1	protein-coding
Diff_Nuc20606	chr16	50889372	50889511	+	0	NA	Intergenic	MLT1A1-int|LTR|MaLR	105919	NR_131005	78639	Mm.160109	NR_131005	ENSMUSG00000092276	1700116B05Rik	-	RIKEN cDNA 1700116B05 gene	ncRNA
Diff_Nuc2277	chr13	39850092	39850231	+	0	NA	Intergenic	MusHAL1|LINE|L1	533219	NM_172143	218165	Mm.364096	NM_172143	ENSMUSG00000047094	Ofcc1	opo	orofacial cleft 1 candidate 1	protein-coding
Diff_Nuc20268	chr16	41946132	41946271	+	0	NA	intron (NM_001347236, intron 2 of 6)	L1Md_F2|LINE|L1	357381	NR_105858	102466172		NR_105858	ENSMUSG00000098300	Mir6540	Gm27780|mir-6540|mmu-mir-6540	microRNA 6540	ncRNA
Diff_Nuc51750	chr3	8121982	8122121	+	0	NA	Intergenic	Intergenic	-167164	NR_040587	75476	Mm.491752	NR_040587	ENSMUSG00000100010	1700010I02Rik	-	RIKEN cDNA 1700010I02 gene	ncRNA
Diff_Nuc45926	chr5	102191612	102191751	+	0	NA	Intergenic	Intergenic	-2468	NM_173370	74596	Mm.46764	NM_173370	ENSMUSG00000029330	Cds1	4833409J18Rik|AI314024|AW125888	CDP-diacylglycerol synthase 1	protein-coding
Diff_Nuc5652	chr12	36781902	36782041	+	0	NA	Intergenic	RLTR23|LTR|ERV1	-12906	NM_025359	66109	Mm.254663	NM_025359	ENSMUSG00000020577	Tspan13	1100001I23Rik|NET-6|Tm4sf13	tetraspanin 13	protein-coding
Diff_Nuc8200	chr12	110113122	110113261	+	0	NA	intron (NM_001164314, intron 6 of 9)	intron (NM_001164314, intron 6 of 9)	18217	NM_001164488	22375	Mm.38433	NM_011710	ENSMUSG00000021266	Wars	TrpRS|WRS	tryptophanyl-tRNA synthetase	protein-coding
Diff_Nuc31085	chr19	59075752	59075891	+	0	NA	intron (NM_001114312, intron 13 of 16)	intron (NM_001114312, intron 13 of 16)	-57659	NM_001327998	73442	Mm.39739	NM_175199	ENSMUSG00000025092	Hspa12a	1700063D12Rik|AI118035|AI840429|AW048913|AW556406|D5Mgi40|Gm19925|mKIAA0417	heat shock protein 12A	protein-coding
Diff_Nuc6487	chr12	59092512	59092651	+	0	NA	Intergenic	Intergenic	-220210	NM_009216	20605	Mm.278336	NM_009216	ENSMUSG00000035431	Sstr1	SRIF-2|SS-1-R|SS1-R|SS1R|Smstr-1|Smstr1|sst1	somatostatin receptor 1	protein-coding
Diff_Nuc72304	chr9	99455752	99455891	+	0	NA	intron (NM_001166138, intron 1 of 11)	L2|LINE|L2	13497	NM_001166138	74125	Mm.234823	NM_028768	ENSMUSG00000032468	Armc8	1200015K23Rik|Gid5|HSPC056	armadillo repeat containing 8	protein-coding
Diff_Nuc45996	chr5	104636662	104636801	+	0	NA	intron (NM_016779, intron 3 of 5)	intron (NM_016779, intron 3 of 5)	5095	NM_016779	13406	Mm.199008	NM_016779	ENSMUSG00000029307	Dmp1	AV020965|Dmp|PP	dentin matrix protein 1	protein-coding
Diff_Nuc15447	chr10	105498612	105498751	+	0	NA	Intergenic	Lx6|LINE|L1	220146	NM_025602	52713	Mm.339224	NM_025602	ENSMUSG00000019897	Ccdc59	2300004H16Rik|D10Ertd718e	coiled-coil domain containing 59	protein-coding
Diff_Nuc44178	chr5	51276972	51277111	+	0	NA	Intergenic	Intergenic	633040	NR_106197	102465903		NR_106197	ENSMUSG00000099124	Mir8117	Gm27323|mmu-mir-8117	microRNA 8117	ncRNA
Diff_Nuc23835	chr15	44240662	44240801	+	0	NA	intron (NM_026149, intron 2 of 9)	intron (NM_026149, intron 2 of 9)	-18926	NM_175009	223527	Mm.291828	NM_175009	ENSMUSG00000022338	Eny2	1810057B09Rik|6720481I12|DC6|Ey2	enhancer of yellow 2 homolog (Drosophila)	protein-coding
Diff_Nuc16019	chr10	121369352	121369491	+	0	NA	intron (NM_001081037, intron 1 of 21)	intron (NM_001081037, intron 1 of 21)	114950	NM_001242411	117600	Mm.288698	NM_001081037	ENSMUSG00000020121	Srgap1	4930572H05Rik|Arhgap13	SLIT-ROBO Rho GTPase activating protein 1	protein-coding
Diff_Nuc67386	chr1	141888222	141888361	+	0	NA	Intergenic	Lx5|LINE|L1	-133015	NM_001025575	545366	Mm.439660	NM_001025575	ENSMUSG00000033898	Cfhr2	Cfhrb_4/2	complement factor H-related 2	protein-coding
Diff_Nuc57576	chr2	21711492	21711631	+	0	NA	intron (NM_001004761, intron 7 of 10)	L1Md_F3|LINE|L1	422367	NM_001004761	241263	Mm.166647	NM_175706	ENSMUSG00000045967	Gpr158	5330427M13Rik|mKIAA1136	G protein-coupled receptor 158	protein-coding
Diff_Nuc22365	chr15	3574452	3574591	+	0	NA	Intergenic	B1F|SINE|Alu	-41169	NM_010284	14600	Mm.3986	NM_010284	ENSMUSG00000055737	Ghr	GHBP|GHR/BP	growth hormone receptor	protein-coding
Diff_Nuc75164	chr8	70376552	70376691	+	0	NA	intron (NM_177698, intron 8 of 14)	B1_Mur3|SINE|Alu	-34427	NM_027626	234353	Mm.32525	NM_027626	ENSMUSG00000030465	Psd3	4931420C21Rik|AI661273|BC003498|D430018P08|EFA6D	pleckstrin and Sec7 domain containing 3	protein-coding
Diff_Nuc43210	chr5	19390992	19391131	+	0	NA	intron (NM_001170746, intron 2 of 22)	L1Md_F3|LINE|L1	-22275	NM_001170745	50791	Mm.332231	NM_015823	ENSMUSG00000040003	Magi2	AIP-1|Acvri1|Acvrinp1|Acvrip1|Magi-2|S-SCAM|mKIAA0705	membrane associated guanylate kinase, WW and PDZ domain containing 2	protein-coding
Diff_Nuc64134	chr1	43318222	43318361	+	0	NA	Intergenic	Intergenic	-64685	NM_001289533	14200	Mm.6799	NM_010212	ENSMUSG00000008136	Fhl2	FHL-2|SLIM-3|SLIM3	four and a half LIM domains 2	protein-coding
Diff_Nuc41968	chr6	128106422	128106561	+	0	NA	Intergenic	ID_B1|SINE|B4	-12895	NM_175414	109246	Mm.21814	NM_175414	ENSMUSG00000030352	Tspan9	6720474K14Rik|9430079M16Rik|AU018597	tetraspanin 9	protein-coding
Diff_Nuc54997	chr3	105419502	105419641	+	0	NA	intron (NM_001039347, intron 2 of 6)	intron (NM_001039347, intron 2 of 6)	70918	NM_017397	53975	Mm.272826	NM_017397	ENSMUSG00000027905	Ddx20	GEMIN3|dp103	DEAD (Asp-Glu-Ala-Asp) box polypeptide 20	protein-coding
Diff_Nuc53007	chr3	44695952	44696091	+	0	NA	Intergenic	Intergenic	486161	NR_045172	72511	Mm.140700	NR_045172	ENSMUSG00000097040	2610316D01Rik	-	RIKEN cDNA 2610316D01 gene	ncRNA
Diff_Nuc76059	chr8	99179572	99179711	+	0	NA	Intergenic	Intergenic	-767376	NM_010325	14719	Mm.230169	NM_010325	ENSMUSG00000031672	Got2	AL022787|FABP-pm|Got-2|Kyat4|mAspAT	glutamatic-oxaloacetic transaminase 2, mitochondrial	protein-coding
Diff_Nuc73039	chr8	4524102	4524241	+	0	NA	3' UTR (NM_026058, exon 11 of 11)	3' UTR (NM_026058, exon 11 of 11)	30766	NM_026058	67260	Mm.35511	NM_026058	ENSMUSG00000008206	Cers4	2900019C14Rik|Lass4|Trh1	ceramide synthase 4	protein-coding
Diff_Nuc53013	chr3	44937452	44937591	+	0	NA	Intergenic	Intergenic	244661	NR_045172	72511	Mm.140700	NR_045172	ENSMUSG00000097040	2610316D01Rik	-	RIKEN cDNA 2610316D01 gene	ncRNA
Diff_Nuc37426	chr7	133488342	133488481	+	0	NA	Intergenic	RMER10B|LTR|ERVL	23148	NR_106025	102466797		NR_106025	ENSMUSG00000099017	Mir7058	Gm27766|mmu-mir-7058	microRNA 7058	ncRNA
Diff_Nuc14598	chr10	81859012	81859151	+	0	NA	Intergenic	ETnERV2-int|LTR|ERVK	96282	NM_001255990	432480	Mm.280394	NM_001255990	ENSMUSG00000094186	Gm1553	Lcrn	predicted gene 1553	protein-coding
Diff_Nuc2088	chr13	32892432	32892571	+	0	NA	Intergenic	Intergenic	-1398	NM_030215	78903	Mm.286680	NM_030215	ENSMUSG00000021400	Wrnip1	4833444L21Rik|WHIP|Wrnip	Werner helicase interacting protein 1	protein-coding
Diff_Nuc73129	chr8	7132082	7132221	+	0	NA	Intergenic	Intergenic	1528622	NM_010111	13642	Mm.209813	NM_010111	ENSMUSG00000001300	Efnb2	ELF-2|Epl5|Eplg5|Htk-L|LERK-5|Lerk5|NLERK-1	ephrin B2	protein-coding
Diff_Nuc44143	chr5	50400052	50400191	+	0	NA	intron (NM_133911, intron 6 of 18)	intron (NM_133911, intron 6 of 18)	50114	NM_133911	70693	Mm.272974	NM_133911	ENSMUSG00000029090	Adgra3	3830613O22Rik|AU044632|Gpr125|Tem5-like	adhesion G protein-coupled receptor A3	protein-coding
Diff_Nuc9447	chr11	32372562	32372701	+	0	NA	intron (NM_173784, intron 1 of 2)	intron (NM_173784, intron 1 of 2)	17259	NM_173784	327900	Mm.260956	NM_173784	ENSMUSG00000044949	Ubtd2	4930571L24|9630054F20Rik|AI645720	ubiquitin domain containing 2	protein-coding
Diff_Nuc41431	chr6	108447432	108447571	+	0	NA	intron (NM_010585, intron 52 of 61)	intron (NM_010585, intron 52 of 61)	7764	NR_106121	102465766		NR_106121	ENSMUSG00000105697	Mir7661	mmu-mir-7661	microRNA 7661	ncRNA
Diff_Nuc26403	chr14	34716602	34716741	+	0	NA	Intergenic	Lx8|LINE|L1	-20102	NM_145741	14560	Mm.432071	NM_145741	ENSMUSG00000021943	Gdf10	Bmp3b	growth differentiation factor 10	protein-coding
Diff_Nuc5393	chr12	28866582	28866721	+	0	NA	Intergenic	Intergenic	366551	NM_001177964	68511	Mm.310284	NM_001177964	ENSMUSG00000020633	Dcdc2c	1110015M06Rik	doublecortin domain containing 2C	protein-coding
Diff_Nuc1218	chr13	8796862	8797001	+	0	NA	Intergenic	Intergenic	73359	NM_001039389	207615	Mm.284654	NM_172445	ENSMUSG00000021147	Wdr37	-	WD repeat domain 37	protein-coding
Diff_Nuc53640	chr3	64077832	64077971	+	0	NA	intron (NM_001104614, intron 3 of 5)	intron (NM_001104614, intron 3 of 5)	13438	NM_001104614	637004	Mm.469887	NM_001104614	ENSMUSG00000091572	Vmn2r3	EG637004	vomeronasal 2, receptor 3	protein-coding
Diff_Nuc18903	chr17	91169162	91169301	+	0	NA	intron (NM_001346957, intron 3 of 18)	B2_Mm2|SINE|B2	23585	NR_136930	102634634		NR_136930		Gm20491	-	enolase 1, alpha non-neuron pseudogene	pseudo
Diff_Nuc5636	chr12	36259952	36260091	+	0	NA	Intergenic	L1_Rod|LINE|L1	-40360	NM_001314027	11622	Mm.341377	NM_013464	ENSMUSG00000019256	Ahr	Ah|Ahh|Ahre|In|bHLHe76	aryl-hydrocarbon receptor	protein-coding
Diff_Nuc75892	chr8	93875452	93875591	+	0	NA	intron (NM_011936, intron 1 of 8)	L1MB8|LINE|L1	38097	NM_011936	26383	Mm.4375	NM_011936	ENSMUSG00000055932	Fto	AW743446|mKIAA1752	fat mass and obesity associated	protein-coding
Diff_Nuc473	chrX	80721032	80721171	+	0	NA	intron (NM_007868, intron 6 of 78)	intron (NM_007868, intron 6 of 78)	12162	NM_021898	100502723	Mm.383210	NM_021898	ENSMUSG00000035522	Tsga8	Halap-X|Halapx	testis specific gene A8	protein-coding
Diff_Nuc61424	chr2	132986442	132986581	+	0	NA	Intergenic	Intergenic	-214739	NM_198029	241639	Mm.209784	NM_198029	ENSMUSG00000027356	Fermt1	5830467P10Rik|Kindlin-1	fermitin family member 1	protein-coding
Diff_Nuc63935	chr1	36222422	36222561	+	0	NA	intron (NM_198899, intron 26 of 40)	intron (NM_198899, intron 26 of 40)	-21333	NR_105862	102465540		NR_105862	ENSMUSG00000098752	Mir6897	Gm27652|mmu-mir-6897	microRNA 6897	ncRNA
Diff_Nuc71528	chr9	75966987	75967126	+	0	NA	intron (NM_173731, intron 7 of 8)	intron (NM_173731, intron 7 of 8)	94408	NM_205844	404194	Mm.213862	NM_205844	ENSMUSG00000059383	Gfral	AY457637|Gral	GDNF family receptor alpha like	protein-coding
Diff_Nuc63987	chr1	38114862	38115001	+	0	NA	intron (NM_019570, intron 14 of 22)	intron (NM_019570, intron 14 of 22)	60076	NM_198303	226982	Mm.260943	NM_198303	ENSMUSG00000026083	Eif5b	A030003E17Rik|BC018347|IF2	eukaryotic translation initiation factor 5B	protein-coding
Diff_Nuc56281	chr3	141578367	141578506	+	0	NA	intron (NM_001277220, intron 1 of 11)	intron (NM_001277220, intron 1 of 11)	16116	NM_001277218	12167	Mm.39089	NM_007560	ENSMUSG00000052430	Bmpr1b	AI385617|ALK-6|AV355320|Acvrlk6|Alk6|BMPR-1B|BMPR-IB|CFK-43a|SKR6	bone morphogenetic protein receptor, type 1B	protein-coding
Diff_Nuc60689	chr2	110955182	110955321	+	0	NA	Intergenic	Intergenic	114506	NM_026248	67575	Mm.84331	NM_026248	ENSMUSG00000027157	4930430A15Rik	-	RIKEN cDNA 4930430A15 gene	protein-coding
Diff_Nuc27483	chr14	72271322	72271461	+	0	NA	intron (NR_046274, intron 3 of 6)	Lx6|LINE|L1	14875	NR_046274	74667	Mm.159286	NR_046274		4930434J06Rik	-	RIKEN cDNA 4930434J06 gene	ncRNA
Diff_Nuc3479	chr13	82803202	82803341	+	0	NA	Intergenic	Intergenic	34061	NR_039537	100628621		NR_039537	ENSMUSG00000106655	Mir3961	mmu-mir-3961	microRNA 3961	ncRNA
Diff_Nuc40227	chr6	68126402	68126541	+	0	NA	Intergenic	RMER19B|LTR|ERVK	-610778	NR_003100	75070	Mm.463364	NR_003100		4930515G16Rik	-	myc induced nuclear antigen pseudogene	pseudo
Diff_Nuc24592	chr15	65592672	65592811	+	0	NA	Intergenic	L1Md_F2|LINE|L1	-25862	NM_133766	76740	Mm.260647	NM_133766	ENSMUSG00000015002	Efr3a	A130089M23Rik|BB071175|C76891|C920006C10Rik|D030063F01Rik|mKIAA0143	EFR3 homolog A	protein-coding
Diff_Nuc47115	chr4	4846222	4846361	+	0	NA	Intergenic	Intergenic	-125838	NM_177730	242291	Mm.218889	NM_177730	ENSMUSG00000066324	Impad1	1110001C20Rik|AA408880|AI451589|AL022796|B230207P20|Jaws|gPAPP	inositol monophosphatase domain containing 1	protein-coding
Diff_Nuc50696	chr4	113398402	113398541	+	0	NA	intron (NM_001167878, intron 27 of 57)	RMER15|LTR|ERVL	273637	NM_001167878	242627	Mm.484115	NM_001167876	ENSMUSG00000078598	Skint5	OTTMUSG00000008560|Skint-5	selection and upkeep of intraepithelial T cells 5	protein-coding
Diff_Nuc51275	chr4	141759822	141759961	+	0	NA	intron (NM_001109685, intron 2 of 7)	B1_Mm|SINE|Alu	6232	NM_144531	71529	Mm.255986	NM_144531	ENSMUSG00000040606	Kazn	2310007B04Rik|9030409G11Rik|AI256607|AI666764|AW061099|Kaz|Kazrin	kazrin, periplakin interacting protein	protein-coding
Diff_Nuc18163	chr17	69219612	69219751	+	0	NA	Intergenic	MER2|DNA|MER2_type	33205	NM_001206661	622645	Mm.86422	NM_001206661	ENSMUSG00000095407	Tmem200c	EG622645|Gm6338	transmembrane protein 200C	protein-coding
Diff_Nuc7639	chr12	91253282	91253421	+	0	NA	intron (NM_001198587, intron 15 of 19)	intron (NM_001198587, intron 15 of 19)	202428	NM_001252074	18191	Mm.425766	NM_172544	ENSMUSG00000066392	Nrxn3	-	neurexin III	protein-coding
Diff_Nuc60342	chr2	101769042	101769181	+	0	NA	Intergenic	MLT1D|LTR|MaLR	42692	NM_029635	76501	Mm.330424	NM_029635	ENSMUSG00000027163	Commd9	1810029F08Rik|AA409293	COMM domain containing 9	protein-coding
Diff_Nuc38548	chr6	21468952	21469091	+	0	NA	intron (NM_019697, intron 1 of 5)	ORR1E|LTR|MaLR	302912	NM_019697	16508	Mm.425316	NM_019697	ENSMUSG00000060882	Kcnd2	AI839615|AW555701|Kv4.2|R75121|mKIAA1044	potassium voltage-gated channel, Shal-related family, member 2	protein-coding
Diff_Nuc56118	chr3	137553232	137553371	+	0	NA	intron (NM_001033155, intron 2 of 7)	MTD|LTR|MaLR	22662	NM_001033155	70604	Mm.256488	NM_001033155	ENSMUSG00000074212	Dnajb14	5730496F10Rik	DnaJ heat shock protein family (Hsp40) member B14	protein-coding
Diff_Nuc49120	chr4	67565182	67565321	+	0	NA	Intergenic	Intergenic	1050180	NM_019967	56710	Mm.248788	NM_019967	ENSMUSG00000028351	Brinp1	BRINP|Dbc1|Dbccr1|Fam5a	bone morphogenic protein/retinoic acid inducible neural specific 1	protein-coding
Diff_Nuc39487	chr6	46152832	46152971	+	0	NA	intron (NM_001004357, intron 9 of 23)	intron (NM_001004357, intron 9 of 23)	-1041494	NM_025771	66797	Mm.440084	NM_025771	ENSMUSG00000039419	Cntnap2	5430425M22Rik|Caspr2|mKIAA0868	contactin associated protein-like 2	protein-coding
Diff_Nuc29061	chr14	114056982	114057121	+	0	NA	Intergenic	Intergenic	-1174136	NR_045661	75822	Mm.410813	NR_045661		4930524C18Rik	-	RIKEN cDNA 4930524C18 gene	ncRNA
Diff_Nuc55843	chr3	128559412	128559551	+	0	NA	Intergenic	Intergenic	-343315	NM_001286942	18741	Mm.246804	NM_011098	ENSMUSG00000028023	Pitx2	9430085M16Rik|Brx1|Brx1b|Munc30|Otlx2|Ptx2|Rieg	paired-like homeodomain transcription factor 2	protein-coding
Diff_Nuc74924	chr8	63370132	63370271	+	0	NA	intron (NM_028299, intron 1 of 7)	ID_B1|SINE|B4	953	NM_028299	72612	Mm.25263	NM_028299	ENSMUSG00000038005	Hpf1	2700029M09Rik|C230006B22Rik|C4orf27	histone PARylation factor 1	protein-coding
Diff_Nuc65135	chr1	69460572	69460711	+	0	NA	Intergenic	Lx9|LINE|L1	271893	NM_011770	22779	Mm.106343	NM_011770	ENSMUSG00000025997	Ikzf2	A730095J18Rik|Helios|Zfpn1a2|Znfn1a2	IKAROS family zinc finger 2	protein-coding
Diff_Nuc14733	chr10	86368752	86368891	+	0	NA	intron (NM_138673, intron 33 of 68)	intron (NM_138673, intron 33 of 68)	101866	NM_138673	192188	Mm.279611	NM_138673	ENSMUSG00000035459	Stab2	FEEL-2|FELL|MFEEL-2|STAB-2	stabilin 2	protein-coding
Diff_Nuc61037	chr2	120499972	120500111	+	0	NA	Intergenic	Intergenic	57212	NM_026891	68968	Mm.2289	NM_026891	ENSMUSG00000027284	Cdan1	1500015A01Rik|AI448026|AW492297|CDA-I|CDA1|CDAI	congenital dyserythropoietic anemia, type I (human)	protein-coding
Diff_Nuc11463	chr11	101744622	101744761	+	0	NA	intron (NM_010791, intron 1 of 2)	intron (NM_010791, intron 1 of 2)	10977	NM_010791	17285	Mm.3404	NM_010791	ENSMUSG00000001493	Meox1	AI385561|D330041M02Rik|Mox-1|Mox1	mesenchyme homeobox 1	protein-coding
Diff_Nuc13796	chr10	53226092	53226231	+	0	NA	intron (NR_037973, intron 3 of 3)	intron (NR_037973, intron 3 of 3)	12634	NR_037973	100502868	Mm.297722	NR_037973		Gm20597	B230314j19	predicted gene, 20597	ncRNA
Diff_Nuc65731	chr1	89620152	89620291	+	0	NA	Intergenic	ORR1B1|LTR|MaLR	-32365	NM_029846	77040	Mm.272972	NM_029846	ENSMUSG00000026289	Atg16l1	1500009K01Rik|Apg16l|Atg16l|WDR30	autophagy related 16-like 1 (S. cerevisiae)	protein-coding
Diff_Nuc12852	chr10	28265862	28266001	+	0	NA	intron (NM_008983, intron 13 of 31)	intron (NM_008983, intron 13 of 31)	-122235	NM_001305663	210757	Mm.123021	NM_178666	ENSMUSG00000049109	Themis	E430004N04Rik|Gasp|Spot|Tsepa|thylex	thymocyte selection associated	protein-coding
Diff_Nuc21294	chr16	68694792	68694931	+	0	NA	Intergenic	Intergenic	-1073708	NM_178721	239857	Mm.394300	NM_178721	ENSMUSG00000064115	Cadm2	2900078E11Rik|9330131D06|A830029E02Rik|Igdf4d|Igsf4d|NECL3|SynCAM 2|SynCAM2	cell adhesion molecule 2	protein-coding
Diff_Nuc76101	chr8	100511002	100511141	+	0	NA	Intergenic	Intergenic	-1024716	NR_110579	100873092	Mm.414599	NR_110579	ENSMUSG00000089819	Gm15679	OTTMUSG00000025218	predicted gene 15679	ncRNA
Diff_Nuc24080	chr15	50617752	50617891	+	0	NA	intron (NM_001310485, intron 5 of 7)	intron (NM_001310485, intron 5 of 7)	102774	NM_001310481	83925	Mm.30466	NM_032000	ENSMUSG00000038679	Trps1	AI115454|AI447310|D15Ertd586e	trichorhinophalangeal syndrome I (human)	protein-coding
Diff_Nuc15142	chr10	97650162	97650301	+	0	NA	Intergenic	Intergenic	164270	NR_045179	667438	Mm.414522	NR_045179		Gm8633	EG667438	predicted gene 8633	ncRNA
Diff_Nuc31827	chr18	24669032	24669171	+	0	NA	intron (NM_144861, intron 1 of 6)	intron (NM_144861, intron 1 of 6)	19604	NM_144861	225283	Mm.28427	NM_144861	ENSMUSG00000040446	Rprd1a	C77387|mKIAA4077	regulation of nuclear pre-mRNA domain containing 1A	protein-coding
Diff_Nuc69323	chr9	4805102	4805241	+	0	NA	Intergenic	Lx7|LINE|L1	-8937	NM_019691	14802	Mm.209263	NM_019691	ENSMUSG00000025892	Gria4	GluA4|GluR-D|Glur-4|Glur4|Gluralpha4|spkw1	glutamate receptor, ionotropic, AMPA4 (alpha 4)	protein-coding
Diff_Nuc36529	chr7	101894082	101894221	+	0	NA	Intergenic	Intergenic	-1425603	NM_001310762	23966	Mm.254610	NM_011858	ENSMUSG00000048078	Tenm4	Doc4|ELM2|Odz4|R75022|Ten-m4|l(7)-3Rn|l7Rn3|mKIAA1302	teneurin transmembrane protein 4	protein-coding
Diff_Nuc35841	chr7	82344382	82344521	+	0	NA	intron (NM_153579, intron 2 of 12)	Lx|LINE|L1	108821	NM_001109753	64176	Mm.273082	NM_153579	ENSMUSG00000053025	Sv2b	A830038F04Rik|AI850768|mKIAA0735	synaptic vesicle glycoprotein 2 b	protein-coding
Diff_Nuc50846	chr4	120179572	120179711	+	0	NA	intron (NM_013883, intron 10 of 16)	L3|LINE|CR1	-25195	NM_177570	194219	Mm.29788	NM_177570	ENSMUSG00000047518	Slfnl1	4933406A14Rik	schlafen like 1	protein-coding
Diff_Nuc18393	chr17	76108342	76108481	+	0	NA	Intergenic	Intergenic	-151952	NR_033456	100043885	Mm.127562	NR_033456		Gm4710	-	predicted gene 4710	ncRNA
Diff_Nuc32299	chr18	36376252	36376391	+	0	NA	Intergenic	L1MA5|LINE|L1	-19507	NM_001167891	100042150	Mm.380390	NM_001167891	ENSMUSG00000060275	Nrg2	Don1|NTAK	neuregulin 2	protein-coding
Diff_Nuc24298	chr15	56439012	56439151	+	0	NA	Intergenic	(TTG)n|Simple_repeat|Simple_repeat	-82418	NR_002874	594843	Mm.484850	NR_002874	ENSMUSG00000086541	Has2os	EG594843|Has2as|Hasnt	hyaluronan synthase 2, opposite strand	ncRNA
Diff_Nuc18018	chr17	63655002	63655141	+	0	NA	intron (NR_130176, intron 3 of 3)	intron (NR_130176, intron 3 of 3)	7251	NR_130176	414079	Mm.444282	NR_130176	ENSMUSG00000090565	4930405O22Rik	-	RIKEN cDNA 4930405O22 gene	ncRNA
Diff_Nuc16963	chr17	25143122	25143261	+	0	NA	intron (NM_020608, intron 2 of 20)	intron (NM_020608, intron 2 of 20)	8984	NM_020608	57354	Mm.328854	NM_020608	ENSMUSG00000038002	Cramp1l	5830477H08Rik|AI256853|AI790734|Cramp1|Tce4|mKIAA1426	Crm, cramped-like (Drosophila)	protein-coding
Diff_Nuc25089	chr15	86172212	86172351	+	0	NA	intron (NM_145476, intron 8 of 12)	intron (NM_145476, intron 8 of 12)	127392	NM_145476	223754	Mm.28904	NM_145476	ENSMUSG00000051864	Tbc1d22a	BC023106|D15Ertd781e	TBC1 domain family, member 22a	protein-coding
Diff_Nuc14056	chr10	62177832	62177971	+	0	NA	intron (NM_001033260, intron 1 of 3)	intron (NM_001033260, intron 1 of 3)	10946	NM_001033260	216021	Mm.39821	NM_001033260	ENSMUSG00000036923	Stox1	4732470K04Rik|Gm63	storkhead box 1	protein-coding
Diff_Nuc54060	chr3	75819752	75819891	+	0	NA	Intergenic	Intergenic	-58662	NM_178673	213262	Mm.379337	NM_178673	ENSMUSG00000034098	Fstl5	9130207J01Rik	follistatin-like 5	protein-coding
Diff_Nuc70814	chr9	53391652	53391791	+	0	NA	intron (NM_144784, intron 10 of 11)	intron (NM_144784, intron 10 of 11)	26734	NM_144784	110446	Mm.293233	NM_144784	ENSMUSG00000032047	Acat1	6330585C21Rik|Acat	acetyl-Coenzyme A acetyltransferase 1	protein-coding
Diff_Nuc40238	chr6	68650762	68650901	+	0	NA	Intergenic	MMERVK10C-int|LTR|ERVK	626337	NR_004434	19783		NR_004434	ENSMUSG00000106222	Rprl1	Rmrp2|Rpr|Rprh2	ribonuclease P RNA-like 1	ncRNA
Diff_Nuc57821	chr2	32839932	32840071	+	0	NA	Intergenic	Intergenic	-2425	NM_019488	56017	Mm.305754	NM_019488	ENSMUSG00000026791	Slc2a8	D2Ertd44e|GLUT8|GlutX1	solute carrier family 2, (facilitated glucose transporter), member 8	protein-coding
Diff_Nuc14280	chr10	69548402	69548541	+	0	NA	Intergenic	MER20|DNA|MER1_type	-11398	NM_001111121	76551	Mm.281741	NM_001111121	ENSMUSG00000048701	Ccdc6	2810012H18Rik|AA536681|AA960498|AW061011	coiled-coil domain containing 6	protein-coding
Diff_Nuc59552	chr2	79900642	79900781	+	0	NA	intron (NM_001159582, intron 2 of 15)	L1_Mus3|LINE|L1	68417	NM_016744	18573	Mm.40678	NM_016744	ENSMUSG00000059173	Pde1a	AI987702|AW125737	phosphodiesterase 1A, calmodulin-dependent	protein-coding
Diff_Nuc52070	chr3	19027312	19027451	+	0	NA	Intergenic	RMER20A|LTR|ERVK	35684	NM_028840	74252	Mm.200383	NM_028840	ENSMUSG00000027599	Armc1	2310016N05Rik|2900046P06Rik|3110009G21Rik|AA409258|AW048872|Arcp|C330014L16Rik	armadillo repeat containing 1	protein-coding
Diff_Nuc45638	chr5	91001552	91001691	+	0	NA	intron (NM_001252661, intron 6 of 13)	Lx9|LINE|L1	11386	NM_001252661	622307	Mm.389654	NM_001252661	ENSMUSG00000070690	5830473C10Rik	Arg|Gm17754	RIKEN cDNA 5830473C10 gene	protein-coding
Diff_Nuc19243	chr16	9792532	9792671	+	0	NA	intron (NM_008170, intron 1 of 11)	MLT1D|LTR|MaLR	200025	NM_008170	14811	Mm.2953	NM_008170	ENSMUSG00000059003	Grin2a	GluN2A|NMDAR2A|NR2A	glutamate receptor, ionotropic, NMDA2A (epsilon 1)	protein-coding
Diff_Nuc5920	chr12	43474042	43474181	+	0	NA	Intergenic	Intergenic	-1261467	NM_010733	16981	Mm.404786	NM_010733	ENSMUSG00000036295	Lrrn3	NLRR-3	leucine rich repeat protein 3, neuronal	protein-coding
Diff_Nuc66348	chr1	109110872	109111011	+	0	NA	Intergenic	Intergenic	-53250	NM_198680	383548	Mm.483991	NM_198680	ENSMUSG00000073602	Serpinb3b	Scca2-rs|Scca2-rs1	serine (or cysteine) peptidase inhibitor, clade B (ovalbumin), member 3B	protein-coding
Diff_Nuc64260	chr1	46269522	46269661	+	0	NA	intron (NM_001160386, intron 32 of 65)	URR1B|DNA|MER1_type	146008	NM_001160386	227058	Mm.296880	NM_001160386	ENSMUSG00000041144	Dnah7b	Dnahc7b|Gm107	dynein, axonemal, heavy chain 7B	protein-coding
Diff_Nuc55104	chr3	107383892	107384031	+	0	NA	Intergenic	Intergenic	-13988	NM_007441	11694	Mm.10112	NM_007441	ENSMUSG00000014603	Alx3	-	aristaless-like homeobox 3	protein-coding
Diff_Nuc21320	chr16	69183532	69183671	+	0	NA	Intergenic	ORR1D1-int|LTR|MaLR	617025	NR_130991	78110	Mm.211406	NR_130991	ENSMUSG00000107073	4930428D20Rik	-	RIKEN cDNA 4930428D20 gene	ncRNA
Diff_Nuc72506	chr9	105334752	105334891	+	0	NA	intron (NM_001253836, intron 18 of 20)	intron (NM_001253836, intron 18 of 20)	31703	NM_001164828	66595	Mm.84941	NM_025651	ENSMUSG00000032567	Aste1	1100001A21Rik|AV006403	asteroid homolog 1 (Drosophila)	protein-coding
Diff_Nuc61495	chr2	134806662	134806801	+	0	NA	intron (NM_001145830, intron 2 of 31)	URR1B|DNA|MER1_type	194831	NM_001145830	18795	Mm.330607	NM_019677	ENSMUSG00000051177	Plcb1	3110043I21Rik|AI132408|Plcb|mKIAA0581	phospholipase C, beta 1	protein-coding
Diff_Nuc62580	chr2	170981942	170982081	+	0	NA	Intergenic	Intergenic	424704	NM_001163686	76829	Mm.41633	NM_029761	ENSMUSG00000027560	Dok5	2700055C10Rik	docking protein 5	protein-coding
Diff_Nuc63530	chr1	24681032	24681171	+	0	NA	Intergenic	Intergenic	-4282	NM_026719	68421	Mm.336563	NM_026719	ENSMUSG00000073725	Lmbrd1	0910001K20Rik|AV347960	LMBR1 domain containing 1	protein-coding
Diff_Nuc57785	chr2	30988092	30988231	+	0	NA	intron (NM_001038700, intron 1 of 14)	intron (NM_001038700, intron 1 of 14)	9367	NM_001177649	14269	Mm.52297	NM_019406	ENSMUSG00000075415	Fnbp1	1110057E06Rik|2210010H06Rik|FBP1|Fbp17	formin binding protein 1	protein-coding
Diff_Nuc52722	chr3	37466432	37466571	+	0	NA	intron (NM_001310473, intron 16 of 16)	intron (NM_001310473, intron 16 of 16)	-42312	NR_130162	75947	Mm.109620	NR_130161	ENSMUSG00000085677	4930594O21Rik	-	RIKEN cDNA 4930594O21 gene	ncRNA
Diff_Nuc30912	chr19	52326442	52326581	+	0	NA	Intergenic	Intergenic	-12276	NM_008386	16333	Mm.46269	NM_008386	ENSMUSG00000035804	Ins1	Ins-1|Ins2-rs1	insulin I	protein-coding
Diff_Nuc18515	chr17	79281552	79281691	+	0	NA	intron (NM_011163, intron 1 of 15)	intron (NM_011163, intron 1 of 15)	291	NM_011163	19106	Mm.378990	NM_011163	ENSMUSG00000024079	Eif2ak2	2310047A08Rik|4732414G15Rik|AI467567|AI747578|Pkr|Prkr|Tik	eukaryotic translation initiation factor 2-alpha kinase 2	protein-coding
Diff_Nuc58801	chr2	58371612	58371751	+	0	NA	intron (NM_007394, intron 2 of 11)	intron (NM_007394, intron 2 of 11)	47558	NM_001110205	11477	Mm.689	NM_007394	ENSMUSG00000026836	Acvr1	ALK2|ActR-I|ActRIA|Acvr|Acvrlk2|Alk-2|Alk8|D330013D15Rik|SKR1|Tsk7L	activin A receptor, type 1	protein-coding
Diff_Nuc6937	chr12	70083762	70083901	+	0	NA	Intergenic	Intergenic	176342	NM_009093	20090	Mm.379006	NM_009093	ENSMUSG00000034892	Rps29	-	ribosomal protein S29	protein-coding
Diff_Nuc26050	chr14	23216532	23216671	+	0	NA	intron (NM_028275, intron 2 of 6)	intron (NM_028275, intron 2 of 6)	145419	NR_046307	74896	Mm.444661	NR_046307		4930405A10Rik	4930456G20Rik	RIKEN cDNA 4930405A10 gene	ncRNA
Diff_Nuc26336	chr14	32601842	32601981	+	0	NA	intron (NM_001024604, intron 1 of 27)	intron (NM_001024604, intron 1 of 27)	41690	NM_001024604	105522	Mm.37660	NM_001024604	ENSMUSG00000014496	Ankrd28	AI465466|AI604979|E430019N21Rik|mKIAA0379	ankyrin repeat domain 28	protein-coding
Diff_Nuc57290	chr2	13694812	13694951	+	0	NA	intron (NM_145838, intron 2 of 7)	intron (NM_145838, intron 2 of 7)	20266	NM_145838	241230	Mm.330004	NM_145838	ENSMUSG00000003418	St8sia6	1700007J08Rik|AI314453|AI875066|ST8SiaVI|Siat8f	ST8 alpha-N-acetyl-neuraminide alpha-2,8-sialyltransferase 6	protein-coding
Diff_Nuc73529	chr8	20033552	20033691	+	0	NA	Intergenic	L1Md_F|LINE|L1	-13229	NR_028428	381598	Mm.359054	NM_001024708	ENSMUSG00000071793	2610005L07Rik	2810038F24Rik|6720476A01Rik	cadherin 11 pseudogene	pseudo
Diff_Nuc494	chrX	83914642	83914781	+	0	NA	Intergenic	L1Md_F3|LINE|L1	-314378	NR_036689	245502	Mm.490821	NR_036689		Gm41	-	melanoma antigen, family B, 4 pseudogene	pseudo
Diff_Nuc71859	chr9	86287932	86288071	+	0	NA	intron (NM_027394, intron 8 of 9)	intron (NM_027394, intron 8 of 9)	70522	NM_027394	70348	Mm.53469	NM_027394	ENSMUSG00000032415	Ube2cbp	2610018I03Rik|Ube3d	ubiquitin-conjugating enzyme E2C binding protein	protein-coding
Diff_Nuc64497	chr1	52862512	52862651	+	0	NA	intron (NM_008384, intron 1 of 5)	intron (NM_008384, intron 1 of 5)	11951	NM_008384	16329	Mm.917	NM_008384	ENSMUSG00000026102	Inpp1	2300002C06Rik|AV137389	inositol polyphosphate-1-phosphatase	protein-coding
Diff_Nuc62342	chr2	159816322	159816461	+	0	NA	Intergenic	Lx7|LINE|L1	-25998	NR_040499	71613	Mm.98139	NR_040499	ENSMUSG00000086653	9130015L21Rik	-	RIKEN cDNA 9130015L21 gene	ncRNA
Diff_Nuc76455	chr8	110393032	110393171	+	0	NA	Intergenic	Intergenic	-280719	NM_010817	17463	Mm.18347	NM_010817	ENSMUSG00000039067	Psmd7	AW107203|Mov-34|Mov34	proteasome (prosome, macropain) 26S subunit, non-ATPase, 7	protein-coding
Diff_Nuc41615	chr6	113329082	113329221	+	0	NA	intron (NM_001170485, intron 1 of 3)	intron (NM_001170485, intron 1 of 3)	1044	NM_001170485	68089	Mm.289306	NM_026552	ENSMUSG00000079426	Arpc4	20kDa|5330419I20Rik|AI327076|p20-Arc	actin related protein 2/3 complex, subunit 4	protein-coding
Diff_Nuc68711	chr1	179902932	179903071	+	0	NA	Intergenic	RMER16-int|LTR|ERVK	-18565	NM_001034899	545391	Mm.442974	NM_001034899	ENSMUSG00000091476	Gm16432	EG545391|EG666250	predicted gene 16432	protein-coding
Diff_Nuc64467	chr1	52020652	52020791	+	0	NA	Intergenic	Lx8|LINE|L1	-23271	NM_001308266	20849	Mm.1550	NM_011487	ENSMUSG00000062939	Stat4	-	signal transducer and activator of transcription 4	protein-coding
Diff_Nuc53634	chr3	63816802	63816941	+	0	NA	intron (NM_001033300, intron 13 of 15)	intron (NM_001033300, intron 13 of 15)	36806	NM_001033300	229363	Mm.331051	NM_001033300	ENSMUSG00000027823	Gmps	670032|AA591640|AI047208|Gm9479	guanine monophosphate synthetase	protein-coding
Diff_Nuc69651	chr9	15079042	15079181	+	0	NA	intron (NM_144933, intron 3 of 11)	intron (NM_144933, intron 3 of 11)	5200	NM_144933	234959	Mm.44151	NM_144933	ENSMUSG00000031935	Med17	77kDa|C330002H14Rik|Crsp6|Trap80	mediator complex subunit 17	protein-coding
Diff_Nuc16544	chr17	12340062	12340201	+	0	NA	intron (NM_026644, intron 1 of 8)	(TCTA)n|Simple_repeat|Simple_repeat	27981	NM_026644	68262	Mm.258300	NM_026644	ENSMUSG00000023827	Agpat4	1500003P24Rik	1-acylglycerol-3-phosphate O-acyltransferase 4 (lysophosphatidic acid acyltransferase, delta)	protein-coding
Diff_Nuc61230	chr2	126188252	126188391	+	0	NA	intron (NM_001080944, intron 20 of 27)	intron (NM_001080944, intron 20 of 27)	128968	NM_001080944	241633	Mm.222235	NM_001080944	ENSMUSG00000060131	Atp8b4	A530043E15|Im	ATPase, class I, type 8B, member 4	protein-coding
Diff_Nuc48362	chr4	41272112	41272251	+	0	NA	Intergenic	Intergenic	-10247	NM_026893	68970	Mm.28891	NM_026893	ENSMUSG00000028436	Dcaf12	1500001L20Rik|5830424K06Rik|AA420338|AI851081|Wdr40a	DDB1 and CUL4 associated factor 12	protein-coding
Diff_Nuc1058	chr13	4212732	4212871	+	0	NA	Intergenic	ETnERV2-int|LTR|ERVK	-20185	NM_001013785	432720	Mm.22832	NM_001013785	ENSMUSG00000071551	Akr1c19	1810010N06Rik	aldo-keto reductase family 1, member C19	protein-coding
Diff_Nuc36273	chr7	96246712	96246851	+	0	NA	Intergenic	Intergenic	240516	NM_028343	72759	Mm.208477	NM_028343	ENSMUSG00000039428	Tmem135	2810439K08Rik|AW319712|PMP52	transmembrane protein 135	protein-coding
Diff_Nuc76193	chr8	102723022	102723161	+	0	NA	Intergenic	Intergenic	782517	NR_132435	234624	Mm.124595	NM_175479	ENSMUSG00000052479	A330008L17Rik	-	RIKEN cDNA A330008L17 gene	ncRNA
Diff_Nuc75297	chr8	74343312	74343451	+	0	NA	Intergenic	RLTR45-int|LTR|ERVK	-62586	NM_145624	236193	Mm.290790	NM_145624	ENSMUSG00000056019	Zfp709	BC021921|GIOT-4|HIT-40	zinc finger protein 709	protein-coding
Diff_Nuc10741	chr11	77175342	77175481	+	0	NA	intron (NM_001291190, intron 1 of 13)	B4A|SINE|B4	13629	NM_001291190	237860	Mm.440381	NM_177710	ENSMUSG00000037926	Ssh2	SSH-2|SSH-2L|mSSH-2L	slingshot homolog 2 (Drosophila)	protein-coding
Diff_Nuc58860	chr2	60675932	60676071	+	0	NA	intron (NM_001141931, intron 2 of 13)	intron (NM_001141931, intron 2 of 13)	43494	NM_001141932	56878	Mm.259667	NM_020296	ENSMUSG00000026970	Rbms1	2600014B10Rik|AI255215|MSSP-1|MSSP-2|MSSP-3|YC1	RNA binding motif, single stranded interacting protein 1	protein-coding
Diff_Nuc26312	chr14	31909162	31909301	+	0	NA	intron (NM_001081251, intron 25 of 32)	L1_Mus4|LINE|L1	32885	NM_001308466	66487	Mm.379116	NM_001308091	ENSMUSG00000058351	Smim4	2010107H07Rik|Gm41122	small integral membrane protein 4	protein-coding
Diff_Nuc10147	chr11	54414472	54414611	+	0	NA	intron (NM_001252497, intron 1 of 11)	B1_Mus2|SINE|Alu	4893	NM_001252497	192786	Mm.254404	NM_175258	ENSMUSG00000037533	Rapgef6	A530068K01|AI844632|BB085664|C030018K18Rik|PDZ-GEF2|Pdzgef2|RA-GEF-2|Ragef2|mKIAA4052	Rap guanine nucleotide exchange factor (GEF) 6	protein-coding
Diff_Nuc17639	chr17	52291582	52291721	+	0	NA	Intergenic	LTR73|LTR|ERV1	269599	NR_045095	100504169	Mm.417731	NR_045095		Gm20098	-	predicted gene, 20098	ncRNA
Diff_Nuc25306	chr15	93120762	93120901	+	0	NA	intron (NM_024189, intron 2 of 3)	intron (NM_024189, intron 2 of 3)	-15221	NM_001346785	223827	Mm.22819	NM_001033275	ENSMUSG00000036197	Gxylt1	Glt8d3|Gm1228|Gm87	glucoside xylosyltransferase 1	protein-coding
Diff_Nuc10025	chr11	50032812	50032951	+	0	NA	Intergenic	Intergenic	-5956	NM_145926	103534	Mm.86759	NM_145926	ENSMUSG00000036620	Mgat4b	AA407995|GnTIVb	mannoside acetylglucosaminyltransferase 4, isoenzyme B	protein-coding
Diff_Nuc75306	chr8	74665392	74665531	+	0	NA	intron (NM_001001491, intron 2 of 7)	intron (NM_001001491, intron 2 of 7)	6270	NM_001001491	326618	Mm.295124	NM_001001491	ENSMUSG00000031799	Tpm4	2610528G24Rik|Tpm4.2|Tpm4.2cy	tropomyosin 4	protein-coding
Diff_Nuc1396	chr13	13558392	13558531	+	0	NA	intron (NM_010917, intron 3 of 19)	YREP_Mm|Unknown|Unknown	28592	NM_010917	18073	Mm.4691	NM_010917	ENSMUSG00000005397	Nid1	A630025O17|Nid|entactin|entactin-1|nidogen-1	nidogen 1	protein-coding
Diff_Nuc70646	chr9	48104562	48104701	+	0	NA	Intergenic	Lx5|LINE|L1	44350	NM_030069	78252	Mm.31626	NM_030069	ENSMUSG00000032028	Nxpe2	4432416J03Rik|AI323362|Fam55b	neurexophilin and PC-esterase domain family, member 2	protein-coding
Diff_Nuc44418	chr5	57799422	57799561	+	0	NA	Intergenic	L1Md_F2|LINE|L1	309667	NR_015588	319216	Mm.332387	NR_015588	ENSMUSG00000097216	4932441J04Rik	-	RIKEN cDNA 4932441J04 gene	ncRNA
Diff_Nuc44346	chr5	55917892	55918031	+	0	NA	Intergenic	L1_Rod|LINE|L1	1176730	NR_038045	330086	Mm.254449	NM_177871	ENSMUSG00000105912	Gm10440	D130065D13|ENSMUSG00000072936	predicted gene 10440	ncRNA
Diff_Nuc37887	chr6	3687762	3687901	+	0	NA	intron (NM_007588, intron 3 of 15)	intron (NM_007588, intron 3 of 15)	-15828	NR_030250	723877		NR_030250	ENSMUSG00000070107	Mir489	Mirn489|mir-489|mmu-mir-489	microRNA 489	ncRNA
Diff_Nuc57437	chr2	17723462	17723601	+	0	NA	Intergenic	Intergenic	-70836	NM_028757	74103	Mm.120298	NM_028757	ENSMUSG00000053702	Nebl	1200007O21Rik|A630080F05Rik|BB140644|D830029A09Rik|Lnebl	nebulette	protein-coding
Diff_Nuc35215	chr7	62357672	62357811	+	0	NA	intron (NM_178705, intron 5 of 11)	L1_Mus1|LINE|L1	267126	NM_178705	233271	Mm.387344	NM_178705	ENSMUSG00000063297	Luzp2	9330154K17Rik|D130073E01	leucine zipper protein 2	protein-coding
Diff_Nuc61594	chr2	136951342	136951481	+	0	NA	Intergenic	Intergenic	-9155	NM_013822	16449	Mm.22398	NM_013822	ENSMUSG00000027276	Jag1	ABE2|Gsfabe2|Htu|Ozz|Ser-1	jagged 1	protein-coding
Diff_Nuc47523	chr4	16470122	16470261	+	0	NA	Intergenic	MTA_Mm-int|LTR|MaLR	378934	NR_045765	100415915	Mm.387180	NR_045765	ENSMUSG00000085112	A530072M11Rik	-	RIKEN cDNA gene A530072M11	ncRNA
Diff_Nuc12479	chr10	17423122	17423261	+	0	NA	Intergenic	Intergenic	-19843	NM_010828	17684	Mm.272321	NM_010828	ENSMUSG00000039910	Cited2	AI835299|ER154-like|Mrg1|Msg2|p35srj	Cbp/p300-interacting transactivator, with Glu/Asp-rich carboxy-terminal domain, 2	protein-coding
Diff_Nuc28611	chr14	102238042	102238181	+	0	NA	intron (NM_201529, intron 3 of 30)	(TCTA)n|Simple_repeat|Simple_repeat	-1729	NM_001347628	380928	Mm.218981	NM_201529	ENSMUSG00000033060	Lmo7	C78582|FBXO20|Gm914|mKIAA0858	LIM domain only 7	protein-coding
Diff_Nuc76329	chr8	106038192	106038331	+	0	NA	Intergenic	ORR1E|LTR|MaLR	-89438	NR_045730	71058	Mm.67707	NR_045730	ENSMUSG00000110336	4933400L20Rik	-	RIKEN cDNA 4933400L20 gene	ncRNA
Diff_Nuc62502	chr2	166888942	166889081	+	0	NA	promoter-TSS (NM_001033196)	promoter-TSS (NM_001033196)	-496	NM_001033196	98999	Mm.297074	NM_001033196	ENSMUSG00000039501	Znfx1	AI481105|Astx3	zinc finger, NFX1-type containing 1	protein-coding
Diff_Nuc23158	chr15	23922182	23922321	+	0	NA	Intergenic	Intergenic	956033	NM_001081299	320865	Mm.241965	NM_001081299	ENSMUSG00000040420	Cdh18	B230220E17Rik|Cdh14l	cadherin 18	protein-coding
Diff_Nuc73752	chr8	30580992	30581131	+	0	NA	Intergenic	L1MA5|LINE|L1	-250953	NM_001347498	210801	Mm.248433	NM_153135	ENSMUSG00000063626	Unc5d	D930029E11Rik|Unc5h4|mKIAA1777	unc-5 netrin receptor D	protein-coding
Diff_Nuc25390	chr15	96196982	96197121	+	0	NA	intron (NM_175251, intron 11 of 20)	intron (NM_175251, intron 11 of 20)	79098	NM_175251	77044	Mm.17166	NM_175251	ENSMUSG00000033237	Arid2	1700124K17Rik|4432409D24Rik|zipzap/p200	AT rich interactive domain 2 (ARID, RFX-like)	protein-coding
Diff_Nuc4847	chr12	6127872	6128011	+	0	NA	Intergenic	L1ME2|LINE|L1	744633	NR_015579	72669	Mm.10434	NM_028318		2810032G03Rik	AI461720	RIKEN cDNA 2810032G03 gene	ncRNA
Diff_Nuc60908	chr2	116492152	116492291	+	0	NA	Intergenic	Intergenic	-212206	NM_026104	67356	Mm.131623	NM_026104	ENSMUSG00000027355	Tmco5	1700095F04Rik|Tmco5a	transmembrane and coiled-coil domains 5	protein-coding
Diff_Nuc38405	chr6	17705422	17705561	+	0	NA	intron (NM_022332, intron 1 of 15)	intron (NM_022332, intron 1 of 15)	6321	NM_022332	64213	Mm.12051	NM_022332	ENSMUSG00000029534	St7	9430001H04Rik|Fam4a2|HELG|RAY1|SEN4|TSG7	suppression of tumorigenicity 7	protein-coding
Diff_Nuc34198	chr7	7342822	7342961	+	0	NA	intron (NM_001105062, intron 4 of 5)	intron (NM_001105062, intron 4 of 5)	9447	NM_001105062	100042591	Mm.469891	NM_001105062	ENSMUSG00000096373	Vmn2r31	-	vomeronasal 2, receptor 31	protein-coding
Diff_Nuc58311	chr2	45859142	45859281	+	0	NA	Intergenic	L1_Mus2|LINE|L1	307086	NR_040497	69405	Mm.396184	NR_040497	ENSMUSG00000086202	1700019E08Rik	-	RIKEN cDNA 1700019E08 gene	ncRNA
Diff_Nuc57160	chr2	9216812	9216951	+	0	NA	Intergenic	Intergenic	105739	NR_038180	73438	Mm.23558	NR_038180	ENSMUSG00000085580	1700061F12Rik	-	RIKEN cDNA 1700061F12 gene	ncRNA
Diff_Nuc69291	chr9	3960162	3960301	+	0	NA	Intergenic	L1Md_F2|LINE|L1	349263	NR_136941	67618	Mm.33970	NM_026276	ENSMUSG00000025894	Aasdhppt	2010309J24Rik|2810407B07Rik|AASD-PPT|CGI-80|LYS2|LYS5	aminoadipate-semialdehyde dehydrogenase-phosphopantetheinyl transferase	protein-coding
Diff_Nuc5853	chr12	41092582	41092721	+	0	NA	intron (NM_178845, intron 2 of 11)	intron (NM_178845, intron 2 of 11)	79726	NM_172575	246196	Mm.26852	NM_172575	ENSMUSG00000055917	Zfp277	2410017E24Rik|NIRF4	zinc finger protein 277	protein-coding
Diff_Nuc59995	chr2	93019882	93020021	+	0	NA	Intergenic	Intergenic	-7790	NM_001025246	277414	Mm.41033	NM_001025246	ENSMUSG00000068735	Trp53i11	Tp53i11	transformation related protein 53 inducible protein 11	protein-coding
Diff_Nuc68706	chr1	179786312	179786451	+	0	NA	Intergenic	RLTR20B3|LTR|ERVK	-59741	NM_007422	11566	Mm.338021	NM_007422	ENSMUSG00000015961	Adss	AI314886|AS|Adss2	adenylosuccinate synthetase, non muscle	protein-coding
Diff_Nuc50742	chr4	115424462	115424601	+	0	NA	intron (NM_172698, intron 3 of 11)	MLT1F1|LTR|MaLR	13853	NM_172698	230648	Mm.283565	NM_172698	ENSMUSG00000034210	Efcab14	4732418C07Rik	EF-hand calcium binding domain 14	protein-coding
Diff_Nuc76413	chr8	108648102	108648241	+	0	NA	intron (NM_010901, intron 9 of 9)	PB1D9|SINE|Alu	-11129	NR_040345	69771	Mm.393274	NR_040344		1810019D21Rik	-	RIKEN cDNA 1810019D21 gene	ncRNA
Diff_Nuc44339	chr5	55815462	55815601	+	0	NA	Intergenic	Lx8|LINE|L1	1074300	NR_038045	330086	Mm.254449	NM_177871	ENSMUSG00000105912	Gm10440	D130065D13|ENSMUSG00000072936	predicted gene 10440	ncRNA
Diff_Nuc43304	chr5	22058022	22058161	+	0	NA	intron (NR_102315, intron 1 of 2)	intron (NR_102315, intron 1 of 2)	1860	NR_102315	320719	Mm.459265	NR_102315	ENSMUSG00000097207	6030443J06Rik	1700030G06Rik	RIKEN cDNA 6030443J06 gene	ncRNA
Diff_Nuc38121	chr6	10292152	10292291	+	0	NA	Intergenic	L1_Mur2|LINE|L1	632157	NR_033776	57866	Mm.4397	NR_033776		AA545190	-	EST AA545190	ncRNA
Diff_Nuc13314	chr10	39519912	39520051	+	0	NA	intron (NM_011264, intron 5 of 31)	RSINE1|SINE|B4	68015	NM_011264	19714	Mm.439723	NM_011264	ENSMUSG00000019841	Rev3l	Rev|Rev3|Sez4	REV3 like, DNA directed polymerase zeta catalytic subunit	protein-coding
Diff_Nuc40348	chr6	72879352	72879491	+	0	NA	Intergenic	Intergenic	28805	NM_001039392	19240	Mm.3532	NM_025284	ENSMUSG00000079523	Tmsb10	Ptmb10|Tb10	thymosin, beta 10	protein-coding
Diff_Nuc34952	chr7	52525832	52525971	+	0	NA	intron (NM_001324535, intron 11 of 12)	intron (NM_001324535, intron 11 of 12)	-12342	NM_001033176	76713	Mm.425445	NM_001033176	ENSMUSG00000070568	Slc6a21	1700039E15Rik|Gm19188	solute carrier family 6 member 21	protein-coding
Diff_Nuc61127	chr2	123262112	123262251	+	0	NA	Intergenic	Intergenic	-653524	NM_001290997	214968	Mm.330536	NM_172537	ENSMUSG00000027200	Sema6d	1110067B02Rik|AA409156|D330011G23|mKIAA1479	sema domain, transmembrane domain (TM), and cytoplasmic domain, (semaphorin) 6D	protein-coding
Diff_Nuc49219	chr4	70750492	70750631	+	0	NA	Intergenic	Lx3B|LINE|L1	-554599	NM_172694	230316	Mm.251188	NM_172694	ENSMUSG00000039270	Megf9	4933405H16Rik|9630025C07|Egfl5|mKIAA0818	multiple EGF-like-domains 9	protein-coding
Diff_Nuc60304	chr2	100799812	100799951	+	0	NA	Intergenic	Lx8|LINE|L1	-665024	NM_009020	19374	Mm.4988	NM_009020	ENSMUSG00000032864	Rag2	Rag-2	recombination activating gene 2	protein-coding
Diff_Nuc14999	chr10	93387542	93387681	+	0	NA	Intergenic	MTC|LTR|MaLR	-33664	NM_019648	56307	Mm.289329	NM_019648	ENSMUSG00000036112	Metap2	4930584B20Rik|A930035J23Rik|AI047573|AL024412|AU014659|Amp2|Mnpep|p67|p67eIF2	methionine aminopeptidase 2	protein-coding
Diff_Nuc52484	chr3	30546132	30546271	+	0	NA	promoter-TSS (NM_001290510)	promoter-TSS (NM_001290510)	539	NM_027941	71827	Mm.45373	NM_027941	ENSMUSG00000027702	Lrrc34	1700007J06Rik|SPATA34	leucine rich repeat containing 34	protein-coding
Diff_Nuc38839	chr6	29499192	29499331	+	0	NA	intron (NM_001347079, intron 21 of 22)	L1M3|LINE|L1	19979	NM_001252382	27056	Mm.6479	NM_012057	ENSMUSG00000029771	Irf5	AW491843|mirf5	interferon regulatory factor 5	protein-coding
Diff_Nuc5197	chr12	16968202	16968341	+	0	NA	intron (NM_009072, intron 17 of 32)	intron (NM_009072, intron 17 of 32)	38653	NM_172574	217430	Mm.379451	NM_172574	ENSMUSG00000045679	Pqlc3	C78076|E030024M05Rik	PQ loop repeat containing	protein-coding
Diff_Nuc321	chrX	57631832	57631971	+	0	NA	intron (NM_001001798, intron 1 of 28)	intron (NM_001001798, intron 1 of 28)	15766	NR_030499	751545		NR_030499	ENSMUSG00000070081	Mir505	Mirn505|mir-505|mmu-mir-505	microRNA 505	ncRNA
Diff_Nuc10030	chr11	50216552	50216691	+	0	NA	intron (NM_172557, intron 11 of 17)	intron (NM_172557, intron 11 of 17)	25400	NM_001347487	59013	Mm.21740	NM_021510	ENSMUSG00000007850	Hnrnph1	AI642080|E430005G16Rik|Hnrnph|Hnrph1	heterogeneous nuclear ribonucleoprotein H1	protein-coding
Diff_Nuc48154	chr4	35003612	35003751	+	0	NA	intron (NM_178061, intron 2 of 3)	intron (NM_178061, intron 2 of 3)	-95623	NM_199157	387510	Mm.386929	NM_199157	ENSMUSG00000042993	Ifnk	-	interferon kappa	protein-coding
Diff_Nuc2157	chr13	35653962	35654101	+	0	NA	Intergenic	L1_Mus3|LINE|L1	-97700	NM_009881	12593	Mm.29002	NM_009881	ENSMUSG00000059288	Cdyl	AI325931	chromodomain protein, Y chromosome-like	protein-coding
Diff_Nuc75568	chr8	83258222	83258361	+	0	NA	intron (NM_053124, intron 2 of 23)	intron (NM_053124, intron 2 of 23)	5067	NM_053124	93762	Mm.246803	NM_053124	ENSMUSG00000031715	Smarca5	4933427E24Rik|D030040M08Rik|D330027N15Rik|MommeD4|Snf2h	SWI/SNF related, matrix associated, actin dependent regulator of chromatin, subfamily a, member 5	protein-coding
Diff_Nuc70672	chr9	49279492	49279631	+	0	NA	intron (NM_172770, intron 4 of 21)	intron (NM_172770, intron 4 of 21)	14769	NM_172770	235330	Mm.177413	NM_172770	ENSMUSG00000040219	Ttc12	E330017O07Rik	tetratricopeptide repeat domain 12	protein-coding
Diff_Nuc57096	chr2	8012002	8012141	+	0	NA	Intergenic	Intergenic	-694246	NM_001110231	14007	Mm.398543	NM_010160	ENSMUSG00000002107	Celf2	B230218O03|B230345P09Rik|C88023|CELF-2|CUG-BP2|Cugbp2|D230046B21Rik|Etr-3|Napor|Napor-2|mETR-3	CUGBP, Elav-like family member 2	protein-coding
Diff_Nuc70019	chr9	27803782	27803921	+	0	NA	intron (NM_177906, intron 1 of 7)	intron (NM_177906, intron 1 of 7)	204997	NM_177906	330908	Mm.379474	NM_177906	ENSMUSG00000062257	Opcml	2900075O15Rik|3732419F12|AI844366|B930023M13Rik|C230027C17|Gm181|Obcam	opioid binding protein/cell adhesion molecule-like	protein-coding
Diff_Nuc59467	chr2	77597762	77597901	+	0	NA	intron (NM_178723, intron 1 of 9)	B3|SINE|B2	-56502	NM_001113399	241494	Mm.490320	NM_178723	ENSMUSG00000027016	Zfp385b	B830010L13Rik|C130013B13Rik|Zfp533|Znf385b	zinc finger protein 385B	protein-coding
Diff_Nuc31750	chr18	22557137	22557276	+	0	NA	intron (NM_001167777, intron 3 of 12)	intron (NM_001167777, intron 3 of 12)	53616	NM_001167777	211961	Mm.392310	NM_001167777	ENSMUSG00000045215	Asxl3	C230079D11Rik|D430002O22Rik|D930044O18Rik|Gm329|Gm945	additional sex combs like 3 (Drosophila)	protein-coding
Diff_Nuc15154	chr10	97779812	97779951	+	0	NA	intron (NR_045179, intron 4 of 4)	L1MB1|LINE|L1	34620	NR_045179	667438	Mm.414522	NR_045179		Gm8633	EG667438	predicted gene 8633	ncRNA
Diff_Nuc60033	chr2	94262622	94262761	+	0	NA	intron (NM_007466, intron 8 of 13)	intron (NM_007466, intron 8 of 13)	15652	NM_007466	11800	Mm.181824	NM_007466	ENSMUSG00000027193	Api5	AAC-11|AI196452|API-5	apoptosis inhibitor 5	protein-coding
Diff_Nuc60745	chr2	112772812	112772951	+	0	NA	intron (NM_001319156, intron 10 of 103)	RLTR1C|LTR|ERV1	97607	NM_177652	20192	Mm.436657	NM_177652	ENSMUSG00000057378	Ryr3	AI851294|C230090H21|RYR-3	ryanodine receptor 3	protein-coding
Diff_Nuc13776	chr10	52659732	52659871	+	0	NA	intron (NM_178675, intron 2 of 7)	intron (NM_178675, intron 2 of 7)	249494	NM_178675	215085	Mm.338690	NM_178675	ENSMUSG00000038602	Slc35f1	Duf6|E130016L02	solute carrier family 35, member F1	protein-coding
Diff_Nuc61120	chr2	123078782	123078921	+	0	NA	Intergenic	L1Md_F3|LINE|L1	471116	NM_021507	59010	Mm.28986	NM_021507	ENSMUSG00000005803	Sqrdl	0610039J17Rik|4930557M22Rik|SQOR	sulfide quinone reductase-like (yeast)	protein-coding
Diff_Nuc44542	chr5	60492832	60492971	+	0	NA	Intergenic	Intergenic	-115660	NR_040682	71057	Mm.50817	NR_040682	ENSMUSG00000106013	4933402J10Rik	-	RIKEN cDNA 4933402J10 gene	ncRNA
Diff_Nuc9630	chr11	38315142	38315281	+	0	NA	intron (NR_040295, intron 1 of 2)	intron (NR_040295, intron 1 of 2)	18336	NR_040295	100502917	Mm.61144	NR_040295		Gm12130	OTTMUSG00000005424	predicted gene 12130	ncRNA
Diff_Nuc66316	chr1	108222962	108223101	+	0	NA	intron (NM_133821, intron 4 of 16)	intron (NM_133821, intron 4 of 16)	154585	NM_133821	98432	Mm.24115	NM_133821	ENSMUSG00000044340	Phlpp1	AI836256|Phlpp|Plekhe1|SCOP|mKIAA0606	PH domain and leucine rich repeat protein phosphatase 1	protein-coding
Diff_Nuc11285	chr11	93774642	93774781	+	0	NA	intron (NM_001346525, intron 7 of 17)	intron (NM_001346525, intron 7 of 17)	27178	NM_134012	103537	Mm.210334	NM_134012	ENSMUSG00000059474	Mbtd1	AA408199|AI194990|hemp	mbt domain containing 1	protein-coding
Diff_Nuc13718	chr10	50894142	50894281	+	0	NA	Intergenic	AT_rich|Low_complexity|Low_complexity	278754	NM_011376	20464	Mm.4774	NM_011376	ENSMUSG00000019913	Sim1	bHLHe14|mSIM1	single-minded homolog 1 (Drosophila)	protein-coding
Diff_Nuc34565	chr7	28538502	28538641	+	0	NA	Intergenic	Intergenic	-12121	NR_033484	100043229	Mm.458666	NR_033484	ENSMUSG00000109143	Gm10046	ENSMUSG00000058661	predicted gene 10046	ncRNA
Diff_Nuc22804	chr15	15884242	15884381	+	0	NA	Intergenic	MTD|LTR|MaLR	-823545	NM_009869	12565	Mm.439758	NM_009869	ENSMUSG00000025370	Cdh9	-	cadherin 9	protein-coding
Diff_Nuc61400	chr2	132087322	132087461	+	0	NA	Intergenic	RMER4B|LTR|ERVK	-1493	NM_001291040	110911	Mm.284503	NM_138651	ENSMUSG00000058793	Cds2	5730450N06Rik|5730460C18Rik|AI854580|D2Wsu127e	CDP-diacylglycerol synthase (phosphatidate cytidylyltransferase) 2	protein-coding
Diff_Nuc46822	chr5	142249532	142249671	+	0	NA	intron (NM_177879, intron 4 of 44)	MTEa|LTR|MaLR	532113	NM_177879	330222	Mm.151931	NM_177879	ENSMUSG00000039683	Sdk1	5330440E10|6720466O15Rik	sidekick cell adhesion molecule 1	protein-coding
Diff_Nuc54407	chr3	85374632	85374771	+	0	NA	Intergenic	Intergenic	-3350	NM_144896	229487	Mm.52275	NM_144896	ENSMUSG00000028085	Gatb	9430026F02Rik|Pet112|Pet112l	glutamyl-tRNA(Gln) amidotransferase, subunit B	protein-coding
Diff_Nuc17927	chr17	61333652	61333791	+	0	NA	Intergenic	Intergenic	1896945	NM_207654	13640	Mm.7978	NM_010109	ENSMUSG00000048915	Efna5	AL-1|AV158822|EFL-5|Ephrin-A5|Epl7|LERK-7|RAGS	ephrin A5	protein-coding
Diff_Nuc17918	chr17	61077812	61077951	+	0	NA	Intergenic	Intergenic	-1925136	NM_026497	67993	Mm.36507	NM_026497	ENSMUSG00000024228	Nudt12	0610016O18Rik	nudix (nucleoside diphosphate linked moiety X)-type motif 12	protein-coding
Diff_Nuc27166	chr14	61338152	61338291	+	0	NA	intron (NM_001033272, intron 4 of 12)	intron (NM_001033272, intron 4 of 12)	-13520	NM_001310594	219140	Mm.149776	NM_001033272	ENSMUSG00000021990	Spata13	C79050|ESTM11|X83327|mFLJ00298	spermatogenesis associated 13	protein-coding
Diff_Nuc42545	chr6	148125412	148125551	+	0	NA	TTS (NM_001347516)	TTS (NM_001347516)	-35329	NR_015615	320737	Mm.137858	NR_015615		4732416N19Rik	-	RIKEN cDNA 4732416N19 gene	ncRNA
Diff_Nuc13739	chr10	51517522	51517661	+	0	NA	Intergenic	Lx2|LINE|L1	-40591	NR_045158	71090	Mm.72588	NM_027670	ENSMUSG00000062224	4933411G06Rik	-	Sumo1 pseudogene	pseudo
Diff_Nuc51179	chr4	135483922	135484061	+	0	NA	intron (NM_024243, intron 3 of 7)	B2_Mm1t|SINE|B2	7350	NM_024243	71665	Mm.439940	NM_024243	ENSMUSG00000028673	Fuca1	0610006A03Rik|9530055J05Rik|Afuc|Fuca	fucosidase, alpha-L- 1, tissue	protein-coding
Diff_Nuc74811	chr8	60751902	60752041	+	0	NA	intron (NM_175032, intron 4 of 11)	intron (NM_175032, intron 4 of 11)	427622	NM_001177534	100271928	Mm.484123	NM_001177534		Gm15881	OTTMUSG00000027193	predicted gene 15881	protein-coding
Diff_Nuc36309	chr7	97174472	97174611	+	0	NA	Intergenic	Intergenic	-3128	NR_110365	319711	Mm.31753	NR_015614	ENSMUSG00000097585	E230029C05Rik	AI452102|B230337J15	RIKEN cDNA E230029C05 gene	ncRNA
Diff_Nuc66853	chr1	124984982	124985121	+	0	NA	Intergenic	B3A|SINE|B2	957085	NM_199021	269109	Mm.417716	NM_199021	ENSMUSG00000036815	Dpp10	6430601K09Rik|DPP X|Dprp3	dipeptidylpeptidase 10	protein-coding
Diff_Nuc59864	chr2	89243422	89243561	+	0	NA	Intergenic	Intergenic	3743	NM_146790	258786	Mm.377690	NM_146790	ENSMUSG00000111517	Olfr1238	MOR231-11	olfactory receptor 1238	protein-coding
Diff_Nuc51186	chr4	135718372	135718511	+	0	NA	Intergenic	Intergenic	-9748	NM_177733	242705	Mm.307932	NM_177733	ENSMUSG00000018983	E2f2	E2F-2	E2F transcription factor 2	protein-coding
Diff_Nuc14947	chr10	91930702	91930841	+	0	NA	Intergenic	B4A|SINE|B4	-92653	NR_046027	627800	Mm.391417	NR_046027	ENSMUSG00000098040	Gm20757	-	predicted gene, 20757	ncRNA
Diff_Nuc67253	chr1	137296272	137296411	+	0	NA	intron (NM_153774, intron 14 of 23)	intron (NM_153774, intron 14 of 23)	-24701	NM_175259	77552	Mm.41407	NM_175259	ENSMUSG00000041889	Shisa4	9330132O05Rik|Tmem58|mShisa4	shisa family member 4	protein-coding
Diff_Nuc39536	chr6	47408282	47408421	+	0	NA	intron (NM_012042, intron 1 of 21)	intron (NM_012042, intron 1 of 21)	4028	NM_012042	26965	Mm.87611	NM_012042	ENSMUSG00000029686	Cul1	-	cullin 1	protein-coding
Diff_Nuc39277	chr6	41163022	41163161	+	0	NA	Intergenic	Intergenic	-89180	NM_011646	22074	Mm.383263	NM_011646	ENSMUSG00000054106	Try4	0910001B19Rik|Td	trypsin 4	protein-coding
Diff_Nuc58848	chr2	60204422	60204561	+	0	NA	intron (NM_013825, intron 3 of 34)	intron (NM_013825, intron 3 of 34)	16797	NM_013825	17076	Mm.2074	NM_013825	ENSMUSG00000026980	Ly75	CD205|DEC-205|DEC205	lymphocyte antigen 75	protein-coding
Diff_Nuc22363	chr15	3514942	3515081	+	0	NA	intron (NM_001048178, intron 1 of 8)	Lx7|LINE|L1	16831	NM_001286370	14600	Mm.3986	NM_010284	ENSMUSG00000055737	Ghr	GHBP|GHR/BP	growth hormone receptor	protein-coding
Diff_Nuc3490	chr13	83079752	83079891	+	0	NA	Intergenic	Intergenic	-242489	NR_039537	100628621		NR_039537	ENSMUSG00000106655	Mir3961	mmu-mir-3961	microRNA 3961	ncRNA
Diff_Nuc61222	chr2	125732752	125732891	+	0	NA	intron (NM_001291002, intron 5 of 9)	intron (NM_001291002, intron 5 of 9)	40862	NM_001291002	69976	Mm.20216	NM_175154	ENSMUSG00000027207	Galk2	2810017M24Rik|AI327030|Gk2	galactokinase 2	protein-coding
Diff_Nuc71023	chr9	60070182	60070321	+	0	NA	intron (NM_001040426, intron 7 of 17)	intron (NM_001040426, intron 7 of 17)	-81224	NM_172444	207596	Mm.28791	NM_172444	ENSMUSG00000032289	Thsd4	ADAMTSL-6|ADAMTSL6|AI585901|Adamtsl4|B230114P05Rik	thrombospondin, type I, domain containing 4	protein-coding
Diff_Nuc21960	chr16	84992792	84992931	+	0	NA	intron (NM_007471, intron 11 of 15)	B1F|SINE|Alu	20405	NR_045889	100038614	Mm.441351	NR_045889		Gm10791	ENSMUSG00000074933	predicted gene 10791	ncRNA
Diff_Nuc36219	chr7	95073302	95073441	+	0	NA	intron (NM_001081414, intron 4 of 9)	intron (NM_001081414, intron 4 of 9)	340693	NM_001143834	108071	Mm.235018	NM_001033224	ENSMUSG00000049583	Grm5	6430542K11Rik|AI850523|Glu5R|Gprc1e|mGluR5|mGluR5b	glutamate receptor, metabotropic 5	protein-coding
Diff_Nuc9965	chr11	48066322	48066461	+	0	NA	Intergenic	Intergenic	-547471	NM_008143	14694	Mm.5305	NM_008143	ENSMUSG00000020372	Rack1	AL033335|GB-like|Gnb2-rs1|Gnb2l1|p205	receptor for activated C kinase 1	protein-coding
Diff_Nuc66919	chr1	126369892	126370031	+	0	NA	Intergenic	MLT1A|LTR|MaLR	-427825	NM_199021	269109	Mm.417716	NM_199021	ENSMUSG00000036815	Dpp10	6430601K09Rik|DPP X|Dprp3	dipeptidylpeptidase 10	protein-coding
Diff_Nuc50083	chr4	94961922	94962061	+	0	NA	Intergenic	Intergenic	-243078	NM_010591	16476	Mm.275071	NM_010591	ENSMUSG00000052684	Jun	AP-1|Junc|c-jun	jun proto-oncogene	protein-coding
Diff_Nuc3669	chr13	87797852	87797991	+	0	NA	Intergenic	Intergenic	-1163156	NM_010103	13612	Mm.125580	NM_010103	ENSMUSG00000034488	Edil3	Del-1|Del1	EGF-like repeats and discoidin I-like domains 3	protein-coding
Diff_Nuc34231	chr7	10819892	10820031	+	0	NA	Intergenic	L1_Mm|LINE|L1	40739	NM_134230	171264	Mm.222637	NM_134230	ENSMUSG00000043066	Vmn1r66	S67|V1re11|V1re3	vomeronasal 1 receptor 66	protein-coding
Diff_Nuc19354	chr16	13823422	13823561	+	0	NA	intron (NM_001346111, intron 1 of 6)	B1_Mus2|SINE|Alu	4147	NM_001346111	18203	Mm.380410	NM_010946	ENSMUSG00000022681	Ntan1	PNAA|PNAD	N-terminal Asn amidase	protein-coding
Diff_Nuc37799	chr7	148423792	148423931	+	0	NA	intron (NM_001081118, intron 4 of 17)	intron (NM_001081118, intron 4 of 17)	9174	NM_001081118	101471	Mm.248656	NM_207211	ENSMUSG00000038611	Phrf1	AA673488	PHD and ring finger domains 1	protein-coding
Diff_Nuc73728	chr8	29738562	29738701	+	0	NA	Intergenic	ORR1D2|LTR|MaLR	-543306	NR_033590	666422	Mm.484413	NR_033590	ENSMUSG00000110372	Gm8096	EG666422	3-phosphoglycerate dehydrogenase pseudogene	pseudo
Diff_Nuc6764	chr12	66023402	66023541	+	0	NA	intron (NM_001025605, intron 3 of 4)	intron (NM_001025605, intron 3 of 4)	4573	NM_001025605	217648	Mm.341586	NM_001025605	ENSMUSG00000047227	Gm527	-	predicted gene 527	protein-coding
Diff_Nuc33475	chr18	70960992	70961131	+	0	NA	Intergenic	RMER4B|LTR|ERVK	233115	NM_010773	17191	Mm.322	NM_010773	ENSMUSG00000024513	Mbd2	MBD2a	methyl-CpG binding domain protein 2	protein-coding
Diff_Nuc64730	chr1	58835572	58835711	+	0	NA	Intergenic	Intergenic	-16577	NM_009812	12370	Mm.336851	NM_009812	ENSMUSG00000026029	Casp8	CASP-8|FLICE|MACH|Mch5	caspase 8	protein-coding
Diff_Nuc29376	chr14	124035912	124036051	+	0	NA	Intergenic	RMER20B|LTR|ERVK	-9615	NM_177393	338370	Mm.255348	NM_177393	ENSMUSG00000000197	Nalcn	A530023G15Rik|AI849508|Vgcnl1	sodium leak channel, non-selective	protein-coding
Diff_Nuc9604	chr11	37520432	37520571	+	0	NA	Intergenic	ORR1A1-int|LTR|MaLR	48010	NR_131154	100039148	Mm.120467	NR_131154	ENSMUSG00000087388	Gm12128	OTTMUSG00000005422	predicted gene 12128	ncRNA
Diff_Nuc47954	chr4	28802252	28802391	+	0	NA	intron (NM_001122889, intron 5 of 9)	intron (NM_001122889, intron 5 of 9)	62026	NM_001122889	13841	Mm.257266	NM_010141	ENSMUSG00000028289	Epha7	Cek11|Ebk|Ehk3|Hek11|Mdk1	Eph receptor A7	protein-coding
Diff_Nuc64413	chr1	50585702	50585841	+	0	NA	Intergenic	L1_Rod|LINE|L1	-398596	NM_019790	56363	Mm.245154	NM_019790	ENSMUSG00000026109	Tmeff2	4832418D20Rik|7630402F16Rik|TR-2	transmembrane protein with EGF-like and two follistatin-like domains 2	protein-coding
Diff_Nuc62315	chr2	158670502	158670641	+	0	NA	intron (NM_145742, intron 18 of 20)	intron (NM_145742, intron 18 of 20)	50028	NM_001291144	71715	Mm.315652	NM_145742	ENSMUSG00000027655	Dhx35	1200009D07Rik|Ddx35	DEAH (Asp-Glu-Ala-His) box polypeptide 35	protein-coding
Diff_Nuc59978	chr2	92348982	92349121	+	0	NA	Intergenic	L1_Mur3|LINE|L1	-48376	NM_145832	228368	Mm.273990	NM_145832	ENSMUSG00000049922	Slc35c1	E430007K15Rik|fuct1	solute carrier family 35, member C1	protein-coding
Diff_Nuc37258	chr7	127327662	127327801	+	0	NA	TTS (NM_028085)	TTS (NM_028085)	10359	NM_028085	72074	Mm.23165	NM_028085	ENSMUSG00000030909	Anks4b	2010013E14Rik|AI956809|Harp	ankyrin repeat and sterile alpha motif domain containing 4B	protein-coding
Diff_Nuc25958	chr14	19718772	19718911	+	0	NA	intron (NM_144839, intron 2 of 5)	intron (NM_144839, intron 2 of 5)	7300	NM_144839	218793	Mm.23551	NM_144839	ENSMUSG00000058317	Ube2e2	BC016265	ubiquitin-conjugating enzyme E2E 2	protein-coding
Diff_Nuc40330	chr6	72232182	72232321	+	0	NA	Intergenic	Intergenic	-22353	NM_001282071	20388	Mm.46033	NM_147779	ENSMUSG00000056370	Sftpb	AI562151|SF-B|SP-B|Sftp-3|Sftp3	surfactant associated protein B	protein-coding
Diff_Nuc44912	chr5	71788572	71788711	+	0	NA	Intergenic	Intergenic	150803	NM_030052	78174	Mm.60690	NM_030052	ENSMUSG00000049387	Cox7b2	4930503B16Rik	cytochrome c oxidase subunit VIIb2	protein-coding
Diff_Nuc41198	chr6	101958142	101958281	+	0	NA	Intergenic	Intergenic	233968	NR_027989	207157	Mm.57632	NM_177579	ENSMUSG00000052236	Gm9871	0610005I04|EG207157|ENSMUSG00000052236	predicted gene 9871	ncRNA
Diff_Nuc64669	chr1	57084852	57084991	+	0	NA	Intergenic	Intergenic	56608	NR_024325	329160	Mm.419039	NR_024325	ENSMUSG00000087022	9130024F11Rik	B530002L08|EG329160	RIKEN cDNA 9130024F11 gene	ncRNA
Diff_Nuc61054	chr2	120781792	120781931	+	0	NA	intron (NM_009461, intron 3 of 46)	L1Md_F2|LINE|L1	14590	NM_009461	22222	Mm.389330	NM_009461	ENSMUSG00000027272	Ubr1	AI504731	ubiquitin protein ligase E3 component n-recognin 1	protein-coding
Diff_Nuc34288	chr7	13426542	13426681	+	0	NA	intron (NM_022981, intron 4 of 7)	intron (NM_022981, intron 4 of 7)	6452	NM_022981	65020	Mm.292297	NM_022981	ENSMUSG00000058638	Zfp110	2900024E01Rik|N28112|NRIF|Nrif1	zinc finger protein 110	protein-coding
Diff_Nuc38024	chr6	7318132	7318271	+	0	NA	Intergenic	Intergenic	-186684	NM_001311060	21333	Mm.1440	NM_009311	ENSMUSG00000061762	Tac1	4930528L02Rik|NK-1|NK1|Nkna|PPT-A|PPTA|SP	tachykinin 1	protein-coding
Diff_Nuc9866	chr11	44742522	44742661	+	0	NA	intron (NM_007897, intron 10 of 15)	intron (NM_007897, intron 10 of 15)	187839	NR_045100	100504255	Mm.123608	NR_045100	ENSMUSG00000084773	Gm12159	OTTMUSG00000005475	predicted gene 12159	ncRNA
Diff_Nuc41792	chr6	119926382	119926521	+	0	NA	intron (NM_198703, intron 4 of 27)	Lx8|LINE|L1	57878	NR_030487	735290		NR_030487	ENSMUSG00000076217	Mir706	Mirn706|mir-706|mmu-mir-706	microRNA 706	ncRNA
Diff_Nuc35500	chr7	70221692	70221831	+	0	NA	Intergenic	Intergenic	135651	NM_007390	11441	Mm.113464	NM_007390	ENSMUSG00000030525	Chrna7	Acra7|alpha7|nAchR	cholinergic receptor, nicotinic, alpha polypeptide 7	protein-coding
Diff_Nuc51053	chr4	129157612	129157751	+	0	NA	intron (NM_133889, intron 9 of 10)	B1_Mus1|SINE|Alu	10333	NM_080442	58864	Mm.143802	NM_080442	ENSMUSG00000000411	Tssk3	1700014N07Rik|4930594I21Rik|Stk22c|Stk22d|Tsk-3|Tssk-3|Tssk3b	testis-specific serine kinase 3	protein-coding
Diff_Nuc34547	chr7	27341552	27341691	+	0	NA	intron (NM_001048220, intron 2 of 8)	intron (NM_001048220, intron 2 of 8)	21579	NM_001048219	233001	Mm.11889	NM_194056	ENSMUSG00000054102	Nlrp9a	D7Ertd565e|Nalp-theta|Nalp9a	NLR family, pyrin domain containing 9A	protein-coding
Diff_Nuc16386	chr17	6099052	6099191	+	0	NA	Intergenic	Intergenic	-7709	NM_001103181	68842	Mm.449307	NM_054040	ENSMUSG00000034377	Tulp4	1110057P05Rik|2210038L17Rik|Tusp	tubby like protein 4	protein-coding
Diff_Nuc32303	chr18	36516892	36517031	+	0	NA	intron (NM_001081365, intron 1 of 2)	intron (NM_001081365, intron 1 of 2)	8683	NM_001081365	66060	Mm.272527	NM_001081365	ENSMUSG00000046727	Cystm1	0610010O12Rik	cysteine-rich transmembrane module containing 1	protein-coding
Diff_Nuc71008	chr9	59623292	59623431	+	0	NA	intron (NM_173018, intron 1 of 43)	B1_Mus2|SINE|Alu	24380	NM_173018	270163	Mm.249545	NM_173018	ENSMUSG00000039585	Myo9a	4732465J09Rik|C130068I12Rik|C230003M11	myosin IXa	protein-coding
Diff_Nuc43263	chr5	20433702	20433841	+	0	NA	intron (NM_001080977, intron 1 of 7)	B1_Mur2|SINE|Alu	-23036	NR_030699	320770	Mm.491217	NR_030699	ENSMUSG00000101013	A630072M18Rik	Aptr	RIKEN cDNA A630072M18 gene	ncRNA
Diff_Nuc41701	chr6	116915672	116915811	+	0	NA	Intergenic	L1MA4|LINE|L1	-202812	NM_001012477	20315	Mm.303231	NM_013655	ENSMUSG00000061353	Cxcl12	Pbsf|Scyb12|Sdf1|Tlsf|Tpar1	chemokine (C-X-C motif) ligand 12	protein-coding
Diff_Nuc75511	chr8	81571172	81571311	+	0	NA	intron (NM_178267, intron 1 of 14)	intron (NM_178267, intron 1 of 14)	18905	NM_178267	622675	Mm.48724	NM_178267	ENSMUSG00000071064	Zfp827	2810449M09Rik|D630040G17Rik|Znf827	zinc finger protein 827	protein-coding
Diff_Nuc17544	chr17	47788522	47788661	+	0	NA	intron (NM_198421, intron 2 of 6)	intron (NM_198421, intron 2 of 6)	20952	NM_198421	224836	Mm.59393	NM_198421	ENSMUSG00000090115	Usp49	C330046L10Rik|Gm545	ubiquitin specific peptidase 49	protein-coding
Diff_Nuc67547	chr1	146269932	146270071	+	0	NA	Intergenic	Intergenic	144796	NM_001290269	624910	Mm.389199	NM_001290269	ENSMUSG00000098509	Rgs21	EG624910	regulator of G-protein signalling 21	protein-coding
Diff_Nuc55679	chr3	124098942	124099081	+	0	NA	Intergenic	Intergenic	29935	NM_027939	71824	Mm.331353	NM_027939	ENSMUSG00000027973	1700006A11Rik	-	RIKEN cDNA 1700006A11 gene	protein-coding
Diff_Nuc9068	chr11	21574332	21574471	+	0	NA	intron (NM_145425, intron 6 of 17)	intron (NM_145425, intron 6 of 17)	102117	NM_145425	216560	Mm.138090	NM_145425	ENSMUSG00000020319	Wdpcp	AV249152	WD repeat containing planar cell polarity effector	protein-coding
Diff_Nuc12742	chr10	25380722	25380861	+	0	NA	intron (NR_136909, intron 3 of 3)	intron (NR_136909, intron 3 of 3)	124599	NR_136909	102640597	Mm.412041	NR_136909	ENSMUSG00000101537	Gm29571	-	predicted gene 29571	ncRNA
Diff_Nuc57230	chr2	12044462	12044601	+	0	NA	intron (NM_001001309, intron 27 of 29)	Lx7|LINE|L1	-178342	NR_040353	338535	Mm.483275	NR_040353	ENSMUSG00000086843	E030013I19Rik	-	RIKEN cDNA E030013I19 gene	ncRNA
Diff_Nuc55607	chr3	121310742	121310881	+	0	NA	Intergenic	Intergenic	35592	NR_036456	100503044	Mm.65320	NM_176992	ENSMUSG00000044522	A730020M07Rik	-	RIKEN cDNA A730020M07 gene	ncRNA
Diff_Nuc39272	chr6	40964352	40964491	+	0	NA	Intergenic	Intergenic	-14943	NM_001102660	100040208	Mm.333011	NM_001102660	ENSMUSG00000096525	Gm2663	-	predicted gene 2663	protein-coding
Diff_Nuc4379	chr13	109852952	109853091	+	0	NA	intron (NM_011056, intron 3 of 16)	intron (NM_011056, intron 3 of 16)	-261917	NR_030644	100124489		NR_030644	ENSMUSG00000076946	Mir582	Mirn582|mir-582|mmu-mir-582	microRNA 582	ncRNA
Diff_Nuc4724	chr13	120135252	120135391	+	0	NA	intron (NM_001308506, intron 14 of 16)	RMER6D|LTR|ERVK	62497	NM_008710	18115	Mm.132584	NM_008710	ENSMUSG00000025453	Nnt	4930423F13Rik|AI323702|BB168308	nicotinamide nucleotide transhydrogenase	protein-coding
Diff_Nuc44	chrX	6895032	6895171	+	0	NA	intron (NM_001243762, intron 1 of 13)	intron (NM_001243762, intron 1 of 13)	1383	NM_001243762	12728	Mm.486257	NM_016691	ENSMUSG00000004317	Clcn5	5430408K11Rik|ClC-5|Clc4-1|Clc5|Clcn4-1|D930009B12Rik|DXImx42e|Sfc13|T25545	chloride channel, voltage-sensitive 5	protein-coding
Diff_Nuc53753	chr3	67820772	67820911	+	0	NA	intron (NM_001113419, intron 1 of 10)	intron (NM_001113419, intron 1 of 10)	-47883	NM_001113421	30953	Mm.331064	NM_013928	ENSMUSG00000027777	Schip1	Nf2ip|Schip-1	schwannomin interacting protein 1	protein-coding
Diff_Nuc18065	chr17	65495462	65495601	+	0	NA	Intergenic	Intergenic	-310120	NM_030031	78057	Mm.109380	NM_030031	ENSMUSG00000024088	4930583I09Rik	-	RIKEN cDNA 4930583I09 gene	protein-coding
Diff_Nuc65926	chr1	97488002	97488141	+	0	NA	3' UTR (NM_009183, exon 5 of 5)	3' UTR (NM_009183, exon 5 of 5)	76100	NM_009183	20452	Mm.306228	NM_009183	ENSMUSG00000040710	St8sia4	PST|PST-1|SIAT8-D|ST8SiaIV|Siat8d	ST8 alpha-N-acetyl-neuraminide alpha-2,8-sialyltransferase 4	protein-coding
Diff_Nuc24269	chr15	55577962	55578101	+	0	NA	intron (NM_016667, intron 3 of 6)	ID_B1|SINE|B4	160473	NM_016667	20649	Mm.309425	NM_016667	ENSMUSG00000060429	Sntb1	-	syntrophin, basic 1	protein-coding
Diff_Nuc24514	chr15	62909162	62909301	+	0	NA	Intergenic	L1Md_A|LINE|L1	401932	NR_045279	432958	Mm.255105	NR_045279		Gm20740	-	predicted gene, 20740	ncRNA
Diff_Nuc65821	chr1	93998472	93998611	+	0	NA	intron (NM_207225, intron 2 of 26)	intron (NM_207225, intron 2 of 26)	78377	NM_207225	208727	Mm.318567	NM_207225	ENSMUSG00000026313	Hdac4	4932408F19Rik|HD4	histone deacetylase 4	protein-coding
Diff_Nuc40863	chr6	89801352	89801491	+	0	NA	Intergenic	L1VL1|LINE|L1	-5812	NM_053221	113848	Mm.349358	NM_053221	ENSMUSG00000068232	Vmn1r42	V1ra1|V1ra3|V1ra6	vomeronasal 1 receptor 42	protein-coding
Diff_Nuc22314	chr16	97480742	97480881	+	0	NA	Intergenic	Intergenic	-88469	NM_031174	13508	Mm.102437	NM_031174	ENSMUSG00000050272	Dscam	4932410A21Rik	Down syndrome cell adhesion molecule	protein-coding
Diff_Nuc18900	chr17	91119382	91119521	+	0	NA	intron (NM_001346957, intron 3 of 18)	intron (NM_001346957, intron 3 of 18)	73365	NR_136930	102634634		NR_136930		Gm20491	-	enolase 1, alpha non-neuron pseudogene	pseudo
Diff_Nuc37840	chr7	150750702	150750841	+	0	NA	intron (NM_013742, intron 18 of 22)	intron (NM_013742, intron 18 of 22)	5893	NR_106031	102465644		NR_106031	ENSMUSG00000098593	Mir7064	Gm27632|mmu-mir-7064	microRNA 7064	ncRNA
Diff_Nuc17566	chr17	49695952	49696091	+	0	NA	intron (NM_001008231, intron 1 of 25)	intron (NM_001008231, intron 1 of 25)	7641	NM_001008231	76441	Mm.211275	NM_001008231	ENSMUSG00000040260	Daam2	2310016D11Rik|AI843643|AW557870	dishevelled associated activator of morphogenesis 2	protein-coding
Diff_Nuc52910	chr3	42394142	42394281	+	0	NA	Intergenic	B3A|SINE|B2	847671	NM_027271	73852	Mm.29006	NM_027271	ENSMUSG00000025766	D3Ertd751e	2810009O15Rik|4930415G15Rik	DNA segment, Chr 3, ERATO Doi 751, expressed	protein-coding
Diff_Nuc893	chrX	143213002	143213141	+	0	NA	Intergenic	Lx9|LINE|L1	-183985	NM_008312	15560	Mm.439670	NM_008312	ENSMUSG00000041380	Htr2c	5-HT2C|5-HT2cR|5-HTR2C|5HT1c|Htr1c|SR1	5-hydroxytryptamine (serotonin) receptor 2C	protein-coding
Diff_Nuc46639	chr5	132973372	132973511	+	0	NA	intron (NM_177047, intron 1 of 19)	intron (NM_177047, intron 1 of 19)	44772	NM_177047	319974	Mm.409595	NM_177047	ENSMUSG00000029673	Auts2	2700063G02Rik|A730011F23Rik|D830032G16Rik	autism susceptibility candidate 2	protein-coding
Diff_Nuc3002	chr13	67113822	67113961	+	0	NA	intron (NR_045851, intron 2 of 8)	MER20B|DNA|MER1_type	19450	NR_045851	71226	Mm.399574	NR_045851		4933433G19Rik	-	RIKEN cDNA 4933433G19 gene	ncRNA
Diff_Nuc17099	chr17	30750102	30750241	+	0	NA	promoter-TSS (NM_001113560)	promoter-TSS (NM_001113560)	-567	NM_001113560	109801	Mm.261984	NM_025374	ENSMUSG00000024026	Glo1	0610009E22Rik|1110008E19Rik|2510049H23Rik|AW550643|GLY1|Glo-1|Glo-1r|Glo-1s|Glo1-r|Glo1-s|Qglo	glyoxalase 1	protein-coding
Diff_Nuc573	chrX	91026962	91027101	+	0	NA	intron (NM_145630, intron 8 of 11)	intron (NM_145630, intron 8 of 11)	50403	NM_145630	236900	Mm.12775	NM_145630	ENSMUSG00000035232	Pdk3	2610001M10Rik|AI035637	pyruvate dehydrogenase kinase, isoenzyme 3	protein-coding
Diff_Nuc52376	chr3	27488132	27488271	+	0	NA	intron (NM_173182, intron 3 of 25)	intron (NM_173182, intron 3 of 25)	-4284	NR_037275	100526525		NR_037275	ENSMUSG00000092695	Mir3092	mir-3092|mmu-mir-3092	microRNA 3092	ncRNA
Diff_Nuc59629	chr2	81897522	81897661	+	0	NA	intron (NM_175513, intron 1 of 3)	intron (NM_175513, intron 1 of 3)	3776	NM_175513	241514	Mm.119383	NM_175513	ENSMUSG00000070866	Zfp804a	C630007C17Rik|Znf804a	zinc finger protein 804A	protein-coding
Diff_Nuc31160	chr18	3403752	3403891	+	0	NA	intron (NM_029402, intron 2 of 20)	intron (NM_029402, intron 2 of 20)	20598	NM_029402	71745	Mm.291707	NM_029402	ENSMUSG00000024231	Cul2	1300003D18Rik|4932411N15Rik|AI327301|mKIAA4106	cullin 2	protein-coding
Diff_Nuc69864	chr9	23453502	23453641	+	0	NA	Intergenic	Intergenic	426051	NM_028472	73230	Mm.335020	NM_028472	ENSMUSG00000031963	Bmper	3110056H04Rik|CV-2|Crim3|Cv2	BMP-binding endothelial regulator	protein-coding
Diff_Nuc46938	chr5	147868532	147868671	+	0	NA	intron (NM_080795, intron 1 of 9)	intron (NM_080795, intron 1 of 9)	19547	NM_080795	140887	Mm.272203	NM_080795	ENSMUSG00000016520	Lnx2	9630046H24|AW209022	ligand of numb-protein X 2	protein-coding
Diff_Nuc27947	chr14	85779032	85779171	+	0	NA	Intergenic	Intergenic	-866676	NR_040457	75155	Mm.399239	NR_040457		4930529K09Rik	4930507G21Rik	RIKEN cDNA 4930529K09 gene	ncRNA
Diff_Nuc56057	chr3	136159122	136159261	+	0	NA	Intergenic	MTC|LTR|MaLR	-46878	NR_040592	70055	Mm.261063	NR_040592	ENSMUSG00000099508	1700030L20Rik	-	RIKEN cDNA 1700030L20 gene	ncRNA
Diff_Nuc50383	chr4	103785182	103785321	+	0	NA	Intergenic	Intergenic	-254892	NR_104385	13131	Mm.289682	NM_010014	ENSMUSG00000028519	Dab1	AI956902|C630028C02Rik|scm|scr|scrambler|yot	disabled 1	protein-coding
Diff_Nuc7769	chr12	94840512	94840651	+	0	NA	Intergenic	B3A|SINE|B2	-157318	NR_126436	75295	Mm.243878	NR_126436		4930559C10Rik	-	RIKEN cDNA 4930559C10 gene	ncRNA
Diff_Nuc18330	chr17	74043827	74043966	+	0	NA	intron (NM_027864, intron 1 of 14)	intron (NM_027864, intron 1 of 14)	15895	NM_027864	71685	Mm.271953	NM_027864	ENSMUSG00000024064	Galnt14	0610033M06Rik	UDP-N-acetyl-alpha-D-galactosamine:polypeptide N-acetylgalactosaminyltransferase 14	protein-coding
Diff_Nuc51837	chr3	10975192	10975331	+	0	NA	Intergenic	Intergenic	-535131	NM_001127191	74718	Mm.440548	NM_029068	ENSMUSG00000027534	Snx16	4930522N22Rik|AI117577|AI747675	sorting nexin 16	protein-coding
Diff_Nuc62621	chr2	173148232	173148371	+	0	NA	Intergenic	L2a|LINE|L2	-46267	NM_022995	65112	Mm.73682	NM_022995	ENSMUSG00000038400	Pmepa1	2210418I02Rik|AW455466|Erg1.2|N4wbp4|Stag1|Tmepai	prostate transmembrane protein, androgen induced 1	protein-coding
Diff_Nuc9554	chr11	36212892	36213031	+	0	NA	intron (NM_011856, intron 2 of 28)	Lx8|LINE|L1	-419370	NM_170779	211652	Mm.31267	NM_170779	ENSMUSG00000018849	Wwc1	AA408228|AU017197|BC037006|Kibra|mKIAA0869	WW, C2 and coiled-coil domain containing 1	protein-coding
Diff_Nuc7034	chr12	72778262	72778401	+	0	NA	Intergenic	Intergenic	136737	NR_045941	73815	Mm.416916	NR_045941		4930404H11Rik	-	RIKEN cDNA 4930404H11 gene	ncRNA
Diff_Nuc75240	chr8	72208752	72208891	+	0	NA	Intergenic	MMETn-int|LTR|ERVK	30366	NM_001177527	636741	Mm.480188	NM_001177527	ENSMUSG00000091764	Zfp964	4732490P12|EG636741|Gm7187	zinc finger protein 964	protein-coding
Diff_Nuc68788	chr1	182114592	182114731	+	0	NA	intron (NM_023341, intron 1 of 14)	B3|SINE|B2	8955	NM_001163290	67426	Mm.38330	NM_023341	ENSMUSG00000026489	Coq8a	4632432J16Rik|AI462003|Adck3|Cabc1|mKIAA0451	coenzyme Q8A	protein-coding
Diff_Nuc26882	chr14	51458032	51458171	+	0	NA	intron (NM_009351, intron 35 of 54)	intron (NM_009351, intron 35 of 54)	30480	NM_009632	11546	Mm.281482	NM_009632	ENSMUSG00000036023	Parp2	ARTD2|Adprt2|Adprtl2|Aspartl2|C78626|PARP-2	poly (ADP-ribose) polymerase family, member 2	protein-coding
Diff_Nuc26350	chr14	33005192	33005331	+	0	NA	intron (NM_016897, intron 4 of 6)	intron (NM_016897, intron 4 of 6)	9816	NM_016897	53600	Mm.303703	NM_016897	ENSMUSG00000013701	Timm23	Tim23	translocase of inner mitochondrial membrane 23	protein-coding
Diff_Nuc6875	chr12	68512082	68512221	+	0	NA	Intergenic	Intergenic	-188615	NM_207010	320772	Mm.227680	NM_207010	ENSMUSG00000034912	Mdga2	6720489L24Rik|9330209L04Rik|Adp|Mamdc1	MAM domain containing glycosylphosphatidylinositol anchor 2	protein-coding
Diff_Nuc25165	chr15	89820462	89820601	+	0	NA	Intergenic	RMER19B|LTR|ERVK	-148240	NM_018803	54526	Mm.261601	NM_018803	ENSMUSG00000063260	Syt10	-	synaptotagmin X	protein-coding
Diff_Nuc51450	chr4	147994432	147994571	+	0	NA	intron (NR_131120, intron 4 of 7)	ID_B1|SINE|B4	6604	NR_027864	230908	Mm.22453	NM_145556	ENSMUSG00000041459	Tardbp	1190002A23Rik|C85084|TDP-43|Tdp43	TAR DNA binding protein	protein-coding
Diff_Nuc1344	chr13	12474252	12474391	+	0	NA	Intergenic	B1_Mus1|SINE|Alu	-13321	NM_144835	217995	Mm.171186	NM_144835	ENSMUSG00000050244	Heatr1	AA517551|B130016L12Rik|BC019693	HEAT repeat containing 1	protein-coding
Diff_Nuc35251	chr7	63385682	63385821	+	0	NA	intron (NM_010418, intron 23 of 92)	intron (NM_010418, intron 23 of 92)	80226	NM_010418	15204	Mm.20929	NM_010418	ENSMUSG00000030451	Herc2	D15F32S1h|D7H15F32S1|D7H15F37S1|jdf2|mKIAA0393|rjs	HECT and RLD domain containing E3 ubiquitin protein ligase 2	protein-coding
Diff_Nuc69144	chr1	196439142	196439281	+	0	NA	Intergenic	Intergenic	-6812	NM_008882	18845	Mm.2251	NM_008882	ENSMUSG00000026640	Plxna2	2810428A13Rik|AA589422|AW457381|OCT|PlexA2|Plxn2|mKIAA0463	plexin A2	protein-coding
Diff_Nuc55878	chr3	129918032	129918171	+	0	NA	intron (NM_198711, intron 2 of 34)	intron (NM_198711, intron 2 of 34)	34338	NM_001244952	77018	Mm.91728	NM_029838	ENSMUSG00000058897	Col25a1	2700062B08Rik|CLAC-P	collagen, type XXV, alpha 1	protein-coding
Diff_Nuc15812	chr10	113786592	113786731	+	0	NA	Intergenic	MTE2b|LTR|MaLR	451765	NM_146241	237553	Mm.445550	NM_146241	ENSMUSG00000050663	Trhde	9330155P21Rik	TRH-degrading enzyme	protein-coding
Diff_Nuc19492	chr16	18059532	18059671	+	0	NA	intron (NM_010047, intron 1 of 5)	intron (NM_010047, intron 1 of 5)	6648	NM_010047	13353	Mm.27155	NM_010047	ENSMUSG00000003531	Dgcr6	-	DiGeorge syndrome critical region gene 6	protein-coding
Diff_Nuc55053	chr3	106298772	106298911	+	0	NA	intron (NM_028110, intron 8 of 11)	intron (NM_028110, intron 8 of 11)	9883	NM_028110	72121	Mm.14816	NM_028110	ENSMUSG00000027901	Dennd2d	2010308M01Rik|AI451421	DENN/MADD domain containing 2D	protein-coding
Diff_Nuc8425	chr12	119919402	119919541	+	0	NA	Intergenic	Intergenic	-150805	NR_045947	100384890	Mm.484658	NR_045947		D230030E09Rik	Npe	Riken cDNA D230030E09 gene	ncRNA
Diff_Nuc33023	chr18	56458482	56458621	+	0	NA	Intergenic	Intergenic	-133235	NM_026240	107022	Mm.24356	NM_026240	ENSMUSG00000001700	Gramd3	9030613F08Rik|9130427A09Rik|AW061306|NS3TP2	GRAM domain containing 3	protein-coding
Diff_Nuc25532	chr15	101413732	101413871	+	0	NA	intron (NM_016879, intron 1 of 3)	intron (NM_016879, intron 1 of 3)	5202	NR_002868	432985	Mm.491078	NR_002868		Gm5476	EG432985|Kb17P	type II keratin Kb17P pseudogene	pseudo
Diff_Nuc69033	chr1	191634702	191634841	+	0	NA	intron (NM_008976, intron 3 of 18)	B2_Mm2|SINE|B2	82624	NM_008976	19250	Mm.4498	NM_008976	ENSMUSG00000026604	Ptpn14	C130080N23Rik|OTTMUSG00000022087|PTP36	protein tyrosine phosphatase, non-receptor type 14	protein-coding
Diff_Nuc53709	chr3	66398672	66398811	+	0	NA	Intergenic	Intergenic	-297982	NM_145820	72789	Mm.443526	NM_028357	ENSMUSG00000027831	Veph1	2810471M23Rik|Veph	ventricular zone expressed PH domain-containing 1	protein-coding
Diff_Nuc41756	chr6	118826722	118826861	+	0	NA	intron (NM_009781, intron 3 of 46)	intron (NM_009781, intron 3 of 46)	-3385	NR_046053	74363	Mm.399403	NR_046053		4931430N09Rik	-	RIKEN cDNA 4931430N09 gene	ncRNA
Diff_Nuc26587	chr14	40372142	40372281	+	0	NA	Intergenic	Intergenic	-85835	NM_008734	18183	Mm.258705	NM_008734	ENSMUSG00000041014	Nrg3	ska	neuregulin 3	protein-coding
Diff_Nuc10244	chr11	58392652	58392791	+	0	NA	Intergenic	Intergenic	-1618	NM_207153	258261	Mm.303171	NM_207153	ENSMUSG00000060765	Olfr325	MOR275-5	olfactory receptor 325	protein-coding
Diff_Nuc8643	chr11	9062672	9062811	+	0	NA	Intergenic	Intergenic	-29204	NM_178259	268379	Mm.39270	NM_178259	ENSMUSG00000004668	Abca13	9830132L24|A930002G16Rik|AI956815	ATP-binding cassette, sub-family A (ABC1), member 13	protein-coding
Diff_Nuc15085	chr10	96293642	96293781	+	0	NA	Intergenic	Intergenic	-204691	NR_045358	75301	Mm.108650	NR_045358		4930556N09Rik	-	RIKEN cDNA 4930556N09 gene	ncRNA
Diff_Nuc56414	chr3	145212252	145212391	+	0	NA	intron (NM_027770, intron 59 of 59)	intron (NM_027770, intron 59 of 59)	-26851	NM_001081094	229937	Mm.24586	NM_001081094	ENSMUSG00000074182	Znhit6	2410019A14Rik	zinc finger, HIT type 6	protein-coding
Diff_Nuc70969	chr9	58860512	58860651	+	0	NA	intron (NM_008684, intron 1 of 28)	intron (NM_008684, intron 1 of 28)	23667	NM_008684	18007	Mm.42249	NM_008684	ENSMUSG00000032340	Neo1	2610028H22Rik|AI327052|D930014N22Rik|Igdcc2	neogenin	protein-coding
Diff_Nuc58682	chr2	55322632	55322771	+	0	NA	intron (NM_008426, intron 3 of 3)	intron (NM_008426, intron 3 of 3)	34320	NM_008426	16519	Mm.5127	NM_008426	ENSMUSG00000026824	Kcnj3	GIRK-1|GIRK1|Kcnf3|Kir3.1	potassium inwardly-rectifying channel, subfamily J, member 3	protein-coding
Diff_Nuc39398	chr6	44454592	44454731	+	0	NA	Intergenic	Intergenic	-555399	NM_001004357	66797	Mm.440084	NM_025771	ENSMUSG00000039419	Cntnap2	5430425M22Rik|Caspr2|mKIAA0868	contactin associated protein-like 2	protein-coding
Diff_Nuc66802	chr1	123748562	123748701	+	0	NA	Intergenic	ORR1E|LTR|MaLR	-284074	NM_025860	66942	Mm.44219	NM_025860	ENSMUSG00000001674	Ddx18	2310005B10Rik	DEAD (Asp-Glu-Ala-Asp) box polypeptide 18	protein-coding
Diff_Nuc10929	chr11	83792062	83792201	+	0	NA	intron (NM_194341, intron 3 of 19)	intron (NM_194341, intron 3 of 19)	14198	NM_194341	217030	Mm.82680	NM_194341	ENSMUSG00000034940	Synrg	Ap1gbp1|SYNG	synergin, gamma	protein-coding
Diff_Nuc20463	chr16	46890442	46890581	+	0	NA	Intergenic	Intergenic	-393431	NM_021497	58998	Mm.40477	NM_021495	ENSMUSG00000022656	Nectin3	2610301B19Rik|3000002N23Rik|4921513D19Rik|AA407785|AU016832|AW538082|CD113|Pvrl3	nectin cell adhesion molecule 3	protein-coding
Diff_Nuc55889	chr3	130412702	130412841	+	0	NA	promoter-TSS (NM_025509)	promoter-TSS (NM_025509)	-409	NM_025509	66357	Mm.300697	NM_025509	ENSMUSG00000041084	Ostc	2310008M10Rik|5730557H03Rik	oligosaccharyltransferase complex subunit (non-catalytic)	protein-coding
Diff_Nuc11320	chr11	95595582	95595721	+	0	NA	Intergenic	Intergenic	10751	NR_028263	320616	Mm.428140	NM_177209	ENSMUSG00000075596	B130006D01Rik	-	RIKEN cDNA B130006D01 gene	ncRNA
Diff_Nuc68921	chr1	187664672	187664811	+	0	NA	Intergenic	Tigger7|DNA|MER2_type	276448	NM_146106	226791	Mm.257116	NM_146106	ENSMUSG00000039246	Lyplal1	BC027340|Q96AVO	lysophospholipase-like 1	protein-coding
Diff_Nuc64163	chr1	44009532	44009671	+	0	NA	intron (NM_009418, intron 4 of 29)	MER99|DNA|hAT?	18762	NM_009418	22019	Mm.401675	NM_009418	ENSMUSG00000041763	Tpp2	TPP-2|TppII	tripeptidyl peptidase II	protein-coding
Diff_Nuc14983	chr10	93063502	93063641	+	0	NA	intron (NR_045810, intron 3 of 3)	intron (NR_045810, intron 3 of 3)	-11168	NM_027246	69878	Mm.259642	NM_027246	ENSMUSG00000020018	Snrpf	2010013O18Rik|SMF|sm-F|snRNP-F	small nuclear ribonucleoprotein polypeptide F	protein-coding
Diff_Nuc56486	chr3	147515412	147515551	+	0	NA	Intergenic	ID4|SINE|ID	1000150	NM_001302958	70892	Mm.187793	NM_027594	ENSMUSG00000036745	Ttll7	1110049N09Rik|4921517B04Rik|C630030B20|mTTLL7	tubulin tyrosine ligase-like family, member 7	protein-coding
Diff_Nuc53659	chr3	64724802	64724941	+	0	NA	Intergenic	Intergenic	-76206	NR_003962	319210	Mm.246646	NM_175670	ENSMUSG00000097538	Vmn2r-ps11	4930518C23Rik	vomeronasal 2, receptor, pseudogene 11	pseudo
Diff_Nuc16262	chr10	128898312	128898451	+	0	NA	Intergenic	L1_Mm|LINE|L1	-1353	NM_001011822	258069	Mm.376120	NM_001011822	ENSMUSG00000096497	Olfr787	MOR111-10	olfactory receptor 787	protein-coding
Diff_Nuc21646	chr16	76936322	76936461	+	0	NA	Intergenic	Intergenic	74735	NR_040573	76601	Mm.396217	NR_040573	ENSMUSG00000100857	1700041M19Rik	-	RIKEN cDNA 1700041M19 gene	ncRNA
Diff_Nuc20969	chr16	60956442	60956581	+	0	NA	Intergenic	L1_Mus1|LINE|L1	-351154	NM_007938	13840	Mm.455790	NM_007938	ENSMUSG00000055540	Epha6	Ehk2|Hek12|m-ehk2	Eph receptor A6	protein-coding
Diff_Nuc57534	chr2	20375612	20375751	+	0	NA	intron (NM_001081006, intron 2 of 21)	intron (NM_001081006, intron 2 of 21)	-55993	NM_029895	208618	Mm.237935	NM_029895	ENSMUSG00000036617	Etl4	6620402G01Rik|9430077C05Rik|BC026657|E330027G05Rik|Etl-4|Skt	enhancer trap locus 4	protein-coding
Diff_Nuc40109	chr6	64223042	64223181	+	0	NA	intron (NM_008167, intron 8 of 15)	intron (NM_008167, intron 8 of 15)	-456029	NM_007500	11921	Mm.57229	NM_007500	ENSMUSG00000073043	Atoh1	Hath1|MATH-1|Math1|bHLHa14	atonal bHLH transcription factor 1	protein-coding
Diff_Nuc30286	chr19	32601792	32601931	+	0	NA	Intergenic	Intergenic	41602	NM_010799	17330	Mm.255116	NM_010799	ENSMUSG00000024896	Minpp1	AA408516	multiple inositol polyphosphate histidine phosphatase 1	protein-coding
Diff_Nuc33623	chr18	74749992	74750131	+	0	NA	intron (NM_201600, intron 4 of 38)	intron (NM_201600, intron 4 of 38)	-59283	NR_045368	73606	Mm.444734	NR_045368		1700120E14Rik	-	RIKEN cDNA 1700120E14 gene	ncRNA
Diff_Nuc34538	chr7	26940982	26941121	+	0	NA	Intergenic	L1_Mus4|LINE|L1	-17377	NM_010000	13094	Mm.14413	NM_010000	ENSMUSG00000040660	Cyp2b9	Cyp2b	cytochrome P450, family 2, subfamily b, polypeptide 9	protein-coding
Diff_Nuc66603	chr1	116248372	116248511	+	0	NA	Intergenic	Lx4B|LINE|L1	-1333273	NM_001077425	636808	Mm.101576	NM_001077425	ENSMUSG00000070695	Cntnap5a	Caspr5-1|EG636808	contactin associated protein-like 5A	protein-coding
Diff_Nuc43692	chr5	35265732	35265871	+	0	NA	intron (NM_207277, intron 2 of 2)	intron (NM_207277, intron 2 of 2)	7237	NM_001310550	403174	Mm.291225	NM_207277	ENSMUSG00000051246	Msantd1	A930005I04Rik|Gm144	Myb/SANT-like DNA-binding domain containing 1	protein-coding
Diff_Nuc10840	chr11	80494792	80494931	+	0	NA	intron (NM_177390, intron 5 of 21)	intron (NM_177390, intron 5 of 21)	98666	NM_177390	338367	Mm.151948	NM_177390	ENSMUSG00000035441	Myo1d	9930104H07Rik|AW544947|D11Ertd9e|myosin-1d	myosin ID	protein-coding
Diff_Nuc76569	chr8	114704092	114704231	+	0	NA	Intergenic	B3|SINE|B2	168902	NM_020584	57321	Mm.213064	NM_020584	ENSMUSG00000033430	Terf2ip	Rap1	telomeric repeat binding factor 2, interacting protein	protein-coding
Diff_Nuc17310	chr17	39406342	39406481	+	0	NA	Intergenic	L1_Mus3|LINE|L1	-136893	NM_001244763	100126774	Mm.350534	NM_001244763	ENSMUSG00000094024	Esp18	Gm20579	exocrine gland secreted peptide 18	protein-coding
Diff_Nuc39343	chr6	43122352	43122491	+	0	NA	promoter-TSS (NR_126472)	promoter-TSS (NR_126472)	-106	NR_126472	75520	Mm.416852	NR_126471		1700024N05Rik	-	RIKEN cDNA 1700024N05 gene	ncRNA
Diff_Nuc35891	chr7	84377162	84377301	+	0	NA	Intergenic	Intergenic	1002458	NM_001199224	244071	Mm.322829	NM_172902	ENSMUSG00000025754	Agbl1	Ccp4|D430020F16|EG244071|Nna1-l1	ATP/GTP binding protein-like 1	protein-coding
Diff_Nuc11158	chr11	90492012	90492151	+	0	NA	intron (NM_011505, intron 1 of 17)	intron (NM_011505, intron 1 of 17)	7341	NM_011505	20913	Mm.207203	NM_011505	ENSMUSG00000020546	Stxbp4	6030470M02Rik|Synip	syntaxin binding protein 4	protein-coding
Diff_Nuc48519	chr4	48450002	48450141	+	0	NA	intron (NM_172304, intron 12 of 15)	L1_Mur3|LINE|L1	36223	NM_172304	269536	Mm.272025	NM_172304	ENSMUSG00000028345	Tex10	2610206N19Rik|2810462N03Rik|BC006867	testis expressed gene 10	protein-coding
Diff_Nuc21608	chr16	75872882	75873021	+	0	NA	intron (NM_023380, intron 6 of 7)	intron (NM_023380, intron 6 of 7)	36560	NM_023380	67742	Mm.131406	NM_023380	ENSMUSG00000022876	Samsn1	4930571B16Rik|930571B16Rik|Hacs1|SLy2	SAM domain, SH3 domain and nuclear localization signals, 1	protein-coding
Diff_Nuc9487	chr11	33275952	33276091	+	0	NA	intron (NM_023146, intron 14 of 27)	Lx3C|LINE|L1	137725	NR_110973	66011	Mm.383775	NM_023146	ENSMUSG00000040594	Ranbp17	-	RAN binding protein 17	protein-coding
Diff_Nuc22500	chr15	7073522	7073661	+	0	NA	Intergenic	Intergenic	-5981	NM_001113386	16880	Mm.149720	NM_013584	ENSMUSG00000054263	Lifr	A230075M04Rik|AW061234|LIF	leukemia inhibitory factor receptor	protein-coding
Diff_Nuc76800	chr8	126919262	126919401	+	0	NA	intron (NM_171824, intron 1 of 6)	intron (NM_171824, intron 1 of 6)	38505	NM_171824	209966	Mm.234233	NM_171824	ENSMUSG00000050751	Pgbd5	2900019M05Rik|AI854313	piggyBac transposable element derived 5	protein-coding
Diff_Nuc44260	chr5	53833592	53833731	+	0	NA	Intergenic	Intergenic	-113357	NM_001080928	19664	Mm.209292	NM_009035	ENSMUSG00000039191	Rbpj	AI843960|CBF1|Igkjrb|Igkrsbp|RBP-J|RBP-J kappa|RBP-Jkappa|RBPjk|Rbpsuh	recombination signal binding protein for immunoglobulin kappa J region	protein-coding
Diff_Nuc38049	chr6	8269852	8269991	+	0	NA	intron (NM_001302354, intron 2 of 3)	Lx9|LINE|L1	60633	NM_001302353	100036521	Mm.446106	NM_001302353	ENSMUSG00000089862	Umad1	Gm16039|OTTMUSG00000029336	UMAP1-MVP12 associated (UMA) domain containing 1	protein-coding
Diff_Nuc74249	chr8	44380282	44380421	+	0	NA	TTS (NM_009556)	TTS (NM_009556)	12012	NM_009556	22702	Mm.285848	NM_009556	ENSMUSG00000051176	Zfp42	Rex-1|Rex1|Zfp-42	zinc finger protein 42	protein-coding
Diff_Nuc76258	chr8	104452012	104452151	+	0	NA	Intergenic	Intergenic	856930	NM_009866	12552	Mm.1571	NM_009866	ENSMUSG00000031673	Cdh11	Cad11|OSF-4	cadherin 11	protein-coding
Diff_Nuc65064	chr1	67771562	67771701	+	0	NA	Intergenic	Intergenic	602030	NM_001080809	227231	Mm.343942	NM_001080809	ENSMUSG00000025991	Cps1	4732433M03Rik|CPS|D1Ucla3	carbamoyl-phosphate synthetase 1	protein-coding
Diff_Nuc41284	chr6	104294002	104294141	+	0	NA	Intergenic	Lx2|LINE|L1	-148967	NM_017383	53870	Mm.321671	NM_017383	ENSMUSG00000030092	Cntn6	NB-3	contactin 6	protein-coding
Diff_Nuc34044	chr18	89337692	89337831	+	0	NA	Intergenic	RLTR20B3|LTR|ERVK	-29058	NM_178687	225825	Mm.139293	NM_178687	ENSMUSG00000034028	Cd226	BC051526|DNAM-1|DNAM1|Pta1|TLiSA1	CD226 antigen	protein-coding
Diff_Nuc6382	chr12	56151342	56151481	+	0	NA	intron (NM_028314, intron 6 of 7)	intron (NM_028314, intron 6 of 7)	29686	NR_030764	72658	Mm.434380	NM_028314	ENSMUSG00000062198	2700097O09Rik	AW552125	RIKEN cDNA 2700097O09 gene	protein-coding
Diff_Nuc62532	chr2	168638842	168638981	+	0	NA	Intergenic	Intergenic	-46210	NM_175303	99377	Mm.434054	NM_175303	ENSMUSG00000027547	Sall4	5730441M18Rik|AA407717|AL022809|AW536104|C330011P20Rik|C78083|C78563|Tex20	sal-like 4 (Drosophila)	protein-coding
Diff_Nuc34026	chr18	88894042	88894181	+	0	NA	Intergenic	L1Md_F2|LINE|L1	169488	NM_018821	54607	Mm.91920	NM_018821	ENSMUSG00000056153	Socs6	1500012M23Rik|5830401B18Rik|AI447482|Cis4|Cish4|HSPC060|SOCS-4|SOCS-6|SSI4|STAI4|STATI4|Socs4	suppressor of cytokine signaling 6	protein-coding
Diff_Nuc35186	chr7	61549642	61549781	+	0	NA	Intergenic	Intergenic	-402452	NR_105746	102466619		NR_105746	ENSMUSG00000099176	Mir6238	Gm27982|mmu-mir-6238	microRNA 6238	ncRNA
Diff_Nuc65943	chr1	97862722	97862861	+	0	NA	Intergenic	Intergenic	55544	NR_040467	73454	Mm.396229	NR_040467	ENSMUSG00000100062	1700063A18Rik	-	RIKEN cDNA 1700063A18 gene	ncRNA
Diff_Nuc33882	chr18	85065532	85065671	+	0	NA	Intergenic	Lx8|LINE|L1	-38816	NM_015798	50764	Mm.28369	NM_015798	ENSMUSG00000034391	Fbxo15	AU019763|Fbx15|ecat3	F-box protein 15	protein-coding
Diff_Nuc50456	chr4	106219492	106219631	+	0	NA	Intergenic	Intergenic	-14082	NM_053272	74754	Mm.133370	NM_053272	ENSMUSG00000034926	Dhcr24	2310076D10Rik|5830417J06Rik|mKIAA0018	24-dehydrocholesterol reductase	protein-coding
Diff_Nuc20679	chr16	52804492	52804631	+	0	NA	intron (NR_040495, intron 2 of 2)	intron (NR_040495, intron 2 of 2)	11296	NR_040495	73820	Mm.60493	NR_040495		4930404A05Rik	-	RIKEN cDNA 4930404A05 gene	ncRNA
Diff_Nuc7958	chr12	100236082	100236221	+	0	NA	Intergenic	Tigger7|DNA|MER2_type	77329	NM_198311	76260	Mm.282660	NM_029553	ENSMUSG00000021013	Ttc8	0610012F22Rik|AV001447|BBS8	tetratricopeptide repeat domain 8	protein-coding
Diff_Nuc10881	chr11	81962342	81962481	+	0	NA	Intergenic	L1_Mur3|LINE|L1	30903	NM_011329	20290	Mm.1283	NM_011329	ENSMUSG00000020702	Ccl1	BF534335|I-309|Scya1|Tca-3	chemokine (C-C motif) ligand 1	protein-coding
Diff_Nuc27486	chr14	72336042	72336181	+	0	NA	Intergenic	Intergenic	79595	NR_046274	74667	Mm.159286	NR_046274		4930434J06Rik	-	RIKEN cDNA 4930434J06 gene	ncRNA
Diff_Nuc74818	chr8	60892762	60892901	+	0	NA	intron (NM_175032, intron 4 of 11)	intron (NM_175032, intron 4 of 11)	286762	NM_001177534	100271928	Mm.484123	NM_001177534		Gm15881	OTTMUSG00000027193	predicted gene 15881	protein-coding
Diff_Nuc22508	chr15	7488802	7488941	+	0	NA	Intergenic	Intergenic	-140476	NM_001289498	268780	Mm.203208	NM_178748	ENSMUSG00000042961	Egflam	5930412K08|AU040377	EGF-like, fibronectin type III and laminin G domains	protein-coding
Diff_Nuc16209	chr10	127386022	127386161	+	0	NA	Intergenic	ID|SINE|ID	50500	NM_027301	70061	Mm.158320	NM_027301	ENSMUSG00000040127	Sdr9c7	1810054F20Rik|Rdh20|Rdhs|SDR-O|Sdro	4short chain dehydrogenase/reductase family 9C, member 7	protein-coding
Diff_Nuc27159	chr14	61110562	61110701	+	0	NA	Intergenic	ID2|SINE|ID	113508	NM_001164705	72125	Mm.275499	NM_028113	ENSMUSG00000021986	Amer2	2600011E07Rik|Fam123a	APC membrane recruitment 2	protein-coding
Diff_Nuc51212	chr4	137429382	137429521	+	0	NA	intron (NM_199307, intron 1 of 19)	intron (NM_199307, intron 1 of 19)	11299	NM_199307	230857	Mm.401062	NM_199307	ENSMUSG00000057530	Ece1	AW322500|ECE-1|ECE-1a|ECE-1b|ECE-1d	endothelin converting enzyme 1	protein-coding
Diff_Nuc15744	chr10	112020572	112020711	+	0	NA	Intergenic	L1MB3|LINE|L1	-143341	NR_040579	69355	Mm.84337	NR_040579	ENSMUSG00000100314	1700010J16Rik	-	RIKEN cDNA 1700010J16 gene	ncRNA
Diff_Nuc5722	chr12	38654002	38654141	+	0	NA	intron (NM_178681, intron 1 of 24)	MusHAL1|LINE|L1	46779	NM_178681	217480	Mm.126525	NM_178681	ENSMUSG00000036095	Dgkb	6430574F24|90kda|C630029D13Rik|DAGK2|DGK|DGK-beta|mKIAA0718	diacylglycerol kinase, beta	protein-coding
Diff_Nuc66830	chr1	124644842	124644981	+	0	NA	Intergenic	Intergenic	-1180354	NM_025860	66942	Mm.44219	NM_025860	ENSMUSG00000001674	Ddx18	2310005B10Rik	DEAD (Asp-Glu-Ala-Asp) box polypeptide 18	protein-coding
Diff_Nuc65231	chr1	72739852	72739991	+	0	NA	intron (NM_001347063, intron 2 of 23)	intron (NM_001347063, intron 2 of 23)	7217	NM_176980	319695	Mm.249056	NM_176980	ENSMUSG00000039342	Ankar	4932422E22Rik	ankyrin and armadillo repeat containing	protein-coding
Diff_Nuc30601	chr19	42161102	42161241	+	0	NA	promoter-TSS (NM_198108)	promoter-TSS (NM_198108)	-311	NM_198108	226123	Mm.259441	NM_198108	ENSMUSG00000049670	Morn4	-	MORN repeat containing 4	protein-coding
Diff_Nuc52622	chr3	34596812	34596951	+	0	NA	Intergenic	B1F|SINE|Alu	18703	NR_038347	100041108	Mm.24764	NR_038347	ENSMUSG00000105153	Gm3143	-	predicted gene 3143	ncRNA
Diff_Nuc14940	chr10	91772092	91772231	+	0	NA	intron (NR_046027, intron 2 of 8)	intron (NR_046027, intron 2 of 8)	65957	NR_046027	627800	Mm.391417	NR_046027	ENSMUSG00000098040	Gm20757	-	predicted gene, 20757	ncRNA
Diff_Nuc36395	chr7	98852862	98853001	+	0	NA	intron (NM_011807, intron 2 of 22)	intron (NM_011807, intron 2 of 22)	-357973	NM_001243046	23859	Mm.147213	NM_011807	ENSMUSG00000052572	Dlg2	A330103J02Rik|B230218P12Rik|B330007M19Rik|Dlgh2|Gm1197|Gm21505|PSD93	discs, large homolog 2 (Drosophila)	protein-coding
Diff_Nuc64890	chr1	63550152	63550291	+	0	NA	intron (NM_011780, intron 3 of 25)	B3|SINE|B2	57756	NM_011780	23792	Mm.124892	NM_011780	ENSMUSG00000025964	Adam23	AW046396|MDC3	a disintegrin and metallopeptidase domain 23	protein-coding
Diff_Nuc63022	chr1	10147042	10147181	+	0	NA	exon (NM_001102430, exon 28 of 38)	exon (NM_001102430, exon 28 of 38)	75640	NM_001102430	211673	Mm.229141	NM_001102430	ENSMUSG00000067851	Arfgef1	ARFGEP1|BIG1|D130059B05Rik|D730028O18Rik|P200	ADP-ribosylation factor guanine nucleotide-exchange factor 1(brefeldin A-inhibited)	protein-coding
Diff_Nuc33290	chr18	65358572	65358711	+	0	NA	intron (NM_031881, intron 23 of 29)	intron (NM_031881, intron 23 of 29)	-49874	NR_029600	387231		NR_029600	ENSMUSG00000065402	Mir122	Mir122a|Mirn122a|mir-122|mmu-mir-122	microRNA 122	ncRNA
Diff_Nuc18003	chr17	63254702	63254841	+	0	NA	Intergenic	Intergenic	-24105	NM_010109	13640	Mm.7978	NM_010109	ENSMUSG00000048915	Efna5	AL-1|AV158822|EFL-5|Ephrin-A5|Epl7|LERK-7|RAGS	ephrin A5	protein-coding
Diff_Nuc19388	chr16	14854742	14854881	+	0	NA	Intergenic	Intergenic	-51928	NM_025769	66793	Mm.100270	NM_025769	ENSMUSG00000068617	Efcab1	4930449A16Rik|5430404L10Rik	EF hand calcium binding domain 1	protein-coding
Diff_Nuc11965	chr10	3074252	3074391	+	0	NA	Intergenic	Intergenic	-59983	NM_172546	215748	Mm.37984	NM_172546	ENSMUSG00000015202	Cnksr3	6820402C05|BC024086|Magi1	Cnksr family member 3	protein-coding
Diff_Nuc10779	chr11	78465842	78465981	+	0	NA	intron (NM_008702, intron 1 of 10)	intron (NM_008702, intron 1 of 10)	45016	NM_008702	18099	Mm.9001	NM_008702	ENSMUSG00000017376	Nlk	AI194375	nemo like kinase	protein-coding
Diff_Nuc4163	chr13	103165992	103166131	+	0	NA	Intergenic	MTC|LTR|MaLR	-317577	NM_008533	17079	Mm.373974	NM_008533	ENSMUSG00000021624	Cd180	F630107B15|Ly78|RP105	CD180 antigen	protein-coding
Diff_Nuc12556	chr10	19280942	19281081	+	0	NA	Intergenic	Intergenic	-30744	NM_010511	15979	Mm.549	NM_010511	ENSMUSG00000020009	Ifngr1	CD119|IFN-gammaR|Ifgr|Ifngr|Nktar	interferon gamma receptor 1	protein-coding
Diff_Nuc60851	chr2	115233982	115234121	+	0	NA	Intergenic	B1F|SINE|Alu	-64035	NR_040516	78193	Mm.189508	NR_040516	ENSMUSG00000087309	4930528P14Rik	-	RIKEN cDNA 4930528P14 gene	ncRNA
Diff_Nuc39004	chr6	33635692	33635831	+	0	NA	intron (NM_009148, intron 10 of 17)	intron (NM_009148, intron 10 of 17)	-343687	NM_028886	74354	Mm.127952	NM_028886	ENSMUSG00000056215	Lrguk	4921528H16Rik	leucine-rich repeats and guanylate kinase domain containing	protein-coding
Diff_Nuc39508	chr6	46645932	46646071	+	0	NA	intron (NM_001004357, intron 13 of 23)	intron (NM_001004357, intron 13 of 23)	-548394	NM_025771	66797	Mm.440084	NM_025771	ENSMUSG00000039419	Cntnap2	5430425M22Rik|Caspr2|mKIAA0868	contactin associated protein-like 2	protein-coding
Diff_Nuc1452	chr13	15535472	15535611	+	0	NA	Intergenic	B1_Mus1|SINE|Alu	-20015	NM_008130	14634	Mm.5098	NM_008130	ENSMUSG00000021318	Gli3	AI854843|AU023367|Bph|GLI3-190|GLI3FL|Pdn|Xt|add	GLI-Kruppel family member GLI3	protein-coding
Diff_Nuc47620	chr4	19256142	19256281	+	0	NA	intron (NM_013927, intron 3 of 17)	L2a|LINE|L2	48214	NM_013927	30952	Mm.445778	NM_013927	ENSMUSG00000056494	Cngb3	CCNC2|CNG6|Cngbeta2	cyclic nucleotide gated channel beta 3	protein-coding
Diff_Nuc43360	chr5	23676142	23676281	+	0	NA	intron (NM_001346582, intron 3 of 5)	intron (NM_001346582, intron 3 of 5)	5430	NM_001346582	231042	Mm.45513	NM_153092	ENSMUSG00000048439	Nupl2	AV116043|CG1|NLP-1|Nlp1	nucleoporin like 2	protein-coding
Diff_Nuc53360	chr3	55414802	55414941	+	0	NA	Intergenic	ID4_|SINE|ID	149191	NM_001195540	13175	Mm.393242	NM_019978	ENSMUSG00000027797	Dclk1	1700113D08Rik|2810480F11Rik|AI836758|Click-I|Cpg16|Dcamkl1|Dcl|Dclk|mKIAA0369	doublecortin-like kinase 1	protein-coding
Diff_Nuc12758	chr10	26073042	26073181	+	0	NA	intron (NM_172787, intron 1 of 21)	Charlie1a|DNA|MER1_type	20729	NM_001347467	237339	Mm.338439	NM_172787	ENSMUSG00000039089	L3mbtl3	AI481284|MBT-1	l(3)mbt-like 3 (Drosophila)	protein-coding
Diff_Nuc9090	chr11	22192072	22192211	+	0	NA	Intergenic	ORR1A4|LTR|MaLR	-5343	NM_001252515	216565	Mm.491265	NM_153078	ENSMUSG00000042302	Ehbp1	AF424697|Flj21950|NACSIN	EH domain binding protein 1	protein-coding
Diff_Nuc2351	chr13	42582042	42582181	+	0	NA	Intergenic	L1_Mus3|LINE|L1	185266	NM_010104	13614	Mm.14543	NM_010104	ENSMUSG00000021367	Edn1	ET-1|PPET1|preproET	endothelin 1	protein-coding
Diff_Nuc4618	chr13	116850832	116850971	+	0	NA	Intergenic	Lx7|LINE|L1	248995	NM_021459	16392	Mm.42242	NM_021459	ENSMUSG00000042258	Isl1	-	ISL1 transcription factor, LIM/homeodomain	protein-coding
Diff_Nuc59263	chr2	71493582	71493721	+	0	NA	Intergenic	Intergenic	-63823	NR_037979	381371	Mm.330284	NM_201366	ENSMUSG00000064263	Platr26	Gm1631	pluripotency associated transcript 26	ncRNA
Diff_Nuc73323	chr8	13311442	13311581	+	0	NA	intron (NM_172282, intron 9 of 12)	intron (NM_172282, intron 9 of 12)	-23385	NM_001042650	102323	Mm.368890	NM_001024504	ENSMUSG00000038506	Dcun1d2	AW495713|mFLJ10704	DCN1, defective in cullin neddylation 1, domain containing 2 (S. cerevisiae)	protein-coding
Diff_Nuc10586	chr11	72108662	72108801	+	0	NA	Intergenic	MYSERV6-int|LTR|ERVK	-6400	NM_001291153	327959	Mm.291131	NM_001037713	ENSMUSG00000040483	Xaf1	Fbox39	XIAP associated factor 1	protein-coding
Diff_Nuc49058	chr4	66015792	66015931	+	0	NA	intron (NM_207109, intron 1 of 22)	intron (NM_207109, intron 1 of 22)	49656	NM_019514	56079	Mm.445312	NM_019514	ENSMUSG00000028373	Astn2	1d8|Astnl|bM452J22.1	astrotactin 2	protein-coding
Diff_Nuc46942	chr5	148015062	148015201	+	0	NA	Intergenic	PB1D9|SINE|Alu	14859	NM_008178	14842	Mm.4797	NM_008178	ENSMUSG00000053129	Gsx1	Gsh-1|Gsh1	GS homeobox 1	protein-coding
Diff_Nuc25133	chr15	88408272	88408411	+	0	NA	Intergenic	Intergenic	-22391	NM_027306	70073	Mm.45306	NM_027306	ENSMUSG00000054117	Zdhhc25	1700030J15Rik	zinc finger, DHHC domain containing 25	protein-coding
Diff_Nuc39554	chr6	47596552	47596691	+	0	NA	Intergenic	RMER12B|LTR|ERVK	8472	NR_002841	19799		NR_002841		Rn4.5s	-	4.5S RNA	rRNA
Diff_Nuc22121	chr16	90371002	90371141	+	0	NA	Intergenic	Intergenic	-15571	NM_015755	26559	Mm.125874	NM_015755	ENSMUSG00000053414	Hunk	Bstk1|Mak-v	hormonally upregulated Neu-associated kinase	protein-coding
Diff_Nuc61095	chr2	121875362	121875501	+	0	NA	intron (NM_001256055, intron 5 of 7)	B2_Mm2|SINE|B2	21112	NM_001256055	100042807	Mm.329403	NM_001256055	ENSMUSG00000043424	Eif3j2	ENSMUSG00000043424|Eif3j-2|Gm9781|eIF3 p35|eIF3j-B	eukaryotic translation initiation factor 3, subunit J2	protein-coding
Diff_Nuc21946	chr16	84546602	84546741	+	0	NA	Intergenic	RMER1C|Other|Other	-133363	NR_040537	78023	Mm.243853	NR_040537		4930529L06Rik	-	RIKEN cDNA 4930529L06 gene	ncRNA
Diff_Nuc41079	chr6	97814672	97814811	+	0	NA	intron (NM_001113198, intron 1 of 9)	intron (NM_001113198, intron 1 of 9)	57689	NM_001113198	17342	Mm.333284	NM_008601	ENSMUSG00000035158	Mitf	BCC2|Bhlhe32|Gsfbcc2|Vitiligo|Wh|bw|mi|vit	microphthalmia-associated transcription factor	protein-coding
Diff_Nuc36011	chr7	88472992	88473131	+	0	NA	exon (NM_008803, exon 20 of 22)	exon (NM_008803, exon 20 of 22)	17059	NM_009092	20068	Mm.42767	NM_009092	ENSMUSG00000061787	Rps17	-	ribosomal protein S17	protein-coding
Diff_Nuc38322	chr6	15599662	15599801	+	0	NA	Intergenic	Intergenic	-70930	NM_175088	16543	Mm.1314	NM_175088	ENSMUSG00000041390	Mdfic	Kdt1|Mdfid	MyoD family inhibitor domain containing	protein-coding
Diff_Nuc71391	chr9	72301512	72301651	+	0	NA	intron (NM_008613, intron 8 of 9)	intron (NM_008613, intron 8 of 9)	15245	NM_008613	17427	Mm.387671	NM_008613	ENSMUSG00000032221	Mns1	AW546487	meiosis-specific nuclear structural protein 1	protein-coding
Diff_Nuc25490	chr15	99740342	99740481	+	0	NA	Intergenic	B1_Mus1|SINE|Alu	21678	NM_028180	72277	Mm.272766	NM_028180	ENSMUSG00000045350	1700030F18Rik	FAM186A	RIKEN cDNA 1700030F18 gene	protein-coding
Diff_Nuc45054	chr5	76443242	76443381	+	0	NA	Intergenic	Intergenic	-68858	NM_010612	16542	Mm.285	NM_010612	ENSMUSG00000062960	Kdr	6130401C07|Flk-1|Flk1|Krd-1|Ly73|VEGFR-2|VEGFR2|sVEGFR-2	kinase insert domain protein receptor	protein-coding
Diff_Nuc12484	chr10	17523872	17524011	+	0	NA	intron (NM_138628, intron 2 of 9)	intron (NM_138628, intron 2 of 9)	7916	NM_138628	378431	Mm.283493	NM_138628	ENSMUSG00000039891	Txlnb	2310001N14Rik|Mdp77	taxilin beta	protein-coding
Diff_Nuc55993	chr3	133984682	133984821	+	0	NA	Intergenic	L1MC2|LINE|L1	-81204	NR_035435	100316832		NR_035435	ENSMUSG00000084564	Mir1895	Mirn1895|mmu-mir-1895	microRNA 1895	ncRNA
Diff_Nuc71123	chr9	64087412	64087551	+	0	NA	intron (NM_008927, intron 1 of 10)	intron (NM_008927, intron 1 of 10)	4473	NM_033607	93841	Mm.390180	NM_033607	ENSMUSG00000035337	Uchl4	-	ubiquitin carboxyl-terminal esterase L4	protein-coding
Diff_Nuc30800	chr19	49967122	49967261	+	0	NA	Intergenic	Intergenic	785945	NM_001252501	58178	Mm.313672	NM_021377	ENSMUSG00000043531	Sorcs1	Sorcs|mSorCS	sortilin-related VPS10 domain containing receptor 1	protein-coding
Diff_Nuc3013	chr13	67343412	67343551	+	0	NA	Intergenic	LTRIS_Mus|LTR|ERV1	26523	NM_001001152	238690	Mm.306358	NM_001001152	ENSMUSG00000055480	Zfp458	BC062958|Rslcan-7|Znf728|mszf59-2	zinc finger protein 458	protein-coding
Diff_Nuc61204	chr2	125055132	125055271	+	0	NA	3' UTR (NM_001079690, exon 28 of 28)	3' UTR (NM_001079690, exon 28 of 28)	-17783	NM_001159646	110074	Mm.282499	NM_023595	ENSMUSG00000027203	Dut	5031412I06Rik|5133400F09Rik|D2Bwg0749e|Dutp|dUTPase	deoxyuridine triphosphatase	protein-coding
Diff_Nuc17269	chr17	38420492	38420631	+	0	NA	Intergenic	Intergenic	8843	NM_130868	170648	Mm.390988	NM_130868	ENSMUSG00000057443	Olfr138	MOR256-40P|Olfr89	olfactory receptor 138	protein-coding
Diff_Nuc38911	chr6	30912192	30912331	+	0	NA	Intergenic	Intergenic	-3271	NM_001135093	619665	Mm.204671	NM_001135093	ENSMUSG00000073209	Klf14	5330411L03Rik|AL022736|BTEB5	Kruppel-like factor 14	protein-coding
Diff_Nuc71000	chr9	59405682	59405821	+	0	NA	intron (NM_010421, intron 5 of 13)	intron (NM_010421, intron 5 of 13)	18404	NM_010421	15211	Mm.2284	NM_010421	ENSMUSG00000025232	Hexa	Hex-1	hexosaminidase A	protein-coding
Diff_Nuc67877	chr1	155692052	155692191	+	0	NA	promoter-TSS (NM_001243223)	promoter-TSS (NM_001243223)	-850	NM_001243223	240816	Mm.329340	NM_001243223	ENSMUSG00000042641	Rgsl1	4930415K13Rik|Gm202|Rgsl2	regulator of G-protein signaling like 1	protein-coding
Diff_Nuc48380	chr4	42924042	42924181	+	0	NA	Intergenic	Lx5|LINE|L1	-6004	NM_001346526	230085	Mm.240965	NM_172690	ENSMUSG00000036062	Phf24	GINIP|N28178	PHD finger protein 24	protein-coding
Diff_Nuc27465	chr14	71505132	71505271	+	0	NA	Intergenic	ORR1D2|LTR|MaLR	-145879	NR_046075	100043132	Mm.399336	NR_046075		Gm4251	-	predicted gene 4251	ncRNA
Diff_Nuc10129	chr11	53892272	53892411	+	0	NA	Intergenic	Lx8|LINE|L1	-9822	NM_019417	30794	Mm.21830	NM_019417	ENSMUSG00000020388	Pdlim4	Ril	PDZ and LIM domain 4	protein-coding
Diff_Nuc45027	chr5	75419822	75419961	+	0	NA	intron (NM_028850, intron 3 of 5)	intron (NM_028850, intron 3 of 5)	20775	NM_028850	74277	Mm.239814	NM_028850	ENSMUSG00000029229	Chic2	1700081B18Rik|4930502K01Rik|BTL	cysteine-rich hydrophobic domain 2	protein-coding
Diff_Nuc25528	chr15	101018932	101019071	+	0	NA	intron (NM_007395, intron 1 of 8)	RSINE1|SINE|B4	-5299	NR_105927	102466774		NR_105927	ENSMUSG00000106563	Mir6962	mmu-mir-6962	microRNA 6962	ncRNA
Diff_Nuc12738	chr10	25284322	25284461	+	0	NA	intron (NR_136909, intron 2 of 3)	L1MB1|LINE|L1	28199	NR_136909	102640597	Mm.412041	NR_136909	ENSMUSG00000101537	Gm29571	-	predicted gene 29571	ncRNA
Diff_Nuc46184	chr5	110423682	110423821	+	0	NA	Intergenic	Intergenic	-1795	NM_145563	69504	Mm.441438	NM_145563	ENSMUSG00000066613	Zfp932	2310001H12Rik|Znf431	zinc finger protein 932	protein-coding
Diff_Nuc20364	chr16	44190232	44190371	+	0	NA	intron (NM_001029889, intron 1 of 7)	MLT1B|LTR|MaLR	16791	NM_001029889	207806	Mm.310566	NM_001029889	ENSMUSG00000068284	Usf3	5530400K22Rik|Gm1779|Gm608|mKIAA2018	upstream transcription factor family member 3	protein-coding
Diff_Nuc70612	chr9	46665992	46666131	+	0	NA	Intergenic	B3|SINE|B2	-55625	NR_015605	73040	Mm.265384	NR_015605	ENSMUSG00000099696	2900052N01Rik	AU067665	RIKEN cDNA 2900052N01 gene	ncRNA
Diff_Nuc34640	chr7	31765782	31765921	+	0	NA	intron (NM_175240, intron 1 of 1)	intron (NM_175240, intron 1 of 1)	-1089	NM_001242647	76415	Mm.259739	NM_175240	ENSMUSG00000046826	Fam187b	1700020B09Rik|Tmem162	family with sequence similarity 187, member B	protein-coding
Diff_Nuc58906	chr2	61851472	61851611	+	0	NA	Intergenic	L1Md_F2|LINE|L1	-33031	NM_001242382	94229	Mm.314497	NM_033552	ENSMUSG00000026904	Slc4a10	NCBE|mKIAA4136	solute carrier family 4, sodium bicarbonate cotransporter-like, member 10	protein-coding
Diff_Nuc525	chrX	85473912	85474051	+	0	NA	Intergenic	B4A|SINE|B4	-113019	NM_001160403	331461	Mm.121680	NM_001160403	ENSMUSG00000052372	Il1rapl1	6330532G10Rik|C030039N24|IL1R8|IL1RAPL|MRX34|OPHN4|TIGIRR-2	interleukin 1 receptor accessory protein-like 1	protein-coding
Diff_Nuc60614	chr2	109222332	109222471	+	0	NA	Intergenic	Intergenic	101506	NM_139303	228421	Mm.274086	NM_139303	ENSMUSG00000027115	Kif18a	AU024633|B130001M12Rik|gcd2	kinesin family member 18A	protein-coding
Diff_Nuc69817	chr9	20809002	20809141	+	0	NA	intron (NM_023167, intron 3 of 8)	B3|SINE|B2	1890	NM_023167	66163	Mm.427576	NM_023167	ENSMUSG00000003299	Mrpl4	1110017G11Rik	mitochondrial ribosomal protein L4	protein-coding
Diff_Nuc44895	chr5	71227552	71227691	+	0	NA	intron (NM_010252, intron 1 of 8)	intron (NM_010252, intron 1 of 8)	6235	NM_010252	14405	Mm.255292	NM_010252	ENSMUSG00000001260	Gabrg1	GabaA|GabaA/BZ	gamma-aminobutyric acid (GABA) A receptor, subunit gamma 1	protein-coding
Diff_Nuc42258	chr6	138186427	138186566	+	0	NA	Intergenic	Intergenic	96381	NM_001347489	56615	Mm.14796	NM_019946	ENSMUSG00000008540	Mgst1	1500002K10Rik|Gst	microsomal glutathione S-transferase 1	protein-coding
Diff_Nuc680	chrX	109895102	109895241	+	0	NA	Intergenic	L1_Mur3|LINE|L1	-82911	NM_181579	69693	Mm.34964	NM_181579	ENSMUSG00000034607	Pof1b	2310066B14Rik	premature ovarian failure 1B	protein-coding
Diff_Nuc5825	chr12	40613362	40613501	+	0	NA	Intergenic	MLT1A0|LTR|MaLR	150532	NM_007487	11861	Mm.12723	NM_007487	ENSMUSG00000047446	Arl4a	AI467555|Arl4	ADP-ribosylation factor-like 4A	protein-coding
Diff_Nuc29096	chr14	115313242	115313381	+	0	NA	Intergenic	Intergenic	31859	NR_126551	74982		NR_126548		1700100I10Rik	1700085D13Rik|4930481K08Rik	RIKEN cDNA 1700100I10 gene	ncRNA
Diff_Nuc50312	chr4	101939212	101939351	+	0	NA	intron (NM_019840, intron 1 of 14)	intron (NM_019840, intron 1 of 14)	11737	NM_019840	18578	Mm.20181	NM_019840	ENSMUSG00000028525	Pde4b	Dpde4|R74983|dunce	phosphodiesterase 4B, cAMP specific	protein-coding
Diff_Nuc58144	chr2	42322442	42322581	+	0	NA	intron (NM_053011, intron 1 of 90)	intron (NM_053011, intron 1 of 90)	-19423	NR_105754	102465171		NR_105754	ENSMUSG00000098660	Mir6336	Gm27584|mmu-mir-6336	microRNA 6336	ncRNA
Diff_Nuc63584	chr1	25736102	25736241	+	0	NA	intron (NM_175642, intron 2 of 30)	intron (NM_175642, intron 2 of 30)	150381	NM_175642	210933	Mm.336569	NM_175642	ENSMUSG00000033569	Adgrb3	A830096D10Rik|Bai3	adhesion G protein-coupled receptor B3	protein-coding
Diff_Nuc2650	chr13	53097512	53097651	+	0	NA	Intergenic	ORR1A1|LTR|MaLR	-21173	NM_017373	18030	Mm.136604	NM_017373	ENSMUSG00000056749	Nfil3	AV225605|E4BP4	nuclear factor, interleukin 3, regulated	protein-coding
Diff_Nuc53891	chr3	71979722	71979861	+	0	NA	Intergenic	Intergenic	790997	NM_001081137	69983	Mm.261054	NM_001081137	ENSMUSG00000027790	Sis	2010204N08Rik|SI|Si-s	sucrase isomaltase (alpha-glucosidase)	protein-coding
Diff_Nuc10196	chr11	56302282	56302421	+	0	NA	Intergenic	Intergenic	-447862	NM_153079	216749	Mm.213205	NM_153079	ENSMUSG00000037393	Nmur2	Nmu2r	neuromedin U receptor 2	protein-coding
Diff_Nuc73843	chr8	33401452	33401591	+	0	NA	Intergenic	Intergenic	139154	NR_046039	666589	Mm.367675	NR_046039		Gm8179	EG666589	predicted gene 8179	ncRNA
Diff_Nuc68756	chr1	181354212	181354351	+	0	NA	intron (NM_027188, intron 1 of 11)	intron (NM_027188, intron 1 of 11)	93853	NM_027188	69726	Mm.222338	NM_027188	ENSMUSG00000055067	Smyd3	2410008A19Rik|Zmynd1	SET and MYND domain containing 3	protein-coding
Diff_Nuc16800	chr17	19380812	19380951	+	0	NA	Intergenic	L1_Mur2|LINE|L1	-118218	NM_001104551	665376	Mm.469859	NM_001104551	ENSMUSG00000090304	Vmn2r99	EG665376	vomeronasal 2, receptor 99	protein-coding
Diff_Nuc75231	chr8	71995752	71995891	+	0	NA	Intergenic	L1_Mus3|LINE|L1	-76378	NR_038043	378466	Mm.37846	NM_194351	ENSMUSG00000110444	Gm10033	9330175B10Rik|ENSMUSG00000057924|Gm10311	predicted gene 10033	ncRNA
Diff_Nuc71332	chr9	70733687	70733826	+	0	NA	intron (NM_001324473, intron 1 of 8)	intron (NM_001324473, intron 1 of 8)	48859	NM_008280	15450	Mm.390187	NM_008280	ENSMUSG00000032207	Lipc	AI256194|HL|Hpl	lipase, hepatic	protein-coding
Diff_Nuc33439	chr18	70039472	70039611	+	0	NA	Intergenic	Intergenic	-45672	NM_201362	381175	Mm.266831	NM_201362	ENSMUSG00000038903	Ccdc68	BC046343	coiled-coil domain containing 68	protein-coding
Diff_Nuc4073	chr13	100786752	100786891	+	0	NA	Intergenic	Intergenic	-1227	NM_030026	78038	Mm.137327	NM_030026	ENSMUSG00000021646	Mccc2	4930552N12Rik|MCCB	methylcrotonoyl-Coenzyme A carboxylase 2 (beta)	protein-coding
Diff_Nuc48477	chr4	46744282	46744421	+	0	NA	intron (NM_001081141, intron 11 of 18)	intron (NM_001081141, intron 11 of 18)	-81280	NM_198664	381605	Mm.331595	NM_198664	ENSMUSG00000039813	Tbc1d2	A630005A06Rik|BC022630|Gm1037|PARIS-1|PARIS1	TBC1 domain family, member 2	protein-coding
Diff_Nuc65509	chr1	81335292	81335431	+	0	NA	Intergenic	Intergenic	261469	NM_172849	241134	Mm.313904	NM_172849	ENSMUSG00000054976	Nyap2	9430031J16Rik|Jr6|Kiaa1486	neuronal tyrosine-phophorylated phosphoinositide 3-kinase adaptor 2	protein-coding
Diff_Nuc30793	chr19	49780272	49780411	+	0	NA	Intergenic	Intergenic	972795	NM_001252501	58178	Mm.313672	NM_021377	ENSMUSG00000043531	Sorcs1	Sorcs|mSorCS	sortilin-related VPS10 domain containing receptor 1	protein-coding
Diff_Nuc48948	chr4	62648032	62648171	+	0	NA	intron (NM_028326, intron 1 of 14)	intron (NM_028326, intron 1 of 14)	21493	NM_028326	72701	Mm.26479	NM_028326	ENSMUSG00000028358	Zfp618	2810031P15Rik|2810040O04Rik|AI415580|AI505139|D430033D05Rik|Nedd10|Znf618|bM257P7.1	zinc finger protein 618	protein-coding
Diff_Nuc62488	chr2	166146702	166146841	+	0	NA	Intergenic	Intergenic	47363	NR_033467	670775	Mm.384326	NR_033467	ENSMUSG00000084840	Gm11468	OTTMUSG00000001131	predicted gene 11468	ncRNA
Diff_Nuc29261	chr14	120137462	120137601	+	0	NA	intron (NM_015820, intron 1 of 1)	MER5B|DNA|MER1_type	-10918	NR_045621	75432	Mm.443277	NR_045621	ENSMUSG00000100274	1700006F04Rik	-	RIKEN cDNA 1700006F04 gene	ncRNA
Diff_Nuc56679	chr3	153396052	153396191	+	0	NA	Intergenic	Intergenic	-8024	NM_011372	20447	Mm.296453	NM_011372	ENSMUSG00000052544	St6galnac3	Siat7c	ST6 (alpha-N-acetyl-neuraminyl-2,3-beta-galactosyl-1,3)-N-acetylgalactosaminide alpha-2,6-sialyltransferase 3	protein-coding
Diff_Nuc30595	chr19	41956852	41956991	+	0	NA	intron (NM_199447, intron 12 of 33)	intron (NM_199447, intron 12 of 33)	13722	NM_199447	107094	Mm.276044	NM_199447	ENSMUSG00000035049	Rrp12	AA408556|AA536972|mKIAA0690	ribosomal RNA processing 12 homolog (S. cerevisiae)	protein-coding
Diff_Nuc3020	chr13	67451092	67451231	+	0	NA	intron (NM_001038651, intron 1 of 3)	L1_Rod|LINE|L1	10347	NM_001038651	629016	Mm.440800	NM_001038651	ENSMUSG00000098905	Zfp953	E130120F12Rik	zinc finger protein 953	protein-coding
Diff_Nuc10621	chr11	73520632	73520771	+	0	NA	intron (NM_001126489, intron 3 of 3)	L1_Mur2|LINE|L1	18421	NM_001126489	76390	Mm.267142	NM_001126489	ENSMUSG00000060630	Zfp735	1700012C15Rik	zinc finger protein 735	protein-coding
Diff_Nuc66685	chr1	118901142	118901281	+	0	NA	Intergenic	Intergenic	1306498	NM_011650	22099	Mm.426637	NM_011650	ENSMUSG00000026374	Tsn	2610034C24Rik|AU040286|C3PO|TB-RBP	translin	protein-coding
Diff_Nuc56324	chr3	142313712	142313851	+	0	NA	Intergenic	ETnERV2-int|LTR|ERVK	-26871	NR_105802	102465200		NR_105802	ENSMUSG00000098871	Mir6381	Gm27963|mmu-mir-6381	microRNA 6381	ncRNA
Diff_Nuc24974	chr15	80646992	80647131	+	0	NA	intron (NM_177124, intron 1 of 21)	intron (NM_177124, intron 1 of 21)	18021	NM_177124	213988	Mm.131328	NM_144812	ENSMUSG00000047888	Tnrc6b	2700090M07Rik|A730065C02Rik|AI848765|D230019K20Rik	trinucleotide repeat containing 6b	protein-coding
Diff_Nuc15369	chr10	103773312	103773451	+	0	NA	Intergenic	Intergenic	49058	NR_105838	102465222		NR_105838	ENSMUSG00000099264	Mir6411	Gm27767|mmu-mir-6411	microRNA 6411	ncRNA
Diff_Nuc61245	chr2	126651062	126651201	+	0	NA	intron (NM_021450, intron 19 of 38)	intron (NM_021450, intron 19 of 38)	-41935	NM_029163	75083	Mm.389373	NM_029163	ENSMUSG00000027364	Usp50	1700086G18Rik|4930511O11Rik	ubiquitin specific peptidase 50	protein-coding
Diff_Nuc38481	chr6	19458202	19458341	+	0	NA	Intergenic	Intergenic	-47071	NR_105789	102465192		NR_105789	ENSMUSG00000099149	Mir6370	Gm27480|mmu-mir-6370	microRNA 6370	ncRNA
Diff_Nuc48530	chr4	48636022	48636161	+	0	NA	intron (NM_021436, intron 5 of 9)	intron (NM_021436, intron 5 of 9)	38026	NM_021436	230157	Mm.422686	NM_021436	ENSMUSG00000028347	Tmeff1	A830033E11|M7365|Tr1	transmembrane protein with EGF-like and two follistatin-like domains 1	protein-coding
Diff_Nuc76619	chr8	116800502	116800641	+	0	NA	intron (NM_173016, intron 4 of 8)	intron (NM_173016, intron 4 of 8)	71031	NM_173016	270097	Mm.334825	NM_173016	ENSMUSG00000046844	Vat1l	9430073I07|AI427515|mKIAA1576	vesicle amine transport protein 1 like	protein-coding
Diff_Nuc34987	chr7	54177802	54177941	+	0	NA	TTS (NM_001040695)	TTS (NM_001040695)	-2571	NM_021884	22088	Mm.241334	NM_021884	ENSMUSG00000014402	Tsg101	AI255943|CC2	tumor susceptibility gene 101	protein-coding
Diff_Nuc33419	chr18	69216602	69216741	+	0	NA	Intergenic	Intergenic	-34744	NR_105780	102465187		NR_105780	ENSMUSG00000098366	Mir145b	Gm27644|mmu-mir-145b	microRNA 145b	ncRNA
Diff_Nuc19330	chr16	12923872	12924011	+	0	NA	Intergenic	Intergenic	112458	NR_040507	75493	Mm.396146	NR_040507	ENSMUSG00000101565	1700003L19Rik	-	RIKEN cDNA 1700003L19 gene	ncRNA
Diff_Nuc49798	chr4	87194872	87195011	+	0	NA	Intergenic	Lx2B|LINE|L1	257286	NM_001286158	70122	Mm.288898	NM_027326	ENSMUSG00000028496	Mllt3	2210011H10Rik|2610012I03Rik|3830408D16Rik|Af9|D4Ertd321e	myeloid/lymphoid or mixed-lineage leukemia; translocated to, 3	protein-coding
Diff_Nuc13301	chr10	39174742	39174881	+	0	NA	intron (NM_001122892, intron 2 of 12)	intron (NM_001122892, intron 2 of 12)	85206	NM_001122893	14360	Mm.4848	NM_008054	ENSMUSG00000019843	Fyn	AI448320|AW552119	Fyn proto-oncogene	protein-coding
Diff_Nuc13451	chr10	44181822	44181961	+	0	NA	Intergenic	Intergenic	-3337	NM_007548	12142	Mm.4800	NM_007548	ENSMUSG00000038151	Prdm1	Blimp-1|Blimp1|PRDI-BF1|ZNFPR1A1|b2b1765Clo	PR domain containing 1, with ZNF domain	protein-coding
Diff_Nuc3494	chr13	83162102	83162241	+	0	NA	Intergenic	Intergenic	-324839	NR_039537	100628621		NR_039537	ENSMUSG00000106655	Mir3961	mmu-mir-3961	microRNA 3961	ncRNA
Diff_Nuc62132	chr2	152949922	152950061	+	0	NA	exon (NM_001172117, exon 2 of 13)	exon (NM_001172117, exon 2 of 13)	15787	NM_010407	15162	Mm.715	NM_010407	ENSMUSG00000003283	Hck	AI849071|Bmk	hemopoietic cell kinase	protein-coding
Diff_Nuc58284	chr2	45376862	45377001	+	0	NA	Intergenic	Intergenic	-175194	NR_040497	69405	Mm.396184	NR_040497	ENSMUSG00000086202	1700019E08Rik	-	RIKEN cDNA 1700019E08 gene	ncRNA
Diff_Nuc54570	chr3	90162382	90162521	+	0	NA	TTS (NM_139304)	TTS (NM_139304)	16875	NM_139304	229542	Mm.270999	NM_139304	ENSMUSG00000042390	Gatad2b	AL118180|C430014D17Rik|P66beta|mKIAA1150	GATA zinc finger domain containing 2B	protein-coding
Diff_Nuc40169	chr6	65973712	65973851	+	0	NA	Intergenic	Intergenic	71216	NM_001161773	67653	Mm.389756	NM_001161773	ENSMUSG00000036463	4930544G11Rik	-	RIKEN cDNA 4930544G11 gene	protein-coding
Diff_Nuc42874	chr5	10583452	10583591	+	0	NA	Intergenic	Intergenic	-281508	NR_003596	623849	Mm.335888	NR_003596	ENSMUSG00000091422	Gm6455	EG623849	predicted gene 6455	pseudo
Diff_Nuc36841	chr7	112670072	112670211	+	0	NA	Intergenic	Intergenic	-32733	NM_011421	20597	Mm.4628	NM_011421	ENSMUSG00000037049	Smpd1	A-SMase|ASM|Zn-SMase|aSMase	sphingomyelin phosphodiesterase 1, acid lysosomal	protein-coding
Diff_Nuc35790	chr7	80492022	80492161	+	0	NA	intron (NR_040324, intron 1 of 2)	intron (NR_040324, intron 1 of 2)	-28315	NM_177740	244058	Mm.333943	NM_177740	ENSMUSG00000070509	Rgma	BC059072|C230063O06	repulsive guidance molecule family member A	protein-coding
Diff_Nuc3643	chr13	87125362	87125501	+	0	NA	Intergenic	Intergenic	-939031	NM_007749	12867	Mm.378898	NM_007749	ENSMUSG00000017778	Cox7c	COXVIIc|Cox7c1	cytochrome c oxidase subunit VIIc	protein-coding
Diff_Nuc65221	chr1	72415082	72415221	+	0	NA	intron (NM_009533, intron 16 of 20)	MTE2a|LTR|MaLR	61156	NM_009533	22596	Mm.246952	NM_009533	ENSMUSG00000026187	Xrcc5	AI314015|Ku80|Ku86	X-ray repair complementing defective repair in Chinese hamster cells 5	protein-coding
Diff_Nuc64937	chr1	64620192	64620331	+	0	NA	intron (NM_133828, intron 5 of 7)	intron (NM_133828, intron 5 of 7)	40883	NM_001037726	12912	Mm.422634	NM_009952	ENSMUSG00000025958	Creb1	2310001E10Rik|3526402H21Rik|AV083133|Creb|Creb-1	cAMP responsive element binding protein 1	protein-coding
Diff_Nuc18798	chr17	88412932	88413071	+	0	NA	intron (NM_001081034, intron 4 of 22)	B3|SINE|B2	38611	NM_010830	17688	Mm.18210	NM_010830	ENSMUSG00000005370	Msh6	AU044881|AW550279|GTBP|Gtmbp	mutS homolog 6	protein-coding
Diff_Nuc12446	chr10	16729102	16729241	+	0	NA	intron (NR_038020, intron 1 of 8)	intron (NR_038020, intron 1 of 8)	86417	NR_038020	100504235	Mm.84044	NR_038020	ENSMUSG00000101969	Gm20125	-	predicted gene, 20125	ncRNA
Diff_Nuc43434	chr5	27017102	27017241	+	0	NA	Intergenic	Intergenic	-126726	NM_010075	13483	Mm.42078	NM_010075	ENSMUSG00000061576	Dpp6	B930011P16Rik|D5Buc3|D5Buc4|D5Buc5|DPP VI|Dpp-6|Gm1377|In(5)6H-p|Peplb|Rw	dipeptidylpeptidase 6	protein-coding
Diff_Nuc23593	chr15	37836792	37836931	+	0	NA	Intergenic	Intergenic	53949	NM_199476	382985	Mm.24738	NM_199476	ENSMUSG00000022292	Rrm2b	p53R2	ribonucleotide reductase M2 B (TP53 inducible)	protein-coding
Diff_Nuc55863	chr3	129408302	129408441	+	0	NA	intron (NM_001329594, intron 10 of 17)	intron (NM_001329594, intron 10 of 17)	19633	NM_001310737	13645	Mm.252481	NM_010113	ENSMUSG00000028017	Egf	AI790464	epidermal growth factor	protein-coding
Diff_Nuc26680	chr14	44832472	44832611	+	0	NA	Intergenic	L1Md_F2|LINE|L1	-41639	NR_073363	74328	Mm.439150	NR_073363		1700047E10Rik	-	RIKEN cDNA 1700047E10 gene	ncRNA
Diff_Nuc53005	chr3	44622762	44622901	+	0	NA	Intergenic	Intergenic	559351	NR_045172	72511	Mm.140700	NR_045172	ENSMUSG00000097040	2610316D01Rik	-	RIKEN cDNA 2610316D01 gene	ncRNA
Diff_Nuc4402	chr13	110307702	110307841	+	0	NA	intron (NM_011056, intron 3 of 16)	intron (NM_011056, intron 3 of 16)	192833	NR_030644	100124489		NR_030644	ENSMUSG00000076946	Mir582	Mirn582|mir-582|mmu-mir-582	microRNA 582	ncRNA
Diff_Nuc38093	chr6	9509402	9509541	+	0	NA	Intergenic	L1_Mus3|LINE|L1	609452	NM_008751	18231	Mm.46954	NM_008751	ENSMUSG00000046178	Nxph1	C130005L03Rik	neurexophilin 1	protein-coding
Diff_Nuc39156	chr6	37774452	37774591	+	0	NA	Intergenic	L1MA4A|LINE|L1	-46290	NM_001272064	21848	Mm.41063	NM_145076	ENSMUSG00000029833	Trim24	A130082H20Rik|AI447469|D430004I05Rik|TIF1|TIF1-alpha|TIF1alpha|Tif1a	tripartite motif-containing 24	protein-coding
Diff_Nuc41494	chr6	110220602	110220741	+	0	NA	Intergenic	Intergenic	-374835	NM_001346640	108073	Mm.240881	NM_177328	ENSMUSG00000056755	Grm7	6330570A01Rik|BB176677|C030018L03|E130018M02Rik|Gpr1g|Gprc1g|SMN2|Tg(SMN2)89Ahmb|mGluR7	glutamate receptor, metabotropic 7	protein-coding
Diff_Nuc54571	chr3	90200662	90200801	+	0	NA	intron (NM_178876, intron 20 of 30)	B1_Mur1|SINE|Alu	-6871	NM_011988	26568	Mm.45519	NM_011988	ENSMUSG00000027932	Slc27a3	Acsvl3|FATP-3|FATP3|Vlcs-3	solute carrier family 27 (fatty acid transporter), member 3	protein-coding
Diff_Nuc1596	chr13	19426892	19427031	+	0	NA	Intergenic	RLTRETN_Mm|LTR|ERVK	60721	NM_024270	76205	Mm.41940	NM_024270	ENSMUSG00000003062	Stard3nl	0610035N01Rik|6530409L22Rik|AW124774|MENTHO	STARD3 N-terminal like	protein-coding
Diff_Nuc4753	chr12	3703662	3703801	+	0	NA	intron (NM_001162465, intron 9 of 17)	L1M4|LINE|L1	-103249	NM_007872	13435	Mm.5001	NM_007872	ENSMUSG00000020661	Dnmt3a	MmuIIIA	DNA methyltransferase 3A	protein-coding
Diff_Nuc42909	chr5	12459582	12459721	+	0	NA	intron (NM_028882, intron 2 of 17)	intron (NM_028882, intron 2 of 17)	76485	NM_028882	108151	Mm.89313	NM_028882	ENSMUSG00000040254	Sema3d	4631426B19Rik	sema domain, immunoglobulin domain (Ig), short basic domain, secreted, (semaphorin) 3D	protein-coding
Diff_Nuc40518	chr6	77579292	77579431	+	0	NA	intron (NM_009819, intron 6 of 18)	intron (NM_009819, intron 6 of 18)	-246892	NR_045141	70753	Mm.490700	NR_045141	ENSMUSG00000108077	6330415B21Rik	-	RIKEN cDNA 6330415B21 gene	ncRNA
Diff_Nuc39167	chr6	37935522	37935661	+	0	NA	intron (NM_177200, intron 15 of 15)	intron (NM_177200, intron 15 of 15)	61405	NM_177200	320590	Mm.197449	NM_177200	ENSMUSG00000029830	Svopl	9430071P14Rik	SV2 related protein homolog (rat)-like	protein-coding
Diff_Nuc62740	chr2	180982962	180983101	+	0	NA	Intergenic	A-rich|Low_complexity|Low_complexity	-6299	NM_183162	229003	Mm.315872	NM_183162	ENSMUSG00000027580	Helz2	PDIP1|Pric285|mKIAA1769|mPDIP1	helicase with zinc finger 2, transcriptional coactivator	protein-coding
Diff_Nuc58605	chr2	53510002	53510141	+	0	NA	Intergenic	Lx4A|LINE|L1	427892	NM_023396	67874	Mm.27086	NM_023396	ENSMUSG00000075334	Rprm	2410012A13Rik|Reprimo	reprimo, TP53 dependent G2 arrest mediator candidate	protein-coding
Diff_Nuc6366	chr12	55624502	55624641	+	0	NA	Intergenic	L1MC5|LINE|L1	122428	NR_035439	100316682		NR_035439	ENSMUSG00000106344	Mir1892	Mirn1892|mir-1892|mmu-mir-1892	microRNA 1892	ncRNA
Diff_Nuc638	chrX	102993562	102993701	+	0	NA	3' UTR (NM_009530, exon 35 of 35)	3' UTR (NM_009530, exon 35 of 35)	33815	NM_030614	80903	Mm.154768	NM_030614	ENSMUSG00000031230	Fgf16	-	fibroblast growth factor 16	protein-coding
Diff_Nuc71650	chr9	79729622	79729761	+	0	NA	intron (NM_001081243, intron 2 of 5)	L2|LINE|L2	88243	NR_040734	74633	Mm.262175	NR_040734	ENSMUSG00000086918	4930429F24Rik	-	RIKEN cDNA 4930429F24 gene	ncRNA
Diff_Nuc66890	chr1	125733482	125733621	+	0	NA	intron (NM_199021, intron 3 of 25)	B4|SINE|B4	208585	NM_199021	269109	Mm.417716	NM_199021	ENSMUSG00000036815	Dpp10	6430601K09Rik|DPP X|Dprp3	dipeptidylpeptidase 10	protein-coding
Diff_Nuc46187	chr5	110556282	110556421	+	0	NA	exon (NM_001163996, exon 5 of 5)	exon (NM_001163996, exon 5 of 5)	-8498	NM_172717	231600	Mm.30264	NM_172717	ENSMUSG00000014668	Chfr	5730484M20Rik|C230082M18|RNF116	checkpoint with forkhead and ring finger domains	protein-coding
Diff_Nuc3497	chr13	83214852	83214991	+	0	NA	Intergenic	Tigger12A|DNA|MER2_type	-377589	NR_039537	100628621		NR_039537	ENSMUSG00000106655	Mir3961	mmu-mir-3961	microRNA 3961	ncRNA
Diff_Nuc71507	chr9	75660292	75660431	+	0	NA	intron (NM_007555, intron 1 of 6)	intron (NM_007555, intron 1 of 6)	37189	NM_007555	12160	Mm.428950	NM_007555	ENSMUSG00000032179	Bmp5	AU023399|se	bone morphogenetic protein 5	protein-coding
Diff_Nuc17713	chr17	54853872	54854011	+	0	NA	Intergenic	RMER5|LTR|ERV1	-344542	NR_045825	69418	Mm.391004	NR_045825	ENSMUSG00000099747	1700025K24Rik	-	RIKEN cDNA 1700025K24 gene	ncRNA
Diff_Nuc39577	chr6	48299982	48300121	+	0	NA	Intergenic	Intergenic	-45534	NM_001347152	77827	Mm.107646	NM_133922	ENSMUSG00000042810	Krba1	A930040G15Rik|AI448780	KRAB-A domain containing 1	protein-coding
Diff_Nuc24550	chr15	64012962	64013101	+	0	NA	intron (NM_010026, intron 5 of 30)	intron (NM_010026, intron 5 of 30)	-121021	NM_144846	223601	Mm.246108	NM_144846	ENSMUSG00000022378	Fam49b	0910001A06Rik|AW122079	family with sequence similarity 49, member B	protein-coding
Diff_Nuc22744	chr15	14349362	14349501	+	0	NA	Intergenic	Intergenic	-1246001	NM_007666	12563	Mm.57048	NM_007666	ENSMUSG00000039385	Cdh6	cad6	cadherin 6	protein-coding
Diff_Nuc21038	chr16	62584012	62584151	+	0	NA	Intergenic	L1Md_F3|LINE|L1	202461	NM_178925	106338	Mm.26321	NM_178925	ENSMUSG00000050312	Nsun3	6720484A09Rik|AU022521	NOL1/NOP2/Sun domain family member 3	protein-coding
Diff_Nuc28305	chr14	94447442	94447581	+	0	NA	Intergenic	Intergenic	-157613	NM_001346722	211712	Mm.37126	NM_001081377	ENSMUSG00000055421	Pcdh9	-	protocadherin 9	protein-coding
Diff_Nuc42852	chr5	10003832	10003971	+	0	NA	Intergenic	Intergenic	-278549	NM_181850	108069	Mm.318966	NM_181850	ENSMUSG00000003974	Grm3	0710001G23Rik|Gprc1c|mGlu3|mGluR3	glutamate receptor, metabotropic 3	protein-coding
Diff_Nuc22676	chr15	12523832	12523971	+	0	NA	Intergenic	Intergenic	-1590	NM_001081064	68070	Mm.423205	NM_001081064	ENSMUSG00000022197	Pdzd2	4930537L06Rik|A930022H17Rik|Gm21706|Gm82|Pdzk3|mKIAA0300	PDZ domain containing 2	protein-coding
Diff_Nuc39403	chr6	44536512	44536651	+	0	NA	Intergenic	L1M2|LINE|L1	-473479	NM_001004357	66797	Mm.440084	NM_025771	ENSMUSG00000039419	Cntnap2	5430425M22Rik|Caspr2|mKIAA0868	contactin associated protein-like 2	protein-coding
Diff_Nuc5714	chr12	38473282	38473421	+	0	NA	Intergenic	Lx9|LINE|L1	-133941	NM_178681	217480	Mm.126525	NM_178681	ENSMUSG00000036095	Dgkb	6430574F24|90kda|C630029D13Rik|DAGK2|DGK|DGK-beta|mKIAA0718	diacylglycerol kinase, beta	protein-coding
Diff_Nuc66789	chr1	123206352	123206491	+	0	NA	intron (NM_178082, intron 3 of 5)	L1_Mus3|LINE|L1	17834	NM_001271531	72999	Mm.27136	NM_133748	ENSMUSG00000003721	Insig2	2900053I11Rik|C730043J18Rik|Insig-2	insulin induced gene 2	protein-coding
Diff_Nuc74447	chr8	49849212	49849351	+	0	NA	Intergenic	Intergenic	-89237	NM_011857	23965	Mm.42191	NM_011857	ENSMUSG00000031561	Tenm3	2610100B16Rik|Odz1|Odz3|Ten-m3|mKIAA1455	teneurin transmembrane protein 3	protein-coding
Diff_Nuc35042	chr7	56408912	56409051	+	0	NA	intron (NM_001111016, intron 2 of 38)	intron (NM_001111016, intron 2 of 38)	-92578	NM_175272	78286	Mm.333881	NM_175272	ENSMUSG00000052512	Nav2	5330421F07Rik|AU067780|BQ960892|HELAD1|POMFIL2|RAINB1|RAINB2|Unc53H2|mKIAA3015	neuron navigator 2	protein-coding
Diff_Nuc75326	chr8	75402412	75402551	+	0	NA	intron (NM_010687, intron 9 of 14)	intron (NM_010687, intron 9 of 14)	116923	NM_007975	14065	Mm.12948	NM_007975	ENSMUSG00000050147	F2rl3	PAR4	coagulation factor II (thrombin) receptor-like 3	protein-coding
Diff_Nuc64981	chr1	66105262	66105401	+	0	NA	Intergenic	Intergenic	-116572	NM_008632	17756	Mm.256966	NM_008632	ENSMUSG00000015222	Map2	G1-397-34|MAP-2|Mtap-2|Mtap2|repro4	microtubule-associated protein 2	protein-coding
Diff_Nuc14152	chr10	65039992	65040131	+	0	NA	Intergenic	Intergenic	546751	NR_038039	69433	Mm.23366	NR_038039	ENSMUSG00000100000	1700023F02Rik	AV205046	RIKEN cDNA 1700023F02 gene	ncRNA
Diff_Nuc21190	chr16	66500852	66500991	+	0	NA	Intergenic	Intergenic	-156442	NR_040512	75501	Mm.394300	NR_040512	ENSMUSG00000092599	1700010K23Rik	-	RIKEN cDNA 1700010K23 gene	ncRNA
Diff_Nuc24744	chr15	70286722	70286861	+	0	NA	Intergenic	Intergenic	532128	NR_045071	100503580	Mm.404646	NR_045071		Gm19782	-	predicted gene, 19782	ncRNA
Diff_Nuc67038	chr1	130123762	130123901	+	0	NA	intron (NM_181750, intron 23 of 26)	L1_Mur3|LINE|L1	-16927	NM_026390	67812	Mm.293321	NM_026390	ENSMUSG00000026353	Ubxn4	1300013G12Rik|Ubxd2|mKIAA0242	UBX domain protein 4	protein-coding
Diff_Nuc12436	chr10	16448062	16448201	+	0	NA	Intergenic	Intergenic	367457	NR_038020	100504235	Mm.84044	NR_038020	ENSMUSG00000101969	Gm20125	-	predicted gene, 20125	ncRNA
Diff_Nuc48608	chr4	51188392	51188531	+	0	NA	Intergenic	L1Md_F2|LINE|L1	-41089	NM_001162865	74914	Mm.159368	NM_001162865	ENSMUSG00000039555	Cylc2	4930488P18Rik	cylicin, basic protein of sperm head cytoskeleton 2	protein-coding
Diff_Nuc50595	chr4	110509512	110509651	+	0	NA	intron (NM_001048189, intron 3 of 12)	Lx9|LINE|L1	439278	NM_030231	78933	Mm.435620	NM_030231	ENSMUSG00000061298	Agbl4	4930578N11Rik|4931433A01Rik	ATP/GTP binding protein-like 4	protein-coding
Diff_Nuc48260	chr4	38218842	38218981	+	0	NA	Intergenic	LTR37B|LTR|ERV1	-1178415	NM_001081095	75471	Mm.23522	NM_001081095	ENSMUSG00000028287	1700009N14Rik	AI429145	RIKEN cDNA 1700009N14 gene	protein-coding
Diff_Nuc62282	chr2	157130552	157130691	+	0	NA	intron (NM_019642, intron 9 of 16)	L1MB7|LINE|L1	-25336	NM_001039557	629499	Mm.384235	NM_001039557	ENSMUSG00000074627	Mroh8	4922505G16Rik	maestro heat-like repeat family member 8	protein-coding
Diff_Nuc28191	chr14	91651072	91651211	+	0	NA	Intergenic	Intergenic	1124443	NR_045712	74967	Mm.390704	NR_045712		4930474H20Rik	-	RIKEN cDNA 4930474H20 gene	ncRNA
Diff_Nuc62401	chr2	161669322	161669461	+	0	NA	intron (NM_021464, intron 9 of 29)	intron (NM_021464, intron 9 of 29)	-547158	NR_040617	77645	Mm.447752	NR_040617	ENSMUSG00000084919	Ptprtos	C330008G21Rik	protein tyrosine phosphatase, receptor type T, opposite strand	ncRNA
Diff_Nuc36157	chr7	93660772	93660911	+	0	NA	Intergenic	RMER1A|Other|Other	-14428	NM_146618	258611	Mm.271464	NM_146618	ENSMUSG00000057067	Olfr297	MOR220-3	olfactory receptor 297	protein-coding
Diff_Nuc7015	chr12	72242652	72242791	+	0	NA	intron (NM_029818, intron 3 of 27)	intron (NM_029818, intron 3 of 27)	4886	NM_001163378	76967	Mm.87290	NM_029818	ENSMUSG00000034601	2700049A03Rik	Ta3|Talpid3|mKIAA0586	RIKEN cDNA 2700049A03 gene	protein-coding
Diff_Nuc76791	chr8	126156562	126156701	+	0	NA	Intergenic	Intergenic	-21198	NM_133955	69581	Mm.168257	NM_133955	ENSMUSG00000039960	Rhou	2310026M05Rik|AI182090|Arhu|CDC42L1|G28K|WRCH-1|WRCH1|mG28K	ras homolog family member U	protein-coding
Diff_Nuc1584	chr13	19185372	19185511	+	0	NA	intron (NM_175007, intron 5 of 20)	intron (NM_175007, intron 5 of 20)	145221	NM_001289546	218038	Mm.101650	NM_175007	ENSMUSG00000021314	Amph	-	amphiphysin	protein-coding
Diff_Nuc4674	chr13	118775312	118775451	+	0	NA	Intergenic	Intergenic	-266563	NR_045508	71100	Mm.414841	NR_045508	ENSMUSG00000079048	4933413L06Rik	-	RIKEN cDNA 4933413L06 gene	ncRNA
Diff_Nuc38550	chr6	21489472	21489611	+	0	NA	intron (NM_019697, intron 1 of 5)	B4A|SINE|B4	312974	NM_173007	269831	Mm.21950	NM_173007	ENSMUSG00000029669	Tspan12	9030619E17|AI426782|AI663988|AW111457|Tm4sf12	tetraspanin 12	protein-coding
Diff_Nuc75147	chr8	69797042	69797181	+	0	NA	Intergenic	MYSERV6-int|LTR|ERVK	-217546	NM_008673	17960	Mm.14125	NM_008673	ENSMUSG00000025588	Nat1	Nat-1	N-acetyl transferase 1	protein-coding
Diff_Nuc3319	chr13	78439062	78439201	+	0	NA	Intergenic	L1Md_A|LINE|L1	-100997	NM_010151	13865	Mm.439653	NM_010151	ENSMUSG00000069171	Nr2f1	COUP-TF1|COUP-TFI|COUPTFA|EAR-3|EAR3|Erbal3|SVP44|Tcfcoup1	nuclear receptor subfamily 2, group F, member 1	protein-coding
Diff_Nuc59348	chr2	73947492	73947631	+	0	NA	Intergenic	Intergenic	-198178	NM_001301722	228033	Mm.2966	NM_175015	ENSMUSG00000018770	Atp5g3	6030447M23	ATP synthase, H+ transporting, mitochondrial F0 complex, subunit C3 (subunit 9)	protein-coding
Diff_Nuc5060	chr12	12635442	12635581	+	0	NA	Intergenic	Intergenic	41212	NR_136889	102637952	Mm.421393	NR_136889		Gm34637	-	predicted gene, 34637	ncRNA
Diff_Nuc47595	chr4	18571772	18571911	+	0	NA	Intergenic	Intergenic	-636156	NM_013927	30952	Mm.445778	NM_013927	ENSMUSG00000056494	Cngb3	CCNC2|CNG6|Cngbeta2	cyclic nucleotide gated channel beta 3	protein-coding
Diff_Nuc33282	chr18	65162332	65162471	+	0	NA	intron (NM_001114386, intron 2 of 30)	intron (NM_001114386, intron 2 of 30)	-20780	NM_031881	83814	Mm.98668	NM_031881	ENSMUSG00000024589	Nedd4l	1300012C07Rik|Nedd4-2|Nedd4b	neural precursor cell expressed, developmentally down-regulated gene 4-like	protein-coding
Diff_Nuc55791	chr3	126948672	126948811	+	0	NA	intron (NM_001327938, intron 1 of 47)	intron (NM_001327938, intron 1 of 47)	84518	NR_105029	100862268	Mm.444603	NR_105029	ENSMUSG00000097456	LOC100862268	-	uncharacterized LOC100862268	ncRNA
Diff_Nuc5264	chr12	21419142	21419281	+	0	NA	intron (NM_011739, intron 1 of 4)	intron (NM_011739, intron 1 of 4)	4086	NM_011739	22630	Mm.289630	NM_011739	ENSMUSG00000076432	Ywhaq	2700028P07Rik|AA409740|AU021156|R74690	tyrosine 3-monooxygenase/tryptophan 5-monooxygenase activation protein, theta polypeptide	protein-coding
Diff_Nuc33548	chr18	72363712	72363851	+	0	NA	intron (NM_007831, intron 1 of 28)	intron (NM_007831, intron 1 of 28)	146942	NM_007831	13176	Mm.167882	NM_007831	ENSMUSG00000060534	Dcc	C030036D22Rik|Igdcc1	deleted in colorectal carcinoma	protein-coding
Diff_Nuc40947	chr6	93171652	93171791	+	0	NA	Intergenic	Intergenic	281145	NR_015530	330385	Mm.483472	NR_015530	ENSMUSG00000097462	9530026P05Rik	B430306B02	RIKEN cDNA 9530026P05 gene	ncRNA
Diff_Nuc24578	chr15	65248562	65248701	+	0	NA	Intergenic	Intergenic	-369972	NM_133766	76740	Mm.260647	NM_133766	ENSMUSG00000015002	Efr3a	A130089M23Rik|BB071175|C76891|C920006C10Rik|D030063F01Rik|mKIAA0143	EFR3 homolog A	protein-coding
Diff_Nuc51266	chr4	141055222	141055361	+	0	NA	intron (NM_001347235, intron 3 of 14)	intron (NM_001347235, intron 3 of 14)	39221	NM_001347235	56381	Mm.299906	NM_019763	ENSMUSG00000040761	Spen	Mint|mKIAA0929	SPEN homolog, transcriptional regulator (Drosophila)	protein-coding
Diff_Nuc73333	chr8	13879522	13879661	+	0	NA	exon (NM_181854, exon 2 of 2)	exon (NM_181854, exon 2 of 2)	9950	NM_181854	101994	Mm.289346	NM_181854	ENSMUSG00000047710	Champ1	AA675043|AI116001|D8Ertd457e|D8Ertd569e|Zfp828|Znf828|mKIAA1802	chromosome alignment maintaining phosphoprotein 1	protein-coding
Diff_Nuc20015	chr16	34994862	34995001	+	0	NA	intron (NM_139300, intron 29 of 31)	intron (NM_139300, intron 29 of 31)	-27576	NM_023587	70757	Mm.27286	NM_023587	ENSMUSG00000035376	Hacd2	6330408J20Rik|AI255777|AI481689|Hcad2|Ptplb	3-hydroxyacyl-CoA dehydratase 2	protein-coding
Diff_Nuc71329	chr9	70528442	70528581	+	0	NA	intron (NM_007399, intron 1 of 15)	intron (NM_007399, intron 1 of 15)	1722	NM_007399	11487	Mm.3037	NM_007399	ENSMUSG00000054693	Adam10	1700031C13Rik|MADM|kuz|kuzbanian	a disintegrin and metallopeptidase domain 10	protein-coding
Diff_Nuc65041	chr1	67310012	67310151	+	0	NA	Intergenic	Intergenic	140480	NM_001080809	227231	Mm.343942	NM_001080809	ENSMUSG00000025991	Cps1	4732433M03Rik|CPS|D1Ucla3	carbamoyl-phosphate synthetase 1	protein-coding
Diff_Nuc39671	chr6	51663162	51663301	+	0	NA	Intergenic	B1F|SINE|Alu	168709	NM_001127348	71982	Mm.294166	NM_028035	ENSMUSG00000038301	Snx10	2410004M09Rik	sorting nexin 10	protein-coding
Diff_Nuc11106	chr11	88886062	88886201	+	0	NA	Intergenic	B2_Mm2|SINE|B2	25414	NM_009546	217069	Mm.248445	NM_009546	ENSMUSG00000000275	Trim25	AA960166|AL022677|EFP|Zfp147	tripartite motif-containing 25	protein-coding
Diff_Nuc66557	chr1	114816422	114816561	+	0	NA	Intergenic	L1Md_F2|LINE|L1	-1054996	NM_001081316	319901	Mm.103468	NM_001081316	ENSMUSG00000038702	Dsel	9330132E09Rik|DS-epi2	dermatan sulfate epimerase-like	protein-coding
Diff_Nuc62293	chr2	157626742	157626881	+	0	NA	intron (NM_025680, intron 5 of 15)	intron (NM_025680, intron 5 of 15)	63674	NM_025680	66642	Mm.45193	NM_025680	ENSMUSG00000027649	Ctnnbl1	5730471K09Rik|NAP|NYD-SP19|P14L	catenin, beta like 1	protein-coding
Diff_Nuc56144	chr3	138357002	138357141	+	0	NA	Intergenic	Lx5|LINE|L1	32877	NR_040545	74635	Mm.410825	NR_040545	ENSMUSG00000105838	4930425O10Rik	-	RIKEN cDNA 4930425O10 gene	ncRNA
Diff_Nuc15015	chr10	94006602	94006741	+	0	NA	intron (NM_172051, intron 1 of 3)	intron (NM_172051, intron 1 of 3)	29069	NM_172051	319880	Mm.23047	NM_172051	ENSMUSG00000020023	Tmcc3	AW488095|C630016B22Rik|C88213|Tmcc1	transmembrane and coiled coil domains 3	protein-coding
Diff_Nuc45527	chr5	87709282	87709421	+	0	NA	Intergenic	MMETn-int|LTR|ERVK	-25538	NM_053215	112417	Mm.160362	NM_053215	ENSMUSG00000057425	Ugt2b37	0610033E06Rik	UDP glucuronosyltransferase 2 family, polypeptide B37	protein-coding
Diff_Nuc5880	chr12	41839002	41839141	+	0	NA	intron (NM_053122, intron 4 of 6)	intron (NM_053122, intron 4 of 6)	88394	NM_053122	93757	Mm.363813	NM_053122	ENSMUSG00000056899	Immp2l	AI853880|IMP2	IMP2 inner mitochondrial membrane peptidase-like (S. cerevisiae)	protein-coding
Diff_Nuc35871	chr7	83647592	83647731	+	0	NA	intron (NM_001199224, intron 17 of 22)	intron (NM_001199224, intron 17 of 22)	272888	NM_001199224	244071	Mm.322829	NM_172902	ENSMUSG00000025754	Agbl1	Ccp4|D430020F16|EG244071|Nna1-l1	ATP/GTP binding protein-like 1	protein-coding
Diff_Nuc12253	chr10	11148302	11148441	+	0	NA	intron (NM_010146, intron 2 of 3)	intron (NM_010146, intron 2 of 3)	85128	NM_010146	13853	Mm.89946	NM_010146	ENSMUSG00000055493	Epm2a	TG-B|Tg(TcraK,TcrbK)TG-BFlv	epilepsy, progressive myoclonic epilepsy, type 2 gene alpha	protein-coding
Diff_Nuc61949	chr2	146340572	146340711	+	0	NA	Intergenic	Intergenic	-2901	NM_001033348	241694	Mm.222310	NM_001033348	ENSMUSG00000037110	Ralgapa2	A230067G21Rik|AS250|BC053994|RGC2|pp250	Ral GTPase activating protein, alpha subunit 2 (catalytic)	protein-coding
Diff_Nuc28927	chr14	110744672	110744811	+	0	NA	Intergenic	RMER19C|LTR|ERVK	409630	NM_175499	239250	Mm.49728	NM_175499	ENSMUSG00000045871	Slitrk6	4832410J21Rik|Sltk6	SLIT and NTRK-like family, member 6	protein-coding
Diff_Nuc23824	chr15	43878522	43878661	+	0	NA	Intergenic	Intergenic	-149090	NM_013696	22045	Mm.309350	NM_013696	ENSMUSG00000038760	Trhr	TRH-R1	thyrotropin releasing hormone receptor	protein-coding
Diff_Nuc11132	chr11	89442682	89442821	+	0	NA	intron (NM_001327810, intron 2 of 19)	intron (NM_001327810, intron 2 of 19)	115499	NM_001327810	382543	Mm.60997	NM_172534	ENSMUSG00000047773	Ankfn1	4932411E22Rik|Gm1175|nmf9	ankyrin-repeat and fibronectin type III domain containing 1	protein-coding
Diff_Nuc68182	chr1	164108572	164108711	+	0	NA	intron (NM_001038619, intron 14 of 20)	AT_rich|Low_complexity|Low_complexity	-39113	NR_002870	474332	Mm.479755	NR_002870	ENSMUSG00000078190	Dnm3os	6030416H16Rik|Hag2|Npn1|P/L01	dynamin 3, opposite strand	ncRNA
Diff_Nuc56309	chr3	142016592	142016731	+	0	NA	intron (NM_019809, intron 2 of 7)	intron (NM_019809, intron 2 of 7)	38153	NM_022554	56376	Mm.117709	NM_019808	ENSMUSG00000028273	Pdlim5	1110001A05Rik|AI987914|C87059|Enh|Enh1|Enh2|Enh3|LIM	PDZ and LIM domain 5	protein-coding
Diff_Nuc58882	chr2	61257542	61257681	+	0	NA	Intergenic	Intergenic	-159032	NM_011529	21353	Mm.244393	NM_011529	ENSMUSG00000064289	Tank	C86182|E430026L09Rik|I-TRAF	TRAF family member-associated Nf-kappa B activator	protein-coding
Diff_Nuc44930	chr5	72243872	72244011	+	0	NA	intron (NM_008069, intron 3 of 8)	L1_Mus2|LINE|L1	152686	NM_008069	14400	Mm.38567	NM_008069	ENSMUSG00000029212	Gabrb1	AW061132|B230208N19Rik|Gabrb-1	gamma-aminobutyric acid (GABA) A receptor, subunit beta 1	protein-coding
Diff_Nuc67222	chr1	136444532	136444671	+	0	NA	intron (NM_001291015, intron 1 of 3)	B1_Mus1|SINE|Alu	1658	NM_001145300	71001	Mm.158529	NM_183292	ENSMUSG00000046367	Mgat4e	4931440L10Rik	MGAT4 family, member E	protein-coding
Diff_Nuc46853	chr5	143860362	143860501	+	0	NA	intron (NM_207110, intron 1 of 16)	intron (NM_207110, intron 1 of 16)	14268	NM_207110	108086	Mm.381440	NM_080561	ENSMUSG00000045078	Rnf216	2810055G22Rik|AI647468|AU019462|C86502|F830018F18Rik|TRIAD3|UIP83|Ubce7ip1	ring finger protein 216	protein-coding
Diff_Nuc22923	chr15	18817952	18818091	+	0	NA	intron (NM_009865, intron 1 of 11)	intron (NM_009865, intron 1 of 11)	67937	NM_009865	320873	Mm.117794	NM_009865	ENSMUSG00000022321	Cdh10	A830016G23Rik|C030003B10Rik|C030011H18Rik	cadherin 10	protein-coding
Diff_Nuc74792	chr8	60205252	60205391	+	0	NA	Intergenic	Intergenic	-73469	NM_144731	108150	Mm.62886	NM_144731	ENSMUSG00000031608	Galnt7	AI225872	UDP-N-acetyl-alpha-D-galactosamine: polypeptide N-acetylgalactosaminyltransferase 7	protein-coding
Diff_Nuc19847	chr16	28568922	28569061	+	0	NA	intron (NM_010199, intron 2 of 5)	L1MC4a|LINE|L1	-3954	NM_001276419	14167	Mm.7996	NM_010199	ENSMUSG00000022523	Fgf12	AV114868|B230343J05Rik|FGF-12|FHF-1|Fhf1	fibroblast growth factor 12	protein-coding
Diff_Nuc55642	chr3	122690842	122690981	+	0	NA	Intergenic	Intergenic	-3546	NM_133857	99526	Mm.491248	NM_133857	ENSMUSG00000039701	Usp53	AA939927|Phxr3|Sp6|mKIAA1350|mbo	ubiquitin specific peptidase 53	protein-coding
Diff_Nuc37413	chr7	132414382	132414521	+	0	NA	Intergenic	Intergenic	78849	NR_045804	71208	Mm.159465	NM_172408	ENSMUSG00000045928	4933440M02Rik	-	RIKEN cDNA 4933440M02 gene	ncRNA
Diff_Nuc6834	chr12	67701412	67701551	+	0	NA	intron (NM_207010, intron 8 of 15)	intron (NM_207010, intron 8 of 15)	-316093	NM_001162933	238217	Mm.188575	NM_001162933	ENSMUSG00000060499	Rpl10l	EG238217	ribosomal protein L10-like	protein-coding
Diff_Nuc42302	chr6	139488552	139488691	+	0	NA	Intergenic	ORR1C1-int|LTR|MaLR	-38191	NM_001128090	632971	Mm.475610	NM_001128090	ENSMUSG00000092164	Rergl	EG632971	RERG/RAS-like	protein-coding
Diff_Nuc23259	chr15	27032482	27032621	+	0	NA	Intergenic	URR1B|DNA|MER1_type	-143326	NR_029647	723831		NR_029647	ENSMUSG00000094316	Mir297-1	Mir297a-1|Mirn297-1	microRNA 297-1	ncRNA
Diff_Nuc27724	chr14	79805902	79806041	+	0	NA	intron (NM_145960, intron 4 of 10)	intron (NM_145960, intron 4 of 10)	8392	NM_145960	211253	Mm.35306	NM_145960	ENSMUSG00000022022	Mtrf1	A830062K05Rik|MtRF-1	mitochondrial translational release factor 1	protein-coding
Diff_Nuc13234	chr10	37185262	37185401	+	0	NA	Intergenic	L1VL2|LINE|L1	-326599	NM_008538	17118	Mm.30059	NM_008538	ENSMUSG00000069662	Marcks	Macs|PKCSL	myristoylated alanine rich protein kinase C substrate	protein-coding
Diff_Nuc68701	chr1	179655642	179655781	+	0	NA	Intergenic	B3|SINE|B2	-4234	NM_027077	69428	Mm.84467	NM_027077	ENSMUSG00000015962	1700016C15Rik	-	RIKEN cDNA 1700016C15 gene	protein-coding
Diff_Nuc9250	chr11	27121372	27121511	+	0	NA	Intergenic	Intergenic	436333	NR_002890	654472	Mm.347777	NR_002890		Gm12070	OTTMUSG00000005300	glyceraldehyde-3-phosphate dehydrogenase pseudogene	pseudo
Diff_Nuc28468	chr14	98641422	98641561	+	0	NA	Intergenic	Intergenic	-72507	NM_007826	13134	Mm.320593	NM_007826	ENSMUSG00000055639	Dach1	Dac|Dach	dachshund 1 (Drosophila)	protein-coding
Diff_Nuc17086	chr17	30255452	30255591	+	0	NA	intron (NM_148926, intron 2 of 4)	intron (NM_148926, intron 2 of 4)	113489	NM_148926	21769	Mm.220972	NM_148926	ENSMUSG00000044477	Zfand3	AW539211|TEG-27|Tex27	zinc finger, AN1-type domain 3	protein-coding
Diff_Nuc15244	chr10	100841582	100841721	+	0	NA	Intergenic	ORR1D1|LTR|MaLR	-302470	NM_001205098	67569	Mm.25252	NM_026243	ENSMUSG00000019888	Mgat4c	9130411I17Rik|GntIVh	MGAT4 family, member C	protein-coding
Diff_Nuc76093	chr8	100356072	100356211	+	0	NA	Intergenic	L1Md_F2|LINE|L1	-1179646	NR_110579	100873092	Mm.414599	NR_110579	ENSMUSG00000089819	Gm15679	OTTMUSG00000025218	predicted gene 15679	ncRNA
Diff_Nuc64252	chr1	46012872	46013011	+	0	NA	Intergenic	L1Md_F2|LINE|L1	-30502	NM_016917	53945	Mm.28756	NM_016917	ENSMUSG00000025993	Slc40a1	Dusg|Fpn1|IREG1|MTP|MTP1|Ol5|Pcm|Slc11a3|Slc39a1	solute carrier family 40 (iron-regulated transporter), member 1	protein-coding
Diff_Nuc64243	chr1	45842282	45842421	+	0	NA	Intergenic	Intergenic	-9995	NM_028599	73674	Mm.270376	NM_028599	ENSMUSG00000025995	Wdr75	1300003A18Rik|2410118I19Rik|C77608	WD repeat domain 75	protein-coding
Diff_Nuc65672	chr1	87733032	87733171	+	0	NA	intron (NM_133781, intron 3 of 8)	intron (NM_133781, intron 3 of 8)	43079	NM_133781	12283	Mm.26135	NM_133781	ENSMUSG00000036707	Cab39	AA408805|AA960512|C78372|MO25|MO25alpha	calcium binding protein 39	protein-coding
Diff_Nuc49942	chr4	91694502	91694641	+	0	NA	Intergenic	Intergenic	119341	NM_027034	69314	Mm.55891	NM_027034	ENSMUSG00000028533	Izumo3	1700011H22Rik	IZUMO family member 3	protein-coding
Diff_Nuc3251	chr13	76712632	76712771	+	0	NA	intron (NM_030174, intron 1 of 20)	L1_Mur2|LINE|L1	190292	NM_030174	78771	Mm.316249	NM_030174	ENSMUSG00000021596	Mctp1	2810465F10Rik	multiple C2 domains, transmembrane 1	protein-coding
Diff_Nuc32137	chr18	31797092	31797231	+	0	NA	intron (NM_172965, intron 2 of 20)	ID_B1|SINE|B4	3124	NM_172965	269003	Mm.194538	NM_172965	ENSMUSG00000024260	Sap130	2610304F09Rik|6720406D06	Sin3A associated protein	protein-coding
Diff_Nuc2097	chr13	33026512	33026651	+	0	NA	Intergenic	Intergenic	-30801	NM_011454	20708	Mm.36526	NM_011454	ENSMUSG00000042842	Serpinb6b	NK13|Spi12|ovalbumin	serine (or cysteine) peptidase inhibitor, clade B, member 6b	protein-coding
Diff_Nuc21858	chr16	82227522	82227661	+	0	NA	Intergenic	Intergenic	1026649	NM_010954	17968	Mm.433941	NM_010954	ENSMUSG00000022762	Ncam2	Ncam-2|Ocam|RNCAM	neural cell adhesion molecule 2	protein-coding
Diff_Nuc5844	chr12	40933742	40933881	+	0	NA	intron (NM_013562, intron 8 of 11)	intron (NM_013562, intron 8 of 11)	-7909	NM_001033437	380755	Mm.390463	NM_001033437	ENSMUSG00000071342	Lsmem1	Gm889	leucine-rich single-pass membrane protein 1	protein-coding
Diff_Nuc56993	chr2	5525422	5525561	+	0	NA	intron (NM_177343, intron 1 of 10)	intron (NM_177343, intron 1 of 10)	71601	NM_001290376	227541	Mm.191949	NM_177343	ENSMUSG00000039145	Camk1d	A630059D12Rik|CKLiK|CaMKIdelta|E030025C11Rik|mCKLiK	calcium/calmodulin-dependent protein kinase ID	protein-coding
Diff_Nuc60775	chr2	113426832	113426971	+	0	NA	intron (NM_001285459, intron 8 of 16)	intron (NM_001285459, intron 8 of 16)	-98346	NM_001287818	14260	Mm.4938	NM_010230	ENSMUSG00000044042	Fmn1	Fmn|formin-1|ld	formin 1	protein-coding
Diff_Nuc307	chrX	56349732	56349871	+	0	NA	intron (NM_001290414, intron 5 of 6)	intron (NM_001290414, intron 5 of 6)	1112	NR_030574	100124476		NR_030574	ENSMUSG00000070110	Mir504	Mirn504|mir-504|mmu-mir-504	microRNA 504	ncRNA
Diff_Nuc6027	chr12	46548752	46548891	+	0	NA	Intergenic	L1Md_F2|LINE|L1	-373351	NM_144552	217517	Mm.285400	NM_144552	ENSMUSG00000046314	Stxbp6	BC024598|C85317	syntaxin binding protein 6 (amisyn)	protein-coding
Diff_Nuc72441	chr9	103348052	103348191	+	0	NA	intron (NM_001002896, intron 4 of 6)	B1_Mus1|SINE|Alu	22213	NR_040466	100529079	Mm.437003	NR_040466	ENSMUSG00000086236	5830418P13Rik	-	RIKEN cDNA 5830418P13 gene	ncRNA
Diff_Nuc43471	chr5	28249142	28249281	+	0	NA	Intergenic	L1_Mus1|LINE|L1	80724	NM_008314	15563	Mm.4835	NM_008314	ENSMUSG00000039106	Htr5a	Htr5	5-hydroxytryptamine (serotonin) receptor 5A	protein-coding
Diff_Nuc23206	chr15	25120962	25121101	+	0	NA	Intergenic	L1_Mus1|LINE|L1	222488	NM_027395	70350	Mm.29586	NM_027395	ENSMUSG00000045763	Basp1	2610024P12Rik|CAP-23|CAP23|Ckap3|NAP-22|NAP22	brain abundant, membrane attached signal protein 1	protein-coding
Diff_Nuc40477	chr6	76520672	76520811	+	0	NA	Intergenic	L1ME3B|LINE|L1	-671970	NM_028880	74342	Mm.292568	NM_028880	ENSMUSG00000060780	Lrrtm1	4632401D06Rik|AW125451	leucine rich repeat transmembrane neuronal 1	protein-coding
Diff_Nuc34117	chr7	3391722	3391861	+	0	NA	Intergenic	Intergenic	-2593	NM_133190	81905	Mm.357990	NM_133190	ENSMUSG00000053395	Cacng8	-	calcium channel, voltage-dependent, gamma subunit 8	protein-coding
Diff_Nuc72686	chr9	112245682	112245821	+	0	NA	intron (NR_033433, intron 2 of 3)	(TC)n|Simple_repeat|Simple_repeat	86673	NR_033433	620760	Mm.259863	NR_015468	ENSMUSG00000087038	2900079G21Rik	C130083B14|Gm6179	RIKEN cDNA 2900079G21 gene	ncRNA
Diff_Nuc55615	chr3	121553382	121553521	+	0	NA	Intergenic	Intergenic	-35318	NM_008991	19299	Mm.399042	NM_008991	ENSMUSG00000028127	Abcd3	AI313901|AU018866|AW146054|PMP68|PMP70|Pxmp1	ATP-binding cassette, sub-family D (ALD), member 3	protein-coding
Diff_Nuc16168	chr10	125175122	125175261	+	0	NA	Intergenic	Intergenic	-228084	NM_177152	320398	Mm.275586	NM_177152	ENSMUSG00000020105	Lrig3	9030421L11Rik|9130004I02Rik|9430095K15Rik|mKIAA3016	leucine-rich repeats and immunoglobulin-like domains 3	protein-coding
Diff_Nuc60585	chr2	108569112	108569251	+	0	NA	Intergenic	Intergenic	549266	NM_029790	76894	Mm.330451	NM_029790	ENSMUSG00000057234	Mettl15	0610027B03Rik|AI303697|AW049952|Mett5d1	methyltransferase like 15	protein-coding
Diff_Nuc74032	chr8	39065322	39065461	+	0	NA	intron (NM_145841, intron 1 of 7)	intron (NM_145841, intron 1 of 7)	249865	NR_029884	723860		NR_029884	ENSMUSG00000065457	Mir383	Mirn383|mir-383|mmu-mir-383	microRNA 383	ncRNA
Diff_Nuc62079	chr2	150852712	150852851	+	0	NA	Intergenic	Intergenic	12334	NM_026086	67311	Mm.480682	NM_026086	ENSMUSG00000053916	Nanp	1600031M04Rik|Hdhd4	N-acetylneuraminic acid phosphatase	protein-coding
Diff_Nuc59844	chr2	88603962	88604101	+	0	NA	Intergenic	RLTR24|LTR|ERV1	4439	NM_001005227	257887	Mm.377285	NM_001005227	ENSMUSG00000075115	Olfr1200	MOR225-12	olfactory receptor 1200	protein-coding
Diff_Nuc69431	chr9	8130332	8130471	+	0	NA	intron (NM_001045524, intron 1 of 10)	intron (NM_001045524, intron 1 of 10)	3893	NM_001045524	234915	Mm.101341	NM_001045524	ENSMUSG00000040729	Cep126	Kiaa1377|mKIAA1377	centrosomal protein 126	protein-coding
Diff_Nuc10531	chr11	70065942	70066081	+	0	NA	exon (NM_007440, exon 6 of 14)	exon (NM_007440, exon 6 of 14)	2861	NM_001331118	11684	Mm.12286	NM_007440	ENSMUSG00000000320	Alox12	9930022G08Rik|Alox12p|P-12LO	arachidonate 12-lipoxygenase	protein-coding
Diff_Nuc61438	chr2	133314502	133314641	+	0	NA	Intergenic	L1_Mur3|LINE|L1	-63324	NM_007553	12156	Mm.103205	NM_007553	ENSMUSG00000027358	Bmp2	AI467020|Bmp2a	bone morphogenetic protein 2	protein-coding
Diff_Nuc32665	chr18	47207252	47207391	+	0	NA	intron (NM_178377, intron 5 of 6)	L1M2|LINE|L1	88791	NM_178377	69456	Mm.210734	NM_178377	ENSMUSG00000042705	Commd10	2310003A05Rik|AU019438|DRWMS2	COMM domain containing 10	protein-coding
Diff_Nuc64878	chr1	63248132	63248271	+	0	NA	intron (NM_001285937, intron 1 of 5)	intron (NM_001285937, intron 1 of 5)	1269	NM_001285936	73884	Mm.86986	NM_028673	ENSMUSG00000027520	Zdbf2	4930431J08Rik|9330107J05Rik	zinc finger, DBF-type containing 2	protein-coding
Diff_Nuc57494	chr2	18958882	18959021	+	0	NA	Intergenic	Intergenic	39005	NR_024323	74629	Mm.117687	NR_024323	ENSMUSG00000026736	4930426L09Rik	-	RIKEN cDNA 4930426L09 gene	ncRNA
Diff_Nuc4641	chr13	117723802	117723941	+	0	NA	intron (NM_001081009, intron 4 of 26)	intron (NM_001081009, intron 4 of 26)	90452	NM_001081009	52552	Mm.274466	NM_027272	ENSMUSG00000021725	Parp8	2810430O08Rik|ARTD16|D13Ertd275e	poly (ADP-ribose) polymerase family, member 8	protein-coding
Diff_Nuc73737	chr8	29938762	29938901	+	0	NA	intron (NM_001347498, intron 4 of 14)	intron (NM_001347498, intron 4 of 14)	391277	NM_001347499	210801	Mm.248433	NM_153135	ENSMUSG00000063626	Unc5d	D930029E11Rik|Unc5h4|mKIAA1777	unc-5 netrin receptor D	protein-coding
Diff_Nuc65353	chr1	77373622	77373761	+	0	NA	intron (NM_007936, intron 15 of 17)	intron (NM_007936, intron 15 of 17)	119652	NR_105770	102465180		NR_105770	ENSMUSG00000099141	Mir6352	Gm27481|mmu-mir-6352	microRNA 6352	ncRNA
Diff_Nuc38292	chr6	14708732	14708871	+	0	NA	Intergenic	Intergenic	-3527	NM_080464	140491	Mm.209429	NM_080464	ENSMUSG00000042717	Ppp1r3a	GM|RG1|RGL	protein phosphatase 1, regulatory (inhibitor) subunit 3A	protein-coding
Diff_Nuc3555	chr13	84571252	84571391	+	0	NA	Intergenic	RMER3D-int|LTR|ERVK	209420	NM_175187	72745	Mm.295063	NM_175187	ENSMUSG00000035762	Tmem161b	2810446P07Rik|AI843389	transmembrane protein 161B	protein-coding
Diff_Nuc72282	chr9	98440152	98440291	+	0	NA	Intergenic	Intergenic	23809	NR_029444	75881	Mm.483402	NM_175227	ENSMUSG00000051074	4930579K19Rik	-	RIKEN cDNA 4930579K19 gene	ncRNA
Diff_Nuc56920	chr3	159572342	159572481	+	0	NA	intron (NR_037590, intron 6 of 12)	intron (NR_037590, intron 6 of 12)	69752	NM_026582	68151	Mm.6766	NM_026582	ENSMUSG00000028173	Wls	5031439A09Rik|AI173978|AI987742|Gpr177	wntless homolog (Drosophila)	protein-coding
Diff_Nuc1097	chr13	5206592	5206731	+	0	NA	Intergenic	L1_Mus3|LINE|L1	-598251	NM_018859	56043	Mm.251908	NM_018859	ENSMUSG00000045410	Akr1e1	1810061I10Rik|Akr1e2	aldo-keto reductase family 1, member E1	protein-coding
Diff_Nuc69876	chr9	23731112	23731251	+	0	NA	Intergenic	Intergenic	-171281	NM_175678	319239	Mm.130824	NM_175678	ENSMUSG00000043659	Npsr1	9330128H10Rik|GPRA|Gpr154|MVTR|PGR14|VRR1	neuropeptide S receptor 1	protein-coding
Diff_Nuc52598	chr3	33962952	33963091	+	0	NA	intron (NM_008053, intron 14 of 15)	intron (NM_008053, intron 14 of 15)	17255	NM_001286972	67713	Mm.274266	NM_026332	ENSMUSG00000027679	Dnajc19	1810055D05Rik|AA959924|Tim14	DnaJ heat shock protein family (Hsp40) member C19	protein-coding
Diff_Nuc53170	chr3	49798892	49799031	+	0	NA	Intergenic	L1Md_F2|LINE|L1	-237723	NM_130448	73173	Mm.87246	NM_130448	ENSMUSG00000037892	Pcdh18	3110038E07Rik|BB095589|PCDH68L	protocadherin 18	protein-coding
Diff_Nuc66542	chr1	114240272	114240411	+	0	NA	Intergenic	Intergenic	-478846	NM_001081316	319901	Mm.103468	NM_001081316	ENSMUSG00000038702	Dsel	9330132E09Rik|DS-epi2	dermatan sulfate epimerase-like	protein-coding
Diff_Nuc36712	chr7	107882052	107882191	+	0	NA	intron (NM_178764, intron 2 of 8)	intron (NM_178764, intron 2 of 8)	26905	NM_178764	319604	Mm.260362	NM_178764	ENSMUSG00000029461	Fam168a	2610030B18Rik|B930006L02Rik|mKIAA0280	family with sequence similarity 168, member A	protein-coding
Diff_Nuc35591	chr7	73334042	73334181	+	0	NA	Intergenic	ORR1A2|LTR|MaLR	79710	NM_001081163	269941	Mm.333916	NM_001081163	ENSMUSG00000032640	Chsy1	mKIAA0990	chondroitin sulfate synthase 1	protein-coding
Diff_Nuc24521	chr15	63040742	63040881	+	0	NA	Intergenic	Intergenic	270352	NR_045279	432958	Mm.255105	NR_045279		Gm20740	-	predicted gene, 20740	ncRNA
Diff_Nuc56832	chr3	157722272	157722411	+	0	NA	intron (NM_024194, intron 11 of 14)	intron (NM_024194, intron 11 of 14)	22695	NM_001289524	67144	Mm.358704	NM_024194	ENSMUSG00000063052	Lrrc40	2610040E16Rik|AI837674	leucine rich repeat containing 40	protein-coding
Diff_Nuc18858	chr17	90267282	90267421	+	0	NA	Intergenic	RMER6C|LTR|ERVK	220357	NM_001346962	18189	Mm.478418	NM_020252	ENSMUSG00000024109	Nrxn1	1700062G21Rik|9330127H16Rik|A230068P09Rik|mKIAA0578	neurexin I	protein-coding
Diff_Nuc1034	chr13	3409572	3409711	+	0	NA	Intergenic	RLTR22_Mur|LTR|ERVK	-67908	NR_015522	76937	Mm.487240	NR_015522	ENSMUSG00000097709	2810429I04Rik	AI256682	RIKEN cDNA 2810429I04 gene	ncRNA
Diff_Nuc63682	chr1	28040492	28040631	+	0	NA	Intergenic	Intergenic	796536	NM_001013750	210962	Mm.214178	NM_001013750	ENSMUSG00000048411	Gm597	-	predicted gene 597	protein-coding
Diff_Nuc59576	chr2	80507262	80507401	+	0	NA	Intergenic	B1_Mm|SINE|Alu	27910	NM_001190179	69482	Mm.29200	NM_027091	ENSMUSG00000026999	Nup35	2310006I24Rik|35kDa|5330402E05Rik|MP44|NO44	nucleoporin 35	protein-coding
Diff_Nuc70485	chr9	41586282	41586421	+	0	NA	Intergenic	ORR1E-int|LTR|MaLR	196342	NR_029822	387236		NR_029822	ENSMUSG00000093354	Mir125b-1	Mirn125b|Mirn125b-1|mir-125b-1	microRNA 125b-1	ncRNA
Diff_Nuc8955	chr11	17922052	17922191	+	0	NA	Intergenic	Intergenic	68148	NR_131915	102633673	Mm.396603	NR_131915	ENSMUSG00000086468	Etaa1os	2900053O20Rik|4930542E09Rik	Ewing tumor-associated antigen 1, opposite strand	ncRNA
Diff_Nuc67117	chr1	132620982	132621121	+	0	NA	intron (NM_001162415, intron 1 of 15)	intron (NM_001162415, intron 1 of 15)	4779	NM_001162415	18640	Mm.249861	NM_008825	ENSMUSG00000026409	Pfkfb2	4930568D07Rik	6-phosphofructo-2-kinase/fructose-2,6-biphosphatase 2	protein-coding
Diff_Nuc43313	chr5	22402542	22402681	+	0	NA	intron (NM_029990, intron 1 of 2)	intron (NM_029990, intron 1 of 2)	-149909	NR_027362	330052	Mm.459265	NR_027362	ENSMUSG00000105076	A930003O13Rik	-	RIKEN cDNA A930003O13 gene	ncRNA
Diff_Nuc49957	chr4	92047772	92047911	+	0	NA	Intergenic	Intergenic	-233929	NM_027034	69314	Mm.55891	NM_027034	ENSMUSG00000028533	Izumo3	1700011H22Rik	IZUMO family member 3	protein-coding
Diff_Nuc12337	chr10	13854662	13854801	+	0	NA	intron (NM_010437, intron 5 of 8)	intron (NM_010437, intron 5 of 8)	168546	NM_010437	15273	Mm.42157	NM_010437	ENSMUSG00000015501	Hivep2	Gm20114|MIBP1|Schnurri-2|Shn-2	human immunodeficiency virus type I enhancer binding protein 2	protein-coding
Diff_Nuc61821	chr2	142099082	142099221	+	0	NA	intron (NM_001013802, intron 13 of 18)	intron (NM_001013802, intron 13 of 18)	628049	NM_001081133	16558	Mm.251934	NM_001081133	ENSMUSG00000038844	Kif16b	8430434E15Rik|AA623607|AI789011|C80253|C80902|mKIAA1590	kinesin family member 16B	protein-coding
Diff_Nuc51213	chr4	137444142	137444281	+	0	NA	intron (NM_199307, intron 1 of 19)	intron (NM_199307, intron 1 of 19)	26059	NM_199307	230857	Mm.401062	NM_199307	ENSMUSG00000057530	Ece1	AW322500|ECE-1|ECE-1a|ECE-1b|ECE-1d	endothelin converting enzyme 1	protein-coding
Diff_Nuc31902	chr18	26784272	26784411	+	0	NA	Intergenic	Lx8|LINE|L1	-871857	NM_001174074	108013	Mm.266435	NM_133195	ENSMUSG00000024268	Celf4	A230070D14Rik|BRUNOL-4|Brul4|Brunol4|C130060B05Rik	CUGBP, Elav-like family member 4	protein-coding
Diff_Nuc23579	chr15	37366642	37366781	+	0	NA	intron (NM_029113, intron 2 of 3)	intron (NM_029113, intron 2 of 3)	-4292	NR_045283	100503538	Mm.445166	NR_045283	ENSMUSG00000086992	Gm15941	OTTMUSG00000028027	predicted gene 15941	ncRNA
Diff_Nuc31668	chr18	19418302	19418441	+	0	NA	Intergenic	Intergenic	742227	NM_007882	13507	Mm.89935	NM_007882	ENSMUSG00000059898	Dsc3	5430426I24Rik	desmocollin 3	protein-coding
Diff_Nuc21357	chr16	69923992	69924131	+	0	NA	Intergenic	Intergenic	-60072	NM_173069	224318	Mm.212743	NM_173069	ENSMUSG00000063163	Speer2	SPEER-2	spermatogenesis associated glutamate (E)-rich protein 2	protein-coding
Diff_Nuc24766	chr15	70817442	70817581	+	0	NA	Intergenic	Intergenic	740757	NM_177819	70363	Mm.126450	NM_177819	ENSMUSG00000036800	Fam135b	1700010C24Rik|A830008O07Rik	family with sequence similarity 135, member B	protein-coding
Diff_Nuc24795	chr15	71995022	71995161	+	0	NA	Intergenic	MERVL_2A-int|LTR|ERVL	-130434	NM_027174	69700	Mm.322500	NM_027174	ENSMUSG00000079022	Col22a1	2310067L16Rik|C80743	collagen, type XXII, alpha 1	protein-coding
Diff_Nuc68693	chr1	179437542	179437681	+	0	NA	Intergenic	Intergenic	61659	NM_013915	30928	Mm.330700	NM_013915	ENSMUSG00000063659	Zbtb18	RP58|Zfp238|Znf238	zinc finger and BTB domain containing 18	protein-coding
Diff_Nuc63066	chr1	11380592	11380731	+	0	NA	Intergenic	RLTR47_MM|LTR|ERV1	-23525	NM_001310451	320492	Mm.52021	NM_177173	ENSMUSG00000057715	A830018L16Rik	-	RIKEN cDNA A830018L16 gene	protein-coding
Diff_Nuc43283	chr5	21084262	21084401	+	0	NA	intron (NM_177076, intron 9 of 19)	intron (NM_177076, intron 9 of 19)	34986	NM_028977	74511	Mm.439963	NM_028977	ENSMUSG00000039883	Lrrc17	37kDa|4833425M04Rik|6130400C22Rik|P37nb	leucine rich repeat containing 17	protein-coding
Diff_Nuc31440	chr18	12196882	12197021	+	0	NA	intron (NM_001289666, intron 13 of 14)	intron (NM_001289666, intron 13 of 14)	83095	NR_110356	338363	Mm.271567	NM_178801	ENSMUSG00000049411	Tmem241	6030446N20Rik	transmembrane protein 241	protein-coding
Diff_Nuc27783	chr14	81703742	81703881	+	0	NA	Intergenic	Intergenic	1303702	NM_001030294	380924	Mm.26456	NM_001030294	ENSMUSG00000022026	Olfm4	GC1|GW112|Gm296|Gm913|OlfD|pPD4	olfactomedin 4	protein-coding
Diff_Nuc22760	chr15	14891392	14891531	+	0	NA	Intergenic	L1_Mus4|LINE|L1	-1788031	NM_007666	12563	Mm.57048	NM_007666	ENSMUSG00000039385	Cdh6	cad6	cadherin 6	protein-coding
Diff_Nuc1171	chr13	7566182	7566321	+	0	NA	Intergenic	L1_Mus4|LINE|L1	-635861	NM_001289530	94191	Mm.425794	NM_052977	ENSMUSG00000052551	Adarb2	Adar3|RED2	adenosine deaminase, RNA-specific, B2	protein-coding
Diff_Nuc74416	chr8	48844632	48844771	+	0	NA	Intergenic	B1_Mus1|SINE|Alu	-45416	NM_172407	70925	Mm.393807	NM_172407	ENSMUSG00000038069	Cdkn2aip	4921511I16Rik|AW208986|CARF	CDKN2A interacting protein	protein-coding
Diff_Nuc52666	chr3	35969332	35969471	+	0	NA	intron (NM_172678, intron 2 of 17)	intron (NM_172678, intron 2 of 17)	4479	NM_172678	229211	Mm.260997	NM_172678	ENSMUSG00000027710	Acad9	2600017P15Rik|4732402K02|C630012L17Rik|NPD002	acyl-Coenzyme A dehydrogenase family, member 9	protein-coding
Diff_Nuc49180	chr4	69415932	69416071	+	0	NA	Intergenic	Intergenic	655468	NM_001313762	214444	Mm.370777	NM_145990	ENSMUSG00000039298	Cdk5rap2	2900018K03Rik|an|mKIAA1633	CDK5 regulatory subunit associated protein 2	protein-coding
Diff_Nuc72420	chr9	102609432	102609571	+	0	NA	Intergenic	MTA_Mm|LTR|MaLR	-10633	NM_019764	56332	Mm.21145	NM_019764	ENSMUSG00000032531	Amotl2	AW549739|C79691|Lccp|MASCOT|mKIAA0989	angiomotin-like 2	protein-coding
Diff_Nuc40008	chr6	62004502	62004641	+	0	NA	intron (NM_183310, intron 10 of 10)	intron (NM_183310, intron 10 of 10)	-873767	NR_040287	100504262	Mm.438066	NR_040287		A730020E08Rik	-	RIKEN cDNA A730020E08 gene	ncRNA
Diff_Nuc32844	chr18	51403182	51403321	+	0	NA	intron (NM_001081224, intron 1 of 1)	intron (NM_001081224, intron 1 of 1)	125699	NM_001081224	71373	Mm.63546	NM_001081224	ENSMUSG00000073565	Prr16	5430406M13Rik|AI607429	proline rich 16	protein-coding
Diff_Nuc70699	chr9	50077432	50077571	+	0	NA	Intergenic	RLTR25A|LTR|ERVK	-36214	NR_131161	71873		NR_131161	ENSMUSG00000110916	2310003N18Rik	-	RIKEN cDNA 2310003N18 gene	ncRNA
Diff_Nuc71236	chr9	67867472	67867611	+	0	NA	non-coding (NR_045745, exon 3 of 3)	non-coding (NR_045745, exon 3 of 3)	5980	NR_045745	434412	Mm.490707	NR_045745	ENSMUSG00000111841	Gm20745	-	predicted gene, 20745	ncRNA
Diff_Nuc55417	chr3	115972732	115972871	+	0	NA	Intergenic	Intergenic	-16399	NM_022427	64378	Mm.40025	NM_022427	ENSMUSG00000068696	Gpr88	AW061286|Strg	G-protein coupled receptor 88	protein-coding
Diff_Nuc20646	chr16	52148922	52149061	+	0	NA	intron (NM_001033238, intron 9 of 17)	intron (NM_001033238, intron 9 of 17)	117329	NM_001033238	208650	Mm.328206	NM_001033238	ENSMUSG00000022637	Cblb	AI429560|AI851073|Cbl-b	Casitas B-lineage lymphoma b	protein-coding
Diff_Nuc30432	chr19	37035932	37036071	+	0	NA	intron (NM_001080706, intron 6 of 37)	intron (NM_001080706, intron 6 of 37)	35432	NM_001080706	107182	Mm.295062	NM_001080706	ENSMUSG00000040565	Btaf1	AI414500|AI447930|E430027O22Rik|TAF170	B-TFIID TATA-box binding protein associated factor 1	protein-coding
Diff_Nuc73809	chr8	31833902	31834041	+	0	NA	Intergenic	Intergenic	155104	NR_045856	71314	Mm.158666	NR_045856	ENSMUSG00000097044	4933433F19Rik	-	RIKEN cDNA 4933433F19 gene	ncRNA
Diff_Nuc59362	chr2	74496512	74496651	+	0	NA	intron (NM_007967, intron 1 of 2)	intron (NM_007967, intron 1 of 2)	1033	NM_007967	14029	Mm.25365	NM_007967	ENSMUSG00000001815	Evx2	Evx-2	even-skipped homeobox 2	protein-coding
Diff_Nuc36849	chr7	112961122	112961261	+	0	NA	Intergenic	Intergenic	-1590	NM_025301	27397	Mm.44225	NM_025301	ENSMUSG00000030879	Mrpl17	MRP-L26|Rpml26	mitochondrial ribosomal protein L17	protein-coding
Diff_Nuc24255	chr15	55104712	55104851	+	0	NA	Intergenic	RLTR41|LTR|ERV1	-34524	NM_181277	12818	Mm.297859	NM_181277	ENSMUSG00000022371	Col14a1	5730412L22Rik|AW108078	collagen, type XIV, alpha 1	protein-coding
Diff_Nuc61978	chr2	147517602	147517741	+	0	NA	Intergenic	Intergenic	-18758	NR_046014	381384	Mm.259809	NR_046014	ENSMUSG00000051986	A530006G24Rik	Gm1003	RIKEN cDNA A530006G24 gene	ncRNA
Diff_Nuc38417	chr6	18155382	18155521	+	0	NA	intron (NM_021050, intron 3 of 26)	intron (NM_021050, intron 3 of 26)	34764	NM_021050	12638	Mm.15621	NM_021050	ENSMUSG00000041301	Cftr	AW495489|Abcc7	cystic fibrosis transmembrane conductance regulator	protein-coding
Diff_Nuc48374	chr4	41564642	41564781	+	0	NA	intron (NM_175138, intron 12 of 19)	B1_Mur4|SINE|Alu	22624	NM_027147	69638	Mm.372459	NM_027147	ENSMUSG00000028445	Enho	1110065P19Rik|2310040A07Rik	energy homeostasis associated	protein-coding
Diff_Nuc35234	chr7	62866402	62866541	+	0	NA	Intergenic	Lx8|LINE|L1	-157083	NM_001310740	233274	Mm.44425	NM_178706	ENSMUSG00000051504	Siglech	6430529G09Rik|Siglec-H	sialic acid binding Ig-like lectin H	protein-coding
Diff_Nuc27251	chr14	64160262	64160401	+	0	NA	intron (NM_177594, intron 2 of 9)	intron (NM_177594, intron 2 of 9)	2459	NM_177594	210376	Mm.441613	NM_177594	ENSMUSG00000035078	Mtmr9	9430075G12Rik|AA516943|AF073881|LIP-STYX|MTMR8|mMTMH3	myotubularin related protein 9	protein-coding
Diff_Nuc73339	chr8	14120782	14120921	+	0	NA	intron (NM_001145965, intron 1 of 14)	intron (NM_001145965, intron 1 of 14)	24976	NM_172910	244310	Mm.404697	NM_172910	ENSMUSG00000047495	Dlgap2	6430596N04Rik|Dap-2|Dap2|Sapap2	discs, large (Drosophila) homolog-associated protein 2	protein-coding
Diff_Nuc72477	chr9	104753512	104753651	+	0	NA	intron (NM_028719, intron 2 of 15)	L1Md_F2|LINE|L1	-202017	NM_053159	94062	Mm.29746	NM_053159	ENSMUSG00000032563	Mrpl3	2010320L16Rik|5930422H18Rik|AA407889	mitochondrial ribosomal protein L3	protein-coding
Diff_Nuc30517	chr19	39028712	39028851	+	0	NA	intron (NM_008234, intron 13 of 21)	intron (NM_008234, intron 13 of 21)	23301	NM_008234	15201	Mm.57223	NM_008234	ENSMUSG00000025001	Hells	AI323785|E130115I21Rik|LSH|Lysh|PASG|YFK8	helicase, lymphoid specific	protein-coding
Diff_Nuc22014	chr16	86689172	86689311	+	0	NA	Intergenic	L2c|LINE|L2	-665189	NM_001159331	67768	Mm.296532	NM_026366	ENSMUSG00000044442	N6amt1	5830445C04Rik|Hemk2|Pred28	N-6 adenine-specific DNA methyltransferase 1 (putative)	protein-coding
Diff_Nuc51881	chr3	12418582	12418721	+	0	NA	Intergenic	L1_Mus3|LINE|L1	-574292	NR_040751	100038545	Mm.388494	NR_040751	ENSMUSG00000104015	Gm10745	ENSMUSG00000074696	predicted gene 10745	ncRNA
Diff_Nuc36289	chr7	96540982	96541121	+	0	NA	Intergenic	Intergenic	-11825	NM_008055	14366	Mm.86755	NM_008055	ENSMUSG00000049791	Fzd4	Fz4	frizzled class receptor 4	protein-coding
Diff_Nuc33386	chr18	68695812	68695951	+	0	NA	Intergenic	Intergenic	-106907	NM_001271716	17200	Mm.426053	NM_008560	ENSMUSG00000045569	Mc2r	ACTH-R|ACTHR|MC2-R	melanocortin 2 receptor	protein-coding
Diff_Nuc61129	chr2	123295502	123295641	+	0	NA	Intergenic	Intergenic	-620134	NM_001290997	214968	Mm.330536	NM_172537	ENSMUSG00000027200	Sema6d	1110067B02Rik|AA409156|D330011G23|mKIAA1479	sema domain, transmembrane domain (TM), and cytoplasmic domain, (semaphorin) 6D	protein-coding
Diff_Nuc7713	chr12	93422832	93422971	+	0	NA	Intergenic	B4A|SINE|B4	-335304	NM_011344	20338	Mm.250605	NM_011344	ENSMUSG00000020964	Sel1l	AW493766|Sel1h|mKIAA4137	sel-1 suppressor of lin-12-like (C. elegans)	protein-coding
Diff_Nuc43465	chr5	28056372	28056511	+	0	NA	Intergenic	Lx8|LINE|L1	61649	NM_018878	55982	Mm.277190	NM_018878	ENSMUSG00000002221	Paxip1	D5Ertd149e|PTIP	PAX interacting (with transcription-activation domain) protein 1	protein-coding
Diff_Nuc8794	chr11	13688922	13689061	+	0	NA	Intergenic	Lx3A|LINE|L1	390053	NR_131011	75280	Mm.108492	NR_131011	ENSMUSG00000085452	4930554G24Rik	-	RIKEN cDNA 4930554G24 gene	ncRNA
Diff_Nuc20011	chr16	34766512	34766651	+	0	NA	Intergenic	L1MA4|LINE|L1	-18455	NM_139300	107589	Mm.33360	NM_139300	ENSMUSG00000022836	Mylk	9530072E15Rik|A930019C19Rik|AW489456|KRP|MLCK108|MLCK210|Mlck|nmMlck|smMLCK	myosin, light polypeptide kinase	protein-coding
Diff_Nuc34077	chr18	89842632	89842771	+	0	NA	intron (NM_001039173, intron 1 of 7)	L1Md_F3|LINE|L1	95827	NM_001039173	623279	Mm.447164	NM_001039173	ENSMUSG00000073514	Dok6	Dok-6	docking protein 6	protein-coding
Diff_Nuc15736	chr10	111829952	111830091	+	0	NA	intron (NM_001025581, intron 2 of 4)	intron (NM_001025581, intron 2 of 4)	121842	NM_001025581	268345	Mm.336242	NM_001025581	ENSMUSG00000035681	Kcnc2	AW047325|B230117I07|KShIIIA|Kv3.2	potassium voltage gated channel, Shaw-related subfamily, member 2	protein-coding
Diff_Nuc63621	chr1	26450162	26450301	+	0	NA	Intergenic	Intergenic	294074	NM_001033764	210940	Mm.297614	NM_001033764	ENSMUSG00000073722	4931408C20Rik	-	RIKEN cDNA 4931408C20 gene	protein-coding
Diff_Nuc29486	chr19	5408322	5408461	+	0	NA	intron (NR_027938, intron 1 of 3)	B1_Mur4|SINE|Alu	1576	NR_027938	74931	Mm.388511	NR_015545	ENSMUSG00000086938	4930481A15Rik	-	RIKEN cDNA 4930481A15 gene	ncRNA
Diff_Nuc30503	chr19	38864252	38864391	+	0	NA	intron (NM_021315, intron 20 of 20)	intron (NM_021315, intron 20 of 20)	29406	NM_021315	57753	Mm.86482	NM_021315	ENSMUSG00000024999	Noc3l	AF233884|Fad24	NOC3 like DNA replication regulator	protein-coding
Diff_Nuc32232	chr18	34403252	34403391	+	0	NA	intron (NM_007462, intron 1 of 15)	B3|SINE|B2	-21895	NR_040534	633395	Mm.414290	NR_040534	ENSMUSG00000073607	Gm10548	ENSMUSG00000073607	ribosomal protein L29 pseudogene	pseudo
Diff_Nuc60137	chr2	96882092	96882231	+	0	NA	intron (NM_001289743, intron 3 of 6)	intron (NM_001289743, intron 3 of 6)	-425653	NM_001289744	241568	Mm.241682	NM_178725	ENSMUSG00000050587	Lrrc4c	6430556C10Rik|NGL-1	leucine rich repeat containing 4C	protein-coding
Diff_Nuc40786	chr6	86151872	86152011	+	0	NA	intron (NM_031199, intron 1 of 5)	intron (NM_031199, intron 1 of 5)	6720	NM_031199	21802	Mm.137222	NM_031199	ENSMUSG00000029999	Tgfa	wa-1|wa1	transforming growth factor alpha	protein-coding
Diff_Nuc34943	chr7	52003092	52003231	+	0	NA	promoter-TSS (NM_133945)	promoter-TSS (NM_133945)	558	NM_001289836	243963	Mm.382935	NM_178734	ENSMUSG00000048012	Zfp473	D030014N22Rik|Znf473|zfp-100	zinc finger protein 473	protein-coding
Diff_Nuc24771	chr15	70989832	70989971	+	0	NA	Intergenic	Lx8|LINE|L1	568367	NM_177819	70363	Mm.126450	NM_177819	ENSMUSG00000036800	Fam135b	1700010C24Rik|A830008O07Rik	family with sequence similarity 135, member B	protein-coding
Diff_Nuc47673	chr4	20558232	20558371	+	0	NA	intron (NM_172987, intron 1 of 4)	intron (NM_172987, intron 1 of 4)	147514	NM_001290410	269513	Mm.317473	NM_172987	ENSMUSG00000055761	Nkain3	C530048M05|E130310K16Rik	Na+/K+ transporting ATPase interacting 3	protein-coding
Diff_Nuc65595	chr1	83998072	83998211	+	0	NA	Intergenic	MTD-int|LTR|MaLR	217395	NR_105771	102465181		NR_105771	ENSMUSG00000098851	Mir6353	Gm27391|mmu-mir-6353	microRNA 6353	ncRNA
Diff_Nuc60093	chr2	96062152	96062291	+	0	NA	Intergenic	L1_Mus3|LINE|L1	-96105	NM_001289742	241568	Mm.241682	NM_178725	ENSMUSG00000050587	Lrrc4c	6430556C10Rik|NGL-1	leucine rich repeat containing 4C	protein-coding
Diff_Nuc47506	chr4	15927742	15927881	+	0	NA	intron (NM_145950, intron 5 of 5)	intron (NM_145950, intron 5 of 5)	13213	NM_145950	209212	Mm.46455	NM_145950	ENSMUSG00000041153	Osgin2	BC010311|C230027H09Rik	oxidative stress induced growth inhibitor family member 2	protein-coding
Diff_Nuc12761	chr10	26089472	26089611	+	0	NA	intron (NM_172787, intron 1 of 21)	intron (NM_172787, intron 1 of 21)	4299	NM_001347467	237339	Mm.338439	NM_172787	ENSMUSG00000039089	L3mbtl3	AI481284|MBT-1	l(3)mbt-like 3 (Drosophila)	protein-coding
Diff_Nuc54496	chr3	87772902	87773041	+	0	NA	Intergenic	B3A|SINE|B2	-2044	NM_016701	18008	Mm.331129	NM_016701	ENSMUSG00000004891	Nes	AA166324|C78523|ESTM46	nestin	protein-coding
Diff_Nuc21430	chr16	72135287	72135426	+	0	NA	Intergenic	MIRb|SINE|MIR	99216	NR_131116	319533	Mm.373754	NR_131115		8030451O07Rik	-	RIKEN cDNA 8030451O07 gene	ncRNA
Diff_Nuc50102	chr4	95472072	95472211	+	0	NA	intron (NM_001113412, intron 9 of 15)	intron (NM_001113412, intron 9 of 15)	161585	NR_045777	319247	Mm.473527	NM_175680	ENSMUSG00000044125	9530080O11Rik	-	RIKEN cDNA 9530080O11 gene	ncRNA
Diff_Nuc65199	chr1	71599572	71599711	+	0	NA	Intergenic	PB1D10|SINE|Alu	-4089	NM_026195	108147	Mm.38010	NM_026195	ENSMUSG00000026192	Atic	2610509C24Rik|AA536954|AW212393	5-aminoimidazole-4-carboxamide ribonucleotide formyltransferase/IMP cyclohydrolase	protein-coding
Diff_Nuc51472	chr4	149114002	149114141	+	0	NA	Intergenic	B3|SINE|B2	-1894	NM_177672	230917	Mm.266704	NM_177672	ENSMUSG00000044700	Tmem201	AV028368|D4Ertd429e|Net5|Samp1	transmembrane protein 201	protein-coding
Diff_Nuc21911	chr16	83529552	83529691	+	0	NA	Intergenic	Intergenic	-841767	NR_040567	75247	Mm.417813	NR_040567		4930553E22Rik	-	RIKEN cDNA 4930553E22 gene	ncRNA
Diff_Nuc11065	chr11	87432972	87433111	+	0	NA	intron (NM_001045527, intron 1 of 5)	intron (NM_001045527, intron 1 of 5)	2375	NM_001045527	327992	Mm.390371	NM_001045527	ENSMUSG00000070345	Hsf5	Gm739|MLZ-220	heat shock transcription factor family member 5	protein-coding
Diff_Nuc1310	chr13	11530882	11531021	+	0	NA	Intergenic	RLTR13B1|LTR|ERVK	-83368	NR_027813	664793	Mm.410565	NR_027813		Zp4-ps	EG664793|Zp4|Zpb	zona pellucida glycoprotein 4, pseudogene	pseudo
Diff_Nuc62447	chr2	163822772	163822911	+	0	NA	intron (NM_018753, intron 1 of 5)	intron (NM_018753, intron 1 of 5)	1908	NM_018753	54401	Mm.34319	NM_018753	ENSMUSG00000018326	Ywhab	1300003C17Rik|14-3-3b	tyrosine 3-monooxygenase/tryptophan 5-monooxygenase activation protein, beta polypeptide	protein-coding
Diff_Nuc54827	chr3	99557352	99557491	+	0	NA	Intergenic	Intergenic	-131919	NM_028892	74362	Mm.55847	NM_028892	ENSMUSG00000027867	Spag17	4931427F14Rik|PF6|Spag17-ps	sperm associated antigen 17	protein-coding
Diff_Nuc18705	chr17	84802122	84802261	+	0	NA	intron (NM_183021, intron 22 of 37)	intron (NM_183021, intron 22 of 37)	63357	NM_183021	240174	Mm.246767	NM_177826	ENSMUSG00000024251	Thada	6530405K19|A930021O22|AU019899|BC052885|GITA	thyroid adenoma associated	protein-coding
Diff_Nuc30681	chr19	45413512	45413651	+	0	NA	Intergenic	PB1D10|SINE|Alu	-24643	NM_001286466	12234	Mm.119717	NM_009771	ENSMUSG00000025217	Btrc	Beta-Trcp1|E3RS-IkappaB|E3RSIkappaB|FWD1|Fbw1a|HOS|Slimb|b-TrCP|beta-TrCP	beta-transducin repeat containing protein	protein-coding
Diff_Nuc35245	chr7	63175572	63175711	+	0	NA	intron (NM_011370, intron 24 of 30)	B3A|SINE|B2	42222	NM_001256133	93790	Mm.37249	NM_023647	ENSMUSG00000030452	Nipa2	2600017P10Rik|3830408P04Rik|AB041581	non imprinted in Prader-Willi/Angelman syndrome 2 homolog (human)	protein-coding
Diff_Nuc17293	chr17	39016677	39016816	+	0	NA	Intergenic	Lx5|LINE|L1	-156894	NM_001256050	100126776	Mm.471588	NM_001256050	ENSMUSG00000095625	Esp24	Gm21947	exocrine gland secreted peptide 24	protein-coding
Diff_Nuc39651	chr6	50737152	50737291	+	0	NA	intron (NR_045984, intron 2 of 4)	RMER19C|LTR|ERVK	11107	NR_045984	319981	Mm.131454	NR_045984	ENSMUSG00000107667	C530044C16Rik	-	RIKEN cDNA C530044C16 gene	ncRNA
Diff_Nuc24546	chr15	63983632	63983771	+	0	NA	intron (NM_010026, intron 13 of 30)	intron (NM_010026, intron 13 of 30)	-91691	NM_144846	223601	Mm.246108	NM_144846	ENSMUSG00000022378	Fam49b	0910001A06Rik|AW122079	family with sequence similarity 49, member B	protein-coding
Diff_Nuc61895	chr2	144399692	144399831	+	0	NA	intron (NM_001281816, intron 7 of 16)	intron (NM_001281816, intron 7 of 16)	9126	NM_001281816	27054	Mm.248492	NM_019787	ENSMUSG00000027429	Sec23b	-	SEC23 homolog B, COPII coat complex component	protein-coding
Diff_Nuc70268	chr9	34495742	34495881	+	0	NA	intron (NM_001190912, intron 1 of 15)	L1ME4a|LINE|L1	199495	NM_001190911	67703	Mm.220710	NM_026324	ENSMUSG00000032036	Kirrel3	1500010O20Rik|2900036G11Rik|NEPH2|SST4|mKIAA1867	kin of IRRE like 3 (Drosophila)	protein-coding
Diff_Nuc53447	chr3	58228962	58229101	+	0	NA	intron (NM_001347233, intron 1 of 2)	intron (NM_001347233, intron 1 of 2)	10389	NM_001081229	72033	Mm.218409	NM_001081229	ENSMUSG00000027806	Tsc22d2	1810043J12Rik|5530402M19Rik	TSC22 domain family, member 2	protein-coding
Diff_Nuc34494	chr7	24634532	24634671	+	0	NA	Intergenic	Intergenic	-13856	NM_001166721	546943	Mm.480275	NM_001166721	ENSMUSG00000096859	Vmn1r176	Gm5998	vomeronasal 1 receptor 176	protein-coding
Diff_Nuc40926	chr6	92683102	92683241	+	0	NA	Intergenic	L1_Rod|LINE|L1	-26993	NM_001081146	243548	Mm.248820	NM_001081146	ENSMUSG00000030020	Prickle2	6230400G14Rik|6720451F06Rik|mpk2	prickle planar cell polarity protein 2	protein-coding
Diff_Nuc62259	chr2	156088972	156089111	+	0	NA	intron (NM_172674, intron 4 of 17)	PB1|SINE|Alu	-49168	NM_027585	70873	Mm.475234	NM_027585	ENSMUSG00000038085	Cnbd2	4921517L17Rik|5430421B09Rik|Cris	cyclic nucleotide binding domain containing 2	protein-coding
Diff_Nuc20651	chr16	52232272	52232411	+	0	NA	Intergenic	Intergenic	200679	NM_001033238	208650	Mm.328206	NM_001033238	ENSMUSG00000022637	Cblb	AI429560|AI851073|Cbl-b	Casitas B-lineage lymphoma b	protein-coding
Diff_Nuc2283	chr13	40066742	40066881	+	0	NA	Intergenic	Intergenic	316569	NM_172143	218165	Mm.364096	NM_172143	ENSMUSG00000047094	Ofcc1	opo	orofacial cleft 1 candidate 1	protein-coding
Diff_Nuc69850	chr9	22714632	22714771	+	0	NA	Intergenic	L1_Mus3|LINE|L1	-312819	NM_028472	73230	Mm.335020	NM_028472	ENSMUSG00000031963	Bmper	3110056H04Rik|CV-2|Crim3|Cv2	BMP-binding endothelial regulator	protein-coding
Diff_Nuc51132	chr4	133129682	133129821	+	0	NA	promoter-TSS (NM_172876)	promoter-TSS (NM_172876)	-909	NM_172876	242691	Mm.40110	NM_172876	ENSMUSG00000028850	Gpatch3	D930035B09Rik|Gpatc3	G patch domain containing 3	protein-coding
Diff_Nuc20954	chr16	60507592	60507731	+	0	NA	intron (NM_007938, intron 2 of 17)	intron (NM_007938, intron 2 of 17)	97696	NM_007938	13840	Mm.455790	NM_007938	ENSMUSG00000055540	Epha6	Ehk2|Hek12|m-ehk2	Eph receptor A6	protein-coding
Diff_Nuc27101	chr14	59493142	59493281	+	0	NA	Intergenic	L1Md_F|LINE|L1	268519	NM_026461	67932	Mm.65550	NM_026461	ENSMUSG00000021977	1700129C05Rik	-	RIKEN cDNA 1700129C05 gene	protein-coding
Diff_Nuc54702	chr3	95020722	95020861	+	0	NA	promoter-TSS (NR_108026)	promoter-TSS (NR_108026)	-588	NR_108026	100504029	Mm.478537	NR_108026	ENSMUSG00000097167	Gm16740	-	predicted gene, 16740	ncRNA
Diff_Nuc1196	chr13	8252262	8252401	+	0	NA	intron (NM_001289530, intron 1 of 9)	intron (NM_001289530, intron 1 of 9)	50219	NM_052977	94191	Mm.425794	NM_052977	ENSMUSG00000052551	Adarb2	Adar3|RED2	adenosine deaminase, RNA-specific, B2	protein-coding
Diff_Nuc4114	chr13	102015742	102015881	+	0	NA	non-coding (NR_046158, exon 4 of 4)	non-coding (NR_046158, exon 4 of 4)	-8463	NR_045846	71174	Mm.399537	NR_045846	ENSMUSG00000100733	4933416M06Rik	-	RIKEN cDNA 4933416M06 gene	ncRNA
Diff_Nuc7360	chr12	82352702	82352841	+	0	NA	intron (NM_080440, intron 2 of 7)	RLTR31_Mm|LTR|ERVK	81396	NM_001167920	110893	Mm.443748	NM_080440	ENSMUSG00000079055	Slc8a3	AW742262|Ncx3	solute carrier family 8 (sodium/calcium exchanger), member 3	protein-coding
Diff_Nuc60866	chr2	115534352	115534491	+	0	NA	intron (NM_207264, intron 10 of 10)	intron (NM_207264, intron 10 of 10)	69960	NR_035476	100316703		NR_035476	ENSMUSG00000088606	Mir1951	mir-1951|mmu-mir-1951	microRNA 1951	ncRNA
Diff_Nuc40160	chr6	65713442	65713581	+	0	NA	Intergenic	Intergenic	-15445	NM_027547	70779	Mm.263355	NM_027547	ENSMUSG00000029913	Prdm5	4432417F03Rik|6530401I24Rik|AI197291|E130112L17Rik|PFM2	PR domain containing 5	protein-coding
Diff_Nuc70620	chr9	46995252	46995391	+	0	NA	Intergenic	Intergenic	188497	NM_001243258	215467	Mm.246572	NM_001243258	ENSMUSG00000094893	Gm4791	D930036J05	predicted gene 4791	protein-coding
Diff_Nuc41861	chr6	122638622	122638761	+	0	NA	Intergenic	B1_Mus1|SINE|Alu	-18816	NM_001289831	71950	Mm.6047	NM_028016	ENSMUSG00000012396	Nanog	2410002E02Rik|ENK|ecat4	Nanog homeobox	protein-coding
Diff_Nuc71822	chr9	85237572	85237711	+	0	NA	Intergenic	Intergenic	-16884	NM_001160379	212943	Mm.74610	NM_001160378	ENSMUSG00000032265	Fam46a	BAP014|D930050G01Rik	family with sequence similarity 46, member A	protein-coding
Diff_Nuc31242	chr18	5877132	5877271	+	0	NA	Intergenic	MTB|LTR|MaLR	258895	NM_029277	75415	Mm.239675	NM_029277	ENSMUSG00000041225	Arhgap12	2810011M08Rik	Rho GTPase activating protein 12	protein-coding
Diff_Nuc22706	chr15	13447412	13447551	+	0	NA	Intergenic	ORR1C1-int|LTR|MaLR	-344051	NM_007666	12563	Mm.57048	NM_007666	ENSMUSG00000039385	Cdh6	cad6	cadherin 6	protein-coding
Diff_Nuc21029	chr16	62367822	62367961	+	0	NA	Intergenic	Intergenic	418651	NM_178925	106338	Mm.26321	NM_178925	ENSMUSG00000050312	Nsun3	6720484A09Rik|AU022521	NOL1/NOP2/Sun domain family member 3	protein-coding
Diff_Nuc47398	chr4	13291062	13291201	+	0	NA	Intergenic	Intergenic	-379318	NM_001111026	12395	Mm.4909	NM_009822	ENSMUSG00000006586	Runx1t1	Cbfa2t1h|ETO|MTG8	runt-related transcription factor 1; translocated to, 1 (cyclin D-related)	protein-coding
Diff_Nuc13854	chr10	54433892	54434031	+	0	NA	Intergenic	Intergenic	638233	NR_038016	100502920	Mm.403982	NR_038016	ENSMUSG00000097069	Gm16998	-	predicted gene, 16998	ncRNA
Diff_Nuc47268	chr4	9373992	9374131	+	0	NA	intron (NM_028940, intron 5 of 5)	intron (NM_028940, intron 5 of 5)	177597	NM_028940	74438	Mm.473368	NM_028940	ENSMUSG00000041216	Clvs1	4933402J24Rik|Clvl1|Rlbp1l1	clavesin 1	protein-coding
Diff_Nuc40811	chr6	87142372	87142511	+	0	NA	intron (NM_054041, intron 14 of 17)	ORR1E|LTR|MaLR	87701	NM_001167937	52372	Mm.282851	NM_001167937	ENSMUSG00000090891	D6Ertd527e	AU043841	DNA segment, Chr 6, ERATO Doi 527, expressed	protein-coding
Diff_Nuc8763	chr11	12794612	12794751	+	0	NA	Intergenic	Lx9|LINE|L1	-429718	NM_001282993	12808	Mm.22847	NM_172496	ENSMUSG00000020173	Cobl	-	cordon-bleu WH2 repeat	protein-coding
Diff_Nuc35906	chr7	84777342	84777481	+	0	NA	Intergenic	Intergenic	945313	NM_008746	18213	Mm.33496	NM_008746	ENSMUSG00000059146	Ntrk3	AW125844|Ntrk3_tv3|TrkC	neurotrophic tyrosine kinase, receptor, type 3	protein-coding
Diff_Nuc26091	chr14	24507572	24507711	+	0	NA	intron (NM_001253374, intron 1 of 28)	intron (NM_001253374, intron 1 of 28)	315786	NM_001253375	16531	Mm.343607	NM_010610	ENSMUSG00000063142	Kcnma1	5730414M22Rik|BKCa|MaxiK|Slo|Slo1|mSlo|mSlo1	potassium large conductance calcium-activated channel, subfamily M, alpha member 1	protein-coding
Diff_Nuc9232	chr11	26577402	26577541	+	0	NA	Intergenic	B3A|SINE|B2	-83551	NM_001252447	69922	Mm.285351	NM_027260	ENSMUSG00000064090	Vrk2	2810003O05Rik|AI447698	vaccinia related kinase 2	protein-coding
Diff_Nuc50736	chr4	115029442	115029581	+	0	NA	Intergenic	L1Md_F2|LINE|L1	-54718	NM_172306	13118	Mm.448292	NM_172306	ENSMUSG00000078597	Cyp4a12b	BC060945|Cyp4a12	cytochrome P450, family 4, subfamily a, polypeptide 12B	protein-coding
Diff_Nuc17389	chr17	41665092	41665231	+	0	NA	Intergenic	Intergenic	593527	NM_008650	17850	Mm.259884	NM_008650	ENSMUSG00000023921	Mut	D230010K02Rik|Mcm	methylmalonyl-Coenzyme A mutase	protein-coding
Diff_Nuc69634	chr9	14453032	14453171	+	0	NA	Intergenic	Intergenic	-33657	NM_001081395	75723	Mm.159552	NM_001081395	ENSMUSG00000013076	Amotl1	2310010G08Rik|2310067L22Rik|4932416D09Rik|JEAP|mFLJ00155	angiomotin-like 1	protein-coding
Diff_Nuc61861	chr2	143140182	143140321	+	0	NA	Intergenic	MTA_Mm|LTR|MaLR	-231618	NM_008792	18549	Mm.294493	NM_008792	ENSMUSG00000027419	Pcsk2	6330411F23Rik|AI839700|Nec-2|Nec2|PC2|Phpp-2|SPC2	proprotein convertase subtilisin/kexin type 2	protein-coding
Diff_Nuc31506	chr18	14232112	14232251	+	0	NA	Intergenic	Intergenic	-100939	NM_145492	225207	Mm.40325	NM_145492	ENSMUSG00000024420	Zfp521	B930086A16Rik|Evi3|Znf521	zinc finger protein 521	protein-coding
Diff_Nuc13830	chr10	53998682	53998821	+	0	NA	Intergenic	Intergenic	203023	NR_038016	100502920	Mm.403982	NR_038016	ENSMUSG00000097069	Gm16998	-	predicted gene, 16998	ncRNA
Diff_Nuc17758	chr17	56197462	56197601	+	0	NA	intron (NM_013733, intron 5 of 13)	intron (NM_013733, intron 5 of 13)	16881	NM_024432	66530	Mm.28000	NM_024432	ENSMUSG00000019578	Ubxn6	1200008L11Rik|2210415J11Rik|AU040909|Ubxd1|Ubxdc2	UBX domain protein 6	protein-coding
Diff_Nuc33256	chr18	64044882	64045021	+	0	NA	intron (NM_001014981, intron 21 of 27)	Lx8|LINE|L1	176602	NM_001014981	104082	Mm.30850	NM_001014981	ENSMUSG00000040560	Wdr7	AI462727|TRAG|mKIAA0541	WD repeat domain 7	protein-coding
Diff_Nuc61170	chr2	124158322	124158461	+	0	NA	intron (NM_001290997, intron 3 of 20)	intron (NM_001290997, intron 3 of 20)	-110297	NR_040612	75946	Mm.415059	NR_040612	ENSMUSG00000086954	4930583P06Rik	-	RIKEN cDNA 4930583P06 gene	ncRNA
Diff_Nuc50134	chr4	96422097	96422236	+	0	NA	intron (NM_001081284, intron 5 of 10)	intron (NM_001081284, intron 5 of 10)	29685	NM_001081284	620779	Mm.439625	NM_001081284	ENSMUSG00000078639	Gm12695	OTTMUSG00000008003	predicted gene 12695	protein-coding
Diff_Nuc20952	chr16	60462932	60463071	+	0	NA	intron (NM_007938, intron 2 of 17)	Lx3C|LINE|L1	142356	NM_007938	13840	Mm.455790	NM_007938	ENSMUSG00000055540	Epha6	Ehk2|Hek12|m-ehk2	Eph receptor A6	protein-coding
Diff_Nuc68306	chr1	167159572	167159711	+	0	NA	intron (NM_145513, intron 1 of 6)	Lx9|LINE|L1	7448	NM_145513	226591	Mm.21520	NM_145513	ENSMUSG00000040843	Tiprl	1810011K17Rik	TIP41, TOR signalling pathway regulator-like (S. cerevisiae)	protein-coding
Diff_Nuc71283	chr9	69176982	69177121	+	0	NA	intron (NM_001289916, intron 1 of 9)	B4A|SINE|B4	35003	NR_136934	102642202	Mm.415363	NR_136934	ENSMUSG00000086648	Gm15511	OTTMUSG00000023029	predicted gene 15511	ncRNA
Diff_Nuc14391	chr10	73436992	73437131	+	0	NA	intron (NM_001142741, intron 2 of 30)	intron (NM_001142741, intron 2 of 30)	152446	NM_001142735	11994	Mm.338933	NM_023115	ENSMUSG00000052613	Pcdh15	BB078305|ENSMUSG00000046980|Gm9815|Ush1f|av|nmf19|roda	protocadherin 15	protein-coding
Diff_Nuc42152	chr6	134750892	134751031	+	0	NA	Intergenic	Intergenic	-8315	NM_001048054	70686	Mm.491182	NM_130447	ENSMUSG00000030203	Dusp16	3830417M17Rik|AW558566|D6Ertd213e|MKP-7|MKP7|Mkpm	dual specificity phosphatase 16	protein-coding
Diff_Nuc33382	chr18	68540022	68540161	+	0	NA	Intergenic	Lx7|LINE|L1	42834	NM_013596	17203	Mm.8003	NM_013596	ENSMUSG00000007480	Mc5r	-	melanocortin 5 receptor	protein-coding
Diff_Nuc55256	chr3	111363002	111363141	+	0	NA	Intergenic	L1Md_F3|LINE|L1	-321750	NR_045362	625585	Mm.389497	NR_045362	ENSMUSG00000104543	Gm6602	-	predicted gene 6602	ncRNA
Diff_Nuc72316	chr9	99786492	99786631	+	0	NA	Intergenic	Intergenic	-9972	NM_011440	20669	Mm.261595	NM_011440	ENSMUSG00000053747	Sox14	-	SRY (sex determining region Y)-box 14	protein-coding
Diff_Nuc7170	chr12	77084532	77084671	+	0	NA	intron (NM_001005510, intron 53 of 115)	intron (NM_001005510, intron 53 of 115)	74511	NR_039560	100628610		NR_039560	ENSMUSG00000092922	Mir5101	mmu-mir-5101|mu-mir-5101	microRNA 5101	ncRNA
Diff_Nuc73674	chr8	27425402	27425541	+	0	NA	Intergenic	ORR1B1|LTR|MaLR	156830	NM_199042	73754	Mm.383241	NM_199042	ENSMUSG00000037214	Thap1	4833431A01Rik|AW490810	THAP domain containing, apoptosis associated protein 1	protein-coding
Diff_Nuc75643	chr8	85051182	85051321	+	0	NA	Intergenic	Intergenic	-124766	NM_008357	16168	Mm.4392	NM_008357	ENSMUSG00000031712	Il15	AI503618|IL-15	interleukin 15	protein-coding
Diff_Nuc17974	chr17	62527052	62527191	+	0	NA	Intergenic	Intergenic	703545	NM_207654	13640	Mm.7978	NM_010109	ENSMUSG00000048915	Efna5	AL-1|AV158822|EFL-5|Ephrin-A5|Epl7|LERK-7|RAGS	ephrin A5	protein-coding
Diff_Nuc1436	chr13	14817662	14817801	+	0	NA	Intergenic	L1Md_F2|LINE|L1	95206	NM_134067	105351	Mm.41450	NM_134067	ENSMUSG00000039182	AW209491	-	expressed sequence AW209491	protein-coding
Diff_Nuc6241	chr12	52385652	52385791	+	0	NA	Intergenic	Intergenic	-63496	NM_001167964	217558	Mm.253264	NM_001015099	ENSMUSG00000035293	G2e3	6030408C04Rik|9030416F18|AW046379|D930034K21Rik|mKIAA1333	G2/M-phase specific E3 ubiquitin ligase	protein-coding
Diff_Nuc5138	chr12	15219792	15219931	+	0	NA	Intergenic	Lx9|LINE|L1	-162666	NR_045960	73972	Mm.107680	NR_045960		4930448C13Rik	-	RIKEN cDNA 4930448C13 gene	ncRNA
Diff_Nuc76482	chr8	111696432	111696571	+	0	NA	intron (NR_126329, intron 3 of 9)	intron (NR_126329, intron 3 of 9)	97379	NR_126329	628686	Mm.203332	NR_126329	ENSMUSG00000097393	D030068K23Rik	-	RIKEN cDNA D030068K23 gene	ncRNA
Diff_Nuc7787	chr12	95356152	95356291	+	0	NA	Intergenic	Intergenic	190723	NR_106175	102465890		NR_106175	ENSMUSG00000098498	Mir8099-1	Gm27917|mmu-mir-8099-1	microRNA 8099-1	ncRNA
Diff_Nuc32642	chr18	46437702	46437841	+	0	NA	intron (NM_172627, intron 1 of 8)	intron (NM_172627, intron 1 of 8)	2733	NM_172627	225467	Mm.262096	NM_172627	ENSMUSG00000024477	Pggt1b	2010207C17Rik|2610100E13|AI451237|AI551093|BGG1|GGT1	protein geranylgeranyltransferase type I, beta subunit	protein-coding
Diff_Nuc36085	chr7	91172882	91173021	+	0	NA	intron (NM_030728, intron 1 of 28)	intron (NM_030728, intron 1 of 28)	62064	NM_030728	80982	Mm.160389	NM_030728	ENSMUSG00000052353	Cemip	12H19.01.T7|6330404C01Rik|9930013L23Rik|AY007814|Kiaa1199	cell migration inducing protein, hyaluronan binding	protein-coding
Diff_Nuc1929	chr13	28174512	28174651	+	0	NA	Intergenic	L1Md_F2|LINE|L1	-59772	NM_023746	28078	Mm.155058	NM_023746	ENSMUSG00000017064	Prl5a1	1600013P04Rik|D13Wsu14e|Ghd24|PLP-L|Prlpl	prolactin family 5, subfamily a, member 1	protein-coding
Diff_Nuc75731	chr8	87825982	87826121	+	0	NA	intron (NR_028268, intron 2 of 5)	intron (NR_028268, intron 2 of 5)	2520	NR_028268	56452	Mm.29709	NM_019716	ENSMUSG00000031697	Orc6	6720420I10Rik|Orc6l	origin recognition complex, subunit 6	protein-coding
Diff_Nuc21138	chr16	65085642	65085781	+	0	NA	intron (NM_008310, intron 1 of 2)	B3|SINE|B2	19899	NM_008310	15557	Mm.5040	NM_008310	ENSMUSG00000050783	Htr1f	Htr1eb	5-hydroxytryptamine (serotonin) receptor 1F	protein-coding
Diff_Nuc14179	chr10	65684062	65684201	+	0	NA	Intergenic	Intergenic	76087	NR_131070	77198	Mm.107617	NR_131070		4930407I19Rik	-	RIKEN cDNA 4930407I19 gene	ncRNA
Diff_Nuc80	chrX	12743962	12744101	+	0	NA	intron (NM_009481, intron 44 of 44)	URR1A|DNA|MER1_type	69378	NR_045430	72122	Mm.75434	NR_045429	ENSMUSG00000100714	2010308F09Rik	-	RIKEN cDNA 2010308F09 gene	ncRNA
Diff_Nuc5344	chr12	26910542	26910681	+	0	NA	intron (NR_046278, intron 2 of 2)	intron (NR_046278, intron 2 of 2)	14479	NR_046278	74930	Mm.398932	NR_046278		4930480M12Rik	-	RIKEN cDNA 4930480M12 gene	ncRNA
Diff_Nuc55732	chr3	125544232	125544371	+	0	NA	Intergenic	Intergenic	97167	NM_011674	22239	Mm.306021	NM_011674	ENSMUSG00000032854	Ugt8a	AI850488|AW455908|Cgt|Ugt8|mCerGT	UDP galactosyltransferase 8A	protein-coding
Diff_Nuc74841	chr8	61324162	61324301	+	0	NA	intron (NM_175032, intron 1 of 11)	intron (NM_175032, intron 1 of 11)	66193	NM_175032	270049	Mm.236368	NM_175032	ENSMUSG00000096914	Galntl6	1700021K10Rik|4930431L04Rik|A830023L05	UDP-N-acetyl-alpha-D-galactosamine:polypeptide N-acetylgalactosaminyltransferase-like 6	protein-coding
Diff_Nuc32033	chr18	29565312	29565451	+	0	NA	intron (NR_045391, intron 7 of 7)	Lx9|LINE|L1	-36473	NR_045395	78199	Mm.243850	NR_045395		4930527G23Rik	-	RIKEN cDNA 4930527G23 gene	ncRNA
Diff_Nuc67172	chr1	134606422	134606561	+	0	NA	intron (NM_182716, intron 1 of 29)	intron (NM_182716, intron 1 of 29)	-2588	NM_001160318	269116	Mm.326702	NM_182716	ENSMUSG00000026442	Nfasc	AA387016|D430023G06Rik|NF|mKIAA0756	neurofascin	protein-coding
Diff_Nuc47901	chr4	27112882	27113021	+	0	NA	Intergenic	Lx7|LINE|L1	-480355	NR_040656	75360	Mm.67233	NR_040656	ENSMUSG00000086257	4930548K13Rik	-	RIKEN cDNA 4930548K13 gene	ncRNA
Diff_Nuc12623	chr10	21187932	21188071	+	0	NA	Intergenic	MTD|LTR|MaLR	90895	NM_178713	237320	Mm.90181	NM_178713	ENSMUSG00000037542	Aldh8a1	Raldh4	aldehyde dehydrogenase 8 family, member A1	protein-coding
Diff_Nuc52104	chr3	20235002	20235141	+	0	NA	intron (NM_175086, intron 1 of 1)	intron (NM_175086, intron 1 of 1)	31028	NM_175086	11608	Mm.134863	NM_175086	ENSMUSG00000054988	Agtr1b	AT1B|AT2R1B|Agtr-1b|Angtr-1b	angiotensin II receptor, type 1b	protein-coding
Diff_Nuc40029	chr6	62350542	62350681	+	0	NA	Intergenic	L1_Mur3|LINE|L1	-856240	NM_008167	14804	Mm.439651	NM_008167	ENSMUSG00000071424	Grid2	B230104L07Rik|GluD2|GluRdelta2|Lc|Lc<J>|MMS10-AC|Ms10ac|cpr|ho|nmf408|tpr	glutamate receptor, ionotropic, delta 2	protein-coding
Diff_Nuc63617	chr1	26355232	26355371	+	0	NA	Intergenic	Intergenic	389004	NM_001033764	210940	Mm.297614	NM_001033764	ENSMUSG00000073722	4931408C20Rik	-	RIKEN cDNA 4931408C20 gene	protein-coding
Diff_Nuc31589	chr18	16970512	16970651	+	0	NA	Intergenic	Intergenic	-2826	NM_007664	12558	Mm.257437	NM_007664	ENSMUSG00000024304	Cdh2	CDHN|N-CAD|Ncad	cadherin 2	protein-coding
Diff_Nuc14181	chr10	65878682	65878821	+	0	NA	Intergenic	L1Md_F|LINE|L1	270707	NR_131070	77198	Mm.107617	NR_131070		4930407I19Rik	-	RIKEN cDNA 4930407I19 gene	ncRNA
Diff_Nuc7072	chr12	74305032	74305171	+	0	NA	intron (NM_008612, intron 6 of 7)	intron (NM_008612, intron 6 of 7)	80397	NM_008612	17420	Mm.246750	NM_008612	ENSMUSG00000021103	Mnat1	E130115E11Rik|MAT1|P36	menage a trois 1	protein-coding
Diff_Nuc36827	chr7	112389952	112390091	+	0	NA	Intergenic	L1Md_F|LINE|L1	-37166	NM_147069	259072	Mm.377823	NM_147069	ENSMUSG00000048425	Olfr686	MOR35-1	olfactory receptor 686	protein-coding
Diff_Nuc21853	chr16	82138832	82138971	+	0	NA	Intergenic	Intergenic	937959	NM_010954	17968	Mm.433941	NM_010954	ENSMUSG00000022762	Ncam2	Ncam-2|Ocam|RNCAM	neural cell adhesion molecule 2	protein-coding
Diff_Nuc58718	chr2	56119812	56119951	+	0	NA	Intergenic	Lx8|LINE|L1	-518341	NR_105751	102465169		NR_105751	ENSMUSG00000098437	Mir195b	Gm27491|mmu-mir-195b	microRNA 195b	ncRNA
Diff_Nuc49982	chr4	92575932	92576071	+	0	NA	Intergenic	Intergenic	426201	NM_026954	69136	Mm.171558	NM_026954	ENSMUSG00000054000	Tusc1	2200001D17Rik|TSG-9	tumor suppressor candidate 1	protein-coding
Diff_Nuc73229	chr8	9913792	9913931	+	0	NA	Intergenic	Intergenic	62462	NM_176953	319583	Mm.80584	NM_176953	ENSMUSG00000049717	Lig4	5830471N16Rik|tiny	ligase IV, DNA, ATP-dependent	protein-coding
Diff_Nuc47012	chr5	151070122	151070261	+	0	NA	intron (NM_172887, intron 1 of 60)	B3|SINE|B2	7686	NM_172887	320365	Mm.216590	NM_172887	ENSMUSG00000056602	Fry	13CDNA73|9330186A19Rik|AF346502|AI462658|C87180|D930046M03|cg003|mKIAA4143	FRY microtubule binding protein	protein-coding
Diff_Nuc921	chrX	150183172	150183311	+	0	NA	Intergenic	ORR1E|LTR|MaLR	25144	NM_027327	70123	Mm.146408	NM_027327	ENSMUSG00000086316	2210013O21Rik	AI181827|Thp5	RIKEN cDNA 2210013O21 gene	protein-coding
Diff_Nuc45579	chr5	89457802	89457941	+	0	NA	intron (NM_018760, intron 4 of 25)	intron (NM_018760, intron 4 of 25)	141586	NM_018760	54403	Mm.41044	NM_018760	ENSMUSG00000060961	Slc4a4	AI835705|NBC|NBC1	solute carrier family 4 (anion exchanger), member 4	protein-coding
Diff_Nuc74985	chr8	65266612	65266751	+	0	NA	Intergenic	MTD|LTR|MaLR	-163348	NM_001252620	72902	Mm.334552	NM_023689	ENSMUSG00000054162	Spock3	2900045C01Rik|AI428471|mKIAA4039	sparc/osteonectin, cwcv and kazal-like domains proteoglycan 3	protein-coding
Diff_Nuc62245	chr2	155786722	155786861	+	0	NA	intron (NM_001129999, intron 1 of 32)	intron (NM_001129999, intron 1 of 32)	4497	NM_177217	16328	Mm.288729	NM_008383	ENSMUSG00000038241	Cep250	AW490617|B230210E21Rik|Cep2|Inmp	centrosomal protein 250	protein-coding
Diff_Nuc38929	chr6	31332672	31332811	+	0	NA	intron (NR_040300, intron 2 of 2)	intron (NR_040300, intron 2 of 2)	16032	NR_040300	100503869	Mm.370532	NR_040300	ENSMUSG00000086212	Mkln1os	Gm13845|OTTMUSG00000014733	muskelin 1, intracellular mediator containing kelch motifs, opposite strand	ncRNA
Diff_Nuc55261	chr3	111483472	111483611	+	0	NA	Intergenic	Intergenic	-201280	NR_045362	625585	Mm.389497	NR_045362	ENSMUSG00000104543	Gm6602	-	predicted gene 6602	ncRNA
Diff_Nuc20722	chr16	53731942	53732081	+	0	NA	Intergenic	Intergenic	-916154	NR_040495	73820	Mm.60493	NR_040495		4930404A05Rik	-	RIKEN cDNA 4930404A05 gene	ncRNA
Diff_Nuc26523	chr14	38527162	38527301	+	0	NA	Intergenic	Intergenic	-578723	NM_078478	66092	Mm.182912	NM_078478	ENSMUSG00000041028	Ghitm	1010001P14Rik|C77840|MICS1|PTD010|Tmbim5	growth hormone inducible transmembrane protein	protein-coding
Diff_Nuc20429	chr16	45929572	45929711	+	0	NA	Intergenic	MIRb|SINE|MIR	80885	NM_001134480	433022	Mm.380993	NM_001134480	ENSMUSG00000087141	Plcxd2	AW494639|EG433022	phosphatidylinositol-specific phospholipase C, X domain containing 2	protein-coding
Diff_Nuc17420	chr17	42852972	42853111	+	0	NA	intron (NM_001033493, intron 2 of 5)	B3|SINE|B2	-23808	NM_030067	78249	Mm.66217	NM_030067	ENSMUSG00000023918	Adgrf4	4632435A09Rik|AV239010|Gpr115	adhesion G protein-coupled receptor F4	protein-coding
Diff_Nuc5752	chr12	39075072	39075211	+	0	NA	intron (NM_178681, intron 20 of 24)	L1Md_F2|LINE|L1	265967	NR_045943	73867	Mm.78933	NR_045943		4930428E07Rik	-	RIKEN cDNA 4930428E07 gene	ncRNA
Diff_Nuc29815	chr19	18024712	18024851	+	0	NA	Intergenic	MER21B|LTR|ERV1	-112659	NM_001190483	18552	Mm.3401	NM_001163144	ENSMUSG00000024713	Pcsk5	PC5|PC6|SPC6|b2b1549Clo|b2b585Clo	proprotein convertase subtilisin/kexin type 5	protein-coding
Diff_Nuc70747	chr9	51371232	51371371	+	0	NA	Intergenic	Intergenic	-202156	NM_175535	244867	Mm.400352	NM_175535	ENSMUSG00000053199	Arhgap20	6530403F17Rik|A530023E23Rik|RARhoGAP|mKIAA1391	Rho GTPase activating protein 20	protein-coding
Diff_Nuc54620	chr3	92007662	92007801	+	0	NA	Intergenic	Intergenic	-12026	NM_001164787	100303744	Mm.429851	NM_001164787	ENSMUSG00000068893	Sprr2a2	-	small proline-rich protein 2A2	protein-coding
Diff_Nuc21764	chr16	80063192	80063331	+	0	NA	Intergenic	Intergenic	-971919	NM_178855	19146	Mm.5184	NM_008941	ENSMUSG00000022857	Tmprss15	Entk|Prss7	transmembrane protease, serine 15	protein-coding
Diff_Nuc18975	chr17	93059162	93059301	+	0	NA	Intergenic	Intergenic	-539126	NM_001315503	11516	Mm.3407	NM_009625	ENSMUSG00000024256	Adcyap1	PACAP	adenylate cyclase activating polypeptide 1	protein-coding
Diff_Nuc50006	chr4	93039332	93039471	+	0	NA	Intergenic	B1_Mm|SINE|Alu	-37199	NM_026954	69136	Mm.171558	NM_026954	ENSMUSG00000054000	Tusc1	2200001D17Rik|TSG-9	tumor suppressor candidate 1	protein-coding
Diff_Nuc25524	chr15	100851202	100851341	+	0	NA	intron (NM_011323, intron 19 of 25)	intron (NM_011323, intron 19 of 25)	33559	NM_001214911	668225	Mm.385011	NM_001214911	ENSMUSG00000095440	Fignl2	EG668225	fidgetin-like 2	protein-coding
Diff_Nuc13838	chr10	54213302	54213441	+	0	NA	Intergenic	L1_Mus1|LINE|L1	417643	NR_038016	100502920	Mm.403982	NR_038016	ENSMUSG00000097069	Gm16998	-	predicted gene, 16998	ncRNA
Diff_Nuc11435	chr11	100667842	100667981	+	0	NA	intron (NM_001113563, intron 2 of 18)	PB1|SINE|Alu	15973	NM_011489	20851	Mm.34064	NM_011489	ENSMUSG00000020919	Stat5b	-	signal transducer and activator of transcription 5B	protein-coding
Diff_Nuc51569	chr4	155077052	155077191	+	0	NA	Intergenic	Intergenic	-1803	NM_026899	68991	Mm.294770	NM_026899	ENSMUSG00000029038	Ssu72	1190002E22Rik|1500011L16Rik|2610101M12Rik	Ssu72 RNA polymerase II CTD phosphatase homolog (yeast)	protein-coding
Diff_Nuc29903	chr19	20758192	20758331	+	0	NA	Intergenic	Intergenic	43785	NM_011921	26358	Mm.14609	NM_011921	ENSMUSG00000024747	Aldh1a7	AI987940|Ahd2-like|Aldh-pb|Aldh1a4|Aldhpb	aldehyde dehydrogenase family 1, subfamily A7	protein-coding
Diff_Nuc71932	chr9	89155402	89155541	+	0	NA	Intergenic	RSINE1|SINE|B4	49443	NM_026829	107885	Mm.486274	NM_026829	ENSMUSG00000066442	Mthfs	1110034I12Rik|2310020H23Rik|AI119695	5, 10-methenyltetrahydrofolate synthetase	protein-coding
Diff_Nuc11396	chr11	98741342	98741481	+	0	NA	intron (NM_197940, intron 1 of 7)	B1_Mur1|SINE|Alu	16499	NM_197940	68524	Mm.28661	NM_197940	ENSMUSG00000038013	Wipf2	1110014J05Rik|5730509C05Rik|AA407487|Gm1176|Wich|Wire	WAS/WASL interacting protein family, member 2	protein-coding
Diff_Nuc68044	chr1	160392222	160392361	+	0	NA	intron (NM_007495, intron 1 of 22)	intron (NM_007495, intron 1 of 22)	-43465	NR_030441	735253		NR_030441	ENSMUSG00000070103	Mir488	Mirn488|mir-488|mmu-mir-488	microRNA 488	ncRNA
Diff_Nuc28804	chr14	108001012	108001151	+	0	NA	Intergenic	L1_Mur3|LINE|L1	-1115344	NR_045938	73631	Mm.48862	NR_045938	ENSMUSG00000099794	1700128A07Rik	-	RIKEN cDNA 1700128A07 gene	ncRNA
Diff_Nuc11534	chr11	104585532	104585671	+	0	NA	Intergenic	B1F|SINE|Alu	116287	NM_016780	16416	Mm.87150	NM_016780	ENSMUSG00000020689	Itgb3	CD61|GP3A|INGRB3	integrin beta 3	protein-coding
Diff_Nuc58616	chr2	53822462	53822601	+	0	NA	Intergenic	Intergenic	115432	NM_023396	67874	Mm.27086	NM_023396	ENSMUSG00000075334	Rprm	2410012A13Rik|Reprimo	reprimo, TP53 dependent G2 arrest mediator candidate	protein-coding
Diff_Nuc51410	chr4	146869312	146869451	+	0	NA	intron (NM_001039209, intron 1 of 2)	intron (NM_001039209, intron 1 of 2)	-58005	NM_001014397	433804	Mm.332047	NM_001014397	ENSMUSG00000065999	Zfp985	Gm13154|OTTMUSG00000010673	zinc finger protein 985	protein-coding
Diff_Nuc68952	chr1	188570622	188570761	+	0	NA	intron (NM_026041, intron 1 of 4)	intron (NM_026041, intron 1 of 4)	2546	NM_026041	67223	Mm.289841	NM_026041	ENSMUSG00000001305	Rrp15	2810430M08Rik|5430437H21Rik	ribosomal RNA processing 15 homolog (S. cerevisiae)	protein-coding
Diff_Nuc5160	chr12	15852742	15852881	+	0	NA	Intergenic	ORR1D2|LTR|MaLR	-29220	NM_144551	217410	Mm.491136	NM_144551	ENSMUSG00000020601	Trib2	AW319517|TRB-2|TRB2	tribbles pseudokinase 2	protein-coding
Diff_Nuc63960	chr1	37068492	37068631	+	0	NA	Intergenic	(CAAA)n|Simple_repeat|Simple_repeat	-72189	NM_018872	56030	Mm.186943	NM_018872	ENSMUSG00000026116	Tmem131	2610524E03Rik|CC28|D1Bwg0491e|Neg|RW1|YR-23|mKIAA0257	transmembrane protein 131	protein-coding
Diff_Nuc75958	chr8	96397192	96397331	+	0	NA	intron (NM_001113384, intron 2 of 7)	intron (NM_001113384, intron 2 of 7)	-59806	NR_026888	75809	Mm.443272	NM_029449		4930488L21Rik	4930452J22Rik	RIKEN cDNA 4930488L21 gene	ncRNA
Diff_Nuc42025	chr6	129863412	129863551	+	0	NA	promoter-TSS (NM_008463)	promoter-TSS (NM_008463)	-239	NM_008463	16636	Mm.14111	NM_008463	ENSMUSG00000030173	Klra5	Ly49e	killer cell lectin-like receptor, subfamily A, member 5	protein-coding
Diff_Nuc9907	chr11	46601582	46601721	+	0	NA	Intergenic	Intergenic	-22650	NM_178759	276891	Mm.69002	NM_178759	ENSMUSG00000055546	Timd4	B430010N18Rik|TIM-4|Tim4	T cell immunoglobulin and mucin domain containing 4	protein-coding
Diff_Nuc5012	chr12	10755552	10755691	+	0	NA	Intergenic	Lx|LINE|L1	-298998	NR_045860	71457	Mm.95280	NR_045860		7420701I03Rik	-	RIKEN cDNA 7420701I03 gene	ncRNA
Diff_Nuc34771	chr7	39124792	39124931	+	0	NA	Intergenic	Intergenic	-68494	NM_025390	66161	Mm.22284	NM_025390	ENSMUSG00000030423	Pop4	1110023P21Rik|Rpp29	processing of precursor 4, ribonuclease P/MRP family, (S. cerevisiae)	protein-coding
Diff_Nuc66760	chr1	121698192	121698331	+	0	NA	intron (NM_019933, intron 2 of 26)	L1ME3|LINE|L1	35387	NM_019933	19258	Mm.458796	NM_019933	ENSMUSG00000026384	Ptpn4	PTPMEG|Ptn4|TEP|TEP/mPTPMEG|hPTP-MEG	protein tyrosine phosphatase, non-receptor type 4	protein-coding
Diff_Nuc60964	chr2	118070682	118070821	+	0	NA	intron (NM_027759, intron 5 of 10)	AT_rich|Low_complexity|Low_complexity	11951	NM_027759	71313	Mm.85046	NM_027759	ENSMUSG00000027344	Fsip1	1700012M13Rik|4933432K11Rik	fibrous sheath-interacting protein 1	protein-coding
Diff_Nuc1374	chr13	12980852	12980991	+	0	NA	Intergenic	Intergenic	-88575	NM_011118	18812	Mm.457984	NM_011118	ENSMUSG00000056457	Prl2c3	Ghd1|MRP-2|MRP-3|Mrpplf3|PLF-2|PLF-3|Plf2|Prl2c4|mrp/plf3	prolactin family 2, subfamily c, member 3	protein-coding
Diff_Nuc21588	chr16	75240572	75240711	+	0	NA	Intergenic	Intergenic	345665	NM_001252513	320355	Mm.99517	NM_177142	ENSMUSG00000032948	Lipi	D930038D03Rik|lpd1	lipase, member I	protein-coding
Diff_Nuc37655	chr7	141562902	141563041	+	0	NA	intron (NM_001081331, intron 1 of 7)	(CA)n|Simple_repeat|Simple_repeat	5540	NM_001081331	71007	Mm.334285	NM_001081331	ENSMUSG00000030994	D7Ertd443e	4933400E14Rik|FATS|Gm497	DNA segment, Chr 7, ERATO Doi 443, expressed	protein-coding
Diff_Nuc21264	chr16	67965302	67965441	+	0	NA	Intergenic	Intergenic	-344218	NM_178721	239857	Mm.394300	NM_178721	ENSMUSG00000064115	Cadm2	2900078E11Rik|9330131D06|A830029E02Rik|Igdf4d|Igsf4d|NECL3|SynCAM 2|SynCAM2	cell adhesion molecule 2	protein-coding
Diff_Nuc46876	chr5	145062272	145062411	+	0	NA	intron (NM_025833, intron 3 of 13)	intron (NM_025833, intron 3 of 13)	24411	NR_040432	100504231	Mm.441035	NR_040432	ENSMUSG00000086894	Gm15708	OTTMUSG00000025583	predicted gene 15708	ncRNA
Diff_Nuc28042	chr14	88117392	88117531	+	0	NA	Intergenic	Intergenic	301071	NM_001253755	219249	Mm.35168	NM_172605	ENSMUSG00000022019	Tdrd3	4732418C03Rik|6720468N18	tudor domain containing 3	protein-coding
Diff_Nuc55939	chr3	132258782	132258921	+	0	NA	Intergenic	L1VL2|LINE|L1	-34304	NM_001270430	433653		NM_001270430	ENSMUSG00000091721	Gimd1	EG433653|Gm5549	GIMAP family P-loop NTPase domain containing 1	protein-coding
Diff_Nuc7799	chr12	95732392	95732531	+	0	NA	Intergenic	L1_Mus3|LINE|L1	566963	NR_106175	102465890		NR_106175	ENSMUSG00000098498	Mir8099-1	Gm27917|mmu-mir-8099-1	microRNA 8099-1	ncRNA
Diff_Nuc56927	chr2	3208042	3208181	+	0	NA	intron (NM_001290369, intron 1 of 12)	ID_B1|SINE|B4	6627	NM_001290370	18108	Mm.65021	NM_008708	ENSMUSG00000026643	Nmt2	A930001K02Rik|AI605445|AU044698|hNMT-2	N-myristoyltransferase 2	protein-coding
Diff_Nuc63226	chr1	16188832	16188971	+	0	NA	Intergenic	Intergenic	92938	NM_133832	98711	Mm.274376	NM_133832	ENSMUSG00000025921	Rdh10	3110069K09Rik|4921506A21Rik|AI875664|AW549993|D1Ertd762e|m366Asp	retinol dehydrogenase 10 (all-trans)	protein-coding
Diff_Nuc74563	chr8	52342862	52343001	+	0	NA	Intergenic	Intergenic	889465	NR_046067	100039954	Mm.400419	NR_046067	ENSMUSG00000110281	Gm2516	-	predicted gene 2516	ncRNA
Diff_Nuc55716	chr3	125064322	125064461	+	0	NA	Intergenic	Intergenic	-42618	NM_022565	64580	Mm.444289	NM_022565	ENSMUSG00000027971	Ndst4	4930439H17Rik	N-deacetylase/N-sulfotransferase (heparin glucosaminyl) 4	protein-coding
Diff_Nuc62053	chr2	149990212	149990351	+	0	NA	Intergenic	Intergenic	-17210	NM_001145863	100271882		NM_001145863	ENSMUSG00000079009	Gm14139	OTTMUSG00000015769	predicted gene 14139	protein-coding
Diff_Nuc27090	chr14	59178102	59178241	+	0	NA	Intergenic	Lx8|LINE|L1	486648	NM_013518	14180	Mm.8846	NM_013518	ENSMUSG00000021974	Fgf9	Eks	fibroblast growth factor 9	protein-coding
Diff_Nuc69361	chr9	5982562	5982701	+	0	NA	Intergenic	L1Md_F2|LINE|L1	-185981	NM_027924	71785	Mm.390122	NM_027924	ENSMUSG00000032006	Pdgfd	1110003I09Rik	platelet-derived growth factor, D polypeptide	protein-coding
Diff_Nuc60553	chr2	107860962	107861101	+	0	NA	Intergenic	L1_Mus2|LINE|L1	730285	NM_021275	16492	Mm.142718	NM_021275	ENSMUSG00000042604	Kcna4	Kv1.4	potassium voltage-gated channel, shaker-related subfamily, member 4	protein-coding
Diff_Nuc33544	chr18	72348212	72348351	+	0	NA	intron (NM_007831, intron 1 of 28)	intron (NM_007831, intron 1 of 28)	162442	NM_007831	13176	Mm.167882	NM_007831	ENSMUSG00000060534	Dcc	C030036D22Rik|Igdcc1	deleted in colorectal carcinoma	protein-coding
Diff_Nuc66921	chr1	126409732	126409871	+	0	NA	Intergenic	Intergenic	-467665	NM_199021	269109	Mm.417716	NM_199021	ENSMUSG00000036815	Dpp10	6430601K09Rik|DPP X|Dprp3	dipeptidylpeptidase 10	protein-coding
Diff_Nuc63033	chr1	10385082	10385221	+	0	NA	intron (NM_177834, intron 8 of 10)	L1_Mus1|LINE|L1	-162400	NM_001102430	211673	Mm.229141	NM_001102430	ENSMUSG00000067851	Arfgef1	ARFGEP1|BIG1|D130059B05Rik|D730028O18Rik|P200	ADP-ribosylation factor guanine nucleotide-exchange factor 1(brefeldin A-inhibited)	protein-coding
Diff_Nuc48807	chr4	57415702	57415841	+	0	NA	Intergenic	Lx5|LINE|L1	-38607	NR_038178	73349	Mm.393774	NR_038178		1700042G15Rik	-	RIKEN cDNA 1700042G15 gene	ncRNA
Diff_Nuc44113	chr5	49437572	49437711	+	0	NA	intron (NM_001199244, intron 1 of 7)	intron (NM_001199244, intron 1 of 7)	-156845	NM_030265	80334	Mm.160172	NM_030265	ENSMUSG00000029088	Kcnip4	AV032399|Calp|Calp250|KChIP4|KChIP4a	Kv channel interacting protein 4	protein-coding
Diff_Nuc24411	chr15	59254962	59255101	+	0	NA	intron (NM_026746, intron 3 of 6)	L1Md_T|LINE|L1	49278	NM_001164604	68501	Mm.27762	NM_026746	ENSMUSG00000059586	Nsmce2	1110014D18Rik|AI661537	NSE2/MMS21 homolog, SMC5-SMC6 complex SUMO ligase	protein-coding
Diff_Nuc12940	chr10	30104602	30104741	+	0	NA	Intergenic	Intergenic	-184325	NM_001109747	66311	Mm.251779	NM_001109747	ENSMUSG00000075266	Cenpw	2610036L11Rik|Cug2	centromere protein W	protein-coding
Diff_Nuc39924	chr6	60022092	60022231	+	0	NA	Intergenic	Intergenic	331540	NR_015565	208079	Mm.131226	NM_177329	ENSMUSG00000046764	A530053G22Rik	-	RIKEN cDNA A530053G22 gene	ncRNA
Diff_Nuc58938	chr2	62808912	62809051	+	0	NA	intron (NM_133207, intron 2 of 15)	MIR3|SINE|MIR	213363	NM_133207	170738	Mm.242532	NM_133207	ENSMUSG00000059742	Kcnh7	9330137I11Rik|Kv11.3|erg3	potassium voltage-gated channel, subfamily H (eag-related), member 7	protein-coding
Diff_Nuc55354	chr3	114193212	114193351	+	0	NA	Intergenic	Intergenic	-413715	NM_153458	229759	Mm.54183	NM_153157	ENSMUSG00000027965	Olfm3	B230206G02Rik	olfactomedin 3	protein-coding
Diff_Nuc19877	chr16	29811922	29812061	+	0	NA	Intergenic	MLT1A0|LTR|MaLR	167219	NR_037689	328657	Mm.425982	NM_001033403		Gm1968	-	predicted gene 1968	ncRNA
Diff_Nuc32953	chr18	54665182	54665321	+	0	NA	Intergenic	Intergenic	83302	NR_040338	77433	Mm.159919	NR_040338		Redrum	9430076G02Rik	Redrum, erythroid developmental long intergenic non-protein coding transcript	ncRNA
Diff_Nuc26304	chr14	31613242	31613381	+	0	NA	intron (NM_001166532, intron 13 of 20)	intron (NM_001166532, intron 13 of 20)	-25469	NM_028839	69179	Mm.143025	NM_028839	ENSMUSG00000006526	Tmem110	1810038N08Rik|2310014H19Rik|AW554125|STIMATE	transmembrane protein 110	protein-coding
Diff_Nuc23963	chr15	47607652	47607791	+	0	NA	intron (NM_001081391, intron 32 of 70)	intron (NM_001081391, intron 32 of 70)	1015814	NM_001081391	239420	Mm.309363	NM_001081391	ENSMUSG00000022311	Csmd3	4930500N14Rik|mKIAA1894	CUB and Sushi multiple domains 3	protein-coding
Diff_Nuc71424	chr9	73458342	73458481	+	0	NA	intron (NM_001081153, intron 17 of 30)	intron (NM_001081153, intron 17 of 30)	322963	NM_001081153	208898	Mm.41035	NM_001081153	ENSMUSG00000062151	Unc13c	1500037O19Rik|AU019458|D9Ertd414e|Munc13-3|Unc13h3	unc-13 homolog C (C. elegans)	protein-coding
Diff_Nuc15947	chr10	118652602	118652741	+	0	NA	intron (NM_027994, intron 6 of 14)	intron (NM_027994, intron 6 of 14)	24440	NM_027994	71902	Mm.203965	NM_027994	ENSMUSG00000020114	Cand1	2310038O07Rik|6330512O03Rik|AI195005|AI846556|D10Ertd516e|Tp120a|mKIAA0829	cullin associated and neddylation disassociated 1	protein-coding
Diff_Nuc7437	chr12	85219082	85219221	+	0	NA	intron (NR_073564, intron 1 of 12)	MTD|LTR|MaLR	-1389	NM_001272056	18222	Mm.4390	NM_010949	ENSMUSG00000021224	Numb	Nb	numb homolog (Drosophila)	protein-coding
Diff_Nuc38061	chr6	8669192	8669331	+	0	NA	intron (NM_010492, intron 6 of 13)	intron (NM_010492, intron 6 of 13)	39197	NM_001252266	15893	Mm.275683	NM_010492	ENSMUSG00000062995	Ica1	69kDa|ICA69	islet cell autoantigen 1	protein-coding
Diff_Nuc21360	chr16	70012792	70012931	+	0	NA	Intergenic	Intergenic	-148872	NM_173069	224318	Mm.212743	NM_173069	ENSMUSG00000063163	Speer2	SPEER-2	spermatogenesis associated glutamate (E)-rich protein 2	protein-coding
Diff_Nuc9333	chr11	29498562	29498701	+	0	NA	Intergenic	RMER16-int|LTR|ERVK	-50591	NM_001033865	78294	Mm.180003	NM_024277	ENSMUSG00000020460	Rps27a	0610006J14Rik|Uba52|Ubb|Ubc	ribosomal protein S27A	protein-coding
Diff_Nuc48099	chr4	33288092	33288231	+	0	NA	Intergenic	MYSERV16_I-int|LTR|ERVK	-7805	NM_177774	272009	Mm.156636	NM_177774	ENSMUSG00000054679	Srsf12	B830039L16|Sfrs13b|Srrp|Srsf13b	serine/arginine-rich splicing factor 12	protein-coding
Diff_Nuc22404	chr15	4298032	4298171	+	0	NA	Intergenic	L1_Mus2|LINE|L1	-27390	NM_177355	239318	Mm.308996	NM_177355	ENSMUSG00000049148	Plcxd3	B130016O10Rik	phosphatidylinositol-specific phospholipase C, X domain containing 3	protein-coding
Diff_Nuc59210	chr2	69645632	69645771	+	0	NA	Intergenic	RMER16-int|LTR|ERVK	-14726	NM_177784	277396	Mm.138073	NM_177784	ENSMUSG00000042155	Klhl23	C130068N17Rik	kelch-like 23	protein-coding
Diff_Nuc69412	chr9	7419642	7419781	+	0	NA	Intergenic	L1_Mus1|LINE|L1	-26111	NM_010809	17392	Mm.4993	NM_010809	ENSMUSG00000043613	Mmp3	EMS-2|MMP-3|SL-1|SLN-1|SLN1|STR-1|Stmy1|Str1	matrix metallopeptidase 3	protein-coding
Diff_Nuc58348	chr2	46759672	46759811	+	0	NA	Intergenic	Intergenic	1207616	NR_040497	69405	Mm.396184	NR_040497	ENSMUSG00000086202	1700019E08Rik	-	RIKEN cDNA 1700019E08 gene	ncRNA
Diff_Nuc73861	chr8	33780852	33780991	+	0	NA	Intergenic	Lx3_Mus|LINE|L1	279577	NM_001177589	100042715	Mm.291093	NM_001177589		Gm3985	-	predicted gene 3985	protein-coding
Diff_Nuc64420	chr1	50719712	50719851	+	0	NA	Intergenic	L1Md_F2|LINE|L1	-264586	NM_019790	56363	Mm.245154	NM_019790	ENSMUSG00000026109	Tmeff2	4832418D20Rik|7630402F16Rik|TR-2	transmembrane protein with EGF-like and two follistatin-like domains 2	protein-coding
Diff_Nuc30589	chr19	41631102	41631241	+	0	NA	intron (NM_172154, intron 2 of 2)	intron (NM_172154, intron 2 of 2)	7042	NM_172154	212391	Mm.422910	NM_172154	ENSMUSG00000025019	Lcor	3110023F06Rik|A630025C20Rik|Mlr2|mKIAA1795	ligand dependent nuclear receptor corepressor	protein-coding
Diff_Nuc23088	chr15	22491092	22491231	+	0	NA	Intergenic	Intergenic	153578	NM_001165971	545091	Mm.475598	NM_001165971		Gm5803	EG545091	predicted gene 5803	protein-coding
Diff_Nuc72231	chr9	96651882	96652021	+	0	NA	intron (NR_015511, intron 1 of 3)	intron (NR_015511, intron 1 of 3)	1299	NR_015511	319859	Mm.259909	NM_177020		E030011O05Rik	-	RIKEN cDNA E030011O05 gene	ncRNA
Diff_Nuc59774	chr2	86246432	86246571	+	0	NA	Intergenic	L1Md_F2|LINE|L1	7706	NM_207134	259022	Mm.377793	NM_207134	ENSMUSG00000075185	Olfr1061	MOR188-1|MOR188-7|MOR188-9|Olfr1515	olfactory receptor 1061	protein-coding
Diff_Nuc69504	chr9	10428402	10428541	+	0	NA	intron (NM_001033359, intron 2 of 20)	B3A|SINE|B2	476255	NM_001033359	244682	Mm.187021	NM_001033359	ENSMUSG00000039488	Cntn5	6720426O10Rik|A830025P08Rik|Gm507|NB-2	contactin 5	protein-coding
Diff_Nuc19544	chr16	20386152	20386291	+	0	NA	intron (NM_013790, intron 12 of 29)	MT2A|LTR|ERVL	40246	NM_013790	27416	Mm.20845	NM_013790	ENSMUSG00000022822	Abcc5	2900011L11Rik|AI132311|Abcc5a|Abcc5b|Mrp5	ATP-binding cassette, sub-family C (CFTR/MRP), member 5	protein-coding
Diff_Nuc55245	chr3	111171522	111171661	+	0	NA	Intergenic	Intergenic	-513230	NR_045362	625585	Mm.389497	NR_045362	ENSMUSG00000104543	Gm6602	-	predicted gene 6602	ncRNA
Diff_Nuc31275	chr18	6981242	6981381	+	0	NA	intron (NM_177595, intron 5 of 6)	intron (NM_177595, intron 5 of 6)	23466	NM_177595	210719	Mm.257186	NM_177595	ENSMUSG00000061013	Mkx	9430023B20Rik|Irxl1	mohawk homeobox	protein-coding
Diff_Nuc50866	chr4	121671672	121671811	+	0	NA	Intergenic	RLTRETN_Mm|LTR|ERVK	-377011	NM_001099309	666927	Mm.465133	NM_001099309	ENSMUSG00000078575	Gm12887	OTTMUSG00000008910	predicted gene 12887	protein-coding
Diff_Nuc29741	chr19	15885262	15885401	+	0	NA	Intergenic	Intergenic	113781	NM_001205339	107272	Mm.289936	NM_177420	ENSMUSG00000024640	Psat1	D8Ertd814e|EPIP|PSA|Psat	phosphoserine aminotransferase 1	protein-coding
Diff_Nuc60507	chr2	106915332	106915471	+	0	NA	Intergenic	Intergenic	-15593	NM_008045	14308	Mm.249525	NM_008045	ENSMUSG00000027120	Fshb	FSH|FSH-B|FSH-beta|Fshbeta	follicle stimulating hormone beta	protein-coding
Diff_Nuc17213	chr17	35980302	35980441	+	0	NA	intron (NM_001010833, intron 1 of 15)	ID4|SINE|ID	1928	NM_001010833	240087	Mm.218511	NM_001010833	ENSMUSG00000061607	Mdc1	6820401C03|AA413496|Nfbd1|mKIAA0170	mediator of DNA damage checkpoint 1	protein-coding
Diff_Nuc70912	chr9	56905312	56905451	+	0	NA	non-coding (NR_045886, exon 2 of 3)	non-coding (NR_045886, exon 2 of 3)	14392	NR_045886	100038566	Mm.361900	NR_045886		Gm10658	ENSMUSG00000074284	predicted gene 10658	ncRNA
Diff_Nuc51874	chr3	12209612	12209751	+	0	NA	Intergenic	Intergenic	-365322	NR_040751	100038545	Mm.388494	NR_040751	ENSMUSG00000104015	Gm10745	ENSMUSG00000074696	predicted gene 10745	ncRNA
Diff_Nuc30069	chr19	26111522	26111661	+	0	NA	Intergenic	Intergenic	364690	NM_145831	226049	Mm.275572	NM_145831	ENSMUSG00000048138	Dmrt2	Terra	doublesex and mab-3 related transcription factor 2	protein-coding
Diff_Nuc44661	chr5	63746502	63746641	+	0	NA	Intergenic	Intergenic	-293771	NM_177006	319807	Mm.319487	NM_028470	ENSMUSG00000090061	Nwd2	3110047P20Rik|B830017A01Rik|Hn1-ps2|mKIAA1239	NACHT and WD repeat domain containing 2	protein-coding
Diff_Nuc69959	chr9	26378122	26378261	+	0	NA	Intergenic	Intergenic	-163202	NM_001310766	76898	Mm.218788	NM_029792	ENSMUSG00000045994	B3gat1	0710007K08Rik|AI846286|GlcAT-P|Glcatp|Hnk1	beta-1,3-glucuronyltransferase 1 (glucuronosyltransferase P)	protein-coding
Diff_Nuc31384	chr18	10159182	10159321	+	0	NA	intron (NM_009071, intron 1 of 32)	L1_Mus1|LINE|L1	22539	NM_009071	19877	Mm.6710	NM_009071	ENSMUSG00000024290	Rock1	1110055K06Rik|Rock-I	Rho-associated coiled-coil containing protein kinase 1	protein-coding
Diff_Nuc45226	chr5	81029782	81029921	+	0	NA	Intergenic	Intergenic	-419745	NM_001347367	319387	Mm.273631	NM_198702	ENSMUSG00000037605	Adgrl3	5430402I23Rik|CIRL-3|D130075K09Rik|Gm1379|LEC3|Lphn3|mKIAA0768	adhesion G protein-coupled receptor L3	protein-coding
Diff_Nuc45657	chr5	91597412	91597551	+	0	NA	Intergenic	Intergenic	28856	NM_009704	11839	Mm.8039	NM_009704	ENSMUSG00000029378	Areg	AR|Mcub|Sdgf	amphiregulin	protein-coding
Diff_Nuc19601	chr16	22375072	22375211	+	0	NA	Intergenic	B2_Mm2|SINE|B2	64502	NM_023794	104156	Mm.155708	NM_023794	ENSMUSG00000013089	Etv5	1110005E01Rik|8430401F14Rik|ERM	ets variant 5	protein-coding
Diff_Nuc72910	chr9	119878422	119878561	+	0	NA	Intergenic	RSINE1|SINE|B4	15285	NM_153287	215418	Mm.491094	NM_153287	ENSMUSG00000032515	Csrnp1	4931429D10Rik|Axud1|CSRNP-1|URAX1|taip-3	cysteine-serine-rich nuclear protein 1	protein-coding
Diff_Nuc57183	chr2	10156722	10156861	+	0	NA	exon (NM_172471, exon 8 of 14)	exon (NM_172471, exon 8 of 14)	81621	NM_172471	209378	Mm.313876	NM_172471	ENSMUSG00000025780	Itih5	4631408O11Rik|5430408M01Rik|E130106B02	inter-alpha (globulin) inhibitor H5	protein-coding
Diff_Nuc44424	chr5	58021822	58021961	+	0	NA	intron (NR_015588, intron 3 of 4)	intron (NR_015588, intron 3 of 4)	87267	NR_015588	319216	Mm.332387	NR_015588	ENSMUSG00000097216	4932441J04Rik	-	RIKEN cDNA 4932441J04 gene	ncRNA
Diff_Nuc55179	chr3	109712462	109712601	+	0	NA	intron (NM_001163349, intron 3 of 5)	intron (NM_001163349, intron 3 of 5)	233859	NM_001163348	80883	Mm.39262	NM_030699	ENSMUSG00000059857	Ntng1	A930010C08Rik|AI853992|Lmnt1	netrin G1	protein-coding
Diff_Nuc50578	chr4	110134312	110134451	+	0	NA	intron (NM_001048189, intron 1 of 12)	Lx5|LINE|L1	64078	NM_030231	78933	Mm.435620	NM_030231	ENSMUSG00000061298	Agbl4	4930578N11Rik|4931433A01Rik	ATP/GTP binding protein-like 4	protein-coding
Diff_Nuc70585	chr9	45457432	45457571	+	0	NA	intron (NM_001081270, intron 3 of 32)	intron (NM_001081270, intron 3 of 32)	179220	NM_001081373	214552	Mm.260103	NM_172531	ENSMUSG00000043987	Cep164	AI450905|BC027092|D030051D21|mKIAA1052	centrosomal protein 164	protein-coding
Diff_Nuc10845	chr11	80585742	80585881	+	0	NA	intron (NM_177390, intron 1 of 21)	intron (NM_177390, intron 1 of 21)	7716	NM_177390	338367	Mm.151948	NM_177390	ENSMUSG00000035441	Myo1d	9930104H07Rik|AW544947|D11Ertd9e|myosin-1d	myosin ID	protein-coding
Diff_Nuc20563	chr16	49720372	49720511	+	0	NA	intron (NM_028680, intron 5 of 10)	intron (NM_028680, intron 5 of 10)	21034	NM_028680	73916	Mm.241276	NM_028680	ENSMUSG00000032965	Ift57	4833420A15Rik|Esrrbl1|Hippi|MHS4R2	intraflagellar transport 57	protein-coding
Diff_Nuc33942	chr18	86768522	86768661	+	0	NA	Intergenic	Lx7|LINE|L1	-111911	NM_001302356	12405	Mm.70775	NM_172633	ENSMUSG00000024647	Cbln2	6330593N19Rik|A730004O05	cerebellin 2 precursor protein	protein-coding
Diff_Nuc2121	chr13	34184312	34184451	+	0	NA	intron (NR_046184, intron 3 of 4)	RMER5|LTR|ERV1	-14504	NM_009450	22151	Mm.422827	NM_009450	ENSMUSG00000058672	Tubb2a	M(beta)2|Tubb2	tubulin, beta 2A class IIA	protein-coding
Diff_Nuc30641	chr19	43785722	43785861	+	0	NA	intron (NM_053103, intron 5 of 12)	intron (NM_053103, intron 5 of 12)	21612	NM_053103	93685	Mm.248237	NM_053103	ENSMUSG00000025192	Entpd7	1810012B13Rik|1810020C02Rik|2810003F23Rik|LALP1|Lysal2	ectonucleoside triphosphate diphosphohydrolase 7	protein-coding
Diff_Nuc20570	chr16	49963332	49963471	+	0	NA	Intergenic	Lx8|LINE|L1	-17172	NR_045001	628951	Mm.428032	NR_045001		Gm6936	-	predicted gene 6936	ncRNA
Diff_Nuc18540	chr17	79905772	79905911	+	0	NA	non-coding (NR_033462, exon 4 of 4)	non-coding (NR_033462, exon 4 of 4)	3985	NR_033462	100038718	Mm.414347	NR_033462		Gm10494	ENSMUSG00000073373	predicted gene 10494	ncRNA
Diff_Nuc31747	chr18	22500342	22500481	+	0	NA	Intergenic	Intergenic	-3179	NM_001167777	211961	Mm.392310	NM_001167777	ENSMUSG00000045215	Asxl3	C230079D11Rik|D430002O22Rik|D930044O18Rik|Gm329|Gm945	additional sex combs like 3 (Drosophila)	protein-coding
Diff_Nuc21441	chr16	72389232	72389371	+	0	NA	Intergenic	Intergenic	-154729	NR_131115	319533	Mm.373754	NR_131115		8030451O07Rik	-	RIKEN cDNA 8030451O07 gene	ncRNA
Diff_Nuc44846	chr5	70109752	70109891	+	0	NA	Intergenic	Intergenic	-126278	NM_001347363	67980	Mm.33830	NM_027681	ENSMUSG00000029209	Gnpda2	4921523I18Rik|4933412A11Rik|BB189630|GNPDA|Gnp2|Sb52|mKIAA4008	glucosamine-6-phosphate deaminase 2	protein-coding
Diff_Nuc71226	chr9	67454902	67455041	+	0	NA	Intergenic	Intergenic	-47461	NM_001081242	70549	Mm.33645	NM_027458	ENSMUSG00000052698	Tln2	5730421P04Rik|AI507121|AI787438|AL118320|mKIAA0320	talin 2	protein-coding
Diff_Nuc39579	chr6	48343622	48343761	+	0	NA	Intergenic	Intergenic	-1894	NM_001347152	77827	Mm.107646	NM_133922	ENSMUSG00000042810	Krba1	A930040G15Rik|AI448780	KRAB-A domain containing 1	protein-coding
Diff_Nuc37132	chr7	122587362	122587501	+	0	NA	Intergenic	L1MEd|LINE|L1	357692	NM_001277328	20679	Mm.323365	NM_011445	ENSMUSG00000051910	Sox6	AI987981|SOX-LZ	SRY (sex determining region Y)-box 6	protein-coding
Diff_Nuc54151	chr3	77649822	77649961	+	0	NA	Intergenic	Intergenic	1298918	NM_001310536	76089	Mm.31220	NM_001099624	ENSMUSG00000062232	Rapgef2	5830453M24Rik|CNRasGEF|Pdzgef1|RA-GEF-1|mKIAA0313|nRapGEP	Rap guanine nucleotide exchange factor (GEF) 2	protein-coding
Diff_Nuc37021	chr7	119021952	119022091	+	0	NA	Intergenic	B3|SINE|B2	-98530	NM_173739	233733	Mm.323322	NM_173739	ENSMUSG00000038296	Galnt18	2900011G21Rik|BC024988|Galntl4	UDP-N-acetyl-alpha-D-galactosamine:polypeptide N-acetylgalactosaminyltransferase 18	protein-coding
Diff_Nuc70736	chr9	51005492	51005631	+	0	NA	Intergenic	RMER12|LTR|ERVK	-16234	NM_011136	18985	Mm.897	NM_011136	ENSMUSG00000032053	Pou2af1	BOB.1|Bob-1|Bob1|OBF-1|OBF.1|OCA-B|OCAB	POU domain, class 2, associating factor 1	protein-coding
Diff_Nuc63716	chr1	28772722	28772861	+	0	NA	Intergenic	L1_Mus1|LINE|L1	64306	NM_001013750	210962	Mm.214178	NM_001013750	ENSMUSG00000048411	Gm597	-	predicted gene 597	protein-coding
Diff_Nuc76151	chr8	101804792	101804931	+	0	NA	intron (NM_001039154, intron 2 of 12)	B3|SINE|B2	135510	NM_001285913	12564	Mm.441131	NM_007667	ENSMUSG00000036510	Cdh8	AI851472|cad8	cadherin 8	protein-coding
Diff_Nuc37013	chr7	118573482	118573621	+	0	NA	Intergenic	Intergenic	-307362	NR_015573	75479	Mm.381620	NR_015573	ENSMUSG00000110424	1700012D14Rik	-	RIKEN cDNA 1700012D14 gene	ncRNA
Diff_Nuc26574	chr14	40150152	40150291	+	0	NA	intron (NM_008734, intron 1 of 9)	intron (NM_008734, intron 1 of 9)	-135496	NR_131973	432842	Mm.352566	NR_131973		LOC432842	-	uncharacterized LOC432842	ncRNA
Diff_Nuc65239	chr1	72929572	72929711	+	0	NA	Intergenic	(TCTA)n|Simple_repeat|Simple_repeat	-8202	NM_010518	16011	Mm.405761	NM_010518	ENSMUSG00000026185	Igfbp5	AI256729|AW208790|IGFBP-5|IGFBP-5P	insulin-like growth factor binding protein 5	protein-coding
Diff_Nuc30608	chr19	42503472	42503611	+	0	NA	intron (NM_145123, intron 1 of 14)	intron (NM_145123, intron 1 of 14)	2732	NM_145123	72832	Mm.313558	NM_145123	ENSMUSG00000042401	Crtac1	2810454P21Rik|AW047536|Crtac1B|Lotus	cartilage acidic protein 1	protein-coding
Diff_Nuc36500	chr7	101199382	101199521	+	0	NA	Intergenic	Intergenic	971062	NM_021427	58238	Mm.113787	NM_021427	ENSMUSG00000051515	Fam181b	A830059I20Rik|AB041569	family with sequence similarity 181, member B	protein-coding
Diff_Nuc31968	chr18	28086622	28086761	+	0	NA	Intergenic	Intergenic	-631974	NR_045398	320624	Mm.50107	NR_045398		4930474G06Rik	-	RIKEN cDNA 4930474G06 gene	ncRNA
Diff_Nuc52033	chr3	17797672	17797811	+	0	NA	Intergenic	MTD|LTR|MaLR	-50703	NM_029289	75439	Mm.27023	NM_029289	ENSMUSG00000027564	Cypt12	1700001F04Rik|AV209098	cysteine-rich perinuclear theca 12	protein-coding
Diff_Nuc27334	chr14	66951422	66951561	+	0	NA	Intergenic	Intergenic	-11642	NM_001310523	56471	Mm.35474	NM_019675	ENSMUSG00000022044	Stmn4	Lagl|R75359|RB3	stathmin-like 4	protein-coding
Diff_Nuc4511	chr13	113232812	113232951	+	0	NA	Intergenic	MIR|SINE|MIR	-21397	NM_010560	16195	Mm.4364	NM_010560	ENSMUSG00000021756	Il6st	5133400A03Rik|AA389424|BB405851|CD130|D13Ertd699e|gp130	interleukin 6 signal transducer	protein-coding
Diff_Nuc6898	chr12	69127382	69127521	+	0	NA	Intergenic	Intergenic	-803915	NM_207010	320772	Mm.227680	NM_207010	ENSMUSG00000034912	Mdga2	6720489L24Rik|9330209L04Rik|Adp|Mamdc1	MAM domain containing glycosylphosphatidylinositol anchor 2	protein-coding
Diff_Nuc29293	chr14	121101902	121102041	+	0	NA	Intergenic	Intergenic	-208445	NM_023579	70572	Mm.221452	NM_023579	ENSMUSG00000030662	Ipo5	1110011C18Rik|5730478E03Rik|AA409333|C76941|IMB3|Kpnb3|Ranbp5	importin 5	protein-coding
Diff_Nuc39549	chr6	47524422	47524561	+	0	NA	intron (NM_001146689, intron 3 of 19)	intron (NM_001146689, intron 3 of 19)	20538	NM_007971	14056	Mm.246688	NM_007971	ENSMUSG00000029687	Ezh2	Enx-1|Enx1h|KMT6|mKIAA4065	enhancer of zeste 2 polycomb repressive complex 2 subunit	protein-coding
Diff_Nuc20199	chr16	40358052	40358191	+	0	NA	Intergenic	L1MDa|LINE|L1	-1174818	NM_001347236	268890	Mm.310524	NM_175548	ENSMUSG00000061080	Lsamp	5430428I19|AW046674|B130007O04Rik|D930023J12Rik|Lam|Lamp	limbic system-associated membrane protein	protein-coding
Diff_Nuc17780	chr17	57161592	57161731	+	0	NA	3' UTR (NM_010613, exon 18 of 18)	3' UTR (NM_010613, exon 18 of 18)	9269	NM_010613	16549	Mm.34296	NM_010613	ENSMUSG00000007670	Khsrp	6330409F21Rik|Fbp2|Fubp2|Ksrp	KH-type splicing regulatory protein	protein-coding
Diff_Nuc6737	chr12	65367652	65367791	+	0	NA	Intergenic	Intergenic	208164	NM_001163271	623046	Mm.189552	NM_001163271	ENSMUSG00000043060	Fscb	EG623046	fibrous sheath CABYR binding protein	protein-coding
Diff_Nuc19673	chr16	24626232	24626371	+	0	NA	intron (NM_001145952, intron 4 of 11)	intron (NM_001145952, intron 4 of 11)	-95640	NM_001145954	210126	Mm.209385	NM_178665	ENSMUSG00000033306	Lpp	9430020K16Rik|AA959454|AU024130|B130055L10Rik|C79715|D630048H16	LIM domain containing preferred translocation partner in lipoma	protein-coding
Diff_Nuc59092	chr2	66976982	66977121	+	0	NA	Intergenic	Intergenic	-34840	NM_001033477	383709	Mm.244520	NM_001033477		Gm1322	-	predicted gene 1322	protein-coding
Diff_Nuc27896	chr14	84687282	84687421	+	0	NA	Intergenic	RLTR13D5|LTR|ERVK	-156019	NM_001013753	219228	Mm.153643	NM_001013753	ENSMUSG00000035566	Pcdh17	C030033F14Rik|Gm78	protocadherin 17	protein-coding
Diff_Nuc54501	chr3	88096312	88096451	+	0	NA	intron (NM_029801, intron 2 of 3)	intron (NM_029801, intron 2 of 3)	4379	NM_029801	76927	Mm.273330	NM_029801	ENSMUSG00000010538	Tsacc	1700021C14Rik|SIP	TSSK6 activating co-chaperone	protein-coding
Diff_Nuc49851	chr4	88398232	88398371	+	0	NA	Intergenic	L1VL1|LINE|L1	-2471	NM_001085528	435791	Mm.473673	NM_001085528	ENSMUSG00000094618	Gm13271	Ifnz|OTTMUSG00000011262	predicted gene 13271	protein-coding
Diff_Nuc46575	chr5	131123062	131123201	+	0	NA	intron (NM_021371, intron 3 of 5)	RMER4B|LTR|ERVK	198469	NM_021371	140904	Mm.40875	NM_021371	ENSMUSG00000060371	Caln1	9630012C17Rik|Cabp8|MNCb-0849	calneuron 1	protein-coding
Diff_Nuc24149	chr15	52322542	52322681	+	0	NA	Intergenic	Lx7|LINE|L1	195503	NM_172816	239436	Mm.208831	NM_172816	ENSMUSG00000022315	Slc30a8	C820002P14Rik|ZnT-8|ZnT8	solute carrier family 30 (zinc transporter), member 8	protein-coding
Diff_Nuc3049	chr13	68884242	68884381	+	0	NA	intron (NM_153534, intron 4 of 24)	intron (NM_153534, intron 4 of 24)	147995	NM_027035	69315	Mm.272795	NM_027035	ENSMUSG00000021534	1700001L19Rik	-	RIKEN cDNA 1700001L19 gene	protein-coding
Diff_Nuc42721	chr5	6235482	6235621	+	0	NA	Intergenic	RMER4B|LTR|ERVK	-486234	NM_027399	70358	Mm.85429	NM_027399	ENSMUSG00000015652	Steap1	2410007B19Rik|Prss24|Steap	six transmembrane epithelial antigen of the prostate 1	protein-coding
Diff_Nuc40313	chr6	71695942	71696081	+	0	NA	intron (NM_178608, intron 1 of 6)	MIRb|SINE|MIR	38336	NM_178608	52250	Mm.146332	NM_178608	ENSMUSG00000052852	Reep1	D6Ertd253e	receptor accessory protein 1	protein-coding
Diff_Nuc74766	chr8	59172182	59172321	+	0	NA	Intergenic	Intergenic	142320	NM_015791	50753	Mm.251174	NM_015791	ENSMUSG00000038206	Fbxo8	Fbx8	F-box protein 8	protein-coding
Diff_Nuc22540	chr15	8349552	8349691	+	0	NA	intron (NM_201232, intron 1 of 45)	intron (NM_201232, intron 1 of 45)	44842	NM_027707	71175	Mm.240329	NM_027707	ENSMUSG00000022141	Nipbl	Idn3	Nipped-B homolog (Drosophila)	protein-coding
Diff_Nuc36142	chr7	93111512	93111651	+	0	NA	Intergenic	Intergenic	-1589	NM_001105187	546980	Mm.469905	NM_001105187	ENSMUSG00000090774	Vmn2r74	EG546980	vomeronasal 2, receptor 74	protein-coding
Diff_Nuc10511	chr11	69398152	69398291	+	0	NA	intron (NM_011640, intron 1 of 10)	intron (NM_011640, intron 1 of 10)	4360	NM_001127233	22059	Mm.222	NM_011640	ENSMUSG00000059552	Trp53	Tp53|bbl|bfy|bhy|p44|p53	transformation related protein 53	protein-coding
Diff_Nuc45237	chr5	81211822	81211961	+	0	NA	Intergenic	Intergenic	-237705	NM_001347367	319387	Mm.273631	NM_198702	ENSMUSG00000037605	Adgrl3	5430402I23Rik|CIRL-3|D130075K09Rik|Gm1379|LEC3|Lphn3|mKIAA0768	adhesion G protein-coupled receptor L3	protein-coding
Diff_Nuc74908	chr8	62909172	62909311	+	0	NA	Intergenic	Intergenic	-75680	NM_011834	23923	Mm.35020	NM_011834	ENSMUSG00000057228	Aadat	AI875679|Aadt|KATII|Kat2|Kyat2|mKat-2	aminoadipate aminotransferase	protein-coding
Diff_Nuc11981	chr10	3555322	3555461	+	0	NA	intron (NM_001302794, intron 1 of 3)	intron (NM_001302794, intron 1 of 3)	2574	NM_001039652	18390	Mm.438000	NM_011013	ENSMUSG00000000766	Oprm1	M-OR-1|MOP-R|MOR-1|MOR-1O|Oprm|mor|muOR	opioid receptor, mu 1	protein-coding
Diff_Nuc59607	chr2	81223632	81223771	+	0	NA	Intergenic	L1Md_F2|LINE|L1	-670114	NM_175513	241514	Mm.119383	NM_175513	ENSMUSG00000070866	Zfp804a	C630007C17Rik|Znf804a	zinc finger protein 804A	protein-coding
Diff_Nuc65621	chr1	84775572	84775711	+	0	NA	intron (NM_133975, intron 5 of 40)	intron (NM_133975, intron 5 of 40)	60238	NM_133975	14897	Mm.209265	NM_133975	ENSMUSG00000026219	Trip12	1110036I07Rik|6720416K24Rik|AA410158|Gtl6|TRIP-12	thyroid hormone receptor interactor 12	protein-coding
Diff_Nuc63269	chr1	17509452	17509591	+	0	NA	Intergenic	ORR1B2|LTR|MaLR	-82461	NM_053191	94227	Mm.442452	NM_053191	ENSMUSG00000067780	Pi15	P24TI|P25TI|PI-15|SugarCrisp	peptidase inhibitor 15	protein-coding
Diff_Nuc41588	chr6	112096352	112096491	+	0	NA	Intergenic	L1M2|LINE|L1	-64281	NR_027865	67336	Mm.378014	NR_027865	ENSMUSG00000100219	1700054K19Rik	-	RIKEN cDNA 1700054K19 gene	ncRNA
Diff_Nuc35443	chr7	68338622	68338761	+	0	NA	Intergenic	Intergenic	421522	NR_045727	319752	Mm.294476	NR_045727		B230209E15Rik	-	RIKEN cDNA B230209E15 gene	ncRNA
Diff_Nuc28336	chr14	95164322	95164461	+	0	NA	Intergenic	Lx9|LINE|L1	-874493	NM_001346722	211712	Mm.37126	NM_001081377	ENSMUSG00000055421	Pcdh9	-	protocadherin 9	protein-coding
Diff_Nuc36740	chr7	108965192	108965331	+	0	NA	Intergenic	Intergenic	-1566	NM_008887	11859	Mm.5028	NM_008887	ENSMUSG00000007946	Phox2a	Arix|Phox2|Pmx2|Pmx2a|Px2a	paired-like homeobox 2a	protein-coding
Diff_Nuc32934	chr18	54039692	54039831	+	0	NA	intron (NM_152809, intron 1 of 12)	intron (NM_152809, intron 1 of 12)	17994	NM_152809	70425	Mm.368668	NM_152809	ENSMUSG00000073563	Csnk1g3	3300002K07Rik|C330049O21Rik	casein kinase 1, gamma 3	protein-coding
Diff_Nuc66292	chr1	107587502	107587641	+	0	NA	intron (NM_029349, intron 4 of 27)	intron (NM_029349, intron 4 of 27)	27133	NM_173187	227446	Mm.337339	NM_029349	ENSMUSG00000026319	2310035C23Rik	6430401N10|Kiaa1468|mKIAA1468	RIKEN cDNA 2310035C23 gene	protein-coding
Diff_Nuc56479	chr3	147360792	147360931	+	0	NA	Intergenic	Intergenic	845530	NM_001302958	70892	Mm.187793	NM_027594	ENSMUSG00000036745	Ttll7	1110049N09Rik|4921517B04Rik|C630030B20|mTTLL7	tubulin tyrosine ligase-like family, member 7	protein-coding
Diff_Nuc35356	chr7	66180112	66180251	+	0	NA	Intergenic	Intergenic	266609	NM_009728	11982	Mm.135129	NM_009728	ENSMUSG00000025324	Atp10a	Atp10c|pfatp	ATPase, class V, type 10A	protein-coding
Diff_Nuc50728	chr4	114664442	114664581	+	0	NA	Intergenic	Intergenic	-4678	NM_025647	66588	Mm.294159	NM_025647	ENSMUSG00000028719	Cmpk1	0610011D08Rik|CK|Cmpk|UMP-CMPk	cytidine monophosphate (UMP-CMP) kinase 1	protein-coding
Diff_Nuc32280	chr18	35749242	35749381	+	0	NA	intron (NM_010771, intron 14 of 14)	intron (NM_010771, intron 14 of 14)	-9010	NM_026420	67869	Mm.126534	NM_026420	ENSMUSG00000037058	Paip2	2310050K10Rik|AU045972	polyadenylate-binding protein-interacting protein 2	protein-coding
Diff_Nuc52389	chr3	28007402	28007541	+	0	NA	intron (NM_008875, intron 20 of 25)	intron (NM_008875, intron 20 of 25)	124378	NM_008875	18805	Mm.212039	NM_008875	ENSMUSG00000027695	Pld1	AA536939|C85393|Pld1a|Pld1b|mPLD1	phospholipase D1	protein-coding
Diff_Nuc58121	chr2	41885652	41885791	+	0	NA	intron (NM_053011, intron 2 of 90)	RMER13B|LTR|ERVK	417367	NR_105754	102465171		NR_105754	ENSMUSG00000098660	Mir6336	Gm27584|mmu-mir-6336	microRNA 6336	ncRNA
Diff_Nuc19414	chr16	15726792	15726931	+	0	NA	intron (NM_011159, intron 41 of 85)	intron (NM_011159, intron 41 of 85)	88902	NM_011159	19090	Mm.71	NM_011159	ENSMUSG00000022672	Prkdc	AI326420|AU019811|DNA-PKcs|DNAPDcs|DNAPK|DNPK1|DOXNPH|HYRC1|XRCC7|dxnph|p460|scid|slip	protein kinase, DNA activated, catalytic polypeptide	protein-coding
Diff_Nuc26480	chr14	37281292	37281431	+	0	NA	Intergenic	Intergenic	373210	NM_175008	218921	Mm.212464	NM_175008	ENSMUSG00000096405	4930474N05Rik	-	RIKEN cDNA 4930474N05 gene	protein-coding
Diff_Nuc67217	chr1	136310882	136311021	+	0	NA	Intergenic	Intergenic	-1004	NM_028320	72674	Mm.259976	NM_028320	ENSMUSG00000026457	Adipor1	2810031L11Rik|ACDCR1|CGI-45|Paqr1	adiponectin receptor 1	protein-coding
Diff_Nuc49582	chr4	80164422	80164561	+	0	NA	Intergenic	Intergenic	-315626	NM_031202	22178	Mm.30438	NM_031202	ENSMUSG00000005994	Tyrp1	Oca3|TRP-1|TRP1|Tyrp|b|brown|isa	tyrosinase-related protein 1	protein-coding
Diff_Nuc45514	chr5	87134572	87134711	+	0	NA	3' UTR (NM_172880, exon 10 of 10)	3' UTR (NM_172880, exon 10 of 10)	-29318	NM_177024	319875	Mm.253994	NM_177024	ENSMUSG00000035861	Tmprss11b	9930019B18Rik|Tmprss11bnl	transmembrane protease, serine 11B	protein-coding
Diff_Nuc62399	chr2	161627432	161627571	+	0	NA	intron (NM_021464, intron 11 of 29)	intron (NM_021464, intron 11 of 29)	-589048	NR_040617	77645	Mm.447752	NR_040617	ENSMUSG00000084919	Ptprtos	C330008G21Rik	protein tyrosine phosphatase, receptor type T, opposite strand	ncRNA
Diff_Nuc62129	chr2	152798692	152798831	+	0	NA	intron (NM_001083618, intron 2 of 14)	RLTR14|LTR|ERV1	10540	NM_001083618	74711	Mm.44746	NM_029064	ENSMUSG00000074673	Ttll9	1700016F23Rik|4930509O20Rik|AW046572	tubulin tyrosine ligase-like family, member 9	protein-coding
Diff_Nuc55270	chr3	111753832	111753971	+	0	NA	intron (NR_045362, intron 2 of 3)	Lx8|LINE|L1	69080	NR_045362	625585	Mm.389497	NR_045362	ENSMUSG00000104543	Gm6602	-	predicted gene 6602	ncRNA
Diff_Nuc38361	chr6	16752972	16753111	+	0	NA	Intergenic	L1_Mus2|LINE|L1	95400	NM_031198	21426	Mm.36217	NM_031198	ENSMUSG00000029553	Tfec	BB107417|Tcfec|bHLHe34	transcription factor EC	protein-coding
Diff_Nuc1277	chr13	10343002	10343141	+	0	NA	intron (NM_033269, intron 1 of 4)	ORR1A2|LTR|MaLR	16978	NM_033269	12671	Mm.342315	NM_033269	ENSMUSG00000046159	Chrm3	Chrm-3|M3|M3R	cholinergic receptor, muscarinic 3, cardiac	protein-coding
Diff_Nuc12967	chr10	30782992	30783131	+	0	NA	Intergenic	Intergenic	-220472	NM_013904	15214	Mm.103573	NM_013904	ENSMUSG00000019789	Hey2	CHF1|Herp1|Hrt2|bHLHb32|hesr2	hairy/enhancer-of-split related with YRPW motif 2	protein-coding
Diff_Nuc6830	chr12	67666942	67667081	+	0	NA	intron (NM_207010, intron 9 of 15)	RMER10B|LTR|ERVL	-281623	NM_001162933	238217	Mm.188575	NM_001162933	ENSMUSG00000060499	Rpl10l	EG238217	ribosomal protein L10-like	protein-coding
Diff_Nuc28456	chr14	98417762	98417901	+	0	NA	intron (NM_007826, intron 2 of 11)	intron (NM_007826, intron 2 of 11)	151153	NM_001038610	13134	Mm.320593	NM_007826	ENSMUSG00000055639	Dach1	Dac|Dach	dachshund 1 (Drosophila)	protein-coding
Diff_Nuc7611	chr12	90912762	90912901	+	0	NA	intron (NM_001198587, intron 14 of 19)	intron (NM_001198587, intron 14 of 19)	-138092	NM_001252074	18191	Mm.425766	NM_172544	ENSMUSG00000066392	Nrxn3	-	neurexin III	protein-coding
Diff_Nuc38746	chr6	27034992	27035131	+	0	NA	Intergenic	Lx8|LINE|L1	851689	NR_030420	735266		NR_030420	ENSMUSG00000076067	Mir592	Mirn592|mir-592|mmu-mir-592	microRNA 592	ncRNA
Diff_Nuc13064	chr10	32999602	32999741	+	0	NA	intron (NM_029726, intron 12 of 37)	L1_Mm|LINE|L1	-23508	NR_040657	442820	Mm.490725	NR_040657		D830005E20Rik	-	RIKEN cDNA D830005E20 gene	ncRNA
Diff_Nuc55466	chr3	117320862	117321001	+	0	NA	intron (NM_029425, intron 1 of 5)	intron (NM_029425, intron 1 of 5)	42786	NM_001305451	75769	Mm.72187	NM_029425	ENSMUSG00000033342	Plppr5	4833424O15Rik|Lppr5|PRG-5|Pap2d	phospholipid phosphatase related 5	protein-coding
Diff_Nuc73167	chr8	8038002	8038141	+	0	NA	Intergenic	Intergenic	622702	NM_010111	13642	Mm.209813	NM_010111	ENSMUSG00000001300	Efnb2	ELF-2|Epl5|Eplg5|Htk-L|LERK-5|Lerk5|NLERK-1	ephrin B2	protein-coding
Diff_Nuc40869	chr6	90318902	90319041	+	0	NA	promoter-TSS (NM_173002)	promoter-TSS (NM_173002)	-517	NM_173002	80292	Mm.100116	NM_030260	ENSMUSG00000034430	Zxdc	A930012H20|B930086F11Rik|BC003332	ZXD family zinc finger C	protein-coding
Diff_Nuc31325	chr18	8676002	8676141	+	0	NA	Intergenic	L1_Mus1|LINE|L1	-536783	NM_008058	14370	Mm.184289	NM_008058	ENSMUSG00000036904	Fzd8	Fz8	frizzled class receptor 8	protein-coding
Diff_Nuc69797	chr9	20232592	20232731	+	0	NA	TTS (NM_011753)	TTS (NM_011753)	31943	NM_011753	22688	Mm.107441	NM_011753	ENSMUSG00000063108	Zfp26	5033428C05Rik|KRAB15|Zfp-26|Zfp70|Zfp81-rs1|mKIAA4196|mkr-3|mszf14|mszf52	zinc finger protein 26	protein-coding
Diff_Nuc43854	chr5	41821902	41822041	+	0	NA	Intergenic	ORR1A3|LTR|MaLR	276959	NM_001310592	100972	Mm.41555	NM_027295	ENSMUSG00000029128	Rab28	2700023P08Rik|AW496496	RAB28, member RAS oncogene family	protein-coding
Diff_Nuc28746	chr14	106529132	106529271	+	0	NA	intron (NR_073203, intron 1 of 1)	L1Md_F2|LINE|L1	23786	NR_073203	212085	Mm.78128	NM_198601	ENSMUSG00000022113	Trim52	4921513B05Rik	tripartite motif-containing 52	protein-coding
Diff_Nuc39334	chr6	42918762	42918901	+	0	NA	Intergenic	Lx6|LINE|L1	13332	NM_146656	258650	Mm.377613	NM_146656	ENSMUSG00000073110	Olfr444	MOR261-2	olfactory receptor 444	protein-coding
Diff_Nuc49671	chr4	83065942	83066081	+	0	NA	intron (NM_029949, intron 2 of 8)	MER5C|DNA|MER1_type	2363	NM_029949	77634	Mm.271985	NM_029949	ENSMUSG00000028483	Snapc3	1810020H02Rik|4930558A07Rik|5031401C21Rik|AI414457|E030018J20Rik	small nuclear RNA activating complex, polypeptide 3	protein-coding
Diff_Nuc1593	chr13	19346922	19347061	+	0	NA	Intergenic	Lx9|LINE|L1	140691	NM_024270	76205	Mm.41940	NM_024270	ENSMUSG00000003062	Stard3nl	0610035N01Rik|6530409L22Rik|AW124774|MENTHO	STARD3 N-terminal like	protein-coding
Diff_Nuc76429	chr8	109423792	109423931	+	0	NA	intron (NM_011574, intron 4 of 16)	B1_Mus2|SINE|Alu	6321	NM_011574	21771	Mm.10665	NM_011574	ENSMUSG00000041438	Cirh1a	Cirhin|Naic|Teg-292|Tex292|Utp4	cirrhosis, autosomal recessive 1A (human)	protein-coding
Diff_Nuc75121	chr8	68852952	68853091	+	0	NA	intron (NM_175188, intron 4 of 7)	intron (NM_175188, intron 4 of 7)	-57179	NM_001166375	72925	Mm.380457	NM_175188	ENSMUSG00000036469	March1	2900024D24Rik|BB085186	membrane-associated ring finger (C3HC4) 1	protein-coding
Diff_Nuc23081	chr15	22224442	22224581	+	0	NA	Intergenic	L1Md_T|LINE|L1	420228	NM_001165971	545091	Mm.475598	NM_001165971		Gm5803	EG545091	predicted gene 5803	protein-coding
Diff_Nuc57143	chr2	8799542	8799681	+	0	NA	Intergenic	Intergenic	-311531	NR_038180	73438	Mm.23558	NR_038180	ENSMUSG00000085580	1700061F12Rik	-	RIKEN cDNA 1700061F12 gene	ncRNA
Diff_Nuc48139	chr4	34551702	34551841	+	0	NA	intron (NM_015824, intron 4 of 19)	Lx|LINE|L1	10420	NM_001159563	50793	Mm.399624	NM_015824	ENSMUSG00000040044	Orc3	Orc3l	origin recognition complex, subunit 3	protein-coding
Diff_Nuc69567	chr9	12160812	12160951	+	0	NA	Intergenic	MERVL_2A-int|LTR|ERVL	944974	NR_040755	78219	Mm.414868	NR_040755	ENSMUSG00000111830	4930568E12Rik	-	RIKEN cDNA 4930568E12 gene	ncRNA
Diff_Nuc72829	chr9	116468942	116469081	+	0	NA	Intergenic	Intergenic	-384530	NM_009371	21813	Mm.172346	NM_009371	ENSMUSG00000032440	Tgfbr2	1110020H15Rik|AU042018|DNIIR|RIIDN|TBR-II|TbetaR-II|TbetaRII	transforming growth factor, beta receptor II	protein-coding
Diff_Nuc1755	chr13	24178112	24178251	+	0	NA	intron (NM_026825, intron 24 of 37)	intron (NM_026825, intron 24 of 37)	-95098	NM_145399	214189	Mm.255667	NM_145399	ENSMUSG00000021337	Scgn	-	secretagogin, EF-hand calcium binding protein	protein-coding
Diff_Nuc64227	chr1	45528302	45528441	+	0	NA	intron (NM_007737, intron 1 of 53)	intron (NM_007737, intron 1 of 53)	31756	NM_007737	12832	Mm.10299	NM_007737	ENSMUSG00000026042	Col5a2	1110014L14Rik	collagen, type V, alpha 2	protein-coding
Diff_Nuc69308	chr9	4452942	4453081	+	0	NA	intron (NM_001113180, intron 14 of 16)	intron (NM_001113180, intron 14 of 16)	69474	NM_145609	78100	Mm.206549	NM_145609	ENSMUSG00000041124	Msantd4	8430410K20Rik|Mysantd4	Myb/SANT-like DNA-binding domain containing 4 with coiled-coils	protein-coding
Diff_Nuc5644	chr12	36571262	36571401	+	0	NA	Intergenic	Lx8|LINE|L1	-80877	NM_207531	403205	Mm.190508	NM_207531	ENSMUSG00000036231	Agr3	BCMP11|E030025L21Rik|Gm888	anterior gradient 3	protein-coding
Diff_Nuc21929	chr16	84046272	84046411	+	0	NA	Intergenic	Lx6|LINE|L1	-325047	NR_040567	75247	Mm.417813	NR_040567		4930553E22Rik	-	RIKEN cDNA 4930553E22 gene	ncRNA
Diff_Nuc59319	chr2	73020452	73020591	+	0	NA	intron (NM_030091, intron 4 of 7)	intron (NM_030091, intron 4 of 7)	31983	NM_030091	67059	Mm.22661	NM_025942	ENSMUSG00000027108	Ola1	2510025G09Rik|2810405J23Rik|2810409H07Rik|Gtpbp9|PTD004	Obg-like ATPase 1	protein-coding
Diff_Nuc16050	chr10	122511382	122511521	+	0	NA	intron (NM_153395, intron 1 of 33)	B1_Mus1|SINE|Alu	2110	NM_001163024	67074	Mm.169924	NM_153395	ENSMUSG00000034602	Mon2	2610528O22Rik|AW495628|Sf21|mKIAA1040	MON2 homolog, regulator of endosome to Golgi trafficking	protein-coding
Diff_Nuc21617	chr16	76091572	76091711	+	0	NA	Intergenic	Intergenic	-31217	NR_040575	78215	Mm.243885	NR_040575		4930578N18Rik	-	RIKEN cDNA 4930578N18 gene	ncRNA
Diff_Nuc24717	chr15	69687462	69687601	+	0	NA	Intergenic	Intergenic	-67132	NR_045071	100503580	Mm.404646	NR_045071		Gm19782	-	predicted gene, 19782	ncRNA
Diff_Nuc74733	chr8	58520222	58520361	+	0	NA	intron (NM_080438, intron 4 of 9)	intron (NM_080438, intron 4 of 9)	100669	NM_080438	110304	Mm.307061	NM_080438	ENSMUSG00000038257	Glra3	-	glycine receptor, alpha 3 subunit	protein-coding
Diff_Nuc35593	chr7	73352052	73352191	+	0	NA	Intergenic	Intergenic	97720	NM_001081163	269941	Mm.333916	NM_001081163	ENSMUSG00000032640	Chsy1	mKIAA0990	chondroitin sulfate synthase 1	protein-coding
Diff_Nuc14971	chr10	92650682	92650821	+	0	NA	intron (NM_146239, intron 1 of 16)	L1M2|LINE|L1	25221	NR_035452	100316689		NR_035452	ENSMUSG00000089214	Mir1931	mir-1931|mmu-mir-1931	microRNA 1931	ncRNA
Diff_Nuc60151	chr2	97258142	97258281	+	0	NA	intron (NM_001289742, intron 5 of 7)	intron (NM_001289742, intron 5 of 7)	-49603	NM_001289744	241568	Mm.241682	NM_178725	ENSMUSG00000050587	Lrrc4c	6430556C10Rik|NGL-1	leucine rich repeat containing 4C	protein-coding
Diff_Nuc33817	chr18	83239122	83239261	+	0	NA	Intergenic	Intergenic	-149239	NR_033307	75853	Mm.420737	NR_033307		4930592I03Rik	-	RIKEN cDNA 4930592I03 gene	ncRNA
Diff_Nuc46734	chr5	137507407	137507546	+	0	NA	exon (NM_001039385, exon 2 of 2)	exon (NM_001039385, exon 2 of 2)	1311	NM_001039385	381677	Mm.389697	NM_001039385	ENSMUSG00000037428	Vgf	Gm1052	VGF nerve growth factor inducible	protein-coding
Diff_Nuc60247	chr2	99041242	99041381	+	0	NA	Intergenic	L1M2|LINE|L1	1733497	NM_178725	241568	Mm.241682	NM_178725	ENSMUSG00000050587	Lrrc4c	6430556C10Rik|NGL-1	leucine rich repeat containing 4C	protein-coding
Diff_Nuc14939	chr10	91731352	91731491	+	0	NA	intron (NR_046027, intron 5 of 8)	intron (NR_046027, intron 5 of 8)	-103498	NR_028262	110333	Mm.429764	NR_028262		Rmst	100041799|AI853140|C230053E11Rik|D930049J19Rik|Dmt2|Gm3515|M2|Ncrms	rhabdomyosarcoma 2 associated transcript (non-coding RNA)	ncRNA
Diff_Nuc8070	chr12	104002462	104002601	+	0	NA	intron (NM_025666, intron 4 of 10)	intron (NM_025666, intron 4 of 10)	6346	NM_025666	66622	Mm.34261	NM_025666	ENSMUSG00000041712	Ubr7	5730410I19Rik|AA589405|AW557761	ubiquitin protein ligase E3 component n-recognin 7 (putative)	protein-coding
Diff_Nuc38828	chr6	28941232	28941371	+	0	NA	Intergenic	Intergenic	-31318	NR_029567	387237		NR_029567	ENSMUSG00000065469	Mir129-1	Mirn129-1|Mirn129b|miR-129b|mir-129-1	microRNA 129-1	ncRNA
Diff_Nuc70532	chr9	43214692	43214831	+	0	NA	Intergenic	B4A|SINE|B4	95915	NM_023655	72169	Mm.273277	NM_023655	ENSMUSG00000032013	Trim29	1110047J21Rik|2810431N19Rik|4732461M22Rik|AI119726	tripartite motif-containing 29	protein-coding
Diff_Nuc23878	chr15	45299052	45299191	+	0	NA	Intergenic	L1VL2|LINE|L1	-352641	NM_026200	67498	Mm.300079	NM_026200	ENSMUSG00000022342	Kcnv1	2700023A03Rik|vibe	potassium channel, subfamily V, member 1	protein-coding
Diff_Nuc50179	chr4	97813242	97813381	+	0	NA	Intergenic	Intergenic	236645	NM_053157	94043	Mm.331719	NM_053157	ENSMUSG00000028563	Tm2d1	2310026L18Rik|AA990549|Bbp	TM2 domain containing 1	protein-coding
Diff_Nuc38030	chr6	7448462	7448601	+	0	NA	Intergenic	Intergenic	-56354	NM_001311060	21333	Mm.1440	NM_009311	ENSMUSG00000061762	Tac1	4930528L02Rik|NK-1|NK1|Nkna|PPT-A|PPTA|SP	tachykinin 1	protein-coding
Diff_Nuc22300	chr16	97043372	97043511	+	0	NA	intron (NM_031174, intron 6 of 32)	intron (NM_031174, intron 6 of 32)	348901	NM_031174	13508	Mm.102437	NM_031174	ENSMUSG00000050272	Dscam	4932410A21Rik	Down syndrome cell adhesion molecule	protein-coding
Diff_Nuc19711	chr16	25302112	25302251	+	0	NA	intron (NM_175165, intron 1 of 5)	intron (NM_175165, intron 1 of 5)	15278	NM_175165	71338	Mm.126851	NM_175165	ENSMUSG00000048399	Tprg	5430420C16Rik|Tprg1	transformation related protein 63 regulated	protein-coding
Diff_Nuc68158	chr1	163155802	163155941	+	0	NA	Intergenic	RMER6C|LTR|ERVK	25470	NR_130150	11758	Mm.186185	NM_007453	ENSMUSG00000026701	Prdx6	1-Cys Prx|1-cysPrx|9430088D19Rik|AA690119|Aop2|Brp-12|CP-3|GPx|Ltw-4|Ltw4|Lvtw-4|NSGPx|ORF06|Prdx5|aiPLA2	peroxiredoxin 6	protein-coding
Diff_Nuc34214	chr7	9867662	9867801	+	0	NA	intron (NM_198961, intron 1 of 5)	intron (NM_198961, intron 1 of 5)	1004	NM_198961	381838	Mm.247383	NM_198961	ENSMUSG00000053720	Vmn2r43	EC2-V2R|Gm1961	vomeronasal 2, receptor 43	protein-coding
Diff_Nuc19205	chr16	8915792	8915931	+	0	NA	Intergenic	B3|SINE|B2	85668	NM_001081400	69053	Mm.390868	NM_001081400	ENSMUSG00000022507	1810013L24Rik	1110017P05Rik|3010002C02Rik|AA792997|AW124177|Gm19906|R74903	RIKEN cDNA 1810013L24 gene	protein-coding
Diff_Nuc19796	chr16	27644012	27644151	+	0	NA	Intergenic	Intergenic	-205935	NR_033475	100038623	Mm.387135	NR_033475		Gm10823	ENSMUSG00000075290	predicted gene 10823	ncRNA
Diff_Nuc68112	chr1	161965842	161965981	+	0	NA	Intergenic	Intergenic	-8600	NR_028111	67647	Mm.171518	NM_001024470	ENSMUSG00000090394	4930523C07Rik	-	RIKEN cDNA 4930523C07 gene	protein-coding
Diff_Nuc26749	chr14	47567572	47567711	+	0	NA	intron (NM_028966, intron 2 of 11)	intron (NM_028966, intron 2 of 11)	6962	NR_105813	102465206		NR_105813	ENSMUSG00000099036	Mir378c	Gm27930|mmu-mir-378c	microRNA 378c	ncRNA
Diff_Nuc76115	chr8	100890382	100890521	+	0	NA	Intergenic	Intergenic	-645336	NR_110579	100873092	Mm.414599	NR_110579	ENSMUSG00000089819	Gm15679	OTTMUSG00000025218	predicted gene 15679	ncRNA
Diff_Nuc40549	chr6	78466772	78466911	+	0	NA	Intergenic	(TTTCC)n|Simple_repeat|Simple_repeat	-47973	NM_011260	19695	Mm.252385	NM_011260	ENSMUSG00000030017	Reg3g	AI449515|REG-3-gamma|reg III-gamma	regenerating islet-derived 3 gamma	protein-coding
Diff_Nuc4920	chr12	7962922	7963061	+	0	NA	Intergenic	Intergenic	-21492	NM_009693	238055	Mm.221239	NM_009693	ENSMUSG00000020609	Apob	AI315052|Apo B-100|apob-100|apob-48	apolipoprotein B	protein-coding
Diff_Nuc76322	chr8	105825712	105825851	+	0	NA	Intergenic	Lx5|LINE|L1	45653	NR_036588	69794	Mm.396139	NR_036588	ENSMUSG00000110340	1600027J07Rik	-	RIKEN cDNA 1600027J07 gene	ncRNA
Diff_Nuc53984	chr3	74434002	74434141	+	0	NA	Intergenic	L1_Mur3|LINE|L1	513623	NM_001310529	213234	Mm.80075	NM_172515	ENSMUSG00000034151	Zbbx	4931432L23	zinc finger, B-box domain containing	protein-coding
Diff_Nuc22117	chr16	90103282	90103421	+	0	NA	Intergenic	Intergenic	-39131	NR_033476	100038709	Mm.484070	NR_033476		Gm10789	ENSMUSG00000074924	predicted gene 10789	ncRNA
Diff_Nuc20640	chr16	52007442	52007581	+	0	NA	Intergenic	Intergenic	-24151	NM_001033238	208650	Mm.328206	NM_001033238	ENSMUSG00000022637	Cblb	AI429560|AI851073|Cbl-b	Casitas B-lineage lymphoma b	protein-coding
Diff_Nuc15237	chr10	100761422	100761561	+	0	NA	Intergenic	Intergenic	-382630	NM_001205098	67569	Mm.25252	NM_026243	ENSMUSG00000019888	Mgat4c	9130411I17Rik|GntIVh	MGAT4 family, member C	protein-coding
Diff_Nuc1819	chr13	25880392	25880531	+	0	NA	Intergenic	Lx7|LINE|L1	177724	NR_045062	100503530	Mm.86763	NR_045062	ENSMUSG00000086531	Gm11351	OTTMUSG00000000620	predicted gene 11351	ncRNA
Diff_Nuc37525	chr7	136851622	136851761	+	0	NA	Intergenic	Lx6|LINE|L1	116314	NM_172255	207425	Mm.229323	NM_172255	ENSMUSG00000042055	Wdr11	2900055P10Rik|AW489876|Brwd2|mKIAA1351	WD repeat domain 11	protein-coding
Diff_Nuc17273	chr17	38485902	38486041	+	0	NA	Intergenic	IAPLTR4_I|LTR|ERVK	13867	NM_146807	258803	Mm.223230	NM_146807	ENSMUSG00000096840	Olfr136	MOR256-7	olfactory receptor 136	protein-coding
Diff_Nuc28145	chr14	90597532	90597671	+	0	NA	intron (NR_045712, intron 5 of 8)	L1Md_F2|LINE|L1	70903	NR_045712	74967	Mm.390704	NR_045712		4930474H20Rik	-	RIKEN cDNA 4930474H20 gene	ncRNA
Diff_Nuc58833	chr2	59796722	59796861	+	0	NA	intron (NM_001001182, intron 10 of 35)	intron (NM_001001182, intron 10 of 35)	-76128	NM_028118	72137	Mm.288734	NM_028118	ENSMUSG00000026988	Wdsub1	1700048E19Rik|2610014F08Rik	WD repeat, SAM and U-box domain containing 1	protein-coding
Diff_Nuc67072	chr1	131344812	131344951	+	0	NA	intron (NM_172485, intron 2 of 27)	Lx3B|LINE|L1	175000	NM_172485	210417	Mm.380518	NM_172485	ENSMUSG00000042581	Thsd7b	1700074E13Rik|B930082A18|D130067I03Rik	thrombospondin, type I, domain containing 7B	protein-coding
Diff_Nuc53831	chr3	70422652	70422791	+	0	NA	Intergenic	Intergenic	188492	NR_040556	625901	Mm.366028	NR_040556	ENSMUSG00000097252	Gm6634	EG625901	predicted gene 6634	ncRNA
Diff_Nuc67518	chr1	145592112	145592251	+	0	NA	exon (NM_001038593, exon 3 of 4)	exon (NM_001038593, exon 3 of 4)	4604	NM_001038594	69367	Mm.272727	NM_023505	ENSMUSG00000018196	Glrx2	1700010P22Rik|AI645710|Grx2	glutaredoxin 2 (thioltransferase)	protein-coding
Diff_Nuc19797	chr16	27682622	27682761	+	0	NA	Intergenic	Intergenic	-167325	NR_033475	100038623	Mm.387135	NR_033475		Gm10823	ENSMUSG00000075290	predicted gene 10823	ncRNA
Diff_Nuc33237	chr18	63490062	63490201	+	0	NA	intron (NM_001039485, intron 1 of 53)	L1MA8|LINE|L1	56706	NM_001039485	667742	Mm.158720	NM_172629	ENSMUSG00000041482	Piezo2	5930434P17|9030411M15Rik|9430028L06Rik|Fam38b|Fam38b2	piezo-type mechanosensitive ion channel component 2	protein-coding
Diff_Nuc8776	chr11	13175552	13175691	+	0	NA	Intergenic	Intergenic	-810658	NM_001282993	12808	Mm.22847	NM_172496	ENSMUSG00000020173	Cobl	-	cordon-bleu WH2 repeat	protein-coding
Diff_Nuc19774	chr16	27088432	27088571	+	0	NA	Intergenic	ID_B1|SINE|B4	-96763	NM_001285918	239789	Mm.326909	NM_001013761	ENSMUSG00000068428	Gmnc	Gemc1|Gm1778|Gm606	geminin coiled-coil domain containing	protein-coding
Diff_Nuc51252	chr4	139973912	139974051	+	0	NA	Intergenic	Intergenic	-171255	NM_198610	230868	Mm.298731	NM_198610	ENSMUSG00000040972	Igsf21	BC055811|Gm141	immunoglobulin superfamily, member 21	protein-coding
Diff_Nuc71592	chr9	78218492	78218631	+	0	NA	Intergenic	MT2C_Mm|LTR|ERVL	-2555	NM_025274	434423	Mm.139314	NM_025274	ENSMUSG00000060461	Dppa5a	AA536857|Dppa5|Esg1|ecat2	developmental pluripotency associated 5A	protein-coding
Diff_Nuc57779	chr2	30668172	30668311	+	0	NA	intron (NM_170592, intron 1 of 3)	RLTR4_MM-int|LTR|ERV1	4744	NM_170592	66617	Mm.33167	NM_170592	ENSMUSG00000026857	Ntmt1	2610205E22Rik|AL033331|AL033332|Mettl11a|NTM1A	N-terminal Xaa-Pro-Lys N-methyltransferase 1	protein-coding
Diff_Nuc16593	chr17	13956272	13956411	+	0	NA	intron (NM_010806, intron 6 of 32)	intron (NM_010806, intron 6 of 32)	-57940	NM_022311	21646	Mm.486358	NM_022311	ENSMUSG00000038347	Tcte2	AI429268|Tcte-2	t-complex-associated testis expressed 2	protein-coding
Diff_Nuc38152	chr6	11196882	11197021	+	0	NA	Intergenic	L1M4b|LINE|L1	-272573	NR_033776	57866	Mm.4397	NR_033776		AA545190	-	EST AA545190	ncRNA
Diff_Nuc40508	chr6	77416602	77416741	+	0	NA	intron (NM_009819, intron 7 of 18)	intron (NM_009819, intron 7 of 18)	-84202	NR_045141	70753	Mm.490700	NR_045141	ENSMUSG00000108077	6330415B21Rik	-	RIKEN cDNA 6330415B21 gene	ncRNA
Diff_Nuc35986	chr7	87660212	87660351	+	0	NA	intron (NM_001042527, intron 1 of 21)	intron (NM_001042527, intron 1 of 21)	19603	NM_007550	12144	Mm.12932	NM_007550	ENSMUSG00000030528	Blm	-	Bloom syndrome, RecQ helicase-like	protein-coding
Diff_Nuc47313	chr4	11001342	11001481	+	0	NA	intron (NM_001085493, intron 1 of 8)	L1MC4|LINE|L1	1941	NM_001085493	76947	Mm.275265	NM_001085493	ENSMUSG00000050323	Ndufaf6	2310030N02Rik	NADH dehydrogenase (ubiquinone) complex I, assembly factor 6	protein-coding
Diff_Nuc14214	chr10	67186672	67186811	+	0	NA	Intergenic	Intergenic	-175038	NM_001005419	211488	Mm.297250	NM_001005419	ENSMUSG00000057134	Ado	Gm237	2-aminoethanethiol (cysteamine) dioxygenase	protein-coding
Diff_Nuc18094	chr17	66384092	66384231	+	0	NA	intron (NM_001025572, intron 5 of 12)	L1_Mm|LINE|L1	42225	NM_001025572	106585	Mm.34706	NM_001025572	ENSMUSG00000034647	Ankrd12	2900001A12Rik|AI447928|ANCO-2|AV347965|GAC-1|mKIAA0874	ankyrin repeat domain 12	protein-coding
Diff_Nuc1304	chr13	11396102	11396241	+	0	NA	Intergenic	ETnERV2-int|LTR|ERVK	-218148	NR_027813	664793	Mm.410565	NR_027813		Zp4-ps	EG664793|Zp4|Zpb	zona pellucida glycoprotein 4, pseudogene	pseudo
Diff_Nuc11847	chr11	116034647	116034786	+	0	NA	3' UTR (NM_001271898, exon 14 of 14)	3' UTR (NM_001271898, exon 14 of 14)	-5224	NM_172571	217335	Mm.35241	NM_172571	ENSMUSG00000020776	Fbf1	1110033G01Rik|5930413D20|mKIAA1863	Fas (TNFRSF6) binding factor 1	protein-coding
Diff_Nuc72564	chr9	107639952	107640091	+	0	NA	Intergenic	B1_Mur1|SINE|Alu	-27215	NM_011349	20350	Mm.12903	NM_011349	ENSMUSG00000034684	Sema3f	Sema4|Semak	sema domain, immunoglobulin domain (Ig), short basic domain, secreted, (semaphorin) 3F	protein-coding
Diff_Nuc35207	chr7	62188522	62188661	+	0	NA	intron (NM_178705, intron 1 of 11)	intron (NM_178705, intron 1 of 11)	97976	NM_178705	233271	Mm.387344	NM_178705	ENSMUSG00000063297	Luzp2	9330154K17Rik|D130073E01	leucine zipper protein 2	protein-coding
Diff_Nuc53869	chr3	71521582	71521721	+	0	NA	Intergenic	RMER15|LTR|ERVL	-910438	NR_040556	625901	Mm.366028	NR_040556	ENSMUSG00000097252	Gm6634	EG625901	predicted gene 6634	ncRNA
Diff_Nuc15778	chr10	113049002	113049141	+	0	NA	Intergenic	Intergenic	-682989	NM_001033474	382423	Mm.431239	NM_001033474	ENSMUSG00000074748	Atxn7l3b	4921506J03Rik|6230409E21Rik|AI315132|ENSMUSG00000074747	ataxin 7-like 3B	protein-coding
Diff_Nuc63649	chr1	27121012	27121151	+	0	NA	Intergenic	Intergenic	-376776	NM_001033764	210940	Mm.297614	NM_001033764	ENSMUSG00000073722	4931408C20Rik	-	RIKEN cDNA 4931408C20 gene	protein-coding
Diff_Nuc70061	chr9	28571832	28571971	+	0	NA	intron (NM_177906, intron 3 of 7)	intron (NM_177906, intron 3 of 7)	973047	NM_177906	330908	Mm.379474	NM_177906	ENSMUSG00000062257	Opcml	2900075O15Rik|3732419F12|AI844366|B930023M13Rik|C230027C17|Gm181|Obcam	opioid binding protein/cell adhesion molecule-like	protein-coding
Diff_Nuc76404	chr8	108429642	108429781	+	0	NA	intron (NM_173432, intron 1 of 2)	B1_Mus2|SINE|Alu	5337	NM_173432	244631	Mm.27627	NM_173432	ENSMUSG00000048310	Pskh1	AW539964|E130013P03Rik|b2b1230Clo	protein serine kinase H1	protein-coding
Diff_Nuc57909	chr2	36520442	36520581	+	0	NA	Intergenic	ETnERV2-int|LTR|ERVK	-23013	NM_146938	258940	Mm.223338	NM_146938	ENSMUSG00000094764	Olfr346	MOR136-11	olfactory receptor 346	protein-coding
Diff_Nuc38810	chr6	28489632	28489771	+	0	NA	intron (NM_019776, intron 9 of 23)	MTE2b|LTR|MaLR	59353	NM_019776	56463	Mm.439987	NM_019776	ENSMUSG00000001424	Snd1	AL033314|Tudor-SN	staphylococcal nuclease and tudor domain containing 1	protein-coding
Diff_Nuc36065	chr7	90467722	90467861	+	0	NA	Intergenic	(CAAT)n|Simple_repeat|Simple_repeat	170811	NM_177895	330578	Mm.5796	NM_177895	ENSMUSG00000053528	A530021J07Rik	-	Riken cDNA A530021J07 gene	protein-coding
Diff_Nuc35037	chr7	56243632	56243771	+	0	NA	intron (NM_001111016, intron 2 of 38)	intron (NM_001111016, intron 2 of 38)	29258	NM_001111016	78286	Mm.333881	NM_175272	ENSMUSG00000052512	Nav2	5330421F07Rik|AU067780|BQ960892|HELAD1|POMFIL2|RAINB1|RAINB2|Unc53H2|mKIAA3015	neuron navigator 2	protein-coding
Diff_Nuc74150	chr8	42119612	42119751	+	0	NA	intron (NM_001005863, intron 5 of 13)	intron (NM_001005863, intron 5 of 13)	7604	NM_001005865	102103	Mm.149438	NM_001005863	ENSMUSG00000045636	Mtus1	AI481402|ATBP135|Atip1|B430010I23Rik|B430305I03Rik|C85752|Cctsg1-440|MD44|MTSG1|mKIAA1288	mitochondrial tumor suppressor 1	protein-coding
Diff_Nuc53949	chr3	73331922	73332061	+	0	NA	intron (NR_040557, intron 2 of 4)	intron (NR_040557, intron 2 of 4)	-46418	NR_040547	74693	Mm.292227	NR_040547	ENSMUSG00000102362	4930509J09Rik	-	RIKEN cDNA 4930509J09 gene	ncRNA
Diff_Nuc4465	chr13	111876952	111877091	+	0	NA	Intergenic	Intergenic	142618	NR_045908	73129	Mm.417826	NR_045908		3110015C05Rik	-	RIKEN cDNA 3110015C05 gene	ncRNA
Diff_Nuc9212	chr11	26185742	26185881	+	0	NA	Intergenic	Intergenic	-75235	NR_027973	70626	Mm.379180	NM_027486		5730522E02Rik	-	RIKEN cDNA 5730522E02 gene	ncRNA
Diff_Nuc76213	chr8	103198562	103198701	+	0	NA	Intergenic	Intergenic	1258057	NR_132435	234624	Mm.124595	NM_175479	ENSMUSG00000052479	A330008L17Rik	-	RIKEN cDNA A330008L17 gene	ncRNA
Diff_Nuc27011	chr14	57024412	57024551	+	0	NA	exon (NM_001033043, exon 2 of 37)	exon (NM_001033043, exon 2 of 37)	2947	NM_001033043	30054	Mm.287783	NM_001033043	ENSMUSG00000000365	Rnf17	MMIP-2|Mmip2|TDRD4	ring finger protein 17	protein-coding
Diff_Nuc16887	chr17	22090032	22090171	+	0	NA	intron (NM_001199048, intron 2 of 5)	intron (NM_001199048, intron 2 of 5)	9330	NM_001199048	73233	Mm.311219	NM_001199048	ENSMUSG00000071267	Zfp942	3110048L19Rik	zinc finger protein 942	protein-coding
Diff_Nuc21407	chr16	71532482	71532621	+	0	NA	Intergenic	Intergenic	282402	NR_040576	78221	Mm.399298	NR_040576		4930567J20Rik	-	RIKEN cDNA 4930567J20 gene	ncRNA
Diff_Nuc17107	chr17	31207332	31207471	+	0	NA	intron (NM_009593, intron 2 of 14)	intron (NM_009593, intron 2 of 14)	12762	NM_009593	11307	Mm.15691	NM_009593	ENSMUSG00000024030	Abcg1	AW413978|Abc8|White	ATP-binding cassette, sub-family G (WHITE), member 1	protein-coding
Diff_Nuc14946	chr10	91896622	91896761	+	0	NA	Intergenic	GA-rich|Low_complexity|Low_complexity	-58573	NR_046027	627800	Mm.391417	NR_046027	ENSMUSG00000098040	Gm20757	-	predicted gene, 20757	ncRNA
Diff_Nuc74777	chr8	59536142	59536281	+	0	NA	Intergenic	Intergenic	263445	NR_110474	102636514		NR_110474	ENSMUSG00000100510	Uph	-	upperhand	ncRNA
Diff_Nuc31659	chr18	19228192	19228331	+	0	NA	Intergenic	Lx7|LINE|L1	932337	NM_007882	13507	Mm.89935	NM_007882	ENSMUSG00000059898	Dsc3	5430426I24Rik	desmocollin 3	protein-coding
Diff_Nuc23210	chr15	25348982	25349121	+	0	NA	intron (NR_027376, intron 1 of 1)	GA-rich|Low_complexity|Low_complexity	5104	NR_027376	432939	Mm.146555	NM_001013791		Gm5468	100040583|EG432939	predicted gene 5468	ncRNA
Diff_Nuc49599	chr4	80764222	80764361	+	0	NA	Intergenic	ORR1E|LTR|MaLR	207701	NM_026821	52829	Mm.273986	NM_026821	ENSMUSG00000048706	Lurap1l	1110029A09Rik|AV077978|AV175137|D4Bwg0951e|WI-13707|bM350F23.1	leucine rich adaptor protein 1-like	protein-coding
Diff_Nuc23650	chr15	39232752	39232891	+	0	NA	intron (NM_053271, intron 5 of 26)	L1MEa|LINE|L1	202989	NM_053271	116838	Mm.309296	NM_053271	ENSMUSG00000037386	Rims2	2810036I15Rik|AW048769|RIM2|Rab3ip2|Rim2(+40A)|Rim2(+44A)|Rim2(+4A)|Serg2|Syt3-rs|mKIAA0751	regulating synaptic membrane exocytosis 2	protein-coding
Diff_Nuc64849	chr1	62413892	62414031	+	0	NA	intron (NM_001081050, intron 18 of 22)	intron (NM_001081050, intron 18 of 22)	-335930	NM_001077406	18187	Mm.266341	NM_010939	ENSMUSG00000025969	Nrp2	1110048P06Rik|Np-2|Np2|Npn-2|Npn2	neuropilin 2	protein-coding
Diff_Nuc38994	chr6	33419452	33419591	+	0	NA	intron (NM_009148, intron 9 of 17)	B1_Mur4|SINE|Alu	220371	NM_009148	20336	Mm.265512	NM_009148	ENSMUSG00000029763	Exoc4	C78892|Sec8|Sec8l1	exocyst complex component 4	protein-coding
Diff_Nuc64586	chr1	54795562	54795701	+	0	NA	intron (NM_001081433, intron 10 of 27)	intron (NM_001081433, intron 10 of 27)	-181103	NM_001163314	241062	Mm.103539	NM_175508	ENSMUSG00000073678	Pgap1	5033403E17Rik|9030223K07Rik|A530084K22|D230012E17Rik|oto	post-GPI attachment to proteins 1	protein-coding
Diff_Nuc14269	chr10	69088012	69088151	+	0	NA	intron (NM_170730, intron 1 of 17)	L1Md_F2|LINE|L1	91625	NM_146005	11735	Mm.235960	NM_009670	ENSMUSG00000069601	Ank3	2900054D09Rik|AI314020|Ank-3|AnkG|Ankyrin-3|Ankyrin-G	ankyrin 3, epithelial	protein-coding
Diff_Nuc29057	chr14	114003622	114003761	+	0	NA	Intergenic	Intergenic	-1227496	NR_045661	75822	Mm.410813	NR_045661		4930524C18Rik	-	RIKEN cDNA 4930524C18 gene	ncRNA
Diff_Nuc3852	chr13	91818772	91818911	+	0	NA	intron (NM_024186, intron 8 of 15)	Lx2B|LINE|L1	-62285	NM_028790	74156	Mm.275963	NM_028790	ENSMUSG00000021620	Acot12	1300004O04Rik|4930449F15Rik|AV027244|Cach|mCACH-1	acyl-CoA thioesterase 12	protein-coding
Diff_Nuc23889	chr15	45588642	45588781	+	0	NA	Intergenic	L1Md_F2|LINE|L1	-567420	NR_045509	71120	Mm.158571	NR_045509	ENSMUSG00000099751	1700022A22Rik	4933413D07Rik	RIKEN cDNA 1700022A22 gene	ncRNA
Diff_Nuc70942	chr9	57942712	57942851	+	0	NA	intron (NM_001166282, intron 4 of 19)	L1MA9|LINE|L1	7251	NM_029212	382077	Mm.335193	NM_029212	ENSMUSG00000037716	Ccdc33	4930535E21Rik|Gm1117|Tzip1	coiled-coil domain containing 33	protein-coding
Diff_Nuc61290	chr2	128624162	128624301	+	0	NA	intron (NM_008587, intron 18 of 18)	intron (NM_008587, intron 18 of 18)	-19808	NM_028248	72477	Mm.259688	NM_028248	ENSMUSG00000014353	Tmem87b	2610301K12Rik|2810431I02Rik|AU014804	transmembrane protein 87B	protein-coding
Diff_Nuc60625	chr2	109476892	109477031	+	0	NA	Intergenic	Intergenic	-37896	NM_007540	12064	Mm.1442	NM_007540	ENSMUSG00000048482	Bdnf	-	brain derived neurotrophic factor	protein-coding
Diff_Nuc21044	chr16	62827982	62828121	+	0	NA	intron (NM_026577, intron 2 of 9)	intron (NM_026577, intron 2 of 9)	13549	NM_026588	68159	Mm.386793	NM_026588	ENSMUSG00000047854	Stx19	A030009B12Rik	syntaxin 19	protein-coding
Diff_Nuc58398	chr2	47820212	47820351	+	0	NA	Intergenic	L1Md_F|LINE|L1	-849348	NM_007396	11480	Mm.314338	NM_007396	ENSMUSG00000052155	Acvr2a	ActrIIa|Acvr2|TactrII	activin receptor IIA	protein-coding
Diff_Nuc14997	chr10	93335912	93336051	+	0	NA	intron (NM_019648, intron 5 of 11)	intron (NM_019648, intron 5 of 11)	17966	NM_019648	56307	Mm.289329	NM_019648	ENSMUSG00000036112	Metap2	4930584B20Rik|A930035J23Rik|AI047573|AL024412|AU014659|Amp2|Mnpep|p67|p67eIF2	methionine aminopeptidase 2	protein-coding
Diff_Nuc38842	chr6	29613712	29613851	+	0	NA	Intergenic	Intergenic	-30433	NM_001301407	232670	Mm.225289	NM_146173	ENSMUSG00000001763	Tspan33	1300010A20Rik|Pen	tetraspanin 33	protein-coding
Diff_Nuc14461	chr10	75908502	75908641	+	0	NA	Intergenic	Intergenic	-2914	NM_001282992	18541	Mm.251794	NM_008787	ENSMUSG00000001151	Pcnt	AW476095|C86676|KEN|Pcnt2|kendrin|m239Asp|m275Asp	pericentrin (kendrin)	protein-coding
Diff_Nuc32645	chr18	46569992	46570131	+	0	NA	Intergenic	MTA_Mm|LTR|MaLR	55409	NR_045438	72076	Mm.82766	NM_028086		Mospd4	2010013H21Rik	motile sperm domain containing 4	pseudo
Diff_Nuc13137	chr10	34435292	34435431	+	0	NA	Intergenic	Lx7|LINE|L1	232155	NM_010237	14302	Mm.332432	NM_010237	ENSMUSG00000019779	Frk	BSK|BSK/IYK|C85044|GTK|RAK	fyn-related kinase	protein-coding
Diff_Nuc68844	chr1	183990922	183991061	+	0	NA	Intergenic	Intergenic	-40880	NM_010135	13800	Mm.87759	NM_008680	ENSMUSG00000022995	Enah	Mena|NDPP-1|Ndpp1|WBP8	enabled homolog (Drosophila)	protein-coding
Diff_Nuc11073	chr11	87760072	87760211	+	0	NA	Intergenic	MurERV4-int|LTR|ERVK	-31636	NM_146412	258407	Mm.271337	NM_146412	ENSMUSG00000060787	Olfr464	MOR240-2	olfactory receptor 464	protein-coding
Diff_Nuc12346	chr10	14268162	14268301	+	0	NA	Intergenic	L1MA7|LINE|L1	-3389	NM_001002268	215798	Mm.440142	NM_001002268	ENSMUSG00000039116	Adgrg6	1190004A11Rik|AI449247|AW045736|DREG|Gm222|Gpr126	adhesion G protein-coupled receptor G6	protein-coding
Diff_Nuc38645	chr6	24604762	24604901	+	0	NA	intron (NM_001167745, intron 1 of 4)	B3|SINE|B2	10164	NM_001167745	73178	Mm.1574	NM_028459	ENSMUSG00000029684	Wasl	2900021I12Rik|3110031I02Rik|N-WASP	Wiskott-Aldrich syndrome-like (human)	protein-coding
Diff_Nuc74374	chr8	47807732	47807871	+	0	NA	Intergenic	ID_B1|SINE|B4	17068	NR_045750	100503498	Mm.187358	NR_045750	ENSMUSG00000097534	Gm16675	-	predicted gene, 16675	ncRNA
Diff_Nuc44017	chr5	46618192	46618331	+	0	NA	Intergenic	Intergenic	-294613	NR_110478	78106	Mm.243807	NR_110478	ENSMUSG00000106602	4930405L22Rik	-	RIKEN cDNA 4930405L22 gene	ncRNA
Diff_Nuc34247	chr7	11783482	11783621	+	0	NA	Intergenic	MTC|LTR|MaLR	-32054	NM_001100186	545913	Mm.380086	NM_001100186	ENSMUSG00000090714	Zscan4d	EG545913	zinc finger and SCAN domain containing 4D	protein-coding
Diff_Nuc74916	chr8	63085572	63085711	+	0	NA	Intergenic	L1Md_F|LINE|L1	-25981	NM_027756	71306	Mm.23242	NM_027756	ENSMUSG00000031647	Mfap3l	4933428A15Rik|5430405D20Rik|AI461995|AW125052|NYD-sp9|mKIAA0626	microfibrillar-associated protein 3-like	protein-coding
Diff_Nuc50410	chr4	104771652	104771791	+	0	NA	intron (NM_178143, intron 1 of 8)	L3|LINE|CR1	10782	NM_178143	108079	Mm.48638	NM_178143	ENSMUSG00000028518	Prkaa2	2310008I11Rik|A830082D05|AMPKalpha2	protein kinase, AMP-activated, alpha 2 catalytic subunit	protein-coding
Diff_Nuc18361	chr17	75061302	75061441	+	0	NA	intron (NM_007566, intron 61 of 72)	intron (NM_007566, intron 61 of 72)	-55719	NM_152817	74196	Mm.209503	NM_152817	ENSMUSG00000024078	Ttc27	2610511O17Rik	tetratricopeptide repeat domain 27	protein-coding
Diff_Nuc41808	chr6	120414912	120415051	+	0	NA	intron (NM_008359, intron 1 of 12)	intron (NM_008359, intron 1 of 12)	1766	NM_008359	16172	Mm.4481	NM_008359	ENSMUSG00000002897	Il17ra	AW538159|Cdw217|Il17r|VDw217	interleukin 17 receptor A	protein-coding
Diff_Nuc60172	chr2	97487412	97487551	+	0	NA	Intergenic	(TAAA)n|Simple_repeat|Simple_repeat	179667	NM_178725	241568	Mm.241682	NM_178725	ENSMUSG00000050587	Lrrc4c	6430556C10Rik|NGL-1	leucine rich repeat containing 4C	protein-coding
Diff_Nuc50370	chr4	103299862	103300001	+	0	NA	Intergenic	Intergenic	244826	NR_040673	622167	Mm.244115	NR_040673	ENSMUSG00000086136	Gm12718	OTTMUSG00000008109	predicted gene 12718	ncRNA
Diff_Nuc45902	chr5	100976002	100976141	+	0	NA	intron (NM_012001, intron 9 of 9)	B1_Mur1|SINE|Alu	25153	NM_139198	231507	Mm.34609	NM_139198	ENSMUSG00000029322	Plac8	C15|D5Wsu111e	placenta-specific 8	protein-coding
Diff_Nuc71775	chr9	83949022	83949161	+	0	NA	intron (NM_199195, intron 8 of 10)	AT_rich|Low_complexity|Low_complexity	106703	NM_199195	12040	Mm.12819	NM_199195	ENSMUSG00000032263	Bckdhb	BCKDE1B|BCKDH E1-beta	branched chain ketoacid dehydrogenase E1, beta polypeptide	protein-coding
Diff_Nuc21317	chr16	69135322	69135461	+	0	NA	Intergenic	L1_Mus4|LINE|L1	665235	NR_130991	78110	Mm.211406	NR_130991	ENSMUSG00000107073	4930428D20Rik	-	RIKEN cDNA 4930428D20 gene	ncRNA
Diff_Nuc2993	chr13	67003372	67003511	+	0	NA	intron (NM_026219, intron 2 of 3)	intron (NM_026219, intron 2 of 3)	2845	NM_026219	67530	Mm.379136	NM_026219	ENSMUSG00000021520	Uqcrb	2210415M14Rik|QP-C|QPC|UQBC|UQBP|UQPC	ubiquinol-cytochrome c reductase binding protein	protein-coding
Diff_Nuc37661	chr7	142047282	142047421	+	0	NA	intron (NM_001033420, intron 25 of 51)	MTE2a|LTR|MaLR	82762	NM_001143802	627214	Mm.323610	NM_001143802	ENSMUSG00000073805	Fam196a	B830028B13Rik	family with sequence similarity 196, member A	protein-coding
Diff_Nuc29648	chr19	12781932	12782071	+	0	NA	intron (NM_029550, intron 1 of 5)	Lx8|LINE|L1	11721	NM_029550	64697	Mm.218561	NM_029550	ENSMUSG00000024694	Keg1	0610008P16Rik|AI316519|GS4059	kidney expressed gene 1	protein-coding
Diff_Nuc5480	chr12	31828392	31828531	+	0	NA	Intergenic	Intergenic	-25266	NR_102715	100043065	Mm.479482	NM_001034058		6030469F06Rik	-	RIKEN cDNA 6030469F06 gene	ncRNA
Diff_Nuc51073	chr4	130373092	130373231	+	0	NA	intron (NM_011520, intron 2 of 4)	intron (NM_011520, intron 2 of 4)	24709	NM_011520	20970	Mm.206536	NM_011520	ENSMUSG00000025743	Sdc3	Synd3|mKIAA0468|syn-3	syndecan 3	protein-coding
Diff_Nuc139	chrX	20936912	20937051	+	0	NA	Intergenic	L1_Mur3|LINE|L1	-1010	NR_045668	331392	Mm.23126	NM_198633	ENSMUSG00000051537	Gm5124	EG331392	nucleolar and coiled-body phosphoprotein 1 pseudogene	pseudo
Diff_Nuc5174	chr12	16319202	16319341	+	0	NA	Intergenic	Intergenic	277305	NM_015763	14245	Mm.153625	NM_015763	ENSMUSG00000020593	Lpin1	4631420P06|Kiaa0188|Lipin1|fld|mKIAA0188	lipin 1	protein-coding
Diff_Nuc28617	chr14	102481092	102481231	+	0	NA	Intergenic	Intergenic	241321	NM_001347628	380928	Mm.218981	NM_201529	ENSMUSG00000033060	Lmo7	C78582|FBXO20|Gm914|mKIAA0858	LIM domain only 7	protein-coding
Diff_Nuc42923	chr5	12728952	12729091	+	0	NA	Intergenic	Lx3_Mus|LINE|L1	345855	NM_028882	108151	Mm.89313	NM_028882	ENSMUSG00000040254	Sema3d	4631426B19Rik	sema domain, immunoglobulin domain (Ig), short basic domain, secreted, (semaphorin) 3D	protein-coding
Diff_Nuc36224	chr7	95127722	95127861	+	0	NA	intron (NM_001081414, intron 5 of 9)	intron (NM_001081414, intron 5 of 9)	-298804	NM_009982	13032	Mm.89295	NM_009982	ENSMUSG00000030560	Ctsc	AI047818|CatC|DPP1|DPPI	cathepsin C	protein-coding
Diff_Nuc60590	chr2	108676082	108676221	+	0	NA	Intergenic	L4|LINE|RTE	442296	NM_029790	76894	Mm.330451	NM_029790	ENSMUSG00000057234	Mettl15	0610027B03Rik|AI303697|AW049952|Mett5d1	methyltransferase like 15	protein-coding
Diff_Nuc53296	chr3	53570992	53571131	+	0	NA	Intergenic	L1_Mus1|LINE|L1	96668	NM_026435	67890	Mm.23067	NM_026435	ENSMUSG00000027746	Ufm1	1810045K17Rik|AI132708|AI463323|ENSMUSG00000074598|Gm10726	ubiquitin-fold modifier 1	protein-coding
Diff_Nuc12349	chr10	14393112	14393251	+	0	NA	intron (NM_025418, intron 5 of 7)	ORR1A4-int|LTR|MaLR	32114	NM_025418	66201	Mm.227983	NM_025418	ENSMUSG00000019868	Vta1	1110001D18Rik|1110059P08Rik|AU040813|C85340|LIP5|SBP1	vesicle (multivesicular body) trafficking 1	protein-coding
Diff_Nuc65847	chr1	95405032	95405171	+	0	NA	3' UTR (NM_001159719, exon 13 of 13)	3' UTR (NM_001159719, exon 13 of 13)	-3580	NM_145519	227377	Mm.243091	NM_145519	ENSMUSG00000034066	Farp2	AI465173|BC009153|D030026M03Rik|Fir|mKIAA0793	FERM, RhoGEF and pleckstrin domain protein 2	protein-coding
Diff_Nuc59737	chr2	85144312	85144451	+	0	NA	Intergenic	Lx9|LINE|L1	27672	NM_001011785	257951	Mm.389304	NM_001011785	ENSMUSG00000075223	Olfr987	GA_x5J8B7TRSBM-251-3|GA_x5J8B7W531T-1241080-1240524|MOR203-7P	olfactory receptor 987	protein-coding
Diff_Nuc10792	chr11	79055932	79056071	+	0	NA	5' UTR (NM_001042565, exon 1 of 4)	5' UTR (NM_001042565, exon 1 of 4)	525	NM_001042565	78889	Mm.307022	NM_019653	ENSMUSG00000017677	Wsb1	1110056B13Rik|2700038M07Rik	WD repeat and SOCS box-containing 1	protein-coding
Diff_Nuc53322	chr3	54304042	54304181	+	0	NA	Intergenic	Intergenic	139082	NM_015784	50706	Mm.236067	NM_015784	ENSMUSG00000027750	Postn	A630052E07Rik|AI747096|OSF-2|Osf2|PLF|PN	periostin, osteoblast specific factor	protein-coding
Diff_Nuc52543	chr3	32584792	32584931	+	0	NA	Intergenic	B4A|SINE|B4	-22607	NM_019673	56456	Mm.41077	NM_019673	ENSMUSG00000027671	Actl6a	2810432C06Rik|AI851094|ARP4|Actl6|Baf53a|C79802	actin-like 6A	protein-coding
Diff_Nuc39089	chr6	36356042	36356181	+	0	NA	intron (NM_203491, intron 2 of 2)	intron (NM_203491, intron 2 of 2)	-15631	NR_030524	735279		NR_030524	ENSMUSG00000070075	Mir490	Mirn490|mir-490|mmu-mir-490	microRNA 490	ncRNA
Diff_Nuc18232	chr17	70969612	70969751	+	0	NA	intron (NM_001347411, intron 6 of 14)	(TAGA)n|Simple_repeat|Simple_repeat	58594	NM_001128181	224997	Mm.311840	NM_027712	ENSMUSG00000003279	Dlgap1	4933422O14Rik|9630002F18|AI845682|AI848168|BB075781|D17Bwg0511e|GKAP/SAPAP|GKPA/SAPAP|Gkap|Sapap1|mKIAA4162	discs, large (Drosophila) homolog-associated protein 1	protein-coding
Diff_Nuc67736	chr1	151454262	151454401	+	0	NA	Intergenic	Lx9|LINE|L1	315238	NM_001305632	18783	Mm.4186	NM_008869	ENSMUSG00000056220	Pla2g4a	Pla2g4|cPLA2|cPLA2-alpha|cPLA2alpha	phospholipase A2, group IVA (cytosolic, calcium-dependent)	protein-coding
Diff_Nuc52439	chr3	29255062	29255201	+	0	NA	intron (NM_001167748, intron 4 of 12)	intron (NM_001167748, intron 4 of 12)	-60614	NR_030422	791072		NR_030422	ENSMUSG00000076120	Mir551b	Mirn551b|mir-551b	microRNA 551b	ncRNA
Diff_Nuc2972	chr13	65384102	65384241	+	0	NA	intron (NM_178364, intron 3 of 7)	L1_Mus1|LINE|L1	4009	NM_178364	170936	Mm.151546	NM_178364	ENSMUSG00000021514	Zfp369	B930030B22Rik|D230020H11Rik|NRIF2	zinc finger protein 369	protein-coding
Diff_Nuc58237	chr2	44416322	44416461	+	0	NA	Intergenic	Intergenic	300751	NM_172662	227835	Mm.314312	NM_172662	ENSMUSG00000036890	Gtdc1	E330008O22Rik	glycosyltransferase-like domain containing 1	protein-coding
Diff_Nuc39531	chr6	47228782	47228921	+	0	NA	intron (NM_001004357, intron 22 of 23)	intron (NM_001004357, intron 22 of 23)	34456	NM_025771	66797	Mm.440084	NM_025771	ENSMUSG00000039419	Cntnap2	5430425M22Rik|Caspr2|mKIAA0868	contactin associated protein-like 2	protein-coding
Diff_Nuc25292	chr15	92701522	92701661	+	0	NA	Intergenic	Lx9|LINE|L1	274051	NM_001164594	239618	Mm.309826	NM_001164593	ENSMUSG00000036218	Pdzrn4	1110017D07Rik|LNX4|SAMCAP3L|mKIAA3027	PDZ domain containing RING finger 4	protein-coding
Diff_Nuc58158	chr2	42827242	42827381	+	0	NA	Intergenic	L1_Mur1|LINE|L1	-318193	NM_053011	94217	Mm.441398	NM_053011	ENSMUSG00000049252	Lrp1b	9630004P12Rik|LRP-DIT	low density lipoprotein-related protein 1B (deleted in tumors)	protein-coding
Diff_Nuc9599	chr11	37401492	37401631	+	0	NA	Intergenic	Intergenic	-70930	NR_131154	100039148	Mm.120467	NR_131154	ENSMUSG00000087388	Gm12128	OTTMUSG00000005422	predicted gene 12128	ncRNA
Diff_Nuc62796	chr1	3640952	3641091	+	0	NA	intron (NM_001011874, intron 1 of 2)	intron (NM_001011874, intron 1 of 2)	20558	NM_001011874	497097	Mm.454496	NM_001011874	ENSMUSG00000051951	Xkr4	AY534250|Gm210|XRG4|mKIAA1889	X-linked Kx blood group related 4	protein-coding
Diff_Nuc12563	chr10	19553392	19553531	+	0	NA	Intergenic	B4|SINE|B4	17804	NM_029529	76157	Mm.74324	NM_029529	ENSMUSG00000050473	Slc35d3	6230421J19Rik|Frcl1	solute carrier family 35, member D3	protein-coding
Diff_Nuc55235	chr3	110855852	110855991	+	0	NA	Intergenic	Lx|LINE|L1	-802004	NR_024139	99890	Mm.36115	NM_178891	ENSMUSG00000049300	Prmt6	AW124876|BB233495|Hrmt1l6	protein arginine N-methyltransferase 6	protein-coding
Diff_Nuc74272	chr8	45132872	45133011	+	0	NA	Intergenic	Intergenic	-348096	NM_001079931	384814	Mm.491652	NM_001079931		Gm5347	EG384814	predicted gene 5347	protein-coding
Diff_Nuc55423	chr3	116060972	116061111	+	0	NA	intron (NM_001080818, intron 5 of 15)	intron (NM_001080818, intron 5 of 15)	65909	NM_001080818	229776	Mm.17647	NM_001080818	ENSMUSG00000033502	Cdc14a	A830059A17Rik|CDC14A2|CDC14a1|Cdc14	CDC14 cell division cycle 14A	protein-coding
Diff_Nuc1836	chr13	26129772	26129911	+	0	NA	Intergenic	Intergenic	-71656	NR_045062	100503530	Mm.86763	NR_045062	ENSMUSG00000086531	Gm11351	OTTMUSG00000000620	predicted gene 11351	ncRNA
Diff_Nuc62724	chr2	179767522	179767661	+	0	NA	intron (NM_177727, intron 7 of 8)	intron (NM_177727, intron 7 of 8)	7899	NM_177727	241846	Mm.21577	NM_177727	ENSMUSG00000039108	Lsm14b	9430078B04|BC040823	LSM family member 14B	protein-coding
Diff_Nuc14813	chr10	88751382	88751521	+	0	NA	Intergenic	L1_Mus2|LINE|L1	-30916	NR_102339	320091	Mm.236464	NM_178773	ENSMUSG00000035189	Ano4	A330096O15Rik|Gm65|Tmem16d	anoctamin 4	protein-coding
Diff_Nuc4779	chr12	4412352	4412491	+	0	NA	intron (NM_010881, intron 2 of 22)	MusHAL1|LINE|L1	71639	NM_010881	17977	Mm.301039	NM_010881	ENSMUSG00000020647	Ncoa1	KAT13A|NCoA-1|NRC-1|SRC-1|SRC-a|SRC1|bHLHe74|mNRC-1	nuclear receptor coactivator 1	protein-coding
Diff_Nuc74644	chr8	54427892	54428031	+	0	NA	Intergenic	Intergenic	-169095	NM_001205054	11593	Mm.334535	NM_001005847	ENSMUSG00000031521	Aga	AW060726	aspartylglucosaminidase	protein-coding
Diff_Nuc48437	chr4	44786392	44786531	+	0	NA	intron (NM_138590, intron 2 of 8)	intron (NM_138590, intron 2 of 8)	17030	NM_138590	319885	Mm.331576	NM_138590	ENSMUSG00000035649	Zcchc7	4930572I07Rik|D4Wsu132e	zinc finger, CCHC domain containing 7	protein-coding
Diff_Nuc3124	chr13	71446997	71447136	+	0	NA	Intergenic	Lx9|LINE|L1	201099	NR_130325	100316804		NR_130325	ENSMUSG00000080580	Mir466f-4	Mirn466f-4|mmu-mir-466f-4	microRNA 466f-4	ncRNA
Diff_Nuc21723	chr16	78880342	78880481	+	0	NA	Intergenic	Intergenic	-50782	NM_139134	246048	Mm.77895	NM_139134	ENSMUSG00000022860	Chodl	3110074E07Rik|MT75|PRED12	chondrolectin	protein-coding
Diff_Nuc63192	chr1	15500502	15500641	+	0	NA	intron (NM_001098528, intron 1 of 1)	L1_Mus1|LINE|L1	198038	NM_001098528	98741	Mm.156081	NM_001033195	ENSMUSG00000092083	Kcnb2	9630047L19Rik|BB130875|Kv2.2	potassium voltage gated channel, Shab-related subfamily, member 2	protein-coding
Diff_Nuc21966	chr16	85159972	85160111	+	0	NA	intron (NM_007471, intron 1 of 15)	intron (NM_007471, intron 1 of 15)	13911	NM_001198825	11820	Mm.277585	NM_007471	ENSMUSG00000022892	App	Abeta|Abpp|Adap|Ag|Cvap|E030013M08Rik|betaApp	amyloid beta (A4) precursor protein	protein-coding
Diff_Nuc23490	chr15	34282742	34282881	+	0	NA	intron (NM_001256161, intron 3 of 3)	intron (NM_001256161, intron 3 of 3)	4816	NM_001256161	77358	Mm.402759	NM_001256161	ENSMUSG00000094447	9430069I07Rik	-	RIKEN cDNA 9430069I07 gene	protein-coding
Diff_Nuc7288	chr12	80257192	80257331	+	0	NA	TTS (NM_009705)	TTS (NM_009705)	16184	NM_016800	53612	Mm.265929	NM_016800	ENSMUSG00000021124	Vti1b	AU015348|GES30|MVti1b|SNARE|Vti1-rp1	vesicle transport through interaction with t-SNAREs 1B	protein-coding
Diff_Nuc58418	chr2	48219622	48219761	+	0	NA	Intergenic	B3|SINE|B2	-449938	NM_007396	11480	Mm.314338	NM_007396	ENSMUSG00000052155	Acvr2a	ActrIIa|Acvr2|TactrII	activin receptor IIA	protein-coding
Diff_Nuc51970	chr3	15531582	15531721	+	0	NA	intron (NM_001173460, intron 4 of 5)	L1_Mus3|LINE|L1	43414	NM_001173460	668101	Mm.423523	NM_001173460	ENSMUSG00000095028	Sirpb1b	-	signal-regulatory protein beta 1B	protein-coding
Diff_Nuc72812	chr9	115720702	115720841	+	0	NA	Intergenic	MYSERV6-int|LTR|ERVK	-97802	NM_028638	73748	Mm.485018	NM_028638	ENSMUSG00000056880	Gadl1	1110027M19Rik|ADC|CSADC	glutamate decarboxylase-like 1	protein-coding
Diff_Nuc75489	chr8	80277562	80277701	+	0	NA	Intergenic	L1M3|LINE|L1	-29280	NM_010332	13617	Mm.283168	NM_010332	ENSMUSG00000031616	Ednra	ET-AR|ETa|Gpcr10	endothelin receptor type A	protein-coding
Diff_Nuc11927	chr11	120419652	120419791	+	0	NA	Intergenic	B1_Mus2|SINE|Alu	-7275	NM_026814	68701	Mm.46477	NM_026814	ENSMUSG00000025129	Ppp1r27	1110033I14Rik|Dysfip1|toonin	protein phosphatase 1, regulatory subunit 27	protein-coding
Diff_Nuc12627	chr10	21354582	21354721	+	0	NA	Intergenic	Intergenic	41700	NR_027968	67692	Mm.54306	NM_183266	ENSMUSG00000050844	1700020N01Rik	-	RIKEN cDNA 1700020N01 gene	ncRNA
Diff_Nuc48988	chr4	64209042	64209181	+	0	NA	Intergenic	Intergenic	-501062	NM_011607	21923	Mm.980	NM_011607	ENSMUSG00000028364	Tnc	AI528729|C130033P17Rik|Hxb|TN|TN-C|Ten|cytotactin|tenascin-C	tenascin C	protein-coding
Diff_Nuc29524	chr19	7642162	7642301	+	0	NA	intron (NM_139269, intron 2 of 4)	intron (NM_139269, intron 2 of 4)	10282	NM_139269	225845	Mm.274810	NM_139269	ENSMUSG00000060675	Pla2g16	C78643|HRSL3|Hrasls3|Hrev107|MLP-3	phospholipase A2, group XVI	protein-coding
Diff_Nuc1284	chr13	10497002	10497141	+	0	NA	Intergenic	Intergenic	-137022	NM_033269	12671	Mm.342315	NM_033269	ENSMUSG00000046159	Chrm3	Chrm-3|M3|M3R	cholinergic receptor, muscarinic 3, cardiac	protein-coding
Diff_Nuc37830	chr7	150424322	150424461	+	0	NA	non-coding (NR_001461, exon 1 of 1)	non-coding (NR_001461, exon 1 of 1)	58061	NR_001461	63830	Mm.356096	NR_001461	ENSMUSG00000101609	Kcnq1ot1	Kvlqt1-as|Lit1|Tssc8	KCNQ1 overlapping transcript 1	ncRNA
Diff_Nuc1296	chr13	10815862	10816001	+	0	NA	Intergenic	RLTR15|LTR|ERVK	-455882	NM_033269	12671	Mm.342315	NM_033269	ENSMUSG00000046159	Chrm3	Chrm-3|M3|M3R	cholinergic receptor, muscarinic 3, cardiac	protein-coding
Diff_Nuc72536	chr9	106843592	106843731	+	0	NA	exon (NM_153413, exon 35 of 53)	exon (NM_153413, exon 35 of 53)	-49392	NM_029103	74840	Mm.29778	NM_029103	ENSMUSG00000032575	Manf	3230402M22Rik|AA407711|AA408789|AA673178|Armet|D17914|D18Mgi17	mesencephalic astrocyte-derived neurotrophic factor	protein-coding
Diff_Nuc71521	chr9	75876012	75876151	+	0	NA	intron (NM_173731, intron 1 of 8)	Lx9|LINE|L1	13297	NM_173731	208982	Mm.82306	NM_173731	ENSMUSG00000007908	Hmgcll1	BC037381	3-hydroxymethyl-3-methylglutaryl-Coenzyme A lyase-like 1	protein-coding
Diff_Nuc47931	chr4	28216632	28216771	+	0	NA	Intergenic	Intergenic	-523580	NM_001290434	13841	Mm.257266	NM_010141	ENSMUSG00000028289	Epha7	Cek11|Ebk|Ehk3|Hek11|Mdk1	Eph receptor A7	protein-coding
Diff_Nuc71675	chr9	80819662	80819801	+	0	NA	Intergenic	Intergenic	-460686	NM_022016	63859	Mm.422780	NM_022016	ENSMUSG00000032343	Impg1	A930015H12Rik|IMP150|SPACR	interphotoreceptor matrix proteoglycan 1	protein-coding
Diff_Nuc41594	chr6	112228902	112229041	+	0	NA	intron (NM_144799, intron 1 of 5)	intron (NM_144799, intron 1 of 5)	5219	NM_144799	30937	Mm.234441	NM_144799	ENSMUSG00000057604	Lmcd1	AW455500|AW553074|dyxin	LIM and cysteine-rich domains 1	protein-coding
Diff_Nuc36177	chr7	94157422	94157561	+	0	NA	intron (NM_001105190, intron 5 of 5)	L1_Mus2|LINE|L1	12516	NM_001105190	621430	Mm.469903	NM_001105190	ENSMUSG00000090362	Vmn2r79	EG621430	vomeronasal 2, receptor 79	protein-coding
Diff_Nuc2361	chr13	42930022	42930161	+	0	NA	intron (NM_001005740, intron 1 of 12)	MTB|LTR|MaLR	-31525	NM_001302636	218194	Mm.160124	NM_198419	ENSMUSG00000054728	Phactr1	9630030F18Rik|Rpel1	phosphatase and actin regulator 1	protein-coding
Diff_Nuc48159	chr4	35111132	35111271	+	0	NA	Intergenic	Intergenic	-6468	NM_178061	214944	Mm.32968	NM_178061	ENSMUSG00000073910	Mob3b	8430436F23Rik|A430018A01Rik|Mobkl2b	MOB kinase activator 3B	protein-coding
Diff_Nuc11406	chr11	99200812	99200951	+	0	NA	Intergenic	Intergenic	-1602	NM_001033397	320864	Mm.440509	NM_001033397	ENSMUSG00000075570	Krt26	4732407F15Rik|Krt25b	keratin 26	protein-coding
Diff_Nuc56976	chr2	5028792	5028931	+	0	NA	Intergenic	Intergenic	-29961	NM_028804	74186	Mm.274715	NM_028804	ENSMUSG00000026676	Ccdc3	2310045O21Rik	coiled-coil domain containing 3	protein-coding
Diff_Nuc57021	chr2	6430392	6430531	+	0	NA	Intergenic	MTB-int|LTR|MaLR	156679	NM_181399	98910	Mm.40673	NM_181399	ENSMUSG00000039046	Usp6nl	AI316785|RNTRE|TRE2NL|mKIAA0019	USP6 N-terminal like	protein-coding
Diff_Nuc40575	chr6	79200522	79200661	+	0	NA	Intergenic	Intergenic	218555	NR_040301	100504701	Mm.400420	NR_040301	ENSMUSG00000108072	Gm20362	-	predicted gene, 20362	ncRNA
Diff_Nuc33401	chr18	68908882	68909021	+	0	NA	Intergenic	Intergenic	9897	NR_105774	102465183		NR_105774	ENSMUSG00000099300	Mir6356	Gm27461|mmu-mir-6356	microRNA 6356	ncRNA
Diff_Nuc46890	chr5	145818202	145818341	+	0	NA	Intergenic	MTB|LTR|MaLR	14412	NM_027069	69396	Mm.45463	NM_027069	ENSMUSG00000029620	1700018F24Rik	AV045857	RIKEN cDNA 1700018F24 gene	protein-coding
Diff_Nuc33692	chr18	78019412	78019551	+	0	NA	intron (NM_007505, intron 8 of 11)	intron (NM_007505, intron 8 of 11)	6974	NM_007505	11946	Mm.276137	NM_007505	ENSMUSG00000025428	Atp5a1	AI035633|AL022851|AL023067|Atpm|D18Ertd206e|Mom2	ATP synthase, H+ transporting, mitochondrial F1 complex, alpha subunit 1	protein-coding
Diff_Nuc6057	chr12	47611042	47611181	+	0	NA	Intergenic	Intergenic	308651	NM_021361	664883	Mm.247195	NM_021361	ENSMUSG00000021047	Nova1	9430099M15Rik|G630039L02|Nova-1	neuro-oncological ventral antigen 1	protein-coding
Diff_Nuc70817	chr9	53428862	53429001	+	0	NA	intron (NM_027807, intron 18 of 18)	intron (NM_027807, intron 18 of 18)	-10476	NM_144784	110446	Mm.293233	NM_144784	ENSMUSG00000032047	Acat1	6330585C21Rik|Acat	acetyl-Coenzyme A acetyltransferase 1	protein-coding
Diff_Nuc67773	chr1	152300442	152300581	+	0	NA	intron (NM_021400, intron 8 of 12)	intron (NM_021400, intron 8 of 12)	12784	NM_021400	96875	Mm.174256	NM_021400	ENSMUSG00000006014	Prg4	CACP|DOL54|JCAP|MSF|SZP|lubricin	proteoglycan 4 (megakaryocyte stimulating factor, articular superficial zone protein)	protein-coding
Diff_Nuc60523	chr2	107295352	107295491	+	0	NA	Intergenic	Intergenic	164675	NM_021275	16492	Mm.142718	NM_021275	ENSMUSG00000042604	Kcna4	Kv1.4	potassium voltage-gated channel, shaker-related subfamily, member 4	protein-coding
Diff_Nuc37563	chr7	138052732	138052871	+	0	NA	TTS (NR_106028)	TTS (NR_106028)	1019	NR_106028	102466219		NR_106028	ENSMUSG00000104914	Mir7061	mmu-mir-7061	microRNA 7061	ncRNA
Diff_Nuc1032	chr13	3366692	3366831	+	0	NA	Intergenic	Intergenic	-110788	NR_015522	76937	Mm.487240	NR_015522	ENSMUSG00000097709	2810429I04Rik	AI256682	RIKEN cDNA 2810429I04 gene	ncRNA
Diff_Nuc10384	chr11	63979052	63979191	+	0	NA	Intergenic	Intergenic	86135	NR_033780	66456	Mm.124828	NR_033780	ENSMUSG00000087497	2810001G20Rik	AW045514	RIKEN cDNA 2810001G20 gene	ncRNA
Diff_Nuc57667	chr2	25125722	25125861	+	0	NA	TTS (NM_023464)	TTS (NM_023464)	2147	NM_023464	68475	Mm.21444	NM_023464	ENSMUSG00000026966	Ssna1	1110003H09Rik|1190004J23Rik|AA934184|N14|NA14	SS nuclear autoantigen 1	protein-coding
Diff_Nuc16721	chr17	17435552	17435691	+	0	NA	intron (NM_001324550, intron 1 of 3)	(TGAA)n|Simple_repeat|Simple_repeat	4214	NM_001324550	100862203	Mm.484235	NM_001324550		Gm6712	EG626854	predicted gene 6712	protein-coding
Diff_Nuc30186	chr19	29848822	29848961	+	0	NA	intron (NM_172836, intron 2 of 7)	B1_Mur2|SINE|Alu	31608	NM_172836	240613	Mm.313351	NM_172836	ENSMUSG00000046138	9930021J03Rik	ENSMUSG00000048936|Gm9832|mKIAA2026	RIKEN cDNA 9930021J03 gene	protein-coding
Diff_Nuc12893	chr10	29139652	29139791	+	0	NA	Intergenic	L1_Mus2|LINE|L1	-57473	NM_001110197	68031	Mm.28930	NM_026518	ENSMUSG00000038876	Rnf146	2610509H23Rik|Iduna	ring finger protein 146	protein-coding
Diff_Nuc59663	chr2	82640572	82640711	+	0	NA	Intergenic	RSINE1|SINE|B4	746826	NM_175513	241514	Mm.119383	NM_175513	ENSMUSG00000070866	Zfp804a	C630007C17Rik|Znf804a	zinc finger protein 804A	protein-coding
Diff_Nuc58612	chr2	53736112	53736251	+	0	NA	Intergenic	Intergenic	201782	NM_023396	67874	Mm.27086	NM_023396	ENSMUSG00000075334	Rprm	2410012A13Rik|Reprimo	reprimo, TP53 dependent G2 arrest mediator candidate	protein-coding
Diff_Nuc25826	chr14	15479712	15479851	+	0	NA	Intergenic	Intergenic	-55758	NM_001033270	218756	Mm.258893	NM_001033270	ENSMUSG00000021733	Slc4a7	E430014N10Rik|NBC3|NBCn1|NBCn1-G	solute carrier family 4, sodium bicarbonate cotransporter, member 7	protein-coding
Diff_Nuc64574	chr1	54600212	54600351	+	0	NA	intron (NM_001163314, intron 3 of 26)	intron (NM_001163314, intron 3 of 26)	14247	NM_001163314	241062	Mm.103539	NM_175508	ENSMUSG00000073678	Pgap1	5033403E17Rik|9030223K07Rik|A530084K22|D230012E17Rik|oto	post-GPI attachment to proteins 1	protein-coding
Diff_Nuc2001	chr13	30004212	30004351	+	0	NA	intron (NM_010093, intron 5 of 6)	B3|SINE|B2	-56739	NM_144536	68916	Mm.212227	NM_144536	ENSMUSG00000006191	Cdkal1	1190005B03Rik|6620401C13Rik	CDK5 regulatory subunit associated protein 1-like 1	protein-coding
Diff_Nuc74203	chr8	43284112	43284251	+	0	NA	Intergenic	L1Md_T|LINE|L1	371560	NR_045497	69966	Mm.416903	NR_045497	ENSMUSG00000102046	2810404M03Rik	-	RIKEN cDNA 2810404M03 gene	ncRNA
Diff_Nuc53852	chr3	70990922	70991061	+	0	NA	Intergenic	Intergenic	-379778	NR_040556	625901	Mm.366028	NR_040556	ENSMUSG00000097252	Gm6634	EG625901	predicted gene 6634	ncRNA
Diff_Nuc6012	chr12	46147852	46147991	+	0	NA	intron (NM_144552, intron 1 of 5)	B1_Mur4|SINE|Alu	27549	NM_144552	217517	Mm.285400	NM_144552	ENSMUSG00000046314	Stxbp6	BC024598|C85317	syntaxin binding protein 6 (amisyn)	protein-coding
Diff_Nuc39365	chr6	43761612	43761751	+	0	NA	Intergenic	Intergenic	-145404	NM_013861	29807	Mm.320979	NM_013861	ENSMUSG00000029735	Tpk1	-	thiamine pyrophosphokinase	protein-coding
Diff_Nuc64607	chr1	55230232	55230371	+	0	NA	intron (NM_028713, intron 8 of 8)	intron (NM_028713, intron 8 of 8)	42212	NM_025283	19070	Mm.291037	NM_025283	ENSMUSG00000025979	Mob4	2610109B12Rik|Mobkl3|Phocn|Prei3	MOB family member 4, phocein	protein-coding
Diff_Nuc46589	chr5	131792722	131792861	+	0	NA	Intergenic	RSINE1|SINE|B4	-9399	NM_145218	212996	Mm.299204	NM_145218	ENSMUSG00000034040	Wbscr17	AA388321|E330012B09Rik	Williams-Beuren syndrome chromosome region 17 homolog (human)	protein-coding
Diff_Nuc17490	chr17	45228532	45228671	+	0	NA	intron (NM_178652, intron 11 of 11)	intron (NM_178652, intron 11 of 11)	-210767	NM_029257	75341	Mm.386821	NM_029257		4930564C03Rik	-	RIKEN cDNA 4930564C03 gene	protein-coding
Diff_Nuc51708	chr3	7075822	7075961	+	0	NA	Intergenic	Lx|LINE|L1	-290713	NM_008862	18767	Mm.3193	NM_008862	ENSMUSG00000027499	Pkia	AI415001|PKIalpha	protein kinase inhibitor, alpha	protein-coding
Diff_Nuc34737	chr7	37550732	37550871	+	0	NA	intron (NM_172298, intron 1 of 1)	intron (NM_172298, intron 1 of 1)	67664	NM_172298	243931	Mm.44141	NM_172298	ENSMUSG00000021217	Tshz3	A630038G13Rik|Tsh3|Zfp537|mKIAA1474|teashirt3	teashirt zinc finger family member 3	protein-coding
Diff_Nuc7320	chr12	81125492	81125631	+	0	NA	Intergenic	Intergenic	-88310	NR_131074	77290	Mm.395042	NR_131073		9430078K24Rik	-	RIKEN cDNA 9430078K24 gene	ncRNA
Diff_Nuc59554	chr2	79960002	79960141	+	0	NA	intron (NM_001159582, intron 2 of 15)	L1Md_F2|LINE|L1	9057	NM_016744	18573	Mm.40678	NM_016744	ENSMUSG00000059173	Pde1a	AI987702|AW125737	phosphodiesterase 1A, calmodulin-dependent	protein-coding
Diff_Nuc57454	chr2	18149152	18149291	+	0	NA	intron (NM_007869, intron 9 of 11)	intron (NM_007869, intron 9 of 11)	163009	NM_001252561	17354	Mm.209175	NM_010804	ENSMUSG00000026743	Mllt10	Af10|B130021D15Rik|D630001B22Rik|mKIAA4140	myeloid/lymphoid or mixed-lineage leukemia; translocated to, 10	protein-coding
Diff_Nuc17101	chr17	30781262	30781401	+	0	NA	intron (NM_013811, intron 4 of 92)	B4|SINE|B4	17450	NM_013811	13417	Mm.426017	NM_013811	ENSMUSG00000033826	Dnah8	ATPase|Dnahc8|Hst6.7b|P1-Loop	dynein, axonemal, heavy chain 8	protein-coding
Diff_Nuc58012	chr2	39563212	39563351	+	0	NA	Intergenic	MERVL_2A-int|LTR|ERVL	-481423	NM_024209	67857	Mm.389242	NM_024209	ENSMUSG00000026753	Ppp6c	2310003C10Rik	protein phosphatase 6, catalytic subunit	protein-coding
Diff_Nuc24396	chr15	58919672	58919811	+	0	NA	Intergenic	RSINE1|SINE|B4	-6160	NM_144800	211401	Mm.215481	NM_144800	ENSMUSG00000022353	Mtss1	2310003N14Rik|BC024131|D130001D01Rik|Mim|mKIAA0429	metastasis suppressor 1	protein-coding
Diff_Nuc8192	chr12	109805022	109805161	+	0	NA	intron (NM_007965, intron 1 of 12)	intron (NM_007965, intron 1 of 12)	-11263	NR_045753	100504467	Mm.394980	NR_045751	ENSMUSG00000097788	Gm16596	-	predicted gene, 16596	ncRNA
Diff_Nuc13148	chr10	34716102	34716241	+	0	NA	Intergenic	Intergenic	512965	NM_010237	14302	Mm.332432	NM_010237	ENSMUSG00000019779	Frk	BSK|BSK/IYK|C85044|GTK|RAK	fyn-related kinase	protein-coding
Diff_Nuc53845	chr3	70718192	70718331	+	0	NA	Intergenic	L1_Mus2|LINE|L1	-107048	NR_040556	625901	Mm.366028	NR_040556	ENSMUSG00000097252	Gm6634	EG625901	predicted gene 6634	ncRNA
Diff_Nuc73875	chr8	34249552	34249691	+	0	NA	Intergenic	Intergenic	-189123	NM_001177589	100042715	Mm.291093	NM_001177589		Gm3985	-	predicted gene 3985	protein-coding
Diff_Nuc73625	chr8	25930527	25930666	+	0	NA	intron (NM_007401, intron 1 of 20)	L1Md_F|LINE|L1	4245	NM_001272058	11499	Mm.143889	NM_007401	ENSMUSG00000031554	Adam5	tMDC II|tMDCII	a disintegrin and metallopeptidase domain 5	protein-coding
Diff_Nuc67769	chr1	152276552	152276691	+	0	NA	exon (NM_133780, exon 32 of 52)	exon (NM_133780, exon 32 of 52)	-36436	NM_145511	226499	Mm.222093	NM_145511	ENSMUSG00000006010	BC003331	1810053E15Rik|Odr4|odr-4	cDNA sequence BC003331	protein-coding
Diff_Nuc64990	chr1	66375512	66375651	+	0	NA	intron (NM_001310634, intron 2 of 14)	intron (NM_001310634, intron 2 of 14)	7283	NM_001310634	17756	Mm.256966	NM_008632	ENSMUSG00000015222	Map2	G1-397-34|MAP-2|Mtap-2|Mtap2|repro4	microtubule-associated protein 2	protein-coding
[truncated: 9,432 more rows]
