# Supplementary material for: Remodeling of epigenome and transcriptome landscapes with aging in mice reveals widespread induction of inflammatory responses
Source: HighWire-hosted journal article supplement (doi:10.1101/gr.240093.118), 2019-03-11
Supplement: Supplemental_Code_Figure3_Machine_learning.zip [file HOMER_liver_8weeks_Pol2_peaks.xls]

PeakID (cmd=annotatePeaks.pl liver_8weeks_Pol2_peaks.bed mm9)	Chr	Start	End	Strand	Peak Score	Focus Ratio/Region Size	Annotation	Detailed Annotation	Distance to TSS	Nearest PromoterID	Entrez ID	Nearest Unigene	Nearest Refseq	Nearest Ensembl	Gene Name	Gene Alias	Gene Description	Gene Type
MACS_peak_2539	chr12	81213753	81214091	+	309.05	NA	promoter-TSS (NM_007564)	promoter-TSS (NM_007564)	78	NM_007564	12192	Mm.235132	NM_007564	ENSMUSG00000021127	Zfp36l1	AW742437|AW743212|Berg36|Brf1|D530020L18Rik|ERF1|TIS11b|cMG1	zinc finger protein 36, C3H type-like 1	protein-coding
MACS_peak_2881	chr13	23790153	23790426	+	298.98	NA	promoter-TSS (NM_178208)	promoter-TSS (NM_178208)	38	NM_178208	319155	Mm.261662	NM_178208		Hist1h4c	-	histone cluster 1, H4c	protein-coding
MACS_peak_10223	chr8	11557778	11558082	+	285.36	NA	intron (NM_011919, intron 1 of 1)	CpG	1864	NM_011919	26356	Mm.25709	NM_011919	ENSMUSG00000045969	Ing1	2610028J21Rik|AA407184|AI875420|mING1h|p33Ing1|p37Ing1b	inhibitor of growth family, member 1	protein-coding
MACS_peak_4643	chr17	26645074	26645480	+	271.80	NA	5' UTR (NM_013642, exon 1 of 4)	5' UTR (NM_013642, exon 1 of 4)	140	NM_013642	19252	Mm.239041	NM_013642	ENSMUSG00000024190	Dusp1	3CH134|MKP1|Ptpn16|U19515|erp|mkp-1	dual specificity phosphatase 1	protein-coding
MACS_peak_828	chr10	59414389	59414679	+	268.32	NA	promoter-TSS (NM_029083)	promoter-TSS (NM_029083)	-16	NM_029083	74747	Mm.21697	NM_029083	ENSMUSG00000020108	Ddit4	5830413E08Rik|AA415483|REDD1|Rtp801|dig2	DNA-damage-inducible transcript 4	protein-coding
MACS_peak_1632	chr11	69571937	69572233	+	268.20	NA	promoter-TSS (NM_001291068)	promoter-TSS (NM_001291068)	50	NM_001291068	20020	Mm.16533	NM_009089	ENSMUSG00000005198	Polr2a	220kDa|Rpb1|Rpo2-1	polymerase (RNA) II (DNA directed) polypeptide A	protein-coding
MACS_peak_11377	chr9	107569375	107569771	+	261.91	NA	5' UTR (NM_023805, exon 1 of 16)	5' UTR (NM_023805, exon 1 of 16)	157	NM_023805	76257	Mm.296560	NM_023805	ENSMUSG00000010064	Slc38a3	0610012J02Rik|D9Ucla2|Nat1|Slc38-3|Sn1|Snat3|mNAT	solute carrier family 38, member 3	protein-coding
MACS_peak_9541	chr7	29163842	29164489	+	255.06	NA	promoter-TSS (NM_011756)	promoter-TSS (NM_011756)	82	NM_011756	22695	Mm.389856	NM_011756	ENSMUSG00000044786	Zfp36	Gos24|Nup475|TIS11D|TISII|Tis11|Ttp|Zfp-36	zinc finger protein 36	protein-coding
MACS_peak_5056	chr17	87846057	87846273	+	254.14	NA	5' UTR (NM_007589, exon 1 of 6)	5' UTR (NM_007589, exon 1 of 6)	110	NM_007589	12314	Mm.329243	NM_007589	ENSMUSG00000036438	Calm2	1500001E21Rik|AL024017	calmodulin 2	protein-coding
MACS_peak_10532	chr8	87502450	87502907	+	253.00	NA	promoter-TSS (NM_008416)	promoter-TSS (NM_008416)	-31	NM_008416	16477	Mm.1167	NM_008416	ENSMUSG00000052837	Junb	-	jun B proto-oncogene	protein-coding
MACS_peak_3890	chr15	81688530	81688971	+	247.98	NA	promoter-TSS (NM_020507)	promoter-TSS (NM_020507)	6	NM_020507	57259	Mm.323595	NM_020507	ENSMUSG00000048546	Tob2	2900090N22Rik|4930545K18Rik|AV071822|mKIAA1663	transducer of ERBB2, 2	protein-coding
MACS_peak_5470	chr19	5802492	5802768	+	244.55	NA	promoter-TSS (NR_002847)	promoter-TSS (NR_002847)	41	NR_002847	72289	Mm.298256	NR_002847	ENSMUSG00000092341	Malat1	2210401K01Rik|9430072K23Rik|AI647968|Neat2	metastasis associated lung adenocarcinoma transcript 1 (non-coding RNA)	ncRNA
MACS_peak_7764	chr4	131825939	131826241	+	239.41	NA	promoter-TSS (NR_002865)	promoter-TSS (NR_002865)	11	NR_002865	353373	Mm.424675	NR_002865		Rnu11	MBII-407|Mirn801|mir-801|mmu-mir-801	U11 small nuclear RNA	snRNA
MACS_peak_7958	chr4	150228875	150229900	+	239.09	NA	promoter-TSS (NR_040649)	promoter-TSS (NR_040649)	187	NM_133753	74155	Mm.318841	NM_133753	ENSMUSG00000028967	Errfi1	1300002F13Rik|AI788755|Mig-6|Mig6|RALT	ERBB receptor feedback inhibitor 1	protein-coding
MACS_peak_10953	chr9	40609266	40609606	+	235.60	NA	promoter-TSS (NM_031165)	promoter-TSS (NM_031165)	80	NM_031165	15481	Mm.290774	NM_031165	ENSMUSG00000015656	Hspa8	2410008N15Rik|Hsc70|Hsc71|Hsc73|Hsp73|Hspa10	heat shock protein 8	protein-coding
MACS_peak_7517	chr4	94718604	94718979	+	235.45	NA	5' UTR (NM_010591, exon 1 of 1)	5' UTR (NM_010591, exon 1 of 1)	122	NM_010591	16476	Mm.275071	NM_010591	ENSMUSG00000052684	Jun	AP-1|Junc|c-jun	jun proto-oncogene	protein-coding
MACS_peak_63	chr1	36364540	36364791	+	234.85	NA	promoter-TSS (NM_001290726)	promoter-TSS (NM_001290726)	87	NM_001172205	214855	Mm.34316	NM_145996	ENSMUSG00000037447	Arid5a	D430024K22Rik|Mrf1	AT rich interactive domain 5A (MRF1-like)	protein-coding
MACS_peak_2873	chr13	23673317	23673798	+	232.83	NA	promoter-TSS (NM_175654)	promoter-TSS (NM_175654)	86	NM_175654	319156	Mm.260530	NM_175654		Hist1h4d	-	histone cluster 1, H4d	protein-coding
MACS_peak_5021	chr17	80606458	80606721	+	231.17	NA	promoter-TSS (NM_146083)	promoter-TSS (NM_146083)	56	NM_001195486	225027	Mm.292016	NM_146083	ENSMUSG00000024097	Srsf7	35kDa|9430065L19Rik|9G8|NX-96|Sfrs7	serine/arginine-rich splicing factor 7	protein-coding
MACS_peak_3689	chr15	38230293	38230542	+	228.03	NA	promoter-TSS (NM_013692)	promoter-TSS (NM_013692)	49	NM_013692	21847	Mm.4292	NM_013692	ENSMUSG00000037465	Klf10	AI115143|EGR[a]|Egral|Gdnfif|TIEG-1|Tieg|Tieg1|mGIF	Kruppel-like factor 10	protein-coding
MACS_peak_7111	chr3	108374531	108374802	+	226.48	NA	promoter-TSS (NM_025444)	promoter-TSS (NM_025444)	49	NM_025444	99730	Mm.24431	NM_025444		Taf13	1810004N01Rik|2010309N11Rik|AI847295|TAFII18	TAF13 RNA polymerase II, TATA box binding protein (TBP)-associated factor	protein-coding
MACS_peak_6067	chr2	34627549	34627815	+	219.19	NA	promoter-TSS (NM_001163434)	promoter-TSS (NM_001163434)	72	NM_022310	14828	Mm.330160	NM_022310	ENSMUSG00000026864	Hspa5	AL022860|AU019543|Bip|D2Wsu141e|D2Wsu17e|Grp78|Hsce70|SEZ-7|Sez7|baffled|mBiP	heat shock protein 5	protein-coding
MACS_peak_10724	chr8	121960964	121961754	+	218.84	NA	intron (NM_027950, intron 1 of 5)	intron (NM_027950, intron 1 of 5)	297	NM_027950	71839	Mm.272357	NM_027950	ENSMUSG00000074063	Osgin1	1700012B18Rik|Okl38	oxidative stress induced growth inhibitor 1	protein-coding
MACS_peak_2250	chr11	119804336	119804589	+	217.68	NA	promoter-TSS (NM_001037754)	promoter-TSS (NM_001037754)	56	NM_130862	108100	Mm.197534	NM_130862	ENSMUSG00000025372	Baiap2	IRSp53|R75030	brain-specific angiogenesis inhibitor 1-associated protein 2	protein-coding
MACS_peak_459	chr1	155746984	155747983	+	216.22	NA	TTS (NR_106194)	TTS (NR_106194)	424	NM_008131	14645	Mm.210745	NM_008131	ENSMUSG00000026473	Glul	GS|Glns	glutamate-ammonia ligase (glutamine synthetase)	protein-coding
MACS_peak_7827	chr4	134828523	134828767	+	216.19	NA	promoter-TSS (NM_013885)	promoter-TSS (NM_013885)	30	NM_013885	29876	Mm.257765	NM_013885	ENSMUSG00000037242	Clic4	D0Jmb3|TU-74|mc3s5|mtCLIC	chloride intracellular channel 4 (mitochondrial)	protein-coding
MACS_peak_7015	chr3	96044028	96044297	+	215.75	NA	promoter-TSS (NM_013549).2	promoter-TSS (NM_013549).2	95	NM_013549	15267	Mm.5220	NM_013549	ENSMUSG00000063954	Hist2h2aa1	AI448581|H2a-614|H2a-615|Hist2	histone cluster 2, H2aa1	protein-coding
MACS_peak_2180	chr11	115885532	115885906	+	212.93	NA	promoter-TSS (NM_008211)	promoter-TSS (NM_008211)	99	NM_008211	15081	Mm.18516	NM_008211	ENSMUSG00000016559	H3f3b	9430068D06Rik|H3.3B	H3 histone, family 3B	protein-coding
MACS_peak_4834	chr17	46169160	46169408	+	209.64	NA	promoter-TSS (NM_001287057)	promoter-TSS (NM_001287057)	42	NM_001287058	22339	Mm.282184	NM_009505	ENSMUSG00000023951	Vegfa	Vegf|Vpf	vascular endothelial growth factor A	protein-coding
MACS_peak_10424	chr8	73363253	73363566	+	207.27	NA	5' UTR (NM_027560, exon 1 of 8)	5' UTR (NM_027560, exon 1 of 8)	210	NM_027560	70807	Mm.24215	NM_027560	ENSMUSG00000002910	Arrdc2	4632416I05Rik|Ilad1	arrestin domain containing 2	protein-coding
MACS_peak_10053	chr7	134416717	134417674	+	203.56	NA	exon (NM_009266, exon 1 of 1)	exon (NM_009266, exon 1 of 1)	378	NM_009266	20768	Mm.20294	NM_009266		Sephs2	Sps2|Ysg3	selenophosphate synthetase 2	protein-coding
MACS_peak_677	chr1	195098610	195099391	+	202.40	NA	intron (NM_008059, intron 1 of 1)	intron (NM_008059, intron 1 of 1)	382	NM_008059	14373	Mm.439721	NM_008059	ENSMUSG00000009633	G0s2	AI255151|AV006465	G0/G1 switch gene 2	protein-coding
MACS_peak_104	chr1	51535034	51535312	+	199.89	NA	promoter-TSS (NM_028696)	promoter-TSS (NM_028696)	70	NM_028696	109019	Mm.196290	NM_028696	ENSMUSG00000026107	Nabp1	4930434H03Rik|4930442A21Rik|4930488J04Rik|4933440J18Rik|5830411E10Rik|AI852561|Nbp1|Obfc2a|Ssb2	nucleic acid binding protein 1	protein-coding
MACS_peak_6561	chr2	160192559	160192900	+	195.86	NA	promoter-TSS (NM_010658)	promoter-TSS (NM_010658)	72	NM_010658	16658	Mm.330745	NM_010658	ENSMUSG00000074622	Mafb	Kreisler|Krml|Krml1|kr	v-maf musculoaponeurotic fibrosarcoma oncogene family, protein B (avian)	protein-coding
MACS_peak_2865	chr13	23622891	23623136	+	195.63	NA	promoter-TSS (NM_153173)	promoter-TSS (NM_153173)	100	NM_153173	69386	Mm.158272	NM_153173	ENSMUSG00000060981	Hist1h4h	1700024H08Rik	histone cluster 1, H4h	protein-coding
MACS_peak_222	chr1	75215659	75216147	+	195.38	NA	promoter-TSS (NM_009447)	promoter-TSS (NM_009447)	-75	NM_009447	22145	Mm.1155	NM_009447	ENSMUSG00000026202	Tuba4a	M[a]4|Tuba4	tubulin, alpha 4A	protein-coding
MACS_peak_5619	chr19	21346709	21346924	+	195.29	NA	promoter-TSS (NM_009551)	promoter-TSS (NM_009551)	48	NM_009551	22682	Mm.292405	NM_009551		Zfand5	2310057A04Rik|5830475F03Rik|AA415485|Za20d2|Zfp216	zinc finger, AN1-type domain 5	protein-coding
MACS_peak_11400	chr9	108241525	108241982	+	194.77	NA	exon (NM_008160, exon 1 of 2)	exon (NM_008160, exon 1 of 2)	342	NM_008160	14775	Mm.1090	NM_008160	ENSMUSG00000063856	Gpx1	AI195024|AL033363|CGPx|GPx-1|GSHPx-1|Gpx	glutathione peroxidase 1	protein-coding
MACS_peak_5405	chr19	3986496	3986723	+	194.16	NA	promoter-TSS (NM_027857)	promoter-TSS (NM_027857)	-52	NM_027857	71670	Mm.29735	NM_027857	ENSMUSG00000024866	Acy3	0610006H10Rik|AA3|AAIII|AW107362|Acy-3|HCBP1	aspartoacylase (aminoacylase) 3	protein-coding
MACS_peak_2633	chr12	101437451	101437950	+	193.68	NA	promoter-TSS (NM_009790)	promoter-TSS (NM_009790)	-51	NM_009790	12313	Mm.285993	NM_009790	ENSMUSG00000001175	Calm1	AI256814|AI327027|AI461935|AL024000|CaM|Calm	calmodulin 1	protein-coding
MACS_peak_3475	chr14	63379809	63380058	+	191.53	NA	promoter-TSS (NM_008715)	promoter-TSS (NM_008715)	16	NM_008715	18130	Mm.319684	NM_008715	ENSMUSG00000035161	Ints6	2900075H24Rik|AI480962|DICE1|Ddx26|HDB|Notch2l	integrator complex subunit 6	protein-coding
MACS_peak_2047	chr11	101526810	101527081	+	191.30	NA	promoter-TSS (NM_025404)	promoter-TSS (NM_025404)	90	NM_025404	80981	Mm.266840	NM_025404	ENSMUSG00000034936	Arl4d	1110036H21Rik|ARL6|AW456149|Arf4l|Arfl4|Arl5	ADP-ribosylation factor-like 4D	protein-coding
MACS_peak_3205	chr13	114584457	114584841	+	184.98	NA	promoter-TSS (NM_172595)	promoter-TSS (NM_172595)	-67	NM_172595	218639	Mm.79837	NM_172595	ENSMUSG00000042348	Arl15	A430036I03|Arfrp2|C230032K13Rik	ADP-ribosylation factor-like 15	protein-coding
MACS_peak_581	chr1	180267769	180268225	+	184.74	NA	promoter-TSS (NM_016805)	promoter-TSS (NM_016805)	-82	NM_016805	51810	Mm.86589	NM_016805	ENSMUSG00000039630	Hnrnpu	AA408410|AI256620|AL024194|AL024437|AW557595|C86794|Hnrpu|SAFA|Sp120|hnRNP U	heterogeneous nuclear ribonucleoprotein U	protein-coding
MACS_peak_1749	chr11	77499576	77499821	+	184.23	NA	promoter-TSS (NM_001024205)	promoter-TSS (NM_001024205)	57	NM_001024205	68564	Mm.428996	NM_001024205		Nufip2	1110001M19Rik|9530056D24Rik|AI256692|AI461731|PIG1|mKIAA1321	nuclear fragile X mental retardation protein interacting protein 2	protein-coding
MACS_peak_11507	chr9	122260787	122261005	+	184.05	NA	5' UTR (NM_026179, exon 1 of 7)	5' UTR (NM_026179, exon 1 of 7)	162	NM_026179	67469	Mm.280254	NM_026179	ENSMUSG00000032540	Abhd5	1300003D03Rik|2010002J10Rik|CDS|CGI-58|IECN5|NCIE2	abhydrolase domain containing 5	protein-coding
MACS_peak_1457	chr11	51420163	51420416	+	184.00	NA	promoter-TSS (NM_010448)	promoter-TSS (NM_010448)	94	NM_001048061	15384	Mm.256875	NM_010448	ENSMUSG00000020358	Hnrnpab	3010025C11Rik|CBF-A|Cgbfa|Hnrpab	heterogeneous nuclear ribonucleoprotein A/B	protein-coding
MACS_peak_4747	chr17	34256079	34256708	+	183.59	NA	non-coding (NR_037970, exon 1 of 13)	non-coding (NR_037970, exon 1 of 13)	452	NR_037970	14312	Mm.3444	NM_010238	ENSMUSG00000024335	Brd2	AW228947|D17H6S113E|Frg-1|Fsrg-1|Fsrg1|Nat|Ring3|Rnf3|mKIAA4005	bromodomain containing 2	protein-coding
MACS_peak_165	chr1	64784105	64784365	+	183.32	NA	promoter-TSS (NM_001042659)	promoter-TSS (NM_001042659)	89	NM_001042659	14367	Mm.150813	NM_022721	ENSMUSG00000045005	Fzd5	5330434N09Rik|AI427138|Fz-5|Fz5|mFz5	frizzled homolog 5 (Drosophila)	protein-coding
MACS_peak_11311	chr9	103132336	103132708	+	182.76	NA	promoter-TSS (NM_133977)	promoter-TSS (NM_133977)	94	NM_133977	22041	Mm.37214	NM_133977	ENSMUSG00000032554	Trf	AI266983|Cd176|HP|Tf|Tfn|hpx	transferrin	protein-coding
MACS_peak_3862	chr15	79913598	79913876	+	181.99	NA	promoter-TSS (NR_028281)	promoter-TSS (NR_028281)	99	NM_013762	27367	Mm.290771	NM_013762	ENSMUSG00000060036	Rpl3	F2|J1	ribosomal protein L3	protein-coding
MACS_peak_9240	chr6	125115420	125115697	+	181.65	NA	intron (NM_001289726, intron 1 of 6)	CpG-12482	233	NM_008084	14433	Mm.304088	NM_008084	ENSMUSG00000057666	Gapdh	Gapd	glyceraldehyde-3-phosphate dehydrogenase	protein-coding
MACS_peak_10925	chr9	31019192	31019503	+	181.11	NA	promoter-TSS (NM_001102456)	promoter-TSS (NM_001102456)	53	NM_001102455	11804	Mm.19133	NM_009691	ENSMUSG00000031996	Aplp2	AI790698|APLP-2	amyloid beta (A4) precursor-like protein 2	protein-coding
MACS_peak_11221	chr9	77602274	77602484	+	181.00	NA	promoter-TSS (NM_010295)	promoter-TSS (NM_010295)	37	NM_010295	14629	Mm.89888	NM_010295	ENSMUSG00000032350	Gclc	D9Wsu168e|GLCL-H|Ggcs-hs|Glclc	glutamate-cysteine ligase, catalytic subunit	protein-coding
MACS_peak_7110	chr3	108357492	108357745	+	180.39	NA	promoter-TSS (NR_028538)	promoter-TSS (NR_028538)	-298	NR_028538	100217438		NR_028538		Scarna2	MBII-382	small Cajal body-specific RNA 2	ncRNA
MACS_peak_3191	chr13	111185061	111185425	+	178.84	NA	promoter-TSS (NM_152804)	promoter-TSS (NM_152804)	-9	NM_152804	20620	Mm.380	NM_152804	ENSMUSG00000021701	Plk2	Snk	polo-like kinase 2	protein-coding
MACS_peak_7628	chr4	116358124	116358406	+	178.47	NA	promoter-TSS (NM_011034)	promoter-TSS (NM_011034)	61	NM_011034	18477	Mm.30929	NM_011034		Prdx1	MSP23|NkefA|OSF-3|OSF3|PAG|Paga|PrdxI|PrxI|TDX2|TPxA|Tdpx2|prx1	peroxiredoxin 1	protein-coding
MACS_peak_180	chr1	71699326	71699830	+	177.43	NA	promoter-TSS (NR_040308)	promoter-TSS (NR_040308)	230	NM_010233	14268	Mm.193099	NM_010233	ENSMUSG00000026193	Fn1	E330027I09|Fn|Fn-1	fibronectin 1	protein-coding
MACS_peak_8994	chr6	72548493	72548788	+	177.27	NA	promoter-TSS (NM_144917)	promoter-TSS (NM_144917)	18	NM_026159	67442	Mm.305108	NM_026159	ENSMUSG00000056666	Retsat	0610039N19Rik|C80029|MMT-7|Ppsig	retinol saturase (all trans retinol 13,14 reductase)	protein-coding
MACS_peak_5494	chr19	5843817	5845565	+	177.12	NA	non-coding (NR_003513, exon 1 of 1)	non-coding (NR_003513, exon 1 of 1)	787	NR_003513	66961	Mm.281895	NR_003513		Neat1	2310043N10Rik|VINC	nuclear paraspeckle assembly transcript 1 (non-protein coding)	ncRNA
MACS_peak_7824	chr4	134479475	134479883	+	177.12	NA	5' UTR (NM_023665, exon 1 of 5)	5' UTR (NM_023665, exon 1 of 5)	139	NM_023665	27981	Mm.331964	NM_023665	ENSMUSG00000037266	Rsrp1	2700043I21Rik|D4Ucla2|D4Wsu53e	arginine/serine rich protein 1	protein-coding
MACS_peak_2855	chr13	21923679	21924145	+	177.09	NA	TTS (NM_001177544).2	TTS (NM_001177544).2	115	NM_175657	319161	Mm.261664	NM_175657		Hist1h4n	-	histone cluster 1, H4n	protein-coding
MACS_peak_3383	chr14	51564090	51564335	+	176.13	NA	5' UTR (NM_013632, exon 1 of 6)	5' UTR (NM_013632, exon 1 of 6)	234	NM_013632	18950	Mm.17932	NM_013632	ENSMUSG00000021871	Pnp	AL024301|AU015798|Np|Np-1|Np-2|Pnp1	purine-nucleoside phosphorylase	protein-coding
MACS_peak_9964	chr7	118226373	118226594	+	175.13	NA	promoter-TSS (NM_013507)	promoter-TSS (NM_013507)	61	NM_001040131	13690	Mm.185453	NM_013507	ENSMUSG00000005610	Eif4g2	AA589388|DAP-5|E130105L11Rik|Nat1|Natm1|p97	eukaryotic translation initiation factor 4, gamma 2	protein-coding
MACS_peak_11347	chr9	106149530	106150271	+	174.52	NA	5' UTR (NM_001291835, exon 1 of 11)	5' UTR (NM_001291835, exon 1 of 11)	161	NM_001291835	11655	Mm.290578	NM_020559	ENSMUSG00000032786	Alas1	ALAS|ALAS-N|Alas-1|Alas-h	aminolevulinic acid synthase 1	protein-coding
MACS_peak_5612	chr19	18706425	18706644	+	173.97	NA	promoter-TSS (NM_017375)	promoter-TSS (NM_017375)	28	NM_145497	225994	Mm.211595	NM_145497	ENSMUSG00000037847	Nmrk1	AA408380|D630020N23Rik|Nrk1	nicotinamide riboside kinase 1	protein-coding
MACS_peak_10668	chr8	112514247	112514538	+	173.74	NA	promoter-TSS (NM_146214)	promoter-TSS (NM_146214)	56	NM_146214	234724	Mm.28110	NM_146214	ENSMUSG00000001670	Tat	-	tyrosine aminotransferase	protein-coding
MACS_peak_2798	chr13	5860285	5860532	+	173.38	NA	promoter-TSS (NM_011803)	promoter-TSS (NM_011803)	-327	NM_011803	23849	Mm.275036	NM_011803	ENSMUSG00000000078	Klf6	AI448727|BCD1|C86813|CPBP|Copeb|FM2|FM6|Ierepo1|Ierepo3|R75280|Zf9	Kruppel-like factor 6	protein-coding
MACS_peak_1902	chr11	94072662	94072959	+	173.20	NA	promoter-TSS (NM_009427)	promoter-TSS (NM_009427)	42	NM_009427	22057	Mm.259673	NM_009427	ENSMUSG00000037573	Tob1	Tob|Trob	transducer of ErbB-2.1	protein-coding
MACS_peak_2995	chr13	51941968	51942328	+	172.96	NA	5' UTR (NM_011817, exon 1 of 4)	5' UTR (NM_011817, exon 1 of 4)	104	NM_011817	23882	Mm.281298	NM_011817	ENSMUSG00000021453	Gadd45g	AI327420|C86281|CR6|DDIT2|OIG37	growth arrest and DNA-damage-inducible 45 gamma	protein-coding
MACS_peak_2326	chr12	7984372	7984772	+	170.69	NA	promoter-TSS (NM_009693)	promoter-TSS (NM_009693)	89	NM_009693	238055	Mm.221239	NM_009693	ENSMUSG00000020609	Apob	AI315052|Apo B-100|apob-100|apob-48	apolipoprotein B	protein-coding
MACS_peak_10634	chr8	108467102	108467473	+	170.53	NA	promoter-TSS (NM_008490)	promoter-TSS (NM_008490)	15	NM_008490	16816	Mm.1593	NM_008490	ENSMUSG00000035237	Lcat	AI046659|D8Wsu61e	lecithin cholesterol acyltransferase	protein-coding
MACS_peak_3866	chr15	80085842	80086091	+	169.28	NA	5' UTR (NM_009716, exon 1 of 3)	5' UTR (NM_009716, exon 1 of 3)	352	NM_009716	11911	Mm.641	NM_009716	ENSMUSG00000042406	Atf4	Atf-4|C/ATF|CREB2|TAXREB67	activating transcription factor 4	protein-coding
MACS_peak_7018	chr3	96049369	96049657	+	169.05	NA	promoter-TSS (NM_013549)	promoter-TSS (NM_013549)	93	NM_013549	15267	Mm.5220	NM_013549	ENSMUSG00000063954	Hist2h2aa1	AI448581|H2a-614|H2a-615|Hist2	histone cluster 2, H2aa1	protein-coding
MACS_peak_2978	chr13	48973855	48974135	+	168.89	NA	TTS (NM_001033268)	TTS (NM_001033268)	-7741	NM_011078	18676	Mm.486213	NM_011078	ENSMUSG00000038025	Phf2	GRC5	PHD finger protein 2	protein-coding
MACS_peak_9884	chr7	106330756	106331308	+	168.89	NA	5' UTR (NM_026384, exon 1 of 8)	5' UTR (NM_026384, exon 1 of 8)	191	NM_026384	67800	Mm.180189	NM_026384	ENSMUSG00000030747	Dgat2	0610010B06Rik|ARAT|DGAT-2	diacylglycerol O-acyltransferase 2	protein-coding
MACS_peak_2618	chr12	92828191	92828477	+	168.52	NA	promoter-TSS (NM_031391)	promoter-TSS (NM_031391)	-245	NM_031391	83602	Mm.275728	NM_031391	ENSMUSG00000020962	Gtf2a1	6330549H03Rik|AA536742|AA959775|AW060250|TfIIAa/b|Tfiia1	general transcription factor II A, 1	protein-coding
MACS_peak_6257	chr2	103325088	103325564	+	167.73	NA	promoter-TSS (NM_009804)	promoter-TSS (NM_009804)	-16	NM_009804	12359	Mm.4215	NM_009804	ENSMUSG00000027187	Cat	2210418N07|Cas-1|Cas1|Cs-1	catalase	protein-coding
MACS_peak_10512	chr8	87186601	87186836	+	167.36	NA	promoter-TSS (NM_010499)	promoter-TSS (NM_010499)	33	NM_010499	15936	Mm.399	NM_010499	ENSMUSG00000053560	Ier2	AI317238|Ch1|Pip92	immediate early response 2	protein-coding
MACS_peak_2404	chr12	45310833	45311150	+	166.25	NA	promoter-TSS (NM_013760)	promoter-TSS (NM_013760)	64	NM_013760	27362	Mm.27432	NM_013760	ENSMUSG00000014905	Dnajb9	AA408011|AA673251|AA673481|AW556981|ERdj4|Mdg1|mDj7	DnaJ (Hsp40) homolog, subfamily B, member 9	protein-coding
MACS_peak_812	chr10	53795366	53795618	+	164.93	NA	promoter-TSS (NR_038016)	promoter-TSS (NR_038016)	110	NM_008548	17155	Mm.117294	NM_008548	ENSMUSG00000003746	Man1a	Man1a1|PCR1	mannosidase 1, alpha	protein-coding
MACS_peak_2202	chr11	116714228	116714486	+	164.20	NA	promoter-TSS (NM_011358)	promoter-TSS (NM_011358)	51	NM_011358	20382	Mm.21841	NM_011358	ENSMUSG00000034120	Srsf2	D11Wsu175e|MRF-1|Pr264|SC35|Sfrs10|Sfrs2	serine/arginine-rich splicing factor 2	protein-coding
MACS_peak_8707	chr5	143668130	143668497	+	163.37	NA	promoter-TSS (NM_007393)	promoter-TSS (NM_007393)	90	NM_007393	11461	Mm.328431	NM_007393	ENSMUSG00000029580	Actb	Actx|E430023M04Rik|beta-actin	actin, beta	protein-coding
MACS_peak_7843	chr4	135699479	135700147	+	161.81	NA	promoter-TSS (NM_008321)	promoter-TSS (NM_008321)	76	NM_008321	15903	Mm.110	NM_008321		Id3	Hlh462|Idb3|bHLHb25	inhibitor of DNA binding 3	protein-coding
MACS_peak_6379	chr2	127951719	127951951	+	161.44	NA	promoter-TSS (NM_207681)	promoter-TSS (NM_207681)	61	NM_009754	12125	Mm.141083	NM_009754	ENSMUSG00000027381	Bcl2l11	1500006F24Rik|Bim|Bod|bcl2-L-11	BCL2-like 11 (apoptosis facilitator)	protein-coding
MACS_peak_629	chr1	186669581	186669780	+	161.43	NA	promoter-TSS (NM_133684)	promoter-TSS (NM_133684)	46	NM_133684	67247	Mm.177724	NM_133684	ENSMUSG00000073481	Marc2	2810484M10Rik|Mosc2|mARC1	mitochondrial amidoxime reducing component 2	protein-coding
MACS_peak_6994	chr3	95462391	95462861	+	161.42	NA	promoter-TSS (NM_008562)	promoter-TSS (NM_008562)	-17	NM_008562	17210	Mm.1639	NM_008562	ENSMUSG00000038612	Mcl1	AW556805|Mcl-1	myeloid cell leukemia sequence 1	protein-coding
MACS_peak_11013	chr9	46036672	46037573	+	161.34	NA	intron (NM_009692, intron 2 of 3)	intron (NM_009692, intron 2 of 3)	409	NM_009692	11806	Mm.26743	NM_009692	ENSMUSG00000032083	Apoa1	Alp-1|Apoa-1|Brp-14|Ltw-1|Lvtw-1|Sep-1|Sep-2|Sep2|apo-AI|apoA-I	apolipoprotein A-I	protein-coding
MACS_peak_143	chr1	59538929	59539165	+	161.16	NA	promoter-TSS (NM_008057)	promoter-TSS (NM_008057)	56	NM_008057	14369	Mm.297906	NM_008057	ENSMUSG00000041075	Fzd7	Fz7	frizzled homolog 7 (Drosophila)	protein-coding
MACS_peak_11408	chr9	108469794	108470052	+	160.33	NA	promoter-TSS (NR_029577)	promoter-TSS (NR_029577)	-250	NM_023247	66706	Mm.29471	NM_023247	ENSMUSG00000070283	Ndufaf3	4733401H18Rik	NADH dehydrogenase (ubiquinone) 1 alpha subcomplex, assembly factor 3	protein-coding
MACS_peak_9088	chr6	90500751	90500973	+	159.86	NA	promoter-TSS (NM_027406)	promoter-TSS (NM_027406)	20	NM_027406	107747	Mm.30035	NM_027406	ENSMUSG00000030088	Aldh1l1	1810048F20Rik|FDH|Fthfd|Neut2	aldehyde dehydrogenase 1 family, member L1	protein-coding
MACS_peak_10976	chr9	44142700	44142976	+	159.76	NA	promoter-TSS (NM_010436)	promoter-TSS (NM_010436)	40	NM_010436	15270	Mm.245931	NM_010436	ENSMUSG00000049932	H2afx	AW228881|H2A.X|H2ax|Hist5-2ax|gammaH2ax	H2A histone family, member X	protein-coding
MACS_peak_821	chr10	58786062	58786259	+	159.76	NA	5' UTR (NM_011030, exon 1 of 15)	5' UTR (NM_011030, exon 1 of 15)	116	NM_011030	18451	Mm.2212	NM_011030	ENSMUSG00000019916	P4ha1	AL022634|P4ha	procollagen-proline, 2-oxoglutarate 4-dioxygenase (proline 4-hydroxylase), alpha 1 polypeptide	protein-coding
MACS_peak_2893	chr13	24892998	24893279	+	159.60	NA	promoter-TSS (NM_024473)	promoter-TSS (NM_024473)	-388	NM_024473	79555	Mm.266668	NM_024473		BC005537	8030460C05Rik|C78201	cDNA sequence BC005537	protein-coding
MACS_peak_1594	chr11	62416299	62416547	+	158.60	NA	promoter-TSS (NR_028550)	promoter-TSS (NR_028550)	44	NR_030738	69221	Mm.270874	NR_030738	ENSMUSG00000086841	2410006H16Rik	-	RIKEN cDNA 2410006H16 gene	ncRNA
MACS_peak_2210	chr11	117515689	117515942	+	158.25	NA	5' UTR (NM_198022, exon 1 of 22)	5' UTR (NM_198022, exon 1 of 22)	212	NM_198022	217351	Mm.40272	NM_198022	ENSMUSG00000025571	Tnrc6c	9930033H14Rik|mKIAA1582	trinucleotide repeat containing 6C	protein-coding
MACS_peak_2366	chr12	25780724	25781435	+	157.15	NA	promoter-TSS (NM_010496)	promoter-TSS (NM_010496)	-122	NM_010496	15902	Mm.34871	NM_010496	ENSMUSG00000020644	Id2	AI255428|C78922|Idb2|bHLHb26	inhibitor of DNA binding 2	protein-coding
MACS_peak_9611	chr7	35903905	35904767	+	157.05	NA	promoter-TSS (NM_007678)	promoter-TSS (NM_007678)	24	NM_007678	12606	Mm.349667	NM_007678	ENSMUSG00000034957	Cebpa	C/ebpalpha|CBF-A|Cebp	CCAAT/enhancer binding protein (C/EBP), alpha	protein-coding
MACS_peak_3732	chr15	59480121	59480401	+	155.23	NA	promoter-TSS (NM_144549)	promoter-TSS (NM_144549)	52	NM_144549	211770	Mm.40298	NM_144549	ENSMUSG00000032501	Trib1	A530090O15Rik|TRB-1|Trb1	tribbles homolog 1 (Drosophila)	protein-coding
MACS_peak_3109	chr13	81022508	81022814	+	155.23	NA	promoter-TSS (NM_001042591)	promoter-TSS (NM_001042591)	-22	NM_001042591	105171	Mm.423137	NM_001042591	ENSMUSG00000074794	Arrdc3	AI450344|mKIAA1376	arrestin domain containing 3	protein-coding
MACS_peak_10466	chr8	79425796	79425992	+	154.63	NA	promoter-TSS (NM_001083906)	promoter-TSS (NM_001083906)	-513	NM_001083906	110784	Mm.324393	NM_001083906	ENSMUSG00000031618	Nr3c2	MR|Mlr	nuclear receptor subfamily 3, group C, member 2	protein-coding
MACS_peak_6835	chr3	65332291	65332529	+	154.44	NA	promoter-TSS (NM_178892)	promoter-TSS (NM_178892)	41	NM_178892	99929	Mm.246398	NM_178892	ENSMUSG00000034640	Tiparp	ARTD14|AW558171|PARP7	TCDD-inducible poly(ADP-ribose) polymerase	protein-coding
MACS_peak_2399	chr12	40949579	40949847	+	153.95	NA	promoter-TSS (NR_035459)	promoter-TSS (NR_035459)	63	NM_013562	15982	Mm.168	NM_013562		Ifrd1	Ifnl|PC4|Tis7	interferon-related developmental regulator 1	protein-coding
MACS_peak_398	chr1	135975511	135975768	+	153.64	NA	promoter-TSS (NM_007570)	promoter-TSS (NM_007570)	93	NM_007570	12227	Mm.392646	NM_007570	ENSMUSG00000020423	Btg2	AA959598|APRO1|Pc3|TIS21	B cell translocation gene 2, anti-proliferative	protein-coding
MACS_peak_8990	chr6	72389347	72389608	+	153.52	NA	promoter-TSS (NM_145569)	promoter-TSS (NM_145569)	75	NM_145569	232087	Mm.29815	NM_145569	ENSMUSG00000053907	Mat2a	D630045P18Rik	methionine adenosyltransferase II, alpha	protein-coding
MACS_peak_10521	chr8	87370591	87370834	+	153.20	NA	5' UTR (NM_007591, exon 1 of 9)	5' UTR (NM_007591, exon 1 of 9)	118	NM_007591	12317	Mm.1971	NM_007591	ENSMUSG00000003814	Calr	CRT|Calregulin	calreticulin	protein-coding
MACS_peak_8574	chr5	125869468	125870208	+	152.82	NA	intron (NM_019639, intron 1 of 1)	CpG	549	NM_019639	22190	Mm.331	NM_019639	ENSMUSG00000008348	Ubc	2700054O04Rik|AI194771|Rps27a|TI-225|Uba52|Ubb	ubiquitin C	protein-coding
MACS_peak_11487	chr9	120842515	120842741	+	152.76	NA	promoter-TSS (NM_001165902)	promoter-TSS (NM_001165902)	-68	NM_001165902	12387	Mm.291928	NM_007614	ENSMUSG00000006932	Ctnnb1	Bfc|Catnb|Mesc	catenin (cadherin associated protein), beta 1	protein-coding
MACS_peak_2160	chr11	115024570	115024846	+	152.22	NA	promoter-TSS (NM_012030)	promoter-TSS (NM_012030)	53	NM_012030	26941	Mm.27842	NM_012030	ENSMUSG00000020733	Slc9a3r1	EBP-50|NHE-RF|NHERF-1|NHERF1	solute carrier family 9 (sodium/hydrogen exchanger), member 3 regulator 1	protein-coding
MACS_peak_3071	chr13	64471452	64471866	+	152.19	NA	promoter-TSS (NM_009984)	promoter-TSS (NM_009984)	-45	NM_009984	13039	Mm.930	NM_009984	ENSMUSG00000021477	Ctsl	1190035F06Rik|Ctsl1|MEP|fs|nkt	cathepsin L	protein-coding
MACS_peak_6175	chr2	75542340	75542630	+	151.84	NA	5' UTR (NM_010902, exon 1 of 5)	5' UTR (NM_010902, exon 1 of 5)	213	NM_010902	18024	Mm.1025	NM_010902	ENSMUSG00000015839	Nfe2l2	AI194320|Nrf2	nuclear factor, erythroid derived 2, like 2	protein-coding
MACS_peak_4821	chr17	45710072	45710277	+	151.82	NA	promoter-TSS (NM_008302)	promoter-TSS (NM_008302)	36	NM_008302	15516	Mm.2180	NM_008302	ENSMUSG00000023944	Hsp90ab1	90kDa|AL022974|C81438|Hsp84|Hsp84-1|Hsp90|Hspcb	heat shock protein 90 alpha (cytosolic), class B member 1	protein-coding
MACS_peak_3176	chr13	102537969	102538188	+	151.61	NA	promoter-TSS (NM_001077495)	promoter-TSS (NM_001077495)	94	NM_001077495	18708	Mm.259333	NM_001024955	ENSMUSG00000041417	Pik3r1	PI3K|p50alpha|p55alpha|p85alpha	phosphatidylinositol 3-kinase, regulatory subunit, polypeptide 1 (p85 alpha)	protein-coding
MACS_peak_2429	chr12	55838878	55839737	+	151.61	NA	Intergenic	Intergenic	-42455	NM_025456	66266	Mm.156440	NM_025456	ENSMUSG00000054302	Eapp	1810011O16Rik	E2F-associated phosphoprotein	protein-coding
MACS_peak_4013	chr15	98507713	98507976	+	151.39	NA	promoter-TSS (NM_172612)	promoter-TSS (NM_172612)	48	NM_172612	223881	Mm.274010	NM_172612	ENSMUSG00000054855	Rnd1	A830014L09Rik|Arhs	Rho family GTPase 1	protein-coding
MACS_peak_862	chr10	62801661	62801836	+	151.23	NA	promoter-TSS (NM_019812)	promoter-TSS (NM_019812)	32	NM_019812	93759	Mm.351459	NM_019812	ENSMUSG00000020063	Sirt1	AA673258|SIR2L1|Sir2|Sir2a|Sir2alpha	sirtuin 1	protein-coding
MACS_peak_9775	chr7	74789885	74790150	+	150.89	NA	intron (NR_028143, intron 1 of 9)	CpG	105	NM_175124	67867	Mm.31247	NM_027413	ENSMUSG00000030556	Lrrc28	1300004K21Rik|2210012C09Rik|2310058O11Rik	leucine rich repeat containing 28	protein-coding
MACS_peak_6589	chr2	164268074	164268774	+	150.83	NA	intron (NM_011521, intron 1 of 4)	intron (NM_011521, intron 1 of 4)	264	NM_011521	20971	Mm.3815	NM_011521	ENSMUSG00000017009	Sdc4	AA959608|AW108331|Synd4|ryudocan|syndecan-4	syndecan 4	protein-coding
MACS_peak_2398	chr12	40763827	40764027	+	149.90	NA	promoter-TSS (NM_007487)	promoter-TSS (NM_007487)	36	NM_007487	11861	Mm.12723	NM_007487	ENSMUSG00000047446	Arl4a	AI467555|Arl4	ADP-ribosylation factor-like 4A	protein-coding
MACS_peak_5344	chr18	75120737	75120975	+	149.81	NA	promoter-TSS (NM_010720)	promoter-TSS (NM_010720)	61	NM_010720	16891	Mm.299647	NM_010720	ENSMUSG00000053846	Lipg	3110013K01Rik|EL|lipase|mEDL	lipase, endothelial	protein-coding
MACS_peak_6671	chr2	179711497	179711781	+	148.73	NA	promoter-TSS (NM_001081092)	promoter-TSS (NM_001081092)	81	NR_033782	66730	Mm.31773	NR_033782	ENSMUSG00000085704	4921531C22Rik	-	RIKEN cDNA 4921531C22 gene	ncRNA
MACS_peak_2331	chr12	8506644	8507169	+	148.46	NA	promoter-TSS (NM_007483)	promoter-TSS (NM_007483)	-115	NM_007483	11852	Mm.687	NM_007483	ENSMUSG00000054364	Rhob	AA017882|Arh6|Arhb	ras homolog gene family, member B	protein-coding
MACS_peak_3998	chr15	96530029	96530328	+	148.27	NA	promoter-TSS (NM_175121)	promoter-TSS (NM_175121)	-49	NM_175121	67760	Mm.46754	NM_175121	ENSMUSG00000022462	Slc38a2	5033402L14Rik|AI316867|ATA2|SAT2|mKIAA1382	solute carrier family 38, member 2	protein-coding
MACS_peak_8567	chr5	125821224	125821552	+	148.05	NA	promoter-TSS (NM_001205082)	promoter-TSS (NM_001205082)	76	NM_016741	20778	Mm.282242	NM_016741	ENSMUSG00000037936	Scarb1	AI120173|CD36|Cd36l1|Cla-1|Cla1|D5Ertd460e|Hdlq1|Hlb398|SR-B1|SR-BI|SRBI|Srb1|mSR-BI	scavenger receptor class B, member 1	protein-coding
MACS_peak_7063	chr3	101408474	101408671	+	148.05	NA	promoter-TSS (NM_144900)	promoter-TSS (NM_144900)	58	NM_144900	11928	Mm.280103	NM_144900	ENSMUSG00000033161	Atp1a1	Atpa-1|BC010319	ATPase, Na+/K+ transporting, alpha 1 polypeptide	protein-coding
MACS_peak_4233	chr16	22265864	22266077	+	148.05	NA	promoter-TSS (NM_009186)	promoter-TSS (NM_009186)	32	NM_009186	20462	Mm.210352	NM_009186		Tra2b	5730405G21Rik|D16Ertd266e|SIG-41|Sfrs10|Silg41|TRA2beta	transformer 2 beta homolog (Drosophila)	protein-coding
MACS_peak_5571	chr19	10056867	10057425	+	147.74	NA	promoter-TSS (NM_010239)	promoter-TSS (NM_010239)	10	NM_010239	14319	Mm.1776	NM_010239	ENSMUSG00000024661	Fth1	FHC|Fth|HFt|MFH	ferritin heavy chain 1	protein-coding
MACS_peak_8950	chr6	66987244	66987462	+	147.58	NA	promoter-TSS (NM_007836)	promoter-TSS (NM_007836)	48	NM_007836	13197	Mm.72235	NM_007836	ENSMUSG00000036390	Gadd45a	AA545191|Ddit1|GADD45	growth arrest and DNA-damage-inducible 45 alpha	protein-coding
MACS_peak_7577	chr4	107790828	107791256	+	146.98	NA	exon (NM_011327, exon 1 of 16)	exon (NM_011327, exon 1 of 16)	110	NM_011327	20280	Mm.379011	NM_011327	ENSMUSG00000028603	Scp2	AA409774|AA409893|C76618|C79031|NSL-TP|SCP-2|SCP-X|SCPX|ns-LTP	sterol carrier protein 2, liver	protein-coding
MACS_peak_8352	chr5	93696550	93696775	+	146.93	NA	promoter-TSS (NM_007635)	promoter-TSS (NM_007635)	63	NM_007635	12452	Mm.3527	NM_007635	ENSMUSG00000029385	Ccng2	-	cyclin G2	protein-coding
MACS_peak_5409	chr19	4037747	4038125	+	146.12	NA	promoter-TSS (NM_013541)	promoter-TSS (NM_013541)	-24	NM_013541	14870	Mm.299292	NM_013541	ENSMUSG00000060803	Gstp1	GstpiB	glutathione S-transferase, pi 1	protein-coding
MACS_peak_1098	chr10	96079545	96079813	+	145.93	NA	promoter-TSS (NM_007569)	promoter-TSS (NM_007569)	44	NM_007569	12226	Mm.23811	NM_007569	ENSMUSG00000036478	Btg1	AI426953|AW546738	B cell translocation gene 1, anti-proliferative	protein-coding
MACS_peak_2169	chr11	115375504	115375772	+	145.82	NA	promoter-TSS (NM_008258)	promoter-TSS (NM_008258)	46	NM_008258	15374	Mm.1775	NM_008258	ENSMUSG00000020737	Hn1	-	hematological and neurological expressed sequence 1	protein-coding
MACS_peak_7790	chr4	132925598	132925862	+	144.86	NA	promoter-TSS (NR_039582)	promoter-TSS (NR_039582)	39	NR_039582	100628620		NR_039582	miRBase:MI0018031	Mir5122	mmu-mir-5122|mu-mir-5122	microRNA 5122	ncRNA
MACS_peak_6400	chr2	130100113	130100334	+	144.86	NA	promoter-TSS (NM_024193)	promoter-TSS (NM_024193)	75	NM_024193	67134	Mm.29363	NM_024193	ENSMUSG00000027405	Nop56	2310044F10Rik|Nol5a	NOP56 ribonucleoprotein	protein-coding
MACS_peak_2194	chr11	116059734	116060150	+	144.78	NA	promoter-TSS (NM_027107)	promoter-TSS (NM_027107)	-227	NM_027107	69535	Mm.390347	NM_027107	ENSMUSG00000020778	Ten1	2310004N24Rik	TEN1 telomerase capping complex subunit	protein-coding
MACS_peak_7046	chr3	97432647	97432984	+	144.40	NA	promoter-TSS (NM_001161765)	promoter-TSS (NM_001161765)	54	NM_010232	14263	Mm.385180	NM_010232	ENSMUSG00000028088	Fmo5	5033418D19Rik|AI195026	flavin containing monooxygenase 5	protein-coding
MACS_peak_8460	chr5	115722775	115722950	+	143.30	NA	promoter-TSS (NM_016698)	promoter-TSS (NM_016698)	42	NM_016698	50849	Mm.30051	NM_016698	ENSMUSG00000041740	Rnf10	AA675014|RIE2|mKIAA0262	ring finger protein 10	protein-coding
MACS_peak_457	chr1	155587409	155587748	+	143.29	NA	promoter-TSS (NM_011267)	promoter-TSS (NM_011267)	95	NM_011267	19734	Mm.181709	NM_011267	ENSMUSG00000026475	Rgs16	Rgs14|Rgsr	regulator of G-protein signaling 16	protein-coding
MACS_peak_1592	chr11	62364939	62365192	+	142.90	NA	promoter-TSS (NM_011664)	promoter-TSS (NM_011664)	59	NM_011664	22187	Mm.282093	NM_011664		Ubb	AL033289|Rps27a|Uba52|Ubb2|Ubc	ubiquitin B	protein-coding
MACS_peak_2296	chr11	120685186	120685500	+	142.04	NA	intron (NM_007988, intron 1 of 42)	CpG	518	NM_007988	14104	Mm.236443	NM_007988	ENSMUSG00000025153	Fasn	A630082H08Rik|FAS	fatty acid synthase	protein-coding
MACS_peak_2423	chr12	55797668	55798020	+	141.72	NA	promoter-TSS (NM_025456)	promoter-TSS (NM_025456)	-992	NM_025456	66266	Mm.156440	NM_025456	ENSMUSG00000054302	Eapp	1810011O16Rik	E2F-associated phosphoprotein	protein-coding
MACS_peak_10112	chr7	146100935	146101232	+	141.69	NA	5' UTR (NM_009760, exon 1 of 6)	5' UTR (NM_009760, exon 1 of 6)	106	NM_009760	12176	Mm.378890	NM_009760	ENSMUSG00000078566	Bnip3	Nip3	BCL2/adenovirus E1B interacting protein 3	protein-coding
MACS_peak_547	chr1	173155141	173155535	+	141.64	NA	intron (NM_013474, intron 1 of 3)	intron (NM_013474, intron 1 of 3)	153	NM_013474	11807	Mm.389209	NM_013474	ENSMUSG00000005681	Apoa2	Alp-2|ApoA-II|ApoAII|Apoa-2|Hdl-1	apolipoprotein A-II	protein-coding
MACS_peak_3546	chr14	76904143	76904493	+	141.42	NA	promoter-TSS (NM_009366)	promoter-TSS (NM_009366)	1	NM_009366	21807	Mm.153272	NM_009366	ENSMUSG00000022010	Tsc22d1	AA589566|AW105905|Egr5|TSC-22|Tgfb1i4|Tsc|Tsc22	TSC22 domain family, member 1	protein-coding
MACS_peak_6507	chr2	154876261	154876581	+	141.33	NA	exon (NM_015770, exon 4 of 4)	exon (NM_015770, exon 4 of 4)	23812	NM_016661	269378	Mm.330692	NM_016661	ENSMUSG00000027597	Ahcy	AA987153|AL024110|CuBP|SAHH	S-adenosylhomocysteine hydrolase	protein-coding
MACS_peak_9370	chr7	4828619	4828880	+	141.15	NA	promoter-TSS (NM_001101598)	promoter-TSS (NM_001101598)	94	NM_001101598	664994	Mm.302624	NM_001101598	ENSMUSG00000086784	Isoc2a	Isoc2	isochorismatase domain containing 2a	protein-coding
MACS_peak_5033	chr17	84586997	84587366	+	140.37	NA	5' UTR (NM_001001806, exon 1 of 2)	5' UTR (NM_001001806, exon 1 of 2)	106	NM_001001806	12193	Mm.259321	NM_001001806	ENSMUSG00000045817	Zfp36l2	Brf2|ERF2|Tis11d	zinc finger protein 36, C3H type-like 2	protein-coding
MACS_peak_3802	chr15	76527099	76527401	+	140.12	NA	promoter-TSS (NM_182805)	promoter-TSS (NM_182805)	56	NM_182805	76282	Mm.30130	NM_182805	ENSMUSG00000022546	Gpt	1300007J06Rik|2310022B03Rik|ALT|Gpt-1|Gpt1	glutamic pyruvic transaminase, soluble	protein-coding
MACS_peak_9873	chr7	105457819	105458089	+	139.99	NA	promoter-TSS (NM_025408)	promoter-TSS (NM_025408)	83	NM_025408	66190	Mm.334041	NM_025408	ENSMUSG00000030760	Acer3	1110057L18Rik|5430429L08Rik|AV015045|Phca	alkaline ceramidase 3	protein-coding
MACS_peak_3540	chr14	76186543	76187129	+	139.98	NA	promoter-TSS (NM_026232)	promoter-TSS (NM_026232)	8	NM_026232	67554	Mm.46067	NM_026232	ENSMUSG00000022003	Slc25a30	4933433D23Rik|AV025504|AV221431|AW319655|KMCP1	solute carrier family 25, member 30	protein-coding
MACS_peak_231	chr1	78654351	78654598	+	139.98	NA	promoter-TSS (NM_001136226)	promoter-TSS (NM_001136226)	74	NM_001001981	195434	Mm.276016	NM_001001981	ENSMUSG00000079470	Utp14b	4932411L21Rik|jsd	UTP14, U3 small nucleolar ribonucleoprotein, homolog B (yeast)	protein-coding
MACS_peak_2877	chr13	23713878	23714509	+	139.57	NA	exon (NM_015787, exon 1 of 1)	exon (NM_015787, exon 1 of 1)	234	NM_015787	50709	Mm.170587	NM_015787		Hist1h1e	H1-4|H1e|H1f4|H1s-4|H1var2	histone cluster 1, H1e	protein-coding
MACS_peak_731	chr10	21714203	21714649	+	139.54	NA	promoter-TSS (NM_011361)	promoter-TSS (NM_011361)	-46	NM_011361	20393	Mm.28405	NM_011361	ENSMUSG00000019970	Sgk1	Sgk	serum/glucocorticoid regulated kinase 1	protein-coding
MACS_peak_2082	chr11	102977476	102977780	+	138.33	NA	promoter-TSS (NM_138753)	promoter-TSS (NM_138753)	-11	NM_138753	192231	Mm.8763	NM_138753	ENSMUSG00000048878	Hexim1	7330426E13Rik|CLP-1|Clp1|HIS1	hexamethylene bis-acetamide inducible 1	protein-coding
MACS_peak_3500	chr14	66743123	66743390	+	138.33	NA	exon (NM_007940, exon 1 of 19)	exon (NM_007940, exon 1 of 19)	103	NM_001271402	13850	Mm.15295	NM_007940	ENSMUSG00000022040	Ephx2	CEH|Eph2|SEH|sEP	epoxide hydrolase 2, cytoplasmic	protein-coding
MACS_peak_712	chr10	17442934	17443204	+	137.35	NA	promoter-TSS (NM_010828)	promoter-TSS (NM_010828)	35	NM_010828	17684	Mm.272321	NM_010828	ENSMUSG00000039910	Cited2	AI835299|ER154-like|Mrg1|Msg2|p35srj	Cbp/p300-interacting transactivator, with Glu/Asp-rich carboxy-terminal domain, 2	protein-coding
MACS_peak_9875	chr7	105509540	105509851	+	136.96	NA	intron (NM_001168540, intron 1 of 2)	CpG	103	NM_001168540	244152	Mm.25317	NM_001024619	ENSMUSG00000049580	Tsku	9530051K01Rik|E2ig4|Lrrc54|Tsk	tsukushi	protein-coding
MACS_peak_6107	chr2	51004479	51004728	+	136.96	NA	promoter-TSS (NM_028810)	promoter-TSS (NM_028810)	28	NM_028810	74194	Mm.46497	NM_028810	ENSMUSG00000017144	Rnd3	2610017M01Rik|AI661404|Arhe|Rhoe	Rho family GTPase 3	protein-coding
MACS_peak_3263	chr14	21748569	21748861	+	136.88	NA	promoter-TSS (NM_009502)	promoter-TSS (NM_009502)	60	NM_009502	22330	Mm.279361	NM_009502	ENSMUSG00000021823	Vcl	9430097D22|AA571387|AI462105|AW545629	vinculin	protein-coding
MACS_peak_6019	chr2	31325743	31326468	+	136.78	NA	intron (NM_007494, intron 1 of 15)	intron (NM_007494, intron 1 of 15)	315	NM_007494	11898	Mm.3217	NM_007494	ENSMUSG00000076441	Ass1	AA408052|ASS|Ass-1|fold	argininosuccinate synthetase 1	protein-coding
MACS_peak_462	chr1	156946545	156946831	+	136.70	NA	promoter-TSS (NM_010500)	promoter-TSS (NM_010500)	78	NM_010500	15939	Mm.12246	NM_010500	ENSMUSG00000056708	Ier5	-	immediate early response 5	protein-coding
MACS_peak_6650	chr2	172978469	172979927	+	136.58	NA	intron (NM_011044, intron 2 of 9)	intron (NM_011044, intron 2 of 9)	624	NM_011044	18534	Mm.266867	NM_011044	ENSMUSG00000027513	Pck1	AI265463|PEPCK|Pck-1	phosphoenolpyruvate carboxykinase 1, cytosolic	protein-coding
MACS_peak_4690	chr17	29627676	29627909	+	136.51	NA	promoter-TSS (NM_008842)	promoter-TSS (NM_008842)	-198	NM_008842	18712	Mm.405293	NM_008842		Pim1	Pim-1	proviral integration site 1	protein-coding
MACS_peak_5694	chr19	36810961	36811230	+	136.31	NA	promoter-TSS (NM_016854)	promoter-TSS (NM_016854)	-1	NM_016854	53412	Mm.24724	NM_016854	ENSMUSG00000067279	Ppp1r3c	PTG|Ppp1r5	protein phosphatase 1, regulatory (inhibitor) subunit 3C	protein-coding
MACS_peak_2111	chr11	106362150	106362505	+	135.72	NA	promoter-TSS (NR_030703)	promoter-TSS (NR_030703)	22	NR_030703	100216537		NR_030703	ENSMUSG00000065126	Snord104	-	small nucleolar RNA, C/D box 104	snoRNA
MACS_peak_10165	chr7	148621048	148621286	+	135.39	NA	promoter-TSS (NM_001177576)	promoter-TSS (NM_001177576)	-674	NM_001177576	68267	Mm.33729	NM_026646	ENSMUSG00000019082	Slc25a22	1300006L01Rik|AI060884|Gc1	solute carrier family 25 (mitochondrial carrier, glutamate), member 22	protein-coding
MACS_peak_2001	chr11	100388961	100389256	+	135.39	NA	intron (NM_001199296, intron 1 of 28)	CpG	206	NM_134037	104112	Mm.282039	NM_134037	ENSMUSG00000020917	Acly	A730098H14Rik|AW538652	ATP citrate lyase	protein-coding
MACS_peak_7471	chr4	62021726	62021965	+	134.23	NA	promoter-TSS (NM_001045528)	promoter-TSS (NM_001045528)	110	NM_175090	20529	Mm.248637	NM_175090	ENSMUSG00000066150	Slc31a1	4930445G01Rik|AI787263|AU016967|Ctr1	solute carrier family 31, member 1	protein-coding
MACS_peak_8108	chr5	28397832	28398806	+	133.85	NA	exon (NM_153526, exon 1 of 5)	exon (NM_153526, exon 1 of 5)	367	NM_153526	231070	Mm.30221	NM_153526	ENSMUSG00000045294	Insig1	1810013C12Rik|Insig-1	insulin induced gene 1	protein-coding
MACS_peak_5537	chr19	7132125	7132409	+	133.83	NA	intron (NM_134147, intron 1 of 10)	intron (NM_134147, intron 1 of 10)	1009	NM_134147	107227	Mm.439977	NM_134147	ENSMUSG00000036278	Macrod1	AI604841|AW743046|D930010J01Rik|Lrp16	MACRO domain containing 1	protein-coding
MACS_peak_9720	chr7	54101139	54101402	+	133.83	NA	promoter-TSS (NM_010699)	promoter-TSS (NM_010699)	96	NR_102727	16828	Mm.29324	NM_010699	ENSMUSG00000063229	Ldha	Ldh1|Ldhm|l7R2	lactate dehydrogenase A	protein-coding
MACS_peak_2884	chr13	23830557	23831121	+	133.43	NA	exon (NM_015786, exon 1 of 1)	exon (NM_015786, exon 1 of 1)	163	NM_015786	50708	Mm.193539	NM_015786	ENSMUSG00000036181	Hist1h1c	0610008C09Rik|H1.2|H1c|H1f2|H1var1|His1a	histone cluster 1, H1c	protein-coding
MACS_peak_6616	chr2	166888655	166888871	+	133.43	NA	promoter-TSS (NM_001033196)	promoter-TSS (NM_001033196)	-248	NM_001033196	98999	Mm.297074	NM_001033196	ENSMUSG00000039501	Znfx1	AI481105	zinc finger, NFX1-type containing 1	protein-coding
MACS_peak_2794	chr13	3892614	3892862	+	133.35	NA	promoter-TSS (NM_001047159)	promoter-TSS (NM_001047159)	89	NM_001047159	56349	Mm.22261	NM_019671	ENSMUSG00000021215	Net1	Net1a|mNET1	neuroepithelial cell transforming gene 1	protein-coding
MACS_peak_1448	chr11	50191158	50191422	+	132.85	NA	promoter-TSS (NM_021510)	promoter-TSS (NM_021510)	69	NM_021510	59013	Mm.21740	NM_021510	ENSMUSG00000007850	Hnrnph1	AI642080|E430005G16Rik|Hnrnph|Hnrph1	heterogeneous nuclear ribonucleoprotein H1	protein-coding
MACS_peak_10221	chr8	11555998	11556217	+	132.50	NA	promoter-TSS (NM_011919)	promoter-TSS (NM_011919)	41	NM_011919	26356	Mm.25709	NM_011919	ENSMUSG00000045969	Ing1	2610028J21Rik|AA407184|AI875420|mING1h|p33Ing1|p37Ing1b	inhibitor of growth family, member 1	protein-coding
MACS_peak_5990	chr2	29821144	29821389	+	132.38	NA	5' UTR (NM_001177667, exon 1 of 57)	5' UTR (NM_001177667, exon 1 of 57)	186	NM_001076554	20740	Mm.204969	NM_001076554	ENSMUSG00000057738	Sptan1	2610027H02Rik|Spna-2|Spna2	spectrin alpha, non-erythrocytic 1	protein-coding
MACS_peak_2830	chr13	17897286	17897580	+	132.34	NA	promoter-TSS (NM_027118)	promoter-TSS (NM_027118)	-502	NM_027118	69562	Mm.193924	NM_027118	ENSMUSG00000041297	Cdk13	2310015O17Rik|Cdc2l5	cyclin-dependent kinase 13	protein-coding
MACS_peak_9432	chr7	19608633	19608972	+	132.27	NA	promoter-TSS (NM_026605)	promoter-TSS (NM_026605)	86	NM_008260	15377	Mm.42260	NM_008260	ENSMUSG00000040891	Foxa3	Hnf-3g|Hnf3g|Tcf-3g|Tcf3g	forkhead box A3	protein-coding
MACS_peak_4741	chr17	34137041	34137315	+	132.13	NA	promoter-TSS (NM_001001892)	promoter-TSS (NM_001001892)	100	NM_001001892	14972	Mm.422886	NM_001001892	ENSMUSG00000061232	H2-K1	H-2K|H-2K(d)|H2-K|K-f	histocompatibility 2, K1, K region	protein-coding
MACS_peak_8271	chr5	72594503	72594736	+	131.83	NA	promoter-TSS (NM_153389)	promoter-TSS (NM_153389)	37	NM_153389	231287	Mm.32775	NM_153389	ENSMUSG00000046808	Atp10d	9830145H18Rik|ATPVD|D5Buc24e	ATPase, class V, type 10D	protein-coding
MACS_peak_2491	chr12	71926421	71926710	+	131.78	NA	promoter-TSS (NM_028127)	promoter-TSS (NM_028127)	64	NM_028127	319710	Mm.2962	NM_028127	ENSMUSG00000048285	Frmd6	2610019M19Rik|4930488L10Rik|AW212977	FERM domain containing 6	protein-coding
MACS_peak_7915	chr4	144836628	144836820	+	131.78	NA	promoter-TSS (NM_011610)	promoter-TSS (NM_011610)	49	NM_011610	21938	Mm.235328	NM_011610		Tnfrsf1b	CD120b|TNF-R-II|TNF-R2|TNF-R75|TNF-alphaR2|TNFBR|TNFR80|TNFRII|TNFalpha-R2|Tnfr-1|Tnfr2|p75	tumor necrosis factor receptor superfamily, member 1b	protein-coding
MACS_peak_10773	chr8	125566406	125566737	+	131.56	NA	promoter-TSS (NR_045268)	promoter-TSS (NR_045268)	96	NR_045268	100503178	Mm.294938	NR_045268		2810013P06Rik	-	RIKEN cDNA 2810013P06 gene	ncRNA
MACS_peak_3496	chr14	66587365	66587710	+	131.45	NA	intron (NM_013492, intron 1 of 8)	intron (NM_013492, intron 1 of 8)	217	NM_013492	12759	Mm.200608	NM_013492	ENSMUSG00000022037	Clu	AI893575|ApoJ|Cli|D14Ucla3|SP-40|Sgp-2|Sgp2|Sugp-2	clusterin	protein-coding
MACS_peak_6864	chr3	82811694	82811925	+	131.32	NA	promoter-TSS (NM_133862)	promoter-TSS (NM_133862)	-9	NM_133862	99571	Mm.16422	NM_133862	ENSMUSG00000033860	Fgg	3010002H13Rik|AI256424	fibrinogen gamma chain	protein-coding
MACS_peak_7773	chr4	132066244	132066458	+	130.88	NA	promoter-TSS (NM_144907)	promoter-TSS (NM_144907)	20	NM_144907	230784	Mm.23608	NM_144907		Sesn2	HI95|SEST2|Ses2	sestrin 2	protein-coding
MACS_peak_601	chr1	182743520	182743756	+	130.40	NA	promoter-TSS (NM_008210)	promoter-TSS (NM_008210)	96	NM_008210	15078	Mm.138832	NM_008210	ENSMUSG00000060743	H3f3a	H3.3A	H3 histone, family 3A	protein-coding
MACS_peak_2960	chr13	44826641	44826853	+	130.21	NA	5' UTR (NM_001205043, exon 1 of 18)	5' UTR (NM_001205043, exon 1 of 18)	107	NM_001205043	16468	Mm.25059	NM_021878	ENSMUSG00000038518	Jarid2	Jmj|jumonji	jumonji, AT rich interactive domain 2	protein-coding
MACS_peak_9681	chr7	52714992	52715339	+	130.14	NA	promoter-TSS (NM_010240)	promoter-TSS (NM_010240)	91	NM_010240	14325	Mm.30357	NM_010240	ENSMUSG00000050708	Ftl1	Ftl|Ftl-1|L-ferritin	ferritin light chain 1	protein-coding
MACS_peak_1107	chr10	98725806	98726004	+	129.54	NA	promoter-TSS (NM_026268)	promoter-TSS (NM_026268)	40	NM_026268	67603	Mm.1791	NM_026268	ENSMUSG00000019960	Dusp6	1300019I03Rik|MKP-3|MKP3|PYST1	dual specificity phosphatase 6	protein-coding
MACS_peak_6936	chr3	89083370	89083796	+	129.14	NA	promoter-TSS (NM_010107)	promoter-TSS (NM_010107)	-16	NM_010107	13636	Mm.15675	NM_010107	ENSMUSG00000027954	Efna1	AI325262|B61|Efl1|Epl1|Eplg1|Lerk1	ephrin A1	protein-coding
MACS_peak_10181	chr7	150238561	150238847	+	129.14	NA	promoter-TSS (NM_133655)	promoter-TSS (NM_133655)	49	NM_133655	12520	Mm.806	NM_133655	ENSMUSG00000037706	Cd81	Tapa-1|Tapa1|Tspan28	CD81 antigen	protein-coding
MACS_peak_4497	chr17	7183133	7183369	+	128.67	NA	promoter-TSS (NM_026611)	promoter-TSS (NM_026611)	42	NM_026611	68195	Mm.181237	NM_026611	ENSMUSG00000094724	Rnaset2b	0610007O07Rik|4833423A10Rik|4930532K22Rik|C79750|RNASE6PL|Rnaset2	ribonuclease T2B	protein-coding
MACS_peak_10168	chr7	148641054	148641292	+	128.64	NA	promoter-TSS (NM_001163689)	promoter-TSS (NM_001163689)	86	NM_001163689	66853	Mm.29998	NM_025802	ENSMUSG00000025509	Pnpla2	0610039C21Rik|1110001C14Rik|Atgl|TTS-2.2	patatin-like phospholipase domain containing 2	protein-coding
MACS_peak_5518	chr19	6983897	6984331	+	128.63	NA	promoter-TSS (NM_001166370)	promoter-TSS (NM_001166370)	21	NM_012021	54683	Mm.279782	NM_012021		Prdx5	AOEB166|AOPP|Pmp20|Prdx6|PrxV	peroxiredoxin 5	protein-coding
MACS_peak_10367	chr8	67212147	67212404	+	128.48	NA	promoter-TSS (NM_025436)	promoter-TSS (NM_025436)	100	NM_025436	66234	Mm.30119	NM_025436	ENSMUSG00000031604	Msmo1	1500001G16Rik|C78600|DESP4|ERG25|Sc4mol	methylsterol monoxygenase 1	protein-coding
MACS_peak_3603	chr15	3220871	3221087	+	127.88	NA	promoter-TSS (NM_009155)	promoter-TSS (NM_009155)	2	NM_009155	20363	Mm.392203	NM_009155	ENSMUSG00000064373	Sepp1	AU018766|D15Ucla1|Se-P|selp	selenoprotein P, plasma, 1	protein-coding
MACS_peak_3063	chr13	63666231	63666494	+	127.88	NA	intron (NM_008957, intron 1 of 22)	CpG-3952	466	NM_008957	19206	Mm.228798	NM_008957	ENSMUSG00000021466	Ptch1	A230106A15Rik|Ptc|Ptc1|Ptch|mes	patched homolog 1	protein-coding
MACS_peak_3640	chr15	11925608	11925819	+	127.59	NA	promoter-TSS (NM_011294)	promoter-TSS (NM_011294)	49	NM_011294	20024	Mm.41746	NM_011294	ENSMUSG00000022205	Sub1	AI842364|P15|P9|Pc4|Rpo2tc1	SUB1 homolog (S. cerevisiae)	protein-coding
MACS_peak_11065	chr9	54765040	54765299	+	127.59	NA	promoter-TSS (NM_177351)	promoter-TSS (NM_177351)	72	NM_177351	235386	Mm.259334	NM_177351	ENSMUSG00000035878	Hykk	Agphd1|C630028N24Rik	hydroxylysine kinase 1	protein-coding
MACS_peak_10032	chr7	133942464	133942746	+	127.37	NA	promoter-TSS (NM_001177307)	promoter-TSS (NM_001177307)	87	NM_001177307	11674	Mm.275831	NM_007438	ENSMUSG00000030695	Aldoa	Aldo-1|Aldo1	aldolase A, fructose-bisphosphate	protein-coding
MACS_peak_3445	chr14	57723097	57723619	+	126.91	NA	5' UTR (NM_008125, exon 1 of 2)	5' UTR (NM_008125, exon 1 of 2)	181	NM_008125	14619	Mm.390683	NM_008125	ENSMUSG00000046352	Gjb2	AI325222|Cnx26|Cx26|Gjb-2	gap junction protein, beta 2	protein-coding
MACS_peak_769	chr10	39861883	39862169	+	126.53	NA	promoter-TSS (NM_001114332)	promoter-TSS (NM_001114332)	34	NM_028247	72472	Mm.186778	NM_028247	ENSMUSG00000019838	Slc16a10	2610103N14Rik|9830169E08|Mct10|PRO0813|TAT1	solute carrier family 16 (monocarboxylic acid transporters), member 10	protein-coding
MACS_peak_7020	chr3	96066994	96067339	+	126.31	NA	promoter-TSS (NM_033596)	promoter-TSS (NM_033596)	74	NM_033596	97122	Mm.227295	NM_033596		Hist2h4	H4|X04652	histone cluster 2, H4	protein-coding
MACS_peak_170	chr1	65233209	65233410	+	126.31	NA	promoter-TSS (NM_011086)	promoter-TSS (NM_011086)	50	NM_011086	18711	Mm.38370	NM_011086		Pikfyve	5230400C17Rik|Pip5k|Pip5k3|Pipk5k3|PipkIII|p235	phosphoinositide kinase, FYVE finger containing	protein-coding
MACS_peak_9466	chr7	20284054	20284700	+	126.26	NA	5' UTR (NM_009696, exon 1 of 4)	5' UTR (NM_009696, exon 1 of 4)	138	NM_009696	11816	Mm.305152	NM_009696	ENSMUSG00000002985	Apoe	AI255918	apolipoprotein E	protein-coding
MACS_peak_2013	chr11	100800616	100800812	+	126.20	NA	5' UTR (NM_213660, exon 1 of 24)	5' UTR (NM_213660, exon 1 of 24)	111	NM_213660	20848	Mm.249934	NM_011486	ENSMUSG00000004040	Stat3	1110034C02Rik|AW109958|Aprf	signal transducer and activator of transcription 3	protein-coding
MACS_peak_3699	chr15	39688853	39689092	+	126.10	NA	promoter-TSS (NM_022722)	promoter-TSS (NM_022722)	44	NM_001164466	64705	Mm.275974	NM_022722	ENSMUSG00000022304	Dpys	1200017I10Rik|1300004I01Rik|DHP|DHPase	dihydropyrimidinase	protein-coding
MACS_peak_2486	chr12	71328440	71328684	+	126.01	NA	promoter-TSS (NR_045174)	promoter-TSS (NR_045174)	108	NM_133198	110095	Mm.256926	NM_133198	ENSMUSG00000021069	Pygl	-	liver glycogen phosphorylase	protein-coding
MACS_peak_2117	chr11	106649678	106649891	+	125.80	NA	promoter-TSS (NM_001166685)	promoter-TSS (NM_001166685)	24	NM_007840	13207	Mm.491096	NM_007840	ENSMUSG00000020719	Ddx5	2600009A06Rik|G17P1|HUMP68|Hlr1|p68	DEAD (Asp-Glu-Ala-Asp) box polypeptide 5	protein-coding
MACS_peak_9993	chr7	125272935	125273163	+	125.57	NA	promoter-TSS (NM_019419)	promoter-TSS (NM_019419)	90	NM_019419	54208	Mm.29924	NM_019419	ENSMUSG00000030654	Arl6ip1	AIP-6|AL022945|ARMER|AU042858|Aip-1|Arl6ip|C85138|mKIAA0069	ADP-ribosylation factor-like 6 interacting protein 1	protein-coding
MACS_peak_10318	chr8	37676797	37677026	+	125.16	NA	promoter-TSS (NM_015802)	promoter-TSS (NM_015802)	86	NM_015802	50768	Mm.125155	NM_015802	ENSMUSG00000031523	Dlc1	A730069N07Rik|Arhgap7|HP|STARD12|dlc-1	deleted in liver cancer 1	protein-coding
MACS_peak_2746	chr12	111934343	111934585	+	125.16	NA	5' UTR (NM_010480, exon 1 of 11)	5' UTR (NM_010480, exon 1 of 11)	141	NM_010480	15519	Mm.1843	NM_010480	ENSMUSG00000021270	Hsp90aa1	86kDa|89kDa|AL024080|AL024147|Hsp86-1|Hsp89|Hsp90|Hspca|hsp4	heat shock protein 90, alpha (cytosolic), class A member 1	protein-coding
MACS_peak_5995	chr2	29989089	29989496	+	124.86	NA	promoter-TSS (NM_146252)	promoter-TSS (NM_146252)	-99	NM_146252	70296	Mm.19172	NM_146252	ENSMUSG00000039678	Tbc1d13	2600014A06Rik|BC025586	TBC1 domain family, member 13	protein-coding
MACS_peak_655	chr1	193006951	193007217	+	124.78	NA	5' UTR (NM_007498, exon 1 of 4)	5' UTR (NM_007498, exon 1 of 4)	128	NM_007498	11910	Mm.2706	NM_007498	ENSMUSG00000026628	Atf3	LRG-21	activating transcription factor 3	protein-coding
MACS_peak_8995	chr6	72566574	72567043	+	124.78	NA	promoter-TSS (NM_009444)	promoter-TSS (NM_009444)	-66	NM_009444	22135	Mm.246563	NM_009444		Tgoln2	TGN38B|TGN41|TGN46|Ttgn2	trans-golgi network protein 2	protein-coding
MACS_peak_1877	chr11	87800784	87801056	+	124.69	NA	promoter-TSS (NM_001168472)	promoter-TSS (NM_001168472)	115	NM_026556	68097	Mm.246436	NM_026556	ENSMUSG00000020483	Dynll2	1700064A15Rik|6720463E02Rik|C87222|DLC8|DLC8b|Dlc2	dynein light chain LC8-type 2	protein-coding
MACS_peak_10267	chr8	23969619	23969787	+	124.47	NA	promoter-TSS (NM_001081149)	promoter-TSS (NM_001081149)	-308	NM_001081149	244349	Mm.182776	NM_001081149	ENSMUSG00000031540	Kat6a	1500036M03|9930021N24Rik|MOZ|Myst3|Zfp220	K(lysine) acetyltransferase 6A	protein-coding
MACS_peak_4791	chr17	35606944	35607845	+	124.04	NA	exon (NM_010391, exon 2 of 7)	exon (NM_010391, exon 2 of 7)	360	NM_010391	15007	Mm.88795	NM_010391	ENSMUSG00000067235	H2-Q10	H-2Q10|Q10|Qa10	histocompatibility 2, Q region locus 10	protein-coding
MACS_peak_5246	chr18	46887553	46888277	+	123.66	NA	promoter-TSS (NM_033037)	promoter-TSS (NM_033037)	81	NM_033037	12583	Mm.241056	NM_033037	ENSMUSG00000033022	Cdo1	1300002L19Rik|Cdo|D18Ucla3	cysteine dioxygenase 1, cytosolic	protein-coding
MACS_peak_9244	chr6	125165525	125165773	+	123.38	NA	promoter-TSS (NM_001080557)	promoter-TSS (NM_001080557)	50	NM_001080557	22317	Mm.32321	NM_009496	ENSMUSG00000030337	Vamp1	Syb-1|Syb1|VAMP-1|lew	vesicle-associated membrane protein 1	protein-coding
MACS_peak_1125	chr10	110943471	110944418	+	123.30	NA	exon (NM_009344, exon 1 of 2)	exon (NM_009344, exon 1 of 2)	602	NM_009344	21664	Mm.3117	NM_009344	ENSMUSG00000020205	Phlda1	DT1P1B11|TDAG51|Tdag	pleckstrin homology-like domain, family A, member 1	protein-coding
MACS_peak_519	chr1	167693762	167694054	+	123.02	NA	promoter-TSS (NM_011804)	promoter-TSS (NM_011804)	-3	NM_011804	433375	Mm.294885	NM_011804	ENSMUSG00000040713	Creg1	AA755314|Creg	cellular repressor of E1A-stimulated genes 1	protein-coding
MACS_peak_9297	chr6	138089017	138089257	+	122.96	NA	promoter-TSS (NM_019946)	promoter-TSS (NM_019946)	79	NM_019946	56615	Mm.14796	NM_019946	ENSMUSG00000008540	Mgst1	1500002K10Rik|Gst	microsomal glutathione S-transferase 1	protein-coding
MACS_peak_3777	chr15	76059753	76059988	+	122.94	NA	promoter-TSS (NM_201385)	promoter-TSS (NM_201385)	57	NM_201385	18810	Mm.234912	NM_011117	ENSMUSG00000022565	Plec	AA591047|AU042537|EBS1|PCN|PLTN|Plec1	plectin	protein-coding
MACS_peak_4189	chr16	18089029	18089464	+	122.94	NA	promoter-TSS (NM_011172)	promoter-TSS (NM_011172)	37	NM_011172	19125	Mm.28456	NM_011172	ENSMUSG00000003526	Prodh	Pro-1|Pro1|Ym24d07	proline dehydrogenase	protein-coding
MACS_peak_2887	chr13	23848796	23849044	+	122.86	NA	exon (NM_178193, exon 1 of 1)	exon (NM_178193, exon 1 of 1)	114	NM_178193	326620	Mm.261642	NM_178193		Hist1h4b	-	histone cluster 1, H4b	protein-coding
MACS_peak_5701	chr19	37509224	37509734	+	122.75	NA	exon (NM_008245, exon 1 of 4)	exon (NM_008245, exon 1 of 4)	148	NM_008245	15242	Mm.33896	NM_008245		Hhex	Hex|Hex1|Hhex-rs2|Prh|Prhx	hematopoietically expressed homeobox	protein-coding
MACS_peak_8905	chr6	49213854	49214088	+	122.72	NA	promoter-TSS (NM_198102)	promoter-TSS (NM_198102)	80	NM_198102	101214	Mm.196598	NM_198102	ENSMUSG00000029817	Tra2a	1500010G04Rik|AL022798|G430041M01Rik|mAWMS1	transformer 2 alpha homolog (Drosophila)	protein-coding
MACS_peak_10737	chr8	122082804	122083021	+	122.65	NA	promoter-TSS (NM_019709)	promoter-TSS (NM_019709)	-251	NM_019709	56453	Mm.206934	NM_019709	ENSMUSG00000031835	Mbtps1	0610038M03Rik|AV003995|S1P|SKI-1|Ski1|mKIAA0091	membrane-bound transcription factor peptidase, site 1	protein-coding
MACS_peak_6627	chr2	167514405	167514870	+	122.33	NA	exon (NM_009883, exon 1 of 1)	exon (NM_009883, exon 1 of 1)	222	NM_001287738	12608	Mm.439656	NM_009883	ENSMUSG00000056501	Cebpb	C/EBPbeta|CRP2|IL-6DBP|LAP|LIP|NF-IL6|NF-M|Nfil6	CCAAT/enhancer binding protein (C/EBP), beta	protein-coding
MACS_peak_1583	chr11	61668465	61668759	+	122.30	NA	promoter-TSS (NM_013881)	promoter-TSS (NM_013881)	-18	NM_013881	29869	Mm.162025	NM_013881	ENSMUSG00000004798	Ulk2	A830085I22Rik|AU015340|Unc51.2|mKIAA0623	unc-51 like kinase 2	protein-coding
MACS_peak_4370	chr16	55822078	55822330	+	121.97	NA	promoter-TSS (NM_001159394)	promoter-TSS (NM_001159394)	47	NM_001159394	80859	Mm.247272	NM_030612	ENSMUSG00000035356	Nfkbiz	AA408868|INAP|Mail	nuclear factor of kappa light polypeptide gene enhancer in B cells inhibitor, zeta	protein-coding
MACS_peak_5714	chr19	40588104	40588308	+	121.85	NA	promoter-TSS (NM_178362)	promoter-TSS (NM_178362)	20	NM_178362	20411	Mm.210815	NM_009166		Sorbs1	2310065E01Rik|9530001P15Rik|CAP|SH3P12|Sh3d5|mKIAA1296	sorbin and SH3 domain containing 1	protein-coding
MACS_peak_2110	chr11	106348908	106349409	+	121.49	NA	promoter-TSS (NM_023913)	promoter-TSS (NM_023913)	-48	NM_023913	78943	Mm.340943	NM_023913		Ern1	9030414B18Rik|AI225830|C85377|Ire1a|Ire1alpha|Ire1p	endoplasmic reticulum (ER) to nucleus signalling 1	protein-coding
MACS_peak_3267	chr14	21895374	21895609	+	121.45	NA	5' UTR (NM_001243041, exon 1 of 11)	5' UTR (NM_001243041, exon 1 of 11)	117	NM_001243041	11534	Mm.188734	NM_134079	ENSMUSG00000039197	Adk	2310026J05Rik|5033405D03Rik|AI255373|AI987814|Ak	adenosine kinase	protein-coding
MACS_peak_7552	chr4	104829884	104830395	+	121.45	NA	5' UTR (NM_080555, exon 1 of 6)	5' UTR (NM_080555, exon 1 of 6)	187	NM_080555	67916	Mm.348326	NM_080555	ENSMUSG00000028517	Ppap2b	1110003O22Rik|2610002D05Rik|AV025606|D4Bwg0538e|D4Bwg1535e|Lpp3|Ppab2b	phosphatidic acid phosphatase type 2B	protein-coding
MACS_peak_8167	chr5	33994783	33995045	+	121.08	NA	TTS (NM_026698)	TTS (NM_026698)	309	NM_001289724	20492	Mm.4172	NM_009193	ENSMUSG00000004642	Slbp	-	stem-loop binding protein	protein-coding
MACS_peak_4440	chr16	91729524	91729782	+	121.07	NA	promoter-TSS (NM_133679)	promoter-TSS (NM_133679)	37	NM_010587	16443	Mm.40546	NM_010587	ENSMUSG00000022957	Itsn1	AA517634|AA545208|AI316805|AI839402|AI848451|Ehsh1|Ese1|Itsn|Sh3p17	intersectin 1 (SH3 domain protein 1A)	protein-coding
MACS_peak_5358	chr18	78012694	78012874	+	120.54	NA	5' UTR (NM_007505, exon 1 of 12)	5' UTR (NM_007505, exon 1 of 12)	277	NM_007505	11946	Mm.276137	NM_007505	ENSMUSG00000025428	Atp5a1	AI035633|AL022851|AL023067|Atpm|D18Ertd206e|Mom2	ATP synthase, H+ transporting, mitochondrial F1 complex, alpha subunit 1	protein-coding
MACS_peak_2617	chr12	92826653	92827073	+	120.37	NA	intron (NM_175335, intron 1 of 8)	CpG	1226	NM_031391	83602	Mm.275728	NM_031391	ENSMUSG00000020962	Gtf2a1	6330549H03Rik|AA536742|AA959775|AW060250|TfIIAa/b|Tfiia1	general transcription factor II A, 1	protein-coding
MACS_peak_9834	chr7	90780461	90780676	+	120.26	NA	promoter-TSS (NM_023377)	promoter-TSS (NM_023377)	41	NM_023377	170460	Mm.357953	NM_023377	ENSMUSG00000046027	Stard5	2310058G22Rik|AI607880|D7Ertd152e	StAR-related lipid transfer (START) domain containing 5	protein-coding
MACS_peak_4601	chr17	24873551	24873807	+	119.52	NA	promoter-TSS (NM_013759)	promoter-TSS (NM_013759)	92	NM_013759	27361	Mm.28212	NM_013759	ENSMUSG00000075705	Msrb1	D17Wsu82e|SELX|SelR|Sepr|Sepx1	methionine sulfoxide reductase B1	protein-coding
MACS_peak_10455	chr8	74842901	74843079	+	118.87	NA	promoter-TSS (NM_008452)	promoter-TSS (NM_008452)	29	NM_008452	16598	Mm.26938	NM_008452	ENSMUSG00000055148	Klf2	Lklf	Kruppel-like factor 2 (lung)	protein-coding
MACS_peak_8556	chr5	124777579	124777857	+	118.83	NA	promoter-TSS (NM_028310)	promoter-TSS (NM_028310)	263	NR_102690	269702	Mm.60224	NM_001081323	ENSMUSG00000038126	Mphosph9	4930548D04Rik|9630025B04Rik|AW413446|AW547060|B930097C17Rik|C87456|MPP-9|MPP9	M-phase phosphoprotein 9	protein-coding
MACS_peak_9304	chr6	145159635	145159889	+	118.43	NA	promoter-TSS (NM_177222)	promoter-TSS (NM_177222)	95	NM_133688	67636	Mm.486359	NM_133688	ENSMUSG00000040370	Lyrm5	4930469P12Rik|AL022899|Ghiso	LYR motif containing 5	protein-coding
MACS_peak_2275	chr11	120433965	120434264	+	118.37	NA	exon (NM_011032, exon 1 of 11)	exon (NM_011032, exon 1 of 11)	136	NM_011032	18453	Mm.16660	NM_011032	ENSMUSG00000025130	P4hb	ERp59|PDI|Pdia1|Thbp	prolyl 4-hydroxylase, beta polypeptide	protein-coding
MACS_peak_11021	chr9	46076596	46077777	+	117.56	NA	exon (NM_080434, exon 2 of 4)	exon (NM_080434, exon 2 of 4)	495	NM_080434	66113	Mm.29738	NM_080434	ENSMUSG00000032079	Apoa5	1300007O05Rik|Apoav|RAP3	apolipoprotein A-V	protein-coding
MACS_peak_4251	chr16	23107766	23108038	+	117.56	NA	intron (NM_013506, intron 1 of 10)	CpG	361	NR_110335	13682	Mm.260084	NM_013506	ENSMUSG00000022884	Eif4a2	4833432N07Rik|BM-010|Ddx2b|Eif4|eIF-4A-II|eIF4A-II	eukaryotic translation initiation factor 4A2	protein-coding
MACS_peak_8517	chr5	122952065	122952307	+	117.52	NA	promoter-TSS (NR_027838)	promoter-TSS (NR_027838)	48	NM_001110140	11938	Mm.227583	NM_009722	ENSMUSG00000029467	Atp2a2	9530097L16Rik|D5Wsu150e|SERCA2|SERCA2B|mKIAA4195	ATPase, Ca++ transporting, cardiac muscle, slow twitch 2	protein-coding
MACS_peak_1721	chr11	75275082	75275324	+	117.49	NA	non-coding (NR_030711, exon 1 of 3)	non-coding (NR_030711, exon 1 of 3)	162	NR_030711	100042498	Mm.482242	NR_030711	ENSMUSG00000085148	Mir22hg	2210403K04Rik	Mir22 host gene (non-protein coding)	ncRNA
MACS_peak_3289	chr14	27783836	27784064	+	117.37	NA	promoter-TSS (NM_145221)	promoter-TSS (NM_145221)	-213	NM_145221	72993	Mm.202322	NM_145221	ENSMUSG00000040760	Appl1	2900057D21Rik|7330406P05Rik|AI585782|AW209077|BB022931|C88264|DIP13	adaptor protein, phosphotyrosine interaction, PH domain and leucine zipper containing 1	protein-coding
MACS_peak_1885	chr11	88860672	88860897	+	117.33	NA	promoter-TSS (NM_009546)	promoter-TSS (NM_009546)	67	NM_009546	217069	Mm.248445	NM_009546	ENSMUSG00000000275	Trim25	AA960166|AL022677|EFP|Zfp147	tripartite motif-containing 25	protein-coding
MACS_peak_8875	chr6	42299990	42300213	+	117.27	NA	5' UTR (NM_011777, exon 1 of 10)	5' UTR (NM_011777, exon 1 of 10)	274	NM_001289619	22793	Mm.282303	NM_011777	ENSMUSG00000029860	Zyx	9530098H06Rik|R75157	zyxin	protein-coding
MACS_peak_5684	chr19	34601723	34601978	+	117.18	NA	intron (NM_021460, intron 1 of 9)	intron (NM_021460, intron 1 of 9)	114	NM_001111100	16889	Mm.157545	NM_021460	ENSMUSG00000024781	Lipa	AA960673|Lal|Lip-1|Lip1	lysosomal acid lipase A	protein-coding
MACS_peak_8471	chr5	116009467	116009657	+	117.18	NA	promoter-TSS (NM_007475)	promoter-TSS (NM_007475)	86	NM_007475	11837	Mm.5286	NM_007475	ENSMUSG00000067274	Rplp0	36B4|Arbp|L10E	ribosomal protein, large, P0	protein-coding
MACS_peak_604	chr1	182780758	182781059	+	116.53	NA	promoter-TSS (NM_145943)	promoter-TSS (NM_145943)	-374	NM_145943	208768	Mm.272625	NM_145943	ENSMUSG00000038806	Sde2	-	SDE2 telomere maintenance homolog (S. pombe)	protein-coding
MACS_peak_345	chr1	122017421	122017664	+	116.53	NA	promoter-TSS (NM_001172074)	promoter-TSS (NM_001172074)	-46	NM_001037999	13167	Mm.2785	NM_007830	ENSMUSG00000026385	Dbi	ACBD1|Acbp|EP|endozepine	diazepam binding inhibitor	protein-coding
MACS_peak_8424	chr5	111238922	111239178	+	116.44	NA	promoter-TSS (NM_009469)	promoter-TSS (NM_009469)	50	NM_009469	22241	Mm.271898	NM_009469	ENSMUSG00000029512	Ulk1	AU041434|Unc51.1|mKIAA0722	unc-51 like kinase 1	protein-coding
MACS_peak_10544	chr8	88016387	88016771	+	115.99	NA	promoter-TSS (NM_173866)	promoter-TSS (NM_173866)	63	NM_173866	108682	Mm.200423	NM_173866	ENSMUSG00000031700	Gpt2	4631422C05Rik|ALT2|AU014768|AU041193|C87201	glutamic pyruvate transaminase (alanine aminotransferase) 2	protein-coding
MACS_peak_11575	chrX	34137963	34138319	+	115.99	NA	promoter-TSS (NM_016783)	promoter-TSS (NM_016783)	-79	NM_016783	53328	Mm.9052	NM_016783	ENSMUSG00000006373	Pgrmc1	AA415812|HPR6.6|PPMR|Vema	progesterone receptor membrane component 1	protein-coding
MACS_peak_1597	chr11	63735584	63735878	+	115.76	NA	promoter-TSS (NM_018805)	promoter-TSS (NM_018805)	55	NM_018805	54710	Mm.274426	NM_018805	ENSMUSG00000070407	Hs3st3b1	3-OST-3B|3OST3B1|3Ost3b|AU041882|AW536289|Hs3st3b|m3-OST-3B	heparan sulfate (glucosamine) 3-O-sulfotransferase 3B1	protein-coding
MACS_peak_7539	chr4	100937662	100938073	+	115.68	NA	promoter-TSS (NM_146145)	promoter-TSS (NM_146145)	20	NM_146145	16451	Mm.289657	NM_146145	ENSMUSG00000028530	Jak1	AA960307|C130039L05Rik	Janus kinase 1	protein-coding
MACS_peak_5543	chr19	7557547	7557801	+	115.68	NA	5' UTR (NM_001271487, exon 1 of 8)	5' UTR (NM_001271487, exon 1 of 8)	107	NM_001271486	20168	Mm.246990	NM_053076	ENSMUSG00000024758	Rtn3	RTN3-A1	reticulon 3	protein-coding
MACS_peak_1930	chr11	96690660	96691039	+	115.68	NA	promoter-TSS (NM_001130450)	promoter-TSS (NM_001130450)	-33	NM_001130450	18023	Mm.6743	NM_008686	ENSMUSG00000038615	Nfe2l1	AA408798|AW212678|LCR-F1|Lcrf1|NRF1|TCF-11|TCF11	nuclear factor, erythroid derived 2,-like 1	protein-coding
MACS_peak_4163	chr16	15887135	15887611	+	115.64	NA	promoter-TSS (NM_007679)	promoter-TSS (NM_007679)	-6	NM_007679	12609	Mm.347407	NM_007679		Cebpd	-	CCAAT/enhancer binding protein (C/EBP), delta	protein-coding
MACS_peak_5923	chr2	25080030	25080263	+	115.49	NA	promoter-TSS (NM_146116)	promoter-TSS (NM_146116)	76	NM_146116	227613	Mm.227260	NM_146116	ENSMUSG00000036752	Tubb4b	4930542G03Rik|Tubb2c|Tubb2c1	tubulin, beta 4B class IVB	protein-coding
MACS_peak_7317	chr4	33335328	33335550	+	115.40	NA	5' UTR (NM_001033225, exon 1 of 2)	5' UTR (NM_001033225, exon 1 of 2)	323	NM_001033225	108767	Mm.27769	NM_001033225	ENSMUSG00000040128	Pnrc1	5730463C12Rik|B4-2|PRR2|Prol2	proline-rich nuclear receptor coactivator 1	protein-coding
MACS_peak_9957	chr7	117365187	117365432	+	115.32	NA	promoter-TSS (NM_009302)	promoter-TSS (NM_009302)	92	NM_009302	20947	Mm.334144	NM_009302	ENSMUSG00000031015	Swap70	70kDa|AV235546	SWA-70 protein	protein-coding
MACS_peak_558	chr1	173367644	173367865	+	115.32	NA	promoter-TSS (NM_172647)	promoter-TSS (NM_172647)	62	NM_172647	16456	Mm.294882	NM_172647	ENSMUSG00000038235	F11r	9130004G24|AA638916|ESTM33|JAM|JAM-1|JAM-A|Jcam|Jcam1|Ly106	F11 receptor	protein-coding
MACS_peak_9932	chr7	112748453	112748690	+	114.73	NA	promoter-TSS (NM_017371)	promoter-TSS (NM_017371)	59	NM_017371	15458	Mm.3485	NM_017371	ENSMUSG00000030895	Hpx	Hpxn|hx	hemopexin	protein-coding
MACS_peak_1050	chr10	86167963	86168300	+	114.69	NA	promoter-TSS (NM_011631)	promoter-TSS (NM_011631)	58	NM_011631	22027	Mm.87773	NM_011631	ENSMUSG00000020048	Hsp90b1	ERp99|GRP94|TA-3|Targ2|Tra-1|Tra1|endoplasmin|gp96	heat shock protein 90, beta (Grp94), member 1	protein-coding
MACS_peak_11452	chr9	114842799	114843012	+	114.46	NA	5' UTR (NM_175380, exon 1 of 8)	5' UTR (NM_175380, exon 1 of 8)	200	NM_175380	333433	Mm.38198	NM_175380	ENSMUSG00000050627	Gpd1l	2210409H23Rik|D9Ertd660e	glycerol-3-phosphate dehydrogenase 1-like	protein-coding
MACS_peak_8671	chr5	139230974	139231209	+	114.21	NA	promoter-TSS (NM_030565)	promoter-TSS (NM_030565)	56	NM_030565	80752	Mm.320355	NM_030565	ENSMUSG00000025854	Fam20c	C76981|DMP-4|DMP4|GEF-CK|mKIAA4081	family with sequence similarity 20, member C	protein-coding
MACS_peak_2428	chr12	55835200	55835878	+	114.05	NA	Intergenic	Intergenic	-38687	NM_025456	66266	Mm.156440	NM_025456	ENSMUSG00000054302	Eapp	1810011O16Rik	E2F-associated phosphoprotein	protein-coding
MACS_peak_10333	chr8	47085098	47085276	+	113.89	NA	promoter-TSS (NM_001039562)	promoter-TSS (NM_001039562)	17	NM_001039562	654824	Mm.334517	NM_001039562	ENSMUSG00000050914	Ankrd37	-	ankyrin repeat domain 37	protein-coding
MACS_peak_8829	chr6	30254387	30254594	+	113.81	NA	promoter-TSS (NM_009459)	promoter-TSS (NM_009459)	49	NM_009459	22214	Mm.332967	NM_009459	ENSMUSG00000039159	Ube2h	1500009C23Rik|AI181839|AI326965|AI462483|AW227540|E2-20K|Gid3|N28148|Ubc8	ubiquitin-conjugating enzyme E2H	protein-coding
MACS_peak_4863	chr17	46865570	46866295	+	113.81	NA	exon (NM_010321, exon 1 of 6)	exon (NM_010321, exon 1 of 6)	182	NM_010321	14711	Mm.29395	NM_010321	ENSMUSG00000002769	Gnmt	-	glycine N-methyltransferase	protein-coding
MACS_peak_11600	chrX	49518384	49518558	+	113.66	NA	promoter-TSS (NM_008150)	promoter-TSS (NM_008150)	-371	NM_008150	14735	Mm.1528	NM_008150	ENSMUSG00000031119	Gpc4	9530073D23Rik|AF311610|AI385680|AI661372|K-glypican	glypican 4	protein-coding
MACS_peak_10213	chr8	11008749	11009029	+	113.39	NA	promoter-TSS (NM_001081212)	promoter-TSS (NM_001081212)	-459	NM_001081212	384783	Mm.407207	NM_001081212	ENSMUSG00000038894	Irs2	Irs-2	insulin receptor substrate 2	protein-coding
MACS_peak_2510	chr12	76697067	76697283	+	113.33	NA	promoter-TSS (NM_012024)	promoter-TSS (NM_012024)	12	NM_012024	26932	Mm.259626	NM_012024	ENSMUSG00000021051	Ppp2r5e	4633401M22Rik|AI449017|B56beta	protein phosphatase 2, regulatory subunit B', epsilon	protein-coding
MACS_peak_9556	chr7	29747119	29747346	+	113.18	NA	promoter-TSS (NM_021895)	promoter-TSS (NM_021895)	67	NM_021895	60595	Mm.81144	NM_021895	ENSMUSG00000054808	Actn4	C77391	actinin alpha 4	protein-coding
MACS_peak_5574	chr19	10175761	10176263	+	113.11	NA	promoter-TSS (NM_019699)	promoter-TSS (NM_019699)	-19	NM_019699	56473	Mm.38901	NM_019699	ENSMUSG00000024665	Fads2	2900042M13Rik|Fadsd2	fatty acid desaturase 2	protein-coding
MACS_peak_489	chr1	162965223	162965442	+	113.00	NA	promoter-TSS (NM_173424)	promoter-TSS (NM_173424)	35	NR_002840	14455	Mm.270065	NR_002840	ENSMUSG00000053332	Gas5	Gas-5|Mir5117	growth arrest specific 5	ncRNA
MACS_peak_10538	chr8	87607150	87607360	+	113.00	NA	promoter-TSS (NM_010764)	promoter-TSS (NM_010764)	87	NM_010764	17159	Mm.4219	NM_010764	ENSMUSG00000005142	Man2b1	AW107687|LAMAN	mannosidase 2, alpha B1	protein-coding
MACS_peak_158	chr1	64168351	64168645	+	112.94	NA	promoter-TSS (NM_033563)	promoter-TSS (NM_033563)	-535	NM_033563	93691	Mm.29466	NM_033563	ENSMUSG00000025959	Klf7	9830124P08Rik	Kruppel-like factor 7 (ubiquitous)	protein-coding
MACS_peak_11304	chr9	102619769	102620295	+	112.86	NA	promoter-TSS (NM_019764)	promoter-TSS (NM_019764)	-102	NM_019764	56332	Mm.21145	NM_019764	ENSMUSG00000032531	Amotl2	AW549739|C79691|Lccp|MASCOT|mKIAA0989	angiomotin-like 2	protein-coding
MACS_peak_514	chr1	167391340	167391521	+	112.86	NA	promoter-TSS (NM_028759)	promoter-TSS (NM_028759)	91	NM_027430	70456	Mm.195625	NM_027430	ENSMUSG00000026568	Mpc2	0610006C01Rik|2010002I07Rik|2610205H19Rik|AA108335|Brp44|ESTM43	mitochondrial pyruvate carrier 2	protein-coding
MACS_peak_8467	chr5	115939332	115939608	+	112.60	NA	Intergenic	U4|snRNA|snRNA	-4977	NM_133760	75387	Mm.332616	NM_133760	ENSMUSG00000029524	Sirt4	4930596O17Rik	sirtuin 4	protein-coding
MACS_peak_9827	chr7	88716114	88716353	+	112.28	NA	promoter-TSS (NM_001004185)	promoter-TSS (NM_001004185)	55	NM_001004185	434204	Mm.181641	NM_001004185	ENSMUSG00000045795	Whamm	BB081391|Whdc1|mKIAA1971	WAS protein homolog associated with actin, golgi membranes and microtubules	protein-coding
MACS_peak_9161	chr6	115626460	115626932	+	112.28	NA	promoter-TSS (NM_029780)	promoter-TSS (NM_029780)	-43	NM_029780	110157	Mm.184163	NM_029780	ENSMUSG00000000441	Raf1	6430402F14Rik|AA990557|BB129353|Craf1|D830050J10Rik|Raf-1|c-Raf|v-Raf	v-raf-leukemia viral oncogene 1	protein-coding
MACS_peak_8911	chr6	51419668	51419926	+	112.10	NA	promoter-TSS (NM_007624)	promoter-TSS (NM_007624)	96	NM_182650	53379	Mm.155896	NM_016806		Hnrnpa2b1	9130414A06Rik|Hnrpa2|Hnrpa2b1|hnrnp-A	heterogeneous nuclear ribonucleoprotein A2/B1	protein-coding
MACS_peak_4800	chr17	36053867	36054140	+	111.99	NA	promoter-TSS (NM_001163818)	promoter-TSS (NM_001163818)	-138	NM_001163818	52040	Mm.29385	NM_175934	ENSMUSG00000039220	Ppp1r10	2610025H06Rik|Cat53|D17Ertd808e|Fb19|Pnuts	protein phosphatase 1, regulatory subunit 10	protein-coding
MACS_peak_11477	chr9	119892656	119892914	+	111.89	NA	intron (NM_153287, intron 1 of 4)	CpG	991	NM_153287	215418	Mm.491094	NM_153287	ENSMUSG00000032515	Csrnp1	4931429D10Rik|Axud1|CSRNP-1|URAX1|taip-3	cysteine-serine-rich nuclear protein 1	protein-coding
MACS_peak_4785	chr17	35399966	35400185	+	111.20	NA	promoter-TSS (NM_010380)	promoter-TSS (NM_010380)	7	NM_001267808	14980	Mm.439675	NM_001267808		H2-L	H-2L	histocompatibility 2, D region locus L	protein-coding
MACS_peak_6504	chr2	154617032	154617257	+	110.96	NA	5' UTR (NM_001139513, exon 1 of 9)	5' UTR (NM_001139513, exon 1 of 9)	298	NM_001139511	19383	Mm.221440	NM_023130	ENSMUSG00000027593	Raly	AI663842|Merc	hnRNP-associated with lethal yellow	protein-coding
MACS_peak_4677	chr17	28828261	28828493	+	110.96	NA	promoter-TSS (NM_011951)	promoter-TSS (NM_011951)	90	NM_001168514	26416	Mm.311337	NM_011951	ENSMUSG00000053436	Mapk14	CSBP2|Crk1|Csbp1|Mxi2|PRKM14|PRKM15|p38|p38-alpha|p38MAPK|p38a|p38alpha	mitogen-activated protein kinase 14	protein-coding
MACS_peak_10739	chr8	122364272	122364518	+	110.93	NA	promoter-TSS (NM_028071)	promoter-TSS (NM_028071)	84	NM_028071	72042	Mm.393405	NM_028071	ENSMUSG00000031827	Cotl1	1810074P22Rik|2010004C08Rik|Clp	coactosin-like 1 (Dictyostelium)	protein-coding
MACS_peak_4471	chr16	98144054	98144266	+	110.87	NA	promoter-TSS (NM_174847)	promoter-TSS (NM_174847)	83	NM_174847	207781	Mm.1465	NM_174847	ENSMUSG00000045975	C2cd2	5730563M15|5830404H04Rik|AI314146|AI449533|BF168443|ORF25|mKIAA4045	C2 calcium-dependent domain containing 2	protein-coding
MACS_peak_899	chr10	75398322	75398807	+	110.78	NA	5' UTR (NM_175329, exon 1 of 4)	5' UTR (NM_175329, exon 1 of 4)	246	NM_175329	103172	Mm.333849	NM_175329	ENSMUSG00000049422	Chchd10	1620401E04Rik|AI267078|Ndg2	coiled-coil-helix-coiled-coil-helix domain containing 10	protein-coding
MACS_peak_7339	chr4	40669489	40669749	+	110.78	NA	promoter-TSS (NR_029594)	promoter-TSS (NR_029594)	118	NM_008298	15502	Mm.27897	NM_008298	ENSMUSG00000028410	Dnaja1	Hsj2|Nedd7	DnaJ (Hsp40) homolog, subfamily A, member 1	protein-coding
MACS_peak_7476	chr4	62360637	62360839	+	110.67	NA	intron (NM_134257, intron 12 of 15)	intron (NM_134257, intron 12 of 15)	80032	NM_134257	50780	Mm.286753	NM_019492	ENSMUSG00000059810	Rgs3	4930506N09Rik|C2PA-RGS3|C2pa|PDZ-RGS3|RGS3S	regulator of G-protein signaling 3	protein-coding
MACS_peak_918	chr10	77044447	77044668	+	110.67	NA	promoter-TSS (NM_145925)	promoter-TSS (NM_145925)	45	NM_145925	108705	Mm.28853	NM_145925	ENSMUSG00000009291	Pttg1ip	1810010L20Rik|AI314311|AU018448|C79540	pituitary tumor-transforming 1 interacting protein	protein-coding
MACS_peak_1670	chr11	70467965	70468196	+	110.63	NA	promoter-TSS (NM_011072)	promoter-TSS (NM_011072)	72	NM_011072	18643	Mm.2647	NM_011072	ENSMUSG00000018293	Pfn1	Pfn	profilin 1	protein-coding
MACS_peak_10338	chr8	47556408	47557147	+	110.42	NA	intron (NM_007981, intron 1 of 20)	CpG	381	NM_007981	14081	Mm.210323	NM_007981	ENSMUSG00000018796	Acsl1	Acas|Acas1|Acs|FACS|Facl2	acyl-CoA synthetase long-chain family member 1	protein-coding
MACS_peak_5267	chr18	57085044	57085227	+	110.12	NA	promoter-TSS (NM_177115)	promoter-TSS (NM_177115)	67	NM_177115	320253	Mm.312623	NM_177115	ENSMUSG00000032656	March3	6330411I15Rik|A530081L18Rik|AI843639|MARCH-III	membrane-associated ring finger (C3HC4) 3	protein-coding
MACS_peak_788	chr10	41996315	41996588	+	110.10	NA	promoter-TSS (NM_019740)	promoter-TSS (NM_019740)	97	NM_019740	56484	Mm.338613	NM_019740	ENSMUSG00000048756	Foxo3	1110048B16Rik|2010203A17Rik|C76856|FKHRL1|Fkhr2|Foxo3a	forkhead box O3	protein-coding
MACS_peak_3332	chr14	35123891	35124182	+	109.79	NA	promoter-TSS (NM_029389)	promoter-TSS (NM_029389)	123	NM_008133	14661	Mm.10600	NM_008133	ENSMUSG00000021794	Glud1	AI118167|Gdh-X|Glud|Gludl	glutamate dehydrogenase 1	protein-coding
MACS_peak_5349	chr18	75526958	75527148	+	109.30	NA	promoter-TSS (NM_001042660)	promoter-TSS (NM_001042660)	34	NM_001042660	17131	Mm.34407	NM_008543	ENSMUSG00000025880	Smad7	Madh7	SMAD family member 7	protein-coding
MACS_peak_10896	chr9	21731652	21731850	+	109.28	NA	promoter-TSS (NM_025977)	promoter-TSS (NM_025977)	-19	NM_001253869	235043	Mm.253329	NM_178577	ENSMUSG00000040883	Tmem205	-	transmembrane protein 205	protein-coding
MACS_peak_3392	chr14	52723533	52723741	+	109.26	NA	promoter-TSS (NM_001170981)	promoter-TSS (NM_001170981)	66	NM_001170982	15381	Mm.427321	NM_016884	ENSMUSG00000060373	Hnrnpc	AL022939|D14Wsu171e|Hnrpc|Hnrpc1|Hnrpc2|hnRNPC1|hnRNPC2|hnrnp-C	heterogeneous nuclear ribonucleoprotein C	protein-coding
MACS_peak_2426	chr12	55819761	55820448	+	109.26	NA	Intergenic	Intergenic	-23252	NM_025456	66266	Mm.156440	NM_025456	ENSMUSG00000054302	Eapp	1810011O16Rik	E2F-associated phosphoprotein	protein-coding
MACS_peak_7633	chr4	116806442	116806666	+	109.23	NA	promoter-TSS (NM_013807)	promoter-TSS (NM_013807)	3	NM_013807	12795	Mm.259022	NM_013807	ENSMUSG00000028680	Plk3	Cnk|Fnk|PRK	polo-like kinase 3	protein-coding
MACS_peak_5224	chr18	38760870	38761052	+	109.07	NA	promoter-TSS (NM_011898)	promoter-TSS (NM_011898)	-39	NM_011898	24066	Mm.42038	NM_011898	ENSMUSG00000024427	Spry4	A030006O18Rik|sprouty4	sprouty homolog 4 (Drosophila)	protein-coding
MACS_peak_256	chr1	88255766	88256007	+	108.72	NA	promoter-TSS (NR_015507)	promoter-TSS (NR_015507)	144	NM_010880	17975	Mm.154378	NM_010880	ENSMUSG00000026234	Ncl	B530004O11Rik|C23|D0Nds28|D1Nds28|Nucl	nucleolin	protein-coding
MACS_peak_7141	chr3	121670644	121670960	+	108.68	NA	intron (NM_172525, intron 1 of 22)	intron (NM_172525, intron 1 of 22)	14558	NM_172525	214137	Mm.229287	NM_172525	ENSMUSG00000039831	Arhgap29	6720461J18Rik|A830014I19|AU040217|B130017I01Rik|C76601|Parg1	Rho GTPase activating protein 29	protein-coding
MACS_peak_9124	chr6	108163025	108163218	+	108.66	NA	promoter-TSS (NM_010585)	promoter-TSS (NM_010585)	31	NM_010585	16438	Mm.227912	NM_010585	ENSMUSG00000030102	Itpr1	D6Pas2|ENSMUSG00000072853|Gm10429|IP3R1|InsP3R|Ip3r|Itpr-1|P400|Pcp-1|Pcp1|opt	inositol 1,4,5-trisphosphate receptor 1	protein-coding
MACS_peak_455	chr1	155334632	155334886	+	108.66	NA	promoter-TSS (NM_007842)	promoter-TSS (NM_007842)	31	NM_007842	13211	Mm.20000	NM_007842	ENSMUSG00000042699	Dhx9	AI326842|Ddx9|HEL-5|NDHII|RHA|mHEL-5	DEAH (Asp-Glu-Ala-His) box polypeptide 9	protein-coding
MACS_peak_5172	chr18	34919134	34919403	+	108.66	NA	intron (NM_175104, intron 1 of 4)	CpG	708	NM_175104	66306	Mm.29424	NM_175104	ENSMUSG00000034300	Fam53c	2810012G03Rik|Gm21179	family with sequence similarity 53, member C	protein-coding
MACS_peak_1223	chr10	127707270	127707767	+	108.59	NA	promoter-TSS (NM_019963)	promoter-TSS (NM_019963)	-114	NM_019963	20847	Mm.293120	NM_019963	ENSMUSG00000040033	Stat2	1600010G07Rik|AW496480	signal transducer and activator of transcription 2	protein-coding
MACS_peak_4836	chr17	46290315	46290508	+	108.40	NA	promoter-TSS (NM_025649)	promoter-TSS (NM_025649)	89	NM_025649	66591	Mm.272024	NM_025649	ENSMUSG00000034509	Mad2l1bp	0610009D16Rik|2510031P20Rik|AU018945|AW550977|C76045|CMT2A|CMT2B|Mad2lbp|mKIAA0110	MAD2L1 binding protein	protein-coding
MACS_peak_5130	chr18	20823818	20824082	+	108.35	NA	exon (NM_013697, exon 1 of 4)	exon (NM_013697, exon 1 of 4)	199	NM_013697	22139	Mm.2108	NM_013697	ENSMUSG00000061808	Ttr	AA408768|AI787086|D17860|prealbumin	transthyretin	protein-coding
MACS_peak_7504	chr4	86315709	86316152	+	107.98	NA	promoter-TSS (NM_007408)	promoter-TSS (NM_007408)	33	NM_007408	11520	Mm.381	NM_007408	ENSMUSG00000028494	Plin2	AA407157|ADPH|Adfp|Adrp	perilipin 2	protein-coding
MACS_peak_6341	chr2	121973329	121973584	+	107.91	NA	promoter-TSS (NM_009735)	promoter-TSS (NM_009735)	33	NM_009735	12010	Mm.163	NM_009735	ENSMUSG00000060802	B2m	Ly-m11|beta2-m|beta2m	beta-2 microglobulin	protein-coding
MACS_peak_2870	chr13	23654115	23654321	+	107.78	NA	promoter-TSS (NM_178205)	promoter-TSS (NM_178205)	16	NM_178205	319151	Mm.261658	NM_178205		Hist1h3e	H3-f|H3.1	histone cluster 1, H3e	protein-coding
MACS_peak_5113	chr18	12801547	12802213	+	107.78	NA	promoter-TSS (NM_028341)	promoter-TSS (NM_028341)	-162	NM_028341	72747	Mm.52526	NM_028341	ENSMUSG00000024424	Ttc39c	1700008N02Rik|2810439F02Rik	tetratricopeptide repeat domain 39C	protein-coding
MACS_peak_6430	chr2	132078751	132078978	+	107.70	NA	promoter-TSS (NM_011045)	promoter-TSS (NM_011045)	52	NM_011045	18538	Mm.7141	NM_011045	ENSMUSG00000027342	Pcna	-	proliferating cell nuclear antigen	protein-coding
MACS_peak_1442	chr11	50024092	50024353	+	107.33	NA	promoter-TSS (NM_011018)	promoter-TSS (NM_011018)	100	NM_001290769	18412	Mm.40828	NM_011018	ENSMUSG00000015837	Sqstm1	A170|OSF-6|Osi|STAP|STONE14|p62	sequestosome 1	protein-coding
MACS_peak_8048	chr5	8996991	8997495	+	107.33	NA	promoter-TSS (NM_023733)	promoter-TSS (NM_023733)	-97	NM_023733	74114	Mm.28197	NM_023733	ENSMUSG00000003623	Crot	1200003H03Rik	carnitine O-octanoyltransferase	protein-coding
MACS_peak_1445	chr11	50105923	50106142	+	107.33	NA	promoter-TSS (NM_175334)	promoter-TSS (NM_175334)	-194	NM_175334	103806	Mm.51116	NM_175334	ENSMUSG00000050567	Maml1	AI644666|AW743257|D930008C07Rik|Mam-1|Mam1|mKIAA0200	mastermind like 1 (Drosophila)	protein-coding
MACS_peak_7215	chr3	142428119	142428363	+	107.22	NA	promoter-TSS (NM_145546)	promoter-TSS (NM_145546)	30	NM_145546	229906	Mm.271756	NM_145546	ENSMUSG00000028271	Gtf2b	-	general transcription factor IIB	protein-coding
MACS_peak_8130	chr5	31224124	31224452	+	107.01	NA	promoter-TSS (NM_008439)	promoter-TSS (NM_008439)	20	NM_008439	16548	Mm.22451	NM_008439	ENSMUSG00000029162	Khk	-	ketohexokinase	protein-coding
MACS_peak_7770	chr4	131909379	131909621	+	106.58	NA	intron (NR_003270, intron 1 of 2)	CpG	101	NR_003270	399101	Mm.486919	NR_002904	ENSMUSG00000085241	Snhg3	Rnu17d|U17HG	small nucleolar RNA host gene 3	ncRNA
MACS_peak_6338	chr2	121853915	121854148	+	106.56	NA	promoter-TSS (NM_001256055)	promoter-TSS (NM_001256055)	-285	NM_144545	78655	Mm.458184	NM_144545		Eif3j1	1810016I04Rik|2700079K05Rik|AA409117|AA409446|C78575|Eif3j|Eif3j-1|Eif3j-2|Eif3j2|Eif3s1|eIF-3-alpha-A|eIF-3-alpha-B|eIF3-alpha|eIF3-p35|eIF3j-A|eIF3j-B	eukaryotic translation initiation factor 3, subunit J1	protein-coding
MACS_peak_5084	chr18	6515965	6516369	+	106.28	NA	promoter-TSS (NM_007935)	promoter-TSS (NM_007935)	-61	NM_007935	13831	Mm.312133	NM_007935	ENSMUSG00000024240	Epc1	2400007E14Rik|5730566F07Rik|A930032N02Rik	enhancer of polycomb homolog 1 (Drosophila)	protein-coding
MACS_peak_947	chr10	79610942	79611204	+	106.28	NA	promoter-TSS (NM_021565)	promoter-TSS (NM_021565)	38	NM_021565	59090	Mm.143813	NM_021565	ENSMUSG00000035621	Midn	3000003C15Rik	midnolin	protein-coding
MACS_peak_3818	chr15	77672397	77672621	+	105.97	NA	promoter-TSS (NM_022410)	promoter-TSS (NM_022410)	96	NM_022410	17886	Mm.29677	NM_022410	ENSMUSG00000022443	Myh9	Fltn|Myhn-1|Myhn1|NMHCIIA|NMMHC-A|NMMHC-IIA|TU72.6	myosin, heavy polypeptide 9, non-muscle	protein-coding
MACS_peak_5343	chr18	74938793	74939033	+	105.78	NA	promoter-TSS (NR_028560)	promoter-TSS (NR_028560)	47	NM_177470	52538	Mm.245724	NM_177470	ENSMUSG00000036880	Acaa2	0610011L04Rik|AI255831|AI265397|D18Ertd240e	acetyl-Coenzyme A acyltransferase 2 (mitochondrial 3-oxoacyl-Coenzyme A thiolase)	protein-coding
MACS_peak_9174	chr6	117118532	117118857	+	105.78	NA	exon (NM_013655, exon 1 of 4)	exon (NM_013655, exon 1 of 4)	141	NM_021704	20315	Mm.303231	NM_013655	ENSMUSG00000061353	Cxcl12	Pbsf|Scyb12|Sdf1|Tlsf|Tpar1	chemokine (C-X-C motif) ligand 12	protein-coding
MACS_peak_11212	chr9	74800669	74800870	+	105.54	NA	promoter-TSS (NM_001113283)	promoter-TSS (NM_001113283)	-91	NM_001113283	235493	Mm.208955	NM_153584	ENSMUSG00000034858	Fam214a	6330415I01Rik|AI553555|C130047D21Rik|Kiaa1370|mKIAA1370	family with sequence similarity 214, member A	protein-coding
MACS_peak_5140	chr18	21458481	21458681	+	104.96	NA	promoter-TSS (NM_001033445)	promoter-TSS (NM_001033445)	59	NM_001033445	381126	Mm.312276	NM_001033445	ENSMUSG00000042680	Garem	C86169|Fam59a|Gm944|mKIAA4238	GRB2 associated, regulator of MAPK1	protein-coding
MACS_peak_3637	chr15	10911416	10911824	+	104.94	NA	exon (NM_008537, exon 1 of 5)	exon (NM_008537, exon 1 of 5)	109	NM_008537	17117	Mm.2787	NM_008537	ENSMUSG00000022244	Amacr	Macr1	alpha-methylacyl-CoA racemase	protein-coding
MACS_peak_6927	chr3	88940433	88940711	+	104.66	NA	promoter-TSS (NM_001099779)	promoter-TSS (NM_001099779)	27	NM_001099779	18770	Mm.383180	NM_013631	ENSMUSG00000041237	Pklr	Pk-1|Pk1|R-PK	pyruvate kinase liver and red blood cell	protein-coding
MACS_peak_9126	chr6	108610598	108610881	+	104.35	NA	5' UTR (NM_011498, exon 1 of 5)	5' UTR (NM_011498, exon 1 of 5)	116	NM_011498	20893	Mm.2436	NM_011498	ENSMUSG00000030103	Bhlhe40	Bhlhb2|C130042M06Rik|CR8|Clast5|Dec1|Sharp2|Stra13|Stra14	basic helix-loop-helix family, member e40	protein-coding
MACS_peak_7710	chr4	125933419	125933601	+	104.33	NA	promoter-TSS (NM_144941)	promoter-TSS (NM_144941)	53	NM_144941	245877	Mm.266716	NM_144941	ENSMUSG00000028849	Map7d1	AV028413|BC019977|Mtap7d1|Parcc1|Rprc1|mKIAA1187	MAP7 domain containing 1	protein-coding
MACS_peak_2852	chr13	21903531	21903814	+	104.33	NA	promoter-TSS (NM_175657)	promoter-TSS (NM_175657)	19	NM_175657	319161	Mm.261664	NM_175657		Hist1h4n	-	histone cluster 1, H4n	protein-coding
MACS_peak_167	chr1	65225479	65225709	+	104.23	NA	5' UTR (NM_010497, exon 1 of 9)	5' UTR (NM_010497, exon 1 of 9)	122	NM_010497	15926	Mm.9925	NM_010497	ENSMUSG00000025950	Idh1	AI314845|AI788952|E030024J03Rik|Id-1|Idh-1|Idpc	isocitrate dehydrogenase 1 (NADP+), soluble	protein-coding
MACS_peak_7431	chr4	49562030	49562423	+	104.02	NA	intron (NM_144903, intron 1 of 8)	intron (NM_144903, intron 1 of 8)	129	NM_144903	230163	Mm.482116	NM_144903	ENSMUSG00000028307	Aldob	Aldo-2|Aldo2|BC016435	aldolase B, fructose-bisphosphate	protein-coding
MACS_peak_1863	chr11	87240127	87240768	+	104.01	NA	promoter-TSS (NM_001199293)	promoter-TSS (NM_001199293)	-646	NM_001199293	83560	Mm.440758	NM_031386	ENSMUSG00000010342	Tex14	C85585	testis expressed gene 14	protein-coding
MACS_peak_1066	chr10	90586576	90586790	+	103.86	NA	promoter-TSS (NM_133668)	promoter-TSS (NM_133668)	25	NM_133668	18674	Mm.298	NM_133668	ENSMUSG00000061904	Slc25a3	5730556H19Rik|PTP|Phc	solute carrier family 25 (mitochondrial carrier, phosphate carrier), member 3	protein-coding
MACS_peak_8166	chr5	33972104	33972324	+	103.44	NA	promoter-TSS (NM_178390)	promoter-TSS (NM_178390)	70	NM_178390	74504	Mm.294695	NM_178390	ENSMUSG00000037339	Fam53a	2410018C17Rik|5430419M09Rik|Dntnp	family with sequence similarity 53, member A	protein-coding
MACS_peak_8580	chr5	125956171	125956441	+	103.16	NA	promoter-TSS (NM_030210)	promoter-TSS (NM_030210)	63	NM_030210	78894	Mm.431573	NM_030210	ENSMUSG00000029482	Aacs	2210408B16Rik|SUR5	acetoacetyl-CoA synthetase	protein-coding
MACS_peak_5804	chr19	47929457	47929692	+	103.10	NA	promoter-TSS (NM_010362)	promoter-TSS (NM_010362)	95	NM_010362	14873	Mm.378931	NM_010362	ENSMUSG00000025068	Gsto1	AA407097|AI194287|AU018802|GSTO 1-1|GSTX|SPG-R|p28	glutathione S-transferase omega 1	protein-coding
MACS_peak_7273	chr4	11083550	11083747	+	103.10	NA	promoter-TSS (NM_001199105)	promoter-TSS (NM_001199105)	60	NM_021897	60599	Mm.393018	NM_021897	ENSMUSG00000028211	Trp53inp1	2700057G22Rik|SIP|SIP18|SIP27|Stinp|Teap	transformation related protein 53 inducible nuclear protein 1	protein-coding
MACS_peak_2042	chr11	101506683	101507123	+	103.10	NA	Intergenic	Intergenic	17640	NM_025654	66599	Mm.41449	NM_025654	ENSMUSG00000010362	Rdm1	2410008M22Rik|AW212028|Rad52b	RAD52 motif 1	protein-coding
MACS_peak_7452	chr4	57969406	57969656	+	103.00	NA	promoter-TSS (NM_011660)	promoter-TSS (NM_011660)	-248	NM_011660	22166	Mm.260618	NM_011660	ENSMUSG00000028367	Txn1	ADF|AW550880|Trx1|Txn	thioredoxin 1	protein-coding
MACS_peak_11544	chrX	11657562	11657738	+	102.99	NA	promoter-TSS (NM_029510)	promoter-TSS (NM_029510)	29	NM_175045	71458	Mm.196328	NM_029510	ENSMUSG00000040363	Bcor	5830466J11Rik|8430401K06Rik|BcorR|D930024N20Rik|mKIAA1575	BCL6 interacting corepressor	protein-coding
MACS_peak_1870	chr11	87284999	87285223	+	102.99	NA	intron (NM_001199293, intron 2 of 30)	intron (NM_001199293, intron 2 of 30)	44018	NM_001199293	83560	Mm.440758	NM_031386	ENSMUSG00000010342	Tex14	C85585	testis expressed gene 14	protein-coding
MACS_peak_1926	chr11	95936729	95937009	+	102.91	NA	promoter-TSS (NM_001161419)	promoter-TSS (NM_001161419)	76	NM_001161419	11951	Mm.258	NM_007506		Atp5g1	-	ATP synthase, H+ transporting, mitochondrial F0 complex, subunit C1 (subunit 9)	protein-coding
MACS_peak_1546	chr11	59623160	59623352	+	102.91	NA	promoter-TSS (NM_001271357)	promoter-TSS (NM_001271357)	-153	NM_001271357	216805	Mm.339640	NM_146018	ENSMUSG00000032633	Flcn	AU014660|B430214A04Rik|Bhd|FLCL	folliculin	protein-coding
MACS_peak_7021	chr3	96072531	96072708	+	102.68	NA	promoter-TSS (NM_178215)	promoter-TSS (NM_178215)	42	NM_178215	319154	Mm.383293	NM_178215	ENSMUSG00000074403	Hist2h3b	H3-615|H3-616	histone cluster 2, H3b	protein-coding
MACS_peak_11267	chr9	94438367	94438551	+	102.60	NA	promoter-TSS (NM_001033145)	promoter-TSS (NM_001033145)	41	NM_001033145	68861	Mm.258746	NM_001033145	ENSMUSG00000045414	1190002N15Rik	GoPro49|HASF	RIKEN cDNA 1190002N15 gene	protein-coding
MACS_peak_11231	chr9	78329227	78329561	+	102.52	NA	intron (NM_010106, intron 1 of 7)	CpG	137	NM_010106	13627	Mm.138471	NM_010106	ENSMUSG00000037742	Eef1a1	-	eukaryotic translation elongation factor 1 alpha 1	protein-coding
MACS_peak_9519	chr7	28271710	28272097	+	102.31	NA	promoter-TSS (NM_018820)	promoter-TSS (NM_018820)	-69	NM_018820	55942	Mm.153684	NM_018820	ENSMUSG00000008384	Sertad1	1110032C13Rik|AV000455|AW456625|Sei-1|Sei1|TRIP-Br1	SERTA domain containing 1	protein-coding
MACS_peak_8222	chr5	45884673	45884880	+	102.20	NA	exon (NM_024434, exon 1 of 13)	exon (NM_024434, exon 1 of 13)	163	NM_024434	66988	Mm.286830	NM_024434	ENSMUSG00000039682	Lap3	2410015L10Rik|AA410100|LAP-3|Lap|Lapep|Pep-7|Pep-S|Pep7|Peps	leucine aminopeptidase 3	protein-coding
MACS_peak_11151	chr9	65142071	65142279	+	101.81	NA	5' UTR (NM_001044389, exon 1 of 13)	5' UTR (NM_001044389, exon 1 of 13)	108	NM_011802	270166	Mm.30088	NM_011802	ENSMUSG00000015357	Clpx	AU014732|E330029I21	caseinolytic mitochondrial matrix peptidase chaperone subunit	protein-coding
MACS_peak_5399	chr19	3767651	3767963	+	101.81	NA	intron (NM_001167884, intron 1 of 13)	CpG	386	NM_001167885	225888	Mm.278578	NM_144871	ENSMUSG00000045098	Suv420h1	AA117471|C630029K18Rik|KMT5B|Suv4-20h1	suppressor of variegation 4-20 homolog 1 (Drosophila)	protein-coding
MACS_peak_616	chr1	184212719	184212972	+	101.81	NA	promoter-TSS (NM_007853)	promoter-TSS (NM_007853)	45	NM_007853	13244	Mm.29648	NM_007853	ENSMUSG00000038633	Degs1	AA536663|Degs|Des1|Mdes	degenerative spermatocyte homolog 1 (Drosophila)	protein-coding
MACS_peak_6280	chr2	109757708	109757958	+	101.77	NA	promoter-TSS (NM_172671)	promoter-TSS (NM_172671)	29	NM_172671	107515	Mm.277351	NM_172671	ENSMUSG00000050199	Lgr4	9130225G07|A330106J01Rik|A930009A08Rik|Gpr48	leucine-rich repeat-containing G protein-coupled receptor 4	protein-coding
MACS_peak_8628	chr5	136410322	136410536	+	101.73	NA	promoter-TSS (NM_018871)	promoter-TSS (NM_018871)	82	NM_018871	22628	Mm.233813	NM_018871	ENSMUSG00000051391	Ywhag	14-3-3gamma|D7Bwg1348e	tyrosine 3-monooxygenase/tryptophan 5-monooxygenase activation protein, gamma polypeptide	protein-coding
MACS_peak_7720	chr4	126698497	126698740	+	101.49	NA	promoter-TSS (NM_023603)	promoter-TSS (NM_023603)	73	NM_023603	71514	Mm.257276	NM_023603	ENSMUSG00000028820	Sfpq	1110004P21Rik|2810416M14Rik|5730453G22Rik|9030402K04Rik|AU021830|D4Ertd314e|Gm12940|OTTMUSG00000009329|PSF|REP1	splicing factor proline/glutamine rich (polypyrimidine tract binding protein associated)	protein-coding
MACS_peak_6462	chr2	147865700	147866017	+	101.21	NA	Intergenic	Intergenic	5342	NM_001291067	15376	Mm.938	NM_010446	ENSMUSG00000037025	Foxa2	HNF3-beta|HNF3beta|Hnf-3b|Hnf3b|Tcf-3b|Tcf3b	forkhead box A2	protein-coding
MACS_peak_3646	chr15	25552271	25552619	+	101.05	NA	5' UTR (NM_019472, exon 1 of 41)	5' UTR (NM_019472, exon 1 of 41)	140	NM_019472	17909	Mm.60590	NM_019472	ENSMUSG00000022272	Myo10	AW048724|D15Ertd600e|mKIAA0799	myosin X	protein-coding
MACS_peak_7012	chr3	96024635	96024904	+	101.04	NA	promoter-TSS (NM_178214)	promoter-TSS (NM_178214)	34	NM_175662	319176	Mm.358954	NM_175662		Hist2h2ac	H2a-613b	histone cluster 2, H2ac	protein-coding
MACS_peak_5223	chr18	38578553	38578758	+	100.47	NA	promoter-TSS (NM_022996)	promoter-TSS (NM_022996)	26	NM_022996	65113	Mm.102496	NM_022996	ENSMUSG00000024425	Ndfip1	0610010M22Rik|N4wbp5	Nedd4 family interacting protein 1	protein-coding
MACS_peak_10613	chr8	107748832	107749330	+	100.40	NA	promoter-TSS (NM_145604)	promoter-TSS (NM_145604)	-7	NM_145604	234678	Mm.27186	NM_145604	ENSMUSG00000031889	D230025D16Rik	BC006874|Lin10	RIKEN cDNA D230025D16 gene	protein-coding
MACS_peak_9603	chr7	35174746	35174928	+	100.40	NA	promoter-TSS (NM_025948)	promoter-TSS (NM_025948)	-278	NM_025948	67070	Mm.276503	NM_025948	ENSMUSG00000066568	Lsm14a	2700023B17Rik|AA407828|AU017544|Tral	LSM14 homolog A (SCD6, S. cerevisiae)	protein-coding
MACS_peak_11136	chr9	64101240	64101465	+	100.33	NA	promoter-TSS (NM_008927)	promoter-TSS (NM_008927)	60	NM_008927	26395	Mm.248907	NM_008927	ENSMUSG00000004936	Map2k1	MAPKK1|MEKK1|Mek1|Prkmk1	mitogen-activated protein kinase kinase 1	protein-coding
MACS_peak_7014	chr3	96043104	96043681	+	100.33	NA	promoter-TSS (NM_178216)	promoter-TSS (NM_178216)	-327	NM_178216	15077	Mm.422680	NM_178216	ENSMUSG00000093769	Hist2h3c1	BE691662|H3-615|H3f2|Hist2h3ca1	histone cluster 2, H3c1	protein-coding
MACS_peak_1991	chr11	98902293	98903146	+	100.33	NA	5' UTR (NM_010517, exon 1 of 4)	5' UTR (NM_010517, exon 1 of 4)	145	NM_010517	16010	Mm.233799	NM_010517		Igfbp4	AI875747|Deb2|IGFBP-4	insulin-like growth factor binding protein 4	protein-coding
MACS_peak_9868	chr7	104727799	104728018	+	100.33	NA	promoter-TSS (NM_001081267)	promoter-TSS (NM_001081267)	99	NM_001177945	66273	Mm.41583	NM_183251	ENSMUSG00000035642	Aamdc	1810020D17Rik|1810037D19Rik|LI2	adipogenesis associated Mth938 domain containing	protein-coding
MACS_peak_9416	chr7	16899233	16899440	+	100.33	NA	intron (NM_133234, intron 3 of 3)	CpG	4404	NM_133234	170770	Mm.7660	NM_133234	ENSMUSG00000002083	Bbc3	PUMA|PUMA/JFY1	BCL2 binding component 3	protein-coding
MACS_peak_8051	chr5	9161814	9162026	+	100.33	NA	promoter-TSS (NM_011806)	promoter-TSS (NM_011806)	-144	NM_011806	23857	Mm.22480	NM_011806	ENSMUSG00000042508	Dmtf1	Dimp|Dmp1	cyclin D binding myb-like transcription factor 1	protein-coding
MACS_peak_1862	chr11	87236256	87236661	+	100.26	NA	intron (NM_031386, intron 1 of 30)	U1|snRNA|snRNA	-4635	NM_001199293	83560	Mm.440758	NM_031386	ENSMUSG00000010342	Tex14	C85585	testis expressed gene 14	protein-coding
MACS_peak_5047	chr17	87152974	87153168	+	100.17	NA	promoter-TSS (NM_010137)	promoter-TSS (NM_010137)	-133	NM_010137	13819	Mm.1415	NM_010137	ENSMUSG00000024140	Epas1	HIF-2alpha|HIF2A|HLF|HRF|MOP2|bHLHe73	endothelial PAS domain protein 1	protein-coding
MACS_peak_2982	chr13	49282864	49283077	+	100.07	NA	promoter-TSS (NM_013610)	promoter-TSS (NM_013610)	54	NM_013610	18081	Mm.18503	NM_013610	ENSMUSG00000037966	Ninj1	AU024536	ninjurin 1	protein-coding
MACS_peak_4042	chr15	100135193	100135433	+	100.00	NA	promoter-TSS (NM_027334)	promoter-TSS (NM_027334)	65	NM_027334	70152	Mm.488086	NM_027334	ENSMUSG00000054619	Mettl7a1	2210414H16Rik|3300001H21Rik|Aam-B|Mettl7a|UbiE1	methyltransferase like 7A1	protein-coding
MACS_peak_1052	chr10	86241707	86241905	+	99.96	NA	promoter-TSS (NM_175331)	promoter-TSS (NM_175331)	56	NM_175331	103466	Mm.200446	NM_175331	ENSMUSG00000054027	Nt5dc3	AU040402|AW540062|C630002B14Rik|TU12B1-TY	5'-nucleotidase domain containing 3	protein-coding
MACS_peak_6382	chr2	128524577	128524788	+	99.84	NA	promoter-TSS (NM_008587)	promoter-TSS (NM_008587)	-51	NM_008587	17289	Mm.239655	NM_008587	ENSMUSG00000014361	Mertk	Eyk|Mer|Nyk|nmf12	c-mer proto-oncogene tyrosine kinase	protein-coding
MACS_peak_5856	chr2	3630718	3630927	+	99.37	NA	promoter-TSS (NM_025626)	promoter-TSS (NM_025626)	92	NM_025626	66540	Mm.277864	NM_025626	ENSMUSG00000026655	Fam107b	3110001A13Rik|AA589595|AA959793|AI132312	family with sequence similarity 107, member B	protein-coding
MACS_peak_7237	chr3	151873073	151873337	+	99.11	NA	promoter-TSS (NM_057172)	promoter-TSS (NM_057172)	-158	NM_027287	67035	Mm.46746	NM_025926	ENSMUSG00000028035	Dnajb4	1700029A20Rik|2010306G19Rik|5730460G06Rik	DnaJ (Hsp40) homolog, subfamily B, member 4	protein-coding
MACS_peak_7193	chr3	136332666	136332915	+	98.82	NA	promoter-TSS (NM_001293622)	promoter-TSS (NM_001293622)	-240	NM_008913	19055	Mm.331389	NM_008913	ENSMUSG00000028161	Ppp3ca	2900074D19Rik|CN|Caln|Calna|CnA	protein phosphatase 3, catalytic subunit, alpha isoform	protein-coding
MACS_peak_3434	chr14	56503590	56503947	+	98.55	NA	promoter-TSS (NM_027143)	promoter-TSS (NM_027143)	-38	NM_027143	219094	Mm.37592	NM_027143	ENSMUSG00000047153	Khnyn	6330555F21|9130227C08Rik|AI605259|Kiaa0323|mKIAA0323	KH and NYN domain containing	protein-coding
MACS_peak_3781	chr15	76077156	76077398	+	98.46	NA	promoter-TSS (NM_023168)	promoter-TSS (NM_023168)	40	NM_023168	66168	Mm.41665	NM_023168	ENSMUSG00000022564	Grina	1110025J15Rik|Lag|Tmbim3	glutamate receptor, ionotropic, N-methyl D-aspartate-associated protein 1 (glutamate binding)	protein-coding
MACS_peak_934	chr10	79167180	79167438	+	98.46	NA	exon (NM_009768, exon 1 of 8)	exon (NM_009768, exon 1 of 8)	206	NM_009768	12215	Mm.726	NM_009768	ENSMUSG00000023175	Bsg	AI115436|AI325119|CD147|EMMPRIN|HT-7	basigin	protein-coding
MACS_peak_979	chr10	80139422	80139739	+	98.37	NA	Intergenic	CpG	-4859	NM_021462	17347	Mm.42126	NM_021462	ENSMUSG00000020190	Mknk2	2010016G11Rik|Gprk7|Mnk2	MAP kinase-interacting serine/threonine kinase 2	protein-coding
MACS_peak_4314	chr16	34745230	34745418	+	98.31	NA	Intergenic	CpG	-39712	NM_139300	107589	Mm.33360	NM_139300	ENSMUSG00000022836	Mylk	9530072E15Rik|A930019C19Rik|AW489456|KRP|MLCK108|MLCK210|Mlck|smMLCK	myosin, light polypeptide kinase	protein-coding
MACS_peak_3737	chr15	61816958	61817284	+	98.31	NA	5' UTR (NM_001177354, exon 1 of 3)	5' UTR (NM_001177354, exon 1 of 3)	225	NM_001177352	17869	Mm.2444	NM_010849	ENSMUSG00000022346	Myc	AU016757|Myc2|Niard|Nird|bHLHe39	myelocytomatosis oncogene	protein-coding
MACS_peak_9567	chr7	30768889	30769169	+	98.27	NA	promoter-TSS (NM_001167873)	promoter-TSS (NM_001167873)	55	NM_001167872	243905	Mm.322432	NM_001033355	ENSMUSG00000074221	Zfp568	C80731|Gm1691|chato	zinc finger protein 568	protein-coding
MACS_peak_7880	chr4	139130549	139130745	+	98.24	NA	promoter-TSS (NM_001205173)	promoter-TSS (NM_001205173)	12	NM_001205173	212632	Mm.30464	NM_183148	ENSMUSG00000041025	Iffo2	C79267	intermediate filament family orphan 2	protein-coding
MACS_peak_4131	chr16	8830163	8830399	+	98.17	NA	promoter-TSS (NM_001081400)	promoter-TSS (NM_001081400)	88	NM_001081400	69053	Mm.390868	NM_001081400	ENSMUSG00000022507	1810013L24Rik	1110017P05Rik|3010002C02Rik|AA792997|AW124177|Gm19906|R74903	RIKEN cDNA 1810013L24 gene	protein-coding
MACS_peak_7268	chr4	9596093	9596283	+	98.10	NA	5' UTR (NM_001177856, exon 1 of 5)	5' UTR (NM_001177856, exon 1 of 5)	121	NM_023066	65973	Mm.222206	NM_023066	ENSMUSG00000028207	Asph	2310005F16Rik|3110001L23Rik|AI848629|AW261690|AW561901|BAH|C79816|cI-37	aspartate-beta-hydroxylase	protein-coding
MACS_peak_950	chr10	79630504	79630718	+	98.07	NA	promoter-TSS (NM_007705)	promoter-TSS (NM_007705)	25	NM_007705	12696	Mm.17898	NM_007705	ENSMUSG00000045193	Cirbp	Cirp|R74941	cold inducible RNA binding protein	protein-coding
MACS_peak_507	chr1	166388304	166388544	+	97.90	NA	promoter-TSS (NM_009721)	promoter-TSS (NM_009721)	62	NM_009721	11931	Mm.4550	NM_009721	ENSMUSG00000026576	Atp1b1	Atp4b|Atpb|Atpb-1|NKbeta1	ATPase, Na+/K+ transporting, beta 1 polypeptide	protein-coding
MACS_peak_1999	chr11	100258903	100259124	+	97.81	NA	promoter-TSS (NM_010593)	promoter-TSS (NM_010593)	91	NM_010593	16480	Mm.299774	NM_010593	ENSMUSG00000001552	Jup	Ctnng|D930025P04Rik|PG	junction plakoglobin	protein-coding
MACS_peak_6798	chr3	52072285	52072505	+	97.76	NA	5' UTR (NM_019739, exon 1 of 3)	5' UTR (NM_019739, exon 1 of 3)	136	NM_019739	56458	Mm.29891	NM_019739	ENSMUSG00000044167	Foxo1	AI876417|Afxh|FKHR|Fkhr1|Foxo1a	forkhead box O1	protein-coding
MACS_peak_5381	chr18	85020734	85020964	+	97.63	NA	promoter-TSS (NM_025797)	promoter-TSS (NM_025797)	43	NM_025797	109672	Mm.31018	NM_025797		Cyb5a	0610009N12Rik|Cyb5	cytochrome b5 type A (microsomal)	protein-coding
MACS_peak_472	chr1	157887975	157888151	+	97.39	NA	promoter-TSS (NM_001160181)	promoter-TSS (NM_001160181)	72	NM_022329	240832	Mm.253335	NM_022329	ENSMUSG00000050565	Tor1aip2	1110020D10Rik|15kDa|A130072J07|AA103493|AW060462|AW610675|C77739|Ifrg15|Lull1	torsin A interacting protein 2	protein-coding
MACS_peak_1674	chr11	70513455	70513901	+	97.39	NA	promoter-TSS (NM_153103)	promoter-TSS (NM_153103)	-21	NM_001252485	103844	Mm.101581	NM_213729	ENSMUSG00000057054	Inca1	AI842396	inhibitor of CDK, cyclin A1 interacting protein 1	protein-coding
MACS_peak_9547	chr7	29177930	29178132	+	97.38	NA	promoter-TSS (NM_026042)	promoter-TSS (NM_026042)	16	NM_019458	54624	Mm.7916	NM_019458	ENSMUSG00000003437	Paf1	5730511K23Rik|AA675045	Paf1, RNA polymerase II associated factor, homolog (S. cerevisiae)	protein-coding
MACS_peak_6815	chr3	58329555	58329739	+	97.23	NA	promoter-TSS (NM_001005509)	promoter-TSS (NM_001005509)	-96	NM_001005509	229317	Mm.21617	NM_001005509	ENSMUSG00000027810	Eif2a	D030048D22|D3Ertd194e	eukaryotic translation initiation factor 2A	protein-coding
MACS_peak_8609	chr5	135462041	135462282	+	97.23	NA	promoter-TSS (NM_009902)	promoter-TSS (NM_009902)	77	NM_009902	12739	Mm.158662	NM_009902	ENSMUSG00000070473	Cldn3	AI182374|Cpetr2|mRVP1	claudin 3	protein-coding
MACS_peak_7272	chr4	11083201	11083478	+	97.20	NA	promoter-TSS (NM_001199105)	promoter-TSS (NM_001199105)	-249	NM_001199105	60599	Mm.393018	NM_021897	ENSMUSG00000028211	Trp53inp1	2700057G22Rik|SIP|SIP18|SIP27|Stinp|Teap	transformation related protein 53 inducible nuclear protein 1	protein-coding
MACS_peak_2859	chr13	22133044	22133305	+	97.18	NA	promoter-TSS (NM_175656)	promoter-TSS (NM_175656)	57	NM_175656	319158	Mm.14775	NM_175656	ENSMUSG00000060639	Hist1h4i	-	histone cluster 1, H4i	protein-coding
MACS_peak_9317	chr6	146591043	146591273	+	97.07	NA	promoter-TSS (NM_025315)	promoter-TSS (NM_025315)	57	NM_025315	108098	Mm.26212	NM_025315	ENSMUSG00000030291	Med21	0610007L03Rik|AI449604|D19234|D6Ertd782e|Srb7|Surb7	mediator complex subunit 21	protein-coding
MACS_peak_336	chr1	120355551	120355932	+	96.93	NA	non-coding (NR_027901, exon 1 of 1)	non-coding (NR_027901, exon 1 of 1)	101	NR_027901	68204	Mm.443536	NR_027901		2900060B14Rik	-	RIKEN cDNA 2900060B14 gene	ncRNA
MACS_peak_9230	chr6	124867715	124868417	+	96.92	NA	promoter-TSS (NM_026988)	promoter-TSS (NM_026988)	-102	NM_026988	69202	Mm.142187	NM_026988	ENSMUSG00000030122	Ptms	2610009E16Rik	parathymosin	protein-coding
MACS_peak_8476	chr5	116872652	116873203	+	96.92	NA	promoter-TSS (NM_030704)	promoter-TSS (NM_030704)	-54	NM_030704	80888	Mm.21549	NM_030704	ENSMUSG00000041548	Hspb8	AU018630|AW413033|Cryac|D5Ucla4|E2IG1|H11|H11K|HSP20-like|HSP22	heat shock protein 8	protein-coding
MACS_peak_741	chr10	24646968	24647308	+	96.92	NA	exon (NM_007482, exon 1 of 8)	exon (NM_007482, exon 1 of 8)	138	NM_007482	11846	Mm.154144	NM_007482	ENSMUSG00000019987	Arg1	AI|AI256583|Arg-1|PGIF	arginase, liver	protein-coding
MACS_peak_2333	chr12	8778136	8778407	+	96.92	NA	promoter-TSS (NM_011519)	promoter-TSS (NM_011519)	69	NM_011519	20969	Mm.2580	NM_011519	ENSMUSG00000020592	Sdc1	AA408134|AA409076|CD138|Sstn|Synd|Synd1|syn-1	syndecan 1	protein-coding
MACS_peak_1631	chr11	69571736	69571884	+	96.66	NA	5' UTR (NM_001291068, exon 1 of 29)	5' UTR (NM_001291068, exon 1 of 29)	325	NM_001291068	20020	Mm.16533	NM_009089	ENSMUSG00000005198	Polr2a	220kDa|Rpb1|Rpo2-1	polymerase (RNA) II (DNA directed) polypeptide A	protein-coding
MACS_peak_1868	chr11	87275919	87276137	+	96.47	NA	intron (NM_001199293, intron 2 of 30)	intron (NM_001199293, intron 2 of 30)	34935	NM_001199293	83560	Mm.440758	NM_031386	ENSMUSG00000010342	Tex14	C85585	testis expressed gene 14	protein-coding
MACS_peak_5089	chr18	9212107	9212328	+	96.30	NA	promoter-TSS (NM_008058)	promoter-TSS (NM_008058)	-637	NM_008058	14370	Mm.184289	NM_008058	ENSMUSG00000036904	Fzd8	Fz8	frizzled homolog 8 (Drosophila)	protein-coding
MACS_peak_770	chr10	39978212	39978533	+	96.19	NA	promoter-TSS (NM_026113)	promoter-TSS (NM_026113)	-901	NM_026113	67371	Mm.64104	NM_026113	ENSMUSG00000019837	Gtf3c6	2410016F19Rik|AU019813	general transcription factor IIIC, polypeptide 6, alpha	protein-coding
MACS_peak_4416	chr16	87699150	87699408	+	95.97	NA	promoter-TSS (NM_007520)	promoter-TSS (NM_007520)	80	NM_007520	12013	Mm.26147	NM_007520	ENSMUSG00000025612	Bach1	6230421P05Rik|AI323795	BTB and CNC homology 1	protein-coding
MACS_peak_4685	chr17	29169548	29169797	+	95.92	NA	promoter-TSS (NR_036613)	promoter-TSS (NR_036613)	67	NR_036613	20383	Mm.6787	NM_013663	ENSMUSG00000071172	Srsf3	AL024116|Sfrs3|X16	serine/arginine-rich splicing factor 3	protein-coding
MACS_peak_1332	chr11	16651992	16652581	+	95.86	NA	promoter-TSS (NM_207655)	promoter-TSS (NM_207655)	80	NM_007912	13649	Mm.8534	NM_007912	ENSMUSG00000020122	Egfr	9030024J15Rik|AI552599|Erbb|Errb1|Errp|Wa5|wa-2|wa2	epidermal growth factor receptor	protein-coding
MACS_peak_1727	chr11	75324067	75324295	+	95.82	NA	exon (NM_001029938, exon 3 of 8)	exon (NM_001029938, exon 3 of 8)	585	NM_001029938	280408	Mm.41416	NM_001029938	ENSMUSG00000038195	Rilp	AI835553|Gm857	Rab interacting lysosomal protein	protein-coding
MACS_peak_10302	chr8	32279279	32279508	+	95.82	NA	promoter-TSS (NM_026453)	promoter-TSS (NM_026453)	-197	NM_026453	67920	Mm.289818	NM_026453	ENSMUSG00000031578	Mak16	2600016B03Rik|AI314911|Rbm13	MAK16 homolog (S. cerevisiae)	protein-coding
MACS_peak_10078	chr7	135110935	135111189	+	95.82	NA	promoter-TSS (NM_139149)	promoter-TSS (NM_139149)	69	NM_139149	233908	Mm.277680	NM_139149	ENSMUSG00000030795	Fus	D430004D17Rik|D930039C12Rik|Fus1|Tls	fused in sarcoma	protein-coding
MACS_peak_8253	chr5	65826791	65827048	+	95.68	NA	5' UTR (NM_009466, exon 1 of 12)	5' UTR (NM_009466, exon 1 of 12)	162	NM_009466	22235	Mm.344831	NM_009466	ENSMUSG00000029201	Ugdh	Udpgdh	UDP-glucose dehydrogenase	protein-coding
MACS_peak_1030	chr10	82321888	82322131	+	95.50	NA	promoter-TSS (NM_001042513)	promoter-TSS (NM_001042513)	58	NM_015762	50493	Mm.210155	NM_015762	ENSMUSG00000020250	Txnrd1	TR|TR1|TrxR1	thioredoxin reductase 1	protein-coding
MACS_peak_10411	chr8	73222727	73223370	+	95.38	NA	exon (NM_010592, exon 1 of 1)	exon (NM_010592, exon 1 of 1)	1410	NM_001286944	16478	Mm.419851	NM_010592	ENSMUSG00000071076	Jund	Jund1	jun D proto-oncogene	protein-coding
MACS_peak_10339	chr8	47702725	47702936	+	95.38	NA	promoter-TSS (NM_001001184)	promoter-TSS (NM_001001184)	185	NM_009810	12367	Mm.34405	NM_009810		Casp3	A830040C14Rik|AC-3|Apopain|CASP-3|CC3|CPP-32|CPP32|Caspase-3|Lice|SCA-1|Yama|mldy	caspase 3	protein-coding
MACS_peak_6470	chr2	148506802	148507064	+	95.36	NA	promoter-TSS (NM_028986)	promoter-TSS (NM_028986)	77	NM_028986	74533	Mm.136913	NM_028986	ENSMUSG00000027439	Gzf1	8430437G08Rik|Zfp336|mGZF1	GDNF-inducible zinc finger protein 1	protein-coding
MACS_peak_9945	chr7	116662671	116662908	+	95.16	NA	promoter-TSS (NM_011975)	promoter-TSS (NM_011975)	80	NM_011975	26451	Mm.305750	NM_011975	ENSMUSG00000046364	Rpl27a	L27'|L27A|L29	ribosomal protein L27A	protein-coding
MACS_peak_9622	chr7	36119290	36119462	+	95.12	NA	exon (NM_027897, exon 1 of 15)	exon (NM_027897, exon 1 of 15)	120	NM_027897	52428	Mm.286600	NM_027897	ENSMUSG00000030494	Rhpn2	1300002E07Rik|AA536890|C85860|D7Ertd784e	rhophilin, Rho GTPase binding protein 2	protein-coding
MACS_peak_5212	chr18	36961217	36961412	+	94.96	NA	promoter-TSS (NR_027885)	promoter-TSS (NR_027885)	-103	NR_027885	378472	Mm.482379	NR_027885		Vaultrc5	Gm22653|Mvg1	vault RNA component 5	ncRNA
MACS_peak_3004	chr13	54605107	54605322	+	94.96	NA	promoter-TSS (NM_176987)	promoter-TSS (NM_176987)	48	NM_176987	319719	Mm.376151	NM_176987	ENSMUSG00000043183	Simc1	4732471D19Rik	SUMO-interacting motifs containing 1	protein-coding
MACS_peak_2223	chr11	117830353	117830605	+	94.74	NA	5' UTR (NM_007707, exon 1 of 2)	5' UTR (NM_007707, exon 1 of 2)	201	NM_007707	12702	Mm.3468	NM_007707	ENSMUSG00000053113	Socs3	Cis3|Cish3|EF-10|Ef10|SSI-3|Ssi3	suppressor of cytokine signaling 3	protein-coding
MACS_peak_7256	chr4	3865998	3866202	+	94.54	NA	promoter-TSS (NM_019969)	promoter-TSS (NM_019969)	65	NM_001285804	66433	Mm.27406	NM_181391	ENSMUSG00000042198	Chchd7	1810049H20Rik	coiled-coil-helix-coiled-coil-helix domain containing 7	protein-coding
MACS_peak_9786	chr7	80703150	80703422	+	94.47	NA	promoter-TSS (NR_037569)	promoter-TSS (NR_037569)	-5	NR_037569	69170	Mm.34539	NR_037569		1810026B05Rik	-	RIKEN cDNA 1810026B05 gene	ncRNA
MACS_peak_2635	chr12	102017236	102017432	+	94.42	NA	promoter-TSS (NM_145448)	promoter-TSS (NM_145448)	1	NM_145448	217830	Mm.218590	NM_145448	ENSMUSG00000021185	9030617O03Rik	-	RIKEN cDNA 9030617O03 gene	protein-coding
MACS_peak_2523	chr12	77505344	77505554	+	94.42	NA	promoter-TSS (NM_008301)	promoter-TSS (NM_008301)	92	NM_008301	15512	Mm.296181	NM_008301	ENSMUSG00000059970	Hspa2	70kDa|HSP70.2|HSP70A2|Hsp70-2	heat shock protein 2	protein-coding
MACS_peak_2581	chr12	85791719	85791979	+	94.05	NA	promoter-TSS (NM_173756)	promoter-TSS (NM_173756)	51	NM_134042	104776	Mm.247510	NM_134042	ENSMUSG00000021238	Aldh6a1	1110038I05Rik|AI314632|Mmsdh	aldehyde dehydrogenase family 6, subfamily A1	protein-coding
MACS_peak_5200	chr18	36720209	36720405	+	93.96	NA	promoter-TSS (NM_175375)	promoter-TSS (NM_175375)	50	NM_175375	108857	Mm.482287	NM_175375	ENSMUSG00000024483	Ankhd1	1110004O12Rik|4933432B13Rik|9130019P20Rik|A530027J04Rik|A630021B20Rik|AA571404|Mask|mFLJ00246|mKIAA1085	ankyrin repeat and KH domain containing 1	protein-coding
MACS_peak_7059	chr3	99966221	99966574	+	93.73	NA	promoter-TSS (NR_104341)	promoter-TSS (NR_104341)	11	NR_104341	14547	Mm.279228	NM_010269	ENSMUSG00000027865	Gdap2	C77050|D3Ertd801e	ganglioside-induced differentiation-associated-protein 2	protein-coding
MACS_peak_4987	chr17	73267446	73267751	+	93.61	NA	promoter-TSS (NM_029999)	promoter-TSS (NM_029999)	-47	NM_029999	77889	Mm.154109	NM_029999	ENSMUSG00000024063	Lbh	1810009F10Rik|6720416L16Rik	limb-bud and heart	protein-coding
MACS_peak_7261	chr4	8165987	8166373	+	93.49	NA	promoter-TSS (NM_007592)	promoter-TSS (NM_007592)	8	NM_007592	12319	Mm.119320	NM_007592		Car8	AW546993|Ca8|Cals|Cals1|Carp|wdl	carbonic anhydrase 8	protein-coding
MACS_peak_11557	chrX	12857960	12858331	+	93.22	NA	promoter-TSS (NM_010028)	promoter-TSS (NM_010028)	-3	NM_010028	13205	Mm.289662	NM_010028	ENSMUSG00000000787	Ddx3x	D1Pas1-rs2|Ddx3|Fin14	DEAD/H (Asp-Glu-Ala-Asp/His) box polypeptide 3, X-linked	protein-coding
MACS_peak_4717	chr17	32487312	32487587	+	93.01	NA	promoter-TSS (NM_017476)	promoter-TSS (NM_017476)	73	NM_017476	54194	Mm.281005	NM_017476	ENSMUSG00000002625	Akap8l	HAP95|Nakap95	A kinase (PRKA) anchor protein 8-like	protein-coding
MACS_peak_9689	chr7	52830409	52830730	+	93.01	NA	promoter-TSS (NR_038166)	promoter-TSS (NR_038166)	-23	NR_038165	71661	Mm.439894	NR_038165	ENSMUSG00000085214	0610005C13Rik	AI182092	RIKEN cDNA 0610005C13 gene	ncRNA
MACS_peak_4274	chr16	26581776	26581963	+	93.00	NA	promoter-TSS (NM_001159318)	promoter-TSS (NM_001159318)	78	NM_008364	16180	Mm.253424	NM_008364	ENSMUSG00000022514	Il1rap	6430709H04Rik|AI255955|AV239853|IL-1RAcP	interleukin 1 receptor accessory protein	protein-coding
MACS_peak_942	chr10	79516318	79516592	+	92.97	NA	promoter-TSS (NM_001037741)	promoter-TSS (NM_001037741)	222	NM_008162	625249	Mm.332810	NM_008162	ENSMUSG00000075706	Gpx4	GPx-4|GSHPx-4|PHGPx|mtPHGPx|snGPx	glutathione peroxidase 4	protein-coding
MACS_peak_879	chr10	70810543	70810741	+	92.90	NA	5' UTR (NM_027184, exon 1 of 6)	5' UTR (NM_027184, exon 1 of 6)	101	NM_027184	69718	Mm.245867	NM_027184	ENSMUSG00000060733	Ipmk	2410017C19Rik|AA408208|Impk	inositol polyphosphate multikinase	protein-coding
MACS_peak_2962	chr13	45485044	45485255	+	92.88	NA	promoter-TSS (NM_153789)	promoter-TSS (NM_153789)	38	NM_153789	218203	Mm.212855	NM_153789	ENSMUSG00000038175	Mylip	9430057C20Rik|Mir	myosin regulatory light chain interacting protein	protein-coding
MACS_peak_4598	chr17	24856708	24856905	+	92.42	NA	promoter-TSS (NR_028515)	promoter-TSS (NR_028515)	-29	NR_028515	100306952	Mm.484806	NR_028515	ENSMUSG00000089255	Snora78	ACA64	small nucleolar RNA, H/ACA box 7	snoRNA
MACS_peak_5628	chr19	23215297	23215923	+	92.42	NA	promoter-TSS (NM_010638)	promoter-TSS (NM_010638)	-106	NM_010638	16601	Mm.291595	NM_010638	ENSMUSG00000033863	Klf9	2310051E17Rik|AA589643|BTEB-1|Bteb1|ENSMUSG00000055440|Gm9971	Kruppel-like factor 9	protein-coding
MACS_peak_9045	chr6	86346980	86347212	+	92.37	NA	promoter-TSS (NM_025823)	promoter-TSS (NM_025823)	48	NM_025823	66881	Mm.30849	NM_025823	ENSMUSG00000029998	Pcyox1	1200015P13Rik|AI115532|AI448340|PCL1|Pcly	prenylcysteine oxidase 1	protein-coding
MACS_peak_5164	chr18	33373286	33373527	+	92.21	NA	promoter-TSS (NM_133774)	promoter-TSS (NM_133774)	64	NM_133774	170459	Mm.127058	NM_133774		Stard4	4632419C16Rik|9030213J02Rik|AA517649|AW324468	StAR-related lipid transfer (START) domain containing 4	protein-coding
MACS_peak_8127	chr5	31210225	31210521	+	92.17	NA	promoter-TSS (NM_001134692)	promoter-TSS (NM_001134692)	-212	NM_024460	67695	Mm.21450	NM_024460	ENSMUSG00000038803	Ost4	2310016E02Rik	oligosaccharyltransferase 4 homolog (S. cerevisiae)	protein-coding
MACS_peak_3955	chr15	88692603	88693153	+	92.16	NA	5' UTR (NM_145478, exon 1 of 6)	5' UTR (NM_145478, exon 1 of 6)	254	NM_145478	223775	Mm.400129	NM_145478	ENSMUSG00000035828	Pim3	BC026639|Kid1	proviral integration site 3	protein-coding
MACS_peak_9288	chr6	135118004	135118219	+	91.94	NA	exon (NM_013546, exon 1 of 4)	exon (NM_013546, exon 1 of 4)	122	NM_013546	15199	Mm.378937	NM_013546	ENSMUSG00000042770	Hebp1	Hebp	heme binding protein 1	protein-coding
MACS_peak_2902	chr13	30428238	30428477	+	91.92	NA	5' UTR (NM_177322, exon 1 of 3)	5' UTR (NM_177322, exon 1 of 3)	132	NM_177322	11607	Mm.35062	NM_177322	ENSMUSG00000049115	Agtr1a	1810074K20Rik|AG2S|AI551199|AT1|AT1a|AT2R1|AT2R1A|Agtr-1a|Agtr1|Angtr-1a	angiotensin II receptor, type 1a	protein-coding
MACS_peak_6449	chr2	143741200	143741426	+	91.92	NA	5' UTR (NM_019771, exon 1 of 4)	5' UTR (NM_019771, exon 1 of 4)	246	NM_019771	56431	Mm.28919	NM_019771	ENSMUSG00000015932	Dstn	2610043P17Rik|ADF|AU042046|Dsn|corn1|sid23p	destrin	protein-coding
MACS_peak_5054	chr17	87681988	87682370	+	91.69	NA	promoter-TSS (NR_015506)	promoter-TSS (NR_015506)	-25	NR_015506	74597	Mm.63783	NR_015506	ENSMUSG00000085287	4833418N02Rik	-	RIKEN cDNA 4833418N02 gene	ncRNA
MACS_peak_6586	chr2	163896724	163896919	+	91.61	NA	promoter-TSS (NM_025996)	promoter-TSS (NM_025996)	17	NM_025996	67145	Mm.23173	NM_025996	ENSMUSG00000018322	Tomm34	2610100K07Rik|TOM34	translocase of outer mitochondrial membrane 34	protein-coding
MACS_peak_7892	chr4	140857055	140857280	+	91.61	NA	promoter-TSS (NM_010139)	promoter-TSS (NM_010139)	31	NM_010139	13836	Mm.2581	NM_010139	ENSMUSG00000006445	Epha2	AW545284|Eck|Myk2|Sek-2|Sek2	Eph receptor A2	protein-coding
MACS_peak_2282	chr11	120479016	120479527	+	91.55	NA	promoter-TSS (NM_024229)	promoter-TSS (NM_024229)	-67	NM_024229	68671	Mm.21439	NM_024229	ENSMUSG00000025137	Pcyt2	1110033E03Rik|ET	phosphate cytidylyltransferase 2, ethanolamine	protein-coding
MACS_peak_9646	chr7	51502100	51502283	+	91.55	NA	promoter-TSS (NM_025880)	promoter-TSS (NM_025880)	99	NM_025880	668661	Mm.274492	NM_025880	ENSMUSG00000045411	2410002F23Rik	-	RIKEN cDNA 2410002F23 gene	protein-coding
MACS_peak_7507	chr4	86520281	86520493	+	91.55	NA	promoter-TSS (NM_001290541)	promoter-TSS (NM_001290541)	69	NM_139306	230379	Mm.45019	NM_139306	ENSMUSG00000038007	Acer2	2410116I05Rik|Asah3l|CRG-L1|maCER2	alkaline ceramidase 2	protein-coding
MACS_peak_4298	chr16	32608990	32609204	+	91.50	NA	5' UTR (NM_011638, exon 1 of 19)	5' UTR (NM_011638, exon 1 of 19)	115	NM_011638	22042	Mm.28683	NM_011638	ENSMUSG00000022797	Tfrc	2610028K12Rik|AI195355|AI426448|AU015758|CD71|E430033M20Rik|Mtvr-1|Mtvr1|TFR|TFR1|TR|Trfr|p90	transferrin receptor	protein-coding
MACS_peak_7022	chr3	96073565	96073809	+	91.46	NA	promoter-TSS (NM_175666)	promoter-TSS (NM_175666)	64	NM_175666	319189	Mm.297655	NM_175666		Hist2h2bb	H2b-616	histone cluster 2, H2bb	protein-coding
MACS_peak_2555	chr12	82127740	82127918	+	91.26	NA	promoter-TSS (NM_001146217)	promoter-TSS (NM_001146217)	34	NM_022316	64075	Mm.273295	NM_022316	ENSMUSG00000021136	Smoc1	2600002F22Rik|AI848508|SRG	SPARC related modular calcium binding 1	protein-coding
MACS_peak_7291	chr4	16090553	16090795	+	91.18	NA	promoter-TSS (NR_045765)	promoter-TSS (NR_045765)	-29	NM_138952	192656	Mm.112765	NM_138952	ENSMUSG00000041135	Ripk2	2210420D18Rik|CARD3|CARDIAK|CCK|D4Bwg0615e|RICK|RIP2	receptor (TNFRSF)-interacting serine-threonine kinase 2	protein-coding
MACS_peak_8778	chr5	151396954	151397309	+	90.81	NA	promoter-TSS (NM_133898)	promoter-TSS (NM_133898)	-31	NM_133898	100637	Mm.279932	NM_133898	ENSMUSG00000041132	N4bp2l1	2410024N18Rik|AI428195|B230342M21Rik	NEDD4 binding protein 2-like 1	protein-coding
MACS_peak_4890	chr17	49567613	49567850	+	90.81	NA	promoter-TSS (NM_020042)	promoter-TSS (NM_020042)	42	NM_020042	56738	Mm.22256	NM_020042	ENSMUSG00000064120	Mocs1	3110045D15Rik|AI043170|AW536397	molybdenum cofactor synthesis 1	protein-coding
MACS_peak_3369	chr14	47808935	47809145	+	90.27	NA	promoter-TSS (NM_008102)	promoter-TSS (NM_008102)	37	NM_008102	14528	Mm.10651	NM_008102	ENSMUSG00000037580	Gch1	GTP-CH|GTPCH|Gch	GTP cyclohydrolase 1	protein-coding
MACS_peak_5040	chr17	85357315	85357517	+	90.22	NA	promoter-TSS (NM_011151)	promoter-TSS (NM_011151)	75	NM_001159496	19043	Mm.249695	NM_011151	ENSMUSG00000061130	Ppm1b	PP2CB	protein phosphatase 1B, magnesium dependent, beta isoform	protein-coding
MACS_peak_8134	chr5	31350754	31351164	+	90.22	NA	promoter-TSS (NM_027855)	promoter-TSS (NM_027855)	-24	NM_001177621	330064	Mm.205463	NM_177870	ENSMUSG00000006641	Slc5a6	E430023I20	solute carrier family 5 (sodium-dependent vitamin transporter), member 6	protein-coding
MACS_peak_3626	chr15	7079516	7079707	+	90.21	NA	promoter-TSS (NM_001113386)	promoter-TSS (NM_001113386)	39	NM_001113386	16880	Mm.149720	NM_013584	ENSMUSG00000054263	Lifr	A230075M04Rik|AW061234|LIF	leukemia inhibitory factor receptor	protein-coding
MACS_peak_2908	chr13	31649757	31650425	+	90.21	NA	promoter-TSS (NM_008239)	promoter-TSS (NM_008239)	52	NM_008239	15220	Mm.44235	NM_008239	ENSMUSG00000038415	Foxq1	HFH-1|Hfh1|Hfh1l|sa	forkhead box Q1	protein-coding
MACS_peak_4593	chr17	24686923	24687131	+	90.10	NA	5' UTR (NM_013630, exon 1 of 46)	5' UTR (NM_013630, exon 1 of 46)	132	NM_013630	18763	Mm.30435	NM_013630	ENSMUSG00000032855	Pkd1	PC1|mFLJ00285	polycystic kidney disease 1 homolog	protein-coding
MACS_peak_7451	chr4	57968963	57969233	+	90.10	NA	5' UTR (NM_011660, exon 1 of 5)	5' UTR (NM_011660, exon 1 of 5)	185	NM_011660	22166	Mm.260618	NM_011660	ENSMUSG00000028367	Txn1	ADF|AW550880|Trx1|Txn	thioredoxin 1	protein-coding
MACS_peak_570	chr1	177555553	177555770	+	90.10	NA	exon (NM_010209, exon 1 of 10)	exon (NM_010209, exon 1 of 10)	105	NM_010209	14194	Mm.41502	NM_010209		Fh1	Fh|Fh-1	fumarate hydratase 1	protein-coding
MACS_peak_5996	chr2	30026973	30027140	+	90.10	NA	promoter-TSS (NM_007931)	promoter-TSS (NM_007931)	12	NM_007931	13804	Mm.474473	NM_007931	ENSMUSG00000015337	Endog	-	endonuclease G	protein-coding
MACS_peak_5583	chr19	10679779	10679979	+	90.07	NA	promoter-TSS (NM_015735)	promoter-TSS (NM_015735)	-236	NM_015735	13194	Mm.289915	NM_015735	ENSMUSG00000024740	Ddb1	127kDa|AA408517|p127-Ddb1	damage specific DNA binding protein 1	protein-coding
MACS_peak_5909	chr2	22924400	22924630	+	89.98	NA	promoter-TSS (NM_001102437)	promoter-TSS (NM_001102437)	-77	NM_001102437	74159	Mm.181973	NM_028793	ENSMUSG00000026781	Acbd5	1300014E15Rik	acyl-Coenzyme A binding domain containing 5	protein-coding
MACS_peak_3245	chr14	21000829	21001191	+	89.95	NA	promoter-TSS (NM_021542)	promoter-TSS (NM_021542)	-6	NM_021542	16529	Mm.68998	NM_021542	ENSMUSG00000023243	Kcnk5	TASK-2	potassium channel, subfamily K, member 5	protein-coding
MACS_peak_8468	chr5	115939786	115940387	+	89.54	NA	Intergenic	CpG	-5593	NM_133760	75387	Mm.332616	NM_133760	ENSMUSG00000029524	Sirt4	4930596O17Rik	sirtuin 4	protein-coding
MACS_peak_991	chr10	80392749	80392919	+	89.54	NA	promoter-TSS (NM_008655)	promoter-TSS (NM_008655)	-2	NM_008655	17873	Mm.1360	NM_008655	ENSMUSG00000015312	Gadd45b	AI323528|Myd118	growth arrest and DNA-damage-inducible 45 beta	protein-coding
MACS_peak_8622	chr5	136164987	136165292	+	89.40	NA	promoter-TSS (NM_008898)	promoter-TSS (NM_008898)	55	NM_008898	18984	Mm.3863	NM_008898	ENSMUSG00000005514	Por	4933424M13Rik|CPR|CYPOR	P450 (cytochrome) oxidoreductase	protein-coding
MACS_peak_5366	chr18	80452978	80453211	+	89.40	NA	promoter-TSS (NM_025861)	promoter-TSS (NM_025861)	49	NM_001164423	66943	Mm.29247	NM_025861	ENSMUSG00000034006	Pqlc1	2310009N05Rik|4933425L21Rik|5730564E11Rik|C78974	PQ loop repeat containing 1	protein-coding
MACS_peak_7558	chr4	106233617	106233929	+	89.30	NA	exon (NM_053272, exon 1 of 9)	exon (NM_053272, exon 1 of 9)	130	NM_053272	74754	Mm.133370	NM_053272	ENSMUSG00000034926	Dhcr24	2310076D10Rik|5830417J06Rik|mKIAA0018	24-dehydrocholesterol reductase	protein-coding
MACS_peak_11356	chr9	106794082	106794328	+	89.30	NA	promoter-TSS (NM_029103)	promoter-TSS (NM_029103)	64	NM_029103	74840	Mm.29778	NM_029103	ENSMUSG00000032575	Manf	3230402M22Rik|AA407711|AA408789|AA673178|Armet|D17914|D18Mgi17	mesencephalic astrocyte-derived neurotrophic factor	protein-coding
MACS_peak_1120	chr10	110601801	110601976	+	89.05	NA	promoter-TSS (NM_175489)	promoter-TSS (NM_175489)	30	NM_175489	237542	Mm.220204	NM_175489	ENSMUSG00000020189	Osbpl8	AA536976|AA536995|C730029P18Rik|D330025H14Rik|ORP-8	oxysterol binding protein-like 8	protein-coding
MACS_peak_2312	chr12	3309769	3310012	+	89.04	NA	promoter-TSS (NM_016676)	promoter-TSS (NM_016676)	79	NM_016676	19325	Mm.378993	NM_016676	ENSMUSG00000020671	Rab10	AW107754	RAB10, member RAS oncogene family	protein-coding
MACS_peak_8316	chr5	89886662	89886844	+	88.95	NA	5' UTR (NM_008096, exon 1 of 13)	5' UTR (NM_008096, exon 1 of 13)	170	NM_008096	14473	Mm.196595	NM_008096	ENSMUSG00000035540	Gc	DBP|VDB	group specific component	protein-coding
MACS_peak_2427	chr12	55830428	55831003	+	88.84	NA	Intergenic	U1|snRNA|snRNA	-33863	NM_025456	66266	Mm.156440	NM_025456	ENSMUSG00000054302	Eapp	1810011O16Rik	E2F-associated phosphoprotein	protein-coding
MACS_peak_10490	chr8	86132120	86132374	+	88.48	NA	exon (NM_018808, exon 1 of 3)	exon (NM_018808, exon 1 of 3)	173	NM_018808	81489	Mm.282092	NM_018808	ENSMUSG00000005483	Dnajb1	0610007I11Rik|HSPF1|Hsp40	DnaJ (Hsp40) homolog, subfamily B, member 1	protein-coding
MACS_peak_5807	chr19	53217228	53217441	+	88.45	NA	promoter-TSS (NM_001277100)	promoter-TSS (NM_001277100)	88	NM_001164100	27360	Mm.426080	NM_013758	ENSMUSG00000025026	Add3	AI463285|R75380	adducin 3 (gamma)	protein-coding
MACS_peak_10812	chr8	129117758	129118529	+	88.19	NA	promoter-TSS (NM_001164598)	promoter-TSS (NM_001164598)	-807	NM_001164598	270110	Mm.334918	NM_001164598	ENSMUSG00000051495	Irf2bp2	E130305N23Rik|IRF-2BP2	interferon regulatory factor 2 binding protein 2	protein-coding
MACS_peak_10375	chr8	71612596	71612840	+	88.14	NA	promoter-TSS (NM_007509)	promoter-TSS (NM_007509)	83	NM_007509	11966	Mm.249096	NM_007509	ENSMUSG00000006273	Atp6v1b2	AI194269|AI790362|Atp6b2|HO57|R74844	ATPase, H+ transporting, lysosomal V1 subunit B2	protein-coding
MACS_peak_4047	chr15	100325556	100325775	+	87.86	NA	promoter-TSS (NM_153407)	promoter-TSS (NM_153407)	5	NM_153407	207785	Mm.294969	NM_153407	ENSMUSG00000044636	Csrnp2	CSRNP-2|Csnrp2|taip-12	cysteine-serine-rich nuclear protein 2	protein-coding
MACS_peak_8702	chr5	143580629	143580818	+	87.79	NA	Intergenic	Intergenic	-1657	NM_001122730	231861	Mm.354649	NM_178242	ENSMUSG00000039477	Tnrc18	BC025631|EG381742|Zfp469	trinucleotide repeat containing 18	protein-coding
MACS_peak_7130	chr3	118265033	118265244	+	87.73	NA	promoter-TSS (NM_170778)	promoter-TSS (NM_170778)	42	NM_170778	99586	Mm.27907	NM_170778	ENSMUSG00000033308	Dpyd	AI315208|DPD|E330028L06Rik	dihydropyrimidine dehydrogenase	protein-coding
MACS_peak_4283	chr16	30599764	30599957	+	87.71	NA	promoter-TSS (NM_177632)	promoter-TSS (NM_177632)	51	NM_177632	224093	Mm.28244	NM_177632	ENSMUSG00000046546	Fam43a	Tuf1	family with sequence similarity 43, member A	protein-coding
MACS_peak_5815	chr19	53977815	53978016	+	87.47	NA	promoter-TSS (NM_001168492)	promoter-TSS (NM_001168492)	74	NM_001168491	18569	Mm.1605	NM_011050	ENSMUSG00000024975	Pdcd4	D19Ucla1|Ma3|Tis	programmed cell death 4	protein-coding
MACS_peak_6577	chr2	163367245	163367510	+	87.44	NA	promoter-TSS (NR_027970)	promoter-TSS (NR_027970)	80	NR_027970	68314	Mm.46190	NM_197983	ENSMUSG00000046840	Hnf4aos	0610008F07Rik	hepatic nuclear factor 4 alpha, opposite strand	ncRNA
MACS_peak_8729	chr5	145118789	145118998	+	87.28	NA	promoter-TSS (NM_025833)	promoter-TSS (NM_025833)	88	NM_025833	66898	Mm.18814	NM_025833	ENSMUSG00000038859	Baiap2l1	1300006M19Rik|AI585895|IRTKS	BAI1-associated protein 2-like 1	protein-coding
MACS_peak_5184	chr18	35758235	35758466	+	87.23	NA	promoter-TSS (NM_026420)	promoter-TSS (NM_026420)	29	NM_026420	67869	Mm.126534	NM_026420	ENSMUSG00000037058	Paip2	2310050K10Rik|AU045972	polyadenylate-binding protein-interacting protein 2	protein-coding
MACS_peak_6295	chr2	118687678	118687932	+	87.23	NA	promoter-TSS (NM_019826)	promoter-TSS (NM_019826)	69	NM_019826	56357	Mm.6635	NM_019826	ENSMUSG00000027332	Ivd	1300016K07Rik|6720455E18Rik|AI463340	isovaleryl coenzyme A dehydrogenase	protein-coding
MACS_peak_1475	chr11	52045238	52045683	+	87.23	NA	promoter-TSS (NM_011543)	promoter-TSS (NM_011543)	-37	NM_011543	21402	Mm.42944	NM_011543	ENSMUSG00000036309	Skp1a	15kDa|2610043E24Rik|2610206H23Rik|EMC19|OCP-II|OCP2|SKP1|Tceb1l|p19A|p19Skp1	S-phase kinase-associated protein 1A	protein-coding
MACS_peak_3077	chr13	67161655	67161855	+	87.23	NA	intron (NM_001166218, intron 1 of 3)	intron (NM_001166218, intron 1 of 3)	351	NM_001166218	78251	Mm.297247	NM_001166218	ENSMUSG00000090641	Zfp712	4921504N20Rik|mszf31|mszf89	zinc finger protein 712	protein-coding
MACS_peak_5439	chr19	4811478	4811650	+	87.13	NA	promoter-TSS (NM_019869)	promoter-TSS (NM_019869)	70	NM_001290127	102902673	Mm.426069	NM_001290127		Rbm14-rbm4	-	Rbm14-Rbm4 readthrough	protein-coding
MACS_peak_11503	chr9	121825247	121825458	+	86.86	NA	promoter-TSS (NM_010012)	promoter-TSS (NM_010012)	71	NM_010012	13124	Mm.20889	NM_010012	ENSMUSG00000050445	Cyp8b1	-	cytochrome P450, family 8, subfamily b, polypeptide 1	protein-coding
MACS_peak_3043	chr13	58503645	58504165	+	86.86	NA	promoter-TSS (NM_028904)	promoter-TSS (NM_028904)	-32	NM_001301344	15387	Mm.142872	NM_025279	ENSMUSG00000021546	Hnrnpk	Hnrpk|KBBP|NOVA	heterogeneous nuclear ribonucleoprotein K	protein-coding
MACS_peak_3827	chr15	78237027	78237330	+	86.81	NA	promoter-TSS (NM_001162493)	promoter-TSS (NM_001162493)	36	NM_001162493	246221	Mm.294215	NM_138670	ENSMUSG00000071711	Mpst	Mst	mercaptopyruvate sulfurtransferase	protein-coding
MACS_peak_3904	chr15	82237360	82237703	+	86.81	NA	promoter-TSS (NM_010005)	promoter-TSS (NM_010005)	93	NM_010005	13101	Mm.174372	NM_010005	ENSMUSG00000094806	Cyp2d10	AI303445|Cyp2d|P450-2D	cytochrome P450, family 2, subfamily d, polypeptide 10	protein-coding
MACS_peak_10571	chr8	96910011	96910824	+	86.71	NA	promoter-TSS (NM_022331)	promoter-TSS (NM_022331)	17	NM_022331	64209	Mm.29151	NM_022331	ENSMUSG00000031770	Herpud1	Herp|Mifl|SUP	homocysteine-inducible, endoplasmic reticulum stress-inducible, ubiquitin-like domain member 1	protein-coding
MACS_peak_310	chr1	95408345	95408568	+	86.68	NA	promoter-TSS (NM_145519)	promoter-TSS (NM_145519)	-225	NM_145519	227377	Mm.243091	NM_145519	ENSMUSG00000034066	Farp2	AI465173|BC009153|D030026M03Rik|Fir|mKIAA0793	FERM, RhoGEF and pleckstrin domain protein 2	protein-coding
MACS_peak_2869	chr13	23646844	23647331	+	86.60	NA	exon (NM_145713, exon 1 of 1)	exon (NM_145713, exon 1 of 1)	186	NM_145713	14957	Mm.247046	NM_145713		Hist1h1d	H1.3|H1D|H1f3|H1s-4	histone cluster 1, H1d	protein-coding
MACS_peak_7857	chr4	137418148	137418367	+	86.54	NA	5' UTR (NM_199307, exon 1 of 20)	5' UTR (NM_199307, exon 1 of 20)	105	NM_199307	230857	Mm.401062	NM_199307	ENSMUSG00000057530	Ece1	AW322500|ECE-1|ECE-1a|ECE-1b|ECE-1d	endothelin converting enzyme 1	protein-coding
MACS_peak_132	chr1	58480698	58481014	+	86.46	NA	promoter-TSS (NM_001042634)	promoter-TSS (NM_001042634)	76	NR_027853	12747	Mm.1761	NM_009905	ENSMUSG00000026034	Clk1	STY	CDC-like kinase 1	protein-coding
MACS_peak_5859	chr2	4839825	4840827	+	86.29	NA	intron (NM_010726, intron 1 of 8)	intron (NM_010726, intron 1 of 8)	284	NM_010726	16922	Mm.391704	NM_010726	ENSMUSG00000026664	Phyh	AI256161|AI265699|Lnap1|PAHX	phytanoyl-CoA hydroxylase	protein-coding
MACS_peak_8105	chr5	28118238	28118464	+	86.26	NA	promoter-TSS (NM_018878)	promoter-TSS (NM_018878)	-261	NM_018878	55982	Mm.277190	NM_018878	ENSMUSG00000002221	Paxip1	D5Ertd149e|PTIP	PAX interacting (with transcription-activation domain) protein 1	protein-coding
MACS_peak_735	chr10	23506862	23507057	+	86.04	NA	promoter-TSS (NM_011295)	promoter-TSS (NM_011295)	56	NM_011295	20042	Mm.371846	NM_011295	ENSMUSG00000061983	Rps12	-	ribosomal protein S12	protein-coding
MACS_peak_970	chr10	79862517	79862740	+	85.90	NA	promoter-TSS (NM_013595)	promoter-TSS (NM_013595)	-404	NM_013595	17192	Mm.7142	NM_013595	ENSMUSG00000035478	Mbd3	AI181826|AU019209	methyl-CpG binding domain protein 3	protein-coding
MACS_peak_2548	chr12	81891483	81891722	+	85.79	NA	promoter-TSS (NM_178682)	promoter-TSS (NM_178682)	83	NM_001242419	217684	Mm.341776	NM_178682	ENSMUSG00000021133	4933426M11Rik	mKIAA0247	RIKEN cDNA 4933426M11 gene	protein-coding
MACS_peak_2346	chr12	16596156	16596634	+	85.79	NA	intron (NM_001130412, intron 1 of 20)	CpG	181	NM_015763	14245	Mm.153625	NM_015763	ENSMUSG00000020593	Lpin1	4631420P06|Kiaa0188|Lipin1|fld|mKIAA0188	lipin 1	protein-coding
MACS_peak_5299	chr18	64499630	64499822	+	85.79	NA	promoter-TSS (NM_194268)	promoter-TSS (NM_194268)	-292	NM_194268	225631	Mm.234723	NM_194268	ENSMUSG00000045991	Onecut2	C730009D12|OC-2|Oc2	one cut domain, family member 2	protein-coding
MACS_peak_9644	chr7	50699452	50699619	+	85.54	NA	promoter-TSS (NR_075104)	promoter-TSS (NR_075104)	93	NR_075104	110826	Mm.30200	NM_026695	ENSMUSG00000004610	Etfb	0610009I16Rik|2810441H06Rik	electron transferring flavoprotein, beta polypeptide	protein-coding
MACS_peak_2031	chr11	101228968	101229634	+	85.49	NA	exon (NM_008061, exon 1 of 5)	exon (NM_008061, exon 1 of 5)	257	NM_008061	14377	Mm.18064	NM_008061	ENSMUSG00000078650	G6pc	AW107337|G6Pase|G6pt|Glc-6-Pase	glucose-6-phosphatase, catalytic	protein-coding
MACS_peak_3050	chr13	60278734	60278982	+	85.47	NA	promoter-TSS (NM_008086)	promoter-TSS (NM_008086)	38	NM_008086	14451	Mm.22701	NM_008086	ENSMUSG00000052957	Gas1	AW554192|Gas-1	growth arrest specific 1	protein-coding
MACS_peak_3221	chr14	9005321	9005546	+	85.42	NA	promoter-TSS (NM_024221)	promoter-TSS (NM_024221)	73	NM_024221	68263	Mm.301527	NM_024221	ENSMUSG00000021748	Pdhb	2610103L06Rik|AL024199|C81408	pyruvate dehydrogenase (lipoamide) beta	protein-coding
MACS_peak_5548	chr19	8788204	8788413	+	85.42	NA	promoter-TSS (NM_008577)	promoter-TSS (NM_008577)	79	NM_008577	17254	Mm.4114	NM_008577	ENSMUSG00000010095	Slc3a2	4F2|4F2HC|AI314110|Cd98|Ly-10|Ly-m10|Ly10|Mdu1|Mgp-2hc|NACAE	solute carrier family 3 (activators of dibasic and neutral amino acid transport), member 2	protein-coding
MACS_peak_2041	chr11	101503192	101503611	+	85.22	NA	Intergenic	Intergenic	14138	NM_025654	66599	Mm.41449	NM_025654	ENSMUSG00000010362	Rdm1	2410008M22Rik|AW212028|Rad52b	RAD52 motif 1	protein-coding
MACS_peak_8965	chr6	71443710	71444063	+	85.22	NA	promoter-TSS (NM_009543)	promoter-TSS (NM_009543)	-2	NM_009543	22644	Mm.422969	NM_009543	ENSMUSG00000052656	Rnf103	AW146237|AW212918|Zfp103|kf-1	ring finger protein 103	protein-coding
MACS_peak_4010	chr15	98398354	98398519	+	84.98	NA	promoter-TSS (NM_009833)	promoter-TSS (NM_009833)	-369	NM_009833	12455	Mm.29941	NM_009833	ENSMUSG00000011960	Ccnt1	2810478G24Rik|AI115585|CycT1	cyclin T1	protein-coding
MACS_peak_7078	chr3	104024148	104024350	+	84.89	NA	promoter-TSS (NM_133853)	promoter-TSS (NM_133853)	80	NM_133853	99470	Mm.264849	NM_133853	ENSMUSG00000052539	Magi3	4732496O19Rik|6530407C02Rik|AA407180|AI120132|mKIAA1634	membrane associated guanylate kinase, WW and PDZ domain containing 3	protein-coding
MACS_peak_7211	chr3	142058441	142058871	+	84.86	NA	promoter-TSS (NM_001190852)	promoter-TSS (NM_001190852)	4	NM_001190853	56376	Mm.117709	NM_019808	ENSMUSG00000028273	Pdlim5	1110001A05Rik|AI987914|C87059|Enh|Enh1|Enh2|Enh3|LIM	PDZ and LIM domain 5	protein-coding
MACS_peak_4398	chr16	70314473	70314898	+	84.79	NA	intron (NM_028803, intron 1 of 15)	CpG	491	NM_028803	74185	Mm.396102	NM_028803	ENSMUSG00000022707	Gbe1	2310045H19Rik|2810426P10Rik|D16Ertd536e	glucan (1,4-alpha-), branching enzyme 1	protein-coding
MACS_peak_7874	chr4	138748453	138748658	+	84.79	NA	promoter-TSS (NM_009798)	promoter-TSS (NM_009798)	-259	NM_009798	12345	Mm.2945	NM_009798	ENSMUSG00000028745	Capzb	1700120C01Rik|AI325129|CPB1|CPB2|CPbeat2|CPbeta1|CPbeta2|Cappb1	capping protein (actin filament) muscle Z-line, beta	protein-coding
MACS_peak_4285	chr16	31201136	31201324	+	84.76	NA	promoter-TSS (NM_030138)	promoter-TSS (NM_030138)	94	NM_030138	78618	Mm.274646	NM_030138	ENSMUSG00000049076	Acap2	4832442G16|9530039J15Rik|CNT-B2|Centb2|mKIAA0041	ArfGAP with coiled-coil, ankyrin repeat and PH domains 2	protein-coding
MACS_peak_4500	chr17	8340498	8340704	+	84.76	NA	promoter-TSS (NM_026611).2	promoter-TSS (NM_026611).2	52	NM_001083938	100037283	Mm.426736	NM_001083938		Rnaset2a	0610007O07Rik|4833423A10Rik|4930532K22Rik|C79750|RNASE6PL|Rnaset2	ribonuclease T2A	protein-coding
MACS_peak_8591	chr5	130362983	130363244	+	84.74	NA	exon (NM_024166, exon 1 of 4)	exon (NM_024166, exon 1 of 4)	227	NM_024166	14004	Mm.30133	NM_024166	ENSMUSG00000070493	Chchd2	AL033347|Etohi6	coiled-coil-helix-coiled-coil-helix domain containing 2	protein-coding
MACS_peak_4436	chr16	91648042	91648288	+	84.70	NA	promoter-TSS (NM_010256)	promoter-TSS (NM_010256)	96	NM_178880	20658	Mm.46401	NM_019973	ENSMUSG00000022961	Son	2900011L12Rik|AA409051|AU067731|C81487|mKIAA1019|nrebp	Son DNA binding protein	protein-coding
MACS_peak_2154	chr11	113612924	113613172	+	84.70	NA	promoter-TSS (NM_020006)	promoter-TSS (NM_020006)	81	NM_001163346	56699	Mm.293378	NM_020006	ENSMUSG00000041598	Cdc42ep4	1500041M20Rik|Borg4|CEP4	CDC42 effector protein (Rho GTPase binding) 4	protein-coding
MACS_peak_937	chr10	79317340	79317608	+	84.62	NA	non-coding (NR_029447, exon 1 of 1)	non-coding (NR_029447, exon 1 of 1)	242	NR_029447	414101	Mm.401339	NR_029447		E130317F20Rik	-	RIKEN cDNA E130317F20 gene	ncRNA
MACS_peak_6583	chr2	163470699	163470903	+	84.36	NA	promoter-TSS (NM_012032)	promoter-TSS (NM_012032)	78	NM_012032	26943	Mm.218473	NM_012032	ENSMUSG00000017707	Serinc3	AA959945|AA960047|AIGP1|DIFF33|TMS-1|Tde1	serine incorporator 3	protein-coding
MACS_peak_11603	chrX	50723524	50723725	+	84.20	NA	non-coding (NR_110964, exon 1 of 7)	non-coding (NR_110964, exon 1 of 7)	112	NM_027409	70380	Mm.491083	NM_027409	ENSMUSG00000023074	Mospd1	1810018L05Rik	motile sperm domain containing 1	protein-coding
MACS_peak_7979	chr4	151382959	151383173	+	84.20	NA	promoter-TSS (NM_001033352)	promoter-TSS (NM_001033352)	66	NM_001033352	242785	Mm.22306	NM_001033352	ENSMUSG00000073700	Klhl21	1810045K06Rik|D330008A20|mKIAA0469	kelch-like 21	protein-coding
MACS_peak_592	chr1	182186488	182186697	+	84.10	NA	promoter-TSS (NM_001128605)	promoter-TSS (NM_001128605)	-161	NM_001128605	19165	Mm.330850	NM_011183	ENSMUSG00000010609	Psen2	ALG-3|Ad4h|Alg3|PS-2|PS2|Psnl2|STM2	presenilin 2	protein-coding
MACS_peak_307	chr1	95342110	95342446	+	84.07	NA	promoter-TSS (NM_001301364)	promoter-TSS (NM_001301364)	0	NM_001301364	110611	Mm.30012	NM_133808	ENSMUSG00000034088	Hdlbp	1110005P14Rik|AA960365|AI118566|D1Ertd101e	high density lipoprotein (HDL) binding protein	protein-coding
MACS_peak_9867	chr7	104565565	104566113	+	84.03	NA	exon (NM_009381, exon 1 of 2)	exon (NM_009381, exon 1 of 2)	181	NM_009381	21835	Mm.28585	NM_009381	ENSMUSG00000035686	Thrsp	S14	thyroid hormone responsive	protein-coding
MACS_peak_9721	chr7	54175187	54175534	+	84.00	NA	promoter-TSS (NM_021884)	promoter-TSS (NM_021884)	-60	NM_021884	22088	Mm.241334	NM_021884	ENSMUSG00000014402	Tsg101	AI255943|CC2	tumor susceptibility gene 101	protein-coding
MACS_peak_11467	chr9	119065915	119066238	+	83.69	NA	exon (NM_146230, exon 1 of 12)	exon (NM_146230, exon 1 of 12)	135	NM_146230	235674	Mm.379402	NM_146230	ENSMUSG00000010651	Acaa1b	-	acetyl-Coenzyme A acyltransferase 1B	protein-coding
MACS_peak_3049	chr13	59924602	59924799	+	83.48	NA	promoter-TSS (NM_153538)	promoter-TSS (NM_153538)	-192	NM_153538	214290	Mm.233082	NM_153538	ENSMUSG00000035248	Zcchc6	6030448M23Rik|AA420405	zinc finger, CCHC domain containing 6	protein-coding
MACS_peak_3530	chr14	73784917	73785128	+	83.33	NA	promoter-TSS (NM_008410)	promoter-TSS (NM_008410)	56	NM_008410	16432	Mm.4266	NM_008410	ENSMUSG00000022108	Itm2b	AI256040|Bri|Bri2|Bricd2b|D14Sel6|E25BMM|imBRI2	integral membrane protein 2B	protein-coding
MACS_peak_8654	chr5	138227742	138227946	+	83.33	NA	promoter-TSS (NM_144913)	promoter-TSS (NM_144913)	85	NM_144913	231803	Mm.61193	NM_144913	ENSMUSG00000029726	Mepce	Bcdin3|D5Wsu46e	methylphosphate capping enzyme	protein-coding
MACS_peak_9168	chr6	116600642	116600872	+	83.33	NA	promoter-TSS (NM_001166580)	promoter-TSS (NM_001166580)	55	NM_001166580	213393	Mm.38231	NM_145980	ENSMUSG00000048489	8430408G22Rik	Depp|Fseg	RIKEN cDNA 8430408G22 gene	protein-coding
MACS_peak_3231	chr14	15535533	15535698	+	83.31	NA	promoter-TSS (NM_001033270)	promoter-TSS (NM_001033270)	76	NM_001033270	218756	Mm.258893	NM_001033270	ENSMUSG00000021733	Slc4a7	E430014N10Rik|NBC3|NBCn1|NBCn1-G	solute carrier family 4, sodium bicarbonate cotransporter, member 7	protein-coding
MACS_peak_6016	chr2	30997324	30997557	+	83.31	NA	promoter-TSS (NM_001177648)	promoter-TSS (NM_001177648)	88	NM_001177649	14269	Mm.52297	NM_019406	ENSMUSG00000075415	Fnbp1	1110057E06Rik|2210010H06Rik|FBP1|Fbp17	formin binding protein 1	protein-coding
MACS_peak_4443	chr16	92058510	92058717	+	83.29	NA	promoter-TSS (NM_080456)	promoter-TSS (NM_080456)	32	NM_080456	121022	Mm.217354	NM_080456	ENSMUSG00000039680	Mrps6	AW046321	mitochondrial ribosomal protein S6	protein-coding
MACS_peak_2446	chr12	56593427	56593667	+	83.29	NA	promoter-TSS (NM_010907)	promoter-TSS (NM_010907)	87	NM_010907	18035	Mm.170515	NM_010907	ENSMUSG00000021025	Nfkbia	AI462015|Nfkbi	nuclear factor of kappa light polypeptide gene enhancer in B cells inhibitor, alpha	protein-coding
MACS_peak_119	chr1	55084119	55084587	+	83.29	NA	promoter-TSS (NM_031179)	promoter-TSS (NM_031179)	-31	NM_031179	81898	Mm.279736	NM_031179	ENSMUSG00000025982	Sf3b1	155kDa|2810001M05Rik|AA409119|Prp10|SAP155|SF3b155|TA-8|Targ4	splicing factor 3b, subunit 1	protein-coding
MACS_peak_995	chr10	80555237	80555423	+	83.29	NA	5' UTR (NM_145365, exon 3 of 12)	5' UTR (NM_145365, exon 3 of 12)	6287	NM_145365	208677	Mm.294693	NM_145365	ENSMUSG00000035041	Creb3l3	BC010786|CREB-H|D10Bur1e	cAMP responsive element binding protein 3-like 3	protein-coding
MACS_peak_8594	chr5	130499976	130500490	+	83.24	NA	promoter-TSS (NM_133768)	promoter-TSS (NM_133768)	-32	NM_133768	109900	Mm.23869	NM_133768	ENSMUSG00000025533	Asl	2510006M18Rik	argininosuccinate lyase	protein-coding
MACS_peak_7435	chr4	53172568	53172834	+	82.94	NA	promoter-TSS (NM_013454)	promoter-TSS (NM_013454)	66	NM_013454	11303	Mm.277376	NM_013454	ENSMUSG00000015243	Abca1	ABC-1|Abc1	ATP-binding cassette, sub-family A (ABC1), member 1	protein-coding
MACS_peak_7053	chr3	98084293	98084560	+	82.88	NA	promoter-TSS (NM_008256)	promoter-TSS (NM_008256)	72	NM_008256	15360	Mm.289131	NM_008256	ENSMUSG00000027875	Hmgcs2	1300002P16|mHS	3-hydroxy-3-methylglutaryl-Coenzyme A synthase 2	protein-coding
MACS_peak_8613	chr5	135582696	135582938	+	82.62	NA	promoter-TSS (NM_021455)	promoter-TSS (NM_021455)	56	NM_021455	58805	Mm.34213	NM_021455	ENSMUSG00000005373	Mlxipl	ChREBP|WS-bHLH|Wbscr14|bHLHd14	MLX interacting protein-like	protein-coding
MACS_peak_3920	chr15	82980039	82980479	+	82.36	NA	promoter-TSS (NM_178627)	promoter-TSS (NM_178627)	184	NR_004432	104307	Mm.471434	NR_004432	ENSMUSG00000065176	Rnu12	-	RNA U12, small nuclear	snRNA
MACS_peak_8056	chr5	20387734	20387922	+	82.35	NA	promoter-TSS (NM_177601)	promoter-TSS (NM_177601)	114	NM_172992	68770	Mm.86410	NM_172992	ENSMUSG00000039987	Phtf2	1110054G21Rik|9530062N20Rik|AI447096|C77923	putative homeodomain transcription factor 2	protein-coding
MACS_peak_8282	chr5	74489084	74489290	+	82.27	NA	promoter-TSS (NR_015531)	promoter-TSS (NR_015531)	79	NR_015531	70036	Mm.46547	NR_015531	ENSMUSG00000053656	Dancr	2700023E23Rik	differentiation antagonizing non-protein coding RNA	ncRNA
MACS_peak_2259	chr11	120094160	120094351	+	82.14	NA	promoter-TSS (NM_198423)	promoter-TSS (NM_198423)	-6	NM_198423	268515	Mm.309498	NM_198423	ENSMUSG00000039741	Bahcc1	B930044J06|BC060615	BAH domain and coiled-coil containing 1	protein-coding
MACS_peak_11504	chr9	122026378	122026586	+	82.05	NA	promoter-TSS (NM_001164572)	promoter-TSS (NM_001164572)	98	NM_133741	20623	Mm.257989	NM_133741	ENSMUSG00000038145	Snrk	2010012F07Rik|AI448042|AW547029|E030034B15|R74830|mKIAA0096	SNF related kinase	protein-coding
MACS_peak_11045	chr9	51771518	51771743	+	81.96	NA	promoter-TSS (NM_007996)	promoter-TSS (NM_007996)	8	NM_007996	14148	Mm.1061	NM_007996	ENSMUSG00000032051	Fdx1	-	ferredoxin 1	protein-coding
MACS_peak_364	chr1	132994287	132994468	+	81.96	NA	promoter-TSS (NM_008551)	promoter-TSS (NM_008551)	-257	NM_008551	17164	Mm.221235	NM_008551	ENSMUSG00000016528	Mapkapk2	AA960234|MAPKAP-K2|MK-2|MK2|Rps6kc1	MAP kinase-activated protein kinase 2	protein-coding
MACS_peak_7566	chr4	106739580	106739758	+	81.82	NA	promoter-TSS (NM_025500)	promoter-TSS (NM_025500)	-198	NM_025500	56280	Mm.29517	NM_025500	ENSMUSG00000028622	Mrpl37	2300004O14Rik|AI132596|MRP-L2|Rpml2	mitochondrial ribosomal protein L37	protein-coding
MACS_peak_11313	chr9	103207170	103207463	+	81.81	NA	promoter-TSS (NM_176979)	promoter-TSS (NM_176979)	-341	NM_176979	235559	Mm.259893	NM_176979	ENSMUSG00000032555	Topbp1	1110031N14Rik|2810429C13Rik|AI256758|D430026L04Rik|mKIAA0259	topoisomerase (DNA) II binding protein 1	protein-coding
MACS_peak_6358	chr2	126378357	126379011	+	81.80	NA	promoter-TSS (NM_011978)	promoter-TSS (NM_011978)	-76	NM_011978	26458	Mm.290044	NM_011978		Slc27a2	ACSVL1|FATP2|VLCS|Vlac|Vlacs	solute carrier family 27 (fatty acid transporter), member 2	protein-coding
MACS_peak_6101	chr2	44782250	44782522	+	81.80	NA	Intergenic	CpG	-65244	NM_172662	227835	Mm.314312	NM_172662	ENSMUSG00000036890	Gtdc1	E330008O22Rik	glycosyltransferase-like domain containing 1	protein-coding
MACS_peak_4770	chr17	35089286	35089484	+	81.80	NA	promoter-TSS (NR_027943)	promoter-TSS (NR_027943)	28	NR_027943	68763	Mm.28895	NR_015536	ENSMUSG00000092203	1110038B12Rik	0610009C20Rik|0910001G04Rik	RIKEN cDNA 1110038B12 gene	ncRNA
MACS_peak_10300	chr8	32260184	32260487	+	81.80	NA	promoter-TSS (NM_001199988)	promoter-TSS (NM_001199988)	-453	NM_144927	234138	Mm.349800	NM_144927	ENSMUSG00000031577	Tti2	-	TELO2 interacting protein 2	protein-coding
MACS_peak_11193	chr9	70526717	70526974	+	81.80	NA	promoter-TSS (NM_007399)	promoter-TSS (NM_007399)	37	NM_007399	11487	Mm.3037	NM_007399	ENSMUSG00000054693	Adam10	1700031C13Rik|MADM|kuz|kuzbanian	a disintegrin and metallopeptidase domain 10	protein-coding
MACS_peak_445	chr1	153275345	153275546	+	81.65	NA	promoter-TSS (NM_026876)	promoter-TSS (NM_026876)	120	NM_025819	66875	Mm.290905	NM_025819	ENSMUSG00000052748	Swt1	1200016B10Rik|C1orf26	SWT1 RNA endoribonuclease homolog (S. cerevisiae)	protein-coding
MACS_peak_6969	chr3	94114043	94114343	+	81.65	NA	exon (NM_029431, exon 1 of 6)	exon (NM_029431, exon 1 of 6)	139	NM_029431	75778	Mm.45092	NM_029431	ENSMUSG00000028145	Them4	2700077M13Rik|4921507I02Rik	thioesterase superfamily member 4	protein-coding
MACS_peak_3298	chr14	31362112	31362551	+	81.58	NA	promoter-TSS (NM_009388)	promoter-TSS (NM_009388)	14	NM_009388	21881	Mm.290692	NM_009388	ENSMUSG00000021957	Tkt	p68	transketolase	protein-coding
MACS_peak_2127	chr11	107331915	107332133	+	81.57	NA	promoter-TSS (NM_145823)	promoter-TSS (NM_145823)	10	NM_145823	71795	Mm.397413	NM_145823	ENSMUSG00000040430	Pitpnc1	1110020B03Rik|5830436L09Rik|AI662802|AI851387|C330017I21Rik|Dnr411|RDGBB|RDGBB1|rdgB-beta	phosphatidylinositol transfer protein, cytoplasmic 1	protein-coding
MACS_peak_7766	chr4	131830082	131830513	+	81.57	NA	promoter-TSS (NM_025579)	promoter-TSS (NM_025579)	7	NM_025579	66464	Mm.331926	NM_025579		Taf12	20kDa|2810422D08Rik|AW557038|Taf2J	TAF12 RNA polymerase II, TATA box binding protein (TBP)-associated factor	protein-coding
MACS_peak_3057	chr13	63341337	63341578	+	81.52	NA	exon (NM_001289924, exon 12 of 17)	exon (NM_001289924, exon 12 of 17)	119	NR_110521	72061	Mm.188105	NM_028079	ENSMUSG00000021458	2010111I01Rik	2300006M17Rik|AP-O|Aopep	RIKEN cDNA 2010111I01 gene	protein-coding
MACS_peak_2417	chr12	53604378	53604675	+	81.41	NA	Intergenic	CpG	-12538	NM_009706	11855	Mm.35059	NM_009706	ENSMUSG00000035133	Arhgap5	p190-B|p190B	Rho GTPase activating protein 5	protein-coding
MACS_peak_8956	chr6	71149815	71150148	+	81.36	NA	promoter-TSS (NM_017399)	promoter-TSS (NM_017399)	99	NM_017399	14080	Mm.22126	NM_017399	ENSMUSG00000054422	Fabp1	Fabpl|L-FABP	fatty acid binding protein 1, liver	protein-coding
MACS_peak_6775	chr3	40753643	40753856	+	81.28	NA	promoter-TSS (NM_001040399)	promoter-TSS (NM_001040399)	-804	NM_001040399	214048	Mm.46782	NM_027663	ENSMUSG00000037814	Larp1b	1700108L22Rik|4933421B21Rik|AA690246|Larp2	La ribonucleoprotein domain family, member 1B	protein-coding
MACS_peak_8547	chr5	124199250	124199463	+	81.13	NA	promoter-TSS (NM_001042421)	promoter-TSS (NM_001042421)	67	NM_001005525	208606	Mm.276341	NM_025438	ENSMUSG00000029422	Rsrc2	1500011J06Rik	arginine/serine-rich coiled-coil 2	protein-coding
MACS_peak_9063	chr6	87761575	87761837	+	81.07	NA	promoter-TSS (NM_001039394)	promoter-TSS (NM_001039394)	67	NM_001039394	69834	Mm.37380	NM_133717	ENSMUSG00000030055	Rab43	1810048P08Rik|2500004H21Rik|AW490415	RAB43, member RAS oncogene family	protein-coding
MACS_peak_1887	chr11	90110791	90111050	+	81.07	NA	5' UTR (NM_026178, exon 1 of 7)	5' UTR (NM_026178, exon 1 of 7)	130	NM_026178	67468	Mm.277518	NM_026178	ENSMUSG00000003948	Mmd	1200017E07Rik|1810073C06Rik|AA690185	monocyte to macrophage differentiation-associated	protein-coding
MACS_peak_6329	chr2	121239623	121239808	+	81.07	NA	promoter-TSS (NM_007952)	promoter-TSS (NM_007952)	77	NM_007952	14827	Mm.263177	NM_007952	ENSMUSG00000027248	Pdia3	58kDa|ERp57|ERp60|ERp61|Erp|Grp58|PDI|PDI-Q2|PI-PLC|PLC[a]|Plca	protein disulfide isomerase associated 3	protein-coding
MACS_peak_4030	chr15	99223354	99223581	+	80.87	NA	promoter-TSS (NM_001171034)	promoter-TSS (NM_001171034)	89	NM_001171034	110213	Mm.16769	NM_026669	ENSMUSG00000023010	Tmbim6	5031406P05Rik|Bi1|Tegt	transmembrane BAX inhibitor motif containing 6	protein-coding
MACS_peak_7733	chr4	128670468	128670692	+	80.61	NA	5' UTR (NM_016895, exon 1 of 7)	5' UTR (NM_016895, exon 1 of 7)	112	NM_001033966	11637	Mm.29460	NM_016895	ENSMUSG00000028792	Ak2	Ak-2|D4Ertd220e	adenylate kinase 2	protein-coding
MACS_peak_11203	chr9	72510102	72510430	+	80.52	NA	5' UTR (NM_010890, exon 1 of 29)	5' UTR (NM_010890, exon 1 of 29)	112	NM_010890	17999	Mm.279923	NM_010890	ENSMUSG00000032216	Nedd4	AA959633|AL023035|AU019897|E430025J12Rik|Nedd4-1|Nedd4a|mKIAA0093	neural precursor cell expressed, developmentally down-regulated 4	protein-coding
MACS_peak_2432	chr12	56087210	56087384	+	80.37	NA	promoter-TSS (NM_013815)	promoter-TSS (NM_013815)	26	NM_013815	217578	Mm.479583	NM_013815	ENSMUSG00000035021	Baz1a	Acf1|B930060C03|BC065123|Gtl5|Wcrf180|cbp146	bromodomain adjacent to zinc finger domain 1A	protein-coding
MACS_peak_10955	chr9	42072186	42072394	+	80.37	NA	promoter-TSS (NM_172769)	promoter-TSS (NM_172769)	93	NM_172769	235293	Mm.32700	NM_172769	ENSMUSG00000032018	Sc5d	A830037K02|A830073K23Rik|Sc5dl	sterol-C5-desaturase (fungal ERG3, delta-5-desaturase) homolog (S. cerevisae)	protein-coding
MACS_peak_3694	chr15	38448872	38449069	+	80.30	NA	promoter-TSS (NM_018745)	promoter-TSS (NM_018745)	51	NM_001102458	54375	Mm.250214	NM_018745	ENSMUSG00000037458	Azin1	1700085L02Rik|AI414949|Oazi|Oazin	antizyme inhibitor 1	protein-coding
MACS_peak_1606	chr11	68666361	68666879	+	80.25	NA	promoter-TSS (NM_023668)	promoter-TSS (NM_023668)	13	NM_023668	83431	Mm.31979	NM_023668	ENSMUSG00000018736	Ndel1	2600006O07Rik|MITAP1|NUDEL|mNudel	nuclear distribution gene E-like homolog 1 (A. nidulans)	protein-coding
MACS_peak_4786	chr17	35516497	35516687	+	80.25	NA	promoter-TSS (NM_001143689)	promoter-TSS (NM_001143689)	30	NM_001143689	15015	Mm.464284	NM_001143689	ENSMUSG00000035929	H2-Q4	H-2Q4|H2-Gs10|Qa-4|Qa4|Qat-4|Qb-1|Qb1	histocompatibility 2, Q region locus 4	protein-coding
MACS_peak_7918	chr4	147310709	147311062	+	80.17	NA	promoter-TSS (NM_011122)	promoter-TSS (NM_011122)	0	NM_011122	18822	Mm.37371	NM_011122	ENSMUSG00000019055	Plod1	2410042F05Rik|AI854890|AV007929|Lh1|Plod	procollagen-lysine, 2-oxoglutarate 5-dioxygenase 1	protein-coding
MACS_peak_3577	chr14	119336795	119337035	+	80.17	NA	promoter-TSS (NM_008929)	promoter-TSS (NM_008929)	-239	NM_008929	100037258	Mm.12616	NM_008929	ENSMUSG00000022136	Dnajc3	AA408985|AU067833|Dnajc3a|Dnajc3b|Prkri|mp58|p58|p58IPK	DnaJ (Hsp40) homolog, subfamily C, member 3	protein-coding
MACS_peak_5401	chr19	3851778	3851940	+	80.14	NA	promoter-TSS (NM_001271496)	promoter-TSS (NM_001271496)	86	NR_073190	12660	Mm.225505	NM_013490	ENSMUSG00000024843	Chka	CK|CK/EK-alpha|Chetk-alpha|Chk|ChoK|EK|EtnK-alpha	choline kinase alpha	protein-coding
MACS_peak_7948	chr4	149611059	149611500	+	80.11	NA	promoter-TSS (NM_023119)	promoter-TSS (NM_023119)	-27	NM_023119	13806	Mm.70666	NM_023119	ENSMUSG00000063524	Eno1	0610008I15|AL022784|Eno-1|MBP-1	enolase 1, alpha non-neuron	protein-coding
MACS_peak_7265	chr4	8574744	8574969	+	80.11	NA	Intergenic	CpG	-42697	NM_001277149	320790	Mm.138792	NM_001033395	ENSMUSG00000041235	Chd7	A730019I05Rik|Cycn|Cyn|Dz|Edy|Flo|GENA 47|GENA 60|Gena 52|Lda|Mt|Obt|Todo|WBE1|Whi|metis	chromodomain helicase DNA binding protein 7	protein-coding
MACS_peak_6898	chr3	87946231	87946422	+	80.11	NA	promoter-TSS (NM_133665)	promoter-TSS (NM_133665)	9	NM_133665	17261	Mm.28184	NM_133665	ENSMUSG00000001419	Mef2d	C80750	myocyte enhancer factor 2D	protein-coding
MACS_peak_8656	chr5	138362744	138362920	+	80.11	NA	promoter-TSS (NM_007819)	promoter-TSS (NM_007819)	15	NM_007819	13113	Mm.289886	NM_007819	ENSMUSG00000029727	Cyp3a13	IIIAm2	cytochrome P450, family 3, subfamily a, polypeptide 13	protein-coding
MACS_peak_9312	chr6	146450551	146450736	+	80.11	NA	5' UTR (NM_019923, exon 1 of 57)	5' UTR (NM_019923, exon 1 of 57)	102	NM_010586	16439	Mm.7800	NM_010586	ENSMUSG00000030287	Itpr2	AI649341|InsP3R-2|InsP3R-5|Ip3r2|Itpr5|insP3R2	inositol 1,4,5-triphosphate receptor 2	protein-coding
MACS_peak_2512	chr12	76770346	76770551	+	80.08	NA	promoter-TSS (NM_028203)	promoter-TSS (NM_028203)	76	NM_028203	72338	Mm.341719	NM_028203	ENSMUSG00000045690	Wdr89	2600001A11Rik	WD repeat domain 89	protein-coding
MACS_peak_8784	chr6	5143689	5143900	+	79.91	NA	5' UTR (NM_011134, exon 1 of 9)	5' UTR (NM_011134, exon 1 of 9)	152	NM_011134	18979	Mm.237657	NM_011134	ENSMUSG00000002588	Pon1	Pon	paraoxonase 1	protein-coding
MACS_peak_9266	chr6	129130592	129131182	+	79.75	NA	intron (NM_053109, intron 1 of 4)	intron (NM_053109, intron 1 of 4)	254	NM_053109	93694	Mm.197536	NM_053109	ENSMUSG00000030157	Clec2d	Clr-b|Clrb|Ocil	C-type lectin domain family 2, member d	protein-coding
MACS_peak_10100	chr7	140122835	140123033	+	79.62	NA	Intergenic	CpG	-18371	NM_207302	360216	Mm.389984	NM_207302	ENSMUSG00000030967	Zranb1	9330160G10Rik|D7Wsu87e|Gm1956|Trabid	zinc finger, RAN-binding domain containing 1	protein-coding
MACS_peak_1512	chr11	55274507	55274725	+	79.28	NA	promoter-TSS (NM_009720)	promoter-TSS (NM_009720)	24	NM_009720	11927	Mm.217759	NM_009720	ENSMUSG00000018585	Atox1	AI256639|Atx1	ATX1 (antioxidant protein 1) homolog 1 (yeast)	protein-coding
MACS_peak_5075	chr18	5334200	5334401	+	79.25	NA	intron (NM_178722, intron 1 of 4)	CpG	137	NM_178722	240186	Mm.118257	NM_178722	ENSMUSG00000050945	Zfp438	9430031G09|9430091M14Rik|B830013J05Rik	zinc finger protein 438	protein-coding
MACS_peak_1411	chr11	33062937	33063141	+	79.22	NA	5' UTR (NM_008722, exon 1 of 11)	5' UTR (NM_008722, exon 1 of 11)	167	NM_001252261	18148	Mm.485384	NM_008722	ENSMUSG00000057113	Npm1	B23|NO38|Npm	nucleophosmin 1	protein-coding
MACS_peak_8058	chr5	20457481	20457681	+	79.06	NA	promoter-TSS (NM_001080977)	promoter-TSS (NM_001080977)	59	NM_001080977	242860	Mm.254286	NM_001080977	ENSMUSG00000039968	Rsbn1l	8430412F05Rik|AI447441|C330002G24Rik	round spermatid basic protein 1-like	protein-coding
MACS_peak_9753	chr7	71432373	71432773	+	79.06	NA	promoter-TSS (NM_172742)	promoter-TSS (NM_172742)	17	NM_172742	233315	Mm.214959	NM_172742	ENSMUSG00000030522	Mtmr10	BB128963|C79734	myotubularin related protein 10	protein-coding
MACS_peak_4313	chr16	34095922	34096172	+	79.02	NA	intron (NM_177357, intron 34 of 59)	intron (NM_177357, intron 34 of 59)	-128958	NM_009471	22247	Mm.13145	NM_009471	ENSMUSG00000022814	Umps	1700095D23Rik|AA408257|AL033308|BB164745	uridine monophosphate synthetase	protein-coding
MACS_peak_11014	chr9	46037617	46039290	+	78.95	NA	TTS (NM_009692)	TTS (NM_009692)	1740	NM_009692	11806	Mm.26743	NM_009692	ENSMUSG00000032083	Apoa1	Alp-1|Apoa-1|Brp-14|Ltw-1|Lvtw-1|Sep-1|Sep-2|Sep2|apo-AI|apoA-I	apolipoprotein A-I	protein-coding
MACS_peak_2604	chr12	88225559	88225825	+	78.95	NA	promoter-TSS (NM_145836)	promoter-TSS (NM_145836)	72	NM_145836	238330	Mm.248358	NM_145836	ENSMUSG00000034168	Irf2bpl	6430527G18Rik|Eap1	interferon regulatory factor 2 binding protein-like	protein-coding
MACS_peak_1215	chr10	127520283	127520537	+	78.92	NA	promoter-TSS (NM_016774)	promoter-TSS (NM_016774)	47	NM_016774	11947	Mm.238973	NM_016774	ENSMUSG00000025393	Atp5b	-	ATP synthase, H+ transporting mitochondrial F1 complex, beta subunit	protein-coding
MACS_peak_5285	chr18	61558486	61558721	+	78.85	NA	intron (NM_133249, intron 1 of 11)	CpG	1482	NM_133249	170826	Mm.415302	NM_133249	ENSMUSG00000033871	Ppargc1b	4631412G21Rik|Perc	peroxisome proliferative activated receptor, gamma, coactivator 1 beta	protein-coding
MACS_peak_5182	chr18	35721822	35721996	+	78.84	NA	promoter-TSS (NM_010771)	promoter-TSS (NM_010771)	97	NM_010771	17184	Mm.215034	NM_010771	ENSMUSG00000037236	Matr3	1110061A14Rik|2810017I02Rik|AI841759|AW555618|D030046F20Rik|mKIAA0723	matrin 3	protein-coding
MACS_peak_7583	chr4	107973554	107973729	+	78.84	NA	promoter-TSS (NM_001033634)	promoter-TSS (NM_001033634)	54	NM_001033634	414872	Mm.426241	NM_001033634	ENSMUSG00000034636	Zyg11b	1110046I03Rik|2810482G21Rik|D4Mgi23|Gm431|mKIAA1730	zyg-ll family member B, cell cycle regulator	protein-coding
MACS_peak_4124	chr16	5233656	5233871	+	78.84	NA	promoter-TSS (NM_145362)	promoter-TSS (NM_145362)	49	NM_145362	208211	Mm.34581	NM_145362	ENSMUSG00000039427	Alg1	HMAT1|HMT1	asparagine-linked glycosylation 1 (beta-1,4-mannosyltransferase)	protein-coding
MACS_peak_4277	chr16	30065334	30065543	+	78.83	NA	promoter-TSS (NM_008235)	promoter-TSS (NM_008235)	-5	NM_008235	15205	Mm.390859	NM_008235	ENSMUSG00000022528	Hes1	Hry|bHLHb39	hairy and enhancer of split 1 (Drosophila)	protein-coding
MACS_peak_10701	chr8	116657441	116658017	+	78.81	NA	5' UTR (NM_001290181, exon 1 of 4)	5' UTR (NM_001290181, exon 1 of 4)	255	NM_024437	67528	Mm.27889	NM_024437	ENSMUSG00000031767	Nudt7	1300007B24Rik|2210404C19Rik	nudix (nucleoside diphosphate linked moiety X)-type motif 7	protein-coding
MACS_peak_1865	chr11	87256869	87257241	+	78.81	NA	intron (NM_001199293, intron 2 of 30)	intron (NM_001199293, intron 2 of 30)	15962	NM_001199293	83560	Mm.440758	NM_031386	ENSMUSG00000010342	Tex14	C85585	testis expressed gene 14	protein-coding
MACS_peak_8119	chr5	30559149	30559345	+	78.70	NA	promoter-TSS (NM_027652)	promoter-TSS (NM_027652)	89	NM_027652	28042	Mm.168854	NM_027652	ENSMUSG00000075703	Ept1	4933402G07Rik|AI448296|AI452230|C79563|D5Wsu178e|SELI|mKIAA1724	ethanolaminephosphotransferase 1 (CDP-ethanolamine-specific)	protein-coding
MACS_peak_1596	chr11	63732422	63732619	+	78.70	NA	intron (NM_018805, intron 1 of 1)	intron (NM_018805, intron 1 of 1)	3266	NM_018805	54710	Mm.274426	NM_018805	ENSMUSG00000070407	Hs3st3b1	3-OST-3B|3OST3B1|3Ost3b|AU041882|AW536289|Hs3st3b|m3-OST-3B	heparan sulfate (glucosamine) 3-O-sulfotransferase 3B1	protein-coding
MACS_peak_5911	chr2	23904018	23904181	+	78.68	NA	intron (NM_080462, intron 2 of 6)	intron (NM_080462, intron 2 of 6)	800	NM_080462	140483	Mm.33120	NM_080462	ENSMUSG00000026986	Hnmt	1500031F01Rik|AI788969	histamine N-methyltransferase	protein-coding
MACS_peak_3564	chr14	103381653	103381910	+	78.60	NA	promoter-TSS (NR_039592)	promoter-TSS (NR_039592)	68	NR_039592	100628599		NR_039592	miRBase:MI0018042	Mir5130	mmu-mir-5130|mu-mir-5130	microRNA 5130	ncRNA
MACS_peak_8823	chr6	29298097	29298311	+	78.48	NA	promoter-TSS (NM_184053)	promoter-TSS (NM_184053)	98	NM_184053	12321	Mm.392075	NM_007594	ENSMUSG00000029767	Calu	9530075H20Rik	calumenin	protein-coding
MACS_peak_3156	chr13	97440492	97440893	+	78.25	NA	intron (NM_008255, intron 1 of 19)	CpG	199	NM_008255	15357	Mm.316652	NM_008255	ENSMUSG00000021670	Hmgcr	HMG-CoAR|Red	3-hydroxy-3-methylglutaryl-Coenzyme A reductase	protein-coding
MACS_peak_8522	chr5	123300158	123300361	+	78.21	NA	promoter-TSS (NM_030564)	promoter-TSS (NM_030564)	62	NM_030564	80751	Mm.388529	NM_030564	ENSMUSG00000029474	Rnf34	AW061037|AW536122|BC004042|C88279|RIFF	ring finger protein 34	protein-coding
MACS_peak_7155	chr3	123211074	123211331	+	78.16	NA	promoter-TSS (NR_028573)	promoter-TSS (NR_028573)	52	NR_028574	69895	Mm.260791	NR_028574		Snhg8	1110065M07Rik|2010109N14Rik	small nucleolar RNA host gene 8	ncRNA
MACS_peak_3386	chr14	52532842	52533377	+	78.16	NA	promoter-TSS (NM_001145959)	promoter-TSS (NM_001145959)	54	NM_001145959	29811	Mm.26722	NM_013864	ENSMUSG00000004558	Ndrg2	AI182517|AU040374|Ndr2|SYLD	N-myc downstream regulated gene 2	protein-coding
MACS_peak_9858	chr7	99818303	99818502	+	78.07	NA	promoter-TSS (NM_029078)	promoter-TSS (NM_029078)	20	NM_029078	74737	Mm.288645	NM_029078	ENSMUSG00000041328	Pcf11	2500001H09Rik|5730417B17Rik|C77803	cleavage and polyadenylation factor subunit homolog (S. cerevisiae)	protein-coding
MACS_peak_11206	chr9	74709623	74709882	+	78.06	NA	promoter-TSS (NM_008262)	promoter-TSS (NM_008262)	24	NM_008262	15379	Mm.303355	NM_008262		Onecut1	D9Ertd423e|HNF-6|Hfh12|Hnf6|Hnf6b|OC-1|Oc1	one cut domain, family member 1	protein-coding
MACS_peak_7333	chr4	40090423	40090653	+	77.76	NA	5' UTR (NM_007386, exon 1 of 21)	5' UTR (NM_007386, exon 1 of 21)	240	NM_007386	11428	Mm.331547	NM_007386	ENSMUSG00000028405	Aco1	Aco-1|Irebp|Irp1	aconitase 1	protein-coding
MACS_peak_1232	chr10	127930715	127930966	+	77.65	NA	promoter-TSS (NM_010860)	promoter-TSS (NM_010860)	41	NM_010860	17904	Mm.337074	NM_010860	ENSMUSG00000090841	Myl6	ESMLC|LC17|LC17-GI|LC17-NM|LC17A|LC17B|MLC-3|MLC1SM|MLC3SM|MLC3nm|Myln	myosin, light polypeptide 6, alkali, smooth muscle and non-muscle	protein-coding
MACS_peak_3578	chr14	119337138	119337339	+	77.63	NA	promoter-TSS (NM_008929)	promoter-TSS (NM_008929)	84	NM_008929	100037258	Mm.12616	NM_008929	ENSMUSG00000022136	Dnajc3	AA408985|AU067833|Dnajc3a|Dnajc3b|Prkri|mp58|p58|p58IPK	DnaJ (Hsp40) homolog, subfamily C, member 3	protein-coding
MACS_peak_9024	chr6	83781581	83781758	+	77.48	NA	promoter-TSS (NM_146169)	promoter-TSS (NM_146169)	66	NM_146169	232164	Mm.404420	NM_146169	ENSMUSG00000045896	Paip2b	-	poly(A) binding protein interacting protein 2B	protein-coding
MACS_peak_4235	chr16	22439543	22439736	+	77.37	NA	promoter-TSS (NM_023794)	promoter-TSS (NM_023794)	4	NM_023794	104156	Mm.155708	NM_023794	ENSMUSG00000013089	Etv5	1110005E01Rik|8430401F14Rik|ERM	ets variant 5	protein-coding
MACS_peak_110	chr1	52289977	52290141	+	77.37	NA	promoter-TSS (NM_001113383)	promoter-TSS (NM_001113383)	17	NM_001081081	14660	Mm.398608	NM_001081081	ENSMUSG00000026103	Gls	6330442B14|AI314027|B230365M23Rik	glutaminase	protein-coding
MACS_peak_8059	chr5	20457737	20457934	+	77.37	NA	promoter-TSS (NM_001080977)	promoter-TSS (NM_001080977)	-195	NM_001080977	242860	Mm.254286	NM_001080977	ENSMUSG00000039968	Rsbn1l	8430412F05Rik|AI447441|C330002G24Rik	round spermatid basic protein 1-like	protein-coding
MACS_peak_5964	chr2	27331024	27331211	+	77.37	NA	promoter-TSS (NM_023336)	promoter-TSS (NM_023336)	76	NM_001113573	67382	Mm.28721	NM_023336	ENSMUSG00000026918	Brd3	2410084F24Rik|AW060456|Fsrg2|ORFX|RINGL3	bromodomain containing 3	protein-coding
MACS_peak_6755	chr3	33918971	33919141	+	77.37	NA	promoter-TSS (NM_001113189)	promoter-TSS (NM_001113189)	55	NM_001113188	14359	Mm.259021	NM_008053	ENSMUSG00000027680	Fxr1	1110050J02Rik|9530073J07Rik|AI851072|Fxr1h|Fxr1p	fragile X mental retardation gene 1, autosomal homolog	protein-coding
MACS_peak_10312	chr8	36439383	36439939	+	77.30	NA	intron (NM_177741, intron 1 of 1)	CpG	866	NM_177741	244416	Mm.247126	NM_177741	ENSMUSG00000046794	Ppp1r3b	6430576E21|AW821953|GL|PTG	protein phosphatase 1, regulatory (inhibitor) subunit 3B	protein-coding
MACS_peak_2758	chr12	112680825	112681025	+	77.30	NA	promoter-TSS (NM_009396)	promoter-TSS (NM_009396)	53	NM_009396	21928	Mm.255332	NM_009396	ENSMUSG00000021281	Tnfaip2	B94|Exoc3l3|M-sec|Tnfip2|tnfb94	tumor necrosis factor, alpha-induced protein 2	protein-coding
MACS_peak_589	chr1	182125932	182126155	+	77.30	NA	5' UTR (NM_023341, exon 1 of 15)	5' UTR (NM_023341, exon 1 of 15)	108	NM_023341	67426	Mm.38330	NM_023341	ENSMUSG00000026489	Adck3	4632432J16Rik|AI462003|Cabc1|mKIAA0451	aarF domain containing kinase 3	protein-coding
MACS_peak_7618	chr4	115894191	115894435	+	77.30	NA	promoter-TSS (NM_181585)	promoter-TSS (NM_181585)	-206	NM_181585	18710	Mm.253819	NM_181585	ENSMUSG00000028698	Pik3r3	AA414954|p55pik	phosphatidylinositol 3 kinase, regulatory subunit, polypeptide 3 (p55)	protein-coding
MACS_peak_6816	chr3	58380452	58380733	+	77.30	NA	promoter-TSS (NM_001040396)	promoter-TSS (NM_001040396)	12	NM_001040396	69227	Mm.270950	NM_001040396	ENSMUSG00000075700	Selt	2810407C02Rik|5730408P04Rik	selenoprotein T	protein-coding
MACS_peak_4375	chr16	56029886	56030072	+	77.30	NA	promoter-TSS (NM_001024622)	promoter-TSS (NM_001024622)	-149	NM_001024622	76302	Mm.310642	NM_001024622	ENSMUSG00000071533	Pcnp	1110018D06Rik|AI647035	PEST proteolytic signal containing nuclear protein	protein-coding
MACS_peak_4075	chr15	102235725	102236070	+	77.11	NA	promoter-TSS (NM_013672)	promoter-TSS (NM_013672)	-850	NM_013672	20683	Mm.4618	NM_013672	ENSMUSG00000001280	Sp1	1110003E12Rik|AA450830|AI845540|Sp1-1	trans-acting transcription factor 1	protein-coding
MACS_peak_1361	chr11	21471669	21471890	+	77.09	NA	promoter-TSS (NM_145425)	promoter-TSS (NM_145425)	158	NM_008618	17449	Mm.212703	NM_008618	ENSMUSG00000020321	Mdh1	B230377B03Rik|D17921|MDH-s|MDHA|Mor-2|Mor2	malate dehydrogenase 1, NAD (soluble)	protein-coding
MACS_peak_7241	chr3	153575751	153575979	+	77.09	NA	promoter-TSS (NM_001163478)	promoter-TSS (NM_001163478)	65	NM_001163478	19352	Mm.277831	NM_011231	ENSMUSG00000038975	Rabggtb	-	Rab geranylgeranyl transferase, b subunit	protein-coding
MACS_peak_5643	chr19	28085950	28086143	+	77.02	NA	promoter-TSS (NM_011265)	promoter-TSS (NM_011265)	-390	NM_011265	19726	Mm.313321	NM_011265	ENSMUSG00000040929	Rfx3	C230093O12Rik|MRFX3	regulatory factor X, 3 (influences HLA class II expression)	protein-coding
MACS_peak_10562	chr8	95655108	95655253	+	76.99	NA	promoter-TSS (NM_007954)	promoter-TSS (NM_007954)	2	NM_007954	13884	Mm.88078	NM_007954	ENSMUSG00000057400	Ces1c	Ces-N|Ee-1|Ee1|Es-4|Es-N|Es1|Es4|EsN|PESN	carboxylesterase 1C	protein-coding
MACS_peak_10009	chr7	130113144	130113583	+	76.97	NA	promoter-TSS (NM_175023)	promoter-TSS (NM_175023)	610	NR_045614	73951	Mm.389936	NR_045614		4930413G21Rik	-	RIKEN cDNA 4930413G21 gene	ncRNA
MACS_peak_2508	chr12	75008918	75009108	+	76.94	NA	5' UTR (NM_010431, exon 1 of 15)	5' UTR (NM_010431, exon 1 of 15)	159	NM_010431	15251	Mm.3879	NM_010431	ENSMUSG00000021109	Hif1a	AA959795|HIF1alpha|MOP1|bHLHe78	hypoxia inducible factor 1, alpha subunit	protein-coding
MACS_peak_1027	chr10	82226575	82226857	+	76.83	NA	intron (NM_010914, intron 1 of 7)	CpG	170	NM_010914	18045	Mm.245998	NM_010914	ENSMUSG00000020248	Nfyb	AA985999|Cbf-A	nuclear transcription factor-Y beta	protein-coding
MACS_peak_10970	chr9	43892979	43893212	+	76.83	NA	promoter-TSS (NM_198091)	promoter-TSS (NM_198091)	92	NM_198091	53376	Mm.272770	NM_016808	ENSMUSG00000032010	Usp2	B930035K21Rik|Ubp41	ubiquitin specific peptidase 2	protein-coding
MACS_peak_368	chr1	133423791	133424168	+	76.78	NA	promoter-TSS (NM_175382)	promoter-TSS (NM_175382)	-41	NM_001081011	14270	Mm.276259	NM_019520	ENSMUSG00000026425	Srgap2	9930124L22Rik|AI448945|FBP2|Fnbp2|srGAP3	SLIT-ROBO Rho GTPase activating protein 2	protein-coding
MACS_peak_7940	chr4	149148177	149148380	+	76.70	NA	promoter-TSS (NM_027460)	promoter-TSS (NM_027460)	98	NM_027460	70556	Mm.41877	NM_027460	ENSMUSG00000028982	Slc25a33	5730438N18Rik|Pnc1	solute carrier family 25, member 33	protein-coding
MACS_peak_807	chr10	53099540	53099722	+	76.67	NA	promoter-TSS (NM_001204983)	promoter-TSS (NM_001204983)	26	NM_001204983	100038725	Mm.441403	NM_001204983	ENSMUSG00000038594	Cep85l	ENSMUSG00000038594|Gm9766	centrosomal protein 85-like	protein-coding
MACS_peak_5199	chr18	36675283	36675485	+	76.63	NA	promoter-TSS (NM_010415)	promoter-TSS (NM_010415)	75	NM_010415	15200	Mm.289681	NM_010415	ENSMUSG00000024486	Hbegf	AW047313|Dtr|Dts|Hegfl	heparin-binding EGF-like growth factor	protein-coding
MACS_peak_6730	chr3	19088185	19088417	+	76.56	NA	promoter-TSS (NM_026182)	promoter-TSS (NM_026182)	80	NR_045575	67472	Mm.45125	NM_026182	ENSMUSG00000027601	Mtfr1	1300002C08Rik|1700080D04Rik|2810026O10Rik|4930579E05Rik|Chppr|Fam54a2	mitochondrial fission regulator 1	protein-coding
MACS_peak_4585	chr17	24591751	24591937	+	76.56	NA	intron (NM_007893, intron 1 of 13)	intron (NM_007893, intron 1 of 13)	412	NM_007893	13560	Mm.163132	NM_007893	ENSMUSG00000024137	E4f1	-	E4F transcription factor 1	protein-coding
MACS_peak_8500	chr5	122043421	122043667	+	76.56	NA	5' UTR (NM_009656, exon 1 of 13)	5' UTR (NM_009656, exon 1 of 13)	289	NM_009656	11669	Mm.284446	NM_009656		Aldh2	Ahd-5|Ahd5	aldehyde dehydrogenase 2, mitochondrial	protein-coding
MACS_peak_11740	chrX	149932718	149932874	+	76.39	NA	promoter-TSS (NM_018798)	promoter-TSS (NM_018798)	21	NM_018798	54609	Mm.430772	NM_018798	ENSMUSG00000050148	Ubqln2	Chap1|Dsk2|HRIHFB2157|Plic-2|Plic2	ubiquilin 2	protein-coding
MACS_peak_675	chr1	194999735	194999986	+	76.34	NA	promoter-TSS (NM_001160359)	promoter-TSS (NM_001160359)	89	NM_181048	319266	Mm.482460	NM_181048	ENSMUSG00000079144	A130010J15Rik	-	RIKEN cDNA A130010J15 gene	protein-coding
MACS_peak_4417	chr16	90220752	90221162	+	76.34	NA	promoter-TSS (NM_011434)	promoter-TSS (NM_011434)	-30	NM_011434	20655	Mm.276325	NM_011434	ENSMUSG00000022982	Sod1	B430204E11Rik|Cu/Zn-SOD|CuZnSOD|Ipo-1|Ipo1|SODC|Sod-1	superoxide dismutase 1, soluble	protein-coding
MACS_peak_1588	chr11	62270750	62271043	+	75.99	NA	promoter-TSS (NM_177229)	promoter-TSS (NM_177229)	-62	NM_177229	20185	Mm.271814	NM_011308	ENSMUSG00000018501	Ncor1	5730405M06Rik|A230020K14Rik|N-CoR|RIP13|Rxrip13|mKIAA1047	nuclear receptor co-repressor 1	protein-coding
MACS_peak_10269	chr8	24318717	24319082	+	75.90	NA	promoter-TSS (NM_018743)	promoter-TSS (NM_018743)	26	NM_018743	102247	Mm.200898	NM_018743	ENSMUSG00000031545	Agpat6	AU041707|AW545732|GPAT4|Tsarg7	1-acylglycerol-3-phosphate O-acyltransferase 6 (lysophosphatidic acid acyltransferase, zeta)	protein-coding
MACS_peak_4110	chr16	4726160	4726560	+	75.90	NA	promoter-TSS (NM_001136066)	promoter-TSS (NM_001136066)	-1	NM_001136066	15369	Mm.272866	NM_010443	ENSMUSG00000004070	Hmox2	HO-2|HO2	heme oxygenase (decycling) 2	protein-coding
MACS_peak_11366	chr9	107479068	107479470	+	75.90	NA	promoter-TSS (NM_008317)	promoter-TSS (NM_008317)	-14	NM_008317	15586	Mm.475658	NM_008317		Hyal1	Hya1|Hyal-1	hyaluronoglucosaminidase 1	protein-coding
MACS_peak_3770	chr15	75799553	75799790	+	75.90	NA	promoter-TSS (NM_001081065)	promoter-TSS (NM_001081065)	56	NM_001081065	69020	Mm.294295	NM_001081065	ENSMUSG00000034429	Zfp707	1500031N24Rik|AI451708|AW495315	zinc finger protein 707	protein-coding
MACS_peak_9284	chr6	134848353	134848635	+	75.90	NA	promoter-TSS (NM_001167696)	promoter-TSS (NM_001167696)	515	NR_029441	72813	Mm.409034	NR_029441		2810454H06Rik	-	RIKEN cDNA 2810454H06 gene	ncRNA
MACS_peak_512	chr1	167390461	167390658	+	75.90	NA	promoter-TSS (NM_028759)	promoter-TSS (NM_028759)	35	NM_028759	74106	Mm.227605	NM_028759	ENSMUSG00000026571	Dcaf6	1200006M05Rik|Iqwd1|PC326	DDB1 and CUL4 associated factor 6	protein-coding
MACS_peak_554	chr1	173200231	173200547	+	75.90	NA	promoter-TSS (NM_020579)	promoter-TSS (NM_020579)	-70	NM_020579	57370	Mm.274011	NM_020579	ENSMUSG00000052423	B4galt3	9530061M23Rik|AA104562|AW125175|ESTM26|ESTM6|R74981	UDP-Gal:betaGlcNAc beta 1,4-galactosyltransferase, polypeptide 3	protein-coding
MACS_peak_11582	chrX	35809440	35809682	+	75.90	NA	promoter-TSS (NM_010685)	promoter-TSS (NM_010685)	76	NM_010685	16784	Mm.486	NM_010685	ENSMUSG00000016534	Lamp2	CD107b|LGP-B|Lamp II|Lamp-2|Lamp-2a|Lamp-2b|Lamp-2c|Mac3	lysosomal-associated membrane protein 2	protein-coding
MACS_peak_10963	chr9	43047709	43048036	+	75.90	NA	promoter-TSS (NM_178644)	promoter-TSS (NM_178644)	27	NM_178644	102644	Mm.246479	NM_178644	ENSMUSG00000032014	Oaf	AL024221|D130038B21Rik|D9Ucla1	OAF homolog (Drosophila)	protein-coding
MACS_peak_153	chr1	60623328	60623638	+	75.78	NA	5' UTR (NM_001045513, exon 1 of 14)	5' UTR (NM_001045513, exon 1 of 14)	126	NM_001045513	77300	Mm.440325	NM_001045513	ENSMUSG00000026014	Raph1	9430025M21Rik|C730009O10Rik|Lpd	Ras association (RalGDS/AF-6) and pleckstrin homology domains 1	protein-coding
MACS_peak_9740	chr7	63305509	63305696	+	75.68	NA	promoter-TSS (NM_010418)	promoter-TSS (NM_010418)	77	NM_010418	15204	Mm.20929	NM_010418	ENSMUSG00000030451	Herc2	D15F32S1h|D7H15F32S1|D7H15F37S1|jdf2|mKIAA0393|rjs	hect (homologous to the E6-AP (UBE3A) carboxyl terminus) domain and RCC1 (CHC1)-like domain (RLD) 2	protein-coding
MACS_peak_9813	chr7	87546734	87546938	+	75.49	NA	intron (NM_001081454, intron 1 of 15)	CpG	812	NM_011046	18550	Mm.5241	NM_011046	ENSMUSG00000030530	Furin	9130404I01Rik|Fur|PACE|Pcsk3|SPC1	furin (paired basic amino acid cleaving enzyme)	protein-coding
MACS_peak_4155	chr16	14159636	14159832	+	75.46	NA	promoter-TSS (NM_001081154)	promoter-TSS (NM_001081154)	15	NR_030252	723916		NR_030252	miRBase:MI0003491	Mir484	Mirn484|mmu-mir-484	microRNA 484	ncRNA
MACS_peak_8047	chr5	8893843	8894072	+	75.37	NA	intron (NM_008830, intron 1 of 27)	CpG	236	NM_008830	18670	Mm.297825	NM_008830	ENSMUSG00000042476	Abcb4	Mdr2|Pgy-2|Pgy2|mdr-2	ATP-binding cassette, sub-family B (MDR/TAP), member 4	protein-coding
MACS_peak_8215	chr5	43624425	43624675	+	75.30	NA	promoter-TSS (NM_001177379)	promoter-TSS (NM_001177379)	-152	NM_175937	231207	Mm.7233	NM_175937	ENSMUSG00000039782	Cpeb2	A630055H10Rik|Cpe-bp2	cytoplasmic polyadenylation element binding protein 2	protein-coding
MACS_peak_2546	chr12	81537432	81537797	+	75.27	NA	promoter-TSS (NM_177267)	promoter-TSS (NM_177267)	-26	NM_177267	320808	Mm.220310	NM_177267	ENSMUSG00000049106	Dcaf5	9430020B07Rik|AI325023|AI430035|AI848110|AW124614|BCRG2|BCRP2|Wdr22	DDB1 and CUL4 associated factor 5	protein-coding
MACS_peak_5165	chr18	33954504	33954666	+	75.22	NA	promoter-TSS (NR_038151)	promoter-TSS (NR_038151)	39	NR_038151	69749	Mm.248787	NR_038151	ENSMUSG00000087590	2410004N09Rik	-	RIKEN cDNA 2410004N09 gene	ncRNA
MACS_peak_4304	chr16	33062265	33062482	+	75.22	NA	promoter-TSS (NM_172823)	promoter-TSS (NM_172823)	-234	NM_172823	239833	Mm.131951	NM_172823		Lmln	5330415H22Rik|AI465495	leishmanolysin-like (metallopeptidase M8 family)	protein-coding
MACS_peak_3679	chr15	36538642	36538809	+	75.22	NA	promoter-TSS (NM_008774)	promoter-TSS (NM_008774)	3	NM_008774	18458	Mm.371570	NM_008774	ENSMUSG00000022283	Pabpc1	PABP|Pabp1|PabpI|Pabpl1|ePAB	poly(A) binding protein, cytoplasmic 1	protein-coding
MACS_peak_9367	chr7	4763855	4764031	+	75.22	NA	promoter-TSS (NM_133777)	promoter-TSS (NM_133777)	-1	NM_133777	77891	Mm.389787	NM_133777	ENSMUSG00000060860	Ube2s	0910001J09Rik|6720465F12Rik|AA409170|E2-EPF	ubiquitin-conjugating enzyme E2S	protein-coding
MACS_peak_5346	chr18	75160047	75160318	+	75.18	NA	promoter-TSS (NR_028552).2	promoter-TSS (NR_028552).2	51	NM_001002239	319195	Mm.276337	NM_001002239	ENSMUSG00000062328	Rpl17	-	ribosomal protein L17	protein-coding
MACS_peak_955	chr10	79723581	79723780	+	75.07	NA	promoter-TSS (NM_010255)	promoter-TSS (NM_010255)	33	NM_010255	14431	Mm.7329	NM_010255	ENSMUSG00000020150	Gamt	AA571402|Spintz1	guanidinoacetate methyltransferase	protein-coding
MACS_peak_4135	chr16	10543029	10543213	+	75.05	NA	promoter-TSS (NM_021428)	promoter-TSS (NM_021428)	26	NM_021428	58239	Mm.353006	NM_021428	ENSMUSG00000038055	Dexi	1810029J14Rik|AI836170|AW413143|D16Bwg0586e|Myle	dexamethasone-induced transcript	protein-coding
MACS_peak_9410	chr7	16683902	16684149	+	75.02	NA	promoter-TSS (NM_025898)	promoter-TSS (NM_025898)	33	NM_025898	108124	Mm.104540	NM_025898	ENSMUSG00000006024	Napa	1500039N14Rik|AW209189|RA81|SNAPA|SNARE|a-SNAP|hyh	N-ethylmaleimide sensitive fusion protein attachment protein alpha	protein-coding
MACS_peak_1324	chr11	7097720	7098377	+	74.74	NA	exon (NM_008341, exon 1 of 4)	exon (NM_008341, exon 1 of 4)	258	NM_008341	16006	Mm.21300	NM_008341	ENSMUSG00000020429	Igfbp1	-	insulin-like growth factor binding protein 1	protein-coding
MACS_peak_6978	chr3	94736931	94737203	+	74.70	NA	promoter-TSS (NM_009150)	promoter-TSS (NM_009150)	62	NM_009150	20341	Mm.196558	NM_009150	ENSMUSG00000068874	Selenbp1	Lp56|Lpsb|SBP56	selenium binding protein 1	protein-coding
MACS_peak_284	chr1	93194896	93195157	+	74.61	NA	intron (NM_016717, intron 1 of 11)	CpG	111	NM_016717	50880	Mm.25724	NM_016717	ENSMUSG00000026307	Scly	9830169H08|A930015N15Rik|SCL|Scly1|Scly2	selenocysteine lyase	protein-coding
MACS_peak_7875	chr4	138866525	138866804	+	74.51	NA	promoter-TSS (NM_145384)	promoter-TSS (NM_145384)	5	NM_025337	110198	Mm.482154	NM_025337		Akr7a5	0610025K21Rik|Afar|Afar1|Akr7a2	aldo-keto reductase family 7, member A5 (aflatoxin aldehyde reductase)	protein-coding
MACS_peak_5603	chr19	14672442	14672575	+	74.51	NA	promoter-TSS (NM_011600)	promoter-TSS (NM_011600)	-35	NM_011600	21888	Mm.103638	NM_011600	ENSMUSG00000024642	Tle4	5730411M05Rik|AA792082|Bce-1|Bce1|ESTM13|ESTM14|Grg4|X83332|X83333	transducin-like enhancer of split 4, homolog of Drosophila E(spl)	protein-coding
MACS_peak_6711	chr3	8923631	8924043	+	74.50	NA	promoter-TSS (NM_025434)	promoter-TSS (NM_025434)	20	NM_025434	66230	Mm.38460	NM_025434	ENSMUSG00000040269	Mrps28	1500012D08Rik|AW061224	mitochondrial ribosomal protein S28	protein-coding
MACS_peak_9193	chr6	119988510	119988720	+	74.45	NA	promoter-TSS (NM_001199083)	promoter-TSS (NM_001199083)	58	NM_001199083	232341	Mm.333349	NM_198703	ENSMUSG00000045962	Wnk1	6430573H23Rik|EG406236|Hsn2|Prkwnk1|mKIAA0344	WNK lysine deficient protein kinase 1	protein-coding
MACS_peak_5203	chr18	36829785	36830006	+	74.45	NA	promoter-TSS (NM_025291)	promoter-TSS (NM_025291)	70	NM_001164406	24068	Mm.29058	NM_025291		Sra1	AA959952|Sra|Srap|Straa1|Strra1	steroid receptor RNA activator 1	protein-coding
MACS_peak_833	chr10	60294182	60294364	+	74.45	NA	promoter-TSS (NM_029770)	promoter-TSS (NM_029770)	56	NM_029770	107449	Mm.290433	NM_029770	ENSMUSG00000020099	Unc5b	6330415E02Rik|A630020F16|D10Bwg0792e|Unc5h2	unc-5 homolog B (C. elegans)	protein-coding
MACS_peak_9493	chr7	26035622	26035817	+	74.12	NA	promoter-TSS (NM_010155)	promoter-TSS (NM_010155)	58	NM_010155	13875	Mm.8068	NM_010155	ENSMUSG00000040857	Erf	-	Ets2 repressor factor	protein-coding
MACS_peak_7061	chr3	100489245	100489443	+	73.93	NA	promoter-TSS (NM_010763)	promoter-TSS (NM_010763)	52	NM_010763	17156	Mm.271617	NM_010763	ENSMUSG00000008763	Man1a2	AI428775|AI528764|AI854422|Man1b|PCR2	mannosidase, alpha, class 1A, member 2	protein-coding
MACS_peak_4461	chr16	96212355	96212748	+	73.93	NA	promoter-TSS (NM_019537)	promoter-TSS (NM_019537)	-41	NM_019537	56088	Mm.396248	NM_019537	ENSMUSG00000022913	Psmg1	AW552102|Dscr2	proteasome (prosome, macropain) assembly chaperone 1	protein-coding
MACS_peak_7135	chr3	121129392	121129643	+	73.93	NA	promoter-TSS (NM_028044)	promoter-TSS (NM_028044)	58	NM_028044	71994	Mm.275555	NM_028044	ENSMUSG00000053931	Cnn3	1600014M03Rik|C85854|Calpo3	calponin 3, acidic	protein-coding
MACS_peak_7881	chr4	139178951	139179183	+	73.89	NA	exon (NM_175438, exon 1 of 15)	exon (NM_175438, exon 1 of 15)	258	NM_175438	212647	Mm.273571	NM_175438	ENSMUSG00000028737	Aldh4a1	A930035F14Rik|Ahd-1|Ahd1|Aldh4|Aldh5a1|E330022C09|P5cd|P5cdh|P5cdhl|P5cdhs|Ssdh1	aldehyde dehydrogenase 4 family, member A1	protein-coding
MACS_peak_10889	chr9	21528006	21528275	+	73.89	NA	5' UTR (NM_001252658, exon 1 of 17)	5' UTR (NM_001252658, exon 1 of 17)	120	NM_010700	16835	Mm.3213	NM_010700	ENSMUSG00000032193	Ldlr	Hlb301	low density lipoprotein receptor	protein-coding
MACS_peak_8630	chr5	136438696	136438920	+	73.82	NA	exon (NM_001160366, exon 9 of 11)	exon (NM_001160366, exon 9 of 11)	11538	NM_001160366	109267	Mm.332750	NM_001160366	ENSMUSG00000029699	Ssc4d	C330016E03Rik|S4D-SRCRB|SRCRB-S4D|Srcrb4d	scavenger receptor cysteine rich family, 4 domains	protein-coding
MACS_peak_4171	chr16	16983255	16983634	+	73.77	NA	promoter-TSS (NM_001038663)	promoter-TSS (NM_001038663)	-31	NM_011949	26413	Mm.196581	NM_011949	ENSMUSG00000063358	Mapk1	9030612K14Rik|AA407128|AU018647|C78273|ERK|Erk2|MAPK2|PRKM2|Prkm1|p41mapk|p42mapk	mitogen-activated protein kinase 1	protein-coding
MACS_peak_5503	chr19	6057581	6057784	+	73.77	NA	promoter-TSS (NM_001160239)	promoter-TSS (NM_001160239)	69	NM_026246	18120	Mm.181290	NM_026246	ENSMUSG00000007338	Mrpl49	4833419D18Rik|Nof1	mitochondrial ribosomal protein L49	protein-coding
MACS_peak_7276	chr4	11181134	11181411	+	73.77	NA	5' UTR (NM_178112, exon 1 of 28)	5' UTR (NM_178112, exon 1 of 28)	134	NM_178112	72656	Mm.246713	NM_178112	ENSMUSG00000040738	Ints8	2810013E07Rik|AV063769|D130008D20Rik	integrator complex subunit 8	protein-coding
MACS_peak_9207	chr6	121195724	121196089	+	73.77	NA	promoter-TSS (NM_011909)	promoter-TSS (NM_011909)	-18	NM_011909	24110	Mm.326911	NM_011909	ENSMUSG00000030107	Usp18	1110058H21Rik|AW047653|UBP43|Ubp15	ubiquitin specific peptidase 18	protein-coding
MACS_peak_11675	chrX	96331163	96331585	+	73.77	NA	promoter-TSS (NM_010110)	promoter-TSS (NM_010110)	-95	NM_010110	13641	Mm.3374	NM_010110	ENSMUSG00000031217	Efnb1	Cek5-L|EFL-3|Elk-L|Epl2|Eplg2|LERK-2|Lerk2|Stra1	ephrin B1	protein-coding
MACS_peak_8099	chr5	25004432	25004622	+	73.63	NA	promoter-TSS (NM_001081383)	promoter-TSS (NM_001081383)	74	NM_001081383	231051	Mm.332268	NM_001081383	ENSMUSG00000038056	Kmt2c	E330008K23Rik|HALR|Mll3|mKIAA1506	lysine (K)-specific methyltransferase 2C	protein-coding
MACS_peak_10013	chr7	132695715	132695914	+	73.56	NA	promoter-TSS (NM_001008700)	promoter-TSS (NM_001008700)	18	NM_001008700	16190	Mm.233802	NM_010557	ENSMUSG00000030748	Il4ra	CD124|Il4r	interleukin 4 receptor, alpha	protein-coding
MACS_peak_8489	chr5	121038476	121038722	+	73.54	NA	promoter-TSS (NM_029408)	promoter-TSS (NM_029408)	23	NM_145853	252972	Mm.114054	NM_145853	ENSMUSG00000032741	Tpcn1	5730403B01Rik|Tpc1|mKIAA1169	two pore channel 1	protein-coding
MACS_peak_4696	chr17	30749329	30749621	+	73.47	NA	exon (NM_001113560, exon 1 of 7)	exon (NM_001113560, exon 1 of 7)	129	NM_025374	109801	Mm.261984	NM_025374	ENSMUSG00000024026	Glo1	0610009E22Rik|1110008E19Rik|2510049H23Rik|AW550643|GLY1|Glo-1|Glo-1r|Glo-1s|Glo1-r|Glo1-s|Qglo	glyoxalase 1	protein-coding
MACS_peak_5709	chr19	38198723	38199362	+	73.47	NA	exon (NM_011255, exon 2 of 6)	exon (NM_011255, exon 2 of 6)	259	NM_011255	19662	Mm.2605	NM_011255	ENSMUSG00000024990	Rbp4	Rbp-4	retinol binding protein 4, plasma	protein-coding
MACS_peak_5398	chr19	3708256	3708455	+	73.35	NA	promoter-TSS (NM_028077)	promoter-TSS (NM_028077)	22	NM_028077	72056	Mm.23780	NM_028077	ENSMUSG00000035372	1810055G02Rik	AI256204	RIKEN cDNA 1810055G02 gene	protein-coding
MACS_peak_9843	chr7	91754108	91754360	+	73.33	NA	5' UTR (NM_010176, exon 1 of 14)	5' UTR (NM_010176, exon 1 of 14)	218	NM_010176	14085	Mm.3798	NM_010176	ENSMUSG00000030630	Fah	-	fumarylacetoacetate hydrolase	protein-coding
MACS_peak_5486	chr19	5839737	5839910	+	73.24	NA	Intergenic	Intergenic	5655	NR_003513	66961	Mm.281895	NR_003513		Neat1	2310043N10Rik|VINC	nuclear paraspeckle assembly transcript 1 (non-protein coding)	ncRNA
MACS_peak_10966	chr9	43552005	43552206	+	73.13	NA	promoter-TSS (NM_021424)	promoter-TSS (NM_021424)	-554	NM_021424	58235	Mm.335096	NM_021424	ENSMUSG00000032012	Pvrl1	AI835281|AW549174|Cd111|HIgR|HveC|PRR|PRR1|nectin-1	poliovirus receptor-related 1	protein-coding
MACS_peak_10335	chr8	47248727	47249213	+	73.13	NA	Intergenic	CpG	-5940	NM_025747	66756	Mm.133623	NM_025747	ENSMUSG00000031631	Cfap97	1110068E21Rik|4933411K20Rik|AW049273|Kiaa1430|mKIAA1430	cilia and flagella associated protein 97	protein-coding
MACS_peak_9225	chr6	124764009	124764265	+	73.13	NA	TTS (NM_013700)	TTS (NM_013700)	177	NM_009415	21991	Mm.4222	NM_009415	ENSMUSG00000023456	Tpi1	AI255506|Tpi|Tpi-1	triosephosphate isomerase 1	protein-coding
MACS_peak_1493	chr11	53583489	53583662	+	73.13	NA	promoter-TSS (NM_008390)	promoter-TSS (NM_008390)	59	NM_008390	16362	Mm.105218	NM_008390	ENSMUSG00000018899	Irf1	AU020929|Irf-1	interferon regulatory factor 1	protein-coding
MACS_peak_8300	chr5	87233206	87233440	+	73.13	NA	promoter-TSS (NM_177680)	promoter-TSS (NM_177680)	-192	NM_177680	231386	Mm.196325	NM_177680	ENSMUSG00000035851	Ythdc1	A730098D12Rik|C80342|mKIAA1966	YTH domain containing 1	protein-coding
MACS_peak_2040	chr11	101502596	101503122	+	73.00	NA	Intergenic	CpG	13596	NM_025654	66599	Mm.41449	NM_025654	ENSMUSG00000010362	Rdm1	2410008M22Rik|AW212028|Rad52b	RAD52 motif 1	protein-coding
MACS_peak_6450	chr2	143836806	143837012	+	73.00	NA	promoter-TSS (NM_024281)	promoter-TSS (NM_024281)	90	NM_133626	81910	Mm.13705	NM_024281	ENSMUSG00000027422	Rrbp1	1700087N07Rik|5730465C04Rik|ES/130|mKIAA1398|mRRp0|mRRp1.8|mRRp10|mRRp15a|mRRp15b|mRRp16.8|mRRp2|mRRp41|mRRp47|mRRp5.4|p180	ribosome binding protein 1	protein-coding
MACS_peak_10774	chr8	125589163	125589310	+	73.00	NA	promoter-TSS (NM_153176)	promoter-TSS (NM_153176)	-172	NM_153176	234847	Mm.292075	NM_153176	ENSMUSG00000000738	Spg7	AI452278|AU015315|Cmar|PGN	spastic paraplegia 7 homolog (human)	protein-coding
MACS_peak_659	chr1	193221558	193221732	+	72.97	NA	promoter-TSS (NM_144880)	promoter-TSS (NM_144880)	-725	NM_144880	226849	Mm.205569	NM_144880	ENSMUSG00000026626	Ppp2r5a	PR61alpha	protein phosphatase 2, regulatory subunit B', alpha	protein-coding
MACS_peak_4719	chr17	32643369	32643526	+	72.90	NA	promoter-TSS (NM_001101445)	promoter-TSS (NM_001101445)	40	NM_001101445	208285	Mm.311422	NM_001101445	ENSMUSG00000091586	Cyp4f17	EG208285	cytochrome P450, family 4, subfamily f, polypeptide 17	protein-coding
MACS_peak_782	chr10	41239241	41239441	+	72.76	NA	promoter-TSS (NM_016898)	promoter-TSS (NM_016898)	35	NM_016898	53599	Mm.269815	NM_016898	ENSMUSG00000019818	Cd164	A115|A24|AA589639|AW540279|MGC-24|MSSP	CD164 antigen	protein-coding
MACS_peak_9707	chr7	52973425	52973609	+	72.76	NA	promoter-TSS (NM_203280)	promoter-TSS (NM_203280)	76	NM_009077	19899	Mm.3459	NM_009077	ENSMUSG00000059070	Rpl18	L18|Rpl18a	ribosomal protein L18	protein-coding
MACS_peak_5880	chr2	12340865	12341102	+	72.56	NA	5' UTR (NM_024185, exon 1 of 15)	5' UTR (NM_024185, exon 1 of 15)	104	NM_024185	66960	Mm.34059	NM_024185	ENSMUSG00000026767	Fam188a	1810041E18Rik|2310047O13Rik|5830410F13Rik|AI447827|AW111958	family with sequence similarity 188, member A	protein-coding
MACS_peak_996	chr10	80568428	80568985	+	72.48	NA	promoter-TSS (NM_023138)	promoter-TSS (NM_023138)	14	NM_023138	26396	Mm.275436	NM_023138	ENSMUSG00000035027	Map2k2	AA589381|MEK2|MK2|Prkmk2	mitogen-activated protein kinase kinase 2	protein-coding
MACS_peak_6868	chr3	82830012	82830220	+	72.48	NA	promoter-TSS (NM_001111048)	promoter-TSS (NM_001111048)	41	NM_001111048	14161	Mm.88793	NM_010196	ENSMUSG00000028001	Fga	ENSMUSG00000059807|Fib	fibrinogen alpha chain	protein-coding
MACS_peak_3592	chr14	122505989	122506236	+	72.40	NA	promoter-TSS (NM_080556)	promoter-TSS (NM_080556)	84	NR_015586	319727	Mm.215552	NR_015586		A330035P11Rik	-	RIKEN cDNA A330035P11 gene	ncRNA
MACS_peak_3105	chr13	75844911	75845095	+	72.40	NA	promoter-TSS (NM_138953)	promoter-TSS (NM_138953)	71	NM_138953	192657	Mm.21288	NM_138953	ENSMUSG00000001542	Ell2	-	elongation factor RNA polymerase II 2	protein-coding
MACS_peak_2821	chr13	14156024	14156197	+	72.40	NA	promoter-TSS (NM_010282)	promoter-TSS (NM_010282)	59	NM_198122	94246	Mm.439784	NM_194262	ENSMUSG00000039219	Arid4b	BCAA|BRCAA1|RBBP1L1|Rbp1l1|SAP180	AT rich interactive domain 4B (RBP1-like)	protein-coding
MACS_peak_3664	chr15	32850499	32850751	+	72.29	NA	5' UTR (NM_008304, exon 1 of 5)	5' UTR (NM_008304, exon 1 of 5)	147	NM_008304	15529	Mm.234266	NM_008304	ENSMUSG00000022261	Sdc2	4833414L08Rik|AA960457|Hspg1|Synd2|syndecan-2	syndecan 2	protein-coding
MACS_peak_6797	chr3	51906700	51906924	+	72.25	NA	intron (NM_001004176, intron 1 of 4)	CpG	2116	NM_001004176	433586	Mm.234972	NM_001004176	ENSMUSG00000061143	Maml3	AV234550|BC049812|Mam-2|mKIAA1816	mastermind like 3 (Drosophila)	protein-coding
MACS_peak_3224	chr14	9632915	9633065	+	72.18	NA	Intergenic	Intergenic	134086	NR_045968	74859	Mm.84041	NR_045968	ENSMUSG00000097898	4930455B14Rik	1700027C12Rik	RIKEN cDNA 4930455B14 gene	ncRNA
MACS_peak_3552	chr14	79880729	79881112	+	72.18	NA	promoter-TSS (NM_007920)	promoter-TSS (NM_007920)	-81	NM_007920	13709	Mm.20938	NM_007920	ENSMUSG00000036461	Elf1	Elf-1|Sts1|mElf-1|p70	E74-like factor 1	protein-coding
MACS_peak_8701	chr5	143579480	143579869	+	72.16	NA	promoter-TSS (NM_178242)	promoter-TSS (NM_178242)	-608	NM_001122730	231861	Mm.354649	NM_178242	ENSMUSG00000039477	Tnrc18	BC025631|EG381742|Zfp469	trinucleotide repeat containing 18	protein-coding
MACS_peak_5531	chr19	7055074	7055286	+	72.08	NA	promoter-TSS (NM_001166368)	promoter-TSS (NM_001166368)	-229	NM_001166368	14227	Mm.4234	NM_008020	ENSMUSG00000056629	Fkbp2	13kDa|FKBP-2|mFKBP13|mFKBP2	FK506 binding protein 2	protein-coding
MACS_peak_7031	chr3	96361800	96362011	+	72.02	NA	promoter-TSS (NM_001009935)	promoter-TSS (NM_001009935)	25	NM_023719	56338	Mm.410189	NM_023719	ENSMUSG00000038393	Txnip	1200008J08Rik|AA682105|Hyplip1|THIF|Tbp-2|VDUP1	thioredoxin interacting protein	protein-coding
MACS_peak_6234	chr2	92274019	92274238	+	71.94	NA	promoter-TSS (NM_009963)	promoter-TSS (NM_009963)	98	NM_009963	12953	Mm.254181	NM_009963	ENSMUSG00000068742	Cry2	AV006279|D130054K12Rik	cryptochrome 2 (photolyase-like)	protein-coding
MACS_peak_3900	chr15	82184494	82184756	+	71.94	NA	promoter-TSS (NM_025987)	promoter-TSS (NM_025987)	96	NM_025987	67130	Mm.27570	NM_025987	ENSMUSG00000022450	Ndufa6	14kDa|2700038D15Rik|B230217P19Rik	NADH dehydrogenase (ubiquinone) 1 alpha subcomplex, 6 (B14)	protein-coding
MACS_peak_4434	chr16	91647273	91647479	+	71.92	NA	promoter-TSS (NM_010256)	promoter-TSS (NM_010256)	-159	NM_010256	14450	Mm.4505	NM_010256	ENSMUSG00000022962	Gart	Gaps|Prgs	phosphoribosylglycinamide formyltransferase	protein-coding
MACS_peak_7505	chr4	86394410	86394646	+	71.90	NA	promoter-TSS (NM_184088)	promoter-TSS (NM_184088)	69	NM_184088	329877	Mm.273718	NM_184088	ENSMUSG00000038024	Dennd4c	1700065A05Rik|AA420392	DENN/MADD domain containing 4C	protein-coding
MACS_peak_1840	chr11	85166630	85166873	+	71.74	NA	promoter-TSS (NM_138681)	promoter-TSS (NM_138681)	85	NM_001166643	192197	Mm.287663	NM_138681	ENSMUSG00000059439	Bcas3	1500019F07Rik|2610028P08Rik|AU021018|BC028339|K20D4|rudhira	breast carcinoma amplified sequence 3	protein-coding
MACS_peak_10262	chr8	23509131	23509305	+	71.74	NA	promoter-TSS (NM_181325)	promoter-TSS (NM_181325)	25	NR_045473	69108	Mm.46108	NR_045473		1810012K16Rik	-	RIKEN cDNA 1810012K16 gene	ncRNA
MACS_peak_11435	chr9	110782421	110782838	+	71.74	NA	promoter-TSS (NM_001146059)	promoter-TSS (NM_001146059)	-42	NM_146260	20776	Mm.390229	NM_146260	ENSMUSG00000049555	Tmie	5131400L21Rik|Mm.87012|sr	transmembrane inner ear	protein-coding
MACS_peak_492	chr1	163181167	163181340	+	71.74	NA	promoter-TSS (NM_007453)	promoter-TSS (NM_007453)	44	NM_007453	11758	Mm.186185	NM_007453	ENSMUSG00000026701	Prdx6	1-cysPrx|9430088D19Rik|AA690119|Aop2|Aop2-rs3|Brp-12|CC26|CP-3|GPx|Ltw-4|Ltw4|Lvtw-4|NSGP|NSGPx|ORF06|Prdx5|Prdx6-rs3|aiPLA2|mKIAA0106	peroxiredoxin 6	protein-coding
MACS_peak_5558	chr19	8894408	8894624	+	71.63	NA	promoter-TSS (NM_027412)	promoter-TSS (NM_027412)	625	NM_001081196	68693	Mm.476519	NM_001081196	ENSMUSG00000071659	Hnrnpul2	1110031M08Rik|AI465155|Hnrpul2	heterogeneous nuclear ribonucleoprotein U-like 2	protein-coding
MACS_peak_9850	chr7	96552836	96553059	+	71.63	NA	promoter-TSS (NM_008055)	promoter-TSS (NM_008055)	71	NM_008055	14366	Mm.86755	NM_008055	ENSMUSG00000049791	Fzd4	Fz4	frizzled homolog 4 (Drosophila)	protein-coding
MACS_peak_6646	chr2	172171076	172171290	+	71.55	NA	exon (NM_025912, exon 1 of 3)	exon (NM_025912, exon 1 of 3)	106	NM_025912	67017	Mm.30013	NM_025912	ENSMUSG00000027495	Fam210b	2010011I20Rik|AI430961|AV108736	family with sequence similarity 210, member B	protein-coding
MACS_peak_192	chr1	72871023	72871194	+	71.55	NA	promoter-TSS (NM_008342)	promoter-TSS (NM_008342)	54	NM_008342	16008	Mm.141936	NM_008342	ENSMUSG00000039323	Igfbp2	AI255832|IBP-2|Igfbp-2|mIGFBP-2	insulin-like growth factor binding protein 2	protein-coding
MACS_peak_8764	chr5	148241526	148241970	+	71.55	NA	promoter-TSS (NM_028291)	promoter-TSS (NM_028291)	-408	NM_028291	72587	Mm.320469	NM_028291	ENSMUSG00000029647	Pan3	2700050F09Rik|A430027N15Rik|AU014670	PAN3 polyA specific ribonuclease subunit homolog (S. cerevisiae)	protein-coding
MACS_peak_3675	chr15	36212741	36212915	+	71.55	NA	promoter-TSS (NM_013923)	promoter-TSS (NM_013923)	74	NM_013923	30945	Mm.5181	NM_013923	ENSMUSG00000022280	Rnf19a	AA032313|Dorfin|Rnf19|UIP117|Ubce7ip2|XYbp	ring finger protein 19A	protein-coding
MACS_peak_4659	chr17	27693299	27693682	+	71.55	NA	promoter-TSS (NM_001166539)	promoter-TSS (NM_001166539)	-29	NM_001166536	15361	Mm.4438	NM_016660	ENSMUSG00000046711	Hmga1	AL023995|Hmga1a|Hmga1b|Hmgi|Hmgiy|Hmgy	high mobility group AT-hook 1	protein-coding
MACS_peak_6614	chr2	166821625	166821791	+	71.55	NA	promoter-TSS (NM_001109906)	promoter-TSS (NM_001109906)	91	NM_011490	20853	Mm.73276	NM_011490	ENSMUSG00000039536	Stau1	5830401L18Rik|AW549911|C85792|Stau	staufen (RNA binding protein) homolog 1 (Drosophila)	protein-coding
MACS_peak_264	chr1	88423217	88423430	+	71.55	NA	promoter-TSS (NM_008972)	promoter-TSS (NM_008972)	12	NM_008972	19231	Mm.19187	NM_008972	ENSMUSG00000026238	Ptma	Thym	prothymosin alpha	protein-coding
MACS_peak_4756	chr17	34724396	34724745	+	71.55	NA	exon (NM_010929, exon 30 of 30)	exon (NM_010929, exon 30 of 30)	-2181	NM_134116	106512	Mm.26584	NM_134116	ENSMUSG00000034786	Gpsm3	AA960287|AGS4	G-protein signalling modulator 3 (AGS3-like, C. elegans)	protein-coding
MACS_peak_5297	chr18	63852095	63852328	+	71.52	NA	promoter-TSS (NM_016792)	promoter-TSS (NM_016792)	-198	NM_016792	53382	Mm.19169	NM_016792	ENSMUSG00000024583	Txnl1	32kDa|TRP32|Txnl	thioredoxin-like 1	protein-coding
MACS_peak_9290	chr6	136752730	136753017	+	71.52	NA	promoter-TSS (NM_175652)	promoter-TSS (NM_175652)	79	NM_175652	320332	Mm.246720	NM_175652	ENSMUSG00000096010	Hist4h4	B130044J01Rik	histone cluster 4, H4	protein-coding
MACS_peak_4984	chr17	73185995	73186220	+	71.45	NA	promoter-TSS (NM_027166)	promoter-TSS (NM_027166)	63	NM_027166	383295	Mm.277533	NM_027166	ENSMUSG00000039770	Ypel5	2310076K21Rik|CGI-127	yippee-like 5 (Drosophila)	protein-coding
MACS_peak_9783	chr7	80682493	80682791	+	71.45	NA	intron (NM_001081345, intron 2 of 38)	CpG	3990	NM_001081345	244059	Mm.34539	NM_001081345	ENSMUSG00000078671	Chd2	2810013C04Rik|2810040A01Rik|5630401D06Rik|AI851092|BC029703|CHD-2	chromodomain helicase DNA binding protein 2	protein-coding
MACS_peak_1770	chr11	78312620	78312937	+	71.39	NA	5' UTR (NM_011707, exon 1 of 8)	5' UTR (NM_011707, exon 1 of 8)	156	NM_011707	22370	Mm.3667	NM_011707	ENSMUSG00000017344	Vtn	AI256434|Vn	vitronectin	protein-coding
MACS_peak_2803	chr13	8885157	8885425	+	71.24	NA	intron (NM_145360, intron 1 of 4)	intron (NM_145360, intron 1 of 4)	439	NM_145360	319554	Mm.29847	NM_145360	ENSMUSG00000058258	Idi1	4832416K17Rik	isopentenyl-diphosphate delta isomerase	protein-coding
MACS_peak_3046	chr13	59870985	59871191	+	71.24	NA	promoter-TSS (NR_015349)	promoter-TSS (NR_015349)	62	NM_026921	69046	Mm.7884	NM_026921	ENSMUSG00000044792	Isca1	1810010A06Rik|Hbld2	iron-sulfur cluster assembly 1 homolog (S. cerevisiae)	protein-coding
MACS_peak_2481	chr12	70825673	70825873	+	70.97	NA	promoter-TSS (NM_026536)	promoter-TSS (NM_026536)	88	NM_145443	217666	Mm.103362	NM_145443	ENSMUSG00000020988	L2hgdh	BC016226	L-2-hydroxyglutarate dehydrogenase	protein-coding
MACS_peak_1090	chr10	95026658	95026861	+	70.94	NA	promoter-TSS (NM_027722)	promoter-TSS (NM_027722)	42	NM_027722	71207	Mm.24397	NM_027722	ENSMUSG00000020029	Nudt4	4933436C10Rik|DIPP2|DIPP2alpha|DIPP2beta|HDCMB47P	nudix (nucleoside diphosphate linked moiety X)-type motif 4	protein-coding
MACS_peak_7197	chr3	137527494	137527694	+	70.86	NA	5' UTR (NM_016750, exon 1 of 5)	5' UTR (NM_016750, exon 1 of 5)	143	NM_016750	51788	Mm.117541	NM_016750	ENSMUSG00000037894	H2afz	H2A.Z|H2a.z-1	H2A histone family, member Z	protein-coding
MACS_peak_9366	chr7	4744514	4744694	+	70.85	NA	promoter-TSS (NM_009081)	promoter-TSS (NM_009081)	37	NM_009081	19943	Mm.379002	NM_009081	ENSMUSG00000030432	Rpl28	D7Wsu21e	ribosomal protein L28	protein-coding
MACS_peak_959	chr10	79755166	79755350	+	70.83	NA	promoter-TSS (NM_009091)	promoter-TSS (NM_009091)	82	NM_009091	20054	Mm.643	NM_009091	ENSMUSG00000063457	Rps15	rig	ribosomal protein S15	protein-coding
MACS_peak_11660	chrX	83021834	83022013	+	70.82	NA	5' UTR (NM_008194, exon 1 of 19)	5' UTR (NM_008194, exon 1 of 19)	235	NM_001294140	14933	Mm.246682	NM_008194	ENSMUSG00000025059	Gyk	D930012N15Rik|GK	glycerol kinase	protein-coding
MACS_peak_7254	chr4	3762607	3762816	+	70.72	NA	promoter-TSS (NM_026147)	promoter-TSS (NM_026147)	36	NM_026147	67427	Mm.21938	NM_026147		Rps20	4632426K06Rik|Dsk4	ribosomal protein S20	protein-coding
MACS_peak_7998	chr4	154597083	154597216	+	70.71	NA	promoter-TSS (NM_011385)	promoter-TSS (NM_011385)	-505	NM_011385	20481	Mm.28520	NM_011385	ENSMUSG00000029050	Ski	2310012I02Rik|2610001A11Rik|AA062172|AA589460|BC004088	ski sarcoma viral oncogene homolog (avian)	protein-coding
MACS_peak_2745	chr12	111839634	111839842	+	70.69	NA	5' UTR (NM_030238, exon 1 of 77)	5' UTR (NM_030238, exon 1 of 77)	133	NM_030238	13424	Mm.181430	NM_030238	ENSMUSG00000018707	Dync1h1	9930018I23Rik|AI894280|DHC1|DHC1a|DNCL|Dnchc1|Dnec1|Dnecl|Loa|MAP1C|P22|Swl|mKIAA0325	dynein cytoplasmic 1 heavy chain 1	protein-coding
MACS_peak_3216	chr13	120251373	120251719	+	70.50	NA	promoter-TSS (NM_001113550)	promoter-TSS (NM_001113550)	-20	NM_001113550	67392	Mm.390641	NM_026127	ENSMUSG00000062822	4833420G17Rik	2210017J06Rik|5730533D17Rik|AW107518|C85193	RIKEN cDNA 4833420G17 gene	protein-coding
MACS_peak_5616	chr19	20676387	20676618	+	70.36	NA	promoter-TSS (NM_013467)	promoter-TSS (NM_013467)	30	NM_013467	11668	Mm.250866	NM_013467	ENSMUSG00000053279	Aldh1a1	Ahd-2|Ahd2|Aldh1|Aldh1a2|E1|Raldh1	aldehyde dehydrogenase family 1, subfamily A1	protein-coding
MACS_peak_10871	chr9	20820366	20820570	+	70.36	NA	promoter-TSS (NM_010493)	promoter-TSS (NM_010493)	64	NM_010493	15894	Mm.435508	NM_010493	ENSMUSG00000037405	Icam1	CD54|Icam-1|Ly-47|MALA-2	intercellular adhesion molecule 1	protein-coding
MACS_peak_5057	chr17	87846553	87846755	+	70.36	NA	promoter-TSS (NM_007589)	promoter-TSS (NM_007589)	-379	NM_007589	12314	Mm.329243	NM_007589	ENSMUSG00000036438	Calm2	1500001E21Rik|AL024017	calmodulin 2	protein-coding
MACS_peak_441	chr1	153191292	153191516	+	70.36	NA	promoter-TSS (NM_054102)	promoter-TSS (NM_054102)	-224	NM_001039512	117198	Mm.33764	NM_028582	ENSMUSG00000023150	Ivns1abp	1190004M08Rik|1700126I16Rik|AA960440|HSPC068|ND1|NS-1|NS1-BP|Nd1-L|Nd1-S|mKIAA0850	influenza virus NS1A binding protein	protein-coding
MACS_peak_1514	chr11	55283163	55283359	+	70.31	NA	promoter-TSS (NM_013716)	promoter-TSS (NM_013716)	7	NM_013716	27041	Mm.39631	NM_013716		G3bp1	AI849976|B430204O07|C87777|G3bp|mKIAA4115	GTPase activating protein (SH3 domain) binding protein 1	protein-coding
MACS_peak_11599	chrX	46641265	46641451	+	70.31	NA	promoter-TSS (NM_001271449)	promoter-TSS (NM_001271449)	61	NM_001271449	209224	Mm.327730	NM_145951	ENSMUSG00000031109	Enox2	APK1|Cova1|tNOX	ecto-NOX disulfide-thiol exchanger 2	protein-coding
MACS_peak_5907	chr2	22895540	22895751	+	70.29	NA	5' UTR (NM_001077193, exon 1 of 8)	5' UTR (NM_001077193, exon 1 of 8)	116	NM_001077192	11308	Mm.205647	NM_007380	ENSMUSG00000058835	Abi1	E3B1|NAP1|Ssh3bp1	abl-interactor 1	protein-coding
MACS_peak_10072	chr7	135038991	135039173	+	70.26	NA	promoter-TSS (NM_178600)	promoter-TSS (NM_178600)	49	NM_178600	27973	Mm.29703	NM_178600	ENSMUSG00000096145	Vkorc1	D7Wsu86e	vitamin K epoxide reductase complex, subunit 1	protein-coding
MACS_peak_11398	chr9	108208167	108208536	+	70.22	NA	promoter-TSS (NM_016802)	promoter-TSS (NM_016802)	-69	NM_133986	102791	Mm.24670	NM_133986	ENSMUSG00000039461	Tcta	9130410M22Rik|AW553637|C85065|Tctal	T cell leukemia translocation altered gene	protein-coding
MACS_peak_8606	chr5	135115083	135115247	+	70.11	NA	promoter-TSS (NM_033561)	promoter-TSS (NM_033561)	33	NM_033561	22384	Mm.27955	NM_033561	ENSMUSG00000040731	Eif4h	AU018978|D5Ertd355e|E430026L18Rik|Ef4h|Wbscr1|Wscr1|mKIAA0038	eukaryotic translation initiation factor 4H	protein-coding
MACS_peak_1783	chr11	79068018	79068262	+	70.08	NA	promoter-TSS (NM_019653)	promoter-TSS (NM_019653)	57	NM_019653	78889	Mm.307022	NM_019653	ENSMUSG00000017677	Wsb1	1110056B13Rik|2700038M07Rik	WD repeat and SOCS box-containing 1	protein-coding
MACS_peak_2940	chr13	41111582	41111805	+	69.93	NA	promoter-TSS (NM_025387)	promoter-TSS (NM_025387)	74	NM_025387	66154	Mm.30005	NM_025387	ENSMUSG00000021361	Tmem14c	1110021D01Rik|AU020193|HSPC194	transmembrane protein 14C	protein-coding
MACS_peak_7658	chr4	118781320	118781561	+	69.93	NA	promoter-TSS (NM_011400)	promoter-TSS (NM_011400)	90	NM_011400	20525	Mm.21002	NM_011400	ENSMUSG00000028645	Slc2a1	Glut-1|Glut1	solute carrier family 2 (facilitated glucose transporter), member 1	protein-coding
MACS_peak_8183	chr5	34868438	34868689	+	69.92	NA	intron (NM_011893, intron 1 of 12)	CpG	130	NM_011893	24055	Mm.5012	NM_011893	ENSMUSG00000054520	Sh3bp2	3BP2	SH3-domain binding protein 2	protein-coding
MACS_peak_487	chr1	162836493	162836695	+	69.92	NA	promoter-TSS (NM_001024952)	promoter-TSS (NM_001024952)	52	NM_001024952	381305	Mm.329667	NM_001024952	ENSMUSG00000040423	Rc3h1	5730557L09Rik|Gm551|N28103|mKIAA2025	RING CCCH (C3H) domains 1	protein-coding
MACS_peak_839	chr10	60915452	60915596	+	69.92	NA	promoter-TSS (NM_010124)	promoter-TSS (NM_010124)	-107	NM_010124	13688	Mm.259516	NM_010124	ENSMUSG00000020091	Eif4ebp2	2810011I19Rik|4E-BP2|AA792569|BC010348|PHAS-II	eukaryotic translation initiation factor 4E binding protein 2	protein-coding
MACS_peak_4519	chr17	13200782	13200964	+	69.92	NA	5' UTR (NM_013671, exon 1 of 5)	5' UTR (NM_013671, exon 1 of 5)	168	NM_013671	20656	Mm.290876	NM_013671	ENSMUSG00000006818	Sod2	MnSOD|Sod-2	superoxide dismutase 2, mitochondrial	protein-coding
MACS_peak_7575	chr4	107595967	107596226	+	69.92	NA	promoter-TSS (NM_009949)	promoter-TSS (NM_009949)	98	NM_009949	12896	Mm.307620	NM_009949	ENSMUSG00000028607	Cpt2	AI323697|CPTII	carnitine palmitoyltransferase 2	protein-coding
MACS_peak_1555	chr11	60023776	60023978	+	69.92	NA	intron (NM_011480, intron 1 of 18)	CpG	-8048	NR_105887	102465556		NR_105887		Mir6922	mmu-mir-6922	microRNA mir-6922	ncRNA
MACS_peak_858	chr10	62501806	62502008	+	69.92	NA	exon (NM_026085, exon 2 of 10)	exon (NM_026085, exon 2 of 10)	14647	NM_026085	67307	Mm.368563	NM_026085	ENSMUSG00000020068	Pbld2	3110049J23Rik|Mawbp	phenazine biosynthesis-like protein domain containing 2	protein-coding
MACS_peak_10271	chr8	25549243	25549494	+	69.68	NA	promoter-TSS (NM_026931)	promoter-TSS (NM_026931)	50	NM_026931	69068	Mm.25775	NM_026931	ENSMUSG00000056313	1810011O10Rik	1110065B09Rik|AW121743|AW321058	RIKEN cDNA 1810011O10 gene	protein-coding
MACS_peak_2947	chr13	41454202	41454463	+	69.38	NA	promoter-TSS (NM_017464)	promoter-TSS (NM_017464)	38	NM_017464	18003	Mm.288980	NM_017464	ENSMUSG00000021365	Nedd9	Cas-L|CasL|HEF1|MEF1|Nedd-9|p105	neural precursor cell expressed, developmentally down-regulated gene 9	protein-coding
MACS_peak_3459	chr14	60059758	60060025	+	69.34	NA	promoter-TSS (NM_001081024)	promoter-TSS (NM_001081024)	73	NM_026908	69008	Mm.179091	NM_026908	ENSMUSG00000021981	Cab39l	1500031K13Rik|2810425O13Rik|4930520C08Rik|AA589432|MO2L	calcium binding protein 39-like	protein-coding
MACS_peak_3705	chr15	53177606	53177921	+	69.31	NA	promoter-TSS (NM_010162)	promoter-TSS (NM_010162)	-25	NM_010162	14042	Mm.309395	NM_010162		Ext1	AA409028	exostoses (multiple) 1	protein-coding
MACS_peak_10280	chr8	26712430	26712650	+	69.31	NA	promoter-TSS (NM_001001735)	promoter-TSS (NM_001001735)	-238	NM_001001735	234135	Mm.217337	NM_001001735	ENSMUSG00000054823	Whsc1l1	6720429E03|A530023P05|AI528490|NSD3|WHISTLE	Wolf-Hirschhorn syndrome candidate 1-like 1 (human)	protein-coding
MACS_peak_9232	chr6	124881382	124881659	+	69.26	NA	5' UTR (NM_001170341, exon 1 of 9)	5' UTR (NM_001170341, exon 1 of 9)	114	NM_001170341	30853	Mm.490270	NM_145385	ENSMUSG00000030120	Mlf2	AI256856|AU018944|C77284	myeloid leukemia factor 2	protein-coding
MACS_peak_101	chr1	46910157	46910378	+	69.19	NA	promoter-TSS (NM_172653)	promoter-TSS (NM_172653)	87	NM_172653	227059	Mm.233889	NM_172653	ENSMUSG00000025986	Slc39a10	2900042E17Rik|5430433I10|mKIAA1265	solute carrier family 39 (zinc transporter), member 10	protein-coding
MACS_peak_7936	chr4	148681694	148681863	+	69.18	NA	promoter-TSS (NM_008441)	promoter-TSS (NM_008441)	29	NM_207682	16561	Mm.402393	NM_008441	ENSMUSG00000063077	Kif1b	A530096N05Rik|AI448212|AI506502|D4Mil1e|KIF1Bp130|KIF1Bp204	kinesin family member 1B	protein-coding
MACS_peak_9286	chr6	134870417	134870858	+	68.99	NA	5' UTR (NM_009875, exon 1 of 3)	5' UTR (NM_009875, exon 1 of 3)	218	NM_009875	12576	Mm.2958	NM_009875	ENSMUSG00000003031	Cdkn1b	AA408329|AI843786|Kip1|p27|p27Kip1	cyclin-dependent kinase inhibitor 1B	protein-coding
MACS_peak_2043	chr11	101507212	101507395	+	68.99	NA	Intergenic	CpG	18040	NM_025654	66599	Mm.41449	NM_025654	ENSMUSG00000010362	Rdm1	2410008M22Rik|AW212028|Rad52b	RAD52 motif 1	protein-coding
MACS_peak_7019	chr3	96049995	96050524	+	68.99	NA	promoter-TSS (NM_178216).2	promoter-TSS (NM_178216).2	-349	NM_178216	15077	Mm.422680	NM_178216	ENSMUSG00000093769	Hist2h3c1	BE691662|H3-615|H3f2|Hist2h3ca1	histone cluster 2, H3c1	protein-coding
MACS_peak_7817	chr4	134024263	134024428	+	68.99	NA	intron (NM_019641, intron 1 of 4)	CpG	110	NM_019641	16765	Mm.378957	NM_019641	ENSMUSG00000028832	Stmn1	19k|Lag|Lap18|Op18|P18|P19|Pig|Pp17|Pp18|Pp19|Pr22|Smn	stathmin 1	protein-coding
MACS_peak_5256	chr18	53335968	53336128	+	68.78	NA	promoter-TSS (NM_026386)	promoter-TSS (NM_026386)	29	NM_026386	67804	Mm.252171	NM_026386	ENSMUSG00000034484	Snx2	0610030A03Rik	sorting nexin 2	protein-coding
MACS_peak_1510	chr11	54911525	54911735	+	68.74	NA	5' UTR (NM_010299, exon 1 of 4)	5' UTR (NM_010299, exon 1 of 4)	143	NM_010299	14667	Mm.287807	NM_010299	ENSMUSG00000000594	Gm2a	AA408702|AW215435|GM2-AP|SAP-3	GM2 ganglioside activator protein	protein-coding
MACS_peak_5123	chr18	14841112	14841332	+	68.73	NA	exon (NM_009280, exon 1 of 11)	exon (NM_009280, exon 1 of 11)	201	NM_001161369	268996	Mm.31761	NM_009280	ENSMUSG00000037013	Ss18	D130059H17|Ssxt|Syt	synovial sarcoma translocation, Chromosome 18	protein-coding
MACS_peak_2561	chr12	84937956	84938175	+	68.68	NA	promoter-TSS (NM_183154)	promoter-TSS (NM_183154)	32	NM_183154	217695	Mm.59257	NM_183154	ENSMUSG00000042628	Zfyve1	DFCP1|G630053K23|TAFF1|ZNFN2A1|mKIAA1589	zinc finger, FYVE domain containing 1	protein-coding
MACS_peak_5910	chr2	22924723	22925109	+	68.68	NA	intron (NM_001102438, intron 1 of 12)	intron (NM_001102438, intron 1 of 12)	324	NM_001102438	74159	Mm.181973	NM_028793	ENSMUSG00000026781	Acbd5	1300014E15Rik	acyl-Coenzyme A binding domain containing 5	protein-coding
MACS_peak_2053	chr11	102080047	102080326	+	68.68	NA	intron (NM_001284248, intron 4 of 28)	intron (NM_001284248, intron 4 of 28)	11278	NR_106179	102465892		NR_106179	miRBase:MI0026031	Mir8101	mmu-mir-8101	microRNA mir-8101	ncRNA
MACS_peak_10524	chr8	87417504	87417744	+	68.67	NA	5' UTR (NM_008097, exon 1 of 11)	5' UTR (NM_008097, exon 1 of 11)	196	NM_001044744	270076	Mm.2475	NM_008097	ENSMUSG00000003809	Gcdh	9030411L18|AI266902|D17825|GCD	glutaryl-Coenzyme A dehydrogenase	protein-coding
MACS_peak_10753	chr8	124114303	124114524	+	68.64	NA	promoter-TSS (NM_026160)	promoter-TSS (NM_026160)	45	NM_026160	67443	Mm.28357	NM_026160		Map1lc3b	1010001C15Rik|Atg8|LC3b|Map1lc3	microtubule-associated protein 1 light chain 3 beta	protein-coding
MACS_peak_673	chr1	194979269	194979538	+	68.64	NA	promoter-TSS (NM_016851)	promoter-TSS (NM_016851)	97	NM_016851	54139	Mm.273695	NM_016851	ENSMUSG00000026638	Irf6	AI876454|E230028I05Rik|mirf6	interferon regulatory factor 6	protein-coding
MACS_peak_11695	chrX	103222574	103222775	+	68.56	NA	5' UTR (NM_001109757, exon 1 of 23)	5' UTR (NM_001109757, exon 1 of 23)	111	NM_009726	11977	Mm.254297	NM_009726		Atp7a	MNK	ATPase, Cu++ transporting, alpha polypeptide	protein-coding
MACS_peak_3203	chr13	113777960	113778138	+	68.48	NA	promoter-TSS (NM_001081062)	promoter-TSS (NM_001081062)	39	NM_001081062	218630	Mm.25457	NM_001081062	ENSMUSG00000042417	Ccno	C86987|Ccnu|E130318K11|Ung2	cyclin O	protein-coding
MACS_peak_8677	chr5	139848052	139848283	+	68.17	NA	intron (NM_028469, intron 2 of 4)	CpG	-2468	NR_029768	723898		NR_029768		Mir339	Mirn339|mmu-mir-339	microRNA 339	ncRNA
MACS_peak_8274	chr5	73259558	73259903	+	68.15	NA	promoter-TSS (NM_001113460)	promoter-TSS (NM_001113460)	-43	NM_001113460	21682	Mm.319581	NM_013689	ENSMUSG00000029217	Tec	-	tec protein tyrosine kinase	protein-coding
MACS_peak_1575	chr11	60745498	60745696	+	68.15	NA	promoter-TSS (NM_008928)	promoter-TSS (NM_008928)	38	NM_008928	26397	Mm.18494	NM_008928	ENSMUSG00000018932	Map2k3	AW212142|MEK3|MKK3|Prkmk3|mMKK3b	mitogen-activated protein kinase kinase 3	protein-coding
MACS_peak_466	chr1	157659808	157660020	+	68.00	NA	exon (NM_023268, exon 1 of 13)	exon (NM_023268, exon 1 of 13)	115	NM_023268	104009	Mm.27035	NM_023268	ENSMUSG00000033684	Qsox1	1300003H02Rik|QSOX|Qscn6|SOx	quiescin Q6 sulfhydryl oxidase 1	protein-coding
MACS_peak_607	chr1	182947492	182947682	+	67.94	NA	promoter-TSS (NM_010145)	promoter-TSS (NM_010145)	39	NM_010145	13849	Mm.9075	NM_010145	ENSMUSG00000038776	Ephx1	AI195553|Eph-1|Eph1|mEH	epoxide hydrolase 1, microsomal	protein-coding
MACS_peak_841	chr10	61111031	61111256	+	67.92	NA	promoter-TSS (NM_026438)	promoter-TSS (NM_026438)	-226	NM_026438	67895	Mm.28897	NM_026438	ENSMUSG00000020089	Ppa1	2010317E03Rik|Pyp	pyrophosphatase (inorganic) 1	protein-coding
MACS_peak_10197	chr8	3467441	3467681	+	67.87	NA	promoter-TSS (NM_026951)	promoter-TSS (NM_026951)	87	NM_026951	69129	Mm.45279	NM_026951		Pex11g	1810022F11Rik|1810049N02Rik|Pex11c|Pex11gamma	peroxisomal biogenesis factor 11 gamma	protein-coding
MACS_peak_891	chr10	75235946	75236157	+	67.83	NA	promoter-TSS (NM_010027)	promoter-TSS (NM_010027)	68	NM_010027	13202	Mm.298947	NM_010027	ENSMUSG00000001666	Ddt	C78655	D-dopachrome tautomerase	protein-coding
MACS_peak_7854	chr4	136913442	136913647	+	67.82	NA	intron (NM_009861, intron 1 of 5)	CpG	130	NM_009861	12540	Mm.1022	NM_009861	ENSMUSG00000006699	Cdc42	AI747189|AU018915	cell division cycle 42	protein-coding
MACS_peak_7113	chr3	108456675	108457128	+	67.82	NA	promoter-TSS (NM_145543)	promoter-TSS (NM_145543)	-7	NM_001177770	229725	Mm.214545	NM_145543	ENSMUSG00000027884	Clcc1	Mclc	chloride channel CLIC-like 1	protein-coding
MACS_peak_2425	chr12	55815065	55815710	+	67.78	NA	Intergenic	Intergenic	-18535	NM_025456	66266	Mm.156440	NM_025456	ENSMUSG00000054302	Eapp	1810011O16Rik	E2F-associated phosphoprotein	protein-coding
MACS_peak_4091	chr15	103135789	103136120	+	67.70	NA	Intergenic	(CGGG)n|Simple_repeat|Simple_repeat	4915	NM_030720	80910	Mm.160369	NM_030720	ENSMUSG00000063234	Gpr84	EX33	G protein-coupled receptor 84	protein-coding
MACS_peak_6012	chr2	30808439	30808652	+	67.64	NA	promoter-TSS (NM_133673)	promoter-TSS (NM_133673)	24	NM_133673	30934	Mm.249164	NM_133673	ENSMUSG00000026848	Tor1b	2610016F05Rik|DQ1|torsinB	torsin family 1, member B	protein-coding
MACS_peak_6340	chr2	121943932	121944341	+	67.64	NA	promoter-TSS (NM_145531)	promoter-TSS (NM_145531)	-14	NM_145531	214585	Mm.222303	NM_145531	ENSMUSG00000033396	Spg11	6030465E24Rik|A330015I11|C530005A01Rik	spastic paraplegia 11	protein-coding
MACS_peak_1745	chr11	77328552	77328756	+	67.64	NA	promoter-TSS (NM_026185)	promoter-TSS (NM_026185)	35	NM_026185	67477	Mm.432526	NM_026185	ENSMUSG00000000686	Abhd15	1300007F04Rik	abhydrolase domain containing 15	protein-coding
MACS_peak_10750	chr8	124102617	124102762	+	67.63	NA	promoter-TSS (NM_133765)	promoter-TSS (NM_133765)	17	NM_133765	76454	Mm.24829	NM_133765	ENSMUSG00000052934	Fbxo31	1110003O08Rik|2310046N15Rik|Fbx14|Fbxo14	F-box protein 31	protein-coding
MACS_peak_11516	chr9	123438895	123439061	+	67.62	NA	promoter-TSS (NM_030692)	promoter-TSS (NM_030692)	-22	NM_030692	83493	Mm.273671	NM_030692	ENSMUSG00000025240	Sacm1l	SAC1|Sac1p|mKIAA0851	SAC1 (suppressor of actin mutations 1, homolog)-like (S. cerevisiae)	protein-coding
MACS_peak_8214	chr5	43623738	43624111	+	67.41	NA	promoter-TSS (NM_001177379)	promoter-TSS (NM_001177379)	-778	NM_175937	231207	Mm.7233	NM_175937	ENSMUSG00000039782	Cpeb2	A630055H10Rik|Cpe-bp2	cytoplasmic polyadenylation element binding protein 2	protein-coding
MACS_peak_11241	chr9	80012796	80013009	+	67.30	NA	promoter-TSS (NM_001039546)	promoter-TSS (NM_001039546)	61	NM_001039546	17920	Mm.4040	NM_008662	ENSMUSG00000033577	Myo6	BC029719|Tlc|sv	myosin VI	protein-coding
MACS_peak_2499	chr12	72932068	72932328	+	67.30	NA	5' UTR (NM_026102, exon 1 of 26)	5' UTR (NM_026102, exon 1 of 26)	143	NM_172464	208846	Mm.87417	NM_026102	ENSMUSG00000034574	Daam1	-	dishevelled associated activator of morphogenesis 1	protein-coding
MACS_peak_1717	chr11	75252867	75253089	+	67.25	NA	promoter-TSS (NM_008878)	promoter-TSS (NM_008878)	25	NM_008878	18816	Mm.279733	NM_008878	ENSMUSG00000038224	Serpinf2	AI747498|Pli|Serpimf2	serine (or cysteine) peptidase inhibitor, clade F, member 2	protein-coding
MACS_peak_2770	chr12	113345004	113345272	+	67.15	NA	exon (NM_001081169, exon 1 of 15)	exon (NM_001081169, exon 1 of 15)	244	NM_001081169	104816	Mm.77133	NM_001081169	ENSMUSG00000037686	Aspg	A530050D06Rik|AI429460|Gm690	asparaginase homolog (S. cerevisiae)	protein-coding
MACS_peak_8386	chr5	106305534	106305719	+	67.01	NA	promoter-TSS (NM_018759)	promoter-TSS (NM_018759)	39	NM_018759	54367	Mm.248876	NM_018759	ENSMUSG00000029290	Zfp326	5730470H14Rik|ZAN75|Znf326	zinc finger protein 326	protein-coding
MACS_peak_4316	chr16	35022469	35022691	+	67.01	NA	promoter-TSS (NM_023587)	promoter-TSS (NM_023587)	73	NM_023587	70757	Mm.27286	NM_023587	ENSMUSG00000035376	Ptplb	6330408J20Rik|AI255777|AI481689|HACD2	protein tyrosine phosphatase-like (proline instead of catalytic arginine), member b	protein-coding
MACS_peak_6110	chr2	52280500	52280647	+	67.01	NA	promoter-TSS (NM_182994)	promoter-TSS (NM_182994)	-179	NM_182994	75423	Mm.314378	NM_182994	ENSMUSG00000036093	Arl5a	2410015N24Rik|2810410P22Rik|AA408731|AW610751|Arl5|T25534	ADP-ribosylation factor-like 5A	protein-coding
MACS_peak_11574	chrX	33868365	33868596	+	67.01	NA	promoter-TSS (NM_028894)	promoter-TSS (NM_028894)	76	NM_028894	74365	Mm.327654	NM_028894		Lonrf3	4932412G04Rik|5730439E01Rik|A830039N02Rik|AU023707|Rnf127	LON peptidase N-terminal domain and ring finger 3	protein-coding
MACS_peak_5789	chr19	46647854	46648035	+	66.99	NA	promoter-TSS (NM_053196)	promoter-TSS (NM_053196)	89	NM_053196	94279	Mm.296837	NM_053196	ENSMUSG00000025036	Sfxn2	C79732|F630107H02Rik	sideroflexin 2	protein-coding
MACS_peak_408	chr1	136453414	136453620	+	66.98	NA	Intergenic	CpG	-3238	NM_152895	75605	Mm.28995	NM_152895	ENSMUSG00000042207	Kdm5b	2010009J12Rik|2210016I17Rik|AW556288|D1Ertd202e|Jarid1b|PLU-1|PUT1|Plu1|RBBP2H1A|Rb-Bp2|mKIAA4034	lysine (K)-specific demethylase 5B	protein-coding
MACS_peak_7835	chr4	135519326	135519557	+	66.92	NA	TTS (NM_008254)	TTS (NM_008254)	-1639	NM_178389	74246	Mm.247946	NM_178389	ENSMUSG00000028671	Gale	2310002A12Rik|AI323962	galactose-4-epimerase, UDP	protein-coding
MACS_peak_7361	chr4	41687979	41688226	+	66.81	NA	exon (NM_011014, exon 1 of 4)	exon (NM_011014, exon 1 of 4)	130	NM_001286540	18391	Mm.425181	NM_011014	ENSMUSG00000036078	Sigmar1	AL024364|Oprs1|sigma1R	sigma non-opioid intracellular receptor 1	protein-coding
MACS_peak_7487	chr4	73897483	73897725	+	66.58	NA	promoter-TSS (NM_144787)	promoter-TSS (NM_144787)	-179	NM_144787	76804	Mm.209059	NM_144787	ENSMUSG00000028397	Kdm4c	2410141F18Rik|AA517467|Gasc1|Jmjd2c	lysine (K)-specific demethylase 4C	protein-coding
MACS_peak_682	chr10	3134091	3134425	+	66.33	NA	promoter-TSS (NM_172546)	promoter-TSS (NM_172546)	-46	NM_172546	215748	Mm.37984	NM_172546	ENSMUSG00000015202	Cnksr3	6820402C05|BC024086|Magi1	Cnksr family member 3	protein-coding
MACS_peak_5321	chr18	67448426	67448645	+	66.30	NA	promoter-TSS (NM_053261)	promoter-TSS (NM_053261)	-342	NM_053261	114663	Mm.34079	NM_053261	ENSMUSG00000024525	Impa2	2210415D20Rik|AI326924|AW259601	inositol (myo)-1(or 4)-monophosphatase 2	protein-coding
MACS_peak_10997	chr9	44610867	44611107	+	66.30	NA	promoter-TSS (NM_138951)	promoter-TSS (NM_138951)	47	NM_138951	192653	Mm.325487	NM_138951	ENSMUSG00000039438	Ttc36	-	tetratricopeptide repeat domain 36	protein-coding
MACS_peak_4059	chr15	101834613	101834819	+	66.30	NA	promoter-TSS (NM_031170)	promoter-TSS (NM_031170)	57	NM_031170	16691	Mm.358618	NM_031170	ENSMUSG00000049382	Krt8	AA960620|AL022697|AU019895|Card2|EndoA|K8|Krt-2.8|Krt2-8	keratin 8	protein-coding
MACS_peak_5302	chr18	64676023	64676222	+	66.28	NA	promoter-TSS (NM_027350)	promoter-TSS (NM_027350)	89	NM_027350	70223	Mm.29192	NM_027350	ENSMUSG00000024587	Nars	3010001M15Rik|AA960128|ASNRS|C78150	asparaginyl-tRNA synthetase	protein-coding
MACS_peak_10638	chr8	108660659	108660836	+	66.28	NA	5' UTR (NM_176838, exon 1 of 15)	5' UTR (NM_176838, exon 1 of 15)	127	NM_176838	77411	Mm.183003	NM_176838	ENSMUSG00000084128	Esrp2	9530027K23Rik|Rbm35b	epithelial splicing regulatory protein 2	protein-coding
MACS_peak_2953	chr13	43399400	43399595	+	66.28	NA	promoter-TSS (NM_001033399)	promoter-TSS (NM_001033399)	44	NM_001033399	328232	Mm.441399	NM_001033399	ENSMUSG00000051335	Gfod1	9630032O13|AI850995	glucose-fructose oxidoreductase domain containing 1	protein-coding
MACS_peak_10349	chr8	48799095	48799381	+	66.28	NA	promoter-TSS (NM_172407)	promoter-TSS (NM_172407)	47	NM_172407	70925	Mm.393807	NM_172407	ENSMUSG00000038069	Cdkn2aip	4921511I16Rik|AW208986|CARF	CDKN2A interacting protein	protein-coding
MACS_peak_4060	chr15	101858574	101858810	+	66.28	NA	promoter-TSS (NM_010664)	promoter-TSS (NM_010664)	45	NM_010664	16668	Mm.22479	NM_010664	ENSMUSG00000023043	Krt18	CK18|K18|Krt1-18	keratin 18	protein-coding
MACS_peak_663	chr1	193730593	193730765	+	66.26	NA	promoter-TSS (NM_009579)	promoter-TSS (NM_009579)	19	NM_009579	22782	Mm.9024	NM_009579	ENSMUSG00000037434	Slc30a1	AI839647|C130040I11Rik|Znt1	solute carrier family 30 (zinc transporter), member 1	protein-coding
MACS_peak_5790	chr19	46673573	46673804	+	66.00	NA	promoter-TSS (NM_146099)	promoter-TSS (NM_146099)	92	NM_146099	226178	Mm.329895	NM_146099	ENSMUSG00000047731	Wbp1l	D19Wsu162e|Opal1	WW domain binding protein 1 like	protein-coding
MACS_peak_5007	chr17	79234535	79234726	+	65.95	NA	promoter-TSS (NM_001081179)	promoter-TSS (NM_001081179)	91	NM_001081179	320473	Mm.46309	NM_028084	ENSMUSG00000039414	Heatr5b	2010013B10Rik|A230048G03Rik|AV071430|D330050P16Rik|mKIAA1414	HEAT repeat containing 5B	protein-coding
MACS_peak_2787	chr12	117519656	117519854	+	65.82	NA	promoter-TSS (NM_028731)	promoter-TSS (NM_028731)	60	NM_028731	52635	Mm.273755	NM_028731	ENSMUSG00000021171	Esyt2	2410017M09Rik|4921504I16Rik|CHR2SYT|D12Ertd551e|Fam62b	extended synaptotagmin-like protein 2	protein-coding
MACS_peak_4463	chr16	96304264	96304535	+	65.82	NA	promoter-TSS (NM_001103179)	promoter-TSS (NM_001103179)	-364	NM_145125	93871	Mm.240871	NM_145125	ENSMUSG00000022914	Brwd1	5330419I02Rik|D530019K20Rik|G1-403-16|Wdr9|repro5	bromodomain and WD repeat domain containing 1	protein-coding
MACS_peak_5263	chr18	56721755	56721943	+	65.79	NA	promoter-TSS (NM_001162989)	promoter-TSS (NM_001162989)	103	NM_138600	110695	Mm.30250	NM_138600		Aldh7a1	Atq1|D18Wsu181e	aldehyde dehydrogenase family 7, member A1	protein-coding
MACS_peak_7231	chr3	146113393	146113632	+	65.79	NA	promoter-TSS (NM_001293672)	promoter-TSS (NM_001293672)	81	NM_001293672	74245	Mm.45396	NM_028836	ENSMUSG00000028189	Ctbs	2210401K11Rik|CTB	chitobiase, di-N-acetyl-	protein-coding
MACS_peak_4194	chr16	18343845	18344065	+	65.67	NA	promoter-TSS (NM_138583)	promoter-TSS (NM_138583)	70	NM_138583	27883	Mm.265990	NM_138583	ENSMUSG00000013539	Tango2	D16H22S680E|T10	transport and golgi organization 2	protein-coding
MACS_peak_7396	chr4	45421440	45421838	+	65.57	NA	promoter-TSS (NM_001009949)	promoter-TSS (NM_001009949)	-1	NM_001009949	230125	Mm.260210	NM_001009949	ENSMUSG00000045973	Slc25a51	9130208E07Rik|D130005A03Rik|Gm138|Mcart1	solute carrier family 25, member 51	protein-coding
MACS_peak_5251	chr18	49992202	49992467	+	65.57	NA	promoter-TSS (NM_001081371)	promoter-TSS (NM_001081371)	-317	NM_001081371	240283	Mm.257790	NM_001081371	ENSMUSG00000037416	Dmxl1	C630007L23Rik|D030030C22	Dmx-like 1	protein-coding
MACS_peak_1001	chr10	80639333	80639579	+	65.53	NA	promoter-TSS (NM_007907)	promoter-TSS (NM_007907)	80	NM_007907	13629	Mm.326799	NM_007907	ENSMUSG00000034994	Eef2	Ef-2	eukaryotic translation elongation factor 2	protein-coding
MACS_peak_10322	chr8	41947688	41947916	+	65.52	NA	promoter-TSS (NM_007514)	promoter-TSS (NM_007514)	81	NM_001044740	11988	Mm.4676	NM_007514	ENSMUSG00000031596	Slc7a2	20.5|AI158848|Atrc2|CAT-2|Cat2|Tea	solute carrier family 7 (cationic amino acid transporter, y+ system), member 2	protein-coding
MACS_peak_378	chr1	133903950	133904281	+	65.50	NA	promoter-TSS (NM_007923)	promoter-TSS (NM_007923)	-67	NM_007923	13714	Mm.254233	NM_007923	ENSMUSG00000026436	Elk4	2310011G17Rik|A130026I01Rik|BB162516|SAP-1|Sap1	ELK4, member of ETS oncogene family	protein-coding
MACS_peak_6826	chr3	62142844	62143022	+	65.50	NA	5' UTR (NM_001081295, exon 1 of 14)	5' UTR (NM_001081295, exon 1 of 14)	234	NM_001081295	622434	Mm.153974	NM_001081295	ENSMUSG00000036885	Arhgef26	4631416L12Rik|8430436L14Rik|AI303572|AW491953|SGEF	Rho guanine nucleotide exchange factor (GEF) 26	protein-coding
MACS_peak_9042	chr6	86321307	86321469	+	65.49	NA	promoter-TSS (NM_026506)	promoter-TSS (NM_026506)	-146	NM_026506	68011	Mm.276802	NM_026506	ENSMUSG00000057278	Snrpg	2810024K17Rik|AL022803|SMG|sm-G|snRNP-G	small nuclear ribonucleoprotein polypeptide G	protein-coding
MACS_peak_4892	chr17	51318502	51318683	+	65.49	NA	promoter-TSS (NM_028162)	promoter-TSS (NM_028162)	85	NM_028162	72238	Mm.120650	NM_028162	ENSMUSG00000023923	Tbc1d5	1600014N05Rik	TBC1 domain family, member 5	protein-coding
MACS_peak_2060	chr11	102181431	102181625	+	65.40	NA	Intergenic	CpG	-1118	NM_011551	21429	Mm.2845	NM_011551	ENSMUSG00000020923	Ubtf	A930005G04Rik|NOR-90|Tcfubf|UBF|UBF1	upstream binding transcription factor, RNA polymerase I	protein-coding
MACS_peak_8143	chr5	31543019	31543425	+	65.38	NA	promoter-TSS (NM_147201)	promoter-TSS (NM_147201)	-69	NM_147201	192292	Mm.292040	NM_147201	ENSMUSG00000029148	Nrbp1	B230344L17Rik|Nrbp	nuclear receptor binding protein 1	protein-coding
MACS_peak_8321	chr5	90889888	90890134	+	65.38	NA	promoter-TSS (NM_009654)	promoter-TSS (NM_009654)	96	NM_009654	11657	Mm.16773	NM_009654	ENSMUSG00000029368	Alb	Alb-1|Alb1	albumin	protein-coding
MACS_peak_6031	chr2	32143418	32143595	+	65.33	NA	promoter-TSS (NM_001290552)	promoter-TSS (NM_001290552)	83	NR_110965	72931	Mm.27344	NM_175190	ENSMUSG00000044627	Swi5	1500019F05Rik|2900010J23Rik|AI046671	SWI5 recombination repair homolog (yeast)	protein-coding
MACS_peak_5291	chr18	61714858	61715064	+	65.16	NA	promoter-TSS (NM_146087)	promoter-TSS (NM_146087)	-275	NM_146087	93687	Mm.26908	NM_146087	ENSMUSG00000024576	Csnk1a1	2610208K14Rik|4632404G05Rik|5430427P18Rik|CK1a|Csnk1a	casein kinase 1, alpha 1	protein-coding
MACS_peak_7971	chr4	150418574	150418779	+	65.16	NA	promoter-TSS (NM_011067)	promoter-TSS (NM_011067)	98	NM_011067	18628	Mm.121361	NM_011067	ENSMUSG00000028957	Per3	2810049O06Rik|mPer3	period circadian clock 3	protein-coding
MACS_peak_4390	chr16	62786668	62786829	+	65.02	NA	promoter-TSS (NM_178925)	promoter-TSS (NM_178925)	-206	NM_178925	106338	Mm.26321	NM_178925		Nsun3	6720484A09Rik|AU022521	NOL1/NOP2/Sun domain family member 3	protein-coding
MACS_peak_8945	chr6	58974344	58974510	+	64.93	NA	promoter-TSS (NM_153574)	promoter-TSS (NM_153574)	69	NM_153574	58909	Mm.28813	NM_153574		Fam13a	AI462012|D430015B01Rik|FAM13A1|Precm1	family with sequence similarity 13, member A	protein-coding
MACS_peak_5317	chr18	66162075	66162321	+	64.93	NA	promoter-TSS (NM_027400)	promoter-TSS (NM_027400)	91	NM_027400	70361	Mm.290857	NM_027400	ENSMUSG00000041891	Lman1	2610020P13Rik|AI326273|AU043785|C730041J05|ERGIC53|F5F8D|MCFD1|MR60|P58|gp58	lectin, mannose-binding, 1	protein-coding
MACS_peak_6778	chr3	40887306	40887510	+	64.93	NA	promoter-TSS (NM_027558)	promoter-TSS (NM_027558)	-440	NM_027558	70804	Mm.40321	NM_027558	ENSMUSG00000049940	Pgrmc2	4631434O19Rik|5730409G06Rik|DG6|PMBP	progesterone receptor membrane component 2	protein-coding
MACS_peak_8149	chr5	32438168	32438422	+	64.93	NA	promoter-TSS (NM_008037)	promoter-TSS (NM_008037)	-550	NM_008037	14284	Mm.24684	NM_008037	ENSMUSG00000029135	Fosl2	Fra-2	fos-like antigen 2	protein-coding
MACS_peak_1430	chr11	48631030	48631192	+	64.93	NA	promoter-TSS (NM_145377)	promoter-TSS (NM_145377)	-218	NM_145377	211007	Mm.794	NM_145377	ENSMUSG00000040365	Trim41	AW552703|BC020156|R75223|RINCK	tripartite motif-containing 41	protein-coding
MACS_peak_7681	chr4	122638270	122638547	+	64.86	NA	promoter-TSS (NM_029662)	promoter-TSS (NM_029662)	23	NM_029662	76574	Mm.331842	NM_029662	ENSMUSG00000028655	Mfsd2a	1700018O18Rik|Mfsd2|NLS1	major facilitator superfamily domain containing 2A	protein-coding
MACS_peak_1318	chr11	6315780	6316105	+	64.76	NA	promoter-TSS (NM_008907)	promoter-TSS (NM_008907)	69	NM_008907	268373	Mm.5246	NM_008907		Ppia	2700098C05|Cphn|CyP-18|CypA	peptidylprolyl isomerase A	protein-coding
MACS_peak_3123	chr13	91363453	91363845	+	64.76	NA	promoter-TSS (NM_025770)	promoter-TSS (NM_025770)	-57	NM_025770	66795	Mm.235385	NM_025770	ENSMUSG00000021619	Atg10	5330424L23Rik|5430428K15Rik|AI852123|APG10|Agp10|Apg10l|Apg10p|Atg10l	autophagy related 10	protein-coding
MACS_peak_9132	chr6	113026998	113027242	+	64.70	NA	promoter-TSS (NM_028385)	promoter-TSS (NM_028385)	118	NR_027010	14910	Mm.280950	NR_027008	ENSMUSG00000086429	Gt(ROSA)26Sor	AV258896|Gtrgeo26|Gtrosa26|R26|ROSA26	gene trap ROSA 26, Philippe Soriano	ncRNA
MACS_peak_4128	chr16	8672077	8672536	+	64.70	NA	promoter-TSS (NM_025821)	promoter-TSS (NM_025821)	-60	NM_025821	52502	Mm.142095	NM_025821	ENSMUSG00000008393	Carhsp1	1200011K09Rik|Crhsp-24|D16Ertd465e	calcium regulated heat stable protein 1	protein-coding
MACS_peak_8773	chr5	149995688	149995897	+	64.70	NA	promoter-TSS (NM_001115153)	promoter-TSS (NM_001115153)	-344	NM_001115153	231915	Mm.29402	NM_001013378	ENSMUSG00000041264	Uspl1	E430026A01Rik	ubiquitin specific peptidase like 1	protein-coding
MACS_peak_3697	chr15	38944067	38944262	+	64.70	NA	promoter-TSS (NM_172402)	promoter-TSS (NM_172402)	98	NM_172402	69906	Mm.17875	NM_172402	ENSMUSG00000022299	Slc25a32	2610043O12Rik|Mftc	solute carrier family 25, member 32	protein-coding
MACS_peak_773	chr10	40021914	40022317	+	64.70	NA	promoter-TSS (NM_007444)	promoter-TSS (NM_007444)	-121	NM_009665	11702	Mm.253533	NM_009665	ENSMUSG00000075232	Amd1	1|AdoMetDC|Amd-1|SAMDC|SAMDC 1|adoMetDC1	S-adenosylmethionine decarboxylase 1	protein-coding
MACS_peak_8184	chr5	34916052	34916253	+	64.64	NA	promoter-TSS (NM_013457)	promoter-TSS (NM_013457)	-211	NM_013457	11518	Mm.289106	NM_013457	ENSMUSG00000029106	Add1	AI256389	adducin 1 (alpha)	protein-coding
MACS_peak_2301	chr11	121098493	121098727	+	64.62	NA	promoter-TSS (NM_026272)	promoter-TSS (NM_026272)	60	NM_026272	67608	Mm.291832	NM_026272	ENSMUSG00000000056	Narf	4430402O11Rik	nuclear prelamin A recognition factor	protein-coding
MACS_peak_11440	chr9	111174329	111174563	+	64.50	NA	promoter-TSS (NM_026810)	promoter-TSS (NM_026810)	97	NM_175266	77781	Mm.209005	NM_175266	ENSMUSG00000046785	Epm2aip1	A930003G21Rik|mKIAA0766	EPM2A (laforin) interacting protein 1	protein-coding
MACS_peak_6990	chr3	95122690	95122882	+	64.41	NA	intron (NM_029789, intron 1 of 10)	intron (NM_029789, intron 1 of 10)	3612	NM_029789	76893	Mm.181009	NM_029789	ENSMUSG00000015714	Cers2	0610013I17Rik|AI225939|Lass2|TRH3	ceramide synthase 2	protein-coding
MACS_peak_1145	chr10	117066489	117066710	+	64.33	NA	promoter-TSS (NM_027468)	promoter-TSS (NM_027468)	43	NM_027468	70574	Mm.339332	NM_027468	ENSMUSG00000020183	Cpm	1110060I01Rik|5730456K23Rik|AA589379|E030045M14Rik	carboxypeptidase M	protein-coding
MACS_peak_4812	chr17	36974061	36974239	+	64.24	NA	promoter-TSS (NM_001286726)	promoter-TSS (NM_001286726)	59	NM_001286726	22670	Mm.34587	NM_030698	ENSMUSG00000024457	Trim26	AI462198|Zfp173|Zfp1736	tripartite motif-containing 26	protein-coding
MACS_peak_2760	chr12	112776345	112776515	+	64.24	NA	5' UTR (NM_173363, exon 1 of 12)	5' UTR (NM_173363, exon 1 of 12)	118	NM_173363	217869	Mm.271222	NM_173363	ENSMUSG00000021282	Eif5	2810011H21Rik|D12Ertd549e	eukaryotic translation initiation factor 5	protein-coding
MACS_peak_302	chr1	95132315	95132546	+	64.17	NA	promoter-TSS (NM_172463)	promoter-TSS (NM_172463)	-44	NM_172463	208777	Mm.271897	NM_172463	ENSMUSG00000047793	Sned1	6720455I24Rik|AI197264|AI642697|D430044C15Rik|SST3|Snep	sushi, nidogen and EGF-like domains 1	protein-coding
MACS_peak_4032	chr15	99547967	99548244	+	64.05	NA	promoter-TSS (NM_010271)	promoter-TSS (NM_010271)	81	NM_010271	14555	Mm.252391	NM_010271	ENSMUSG00000023019	Gpd1	AI747587|Gdc-1|Gdc1|mKIAA4010	glycerol-3-phosphate dehydrogenase 1 (soluble)	protein-coding
MACS_peak_6651	chr2	172980024	172981234	+	63.95	NA	intron (NM_011044, intron 4 of 9)	intron (NM_011044, intron 4 of 9)	2055	NM_011044	18534	Mm.266867	NM_011044	ENSMUSG00000027513	Pck1	AI265463|PEPCK|Pck-1	phosphoenolpyruvate carboxykinase 1, cytosolic	protein-coding
MACS_peak_6874	chr3	83843921	83844095	+	63.93	NA	promoter-TSS (NM_172681)	promoter-TSS (NM_172681)	75	NM_172681	229473	Mm.28838	NM_172681	ENSMUSG00000033767	D930015E06Rik	Kiaa0922|mKIAA0922	RIKEN cDNA D930015E06 gene	protein-coding
MACS_peak_10081	chr7	135666812	135667378	+	63.76	NA	promoter-TSS (NM_013863)	promoter-TSS (NM_013863)	-2	NM_013863	29810	Mm.84073	NM_013863	ENSMUSG00000030847	Bag3	AA407278|Bis|mg638	BCL2-associated athanogene 3	protein-coding
MACS_peak_2549	chr12	82046300	82046721	+	63.76	NA	promoter-TSS (NM_009159)	promoter-TSS (NM_009159)	19	NM_009159	20384	Mm.43331	NM_009159	ENSMUSG00000021134	Srsf5	Sfrs5	serine/arginine-rich splicing factor 5	protein-coding
MACS_peak_2046	chr11	101519676	101520077	+	63.76	NA	Intergenic	Intergenic	-6979	NM_025404	80981	Mm.266840	NM_025404	ENSMUSG00000034936	Arl4d	1110036H21Rik|ARL6|AW456149|Arf4l|Arfl4|Arl5	ADP-ribosylation factor-like 4D	protein-coding
MACS_peak_9263	chr6	128476620	128476785	+	63.74	NA	promoter-TSS (NM_007376)	promoter-TSS (NM_007376)	36	NM_007376	11287	Mm.260144	NM_007376	ENSMUSG00000030359	Pzp	A1m|A2m|AI893533|MAM	pregnancy zone protein	protein-coding
MACS_peak_6813	chr3	58218618	58218826	+	63.66	NA	promoter-TSS (NM_001081229)	promoter-TSS (NM_001081229)	-889	NM_001081229	72033	Mm.218409	NM_028067	ENSMUSG00000027806	Tsc22d2	1810043J12Rik|5530402M19Rik	TSC22 domain family, member 2	protein-coding
MACS_peak_5999	chr2	30061125	30061605	+	63.65	NA	promoter-TSS (NM_172404)	promoter-TSS (NM_172404)	-146	NM_172404	70266	Mm.216089	NM_172404	ENSMUSG00000039648	Ccbl1	2010009K05Rik|AI182306|Gtk|Kat1|KatI	cysteine conjugate-beta lyase 1	protein-coding
MACS_peak_6221	chr2	91476436	91476631	+	63.65	NA	promoter-TSS (NM_010168)	promoter-TSS (NM_010168)	38	NM_010168	14061	Mm.89048	NM_010168	ENSMUSG00000027249	F2	Cf-2|Cf2|FII|thrombin	coagulation factor II	protein-coding
MACS_peak_5434	chr19	4510453	4510660	+	63.65	NA	promoter-TSS (NM_001162946)	promoter-TSS (NM_001162946)	84	NM_001162946	18563	Mm.1845	NM_008797	ENSMUSG00000024892	Pcx	Pc|Pcb	pyruvate carboxylase	protein-coding
MACS_peak_9305	chr6	145289147	145289358	+	63.65	NA	Intergenic	CpG	-46893	NR_003625	381827	Mm.179075	NM_001001987		1700073E17Rik	-	ribosomal protein L7 pseudogene	pseudo
MACS_peak_6343	chr2	122060501	122060774	+	63.65	NA	promoter-TSS (NM_146126)	promoter-TSS (NM_146126)	62	NM_146126	20322	Mm.371580	NM_146126	ENSMUSG00000027227	Sord	Sdh-1|Sdh1|Sodh-1	sorbitol dehydrogenase	protein-coding
MACS_peak_9857	chr7	97624678	97624893	+	63.65	NA	promoter-TSS (NM_026734)	promoter-TSS (NM_026734)	-280	NM_026734	68472	Mm.289791	NM_026734		Tmem126b	1110001A23Rik	transmembrane protein 126B	protein-coding
MACS_peak_3187	chr13	108680453	108680630	+	63.59	NA	promoter-TSS (NM_145456)	promoter-TSS (NM_145456)	-283	NM_145456	67263	Mm.490418	NM_145456	ENSMUSG00000032846	Zswim6	2900036G02Rik|mKIAA1577	zinc finger SWIM-type containing 6	protein-coding
MACS_peak_11228	chr9	78023685	78023869	+	63.59	NA	promoter-TSS (NR_040401)	promoter-TSS (NR_040401)	56	NR_040401	320295	Mm.131285	NR_040401	ENSMUSG00000097574	C920006O11Rik	-	RIKEN cDNA C920006O11 gene	ncRNA
MACS_peak_843	chr10	61142759	61142967	+	63.59	NA	promoter-TSS (NM_009120)	promoter-TSS (NM_009120)	-206	NM_009120	20224	Mm.391794	NM_009120	ENSMUSG00000020088	Sar1a	1600019H17Rik|Sara|Sara1	SAR1 gene homolog A (S. cerevisiae)	protein-coding
MACS_peak_8457	chr5	115608048	115608232	+	63.59	NA	promoter-TSS (NM_175403)	promoter-TSS (NM_175403)	45	NM_175403	109154	Mm.153963	NM_175403	ENSMUSG00000048578	Mlec	2410014A08Rik|AI850530|ESTM19|X83352|mKIAA0152	malectin	protein-coding
MACS_peak_10408	chr8	73155359	73155606	+	63.59	NA	promoter-TSS (NM_011819)	promoter-TSS (NM_011819)	52	NM_011819	23886	Mm.31325	NM_011819		Gdf15	MIC-1|NAG-1|SBF	growth differentiation factor 15	protein-coding
MACS_peak_4359	chr16	46010606	46010819	+	63.56	NA	promoter-TSS (NM_001134480)	promoter-TSS (NM_001134480)	-186	NM_001134480	433022	Mm.380993	NM_001134480	ENSMUSG00000087141	Plcxd2	AW494639|EG433022	phosphatidylinositol-specific phospholipase C, X domain containing 2	protein-coding
MACS_peak_1452	chr11	51076595	51076807	+	63.50	NA	promoter-TSS (NM_007714)	promoter-TSS (NM_007714)	28	NM_007714	12750	Mm.239354	NM_007714	ENSMUSG00000020385	Clk4	AI987988|C85119	CDC like kinase 4	protein-coding
MACS_peak_5741	chr19	43598790	43599054	+	63.49	NA	exon (NM_010324, exon 1 of 9)	exon (NM_010324, exon 1 of 9)	173	NM_010324	14718	Mm.19039	NM_010324	ENSMUSG00000025190	Got1	AI789014|Got-1|cAspAT|cCAT	glutamate oxaloacetate transaminase 1, soluble	protein-coding
MACS_peak_4496	chr17	7165911	7166119	+	63.46	NA	promoter-TSS (NM_147155)	promoter-TSS (NM_147155)	-510	NM_147155	380608	Mm.371734	NM_147155	ENSMUSG00000052031	Tagap1	2610315E15Rik|AA415005|FKSG15	T cell activation GTPase activating protein 1	protein-coding
MACS_peak_2496	chr12	72116933	72117172	+	63.46	NA	promoter-TSS (NM_001081195)	promoter-TSS (NM_001081195)	98	NM_001081195	238247	Mm.241601	NM_001081195	ENSMUSG00000048118	Arid4a	A630009N03|A630067N03Rik|MmRBBP1|Rbbp1	AT rich interactive domain 4A (RBP1-like)	protein-coding
MACS_peak_7334	chr4	40216574	40216971	+	63.41	NA	TTS (NM_001033305)	TTS (NM_001033305)	102	NM_134097	106021	Mm.251548	NM_134097	ENSMUSG00000036822	Topors	AW105885|LUN|TP53BPL|p53BP3/LUN	topoisomerase I binding, arginine/serine-rich	protein-coding
MACS_peak_3440	chr14	57397028	57397223	+	63.41	NA	promoter-TSS (NM_025682)	promoter-TSS (NM_025682)	28	NM_025682	66645	Mm.20129	NM_025682	ENSMUSG00000021938	Pspc1	5730470C09Rik|AI327109|AI449052|PSP1	paraspeckle protein 1	protein-coding
MACS_peak_5306	chr18	65403876	65404134	+	63.41	NA	Intergenic	Intergenic	-4510	NR_029600	387231		NR_029600	miRBase:MI0000256	Mir122a	Mirn122a|mmu-mir-122	microRNA 122a	ncRNA
MACS_peak_8499	chr5	121902602	121902875	+	63.41	NA	promoter-TSS (NM_029912)	promoter-TSS (NM_029912)	20	NM_029912	77462	Mm.358781	NM_029912	ENSMUSG00000029452	Tmem116	4930406A18Rik|4930513P12Rik|C030022K24Rik	transmembrane protein 116	protein-coding
MACS_peak_1789	chr11	79524765	79524970	+	63.41	NA	promoter-TSS (NR_029579)	promoter-TSS (NR_029579)	-604	NR_029579	387188		NR_029579	miRBase:MI0000235	Mir193a	Mir193|Mirn193|mmu-mir-193|mmu-mir-193a	microRNA 193a	ncRNA
MACS_peak_209	chr1	74760050	74760363	+	63.38	NA	promoter-TSS (NM_024264)	promoter-TSS (NM_024264)	58	NM_024264	104086	Mm.85083	NM_024264	ENSMUSG00000026170	Cyp27a1	1300013A03Rik|Cyp27	cytochrome P450, family 27, subfamily a, polypeptide 1	protein-coding
MACS_peak_4730	chr17	33918047	33918572	+	63.35	NA	exon (NM_020581, exon 1 of 7)	exon (NM_020581, exon 1 of 7)	211	NM_020581	57875	Mm.196189	NM_020581		Angptl4	Arp4|Bk89|Fiaf|Hfarp|Ng27|Pgar|Pgarg|Pp1158	angiopoietin-like 4	protein-coding
MACS_peak_7097	chr3	107136957	107137159	+	63.33	NA	promoter-TSS (NM_001045807)	promoter-TSS (NM_001045807)	-851	NM_001045807	229700	Mm.27966	NM_001045807	ENSMUSG00000048109	Rbm15	C230088J01Rik|mKIAA1438	RNA binding motif protein 15	protein-coding
MACS_peak_4116	chr16	4880651	4880869	+	63.33	NA	promoter-TSS (NM_145359)	promoter-TSS (NM_145359)	-909	NM_145359	207740	Mm.268895	NM_145359		Ubald1	1500031H01Rik|BC013706|Fam100a	UBA-like domain containing 1	protein-coding
MACS_peak_8315	chr5	89315763	89315995	+	63.31	NA	promoter-TSS (NM_018760)	promoter-TSS (NM_018760)	-406	NM_001197147	54403	Mm.41044	NM_018760	ENSMUSG00000060961	Slc4a4	AI835705|NBC|NBC1	solute carrier family 4 (anion exchanger), member 4	protein-coding
MACS_peak_3023	chr13	55614636	55614862	+	63.31	NA	promoter-TSS (NM_001114088)	promoter-TSS (NM_001114088)	58	NM_026131	67399	Mm.275648	NM_026131	ENSMUSG00000021493	Pdlim7	LMP	PDZ and LIM domain 7	protein-coding
MACS_peak_6609	chr2	165818109	165818325	+	63.31	NA	promoter-TSS (NM_008679)	promoter-TSS (NM_008679)	80	NM_008679	17979	Mm.469663	NM_008679	ENSMUSG00000027678	Ncoa3	2010305B15Rik|AW321064|Actr|Aib1|KAT13B|Rac3|Src3|Tram-1|Tram1|bHLHe42|p/Cip|pCip	nuclear receptor coactivator 3	protein-coding
MACS_peak_8650	chr5	138125781	138125979	+	63.29	NA	promoter-TSS (NM_178162)	promoter-TSS (NM_178162)	-35	NM_178162	231801	Mm.260869	NM_145566	ENSMUSG00000029722	Agfg2	A630095P14Rik|Hrbl|RABR	ArfGAP with FG repeats 2	protein-coding
MACS_peak_11450	chr9	114640206	114640460	+	63.27	NA	promoter-TSS (NM_026036)	promoter-TSS (NM_026036)	12	NM_026036	67213	Mm.28858	NM_026036	ENSMUSG00000032434	Cmtm6	2810051A14Rik|AA536733|Cklfsf6	CKLF-like MARVEL transmembrane domain containing 6	protein-coding
MACS_peak_10581	chr8	97855949	97856344	+	63.26	NA	promoter-TSS (NM_133954)	promoter-TSS (NM_133954)	-38	NM_133954	101985	Mm.29069	NM_133954	ENSMUSG00000031792	Usb1	AA960436	U6 snRNA biogenesis 1	protein-coding
MACS_peak_2932	chr13	38085871	38086060	+	63.26	NA	promoter-TSS (NM_025965)	promoter-TSS (NM_025965)	94	NM_025965	107513	Mm.426670	NM_025965	ENSMUSG00000021427	Ssr1	2510001K09Rik|6330400D04|AI159733|AI452176|SSR|TRAPA	signal sequence receptor, alpha	protein-coding
MACS_peak_8220	chr5	45841249	45841458	+	63.21	NA	5' UTR (NM_024236, exon 1 of 7)	5' UTR (NM_024236, exon 1 of 7)	115	NM_024236	110391	Mm.30204	NM_024236	ENSMUSG00000015806	Qdpr	2610008L04Rik|D5Ertd371e|Dhpr|PKU2	quinoid dihydropteridine reductase	protein-coding
MACS_peak_7570	chr4	106979624	106979846	+	63.16	NA	promoter-TSS (NM_007860)	promoter-TSS (NM_007860)	13	NM_007860	13370	Mm.148342	NM_007860	ENSMUSG00000034785	Dio1	5DI|D1|ITDI1|TXDI1	deiodinase, iodothyronine, type I	protein-coding
MACS_peak_2049	chr11	102006737	102006955	+	63.16	NA	promoter-TSS (NM_145829)	promoter-TSS (NM_145829)	19	NM_145829	217214	Mm.31686	NM_145829	ENSMUSG00000048217	Nags	1700120E20Rik|argA	N-acetylglutamate synthase	protein-coding
MACS_peak_1354	chr11	20531944	20532150	+	63.00	NA	promoter-TSS (NM_001038625)	promoter-TSS (NM_001038625)	67	NM_001038625	58172	Mm.339676	NM_021372	ENSMUSG00000049800	Sertad2	AB041541|AU021878|Kiaa0127|SEI-2|Sei2|TRIP-Br2|mKIAA0127	SERTA domain containing 2	protein-coding
MACS_peak_868	chr10	67599213	67599580	+	62.78	NA	intron (NM_023598, intron 4 of 9)	intron (NM_023598, intron 4 of 9)	142078	NM_023598	71371	Mm.440357	NM_023598	ENSMUSG00000019947	Arid5b	4930580B11|5430435G07Rik|AI467247|Desrt|Mrf2|Mrf2alpha|Mrf2beta	AT rich interactive domain 5B (MRF1-like)	protein-coding
MACS_peak_5873	chr2	11457276	11457435	+	62.78	NA	intron (NM_001177758, intron 1 of 14)	CpG	18201	NM_001177758	170768	Mm.19669	NM_133232	ENSMUSG00000026773	Pfkfb3	E330010H22Rik|iPFK-2|uPFK-2	6-phosphofructo-2-kinase/fructose-2,6-biphosphatase 3	protein-coding
MACS_peak_43	chr1	23263049	23263234	+	62.78	NA	Intergenic	CpG	-15967	NR_029533	387225		NR_029533	miRBase:MI0000144	Mir30a	Mirn30a|mmu-mir-30a	microRNA 30a	ncRNA
MACS_peak_10180	chr7	149573620	149573809	+	62.78	NA	promoter-TSS (NM_009983)	promoter-TSS (NM_009983)	61	NM_009983	13033	Mm.231395	NM_009983	ENSMUSG00000007891	Ctsd	CD|CatD	cathepsin D	protein-coding
MACS_peak_6306	chr2	119176964	119177141	+	62.69	NA	promoter-TSS (NM_026929)	promoter-TSS (NM_026929)	74	NM_026929	69065	Mm.35083	NM_026929	ENSMUSG00000027313	Chac1	1810008K03Rik	ChaC, cation transport regulator 1	protein-coding
MACS_peak_3252	chr14	21365227	21365447	+	62.69	NA	promoter-TSS (NR_033571)	promoter-TSS (NR_033571)	-178	NR_033571	75602	Mm.437061	NR_033571	ENSMUSG00000084925	1810062O18Rik	-	RIKEN cDNA 1810062O18 gene	ncRNA
MACS_peak_5832	chr19	57685500	57685661	+	62.69	NA	promoter-TSS (NM_181415)	promoter-TSS (NM_181415)	56	NM_181415	226255	Mm.245340	NM_181415	ENSMUSG00000054843	Atrnl1	AI504415|AW555641|Alp|Atrnl|Atrnlp	attractin like 1	protein-coding
MACS_peak_11537	chrX	7769881	7770042	+	62.69	NA	5' UTR (NM_007898, exon 1 of 5)	5' UTR (NM_007898, exon 1 of 5)	677	NM_007898	13595	Mm.27183	NM_007898	ENSMUSG00000031168	Ebp	AI255399|Pabp|Td|mSI	phenylalkylamine Ca2+ antagonist (emopamil) binding protein	protein-coding
MACS_peak_8133	chr5	31262499	31262802	+	62.55	NA	promoter-TSS (NM_001294302)	promoter-TSS (NM_001294302)	50	NM_016703	50907	Mm.272414	NM_016703	ENSMUSG00000045302	Preb	C85705	prolactin regulatory element binding	protein-coding
MACS_peak_8486	chr5	120961168	120961467	+	62.40	NA	intron (NM_133221, intron 1 of 15)	CpG	116	NM_133221	170756	Mm.291070	NM_133221	ENSMUSG00000032754	Slc8b1	AF261233|NCKX6|NCLX|Slc24a6	solute carrier family 8 (sodium/lithium/calcium exchanger), member B1	protein-coding
MACS_peak_2895	chr13	24923475	24923658	+	62.40	NA	promoter-TSS (NM_019551)	promoter-TSS (NM_019551)	38	NM_019551	56196	Mm.427162	NM_019551	ENSMUSG00000035958	Tdp2	D13Ertd656e|Ttrap	tyrosyl-DNA phosphodiesterase 2	protein-coding
MACS_peak_6563	chr2	160471609	160471892	+	62.40	NA	5' UTR (NM_009408, exon 1 of 21)	5' UTR (NM_009408, exon 1 of 21)	117	NM_009408	21969	Mm.217233	NM_009408	ENSMUSG00000070544	Top1	AI467334|D130064I21Rik|Top-1	topoisomerase (DNA) I	protein-coding
MACS_peak_1293	chr11	5442075	5442268	+	62.25	NA	promoter-TSS (NM_134033)	promoter-TSS (NM_134033)	49	NM_134033	104479	Mm.210403	NM_134033	ENSMUSG00000020482	Ccdc117	1110004K02Rik|1700026O03Rik|AU018638|AU042822|AV173073|BC018601	coiled-coil domain containing 117	protein-coding
MACS_peak_1967	chr11	98064065	98064240	+	62.25	NA	promoter-TSS (NM_026952)	promoter-TSS (NM_026952)	-467	NM_001109628	69131	Mm.260516	NM_026952	ENSMUSG00000003119	Cdk12	1810022J16Rik|AI646528|Crk7|Crkrs|D11Ertd752e|Pksc	cyclin-dependent kinase 12	protein-coding
MACS_peak_9671	chr7	52383939	52384165	+	62.25	NA	promoter-TSS (NM_009438)	promoter-TSS (NM_009438)	63	NM_009438	22121	Mm.180458	NM_009438	ENSMUSG00000074129	Rpl13a	1810026N22Rik|Tstap198-7|tum-antigen	ribosomal protein L13A	protein-coding
MACS_peak_9767	chr7	73224500	73224693	+	62.25	NA	promoter-TSS (NM_024439)	promoter-TSS (NM_024439)	61	NM_024439	109815	Mm.482127	NM_024439	ENSMUSG00000075701	Vimp	1500011E07Rik|C78786|H-4|H-47|H4|H47|Sels	VCP-interacting membrane protein	protein-coding
MACS_peak_2114	chr11	106640675	106640972	+	62.25	NA	promoter-TSS (NM_015810)	promoter-TSS (NM_015810)	6	NR_027785	50776	Mm.859	NM_015810	ENSMUSG00000020718	Polg2	-	polymerase (DNA directed), gamma 2, accessory subunit	protein-coding
MACS_peak_1796	chr11	79967499	79967780	+	62.25	NA	promoter-TSS (NM_172133)	promoter-TSS (NM_172133)	-25	NM_172133	216991	Mm.341520	NM_172133	ENSMUSG00000020709	Adap2	Centa2	ArfGAP with dual PH domains 2	protein-coding
MACS_peak_3234	chr14	17081757	17081996	+	62.25	NA	promoter-TSS (NM_021504)	promoter-TSS (NM_021504)	48	NM_021504	59007	Mm.258381	NM_021504	ENSMUSG00000021785	Ngly1	1110002C09Rik|PNGase|Png1	N-glycanase 1	protein-coding
MACS_peak_7389	chr4	44247017	44247235	+	62.25	NA	Intergenic	CpG	-12987	NR_039565	100628618		NR_039565	miRBase:MI0018014	Mir5106	mmu-mir-5106|mu-mir-5106	microRNA 5106	ncRNA
MACS_peak_8404	chr5	109058607	109058780	+	62.22	NA	promoter-TSS (NM_001163532)	promoter-TSS (NM_001163532)	103	NM_153569	231580	Mm.276647	NM_153569	ENSMUSG00000062234	Gak	D130045N16Rik	cyclin G associated kinase	protein-coding
MACS_peak_16	chr1	9738320	9738548	+	62.12	NA	promoter-TSS (NM_173443)	promoter-TSS (NM_173443)	29	NM_173443	70675	Mm.274493	NM_173443		Vcpip1	4932442A08|5730421J18Rik|5730538E15Rik|VCIP135|mKIAA1850	valosin containing protein (p97)/p47 complex interacting protein 1	protein-coding
MACS_peak_2848	chr13	21842272	21842526	+	61.80	NA	promoter-TSS (NM_178211)	promoter-TSS (NM_178211)	23	NM_178211	319160	Mm.255646	NM_178211	ENSMUSG00000064288	Hist1h4k	-	histone cluster 1, H4k	protein-coding
MACS_peak_10340	chr8	47824708	47824904	+	61.80	NA	promoter-TSS (NM_008391)	promoter-TSS (NM_008391)	63	NR_045750	100503498	Mm.187358	NR_045750	ENSMUSG00000097534	Gm16675	-	predicted gene, 16675	ncRNA
MACS_peak_6992	chr3	95238283	95238626	+	61.80	NA	5' UTR (NM_009709, exon 1 of 21)	5' UTR (NM_009709, exon 1 of 21)	142	NM_001037737	11863	Mm.250265	NM_009709	ENSMUSG00000015522	Arnt	D3Ertd557e|Drnt|ESTM42|Hif1b|W08714|bHLHe2|mKIAA4051	aryl hydrocarbon receptor nuclear translocator	protein-coding
MACS_peak_7219	chr3	143868028	143868187	+	61.80	NA	5' UTR (NM_010723, exon 1 of 5)	5' UTR (NM_010723, exon 1 of 5)	112	NM_010723	16911	Mm.29187	NM_010723	ENSMUSG00000028266	Lmo4	A730077C12Rik|Crp3|Etohi4	LIM domain only 4	protein-coding
MACS_peak_3489	chr14	65271340	65271532	+	61.80	NA	promoter-TSS (NM_001081177)	promoter-TSS (NM_001081177)	68	NM_001081177	16554	Mm.23611	NM_001081177	ENSMUSG00000060012	Kif13b	5330429L19Rik|6030414C01|AI429803|C130021D12Rik|GAKIN	kinesin family member 13B	protein-coding
MACS_peak_4872	chr17	47147321	47147540	+	61.78	NA	promoter-TSS (NM_001177374)	promoter-TSS (NM_001177374)	51	NM_146078	224826	Mm.28234	NM_146078	ENSMUSG00000023977	Ubr2	9930021A08Rik|AI462103|AW540746|E130209G04Rik|mKIAA0349	ubiquitin protein ligase E3 component n-recognin 2	protein-coding
MACS_peak_4599	chr17	24857001	24857192	+	61.78	NA	promoter-TSS (NR_028515)	promoter-TSS (NR_028515)	88	NM_008503	16898	Mm.157452	NM_008503	ENSMUSG00000044533	Rps2	Llrep3|S4	ribosomal protein S2	protein-coding
MACS_peak_2566	chr12	85262667	85262894	+	61.77	NA	non-coding (NR_073564, exon 1 of 13)	non-coding (NR_073564, exon 1 of 13)	104	NR_073563	18222	Mm.4390	NM_010949	ENSMUSG00000021224	Numb	Nb	numb gene homolog (Drosophila)	protein-coding
MACS_peak_832	chr10	60215388	60215582	+	61.71	NA	promoter-TSS (NM_023596)	promoter-TSS (NM_023596)	45	NM_023596	71279	Mm.284462	NM_023596	ENSMUSG00000020100	Slc29a3	4933435C21Rik|AW987637|Ent3	solute carrier family 29 (nucleoside transporters), member 3	protein-coding
MACS_peak_3728	chr15	58913265	58913669	+	61.71	NA	5' UTR (NM_144800, exon 1 of 15)	5' UTR (NM_144800, exon 1 of 15)	114	NM_001146180	211401	Mm.215481	NM_144800	ENSMUSG00000022353	Mtss1	2310003N14Rik|BC024131|D130001D01Rik|Mim|mKIAA0429	metastasis suppressor 1	protein-coding
MACS_peak_11298	chr9	100935326	100935520	+	61.71	NA	promoter-TSS (NM_025835)	promoter-TSS (NM_025835)	-129	NM_025835	66904	Mm.335385	NM_025835	ENSMUSG00000032527	Pccb	1300012P06Rik|AI314687|R74805	propionyl Coenzyme A carboxylase, beta polypeptide	protein-coding
MACS_peak_263	chr1	88422625	88422881	+	61.60	NA	promoter-TSS (NM_008972)	promoter-TSS (NM_008972)	-558	NM_008972	19231	Mm.19187	NM_008972	ENSMUSG00000026238	Ptma	Thym	prothymosin alpha	protein-coding
MACS_peak_8353	chr5	96591395	96591620	+	61.60	NA	promoter-TSS (NM_178854)	promoter-TSS (NM_178854)	-498	NM_144910	231464	Mm.28374	NM_144910	ENSMUSG00000034724	Cnot6l	4932442K20Rik	CCR4-NOT transcription complex, subunit 6-like	protein-coding
MACS_peak_11653	chrX	72661741	72661943	+	61.44	NA	promoter-TSS (NM_145956)	promoter-TSS (NM_145956)	81	NM_010839	17763	Mm.16366	NM_010839	ENSMUSG00000031200	Mtcp1	Cmc4|P13MTCP1|p8MTCP1	mature T cell proliferation 1	protein-coding
MACS_peak_10723	chr8	121918764	121918947	+	61.44	NA	promoter-TSS (NM_019966)	promoter-TSS (NM_019966)	63	NM_019966	56690	Mm.423037	NM_019966	ENSMUSG00000074064	Mlycd	AI324784|Mcd	malonyl-CoA decarboxylase	protein-coding
MACS_peak_6553	chr2	157971915	157972173	+	61.44	NA	promoter-TSS (NM_009373)	promoter-TSS (NM_009373)	84	NM_009373	21817	Mm.330731	NM_009373	ENSMUSG00000037820	Tgm2	G[a]h|TG2|TGase2|tTG|tTGas	transglutaminase 2, C polypeptide	protein-coding
MACS_peak_5240	chr18	46685332	46685566	+	61.40	NA	5' UTR (NM_173423, exon 1 of 3)	5' UTR (NM_173423, exon 1 of 3)	176	NM_173423	240263	Mm.38249	NM_173423		Fem1c	2610312A07Rik|3632443A22Rik|AI646567	fem-1 homolog c (C.elegans)	protein-coding
MACS_peak_10394	chr8	72736013	72736235	+	61.37	NA	promoter-TSS (NM_001007570)	promoter-TSS (NM_001007570)	56	NM_001007570	73095	Mm.185413	NM_001007570	ENSMUSG00000002346	Slc25a42	2900084M01Rik	solute carrier family 25, member 42	protein-coding
MACS_peak_3155	chr13	97312661	97312833	+	61.27	NA	promoter-TSS (NM_001164222)	promoter-TSS (NM_001164222)	57	NM_023420	68018	Mm.24125	NM_023420	ENSMUSG00000021669	Col4a3bp	2810404O15Rik|9230101K08Rik|AU016711|CERT|GPBP	collagen, type IV, alpha 3 (Goodpasture antigen) binding protein	protein-coding
MACS_peak_2721	chr12	106270829	106271008	+	61.19	NA	promoter-TSS (NM_028419)	promoter-TSS (NM_028419)	19	NM_028419	73046	Mm.29128	NM_028419	ENSMUSG00000021102	Glrx5	2310004O13Rik|2900070E19Rik|AU020725	glutaredoxin 5 homolog (S. cerevisiae)	protein-coding
MACS_peak_7243	chr3	153607267	153607464	+	61.19	NA	exon (NM_007382, exon 1 of 12)	exon (NM_007382, exon 1 of 12)	242	NM_007382	11364	Mm.10530	NM_007382	ENSMUSG00000062908	Acadm	AU018656|MCAD	acyl-Coenzyme A dehydrogenase, medium chain	protein-coding
MACS_peak_1503	chr11	54336353	54336574	+	61.17	NA	5' UTR (NM_001252496, exon 1 of 29)	5' UTR (NM_001252496, exon 1 of 29)	116	NM_001252496	192786	Mm.254404	NM_175258	ENSMUSG00000037533	Rapgef6	A530068K01|AI844632|BB085664|C030018K18Rik|PDZ-GEF2|Pdzgef2|RA-GEF-2|Ragef2|mKIAA4052	Rap guanine nucleotide exchange factor (GEF) 6	protein-coding
MACS_peak_4817	chr17	45570370	45570540	+	61.15	NA	5' UTR (NM_152810, exon 1 of 16)	5' UTR (NM_152810, exon 1 of 16)	201	NM_152810	71702	Mm.28270	NM_152810	ENSMUSG00000023932	Cdc5l	1200002I02Rik|AA408004|PCDC5RP	cell division cycle 5-like (S. pombe)	protein-coding
MACS_peak_584	chr1	180336288	180336812	+	61.11	NA	intron (NM_026626, intron 1 of 6)	CpG	538	NM_026626	68226	Mm.252132	NM_026626	ENSMUSG00000026495	Efcab2	1700073K01Rik|D830011E08Rik	EF-hand calcium binding domain 2	protein-coding
MACS_peak_3350	chr14	45938033	45938461	+	61.10	NA	promoter-TSS (NM_015774)	promoter-TSS (NM_015774)	0	NM_015774	50527	Mm.387108	NM_015774	ENSMUSG00000021831	Ero1l	ERO1-L	ERO1-like (S. cerevisiae)	protein-coding
MACS_peak_10263	chr8	23586930	23587163	+	61.10	NA	promoter-TSS (NM_011394)	promoter-TSS (NM_011394)	-126	NM_011394	20516	Mm.323901	NM_011394	ENSMUSG00000037656	Slc20a2	MolPit2|Pit-2|Pit2|Ram-1|Ram1	solute carrier family 20, member 2	protein-coding
MACS_peak_7897	chr4	141102034	141102231	+	61.06	NA	promoter-TSS (NR_030695)	promoter-TSS (NR_030695)	55	NR_030695	320456	Mm.32859	NM_177163		B330016D10Rik	-	RIKEN cDNA B330016D10 gene	ncRNA
MACS_peak_8929	chr6	55124810	55125119	+	61.04	NA	promoter-TSS (NM_009349)	promoter-TSS (NM_009349)	20	NM_009349	21743	Mm.299	NM_009349	ENSMUSG00000003477	Inmt	Temt	indolethylamine N-methyltransferase	protein-coding
MACS_peak_4641	chr17	26389768	26390070	+	61.04	NA	promoter-TSS (NM_025881)	promoter-TSS (NM_025881)	64	NR_037905	66978	Mm.440216	NM_025881	ENSMUSG00000024188	Luc7l	1810045C04Rik|2410018D03Rik	Luc7 homolog (S. cerevisiae)-like	protein-coding
MACS_peak_842	chr10	61111313	61111580	+	60.92	NA	promoter-TSS (NM_026438)	promoter-TSS (NM_026438)	77	NM_026438	67895	Mm.28897	NM_026438	ENSMUSG00000020089	Ppa1	2010317E03Rik|Pyp	pyrophosphatase (inorganic) 1	protein-coding
MACS_peak_8914	chr6	52590171	52590388	+	60.92	NA	promoter-TSS (NM_145567)	promoter-TSS (NM_145567)	15	NM_145567	58875	Mm.286458	NM_145567	ENSMUSG00000029776	Hibadh	6430402H10Rik|AI265272	3-hydroxyisobutyrate dehydrogenase	protein-coding
MACS_peak_11251	chr9	86465277	86465463	+	60.92	NA	promoter-TSS (NM_001145968)	promoter-TSS (NM_001145968)	79	NM_001163746	109785	Mm.390201	NM_028352	ENSMUSG00000056131	Pgm3	2810473H05Rik|Agm1|BB187688|C77933|PAGM|Pgm-3	phosphoglucomutase 3	protein-coding
MACS_peak_2360	chr12	21423277	21423478	+	60.92	NA	promoter-TSS (NM_011739)	promoter-TSS (NM_011739)	-80	NM_011739	22630	Mm.289630	NM_011739	ENSMUSG00000076432	Ywhaq	2700028P07Rik|AA409740|AU021156|R74690	tyrosine 3-monooxygenase/tryptophan 5-monooxygenase activation protein, theta polypeptide	protein-coding
MACS_peak_4159	chr16	14705888	14706118	+	60.92	NA	promoter-TSS (NM_011415)	promoter-TSS (NM_011415)	51	NM_011415	20583	Mm.4272	NM_011415	ENSMUSG00000022676	Snai2	Slug|Slugh|Snail2	snail family zinc finger 2	protein-coding
MACS_peak_2424	chr12	55811153	55811954	+	60.92	NA	Intergenic	Intergenic	-14701	NM_025456	66266	Mm.156440	NM_025456	ENSMUSG00000054302	Eapp	1810011O16Rik	E2F-associated phosphoprotein	protein-coding
MACS_peak_4504	chr17	8476608	8476832	+	60.92	NA	promoter-TSS (NM_018819)	promoter-TSS (NM_018819)	42	NM_018819	55951	Mm.288510	NM_018819	ENSMUSG00000023861	Mpc1	0610006G08Rik|3830411I18Rik|Brp44l	mitochondrial pyruvate carrier 1	protein-coding
MACS_peak_1480	chr11	53113820	53114005	+	60.92	NA	promoter-TSS (NM_008300)	promoter-TSS (NM_008300)	69	NM_008300	15525	Mm.239865	NM_008300	ENSMUSG00000020361	Hspa4	70kDa|AI317151|APG-2|Hsp110|Hsp70RY|mKIAA4025	heat shock protein 4	protein-coding
MACS_peak_7008	chr3	95976178	95976383	+	60.92	NA	promoter-TSS (NM_153053)	promoter-TSS (NM_153053)	-193	NM_153053	107701	Mm.219671	NM_153053	ENSMUSG00000068856	Sf3b4	49kDa|SF3b49|SF3b50|Sap49	splicing factor 3b, subunit 4	protein-coding
MACS_peak_523	chr1	169238634	169238968	+	60.86	NA	promoter-TSS (NM_001039483)	promoter-TSS (NM_001039483)	0	NM_001039483	68944	Mm.330045	NM_026881	ENSMUSG00000052428	Tmco1	1190006A08Rik|4930403O06Rik|AA109065|AU022572|ESTM39	transmembrane and coiled-coil domains 1	protein-coding
MACS_peak_7876	chr4	138886723	138886955	+	60.85	NA	Intergenic	Intergenic	20180	NM_025337	110198	Mm.482154	NM_025337		Akr7a5	0610025K21Rik|Afar|Afar1|Akr7a2	aldo-keto reductase family 7, member A5 (aflatoxin aldehyde reductase)	protein-coding
MACS_peak_10066	chr7	134944122	134944325	+	60.85	NA	promoter-TSS (NM_001040684)	promoter-TSS (NM_001040684)	100	NM_001040684	101502	Mm.157103	NM_133943	ENSMUSG00000042289	Hsd3b7	AI195443|BB098564	hydroxy-delta-5-steroid dehydrogenase, 3 beta- and steroid delta-isomerase 7	protein-coding
MACS_peak_1637	chr11	69659743	69660036	+	60.85	NA	promoter-TSS (NM_001168497)	promoter-TSS (NM_001168497)	15	NM_001168497	70310	Mm.28874	NM_023564	ENSMUSG00000019461	Plscr3	2210403O21Rik|2610037N06Rik|ESTM3|X83310	phospholipid scramblase 3	protein-coding
MACS_peak_6008	chr2	30271531	30271737	+	60.85	NA	promoter-TSS (NM_138748)	promoter-TSS (NM_138748)	64	NM_138748	110854	Mm.275393	NM_138748	ENSMUSG00000039515	Ppp2r4	2610042B21Rik|C77440|N28142|PR53	protein phosphatase 2A activator, regulatory subunit B	protein-coding
MACS_peak_2810	chr13	12350251	12350457	+	60.78	NA	promoter-TSS (NM_001081128)	promoter-TSS (NM_001081128)	26	NM_001081128	238505	Mm.40335	NM_001081128	ENSMUSG00000021311	Mtr	AI894170|D830038K18Rik|MS	5-methyltetrahydrofolate-homocysteine methyltransferase	protein-coding
MACS_peak_223	chr1	75232757	75232934	+	60.78	NA	promoter-TSS (NM_001159884)	promoter-TSS (NM_001159884)	-153	NM_020266	56812	Mm.489660	NM_020266		Dnajb2	2700059H22Rik|Dnajb10|Hsj1|mDj8	DnaJ (Hsp40) homolog, subfamily B, member 2	protein-coding
MACS_peak_7116	chr3	108714507	108714865	+	60.78	NA	promoter-TSS (NM_025845)	promoter-TSS (NM_025845)	-64	NM_025845	66921	Mm.51049	NM_025845	ENSMUSG00000027881	Prpf38b	1110021E09Rik|AU018955	PRP38 pre-mRNA processing factor 38 (yeast) domain containing B	protein-coding
MACS_peak_66	chr1	36568692	36568887	+	60.78	NA	promoter-TSS (NM_001039551)	promoter-TSS (NM_001039551)	68	NM_053186	94218	Mm.256323	NM_053186	ENSMUSG00000001138	Cnnm3	Acdp3|Clp3|mACDP3	cyclin M3	protein-coding
MACS_peak_1866	chr11	87262259	87262403	+	60.64	NA	intron (NM_001199293, intron 2 of 30)	U3|snRNA|snRNA	21238	NM_001199293	83560	Mm.440758	NM_031386	ENSMUSG00000010342	Tex14	C85585	testis expressed gene 14	protein-coding
MACS_peak_3318	chr14	32149804	32150013	+	60.60	NA	promoter-TSS (NM_009796)	promoter-TSS (NM_009796)	-2	NM_009796	12339	Mm.201535	NM_009796	ENSMUSG00000021893	Capn7	AU022319|PalBH	calpain 7	protein-coding
MACS_peak_11086	chr9	57369019	57369187	+	60.33	NA	promoter-TSS (NM_007747)	promoter-TSS (NM_007747)	64	NM_007747	12858	Mm.273403	NM_007747	ENSMUSG00000000088	Cox5a	AA959768|CcOX	cytochrome c oxidase subunit Va	protein-coding
MACS_peak_6486	chr2	152119565	152119739	+	60.32	NA	promoter-TSS (NM_024196)	promoter-TSS (NM_024196)	44	NM_024196	67231	Mm.288733	NM_024196		Tbc1d20	1110028I04Rik|2810442O16Rik|AI414693	TBC1 domain family, member 20	protein-coding
MACS_peak_10796	chr8	127093435	127093668	+	60.31	NA	promoter-TSS (NM_007428)	promoter-TSS (NM_007428)	56	NM_007428	11606	Mm.301626	NM_007428	ENSMUSG00000031980	Agt	AI265500|AngI|AngII|Aogen|Serpina8	angiotensinogen (serpin peptidase inhibitor, clade A, member 8)	protein-coding
MACS_peak_3291	chr14	28149159	28149372	+	60.26	NA	promoter-TSS (NM_001289687)	promoter-TSS (NM_001289687)	42	NM_001289687	71704	Mm.248606	NM_027871	ENSMUSG00000021895	Arhgef3	1200004I24Rik|9830169H03Rik|C76747|Xpln	Rho guanine nucleotide exchange factor (GEF) 3	protein-coding
MACS_peak_3803	chr15	76528260	76528509	+	60.21	NA	exon (NM_182805, exon 5 of 11)	exon (NM_182805, exon 5 of 11)	1190	NM_182805	76282	Mm.30130	NM_182805	ENSMUSG00000022546	Gpt	1300007J06Rik|2310022B03Rik|ALT|Gpt-1|Gpt1	glutamic pyruvic transaminase, soluble	protein-coding
MACS_peak_9599	chr7	35015137	35015355	+	60.20	NA	5' UTR (NM_008155, exon 1 of 18)	5' UTR (NM_008155, exon 1 of 18)	109	NM_008155	14751	Mm.589	NM_008155		Gpi1	Amf|Gpi|Gpi-1|Gpi-1r|Gpi-1s|Gpi-1t|Gpi1-r|Gpi1-s|Gpi1-t|Gpi1s|MF|NK|NK/GPI|Nlk|Org|Pgi|Phi	glucose phosphate isomerase 1	protein-coding
MACS_peak_1358	chr11	20991256	20991537	+	60.20	NA	promoter-TSS (NM_023324)	promoter-TSS (NM_023324)	69	NM_023324	67245	Mm.28957	NM_023324	ENSMUSG00000020134	Peli1	2810468L03Rik|A930031K15Rik|AA409794|AI586297|D11Ertd676e	pellino 1	protein-coding
MACS_peak_5948	chr2	26359215	26359566	+	60.20	NA	promoter-TSS (NM_008714)	promoter-TSS (NM_008714)	-48	NM_008714	18128	Mm.290610	NM_008714	ENSMUSG00000026923	Notch1	9930111A19Rik|Mis6|N1|Tan1|lin-12	notch 1	protein-coding
MACS_peak_19	chr1	10029862	10030027	+	60.20	NA	intron (NM_026493, intron 1 of 29)	CpG	1645	NM_026493	211660	Mm.244046	NM_026493	ENSMUSG00000056763	Cspp1	2310020J12Rik|4930413O22Rik|AA387550|BC055915|Cspp2|Cspp3	centrosome and spindle pole associated protein 1	protein-coding
MACS_peak_6570	chr2	162757214	162757402	+	60.20	NA	promoter-TSS (NM_026499)	promoter-TSS (NM_026499)	64	NM_026499	67996	Mm.24042	NM_026499	ENSMUSG00000016921	Srsf6	1210001E11Rik|AI314910|AW146126|Sfrs6	serine/arginine-rich splicing factor 6	protein-coding
MACS_peak_10981	chr9	44205043	44205349	+	60.17	NA	promoter-TSS (NM_001293630)	promoter-TSS (NM_001293630)	18	NM_001293630	14385	Mm.30087	NM_008063	ENSMUSG00000032114	Slc37a4	G6PT|G6pt1|GSD-1b|mG6PT	solute carrier family 37 (glucose-6-phosphate transporter), member 4	protein-coding
MACS_peak_9881	chr7	106289474	106289726	+	60.17	NA	promoter-TSS (NM_178635)	promoter-TSS (NM_178635)	54	NM_178635	78610	Mm.323072	NM_178635	ENSMUSG00000035354	Uvrag	9530039D02Rik|AI648770|BB124205|Uvrag1|Uvragl	UV radiation resistance associated gene	protein-coding
MACS_peak_5872	chr2	11423523	11423715	+	60.08	NA	promoter-TSS (NM_001177754)	promoter-TSS (NM_001177754)	98	NM_001177754	170768	Mm.19669	NM_133232	ENSMUSG00000026773	Pfkfb3	E330010H22Rik|iPFK-2|uPFK-2	6-phosphofructo-2-kinase/fructose-2,6-biphosphatase 3	protein-coding
MACS_peak_6907	chr3	88307082	88307294	+	59.94	NA	promoter-TSS (NM_001111102)	promoter-TSS (NM_001111102)	86	NM_001111102	16905	Mm.243014	NM_019390	ENSMUSG00000028063	Lmna	Dhe	lamin A	protein-coding
MACS_peak_2729	chr12	110031160	110031414	+	59.89	NA	promoter-TSS (NM_009537)	promoter-TSS (NM_009537)	-234	NM_009537	22632	Mm.3868	NM_009537	ENSMUSG00000021264	Yy1	AW488674|NF-E1	YY1 transcription factor	protein-coding
MACS_peak_9500	chr7	26443620	26443795	+	59.87	NA	promoter-TSS (NM_138586)	promoter-TSS (NM_138586)	73	NM_007533	12039	Mm.25848	NM_007533	ENSMUSG00000060376	Bckdha	-	branched chain ketoacid dehydrogenase E1, alpha polypeptide	protein-coding
MACS_peak_10119	chr7	147302119	147302565	+	59.76	NA	promoter-TSS (NM_053119)	promoter-TSS (NM_053119)	-20	NM_053119	93747	Mm.24452	NM_053119	ENSMUSG00000025465	Echs1	C80529	enoyl Coenzyme A hydratase, short chain, 1, mitochondrial	protein-coding
MACS_peak_4774	chr17	35118647	35118919	+	59.70	NA	promoter-TSS (NM_030597)	promoter-TSS (NM_030597)	-16	NM_001110101	27756	Mm.165735	NM_030597	ENSMUSG00000007050	Lsm2	D17H6S56E-2|D17H6S56E2|Dmapl|Dmpkap|G7b|Sm-X5|SmX5|snRNP	LSM2 homolog, U6 small nuclear RNA associated (S. cerevisiae)	protein-coding
MACS_peak_7647	chr4	117807613	117807832	+	59.70	NA	promoter-TSS (NM_001161774)	promoter-TSS (NM_001161774)	-171	NM_001161774	20441	Mm.251002	NM_009176	ENSMUSG00000028538	St3gal3	ST3GalIII|ST3N|Siat3|Siat6	ST3 beta-galactoside alpha-2,3-sialyltransferase 3	protein-coding
MACS_peak_5816	chr19	54018338	54018502	+	59.59	NA	promoter-TSS (NM_019658)	promoter-TSS (NM_019658)	-376	NM_001168505	56392	Mm.228669	NM_019658	ENSMUSG00000024976	Shoc2	AU017287|Sur8|mKIAA0862	soc-2 (suppressor of clear) homolog (C. elegans)	protein-coding
MACS_peak_370	chr1	133693909	133694188	+	59.59	NA	promoter-TSS (NM_178079)	promoter-TSS (NM_178079)	76	NM_178079	212933	Mm.23844	NM_178079	ENSMUSG00000042251	Pm20d1	4732466D17Rik|AI098026	peptidase M20 domain containing 1	protein-coding
MACS_peak_6837	chr3	65762006	65762427	+	59.59	NA	promoter-TSS (NM_019937)	promoter-TSS (NM_019937)	-69	NM_019937	56706	Mm.175612	NM_019937	ENSMUSG00000027829	Ccnl1	2610030E23Rik|AU018493|Ccnl|ania-6a	cyclin L1	protein-coding
MACS_peak_5441	chr19	4839128	4839338	+	59.59	NA	promoter-TSS (NM_016892)	promoter-TSS (NM_016892)	89	NM_016892	12460	Mm.434411	NM_016892	ENSMUSG00000034108	Ccs	Ccsd	copper chaperone for superoxide dismutase	protein-coding
MACS_peak_4114	chr16	4879634	4880022	+	59.58	NA	promoter-TSS (NM_145359)	promoter-TSS (NM_145359)	23	NM_145359	207740	Mm.268895	NM_145359		Ubald1	1500031H01Rik|BC013706|Fam100a	UBA-like domain containing 1	protein-coding
MACS_peak_6421	chr2	131059760	131060030	+	59.58	NA	promoter-TSS (NM_001206385)	promoter-TSS (NM_001206385)	96	NM_144888	228607	Mm.287226	NM_144888	ENSMUSG00000037523	Mavs	D430028G21Rik|IPS-1|Visa|cardif	mitochondrial antiviral signaling protein	protein-coding
MACS_peak_698	chr10	11000845	11001055	+	59.58	NA	promoter-TSS (NM_027968)	promoter-TSS (NM_027968)	-178	NM_027968	71865	Mm.276229	NM_027968	ENSMUSG00000047648	Fbxo30	1700026A16Rik|MUSA1	F-box protein 30	protein-coding
MACS_peak_11116	chr9	62189134	62189320	+	59.57	NA	promoter-TSS (NM_009672)	promoter-TSS (NM_009672)	77	NM_009672	11737	Mm.269088	NM_009672	ENSMUSG00000032249	Anp32a	Anp32|I1PP2A|LANP|PHAP1|W91701|pp32	acidic (leucine-rich) nuclear phosphoprotein 32 family, member A	protein-coding
MACS_peak_437	chr1	145851177	145851329	+	59.57	NA	promoter-TSS (NM_009061)	promoter-TSS (NM_009061)	26	NM_009061	19735	Mm.28262	NM_009061	ENSMUSG00000026360	Rgs2	GOS8	regulator of G-protein signaling 2	protein-coding
MACS_peak_3968	chr15	89026441	89026737	+	59.56	NA	intron (NM_027081, intron 1 of 20)	CpG	316	NM_027081	69440	Mm.482128	NM_027081	ENSMUSG00000015377	Dennd6b	1700027J05Rik|AI414881|Fam116b	DENN/MADD domain containing 6B	protein-coding
MACS_peak_9352	chr7	3616914	3617130	+	59.54	NA	TTS (NM_181820)	TTS (NM_181820)	420	NM_027203	69757	Mm.389782	NM_027203	ENSMUSG00000078813	Leng1	1500001K17Rik	leukocyte receptor cluster (LRC) member 1	protein-coding
MACS_peak_8118	chr5	30481785	30481962	+	59.49	NA	promoter-TSS (NM_178878)	promoter-TSS (NM_178878)	80	NM_001289798	231086	Mm.291463	NM_145558	ENSMUSG00000059447	Hadhb	4930479F15Rik|Mtpb|TP-beta	hydroxyacyl-Coenzyme A dehydrogenase/3-ketoacyl-Coenzyme A thiolase/enoyl-Coenzyme A hydratase (trifunctional protein), beta subunit	protein-coding
MACS_peak_5015	chr17	80295220	80295441	+	59.40	NA	exon (NM_019717, exon 1 of 13)	exon (NM_019717, exon 1 of 13)	133	NM_178050	56298	Mm.175403	NM_019717	ENSMUSG00000059811	Atl2	2010110I21Rik|AA407293|AV334690|Aip-2|Arl6ip2	atlastin GTPase 2	protein-coding
MACS_peak_4584	chr17	24563577	24563728	+	59.26	NA	promoter-TSS (NM_010023)	promoter-TSS (NM_010023)	24	NM_010023	13177	Mm.291743	NM_010023	ENSMUSG00000024132	Eci1	Dci|eci	enoyl-Coenzyme A delta isomerase 1	protein-coding
MACS_peak_7506	chr4	86503135	86503526	+	59.24	NA	promoter-TSS (NM_009096)	promoter-TSS (NM_009096)	-59	NM_009096	20104	Mm.379007	NM_009096		Rps6	S6R	ribosomal protein S6	protein-coding
MACS_peak_10254	chr8	19784640	19784833	+	59.09	NA	Intergenic	CpG	55160	NM_001039553	626415	Mm.425517	NM_001039553		4930467E23Rik	ENSMUSG00000074453|OTTMUSG00000018948|TSAP	RIKEN cDNA 4930467E23 gene	protein-coding
MACS_peak_10103	chr7	140900546	140900777	+	59.07	NA	promoter-TSS (NM_025392)	promoter-TSS (NM_025392)	317	NM_009479	22276	Mm.3160	NM_009479	ENSMUSG00000030979	Uros	AI415298|Uros3	uroporphyrinogen III synthase	protein-coding
MACS_peak_6501	chr2	154429229	154429455	+	59.02	NA	promoter-TSS (NM_021534)	promoter-TSS (NM_021534)	67	NM_021534	59038	Mm.24673	NM_021534		Pxmp4	3010018P03Rik|Pmp24	peroxisomal membrane protein 4	protein-coding
MACS_peak_8371	chr5	102498804	102499040	+	58.99	NA	promoter-TSS (NM_172882)	promoter-TSS (NM_172882)	18	NM_172882	72145	Mm.332522	NM_172882	ENSMUSG00000043940	Wdfy3	2610509D04Rik|ALFY|AW319683|B930017C24|BWF1|Bchs|D5Ertd66e|Ggtb3|ZFYVE25|mKIAA0993	WD repeat and FYVE domain containing 3	protein-coding
MACS_peak_7225	chr3	145312795	145313021	+	58.94	NA	promoter-TSS (NM_010516)	promoter-TSS (NM_010516)	41	NM_010516	16007	Mm.1231	NM_010516	ENSMUSG00000028195	Cyr61	AI325051|CCN1|Igfbp10	cysteine rich protein 61	protein-coding
MACS_peak_6500	chr2	154233618	154233820	+	58.89	NA	5' UTR (NM_009228, exon 1 of 8)	5' UTR (NM_009228, exon 1 of 8)	101	NM_009228	20648	Mm.1541	NM_009228	ENSMUSG00000027488	Snta1	AW228934|Snt1	syntrophin, acidic 1	protein-coding
MACS_peak_4985	chr17	73186648	73186863	+	58.89	NA	intron (NM_027166, intron 1 of 2)	CpG	711	NM_027166	383295	Mm.277533	NM_027166	ENSMUSG00000039770	Ypel5	2310076K21Rik|CGI-127	yippee-like 5 (Drosophila)	protein-coding
MACS_peak_6883	chr3	85774959	85775142	+	58.89	NA	Intergenic	CpG	31363	NM_001001650	368202	Mm.253822	NM_001001650	ENSMUSG00000049013	Prss48	Esspl|Gm1019	protease, serine 48	protein-coding
MACS_peak_9756	chr7	71537593	71537763	+	58.86	NA	promoter-TSS (NM_028626)	promoter-TSS (NM_028626)	21	NM_028626	73724	Mm.10093	NM_028626	ENSMUSG00000033429	Mcee	1110007A04Rik	methylmalonyl CoA epimerase	protein-coding
MACS_peak_5166	chr18	34380538	34380758	+	58.86	NA	promoter-TSS (NM_007462)	promoter-TSS (NM_007462)	10	NM_007462	11789	Mm.384171	NM_007462	ENSMUSG00000005871	Apc	AI047805|AU020952|AW124434|CC1|Min|mAPC	adenomatosis polyposis coli	protein-coding
MACS_peak_2974	chr13	48356426	48356597	+	58.85	NA	promoter-TSS (NM_031166)	promoter-TSS (NM_031166)	-285	NM_031166	15904	Mm.458006	NM_031166	ENSMUSG00000021379	Id4	Idb4|bHLHb27	inhibitor of DNA binding 4	protein-coding
MACS_peak_11100	chr9	58430104	58430321	+	58.85	NA	5' UTR (NM_009145, exon 1 of 8)	5' UTR (NM_009145, exon 1 of 8)	165	NM_009145	20320	Mm.15125	NM_009145	ENSMUSG00000032336	Nptn	AW554172|SDR-1|Sdfr1	neuroplastin	protein-coding
MACS_peak_7671	chr4	120339131	120339299	+	58.85	NA	promoter-TSS (NM_019563)	promoter-TSS (NM_019563)	47	NM_019563	56222	Mm.272646	NM_019563	ENSMUSG00000070803	Cited4	MRG-2|Mrg2	Cbp/p300-interacting transactivator, with Glu/Asp-rich carboxy-terminal domain, 4	protein-coding
MACS_peak_9751	chr7	71083607	71083829	+	58.85	NA	promoter-TSS (NM_021366)	promoter-TSS (NM_021366)	83	NM_021366	50794	Mm.240473	NM_021366	ENSMUSG00000052040	Klf13	0610043C13Rik|9430029L20Rik|Bteb3|FKLF-2|FKLF2|NSLP1|RFLAT-1|RFLAT1	Kruppel-like factor 13	protein-coding
MACS_peak_8295	chr5	77524109	77524448	+	58.82	NA	promoter-TSS (NM_001159901)	promoter-TSS (NM_001159901)	14	NM_001159901	74318	Mm.181852	NM_175606	ENSMUSG00000059325	Hopx	1110018K11Rik|1200015P04Rik|2300002F06Rik|AI848177|AW490897|Cameo|Hdop|Hod|Hop|Ob1|Obl|Toto	HOP homeobox	protein-coding
MACS_peak_5680	chr19	32832029	32832235	+	58.82	NA	promoter-TSS (NM_008960)	promoter-TSS (NM_008960)	65	NM_008960	19211	Mm.245395	NM_008960	ENSMUSG00000013663	Pten	2310035O07Rik|A130070J02Rik|AI463227|B430203M17Rik|MMAC1|TEP1	phosphatase and tensin homolog	protein-coding
MACS_peak_7767	chr4	131864518	131864766	+	58.81	NA	promoter-TSS (NR_029412)	promoter-TSS (NR_029412)	49	NR_029468	100039864	Mm.258912	NR_029468	ENSMUSG00000086290	Snhg12	2310005L22Rik	small nucleolar RNA host gene 12	ncRNA
MACS_peak_3610	chr15	3533095	3533274	+	58.81	NA	5' UTR (NM_010284, exon 1 of 11)	5' UTR (NM_010284, exon 1 of 11)	168	NM_001048178	14600	Mm.3986	NM_010284	ENSMUSG00000055737	Ghr	GHBP|GHR/BP	growth hormone receptor	protein-coding
MACS_peak_8898	chr6	48551643	48551924	+	58.78	NA	Intergenic	CpG	7901	NM_001079904	58887	Mm.219183	NM_175099	ENSMUSG00000052751	Repin1	AI425994|Ap4|E430037F08Rik|Zfp-464|Zfp464	replication initiator 1	protein-coding
MACS_peak_7320	chr4	34497824	34498042	+	58.76	NA	promoter-TSS (NM_001007589)	promoter-TSS (NM_001007589)	69	NM_001007589	433693	Mm.389532	NM_026019	ENSMUSG00000028291	Akirin2	2700059D21Rik|AA114675|AA522011|AU019887|Akirin-2	akirin 2	protein-coding
MACS_peak_1781	chr11	78798291	78798449	+	58.74	NA	promoter-TSS (NM_001159301)	promoter-TSS (NM_001159301)	56	NM_001159301	16859	Mm.341434	NM_010708	ENSMUSG00000001123	Lgals9	AA407335|AI194909|AI265545|LGALS35|Lgals5|gal-9|galectin-9	lectin, galactose binding, soluble 9	protein-coding
MACS_peak_8885	chr6	47763144	47763462	+	58.72	NA	exon (NM_009787, exon 1 of 10)	exon (NM_009787, exon 1 of 10)	208	NM_009787	12304	Mm.2442	NM_009787	ENSMUSG00000025823	Pdia4	AI987846|Cai|ERp-72|Erp72	protein disulfide isomerase associated 4	protein-coding
MACS_peak_1406	chr11	31770854	31771021	+	58.72	NA	promoter-TSS (NM_001290676)	promoter-TSS (NM_001290676)	-3	NM_001290676	67579	Mm.339792	NM_026252	ENSMUSG00000020300	Cpeb4	Cpe-bp4|Cpeb-4|mCPEB-4	cytoplasmic polyadenylation element binding protein 4	protein-coding
MACS_peak_4912	chr17	56219037	56219241	+	58.69	NA	promoter-TSS (NM_008233)	promoter-TSS (NM_008233)	59	NM_008233	15193	Mm.279188	NM_008233	ENSMUSG00000002833	Hdgfrp2	HRP-2	hepatoma-derived growth factor, related protein 2	protein-coding
MACS_peak_11473	chr9	119266650	119266817	+	58.69	NA	exon (NM_001033209, exon 1 of 19)	exon (NM_001033209, exon 1 of 19)	234	NM_001199568	102448	Mm.219497	NM_001033209	ENSMUSG00000035769	Xylb	AI132223|AI327421	xylulokinase homolog (H. influenzae)	protein-coding
MACS_peak_10044	chr7	134387791	134387977	+	58.59	NA	promoter-TSS (NM_177362)	promoter-TSS (NM_177362)	-156	NM_177362	244216	Mm.41038	NM_177362	ENSMUSG00000054716	Zfp771	G630024C07Rik|Znf771	zinc finger protein 771	protein-coding
MACS_peak_11227	chr9	77956324	77956507	+	58.44	NA	promoter-TSS (NM_023605)	promoter-TSS (NM_023605)	48	NM_023605	71538	Mm.28584	NM_023605	ENSMUSG00000001366	Fbxo9	9030401P18Rik|AA986398	f-box protein 9	protein-coding
MACS_peak_7911	chr4	142751781	142752103	+	58.41	NA	intron (NM_001081355, intron 6 of 9)	CpG	-25877	NR_105988	102465618		NR_105988		Mir7021	mmu-mir-7021	microRNA mir-7021	ncRNA
MACS_peak_4125	chr16	8513515	8513736	+	58.30	NA	5' UTR (NM_001170978, exon 1 of 15)	5' UTR (NM_001170978, exon 1 of 15)	103	NM_172961	268860	Mm.259315	NM_172961	ENSMUSG00000057880	Abat	9630038C02Rik|AI255750|ENSMUSG00000051226|Gabaat|Gabat|Gm9851|I54|Laibat|X61497	4-aminobutyrate aminotransferase	protein-coding
MACS_peak_1291	chr11	5420883	5421167	+	58.30	NA	exon (NM_013842, exon 1 of 5)	exon (NM_013842, exon 1 of 5)	381	NM_001271730	22433	Mm.469937	NM_013842	ENSMUSG00000020484	Xbp1	D11Ertd39e|TREB-5|TREB5|XBP-1	X-box binding protein 1	protein-coding
MACS_peak_3519	chr14	70843260	70843484	+	58.30	NA	promoter-TSS (NR_029802)	promoter-TSS (NR_029802)	55	NR_029802	723838		NR_029802	miRBase:MI0000704	Mir320	Mirn320|mmu-mir-320	microRNA 320	ncRNA
MACS_peak_9128	chr6	108778568	108778818	+	58.30	NA	promoter-TSS (NM_138677)	promoter-TSS (NM_138677)	58	NM_138677	192193	Mm.21596	NM_138677	ENSMUSG00000030104	Edem1	A130059K23Rik|EDEM|mKIAA0212	ER degradation enhancer, mannosidase alpha-like 1	protein-coding
MACS_peak_4971	chr17	71200422	71200587	+	58.30	NA	promoter-TSS (NM_009372)	promoter-TSS (NM_009372)	46	NM_009372	21815	Mm.101034	NM_009372	ENSMUSG00000047407	Tgif1	AA959811|AI462167|Tgif	TGFB-induced factor homeobox 1	protein-coding
MACS_peak_9458	chr7	20277551	20278067	+	58.27	NA	exon (NM_007469, exon 1 of 3)	exon (NM_007469, exon 1 of 3)	199	NM_001110009	11812	Mm.182440	NM_007469	ENSMUSG00000040564	Apoc1	Apo-CIB|ApoC-IB|apo-CI|apoC-I	apolipoprotein C-I	protein-coding
MACS_peak_8065	chr5	21207315	21207552	+	58.27	NA	promoter-TSS (NM_178728)	promoter-TSS (NM_178728)	-270	NM_178728	242864	Mm.153292	NM_178728	ENSMUSG00000044968	Napepld	A530089G06|Mbldc1|NAPE-PLD	N-acyl phosphatidylethanolamine phospholipase D	protein-coding
MACS_peak_941	chr10	79515982	79516197	+	58.27	NA	promoter-TSS (NM_008162)	promoter-TSS (NM_008162)	-144	NM_008162	625249	Mm.332810	NM_008162	ENSMUSG00000075706	Gpx4	GPx-4|GSHPx-4|PHGPx|mtPHGPx|snGPx	glutathione peroxidase 4	protein-coding
MACS_peak_6471	chr2	148558001	148558223	+	58.27	NA	promoter-TSS (NM_019632)	promoter-TSS (NM_019632)	44	NM_019632	17957	Mm.274308	NM_019632	ENSMUSG00000027438	Napb	Brp14|E161|I47|SNARE|b-SNAP	N-ethylmaleimide sensitive fusion protein attachment protein beta	protein-coding
MACS_peak_3826	chr15	78236606	78236891	+	58.27	NA	promoter-TSS (NM_001162493)	promoter-TSS (NM_001162493)	-394	NM_001162493	246221	Mm.294215	NM_138670	ENSMUSG00000071711	Mpst	Mst	mercaptopyruvate sulfurtransferase	protein-coding
MACS_peak_10748	chr8	123260205	123260416	+	58.20	NA	promoter-TSS (NM_008320)	promoter-TSS (NM_008320)	34	NM_008320	15900	Mm.334861	NM_008320	ENSMUSG00000041515	Irf8	AI893568|ICSBP|IRF-8|Icsbp1|Myls	interferon regulatory factor 8	protein-coding
MACS_peak_1259	chr11	3166228	3166699	+	58.17	NA	promoter-TSS (NM_007879)	promoter-TSS (NM_007879)	-74	NM_007879	13494	Mm.3250	NM_007879	ENSMUSG00000020457	Drg1	AA408859|AI132520|Nedd3	developmentally regulated GTP binding protein 1	protein-coding
MACS_peak_4909	chr17	56148443	56148830	+	58.09	NA	promoter-TSS (NM_026530)	promoter-TSS (NM_026530)	12	NM_026530	68047	Mm.358710	NM_026530	ENSMUSG00000003199	Mpnd	E130307M08Rik	MPN domain containing	protein-coding
MACS_peak_2069	chr11	102291762	102291957	+	57.97	NA	intron (NM_008175, intron 1 of 12)	intron (NM_008175, intron 1 of 12)	223	NM_008175	14824	Mm.1568	NM_008175	ENSMUSG00000034708	Grn	Pgrn|epithelin	granulin	protein-coding
MACS_peak_5611	chr19	18706079	18706343	+	57.97	NA	promoter-TSS (NM_017375)	promoter-TSS (NM_017375)	92	NM_017375	20409	Mm.172222	NM_017375		Ostf1	C78236|SH3P2|Sh3d3	osteoclast stimulating factor 1	protein-coding
MACS_peak_2356	chr12	17888636	17888833	+	57.91	NA	Intergenic	CpG	191114	NM_016677	53602	Mm.313619	NM_016677	ENSMUSG00000071379	Hpcal1	NVP-3|Nvp3|VILIP3|Vnsl3|Vsnl3	hippocalcin-like 1	protein-coding
MACS_peak_1114	chr10	107769150	107769365	+	57.91	NA	promoter-TSS (NM_054056)	promoter-TSS (NM_054056)	12	NM_054056	114774	Mm.391419	NM_054056	ENSMUSG00000035873	Pawr	2310001G03Rik|PAR4|Par-4	PRKC, apoptosis, WT1, regulator	protein-coding
MACS_peak_6532	chr2	156005759	156005936	+	57.89	NA	promoter-TSS (NM_001291115)	promoter-TSS (NM_001291115)	127	NM_001291114	170791	Mm.392436	NM_133242	ENSMUSG00000027620	Rbm39	1500012C14Rik|2310040E03Rik|B330012G18Rik|C79248|R75070|Rnpc2|caper	RNA binding motif protein 39	protein-coding
MACS_peak_2220	chr11	117710244	117710500	+	57.89	NA	promoter-TSS (NM_009689)	promoter-TSS (NM_009689)	-179	NM_001012273	11799	Mm.8552	NM_009689	ENSMUSG00000017716	Birc5	AAC-11|Api4|TIAP|survivin40	baculoviral IAP repeat-containing 5	protein-coding
MACS_peak_9965	chr7	118226671	118227026	+	57.88	NA	promoter-TSS (NM_013507)	promoter-TSS (NM_013507)	-304	NM_013507	13690	Mm.185453	NM_013507	ENSMUSG00000005610	Eif4g2	AA589388|DAP-5|E130105L11Rik|Nat1|Natm1|p97	eukaryotic translation initiation factor 4, gamma 2	protein-coding
MACS_peak_2847	chr13	21826845	21827082	+	57.80	NA	promoter-TSS (NM_178210)	promoter-TSS (NM_178210)	-2	NM_178210	319159	Mm.486099	NM_178210		Hist1h4j	-	histone cluster 1, H4j	protein-coding
MACS_peak_11172	chr9	66793861	66794043	+	57.64	NA	promoter-TSS (NM_026467)	promoter-TSS (NM_026467)	27	NM_026467	67941	Mm.30120	NM_026467	ENSMUSG00000036781	Rps27l	1810034D23Rik	ribosomal protein S27-like	protein-coding
MACS_peak_5954	chr2	26766279	26766475	+	57.63	NA	promoter-TSS (NM_001033908)	promoter-TSS (NM_001033908)	50	NM_013721	27176	Mm.328601	NM_013721	ENSMUSG00000062647	Rpl7a	Surf3	ribosomal protein L7A	protein-coding
MACS_peak_4340	chr16	38452783	38453060	+	57.62	NA	promoter-TSS (NM_007414)	promoter-TSS (NM_007414)	-152	NM_007414	11544	Mm.20047	NM_007414	ENSMUSG00000002844	Adprh	Arh1	ADP-ribosylarginine hydrolase	protein-coding
MACS_peak_9686	chr7	52781419	52781821	+	57.51	NA	promoter-TSS (NM_148927)	promoter-TSS (NM_148927)	18	NM_008654	17872	Mm.4048	NM_008654	ENSMUSG00000040435	Ppp1r15a	9630030H21|Gadd34|Myd116	protein phosphatase 1, regulatory (inhibitor) subunit 15A	protein-coding
MACS_peak_4865	chr17	46909329	46909510	+	57.51	NA	promoter-TSS (NM_025966)	promoter-TSS (NM_025966)	-165	NM_025966	67101	Mm.358702	NM_025966	ENSMUSG00000062619	2310039H08Rik	-	RIKEN cDNA 2310039H08 gene	protein-coding
MACS_peak_1702	chr11	74537712	74538156	+	57.48	NA	promoter-TSS (NM_013625)	promoter-TSS (NM_013625)	-48	NM_013625	18472	Mm.397111	NM_013625	ENSMUSG00000020745	Pafah1b1	LIS-1|Lis1|MMS10-U|Mdsh|Ms10u|Pafaha	platelet-activating factor acetylhydrolase, isoform 1b, subunit 1	protein-coding
MACS_peak_2420	chr12	55304688	55304867	+	57.48	NA	promoter-TSS (NM_028133)	promoter-TSS (NM_028133)	84	NM_028133	112407	Mm.133037	NM_028133	ENSMUSG00000035105	Egln3	2610021G09Rik|AI505553|AI648162|Hif-p4h-3|Phd3|SM-20	egl-9 family hypoxia-inducible factor 3	protein-coding
MACS_peak_8989	chr6	72364284	72364492	+	57.44	NA	promoter-TSS (NM_019802)	promoter-TSS (NM_019802)	86	NM_019802	56316	Mm.19937	NM_019802	ENSMUSG00000053460	Ggcx	-	gamma-glutamyl carboxylase	protein-coding
MACS_peak_4975	chr17	71351415	71351609	+	57.43	NA	5' UTR (NM_026064, exon 1 of 4)	5' UTR (NM_026064, exon 1 of 4)	361	NM_026064	67268	Mm.489605	NM_026064	ENSMUSG00000024048	Myl12a	2900073G15Rik|AI838292|C80200	myosin, light chain 12A, regulatory, non-sarcomeric	protein-coding
MACS_peak_8598	chr5	130647333	130647579	+	57.43	NA	promoter-TSS (NM_001199059)	promoter-TSS (NM_001199059)	-233	NM_001199059	56715	Mm.288639	NM_019983	ENSMUSG00000025340	Rabgef1	Rab5ef|Rabex5|Rin2	RAB guanine nucleotide exchange factor (GEF) 1	protein-coding
MACS_peak_910	chr10	76576254	76576496	+	57.43	NA	promoter-TSS (NM_001109991)	promoter-TSS (NM_001109991)	75	NM_001109991	12822	Mm.4352	NM_009929	ENSMUSG00000001435	Col18a1	-	collagen, type XVIII, alpha 1	protein-coding
MACS_peak_11397	chr9	108166371	108166564	+	57.43	NA	promoter-TSS (NM_010017)	promoter-TSS (NM_010017)	-178	NM_001276486	13138	Mm.7524	NM_010017		Dag1	D9Wsu13e|DG|Dp427|Dp71	dystroglycan 1	protein-coding
MACS_peak_8663	chr5	138628321	138628475	+	57.43	NA	promoter-TSS (NM_009315)	promoter-TSS (NM_009315)	16	NM_009315	21343	Mm.248517	NM_009315	ENSMUSG00000036980	Taf6	80kDa|AW549759|TAF(II)80|TAFII70|Taf2e|p80	TAF6 RNA polymerase II, TATA box binding protein (TBP)-associated factor	protein-coding
MACS_peak_796	chr10	42941014	42941240	+	57.43	NA	promoter-TSS (NM_001168289)	promoter-TSS (NM_001168289)	-165	NM_027772	71365	Mm.490430	NM_027772	ENSMUSG00000038240	Pdss2	5430420P03Rik|Gm60|Plmp|kd|mDLP1	prenyl (solanesyl) diphosphate synthase, subunit 2	protein-coding
MACS_peak_6649	chr2	172847356	172847548	+	57.43	NA	promoter-TSS (NM_019547)	promoter-TSS (NM_019547)	49	NM_019547	56190	Mm.485782	NM_019547	ENSMUSG00000027510	Rbm38	Rnpc1|Seb4|Seb4l	RNA binding motif protein 38	protein-coding
MACS_peak_8796	chr6	8459360	8459545	+	57.41	NA	promoter-TSS (NR_040452)	promoter-TSS (NR_040452)	-148	NM_133236	170772	Mm.210787	NM_133236	ENSMUSG00000029638	Glcci1	2310047L21Rik|A130036A18Rik|Fam117c|Gig18|Tssn1	glucocorticoid induced transcript 1	protein-coding
MACS_peak_8011	chr4	155158488	155158750	+	57.38	NA	exon (NM_001033394, exon 2 of 2)	exon (NM_001033394, exon 2 of 2)	1364	NM_001033394	320587	Mm.384382	NM_001033394	ENSMUSG00000073680	Tmem88b	A230069A22Rik	transmembrane protein 88B	protein-coding
MACS_peak_7151	chr3	122687198	122687433	+	57.37	NA	promoter-TSS (NM_133857)	promoter-TSS (NM_133857)	50	NM_133857	99526	Mm.491248	NM_133857	ENSMUSG00000039701	Usp53	AA939927|Phxr3|Sp6|mKIAA1350	ubiquitin specific peptidase 53	protein-coding
MACS_peak_6424	chr2	131088179	131088392	+	57.37	NA	promoter-TSS (NM_153501)	promoter-TSS (NM_153501)	49	NM_153501	74450	Mm.101264	NM_153501	ENSMUSG00000037514	Pank2	4933409I19Rik|AI642621	pantothenate kinase 2	protein-coding
MACS_peak_2263	chr11	120209622	120209868	+	57.37	NA	promoter-TSS (NM_009609)	promoter-TSS (NM_009609)	53	NM_009609	11465	Mm.196173	NM_009609	ENSMUSG00000062825	Actg1	AL023024|Actg|Actl|E51	actin, gamma, cytoplasmic 1	protein-coding
MACS_peak_6757	chr3	35652997	35653223	+	57.37	NA	promoter-TSS (NM_029570)	promoter-TSS (NM_029570)	50	NM_029570	76295	Mm.239416	NM_029570	ENSMUSG00000037400	Atp11b	1110019I14Rik|ATPIF|ATPIR|mKIAA0956	ATPase, class VI, type 11B	protein-coding
MACS_peak_8538	chr5	123632574	123632908	+	57.37	NA	promoter-TSS (NM_008277)	promoter-TSS (NM_008277)	-46	NM_008277	15445	Mm.439709	NM_008277	ENSMUSG00000029445	Hpd	Fla|Flp|Hppd|Laf	4-hydroxyphenylpyruvic acid dioxygenase	protein-coding
MACS_peak_3201	chr13	113590967	113591205	+	57.35	NA	5' UTR (NM_008903, exon 1 of 6)	5' UTR (NM_008903, exon 1 of 6)	101	NM_008247	19012	Mm.317186	NM_008247	ENSMUSG00000021759	Ppap2a	Hic53|Hpic53|LPP-1|LPP1|PAP-2a|PAP2-alpha|PAP2a|mPAP	phosphatidic acid phosphatase type 2A	protein-coding
MACS_peak_161	chr1	64579374	64579666	+	57.35	NA	5' UTR (NM_009952, exon 1 of 9)	5' UTR (NM_009952, exon 1 of 9)	142	NM_001037726	12912	Mm.422634	NM_009952	ENSMUSG00000025958	Creb1	2310001E10Rik|3526402H21Rik|AV083133|Creb|Creb-1	cAMP responsive element binding protein 1	protein-coding
MACS_peak_5161	chr18	32322566	32322890	+	57.30	NA	promoter-TSS (NM_011946)	promoter-TSS (NM_011946)	-15	NM_011946	26405	Mm.211762	NM_011946	ENSMUSG00000024383	Map3k2	9630061B06Rik|AI585793|Mekk2|Mekk2b	mitogen-activated protein kinase kinase kinase 2	protein-coding
MACS_peak_1151	chr10	117282913	117283103	+	57.30	NA	promoter-TSS (NM_024457)	promoter-TSS (NM_024457)	22	NM_024457	215449	Mm.233009	NM_024457	ENSMUSG00000052681	Rap1b	2810443E11Rik	RAS related protein 1b	protein-coding
MACS_peak_6239	chr2	93302446	93302650	+	57.26	NA	promoter-TSS (NM_001271461)	promoter-TSS (NM_001271461)	111	NM_001271430	12521	Mm.4261	NM_007656	ENSMUSG00000027215	Cd82	AA682076|AL023070|C33|IA4|Kai1|Tspan27	CD82 antigen	protein-coding
MACS_peak_10096	chr7	139767875	139768080	+	57.19	NA	intron (NM_016978, intron 1 of 9)	CpG	104	NM_016978	18242	Mm.13694	NM_016978	ENSMUSG00000030934	Oat	AI194874	ornithine aminotransferase	protein-coding
MACS_peak_9963	chr7	118172467	118172635	+	57.15	NA	promoter-TSS (NM_009431)	promoter-TSS (NM_009431)	86	NM_009431	22083	Mm.255858	NM_009431	ENSMUSG00000005609	Ctr9	AA409336|Sh2bp1|Tsbp|Tsp|mKIAA0155	Ctr9, Paf1/RNA polymerase II complex component, homolog (S. cerevisiae)	protein-coding
MACS_peak_142	chr1	59293925	59294091	+	57.07	NA	promoter-TSS (NM_028717)	promoter-TSS (NM_028717)	67	NM_028717	74018	Mm.272078	NM_028717	ENSMUSG00000026024	Als2	3222402C23Rik|9430073A21Rik|Als2cr6|Alsin|mKIAA1563	amyotrophic lateral sclerosis 2 (juvenile)	protein-coding
MACS_peak_2915	chr13	34169733	34169931	+	57.04	NA	promoter-TSS (NM_009450)	promoter-TSS (NM_009450)	45	NM_009450	22151	Mm.422827	NM_009450	ENSMUSG00000058672	Tubb2a	M(beta)2|Tubb2	tubulin, beta 2A class IIA	protein-coding
MACS_peak_4870	chr17	47027517	47027744	+	57.04	NA	promoter-TSS (NM_178385)	promoter-TSS (NM_178385)	60	NM_178385	72726	Mm.33780	NM_178385	ENSMUSG00000036430	Tbcc	2810055C19Rik	tubulin-specific chaperone C	protein-coding
MACS_peak_1071	chr10	92623127	92623320	+	57.04	NA	promoter-TSS (NM_146239)	promoter-TSS (NM_146239)	-398	NM_146239	237459	Mm.217404	NM_146239	ENSMUSG00000020015	Cdk17	6430598J10Rik|Pctk2	cyclin-dependent kinase 17	protein-coding
MACS_peak_6331	chr2	121275057	121275275	+	57.04	NA	non-coding (NR_110986, exon 1 of 3)	non-coding (NR_110986, exon 1 of 3)	232	NR_110986	378702	Mm.262252	NM_011354	ENSMUSG00000074884	Serf2	C80083|Msmac1l|m4F5rel	small EDRK-rich factor 2	protein-coding
MACS_peak_1743	chr11	77326987	77327138	+	57.04	NA	promoter-TSS (NM_001024920)	promoter-TSS (NM_001024920)	-287	NM_001024920	216964	Mm.341211	NM_001024920	ENSMUSG00000044328	Trp53i13	2410019G02Rik|Tp53i13	transformation related protein 53 inducible protein 13	protein-coding
MACS_peak_3186	chr13	108680180	108680360	+	57.04	NA	promoter-TSS (NM_145456)	promoter-TSS (NM_145456)	-12	NM_145456	67263	Mm.490418	NM_145456	ENSMUSG00000032846	Zswim6	2900036G02Rik|mKIAA1577	zinc finger SWIM-type containing 6	protein-coding
MACS_peak_5845	chr19	60866400	60866933	+	57.04	NA	promoter-TSS (NM_010123)	promoter-TSS (NM_010123)	-70	NM_010123	13669	Mm.2238	NM_010123	ENSMUSG00000024991	Eif3a	A830012B05Rik|Csma|Eif3|Eif3s10|mKIAA0139	eukaryotic translation initiation factor 3, subunit A	protein-coding
MACS_peak_4138	chr16	11134421	11134752	+	57.01	NA	promoter-TSS (NM_029582)	promoter-TSS (NM_029582)	39	NM_029582	106200	Mm.291015	NM_029582	ENSMUSG00000022498	Txndc11	2810408E11Rik|AI427833|EFP1|Txdc11	thioredoxin domain containing 11	protein-coding
MACS_peak_4689	chr17	29627061	29627313	+	56.96	NA	promoter-TSS (NM_008842)	promoter-TSS (NM_008842)	-803	NM_008842	18712	Mm.405293	NM_008842		Pim1	Pim-1	proviral integration site 1	protein-coding
MACS_peak_403	chr1	136258402	136258808	+	56.96	NA	promoter-TSS (NM_020588)	promoter-TSS (NM_020588)	-29	NM_020588	57439	Mm.393140	NM_020588	ENSMUSG00000042305	Tmem183a	1300007B12Rik|1700020N19Rik|Tmem183	transmembrane protein 183A	protein-coding
MACS_peak_7661	chr4	118905123	118905344	+	56.96	NA	promoter-TSS (NM_001286148)	promoter-TSS (NM_001286148)	96	NM_001012400	230696	Mm.473722	NM_001012400		AU022252	AI450326	expressed sequence AU022252	protein-coding
MACS_peak_5304	chr18	64820561	64820949	+	56.86	NA	promoter-TSS (NM_001001488)	promoter-TSS (NM_001001488)	-101	NM_001001488	54670	Mm.270043	NM_001001488	ENSMUSG00000039529	Atp8b1	AI451886|FIC1|Ic	ATPase, class I, type 8B, member 1	protein-coding
MACS_peak_7206	chr3	138106032	138106287	+	56.86	NA	intron (NM_007410, intron 1 of 8)	CpG	102	NM_007410	11532	Mm.3874	NM_007410	ENSMUSG00000028138	Adh5	Adh-5|Adh3|GSNOR	alcohol dehydrogenase 5 (class III), chi polypeptide	protein-coding
MACS_peak_4460	chr16	95923805	95924159	+	56.82	NA	promoter-TSS (NM_011809)	promoter-TSS (NM_011809)	-32	NM_011809	23872	Mm.290207	NM_011809	ENSMUSG00000022895	Ets2	AU022856|Ets-2	E26 avian leukemia oncogene 2, 3' domain	protein-coding
MACS_peak_7711	chr4	125933804	125933946	+	56.73	NA	promoter-TSS (NM_144941)	promoter-TSS (NM_144941)	-312	NM_001145970	245877	Mm.266716	NM_144941	ENSMUSG00000028849	Map7d1	AV028413|BC019977|Mtap7d1|Parcc1|Rprc1|mKIAA1187	MAP7 domain containing 1	protein-coding
MACS_peak_2125	chr11	106860965	106861121	+	56.73	NA	promoter-TSS (NM_010655)	promoter-TSS (NM_010655)	-204	NM_010655	16647	Mm.12508	NM_010655	ENSMUSG00000018362	Kpna2	2410044B12Rik|IPOA1|PTAC58|Rch1	karyopherin (importin) alpha 2	protein-coding
MACS_peak_1668	chr11	70460310	70460551	+	56.65	NA	promoter-TSS (NM_027445)	promoter-TSS (NM_027445)	111	NM_024211	67863	Mm.296082	NM_024211	ENSMUSG00000014606	Slc25a11	2310022P18Rik|2oxoc	solute carrier family 25 (mitochondrial carrier oxoglutarate carrier), member 11	protein-coding
MACS_peak_3131	chr13	93380737	93380968	+	56.65	NA	promoter-TSS (NM_172588)	promoter-TSS (NM_172588)	-241	NM_172588	218442	Mm.297970	NM_172588	ENSMUSG00000021703	Serinc5	A130038L21Rik|AIGP3|C86123|TPO1	serine incorporator 5	protein-coding
MACS_peak_7295	chr4	19502279	19502445	+	56.44	NA	exon (NM_025476, exon 1 of 10)	exon (NM_025476, exon 1 of 10)	149	NM_025476	66302	Mm.440686	NM_025476	ENSMUSG00000028229	Rmdn1	Fam82b|RMD-1	regulator of microtubule dynamics 1	protein-coding
MACS_peak_4399	chr16	76373172	76373493	+	56.34	NA	promoter-TSS (NM_173440)	promoter-TSS (NM_173440)	-38	NM_173440	268903	Mm.74711	NM_173440	ENSMUSG00000048490	Nrip1	6030458L20Rik|8430438I05Rik|9630050P12|AA959574|AW456757|RIP140	nuclear receptor interacting protein 1	protein-coding
MACS_peak_3053	chr13	62989240	62989589	+	56.33	NA	5' UTR (NM_019395, exon 1 of 7)	5' UTR (NM_019395, exon 1 of 7)	228	NM_019395	14121	Mm.423078	NM_019395	ENSMUSG00000069805	Fbp1	Fbp-2|Fbp2|Fbp3	fructose bisphosphatase 1	protein-coding
MACS_peak_4635	chr17	26206532	26206699	+	56.30	NA	promoter-TSS (NM_001162869)	promoter-TSS (NM_001162869)	-493	NM_001162869	215445	Mm.41191	NM_153140	ENSMUSG00000037098	Rab11fip3	Cart1|D030060O14Rik|Rab11-FIP3|mKIAA0665	RAB11 family interacting protein 3 (class II)	protein-coding
MACS_peak_7236	chr3	151856622	151856802	+	56.30	NA	promoter-TSS (NM_025926)	promoter-TSS (NM_025926)	97	NM_025926	67035	Mm.46746	NM_025926	ENSMUSG00000028035	Dnajb4	1700029A20Rik|2010306G19Rik|5730460G06Rik	DnaJ (Hsp40) homolog, subfamily B, member 4	protein-coding
MACS_peak_6102	chr2	44782859	44783114	+	56.30	NA	Intergenic	CpG	-65844	NM_172662	227835	Mm.314312	NM_172662	ENSMUSG00000036890	Gtdc1	E330008O22Rik	glycosyltransferase-like domain containing 1	protein-coding
MACS_peak_4574	chr17	24306215	24306433	+	56.30	NA	promoter-TSS (NM_009729)	promoter-TSS (NM_009729)	16	NR_037854	100039636	Mm.30155	NR_037854	ENSMUSG00000080242	Atp6v0c-ps2	Atp6l-ps2|Gm15487	ATPase, H+ transporting, lysosomal V0 subunit C, pseudogene 2	pseudo
MACS_peak_3796	chr15	76447005	76447276	+	56.30	NA	exon (NM_028064, exon 1 of 12)	exon (NM_028064, exon 1 of 12)	142	NM_028064	72027	Mm.276829	NM_028064	ENSMUSG00000063354	Slc39a4	1600025H15Rik|AU041686|AWMS2|ZIP4	solute carrier family 39 (zinc transporter), member 4	protein-coding
MACS_peak_652	chr1	192849954	192850125	+	56.30	NA	promoter-TSS (NM_001081259)	promoter-TSS (NM_001081259)	30	NM_001081259	226844	Mm.134053	NM_001081259	ENSMUSG00000066595	Mfsd7b	9630055N22Rik|FLVCR|Flvcr1	major facilitator superfamily domain containing 7B	protein-coding
MACS_peak_3454	chr14	58416971	58417163	+	56.27	NA	promoter-TSS (NM_001142441)	promoter-TSS (NM_001142441)	12	NM_001142441	100041953	Mm.290178	NM_001142441	ENSMUSG00000061104	Gm10094	ENSMUSG00000061104	predicted gene 10094	protein-coding
MACS_peak_7680	chr4	122563456	122563683	+	56.27	NA	promoter-TSS (NM_001301067)	promoter-TSS (NM_001301067)	-269	NM_001301067	12331	Mm.8687	NM_007598	ENSMUSG00000028656	Cap1	-	CAP, adenylate cyclase-associated protein 1 (yeast)	protein-coding
MACS_peak_10781	chr8	125778147	125778356	+	56.05	NA	promoter-TSS (NM_028200)	promoter-TSS (NM_028200)	156	NM_020497	57247	Mm.379084	NM_020497	ENSMUSG00000001065	Zfp276	AW048709|D8Ertd370e|D8Ertd377e|Znf276	zinc finger protein (C2H2 type) 276	protein-coding
MACS_peak_5390	chr19	3323269	3323597	+	56.05	NA	intron (NM_013495, intron 1 of 18)	CpG	132	NM_013495	12894	Mm.18522	NM_013495	ENSMUSG00000024900	Cpt1a	C730027G07|CPTI|Cpt1	carnitine palmitoyltransferase 1a, liver	protein-coding
MACS_peak_9673	chr7	52409468	52409927	+	56.05	NA	promoter-TSS (NM_029406)	promoter-TSS (NM_029406)	24	NM_001278207	68845	Mm.181689	NM_029406	ENSMUSG00000003423	Pih1d1	1110061L23Rik|4933413A04Rik|Nop17	PIH1 domain containing 1	protein-coding
MACS_peak_1710	chr11	74739578	74739737	+	56.05	NA	promoter-TSS (NM_001163311)	promoter-TSS (NM_001163311)	283	NM_001002764	103677	Mm.288460	NM_001002764	ENSMUSG00000038290	Smg6	AI317223|AU041178	Smg-6 homolog, nonsense mediated mRNA decay factor (C. elegans)	protein-coding
MACS_peak_2923	chr13	35085763	35086019	+	56.05	NA	exon (NM_001110331, exon 1 of 10)	exon (NM_001110331, exon 1 of 10)	122	NM_011868	23986	Mm.491141	NM_011868	ENSMUSG00000021417	Eci2	Acbd2|Drs1|Hca88|Peci	enoyl-Coenzyme A delta isomerase 2	protein-coding
MACS_peak_2018	chr11	100943903	100944093	+	56.05	NA	promoter-TSS (NM_027896)	promoter-TSS (NM_027896)	59	NM_027896	71743	Mm.182271	NM_027896	ENSMUSG00000001755	Coasy	1300003G02Rik|Dpck|Ppat|Ukr1	Coenzyme A synthase	protein-coding
MACS_peak_7594	chr4	109339425	109339632	+	56.05	NA	promoter-TSS (NM_001301368)	promoter-TSS (NM_001301368)	-167	NM_001301368	12580	Mm.1912	NM_007671	ENSMUSG00000028551	Cdkn2c	C77269|INK4c|p18|p18-INK4c|p18-INK6|p18INK4c	cyclin-dependent kinase inhibitor 2C (p18, inhibits CDK4)	protein-coding
MACS_peak_2072	chr11	102417344	102417497	+	56.05	NA	promoter-TSS (NM_001159492)	promoter-TSS (NM_001159492)	52	NM_001159492	237943	Mm.260282	NM_001159492	ENSMUSG00000034621	Gpatch8	5430405G24Rik|AU018890|ENSMUSG00000075516|Fbm1|Gpatc8|mKIAA0553	G patch domain containing 8	protein-coding
MACS_peak_9221	chr6	124690943	124691397	+	56.00	NA	promoter-TSS (NM_013535)	promoter-TSS (NM_013535)	-73	NM_013535	14790	Mm.439877	NM_013535		Grcc10	2310033H05Rik|C10	gene rich cluster, C10 gene	protein-coding
MACS_peak_117	chr1	53841871	53842071	+	55.91	NA	promoter-TSS (NM_133810)	promoter-TSS (NM_133810)	88	NM_133810	98267	Mm.25559	NM_133810	ENSMUSG00000026094	Stk17b	3110009A03Rik|AI120141|Drak2	serine/threonine kinase 17b (apoptosis-inducing)	protein-coding
MACS_peak_131	chr1	58449803	58450123	+	55.91	NA	promoter-TSS (NM_025824)	promoter-TSS (NM_025824)	-17	NM_025824	66882	Mm.21848	NM_025824	ENSMUSG00000051223	Bzw1	1200015E15Rik|mKIAA0005	basic leucine zipper and W2 domains 1	protein-coding
MACS_peak_235	chr1	80337137	80337319	+	55.91	NA	promoter-TSS (NM_016716)	promoter-TSS (NM_016716)	-223	NM_016716	26554	Mm.12665	NM_016716	ENSMUSG00000004364	Cul3	AI467304|AW146203|mKIAA0617	cullin 3	protein-coding
MACS_peak_9994	chr7	125386972	125387201	+	55.89	NA	promoter-TSS (NM_001031814)	promoter-TSS (NM_001031814)	65	NM_001031814	233789	Mm.309053	NM_177180	ENSMUSG00000030655	Smg1	2610207I05Rik|5430435M13Rik|C130002K18Rik|mKIAA0421	SMG1 homolog, phosphatidylinositol 3-kinase-related kinase (C. elegans)	protein-coding
MACS_peak_122	chr1	55145130	55145342	+	55.89	NA	promoter-TSS (NM_010477)	promoter-TSS (NM_010477)	244	NM_008303	15528	Mm.215667	NM_008303	ENSMUSG00000073676	Hspe1	10kDa|Hsp10|mt-cpn10	heat shock protein 1 (chaperonin 10)	protein-coding
MACS_peak_6309	chr2	119420011	119420222	+	55.89	NA	promoter-TSS (NR_015473)	promoter-TSS (NR_015473)	84	NR_015473	66602	Mm.379181	NR_015473	ENSMUSG00000085438	1700020I14Rik	1190006L01Rik|4933437I03Rik|AI451541|AI585852|AW538376|AW558897	RIKEN cDNA 1700020I14 gene	ncRNA
MACS_peak_8246	chr5	65194732	65194932	+	55.88	NA	promoter-TSS (NM_008453)	promoter-TSS (NM_008453)	70	NM_008453	16599	Mm.392759	NM_008453	ENSMUSG00000029178	Klf3	9930027G08Rik|AL024007|Bklf|Tef-2	Kruppel-like factor 3 (basic)	protein-coding
MACS_peak_10895	chr9	21639885	21640063	+	55.86	NA	promoter-TSS (NM_001080940)	promoter-TSS (NM_001080940)	20	NM_001080940	624219	Mm.440264	NM_001080940	ENSMUSG00000047822	Gm6484	Angptl8|EG624219|Rifl	predicted gene 6484	protein-coding
MACS_peak_9064	chr6	87800847	87801087	+	55.86	NA	5' UTR (NM_001109745, exon 1 of 5)	5' UTR (NM_001109745, exon 1 of 5)	133	NM_001109746	12785	Mm.290251	NM_013493	ENSMUSG00000030057	Cnbp	AA408710|Cnbp1|Znf9	cellular nucleic acid binding protein	protein-coding
MACS_peak_11358	chr9	106794748	106794975	+	55.81	NA	promoter-TSS (NM_029103)	promoter-TSS (NM_029103)	-592	NM_029103	74840	Mm.29778	NM_029103	ENSMUSG00000032575	Manf	3230402M22Rik|AA407711|AA408789|AA673178|Armet|D17914|D18Mgi17	mesencephalic astrocyte-derived neurotrophic factor	protein-coding
MACS_peak_3327	chr14	32978908	32979115	+	55.81	NA	promoter-TSS (NM_019744)	promoter-TSS (NM_019744)	36	NM_019744	27057	Mm.371598	NM_019744	ENSMUSG00000056234	Ncoa4	ARA70|Rfg	nuclear receptor coactivator 4	protein-coding
MACS_peak_8705	chr5	143585199	143585355	+	55.80	NA	Intergenic	Intergenic	-6211	NM_001122730	231861	Mm.354649	NM_178242	ENSMUSG00000039477	Tnrc18	BC025631|EG381742|Zfp469	trinucleotide repeat containing 18	protein-coding
MACS_peak_3199	chr13	113253967	113254493	+	55.80	NA	promoter-TSS (NM_010560)	promoter-TSS (NM_010560)	-48	NM_010560	16195	Mm.4364	NM_010560	ENSMUSG00000021756	Il6st	5133400A03Rik|AA389424|BB405851|CD130|D13Ertd699e|gp130	interleukin 6 signal transducer	protein-coding
MACS_peak_8278	chr5	73881795	73881998	+	55.80	NA	promoter-TSS (NM_001190733)	promoter-TSS (NM_001190733)	-369	NM_178896	100737	Mm.220312	NM_178896	ENSMUSG00000051674	Dcun1d4	AI836376	DCN1, defective in cullin neddylation 1, domain containing 4 (S. cerevisiae)	protein-coding
MACS_peak_7293	chr4	19497090	19497280	+	55.80	NA	promoter-TSS (NM_027769)	promoter-TSS (NM_027769)	66	NM_027769	70568	Mm.38390	NM_027769	ENSMUSG00000028228	Cpne3	5430428M23Rik|5730450C07Rik|C85108|CPN3	copine III	protein-coding
MACS_peak_1657	chr11	70053198	70053352	+	55.79	NA	promoter-TSS (NM_173742)	promoter-TSS (NM_173742)	79	NM_173742	52898	Mm.29852	NM_173742	ENSMUSG00000093989	Rnasek	2310033H11Rik|AA571397|D11Bwg0434e	ribonuclease, RNase K	protein-coding
MACS_peak_5250	chr18	49915358	49915567	+	55.73	NA	promoter-TSS (NM_001170960)	promoter-TSS (NM_001170960)	-207	NM_001170960	68857	Mm.96010	NM_026854	ENSMUSG00000024505	Dtwd2	1190002H09Rik|8030470C17Rik|AI414673|BB115449	DTW domain containing 2	protein-coding
MACS_peak_6443	chr2	136505520	136505707	+	55.65	NA	Intergenic	Intergenic	-33573	NM_011428	20614	Mm.45953	NM_011428	ENSMUSG00000027273	Snap25	Bdr|GENA70|SNAP-25|SUP|sp	synaptosomal-associated protein 25	protein-coding
MACS_peak_7908	chr4	141430686	141430883	+	55.65	NA	promoter-TSS (NM_025994)	promoter-TSS (NM_025994)	51	NM_025994	27984	Mm.395598	NM_025994	ENSMUSG00000040659	Efhd2	2600015J22Rik|AA408606|D4Wsu27e	EF hand domain containing 2	protein-coding
MACS_peak_1383	chr11	23565791	23566082	+	55.65	NA	promoter-TSS (NM_023651)	promoter-TSS (NM_023651)	-1	NM_023651	72129	Mm.29536	NM_023651	ENSMUSG00000020283	Pex13	2610008O20Rik	peroxisomal biogenesis factor 13	protein-coding
MACS_peak_3304	chr14	31736633	31736792	+	55.65	NA	promoter-TSS (NM_008407)	promoter-TSS (NM_008407)	61	NM_008407	16426	Mm.4517	NM_008407	ENSMUSG00000006522	Itih3	AW108094|Intin3|Itih-3	inter-alpha trypsin inhibitor, heavy chain 3	protein-coding
MACS_peak_5024	chr17	80882188	80882361	+	55.65	NA	Intergenic	Intergenic	-2481	NM_009231	20662	Mm.60975	NM_009231	ENSMUSG00000024241	Sos1	4430401P03Rik|9630010N06|AI449023	son of sevenless homolog 1 (Drosophila)	protein-coding
MACS_peak_5070	chr18	4352825	4353335	+	55.65	NA	promoter-TSS (NM_007746)	promoter-TSS (NM_007746)	-129	NM_007746	26410	Mm.3275	NM_007746	ENSMUSG00000024235	Map3k8	Cot|Cot/Tpl2|Est|Estf|Tpl-2|Tpl2|c-COT	mitogen-activated protein kinase kinase kinase 8	protein-coding
MACS_peak_6435	chr2	132403799	132403999	+	55.65	NA	promoter-TSS (NM_001042672)	promoter-TSS (NM_001042672)	85	NM_001291050	74182	Mm.211211	NM_027096	ENSMUSG00000027346	Gpcpd1	2310004G06Rik|2310032D16Rik|AU015213|Gde5|Prei4|mKIAA1434	glycerophosphocholine phosphodiesterase GDE1 homolog (S. cerevisiae)	protein-coding
MACS_peak_6572	chr2	163245078	163245291	+	55.65	NA	promoter-TSS (NM_025699)	promoter-TSS (NM_025699)	22	NM_025699	66680	Mm.25119	NM_025699	ENSMUSG00000035399	Oser1	3230401D17Rik|AI256769|Perit1	oxidative stress responsive serine rich 1	protein-coding
MACS_peak_4738	chr17	34092422	34092667	+	55.61	NA	promoter-TSS (NM_011296)	promoter-TSS (NM_011296)	42	NM_011296	20084	Mm.298745	NM_011296	ENSMUSG00000008668	Rps18	H-2Ke3|H2-Ke3|Ke-3|ke3	ribosomal protein S18	protein-coding
MACS_peak_561	chr1	174078041	174078387	+	55.61	NA	promoter-TSS (NM_153555)	promoter-TSS (NM_153555)	68	NM_153555	98193	Mm.159915	NM_153555	ENSMUSG00000026554	Dcaf8	AA408877|AA433120|AA792214|AU018973|C76055|D1Dau35e|D1Ucla4|H326|Wdr42a	DDB1 and CUL4 associated factor 8	protein-coding
MACS_peak_6005	chr2	30219710	30219902	+	55.51	NA	promoter-TSS (NM_175392)	promoter-TSS (NM_175392)	-49	NM_175392	108958	Mm.254974	NM_175392	ENSMUSG00000026858	Fam73b	5730472N09Rik|AA408683|AI790341|C9orf54|R74766	family with sequence similarity 73, member B	protein-coding
MACS_peak_3820	chr15	77759227	77759454	+	55.50	NA	promoter-TSS (NM_019913)	promoter-TSS (NM_019913)	84	NM_019913	56551	Mm.291917	NM_019913	ENSMUSG00000005354	Txn2	2510006J11Rik|AI788873|Trx2	thioredoxin 2	protein-coding
MACS_peak_6855	chr3	79091071	79091244	+	55.48	NA	Intergenic	CpG	-58141	NM_001142953	100233207	Mm.373801	NM_001142953	ENSMUSG00000091685	Gm17359	-	predicted gene, 17359	protein-coding
MACS_peak_1335	chr11	17059294	17059443	+	55.44	NA	promoter-TSS (NM_024459)	promoter-TSS (NM_024459)	67	NM_024459	19058	Mm.41840	NM_024459	ENSMUSG00000033953	Ppp3r1	CaNB1|Cnb1|MCIP1	protein phosphatase 3, regulatory subunit B, alpha isoform (calcineurin B, type I)	protein-coding
MACS_peak_9966	chr7	118266034	118266477	+	55.38	NA	promoter-TSS (NR_015573)	promoter-TSS (NR_015573)	-66	NR_015573	75479	Mm.381620	NR_015573		1700012D14Rik	-	RIKEN cDNA 1700012D14 gene	ncRNA
MACS_peak_3326	chr14	32972938	32973338	+	55.35	NA	promoter-TSS (NM_001033988)	promoter-TSS (NM_001033988)	65	NM_001033988	27057	Mm.371598	NM_019744	ENSMUSG00000056234	Ncoa4	ARA70|Rfg	nuclear receptor coactivator 4	protein-coding
MACS_peak_3841	chr15	78860945	78861556	+	55.29	NA	promoter-TSS (NM_013847)	promoter-TSS (NM_013847)	-54	NM_013847	26912	Mm.237085	NM_013847	ENSMUSG00000006378	Gcat	AI526977|Kbl	glycine C-acetyltransferase (2-amino-3-ketobutyrate-coenzyme A ligase)	protein-coding
MACS_peak_5342	chr18	74938230	74938466	+	55.15	NA	promoter-TSS (NR_028560)	promoter-TSS (NR_028560)	-239	NR_028560	100217466		NR_028560		Scarna17	MBII-119	small Cajal body-specific RNA 17	ncRNA
MACS_peak_3048	chr13	59924310	59924522	+	55.12	NA	promoter-TSS (NM_153538)	promoter-TSS (NM_153538)	92	NM_153538	214290	Mm.233082	NM_153538	ENSMUSG00000035248	Zcchc6	6030448M23Rik|AA420405	zinc finger, CCHC domain containing 6	protein-coding
MACS_peak_7246	chr3	157587703	157588061	+	55.09	NA	exon (NM_145953, exon 1 of 12)	exon (NM_145953, exon 1 of 12)	145	NM_145953	107869	Mm.28301	NM_145953	ENSMUSG00000028179	Cth	0610010I13Rik|AI314617|BC019483|CSE|Cys3	cystathionase (cystathionine gamma-lyase)	protein-coding
MACS_peak_2812	chr13	12658086	12658284	+	55.01	NA	promoter-TSS (NM_026184)	promoter-TSS (NM_026184)	35	NM_026184	67475	Mm.358706	NM_026184	ENSMUSG00000057069	Ero1lb	1300013B24Rik|1700065B09Rik|AI447560|ero1-beta	ERO1-like beta (S. cerevisiae)	protein-coding
MACS_peak_9238	chr6	125081668	125081853	+	54.94	NA	promoter-TSS (NM_138747)	promoter-TSS (NM_138747)	-141	NM_138747	110109	Mm.29203	NM_138747	ENSMUSG00000038279	Nop2	120kDa|A530002O17|Nol1	NOP2 nucleolar protein	protein-coding
MACS_peak_2453	chr12	60112748	60112950	+	54.80	NA	5' UTR (NM_009147, exon 1 of 20)	5' UTR (NM_009147, exon 1 of 20)	155	NM_009147	20334	Mm.491137	NM_009147	ENSMUSG00000020986	Sec23a	Msec23|Sec23r	SEC23A (S. cerevisiae)	protein-coding
MACS_peak_1688	chr11	72420667	72420973	+	54.73	NA	promoter-TSS (NM_025985)	promoter-TSS (NM_025985)	57	NM_025985	67128	Mm.458052	NM_025985	ENSMUSG00000020794	Ube2g1	2700059C12Rik|AI256795|AU014992|AW552068|D130023C12Rik	ubiquitin-conjugating enzyme E2G 1	protein-coding
MACS_peak_2000	chr11	100333980	100334155	+	54.68	NA	promoter-TSS (NM_172565)	promoter-TSS (NM_172565)	29	NM_172565	217194	Mm.183320	NM_172565	ENSMUSG00000048732	Klhl11	BC011167	kelch-like 11	protein-coding
MACS_peak_1285	chr11	4998924	4999162	+	54.68	NA	promoter-TSS (NM_007968)	promoter-TSS (NM_007968)	48	NM_001283062	14030	Mm.142822	NM_007968	ENSMUSG00000009079	Ewsr1	Ews|Ewsh	Ewing sarcoma breakpoint region 1	protein-coding
MACS_peak_4562	chr17	23700888	23701338	+	54.68	NA	promoter-TSS (NM_001033496)	promoter-TSS (NM_001033496)	80	NM_001033496	449521	Mm.268582	NM_001033496	ENSMUSG00000071256	Zfp213	BC038178|D17Ertd197e	zinc finger protein 213	protein-coding
MACS_peak_1661	chr11	70332656	70332805	+	54.68	NA	promoter-TSS (NM_146020)	promoter-TSS (NM_146020)	19	NM_146020	216871	Mm.22551	NM_146020	ENSMUSG00000046811	Gltpd2	C730027E14Rik	glycolipid transfer protein domain containing 2	protein-coding
MACS_peak_6716	chr3	9833470	9833663	+	54.68	NA	5' UTR (NM_053182, exon 1 of 8)	5' UTR (NM_053182, exon 1 of 8)	113	NM_053182	94212	Mm.23897	NM_053182	ENSMUSG00000027508	Pag1	Cbp|F730007C19Rik|Pag	phosphoprotein associated with glycosphingolipid microdomains 1	protein-coding
MACS_peak_1242	chr10	128026598	128027015	+	54.68	NA	promoter-TSS (NM_010153)	promoter-TSS (NM_010153)	-249	NM_010153	13867	Mm.373043	NM_010153		Erbb3	C76256|Erbb-3|Erbb3r|Her3	v-erb-b2 erythroblastic leukemia viral oncogene homolog 3 (avian)	protein-coding
MACS_peak_7537	chr4	99602042	99602492	+	54.68	NA	exon (NM_028132, exon 1 of 11)	exon (NM_028132, exon 1 of 11)	211	NM_028132	72157	Mm.217764	NM_028132	ENSMUSG00000025791	Pgm2	2610020G18Rik|AA407108|AI098105|Pgm-2|Pgm1	phosphoglucomutase 2	protein-coding
MACS_peak_10145	chr7	148067574	148067771	+	54.66	NA	promoter-TSS (NM_011875)	promoter-TSS (NM_011875)	96	NM_001127351	64384	Mm.244216	NM_022433	ENSMUSG00000025486	Sirt3	2310003L23Rik|AI848213|Sir2l3	sirtuin 3	protein-coding
MACS_peak_8797	chr6	11857273	11857521	+	54.57	NA	promoter-TSS (NM_010886)	promoter-TSS (NM_010886)	49	NM_010886	17992	Mm.415865	NM_010886	ENSMUSG00000029632	Ndufa4	MLRQ	NADH dehydrogenase (ubiquinone) 1 alpha subcomplex, 4	protein-coding
MACS_peak_6739	chr3	28704371	28704555	+	54.57	NA	promoter-TSS (NM_026517)	promoter-TSS (NM_026517)	30	NM_026517	68028	Mm.371630	NM_026517	ENSMUSG00000039221	Rpl22l1	3110001N18Rik|AU041196	ribosomal protein L22 like 1	protein-coding
MACS_peak_781	chr10	41238789	41238970	+	54.55	NA	promoter-TSS (NM_016898)	promoter-TSS (NM_016898)	-427	NM_016898	53599	Mm.269815	NM_016898	ENSMUSG00000019818	Cd164	A115|A24|AA589639|AW540279|MGC-24|MSSP	CD164 antigen	protein-coding
MACS_peak_17	chr1	9934024	9934304	+	54.54	NA	promoter-TSS (NR_024067)	promoter-TSS (NR_024067)	35	NR_024067	73824	Mm.28311	NR_024067	ENSMUSG00000098234	Snhg6	1110008H02Rik	small nucleolar RNA host gene 6	ncRNA
MACS_peak_6367	chr2	126758646	126759047	+	54.54	NA	5' UTR (NM_023220, exon 1 of 15)	5' UTR (NM_023220, exon 1 of 15)	125	NM_023220	66552	Mm.269928	NM_023220	ENSMUSG00000027366	Sppl2a	2010106G01Rik|C130089K23Rik	signal peptide peptidase like 2A	protein-coding
MACS_peak_1782	chr11	78959843	78960034	+	54.54	NA	promoter-TSS (NM_013571)	promoter-TSS (NM_013571)	-82	NM_013571	16706	Mm.4745	NM_013571	ENSMUSG00000018334	Ksr1	AW492498|B-KSR1|D11Bhm183e|D11Bhm184e|Ksr|RSU2|hb	kinase suppressor of ras 1	protein-coding
MACS_peak_4636	chr17	26226935	26227136	+	54.54	NA	promoter-TSS (NM_011933)	promoter-TSS (NM_011933)	74	NM_011933	26378	Mm.292869	NM_011933	ENSMUSG00000036775	Decr2	-	2-4-dienoyl-Coenzyme A reductase 2, peroxisomal	protein-coding
MACS_peak_4358	chr16	46010315	46010559	+	54.54	NA	promoter-TSS (NM_001134480)	promoter-TSS (NM_001134480)	89	NM_001134480	433022	Mm.380993	NM_001134480	ENSMUSG00000087141	Plcxd2	AW494639|EG433022	phosphatidylinositol-specific phospholipase C, X domain containing 2	protein-coding
MACS_peak_1296	chr11	5661953	5662542	+	54.54	NA	promoter-TSS (NR_015577)	promoter-TSS (NR_015577)	94	NR_015577	76508	Mm.260203	NR_015577	ENSMUSG00000083844	2210015D19Rik	1600028I17Rik|AI596465	RIKEN cDNA 2210015D19 gene	ncRNA
MACS_peak_3484	chr14	63863938	63864144	+	54.53	NA	promoter-TSS (NM_008092)	promoter-TSS (NM_008092)	56	NM_008092	14463	Mm.247669	NM_008092	ENSMUSG00000021944	Gata4	Gata-4	GATA binding protein 4	protein-coding
MACS_peak_10179	chr7	149246821	149247129	+	54.53	NA	promoter-TSS (NM_028308)	promoter-TSS (NM_028308)	-36	NM_028308	101513	Mm.53259	NM_028308	ENSMUSG00000025147	Mob2	1110017M21Rik|2700078K21Rik|AI256456|Mmh	MOB kinase activator 2	protein-coding
MACS_peak_1774	chr11	78325733	78325981	+	54.53	NA	promoter-TSS (NM_026389)	promoter-TSS (NM_026389)	59	NM_026389	67811	Mm.197493	NM_026389	ENSMUSG00000001100	Poldip2	1300003F06Rik|Pdip38	polymerase (DNA-directed), delta interacting protein 2	protein-coding
MACS_peak_9262	chr6	128388553	128388698	+	54.46	NA	promoter-TSS (NM_010219)	promoter-TSS (NM_010219)	24	NM_010219	14228	Mm.12758	NM_010219	ENSMUSG00000030357	Fkbp4	59kDa|AL022792|AW208983|FKBP-4|FKBP-52|FKBP52|FKPB52|p59	FK506 binding protein 4	protein-coding
MACS_peak_4240	chr16	22894229	22894531	+	54.46	NA	promoter-TSS (NR_110508)	promoter-TSS (NR_110508)	79	NR_110508	102632430	Mm.474375	NR_110508		LOC102632430	-	uncharacterized LOC102632430	ncRNA
MACS_peak_6353	chr2	125608363	125608532	+	54.46	NA	5' UTR (NM_177608, exon 1 of 18)	5' UTR (NM_177608, exon 1 of 18)	159	NM_177608	70354	Mm.138091	NM_133725	ENSMUSG00000035093	Secisbp2l	3110001I20Rik|AI504340|C630011I23	SECIS binding protein 2-like	protein-coding
MACS_peak_9058	chr6	86959767	86960076	+	54.46	NA	promoter-TSS (NM_001170591)	promoter-TSS (NM_001170591)	91	NM_020045	56748	Mm.23809	NM_020045	ENSMUSG00000029993	Nfu1	0610006G17Rik|CGI-33|Hirip5	NFU1 iron-sulfur cluster scaffold homolog (S. cerevisiae)	protein-coding
MACS_peak_4679	chr17	28938411	28938634	+	54.46	NA	intron (NM_001081315, intron 1 of 12)	CpG	451	NM_001081315	268936	Mm.291877	NM_199061	ENSMUSG00000063952	Brpf3	AI413466|AW493400|mKIAA1286	bromodomain and PHD finger containing, 3	protein-coding
MACS_peak_8169	chr5	34064368	34064579	+	54.45	NA	promoter-TSS (NM_001163216)	promoter-TSS (NM_001163216)	100	NM_001163215	14184	Mm.6904	NM_008010	ENSMUSG00000054252	Fgfr3	CD333|FR3|Fgfr-3|Flg-2|HBGFR|Mfr3|sam3	fibroblast growth factor receptor 3	protein-coding
MACS_peak_5890	chr2	17978623	17978926	+	54.44	NA	promoter-TSS (NR_106115)	promoter-TSS (NR_106115)	-699	NR_106115	102466840		NR_106115	miRBase:MI0024995	Mir7655	mmu-mir-7655	microRNA mir-7655	ncRNA
MACS_peak_8469	chr5	115956674	115956873	+	54.39	NA	promoter-TSS (NM_011223)	promoter-TSS (NM_011223)	88	NM_133915	19303	Mm.18714	NM_011223	ENSMUSG00000029528	Pxn	AW108311|AW123232|Pax	paxillin	protein-coding
MACS_peak_72	chr1	36996315	36996507	+	54.39	NA	promoter-TSS (NM_018872)	promoter-TSS (NM_018872)	-39	NM_018872	56030	Mm.186943	NM_018872	ENSMUSG00000026116	Tmem131	2610524E03Rik|CC28|D1Bwg0491e|Neg|RW1|YR-23|mKIAA0257	transmembrane protein 131	protein-coding
MACS_peak_10909	chr9	22193699	22193865	+	54.39	NA	promoter-TSS (NM_028390)	promoter-TSS (NM_028390)	-132	NM_028390	68743	Mm.282751	NM_028390	ENSMUSG00000036777	Anln	1110037A17Rik|2900037I21Rik|C78101|Scraps	anillin, actin binding protein	protein-coding
MACS_peak_9990	chr7	123586780	123587167	+	54.35	NA	promoter-TSS (NM_011083)	promoter-TSS (NM_011083)	-1	NM_011083	18704	Mm.3810	NM_011083	ENSMUSG00000030660	Pik3c2a	Cpk-m|PI3KC2	phosphatidylinositol 3-kinase, C2 domain containing, alpha polypeptide	protein-coding
MACS_peak_3960	chr15	88919276	88919670	+	54.35	NA	promoter-TSS (NM_027905)	promoter-TSS (NM_027905)	-64	NM_027905	223776	Mm.44763	NM_027905	ENSMUSG00000035757	Selo	1300018J18Rik	selenoprotein O	protein-coding
MACS_peak_159	chr1	64168684	64168938	+	54.35	NA	promoter-TSS (NM_033563)	promoter-TSS (NM_033563)	-848	NM_033563	93691	Mm.29466	NM_033563	ENSMUSG00000025959	Klf7	9830124P08Rik	Kruppel-like factor 7 (ubiquitous)	protein-coding
MACS_peak_5755	chr19	44629783	44629982	+	54.35	NA	promoter-TSS (NM_026061)	promoter-TSS (NM_026061)	23	NM_026061	67264	Mm.2060	NM_026061	ENSMUSG00000025204	Ndufb8	2900010I05Rik|AI987932	NADH dehydrogenase (ubiquinone) 1 beta subcomplex 8	protein-coding
MACS_peak_4652	chr17	27076710	27076875	+	54.35	NA	promoter-TSS (NM_026307)	promoter-TSS (NM_026307)	-309	NM_026307	67675	Mm.439919	NM_026307	ENSMUSG00000024194	Cuta	0610039D01Rik|1810022E02Rik|1810060C03Rik|2700094G22Rik|AI326454	cutA divalent cation tolerance homolog (E. coli)	protein-coding
MACS_peak_2131	chr11	108256578	108256728	+	54.35	NA	promoter-TSS (NM_013475)	promoter-TSS (NM_013475)	42	NM_013475	11818	Mm.2266	NM_013475	ENSMUSG00000000049	Apoh	B2GPI|beta-2-GPI|beta2-GPI	apolipoprotein H	protein-coding
MACS_peak_1455	chr11	51398254	51398455	+	54.35	NA	promoter-TSS (NM_028398)	promoter-TSS (NM_028398)	95	NM_028398	72947	Mm.256875	NM_028398		Phykpl	2900006B13Rik|Agxt2l2	5-phosphohydroxy-L-lysine phospholyase	protein-coding
MACS_peak_657	chr1	193220748	193221022	+	54.35	NA	promoter-TSS (NM_144880)	promoter-TSS (NM_144880)	35	NM_144880	226849	Mm.205569	NM_144880	ENSMUSG00000026626	Ppp2r5a	PR61alpha	protein phosphatase 2, regulatory subunit B', alpha	protein-coding
MACS_peak_5774	chr19	46226968	46227134	+	54.33	NA	promoter-TSS (NM_178930)	promoter-TSS (NM_178930)	3	NM_178930	107338	Mm.271620	NM_178930	ENSMUSG00000025224	Gbf1	1700083E03Rik|AI035702|AW049900|mKIAA0248	golgi-specific brefeldin A-resistance factor 1	protein-coding
MACS_peak_3355	chr14	46008257	46008518	+	54.22	NA	promoter-TSS (NM_019425)	promoter-TSS (NM_019425)	84	NM_019425	54342	Mm.312945	NM_019425	ENSMUSG00000037722	Gnpnat1	AU017428|AU040593|EMeg32|Gpnat1|Gsnpat	glucosamine-phosphate N-acetyltransferase 1	protein-coding
MACS_peak_130	chr1	58449482	58449680	+	54.22	NA	promoter-TSS (NM_025824)	promoter-TSS (NM_025824)	-399	NM_025824	66882	Mm.21848	NM_025824	ENSMUSG00000051223	Bzw1	1200015E15Rik|mKIAA0005	basic leucine zipper and W2 domains 1	protein-coding
MACS_peak_8740	chr5	145992309	145992768	+	54.15	NA	promoter-TSS (NM_028298)	promoter-TSS (NM_028298)	-46	NM_001083958	72611	Mm.206555	NM_028298	ENSMUSG00000007812	Zfp655	2700038I16Rik|9030409O18Rik|mKIAA4222	zinc finger protein 655	protein-coding
MACS_peak_3095	chr13	74146691	74147037	+	54.15	NA	promoter-TSS (NM_182839)	promoter-TSS (NM_182839)	-3	NM_182839	72948	Mm.39752	NM_182839	ENSMUSG00000021573	Tppp	2900041A09Rik|AI849835	tubulin polymerization promoting protein	protein-coding
MACS_peak_10306	chr8	35040164	35040468	+	54.14	NA	promoter-TSS (NM_001286168)	promoter-TSS (NM_001286168)	19	NM_019733	19663	Mm.323997	NM_019733	ENSMUSG00000031586	Rbpms	2010300K22Rik|2700019M19Rik|AU017537|RBP-MS|hermes	RNA binding protein gene with multiple splicing	protein-coding
MACS_peak_6259	chr2	103406418	103406626	+	54.11	NA	promoter-TSS (NM_178890)	promoter-TSS (NM_178890)	55	NM_178890	99382	Mm.35850	NM_178890	ENSMUSG00000032724	Abtb2	AW539457|BPOZ-2	ankyrin repeat and BTB (POZ) domain containing 2	protein-coding
MACS_peak_4137	chr16	10993045	10993268	+	54.03	NA	promoter-TSS (NM_019980)	promoter-TSS (NM_019980)	58	NM_019980	56722	Mm.294753	NM_019980	ENSMUSG00000022500	Litaf	3222402J11Rik|C85531|N4WBP3|TBX1	LPS-induced TN factor	protein-coding
MACS_peak_658	chr1	193221201	193221466	+	53.98	NA	promoter-TSS (NM_144880)	promoter-TSS (NM_144880)	-413	NM_144880	226849	Mm.205569	NM_144880	ENSMUSG00000026626	Ppp2r5a	PR61alpha	protein phosphatase 2, regulatory subunit B', alpha	protein-coding
MACS_peak_4302	chr16	32914154	32914342	+	53.89	NA	promoter-TSS (NM_001081255)	promoter-TSS (NM_001081255)	62	NM_001081255	70144	Mm.491178	NM_001081255	ENSMUSG00000022801	Lrch3	2210409B11Rik|AW215594|Gm1742	leucine-rich repeats and calponin homology (CH) domain containing 3	protein-coding
MACS_peak_4733	chr17	33961304	33961709	+	53.89	NA	promoter-TSS (NM_016844)	promoter-TSS (NM_016844)	-11	NR_103515	66416	Mm.29513	NM_023202	ENSMUSG00000041881	Ndufa7	14.5kDa|2400007M02Rik|CI-B14.5a	NADH dehydrogenase (ubiquinone) 1 alpha subcomplex, 7 (B14.5a)	protein-coding
MACS_peak_2471	chr12	70284912	70285330	+	53.89	NA	promoter-TSS (NM_025589)	promoter-TSS (NM_025589)	-24	NM_146035	217664	Mm.206642	NM_146035	ENSMUSG00000043998	Mgat2	AA407964|CDGS2|GLCNACTII|GNT-II|GNT2	mannoside acetylglucosaminyltransferase 2	protein-coding
MACS_peak_3725	chr15	58765125	58765470	+	53.88	NA	promoter-TSS (NM_023172)	promoter-TSS (NM_023172)	-12	NM_175151	69694	Mm.383230	NM_175151	ENSMUSG00000050891	Tatdn1	2310079P03Rik|CDA11	TatD DNase domain containing 1	protein-coding
MACS_peak_4704	chr17	31774252	31774405	+	53.86	NA	promoter-TSS (NM_178224)	promoter-TSS (NM_178224)	-178	NM_178224	12411	Mm.206417	NM_144855	ENSMUSG00000024039	Cbs	AI047524|AI303044|HIP4	cystathionine beta-synthase	protein-coding
MACS_peak_1314	chr11	6174716	6174913	+	53.79	NA	promoter-TSS (NM_134020)	promoter-TSS (NM_134020)	26	NM_134020	103694	Mm.254495	NM_134020	ENSMUSG00000004394	Tmed4	1110014L17Rik|AI326346	transmembrane emp24 protein transport domain containing 4	protein-coding
MACS_peak_7308	chr4	28740276	28740441	+	53.74	NA	promoter-TSS (NM_001122889)	promoter-TSS (NM_001122889)	63	NM_001122889	13841	Mm.257266	NM_010141	ENSMUSG00000028289	Epha7	Cek11|Ebk|Ehk3|Hek11|Mdk1	Eph receptor A7	protein-coding
MACS_peak_2515	chr12	76919275	76919438	+	53.66	NA	promoter-TSS (NM_001005510)	promoter-TSS (NM_001005510)	51	NM_001005510	319565	Mm.26652	NM_001005510	ENSMUSG00000063450	Syne2	6820443O06Rik|AW546258|D12Ertd777e|NUA|Nesp2g|mKIAA1011	spectrin repeat containing, nuclear envelope 2	protein-coding
MACS_peak_8549	chr5	124380545	124380864	+	53.64	NA	promoter-TSS (NM_001134767)	promoter-TSS (NM_001134767)	6	NM_001134767	208908	Mm.243679	NM_001134767	ENSMUSG00000061882	Ccdc62	AI661708|Gm150	coiled-coil domain containing 62	protein-coding
MACS_peak_4177	chr16	17452051	17452234	+	53.63	NA	promoter-TSS (NM_007764)	promoter-TSS (NM_007764)	64	NM_007764	12929	Mm.21048	NM_007764		Crkl	1110025F07Rik|AA589403|AI325100|Crkol	v-crk sarcoma virus CT10 oncogene homolog (avian)-like	protein-coding
MACS_peak_6973	chr3	94497452	94497665	+	53.57	NA	promoter-TSS (NM_019414)	promoter-TSS (NM_019414)	63	NM_019414	20342	Mm.225405	NM_019414	ENSMUSG00000068877	Selenbp2	AP56|Lpsb2	selenium binding protein 2	protein-coding
MACS_peak_8625	chr5	136254470	136254666	+	53.54	NA	promoter-TSS (NM_008617)	promoter-TSS (NM_008617)	49	NM_008617	17448	Mm.297096	NM_008617	ENSMUSG00000019179	Mdh2	MDH|Mdh-2|Mor-1|Mor1	malate dehydrogenase 2, NAD (mitochondrial)	protein-coding
MACS_peak_1857	chr11	86571328	86571743	+	53.54	NA	promoter-TSS (NM_001003908)	promoter-TSS (NM_001003908)	-541	NM_001003908	67300	Mm.254588	NM_001003908	ENSMUSG00000047126	Cltc	3110065L21Rik|CHC|R74732	clathrin, heavy polypeptide (Hc)	protein-coding
MACS_peak_2276	chr11	120434690	120434899	+	53.54	NA	promoter-TSS (NM_011032)	promoter-TSS (NM_011032)	-544	NM_011032	18453	Mm.16660	NM_011032	ENSMUSG00000025130	P4hb	ERp59|PDI|Pdia1|Thbp	prolyl 4-hydroxylase, beta polypeptide	protein-coding
MACS_peak_3035	chr13	56623801	56624009	+	53.54	NA	promoter-TSS (NM_178674)	promoter-TSS (NM_178674)	36	NM_178674	213311	Mm.233904	NM_178674	ENSMUSG00000035509	Fbxl21	D630045D17Rik|FBL3B|FBXL3B|Psttm	F-box and leucine-rich repeat protein 21	protein-coding
MACS_peak_9340	chr6	149136982	149137259	+	53.54	NA	intron (NM_001113424, intron 1 of 6)	intron (NM_001113424, intron 1 of 6)	114	NM_001113424	232566	Mm.209147	NM_001113424	ENSMUSG00000068250	Amn1	5830467E07Rik|A230083D09|C730024G19Rik	antagonist of mitotic exit network 1	protein-coding
MACS_peak_830	chr10	59740409	59740581	+	53.49	NA	exon (NM_001146122, exon 1 of 14)	exon (NM_001146122, exon 1 of 14)	119	NM_001146121	19156	Mm.277498	NM_011179	ENSMUSG00000004207	Psap	AI037048|SGP-1	prosaposin	protein-coding
MACS_peak_726	chr10	20032227	20032460	+	53.47	NA	promoter-TSS (NM_001025393)	promoter-TSS (NM_001025393)	68	NM_001025393	72567	Mm.294783	NM_153787	ENSMUSG00000037608	Bclaf1	2610102K23Rik|2700025J07Rik|2810454G14Rik|5730534O06Rik|AI450190|AW556225|Btf|mKIAA0164	BCL2-associated transcription factor 1	protein-coding
MACS_peak_4604	chr17	24986884	24987291	+	53.42	NA	promoter-TSS (NM_001159626)	promoter-TSS (NM_001159626)	160	NM_023480	68636	Mm.347964	NM_023480	ENSMUSG00000045316	Fahd1	1110025H10Rik|AV002085	fumarylacetoacetate hydrolase domain containing 1	protein-coding
MACS_peak_8601	chr5	130731183	130731416	+	53.42	NA	promoter-TSS (NM_023248)	promoter-TSS (NM_023248)	33	NM_023248	66711	Mm.280484	NM_023248	ENSMUSG00000025337	Sbds	4733401P19Rik|AI836084|CGI-97|SDS	Shwachman-Bodian-Diamond syndrome homolog (human)	protein-coding
MACS_peak_3627	chr15	7090470	7090643	+	53.42	NA	promoter-TSS (NM_013584)	promoter-TSS (NM_013584)	14	NM_013584	16880	Mm.149720	NM_013584	ENSMUSG00000054263	Lifr	A230075M04Rik|AW061234|LIF	leukemia inhibitory factor receptor	protein-coding
MACS_peak_6374	chr2	127095908	127096102	+	53.39	NA	promoter-TSS (NM_139308)	promoter-TSS (NM_139308)	40	NM_139308	99138	Mm.41271	NM_139308	ENSMUSG00000027367	Stard7	AI852671|AL022671|AW544915	START domain containing 7	protein-coding
MACS_peak_8336	chr5	92512617	92512805	+	53.34	NA	promoter-TSS (NM_001080797)	promoter-TSS (NM_001080797)	50	NM_011816	23881	Mm.290530	NM_011816	ENSMUSG00000029405	G3bp2	AA409541|E430034L04Rik|G3BP|mKIAA0660	GTPase activating protein (SH3 domain) binding protein 2	protein-coding
MACS_peak_6393	chr2	129024484	129024708	+	53.32	NA	promoter-TSS (NM_001159593)	promoter-TSS (NM_001159593)	87	NM_001159593	20515	Mm.272675	NM_015747	ENSMUSG00000027397	Slc20a1	AI607883|Glvr-1|Glvr1	solute carrier family 20, member 1	protein-coding
MACS_peak_10894	chr9	21602813	21603104	+	53.32	NA	promoter-TSS (NM_145611)	promoter-TSS (NM_145611)	32	NM_145611	235041	Mm.257371	NM_145611	ENSMUSG00000032194	Kank2	AI504612|Ankrd25|BC010245	KN motif and ankyrin repeat domains 2	protein-coding
MACS_peak_6799	chr3	52073878	52074148	+	53.32	NA	intron (NM_019739, intron 1 of 2)	intron (NM_019739, intron 1 of 2)	1754	NM_019739	56458	Mm.29891	NM_019739	ENSMUSG00000044167	Foxo1	AI876417|Afxh|FKHR|Fkhr1|Foxo1a	forkhead box O1	protein-coding
MACS_peak_5864	chr2	5816222	5816462	+	53.32	NA	promoter-TSS (NM_021305)	promoter-TSS (NM_021305)	57	NM_021305	57743	Mm.21435	NM_021305	ENSMUSG00000025816	Sec61a2	-	Sec61, alpha subunit 2 (S. cerevisiae)	protein-coding
MACS_peak_1179	chr10	126415379	126415568	+	53.32	NA	promoter-TSS (NM_001113470)	promoter-TSS (NM_001113470)	-300	NM_001113470	52468	Mm.29490	NM_146012	ENSMUSG00000078429	Ctdsp2	AI586070|D10Ertd73e|OS-4|OS4|SCP2	CTD (carboxy-terminal domain, RNA polymerase II, polypeptide A) small phosphatase 2	protein-coding
MACS_peak_1538	chr11	59041554	59041757	+	53.32	NA	promoter-TSS (NM_001130408)	promoter-TSS (NM_001130408)	9	NM_001130408	11840	Mm.371546	NM_007476	ENSMUSG00000048076	Arf1	-	ADP-ribosylation factor 1	protein-coding
MACS_peak_9738	chr7	63217693	63217860	+	53.32	NA	promoter-TSS (NM_001256133)	promoter-TSS (NM_001256133)	87	NM_001256133	93790	Mm.37249	NM_023647	ENSMUSG00000030452	Nipa2	2600017P10Rik|3830408P04Rik|AB041581	non imprinted in Prader-Willi/Angelman syndrome 2 homolog (human)	protein-coding
MACS_peak_1750	chr11	77577429	77577592	+	53.30	NA	Intergenic	Intergenic	-13227	NM_001291213	360013	Mm.341248	NM_011586	ENSMUSG00000000631	Myo18a	MAJN|MyoPDZ|MysPDZ	myosin XVIIIA	protein-coding
MACS_peak_6362	chr2	126533051	126533220	+	53.30	NA	promoter-TSS (NM_001252580)	promoter-TSS (NM_001252580)	71	NM_019729	84092	Mm.272629	NM_019729	ENSMUSG00000027363	Usp8	AI574262|AW557536|Ubpy|mKIAA0055	ubiquitin specific peptidase 8	protein-coding
MACS_peak_11023	chr9	46079465	46080393	+	53.30	NA	TTS (NM_080434)	TTS (NM_080434)	-1218	NM_011752	22687	Mm.17519	NM_011752	ENSMUSG00000032078	Zpr1	AI303781|Zfp259|Znf259	ZPR1 zinc finger	protein-coding
MACS_peak_10639	chr8	108660877	108661102	+	53.30	NA	promoter-TSS (NM_176838)	promoter-TSS (NM_176838)	-115	NM_176838	77411	Mm.183003	NM_176838	ENSMUSG00000084128	Esrp2	9530027K23Rik|Rbm35b	epithelial splicing regulatory protein 2	protein-coding
MACS_peak_8290	chr5	77334385	77334751	+	53.30	NA	promoter-TSS (NM_173765)	promoter-TSS (NM_173765)	-29	NM_173765	231326	Mm.39271	NM_173765	ENSMUSG00000055923	Aasdh	A230062G08Rik|A830035E16|Acsf4|U26	aminoadipate-semialdehyde dehydrogenase	protein-coding
MACS_peak_1245	chr10	128133149	128133343	+	53.30	NA	promoter-TSS (NM_177411)	promoter-TSS (NM_177411)	78	NM_177411	19344	Mm.12815	NM_011229	ENSMUSG00000000711	Rab5b	C030027M18Rik	RAB5B, member RAS oncogene family	protein-coding
MACS_peak_3812	chr15	76734466	76734669	+	53.30	NA	promoter-TSS (NM_012053)	promoter-TSS (NM_012053)	66	NM_012053	26961	Mm.30066	NM_012053	ENSMUSG00000003970	Rpl8	-	ribosomal protein L8	protein-coding
MACS_peak_9647	chr7	51560131	51560331	+	53.06	NA	exon (NM_009131, exon 4 of 4)	exon (NM_009131, exon 4 of 4)	2098	NM_009131	20256	Mm.20428	NM_009131	ENSMUSG00000004473	Clec11a	AW457320|Clecsf3|Scgf	C-type lectin domain family 11, member a	protein-coding
MACS_peak_1272	chr11	4018581	4018792	+	53.06	NA	promoter-TSS (NM_144520)	promoter-TSS (NM_144520)	46	NM_144520	67815	Mm.253922	NM_144520	ENSMUSG00000003585	Sec14l2	1300013M05Rik|Spf|TAP	SEC14-like 2 (S. cerevisiae)	protein-coding
MACS_peak_8420	chr5	110877395	110877563	+	53.06	NA	promoter-TSS (NM_001142642)	promoter-TSS (NM_001142642)	43	NM_001142642	381668	Mm.348782	NM_028596	ENSMUSG00000043323	Fbrsl1	2410025L10Rik|AI467568|Gm1049|mKIAA1545	fibrosin-like 1	protein-coding
MACS_peak_2395	chr12	36883238	36883394	+	53.06	NA	promoter-TSS (NM_146033)	promoter-TSS (NM_146033)	96	NM_025840	66912	Mm.288669	NM_025840	ENSMUSG00000020547	Bzw2	1110001I24Rik|Bdm2|HSPC028	basic leucine zipper and W2 domains 2	protein-coding
MACS_peak_4489	chr17	5492317	5492715	+	53.06	NA	promoter-TSS (NM_146073)	promoter-TSS (NM_146073)	-84	NM_146073	224454	Mm.487663	NM_146073	ENSMUSG00000034265	Zdhhc14	B530001K09Rik|New1cp	zinc finger, DHHC domain containing 14	protein-coding
MACS_peak_2759	chr12	112775996	112776238	+	53.06	NA	promoter-TSS (NM_173363)	promoter-TSS (NM_173363)	-195	NM_178041	217869	Mm.271222	NM_173363	ENSMUSG00000021282	Eif5	2810011H21Rik|D12Ertd549e	eukaryotic translation initiation factor 5	protein-coding
MACS_peak_952	chr10	79712148	79712358	+	53.06	NA	promoter-TSS (NM_029272)	promoter-TSS (NM_029272)	56	NM_029272	75406	Mm.28712	NM_029272	ENSMUSG00000020153	Ndufs7	1010001M04Rik	NADH dehydrogenase (ubiquinone) Fe-S protein 7	protein-coding
MACS_peak_2487	chr12	71328754	71328922	+	53.04	NA	promoter-TSS (NR_045174)	promoter-TSS (NR_045174)	10	NR_045174	414124	Mm.416164	NR_045174	ENSMUSG00000085298	F730035M05Rik	-	RIKEN cDNA F730035M05 gene	ncRNA
MACS_peak_11029	chr9	48303254	48303659	+	53.03	NA	promoter-TSS (NM_001004191)	promoter-TSS (NM_001004191)	8	NM_001004191	434402	Mm.386950	NM_001004191	ENSMUSG00000042293	Gm5617	EG434402	predicted gene 5617	protein-coding
MACS_peak_11543	chrX	10294585	10294849	+	53.01	NA	5' UTR (NM_026524, exon 1 of 2)	5' UTR (NM_026524, exon 1 of 2)	226	NM_001166635	68041	Mm.29429	NM_026524	ENSMUSG00000008035	Mid1ip1	3110038L01Rik|Mig12|S14R	Mid1 interacting protein 1 (gastrulation specific G12-like (zebrafish))	protein-coding
MACS_peak_4760	chr17	34742525	34742945	+	53.01	NA	promoter-TSS (NM_001163379)	promoter-TSS (NM_001163379)	-71	NM_001163379	55979	Mm.8684	NM_018862	ENSMUSG00000034254	Agpat1	1-AGP|1-AGPAT|AW047140	1-acylglycerol-3-phosphate O-acyltransferase 1 (lysophosphatidic acid acyltransferase, alpha)	protein-coding
MACS_peak_7026	chr3	96290621	96291063	+	53.01	NA	Intergenic	CpG	-34613	NM_001256180	329716	Mm.275223	NM_183223	ENSMUSG00000046317	BC107364	D730018G16	cDNA sequence BC107364	protein-coding
MACS_peak_4092	chr15	103196844	103197043	+	53.01	NA	exon (NM_010577, exon 1 of 30)	exon (NM_010577, exon 1 of 30)	236	NM_010577	16402	Mm.16234	NM_010577	ENSMUSG00000000555	Itga5	Cd49e|Fnra|VLA5	integrin alpha 5 (fibronectin receptor alpha)	protein-coding
MACS_peak_11123	chr9	62828567	62828763	+	53.01	NA	promoter-TSS (NM_019663)	promoter-TSS (NM_019663)	21	NM_019663	56469	Mm.431253	NM_019663	ENSMUSG00000032405	Pias1	2900068C24Rik|Ddxbp1|GBP	protein inhibitor of activated STAT 1	protein-coding
MACS_peak_3840	chr15	78858718	78859131	+	53.01	NA	5' UTR (NM_008197, exon 1 of 1)	5' UTR (NM_008197, exon 1 of 1)	282	NM_008197	14958	Mm.24350	NM_008197	ENSMUSG00000096210	H1f0	D130017D06Rik|H1(0)|H1fv	H1 histone family, member 0	protein-coding
MACS_peak_5124	chr18	14941707	14941869	+	52.93	NA	promoter-TSS (NM_001100449)	promoter-TSS (NM_001100449)	34	NM_001100449	72504	Mm.312233	NM_001100449	ENSMUSG00000054321	Taf4b	105kDa|2610524B04Rik|4932409F03Rik|AW987595|TAFII105|Taf2c2	TAF4B RNA polymerase II, TATA box binding protein (TBP)-associated factor	protein-coding
MACS_peak_1581	chr11	61575444	61575612	+	52.92	NA	promoter-TSS (NM_001164242)	promoter-TSS (NM_001164242)	62	NM_144806	212627	Mm.27703	NM_144806	ENSMUSG00000020528	Prpsap2	A230054F23Rik	phosphoribosyl pyrophosphate synthetase-associated protein 2	protein-coding
MACS_peak_366	chr1	133141638	133141818	+	52.92	NA	promoter-TSS (NM_018750)	promoter-TSS (NM_018750)	27	NM_018750	54354	Mm.248291	NM_018750	ENSMUSG00000026430	Rassf5	1300019G20Rik|AU042887|Maxp1|Nore1|Nore1A|Nore1B|Rapl	Ras association (RalGDS/AF-6) domain family member 5	protein-coding
MACS_peak_8049	chr5	9100504	9100833	+	52.90	NA	promoter-TSS (NM_001081029)	promoter-TSS (NM_001081029)	-69	NM_001081029	652925	Mm.439954	NM_001081029	ENSMUSG00000079659	Tmem243	4930420K17Rik|E030031F02Rik	transmembrane protein 243, mitochondrial	protein-coding
MACS_peak_2123	chr11	106782141	106782352	+	52.90	NA	promoter-TSS (NM_025481)	promoter-TSS (NM_025481)	-217	NM_025481	66313	Mm.340955	NM_025481	ENSMUSG00000018363	Smurf2	2810411E22Rik|AI558114|AI649275	SMAD specific E3 ubiquitin protein ligase 2	protein-coding
MACS_peak_4402	chr16	78576781	78576943	+	52.90	NA	promoter-TSS (NM_001252440)	promoter-TSS (NM_001252440)	71	NM_001252438	67102	Mm.37332	NM_025967		D16Ertd472e	1700010I10Rik|2310009O17Rik|E330003K22Rik|Eurl	DNA segment, Chr 16, ERATO Doi 472, expressed	protein-coding
MACS_peak_5406	chr19	4000404	4000739	+	52.89	NA	promoter-TSS (NM_025529)	promoter-TSS (NM_025529)	-9	NM_025529	66387	Mm.259222	NM_025529	ENSMUSG00000024869	Nudt8	2310039H17Rik	nudix (nucleoside diphosphate linked moiety X)-type motif 8	protein-coding
MACS_peak_4769	chr17	35068267	35068486	+	52.87	NA	TTS (NM_023557)	TTS (NM_023557)	178	NM_010893	18010	Mm.8856	NM_010893		Neu1	AA407268|AA407316|Aglp|Apl|Bat-7|Bat7|G9|Map-2|Neu|Neu-1	neuraminidase 1	protein-coding
MACS_peak_2122	chr11	106781881	106782058	+	52.85	NA	promoter-TSS (NM_025481)	promoter-TSS (NM_025481)	60	NM_025481	66313	Mm.340955	NM_025481	ENSMUSG00000018363	Smurf2	2810411E22Rik|AI558114|AI649275	SMAD specific E3 ubiquitin protein ligase 2	protein-coding
MACS_peak_1705	chr11	74645352	74645729	+	52.83	NA	intron (NM_010813, intron 1 of 5)	CpG-2210	1114	NM_010813	17428	Mm.3759	NM_010813	ENSMUSG00000000282	Mnt	Rox|bHLHd3	max binding protein	protein-coding
MACS_peak_9488	chr7	26004717	26004921	+	52.77	NA	promoter-TSS (NM_207677)	promoter-TSS (NM_207677)	59	NM_207677	67379	Mm.280594	NM_026117	ENSMUSG00000054499	Dedd2	2410050E11Rik|FLAME-3	death effector domain-containing DNA binding protein 2	protein-coding
MACS_peak_3685	chr15	37890504	37890779	+	52.69	NA	exon (NM_199476, exon 1 of 9)	exon (NM_199476, exon 1 of 9)	169	NM_199476	382985	Mm.24738	NM_199476	ENSMUSG00000022292	Rrm2b	p53R2	ribonucleotide reductase M2 B (TP53 inducible)	protein-coding
MACS_peak_10891	chr9	21528813	21529036	+	52.69	NA	intron (NM_001252659, intron 1 of 17)	intron (NM_001252659, intron 1 of 17)	904	NM_010700	16835	Mm.3213	NM_010700	ENSMUSG00000032193	Ldlr	Hlb301	low density lipoprotein receptor	protein-coding
MACS_peak_1290	chr11	5420656	5420843	+	52.69	NA	5' UTR (NM_013842, exon 1 of 5)	5' UTR (NM_013842, exon 1 of 5)	105	NM_001271730	22433	Mm.469937	NM_013842	ENSMUSG00000020484	Xbp1	D11Ertd39e|TREB-5|TREB5|XBP-1	X-box binding protein 1	protein-coding
MACS_peak_2597	chr12	86814752	86814974	+	52.60	NA	promoter-TSS (NM_010234)	promoter-TSS (NM_010234)	12	NM_010234	14281	Mm.246513	NM_010234	ENSMUSG00000021250	Fos	D12Rfj1|c-fos|cFos	FBJ osteosarcoma oncogene	protein-coding
MACS_peak_9405	chr7	16507532	16507731	+	52.58	NA	promoter-TSS (NM_009156)	promoter-TSS (NM_009156)	89	NM_009156	20364	Mm.42829	NM_009156	ENSMUSG00000041571	Sepw1	selW	selenoprotein W, muscle 1	protein-coding
MACS_peak_1157	chr10	118676999	118677146	+	52.58	NA	promoter-TSS (NM_027994)	promoter-TSS (NM_027994)	39	NM_027994	71902	Mm.203965	NM_027994	ENSMUSG00000020114	Cand1	2310038O07Rik|6330512O03Rik|AI195005|AI846556|D10Ertd516e|Tp120a|mKIAA0829	cullin associated and neddylation disassociated 1	protein-coding
MACS_peak_5916	chr2	24830740	24830956	+	52.46	NA	promoter-TSS (NM_001031808)	promoter-TSS (NM_001031808)	-230	NM_001031808	107733	Mm.23010	NM_001031808		Mrpl41	MRP-L27|Rpml27	mitochondrial ribosomal protein L41	protein-coding
MACS_peak_1137	chr10	114821959	114822154	+	52.39	NA	promoter-TSS (NM_001033261)	promoter-TSS (NM_001033261)	41	NM_001033261	216345	Mm.207621	NM_001033261	ENSMUSG00000034163	Zfc3h1	BC033596|Ccdc131|Psrc2	zinc finger, C3H1-type containing	protein-coding
MACS_peak_6748	chr3	32295676	32295919	+	52.39	NA	Intergenic	CpG	-31210	NM_009517	22401	Mm.35705	NM_009517	ENSMUSG00000027663	Zmat3	Wig1	zinc finger matrin type 3	protein-coding
MACS_peak_2108	chr11	106134063	106134332	+	52.39	NA	promoter-TSS (NM_001130187)	promoter-TSS (NM_001130187)	89	NM_001130187	83796	Mm.21772	NM_031878	ENSMUSG00000078619	Smarcd2	AW322457|Baf60b	SWI/SNF related, matrix associated, actin dependent regulator of chromatin, subfamily d, member 2	protein-coding
MACS_peak_5993	chr2	29921947	29922099	+	52.34	NA	promoter-TSS (NM_001204875)	promoter-TSS (NM_001204875)	29	NM_001204875	56086	Mm.335942	NM_023871	ENSMUSG00000054766	Set	2610030F17Rik|5730420M11Rik|AA407739|I-2PP2A|StF-IT-1|TAF-I	SET nuclear oncogene	protein-coding
MACS_peak_6253	chr2	102913838	102914064	+	52.30	NA	promoter-TSS (NM_175094)	promoter-TSS (NM_175094)	119	NM_019735	56369	Mm.24772	NM_019735	ENSMUSG00000010911	Apip	APIP2|CGI-29|Mmrp19	APAF1 interacting protein	protein-coding
MACS_peak_11718	chrX	136991110	136991262	+	52.25	NA	promoter-TSS (NM_021463)	promoter-TSS (NM_021463)	44	NM_021463	19139	Mm.287178	NM_021463	ENSMUSG00000031432	Prps1	2310010D17Rik|C76571|C76678|PRS-I|Prps-1	phosphoribosyl pyrophosphate synthetase 1	protein-coding
MACS_peak_4074	chr15	102230227	102230401	+	52.12	NA	Intergenic	Intergenic	-6433	NM_013672	20683	Mm.4618	NM_013672	ENSMUSG00000001280	Sp1	1110003E12Rik|AA450830|AI845540|Sp1-1	trans-acting transcription factor 1	protein-coding
MACS_peak_3094	chr13	73901117	73901291	+	52.12	NA	promoter-TSS (NM_011390)	promoter-TSS (NM_011390)	59	NM_011390	20499	Mm.275800	NM_011390	ENSMUSG00000017756	Slc12a7	AA408796|D13Ertd261e|Kcc4	solute carrier family 12, member 7	protein-coding
MACS_peak_98	chr1	44204711	44204897	+	52.07	NA	5' UTR (NM_011729, exon 1 of 15)	5' UTR (NM_011729, exon 1 of 15)	215	NM_011729	22592	Mm.2213	NM_011729	ENSMUSG00000026048	Ercc5	Xpg	excision repair cross-complementing rodent repair deficiency, complementation group 5	protein-coding
MACS_peak_6718	chr3	10012541	10012681	+	52.07	NA	promoter-TSS (NM_001272097)	promoter-TSS (NM_001272097)	26	NM_001272098	16592	Mm.741	NM_010634	ENSMUSG00000027533	Fabp5	E-FABP|Fabpe|Klbp|PA-FABP|mal1	fatty acid binding protein 5, epidermal	protein-coding
MACS_peak_1577	chr11	61080509	61080674	+	52.07	NA	promoter-TSS (NM_007437)	promoter-TSS (NM_007437)	38	NM_007437	11671	Mm.398221	NM_007437	ENSMUSG00000010025	Aldh3a2	AI194803|Ahd-3|Ahd-3r|Ahd3|Ahd3-r|Aldh4|Aldh4-r|FALDH	aldehyde dehydrogenase family 3, subfamily A2	protein-coding
MACS_peak_945	chr10	79578510	79578696	+	52.03	NA	promoter-TSS (NM_011492)	promoter-TSS (NM_011492)	-678	NM_011492	20869	Mm.44231	NM_011492		Stk11	AA408040|Lkb1|Par-4|R75140|mLKB1	serine/threonine kinase 11	protein-coding
MACS_peak_8345	chr5	93032073	93032242	+	52.03	NA	promoter-TSS (NM_175096)	promoter-TSS (NM_175096)	80	NM_175096	52331	Mm.21965	NM_175096	ENSMUSG00000047963	Stbd1	D530019K15Rik|D5Ertd593e	starch binding domain 1	protein-coding
MACS_peak_2351	chr12	17273352	17273545	+	51.98	NA	promoter-TSS (NM_027959)	promoter-TSS (NM_027959)	47	NM_027959	71853	Mm.222825	NM_027959	ENSMUSG00000020571	Pdia6	1700015E05Rik|AL023058|C77895|CaBP5|P5|Txndc7	protein disulfide isomerase associated 6	protein-coding
MACS_peak_6200	chr2	84901056	84901204	+	51.98	NA	intron (NM_001081260, intron 5 of 11)	intron (NM_001081260, intron 5 of 11)	10513	NM_001081260	228140	Mm.23606	NM_001081260	ENSMUSG00000033955	Tnks1bp1	Tab182|mKIAA1741	tankyrase 1 binding protein 1	protein-coding
MACS_peak_3204	chr13	114408632	114408804	+	51.98	NA	promoter-TSS (NM_130796)	promoter-TSS (NM_130796)	54	NM_130796	170625	Mm.33721	NM_130796	ENSMUSG00000042364	Snx18	Snag1	sorting nexin 18	protein-coding
MACS_peak_11681	chrX	98572561	98572827	+	51.98	NA	promoter-TSS (NM_008124)	promoter-TSS (NM_008124)	18	NM_008124	14618	Mm.21198	NM_008124	ENSMUSG00000047797	Gjb1	AI118175|Cnx32|Cx32|Gjb-1	gap junction protein, beta 1	protein-coding
MACS_peak_4959	chr17	65962755	65962914	+	51.98	NA	promoter-TSS (NM_013933)	promoter-TSS (NM_013933)	61	NM_013933	30960	Mm.266767	NM_013933	ENSMUSG00000024091	Vapa	33kDa|VAP33	vesicle-associated membrane protein, associated protein A	protein-coding
MACS_peak_7829	chr4	134908920	134909117	+	51.98	NA	exon (NM_016799, exon 1 of 18)	exon (NM_016799, exon 1 of 18)	111	NM_016799	51796	Mm.1963	NM_016799	ENSMUSG00000028809	Srrm1	AA407769|POP101|Srm160	serine/arginine repetitive matrix 1	protein-coding
MACS_peak_6702	chr2	181406230	181406395	+	51.96	NA	promoter-TSS (NM_009236)	promoter-TSS (NM_009236)	33	NM_009236	20672	Mm.264904	NM_009236	ENSMUSG00000046470	Sox18	AI385749|Ra|Ragl	SRY (sex determining region Y)-box 18	protein-coding
MACS_peak_10935	chr9	34924512	34924797	+	51.95	NA	promoter-TSS (NM_009178)	promoter-TSS (NM_009178)	-259	NM_009178	20443	Mm.275973	NM_009178	ENSMUSG00000032038	St3gal4	Siat4c	ST3 beta-galactoside alpha-2,3-sialyltransferase 4	protein-coding
MACS_peak_11160	chr9	65907968	65908205	+	51.86	NA	exon (NM_011149, exon 1 of 5)	exon (NM_011149, exon 1 of 5)	110	NM_011149	19035	Mm.335249	NM_011149	ENSMUSG00000032383	Ppib	AA408962|AA553318|AI844835|Cphn-2|Cphn2|CyP-20b	peptidylprolyl isomerase B	protein-coding
MACS_peak_11328	chr9	106073203	106073401	+	51.84	NA	promoter-TSS (NM_029896)	promoter-TSS (NM_029896)	42	NM_029896	77305	Mm.265125	NM_029896	ENSMUSG00000020257	Wdr82	9430077D24Rik|CDW5/WDR82	WD repeat domain containing 82	protein-coding
MACS_peak_3924	chr15	83357233	83357471	+	51.84	NA	promoter-TSS (NM_007546)	promoter-TSS (NM_007546)	60	NM_007546	12124	Mm.267006	NM_007546	ENSMUSG00000016758	Bik	Biklk|Blk|Nbk	BCL2-interacting killer	protein-coding
MACS_peak_8061	chr5	20562033	20562248	+	51.77	NA	promoter-TSS (NM_011203)	promoter-TSS (NM_011203)	-525	NM_011203	19248	Mm.319117	NM_011203	ENSMUSG00000028771	Ptpn12	P19-PTP|PTP-P19|PTP-PEST|PTPG1	protein tyrosine phosphatase, non-receptor type 12	protein-coding
MACS_peak_6334	chr2	121332272	121332436	+	51.77	NA	promoter-TSS (NM_026220)	promoter-TSS (NM_026220)	38	NM_026220	67532	Mm.440764	NM_026220	ENSMUSG00000068479	Mfap1a	4432409M24Rik|Mfap1	microfibrillar-associated protein 1A	protein-coding
MACS_peak_3025	chr13	55694473	55694662	+	51.77	NA	promoter-TSS (NM_026211)	promoter-TSS (NM_026211)	71	NM_026211	67511	Mm.45233	NM_026211	ENSMUSG00000058569	Tmed9	2400003B06Rik	transmembrane emp24 protein transport domain containing 9	protein-coding
MACS_peak_3534	chr14	75132102	75132298	+	51.77	NA	promoter-TSS (NM_016903)	promoter-TSS (NM_016903)	96	NM_016903	13885	Mm.38055	NM_016903	ENSMUSG00000021996	Esd	Es-10|Es10|FGH|sid478	esterase D/formylglutathione hydrolase	protein-coding
MACS_peak_1136	chr10	114821695	114821896	+	51.77	NA	promoter-TSS (NM_001033261)	promoter-TSS (NM_001033261)	-220	NM_001033261	216345	Mm.207621	NM_001033261	ENSMUSG00000034163	Zfc3h1	BC033596|Ccdc131|Psrc2	zinc finger, C3H1-type containing	protein-coding
MACS_peak_6783	chr3	51028381	51028586	+	51.77	NA	5' UTR (NM_009834, exon 1 of 3)	5' UTR (NM_009834, exon 1 of 3)	114	NM_009834	12457	Mm.86541	NM_009834	ENSMUSG00000023087	Ccrn4l	AU043840|Ccr4|nocturnin	CCR4 carbon catabolite repression 4-like (S. cerevisiae)	protein-coding
MACS_peak_4326	chr16	36071550	36071931	+	51.77	NA	promoter-TSS (NM_027342)	promoter-TSS (NM_027342)	-6	NM_198645	381045	Mm.310434	NM_198645	ENSMUSG00000075229	Ccdc58	A930007B11Rik|AI413631	coiled-coil domain containing 58	protein-coding
MACS_peak_5871	chr2	10001873	10002362	+	51.77	NA	promoter-TSS (NM_020615)	promoter-TSS (NM_020615)	20	NM_020615	11949	Mm.12677	NM_020615	ENSMUSG00000025781	Atp5c1	1700094F02Rik	ATP synthase, H+ transporting, mitochondrial F1 complex, gamma polypeptide 1	protein-coding
MACS_peak_4913	chr17	56256807	56257001	+	51.75	NA	promoter-TSS (NM_001077348)	promoter-TSS (NM_001077348)	67	NM_025874	66968	Mm.254985	NM_025874	ENSMUSG00000011305	Plin5	2310076L09Rik|AI415325|AW109675|Lsdp5|MLDP|PAT-1	perilipin 5	protein-coding
MACS_peak_4400	chr16	77013963	77014101	+	51.68	NA	promoter-TSS (NM_013918)	promoter-TSS (NM_013918)	-282	NM_013918	30940	Mm.40986	NM_013918	ENSMUSG00000022867	Usp25	-	ubiquitin specific peptidase 25	protein-coding
MACS_peak_6445	chr2	136942340	136942738	+	51.66	NA	promoter-TSS (NM_013822)	promoter-TSS (NM_013822)	-283	NM_013822	16449	Mm.22398	NM_013822	ENSMUSG00000027276	Jag1	ABE2|Gsfabe2|Htu|Ozz|Ser-1	jagged 1	protein-coding
MACS_peak_5287	chr18	61559865	61560132	+	51.57	NA	promoter-TSS (NM_133249)	promoter-TSS (NM_133249)	87	NM_133249	170826	Mm.415302	NM_133249	ENSMUSG00000033871	Ppargc1b	4631412G21Rik|Perc	peroxisome proliferative activated receptor, gamma, coactivator 1 beta	protein-coding
MACS_peak_8428	chr5	111846186	111846413	+	51.57	NA	promoter-TSS (NM_001081235)	promoter-TSS (NM_001081235)	-887	NM_001081235	433938	Mm.332576	NM_001081235	ENSMUSG00000070576	Mn1	AA003644|AA009236	meningioma 1	protein-coding
MACS_peak_8816	chr6	28211800	28212140	+	51.57	NA	promoter-TSS (NM_001081678)	promoter-TSS (NM_001081678)	-369	NM_001081678	627049	Mm.84441	NM_001081678	ENSMUSG00000039841	Zfp800	AA407452|Znf800	zinc finger protein 800	protein-coding
MACS_peak_11182	chr9	69837051	69837193	+	51.57	NA	promoter-TSS (NM_016787)	promoter-TSS (NM_016787)	-151	NM_016787	12175	Mm.159777	NM_016787		Bnip2	5730523P12Rik|BNIP2beta|Nip21	BCL2/adenovirus E1B interacting protein 2	protein-coding
MACS_peak_4501	chr17	8357831	8358017	+	51.57	NA	promoter-TSS (NM_201230)	promoter-TSS (NM_201230)	-459	NM_001197046	75296	Mm.227250	NM_201230	ENSMUSG00000069135	Fgfr1op	4930553O10Rik|FOP	Fgfr1 oncogene partner	protein-coding
MACS_peak_8160	chr5	33361129	33361349	+	51.57	NA	promoter-TSS (NM_011738)	promoter-TSS (NM_011738)	-226	NM_011738	22629	Mm.332314	NM_011738	ENSMUSG00000018965	Ywhah	-	tyrosine 3-monooxygenase/tryptophan 5-monooxygenase activation protein, eta polypeptide	protein-coding
MACS_peak_11027	chr9	47338374	47338539	+	51.57	NA	promoter-TSS (NM_207676)	promoter-TSS (NM_207676)	21	NM_018770	54725	Mm.234832	NM_018770	ENSMUSG00000032076	Cadm1	2900073G06Rik|3100001I08Rik|AI987920|Bl2|Igsf4|Igsf4a|Necl2|RA175|RA175A|RA175B|RA175C|RA175N|ST17|SgIGSF|SynCam|Tslc1	cell adhesion molecule 1	protein-coding
MACS_peak_2378	chr12	31058067	31058269	+	51.55	NA	promoter-TSS (NM_172951)	promoter-TSS (NM_172951)	72	NM_172951	268534	Mm.279765	NM_172951	ENSMUSG00000020672	Sntg2	2210008K22Rik|9530013L23|BB121248	syntrophin, gamma 2	protein-coding
MACS_peak_7868	chr4	138010201	138010412	+	51.55	NA	promoter-TSS (NM_025451)	promoter-TSS (NM_025451)	-757	NM_025451	66259	Mm.41603	NM_025451	ENSMUSG00000046447	Camk2n1	1810006K23Rik|AI848599|AI891706	calcium/calmodulin-dependent protein kinase II inhibitor 1	protein-coding
MACS_peak_8376	chr5	104183163	104183373	+	51.51	NA	promoter-TSS (NM_133919)	promoter-TSS (NM_133919)	87	NM_133919	17355	Mm.6949	NM_133919	ENSMUSG00000029313	Aff1	9630032B01Rik|AW319193|Af4|Mllt2h|Rob	AF4/FMR2 family, member 1	protein-coding
MACS_peak_8374	chr5	104121400	104121581	+	51.51	NA	Intergenic	CpG	-36739	NM_001163550	74218	Mm.159141	NM_028824	ENSMUSG00000029320	1700016H13Rik	-	RIKEN cDNA 1700016H13 gene	protein-coding
MACS_peak_7818	chr4	134052755	134053090	+	51.51	NA	promoter-TSS (NM_001285849)	promoter-TSS (NM_001285849)	-34	NM_001285849	71904	Mm.142343	NM_027995	ENSMUSG00000037348	Paqr7	2310021M12Rik|AV001994|BB007237|Mpra|PGLP|mPR	progestin and adipoQ receptor family member VII	protein-coding
MACS_peak_9668	chr7	52309407	52309614	+	51.51	NA	3' UTR (NM_022999, exon 7 of 7)	3' UTR (NM_022999, exon 7 of 7)	-1259	NM_175022	233210	Mm.219137	NM_175022	ENSMUSG00000046574	Prr12	6720469B10|BC058674	proline rich 12	protein-coding
MACS_peak_10590	chr8	106772296	106772490	+	51.51	NA	promoter-TSS (NM_021028)	promoter-TSS (NM_021028)	65	NR_045642	57813	Mm.183110	NM_021028	ENSMUSG00000035824	Tk2	AU024611|mt-TK	thymidine kinase 2, mitochondrial	protein-coding
MACS_peak_5283	chr18	61370940	61371224	+	51.46	NA	5' UTR (NM_007885, exon 1 of 4)	5' UTR (NM_007885, exon 1 of 4)	168	NM_007885	13521	Mm.24803	NM_007885		Slc26a2	Dtd|ST-OB	solute carrier family 26 (sulfate transporter), member 2	protein-coding
MACS_peak_11373	chr9	107537563	107537720	+	51.42	NA	promoter-TSS (NM_008138)	promoter-TSS (NM_008138)	32	NM_008138	14678	Mm.196464	NM_008138	ENSMUSG00000032562	Gnai2	C76432|Galphai2|Gia|Gnai-2	guanine nucleotide binding protein (G protein), alpha inhibiting 2	protein-coding
MACS_peak_9201	chr6	120772570	120772774	+	51.42	NA	promoter-TSS (NM_007510)	promoter-TSS (NM_007510)	31	NM_007510	11973	Mm.29045	NM_007510	ENSMUSG00000019210	Atp6v1e1	2410029D23Rik|Atp6e|Atp6e2|Atp6v1e|D6Ertd385e|E2|P31|Vma4	ATPase, H+ transporting, lysosomal V1 subunit E1	protein-coding
MACS_peak_9315	chr6	146526134	146526621	+	51.30	NA	promoter-TSS (NM_026218)	promoter-TSS (NM_026218)	-20	NM_138757	71177	Mm.271774	NM_138757	ENSMUSG00000040250	Asun	4933424B01Rik|Spata30	asunder, spermatogenesis regulator	protein-coding
MACS_peak_1914	chr11	94902479	94902739	+	51.30	NA	promoter-TSS (NM_133667)	promoter-TSS (NM_133667)	76	NM_133667	18604	Mm.29768	NM_133667	ENSMUSG00000038967	Pdk2	-	pyruvate dehydrogenase kinase, isoenzyme 2	protein-coding
MACS_peak_11577	chrX	34335507	34335832	+	51.27	NA	promoter-TSS (NM_007451)	promoter-TSS (NM_007451)	22	NM_007451	11740	Mm.371544	NM_007451	ENSMUSG00000016319	Slc25a5	Ant2	solute carrier family 25 (mitochondrial carrier, adenine nucleotide translocator), member 5	protein-coding
MACS_peak_8311	chr5	89105088	89105262	+	51.27	NA	promoter-TSS (NM_178700)	promoter-TSS (NM_178700)	21	NM_178700	231413	Mm.332474	NM_178700	ENSMUSG00000044221	Grsf1	BB232551|C80280|D5Wsu31e	G-rich RNA sequence binding factor 1	protein-coding
MACS_peak_2913	chr13	34129460	34129637	+	51.24	NA	promoter-TSS (NM_026512)	promoter-TSS (NM_026512)	38	NM_026512	68021	Mm.140243	NM_026512	ENSMUSG00000038286	Bphl	2010012D11Rik|5730533B08Rik|AI115341	biphenyl hydrolase-like (serine hydrolase, breast epithelial mucin-associated antigen)	protein-coding
MACS_peak_8657	chr5	138422605	138422908	+	51.24	NA	promoter-TSS (NM_013478)	promoter-TSS (NM_013478)	7	NM_013478	12007	Mm.30061	NM_013478	ENSMUSG00000037053	Azgp1	Zag	alpha-2-glycoprotein 1, zinc	protein-coding
MACS_peak_11672	chrX	93152126	93152297	+	51.24	NA	5' UTR (NM_152822, exon 1 of 13)	5' UTR (NM_152822, exon 1 of 13)	102	NM_152822	76130	Mm.274318	NM_152822	ENSMUSG00000057421	Las1l	1810030A06Rik|5830482G23Rik	LAS1-like (S. cerevisiae)	protein-coding
MACS_peak_3852	chr15	79376875	79377043	+	51.24	NA	promoter-TSS (NM_199079)	promoter-TSS (NM_199079)	30	NM_199079	67040	Mm.29644	NM_152806	ENSMUSG00000055065	Ddx17	2610007K22Rik|A430025E01Rik|AI047725|C80929|Gm926|p72	DEAD (Asp-Glu-Ala-Asp) box polypeptide 17	protein-coding
MACS_peak_7081	chr3	104442548	104442708	+	51.24	NA	promoter-TSS (NM_009196)	promoter-TSS (NM_009196)	41	NM_009196	20501	Mm.9086	NM_009196	ENSMUSG00000032902	Slc16a1	AL022710|Mct1	solute carrier family 16 (monocarboxylic acid transporters), member 1	protein-coding
MACS_peak_8483	chr5	120120648	120121131	+	51.05	NA	promoter-TSS (NM_011535)	promoter-TSS (NM_011535)	18	NM_198052	21386	Mm.219139	NM_011535	ENSMUSG00000018604	Tbx3	D5Ertd189e	T-box 3	protein-coding
MACS_peak_6009	chr2	30329621	30329791	+	51.01	NA	promoter-TSS (NM_030244)	promoter-TSS (NM_030244)	13	NM_030244	72500	Mm.295464	NM_030244	ENSMUSG00000089762	Ier5l	2610524G09Rik	immediate early response 5-like	protein-coding
MACS_peak_11685	chrX	99384536	99384712	+	51.01	NA	promoter-TSS (NM_009094)	promoter-TSS (NM_009094)	-914	NM_009094	20102	Mm.66	NM_009094	ENSMUSG00000031320	Rps4x	Rps4|Rps4-1	ribosomal protein S4, X-linked	protein-coding
MACS_peak_3066	chr13	64230441	64230701	+	50.99	NA	promoter-TSS (NM_001001321)	promoter-TSS (NM_001001321)	67	NM_001001321	70484	Mm.133731	NM_001001321	ENSMUSG00000033114	Slc35d2	5730408I21Rik|SQV7L|UGTrel8|hfrc|mUGTrel8	solute carrier family 35, member D2	protein-coding
MACS_peak_11750	chrX	159198296	159198530	+	50.99	NA	5' UTR (NM_009031, exon 1 of 12)	5' UTR (NM_009031, exon 1 of 12)	109	NM_009031	245688	Mm.270186	NM_009031	ENSMUSG00000031353	Rbbp7	AA409861|AI173248|AU019541|BB114024|mRbAp46	retinoblastoma binding protein 7	protein-coding
MACS_peak_7685	chr4	122959953	122960118	+	50.99	NA	promoter-TSS (NM_148917)	promoter-TSS (NM_148917)	-119	NM_130881	230721	Mm.277091	NM_130881	ENSMUSG00000011257	Pabpc4	-	poly(A) binding protein, cytoplasmic 4	protein-coding
MACS_peak_8472	chr5	116081658	116081863	+	50.90	NA	promoter-TSS (NM_198163)	promoter-TSS (NM_198163)	65	NR_027810	66123	Mm.133063	NM_021417		1110006O24Rik	-	RIKEN cDNA 1110006O24 gene	ncRNA
MACS_peak_9951	chr7	117161787	117161962	+	50.90	NA	promoter-TSS (NM_181517)	promoter-TSS (NM_181517)	-65	NM_181517	233726	Mm.222328	NM_181517	ENSMUSG00000066232	Ipo7	A330055O14Rik|C330016G14|Imp7|Ranbp7	importin 7	protein-coding
MACS_peak_7391	chr4	44994279	44994502	+	50.89	NA	exon (NM_080289, exon 1 of 9)	exon (NM_080289, exon 1 of 9)	107	NM_080289	76238	Mm.196574	NM_080289	ENSMUSG00000035637	Grhpr	1110059D05Rik|6430629L09Rik	glyoxylate reductase/hydroxypyruvate reductase	protein-coding
MACS_peak_5112	chr18	12394668	12394930	+	50.88	NA	promoter-TSS (NM_008720)	promoter-TSS (NM_008720)	96	NM_008720	18145	Mm.3484	NM_008720	ENSMUSG00000024413	Npc1	A430089E03Rik|C85354|D18Ertd139e|D18Ertd723e|lcsd|nmf164|spm	Niemann-Pick type C1	protein-coding
MACS_peak_3703	chr15	44259639	44259811	+	50.84	NA	promoter-TSS (NM_175009)	promoter-TSS (NM_175009)	68	NM_175009	223527	Mm.291828	NM_175009	ENSMUSG00000022338	Eny2	1810057B09Rik|6720481I12|DC6|Ey2	enhancer of yellow 2 homolog (Drosophila)	protein-coding
MACS_peak_986	chr10	80288916	80289071	+	50.84	NA	promoter-TSS (NR_027656)	promoter-TSS (NR_027656)	-408	NM_001301034	18245	Mm.398119	NM_008753	ENSMUSG00000035242	Oaz1	AZ-1|AZ1|Antizyme|ODC-Az|Oaz	ornithine decarboxylase antizyme 1	protein-coding
MACS_peak_10819	chr8	129964895	129965180	+	50.84	NA	intron (NM_033620, intron 20 of 24)	intron (NM_033620, intron 20 of 24)	141485	NM_001013580	93742	Mm.299254	NM_033620	ENSMUSG00000025812	Pard3	AA960621|AI256638|ASIP|D8Ertd580e|PAR-3|Par3|Pard3a	par-3 family cell polarity regulator	protein-coding
MACS_peak_9844	chr7	91838207	91838434	+	50.66	NA	non-coding (NR_038175, exon 1 of 5)	non-coding (NR_038175, exon 1 of 5)	170	NR_038175	72495	Mm.382914	NR_038175		2610206C17Rik	-	RIKEN cDNA 2610206C17 gene	ncRNA
MACS_peak_10647	chr8	109206947	109207130	+	50.63	NA	promoter-TSS (NM_173037)	promoter-TSS (NM_173037)	70	NM_173037	272538	Mm.87151	NM_173037	ENSMUSG00000041949	Tango6	AW413431|E330010G16|Tmco7	transport and golgi organization 6	protein-coding
MACS_peak_10309	chr8	35870326	35870523	+	50.63	NA	promoter-TSS (NM_176933)	promoter-TSS (NM_176933)	-240	NM_176933	319520	Mm.170276	NM_176933	ENSMUSG00000031530	Dusp4	2700078F24Rik|AI844617|BB104621|E130306H24Rik|MKP2	dual specificity phosphatase 4	protein-coding
MACS_peak_8255	chr5	65883952	65884141	+	50.63	NA	promoter-TSS (NM_133697)	promoter-TSS (NM_133697)	28	NM_133697	68552	Mm.10709	NM_133697	ENSMUSG00000037822	Smim14	1110003E01Rik|1700127H04Rik|5430439C17Rik|MAd4	small integral membrane protein 14	protein-coding
MACS_peak_7199	chr3	137794212	137794364	+	50.63	NA	promoter-TSS (NM_008642)	promoter-TSS (NM_008642)	53	NM_008642	17777	Mm.2941	NM_008642	ENSMUSG00000028158	Mttp	1810043K16Rik|MTP	microsomal triglyceride transfer protein	protein-coding
MACS_peak_1628	chr11	69485650	69485873	+	50.61	NA	TTS (NM_001163571)	TTS (NM_001163571)	164	NM_144958	13681	Mm.279821	NM_144958	ENSMUSG00000059796	Eif4a1	BM-010|Ddx2a|Eif4	eukaryotic translation initiation factor 4A1	protein-coding
MACS_peak_587	chr1	181733612	181733833	+	50.61	NA	5' UTR (NM_026375, exon 1 of 36)	5' UTR (NM_026375, exon 1 of 36)	424	NM_026375	226747	Mm.128165	NM_026375	ENSMUSG00000026491	Ahctf1	6230412P20Rik|AV011447|Elys	AT hook containing transcription factor 1	protein-coding
MACS_peak_247	chr1	87689990	87690128	+	50.55	NA	promoter-TSS (NM_133781)	promoter-TSS (NM_133781)	37	NM_133781	12283	Mm.26135	NM_133781	ENSMUSG00000036707	Cab39	AA408805|AA960512|C78372|MO25|MO25alpha	calcium binding protein 39	protein-coding
MACS_peak_6839	chr3	65778831	65778987	+	50.50	NA	Intergenic	CpG	-16762	NM_019937	56706	Mm.175612	NM_019937	ENSMUSG00000027829	Ccnl1	2610030E23Rik|AU018493|Ccnl|ania-6a	cyclin L1	protein-coding
MACS_peak_9727	chr7	56136248	56136535	+	50.50	NA	promoter-TSS (NM_001013368)	promoter-TSS (NM_001013368)	20	NM_001013368	108961	Mm.240566	NM_001013368	ENSMUSG00000046179	E2f8	4432406C08Rik|AA410048	E2F transcription factor 8	protein-coding
MACS_peak_10422	chr8	73328712	73328922	+	50.50	NA	Intergenic	CpG	-3531	NM_008353	16161	Mm.731	NM_008353	ENSMUSG00000000791	Il12rb1	CD212|IL-12R[b]	interleukin 12 receptor, beta 1	protein-coding
MACS_peak_7138	chr3	121517968	121518155	+	50.50	NA	promoter-TSS (NM_008991)	promoter-TSS (NM_008991)	72	NM_008991	19299	Mm.399042	NM_008991	ENSMUSG00000028127	Abcd3	AI313901|AU018866|AW146054|PMP68|PMP70|Pxmp1	ATP-binding cassette, sub-family D (ALD), member 3	protein-coding
MACS_peak_3038	chr13	58229811	58229958	+	50.50	NA	promoter-TSS (NM_029872)	promoter-TSS (NM_029872)	33	NM_029872	77134	Mm.490274	NM_029872	ENSMUSG00000007836	Hnrnpa0	1110055B05Rik|3010025E17Rik|Hnrpa0|hnRNP A0	heterogeneous nuclear ribonucleoprotein A0	protein-coding
MACS_peak_4209	chr16	20097581	20097784	+	50.50	NA	promoter-TSS (NM_029436)	promoter-TSS (NM_029436)	55	NM_029436	75785	Mm.392450	NM_029436	ENSMUSG00000062901	Klhl24	1110046J11Rik|4930429H24Rik|6530402O20Rik|C85082	kelch-like 24	protein-coding
MACS_peak_8781	chr5	152171481	152171735	+	50.50	NA	intron (NR_045700, intron 1 of 3)	intron (NR_045700, intron 1 of 3)	358	NR_045699	625175	Mm.443286	NR_045699	ENSMUSG00000097321	1700028E10Rik	A630054D14|Gm6561	RIKEN cDNA 1700028E10 gene	ncRNA
MACS_peak_4565	chr17	23814216	23814477	+	50.50	NA	promoter-TSS (NM_013749)	promoter-TSS (NM_013749)	70	NM_001161746	27279	Mm.28518	NM_013749	ENSMUSG00000023905	Tnfrsf12a	AI255180|C87282|Fn14|HPIP|TWEAK-R|TweakR	tumor necrosis factor receptor superfamily, member 12a	protein-coding
MACS_peak_820	chr10	58684633	58684812	+	50.47	NA	promoter-TSS (NM_001024911)	promoter-TSS (NM_001024911)	52	NM_172939	268301	Mm.3036	NM_172939	ENSMUSG00000098188	Sowahc	4921515A04Rik|9430099J10Rik|Ankrd57|C820004L04Rik	sosondowah ankyrin repeat domain family member C	protein-coding
MACS_peak_3977	chr15	89260146	89260405	+	50.47	NA	promoter-TSS (NM_007692)	promoter-TSS (NM_007692)	83	NR_037154	12651	Mm.485045	NM_007692	ENSMUSG00000022617	Chkb	Chetk|Chkl|Ck|Ck/Ek|Ck/Ek-beta|Ckb|Ckekb|Ek	choline kinase beta	protein-coding
MACS_peak_5817	chr19	54019331	54019496	+	50.45	NA	promoter-TSS (NM_001195348)	promoter-TSS (NM_001195348)	47	NM_019658	56392	Mm.228669	NM_019658	ENSMUSG00000024976	Shoc2	AU017287|Sur8|mKIAA0862	soc-2 (suppressor of clear) homolog (C. elegans)	protein-coding
MACS_peak_5425	chr19	4192124	4192288	+	50.45	NA	promoter-TSS (NM_031868)	promoter-TSS (NM_031868)	32	NM_031868	19045	Mm.1970	NM_031868	ENSMUSG00000040385	Ppp1ca	Ppp1c|dism2	protein phosphatase 1, catalytic subunit, alpha isoform	protein-coding
MACS_peak_8070	chr5	22938969	22939853	+	50.43	NA	promoter-TSS (NM_026984)	promoter-TSS (NM_026984)	760	NR_040469	269630	Mm.425231	NR_040469	ENSMUSG00000073147	5031425E22Rik	-	RIKEN cDNA 5031425E22 gene	ncRNA
MACS_peak_3264	chr14	21871277	21871717	+	50.43	NA	promoter-TSS (NM_134079)	promoter-TSS (NM_134079)	167	NM_018829	55946	Mm.376269	NM_018829		Ap3m1	1200013D09Rik|C78982|R75378	adaptor-related protein complex 3, mu 1 subunit	protein-coding
MACS_peak_6520	chr2	155343736	155343952	+	50.39	NA	promoter-TSS (NM_019811)	promoter-TSS (NM_019811)	65	NM_019811	60525	Mm.255026	NM_019811	ENSMUSG00000027605	Acss2	1110017C11Rik|ACAS|Acas1|Acas2|AceCS1|Acs1	acyl-CoA synthetase short-chain family member 2	protein-coding
MACS_peak_3107	chr13	76155867	76156060	+	50.39	NA	promoter-TSS (NM_001131068)	promoter-TSS (NM_001131068)	47	NM_178916	218341	Mm.266515	NM_178916	ENSMUSG00000043190	Rfesd	AI256775|D030068K09	Rieske (Fe-S) domain containing	protein-coding
MACS_peak_10247	chr8	14888322	14888553	+	50.39	NA	promoter-TSS (NM_012000)	promoter-TSS (NM_012000)	-99	NM_012000	26889	Mm.254027	NM_012000	ENSMUSG00000026317	Cln8	mnd	ceroid-lipofuscinosis, neuronal 8	protein-coding
MACS_peak_5498	chr19	5912707	5912842	+	50.38	NA	promoter-TSS (NM_001291078)	promoter-TSS (NM_001291078)	97	NM_011262	19708	Mm.2651	NM_011262	ENSMUSG00000024826	Dpf2	2210010M07Rik|BAF45D|Req|ubi-d4	D4, zinc and double PHD fingers family 2	protein-coding
MACS_peak_1979	chr11	98636311	98636625	+	50.33	NA	5' UTR (NM_145434, exon 1 of 8)	5' UTR (NM_145434, exon 1 of 8)	223	NM_145434	217166	Mm.390397	NM_145434	ENSMUSG00000020889	Nr1d1	A530070C09Rik|R75201	nuclear receptor subfamily 1, group D, member 1	protein-coding
MACS_peak_4076	chr15	102289615	102289768	+	50.27	NA	promoter-TSS (NM_025385)	promoter-TSS (NM_025385)	90	NM_025385	66151	Mm.393955	NM_025385	ENSMUSG00000023048	Prr13	1110020C13Rik|2010324E22Rik	proline rich 13	protein-coding
MACS_peak_4410	chr16	85803229	85803616	+	50.27	NA	promoter-TSS (NM_009621)	promoter-TSS (NM_009621)	-62	NM_009621	11504	Mm.1421	NM_009621	ENSMUSG00000022893	Adamts1	ADAM-TS1|ADAMTS|ADAMTS-1|C3-C5|METH-1|METH1	a disintegrin-like and metallopeptidase (reprolysin type) with thrombospondin type 1 motif, 1	protein-coding
MACS_peak_978	chr10	80138974	80139139	+	50.22	NA	Intergenic	CpG	-4335	NM_021462	17347	Mm.42126	NM_021462	ENSMUSG00000020190	Mknk2	2010016G11Rik|Gprk7|Mnk2	MAP kinase-interacting serine/threonine kinase 2	protein-coding
MACS_peak_3274	chr14	22806991	22807161	+	50.16	NA	5' UTR (NM_145459, exon 2 of 3)	5' UTR (NM_145459, exon 2 of 3)	1747	NM_145459	218820	Mm.292401	NM_145459	ENSMUSG00000039081	Zfp503	AI181838|B830002A16Rik|Nolz-1|Nolz1|Znf503	zinc finger protein 503	protein-coding
MACS_peak_4040	chr15	100058028	100058215	+	50.15	NA	promoter-TSS (NM_007497)	promoter-TSS (NM_007497)	-169	NM_007497	11908	Mm.676	NM_007497	ENSMUSG00000023027	Atf1	-	activating transcription factor 1	protein-coding
MACS_peak_3458	chr14	60059489	60059718	+	50.15	NA	promoter-TSS (NM_026908)	promoter-TSS (NM_026908)	111	NM_001081024	239122	Mm.205022	NM_001081024	ENSMUSG00000071350	Setdb2	Clld8|Gm293|KMT1F	SET domain, bifurcated 2	protein-coding
MACS_peak_9785	chr7	80686482	80686675	+	50.15	NA	promoter-TSS (NM_001081345)	promoter-TSS (NM_001081345)	54	NM_001081345	244059	Mm.34539	NM_001081345	ENSMUSG00000078671	Chd2	2810013C04Rik|2810040A01Rik|5630401D06Rik|AI851092|BC029703|CHD-2	chromodomain helicase DNA binding protein 2	protein-coding
MACS_peak_9954	chr7	117205578	117205771	+	50.13	NA	intron (NM_009281, intron 1 of 15)	CpG	458	NM_009281	20841	Mm.10815	NM_009281	ENSMUSG00000061079	Zfp143	AA959806|AU015869|D7Ertd805e|KRAB14|SBF|Staf|Zfp79|Zfp80-rs1|Znf143|pHZ-1	zinc finger protein 143	protein-coding
MACS_peak_11097	chr9	57758619	57758961	+	50.13	NA	promoter-TSS (NM_001122873)	promoter-TSS (NM_001122873)	-3	NM_027086	69459	Mm.41735	NM_027086	ENSMUSG00000055720	Ubl7	2300004C15Rik	ubiquitin-like 7 (bone marrow stromal cell-derived)	protein-coding
MACS_peak_7509	chr4	87740502	87740683	+	50.10	NA	promoter-TSS (NM_001081184)	promoter-TSS (NM_001081184)	58	NM_001081184	230393	Mm.287210	NM_001081184	ENSMUSG00000038368	Focad	Kiaa1797|mKIAA1797	focadhesin	protein-coding
MACS_peak_8646	chr5	138011027	138011276	+	50.10	NA	promoter-TSS (NM_015799)	promoter-TSS (NM_015799)	83	NM_001289509	50765	Mm.21757	NM_015799	ENSMUSG00000029716	Tfr2	Trfr2	transferrin receptor 2	protein-coding
MACS_peak_3479	chr14	63741274	63741496	+	50.10	NA	promoter-TSS (NM_007798)	promoter-TSS (NM_007798)	86	NM_007798	13030	Mm.236553	NM_007798	ENSMUSG00000021939	Ctsb	CB	cathepsin B	protein-coding
MACS_peak_6763	chr3	36374814	36374992	+	50.10	NA	promoter-TSS (NM_009673)	promoter-TSS (NM_009673)	44	NM_028183	72282	Mm.55317	NM_028183	ENSMUSG00000027713	1810062G17Rik	-	RIKEN cDNA 1810062G17 gene	protein-coding
MACS_peak_6600	chr2	164705493	164705747	+	50.10	NA	intron (NM_146129, intron 1 of 16)	intron (NM_146129, intron 1 of 16)	752	NM_146129	228866	Mm.241134	NM_146129		Pcif1	2310022K11Rik|C20orf67|F730014I05Rik	PDX1 C-terminal inhibiting factor 1	protein-coding
MACS_peak_10195	chr8	3279412	3279652	+	50.08	NA	promoter-TSS (NM_010568)	promoter-TSS (NM_010568)	85	NM_010568	16337	Mm.268003	NM_010568	ENSMUSG00000005534	Insr	4932439J01Rik|CD220|D630014A15Rik|IR|IR-A|IR-B	insulin receptor	protein-coding
MACS_peak_290	chr1	93436857	93437043	+	50.08	NA	promoter-TSS (NM_023046)	promoter-TSS (NM_023046)	-192	NM_001039126	65247	Mm.234152	NM_023046	ENSMUSG00000026311	Asb1	1700029O08Rik|1700054C17Rik|AI426616|AI851378|mKIAA1146	ankyrin repeat and SOCS box-containing 1	protein-coding
MACS_peak_10706	chr8	118231603	118231754	+	50.08	NA	promoter-TSS (NM_001025577)	promoter-TSS (NM_001025577)	-884	NM_001025577	17132	Mm.275549	NM_001025577		Maf	2810401A20Rik|A230108G15Rik|AW047063|c-maf	avian musculoaponeurotic fibrosarcoma (v-maf) AS42 oncogene homolog	protein-coding
MACS_peak_715	chr10	17954651	17954822	+	50.03	NA	promoter-TSS (NM_144820)	promoter-TSS (NM_144820)	51	NM_144820	215814	Mm.296565	NM_144820	ENSMUSG00000059554	Ccdc28a	1700009P13Rik|AI480677	coiled-coil domain containing 28A	protein-coding
MACS_peak_4807	chr17	36169469	36169689	+	50.02	NA	promoter-TSS (NM_010398)	promoter-TSS (NM_010398)	67	NM_010398	15040	Mm.439648	NM_010398	ENSMUSG00000067212	H2-T23	37b|37c|H-2T23|H2-Qa1|Qa-1|Qa-1(b)|Qa1|Qed-1|T18c|T18c(37)|T23b|T23d	histocompatibility 2, T region locus 23	protein-coding
MACS_peak_602	chr1	182743876	182744039	+	50.00	NA	promoter-TSS (NM_008210)	promoter-TSS (NM_008210)	-223	NM_008210	15078	Mm.138832	NM_008210	ENSMUSG00000060743	H3f3a	H3.3A	H3 histone, family 3A	protein-coding
MACS_peak_10917	chr9	25289096	25289344	+	50.00	NA	promoter-TSS (NM_026189)	promoter-TSS (NM_026189)	38	NM_026189	67484	Mm.112977	NM_026189	ENSMUSG00000036611	Eepd1	2310005P05Rik|AI481005	endonuclease/exonuclease/phosphatase family domain containing 1	protein-coding
MACS_peak_5051	chr17	87665000	87665267	+	49.89	NA	intron (NM_176808, intron 1 of 4)	CpG	154	NM_176808	193813	Mm.30251	NM_139295	ENSMUSG00000024150	Mcfd2	1810021C21Rik|F5f8d|Lman1ip|Sdnsf	multiple coagulation factor deficiency 2	protein-coding
MACS_peak_6043	chr2	32390795	32391115	+	49.89	NA	promoter-TSS (NM_153560)	promoter-TSS (NM_153560)	76	NM_153560	98952	Mm.4065	NM_153560	ENSMUSG00000039157	Fam102a	AI426465|C230093N12Rik|Eeig1	family with sequence similarity 102, member A	protein-coding
MACS_peak_7373	chr4	43455106	43455257	+	49.83	NA	promoter-TSS (NM_011571)	promoter-TSS (NM_011571)	32	NM_011571	21754	Mm.485441	NM_011571	ENSMUSG00000028458	Tesk1	AI326901	testis specific protein kinase 1	protein-coding
MACS_peak_7235	chr3	148652366	148652708	+	49.74	NA	Intergenic	CpG	-34938	NM_001081298	99633	Mm.9776	NM_001081298	ENSMUSG00000028184	Lphn2	AI450192|Gm619|Lec1|Lphh1|mKIAA0786	latrophilin 2	protein-coding
MACS_peak_409	chr1	136456728	136456899	+	49.62	NA	promoter-TSS (NM_152895)	promoter-TSS (NM_152895)	58	NM_152895	75605	Mm.28995	NM_152895	ENSMUSG00000042207	Kdm5b	2010009J12Rik|2210016I17Rik|AW556288|D1Ertd202e|Jarid1b|PLU-1|PUT1|Plu1|RBBP2H1A|Rb-Bp2|mKIAA4034	lysine (K)-specific demethylase 5B	protein-coding
MACS_peak_186	chr1	72290643	72290815	+	49.62	NA	Intergenic	CpG	-31848	NM_001005423	381269	Mm.422636	NM_001005423	ENSMUSG00000039395	Mreg	Gm974|Wdt2|dsu	melanoregulin	protein-coding
MACS_peak_8277	chr5	73683994	73684186	+	49.62	NA	promoter-TSS (NM_001159887)	promoter-TSS (NM_001159887)	57	NM_001159888	68095	Mm.247039	NM_023429	ENSMUSG00000029152	Ociad1	6030432N09Rik|AI481327|AW557942|Asrij|B230209J16Rik|BB021357|Emi2|Imi2|OCIA|TPA018	OCIA domain containing 1	protein-coding
MACS_peak_8719	chr5	144493450	144493651	+	49.62	NA	promoter-TSS (NM_029749)	promoter-TSS (NM_029749)	-401	NM_029749	76800	Mm.259620	NM_029749	ENSMUSG00000051306	Usp42	2410140K03Rik|3110031A07Rik|A630018G05Rik|D5Ertd591e	ubiquitin specific peptidase 42	protein-coding
MACS_peak_2255	chr11	120051012	120051262	+	49.62	NA	promoter-TSS (NR_030682)	promoter-TSS (NR_030682)	33	NR_030682	100042332	Mm.269766	NR_030682		2810410L24Rik	-	RIKEN cDNA 2810410L24 gene	ncRNA
MACS_peak_6889	chr3	87329334	87329650	+	49.57	NA	promoter-TSS (NM_012051)	promoter-TSS (NM_012051)	-8	NM_001083318	27049	Mm.219460	NM_012051	ENSMUSG00000003382	Etv3	AI414410|METS|Pe1	ets variant 3	protein-coding
MACS_peak_1166	chr10	120913256	120913408	+	49.53	NA	promoter-TSS (NM_138956)	promoter-TSS (NM_138956)	-26	NM_138956	192678	Mm.41265	NM_138956	ENSMUSG00000025795	Rassf3	AW212023|AW322379	Ras association (RalGDS/AF-6) domain family member 3	protein-coding
MACS_peak_3236	chr14	17408092	17408264	+	49.46	NA	promoter-TSS (NM_011243)	promoter-TSS (NM_011243)	-188	NM_001289762	218772	Mm.259318	NM_011243	ENSMUSG00000017491	Rarb	A830025K23|Hap|Nr1b2	retinoic acid receptor, beta	protein-coding
MACS_peak_4507	chr17	10512098	10512321	+	49.46	NA	promoter-TSS (NR_037588)	promoter-TSS (NR_037588)	17	NM_021881	19317	Mm.130694	NM_021881	ENSMUSG00000062078	Qk	1110003F05Rik|1500005P18|QkI|l(17)-1Wis|l17Wis1	quaking	protein-coding
MACS_peak_4286	chr16	31275102	31275392	+	49.46	NA	5' UTR (NM_025800, exon 1 of 6)	5' UTR (NM_025800, exon 1 of 6)	116	NM_025800	66849	Mm.291593	NM_025800	ENSMUSG00000047714	Ppp1r2	0610025N14Rik|2310007G06Rik|4930440J04Rik|5430408E15Rik|D16Ertd248e|IPP-2	protein phosphatase 1, regulatory (inhibitor) subunit 2	protein-coding
MACS_peak_2494	chr12	72075633	72075826	+	49.40	NA	5' UTR (NM_011184, exon 1 of 11)	5' UTR (NM_011184, exon 1 of 11)	119	NM_011184	19167	Mm.296338	NM_011184		Psma3	Lmpc8	proteasome (prosome, macropain) subunit, alpha type 3	protein-coding
MACS_peak_10641	chr8	108661977	108662203	+	49.40	NA	non-coding (NR_040346, exon 4 of 4)	non-coding (NR_040346, exon 4 of 4)	-1216	NM_176838	77411	Mm.183003	NM_176838	ENSMUSG00000084128	Esrp2	9530027K23Rik|Rbm35b	epithelial splicing regulatory protein 2	protein-coding
MACS_peak_1006	chr10	80730936	80731164	+	49.40	NA	5' UTR (NM_018758, exon 1 of 11)	5' UTR (NM_018758, exon 1 of 11)	133	NM_018758	57267	Mm.293931	NM_018758	ENSMUSG00000004931	Apba3	AW208791|Mint-3|X11gamma|lin-10|mint3	amyloid beta (A4) precursor protein-binding, family A, member 3	protein-coding
MACS_peak_8443	chr5	114830351	114830521	+	49.35	NA	promoter-TSS (NM_026145)	promoter-TSS (NM_026145)	78	NM_026145	330171	Mm.238285	NM_026145	ENSMUSG00000001098	Kctd10	AW536343|C87062|mBACURD3	potassium channel tetramerisation domain containing 10	protein-coding
MACS_peak_836	chr10	60610211	60610413	+	49.35	NA	5' UTR (NM_009163, exon 1 of 15)	5' UTR (NM_009163, exon 1 of 15)	101	NM_009163	20397	Mm.412319	NM_009163	ENSMUSG00000020097	Sgpl1	AI428538|D10Xrf456|S1PL|Spl	sphingosine phosphate lyase 1	protein-coding
MACS_peak_4797	chr17	35975088	35975219	+	49.29	NA	promoter-TSS (NM_011655)	promoter-TSS (NM_011655)	93	NM_011655	22154	Mm.273538	NM_011655	ENSMUSG00000001525	Tubb5	AA408537|AI596182|B130022C14Rik|M(beta)5	tubulin, beta 5 class I	protein-coding
MACS_peak_4206	chr16	18836624	18836771	+	49.29	NA	promoter-TSS (NM_001033164)	promoter-TSS (NM_001033164)	24	NM_001033164	72307	Mm.36907	NM_001033164	ENSMUSG00000071632	2510002D24Rik	2410043I01Rik|AA163535|AA409624|DXMgi27	RIKEN cDNA 2510002D24 gene	protein-coding
MACS_peak_2971	chr13	47138863	47139091	+	49.29	NA	promoter-TSS (NM_016785)	promoter-TSS (NM_016785)	109	NM_172262	218214	Mm.31259	NM_172262	ENSMUSG00000038080	Kdm1b	4632428N09Rik|AI482520|Aof1	lysine (K)-specific demethylase 1B	protein-coding
MACS_peak_9630	chr7	39012820	39013052	+	49.29	NA	promoter-TSS (NM_024413)	promoter-TSS (NM_024413)	77	NM_024413	72287	Mm.333798	NM_024413	ENSMUSG00000074170	Plekhf1	1810013P09Rik|APPD|LAPF|PHAFIN1|ZFYVE15	pleckstrin homology domain containing, family F (with FYVE domain) member 1	protein-coding
MACS_peak_8664	chr5	138696704	138696847	+	49.29	NA	promoter-TSS (NM_001081108)	promoter-TSS (NM_001081108)	65	NM_001081108	66096	Mm.206901	NM_001081108	ENSMUSG00000050552	Lamtor4	0910001L09Rik|AV006840	late endosomal/lysosomal adaptor, MAPK and MTOR activator 4	protein-coding
MACS_peak_89	chr1	39634102	39634278	+	49.29	NA	promoter-TSS (NM_001033135)	promoter-TSS (NM_001033135)	2	NM_001033135	67702	Mm.28614	NM_001033135	ENSMUSG00000048234	Rnf149	1600023E10Rik|AV037261|C76763|Gm15832|Greul4|OTTMUSG00000026591	ring finger protein 149	protein-coding
MACS_peak_5098	chr18	10725469	10725731	+	49.29	NA	promoter-TSS (NM_144860)	promoter-TSS (NM_144860)	-23	NM_144860	225164	Mm.21500	NM_144860	ENSMUSG00000024294	Mib1	DIP-1|E430019M12Rik|Mib|mKIAA1323	mindbomb homolog 1 (Drosophila)	protein-coding
MACS_peak_383	chr1	134212639	134212868	+	49.28	NA	promoter-TSS (NM_028778)	promoter-TSS (NM_028778)	51	NM_001195025	74137	Mm.100666	NM_028778	ENSMUSG00000009772	Nuak2	1200013B22Rik|Omphk2|Snark|mKIAA0537	NUAK family, SNF1-like kinase, 2	protein-coding
MACS_peak_59	chr1	36125164	36125322	+	49.28	NA	promoter-TSS (NM_015818)	promoter-TSS (NM_015818)	-2	NM_015818	50785	Mm.213566	NM_015818	ENSMUSG00000045216	Hs6st1	6Ost1	heparan sulfate 6-O-sulfotransferase 1	protein-coding
MACS_peak_8846	chr6	34813116	34813293	+	49.27	NA	promoter-TSS (NM_197986)	promoter-TSS (NM_197986)	58	NM_197986	68487	Mm.248440	NM_197986	ENSMUSG00000057137	Tmem140	1110007F12Rik	transmembrane protein 140	protein-coding
MACS_peak_2045	chr11	101519241	101519608	+	49.27	NA	Intergenic	CpG	-7431	NM_025404	80981	Mm.266840	NM_025404	ENSMUSG00000034936	Arl4d	1110036H21Rik|ARL6|AW456149|Arf4l|Arfl4|Arl5	ADP-ribosylation factor-like 4D	protein-coding
MACS_peak_2479	chr12	70473019	70473279	+	49.26	NA	promoter-TSS (NM_007481)	promoter-TSS (NM_007481)	12	NM_007481	11845	Mm.27308	NM_007481	ENSMUSG00000044147	Arf6	AI788669|AW496366	ADP-ribosylation factor 6	protein-coding
MACS_peak_2576	chr12	85626275	85626439	+	49.22	NA	5' UTR (NM_001252625, exon 1 of 10)	5' UTR (NM_001252625, exon 1 of 10)	111	NM_001252626	77219	Mm.246127	NM_029880	ENSMUSG00000072946	Ptgr2	1810016I24Rik|9130222H03Rik|9630002F03Rik|AI838763|B830026H24Rik|PGR-2|PRG-2|Zadh1	prostaglandin reductase 2	protein-coding
MACS_peak_4365	chr16	50432329	50432580	+	49.22	NA	promoter-TSS (NM_027444)	promoter-TSS (NM_027444)	48	NM_027444	70508	Mm.28940	NM_027444	ENSMUSG00000022641	Bbx	5530401J07Rik|5730403O13Rik	bobby sox homolog (Drosophila)	protein-coding
MACS_peak_6187	chr2	83564375	83564758	+	49.22	NA	promoter-TSS (NM_008402)	promoter-TSS (NM_008402)	12	NM_008402	16410	Mm.227	NM_008402	ENSMUSG00000027087	Itgav	1110004F14Rik|2610028E01Rik|CD51|D430040G12Rik	integrin alpha V	protein-coding
MACS_peak_9487	chr7	25862217	25862385	+	49.22	NA	promoter-TSS (NM_175477)	promoter-TSS (NM_175477)	36	NM_175477	232976	Mm.41568	NM_175477	ENSMUSG00000045252	Zfp574	A630056B21Rik|Znf574	zinc finger protein 574	protein-coding
MACS_peak_10148	chr7	148127617	148127986	+	49.22	NA	intron (NM_145387, intron 1 of 13)	intron (NM_145387, intron 1 of 13)	321	NM_145387	212974	Mm.260139	NM_145387	ENSMUSG00000062031	Athl1	5730511L01Rik|BC023151	ATH1, acid trehalase-like 1 (yeast)	protein-coding
MACS_peak_10907	chr9	22030118	22030311	+	49.22	NA	promoter-TSS (NM_172763)	promoter-TSS (NM_172763)	58	NM_001164624	235047	Mm.290849	NM_172763	ENSMUSG00000057982	Zfp809	BB114266|C330026E23	zinc finger protein 809	protein-coding
MACS_peak_3359	chr14	46277636	46277795	+	49.22	NA	promoter-TSS (NR_039593)	promoter-TSS (NR_039593)	13	NR_039593	100628600		NR_039593		Mir5131	mmu-mir-5131|mu-mir-5131	microRNA 5131	ncRNA
MACS_peak_872	chr10	68675374	68676131	+	49.21	NA	promoter-TSS (NM_001252638)	promoter-TSS (NM_001252638)	-190	NM_001252637	69288	Mm.26659	NM_001081347	ENSMUSG00000019944	Rhobtb1	1700008H16Rik|3110048G13Rik|AI173445|AI573858|AV350930	Rho-related BTB domain containing 1	protein-coding
MACS_peak_11112	chr9	61762170	61762644	+	49.20	NA	promoter-TSS (NM_018853)	promoter-TSS (NM_018853)	-90	NM_018853	56040	Mm.3158	NM_018853	ENSMUSG00000007892	Rplp1	2410042H16Rik|Arpp1|C430017H15Rik	ribosomal protein, large, P1	protein-coding
MACS_peak_11104	chr9	59334353	59334508	+	49.17	NA	promoter-TSS (NM_019927)	promoter-TSS (NM_019927)	-249	NM_019927	23806	Mm.305925	NM_019927	ENSMUSG00000025234	Arih1	AU021774|Ari|Ari1|Hari|Hhari|Ubch7bp|Uip77	ariadne ubiquitin-conjugating enzyme E2 binding protein homolog 1 (Drosophila)	protein-coding
MACS_peak_5293	chr18	62339514	62339714	+	49.16	NA	promoter-TSS (NM_007420)	promoter-TSS (NM_007420)	21	NM_007420	11555	Mm.5598	NM_007420	ENSMUSG00000045730	Adrb2	Adrb-2|Badm|Gpcr7	adrenergic receptor, beta 2	protein-coding
MACS_peak_3400	chr14	54873446	54873600	+	49.15	NA	promoter-TSS (NM_001113358)	promoter-TSS (NM_001113358)	81	NM_001113358	13135	Mm.319038	NM_010015	ENSMUSG00000022174	Dad1	AI323713	defender against cell death 1	protein-coding
MACS_peak_1190	chr10	126727764	126728001	+	49.15	NA	promoter-TSS (NM_001290183)	promoter-TSS (NM_001290183)	33	NM_001290183	13198	Mm.110220	NM_007837	ENSMUSG00000025408	Ddit3	CHOP-10|CHOP10|chop|gadd153	DNA-damage inducible transcript 3	protein-coding
MACS_peak_10278	chr8	26707845	26708082	+	49.15	NA	promoter-TSS (NM_173012)	promoter-TSS (NM_173012)	-4	NM_173012	270035	Mm.268349	NM_173012	ENSMUSG00000037363	Letm2	6030453H13|D030041N04Rik	leucine zipper-EF-hand containing transmembrane protein 2	protein-coding
MACS_peak_8939	chr6	57641671	57641857	+	49.06	NA	intron (NM_025574, intron 1 of 1)	CpG	308	NM_025574	66459	Mm.44201	NM_025574	ENSMUSG00000098753	Pyurf	2610022G08Rik|AI847956|Prey	Pigy upstream reading frame	protein-coding
MACS_peak_7840	chr4	135577467	135577679	+	48.99	NA	promoter-TSS (NM_013736)	promoter-TSS (NM_013736)	-9	NM_013736	27224	Mm.27663	NM_013736	ENSMUSG00000028668	Tceb3	110kDa|AA408125|Tceb3a	transcription elongation factor B (SIII), polypeptide 3	protein-coding
MACS_peak_5555	chr19	8848787	8849154	+	48.98	NA	promoter-TSS (NR_015538)	promoter-TSS (NR_015538)	-5	NR_015538	100039957	Mm.220886	NR_015538		Gm2518	D630022E15Rik	interferon induced transmembrane protein 2 pseudogene	pseudo
MACS_peak_1398	chr11	29447749	29447910	+	48.98	NA	promoter-TSS (NM_001163521)	promoter-TSS (NM_001163521)	-121	NM_028504	73324	Mm.69388	NM_028504	ENSMUSG00000020461	1700034F02Rik	Clhc1	RIKEN cDNA 1700034F02 gene	protein-coding
MACS_peak_6418	chr2	130985903	130986106	+	48.97	NA	promoter-TSS (NM_026091)	promoter-TSS (NM_026091)	-248	NM_026091	67326	Mm.27711	NM_026091	ENSMUSG00000027327	1700037H04Rik	-	RIKEN cDNA 1700037H04 gene	protein-coding
MACS_peak_10311	chr8	36438733	36439068	+	48.97	NA	intron (NM_177741, intron 1 of 1)	intron (NM_177741, intron 1 of 1)	105	NM_177741	244416	Mm.247126	NM_177741	ENSMUSG00000046794	Ppp1r3b	6430576E21|AW821953|GL|PTG	protein phosphatase 1, regulatory (inhibitor) subunit 3B	protein-coding
MACS_peak_11451	chr9	114753112	114753520	+	48.97	NA	promoter-TSS (NM_027294)	promoter-TSS (NM_027294)	-46	NM_027294	70031	Mm.150064	NM_027294	ENSMUSG00000041012	Cmtm8	2700018N07Rik|AA408515|Cklfsf8	CKLF-like MARVEL transmembrane domain containing 8	protein-coding
MACS_peak_3276	chr14	25309889	25310077	+	48.97	NA	promoter-TSS (NM_207634)	promoter-TSS (NM_207634)	80	NM_011297	20088	Mm.16775	NM_011297	ENSMUSG00000025290	Rps24	-	ribosomal protein S24	protein-coding
MACS_peak_5201	chr18	36823710	36824010	+	48.79	NA	exon (NM_201256, exon 1 of 3)	exon (NM_201256, exon 1 of 3)	146	NM_201256	108112	Mm.24790	NM_201256		Eif4ebp3	4e-bp3	eukaryotic translation initiation factor 4E binding protein 3	protein-coding
MACS_peak_8397	chr5	108561436	108561645	+	48.76	NA	promoter-TSS (NM_028876)	promoter-TSS (NM_028876)	70	NM_028876	73130	Mm.363960	NM_028876	ENSMUSG00000063406	Tmed5	3110020O18Rik|4432412D15Rik	transmembrane emp24 protein transport domain containing 5	protein-coding
MACS_peak_963	chr10	79792865	79793135	+	48.75	NA	promoter-TSS (NM_008793)	promoter-TSS (NM_008793)	110	NM_139292	70335	Mm.28147	NM_139292	ENSMUSG00000035504	Reep6	0610011M24Rik|Dp1l1	receptor accessory protein 6	protein-coding
MACS_peak_8349	chr5	93635376	93635517	+	48.75	NA	promoter-TSS (NM_029363)	promoter-TSS (NM_029363)	75	NM_017367	12453	Mm.250419	NM_017367	ENSMUSG00000063015	Ccni	-	cyclin I	protein-coding
MACS_peak_5402	chr19	3906943	3907120	+	48.75	NA	promoter-TSS (NM_001167784)	promoter-TSS (NM_001167784)	-48	NM_001167784	27060	Mm.271689	NM_016921	ENSMUSG00000001750	Tcirg1	ATP6N1C|ATP6a3|Atp6i|OC-116|OPTB1|Stv1|TIRC7|Vph1|oc	T cell, immune regulator 1, ATPase, H+ transporting, lysosomal V0 protein A3	protein-coding
MACS_peak_8699	chr5	143105484	143105672	+	48.75	NA	promoter-TSS (NM_178398)	promoter-TSS (NM_178398)	40	NM_178398	74781	Mm.29432	NM_178398		Wipi2	1110018O08Rik|2510001I10Rik	WD repeat domain, phosphoinositide interacting 2	protein-coding
MACS_peak_6996	chr3	95623425	95623859	+	48.74	NA	promoter-TSS (NM_001081293)	promoter-TSS (NM_001081293)	-766	NM_001081293	75137	Mm.196275	NM_028328	ENSMUSG00000028106	Rprd2	2810036A19Rik|4930535B03Rik|6720469I21Rik|AL022841|AL022940|AU021304|BB077382|mKIAA0460	regulation of nuclear pre-mRNA domain containing 2	protein-coding
MACS_peak_1116	chr10	110357181	110357434	+	48.74	NA	promoter-TSS (NM_007792)	promoter-TSS (NM_007792)	75	NM_007792	13008	Mm.2020	NM_007792	ENSMUSG00000020186	Csrp2	AW551867|Crp2|SmLim	cysteine and glycine-rich protein 2	protein-coding
MACS_peak_8626	chr5	136363804	136363967	+	48.73	NA	promoter-TSS (NM_013560)	promoter-TSS (NM_013560)	96	NM_013560	15507	Mm.13849	NM_013560	ENSMUSG00000004951	Hspb1	27kDa|Hsp25	heat shock protein 1	protein-coding
MACS_peak_10465	chr8	77617465	77617655	+	48.72	NA	promoter-TSS (NM_010442)	promoter-TSS (NM_010442)	43	NM_010442	15368	Mm.276389	NM_010442	ENSMUSG00000005413	Hmox1	D8Wsu38e|HO-1|HO1|Hemox|Hmox|Hsp32	heme oxygenase (decycling) 1	protein-coding
MACS_peak_8581	chr5	128097545	128097942	+	48.71	NA	promoter-TSS (NM_133895)	promoter-TSS (NM_133895)	19	NM_133895	100561	Mm.28506	NM_133895	ENSMUSG00000029416	Slc15a4	AA987064|AW742963|C130069N12Rik|PHT1|PTR4	solute carrier family 15, member 4	protein-coding
MACS_peak_9886	chr7	106632059	106632229	+	48.71	NA	promoter-TSS (NM_012052)	promoter-TSS (NM_012052)	75	NM_012052	27050	Mm.236868	NM_012052	ENSMUSG00000030744	Rps3	D7Ertd795e|Rs_3	ribosomal protein S3	protein-coding
MACS_peak_8175	chr5	34512342	34512508	+	48.71	NA	promoter-TSS (NM_146159)	promoter-TSS (NM_146159)	-250	NM_001289804	272158	Mm.319286	NM_181857	ENSMUSG00000045102	Poln	POL4P	DNA polymerase N	protein-coding
MACS_peak_8366	chr5	100858373	100858598	+	48.66	NA	promoter-TSS (NR_034038)	promoter-TSS (NR_034038)	69	NR_034038	100503199	Mm.392282	NR_034038	ENSMUSG00000097772	5430416N02Rik	100041797|Adapt33|Gm3514	RIKEN cDNA 5430416N02 gene	ncRNA
MACS_peak_9254	chr6	127100929	127101099	+	48.59	NA	promoter-TSS (NM_009829)	promoter-TSS (NM_009829)	52	NM_009829	12444	Mm.333406	NM_009829	ENSMUSG00000000184	Ccnd2	2600016F06Rik|AI256817|BF642806|C86853|Vin-1|Vin1|cD2	cyclin D2	protein-coding
MACS_peak_11476	chr9	119846479	119846691	+	48.58	NA	promoter-TSS (NM_028735)	promoter-TSS (NM_028735)	91	NM_028976	74498	Mm.104789	NM_028976	ENSMUSG00000032513	Gorasp1	5430411C10Rik|GOLPH5|GRASP65|P65	golgi reassembly stacking protein 1	protein-coding
MACS_peak_10982	chr9	44206260	44206623	+	48.58	NA	5' UTR (NM_008063, exon 1 of 8)	5' UTR (NM_008063, exon 1 of 8)	182	NM_008063	14385	Mm.30087	NM_008063	ENSMUSG00000032114	Slc37a4	G6PT|G6pt1|GSD-1b|mG6PT	solute carrier family 37 (glucose-6-phosphate transporter), member 4	protein-coding
MACS_peak_4973	chr17	71339748	71339910	+	48.48	NA	promoter-TSS (NM_023402)	promoter-TSS (NM_023402)	27	NM_023402	67938	Mm.261329	NM_023402		Myl12b	1500001M02Rik|C77744|Mylc2b|RLC-B	myosin, light chain 12B, regulatory	protein-coding
MACS_peak_1407	chr11	32126471	32126691	+	48.46	NA	promoter-TSS (NM_010822)	promoter-TSS (NM_010822)	76	NM_010822	268395	Mm.263161	NM_010822	ENSMUSG00000020287	Mpg	9830006D05|AI326268|APNG|Aag|Mid1	N-methylpurine-DNA glycosylase	protein-coding
MACS_peak_2262	chr11	120177368	120177756	+	48.41	NA	Intergenic	Intergenic	31165	NR_105900	102465564		NR_105900		Mir6935	mmu-mir-6935	microRNA mir-6935	ncRNA
MACS_peak_156	chr1	63223658	63223850	+	48.41	NA	promoter-TSS (NM_001160039)	promoter-TSS (NM_001160039)	349	NM_018796	55949	Mm.2718	NM_018796	ENSMUSG00000025967	Eef1b2	2810017J07Rik|Eef1b	eukaryotic translation elongation factor 1 beta 2	protein-coding
MACS_peak_3110	chr13	81024669	81025299	+	48.41	NA	intron (NM_001042591, intron 1 of 7)	CpG	2301	NM_001042591	105171	Mm.423137	NM_001042591	ENSMUSG00000074794	Arrdc3	AI450344|mKIAA1376	arrestin domain containing 3	protein-coding
MACS_peak_7930	chr4	148000733	148000931	+	48.39	NA	non-coding (NR_027864, exon 1 of 8)	non-coding (NR_027864, exon 1 of 8)	273	NR_027864	230908	Mm.22453	NM_145556	ENSMUSG00000041459	Tardbp	1190002A23Rik|C85084|TDP-43|Tdp43	TAR DNA binding protein	protein-coding
MACS_peak_388	chr1	135027796	135027983	+	48.34	NA	5' UTR (NM_133819, exon 1 of 2)	5' UTR (NM_133819, exon 1 of 2)	146	NM_133819	108954	Mm.293628	NM_133819	ENSMUSG00000046062	Ppp1r15b	1810033K10Rik|AI606441|C530022L24Rik|CReP	protein phosphatase 1, regulatory (inhibitor) subunit 15b	protein-coding
MACS_peak_1444	chr11	50105698	50105862	+	48.27	NA	promoter-TSS (NM_175334)	promoter-TSS (NM_175334)	58	NM_175334	103806	Mm.51116	NM_175334	ENSMUSG00000050567	Maml1	AI644666|AW743257|D930008C07Rik|Mam-1|Mam1|mKIAA0200	mastermind like 1 (Drosophila)	protein-coding
MACS_peak_818	chr10	57786296	57786451	+	48.27	NA	5' UTR (NM_026148, exon 1 of 10)	5' UTR (NM_026148, exon 1 of 10)	159	NM_026148	110829	Mm.57734	NM_026148	ENSMUSG00000019920	Lims1	2310016J22Rik|4921524A02Rik|AI507642|AU021743|AW551584|C430041B13Rik|Lims1l|PINCH|PINCH1	LIM and senescent cell antigen-like domains 1	protein-coding
MACS_peak_5649	chr19	29175457	29175688	+	48.27	NA	promoter-TSS (NM_021525)	promoter-TSS (NM_021525)	-293	NM_021525	59028	Mm.28630	NM_021525	ENSMUSG00000024785	Rcl1	2310040A02Rik|AI789745|C76567|RPCL1|Rnac	RNA terminal phosphate cyclase-like 1	protein-coding
MACS_peak_11352	chr9	106350926	106351315	+	48.17	NA	intron (NM_029631, intron 1 of 3)	intron (NM_029631, intron 1 of 3)	149	NM_029631	76491	Mm.335427	NM_029631	ENSMUSG00000042073	Abhd14b	1810013B01Rik	abhydrolase domain containing 14b	protein-coding
MACS_peak_2137	chr11	109512204	109512424	+	48.11	NA	promoter-TSS (NM_021880)	promoter-TSS (NM_021880)	51	NM_021880	19084	Mm.30039	NM_021880	ENSMUSG00000020612	Prkar1a	1300018C22Rik|RIalpha|Tse-1|Tse1	protein kinase, cAMP dependent regulatory, type I, alpha	protein-coding
MACS_peak_9402	chr7	13623335	13623542	+	48.10	NA	promoter-TSS (NM_001243968)	promoter-TSS (NM_001243968)	-111	NM_145578	22192	Mm.196580	NM_145578	ENSMUSG00000005575	Ube2m	2510040H03Rik|UBC12|Ubc-rs2	ubiquitin-conjugating enzyme E2M	protein-coding
MACS_peak_11103	chr9	59139360	59139557	+	48.08	NA	promoter-TSS (NM_028121)	promoter-TSS (NM_028121)	79	NM_028121	72141	Mm.22456	NM_028121	ENSMUSG00000025236	Adpgk	2610017G09Rik|Adp-gk|C77577	ADP-dependent glucokinase	protein-coding
MACS_peak_7899	chr4	141173835	141174005	+	48.00	NA	TTS (NM_001013780)	TTS (NM_001013780)	628	NM_145987	213989	Mm.34891	NM_145987	ENSMUSG00000043085	Tmem82	-	transmembrane protein 82	protein-coding
MACS_peak_1900	chr11	94071665	94071863	+	47.99	NA	Intergenic	CpG	-1004	NM_009427	22057	Mm.259673	NM_009427	ENSMUSG00000037573	Tob1	Tob|Trob	transducer of ErbB-2.1	protein-coding
MACS_peak_6622	chr2	167363646	167363838	+	47.99	NA	promoter-TSS (NM_011427)	promoter-TSS (NM_011427)	15	NM_011427	20613	Mm.2093	NM_011427	ENSMUSG00000042821	Snai1	AI194338|Sna|Sna1|Snail|Snail1	snail family zinc finger 1	protein-coding
MACS_peak_4035	chr15	99705693	99705874	+	47.96	NA	5' UTR (NM_001113545, exon 1 of 11)	5' UTR (NM_001113545, exon 1 of 11)	104	NM_001113545	65970	Mm.33207	NM_023063	ENSMUSG00000023022	Lima1	Eplin	LIM domain and actin binding 1	protein-coding
MACS_peak_4107	chr16	4639867	4640108	+	47.96	NA	promoter-TSS (NM_139307)	promoter-TSS (NM_139307)	42	NM_139307	246154	Mm.482140	NM_139307	ENSMUSG00000039646	Vasn	2610528G05Rik|Atia|Slitl2	vasorin	protein-coding
MACS_peak_2559	chr12	83270329	83270525	+	47.96	NA	promoter-TSS (NM_001167983)	promoter-TSS (NM_001167983)	-576	NM_001167983	217692	Mm.261333	NM_172579	ENSMUSG00000042700	Sipa1l1	4931426N11Rik|AW213287|Spar|mKIAA0440	signal-induced proliferation-associated 1 like 1	protein-coding
MACS_peak_10064	chr7	134913160	134913499	+	47.96	NA	promoter-TSS (NM_198424)	promoter-TSS (NM_198424)	0	NM_198424	269999	Mm.36852	NM_198424	ENSMUSG00000043964	Orai3	9930124N15|BC061259|Tmem142c	ORAI calcium release-activated calcium modulator 3	protein-coding
MACS_peak_6940	chr3	89197709	89197919	+	47.96	NA	promoter-TSS (NR_040404)	promoter-TSS (NR_040404)	-398	NR_040404	545539	Mm.393389	NR_040403	ENSMUSG00000074466	Gm15417	ENSMUSG00000074466|OTTMUSG00000021274	predicted gene 15417	ncRNA
MACS_peak_7264	chr4	8574185	8574615	+	47.96	NA	Intergenic	CpG	-43153	NM_001277149	320790	Mm.138792	NM_001033395	ENSMUSG00000041235	Chd7	A730019I05Rik|Cycn|Cyn|Dz|Edy|Flo|GENA 47|GENA 60|Gena 52|Lda|Mt|Obt|Todo|WBE1|Whi|metis	chromodomain helicase DNA binding protein 7	protein-coding
MACS_peak_9424	chr7	17366655	17366822	+	47.96	NA	promoter-TSS (NM_009201)	promoter-TSS (NM_009201)	43	NM_009201	20514	Mm.1056	NM_009201	ENSMUSG00000001918	Slc1a5	AAAT|ASCT2|ATBO|M7V1|M7VS1|R16|RDRC|Slc1a7	solute carrier family 1 (neutral amino acid transporter), member 5	protein-coding
MACS_peak_8844	chr6	34426317	34426443	+	47.96	NA	promoter-TSS (NM_007563)	promoter-TSS (NM_007563)	24	NM_007563	12183	Mm.282863	NM_007563	ENSMUSG00000038871	Bpgm	AI323730|AL022789|C86192	2,3-bisphosphoglycerate mutase	protein-coding
MACS_peak_7906	chr4	141346427	141346619	+	47.94	NA	promoter-TSS (NM_172338)	promoter-TSS (NM_172338)	36	NM_172338	214063	Mm.39102	NM_172338		Dnajc16	2900037O03Rik|4732437J24Rik|D030060M24|mKIAA0962	DnaJ (Hsp40) homolog, subfamily C, member 16	protein-coding
MACS_peak_2112	chr11	106362609	106363032	+	47.94	NA	TTS (NR_030703)	TTS (NR_030703)	515	NR_030703	100216537		NR_030703	ENSMUSG00000065126	Snord104	-	small nucleolar RNA, C/D box 104	snoRNA
MACS_peak_8817	chr6	28371453	28371684	+	47.94	NA	5' UTR (NM_028900, exon 1 of 2)	5' UTR (NM_028900, exon 1 of 2)	156	NM_028900	74375	Mm.332950	NM_028900	ENSMUSG00000029708	Gcc1	4932417P04Rik	golgi coiled coil 1	protein-coding
MACS_peak_4600	chr17	24861138	24861410	+	47.92	NA	promoter-TSS (NM_026684)	promoter-TSS (NM_026684)	59	NM_026684	68342	Mm.1129	NM_026684	ENSMUSG00000040048	Ndufb10	0610011B04Rik|22kDa|PDSW	NADH dehydrogenase (ubiquinone) 1 beta subcomplex, 10	protein-coding
MACS_peak_6339	chr2	121854293	121854455	+	47.92	NA	promoter-TSS (NM_001256055)	promoter-TSS (NM_001256055)	55	NM_001256055	100042807	Mm.329403	NM_001256055	ENSMUSG00000043424	Eif3j2	ENSMUSG00000043424|Eif3j-2|Gm9781|eIF3 p35|eIF3j-B	eukaryotic translation initiation factor 3, subunit J2	protein-coding
MACS_peak_7725	chr4	128404803	128404963	+	47.92	NA	promoter-TSS (NM_001195083)	promoter-TSS (NM_001195083)	68	NM_001195083	54383	Mm.473738	NM_018774	ENSMUSG00000028796	Phc2	A3galt2|AA415044|D130050K19Rik|D4Ertd810e|Edr2|Mph2|p36	polyhomeotic-like 2 (Drosophila)	protein-coding
MACS_peak_4053	chr15	101004036	101004359	+	47.92	NA	promoter-TSS (NM_007395)	promoter-TSS (NM_007395)	-359	NM_007395	11479	Mm.308467	NM_007395	ENSMUSG00000000532	Acvr1b	6820432J04|ActR-IB|ActRIB|Acvrlk4|Alk4|SKR2	activin A receptor, type 1B	protein-coding
MACS_peak_7204	chr3	137940561	137940785	+	47.90	NA	promoter-TSS (NM_007409)	promoter-TSS (NM_007409)	64	NM_007409	11522	Mm.2409	NM_007409	ENSMUSG00000074207	Adh1	ADH-AA|AI194826|Adh-1|Adh-1-t|Adh-1e|Adh-1t|Adh-3e|Adh1-e|Adh1-t|Adh1tl|Adh3-e	alcohol dehydrogenase 1 (class I)	protein-coding
MACS_peak_8984	chr6	72312260	72312438	+	47.89	NA	promoter-TSS (NM_025607)	promoter-TSS (NM_025607)	26	NM_025607	66510	Mm.170023	NM_025607	ENSMUSG00000055850	Rnf181	1700047F16Rik|2500002L14Rik|6230415N01Rik|C77350	ring finger protein 181	protein-coding
MACS_peak_7831	chr4	135429630	135429790	+	47.84	NA	promoter-TSS (NM_026383)	promoter-TSS (NM_026383)	51	NM_026383	52830	Mm.29159	NM_026383	ENSMUSG00000028675	Pnrc2	0610011E17Rik|D4Bwg0593e	proline-rich nuclear receptor coactivator 2	protein-coding
MACS_peak_1615	chr11	68908679	68908934	+	47.84	NA	Intergenic	CpG	-3652	NM_011065	18626	Mm.7373	NM_011065	ENSMUSG00000020893	Per1	Per|m-rigui|mPer1	period circadian clock 1	protein-coding
MACS_peak_9776	chr7	74790292	74790506	+	47.84	NA	promoter-TSS (NM_027413)	promoter-TSS (NM_027413)	-277	NR_028143	67867	Mm.31247	NM_027413	ENSMUSG00000030556	Lrrc28	1300004K21Rik|2210012C09Rik|2310058O11Rik	leucine rich repeat containing 28	protein-coding
MACS_peak_6060	chr2	33323955	33324110	+	47.84	NA	promoter-TSS (NM_027947)	promoter-TSS (NM_027947)	20	NM_027947	71834	Mm.44186	NM_027947	ENSMUSG00000026788	Zbtb43	1700010E06Rik|Zfp297b|mKIAA0414	zinc finger and BTB domain containing 43	protein-coding
MACS_peak_7601	chr4	115273514	115273811	+	47.78	NA	exon (NM_001100181, exon 1 of 13)	exon (NM_001100181, exon 1 of 13)	119	NM_001100181	100040843	Mm.482683	NM_001100181	ENSMUSG00000063929	Cyp4a32	OTTMUSG00000008689	cytochrome P450, family 4, subfamily a, polypeptide 32	protein-coding
MACS_peak_1963	chr11	97887863	97888019	+	47.77	NA	promoter-TSS (NM_009078)	promoter-TSS (NM_009078)	-83	NM_001159483	19921	Mm.10247	NM_009078	ENSMUSG00000017404	Rpl19	-	ribosomal protein L19	protein-coding
MACS_peak_10279	chr8	26711896	26712298	+	47.76	NA	promoter-TSS (NM_001001735)	promoter-TSS (NM_001001735)	-681	NM_001001735	234135	Mm.217337	NM_001001735	ENSMUSG00000054823	Whsc1l1	6720429E03|A530023P05|AI528490|NSD3|WHISTLE	Wolf-Hirschhorn syndrome candidate 1-like 1 (human)	protein-coding
MACS_peak_2270	chr11	120353162	120353387	+	47.68	NA	5' UTR (NM_013770, exon 1 of 11)	5' UTR (NM_013770, exon 1 of 11)	123	NM_013770	27376	Mm.3991	NM_013770		Slc25a10	Dic	solute carrier family 25 (mitochondrial carrier, dicarboxylate transporter), member 10	protein-coding
MACS_peak_3467	chr14	62175431	62175657	+	47.64	NA	5' UTR (NM_025697, exon 1 of 5)	5' UTR (NM_025697, exon 1 of 5)	179	NM_025697	66674	Mm.282706	NM_025697	ENSMUSG00000021930	Spryd7	6330409N04Rik|Clld6	SPRY domain containing 7	protein-coding
MACS_peak_6174	chr2	75541758	75542063	+	47.64	NA	intron (NM_010902, intron 1 of 4)	CpG	788	NM_010902	18024	Mm.1025	NM_010902	ENSMUSG00000015839	Nfe2l2	AI194320|Nrf2	nuclear factor, erythroid derived 2, like 2	protein-coding
MACS_peak_3784	chr15	76137560	76137757	+	47.64	NA	promoter-TSS (NM_153122)	promoter-TSS (NM_153122)	17	NM_153122	75475	Mm.322738	NM_153122	ENSMUSG00000022562	Oplah	1700010G02Rik	5-oxoprolinase (ATP-hydrolysing)	protein-coding
MACS_peak_987	chr10	80289349	80289568	+	47.64	NA	promoter-TSS (NR_027656)	promoter-TSS (NR_027656)	17	NR_027656	100041965	Mm.328806	NR_027656		Oaz1-ps	ENSMUSG00000043801|Gm1823|Gm9786|Oaz-ps	ornithine decarboxylase antizyme 1, pseudogene	pseudo
MACS_peak_7589	chr4	108673219	108673513	+	47.63	NA	promoter-TSS (NM_146150)	promoter-TSS (NM_146150)	-44	NM_146150	230598	Mm.274950	NM_146150	ENSMUSG00000053510	Nrd1	2600011I06Rik|AI875733|NRD-C	nardilysin, N-arginine dibasic convertase, NRD convertase 1	protein-coding
MACS_peak_9335	chr6	149116153	149116371	+	47.56	NA	intron (NM_001113424, intron 5 of 6)	intron (NM_001113424, intron 5 of 6)	20972	NM_001113424	232566	Mm.209147	NM_001113424	ENSMUSG00000068250	Amn1	5830467E07Rik|A230083D09|C730024G19Rik	antagonist of mitotic exit network 1	protein-coding
MACS_peak_1302	chr11	5814904	5815182	+	47.55	NA	promoter-TSS (NM_001287386)	promoter-TSS (NM_001287386)	95	NM_001287386	103988	Mm.220358	NM_010292	ENSMUSG00000041798	Gck	GLK|Gk|Gls006|HK4|HKIV|HXKP|MODY2	glucokinase	protein-coding
MACS_peak_3286	chr14	27457626	27457828	+	47.55	NA	promoter-TSS (NM_007479)	promoter-TSS (NM_007479)	44	NM_007479	11843	Mm.297768	NM_007479	ENSMUSG00000021877	Arf4	AA407803	ADP-ribosylation factor 4	protein-coding
MACS_peak_1591	chr11	62364376	62364577	+	47.50	NA	promoter-TSS (NM_011664)	promoter-TSS (NM_011664)	-530	NM_011664	22187	Mm.282093	NM_011664		Ubb	AL033289|Rps27a|Uba52|Ubb2|Ubc	ubiquitin B	protein-coding
MACS_peak_9136	chr6	113276530	113276672	+	47.50	NA	promoter-TSS (NM_010957)	promoter-TSS (NM_010957)	-369	NM_010957	18294	Mm.43612	NM_010957	ENSMUSG00000030271	Ogg1	Mmh	8-oxoguanine DNA-glycosylase 1	protein-coding
MACS_peak_785	chr10	41607220	41607418	+	47.47	NA	promoter-TSS (NM_001013370)	promoter-TSS (NM_001013370)	74	NM_001013370	140742	Mm.139418	NM_001013370	ENSMUSG00000038332	Sesn1	1110002G11Rik|AU044290|Pa26|Sest1	sestrin 1	protein-coding
MACS_peak_6168	chr2	73749241	73749421	+	47.47	NA	promoter-TSS (NM_175015)	promoter-TSS (NM_175015)	20	NM_175015	228033	Mm.2966	NM_175015	ENSMUSG00000018770	Atp5g3	6030447M23	ATP synthase, H+ transporting, mitochondrial F0 complex, subunit C3 (subunit 9)	protein-coding
MACS_peak_9251	chr6	125330373	125330761	+	47.43	NA	promoter-TSS (NM_198604)	promoter-TSS (NM_198604)	-45	NM_198604	213522	Mm.333396	NM_198604	ENSMUSG00000038167	Plekhg6	BC026778|Gm155	pleckstrin homology domain containing, family G (with RhoGef domain) member 6	protein-coding
MACS_peak_1458	chr11	51420473	51420649	+	47.36	NA	promoter-TSS (NM_010448)	promoter-TSS (NM_010448)	-178	NM_010448	15384	Mm.256875	NM_010448	ENSMUSG00000020358	Hnrnpab	3010025C11Rik|CBF-A|Cgbfa|Hnrpab	heterogeneous nuclear ribonucleoprotein A/B	protein-coding
MACS_peak_5153	chr18	31794699	31794938	+	47.36	NA	intron (NM_172965, intron 1 of 20)	CpG	781	NM_172965	269003	Mm.194538	NM_172965	ENSMUSG00000024260	Sap130	2610304F09Rik|6720406D06	Sin3A associated protein	protein-coding
MACS_peak_11551	chrX	12164886	12165070	+	47.31	NA	promoter-TSS (NM_027439)	promoter-TSS (NM_027439)	93	NM_027439	70495	Mm.25148	NM_027439	ENSMUSG00000031007	Atp6ap2	(P)RR|5730403E06Rik|APT6M8-9|ATP6M8-9|Atp6ip2|M8-9	ATPase, H+ transporting, lysosomal accessory protein 2	protein-coding
MACS_peak_2955	chr13	43576525	43576685	+	47.31	NA	promoter-TSS (NM_019930)	promoter-TSS (NM_019930)	-263	NM_019930	56705	Mm.148781	NM_019930	ENSMUSG00000038546	Ranbp9	IBAP-1|Ibap1|RanBPM	RAN binding protein 9	protein-coding
MACS_peak_1886	chr11	89864040	89864228	+	47.31	NA	promoter-TSS (NM_008796)	promoter-TSS (NM_008796)	74	NM_008796	18559	Mm.5062	NM_008796		Pctp	PC-TP|StarD2	phosphatidylcholine transfer protein	protein-coding
MACS_peak_8225	chr5	50450085	50450229	+	47.31	NA	promoter-TSS (NM_133911)	promoter-TSS (NM_133911)	78	NM_133911	70693	Mm.272974	NM_133911	ENSMUSG00000029090	Gpr125	3830613O22Rik|AU044632|Tem5-like	G protein-coupled receptor 125	protein-coding
MACS_peak_10687	chr8	113782950	113783344	+	47.31	NA	promoter-TSS (NM_009149)	promoter-TSS (NM_009149)	-45	NM_009149	20340	Mm.276271	NM_009149	ENSMUSG00000003316	Glg1	AI593353|AW537898|CFR|CFR-1|ESL-1|MG-160|MG160|Selel	golgi apparatus protein 1	protein-coding
MACS_peak_5843	chr19	60656689	60656918	+	47.31	NA	5' UTR (NM_001172097, exon 1 of 7)	5' UTR (NM_001172097, exon 1 of 7)	123	NM_001172097	78832	Mm.259026	NM_030197	ENSMUSG00000033417	Cacul1	2700078E11Rik|2810417M16Rik|9830127L17Rik|AI450346|D130033C15Rik	CDK2 associated, cullin domain 1	protein-coding
MACS_peak_631	chr1	186706766	186706941	+	47.31	NA	promoter-TSS (NM_178692)	promoter-TSS (NM_178692)	62	NM_178692	226777	Mm.169542	NM_178692	ENSMUSG00000039349	C130074G19Rik	-	RIKEN cDNA C130074G19 gene	protein-coding
MACS_peak_2478	chr12	70465140	70465458	+	47.31	NA	Intergenic	Intergenic	-7136	NM_025441	66244	Mm.46705	NM_025441	ENSMUSG00000020982	Nemf	1500011I12Rik|4933405E14Rik|Sdccag1	nuclear export mediator factor	protein-coding
MACS_peak_3283	chr14	27398894	27399214	+	47.31	NA	promoter-TSS (NM_001134465)	promoter-TSS (NM_001134465)	18	NM_145969	211922	Mm.260512	NM_145969	ENSMUSG00000040818	Dennd6a	Fam116a	DENN/MADD domain containing 6A	protein-coding
MACS_peak_2867	chr13	23636283	23636445	+	47.31	NA	exon (NM_013548, exon 1 of 1)	exon (NM_013548, exon 1 of 1)	443	NM_013548	260423	Mm.221389	NM_013548	ENSMUSG00000059309	Hist1h3f	H3.2-221|Hist1	histone cluster 1, H3f	protein-coding
MACS_peak_10930	chr9	31193521	31193688	+	47.29	NA	promoter-TSS (NM_172766)	promoter-TSS (NM_172766)	-173	NM_172766	235134	Mm.238146	NM_172766	ENSMUSG00000042185	Nfrkb	A530090G11Rik	nuclear factor related to kappa B binding protein	protein-coding
MACS_peak_2415	chr12	53107338	53107530	+	47.29	NA	promoter-TSS (NM_029545)	promoter-TSS (NM_029545)	54	NM_029545	328092	Mm.2821	NM_029545	ENSMUSG00000020956	Dtd2	4930578F06Rik|6530401N04Rik|B830049N13Rik	D-tyrosyl-tRNA deacylase 2	protein-coding
MACS_peak_4852	chr17	46841779	46841994	+	47.28	NA	promoter-TSS (NM_009358)	promoter-TSS (NM_009358)	65	NM_009358	21770	Mm.295009	NM_009358	ENSMUSG00000059409	Ppp2r5d	B'delta|TEG-271|Tex271	protein phosphatase 2, regulatory subunit B', delta	protein-coding
MACS_peak_10327	chr8	42460181	42460370	+	47.28	NA	promoter-TSS (NM_019734)	promoter-TSS (NM_019734)	-224	NM_019734	11886	Mm.22547	NM_019734	ENSMUSG00000031591	Asah1	2310081N20Rik|AC|Asah	N-acylsphingosine amidohydrolase 1	protein-coding
[truncated: 10,169 more rows]
