# Supplementary material for: Remodeling of epigenome and transcriptome landscapes with aging in mice reveals widespread induction of inflammatory responses
Source: HighWire-hosted journal article supplement (doi:10.1101/gr.240093.118), 2019-03-11
Supplement: Supplemental_Code_Figure3_Machine_learning.zip [file HOMER_olfactoryBulb_8weeks_Pol2_peaks.xls]

PeakID (cmd=annotatePeaks.pl olfactoryBulb_8weeks_Pol2_peaks.bed mm9)	Chr	Start	End	Strand	Peak Score	Focus Ratio/Region Size	Annotation	Detailed Annotation	Distance to TSS	Nearest PromoterID	Entrez ID	Nearest Unigene	Nearest Refseq	Nearest Ensembl	Gene Name	Gene Alias	Gene Description	Gene Type
MACS_peak_2695	chr11	94072654	94072979	+	368.03	NA	promoter-TSS (NM_009427)	promoter-TSS (NM_009427)	48	NM_009427	22057	Mm.259673	NM_009427	ENSMUSG00000037573	Tob1	Tob|Trob	transducer of ErbB-2.1	protein-coding
MACS_peak_7866	chr19	5802529	5802787	+	316.20	NA	promoter-TSS (NR_002847)	promoter-TSS (NR_002847)	13	NR_002847	72289	Mm.298256	NR_002847	ENSMUSG00000092341	Malat1	2210401K01Rik|9430072K23Rik|AI647968|Neat2	metastasis associated lung adenocarcinoma transcript 1 (non-coding RNA)	ncRNA
MACS_peak_2366	chr11	69571520	69572448	+	301.05	NA	5' UTR (NM_001291068, exon 1 of 29)	5' UTR (NM_001291068, exon 1 of 29)	151	NM_001291068	20020	Mm.16533	NM_009089	ENSMUSG00000005198	Polr2a	220kDa|Rpb1|Rpo2-1	polymerase (RNA) II (DNA directed) polypeptide A	protein-coding
MACS_peak_10290	chr3	108374506	108374827	+	274.81	NA	promoter-TSS (NM_025444)	promoter-TSS (NM_025444)	49	NM_025444	99730	Mm.24431	NM_025444		Taf13	1810004N01Rik|2010309N11Rik|AI847295|TAFII18	TAF13 RNA polymerase II, TATA box binding protein (TBP)-associated factor	protein-coding
MACS_peak_15119	chr8	73222410	73223117	+	270.03	NA	5' UTR (NM_001286944, exon 1 of 1)	5' UTR (NM_001286944, exon 1 of 1)	1125	NM_001286944	16478	Mm.419851	NM_010592	ENSMUSG00000071076	Jund	Jund1	jun D proto-oncogene	protein-coding
MACS_peak_11447	chr4	150228826	150229541	+	247.09	NA	promoter-TSS (NR_040649)	promoter-TSS (NR_040649)	-17	NM_133753	74155	Mm.318841	NM_133753	ENSMUSG00000028967	Errfi1	1300002F13Rik|AI788755|Mig-6|Mig6|RALT	ERBB receptor feedback inhibitor 1	protein-coding
MACS_peak_7417	chr18	34919062	34919514	+	243.29	NA	intron (NM_175104, intron 1 of 4)	CpG	728	NM_175104	66306	Mm.29424	NM_175104	ENSMUSG00000034300	Fam53c	2810012G03Rik|Gm21179	family with sequence similarity 53, member C	protein-coding
MACS_peak_14811	chr8	11557730	11558132	+	242.04	NA	intron (NM_011919, intron 1 of 1)	CpG	1865	NM_011919	26356	Mm.25709	NM_011919	ENSMUSG00000045969	Ing1	2610028J21Rik|AA407184|AI875420|mING1h|p33Ing1|p37Ing1b	inhibitor of growth family, member 1	protein-coding
MACS_peak_8577	chr2	29821074	29821408	+	237.75	NA	5' UTR (NM_001177667, exon 1 of 57)	5' UTR (NM_001177667, exon 1 of 57)	161	NM_001076554	20740	Mm.204969	NM_001076554	ENSMUSG00000057738	Sptan1	2610027H02Rik|Spna-2|Spna2	spectrin alpha, non-erythrocytic 1	protein-coding
MACS_peak_2279	chr11	61668358	61668963	+	237.75	NA	promoter-TSS (NM_013881)	promoter-TSS (NM_013881)	-66	NM_013881	29869	Mm.162025	NM_013881	ENSMUSG00000004798	Ulk2	A830085I22Rik|AU015340|Unc51.2|mKIAA0623	unc-51 like kinase 2	protein-coding
MACS_peak_3130	chr11	117515266	117515976	+	233.09	NA	promoter-TSS (NM_198022)	promoter-TSS (NM_198022)	18	NM_198022	217351	Mm.40272	NM_198022	ENSMUSG00000025571	Tnrc6c	9930033H14Rik|mKIAA1582	trinucleotide repeat containing 6C	protein-coding
MACS_peak_10288	chr3	108357381	108357816	+	228.82	NA	promoter-TSS (NR_028538)	promoter-TSS (NR_028538)	-278	NR_028538	100217438		NR_028538		Scarna2	MBII-382	small Cajal body-specific RNA 2	ncRNA
MACS_peak_3093	chr11	115885284	115885949	+	226.64	NA	intron (NM_008211, intron 1 of 3)	CpG-2829	202	NM_008211	15081	Mm.18516	NM_008211	ENSMUSG00000016559	H3f3b	9430068D06Rik|H3.3B	H3 histone, family 3B	protein-coding
MACS_peak_1617	chr10	96079024	96079902	+	226.26	NA	promoter-TSS (NM_007569)	promoter-TSS (NM_007569)	-172	NM_007569	12226	Mm.23811	NM_007569	ENSMUSG00000036478	Btg1	AI426953|AW546738	B cell translocation gene 1, anti-proliferative	protein-coding
MACS_peak_4914	chr14	63379321	63380541	+	223.18	NA	promoter-TSS (NM_008715)	promoter-TSS (NM_008715)	18	NM_008715	18130	Mm.319684	NM_008715	ENSMUSG00000035161	Ints6	2900075H24Rik|AI480962|DICE1|Ddx26|HDB|Notch2l	integrator complex subunit 6	protein-coding
MACS_peak_15300	chr8	87502425	87502858	+	218.42	NA	promoter-TSS (NM_008416)	promoter-TSS (NM_008416)	6	NM_008416	16477	Mm.1167	NM_008416	ENSMUSG00000052837	Junb	-	jun B proto-oncogene	protein-coding
MACS_peak_12563	chr5	143668189	143668546	+	213.21	NA	promoter-TSS (NM_007393)	promoter-TSS (NM_007393)	36	NM_007393	11461	Mm.328431	NM_007393	ENSMUSG00000029580	Actb	Actx|E430023M04Rik|beta-actin	actin, beta	protein-coding
MACS_peak_4518	chr13	111184968	111185474	+	211.96	NA	promoter-TSS (NM_152804)	promoter-TSS (NM_152804)	-31	NM_152804	20620	Mm.380	NM_152804	ENSMUSG00000021701	Plk2	Snk	polo-like kinase 2	protein-coding
MACS_peak_9596	chr2	166888013	166888943	+	210.21	NA	promoter-TSS (NM_001081005)	promoter-TSS (NM_001081005)	37	NM_001033196	98999	Mm.297074	NM_001033196	ENSMUSG00000039501	Znfx1	AI481105	zinc finger, NFX1-type containing 1	protein-coding
MACS_peak_568	chr1	135975397	135975796	+	209.60	NA	exon (NM_007570, exon 1 of 2)	exon (NM_007570, exon 1 of 2)	136	NM_007570	12227	Mm.392646	NM_007570	ENSMUSG00000020423	Btg2	AA959598|APRO1|Pc3|TIS21	B cell translocation gene 2, anti-proliferative	protein-coding
MACS_peak_9649	chr2	179711478	179711817	+	205.77	NA	promoter-TSS (NM_001081092)	promoter-TSS (NM_001081092)	89	NR_033782	66730	Mm.31773	NR_033782	ENSMUSG00000085704	4921531C22Rik	-	RIKEN cDNA 4921531C22 gene	ncRNA
MACS_peak_4028	chr13	23790148	23790463	+	205.36	NA	promoter-TSS (NM_178208)	promoter-TSS (NM_178208)	22	NM_178208	319155	Mm.261662	NM_178208		Hist1h4c	-	histone cluster 1, H4c	protein-coding
MACS_peak_7192	chr17	80606406	80606938	+	204.20	NA	promoter-TSS (NM_146083)	promoter-TSS (NM_146083)	-27	NM_001195485	225027	Mm.292016	NM_146083	ENSMUSG00000024097	Srsf7	35kDa|9430065L19Rik|9G8|NX-96|Sfrs7	serine/arginine-rich splicing factor 7	protein-coding
MACS_peak_662	chr1	156946548	156946878	+	201.95	NA	promoter-TSS (NM_010500)	promoter-TSS (NM_010500)	53	NM_010500	15939	Mm.12246	NM_010500	ENSMUSG00000056708	Ier5	-	immediate early response 5	protein-coding
MACS_peak_1443	chr10	80392697	80393034	+	201.73	NA	promoter-TSS (NM_008655)	promoter-TSS (NM_008655)	29	NM_008655	17873	Mm.1360	NM_008655	ENSMUSG00000015312	Gadd45b	AI323528|Myd118	growth arrest and DNA-damage-inducible 45 beta	protein-coding
MACS_peak_14338	chr7	106331008	106331447	+	199.32	NA	promoter-TSS (NM_026384)	promoter-TSS (NM_026384)	-4	NM_026384	67800	Mm.180189	NM_026384	ENSMUSG00000030747	Dgat2	0610010B06Rik|ARAT|DGAT-2	diacylglycerol O-acyltransferase 2	protein-coding
MACS_peak_3753	chr12	101437337	101437937	+	197.29	NA	promoter-TSS (NM_009790)	promoter-TSS (NM_009790)	-114	NM_009790	12313	Mm.285993	NM_009790	ENSMUSG00000001175	Calm1	AI256814|AI327027|AI461935|AL024000|CaM|Calm	calmodulin 1	protein-coding
MACS_peak_4539	chr13	114584419	114584953	+	197.24	NA	promoter-TSS (NM_172595)	promoter-TSS (NM_172595)	-30	NM_172595	218639	Mm.79837	NM_172595	ENSMUSG00000042348	Arl15	A430036I03|Arfrp2|C230032K13Rik	ADP-ribosylation factor-like 15	protein-coding
MACS_peak_7819	chr19	4989755	4990094	+	197.13	NA	promoter-TSS (NM_153553)	promoter-TSS (NM_153553)	47	NM_153553	225872	Mm.287867	NM_153553	ENSMUSG00000045903	Npas4	LE-PAS|Nxf	neuronal PAS domain protein 4	protein-coding
MACS_peak_16617	chr9	120842441	120842769	+	195.60	NA	promoter-TSS (NM_007614)	promoter-TSS (NM_007614)	87	NM_007614	12387	Mm.291928	NM_007614	ENSMUSG00000006932	Ctnnb1	Bfc|Catnb|Mesc	catenin (cadherin associated protein), beta 1	protein-coding
MACS_peak_13339	chr6	125115250	125115947	+	195.48	NA	5' UTR (NM_008084, exon 1 of 7)	5' UTR (NM_008084, exon 1 of 7)	193	NM_008084	14433	Mm.304088	NM_008084	ENSMUSG00000057666	Gapdh	Gapd	glyceraldehyde-3-phosphate dehydrogenase	protein-coding
MACS_peak_12305	chr5	124777363	124778390	+	194.73	NA	promoter-TSS (NM_028310)	promoter-TSS (NM_028310)	105	NR_102690	269702	Mm.60224	NM_001081323	ENSMUSG00000038126	Mphosph9	4930548D04Rik|9630025B04Rik|AW413446|AW547060|B930097C17Rik|C87456|MPP-9|MPP9	M-phase phosphoprotein 9	protein-coding
MACS_peak_3722	chr12	92826592	92827098	+	193.50	NA	intron (NM_175335, intron 1 of 8)	CpG	1244	NM_031391	83602	Mm.275728	NM_031391	ENSMUSG00000020962	Gtf2a1	6330549H03Rik|AA536742|AA959775|AW060250|TfIIAa/b|Tfiia1	general transcription factor II A, 1	protein-coding
MACS_peak_1185	chr10	58785674	58786300	+	191.33	NA	promoter-TSS (NM_011030)	promoter-TSS (NM_011030)	-57	NM_011030	18451	Mm.2212	NM_011030	ENSMUSG00000019916	P4ha1	AL022634|P4ha	procollagen-proline, 2-oxoglutarate 4-dioxygenase (proline 4-hydroxylase), alpha 1 polypeptide	protein-coding
MACS_peak_14610	chr7	135110870	135111215	+	188.87	NA	promoter-TSS (NM_139149)	promoter-TSS (NM_139149)	49	NM_139149	233908	Mm.277680	NM_139149	ENSMUSG00000030795	Fus	D430004D17Rik|D930039C12Rik|Fus1|Tls	fused in sarcoma	protein-coding
MACS_peak_6818	chr17	34256022	34257031	+	188.77	NA	non-coding (NR_037970, exon 1 of 13)	non-coding (NR_037970, exon 1 of 13)	319	NR_037970	14312	Mm.3444	NM_010238	ENSMUSG00000024335	Brd2	AW228947|D17H6S113E|Frg-1|Fsrg-1|Fsrg1|Nat|Ring3|Rnf3|mKIAA4005	bromodomain containing 2	protein-coding
MACS_peak_3069	chr11	115375489	115375811	+	188.52	NA	promoter-TSS (NM_008258)	promoter-TSS (NM_008258)	34	NM_008258	15374	Mm.1775	NM_008258	ENSMUSG00000020737	Hn1	-	hematological and neurological expressed sequence 1	protein-coding
MACS_peak_11268	chr4	134479426	134479729	+	186.90	NA	promoter-TSS (NM_023665)	promoter-TSS (NM_023665)	37	NM_023665	27981	Mm.331964	NM_023665	ENSMUSG00000037266	Rsrp1	2700043I21Rik|D4Ucla2|D4Wsu53e	arginine/serine rich protein 1	protein-coding
MACS_peak_11832	chr5	43624178	43625348	+	186.18	NA	promoter-TSS (NM_001177379)	promoter-TSS (NM_001177379)	61	NM_001177379	231207	Mm.7233	NM_175937	ENSMUSG00000039782	Cpeb2	A630055H10Rik|Cpe-bp2	cytoplasmic polyadenylation element binding protein 2	protein-coding
MACS_peak_5820	chr15	100325458	100325972	+	185.83	NA	promoter-TSS (NM_153407)	promoter-TSS (NM_153407)	-45	NM_153407	207785	Mm.294969	NM_153407	ENSMUSG00000044636	Csrnp2	CSRNP-2|Csnrp2|taip-12	cysteine-serine-rich nuclear protein 2	protein-coding
MACS_peak_10176	chr3	96044027	96044570	+	185.67	NA	promoter-TSS (NM_178212)	promoter-TSS (NM_178212)	-1	NM_178212	319192	Mm.5220	NM_178212	ENSMUSG00000064220	Hist2h2aa2	H2a-614|H2a-615	histone cluster 2, H2aa2	protein-coding
MACS_peak_100	chr1	36364495	36364800	+	185.33	NA	promoter-TSS (NM_001290726)	promoter-TSS (NM_001290726)	69	NM_001172205	214855	Mm.34316	NM_145996	ENSMUSG00000037447	Arid5a	D430024K22Rik|Mrf1	AT rich interactive domain 5A (MRF1-like)	protein-coding
MACS_peak_4174	chr13	51941930	51942265	+	185.27	NA	promoter-TSS (NM_011817)	promoter-TSS (NM_011817)	53	NM_011817	23882	Mm.281298	NM_011817	ENSMUSG00000021453	Gadd45g	AI327420|C86281|CR6|DDIT2|OIG37	growth arrest and DNA-damage-inducible 45 gamma	protein-coding
MACS_peak_250	chr1	64168181	64169068	+	182.82	NA	promoter-TSS (NM_033563)	promoter-TSS (NM_033563)	-661	NM_033563	93691	Mm.29466	NM_033563	ENSMUSG00000025959	Klf7	9830124P08Rik	Kruppel-like factor 7 (ubiquitous)	protein-coding
MACS_peak_15835	chr9	31019167	31019527	+	182.04	NA	promoter-TSS (NM_001102456)	promoter-TSS (NM_001102456)	53	NM_001102455	11804	Mm.19133	NM_009691	ENSMUSG00000031996	Aplp2	AI790698|APLP-2	amyloid beta (A4) precursor-like protein 2	protein-coding
MACS_peak_5981	chr16	14159595	14159935	+	180.19	NA	promoter-TSS (NM_001081154)	promoter-TSS (NM_001081154)	46	NR_030252	723916		NR_030252	miRBase:MI0003491	Mir484	Mirn484|mmu-mir-484	microRNA 484	ncRNA
MACS_peak_11678	chr5	28397787	28398122	+	179.54	NA	promoter-TSS (NM_153526)	promoter-TSS (NM_153526)	2	NM_153526	231070	Mm.30221	NM_153526	ENSMUSG00000045294	Insig1	1810013C12Rik|Insig-1	insulin induced gene 1	protein-coding
MACS_peak_2132	chr11	51420179	51420714	+	179.04	NA	promoter-TSS (NM_010448)	promoter-TSS (NM_010448)	-63	NM_010448	15384	Mm.256875	NM_010448	ENSMUSG00000020358	Hnrnpab	3010025C11Rik|CBF-A|Cgbfa|Hnrpab	heterogeneous nuclear ribonucleoprotein A/B	protein-coding
MACS_peak_3999	chr13	21923908	21924212	+	179.03	NA	promoter-TSS (NM_175657).2	promoter-TSS (NM_175657).2	-33	NM_175657	319161	Mm.261664	NM_175657		Hist1h4n	-	histone cluster 1, H4n	protein-coding
MACS_peak_8046	chr19	21346126	21346997	+	177.81	NA	promoter-TSS (NM_009551)	promoter-TSS (NM_009551)	-207	NM_009551	22682	Mm.292405	NM_009551		Zfand5	2310057A04Rik|5830475F03Rik|AA415485|Za20d2|Zfp216	zinc finger, AN1-type domain 5	protein-coding
MACS_peak_11197	chr4	131825936	131826236	+	177.50	NA	promoter-TSS (NR_002865)	promoter-TSS (NR_002865)	15	NR_002865	353373	Mm.424675	NR_002865		Rnu11	MBII-407|Mirn801|mir-801|mmu-mir-801	U11 small nuclear RNA	snRNA
MACS_peak_5024	chr14	76903944	76904547	+	177.50	NA	promoter-TSS (NM_009366)	promoter-TSS (NM_009366)	-72	NM_009366	21807	Mm.153272	NM_009366	ENSMUSG00000022010	Tsc22d1	AA589566|AW105905|Egr5|TSC-22|Tgfb1i4|Tsc|Tsc22	TSC22 domain family, member 1	protein-coding
MACS_peak_1425	chr10	80138951	80139216	+	177.03	NA	Intergenic	CpG	-4362	NM_021462	17347	Mm.42126	NM_021462	ENSMUSG00000020190	Mknk2	2010016G11Rik|Gprk7|Mnk2	MAP kinase-interacting serine/threonine kinase 2	protein-coding
MACS_peak_4381	chr13	81022457	81022892	+	176.28	NA	promoter-TSS (NM_001042591)	promoter-TSS (NM_001042591)	-9	NM_001042591	105171	Mm.423137	NM_001042591	ENSMUSG00000074794	Arrdc3	AI450344|mKIAA1376	arrestin domain containing 3	protein-coding
MACS_peak_16280	chr9	78329094	78329596	+	176.28	NA	intron (NM_010106, intron 1 of 7)	CpG	186	NM_010106	13627	Mm.138471	NM_010106	ENSMUSG00000037742	Eef1a1	-	eukaryotic translation elongation factor 1 alpha 1	protein-coding
MACS_peak_3833	chr12	111934078	111934997	+	175.62	NA	promoter-TSS (NM_010480)	promoter-TSS (NM_010480)	68	NM_010480	15519	Mm.1843	NM_010480	ENSMUSG00000021270	Hsp90aa1	86kDa|89kDa|AL024080|AL024147|Hsp86-1|Hsp89|Hsp90|Hspca|hsp4	heat shock protein 90, alpha (cytosolic), class A member 1	protein-coding
MACS_peak_7768	chr19	3767325	3768751	+	172.80	NA	5' UTR (NM_001167886, exon 2 of 11)	5' UTR (NM_001167886, exon 2 of 11)	617	NM_001167885	225888	Mm.278578	NM_144871	ENSMUSG00000045098	Suv420h1	AA117471|C630029K18Rik|KMT5B|Suv4-20h1	suppressor of variegation 4-20 homolog 1 (Drosophila)	protein-coding
MACS_peak_10177	chr3	96049034	96049644	+	171.65	NA	promoter-TSS (NM_178212).2	promoter-TSS (NM_178212).2	-41	NM_178212	319192	Mm.5220	NM_178212	ENSMUSG00000064220	Hist2h2aa2	H2a-614|H2a-615	histone cluster 2, H2aa2	protein-coding
MACS_peak_2514	chr11	77499308	77499946	+	171.56	NA	promoter-TSS (NM_001024205)	promoter-TSS (NM_001024205)	-14	NM_001024205	68564	Mm.428996	NM_001024205		Nufip2	1110001M19Rik|9530056D24Rik|AI256692|AI461731|PIG1|mKIAA1321	nuclear fragile X mental retardation protein interacting protein 2	protein-coding
MACS_peak_15889	chr9	40609256	40609568	+	171.13	NA	promoter-TSS (NM_031165)	promoter-TSS (NM_031165)	56	NM_031165	15481	Mm.290774	NM_031165	ENSMUSG00000015656	Hspa8	2410008N15Rik|Hsc70|Hsc71|Hsc73|Hsp73|Hspa10	heat shock protein 8	protein-coding
MACS_peak_7251	chr17	87845914	87846309	+	170.22	NA	intron (NM_007589, intron 1 of 5)	CpG	164	NM_007589	12314	Mm.329243	NM_007589	ENSMUSG00000036438	Calm2	1500001E21Rik|AL024017	calmodulin 2	protein-coding
MACS_peak_7295	chr18	6515905	6516510	+	168.14	NA	promoter-TSS (NM_007935)	promoter-TSS (NM_007935)	-101	NM_007935	13831	Mm.312133	NM_007935	ENSMUSG00000024240	Epc1	2400007E14Rik|5730566F07Rik|A930032N02Rik	enhancer of polycomb homolog 1 (Drosophila)	protein-coding
MACS_peak_2880	chr11	101526655	101527080	+	167.26	NA	promoter-TSS (NM_025404)	promoter-TSS (NM_025404)	12	NM_025404	80981	Mm.266840	NM_025404	ENSMUSG00000034936	Arl4d	1110036H21Rik|ARL6|AW456149|Arf4l|Arfl4|Arl5	ADP-ribosylation factor-like 4D	protein-coding
MACS_peak_9433	chr2	154616897	154617368	+	165.33	NA	5' UTR (NM_001139513, exon 1 of 9)	5' UTR (NM_001139513, exon 1 of 9)	286	NM_001139511	19383	Mm.221440	NM_023130	ENSMUSG00000027593	Raly	AI663842|Merc	hnRNP-associated with lethal yellow	protein-coding
MACS_peak_700	chr1	162965067	162965492	+	165.23	NA	promoter-TSS (NM_173424)	promoter-TSS (NM_173424)	-18	NR_002840	14455	Mm.270065	NR_002840	ENSMUSG00000053332	Gas5	Gas-5|Mir5117	growth arrest specific 5	ncRNA
MACS_peak_338	chr1	78654074	78654836	+	164.60	NA	promoter-TSS (NM_001136226)	promoter-TSS (NM_001136226)	55	NM_001001981	195434	Mm.276016	NM_001001981	ENSMUSG00000079470	Utp14b	4932411L21Rik|jsd	UTP14, U3 small nucleolar ribonucleoprotein, homolog B (yeast)	protein-coding
MACS_peak_3170	chr11	119804317	119804611	+	164.47	NA	promoter-TSS (NM_001037754)	promoter-TSS (NM_001037754)	58	NM_130862	108100	Mm.197534	NM_130862	ENSMUSG00000025372	Baiap2	IRSp53|R75030	brain-specific angiogenesis inhibitor 1-associated protein 2	protein-coding
MACS_peak_6733	chr17	29169149	29169810	+	164.25	NA	promoter-TSS (NR_036613)	promoter-TSS (NR_036613)	-126	NM_013663	20383	Mm.6787	NM_013663	ENSMUSG00000071172	Srsf3	AL024116|Sfrs3|X16	serine/arginine-rich splicing factor 3	protein-coding
MACS_peak_9246	chr2	130099702	130100565	+	163.96	NA	promoter-TSS (NM_024193)	promoter-TSS (NM_024193)	-15	NM_024193	67134	Mm.29363	NM_024193	ENSMUSG00000027405	Nop56	2310044F10Rik|Nol5a	NOP56 ribonucleoprotein	protein-coding
MACS_peak_8467	chr2	25079951	25080306	+	163.90	NA	promoter-TSS (NM_146116)	promoter-TSS (NM_146116)	94	NM_146116	227613	Mm.227260	NM_146116	ENSMUSG00000036752	Tubb4b	4930542G03Rik|Tubb2c|Tubb2c1	tubulin, beta 4B class IVB	protein-coding
MACS_peak_260	chr1	65233159	65233482	+	163.19	NA	promoter-TSS (NM_011086)	promoter-TSS (NM_011086)	61	NM_011086	18711	Mm.38370	NM_011086		Pikfyve	5230400C17Rik|Pip5k|Pip5k3|Pipk5k3|PipkIII|p235	phosphoinositide kinase, FYVE finger containing	protein-coding
MACS_peak_8689	chr2	34627492	34627799	+	161.99	NA	promoter-TSS (NM_001163434)	promoter-TSS (NM_001163434)	35	NM_022310	14828	Mm.330160	NM_022310	ENSMUSG00000026864	Hspa5	AL022860|AU019543|Bip|D2Wsu141e|D2Wsu17e|Grp78|Hsce70|SEZ-7|Sez7|baffled|mBiP	heat shock protein 5	protein-coding
MACS_peak_11148	chr4	128735042	128735628	+	161.61	NA	promoter-TSS (NM_029219)	promoter-TSS (NM_029219)	-180	NM_029219	75234	Mm.259672	NM_029219	ENSMUSG00000028793	Rnf19b	4930534K13Rik|4930555L03Rik|Ibrdc3	ring finger protein 19B	protein-coding
MACS_peak_1021	chr10	17442782	17443248	+	160.46	NA	promoter-TSS (NM_010828)	promoter-TSS (NM_010828)	-19	NM_010828	17684	Mm.272321	NM_010828	ENSMUSG00000039910	Cited2	AI835299|ER154-like|Mrg1|Msg2|p35srj	Cbp/p300-interacting transactivator, with Glu/Asp-rich carboxy-terminal domain, 2	protein-coding
MACS_peak_3724	chr12	92828155	92828515	+	159.69	NA	promoter-TSS (NM_031391)	promoter-TSS (NM_031391)	-246	NM_031391	83602	Mm.275728	NM_031391	ENSMUSG00000020962	Gtf2a1	6330549H03Rik|AA536742|AA959775|AW060250|TfIIAa/b|Tfiia1	general transcription factor II A, 1	protein-coding
MACS_peak_9175	chr2	121943849	121944420	+	159.52	NA	promoter-TSS (NM_145531)	promoter-TSS (NM_145531)	-12	NM_145531	214585	Mm.222303	NM_145531	ENSMUSG00000033396	Spg11	6030465E24Rik|A330015I11|C530005A01Rik	spastic paraplegia 11	protein-coding
MACS_peak_12335	chr5	125869910	125870341	+	157.51	NA	intron (NM_019639, intron 1 of 1)	CpG	262	NM_019639	22190	Mm.331	NM_019639	ENSMUSG00000008348	Ubc	2700054O04Rik|AI194771|Rps27a|TI-225|Uba52|Ubb	ubiquitin C	protein-coding
MACS_peak_5374	chr15	74502754	74503133	+	155.55	NA	promoter-TSS (NM_001276684)	promoter-TSS (NM_001276684)	57	NM_001276684	11838	Mm.491310	NM_018790	ENSMUSG00000022602	Arc	Arc3.1|C86064|arg3.1|mArc	activity regulated cytoskeletal-associated protein	protein-coding
MACS_peak_12976	chr6	72388864	72389703	+	154.66	NA	non-coding (NR_046011, exon 1 of 1)	non-coding (NR_046011, exon 1 of 1)	269	NM_145569	232087	Mm.29815	NM_145569	ENSMUSG00000053907	Mat2a	D630045P18Rik	methionine adenosyltransferase II, alpha	protein-coding
MACS_peak_1193	chr10	59414353	59414699	+	154.57	NA	promoter-TSS (NM_029083)	promoter-TSS (NM_029083)	-8	NM_029083	74747	Mm.21697	NM_029083	ENSMUSG00000020108	Ddit4	5830413E08Rik|AA415483|REDD1|Rtp801|dig2	DNA-damage-inducible transcript 4	protein-coding
MACS_peak_2291	chr11	62416009	62416641	+	154.57	NA	promoter-TSS (NR_028550)	promoter-TSS (NR_028550)	-54	NR_030738	69221	Mm.270874	NR_030738	ENSMUSG00000086841	2410006H16Rik	-	RIKEN cDNA 2410006H16 gene	ncRNA
MACS_peak_13605	chr7	16899082	16899589	+	154.48	NA	intron (NM_133234, intron 3 of 3)	CpG	4403	NM_133234	170770	Mm.7660	NM_133234	ENSMUSG00000002083	Bbc3	PUMA|PUMA/JFY1	BCL2 binding component 3	protein-coding
MACS_peak_3221	chr11	120685128	120685535	+	154.31	NA	intron (NM_007988, intron 1 of 42)	CpG	530	NM_007988	14104	Mm.236443	NM_007988	ENSMUSG00000025153	Fasn	A630082H08Rik|FAS	fatty acid synthase	protein-coding
MACS_peak_3118	chr11	116714191	116715365	+	154.08	NA	promoter-TSS (NM_011358)	promoter-TSS (NM_011358)	-370	NM_011358	20382	Mm.21841	NM_011358	ENSMUSG00000034120	Srsf2	D11Wsu175e|MRF-1|Pr264|SC35|Sfrs10|Sfrs2	serine/arginine-rich splicing factor 2	protein-coding
MACS_peak_5521	chr15	79913597	79913907	+	153.11	NA	promoter-TSS (NR_028281)	promoter-TSS (NR_028281)	84	NM_013762	27367	Mm.290771	NM_013762	ENSMUSG00000060036	Rpl3	F2|J1	ribosomal protein L3	protein-coding
MACS_peak_7381	chr18	25912783	25913087	+	153.03	NA	promoter-TSS (NM_001174074)	promoter-TSS (NM_001174074)	-451	NM_001174074	108013	Mm.266435	NM_133195	ENSMUSG00000024268	Celf4	A230070D14Rik|BRUNOL-4|Brul4|Brunol4|C130060B05Rik	CUGBP, Elav-like family member 4	protein-coding
MACS_peak_8865	chr2	73109861	73110209	+	153.00	NA	promoter-TSS (NM_001005343)	promoter-TSS (NM_001005343)	52	NM_001005343	381373	Mm.330293	NM_001005343		Sp9	-	trans-acting transcription factor 9	protein-coding
MACS_peak_11583	chr5	9161793	9162096	+	152.94	NA	promoter-TSS (NM_011806)	promoter-TSS (NM_011806)	-168	NM_011806	23857	Mm.22480	NM_011806	ENSMUSG00000042508	Dmtf1	Dimp|Dmp1	cyclin D binding myb-like transcription factor 1	protein-coding
MACS_peak_2106	chr11	50024078	50024597	+	152.75	NA	promoter-TSS (NM_011018)	promoter-TSS (NM_011018)	-15	NM_011018	18412	Mm.40828	NM_011018	ENSMUSG00000015837	Sqstm1	A170|OSF-6|Osi|STAP|STONE14|p62	sequestosome 1	protein-coding
MACS_peak_14905	chr8	26629092	26629481	+	152.04	NA	promoter-TSS (NM_001079909)	promoter-TSS (NM_001079909)	55	NM_001079908	14182	Mm.265716	NM_010206	ENSMUSG00000031565	Fgfr1	AW208770|Eask|FLG|Fgfr-1|Flt-2|Hspy|MFR|bFGF-R-1|c-fgr	fibroblast growth factor receptor 1	protein-coding
MACS_peak_7639	chr18	67883540	67884330	+	151.74	NA	intron (NM_001127177, intron 1 of 8)	CpG	340	NM_001127177	19255	Mm.260433	NM_008977	ENSMUSG00000024539	Ptpn2	AI325124|Ptpt|TC-PTP	protein tyrosine phosphatase, non-receptor type 2	protein-coding
MACS_peak_3278	chr12	8506570	8507219	+	151.06	NA	promoter-TSS (NM_007483)	promoter-TSS (NM_007483)	-103	NM_007483	11852	Mm.687	NM_007483	ENSMUSG00000054364	Rhob	AA017882|Arh6|Arhb	ras homolog gene family, member B	protein-coding
MACS_peak_5775	chr15	98783791	98784284	+	150.89	NA	promoter-TSS (NM_011653)	promoter-TSS (NM_011653)	-105	NM_011653	22142	Mm.405359	NM_011653	ENSMUSG00000072235	Tuba1a	Tuba-1|Tuba1	tubulin, alpha 1A	protein-coding
MACS_peak_5665	chr15	88692227	88693118	+	149.69	NA	promoter-TSS (NM_145478)	promoter-TSS (NM_145478)	48	NM_145478	223775	Mm.400129	NM_145478	ENSMUSG00000035828	Pim3	BC026639|Kid1	proviral integration site 3	protein-coding
MACS_peak_14536	chr7	133792796	133793343	+	149.59	NA	intron (NM_029339, intron 1 of 9)	CpG	246	NM_029339	75565	Mm.45686	NM_029339	ENSMUSG00000030714	Ccdc101	1700023O11Rik|9530025I05Rik	coiled-coil domain containing 101	protein-coding
MACS_peak_6724	chr17	28827931	28828598	+	149.23	NA	promoter-TSS (NM_011951)	promoter-TSS (NM_011951)	-23	NM_001168508	26416	Mm.311337	NM_011951	ENSMUSG00000053436	Mapk14	CSBP2|Crk1|Csbp1|Mxi2|PRKM14|PRKM15|p38|p38-alpha|p38MAPK|p38a|p38alpha	mitogen-activated protein kinase 14	protein-coding
MACS_peak_13569	chr7	13609426	13610038	+	149.21	NA	5' UTR (NM_011588, exon 1 of 17)	5' UTR (NM_011588, exon 1 of 17)	231	NM_011588	21849	Mm.15701	NM_011588	ENSMUSG00000005566	Trim28	AA408787|KAP-1|KRIP-1|MommeD9|Tif1b|Tif1beta	tripartite motif-containing 28	protein-coding
MACS_peak_723	chr1	166387607	166388924	+	148.06	NA	5' UTR (NM_009721, exon 1 of 6)	5' UTR (NM_009721, exon 1 of 6)	221	NM_009721	11931	Mm.4550	NM_009721	ENSMUSG00000026576	Atp1b1	Atp4b|Atpb|Atpb-1|NKbeta1	ATPase, Na+/K+ transporting, beta 1 polypeptide	protein-coding
MACS_peak_3408	chr12	45310858	45311553	+	147.76	NA	promoter-TSS (NM_013760)	promoter-TSS (NM_013760)	-95	NR_049203	100885842		NR_049203	miRBase:MI0019198	Mir5627	mmu-mir-5627	microRNA mir-5627	ncRNA
MACS_peak_4005	chr13	22133073	22133348	+	147.60	NA	promoter-TSS (NM_175656)	promoter-TSS (NM_175656)	21	NM_175656	319158	Mm.14775	NM_175656	ENSMUSG00000060639	Hist1h4i	-	histone cluster 1, H4i	protein-coding
MACS_peak_3998	chr13	21903482	21903804	+	147.53	NA	promoter-TSS (NM_175657)	promoter-TSS (NM_175657)	-10	NM_175657	319161	Mm.261664	NM_175657		Hist1h4n	-	histone cluster 1, H4n	protein-coding
MACS_peak_9525	chr2	162756749	162757847	+	147.07	NA	promoter-TSS (NM_026499)	promoter-TSS (NM_026499)	54	NM_026499	67996	Mm.24042	NM_026499	ENSMUSG00000016921	Srsf6	1210001E11Rik|AI314910|AW146126|Sfrs6	serine/arginine-rich splicing factor 6	protein-coding
MACS_peak_10415	chr3	138738323	138738853	+	146.38	NA	promoter-TSS (NM_001040690)	promoter-TSS (NM_001040690)	-423	NM_001040690	229877	Mm.28893	NM_145544	ENSMUSG00000028149	Rap1gds1	BC011279|GDS1	RAP1, GTP-GDP dissociation stimulator 1	protein-coding
MACS_peak_6885	chr17	36053822	36054139	+	146.05	NA	promoter-TSS (NM_001163818)	promoter-TSS (NM_001163818)	-161	NM_001163818	52040	Mm.29385	NM_175934	ENSMUSG00000039220	Ppp1r10	2610025H06Rik|Cat53|D17Ertd808e|Fb19|Pnuts	protein phosphatase 1, regulatory subunit 10	protein-coding
MACS_peak_14803	chr8	11008712	11009489	+	146.01	NA	promoter-TSS (NM_001081212)	promoter-TSS (NM_001081212)	-670	NM_001081212	384783	Mm.407207	NM_001081212	ENSMUSG00000038894	Irs2	Irs-2	insulin receptor substrate 2	protein-coding
MACS_peak_14091	chr7	54174945	54175592	+	145.89	NA	promoter-TSS (NM_021884)	promoter-TSS (NM_021884)	32	NM_021884	22088	Mm.241334	NM_021884	ENSMUSG00000014402	Tsg101	AI255943|CC2	tumor susceptibility gene 101	protein-coding
MACS_peak_864	chr1	182743409	182743787	+	145.46	NA	intron (NM_008210, intron 1 of 3)	CpG	136	NM_008210	15078	Mm.138832	NM_008210	ENSMUSG00000060743	H3f3a	H3.3A	H3 histone, family 3A	protein-coding
MACS_peak_4017	chr13	23654064	23654382	+	145.07	NA	promoter-TSS (NM_178205)	promoter-TSS (NM_178205)	11	NM_178205	319151	Mm.261658	NM_178205		Hist1h3e	H3-f|H3.1	histone cluster 1, H3e	protein-coding
MACS_peak_15639	chr8	125935167	125935675	+	144.47	NA	promoter-TSS (NM_023279)	promoter-TSS (NM_023279)	-43	NM_023279	22152	Mm.40068	NM_023279	ENSMUSG00000062380	Tubb3	3200002H15Rik|M(beta)3|M(beta)6	tubulin, beta 3 class III	protein-coding
MACS_peak_14990	chr8	47296171	47296701	+	144.41	NA	promoter-TSS (NM_007450)	promoter-TSS (NM_007450)	-73	NM_007450	11739	Mm.16228	NM_007450		Slc25a4	AU019225|Ant1	solute carrier family 25 (mitochondrial carrier, adenine nucleotide translocator), member 4	protein-coding
MACS_peak_3855	chr12	112910280	112910874	+	144.41	NA	promoter-TSS (NM_021273)	promoter-TSS (NM_021273)	-28	NM_021273	12709	Mm.16831	NM_021273	ENSMUSG00000001270	Ckb	B-CK|Bck|Ck-3|Ck3|Ckbb	creatine kinase, brain	protein-coding
MACS_peak_12291	chr5	124380385	124380955	+	144.30	NA	promoter-TSS (NM_001134767)	promoter-TSS (NM_001134767)	-28	NM_001134767	208908	Mm.243679	NM_001134767	ENSMUSG00000061882	Ccdc62	AI661708|Gm150	coiled-coil domain containing 62	protein-coding
MACS_peak_15919	chr9	44142653	44142989	+	143.49	NA	promoter-TSS (NM_010436)	promoter-TSS (NM_010436)	23	NM_010436	15270	Mm.245931	NM_010436	ENSMUSG00000049932	H2afx	AW228881|H2A.X|H2ax|Hist5-2ax|gammaH2ax	H2A histone family, member X	protein-coding
MACS_peak_12758	chr6	30254023	30254627	+	142.47	NA	5' UTR (NM_009459, exon 1 of 7)	5' UTR (NM_009459, exon 1 of 7)	214	NM_009459	22214	Mm.332967	NM_009459	ENSMUSG00000039159	Ube2h	1500009C23Rik|AI181839|AI326965|AI462483|AW227540|E2-20K|Gid3|N28148|Ubc8	ubiquitin-conjugating enzyme E2H	protein-coding
MACS_peak_1886	chr11	5661910	5662560	+	141.22	NA	promoter-TSS (NR_015577)	promoter-TSS (NR_015577)	82	NR_015577	76508	Mm.260203	NR_015577	ENSMUSG00000083844	2210015D19Rik	1600028I17Rik|AI596465	RIKEN cDNA 2210015D19 gene	ncRNA
MACS_peak_16630	chr9	122026177	122026710	+	140.68	NA	promoter-TSS (NM_001164572)	promoter-TSS (NM_001164572)	59	NM_133741	20623	Mm.257989	NM_133741	ENSMUSG00000038145	Snrk	2010012F07Rik|AI448042|AW547029|E030034B15|R74830|mKIAA0096	SNF related kinase	protein-coding
MACS_peak_626	chr1	145851066	145851383	+	140.10	NA	promoter-TSS (NM_009061)	promoter-TSS (NM_009061)	55	NM_009061	19735	Mm.28262	NM_009061	ENSMUSG00000026360	Rgs2	GOS8	regulator of G-protein signaling 2	protein-coding
MACS_peak_812	chr1	175297529	175297867	+	139.94	NA	5' UTR (NM_053199, exon 1 of 9)	5' UTR (NM_053199, exon 1 of 9)	128	NM_053199	94332	Mm.330524	NM_053199	ENSMUSG00000005338	Cadm3	BIgR|Igsf4b|Necl-1|Necl1|SynCAM3|Tsll1	cell adhesion molecule 3	protein-coding
MACS_peak_14205	chr7	86649515	86650063	+	139.63	NA	promoter-TSS (NR_029818)	promoter-TSS (NR_029818)	-361	NR_029818	723968		NR_029818	miRBase:MI0000721	Mir9-3	Mirn9-3|mmu-mir-9-3	microRNA 9-3	ncRNA
MACS_peak_9436	chr2	154876293	154876631	+	139.61	NA	exon (NM_015770, exon 4 of 4)	exon (NM_015770, exon 4 of 4)	23771	NM_016661	269378	Mm.330692	NM_016661	ENSMUSG00000027597	Ahcy	AA987153|AL024110|CuBP|SAHH	S-adenosylhomocysteine hydrolase	protein-coding
MACS_peak_9838	chr3	45182002	45182473	+	139.47	NA	promoter-TSS (NM_001098172)	promoter-TSS (NM_001098172)	-55	NR_045172	72511	Mm.140700	NR_045172	ENSMUSG00000097040	2610316D01Rik	-	RIKEN cDNA 2610316D01 gene	ncRNA
MACS_peak_12181	chr5	116081597	116082091	+	139.07	NA	promoter-TSS (NM_198163)	promoter-TSS (NM_198163)	-19	NR_027810	66123	Mm.133063	NM_021417		1110006O24Rik	-	RIKEN cDNA 1110006O24 gene	ncRNA
MACS_peak_2015	chr11	29592841	29593179	+	139.07	NA	promoter-TSS (NM_194051)	promoter-TSS (NM_194051)	112	NM_194052	68585	Mm.192580	NM_024226	ENSMUSG00000020458	Rtn4	1110020G17Rik|AA407876|AA409940|AA960376|ASY|C130026I10Rik|NOGO|NSP-CL|NgA|Nogo-A|Nogo-B|Nogo-C|mKIAA0886|mKIAA4153	reticulon 4	protein-coding
MACS_peak_10182	chr3	96073486	96074018	+	138.46	NA	TTS (NM_178215)	TTS (NM_178215)	129	NM_175666	319189	Mm.297655	NM_175666		Hist2h2bb	H2b-616	histone cluster 2, H2bb	protein-coding
MACS_peak_12432	chr5	136410256	136410755	+	138.29	NA	promoter-TSS (NM_018871)	promoter-TSS (NM_018871)	6	NM_018871	22628	Mm.233813	NM_018871	ENSMUSG00000051391	Ywhag	14-3-3gamma|D7Bwg1348e	tyrosine 3-monooxygenase/tryptophan 5-monooxygenase activation protein, gamma polypeptide	protein-coding
MACS_peak_12258	chr5	122951959	122953006	+	138.08	NA	promoter-TSS (NR_027838)	promoter-TSS (NR_027838)	-248	NR_027838	11938	Mm.227583	NM_009722	ENSMUSG00000029467	Atp2a2	9530097L16Rik|D5Wsu150e|SERCA2|SERCA2B|mKIAA4195	ATPase, Ca++ transporting, cardiac muscle, slow twitch 2	protein-coding
MACS_peak_8274	chr19	47142019	47142421	+	137.53	NA	promoter-TSS (NM_177342)	promoter-TSS (NM_177342)	-18	NM_177342	226182	Mm.301522	NM_177342	ENSMUSG00000025049	Taf5	6330528C20Rik|AV117817	TAF5 RNA polymerase II, TATA box binding protein (TBP)-associated factor	protein-coding
MACS_peak_8152	chr19	40587983	40588591	+	137.37	NA	promoter-TSS (NM_178362)	promoter-TSS (NM_178362)	15	NM_009166	20411	Mm.210815	NM_009166		Sorbs1	2310065E01Rik|9530001P15Rik|CAP|SH3P12|Sh3d5|mKIAA1296	sorbin and SH3 domain containing 1	protein-coding
MACS_peak_8085	chr19	29175316	29175748	+	137.16	NA	promoter-TSS (NM_021525)	promoter-TSS (NM_021525)	-333	NM_021525	59028	Mm.28630	NM_021525	ENSMUSG00000024785	Rcl1	2310040A02Rik|AI789745|C76567|RPCL1|Rnac	RNA terminal phosphate cyclase-like 1	protein-coding
MACS_peak_6655	chr17	26260354	26260668	+	136.73	NA	promoter-TSS (NM_024227)	promoter-TSS (NM_024227)	63	NM_024227	68611	Mm.273102	NM_024227	ENSMUSG00000024181	Mrpl28	1110015G04Rik|L28mt|MAAT1|MRP-L28|p15	mitochondrial ribosomal protein L28	protein-coding
MACS_peak_7845	chr19	5457295	5457787	+	136.63	NA	promoter-TSS (NM_001243307)	promoter-TSS (NM_001243307)	22	NM_198616	240514	Mm.329657	NM_198616		Ccdc85b	AI842788|BB115872	coiled-coil domain containing 85B	protein-coding
MACS_peak_1458	chr10	80639235	80639749	+	136.53	NA	intron (NM_007907, intron 1 of 13)	CpG	116	NM_007907	13629	Mm.326799	NM_007907	ENSMUSG00000034994	Eef2	Ef-2	eukaryotic translation elongation factor 2	protein-coding
MACS_peak_10975	chr4	115894169	115894484	+	136.47	NA	promoter-TSS (NM_181585)	promoter-TSS (NM_181585)	-193	NM_181585	18710	Mm.253819	NM_181585	ENSMUSG00000028698	Pik3r3	AA414954|p55pik	phosphatidylinositol 3 kinase, regulatory subunit, polypeptide 3 (p55)	protein-coding
MACS_peak_2985	chr11	106362117	106362422	+	136.42	NA	promoter-TSS (NR_030703)	promoter-TSS (NR_030703)	-36	NR_030703	100216537		NR_030703	ENSMUSG00000065126	Snord104	-	small nucleolar RNA, C/D box 104	snoRNA
MACS_peak_12144	chr5	115017288	115017686	+	136.39	NA	promoter-TSS (NM_001004180)	promoter-TSS (NM_001004180)	-773	NM_001004180	433940	Mm.194212	NM_001004180	ENSMUSG00000041930	Fam222a	-	family with sequence similarity 222, member A	protein-coding
MACS_peak_12154	chr5	115460795	115461228	+	135.68	NA	promoter-TSS (NM_029012)	promoter-TSS (NM_029012)	-522	NM_029012	74585	Mm.355894	NM_029012	ENSMUSG00000029550	Sppl3	4833416I09Rik|Psl4|Usmg3	signal peptide peptidase 3	protein-coding
MACS_peak_7150	chr17	73267070	73267828	+	135.55	NA	promoter-TSS (NM_029999)	promoter-TSS (NM_029999)	-196	NM_029999	77889	Mm.154109	NM_029999	ENSMUSG00000024063	Lbh	1810009F10Rik|6720416L16Rik	limb-bud and heart	protein-coding
MACS_peak_2454	chr11	74537668	74538212	+	135.18	NA	promoter-TSS (NM_013625)	promoter-TSS (NM_013625)	-54	NM_013625	18472	Mm.397111	NM_013625	ENSMUSG00000020745	Pafah1b1	LIS-1|Lis1|MMS10-U|Mdsh|Ms10u|Pafaha	platelet-activating factor acetylhydrolase, isoform 1b, subunit 1	protein-coding
MACS_peak_4051	chr13	29045030	29045930	+	134.85	NA	promoter-TSS (NM_009238)	promoter-TSS (NM_009238)	71	NM_009238	20677	Mm.240627	NM_009238		Sox4	AA682046|Sox-4	SRY (sex determining region Y)-box 4	protein-coding
MACS_peak_15381	chr8	97295839	97296270	+	134.82	NA	promoter-TSS (NM_009142)	promoter-TSS (NM_009142)	-26	NM_009142	20312	Mm.103711	NM_009142	ENSMUSG00000031778	Cx3cl1	AB030188|ABCD-3|AI848747|CX3C|Cxc3|D8Bwg0439e|Scyd1	chemokine (C-X3-C motif) ligand 1	protein-coding
MACS_peak_15399	chr8	98226560	98227143	+	134.22	NA	promoter-TSS (NM_145602)	promoter-TSS (NM_145602)	-86	NM_001195006	234593	Mm.29846	NM_145602	ENSMUSG00000036564	Ndrg4	D8Bwg1337e|Ndr1-rs|Ndr4|R74996|SMAP-8	N-myc downstream regulated gene 4	protein-coding
MACS_peak_8991	chr2	93797054	93797518	+	133.67	NA	promoter-TSS (NM_001145034)	promoter-TSS (NM_001145034)	-29	NM_001145034	620695	Mm.482106	NM_001145034		Gm13889	Ag2|OTTMUSG00000014994	predicted gene 13889	protein-coding
MACS_peak_5095	chr14	118531769	118532204	+	133.59	NA	promoter-TSS (NM_029578)	promoter-TSS (NM_029578)	1	NM_029578	76355	Mm.251537	NM_029578	ENSMUSG00000022130	Tgds	2610017J16Rik|2610025M23Rik|AI648925	TDP-glucose 4,6-dehydratase	protein-coding
MACS_peak_9149	chr2	120965806	120966450	+	133.52	NA	promoter-TSS (NM_001290811)	promoter-TSS (NM_001290811)	-36	NM_001290811	75894	Mm.384805	NM_029475	ENSMUSG00000027259	Adal	4930578F03Rik	adenosine deaminase-like	protein-coding
MACS_peak_6148	chr16	32608712	32609260	+	133.33	NA	promoter-TSS (NM_011638)	promoter-TSS (NM_011638)	4	NM_011638	22042	Mm.28683	NM_011638	ENSMUSG00000022797	Tfrc	2610028K12Rik|AI195355|AI426448|AU015758|CD71|E430033M20Rik|Mtvr-1|Mtvr1|TFR|TFR1|TR|Trfr|p90	transferrin receptor	protein-coding
MACS_peak_6095	chr16	23107263	23108063	+	133.24	NA	non-coding (NR_110335, exon 1 of 12)	non-coding (NR_110335, exon 1 of 12)	122	NR_110335	13682	Mm.260084	NM_013506	ENSMUSG00000022884	Eif4a2	4833432N07Rik|BM-010|Ddx2b|Eif4|eIF-4A-II|eIF4A-II	eukaryotic translation initiation factor 4A2	protein-coding
MACS_peak_5174	chr15	11925564	11925961	+	132.75	NA	promoter-TSS (NM_011294)	promoter-TSS (NM_011294)	0	NM_011294	20024	Mm.41746	NM_011294	ENSMUSG00000022205	Sub1	AI842364|P15|P9|Pc4|Rpo2tc1	SUB1 homolog (S. cerevisiae)	protein-coding
MACS_peak_2926	chr11	102977399	102978023	+	132.48	NA	promoter-TSS (NM_138753)	promoter-TSS (NM_138753)	72	NM_138753	192231	Mm.8763	NM_138753	ENSMUSG00000048878	Hexim1	7330426E13Rik|CLP-1|Clp1|HIS1	hexamethylene bis-acetamide inducible 1	protein-coding
MACS_peak_5124	chr14	122505968	122506555	+	132.47	NA	promoter-TSS (NM_080556)	promoter-TSS (NM_080556)	-43	NM_080556	68059	Mm.275191	NM_080556	ENSMUSG00000025544	Tm9sf2	1500001N15Rik|AA536814|D14Ertd64e|P76	transmembrane 9 superfamily member 2	protein-coding
MACS_peak_16018	chr9	54547087	54547569	+	132.01	NA	promoter-TSS (NM_021422)	promoter-TSS (NM_021422)	-38	NM_021422	58233	Mm.489676	NM_021422	ENSMUSG00000032285	Dnaja4	1110021L12Rik|AV358213|Dj4|Hsj4|mmDjA4	DnaJ (Hsp40) homolog, subfamily A, member 4	protein-coding
MACS_peak_4427	chr13	94073380	94073963	+	131.97	NA	promoter-TSS (NM_011982)	promoter-TSS (NM_011982)	-779	NM_147176	26556	Mm.37533	NM_011982		Homer1	PSD-Zip45|SYN47|Ves-1|homer-1|vesl-1	homer homolog 1 (Drosophila)	protein-coding
MACS_peak_923	chr1	192849854	192850474	+	131.85	NA	promoter-TSS (NM_001081259)	promoter-TSS (NM_001081259)	-95	NM_001081259	226844	Mm.134053	NM_001081259	ENSMUSG00000066595	Mfsd7b	9630055N22Rik|FLVCR|Flvcr1	major facilitator superfamily domain containing 7B	protein-coding
MACS_peak_6129	chr16	31275144	31275412	+	131.49	NA	promoter-TSS (NM_025800)	promoter-TSS (NM_025800)	85	NM_025800	66849	Mm.291593	NM_025800	ENSMUSG00000047714	Ppp1r2	0610025N14Rik|2310007G06Rik|4930440J04Rik|5430408E15Rik|D16Ertd248e|IPP-2	protein phosphatase 1, regulatory (inhibitor) subunit 2	protein-coding
MACS_peak_3928	chr13	5860151	5860585	+	131.29	NA	promoter-TSS (NM_011803)	promoter-TSS (NM_011803)	-367	NM_011803	23849	Mm.275036	NM_011803	ENSMUSG00000000078	Klf6	AI448727|BCD1|C86813|CPBP|Copeb|FM2|FM6|Ierepo1|Ierepo3|R75280|Zf9	Kruppel-like factor 6	protein-coding
MACS_peak_171	chr1	51535022	51535355	+	131.21	NA	promoter-TSS (NM_028696)	promoter-TSS (NM_028696)	55	NM_028696	109019	Mm.196290	NM_028696	ENSMUSG00000026107	Nabp1	4930434H03Rik|4930442A21Rik|4930488J04Rik|4933440J18Rik|5830411E10Rik|AI852561|Nbp1|Obfc2a|Ssb2	nucleic acid binding protein 1	protein-coding
MACS_peak_11226	chr4	132925576	132926001	+	130.94	NA	promoter-TSS (NR_039582)	promoter-TSS (NR_039582)	97	NR_039582	100628620		NR_039582	miRBase:MI0018031	Mir5122	mmu-mir-5122|mu-mir-5122	microRNA 5122	ncRNA
MACS_peak_7770	chr19	3851712	3852117	+	130.31	NA	non-coding (NR_073190, exon 1 of 13)	non-coding (NR_073190, exon 1 of 13)	141	NR_073190	12660	Mm.225505	NM_013490	ENSMUSG00000024843	Chka	CK|CK/EK-alpha|Chetk-alpha|Chk|ChoK|EK|EtnK-alpha	choline kinase alpha	protein-coding
MACS_peak_687	chr1	161161899	161162659	+	130.20	NA	promoter-TSS (NM_011931)	promoter-TSS (NM_011931)	-178	NM_011931	26374	Mm.328135	NM_011931	ENSMUSG00000040782	Rfwd2	AI316802|C80879|Cop1	ring finger and WD repeat domain 2	protein-coding
MACS_peak_5529	chr15	80085651	80086245	+	130.13	NA	5' UTR (NM_009716, exon 1 of 3)	5' UTR (NM_009716, exon 1 of 3)	334	NM_009716	11911	Mm.641	NM_009716	ENSMUSG00000042406	Atf4	Atf-4|C/ATF|CREB2|TAXREB67	activating transcription factor 4	protein-coding
MACS_peak_15606	chr8	124431393	124431693	+	129.84	NA	promoter-TSS (NM_001033485)	promoter-TSS (NM_001033485)	43	NM_011404	20539	Mm.27943	NM_011404	ENSMUSG00000040010	Slc7a5	4F2LC|D0H16S474E|LAT1|TA1	solute carrier family 7 (cationic amino acid transporter, y+ system), member 5	protein-coding
MACS_peak_2552	chr11	78959721	78960127	+	129.22	NA	promoter-TSS (NM_013571)	promoter-TSS (NM_013571)	-68	NM_013571	16706	Mm.4745	NM_013571	ENSMUSG00000018334	Ksr1	AW492498|B-KSR1|D11Bhm183e|D11Bhm184e|Ksr|RSU2|hb	kinase suppressor of ras 1	protein-coding
MACS_peak_9237	chr2	129024145	129024729	+	128.55	NA	promoter-TSS (NM_001159593)	promoter-TSS (NM_001159593)	-72	NM_015747	20515	Mm.272675	NM_015747	ENSMUSG00000027397	Slc20a1	AI607883|Glvr-1|Glvr1	solute carrier family 20, member 1	protein-coding
MACS_peak_9444	chr2	155207292	155208146	+	128.34	NA	5' UTR (NM_178111, exon 1 of 4)	5' UTR (NM_178111, exon 1 of 4)	127	NM_178111	68728	Mm.293605	NM_178111	ENSMUSG00000038375	Trp53inp2	1110029F20Rik|Tp53inp2	transformation related protein 53 inducible nuclear protein 2	protein-coding
MACS_peak_4961	chr14	67487394	67488255	+	128.27	NA	promoter-TSS (NM_009955)	promoter-TSS (NM_009955)	137	NM_001034881	432870	Mm.425890	NM_001034881	ENSMUSG00000075553	Gm5464	EG432870	predicted gene 5464	protein-coding
MACS_peak_5929	chr16	5233581	5233941	+	127.70	NA	promoter-TSS (NM_145362)	promoter-TSS (NM_145362)	47	NM_145362	208211	Mm.34581	NM_145362	ENSMUSG00000039427	Alg1	HMAT1|HMT1	asparagine-linked glycosylation 1 (beta-1,4-mannosyltransferase)	protein-coding
MACS_peak_9535	chr2	163470608	163471094	+	127.08	NA	promoter-TSS (NM_012032)	promoter-TSS (NM_012032)	28	NM_012032	26943	Mm.218473	NM_012032	ENSMUSG00000017707	Serinc3	AA959945|AA960047|AIGP1|DIFF33|TMS-1|Tde1	serine incorporator 3	protein-coding
MACS_peak_12164	chr5	115750711	115751035	+	126.91	NA	5' UTR (NM_019682, exon 1 of 3)	5' UTR (NM_019682, exon 1 of 3)	126	NM_019682	56455	Mm.256858	NM_019682	ENSMUSG00000009013	Dynll1	Dlc8|Dnclc1|Pin	dynein light chain LC8-type 1	protein-coding
MACS_peak_16149	chr9	64100968	64101624	+	125.81	NA	5' UTR (NM_008927, exon 1 of 11)	5' UTR (NM_008927, exon 1 of 11)	116	NM_008927	26395	Mm.248907	NM_008927	ENSMUSG00000004936	Map2k1	MAPKK1|MEKK1|Mek1|Prkmk1	mitogen-activated protein kinase kinase 1	protein-coding
MACS_peak_4151	chr13	48973841	48974403	+	125.78	NA	TTS (NM_001033268)	TTS (NM_001033268)	-7868	NM_011078	18676	Mm.486213	NM_011078	ENSMUSG00000038025	Phf2	GRC5	PHD finger protein 2	protein-coding
MACS_peak_1390	chr10	79630473	79630854	+	125.67	NA	promoter-TSS (NM_007705)	promoter-TSS (NM_007705)	77	NM_007705	12696	Mm.17898	NM_007705	ENSMUSG00000045193	Cirbp	Cirp|R74941	cold inducible RNA binding protein	protein-coding
MACS_peak_7989	chr19	10056879	10057462	+	125.62	NA	promoter-TSS (NM_010239)	promoter-TSS (NM_010239)	34	NM_010239	14319	Mm.1776	NM_010239	ENSMUSG00000024661	Fth1	FHC|Fth|HFt|MFH	ferritin heavy chain 1	protein-coding
MACS_peak_14304	chr7	99818195	99818964	+	125.59	NA	promoter-TSS (NM_029078)	promoter-TSS (NM_029078)	-157	NM_029078	74737	Mm.288645	NM_029078	ENSMUSG00000041328	Pcf11	2500001H09Rik|5730417B17Rik|C77803	cleavage and polyadenylation factor subunit homolog (S. cerevisiae)	protein-coding
MACS_peak_2290	chr11	62364835	62365201	+	125.49	NA	promoter-TSS (NM_011664)	promoter-TSS (NM_011664)	12	NM_011664	22187	Mm.282093	NM_011664		Ubb	AL033289|Rps27a|Uba52|Ubb2|Ubc	ubiquitin B	protein-coding
MACS_peak_12161	chr5	115722676	115723095	+	125.44	NA	promoter-TSS (NM_016698)	promoter-TSS (NM_016698)	19	NM_016698	50849	Mm.30051	NM_016698	ENSMUSG00000041740	Rnf10	AA675014|RIE2|mKIAA0262	ring finger protein 10	protein-coding
MACS_peak_3039	chr11	113062818	113063270	+	125.37	NA	non-coding (NR_015556, exon 1 of 3)	non-coding (NR_015556, exon 1 of 3)	108	NR_015556	72386	Mm.266961	NR_015556	ENSMUSG00000087259	2610035D17Rik	-	RIKEN cDNA 2610035D17 gene	ncRNA
MACS_peak_11199	chr4	131830014	131830552	+	125.35	NA	promoter-TSS (NM_025579)	promoter-TSS (NM_025579)	-7	NM_025579	66464	Mm.331926	NM_025579		Taf12	20kDa|2810422D08Rik|AW557038|Taf2J	TAF12 RNA polymerase II, TATA box binding protein (TBP)-associated factor	protein-coding
MACS_peak_1679	chr10	116813890	116814276	+	124.96	NA	promoter-TSS (NM_001013391)	promoter-TSS (NM_001013391)	-54	NM_001013391	432508	Mm.478881	NM_001013391	ENSMUSG00000055531	Cpsf6	4733401N12Rik|AI256641|CFIM|CFIM68|HPBRII-4|HPBRII-7	cleavage and polyadenylation specific factor 6	protein-coding
MACS_peak_14937	chr8	32278990	32279520	+	124.71	NA	promoter-TSS (NM_026453)	promoter-TSS (NM_026453)	-59	NM_026453	67920	Mm.289818	NM_026453	ENSMUSG00000031578	Mak16	2600016B03Rik|AI314911|Rbm13	MAK16 homolog (S. cerevisiae)	protein-coding
MACS_peak_2482	chr11	75401345	75401817	+	124.33	NA	promoter-TSS (NM_008850)	promoter-TSS (NM_008850)	-29	NM_008850	18738	Mm.3128	NM_008850	ENSMUSG00000017781	Pitpna	Pitpn|vb|vibrator	phosphatidylinositol transfer protein, alpha	protein-coding
MACS_peak_14989	chr8	47248670	47249245	+	123.70	NA	Intergenic	CpG	-5953	NM_025747	66756	Mm.133623	NM_025747	ENSMUSG00000031631	Cfap97	1110068E21Rik|4933411K20Rik|AW049273|Kiaa1430|mKIAA1430	cilia and flagella associated protein 97	protein-coding
MACS_peak_11377	chr4	141101953	141102649	+	123.65	NA	non-coding (NR_030695, exon 1 of 1)	non-coding (NR_030695, exon 1 of 1)	224	NR_030695	320456	Mm.32859	NM_177163		B330016D10Rik	-	RIKEN cDNA B330016D10 gene	ncRNA
MACS_peak_1284	chr10	74674786	74675325	+	123.64	NA	promoter-TSS (NM_001145826)	promoter-TSS (NM_001145826)	-80	NM_001145826	74392	Mm.27716	NM_153406	ENSMUSG00000033444	Specc1l	4930470P14Rik|4932439K10Rik|9530057A13Rik|AI317249|Cytsa|mKIAA0376	sperm antigen with calponin homology and coiled-coil domains 1-like	protein-coding
MACS_peak_10597	chr4	33335129	33335813	+	123.61	NA	5' UTR (NM_001033225, exon 1 of 2)	5' UTR (NM_001033225, exon 1 of 2)	291	NM_001033225	108767	Mm.27769	NM_001033225	ENSMUSG00000040128	Pnrc1	5730463C12Rik|B4-2|PRR2|Prol2	proline-rich nuclear receptor coactivator 1	protein-coding
MACS_peak_15971	chr9	47338346	47338620	+	122.93	NA	promoter-TSS (NM_207676)	promoter-TSS (NM_207676)	48	NM_018770	54725	Mm.234832	NM_018770	ENSMUSG00000032076	Cadm1	2900073G06Rik|3100001I08Rik|AI987920|Bl2|Igsf4|Igsf4a|Necl2|RA175|RA175A|RA175B|RA175C|RA175N|ST17|SgIGSF|SynCam|Tslc1	cell adhesion molecule 1	protein-coding
MACS_peak_15071	chr8	72273420	72273887	+	122.79	NA	intron (NM_001200023, intron 1 of 3)	CpG	208	NM_001200023	620419	Mm.460423	NM_001200023	ENSMUSG00000092260	Zfp963	-	zinc finger protein 963	protein-coding
MACS_peak_3704	chr12	88225414	88225872	+	122.79	NA	5' UTR (NM_145836, exon 1 of 1)	5' UTR (NM_145836, exon 1 of 1)	121	NM_145836	238330	Mm.248358	NM_145836	ENSMUSG00000034168	Irf2bpl	6430527G18Rik|Eap1	interferon regulatory factor 2 binding protein-like	protein-coding
MACS_peak_13216	chr6	115626416	115626938	+	122.60	NA	promoter-TSS (NM_029780)	promoter-TSS (NM_029780)	-24	NM_029780	110157	Mm.184163	NM_029780	ENSMUSG00000000441	Raf1	6430402F14Rik|AA990557|BB129353|Craf1|D830050J10Rik|Raf-1|c-Raf|v-Raf	v-raf-leukemia viral oncogene 1	protein-coding
MACS_peak_5812	chr15	100057934	100058238	+	122.54	NA	promoter-TSS (NM_007497)	promoter-TSS (NM_007497)	-204	NM_007497	11908	Mm.676	NM_007497	ENSMUSG00000023027	Atf1	-	activating transcription factor 1	protein-coding
MACS_peak_2991	chr11	106649598	106650840	+	122.31	NA	promoter-TSS (NM_001166685)	promoter-TSS (NM_001166685)	-347	NM_177088	320162	Mm.30524	NM_177088	ENSMUSG00000018372	Cep95	4732496G21Rik|AI118346|AI448335|Ccdc45|D330027A14Rik|F630025I20Rik	centrosomal protein 95	protein-coding
MACS_peak_12375	chr5	130647332	130647876	+	122.29	NA	promoter-TSS (NM_001199059)	promoter-TSS (NM_001199059)	-85	NM_001199059	56715	Mm.288639	NM_019983	ENSMUSG00000025340	Rabgef1	Rab5ef|Rabex5|Rin2	RAB guanine nucleotide exchange factor (GEF) 1	protein-coding
MACS_peak_7751	chr18	85121022	85121754	+	122.20	NA	promoter-TSS (NM_025969)	promoter-TSS (NM_025969)	-472	NM_025969	67105	Mm.250617	NM_025969	ENSMUSG00000024645	Timm21	1700034H14Rik|2700002I20Rik	tranlocase of inner mitochondrial membrane 21	protein-coding
MACS_peak_8181	chr19	42506002	42506549	+	121.16	NA	promoter-TSS (NM_145123)	promoter-TSS (NM_145123)	-2	NM_145123	72832	Mm.313558	NM_145123	ENSMUSG00000042401	Crtac1	2810454P21Rik|AW047536|Crtac1B|Lotus	cartilage acidic protein 1	protein-coding
MACS_peak_3190	chr11	120209484	120209908	+	120.74	NA	promoter-TSS (NR_038126)	promoter-TSS (NR_038126)	102	NM_009609	11465	Mm.196173	NM_009609	ENSMUSG00000062825	Actg1	AL023024|Actg|Actl|E51	actin, gamma, cytoplasmic 1	protein-coding
MACS_peak_10368	chr3	130412132	130412413	+	120.66	NA	promoter-TSS (NM_025509)	promoter-TSS (NM_025509)	90	NM_025509	66357	Mm.300697	NM_025509	ENSMUSG00000041084	Ostc	2310008M10Rik|5730557H03Rik	oligosaccharyltransferase complex subunit	protein-coding
MACS_peak_2356	chr11	69419270	69419531	+	120.65	NA	promoter-TSS (NM_013415)	promoter-TSS (NM_013415)	62	NM_013415	11932	Mm.235204	NM_013415	ENSMUSG00000041329	Atp1b2	Amog|Atpb-2	ATPase, Na+/K+ transporting, beta 2 polypeptide	protein-coding
MACS_peak_14547	chr7	134027926	134028414	+	120.46	NA	5' UTR (NM_001163774, exon 1 of 19)	5' UTR (NM_001163774, exon 1 of 19)	311	NM_001163775	381921	Mm.259634	NM_001163774	ENSMUSG00000059981	Taok2	1110033K02Rik|B230344N16|MAP3K17|PSK|PSK1|TAO1|TAO2|mKIAA0881	TAO kinase 2	protein-coding
MACS_peak_12100	chr5	111238879	111239216	+	120.36	NA	promoter-TSS (NM_009469)	promoter-TSS (NM_009469)	53	NM_009469	22241	Mm.271898	NM_009469	ENSMUSG00000029512	Ulk1	AU041434|Unc51.1|mKIAA0722	unc-51 like kinase 1	protein-coding
MACS_peak_2654	chr11	87800776	87801106	+	119.85	NA	promoter-TSS (NM_026556)	promoter-TSS (NM_026556)	94	NM_026556	68097	Mm.246436	NM_026556	ENSMUSG00000020483	Dynll2	1700064A15Rik|6720463E02Rik|C87222|DLC8|DLC8b|Dlc2	dynein light chain LC8-type 2	protein-coding
MACS_peak_12066	chr5	108697600	108698157	+	119.32	NA	promoter-TSS (NM_026106)	promoter-TSS (NM_026106)	-38	NM_026106	13486	Mm.303534	NM_026106	ENSMUSG00000029265	Dr1	1700121L09Rik|Dr1l|NC2|NC2beta	down-regulator of transcription 1	protein-coding
MACS_peak_6947	chr17	46169129	46169528	+	119.01	NA	promoter-TSS (NM_001287057)	promoter-TSS (NM_001287057)	-2	NM_001287057	22339	Mm.282184	NM_009505	ENSMUSG00000023951	Vegfa	Vegf|Vpf	vascular endothelial growth factor A	protein-coding
MACS_peak_9056	chr2	109757664	109757963	+	118.91	NA	promoter-TSS (NM_172671)	promoter-TSS (NM_172671)	9	NM_172671	107515	Mm.277351	NM_172671	ENSMUSG00000050199	Lgr4	9130225G07|A330106J01Rik|A930009A08Rik|Gpr48	leucine-rich repeat-containing G protein-coupled receptor 4	protein-coding
MACS_peak_7945	chr19	7557481	7557872	+	118.91	NA	5' UTR (NM_001271487, exon 1 of 8)	5' UTR (NM_001271487, exon 1 of 8)	105	NM_001271486	20168	Mm.246990	NM_053076	ENSMUSG00000024758	Rtn3	RTN3-A1	reticulon 3	protein-coding
MACS_peak_13720	chr7	25790654	25791025	+	118.85	NA	5' UTR (NM_001290469, exon 1 of 23)	5' UTR (NM_001290469, exon 1 of 23)	117	NM_001290469	232975	Mm.44101	NM_144921	ENSMUSG00000040907	Atp1a3	Atpa-2	ATPase, Na+/K+ transporting, alpha 3 polypeptide	protein-coding
MACS_peak_119	chr1	37597957	37598297	+	118.31	NA	promoter-TSS (NM_173870)	promoter-TSS (NM_173870)	-266	NM_173870	269181	Mm.25861	NM_173870	ENSMUSG00000026110	Mgat4a	9530018I07Rik|GnT-IVa|glcNAc-T-IVa	mannoside acetylglucosaminyltransferase 4, isoenzyme A	protein-coding
MACS_peak_10346	chr3	123211041	123211864	+	118.30	NA	promoter-TSS (NR_028573)	promoter-TSS (NR_028573)	-198	NR_028574	69895	Mm.260791	NR_028574		Snhg8	1110065M07Rik|2010109N14Rik	small nucleolar RNA host gene 8	ncRNA
MACS_peak_12958	chr6	71443805	71444184	+	118.00	NA	5' UTR (NM_009543, exon 1 of 4)	5' UTR (NM_009543, exon 1 of 4)	106	NM_009543	22644	Mm.422969	NM_009543	ENSMUSG00000052656	Rnf103	AW146237|AW212918|Zfp103|kf-1	ring finger protein 103	protein-coding
MACS_peak_11389	chr4	142751698	142752159	+	117.82	NA	intron (NM_001081355, intron 6 of 9)	CpG	-25863	NR_105988	102465618		NR_105988		Mir7021	mmu-mir-7021	microRNA mir-7021	ncRNA
MACS_peak_9277	chr2	132078712	132079281	+	117.82	NA	promoter-TSS (NM_011045)	promoter-TSS (NM_011045)	-80	NM_011045	18538	Mm.7141	NM_011045	ENSMUSG00000027342	Pcna	-	proliferating cell nuclear antigen	protein-coding
MACS_peak_13623	chr7	17529843	17530282	+	117.42	NA	promoter-TSS (NM_001099636)	promoter-TSS (NM_001099636)	31	NM_001099636	434128	Mm.483018	NM_001099636	ENSMUSG00000070802	Pnmal2	EG434128	PNMA-like 2	protein-coding
MACS_peak_5049	chr14	84843044	84843573	+	117.37	NA	promoter-TSS (NM_001013753)	promoter-TSS (NM_001013753)	-62	NM_001013753	219228	Mm.153643	NM_001013753	ENSMUSG00000035566	Pcdh17	C030033F14Rik|Gm78	protocadherin 17	protein-coding
MACS_peak_2010	chr11	29273268	29274149	+	117.37	NA	promoter-TSS (NM_176841)	promoter-TSS (NM_176841)	-464	NM_176841	108686	Mm.338284	NM_176841	ENSMUSG00000032740	Ccdc88a	A430106J12Rik|AI848406|Ape|C130096N06Rik|C330012F17Rik|D130005J21Rik|Girdin|Giv|Grdn|Hkrp1	coiled coil domain containing 88A	protein-coding
MACS_peak_16114	chr9	61970239	61970568	+	117.36	NA	promoter-TSS (NR_039595)	promoter-TSS (NR_039595)	-2	NR_039595	100628602		NR_039595	miRBase:MI0018045	Mir5133	mmu-mir-5133|mu-mir-5133	microRNA 5133	ncRNA
MACS_peak_1963	chr11	20991234	20991518	+	117.34	NA	promoter-TSS (NM_023324)	promoter-TSS (NM_023324)	49	NM_023324	67245	Mm.28957	NM_023324	ENSMUSG00000020134	Peli1	2810468L03Rik|A930031K15Rik|AA409794|AI586297|D11Ertd676e	pellino 1	protein-coding
MACS_peak_13951	chr7	46772907	46773516	+	117.28	NA	promoter-TSS (NM_001004139)	promoter-TSS (NM_001004139)	75	NM_001004139	70227	Mm.333800	NM_001004139	ENSMUSG00000068959	Zfp619	3000002G13Rik	zinc finger protein 619	protein-coding
MACS_peak_12564	chr5	143721933	143722262	+	117.14	NA	promoter-TSS (NM_007984)	promoter-TSS (NM_007984)	63	NM_007984	14086	Mm.289707	NM_007984	ENSMUSG00000029581	Fscn1	AI663989|Fan1|fascin-1	fascin homolog 1, actin bundling protein (Strongylocentrotus purpuratus)	protein-coding
MACS_peak_6360	chr16	94591749	94592545	+	117.10	NA	promoter-TSS (NM_001159618)	promoter-TSS (NM_001159618)	10	NM_001159618	56176	Mm.474449	NM_019543	ENSMUSG00000022940	Pigp	Dcrc|Dscr5	phosphatidylinositol glycan anchor biosynthesis, class P	protein-coding
MACS_peak_2115	chr11	50191148	50191646	+	116.86	NA	intron (NM_021510, intron 1 of 13)	CpG	176	NM_021510	59013	Mm.21740	NM_021510	ENSMUSG00000007850	Hnrnph1	AI642080|E430005G16Rik|Hnrnph|Hnrph1	heterogeneous nuclear ribonucleoprotein H1	protein-coding
MACS_peak_3968	chr13	17896820	17897598	+	116.86	NA	promoter-TSS (NM_027118)	promoter-TSS (NM_027118)	-278	NM_027118	69562	Mm.193924	NM_027118	ENSMUSG00000041297	Cdk13	2310015O17Rik|Cdc2l5	cyclin-dependent kinase 13	protein-coding
MACS_peak_10853	chr4	94718694	94718988	+	116.84	NA	promoter-TSS (NM_010591)	promoter-TSS (NM_010591)	72	NM_010591	16476	Mm.275071	NM_010591	ENSMUSG00000052684	Jun	AP-1|Junc|c-jun	jun proto-oncogene	protein-coding
MACS_peak_178	chr1	52289860	52290457	+	116.48	NA	promoter-TSS (NM_001113383)	promoter-TSS (NM_001113383)	-82	NM_001113383	14660	Mm.398608	NM_001081081	ENSMUSG00000026103	Gls	6330442B14|AI314027|B230365M23Rik	glutaminase	protein-coding
MACS_peak_8603	chr2	30329564	30329878	+	116.48	NA	promoter-TSS (NM_030244)	promoter-TSS (NM_030244)	-2	NM_030244	72500	Mm.295464	NM_030244	ENSMUSG00000089762	Ier5l	2610524G09Rik	immediate early response 5-like	protein-coding
MACS_peak_2186	chr11	55283125	55283471	+	116.29	NA	promoter-TSS (NM_013716)	promoter-TSS (NM_013716)	44	NM_013716	27041	Mm.39631	NM_013716		G3bp1	AI849976|B430204O07|C87777|G3bp|mKIAA4115	GTPase activating protein (SH3 domain) binding protein 1	protein-coding
MACS_peak_4233	chr13	55614534	55614956	+	115.98	NA	promoter-TSS (NM_001114088)	promoter-TSS (NM_001114088)	62	NM_026131	67399	Mm.275648	NM_026131	ENSMUSG00000021493	Pdlim7	LMP	PDZ and LIM domain 7	protein-coding
MACS_peak_3901	chr12	117519191	117519911	+	115.98	NA	promoter-TSS (NM_028731)	promoter-TSS (NM_028731)	-144	NM_028731	52635	Mm.273755	NM_028731	ENSMUSG00000021171	Esyt2	2410017M09Rik|4921504I16Rik|CHR2SYT|D12Ertd551e|Fam62b	extended synaptotagmin-like protein 2	protein-coding
MACS_peak_16760	chrX	34137841	34138412	+	115.87	NA	promoter-TSS (NM_016783)	promoter-TSS (NM_016783)	-94	NM_016783	53328	Mm.9052	NM_016783	ENSMUSG00000006373	Pgrmc1	AA415812|HPR6.6|PPMR|Vema	progesterone receptor membrane component 1	protein-coding
MACS_peak_9639	chr2	174153163	174153412	+	115.75	NA	promoter-TSS (NR_003258)	promoter-TSS (NR_003258)	-128	NR_003258	14683	Mm.125770	NM_010309	ENSMUSG00000027523	Gnas	5530400H20Rik|A930027G11Rik|C130027O20Rik|GPSA|GSP|Galphas|Gnas1|Gnasxl|Gsa|Nesp|Nespl|Oed-Sml|Oedsml|P1|P2|P3|PHP1A|PHP1B|POH	GNAS (guanine nucleotide binding protein, alpha stimulating) complex locus	protein-coding
MACS_peak_2110	chr11	50139302	50139634	+	115.72	NA	promoter-TSS (NM_007597)	promoter-TSS (NM_007597)	-293	NM_001110500	12330	Mm.248827	NM_007597	ENSMUSG00000020368	Canx	1110069N15Rik|AI988026|Cnx|D11Ertd153e	calnexin	protein-coding
MACS_peak_5957	chr16	11066050	11066643	+	115.65	NA	promoter-TSS (NM_009223)	promoter-TSS (NM_009223)	-45	NM_009223	20621	Mm.325800	NM_009223	ENSMUSG00000037972	Snn	2810407J07Rik|AI848521|AW547286	stannin	protein-coding
MACS_peak_14987	chr8	47085026	47085816	+	115.02	NA	promoter-TSS (NM_001039562)	promoter-TSS (NM_001039562)	-217	NM_001039562	654824	Mm.334517	NM_001039562	ENSMUSG00000050914	Ankrd37	-	ankyrin repeat domain 37	protein-coding
MACS_peak_12574	chr5	144225220	144225821	+	114.78	NA	5' UTR (NM_144915, exon 1 of 15)	5' UTR (NM_144915, exon 1 of 15)	159	NM_144915	231871	Mm.469963	NM_144915	ENSMUSG00000039206	Daglb	E330036I19Rik	diacylglycerol lipase, beta	protein-coding
MACS_peak_608	chr1	138242376	138242985	+	114.76	NA	promoter-TSS (NM_001081360)	promoter-TSS (NM_001081360)	1	NM_001081360	67886	Mm.144143	NM_001081360	ENSMUSG00000041570	Camsap2	1600013L13Rik|4930541M15Rik|Camsap1l1|mKIAA1078	calmodulin regulated spectrin-associated protein family, member 2	protein-coding
MACS_peak_12755	chr6	29997583	29998154	+	114.54	NA	promoter-TSS (NM_001164227)	promoter-TSS (NM_001164227)	-120	NM_010938	18181	Mm.259258	NM_010938	ENSMUSG00000058440	Nrf1	C87038|D6Ertd415e	nuclear respiratory factor 1	protein-coding
MACS_peak_2213	chr11	58762323	58762584	+	114.44	NA	promoter-TSS (NM_030082)	promoter-TSS (NM_030082)	40	NM_030082	78303	Mm.28022	NM_030082	ENSMUSG00000056895	Hist3h2ba	1500011O09Rik|AI413321	histone cluster 3, H2ba	protein-coding
MACS_peak_1470	chr10	80755680	80755960	+	114.19	NA	exon (NM_001293646, exon 1 of 19)	exon (NM_001293646, exon 1 of 19)	112	NM_001146687	18717	Mm.29836	NM_008844	ENSMUSG00000034902	Pip5k1c	AI115456|AI835305|Pip5kIgamma	phosphatidylinositol-4-phosphate 5-kinase, type 1 gamma	protein-coding
MACS_peak_15477	chr8	109817020	109817599	+	114.18	NA	promoter-TSS (NM_133957)	promoter-TSS (NM_133957)	-61	NM_018823	54446	Mm.390057	NM_018823	ENSMUSG00000003847	Nfat5	AI225870|B130038B15Rik|CAG-8|CAG80|NFATL1|OREBP|TonEBP|mKIAA0827|nfatz	nuclear factor of activated T cells 5	protein-coding
MACS_peak_14203	chr7	86644449	86645079	+	114.12	NA	promoter-TSS (NR_040314)	promoter-TSS (NR_040314)	-148	NR_040311	101694	Mm.41661	NR_040311		AI854517	-	expressed sequence AI854517	ncRNA
MACS_peak_6875	chr17	35975038	35975280	+	114.08	NA	promoter-TSS (NM_011655)	promoter-TSS (NM_011655)	87	NM_011655	22154	Mm.273538	NM_011655	ENSMUSG00000001525	Tubb5	AA408537|AI596182|B130022C14Rik|M(beta)5	tubulin, beta 5 class I	protein-coding
MACS_peak_6600	chr17	24856635	24857262	+	114.08	NA	promoter-TSS (NR_028515)	promoter-TSS (NR_028515)	-38	NR_027900	73474	Mm.443320	NR_027900	ENSMUSG00000090101	Snhg9	1700072N11Rik	small nucleolar RNA host gene 9	ncRNA
MACS_peak_385	chr1	88383713	88384213	+	113.22	NA	Intergenic	CpG	-39348	NM_008972	19231	Mm.19187	NM_008972	ENSMUSG00000026238	Ptma	Thym	prothymosin alpha	protein-coding
MACS_peak_12289	chr5	124199198	124199520	+	113.10	NA	promoter-TSS (NM_001042421)	promoter-TSS (NM_001042421)	64	NM_001005525	208606	Mm.276341	NM_025438	ENSMUSG00000029422	Rsrc2	1500011J06Rik	arginine/serine-rich coiled-coil 2	protein-coding
MACS_peak_7851	chr19	5490246	5490755	+	112.76	NA	promoter-TSS (NM_007687)	promoter-TSS (NM_007687)	45	NM_007687	12631	Mm.329655	NM_007687		Cfl1	AA959946|Cof|n-cofilin	cofilin 1, non-muscle	protein-coding
MACS_peak_4278	chr13	59924221	59924866	+	112.45	NA	promoter-TSS (NM_153538)	promoter-TSS (NM_153538)	-35	NM_153538	214290	Mm.233082	NM_153538	ENSMUSG00000035248	Zcchc6	6030448M23Rik|AA420405	zinc finger, CCHC domain containing 6	protein-coding
MACS_peak_13974	chr7	51502034	51502358	+	112.10	NA	intron (NM_025880, intron 1 of 5)	CpG	104	NM_025880	668661	Mm.274492	NM_025880	ENSMUSG00000045411	2410002F23Rik	-	RIKEN cDNA 2410002F23 gene	protein-coding
MACS_peak_14045	chr7	52715041	52715576	+	111.73	NA	promoter-TSS (NM_010240)	promoter-TSS (NM_010240)	-52	NM_010240	14325	Mm.30357	NM_010240	ENSMUSG00000050708	Ftl1	Ftl|Ftl-1|L-ferritin	ferritin light chain 1	protein-coding
MACS_peak_780	chr1	173200205	173200651	+	111.73	NA	promoter-TSS (NM_020579)	promoter-TSS (NM_020579)	-31	NM_020579	57370	Mm.274011	NM_020579	ENSMUSG00000052423	B4galt3	9530061M23Rik|AA104562|AW125175|ESTM26|ESTM6|R74981	UDP-Gal:betaGlcNAc beta 1,4-galactosyltransferase, polypeptide 3	protein-coding
MACS_peak_13175	chr6	113026841	113027488	+	111.68	NA	promoter-TSS (NM_028385)	promoter-TSS (NM_028385)	74	NR_027010	14910	Mm.280950	NR_027008	ENSMUSG00000086429	Gt(ROSA)26Sor	AV258896|Gtrgeo26|Gtrosa26|R26|ROSA26	gene trap ROSA 26, Philippe Soriano	ncRNA
MACS_peak_15807	chr9	21960991	21961528	+	111.68	NA	promoter-TSS (NM_001082532)	promoter-TSS (NM_001082532)	-31	NM_001082532	66268	Mm.28924	NM_025457	ENSMUSG00000010607	Pigyl	1810008A14Rik|PIG-Y|Pigy	phosphatidylinositol glycan anchor biosynthesis, class Y-like	protein-coding
MACS_peak_1678	chr10	116661134	116661748	+	111.66	NA	5' UTR (NM_026570, exon 1 of 7)	5' UTR (NM_026570, exon 1 of 7)	122	NM_026570	64050	Mm.233529	NM_026570	ENSMUSG00000020171	Yeats4	4930573H17Rik|B230215M10Rik|GAS41|NuBI-1	YEATS domain containing 4	protein-coding
MACS_peak_1787	chr10	127930658	127931029	+	111.36	NA	promoter-TSS (NM_010860)	promoter-TSS (NM_010860)	38	NM_010860	17904	Mm.337074	NM_010860	ENSMUSG00000090841	Myl6	ESMLC|LC17|LC17-GI|LC17-NM|LC17A|LC17B|MLC-3|MLC1SM|MLC3SM|MLC3nm|Myln	myosin, light polypeptide 6, alkali, smooth muscle and non-muscle	protein-coding
MACS_peak_1436	chr10	80289303	80289786	+	111.36	NA	non-coding (NR_027656, exon 1 of 5)	non-coding (NR_027656, exon 1 of 5)	103	NR_027656	100041965	Mm.328806	NR_027656		Oaz1-ps	ENSMUSG00000043801|Gm1823|Gm9786|Oaz-ps	ornithine decarboxylase antizyme 1, pseudogene	pseudo
MACS_peak_15688	chr8	129117762	129118145	+	111.19	NA	promoter-TSS (NM_001164598)	promoter-TSS (NM_001164598)	-617	NM_001164598	270110	Mm.334918	NM_001164598	ENSMUSG00000051495	Irf2bp2	E130305N23Rik|IRF-2BP2	interferon regulatory factor 2 binding protein 2	protein-coding
MACS_peak_212	chr1	58480681	58481074	+	110.94	NA	promoter-TSS (NM_001042634)	promoter-TSS (NM_001042634)	55	NR_027853	12747	Mm.1761	NM_009905	ENSMUSG00000026034	Clk1	STY	CDC-like kinase 1	protein-coding
MACS_peak_14441	chr7	118226239	118226988	+	110.91	NA	promoter-TSS (NM_013507)	promoter-TSS (NM_013507)	-69	NM_013507	13690	Mm.185453	NM_013507	ENSMUSG00000005610	Eif4g2	AA589388|DAP-5|E130105L11Rik|Nat1|Natm1|p97	eukaryotic translation initiation factor 4, gamma 2	protein-coding
MACS_peak_10144	chr3	95462370	95462893	+	110.88	NA	promoter-TSS (NM_008562)	promoter-TSS (NM_008562)	-12	NM_008562	17210	Mm.1639	NM_008562	ENSMUSG00000038612	Mcl1	AW556805|Mcl-1	myeloid cell leukemia sequence 1	protein-coding
MACS_peak_7807	chr19	4811196	4811962	+	109.94	NA	promoter-TSS (NM_019869)	promoter-TSS (NM_019869)	55	NM_001290127	102902673	Mm.426069	NM_001290127		Rbm14-rbm4	-	Rbm14-Rbm4 readthrough	protein-coding
MACS_peak_4071	chr13	34169525	34170173	+	109.78	NA	promoter-TSS (NM_009450)	promoter-TSS (NM_009450)	28	NM_009450	22151	Mm.422827	NM_009450	ENSMUSG00000058672	Tubb2a	M(beta)2|Tubb2	tubulin, beta 2A class IIA	protein-coding
MACS_peak_15564	chr8	122364241	122364826	+	109.78	NA	promoter-TSS (NM_028071)	promoter-TSS (NM_028071)	-54	NM_028071	72042	Mm.393405	NM_028071	ENSMUSG00000031827	Cotl1	1810074P22Rik|2010004C08Rik|Clp	coactosin-like 1 (Dictyostelium)	protein-coding
MACS_peak_11439	chr4	149148113	149148492	+	109.78	NA	promoter-TSS (NM_027460)	promoter-TSS (NM_027460)	74	NM_027460	70556	Mm.41877	NM_027460	ENSMUSG00000028982	Slc25a33	5730438N18Rik|Pnc1	solute carrier family 25, member 33	protein-coding
MACS_peak_9349	chr2	148557860	148558355	+	109.68	NA	promoter-TSS (NM_019632)	promoter-TSS (NM_019632)	49	NM_019632	17957	Mm.274308	NM_019632	ENSMUSG00000027438	Napb	Brp14|E161|I47|SNARE|b-SNAP	N-ethylmaleimide sensitive fusion protein attachment protein beta	protein-coding
MACS_peak_168	chr1	46910098	46910413	+	109.68	NA	promoter-TSS (NM_172653)	promoter-TSS (NM_172653)	99	NM_172653	227059	Mm.233889	NM_172653	ENSMUSG00000025986	Slc39a10	2900042E17Rik|5430433I10|mKIAA1265	solute carrier family 39 (zinc transporter), member 10	protein-coding
MACS_peak_2623	chr11	86570769	86571862	+	109.34	NA	promoter-TSS (NM_001003908)	promoter-TSS (NM_001003908)	-321	NM_001003908	67300	Mm.254588	NM_001003908	ENSMUSG00000047126	Cltc	3110065L21Rik|CHC|R74732	clathrin, heavy polypeptide (Hc)	protein-coding
MACS_peak_13365	chr6	128388425	128388803	+	109.27	NA	promoter-TSS (NM_010219)	promoter-TSS (NM_010219)	35	NM_010219	14228	Mm.12758	NM_010219	ENSMUSG00000030357	Fkbp4	59kDa|AL022792|AW208983|FKBP-4|FKBP-52|FKBP52|FKPB52|p59	FK506 binding protein 4	protein-coding
MACS_peak_13835	chr7	29747079	29747529	+	109.26	NA	promoter-TSS (NM_021895)	promoter-TSS (NM_021895)	-5	NM_021895	60595	Mm.81144	NM_021895	ENSMUSG00000054808	Actn4	C77391	actinin alpha 4	protein-coding
MACS_peak_12266	chr5	123300091	123300408	+	109.26	NA	promoter-TSS (NM_030564)	promoter-TSS (NM_030564)	52	NM_030564	80751	Mm.388529	NM_030564	ENSMUSG00000029474	Rnf34	AW061037|AW536122|BC004042|C88279|RIFF	ring finger protein 34	protein-coding
MACS_peak_13572	chr7	13623163	13624003	+	109.19	NA	promoter-TSS (NM_001243968)	promoter-TSS (NM_001243968)	41	NM_001168469	22192	Mm.196580	NM_145578	ENSMUSG00000005575	Ube2m	2510040H03Rik|UBC12|Ubc-rs2	ubiquitin-conjugating enzyme E2M	protein-coding
MACS_peak_15732	chr9	15161973	15162547	+	109.00	NA	promoter-TSS (NM_176976)	promoter-TSS (NM_176976)	-28	NM_176976	319675	Mm.218317	NM_176976	ENSMUSG00000046111	5830418K08Rik	5832426L23Rik|Gm1131|Kiaa1731	RIKEN cDNA 5830418K08 gene	protein-coding
MACS_peak_4034	chr13	23852894	23853187	+	108.88	NA	promoter-TSS (NM_178192)	promoter-TSS (NM_178192)	78	NM_178192	326619	Mm.228709	NM_178192		Hist1h4a	-	histone cluster 1, H4a	protein-coding
MACS_peak_1795	chr10	128063359	128063653	+	108.88	NA	promoter-TSS (NM_013765)	promoter-TSS (NM_013765)	56	NM_013765	27370	Mm.261679	NM_013765	ENSMUSG00000025362	Rps26	-	ribosomal protein S26	protein-coding
MACS_peak_16088	chr9	59139056	59139614	+	108.87	NA	promoter-TSS (NM_028121)	promoter-TSS (NM_028121)	-44	NM_028121	72141	Mm.22456	NM_028121	ENSMUSG00000025236	Adpgk	2610017G09Rik|Adp-gk|C77577	ADP-dependent glucokinase	protein-coding
MACS_peak_10519	chr4	9596036	9596510	+	108.38	NA	promoter-TSS (NM_001177856)	promoter-TSS (NM_001177856)	36	NM_023066	65973	Mm.222206	NM_023066	ENSMUSG00000028207	Asph	2310005F16Rik|3110001L23Rik|AI848629|AW261690|AW561901|BAH|C79816|cI-37	aspartate-beta-hydroxylase	protein-coding
MACS_peak_3009	chr11	108205061	108205560	+	108.32	NA	promoter-TSS (NM_011101)	promoter-TSS (NM_011101)	-108	NM_011101	18750	Mm.222178	NM_011101	ENSMUSG00000050965	Prkca	AI875142|Pkca	protein kinase C, alpha	protein-coding
MACS_peak_4259	chr13	58503371	58503946	+	108.30	NA	promoter-TSS (NM_028904)	promoter-TSS (NM_028904)	49	NR_031761	74386	Mm.85289	NM_028904	ENSMUSG00000035367	Rmi1	4932432N11Rik|C79893	RMI1, RecQ mediated genome instability 1, homolog (S. cerevisiae)	protein-coding
MACS_peak_15099	chr8	72963330	72963885	+	108.13	NA	promoter-TSS (NM_001004062)	promoter-TSS (NM_001004062)	-135	NM_001004062	382056	Mm.227767	NM_001004062	ENSMUSG00000003575	Crtc1	AI413414|Mect1|R74955|TORC1|mKIAA0616	CREB regulated transcription coactivator 1	protein-coding
MACS_peak_6907	chr17	37187367	37187741	+	108.01	NA	intron (NM_019439, intron 5 of 22)	intron (NM_019439, intron 5 of 22)	4643	NM_019439	54393	Mm.32191	NM_019439	ENSMUSG00000024462	Gabbr1	GABAB1|GABAbR1|bM573K1.1	gamma-aminobutyric acid (GABA) B receptor, 1	protein-coding
MACS_peak_3618	chr12	81891403	81891804	+	108.01	NA	promoter-TSS (NM_178682)	promoter-TSS (NM_178682)	84	NM_001242419	217684	Mm.341776	NM_178682	ENSMUSG00000021133	4933426M11Rik	mKIAA0247	RIKEN cDNA 4933426M11 gene	protein-coding
MACS_peak_6089	chr16	22265816	22266347	+	107.99	NA	promoter-TSS (NM_009186)	promoter-TSS (NM_009186)	-79	NM_009186	20462	Mm.210352	NM_009186		Tra2b	5730405G21Rik|D16Ertd266e|SIG-41|Sfrs10|Silg41|TRA2beta	transformer 2 beta homolog (Drosophila)	protein-coding
MACS_peak_3974	chr13	19487405	19487724	+	107.71	NA	promoter-TSS (NM_024270)	promoter-TSS (NM_024270)	57	NM_024270	76205	Mm.41940	NM_024270	ENSMUSG00000003062	Stard3nl	0610035N01Rik|6530409L22Rik|AW124774|MENTHO	STARD3 N-terminal like	protein-coding
MACS_peak_1575	chr10	90586419	90587058	+	107.38	NA	promoter-TSS (NM_133668)	promoter-TSS (NM_133668)	-30	NM_133668	18674	Mm.298	NM_133668	ENSMUSG00000061904	Slc25a3	5730556H19Rik|PTP|Phc	solute carrier family 25 (mitochondrial carrier, phosphate carrier), member 3	protein-coding
MACS_peak_971	chr10	5913690	5914460	+	107.29	NA	promoter-TSS (NM_025343)	promoter-TSS (NM_025343)	-114	NM_025343	66084	Mm.153111	NM_025343		Rmnd1	0610042C05Rik|AA408137|AI462664|AW536662	required for meiotic nuclear division 1 homolog (S. cerevisiae)	protein-coding
MACS_peak_12105	chr5	111759372	111759974	+	107.21	NA	promoter-TSS (NM_019640)	promoter-TSS (NM_019640)	-110	NM_019640	56305	Mm.200516	NM_019640	ENSMUSG00000050017	Pitpnb	AI256223|AU040890	phosphatidylinositol transfer protein, beta	protein-coding
MACS_peak_1368	chr10	79515931	79516634	+	107.09	NA	promoter-TSS (NM_008162)	promoter-TSS (NM_008162)	49	NM_008162	625249	Mm.332810	NM_008162	ENSMUSG00000075706	Gpx4	GPx-4|GSHPx-4|PHGPx|mtPHGPx|snGPx	glutathione peroxidase 4	protein-coding
MACS_peak_17119	chrX	163646922	163647208	+	107.09	NA	promoter-TSS (NM_021278)	promoter-TSS (NM_021278)	85	NM_021278	19241	Mm.142729	NM_021278	ENSMUSG00000049775	Tmsb4x	Ptmb4|Tb4	thymosin, beta 4, X chromosome	protein-coding
MACS_peak_11123	chr4	126698473	126698769	+	107.09	NA	promoter-TSS (NM_023603)	promoter-TSS (NM_023603)	76	NM_023603	71514	Mm.257276	NM_023603	ENSMUSG00000028820	Sfpq	1110004P21Rik|2810416M14Rik|5730453G22Rik|9030402K04Rik|AU021830|D4Ertd314e|Gm12940|OTTMUSG00000009329|PSF|REP1	splicing factor proline/glutamine rich (polypyrimidine tract binding protein associated)	protein-coding
MACS_peak_3281	chr12	8680671	8681024	+	106.98	NA	promoter-TSS (NM_001160219)	promoter-TSS (NM_001160219)	-93	NM_001160221	80913	Mm.341243	NM_030723	ENSMUSG00000020594	Pum2	5730503J23Rik|Pumm2|mKIAA0235	pumilio RNA-binding family member 2	protein-coding
MACS_peak_4241	chr13	55794191	55794689	+	106.98	NA	promoter-TSS (NM_181278)	promoter-TSS (NM_181278)	-45	NM_181278	78521	Mm.28449	NM_181278	ENSMUSG00000045767	B230219D22Rik	AA119856|D530037I19Rik	RIKEN cDNA B230219D22 gene	protein-coding
MACS_peak_5478	chr15	78744197	78744688	+	106.98	NA	promoter-TSS (NM_020271)	promoter-TSS (NM_020271)	93	NM_020271	57028	Mm.263169	NM_020271	ENSMUSG00000068221	Pdxp	1600027H05Rik|AB041662|PLPP	pyridoxal (pyridoxine, vitamin B6) phosphatase	protein-coding
MACS_peak_14793	chr8	8661017	8661394	+	106.78	NA	promoter-TSS (NM_010111)	promoter-TSS (NM_010111)	-432	NM_010111	13642	Mm.209813	NM_010111	ENSMUSG00000001300	Efnb2	ELF-2|Epl5|Eplg5|Htk-L|LERK-5|Lerk5|NLERK-1	ephrin B2	protein-coding
MACS_peak_7324	chr18	12899510	12900055	+	106.78	NA	promoter-TSS (NM_181731)	promoter-TSS (NM_181731)	-82	NM_001042419	71132	Mm.179740	NM_027687	ENSMUSG00000024430	Cabyr	1700016C01Rik|4933421A18Rik|CBP86|FSP-2	calcium-binding tyrosine-(Y)-phosphorylation regulated (fibrousheathin 2)	protein-coding
MACS_peak_15286	chr8	87370555	87370891	+	106.65	NA	5' UTR (NM_007591, exon 1 of 9)	5' UTR (NM_007591, exon 1 of 9)	107	NM_007591	12317	Mm.1971	NM_007591	ENSMUSG00000003814	Calr	CRT|Calregulin	calreticulin	protein-coding
MACS_peak_8357	chr19	60866352	60866936	+	106.49	NA	promoter-TSS (NM_010123)	promoter-TSS (NM_010123)	-48	NM_010123	13669	Mm.2238	NM_010123	ENSMUSG00000024991	Eif3a	A830012B05Rik|Csma|Eif3|Eif3s10|mKIAA0139	eukaryotic translation initiation factor 3, subunit A	protein-coding
MACS_peak_12423	chr5	136164939	136165257	+	106.30	NA	promoter-TSS (NM_008898)	promoter-TSS (NM_008898)	14	NM_008898	18984	Mm.3863	NM_008898	ENSMUSG00000005514	Por	4933424M13Rik|CPR|CYPOR	P450 (cytochrome) oxidoreductase	protein-coding
MACS_peak_610	chr1	138311728	138312305	+	106.20	NA	promoter-TSS (NR_024328)	promoter-TSS (NR_024328)	80	NR_024328	320054	Mm.208000	NR_024328	ENSMUSG00000097403	9230116N13Rik	-	RIKEN cDNA 9230116N13 gene	ncRNA
MACS_peak_3497	chr12	70284687	70285382	+	106.08	NA	promoter-TSS (NM_025589)	promoter-TSS (NM_025589)	20	NM_025589	66483	Mm.379115	NM_025589	ENSMUSG00000049751	Rpl36al	2410038A03Rik|RPL36A	ribosomal protein L36A-like	protein-coding
MACS_peak_6318	chr16	90143880	90144206	+	105.96	NA	non-coding (NR_033476, exon 1 of 1)	non-coding (NR_033476, exon 1 of 1)	1561	NR_033476	100038709	Mm.484070	NR_033476		Gm10789	ENSMUSG00000074924	predicted gene 10789	ncRNA
MACS_peak_4506	chr13	108680146	108680602	+	105.57	NA	promoter-TSS (NM_145456)	promoter-TSS (NM_145456)	-116	NM_145456	67263	Mm.490418	NM_145456	ENSMUSG00000032846	Zswim6	2900036G02Rik|mKIAA1577	zinc finger SWIM-type containing 6	protein-coding
MACS_peak_12179	chr5	116009401	116009711	+	105.53	NA	promoter-TSS (NM_007475)	promoter-TSS (NM_007475)	80	NM_007475	11837	Mm.5286	NM_007475	ENSMUSG00000067274	Rplp0	36B4|Arbp|L10E	ribosomal protein, large, P0	protein-coding
MACS_peak_2536	chr11	78075199	78075458	+	105.08	NA	promoter-TSS (NM_001002004)	promoter-TSS (NM_001002004)	72	NM_001002004	72503	Mm.237103	NM_001002004	ENSMUSG00000010277	2610507B11Rik	AU022687|D11Bhm178e|D11Bhm179e|E1|Kiaa0100|mKIAA0100	RIKEN cDNA 2610507B11 gene	protein-coding
MACS_peak_9173	chr2	121853929	121854164	+	104.78	NA	promoter-TSS (NM_001256055)	promoter-TSS (NM_001256055)	-270	NM_144545	78655	Mm.458184	NM_144545		Eif3j1	1810016I04Rik|2700079K05Rik|AA409117|AA409446|C78575|Eif3j|Eif3j-1|Eif3j-2|Eif3j2|Eif3s1|eIF-3-alpha-A|eIF-3-alpha-B|eIF3-alpha|eIF3-p35|eIF3j-A|eIF3j-B	eukaryotic translation initiation factor 3, subunit J1	protein-coding
MACS_peak_7570	chr18	57084954	57085640	+	104.51	NA	promoter-TSS (NM_177115)	promoter-TSS (NM_177115)	-95	NM_177115	320253	Mm.312623	NM_177115	ENSMUSG00000032656	March3	6330411I15Rik|A530081L18Rik|AI843639|MARCH-III	membrane-associated ring finger (C3HC4) 3	protein-coding
MACS_peak_1308	chr10	76721965	76722428	+	104.51	NA	promoter-TSS (NR_026944)	promoter-TSS (NR_026944)	151	NM_030262	80294	Mm.203556	NM_030262	ENSMUSG00000020260	Pofut2	2310011G23Rik|AI256847|BC003494|C21orf80|FUT13	protein O-fucosyltransferase 2	protein-coding
MACS_peak_10228	chr3	103083125	103083868	+	104.36	NA	5' UTR (NM_053170, exon 1 of 20)	5' UTR (NM_053170, exon 1 of 20)	280	NM_001079830	94093	Mm.195036	NM_053170	ENSMUSG00000033014	Trim33	8030451N04Rik|AI413936|Ecto|Tif1g	tripartite motif-containing 33	protein-coding
MACS_peak_3401	chr12	40949519	40949859	+	104.25	NA	promoter-TSS (NR_035459)	promoter-TSS (NR_035459)	87	NM_013562	15982	Mm.168	NM_013562		Ifrd1	Ifnl|PC4|Tis7	interferon-related developmental regulator 1	protein-coding
MACS_peak_11145	chr4	128639456	128640044	+	104.05	NA	promoter-TSS (NM_172875)	promoter-TSS (NM_172875)	-51	NM_172875	242669	Mm.215814	NM_172875	ENSMUSG00000028789	Azin2	4933429I20Rik|Adc|Azi2|B930082O19|Odcp	antizyme inhibitor 2	protein-coding
MACS_peak_6943	chr17	45873695	45874126	+	104.05	NA	Intergenic	Intergenic	-3117	NM_028164	72240	Mm.482897	NM_028164	ENSMUSG00000094690	1600014C23Rik	-	RIKEN cDNA 1600014C23 gene	protein-coding
MACS_peak_11334	chr4	138469613	138469982	+	103.75	NA	promoter-TSS (NM_028453)	promoter-TSS (NM_028453)	65	NM_028453	73162	Mm.238081	NM_028453	ENSMUSG00000041161	Otud3	3110030K17Rik	OTU domain containing 3	protein-coding
MACS_peak_7424	chr18	35020757	35021242	+	103.66	NA	5' UTR (NM_007913, exon 1 of 2)	5' UTR (NM_007913, exon 1 of 2)	138	NM_007913	13653	Mm.181959	NM_007913		Egr1	A530045N19Rik|ETR103|Egr-1|Krox-1|Krox-24|Krox24|NGF1-A|NGFI-A|NGFIA|TIS8|Zenk|Zfp-6|Zif268|egr	early growth response 1	protein-coding
MACS_peak_11991	chr5	93696546	93696783	+	103.66	NA	promoter-TSS (NM_007635)	promoter-TSS (NM_007635)	65	NM_007635	12452	Mm.3527	NM_007635	ENSMUSG00000029385	Ccng2	-	cyclin G2	protein-coding
MACS_peak_13710	chr7	25372427	25372772	+	103.56	NA	promoter-TSS (NM_001033205)	promoter-TSS (NM_001033205)	37	NM_023154	66071	Mm.29553	NM_023154	ENSMUSG00000064254	Ethe1	0610025L15Rik|Hsco	ethylmalonic encephalopathy 1	protein-coding
MACS_peak_6936	chr17	45709525	45710523	+	103.09	NA	intron (NM_008302, intron 1 of 10)	CpG	186	NM_008302	15516	Mm.2180	NM_008302	ENSMUSG00000023944	Hsp90ab1	90kDa|AL022974|C81438|Hsp84|Hsp84-1|Hsp90|Hspcb	heat shock protein 90 alpha (cytosolic), class B member 1	protein-coding
MACS_peak_634	chr1	153275657	153275996	+	102.80	NA	promoter-TSS (NM_025819)	promoter-TSS (NM_025819)	48	NM_026876	98685	Mm.289373	NM_026876	ENSMUSG00000053286	Trmt1l	1190005F20Rik|AW226554|C1orf25|Trm1-like|Trm1l	tRNA methyltransferase 1 like	protein-coding
MACS_peak_8347	chr19	59017989	59018420	+	102.80	NA	intron (NM_178689, intron 1 of 13)	CpG	289	NM_178689	226265	Mm.103154	NM_178689	ENSMUSG00000048029	Eno4	6430537H07Rik	enolase 4	protein-coding
MACS_peak_9875	chr3	54538780	54539335	+	102.80	NA	promoter-TSS (NM_025442)	promoter-TSS (NM_025442)	229	NM_027148	69639	Mm.29253	NM_027148	ENSMUSG00000027752	Exosc8	2310032N20Rik|CIP3|mKIAA4013	exosome component 8	protein-coding
MACS_peak_6172	chr16	36071347	36072238	+	102.80	NA	promoter-TSS (NM_027342)	promoter-TSS (NM_027342)	46	NM_001159421	381045	Mm.310434	NM_198645	ENSMUSG00000075229	Ccdc58	A930007B11Rik|AI413631	coiled-coil domain containing 58	protein-coding
MACS_peak_12639	chr5	149995457	149995912	+	102.80	NA	promoter-TSS (NM_001115153)	promoter-TSS (NM_001115153)	-452	NM_001115153	231915	Mm.29402	NM_001013378	ENSMUSG00000041264	Uspl1	E430026A01Rik	ubiquitin specific peptidase like 1	protein-coding
MACS_peak_11374	chr4	141094578	141094995	+	102.54	NA	promoter-TSS (NM_019763)	promoter-TSS (NM_019763)	-274	NM_019763	56381	Mm.299906	NM_019763	ENSMUSG00000040761	Spen	Mint|mKIAA0929	SPEN homolog, transcriptional regulator (Drosophila)	protein-coding
MACS_peak_3992	chr13	21842280	21842504	+	102.54	NA	promoter-TSS (NM_178211)	promoter-TSS (NM_178211)	30	NM_178211	319160	Mm.255646	NM_178211	ENSMUSG00000064288	Hist1h4k	-	histone cluster 1, H4k	protein-coding
MACS_peak_14029	chr7	52409410	52409970	+	102.24	NA	promoter-TSS (NM_029406)	promoter-TSS (NM_029406)	17	NM_001278207	68845	Mm.181689	NM_029406	ENSMUSG00000003423	Pih1d1	1110061L23Rik|4933413A04Rik|Nop17	PIH1 domain containing 1	protein-coding
MACS_peak_12580	chr5	144493207	144493711	+	102.15	NA	promoter-TSS (NM_029749)	promoter-TSS (NM_029749)	-310	NM_029749	76800	Mm.259620	NM_029749	ENSMUSG00000051306	Usp42	2410140K03Rik|3110031A07Rik|A630018G05Rik|D5Ertd591e	ubiquitin specific peptidase 42	protein-coding
MACS_peak_1775	chr10	127669165	127669619	+	102.12	NA	TTS (NM_008600)	TTS (NM_008600)	273	NM_001136082	21853	Mm.6458	NM_011589	ENSMUSG00000039994	Timeless	C77407|Debt69|tim	timeless circadian clock 1	protein-coding
MACS_peak_3576	chr12	77505292	77505569	+	101.97	NA	promoter-TSS (NM_008301)	promoter-TSS (NM_008301)	73	NM_008301	15512	Mm.296181	NM_008301	ENSMUSG00000059970	Hspa2	70kDa|HSP70.2|HSP70A2|Hsp70-2	heat shock protein 2	protein-coding
MACS_peak_13258	chr6	119988476	119988769	+	101.88	NA	promoter-TSS (NM_001199083)	promoter-TSS (NM_001199083)	51	NM_001199083	232341	Mm.333349	NM_198703	ENSMUSG00000045962	Wnk1	6430573H23Rik|EG406236|Hsn2|Prkwnk1|mKIAA0344	WNK lysine deficient protein kinase 1	protein-coding
MACS_peak_9509	chr2	158492762	158493114	+	101.79	NA	promoter-TSS (NM_001159662)	promoter-TSS (NM_001159662)	67	NM_001159662	228852	Mm.150540	NM_153089	ENSMUSG00000037754	Ppp1r16b	ANKRD4|C130078N17Rik|TIMAP|Wdt4	protein phosphatase 1, regulatory (inhibitor) subunit 16B	protein-coding
MACS_peak_8480	chr2	25174448	25174822	+	101.72	NA	promoter-TSS (NM_008169)	promoter-TSS (NM_008169)	72	NM_008169	14810	Mm.278672	NM_008169	ENSMUSG00000026959	Grin1	GluN1|GluRdelta1|GluRzeta1|M100174|NMD-R1|NMDAR1|NR1|Nmdar|Rgsc174	glutamate receptor, ionotropic, NMDA1 (zeta 1)	protein-coding
MACS_peak_7706	chr18	78012644	78013003	+	101.68	NA	exon (NM_007505, exon 1 of 12)	exon (NM_007505, exon 1 of 12)	316	NM_007505	11946	Mm.276137	NM_007505	ENSMUSG00000025428	Atp5a1	AI035633|AL022851|AL023067|Atpm|D18Ertd206e|Mom2	ATP synthase, H+ transporting, mitochondrial F1 complex, alpha subunit 1	protein-coding
MACS_peak_5263	chr15	38448842	38449618	+	101.50	NA	promoter-TSS (NM_018745)	promoter-TSS (NM_018745)	-209	NM_018745	54375	Mm.250214	NM_018745	ENSMUSG00000037458	Azin1	1700085L02Rik|AI414949|Oazi|Oazin	antizyme inhibitor 1	protein-coding
MACS_peak_11826	chr5	40035635	40036193	+	101.42	NA	promoter-TSS (NM_010474)	promoter-TSS (NM_010474)	-44	NM_010474	15476	Mm.12559	NM_010474	ENSMUSG00000051022	Hs3st1	3-Ost|D5Wsu110e|Hsg3ost	heparan sulfate (glucosamine) 3-O-sulfotransferase 1	protein-coding
MACS_peak_13447	chr6	146525756	146526770	+	101.30	NA	promoter-TSS (NM_026218)	promoter-TSS (NM_026218)	94	NM_138757	71177	Mm.271774	NM_138757	ENSMUSG00000040250	Asun	4933424B01Rik|Spata30	asunder, spermatogenesis regulator	protein-coding
MACS_peak_12895	chr6	51419562	51419973	+	101.29	NA	promoter-TSS (NM_007624)	promoter-TSS (NM_007624)	126	NM_182650	53379	Mm.155896	NM_016806		Hnrnpa2b1	9130414A06Rik|Hnrpa2|Hnrpa2b1|hnrnp-A	heterogeneous nuclear ribonucleoprotein A2/B1	protein-coding
MACS_peak_10735	chr4	53452794	53453163	+	101.28	NA	promoter-TSS (NM_133891)	promoter-TSS (NM_133891)	-307	NM_001159633	100434	Mm.482207	NM_133891	ENSMUSG00000028412	Slc44a1	2210409B22Rik|4833416H08Rik|AW547365|CHTL1|CTL1|Cdw92	solute carrier family 44, member 1	protein-coding
MACS_peak_1044	chr10	21714195	21714634	+	101.23	NA	promoter-TSS (NM_011361)	promoter-TSS (NM_011361)	-58	NM_011361	20393	Mm.28405	NM_011361	ENSMUSG00000019970	Sgk1	Sgk	serum/glucocorticoid regulated kinase 1	protein-coding
MACS_peak_9269	chr2	131087790	131088686	+	101.16	NA	promoter-TSS (NM_153501)	promoter-TSS (NM_153501)	2	NM_153501	74450	Mm.101264	NM_153501	ENSMUSG00000037514	Pank2	4933409I19Rik|AI642621	pantothenate kinase 2	protein-coding
MACS_peak_11926	chr5	74590958	74591523	+	101.03	NA	promoter-TSS (NM_026878)	promoter-TSS (NM_026878)	-111	NM_026878	68939	Mm.293316	NM_026878	ENSMUSG00000049907	Rasl11b	1190017B18Rik	RAS-like, family 11, member B	protein-coding
MACS_peak_6000	chr16	16983145	16983712	+	101.03	NA	promoter-TSS (NM_001038663)	promoter-TSS (NM_001038663)	-47	NM_011949	26413	Mm.196581	NM_011949	ENSMUSG00000063358	Mapk1	9030612K14Rik|AA407128|AU018647|C78273|ERK|Erk2|MAPK2|PRKM2|Prkm1|p41mapk|p42mapk	mitogen-activated protein kinase 1	protein-coding
MACS_peak_13435	chr6	145159635	145159958	+	101.03	NA	promoter-TSS (NM_177222)	promoter-TSS (NM_177222)	129	NM_133688	67636	Mm.486359	NM_133688	ENSMUSG00000040370	Lyrm5	4930469P12Rik|AL022899|Ghiso	LYR motif containing 5	protein-coding
MACS_peak_5711	chr15	93425962	93426453	+	101.03	NA	5' UTR (NM_001033217, exon 1 of 8)	5' UTR (NM_001033217, exon 1 of 8)	115	NM_001033217	106042	Mm.150314	NM_001033217	ENSMUSG00000036158	Prickle1	1110058P22Rik|AW215793|Prickle|b2b019Clo|mpk1	prickle homolog 1 (Drosophila)	protein-coding
MACS_peak_653	chr1	155334568	155334973	+	100.97	NA	promoter-TSS (NM_007842)	promoter-TSS (NM_007842)	20	NM_007842	13211	Mm.20000	NM_007842	ENSMUSG00000042699	Dhx9	AI326842|Ddx9|HEL-5|NDHII|RHA|mHEL-5	DEAH (Asp-Glu-Ala-His) box polypeptide 9	protein-coding
MACS_peak_11896	chr5	67697903	67698421	+	100.79	NA	promoter-TSS (NM_178651)	promoter-TSS (NM_178651)	-34	NM_178651	109108	Mm.234455	NM_178651		Slc30a9	2310024J23Rik|AL024256|GAC63|HUEL	solute carrier family 30 (zinc transporter), member 9	protein-coding
MACS_peak_3683	chr12	86814705	86815053	+	100.79	NA	promoter-TSS (NM_010234)	promoter-TSS (NM_010234)	28	NM_010234	14281	Mm.246513	NM_010234	ENSMUSG00000021250	Fos	D12Rfj1|c-fos|cFos	FBJ osteosarcoma oncogene	protein-coding
MACS_peak_3487	chr12	66174404	66175312	+	100.79	NA	promoter-TSS (NM_013902)	promoter-TSS (NM_013902)	67	NM_013902	30795	Mm.28480	NM_013902	ENSMUSG00000020949	Fkbp3	25kDa|FKBP-3|FKBP25	FK506 binding protein 3	protein-coding
MACS_peak_12587	chr5	144984256	144984840	+	100.79	NA	promoter-TSS (NM_027410)	promoter-TSS (NM_027410)	-101	NM_027410	70381	Mm.239412	NM_027410	ENSMUSG00000066621	Tecpr1	2210010N04Rik|mKIAA1358	tectonin beta-propeller repeat containing 1	protein-coding
MACS_peak_4773	chr14	52723443	52723811	+	100.74	NA	promoter-TSS (NM_001170981)	promoter-TSS (NM_001170981)	76	NM_001170982	15381	Mm.427321	NM_016884	ENSMUSG00000060373	Hnrnpc	AL022939|D14Wsu171e|Hnrpc|Hnrpc1|Hnrpc2|hnRNPC1|hnRNPC2|hnrnp-C	heterogeneous nuclear ribonucleoprotein C	protein-coding
MACS_peak_16302	chr9	83699643	83700172	+	100.64	NA	promoter-TSS (NM_148941)	promoter-TSS (NM_148941)	5	NM_148941	83603	Mm.83949	NM_148941	ENSMUSG00000032262	Elovl4	-	elongation of very long chain fatty acids (FEN1/Elo2, SUR4/Elo3, yeast)-like 4	protein-coding
MACS_peak_12498	chr5	139060622	139061146	+	100.42	NA	promoter-TSS (NM_013844)	promoter-TSS (NM_013844)	87	NM_013844	24135	Mm.27575	NM_013844		Zfp68	KRAB3|KRAZ2|Zfp70|mszf22|mszf49	zinc finger protein 68	protein-coding
MACS_peak_14879	chr8	23704050	23704736	+	100.21	NA	promoter-TSS (NM_011696)	promoter-TSS (NM_011696)	-108	NM_011696	22335	Mm.227704	NM_011696	ENSMUSG00000008892	Vdac3	-	voltage-dependent anion channel 3	protein-coding
MACS_peak_2173	chr11	54600941	54601523	+	100.21	NA	promoter-TSS (NM_178626)	promoter-TSS (NM_178626)	-27	NM_178626	72729	Mm.29476	NM_178626	ENSMUSG00000052298	Cdc42se2	2810404F18Rik|AA408783|AA536669|SPEC2	CDC42 small effector 2	protein-coding
MACS_peak_5728	chr15	96529999	96530444	+	100.20	NA	promoter-TSS (NM_175121)	promoter-TSS (NM_175121)	-92	NM_175121	67760	Mm.46754	NM_175121	ENSMUSG00000022462	Slc38a2	5033402L14Rik|AI316867|ATA2|SAT2|mKIAA1382	solute carrier family 38, member 2	protein-coding
MACS_peak_1661	chr10	114752463	114752891	+	100.03	NA	promoter-TSS (NM_024454)	promoter-TSS (NM_024454)	-30	NM_024454	216344	Mm.21936	NM_024454	ENSMUSG00000020132	Rab21	9630024B22	RAB21, member RAS oncogene family	protein-coding
MACS_peak_2878	chr11	101507201	101507765	+	99.99	NA	Intergenic	CpG	18220	NM_025654	66599	Mm.41449	NM_025654	ENSMUSG00000010362	Rdm1	2410008M22Rik|AW212028|Rad52b	RAD52 motif 1	protein-coding
MACS_peak_16217	chr9	70504744	70505092	+	99.88	NA	promoter-TSS (NM_172772)	promoter-TSS (NM_172772)	63	NM_172772	235461	Mm.170855	NM_172772	ENSMUSG00000042444	Fam63b	AI465301|B230380D07Rik|mKIAA1164	family with sequence similarity 63, member B	protein-coding
MACS_peak_8588	chr2	30026854	30027534	+	99.88	NA	exon (NM_007931, exon 1 of 3)	exon (NM_007931, exon 1 of 3)	150	NM_007931	13804	Mm.474473	NM_007931	ENSMUSG00000015337	Endog	-	endonuclease G	protein-coding
MACS_peak_2593	chr11	83286535	83286809	+	99.84	NA	promoter-TSS (NM_027427)	promoter-TSS (NM_027427)	62	NM_027427	70439	Mm.181050	NM_027427	ENSMUSG00000020680	Taf15	2610111C21Rik|68kDa|TAFII68|Taf2n	TAF15 RNA polymerase II, TATA box binding protein (TBP)-associated factor	protein-coding
MACS_peak_8862	chr2	72817911	72819076	+	99.84	NA	promoter-TSS (NM_001018042)	promoter-TSS (NM_001018042)	10	NM_001018042	20687	Mm.124328	NM_011450	ENSMUSG00000027109	Sp3	D130027J01Rik	trans-acting transcription factor 3	protein-coding
MACS_peak_8669	chr2	32702184	32702809	+	99.78	NA	intron (NM_009295, intron 1 of 18)	intron (NM_009295, intron 1 of 18)	256	NM_009295	20910	Mm.278865	NM_009295	ENSMUSG00000026797	Stxbp1	AI317162|AI326233|MMS10-G|Ms10g|Munc-18a|Munc18-1|N-sec1|Rb-sec1|Sxtbp1|Unc18-1|Unc18h|nsec1	syntaxin binding protein 1	protein-coding
MACS_peak_13363	chr6	128374490	128375091	+	99.53	NA	exon (NM_133927, exon 1 of 12)	exon (NM_133927, exon 1 of 12)	138	NM_133927	101142	Mm.31345	NM_133927	ENSMUSG00000001518	Itfg2	2700050P07Rik|AI646725	integrin alpha FG-GAP repeat containing 2	protein-coding
MACS_peak_3553	chr12	75008559	75009261	+	99.48	NA	promoter-TSS (NM_010431)	promoter-TSS (NM_010431)	56	NM_010431	15251	Mm.3879	NM_010431	ENSMUSG00000021109	Hif1a	AA959795|HIF1alpha|MOP1|bHLHe78	hypoxia inducible factor 1, alpha subunit	protein-coding
MACS_peak_932	chr1	193221173	193221778	+	99.48	NA	promoter-TSS (NM_144880)	promoter-TSS (NM_144880)	-555	NM_144880	226849	Mm.205569	NM_144880	ENSMUSG00000026626	Ppp2r5a	PR61alpha	protein phosphatase 2, regulatory subunit B', alpha	protein-coding
MACS_peak_14542	chr7	133942331	133942828	+	99.35	NA	5' UTR (NM_001177307, exon 1 of 10)	5' UTR (NM_001177307, exon 1 of 10)	113	NM_001177307	11674	Mm.275831	NM_007438	ENSMUSG00000030695	Aldoa	Aldo-1|Aldo1	aldolase A, fructose-bisphosphate	protein-coding
MACS_peak_3846	chr12	112615541	112616508	+	99.01	NA	promoter-TSS (NM_183016)	promoter-TSS (NM_183016)	-95	NM_183016	217866	Mm.27397	NM_183016	ENSMUSG00000021279	Cdc42bpb	MRCKb	CDC42 binding protein kinase beta	protein-coding
MACS_peak_142	chr1	39633664	39634564	+	99.01	NA	promoter-TSS (NM_001033135)	promoter-TSS (NM_001033135)	78	NM_001033135	67702	Mm.28614	NM_001033135	ENSMUSG00000048234	Rnf149	1600023E10Rik|AV037261|C76763|Gm15832|Greul4|OTTMUSG00000026591	ring finger protein 149	protein-coding
MACS_peak_13066	chr6	86992351	86993038	+	98.93	NA	promoter-TSS (NM_013528)	promoter-TSS (NM_013528)	-146	NM_013528	14583	Mm.19893	NM_013528	ENSMUSG00000029992	Gfpt1	2810423A18Rik|AI324119|AI449986|GFA|GFAT|GFAT1|GFAT1m|Gfpt	glutamine fructose-6-phosphate transaminase 1	protein-coding
MACS_peak_9559	chr2	164704812	164705372	+	98.56	NA	intron (NM_146129, intron 1 of 16)	CpG	224	NM_146129	228866	Mm.241134	NM_146129		Pcif1	2310022K11Rik|C20orf67|F730014I05Rik	PDX1 C-terminal inhibiting factor 1	protein-coding
MACS_peak_4658	chr14	27398955	27399460	+	98.56	NA	exon (NM_001134465, exon 1 of 20)	exon (NM_001134465, exon 1 of 20)	171	NM_145969	211922	Mm.260512	NM_145969	ENSMUSG00000040818	Dennd6a	Fam116a	DENN/MADD domain containing 6A	protein-coding
MACS_peak_14623	chr7	135888355	135888704	+	98.42	NA	5' UTR (NM_001029982, exon 1 of 19)	5' UTR (NM_001029982, exon 1 of 19)	145	NM_001029982	207352	Mm.297105	NM_001029982	ENSMUSG00000055319	Sec23ip	D7Ertd373e|p125	Sec23 interacting protein	protein-coding
MACS_peak_19	chr1	9934005	9934362	+	98.34	NA	promoter-TSS (NR_024067)	promoter-TSS (NR_024067)	16	NR_024067	73824	Mm.28311	NR_024067	ENSMUSG00000098234	Snhg6	1110008H02Rik	small nucleolar RNA host gene 6	ncRNA
MACS_peak_306	chr1	74901422	74901718	+	98.14	NA	promoter-TSS (NM_009872)	promoter-TSS (NM_009872)	-33	NM_009872	12570	Mm.153833	NM_009872	ENSMUSG00000090071	Cdk5r2	B230310J22Rik|p39	cyclin-dependent kinase 5, regulatory subunit 2 (p39)	protein-coding
MACS_peak_7436	chr18	35721780	35722064	+	98.00	NA	5' UTR (NM_010771, exon 1 of 15)	5' UTR (NM_010771, exon 1 of 15)	110	NM_010771	17184	Mm.215034	NM_010771	ENSMUSG00000037236	Matr3	1110061A14Rik|2810017I02Rik|AI841759|AW555618|D030046F20Rik|mKIAA0723	matrin 3	protein-coding
MACS_peak_16404	chr9	103207155	103207632	+	97.97	NA	promoter-TSS (NM_176979)	promoter-TSS (NM_176979)	-264	NM_176979	235559	Mm.259893	NM_176979	ENSMUSG00000032555	Topbp1	1110031N14Rik|2810429C13Rik|AI256758|D430026L04Rik|mKIAA0259	topoisomerase (DNA) II binding protein 1	protein-coding
MACS_peak_4709	chr14	34260120	34260444	+	97.97	NA	promoter-TSS (NM_016700)	promoter-TSS (NM_016700)	62	NM_016700	26419	Mm.21495	NM_016700	ENSMUSG00000021936	Mapk8	AI849689|JNK|JNK1|Prkm8|SAPK1	mitogen-activated protein kinase 8	protein-coding
MACS_peak_5231	chr15	36103544	36103976	+	97.92	NA	promoter-TSS (NM_001039368)	promoter-TSS (NM_001039368)	-5	NM_023127	17749	Mm.27375	NM_023127	ENSMUSG00000045996	Polr2k	ABC10-alpha|MafY|Mt1a|RPABC4|RPB10alpha|RPB12|RPB7.0	polymerase (RNA) II (DNA directed) polypeptide K	protein-coding
MACS_peak_2852	chr11	100870579	100871055	+	97.75	NA	promoter-TSS (NM_016920)	promoter-TSS (NM_016920)	51	NM_001243051	11975	Mm.340818	NM_016920	ENSMUSG00000019302	Atp6v0a1	AA959968|ATP6a1|Atp6n1|Atp6n1a|Atpv0a1|Vpp-1|Vpp1	ATPase, H+ transporting, lysosomal V0 subunit A1	protein-coding
MACS_peak_11254	chr4	134024205	134024518	+	97.29	NA	intron (NM_019641, intron 1 of 4)	CpG	126	NM_019641	16765	Mm.378957	NM_019641	ENSMUSG00000028832	Stmn1	19k|Lag|Lap18|Op18|P18|P19|Pig|Pp17|Pp18|Pp19|Pr22|Smn	stathmin 1	protein-coding
MACS_peak_8541	chr2	27330900	27331283	+	97.09	NA	promoter-TSS (NM_023336)	promoter-TSS (NM_023336)	102	NM_001113573	67382	Mm.28721	NM_023336	ENSMUSG00000026918	Brd3	2410084F24Rik|AW060456|Fsrg2|ORFX|RINGL3	bromodomain containing 3	protein-coding
MACS_peak_14727	chr7	148748044	148748343	+	97.09	NA	5' UTR (NM_007459, exon 1 of 22)	5' UTR (NM_007459, exon 1 of 22)	114	NM_007459	11772	Mm.253090	NM_007459	ENSMUSG00000002957	Ap2a2	2410074K14Rik|AF006990|AW146353|Adtab|C78001|L25	adaptor-related protein complex 2, alpha 2 subunit	protein-coding
MACS_peak_8526	chr2	26765941	26766527	+	97.09	NA	promoter-TSS (NM_001033908)	promoter-TSS (NM_001033908)	-72	NM_001033908	20933	Mm.397932	NM_011513	ENSMUSG00000015776	Med22	AW212655|AW558812|Surf-5|Surf5	mediator complex subunit 22	protein-coding
MACS_peak_6727	chr17	28938382	28938985	+	96.98	NA	intron (NM_001081315, intron 1 of 12)	CpG	612	NM_001081315	268936	Mm.291877	NM_199061	ENSMUSG00000063952	Brpf3	AI413466|AW493400|mKIAA1286	bromodomain and PHD finger containing, 3	protein-coding
MACS_peak_9891	chr3	58218532	58219040	+	96.98	NA	promoter-TSS (NM_001081229)	promoter-TSS (NM_001081229)	-825	NM_001081229	72033	Mm.218409	NM_028067	ENSMUSG00000027806	Tsc22d2	1810043J12Rik|5530402M19Rik	TSC22 domain family, member 2	protein-coding
MACS_peak_12626	chr5	148671911	148672491	+	96.80	NA	promoter-TSS (NM_025624)	promoter-TSS (NM_025624)	-3	NM_025624	66537	Mm.332855	NM_025624	ENSMUSG00000029649	Pomp	2510048O06Rik|Ump1	proteasome maturation protein	protein-coding
MACS_peak_10523	chr4	11083198	11083897	+	96.69	NA	promoter-TSS (NM_001199105)	promoter-TSS (NM_001199105)	-41	NM_001199105	60599	Mm.393018	NM_021897	ENSMUSG00000028211	Trp53inp1	2700057G22Rik|SIP|SIP18|SIP27|Stinp|Teap	transformation related protein 53 inducible nuclear protein 1	protein-coding
MACS_peak_11756	chr5	33971938	33972352	+	96.56	NA	5' UTR (NM_178390, exon 1 of 6)	5' UTR (NM_178390, exon 1 of 6)	139	NM_178390	74504	Mm.294695	NM_178390	ENSMUSG00000037339	Fam53a	2410018C17Rik|5430419M09Rik|Dntnp	family with sequence similarity 53, member A	protein-coding
MACS_peak_5237	chr15	36538553	36539519	+	96.54	NA	promoter-TSS (NM_008774)	promoter-TSS (NM_008774)	-308	NM_008774	18458	Mm.371570	NM_008774	ENSMUSG00000022283	Pabpc1	PABP|Pabp1|PabpI|Pabpl1|ePAB	poly(A) binding protein, cytoplasmic 1	protein-coding
MACS_peak_7310	chr18	10725464	10725777	+	96.54	NA	promoter-TSS (NM_144860)	promoter-TSS (NM_144860)	-3	NM_144860	225164	Mm.21500	NM_144860	ENSMUSG00000024294	Mib1	DIP-1|E430019M12Rik|Mib|mKIAA1323	mindbomb homolog 1 (Drosophila)	protein-coding
MACS_peak_11602	chr5	20457427	20457963	+	96.52	NA	promoter-TSS (NM_001080977)	promoter-TSS (NM_001080977)	-55	NM_001080977	242860	Mm.254286	NM_001080977	ENSMUSG00000039968	Rsbn1l	8430412F05Rik|AI447441|C330002G24Rik	round spermatid basic protein 1-like	protein-coding
MACS_peak_9722	chr3	9833396	9833710	+	96.51	NA	5' UTR (NM_053182, exon 1 of 8)	5' UTR (NM_053182, exon 1 of 8)	126	NM_053182	94212	Mm.23897	NM_053182	ENSMUSG00000027508	Pag1	Cbp|F730007C19Rik|Pag	phosphoprotein associated with glycosphingolipid microdomains 1	protein-coding
MACS_peak_10390	chr3	135085834	135086687	+	96.51	NA	exon (NM_025902, exon 1 of 3)	exon (NM_025902, exon 1 of 3)	137	NM_025902	67006	Mm.269993	NM_025902	ENSMUSG00000028165	Cisd2	1500009M05Rik|1500026J14Rik|1500031D15Rik|AI848398|B630006A20Rik|Miner1|Noxp70|Zcd2	CDGSH iron sulfur domain 2	protein-coding
MACS_peak_4724	chr14	45839303	45839590	+	96.50	NA	promoter-TSS (NM_027518)	promoter-TSS (NM_027518)	54	NM_027518	70713	Mm.343793	NM_027518	ENSMUSG00000049092	Gpr137c	6330416L11Rik|Gm908|TM7SF1L2	G protein-coupled receptor 137C	protein-coding
MACS_peak_1204	chr10	59740154	59740833	+	95.98	NA	exon (NM_001146122, exon 1 of 14)	exon (NM_001146122, exon 1 of 14)	117	NM_001146121	19156	Mm.277498	NM_011179	ENSMUSG00000004207	Psap	AI037048|SGP-1	prosaposin	protein-coding
MACS_peak_11062	chr4	122563414	122564007	+	95.92	NA	promoter-TSS (NM_001301067)	promoter-TSS (NM_001301067)	-410	NM_001301067	12331	Mm.8687	NM_007598	ENSMUSG00000028656	Cap1	-	CAP, adenylate cyclase-associated protein 1 (yeast)	protein-coding
MACS_peak_380	chr1	88255481	88256042	+	95.92	NA	promoter-TSS (NR_015507)	promoter-TSS (NR_015507)	269	NM_010880	17975	Mm.154378	NM_010880	ENSMUSG00000026234	Ncl	B530004O11Rik|C23|D0Nds28|D1Nds28|Nucl	nucleolin	protein-coding
MACS_peak_1312	chr10	77044124	77044735	+	95.92	NA	promoter-TSS (NM_145925)	promoter-TSS (NM_145925)	-83	NM_145925	108705	Mm.28853	NM_145925	ENSMUSG00000009291	Pttg1ip	1810010L20Rik|AI314311|AU018448|C79540	pituitary tumor-transforming 1 interacting protein	protein-coding
MACS_peak_10222	chr3	101407931	101409083	+	95.78	NA	5' UTR (NM_144900, exon 1 of 23)	5' UTR (NM_144900, exon 1 of 23)	123	NM_144900	11928	Mm.280103	NM_144900	ENSMUSG00000033161	Atp1a1	Atpa-1|BC010319	ATPase, Na+/K+ transporting, alpha 1 polypeptide	protein-coding
MACS_peak_848	chr1	181733582	181734248	+	95.71	NA	5' UTR (NM_026375, exon 1 of 36)	5' UTR (NM_026375, exon 1 of 36)	231	NM_026375	226747	Mm.128165	NM_026375	ENSMUSG00000026491	Ahctf1	6230412P20Rik|AV011447|Elys	AT hook containing transcription factor 1	protein-coding
MACS_peak_5951	chr16	10542959	10543265	+	95.38	NA	promoter-TSS (NM_021428)	promoter-TSS (NM_021428)	35	NM_021428	58239	Mm.353006	NM_021428	ENSMUSG00000038055	Dexi	1810029J14Rik|AI836170|AW413143|D16Bwg0586e|Myle	dexamethasone-induced transcript	protein-coding
MACS_peak_11053	chr4	120624325	120624637	+	95.26	NA	promoter-TSS (NM_001005788)	promoter-TSS (NM_001005788)	-175	NM_001005788	381549	Mm.331840	NM_001005788	ENSMUSG00000064141	Zfp69	Gm1029|Krab2|Zfp63	zinc finger protein 69	protein-coding
MACS_peak_201	chr1	55187749	55188328	+	95.26	NA	promoter-TSS (NM_025283)	promoter-TSS (NM_025283)	-51	NM_025283	19070	Mm.291037	NM_025283	ENSMUSG00000025979	Mob4	2610109B12Rik|Mobkl3|Phocn|Prei3	MOB family member 4, phocein	protein-coding
MACS_peak_14880	chr8	23763770	23764168	+	95.23	NA	promoter-TSS (NM_011130)	promoter-TSS (NM_011130)	-60	NM_011130	18970	Mm.123211	NM_011130	ENSMUSG00000031536	Polb	A430088C08Rik	polymerase (DNA directed), beta	protein-coding
MACS_peak_16132	chr9	62828471	62828764	+	95.21	NA	promoter-TSS (NM_019663)	promoter-TSS (NM_019663)	69	NM_019663	56469	Mm.431253	NM_019663	ENSMUSG00000032405	Pias1	2900068C24Rik|Ddxbp1|GBP	protein inhibitor of activated STAT 1	protein-coding
MACS_peak_2129	chr11	51076304	51076872	+	95.08	NA	promoter-TSS (NM_007714)	promoter-TSS (NM_007714)	-85	NM_007714	12750	Mm.239354	NM_007714	ENSMUSG00000020385	Clk4	AI987988|C85119	CDC like kinase 4	protein-coding
MACS_peak_3429	chr12	53107268	53107635	+	95.04	NA	promoter-TSS (NM_029545)	promoter-TSS (NM_029545)	37	NM_029545	328092	Mm.2821	NM_029545	ENSMUSG00000020956	Dtd2	4930578F06Rik|6530401N04Rik|B830049N13Rik	D-tyrosyl-tRNA deacylase 2	protein-coding
MACS_peak_11941	chr5	77334274	77334896	+	95.04	NA	promoter-TSS (NM_173765)	promoter-TSS (NM_173765)	-46	NM_173765	231326	Mm.39271	NM_173765	ENSMUSG00000055923	Aasdh	A230062G08Rik|A830035E16|Acsf4|U26	aminoadipate-semialdehyde dehydrogenase	protein-coding
MACS_peak_2362	chr11	69485620	69485917	+	95.00	NA	TTS (NM_001163571)	TTS (NM_001163571)	157	NM_144958	13681	Mm.279821	NM_144958	ENSMUSG00000059796	Eif4a1	BM-010|Ddx2a|Eif4	eukaryotic translation initiation factor 4A1	protein-coding
MACS_peak_1111	chr10	40603270	40603960	+	94.92	NA	promoter-TSS (NM_027879)	promoter-TSS (NM_027879)	275	NM_031877	83767	Mm.41353	NM_031877	ENSMUSG00000019831	Wasf1	AI195380|AI838537|Scar|WAVE|WAVE-1	WAS protein family, member 1	protein-coding
MACS_peak_15247	chr8	86118003	86118734	+	94.91	NA	promoter-TSS (NM_134118)	promoter-TSS (NM_134118)	22	NM_027179	106529	Mm.352239	NM_027179	ENSMUSG00000031708	Tecr	2410016D23Rik|A230102P12Rik|AI173355|D17Ertd178e|Gpsn2|SC2	trans-2,3-enoyl-CoA reductase	protein-coding
MACS_peak_5013	chr14	76186353	76187156	+	94.90	NA	promoter-TSS (NM_026232)	promoter-TSS (NM_026232)	90	NM_026232	67554	Mm.46067	NM_026232	ENSMUSG00000022003	Slc25a30	4933433D23Rik|AV025504|AV221431|AW319655|KMCP1	solute carrier family 25, member 30	protein-coding
MACS_peak_5589	chr15	82184369	82185102	+	94.85	NA	promoter-TSS (NM_025987)	promoter-TSS (NM_025987)	-14	NM_025987	67130	Mm.27570	NM_025987	ENSMUSG00000022450	Ndufa6	14kDa|2700038D15Rik|B230217P19Rik	NADH dehydrogenase (ubiquinone) 1 alpha subcomplex, 6 (B14)	protein-coding
MACS_peak_580	chr1	136456600	136456949	+	94.82	NA	promoter-TSS (NM_152895)	promoter-TSS (NM_152895)	19	NM_152895	75605	Mm.28995	NM_152895	ENSMUSG00000042207	Kdm5b	2010009J12Rik|2210016I17Rik|AW556288|D1Ertd202e|Jarid1b|PLU-1|PUT1|Plu1|RBBP2H1A|Rb-Bp2|mKIAA4034	lysine (K)-specific demethylase 5B	protein-coding
MACS_peak_14840	chr8	13785530	13786092	+	94.27	NA	exon (NM_025924, exon 1 of 9)	exon (NM_025924, exon 1 of 9)	196	NM_025924	67031	Mm.44858	NM_025924	ENSMUSG00000038398	Upf3a	2600001C03Rik|4930546M19Rik|RENT3A|UPF3	UPF3 regulator of nonsense transcripts homolog A (yeast)	protein-coding
MACS_peak_11676	chr5	28118215	28118477	+	93.90	NA	promoter-TSS (NM_018878)	promoter-TSS (NM_018878)	-256	NM_018878	55982	Mm.277190	NM_018878	ENSMUSG00000002221	Paxip1	D5Ertd149e|PTIP	PAX interacting (with transcription-activation domain) protein 1	protein-coding
MACS_peak_12452	chr5	137505914	137506350	+	93.87	NA	promoter-TSS (NM_001039385)	promoter-TSS (NM_001039385)	-33	NM_001039385	381677	Mm.389697	NM_001039385	ENSMUSG00000037428	Vgf	Gm1052	VGF nerve growth factor inducible	protein-coding
MACS_peak_1304	chr10	76424409	76424741	+	93.66	NA	5' UTR (NM_021568, exon 1 of 16)	5' UTR (NM_021568, exon 1 of 16)	117	NM_021568	59093	Mm.272803	NM_021568	ENSMUSG00000001120	Pcbp3	AlphaCP-3	poly(rC) binding protein 3	protein-coding
MACS_peak_15776	chr9	21069403	21069992	+	93.66	NA	promoter-TSS (NM_153583)	promoter-TSS (NM_153583)	-32	NM_153583	235040	Mm.440165	NM_153583	ENSMUSG00000002820	Atg4d	9830134P12Rik|APG4-D|Apg4d|Atg4dl|Autl4	autophagy related 4D, cysteine peptidase	protein-coding
MACS_peak_11120	chr4	126430421	126431252	+	93.56	NA	promoter-TSS (NM_011986)	promoter-TSS (NM_011986)	37	NM_001035525	100317	Mm.206206	NM_133886	ENSMUSG00000028830	AU040320	A730047D20Rik|Kiaa0319l	expressed sequence AU040320	protein-coding
MACS_peak_11315	chr4	137549047	137549585	+	93.56	NA	promoter-TSS (NM_001256195)	promoter-TSS (NM_001256195)	-55	NM_001256198	230861	Mm.268903	NM_172703	ENSMUSG00000028760	Eif4g3	1500002J22Rik|4833436O05|4930523M17Rik|G1-419-52|eIF4GII|repro8	eukaryotic translation initiation factor 4 gamma, 3	protein-coding
MACS_peak_11339	chr4	138866411	138866869	+	93.51	NA	promoter-TSS (NM_145384)	promoter-TSS (NM_145384)	-19	NM_025337	110198	Mm.482154	NM_025337		Akr7a5	0610025K21Rik|Afar|Afar1|Akr7a2	aldo-keto reductase family 7, member A5 (aflatoxin aldehyde reductase)	protein-coding
MACS_peak_392	chr1	88423166	88423484	+	93.42	NA	promoter-TSS (NM_008972)	promoter-TSS (NM_008972)	14	NM_008972	19231	Mm.19187	NM_008972	ENSMUSG00000026238	Ptma	Thym	prothymosin alpha	protein-coding
MACS_peak_14121	chr7	65654366	65654644	+	93.35	NA	Intergenic	Intergenic	-259067	NM_009728	11982	Mm.135129	NM_009728	ENSMUSG00000025324	Atp10a	Atp10c|pfatp	ATPase, class V, type 10A	protein-coding
MACS_peak_4784	chr14	54873373	54873648	+	93.24	NA	promoter-TSS (NM_001113358)	promoter-TSS (NM_001113358)	94	NM_001113358	13135	Mm.319038	NM_010015	ENSMUSG00000022174	Dad1	AI323713	defender against cell death 1	protein-coding
MACS_peak_9674	chr2	180627292	180628558	+	93.12	NA	promoter-TSS (NR_029538)	promoter-TSS (NR_029538)	-820	NR_029538	723951		NR_029538		Mir124a-3	Mirn124a-3|mir-124a-3	microRNA 124a-3	ncRNA
MACS_peak_5050	chr14	87815569	87816478	+	93.07	NA	promoter-TSS (NM_001253755)	promoter-TSS (NM_001253755)	-367	NM_172605	219249	Mm.35168	NM_172605	ENSMUSG00000022019	Tdrd3	4732418C03Rik|6720468N18	tudor domain containing 3	protein-coding
MACS_peak_8454	chr2	22924377	22924750	+	93.07	NA	promoter-TSS (NM_001102437)	promoter-TSS (NM_001102437)	-29	NM_001102437	74159	Mm.181973	NM_028793	ENSMUSG00000026781	Acbd5	1300014E15Rik	acyl-Coenzyme A binding domain containing 5	protein-coding
MACS_peak_13360	chr6	128305725	128306225	+	92.77	NA	promoter-TSS (NM_011657)	promoter-TSS (NM_011657)	-106	NM_011657	22158	Mm.291783	NM_011657	ENSMUSG00000001521	Tulp3	2310022L06Rik|AI316887	tubby-like protein 3	protein-coding
MACS_peak_10469	chr3	153575604	153576326	+	92.73	NA	promoter-TSS (NM_001163478)	promoter-TSS (NM_001163478)	-35	NR_028094	19352	Mm.277831	NM_011231	ENSMUSG00000038975	Rabggtb	-	Rab geranylgeranyl transferase, b subunit	protein-coding
MACS_peak_16429	chr9	106149992	106150492	+	92.72	NA	promoter-TSS (NM_020559)	promoter-TSS (NM_020559)	43	NM_020559	11655	Mm.290578	NM_020559	ENSMUSG00000032786	Alas1	ALAS|ALAS-N|Alas-1|Alas-h	aminolevulinic acid synthase 1	protein-coding
MACS_peak_13975	chr7	51559916	51560495	+	92.72	NA	exon (NM_009131, exon 4 of 4)	exon (NM_009131, exon 4 of 4)	2124	NM_009131	20256	Mm.20428	NM_009131	ENSMUSG00000004473	Clec11a	AW457320|Clecsf3|Scgf	C-type lectin domain family 11, member a	protein-coding
MACS_peak_4691	chr14	32149518	32150139	+	92.64	NA	promoter-TSS (NM_009796)	promoter-TSS (NM_009796)	-82	NM_009796	12339	Mm.201535	NM_009796	ENSMUSG00000021893	Capn7	AU022319|PalBH	calpain 7	protein-coding
MACS_peak_11609	chr5	21207301	21207747	+	92.55	NA	promoter-TSS (NM_178728)	promoter-TSS (NM_178728)	-361	NM_178728	242864	Mm.153292	NM_178728	ENSMUSG00000044968	Napepld	A530089G06|Mbldc1|NAPE-PLD	N-acyl phosphatidylethanolamine phospholipase D	protein-coding
MACS_peak_8750	chr2	51004487	51004736	+	92.55	NA	promoter-TSS (NM_028810)	promoter-TSS (NM_028810)	20	NM_028810	74194	Mm.46497	NM_028810	ENSMUSG00000017144	Rnd3	2610017M01Rik|AI661404|Arhe|Rhoe	Rho family GTPase 3	protein-coding
MACS_peak_6662	chr17	26645112	26645494	+	92.44	NA	5' UTR (NM_013642, exon 1 of 4)	5' UTR (NM_013642, exon 1 of 4)	114	NM_013642	19252	Mm.239041	NM_013642	ENSMUSG00000024190	Dusp1	3CH134|MKP1|Ptpn16|U19515|erp|mkp-1	dual specificity phosphatase 1	protein-coding
MACS_peak_8205	chr19	44368441	44368938	+	92.41	NA	5' UTR (NM_009128, exon 1 of 6)	5' UTR (NM_009128, exon 1 of 6)	523	NM_009128	20250	Mm.487021	NM_009128	ENSMUSG00000025203	Scd2	Scd-2|swty	stearoyl-Coenzyme A desaturase 2	protein-coding
MACS_peak_3158	chr11	118947398	118947703	+	92.41	NA	promoter-TSS (NM_007625)	promoter-TSS (NM_007625)	1	NM_007625	12418	Mm.268070	NM_007625	ENSMUSG00000039989	Cbx4	MPc2|PC2	chromobox 4	protein-coding
MACS_peak_1448	chr10	80568389	80569049	+	92.34	NA	promoter-TSS (NM_023138)	promoter-TSS (NM_023138)	27	NM_023138	26396	Mm.275436	NM_023138	ENSMUSG00000035027	Map2k2	AA589381|MEK2|MK2|Prkmk2	mitogen-activated protein kinase kinase 2	protein-coding
MACS_peak_11715	chr5	31350716	31351300	+	92.25	NA	promoter-TSS (NM_027855)	promoter-TSS (NM_027855)	-5	NM_212470	381629	Mm.28144	NM_027855	ENSMUSG00000013622	Atraid	0610007C21Rik|AI316792|Apr3|HSPC013|p18	all-trans retinoic acid induced differentiation factor	protein-coding
MACS_peak_1047	chr10	23506825	23507109	+	92.11	NA	promoter-TSS (NM_011295)	promoter-TSS (NM_011295)	48	NM_011295	20042	Mm.371846	NM_011295	ENSMUSG00000061983	Rps12	-	ribosomal protein S12	protein-coding
MACS_peak_170	chr1	50983925	50984575	+	92.11	NA	promoter-TSS (NM_019790)	promoter-TSS (NM_019790)	-117	NM_019790	56363	Mm.245154	NM_019790	ENSMUSG00000026109	Tmeff2	4832418D20Rik|7630402F16Rik|TR-2	transmembrane protein with EGF-like and two follistatin-like domains 2	protein-coding
MACS_peak_9771	chr3	30691719	30692433	+	92.08	NA	5' UTR (NM_027016, exon 1 of 8)	5' UTR (NM_027016, exon 1 of 8)	278	NM_027016	69276	Mm.26017	NM_027016	ENSMUSG00000027706	Sec62	3100002M17Rik|AI844545|AW545092|Dtrp1|HTP1|Tloc1	SEC62 homolog (S. cerevisiae)	protein-coding
MACS_peak_3270	chr12	4923860	4924410	+	92.08	NA	promoter-TSS (NM_001099628)	promoter-TSS (NM_001099628)	-24	NM_001099628	320817	Mm.210966	NM_001099628		Atad2b	1110014E10Rik|BC032887|C79189|D530031C13Rik	ATPase family, AAA domain containing 2B	protein-coding
MACS_peak_9610	chr2	167487177	167487479	+	92.08	NA	promoter-TSS (NM_145538)	promoter-TSS (NM_145538)	-284	NM_145538	407243	Mm.4863	NM_145538		Tmem189	AI840826|Kua	transmembrane protein 189	protein-coding
MACS_peak_7549	chr18	49992192	49992553	+	92.08	NA	promoter-TSS (NM_001081371)	promoter-TSS (NM_001081371)	-279	NM_001081371	240283	Mm.257790	NM_001081371	ENSMUSG00000037416	Dmxl1	C630007L23Rik|D030030C22	Dmx-like 1	protein-coding
MACS_peak_13277	chr6	121423457	121423853	+	91.85	NA	promoter-TSS (NR_110358)	promoter-TSS (NR_110358)	41	NM_001033354	243621	Mm.299442	NM_001033354	ENSMUSG00000040797	Iqsec3	AK122446|BRAG3|mKIAA1110|synarfGEF	IQ motif and Sec7 domain 3	protein-coding
MACS_peak_12426	chr5	136254427	136254742	+	91.85	NA	promoter-TSS (NM_008617)	promoter-TSS (NM_008617)	65	NM_008617	17448	Mm.297096	NM_008617	ENSMUSG00000019179	Mdh2	MDH|Mdh-2|Mor-1|Mor1	malate dehydrogenase 2, NAD (mitochondrial)	protein-coding
MACS_peak_14179	chr7	80703074	80703521	+	91.81	NA	promoter-TSS (NR_037569)	promoter-TSS (NR_037569)	-16	NR_037569	69170	Mm.34539	NR_037569		1810026B05Rik	-	RIKEN cDNA 1810026B05 gene	ncRNA
MACS_peak_5344	chr15	68090365	68090762	+	91.79	NA	promoter-TSS (NM_001145888)	promoter-TSS (NM_001145888)	-145	NM_198644	380993	Mm.309526	NM_198644	ENSMUSG00000022335	Zfat	Gm922|Zfat1|Zfp406	zinc finger and AT hook domain containing	protein-coding
MACS_peak_760	chr1	171677589	171678000	+	91.72	NA	promoter-TSS (NM_009062)	promoter-TSS (NM_009062)	-21	NM_009062	19736	Mm.41642	NM_009062	ENSMUSG00000038530	Rgs4	AA004315|AA597169|ESTM48|ESTM50	regulator of G-protein signaling 4	protein-coding
MACS_peak_386	chr1	88384263	88384593	+	91.71	NA	Intergenic	CpG	-38883	NM_008972	19231	Mm.19187	NM_008972	ENSMUSG00000026238	Ptma	Thym	prothymosin alpha	protein-coding
MACS_peak_2626	chr11	86806961	86807316	+	91.70	NA	5' UTR (NM_001005341, exon 1 of 5)	5' UTR (NM_001005341, exon 1 of 5)	126	NM_001005341	77864	Mm.191894	NM_001005341	ENSMUSG00000018427	Ypel2	6430570G24|E130113K08Rik	yippee-like 2 (Drosophila)	protein-coding
MACS_peak_8221	chr19	45149278	45149735	+	91.67	NA	Intergenic	CpG	-1123	NM_178929	107250	Mm.24417	NM_178929	ENSMUSG00000025213	Kazald1	AI842353|Bono1|IGFBP-rP10	Kazal-type serine peptidase inhibitor domain 1	protein-coding
MACS_peak_10847	chr4	94223272	94223679	+	91.67	NA	promoter-TSS (NM_026368)	promoter-TSS (NM_026368)	12	NM_026368	67770	Mm.35170	NM_026368	ENSMUSG00000028578	Caap1	5830433M19Rik|AI536248|CAAP	caspase activity and apoptosis inhibitor 1	protein-coding
MACS_peak_10825	chr4	83170993	83171396	+	91.63	NA	promoter-TSS (NM_001081012)	promoter-TSS (NM_001081012)	-255	NM_001081012	320226	Mm.180032	NM_029117	ENSMUSG00000052407	Ccdc171	4930418J05Rik|4930473A06Rik|A330015D16Rik	coiled-coil domain containing 171	protein-coding
MACS_peak_4986	chr14	70843104	70843510	+	91.63	NA	promoter-TSS (NR_029802)	promoter-TSS (NR_029802)	-10	NR_029802	723838		NR_029802	miRBase:MI0000704	Mir320	Mirn320|mmu-mir-320	microRNA 320	ncRNA
MACS_peak_13918	chr7	35174473	35175102	+	91.36	NA	promoter-TSS (NM_025948)	promoter-TSS (NM_025948)	-228	NM_025948	67070	Mm.276503	NM_025948	ENSMUSG00000066568	Lsm14a	2700023B17Rik|AA407828|AU017544|Tral	LSM14 homolog A (SCD6, S. cerevisiae)	protein-coding
MACS_peak_14423	chr7	117103805	117104282	+	91.34	NA	promoter-TSS (NM_021494)	promoter-TSS (NM_021494)	-107	NM_021494	19347	Mm.21904	NM_021494	ENSMUSG00000035901	Dennd5a	1500012B19Rik|AJ245569|AW496491|ORF37|Rab6ip1|mKIAA1091	DENN/MADD domain containing 5A	protein-coding
MACS_peak_5611	chr15	83998139	83998485	+	91.29	NA	promoter-TSS (NM_054088)	promoter-TSS (NM_054088)	66	NM_054088	116939	Mm.390817	NM_054088	ENSMUSG00000041653	Pnpla3	Adpn	patatin-like phospholipase domain containing 3	protein-coding
MACS_peak_1844	chr11	3404567	3405043	+	91.28	NA	promoter-TSS (NM_172439)	promoter-TSS (NM_172439)	19	NM_172439	170835	Mm.24313	NM_172439	ENSMUSG00000034570	Inpp5j	Pib5pa|Pipp	inositol polyphosphate 5-phosphatase J	protein-coding
MACS_peak_6170	chr16	35983170	35983660	+	91.20	NA	promoter-TSS (NM_008465)	promoter-TSS (NM_008465)	-34	NM_008465	16646	Mm.6952	NM_008465	ENSMUSG00000022905	Kpna1	AW494490|IPOA5|NPI1|Rch2|mSRP1	karyopherin (importin) alpha 1	protein-coding
MACS_peak_15423	chr8	107748717	107749275	+	90.93	NA	promoter-TSS (NM_145604)	promoter-TSS (NM_145604)	-92	NM_145604	234678	Mm.27186	NM_145604	ENSMUSG00000031889	D230025D16Rik	BC006874|Lin10	RIKEN cDNA D230025D16 gene	protein-coding
MACS_peak_6736	chr17	29230628	29230978	+	90.85	NA	promoter-TSS (NM_007669)	promoter-TSS (NM_007669)	86	NM_007669	12575	Mm.195663	NM_007669	ENSMUSG00000023067	Cdkn1a	CAP20|CDKI|CIP1|Cdkn1|P21|SDI1|Waf1|mda6|p21Cip1|p21WAF	cyclin-dependent kinase inhibitor 1A (P21)	protein-coding
MACS_peak_15518	chr8	113782919	113783385	+	90.85	NA	promoter-TSS (NM_009149)	promoter-TSS (NM_009149)	-50	NM_009149	20340	Mm.276271	NM_009149	ENSMUSG00000003316	Glg1	AI593353|AW537898|CFR|CFR-1|ESL-1|MG-160|MG160|Selel	golgi apparatus protein 1	protein-coding
MACS_peak_7078	chr17	57150585	57151356	+	90.72	NA	promoter-TSS (NM_133801)	promoter-TSS (NM_133801)	-259	NM_133801	98053	Mm.24632	NM_133801	ENSMUSG00000002658	Gtf2f1	2810405L04Rik|C76800|RAP74	general transcription factor IIF, polypeptide 1	protein-coding
MACS_peak_15375	chr8	96909961	96910581	+	90.72	NA	promoter-TSS (NM_022331)	promoter-TSS (NM_022331)	-129	NM_022331	64209	Mm.29151	NM_022331	ENSMUSG00000031770	Herpud1	Herp|Mifl|SUP	homocysteine-inducible, endoplasmic reticulum stress-inducible, ubiquitin-like domain member 1	protein-coding
MACS_peak_10463	chr3	152059279	152059813	+	90.63	NA	promoter-TSS (NM_001287139)	promoter-TSS (NM_001287139)	-102	NM_001287139	108946	Mm.379292	NM_198416	ENSMUSG00000039068	Zzz3	3110065C23Rik|6430567E01Rik|AA408566|AI481057|AW556059|R75514	zinc finger, ZZ domain containing 3	protein-coding
MACS_peak_15827	chr9	27106561	27107015	+	90.61	NA	promoter-TSS (NM_001033323)	promoter-TSS (NM_001033323)	-25	NM_001033323	235086	Mm.335029	NM_001033323	ENSMUSG00000034275	Igsf9b	Gm508|mKIAA1030	immunoglobulin superfamily, member 9B	protein-coding
MACS_peak_7162	chr17	74927139	74927481	+	90.61	NA	promoter-TSS (NM_007566)	promoter-TSS (NM_007566)	-325	NM_007566	12211	Mm.442564	NM_007566	ENSMUSG00000024073	Birc6	A430032G04Rik|A430040A19Rik|AA501170|Bruce|D630005A10Rik|mKIAA1289	baculoviral IAP repeat-containing 6	protein-coding
MACS_peak_12371	chr5	130555224	130555585	+	90.61	NA	5' UTR (NM_001130476, exon 1 of 6)	5' UTR (NM_001130476, exon 1 of 6)	164	NM_001130476	22021	Mm.332720	NM_013837	ENSMUSG00000034118	Tpst1	R75054|Tango13a	protein-tyrosine sulfotransferase 1	protein-coding
MACS_peak_11200	chr4	131864384	131864835	+	90.50	NA	promoter-TSS (NR_029412)	promoter-TSS (NR_029412)	16	NR_029468	100039864	Mm.258912	NR_029468	ENSMUSG00000086290	Snhg12	2310005L22Rik	small nucleolar RNA host gene 12	ncRNA
MACS_peak_3890	chr12	114252227	114252558	+	90.50	NA	promoter-TSS (NM_001291445)	promoter-TSS (NM_001291445)	-327	NM_001291445	217893	Mm.35754	NM_198165	ENSMUSG00000021143	Pacs2	6720425G15Rik|AW208651|AW489976|E230011J22|Pacs1l|mKIAA0602	phosphofurin acidic cluster sorting protein 2	protein-coding
MACS_peak_998	chr10	11000663	11001254	+	90.50	NA	promoter-TSS (NM_027968)	promoter-TSS (NM_027968)	-170	NM_027968	71865	Mm.276229	NM_027968	ENSMUSG00000047648	Fbxo30	1700026A16Rik|MUSA1	F-box protein 30	protein-coding
MACS_peak_2306	chr11	65601610	65601879	+	90.47	NA	promoter-TSS (NM_009157)	promoter-TSS (NM_009157)	55	NM_009157	26398	Mm.412922	NM_009157	ENSMUSG00000033352	Map2k4	JNKK1|MEK4|MKK4|PRKMK4|Sek1|Serk1	mitogen-activated protein kinase kinase 4	protein-coding
MACS_peak_5235	chr15	36212949	36213241	+	90.34	NA	promoter-TSS (NM_013923)	promoter-TSS (NM_013923)	-193	NM_013923	30945	Mm.5181	NM_013923	ENSMUSG00000022280	Rnf19a	AA032313|Dorfin|Rnf19|UIP117|Ubce7ip2|XYbp	ring finger protein 19A	protein-coding
MACS_peak_9252	chr2	130275758	130276250	+	90.31	NA	promoter-TSS (NM_001163688)	promoter-TSS (NM_001163688)	-10	NM_008980	19262	Mm.224246	NM_008980	ENSMUSG00000027303	Ptpra	Ptpa|Ptpalpha|Rptpalpha|Rptra|Rptralpha	protein tyrosine phosphatase, receptor type, A	protein-coding
MACS_peak_3398	chr12	40763756	40764049	+	90.18	NA	promoter-TSS (NM_007487)	promoter-TSS (NM_007487)	61	NM_007487	11861	Mm.12723	NM_007487	ENSMUSG00000047446	Arl4a	AI467555|Arl4	ADP-ribosylation factor-like 4A	protein-coding
MACS_peak_7673	chr18	74938215	74938508	+	90.11	NA	promoter-TSS (NR_028560)	promoter-TSS (NR_028560)	-252	NR_028560	100217466		NR_028560		Scarna17	MBII-119	small Cajal body-specific RNA 17	ncRNA
MACS_peak_7601	chr18	61714433	61715108	+	90.11	NA	promoter-TSS (NM_146087)	promoter-TSS (NM_146087)	-466	NM_146087	93687	Mm.26908	NM_146087	ENSMUSG00000024576	Csnk1a1	2610208K14Rik|4632404G05Rik|5430427P18Rik|CK1a|Csnk1a	casein kinase 1, alpha 1	protein-coding
MACS_peak_1674	chr10	116387258	116387534	+	90.11	NA	promoter-TSS (NR_038025)	promoter-TSS (NR_038025)	40	NM_001003950	216363	Mm.336394	NM_001003950	ENSMUSG00000064181	Rab3ip	B230311A06|Gtpat12|Rabin3	RAB3A interacting protein	protein-coding
MACS_peak_5760	chr15	98507717	98508029	+	89.84	NA	promoter-TSS (NM_172612)	promoter-TSS (NM_172612)	19	NM_172612	223881	Mm.274010	NM_172612	ENSMUSG00000054855	Rnd1	A830014L09Rik|Arhs	Rho family GTPase 1	protein-coding
MACS_peak_6269	chr16	62786378	62786890	+	89.79	NA	promoter-TSS (NM_178925)	promoter-TSS (NM_178925)	-92	NM_178925	106338	Mm.26321	NM_178925		Nsun3	6720484A09Rik|AU022521	NOL1/NOP2/Sun domain family member 3	protein-coding
MACS_peak_2833	chr11	100333883	100334215	+	89.71	NA	promoter-TSS (NM_172565)	promoter-TSS (NM_172565)	47	NM_172565	217194	Mm.183320	NM_172565	ENSMUSG00000048732	Klhl11	BC011167	kelch-like 11	protein-coding
MACS_peak_1614	chr10	95026607	95026899	+	89.70	NA	promoter-TSS (NM_027722)	promoter-TSS (NM_027722)	48	NM_027722	71207	Mm.24397	NM_027722	ENSMUSG00000020029	Nudt4	4933436C10Rik|DIPP2|DIPP2alpha|DIPP2beta|HDCMB47P	nudix (nucleoside diphosphate linked moiety X)-type motif 4	protein-coding
MACS_peak_4590	chr14	17081569	17082040	+	89.54	NA	promoter-TSS (NM_021504)	promoter-TSS (NM_021504)	-24	NM_021504	59007	Mm.258381	NM_021504	ENSMUSG00000021785	Ngly1	1110002C09Rik|PNGase|Png1	N-glycanase 1	protein-coding
MACS_peak_13714	chr7	25669540	25669875	+	89.52	NA	promoter-TSS (NM_023133)	promoter-TSS (NM_023133)	-26	NM_023133	20085	Mm.300281	NM_023133	ENSMUSG00000040952	Rps19	Dsk3	ribosomal protein S19	protein-coding
MACS_peak_6490	chr17	15178238	15178827	+	89.33	NA	promoter-TSS (NM_198104)	promoter-TSS (NM_198104)	-9	NM_011560	21647	Mm.440445	NM_011560	ENSMUSG00000079707	Tcte3	D17Leh117c|LC2|Tcte-3|Tctex-2|Tctex-4|Tctex2|Tctex4	t-complex-associated testis expressed 3	protein-coding
MACS_peak_9896	chr3	58495812	58496337	+	89.18	NA	promoter-TSS (NR_045167)	promoter-TSS (NR_045167)	236	NM_009174	20439	Mm.2847	NM_009174	ENSMUSG00000036432	Siah2	AA415433|Sinh2	seven in absentia 2	protein-coding
MACS_peak_289	chr1	74282715	74283221	+	89.18	NA	promoter-TSS (NM_029711)	promoter-TSS (NM_029711)	-156	NM_029711	76709	Mm.337038	NM_029711	ENSMUSG00000006304	Arpc2	2210023N03Rik|34kDa|p34-Arc	actin related protein 2/3 complex, subunit 2	protein-coding
MACS_peak_6828	chr17	34724273	34724885	+	89.16	NA	exon (NM_010929, exon 30 of 30)	exon (NM_010929, exon 30 of 30)	-2172	NM_134116	106512	Mm.26584	NM_134116	ENSMUSG00000034786	Gpsm3	AA960287|AGS4	G-protein signalling modulator 3 (AGS3-like, C. elegans)	protein-coding
MACS_peak_2101	chr11	49838314	49838789	+	89.15	NA	promoter-TSS (NM_021540)	promoter-TSS (NM_021540)	-282	NM_021540	59044	Mm.359004	NM_021540	ENSMUSG00000020376	Rnf130	G1RZFP|G1rp|GOLIATH|GP	ring finger protein 130	protein-coding
MACS_peak_5077	chr14	104049297	104049673	+	89.15	NA	promoter-TSS (NM_198014)	promoter-TSS (NM_198014)	25	NM_198014	105439	Mm.27548	NM_198014	ENSMUSG00000055717	Slain1	9630044O09Rik|AA675320|AW742596	SLAIN motif family, member 1	protein-coding
MACS_peak_8095	chr19	30104676	30105317	+	89.15	NA	promoter-TSS (NM_144873)	promoter-TSS (NM_144873)	-7	NM_144873	109113	Mm.313364	NM_144873	ENSMUSG00000024817	Uhrf2	2310065A22Rik|AI426270|AW214556|D130071B19Rik|Nirf	ubiquitin-like, containing PHD and RING finger domains 2	protein-coding
MACS_peak_11680	chr5	28643140	28643899	+	89.15	NA	promoter-TSS (NM_028234)	promoter-TSS (NM_028234)	-210	NM_028234	381626	Mm.304075	NM_028234	ENSMUSG00000048271	Rbm33	3200001K10Rik|6430512A10Rik|AA386890|Prr8	RNA binding motif protein 33	protein-coding
MACS_peak_11599	chr5	20387695	20388088	+	89.15	NA	promoter-TSS (NM_177601)	promoter-TSS (NM_177601)	51	NM_172992	68770	Mm.86410	NM_172992	ENSMUSG00000039987	Phtf2	1110054G21Rik|9530062N20Rik|AI447096|C77923	putative homeodomain transcription factor 2	protein-coding
MACS_peak_3824	chr12	110778906	110779414	+	88.98	NA	promoter-TSS (NR_027651)	promoter-TSS (NR_027651)	-46	NR_027652	17263	Mm.289645	NM_144513	ENSMUSG00000021268	Meg3	2900016C05Rik|3110050O07Rik|6330408G06Rik|AI425946|AW108224|D12Bwg1266e|Gtl2|R74756|R75394	maternally expressed 3	ncRNA
MACS_peak_15802	chr9	21856252	21856584	+	88.94	NA	promoter-TSS (NM_010487)	promoter-TSS (NM_010487)	49	NM_010487	15571	Mm.390167	NM_010487	ENSMUSG00000003410	Elavl3	2600009P04Rik|Huc|PLE21|mHuC	ELAV (embryonic lethal, abnormal vision, Drosophila)-like 3 (Hu antigen C)	protein-coding
MACS_peak_6185	chr16	38088522	38088956	+	88.87	NA	promoter-TSS (NM_019827)	promoter-TSS (NM_019827)	-348	NM_019827	56637	Mm.394930	NM_019827	ENSMUSG00000022812	Gsk3b	7330414F15Rik|8430431H08Rik|C86142|GSK-3|GSK-3beta|GSK3	glycogen synthase kinase 3 beta	protein-coding
MACS_peak_10398	chr3	137527452	137527727	+	88.87	NA	5' UTR (NM_016750, exon 1 of 5)	5' UTR (NM_016750, exon 1 of 5)	138	NM_016750	51788	Mm.117541	NM_016750	ENSMUSG00000037894	H2afz	H2A.Z|H2a.z-1	H2A histone family, member Z	protein-coding
MACS_peak_3162	chr11	119161217	119161713	+	88.76	NA	promoter-TSS (NM_138669)	promoter-TSS (NM_138669)	-108	NM_138669	192170	Mm.197555	NM_138669	ENSMUSG00000025580	Eif4a3	2400003O03Rik|Ddx48|eIF4A-III|mKIAA0111	eukaryotic translation initiation factor 4A3	protein-coding
MACS_peak_12590	chr5	145306455	145306920	+	88.63	NA	promoter-TSS (NM_016789)	promoter-TSS (NM_016789)	-69	NM_016789	53324	Mm.10099	NM_016789	ENSMUSG00000059991	Nptx2	Narp|np2	neuronal pentraxin 2	protein-coding
MACS_peak_729	chr1	167391243	167391603	+	88.59	NA	promoter-TSS (NM_028759)	promoter-TSS (NM_028759)	84	NM_027430	70456	Mm.195625	NM_027430	ENSMUSG00000026568	Mpc2	0610006C01Rik|2010002I07Rik|2610205H19Rik|AA108335|Brp44|ESTM43	mitochondrial pyruvate carrier 2	protein-coding
MACS_peak_7351	chr18	21458333	21458774	+	88.59	NA	promoter-TSS (NM_001033445)	promoter-TSS (NM_001033445)	87	NM_001033445	381126	Mm.312276	NM_001033445	ENSMUSG00000042680	Garem	C86169|Fam59a|Gm944|mKIAA4238	GRB2 associated, regulator of MAPK1	protein-coding
MACS_peak_464	chr1	95721577	95722291	+	88.58	NA	intron (NM_178882, intron 1 of 9)	intron (NM_178882, intron 1 of 9)	117	NM_178882	98314	Mm.383401	NM_178882	ENSMUSG00000073609	D2hgdh	AA408776|AA408778|AI325464	D-2-hydroxyglutarate dehydrogenase	protein-coding
MACS_peak_9230	chr2	128769302	128769970	+	88.56	NA	exon (NM_020594, exon 1 of 9)	exon (NM_020594, exon 1 of 9)	120	NM_020594	57432	Mm.11675	NM_020594	ENSMUSG00000027387	Zc3h8	AU020882|E130108N08Rik|Fliz1|Zc3hdc8	zinc finger CCCH type containing 8	protein-coding
MACS_peak_952	chr1	194999420	195000023	+	88.56	NA	promoter-TSS (NM_001160360)	promoter-TSS (NM_001160360)	-50	NM_001160359	319266	Mm.482460	NM_181048	ENSMUSG00000079144	A130010J15Rik	-	RIKEN cDNA A130010J15 gene	protein-coding
MACS_peak_776	chr1	173126189	173126462	+	88.56	NA	promoter-TSS (NM_025557)	promoter-TSS (NM_025557)	74	NM_025557	66425	Mm.482117	NM_025557	ENSMUSG00000038370	Pcp4l1	1500036F01Rik	Purkinje cell protein 4-like 1	protein-coding
MACS_peak_5815	chr15	100135169	100135435	+	88.56	NA	promoter-TSS (NM_027334)	promoter-TSS (NM_027334)	54	NM_027334	70152	Mm.488086	NM_027334	ENSMUSG00000054619	Mettl7a1	2210414H16Rik|3300001H21Rik|Aam-B|Mettl7a|UbiE1	methyltransferase like 7A1	protein-coding
MACS_peak_8134	chr19	36908467	36908988	+	88.56	NA	promoter-TSS (NM_001163635)	promoter-TSS (NM_001163635)	5	NM_001163635	74493	Mm.249310	NM_001163635	ENSMUSG00000024811	Tnks2	5430432P15Rik|AA517131|AI662480|ARTD6|TNKS-2|Tank2	tankyrase, TRF1-interacting ankyrin-related ADP-ribose polymerase 2	protein-coding
MACS_peak_8901	chr2	80155511	80156207	+	88.55	NA	5' UTR (NM_024181, exon 1 of 23)	5' UTR (NM_024181, exon 1 of 23)	236	NM_024181	66861	Mm.21762	NM_024181	ENSMUSG00000027006	Dnajc10	1200006L06Rik|D2Ertd706e|ERdj5|JPDI	DnaJ (Hsp40) homolog, subfamily C, member 10	protein-coding
MACS_peak_2876	chr11	101502554	101503136	+	88.52	NA	Intergenic	CpG	13582	NM_025654	66599	Mm.41449	NM_025654	ENSMUSG00000010362	Rdm1	2410008M22Rik|AW212028|Rad52b	RAD52 motif 1	protein-coding
MACS_peak_6769	chr17	32421442	32421947	+	88.51	NA	promoter-TSS (NM_198094)	promoter-TSS (NM_198094)	-616	NM_020508	57261	Mm.253518	NM_020508	ENSMUSG00000024002	Brd4	Brd5|HUNK1|MCAP|WI-11513	bromodomain containing 4	protein-coding
MACS_peak_2401	chr11	70460270	70460592	+	88.31	NA	promoter-TSS (NM_027445)	promoter-TSS (NM_027445)	110	NM_024211	67863	Mm.296082	NM_024211	ENSMUSG00000014606	Slc25a11	2310022P18Rik|2oxoc	solute carrier family 25 (mitochondrial carrier oxoglutarate carrier), member 11	protein-coding
MACS_peak_10832	chr4	86503020	86503605	+	88.31	NA	promoter-TSS (NM_009096)	promoter-TSS (NM_009096)	-41	NM_009096	20104	Mm.379007	NM_009096		Rps6	S6R	ribosomal protein S6	protein-coding
MACS_peak_6683	chr17	27270636	27271115	+	88.13	NA	promoter-TSS (NM_026063)	promoter-TSS (NM_026063)	-39	NM_026063	67267	Mm.272389	NM_026063	ENSMUSG00000024208	Uqcc2	2900010M23Rik|Cbp6|M19|Mnf1	ubiquinol-cytochrome c reductase complex assembly factor 2	protein-coding
MACS_peak_12492	chr5	138628233	138628518	+	88.05	NA	promoter-TSS (NM_009315)	promoter-TSS (NM_009315)	39	NM_009315	21343	Mm.248517	NM_009315	ENSMUSG00000036980	Taf6	80kDa|AW549759|TAF(II)80|TAFII70|Taf2e|p80	TAF6 RNA polymerase II, TATA box binding protein (TBP)-associated factor	protein-coding
MACS_peak_6127	chr16	31200928	31201596	+	88.05	NA	promoter-TSS (NM_030138)	promoter-TSS (NM_030138)	62	NM_030138	78618	Mm.274646	NM_030138	ENSMUSG00000049076	Acap2	4832442G16|9530039J15Rik|CNT-B2|Centb2|mKIAA0041	ArfGAP with coiled-coil, ankyrin repeat and PH domains 2	protein-coding
MACS_peak_2036	chr11	31770823	31771137	+	87.82	NA	promoter-TSS (NM_001290676)	promoter-TSS (NM_001290676)	40	NM_026252	67579	Mm.339792	NM_026252	ENSMUSG00000020300	Cpeb4	Cpe-bp4|Cpeb-4|mCPEB-4	cytoplasmic polyadenylation element binding protein 4	protein-coding
MACS_peak_6807	chr17	34092413	34092745	+	87.82	NA	promoter-TSS (NM_011296)	promoter-TSS (NM_011296)	7	NM_011296	20084	Mm.298745	NM_011296	ENSMUSG00000008668	Rps18	H-2Ke3|H2-Ke3|Ke-3|ke3	ribosomal protein S18	protein-coding
MACS_peak_5155	chr15	7079154	7079812	+	87.82	NA	promoter-TSS (NM_001113386)	promoter-TSS (NM_001113386)	-89	NM_001113386	16880	Mm.149720	NM_013584	ENSMUSG00000054263	Lifr	A230075M04Rik|AW061234|LIF	leukemia inhibitory factor receptor	protein-coding
MACS_peak_14417	chr7	116662321	116662914	+	87.73	NA	promoter-TSS (NM_011975)	promoter-TSS (NM_011975)	-92	NM_011975	26451	Mm.305750	NM_011975	ENSMUSG00000046364	Rpl27a	L27'|L27A|L29	ribosomal protein L27A	protein-coding
MACS_peak_14050	chr7	52781388	52781832	+	87.72	NA	promoter-TSS (NM_148927)	promoter-TSS (NM_148927)	28	NM_008654	17872	Mm.4048	NM_008654	ENSMUSG00000040435	Ppp1r15a	9630030H21|Gadd34|Myd116	protein phosphatase 1, regulatory (inhibitor) subunit 15A	protein-coding
MACS_peak_6594	chr17	24806394	24806886	+	87.68	NA	promoter-TSS (NM_183149)	promoter-TSS (NM_183149)	-57	NM_183149	213753	Mm.219581	NM_183149	ENSMUSG00000041130	Zfp598	BC023040|Ntrap|Znf598	zinc finger protein 598	protein-coding
MACS_peak_3442	chr12	55797657	55797995	+	87.68	NA	promoter-TSS (NM_025456)	promoter-TSS (NM_025456)	-974	NM_025456	66266	Mm.156440	NM_025456	ENSMUSG00000054302	Eapp	1810011O16Rik	E2F-associated phosphoprotein	protein-coding
MACS_peak_1127	chr10	41996248	41996869	+	87.54	NA	promoter-TSS (NM_019740)	promoter-TSS (NM_019740)	-10	NM_019740	56484	Mm.338613	NM_019740	ENSMUSG00000048756	Foxo3	1110048B16Rik|2010203A17Rik|C76856|FKHRL1|Fkhr2|Foxo3a	forkhead box O3	protein-coding
MACS_peak_8193	chr19	43763854	43764505	+	87.52	NA	promoter-TSS (NM_053103)	promoter-TSS (NM_053103)	0	NM_053103	93685	Mm.248237	NM_053103	ENSMUSG00000025192	Entpd7	1810012B13Rik|1810020C02Rik|2810003F23Rik|LALP1|Lysal2	ectonucleoside triphosphate diphosphohydrolase 7	protein-coding
MACS_peak_2927	chr11	102993997	102994319	+	87.41	NA	promoter-TSS (NM_001130516)	promoter-TSS (NM_001130516)	-495	NM_001130516	71059	Mm.273871	NM_027658	ENSMUSG00000043372	Hexim2	4933402L21Rik	hexamethylene bis-acetamide inducible 2	protein-coding
MACS_peak_11203	chr4	131909384	131909670	+	87.41	NA	promoter-TSS (NR_003270)	promoter-TSS (NR_003270)	74	NR_003270	399101	Mm.486919	NR_002904	ENSMUSG00000085241	Snhg3	Rnu17d|U17HG	small nucleolar RNA host gene 3	ncRNA
MACS_peak_15855	chr9	35075166	35075419	+	87.41	NA	promoter-TSS (NM_175411)	promoter-TSS (NM_175411)	98	NM_175411	109229	Mm.24197	NM_175411	ENSMUSG00000050471	Fam118b	2310022O21Rik|2700018L24Rik|C030004A17Rik|Ppp4r1l	family with sequence similarity 118, member B	protein-coding
MACS_peak_10494	chr4	3762541	3762970	+	87.35	NA	promoter-TSS (NM_026147)	promoter-TSS (NM_026147)	-8	NM_026147	67427	Mm.21938	NM_026147		Rps20	4632426K06Rik|Dsk4	ribosomal protein S20	protein-coding
MACS_peak_7109	chr17	66450611	66451190	+	87.25	NA	promoter-TSS (NM_028388)	promoter-TSS (NM_028388)	-1	NM_028388	72900	Mm.2206	NM_028388	ENSMUSG00000024099	Ndufv2	2900010C23Rik	NADH dehydrogenase (ubiquinone) flavoprotein 2	protein-coding
MACS_peak_10985	chr4	116357936	116358378	+	87.12	NA	promoter-TSS (NM_011034)	promoter-TSS (NM_011034)	-47	NM_011034	18477	Mm.30929	NM_011034		Prdx1	MSP23|NkefA|OSF-3|OSF3|PAG|Paga|PrdxI|PrxI|TDX2|TPxA|Tdpx2|prx1	peroxiredoxin 1	protein-coding
MACS_peak_934	chr1	193399562	193399929	+	87.12	NA	promoter-TSS (NM_029766)	promoter-TSS (NM_029766)	132	NM_178632	77065	Mm.338175	NM_178632	ENSMUSG00000037461	Ints7	5930412E23Rik	integrator complex subunit 7	protein-coding
MACS_peak_12617	chr5	147644556	147644995	+	87.11	NA	intron (NM_019647, intron 1 of 5)	CpG	309	NM_019647	19933	Mm.316592	NM_019647	ENSMUSG00000041453	Rpl21	8430440E03Rik|L21	ribosomal protein L21	protein-coding
MACS_peak_4712	chr14	35123375	35124164	+	87.01	NA	promoter-TSS (NM_008133)	promoter-TSS (NM_008133)	-80	NM_029389	75698	Mm.45406	NM_029389	ENSMUSG00000041471	Fam35a	3110001K24Rik	family with sequence similarity 35, member A	protein-coding
MACS_peak_3055	chr11	115048479	115049039	+	87.00	NA	promoter-TSS (NM_001033393)	promoter-TSS (NM_001033393)	-42	NM_001033393	320534	Mm.260587	NM_001033393	ENSMUSG00000045980	Tmem104	C630005D06Rik|mFLJ00021	transmembrane protein 104	protein-coding
MACS_peak_4483	chr13	102537894	102538493	+	86.94	NA	promoter-TSS (NM_001077495)	promoter-TSS (NM_001077495)	-21	NM_001077495	18708	Mm.259333	NM_001024955	ENSMUSG00000041417	Pik3r1	PI3K|p50alpha|p55alpha|p85alpha	phosphatidylinositol 3-kinase, regulatory subunit, polypeptide 1 (p85 alpha)	protein-coding
MACS_peak_5311	chr15	58654858	58655556	+	86.92	NA	promoter-TSS (NM_175212)	promoter-TSS (NM_175212)	-225	NM_175212	74868	Mm.293754	NM_175212	ENSMUSG00000062373	Tmem65	2610029O13Rik|4930438D12Rik	transmembrane protein 65	protein-coding
MACS_peak_12586	chr5	144861147	144861450	+	86.92	NA	promoter-TSS (NM_001081109)	promoter-TSS (NM_001081109)	-7	NM_001081109	231876	Mm.288726	NM_001081109	ENSMUSG00000038970	Lmtk2	2900041G10Rik|A330101P12Rik|BREK|KPI-2|KPI2|aatyk2|cprk	lemur tyrosine kinase 2	protein-coding
MACS_peak_10955	chr4	109348838	109349464	+	86.83	NA	promoter-TSS (NM_007983)	promoter-TSS (NM_007983)	-81	NM_007983	14084	Mm.318259	NM_007983	ENSMUSG00000010517	Faf1	AA408698|Dffrx|Fam	Fas-associated factor 1	protein-coding
MACS_peak_6336	chr16	91647006	91648322	+	86.66	NA	promoter-TSS (NM_010256)	promoter-TSS (NM_010256)	-405	NM_019973	20658	Mm.46401	NM_019973	ENSMUSG00000022961	Son	2900011L12Rik|AA409051|AU067731|C81487|mKIAA1019|nrebp	Son DNA binding protein	protein-coding
MACS_peak_13343	chr6	125165505	125165835	+	86.57	NA	promoter-TSS (NM_001080557)	promoter-TSS (NM_001080557)	71	NM_001080557	22317	Mm.32321	NM_009496	ENSMUSG00000030337	Vamp1	Syb-1|Syb1|VAMP-1|lew	vesicle-associated membrane protein 1	protein-coding
MACS_peak_9074	chr2	114026935	114027255	+	86.57	NA	promoter-TSS (NM_175466)	promoter-TSS (NM_175466)	73	NM_175466	228491	Mm.132523	NM_175466	ENSMUSG00000040321	Zfp770	6430601A21Rik|Znf770	zinc finger protein 770	protein-coding
MACS_peak_10014	chr3	88213739	88214288	+	86.48	NA	TTS (NM_001281795)	TTS (NM_001281795)	225	NM_025928	67037	Mm.36715	NM_025928	ENSMUSG00000028066	Pmf1	2600009M07Rik|AL033286|AW060657	polyamine-modulated factor 1	protein-coding
MACS_peak_6441	chr17	8476079	8476921	+	86.48	NA	promoter-TSS (NM_018819)	promoter-TSS (NM_018819)	-178	NM_018819	55951	Mm.288510	NM_018819	ENSMUSG00000023861	Mpc1	0610006G08Rik|3830411I18Rik|Brp44l	mitochondrial pyruvate carrier 1	protein-coding
MACS_peak_8315	chr19	53603265	53604022	+	86.48	NA	promoter-TSS (NM_001085390)	promoter-TSS (NM_001085390)	-165	NM_001085390	240672	Mm.482424	NM_001085390		Dusp5	Gm337	dual specificity phosphatase 5	protein-coding
MACS_peak_14706	chr7	148358239	148358948	+	86.48	NA	intron (NM_001172100, intron 1 of 9)	CpG	157	NM_001172100	107702	Mm.279485	NM_145135	ENSMUSG00000038650	Rnh1	AW546468|C80305|RNH	ribonuclease/angiogenin inhibitor 1	protein-coding
MACS_peak_8462	chr2	24830384	24831012	+	86.48	NA	promoter-TSS (NM_001031808)	promoter-TSS (NM_001031808)	-80	NM_001031808	107733	Mm.23010	NM_001031808		Mrpl41	MRP-L27|Rpml27	mitochondrial ribosomal protein L41	protein-coding
MACS_peak_11208	chr4	132089259	132089626	+	86.32	NA	exon (NM_007512, exon 1 of 3)	exon (NM_007512, exon 1 of 3)	132	NM_007512	11983	Mm.2171	NM_007512	ENSMUSG00000054428	Atpif1	Atpi|If1	ATPase inhibitory factor 1	protein-coding
MACS_peak_14767	chr8	3500172	3500734	+	86.32	NA	promoter-TSS (NM_053177)	promoter-TSS (NM_053177)	-66	NM_053177	94178	Mm.8356	NM_053177	ENSMUSG00000004567	Mcoln1	2210015I05Rik|TRPML1|mucolipidin	mucolipin 1	protein-coding
MACS_peak_12351	chr5	129525476	129525926	+	86.22	NA	promoter-TSS (NM_009391)	promoter-TSS (NM_009391)	-330	NM_009391	19384	Mm.297440	NM_009391	ENSMUSG00000029430	Ran	-	RAN, member RAS oncogene family	protein-coding
MACS_peak_12278	chr5	123590985	123591836	+	86.22	NA	promoter-TSS (NM_001040398)	promoter-TSS (NM_001040398)	-792	NM_001040398	208043	Mm.250391	NM_177581	ENSMUSG00000038384	Setd1b	AA516740|BC035291|KMT2G|mKIAA1076	SET domain containing 1B	protein-coding
MACS_peak_8285	chr19	47653808	47654351	+	86.22	NA	promoter-TSS (NM_001164639)	promoter-TSS (NM_001164639)	-430	NM_009289	20874	Mm.281011	NM_009289	ENSMUSG00000025060	Slk	9A2|AV021402|AW411554|Etk4|SMAK|Stk2|mKIAA0204|mSLK	STE20-like kinase	protein-coding
MACS_peak_8317	chr19	53674334	53674628	+	86.22	NA	promoter-TSS (NM_007790)	promoter-TSS (NM_007790)	-405	NM_007790	13006	Mm.14910	NM_007790	ENSMUSG00000024974	Smc3	Bamacan|Cspg6|HCAP|Mmip1|SMC-3|SmcD	structural maintenance of chromosomes 3	protein-coding
MACS_peak_10457	chr3	151872838	151874123	+	86.15	NA	promoter-TSS (NM_057172)	promoter-TSS (NM_057172)	58	NM_057172	51886	Mm.278922	NM_057172	ENSMUSG00000028034	Fubp1	9530027K12Rik|D3Ertd330e|FBP|Fubp|Fubp4	far upstream element (FUSE) binding protein 1	protein-coding
MACS_peak_868	chr1	182780664	182781144	+	86.09	NA	promoter-TSS (NM_145943)	promoter-TSS (NM_145943)	-378	NM_145943	208768	Mm.272625	NM_145943	ENSMUSG00000038806	Sde2	-	SDE2 telomere maintenance homolog (S. pombe)	protein-coding
MACS_peak_17022	chrX	132804738	132805035	+	85.80	NA	promoter-TSS (NM_001110234)	promoter-TSS (NM_001110234)	94	NM_001110234	12070	Mm.90787	NM_009750	ENSMUSG00000046432	Ngfrap1	AL033356|Bex3|DXWsu67e|Gcap27|Nade	nerve growth factor receptor (TNFRSF16) associated protein 1	protein-coding
MACS_peak_12073	chr5	109058538	109059085	+	85.72	NA	promoter-TSS (NM_001163532)	promoter-TSS (NM_001163532)	-15	NM_001282051	231580	Mm.276647	NM_153569	ENSMUSG00000062234	Gak	D130045N16Rik	cyclin G associated kinase	protein-coding
MACS_peak_6474	chr17	13200458	13201066	+	85.72	NA	promoter-TSS (NM_013671)	promoter-TSS (NM_013671)	57	NM_013671	20656	Mm.290876	NM_013671	ENSMUSG00000006818	Sod2	MnSOD|Sod-2	superoxide dismutase 2, mitochondrial	protein-coding
MACS_peak_6184	chr16	37868146	37868850	+	85.72	NA	promoter-TSS (NM_177093)	promoter-TSS (NM_177093)	12	NM_177093	320184	Mm.390882	NM_177093	ENSMUSG00000034158	Lrrc58	1810012N18Rik|C330018J07Rik	leucine rich repeat containing 58	protein-coding
MACS_peak_10617	chr4	40669171	40670176	+	85.65	NA	promoter-TSS (NR_029594)	promoter-TSS (NR_029594)	172	NM_008298	15502	Mm.27897	NM_008298	ENSMUSG00000028410	Dnaja1	Hsj2|Nedd7	DnaJ (Hsp40) homolog, subfamily A, member 1	protein-coding
MACS_peak_11758	chr5	33994779	33995069	+	85.63	NA	TTS (NM_026698)	TTS (NM_026698)	299	NM_001289724	20492	Mm.4172	NM_009193	ENSMUSG00000004642	Slbp	-	stem-loop binding protein	protein-coding
MACS_peak_2834	chr11	100389019	100389308	+	85.55	NA	5' UTR (NM_134037, exon 1 of 28)	5' UTR (NM_134037, exon 1 of 28)	151	NM_134037	104112	Mm.282039	NM_134037	ENSMUSG00000020917	Acly	A730098H14Rik|AW538652	ATP citrate lyase	protein-coding
MACS_peak_6570	chr17	24306114	24306558	+	85.55	NA	promoter-TSS (NM_009729)	promoter-TSS (NM_009729)	4	NR_037854	100039636	Mm.30155	NR_037854	ENSMUSG00000080242	Atp6v0c-ps2	Atp6l-ps2|Gm15487	ATPase, H+ transporting, lysosomal V0 subunit C, pseudogene 2	pseudo
MACS_peak_986	chr10	7400727	7401150	+	85.46	NA	promoter-TSS (NM_010690)	promoter-TSS (NM_010690)	18	NR_033219	407824	Mm.393120	NR_033219		BC020402	-	cDNA sequence BC020402	ncRNA
MACS_peak_16237	chr9	72510087	72510441	+	85.38	NA	5' UTR (NM_010890, exon 1 of 29)	5' UTR (NM_010890, exon 1 of 29)	110	NM_010890	17999	Mm.279923	NM_010890	ENSMUSG00000032216	Nedd4	AA959633|AL023035|AU019897|E430025J12Rik|Nedd4-1|Nedd4a|mKIAA0093	neural precursor cell expressed, developmentally down-regulated 4	protein-coding
MACS_peak_9260	chr2	130665663	130666230	+	85.37	NA	promoter-TSS (NM_029432)	promoter-TSS (NM_029432)	-100	NM_029432	228602	Mm.271990	NM_029432	ENSMUSG00000027309	4930402H24Rik	2810487F15Rik|AI413763|C78926	RIKEN cDNA 4930402H24 gene	protein-coding
MACS_peak_656	chr1	155746630	155747497	+	85.36	NA	promoter-TSS (NM_008131)	promoter-TSS (NM_008131)	4	NM_008131	14645	Mm.210745	NM_008131	ENSMUSG00000026473	Glul	GS|Glns	glutamate-ammonia ligase (glutamine synthetase)	protein-coding
MACS_peak_10546	chr4	15940793	15941426	+	85.28	NA	promoter-TSS (NM_145950)	promoter-TSS (NM_145950)	-85	NM_145950	209212	Mm.46455	NM_145950	ENSMUSG00000041153	Osgin2	BC010311|C230027H09Rik	oxidative stress induced growth inhibitor family member 2	protein-coding
MACS_peak_7396	chr18	32070098	32071001	+	85.28	NA	exon (NM_026006, exon 1 of 1)	exon (NM_026006, exon 1 of 1)	1008	NM_026006	67158	Mm.31537	NM_026006	ENSMUSG00000044982	Sft2d3	2610206C24Rik|AI847965|AW046173	SFT2 domain containing 3	protein-coding
MACS_peak_4706	chr14	33326478	33327082	+	85.28	NA	promoter-TSS (NM_001081221)	promoter-TSS (NM_001081221)	73	NM_001081221	319955	Mm.318310	NM_177043	ENSMUSG00000054051	Ercc6	4732403I04|C130058G22Rik|CSB	excision repair cross-complementing rodent repair deficiency, complementation group 6	protein-coding
MACS_peak_8090	chr19	29596507	29597041	+	85.15	NA	promoter-TSS (NM_001081319)	promoter-TSS (NM_001081319)	2	NM_001081319	226089	Mm.353838	NM_177641	ENSMUSG00000038658	Ric1	C030046E11Rik|C130057E09Rik|Kiaa1432	RAB6A GEF complex partner 1	protein-coding
MACS_peak_15056	chr8	71612325	71612912	+	85.15	NA	promoter-TSS (NM_007509)	promoter-TSS (NM_007509)	-17	NM_007509	11966	Mm.249096	NM_007509	ENSMUSG00000006273	Atp6v1b2	AI194269|AI790362|Atp6b2|HO57|R74844	ATPase, H+ transporting, lysosomal V1 subunit B2	protein-coding
MACS_peak_1426	chr10	80139394	80139745	+	85.09	NA	Intergenic	CpG	-4848	NM_021462	17347	Mm.42126	NM_021462	ENSMUSG00000020190	Mknk2	2010016G11Rik|Gprk7|Mnk2	MAP kinase-interacting serine/threonine kinase 2	protein-coding
MACS_peak_8005	chr19	10679683	10680267	+	85.08	NA	promoter-TSS (NM_015735)	promoter-TSS (NM_015735)	-140	NM_015735	13194	Mm.289915	NM_015735	ENSMUSG00000024740	Ddb1	127kDa|AA408517|p127-Ddb1	damage specific DNA binding protein 1	protein-coding
MACS_peak_15208	chr8	79425812	79426047	+	85.08	NA	promoter-TSS (NM_001083906)	promoter-TSS (NM_001083906)	-478	NM_001083906	110784	Mm.324393	NM_001083906	ENSMUSG00000031618	Nr3c2	MR|Mlr	nuclear receptor subfamily 3, group C, member 2	protein-coding
MACS_peak_5751	chr15	98364420	98364818	+	84.90	NA	promoter-TSS (NM_001289439)	promoter-TSS (NM_001289439)	81	NM_001289438	69612	Mm.296240	NM_133714	ENSMUSG00000022992	Kansl2	2310037I24Rik|B930009D17	KAT8 regulatory NSL complex subunit 2	protein-coding
MACS_peak_15367	chr8	96621936	96622753	+	84.78	NA	5' UTR (NM_026116, exon 1 of 17)	5' UTR (NM_026116, exon 1 of 17)	367	NM_026116	67378	Mm.292107	NM_026116	ENSMUSG00000031755	Bbs2	2410125H22Rik|AI447581	Bardet-Biedl syndrome 2 (human)	protein-coding
MACS_peak_8321	chr19	53977426	53978117	+	84.78	NA	promoter-TSS (NM_001168492)	promoter-TSS (NM_001168492)	-70	NM_001168492	18569	Mm.1605	NM_011050	ENSMUSG00000024975	Pdcd4	D19Ucla1|Ma3|Tis	programmed cell death 4	protein-coding
MACS_peak_7916	chr19	6996126	6996418	+	84.59	NA	promoter-TSS (NM_007953)	promoter-TSS (NM_007953)	26	NM_007953	26379	Mm.386776	NM_007953	ENSMUSG00000024955	Esrra	ERRalpha|Err1|Estrra|Nr3b1	estrogen related receptor, alpha	protein-coding
MACS_peak_9584	chr2	165817842	165818395	+	84.59	NA	promoter-TSS (NM_008679)	promoter-TSS (NM_008679)	-19	NM_008679	17979	Mm.469663	NM_008679	ENSMUSG00000027678	Ncoa3	2010305B15Rik|AW321064|Actr|Aib1|KAT13B|Rac3|Src3|Tram-1|Tram1|bHLHe42|p/Cip|pCip	nuclear receptor coactivator 3	protein-coding
MACS_peak_14919	chr8	27229407	27230453	+	84.51	NA	promoter-TSS (NM_029965)	promoter-TSS (NM_029965)	78	NM_029965	77733	Mm.291906	NM_029965	ENSMUSG00000013878	Rnf170	6720407G21Rik|AI481227	ring finger protein 170	protein-coding
MACS_peak_16479	chr9	107904535	107905223	+	84.44	NA	promoter-TSS (NM_013785)	promoter-TSS (NM_013785)	-100	NM_013785	27399	Mm.276155	NM_013785	ENSMUSG00000032594	Ip6k1	1200016D08Rik|AU022776|Ihpk1|InsP6|InsP6k1|Itpk6	inositol hexaphosphate kinase 1	protein-coding
MACS_peak_4301	chr13	64471292	64471887	+	84.27	NA	promoter-TSS (NM_009984)	promoter-TSS (NM_009984)	25	NM_009984	13039	Mm.930	NM_009984	ENSMUSG00000021477	Ctsl	1190035F06Rik|Ctsl1|MEP|fs|nkt	cathepsin L	protein-coding
MACS_peak_6930	chr17	45570322	45570928	+	84.27	NA	promoter-TSS (NM_152810)	promoter-TSS (NM_152810)	31	NM_152810	71702	Mm.28270	NM_152810	ENSMUSG00000023932	Cdc5l	1200002I02Rik|AA408004|PCDC5RP	cell division cycle 5-like (S. pombe)	protein-coding
MACS_peak_1464	chr10	80693337	80693633	+	84.18	NA	promoter-TSS (NM_178662)	promoter-TSS (NM_178662)	39	NM_178662	16467	Mm.127681	NM_178662	ENSMUSG00000034958	Atcay	3322401A10Rik|BB077577|BNIP-H|CLAC|hes|ji	ataxia, cerebellar, Cayman type homolog (human)	protein-coding
MACS_peak_12596	chr5	145844467	145844940	+	84.18	NA	promoter-TSS (NM_019767)	promoter-TSS (NM_019767)	-35	NM_019767	56443	Mm.371610	NM_019767	ENSMUSG00000029621	Arpc1a	0610010H08Rik|1110030K07Rik|41kDa|AA407347|Sid32|Sid329	actin related protein 2/3 complex, subunit 1A	protein-coding
MACS_peak_16725	chrX	12857661	12858572	+	84.09	NA	promoter-TSS (NM_010028)	promoter-TSS (NM_010028)	-32	NM_010028	13205	Mm.289662	NM_010028	ENSMUSG00000000787	Ddx3x	D1Pas1-rs2|Ddx3|Fin14	DEAD/H (Asp-Glu-Ala-Asp/His) box polypeptide 3, X-linked	protein-coding
MACS_peak_6482	chr17	15115508	15116141	+	83.92	NA	promoter-TSS (NM_001123367)	promoter-TSS (NM_001123367)	-4	NM_001123370	100041574	Mm.393767	NM_001123370	ENSMUSG00000073455	9030025P20Rik	D17Zt9e	RIKEN cDNA 9030025P20 gene	protein-coding
MACS_peak_10217	chr3	100489188	100490124	+	83.92	NA	promoter-TSS (NM_010763)	promoter-TSS (NM_010763)	-260	NM_010763	17156	Mm.271617	NM_010763	ENSMUSG00000008763	Man1a2	AI428775|AI528764|AI854422|Man1b|PCR2	mannosidase, alpha, class 1A, member 2	protein-coding
MACS_peak_15318	chr8	88224565	88225055	+	83.92	NA	promoter-TSS (NR_106189)	promoter-TSS (NR_106189)	6	NR_106189	102465898		NR_106189	miRBase:MI0026041	Mir8109	mmu-mir-8109	microRNA mir-8109	ncRNA
MACS_peak_836	chr1	180267676	180268238	+	83.89	NA	promoter-TSS (NM_016805)	promoter-TSS (NM_016805)	-42	NM_016805	51810	Mm.86589	NM_016805	ENSMUSG00000039630	Hnrnpu	AA408410|AI256620|AL024194|AL024437|AW557595|C86794|Hnrpu|SAFA|Sp120|hnRNP U	heterogeneous nuclear ribonucleoprotein U	protein-coding
MACS_peak_12918	chr6	55401664	55402239	+	83.89	NA	promoter-TSS (NM_007407)	promoter-TSS (NM_007407)	-21	NM_001025372	11517	Mm.44245	NM_007407	ENSMUSG00000029778	Adcyap1r1	2900024I10Rik|AI846590|PAC1|PAC1R|PACAP1-R	adenylate cyclase activating polypeptide 1 receptor 1	protein-coding
MACS_peak_2995	chr11	106873818	106874094	+	83.89	NA	Intergenic	CpG	-13117	NM_010655	16647	Mm.12508	NM_010655	ENSMUSG00000018362	Kpna2	2410044B12Rik|IPOA1|PTAC58|Rch1	karyopherin (importin) alpha 2	protein-coding
MACS_peak_4123	chr13	44826436	44826859	+	83.85	NA	promoter-TSS (NM_001205043)	promoter-TSS (NM_001205043)	7	NM_001205043	16468	Mm.25059	NM_021878	ENSMUSG00000038518	Jarid2	Jmj|jumonji	jumonji, AT rich interactive domain 2	protein-coding
MACS_peak_1932	chr11	16407969	16408482	+	83.85	NA	5' UTR (NM_001109972, exon 1 of 4)	5' UTR (NM_001109972, exon 1 of 4)	262	NM_011343	20335	Mm.325350	NM_011343	ENSMUSG00000078974	Sec61g	-	SEC61, gamma subunit	protein-coding
MACS_peak_1980	chr11	22967617	22968179	+	83.84	NA	Intergenic	CpG	54511	NM_028672	73873	Mm.252406	NM_028672	ENSMUSG00000049811	Fam161a	4930430E16Rik	family with sequence similarity 161, member A	protein-coding
MACS_peak_7361	chr18	23962162	23962969	+	83.82	NA	promoter-TSS (NM_153058)	promoter-TSS (NM_153058)	94	NM_153058	212307	Mm.132237	NM_153058	ENSMUSG00000024277	Mapre2	AI314113|C820009F03Rik|D18Abb1e|EB1|EB2|RP1	microtubule-associated protein, RP/EB family, member 2	protein-coding
MACS_peak_10360	chr3	129239024	129239333	+	83.77	NA	intron (NM_130450, intron 2 of 4)	intron (NM_130450, intron 2 of 4)	3874	NM_130450	170439	Mm.314113	NM_130450	ENSMUSG00000041220	Elovl6	C77826|FAE|LCE	ELOVL family member 6, elongation of long chain fatty acids (yeast)	protein-coding
MACS_peak_1781	chr10	127813833	127814330	+	83.76	NA	promoter-TSS (NM_172790)	promoter-TSS (NM_172790)	-99	NM_172790	237615	Mm.440177	NM_172790	ENSMUSG00000014498	Ankrd52	6430544C07|G431002C21Rik	ankyrin repeat domain 52	protein-coding
MACS_peak_9176	chr2	121973297	121973833	+	83.76	NA	intron (NM_009735, intron 1 of 3)	intron (NM_009735, intron 1 of 3)	142	NM_009735	12010	Mm.163	NM_009735	ENSMUSG00000060802	B2m	Ly-m11|beta2-m|beta2m	beta-2 microglobulin	protein-coding
MACS_peak_9381	chr2	152119386	152119825	+	83.61	NA	promoter-TSS (NM_024196)	promoter-TSS (NM_024196)	-3	NM_024196	67231	Mm.288733	NM_024196		Tbc1d20	1110028I04Rik|2810442O16Rik|AI414693	TBC1 domain family, member 20	protein-coding
MACS_peak_14149	chr7	72017701	72018115	+	83.61	NA	promoter-TSS (NM_023239)	promoter-TSS (NM_023239)	18	NM_023239	66647	Mm.19944	NM_023239		Ndnl2	5730494G16Rik|AI642138|BB044375|HCA4|Mageg1|mage-g1	necdin-like 2	protein-coding
MACS_peak_8430	chr2	18593587	18594369	+	83.61	NA	promoter-TSS (NM_147778)	promoter-TSS (NM_147778)	-111	NM_147778	12238	Mm.249586	NM_147778	ENSMUSG00000051154	Commd3	AW550818|Bup|D2Ertd542e	COMM domain containing 3	protein-coding
MACS_peak_2858	chr11	100980949	100981633	+	83.51	NA	promoter-TSS (NM_028933)	promoter-TSS (NM_028933)	-134	NM_028933	67998	Mm.33881	NM_026501	ENSMUSG00000017802	Fam134c	1300010M03Rik|4933404C01Rik|AI551748	family with sequence similarity 134, member C	protein-coding
MACS_peak_1677	chr10	116585360	116585666	+	83.49	NA	promoter-TSS (NM_177798)	promoter-TSS (NM_177798)	17	NM_177798	327826	Mm.135965	NM_177798	ENSMUSG00000020170	Frs2	4732458E18|C330018A15Rik|Frs2alpha|SNT1	fibroblast growth factor receptor substrate 2	protein-coding
MACS_peak_3838	chr12	112127239	112127845	+	83.41	NA	promoter-TSS (NM_027223)	promoter-TSS (NM_027223)	68	NM_001081057	104859	Mm.35583	NM_175336	ENSMUSG00000021275	Tecpr2	4930573I19Rik|AI604920|mKIAA0297	tectonin beta-propeller repeat containing 2	protein-coding
MACS_peak_1046	chr10	22450919	22451510	+	83.34	NA	promoter-TSS (NM_011603)	promoter-TSS (NM_011603)	39	NM_011603	237336	Mm.86670	NM_011603	ENSMUSG00000071359	Tbpl1	4732475G08|AW011832|AW491032|D18347|STD|TLF|TRF2|TRP|Tlp	TATA box binding protein-like 1	protein-coding
MACS_peak_10496	chr4	3865957	3866271	+	83.33	NA	promoter-TSS (NM_019969)	promoter-TSS (NM_019969)	79	NM_001285804	66433	Mm.27406	NM_181391	ENSMUSG00000042198	Chchd7	1810049H20Rik	coiled-coil-helix-coiled-coil-helix domain containing 7	protein-coding
MACS_peak_575	chr1	136258329	136258856	+	83.33	NA	promoter-TSS (NM_020588)	promoter-TSS (NM_020588)	-16	NM_020588	57439	Mm.393140	NM_020588	ENSMUSG00000042305	Tmem183a	1300007B12Rik|1700020N19Rik|Tmem183	transmembrane protein 183A	protein-coding
MACS_peak_230	chr1	59819955	59820652	+	83.33	NA	promoter-TSS (NM_007561)	promoter-TSS (NM_007561)	-820	NM_007561	12168	Mm.7106	NM_007561		Bmpr2	2610024H22Rik|AL117858|AW546137|BB189135|BMP-2|BMPR-2|BMPR-II|BMPRII|BRK-3|Gm20272	bone morphogenetic protein receptor, type II (serine/threonine kinase)	protein-coding
MACS_peak_7578	chr18	60685554	60686079	+	83.11	NA	promoter-TSS (NM_026302)	promoter-TSS (NM_026302)	-59	NM_026302	67665	Mm.272801	NM_026302	ENSMUSG00000024603	Dctn4	1110001K06Rik|4930547K17Rik|C130039E17Rik|p62	dynactin 4	protein-coding
MACS_peak_10181	chr3	96072511	96072749	+	83.11	NA	promoter-TSS (NM_178215)	promoter-TSS (NM_178215)	53	NM_178215	319154	Mm.383293	NM_178215	ENSMUSG00000074403	Hist2h3b	H3-615|H3-616	histone cluster 2, H3b	protein-coding
MACS_peak_9481	chr2	156688505	156689100	+	83.11	NA	promoter-TSS (NM_026124)	promoter-TSS (NM_026124)	-56	NM_026124	67388	Mm.29264	NM_026124	ENSMUSG00000027637	1110008F13Rik	AI316789	RIKEN cDNA 1110008F13 gene	protein-coding
MACS_peak_6766	chr17	31795477	31796063	+	83.07	NA	promoter-TSS (NM_001163769)	promoter-TSS (NM_001163769)	-71	NM_001163769	108121	Mm.379289	NM_024187	ENSMUSG00000061613	U2af1	2010107D16Rik|35kDa	U2 small nuclear ribonucleoprotein auxiliary factor (U2AF) 1	protein-coding
MACS_peak_11271	chr4	134828451	134828785	+	83.07	NA	promoter-TSS (NM_013885)	promoter-TSS (NM_013885)	57	NM_013885	29876	Mm.257765	NM_013885	ENSMUSG00000037242	Clic4	D0Jmb3|TU-74|mc3s5|mtCLIC	chloride intracellular channel 4 (mitochondrial)	protein-coding
MACS_peak_8301	chr19	53216610	53216971	+	83.07	NA	promoter-TSS (NM_001277100)	promoter-TSS (NM_001277100)	-456	NM_001277100	27360	Mm.426080	NM_013758	ENSMUSG00000025026	Add3	AI463285|R75380	adducin 3 (gamma)	protein-coding
MACS_peak_13422	chr6	142456248	142456695	+	82.87	NA	promoter-TSS (NM_008492)	promoter-TSS (NM_008492)	-8	NM_008492	16832	Mm.9745	NM_008492	ENSMUSG00000030246	Ldhb	AI790582|H-Ldh|LDH-B|LDH-H|Ldh-2|Ldh2	lactate dehydrogenase B	protein-coding
MACS_peak_8621	chr2	30808403	30808672	+	82.74	NA	promoter-TSS (NM_133673)	promoter-TSS (NM_133673)	16	NM_133673	30934	Mm.249164	NM_133673	ENSMUSG00000026848	Tor1b	2610016F05Rik|DQ1|torsinB	torsin family 1, member B	protein-coding
MACS_peak_3284	chr12	8928484	8929252	+	82.67	NA	exon (NM_008640, exon 1 of 7)	exon (NM_008640, exon 1 of 7)	755	NM_008640	17775	Mm.30071	NM_008640	ENSMUSG00000020585	Laptm4a	AA286466|LAPTM4|MTP|Mtrp|mKIAA0108	lysosomal-associated protein transmembrane 4A	protein-coding
MACS_peak_7876	chr19	5893957	5894212	+	82.67	NA	promoter-TSS (NM_198634)	promoter-TSS (NM_198634)	23	NM_198634	332359	Mm.329642	NM_198634	ENSMUSG00000044390	Tigd3	-	tigger transposable element derived 3	protein-coding
MACS_peak_7665	chr18	73974845	73975636	+	82.53	NA	promoter-TSS (NM_145494)	promoter-TSS (NM_145494)	-194	NM_145494	107029	Mm.36817	NM_145494	ENSMUSG00000024556	Me2	AW120568|D030040L20Rik|NAD-ME	malic enzyme 2, NAD(+)-dependent, mitochondrial	protein-coding
MACS_peak_9894	chr3	58380365	58381070	+	82.51	NA	exon (NM_001040396, exon 1 of 6)	exon (NM_001040396, exon 1 of 6)	137	NM_001040396	69227	Mm.270950	NM_001040396	ENSMUSG00000075700	Selt	2810407C02Rik|5730408P04Rik	selenoprotein T	protein-coding
MACS_peak_16303	chr9	83727958	83728313	+	82.51	NA	promoter-TSS (NM_001110265)	promoter-TSS (NM_001110265)	-161	NM_009445	22137	Mm.1904	NM_009445	ENSMUSG00000038379	Ttk	AL022661|Esk1|Mps1|PYT|esk	Ttk protein kinase	protein-coding
MACS_peak_4023	chr13	23673293	23673765	+	82.51	NA	promoter-TSS (NM_175654)	promoter-TSS (NM_175654)	58	NM_175654	319156	Mm.260530	NM_175654		Hist1h4d	-	histone cluster 1, H4d	protein-coding
MACS_peak_10420	chr3	142427942	142428380	+	82.51	NA	promoter-TSS (NM_145546)	promoter-TSS (NM_145546)	-50	NM_145546	229906	Mm.271756	NM_145546	ENSMUSG00000028271	Gtf2b	-	general transcription factor IIB	protein-coding
MACS_peak_5296	chr15	54903450	54903881	+	82.51	NA	promoter-TSS (NM_001081288)	promoter-TSS (NM_001081288)	42	NM_001081288	319944	Mm.380957	NM_001081288	ENSMUSG00000037343	Taf2	150kDa|4732460C16Rik|AI425886|CIF150|TAF2B|TAFII-150|TAFII150	TAF2 RNA polymerase II, TATA box binding protein (TBP)-associated factor	protein-coding
MACS_peak_1100	chr10	39618671	39619252	+	82.43	NA	promoter-TSS (NR_033628)	promoter-TSS (NR_033628)	83	NR_033628	213332	Mm.484359	NR_033628		AA474331	-	expressed sequence AA474331	pseudo
MACS_peak_15865	chr9	36640177	36640560	+	82.39	NA	Intergenic	Intergenic	-10876	NM_183171	235180	Mm.5264	NM_183171	ENSMUSG00000032118	Fez1	UNC-76|UNC76	fasciculation and elongation protein zeta 1 (zygin I)	protein-coding
MACS_peak_10143	chr3	95428836	95429242	+	82.39	NA	5' UTR (NM_019561, exon 1 of 4)	5' UTR (NM_019561, exon 1 of 4)	137	NM_001026212	56205	Mm.241365	NM_019561	ENSMUSG00000038619	Ensa	1700020C18Rik|2610007F17Rik|AI451924	endosulfine alpha	protein-coding
MACS_peak_10054	chr3	88968460	88969054	+	82.38	NA	promoter-TSS (NM_007712)	promoter-TSS (NM_007712)	30	NM_001163432	12748	Mm.288098	NM_007712	ENSMUSG00000068917	Clk2	AU041688|Tu52	CDC-like kinase 2	protein-coding
MACS_peak_16090	chr9	59334347	59334886	+	82.35	NA	promoter-TSS (NM_019927)	promoter-TSS (NM_019927)	-435	NM_019927	23806	Mm.305925	NM_019927	ENSMUSG00000025234	Arih1	AU021774|Ari|Ari1|Hari|Hhari|Ubch7bp|Uip77	ariadne ubiquitin-conjugating enzyme E2 binding protein homolog 1 (Drosophila)	protein-coding
MACS_peak_15995	chr9	50816846	50817192	+	82.17	NA	5' UTR (NM_178710, exon 1 of 16)	5' UTR (NM_178710, exon 1 of 16)	159	NM_178710	235344	Mm.104932	NM_178710	ENSMUSG00000037112	Sik2	G630080D20Rik|Snf1lk2	salt inducible kinase 2	protein-coding
MACS_peak_1703	chr10	120747886	120748404	+	82.17	NA	promoter-TSS (NM_029057)	promoter-TSS (NM_029057)	100	NM_029057	74694	Mm.233833	NM_029057	ENSMUSG00000052302	Tbc1d30	4930505D03Rik	TBC1 domain family, member 30	protein-coding
MACS_peak_2776	chr11	97702485	97702858	+	82.14	NA	exon (NM_001080935, exon 2 of 3)	exon (NM_001080935, exon 2 of 3)	577	NM_001080935	68127	Mm.110270	NM_001080935	ENSMUSG00000089676	B230217C12Rik	AI840637	RIKEN cDNA B230217C12 gene	protein-coding
MACS_peak_10639	chr4	41660359	41660806	+	82.14	NA	promoter-TSS (NM_027278)	promoter-TSS (NM_027278)	-33	NM_027278	69961	Mm.425182	NM_027278	ENSMUSG00000036114	Rpp25l	2810432D09Rik|AW987258|Rppl25	ribonuclease P/MRP 25 subunit-like	protein-coding
MACS_peak_2316	chr11	68666261	68666927	+	82.03	NA	promoter-TSS (NM_023668)	promoter-TSS (NM_023668)	39	NM_023668	83431	Mm.31979	NM_023668	ENSMUSG00000018736	Ndel1	2600006O07Rik|MITAP1|NUDEL|mNudel	nuclear distribution gene E-like homolog 1 (A. nidulans)	protein-coding
MACS_peak_8447	chr2	21127134	21127627	+	81.88	NA	promoter-TSS (NM_027728)	promoter-TSS (NM_027728)	29	NM_177588	208967	Mm.268841	NM_177588	ENSMUSG00000048550	Thnsl1	AW413632	threonine synthase-like 1 (bacterial)	protein-coding
MACS_peak_13158	chr6	108162992	108163260	+	81.88	NA	promoter-TSS (NM_010585)	promoter-TSS (NM_010585)	36	NM_010585	16438	Mm.227912	NM_010585	ENSMUSG00000030102	Itpr1	D6Pas2|ENSMUSG00000072853|Gm10429|IP3R1|InsP3R|Ip3r|Itpr-1|P400|Pcp-1|Pcp1|opt	inositol 1,4,5-trisphosphate receptor 1	protein-coding
MACS_peak_2830	chr11	100258867	100259188	+	81.88	NA	promoter-TSS (NM_010593)	promoter-TSS (NM_010593)	77	NM_010593	16480	Mm.299774	NM_010593	ENSMUSG00000001552	Jup	Ctnng|D930025P04Rik|PG	junction plakoglobin	protein-coding
MACS_peak_10375	chr3	131227364	131227633	+	81.88	NA	promoter-TSS (NM_011863)	promoter-TSS (NM_011863)	-234	NM_001289479	23971	Mm.244912	NM_011863	ENSMUSG00000028032	Papss1	AI325286|Asapk|SK1	3'-phosphoadenosine 5'-phosphosulfate synthase 1	protein-coding
MACS_peak_16318	chr9	88417485	88417975	+	81.88	NA	promoter-TSS (NR_040721)	promoter-TSS (NR_040721)	5	NR_040721	72655	Mm.21798	NR_040721	ENSMUSG00000097195	Snhg5	2810026P18Rik|4933428I09Rik|mU50HG-b	small nucleolar RNA host gene 5	ncRNA
MACS_peak_9161	chr2	121239195	121239895	+	81.88	NA	promoter-TSS (NM_007952)	promoter-TSS (NM_007952)	-17	NM_153075	212670	Mm.384318	NM_153075	ENSMUSG00000033486	Catsper2	-	cation channel, sperm associated 2	protein-coding
MACS_peak_14908	chr8	26712383	26713111	+	81.85	NA	promoter-TSS (NM_001001735)	promoter-TSS (NM_001001735)	-31	NM_001001735	234135	Mm.217337	NM_001001735	ENSMUSG00000054823	Whsc1l1	6720429E03|A530023P05|AI528490|NSD3|WHISTLE	Wolf-Hirschhorn syndrome candidate 1-like 1 (human)	protein-coding
MACS_peak_1341	chr10	79166882	79167444	+	81.73	NA	promoter-TSS (NM_009768)	promoter-TSS (NM_009768)	60	NM_009768	12215	Mm.726	NM_009768	ENSMUSG00000023175	Bsg	AI115436|AI325119|CD147|EMMPRIN|HT-7	basigin	protein-coding
MACS_peak_14910	chr8	26864585	26865202	+	81.64	NA	promoter-TSS (NM_028102)	promoter-TSS (NM_028102)	-141	NM_028102	72108	Mm.246875	NM_028102	ENSMUSG00000061313	Ddhd2	2010305K11Rik|SAMWD1|mKIAA0725	DDHD domain containing 2	protein-coding
MACS_peak_8271	chr19	47089077	47089357	+	81.64	NA	promoter-TSS (NM_146100)	promoter-TSS (NM_146100)	29	NM_146100	226180	Mm.276251	NM_146100		Ina	AV028420|NF-66|NF66	internexin neuronal intermediate filament protein, alpha	protein-coding
MACS_peak_13930	chr7	36340259	36341020	+	81.58	NA	exon (NM_033080, exon 1 of 3)	exon (NM_033080, exon 1 of 3)	308	NM_033080	110959	Mm.410206	NM_033080	ENSMUSG00000034875	Nudt19	D7Rp2|D7Rp2-r|D7Rp2-s|D7Rp2e|RP2-r|RP2-s	nudix (nucleoside diphosphate linked moiety X)-type motif 19	protein-coding
MACS_peak_3538	chr12	72932030	72932328	+	81.58	NA	5' UTR (NM_172464, exon 1 of 26)	5' UTR (NM_172464, exon 1 of 26)	124	NM_172464	208846	Mm.87417	NM_026102	ENSMUSG00000034574	Daam1	-	dishevelled associated activator of morphogenesis 1	protein-coding
MACS_peak_12285	chr5	123973826	123974253	+	81.38	NA	intron (NM_023232, intron 1 of 5)	CpG	134	NM_023232	66593	Mm.46716	NM_023232	ENSMUSG00000029433	Diablo	0610041G12Rik|1700006L01Rik|AU040403|Smac	diablo homolog (Drosophila)	protein-coding
MACS_peak_11165	chr4	129296074	129296666	+	81.38	NA	promoter-TSS (NM_198026)	promoter-TSS (NM_198026)	-33	NM_198026	230767	Mm.441132	NM_198026	ENSMUSG00000040795	Iqcc	BC026978	IQ motif containing C	protein-coding
MACS_peak_4042	chr13	24892953	24893376	+	81.36	NA	promoter-TSS (NM_024473)	promoter-TSS (NM_024473)	-362	NM_024473	79555	Mm.266668	NM_024473		BC005537	8030460C05Rik|C78201	cDNA sequence BC005537	protein-coding
MACS_peak_315	chr1	75215649	75215953	+	81.30	NA	promoter-TSS (NM_009447)	promoter-TSS (NM_009447)	27	NM_009447	22145	Mm.1155	NM_009447	ENSMUSG00000026202	Tuba4a	M[a]4|Tuba4	tubulin, alpha 4A	protein-coding
MACS_peak_13503	chr7	4763750	4764072	+	81.18	NA	promoter-TSS (NM_133777)	promoter-TSS (NM_133777)	31	NM_133777	77891	Mm.389787	NM_133777	ENSMUSG00000060860	Ube2s	0910001J09Rik|6720465F12Rik|AA409170|E2-EPF	ubiquitin-conjugating enzyme E2S	protein-coding
MACS_peak_10979	chr4	116179899	116180447	+	81.18	NA	promoter-TSS (NM_008389)	promoter-TSS (NM_008389)	19	NM_008389	16351	Mm.1350	NM_008389	ENSMUSG00000028696	Ipp	D4Jhu8|Mipp	IAP promoted placental gene	protein-coding
MACS_peak_4810	chr14	55531704	55532164	+	81.18	NA	promoter-TSS (NM_021551)	promoter-TSS (NM_021551)	35	NM_021551	59049	Mm.27435	NM_021551	ENSMUSG00000022199	Slc22a17	1700094C23Rik|24p3R|AU041908|AW555662|BOIT|Boct|mBOCT	solute carrier family 22 (organic cation transporter), member 17	protein-coding
MACS_peak_2553	chr11	79067988	79068369	+	81.18	NA	promoter-TSS (NM_019653)	promoter-TSS (NM_019653)	19	NM_019653	78889	Mm.307022	NM_019653	ENSMUSG00000017677	Wsb1	1110056B13Rik|2700038M07Rik	WD repeat and SOCS box-containing 1	protein-coding
MACS_peak_2277	chr11	61575259	61575634	+	81.15	NA	intron (NM_001164243, intron 1 of 10)	CpG	144	NM_144806	212627	Mm.27703	NM_144806	ENSMUSG00000020528	Prpsap2	A230054F23Rik	phosphoribosyl pyrophosphate synthetase-associated protein 2	protein-coding
MACS_peak_13552	chr7	13404003	13404426	+	81.15	NA	promoter-TSS (NM_026046)	promoter-TSS (NM_026046)	-5	NM_026046	67230	Mm.333574	NM_026046	ENSMUSG00000057894	Zfp329	2810439M05Rik|4632409L22Rik|ZNF329	zinc finger protein 329	protein-coding
MACS_peak_9061	chr2	112102028	112102363	+	81.15	NA	exon (NM_025403, exon 1 of 2)	exon (NM_025403, exon 1 of 2)	112	NM_025403	66181	Mm.272346	NM_025403		Nop10	1110036B12Rik|NOP10P|Nola3	NOP10 ribonucleoprotein	protein-coding
MACS_peak_11990	chr5	93695870	93696161	+	81.15	NA	promoter-TSS (NM_007635)	promoter-TSS (NM_007635)	-584	NM_007635	12452	Mm.3527	NM_007635	ENSMUSG00000029385	Ccng2	-	cyclin G2	protein-coding
MACS_peak_1294	chr10	75398367	75398966	+	81.15	NA	5' UTR (NM_175329, exon 1 of 4)	5' UTR (NM_175329, exon 1 of 4)	348	NM_175329	103172	Mm.333849	NM_175329	ENSMUSG00000049422	Chchd10	1620401E04Rik|AI267078|Ndg2	coiled-coil-helix-coiled-coil-helix domain containing 10	protein-coding
MACS_peak_15571	chr8	122637548	122637884	+	81.14	NA	promoter-TSS (NM_001163762)	promoter-TSS (NM_001163762)	-336	NM_001163762	234797	Mm.101958	NM_172286	ENSMUSG00000031824	6430548M08Rik	AW049007|Kiaa0513|mKIAA0513	RIKEN cDNA 6430548M08 gene	protein-coding
MACS_peak_3720	chr12	89961212	89961460	+	81.14	NA	Intergenic	Intergenic	-71612	NM_001198587	18191	Mm.425766	NM_172544	ENSMUSG00000066392	Nrxn3	-	neurexin III	protein-coding
MACS_peak_5839	chr15	101054498	101054990	+	81.14	NA	promoter-TSS (NR_045326)	promoter-TSS (NR_045326)	106	NM_019518	56149	Mm.276573	NM_019518	ENSMUSG00000000531	Grasp	tamalin	GRP1 (general receptor for phosphoinositides 1)-associated scaffold protein	protein-coding
MACS_peak_12241	chr5	122161242	122161687	+	80.86	NA	promoter-TSS (NM_009125)	promoter-TSS (NM_009125)	-154	NM_009125	20239	Mm.260900	NM_009125	ENSMUSG00000042605	Atxn2	9630045M23Rik|ATX2|AW544490|Sca2	ataxin 2	protein-coding
MACS_peak_13780	chr7	28271698	28272490	+	80.86	NA	5' UTR (NM_018820, exon 1 of 2)	5' UTR (NM_018820, exon 1 of 2)	122	NM_018820	55942	Mm.153684	NM_018820	ENSMUSG00000008384	Sertad1	1110032C13Rik|AV000455|AW456625|Sei-1|Sei1|TRIP-Br1	SERTA domain containing 1	protein-coding
MACS_peak_10179	chr3	96067041	96067401	+	80.86	NA	promoter-TSS (NM_033596)	promoter-TSS (NM_033596)	19	NM_033596	97122	Mm.227295	NM_033596		Hist2h4	H4|X04652	histone cluster 2, H4	protein-coding
MACS_peak_10851	chr4	94645514	94646067	+	80.86	NA	promoter-TSS (NM_177239)	promoter-TSS (NM_177239)	1	NM_177239	320713	Mm.208868	NM_177239	ENSMUSG00000062627	Mysm1	C130067A03Rik|C530050H10Rik	myb-like, SWIRM and MPN domains 1	protein-coding
MACS_peak_8427	chr2	17985882	17986464	+	80.86	NA	promoter-TSS (NM_001252560)	promoter-TSS (NM_001252560)	-39	NM_001252560	17354	Mm.209175	NM_010804	ENSMUSG00000026743	Mllt10	Af10|B130021D15Rik|D630001B22Rik|mKIAA4140	myeloid/lymphoid or mixed-lineage leukemia (trithorax homolog, Drosophila); translocated to, 10	protein-coding
MACS_peak_10137	chr3	95031987	95033065	+	80.86	NA	promoter-TSS (NM_019914)	promoter-TSS (NM_019914)	73	NM_019914	56772	Mm.331208	NM_019914		Mllt11	AI839562|Af1q|Zfp692	myeloid/lymphoid or mixed-lineage leukemia (trithorax homolog, Drosophila); translocated to, 11	protein-coding
MACS_peak_16534	chr9	110034250	110034797	+	80.81	NA	promoter-TSS (NM_009211)	promoter-TSS (NM_009211)	-5	NM_009211	20588	Mm.85410	NM_009211	ENSMUSG00000032481	Smarcc1	AI115498|BAF155|Rsc8|SRG3	SWI/SNF related, matrix associated, actin dependent regulator of chromatin, subfamily c, member 1	protein-coding
MACS_peak_1683	chr10	117147447	117148108	+	80.81	NA	promoter-TSS (NM_010786)	promoter-TSS (NM_010786)	37	NM_010786	17246	Mm.22670	NM_010786	ENSMUSG00000020184	Mdm2	1700007J15Rik|AA415488|Mdm-2	transformed mouse 3T3 cell double minute 2	protein-coding
MACS_peak_16179	chr9	65907892	65908257	+	80.72	NA	promoter-TSS (NM_011149)	promoter-TSS (NM_011149)	98	NM_011149	19035	Mm.335249	NM_011149	ENSMUSG00000032383	Ppib	AA408962|AA553318|AI844835|Cphn-2|Cphn2|CyP-20b	peptidylprolyl isomerase B	protein-coding
MACS_peak_11908	chr5	72559191	72559496	+	80.71	NA	promoter-TSS (NM_178599)	promoter-TSS (NM_178599)	79	NM_178599	27784	Mm.44223	NM_178599	ENSMUSG00000029213	Commd8	C77770|D5Buc26e	COMM domain containing 8	protein-coding
MACS_peak_11297	chr4	136025579	136025980	+	80.71	NA	intron (NM_024452, intron 1 of 4)	CpG	103	NM_024452	269593	Mm.485824	NM_024452	ENSMUSG00000001089	Luzp1	2700072H04Rik|AI266952|Luzp|mFLJ00226	leucine zipper protein 1	protein-coding
MACS_peak_8452	chr2	22895448	22895766	+	80.71	NA	5' UTR (NM_001077193, exon 1 of 8)	5' UTR (NM_001077193, exon 1 of 8)	154	NM_001077192	11308	Mm.205647	NM_007380	ENSMUSG00000058835	Abi1	E3B1|NAP1|Ssh3bp1	abl-interactor 1	protein-coding
MACS_peak_13054	chr6	86476156	86477491	+	80.67	NA	promoter-TSS (NM_011865)	promoter-TSS (NM_011865)	-501	NR_037960	72012	Mm.349174	NR_037960	ENSMUSG00000097048	1600020E01Rik	-	RIKEN cDNA 1600020E01 gene	ncRNA
MACS_peak_16573	chr9	114597584	114598126	+	80.45	NA	promoter-TSS (NM_146229)	promoter-TSS (NM_146229)	-94	NM_146229	235661	Mm.128627	NM_146229		Dync1li1	1110053F02Rik|Dnclic1|LIC-1	dynein cytoplasmic 1 light intermediate chain 1	protein-coding
MACS_peak_1641	chr10	107598757	107599358	+	80.21	NA	promoter-TSS (NM_027892)	promoter-TSS (NM_027892)	-399	NM_027892	17931	Mm.422959	NM_027892	ENSMUSG00000019907	Ppp1r12a	1200015F06Rik|5730577I22Rik|AA792106|AV099298|D10Ertd625e|Mypt1	protein phosphatase 1, regulatory (inhibitor) subunit 12A	protein-coding
MACS_peak_16211	chr9	69860153	69860653	+	80.17	NA	promoter-TSS (NM_001039519)	promoter-TSS (NM_001039519)	48	NM_001282083	235459	Mm.293117	NM_199151	ENSMUSG00000033543	Gtf2a2	TFIIA-gamma|TfIIg|Tfiia2	general transcription factor II A, 2	protein-coding
MACS_peak_6898	chr17	36973795	36974266	+	80.11	NA	promoter-TSS (NM_001286726)	promoter-TSS (NM_001286726)	-61	NM_001025599	22670	Mm.34587	NM_030698	ENSMUSG00000024457	Trim26	AI462198|Zfp173|Zfp1736	tripartite motif-containing 26	protein-coding
MACS_peak_5958	chr16	11134432	11135059	+	79.91	NA	promoter-TSS (NM_029582)	promoter-TSS (NM_029582)	-120	NM_029582	106200	Mm.291015	NM_029582	ENSMUSG00000022498	Txndc11	2810408E11Rik|AI427833|EFP1|Txdc11	thioredoxin domain containing 11	protein-coding
MACS_peak_15384	chr8	97362003	97362699	+	79.91	NA	promoter-TSS (NM_026452)	promoter-TSS (NM_026452)	34	NM_026452	67914	Mm.169234	NM_026452	ENSMUSG00000031782	Coq9	2310005O14Rik|C78387	coenzyme Q9 homolog (yeast)	protein-coding
MACS_peak_1627	chr10	98725587	98726051	+	79.91	NA	promoter-TSS (NM_026268)	promoter-TSS (NM_026268)	-46	NM_026268	67603	Mm.1791	NM_026268	ENSMUSG00000019960	Dusp6	1300019I03Rik|MKP-3|MKP3|PYST1	dual specificity phosphatase 6	protein-coding
MACS_peak_9830	chr3	40887273	40887612	+	79.86	NA	promoter-TSS (NM_027558)	promoter-TSS (NM_027558)	-474	NM_027558	70804	Mm.40321	NM_027558	ENSMUSG00000049940	Pgrmc2	4631434O19Rik|5730409G06Rik|DG6|PMBP	progesterone receptor membrane component 2	protein-coding
MACS_peak_12923	chr6	56747256	56748047	+	79.86	NA	5' UTR (NM_145958, exon 1 of 4)	5' UTR (NM_145958, exon 1 of 4)	156	NM_145958	210973	Mm.57295	NM_145958	ENSMUSG00000059486	Kbtbd2	BC022962|Bklhd1|mKIAA1489	kelch repeat and BTB (POZ) domain containing 2	protein-coding
MACS_peak_8653	chr2	32390732	32391092	+	79.78	NA	promoter-TSS (NM_153560)	promoter-TSS (NM_153560)	33	NM_153560	98952	Mm.4065	NM_153560	ENSMUSG00000039157	Fam102a	AI426465|C230093N12Rik|Eeig1	family with sequence similarity 102, member A	protein-coding
MACS_peak_14837	chr8	13677355	13677695	+	79.78	NA	promoter-TSS (NM_009025)	promoter-TSS (NM_009025)	62	NM_009025	19414	Mm.18517	NM_009025	ENSMUSG00000031453	Rasa3	AI326412|C86362|E130011G04|GAPIII|scat	RAS p21 protein activator 3	protein-coding
MACS_peak_5937	chr16	8513483	8513801	+	79.78	NA	5' UTR (NM_001170978, exon 1 of 15)	5' UTR (NM_001170978, exon 1 of 15)	120	NM_172961	268860	Mm.259315	NM_172961	ENSMUSG00000057880	Abat	9630038C02Rik|AI255750|ENSMUSG00000051226|Gabaat|Gabat|Gm9851|I54|Laibat|X61497	4-aminobutyrate aminotransferase	protein-coding
MACS_peak_3462	chr12	56499524	56499964	+	79.78	NA	promoter-TSS (NM_011968)	promoter-TSS (NM_011968)	-68	NM_011968	26443	Mm.30210	NM_011968	ENSMUSG00000021024	Psma6	IOTA	proteasome (prosome, macropain) subunit, alpha type 6	protein-coding
MACS_peak_4435	chr13	95128656	95129122	+	79.77	NA	promoter-TSS (NM_009680)	promoter-TSS (NM_009680)	-11	NR_045619	328309	Mm.174191	NM_183205		Gm9776	A530089L17|ENSMUSG00000042857	predicted gene 9776	ncRNA
MACS_peak_13398	chr6	136467249	136467723	+	79.64	NA	intron (NM_019426, intron 1 of 14)	CpG	114	NM_019426	54343	Mm.173271	NM_019426	ENSMUSG00000030213	Atf7ip	2610204M12Rik|AM|Mcaf1	activating transcription factor 7 interacting protein	protein-coding
MACS_peak_14102	chr7	56501182	56501736	+	79.52	NA	promoter-TSS (NM_175272)	promoter-TSS (NM_175272)	-100	NM_175272	78286	Mm.333881	NM_175272	ENSMUSG00000052512	Nav2	5330421F07Rik|AU067780|BQ960892|HELAD1|POMFIL2|RAINB1|RAINB2|Unc53H2|mKIAA3015	neuron navigator 2	protein-coding
MACS_peak_16428	chr9	106105187	106105713	+	79.52	NA	promoter-TSS (NM_011876)	promoter-TSS (NM_011876)	11	NM_011876	23999	Mm.274346	NM_011876	ENSMUSG00000023277	Twf2	A6-related|AU014993|Ptk9l|Ptk9r	twinfilin, actin-binding protein, homolog 2 (Drosophila)	protein-coding
MACS_peak_10301	chr3	113332751	113333330	+	79.45	NA	promoter-TSS (NM_026043)	promoter-TSS (NM_026043)	27	NM_026043	67225	Mm.316928	NM_026043	ENSMUSG00000027981	Rnpc3	2810441O16Rik|AI447568|C030014B17Rik	RNA-binding region (RNP1, RRM) containing 3	protein-coding
MACS_peak_11444	chr4	149655227	149655891	+	79.34	NA	promoter-TSS (NM_001085492)	promoter-TSS (NM_001085492)	-466	NM_001085492	68703	Mm.291274	NM_001085492	ENSMUSG00000039852	Rere	1110033A15Rik|AI414665|ARG|ARP|ATN1L|AW742570|Atr2|DNB1|eye<m03Jus>|eyes3|mKIAA0458	arginine glutamic acid dipeptide (RE) repeats	protein-coding
MACS_peak_3243	chr12	3309763	3310062	+	79.34	NA	promoter-TSS (NM_016676)	promoter-TSS (NM_016676)	57	NM_016676	19325	Mm.378993	NM_016676	ENSMUSG00000020671	Rab10	AW107754	RAB10, member RAS oncogene family	protein-coding
MACS_peak_1027	chr10	17954548	17955231	+	79.34	NA	promoter-TSS (NM_144820)	promoter-TSS (NM_144820)	-102	NM_144820	215814	Mm.296565	NM_144820	ENSMUSG00000059554	Ccdc28a	1700009P13Rik|AI480677	coiled-coil domain containing 28A	protein-coding
MACS_peak_6009	chr16	17405478	17406279	+	79.34	NA	promoter-TSS (NM_023348)	promoter-TSS (NM_023348)	-215	NM_023348	67474	Mm.271992	NM_023348	ENSMUSG00000022765	Snap29	1300018G05Rik|AI891940|AU020222|BB131856|Gs32	synaptosomal-associated protein 29	protein-coding
MACS_peak_14512	chr7	130112955	130113784	+	79.34	NA	promoter-TSS (NM_175023)	promoter-TSS (NM_175023)	604	NR_045614	73951	Mm.389936	NR_045614		4930413G21Rik	-	RIKEN cDNA 4930413G21 gene	ncRNA
MACS_peak_12885	chr6	49213812	49214296	+	79.34	NA	promoter-TSS (NM_198102)	promoter-TSS (NM_198102)	-3	NM_198102	101214	Mm.196598	NM_198102	ENSMUSG00000029817	Tra2a	1500010G04Rik|AL022798|G430041M01Rik|mAWMS1	transformer 2 alpha homolog (Drosophila)	protein-coding
MACS_peak_16053	chr9	57287660	57287978	+	79.34	NA	intron (NM_176831, intron 1 of 6)	intron (NM_176831, intron 1 of 6)	102	NM_176831	66812	Mm.250508	NM_176831	ENSMUSG00000063849	Ppcdc	1810057I13Rik|8430432M10Rik	phosphopantothenoylcysteine decarboxylase	protein-coding
MACS_peak_5136	chr14	123382590	123382873	+	79.29	NA	promoter-TSS (NM_028651)	promoter-TSS (NM_028651)	-248	NM_028651	70551	Mm.271988	NM_028651	ENSMUSG00000041594	Tmtc4	4930403J22Rik|5730419O14Rik	transmembrane and tetratricopeptide repeat containing 4	protein-coding
MACS_peak_6049	chr16	20097561	20098231	+	79.27	NA	intron (NM_029436, intron 1 of 7)	CpG	269	NM_029436	75785	Mm.392450	NM_029436	ENSMUSG00000062901	Klhl24	1110046J11Rik|4930429H24Rik|6530402O20Rik|C85082	kelch-like 24	protein-coding
MACS_peak_6221	chr16	46497376	46497660	+	79.27	NA	promoter-TSS (NM_021496)	promoter-TSS (NM_021496)	-438	NM_021497	58998	Mm.328072	NM_021495	ENSMUSG00000022656	Pvrl3	2610301B19Rik|3000002N23Rik|4921513D19Rik|AA407785|AU016832|AW538082|CD113	poliovirus receptor-related 3	protein-coding
MACS_peak_9143	chr2	120557053	120557390	+	79.20	NA	promoter-TSS (NM_026891)	promoter-TSS (NM_026891)	32	NM_026891	68968	Mm.2289	NM_026891	ENSMUSG00000027284	Cdan1	1500015A01Rik|AI448026|AW492297|CDA-I|CDA1|CDAI	congenital dyserythropoietic anemia, type I (human)	protein-coding
MACS_peak_6731	chr17	29089099	29089749	+	79.19	NA	promoter-TSS (NM_025888)	promoter-TSS (NM_025888)	-737	NM_025888	66989	Mm.435	NM_025888	ENSMUSG00000005936	Kctd20	2410004N11Rik|AI451943|AW541186|D17Ertd562e	potassium channel tetramerisation domain containing 20	protein-coding
MACS_peak_9542	chr2	163899781	163900095	+	79.19	NA	promoter-TSS (NM_021420)	promoter-TSS (NM_021420)	24	NM_021420	58231	Mm.234472	NM_021420	ENSMUSG00000018209	Stk4	AI447339|AU020804|Kas-2|Mst1|Ysk3	serine/threonine kinase 4	protein-coding
MACS_peak_1400	chr10	79727715	79728034	+	79.14	NA	5' UTR (NM_001122604, exon 1 of 12)	5' UTR (NM_001122604, exon 1 of 12)	138	NM_133188	70248	Mm.148693	NM_133188	ENSMUSG00000069565	Dazap1	2410042M16Rik|mPrrp	DAZ associated protein 1	protein-coding
MACS_peak_113	chr1	36766629	36766899	+	79.14	NA	promoter-TSS (NM_146107)	promoter-TSS (NM_146107)	6	NM_146107	226977	Mm.28521	NM_146107	ENSMUSG00000037351	Actr1b	2310066K23Rik|AA960180|AI851923|Arp1b	ARP1 actin-related protein 1B, centractin beta	protein-coding
MACS_peak_14870	chr8	23171023	23171400	+	79.04	NA	promoter-TSS (NM_183142)	promoter-TSS (NM_183142)	18	NM_183142	207958	Mm.267439	NM_183142	ENSMUSG00000063362	Alg11	AI849156|AW492253|B230397C21|Mmat-4(5)	asparagine-linked glycosylation 11 (alpha-1,2-mannosyltransferase)	protein-coding
MACS_peak_14345	chr7	106631955	106632287	+	79.02	NA	promoter-TSS (NM_012052)	promoter-TSS (NM_012052)	98	NM_012052	27050	Mm.236868	NM_012052	ENSMUSG00000030744	Rps3	D7Ertd795e|Rs_3	ribosomal protein S3	protein-coding
MACS_peak_8161	chr19	41557071	41557370	+	78.99	NA	Intergenic	Intergenic	-66909	NM_172154	212391	Mm.422910	NM_172154	ENSMUSG00000025019	Lcor	3110023F06Rik|A630025C20Rik|Mlr2|mKIAA1795	ligand dependent nuclear receptor corepressor	protein-coding
MACS_peak_5447	chr15	76648299	76648906	+	78.97	NA	promoter-TSS (NM_001168288)	promoter-TSS (NM_001168288)	-2	NM_198420	223666	Mm.322931	NM_198420	ENSMUSG00000033697	Arhgap39	9530053N22|AI843066|D15Wsu169e|Kiaa1688|Porf-2	Rho GTPase activating protein 39	protein-coding
MACS_peak_16635	chr9	122481533	122481815	+	78.91	NA	promoter-TSS (NR_015610)	promoter-TSS (NR_015610)	55	NR_015610	319626	Mm.186748	NR_015610	ENSMUSG00000097736	9530059O14Rik	-	RIKEN cDNA 9530059O14 gene	ncRNA
MACS_peak_5512	chr15	79664482	79665081	+	78.77	NA	promoter-TSS (NM_028763)	promoter-TSS (NM_028763)	-18	NM_001013362	504193	Mm.38438	NM_029079	ENSMUSG00000022421	Npcd	Cbx6-Nptxr	neuronal pentraxin chromo domain	protein-coding
MACS_peak_3960	chr13	14155462	14155734	+	78.57	NA	promoter-TSS (NM_010282)	promoter-TSS (NM_010282)	70	NM_010282	14593	Mm.148039	NM_010282	ENSMUSG00000021302	Ggps1	1810026C22Rik|9530089B04Rik|AI843169|C79210	geranylgeranyl diphosphate synthase 1	protein-coding
MACS_peak_16157	chr9	64869290	64869537	+	78.57	NA	5' UTR (NM_021345, exon 1 of 11)	5' UTR (NM_021345, exon 1 of 11)	111	NM_021345	57874	Mm.308180	NM_021345	ENSMUSG00000033629	Ptplad1	4930523M17Rik|AW742319|B-ind1|HACD3|Hspc121	protein tyrosine phosphatase-like A domain containing 1	protein-coding
MACS_peak_1867	chr11	4604138	4604395	+	78.57	NA	promoter-TSS (NM_197979)	promoter-TSS (NM_197979)	81	NM_197979	66152	Mm.269736	NM_197979	ENSMUSG00000059534	Uqcr10	1110020P15Rik|AA960494|Ucrc	ubiquinol-cytochrome c reductase, complex III subunit X	protein-coding
MACS_peak_3585	chr12	78338977	78340162	+	78.53	NA	promoter-TSS (NR_045554)	promoter-TSS (NR_045554)	-157	NR_045554	53618	Mm.35628	NM_016893	ENSMUSG00000021065	Fut8	-	fucosyltransferase 8	protein-coding
MACS_peak_5109	chr14	120876421	120876766	+	78.51	NA	Intergenic	Intergenic	-1090	NM_029519	76108	Mm.261448	NM_029519	ENSMUSG00000051615	Rap2a	5830461H18Rik	RAS related protein 2a	protein-coding
MACS_peak_2477	chr11	75275066	75275349	+	78.42	NA	non-coding (NR_030711, exon 1 of 3)	non-coding (NR_030711, exon 1 of 3)	166	NR_030711	100042498	Mm.482242	NR_030711	ENSMUSG00000085148	Mir22hg	2210403K04Rik	Mir22 host gene (non-protein coding)	ncRNA
MACS_peak_1094	chr10	39089265	39089796	+	78.42	NA	promoter-TSS (NM_008054)	promoter-TSS (NM_008054)	-75	NM_001122892	14360	Mm.4848	NM_008054	ENSMUSG00000019843	Fyn	AI448320|AW552119	Fyn proto-oncogene	protein-coding
MACS_peak_15368	chr8	96676394	96676834	+	78.42	NA	5' UTR (NM_013603, exon 1 of 3)	5' UTR (NM_013603, exon 1 of 3)	107	NM_013603	17751	Mm.2064	NM_013603	ENSMUSG00000031760	Mt3	Mt-3	metallothionein 3	protein-coding
MACS_peak_5248	chr15	36936815	36937501	+	78.42	NA	promoter-TSS (NM_026521)	promoter-TSS (NM_026521)	-1	NM_026521	68036	Mm.371631	NM_026521	ENSMUSG00000062397	Zfp706	3110006P09Rik|AA793007|AW536850|C77232|Znf706	zinc finger protein 706	protein-coding
MACS_peak_11313	chr4	137418108	137418394	+	78.42	NA	promoter-TSS (NM_199307)	promoter-TSS (NM_199307)	99	NM_199307	230857	Mm.401062	NM_199307	ENSMUSG00000057530	Ece1	AW322500|ECE-1|ECE-1a|ECE-1b|ECE-1d	endothelin converting enzyme 1	protein-coding
MACS_peak_1769	chr10	127520274	127520570	+	78.37	NA	promoter-TSS (NM_016774)	promoter-TSS (NM_016774)	59	NM_016774	11947	Mm.238973	NM_016774	ENSMUSG00000025393	Atp5b	-	ATP synthase, H+ transporting mitochondrial F1 complex, beta subunit	protein-coding
MACS_peak_10017	chr3	88307041	88307355	+	78.18	NA	promoter-TSS (NM_001111102)	promoter-TSS (NM_001111102)	76	NM_001111102	16905	Mm.243014	NM_019390	ENSMUSG00000028063	Lmna	Dhe	lamin A	protein-coding
MACS_peak_8	chr1	7078493	7079428	+	77.96	NA	promoter-TSS (NM_183028)	promoter-TSS (NM_183028)	-41	NM_183028	319263	Mm.21539	NM_183028	ENSMUSG00000051285	Pcmtd1	8430411F12Rik|A030012M09Rik	protein-L-isoaspartate (D-aspartate) O-methyltransferase domain containing 1	protein-coding
MACS_peak_14163	chr7	74789901	74790204	+	77.94	NA	promoter-TSS (NM_027413)	promoter-TSS (NM_027413)	70	NM_175124	67867	Mm.31247	NM_027413	ENSMUSG00000030556	Lrrc28	1300004K21Rik|2210012C09Rik|2310058O11Rik	leucine rich repeat containing 28	protein-coding
MACS_peak_6847	chr17	35089220	35089520	+	77.93	NA	promoter-TSS (NR_027943)	promoter-TSS (NR_027943)	43	NR_027943	68763	Mm.28895	NR_015536	ENSMUSG00000092203	1110038B12Rik	0610009C20Rik|0910001G04Rik	RIKEN cDNA 1110038B12 gene	ncRNA
MACS_peak_3286	chr12	9036799	9037286	+	77.93	NA	intron (NM_029321, intron 1 of 2)	CpG	239	NM_029321	75516	Mm.37581	NM_029321	ENSMUSG00000066637	Ttc32	1700013G20Rik	tetratricopeptide repeat domain 32	protein-coding
MACS_peak_11365	chr4	140634032	140634400	+	77.83	NA	promoter-TSS (NM_025383)	promoter-TSS (NM_025383)	44	NM_025383	66147	Mm.21187	NM_025383	ENSMUSG00000028923	Necap2	1110005F07Rik|AA409105|C78898	NECAP endocytosis associated 2	protein-coding
MACS_peak_16452	chr9	107133963	107134524	+	77.83	NA	promoter-TSS (NM_153413)	promoter-TSS (NM_153413)	-3	NM_153413	208869	Mm.150259	NM_153413	ENSMUSG00000039716	Dock3	MOCA|PBP|mKIAA0299	dedicator of cyto-kinesis 3	protein-coding
MACS_peak_5121	chr14	122197545	122197925	+	77.83	NA	promoter-TSS (NM_134074)	promoter-TSS (NM_134074)	-779	NM_134074	105445	Mm.441054	NM_134074	ENSMUSG00000025558	Dock9	AA959601|AW538057|B230309H04Rik|D14Wsu89e|Zizimin1|mKIAA1058	dedicator of cytokinesis 9	protein-coding
MACS_peak_6143	chr16	32332072	32332550	+	77.83	NA	promoter-TSS (NM_177633)	promoter-TSS (NM_177633)	-27	NM_177633	224111	Mm.31275	NM_177633	ENSMUSG00000053774	Ubxn7	A630090P18|AI196514|Ubxd7|mKIAA0794	UBX domain protein 7	protein-coding
MACS_peak_6300	chr16	85173750	85174301	+	77.75	NA	promoter-TSS (NM_007471)	promoter-TSS (NM_007471)	-73	NM_001198826	11820	Mm.277585	NM_007471	ENSMUSG00000022892	App	Abeta|Abpp|Adap|Ag|Cvap|E030013M08Rik|betaApp	amyloid beta (A4) precursor protein	protein-coding
MACS_peak_4726	chr14	45938011	45938528	+	77.72	NA	promoter-TSS (NM_015774)	promoter-TSS (NM_015774)	-22	NM_015774	50527	Mm.387108	NM_015774	ENSMUSG00000021831	Ero1l	ERO1-L	ERO1-like (S. cerevisiae)	protein-coding
MACS_peak_2392	chr11	70053135	70053391	+	77.72	NA	promoter-TSS (NM_173742)	promoter-TSS (NM_173742)	91	NM_173742	52898	Mm.29852	NM_173742	ENSMUSG00000093989	Rnasek	2310033H11Rik|AA571397|D11Bwg0434e	ribonuclease, RNase K	protein-coding
MACS_peak_2620	chr11	86298089	86298397	+	77.67	NA	promoter-TSS (NM_029788)	promoter-TSS (NM_029788)	84	NM_029788	76892	Mm.262707	NM_029788	ENSMUSG00000020521	Rnft1	0610013E23Rik|AV007605	ring finger protein, transmembrane 1	protein-coding
MACS_peak_3564	chr12	76697379	76697700	+	77.59	NA	promoter-TSS (NM_012024)	promoter-TSS (NM_012024)	-352	NM_012024	26932	Mm.259626	NM_012024	ENSMUSG00000021051	Ppp2r5e	4633401M22Rik|AI449017|B56beta	protein phosphatase 2, regulatory subunit B', epsilon	protein-coding
MACS_peak_11190	chr4	131429151	131429985	+	77.59	NA	promoter-TSS (NM_020587)	promoter-TSS (NM_020587)	14	NM_020587	57317	Mm.2478	NM_020587	ENSMUSG00000028911	Srsf4	5730499P16Rik|AW550192|MNCb-2616|SRp75|Sfrs4	serine/arginine-rich splicing factor 4	protein-coding
MACS_peak_10476	chr3	156223555	156224160	+	77.59	NA	promoter-TSS (NM_001039094)	promoter-TSS (NM_001039094)	794	NR_040398	329782	Mm.183459	NR_040398	ENSMUSG00000085084	4930570G19Rik	C630015G22	RIKEN cDNA 4930570G19 gene	ncRNA
MACS_peak_374	chr1	87689900	87690375	+	77.59	NA	5' UTR (NM_133781, exon 1 of 9)	5' UTR (NM_133781, exon 1 of 9)	115	NM_133781	12283	Mm.26135	NM_133781	ENSMUSG00000036707	Cab39	AA408805|AA960512|C78372|MO25|MO25alpha	calcium binding protein 39	protein-coding
MACS_peak_11471	chr4	151551709	151552506	+	77.59	NA	promoter-TSS (NM_133348)	promoter-TSS (NM_133348)	-102	NM_133348	70025	Mm.296191	NM_133348	ENSMUSG00000028937	Acot7	2410041A17Rik|Ach1|Act|Bach|CTE-IIa|Cte-II|Lach1	acyl-CoA thioesterase 7	protein-coding
MACS_peak_7252	chr17	87846407	87846805	+	77.59	NA	promoter-TSS (NM_007589)	promoter-TSS (NM_007589)	-331	NM_007589	12314	Mm.329243	NM_007589	ENSMUSG00000036438	Calm2	1500001E21Rik|AL024017	calmodulin 2	protein-coding
MACS_peak_9179	chr2	122174203	122174868	+	77.48	NA	TTS (NM_001099297)	TTS (NM_001099297)	20119	NM_001013829	435684	Mm.458215	NM_001013829	ENSMUSG00000033256	Shf	-	Src homology 2 domain containing F	protein-coding
MACS_peak_3991	chr13	21826714	21827074	+	77.40	NA	promoter-TSS (NM_178210)	promoter-TSS (NM_178210)	-71	NM_178210	319159	Mm.486099	NM_178210		Hist1h4j	-	histone cluster 1, H4j	protein-coding
MACS_peak_8731	chr2	44782124	44783186	+	77.40	NA	Intergenic	CpG	-65513	NM_172662	227835	Mm.314312	NM_172662	ENSMUSG00000036890	Gtdc1	E330008O22Rik	glycosyltransferase-like domain containing 1	protein-coding
MACS_peak_11920	chr5	73882275	73882553	+	77.38	NA	exon (NM_001190733, exon 1 of 10)	exon (NM_001190733, exon 1 of 10)	149	NM_001190733	100737	Mm.220312	NM_178896	ENSMUSG00000051674	Dcun1d4	AI836376	DCN1, defective in cullin neddylation 1, domain containing 4 (S. cerevisiae)	protein-coding
MACS_peak_4191	chr13	54666510	54667020	+	77.35	NA	promoter-TSS (NM_133797)	promoter-TSS (NM_133797)	-22	NM_133797	97820	Mm.24593	NM_133797	ENSMUSG00000025871	4833439L19Rik	4930558H15Rik|C81457|Kiaa1191|P33monox	RIKEN cDNA 4833439L19 gene	protein-coding
MACS_peak_2039	chr11	32126414	32126756	+	77.35	NA	promoter-TSS (NM_010822)	promoter-TSS (NM_010822)	80	NM_010822	268395	Mm.263161	NM_010822	ENSMUSG00000020287	Mpg	9830006D05|AI326268|APNG|Aag|Mid1	N-methylpurine-DNA glycosylase	protein-coding
MACS_peak_3419	chr12	50484811	50485373	+	77.27	NA	5' UTR (NM_001160112, exon 1 of 1)	5' UTR (NM_001160112, exon 1 of 1)	1098	NM_008241	15228	Mm.4704	NM_008241	ENSMUSG00000020950	Foxg1	2900064B05Rik|BF-1|Bf1|Hfh9|Hfhbf1	forkhead box G1	protein-coding
MACS_peak_11743	chr5	33128090	33128599	+	77.12	NA	promoter-TSS (NM_177298)	promoter-TSS (NM_177298)	-69	NM_177298	320951	Mm.273765	NM_177298	ENSMUSG00000023452	Pisd	9030221M09Rik	phosphatidylserine decarboxylase	protein-coding
MACS_peak_2512	chr11	77421166	77421707	+	77.12	NA	promoter-TSS (NM_144825)	promoter-TSS (NM_144825)	-119	NM_144825	216965	Mm.340436	NM_144825	ENSMUSG00000017291	Taok1	2810468K05Rik|AU020252|D130018F14Rik|Map3k16|Markk|Psk2|mKIAA1361	TAO kinase 1	protein-coding
MACS_peak_1107	chr10	40021886	40022352	+	77.06	NA	promoter-TSS (NM_007444)	promoter-TSS (NM_007444)	-125	NM_009665	11702	Mm.253533	NM_009665	ENSMUSG00000075232	Amd1	1|AdoMetDC|Amd-1|SAMDC|SAMDC 1|adoMetDC1	S-adenosylmethionine decarboxylase 1	protein-coding
MACS_peak_2313	chr11	68504801	68505343	+	77.06	NA	promoter-TSS (NM_175260)	promoter-TSS (NM_175260)	-345	NM_175260	77579	Mm.218233	NM_175260	ENSMUSG00000020900	Myh10	5730504C04Rik|9330167F11Rik|Fltn|Myhn-2|Myhn2|NMHC II-B|NMHC-B|NMHCII-B|NMMHC II-b|NMMHC-B|NMMHC-IIB|SMemb|mKIAA3005	myosin, heavy polypeptide 10, non-muscle	protein-coding
MACS_peak_1119	chr10	41238639	41239457	+	77.06	NA	promoter-TSS (NM_016898)	promoter-TSS (NM_016898)	-258	NM_016898	53599	Mm.269815	NM_016898	ENSMUSG00000019818	Cd164	A115|A24|AA589639|AW540279|MGC-24|MSSP	CD164 antigen	protein-coding
MACS_peak_4335	chr13	69878517	69878830	+	77.06	NA	5' UTR (NM_001145162, exon 1 of 2)	5' UTR (NM_001145162, exon 1 of 2)	102	NM_001145162	76980	Mm.23960	NM_001145162	ENSMUSG00000052981	Ube2ql1	3110006E14Rik	ubiquitin-conjugating enzyme E2Q family-like 1	protein-coding
MACS_peak_13047	chr6	86346926	86347314	+	77.06	NA	promoter-TSS (NM_025823)	promoter-TSS (NM_025823)	24	NM_025823	66881	Mm.30849	NM_025823	ENSMUSG00000029998	Pcyox1	1200015P13Rik|AI115532|AI448340|PCL1|Pcly	prenylcysteine oxidase 1	protein-coding
MACS_peak_5922	chr16	4880629	4880910	+	76.99	NA	promoter-TSS (NM_145359)	promoter-TSS (NM_145359)	-918	NM_145359	207740	Mm.268895	NM_145359		Ubald1	1500031H01Rik|BC013706|Fam100a	UBA-like domain containing 1	protein-coding
MACS_peak_2535	chr11	78074838	78075110	+	76.89	NA	promoter-TSS (NM_001002004)	promoter-TSS (NM_001002004)	-282	NM_001002004	72503	Mm.237103	NM_001002004	ENSMUSG00000010277	2610507B11Rik	AU022687|D11Bhm178e|D11Bhm179e|E1|Kiaa0100|mKIAA0100	RIKEN cDNA 2610507B11 gene	protein-coding
MACS_peak_4117	chr13	43576334	43577015	+	76.89	NA	promoter-TSS (NM_019930)	promoter-TSS (NM_019930)	-332	NM_019930	56705	Mm.148781	NM_019930	ENSMUSG00000038546	Ranbp9	IBAP-1|Ibap1|RanBPM	RAN binding protein 9	protein-coding
MACS_peak_2890	chr11	102046355	102046774	+	76.89	NA	promoter-TSS (NM_172947)	promoter-TSS (NM_172947)	6	NM_172947	268490	Mm.259079	NM_172947		Lsm12	1110032E16Rik|1110059P07|2600001B17Rik	LSM12 homolog (S. cerevisiae)	protein-coding
MACS_peak_10334	chr3	121977229	121977510	+	76.89	NA	promoter-TSS (NM_153806)	promoter-TSS (NM_153806)	37	NM_153806	99480	Mm.398647	NM_153806	ENSMUSG00000039756	Dnttip2	4930588M11Rik|AA408582|AU014960|HSU15552	deoxynucleotidyltransferase, terminal, interacting protein 2	protein-coding
MACS_peak_2945	chr11	103815089	103815668	+	76.89	NA	promoter-TSS (NM_008740)	promoter-TSS (NM_008740)	-8	NM_008740	18195	Mm.260117	NM_008740	ENSMUSG00000034187	Nsf	AI316878|AU020090|AU067812|SKD2	N-ethylmaleimide sensitive fusion protein	protein-coding
MACS_peak_14636	chr7	138514582	138514889	+	76.71	NA	promoter-TSS (NM_001039534)	promoter-TSS (NM_001039534)	75	NM_001039534	214580	Mm.272948	NM_177609	ENSMUSG00000063179	Pstk	5430423O14Rik|5730458D16Rik|Gm1099|R75284	phosphoseryl-tRNA kinase	protein-coding
MACS_peak_1238	chr10	62486100	62487246	+	76.64	NA	promoter-TSS (NM_026085)	promoter-TSS (NM_026085)	-76	NM_001079824	432467	Mm.274784	NM_001079824	ENSMUSG00000020069	Hnrnph3	AA693301|AI666703|Hnrph3	heterogeneous nuclear ribonucleoprotein H3	protein-coding
MACS_peak_6590	chr17	24686899	24687234	+	76.49	NA	5' UTR (NM_013630, exon 1 of 46)	5' UTR (NM_013630, exon 1 of 46)	171	NM_013630	18763	Mm.30435	NM_013630	ENSMUSG00000032855	Pkd1	PC1|mFLJ00285	polycystic kidney disease 1 homolog	protein-coding
MACS_peak_1344	chr10	79209076	79209421	+	76.32	NA	promoter-TSS (NM_172551)	promoter-TSS (NM_172551)	78	NM_172551	216151	Mm.39001	NM_172551	ENSMUSG00000020329	Polrmt	1110018N15Rik|4932416K13	polymerase (RNA) mitochondrial (DNA directed)	protein-coding
MACS_peak_5943	chr16	8830108	8830416	+	76.32	NA	promoter-TSS (NM_001081400)	promoter-TSS (NM_001081400)	69	NM_001081400	69053	Mm.390868	NM_001081400	ENSMUSG00000022507	1810013L24Rik	1110017P05Rik|3010002C02Rik|AA792997|AW124177|Gm19906|R74903	RIKEN cDNA 1810013L24 gene	protein-coding
MACS_peak_5070	chr14	103381651	103381926	+	76.32	NA	promoter-TSS (NR_039592)	promoter-TSS (NR_039592)	61	NR_039592	100628599		NR_039592	miRBase:MI0018042	Mir5130	mmu-mir-5130|mu-mir-5130	microRNA 5130	ncRNA
MACS_peak_11724	chr5	31522798	31523334	+	76.31	NA	promoter-TSS (NM_008014)	promoter-TSS (NM_008014)	-148	NM_008014	14208	Mm.14501	NM_008014	ENSMUSG00000029147	Ppm1g	AI385652|Fin13	protein phosphatase 1G (formerly 2C), magnesium-dependent, gamma isoform	protein-coding
MACS_peak_8833	chr2	70893416	70894037	+	76.30	NA	promoter-TSS (NM_001165982)	promoter-TSS (NM_001165982)	-63	NM_145524	228019	Mm.490343	NM_145524	ENSMUSG00000041975	Mettl8	BC004636|Tip	methyltransferase like 8	protein-coding
MACS_peak_14092	chr7	54263307	54263961	+	76.18	NA	5' UTR (NM_175318, exon 1 of 6)	5' UTR (NM_175318, exon 1 of 6)	150	NM_175318	101685	Mm.155687	NM_175318	ENSMUSG00000049516	Spty2d1	5830435K17Rik|AI852426|P16H6	SPT2, Suppressor of Ty, domain containing 1 (S. cerevisiae)	protein-coding
MACS_peak_15083	chr8	72644541	72644883	+	76.16	NA	promoter-TSS (NM_007789)	promoter-TSS (NM_007789)	31	NM_007789	13004	Mm.268079	NM_007789	ENSMUSG00000002341	Ncan	C230035B04|Cspg3|Cspg3-rs|Tgfbit	neurocan	protein-coding
MACS_peak_1495	chr10	81106215	81106777	+	76.16	NA	exon (NM_027480, exon 17 of 20)	exon (NM_027480, exon 17 of 20)	-5318	NM_001142963	100233208	Mm.327168	NM_001142963		Gm10778	ENSMUSG00000074860	predicted gene 10778	protein-coding
MACS_peak_884	chr1	184212704	184213101	+	76.05	NA	promoter-TSS (NM_007853)	promoter-TSS (NM_007853)	-12	NM_007853	13244	Mm.29648	NM_007853	ENSMUSG00000038633	Degs1	AA536663|Degs|Des1|Mdes	degenerative spermatocyte homolog 1 (Drosophila)	protein-coding
MACS_peak_12985	chr6	72566536	72567072	+	75.99	NA	promoter-TSS (NM_009444)	promoter-TSS (NM_009444)	-62	NM_009444	22135	Mm.246563	NM_009444		Tgoln2	TGN38B|TGN41|TGN46|Ttgn2	trans-golgi network protein 2	protein-coding
MACS_peak_4714	chr14	35315953	35316339	+	75.99	NA	promoter-TSS (NM_009758)	promoter-TSS (NM_009758)	-414	NM_009758	12166	Mm.237825	NM_009758	ENSMUSG00000021796	Bmpr1a	1110037I22Rik|ALK3|AU045487|BMPR-IA|Bmpr	bone morphogenetic protein receptor, type 1A	protein-coding
MACS_peak_15072	chr8	72298409	72298887	+	75.96	NA	intron (NM_177899, intron 1 of 3)	CpG	162	NM_177899	330788	Mm.41364	NM_177899		Zfp866	9830167H18Rik|AI875089|C85843|D330038O06Rik	zinc finger protein 866	protein-coding
MACS_peak_7676	chr18	75160031	75160377	+	75.96	NA	promoter-TSS (NR_028552).2	promoter-TSS (NR_028552).2	73	NM_001002239	319195	Mm.276337	NM_001002239	ENSMUSG00000062328	Rpl17	-	ribosomal protein L17	protein-coding
MACS_peak_5789	chr15	99223346	99223627	+	75.96	NA	promoter-TSS (NM_001171035)	promoter-TSS (NM_001171035)	108	NM_001171034	110213	Mm.16769	NM_026669	ENSMUSG00000023010	Tmbim6	5031406P05Rik|Bi1|Tegt	transmembrane BAX inhibitor motif containing 6	protein-coding
MACS_peak_13463	chr6	148844518	148845045	+	75.96	NA	promoter-TSS (NM_001301351)	promoter-TSS (NM_001301351)	-22	NM_181541	232560	Mm.150568	NM_181541	ENSMUSG00000030309	Caprin2	C1qdc1|Eeg1|rng140	caprin family member 2	protein-coding
MACS_peak_3944	chr13	12350208	12350552	+	75.93	NA	promoter-TSS (NM_001081128)	promoter-TSS (NM_001081128)	0	NM_001081128	238505	Mm.40335	NM_001081128	ENSMUSG00000021311	Mtr	AI894170|D830038K18Rik|MS	5-methyltetrahydrofolate-homocysteine methyltransferase	protein-coding
MACS_peak_5915	chr16	4683972	4684319	+	75.93	NA	promoter-TSS (NM_023646)	promoter-TSS (NM_023646)	75	NM_001135112	83945	Mm.248337	NM_023646	ENSMUSG00000004069	Dnaja3	1200003J13Rik|1810053A11Rik|C81173|Tid-1|Tid1l	DnaJ (Hsp40) homolog, subfamily A, member 3	protein-coding
MACS_peak_16459	chr9	107456512	107456859	+	75.93	NA	promoter-TSS (NM_019713)	promoter-TSS (NM_019713)	-229	NM_019713	56289	Mm.12091	NM_019713	ENSMUSG00000010067	Rassf1	123F2|AA536941|AU044980|NORE2A|RDA32|REH3P21|Rassf1A|Rassf1B|Rassf1C	Ras association (RalGDS/AF-6) domain family member 1	protein-coding
MACS_peak_7620	chr18	64675981	64676488	+	75.83	NA	promoter-TSS (NM_027350)	promoter-TSS (NM_027350)	-23	NM_001142950	70223	Mm.29192	NM_027350	ENSMUSG00000024587	Nars	3010001M15Rik|AA960128|ASNRS|C78150	asparaginyl-tRNA synthetase	protein-coding
MACS_peak_9928	chr3	69120748	69121075	+	75.83	NA	promoter-TSS (NM_178726)	promoter-TSS (NM_178726)	71	NM_178726	242083	Mm.40577	NM_178726		Ppm1l	3222401G13|5930404J21Rik|AI481720|AW045850|PP2C|PP2Cepsilon|Pp2ce|Ppp2ce|mKIAA4175	protein phosphatase 1 (formerly 2C)-like	protein-coding
MACS_peak_13509	chr7	4866553	4867021	+	75.83	NA	promoter-TSS (NM_170759)	promoter-TSS (NM_170759)	-32	NM_170759	232816	Mm.27442	NM_170759	ENSMUSG00000074406	Zfp628	Zec|Znf628	zinc finger protein 628	protein-coding
MACS_peak_815	chr1	176431878	176432506	+	75.77	NA	exon (NM_019445, exon 1 of 18)	exon (NM_019445, exon 1 of 18)	236	NM_019445	54418	Mm.330620	NM_019445	ENSMUSG00000028354	Fmn2	AU024104	formin 2	protein-coding
MACS_peak_9362	chr2	150730221	150730784	+	75.74	NA	promoter-TSS (NM_024465)	promoter-TSS (NM_024465)	-35	NM_024465	76192	Mm.112632	NM_024465	ENSMUSG00000032046	Abhd12	1500011G07Rik|6330583M11Rik|AI431047|AW547313	abhydrolase domain containing 12	protein-coding
MACS_peak_8106	chr19	32786637	32787066	+	75.74	NA	promoter-TSS (NM_026487)	promoter-TSS (NM_026487)	-63	NM_026487	67979	Mm.27123	NM_026487	ENSMUSG00000013662	Atad1	4921525H23Rik|AW107648|Thorase	ATPase family, AAA domain containing 1	protein-coding
MACS_peak_3949	chr13	12658081	12658366	+	75.72	NA	promoter-TSS (NM_026184)	promoter-TSS (NM_026184)	73	NM_026184	67475	Mm.358706	NM_026184	ENSMUSG00000057069	Ero1lb	1300013B24Rik|1700065B09Rik|AI447560|ero1-beta	ERO1-like beta (S. cerevisiae)	protein-coding
MACS_peak_253	chr1	64663548	64664102	+	75.72	NA	promoter-TSS (NM_025964)	promoter-TSS (NM_025964)	-83	NM_025964	67099	Mm.46394	NM_025964	ENSMUSG00000025956	Mettl21a	2310038H17Rik|AI464204|Fam119a	methyltransferase like 21A	protein-coding
MACS_peak_1831	chr11	3166190	3166774	+	75.72	NA	promoter-TSS (NM_007879)	promoter-TSS (NM_007879)	-93	NM_007879	13494	Mm.3250	NM_007879	ENSMUSG00000020457	Drg1	AA408859|AI132520|Nedd3	developmentally regulated GTP binding protein 1	protein-coding
MACS_peak_6388	chr16	98183861	98184105	+	75.72	NA	promoter-TSS (NM_001081685)	promoter-TSS (NM_001081685)	-197	NM_175428	114565	Mm.474489	NM_175428	ENSMUSG00000046962	Zbtb21	5430437K12Rik|B430213I24Rik|Zfp295|Znf295|mKIAA1227	zinc finger and BTB domain containing 21	protein-coding
MACS_peak_10702	chr4	46402123	46402553	+	75.72	NA	promoter-TSS (NM_029086)	promoter-TSS (NM_029086)	-43	NM_029086	74753	Mm.45973	NM_029086	ENSMUSG00000028331	5830415F09Rik	AV014846|Nap1	RIKEN cDNA 5830415F09 gene	protein-coding
MACS_peak_12041	chr5	104937326	104937604	+	75.63	NA	promoter-TSS (NM_001166581)	promoter-TSS (NM_001166581)	94	NM_001166581	100042165	Mm.482189	NM_001166581	ENSMUSG00000079065	BC005561	-	cDNA sequence BC005561	protein-coding
MACS_peak_7029	chr17	56031170	56031959	+	75.62	NA	promoter-TSS (NM_145490)	promoter-TSS (NM_145490)	48	NM_145490	224893	Mm.294853	NM_145490		Zfp959	-	zinc finger protein 959	protein-coding
MACS_peak_3203	chr11	120442783	120443211	+	75.56	NA	promoter-TSS (NM_133796)	promoter-TSS (NM_133796)	-63	NM_133796	192662	Mm.30016	NM_133796	ENSMUSG00000025132	Arhgdia	5330430M07Rik|Gdi-1|Rho-GDI|RhoDGI|RhoGDI-1	Rho GDP dissociation inhibitor (GDI) alpha	protein-coding
MACS_peak_14446	chr7	119369274	119369593	+	75.56	NA	promoter-TSS (NM_001193305)	promoter-TSS (NM_001193305)	83	NM_001193305	320878	Mm.52312	NM_177282	ENSMUSG00000038244	Mical2	5330438E18Rik|9530064J02|MICAL-2|mKIAA0750	microtubule associated monooxygenase, calponin and LIM domain containing 2	protein-coding
MACS_peak_3316	chr12	17355023	17355440	+	75.41	NA	promoter-TSS (NM_001008421)	promoter-TSS (NM_001008421)	-68	NM_001008421	217431	Mm.27536	NM_001008421	ENSMUSG00000061458	Nol10	Gm67	nucleolar protein 10	protein-coding
MACS_peak_6369	chr16	96212316	96212838	+	75.31	NA	promoter-TSS (NM_019537)	promoter-TSS (NM_019537)	-67	NM_019537	56088	Mm.396248	NM_019537	ENSMUSG00000022913	Psmg1	AW552102|Dscr2	proteasome (prosome, macropain) assembly chaperone 1	protein-coding
MACS_peak_11206	chr4	132066215	132066540	+	75.28	NA	promoter-TSS (NM_144907)	promoter-TSS (NM_144907)	-6	NM_144907	230784	Mm.23608	NM_144907		Sesn2	HI95|SEST2|Ses2	sestrin 2	protein-coding
MACS_peak_17016	chrX	132602475	132602875	+	75.25	NA	promoter-TSS (NM_009749)	promoter-TSS (NM_009749)	100	NM_009749	12069	Mm.94160	NM_009749	ENSMUSG00000042750	Bex2	AL024066|Bex1	brain expressed X-linked 2	protein-coding
MACS_peak_7968	chr19	8894080	8894901	+	75.24	NA	promoter-TSS (NM_027412)	promoter-TSS (NM_027412)	599	NM_001081196	68693	Mm.476519	NM_001081196	ENSMUSG00000071659	Hnrnpul2	1110031M08Rik|AI465155|Hnrpul2	heterogeneous nuclear ribonucleoprotein U-like 2	protein-coding
MACS_peak_15112	chr8	73131958	73132274	+	75.20	NA	promoter-TSS (NM_133772)	promoter-TSS (NM_133772)	97	NM_133772	76900	Mm.6667	NM_133772	ENSMUSG00000070003	Ssbp4	1210002E11Rik|AW743380|Sspb4	single stranded DNA binding protein 4	protein-coding
MACS_peak_10802	chr4	70196095	70196454	+	75.20	NA	promoter-TSS (NM_172694)	promoter-TSS (NM_172694)	-312	NM_172694	230316	Mm.251188	NM_172694		Megf9	4933405H16Rik|9630025C07|Egfl5|mKIAA0818	multiple EGF-like-domains 9	protein-coding
MACS_peak_3272	chr12	5382328	5382604	+	75.16	NA	promoter-TSS (NR_015579)	promoter-TSS (NR_015579)	22	NM_001164493	208439	Mm.388281	NM_001164493	ENSMUSG00000020627	Klhl29	A230106N14Rik|Gm68|Kbtbd9|mKIAA1921	kelch-like 29	protein-coding
MACS_peak_2618	chr11	86171616	86171947	+	74.82	NA	promoter-TSS (NM_001080931)	promoter-TSS (NM_001080931)	-754	NM_001080931	327987	Mm.341886	NM_001080931	ENSMUSG00000034297	Med13	1110067M05Rik|D030023K18|Thrap1|Trap240	mediator complex subunit 13	protein-coding
MACS_peak_2289	chr11	62364296	62364611	+	74.78	NA	promoter-TSS (NM_011664)	promoter-TSS (NM_011664)	-553	NM_011664	22187	Mm.282093	NM_011664		Ubb	AL033289|Rps27a|Uba52|Ubb2|Ubc	ubiquitin B	protein-coding
MACS_peak_1502	chr10	81459664	81460193	+	74.76	NA	Intergenic	CpG	-50944	NM_001024626	408062	Mm.391409	NM_001024626		Zfp873	-	zinc finger protein 873	protein-coding
MACS_peak_13980	chr7	51615266	51615857	+	74.76	NA	exon (NM_027049, exon 6 of 6)	exon (NM_027049, exon 6 of 6)	14839	NM_027049	69349	Mm.358922	NM_027049	ENSMUSG00000008028	1700008O03Rik	-	RIKEN cDNA 1700008O03 gene	protein-coding
MACS_peak_11305	chr4	136913341	136913841	+	74.76	NA	promoter-TSS (NM_001243769)	promoter-TSS (NM_001243769)	83	NM_009861	12540	Mm.1022	NM_009861	ENSMUSG00000006699	Cdc42	AI747189|AU018915	cell division cycle 42	protein-coding
MACS_peak_10091	chr3	90017343	90017824	+	74.67	NA	promoter-TSS (NM_001190258)	promoter-TSS (NM_001190258)	-13	NM_027015	57294	Mm.270283	NM_027015		Rps27	3200001M24Rik	ribosomal protein S27	protein-coding
MACS_peak_12742	chr6	29297631	29298449	+	74.55	NA	promoter-TSS (NM_184053)	promoter-TSS (NM_184053)	-66	NM_007594	12321	Mm.392075	NM_007594	ENSMUSG00000029767	Calu	9530075H20Rik	calumenin	protein-coding
MACS_peak_6224	chr16	49855358	49855992	+	74.55	NA	promoter-TSS (NM_010581)	promoter-TSS (NM_010581)	-92	NM_010581	16423	Mm.31752	NM_010581	ENSMUSG00000055447	Cd47	9130415E20Rik|AA407862|AI848868|AW108519|B430305P08Rik|IAP|Itgp	CD47 antigen (Rh-related antigen, integrin-associated signal transducer)	protein-coding
MACS_peak_3107	chr11	116295346	116295746	+	74.54	NA	promoter-TSS (NR_003376)	promoter-TSS (NR_003376)	19	NR_003376	664849	Mm.258466	NR_003376		Gm7367	EG664849	1110014K08Rik pseudogene	pseudo
MACS_peak_16537	chr9	110207386	110208137	+	74.54	NA	promoter-TSS (NM_001081381)	promoter-TSS (NM_001081381)	65	NM_001081381	72341	Mm.374250	NM_001081381	ENSMUSG00000054836	Elp6	2610001P13Rik|2610002I17Rik|AV159994|Tmem103	elongator acetyltransferase complex subunit 6	protein-coding
MACS_peak_3523	chr12	71448064	71449050	+	74.54	NA	promoter-TSS (NM_001110203)	promoter-TSS (NM_001110203)	44	NM_001286386	94090	Mm.184012	NM_053167	ENSMUSG00000021071	Trim9	-	tripartite motif-containing 9	protein-coding
MACS_peak_13997	chr7	51846221	51846435	+	74.54	NA	promoter-TSS (NM_008422)	promoter-TSS (NM_008422)	72	NM_001290682	16504	Mm.40312	NM_008422	ENSMUSG00000062785	Kcnc3	KShIIID|Kcr2-3|Kv3.3	potassium voltage gated channel, Shaw-related subfamily, member 3	protein-coding
MACS_peak_12019	chr5	100858335	100858898	+	74.39	NA	promoter-TSS (NR_034038)	promoter-TSS (NR_034038)	-62	NR_034038	100503199	Mm.392282	NR_034038	ENSMUSG00000097772	5430416N02Rik	100041797|Adapt33|Gm3514	RIKEN cDNA 5430416N02 gene	ncRNA
MACS_peak_6507	chr17	17483010	17483264	+	74.38	NA	Intergenic	CpG	-28159	NM_025934	67045	Mm.35117	NM_025934	ENSMUSG00000023846	Riok2	2010110K24Rik|2410085M17Rik	RIO kinase 2 (yeast)	protein-coding
MACS_peak_15098	chr8	72877336	72877638	+	74.36	NA	promoter-TSS (NM_001122829)	promoter-TSS (NM_001122829)	-315	NM_001122829	19704	Mm.390048	NM_030680	ENSMUSG00000058301	Upf1	B430202H16Rik|NORF1|PNORF-1|Rent1|Upflp	UPF1 regulator of nonsense transcripts homolog (yeast)	protein-coding
MACS_peak_5926	chr16	5013462	5013726	+	74.36	NA	promoter-TSS (NM_133185)	promoter-TSS (NM_133185)	52	NM_133185	66049	Mm.27792	NM_133185	ENSMUSG00000022540	Rogdi	0610011C19Rik|AU020118|C76152|Lzf	rogdi homolog (Drosophila)	protein-coding
MACS_peak_10770	chr4	59015899	59016241	+	74.31	NA	promoter-TSS (NM_001033165)	promoter-TSS (NM_001033165)	5	NM_001033165	72429	Mm.317801	NM_001033165		Dnajc25	2010109C08Rik|2010203O07Rik	DnaJ (Hsp40) homolog, subfamily C, member 25	protein-coding
MACS_peak_7157	chr17	74715577	74715999	+	74.31	NA	promoter-TSS (NM_001146224)	promoter-TSS (NM_001146224)	-15	NM_001146223	66310	Mm.28536	NM_024428	ENSMUSG00000024067	Dpy30	2810410M20Rik|C87842	dpy-30 homolog (C. elegans)	protein-coding
MACS_peak_14735	chr7	150238588	150238961	+	74.31	NA	5' UTR (NM_133655, exon 1 of 8)	5' UTR (NM_133655, exon 1 of 8)	119	NM_133655	12520	Mm.806	NM_133655	ENSMUSG00000037706	Cd81	Tapa-1|Tapa1|Tspan28	CD81 antigen	protein-coding
MACS_peak_8041	chr19	17468535	17468783	+	74.27	NA	5' UTR (NM_019437, exon 1 of 4)	5' UTR (NM_019437, exon 1 of 4)	126	NM_019437	54391	Mm.7013	NM_019437	ENSMUSG00000024712	Rfk	0610038L10Rik|AF031381|KOI-4	riboflavin kinase	protein-coding
MACS_peak_2217	chr11	58768146	58768905	+	74.27	NA	promoter-TSS (NM_206882)	promoter-TSS (NM_206882)	338	NM_178218	319162	Mm.212549	NM_178218	ENSMUSG00000078851	Hist3h2a	-	histone cluster 3, H2a	protein-coding
MACS_peak_4350	chr13	74345945	74346400	+	74.22	NA	promoter-TSS (NM_177333)	promoter-TSS (NM_177333)	-24	NM_177333	211446	Mm.261859	NM_177333	ENSMUSG00000034152	Exoc3	2810050O03Rik|E430013E20Rik|Sec6|Sec6l1	exocyst complex component 3	protein-coding
MACS_peak_2545	chr11	78325411	78326059	+	74.19	NA	promoter-TSS (NM_026389)	promoter-TSS (NM_026389)	-63	NM_026389	67811	Mm.197493	NM_026389	ENSMUSG00000001100	Poldip2	1300003F06Rik|Pdip38	polymerase (DNA-directed), delta interacting protein 2	protein-coding
MACS_peak_14889	chr8	24318693	24319162	+	74.19	NA	promoter-TSS (NM_018743)	promoter-TSS (NM_018743)	-2	NM_018743	102247	Mm.200898	NM_018743	ENSMUSG00000031545	Agpat6	AU041707|AW545732|GPAT4|Tsarg7	1-acylglycerol-3-phosphate O-acyltransferase 6 (lysophosphatidic acid acyltransferase, zeta)	protein-coding
MACS_peak_1566	chr10	89207685	89208152	+	74.18	NA	5' UTR (NM_029166, exon 1 of 21)	5' UTR (NM_029166, exon 1 of 21)	182	NM_029166	75089	Mm.268922	NM_029166	ENSMUSG00000019951	Uhrf1bp1l	2010319N22Rik|4930506D01Rik|AA589495|C80672|E030041M21Rik|mKIAA0701	UHRF1 (ICBP90) binding protein 1-like	protein-coding
MACS_peak_14295	chr7	97591162	97591489	+	74.18	NA	promoter-TSS (NR_073438)	promoter-TSS (NR_073438)	34	NR_073438	233490	Mm.29496	NM_145151	ENSMUSG00000051451	Crebzf	1110034C16Rik|6330417B10Rik|LAZip|LAZipII|SMILE|Zf	CREB/ATF bZIP transcription factor	protein-coding
MACS_peak_8974	chr2	92273970	92274287	+	74.18	NA	promoter-TSS (NM_009963)	promoter-TSS (NM_009963)	98	NM_009963	12953	Mm.254181	NM_009963	ENSMUSG00000068742	Cry2	AV006279|D130054K12Rik	cryptochrome 2 (photolyase-like)	protein-coding
MACS_peak_9284	chr2	134469294	134470042	+	74.18	NA	exon (NM_029148, exon 1 of 8)	exon (NM_029148, exon 1 of 8)	189	NM_029148	52837	Mm.264096	NM_029148	ENSMUSG00000034723	Tmx4	2810417D04Rik|4930500L08Rik|AI843224|AW046784|D2Bwg1356e|Txndc13|mKIAA1162	thioredoxin-related transmembrane protein 4	protein-coding
MACS_peak_5074	chr14	103745787	103746312	+	74.15	NA	promoter-TSS (NM_207215)	promoter-TSS (NM_207215)	-32	NM_207215	105689	Mm.6478	NM_207215	ENSMUSG00000033004	Mycbp2	AU023734|AW107953|AW546647|C130061D10Rik|Pam|Phr1|R75243	MYC binding protein 2	protein-coding
MACS_peak_7541	chr18	46901013	46901283	+	74.15	NA	promoter-TSS (NM_026217)	promoter-TSS (NM_026217)	85	NM_026217	67526	Mm.9852	NM_026217	ENSMUSG00000032905	Atg12	4931423H11Rik|A330058M13Rik|Apg12l|Atg12l	autophagy related 12	protein-coding
MACS_peak_1083	chr10	34017149	34017459	+	74.15	NA	promoter-TSS (NM_030203)	promoter-TSS (NM_030203)	77	NM_030203	72480	Mm.21485	NM_030203	ENSMUSG00000039485	Tspyl4	2610102M01Rik|B230210I21Rik|D10Bwg0791e	TSPY-like 4	protein-coding
MACS_peak_7458	chr18	36440414	36440976	+	74.08	NA	promoter-TSS (NM_008989)	promoter-TSS (NM_008989)	-121	NM_008989	19290	Mm.231802	NM_008989		Pura	CAGER-1|Pur-alpha|ssCRE-BP	purine rich element binding protein A	protein-coding
MACS_peak_16450	chr9	106794078	106794368	+	74.05	NA	promoter-TSS (NM_029103)	promoter-TSS (NM_029103)	46	NM_029103	74840	Mm.29778	NM_029103	ENSMUSG00000032575	Manf	3230402M22Rik|AA407711|AA408789|AA673178|Armet|D17914|D18Mgi17	mesencephalic astrocyte-derived neurotrophic factor	protein-coding
MACS_peak_13878	chr7	31076501	31076879	+	73.94	NA	promoter-TSS (NM_001081114)	promoter-TSS (NM_001081114)	-82	NM_001081114	76686	Mm.159258	NM_001081114	ENSMUSG00000013921	Clip3	1500005P14Rik|AI844915|Clipr-59	CAP-GLY domain containing linker protein 3	protein-coding
MACS_peak_14256	chr7	88716068	88716394	+	73.94	NA	promoter-TSS (NM_001004185)	promoter-TSS (NM_001004185)	53	NM_001004185	434204	Mm.181641	NM_001004185	ENSMUSG00000045795	Whamm	BB081391|Whdc1|mKIAA1971	WAS protein homolog associated with actin, golgi membranes and microtubules	protein-coding
MACS_peak_1447	chr10	80532713	80533069	+	73.94	NA	promoter-TSS (NM_022653)	promoter-TSS (NM_022653)	63	NM_022653	50492	Mm.26995	NM_022653	ENSMUSG00000004929	Thop1	AI131655|AI327041|EP24.15	thimet oligopeptidase 1	protein-coding
MACS_peak_14428	chr7	117205157	117205810	+	73.94	NA	intron (NM_009281, intron 1 of 15)	CpG	267	NM_009281	20841	Mm.10815	NM_009281	ENSMUSG00000061079	Zfp143	AA959806|AU015869|D7Ertd805e|KRAB14|SBF|Staf|Zfp79|Zfp80-rs1|Znf143|pHZ-1	zinc finger protein 143	protein-coding
MACS_peak_13201	chr6	113841152	113841387	+	73.91	NA	5' UTR (NM_001036684, exon 1 of 20)	5' UTR (NM_001036684, exon 1 of 20)	101	NM_001036684	11941	Mm.321755	NM_009723	ENSMUSG00000030302	Atp2b2	D6Abb2e|Gena300|PMCA2|Tmy|dfw|jog|wms|wri	ATPase, Ca++ transporting, plasma membrane 2	protein-coding
MACS_peak_12482	chr5	138227083	138227950	+	73.86	NA	5' UTR (NM_144913, exon 1 of 4)	5' UTR (NM_144913, exon 1 of 4)	413	NM_144913	231803	Mm.61193	NM_144913	ENSMUSG00000029726	Mepce	Bcdin3|D5Wsu46e	methylphosphate capping enzyme	protein-coding
MACS_peak_16362	chr9	96531739	96532163	+	73.78	NA	promoter-TSS (NM_053268)	promoter-TSS (NM_053268)	-29	NM_053268	114713	Mm.124502	NM_053268	ENSMUSG00000032413	Rasa2	5430433H21Rik|AA517451|AU023900|GAP1m	RAS p21 protein activator 2	protein-coding
MACS_peak_2548	chr11	78364098	78364648	+	73.66	NA	promoter-TSS (NM_133706)	promoter-TSS (NM_133706)	-136	NM_133706	69071	Mm.29431	NM_133706	ENSMUSG00000037278	Tmem97	1810014L12Rik|AI115531|AL022956|D11Bhm182e	transmembrane protein 97	protein-coding
MACS_peak_11725	chr5	31542946	31543450	+	73.66	NA	promoter-TSS (NM_147201)	promoter-TSS (NM_147201)	-93	NM_147201	192292	Mm.292040	NM_147201	ENSMUSG00000029148	Nrbp1	B230344L17Rik|Nrbp	nuclear receptor binding protein 1	protein-coding
MACS_peak_13643	chr7	19705164	19705443	+	73.66	NA	promoter-TSS (NM_175530)	promoter-TSS (NM_175530)	95	NM_175530	243867	Mm.230830	NM_175530	ENSMUSG00000050428	Fbxo46	20D7-FC4|4932704E22Rik|Fbxo34l	F-box protein 46	protein-coding
MACS_peak_6085	chr16	21794168	21794752	+	73.55	NA	promoter-TSS (NR_037958)	promoter-TSS (NR_037958)	40	NR_037957	100043489	Mm.326535	NR_037957	ENSMUSG00000097290	1300002E11Rik	1500026P21Rik	RIKEN cDNA 1300002E11 gene	ncRNA
MACS_peak_3318	chr12	17551639	17551936	+	73.55	NA	5' UTR (NM_013614, exon 1 of 12)	5' UTR (NM_013614, exon 1 of 12)	108	NM_013614	18263	Mm.34102	NM_013614	ENSMUSG00000011179	Odc1	ODC	ornithine decarboxylase, structural 1	protein-coding
MACS_peak_11819	chr5	38550450	38551126	+	73.52	NA	promoter-TSS (NM_010942)	promoter-TSS (NM_010942)	-82	NM_010942	18196	Mm.7414	NM_010942	ENSMUSG00000029126	Nsg1	Neep21|m234|p21	neuron specific gene family member 1	protein-coding
MACS_peak_9981	chr3	87329218	87329801	+	73.52	NA	promoter-TSS (NM_012051)	promoter-TSS (NM_012051)	9	NM_012051	27049	Mm.219460	NM_012051	ENSMUSG00000003382	Etv3	AI414410|METS|Pe1	ets variant 3	protein-coding
MACS_peak_13266	chr6	120481101	120481655	+	73.52	NA	promoter-TSS (NM_144815)	promoter-TSS (NM_144815)	-61	NM_144815	214932	Mm.255322	NM_144815	ENSMUSG00000058979	Cecr5	A930002G03Rik	cat eye syndrome chromosome region, candidate 5	protein-coding
MACS_peak_15758	chr9	20807098	20807572	+	73.41	NA	5' UTR (NM_023167, exon 1 of 9)	5' UTR (NM_023167, exon 1 of 9)	154	NM_023167	66163	Mm.427576	NM_023167	ENSMUSG00000003299	Mrpl4	1110017G11Rik	mitochondrial ribosomal protein L4	protein-coding
MACS_peak_6025	chr16	18066209	18066714	+	73.41	NA	promoter-TSS (NM_001289814)	promoter-TSS (NM_001289814)	-35	NR_110380	13353	Mm.27155	NM_010047	ENSMUSG00000003531	Dgcr6	-	DiGeorge syndrome critical region gene 6	protein-coding
MACS_peak_15709	chr9	7836798	7837539	+	73.41	NA	Intergenic	CpG	-1913	NM_007465	11797	Mm.335659	NM_007465	ENSMUSG00000057367	Birc2	AW146227|Api1|Api2|Birc3|HIAP1|HIAP2|IAP1|IAP2|MIAP1|MIAP2|MIHB|MIHC|RNF48|cIAP1|cIAP2|mcIAP1	baculoviral IAP repeat-containing 2	protein-coding
MACS_peak_8159	chr19	41338335	41338819	+	73.37	NA	promoter-TSS (NM_133352)	promoter-TSS (NM_133352)	-83	NM_133352	107358	Mm.246440	NM_133352	ENSMUSG00000025016	Tm9sf3	1810073M23Rik|2810031D16Rik|AI115521|AI413748|AW146116|AW549777|Smbp|mKIAA4036	transmembrane 9 superfamily member 3	protein-coding
MACS_peak_7028	chr17	56017738	56018537	+	73.37	NA	promoter-TSS (NM_144546)	promoter-TSS (NM_144546)	81	NM_144546	104349	Mm.460659	NM_144546		Zfp119a	AL024077|Mzf13|Zfp119	zinc finger protein 119a	protein-coding
MACS_peak_12965	chr6	71780975	71781716	+	73.37	NA	promoter-TSS (NM_029673)	promoter-TSS (NM_029673)	31	NM_001253688	76614	Mm.235123	NM_029673	ENSMUSG00000052337	Immt	1700082C19Rik|D830041H16Rik|HMP|P87|P87/89|P89	inner membrane protein, mitochondrial	protein-coding
MACS_peak_1139	chr10	42940752	42941494	+	73.37	NA	promoter-TSS (NM_001168289)	promoter-TSS (NM_001168289)	-169	NM_027772	71365	Mm.490430	NM_027772	ENSMUSG00000038240	Pdss2	5430420P03Rik|Gm60|Plmp|kd|mDLP1	prenyl (solanesyl) diphosphate synthase, subunit 2	protein-coding
MACS_peak_4057	chr13	30637007	30637514	+	73.35	NA	promoter-TSS (NM_025710)	promoter-TSS (NM_025710)	-75	NM_025710	66694	Mm.181933	NM_025710	ENSMUSG00000038462	Uqcrfs1	4430402G14Rik|AI875505	ubiquinol-cytochrome c reductase, Rieske iron-sulfur polypeptide 1	protein-coding
MACS_peak_3302	chr12	14158626	14159033	+	73.35	NA	promoter-TSS (NM_029007)	promoter-TSS (NM_029007)	15	NM_029007	105005	Mm.227253	NM_029007	ENSMUSG00000020607	Fam84a	2310003N02Rik|4731402F03Rik|AW125753|Nse1	family with sequence similarity 84, member A	protein-coding
MACS_peak_6064	chr16	20610603	20610892	+	73.33	NA	promoter-TSS (NM_025462)	promoter-TSS (NM_025462)	75	NM_145939	208624	Mm.24950	NM_145939	ENSMUSG00000033809	Alg3	D16Ertd36e	asparagine-linked glycosylation 3 (alpha-1,3-mannosyltransferase)	protein-coding
MACS_peak_4256	chr13	58230268	58230700	+	73.33	NA	promoter-TSS (NM_029872)	promoter-TSS (NM_029872)	-567	NM_029872	77134	Mm.490274	NM_029872	ENSMUSG00000007836	Hnrnpa0	1110055B05Rik|3010025E17Rik|Hnrpa0|hnRNP A0	heterogeneous nuclear ribonucleoprotein A0	protein-coding
MACS_peak_12064	chr5	108494417	108494886	+	73.12	NA	promoter-TSS (NM_001253877)	promoter-TSS (NM_001253877)	-42	NM_001253880	17765	Mm.257149	NM_013827	ENSMUSG00000029267	Mtf2	9230112N11Rik|AA537621|C76717|M96|Pcl2	metal response element binding transcription factor 2	protein-coding
MACS_peak_7153	chr17	74154110	74154448	+	73.12	NA	promoter-TSS (NM_020578)	promoter-TSS (NM_020578)	98	NM_020578	57440	Mm.18526	NM_020578	ENSMUSG00000024065	Ehd3	Ehd2	EH-domain containing 3	protein-coding
MACS_peak_12191	chr5	117041631	117042156	+	73.12	NA	promoter-TSS (NM_026886)	promoter-TSS (NM_026886)	-67	NM_026886	68955	Mm.146779	NM_026886	ENSMUSG00000063919	Srrm4	1500001A10Rik|B230202K19Rik|bv|mKIAA1853|nSR100	serine/arginine repetitive matrix 4	protein-coding
MACS_peak_11345	chr4	139130500	139130803	+	73.12	NA	promoter-TSS (NM_001205173)	promoter-TSS (NM_001205173)	16	NM_001205173	212632	Mm.30464	NM_183148	ENSMUSG00000041025	Iffo2	C79267	intermediate filament family orphan 2	protein-coding
MACS_peak_6079	chr16	21333203	21333648	+	73.12	NA	Intergenic	CpG	-36480	NR_046162	328646	Mm.404748	NR_046162	ENSMUSG00000096918	Gm16863	A830060N17	predicted gene, 16863	ncRNA
MACS_peak_81	chr1	33726468	33727007	+	73.09	NA	promoter-TSS (NR_033199)	promoter-TSS (NR_033199)	68	NR_033199	67503	Mm.87069	NM_026204	ENSMUSG00000044744	1700001G17Rik	-	RIKEN cDNA 1700001G17 gene	ncRNA
MACS_peak_10798	chr4	68615188	68615499	+	73.09	NA	promoter-TSS (NM_019967)	promoter-TSS (NM_019967)	88	NM_019967	56710	Mm.248788	NM_019967	ENSMUSG00000028351	Brinp1	BRINP|Dbc1|Dbccr1|Fam5a	bone morphogenic protein/retinoic acid inducible neural specific 1	protein-coding
MACS_peak_9487	chr2	157030396	157030768	+	73.03	NA	promoter-TSS (NM_011249)	promoter-TSS (NM_011249)	-312	NM_001139516	19650	Mm.244671	NM_011249	ENSMUSG00000027641	Rbl1	AW547426|PRB1|p107	retinoblastoma-like 1 (p107)	protein-coding
MACS_peak_10215	chr3	99966168	99966653	+	73.03	NA	promoter-TSS (NR_104341)	promoter-TSS (NR_104341)	24	NR_104341	14547	Mm.279228	NM_010269	ENSMUSG00000027865	Gdap2	C77050|D3Ertd801e	ganglioside-induced differentiation-associated-protein 2	protein-coding
MACS_peak_10738	chr4	53644058	53644418	+	73.03	NA	promoter-TSS (NM_176966)	promoter-TSS (NM_176966)	-105	NM_176966	319636	Mm.103464	NM_176966	ENSMUSG00000054752	Fsd1l	A230072O16Rik|Ccdc10|Csdufd1|Fsd1nl|OTTMUSG00000007002	fibronectin type III and SPRY domain containing 1-like	protein-coding
MACS_peak_6192	chr16	38522508	38523090	+	73.03	NA	promoter-TSS (NM_024273)	promoter-TSS (NM_024273)	-52	NM_024273	76916	Mm.132231	NM_024273		Timmdc1	2810021C21Rik|4930455C21Rik|AV135763	translocase of inner mitochondrial membrane domain containing 1	protein-coding
MACS_peak_6678	chr17	27109752	27110303	+	73.03	NA	promoter-TSS (NM_001005916)	promoter-TSS (NM_001005916)	-97	NM_001005916	474156	Mm.328890	NM_001005916	ENSMUSG00000079605	Zbtb9	3930402F13Rik	zinc finger and BTB domain containing 9	protein-coding
MACS_peak_730	chr1	167564466	167565007	+	73.03	NA	promoter-TSS (NM_001001880)	promoter-TSS (NM_001001880)	-64	NM_001083897	68481	Mm.46438	NM_001001880	ENSMUSG00000026566	Mpzl1	1110007A10Rik|PZR	myelin protein zero-like 1	protein-coding
MACS_peak_12795	chr6	37249743	37250237	+	73.03	NA	promoter-TSS (NM_001081206)	promoter-TSS (NM_001081206)	-14	NM_001081206	320127	Mm.119469	NM_001081206	ENSMUSG00000038665	Dgki	C130010K08Rik	diacylglycerol kinase, iota	protein-coding
MACS_peak_13024	chr6	83781496	83781802	+	73.03	NA	promoter-TSS (NM_146169)	promoter-TSS (NM_146169)	86	NM_146169	232164	Mm.404420	NM_146169	ENSMUSG00000045896	Paip2b	-	poly(A) binding protein interacting protein 2B	protein-coding
MACS_peak_12438	chr5	136470656	136470870	+	73.00	NA	promoter-TSS (NM_001256096)	promoter-TSS (NM_001256096)	93	NM_001256098	74198	Mm.275574	NM_023742	ENSMUSG00000004947	Dtx2	2610524D08Rik|AA408415|AU022494|Deltex2	deltex 2 homolog (Drosophila)	protein-coding
MACS_peak_3863	chr12	112996706	112997307	+	72.97	NA	promoter-TSS (NM_001081959)	promoter-TSS (NM_001081959)	-54	NM_008450	16593	Mm.278357	NM_008450	ENSMUSG00000021288	Klc1	AI874768|Kns2	kinesin light chain 1	protein-coding
MACS_peak_7548	chr18	49914944	49915733	+	72.77	NA	promoter-TSS (NM_001170960)	promoter-TSS (NM_001170960)	-83	NM_001170960	68857	Mm.96010	NM_026854	ENSMUSG00000024505	Dtwd2	1190002H09Rik|8030470C17Rik|AI414673|BB115449	DTW domain containing 2	protein-coding
MACS_peak_2992	chr11	106781807	106782369	+	72.77	NA	promoter-TSS (NM_025481)	promoter-TSS (NM_025481)	-59	NM_025481	66313	Mm.340955	NM_025481	ENSMUSG00000018363	Smurf2	2810411E22Rik|AI558114|AI649275	SMAD specific E3 ubiquitin protein ligase 2	protein-coding
MACS_peak_10953	chr4	109148967	109149545	+	72.60	NA	promoter-TSS (NM_013876)	promoter-TSS (NM_013876)	-146	NM_013876	29864	Mm.392580	NM_013876	ENSMUSG00000028557	Rnf11	-	ring finger protein 11	protein-coding
MACS_peak_13577	chr7	16507515	16507846	+	72.57	NA	promoter-TSS (NM_009156)	promoter-TSS (NM_009156)	40	NM_009156	20364	Mm.42829	NM_009156	ENSMUSG00000041571	Sepw1	selW	selenoprotein W, muscle 1	protein-coding
MACS_peak_989	chr10	7512389	7512885	+	72.57	NA	promoter-TSS (NM_026141)	promoter-TSS (NM_026141)	-55	NM_026141	67418	Mm.38927	NM_026141	ENSMUSG00000015757	Ppil4	3732410E19Rik|3830425H19Rik|AI788954|AW146233|PPIase	peptidylprolyl isomerase (cyclophilin)-like 4	protein-coding
MACS_peak_4952	chr14	66915682	66916099	+	72.55	NA	promoter-TSS (NM_029979)	promoter-TSS (NM_029979)	28	NM_029979	66854	Mm.43871	NM_029979	ENSMUSG00000022043	Trim35	0710005M05Rik|A430106H13Rik|AW046487|HLS5|Mair|NC8|mKIAA1098	tripartite motif-containing 35	protein-coding
MACS_peak_3205	chr11	120478910	120479284	+	72.50	NA	TTS (NM_153056)	TTS (NM_153056)	107	NM_024229	68671	Mm.21439	NM_024229	ENSMUSG00000025137	Pcyt2	1110033E03Rik|ET	phosphate cytidylyltransferase 2, ethanolamine	protein-coding
MACS_peak_3448	chr12	55839333	55839824	+	72.47	NA	Intergenic	U1|snRNA|snRNA	-42726	NM_025456	66266	Mm.156440	NM_025456	ENSMUSG00000054302	Eapp	1810011O16Rik	E2F-associated phosphoprotein	protein-coding
MACS_peak_2028	chr11	30671481	30671916	+	72.47	NA	promoter-TSS (NM_134013)	promoter-TSS (NM_134013)	-77	NM_134013	103554	Mm.240066	NM_134013	ENSMUSG00000040850	Psme4	AA409398|AU041366|TEMO|mKIAA0077	proteasome (prosome, macropain) activator subunit 4	protein-coding
MACS_peak_11535	chr4	155221172	155221448	+	72.47	NA	promoter-TSS (NM_010091)	promoter-TSS (NM_010091)	-211	NM_010091	13542	Mm.3400	NM_010091	ENSMUSG00000029071	Dvl1	Dvl|mKIAA4029	dishevelled, dsh homolog 1 (Drosophila)	protein-coding
MACS_peak_2669	chr11	88725715	88726304	+	72.47	NA	promoter-TSS (NM_001042541)	promoter-TSS (NM_001042541)	-109	NM_001042541	11640	Mm.2969	NM_009648	ENSMUSG00000018428	Akap1	AKAP121|AKAP84|Akap|C76494|C81186|DAKAP1|S-AKAP84	A kinase (PRKA) anchor protein 1	protein-coding
MACS_peak_15279	chr8	87186572	87186862	+	72.35	NA	promoter-TSS (NM_010499)	promoter-TSS (NM_010499)	34	NM_010499	15936	Mm.399	NM_010499	ENSMUSG00000053560	Ier2	AI317238|Ch1|Pip92	immediate early response 2	protein-coding
MACS_peak_631	chr1	153191285	153191866	+	72.35	NA	promoter-TSS (NM_054102)	promoter-TSS (NM_054102)	-53	NM_001039512	117198	Mm.33764	NM_028582	ENSMUSG00000023150	Ivns1abp	1190004M08Rik|1700126I16Rik|AA960440|HSPC068|ND1|NS-1|NS1-BP|Nd1-L|Nd1-S|mKIAA0850	influenza virus NS1A binding protein	protein-coding
MACS_peak_4944	chr14	65962271	65963232	+	72.19	NA	Intergenic	CpG	-14762	NM_199029	380912	Mm.270087	NM_199029	ENSMUSG00000034522	Zfp395	BC053701|Gm910	zinc finger protein 395	protein-coding
MACS_peak_10684	chr4	45097247	45097583	+	72.19	NA	promoter-TSS (NM_001024142)	promoter-TSS (NM_001024142)	61	NM_001024142	269529	Mm.389552	NM_001024142	ENSMUSG00000048232	Fbxo10	FBX10|Gm634	F-box protein 10	protein-coding
MACS_peak_16022	chr9	54798425	54798790	+	72.10	NA	promoter-TSS (NM_011966)	promoter-TSS (NM_011966)	-59	NM_011966	26441	Mm.30270	NM_011966	ENSMUSG00000032301	Psma4	C9	proteasome (prosome, macropain) subunit, alpha type 4	protein-coding
MACS_peak_4029	chr13	23830531	23830986	+	72.10	NA	promoter-TSS (NM_015786)	promoter-TSS (NM_015786)	82	NM_015786	50708	Mm.193539	NM_015786	ENSMUSG00000036181	Hist1h1c	0610008C09Rik|H1.2|H1c|H1f2|H1var1|His1a	histone cluster 1, H1c	protein-coding
MACS_peak_3485	chr12	66066682	66066998	+	72.10	NA	promoter-TSS (NM_025707)	promoter-TSS (NM_025707)	111	NM_177805	328108	Mm.138465	NM_177805	ENSMUSG00000035614	Fam179b	A430041B07Rik|BC062107|C130034K06|mKIAA0423	family with sequence similarity 179, member B	protein-coding
MACS_peak_1551	chr10	86168017	86168306	+	72.10	NA	promoter-TSS (NM_011631)	promoter-TSS (NM_011631)	28	NM_011631	22027	Mm.87773	NM_011631	ENSMUSG00000020048	Hsp90b1	ERp99|GRP94|TA-3|Targ2|Tra-1|Tra1|endoplasmin|gp96	heat shock protein 90, beta (Grp94), member 1	protein-coding
MACS_peak_15853	chr9	35018314	35018615	+	72.10	NA	promoter-TSS (NM_026130)	promoter-TSS (NM_026130)	176	NM_172291	235169	Mm.138512	NM_172291	ENSMUSG00000039048	Foxred1	BC024806|TEG-23|Tex23	FAD-dependent oxidoreductase domain containing 1	protein-coding
MACS_peak_3939	chr13	9275638	9276073	+	72.10	NA	promoter-TSS (NM_001081426)	promoter-TSS (NM_001081426)	84	NM_001081426	208440	Mm.217326	NM_172459	ENSMUSG00000048264	Dip2c	2900024P20Rik|9630044M06|mKIAA0934	DIP2 disco-interacting protein 2 homolog C (Drosophila)	protein-coding
MACS_peak_15226	chr8	82162713	82163133	+	72.10	NA	promoter-TSS (NM_001081164)	promoter-TSS (NM_001081164)	-652	NM_001256033	73945	Mm.34348	NM_001081164	ENSMUSG00000036990	Otud4	4930431L18Rik|AI449692|D8Ertd69e|mKIAA1046	OTU domain containing 4	protein-coding
MACS_peak_11899	chr5	68238418	68238746	+	72.09	NA	promoter-TSS (NM_009727)	promoter-TSS (NM_009727)	88	NM_001284345	11980	Mm.153230	NM_009727	ENSMUSG00000037685	Atp8a1	AI481521|AI853962|APLT|AW743152|AW822227|Atp3a2|B230107D19Rik|ClassI	ATPase, aminophospholipid transporter (APLT), class I, type 8A, member 1	protein-coding
MACS_peak_14633	chr7	138009294	138009597	+	72.09	NA	promoter-TSS (NM_133942)	promoter-TSS (NM_133942)	21	NM_133942	101476	Mm.323554	NM_133942	ENSMUSG00000040268	Plekha1	AA960558|C920009D07Rik|TAPP1	pleckstrin homology domain containing, family A (phosphoinositide binding specific) member 1	protein-coding
MACS_peak_7575	chr18	58038174	58038490	+	72.01	NA	promoter-TSS (NM_009194)	promoter-TSS (NM_009194)	0	NM_009194	20496	Mm.399997	NM_009194	ENSMUSG00000024597	Slc12a2	9330166H04Rik|Nkcc1|mBSC2|sy-ns	solute carrier family 12, member 2	protein-coding
MACS_peak_6633	chr17	25945609	25946299	+	71.98	NA	promoter-TSS (NM_001164225)	promoter-TSS (NM_001164225)	-76	NM_001164225	214931	Mm.152289	NM_001164225	ENSMUSG00000025738	Fbxl16	BC042620|Scirr1	F-box and leucine-rich repeat protein 16	protein-coding
MACS_peak_14083	chr7	53289018	53289336	+	71.98	NA	5' UTR (NM_153057, exon 1 of 31)	5' UTR (NM_153057, exon 1 of 31)	111	NM_153057	211548	Mm.274811	NM_153057	ENSMUSG00000030835	Nomo1	D7Ertd156e|Nomo|pM5	nodal modulator 1	protein-coding
MACS_peak_8142	chr19	37624861	37625133	+	71.95	NA	promoter-TSS (NM_175353)	promoter-TSS (NM_175353)	89	NM_175353	107371	Mm.24865	NM_175353	ENSMUSG00000053799	Exoc6	4833405E05Rik|AW413330|C430002C19|Sec15|Sec15l1|hbd|msec15	exocyst complex component 6	protein-coding
MACS_peak_1179	chr10	57718001	57718476	+	71.95	NA	promoter-TSS (NM_027375)	promoter-TSS (NM_027375)	-36	NM_027375	70297	Mm.25531	NM_027375	ENSMUSG00000038039	Gcc2	0610043A03Rik|2210420P05Rik|2600014C01Rik|AW112121|mKIAA0336	GRIP and coiled-coil domain containing 2	protein-coding
MACS_peak_96	chr1	34899679	34900131	+	71.95	NA	promoter-TSS (NM_001160236)	promoter-TSS (NM_001160236)	-10	NM_174997	214469	Mm.120151	NM_174997	ENSMUSG00000037503	Fam168b	mKIAA4042	family with sequence similarity 168, member B	protein-coding
MACS_peak_252	chr1	64579045	64579799	+	71.95	NA	promoter-TSS (NM_009952)	promoter-TSS (NM_009952)	44	NM_001037726	12912	Mm.422634	NM_009952	ENSMUSG00000025958	Creb1	2310001E10Rik|3526402H21Rik|AV083133|Creb|Creb-1	cAMP responsive element binding protein 1	protein-coding
MACS_peak_16467	chr9	107537479	107537756	+	71.93	NA	promoter-TSS (NM_008138)	promoter-TSS (NM_008138)	56	NM_008138	14678	Mm.196464	NM_008138	ENSMUSG00000032562	Gnai2	C76432|Galphai2|Gia|Gnai-2	guanine nucleotide binding protein (G protein), alpha inhibiting 2	protein-coding
MACS_peak_1187	chr10	59079197	59079686	+	71.83	NA	promoter-TSS (NM_001033259)	promoter-TSS (NM_001033259)	-1	NM_001033259	215999	Mm.296470	NM_001033259	ENSMUSG00000009647	Mcu	2010012O16Rik|AV064928|C10orf42|Ccdc109a|D130073L02Rik|Gm64	mitochondrial calcium uniporter	protein-coding
MACS_peak_3173	chr11	119947799	119948219	+	71.83	NA	5' UTR (NM_009734, exon 1 of 26)	5' UTR (NM_009734, exon 1 of 26)	132	NM_009734	12009	Mm.2556	NM_009734	ENSMUSG00000039781	Cep131	AZ1|Azi|Azi1	centrosomal protein 131	protein-coding
MACS_peak_7473	chr18	36829601	36830028	+	71.83	NA	TTS (NM_146085)	TTS (NM_146085)	151	NM_001164406	24068	Mm.29058	NM_025291		Sra1	AA959952|Sra|Srap|Straa1|Strra1	steroid receptor RNA activator 1	protein-coding
MACS_peak_13929	chr7	36182000	36182306	+	71.83	NA	promoter-TSS (NM_028120)	promoter-TSS (NM_028120)	41	NM_028120	72140	Mm.133263	NM_028120	ENSMUSG00000023072	Cep89	2610507L03Rik|Ccdc123	centrosomal protein 89	protein-coding
MACS_peak_6100	chr16	23988528	23989245	+	71.83	NA	promoter-TSS (NM_009744)	promoter-TSS (NM_009744)	-188	NM_009744	12053	Mm.347398	NM_009744	ENSMUSG00000022508	Bcl6	Bcl5	B cell leukemia/lymphoma 6	protein-coding
MACS_peak_4978	chr14	70476591	70476810	+	71.80	NA	promoter-TSS (NM_018781)	promoter-TSS (NM_018781)	-552	NM_018781	13655	Mm.103737	NM_018781	ENSMUSG00000033730	Egr3	Pilot	early growth response 3	protein-coding
MACS_peak_6485	chr17	15146870	15147459	+	71.73	NA	promoter-TSS (NM_001123367).2	promoter-TSS (NM_001123367).2	-16	NM_001123367	100041639	Mm.440445	NM_001123367	ENSMUSG00000079710	Gm3448	-	predicted gene 3448	protein-coding
MACS_peak_938	chr1	193730536	193730841	+	71.72	NA	promoter-TSS (NM_009579)	promoter-TSS (NM_009579)	28	NM_009579	22782	Mm.9024	NM_009579	ENSMUSG00000037434	Slc30a1	AI839647|C130040I11Rik|Znt1	solute carrier family 30 (zinc transporter), member 1	protein-coding
MACS_peak_3189	chr11	120177250	120177813	+	71.72	NA	Intergenic	Intergenic	31196	NR_105900	102465564		NR_105900		Mir6935	mmu-mir-6935	microRNA mir-6935	ncRNA
MACS_peak_10192	chr3	96433592	96434037	+	71.72	NA	promoter-TSS (NR_003619)	promoter-TSS (NR_003619)	-37	NM_025875	60365	Mm.261972	NM_025875	ENSMUSG00000038374	Rbm8a	2310057C03Rik|AA673428|Rbm8	RNA binding motif protein 8a	protein-coding
MACS_peak_9257	chr2	130490040	130490569	+	71.72	NA	promoter-TSS (NM_029832)	promoter-TSS (NM_029832)	77	NM_029832	77006	Mm.440063	NM_029832	ENSMUSG00000068290	Ddrgk1	1110001I20Rik|2600009E05Rik|AI326138|Ufbp1	DDRGK domain containing 1	protein-coding
MACS_peak_9836	chr3	41546216	41546783	+	71.70	NA	promoter-TSS (NM_001081411)	promoter-TSS (NM_001081411)	-38	NM_001291048	73852	Mm.29006	NM_027271	ENSMUSG00000025766	D3Ertd751e	2810009O15Rik|4930415G15Rik	DNA segment, Chr 3, ERATO Doi 751, expressed	protein-coding
MACS_peak_8849	chr2	71384189	71385101	+	71.70	NA	5' UTR (NM_010054, exon 1 of 3)	5' UTR (NM_010054, exon 1 of 3)	166	NM_010054	13392	Mm.3896	NM_010054	ENSMUSG00000023391	Dlx2	AW121999|Dlx-2|Tes-1	distal-less homeobox 2	protein-coding
MACS_peak_8302	chr19	53217152	53217460	+	71.70	NA	promoter-TSS (NM_001277100)	promoter-TSS (NM_001277100)	60	NM_001164100	27360	Mm.426080	NM_013758	ENSMUSG00000025026	Add3	AI463285|R75380	adducin 3 (gamma)	protein-coding
MACS_peak_9910	chr3	65331709	65332738	+	71.70	NA	promoter-TSS (NM_178892)	promoter-TSS (NM_178892)	-146	NM_178892	99929	Mm.246398	NM_178892	ENSMUSG00000034640	Tiparp	ARTD14|AW558171|PARP7	TCDD-inducible poly(ADP-ribose) polymerase	protein-coding
MACS_peak_15190	chr8	74998800	74999499	+	71.70	NA	promoter-TSS (NM_138585)	promoter-TSS (NM_138585)	-17	NM_138585	27967	Mm.30136	NM_138585	ENSMUSG00000052488	Cherp	5730408I11Rik|D8Wsu96e|DAN16|Scaf6	calcium homeostasis endoplasmic reticulum protein	protein-coding
MACS_peak_2616	chr11	85166624	85166929	+	71.70	NA	intron (NM_001166643, intron 1 of 23)	intron (NM_001166643, intron 1 of 23)	110	NM_001166643	192197	Mm.287663	NM_138681	ENSMUSG00000059439	Bcas3	1500019F07Rik|2610028P08Rik|AU021018|BC028339|K20D4|rudhira	breast carcinoma amplified sequence 3	protein-coding
MACS_peak_15530	chr8	114535030	114535508	+	71.68	NA	promoter-TSS (NM_001130868)	promoter-TSS (NM_001130868)	10	NM_020584	57321	Mm.213064	NM_020584	ENSMUSG00000033430	Terf2ip	Rap1	telomeric repeat binding factor 2, interacting protein	protein-coding
MACS_peak_11443	chr4	149610684	149611599	+	71.65	NA	promoter-TSS (NM_023119)	promoter-TSS (NM_023119)	-165	NM_023119	13806	Mm.70666	NM_023119	ENSMUSG00000063524	Eno1	0610008I15|AL022784|Eno-1|MBP-1	enolase 1, alpha non-neuron	protein-coding
MACS_peak_1522	chr10	83006330	83007154	+	71.65	NA	promoter-TSS (NM_001033375)	promoter-TSS (NM_001033375)	56	NM_001033375	319277	Mm.491194	NM_001033375	ENSMUSG00000034560	A230046K03Rik	AA589518|Kiaa1033|mKIAA1033	RIKEN cDNA A230046K03 gene	protein-coding
MACS_peak_5753	chr15	98398322	98398662	+	71.65	NA	promoter-TSS (NM_009833)	promoter-TSS (NM_009833)	-425	NM_009833	12455	Mm.29941	NM_009833	ENSMUSG00000011960	Ccnt1	2810478G24Rik|AI115585|CycT1	cyclin T1	protein-coding
MACS_peak_11989	chr5	93635153	93636032	+	71.61	NA	promoter-TSS (NM_029363)	promoter-TSS (NM_029363)	48	NM_029363	75610	Mm.175502	NM_029363	ENSMUSG00000029384	2010109A12Rik	-	RIKEN cDNA 2010109A12 gene	protein-coding
MACS_peak_15331	chr8	90722793	90723454	+	71.49	NA	promoter-TSS (NM_001164499)	promoter-TSS (NM_001164499)	11	NM_001164498	214627	Mm.491211	NM_001164497	ENSMUSG00000036779	Papd5	5730445M16Rik|5830428A09	PAP associated domain containing 5	protein-coding
MACS_peak_4146	chr13	48641645	48642086	+	71.32	NA	Intergenic	CpG	-8224	NR_029725	387244		NR_029725	miRBase:MI0000556	Mirlet7a-1	Let-7a|Mirnlet7a|Mirnlet7a-1	microRNA let7a-1	ncRNA
MACS_peak_16059	chr9	57368784	57369282	+	71.32	NA	promoter-TSS (NM_007747)	promoter-TSS (NM_007747)	-6	NM_007747	12858	Mm.273403	NM_007747	ENSMUSG00000000088	Cox5a	AA959768|CcOX	cytochrome c oxidase subunit Va	protein-coding
MACS_peak_2336	chr11	69137127	69137416	+	71.32	NA	promoter-TSS (NM_001024206)	promoter-TSS (NM_001024206)	104	NM_172560	216846	Mm.28774	NM_172560	ENSMUSG00000032782	Cntrob	9830165K03Rik|Lip8	centrobin, centrosomal BRCA2 interacting protein	protein-coding
MACS_peak_4225	chr13	55565346	55566080	+	71.32	NA	promoter-TSS (NM_001030296)	promoter-TSS (NM_001030296)	85	NM_001030296	432763	Mm.315457	NM_001030296	ENSMUSG00000034686	Prr7	XM_484263	proline rich 7 (synaptic)	protein-coding
MACS_peak_11614	chr5	22055982	22056434	+	71.24	NA	promoter-TSS (NM_011959)	promoter-TSS (NM_011959)	-23	NR_102315	320719	Mm.459265	NR_102315	ENSMUSG00000097207	6030443J06Rik	1700030G06Rik	RIKEN cDNA 6030443J06 gene	ncRNA
MACS_peak_8137	chr19	37000297	37000910	+	71.24	NA	promoter-TSS (NM_001080706)	promoter-TSS (NM_001080706)	34	NM_001080706	107182	Mm.295062	NM_001080706	ENSMUSG00000040565	Btaf1	AI414500|AI447930|E430027O22Rik|TAF170	BTAF1 RNA polymerase II, B-TFIID transcription factor-associated, (Mot1 homolog, S. cerevisiae)	protein-coding
MACS_peak_8391	chr2	5816085	5816495	+	71.16	NA	intron (NM_021305, intron 1 of 11)	CpG	109	NM_021305	57743	Mm.21435	NM_021305	ENSMUSG00000025816	Sec61a2	-	Sec61, alpha subunit 2 (S. cerevisiae)	protein-coding
MACS_peak_8400	chr2	10001858	10002390	+	71.16	NA	promoter-TSS (NM_020615)	promoter-TSS (NM_020615)	13	NM_020615	11949	Mm.12677	NM_020615	ENSMUSG00000025781	Atp5c1	1700094F02Rik	ATP synthase, H+ transporting, mitochondrial F1 complex, gamma polypeptide 1	protein-coding
MACS_peak_2056	chr11	35611873	35612413	+	71.16	NA	5' UTR (NM_001004147, exon 1 of 1)	5' UTR (NM_001004147, exon 1 of 1)	243	NM_001004147	237730	Mm.189222	NM_001004147	ENSMUSG00000051062	Fbll1	AI595406	fibrillarin-like 1	protein-coding
MACS_peak_4803	chr14	55400549	55400875	+	71.16	NA	promoter-TSS (NM_016972)	promoter-TSS (NM_016972)	11	NM_016972	50934	Mm.276831	NM_016972	ENSMUSG00000022180	Slc7a8	AA408822|LAT2	solute carrier family 7 (cationic amino acid transporter, y+ system), member 8	protein-coding
MACS_peak_14866	chr8	19784527	19784914	+	71.09	NA	Intergenic	CpG	55144	NM_001039553	626415	Mm.425517	NM_001039553		4930467E23Rik	ENSMUSG00000074453|OTTMUSG00000018948|TSAP	RIKEN cDNA 4930467E23 gene	protein-coding
MACS_peak_8568	chr2	29658086	29658377	+	71.00	NA	promoter-TSS (NM_011989)	promoter-TSS (NM_011989)	31	NM_011989	26569	Mm.330113	NM_011989	ENSMUSG00000059316	Slc27a4	BB144259|FATP4	solute carrier family 27 (fatty acid transporter), member 4	protein-coding
MACS_peak_2946	chr11	103828001	103828246	+	70.94	NA	promoter-TSS (NM_007477)	promoter-TSS (NM_007477)	-62	NM_007477	11841	Mm.5061	NM_007477	ENSMUSG00000062421	Arf2	-	ADP-ribosylation factor 2	protein-coding
MACS_peak_7408	chr18	34380293	34380905	+	70.94	NA	promoter-TSS (NM_007462)	promoter-TSS (NM_007462)	-39	NM_007462	11789	Mm.384171	NM_007462	ENSMUSG00000005871	Apc	AI047805|AU020952|AW124434|CC1|Min|mAPC	adenomatosis polyposis coli	protein-coding
MACS_peak_5535	chr15	80541203	80541568	+	70.83	NA	promoter-TSS (NM_144812)	promoter-TSS (NM_144812)	-358	NM_144812	213988	Mm.131328	NM_144812	ENSMUSG00000047888	Tnrc6b	2700090M07Rik|A730065C02Rik|AI848765|D230019K20Rik	trinucleotide repeat containing 6b	protein-coding
MACS_peak_14442	chr7	118265865	118266582	+	70.75	NA	promoter-TSS (NR_015573)	promoter-TSS (NR_015573)	-34	NR_015573	75479	Mm.381620	NR_015573		1700012D14Rik	-	RIKEN cDNA 1700012D14 gene	ncRNA
MACS_peak_12694	chr6	11857704	11858030	+	70.74	NA	promoter-TSS (NM_010886)	promoter-TSS (NM_010886)	-421	NM_010886	17992	Mm.415865	NM_010886	ENSMUSG00000029632	Ndufa4	MLRQ	NADH dehydrogenase (ubiquinone) 1 alpha subcomplex, 4	protein-coding
MACS_peak_5599	chr15	82979287	82979857	+	70.71	NA	promoter-TSS (NR_004432)	promoter-TSS (NR_004432)	194	NM_178627	73826	Mm.23758	NM_178627	ENSMUSG00000041815	Poldip3	1110008P04Rik|AA408269|AL022852|C77954|PDIP46|SKAR|mKIAA1649	polymerase (DNA-directed), delta interacting protein 3	protein-coding
MACS_peak_187	chr1	53409246	53409634	+	70.71	NA	5' UTR (NM_133728, exon 1 of 6)	5' UTR (NM_133728, exon 1 of 6)	156	NM_001290984	70396	Mm.285783	NM_133728	ENSMUSG00000026095	Asnsd1	2210409M21Rik	asparagine synthetase domain containing 1	protein-coding
MACS_peak_14388	chr7	109358455	109358734	+	70.69	NA	promoter-TSS (NM_001291358)	promoter-TSS (NM_001291358)	86	NM_001287166	269966	Mm.439800	NM_022979	ENSMUSG00000063550	Nup98	4732457F17|AI849286|Nup96	nucleoporin 98	protein-coding
MACS_peak_12733	chr6	29114490	29114814	+	70.69	NA	promoter-TSS (NM_133925)	promoter-TSS (NM_133925)	72	NM_133925	68272	Mm.40802	NM_026650	ENSMUSG00000029701	Rbm28	2810480G15Rik|AI503051	RNA binding motif protein 28	protein-coding
MACS_peak_2431	chr11	72303349	72303598	+	70.60	NA	promoter-TSS (NM_153060)	promoter-TSS (NM_153060)	-51	NM_153060	216892	Mm.212812	NM_153060	ENSMUSG00000040447	Spns2	-	spinster homolog 2	protein-coding
MACS_peak_16390	chr9	100446293	100446911	+	70.55	NA	promoter-TSS (NM_010878)	promoter-TSS (NM_010878)	-130	NM_010878	17973	Mm.181485	NM_010878	ENSMUSG00000032475	Nck1	6330586M15Rik|D230010O13Rik|Nck|Nck-1	non-catalytic region of tyrosine kinase adaptor protein 1	protein-coding
MACS_peak_8576	chr2	29820669	29821028	+	70.55	NA	promoter-TSS (NM_001177667)	promoter-TSS (NM_001177667)	-232	NM_001177668	20740	Mm.204969	NM_001076554	ENSMUSG00000057738	Sptan1	2610027H02Rik|Spna-2|Spna2	spectrin alpha, non-erythrocytic 1	protein-coding
MACS_peak_7571	chr18	57134768	57135097	+	70.55	NA	intron (NM_029909, intron 1 of 4)	CpG	101	NM_029909	77422	Mm.256874	NM_029909	ENSMUSG00000024592	C330018D20Rik	AU018666	RIKEN cDNA C330018D20 gene	protein-coding
MACS_peak_10688	chr4	45421430	45421859	+	70.55	NA	promoter-TSS (NM_001009949)	promoter-TSS (NM_001009949)	-6	NM_001009949	230125	Mm.260210	NM_001009949	ENSMUSG00000045973	Slc25a51	9130208E07Rik|D130005A03Rik|Gm138|Mcart1	solute carrier family 25, member 51	protein-coding
MACS_peak_7931	chr19	7114868	7115238	+	70.55	NA	promoter-TSS (NM_016737)	promoter-TSS (NM_016737)	-537	NM_016737	20867	Mm.258633	NM_016737	ENSMUSG00000024966	Stip1	Hop|Sti1|p60	stress-induced phosphoprotein 1	protein-coding
MACS_peak_3527	chr12	71926289	71926650	+	70.45	NA	promoter-TSS (NM_028127)	promoter-TSS (NM_028127)	-32	NM_028127	319710	Mm.2962	NM_028127	ENSMUSG00000048285	Frmd6	2610019M19Rik|4930488L10Rik|AW212977	FERM domain containing 6	protein-coding
MACS_peak_8326	chr19	55173728	55174239	+	70.42	NA	promoter-TSS (NM_008149)	promoter-TSS (NM_008149)	-46	NM_008149	14732	Mm.210196	NM_008149	ENSMUSG00000024978	Gpam	GPAT|GPAT1	glycerol-3-phosphate acyltransferase, mitochondrial	protein-coding
MACS_peak_9500	chr2	158201270	158201613	+	70.37	NA	promoter-TSS (NM_175692)	promoter-TSS (NM_175692)	67	NM_175692	319317	Mm.294494	NM_175692	ENSMUSG00000044349	Snhg11	A930034L06Rik|AI854265|AL022637|AW319638|E130013N09Rik	small nucleolar RNA host gene 11	protein-coding
MACS_peak_4129	chr13	45485009	45485288	+	70.37	NA	promoter-TSS (NM_153789)	promoter-TSS (NM_153789)	37	NM_153789	218203	Mm.212855	NM_153789	ENSMUSG00000038175	Mylip	9430057C20Rik|Mir	myosin regulatory light chain interacting protein	protein-coding
MACS_peak_16498	chr9	108462677	108463038	+	70.37	NA	promoter-TSS (NM_011830)	promoter-TSS (NM_011830)	25	NM_011830	23918	Mm.6065	NM_011830	ENSMUSG00000062867	Impdh2	IMPD	inosine 5'-phosphate dehydrogenase 2	protein-coding
MACS_peak_16277	chr9	78023655	78023925	+	70.37	NA	promoter-TSS (NR_040401)	promoter-TSS (NR_040401)	69	NR_040401	320295	Mm.131285	NR_040401	ENSMUSG00000097574	C920006O11Rik	-	RIKEN cDNA C920006O11 gene	ncRNA
MACS_peak_9966	chr3	84618006	84618763	+	70.35	NA	Intergenic	CpG	-1115	NM_001177773	50754	Mm.196475	NM_080428	ENSMUSG00000028086	Fbxw7	1110001A17Rik|AGO|Cdc4|Fbw7|Fbwd6|Fbx30|Fbxo30|Fbxw6|SEL-10	F-box and WD-40 domain protein 7	protein-coding
MACS_peak_15669	chr8	127473310	127473676	+	70.34	NA	promoter-TSS (NM_053207)	promoter-TSS (NM_053207)	-339	NM_053207	112405	Mm.140619	NM_053207	ENSMUSG00000031987	Egln1	AI503754|C1orf12|HIF-PH2|HPH-2|Hif-p4h-2|ORF13|Phd2|SM-20	egl-9 family hypoxia-inducible factor 1	protein-coding
MACS_peak_4419	chr13	93124680	93125189	+	70.33	NA	promoter-TSS (NM_010829)	promoter-TSS (NM_010829)	24	NM_010829	17686	Mm.343101	NM_010829	ENSMUSG00000014850	Msh3	D13Em1|Rep-3|Rep3	mutS homolog 3 (E. coli)	protein-coding
MACS_peak_12912	chr6	54766514	54767017	+	70.33	NA	promoter-TSS (NM_199143)	promoter-TSS (NM_199143)	-145	NM_199143	387524	Mm.286149	NM_199143		Znrf2	1190002C14Rik|AU044205|D6Ertd365e	zinc and ring finger 2	protein-coding
MACS_peak_1497	chr10	81167453	81167975	+	70.33	NA	intron (NM_001243067, intron 1 of 3)	CpG	144	NM_001243067	73610	Mm.490466	NM_001243067		Zfp433	1700123A16Rik	RIKEN cDNA 1700123A16 gene	protein-coding
MACS_peak_16613	chr9	120401410	120401970	+	70.33	NA	promoter-TSS (NM_026892)	promoter-TSS (NM_026892)	-34	NM_026892	68969	Mm.28753	NM_026892	ENSMUSG00000006941	Eif1b	1500010M16Rik|3110001N14Rik|Gc20	eukaryotic translation initiation factor 1B	protein-coding
MACS_peak_12014	chr5	100467696	100468205	+	70.33	NA	exon (NM_016690, exon 1 of 8)	exon (NM_016690, exon 1 of 8)	291	NM_016690	50926	Mm.389579	NM_016690	ENSMUSG00000029328	Hnrnpdl	AA407431|AA959857|D5Ertd650e|D5Wsu145e|Hnrnpdl1|Hnrpdl|JKTBP|hnRNP DL|hnRNP-DL	heterogeneous nuclear ribonucleoprotein D-like	protein-coding
MACS_peak_11108	chr4	125933356	125934046	+	70.22	NA	promoter-TSS (NM_144941)	promoter-TSS (NM_144941)	-138	NM_001145970	245877	Mm.266716	NM_144941	ENSMUSG00000028849	Map7d1	AV028413|BC019977|Mtap7d1|Parcc1|Rprc1|mKIAA1187	MAP7 domain containing 1	protein-coding
MACS_peak_9281	chr2	132607031	132607838	+	70.22	NA	5' UTR (NM_007694, exon 1 of 5)	5' UTR (NM_007694, exon 1 of 5)	420	NM_007694	12653	Mm.255241	NM_007694	ENSMUSG00000027350	Chgb	Scg-1	chromogranin B	protein-coding
MACS_peak_3340	chr12	25780780	25781510	+	70.13	NA	promoter-TSS (NM_010496)	promoter-TSS (NM_010496)	-188	NM_010496	15902	Mm.34871	NM_010496	ENSMUSG00000020644	Id2	AI255428|C78922|Idb2|bHLHb26	inhibitor of DNA binding 2	protein-coding
MACS_peak_3500	chr12	70342645	70343014	+	69.98	NA	promoter-TSS (NM_178253)	promoter-TSS (NM_178253)	10	NM_178253	271005	Mm.180969	NM_178253		Klhdc1	-	kelch domain containing 1	protein-coding
MACS_peak_9936	chr3	75361092	75361660	+	69.98	NA	promoter-TSS (NM_019745)	promoter-TSS (NM_019745)	-79	NM_009250	20713	Mm.41560	NM_009250		Serpini1	AI837402|Ns|PI-12|PI12|Spi17	serine (or cysteine) peptidase inhibitor, clade I, member 1	protein-coding
MACS_peak_10253	chr3	105761973	105762250	+	69.91	NA	promoter-TSS (NM_027432)	promoter-TSS (NM_027432)	-305	NM_027432	70465	Mm.5110	NM_027432	ENSMUSG00000000561	Wdr77	2610003I18Rik|2610312E17Rik|C79984|p44/MEP50	WD repeat domain 77	protein-coding
MACS_peak_15595	chr8	124114023	124114547	+	69.88	NA	promoter-TSS (NM_026160)	promoter-TSS (NM_026160)	-83	NM_026160	67443	Mm.28357	NM_026160		Map1lc3b	1010001C15Rik|Atg8|LC3b|Map1lc3	microtubule-associated protein 1 light chain 3 beta	protein-coding
MACS_peak_15242	chr8	85856176	85856493	+	69.88	NA	promoter-TSS (NM_001170691)	promoter-TSS (NM_001170691)	51	NM_001170691	244548	Mm.38762	NM_178736	ENSMUSG00000035151	Elmod2	9830169G11Rik	ELMO/CED-12 domain containing 2	protein-coding
MACS_peak_6124	chr16	30599644	30599986	+	69.88	NA	promoter-TSS (NM_177632)	promoter-TSS (NM_177632)	6	NM_177632	224093	Mm.28244	NM_177632	ENSMUSG00000046546	Fam43a	Tuf1	family with sequence similarity 43, member A	protein-coding
MACS_peak_4591	chr14	17197365	17198007	+	69.88	NA	promoter-TSS (NM_009409)	promoter-TSS (NM_009409)	-34	NM_009409	21974	Mm.130362	NM_009409	ENSMUSG00000017485	Top2b	D230016L12Rik|Top-2	topoisomerase (DNA) II beta	protein-coding
MACS_peak_16345	chr9	95307465	95307960	+	69.80	NA	promoter-TSS (NM_018763)	promoter-TSS (NM_018763)	-23	NM_018763	54371	Mm.212446	NM_018763	ENSMUSG00000033350	Chst2	AI428561|AW121776|C130041E03Rik|Chts2|GST-2|GlcNAc6ST|Gn6st	carbohydrate sulfotransferase 2	protein-coding
MACS_peak_7031	chr17	56084218	56085043	+	69.80	NA	promoter-TSS (NM_146249)	promoter-TSS (NM_146249)	52	NM_146249	240120	Mm.441018	NM_146249		Zfp119b	-	zinc finger protein 119b	protein-coding
MACS_peak_15700	chr9	3532107	3532619	+	69.79	NA	promoter-TSS (NM_001033322)	promoter-TSS (NM_001033322)	14	NM_001033322	234889	Mm.91240	NM_001033322		Gucy1a2	6330407I18Rik|A230060L24Rik	guanylate cyclase 1, soluble, alpha 2	protein-coding
MACS_peak_14077	chr7	53069322	53069747	+	69.66	NA	5' UTR (NM_011181, exon 1 of 12)	5' UTR (NM_011181, exon 1 of 12)	152	NM_011181	19158	Mm.272130	NM_011181	ENSMUSG00000003269	Cyth2	ARNO|CLM2|Pscd2	cytohesin 2	protein-coding
MACS_peak_6771	chr17	32487310	32487603	+	69.66	NA	promoter-TSS (NM_017476)	promoter-TSS (NM_017476)	66	NM_017476	54194	Mm.281005	NM_017476	ENSMUSG00000002625	Akap8l	HAP95|Nakap95	A kinase (PRKA) anchor protein 8-like	protein-coding
MACS_peak_3803	chr12	109242108	109242372	+	69.63	NA	promoter-TSS (NM_001286343)	promoter-TSS (NM_001286343)	-616	NM_021399	58208	Mm.392694	NM_021399	ENSMUSG00000048251	Bcl11b	9130430L19Rik|AI604821|B630002E05Rik|BCL-11B|Ctip2|Rit1	B cell leukemia/lymphoma 11B	protein-coding
MACS_peak_10337	chr3	122322374	122322670	+	69.63	NA	5' UTR (NM_153118, exon 1 of 14)	5' UTR (NM_153118, exon 1 of 14)	110	NM_001114665	214459	Mm.209491	NM_153118	ENSMUSG00000039735	Fnbp1l	2610318I01Rik|AW548221|TOCA1|toca-1	formin binding protein 1-like	protein-coding
MACS_peak_5647	chr15	85641775	85642402	+	69.61	NA	promoter-TSS (NM_197998)	promoter-TSS (NM_197998)	39	NM_001164626	72355	Mm.33706	NM_197998	ENSMUSG00000064284	Cdpf1	2210021J22Rik	cysteine rich, DPF motif domain containing 1	protein-coding
MACS_peak_4795	chr14	55221997	55222488	+	69.55	NA	intron (NM_028890, intron 1 of 6)	CpG	2503	NM_028890	74359	Mm.79815	NM_028890	ENSMUSG00000022179	4931414P19Rik	-	RIKEN cDNA 4931414P19 gene	protein-coding
MACS_peak_6319	chr16	90220675	90221185	+	69.55	NA	promoter-TSS (NM_011434)	promoter-TSS (NM_011434)	-57	NM_011434	20655	Mm.276325	NM_011434	ENSMUSG00000022982	Sod1	B430204E11Rik|Cu/Zn-SOD|CuZnSOD|Ipo-1|Ipo1|SODC|Sod-1	superoxide dismutase 1, soluble	protein-coding
MACS_peak_14609	chr7	135110494	135110824	+	69.55	NA	promoter-TSS (NM_139149)	promoter-TSS (NM_139149)	-334	NM_139149	233908	Mm.277680	NM_139149	ENSMUSG00000030795	Fus	D430004D17Rik|D930039C12Rik|Fus1|Tls	fused in sarcoma	protein-coding
MACS_peak_15908	chr9	43892945	43893180	+	69.55	NA	promoter-TSS (NM_198091)	promoter-TSS (NM_198091)	59	NM_198091	53376	Mm.272770	NM_016808	ENSMUSG00000032010	Usp2	B930035K21Rik|Ubp41	ubiquitin specific peptidase 2	protein-coding
MACS_peak_6039	chr16	18498555	18499088	+	69.53	NA	promoter-TSS (NR_104347)	promoter-TSS (NR_104347)	15	NM_001285491	13972	Mm.236139	NM_023120	ENSMUSG00000000884	Gnb1l	ESTM55|Gm16314|Me49f07|OTTMUSG00000033458|Wdr14|Wdvcf	guanine nucleotide binding protein (G protein), beta polypeptide 1-like	protein-coding
MACS_peak_6512	chr17	17963650	17964018	+	69.52	NA	Intergenic	Intergenic	-3318	NR_029536	387230		NR_029536		Mir99b	Mirn99b|mmu-mir-99b	microRNA 99b	ncRNA
MACS_peak_7886	chr19	6057561	6058113	+	69.50	NA	promoter-TSS (NM_001160239)	promoter-TSS (NM_001160239)	-51	NM_007990	14109	Mm.329631	NM_007990	ENSMUSG00000038274	Fau	MNSFbeta	Finkel-Biskis-Reilly murine sarcoma virus (FBR-MuSV) ubiquitously expressed (fox derived)	protein-coding
MACS_peak_2501	chr11	76660267	76660647	+	69.44	NA	promoter-TSS (NM_007754)	promoter-TSS (NM_007754)	53	NM_007754	12874	Mm.276736	NM_007754	ENSMUSG00000020841	Cpd	AA960140|AW322530|D830034L15Rik	carboxypeptidase D	protein-coding
MACS_peak_3816	chr12	110030409	110031424	+	69.44	NA	promoter-TSS (NM_009537)	promoter-TSS (NM_009537)	-605	NM_009537	22632	Mm.3868	NM_009537	ENSMUSG00000021264	Yy1	AW488674|NF-E1	YY1 transcription factor	protein-coding
MACS_peak_4137	chr13	46823115	46823696	+	69.44	NA	promoter-TSS (NM_175749)	promoter-TSS (NM_175749)	-187	NM_175749	218210	Mm.255398	NM_175749	ENSMUSG00000021374	Nup153	B130015D15Rik|C88147	nucleoporin 153	protein-coding
MACS_peak_10246	chr3	104855512	104856251	+	69.41	NA	promoter-TSS (NM_001163333)	promoter-TSS (NM_001163333)	-10	NM_001163332	80281	Mm.200327	NM_030249	ENSMUSG00000062127	Cttnbp2nl	AA552995|AA589392|AU018624|BC003236|mKIAA1433	CTTNBP2 N-terminal like	protein-coding
MACS_peak_7105	chr17	66234362	66234927	+	69.37	NA	promoter-TSS (NM_001198949)	promoter-TSS (NM_001198949)	-381	NM_001198949	19765	Mm.17009	NM_009067	ENSMUSG00000024096	Ralbp1	RLIP76|Rip1	ralA binding protein 1	protein-coding
MACS_peak_8034	chr19	16059284	16059772	+	69.37	NA	promoter-TSS (NM_198019)	promoter-TSS (NM_198019)	-37	NR_045355	100502653	Mm.149980	NR_045355	ENSMUSG00000097557	C130060C02Rik	-	RIKEN cDNA C130060C02 gene	ncRNA
MACS_peak_9689	chr2	181022473	181022714	+	69.37	NA	promoter-TSS (NM_198169)	promoter-TSS (NM_198169)	78	NM_198169	229004	Mm.220423	NM_198169	ENSMUSG00000038705	Gmeb2	AI839884	glucocorticoid modulatory element binding protein 2	protein-coding
MACS_peak_10149	chr3	95623290	95623880	+	69.34	NA	promoter-TSS (NM_001081293)	promoter-TSS (NM_001081293)	-709	NM_001081293	75137	Mm.196275	NM_028328	ENSMUSG00000028106	Rprd2	2810036A19Rik|4930535B03Rik|6720469I21Rik|AL022841|AL022940|AU021304|BB077382|mKIAA0460	regulation of nuclear pre-mRNA domain containing 2	protein-coding
MACS_peak_11228	chr4	133101635	133102013	+	69.30	NA	5' UTR (NM_010948, exon 1 of 8)	5' UTR (NM_010948, exon 1 of 8)	118	NM_010948	18221	Mm.69	NM_010948	ENSMUSG00000028851	Nudc	SIG-92|Silg92	nuclear distribution gene C homolog (Aspergillus)	protein-coding
MACS_peak_2176	chr11	54679654	54680293	+	69.25	NA	promoter-TSS (NM_008248)	promoter-TSS (NM_008248)	33	NM_008248	15254	Mm.425	NM_008248	ENSMUSG00000020267	Hint1	AA673479|Hint|Ipk1|PKCI-1|PRKCNH1	histidine triad nucleotide binding protein 1	protein-coding
MACS_peak_10647	chr4	42962663	42963374	+	69.23	NA	Intergenic	CpG	-2948	NM_019874	56323	Mm.20437	NM_019874	ENSMUSG00000036052	Dnajb5	1110058L06Rik|AI462558|Hsc40|Hsp40-3	DnaJ (Hsp40) homolog, subfamily B, member 5	protein-coding
MACS_peak_10690	chr4	45543456	45544051	+	69.20	NA	promoter-TSS (NM_001033306)	promoter-TSS (NM_001033306)	-53	NM_001033306	230126	Mm.251716	NM_001033306	ENSMUSG00000044813	Shb	BC028832	src homology 2 domain-containing transforming protein B	protein-coding
MACS_peak_15959	chr9	45646552	45646868	+	69.16	NA	promoter-TSS (NM_011792)	promoter-TSS (NM_011792)	98	NM_011792	23821	Mm.24044	NM_011792	ENSMUSG00000032086	Bace1	C76936	beta-site APP cleaving enzyme 1	protein-coding
MACS_peak_3060	chr11	115228783	115229182	+	69.16	NA	promoter-TSS (NM_175454)	promoter-TSS (NM_175454)	51	NM_175454	217310	Mm.205707	NM_175454	ENSMUSG00000034586	Hid1	C630004H02Rik	HID1 domain containing	protein-coding
MACS_peak_4766	chr14	51564011	51564522	+	69.16	NA	exon (NM_013632, exon 1 of 6)	exon (NM_013632, exon 1 of 6)	288	NM_013632	18950	Mm.17932	NM_013632	ENSMUSG00000021871	Pnp	AL024301|AU015798|Np|Np-1|Np-2|Pnp1	purine-nucleoside phosphorylase	protein-coding
MACS_peak_16308	chr9	86465212	86465890	+	69.16	NA	promoter-TSS (NM_001145968)	promoter-TSS (NM_001145968)	-44	NM_001145969	69519	Mm.272517	NM_027100	ENSMUSG00000032417	Rwdd2a	1700030C20Rik|AI848608|Rwdd2	RWD domain containing 2A	protein-coding
MACS_peak_10493	chr4	3501819	3502361	+	69.16	NA	promoter-TSS (NM_028097)	promoter-TSS (NM_028097)	64	NM_054089	116940	Mm.171323	NM_054089	ENSMUSG00000028233	Tgs1	D4Ertd800e|Ncoa6ip|Pimt	trimethylguanosine synthase homolog (S. cerevisiae)	protein-coding
MACS_peak_6708	chr17	28313869	28314552	+	69.15	NA	promoter-TSS (NM_172617)	promoter-TSS (NM_172617)	-153	NM_172617	224656	Mm.267359	NM_172617	ENSMUSG00000024220	Zfp523	2810027J07|BC025615|Znf76	zinc finger protein 523	protein-coding
MACS_peak_9162	chr2	121275030	121275362	+	69.15	NA	intron (NM_011354, intron 1 of 2)	CpG	262	NR_110986	378702	Mm.262252	NM_011354	ENSMUSG00000074884	Serf2	C80083|Msmac1l|m4F5rel	small EDRK-rich factor 2	protein-coding
MACS_peak_1174	chr10	57206156	57206434	+	69.15	NA	promoter-TSS (NR_045353)	promoter-TSS (NR_045353)	104	NM_008297	15500	Mm.261395	NM_008297	ENSMUSG00000019878	Hsf2	AI661205	heat shock factor 2	protein-coding
MACS_peak_10659	chr4	43455040	43455409	+	69.10	NA	promoter-TSS (NM_011571)	promoter-TSS (NM_011571)	75	NM_011571	21754	Mm.485441	NM_011571	ENSMUSG00000028458	Tesk1	AI326901	testis specific protein kinase 1	protein-coding
MACS_peak_14422	chr7	116924797	116925174	+	69.10	NA	promoter-TSS (NM_020610)	promoter-TSS (NM_020610)	74	NM_020610	78593	Mm.275374	NM_020610	ENSMUSG00000034825	Nrip3	A330103B05Rik|D7H11orf14|ICRFP703B1614Q5.2	nuclear receptor interacting protein 3	protein-coding
MACS_peak_11957	chr5	87233183	87233554	+	69.03	NA	promoter-TSS (NM_177680)	promoter-TSS (NM_177680)	-147	NM_177680	231386	Mm.196325	NM_177680	ENSMUSG00000035851	Ythdc1	A730098D12Rik|C80342|mKIAA1966	YTH domain containing 1	protein-coding
MACS_peak_1793	chr10	127985940	127986285	+	69.03	NA	intron (NM_018860, intron 1 of 3)	CpG-1621	112	NM_018860	67945	Mm.290786	NM_018860	ENSMUSG00000093674	Rpl41	1810055P16Rik|2210411K19Rik	ribosomal protein L41	protein-coding
MACS_peak_2174	chr11	54673872	54674201	+	69.03	NA	promoter-TSS (NM_029327)	promoter-TSS (NM_029327)	57	NM_029327	75530	Mm.83578	NM_029327		Lyrm7	1700024C24Rik|9330147L21Rik	LYR motif containing 7	protein-coding
MACS_peak_3670	chr12	86337205	86337494	+	69.03	NA	promoter-TSS (NM_178363)	promoter-TSS (NM_178363)	78	NM_178363	56531	Mm.153183	NM_178363	ENSMUSG00000021244	Ylpm1	A930013E17Rik|ZAP|Zap3	YLP motif containing 1	protein-coding
MACS_peak_10939	chr4	108292252	108292797	+	69.03	NA	promoter-TSS (NM_177045)	promoter-TSS (NM_177045)	-37	NM_177045	319965	Mm.151129	NM_177045	ENSMUSG00000028582	Cc2d1b	A830039B04Rik|Freud2	coiled-coil and C2 domain containing 1B	protein-coding
MACS_peak_13211	chr6	115084563	115085202	+	69.03	NA	promoter-TSS (NM_001111015)	promoter-TSS (NM_001111015)	-38	NM_013681	20965	Mm.441431	NM_013681	ENSMUSG00000009394	Syn2	2900074L19Rik|AI836018|AI841723	synapsin II	protein-coding
MACS_peak_14090	chr7	54101064	54101378	+	69.03	NA	promoter-TSS (NM_010699)	promoter-TSS (NM_010699)	47	NR_102727	16828	Mm.29324	NM_010699	ENSMUSG00000063229	Ldha	Ldh1|Ldhm|l7R2	lactate dehydrogenase A	protein-coding
MACS_peak_10668	chr4	43669131	43669421	+	69.03	NA	promoter-TSS (NM_026871)	promoter-TSS (NM_026871)	41	NM_026871	68917	Mm.25285	NM_026871	ENSMUSG00000028470	Hint2	1190005L05Rik	histidine triad nucleotide binding protein 2	protein-coding
MACS_peak_13378	chr6	134516747	134517498	+	69.03	NA	promoter-TSS (NM_008514)	promoter-TSS (NM_008514)	-191	NM_008514	16974	Mm.321990	NM_008514	ENSMUSG00000030201	Lrp6	C030016K15Rik|Cd|Gw|ska26|ska<m26Jus>|skax26	low density lipoprotein receptor-related protein 6	protein-coding
MACS_peak_16766	chrX	34414255	34414512	+	68.99	NA	promoter-TSS (NM_019668)	promoter-TSS (NM_019668)	22	NM_019668	22209	Mm.395649	NM_019668	ENSMUSG00000016308	Ube2a	HHR6A|HR6A|Mhr6a	ubiquitin-conjugating enzyme E2A	protein-coding
MACS_peak_279	chr1	72330875	72331139	+	68.96	NA	promoter-TSS (NM_023523)	promoter-TSS (NM_023523)	60	NM_175564	271711	Mm.80318	NM_175564	ENSMUSG00000026188	Tmem169	A830020B06Rik	transmembrane protein 169	protein-coding
MACS_peak_7867	chr19	5803066	5803946	+	68.96	NA	promoter-TSS (NR_002847)	promoter-TSS (NR_002847)	-835	NR_002847	72289	Mm.298256	NR_002847	ENSMUSG00000092341	Malat1	2210401K01Rik|9430072K23Rik|AI647968|Neat2	metastasis associated lung adenocarcinoma transcript 1 (non-coding RNA)	ncRNA
MACS_peak_15330	chr8	90661696	90662391	+	68.95	NA	promoter-TSS (NR_106039)	promoter-TSS (NR_106039)	-62	NR_106039	102465649		NR_106039		Mir7071	mmu-mir-7071	microRNA mir-7071	ncRNA
MACS_peak_97	chr1	34906571	34907007	+	68.88	NA	promoter-TSS (NM_175421)	promoter-TSS (NM_175421)	-15	NM_175421	226971	Mm.292751	NM_145516	ENSMUSG00000026123	Plekhb2	2310009M15Rik|AU018239|Evt2|Phdc|evt-2	pleckstrin homology domain containing, family B (evectins) member 2	protein-coding
MACS_peak_6732	chr17	29144505	29145147	+	68.88	NA	promoter-TSS (NM_134115)	promoter-TSS (NM_134115)	56	NM_134115	106504	Mm.439986	NM_134115	ENSMUSG00000024006	Stk38	5830476G13Rik|9530097A09Rik|AA617404|Ndr1	serine/threonine kinase 38	protein-coding
MACS_peak_4745	chr14	48092156	48092494	+	68.88	NA	promoter-TSS (NM_001146086)	promoter-TSS (NM_001146086)	89	NM_001146085	78938	Mm.11935	NM_030236	ENSMUSG00000037536	Fbxo34	2900057B08Rik|5830426G16Rik	F-box protein 34	protein-coding
MACS_peak_16644	chr9	123169540	123169991	+	68.79	NA	5' UTR (NM_001002267, exon 1 of 1)	5' UTR (NM_001002267, exon 1 of 1)	142	NM_001002267	72309	Mm.8569	NM_001002267	ENSMUSG00000054871	Tmem158	2310037P21Rik|Ris1	transmembrane protein 158	protein-coding
MACS_peak_7767	chr19	3707969	3708548	+	68.60	NA	promoter-TSS (NM_028077)	promoter-TSS (NM_028077)	-75	NM_028077	72056	Mm.23780	NM_028077	ENSMUSG00000035372	1810055G02Rik	AI256204	RIKEN cDNA 1810055G02 gene	protein-coding
MACS_peak_13073	chr6	87800815	87801380	+	68.57	NA	promoter-TSS (NM_001109745)	promoter-TSS (NM_001109745)	3	NM_001109746	12785	Mm.290251	NM_013493	ENSMUSG00000030057	Cnbp	AA408710|Cnbp1|Znf9	cellular nucleic acid binding protein	protein-coding
MACS_peak_6562	chr17	23940083	23940399	+	68.53	NA	promoter-TSS (NM_175229)	promoter-TSS (NM_175229)	87	NM_175229	75956	Mm.5222	NM_175229	ENSMUSG00000039218	Srrm2	5033413A03Rik|AA410130|SRm300|mKIAA0324	serine/arginine repetitive matrix 2	protein-coding
MACS_peak_3887	chr12	114214571	114214919	+	68.53	NA	promoter-TSS (NM_001145900)	promoter-TSS (NM_001145900)	-29	NM_201646	399566	Mm.440140	NM_201646	ENSMUSG00000002803	Btbd6	-	BTB (POZ) domain containing 6	protein-coding
MACS_peak_6555	chr17	23877100	23877565	+	68.46	NA	promoter-TSS (NM_023824)	promoter-TSS (NM_023824)	-35	NM_023824	76498	Mm.491253	NM_023824	ENSMUSG00000023909	Paqr4	1500004C10Rik	progestin and adipoQ receptor family member IV	protein-coding
MACS_peak_750	chr1	169238401	169238985	+	68.46	NA	promoter-TSS (NM_001039483)	promoter-TSS (NM_001039483)	-108	NM_001039483	68944	Mm.330045	NM_026881	ENSMUSG00000052428	Tmco1	1190006A08Rik|4930403O06Rik|AA109065|AU022572|ESTM39	transmembrane and coiled-coil domains 1	protein-coding
MACS_peak_6971	chr17	46841657	46842039	+	68.44	NA	5' UTR (NM_009358, exon 1 of 15)	5' UTR (NM_009358, exon 1 of 15)	103	NM_009358	21770	Mm.295009	NM_009358	ENSMUSG00000059409	Ppp2r5d	B'delta|TEG-271|Tex271	protein phosphatase 2, regulatory subunit B', delta	protein-coding
MACS_peak_4680	chr14	31467479	31467840	+	68.44	NA	promoter-TSS (NM_177815)	promoter-TSS (NM_177815)	98	NM_177815	328370	Mm.259657	NM_177815	ENSMUSG00000052395	Rft1	D930025H04	RFT1 homolog (S. cerevisiae)	protein-coding
MACS_peak_3151	chr11	118902014	118902274	+	68.44	NA	promoter-TSS (NM_013926)	promoter-TSS (NM_013926)	83	NM_013926	30951	Mm.99953	NM_013926	ENSMUSG00000025578	Cbx8	Pc3	chromobox 8	protein-coding
MACS_peak_15540	chr8	119445012	119445402	+	68.29	NA	promoter-TSS (NM_028131)	promoter-TSS (NM_028131)	129	NM_026844	66531	Mm.4011	NM_026844	ENSMUSG00000014633	Cmc2	1110046L09Rik|2310061C15Rik|DC13	COX assembly mitochondrial protein 2	protein-coding
MACS_peak_7200	chr17	80882116	80882631	+	68.29	NA	Intergenic	CpG	-2580	NM_009231	20662	Mm.60975	NM_009231	ENSMUSG00000024241	Sos1	4430401P03Rik|9630010N06|AI449023	son of sevenless homolog 1 (Drosophila)	protein-coding
MACS_peak_3456	chr12	56225184	56225842	+	68.27	NA	promoter-TSS (NM_001100116)	promoter-TSS (NM_001100116)	-2	NM_001100116	100101807	Mm.439875	NM_001100116		1700047I17Rik2	-	RIKEN cDNA 1700047I17 gene 2	protein-coding
MACS_peak_9952	chr3	80717351	80717781	+	68.27	NA	promoter-TSS (NM_010298)	promoter-TSS (NM_010298)	16	NM_010298	14658	Mm.275639	NM_010298	ENSMUSG00000028020	Glrb	AI853901|Glyrb|spa|spastic	glycine receptor, beta subunit	protein-coding
MACS_peak_14330	chr7	105457801	105458252	+	68.27	NA	promoter-TSS (NM_025408)	promoter-TSS (NM_025408)	11	NM_025408	66190	Mm.334041	NM_025408	ENSMUSG00000030760	Acer3	1110057L18Rik|5430429L08Rik|AV015045|Phca	alkaline ceramidase 3	protein-coding
MACS_peak_14421	chr7	116895579	116896001	+	68.13	NA	promoter-TSS (NM_020050)	promoter-TSS (NM_020050)	-13	NM_020050	56786	Mm.240668	NM_020050	ENSMUSG00000031021	Tmem9b	2310004K06Rik|AW539847|D7H11orf15|ICRFP703B1614Q5.3	TMEM9 domain family, member B	protein-coding
MACS_peak_9097	chr2	118199513	118199957	+	68.13	NA	promoter-TSS (NM_201367)	promoter-TSS (NM_201367)	-580	NM_201367	381413	Mm.70979	NM_201367	ENSMUSG00000040133	Gpr176	Gm1012	G protein-coupled receptor 176	protein-coding
MACS_peak_9841	chr3	51028655	51029011	+	68.11	NA	5' UTR (NM_009834, exon 1 of 3)	5' UTR (NM_009834, exon 1 of 3)	464	NM_009834	12457	Mm.86541	NM_009834	ENSMUSG00000023087	Ccrn4l	AU043840|Ccr4|nocturnin	CCR4 carbon catabolite repression 4-like (S. cerevisiae)	protein-coding
MACS_peak_5560	chr15	81688539	81688963	+	68.11	NA	promoter-TSS (NM_020507)	promoter-TSS (NM_020507)	5	NM_020507	57259	Mm.323595	NM_020507	ENSMUSG00000048546	Tob2	2900090N22Rik|4930545K18Rik|AV071822|mKIAA1663	transducer of ERBB2, 2	protein-coding
MACS_peak_1862	chr11	4086727	4087060	+	68.10	NA	promoter-TSS (NM_134023)	promoter-TSS (NM_134023)	57	NM_134023	103724	Mm.28140	NM_134023	ENSMUSG00000034412	Tbc1d10a	AI447804|EPI64|Tbc1d10|mFLJ00288	TBC1 domain family, member 10a	protein-coding
MACS_peak_10750	chr4	55545542	55546130	+	68.10	NA	promoter-TSS (NM_010637)	promoter-TSS (NM_010637)	-489	NM_010637	16600	Mm.4325	NM_010637	ENSMUSG00000003032	Klf4	EZF|Gklf|Zie	Kruppel-like factor 4 (gut)	protein-coding
MACS_peak_3308	chr12	16817670	16817954	+	68.10	NA	promoter-TSS (NM_033270)	promoter-TSS (NM_033270)	41	NM_033270	50496	Mm.23296	NM_033270	ENSMUSG00000057469	E2f6	AI462434|E2F6b|EMA	E2F transcription factor 6	protein-coding
MACS_peak_9464	chr2	155937457	155937856	+	68.10	NA	promoter-TSS (NM_170590)	promoter-TSS (NM_170590)	45	NM_170598	75710	Mm.27660	NM_029397		Rbm12	5730420G12Rik|9430070C08Rik|AI852903|SWAN|mKIAA0765	RNA binding motif protein 12	protein-coding
MACS_peak_345	chr1	80337106	80337334	+	68.10	NA	promoter-TSS (NM_016716)	promoter-TSS (NM_016716)	-215	NM_016716	26554	Mm.12665	NM_016716	ENSMUSG00000004364	Cul3	AI467304|AW146203|mKIAA0617	cullin 3	protein-coding
MACS_peak_3533	chr12	72116390	72116669	+	68.10	NA	promoter-TSS (NM_001081195)	promoter-TSS (NM_001081195)	281	NR_045056	73204	Mm.363770	NR_045055	ENSMUSG00000085622	3110056K07Rik	4921536K06Rik	RIKEN cDNA 3110056K07 gene	ncRNA
MACS_peak_14027	chr7	52383929	52384225	+	68.03	NA	promoter-TSS (NM_009438)	promoter-TSS (NM_009438)	38	NM_009438	22121	Mm.180458	NM_009438	ENSMUSG00000074129	Rpl13a	1810026N22Rik|Tstap198-7|tum-antigen	ribosomal protein L13A	protein-coding
MACS_peak_3772	chr12	103981648	103982097	+	67.99	NA	promoter-TSS (NM_022323)	promoter-TSS (NM_022323)	-1	NM_022323	64113	Mm.291222	NM_022323		Moap1	AA987038|Map-1|Pnma4	modulator of apoptosis 1	protein-coding
MACS_peak_3066	chr11	115281041	115281578	+	67.99	NA	promoter-TSS (NM_027862)	promoter-TSS (NM_027862)	-76	NM_027862	71679	Mm.371641	NM_027862	ENSMUSG00000034566	Atp5h	0610009D10Rik	ATP synthase, H+ transporting, mitochondrial F0 complex, subunit D	protein-coding
MACS_peak_1982	chr11	23155901	23156238	+	67.97	NA	promoter-TSS (NM_001035226)	promoter-TSS (NM_001035226)	28	NM_134014	103573	Mm.217547	NM_134014	ENSMUSG00000020290	Xpo1	AA420417|Crm1|Exp1	exportin 1, CRM1 homolog (yeast)	protein-coding
MACS_peak_10318	chr3	117571611	117572171	+	67.87	NA	promoter-TSS (NM_029655)	promoter-TSS (NM_029655)	-37	NM_029655	76561	Mm.33824	NM_029655	ENSMUSG00000028007	Snx7	2510028H01Rik	sorting nexin 7	protein-coding
MACS_peak_8979	chr2	92439791	92440087	+	67.86	NA	promoter-TSS (NM_023850)	promoter-TSS (NM_023850)	75	NM_023850	76969	Mm.38021	NM_023850	ENSMUSG00000027221	Chst1	2610008E20Rik|AW125896|C6ST|GST-1|Gst1|KSGAL6ST	carbohydrate (keratan sulfate Gal-6) sulfotransferase 1	protein-coding
MACS_peak_4308	chr13	67033712	67034493	+	67.80	NA	promoter-TSS (NM_025547)	promoter-TSS (NM_025547)	-94	NM_025547	66410	Mm.347939	NM_025547	ENSMUSG00000021519	Mterf3	2410017I18Rik|Mterfd1	mitochondrial transcription termination factor 3	protein-coding
MACS_peak_13487	chr7	4088385	4089259	+	67.80	NA	promoter-TSS (NR_033548)	promoter-TSS (NR_033548)	164	NM_172736	232798	Mm.22831	NM_172736	ENSMUSG00000035545	Leng8	AW049671	leukocyte receptor cluster (LRC) member 8	protein-coding
MACS_peak_16545	chr9	110558815	110559521	+	67.78	NA	intron (NM_028312, intron 1 of 6)	CpG	161	NM_028312	72654	Mm.249115	NM_028312	ENSMUSG00000019659	Ccdc12	2700094L05Rik|C76605	coiled-coil domain containing 12	protein-coding
MACS_peak_6546	chr17	23700840	23701514	+	67.78	NA	promoter-TSS (NM_001033496)	promoter-TSS (NM_001033496)	16	NM_001033496	449521	Mm.268582	NM_001033496	ENSMUSG00000071256	Zfp213	BC038178|D17Ertd197e	zinc finger protein 213	protein-coding
MACS_peak_10526	chr4	11181098	11181484	+	67.78	NA	5' UTR (NM_178112, exon 1 of 28)	5' UTR (NM_178112, exon 1 of 28)	115	NM_178112	72656	Mm.246713	NM_178112	ENSMUSG00000040738	Ints8	2810013E07Rik|AV063769|D130008D20Rik	integrator complex subunit 8	protein-coding
MACS_peak_14549	chr7	134041499	134042037	+	67.78	NA	promoter-TSS (NM_028389)	promoter-TSS (NM_028389)	24	NM_026827	68742	Mm.248646	NM_026827	ENSMUSG00000060538	Tmem219	1110032O16Rik|2900045G02Rik|IGFBP-3R	transmembrane protein 219	protein-coding
MACS_peak_16029	chr9	55359765	55360056	+	67.78	NA	5' UTR (NM_145615, exon 1 of 12)	5' UTR (NM_145615, exon 1 of 12)	140	NM_145615	110842	Mm.290853	NM_145615	ENSMUSG00000032314	Etfa	2010200I21Rik|D9Ertd394e	electron transferring flavoprotein, alpha polypeptide	protein-coding
MACS_peak_4160	chr13	49516222	49516841	+	67.78	NA	promoter-TSS (NM_001276399)	promoter-TSS (NM_001276399)	-61	NR_075085	75678	Mm.390586	NM_199056	ENSMUSG00000021385	Ippk	1810043M15Rik|InsP6	inositol 1,3,4,5,6-pentakisphosphate 2-kinase	protein-coding
MACS_peak_6359	chr16	94534806	94535475	+	67.78	NA	Intergenic	CpG	-14889	NM_133229	170765	Mm.42604	NM_133229	ENSMUSG00000022941	Ripply3	Dscr6	ripply3 homolog (zebrafish)	protein-coding
MACS_peak_2281	chr11	61743582	61744122	+	67.78	NA	promoter-TSS (NM_019921)	promoter-TSS (NM_019921)	-93	NM_019921	56697	Mm.274404	NM_019921	ENSMUSG00000047804	Akap10	1500031L16Rik|B130049N18Rik|D-AKAP-2|D-AKAP2|PRKA10	A kinase (PRKA) anchor protein 10	protein-coding
MACS_peak_3197	chr11	120328563	120329173	+	67.73	NA	promoter-TSS (NM_001159328)	promoter-TSS (NM_001159328)	46	NM_197995	70317	Mm.485046	NM_197995		Arl16	2600005N12Rik	ADP-ribosylation factor-like 16	protein-coding
MACS_peak_11280	chr4	135411426	135412238	+	67.73	NA	promoter-TSS (NM_001284196)	promoter-TSS (NM_001284196)	-154	NM_001284196	14105	Mm.10229	NM_010178	ENSMUSG00000028676	Srsf10	FUSIP2|Fusip1|NSSR1|NSSR2|Nssr|SRrp40|Sfrs13a|Srsf13a|TASR|TASR1|TASR2	serine/arginine-rich splicing factor 10	protein-coding
MACS_peak_3848	chr12	112776314	112777132	+	67.73	NA	5' UTR (NM_173363, exon 2 of 12)	5' UTR (NM_173363, exon 2 of 12)	411	NM_173363	217869	Mm.271222	NM_173363	ENSMUSG00000021282	Eif5	2810011H21Rik|D12Ertd549e	eukaryotic translation initiation factor 5	protein-coding
MACS_peak_10995	chr4	116691818	116692229	+	67.73	NA	promoter-TSS (NM_001111277)	promoter-TSS (NM_001111277)	10	NM_001111277	108067	Mm.34612	NM_175135	ENSMUSG00000028683	Eif2b3	1190002P15Rik	eukaryotic translation initiation factor 2B, subunit 3	protein-coding
MACS_peak_9995	chr3	87862245	87862630	+	67.73	NA	promoter-TSS (NM_144897)	promoter-TSS (NM_144897)	-20	NM_144897	246703	Mm.205996	NM_144897	ENSMUSG00000028070	Apoa1bp	AA087124|AI-BP|AIBP|Apoa1ip|ESTM37	apolipoprotein A-I binding protein	protein-coding
MACS_peak_7907	chr19	6418427	6418932	+	67.73	NA	promoter-TSS (NM_020253)	promoter-TSS (NM_020253)	-59	NM_001205235	18190	Mm.329616	NM_020253	ENSMUSG00000033768	Nrxn2	6430591O13Rik|mKIAA0921	neurexin II	protein-coding
MACS_peak_7963	chr19	8848719	8849421	+	67.56	NA	promoter-TSS (NR_015538)	promoter-TSS (NR_015538)	95	NR_015538	100039957	Mm.220886	NR_015538		Gm2518	D630022E15Rik	interferon induced transmembrane protein 2 pseudogene	pseudo
MACS_peak_4941	chr14	65881016	65881547	+	67.56	NA	promoter-TSS (NM_021458)	promoter-TSS (NM_021458)	19	NM_021458	14365	Mm.214687	NM_021458		Fzd3	AU020229|D930050A07Rik|Fz3	frizzled homolog 3 (Drosophila)	protein-coding
MACS_peak_13823	chr7	29526547	29526881	+	67.54	NA	promoter-TSS (NM_011885)	promoter-TSS (NM_011885)	86	NM_011885	24030	Mm.358650	NM_011885	ENSMUSG00000045948	Mrps12	AI327385|Rpms12|rps12	mitochondrial ribosomal protein S12	protein-coding
MACS_peak_11250	chr4	133842983	133843560	+	67.54	NA	promoter-TSS (NM_001163794)	promoter-TSS (NM_001163794)	-103	NM_001163794	230809	Mm.22778	NM_146156	ENSMUSG00000050890	Pdik1l	BC027088|stk35l2	PDLIM1 interacting kinase 1 like	protein-coding
MACS_peak_3140	chr11	118151682	118152041	+	67.54	NA	promoter-TSS (NM_001033528)	promoter-TSS (NM_001033528)	-303	NM_001033528	72344	Mm.232293	NM_001033528	ENSMUSG00000033909	Usp36	2700002L06Rik|mKIAA1453	ubiquitin specific peptidase 36	protein-coding
MACS_peak_12495	chr5	138705010	138705439	+	67.49	NA	promoter-TSS (NR_045821)	promoter-TSS (NR_045821)	-49	NR_045821	69004	Mm.439868	NR_045821	ENSMUSG00000085227	6330418K02Rik	-	RIKEN cDNA 6330418K02 gene	ncRNA
MACS_peak_15508	chr8	113370854	113371150	+	67.41	NA	promoter-TSS (NM_133953)	promoter-TSS (NM_133953)	78	NM_133973	102339	Mm.272930	NM_133973	ENSMUSG00000031753	Cog4	AW554810|D8Ertd515e	component of oligomeric golgi complex 4	protein-coding
MACS_peak_10878	chr4	101029412	101029734	+	67.41	NA	promoter-TSS (NR_040708)	promoter-TSS (NR_040708)	-720	NR_040708	77866	Mm.137053	NR_040708	ENSMUSG00000086782	E130102H24Rik	-	RIKEN cDNA E130102H24 gene	ncRNA
MACS_peak_11995	chr5	96638892	96639350	+	67.37	NA	promoter-TSS (NM_001039084)	promoter-TSS (NM_001039084)	-13	NM_001039084	94061	Mm.295499	NM_053158	ENSMUSG00000029486	Mrpl1	2410002L03Rik|5830418D04Rik|AI462572|L1mt	mitochondrial ribosomal protein L1	protein-coding
MACS_peak_3029	chr11	109512192	109512510	+	67.37	NA	promoter-TSS (NM_021880)	promoter-TSS (NM_021880)	88	NM_021880	19084	Mm.30039	NM_021880	ENSMUSG00000020612	Prkar1a	1300018C22Rik|RIalpha|Tse-1|Tse1	protein kinase, cAMP dependent regulatory, type I, alpha	protein-coding
MACS_peak_7291	chr18	6241241	6241726	+	67.37	NA	promoter-TSS (NM_008448)	promoter-TSS (NM_008448)	39	NM_008448	16573	Mm.223744	NM_008448	ENSMUSG00000006740	Kif5b	AL022807|Khc|Khcs|Kns1|Ukhc	kinesin family member 5B	protein-coding
MACS_peak_11049	chr4	120497582	120498649	+	67.37	NA	intron (NM_001048168, intron 1 of 9)	CpG	231	NM_001277095	18046	Mm.435590	NM_008692	ENSMUSG00000032897	Nfyc	-	nuclear transcription factor-Y gamma	protein-coding
MACS_peak_1961	chr11	20641354	20642006	+	67.35	NA	promoter-TSS (NM_181411)	promoter-TSS (NM_181411)	-121	NM_181411	216549	Mm.356580	NM_181411	ENSMUSG00000049659	Aftph	-	aftiphilin	protein-coding
MACS_peak_15984	chr9	50336493	50336921	+	67.31	NA	promoter-TSS (NM_011220)	promoter-TSS (NM_011220)	39	NM_011220	19286	Mm.35856	NM_011220	ENSMUSG00000032067	Pts	PTPS	6-pyruvoyl-tetrahydropterin synthase	protein-coding
MACS_peak_9849	chr3	51287620	51288389	+	67.30	NA	5' UTR (NM_016858, exon 1 of 2)	5' UTR (NM_016858, exon 1 of 2)	116	NM_016858	19338	Mm.1664	NM_016858	ENSMUSG00000027739	Rab33b	-	RAB33B, member RAS oncogene family	protein-coding
MACS_peak_2435	chr11	72503426	72503735	+	67.30	NA	promoter-TSS (NM_009671)	promoter-TSS (NM_009671)	76	NM_009671	11736	Mm.10313	NM_009671	ENSMUSG00000020790	Ankfy1	Ankhzn|ZFYVE14|mKIAA1255	ankyrin repeat and FYVE domain containing 1	protein-coding
MACS_peak_15617	chr8	124967508	124967785	+	67.30	NA	promoter-TSS (NR_028354)	promoter-TSS (NR_028354)	90	NR_045696	100689703	Mm.271989	NR_045696		9330133O14Rik	-	RIKEN cDNA 9330133O14 gene	ncRNA
MACS_peak_6190	chr16	38452684	38453076	+	67.14	NA	promoter-TSS (NM_007414)	promoter-TSS (NM_007414)	-111	NM_007414	11544	Mm.20047	NM_007414	ENSMUSG00000002844	Adprh	Arh1	ADP-ribosylarginine hydrolase	protein-coding
MACS_peak_449	chr1	94998242	94998803	+	67.13	NA	promoter-TSS (NM_001110315)	promoter-TSS (NM_001110315)	-71	NM_001110315	16560	Mm.276408	NM_008440	ENSMUSG00000014602	Kif1a	ATSV|C630002N23Rik|Gm1626|Kns1	kinesin family member 1A	protein-coding
MACS_peak_5819	chr15	100299170	100299692	+	67.13	NA	promoter-TSS (NM_134093)	promoter-TSS (NM_134093)	-34	NM_134093	68614	Mm.275272	NM_134093	ENSMUSG00000037353	Letmd1	1110019O13Rik|AI593524|BB130465|BB235638|HCCR-2|HCCR1|MCC-32|Mccr	LETM1 domain containing 1	protein-coding
MACS_peak_11211	chr4	132398883	132399411	+	67.07	NA	promoter-TSS (NM_146154)	promoter-TSS (NM_146154)	-63	NM_146154	100336	Mm.105230	NM_146154	ENSMUSG00000028882	Ppp1r8	6330548N22Rik|AU044684|NIPP1	protein phosphatase 1, regulatory (inhibitor) subunit 8	protein-coding
MACS_peak_6843	chr17	34987284	34987555	+	67.07	NA	promoter-TSS (NM_021337)	promoter-TSS (NM_021337)	83	NM_001045864	27632	Mm.653	NM_138580	ENSMUSG00000024369	Nelfe	D17H6S45|NELF-E|RD|Rdbp	negative elongation factor complex member E, Rdbp	protein-coding
MACS_peak_6377	chr16	96413677	96414156	+	67.03	NA	promoter-TSS (NM_001001492)	promoter-TSS (NM_001001492)	-52	NM_001001492	385668	Mm.24626	NM_001001492	ENSMUSG00000045275	Lca5l	4921526F01Rik|Lcca5l	Leber congenital amaurosis 5-like	protein-coding
MACS_peak_13449	chr6	146590763	146591309	+	67.03	NA	promoter-TSS (NM_025315)	promoter-TSS (NM_025315)	-65	NM_025315	108098	Mm.26212	NM_025315	ENSMUSG00000030291	Med21	0610007L03Rik|AI449604|D19234|D6Ertd782e|Srb7|Surb7	mediator complex subunit 21	protein-coding
MACS_peak_3619	chr12	82046293	82046841	+	67.03	NA	promoter-TSS (NM_009159)	promoter-TSS (NM_009159)	76	NM_009159	20384	Mm.43331	NM_009159	ENSMUSG00000021134	Srsf5	Sfrs5	serine/arginine-rich splicing factor 5	protein-coding
MACS_peak_12233	chr5	121902171	121902940	+	67.03	NA	promoter-TSS (NM_029912)	promoter-TSS (NM_029912)	-72	NM_026129	67397	Mm.154570	NM_026129		Erp29	1200015M03Rik|2810446M09Rik|AW209030|Erp28|Erp31|PDI-Db	endoplasmic reticulum protein 29	protein-coding
MACS_peak_6017	chr16	17759481	17759935	+	66.99	NA	promoter-TSS (NM_145479)	promoter-TSS (NM_145479)	-6	NM_145479	224023	Mm.282807	NM_145479	ENSMUSG00000022750	Klhl22	2610318I18Rik|Kelchl	kelch-like 22	protein-coding
MACS_peak_3879	chr12	113931548	113932108	+	66.99	NA	Intergenic	CpG	14777	NM_001100460	382639	Mm.11350	NM_001100460	ENSMUSG00000037638	Zbtb42	EG382639|Gm5188|simiRP58	zinc finger and BTB domain containing 42	protein-coding
MACS_peak_9847	chr3	51212682	51212975	+	66.99	NA	promoter-TSS (NM_025523)	promoter-TSS (NM_025523)	49	NM_025523	66377	Mm.331007	NM_025523		Ndufc1	2310016K22Rik|KFYI	NADH dehydrogenase (ubiquinone) 1, subcomplex unknown, 1	protein-coding
MACS_peak_1189	chr10	59342332	59342910	+	66.79	NA	intron (NM_019965, intron 1 of 8)	CpG	282	NM_019965	56709	Mm.103610	NM_019965	ENSMUSG00000020109	Dnajb12	Dj10|mDj10	DnaJ (Hsp40) homolog, subfamily B, member 12	protein-coding
MACS_peak_14914	chr8	27086949	27087437	+	66.75	NA	promoter-TSS (NM_029884)	promoter-TSS (NM_029884)	23	NM_029884	52120	Mm.28326	NM_029884	ENSMUSG00000037260	Hgsnat	9430010M12Rik|AW208455|D8Ertd354e|Tmem76	heparan-alpha-glucosaminide N-acetyltransferase	protein-coding
MACS_peak_9880	chr3	54915945	54916292	+	66.72	NA	promoter-TSS (NM_001144988)	promoter-TSS (NM_001144988)	30	NM_001144987	229285	Mm.235523	NM_144895	ENSMUSG00000036580	Spg20	AI840044|C79168|SPARTIN|TAHCCP1|mKIAA0610	spastic paraplegia 20, spartin (Troyer syndrome) homolog (human)	protein-coding
MACS_peak_2293	chr11	62545072	62545475	+	66.72	NA	Intergenic	CpG	-2678	NM_133208	170740	Mm.339982	NM_133208		Zfp287	B230333C16Rik|SKAT-2|Skat2|Znf287|mszf16|mszf74	zinc finger protein 287	protein-coding
MACS_peak_4255	chr13	58229787	58230210	+	66.66	NA	promoter-TSS (NM_029872)	promoter-TSS (NM_029872)	-81	NM_029872	77134	Mm.490274	NM_029872	ENSMUSG00000007836	Hnrnpa0	1110055B05Rik|3010025E17Rik|Hnrpa0|hnRNP A0	heterogeneous nuclear ribonucleoprotein A0	protein-coding
MACS_peak_9393	chr2	152495047	152495473	+	66.63	NA	promoter-TSS (NM_001159551)	promoter-TSS (NM_001159551)	63	NM_001159552	14950	Mm.277327	NM_010376	ENSMUSG00000019188	H13	1200006O09Rik|4930443L17Rik|5031424B04Rik|AV020344|H-13|Hm13|PSL3|Spp	histocompatibility 13	protein-coding
MACS_peak_1892	chr11	5855482	5856012	+	66.63	NA	promoter-TSS (NM_019661)	promoter-TSS (NM_019661)	-14	NM_019661	56418	Mm.294821	NM_019661	ENSMUSG00000002741	Ykt6	0610042I15Rik|1810013M05Rik|AW105923	YKT6 homolog (S. Cerevisiae)	protein-coding
MACS_peak_16307	chr9	86360669	86361085	+	66.57	NA	5' UTR (NM_177208, exon 1 of 39)	5' UTR (NM_177208, exon 1 of 39)	116	NM_177208	320615	Mm.245500	NM_177208	ENSMUSG00000034973	Dopey1	B130005I07Rik|BC035275|C130028L17|D9Ertd809e	dopey family member 1	protein-coding
MACS_peak_7018	chr17	51318395	51318918	+	66.43	NA	promoter-TSS (NM_028162)	promoter-TSS (NM_028162)	21	NM_028162	72238	Mm.120650	NM_028162	ENSMUSG00000023923	Tbc1d5	1600014N05Rik	TBC1 domain family, member 5	protein-coding
MACS_peak_12569	chr5	144031484	144032042	+	66.42	NA	promoter-TSS (NM_017467)	promoter-TSS (NM_017467)	-62	NM_017467	54201	Mm.6666	NM_017467	ENSMUSG00000046658	Zfp316	Emzf1|Mzf3|Znf316	zinc finger protein 316	protein-coding
MACS_peak_7717	chr18	80403248	80403935	+	66.42	NA	promoter-TSS (NM_025299)	promoter-TSS (NM_025299)	6	NM_178604	27366	Mm.172411	NM_025299		Txnl4a	D18Wsu98e|Dim1|ENSMUSG00000057130|Txnl4|U5-15kD|U5-15kDa	thioredoxin-like 4A	protein-coding
MACS_peak_12717	chr6	24614689	24615509	+	66.42	NA	promoter-TSS (NM_028459)	promoter-TSS (NM_028459)	-104	NM_028459	73178	Mm.1574	NM_028459	ENSMUSG00000029684	Wasl	2900021I12Rik|3110031I02Rik|N-WASP	Wiskott-Aldrich syndrome-like (human)	protein-coding
MACS_peak_11538	chr4	155243366	155243943	+	66.42	NA	promoter-TSS (NM_024472)	promoter-TSS (NM_024472)	-22	NM_028020	71957	Mm.475640	NM_028020	ENSMUSG00000029034	Cpsf3l	2410006F12Rik|AU044035	cleavage and polyadenylation specific factor 3-like	protein-coding
MACS_peak_12576	chr5	144309455	144309773	+	66.42	NA	promoter-TSS (NM_133703)	promoter-TSS (NM_133703)	40	NM_026050	67238	Mm.383219	NM_026050	ENSMUSG00000048910	Fam220a	1500026F15Rik|2810453I06Rik|AW047776|Acpin1|Sipar	family with sequence similarity 220, member A	protein-coding
MACS_peak_2531	chr11	77996880	77997123	+	66.42	NA	promoter-TSS (NM_207523)	promoter-TSS (NM_207523)	85	NM_207523	268449	Mm.22723	NM_207523	ENSMUSG00000058546	Rpl23a	BC029892|MDA20	ribosomal protein L23A	protein-coding
MACS_peak_13428	chr6	143048148	143048949	+	66.41	NA	5' UTR (NM_001109688, exon 1 of 25)	5' UTR (NM_001109688, exon 1 of 25)	124	NM_001286578	74741	Mm.130260	NM_029081	ENSMUSG00000030279	C2cd5	5730419I09Rik|C030008B15Rik|CDP138	C2 calcium-dependent domain containing 5	protein-coding
MACS_peak_7363	chr18	24112918	24113393	+	66.41	NA	promoter-TSS (NM_027007)	promoter-TSS (NM_027007)	-34	NM_027007	69256	Mm.218343	NM_027007	ENSMUSG00000024276	Zfp397	2810411K16Rik|6720480F11Rik|AI461664	zinc finger protein 397	protein-coding
MACS_peak_16116	chr9	62188843	62189354	+	66.41	NA	promoter-TSS (NM_009672)	promoter-TSS (NM_009672)	-52	NM_009672	11737	Mm.269088	NM_009672	ENSMUSG00000032249	Anp32a	Anp32|I1PP2A|LANP|PHAP1|W91701|pp32	acidic (leucine-rich) nuclear phosphoprotein 32 family, member A	protein-coding
MACS_peak_2285	chr11	62094613	62095139	+	66.41	NA	promoter-TSS (NM_027198)	promoter-TSS (NM_027198)	21	NM_027198	69747	Mm.141150	NM_027198	ENSMUSG00000014243	Zswim7	2410012H22Rik	zinc finger SWIM-type containing 7	protein-coding
MACS_peak_1066	chr10	29081652	29082137	+	66.34	NA	5' UTR (NM_001110198, exon 1 of 4)	5' UTR (NM_001110198, exon 1 of 4)	354	NM_026518	68031	Mm.28930	NM_026518	ENSMUSG00000038876	Rnf146	2610509H23Rik|Iduna	ring finger protein 146	protein-coding
MACS_peak_2487	chr11	75546380	75546616	+	66.34	NA	5' UTR (NM_009536, exon 1 of 6)	5' UTR (NM_009536, exon 1 of 6)	109	NM_009536	22627	Mm.234700	NM_009536	ENSMUSG00000020849	Ywhae	AU019196	tyrosine 3-monooxygenase/tryptophan 5-monooxygenase activation protein, epsilon polypeptide	protein-coding
MACS_peak_13291	chr6	122824358	122824744	+	66.31	NA	promoter-TSS (NM_026267)	promoter-TSS (NM_026267)	-24	NM_026267	67602	Mm.288114	NM_026267	ENSMUSG00000030327	Necap1	1200016B17Rik|AI747569|mFLJ00061	NECAP endocytosis associated 1	protein-coding
MACS_peak_6867	chr17	35804087	35804806	+	66.30	NA	promoter-TSS (NM_175137)	promoter-TSS (NM_175137)	91	NM_175137	68915	Mm.32002	NM_175137	ENSMUSG00000038838	Vars2	1190004I24Rik|Vars2l|mKIAA1885	valyl-tRNA synthetase 2, mitochondrial (putative)	protein-coding
MACS_peak_14098	chr7	56044355	56044603	+	66.19	NA	5' UTR (NM_028031, exon 1 of 17)	5' UTR (NM_028031, exon 1 of 17)	106	NM_028031	243983	Mm.279116	NM_028031	ENSMUSG00000030471	Zdhhc13	2410004E01Rik|C530010M18|HIP3RP|Hip14l|kojak|skc4	zinc finger, DHHC domain containing 13	protein-coding
MACS_peak_2544	chr11	78311059	78311566	+	66.19	NA	promoter-TSS (NM_001168521)	promoter-TSS (NM_001168521)	-56	NM_172795	237868	Mm.210332	NM_172795	ENSMUSG00000050132	Sarm1	A830091I15Rik|C78606|MyD885|Sarm	sterile alpha and HEAT/Armadillo motif containing 1	protein-coding
MACS_peak_14290	chr7	97129135	97129520	+	66.19	NA	5' UTR (NM_021876, exon 1 of 12)	5' UTR (NM_021876, exon 1 of 12)	159	NM_021876	13626	Mm.380914	NM_021876	ENSMUSG00000030619	Eed	ENSMUSG00000039373|l(7)5Rn|l7Rn5|lusk	embryonic ectoderm development	protein-coding
MACS_peak_16322	chr9	88614209	88614837	+	66.19	NA	exon (NM_001128601, exon 1 of 3)	exon (NM_001128601, exon 1 of 3)	113	NM_001128601	100039707	Mm.347377	NM_001128601	ENSMUSG00000079427	Gm2382	-	predicted gene 2382	protein-coding
MACS_peak_2147	chr11	51912262	51912993	+	66.19	NA	exon (NM_019411, exon 1 of 7)	exon (NM_019411, exon 1 of 7)	301	NM_019411	19052	Mm.260288	NM_019411		Ppp2ca	PP2A|R75353	protein phosphatase 2 (formerly 2A), catalytic subunit, alpha isoform	protein-coding
MACS_peak_60	chr1	23262710	23263321	+	66.19	NA	Intergenic	CpG	-16093	NR_029533	387225		NR_029533	miRBase:MI0000144	Mir30a	Mirn30a|mmu-mir-30a	microRNA 30a	ncRNA
MACS_peak_8659	chr2	32480863	32481180	+	66.14	NA	promoter-TSS (NM_001198791)	promoter-TSS (NM_001198791)	64	NM_001198791	11636	Mm.29189	NM_021515	ENSMUSG00000026817	Ak1	Ak-1|B430205N08Rik	adenylate kinase 1	protein-coding
MACS_peak_4629	chr14	22569717	22570029	+	66.03	NA	exon (NM_026283, exon 1 of 6)	exon (NM_026283, exon 1 of 6)	120	NM_026283	67630	Mm.102765	NM_026283	ENSMUSG00000021770	Samd8	1110053F04Rik|1700010P07Rik|SMSr	sterile alpha motif domain containing 8	protein-coding
MACS_peak_11288	chr4	135577484	135577773	+	66.03	NA	promoter-TSS (NM_013736)	promoter-TSS (NM_013736)	-64	NM_013736	27224	Mm.27663	NM_013736	ENSMUSG00000028668	Tceb3	110kDa|AA408125|Tceb3a	transcription elongation factor B (SIII), polypeptide 3	protein-coding
MACS_peak_9974	chr3	86027573	86028852	+	65.98	NA	promoter-TSS (NM_001077687)	promoter-TSS (NM_001077687)	-400	NM_001077688	80877	Mm.439825	NM_030695	ENSMUSG00000028080	Lrba	C80285|D3Ertd775e|Lab300|Lba	LPS-responsive beige-like anchor	protein-coding
MACS_peak_7618	chr18	64648413	64648957	+	65.95	NA	promoter-TSS (NM_007998)	promoter-TSS (NM_007998)	35	NM_007998	14151	Mm.1070	NM_007998	ENSMUSG00000024588	Fech	AI894116|Fcl|fch	ferrochelatase	protein-coding
MACS_peak_8877	chr2	73749138	73749652	+	65.95	NA	promoter-TSS (NM_175015)	promoter-TSS (NM_175015)	-44	NM_175015	228033	Mm.2966	NM_175015	ENSMUSG00000018770	Atp5g3	6030447M23	ATP synthase, H+ transporting, mitochondrial F0 complex, subunit C3 (subunit 9)	protein-coding
MACS_peak_13502	chr7	4744309	4744804	+	65.95	NA	promoter-TSS (NM_009081)	promoter-TSS (NM_009081)	-11	NM_009081	19943	Mm.379002	NM_009081	ENSMUSG00000030432	Rpl28	D7Wsu21e	ribosomal protein L28	protein-coding
MACS_peak_12565	chr5	143874479	143874845	+	65.94	NA	promoter-TSS (NM_080561)	promoter-TSS (NM_080561)	37	NM_080561	108086	Mm.381440	NM_080561	ENSMUSG00000045078	Rnf216	2810055G22Rik|AI647468|AU019462|C86502|F830018F18Rik|TRIAD3|UIP83|Ubce7ip1	ring finger protein 216	protein-coding
MACS_peak_11649	chr5	24083011	24083283	+	65.94	NA	intron (NM_001190443, intron 1 of 13)	CpG	138	NM_001190443	27407	Mm.21629	NM_013853	ENSMUSG00000028953	Abcf2	0710005O05Rik|Drr3|E430001O06	ATP-binding cassette, sub-family F (GCN20), member 2	protein-coding
MACS_peak_2040	chr11	32167394	32167822	+	65.94	NA	promoter-TSS (NM_181569)	promoter-TSS (NM_181569)	99	NM_181569	17168	Mm.263161	NM_181569	ENSMUSG00000020289	Nprl3	Aag|CGTHBA|HS-26|HS-40|Mare|Phg|Prox1|m(alpha)RE	nitrogen permease regulator-like 3	protein-coding
MACS_peak_9768	chr3	28704172	28704646	+	65.77	NA	promoter-TSS (NM_026517)	promoter-TSS (NM_026517)	-24	NM_026517	68028	Mm.371630	NM_026517	ENSMUSG00000039221	Rpl22l1	3110001N18Rik|AU041196	ribosomal protein L22 like 1	protein-coding
MACS_peak_929	chr1	193149542	193150011	+	65.77	NA	promoter-TSS (NM_025864)	promoter-TSS (NM_025864)	-68	NM_025864	66950	Mm.236300	NM_025864		Tmem206	2310028N02Rik|AI118576	transmembrane protein 206	protein-coding
MACS_peak_6833	chr17	34742511	34742960	+	65.77	NA	promoter-TSS (NM_001163379)	promoter-TSS (NM_001163379)	-71	NM_001163379	55979	Mm.8684	NM_018862	ENSMUSG00000034254	Agpat1	1-AGP|1-AGPAT|AW047140	1-acylglycerol-3-phosphate O-acyltransferase 1 (lysophosphatidic acid acyltransferase, alpha)	protein-coding
MACS_peak_1274	chr10	70810215	70810804	+	65.77	NA	promoter-TSS (NM_027184)	promoter-TSS (NM_027184)	-32	NM_027184	69718	Mm.245867	NM_027184	ENSMUSG00000060733	Ipmk	2410017C19Rik|AA408208|Impk	inositol polyphosphate multikinase	protein-coding
MACS_peak_10714	chr4	47487016	47487301	+	65.77	NA	promoter-TSS (NM_024171)	promoter-TSS (NM_024171)	81	NM_019998	56737	Mm.22218	NM_019998	ENSMUSG00000039740	Alg2	1110018A23Rik|1300013N08Rik|ALPG2|CDGIi|MNCb-5081	asparagine-linked glycosylation 2 (alpha-1,3-mannosyltransferase)	protein-coding
MACS_peak_12107	chr5	112705133	112705476	+	65.77	NA	promoter-TSS (NM_009419)	promoter-TSS (NM_009419)	-423	NM_009419	22022	Mm.250631	NM_009419	ENSMUSG00000029344	Tpst2	AI448750|D5Ucla3|Tango13b|grm|grt	protein-tyrosine sulfotransferase 2	protein-coding
MACS_peak_2046	chr11	33062904	33063167	+	65.73	NA	5' UTR (NM_008722, exon 1 of 11)	5' UTR (NM_008722, exon 1 of 11)	171	NM_001252261	18148	Mm.485384	NM_008722	ENSMUSG00000057113	Npm1	B23|NO38|Npm	nucleophosmin 1	protein-coding
MACS_peak_1990	chr11	23671075	23671471	+	65.72	NA	promoter-TSS (NM_009044)	promoter-TSS (NM_009044)	-303	NM_009044	19696	Mm.4869	NM_009044	ENSMUSG00000020275	Rel	c-Rel	reticuloendotheliosis oncogene	protein-coding
MACS_peak_9201	chr2	126532799	126533308	+	65.72	NA	promoter-TSS (NM_001252580)	promoter-TSS (NM_001252580)	-11	NM_001252580	84092	Mm.272629	NM_019729	ENSMUSG00000027363	Usp8	AI574262|AW557536|Ubpy|mKIAA0055	ubiquitin specific peptidase 8	protein-coding
MACS_peak_16873	chrX	71516077	71516384	+	65.72	NA	promoter-TSS (NM_052835)	promoter-TSS (NM_052835)	75	NM_052835	110954	Mm.100113	NM_052835	ENSMUSG00000008682	Rpl10	D0HXS648|DXHXS648|DXHXS648E|QM|QM16	ribosomal protein L10	protein-coding
MACS_peak_13337	chr6	125095005	125095549	+	65.69	NA	promoter-TSS (NM_001039669)	promoter-TSS (NM_001039669)	8	NM_001039669	320678	Mm.129415	NM_178787	ENSMUSG00000038271	Iffo1	4733401N06Rik|A930037G23Rik|HOM-TES-103|Iffo	intermediate filament family orphan 1	protein-coding
MACS_peak_6861	chr17	35302065	35302361	+	65.63	NA	promoter-TSS (NM_020027)	promoter-TSS (NM_020027)	-391	NM_020027	53761	Mm.272462	NM_020027	ENSMUSG00000024393	Prrc2a	3110039B05Rik|Bat-2|Bat2|D17H6S51E|G2|Wbp12|mKIAA4178	proline-rich coiled-coil 2A	protein-coding
MACS_peak_2170	chr11	54251301	54251547	+	65.62	NA	promoter-TSS (NM_173753)	promoter-TSS (NM_173753)	-257	NM_173753	216742	Mm.34087	NM_173753	ENSMUSG00000035992	Fnip1	A730024A03Rik|AI838773|AW557298	folliculin interacting protein 1	protein-coding
MACS_peak_14471	chr7	125272906	125273254	+	65.60	NA	promoter-TSS (NM_019419)	promoter-TSS (NM_019419)	59	NM_019419	54208	Mm.29924	NM_019419	ENSMUSG00000030654	Arl6ip1	AIP-6|AL022945|ARMER|AU042858|Aip-1|Arl6ip|C85138|mKIAA0069	ADP-ribosylation factor-like 6 interacting protein 1	protein-coding
MACS_peak_11683	chr5	29522137	29522440	+	65.58	NA	promoter-TSS (NM_001289757)	promoter-TSS (NM_001289757)	-245	NM_021470	56874	Mm.87352	NM_021470	ENSMUSG00000029130	Rnf32	1700009J01Rik|2700025B22Rik|4930542N22Rik|Lmbr2	ring finger protein 32	protein-coding
MACS_peak_1172	chr10	55948309	55948867	+	65.33	NA	promoter-TSS (NM_001033385)	promoter-TSS (NM_001033385)	-93	NM_001033385	544696	Mm.411188	NM_001033385	ENSMUSG00000038122	Tbc1d32	Bromi|D630037F22Rik|b2b2284Clo	TBC1 domain family, member 32	protein-coding
MACS_peak_9316	chr2	143741016	143741498	+	65.27	NA	5' UTR (NM_019771, exon 1 of 4)	5' UTR (NM_019771, exon 1 of 4)	190	NM_019771	56431	Mm.28919	NM_019771	ENSMUSG00000015932	Dstn	2610043P17Rik|ADF|AU042046|Dsn|corn1|sid23p	destrin	protein-coding
MACS_peak_5993	chr16	16302824	16303237	+	65.27	NA	promoter-TSS (NR_038046)	promoter-TSS (NR_038046)	-28	NR_038046	70120	Mm.37486	NM_198246	ENSMUSG00000022792	Yars2	2210023C10Rik|tyrRS	tyrosyl-tRNA synthetase 2 (mitochondrial)	protein-coding
MACS_peak_2216	chr11	58767733	58767989	+	65.27	NA	promoter-TSS (NM_178218)	promoter-TSS (NM_178218)	153	NM_206882	382522	Mm.377898	NM_206882		Hist3h2bb-ps	4930534G10Rik|4933432H21|B2Hist3h2bb|Hist3h2bb|R75370	histone cluster 3, H2bb, pseudogene	protein-coding
MACS_peak_8154	chr19	40905498	40906000	+	65.23	NA	promoter-TSS (NM_172839)	promoter-TSS (NM_172839)	-20	NM_172839	240665	Mm.309	NM_172839	ENSMUSG00000025010	Ccnj	D430039C20Rik	cyclin J	protein-coding
MACS_peak_15306	chr8	87550481	87551013	+	65.23	NA	promoter-TSS (NM_026760)	promoter-TSS (NM_026760)	15	NM_026760	68544	Mm.196005	NM_026760	ENSMUSG00000041203	2310036O22Rik	1110002H14Rik|AI854688	RIKEN cDNA 2310036O22 gene	protein-coding
MACS_peak_16201	chr9	67481601	67482091	+	65.23	NA	Intergenic	CpG	-74336	NM_001081242	70549	Mm.33645	NM_027458	ENSMUSG00000052698	Tln2	5730421P04Rik|AI507121|AI787438|AL118320|mKIAA0320	talin 2	protein-coding
MACS_peak_579	chr1	136453006	136453890	+	65.23	NA	Intergenic	CpG	-3307	NM_152895	75605	Mm.28995	NM_152895	ENSMUSG00000042207	Kdm5b	2010009J12Rik|2210016I17Rik|AW556288|D1Ertd202e|Jarid1b|PLU-1|PUT1|Plu1|RBBP2H1A|Rb-Bp2|mKIAA4034	lysine (K)-specific demethylase 5B	protein-coding
MACS_peak_10838	chr4	87679045	87679355	+	65.17	NA	5' UTR (NM_027326, exon 1 of 11)	5' UTR (NM_027326, exon 1 of 11)	111	NM_027326	70122	Mm.288898	NM_027326	ENSMUSG00000028496	Mllt3	2210011H10Rik|2610012I03Rik|3830408D16Rik|Af9|D4Ertd321e	myeloid/lymphoid or mixed-lineage leukemia (trithorax homolog, Drosophila); translocated to, 3	protein-coding
MACS_peak_11786	chr5	35448159	35448432	+	65.11	NA	promoter-TSS (NM_013587)	promoter-TSS (NM_013587)	51	NM_013587	16976	Mm.277661	NM_013587	ENSMUSG00000029103	Lrpap1	AA617339|AI790446|AU042172|C77774|HBP44|RAP	low density lipoprotein receptor-related protein associated protein 1	protein-coding
MACS_peak_11605	chr5	20562009	20562251	+	65.11	NA	promoter-TSS (NM_011203)	promoter-TSS (NM_011203)	-515	NM_011203	19248	Mm.319117	NM_011203	ENSMUSG00000028771	Ptpn12	P19-PTP|PTP-P19|PTP-PEST|PTPG1	protein tyrosine phosphatase, non-receptor type 12	protein-coding
MACS_peak_7805	chr19	4756179	4756766	+	65.11	NA	promoter-TSS (NM_025717)	promoter-TSS (NM_025717)	-53	NM_025717	66704	Mm.396734	NM_025717	ENSMUSG00000033760	Rbm4b	4921506I22Rik|AI504630|AI506404|Lark2	RNA binding motif protein 4B	protein-coding
MACS_peak_693	chr1	162142690	162143008	+	65.11	NA	5' UTR (NM_009786, exon 1 of 6)	5' UTR (NM_009786, exon 1 of 6)	174	NM_009786	12301	Mm.10702	NM_009786	ENSMUSG00000014226	Cacybp	SIP	calcyclin binding protein	protein-coding
MACS_peak_9534	chr2	163427874	163428302	+	65.11	NA	promoter-TSS (NM_029512)	promoter-TSS (NM_029512)	38	NM_029512	76080	Mm.89828	NM_029512	ENSMUSG00000017679	Ttpal	3110080A02Rik|5830472M02Rik	tocopherol (alpha) transfer protein-like	protein-coding
MACS_peak_9783	chr3	32428260	32428566	+	65.03	NA	promoter-TSS (NM_024200)	promoter-TSS (NM_024200)	9	NM_024200	67414	Mm.290414	NM_024200	ENSMUSG00000027668	Mfn1	2310002F04Rik|6330416C07Rik|D3Ertd265e|HR2|mKIAA4032	mitofusin 1	protein-coding
MACS_peak_5857	chr15	102109550	102110318	+	65.03	NA	promoter-TSS (NM_134100)	promoter-TSS (NM_134100)	47	NM_134100	106073	Mm.287740	NM_134100	ENSMUSG00000045665	Mfsd5	AA409375|AW556797|D15Mgi27	major facilitator superfamily domain containing 5	protein-coding
MACS_peak_5103	chr14	119336714	119337365	+	65.03	NA	promoter-TSS (NM_008929)	promoter-TSS (NM_008929)	-115	NM_008929	100037258	Mm.12616	NM_008929	ENSMUSG00000022136	Dnajc3	AA408985|AU067833|Dnajc3a|Dnajc3b|Prkri|mp58|p58|p58IPK	DnaJ (Hsp40) homolog, subfamily C, member 3	protein-coding
MACS_peak_2172	chr11	54335952	54336584	+	65.03	NA	promoter-TSS (NM_001252496)	promoter-TSS (NM_001252496)	-79	NM_001252494	192786	Mm.254404	NM_175258	ENSMUSG00000037533	Rapgef6	A530068K01|AI844632|BB085664|C030018K18Rik|PDZ-GEF2|Pdzgef2|RA-GEF-2|Ragef2|mKIAA4052	Rap guanine nucleotide exchange factor (GEF) 6	protein-coding
MACS_peak_8714	chr2	37307436	37307999	+	65.03	NA	promoter-TSS (NM_001033960)	promoter-TSS (NM_001033960)	-57	NM_001033960	227800	Mm.383192	NM_146121	ENSMUSG00000035437	Rabgap1	Gapcena|mKIAA4104	RAB GTPase activating protein 1	protein-coding
MACS_peak_6798	chr17	33961258	33961730	+	64.90	NA	promoter-TSS (NM_016844)	promoter-TSS (NM_016844)	-23	NR_103515	66416	Mm.29513	NM_023202	ENSMUSG00000041881	Ndufa7	14.5kDa|2400007M02Rik|CI-B14.5a	NADH dehydrogenase (ubiquinone) 1 alpha subcomplex, 7 (B14.5a)	protein-coding
MACS_peak_2148	chr11	52045319	52045828	+	64.83	NA	promoter-TSS (NM_011543)	promoter-TSS (NM_011543)	76	NM_011543	21402	Mm.42944	NM_011543	ENSMUSG00000036309	Skp1a	15kDa|2610043E24Rik|2610206H23Rik|EMC19|OCP-II|OCP2|SKP1|Tceb1l|p19A|p19Skp1	S-phase kinase-associated protein 1A	protein-coding
MACS_peak_13040	chr6	85911441	85912054	+	64.83	NA	promoter-TSS (NM_028099)	promoter-TSS (NM_028099)	-86	NM_028099	72102	Mm.24007	NM_028099	ENSMUSG00000030002	Dusp11	2010300F21Rik|AI481497	dual specificity phosphatase 11 (RNA/RNP complex 1-interacting)	protein-coding
MACS_peak_2486	chr11	75492723	75493029	+	64.83	NA	5' UTR (NM_001277219, exon 1 of 3)	5' UTR (NM_001277219, exon 1 of 3)	115	NM_001277221	12928	Mm.280125	NM_133656		Crk	Crk-I|Crk-II|Crk-III|Crk3|CrkIII|Crko|c-Crk|p38	v-crk sarcoma virus CT10 oncogene homolog (avian)	protein-coding
MACS_peak_3831	chr12	111839415	111839922	+	64.79	NA	promoter-TSS (NM_030238)	promoter-TSS (NM_030238)	63	NM_030238	13424	Mm.181430	NM_030238	ENSMUSG00000018707	Dync1h1	9930018I23Rik|AI894280|DHC1|DHC1a|DNCL|Dnchc1|Dnec1|Dnecl|Loa|MAP1C|P22|Swl|mKIAA0325	dynein cytoplasmic 1 heavy chain 1	protein-coding
MACS_peak_8081	chr19	28909312	28909793	+	64.69	NA	promoter-TSS (NM_009199)	promoter-TSS (NM_009199)	-104	NM_009199	20510	Mm.246670	NM_009199	ENSMUSG00000024935	Slc1a1	D130048G10Rik|EAAC1|EAAC2|EAAT3|MEAAC1	solute carrier family 1 (neuronal/epithelial high affinity glutamate transporter, system Xag), member 1	protein-coding
MACS_peak_9472	chr2	156218525	156218786	+	64.64	NA	promoter-TSS (NR_024329)	promoter-TSS (NR_024329)	60	NR_024329	347740	Mm.324242	NR_024329		2900097C17Rik	1810005K14Rik|4930563C06Rik	RIKEN cDNA 2900097C17 gene	ncRNA
MACS_peak_6965	chr17	46783121	46783393	+	64.60	NA	promoter-TSS (NM_025302)	promoter-TSS (NM_025302)	60	NM_025302	27398	Mm.391007	NM_025302	ENSMUSG00000002767	Mrpl2	CGI-22|MRP-L14|Rpml14	mitochondrial ribosomal protein L2	protein-coding
MACS_peak_2521	chr11	77796187	77796526	+	64.58	NA	promoter-TSS (NM_174852)	promoter-TSS (NM_174852)	38	NM_174852	268448	Mm.274329	NM_174852	ENSMUSG00000037791	Phf12	2410142K10Rik|F630045O13|PF1|mKIAA1523	PHD finger protein 12	protein-coding
MACS_peak_2628	chr11	86887378	86887914	+	64.54	NA	promoter-TSS (NM_025638)	promoter-TSS (NM_025638)	-7	NM_025638	66569	Mm.281887	NM_025638	ENSMUSG00000061666	Gdpd1	2610020H15Rik	glycerophosphodiester phosphodiesterase domain containing 1	protein-coding
MACS_peak_7509	chr18	38578504	38578813	+	64.53	NA	promoter-TSS (NM_022996)	promoter-TSS (NM_022996)	29	NM_022996	65113	Mm.102496	NM_022996	ENSMUSG00000024425	Ndfip1	0610010M22Rik|N4wbp5	Nedd4 family interacting protein 1	protein-coding
MACS_peak_3389	chr12	35731597	35732120	+	64.53	NA	promoter-TSS (NM_001014973)	promoter-TSS (NM_001014973)	-3	NM_001014973	217463	Mm.213991	NM_001014973	ENSMUSG00000020590	Snx13	Rgs-px1|mKIAA0713	sorting nexin 13	protein-coding
MACS_peak_13541	chr7	6682933	6683227	+	64.53	NA	promoter-TSS (NM_021323)	promoter-TSS (NM_021323)	50	NM_008817	18616	Mm.389800	NM_008817		Peg3	AL022617|ASF-1|End4|Gcap4|Pw1|Zfp102|mKIAA0287	paternally expressed 3	protein-coding
MACS_peak_11136	chr4	128404514	128404999	+	64.49	NA	promoter-TSS (NM_001195083)	promoter-TSS (NM_001195083)	-59	NM_001195083	54383	Mm.473738	NM_018774	ENSMUSG00000028796	Phc2	A3galt2|AA415044|D130050K19Rik|D4Ertd810e|Edr2|Mph2|p36	polyhomeotic-like 2 (Drosophila)	protein-coding
MACS_peak_15196	chr8	75247030	75247403	+	64.49	NA	promoter-TSS (NM_009188)	promoter-TSS (NM_009188)	47	NM_009188	20467	Mm.2137	NM_009188	ENSMUSG00000031622	Sin3b	2810430C10Rik	transcriptional regulator, SIN3B (yeast)	protein-coding
MACS_peak_9660	chr2	179905962	179906681	+	64.49	NA	promoter-TSS (NM_019822)	promoter-TSS (NM_019822)	28	NM_019822	56436	Mm.379082	NM_019822	ENSMUSG00000039041	Adrm1	1110063P18Rik|2510006J17Rik|AA408205|ARM-1|AU043535|Arm1|Gp110|Rpn13	adhesion regulating molecule 1	protein-coding
MACS_peak_10591	chr4	33118094	33118652	+	64.49	NA	promoter-TSS (NM_019586)	promoter-TSS (NM_019586)	-27	NM_019586	56228	Mm.259095	NM_019586	ENSMUSG00000028277	Ube2j1	0710008M05Rik|1110030I22Rik|NCUBE-1|Ncube|Ncube1|Ubc6p	ubiquitin-conjugating enzyme E2J 1	protein-coding
MACS_peak_11617	chr5	22938577	22939885	+	64.49	NA	non-coding (NR_040469, exon 1 of 1)	non-coding (NR_040469, exon 1 of 1)	940	NR_040469	269630	Mm.425231	NR_040469	ENSMUSG00000073147	5031425E22Rik	-	RIKEN cDNA 5031425E22 gene	ncRNA
MACS_peak_1414	chr10	79938186	79938483	+	64.49	NA	Intergenic	CpG	-19317	NM_139226	246086	Mm.250572	NM_139226	ENSMUSG00000045518	Onecut3	OC-3|Oc3	one cut domain, family member 3	protein-coding
MACS_peak_15593	chr8	124109136	124109439	+	64.49	NA	Intergenic	CpG	-5081	NM_026160	67443	Mm.28357	NM_026160		Map1lc3b	1010001C15Rik|Atg8|LC3b|Map1lc3	microtubule-associated protein 1 light chain 3 beta	protein-coding
MACS_peak_149	chr1	42908063	42908306	+	64.49	NA	exon (NM_023514, exon 1 of 11)	exon (NM_023514, exon 1 of 11)	106	NM_023514	69527	Mm.252982	NM_023514	ENSMUSG00000060679	Mrps9	2310002A08Rik|AW322516|Mrp-S9|S9mt|mg637	mitochondrial ribosomal protein S9	protein-coding
MACS_peak_9231	chr2	128792716	128793997	+	64.38	NA	5' UTR (NM_178404, exon 1 of 12)	5' UTR (NM_178404, exon 1 of 12)	218	NM_178404	78751	Mm.26377	NM_178404	ENSMUSG00000042851	Zc3h6	4631426G04Rik|4833425H18Rik|AU024389|AW060453|Zc3hdc6|mKIAA2035	zinc finger CCCH type containing 6	protein-coding
MACS_peak_3498	chr12	70297984	70298443	+	64.38	NA	promoter-TSS (NR_033222)	promoter-TSS (NR_033222)	15	NR_033222	414085	Mm.256223	NR_033222	ENSMUSG00000097061	9330151L19Rik	-	RIKEN cDNA 9330151L19 gene	ncRNA
MACS_peak_7961	chr19	8831245	8831819	+	64.38	NA	promoter-TSS (NM_016813)	promoter-TSS (NM_016813)	-61	NM_016813	53319	Mm.7271	NM_016813	ENSMUSG00000010097	Nxf1	Mex67|Mvb1|Tap	nuclear RNA export factor 1	protein-coding
MACS_peak_14453	chr7	120512654	120513166	+	64.38	NA	promoter-TSS (NM_133700)	promoter-TSS (NM_133700)	-57	NM_133700	68815	Mm.238034	NM_133700	ENSMUSG00000038187	Btbd10	1110056N09Rik|Gmrp1	BTB (POZ) domain containing 10	protein-coding
MACS_peak_1779	chr10	127774768	127775119	+	64.27	NA	promoter-TSS (NM_026444)	promoter-TSS (NM_026444)	55	NM_026444	12974	Mm.58836	NM_026444	ENSMUSG00000005683	Cs	2610511A05Rik|9030605P22Rik|BB234005|Cis|ahl4	citrate synthase	protein-coding
MACS_peak_1662	chr10	114799089	114799332	+	64.27	NA	5' UTR (NM_133683, exon 1 of 7)	5' UTR (NM_133683, exon 1 of 7)	108	NM_133683	67226	Mm.29647	NM_133683	ENSMUSG00000069520	Tmem19	2810428F02Rik|AW125171	transmembrane protein 19	protein-coding
MACS_peak_14227	chr7	87484861	87485461	+	64.16	NA	promoter-TSS (NM_133952)	promoter-TSS (NM_133952)	-56	NM_133952	101869	Mm.243024	NM_133952	ENSMUSG00000030533	Unc45a	AW538196	unc-45 homolog A (C. elegans)	protein-coding
MACS_peak_1688	chr10	117282837	117283384	+	64.16	NA	promoter-TSS (NM_024457)	promoter-TSS (NM_024457)	-80	NM_024457	215449	Mm.233009	NM_024457	ENSMUSG00000052681	Rap1b	2810443E11Rik	RAS related protein 1b	protein-coding
MACS_peak_4006	chr13	22135006	22135224	+	64.04	NA	promoter-TSS (NM_178186)	promoter-TSS (NM_178186)	16	NM_178198	319183	Mm.371766	NM_178198	ENSMUSG00000069300	Hist1h2bj	-	histone cluster 1, H2bj	protein-coding
MACS_peak_5293	chr15	53177592	53178096	+	64.04	NA	promoter-TSS (NM_010162)	promoter-TSS (NM_010162)	-106	NM_010162	14042	Mm.309395	NM_010162		Ext1	AA409028	exostoses (multiple) 1	protein-coding
MACS_peak_16908	chrX	90531719	90532028	+	64.04	NA	promoter-TSS (NM_007492)	promoter-TSS (NM_007492)	-112	NM_007492	11878	Mm.275547	NM_007492	ENSMUSG00000035277	Arx	-	aristaless related homeobox	protein-coding
MACS_peak_2413	chr11	70657971	70658589	+	64.04	NA	promoter-TSS (NM_019400)	promoter-TSS (NM_019400)	17	NM_001291142	54189	Mm.7087	NM_019400	ENSMUSG00000020817	Rabep1	Rab5ep|rabaptin-5|rabaptin-5alpha	rabaptin, RAB GTPase binding effector protein 1	protein-coding
MACS_peak_878	chr1	183772297	183772789	+	64.01	NA	promoter-TSS (NM_133815)	promoter-TSS (NM_133815)	-11	NM_133815	98386	Mm.4538	NM_133815	ENSMUSG00000004880	Lbr	AI505894|ic	lamin B receptor	protein-coding
MACS_peak_139	chr1	39535324	39535674	+	64.01	NA	promoter-TSS (NM_018775)	promoter-TSS (NM_018775)	93	NM_018775	54610	Mm.387293	NM_018775	ENSMUSG00000003134	Tbc1d8	AD3|HBLP1|VRP	TBC1 domain family, member 8	protein-coding
MACS_peak_14259	chr7	88934133	88934654	+	63.99	NA	promoter-TSS (NM_026077)	promoter-TSS (NM_026077)	-54	NM_026077	67290	Mm.248391	NM_026077	ENSMUSG00000025102	3110040N11Rik	AI851475	RIKEN cDNA 3110040N11 gene	protein-coding
MACS_peak_5844	chr15	101114648	101114924	+	63.95	NA	promoter-TSS (NM_026566)	promoter-TSS (NM_026566)	54	NM_026566	68118	Mm.482360	NM_026566	ENSMUSG00000037204	Atg101	9430023L20Rik|AA407441|AU022967	autophagy related 101	protein-coding
MACS_peak_13902	chr7	31741911	31742797	+	63.91	NA	promoter-TSS (NM_011680)	promoter-TSS (NM_011680)	-532	NM_011680	22282	Mm.322453	NM_011680	ENSMUSG00000058239	Usf2	Usf-2|bHLHb12	upstream transcription factor 2	protein-coding
MACS_peak_15875	chr9	37296648	37297066	+	63.91	NA	promoter-TSS (NM_146222)	promoter-TSS (NM_146222)	-49	NM_146222	235184	Mm.127892	NM_146222	ENSMUSG00000042138	Msantd2	2810450G17Rik|9530092B10Rik	Myb/SANT-like DNA-binding domain containing 2	protein-coding
MACS_peak_5048	chr14	80170918	80171259	+	63.91	NA	promoter-TSS (NM_021543)	promoter-TSS (NM_021543)	31	NM_001042726	18530	Mm.390715	NM_021543	ENSMUSG00000036422	Pcdh8	1700080P15Rik|Papc	protocadherin 8	protein-coding
MACS_peak_11024	chr4	118846524	118846958	+	63.80	NA	promoter-TSS (NM_183140)	promoter-TSS (NM_183140)	59	NM_001145936	195522	Mm.169620	NM_183140	ENSMUSG00000045268	Zfp691	6430544H17Rik|Znf691	zinc finger protein 691	protein-coding
MACS_peak_14721	chr7	148633331	148633902	+	63.80	NA	promoter-TSS (NM_026020)	promoter-TSS (NM_026020)	67	NM_026020	67186	Mm.380435	NM_026020	ENSMUSG00000025508	Rplp2	2700049I22Rik	ribosomal protein, large P2	protein-coding
MACS_peak_15058	chr8	71707823	71708142	+	63.80	NA	Intergenic	Intergenic	-24963	NM_001013379	234358	Mm.334577	NM_001013379		Zfp930	-	zinc finger protein 930	protein-coding
MACS_peak_12687	chr6	8459294	8459780	+	63.80	NA	promoter-TSS (NR_040452)	promoter-TSS (NR_040452)	-63	NM_133236	170772	Mm.210787	NM_133236	ENSMUSG00000029638	Glcci1	2310047L21Rik|A130036A18Rik|Fam117c|Gig18|Tssn1	glucocorticoid induced transcript 1	protein-coding
MACS_peak_7084	chr17	57226761	57227146	+	63.80	NA	5' UTR (NM_009451, exon 1 of 4)	5' UTR (NM_009451, exon 1 of 4)	252	NM_009451	22153	Mm.7420	NM_009451	ENSMUSG00000062591	Tubb4a	AI325297|M(beta)4|Tubb|Tubb4	tubulin, beta 4A class IVA	protein-coding
MACS_peak_2965	chr11	105450544	105451110	+	63.77	NA	promoter-TSS (NM_181071)	promoter-TSS (NM_181071)	-473	NM_181071	77097	Mm.22501	NM_175492	ENSMUSG00000053580	Tanc2	3526402J09Rik|5730590C14Rik	tetratricopeptide repeat, ankyrin repeat and coiled-coil containing 2	protein-coding
MACS_peak_3954	chr13	13876204	13876909	+	63.70	NA	promoter-TSS (NM_010317)	promoter-TSS (NM_010317)	-250	NM_010317	14706	Mm.215394	NM_010317	ENSMUSG00000021303	Gng4	-	guanine nucleotide binding protein (G protein), gamma 4	protein-coding
MACS_peak_6896	chr17	36407925	36408850	+	63.67	NA	promoter-TSS (NM_178281)	promoter-TSS (NM_178281)	-9	NM_178281	79263	Mm.40624	NM_024468	ENSMUSG00000045409	Trim39	1100001D15Rik|E130103K13Rik|RBCC-B30.2|Rnf23|mKIAA4179|tfp	tripartite motif-containing 39	protein-coding
MACS_peak_10606	chr4	34829902	34830512	+	63.67	NA	promoter-TSS (NM_013889)	promoter-TSS (NM_013889)	-10	NM_013889	30046	Mm.38193	NM_013889	ENSMUSG00000039967	Zfp292	5730450D02Rik|5830493J20Rik|9430062L07Rik|AI449016|Krox-10|Zfp-15|Zfp15|Zn-15|Zn-16|mKIAA0530	zinc finger protein 292	protein-coding
MACS_peak_4015	chr13	23643358	23643637	+	63.67	NA	promoter-TSS (NM_175655)	promoter-TSS (NM_175655)	15	NM_175655	319157	Mm.442307	NM_175655		Hist1h4f	-	histone cluster 1, H4f	protein-coding
MACS_peak_10157	chr3	95754632	95755357	+	63.67	NA	Intergenic	CpG	21814	NM_023210	66471	Mm.218657	NM_023210	ENSMUSG00000015749	Anp32e	2810018A15Rik|AI047746|AI326868|CPD1|LANP-L|LANPL|mLANP-L	acidic (leucine-rich) nuclear phosphoprotein 32 family, member E	protein-coding
MACS_peak_10998	chr4	116828440	116828940	+	63.67	NA	promoter-TSS (NM_009098)	promoter-TSS (NM_009098)	47	NM_009098	20116	Mm.260904	NM_009098	ENSMUSG00000047675	Rps8	-	ribosomal protein S8	protein-coding
MACS_peak_16355	chr9	96096394	96096937	+	63.67	NA	promoter-TSS (NM_001184708)	promoter-TSS (NM_001184708)	-29	NM_178667	211586	Mm.17977	NM_178667	ENSMUSG00000032411	Tfdp2	1110029I05Rik|A330080J22Rik|DP-3|DP3	transcription factor Dp 2	protein-coding
MACS_peak_3962	chr13	14705128	14705392	+	63.67	NA	promoter-TSS (NM_008944)	promoter-TSS (NM_008944)	44	NM_029271	75398	Mm.36511	NM_029271	ENSMUSG00000015672	Mrpl32	0610033O15Rik	mitochondrial ribosomal protein L32	protein-coding
MACS_peak_11078	chr4	123427312	123427901	+	63.67	NA	promoter-TSS (NM_023423)	promoter-TSS (NM_023423)	-64	NM_023423	68050	Mm.27903	NM_023423		Akirin1	6330407G11Rik	akirin 1	protein-coding
MACS_peak_10839	chr4	87740217	87740826	+	63.67	NA	promoter-TSS (NM_001081184)	promoter-TSS (NM_001081184)	-13	NM_001081184	230393	Mm.287210	NM_001081184	ENSMUSG00000038368	Focad	Kiaa1797|mKIAA1797	focadhesin	protein-coding
MACS_peak_8429	chr2	18314211	18314687	+	63.55	NA	promoter-TSS (NM_001190817)	promoter-TSS (NM_001190817)	8	NM_001190817	13418	Mm.246674	NM_007869	ENSMUSG00000026740	Dnajc1	4733401K02Rik|AA960110|D230036H06Rik|Dnajl1|ERdj1|ERj1p|MTJ1	DnaJ (Hsp40) homolog, subfamily C, member 1	protein-coding
MACS_peak_7266	chr17	88929122	88929547	+	63.55	NA	promoter-TSS (NM_028658)	promoter-TSS (NM_028658)	-130	NM_028658	73825	Mm.271817	NM_028658	ENSMUSG00000034709	Ppp1r21	1110018J12Rik|AI426045|AW550781|Ccdc128|Klraq1	protein phosphatase 1, regulatory subunit 21	protein-coding
MACS_peak_13519	chr7	4989879	4990310	+	63.55	NA	promoter-TSS (NM_001039532)	promoter-TSS (NM_001039532)	-46	NM_001039532	654801	Mm.333548	NM_001039532	ENSMUSG00000043290	Zfp784	C730049F21Rik|Znf784	zinc finger protein 784	protein-coding
MACS_peak_10009	chr3	88139920	88140451	+	63.55	NA	promoter-TSS (NM_178246)	promoter-TSS (NM_178246)	3	NM_178246	229512	Mm.439830	NM_173188	ENSMUSG00000001415	Smg5	BC024683|mKIAA1089	Smg-5 homolog, nonsense mediated mRNA decay factor (C. elegans)	protein-coding
MACS_peak_15814	chr9	22272559	22272825	+	63.53	NA	5' UTR (NM_018739, exon 1 of 6)	5' UTR (NM_018739, exon 1 of 6)	108	NM_018739	55934	Mm.38235	NM_018739	ENSMUSG00000032239	Rp9	PAP-1|Rp9h	retinitis pigmentosa 9 (human)	protein-coding
MACS_peak_1847	chr11	3414695	3415120	+	63.51	NA	5' UTR (NM_053267, exon 1 of 5)	5' UTR (NM_053267, exon 1 of 5)	202	NM_053267	114679	Mm.34046	NM_053267	ENSMUSG00000075702	Selm	1500040L08Rik|A230103K18|Sepm	selenoprotein M	protein-coding
MACS_peak_14835	chr8	13494300	13494561	+	63.46	NA	5' UTR (NM_019521, exon 1 of 15)	5' UTR (NM_019521, exon 1 of 15)	105	NM_019521	14456	Mm.3982	NM_019521	ENSMUSG00000031451	Gas6	Gas-6	growth arrest specific 6	protein-coding
MACS_peak_1271	chr10	70700635	70701162	+	63.46	NA	promoter-TSS (NM_009360)	promoter-TSS (NM_009360)	-106	NM_009360	21780	Mm.229292	NM_009360	ENSMUSG00000003923	Tfam	AI661103|Hmgts|mtTFA|tsHMG	transcription factor A, mitochondrial	protein-coding
MACS_peak_1515	chr10	82226556	82227116	+	63.45	NA	promoter-TSS (NM_010914)	promoter-TSS (NM_010914)	50	NM_010914	18045	Mm.245998	NM_010914	ENSMUSG00000020248	Nfyb	AA985999|Cbf-A	nuclear transcription factor-Y beta	protein-coding
MACS_peak_5379	chr15	74551566	74551867	+	63.40	NA	promoter-TSS (NM_198607)	promoter-TSS (NM_198607)	52	NM_198607	223626	Mm.268603	NM_198607	ENSMUSG00000056665	Them6	4930572J05Rik	thioesterase superfamily member 6	protein-coding
MACS_peak_1657	chr10	112365860	112366337	+	63.37	NA	promoter-TSS (NM_001033474)	promoter-TSS (NM_001033474)	-16	NM_001033474	382423	Mm.431239	NM_001033474	ENSMUSG00000074748	Atxn7l3b	4921506J03Rik|6230409E21Rik|AI315132|ENSMUSG00000074747	ataxin 7-like 3B	protein-coding
MACS_peak_13917	chr7	35098187	35098788	+	63.37	NA	Intergenic	CpG	-27859	NM_172741	233103	Mm.491097	NM_172741	ENSMUSG00000066571	4931406P16Rik	AA553327|mKIAA0355	RIKEN cDNA 4931406P16 gene	protein-coding
MACS_peak_2154	chr11	53163871	53164764	+	63.37	NA	promoter-TSS (NM_033565)	promoter-TSS (NM_033565)	48	NM_033565	93736	Mm.395281	NM_033565	ENSMUSG00000049470	Aff4	AF5Q31|Alf4|Laf4l|MCEF	AF4/FMR2 family, member 4	protein-coding
MACS_peak_15509	chr8	113426112	113426427	+	63.36	NA	intron (NM_172283, intron 1 of 23)	CpG	119	NM_172283	234730	Mm.102591	NM_172283	ENSMUSG00000033703	Fuk	1110046B12Rik|AI303278	fucokinase	protein-coding
MACS_peak_14143	chr7	71083583	71084364	+	63.29	NA	promoter-TSS (NM_021366)	promoter-TSS (NM_021366)	-172	NM_021366	50794	Mm.240473	NM_021366	ENSMUSG00000052040	Klf13	0610043C13Rik|9430029L20Rik|Bteb3|FKLF-2|FKLF2|NSLP1|RFLAT-1|RFLAT1	Kruppel-like factor 13	protein-coding
MACS_peak_2782	chr11	97887776	97888051	+	63.29	NA	promoter-TSS (NM_009078)	promoter-TSS (NM_009078)	-111	NM_001159483	19921	Mm.10247	NM_009078	ENSMUSG00000017404	Rpl19	-	ribosomal protein L19	protein-coding
MACS_peak_1124	chr10	41738221	41738471	+	63.22	NA	promoter-TSS (NM_001034858)	promoter-TSS (NM_001034858)	-158	NM_001034858	213402	Mm.211320	NM_001034858	ENSMUSG00000071324	Armc2	2610018I05Rik	armadillo repeat containing 2	protein-coding
MACS_peak_3518	chr12	71087903	71088460	+	63.22	NA	promoter-TSS (NM_022028)	promoter-TSS (NM_022028)	-192	NM_022028	64010	Mm.390480	NM_022028	ENSMUSG00000021067	Sav1	1700040G09Rik|Salv|Sav|WW45|Wwp3|Wwp4	salvador homolog 1 (Drosophila)	protein-coding
MACS_peak_10662	chr4	43506161	43506466	+	63.21	NA	promoter-TSS (NR_001460)	promoter-TSS (NR_001460)	76	NM_001037913	622404	Mm.289109	NM_001037913	ENSMUSG00000028461	Ccdc107	-	coiled-coil domain containing 107	protein-coding
MACS_peak_1330	chr10	78215104	78215611	+	63.20	NA	exon (NM_027630, exon 1 of 7)	exon (NM_027630, exon 1 of 7)	455	NM_027630	70976	Mm.188505	NM_027630	ENSMUSG00000078442	Ccdc105	4931413A09Rik	coiled-coil domain containing 105	protein-coding
MACS_peak_16642	chr9	123022068	123022556	+	63.17	NA	promoter-TSS (NM_026917)	promoter-TSS (NM_026917)	11	NM_026917	69035	Mm.28300	NM_026917		Zdhhc3	1110020O22Rik|1810006O10Rik|2210017C02Rik|DHHC-3|GODZ|Gramp1|Zfp373	zinc finger, DHHC domain containing 3	protein-coding
MACS_peak_16142	chr9	63450068	63450740	+	63.17	NA	promoter-TSS (NM_025857)	promoter-TSS (NM_025857)	-58	NM_025857	66939	Mm.34338	NM_025857	ENSMUSG00000037257	Aagab	2310007F21Rik|p34	alpha- and gamma-adaptin binding protein	protein-coding
MACS_peak_16341	chr9	94438328	94438984	+	63.15	NA	promoter-TSS (NM_001033145)	promoter-TSS (NM_001033145)	-156	NM_001033145	68861	Mm.258746	NM_001033145	ENSMUSG00000045414	1190002N15Rik	GoPro49|HASF	RIKEN cDNA 1190002N15 gene	protein-coding
MACS_peak_4983	chr14	70688939	70689525	+	63.15	NA	promoter-TSS (NM_008915)	promoter-TSS (NM_008915)	24	NM_008915	19057	Mm.439683	NM_008915	ENSMUSG00000022092	Ppp3cc	Calnc	protein phosphatase 3, catalytic subunit, gamma isoform	protein-coding
MACS_peak_14641	chr7	139767862	139768362	+	63.15	NA	promoter-TSS (NM_016978)	promoter-TSS (NM_016978)	-31	NM_016978	18242	Mm.13694	NM_016978	ENSMUSG00000030934	Oat	AI194874	ornithine aminotransferase	protein-coding
MACS_peak_6812	chr17	34161216	34162015	+	63.15	NA	promoter-TSS (NM_009066)	promoter-TSS (NM_009066)	10	NM_009066	19763	Mm.20343	NM_009066	ENSMUSG00000024325	Ring1	Ring1A	ring finger protein 1	protein-coding
MACS_peak_1283	chr10	74674493	74674742	+	63.04	NA	promoter-TSS (NM_001145826)	promoter-TSS (NM_001145826)	-201	NM_153406	74392	Mm.27716	NM_153406	ENSMUSG00000033444	Specc1l	4930470P14Rik|4932439K10Rik|9530057A13Rik|AI317249|Cytsa|mKIAA0376	sperm antigen with calponin homology and coiled-coil domains 1-like	protein-coding
MACS_peak_4602	chr14	20642840	20643129	+	63.04	NA	promoter-TSS (NM_026528)	promoter-TSS (NM_026528)	61	NM_026528	68045	Mm.21932	NM_026528	ENSMUSG00000021807	2700060E02Rik	-	RIKEN cDNA 2700060E02 gene	protein-coding
MACS_peak_9727	chr3	10351028	10351385	+	63.04	NA	promoter-TSS (NM_025512)	promoter-TSS (NM_025512)	95	NM_025512	66361	Mm.371617	NM_025512	ENSMUSG00000039795	Zfand1	2310008M20Rik|AW048890	zinc finger, AN1-type domain 1	protein-coding
MACS_peak_4465	chr13	99696071	99696793	+	63.04	NA	promoter-TSS (NM_178716)	promoter-TSS (NM_178716)	-93	NM_178716	238799	Mm.173286	NM_178716	ENSMUSG00000009470	Tnpo1	AU021749|D13Ertd688e|IPO2|Kpnb2|MIP|MIP1|TRN	transportin 1	protein-coding
MACS_peak_6386	chr16	98183242	98183541	+	62.89	NA	intron (NM_175428, intron 1 of 2)	CpG	395	NM_001081685	114565	Mm.474489	NM_175428	ENSMUSG00000046962	Zbtb21	5430437K12Rik|B430213I24Rik|Zfp295|Znf295|mKIAA1227	zinc finger and BTB domain containing 21	protein-coding
MACS_peak_13334	chr6	125046108	125046428	+	62.82	NA	promoter-TSS (NM_145979)	promoter-TSS (NM_145979)	87	NM_145979	107932	Mm.333388	NM_145979	ENSMUSG00000063870	Chd4	9530019N15Rik|AA617397|BC005710|D6Ertd380e|Mi-2beta|mKIAA4075	chromodomain helicase DNA binding protein 4	protein-coding
MACS_peak_11161	chr4	129190767	129191007	+	62.76	NA	promoter-TSS (NM_010807)	promoter-TSS (NM_010807)	62	NM_010807	17357	Mm.424974	NM_010807	ENSMUSG00000047945	Marcksl1	AL022768|AW215397|AW536807|D4Bc1|F52|MacMARCKS|Macs2|Macs3|Mlp|Mrp	MARCKS-like 1	protein-coding
MACS_peak_7799	chr19	4625368	4625876	+	62.76	NA	promoter-TSS (NM_023131)	promoter-TSS (NM_023131)	-5	NM_023131	19671	Mm.391143	NM_023131	ENSMUSG00000024889	Rce1	D19Ertd283e|D19Ertd98e	RCE1 homolog, prenyl protein peptidase (S. cerevisiae)	protein-coding
MACS_peak_15198	chr8	75877186	75877762	+	62.68	NA	Intergenic	CpG	-1019	NM_010687	16795	Mm.324371	NM_010687	ENSMUSG00000004383	Large	BPFD#36|Gyltl1a|Mbp-1|Mbp1|enr|fg|froggy|mKIAA0609|myd	like-glycosyltransferase	protein-coding
MACS_peak_2224	chr11	59041535	59042071	+	62.64	NA	promoter-TSS (NM_001130408)	promoter-TSS (NM_001130408)	-34	NM_007476	11840	Mm.371546	NM_007476	ENSMUSG00000048076	Arf1	-	ADP-ribosylation factor 1	protein-coding
MACS_peak_10240	chr3	104442211	104442737	+	62.58	NA	promoter-TSS (NM_009196)	promoter-TSS (NM_009196)	-113	NM_009196	20501	Mm.9086	NM_009196	ENSMUSG00000032902	Slc16a1	AL022710|Mct1	solute carrier family 16 (monocarboxylic acid transporters), member 1	protein-coding
MACS_peak_8233	chr19	46119416	46120389	+	62.58	NA	promoter-TSS (NM_001113408)	promoter-TSS (NM_001113408)	-201	NM_001113408	16825	Mm.327442	NM_010697	ENSMUSG00000025223	Ldb1	CLIM2|NLI	LIM domain binding 1	protein-coding
MACS_peak_9616	chr2	168055672	168055964	+	62.58	NA	promoter-TSS (NM_001160330)	promoter-TSS (NM_001160330)	61	NM_010072	13480	Mm.422657	NM_010072	ENSMUSG00000078919	Dpm1	AI118379|AI194292	dolichol-phosphate (beta-D) mannosyltransferase 1	protein-coding
MACS_peak_5729	chr15	96539872	96540713	+	62.57	NA	Intergenic	CpG	-10163	NM_175121	67760	Mm.46754	NM_175121	ENSMUSG00000022462	Slc38a2	5033402L14Rik|AI316867|ATA2|SAT2|mKIAA1382	solute carrier family 38, member 2	protein-coding
MACS_peak_16219	chr9	70526379	70527031	+	62.53	NA	promoter-TSS (NM_007399)	promoter-TSS (NM_007399)	-103	NM_007399	11487	Mm.3037	NM_007399	ENSMUSG00000054693	Adam10	1700031C13Rik|MADM|kuz|kuzbanian	a disintegrin and metallopeptidase domain 10	protein-coding
MACS_peak_77	chr1	30930391	30931082	+	62.53	NA	Intergenic	CpG	-10635	NM_001081080	213109	Mm.194486	NM_025871	ENSMUSG00000048874	Phf3	2310061N19Rik|mKIAA0244	PHD finger protein 3	protein-coding
MACS_peak_6193	chr16	38550094	38550478	+	62.52	NA	promoter-TSS (NM_001300827)	promoter-TSS (NM_001300827)	52	NM_172380	224143	Mm.284366	NM_172380	ENSMUSG00000034064	Poglut1	9630046K23Rik|Clp46|Ktelc1|Rumi	protein O-glucosyltransferase 1	protein-coding
MACS_peak_6651	chr17	26206286	26206731	+	62.52	NA	promoter-TSS (NM_001162869)	promoter-TSS (NM_001162869)	-386	NM_001162869	215445	Mm.41191	NM_153140	ENSMUSG00000037098	Rab11fip3	Cart1|D030060O14Rik|Rab11-FIP3|mKIAA0665	RAB11 family interacting protein 3 (class II)	protein-coding
MACS_peak_4901	chr14	62175342	62175666	+	62.52	NA	5' UTR (NM_025697, exon 1 of 5)	5' UTR (NM_025697, exon 1 of 5)	219	NM_025697	66674	Mm.282706	NM_025697	ENSMUSG00000021930	Spryd7	6330409N04Rik|Clld6	SPRY domain containing 7	protein-coding
MACS_peak_7470	chr18	36675249	36675499	+	62.52	NA	promoter-TSS (NM_010415)	promoter-TSS (NM_010415)	85	NM_010415	15200	Mm.289681	NM_010415	ENSMUSG00000024486	Hbegf	AW047313|Dtr|Dts|Hegfl	heparin-binding EGF-like growth factor	protein-coding
MACS_peak_14465	chr7	123477432	123477908	+	62.52	NA	promoter-TSS (NM_026533)	promoter-TSS (NM_026533)	34	NM_026533	68052	Mm.14798	NM_026533	ENSMUSG00000090862	Rps13	2700063M04Rik	ribosomal protein S13	protein-coding
MACS_peak_651	chr1	155179695	155180088	+	62.47	NA	promoter-TSS (NM_010683)	promoter-TSS (NM_010683)	25	NM_010683	226519	Mm.1249	NM_010683	ENSMUSG00000026478	Lamc1	Lamb2	laminin, gamma 1	protein-coding
MACS_peak_4596	chr14	19103273	19103606	+	62.44	NA	promoter-TSS (NM_025586)	promoter-TSS (NM_025586)	61	NM_025586	66480	Mm.2050	NM_025586	ENSMUSG00000012405	Rpl15	2510008H07Rik	ribosomal protein L15	protein-coding
MACS_peak_3106	chr11	116274118	116274846	+	62.38	NA	promoter-TSS (NM_027258)	promoter-TSS (NM_027258)	-136	NM_027258	217340	Mm.426344	NM_027258	ENSMUSG00000052949	Rnf157	2610036E23Rik|A130073L17Rik|mKIAA1917	ring finger protein 157	protein-coding
MACS_peak_7671	chr18	74427563	74428184	+	62.37	NA	promoter-TSS (NM_013594)	promoter-TSS (NM_013594)	-69	NM_013594	17190	Mm.22522	NM_013594	ENSMUSG00000024561	Mbd1	Cxxc3|PCM1	methyl-CpG binding domain protein 1	protein-coding
MACS_peak_5973	chr16	13780566	13781001	+	62.37	NA	promoter-TSS (NM_001039521)	promoter-TSS (NM_001039521)	-9	NM_001039521	106298	Mm.490362	NM_001039521	ENSMUSG00000022682	Rrn3	AL023001|E130302O19Rik|R75565|TIF-1A|Tif1a	RRN3 RNA polymerase I transcription factor homolog (yeast)	protein-coding
MACS_peak_9921	chr3	68376250	68376559	+	62.37	NA	5' UTR (NM_013928, exon 1 of 7)	5' UTR (NM_013928, exon 1 of 7)	114	NM_013928	30953	Mm.331064	NM_013928	ENSMUSG00000027777	Schip1	Nf2ip|Schip-1	schwannomin interacting protein 1	protein-coding
MACS_peak_12238	chr5	122068690	122069304	+	62.31	NA	promoter-TSS (NM_178799)	promoter-TSS (NM_178799)	-50	NM_178799	338350	Mm.482918	NM_178799	ENSMUSG00000042647	Acad12	9330129D05Rik	acyl-Coenzyme A dehydrogenase family, member 12	protein-coding
MACS_peak_1167	chr10	53795385	53795629	+	62.31	NA	promoter-TSS (NR_038016)	promoter-TSS (NR_038016)	95	NM_008548	17155	Mm.117294	NM_008548	ENSMUSG00000003746	Man1a	Man1a1|PCR1	mannosidase 1, alpha	protein-coding
MACS_peak_13616	chr7	17401414	17402049	+	62.31	NA	exon (NM_133789, exon 1 of 18)	exon (NM_133789, exon 1 of 18)	350	NM_173430	243853	Mm.39703	NM_173430	ENSMUSG00000048920	Fkrp	A830029B19Rik|AI842067|AI847300|LGMD1I|MDC1C	fukutin related protein	protein-coding
MACS_peak_840	chr1	180336133	180336878	+	62.31	NA	intron (NM_026626, intron 1 of 6)	CpG	493	NM_026626	68226	Mm.252132	NM_026626	ENSMUSG00000026495	Efcab2	1700073K01Rik|D830011E08Rik	EF-hand calcium binding domain 2	protein-coding
MACS_peak_5806	chr15	99602653	99603170	+	62.31	NA	promoter-TSS (NM_028015)	promoter-TSS (NM_028015)	35	NM_028015	71949	Mm.390821	NM_028015		Cers5	2310081H14Rik|AU045339|AW544927|Lass5|Trh4	ceramide synthase 5	protein-coding
MACS_peak_16580	chr9	115219720	115220208	+	62.31	NA	promoter-TSS (NM_024222)	promoter-TSS (NM_024222)	-425	NM_024222	68292	Mm.296158	NM_024222	ENSMUSG00000032437	Stt3b	1300006C19Rik|Simp	STT3, subunit of the oligosaccharyltransferase complex, homolog B (S. cerevisiae)	protein-coding
MACS_peak_13028	chr6	85019246	85019616	+	62.31	NA	promoter-TSS (NM_177077)	promoter-TSS (NM_177077)	76	NM_177077	75914	Mm.159621	NM_177077	ENSMUSG00000033769	Exoc6b	4930569O18Rik|G430127E12Rik|Sec15b|Sec15l2|mKIAA0919	exocyst complex component 6B	protein-coding
MACS_peak_13912	chr7	34953387	34953799	+	62.31	NA	promoter-TSS (NM_016682)	promoter-TSS (NM_016682)	-45	NM_016682	50995	Mm.27560	NM_016682	ENSMUSG00000052997	Uba2	AA986091|Arx|Sae2|UBA1|Ubl1a2|Uble1b	ubiquitin-like modifier activating enzyme 2	protein-coding
MACS_peak_16610	chr9	120036802	120037120	+	62.31	NA	promoter-TSS (NM_011029)	promoter-TSS (NM_011029)	77	NM_011029	16785	Mm.4071	NM_011029	ENSMUSG00000032518	Rpsa	67kDa|67lr|AL022858|Lamr|Lamr1|Lamrl1|MLR|P40|P40-3|P40-8	ribosomal protein SA	protein-coding
MACS_peak_3769	chr12	103793122	103793414	+	62.29	NA	promoter-TSS (NM_007693)	promoter-TSS (NM_007693)	89	NM_007693	12652	Mm.4137	NM_007693	ENSMUSG00000021194	Chga	ChrA	chromogranin A	protein-coding
MACS_peak_8111	chr19	32832001	32832372	+	62.28	NA	5' UTR (NM_008960, exon 1 of 9)	5' UTR (NM_008960, exon 1 of 9)	119	NM_008960	19211	Mm.245395	NM_008960	ENSMUSG00000013663	Pten	2310035O07Rik|A130070J02Rik|AI463227|B430203M17Rik|MMAC1|TEP1	phosphatase and tensin homolog	protein-coding
MACS_peak_7721	chr18	80666788	80667051	+	62.28	NA	promoter-TSS (NM_026295)	promoter-TSS (NM_026295)	-513	NM_026295	67655	Mm.312893	NM_026295	ENSMUSG00000033323	Ctdp1	4930563P03Rik|AW553592	CTD (carboxy-terminal domain, RNA polymerase II, polypeptide A) phosphatase, subunit 1	protein-coding
MACS_peak_13240	chr6	118088811	118089252	+	62.28	NA	intron (NM_030165, intron 1 of 7)	CpG	127	NM_030165	78752	Mm.300317	NM_030165	ENSMUSG00000042042	Csgalnact2	4632415D10Rik|Galnact2	chondroitin sulfate N-acetylgalactosaminyltransferase 2	protein-coding
MACS_peak_8812	chr2	69699592	69699858	+	62.28	NA	5' UTR (NM_009278, exon 1 of 12)	5' UTR (NM_009278, exon 1 of 12)	106	NM_009278	20823	Mm.10508	NM_009278	ENSMUSG00000068882	Ssb	SS-B	Sjogren syndrome antigen B	protein-coding
MACS_peak_865	chr1	182743845	182744046	+	62.24	NA	promoter-TSS (NM_008210)	promoter-TSS (NM_008210)	-211	NM_008210	15078	Mm.138832	NM_008210	ENSMUSG00000060743	H3f3a	H3.3A	H3 histone, family 3A	protein-coding
MACS_peak_4734	chr14	46277577	46278143	+	62.19	NA	promoter-TSS (NM_001042719)	promoter-TSS (NM_001042719)	-42	NM_001042719	114874	Mm.121918	NM_176845	ENSMUSG00000037697	Ddhd1	PA-PLA1	DDHD domain containing 1	protein-coding
MACS_peak_2399	chr11	70376110	70376591	+	62.19	NA	promoter-TSS (NM_001045959)	promoter-TSS (NM_001045959)	-33	NM_001045964	50932	Mm.42967	NM_016713	ENSMUSG00000020827	Mink1	B55|MINK|Map4k6|Ysk2	misshapen-like kinase 1 (zebrafish)	protein-coding
MACS_peak_2351	chr11	69373490	69373751	+	62.16	NA	5' UTR (NM_007911, exon 1 of 5)	5' UTR (NM_007911, exon 1 of 5)	119	NM_007911	13643	Mm.249637	NM_007911	ENSMUSG00000003934	Efnb3	EFL-6|ELF-3|Elk-L3|Epl8|LERK-8|NLERK-2	ephrin B3	protein-coding
MACS_peak_12053	chr5	107125298	107125965	+	62.16	NA	5' UTR (NM_026856, exon 1 of 7)	5' UTR (NM_026856, exon 1 of 7)	218	NM_026856	52397	Mm.249474	NM_026856	ENSMUSG00000049606	Zfp644	1110068L01Rik|AA408882|BM-005|D5Ertd689e|Zep-2	zinc finger protein 644	protein-coding
MACS_peak_12312	chr5	124895176	124895468	+	62.16	NA	intron (NM_030241, intron 1 of 7)	CpG	5383	NM_030241	67956	Mm.137966	NM_030241	ENSMUSG00000049327	Setd8	2410195B05Rik|AA617402|AW536475|PR-SET7	SET domain containing (lysine methyltransferase) 8	protein-coding
MACS_peak_12833	chr6	40421237	40421667	+	62.16	NA	promoter-TSS (NM_028358)	promoter-TSS (NM_028358)	-15	NM_001286664	381760	Mm.276356	NM_028358	ENSMUSG00000029911	Ssbp1	2810480P10Rik|G630031O20Rik|MtSSB|mtDBP	single-stranded DNA binding protein 1	protein-coding
MACS_peak_14723	chr7	148660853	148661204	+	62.16	NA	promoter-TSS (NM_025593)	promoter-TSS (NM_025593)	24	NM_025593	66491	Mm.380115	NM_025593	ENSMUSG00000038489	Polr2l	2510029B14Rik	polymerase (RNA) II (DNA directed) polypeptide L	protein-coding
MACS_peak_9271	chr2	131317256	131317920	+	62.15	NA	promoter-TSS (NM_001177839)	promoter-TSS (NM_001177839)	-10	NM_001177834	228608	Mm.136586	NM_145533	ENSMUSG00000027333	Smox	B130066H01Rik|PAO|PAOh1|SMO	spermine oxidase	protein-coding
MACS_peak_14678	chr7	146434029	146434369	+	62.11	NA	promoter-TSS (NM_001033206)	promoter-TSS (NM_001033206)	-182	NM_001033206	101631	Mm.334300	NM_001033206	ENSMUSG00000060260	Pwwp2b	AI594893|D7Ertd517e|D930023J19Rik|Pwwp2	PWWP domain containing 2B	protein-coding
MACS_peak_13869	chr7	30906651	30907154	+	62.11	NA	promoter-TSS (NM_001081007)	promoter-TSS (NM_001081007)	-65	NM_001081007	233060	Mm.443484	NM_001081007	ENSMUSG00000074220	Zfp382	5930415A09Rik|Znf382	zinc finger protein 382	protein-coding
MACS_peak_5870	chr15	102348122	102348377	+	62.11	NA	promoter-TSS (NM_009319)	promoter-TSS (NM_009319)	-374	NM_001253795	21357	Mm.291485	NM_009319	ENSMUSG00000023051	Tarbp2	Prbp|TRBP	TAR (HIV) RNA binding protein 2	protein-coding
MACS_peak_13953	chr7	46807801	46808245	+	62.11	NA	Intergenic	CpG	34887	NM_001004139	70227	Mm.333800	NM_001004139	ENSMUSG00000068959	Zfp619	3000002G13Rik	zinc finger protein 619	protein-coding
MACS_peak_11688	chr5	29895689	29895935	+	62.11	NA	promoter-TSS (NM_133907)	promoter-TSS (NM_133907)	30	NM_133907	100763	Mm.137746	NM_133907	ENSMUSG00000039000	Ube3c	AI853514|mKIAA0010	ubiquitin protein ligase E3C	protein-coding
MACS_peak_8191	chr19	43749542	43750142	+	62.11	NA	promoter-TSS (NM_145156)	promoter-TSS (NM_145156)	174	NR_045645	100502982	Mm.313570	NR_045645		BC037704	-	cDNA sequence BC037704	ncRNA
MACS_peak_9903	chr3	61168428	61168805	+	62.11	NA	5' UTR (NM_028712, exon 1 of 1)	5' UTR (NM_028712, exon 1 of 1)	187	NM_028712	74012	Mm.422674	NM_028712	ENSMUSG00000036894	Rap2b	4021402C18Rik|AA408554	RAP2B, member of RAS oncogene family	protein-coding
MACS_peak_14269	chr7	90014652	90015518	+	62.05	NA	promoter-TSS (NM_175366)	promoter-TSS (NM_175366)	-758	NM_175366	108797	Mm.306789	NM_175366	ENSMUSG00000057706	Mex3b	4931439A04Rik|M-04814|Rkhd3|mKIAA2009	mex3 homolog B (C. elegans)	protein-coding
MACS_peak_8963	chr2	91848332	91848936	+	62.02	NA	intron (NM_011957, intron 1 of 11)	CpG	15693	NM_011957	26427	Mm.10353	NM_011957	ENSMUSG00000027230	Creb3l1	Oasis	cAMP responsive element binding protein 3-like 1	protein-coding
MACS_peak_47	chr1	16609485	16609720	+	62.02	NA	promoter-TSS (NM_025773)	promoter-TSS (NM_025773)	-183	NM_001271017	66799	Mm.122430	NM_025773	ENSMUSG00000025939	Ube2w	6130401J04Rik	ubiquitin-conjugating enzyme E2W (putative)	protein-coding
MACS_peak_10700	chr4	46317653	46318024	+	62.02	NA	Intergenic	CpG	-39228	NM_183298	110805	Mm.354634	NM_183298		Foxe1	Titf2	forkhead box E1	protein-coding
MACS_peak_4395	chr13	83860528	83861012	+	62.02	NA	Intergenic	CpG	-6941	NR_015561	320203	Mm.245636	NM_177100	ENSMUSG00000050334	C130071C03Rik	2810449C10Rik	RIKEN cDNA C130071C03 gene	ncRNA
MACS_peak_3956	chr13	14046446	14046703	+	62.01	NA	promoter-TSS (NM_178640)	promoter-TSS (NM_178640)	-367	NM_178640	97884	Mm.21686	NM_178640	ENSMUSG00000039242	B3galnt2	A930105D20Rik|C80633|D230016N13Rik	UDP-GalNAc:betaGlcNAc beta 1,3-galactosaminyltransferase, polypeptide 2	protein-coding
MACS_peak_10765	chr4	57969002	57969648	+	61.91	NA	promoter-TSS (NM_011660)	promoter-TSS (NM_011660)	-42	NM_011660	22166	Mm.260618	NM_011660	ENSMUSG00000028367	Txn1	ADF|AW550880|Trx1|Txn	thioredoxin 1	protein-coding
MACS_peak_15666	chr8	127386726	127387198	+	61.87	NA	promoter-TSS (NM_025615)	promoter-TSS (NM_025615)	29	NM_010322	14712	Mm.29114	NM_010322	ENSMUSG00000031985	Gnpat	AU019525|D1Ertd819e|DHAPAT	glyceronephosphate O-acyltransferase	protein-coding
MACS_peak_1776	chr10	127707538	127707865	+	61.87	NA	promoter-TSS (NM_019963)	promoter-TSS (NM_019963)	69	NM_019963	20847	Mm.293120	NM_019963	ENSMUSG00000040033	Stat2	1600010G07Rik|AW496480	signal transducer and activator of transcription 2	protein-coding
MACS_peak_6567	chr17	24278224	24278572	+	61.85	NA	intron (NM_001286662, intron 1 of 13)	CpG	163	NM_011062	18607	Mm.10504	NM_011062	ENSMUSG00000024122	Pdpk1	Pdk1	3-phosphoinositide dependent protein kinase 1	protein-coding
MACS_peak_9412	chr2	153318304	153318657	+	61.76	NA	intron (NM_001134300, intron 1 of 10)	CpG	37227	NM_001134300	329540	Mm.50600	NM_001001986	ENSMUSG00000061411	Nol4l	4931410H15|8430427H17Rik|AI429157|Gm1636	nucleolar protein 4-like	protein-coding
MACS_peak_4625	chr14	21894889	21895558	+	61.75	NA	promoter-TSS (NM_001243041)	promoter-TSS (NM_001243041)	-151	NM_001243041	11534	Mm.188734	NM_134079	ENSMUSG00000039197	Adk	2310026J05Rik|5033405D03Rik|AI255373|AI987814|Ak	adenosine kinase	protein-coding
MACS_peak_6007	chr16	17233399	17233999	+	61.70	NA	promoter-TSS (NM_178922)	promoter-TSS (NM_178922)	19	NM_178922	58180	Mm.261602	NM_178922	ENSMUSG00000050240	Hic2	AA409108|HRG22|mKIAA1020	hypermethylated in cancer 2	protein-coding
MACS_peak_11644	chr5	23950627	23951300	+	61.70	NA	promoter-TSS (NM_023229)	promoter-TSS (NM_023229)	90	NM_023229	66587	Mm.28123	NM_023229	ENSMUSG00000028959	Fastk	0610011K02Rik|610011K02Rik	Fas-activated serine/threonine kinase	protein-coding
MACS_peak_16509	chr9	108685897	108686411	+	61.68	NA	Intergenic	CpG	-12171	NM_029634	76500	Mm.276336	NM_029634	ENSMUSG00000032599	Ip6k2	1500005N04Rik|AW050208|Ihpk2	inositol hexaphosphate kinase 2	protein-coding
MACS_peak_104	chr1	36568628	36569043	+	61.68	NA	exon (NM_001039551, exon 1 of 9)	exon (NM_001039551, exon 1 of 9)	114	NM_053186	94218	Mm.256323	NM_053186	ENSMUSG00000001138	Cnnm3	Acdp3|Clp3|mACDP3	cyclin M3	protein-coding
MACS_peak_16253	chr9	74918743	74919281	+	61.66	NA	promoter-TSS (NM_010864)	promoter-TSS (NM_010864)	-1	NM_010864	17918	Mm.3645	NM_010864	ENSMUSG00000034593	Myo5a	9630007J19Rik|AI413174|AI661011|Dbv|MVa|Myo5|MyoVA|Sev-1|d|d-120J|flail|flr	myosin VA	protein-coding
MACS_peak_7128	chr17	69766464	69766902	+	61.66	NA	non-coding (NR_026848, exon 1 of 1)	non-coding (NR_026848, exon 1 of 1)	896	NR_026848	77533	Mm.266592	NR_026848		C030034I22Rik	-	RIKEN cDNA C030034I22 gene	ncRNA
MACS_peak_12944	chr6	66987250	66987504	+	61.65	NA	promoter-TSS (NM_007836)	promoter-TSS (NM_007836)	24	NM_007836	13197	Mm.72235	NM_007836	ENSMUSG00000036390	Gadd45a	AA545191|Ddit1|GADD45	growth arrest and DNA-damage-inducible 45 alpha	protein-coding
MACS_peak_9314	chr2	143371794	143372069	+	61.60	NA	promoter-TSS (NM_008792)	promoter-TSS (NM_008792)	62	NM_008792	18549	Mm.294493	NM_008792	ENSMUSG00000027419	Pcsk2	6330411F23Rik|AI839700|Nec-2|Nec2|PC2|Phpp-2|SPC2	proprotein convertase subtilisin/kexin type 2	protein-coding
MACS_peak_10129	chr3	94846317	94846769	+	61.60	NA	promoter-TSS (NM_001282017)	promoter-TSS (NM_001282017)	-7	NM_008951	19185	Mm.2261	NM_008951	ENSMUSG00000005625	Psmd4	Af1|Mcb1|angiocidin	proteasome (prosome, macropain) 26S subunit, non-ATPase, 4	protein-coding
MACS_peak_3790	chr12	106270724	106271098	+	61.59	NA	promoter-TSS (NM_028419)	promoter-TSS (NM_028419)	12	NM_028419	73046	Mm.29128	NM_028419	ENSMUSG00000021102	Glrx5	2310004O13Rik|2900070E19Rik|AU020725	glutaredoxin 5 homolog (S. cerevisiae)	protein-coding
MACS_peak_543	chr1	134288256	134288632	+	61.56	NA	promoter-TSS (NM_178874)	promoter-TSS (NM_178874)	-586	NM_178874	68875	Mm.273785	NM_178874	ENSMUSG00000042066	Tmcc2	1110063G11Rik	transmembrane and coiled-coil domains 2	protein-coding
MACS_peak_6442	chr17	8503689	8504309	+	61.56	NA	promoter-TSS (NM_134114)	promoter-TSS (NM_134114)	-16	NR_073374	75060	Mm.426530	NR_073374	ENSMUSG00000087478	4930506C21Rik	-	RIKEN cDNA 4930506C21 gene	ncRNA
MACS_peak_8595	chr2	30247875	30248263	+	61.35	NA	intron (NR_110963, intron 1 of 4)	CpG	295	NM_001290508	57170	Mm.285167	NM_020329	ENSMUSG00000026856	Dolpp1	0610011H20Rik|AB030189|LSFR2	dolichyl pyrophosphate phosphatase 1	protein-coding
MACS_peak_11281	chr4	135429404	135429829	+	61.35	NA	5' UTR (NM_026383, exon 1 of 3)	5' UTR (NM_026383, exon 1 of 3)	145	NM_026383	52830	Mm.29159	NM_026383	ENSMUSG00000028675	Pnrc2	0610011E17Rik|D4Bwg0593e	proline-rich nuclear receptor coactivator 2	protein-coding
MACS_peak_14113	chr7	63217644	63218094	+	61.35	NA	promoter-TSS (NM_001256133)	promoter-TSS (NM_001256133)	-6	NM_001256130	93790	Mm.37249	NM_023647	ENSMUSG00000030452	Nipa2	2600017P10Rik|3830408P04Rik|AB041581	non imprinted in Prader-Willi/Angelman syndrome 2 homolog (human)	protein-coding
MACS_peak_3882	chr12	114067824	114068218	+	61.35	NA	promoter-TSS (NM_028023)	promoter-TSS (NM_028023)	-421	NM_028023	71963	Mm.313185	NM_028023	ENSMUSG00000047832	Cdca4	2410018C03Rik|HEPP|SEI-3	cell division cycle associated 4	protein-coding
MACS_peak_2504	chr11	77029435	77029897	+	61.35	NA	promoter-TSS (NM_177710)	promoter-TSS (NM_177710)	-261	NM_177710	237860	Mm.440381	NM_177710	ENSMUSG00000037926	Ssh2	SSH-2|SSH-2L|mSSH-2L	slingshot homolog 2 (Drosophila)	protein-coding
MACS_peak_10376	chr3	131227770	131228153	+	61.35	NA	intron (NM_011863, intron 1 of 11)	CpG	229	NM_011863	23971	Mm.244912	NM_011863	ENSMUSG00000028032	Papss1	AI325286|Asapk|SK1	3'-phosphoadenosine 5'-phosphosulfate synthase 1	protein-coding
MACS_peak_15371	chr8	96702977	96703314	+	61.24	NA	5' UTR (NM_013602, exon 1 of 3)	5' UTR (NM_013602, exon 1 of 3)	156	NM_013602	17748	Mm.192991	NM_013602	ENSMUSG00000031765	Mt1	MT-I|Mt-1	metallothionein 1	protein-coding
MACS_peak_2204	chr11	58136489	58137199	+	61.24	NA	promoter-TSS (NM_001256518)	promoter-TSS (NM_001256518)	23	NM_001256517	319475	Mm.72124	NM_178761	ENSMUSG00000049755	Zfp672	4930488P06Rik|4930511N19Rik|Znf672	zinc finger protein 672	protein-coding
MACS_peak_1223	chr10	62040968	62041246	+	61.24	NA	promoter-TSS (NM_028197)	promoter-TSS (NM_028197)	98	NM_028197	72320	Mm.258955	NM_028197	ENSMUSG00000036955	2510003E04Rik	0710007C18Rik|KBP|mKIAA1279	RIKEN cDNA 2510003E04 gene	protein-coding
MACS_peak_15559	chr8	121918462	121918973	+	61.24	NA	promoter-TSS (NM_019966)	promoter-TSS (NM_019966)	-75	NM_019966	56690	Mm.423037	NM_019966	ENSMUSG00000074064	Mlycd	AI324784|Mcd	malonyl-CoA decarboxylase	protein-coding
MACS_peak_6987	chr17	47027518	47027805	+	61.24	NA	promoter-TSS (NM_178385)	promoter-TSS (NM_178385)	91	NM_178385	72726	Mm.33780	NM_178385	ENSMUSG00000036430	Tbcc	2810055C19Rik	tubulin-specific chaperone C	protein-coding
MACS_peak_13587	chr7	16683873	16684195	+	61.24	NA	promoter-TSS (NM_025898)	promoter-TSS (NM_025898)	42	NM_025898	108124	Mm.104540	NM_025898	ENSMUSG00000006024	Napa	1500039N14Rik|AW209189|RA81|SNAPA|SNARE|a-SNAP|hyh	N-ethylmaleimide sensitive fusion protein attachment protein alpha	protein-coding
MACS_peak_6354	chr16	93832165	93832766	+	61.24	NA	promoter-TSS (NM_001045529)	promoter-TSS (NM_001045529)	99	NM_001045529	338467	Mm.287329	NM_001045529	ENSMUSG00000039456	Morc3	1110051N18Rik|AI452146|BF318192|D16Jhu32e|NXP2|Zcwcc3	microrchidia 3	protein-coding
MACS_peak_984	chr10	7382714	7383375	+	61.22	NA	promoter-TSS (NR_030698)	promoter-TSS (NR_030698)	-125	NR_030698	320642	Mm.398806	NR_030698		A630066F11Rik	-	RIKEN cDNA A630066F11 gene	ncRNA
MACS_peak_8103	chr19	32560179	32560625	+	61.22	NA	5' UTR (NM_010799, exon 1 of 5)	5' UTR (NM_010799, exon 1 of 5)	143	NM_010799	17330	Mm.255116	NM_010799	ENSMUSG00000024896	Minpp1	AA408516	multiple inositol polyphosphate histidine phosphatase 1	protein-coding
MACS_peak_14463	chr7	123236489	123237068	+	61.22	NA	promoter-TSS (NM_019772)	promoter-TSS (NM_019772)	-115	NR_029433	69350	Mm.440425	NR_029433	ENSMUSG00000087621	1700003G18Rik	2610312K03Rik	RIKEN cDNA 1700003G18 gene	ncRNA
MACS_peak_4990	chr14	70977358	70978026	+	61.22	NA	promoter-TSS (NM_153136)	promoter-TSS (NM_153136)	38	NM_153136	213484	Mm.34191	NM_153136	ENSMUSG00000045211	Nudt18	BC036718	nudix (nucleoside diphosphate linked moiety X)-type motif 18	protein-coding
MACS_peak_15446	chr8	108375710	108375982	+	61.22	NA	promoter-TSS (NM_177150)	promoter-TSS (NM_177150)	62	NM_177150	320394	Mm.334775	NM_177150	ENSMUSG00000036672	Cenpt	G630055P03Rik	centromere protein T	protein-coding
MACS_peak_14715	chr7	148599682	148600055	+	61.22	NA	intron (NM_172116, intron 1 of 7)	intron (NM_172116, intron 1 of 7)	156	NM_172116	213350	Mm.290953	NM_172116	ENSMUSG00000051007	Pddc1	BC023835|D230016J19Rik	Parkinson disease 7 domain containing 1	protein-coding
MACS_peak_1317	chr10	77440943	77441597	+	61.18	NA	promoter-TSS (NM_026431)	promoter-TSS (NM_026431)	-125	NM_026431	67884	Mm.297512	NM_026431	ENSMUSG00000020284	1810043G02Rik	AV026620|D10Jhu13e	RIKEN cDNA 1810043G02 gene	protein-coding
MACS_peak_4294	chr13	63916149	63916857	+	61.13	NA	promoter-TSS (NM_023507)	promoter-TSS (NM_023507)	-125	NM_001013608	76251	Mm.186610	NM_023507	ENSMUSG00000021470	Ercc6l2	0610007P08Rik|1700019D06Rik|9330134C04Rik|Rad26l|Sr278	excision repair cross-complementing rodent repair deficiency, complementation group 6 like 2	protein-coding
MACS_peak_12264	chr5	123270883	123271581	+	61.07	NA	5' UTR (NM_001042491, exon 1 of 17)	5' UTR (NM_001042491, exon 1 of 17)	119	NM_001289518	59008	Mm.332667	NM_021505	ENSMUSG00000029472	Anapc5	2510006G12Rik|AA408751|AA536819|AA986414|APC5|Anpc5	anaphase-promoting complex subunit 5	protein-coding
MACS_peak_4154	chr13	49243108	49243447	+	61.04	NA	5' UTR (NM_001290311, exon 1 of 29)	5' UTR (NM_001290311, exon 1 of 29)	420	NM_029361	75607	Mm.342723	NM_029361	ENSMUSG00000037989	Wnk2	1810073P09Rik|AW122246|ESTM15|X83337|mKIAA1760	WNK lysine deficient protein kinase 2	protein-coding
MACS_peak_10197	chr3	96709068	96709374	+	60.97	NA	promoter-TSS (NM_026229)	promoter-TSS (NM_026229)	0	NM_026229	67549	Mm.46722	NM_026229		Gpr89	4933412D19Rik|Gpr89a|SH120	G protein-coupled receptor 89	protein-coding
MACS_peak_9944	chr3	79090834	79091537	+	60.97	NA	Intergenic	CpG	-58113	NM_001142953	100233207	Mm.373801	NM_001142953	ENSMUSG00000091685	Gm17359	-	predicted gene, 17359	protein-coding
MACS_peak_6246	chr16	56037574	56038168	+	60.96	NA	promoter-TSS (NM_029092)	promoter-TSS (NM_029092)	16	NM_029092	52575	Mm.288742	NM_029092		Trmt10c	1300018J16Rik|D16Ertd454e|Rg9mtd1|Rnmtd1	tRNA methyltransferase 10C	protein-coding
MACS_peak_7663	chr18	73863278	73863765	+	60.96	NA	promoter-TSS (NM_008540)	promoter-TSS (NM_008540)	-126	NM_008540	17128	Mm.100399	NM_008540	ENSMUSG00000024515	Smad4	AW743858|D18Wsu70e|DPC4|Madh4	SMAD family member 4	protein-coding
MACS_peak_5216	chr15	31531819	31532103	+	60.96	NA	promoter-TSS (NM_026546)	promoter-TSS (NM_026546)	90	NM_026546	68073	Mm.119185	NM_026546	ENSMUSG00000039065	Fam173b	A930016P21Rik|AA987072	family with sequence similarity 173, member B	protein-coding
MACS_peak_8524	chr2	26495583	26495866	+	60.96	NA	promoter-TSS (NR_028571)	promoter-TSS (NR_028571)	40	NR_024068	72091	Mm.27103	NR_024068	ENSMUSG00000097052	Snhg7	2610002F03Rik|AI427062	small nucleolar RNA host gene 7	ncRNA
MACS_peak_16507	chr9	108594172	108594701	+	60.96	NA	promoter-TSS (NM_008924)	promoter-TSS (NM_008924)	-38	NM_008924	19087	Mm.253102	NM_008924	ENSMUSG00000032601	Prkar2a	1110061A24Rik|AI317181|AI836829|RII(alpha)	protein kinase, cAMP dependent regulatory, type II alpha	protein-coding
MACS_peak_8349	chr19	59420085	59420683	+	60.96	NA	promoter-TSS (NM_001033222)	promoter-TSS (NM_001033222)	-114	NM_001033222	107368	Mm.268797	NM_001033222	ENSMUSG00000074746	Pdzd8	A630041P07Rik|AV329468|AW228944|Pdzk8	PDZ domain containing 8	protein-coding
MACS_peak_6700	chr17	27957563	27957986	+	60.96	NA	promoter-TSS (NM_001271511)	promoter-TSS (NM_001271511)	-287	NM_001271511	224647	Mm.196577	NM_001033279	ENSMUSG00000056692	D17Wsu92e	AU020189|C030010A15|C80239	DNA segment, Chr 17, Wayne State University 92, expressed	protein-coding
MACS_peak_12675	chr6	6812641	6813053	+	60.96	NA	promoter-TSS (NM_010057)	promoter-TSS (NM_010057)	-487	NM_010057	13396	Mm.439763	NM_010057	ENSMUSG00000029754	Dlx6	-	distal-less homeobox 6	protein-coding
MACS_peak_4494	chr13	105018716	105019088	+	60.96	NA	promoter-TSS (NM_021790)	promoter-TSS (NM_021790)	22	NM_172807	238831	Mm.98910	NM_172807	ENSMUSG00000021713	Ppwd1	4632422M10Rik|A330090G21Rik	peptidylprolyl isomerase domain and WD repeat containing 1	protein-coding
MACS_peak_436	chr1	94077181	94077766	+	60.96	NA	Intergenic	CpG	-32503	NM_207225	208727	Mm.318567	NM_207225	ENSMUSG00000026313	Hdac4	4932408F19Rik|AI047285	histone deacetylase 4	protein-coding
MACS_peak_11520	chr4	154975222	154975449	+	60.96	NA	promoter-TSS (NM_177186)	promoter-TSS (NM_177186)	-190	NM_177186	320541	Mm.306018	NM_177186	ENSMUSG00000042202	Slc35e2	A530082C11Rik|AI957035	solute carrier family 35, member E2	protein-coding
MACS_peak_13321	chr6	124867881	124868071	+	60.92	NA	promoter-TSS (NM_026988)	promoter-TSS (NM_026988)	-12	NM_026988	69202	Mm.142187	NM_026988	ENSMUSG00000030122	Ptms	2610009E16Rik	parathymosin	protein-coding
MACS_peak_8968	chr2	92023893	92024160	+	60.91	NA	promoter-TSS (NM_138755)	promoter-TSS (NM_138755)	-313	NM_138755	192285	Mm.330408	NM_138755	ENSMUSG00000058318	Phf21a	80kDa|Bhc|Bhc80|D030065N23Rik|PFTF1	PHD finger protein 21A	protein-coding
MACS_peak_507	chr1	125942411	125942671	+	60.91	NA	promoter-TSS (NM_199021)	promoter-TSS (NM_199021)	-405	NM_199021	269109	Mm.483255	NM_199021	ENSMUSG00000036815	Dpp10	6430601K09Rik|DPP X|Dprp3	dipeptidylpeptidase 10	protein-coding
MACS_peak_12242	chr5	122161790	122162002	+	60.87	NA	exon (NM_009125, exon 1 of 25)	exon (NM_009125, exon 1 of 25)	278	NM_009125	20239	Mm.260900	NM_009125	ENSMUSG00000042605	Atxn2	9630045M23Rik|ATX2|AW544490|Sca2	ataxin 2	protein-coding
MACS_peak_2636	chr11	87240116	87240441	+	60.87	NA	promoter-TSS (NM_001199293)	promoter-TSS (NM_001199293)	-815	NM_001199293	83560	Mm.440758	NM_031386	ENSMUSG00000010342	Tex14	C85585	testis expressed gene 14	protein-coding
MACS_peak_8694	chr2	34726235	34727004	+	60.87	NA	promoter-TSS (NM_080554)	promoter-TSS (NM_080554)	-137	NM_080554	66998	Mm.270632	NM_080554	ENSMUSG00000026869	Psmd5	1500032A03Rik|AW475925|S5b|W91691|mKIAA0072	proteasome (prosome, macropain) 26S subunit, non-ATPase, 5	protein-coding
MACS_peak_8814	chr2	69735198	69735526	+	60.87	NA	promoter-TSS (NM_001081548)	promoter-TSS (NM_001081548)	59	NM_001081548	68795	Mm.314576	NM_177783	ENSMUSG00000044308	Ubr3	1110059H15Rik|4833421P10Rik|A130030D10Rik|AA409735|AA414972|AA422631|AI646861|AU016126|Zfp650|Znf650	ubiquitin protein ligase E3 component n-recognin 3	protein-coding
MACS_peak_2783	chr11	97888206	97888430	+	60.84	NA	promoter-TSS (NM_009078)	promoter-TSS (NM_009078)	80	NM_009078	19921	Mm.10247	NM_009078	ENSMUSG00000017404	Rpl19	-	ribosomal protein L19	protein-coding
MACS_peak_12437	chr5	136438658	136438950	+	60.84	NA	exon (NM_001160366, exon 9 of 11)	exon (NM_001160366, exon 9 of 11)	11542	NM_001160366	109267	Mm.332750	NM_001160366	ENSMUSG00000029699	Ssc4d	C330016E03Rik|S4D-SRCRB|SRCRB-S4D|Srcrb4d	scavenger receptor cysteine rich family, 4 domains	protein-coding
MACS_peak_9263	chr2	130985583	130986171	+	60.83	NA	promoter-TSS (NM_026091)	promoter-TSS (NM_026091)	-121	NM_026091	67326	Mm.27711	NM_026091	ENSMUSG00000027327	1700037H04Rik	-	RIKEN cDNA 1700037H04 gene	protein-coding
MACS_peak_11428	chr4	148681509	148681918	+	60.82	NA	promoter-TSS (NM_008441)	promoter-TSS (NM_008441)	94	NM_207682	16561	Mm.402393	NM_008441	ENSMUSG00000063077	Kif1b	A530096N05Rik|AI448212|AI506502|D4Mil1e|KIF1Bp130|KIF1Bp204	kinesin family member 1B	protein-coding
MACS_peak_711	chr1	164478577	164478976	+	60.82	NA	promoter-TSS (NM_144877)	promoter-TSS (NM_144877)	-300	NM_144877	71449	Mm.270569	NM_144877		Mettl13	5630401D24Rik	methyltransferase like 13	protein-coding
MACS_peak_15834	chr9	30837664	30838364	+	60.82	NA	promoter-TSS (NM_001115130)	promoter-TSS (NM_001115130)	-215	NM_001115130	235132	Mm.239355	NM_172765	ENSMUSG00000047412	Zbtb44	6030404E16Rik|Btbd15|E230011F09	zinc finger and BTB domain containing 44	protein-coding
MACS_peak_15525	chr8	114378053	114378346	+	60.82	NA	promoter-TSS (NM_011801)	promoter-TSS (NM_011801)	11	NM_011801	23837	Mm.279437	NM_011801	ENSMUSG00000031954	Cfdp1	AA408409|Bcnt|Bucentaur|Cfdp|cp27	craniofacial development protein 1	protein-coding
MACS_peak_16054	chr9	57315629	57316180	+	60.82	NA	promoter-TSS (NM_020270)	promoter-TSS (NM_020270)	-73	NM_020270	56807	Mm.102278	NM_020270	ENSMUSG00000040722	Scamp5	AI426171|AW558254|Sc5	secretory carrier membrane protein 5	protein-coding
MACS_peak_4871	chr14	58190167	58190514	+	60.82	NA	promoter-TSS (NM_026526)	promoter-TSS (NM_026526)	66	NM_026526	68043	Mm.45225	NM_026526	ENSMUSG00000021951	N6amt2	2510005D08Rik|AW045965|Ayu21-96|Gt(pU21)96Imeg|GtAyu21-96	N-6 adenine-specific DNA methyltransferase 2 (putative)	protein-coding
MACS_peak_3542	chr12	73337488	73337900	+	60.82	NA	promoter-TSS (NR_104446)	promoter-TSS (NR_104446)	20	NM_001007596	104001	Mm.221275	NM_153457	ENSMUSG00000021087	Rtn1	Nsp	reticulon 1	protein-coding
MACS_peak_15468	chr8	109417301	109417747	+	60.80	NA	promoter-TSS (NM_011574)	promoter-TSS (NM_011574)	-16	NM_011574	21771	Mm.10665	NM_011574	ENSMUSG00000041438	Cirh1a	Cirhin|Naic|Teg-292|Tex292	cirrhosis, autosomal recessive 1A (human)	protein-coding
MACS_peak_7846	chr19	5460452	5460823	+	60.76	NA	promoter-TSS (NM_021438)	promoter-TSS (NM_021438)	30	NM_021438	58249	Mm.329656	NM_021438	ENSMUSG00000024911	Fibp	2010004G08Rik|2010005N21Rik|3010027N18Rik	fibroblast growth factor (acidic) intracellular binding protein	protein-coding
MACS_peak_15317	chr8	88079028	88079602	+	60.76	NA	promoter-TSS (NM_019794)	promoter-TSS (NM_019794)	-145	NM_019794	56445	Mm.475573	NM_019794	ENSMUSG00000031701	Dnaja2	1500017M13Rik|2010206B19Rik|DNAJ|DNJ3|Dnaj3|HIRIP4|PRO3015|mDj3	DnaJ (Hsp40) homolog, subfamily A, member 2	protein-coding
MACS_peak_4433	chr13	94541980	94542254	+	60.76	NA	intron (NM_009712, intron 1 of 7)	intron (NM_009712, intron 1 of 7)	483	NM_009712	11881	Mm.300178	NM_009712	ENSMUSG00000042082	Arsb	1110007C02Rik|AI480648|As-1|As-1r|As-1s|As-1t|As1|As1-r|As1-s|As1-t|Asr-1|Ast-1	arylsulfatase B	protein-coding
MACS_peak_16379	chr9	99040403	99040644	+	60.59	NA	5' UTR (NM_029094, exon 1 of 24)	5' UTR (NM_029094, exon 1 of 24)	107	NM_029094	74769	Mm.213128	NM_029094	ENSMUSG00000032462	Pik3cb	1110001J02Rik|AI447572|p110beta	phosphatidylinositol 3-kinase, catalytic, beta polypeptide	protein-coding
MACS_peak_12249	chr5	122608225	122608600	+	60.59	NA	5' UTR (NM_013636, exon 1 of 7)	5' UTR (NM_013636, exon 1 of 7)	124	NM_013636	19047	Mm.280784	NM_013636	ENSMUSG00000004455	Ppp1cc	PP-1G|PP1|dis2m1	protein phosphatase 1, catalytic subunit, gamma isoform	protein-coding
MACS_peak_3349	chr12	29359945	29360269	+	60.59	NA	promoter-TSS (NM_134052)	promoter-TSS (NM_134052)	35	NM_134052	104923	Mm.291504	NM_134052	ENSMUSG00000020629	Adi1	AL024210|Fe-ARD|MTCBP-1|Ni-ARD	acireductone dioxygenase 1	protein-coding
MACS_peak_10716	chr4	48055627	48056198	+	60.59	NA	Intergenic	CpG	-8208	NM_015743	18124	Mm.247261	NM_015743	ENSMUSG00000028341	Nr4a3	AI573420|CHN|CSMF|MINOR|NOR-1|Nor1|TEC	nuclear receptor subfamily 4, group A, member 3	protein-coding
MACS_peak_6476	chr17	13897222	13897482	+	60.59	NA	promoter-TSS (NM_010806)	promoter-TSS (NM_010806)	-196	NM_010806	17356	Mm.59167	NM_010806	ENSMUSG00000068036	Mllt4	5033403D15Rik|AF6|Af-6|Afadin|Gm314|I-afadin|S-afadin	myeloid/lymphoid or mixed-lineage leukemia (trithorax homolog, Drosophila); translocated to, 4	protein-coding
MACS_peak_3459	chr12	56300268	56300706	+	60.59	NA	promoter-TSS (NM_001100116).2	promoter-TSS (NM_001100116).2	-92	NM_001100116	100101807	Mm.439875	NM_001100116		1700047I17Rik2	-	RIKEN cDNA 1700047I17 gene 2	protein-coding
MACS_peak_638	chr1	153602321	153602759	+	60.56	NA	promoter-TSS (NM_001039644)	promoter-TSS (NM_001039644)	36	NM_001039644	66967	Mm.337691	NM_001039644	ENSMUSG00000043019	Edem3	2310050N11Rik	ER degradation enhancer, mannosidase alpha-like 3	protein-coding
MACS_peak_13154	chr6	107479706	107479924	+	60.56	NA	promoter-TSS (NM_008516)	promoter-TSS (NM_008516)	95	NM_008516	16979	Mm.428543	NM_008516	ENSMUSG00000034648	Lrrn1	2810047E21Rik|NLRR-1	leucine rich repeat protein 1, neuronal	protein-coding
MACS_peak_6357	chr16	94511686	94512142	+	60.38	NA	Intergenic	Intergenic	-2451	NM_139145	110948	Mm.30921	NM_139145	ENSMUSG00000040820	Hlcs	410I21.SP6|D16Jhu34	holocarboxylase synthetase (biotin- [propriony-Coenzyme A-carboxylase (ATP-hydrolysing)] ligase)	protein-coding
MACS_peak_8440	chr2	19579015	19579718	+	60.38	NA	promoter-TSS (NM_027715)	promoter-TSS (NM_027715)	158	NR_033642	100041244	Mm.407223	NR_033642		Gm3230	-	predicted gene 3230	ncRNA
MACS_peak_6406	chr17	5492292	5492883	+	60.38	NA	promoter-TSS (NM_146073)	promoter-TSS (NM_146073)	-13	NM_146073	224454	Mm.487663	NM_146073	ENSMUSG00000034265	Zdhhc14	B530001K09Rik|New1cp	zinc finger, DHHC domain containing 14	protein-coding
MACS_peak_3935	chr13	8884878	8885432	+	60.37	NA	exon (NM_145360, exon 1 of 5)	exon (NM_145360, exon 1 of 5)	303	NM_145360	319554	Mm.29847	NM_145360	ENSMUSG00000058258	Idi1	4832416K17Rik	isopentenyl-diphosphate delta isomerase	protein-coding
MACS_peak_1401	chr10	79755020	79755401	+	60.37	NA	promoter-TSS (NM_009091)	promoter-TSS (NM_009091)	34	NM_009091	20054	Mm.643	NM_009091	ENSMUSG00000063457	Rps15	rig	ribosomal protein S15	protein-coding
MACS_peak_5171	chr15	10911306	10911899	+	60.37	NA	promoter-TSS (NM_008537)	promoter-TSS (NM_008537)	91	NM_008537	17117	Mm.2787	NM_008537	ENSMUSG00000022244	Amacr	Macr1	alpha-methylacyl-CoA racemase	protein-coding
MACS_peak_309	chr1	75138893	75139662	+	60.37	NA	promoter-TSS (NM_170755)	promoter-TSS (NM_170755)	-83	NM_170755	227298	Mm.273062	NM_170755	ENSMUSG00000049339	Fam134a	-	family with sequence similarity 134, member A	protein-coding
MACS_peak_8079	chr19	28085785	28086569	+	60.37	NA	promoter-TSS (NM_011265)	promoter-TSS (NM_011265)	-521	NM_011265	19726	Mm.313321	NM_011265	ENSMUSG00000040929	Rfx3	C230093O12Rik|MRFX3	regulatory factor X, 3 (influences HLA class II expression)	protein-coding
MACS_peak_13666	chr7	19944606	19944858	+	60.37	NA	promoter-TSS (NM_145822)	promoter-TSS (NM_145822)	100	NM_145822	70333	Mm.171370	NM_145822		Cd3eap	1190028F09|2610103M17Rik|ASE-1|Ase1|CAST|PAF49	CD3E antigen, epsilon polypeptide associated protein	protein-coding
MACS_peak_12961	chr6	71582685	71583014	+	60.37	NA	promoter-TSS (NM_001038695)	promoter-TSS (NM_001038695)	62	NM_001038695	104263	Mm.260479	NM_173001	ENSMUSG00000053470	Kdm3a	1700105C21Rik|C230043E16Rik|JHDM2a|Jmjd1|Jmjd1a|KDM2A|TGSA|Tsga	lysine (K)-specific demethylase 3A	protein-coding
MACS_peak_10224	chr3	102799507	102799866	+	60.34	NA	promoter-TSS (NM_025679)	promoter-TSS (NM_025679)	23	NM_025679	66641	Mm.33937	NM_025679	ENSMUSG00000027854	Sike1	2810005O12Rik|5730470L24Rik|AI450236|AI839862|Sike|Sikeb	suppressor of IKBKE 1	protein-coding
MACS_peak_10732	chr4	53172572	53172871	+	60.30	NA	promoter-TSS (NM_013454)	promoter-TSS (NM_013454)	46	NM_013454	11303	Mm.277376	NM_013454	ENSMUSG00000015243	Abca1	ABC-1|Abc1	ATP-binding cassette, sub-family A (ABC1), member 1	protein-coding
MACS_peak_6409	chr17	6079569	6080209	+	60.30	NA	promoter-TSS (NM_001111017)	promoter-TSS (NM_001111017)	61	NM_181392	66467	Mm.303441	NM_181392	ENSMUSG00000034345	Gtf2h5	2700017P07Rik|2810432H05Rik|D17Wsu155e	general transcription factor IIH, polypeptide 5	protein-coding
MACS_peak_1408	chr10	79861386	79862231	+	60.30	NA	intron (NM_013595, intron 1 of 6)	CpG	416	NM_013595	17192	Mm.7142	NM_013595	ENSMUSG00000035478	Mbd3	AI181826|AU019209	methyl-CpG binding domain protein 3	protein-coding
MACS_peak_4915	chr14	63741267	63741670	+	60.27	NA	intron (NM_007798, intron 1 of 9)	CpG	169	NM_007798	13030	Mm.236553	NM_007798	ENSMUSG00000021939	Ctsb	CB	cathepsin B	protein-coding
MACS_peak_15932	chr9	44290640	44291027	+	60.26	NA	Intergenic	CpG	-16386	NM_030256	80288	Mm.370270	NM_030256	ENSMUSG00000063382	Bcl9l	B9L|BC003321|BCL9-2|DLNB11	B cell CLL/lymphoma 9-like	protein-coding
MACS_peak_6153	chr16	32914012	32914388	+	60.24	NA	promoter-TSS (NM_001081255)	promoter-TSS (NM_001081255)	14	NM_001081255	70144	Mm.491178	NM_001081255	ENSMUSG00000022801	Lrch3	2210409B11Rik|AW215594|Gm1742	leucine-rich repeats and calponin homology (CH) domain containing 3	protein-coding
MACS_peak_17083	chrX	149932700	149933088	+	60.17	NA	5' UTR (NM_018798, exon 1 of 1)	5' UTR (NM_018798, exon 1 of 1)	119	NM_018798	54609	Mm.430772	NM_018798	ENSMUSG00000050148	Ubqln2	Chap1|Dsk2|HRIHFB2157|Plic-2|Plic2	ubiquilin 2	protein-coding
MACS_peak_3062	chr11	115243104	115243464	+	60.17	NA	promoter-TSS (NM_001080929)	promoter-TSS (NM_001080929)	54	NM_001080929	237988	Mm.102872	NM_001080929	ENSMUSG00000050910	Cdr2l	D030068L24Rik|Gm21	cerebellar degeneration-related protein 2-like	protein-coding
MACS_peak_16505	chr9	108551487	108551938	+	60.17	NA	promoter-TSS (NM_011790)	promoter-TSS (NM_011790)	-1	NM_011790	23807	Mm.290447	NM_011790	ENSMUSG00000064145	Arih2	AI843547|ARI2|TRIAD1|UIP48	ariadne homolog 2 (Drosophila)	protein-coding
MACS_peak_4270	chr13	59658369	59658739	+	60.15	NA	promoter-TSS (NM_001284219)	promoter-TSS (NM_001284219)	154	NM_001284218	67269	Mm.153008	NM_023328	ENSMUSG00000021557	Agtpbp1	1700020N17Rik|2310001G17Rik|2900054O13Rik|4930445M19Rik|5730402G09Rik|CCP1|Nna1|nmf243|pcd	ATP/GTP binding protein 1	protein-coding
MACS_peak_5986	chr16	15594390	15594695	+	60.15	NA	promoter-TSS (NM_001159351)	promoter-TSS (NM_001159351)	69	NM_001159351	70620	Mm.235407	NM_023585		Ube2v2	1110021H13Rik|4632410D19Rik|5730524P06Rik|6820402M05|AI848315|C81524|MMS2	ubiquitin-conjugating enzyme E2 variant 2	protein-coding
MACS_peak_11654	chr5	24130009	24130307	+	60.13	NA	Intergenic	Intergenic	-21113	NR_003953	72252	Mm.87446	NR_003953	ENSMUSG00000038165	1700022A21Rik	-	glycerol-3-phosphate dehydrogenase 1-like pseudogene	pseudo
MACS_peak_13803	chr7	29052662	29053100	+	60.01	NA	promoter-TSS (NM_198425)	promoter-TSS (NM_198425)	-19	NM_198425	386655	Mm.258201	NM_198425	ENSMUSG00000046058	Eid2	Cri2|EID-2	EP300 interacting inhibitor of differentiation 2	protein-coding
MACS_peak_7613	chr18	63851835	63852386	+	59.98	NA	promoter-TSS (NM_016792)	promoter-TSS (NM_016792)	-97	NM_016792	53382	Mm.19169	NM_016792	ENSMUSG00000024583	Txnl1	32kDa|TRP32|Txnl	thioredoxin-like 1	protein-coding
MACS_peak_11755	chr5	33720998	33721653	+	59.96	NA	promoter-TSS (NM_001081101)	promoter-TSS (NM_001081101)	-20	NM_001081101	71101	Mm.132178	NM_001081101	ENSMUSG00000037355	Uvssa	4933407H18Rik|D330017J19Rik|Kiaa1530|mKIAA1530	UV stimulated scaffold protein A	protein-coding
MACS_peak_4521	chr13	112280439	112280992	+	59.96	NA	promoter-TSS (NM_028487)	promoter-TSS (NM_028487)	-466	NM_001122963	73274	Mm.57286	NM_028487	ENSMUSG00000032745	Gpbp1	1700034P14Rik|AU019836|D230035M11Rik|Gpbp|mGPBP	GC-rich promoter binding protein 1	protein-coding
MACS_peak_8747	chr2	50151998	50152370	+	59.96	NA	promoter-TSS (NR_040362)	promoter-TSS (NR_040362)	13	NM_133839	109129	Mm.29214	NM_133839	ENSMUSG00000026766	Mmadhc	2010311D03Rik|AI314967	methylmalonic aciduria (cobalamin deficiency) cblD type, with homocystinuria	protein-coding
MACS_peak_16500	chr9	108469475	108470119	+	59.96	NA	promoter-TSS (NR_029577)	promoter-TSS (NR_029577)	-124	NM_023247	66706	Mm.29471	NM_023247	ENSMUSG00000070283	Ndufaf3	4733401H18Rik	NADH dehydrogenase (ubiquinone) 1 alpha subcomplex, assembly factor 3	protein-coding
MACS_peak_520	chr1	129765175	129765538	+	59.96	NA	promoter-TSS (NM_178690)	promoter-TSS (NM_178690)	6	NM_178690	226407	Mm.489713	NM_178690	ENSMUSG00000036104	Rab3gap1	1700003B17Rik|4732493F09Rik|AL117896|Rab3gap|p130	RAB3 GTPase activating protein subunit 1	protein-coding
MACS_peak_6694	chr17	27760179	27760686	+	59.96	NA	promoter-TSS (NM_019837)	promoter-TSS (NM_019837)	-35	NM_019837	56409	Mm.144699	NM_019837	ENSMUSG00000024213	Nudt3	1110011B09Rik|AA960325|Dipp|Dipp1	nudix (nucleotide diphosphate linked moiety X)-type motif 3	protein-coding
MACS_peak_11804	chr5	37187766	37188299	+	59.96	NA	promoter-TSS (NM_026242)	promoter-TSS (NM_026242)	-39	NM_026242	67568	Mm.332336	NM_026242	ENSMUSG00000055302	Mrfap1	9130413I22Rik|AL022827|Pam14	Morf4 family associated protein 1	protein-coding
MACS_peak_9692	chr2	181048780	181049076	+	59.96	NA	5' UTR (NM_009133, exon 1 of 5)	5' UTR (NM_009133, exon 1 of 5)	277	NM_009133	20262	Mm.2319	NM_009133	ENSMUSG00000027581	Stmn3	9330161A03Rik|AI604839|R75323|Sclip	stathmin-like 3	protein-coding
MACS_peak_13089	chr6	88468608	88468878	+	59.95	NA	promoter-TSS (NM_016906)	promoter-TSS (NM_016906)	51	NM_016906	53421	Mm.28375	NM_016906	ENSMUSG00000030082	Sec61a1	AA408394|AA410007|Sec61a	Sec61 alpha 1 subunit (S. cerevisiae)	protein-coding
MACS_peak_12845	chr6	43615855	43616460	+	59.95	NA	promoter-TSS (NM_013861)	promoter-TSS (NM_013861)	17	NM_013861	29807	Mm.320979	NM_013861	ENSMUSG00000029735	Tpk1	-	thiamine pyrophosphokinase	protein-coding
MACS_peak_16251	chr9	74823778	74824142	+	59.95	NA	promoter-TSS (NM_153584)	promoter-TSS (NM_153584)	42	NM_153584	235493	Mm.208955	NM_153584	ENSMUSG00000034858	Fam214a	6330415I01Rik|AI553555|C130047D21Rik|Kiaa1370|mKIAA1370	family with sequence similarity 214, member A	protein-coding
MACS_peak_12097	chr5	111082238	111082687	+	59.92	NA	promoter-TSS (NM_027156)	promoter-TSS (NM_027156)	-8	NM_027156	69663	Mm.5267	NM_027156	ENSMUSG00000029504	Ddx51	2310061O04Rik|AA537002|C81583|R75505	DEAD (Asp-Glu-Ala-Asp) box polypeptide 51	protein-coding
MACS_peak_1884	chr11	5607475	5607811	+	59.92	NA	promoter-TSS (NM_026080)	promoter-TSS (NM_026080)	59	NM_026080	64660	Mm.7328	NM_026080	ENSMUSG00000020477	Mrps24	3110030K20Rik|AI414579|Rpms24	mitochondrial ribosomal protein S24	protein-coding
MACS_peak_12806	chr6	38383817	38384663	+	59.89	NA	exon (NM_177185, exon 1 of 17)	exon (NM_177185, exon 1 of 17)	315	NM_177185	320538	Mm.302831	NM_177185	ENSMUSG00000038538	Ubn2	2900060J04Rik|6030408G03Rik|BC060116|D130059P03Rik|mKIAA2030	ubinuclein 2	protein-coding
MACS_peak_2394	chr11	70245628	70246328	+	59.89	NA	promoter-TSS (NM_001271358)	promoter-TSS (NM_001271358)	-104	NM_001271360	216869	Mm.203747	NM_145429	ENSMUSG00000060216	Arrb2	AI326910|AW122872	arrestin, beta 2	protein-coding
MACS_peak_6975	chr17	46888926	46889183	+	59.89	NA	exon (NM_028065, exon 1 of 6)	exon (NM_028065, exon 1 of 6)	107	NM_028065	72029	Mm.240325	NM_028065	ENSMUSG00000023973	Cnpy3	1600025D17Rik|2410050O22Rik|AI413153|CAG4A|ERDA5|PRAT4A|Tnrc5	canopy 3 homolog (zebrafish)	protein-coding
MACS_peak_11322	chr4	137860664	137860971	+	59.89	NA	exon (NM_007838, exon 1 of 11)	exon (NM_007838, exon 1 of 11)	164	NM_007838	13200	Mm.7236	NM_007838	ENSMUSG00000028757	Ddost	-	dolichyl-di-phosphooligosaccharide-protein glycotransferase	protein-coding
MACS_peak_15013	chr8	48799081	48799881	+	59.89	NA	promoter-TSS (NM_172407)	promoter-TSS (NM_172407)	-196	NM_172407	70925	Mm.393807	NM_172407	ENSMUSG00000038069	Cdkn2aip	4921511I16Rik|AW208986|CARF	CDKN2A interacting protein	protein-coding
MACS_peak_17037	chrX	136991077	136991312	+	59.88	NA	promoter-TSS (NM_021463)	promoter-TSS (NM_021463)	52	NM_021463	19139	Mm.287178	NM_021463	ENSMUSG00000031432	Prps1	2310010D17Rik|C76571|C76678|PRS-I|Prps-1	phosphoribosyl pyrophosphate synthetase 1	protein-coding
MACS_peak_12853	chr6	47544899	47545369	+	59.86	NA	promoter-TSS (NM_007971)	promoter-TSS (NM_007971)	-105	NM_001146689	14056	Mm.246688	NM_007971	ENSMUSG00000029687	Ezh2	Enx-1|Enx1h|KMT6|mKIAA4065	enhancer of zeste homolog 2 (Drosophila)	protein-coding
MACS_peak_7332	chr18	14841085	14841360	+	59.86	NA	exon (NM_009280, exon 1 of 11)	exon (NM_009280, exon 1 of 11)	201	NM_001161369	268996	Mm.31761	NM_009280	ENSMUSG00000037013	Ss18	D130059H17|Ssxt|Syt	synovial sarcoma translocation, Chromosome 18	protein-coding
MACS_peak_15316	chr8	88016386	88016788	+	59.86	NA	promoter-TSS (NM_173866)	promoter-TSS (NM_173866)	71	NM_173866	108682	Mm.200423	NM_173866	ENSMUSG00000031700	Gpt2	4631422C05Rik|ALT2|AU014768|AU041193|C87201	glutamic pyruvate transaminase (alanine aminotransferase) 2	protein-coding
MACS_peak_6166	chr16	35363757	35364325	+	59.86	NA	promoter-TSS (NM_133704)	promoter-TSS (NM_133704)	-37	NM_133704	317717	Mm.259164	NM_133704	ENSMUSG00000034473	Sec22a	1810005C06Rik|Sec22l2	SEC22 vesicle trafficking protein homolog A (S. cerevisiae)	protein-coding
MACS_peak_6391	chr17	3083894	3084588	+	59.80	NA	promoter-TSS (NR_003519)	promoter-TSS (NR_003519)	-58	NR_003519	328734	Mm.335641	NR_003519		Pisd-ps2	D030013I16Rik	phosphatidylserine decarboxylase, pseudogene 2	pseudo
MACS_peak_11502	chr4	154441076	154441362	+	59.80	NA	promoter-TSS (NM_001042407)	promoter-TSS (NM_001042407)	80	NM_001042407	668173	Mm.133114	NM_001042407	ENSMUSG00000029047	Pex10	AV128229|Gm142	peroxisomal biogenesis factor 10	protein-coding
MACS_peak_3202	chr11	120434668	120434949	+	59.80	NA	promoter-TSS (NM_011032)	promoter-TSS (NM_011032)	-558	NM_011032	18453	Mm.16660	NM_011032	ENSMUSG00000025130	P4hb	ERp59|PDI|Pdia1|Thbp	prolyl 4-hydroxylase, beta polypeptide	protein-coding
MACS_peak_6601	chr17	24861161	24861429	+	59.64	NA	promoter-TSS (NM_026684)	promoter-TSS (NM_026684)	38	NM_026684	68342	Mm.1129	NM_026684	ENSMUSG00000040048	Ndufb10	0610011B04Rik|22kDa|PDSW	NADH dehydrogenase (ubiquinone) 1 beta subcomplex, 10	protein-coding
MACS_peak_14754	chr7	151739500	151739964	+	59.64	NA	promoter-TSS (NM_001195086)	promoter-TSS (NM_001195086)	-98	NM_001195086	233977	Mm.490347	NM_001033319	ENSMUSG00000037519	Ppfia1	C030014K08Rik|C87158|LIP.1|LIP1	protein tyrosine phosphatase, receptor type, f polypeptide (PTPRF), interacting protein (liprin), alpha 1	protein-coding
MACS_peak_4013	chr13	23622714	23623129	+	59.64	NA	promoter-TSS (NM_153173)	promoter-TSS (NM_153173)	8	NM_153173	69386	Mm.158272	NM_153173	ENSMUSG00000060981	Hist1h4h	1700024H08Rik	histone cluster 1, H4h	protein-coding
MACS_peak_16249	chr9	74800446	74801121	+	59.62	NA	promoter-TSS (NM_001113283)	promoter-TSS (NM_001113283)	-77	NM_001113283	235493	Mm.208955	NM_153584	ENSMUSG00000034858	Fam214a	6330415I01Rik|AI553555|C130047D21Rik|Kiaa1370|mKIAA1370	family with sequence similarity 214, member A	protein-coding
MACS_peak_853	chr1	182295320	182295715	+	59.62	NA	intron (NM_001081175, intron 2 of 7)	intron (NM_001081175, intron 2 of 7)	-34837	NR_003623	277333	Mm.389223	NM_199472		Gm5069	EG277333	glyceraldehyde-3-phosphate dehydrogenase pseudogene	pseudo
MACS_peak_13387	chr6	134847749	134848706	+	59.62	NA	promoter-TSS (NM_001167696)	promoter-TSS (NM_001167696)	248	NR_029441	72813	Mm.409034	NR_029441		2810454H06Rik	-	RIKEN cDNA 2810454H06 gene	ncRNA
MACS_peak_13451	chr6	146673386	146673695	+	59.62	NA	promoter-TSS (NM_172734)	promoter-TSS (NM_172734)	88	NM_172734	232533	Mm.322121	NM_172734	ENSMUSG00000001630	Stk38l	4930473A22Rik|B230328I19|Ndr2|Ndr54	serine/threonine kinase 38 like	protein-coding
MACS_peak_15352	chr8	93658111	93658437	+	59.61	NA	5' UTR (NM_010241, exon 2 of 11)	5' UTR (NM_010241, exon 2 of 11)	1121	NM_010241	14339	Mm.324588	NM_010241	ENSMUSG00000031667	Aktip	AL023020|Fif|Ft|Ft1|Fts	thymoma viral proto-oncogene 1 interacting protein	protein-coding
MACS_peak_1269	chr10	70062302	70062767	+	59.59	NA	promoter-TSS (NM_178621)	promoter-TSS (NM_178621)	-495	NM_178621	70911	Mm.19825	NM_178621	ENSMUSG00000037747	Phyhipl	4921522K17Rik|AI267048	phytanoyl-CoA hydroxylase interacting protein-like	protein-coding
MACS_peak_5358	chr15	73253391	73253917	+	59.59	NA	promoter-TSS (NM_001130409)	promoter-TSS (NM_001130409)	-33	NM_001130409	14083	Mm.254494	NM_007982	ENSMUSG00000022607	Ptk2	FAK|FRNK|Fadk|mKIAA4203|p125FAK	PTK2 protein tyrosine kinase 2	protein-coding
MACS_peak_3933	chr13	8201814	8202389	+	59.59	NA	promoter-TSS (NR_110345)	promoter-TSS (NR_110345)	-11	NM_001289530	94191	Mm.425794	NM_052977	ENSMUSG00000052551	Adarb2	Adar3|RED2	adenosine deaminase, RNA-specific, B2	protein-coding
MACS_peak_13231	chr6	117829050	117830159	+	59.59	NA	Intergenic	CpG	16509	NM_001001792	22685	Mm.249661	NM_008616	ENSMUSG00000042097	Zfp239	Mok-2|Mok2|Znf239	zinc finger protein 239	protein-coding
MACS_peak_13022	chr6	83725506	83725937	+	59.57	NA	promoter-TSS (NM_009357)	promoter-TSS (NM_009357)	85	NM_009357	21766	Mm.28371	NM_009357		Tex261	3110001O07Rik|AA409339|AI480706|AL033351|TEG-261	testis expressed gene 261	protein-coding
MACS_peak_6539	chr17	22451601	22451901	+	59.57	NA	Intergenic	Intergenic	46616	NM_176962	319615	Mm.442162	NM_176962	ENSMUSG00000033972	Zfp944	6330416L07Rik	zinc finger protein 944	protein-coding
MACS_peak_3967	chr13	17786972	17787454	+	59.57	NA	promoter-TSS (NM_025479)	promoter-TSS (NM_025479)	-34	NM_025479	66308	Mm.291109	NM_025479	ENSMUSG00000012429	Mplkip	2810021B07Rik|C330007M08Rik|Ttdn1	M-phase specific PLK1 intereacting protein	protein-coding
MACS_peak_14809	chr8	11555946	11556328	+	59.57	NA	promoter-TSS (NM_011919)	promoter-TSS (NM_011919)	71	NM_011919	26356	Mm.25709	NM_011919	ENSMUSG00000045969	Ing1	2610028J21Rik|AA407184|AI875420|mING1h|p33Ing1|p37Ing1b	inhibitor of growth family, member 1	protein-coding
MACS_peak_9731	chr3	14578423	14578976	+	59.57	NA	promoter-TSS (NM_007892)	promoter-TSS (NM_007892)	28	NM_007892	13559	Mm.153415	NM_007892	ENSMUSG00000027552	E2f5	AU024671|E2F-5	E2F transcription factor 5	protein-coding
MACS_peak_906	chr1	187940960	187941302	+	59.43	NA	promoter-TSS (NM_146106)	promoter-TSS (NM_146106)	58	NM_146106	226791	Mm.257116	NM_146106	ENSMUSG00000039246	Lyplal1	BC027340|Q96AVO	lysophospholipase-like 1	protein-coding
MACS_peak_3329	chr12	21423655	21423957	+	59.42	NA	promoter-TSS (NM_011739)	promoter-TSS (NM_011739)	-509	NM_011739	22630	Mm.289630	NM_011739	ENSMUSG00000076432	Ywhaq	2700028P07Rik|AA409740|AU021156|R74690	tyrosine 3-monooxygenase/tryptophan 5-monooxygenase activation protein, theta polypeptide	protein-coding
MACS_peak_11264	chr4	134409444	134410148	+	59.38	NA	promoter-TSS (NM_025382)	promoter-TSS (NM_025382)	-536	NM_025382	66146	Mm.99793	NM_025382	ENSMUSG00000028826	Tmem57	1110007C24Rik|9230118A01Rik|AI317300|AI606104|C61	transmembrane protein 57	protein-coding
MACS_peak_3603	chr12	81213799	81214098	+	59.32	NA	promoter-TSS (NM_007564)	promoter-TSS (NM_007564)	52	NM_007564	12192	Mm.235132	NM_007564	ENSMUSG00000021127	Zfp36l1	AW742437|AW743212|Berg36|Brf1|D530020L18Rik|ERF1|TIS11b|cMG1	zinc finger protein 36, C3H type-like 1	protein-coding
MACS_peak_1098	chr10	39451883	39452873	+	59.32	NA	promoter-TSS (NR_038037)	promoter-TSS (NR_038037)	412	NM_011264	19714	Mm.439723	NM_011264	ENSMUSG00000019841	Rev3l	Rev|Rev3|Sez4	REV3-like, catalytic subunit of DNA polymerase zeta RAD54 like (S. cerevisiae)	protein-coding
MACS_peak_267	chr1	66863707	66864199	+	59.27	NA	5' UTR (NM_177645, exon 1 of 14)	5' UTR (NM_177645, exon 1 of 14)	216	NM_177645	68691	Mm.240912	NM_177645	ENSMUSG00000026004	Kansl1l	1110028C15Rik|1190030G24|AI427598|C430010P07Rik|mKIAA4189	KAT8 regulatory NSL complex subunit 1-like	protein-coding
MACS_peak_12035	chr5	104340011	104340298	+	59.27	NA	promoter-TSS (NM_178741)	promoter-TSS (NM_178741)	94	NM_178741	246293	Mm.179871	NM_178741	ENSMUSG00000029312	Klhl8	2310001P09Rik|D5Ertd431e	kelch-like 8	protein-coding
MACS_peak_3578	chr12	77866360	77866948	+	59.27	NA	promoter-TSS (NM_206534)	promoter-TSS (NM_206534)	94	NM_206534	211151	Mm.80970	NM_206534	ENSMUSG00000090258	Churc1	1700030P15Rik|My015|chch	churchill domain containing 1	protein-coding
MACS_peak_16794	chrX	45696836	45697122	+	59.27	NA	intron (NM_178782, intron 2 of 14)	CpG	2444	NM_178782	320376	Mm.210146	NM_178782	ENSMUSG00000036959	Bcorl1	6720425J07Rik|B930011H20Rik	BCL6 co-repressor-like 1	protein-coding
MACS_peak_8227	chr19	45734772	45735170	+	59.24	NA	promoter-TSS (NM_013907)	promoter-TSS (NM_013907)	-288	NM_013907	30838	Mm.254739	NM_013907	ENSMUSG00000040913	Fbxw4	Dac|Fbw4|SHFM3|SHSF3|dactylin|dactylyn	F-box and WD-40 domain protein 4	protein-coding
MACS_peak_12699	chr6	13627690	13628057	+	59.18	NA	promoter-TSS (NM_175312)	promoter-TSS (NM_175312)	93	NM_175312	101148	Mm.354863	NM_175312	ENSMUSG00000042742	B630005N14Rik	AI666701	RIKEN cDNA B630005N14 gene	protein-coding
MACS_peak_5033	chr14	77556316	77556802	+	59.18	NA	promoter-TSS (NM_001253759)	promoter-TSS (NM_001253759)	-11	NM_001253759	239188	Mm.441158	NM_172813	ENSMUSG00000022012	Enox1	B230207J08|D230005D02Rik	ecto-NOX disulfide-thiol exchanger 1	protein-coding
MACS_peak_1375	chr10	79601770	79602169	+	59.18	NA	non-coding (NR_036582, exon 1 of 11)	non-coding (NR_036582, exon 1 of 11)	143	NR_036582	100503659	Mm.485395	NM_015761	ENSMUSG00000035640	Dos	9630008F14|R29144/1	downstream of Stk11	protein-coding
MACS_peak_2984	chr11	106348926	106349318	+	59.06	NA	promoter-TSS (NM_023913)	promoter-TSS (NM_023913)	-12	NM_023913	78943	Mm.340943	NM_023913		Ern1	9030414B18Rik|AI225830|C85377|Ire1a|Ire1alpha|Ire1p	endoplasmic reticulum (ER) to nucleus signalling 1	protein-coding
MACS_peak_13753	chr7	26465644	26466118	+	59.05	NA	promoter-TSS (NM_172148)	promoter-TSS (NM_172148)	-296	NM_172148	232987	Mm.22849	NM_172148	ENSMUSG00000063439	B9d2	stumpy	B9 protein domain 2	protein-coding
MACS_peak_8625	chr2	30997303	30997584	+	59.05	NA	promoter-TSS (NM_001177648)	promoter-TSS (NM_001177648)	85	NM_001177649	14269	Mm.52297	NM_019406	ENSMUSG00000075415	Fnbp1	1110057E06Rik|2210010H06Rik|FBP1|Fbp17	formin binding protein 1	protein-coding
MACS_peak_13430	chr6	143115509	143116050	+	59.05	NA	promoter-TSS (NM_029250)	promoter-TSS (NM_029250)	29	NM_029250	75320	Mm.272548	NM_029250	ENSMUSG00000030275	Etnk1	1110061E11Rik|4930555L11Rik|AI195356|AI841245|C80956|D6Ertd3e|EKI1	ethanolamine kinase 1	protein-coding
MACS_peak_1224	chr10	62064740	62065317	+	59.05	NA	promoter-TSS (NM_019553)	promoter-TSS (NM_019553)	18	NM_019553	56200	Mm.413275	NM_019553	ENSMUSG00000020075	Ddx21	AI255159|AL022742|D10Ertd645e|D10Wsu42e	DEAD (Asp-Glu-Ala-Asp) box polypeptide 21	protein-coding
MACS_peak_1122	chr10	41606932	41607531	+	59.02	NA	promoter-TSS (NM_001013370)	promoter-TSS (NM_001013370)	-14	NM_001013370	140742	Mm.139418	NM_001013370	ENSMUSG00000038332	Sesn1	1110002G11Rik|AU044290|Pa26|Sest1	sestrin 1	protein-coding
MACS_peak_6055	chr16	20426064	20426744	+	58.98	NA	promoter-TSS (NM_013790)	promoter-TSS (NM_013790)	63	NM_013790	27416	Mm.20845	NM_013790	ENSMUSG00000022822	Abcc5	2900011L11Rik|AI132311|Abcc5a|Abcc5b|Mrp5	ATP-binding cassette, sub-family C (CFTR/MRP), member 5	protein-coding
MACS_peak_9279	chr2	132403790	132404012	+	58.98	NA	promoter-TSS (NM_001042672)	promoter-TSS (NM_001042672)	83	NM_001291050	74182	Mm.211211	NM_027096	ENSMUSG00000027346	Gpcpd1	2310004G06Rik|2310032D16Rik|AU015213|Gde5|Prei4|mKIAA1434	glycerophosphocholine phosphodiesterase GDE1 homolog (S. cerevisiae)	protein-coding
MACS_peak_13864	chr7	30768803	30769179	+	58.98	NA	promoter-TSS (NM_001167873)	promoter-TSS (NM_001167873)	17	NM_001167872	243905	Mm.322432	NM_001033355	ENSMUSG00000074221	Zfp568	C80731|Gm1691|chato	zinc finger protein 568	protein-coding
MACS_peak_9959	chr3	83843862	83844115	+	58.95	NA	promoter-TSS (NM_172681)	promoter-TSS (NM_172681)	95	NM_172681	229473	Mm.28838	NM_172681	ENSMUSG00000033767	D930015E06Rik	Kiaa0922|mKIAA0922	RIKEN cDNA D930015E06 gene	protein-coding
MACS_peak_11284	chr4	135502281	135502540	+	58.95	NA	promoter-TSS (NM_008254)	promoter-TSS (NM_008254)	42	NM_008254	15356	Mm.482102	NM_008254	ENSMUSG00000028672	Hmgcl	AW476067|HL	3-hydroxy-3-methylglutaryl-Coenzyme A lyase	protein-coding
MACS_peak_15126	chr8	73300371	73301075	+	58.95	NA	promoter-TSS (NR_029440)	promoter-TSS (NR_029440)	-38	NR_029440	72093	Mm.271208	NR_029440		2010320M18Rik	-	RIKEN cDNA 2010320M18 gene	ncRNA
MACS_peak_7636	chr18	67624268	67624799	+	58.84	NA	promoter-TSS (NM_144867)	promoter-TSS (NM_144867)	30	NM_144867	225655	Mm.221420	NM_144867	ENSMUSG00000024530	Slmo1	A230074A19Rik|BC019561	slowmo homolog 1 (Drosophila)	protein-coding
MACS_peak_5353	chr15	72920584	72921489	+	58.84	NA	intron (NM_053068, intron 1 of 2)	CpG	194	NM_053068	93696	Mm.23095	NM_053068	ENSMUSG00000068391	Chrac1	2410152E03Rik|2810406L04Rik|YCL1	chromatin accessibility complex 1	protein-coding
MACS_peak_2022	chr11	30167994	30168207	+	58.82	NA	Intergenic	CpG	-48328	NM_175836	20742	Mm.123110	NM_009260	ENSMUSG00000020315	Sptbn1	9930031C03Rik|AL033301|SPTB2|Spnb-2|Spnb2|elf1|elf3|mKIAA4049	spectrin beta, non-erythrocytic 1	protein-coding
MACS_peak_16465	chr9	107515003	107515351	+	58.74	NA	Intergenic	CpG	-3605	NM_001291539	20347	Mm.4083	NM_009153	ENSMUSG00000057969	Sema3b	SemA|Semaa|sema5|semaV	sema domain, immunoglobulin domain (Ig), short basic domain, secreted, (semaphorin) 3B	protein-coding
MACS_peak_7147	chr17	73185929	73186332	+	58.74	NA	promoter-TSS (NM_027166)	promoter-TSS (NM_027166)	86	NM_027166	383295	Mm.277533	NM_027166	ENSMUSG00000039770	Ypel5	2310076K21Rik|CGI-127	yippee-like 5 (Drosophila)	protein-coding
MACS_peak_1210	chr10	60915392	60915674	+	58.74	NA	promoter-TSS (NM_010124)	promoter-TSS (NM_010124)	-116	NM_010124	13688	Mm.259516	NM_010124	ENSMUSG00000020091	Eif4ebp2	2810011I19Rik|4E-BP2|AA792569|BC010348|PHAS-II	eukaryotic translation initiation factor 4E binding protein 2	protein-coding
MACS_peak_11525	chr4	155068289	155069134	+	58.74	NA	exon (NM_178699, exon 1 of 1)	exon (NM_178699, exon 1 of 1)	260	NM_178699	230991	Mm.29083	NM_178699	ENSMUSG00000074738	B930041F14Rik	MNCb-3966	RIKEN cDNA B930041F14 gene	protein-coding
MACS_peak_123	chr1	37921511	37922395	+	58.74	NA	promoter-TSS (NM_207228)	promoter-TSS (NM_207228)	-26	NM_207228	211484	Mm.332756	NM_207228	ENSMUSG00000060771	Tsga10	4933432N21Rik|AI843383|Gm217|Mtsga10	testis specific 10	protein-coding
MACS_peak_3294	chr12	12268919	12269227	+	58.74	NA	intron (NM_001146119, intron 1 of 11)	CpG	128	NM_001146119	76820	Mm.440802	NM_029758	ENSMUSG00000020589	Fam49a	2410157M17Rik|9630047E15|D12Ertd553e	family with sequence similarity 49, member A	protein-coding
MACS_peak_11300	chr4	136158464	136158723	+	58.74	NA	promoter-TSS (NM_133872)	promoter-TSS (NM_133872)	45	NM_133872	99982	Mm.28540	NM_133872	ENSMUSG00000036940	Kdm1a	1810043O07Rik|AA408884|Aof2|D4Ertd478e|Kdm1|Lsd1|mKIAA0601	lysine (K)-specific demethylase 1A	protein-coding
MACS_peak_11647	chr5	23957705	23957946	+	58.74	NA	promoter-TSS (NM_139153)	promoter-TSS (NM_139153)	-170	NM_139153	213990	Mm.250703	NM_139153	ENSMUSG00000023353	Agap3	AGAP-3|AV028425|Centg3|Crag|Crag.|MRIP-1|cnt-g3	ArfGAP with GTPase domain, ankyrin repeat and PH domain 3	protein-coding
MACS_peak_12920	chr6	56664777	56665137	+	58.74	NA	promoter-TSS (NM_030235)	promoter-TSS (NM_030235)	58	NM_030235	78937	Mm.105343	NM_030235	ENSMUSG00000029787	Avl9	5830411G16Rik|D730049P16Rik|mKIAA0241	AVL9 homolog (S. cerevisiase)	protein-coding
MACS_peak_15587	chr8	123191770	123192027	+	58.69	NA	promoter-TSS (NM_009941)	promoter-TSS (NM_009941)	114	NM_010926	18117	Mm.2136	NM_010926	ENSMUSG00000031819	Emc8	Cox4nb|Fam158b|Noc4	ER membrane protein complex subunit 8	protein-coding
MACS_peak_5177	chr15	12250938	12251456	+	58.69	NA	promoter-TSS (NM_025673)	promoter-TSS (NM_025673)	-54	NM_025673	66629	Mm.157655	NM_025673	ENSMUSG00000022200	Golph3	4733401N08Rik|5730410D03Rik|AW413496	golgi phosphoprotein 3	protein-coding
MACS_peak_7025	chr17	53828693	53828970	+	58.69	NA	promoter-TSS (NM_028232)	promoter-TSS (NM_028232)	-191	NM_028232	72415	Mm.153202	NM_028232	ENSMUSG00000023940	Sgol1	3300001M08Rik|C81037|Sgo1	shugoshin-like 1 (S. pombe)	protein-coding
MACS_peak_9099	chr2	118305201	118305667	+	58.69	NA	promoter-TSS (NM_009273)	promoter-TSS (NM_009273)	-2	NM_009273	20813	Mm.363404	NM_009273	ENSMUSG00000009549	Srp14	14kDa|AW536328	signal recognition particle 14	protein-coding
MACS_peak_8481	chr2	25187888	25188485	+	58.69	NA	promoter-TSS (NM_001029983)	promoter-TSS (NM_001029983)	-77	NM_001029983	227619	Mm.270798	NM_001029983	ENSMUSG00000036646	Man1b1	E430019H13Rik|ERMan1|Gm108|MANA-ER	mannosidase, alpha, class 1B, member 1	protein-coding
MACS_peak_8229	chr19	45857558	45858095	+	58.69	NA	promoter-TSS (NM_023799)	promoter-TSS (NM_023799)	-45	NM_023799	76055	Mm.122725	NM_023799	ENSMUSG00000025220	Mgea5	2810009A20Rik|4833427O07Rik|5830447M11Rik|AA408215|Hy5|Ncoat|mKIAA0679	meningioma expressed antigen 5 (hyaluronidase)	protein-coding
MACS_peak_6023	chr16	17921815	17922332	+	58.69	NA	Intergenic	CpG	6239	NM_153150	13358	Mm.229291	NM_153150	ENSMUSG00000003528	Slc25a1	1300019P08Rik|2610100G11Rik|AI194714|Ctp|Dgsj|Slc20a3	solute carrier family 25 (mitochondrial carrier, citrate transporter), member 1	protein-coding
MACS_peak_7413	chr18	34568853	34569280	+	58.69	NA	promoter-TSS (NM_016927)	promoter-TSS (NM_016927)	-11	NM_001163004	53871	Mm.445792	NM_016927	ENSMUSG00000014503	Pkd2l2	TRPP5	polycystic kidney disease 2-like 2	protein-coding
MACS_peak_3328	chr12	21422993	21423508	+	58.69	NA	promoter-TSS (NM_011739)	promoter-TSS (NM_011739)	47	NM_011739	22630	Mm.289630	NM_011739	ENSMUSG00000076432	Ywhaq	2700028P07Rik|AA409740|AU021156|R74690	tyrosine 3-monooxygenase/tryptophan 5-monooxygenase activation protein, theta polypeptide	protein-coding
MACS_peak_3239	chr11	121534204	121534785	+	58.69	NA	promoter-TSS (NM_178664)	promoter-TSS (NM_178664)	-29	NM_178664	210004	Mm.386847	NM_178664	ENSMUSG00000046605	B3gntl1	6030413G23Rik	UDP-GlcNAc:betaGal beta-1,3-N-acetylglucosaminyltransferase-like 1	protein-coding
MACS_peak_14606	chr7	135047521	135047805	+	58.63	NA	promoter-TSS (NM_009739)	promoter-TSS (NM_009739)	76	NM_009739	12041	Mm.425495	NM_009739	ENSMUSG00000030802	Bckdk	AI327402	branched chain ketoacid dehydrogenase kinase	protein-coding
MACS_peak_12659	chr5	152170888	152171778	+	58.56	NA	promoter-TSS (NR_045699)	promoter-TSS (NR_045699)	83	NR_045699	625175	Mm.443286	NR_045699	ENSMUSG00000097321	1700028E10Rik	A630054D14|Gm6561	RIKEN cDNA 1700028E10 gene	ncRNA
MACS_peak_12222	chr5	121038454	121038734	+	58.56	NA	promoter-TSS (NM_029408)	promoter-TSS (NM_029408)	28	NM_145853	252972	Mm.114054	NM_145853	ENSMUSG00000032741	Tpcn1	5730403B01Rik|Tpc1|mKIAA1169	two pore channel 1	protein-coding
MACS_peak_12338	chr5	125914256	125914533	+	58.56	NA	promoter-TSS (NM_203319)	promoter-TSS (NM_203319)	24	NM_203319	208144	Mm.296385	NM_203319	ENSMUSG00000029480	Dhx37	Gm1050|Gm451|mKIAA1517	DEAH (Asp-Glu-Ala-His) box polypeptide 37	protein-coding
MACS_peak_13840	chr7	29965217	29965573	+	58.56	NA	exon (NM_026545, exon 1 of 7)	exon (NM_026545, exon 1 of 7)	297	NM_026545	57296	Mm.273152	NM_026545	ENSMUSG00000030591	Psmd8	6720456J22Rik|AA407360|AL033291|AL033322|AL033323|C76433	proteasome (prosome, macropain) 26S subunit, non-ATPase, 8	protein-coding
MACS_peak_15442	chr8	108224661	108225232	+	58.56	NA	promoter-TSS (NM_001047436)	promoter-TSS (NM_001047436)	49	NM_001012638	497652	Mm.12964	NM_001012638	ENSMUSG00000038000	Acd	-	adrenocortical dysplasia	protein-coding
MACS_peak_16380	chr9	99040723	99040956	+	58.49	NA	promoter-TSS (NM_029094)	promoter-TSS (NM_029094)	-209	NM_029094	74769	Mm.213128	NM_029094	ENSMUSG00000032462	Pik3cb	1110001J02Rik|AI447572|p110beta	phosphatidylinositol 3-kinase, catalytic, beta polypeptide	protein-coding
MACS_peak_13400	chr6	136752742	136753098	+	58.49	NA	promoter-TSS (NM_175652)	promoter-TSS (NM_175652)	32	NM_175652	320332	Mm.246720	NM_175652	ENSMUSG00000096010	Hist4h4	B130044J01Rik	histone cluster 4, H4	protein-coding
MACS_peak_4575	chr14	13116656	13117032	+	58.47	NA	5' UTR (NM_001284385, exon 1 of 5)	5' UTR (NM_001284385, exon 1 of 5)	127	NM_001284386	218734	Mm.44068	NM_146051	ENSMUSG00000033111	3830406C13Rik	-	RIKEN cDNA 3830406C13 gene	protein-coding
MACS_peak_3001	chr11	107331727	107332181	+	58.47	NA	promoter-TSS (NM_145823)	promoter-TSS (NM_145823)	80	NM_145823	71795	Mm.397413	NM_145823	ENSMUSG00000040430	Pitpnc1	1110020B03Rik|5830436L09Rik|AI662802|AI851387|C330017I21Rik|Dnr411|RDGBB|RDGBB1|rdgB-beta	phosphatidylinositol transfer protein, cytoplasmic 1	protein-coding
MACS_peak_16227	chr9	72122419	72122874	+	58.47	NA	promoter-TSS (NM_146224)	promoter-TSS (NM_146224)	-60	NM_146224	235469	Mm.242791	NM_146224	ENSMUSG00000038535	Zfp280d	A930005F02Rik|BC027163|Suhw4|ZNF634|Znf280d	zinc finger protein 280D	protein-coding
MACS_peak_7651	chr18	69503808	69504294	+	58.47	NA	promoter-TSS (NM_013685)	promoter-TSS (NM_013685)	-95	NM_013685	21413	Mm.4269	NM_013685	ENSMUSG00000053477	Tcf4	5730422P05Rik|ASP-I2|E2-2|E2.2|ITF-2|ITF-2b|ITF2|ME2|MITF-2A|MITF-2B|SEF-2|SEF2|SEF2-1|TFE|Tcf-4|bHLHb19	transcription factor 4	protein-coding
MACS_peak_1971	chr11	22187308	22187598	+	58.47	NA	promoter-TSS (NM_001252515)	promoter-TSS (NM_001252515)	-655	NM_001252515	216565	Mm.491265	NM_153078	ENSMUSG00000042302	Ehbp1	AF424697|Flj21950|NACSIN	EH domain binding protein 1	protein-coding
MACS_peak_6165	chr16	35022424	35022724	+	58.47	NA	promoter-TSS (NM_023587)	promoter-TSS (NM_023587)	67	NM_023587	70757	Mm.27286	NM_023587	ENSMUSG00000035376	Ptplb	6330408J20Rik|AI255777|AI481689|HACD2	protein tyrosine phosphatase-like (proline instead of catalytic arginine), member b	protein-coding
MACS_peak_8167	chr19	41922368	41922808	+	58.47	NA	promoter-TSS (NM_177603)	promoter-TSS (NM_177603)	34	NM_177603	212398	Mm.222723	NM_177603	ENSMUSG00000047604	Frat2	-	frequently rearranged in advanced T cell lymphomas 2	protein-coding
MACS_peak_3524	chr12	71553787	71554275	+	58.47	NA	promoter-TSS (NM_028339)	promoter-TSS (NM_028339)	-110	NM_028339	72736	Mm.204670	NM_028339	ENSMUSG00000021072	Tmx1	2810425A04Rik|AI465319|Txndc1	thioredoxin-related transmembrane protein 1	protein-coding
MACS_peak_4088	chr13	38085817	38086366	+	58.47	NA	promoter-TSS (NM_025965)	promoter-TSS (NM_025965)	-32	NM_025965	107513	Mm.426670	NM_025965	ENSMUSG00000021427	Ssr1	2510001K09Rik|6330400D04|AI159733|AI452176|SSR|TRAPA	signal sequence receptor, alpha	protein-coding
MACS_peak_11468	chr4	151401555	151402076	+	58.38	NA	promoter-TSS (NM_133879)	promoter-TSS (NM_133879)	-35	NM_133879	100090	Mm.24661	NM_133879	ENSMUSG00000028952	Zbtb48	0610011D15Rik|AI327031|Hkr3	zinc finger and BTB domain containing 48	protein-coding
MACS_peak_1912	chr11	6376088	6376373	+	58.38	NA	promoter-TSS (NM_011221)	promoter-TSS (NM_011221)	-151	NM_011221	19291	Mm.390332	NM_011221	ENSMUSG00000094483	Purb	2310015K15Rik|AA114818|Cager-2|D11Bwg0414e	purine rich element binding protein B	protein-coding
MACS_peak_7407	chr18	33954328	33954714	+	58.38	NA	promoter-TSS (NR_038151)	promoter-TSS (NR_038151)	-25	NR_038152	69749	Mm.248787	NR_038151	ENSMUSG00000087590	2410004N09Rik	-	RIKEN cDNA 2410004N09 gene	ncRNA
MACS_peak_7472	chr18	36720177	36720496	+	58.38	NA	promoter-TSS (NM_175375)	promoter-TSS (NM_175375)	79	NM_175375	108857	Mm.482287	NM_175375	ENSMUSG00000024483	Ankhd1	1110004O12Rik|4933432B13Rik|9130019P20Rik|A530027J04Rik|A630021B20Rik|AA571404|Mask|mFLJ00246|mKIAA1085	ankyrin repeat and KH domain containing 1	protein-coding
MACS_peak_16422	chr9	105397168	105397766	+	58.38	NA	promoter-TSS (NM_001253836)	promoter-TSS (NM_001253836)	-4	NM_001253836	235574	Mm.326247	NM_175025	ENSMUSG00000032570	Atp2c1	1700121J11Rik|ATP2C1A|AW061228|BCPM|D930003G21Rik|HHD|SPCA|pmr1	ATPase, Ca++-sequestering	protein-coding
MACS_peak_4069	chr13	34129295	34129686	+	58.29	NA	promoter-TSS (NM_026512)	promoter-TSS (NM_026512)	-20	NM_026512	68021	Mm.140243	NM_026512	ENSMUSG00000038286	Bphl	2010012D11Rik|5730533B08Rik|AI115341	biphenyl hydrolase-like (serine hydrolase, breast epithelial mucin-associated antigen)	protein-coding
MACS_peak_2707	chr11	94538525	94538855	+	58.29	NA	exon (NM_145828, exon 1 of 11)	exon (NM_145828, exon 1 of 11)	117	NM_145828	217119	Mm.100638	NM_145828	ENSMUSG00000020868	Xylt2	E030002B02Rik|XT-II|XT2|xylT-II	xylosyltransferase II	protein-coding
MACS_peak_11241	chr4	133466423	133466997	+	58.28	NA	Intergenic	CpG	-22998	NM_009097	20111	Mm.301827	NM_009097	ENSMUSG00000003644	Rps6ka1	Mapkapk-1a|Rsk|Rsk-1|Rsk1|S6K-alpha-1|p90-Rsk1|p90Rsk1|p90S6K|p90rsk	ribosomal protein S6 kinase polypeptide 1	protein-coding
MACS_peak_12284	chr5	123844528	123845009	+	58.28	NA	promoter-TSS (NM_133917)	promoter-TSS (NM_133917)	-39	NM_177582	208104	Mm.83277	NM_133917	ENSMUSG00000038342	Mlxip	AW228700|Mir|bHLHe36	MLX interacting protein	protein-coding
MACS_peak_8459	chr2	24774944	24775453	+	58.28	NA	promoter-TSS (NM_001109687)	promoter-TSS (NM_001109687)	-69	NM_001109686	77683	Mm.24176	NM_172545	ENSMUSG00000036893	Ehmt1	9230102N17Rik|D330003E03|Eu-HMTase1|GLP|GLP1|KMT1D|mKIAA1876	euchromatic histone methyltransferase 1	protein-coding
MACS_peak_11767	chr5	34325809	34326338	+	58.28	NA	promoter-TSS (NM_001033458)	promoter-TSS (NM_001033458)	-50	NM_001033458	381633	Mm.4923	NM_001033458	ENSMUSG00000070858	Gm1673	-	predicted gene 1673	protein-coding
MACS_peak_3797	chr12	107022864	107023127	+	58.28	NA	promoter-TSS (NM_011112)	promoter-TSS (NM_011112)	83	NM_011112	18789	Mm.255877	NM_011112	ENSMUSG00000021111	Papola	Pap|PapIII|Plap	poly (A) polymerase alpha	protein-coding
MACS_peak_15870	chr9	37155768	37156234	+	58.28	NA	promoter-TSS (NM_001081429)	promoter-TSS (NM_001081429)	-24	NM_001081429	245902	Mm.390150	NM_001081429	ENSMUSG00000034303	Ccdc15	A630039F14Rik|D030074L19	coiled-coil domain containing 15	protein-coding
MACS_peak_4683	chr14	31638732	31639001	+	58.28	NA	promoter-TSS (NM_028839)	promoter-TSS (NM_028839)	86	NM_028839	69179	Mm.143025	NM_028839	ENSMUSG00000006526	Tmem110	1810038N08Rik|2310014H19Rik|AW554125	transmembrane protein 110	protein-coding
MACS_peak_1671	chr10	116018454	116018840	+	58.28	NA	promoter-TSS (NM_001037846)	promoter-TSS (NM_001037846)	-80	NM_001037846	72068	Mm.351553	NM_028082	ENSMUSG00000020166	Cnot2	2600016M12Rik|2810470K03Rik|AA537049|AA959607|AW557563|C79650	CCR4-NOT transcription complex, subunit 2	protein-coding
MACS_peak_2220	chr11	58977006	58977481	+	58.28	NA	promoter-TSS (NM_173785)	promoter-TSS (NM_173785)	4	NM_001270791	216792	Mm.266175	NM_173785	ENSMUSG00000049287	Iba57	4930543L23Rik|A230051G13Rik|C1orf69	IBA57, iron-sulfur cluster assembly homolog (S. cerevisiae)	protein-coding
MACS_peak_4481	chr13	101603083	101603528	+	58.24	NA	promoter-TSS (NM_022885)	promoter-TSS (NM_022885)	77	NM_022885	69048	Mm.402215	NM_022885	ENSMUSG00000021629	Slc30a5	1810010K08Rik|AF233321|ZNT5|ZTL1|ZnT-5|Zntl1	solute carrier family 30 (zinc transporter), member 5	protein-coding
MACS_peak_9141	chr2	120393224	120393600	+	58.24	NA	promoter-TSS (NM_009222)	promoter-TSS (NM_009222)	5	NM_009222	20619	Mm.245715	NM_009222	ENSMUSG00000027287	Snap23	23kDa|AA408749|SNAP-23|Sndt|Syndet	synaptosomal-associated protein 23	protein-coding
MACS_peak_4009	chr13	23460899	23461452	+	58.24	NA	promoter-TSS (NM_001111107)	promoter-TSS (NM_001111107)	-98	NM_001286155	218100	Mm.286454	NM_172586	ENSMUSG00000046351	Zfp322a	Znf322|Znf322a	zinc finger protein 322A	protein-coding
MACS_peak_3345	chr12	28027433	28027775	+	58.16	NA	promoter-TSS (NM_009234)	promoter-TSS (NM_009234)	-21	NM_009234	20666	Mm.41702	NM_009234		Sox11	1110038H03Rik|6230403H02Rik|AI836553|end1	SRY (sex determining region Y)-box 11	protein-coding
MACS_peak_11814	chr5	37632940	37633497	+	58.16	NA	promoter-TSS (NM_001136058)	promoter-TSS (NM_001136058)	-79	NM_001136058	12933	Mm.290995	NM_007765	ENSMUSG00000029121	Crmp1	CRMP-1|DRP-1|Dpysl1|ULIP-3|Ulip3	collapsin response mediator protein 1	protein-coding
MACS_peak_5149	chr15	5066174	5066832	+	58.13	NA	promoter-TSS (NM_026069)	promoter-TSS (NM_026069)	-110	NM_026069	67281	Mm.10474	NM_026069	ENSMUSG00000041841	Rpl37	3110005M08Rik	ribosomal protein L37	protein-coding
MACS_peak_10577	chr4	28740041	28740467	+	58.08	NA	promoter-TSS (NM_001122889)	promoter-TSS (NM_001122889)	-27	NM_001290434	13841	Mm.257266	NM_010141	ENSMUSG00000028289	Epha7	Cek11|Ebk|Ehk3|Hek11|Mdk1	Eph receptor A7	protein-coding
MACS_peak_5843	chr15	101097184	101097525	+	58.08	NA	promoter-TSS (NM_010444)	promoter-TSS (NM_010444)	77	NM_010444	15370	Mm.119	NM_010444	ENSMUSG00000023034	Nr4a1	GFRP1|Gfrp|Hbr-1|Hbr1|Hmr|N10|NGFI-B|NGFIB|NP10|TIS1|TR3|nur77	nuclear receptor subfamily 4, group A, member 1	protein-coding
MACS_peak_9881	chr3	55046383	55046675	+	58.08	NA	promoter-TSS (NM_001195538)	promoter-TSS (NM_001195538)	81	NM_001195538	13175	Mm.393242	NM_019978	ENSMUSG00000027797	Dclk1	1700113D08Rik|2810480F11Rik|AI836758|Click-I|Cpg16|Dcamkl1|Dcl|Dclk|mKIAA0369	doublecortin-like kinase 1	protein-coding
MACS_peak_4806	chr14	55495150	55496327	+	58.05	NA	exon (NM_001167908, exon 1 of 2)	exon (NM_001167908, exon 1 of 2)	637	NM_001167908	105651	Mm.297365	NM_001167908	ENSMUSG00000072494	Ppp1r3e	A630071A11Rik|AW049239|Gm1211	protein phosphatase 1, regulatory (inhibitor) subunit 3E	protein-coding
MACS_peak_1338	chr10	79144365	79144690	+	57.98	NA	promoter-TSS (NM_177613)	promoter-TSS (NM_177613)	-413	NM_177613	216150	Mm.21981	NM_177613	ENSMUSG00000020307	Cdc34	AI327276|UBE2R1	cell division cycle 34	protein-coding
MACS_peak_7815	chr19	4927902	4928562	+	57.98	NA	promoter-TSS (NM_133803)	promoter-TSS (NM_133803)	55	NM_133803	75221	Mm.234769	NM_133803	ENSMUSG00000063904	Dpp3	4930533O14Rik|C86324	dipeptidylpeptidase 3	protein-coding
MACS_peak_5984	chr16	14361382	14361814	+	57.86	NA	promoter-TSS (NM_008576)	promoter-TSS (NM_008576)	-53	NM_008576	17250	Mm.196634	NM_008576	ENSMUSG00000023088	Abcc1	Abcc1a|Abcc1b|MRP|Mdrap|Mrp1	ATP-binding cassette, sub-family C (CFTR/MRP), member 1	protein-coding
MACS_peak_9166	chr2	121332198	121332547	+	57.86	NA	promoter-TSS (NM_026220)	promoter-TSS (NM_026220)	20	NM_026220	67532	Mm.440764	NM_026220	ENSMUSG00000068479	Mfap1a	4432409M24Rik|Mfap1	microfibrillar-associated protein 1A	protein-coding
MACS_peak_16670	chrX	7274236	7274509	+	57.81	NA	exon (NM_173747, exon 1 of 11)	exon (NM_173747, exon 1 of 11)	112	NM_173747	209416	Mm.148753	NM_173747	ENSMUSG00000031148	Gpkow	4432411B18|DXErtd697e|DXImx41e|T54	G patch domain and KOW motifs	protein-coding
MACS_peak_16066	chr9	57556260	57556585	+	57.81	NA	promoter-TSS (NM_153799)	promoter-TSS (NM_153799)	46	NM_153799	353190	Mm.268104	NM_153799		Edc3	AA517853|Lsm16|Yjdc	enhancer of mRNA decapping 3 homolog (S. cerevisiae)	protein-coding
MACS_peak_2621	chr11	86358092	86358391	+	57.77	NA	promoter-TSS (NM_001199046)	promoter-TSS (NM_001199046)	68	NM_028259	72508	Mm.394280	NM_028259	ENSMUSG00000020516	Rps6kb1	2610318I15Rik|4732464A07Rik|70kDa|AA959758|AI256796|AI314060|S6K1|p70/85s6k|p70s6k	ribosomal protein S6 kinase, polypeptide 1	protein-coding
MACS_peak_9650	chr2	179759276	179759831	+	57.77	NA	promoter-TSS (NM_177727)	promoter-TSS (NM_177727)	-139	NM_177727	241846	Mm.21577	NM_177727	ENSMUSG00000039108	Lsm14b	9430078B04|BC040823	LSM14 homolog B (SCD6, S. cerevisiae)	protein-coding
MACS_peak_14328	chr7	104991301	104991687	+	57.77	NA	promoter-TSS (NM_011035)	promoter-TSS (NM_011035)	45	NM_011035	18479	Mm.260227	NM_011035	ENSMUSG00000030774	Pak1	AW045634|PAK-1|Paka	p21 protein (Cdc42/Rac)-activated kinase 1	protein-coding
MACS_peak_5082	chr14	105657676	105658225	+	57.77	NA	promoter-TSS (NM_029561)	promoter-TSS (NM_029561)	60	NM_001190989	76273	Mm.290669	NM_029561	ENSMUSG00000053253	Ndfip2	0710001O20Rik|2810436B12Rik|9130207N19Rik|N4wbp5a|mKIAA1165	Nedd4 family interacting protein 2	protein-coding
MACS_peak_5740	chr15	97794335	97794914	+	57.77	NA	promoter-TSS (NM_201359)	promoter-TSS (NM_201359)	-36	NM_201359	380967	Mm.196630	NM_201359	ENSMUSG00000052369	Tmem106c	AI046681|BC046621|D15Ertd405e	transmembrane protein 106C	protein-coding
MACS_peak_3466	chr12	56921876	56922238	+	57.77	NA	5' UTR (NM_019994, exon 1 of 41)	5' UTR (NM_019994, exon 1 of 41)	446	NM_019994	56784	Mm.292180	NM_019994	ENSMUSG00000021027	Ralgapa1	2310003F20Rik|4930400K19Rik|AI563624|GRIPE|Garnl1|Tulip1|mKIAA0884	Ral GTPase activating protein, alpha subunit 1	protein-coding
MACS_peak_1159	chr10	53099467	53099741	+	57.77	NA	promoter-TSS (NM_001204983)	promoter-TSS (NM_001204983)	53	NM_001204983	100038725	Mm.441403	NM_001204983	ENSMUSG00000038594	Cep85l	ENSMUSG00000038594|Gm9766	centrosomal protein 85-like	protein-coding
MACS_peak_12625	chr5	148241510	148241984	+	57.77	NA	promoter-TSS (NM_028291)	promoter-TSS (NM_028291)	-409	NM_028291	72587	Mm.320469	NM_028291	ENSMUSG00000029647	Pan3	2700050F09Rik|A430027N15Rik|AU014670	PAN3 polyA specific ribonuclease subunit homolog (S. cerevisiae)	protein-coding
MACS_peak_3549	chr12	73861845	73862103	+	57.77	NA	promoter-TSS (NM_008910)	promoter-TSS (NM_008910)	-224	NM_008910	19042	Mm.261045	NM_008910	ENSMUSG00000021096	Ppm1a	2310003C21Rik|2900017D14Rik|AI427932|AU017636|MMPa-2|MPPa-1	protein phosphatase 1A, magnesium dependent, alpha isoform	protein-coding
MACS_peak_12548	chr5	142843110	142843948	+	57.75	NA	Intergenic	CpG	-33922	NM_199068	17425	Mm.24214	NM_010812	ENSMUSG00000056493	Foxk1	A630048H08Rik|AI463295|ENSMUSG00000075577|Gm10868|Mnf	forkhead box K1	protein-coding
MACS_peak_4327	chr13	68720706	68721288	+	57.75	NA	promoter-TSS (NM_027123)	promoter-TSS (NM_027123)	1	NM_172480	210009	Mm.205514	NM_172480	ENSMUSG00000034617	Mtrr	4732420G08|MSR	5-methyltetrahydrofolate-homocysteine methyltransferase reductase	protein-coding
MACS_peak_14366	chr7	107855144	107855436	+	57.74	NA	promoter-TSS (NM_178764)	promoter-TSS (NM_178764)	74	NM_178764	319604	Mm.260362	NM_178764	ENSMUSG00000029461	Fam168a	2610030B18Rik|B930006L02Rik|mKIAA0280	family with sequence similarity 168, member A	protein-coding
MACS_peak_5916	chr16	4726118	4726600	+	57.71	NA	promoter-TSS (NM_001136066)	promoter-TSS (NM_001136066)	-2	NM_001136066	15369	Mm.272866	NM_010443	ENSMUSG00000004070	Hmox2	HO-2|HO2	heme oxygenase (decycling) 2	protein-coding
MACS_peak_8729	chr2	39081420	39081913	+	57.68	NA	intron (NM_024209, intron 1 of 6)	CpG	192	NM_024209	67857	Mm.389242	NM_024209		Ppp6c	2310003C10Rik	protein phosphatase 6, catalytic subunit	protein-coding
MACS_peak_3814	chr12	109792844	109793386	+	57.68	NA	5' UTR (NM_007965, exon 1 of 13)	5' UTR (NM_007965, exon 1 of 13)	185	NM_007965	14026	Mm.238841	NM_007965	ENSMUSG00000021262	Evl	AI528774	Ena-vasodilator stimulated phosphoprotein	protein-coding
MACS_peak_15560	chr8	122082201	122083036	+	57.61	NA	promoter-TSS (NM_019709)	promoter-TSS (NM_019709)	43	NM_001167910	56453	Mm.206934	NM_019709	ENSMUSG00000031835	Mbtps1	0610038M03Rik|AV003995|S1P|SKI-1|Ski1|mKIAA0091	membrane-bound transcription factor peptidase, site 1	protein-coding
MACS_peak_13205	chr6	114232574	114232962	+	57.61	NA	5' UTR (NM_178703, exon 1 of 16)	5' UTR (NM_178703, exon 1 of 16)	139	NM_178703	232333	Mm.5260	NM_178703	ENSMUSG00000030310	Slc6a1	A730043E01|GABATHG|GABATR|GAT-1|Gabt|Gabt1|Gat1|XT-1|Xtrp1	solute carrier family 6 (neurotransmitter transporter, GABA), member 1	protein-coding
MACS_peak_4169	chr13	51746812	51747327	+	57.58	NA	promoter-TSS (NM_029279)	promoter-TSS (NM_029279)	-14	NM_029279	75420	Mm.275981	NM_029279	ENSMUSG00000035139	Secisbp2	2210413N07Rik|2810012K13Rik|SBP2	SECIS binding protein 2	protein-coding
MACS_peak_11216	chr4	132567348	132567920	+	57.45	NA	intron (NM_146155, intron 1 of 6)	CpG	213	NM_146155	230793	Mm.31816	NM_146155	ENSMUSG00000037692	Ahdc1	D030015G18Rik	AT hook, DNA binding motif, containing 1	protein-coding
MACS_peak_6245	chr16	56029625	56030114	+	57.45	NA	promoter-TSS (NM_001024622)	promoter-TSS (NM_001024622)	-39	NM_001024622	76302	Mm.310642	NM_001024622	ENSMUSG00000071533	Pcnp	1110018D06Rik|AI647035	PEST proteolytic signal containing nuclear protein	protein-coding
MACS_peak_2391	chr11	70051226	70051733	+	57.41	NA	promoter-TSS (NM_026757)	promoter-TSS (NM_026757)	-63	NM_145758	104457	Mm.39265	NM_026757	ENSMUSG00000020831	0610010K14Rik	1110020A23Rik|AL033328|AU045833|Bap18	RIKEN cDNA 0610010K14 gene	protein-coding
MACS_peak_1432	chr10	80260954	80261360	+	57.41	NA	promoter-TSS (NM_013651)	promoter-TSS (NM_013651)	214	NM_023900	78670	Mm.41479	NM_023900	ENSMUSG00000035278	Plekhj1	9530063M10Rik	pleckstrin homology domain containing, family J member 1	protein-coding
MACS_peak_15429	chr8	107849970	107850448	+	57.41	NA	promoter-TSS (NM_177449)	promoter-TSS (NM_177449)	-33	NM_177449	234684	Mm.381717	NM_177449	ENSMUSG00000041679	Lrrc29	A630024J02Rik|FBL9|FBXL9	leucine rich repeat containing 29	protein-coding
MACS_peak_14226	chr7	87468928	87469324	+	57.41	NA	5' UTR (NM_173445, exon 1 of 9)	5' UTR (NM_173445, exon 1 of 9)	214	NM_173445	269955	Mm.474502	NM_173445	ENSMUSG00000038930	Rccd1	5830436H09|E430018M08Rik	RCC1 domain containing 1	protein-coding
MACS_peak_1198	chr10	59465370	59465915	+	57.41	NA	promoter-TSS (NM_026937)	promoter-TSS (NM_026937)	89	NM_026937	69090	Mm.155839	NM_026937	ENSMUSG00000044475	Ascc1	1810015P09Rik|AI550520|ASC1p50|CGI-18	activating signal cointegrator 1 complex subunit 1	protein-coding
MACS_peak_6473	chr17	13184902	13185754	+	57.33	NA	promoter-TSS (NM_001113533)	promoter-TSS (NM_001113533)	77	NM_175394	60532	Mm.275521	NM_175394	ENSMUSG00000060475	Wtap	2810408K05Rik|9430038B09Rik	Wilms tumour 1-associating protein	protein-coding
[truncated: 15,527 more rows]
