# Supplementary material for: Remodeling of epigenome and transcriptome landscapes with aging in mice reveals widespread induction of inflammatory responses
Source: HighWire-hosted journal article supplement (doi:10.1101/gr.240093.118), 2019-03-11
Supplement: Supplemental_Code_FigureS7_CIBERSORT.zip [file Alzh_CIBERSORT.Output_Job58.pdf › Disease_models/Alzh_CIBERSORT.Output_Job58.pdf]

| Input Sample                     |            |       |            |                   |              |              |             |           |           |         |          |       |                  |       |         |                |             |         |                     |                    |           | Pearson |             | RMSE  |
|----------------------------------|------------|-------|------------|-------------------|--------------|--------------|-------------|-----------|-----------|---------|----------|-------|------------------|-------|---------|----------------|-------------|---------|---------------------|--------------------|-----------|---------|-------------|-------|
|                                  | Adipocytes | aNSCs | Astrocytes | Endothelial cells | Erythrocytes | Granulocytes | Macrophages | Microglia | Monocytes | Neurons | NK cells | NPCs  | Oligodendrocytes | qNSCs | T cells | Cardiomyocytes | Hepatocytes | B cells | Cardiac Fibroblasts | Dermal Fibroblasts | Ependymal | P-value | Correlation |       |
| CX_2wk_RNA_rep1Aligned.out.bam   | 0          | 0     | 0.222      | 0                 | 0            | 0            | 0           | 0.111     | 0.009     | 0       | 0        | 0.176 | 0.033            | 0     | 0       | 0.082          | 0.017       | 0       | 0                   | 0                  | 0.041     | 0.090   | 0.084       | 1.026 |
| CX_2wk_RNA_rep2Aligned.out.bam   | 0          | 0     | 0.188      | 0.018             | 0            | 0            | 0           | 0.099     | 0.011     | 0       | 0        | 0.199 | 0.051            | 0     | 0.072   | 0.06           | 0           | 0       | 0.001               | 0                  | 0         | 0.240   | 0.057       | 1.029 |
| CX_2wk_RNA_rep3Aligned.out.bam   | 0          | 0.002 | 0.155      | 0                 | 0            | 0            | 0           | 0.097     | 0.006     | 0       | 0        | 0.114 | 0.077            | 0     | 0       | 0.047          | 0           | 0.016   | 0                   | 0.003              | 0         | 0.120   | 0.080       | 1.039 |
| CX_6wk_RNA_rep1Aligned.out.bam   | 0.005      | 0.042 | 0.231      | 0                 | 0            | 0            | 0           | 0.026     | 0.024     | 0.005   | 0        | 0.067 | 0.058            | 0     | 0.004   | 0.084          | 0           | 0       | 0                   | 0.01               | 0         | 0.160   | 0.075       | 1.043 |
| CX_6wk_RNA_rep2Aligned.out.bam   | 0          | 0     | 0.075      | 0                 | 0.012        | 0            | 0           | 0.115     | 0.038     | 0.228   | 0.014    | 0.045 | 0.094            | 0     | 0       | 0.118          | 0           | 0       | 0.032               | 0                  | 0         | 0.240   | 0.057       | 1.048 |
| CX_6wk_RNA_rep3Aligned.out.bam   | 0          | 0     | 0.225      | 0.018             | 0.029        | 0            | 0           | 0.05      | 0.023     | 0.248   | 0        | 0.205 | 0.063            | 0     | 0       | 0.086          | 0.02        | 0       | 0                   | 0                  | 0.032     | 0.200   | 0.067       | 1.032 |
| Ck25_2wk_RNA_rep1Aligned.out.bam | 0          | 0     | 0.228      | 0.064             | 0            | 0            | 0.004       | 0         | 0.163     | 0       | 0.148    | 0.122 | 0                | 0.072 | 0       | 0.143          | 0.008       | 0       | 0                   | 0                  | 0.05      | 0.410   | 0.042       | 1.043 |
| Ck25_2wk_RNA_rep2Aligned.out.bam | 0          | 0     | 0.15       | 0                 | 0            | 0            | 0           | 0.12      | 0.012     | 0.182   | 0        | 0.072 | 0.064            | 0     | 0.019   | 0.096          | 0           | 0       | 0                   | 0                  | 0         | 0.460   | 0.037       | 1.036 |
| Ck25_2wk_RNA_rep3Aligned.out.bam | 0          | 0     | 0.173      | 0                 | 0            | 0            | 0           | 0.222     | 0.023     | 0.04    | 0        | 0.216 | 0.068            | 0     | 0.068   | 0.079          | 0.026       | 0.014   | 0                   | 0.025              | 0.045     | 0.590   | 0.031       | 1.034 |
| Ck25_6wk_RNA_rep1Aligned.out.bam | 0          | 0     | 0.228      | 0                 | 0            | 0            | 0.074       | 0.138     | 0         | 0.062   | 0.062    | 0.137 | 0.098            | 0     | 0       | 0.121          | 0.017       | 0.004   | 0.025               | 0.014              | 0.021     | 0.210   | 0.065       | 1.034 |
| Ck25_6wk_RNA_rep2Aligned.out.bam | 0          | 0     | 0.21       | 0.087             | 0            | 0            | 0           | 0.072     | 0.011     | 0.181   | 0.032    | 0.074 | 0.097            | 0.015 | 0       | 0.113          | 0           | 0       | 0                   | 0                  | 0.037     | 0.220   | 0.064       | 1.043 |
| Ck25_6wk_RNA_rep3Aligned.out.bam | 0          | 0     | 0.219      | 0                 | 0            | 0            | 0           | 0.24      | 0.002     | 0.121   | 0.047    | 0.146 | 0.078            | 0     | 0       | 0.097          | 0.008       | 0       | 0                   | 0.008              | 0.033     | 0.230   | 0.057       | 1.032 |
