# Supplementary material for: Remodeling of epigenome and transcriptome landscapes with aging in mice reveals widespread induction of inflammatory responses
Source: HighWire-hosted journal article supplement (doi:10.1101/gr.240093.118), 2019-03-11
Supplement: Supplemental_Code_FigureS7_CIBERSORT.zip [file Hippo_40Hz_CIBERSORT.Output_Job57.pdf › Disease_models/Hippo_40Hz_CIBERSORT.Output_Job57.pdf]

| Input Sample                      |            |       |            |                   |              |              |             |           |           |         |          |       |                  |      |         |                |             |         |                     |                    |           | Pearson |             |       |       |
|-----------------------------------|------------|-------|------------|-------------------|--------------|--------------|-------------|-----------|-----------|---------|----------|-------|------------------|------|---------|----------------|-------------|---------|---------------------|--------------------|-----------|---------|-------------|-------|-------|
|                                   | Adipocytes | aNSCs | Astrocytes | Endothelial cells | Erythrocytes | Granulocytes | Macrophages | Microglia | Monocytes | Neurons | NK cells | NPCs  | Oligodendrocytes | NSCs | T cells | Cardiomyocytes | Hepatocytes | B cells | Cardiac Fibroblasts | Dermal Fibroblasts | Ependymal | P-value | Correlation | RMSE  |       |
| Hippocampal_CA1_CTRL1_RNASeq.bam  | 0.004      | 0     | 0.201      | 0.001             | 0            | 0            | 0.13        | 0         | 0         | 0.15    | 0.028    | 0.089 | 0.03             | 0    | 0       | 0.001          | 0.002       | 0       | 0                   | 0                  | 0         | 0.01    | 0.100       | 0.068 | 1.042 |
| Hippocampal_CA1_CTRL2_RNASeq.bam  | 0.003      | 0     | 0.206      | 0.001             | 0            | 0            | 0.074       | 0         | 0         | 0.15    | 0        | 0.087 | 0.046            | 0    | 0       | 0.002          | 0.016       | 0.002   | 0                   | 0                  | 0         | 0.01    | 0.110       | 0.068 | 1.051 |
| Hippocampal_CA1_CTRL3_RNASeq.bam  | 0.007      | 0     | 0.219      | 0                 | 0            | 0            | 0.109       | 0         | 0         | 0.15    | 0.002    | 0.07  | 0.081            | 0    | 0.001   | 0.002          | 0.002       | 0       | 0                   | 0.004              | 0.008     | 0.140   | 0.062       | 1.053 |       |
| Hippocampal_CA1_GAMMA1_RNASeq.bam | 0.002      | 0     | 0.215      | 0.002             | 0            | 0            | 0.168       | 0         | 0         | 0.15    | 0        | 0.042 | 0.06             | 0    | 0       | 0.001          | 0.02        | 0       | 0                   | 0                  | 0         | 0.040   | 0.085       | 1.041 |       |
| Hippocampal_CA1_GAMMA2_RNASeq.bam | 0          | 0     | 0.268      | 0.004             | 0            | 0            | 0.131       | 0.002     | 0         | 0.15    | 0.01     | 0.084 | 0.053            | 0    | 0       | 0.001          | 0.011       | 0       | 0.001               | 0                  | 0.019     | 0.070   | 0.077       | 1.038 |       |
| Hippocampal_CA1_GAMMA3_RNASeq.bam | 0.001      | 0.003 | 0.215      | 0.002             | 0            | 0            | 0.138       | 0         | 0         | 0.15    | 0        | 0.045 | 0.056            | 0    | 0.019   | 0.004          | 0.002       | 0       | 0                   | 0                  | 0         | 0.070   | 0.077       | 1.043 |       |
