# Supplementary material for: Remodeling of epigenome and transcriptome landscapes with aging in mice reveals widespread induction of inflammatory responses
Source: HighWire-hosted journal article supplement (doi:10.1101/gr.240093.118), 2019-03-11
Supplement: Supplemental_Table_S1.xlsx [file Supplemental_Table_S1.xlsx]

## Sheet: Index
Supplemental Table S1
	A	Biological samples information
	B	Sequencing and quality metrics for RNA-seq samples
	C	Sequencing and quality metrics for ChIP-seq samples
	D	Pearson's correlation between biological samples of RNA-seq, H3K4me3 ChIP-seq and H3K27ac ChIP-seq
	E	Spearman's rank correlation between biological samples of RNA-seq, H3K4me3 ChIP-seq and H3K27ac ChIP-seq

## Sheet: A
Tissue/Cell	Sample name	Molecules	Sample information	Dissection date	Library QC	Sequencing info	Spike-in included?	Pairing
Olfactory Bulb	3m1	H3,H3K4me3,H3K27ac	3m1 (4 mice pooled) + 3m2 (3 mice pooled)	2014-07-23	OK	H3 and H3K4me3 mutliplexed on 1 lane, H3K27ac mutliplexed on 1 lane with 1st batch NPC samples (HiSeq2000)	NO	These samples are not paired with RNA-seq samples
Olfactory Bulb	3m2	H3,H3K4me3,H3K27ac	3m3 (4 mice pooled)	2014-08-11	OK		NO
Olfactory Bulb	12m1	H3,H3K4me3,H3K27ac	12m3 (4 mice pooled)	2014-08-11	OK		NO
Olfactory Bulb	12m2	H3,H3K4me3,H3K27ac	12m4 (4 mice pooled)	2014-08-11	OK		NO
Olfactory Bulb	29m1	H3,H3K4me3,H3K27ac	29m 1(4 mice pooled) + 29m2 (3 mice pooled)	2014-07-23	OK		NO
Olfactory Bulb	29m2	H3,H3K4me3,H3K27ac	29m3 (4 mice pooled)	2014-08-11	OK		NO
Olfactory Bulb	3m1_RNA	RNA	3m1, 2 mices pooled	2015-01-20	OK	Multiplexed on 1 lane (NextSeq500)	ERCC, norm to total RNA	Not paired with chromatin
Olfactory Bulb	3m2_RNA	RNA	3m2, 2 mices pooled (1/2 first day, 1/2 second day)	1/20/15 and 1/21/15	OK		ERCC, norm to total RNA
Olfactory Bulb	3m3_RNA	RNA	3m3, 2 mices pooled	2015-01-21	OK		ERCC, norm to total RNA
Olfactory Bulb	12m1_RNA	RNA	12m1, 2 mices pooled	2015-01-20	OK		ERCC, norm to total RNA
Olfactory Bulb	12m2_RNA	RNA	12m2, 2 mices pooled (1/2 first day, 1/2 second day)	1/20/15 and 1/21/15	ND at bioanalyzer (not sequenced)		ERCC, norm to total RNA
Olfactory Bulb	12m3_RNA	RNA	12m3, 2 mices pooled	2015-01-21	OK		ERCC, norm to total RNA
Olfactory Bulb	29m1_RNA	RNA	29m1, 2 mices pooled	2015-01-20	OK		ERCC, norm to total RNA
Olfactory Bulb	29m2_RNA	RNA	29m2, 2 mices pooled (1/2 first day, 1/2 second day)	1/20/15 and 1/21/15	OK		ERCC, norm to total RNA
Olfactory Bulb	29m3_RNA	RNA	29m3, 2 mices pooled	2015-01-21	OK		ERCC, norm to total RNA
Heart	3m2	H3,H3K4me3,H3K27ac	3 mon-2	2014-07-23	OK	H3 and H3K4me3 mutliplexed on 1 lane, H3K27ac mutliplexed on 1 lane (HiSeq2000)	S2 chromatin	These samples are not paired with RNA-seq samples
Heart	3m3	H3,H3K4me3,H3K27ac	3 mon-3	2014-07-23	OK		S2 chromatin
Heart	12m1	H3,H3K4me3,H3K27ac	12 mon-1	2014-07-23	OK		S2 chromatin
Heart	12m2	H3,H3K4me3,H3K27ac	12 mon-2	2014-07-23	OK		S2 chromatin
Heart	29m1	H3,H3K4me3,H3K27ac	29 mon-1	2014-07-23	OK		S2 chromatin
Heart	29m2	H3,H3K4me3,H3K27ac	29 mon-2	2014-07-23	OK		S2 chromatin
Heart	3m1_RNA	RNA	3m4	2015-01-21	OK	Multiplexed on 1 lane (NextSeq500)	ERCC, norm to total RNA	Not paired with chromatin
Heart	3m2_RNA	RNA	3m5	2015-01-21	OK		ERCC, norm to total RNA
Heart	3m3_RNA	RNA	3m6	2015-01-21	OK		ERCC, norm to total RNA
Heart	12m1_RNA	RNA	12m4	2015-01-21	OK		ERCC, norm to total RNA
Heart	12m2_RNA	RNA	12m5	2015-01-21	OK		ERCC, norm to total RNA
Heart	12m3_RNA	RNA	12m6	2015-01-21	OK		ERCC, norm to total RNA
Heart	29m1_RNA	RNA	29m4	2015-01-21	OK		ERCC, norm to total RNA
Heart	29m2_RNA	RNA	29m5	2015-01-21	OK		ERCC, norm to total RNA
Heart	29m3_RNA	RNA	29m6	2015-01-21	OK		ERCC, norm to total RNA
Cerebellum	3m4	H3,H3K4me3,H3K27ac	3 mon cere 1+2, 2 mices pooled	2014-08-11	OK	H3 and H3K4me3 mutliplexed on 1 lane, H3K27ac mutliplexed on 1 lane (HiSeq2000)	S2 chromatin	These samples are not paired with RNA-seq samples
Cerebellum	3m5	H3,H3K4me3,H3K27ac	3 mon cere 3+4, 2 mices pooled	2014-08-11	OK		S2 chromatin
Cerebellum	12m4	H3,H3K4me3,H3K27ac	12 mon cere 1+2, 2 mices pooled	2014-08-11	OK		S2 chromatin
Cerebellum	12m5	H3,H3K4me3,H3K27ac	12 mon cere 3+4, 2 mices pooled	2014-08-11	OK		S2 chromatin
Cerebellum	29m4	H3,H3K4me3,H3K27ac	29 mon cere 1+2, 2 mices pooled	2014-08-11	OK		S2 chromatin
Cerebellum	29m5	H3,H3K4me3,H3K27ac	29 mon cere 3+4, 2 mices pooled	2014-08-11	OK		S2 chromatin
Cerebellum	3m1_RNA	RNA	3m1, 2 mices pooled	2015-01-20	OK	Multiplexed on 1 lane (NextSeq500)	ERCC, norm to total RNA	Not paired with chromatin
Cerebellum	3m2_RNA	RNA	3m2, 2 mices pooled	2015-01-20	OK		ERCC, norm to total RNA
Cerebellum	3m3_RNA	RNA	3m3, 2 mices pooled	1/20/15 and 1/21/15	OK		ERCC, norm to total RNA
Cerebellum	12m1_RNA	RNA	12m1, 2 mices pooled	2015-01-20	OK		ERCC, norm to total RNA
Cerebellum	12m2_RNA	RNA	12m2, 2 mices pooled	2015-01-20	OK		ERCC, norm to total RNA
Cerebellum	12m3_RNA	RNA	12m3, 2 mices pooled	1/20/15 and 1/21/15	OK		ERCC, norm to total RNA
Cerebellum	29m1_RNA	RNA	29m2, 2 mices pooled	2015-01-20	OK		ERCC, norm to total RNA
Cerebellum	29m2_RNA	RNA	29m3, 2 mices pooled	2015-01-20	OK		ERCC, norm to total RNA
Cerebellum	29m3_RNA	RNA	29m4, 2 mices pooled	1/20/15 and 1/21/15	OK		ERCC, norm to total RNA
Liver	3m1	H3,H3K4me3,H3K27ac	3 mon liver 1	2014-07-23	OK	H3 and H3K4me3 mutliplexed on 1 lane, H3K27ac mutliplexed on 1 lane (HiSeq2000)	S2 chromatin	These samples are not paired with RNA-seq samples
Liver	3m4	H3,H3K4me3,H3K27ac	3 mon liver 4	2014-08-11	OK		S2 chromatin
Liver	12m1	H3,H3K4me3,H3K27ac	12 mon liver 1	2014-07-23	OK		S2 chromatin
Liver	12m2	H3,H3K4me3,H3K27ac	12 mon liver 2	2014-07-23	OK		S2 chromatin
Liver	29m1	H3,H3K4me3,H3K27ac	29 mon liver 1	2014-07-23	OK		S2 chromatin
Liver	29m3	H3,H3K4me3,H3K27ac	29 mon liver 3	2014-08-11	OK		S2 chromatin
Liver	3m1_RNA	RNA	3m4	2015-01-21	OK	Multiplexed on 1 lane (NextSeq500)	ERCC, norm to total RNA	Not paired with chromatin
Liver	3m2_RNA	RNA	3m5	2015-01-21	OK		ERCC, norm to total RNA
Liver	3m3_RNA	RNA	3m6	2015-01-21	OK		ERCC, norm to total RNA
Liver	12m1_RNA	RNA	12m3	2015-01-20	OK		ERCC, norm to total RNA
Liver	12m2_RNA	RNA	12m5	2015-01-21	OK		ERCC, norm to total RNA
Liver	12m3_RNA	RNA	12m6	2015-01-21	OK		ERCC, norm to total RNA
Liver	29m1_RNA	RNA	29m4	2015-01-21	OK		ERCC, norm to total RNA
Liver	29m2_RNA	RNA	29m5	2015-01-21	OK		ERCC, norm to total RNA
Liver	29m3_RNA	RNA	29m6	2015-01-21	OK		ERCC, norm to total RNA
Primary NSCs	3m1	H3,H3K4me3	3m1 NS3/4	2014-07-23	OK	H3 and H3K4me3 mutliplexed on 1 lane, H3K27ac mutliplexed on 1 lane with OB H3K27ac (HiSeq2000)	NO	These samples are not paired with RNA-seq samples	Batch was accounted for as a covariate in DEseq2 models
Primary NSCs	3m3	H3,H3K4me3,H3K27ac	3m3 NS2/3	2014-08-11	OK		NO
Primary NSCs	12m2	H3,H3K4me3	12m2 NS3/4	2014-07-23	OK		NO
Primary NSCs	12m4	H3,H3K4me3,H3K27ac	12m4 NS2/3	2014-08-11	OK		NO
Primary NSCs	29m1	H3,H3K4me3	29m1 NS3/4	2014-07-23	OK		NO
Primary NSCs	29m3	H3,H3K4me3,H3K27ac	29m3 NS2/3	2014-08-11	OK		NO
Primary NSCs	3mb	H3K27ac	3m4 NS3/4	2014-08-11	OK	H3K27ac mutliplexed on 1 lane (HiSeq2000), with other samples	NO
Primary NSCs	12mb	H3K27ac	12m4 NS3/4	2014-08-11	OK		NO
Primary NSCs	29mb	H3K27ac	29m1 NS3/4	2014-07-23	OK		NO
Primary NSCs	3m5	H3,H3K4me3	3m5 (NS3/4)	2015-01-20	OK	H3 and H3K4me3 mutliplexed on 1 lane (HiSeq2000)	S2 chromatin	These samples are paired with RNAseq samples
Primary NSCs	3m6	H3,H3K4me3	3m6 (NS3/4)	2015-01-21	OK		S2 chromatin
Primary NSCs	12m5	H3,H3K4me3	12m5 (NS3/4)	2015-01-20	OK		S2 chromatin
Primary NSCs	12m6	H3,H3K4me3	12m6 (NS3/4)	2015-01-21	OK		S2 chromatin
Primary NSCs	29m5	H3,H3K4me3	29m5 (NS3/4)	2015-01-20	OK		S2 chromatin
Primary NSCs	29m6	H3,H3K4me3	29m6 (NS3/4)	2015-01-21	OK		S2 chromatin
Primary NSCs	3m1_RNA	RNA	3m5 (NS2/3)	2015-01-20	OK	Multiplexed on 1 lane (NextSeq500)	ERCC, norm to total RNA	Paired with second batch of chromatin samples (5 and 6)
Primary NSCs	3m2_RNA	RNA	3m6 (NS2/3)	2015-01-21	OK		ERCC, norm to total RNA
Primary NSCs	12m1_RNA	RNA	12m5 (NS2/3)	2015-01-20	OK		ERCC, norm to total RNA
Primary NSCs	12m2_RNA	RNA	12m6 (NS2/3)	2015-01-21	OK		ERCC, norm to total RNA
Primary NSCs	29m1_RNA	RNA	29m5 (NS2/3)	2015-01-20	OK		ERCC, norm to total RNA
Primary NSCs	29m2_RNA	RNA	29m6 (NS2/3)	2015-01-21	OK		ERCC, norm to total RNA
3m	3 month old
12m	12 month old
29m	29 month old

## Sheet: B
Tissue/Cell	Sample name	Sample type	Total QC reads pairs	Read length	Sequencing platform	Uniquely mapped reads (mm9)	Uniquely mapped QC reads (%)	# Sequencing runs
Cerebellum	3m1_RNA	Ribosomal RNA depleted RNA-seq library	26745537	2x75bp	NetxSeq500	21782855	0.814448	2 runs		3m	3 month old
Cerebellum	3m2_RNA	Ribosomal RNA depleted RNA-seq library	42443149	2x75bp	NetxSeq500	33396019	0.786841	2 runs		12m	12 month old
Cerebellum	3m3_RNA	Ribosomal RNA depleted RNA-seq library	33183801	2x75bp	NetxSeq500	25677451	0.773795	2 runs		29m	29 month old
Cerebellum	12m1_RNA	Ribosomal RNA depleted RNA-seq library	48739480	2x75bp	NetxSeq500	38103250	0.781774	2 runs
Cerebellum	12m2_RNA	Ribosomal RNA depleted RNA-seq library	44584891	2x75bp	NetxSeq500	34759988	0.779636	2 runs
Cerebellum	12m3_RNA	Ribosomal RNA depleted RNA-seq library	53357027	2x75bp	NetxSeq500	40188798	0.753205	2 runs
Cerebellum	29m1_RNA	Ribosomal RNA depleted RNA-seq library	42380850	2x75bp	NetxSeq500	33120510	0.781497	2 runs
Cerebellum	29m2_RNA	Ribosomal RNA depleted RNA-seq library	41186233	2x75bp	NetxSeq500	31851985	0.773365	2 runs
Cerebellum	29m3_RNA	Ribosomal RNA depleted RNA-seq library	37553680	2x75bp	NetxSeq500	29052754	0.773633	2 runs
Heart	3m1_RNA	Ribosomal RNA depleted RNA-seq library	4486489	2x75bp	NetxSeq500	2598934	0.57928	1 run
Heart	3m2_RNA	Ribosomal RNA depleted RNA-seq library	11388132	2x75bp	NetxSeq500	5243650	0.460449	1 run
Heart	3m3_RNA	Ribosomal RNA depleted RNA-seq library	5695366	2x75bp	NetxSeq500	2697115	0.473563	1 run
Heart	12m1_RNA	Ribosomal RNA depleted RNA-seq library	9692801	2x75bp	NetxSeq500	4587103	0.473248	1 run
Heart	12m2_RNA	Ribosomal RNA depleted RNA-seq library	12583124	2x75bp	NetxSeq500	5883198	0.467547	1 run
Heart	12m3_RNA	Ribosomal RNA depleted RNA-seq library	13571385	2x75bp	NetxSeq500	6226884	0.458825	1 run
Heart	29m1_RNA	Ribosomal RNA depleted RNA-seq library	12047752	2x75bp	NetxSeq500	5811954	0.48241	1 run
Heart	29m2_RNA	Ribosomal RNA depleted RNA-seq library	9120567	2x75bp	NetxSeq500	4560050	0.499974	1 run
Heart	29m3_RNA	Ribosomal RNA depleted RNA-seq library	9773475	2x75bp	NetxSeq500	5250553	0.537225	1 run
Liver	3m1_RNA	Ribosomal RNA depleted RNA-seq library	42633038	2x75bp	NetxSeq500	21225298	0.49786	1 run
Liver	3m2_RNA	Ribosomal RNA depleted RNA-seq library	35655973	2x75bp	NetxSeq500	20713278	0.58092	1 run
Liver	3m3_RNA	Ribosomal RNA depleted RNA-seq library	59474704	2x75bp	NetxSeq500	32146667	0.54051	1 run
Liver	12m1_RNA	Ribosomal RNA depleted RNA-seq library	45707355	2x75bp	NetxSeq500	26843415	0.587289	1 run
Liver	12m2_RNA	Ribosomal RNA depleted RNA-seq library	37699405	2x75bp	NetxSeq500	23330537	0.618857	1 run
Liver	12m3_RNA	Ribosomal RNA depleted RNA-seq library	32166026	2x75bp	NetxSeq500	18984346	0.590199	1 run
Liver	29m1_RNA	Ribosomal RNA depleted RNA-seq library	29834764	2x75bp	NetxSeq500	18534582	0.621241	1 run
Liver	29m2_RNA	Ribosomal RNA depleted RNA-seq library	38574720	2x75bp	NetxSeq500	22464565	0.582365	1 run
Liver	29m3_RNA	Ribosomal RNA depleted RNA-seq library	42179876	2x75bp	NetxSeq500	23586981	0.5592	1 run
Olfactory Bulb	3m1_RNA	Ribosomal RNA depleted RNA-seq library	30817889	2x75bp	NetxSeq500	24694137	0.801292	1 run
Olfactory Bulb	3m2_RNA	Ribosomal RNA depleted RNA-seq library	37439363	2x75bp	NetxSeq500	30334364	0.810226	1 run
Olfactory Bulb	3m3_RNA	Ribosomal RNA depleted RNA-seq library	21711264	2x75bp	NetxSeq500	17489356	0.805543	1 run
Olfactory Bulb	12m1_RNA	Ribosomal RNA depleted RNA-seq library	32833599	2x75bp	NetxSeq500	26857931	0.818001	1 run
Olfactory Bulb	12m3_RNA	Ribosomal RNA depleted RNA-seq library	35223683	2x75bp	NetxSeq500	27122271	0.770001	1 run
Olfactory Bulb	29m1_RNA	Ribosomal RNA depleted RNA-seq library	24599382	2x75bp	NetxSeq500	20072365	0.81597	1 run
Olfactory Bulb	29m2_RNA	Ribosomal RNA depleted RNA-seq library	27913985	2x75bp	NetxSeq500	22289034	0.79849	1 run
Olfactory Bulb	29m3_RNA	Ribosomal RNA depleted RNA-seq library	44380258	2x75bp	NetxSeq500	34559803	0.77872	1 run
Primary NSCs	3m1_RNA	Ribosomal RNA depleted RNA-seq library	41705050	2x75bp	NetxSeq500	16826343	0.403461	1 run
Primary NSCs	3m2_RNA	Ribosomal RNA depleted RNA-seq library	9511836	2x75bp	NetxSeq500	4897485	0.514883	1 run
Primary NSCs	12m1_RNA	Ribosomal RNA depleted RNA-seq library	21631838	2x75bp	NetxSeq500	8855870	0.409391	1 run
Primary NSCs	12m2_RNA	Ribosomal RNA depleted RNA-seq library	15845447	2x75bp	NetxSeq500	7926998	0.50027	1 run
Primary NSCs	29m1_RNA	Ribosomal RNA depleted RNA-seq library	27901072	2x75bp	NetxSeq500	12043183	0.431639	1 run
Primary NSCs	29m2_RNA	Ribosomal RNA depleted RNA-seq library	20346948	2x75bp	NetxSeq500	9875907	0.485375	1 run

## Sheet: C
Tissue/Cell type	Sample name	Molecule (Antibody target)	Total reads (pre QC)	Lane 1	Lane 2	# Sequencing runs	Read length	Sequencing platform	Unique mapped reads after PCR duplicate removal (FIXSEQ)	PCR duplication rate estimate (FIXSEQ) (%) *	MACS2 peaks (FDR < 1%)	Peaks with >5-fold MACS2 enrichment
Cerebellum	3m4	H3	46245100	14896534	31348566	2 runs	101bp	HiSeq2000	36088587	1.5	NA	NA		3m	3 month old
Cerebellum	3m4	H3K27ac	24128380	24128380	NA	1 run	101bp	HiSeq2000	15239428	12.64	52025	48376		12m	12 month old
Cerebellum	3m4	H3K4me3	12956918	12956918	NA	1 run	101bp	HiSeq2000	9110755	15.47	17306	16510		29m	29 month old
Cerebellum	3m5	H3	37657731	13726416	23931315	2 runs	101bp	HiSeq2000	28964736	1.37	NA	NA
Cerebellum	3m5	H3K27ac	25794033	25794033	NA	1 run	101bp	HiSeq2000	17256534	13.68	55624	49706		* FIXSEQ duplication rate: when 2 runs are present, the estimated value from the deeper sequencing run is reported
Cerebellum	3m5	H3K4me3	13504206	13504206	NA	1 run	101bp	HiSeq2000	9065792	15.77	17202	16484
Cerebellum	12m4	H3	49163688	16333868	32829820	2 runs	101bp	HiSeq2000	38050864	1.53	NA	NA
Cerebellum	12m4	H3K27ac	27245918	27245918	NA	1 run	101bp	HiSeq2000	16847443	12.05	52685	47712
Cerebellum	12m4	H3K4me3	12828871	12828871	NA	1 run	101bp	HiSeq2000	7700065	14.84	16703	16247
Cerebellum	12m5	H3	37439950	12534641	24905309	2 runs	101bp	HiSeq2000	28517748	1.77	NA	NA
Cerebellum	12m5	H3K27ac	33032644	33032644	NA	1 run	101bp	HiSeq2000	23987863	15.81	53787	50013
Cerebellum	12m5	H3K4me3	11520584	11520584	NA	1 run	101bp	HiSeq2000	7567822	14.9	16177	15859
Cerebellum	29m4	H3	40108960	14057884	26051076	2 runs	101bp	HiSeq2000	30698828	1.52	NA	NA
Cerebellum	29m4	H3K27ac	32442191	32442191	NA	1 run	101bp	HiSeq2000	19542880	13.01	56828	51267
Cerebellum	29m4	H3K4me3	11394407	11394407	NA	1 run	101bp	HiSeq2000	7746664	14.82	16755	16288
Cerebellum	29m5	H3	35988383	11562946	24425437	2 runs	101bp	HiSeq2000	27882440	1.54	NA	NA
Cerebellum	29m5	H3K27ac	31239719	31239719	NA	1 run	101bp	HiSeq2000	23457406	15.71	59048	54116
Cerebellum	29m5	H3K4me3	12927738	12927738	NA	1 run	101bp	HiSeq2000	7291593	14.28	16725	16162
Heart	3m2	H3	34480760	10339155	24141605	2 runs	101bp	HiSeq2000	27945456	1.15	NA	NA
Heart	3m2	H3K27ac	20867153	20867153	NA	1 run	101bp	HiSeq2000	16319910	15.03	65324	57762
Heart	3m2	H3K4me3	17238068	17238068	NA	1 run	101bp	HiSeq2000	11366261	17.82	20409	19601
Heart	3m3	H3	28880002	10508863	18371139	2 runs	101bp	HiSeq2000	22879157	1.06	NA	NA
Heart	3m3	H3K27ac	17283229	17283229	NA	1 run	101bp	HiSeq2000	13331616	15.66	58065	54640
Heart	3m3	H3K4me3	10396363	10396363	NA	1 run	101bp	HiSeq2000	7082591	15.16	18853	18099
Heart	12m1	H3	28972134	11708604	17263530	2 runs	101bp	HiSeq2000	22934697	1.13	NA	NA
Heart	12m1	H3K27ac	23649221	23649221	NA	1 run	101bp	HiSeq2000	18388750	14.46	64675	58564
Heart	12m1	H3K4me3	11489744	11489744	NA	1 run	101bp	HiSeq2000	7818061	13.16	19272	18563
Heart	12m2	H3	38080666	14088595	23992071	2 runs	101bp	HiSeq2000	30042546	1.11	NA	NA
Heart	12m2	H3K27ac	19298089	19298089	NA	1 run	101bp	HiSeq2000	13267550	23.03	66947	59178
Heart	12m2	H3K4me3	17114514	17114514	NA	1 run	101bp	HiSeq2000	11863692	18.47	20550	19532
Heart	29m1	H3	39047763	11377547	27670216	2 runs	101bp	HiSeq2000	31049015	1.21	NA	NA
Heart	29m1	H3K27ac	19466821	19466821	NA	1 run	101bp	HiSeq2000	13130579	26.49	67666	58915
Heart	29m1	H3K4me3	16123197	16123197	NA	1 run	101bp	HiSeq2000	10995504	16.19	20274	19379
Heart	29m2	H3	33748784	12235623	21513161	2 runs	101bp	HiSeq2000	24295884	8.78	NA	NA
Heart	29m2	H3K27ac	14075052	14075052	NA	1 run	101bp	HiSeq2000	10509977	13.93	53631	46400
Heart	29m2	H3K4me3	16021610	16021610	NA	1 run	101bp	HiSeq2000	5377604	29.2	19234	18058
Liver	3m1	H3	40159561	13532998	26626563	2 runs	101bp	HiSeq2000	28942344	13.63	NA	NA
Liver	3m1	H3K27ac	21231080	21231080	NA	1 run	101bp	HiSeq2000	10015180	22.35	46145	42048
Liver	3m1	H3K4me3	17293896	17293896	NA	1 run	101bp	HiSeq2000	10469150	21.98	19778	19120
Liver	3m4	H3	34915195	13260104	21655091	2 runs	101bp	HiSeq2000	25390497	11.48	NA	NA
Liver	3m4	H3K27ac	30464107	30464107	NA	1 run	101bp	HiSeq2000	17856186	27.61	54978	50874
Liver	3m4	H3K4me3	28753478	28753478	NA	1 run	101bp	HiSeq2000	17625319	22.49	19740	19162
Liver	12m1	H3	41116152	12495460	28620692	2 runs	101bp	HiSeq2000	27753857	20.76	NA	NA
Liver	12m1	H3K27ac	29539787	29539787	NA	1 run	101bp	HiSeq2000	17414002	28.22	55752	52579
Liver	12m1	H3K4me3	16835251	16835251	NA	1 run	101bp	HiSeq2000	11025394	20.21	21012	19595
Liver	12m2	H3	38398548	12710007	25688541	2 runs	101bp	HiSeq2000	28669949	9.72	NA	NA
Liver	12m2	H3K27ac	20838553	20838553	NA	1 run	101bp	HiSeq2000	12765088	26.62	49428	45066
Liver	12m2	H3K4me3	12738367	12738367	NA	1 run	101bp	HiSeq2000	8097898	18.27	19950	18985
Liver	29m1	H3	37443068	13860117	23582951	2 runs	101bp	HiSeq2000	29559799	8.19	NA	NA
Liver	29m1	H3K27ac	34026268	34026268	NA	1 run	101bp	HiSeq2000	23434378	23.7	65438	62524
Liver	29m1	H3K4me3	11358517	11358517	NA	1 run	101bp	HiSeq2000	7486810	16.69	19583	18678
Liver	29m3	H3	43667066	18683131	24983935	2 runs	101bp	HiSeq2000	30280100	8.53	NA	NA
Liver	29m3	H3K27ac	42300670	42300670	NA	1 run	101bp	HiSeq2000	28415733	27.91	68268	65459
Liver	29m3	H3K4me3	14363726	14363726	NA	1 run	101bp	HiSeq2000	12033266	21.09	21432	20406
Olfactory Bulb	3m1	H3	42226313	17567148	24659165	2 runs	101bp	HiSeq2000	25686274	25.61	NA	NA
Olfactory Bulb	3m1	H3K27ac	45764823	18981723	26783100	2 runs	101bp	HiSeq2000	9512912	75.73	119139	80810
Olfactory Bulb	3m1	H3K4me3	14649660	14649660	NA	1 run	101bp	HiSeq2000	8800934	20.48	20197	19239
Olfactory Bulb	3m2	H3	35196927	12093059	23103868	2 runs	101bp	HiSeq2000	22367621	21.29	NA	NA
Olfactory Bulb	3m2	H3K27ac	37393903	12037809	25356094	2 runs	101bp	HiSeq2000	7570646	79.77	152391	102957
Olfactory Bulb	3m2	H3K4me3	14051858	14051858	NA	1 run	101bp	HiSeq2000	8374971	24.14	20650	19449
Olfactory Bulb	12m1	H3	44652331	15850897	28801434	2 runs	101bp	HiSeq2000	23822167	35.49	NA	NA
Olfactory Bulb	12m1	H3K27ac	46268652	18358847	27909805	2 runs	101bp	HiSeq2000	17388870	58.36	94176	82495
Olfactory Bulb	12m1	H3K4me3	16918147	16918147	NA	1 run	101bp	HiSeq2000	10414183	23.75	19759	19123
Olfactory Bulb	12m2	H3	54040706	15402323	38638383	2 runs	101bp	HiSeq2000	17286297	64.25	NA	NA
Olfactory Bulb	12m2	H3K27ac	51611574	22637087	28974487	2 runs	101bp	HiSeq2000	18833203	58.83	86443	77301
Olfactory Bulb	12m2	H3K4me3	18735514	18735514	NA	1 run	101bp	HiSeq2000	11187491	27.24	20036	19381
Olfactory Bulb	29m1	H3	44351956	13044910	31307046	2 runs	101bp	HiSeq2000	25982684	29.6	NA	NA
Olfactory Bulb	29m1	H3K27ac	51491302	19928443	31562859	2 runs	101bp	HiSeq2000	12707634	72.5	115463	93827
Olfactory Bulb	29m1	H3K4me3	12544351	12544351	NA	1 run	101bp	HiSeq2000	7290231	25.3	19523	18576
Olfactory Bulb	29m2	H3	42432636	19070538	23362098	2 runs	101bp	HiSeq2000	28240778	16.77	NA	NA
Olfactory Bulb	29m2	H3K27ac	59372038	18597223	40774815	2 runs	101bp	HiSeq2000	13110812	77.1	117062	93730
Olfactory Bulb	29m2	H3K4me3	14415302	14415302	NA	1 run	101bp	HiSeq2000	8859481	24.25	20222	19307
Primary NSCs	3m1	H3	11536659	11536659	NA	1 run	101bp	HiSeq2000	6525685	28.09	NA	NA
Primary NSCs	3m1	H3K4me3	10146018	10146018	NA	1 run	101bp	HiSeq2000	6199034	16.87	18081	17163
Primary NSCs	3m3	H3	16747760	16747760	NA	1 run	101bp	HiSeq2000	9780190	25.19	NA	NA
Primary NSCs	3m3	H3K27ac	49835275	16112010	33723265	2 runs	101bp	HiSeq2000	24325090	41.36	36945	33788
Primary NSCs	3m3	H3K4me3	10106571	10106571	NA	1 run	101bp	HiSeq2000	5933927	22.31	18846	17927
Primary NSCs	3m5	H3	19600413	8817590	10782823	2 runs	101bp	HiSeq2000	15187218	1.2	NA	NA
Primary NSCs	3m5	H3K4me3	9023718	9023718	NA	1 run	101bp	HiSeq2000	5211924	28.71	17249	16584
Primary NSCs	3m6	H3	27005518	11851677	15153841	2 runs	101bp	HiSeq2000	20843264	0.96	NA	NA
Primary NSCs	3m6	H3K4me3	11071480	11071480	NA	1 run	101bp	HiSeq2000	6228964	28.66	17691	17001
Primary NSCs	3mb	H3K27ac	65223582	31674431	33549151	2 runs	101bp	HiSeq2000	33627383	41.45	54405	50629
Primary NSCs	12m2	H3	10957609	10957609	NA	1 run	101bp	HiSeq2000	6343286	28.45	NA	NA
Primary NSCs	12m2	H3K4me3	19735397	19735397	NA	1 run	101bp	HiSeq2000	12438661	14.54	18296	17593
Primary NSCs	12m4	H3	11797717	11797717	NA	1 run	101bp	HiSeq2000	6539258	29.31	NA	NA
Primary NSCs	12m4	H3K27ac	45732211	14756190	30976021	2 runs	101bp	HiSeq2000	21362099	45.97	34486	32678
Primary NSCs	12m4	H3K4me3	18168325	18168325	NA	1 run	101bp	HiSeq2000	11209913	17.92	18216	17770
Primary NSCs	12m5	H3	44406634	12876374	31530260	2 runs	101bp	HiSeq2000	35327640	0.89	NA	NA
Primary NSCs	12m5	H3K4me3	10402178	10402178	NA	1 run	101bp	HiSeq2000	6649364	23.79	17273	16925
Primary NSCs	12m6	H3	47286456	20918619	26367837	2 runs	101bp	HiSeq2000	37533221	0.74	NA	NA
Primary NSCs	12m6	H3K4me3	9982636	9982636	NA	1 run	101bp	HiSeq2000	4778135	38.04	17062	16340
Primary NSCs	12mb	H3K27ac	38629680	28132510	10497170	2 runs	101bp	HiSeq2000	22181422	20.47	44090	41642
Primary NSCs	29m1	H3	10827345	10827345	NA	1 run	101bp	HiSeq2000	5370195	38.48	NA	NA
Primary NSCs	29m1	H3K4me3	9820863	9820863	NA	1 run	101bp	HiSeq2000	5145127	26.32	18100	17270
Primary NSCs	29m3	H3	11547889	11547889	NA	1 run	101bp	HiSeq2000	6166382	34.19	NA	NA
Primary NSCs	29m3	H3K27ac	46493872	17313501	29180371	2 runs	101bp	HiSeq2000	22182899	41.93	35564	33611
Primary NSCs	29m3	H3K4me3	9890365	9890365	NA	1 run	101bp	HiSeq2000	6365559	13	18538	17811
Primary NSCs	29m5	H3	59571293	15894526	43676767	2 runs	101bp	HiSeq2000	47366417	0.88	NA	NA
Primary NSCs	29m5	H3K4me3	8331620	8331620	NA	1 run	101bp	HiSeq2000	4132571	39.82	16986	16375
Primary NSCs	29m6	H3	50603974	14293971	36310003	2 runs	101bp	HiSeq2000	39765924	0.82	NA	NA
Primary NSCs	29m6	H3K4me3	9215072	9215072	NA	1 run	101bp	HiSeq2000	4596518	36.35	16834	16302
Primary NSCs	29mb	H3K27ac	77111153	39121851	37989302	2 runs	101bp	HiSeq2000	47333290	27.49	44741	42169

## Sheet: D
Sample correlation analysis (Pearson)
3m	3 month old
12m	12 month old
29m	29 month old
		Pearson correlation of DESeq2 counts over expressed genes														Pearson correlation of Diffbind normalized counts over H3K4me3 peaks																	Pearson correlation of Diffbind normalized counts over H3K27ac peaks
Heart samples		Heart RNA-seq samples														Heart H3K4me3 samples (normalized to H3)																	Heart H3K27ac samples (normalized to H3)
			3m1	3m2	3m3	12m1	12m2	12m3	29m1	29m2	29m3	Replicates					3m1	3m2	12m1	12m2	29m1	29m2	Replicates											3m1	3m2	12m1	12m2	29m1	29m2	Replicates
		3m1	1	0.866462	0.857086	0.853865	0.869037	0.869245	0.842076	0.850388	0.855743	3m average	0.863453			3m1	1	0.967757	0.968948	0.971045	0.968763	0.953793	3m average	0.967757									3m1	1	0.923241	0.922134	0.905122	0.891793	0.901833	3m average	0.923241
		3m2		1	0.866809	0.869405	0.883058	0.882113	0.856801	0.857689	0.873171					3m2		1	0.956935	0.960982	0.959915	0.945407											3m2		1	0.927499	0.906828	0.895416	0.890263
		3m3			1	0.854735	0.864343	0.863046	0.842235	0.842168	0.852858					12m1			1	0.968426	0.964714	0.946195	12m average	0.968426									12m1			1	0.93747	0.908045	0.894195	12m average	0.93747
		12m1				1	0.871813	0.867789	0.867324	0.848826	0.861878	12m average	0.86363			12m2				1	0.970556	0.955001											12m2				1	0.894094	0.88638
		12m2					1	0.884265	0.8582	0.870874	0.879646					29m1					1	0.958263	29m average	0.958263									29m1					1	0.89307	29m average	0.89307
		12m3						1	0.851551	0.867115	0.876655					29m2						1											29m2						1
		29m1							1	0.849358	0.854917	29m average	0.858431
		29m2								1	0.871017
		29m3									1
Liver samples		Liver RNA-seq samples														Liver H3K4me3 samples (normalized to H3)																	Liver H3K27ac samples (normalized to H3)
			3m1	3m2	3m3	12m1	12m2	12m3	29m1	29m2	29m3	Replicates					3m1	3m2	12m1	12m2	29m1	29m2	Replicates											3m1	3m2	12m1	12m2	29m1	29m2	Replicates
		3m1	1	0.856766	0.851582	0.847257	0.850389	0.846283	0.83376	0.818803	0.838458	3m average	0.860141			3m1	1	0.959249	0.954747	0.950761	0.934273	0.944292	3m average	0.959249									3m1	1	0.909599	0.896048	0.892377	0.888757	0.848132	3m average	0.909599
		3m2		1	0.872076	0.863317	0.867383	0.859789	0.849579	0.829961	0.85883					3m2		1	0.95986	0.957202	0.943598	0.957097											3m2		1	0.919688	0.908726	0.909317	0.867121
		3m3			1	0.85803	0.863215	0.854837	0.840512	0.822254	0.857696					12m1			1	0.973283	0.94485	0.948287	12m average	0.973283									12m1			1	0.933058	0.919334	0.876004	12m average	0.933058
		12m1				1	0.860596	0.861843	0.853185	0.836585	0.85514	12m average	0.860614			12m2				1	0.941012	0.948518											12m2				1	0.913876	0.865737
		12m2					1	0.858135	0.845841	0.833079	0.858001					29m1					1	0.958648	29m average	0.958648									29m1					1	0.931382	29m average	0.931382
		12m3						1	0.852653	0.833713	0.853574					29m2						1											29m2						1
		29m1							1	0.847146	0.84768	29m average	0.845738
		29m2								1	0.842388
		29m3									1
Cerebellum samples		Cerebellum RNA-seq samples														Cerebellum H3K4me3 samples (normalized to H3)																	Cerebellum H3K27ac samples (normalized to H3)
			3m1	3m2	3m3	12m1	12m2	12m3	29m1	29m2	29m3	Replicates					3m1	3m2	12m1	12m2	29m1	29m2	Replicates											3m1	3m2	12m1	12m2	29m1	29m2	Replicates
		3m1	1	0.909395	0.909967	0.918663	0.919335	0.913386	0.905794	0.906441	0.905664	3m average	0.910241			3m1	1	0.98044	0.973742	0.972421	0.967626	0.964255	3m average	0.98044									3m1	1	0.932311	0.921219	0.938745	0.925882	0.932849	3m average	0.932311
		3m2		1	0.911362	0.920723	0.916513	0.917531	0.906668	0.909385	0.910027					3m2		1	0.973658	0.971505	0.96709	0.965091											3m2		1	0.931092	0.948254	0.936715	0.94366
		3m3			1	0.920955	0.917759	0.919227	0.910664	0.910349	0.909021					12m1			1	0.975032	0.974962	0.972963	12m average	0.975032									12m1			1	0.947712	0.936952	0.94433	12m average	0.947712
		12m1				1	0.931125	0.929692	0.921096	0.922098	0.924349	12m average	0.92328			12m2				1	0.97405	0.969622											12m2				1	0.955783	0.962516
		12m2					1	0.923796	0.916717	0.918919	0.918011					29m1					1	0.97435	29m average	0.97435									29m1					1	0.962383	29m average	0.962383
		12m3						1	0.920705	0.923245	0.920165					29m2						1											29m2						1
		29m1							1	0.919879	0.917976	29m average	0.921326
		29m2								1	0.926123
		29m3									1
Olfactory Bulb samples		Olfactory Bulb RNA-seq samples														Olfactory Bulb H3K4me3 samples (normalized to H3)																	Olfactory Bulb H3K27ac samples (normalized to H3)
			3m1	3m2	3m3	12m1	12m2	29m1	29m2	29m3	Replicates						3m1	3m2	12m1	12m2	29m1	29m2	Replicates											3m1	3m2	12m1	12m2	29m1	29m2	Replicates
		3m1	1	0.91335	0.913086	0.911929	0.91164	0.907201	0.907192	0.903809	3m average	0.971117				3m1	1	0.970195	0.971387	0.972531	0.964139	0.966199	3m average	0.970195									3m1	1	0.694482	0.749634	0.758394	0.716533	0.70256	3m average	0.694482
		3m2		1	0.920714	0.918685	0.919796	0.911761	0.914444	0.907012						3m2		1	0.973404	0.974245	0.963796	0.968331											3m2		1	0.740806	0.749554	0.708989	0.688559
		3m3			1	0.919741	0.917112	0.915013	0.915868	0.910129						12m1			1	0.981856	0.972752	0.97599	12m average	0.981856									12m1			1	0.837381	0.784816	0.762241	12m average	0.837381
		12m1				1	0.919205	0.917519	0.914893	0.913083	12m average	0.919205				12m2				1	0.973999	0.977934											12m2				1	0.794921	0.771212
		12m2					1	0.914492	0.916196	0.908273						29m1					1	0.970379	29m average	0.970379									29m1					1	0.728248	29m average	0.728248
		29m1						1	0.916729	0.912763	29m average	0.913352				29m2						1											29m2						1
		29m2							1	0.910563
		29m3								1
NSCs samples		NSCs RNA-seq samples														NSCs H3K4me3 samples (normalized to H3) (postbatch correction)																	NSCs H3K27ac samples (normalized to H3)
			3m1	3m2	12m1	12m2	29m1	29m2	Replicates								3m1	3m2	3m5	3m6	12m1	12m2	12m5	12m6	29m1	29m2	29m5	29m6	Replicates					3m1	3m2	12m1	12m2	29m1	29m2	Replicates
		3m1	1	0.821759	0.860641	0.843047	0.859496	0.848514	3m average	0.821759						3m1	1	0.991169	0.99468	0.995036	0.992285	0.992583	0.992287	0.99322	0.988159	0.990934	0.990189	0.989767	3m average	0.994051			3m1	1	0.995868	0.992403	0.99454	0.990377	0.990992	3m average	0.995868
		3m2		1	0.816971	0.814152	0.818075	0.806291								3m2		1	0.995325	0.995295	0.992255	0.992105	0.991154	0.992579	0.986693	0.992651	0.990344	0.990349					3m2		1	0.99553	0.99702	0.994958	0.988082
		12m1			1	0.839931	0.855059	0.835383	12m average	0.839931						3m5			1	0.992802	0.993334	0.993464	0.990151	0.990733	0.986952	0.992439	0.991571	0.990979					12m1			1	0.995835	0.992771	0.992831	12m average	0.995835
		12m2				1	0.837473	0.826091								3m6				1	0.993198	0.994053	0.990242	0.991598	0.986601	0.991413	0.990367	0.990604					12m2				1	0.9954	0.987514
		29m1					1	0.844532	29m average	0.844532						12m1					1	0.993659	0.994716	0.993978	0.992414	0.990973	0.992749	0.993364	12m average	0.993504			29m1					1	0.992184	29m average	0.992184
		29m2						1								12m2						1	0.993589	0.993807	0.990201	0.991369	0.992357	0.9924					29m2						1
																12m5							1	0.991277	0.991901	0.989781	0.991115	0.990587
																12m6								1	0.990843	0.990505	0.990048	0.991098
																29m1									1	0.984657	0.992059	0.993489	29m average	0.990921
																29m2										1	0.994084	0.992605
																29m5											1	0.988634
																29m6												1

## Sheet: E
Sample correlation analysis (Spearman)
3m	3 month old
12m	12 month old
29m	29 month old
		Spearman correlation of DESeq2 counts over expressed genes														Spearman correlation of Diffbind normalized counts over H3K4me3 peaks																	Spearman correlation of Diffbind normalized counts over H3K27ac peaks
Heart samples		Heart RNA-seq samples														Heart H3K4me3 samples (normalized to H3)																	Heart H3K27ac samples (normalized to H3)
			3m1	3m2	3m3	12m1	12m2	12m3	29m1	29m2	29m3	Replicates					3m1	3m2	12m1	12m2	29m1	29m2	Replicates											3m1	3m2	12m1	12m2	29m1	29m2	Replicates
		3m1	1	0.974895	0.96874	0.972995	0.973996	0.974678	0.970719	0.964503	0.972123	3m average	0.972969			3m1	1	0.981009	0.981362	0.981114	0.978879	0.966688	3m average	0.981009									3m1	1	0.922891	0.915379	0.902287	0.891861	0.905909	3m average	0.922891
		3m2		1	0.975271	0.979834	0.982085	0.981849	0.97649	0.972767	0.980789					3m2		1	0.97674	0.976848	0.975594	0.964535											3m2		1	0.925878	0.908963	0.901091	0.898654
		3m3			1	0.971475	0.973722	0.974193	0.969034	0.962903	0.971623					12m1			1	0.982466	0.978912	0.964769	12m average	0.982466									12m1			1	0.936322	0.907865	0.896871	12m average	0.936322
		12m1				1	0.979642	0.979921	0.980125	0.97155	0.978993	12m average	0.974946			12m2				1	0.98156	0.968423											12m2				1	0.898389	0.893832
		12m2					1	0.981867	0.975982	0.973536	0.981593					29m1					1	0.970359	29m average	0.970359									29m1					1	0.904688	29m average	0.904688
		12m3						1	0.977958	0.97548	0.981753					29m2						1											29m2						1
		29m1							1	0.975575	0.979605	29m average	0.978093
		29m2								1	0.979098
		29m3									1
Liver samples		Liver RNA-seq samples														Liver H3K4me3 samples (normalized to H3)																	Liver H3K27ac samples (normalized to H3)
			3m1	3m2	3m3	12m1	12m2	12m3	29m1	29m2	29m3	Replicates					3m1	3m2	12m1	12m2	29m1	29m2	Replicates											3m1	3m2	12m1	12m2	29m1	29m2	Replicates
		3m1	1	0.967409	0.969641	0.966282	0.966608	0.964805	0.958103	0.947923	0.962243	3m average	0.971277			3m1	1	0.965385	0.96129	0.960056	0.948691	0.952544	3m average	0.965385									3m1	1	0.900262	0.878094	0.872077	0.856592	0.813024	3m average	0.900262
		3m2		1	0.976781	0.971065	0.973941	0.971941	0.965283	0.957532	0.971781					3m2		1	0.960465	0.961446	0.952099	0.959788											3m2		1	0.916082	0.901295	0.894608	0.849436
		3m3			1	0.971286	0.974821	0.971927	0.963368	0.955487	0.972226					12m1			1	0.976436	0.952009	0.951076	12m average	0.976436									12m1			1	0.925273	0.900393	0.854585	12m average	0.925273
		12m1				1	0.973527	0.970955	0.972512	0.961536	0.970039	12m average	0.973211			12m2				1	0.951022	0.953836											12m2				1	0.889325	0.83635
		12m2					1	0.974433	0.969987	0.959354	0.973705					29m1					1	0.965277	29m average	0.965277									29m1					1	0.912294	29m average	0.912294
		12m3						1	0.969374	0.960573	0.97217					29m2						1											29m2						1
		29m1							1	0.968871	0.972309	29m average	0.969879
		29m2								1	0.968458
		29m3									1
Cerebellum samples		Cerebellum RNA-seq samples														Cerebellum H3K4me3 samples (normalized to H3)																	Cerebellum H3K27ac samples (normalized to H3)
			3m1	3m2	3m3	12m1	12m2	12m3	29m1	29m2	29m3	Replicates					3m1	3m2	12m1	12m2	29m1	29m2	Replicates											3m1	3m2	12m1	12m2	29m1	29m2	Replicates
		3m1	1	0.98983	0.989659	0.992259	0.992046	0.99037	0.988015	0.987953	0.988511	3m average	0.98955			3m1	1	0.992913	0.990055	0.989975	0.987009	0.985962	3m average	0.992913									3m1	1	0.924665	0.912318	0.923178	0.90977	0.91508	3m average	0.924665
		3m2		1	0.989161	0.990619	0.990121	0.989386	0.986517	0.987755	0.987774					3m2		1	0.990169	0.988741	0.986199	0.986376											3m2		1	0.920625	0.931257	0.919117	0.924794
		3m3			1	0.991305	0.990712	0.990971	0.988753	0.987483	0.988094					12m1			1	0.991223	0.9909	0.991049	12m average	0.991223									12m1			1	0.933132	0.921841	0.928496	12m average	0.933132
		12m1				1	0.994155	0.992813	0.991418	0.990455	0.991796	12m average	0.992057			12m2				1	0.991013	0.989129											12m2				1	0.934888	0.940674
		12m2					1	0.991575	0.990116	0.990195	0.991557					29m1					1	0.991309	29m average	0.991309									29m1					1	0.944463	29m average	0.944463
		12m3						1	0.991432	0.990828	0.990444					29m2						1											29m2						1
		29m1							1	0.991598	0.991848	29m average	0.992545
		29m2								1	0.994189
		29m3									1
Olfactory Bulb samples		Olfactory Bulb RNA-seq samples														Olfactory Bulb H3K4me3 samples (normalized to H3)																	Olfactory Bulb H3K27ac samples (normalized to H3)
			3m1	3m2	3m3	12m1	12m2	29m1	29m2	29m3	Replicates						3m1	3m2	12m1	12m2	29m1	29m2	Replicates											3m1	3m2	12m1	12m2	29m1	29m2	Replicates
		3m1	1	0.990688	0.990469	0.990927	0.986335	0.988741	0.988482	0.989745	3m average	0.996896				3m1	1	0.989936	0.988753	0.988195	0.986204	0.986948	3m average	0.989936									3m1	1	0.605597	0.679042	0.682591	0.648899	0.632748	3m average	0.605597
		3m2		1	0.993727	0.993148	0.991151	0.990529	0.992191	0.991059						3m2		1	0.989198	0.988685	0.985601	0.987418											3m2		1	0.674197	0.677639	0.645316	0.622287
		3m3			1	0.992588	0.990737	0.991311	0.99162	0.99121						12m1			1	0.992252	0.989575	0.990751	12m average	0.992252									12m1			1	0.802101	0.749902	0.722523	12m average	0.802101
		12m1				1	0.991215	0.991547	0.992713	0.992162	12m average	0.991215				12m2				1	0.989295	0.990657											12m2				1	0.7561	0.725928
		12m2					1	0.990392	0.990815	0.988378						29m1					1	0.989019	29m average	0.989019									29m1					1	0.689941	29m average	0.689941
		29m1						1	0.992362	0.9921	29m average	0.992291				29m2						1											29m2						1
		29m2							1	0.992412
		29m3								1
NSCs samples		NSCs RNA-seq samples														NSCs H3K4me3 samples (normalized to H3) (postbatch correction)																	NSCs H3K27ac samples (normalized to H3)
			3m1	3m2	12m1	12m2	29m1	29m2	Replicates								3m1	3m2	3m5	3m6	12m1	12m2	12m5	12m6	29m1	29m2	29m5	29m6	Replicates					3m1	3m2	12m1	12m2	29m1	29m2	Replicates
		3m1	1	0.969613	0.983239	0.976591	0.984557	0.977054	3m average	0.969613						3m1	1	0.98501	0.991265	0.99148	0.987481	0.987004	0.989445	0.988443	0.982827	0.984848	0.982938	0.983262	3m average	0.989793			3m1	1	0.943242	0.907585	0.939793	0.903672	0.937207	3m average	0.943242
		3m2		1	0.967926	0.966043	0.968497	0.960267								3m2		1	0.991673	0.991612	0.988009	0.987214	0.989092	0.98853	0.982468	0.986697	0.983988	0.98422					3m2		1	0.941778	0.92066	0.940321	0.922134
		12m1			1	0.976254	0.983023	0.974214	12m average	0.976254						3m5			1	0.987716	0.990339	0.989993	0.987945	0.9857	0.982567	0.98598	0.985416	0.985172					12m1			1	0.941277	0.904443	0.940186	12m average	0.941277
		12m2				1	0.976524	0.969986								3m6				1	0.990259	0.990369	0.987802	0.986369	0.982307	0.985508	0.984647	0.985193					12m2				1	0.940409	0.914522
		29m1					1	0.97592	29m average	0.97592						12m1					1	0.989822	0.991802	0.989941	0.987168	0.987933	0.988528	0.988974	12m average	0.989886			29m1					1	0.939063	29m average	0.939063
		29m2						1								12m2						1	0.990882	0.989409	0.985301	0.987323	0.987762	0.987957					29m2						1
																12m5							1	0.987458	0.987244	0.988121	0.986983	0.986662
																12m6								1	0.985662	0.987162	0.984274	0.985708
																29m1									1	0.982062	0.990086	0.990803	29m average	0.988
																29m2										1	0.991216	0.990626
																29m5											1	0.983209
																29m6												1
