# Supplementary material for: Remodeling of epigenome and transcriptome landscapes with aging in mice reveals widespread induction of inflammatory responses
Source: HighWire-hosted journal article supplement (doi:10.1101/gr.240093.118), 2019-03-11
Supplement: Supplemental_Table_S2.xlsx [file Supplemental_Table_S2.xlsx]

## Sheet: Index
Supplemental Table S2
Accession for publically available datasets used in this study.
	A	Mouse ENCODE datasets used for tissue machine learning analyses
	B	Pure cell type RNA-seq datasets used to build and train a mouse signature matrix for CIBERSORT
	C	Publicly available RNA-seq datasets for aging reanalyzed in this study

## Sheet: A
Accession	Title (from GEO)	PMID
GSM851310	RenLab-CTCF-olfactory-bulb	22763441; 25409824
GSM851311	RenLab-H3K4me1-olfactory-bulb	22763441; 25409824
GSM851313	RenLab-Pol2-olfactory-bulb	22763441; 25409824
GSM851314	RenLab-H3K27ac-olfactory-bulb	22763441; 25409824
GSM851315	RenLab-Input-olfactory-bulb	22763441; 25409824
GSM1000143	LICR_ChipSeq_WholeBrain_H3K27me3_E14.5	22763441; 25409824
GSM1000098	LICR_ChipSeq_WholeBrain_Input_E14.5	22763441; 25409824
ENCODE DCC wgEncodeUwDnaseWbrainC57bl6MAdult8wks	Encode_Dnase_WholeBrain_Adult8wks	22763441; 25409824
GSM722759	RenLab-CTCF-liver	22763441; 25409824
GSM722760	RenLab-H3K4me1-liver	22763441; 25409824
GSM722763	RenLab-Pol2-liver	22763441; 25409824
GSM851275	RenLab-H3K27ac-liver	22763441; 25409824
ENCODE DCC wgEncodeLicrHistoneLiverH3k27me3MAdult8wksC57bl6Std	RenLab-H3K27me3-Liver_8weeks.fastq	22763441; 25409824
GSM722764	RenLab-Input-liver	22763441; 25409824
ENCODE DCC wgEncodeUwDnaseCbellumC57bl6MAdult8wks	Encode_Dnase_Liver_Adult8wks	22763441; 25409824
GSM722663	RenLab-CTCF-cerebellum	22763441; 25409824
GSM722664	RenLab-H3K4me1-cerebellum	22763441; 25409824
GSM722666	RenLab-Pol2-cerebellum	22763441; 25409824
GSM851271	RenLab-H3K27ac-cerebellum	22763441; 25409824
ENCODE DCC wgEncodeLicrHistoneCbellumH3k27me3MAdult8wksC57bl6Std	RenLab-H3K27me3-cerebellum_8weeks.fastq	22763441; 25409824
GSM722667	RenLab-Input-cerebellum	22763441; 25409824
ENCODE DCC wgEncodeUwDnaseLiverC57bl6MAdult8wks	Encode_Dnase_Cerebellum_Adult8wks	22763441; 25409824
GSM722692	RenLab-CTCF-heart	22763441; 25409824
GSM722693	RenLab-H3K4me1-heart	22763441; 25409824
GSM722696	RenLab-Pol2-heart	22763441; 25409824
GSM851273	RenLab-H3K27ac-heart	22763441; 25409824
ENCODE DCC wgEncodeLicrHistoneHeartH3k27me3MAdult8wksC57bl6Std	RenLab-H3K27me3-Heart_8weeks.fastq	22763441; 25409824
GSM722697	RenLab-Input-heart	22763441; 25409824
ENCODE DCC wgEncodeUwDnaseHeartC57bl6MAdult8wks	Encode_Dnase_Heart_Adult8wks	22763441; 25409824

## Sheet: B
Accession	Cell type	Data notes and description	Bulk or Single cell RNA-seq
ERR525589	Adipocytes	Classical brown adipocyte	Bulk
ERR525590	Adipocytes	inguinal white adipocyte	Bulk
ERR525591	Adipocytes	rosiglitazone-treated adipocyte (beige cell)	Bulk
ERR525592	Adipocytes	Classical brown adipocyte	Bulk
ERR525593	Adipocytes	rosiglitazone-treated adipocyte (beige cell)	Bulk
ERR525594	Adipocytes	inguinal white adipocyte	Bulk
ERR599390	Endothelial_cells	C57BL/6NJ, 4 to 6 week. GFP+ CD31+ VE-Cadherin+ CD45-Ter119-7AAD-	Bulk
ERR599391	Macrophages	C57BL/6NJ, 4 to 6 week. bone marrow populations	Bulk
ERR647660	Neurons	mOR-EG GFP, single Adult Cell, olfactory sensory neuron	Single
ERR647661	Neurons	mOR-EG GFP, single Adult Cell, olfactory sensory neuron	Single
ERR647663	Neurons	mOR-EG GFP, single Adult Cell, olfactory sensory neuron	Single
ERR647666	Neurons	mOR-EG GFP, single Adult Cell, olfactory sensory neuron	Single
ERR674978	Erythrocytes	Nuc.Erythro_C57BL/6J__4 to 6 (week)_nucleate erythrocyte_Ter119+, CD71+, CD3-, CD4-, CD8-, B220-, IgM-, Gr1-, Mac1-	Bulk
ERR674979	B_cells	B Cell_C57BL/6J__4 to 6 (week)_lymphocyte of B lineage_B220+, IgM+, CD3-, CD4-, CD8-, Ter119-, Gr1-, Mac1-__	Bulk
ERR674980	T_cells	T Cell_C57BL/6J__4 to 6 (week)_T cell_CD3+, CD4+, CD8+, B220-, IgM-, Ter119-, Gr1-, Mac1-__	Bulk
ERR674981	Monocytes	Mono_C57BL/6J__4 to 6 (week)_monocyte_Gr1 medium, Mac1+, CFMS+, CD3-, CD4-, CD8-, IgM-, Ter119-__	Bulk
ERR674984	Granulocytes	Granulo_C57BL/6J__4 to 6 (week)_granulocyte_Gr1+, Mac1+, CD3-, CD4-, CD8-, IgM-, Ter119-__	Bulk
ERR674988	NK_cells	NK Cell_C57BL/6J__4 to 6 (week)_natural killer cell_NK1.1+, B220-, IgM-, Gr1-, Mac1-, Ter119-__	Bulk
GSM2188962	Neurons	Steve_quake Striatum scRNAseq	Single
GSM2188963	Neurons	Steve_quake Striatum scRNAseq	Single
GSM2188964	Neurons	Steve_quake Striatum scRNAseq	Single
GSM2188965	Neurons	Steve_quake Striatum scRNAseq	Single
GSM2188966	Neurons	Steve_quake Striatum scRNAseq	Single
GSM2188967	Astrocytes	Steve_quake Striatum scRNAseq	Single
GSM2188968	Astrocytes	Steve_quake Striatum scRNAseq	Single
GSM2188969	Astrocytes	Steve_quake Striatum scRNAseq	Single
GSM2188970	Astrocytes	Steve_quake Striatum scRNAseq	Single
GSM2188971	Astrocytes	Steve_quake Striatum scRNAseq	Single
GSM2188972	Astrocytes	Steve_quake Striatum scRNAseq	Single
GSM2188973	Astrocytes	Steve_quake Striatum scRNAseq	Single
GSM2188974	Astrocytes	Steve_quake Striatum scRNAseq	Single
GSM2188975	Astrocytes	Steve_quake Striatum scRNAseq	Single
GSM2188976	Astrocytes	Steve_quake Striatum scRNAseq	Single
GSM2188977	Oligodendrocytes	Steve_quake Striatum scRNAseq	Single
GSM2188978	Astrocytes	Steve_quake Striatum scRNAseq	Single
GSM2188979	Astrocytes	Steve_quake Striatum scRNAseq	Single
GSM2188980	Astrocytes	Steve_quake Striatum scRNAseq	Single
GSM2188981	Astrocytes	Steve_quake Striatum scRNAseq	Single
GSM2188982	Astrocytes	Steve_quake Striatum scRNAseq	Single
GSM2188983	Astrocytes	Steve_quake Striatum scRNAseq	Single
GSM2188984	Astrocytes	Steve_quake Striatum scRNAseq	Single
GSM2188985	Astrocytes	Steve_quake Striatum scRNAseq	Single
GSM2188986	Astrocytes	Steve_quake Striatum scRNAseq	Single
GSM2188987	Astrocytes	Steve_quake Striatum scRNAseq	Single
GSM2188988	Astrocytes	Steve_quake Striatum scRNAseq	Single
GSM2188989	Astrocytes	Steve_quake Striatum scRNAseq	Single
GSM2188990	Astrocytes	Steve_quake Striatum scRNAseq	Single
GSM2188991	Astrocytes	Steve_quake Striatum scRNAseq	Single
GSM2188992	Astrocytes	Steve_quake Striatum scRNAseq	Single
GSM2188993	Astrocytes	Steve_quake Striatum scRNAseq	Single
GSM2188994	Astrocytes	Steve_quake Striatum scRNAseq	Single
GSM2188995	Astrocytes	Steve_quake Striatum scRNAseq	Single
GSM2188996	Astrocytes	Steve_quake Striatum scRNAseq	Single
GSM2188997	Astrocytes	Steve_quake Striatum scRNAseq	Single
GSM2188998	Astrocytes	Steve_quake Striatum scRNAseq	Single
GSM2188999	Astrocytes	Steve_quake Striatum scRNAseq	Single
GSM2189000	Astrocytes	Steve_quake Striatum scRNAseq	Single
GSM2189001	Astrocytes	Steve_quake Striatum scRNAseq	Single
GSM2189002	Astrocytes	Steve_quake Striatum scRNAseq	Single
GSM2189003	Astrocytes	Steve_quake Striatum scRNAseq	Single
GSM2189004	Astrocytes	Steve_quake Striatum scRNAseq	Single
GSM2189005	Astrocytes	Steve_quake Striatum scRNAseq	Single
GSM2189006	Neurons	Steve_quake Striatum scRNAseq	Single
GSM2189007	Neurons	Steve_quake Striatum scRNAseq	Single
GSM2189008	Neurons	Steve_quake Striatum scRNAseq	Single
GSM2189009	Neurons	Steve_quake Striatum scRNAseq	Single
GSM2189010	Neurons	Steve_quake Striatum scRNAseq	Single
GSM2189011	Neurons	Steve_quake Striatum scRNAseq	Single
GSM2189012	Neurons	Steve_quake Striatum scRNAseq	Single
GSM2189013	Neurons	Steve_quake Striatum scRNAseq	Single
GSM2189014	Neurons	Steve_quake Striatum scRNAseq	Single
GSM2189015	Neurons	Steve_quake Striatum scRNAseq	Single
GSM2189016	Neurons	Steve_quake Striatum scRNAseq	Single
GSM2189017	Neurons	Steve_quake Striatum scRNAseq	Single
GSM2189018	Neurons	Steve_quake Striatum scRNAseq	Single
GSM2189019	Neurons	Steve_quake Striatum scRNAseq	Single
GSM2189020	Neurons	Steve_quake Striatum scRNAseq	Single
GSM2189021	Neurons	Steve_quake Striatum scRNAseq	Single
GSM2189022	Neurons	Steve_quake Striatum scRNAseq	Single
GSM2189023	Neurons	Steve_quake Striatum scRNAseq	Single
GSM2189024	Neurons	Steve_quake Striatum scRNAseq	Single
GSM2189025	Neurons	Steve_quake Striatum scRNAseq	Single
GSM2189026	Neurons	Steve_quake Striatum scRNAseq	Single
GSM2189027	Neurons	Steve_quake Striatum scRNAseq	Single
GSM2189028	Neurons	Steve_quake Striatum scRNAseq	Single
GSM2189029	Neurons	Steve_quake Striatum scRNAseq	Single
GSM2189030	Astrocytes	Steve_quake Striatum scRNAseq	Single
GSM2189032	Astrocytes	Steve_quake Striatum scRNAseq	Single
GSM2189033	Astrocytes	Steve_quake Striatum scRNAseq	Single
GSM2189034	Astrocytes	Steve_quake Striatum scRNAseq	Single
GSM2189035	Astrocytes	Steve_quake Striatum scRNAseq	Single
GSM2189036	Astrocytes	Steve_quake Striatum scRNAseq	Single
GSM2189037	Astrocytes	Steve_quake Striatum scRNAseq	Single
GSM2189038	Astrocytes	Steve_quake Striatum scRNAseq	Single
GSM2189039	Neurons	Steve_quake Striatum scRNAseq	Single
GSM2189040	Neurons	Steve_quake Striatum scRNAseq	Single
GSM2189041	Neurons	Steve_quake Striatum scRNAseq	Single
GSM2189042	Neurons	Steve_quake Striatum scRNAseq	Single
GSM2189043	Neurons	Steve_quake Striatum scRNAseq	Single
GSM2189044	Neurons	Steve_quake Striatum scRNAseq	Single
GSM2189045	Neurons	Steve_quake Striatum scRNAseq	Single
GSM2189046	Neurons	Steve_quake Striatum scRNAseq	Single
GSM2189047	Neurons	Steve_quake Striatum scRNAseq	Single
GSM2189048	Neurons	Steve_quake Striatum scRNAseq	Single
GSM2189049	Neurons	Steve_quake Striatum scRNAseq	Single
GSM2189050	Neurons	Steve_quake Striatum scRNAseq	Single
GSM2189051	Neurons	Steve_quake Striatum scRNAseq	Single
GSM2189052	Neurons	Steve_quake Striatum scRNAseq	Single
GSM2189053	Neurons	Steve_quake Striatum scRNAseq	Single
GSM2189054	Neurons	Steve_quake Striatum scRNAseq	Single
GSM2189055	Neurons	Steve_quake Striatum scRNAseq	Single
GSM2189056	Neurons	Steve_quake Striatum scRNAseq	Single
GSM2189057	Neurons	Steve_quake Striatum scRNAseq	Single
GSM2189058	Neurons	Steve_quake Striatum scRNAseq	Single
GSM2189059	Neurons	Steve_quake Striatum scRNAseq	Single
GSM2189060	Neurons	Steve_quake Striatum scRNAseq	Single
GSM2189061	Neurons	Steve_quake Striatum scRNAseq	Single
GSM2189062	Neurons	Steve_quake Striatum scRNAseq	Single
GSM2189063	Neurons	Steve_quake Striatum scRNAseq	Single
GSM2189064	Neurons	Steve_quake Striatum scRNAseq	Single
GSM2189065	Neurons	Steve_quake Striatum scRNAseq	Single
GSM2189066	Neurons	Steve_quake Striatum scRNAseq	Single
GSM2189067	Neurons	Steve_quake Striatum scRNAseq	Single
GSM2189068	Neurons	Steve_quake Striatum scRNAseq	Single
GSM2189069	Neurons	Steve_quake Striatum scRNAseq	Single
GSM2189070	Neurons	Steve_quake Striatum scRNAseq	Single
GSM2189071	Neurons	Steve_quake Striatum scRNAseq	Single
GSM2189072	Neurons	Steve_quake Striatum scRNAseq	Single
GSM2189073	Neurons	Steve_quake Striatum scRNAseq	Single
GSM2189074	Neurons	Steve_quake Striatum scRNAseq	Single
GSM2189075	Neurons	Steve_quake Striatum scRNAseq	Single
GSM2189076	Neurons	Steve_quake Striatum scRNAseq	Single
GSM2189077	Neurons	Steve_quake Striatum scRNAseq	Single
GSM2189078	Neurons	Steve_quake Striatum scRNAseq	Single
GSM2189079	Neurons	Steve_quake Striatum scRNAseq	Single
GSM2189080	Neurons	Steve_quake Striatum scRNAseq	Single
GSM2189081	Neurons	Steve_quake Striatum scRNAseq	Single
GSM2189082	Neurons	Steve_quake Striatum scRNAseq	Single
GSM2189083	Neurons	Steve_quake Striatum scRNAseq	Single
GSM2189084	Neurons	Steve_quake Striatum scRNAseq	Single
GSM2189085	Neurons	Steve_quake Striatum scRNAseq	Single
GSM2189086	Neurons	Steve_quake Striatum scRNAseq	Single
GSM2189087	Neurons	Steve_quake Striatum scRNAseq	Single
GSM2189088	Neurons	Steve_quake Striatum scRNAseq	Single
GSM2189089	Astrocytes	Steve_quake Striatum scRNAseq	Single
GSM2189090	Astrocytes	Steve_quake Striatum scRNAseq	Single
GSM2189091	Astrocytes	Steve_quake Striatum scRNAseq	Single
GSM2189092	Neurons	Steve_quake Striatum scRNAseq	Single
GSM2189093	Neurons	Steve_quake Striatum scRNAseq	Single
GSM2189094	Neurons	Steve_quake Striatum scRNAseq	Single
GSM2189095	Neurons	Steve_quake Striatum scRNAseq	Single
GSM2189096	Neurons	Steve_quake Striatum scRNAseq	Single
GSM2189097	Neurons	Steve_quake Striatum scRNAseq	Single
GSM2189098	Neurons	Steve_quake Striatum scRNAseq	Single
GSM2189099	Neurons	Steve_quake Striatum scRNAseq	Single
GSM2189100	Neurons	Steve_quake Striatum scRNAseq	Single
GSM2189101	Neurons	Steve_quake Striatum scRNAseq	Single
GSM2189102	Neurons	Steve_quake Striatum scRNAseq	Single
GSM2189103	Neurons	Steve_quake Striatum scRNAseq	Single
GSM2189104	Neurons	Steve_quake Striatum scRNAseq	Single
GSM2189105	Neurons	Steve_quake Striatum scRNAseq	Single
GSM2189106	Neurons	Steve_quake Striatum scRNAseq	Single
GSM2189107	Neurons	Steve_quake Striatum scRNAseq	Single
GSM2189108	Neurons	Steve_quake Striatum scRNAseq	Single
GSM2189109	Neurons	Steve_quake Striatum scRNAseq	Single
GSM2189110	Neurons	Steve_quake Striatum scRNAseq	Single
GSM2189111	Neurons	Steve_quake Striatum scRNAseq	Single
GSM2189112	Neurons	Steve_quake Striatum scRNAseq	Single
GSM2189113	Neurons	Steve_quake Striatum scRNAseq	Single
GSM2189114	Neurons	Steve_quake Striatum scRNAseq	Single
GSM2189115	Neurons	Steve_quake Striatum scRNAseq	Single
GSM2189116	Neurons	Steve_quake Striatum scRNAseq	Single
GSM2189117	Neurons	Steve_quake Striatum scRNAseq	Single
GSM2189118	Neurons	Steve_quake Striatum scRNAseq	Single
GSM2189119	Neurons	Steve_quake Striatum scRNAseq	Single
GSM2189120	Neurons	Steve_quake Striatum scRNAseq	Single
GSM2189121	Neurons	Steve_quake Striatum scRNAseq	Single
GSM2189122	Neurons	Steve_quake Striatum scRNAseq	Single
GSM2189123	Neurons	Steve_quake Striatum scRNAseq	Single
GSM2189124	Neurons	Steve_quake Striatum scRNAseq	Single
GSM2189125	Neurons	Steve_quake Striatum scRNAseq	Single
GSM2189126	Neurons	Steve_quake Striatum scRNAseq	Single
GSM2189127	Neurons	Steve_quake Striatum scRNAseq	Single
GSM2189128	Neurons	Steve_quake Striatum scRNAseq	Single
GSM2189129	Neurons	Steve_quake Striatum scRNAseq	Single
GSM2189130	Neurons	Steve_quake Striatum scRNAseq	Single
GSM2189131	Neurons	Steve_quake Striatum scRNAseq	Single
GSM2189132	Neurons	Steve_quake Striatum scRNAseq	Single
GSM2189133	Neurons	Steve_quake Striatum scRNAseq	Single
GSM2189134	Neurons	Steve_quake Striatum scRNAseq	Single
GSM2189135	Neurons	Steve_quake Striatum scRNAseq	Single
GSM2189136	Neurons	Steve_quake Striatum scRNAseq	Single
GSM2189137	Neurons	Steve_quake Striatum scRNAseq	Single
GSM2189138	Neurons	Steve_quake Striatum scRNAseq	Single
GSM2189139	Neurons	Steve_quake Striatum scRNAseq	Single
GSM2189140	Neurons	Steve_quake Striatum scRNAseq	Single
GSM2189141	Neurons	Steve_quake Striatum scRNAseq	Single
GSM2189142	Neurons	Steve_quake Striatum scRNAseq	Single
GSM2189143	Neurons	Steve_quake Striatum scRNAseq	Single
GSM2189144	Neurons	Steve_quake Striatum scRNAseq	Single
GSM2189145	Neurons	Steve_quake Striatum scRNAseq	Single
GSM2189146	Neurons	Steve_quake Striatum scRNAseq	Single
GSM2189147	Neurons	Steve_quake Striatum scRNAseq	Single
GSM2189148	Neurons	Steve_quake Striatum scRNAseq	Single
GSM2189149	Neurons	Steve_quake Striatum scRNAseq	Single
GSM2189150	Neurons	Steve_quake Striatum scRNAseq	Single
GSM2189151	Neurons	Steve_quake Striatum scRNAseq	Single
GSM2189152	Neurons	Steve_quake Striatum scRNAseq	Single
GSM2189153	Neurons	Steve_quake Striatum scRNAseq	Single
GSM2189154	Neurons	Steve_quake Striatum scRNAseq	Single
GSM2189155	Neurons	Steve_quake Striatum scRNAseq	Single
GSM2189156	Neurons	Steve_quake Striatum scRNAseq	Single
GSM2189157	Neurons	Steve_quake Striatum scRNAseq	Single
GSM2189158	Neurons	Steve_quake Striatum scRNAseq	Single
GSM2189159	Neurons	Steve_quake Striatum scRNAseq	Single
GSM2189160	Neurons	Steve_quake Striatum scRNAseq	Single
GSM2189161	Neurons	Steve_quake Striatum scRNAseq	Single
GSM2189162	Neurons	Steve_quake Striatum scRNAseq	Single
GSM2189163	Neurons	Steve_quake Striatum scRNAseq	Single
GSM2189164	Neurons	Steve_quake Striatum scRNAseq	Single
GSM2189165	Neurons	Steve_quake Striatum scRNAseq	Single
GSM2189166	Neurons	Steve_quake Striatum scRNAseq	Single
GSM2189167	Neurons	Steve_quake Striatum scRNAseq	Single
GSM2189168	Neurons	Steve_quake Striatum scRNAseq	Single
GSM2189169	Neurons	Steve_quake Striatum scRNAseq	Single
GSM2189170	Neurons	Steve_quake Striatum scRNAseq	Single
GSM2189171	Neurons	Steve_quake Striatum scRNAseq	Single
GSM2189172	Neurons	Steve_quake Striatum scRNAseq	Single
GSM2189173	Neurons	Steve_quake Striatum scRNAseq	Single
GSM2189174	Neurons	Steve_quake Striatum scRNAseq	Single
GSM2189175	Neurons	Steve_quake Striatum scRNAseq	Single
GSM2189176	Neurons	Steve_quake Striatum scRNAseq	Single
GSM2189177	Neurons	Steve_quake Striatum scRNAseq	Single
GSM2189178	Neurons	Steve_quake Striatum scRNAseq	Single
GSM2189179	Neurons	Steve_quake Striatum scRNAseq	Single
GSM2189180	Neurons	Steve_quake Striatum scRNAseq	Single
GSM2189181	Neurons	Steve_quake Striatum scRNAseq	Single
GSM2189182	Neurons	Steve_quake Striatum scRNAseq	Single
GSM2189183	Neurons	Steve_quake Striatum scRNAseq	Single
GSM2189184	Neurons	Steve_quake Striatum scRNAseq	Single
GSM2189185	Neurons	Steve_quake Striatum scRNAseq	Single
GSM2189186	Neurons	Steve_quake Striatum scRNAseq	Single
GSM2189187	Neurons	Steve_quake Striatum scRNAseq	Single
GSM2189188	Neurons	Steve_quake Striatum scRNAseq	Single
GSM2189189	Neurons	Steve_quake Striatum scRNAseq	Single
GSM2189190	Neurons	Steve_quake Striatum scRNAseq	Single
GSM2189191	Neurons	Steve_quake Striatum scRNAseq	Single
GSM2189192	Neurons	Steve_quake Striatum scRNAseq	Single
GSM2189193	Neurons	Steve_quake Striatum scRNAseq	Single
GSM2189194	Neurons	Steve_quake Striatum scRNAseq	Single
GSM2189195	Neurons	Steve_quake Striatum scRNAseq	Single
GSM2189196	Neurons	Steve_quake Striatum scRNAseq	Single
GSM2189197	Neurons	Steve_quake Striatum scRNAseq	Single
GSM2189198	Neurons	Steve_quake Striatum scRNAseq	Single
GSM2189199	Neurons	Steve_quake Striatum scRNAseq	Single
GSM2189200	Neurons	Steve_quake Striatum scRNAseq	Single
GSM2189201	Neurons	Steve_quake Striatum scRNAseq	Single
GSM2189202	Neurons	Steve_quake Striatum scRNAseq	Single
GSM2189203	Neurons	Steve_quake Striatum scRNAseq	Single
GSM2189204	Neurons	Steve_quake Striatum scRNAseq	Single
GSM2189205	Neurons	Steve_quake Striatum scRNAseq	Single
GSM2189206	Neurons	Steve_quake Striatum scRNAseq	Single
GSM2189207	Neurons	Steve_quake Striatum scRNAseq	Single
GSM2189208	Neurons	Steve_quake Striatum scRNAseq	Single
GSM2189209	Neurons	Steve_quake Striatum scRNAseq	Single
GSM2189210	Neurons	Steve_quake Striatum scRNAseq	Single
GSM2189211	Neurons	Steve_quake Striatum scRNAseq	Single
GSM2189212	Neurons	Steve_quake Striatum scRNAseq	Single
GSM2189213	Neurons	Steve_quake Striatum scRNAseq	Single
GSM2189214	Neurons	Steve_quake Striatum scRNAseq	Single
GSM2189215	Neurons	Steve_quake Striatum scRNAseq	Single
GSM2189216	Neurons	Steve_quake Striatum scRNAseq	Single
GSM2189217	Neurons	Steve_quake Striatum scRNAseq	Single
GSM2189218	Neurons	Steve_quake Striatum scRNAseq	Single
GSM2189219	Neurons	Steve_quake Striatum scRNAseq	Single
GSM2189220	Neurons	Steve_quake Striatum scRNAseq	Single
GSM2189221	Neurons	Steve_quake Striatum scRNAseq	Single
GSM2189222	Neurons	Steve_quake Striatum scRNAseq	Single
GSM2189223	Neurons	Steve_quake Striatum scRNAseq	Single
GSM2189224	Neurons	Steve_quake Striatum scRNAseq	Single
GSM2189225	Neurons	Steve_quake Striatum scRNAseq	Single
GSM2189226	Neurons	Steve_quake Striatum scRNAseq	Single
GSM2189227	Neurons	Steve_quake Striatum scRNAseq	Single
GSM2189228	Neurons	Steve_quake Striatum scRNAseq	Single
GSM2189229	Neurons	Steve_quake Striatum scRNAseq	Single
GSM2189230	Neurons	Steve_quake Striatum scRNAseq	Single
GSM2189231	Neurons	Steve_quake Striatum scRNAseq	Single
GSM2189232	Microglia	Steve_quake Striatum scRNAseq	Single
GSM2189234	OPCs	Steve_quake Striatum scRNAseq	Single
GSM2189235	Neurons	Steve_quake Striatum scRNAseq	Single
GSM2189236	Neurons	Steve_quake Striatum scRNAseq	Single
GSM2189237	Neurons	Steve_quake Striatum scRNAseq	Single
GSM2189238	Neurons	Steve_quake Striatum scRNAseq	Single
GSM2189239	Neurons	Steve_quake Striatum scRNAseq	Single
GSM2189240	Neurons	Steve_quake Striatum scRNAseq	Single
GSM2189241	Neurons	Steve_quake Striatum scRNAseq	Single
GSM2189242	Neurons	Steve_quake Striatum scRNAseq	Single
GSM2189243	Neurons	Steve_quake Striatum scRNAseq	Single
GSM2189244	Neurons	Steve_quake Striatum scRNAseq	Single
GSM2189245	Neurons	Steve_quake Striatum scRNAseq	Single
GSM2189246	Neurons	Steve_quake Striatum scRNAseq	Single
GSM2189247	Neurons	Steve_quake Striatum scRNAseq	Single
GSM2189248	Neurons	Steve_quake Striatum scRNAseq	Single
GSM2189249	Neurons	Steve_quake Striatum scRNAseq	Single
GSM2189250	Neurons	Steve_quake Striatum scRNAseq	Single
GSM2189251	Neurons	Steve_quake Striatum scRNAseq	Single
GSM2189252	Neurons	Steve_quake Striatum scRNAseq	Single
GSM2189253	Neurons	Steve_quake Striatum scRNAseq	Single
GSM2189254	Neurons	Steve_quake Striatum scRNAseq	Single
GSM2189255	Neurons	Steve_quake Striatum scRNAseq	Single
GSM2189256	Neurons	Steve_quake Striatum scRNAseq	Single
GSM2189257	Neurons	Steve_quake Striatum scRNAseq	Single
GSM2189258	Neurons	Steve_quake Striatum scRNAseq	Single
GSM2189259	Neurons	Steve_quake Striatum scRNAseq	Single
GSM2189260	Neurons	Steve_quake Striatum scRNAseq	Single
GSM2189261	Neurons	Steve_quake Striatum scRNAseq	Single
GSM2189262	Neurons	Steve_quake Striatum scRNAseq	Single
GSM2189263	Neurons	Steve_quake Striatum scRNAseq	Single
GSM2189264	Neurons	Steve_quake Striatum scRNAseq	Single
GSM2189265	Neurons	Steve_quake Striatum scRNAseq	Single
GSM2189266	Neurons	Steve_quake Striatum scRNAseq	Single
GSM2189267	Neurons	Steve_quake Striatum scRNAseq	Single
GSM2189268	Neurons	Steve_quake Striatum scRNAseq	Single
GSM2189269	Neurons	Steve_quake Striatum scRNAseq	Single
GSM2189270	Neurons	Steve_quake Striatum scRNAseq	Single
GSM2189271	Neurons	Steve_quake Striatum scRNAseq	Single
GSM2189272	Neurons	Steve_quake Striatum scRNAseq	Single
GSM2189273	Neurons	Steve_quake Striatum scRNAseq	Single
GSM2189274	Neurons	Steve_quake Striatum scRNAseq	Single
GSM2189275	Neurons	Steve_quake Striatum scRNAseq	Single
GSM2189276	Neurons	Steve_quake Striatum scRNAseq	Single
GSM2189277	Neurons	Steve_quake Striatum scRNAseq	Single
GSM2189278	Neurons	Steve_quake Striatum scRNAseq	Single
GSM2189279	Neurons	Steve_quake Striatum scRNAseq	Single
GSM2189280	Neurons	Steve_quake Striatum scRNAseq	Single
GSM2189281	Neurons	Steve_quake Striatum scRNAseq	Single
GSM2189282	Neurons	Steve_quake Striatum scRNAseq	Single
GSM2189283	Neurons	Steve_quake Striatum scRNAseq	Single
GSM2189284	Neurons	Steve_quake Striatum scRNAseq	Single
GSM2189285	Neurons	Steve_quake Striatum scRNAseq	Single
GSM2189286	Neurons	Steve_quake Striatum scRNAseq	Single
GSM2189287	Neurons	Steve_quake Striatum scRNAseq	Single
GSM2189288	Neurons	Steve_quake Striatum scRNAseq	Single
GSM2189289	Neurons	Steve_quake Striatum scRNAseq	Single
GSM2189290	Neurons	Steve_quake Striatum scRNAseq	Single
GSM2189291	Neurons	Steve_quake Striatum scRNAseq	Single
GSM2189292	Neurons	Steve_quake Striatum scRNAseq	Single
GSM2189293	Neurons	Steve_quake Striatum scRNAseq	Single
GSM2189294	Neurons	Steve_quake Striatum scRNAseq	Single
GSM2189295	Neurons	Steve_quake Striatum scRNAseq	Single
GSM2189296	Neurons	Steve_quake Striatum scRNAseq	Single
GSM2189297	Neurons	Steve_quake Striatum scRNAseq	Single
GSM2189298	Neurons	Steve_quake Striatum scRNAseq	Single
GSM2189299	Neurons	Steve_quake Striatum scRNAseq	Single
GSM2189300	Neurons	Steve_quake Striatum scRNAseq	Single
GSM2189301	Neurons	Steve_quake Striatum scRNAseq	Single
GSM2189302	Neurons	Steve_quake Striatum scRNAseq	Single
GSM2189303	Neurons	Steve_quake Striatum scRNAseq	Single
GSM2189304	Neurons	Steve_quake Striatum scRNAseq	Single
GSM2189305	Neurons	Steve_quake Striatum scRNAseq	Single
GSM2189306	Neurons	Steve_quake Striatum scRNAseq	Single
GSM2189307	Neurons	Steve_quake Striatum scRNAseq	Single
GSM2189308	Neurons	Steve_quake Striatum scRNAseq	Single
GSM2189309	Neurons	Steve_quake Striatum scRNAseq	Single
GSM2189310	Microglia	Steve_quake Striatum scRNAseq	Single
GSM2189311	Microglia	Steve_quake Striatum scRNAseq	Single
GSM2189312	Microglia	Steve_quake Striatum scRNAseq	Single
GSM2189314	Ependymal_cells	Steve_quake Striatum scRNAseq, Ependy-Sec	Single
GSM2189315	Macrophages	Steve_quake Striatum scRNAseq	Single
GSM2189316	Astrocytes	Steve_quake Striatum scRNAseq	Single
GSM2189318	Oligodendrocytes	Steve_quake Striatum scRNAseq	Single
GSM2189319	Oligodendrocytes	Steve_quake Striatum scRNAseq	Single
GSM2189320	OPCs	Steve_quake Striatum scRNAseq	Single
GSM2189321	Microglia	Steve_quake Striatum scRNAseq	Single
GSM2189322	Ependymal_cells	Steve_quake Striatum scRNAseq, Ependy-Sec	Single
GSM2189323	Oligodendrocytes	Steve_quake Striatum scRNAseq	Single
GSM2189324	Oligodendrocytes	Steve_quake Striatum scRNAseq	Single
GSM2189325	Oligodendrocytes	Steve_quake Striatum scRNAseq	Single
GSM2189326	Microglia	Steve_quake Striatum scRNAseq	Single
GSM2189327	Microglia	Steve_quake Striatum scRNAseq	Single
GSM2189328	Microglia	Steve_quake Striatum scRNAseq	Single
GSM2189329	Microglia	Steve_quake Striatum scRNAseq	Single
GSM2189330	Ependymal_cells	Steve_quake Striatum scRNAseq, Ependy-Sec	Single
GSM2189331	Ependymal_cells	Steve_quake Striatum scRNAseq, Ependy-C	Single
GSM2189332	Microglia	Steve_quake Striatum scRNAseq	Single
GSM2189333	Microglia	Steve_quake Striatum scRNAseq	Single
GSM2189334	Microglia	Steve_quake Striatum scRNAseq	Single
GSM2189335	Microglia	Steve_quake Striatum scRNAseq	Single
GSM2189336	Oligodendrocytes	Steve_quake Striatum scRNAseq	Single
GSM2189337	Microglia	Steve_quake Striatum scRNAseq	Single
GSM2189338	Astrocytes	Steve_quake Striatum scRNAseq	Single
GSM2189339	Microglia	Steve_quake Striatum scRNAseq	Single
GSM2189340	Microglia	Steve_quake Striatum scRNAseq	Single
GSM2189341	Ependymal_cells	Steve_quake Striatum scRNAseq, Ependy-C	Single
GSM2189342	Microglia	Steve_quake Striatum scRNAseq	Single
GSM2189343	Oligodendrocytes	Steve_quake Striatum scRNAseq	Single
GSM2189344	Macrophages	Steve_quake Striatum scRNAseq	Single
GSM2189346	Oligodendrocytes	Steve_quake Striatum scRNAseq	Single
GSM2189347	Astrocytes	Steve_quake Striatum scRNAseq	Single
GSM2189348	Neurons	Steve_quake Striatum scRNAseq	Single
GSM2189349	Macrophages	Steve_quake Striatum scRNAseq	Single
GSM2189350	Ependymal_cells	Steve_quake Striatum scRNAseq, Ependy-C	Single
GSM2189351	Ependymal_cells	Steve_quake Striatum scRNAseq, Ependy-C	Single
GSM2189352	Ependymal_cells	Steve_quake Striatum scRNAseq, Ependy-C	Single
GSM2189353	Ependymal_cells	Steve_quake Striatum scRNAseq, Ependy-C	Single
GSM2189354	Astrocytes	Steve_quake Striatum scRNAseq	Single
GSM2189355	Astrocytes	Steve_quake Striatum scRNAseq	Single
GSM2189356	Astrocytes	Steve_quake Striatum scRNAseq	Single
GSM2189357	Astrocytes	Steve_quake Striatum scRNAseq	Single
GSM2189358	Astrocytes	Steve_quake Striatum scRNAseq	Single
GSM2189359	Astrocytes	Steve_quake Striatum scRNAseq	Single
GSM2189360	Macrophages	Steve_quake Striatum scRNAseq	Single
GSM2189361	Macrophages	Steve_quake Striatum scRNAseq	Single
GSM2189362	Macrophages	Steve_quake Striatum scRNAseq	Single
GSM2189363	Macrophages	Steve_quake Striatum scRNAseq	Single
GSM2189364	Macrophages	Steve_quake Striatum scRNAseq	Single
GSM2189365	Macrophages	Steve_quake Striatum scRNAseq	Single
GSM2189366	Macrophages	Steve_quake Striatum scRNAseq	Single
GSM2189367	Oligodendrocytes	Steve_quake Striatum scRNAseq	Single
GSM2189368	Macrophages	Steve_quake Striatum scRNAseq	Single
GSM2189369	Macrophages	Steve_quake Striatum scRNAseq	Single
GSM2189370	Macrophages	Steve_quake Striatum scRNAseq	Single
GSM2189371	Macrophages	Steve_quake Striatum scRNAseq	Single
GSM2189372	Macrophages	Steve_quake Striatum scRNAseq	Single
GSM2189373	Ependymal_cells	Steve_quake Striatum scRNAseq, Ependy-Sec	Single
GSM2189374	Astrocytes	Steve_quake Striatum scRNAseq	Single
GSM2189375	Astrocytes	Steve_quake Striatum scRNAseq	Single
GSM2189376	Astrocytes	Steve_quake Striatum scRNAseq	Single
GSM2189377	Astrocytes	Steve_quake Striatum scRNAseq	Single
GSM2189378	Astrocytes	Steve_quake Striatum scRNAseq	Single
GSM2189379	Astrocytes	Steve_quake Striatum scRNAseq	Single
GSM2189380	Macrophages	Steve_quake Striatum scRNAseq	Single
GSM2189381	Macrophages	Steve_quake Striatum scRNAseq	Single
GSM2189382	Macrophages	Steve_quake Striatum scRNAseq	Single
GSM2189383	Macrophages	Steve_quake Striatum scRNAseq	Single
GSM2189384	Macrophages	Steve_quake Striatum scRNAseq	Single
GSM2189385	Macrophages	Steve_quake Striatum scRNAseq	Single
GSM2189386	Macrophages	Steve_quake Striatum scRNAseq	Single
GSM2189387	Ependymal_cells	Steve_quake Striatum scRNAseq, Ependy-Sec	Single
GSM2189388	Macrophages	Steve_quake Striatum scRNAseq	Single
GSM2189389	Microglia	Steve_quake Striatum scRNAseq	Single
GSM2189390	Ependymal_cells	Steve_quake Striatum scRNAseq, Ependy-Sec	Single
GSM2189391	Macrophages	Steve_quake Striatum scRNAseq	Single
GSM2189392	Ependymal_cells	Steve_quake Striatum scRNAseq, Ependy-Sec	Single
GSM2189393	Ependymal_cells	Steve_quake Striatum scRNAseq, Ependy-Sec	Single
GSM2189394	Ependymal_cells	Steve_quake Striatum scRNAseq, Ependy-Sec	Single
GSM2189395	Macrophages	Steve_quake Striatum scRNAseq	Single
GSM2189396	Macrophages	Steve_quake Striatum scRNAseq	Single
GSM2189397	Ependymal_cells	Steve_quake Striatum scRNAseq, Ependy-Sec	Single
GSM2189398	Ependymal_cells	Steve_quake Striatum scRNAseq, Ependy-Sec	Single
GSM2189399	Ependymal_cells	Steve_quake Striatum scRNAseq, Ependy-Sec	Single
GSM2189400	Ependymal_cells	Steve_quake Striatum scRNAseq, Ependy-Sec	Single
GSM2189401	Macrophages	Steve_quake Striatum scRNAseq	Single
GSM2189402	Macrophages	Steve_quake Striatum scRNAseq	Single
GSM2189403	Macrophages	Steve_quake Striatum scRNAseq	Single
GSM2189404	Ependymal_cells	Steve_quake Striatum scRNAseq, Ependy-Sec	Single
GSM2189405	Macrophages	Steve_quake Striatum scRNAseq	Single
GSM2189406	Macrophages	Steve_quake Striatum scRNAseq	Single
GSM2189407	Macrophages	Steve_quake Striatum scRNAseq	Single
GSM2189408	Macrophages	Steve_quake Striatum scRNAseq	Single
GSM2189409	Macrophages	Steve_quake Striatum scRNAseq	Single
GSM2189410	Macrophages	Steve_quake Striatum scRNAseq	Single
GSM2189411	Macrophages	Steve_quake Striatum scRNAseq	Single
GSM2189412	Astrocytes	Steve_quake Striatum scRNAseq	Single
GSM2189413	Astrocytes	Steve_quake Striatum scRNAseq	Single
GSM2189414	Astrocytes	Steve_quake Striatum scRNAseq	Single
GSM2189415	Astrocytes	Steve_quake Striatum scRNAseq	Single
GSM2189416	Ependymal_cells	Steve_quake Striatum scRNAseq, Ependy-Sec	Single
GSM2189417	Astrocytes	Steve_quake Striatum scRNAseq	Single
GSM2189418	Ependymal_cells	Steve_quake Striatum scRNAseq, Ependy-C	Single
GSM2189419	Astrocytes	Steve_quake Striatum scRNAseq	Single
GSM2189420	Astrocytes	Steve_quake Striatum scRNAseq	Single
GSM2189421	Macrophages	Steve_quake Striatum scRNAseq	Single
GSM2189422	Macrophages	Steve_quake Striatum scRNAseq	Single
GSM2189423	Macrophages	Steve_quake Striatum scRNAseq	Single
GSM2189424	Macrophages	Steve_quake Striatum scRNAseq	Single
GSM2189425	Macrophages	Steve_quake Striatum scRNAseq	Single
GSM2189426	Macrophages	Steve_quake Striatum scRNAseq	Single
GSM2189427	Macrophages	Steve_quake Striatum scRNAseq	Single
GSM2189428	Macrophages	Steve_quake Striatum scRNAseq	Single
GSM2189429	Macrophages	Steve_quake Striatum scRNAseq	Single
GSM2189430	Macrophages	Steve_quake Striatum scRNAseq	Single
GSM2189431	Macrophages	Steve_quake Striatum scRNAseq	Single
GSM2189432	Macrophages	Steve_quake Striatum scRNAseq	Single
GSM2189433	Macrophages	Steve_quake Striatum scRNAseq	Single
GSM2189434	Macrophages	Steve_quake Striatum scRNAseq	Single
GSM2189435	Macrophages	Steve_quake Striatum scRNAseq	Single
GSM2189436	Ependymal_cells	Steve_quake Striatum scRNAseq, Ependy-Sec	Single
GSM2189437	Astrocytes	Steve_quake Striatum scRNAseq	Single
GSM2189438	Astrocytes	Steve_quake Striatum scRNAseq	Single
GSM2189439	Astrocytes	Steve_quake Striatum scRNAseq	Single
GSM2189440	Astrocytes	Steve_quake Striatum scRNAseq	Single
GSM2189441	Astrocytes	Steve_quake Striatum scRNAseq	Single
GSM2189442	Astrocytes	Steve_quake Striatum scRNAseq	Single
GSM2189443	Astrocytes	Steve_quake Striatum scRNAseq	Single
GSM2189444	Astrocytes	Steve_quake Striatum scRNAseq	Single
GSM2189445	Astrocytes	Steve_quake Striatum scRNAseq	Single
GSM2189446	Astrocytes	Steve_quake Striatum scRNAseq	Single
GSM2189447	Astrocytes	Steve_quake Striatum scRNAseq	Single
GSM2189448	Astrocytes	Steve_quake Striatum scRNAseq	Single
GSM2189449	Astrocytes	Steve_quake Striatum scRNAseq	Single
GSM2189450	Astrocytes	Steve_quake Striatum scRNAseq	Single
GSM2189451	Macrophages	Steve_quake Striatum scRNAseq	Single
GSM2189452	Ependymal_cells	Steve_quake Striatum scRNAseq, Ependy-Sec	Single
GSM2189453	Macrophages	Steve_quake Striatum scRNAseq	Single
GSM2189454	Macrophages	Steve_quake Striatum scRNAseq	Single
GSM2189455	Macrophages	Steve_quake Striatum scRNAseq	Single
GSM2189456	Macrophages	Steve_quake Striatum scRNAseq	Single
GSM2189457	Macrophages	Steve_quake Striatum scRNAseq	Single
GSM2189458	Macrophages	Steve_quake Striatum scRNAseq	Single
GSM2189459	Astrocytes	Steve_quake Striatum scRNAseq	Single
GSM2189460	Astrocytes	Steve_quake Striatum scRNAseq	Single
GSM2189461	Astrocytes	Steve_quake Striatum scRNAseq	Single
GSM2189462	Astrocytes	Steve_quake Striatum scRNAseq	Single
GSM2189463	Astrocytes	Steve_quake Striatum scRNAseq	Single
GSM2189464	Oligodendrocytes	Steve_quake Striatum scRNAseq	Single
GSM2189465	aNSCs	Steve_quake Striatum scRNAseq	Single
GSM2189468	Oligodendrocytes	Steve_quake Striatum scRNAseq	Single
GSM2189469	aNSCs	Steve_quake Striatum scRNAseq	Single
GSM2189470	OPCs	Steve_quake Striatum scRNAseq	Single
GSM2189472	Astrocytes	Steve_quake Striatum scRNAseq	Single
GSM2189475	Oligodendrocytes	Steve_quake Striatum scRNAseq	Single
GSM2189476	aNSCs	Steve_quake Striatum scRNAseq	Single
GSM2189477	Neurons	Steve_quake Striatum scRNAseq	Single
GSM2189478	Microglia	Steve_quake Striatum scRNAseq	Single
GSM2189479	Oligodendrocytes	Steve_quake Striatum scRNAseq	Single
GSM2189480	Oligodendrocytes	Steve_quake Striatum scRNAseq	Single
GSM2189481	Oligodendrocytes	Steve_quake Striatum scRNAseq	Single
GSM2189482	Oligodendrocytes	Steve_quake Striatum scRNAseq	Single
GSM2189484	Oligodendrocytes	Steve_quake Striatum scRNAseq	Single
GSM2189485	Neurons	Steve_quake Striatum scRNAseq	Single
GSM2189486	Oligodendrocytes	Steve_quake Striatum scRNAseq	Single
GSM2189487	OPCs	Steve_quake Striatum scRNAseq	Single
GSM2189488	Oligodendrocytes	Steve_quake Striatum scRNAseq	Single
GSM2189489	aNSCs	Steve_quake Striatum scRNAseq	Single
GSM2189490	Oligodendrocytes	Steve_quake Striatum scRNAseq	Single
GSM2189491	Neurons	Steve_quake Striatum scRNAseq	Single
GSM2189492	Oligodendrocytes	Steve_quake Striatum scRNAseq	Single
GSM2189493	OPCs	Steve_quake Striatum scRNAseq	Single
GSM2189494	Microglia	Steve_quake Striatum scRNAseq	Single
GSM2189495	Microglia	Steve_quake Striatum scRNAseq	Single
GSM2189496	Oligodendrocytes	Steve_quake Striatum scRNAseq	Single
GSM2189497	OPCs	Steve_quake Striatum scRNAseq	Single
GSM2189498	OPCs	Steve_quake Striatum scRNAseq	Single
GSM2189499	OPCs	Steve_quake Striatum scRNAseq	Single
GSM2189500	Oligodendrocytes	Steve_quake Striatum scRNAseq	Single
GSM2189501	Oligodendrocytes	Steve_quake Striatum scRNAseq	Single
GSM2189502	OPCs	Steve_quake Striatum scRNAseq	Single
GSM2189504	Microglia	Steve_quake Striatum scRNAseq	Single
GSM2189505	Microglia	Steve_quake Striatum scRNAseq	Single
GSM2189506	aNSCs	Steve_quake Striatum scRNAseq	Single
GSM2189507	Astrocytes	Steve_quake Striatum scRNAseq	Single
GSM2189508	aNSCs	Steve_quake Striatum scRNAseq	Single
GSM2189510	Oligodendrocytes	Steve_quake Striatum scRNAseq	Single
GSM2189511	Microglia	Steve_quake Striatum scRNAseq	Single
GSM2189512	Oligodendrocytes	Steve_quake Striatum scRNAseq	Single
GSM2189513	Astrocytes	Steve_quake Striatum scRNAseq	Single
GSM2189514	Oligodendrocytes	Steve_quake Striatum scRNAseq	Single
GSM2189515	Microglia	Steve_quake Striatum scRNAseq	Single
GSM2189516	Microglia	Steve_quake Striatum scRNAseq	Single
GSM2189517	Microglia	Steve_quake Striatum scRNAseq	Single
GSM2189518	Macrophages	Steve_quake Striatum scRNAseq	Single
GSM2189519	Oligodendrocytes	Steve_quake Striatum scRNAseq	Single
GSM2189520	Oligodendrocytes	Steve_quake Striatum scRNAseq	Single
GSM2189521	Oligodendrocytes	Steve_quake Striatum scRNAseq	Single
GSM2189522	Microglia	Steve_quake Striatum scRNAseq	Single
GSM2189523	Microglia	Steve_quake Striatum scRNAseq	Single
GSM2189524	Microglia	Steve_quake Striatum scRNAseq	Single
GSM2189525	Microglia	Steve_quake Striatum scRNAseq	Single
GSM2189526	Oligodendrocytes	Steve_quake Striatum scRNAseq	Single
GSM2189527	Macrophages	Steve_quake Striatum scRNAseq	Single
GSM2189528	Macrophages	Steve_quake Striatum scRNAseq	Single
GSM2189530	Microglia	Steve_quake Striatum scRNAseq	Single
GSM2189531	Ependymal_cells	Steve_quake Striatum scRNAseq, Ependy-C	Single
GSM2189532	Microglia	Steve_quake Striatum scRNAseq	Single
GSM2189533	Astrocytes	Steve_quake Striatum scRNAseq	Single
GSM2189534	OPCs	Steve_quake Striatum scRNAseq	Single
GSM2189535	OPCs	Steve_quake Striatum scRNAseq	Single
GSM2189536	Ependymal_cells	Steve_quake Striatum scRNAseq, Ependy-C	Single
GSM2189537	Macrophages	Steve_quake Striatum scRNAseq	Single
GSM2189538	Macrophages	Steve_quake Striatum scRNAseq	Single
GSM2189539	Microglia	Steve_quake Striatum scRNAseq	Single
GSM2189540	Astrocytes	Steve_quake Striatum scRNAseq	Single
GSM2189541	Oligodendrocytes	Steve_quake Striatum scRNAseq	Single
GSM2189542	Astrocytes	Steve_quake Striatum scRNAseq	Single
GSM2189543	Ependymal_cells	Steve_quake Striatum scRNAseq, Ependy-C	Single
GSM2189544	Astrocytes	Steve_quake Striatum scRNAseq	Single
GSM2189545	Astrocytes	Steve_quake Striatum scRNAseq	Single
GSM2189546	Ependymal_cells	Steve_quake Striatum scRNAseq, Ependy-Sec	Single
GSM2189547	Oligodendrocytes	Steve_quake Striatum scRNAseq	Single
GSM2189549	Ependymal_cells	Steve_quake Striatum scRNAseq, Ependy-C	Single
GSM2189550	Oligodendrocytes	Steve_quake Striatum scRNAseq	Single
GSM2189551	Oligodendrocytes	Steve_quake Striatum scRNAseq	Single
GSM2189552	Microglia	Steve_quake Striatum scRNAseq	Single
GSM2189553	aNSCs	Steve_quake Striatum scRNAseq	Single
GSM2189554	Microglia	Steve_quake Striatum scRNAseq	Single
GSM2189555	Oligodendrocytes	Steve_quake Striatum scRNAseq	Single
GSM2189556	Microglia	Steve_quake Striatum scRNAseq	Single
GSM2189557	Macrophages	Steve_quake Striatum scRNAseq	Single
GSM2189558	Oligodendrocytes	Steve_quake Striatum scRNAseq	Single
GSM2189559	Oligodendrocytes	Steve_quake Striatum scRNAseq	Single
GSM2189560	Astrocytes	Steve_quake Striatum scRNAseq	Single
GSM2189561	Oligodendrocytes	Steve_quake Striatum scRNAseq	Single
GSM2189562	Oligodendrocytes	Steve_quake Striatum scRNAseq	Single
GSM2189563	Neurons	Steve_quake Striatum scRNAseq	Single
GSM2189564	Neurons	Steve_quake Striatum scRNAseq	Single
GSM2189565	Neurons	Steve_quake Striatum scRNAseq	Single
GSM2189566	Neurons	Steve_quake Striatum scRNAseq	Single
GSM2189568	Microglia	Steve_quake Striatum scRNAseq	Single
GSM2189569	Ependymal_cells	Steve_quake Striatum scRNAseq, Ependy-C	Single
GSM2189570	Macrophages	Steve_quake Striatum scRNAseq	Single
GSM2189571	Microglia	Steve_quake Striatum scRNAseq	Single
GSM2189572	Macrophages	Steve_quake Striatum scRNAseq	Single
GSM2189573	Microglia	Steve_quake Striatum scRNAseq	Single
GSM2189574	Macrophages	Steve_quake Striatum scRNAseq	Single
GSM2189575	Microglia	Steve_quake Striatum scRNAseq	Single
GSM2189576	Macrophages	Steve_quake Striatum scRNAseq	Single
GSM2189577	Astrocytes	Steve_quake Striatum scRNAseq	Single
GSM2189578	Astrocytes	Steve_quake Striatum scRNAseq	Single
GSM2189579	Microglia	Steve_quake Striatum scRNAseq	Single
GSM2189580	Oligodendrocytes	Steve_quake Striatum scRNAseq	Single
GSM2189581	Macrophages	Steve_quake Striatum scRNAseq	Single
GSM2189582	Microglia	Steve_quake Striatum scRNAseq	Single
GSM2189583	Microglia	Steve_quake Striatum scRNAseq	Single
GSM2189584	Astrocytes	Steve_quake Striatum scRNAseq	Single
GSM2189585	Astrocytes	Steve_quake Striatum scRNAseq	Single
GSM2189586	Microglia	Steve_quake Striatum scRNAseq	Single
GSM2189587	Ependymal_cells	Steve_quake Striatum scRNAseq, Ependy-C	Single
GSM2189588	Microglia	Steve_quake Striatum scRNAseq	Single
GSM2189589	Ependymal_cells	Steve_quake Striatum scRNAseq, Ependy-Sec	Single
GSM2189590	Ependymal_cells	Steve_quake Striatum scRNAseq, Ependy-C	Single
GSM2189591	Ependymal_cells	Steve_quake Striatum scRNAseq, Ependy-C	Single
GSM2189592	Ependymal_cells	Steve_quake Striatum scRNAseq, Ependy-Sec	Single
GSM2189593	Ependymal_cells	Steve_quake Striatum scRNAseq, Ependy-Sec	Single
GSM2189594	Ependymal_cells	Steve_quake Striatum scRNAseq, Ependy-C	Single
GSM2189595	Astrocytes	Steve_quake Striatum scRNAseq	Single
GSM2189596	Astrocytes	Steve_quake Striatum scRNAseq	Single
GSM2189597	Oligodendrocytes	Steve_quake Striatum scRNAseq	Single
GSM2189598	Astrocytes	Steve_quake Striatum scRNAseq	Single
GSM2189599	Astrocytes	Steve_quake Striatum scRNAseq	Single
GSM2189600	Microglia	Steve_quake Striatum scRNAseq	Single
GSM2189601	Ependymal_cells	Steve_quake Striatum scRNAseq, Ependy-C	Single
GSM2189606	Neurons	Steve_quake Striatum scRNAseq	Single
GSM2189607	Neurons	Steve_quake Striatum scRNAseq	Single
GSM2189608	Neurons	Steve_quake Striatum scRNAseq	Single
GSM2189609	Neurons	Steve_quake Striatum scRNAseq	Single
GSM2189610	Neurons	Steve_quake Striatum scRNAseq	Single
GSM2189611	Neurons	Steve_quake Striatum scRNAseq	Single
GSM2189612	Neurons	Steve_quake Striatum scRNAseq	Single
GSM2189613	Neurons	Steve_quake Striatum scRNAseq	Single
GSM2189614	Neurons	Steve_quake Striatum scRNAseq	Single
GSM2189615	Neurons	Steve_quake Striatum scRNAseq	Single
GSM2189616	Neurons	Steve_quake Striatum scRNAseq	Single
GSM2189617	Neurons	Steve_quake Striatum scRNAseq	Single
GSM2189618	Neurons	Steve_quake Striatum scRNAseq	Single
GSM2189619	Neurons	Steve_quake Striatum scRNAseq	Single
GSM2189620	Neurons	Steve_quake Striatum scRNAseq	Single
GSM2189621	Neurons	Steve_quake Striatum scRNAseq	Single
GSM2189622	Neurons	Steve_quake Striatum scRNAseq	Single
GSM2189623	Neurons	Steve_quake Striatum scRNAseq	Single
GSM2189624	Neurons	Steve_quake Striatum scRNAseq	Single
GSM2189625	Neurons	Steve_quake Striatum scRNAseq	Single
GSM2189626	Neurons	Steve_quake Striatum scRNAseq	Single
GSM2189627	Neurons	Steve_quake Striatum scRNAseq	Single
GSM2189628	Neurons	Steve_quake Striatum scRNAseq	Single
GSM2189629	Neurons	Steve_quake Striatum scRNAseq	Single
GSM2189630	Neurons	Steve_quake Striatum scRNAseq	Single
GSM2189631	Neurons	Steve_quake Striatum scRNAseq	Single
GSM2189632	Neurons	Steve_quake Striatum scRNAseq	Single
GSM2189633	Neurons	Steve_quake Striatum scRNAseq	Single
GSM2189634	Neurons	Steve_quake Striatum scRNAseq	Single
GSM2189635	Neurons	Steve_quake Striatum scRNAseq	Single
GSM2189636	OPCs	Steve_quake Striatum scRNAseq	Single
GSM2189642	Neurons	Steve_quake Striatum scRNAseq	Single
GSM2189645	Neurons	Steve_quake Striatum scRNAseq	Single
GSM2189646	Macrophages	Steve_quake Striatum scRNAseq	Single
GSM2189663	OPCs	Steve_quake Striatum scRNAseq	Single
GSM2189664	Ependymal_cells	Steve_quake Striatum scRNAseq, Ependy-C	Single
GSM2189665	Macrophages	Steve_quake Striatum scRNAseq	Single
GSM2189666	Microglia	Steve_quake Striatum scRNAseq	Single
GSM2189667	Neurons	Steve_quake Striatum scRNAseq	Single
GSM2189668	Neurons	Steve_quake Striatum scRNAseq	Single
GSM2189669	Neurons	Steve_quake Striatum scRNAseq	Single
GSM2189670	Neurons	Steve_quake Striatum scRNAseq	Single
GSM2189671	Neurons	Steve_quake Striatum scRNAseq	Single
GSM2189672	Neurons	Steve_quake Striatum scRNAseq	Single
GSM2189673	Neurons	Steve_quake Striatum scRNAseq	Single
GSM2189674	Neurons	Steve_quake Striatum scRNAseq	Single
GSM2189675	Neurons	Steve_quake Striatum scRNAseq	Single
GSM2189676	Neurons	Steve_quake Striatum scRNAseq	Single
GSM2189677	Neurons	Steve_quake Striatum scRNAseq	Single
GSM2189678	Neurons	Steve_quake Striatum scRNAseq	Single
GSM2189679	Neurons	Steve_quake Striatum scRNAseq	Single
GSM2189680	Neurons	Steve_quake Striatum scRNAseq	Single
GSM2189681	Neurons	Steve_quake Striatum scRNAseq	Single
GSM2189682	Neurons	Steve_quake Striatum scRNAseq	Single
GSM2189683	Neurons	Steve_quake Striatum scRNAseq	Single
GSM2189684	Neurons	Steve_quake Striatum scRNAseq	Single
GSM2189685	Neurons	Steve_quake Striatum scRNAseq	Single
GSM2189686	Neurons	Steve_quake Striatum scRNAseq	Single
GSM2189687	Neurons	Steve_quake Striatum scRNAseq	Single
GSM2189688	Neurons	Steve_quake Striatum scRNAseq	Single
GSM2189689	Neurons	Steve_quake Striatum scRNAseq	Single
GSM2189690	Neurons	Steve_quake Striatum scRNAseq	Single
GSM2189691	Neurons	Steve_quake Striatum scRNAseq	Single
GSM2189692	Neurons	Steve_quake Striatum scRNAseq	Single
GSM2189693	Neurons	Steve_quake Striatum scRNAseq	Single
GSM2189694	Neurons	Steve_quake Striatum scRNAseq	Single
GSM2189695	Neurons	Steve_quake Striatum scRNAseq	Single
GSM2189696	Neurons	Steve_quake Striatum scRNAseq	Single
GSM2189697	Neurons	Steve_quake Striatum scRNAseq	Single
GSM2189698	Neurons	Steve_quake Striatum scRNAseq	Single
GSM2189699	Neurons	Steve_quake Striatum scRNAseq	Single
GSM2189700	Neurons	Steve_quake Striatum scRNAseq	Single
GSM2189701	Neurons	Steve_quake Striatum scRNAseq	Single
GSM2189702	Neurons	Steve_quake Striatum scRNAseq	Single
GSM2189703	Neurons	Steve_quake Striatum scRNAseq	Single
GSM2189704	Neurons	Steve_quake Striatum scRNAseq	Single
GSM2189705	Neurons	Steve_quake Striatum scRNAseq	Single
GSM2189706	Neurons	Steve_quake Striatum scRNAseq	Single
GSM2189707	Neurons	Steve_quake Striatum scRNAseq	Single
GSM2189708	Neurons	Steve_quake Striatum scRNAseq	Single
GSM2189709	Neurons	Steve_quake Striatum scRNAseq	Single
GSM2189710	Neurons	Steve_quake Striatum scRNAseq	Single
GSM2189711	Neurons	Steve_quake Striatum scRNAseq	Single
GSM2189712	Neurons	Steve_quake Striatum scRNAseq	Single
GSM2189713	Neurons	Steve_quake Striatum scRNAseq	Single
GSM2189714	Neurons	Steve_quake Striatum scRNAseq	Single
GSM2189715	Neurons	Steve_quake Striatum scRNAseq	Single
GSM2189716	Neurons	Steve_quake Striatum scRNAseq	Single
GSM2189717	Neurons	Steve_quake Striatum scRNAseq	Single
GSM2189718	Neurons	Steve_quake Striatum scRNAseq	Single
GSM2189719	Neurons	Steve_quake Striatum scRNAseq	Single
GSM2189720	Neurons	Steve_quake Striatum scRNAseq	Single
GSM2189721	Neurons	Steve_quake Striatum scRNAseq	Single
GSM2189722	Neurons	Steve_quake Striatum scRNAseq	Single
GSM2189723	Neurons	Steve_quake Striatum scRNAseq	Single
GSM2189724	Neurons	Steve_quake Striatum scRNAseq	Single
GSM2189725	Neurons	Steve_quake Striatum scRNAseq	Single
GSM2189726	Neurons	Steve_quake Striatum scRNAseq	Single
GSM2189727	Neurons	Steve_quake Striatum scRNAseq	Single
GSM2189728	Neurons	Steve_quake Striatum scRNAseq	Single
GSM2189729	Neurons	Steve_quake Striatum scRNAseq	Single
GSM2189730	Neurons	Steve_quake Striatum scRNAseq	Single
GSM2189731	Neurons	Steve_quake Striatum scRNAseq	Single
GSM2189732	Neurons	Steve_quake Striatum scRNAseq	Single
GSM2189733	Neurons	Steve_quake Striatum scRNAseq	Single
GSM2189734	Neurons	Steve_quake Striatum scRNAseq	Single
GSM2189735	Neurons	Steve_quake Striatum scRNAseq	Single
GSM2189736	Neurons	Steve_quake Striatum scRNAseq	Single
GSM2189737	Neurons	Steve_quake Striatum scRNAseq	Single
GSM2189738	Neurons	Steve_quake Striatum scRNAseq	Single
GSM2189739	Neurons	Steve_quake Striatum scRNAseq	Single
GSM2189740	Neurons	Steve_quake Striatum scRNAseq	Single
GSM2189741	Neurons	Steve_quake Striatum scRNAseq	Single
GSM2189742	Neurons	Steve_quake Striatum scRNAseq	Single
GSM2189743	Neurons	Steve_quake Striatum scRNAseq	Single
GSM2189744	Neurons	Steve_quake Striatum scRNAseq	Single
GSM2189745	Neurons	Steve_quake Striatum scRNAseq	Single
GSM2189746	Neurons	Steve_quake Striatum scRNAseq	Single
GSM2189747	Neurons	Steve_quake Striatum scRNAseq	Single
GSM2189748	Neurons	Steve_quake Striatum scRNAseq	Single
GSM2189749	Neurons	Steve_quake Striatum scRNAseq	Single
GSM2189750	Neurons	Steve_quake Striatum scRNAseq	Single
GSM2189751	Neurons	Steve_quake Striatum scRNAseq	Single
GSM2189752	Neurons	Steve_quake Striatum scRNAseq	Single
GSM2189753	Neurons	Steve_quake Striatum scRNAseq	Single
GSM2189754	Neurons	Steve_quake Striatum scRNAseq	Single
GSM2189755	Neurons	Steve_quake Striatum scRNAseq	Single
GSM2189756	Neurons	Steve_quake Striatum scRNAseq	Single
GSM2189757	Neurons	Steve_quake Striatum scRNAseq	Single
GSM2189758	Neurons	Steve_quake Striatum scRNAseq	Single
GSM2189759	Neurons	Steve_quake Striatum scRNAseq	Single
GSM2189760	Neurons	Steve_quake Striatum scRNAseq	Single
GSM2189761	Neurons	Steve_quake Striatum scRNAseq	Single
GSM2189762	Neurons	Steve_quake Striatum scRNAseq	Single
GSM2189763	Neurons	Steve_quake Striatum scRNAseq	Single
GSM2189764	Neurons	Steve_quake Striatum scRNAseq	Single
GSM2189765	Neurons	Steve_quake Striatum scRNAseq	Single
GSM2189766	Neurons	Steve_quake Striatum scRNAseq	Single
GSM2189767	Neurons	Steve_quake Striatum scRNAseq	Single
GSM2189768	Neurons	Steve_quake Striatum scRNAseq	Single
GSM2189769	Neurons	Steve_quake Striatum scRNAseq	Single
GSM2189770	Neurons	Steve_quake Striatum scRNAseq	Single
GSM2189771	Neurons	Steve_quake Striatum scRNAseq	Single
GSM2189772	Neurons	Steve_quake Striatum scRNAseq	Single
GSM2189773	Neurons	Steve_quake Striatum scRNAseq	Single
GSM2189774	Neurons	Steve_quake Striatum scRNAseq	Single
GSM2189775	Neurons	Steve_quake Striatum scRNAseq	Single
GSM2189776	Neurons	Steve_quake Striatum scRNAseq	Single
GSM2189777	Neurons	Steve_quake Striatum scRNAseq	Single
GSM2189778	Neurons	Steve_quake Striatum scRNAseq	Single
GSM2189779	Neurons	Steve_quake Striatum scRNAseq	Single
GSM2189780	Neurons	Steve_quake Striatum scRNAseq	Single
GSM2189781	Neurons	Steve_quake Striatum scRNAseq	Single
GSM2189782	Neurons	Steve_quake Striatum scRNAseq	Single
GSM2189783	Neurons	Steve_quake Striatum scRNAseq	Single
GSM2189784	Neurons	Steve_quake Striatum scRNAseq	Single
GSM2189785	Neurons	Steve_quake Striatum scRNAseq	Single
GSM2189786	Neurons	Steve_quake Striatum scRNAseq	Single
GSM2189787	Neurons	Steve_quake Striatum scRNAseq	Single
GSM2189788	Neurons	Steve_quake Striatum scRNAseq	Single
GSM2189789	Neurons	Steve_quake Striatum scRNAseq	Single
GSM2189790	Neurons	Steve_quake Striatum scRNAseq	Single
GSM2189791	Neurons	Steve_quake Striatum scRNAseq	Single
GSM2189792	Neurons	Steve_quake Striatum scRNAseq	Single
GSM2189793	Neurons	Steve_quake Striatum scRNAseq	Single
GSM2189794	Neurons	Steve_quake Striatum scRNAseq	Single
GSM2189795	Neurons	Steve_quake Striatum scRNAseq	Single
GSM2189796	Neurons	Steve_quake Striatum scRNAseq	Single
GSM2189797	Neurons	Steve_quake Striatum scRNAseq	Single
GSM2189798	Neurons	Steve_quake Striatum scRNAseq	Single
GSM2189799	Neurons	Steve_quake Striatum scRNAseq	Single
GSM2189800	Neurons	Steve_quake Striatum scRNAseq	Single
GSM2189801	Neurons	Steve_quake Striatum scRNAseq	Single
GSM2189802	Neurons	Steve_quake Striatum scRNAseq	Single
GSM2189803	Neurons	Steve_quake Striatum scRNAseq	Single
GSM2189804	Neurons	Steve_quake Striatum scRNAseq	Single
GSM2189805	Neurons	Steve_quake Striatum scRNAseq	Single
GSM2189806	Neurons	Steve_quake Striatum scRNAseq	Single
GSM2189807	Neurons	Steve_quake Striatum scRNAseq	Single
GSM2189808	Neurons	Steve_quake Striatum scRNAseq	Single
GSM2189809	Neurons	Steve_quake Striatum scRNAseq	Single
GSM2189810	Neurons	Steve_quake Striatum scRNAseq	Single
GSM2189811	Neurons	Steve_quake Striatum scRNAseq	Single
GSM2189812	Neurons	Steve_quake Striatum scRNAseq	Single
GSM2189813	Neurons	Steve_quake Striatum scRNAseq	Single
GSM2189814	Neurons	Steve_quake Striatum scRNAseq	Single
GSM2189815	Neurons	Steve_quake Striatum scRNAseq	Single
GSM2189816	Neurons	Steve_quake Striatum scRNAseq	Single
GSM2189817	Neurons	Steve_quake Striatum scRNAseq	Single
GSM2189818	Neurons	Steve_quake Striatum scRNAseq	Single
GSM2189819	Neurons	Steve_quake Striatum scRNAseq	Single
GSM2189820	Neurons	Steve_quake Striatum scRNAseq	Single
GSM2189821	Neurons	Steve_quake Striatum scRNAseq	Single
GSM2189822	Neurons	Steve_quake Striatum scRNAseq	Single
GSM2189823	Neurons	Steve_quake Striatum scRNAseq	Single
GSM2189824	Neurons	Steve_quake Striatum scRNAseq	Single
GSM2189825	Neurons	Steve_quake Striatum scRNAseq	Single
GSM2189826	Neurons	Steve_quake Striatum scRNAseq	Single
GSM2189827	Neurons	Steve_quake Striatum scRNAseq	Single
GSM2189828	Neurons	Steve_quake Striatum scRNAseq	Single
GSM2189829	Neurons	Steve_quake Striatum scRNAseq	Single
GSM2189830	Neurons	Steve_quake Striatum scRNAseq	Single
GSM2189831	Neurons	Steve_quake Striatum scRNAseq	Single
GSM2189832	Neurons	Steve_quake Striatum scRNAseq	Single
GSM2189833	Neurons	Steve_quake Striatum scRNAseq	Single
GSM2189834	Neurons	Steve_quake Striatum scRNAseq	Single
GSM2189835	Neurons	Steve_quake Striatum scRNAseq	Single
GSM2189836	Neurons	Steve_quake Striatum scRNAseq	Single
GSM2189837	Neurons	Steve_quake Striatum scRNAseq	Single
GSM2189838	Neurons	Steve_quake Striatum scRNAseq	Single
GSM2189839	Neurons	Steve_quake Striatum scRNAseq	Single
GSM2189840	Neurons	Steve_quake Striatum scRNAseq	Single
GSM2189841	Neurons	Steve_quake Striatum scRNAseq	Single
GSM2189842	Neurons	Steve_quake Striatum scRNAseq	Single
GSM2189843	Neurons	Steve_quake Striatum scRNAseq	Single
GSM2189844	Neurons	Steve_quake Striatum scRNAseq	Single
GSM2189845	Neurons	Steve_quake Striatum scRNAseq	Single
GSM2189846	Neurons	Steve_quake Striatum scRNAseq	Single
GSM2189847	Neurons	Steve_quake Striatum scRNAseq	Single
GSM2189848	Neurons	Steve_quake Striatum scRNAseq	Single
GSM2189849	Neurons	Steve_quake Striatum scRNAseq	Single
GSM2189850	Neurons	Steve_quake Striatum scRNAseq	Single
GSM2189851	Neurons	Steve_quake Striatum scRNAseq	Single
GSM2189852	Neurons	Steve_quake Striatum scRNAseq	Single
GSM2189853	Neurons	Steve_quake Striatum scRNAseq	Single
GSM2189854	Neurons	Steve_quake Striatum scRNAseq	Single
GSM2189855	Neurons	Steve_quake Striatum scRNAseq	Single
GSM2189856	Neurons	Steve_quake Striatum scRNAseq	Single
GSM2189857	Neurons	Steve_quake Striatum scRNAseq	Single
GSM2189858	Neurons	Steve_quake Striatum scRNAseq	Single
GSM2189859	Neurons	Steve_quake Striatum scRNAseq	Single
GSM2189860	Neurons	Steve_quake Striatum scRNAseq	Single
GSM2189861	Neurons	Steve_quake Striatum scRNAseq	Single
GSM2189862	Neurons	Steve_quake Striatum scRNAseq	Single
GSM2189863	Neurons	Steve_quake Striatum scRNAseq	Single
GSM2189864	Neurons	Steve_quake Striatum scRNAseq	Single
GSM2189865	Neurons	Steve_quake Striatum scRNAseq	Single
GSM2189866	Neurons	Steve_quake Striatum scRNAseq	Single
GSM2189867	Neurons	Steve_quake Striatum scRNAseq	Single
GSM2189868	Neurons	Steve_quake Striatum scRNAseq	Single
GSM2189869	Neurons	Steve_quake Striatum scRNAseq	Single
GSM2189870	Neurons	Steve_quake Striatum scRNAseq	Single
GSM2189871	Neurons	Steve_quake Striatum scRNAseq	Single
GSM2189872	Neurons	Steve_quake Striatum scRNAseq	Single
GSM2189873	Neurons	Steve_quake Striatum scRNAseq	Single
GSM2189874	Neurons	Steve_quake Striatum scRNAseq	Single
GSM2189875	Neurons	Steve_quake Striatum scRNAseq	Single
GSM2189876	Neurons	Steve_quake Striatum scRNAseq	Single
GSM2189877	Neurons	Steve_quake Striatum scRNAseq	Single
GSM2189878	Neurons	Steve_quake Striatum scRNAseq	Single
GSM2189879	Neurons	Steve_quake Striatum scRNAseq	Single
GSM2189880	Neurons	Steve_quake Striatum scRNAseq	Single
GSM2189881	Neurons	Steve_quake Striatum scRNAseq	Single
GSM2189882	Neurons	Steve_quake Striatum scRNAseq	Single
GSM2189883	Neurons	Steve_quake Striatum scRNAseq	Single
GSM2189884	Neurons	Steve_quake Striatum scRNAseq	Single
GSM2189885	Neurons	Steve_quake Striatum scRNAseq	Single
GSM2189886	Neurons	Steve_quake Striatum scRNAseq	Single
GSM2189887	Neurons	Steve_quake Striatum scRNAseq	Single
GSM2189888	Neurons	Steve_quake Striatum scRNAseq	Single
GSM2189889	Neurons	Steve_quake Striatum scRNAseq	Single
GSM2189890	Neurons	Steve_quake Striatum scRNAseq	Single
GSM2189891	Neurons	Steve_quake Striatum scRNAseq	Single
GSM2189892	Neurons	Steve_quake Striatum scRNAseq	Single
GSM2189893	Neurons	Steve_quake Striatum scRNAseq	Single
GSM2189894	Neurons	Steve_quake Striatum scRNAseq	Single
GSM2189895	Neurons	Steve_quake Striatum scRNAseq	Single
GSM2189896	Neurons	Steve_quake Striatum scRNAseq	Single
GSM2189897	Neurons	Steve_quake Striatum scRNAseq	Single
GSM2189898	Neurons	Steve_quake Striatum scRNAseq	Single
GSM2189899	Neurons	Steve_quake Striatum scRNAseq	Single
GSM2189900	Neurons	Steve_quake Striatum scRNAseq	Single
GSM2189901	Neurons	Steve_quake Striatum scRNAseq	Single
GSM2189902	Neurons	Steve_quake Striatum scRNAseq	Single
GSM2189903	Neurons	Steve_quake Striatum scRNAseq	Single
GSM2189904	Neurons	Steve_quake Striatum scRNAseq	Single
GSM2189905	Neurons	Steve_quake Striatum scRNAseq	Single
GSM2189906	Neurons	Steve_quake Striatum scRNAseq	Single
GSM2189907	Neurons	Steve_quake Striatum scRNAseq	Single
GSM2189908	Neurons	Steve_quake Striatum scRNAseq	Single
GSM2189909	Neurons	Steve_quake Striatum scRNAseq	Single
GSM2189910	Neurons	Steve_quake Striatum scRNAseq	Single
GSM2189911	Neurons	Steve_quake Striatum scRNAseq	Single
GSM2189912	Neurons	Steve_quake Striatum scRNAseq	Single
GSM2189913	Neurons	Steve_quake Striatum scRNAseq	Single
GSM2189914	Neurons	Steve_quake Striatum scRNAseq	Single
GSM2189915	Neurons	Steve_quake Striatum scRNAseq	Single
GSM2189916	Neurons	Steve_quake Striatum scRNAseq	Single
GSM2189917	Neurons	Steve_quake Striatum scRNAseq	Single
GSM2189918	Neurons	Steve_quake Striatum scRNAseq	Single
GSM2189919	Neurons	Steve_quake Striatum scRNAseq	Single
GSM2189920	Neurons	Steve_quake Striatum scRNAseq	Single
GSM2189921	Neurons	Steve_quake Striatum scRNAseq	Single
GSM2189922	Neurons	Steve_quake Striatum scRNAseq	Single
GSM2189923	Neurons	Steve_quake Striatum scRNAseq	Single
GSM2189924	Neurons	Steve_quake Striatum scRNAseq	Single
GSM2189925	Neurons	Steve_quake Striatum scRNAseq	Single
GSM2189926	Neurons	Steve_quake Striatum scRNAseq	Single
GSM2189927	Neurons	Steve_quake Striatum scRNAseq	Single
GSM2189928	Neurons	Steve_quake Striatum scRNAseq	Single
GSM2189929	Neurons	Steve_quake Striatum scRNAseq	Single
GSM2189930	Neurons	Steve_quake Striatum scRNAseq	Single
GSM2189931	Neurons	Steve_quake Striatum scRNAseq	Single
GSM2189932	Neurons	Steve_quake Striatum scRNAseq	Single
GSM2189933	Neurons	Steve_quake Striatum scRNAseq	Single
GSM2189934	Neurons	Steve_quake Striatum scRNAseq	Single
GSM2189935	Neurons	Steve_quake Striatum scRNAseq	Single
GSM2189936	Neurons	Steve_quake Striatum scRNAseq	Single
GSM2189937	Neurons	Steve_quake Striatum scRNAseq	Single
GSM2189938	Neurons	Steve_quake Striatum scRNAseq	Single
GSM2189939	Neurons	Steve_quake Striatum scRNAseq	Single
GSM2189940	Neurons	Steve_quake Striatum scRNAseq	Single
GSM2189941	Neurons	Steve_quake Striatum scRNAseq	Single
GSM2189942	Neurons	Steve_quake Striatum scRNAseq	Single
GSM2189943	Neurons	Steve_quake Striatum scRNAseq	Single
GSM2189944	Neurons	Steve_quake Striatum scRNAseq	Single
GSM2189945	Neurons	Steve_quake Striatum scRNAseq	Single
GSM2189946	Neurons	Steve_quake Striatum scRNAseq	Single
GSM2189947	Neurons	Steve_quake Striatum scRNAseq	Single
GSM2189948	Neurons	Steve_quake Striatum scRNAseq	Single
GSM2189949	Neurons	Steve_quake Striatum scRNAseq	Single
GSM2189950	Neurons	Steve_quake Striatum scRNAseq	Single
GSM2189951	Neurons	Steve_quake Striatum scRNAseq	Single
GSM2189952	Neurons	Steve_quake Striatum scRNAseq	Single
GSM2189953	Neurons	Steve_quake Striatum scRNAseq	Single
GSM2189954	Neurons	Steve_quake Striatum scRNAseq	Single
GSM2189955	Neurons	Steve_quake Striatum scRNAseq	Single
GSM2189956	Neurons	Steve_quake Striatum scRNAseq	Single
GSM2189957	Neurons	Steve_quake Striatum scRNAseq	Single
GSM2189958	Neurons	Steve_quake Striatum scRNAseq	Single
GSM2189959	Neurons	Steve_quake Striatum scRNAseq	Single
GSM2189960	Neurons	Steve_quake Striatum scRNAseq	Single
GSM2189961	Neurons	Steve_quake Striatum scRNAseq	Single
GSM2189962	Neurons	Steve_quake Striatum scRNAseq	Single
GSM2189963	Neurons	Steve_quake Striatum scRNAseq	Single
GSM2189964	Neurons	Steve_quake Striatum scRNAseq	Single
GSM2189965	Neurons	Steve_quake Striatum scRNAseq	Single
GSM2189966	Neurons	Steve_quake Striatum scRNAseq	Single
GSM2189967	Neurons	Steve_quake Striatum scRNAseq	Single
GSM2189968	Neurons	Steve_quake Striatum scRNAseq	Single
GSM2189969	Neurons	Steve_quake Striatum scRNAseq	Single
GSM2189970	Neurons	Steve_quake Striatum scRNAseq	Single
GSM2189971	Neurons	Steve_quake Striatum scRNAseq	Single
GSM2189972	Neurons	Steve_quake Striatum scRNAseq	Single
GSM2189973	Neurons	Steve_quake Striatum scRNAseq	Single
GSM2189974	Neurons	Steve_quake Striatum scRNAseq	Single
GSM2189975	Neurons	Steve_quake Striatum scRNAseq	Single
GSM2189976	Neurons	Steve_quake Striatum scRNAseq	Single
GSM2189977	Neurons	Steve_quake Striatum scRNAseq	Single
GSM2189978	Neurons	Steve_quake Striatum scRNAseq	Single
GSM2189979	Neurons	Steve_quake Striatum scRNAseq	Single
GSM2189980	Neurons	Steve_quake Striatum scRNAseq	Single
GSM2189981	Neurons	Steve_quake Striatum scRNAseq	Single
GSM2189982	Neurons	Steve_quake Striatum scRNAseq	Single
GSM2189983	Neurons	Steve_quake Striatum scRNAseq	Single
GSM2189984	Neurons	Steve_quake Striatum scRNAseq	Single
GSM2189985	Neurons	Steve_quake Striatum scRNAseq	Single
GSM2189986	Neurons	Steve_quake Striatum scRNAseq	Single
GSM2189987	Neurons	Steve_quake Striatum scRNAseq	Single
GSM2189988	Neurons	Steve_quake Striatum scRNAseq	Single
GSM2189989	Neurons	Steve_quake Striatum scRNAseq	Single
GSM2189990	Neurons	Steve_quake Striatum scRNAseq	Single
GSM2189991	Neurons	Steve_quake Striatum scRNAseq	Single
GSM2189992	Neurons	Steve_quake Striatum scRNAseq	Single
GSM2189993	Neurons	Steve_quake Striatum scRNAseq	Single
GSM2189994	Neurons	Steve_quake Striatum scRNAseq	Single
GSM2189995	Neurons	Steve_quake Striatum scRNAseq	Single
GSM2189996	Neurons	Steve_quake Striatum scRNAseq	Single
GSM2189997	Neurons	Steve_quake Striatum scRNAseq	Single
GSM2189998	Neurons	Steve_quake Striatum scRNAseq	Single
GSM2189999	Neurons	Steve_quake Striatum scRNAseq	Single
GSM2190000	Neurons	Steve_quake Striatum scRNAseq	Single
GSM2190001	Neurons	Steve_quake Striatum scRNAseq	Single
GSM2190002	Neurons	Steve_quake Striatum scRNAseq	Single
GSM2190003	Neurons	Steve_quake Striatum scRNAseq	Single
GSM2190004	Neurons	Steve_quake Striatum scRNAseq	Single
GSM2190005	Neurons	Steve_quake Striatum scRNAseq	Single
GSM2190006	Neurons	Steve_quake Striatum scRNAseq	Single
GSM2190007	Neurons	Steve_quake Striatum scRNAseq	Single
GSM2190008	Neurons	Steve_quake Striatum scRNAseq	Single
GSM2190009	Neurons	Steve_quake Striatum scRNAseq	Single
GSM2190010	Neurons	Steve_quake Striatum scRNAseq	Single
GSM2190011	Neurons	Steve_quake Striatum scRNAseq	Single
GSM2190012	Neurons	Steve_quake Striatum scRNAseq	Single
GSM2190013	Neurons	Steve_quake Striatum scRNAseq	Single
GSM2190014	Neurons	Steve_quake Striatum scRNAseq	Single
GSM2190015	Neurons	Steve_quake Striatum scRNAseq	Single
GSM2190016	Neurons	Steve_quake Striatum scRNAseq	Single
GSM2190017	Neurons	Steve_quake Striatum scRNAseq	Single
GSM2190018	Neurons	Steve_quake Striatum scRNAseq	Single
GSM2190019	Neurons	Steve_quake Striatum scRNAseq	Single
GSM2190020	Neurons	Steve_quake Striatum scRNAseq	Single
GSM2190021	Neurons	Steve_quake Striatum scRNAseq	Single
GSM2190022	Neurons	Steve_quake Striatum scRNAseq	Single
GSM2190023	Neurons	Steve_quake Striatum scRNAseq	Single
GSM2190024	Neurons	Steve_quake Striatum scRNAseq	Single
GSM2190025	Neurons	Steve_quake Striatum scRNAseq	Single
GSM2190026	Neurons	Steve_quake Striatum scRNAseq	Single
GSM2190027	Neurons	Steve_quake Striatum scRNAseq	Single
GSM2190028	Neurons	Steve_quake Striatum scRNAseq	Single
GSM2190029	Neurons	Steve_quake Striatum scRNAseq	Single
GSM2190030	Neurons	Steve_quake Striatum scRNAseq	Single
GSM2190031	Neurons	Steve_quake Striatum scRNAseq	Single
GSM2190032	Neurons	Steve_quake Striatum scRNAseq	Single
GSM2190033	Neurons	Steve_quake Striatum scRNAseq	Single
GSM2190034	Neurons	Steve_quake Striatum scRNAseq	Single
GSM2190035	Neurons	Steve_quake Striatum scRNAseq	Single
GSM2190036	Neurons	Steve_quake Striatum scRNAseq	Single
GSM2190037	Neurons	Steve_quake Striatum scRNAseq	Single
GSM2190038	Neurons	Steve_quake Striatum scRNAseq	Single
GSM2190039	Neurons	Steve_quake Striatum scRNAseq	Single
GSM2190040	Neurons	Steve_quake Striatum scRNAseq	Single
GSM2190041	Neurons	Steve_quake Striatum scRNAseq	Single
GSM2190042	Neurons	Steve_quake Striatum scRNAseq	Single
GSM2190043	Neurons	Steve_quake Striatum scRNAseq	Single
GSM2190044	Neurons	Steve_quake Striatum scRNAseq	Single
GSM2190045	Neurons	Steve_quake Striatum scRNAseq	Single
GSM2190046	Neurons	Steve_quake Striatum scRNAseq	Single
GSM2190047	Neurons	Steve_quake Striatum scRNAseq	Single
GSM2190048	Neurons	Steve_quake Striatum scRNAseq	Single
GSM2190049	Neurons	Steve_quake Striatum scRNAseq	Single
GSM2190050	Neurons	Steve_quake Striatum scRNAseq	Single
GSM2190051	Neurons	Steve_quake Striatum scRNAseq	Single
GSM2190052	Neurons	Steve_quake Striatum scRNAseq	Single
GSM2190053	Neurons	Steve_quake Striatum scRNAseq	Single
GSM2190054	Neurons	Steve_quake Striatum scRNAseq	Single
GSM2190055	Neurons	Steve_quake Striatum scRNAseq	Single
GSM2190056	Neurons	Steve_quake Striatum scRNAseq	Single
GSM2190057	Neurons	Steve_quake Striatum scRNAseq	Single
GSM2190058	Neurons	Steve_quake Striatum scRNAseq	Single
GSM2190059	Neurons	Steve_quake Striatum scRNAseq	Single
GSM2190060	Neurons	Steve_quake Striatum scRNAseq	Single
GSM2190061	Neurons	Steve_quake Striatum scRNAseq	Single
GSM2190062	Neurons	Steve_quake Striatum scRNAseq	Single
GSM2190063	Neurons	Steve_quake Striatum scRNAseq	Single
GSM2190064	Neurons	Steve_quake Striatum scRNAseq	Single
GSM2190065	Neurons	Steve_quake Striatum scRNAseq	Single
GSM2190066	Neurons	Steve_quake Striatum scRNAseq	Single
GSM2190067	Neurons	Steve_quake Striatum scRNAseq	Single
GSM2190068	Neurons	Steve_quake Striatum scRNAseq	Single
GSM2190069	Neurons	Steve_quake Striatum scRNAseq	Single
GSM2190070	Neurons	Steve_quake Striatum scRNAseq	Single
GSM2190071	Neurons	Steve_quake Striatum scRNAseq	Single
GSM2190072	Neurons	Steve_quake Striatum scRNAseq	Single
GSM2190073	Neurons	Steve_quake Striatum scRNAseq	Single
GSM2190074	Neurons	Steve_quake Striatum scRNAseq	Single
GSM2190075	Neurons	Steve_quake Striatum scRNAseq	Single
GSM2190076	Neurons	Steve_quake Striatum scRNAseq	Single
GSM2190077	Neurons	Steve_quake Striatum scRNAseq	Single
GSM2190078	Neurons	Steve_quake Striatum scRNAseq	Single
GSM2190079	Neurons	Steve_quake Striatum scRNAseq	Single
GSM2190080	Neurons	Steve_quake Striatum scRNAseq	Single
GSM2190081	Neurons	Steve_quake Striatum scRNAseq	Single
GSM2190082	Neurons	Steve_quake Striatum scRNAseq	Single
GSM2190083	Neurons	Steve_quake Striatum scRNAseq	Single
GSM2190084	Neurons	Steve_quake Striatum scRNAseq	Single
GSM2190085	Neurons	Steve_quake Striatum scRNAseq	Single
GSM2190086	Neurons	Steve_quake Striatum scRNAseq	Single
GSM2190087	Neurons	Steve_quake Striatum scRNAseq	Single
GSM2190088	Neurons	Steve_quake Striatum scRNAseq	Single
GSM2190089	Neurons	Steve_quake Striatum scRNAseq	Single
GSM2190090	Neurons	Steve_quake Striatum scRNAseq	Single
GSM2190091	Neurons	Steve_quake Striatum scRNAseq	Single
GSM2190092	Neurons	Steve_quake Striatum scRNAseq	Single
GSM2190093	Neurons	Steve_quake Striatum scRNAseq	Single
GSM2190094	Neurons	Steve_quake Striatum scRNAseq	Single
GSM2190095	Neurons	Steve_quake Striatum scRNAseq	Single
GSM2190096	Neurons	Steve_quake Striatum scRNAseq	Single
GSM2190097	Neurons	Steve_quake Striatum scRNAseq	Single
GSM2190098	Neurons	Steve_quake Striatum scRNAseq	Single
GSM2190099	Neurons	Steve_quake Striatum scRNAseq	Single
GSM2190100	Neurons	Steve_quake Striatum scRNAseq	Single
GSM2190101	Neurons	Steve_quake Striatum scRNAseq	Single
GSM2190102	Neurons	Steve_quake Striatum scRNAseq	Single
GSM2190103	Neurons	Steve_quake Striatum scRNAseq	Single
GSM2190104	Neurons	Steve_quake Striatum scRNAseq	Single
GSM2190105	Neurons	Steve_quake Striatum scRNAseq	Single
GSM2190106	Neurons	Steve_quake Striatum scRNAseq	Single
GSM2190107	Neurons	Steve_quake Striatum scRNAseq	Single
GSM2190108	Neurons	Steve_quake Striatum scRNAseq	Single
GSM2190109	Neurons	Steve_quake Striatum scRNAseq	Single
GSM2190110	Neurons	Steve_quake Striatum scRNAseq	Single
GSM2190111	Neurons	Steve_quake Striatum scRNAseq	Single
GSM2190112	Neurons	Steve_quake Striatum scRNAseq	Single
GSM2190113	Neurons	Steve_quake Striatum scRNAseq	Single
GSM2190114	Neurons	Steve_quake Striatum scRNAseq	Single
GSM2190115	Neurons	Steve_quake Striatum scRNAseq	Single
GSM2190116	Neurons	Steve_quake Striatum scRNAseq	Single
GSM2190117	Neurons	Steve_quake Striatum scRNAseq	Single
GSM2190118	Neurons	Steve_quake Striatum scRNAseq	Single
GSM2190119	Neurons	Steve_quake Striatum scRNAseq	Single
GSM2190120	Neurons	Steve_quake Striatum scRNAseq	Single
GSM2190121	Neurons	Steve_quake Striatum scRNAseq	Single
GSM2190122	Neurons	Steve_quake Striatum scRNAseq	Single
GSM2190123	Neurons	Steve_quake Striatum scRNAseq	Single
GSM2190124	Neurons	Steve_quake Striatum scRNAseq	Single
GSM2190125	Neurons	Steve_quake Striatum scRNAseq	Single
GSM2190126	Neurons	Steve_quake Striatum scRNAseq	Single
GSM2190127	Neurons	Steve_quake Striatum scRNAseq	Single
GSM2190128	Neurons	Steve_quake Striatum scRNAseq	Single
GSM2190129	Neurons	Steve_quake Striatum scRNAseq	Single
GSM2190130	Neurons	Steve_quake Striatum scRNAseq	Single
GSM2190131	Neurons	Steve_quake Striatum scRNAseq	Single
GSM2190132	Neurons	Steve_quake Striatum scRNAseq	Single
GSM2190133	Neurons	Steve_quake Striatum scRNAseq	Single
GSM2190134	Neurons	Steve_quake Striatum scRNAseq	Single
GSM2190135	Neurons	Steve_quake Striatum scRNAseq	Single
GSM2190136	Neurons	Steve_quake Striatum scRNAseq	Single
GSM2190137	Neurons	Steve_quake Striatum scRNAseq	Single
GSM2190138	Neurons	Steve_quake Striatum scRNAseq	Single
GSM2190139	Neurons	Steve_quake Striatum scRNAseq	Single
GSM2190140	Neurons	Steve_quake Striatum scRNAseq	Single
GSM2190141	Neurons	Steve_quake Striatum scRNAseq	Single
GSM2190142	Neurons	Steve_quake Striatum scRNAseq	Single
GSM2190143	Neurons	Steve_quake Striatum scRNAseq	Single
GSM2190144	Neurons	Steve_quake Striatum scRNAseq	Single
GSM2190145	Neurons	Steve_quake Striatum scRNAseq	Single
GSM2190146	Neurons	Steve_quake Striatum scRNAseq	Single
GSM2190147	Neurons	Steve_quake Striatum scRNAseq	Single
GSM2190148	Neurons	Steve_quake Striatum scRNAseq	Single
GSM2190149	Neurons	Steve_quake Striatum scRNAseq	Single
GSM2190150	Neurons	Steve_quake Striatum scRNAseq	Single
GSM2190151	Neurons	Steve_quake Striatum scRNAseq	Single
GSM2190152	Neurons	Steve_quake Striatum scRNAseq	Single
GSM2190153	Neurons	Steve_quake Striatum scRNAseq	Single
GSM2190154	Neurons	Steve_quake Striatum scRNAseq	Single
GSM2190155	Neurons	Steve_quake Striatum scRNAseq	Single
GSM2190156	Neurons	Steve_quake Striatum scRNAseq	Single
GSM2190157	Neurons	Steve_quake Striatum scRNAseq	Single
GSM2190158	Neurons	Steve_quake Striatum scRNAseq	Single
GSM2190159	Neurons	Steve_quake Striatum scRNAseq	Single
GSM2190160	Neurons	Steve_quake Striatum scRNAseq	Single
GSM2190161	Neurons	Steve_quake Striatum scRNAseq	Single
GSM2190162	Neurons	Steve_quake Striatum scRNAseq	Single
GSM2190163	Neurons	Steve_quake Striatum scRNAseq	Single
GSM2190164	Neurons	Steve_quake Striatum scRNAseq	Single
GSM2190165	Neurons	Steve_quake Striatum scRNAseq	Single
GSM2190166	Neurons	Steve_quake Striatum scRNAseq	Single
GSM2190167	Neurons	Steve_quake Striatum scRNAseq	Single
GSM2190168	Neurons	Steve_quake Striatum scRNAseq	Single
GSM2190169	Neurons	Steve_quake Striatum scRNAseq	Single
PRJNA316110 (3m1_cohort1_dermal_fibro)	Fibroblasts	ear fibroblats, culture, 3m	Bulk
PRJNA316110 (3m2_cohort1_dermal_fibro)	Fibroblasts	ear fibroblats, culture, 3m	Bulk
PRJNA316110 (3m3_cohort4_dermal_fibro)	Fibroblasts	ear fibroblats, culture, 3m	Bulk
PRJNA316110 (3m4_cohort1_dermal_fibro)	Fibroblasts	ear fibroblats, culture, 3m	Bulk
PRJNA316110 (3m6_cohort4_dermal_fibro)	Fibroblasts	ear fibroblats, culture, 3m	Bulk
PRJNA316110 (3m7_cohort4_dermal_fibro)	Fibroblasts	ear fibroblats, culture, 3m	Bulk
SRP075993 (CD31_young_C)	Endothelial_cells	Endothelial cell SVZ, 3m	Bulk
SRP075993 (CD31_young_D)	Endothelial_cells	Endothelial cell SVZ, 3m	Bulk
SRP075993 (CD31_young_E)	Endothelial_cells	Endothelial cell SVZ, 3m	Bulk
SRP075993 (CD31_young_F)	Endothelial_cells	Endothelial cell SVZ, 3m	Bulk
SRP075993 (E_young_C)	NPCs	NPCs SVZ in vivo, 3m	Bulk
SRP075993 (E_young_D)	NPCs	NPCs SVZ in vivo, 3m	Bulk
SRP075993 (E_young_E)	NPCs	NPCs SVZ in vivo, 3m	Bulk
SRP075993 (E_young_F)	NPCs	NPCs SVZ in vivo, 3m	Bulk
SRP075993 (G_young_C)	Astrocytes	Astrocytes SVZ, 3m	Bulk
SRP075993 (G_young_D)	Astrocytes	Astrocytes SVZ, 3m	Bulk
SRP075993 (G_young_E)	Astrocytes	Astrocytes SVZ, 3m	Bulk
SRP075993 (G_young_F)	Astrocytes	Astrocytes SVZ, 3m	Bulk
SRP075993 (PG_young_D)	qNSCs	qNSCs SVZ, 3m	Bulk
SRP075993 (PG_young_E)	qNSCs	qNSCs SVZ, 3m	Bulk
SRP075993 (PG_young_F)	qNSCs	qNSCs SVZ, 3m	Bulk
SRP075993 (PGE_young_D)	aNSCs	aNSCs SVZ, 3m	Bulk
SRP075993 (PGE_young_E)	aNSCs	aNSCs SVZ, 3m	Bulk
SRP075993 (PGE_young_F)	aNSCs	aNSCs SVZ, 3m	Bulk
SRR038535	T_cells	C57BL/6,Th1_cells	Bulk
SRR038537	T_cells	C57BL/6,Th2_cells	Bulk
SRR038539	T_cells	C57BL/6,Th17_cells	Bulk
SRR096541	T_cells	C57BL/6,Th17_cells	Bulk
SRR096543	T_cells	C57BL/6,Th1_cells	Bulk
SRR096545	T_cells	C57BL/6,Th2_cells	Bulk
SRR1015749	Fibroblasts	THY1+HE-, control, rep1 Cardiac_fibroblasts	Bulk
SRR1015750	Fibroblasts	THY1+HE-, control, rep2 Cardiac_fibroblasts	Bulk
SRR1015751	Fibroblasts	THY1+HE-, control, rep3 Cardiac_fibroblasts	Bulk
SRR1016945	Neurons	Lumbar segment spinal cord, Ventral horn motor neurons, Postnatal day 1	Bulk
SRR1016946	Neurons	Lumbar segment spinal cord, Ventral horn motor neurons, Postnatal day 1	Bulk
SRR1023831	NK_cells	C57BL/6,Liver_NK1.1plus-CD49plus_NK	Bulk
SRR1023832	NK_cells	C57BL/6,Liver_NK1.1plus-CD49plus_NK	Bulk
SRR1023833	NK_cells	C57BL/6, Liver_NK1.1min-CD49plus_NK	Bulk
SRR1023834	NK_cells	C57BL/6, Liver_NK1.1min-CD49plus_NK	Bulk
SRR1023835	NK_cells	C57BL/6, Liver_NK1.1min-CD49plus_NK	Bulk
SRR1023836	NK_cells	C57BL/6, Spleen_NK1.1min-CD49plus_NK	Bulk
SRR1023837	NK_cells	C57BL/6, Spleen_NK1.1min-CD49plus_NK	Bulk
SRR1023838	NK_cells	C57BL/6, Spleen_NK1.1min-CD49plus_NK	Bulk
SRR1023839	NK_cells	C57BL/6, Spleen_NK1.1min-CD49plus_NK	Bulk
SRR1023840	NK_cells	C57BL/6,Liver_DX5min-CD49plus_NK	Bulk
SRR1023841	NK_cells	C57BL/6,Liver_DX5min-CD49plus_NK	Bulk
SRR1023842	NK_cells	C57BL/6, Liver_DX5plus_NK	Bulk
SRR1023843	NK_cells	C57BL/6, Liver_DX5plus_NK	Bulk
SRR1023844	NK_cells	C57BL/6, Spleen_DX5plus_NK	Bulk
SRR1023845	NK_cells	C57BL/6, Spleen_DX5plus_NK	Bulk
SRR1033783	Astrocytes	P7 Aldh1l1-EGFP transgenic mice of both genders	Bulk
SRR1033784	Astrocytes	P7 Aldh1l1-EGFP transgenic mice of both genders	Bulk
SRR1033785	Neurons	P7 Aldh1l1-EGFP transgenic mice of both genders	Bulk
SRR1033786	Neurons	P7 Aldh1l1-EGFP transgenic mice of both genders	Bulk
SRR1033789	Oligodendrocytes	P7 Aldh1l1-EGFP transgenic mice of both genders, Newly_formed_oligodendrocyte	Bulk
SRR1033790	Oligodendrocytes	P7 Aldh1l1-EGFP transgenic mice of both genders, Newly_formed_oligodendrocyte	Bulk
SRR1033791	Oligodendrocytes	P7 Aldh1l1-EGFP transgenic mice of both genders, Myelinating_oligodendrocyte	Bulk
SRR1033792	Oligodendrocytes	P7 Aldh1l1-EGFP transgenic mice of both genders, Myelinating_oligodendrocyte	Bulk
SRR1033793	Microglia	P7 Aldh1l1-EGFP transgenic mice of both genders	Bulk
SRR1033794	Microglia	P7 Aldh1l1-EGFP transgenic mice of both genders	Bulk
SRR1033795	Endothelial_cells	P7 Aldh1l1-EGFP transgenic mice of both genders	Bulk
SRR1033796	Endothelial_cells	P7 Aldh1l1-EGFP transgenic mice of both genders	Bulk
SRR1068302	Microglia	LCM_GFP-S1-22689-1, Microglia	Bulk
SRR1068303	Microglia	LCM_GFP-S2-22835-3, Microglia	Bulk
SRR1068304	Microglia	LCM_GFP-S3-22690-2, Microglia	Bulk
SRR1068305	Microglia	LCM_GFP-S4-22691-8, Microglia	Bulk
SRR1068306	Microglia	FACS_WT-S5-1135739, Microglia	Bulk
SRR1068308	Microglia	FACS_WT-S6--1135740, Microglia	Bulk
SRR1068310	Microglia	FACS_WT-S7-1135741, Microglia	Bulk
SRR1068312	Microglia	FACS_GFP-S8-1135742, Microglia	Bulk
SRR1068313	Microglia	FACS_GFP-S9-1135743, Microglia	Bulk
SRR1068314	Microglia	FACS_GFP-S10-1135744, Microglia	Bulk
SRR1171332	Granulocytes	141 Srf WT, Mature Gr1 high, 7/4 high, SSC high neutrophils	Bulk
SRR1171333	Granulocytes	142 Srf WT, Mature Gr1 high, 7/4 high, SSC high neutrophils	Bulk
SRR1184581	Granulocytes	2276_1_WT_1 GSE55633 Neutrophils	Bulk
SRR1184582	Granulocytes	2276_2_WT_2 GSE55633 Neutrophils	Bulk
SRR1184583	Granulocytes	2276_3_WT_3 GSE55633 Neutrophils	Bulk
SRR1184584	Granulocytes	2276_5_WT_5 GSE55633 Neutrophils	Bulk
SRR1233039	Cardiomyocytes	CD-1, Cardiomyocyte E 14.5	Single
SRR1233040	Cardiomyocytes	CD-1, Cardiomyocyte E 14.5	Single
SRR1233041	Cardiomyocytes	CD-1, Cardiomyocyte E 14.5	Single
SRR1233042	Cardiomyocytes	CD-1, Cardiomyocyte E 14.5	Single
SRR1233043	Cardiomyocytes	CD-1, Cardiomyocyte E 14.5	Single
SRR1233044	Cardiomyocytes	CD-1, Cardiomyocyte E 14.5	Single
SRR1233045	Cardiomyocytes	CD-1, Cardiomyocyte E 14.5	Single
SRR1233046	Cardiomyocytes	CD-1, Cardiomyocyte E 14.5	Single
SRR1233047	Cardiomyocytes	CD-1, Cardiomyocyte E 14.5	Single
SRR1233048	Cardiomyocytes	CD-1, Cardiomyocyte E 14.5	Single
SRR1233049	Cardiomyocytes	CD-1, Cardiomyocyte E 14.5	Single
SRR1233050	Cardiomyocytes	CD-1, Cardiomyocyte E 14.5	Single
SRR1233051	Cardiomyocytes	CD-1, Cardiomyocyte E 14.5	Single
SRR1233052	Cardiomyocytes	CD-1, Cardiomyocyte E 14.5	Single
SRR1233053	Cardiomyocytes	CD-1, Cardiomyocyte E 14.5	Single
SRR1233054	Cardiomyocytes	CD-1, Cardiomyocyte E 14.5	Single
SRR1233055	Cardiomyocytes	CD-1, Cardiomyocyte E 14.5	Single
SRR1233056	Cardiomyocytes	CD-1, Cardiomyocyte E 14.5	Single
SRR1233057	Cardiomyocytes	CD-1, Cardiomyocyte E 14.5	Single
SRR1233058	Neurons	C57BL/6, Cortex Pyramidal neuron E18	Single
SRR1233059	Neurons	C57BL/6, Cortex Pyramidal neuron E18	Single
SRR1233060	Neurons	C57BL/6, Cortex Pyramidal neuron E18	Single
SRR1233061	Neurons	C57BL/6, Cortex Pyramidal neuron E18	Single
SRR1233062	Neurons	C57BL/6, Cortex Pyramidal neuron E18	Single
SRR1233063	Neurons	C57BL/6, Cortex Pyramidal neuron E18	Single
SRR1233064	Neurons	C57BL/6, Cortex Pyramidal neuron E18	Single
SRR1233065	Neurons	C57BL/6, Cortex Pyramidal neuron E18	Single
SRR1233066	Neurons	C57BL/6, Cortex Pyramidal neuron E18	Single
SRR1233067	Neurons	C57BL/6, Cortex Pyramidal neuron E18	Single
SRR1233068	Neurons	C57BL/6, Cortex Pyramidal neuron E18	Single
SRR1233069	Neurons	C57BL/6, Cortex Pyramidal neuron E18	Single
SRR1233070	Neurons	C57BL/6, Cortex Pyramidal neuron E18	Single
SRR1233071	Neurons	C57BL/6, Cortex Pyramidal neuron E18	Single
SRR1233072	Neurons	C57BL/6, Cortex Pyramidal neuron E18	Single
SRR1233073	Neurons	C57BL/6, Cortex Pyramidal neuron E18	Single
SRR1233074	Neurons	C57BL/6, Cortex Pyramidal neuron E18	Single
SRR1233075	Neurons	C57BL/6, Cortex Pyramidal neuron E18	Single
SRR1233076	Neurons	C57BL/6, Cortex Pyramidal neuron E18	Single
SRR1233077	Neurons	e-PET-YFP, Dorsal Raphe; 5-HT neuron post natal 60	Single
SRR1233078	Neurons	e-PET-YFP, Dorsal Raphe; 5-HT neuron post natal 60	Single
SRR1233079	Neurons	e-PET-YFP, Dorsal Raphe; 5-HT neuron post natal 60	Single
SRR1233080	Neurons	e-PET-YFP, Dorsal Raphe; 5-HT neuron post natal 60	Single
SRR1233081	Neurons	e-PET-YFP, Dorsal Raphe; 5-HT neuron post natal 60	Single
SRR1233082	Neurons	e-PET-YFP, Dorsal Raphe; 5-HT neuron post natal 60	Single
SRR1233083	Neurons	e-PET-YFP, Dorsal Raphe; 5-HT neuron post natal 60	Single
SRR1233084	Neurons	e-PET-YFP, Dorsal Raphe; 5-HT neuron post natal 60	Single
SRR1233085	Neurons	e-PET-YFP, Dorsal Raphe; 5-HT neuron post natal 60	Single
SRR1233086	Neurons	e-PET-YFP, Dorsal Raphe; 5-HT neuron post natal 60	Single
SRR1233087	Neurons	e-PET-YFP, Dorsal Raphe; 5-HT neuron post natal 60	Single
SRR1233088	Neurons	e-PET-YFP, Dorsal Raphe; 5-HT neuron post natal 60	Single
SRR1233089	Neurons	e-PET-YFP, Dorsal Raphe; 5-HT neuron post natal 60	Single
SRR1233090	Neurons	e-PET-YFP, Dorsal Raphe; 5-HT neuron post natal 60	Single
SRR1233091	Neurons	e-PET-YFP, Dorsal Raphe; 5-HT neuron post natal 60	Single
SRR1233092	Neurons	e-PET-YFP, Dorsal Raphe; 5-HT neuron post natal 60	Single
SRR1233093	Neurons	e-PET-YFP, Dorsal Raphe; 5-HT neuron post natal 60	Single
SRR1233094	Neurons	e-PET-YFP, Dorsal Raphe; 5-HT neuron post natal 60	Single
SRR1233095	Neurons	e-PET-YFP, Dorsal Raphe; 5-HT neuron post natal 60	Single
SRR1233096	Neurons	e-PET-YFP, Dorsal Raphe; 5-HT neuron post natal 60	Single
SRR1233097	Neurons	e-PET-YFP, Dorsal Raphe; 5-HT neuron post natal 60	Single
SRR1233098	Neurons	e-PET-YFP, Dorsal Raphe; 5-HT neuron post natal 60	Single
SRR1233099	Neurons	C57BL/6, Hippocampus pyramidal neuron E18	Single
SRR1233100	Neurons	C57BL/6, Hippocampus pyramidal neuron E18	Single
SRR1233101	Neurons	C57BL/6, Hippocampus pyramidal neuron E18	Single
SRR1233102	Neurons	C57BL/6, Hippocampus pyramidal neuron E18	Single
SRR1233103	Neurons	C57BL/6, Hippocampus pyramidal neuron E18	Single
SRR1233104	Neurons	C57BL/6, Hippocampus pyramidal neuron E18	Single
SRR1233105	Neurons	C57BL/6, Hippocampus pyramidal neuron E18	Single
SRR1233106	Neurons	C57BL/6, Hippocampus pyramidal neuron E18	Single
SRR1233107	Neurons	C57BL/6, Hippocampus pyramidal neuron E18	Single
SRR1233108	Neurons	C57BL/6, Hippocampus pyramidal neuron E18	Single
SRR1233109	Neurons	C57BL/6, Hippocampus pyramidal neuron E18	Single
SRR1233110	Neurons	C57BL/6, Hippocampus pyramidal neuron E18	Single
SRR1233111	Neurons	C57BL/6, Hippocampus pyramidal neuron E18	Single
SRR1233112	Neurons	C57BL/6, Hippocampus pyramidal neuron E18	Single
SRR1233113	Neurons	C57BL/6, Hippocampus pyramidal neuron E18	Single
SRR1233114	Neurons	C57BL/6, Hippocampus pyramidal neuron E18	Single
SRR1233115	Neurons	C57BL/6, Hippocampus pyramidal neuron E18	Single
SRR1233116	Neurons	C57BL/6, Hippocampus pyramidal neuron E18	Single
SRR1286091	Hepatocytes	Primary mouse hepatocyte	Bulk
SRR1390711	Cardiomyocytes	FVB/NJ, 12 weeks,female,tissue: heart	Bulk
SRR1390712	Cardiomyocytes	FVB/NJ, 12 weeks,female,tissue: heart	Bulk
SRR1390713	Cardiomyocytes	FVB/NJ, 12 weeks,female,tissue: heart	Bulk
SRR1390714	Fibroblasts	FVB/NJ, 12 weeks,female,tissue: heart Cardiac_fibroblasts	Bulk
SRR1390715	Fibroblasts	FVB/NJ, 12 weeks,female,tissue: heart Cardiac_fibroblasts	Bulk
SRR1390716	Fibroblasts	FVB/NJ, 12 weeks,female,tissue: heart Cardiac_fibroblasts	Bulk
SRR1536397	Macrophages	C57BL/6,12 to 15 weeks-old mice, 3' RNA-seq, Bone_marrow_derived_macrophages	Bulk
SRR1536398	Macrophages	C57BL/6,12 to 15 weeks-old mice, 3' RNA-seq, Bone_marrow_derived_macrophages	Bulk
SRR1536399	Macrophages	C57BL/6,12 to 15 weeks-old mice, 3' RNA-seq, Bone_marrow_derived_macrophages	Bulk
SRR1536400	Macrophages	C57BL/6,12 to 15 weeks-old mice, 3' RNA-seq, Bone_marrow_derived_macrophages	Bulk
SRR1536401	Granulocytes	C57BL/6,12 to 15 weeks-old mice, 3' RNA-seq	Bulk
SRR1536402	Granulocytes	C57BL/6,12 to 15 weeks-old mice, 3' RNA-seq	Bulk
SRR1536403	Granulocytes	C57BL/6,12 to 15 weeks-old mice, 3' RNA-seq	Bulk
SRR1536404	Granulocytes	C57BL/6,12 to 15 weeks-old mice, 3' RNA-seq	Bulk
SRR1536405	Granulocytes	C57BL/6,12 to 15 weeks-old mice, 3' RNA-seq	Bulk
SRR1536406	Granulocytes	C57BL/6,12 to 15 weeks-old mice, 3' RNA-seq	Bulk
SRR1536407	Monocytes	C57BL/6,12 to 15 weeks-old mice, 3' RNA-seq	Bulk
SRR1536408	Monocytes	C57BL/6,12 to 15 weeks-old mice, 3' RNA-seq	Bulk
SRR1536409	Monocytes	C57BL/6,12 to 15 weeks-old mice, 3' RNA-seq	Bulk
SRR1536410	Monocytes	C57BL/6,12 to 15 weeks-old mice, 3' RNA-seq	Bulk
SRR1536411	B_cells	C57BL/6,12 to 15 weeks-old mice, 3' RNA-seq	Bulk
SRR1536412	B_cells	C57BL/6,12 to 15 weeks-old mice, 3' RNA-seq	Bulk
SRR1536413	T_cells	C57BL/6,12 to 15 weeks-old mice, 3' RNA-seq, CD4+	Bulk
SRR1536414	T_cells	C57BL/6,12 to 15 weeks-old mice, 3' RNA-seq, CD4+	Bulk
SRR1536415	T_cells	C57BL/6,12 to 15 weeks-old mice, 3' RNA-seq, CD4+	Bulk
SRR1536416	T_cells	C57BL/6,12 to 15 weeks-old mice, 3' RNA-seq, CD4+	Bulk
SRR1536417	T_cells	C57BL/6,12 to 15 weeks-old mice, 3' RNA-seq, CD8+	Bulk
SRR1536418	T_cells	C57BL/6,12 to 15 weeks-old mice, 3' RNA-seq, CD8+	Bulk
SRR1536419	T_cells	C57BL/6,12 to 15 weeks-old mice, 3' RNA-seq, CD8+	Bulk
SRR1536420	T_cells	C57BL/6,12 to 15 weeks-old mice, 3' RNA-seq, CD8+	Bulk
SRR1536421	NK_cells	C57BL/6,12 to 15 weeks-old mice, 3' RNA-seq	Bulk
SRR1536422	NK_cells	C57BL/6,12 to 15 weeks-old mice, 3' RNA-seq	Bulk
SRR1536427	Erythrocytes	C57BL/6,12 to 15 weeks-old mice, 3' RNA-seq	Bulk
SRR1536428	Erythrocytes	C57BL/6,12 to 15 weeks-old mice, 3' RNA-seq	Bulk
SRR1536429	Erythrocytes	C57BL/6,12 to 15 weeks-old mice, 3' RNA-seq	Bulk
SRR1557080	Neurons	d7, immature, cerebellar cortical neurons	Bulk
SRR1557081	Neurons	d7, immature, cerebellar cortical neurons	Bulk
SRR1557082	Neurons	d7, immature, cerebellar cortical neurons	Bulk
SRR1561641	B_cells	C57BL/6, Ex vivo, Follicular_B_cells	Bulk
SRR1561642	B_cells	C57BL/6, Ex vivo, Follicular_B_cells	Bulk
SRR1561646	B_cells	C57BL/6, Ex vivo, Germinal_center_B_cells	Bulk
SRR1561647	B_cells	C57BL/6, Ex vivo, Germinal_center_B_cells	Bulk
SRR1561648	B_cells	C57BL/6, Ex vivo, Germinal_center_B_cells	Bulk
SRR1631762	Endothelial_cells	1_KT+VECs_rep1, vascular endothelial cells	Bulk
SRR1631763	Endothelial_cells	2_KT+VECs_rep2, vascular endothelial cells	Bulk
SRR1631764	Endothelial_cells	3_KT+VECs_rep3, vascular endothelial cells	Bulk
SRR1631765	Endothelial_cells	4_KT-VECs_rep1, vascular endothelial cells	Bulk
SRR1631766	Endothelial_cells	5_KT-VECs_rep2, vascular endothelial cells	Bulk
SRR1631767	Endothelial_cells	6_KT-VECs_rep3, vascular endothelial cells	Bulk
SRR1634672	Microglia	NOD/ShiLtJ, RNA-Seq	Bulk
SRR1634673	Microglia	SPRET/EiJ, RNA-Seq	Bulk
SRR1634674	Macrophages	C57BL6/J, RNA-Seq, Bone_marrow_derived_macrophages	Bulk
SRR1634675	Macrophages	C57BL6/J, Ribozero RNA-Seq, Peritoneal_macrophages	Bulk
SRR1634676	Macrophages	C57BL6/J, Ribozero RNA-Seq, Small_peritoneal_macrophages	Bulk
SRR1634677	Microglia	C57BL6/J, Ribozero RNA-Seq	Bulk
SRR1634678	Macrophages	C57BL6/J, RNA-Seq, peritoneal_thioglycolate-elicited_macrophages	Bulk
SRR1634708	Macrophages	C57BL6/J, polyA RNA-Seq, Bone_marrow_derived_macrophages	Bulk
SRR1634709	Macrophages	C57BL6/J, polyA RNA-Seq, Peritoneal_macrophages	Bulk
SRR1634710	Macrophages	C57BL6/J, polyA RNA-Seq, Small_peritoneal_macrophages	Bulk
SRR1634711	Microglia	C57BL6/J, polyA RNA-Seq	Bulk
SRR1634712	Macrophages	C57BL6/J, polyA RNA-Seq, peritoneal_thioglycolate-elicited_macrophages	Bulk
SRR1634721	Microglia	C57BL6/J, RNA-Seq	Bulk
SRR1634740	Macrophages	NOD/ShiLtJ, RNA-Seq , Peritoneal_macrophages	Bulk
SRR1634741	Macrophages	SPRET/EiJ, RNA-Seq , Peritoneal_macrophages	Bulk
SRR1647854	Neurons	C57BL6J/129, 8-11 weeks, excitatory_pyramidal_neurons	Bulk
SRR1647855	Neurons	C57BL6J/129, 8-11 weeks, excitatory_pyramidal_neurons	Bulk
SRR1647856	Neurons	C57BL6J/129, 8-11 weeks, Parvalbumin_inhibitory_neurons	Bulk
SRR1647857	Neurons	C57BL6J/129, 8-11 weeks, Parvalbumin_inhibitory_neurons	Bulk
SRR1647858	Neurons	C57BL6J/129, 8-11 weeks, Vasoactive_intestinal_peptide_inhibitory_neurons	Bulk
SRR1647859	Neurons	C57BL6J/129, 8-11 weeks, Vasoactive_intestinal_peptide_inhibitory_neurons	Bulk
SRR1653925	Granulocytes	b05_Neutrophil1_Exp2 Neutrophils	Bulk
SRR1653926	Granulocytes	b07_Neutrophil3_Exp2 Neutrophils	Bulk
SRR1653927	Monocytes	b10_Monocyte1_Exp2	Bulk
SRR1653928	Monocytes	b11_Monocyte2_Exp2	Bulk
SRR1653929	Microglia	a01_brain_microglia1_Exp1_m	Bulk
SRR1653930	Microglia	a01_brain_microglia1_Exp1_m	Bulk
SRR1653931	Microglia	a02_brain_microglia2_Exp1_m	Bulk
SRR1653932	Microglia	a02_brain_microglia2_Exp1_m	Bulk
SRR1653933	Macrophages	a06_peritoneum_Mac1_Exp1_m, Peritoneal_macrophages	Bulk
SRR1653934	Macrophages	a06_peritoneum_Mac1_Exp1_m, Peritoneal_macrophages	Bulk
SRR1653935	Macrophages	a07_peritoneum_Mac2_Exp1_m, Peritoneal_macrophages	Bulk
SRR1653936	Macrophages	a07_peritoneum_Mac2_Exp1_m, Peritoneal_macrophages	Bulk
SRR1653939	Macrophages	b04_Kupffer_Exp2, liver	Bulk
SRR1653940	Macrophages	b15_Kupffer2_Exp2, liver	Bulk
SRR1769848	Hepatocytes	C57BL/6,1-2 months	Bulk
SRR1769856	Hepatocytes	C57BL/6,1-2 months	Bulk
SRR1810040	Oligodendrocytes	P18 brain oligodendrocytes_RNASeq_n1	Bulk
SRR1810041	Oligodendrocytes	P18 brain oligodendrocytes_RNASeq_n2	Bulk
SRR1810042	Oligodendrocytes	P18 brain oligodendrocytes_RNASeq_n3	Bulk
SRR1873549	Adipocytes	gonadal white adipose tissue, male	Bulk
SRR1873550	Adipocytes	gonadal white adipose tissue, male	Bulk
SRR1873551	Adipocytes	gonadal white adipose tissue, male	Bulk
SRR1873552	Adipocytes	gonadal white adipose tissue, male	Bulk
SRR1976571	Granulocytes	ImmGen RNAseq Neutrophils	Bulk
SRR1976588	B_cells	ImmGen RNAseq, B1ab_cells	Bulk
SRR1976589	NK_cells	ImmGen RNAseq	Bulk
SRR1976590	T_cells	ImmGen RNAseq,Treg_cells	Bulk
SRR1976591	T_cells	ImmGen RNAseq, CD4+	Bulk
SRR1976592	T_cells	ImmGen RNAseq, CD8+	Bulk
SRR1976593	B_cells	ImmGen RNAseq, CD19+_B_cell	Bulk
SRR1976594	T_cells	ImmGen RNAseq,TRCgd	Bulk
SRR1976597	Macrophages	ImmGen RNAseq, Peritoneal_macrophages	Bulk
SRR1997853	aNSCs	NSCs hippocampus; LPA1-GFP+EGFR+Prominin1+, rep1	Bulk
SRR1997854	aNSCs	NSCs hippocampus; LPA1-GFP+EGFR+Prominin1+, rep2	Bulk
SRR1997855	aNSCs	NSCs hippocampus; LPA1-GFP+EGFR+Prominin1+, rep3	Bulk
SRR1997856	aNSCs	NSCs hippocampus; LPA1-GFP+EGFR+Prominin1+, rep4	Bulk
SRR1997857	NPCs	NPCs hippocampus in vivo, LPA1-GFP+EGFR+Prominin-1-, LPA1-GFP+EGF-Prominin-1+ and LPA1-GFP+EGFR-Prominin-1-, rep1	Bulk
SRR1997858	NPCs	NPCs hippocampus in vivo, LPA1-GFP+EGFR+Prominin-1-, LPA1-GFP+EGF-Prominin-1+ and LPA1-GFP+EGFR-Prominin-1-, rep2	Bulk
SRR1997859	NPCs	NPCs hippocampus in vivo, LPA1-GFP+EGFR+Prominin-1-, LPA1-GFP+EGF-Prominin-1+ and LPA1-GFP+EGFR-Prominin-1-, rep3	Bulk
SRR1997860	NPCs	NPCs hippocampus in vivo, LPA1-GFP+EGFR+Prominin-1-, LPA1-GFP+EGF-Prominin-1+ and LPA1-GFP+EGFR-Prominin-1-, rep4	Bulk
SRR2006897	Cardiomyocytes	isolated adult mouse ventricular cardiomyocytes, CM_1	Bulk
SRR2006898	Cardiomyocytes	isolated adult mouse ventricular cardiomyocytes, CM_1	Bulk
SRR2006899	Cardiomyocytes	isolated adult mouse ventricular cardiomyocytes, CM_2	Bulk
SRR2006900	Cardiomyocytes	isolated adult mouse ventricular cardiomyocytes, CM_2	Bulk
SRR2006901	Cardiomyocytes	isolated adult mouse ventricular cardiomyocytes, CM_3	Bulk
SRR2006902	Cardiomyocytes	isolated adult mouse ventricular cardiomyocytes, CM_3	Bulk
SRR2017482	Hepatocytes	C57BL/6, post natal day 63, Axin2- mature hepatocytes	Bulk
SRR2017483	Hepatocytes	C57BL/6, post natal day 63, Axin2- mature hepatocytes	Bulk
SRR2017484	Hepatocytes	C57BL/6, post natal day 63, Axin2- mature hepatocytes	Bulk
SRR2040945	Hepatocytes	Primary mouse hepatocytes, gene expression profiling (RNA-seq, mRNA), 19h control treatment, biological replicate 1	Bulk
SRR2040946	Hepatocytes	Primary mouse hepatocytes, gene expression profiling (RNA-seq, mRNA), 19h control treatment, biological replicate 2	Bulk
SRR2040947	Hepatocytes	Primary mouse hepatocytes, gene expression profiling (RNA-seq, mRNA), 19h control treatment, biological replicate 3	Bulk
SRR2443105	Fibroblasts	GSM1888151_Bone_SCA1p_1	Bulk
SRR2443106	Fibroblasts	GSM1888151_Bone_SCA1p_1	Bulk
SRR2443107	Fibroblasts	GSM1888151_Bone_SCA1p_1	Bulk
SRR2443108	Fibroblasts	GSM1888152_Bone_SCA1p_2	Bulk
SRR2443109	Fibroblasts	GSM1888152_Bone_SCA1p_2	Bulk
SRR2443110	Fibroblasts	GSM1888152_Bone_SCA1p_2	Bulk
SRR2443111	Fibroblasts	GSM1888153_Bone_SCA1p_3	Bulk
SRR2443112	Fibroblasts	GSM1888153_Bone_SCA1p_3	Bulk
SRR2443113	Fibroblasts	GSM1888153_Bone_SCA1p_3	Bulk
SRR2443114	Fibroblasts	GSM1888154_Skin_SCA1p_1	Bulk
SRR2443115	Fibroblasts	GSM1888154_Skin_SCA1p_1	Bulk
SRR2443116	Fibroblasts	GSM1888154_Skin_SCA1p_1	Bulk
SRR2443117	Fibroblasts	GSM1888154_Skin_SCA1p_1	Bulk
SRR2443118	Fibroblasts	GSM1888154_Skin_SCA1p_1	Bulk
SRR2443119	Fibroblasts	GSM1888155_Skin_SCA1p_2	Bulk
SRR2443120	Fibroblasts	GSM1888155_Skin_SCA1p_2	Bulk
SRR2443121	Fibroblasts	GSM1888155_Skin_SCA1p_2	Bulk
SRR2443122	Fibroblasts	GSM1888156_Skin_SCA1p_3	Bulk
SRR2443123	Fibroblasts	GSM1888156_Skin_SCA1p_3	Bulk
SRR2443124	Fibroblasts	GSM1888156_Skin_SCA1p_3	Bulk
SRR2443125	Fibroblasts	GSM1888156_Skin_SCA1p_3	Bulk
SRR2443126	Fibroblasts	GSM1888156_Skin_SCA1p_3	Bulk
SRR2443127	Fibroblasts	GSM1888157_Thymus_SCA1p_2	Bulk
SRR2443128	Fibroblasts	GSM1888157_Thymus_SCA1p_2	Bulk
SRR2443129	Fibroblasts	GSM1888157_Thymus_SCA1p_2	Bulk
SRR2443130	Fibroblasts	GSM1888158_Thymus_SCA1p_3	Bulk
SRR2443131	Fibroblasts	GSM1888158_Thymus_SCA1p_3	Bulk
SRR2443132	Fibroblasts	GSM1888158_Thymus_SCA1p_3	Bulk
SRR2443133	Fibroblasts	GSM1888159_Thymus_SCA1p_1-3	Bulk
SRR2443134	Fibroblasts	GSM1888159_Thymus_SCA1p_1-3	Bulk
SRR2557110	Astrocytes	Mouse 4 month astro SRR2557110	Bulk
SRR2557111	Astrocytes	Mouse 7 month astro SRR2557111	Bulk
SRR2557112	Astrocytes	Mouse 9 month astro SRR2557112	Bulk
SRR275529	Adipocytes	cultured White_adipocytes	Bulk
SRR275532	Adipocytes	cultured brown adipocyte	Bulk
SRR275533	Adipocytes	primary White_adipocytes	Bulk
SRR275534	Adipocytes	primary brown adipocyte	Bulk
SRR278172	Adipocytes	cultured brown adipocyte	Bulk
SRR2961933	Neurons	Female 13months	Bulk
SRR2961935	Microglia	Female 13months	Bulk
SRR2961938	Astrocytes	Female 7months	Bulk
SRR2961941	Neurons	Male 13months	Bulk
SRR2961945	Microglia	Female 7months	Bulk
SRR2961946	Astrocytes	Female 13months	Bulk
SRR2961948	Astrocytes	Female 13months	Bulk
SRR2961949	Neurons	Female 7months	Bulk
SRR2961950	Microglia	Female 13months	Bulk
SRR2961952	Astrocytes	Female 7months	Bulk
SRR2961954	Neurons	Female 7months	Bulk
SRR2961955	Astrocytes	Female 7months	Bulk
SRR2961956	Neurons	Female 7months	Bulk
SRR2961959	Microglia	Female 7months	Bulk
SRR2961965	Astrocytes	Female 13months	Bulk
SRR2961967	Microglia	Male 13months	Bulk
SRR2961968	Astrocytes	Female 13months	Bulk
SRR2961969	Neurons	Female 13months	Bulk
SRR2961971	Astrocytes	Male 13months	Bulk
SRR2961972	Neurons	Female 13months	Bulk
SRR2961973	Astrocytes	Female 7months	Bulk
SRR2961974	Neurons	Female 7months	Bulk
SRR2961975	Microglia	Female 13months	Bulk
SRR2961978	Microglia	Female 7months	Bulk
SRR2961982	Microglia	Female 13months	Bulk
SRR2961983	Neurons	Female 7months	Bulk
SRR2961984	Neurons	Female 7months	Bulk
SRR2961985	Astrocytes	Female 7months	Bulk
SRR2961986	Microglia	Female 7months	Bulk
SRR2961987	Microglia	Female 7months	Bulk
SRR2961988	Neurons	Female 13months	Bulk
SRR2961991	Neurons	Female 7months	Bulk
SRR496223	Macrophages	8 weeks, Bone_marrow_derived_macrophages	Bulk
SRR496224	Macrophages	8 weeks, Bone_marrow_derived_macrophages	Bulk
SRR964795	Fibroblasts	PN60, adult Cardiac_fibroblasts	Bulk
SRR964796	Fibroblasts	PN28 Cardiac_fibroblasts	Bulk
SRR964799	Cardiomyocytes	PN67, adult	Bulk
SRR964800	Cardiomyocytes	PN30	Bulk
SRR972459	NPCs	NPCs SVZ in vitro, 3m	Bulk
SRR972720	NPCs	NPCs SVZ in vitro, 3m	Bulk
SRR972721	NPCs	NPCs SVZ in vitro, 3m	Bulk
SRR972723	NPCs	NPCs SVZ in vitro, 3m	Bulk

## Sheet: C
Accession	Title	Ages	Sex	Strain	Replicates	PMID
SRP053350	Liver RNA-seq	4 vs. 28months	M	Balb/C	N=3	25858675; 26541291
SRP042091	Liver RNA-seq	3 vs. 21 months	M	C57BL6/N	N=3-4	25437555
SRP108790	Ribotag Astrocytes/Cerebellum	4 vs. 24 months	M	B6N.129; flox-Rpl22-HA	N = 3-4	29298427
