# Supplementary material for: Remodeling of epigenome and transcriptome landscapes with aging in mice reveals widespread induction of inflammatory responses
Source: HighWire-hosted journal article supplement (doi:10.1101/gr.240093.118), 2019-03-11
Supplement: Supplemental_Table_S3.xlsx [file Supplemental_Table_S3.xlsx]

## Sheet: Index
Supplemental Table S3
	A	Class sizes across tissues for models
	B	Performance metrics for machine learning models on test sets
Please note that NSCs were not included in the models because there were no significant genes changing with aging.

## Sheet: A
	Class sizes for machine learning
Tissue	"Up" genes	"Down" genes	"Constant" genes
Heart	158	70	3288
Liver	302	128	3702
Cerebellum	321	312	4558
OB	97	45	4326

## Sheet: B
			Heart					Liver					Cerebellum					Olfactory bulb								Average accuracy	Average Specificity	Average Sensitivity	Average Precision	Average AUC (2-class)
			Balanced accuracy	Specificity	Sensitivity / Recall	Precision / PPV	AUC (2-class)	Balanced accuracy	Specificity	Sensitivity / Recall	Precision / PPV	AUC (2-class)	Balanced accuracy	Specificity	Sensitivity / Recall	Precision / PPV	AUC (2-class)	Balanced accuracy	Specificity	Sensitivity / Recall	Precision / PPV	AUC (2-class)
Machine-learning on transcriptional aging (Dynamic and static features)	SVM	3-class	0.641133	0.782739	0.499527	0.40731		0.736662	0.836525	0.636799	0.543452		0.640155	0.760474	0.519837	0.45432		0.658082	0.797111	0.519052	0.363652			SVM	3-class	0.669008	0.794212	0.543804	0.442184
		2-class	0.611204	0.961538	0.26087	0.75	0.821906	0.814935	0.939394	0.690476	0.828571	0.934223	0.691176	0.66667	0.715686	0.675926	0.753688	0.738839	0.90625	0.571429	0.727273	0.881696			2-class	0.714039	0.868463	0.559615	0.745443	0.847879
	NNET	3-class	0.60086	0.749132	0.452588	0.420037		0.710602	0.815546	0.605658	0.546541		0.658583	0.776093	0.541072	0.486635		0.705659	0.824948	0.586371	0.401672			NNET	3-class	0.668926	0.79143	0.546422	0.463721
		2-class	0.763796	0.788462	0.73913	0.607143	0.851171	0.83189	0.949495	0.714286	0.857143	0.946128	0.701261	0.647619	0.754902	0.675439	0.772456	0.707589	0.84375	0.571429	0.615385	0.792411			2-class	0.751134	0.807331	0.694937	0.688777	0.840541
	RF	3-class	0.6789	0.802842	0.554958	0.436473		0.726811	0.829238	0.624384	0.519223		0.693954	0.795267	0.59285	0.506149		0.673914	0.809811	0.538017	0.369459			RF	3-class	0.693395	0.809289	0.577552	0.457826
		2-class	0.734532	0.903846	0.565217	0.722222	0.865385	0.867605	0.949495	0.785714	0.868421	0.958995	0.773529	0.733333	0.813725	0.747748	0.825537	0.790179	0.9375	0.642857	0.818182	0.90625			2-class	0.791461	0.881044	0.701879	0.789143	0.889042
	GBM	3-class	0.699204	0.819169	0.57924	0.457237		0.731684	0.82848	0.634888	0.529301		0.703331	0.79808	0.608583	0.510456		0.690329	0.80781	0.572849	0.376406			GBM	3-class	0.706137	0.813385	0.59889	0.46835
		2-class	0.765886	0.923077	0.608696	0.777778	0.87709	0.874459	0.939394	0.809524	0.85	0.974026	0.797619	0.761905	0.833333	0.772727	0.873016	0.785714	1	0.571429	1	0.899554			2-class	0.80592	0.906094	0.705745	0.850126	0.905921
Machine-learning on transcriptional aging (Static features only)	SVM	3-class	0.631077	0.775796	0.486358	NA		0.697452	0.820082	0.574822	0.512464		0.619707	0.753164	0.486251	0.422853		0.652071	0.799711	0.504431	NA			SVM	3-class	0.650077	0.787188	0.512965	0.467659
		2-class	0.524247	0.961538	0.0869565	0.5	0.717391	0.699495	0.89899	0.5	0.677419	0.779822	0.652101	0.657143	0.647059	0.647059	0.691503	0.774554	0.90625	0.642857	0.75	0.765625			2-class	0.662599	0.85598	0.469218	0.64362	0.738585
	NNET	3-class	0.560132	0.712282	0.407982	0.374252		0.690187	0.810063	0.570311	0.554845		0.614735	0.746998	0.482472	0.444527		0.642974	0.785125	0.500823	0.382467			NNET	3-class	0.627007	0.763617	0.490397	0.439023
		2-class	0.669732	0.730769	0.608696	0.5	0.709866	0.726912	0.858586	0.595238	0.641026	0.799904	0.671849	0.647619	0.696078	0.657407	0.689449	0.758929	0.875	0.642857	0.692308	0.776786			2-class	0.706855	0.777994	0.635717	0.622685	0.744001
	RF	3-class	0.66528	0.793337	0.537222	0.421375		0.697666	0.813919	0.581413	0.482146		0.668617	0.784132	0.552673	0.456589		0.671344	0.805667	0.537022	0.373767			RF	3-class	0.675727	0.799264	0.552082	0.433469
		2-class	0.703177	0.884615	0.521739	0.666667	0.764632	0.792929	0.919192	0.666667	0.777778	0.900192	0.704902	0.733333	0.676471	0.71134	0.755415	0.703125	0.90625	0.5	0.7	0.871652			2-class	0.726033	0.860848	0.591219	0.713946	0.822973
	GBM	3-class	0.680456	0.802481	0.558432	0.436474		0.710045	0.821056	0.599034	0.491895		0.669988	0.784806	0.55517	0.460511		0.676227	0.807446	0.545008	0.368266			GBM	3-class	0.684179	0.803947	0.564411	0.439287
		2-class	0.666806	0.942308	0.391304	0.75	0.782609	0.806638	0.89899	0.714286	0.75	0.916306	0.72465	0.72381	0.72549	0.718447	0.770121	0.6875	0.875	0.5	0.636364	0.783482			2-class	0.721398	0.860027	0.58277	0.713703	0.81313
Machine-learning on transcriptional aging (Dynamic features only)	SVM	3-class	0.504515	0.670209	0.338822	NA		0.623621	0.752267	0.494975	0.466421		0.537306	0.686587	0.388026	0.36533		0.541597	0.697266	0.385928	NA			SVM	3-class	0.55176	0.701582	0.401938	0.415875
		2-class	0.536371	0.942308	0.130435	0.5	0.677258	0.670274	0.959596	0.380952	0.8	0.853535	0.778571	0.72381	0.833333	0.745614	0.815126	0.5	1	0	NA	0.658482			2-class	0.621304	0.906428	0.33618	0.681871	0.7511
	NNET	3-class	0.526682	0.691708	0.361657	0.364657		0.661892	0.769723	0.554061	0.463464		0.567467	0.707945	0.426988	0.435969		0.594797	0.737819	0.451776	0.464787			NNET	3-class	0.587709	0.726799	0.44862	0.432219
		2-class	0.746656	0.884615	0.608696	0.7	0.810201	0.77417	0.929293	0.619048	0.787879	0.907407	0.767507	0.809524	0.72549	0.787234	0.858917	0.584821	0.8125	0.357143	0.454545	0.640625			2-class	0.718289	0.858983	0.577594	0.682415	0.804287
	RF	3-class	0.588097	0.729732	0.446462	0.393208		0.652233	0.766096	0.53837	0.457663		0.590056	0.720973	0.45914	0.427284		0.602749	0.746204	0.459295	0.36512			RF	3-class	0.608284	0.740751	0.475816	0.410819
		2-class	0.703177	0.884615	0.521739	0.666667	0.801839	0.80303	0.939394	0.666667	0.823529	0.924964	0.74916	0.714286	0.77451	0.724771	0.837021	0.636161	0.84375	0.428571	0.545455	0.777902			2-class	0.722882	0.845511	0.597872	0.690105	0.835432
	GBM	3-class	0.596723	0.737371	0.456074	0.393952		0.661979	0.773395	0.550564	0.458207		0.595323	0.722482	0.468164	0.428729		0.631514	0.758485	0.504544	0.37178			GBM	3-class	0.621385	0.747933	0.494836	0.413167
		2-class	0.775502	0.942308	0.608696	0.823529	0.860368	0.777417	0.959596	0.595238	0.862069	0.932179	0.772829	0.780952	0.764706	0.772277	0.860504	0.667411	0.90625	0.428571	0.666667	0.816964			2-class	0.74829	0.897277	0.599303	0.781136	0.867504
NA values correspond to values that the computer could not compute for at least one class																										0.693395	0.668926
																										0.80592	0.751134
*All metrics on testing data, without interference on potential classes imbalances
* AUC (Area Under the Curve) can only be computed in the 2-class case
* PPV: positive predictive value, synonym to precision
