# Supplementary material for: Remodeling of epigenome and transcriptome landscapes with aging in mice reveals widespread induction of inflammatory responses
Source: HighWire-hosted journal article supplement (doi:10.1101/gr.240093.118), 2019-03-11
Supplement: Supplemental_Table_S4.xlsx [file Supplemental_Table_S4.xlsx]

## Sheet: Index
Supplemental Table S4
	A	Tissue Independent RNA-seq aging (DEseq2; FDR <5%)
	B	Heart RNA-seq aging (DEseq2; FDR <5%)
	C	Liver RNA-seq aging (DEseq2; FDR <5%)
	D	Cerebellum RNA-seq aging (DEseq2; FDR <5%)
	E	Olfactory bulb RNA-seq aging (DEseq2; FDR <5%)
	No significant changes were observed with NSCs RNA-seq aging (DEseq2; FDR <5%)

## Sheet: A
Tissue-independent aging DESeq2 (FDR < 5%)
Gene Name	Mean gene expression	log2(FoldChange per month of life)	p-value	Adjusted p-value (FDR)	Age change
Gpr17	35.1934	-0.0215328	3.88679e-09	3.54108e-07	DOWN
Ugt2b38	70.6363	-0.0202741	1.17438e-08	9.53399e-07	DOWN
Adh6-ps1	185.079	-0.0175525	1.63146e-06	8.85906e-05	DOWN
Zfp57	14.4907	-0.0175249	1.60556e-06	8.74737e-05	DOWN
Crabp2	4.43993	-0.0156854	1.49535e-05	0.000638601	DOWN
Aadac	347.474	-0.0151118	2.51623e-05	0.00100889	DOWN
Unc13c	611.257	-0.014651	1.72603e-06	9.31092e-05	DOWN
Ces3b	524.701	-0.0145325	7.2485e-05	0.00247642	DOWN
Cyp2c69	119.2	-0.0144208	2.64213e-05	0.00105421	DOWN
Slc22a28	52.5108	-0.0141752	0.000108414	0.00351633	DOWN
Eya2	24.1944	-0.0140173	9.75817e-05	0.0032198	DOWN
Asxl3	60.99	-0.013991	2.66027e-05	0.00105888	DOWN
Wnk4	33.9056	-0.0138124	0.000141051	0.00443974	DOWN
Cbx8	22.4943	-0.0137156	6.43207e-05	0.00225384	DOWN
Cyp2d12	15.2542	-0.0136694	5.81103e-07	3.36731e-05	DOWN
Prr16	72.4036	-0.0134267	4.44276e-05	0.00167103	DOWN
Vat1l	95.3371	-0.0132873	2.0971e-06	0.000109176	DOWN
Gpc3	20.9163	-0.01292	0.000397443	0.0105978	DOWN
Igfbpl1	3.5577	-0.0129128	0.000124428	0.00395446	DOWN
1700086L19Rik	24.0862	-0.0128878	0.000348148	0.00949962	DOWN
Ugt2b35	168.412	-0.0127961	0.000231982	0.00674516	DOWN
Gpc2	11.7323	-0.0127934	0.00017605	0.00537624	DOWN
E130309F12Rik	15.7313	-0.0125369	0.000470677	0.0120604	DOWN
Dcx	220.087	-0.0124309	0.000349999	0.00953426	DOWN
Akr1c19	58.2603	-0.0123426	0.000610462	0.0148751	DOWN
Gm4952	90.6135	-0.0123414	0.000746272	0.0175583	DOWN
Acot12	147.067	-0.0122999	0.00059148	0.0145205	DOWN
Tmem181b-ps	116.65	-0.0122753	0.000442627	0.0115463	DOWN
Adamts18	17.9761	-0.0122695	0.000703138	0.0167598	DOWN
Slc25a29	14.695	-0.0121703	0.000599136	0.0146209	DOWN
Ttc9b	10.5277	-0.0121504	0.000337872	0.00926548	DOWN
Dio1	81.8997	-0.0121049	0.000152413	0.00476081	DOWN
Akr1c6	1101.92	-0.0120814	0.000863502	0.019759	DOWN
Sycp1	32.7208	-0.0120266	0.000444981	0.0115463	DOWN
Sdk2	43.53	-0.0119764	0.000107337	0.00349944	DOWN
Itga10	7.80842	-0.0119744	0.00106435	0.0232105	DOWN
Golga7b	110.089	-0.0118892	1.42265e-06	7.8027e-05	DOWN
Fabp7	696.222	-0.0118697	0.00045839	0.0118567	DOWN
Glra2	7.62676	-0.0116396	0.000444367	0.0115463	DOWN
Epn3	34.2082	-0.0116389	0.00119853	0.0254926	DOWN
Dpysl3	161.695	-0.0115559	0.000322686	0.00892365	DOWN
Ncan	689.242	-0.0115197	0.000317553	0.00881142	DOWN
Ky	35.3556	-0.0113837	0.00188344	0.0364659	DOWN
Ces2c	23.5431	-0.011284	0.000434148	0.0114279	DOWN
Slc36a2	13.0087	-0.0112066	0.00166418	0.0332409	DOWN
Cyp2d11	38.0864	-0.0112016	0.000208721	0.00621202	DOWN
Slc30a10	93.6457	-0.0109805	0.000844191	0.0193892	DOWN
Dusp4	48.0962	-0.0109622	0.00259671	0.0462863	DOWN
Camk4	1345.35	-0.010947	0.000411663	0.0109414	DOWN
Ccnjl	19.6642	-0.0108991	0.00265489	0.047272	DOWN
Slc7a10	38.4504	-0.0108899	0.000165219	0.00510249	DOWN
Akr1c14	554.397	-0.0107016	0.00282021	0.0491484	DOWN
Ppp1r14c	233.719	-0.0106386	0.000313226	0.0087061	DOWN
Tubb2b	563.706	-0.0105783	0.000518717	0.0130467	DOWN
Gpc4	145.891	-0.010547	0.00049701	0.0126954	DOWN
St8sia2	5.84823	-0.0104753	0.00202073	0.0384877	DOWN
Abhd5	134.002	-0.010378	1.65877e-05	0.000700434	DOWN
Shisa2	20.0347	-0.0103668	0.00199338	0.0380551	DOWN
Hsd3b4	6.90413	-0.0101654	8.42497e-05	0.00282538	DOWN
Cyp1a1	7.93522	-0.0100561	0.000221013	0.00649532	DOWN
Sncaip	71.4988	-0.00982149	0.00101263	0.02235	DOWN
Wnt7a	49.9361	-0.00981704	0.00172719	0.0340845	DOWN
Urod	138.215	-0.00981593	0.000165059	0.00510249	DOWN
Traf4	142.05	-0.00977509	0.0014473	0.0297795	DOWN
Erc1	1110.82	-0.00971063	2.1137e-07	1.36467e-05	DOWN
Ugt2b37	22.097	-0.00970397	0.000151839	0.00475191	DOWN
Lamtor2	68.5761	-0.00969854	0.000393739	0.0105162	DOWN
Dok4	36.1973	-0.00969355	0.00277804	0.0487764	DOWN
Tbc1d16	240.021	-0.00960994	1.25997e-05	0.00055844	DOWN
Metrn	117.965	-0.00958744	0.000528698	0.0132571	DOWN
Car4	137.844	-0.00957827	0.00103218	0.0226596	DOWN
Cyp2d9	442.071	-0.00941144	0.00242713	0.0439571	DOWN
Gdf11	56.4952	-0.00940275	0.00287448	0.0498821	DOWN
Hopx	185.501	-0.00939373	0.00170747	0.0338582	DOWN
Cacng4	27.6901	-0.00939132	0.00239926	0.0435719	DOWN
Calb2	610.013	-0.00934157	0.001643	0.0328581	DOWN
Hsph1	714.101	-0.00927613	0.000370695	0.00998198	DOWN
Nwd1	218.553	-0.00925988	7.34115e-05	0.00250286	DOWN
Scarna10	83.5475	-0.0091785	0.00214311	0.0403501	DOWN
Tet1	140.679	-0.00915488	4.89493e-05	0.00180793	DOWN
Epha5	370.023	-0.00911845	0.000931177	0.0209183	DOWN
Epha7	92.7643	-0.00908809	0.000633976	0.0153568	DOWN
Them4	46.8605	-0.00906872	0.00074148	0.0174957	DOWN
Cyp2d40	16.2115	-0.00903603	0.00225493	0.0416894	DOWN
Abcd3	1581.79	-0.00901818	7.99163e-05	0.00270216	DOWN
Gm12824	329.546	-0.00899517	0.000969032	0.0215912	DOWN
Cbx4	128.794	-0.00895934	0.000507241	0.0129165	DOWN
Sv2c	121.031	-0.0089101	0.00125077	0.0263981	DOWN
Klhl2	174.914	-0.00888492	0.000889394	0.0202011	DOWN
Sucla2	1220.04	-0.00877885	1.05921e-05	0.000477198	DOWN
Trib2	255.376	-0.00872743	4.69078e-05	0.00175626	DOWN
Acsl1	2316.53	-0.00856451	0.00217806	0.0408674	DOWN
D430041D05Rik	374.839	-0.00849306	0.00145073	0.0298126	DOWN
Grb14	507.396	-0.00842227	0.000108845	0.0035206	DOWN
Larp1b	415.317	-0.00831905	2.06869e-06	0.00010804	DOWN
Erbb4	145.199	-0.00812053	0.00178062	0.0349288	DOWN
Cgnl1	586.694	-0.00804006	0.00220635	0.0410887	DOWN
Pvrl3	165.628	-0.00802323	0.00122666	0.026057	DOWN
Glrx5	119.853	-0.00800275	0.00110173	0.023867	DOWN
Idh1	865.321	-0.00794222	0.000171047	0.00526267	DOWN
Ahsa2	137.849	-0.00791315	0.00061981	0.0150805	DOWN
Tmc7	49.3097	-0.00785648	0.0014397	0.0296605	DOWN
Ptprk	309.592	-0.0077854	7.21594e-05	0.00247044	DOWN
Gramd4	219.502	-0.00770959	0.00040924	0.0108947	DOWN
Gap43	244.335	-0.00769164	0.00015325	0.00477784	DOWN
Fads2	436.252	-0.00755418	0.00190041	0.0366234	DOWN
Hsdl2	555.354	-0.00751913	0.000967111	0.0215778	DOWN
Dyrk2	182.385	-0.00751675	0.00124063	0.0262517	DOWN
Usp3	221.013	-0.00743701	0.000554339	0.0138155	DOWN
Yy1	271.507	-0.00741358	5.0669e-05	0.00184649	DOWN
9630013A20Rik	1.43329	-0.00733742	0.000760517	0.0177913	DOWN
Nasp	442.868	-0.00732358	0.00223209	0.0414541	DOWN
Agtpbp1	868.389	-0.00714388	0.000144836	0.00455014	DOWN
Trp53inp2	819.835	-0.00706018	0.0010433	0.0228425	DOWN
Rapgef4	999.863	-0.00705918	0.00111788	0.024153	DOWN
Sema6a	438.688	-0.00704599	0.000757163	0.0177635	DOWN
Mmp15	501.331	-0.00695286	0.00285897	0.0496655	DOWN
Fam108b	102.743	-0.00687167	0.00283359	0.0492767	DOWN
Pik3r1	1422.19	-0.00681853	0.000868861	0.0198426	DOWN
Dgkd	429.612	-0.00675183	0.000514754	0.0130028	DOWN
Nell1	58.7005	-0.00671892	0.00222781	0.0414217	DOWN
Chchd2	346.511	-0.006684	0.00058779	0.0144732	DOWN
Ndufa5	559.533	-0.00666979	0.00150133	0.0305084	DOWN
Klhl24	937.027	-0.00662898	0.0011809	0.0251835	DOWN
Cox6c	1652.45	-0.00662564	0.00218613	0.040893	DOWN
Atp13a3	810.33	-0.00662517	0.000533645	0.0133607	DOWN
Slc35e3	109.467	-0.00661596	0.000850064	0.0194968	DOWN
Wdr41	131.012	-0.00656702	0.000177073	0.00539744	DOWN
Acot7	256.718	-0.00651292	0.000462013	0.0119128	DOWN
Tom1l1	112.815	-0.00650304	0.00276603	0.0487101	DOWN
Med8	129.062	-0.00634841	0.00235378	0.0430799	DOWN
Tmx4	927.102	-0.006285	0.0023143	0.0425951	DOWN
Rap2a	257.167	-0.00627281	0.0010575	0.0230918	DOWN
Mup11	164.835	-0.00622881	0.00224816	0.0416583	DOWN
Cisd2	227.357	-0.00621042	0.00211623	0.0400278	DOWN
Ddx3y	488.07	-0.00619948	0.000655719	0.0157424	DOWN
Atp2a2	20102.3	-0.00609661	0.00252876	0.0454208	DOWN
Atp5h	759.466	-0.00608276	0.000717619	0.017045	DOWN
Pdha1	2167.53	-0.00607726	0.000901825	0.0204268	DOWN
LOC100048884	2155.74	-0.00605269	0.00254834	0.0456723	DOWN
Aifm1	372.831	-0.00596372	0.000436891	0.0114817	DOWN
Dynll2	931.493	-0.00588124	0.000352265	0.00958009	DOWN
2010107E04Rik	180.238	-0.00583465	0.00280465	0.0490127	DOWN
Mup6	29.2685	-0.00578637	0.00190635	0.0366751	DOWN
Trap1	587.834	-0.00577851	0.000116402	0.00373556	DOWN
Kctd3	157.468	-0.005679	0.00249378	0.0448908	DOWN
Ccdc25	299.54	-0.00565968	0.000786445	0.0182752	DOWN
Sdhd	478.647	-0.00561316	0.00084143	0.0193801	DOWN
Sod2	1331.73	-0.00555429	0.00118093	0.0251835	DOWN
Hadha	2692.85	-0.00553568	0.00238184	0.0433999	DOWN
Hdac2	465.138	-0.00548917	0.00115334	0.024784	DOWN
Gde1	223.649	-0.00544122	0.000516086	0.0130028	DOWN
Mapk6	429.481	-0.00543707	0.000270188	0.00766576	DOWN
Fbxo22	210.15	-0.00539225	0.00187189	0.0363722	DOWN
Phf10	274.809	-0.00539019	0.00272282	0.0481677	DOWN
Snord1c	2.89314	-0.00531499	0.00257339	0.0460207	DOWN
Ehmt1	353.955	-0.0053126	0.00217803	0.0408674	DOWN
Eif4a2	1421.77	-0.00527813	0.000422571	0.011177	DOWN
Strn3	1045.6	-0.00526166	0.00187417	0.0363722	DOWN
Nfib	1660.01	-0.00525849	6.80824e-05	0.00237045	DOWN
Fxr1	838.753	-0.00521059	0.00147381	0.030162	DOWN
Lrpprc	928.781	-0.00520368	0.00226222	0.0417771	DOWN
Pdhb	627.884	-0.00515811	0.00137213	0.028483	DOWN
Klhl12	139.011	-0.00513588	0.00234021	0.0429274	DOWN
Lsm14b	297.289	-0.00507773	0.001421	0.0293356	DOWN
Hectd1	1981.61	-0.00507183	0.0024773	0.0446923	DOWN
Bpnt1	241.168	-0.00502475	0.00130057	0.0273086	DOWN
Atrnl1	369.601	-0.00502219	0.00170145	0.0338031	DOWN
Ndufa9	488.618	-0.00498868	0.000718219	0.017045	DOWN
Psma4	586.665	-0.00481186	0.00114704	0.0246854	DOWN
Jarid2	349.778	-0.0047477	0.000786773	0.0182752	DOWN
Tollip	347.482	-0.00454772	0.0021895	0.0408948	DOWN
Reep5	867.968	-0.00446542	0.00253224	0.0454335	DOWN
Kidins220	1349.73	-0.00389717	0.00185987	0.0363245	DOWN
Ddx24	777.053	0.00392498	0.000526205	0.0132147	UP
Ereg	0.793528	0.00419627	0.00090333	0.0204327	UP
Sult1c1	1.23706	0.00432195	0.00248417	0.044767	UP
Efha1	353.302	0.00476059	0.0022074	0.0410887	UP
Il6st	873.607	0.00481695	0.000704279	0.0167627	UP
Pias1	184.675	0.00490696	0.0012442	0.0262934	UP
Aim1l	2.57614	0.00526666	0.0016836	0.0335879	UP
Olfr701	1.38929	0.00539859	0.000977188	0.0217434	UP
Cxcl13	10.6743	0.0054477	0.000994966	0.0219898	UP
Sult2a7	1.97934	0.00566442	0.00235726	0.0430956	UP
Clec4e	0.915581	0.00568807	0.000213167	0.00628727	UP
Snx5	359.666	0.00569702	0.00104769	0.0229082	UP
Tnfsf8	0.849805	0.00572549	0.00150828	0.030574	UP
Eef1a1	5035.73	0.0058063	0.000197456	0.0059197	UP
Gnai2	1051.63	0.00593018	5.89648e-05	0.00208848	UP
Polr2a	558.717	0.00593742	0.00227976	0.0420065	UP
Dnm3	780.926	0.00604902	0.00259557	0.0462863	UP
Mpp1	136.196	0.00606083	0.000901624	0.0204268	UP
Pilrb2	1.80716	0.00611499	0.000583426	0.0143874	UP
Phf11	1.4259	0.00619837	0.000655417	0.0157424	UP
Gas6	296.186	0.00633769	0.00190767	0.0366751	UP
Mll1	1285.05	0.0064307	0.00242851	0.0439571	UP
Ifnar2	260.735	0.00643956	0.00087155	0.0198508	UP
Trps1	302.734	0.00644454	0.000425626	0.0112397	UP
Ezh1	234.322	0.00644923	0.000180729	0.00547833	UP
Cacna1d	303.597	0.00646681	0.000513047	0.0129837	UP
Rfwd3	121.443	0.00650244	0.0022522	0.041686	UP
Anxa7	307.543	0.00650291	0.000179126	0.00543979	UP
Cyp2g1	5.40689	0.00651272	0.00156101	0.0315258	UP
Rps4x	406.198	0.0065178	0.000206493	0.00615687	UP
Ripk1	162.939	0.00653962	0.00149088	0.0304091	UP
Tmem209	80.9411	0.00655252	0.00158445	0.0319207	UP
Flnb	493.266	0.006565	0.00173735	0.0341638	UP
Itgb1bp3	3.91806	0.00659155	0.00192975	0.0370561	UP
Clu	2203.97	0.00665246	0.00150754	0.030574	UP
Rpl3	868.06	0.00672053	5.44191e-05	0.00196568	UP
Ccl7	1.74136	0.00673031	0.000509423	0.0129391	UP
Gns	576.8	0.00673892	5.37793e-05	0.00194686	UP
Fth1	3124.18	0.00693837	0.000833825	0.019259	UP
Pira6	2.22743	0.00706181	0.00135367	0.0282429	UP
Rgs1	2.22005	0.00712188	0.000869984	0.0198426	UP
Aox3l1	1.4322	0.00714667	0.000347591	0.00949962	UP
Zfp536	114.492	0.00718105	0.00238835	0.0434337	UP
Saa2	31.9628	0.00720298	0.000210805	0.00625133	UP
Irg1	2.47339	0.00721657	6.94397e-05	0.00239735	UP
Ptpn1	205.093	0.00722843	0.00212499	0.0401472	UP
A530032D15Rik	0.964385	0.00724977	4.97136e-05	0.00182792	UP
Niacr1	0.816916	0.00725576	2.02591e-05	0.000836848	UP
Timeless	81.9154	0.00728262	0.00275686	0.0487101	UP
E130306D19Rik	2.92927	0.00730019	0.00281611	0.0491291	UP
Tln1	887.172	0.00732504	1.07392e-05	0.000482497	UP
Spock1	405.485	0.0073298	2.01146e-06	0.000105724	UP
4933407H18Rik	140.537	0.00737292	0.000228001	0.00667677	UP
Slamf6	2.46438	0.00740942	0.00102229	0.0225329	UP
Sgpl1	225.717	0.00742986	0.000263012	0.00748809	UP
Slfn1	2.26691	0.00743714	0.000589081	0.0144833	UP
Cxcr6	1.22594	0.00747895	0.000187971	0.00565603	UP
Ch25h	1.68949	0.00751178	0.000304309	0.0084799	UP
Il7r	2.21604	0.00753537	0.000863908	0.019759	UP
Stx2	81.652	0.00754901	0.00174776	0.0343252	UP
Rtn4	1930.72	0.00755557	0.00187285	0.0363722	UP
Klrk1	3.51084	0.00764243	0.0026781	0.047582	UP
Ctse	0.907107	0.00764304	0.000110878	0.00357226	UP
Cd3e	1.51152	0.00765158	0.000336799	0.00926548	UP
Glipr1	2.32133	0.00766536	0.00245458	0.0443311	UP
Map3k1	444.493	0.00767934	0.000932831	0.0209268	UP
Actb	5664.95	0.00770896	7.08065e-05	0.0024292	UP
Abca13	2.28363	0.00777257	0.00196245	0.0375521	UP
Cast	408.49	0.00778147	1.43539e-05	0.000617821	UP
Tnf	1.09268	0.0078335	8.38374e-05	0.00281732	UP
Man2a1	652.407	0.0078852	1.33361e-05	0.000581644	UP
Ccl2	3.46236	0.00788909	0.00142215	0.0293356	UP
Ifngr1	168.833	0.0078931	0.000210589	0.00625133	UP
Adar	368.45	0.00795413	0.00190051	0.0366234	UP
Cd300lb	1.83951	0.00796964	0.000753856	0.0177113	UP
Slc16a3	1.77152	0.00797366	0.00123258	0.0261488	UP
Ctsl	912.259	0.00799239	2.72369e-05	0.0010815	UP
Slc9a9	71.8071	0.00799271	0.00109473	0.0237467	UP
Grap2	2.25725	0.00801248	0.000577245	0.0142564	UP
Themis	1.22255	0.00804963	2.40599e-05	0.00096943	UP
Cdc14b	107.34	0.00805463	0.00126902	0.0267146	UP
Ostn	2.85539	0.00806339	0.00159504	0.0320641	UP
Sec14l3	9.22755	0.00808022	0.000264745	0.00752437	UP
Batf2	2.10161	0.00808325	0.00117202	0.0251242	UP
Pisd	75.6193	0.0081044	0.00096143	0.0215095	UP
Podxl	354.777	0.00810971	0.00270679	0.0479359	UP
Fah	512.61	0.00811623	0.00163885	0.0328151	UP
Pip4k2a	189.536	0.00811807	0.000368043	0.00994324	UP
Slfn4	1.82982	0.00814532	9.5686e-05	0.00316362	UP
Flt1	448.968	0.00821249	1.02279e-05	0.000463344	UP
Itga9	185.233	0.00823838	0.00159639	0.0320641	UP
Cfh	2568.6	0.00827494	0.0021668	0.0407493	UP
Npc2	122.773	0.00828612	0.00131394	0.0275189	UP
Scpep1	85.6998	0.00832898	0.0020114	0.0383546	UP
Necap2	106.707	0.00833736	0.0023189	0.0426319	UP
Ehd4	690.97	0.00839161	0.000110803	0.00357226	UP
Lig1	204.063	0.00843575	0.00075865	0.017773	UP
Ubd	2.70379	0.00845543	3.51343e-06	0.000175127	UP
Dopey2	332.936	0.00845621	0.000281795	0.00796752	UP
Serpine2	1173.58	0.00847767	0.00140828	0.0291596	UP
Man2b1	167.981	0.00849852	0.001082	0.0235329	UP
Itk	2.47198	0.00850077	0.00276799	0.0487101	UP
Abcg1	204.776	0.00851424	0.0026736	0.0475536	UP
Nfatc1	111.177	0.00852952	0.00212768	0.0401516	UP
Hmgb2	371.978	0.00854792	0.00205434	0.038992	UP
Lrp1	3883.95	0.00858706	0.000240182	0.00692222	UP
Pecam1	317.176	0.00863643	2.44349e-06	0.000125614	UP
Gm11428	4.5744	0.00865318	0.000665797	0.0159393	UP
Phf15	241.625	0.00867888	0.00151116	0.0305945	UP
Mcam	134.771	0.00868558	0.00234837	0.0430289	UP
Umodl1	5.3548	0.00871276	0.000625762	0.0152028	UP
Adssl1	154.589	0.00878318	0.00149599	0.0304376	UP
H2-M2	1.75193	0.00878542	3.82283e-07	2.34796e-05	UP
Clec2d	504.902	0.00880642	0.00242503	0.0439571	UP
Gm7609	3.64091	0.00883279	6.48501e-05	0.00226754	UP
Ms4a4b	1.41403	0.00886951	9.10725e-06	0.000417178	UP
Serpinb6a	183.123	0.00891145	6.52204e-06	0.000310156	UP
Nfe2l2	230.644	0.0089593	6.99503e-05	0.00240991	UP
Cyp2b10	5.45568	0.00897185	0.000293443	0.00822593	UP
Lrrc25	4.02859	0.0090385	0.000441852	0.0115463	UP
BC094916	1.83274	0.00905276	2.11464e-05	0.000867684	UP
Folr2	7.36781	0.00911417	0.0025584	0.0458026	UP
Sat1	103.437	0.00913688	0.00102511	0.0225648	UP
Flna	618.545	0.00915328	0.000909302	0.0205395	UP
Dkk2	2.14496	0.00918952	0.00110792	0.0239694	UP
Aim1	111.364	0.00920123	0.00156547	0.031577	UP
Hpse	8.33069	0.00922607	0.00183385	0.0359299	UP
Tmc3	5.84682	0.00923767	0.000438917	0.0114981	UP
Fam129b	72.3532	0.00924298	0.00227018	0.041877	UP
Lcn2	11.9349	0.0092452	3.3884e-06	0.00016941	UP
Psme1	616.024	0.00925166	6.16337e-05	0.00217362	UP
Endod1	230.871	0.00928115	7.79521e-05	0.00264666	UP
Cd5l	147.307	0.00928774	0.000226046	0.00663135	UP
Pgm5	278.906	0.00934285	0.00170263	0.0338031	UP
Cd226	2.71207	0.00937045	0.00148187	0.030263	UP
Bcl2a1a	0.798871	0.00945513	7.05753e-06	0.000334027	UP
Cxcl12	685.342	0.00946494	0.000106145	0.00346747	UP
Atp11a	432.899	0.00947248	0.0019502	0.0374051	UP
Pcdhb18	45.2136	0.00955307	0.00279083	0.0488974	UP
Hexa	151.281	0.00955785	4.79708e-05	0.00178789	UP
Myo1d	103.338	0.00957359	0.000236102	0.00682865	UP
Atp6v0d2	11.7019	0.0095779	2.68411e-06	0.000136698	UP
Mvp	171.899	0.00958897	0.000288945	0.00813283	UP
Bcl2a1b	2.79908	0.0095993	0.000466456	0.0119897	UP
Coro2a	32.9656	0.00960517	0.00199153	0.0380551	UP
Plac8	2.79799	0.00961612	1.88274e-05	0.000783629	UP
Tubb1	6.36899	0.00964795	0.00136792	0.0284315	UP
Skap2	79.2636	0.00965611	0.000724396	0.0171667	UP
Gls2	327.134	0.009691	0.000234822	0.00680362	UP
2010300C02Rik	446.636	0.00970856	0.00102805	0.0225991	UP
Prkch	42.5779	0.00971591	0.00280644	0.0490127	UP
Nlrp1b	5.96653	0.00979541	0.00188012	0.0364446	UP
Apol11b	4.17031	0.00981102	5.87567e-05	0.00208848	UP
Utp14b	183.244	0.00982546	0.00196103	0.0375521	UP
Mecom	48.4843	0.00983229	0.00152158	0.0307675	UP
Trank1	582.278	0.00984781	0.0014666	0.0300635	UP
Pcdhb15	17.1348	0.00987019	0.00269867	0.0478956	UP
Ms4a6b	4.64987	0.00989999	0.00159744	0.0320641	UP
Saa1	46.419	0.00990827	3.05654e-05	0.00119343	UP
Ctsb	1229.51	0.00991488	1.1026e-08	9.04075e-07	UP
Col6a3	142.631	0.0099382	0.0027713	0.0487101	UP
Card11	4.81393	0.00998154	0.000881409	0.0200475	UP
Was	6.29696	0.0100869	0.00220507	0.0410887	UP
Sdc3	620.814	0.0101131	0.000912499	0.0205833	UP
Man2b2	96.2931	0.0101362	0.000218739	0.00644005	UP
Anxa5	236.033	0.0101726	2.38056e-05	0.000963607	UP
Lyl1	3.84731	0.0101839	0.00187244	0.0363722	UP
Slamf9	3.05813	0.0101888	0.000212411	0.00628516	UP
Treml4	5.88369	0.0102037	5.61465e-05	0.00201809	UP
Dcdc2a	53.4628	0.0102244	0.00141146	0.0291885	UP
Tnfaip8l2	3.84363	0.0102524	0.000816159	0.018931	UP
Gm581	7.1217	0.0102536	0.0011198	0.0241626	UP
Bcas1	275.821	0.0102592	0.000820486	0.0190044	UP
Dlgap5	51.8359	0.0102735	0.00270315	0.0479232	UP
Srgn	38.8345	0.010315	0.00117397	0.0251332	UP
4632428N05Rik	51.9127	0.0103213	0.0014933	0.0304206	UP
Mcm3	147.675	0.0103491	0.000510209	0.0129391	UP
Ctla2b	11.5748	0.0103543	0.00172201	0.0340482	UP
Mstn	1.84529	0.0103584	0.000421056	0.0111549	UP
Ccl5	3.10437	0.0103618	8.81011e-06	0.000404698	UP
Apon	208.923	0.0103897	0.0023755	0.0433323	UP
Serpina10	149.898	0.0103901	0.002389	0.0434337	UP
Itpripl2	106.486	0.0104002	0.000146273	0.00458648	UP
Capn1	53.6863	0.0104152	0.000596234	0.0145935	UP
Mslnl	1.09383	0.0104161	0.000107647	0.0035026	UP
Stat6	212.598	0.0104324	4.71466e-06	0.000229424	UP
Cd72	8.52403	0.0104492	0.000649958	0.0156745	UP
Samsn1	14.6752	0.0104492	0.00223542	0.041469	UP
Csf2ra	40.5266	0.0104625	0.0014617	0.0300006	UP
Pm20d1	130.63	0.0104821	0.00127478	0.0268014	UP
Ms4a7	3.95276	0.0104832	0.000172879	0.00529916	UP
Cd209f	3.31793	0.010484	0.000184741	0.0055793	UP
Ptprcap	2.3683	0.010506	3.53108e-05	0.0013593	UP
Tlr9	3.18004	0.010521	0.000438777	0.0114981	UP
Znfx1	550.716	0.0105372	6.52502e-06	0.000310156	UP
Scamp2	43.4869	0.010557	0.00055991	0.0139332	UP
Ppbp	6.13959	0.0105786	0.000443386	0.0115463	UP
Eng	258.102	0.0105938	3.54941e-05	0.00136316	UP
Paox	25.477	0.0105943	0.0027909	0.0488974	UP
Cd14	5.26875	0.0106208	0.00205684	0.0389943	UP
Cd8b1	1.3614	0.0106264	5.27959e-07	3.09214e-05	UP
Myom3	5.8816	0.0106428	0.00258648	0.0462044	UP
Osbpl7	35.1324	0.0106473	0.000839246	0.019357	UP
Anxa3	35.8471	0.0106492	0.000989309	0.0219239	UP
Rffl	42.4142	0.0106795	0.000297211	0.00830318	UP
Msn	1066.94	0.0106814	0.000122542	0.00392492	UP
Siglec5	1.05926	0.0106856	1.95544e-05	0.000809778	UP
Pcdhga9	37.7765	0.0107198	0.00173746	0.0341638	UP
Ucma	3.99668	0.0107288	0.00218073	0.0408707	UP
Gimap3	3.90903	0.0107424	2.38566e-05	0.000963607	UP
Myof	70.5827	0.0107553	0.00117982	0.0251835	UP
Slc25a45	24.2811	0.0107703	0.00283276	0.0492767	UP
Cyp2e1	3701.7	0.0107744	0.000135826	0.00430003	UP
Mxra7	70.9116	0.0107779	0.000241119	0.00693704	UP
Ahnak	2916.76	0.0107852	4.69065e-06	0.000228934	UP
Nipal1	13.0684	0.0107871	2.11457e-05	0.000867684	UP
Pcdhgb1	46.1776	0.0107947	0.000920382	0.0207326	UP
Rnf135	13.8782	0.0108307	0.00276934	0.0487101	UP
Pvrl4	20.071	0.0108319	0.00279837	0.048976	UP
Tgfb1	42.2454	0.0108477	0.00136206	0.0283457	UP
Hc	1884.23	0.0108565	0.0013606	0.0283457	UP
Edn3	18.0658	0.0108582	0.00249952	0.0449448	UP
Il1b	3.11441	0.0109036	1.81918e-06	9.65461e-05	UP
Neb	429.381	0.0109078	0.00189571	0.0366234	UP
2610305D13Rik	35.8636	0.0109251	0.0027712	0.0487101	UP
Pcdha8	5.01894	0.010928	0.00213075	0.0401634	UP
5430435G22Rik	10.2654	0.0109496	0.00189758	0.0366234	UP
Steap4	360.273	0.0109547	0.00243318	0.0439931	UP
Tnxb	234.458	0.0109556	0.000249328	0.00716064	UP
Postn	151.978	0.0109726	0.00237247	0.0433254	UP
Espl1	27.6413	0.0110068	0.00210553	0.0398713	UP
Inf2	173.737	0.0110094	3.34184e-05	0.00129457	UP
Dok1	3.71777	0.0110251	0.000255085	0.00730043	UP
P2rx7	77.4368	0.0110375	0.000281057	0.00796037	UP
Smad6	29.8982	0.0110379	0.00186863	0.0363722	UP
Vipr2	54.853	0.0110491	0.000843804	0.0193892	UP
Mr1	33.4852	0.0110552	0.000656571	0.0157424	UP
H2-DMa	8.28723	0.0110777	0.00204365	0.038879	UP
Amy1	197.695	0.011084	0.00132927	0.0278045	UP
Cd97	102.051	0.0110935	0.000510493	0.0129391	UP
B230206H07Rik	4.75665	0.0111184	0.00137399	0.0284855	UP
Cd109	43.0719	0.011122	0.00218691	0.040893	UP
Cyp1b1	39.7861	0.0111243	0.00162965	0.0326706	UP
Plcb2	9.74705	0.0111366	0.0023311	0.0428081	UP
Vmn1r90	17.8414	0.0111391	0.00171118	0.0338908	UP
Ptgs2	11.1059	0.0111475	0.00046613	0.0119897	UP
Snx20	3.54952	0.0111541	0.000230157	0.00671127	UP
Shroom3	117.885	0.0111541	0.000567109	0.0140484	UP
Tlr8	5.08835	0.0111649	0.00032695	0.00902634	UP
Pcdhga6	52.4604	0.0111861	0.000506142	0.0129086	UP
Fgfr4	70.8018	0.0112315	0.00103704	0.0227358	UP
Zfp808	13.3142	0.0112331	0.0018429	0.0360641	UP
Alox8	4.39154	0.0112344	0.00169987	0.0338031	UP
Fgl2	61.0553	0.0112438	0.00205086	0.0389712	UP
Thbs4	10.478	0.0112754	0.000649569	0.0156745	UP
Casp4	6.27279	0.0112851	0.000337303	0.00926548	UP
Mtbp	51.2239	0.0112862	7.06105e-05	0.00242755	UP
Gm4980	22.1726	0.011294	0.00134731	0.0281458	UP
Ftl1	1241.24	0.0112992	8.28843e-06	0.000386142	UP
Ccl3	0.970053	0.011303	4.71174e-07	2.80974e-05	UP
Itgb5	352.87	0.0113088	7.00705e-09	6.11216e-07	UP
Efemp1	70.2792	0.0113116	0.000290742	0.00816417	UP
Fam83f	4.06526	0.0113395	0.000304571	0.0084799	UP
Itih3	972.146	0.0113524	0.00172328	0.0340482	UP
Pla1a	45.3421	0.0113544	0.00186064	0.0363245	UP
Cotl1	151.408	0.0113546	0.000253072	0.00725547	UP
2200002D01Rik	25.6499	0.0113684	0.00169525	0.0337794	UP
Ciita	10.3306	0.0113748	0.000825946	0.0191039	UP
5430427O19Rik	1.7783	0.0113804	2.37712e-05	0.000963607	UP
Lag3	3.98872	0.0114086	0.000415613	0.0110285	UP
Tifa	27.9321	0.0114505	0.00115464	0.024784	UP
Thbs1	71.8283	0.0114715	0.00173349	0.0341638	UP
Comp	7.91973	0.0114828	1.40639e-05	0.000606932	UP
H2-Ob	2.56637	0.0114842	5.88608e-05	0.00208848	UP
Mmp12	2.30716	0.0114948	3.19336e-08	2.36959e-06	UP
Stk10	127.239	0.0115098	2.86332e-05	0.00112874	UP
Itpr3	109.157	0.0115278	0.000386875	0.0103497	UP
Fbln5	39.8057	0.01154	0.00131091	0.0274905	UP
Mmrn2	118.866	0.01157	6.89789e-05	0.00238647	UP
Gm4841	8.01667	0.0115784	1.32639e-05	0.00058004	UP
Emr4	9.32782	0.0115855	7.97246e-05	0.00270125	UP
Ptpn18	7.61998	0.011586	0.00124054	0.0262517	UP
Nfkbiz	49.1351	0.011589	0.0011838	0.0252119	UP
Gdf15	8.83255	0.011592	0.000369287	0.00996042	UP
Hk3	10.4583	0.0116179	0.000459525	0.0118673	UP
Rinl	8.36594	0.011629	0.00126075	0.0265746	UP
Pilra	7.5	0.0116453	4.05174e-05	0.00153098	UP
Tcfcp2l1	31.0371	0.0116465	0.00147509	0.030162	UP
Bcl2a1d	1.95303	0.011647	4.19448e-06	0.000205333	UP
Trf	14349.8	0.0116624	7.06796e-06	0.000334027	UP
S100a11	39.4988	0.011672	0.00073703	0.0174158	UP
Sh3bp1	22.9362	0.0116731	0.00056256	0.0139779	UP
Reck	35.6759	0.0116896	0.000137681	0.00435035	UP
Cytip	3.70905	0.0117035	5.13917e-05	0.00186868	UP
Serpine1	22.2688	0.0117071	0.000774041	0.0180562	UP
Oas3	3.41158	0.011721	8.23336e-07	4.68815e-05	UP
Agxt2l1	239.437	0.0117335	0.000630456	0.0152942	UP
Pcdhga7	49.6845	0.0117595	0.000341811	0.00935786	UP
Rgs18	3.47403	0.0117747	2.98728e-05	0.00117197	UP
Rftn1	85.2371	0.0117773	3.59045e-05	0.0013693	UP
Rhbdf2	28.1433	0.0117795	0.00109328	0.0237467	UP
Lrg1	169.453	0.0118387	0.000744238	0.0175356	UP
Iqgap1	382.023	0.0118654	1.03622e-05	0.000468126	UP
BC020535	13.4082	0.0118776	0.00113382	0.0244331	UP
H2-DMb1	5.90669	0.0118814	0.000205313	0.00613283	UP
AF251705	4.48904	0.0118832	5.70422e-05	0.00203668	UP
Tlr1	3.43208	0.0119587	1.70584e-05	0.000717286	UP
Birc3	48.4536	0.0119591	0.000365544	0.009892	UP
Pqlc3	11.1277	0.0119654	0.000987136	0.0219053	UP
Cmtm7	10.1708	0.0119663	0.000684953	0.0163501	UP
Gimap4	83.7349	0.0119728	0.000946958	0.0212147	UP
Ang	179.985	0.0119758	0.00107093	0.0233229	UP
1200009I06Rik	8.11554	0.0119894	0.000979904	0.0217743	UP
Vwa5a	188.607	0.0119902	5.83786e-09	5.14704e-07	UP
Sash3	7.22466	0.0120215	0.000157956	0.0049059	UP
Gldn	2.96575	0.01203	3.19354e-05	0.00124396	UP
Casp1	18.4095	0.0120321	0.000994557	0.0219898	UP
Cd2	2.90474	0.012063	3.35891e-06	0.000168449	UP
C1rb	66.0038	0.0120845	0.000964336	0.0215452	UP
Ctla2a	31.5414	0.0121123	0.000926064	0.020832	UP
Samhd1	197.534	0.0121368	4.96748e-05	0.00182792	UP
Vwa1	69.5957	0.0121898	0.000129751	0.00411564	UP
C1s	720.555	0.0122056	0.000430822	0.0113586	UP
Apod	501.715	0.012211	0.000775494	0.0180644	UP
Pkn3	6.76609	0.012215	0.000469356	0.0120453	UP
Tbx20	204.813	0.012264	0.000352971	0.0095834	UP
Csf1	91.7429	0.0122834	0.000194247	0.00583416	UP
Mlkl	26.8337	0.012297	0.000764387	0.0178564	UP
G530011O06Rik	15.8937	0.012307	0.000123366	0.00393594	UP
Capn3	13.338	0.0123136	0.000729864	0.0172713	UP
Tifab	6.67377	0.0123366	0.000373501	0.0100246	UP
D7Ertd443e	14.7477	0.0123417	0.000446036	0.0115554	UP
Mcm6	127.536	0.0123693	0.000114096	0.00366876	UP
Aim2	11.1242	0.0123695	0.00064607	0.0156267	UP
Prkcd	209.602	0.0124023	3.58854e-05	0.0013693	UP
Cdhr5	88.9754	0.0124046	0.000656612	0.0157424	UP
Apol10b	16.6398	0.0124059	0.000230407	0.00671127	UP
H2-Q8	14.8183	0.0124103	0.000199029	0.00595597	UP
Ccdc88b	12.9634	0.0124114	0.000672037	0.0160652	UP
Esyt1	89.7046	0.01244	2.58928e-07	1.6458e-05	UP
Trim66	60.9852	0.0124578	2.96485e-05	0.00116596	UP
Tspan17	9.89927	0.0124634	0.000563428	0.0139783	UP
Gpr183	5.66541	0.0124744	0.000186488	0.00562171	UP
Sbno2	89.2258	0.0124825	2.85608e-06	0.000144558	UP
Sla	32.7066	0.0124974	0.000575034	0.0142232	UP
Pmaip1	18.7129	0.0124988	0.00053814	0.0134322	UP
Mmp3	6.42084	0.0125001	1.98314e-07	1.28544e-05	UP
Gstt3	38.6046	0.0125001	0.000598752	0.0146209	UP
Litaf	150.981	0.0125058	3.34715e-05	0.00129457	UP
Pstpip1	6.91628	0.0125059	0.000337569	0.00926548	UP
Kcnk6	11.6519	0.012525	0.000593646	0.0145519	UP
S100a4	2.36998	0.0125281	2.90406e-07	1.8177e-05	UP
Tgfbi	147.556	0.0125385	8.94368e-05	0.002975	UP
Spp1	157.759	0.0125417	0.000443776	0.0115463	UP
Dpyd	1367.36	0.0125436	4.56584e-07	2.74268e-05	UP
Pml	92.5948	0.0125861	2.8676e-06	0.000144695	UP
Tmem106a	18.5982	0.0125923	0.000516178	0.0130028	UP
Vim	2734.34	0.0126056	1.30896e-05	0.000575484	UP
Spdya	2.6544	0.0126197	0.000140027	0.00441597	UP
Atp8b4	4.61044	0.0126267	5.62764e-06	0.000270638	UP
Frmd8	60.5973	0.0126434	2.20799e-06	0.000114585	UP
Cygb	134.996	0.0126504	3.32172e-05	0.00129083	UP
Pcdhb13	12.7331	0.0126702	0.000535748	0.0133929	UP
Entpd1	80.3284	0.0126995	7.53101e-05	0.00256226	UP
Dennd2d	13.2178	0.0127183	0.000359599	0.00974722	UP
Tmco4	27.7984	0.0127189	0.00023889	0.00689712	UP
Tmem176b	286.698	0.012725	3.65962e-05	0.00139244	UP
Gsta1	29.6303	0.0127509	0.00023003	0.00671127	UP
S1pr5	32.4644	0.0127792	8.47488e-05	0.00283584	UP
Socs3	18.094	0.0127829	0.000479604	0.0122699	UP
Serpinb9	62.6334	0.0128207	9.29158e-06	0.000424436	UP
Nlrp1c-ps	4.14568	0.0128344	1.27337e-05	0.000562858	UP
Il13ra1	115.081	0.0128489	8.19313e-05	0.00276459	UP
B430306N03Rik	4.3543	0.0128533	1.0664e-06	5.94829e-05	UP
Ncf2	11.6411	0.0129111	0.000293977	0.00822684	UP
Bub1b	69.8778	0.0129887	0.000385956	0.010342	UP
Pla2g4a	24.7089	0.0130368	0.000371925	0.00999869	UP
Psd4	8.58131	0.013071	0.000123169	0.00393594	UP
Gltp	36.0019	0.0130773	2.28378e-05	0.000929321	UP
Axl	213.411	0.0130918	1.70411e-06	9.22302e-05	UP
Fam105a	25.6305	0.0131654	0.000321253	0.00889902	UP
Wipf1	74.6505	0.0132151	1.18497e-06	6.54284e-05	UP
Clec4a1	6.21841	0.0132293	2.76816e-05	0.0010965	UP
Evi2a	37.8028	0.0132294	0.000283747	0.00800891	UP
Mt2	42.7193	0.0132457	0.00025693	0.0073404	UP
Coro1a	35.9567	0.0132776	0.00028913	0.00813283	UP
Pcdhgb8	20.4033	0.013284	0.000175943	0.00537624	UP
9030625A04Rik	23.6101	0.0132874	0.000178601	0.0054339	UP
Pik3cg	11.955	0.0132911	0.000257645	0.00734803	UP
Ctsd	1078.64	0.013313	9.92754e-07	5.55637e-05	UP
Cp	2605.29	0.0133166	3.67089e-09	3.36307e-07	UP
Pcdhgb4	29.8037	0.0133166	4.71534e-05	0.00176143	UP
Pcdhb4	11.786	0.0134175	0.000234355	0.0068021	UP
Gsdmd	37.1715	0.0134358	0.000212712	0.00628516	UP
Ptafr	5.89192	0.0134479	0.00010027	0.00329692	UP
Pcdhb12	24.27	0.0134841	1.85201e-05	0.000772801	UP
Ifi35	32.5999	0.0135153	0.000154469	0.00480672	UP
Shisa5	51.3128	0.0135502	4.80009e-06	0.00023289	UP
Ano5	40.2222	0.0135566	0.000172381	0.00529378	UP
Apobr	10.989	0.0135659	0.000100321	0.00329692	UP
Cml2	982.921	0.0136238	4.4872e-05	0.00168388	UP
Apobec1	36.181	0.0136291	0.000164746	0.00510249	UP
Padi2	42.3362	0.0136343	8.30001e-05	0.0027949	UP
Trim21	39.1034	0.0136662	6.89093e-05	0.00238647	UP
Cfb	1348.55	0.0136823	5.07519e-06	0.000245511	UP
Crip1	21.9842	0.013689	0.000183081	0.00553939	UP
Gngt2	14.8063	0.0136895	9.34273e-05	0.00309518	UP
Stat3	534.786	0.0136916	9.32851e-09	7.96761e-07	UP
Vsig4	30.1628	0.0136928	1.6615e-05	0.000700434	UP
Galns	39.668	0.0136969	4.31052e-05	0.00162502	UP
Rasal3	3.52708	0.0137003	7.86089e-06	0.000368316	UP
Cd48	5.36168	0.0137084	3.48871e-05	0.00134615	UP
Clec1a	43.7533	0.0137355	8.96258e-05	0.00297525	UP
Bcl3	25.2611	0.0137518	0.000169251	0.00521721	UP
Il2rg	16.8843	0.0138448	0.000123778	0.00394143	UP
Grn	422.805	0.013881	2.08184e-08	1.64135e-06	UP
C3	16352.1	0.0139	2.39543e-06	0.00012353	UP
Hspa2	175.877	0.0139025	1.42593e-09	1.43459e-07	UP
Parvg	6.22927	0.0139125	5.90969e-05	0.00208864	UP
Serpina7	78.2258	0.0139187	1.15929e-05	0.000519432	UP
Ly6c1	45.4491	0.0139588	1.34778e-05	0.000584717	UP
Cbr2	7.35921	0.0139607	5.35699e-05	0.00194357	UP
Tgfbr2	218.544	0.0139738	7.90498e-09	6.85893e-07	UP
Arhgap15	9.28179	0.0140189	0.000104042	0.00340556	UP
Prelp	185.779	0.0140219	2.33111e-06	0.000120593	UP
C5ar1	7.1126	0.0140675	1.19159e-05	0.000531003	UP
Plag1	22.6551	0.0140997	8.53092e-05	0.00284347	UP
St14	5.01328	0.0141007	4.86281e-05	0.00180012	UP
Gm5431	7.52077	0.0141057	1.25596e-05	0.000558172	UP
Trim25	261.209	0.0141229	1.80339e-06	9.65461e-05	UP
Fes	21.4265	0.01418	0.000108498	0.00351633	UP
Hapln2	28.2229	0.0141836	1.38141e-05	0.000597726	UP
Alpk1	18.7838	0.0142088	0.000103136	0.00338266	UP
Sfpi1	12.9057	0.014218	5.70909e-05	0.00203668	UP
Il21r	3.26214	0.0142513	1.46117e-06	7.98725e-05	UP
Myo1g	6.86542	0.014259	8.52915e-06	0.000395111	UP
Loxl2	62.6316	0.014344	1.56942e-05	0.000665035	UP
BC006779	305.288	0.0143594	1.42139e-06	7.8027e-05	UP
Nfam1	10.9986	0.0143706	5.04253e-05	0.00184581	UP
F13a1	82.769	0.0143717	6.20494e-05	0.00218358	UP
Ifi205	40.9739	0.0143761	1.17872e-05	0.000526699	UP
Six4	21.2553	0.0143895	6.26979e-05	0.00220168	UP
Ppl	73.0364	0.0143975	8.49074e-05	0.00283584	UP
Slc22a18	24.5827	0.0144269	5.06389e-05	0.00184649	UP
Plau	12.9422	0.0144302	3.90427e-05	0.00147866	UP
Tnfaip2	93.9765	0.0144313	6.8007e-05	0.00237045	UP
Gm4759	2.82018	0.0144527	1.25518e-07	8.47066e-06	UP
Lair1	29.3343	0.0144618	6.87787e-05	0.00238647	UP
Sykb	79.2573	0.0144775	5.71299e-05	0.00203668	UP
Clec4n	3.7873	0.014487	4.30696e-07	2.61592e-05	UP
Sulf1	151.188	0.0144889	2.19176e-07	1.40952e-05	UP
Pcdhb5	15.2499	0.0145009	5.62393e-05	0.00201809	UP
Cd8a	1.68774	0.0145636	1.22718e-09	1.28182e-07	UP
Pcdhb9	23.1721	0.014608	1.74433e-05	0.000731594	UP
Slamf7	7.25606	0.0146777	3.97129e-08	2.89445e-06	UP
Rbm43	27.172	0.0147281	3.76503e-07	2.32116e-05	UP
Jak3	24.6615	0.0147669	5.54104e-05	0.00199709	UP
Tnfrsf1a	114.515	0.0148061	4.00613e-07	2.45136e-05	UP
Tnfrsf1b	49.018	0.0148199	4.81655e-05	0.00179108	UP
Fam111a	77.0741	0.0148289	1.76987e-05	0.00074041	UP
Ccl8	2.82096	0.0148332	9.82345e-10	1.05983e-07	UP
H2-Eb1	73.7066	0.0148484	5.02155e-05	0.00184225	UP
Apobec3	17.9088	0.0148646	4.85293e-05	0.00180012	UP
Zmynd15	7.53078	0.0148926	2.81781e-06	0.000143063	UP
Psmb10	57.3791	0.0149227	2.6036e-06	0.000133011	UP
Cxcl10	6.10547	0.0149356	4.33673e-09	3.92918e-07	UP
Cd86	10.4299	0.01494	3.85197e-05	0.00146223	UP
Irf1	89.6148	0.0149526	3.09239e-06	0.000155559	UP
H2-Ab1	101.996	0.0150544	2.82855e-05	0.00111772	UP
Neurl3	12.9463	0.0150624	2.56066e-05	0.0010242	UP
Casp12	26.5526	0.0150873	3.58675e-05	0.0013693	UP
H2-M3	10.9497	0.015117	3.01013e-05	0.00117812	UP
Ankdd1b	2.46168	0.0151459	3.29058e-07	2.05179e-05	UP
Serpina3g	18.2106	0.0152013	1.81179e-06	9.65461e-05	UP
Cmklr1	30.2872	0.0152178	1.29031e-05	0.000568813	UP
Fcgr4	4.15485	0.0152696	5.52081e-08	3.93634e-06	UP
Lpcat2	18.1721	0.0153122	1.33938e-05	0.000582614	UP
Gm12185	5.22291	0.0153226	1.76837e-07	1.15998e-05	UP
S100a9	3.24088	0.0153492	2.64169e-08	2.0056e-06	UP
Mid1	98.6918	0.0153652	2.47188e-05	0.00099354	UP
Oas1b	3.19805	0.0154136	1.32379e-07	8.89704e-06	UP
Stat2	182.869	0.0154348	1.45846e-11	2.34483e-09	UP
Trim12c	51.6608	0.0154645	8.73106e-06	0.000402193	UP
Stx11	10.0716	0.0154773	2.12235e-05	0.000867684	UP
Tapbp	253.6	0.0155033	6.64217e-10	7.40986e-08	UP
Cd44	117.593	0.0155107	1.47424e-05	0.000631229	UP
Apbb1ip	19.2293	0.0155558	2.12233e-05	0.000867684	UP
Alox5ap	18.8715	0.0155643	2.12701e-05	0.000867684	UP
Pydc4	5.14316	0.0155834	5.78654e-09	5.12938e-07	UP
Parp4	229.081	0.0155903	5.74064e-11	8.11558e-09	UP
Ccr2	12.6813	0.0156382	1.93655e-06	0.000102444	UP
Ltbp2	50.9001	0.0156388	1.56772e-05	0.000665035	UP
Irak3	20.7315	0.0156431	1.95503e-05	0.000809778	UP
Pik3cd	32.5256	0.0156432	1.02281e-05	0.000463344	UP
Il10ra	19.7968	0.0156835	1.50209e-05	0.000639813	UP
Clec5a	7.37244	0.0157683	1.45134e-05	0.000623052	UP
Ggta1	46.3463	0.0157717	5.11104e-07	3.01496e-05	UP
Btk	4.83984	0.0157884	2.55236e-06	0.0001308	UP
Itgax	6.92456	0.0158184	5.53943e-09	4.96399e-07	UP
Csprs	4.2352	0.0158314	2.30134e-10	2.81639e-08	UP
Plcg2	42.3877	0.0158335	7.83889e-06	0.000368316	UP
Arpc1b	79.5424	0.0158692	9.76552e-08	6.70062e-06	UP
Dock8	168.35	0.0158693	4.6736e-07	2.79716e-05	UP
Gfap	353.536	0.0159118	7.53232e-06	0.00035495	UP
Irf5	27.0566	0.0159613	1.31929e-05	0.000578478	UP
Fgr	5.23736	0.0159965	1.07969e-07	7.34681e-06	UP
Fxyd5	22.4565	0.0160173	8.71576e-06	0.000402193	UP
Lpxn	4.71153	0.0160191	6.17094e-06	0.000295898	UP
Muc4	2.73557	0.0160274	1.67781e-10	2.16572e-08	UP
2810047C21Rik1	2.32167	0.0160382	1.58473e-07	1.04791e-05	UP
Ifi47	22.6895	0.0160969	6.20855e-06	0.000296834	UP
Pros1	224.029	0.0161171	4.05291e-10	4.71373e-08	UP
Hmox1	51.8412	0.0161599	9.79874e-06	0.00044636	UP
Cd74	201.785	0.0162272	8.48223e-06	0.000394051	UP
Tgm2	415.911	0.0162697	8.95298e-08	6.19493e-06	UP
Csf2rb2	6.41205	0.0162861	1.75645e-07	1.15679e-05	UP
Hexb	159.736	0.0162975	1.98992e-06	0.000104928	UP
Cpxm2	77.3463	0.0163207	7.95143e-06	0.000371497	UP
Gm5424	1616.4	0.0163266	1.57542e-07	1.04596e-05	UP
Aoah	5.96346	0.0164048	1.78268e-06	9.585e-05	UP
Lyz1	17.4695	0.0164589	1.09493e-07	7.41977e-06	UP
Igj	3.86034	0.0164777	2.97584e-08	2.22835e-06	UP
Rnase4	680.726	0.0164865	3.87406e-08	2.83619e-06	UP
BC013712	16.7789	0.0165012	3.76404e-06	0.000186485	UP
Pcdhga8	38.8288	0.0165387	8.76389e-07	4.95583e-05	UP
P2ry13	10.2965	0.0165884	5.59461e-06	0.000269841	UP
Tcirg1	43.9658	0.0166533	8.73529e-07	4.95583e-05	UP
Ifi30	27.7353	0.0167095	3.92908e-06	0.000194075	UP
Ccl12	2.68958	0.0167622	3.96014e-10	4.68462e-08	UP
Parp3	95.4137	0.0168108	9.78748e-09	8.23905e-07	UP
Dkk3	52.4433	0.0168551	4.19457e-06	0.000205333	UP
Fermt3	21.0483	0.016857	4.19445e-06	0.000205333	UP
Pik3ap1	155.61	0.0169119	3.53472e-06	0.000175654	UP
Olfml3	40.9637	0.0169333	2.61975e-07	1.65874e-05	UP
Cd22	5.77947	0.0169388	1.96416e-08	1.55605e-06	UP
F830016B08Rik	155.473	0.0171364	9.59543e-07	5.38888e-05	UP
Apcs	57.5807	0.0172154	4.98229e-07	2.95212e-05	UP
Adcy7	27.5069	0.0173902	2.03183e-06	0.000106454	UP
Clec7a	18.6513	0.0173985	1.31769e-09	1.35055e-07	UP
Gpr65	4.91095	0.0174194	1.18529e-08	9.57513e-07	UP
Wdfy4	30.6388	0.017474	1.81838e-06	9.65461e-05	UP
Vcam1	78.2236	0.0175068	6.28869e-07	3.63128e-05	UP
Zfp951	17.4382	0.0175337	1.13634e-06	6.3169e-05	UP
Naalad2	30.2091	0.0175561	8.07961e-07	4.61664e-05	UP
Trem2	7.94701	0.0176381	2.28141e-08	1.77312e-06	UP
Pld4	20.4138	0.0176886	1.17566e-06	6.51338e-05	UP
Arhgap9	5.88532	0.0176896	4.54444e-08	3.283e-06	UP
Pcdhb6	25.4026	0.0177117	7.17704e-07	4.1297e-05	UP
Hck	10.934	0.0177268	3.37237e-07	2.09483e-05	UP
Psmb9	11.4301	0.017738	5.34375e-07	3.11858e-05	UP
C1ra	490.159	0.0178432	7.20604e-07	4.13188e-05	UP
Pik3r5	10.6431	0.0179356	3.56624e-07	2.2069e-05	UP
Fcgr2b	87.7177	0.0179589	9.47518e-07	5.33964e-05	UP
Il33	54.6162	0.017971	1.86949e-07	1.21658e-05	UP
Pcdhga3	79.7418	0.0179717	1.26133e-09	1.30092e-07	UP
St8sia6	21.4233	0.0180189	2.76131e-07	1.73497e-05	UP
Abi3	33.4254	0.0180447	4.43322e-07	2.67281e-05	UP
Tor3a	44.0199	0.0181674	1.32212e-10	1.73452e-08	UP
Orm2	13.2872	0.0182186	5.64048e-10	6.37919e-08	UP
Gbp4	51.6704	0.0182267	5.1812e-07	3.04539e-05	UP
Tnfsf10	42.8298	0.0182897	7.4971e-08	5.2317e-06	UP
Dtx3l	256.86	0.0183077	2.01184e-10	2.49941e-08	UP
Xdh	350.442	0.0183141	1.3855e-09	1.40252e-07	UP
Irf8	22.5744	0.0183225	5.67558e-07	3.30049e-05	UP
Gbp8	14.7187	0.0183573	2.18389e-08	1.70541e-06	UP
Csf2rb	16.3632	0.018389	2.6408e-07	1.66564e-05	UP
Arhgap25	18.0905	0.0183977	4.4131e-07	2.6705e-05	UP
Cyth4	28.8867	0.0184151	4.9865e-07	2.95212e-05	UP
Pdlim1	86.8522	0.0184322	1.00066e-08	8.3299e-07	UP
Gbp5	46.6193	0.0185106	4.28697e-07	2.61346e-05	UP
Ctsz	188.467	0.0185549	3.34593e-11	5.03394e-09	UP
Cd300ld	14.7641	0.0186472	9.31971e-08	6.4216e-06	UP
Ms4a6c	8.36489	0.0186523	2.60517e-08	1.98708e-06	UP
Ifit2	126.687	0.0187424	5.6358e-08	4.00093e-06	UP
Havcr2	8.02255	0.0188082	2.43558e-07	1.55978e-05	UP
Cx3cr1	53.6336	0.0188519	2.81447e-08	2.11718e-06	UP
Il1rn	4.54178	0.01889	1.1233e-11	1.8421e-09	UP
Acer2	46.2955	0.0188979	2.44444e-07	1.55978e-05	UP
Cd68	20.1892	0.018899	2.30797e-08	1.7853e-06	UP
Slc15a3	12.6174	0.0190054	1.08869e-08	8.9716e-07	UP
Fmo2	65.7129	0.0190148	1.77599e-07	1.16034e-05	UP
Csf1r	157.476	0.01902	1.01439e-08	8.40153e-07	UP
Ikzf1	15.4674	0.0190916	1.49355e-07	9.95642e-06	UP
Slfn5	306.068	0.0191494	2.13269e-09	2.0573e-07	UP
Capg	9.31533	0.0191527	1.15197e-08	9.39856e-07	UP
Ms4a6d	3.56089	0.0191722	9.93192e-10	1.06453e-07	UP
Sncg	14.7293	0.0192086	7.24866e-08	5.07995e-06	UP
Cxcl16	49.659	0.0193158	1.34391e-07	8.99543e-06	UP
Serping1	640.146	0.0193552	8.95837e-15	2.44847e-12	UP
Cmpk2	45.7158	0.0193571	3.35191e-10	4.0717e-08	UP
Aif1	13.4949	0.0193742	1.03346e-07	7.06158e-06	UP
Treml2	4.39716	0.0194091	2.32575e-09	2.20462e-07	UP
Tyrobp	9.40939	0.019496	1.48898e-08	1.18533e-06	UP
Rac2	8.3278	0.0195016	9.14583e-09	7.85249e-07	UP
Clec4a3	9.19868	0.0195177	3.74166e-08	2.76394e-06	UP
Selplg	21.2736	0.0195695	5.26309e-08	3.76897e-06	UP
Lsp1	44.1801	0.0195854	8.60186e-08	5.9772e-06	UP
Fcgr3	41.9394	0.0196103	6.4972e-08	4.57286e-06	UP
Emr1	46.5791	0.0197154	6.07052e-08	4.29097e-06	UP
Parp10	27.8442	0.0197821	2.45203e-08	1.88783e-06	UP
Cd33	14.8446	0.0198051	2.14716e-08	1.68475e-06	UP
Blnk	7.98361	0.0198569	3.84085e-08	2.82449e-06	UP
Slc11a1	11.2963	0.0198762	5.93806e-09	5.20739e-07	UP
Tbxas1	11.936	0.0198843	5.08068e-08	3.6543e-06	UP
Inpp5d	39.6702	0.019894	3.11674e-08	2.32325e-06	UP
Ly9	7.28175	0.0199279	5.16132e-11	7.49031e-09	UP
Clec12a	16.4273	0.019963	2.69969e-08	2.04019e-06	UP
Cd52	6.94702	0.0199768	3.78885e-10	4.53528e-08	UP
Fmn1	140.221	0.0199838	8.88305e-11	1.20391e-08	UP
Msr1	39.9819	0.0200166	4.39827e-08	3.19147e-06	UP
Arhgdib	33.6404	0.0200866	8.40298e-09	7.25266e-07	UP
Evi2b	8.73215	0.0201401	1.25099e-08	1.00563e-06	UP
Siglec1	25.8081	0.0203359	5.16898e-10	5.9277e-08	UP
Fcgr1	12.2493	0.0203438	2.57428e-08	1.97269e-06	UP
Csf3r	10.1649	0.0203522	9.81663e-09	8.23905e-07	UP
Pcdhb3	17.7243	0.0204275	3.36294e-09	3.11576e-07	UP
Tap2	81.6139	0.0204568	4.39925e-11	6.44137e-09	UP
Parp12	107.336	0.0205638	1.40125e-13	3.33029e-11	UP
Eif2ak2	201.307	0.0206499	6.84049e-12	1.15647e-09	UP
Uba7	29.6712	0.0206607	9.46552e-09	8.04275e-07	UP
Tlr13	10.8278	0.0207254	2.4412e-09	2.30076e-07	UP
C4a	181.996	0.0207376	5.6625e-09	5.0467e-07	UP
Gm4902	5.20348	0.0207377	1.70363e-10	2.16572e-08	UP
H2-Aa	56.3428	0.0207385	1.41199e-08	1.12953e-06	UP
Hpgds	17.6679	0.0208532	9.84727e-09	8.23905e-07	UP
Gm4951	273.881	0.0208653	2.20483e-09	2.10216e-07	UP
Itih4	1819.04	0.0209065	1.66085e-09	1.63336e-07	UP
Igsf6	13.1105	0.0209534	1.74451e-09	1.70287e-07	UP
Vwf	142.439	0.0209655	9.80517e-10	1.05983e-07	UP
Pisd-ps2	49.9579	0.021024	3.98484e-10	4.68462e-08	UP
Cd3g	3.87934	0.0211679	1.3276e-13	3.20166e-11	UP
Osmr	63.7286	0.0212178	1.05308e-09	1.12139e-07	UP
Unc93b1	87.6456	0.0213244	9.89742e-11	1.31958e-08	UP
Nckap1l	35.9217	0.0214116	4.92296e-09	4.4358e-07	UP
Tgtp2	75.1892	0.0214872	2.01618e-09	1.95641e-07	UP
Gbp9	86.5927	0.0214916	2.15134e-09	2.06315e-07	UP
Runx1	18.3304	0.021517	3.47655e-09	3.20292e-07	UP
Ube2l6	82.8035	0.0215665	2.26804e-11	3.50884e-09	UP
Lcp1	183.649	0.021595	2.23362e-11	3.48849e-09	UP
Sp140	13.4686	0.0216226	2.60738e-09	2.44334e-07	UP
Mx2	23.754	0.0216306	3.23118e-09	3.01069e-07	UP
Pcdhb11	23.1603	0.0216472	8.16214e-11	1.11542e-08	UP
Ly6e	321.362	0.0216664	5.35047e-10	6.09321e-08	UP
Ifi27l2b	20.8735	0.0217395	2.82686e-14	7.47705e-12	UP
Epsti1	25.8811	0.0218535	1.24961e-09	1.29699e-07	UP
Cd180	10.6969	0.0218574	1.33356e-09	1.35833e-07	UP
Eya4	18.0981	0.0220258	1.66334e-09	1.63336e-07	UP
Gbp7	144.515	0.0221213	4.53351e-10	5.23556e-08	UP
Tlr7	13.1324	0.0221324	1.49196e-09	1.48283e-07	UP
Hvcn1	11.9562	0.0221362	8.20639e-10	8.97178e-08	UP
Cd274	26.3169	0.0221504	1.47725e-09	1.47716e-07	UP
Naip5	10.5886	0.0221625	1.10731e-09	1.17153e-07	UP
Hmha1	30.3162	0.0221866	7.48213e-11	1.03109e-08	UP
Lcp2	22.0989	0.0222129	1.19766e-09	1.259e-07	UP
Mx1	7.17823	0.0222636	3.95691e-11	5.84589e-09	UP
Ly86	10.0069	0.0222939	7.24793e-10	8.031e-08	UP
Cybb	77.3603	0.0223965	3.51416e-11	5.23897e-09	UP
Pcdhb2	15.258	0.0225026	7.51936e-10	8.27584e-08	UP
Herc6	103.083	0.0225293	1.9319e-10	2.41842e-08	UP
Itgal	23.6089	0.0226297	2.04149e-10	2.51717e-08	UP
Gpx3	147.28	0.0226566	1.76283e-10	2.22374e-08	UP
Elf4	25.4636	0.0226579	6.1294e-10	6.88466e-08	UP
Parp9	129.772	0.0228602	2.14957e-13	4.89595e-11	UP
Vav1	22.8789	0.0229103	3.99931e-10	4.68462e-08	UP
Arhgap30	33.55	0.0229684	3.60737e-10	4.34979e-08	UP
9930111J21Rik1	29.9788	0.0230652	1.64017e-10	2.13469e-08	UP
Cd84	25.1095	0.0233142	1.69709e-10	2.16572e-08	UP
Plek	56.9129	0.0233188	9.12997e-11	1.22723e-08	UP
9930111J21Rik2	34.2517	0.0233436	2.07907e-11	3.27833e-09	UP
C130026I21Rik	3.36788	0.023377	3.27802e-18	1.85366e-15	UP
Iigp1	688.37	0.0233817	5.62582e-11	8.02242e-09	UP
Itgam	44.7853	0.0234283	7.05429e-11	9.80368e-09	UP
Lgals3	10.3636	0.0234376	6.47535e-12	1.10614e-09	UP
Lgals9	486.466	0.0236706	3.90613e-12	7.19738e-10	UP
Hcls1	45.2902	0.0236834	1.00492e-10	1.32901e-08	UP
Ikzf3	6.62154	0.0237844	7.71436e-12	1.2909e-09	UP
Slfn9	50.0516	0.0238859	6.98431e-11	9.78937e-09	UP
H2-Gs10	114.478	0.0239204	2.71217e-11	4.15671e-09	UP
Tlr2	9.14017	0.024024	4.30191e-12	7.75243e-10	UP
Bst2	70.0186	0.0240374	5.31622e-11	7.64743e-09	UP
Serpina3n	287.791	0.0240651	3.28515e-11	4.98825e-09	UP
Mnda	37.6598	0.0240878	6.38949e-12	1.10296e-09	UP
Spn	9.70267	0.0241686	1.47368e-12	2.84317e-10	UP
Isg15	13.4079	0.0242435	1.97071e-11	3.13763e-09	UP
Oas1g	6.92043	0.0243013	1.33136e-12	2.63049e-10	UP
H2-Q6	79.7481	0.0244566	3.38323e-12	6.30473e-10	UP
Ifi203	76.5621	0.0244869	1.43816e-12	2.80767e-10	UP
Mndal	81.7293	0.024497	4.47585e-12	7.97821e-10	UP
Ptpn6	76.7904	0.0245631	3.02821e-12	5.708e-10	UP
AW112010	48.5067	0.0245856	1.07483e-11	1.78042e-09	UP
Gbp3	178.189	0.024774	1.34114e-11	2.17755e-09	UP
AI607873	54.8724	0.0248787	4.02258e-12	7.32959e-10	UP
Zc3hav1	192.426	0.0249458	4.64247e-16	1.65504e-13	UP
Fcer1g	19.882	0.0252071	5.30495e-12	9.34464e-10	UP
Cd53	14.2316	0.0252195	5.3564e-12	9.34464e-10	UP
Samd9l	127.057	0.0252549	2.68934e-13	6.04145e-11	UP
Lyz2	244.025	0.0252688	4.1464e-13	8.94694e-11	UP
H2-K1	1549.12	0.0256059	1.40573e-14	3.77911e-12	UP
H2-D1	759.081	0.0256229	1.53707e-20	1.40035e-17	UP
B2m	1649.29	0.0256283	4.71744e-17	2.09085e-14	UP
Ncf1	22.2137	0.0257069	1.2814e-12	2.56264e-10	UP
Naip2	21.9895	0.0258198	1.7867e-12	3.407e-10	UP
C1qa	53.898	0.0260874	1.05287e-12	2.1316e-10	UP
Dock2	51.71	0.0261022	9.03983e-13	1.85305e-10	UP
C3ar1	30.5397	0.0261108	7.96706e-13	1.65382e-10	UP
Oasl1	17.8144	0.0261215	8.93179e-14	2.21928e-11	UP
Myo1f	21.6159	0.0261953	6.21776e-13	1.30724e-10	UP
Oas2	13.0567	0.0262915	3.36089e-13	7.44801e-11	UP
Lilrb4	17.147	0.026306	1.85264e-15	5.73236e-13	UP
Trim34a	34.3532	0.0263884	1.75122e-13	4.10261e-11	UP
Gbp2	98.2603	0.0264222	4.11168e-13	8.94694e-11	UP
Slfn2	29.4032	0.0264907	2.02409e-13	4.67507e-11	UP
Igtp	107.694	0.0265293	4.43383e-13	9.44291e-11	UP
Ifi27l2a	9.20792	0.0267058	1.28461e-15	4.05123e-13	UP
Irgm2	158.823	0.0267113	9.10392e-14	2.22829e-11	UP
Tap1	67.313	0.0267592	5.79182e-15	1.69607e-12	UP
Oas1a	8.4713	0.0267594	8.72229e-15	2.42435e-12	UP
Sp100	104.791	0.0267679	4.4251e-15	1.3194e-12	UP
Stat1	432.907	0.026777	2.70277e-16	1.08104e-13	UP
Pcdhb14	62.4846	0.0268237	1.61544e-18	1.03257e-15	UP
Ifih1	156.519	0.0268399	2.73637e-17	1.28211e-14	UP
Psmb8	50.8263	0.0270208	7.8782e-14	2.01867e-11	UP
Trim12a	37.6515	0.0271079	1.19829e-15	3.85309e-13	UP
Icam1	40.8446	0.0271091	8.61545e-14	2.17361e-11	UP
Pyhin1	9.72388	0.0272368	1.10562e-15	3.62622e-13	UP
Sp110	25.6804	0.0277865	2.99044e-14	7.78416e-12	UP
Irgm1	139.446	0.0277983	7.03578e-16	2.45489e-13	UP
Ly6a	43.2222	0.0278126	6.4948e-15	1.86856e-12	UP
Parp14	336.763	0.0281313	1.25335e-17	6.63021e-15	UP
Laptm5	57.7637	0.0282332	8.41959e-15	2.38057e-12	UP
Irf9	111.069	0.0286869	1.70006e-18	1.03257e-15	UP
C1qc	72.677	0.0289258	2.42523e-15	7.36507e-13	UP
Ddx58	129.769	0.0291403	9.75198e-19	6.66345e-16	UP
Pydc3	15.5259	0.0291572	3.6928e-16	1.34574e-13	UP
C1qb	70.5362	0.0291952	3.41956e-16	1.27449e-13	UP
Nlrc5	54.8626	0.0294814	8.38611e-16	2.80661e-13	UP
Fyb	91.7961	0.0295179	7.68403e-16	2.62522e-13	UP
Myot	185.784	0.0296775	2.33201e-16	9.56064e-14	UP
Apol9b	136.903	0.0297673	1.5539e-16	6.53396e-14	UP
Ccl6	24.3693	0.0298288	3.28505e-16	1.27449e-13	UP
Rsad2	60.7736	0.0298762	3.4178e-16	1.27449e-13	UP
Gp49a	8.08836	0.0302392	4.15799e-20	3.40934e-17	UP
D14Ertd668e	27.8972	0.0304027	5.42153e-17	2.33968e-14	UP
H2-T24	30.4252	0.0304352	3.05955e-17	1.39371e-14	UP
Gm12250	16.1057	0.030716	4.13208e-19	3.08009e-16	UP
Ctss	278.556	0.030823	1.80369e-17	8.96326e-15	UP
Ptprc	65.084	0.0310758	2.19279e-17	1.05764e-14	UP
I830012O16Rik	72.0855	0.0311094	1.31207e-17	6.72393e-15	UP
C4b	1755.54	0.0314008	2.24136e-18	1.31271e-15	UP
Slfn8	26.519	0.0316443	5.70468e-18	3.11837e-15	UP
Dhx58	30.9064	0.0316659	1.66203e-18	1.03257e-15	UP
Mpeg1	157.862	0.0325284	5.82286e-19	4.1517e-16	UP
Apol9a	96.0979	0.0328507	1.00989e-19	7.88626e-17	UP
Lilrb3	19.356	0.0332222	3.35021e-20	2.89158e-17	UP
Lgals3bp	148.837	0.0338221	5.40549e-22	6.13619e-19	UP
Ddx60	45.3917	0.0345479	2.55769e-21	2.46727e-18	UP
Itgb2	51.982	0.0347493	1.91922e-21	1.96708e-18	UP
Rtp4	38.6277	0.0352475	5.61271e-22	6.13619e-19	UP
Gbp10	149.91	0.0356132	1.3844e-22	1.74637e-19	UP
Trim30d	40.1893	0.0360288	2.65774e-23	3.63203e-20	UP
Zbp1	33.4401	0.0361325	1.48957e-24	2.44275e-21	UP
Ifi204	58.9875	0.0372348	2.675e-24	3.98794e-21	UP
Xaf1	33.7416	0.0373687	3.58543e-27	7.34969e-24	UP
Oasl2	45.7859	0.0380445	1.6907e-25	3.08065e-22	UP
Ifit3	131.573	0.0393954	1.06075e-28	2.89921e-25	UP
Gbp6	202.843	0.0395078	7.12776e-28	1.66983e-24	UP
Ifi44	31.114	0.0432995	2.94649e-32	9.66388e-29	UP
Usp18	39.3862	0.0437387	5.69916e-33	2.33651e-29	UP
Ifit1	75.6391	0.0454707	6.11684e-36	3.34367e-32	UP
Trim30a	51.4822	0.0458337	1.44751e-41	1.18689e-37	UP
Irf7	84.2623	0.0538804	1.24739e-50	2.04559e-46	UP

## Sheet: B
Heart aging DESeq2 (FDR < 5%)
Gene Name	Mean gene expression	log2(FoldChange per month of life)	p-value	Adjusted p-value (FDR)	Age change
Kcnd2	79.8532	-0.0231573	1.44457e-06	0.000535283	DOWN
Phkg1	38.0716	-0.0212225	2.35694e-05	0.00429749	DOWN
Tfpi	165.454	-0.0197121	3.2254e-06	0.000950006	DOWN
Whrn	69.7676	-0.0191846	8.1897e-05	0.00990264	DOWN
Agtpbp1	410.712	-0.018858	5.56815e-08	5.33012e-05	DOWN
Pde1c	194.853	-0.0186066	2.64518e-05	0.00467464	DOWN
Aqp4	16.3947	-0.018231	3.33991e-05	0.00543218	DOWN
Dut	51.8995	-0.0181749	0.00025683	0.0230485	DOWN
Kcnj3	109.683	-0.0179381	0.000122891	0.0135089	DOWN
Peg3	30.8147	-0.0173	0.000341734	0.0270724	DOWN
Epn3	33.9582	-0.0171898	0.000589444	0.0382539	DOWN
Aqp1	409.736	-0.0169221	3.38728e-07	0.000216165	DOWN
Cacna2d1	787.486	-0.0167643	1.85247e-05	0.00373321	DOWN
Ces1d	142.624	-0.016746	0.000521537	0.0355138	DOWN
Armcx3	36.245	-0.0166168	0.000870259	0.0492446	DOWN
Erc1	505.436	-0.0162049	1.60874e-06	0.000559989	DOWN
Ppip5k2	566.474	-0.0160422	3.35758e-05	0.00543218	DOWN
Ndrg4	258.711	-0.0158084	0.00032751	0.0266816	DOWN
9030617O03Rik	118.381	-0.0156433	0.000618393	0.0390301	DOWN
Dbt	175.249	-0.0156104	0.000259255	0.0230857	DOWN
Rilpl1	425.59	-0.0155619	5.93763e-06	0.00142095	DOWN
Kcnb1	108.091	-0.015312	0.000588634	0.0382539	DOWN
Rmnd5a	312.43	-0.0149719	1.88881e-05	0.00374082	DOWN
Klf9	389.014	-0.0146457	2.1746e-05	0.00409501	DOWN
Klhl24	1030.3	-0.0141529	0.000100751	0.0114587	DOWN
Ghr	380.895	-0.0137722	6.97781e-05	0.00921311	DOWN
Ppp2r3a	1137.63	-0.0137318	1.42983e-05	0.00309895	DOWN
Tgfbr3	241.73	-0.0134599	0.000574838	0.0377324	DOWN
Nfia	366.634	-0.0134051	5.85341e-05	0.00862028	DOWN
Sspn	493.357	-0.0133291	0.000170988	0.0169322	DOWN
Cox7a1	495.686	-0.0133098	0.000446365	0.0322478	DOWN
Ivd	490.124	-0.0131683	0.000300483	0.0249586	DOWN
Pik3r1	770.105	-0.0131661	0.00064498	0.040048	DOWN
Ppp1r14c	346.561	-0.0127804	0.00042664	0.0310178	DOWN
Ryr2	13080.9	-0.0121619	0.000316948	0.0260056	DOWN
Cpeb3	321.2	-0.0121161	0.000782584	0.045865	DOWN
Ifngr2	434.122	-0.0120152	0.000491981	0.0342508	DOWN
Sucla2	1414.66	-0.0120017	0.00052128	0.0355138	DOWN
Rbm24	480.155	-0.0119745	0.000501838	0.0347266	DOWN
Plin4	471.074	-0.0119164	0.000483019	0.0340395	DOWN
Mef2a	537.216	-0.0114136	0.000420647	0.0307883	DOWN
Slc2a4	527.316	-0.0111935	0.000302015	0.0249586	DOWN
Ndufs1	1589.31	-0.0110072	0.000131726	0.0140997	DOWN
Fndc5	770.764	-0.0107693	0.000334555	0.0268042	DOWN
Fkbp4	1008.87	-0.0104888	0.000224929	0.0208368	DOWN
Hspa5	1608.58	-0.0104542	7.96672e-05	0.00982773	DOWN
Vldlr	1376.97	-0.0102254	0.000216823	0.0202492	DOWN
Myh6	163248	-0.00995319	6.23334e-05	0.00873199	DOWN
Kif1c	2037.84	-0.00970928	2.61231e-05	0.00467464	DOWN
Hrc	7074.55	-0.00955404	0.00021403	0.0202492	DOWN
Atp2a2	33502.9	-0.00922485	0.000805062	0.0467058	DOWN
Nrap	2549.92	0.00874246	0.000559162	0.0371277	UP
Flnc	1412.72	0.00934304	0.000599917	0.0382847	UP
Kif5b	1279.62	0.0096703	0.000413893	0.0307883	UP
Hspb7	3801.3	0.0105099	0.000145623	0.0150573	UP
Muc4	4.26275	0.0106229	0.000402961	0.0302537	UP
Ccl8	4.61278	0.011135	0.000370033	0.02872	UP
Gpnmb	5.60505	0.0114174	0.000810736	0.0467986	UP
2900052N01Rik	4.46349	0.011506	0.000301819	0.0249586	UP
Tgm2	443.588	0.0117064	0.000401497	0.0302537	UP
Ppfibp1	365.93	0.0118604	0.000686867	0.0421927	UP
Kif5a	6.21353	0.012046	0.000573262	0.0377324	UP
Kcnc1	6.51734	0.0120754	0.000642085	0.040048	UP
Dlgap1	4.9866	0.0124027	9.47542e-05	0.0109944	UP
Prune2	1554.49	0.0126835	0.000236454	0.0217292	UP
Gm12185	6.36167	0.0127273	0.000135019	0.0140997	UP
Il33	7.43343	0.0127961	0.000801691	0.0467058	UP
Gm4841	9.59176	0.0129515	0.000110467	0.0124406	UP
Actg1	312.518	0.0131807	0.000465342	0.0329962	UP
C4a	7.0035	0.013375	0.000301963	0.0249586	UP
Eef1a1	660.777	0.0135056	6.13291e-05	0.00873199	UP
Myh9	1426.15	0.0135695	0.000214353	0.0202492	UP
Rorb	9.32066	0.0137462	0.000641989	0.040048	UP
Akap12	486.269	0.0138734	6.17484e-05	0.00873199	UP
Itgb1bp3	7.33345	0.0138885	7.65925e-05	0.0096914	UP
Enah	541.362	0.0139183	2.92172e-05	0.00500923	UP
Apod	13.1482	0.0140147	0.000278444	0.0240596	UP
C1rb	10.843	0.0140673	0.000760836	0.0450501	UP
Klra9	11.896	0.0141497	0.000552489	0.0368979	UP
Spn	10.4086	0.014398	0.000420803	0.0307883	UP
Iqgap1	256.445	0.0144042	0.000134473	0.0140997	UP
Kcnk1	5.87338	0.0145118	2.11512e-05	0.0040677	UP
Layn	12.5855	0.014578	0.000729792	0.0438907	UP
Ace	177.392	0.0146422	0.000366786	0.0286617	UP
Ccdc80	343.239	0.0146577	0.000549407	0.0368979	UP
Fabp5	111.144	0.0154052	0.000850543	0.0486079	UP
Pik3ap1	15.2567	0.0154126	0.000336015	0.0268042	UP
Col1a1	223.857	0.0154479	0.000488056	0.0341848	UP
Lilrb3	14.476	0.0155894	0.000592808	0.0382561	UP
Cfh	527.59	0.0156334	6.408e-05	0.00885992	UP
Ccnd1	172.453	0.015687	0.000450286	0.0323277	UP
Rpl3	192.881	0.0157915	0.00035614	0.0280204	UP
Stat3	335.906	0.015793	5.79436e-06	0.00141617	UP
Tgfbr2	187.43	0.0160061	0.00024138	0.0220058	UP
Pydc3	14.0293	0.0160251	0.000272252	0.023873	UP
Vim	842.354	0.0160644	4.7892e-05	0.00714462	UP
Ptpn1	65.7722	0.0161033	0.000843373	0.0484391	UP
Frzb	10.4033	0.0161464	6.49077e-05	0.00885992	UP
Itgbl1	30.4258	0.0161896	0.000746451	0.0446587	UP
Iigp1	175.231	0.0164257	0.0007241	0.0437776	UP
Csf1r	82.2239	0.016518	0.000862868	0.0490681	UP
Actb	1395.13	0.0165714	7.48837e-06	0.00175549	UP
Rbp1	19.5324	0.0166006	0.000456744	0.0325877	UP
Cx3cl1	20.3444	0.0166045	0.000380848	0.0293611	UP
Ccl6	26.0586	0.0166593	0.000699569	0.0426712	UP
Icam1	34.8624	0.0166915	0.000760408	0.0450501	UP
Aspn	94.1391	0.0167201	0.00060465	0.0383735	UP
C1qa	36.2526	0.0167386	0.000666093	0.0411366	UP
Coro1a	15.6312	0.0167747	0.000158889	0.015871	UP
Ecm1	36.8857	0.0168512	0.000774916	0.0456485	UP
Ide	224.96	0.0168909	6.60302e-05	0.00885992	UP
Scd1	67.2807	0.0170044	0.000702085	0.0426712	UP
Cp	484.209	0.0171322	8.12856e-07	0.000373491	UP
Ly6a	54.0199	0.0171662	0.000598188	0.0382847	UP
Serpine2	53.5202	0.0171969	0.000522489	0.0355138	UP
Igfbp7	251.709	0.0172766	6.15196e-05	0.00873199	UP
Ano5	55.6875	0.017347	0.000545012	0.0368268	UP
Ric3	15.796	0.0174425	0.000150932	0.015343	UP
Sfrp1	36.1225	0.0174965	0.000402055	0.0302537	UP
Tap1	30.1416	0.0175131	0.000247158	0.0223551	UP
Oasl2	27.7895	0.0175351	0.000146811	0.0150573	UP
Fbn1	489.185	0.0175549	3.98931e-05	0.00619259	UP
2011-09-01	120.761	0.0175796	0.000134197	0.0140997	UP
Col8a1	79.5891	0.017592	0.000394506	0.0302113	UP
Ifitm3	95.0664	0.0176296	0.000419571	0.0307883	UP
Samd9l	82.2956	0.0177142	0.000216793	0.0202492	UP
F830016B08Rik	118.89	0.0177416	3.62145e-05	0.00569858	UP
Ryr1	8.01432	0.0179401	3.09522e-06	0.000935651	UP
Psmb10	46.7713	0.0179493	0.000335661	0.0268042	UP
Hcls1	31.4174	0.0179983	0.000175019	0.0170377	UP
Cxcl16	37.0039	0.0180272	0.000202845	0.0195806	UP
Arpc1b	49.8872	0.0180749	0.000278569	0.0240596	UP
B2m	513.119	0.0180756	0.000285388	0.0244645	UP
Fbln2	356.553	0.0180965	1.22421e-05	0.00270432	UP
Abat	50.6709	0.0181189	0.000299743	0.0249586	UP
Rtn4	320.276	0.0181507	8.50231e-07	0.000375638	UP
Irgm1	51.593	0.0182888	0.000267088	0.0236003	UP
Tgfbi	75.6866	0.0183167	0.000155866	0.0157056	UP
Gpx3	241.642	0.0183371	4.50281e-05	0.00680577	UP
Myl1	76.6782	0.0183511	0.000132311	0.0140997	UP
Ifi27l1	19.1709	0.0184845	9.34784e-05	0.010957	UP
Pde8a	89.9316	0.018585	9.31652e-05	0.010957	UP
Vwf	168.23	0.0186994	5.1893e-06	0.00131972	UP
Ddx58	54.9251	0.0187591	0.000172941	0.0169792	UP
Itgam	23.2825	0.0189371	7.62118e-05	0.0096914	UP
Ankrd1	3010.85	0.0191593	9.85253e-05	0.0113176	UP
Cfb	9.57703	0.0191615	1.98184e-07	0.00015177	UP
Aebp1	65.5602	0.0192069	0.000117682	0.0131244	UP
Lima1	82.327	0.0192084	4.38065e-05	0.00670941	UP
Mrc2	67.7576	0.0192264	8.0422e-05	0.00982773	UP
Loxl2	81.3747	0.0192547	7.67753e-05	0.0096914	UP
Tgfb2	44.6506	0.0192695	0.000123482	0.0135089	UP
Anxa2	76.3732	0.0194794	6.63318e-05	0.00885992	UP
Parp14	217.131	0.0194879	1.60966e-05	0.00342409	UP
Gm12250	10.2532	0.0195236	4.67068e-07	0.000255486	UP
Acta1	560.579	0.0195896	4.02467e-06	0.00110075	UP
Meox1	39.9839	0.0196447	7.79259e-05	0.00972972	UP
I830012O16Rik	24.6469	0.0196801	2.12468e-05	0.0040677	UP
Dap	44.3586	0.0196837	8.61759e-05	0.0103115	UP
C1ra	49.0006	0.0198034	7.47933e-05	0.0096914	UP
Edn3	13.7147	0.0200712	1.54288e-06	0.000553844	UP
C4b	71.7208	0.0203975	5.80264e-07	0.000295735	UP
Ifi44	20.178	0.0204451	1.64423e-05	0.00343404	UP
F5	13.5484	0.0205697	2.76345e-07	0.000186728	UP
Ctss	70.7198	0.0206664	3.5869e-05	0.00569858	UP
C1s	90.5517	0.0206816	2.22472e-05	0.00412183	UP
Ptprc	41.0057	0.020717	3.31631e-05	0.00543218	UP
Myoc	17.2662	0.0208304	4.76783e-06	0.00127368	UP
Ifit2	76.7007	0.0208483	3.09221e-05	0.00522356	UP
Cygb	112.452	0.0208718	5.1025e-06	0.00131972	UP
Itgb2	27.3277	0.0209104	1.81419e-05	0.00372136	UP
C1qc	64.3736	0.0209833	2.90497e-05	0.00500923	UP
Fstl1	334.305	0.0212828	2.32761e-06	0.00075031	UP
Lrp1	1015.45	0.0213907	1.68513e-08	1.75974e-05	UP
Cds1	24.0015	0.02143	1.01191e-05	0.00228362	UP
Scn4b	184.311	0.021459	9.66448e-07	0.00041117	UP
Lrrcc1	111.454	0.0214785	3.969e-06	0.00110075	UP
Postn	222.84	0.0214931	2.35145e-06	0.00075031	UP
Plek	27.42	0.0217851	1.01388e-05	0.00228362	UP
Mki67	80.569	0.021924	5.28487e-06	0.00131972	UP
Serpina3n	26.7981	0.0219327	3.82242e-06	0.0010977	UP
Mgp	183.34	0.022076	1.85597e-07	0.00015177	UP
Bdh1	437.253	0.0223393	2.61566e-07	0.000186728	UP
Cilp	74.1491	0.0224637	4.30466e-07	0.000247238	UP
Emp1	104.81	0.022503	2.05921e-06	0.00069571	UP
Ankrd23	1170.08	0.0225216	4.03841e-09	5.15435e-06	UP
Prelp	120.056	0.0226493	1.19052e-06	0.000471568	UP
Amy1	29.3742	0.023105	2.52979e-06	0.000785399	UP
Vcan	152.376	0.0236307	1.24969e-06	0.000478506	UP
Dkk3	11.917	0.0237773	8.77787e-09	1.00831e-05	UP
Ifit1	31.729	0.023997	6.29243e-07	0.000301171	UP
Apoe	808.948	0.0244803	1.98821e-09	3.31758e-06	UP
Gbp6	204.109	0.0245049	1.00231e-06	0.000411198	UP
Ifi204	35.8887	0.0248974	3.91548e-07	0.000236722	UP
Trim30a	39.2742	0.025068	5.92139e-07	0.000295735	UP
Prkcq	38.2336	0.026214	1.70813e-07	0.000150933	UP
Bgn	352.074	0.0270914	2.47384e-09	3.55213e-06	UP
Thbs1	84.6575	0.029943	2.02168e-09	3.31758e-06	UP
Gbp10	108.902	0.0301384	5.89117e-10	1.35344e-06	UP
C3	916.824	0.0342166	4.24003e-17	2.43526e-13	UP
Ifit3	58.7047	0.0351281	2.48076e-12	7.12412e-09	UP
Cpxm2	132.913	0.0389052	3.17297e-15	1.21493e-11	UP
Myot	352.509	0.0392499	1.07942e-20	1.23993e-16	UP

## Sheet: C
Liver aging DESeq2 (FDR < 5%)
Gene Name	Mean gene expression	log2(FoldChange per month of life)	p-value	Adjusted p-value (FDR)	Age change
Cyp2d12	25.5829	-0.046724	2.56865e-08	6.67291e-06	DOWN
Slc25a30	86.1072	-0.0451883	8.53355e-09	2.68358e-06	DOWN
Ugt2b38	118.446	-0.0429581	1.60897e-09	6.00848e-07	DOWN
Cd163	38.8907	-0.0410883	8.24629e-07	0.000124738	DOWN
Mup10	4364.68	-0.0403189	1.41958e-06	0.000201953	DOWN
Gstp2	396.623	-0.0395316	4.91572e-11	3.26349e-08	DOWN
Retsat	343.616	-0.0373253	1.52014e-07	3.10898e-05	DOWN
Gstp1	734.824	-0.0372654	5.09461e-08	1.21761e-05	DOWN
Cyp2d11	63.7675	-0.0355605	1.28989e-05	0.00126346	DOWN
Ugt2b37	37.0493	-0.0347982	3.31004e-05	0.00269546	DOWN
Wnk4	11.8669	-0.0341001	3.84163e-05	0.00304023	DOWN
Adh6-ps1	310.197	-0.0339698	5.61372e-09	1.81308e-06	DOWN
Mup13	1517.75	-0.0332277	7.23367e-05	0.00485631	DOWN
Cyp1a1	11.4538	-0.0331454	4.72519e-05	0.0035072	DOWN
Dio1	137.164	-0.0329832	3.69067e-05	0.00297997	DOWN
Inmt	413.354	-0.0329017	5.61244e-07	8.94249e-05	DOWN
Selenbp2	644.15	-0.0328314	9.10297e-05	0.00574538	DOWN
Acsl1	2131.76	-0.0327964	2.38163e-08	6.46829e-06	DOWN
Tsku	61.1243	-0.032035	3.72151e-05	0.0029847	DOWN
Cyp2c69	199.775	-0.0320217	2.46381e-05	0.00211817	DOWN
Hsd3b4	11.5074	-0.0318064	0.000128514	0.00748724	DOWN
Med12l	17.7345	-0.031579	0.000164592	0.00876216	DOWN
LOC100048884	3617.74	-0.0310223	9.23641e-05	0.0057788	DOWN
Ces2c	39.446	-0.0305739	0.000155937	0.0084702	DOWN
Mup16	1922.62	-0.0297742	0.000252907	0.012089	DOWN
Snord57	34.2459	-0.0296554	0.000395615	0.0170123	DOWN
Akr1c14	898.592	-0.0294221	2.02247e-06	0.000271556	DOWN
Fam35a	120.654	-0.029206	0.000140783	0.00793567	DOWN
Cyp2d9	739.866	-0.0291018	0.000110523	0.00663692	DOWN
Mup9	723.144	-0.0288156	0.000523687	0.0212859	DOWN
Mphosph10	60.2829	-0.0286444	8.17002e-05	0.00530607	DOWN
Sort1	68.3423	-0.0282787	2.17484e-05	0.00191098	DOWN
2810007J24Rik	1837.88	-0.0276194	2.90986e-05	0.00246615	DOWN
Fam126b	87.9731	-0.0275382	4.96323e-05	0.00366115	DOWN
Mup6	49.016	-0.0274133	0.000227542	0.0110985	DOWN
Fabp1	6042.08	-0.0265298	1.8815e-05	0.00169087	DOWN
Lifr	1190.94	-0.0264464	4.48756e-05	0.00337273	DOWN
Taf2	86.8839	-0.0263945	3.93604e-05	0.00309445	DOWN
Snord32a	68.4965	-0.0263817	0.00156598	0.0470017	DOWN
Ces2d-ps	18.1342	-0.0263296	0.0017016	0.0498386	DOWN
Abhd5	69.7567	-0.0262682	0.000150837	0.00830649	DOWN
Mup11	276.53	-0.0262377	0.000757468	0.028024	DOWN
Whsc1l1	456.684	-0.026232	1.6347e-08	4.54294e-06	DOWN
Cyp2d40	27.1675	-0.0261782	0.001655	0.0487472	DOWN
Mup4	19.5007	-0.0260133	0.000917959	0.0327889	DOWN
Abcg2	154.702	-0.0258996	6.39081e-06	0.000707131	DOWN
Slc17a2	310.036	-0.025898	0.000240014	0.0115422	DOWN
Itih5	80.6842	-0.0255665	0.000200974	0.0102634	DOWN
Csad	693.662	-0.0252974	0.000226558	0.0110958	DOWN
Klhl2	85.5265	-0.0250924	0.000176977	0.00927579	DOWN
Mcm10	249.415	-0.0248364	0.000365612	0.0160627	DOWN
Slc22a28	87.9961	-0.0247183	0.000176323	0.00927579	DOWN
Ces3b	879.571	-0.0246714	6.32244e-05	0.0044443	DOWN
Abcd3	1879.82	-0.024622	8.50242e-06	0.00089915	DOWN
Acsm3	244.618	-0.0245437	9.12115e-06	0.000956121	DOWN
Akr1c19	95.8731	-0.0244424	0.00065007	0.0249786	DOWN
Mup21	359.157	-0.0240421	0.000501408	0.0205199	DOWN
Mup12	701.924	-0.0237465	0.00134257	0.0423317	DOWN
Car14	76.2765	-0.0236636	0.00135926	0.0427451	DOWN
Hsd17b2	197.224	-0.0232723	6.81945e-05	0.00468332	DOWN
Aox3	2154.89	-0.0230936	1.73704e-05	0.00159674	DOWN
Abca8a	318.578	-0.0229647	0.000183309	0.00952412	DOWN
Cyp1a2	1176.1	-0.0228007	0.000267781	0.0126481	DOWN
Aadac	582.015	-0.0227895	3.10015e-05	0.00257283	DOWN
Rapgef4	578.462	-0.0223764	2.69964e-07	5.20334e-05	DOWN
Mgll	173.853	-0.0223366	0.000577491	0.0228511	DOWN
Gm14057	3.94425	-0.0222436	0.00140496	0.0437221	DOWN
Creb3l3	599.597	-0.0219686	1.75279e-05	0.00159892	DOWN
Cmtm6	261.901	-0.0219213	0.000140261	0.00793567	DOWN
Cml1	84.3727	-0.021909	0.00159524	0.0476579	DOWN
Nudt7	637.628	-0.0218402	0.000553638	0.0221115	DOWN
Prkaa2	256.467	-0.0217484	0.000145307	0.00815222	DOWN
Ugt2b36	644.245	-0.0214849	0.000164978	0.00876216	DOWN
Fgf1	193.936	-0.0211522	0.00071887	0.0270141	DOWN
Hsd11b1	802.448	-0.0210929	0.000217234	0.010764	DOWN
Hao1	556.07	-0.0208872	0.00117579	0.038907	DOWN
Lmbrd2	235.602	-0.0208718	3.83502e-05	0.00304023	DOWN
Ugt2b5	1031.11	-0.020865	0.00156935	0.0470017	DOWN
Gm4952	151.615	-0.0207716	0.000871265	0.0313603	DOWN
Rasal2	84.2534	-0.020479	0.0012761	0.0411036	DOWN
Epb4.1l4b	134.985	-0.0204752	0.00141096	0.0437947	DOWN
Cyp4v3	1101.34	-0.0204462	0.000331065	0.0148173	DOWN
Ppm1g	172.344	-0.0199723	0.000692615	0.0262754	DOWN
Rpl35a	112.56	-0.0198672	0.000753223	0.028024	DOWN
Nrp1	294.389	-0.019596	0.000179286	0.00935573	DOWN
Acot12	245.093	-0.0194909	0.000272808	0.0127845	DOWN
Chuk	365.641	-0.0193543	5.00262e-05	0.00366757	DOWN
Cyp2f2	1822.75	-0.0193015	0.000604877	0.0236993	DOWN
Slc27a2	2787.63	-0.0192488	0.000302971	0.013927	DOWN
Acbd5	753.39	-0.0192482	1.14576e-06	0.000169035	DOWN
Akr1c6	1845.5	-0.0192422	0.00033655	0.0150066	DOWN
Vps37a	222.927	-0.0182679	0.000319567	0.0144769	DOWN
Ugt2b35	282.028	-0.0182525	0.000395768	0.0170123	DOWN
Hrsp12	1233.45	-0.0180841	5.64546e-05	0.00406405	DOWN
Abcb4	912.309	-0.018005	8.71325e-05	0.00553848	DOWN
Larp4b	332.861	-0.0176799	0.000146475	0.00817931	DOWN
Atp13a3	566.248	-0.017663	0.000148683	0.00822573	DOWN
Hectd1	1063.97	-0.0175178	1.57852e-05	0.0014853	DOWN
Atp5h	215.687	-0.0175108	0.00111209	0.0372253	DOWN
Tmf1	289.324	-0.017355	0.000433423	0.0183018	DOWN
Acadvl	470.869	-0.017333	0.000213612	0.0106361	DOWN
Prpf6	245.472	-0.0173083	0.000323857	0.0146041	DOWN
Sucla2	313.699	-0.0172055	0.000555101	0.0221115	DOWN
Kpna1	190.398	-0.01699	0.00140367	0.0437221	DOWN
Akr1c13	226.707	-0.0164237	0.00108822	0.0366317	DOWN
Gjb1	649.563	-0.0164013	0.00168033	0.0493365	DOWN
Naca	462.335	-0.0156544	0.00103714	0.0356146	DOWN
Apoa2	13041.4	-0.0155755	0.000283592	0.013238	DOWN
Ddx3y	267.62	-0.01537	0.0004664	0.0193524	DOWN
Nucks1	461.986	-0.0145569	0.00138967	0.0434726	DOWN
Abcb11	2192.82	-0.014182	0.00165045	0.0487472	DOWN
Gspt1	399.426	-0.0137536	0.000786145	0.0288173	DOWN
Ces1c	3612.46	-0.0124782	9.34117e-05	0.00578378	DOWN
Cyb5	1581.83	-0.0112913	0.000950376	0.0336006	DOWN
Kng1	4494.04	0.0115937	0.00162327	0.0482541	UP
H2-K1	2216.46	0.0123278	0.000269654	0.0126865	UP
Cp	3734.24	0.0156256	0.000128616	0.00748724	UP
Tor1aip1	172.385	0.0161949	0.00138714	0.0434726	UP
B2m	2052.36	0.0165941	0.000156822	0.00847972	UP
Cml2	1642.17	0.0174129	0.000438051	0.0184321	UP
Idh2	242.927	0.0175296	0.000159808	0.00860225	UP
Dhcr24	1236.9	0.0183668	0.000167328	0.00884766	UP
Stat2	165.49	0.0187699	0.000712588	0.0269475	UP
Sult1a1	483.928	0.0192863	0.00121592	0.0398089	UP
Ccl2	2.92902	0.0193392	0.00156312	0.0470017	UP
Gm5424	2677.3	0.0194594	0.000319824	0.0144769	UP
Iigp1	983.178	0.0196638	0.00151279	0.0462363	UP
Cd2	2.74522	0.0203646	0.00124713	0.0406081	UP
Heg1	101.897	0.0203799	0.00105425	0.0359952	UP
Tapbp	186.62	0.0204411	0.000526637	0.0213333	UP
Ctsb	696.172	0.0206995	1.5114e-06	0.000212485	UP
Parp9	146.912	0.021108	0.000210024	0.0105898	UP
Rtn4	138.471	0.0212518	0.000823875	0.0300162	UP
Eif2ak2	143.841	0.0213582	0.000212985	0.0106361	UP
Map3k1	115.737	0.0215498	0.00153468	0.0466156	UP
Krt18	583.62	0.021846	0.000410161	0.0175648	UP
Ccl5	3.11275	0.0218736	0.000682585	0.0261116	UP
Ubc	976.443	0.0219095	0.00102234	0.0352073	UP
Serpina3n	411.951	0.0219187	0.00041156	0.0175648	UP
Itih3	1511.8	0.0220316	0.000346948	0.0154127	UP
Lrrc25	4.20221	0.0220884	0.00105739	0.0359994	UP
Pydc4	4.63912	0.0222753	0.00107011	0.0362261	UP
Plac8	4.1803	0.0225597	0.00124617	0.0406081	UP
Tgfbi	151.833	0.0226288	0.000218095	0.010764	UP
Anxa5	131.458	0.0226338	0.000777735	0.0285967	UP
Lbp	166.761	0.0227411	0.000639192	0.0247196	UP
Dopey2	160.409	0.0227417	0.000392345	0.0170123	UP
Serping1	906.49	0.0227769	4.70535e-08	1.14753e-05	UP
Mmp14	92.0655	0.0229806	0.000140771	0.00793567	UP
Sat1	87.2423	0.0231436	0.000439873	0.0184438	UP
Cxcl10	7.1426	0.0231762	0.00127439	0.0411036	UP
Tlr1	3.52259	0.0231898	0.000265504	0.0125903	UP
Ang	295.216	0.0231994	4.46044e-05	0.00337273	UP
Cd83	3.94	0.0232676	0.000901862	0.0323641	UP
H2-M2	2.63109	0.0232774	9.61567e-05	0.00587959	UP
Bst2	93.1447	0.0233348	0.00148588	0.0456459	UP
Cdhr5	148.757	0.0234967	0.000211654	0.0106271	UP
Bgn	182.252	0.0236391	1.4031e-05	0.00135218	UP
Rbm3	49.1772	0.0236516	0.00128632	0.0412106	UP
Actg1	142.974	0.0237372	0.00104321	0.0357203	UP
Irf1	86.5607	0.0237389	0.00106581	0.036183	UP
Hist1h2af	5.53137	0.0237954	0.00153695	0.0466156	UP
Slc22a18	40.2442	0.0238656	0.00155697	0.0469843	UP
Igfbp3	72.7336	0.0238884	0.000189871	0.00973803	UP
Pdgfrb	40.6397	0.0241702	0.00127324	0.0411036	UP
Ttn	6.54667	0.0241872	0.000962988	0.0338462	UP
Ly9	6.86258	0.0242473	0.00131659	0.0417327	UP
H2-Q6	80.6327	0.0243126	0.00109268	0.0366785	UP
Itgax	5.26035	0.0243858	0.00101768	0.0352073	UP
Basp1	7.25687	0.0244435	0.00102104	0.0352073	UP
Zap70	6.41285	0.024561	0.00161381	0.0480924	UP
Lgmn	114.212	0.0246617	0.00112332	0.0374963	UP
Asb2	5.11956	0.0247641	0.000942756	0.0334301	UP
Cd53	7.19086	0.0248785	0.00131416	0.0417327	UP
Tmem26	6.93689	0.0250147	0.00130445	0.0416796	UP
Apba2	2.72958	0.0251174	6.90768e-05	0.00469016	UP
Lbh	44.075	0.0252378	0.000935072	0.0332563	UP
Myo5a	7.66263	0.0253513	0.0013342	0.042179	UP
Evi2b	6.36801	0.0254089	0.000611878	0.0238174	UP
Tcirg1	48.2762	0.02541	0.00044548	0.0186136	UP
Marcks	65.2229	0.0254867	0.000236079	0.0114216	UP
Hk2	8.88007	0.0254883	0.00142643	0.0441602	UP
Sytl5	22.5953	0.0256305	0.00162922	0.0483105	UP
C130026I21Rik	3.47158	0.0256518	5.72603e-05	0.00409511	UP
Sp110	16.0501	0.0256552	0.00171011	0.0499654	UP
Gngt2	12.5868	0.0258608	0.00154555	0.0467578	UP
Csf3r	6.17339	0.025883	0.000393023	0.0170123	UP
Ube2l6	91.1208	0.0259682	9.13492e-05	0.00574538	UP
Abhd2	133.403	0.0260034	0.000423388	0.0179415	UP
Mndal	54.6366	0.0260218	0.000854826	0.0310491	UP
Flna	147.896	0.0260534	0.000378184	0.0165542	UP
Stx3	7.60336	0.0260842	0.001007	0.0350836	UP
Itgam	7.08649	0.0260972	0.00107648	0.0363388	UP
Myof	28.4786	0.0261029	0.00128438	0.0412106	UP
Ubd	3.74094	0.0261656	0.000138364	0.00791125	UP
Ikbke	35.4831	0.0261846	0.000549644	0.0220411	UP
Csf1r	98.776	0.02619	0.00115853	0.0385639	UP
C3ar1	12.0228	0.0261972	0.00151284	0.0462363	UP
Tgm2	266.992	0.0262077	1.51127e-05	0.00143331	UP
BC013712	16.5886	0.026273	0.0014527	0.0447417	UP
Nlrc5	68.1095	0.0263015	0.00118337	0.038907	UP
Rhbdf2	17.6776	0.0263531	0.00165618	0.0487472	UP
Esr1	82.5199	0.0263583	0.000207111	0.0104872	UP
Wdfy4	25.0158	0.0265874	0.00153253	0.0466156	UP
Galns	24.3638	0.026692	0.00125124	0.0406314	UP
Gm10639	17.4488	0.026698	0.00143873	0.044426	UP
Ifitm3	477.492	0.026738	2.66036e-06	0.000345558	UP
Ctgf	33.4117	0.0267996	0.00118512	0.038907	UP
Gsta1	42.4139	0.0268292	0.00085942	0.0311214	UP
Ctbs	29.2077	0.0268612	0.000959254	0.0338144	UP
Jak3	15.5461	0.0269521	0.0013159	0.0417327	UP
Fam105a	9.70984	0.0269842	0.000683928	0.0261116	UP
Sema4d	5.54269	0.0270302	0.000416596	0.0177164	UP
C4b	2702.65	0.02706	1.34649e-10	7.31389e-08	UP
Axl	57.3397	0.0270714	0.000757435	0.028024	UP
Zmynd15	8.73069	0.027104	0.000818996	0.0299297	UP
S100a11	9.58903	0.0271203	0.000998826	0.0349005	UP
Rbp1	47.4078	0.0271807	0.001184	0.038907	UP
Ifi30	27.6411	0.0272117	0.000973865	0.0341281	UP
Wipf1	18.9958	0.0272322	0.00117302	0.038907	UP
Dntt	14.015	0.0273177	0.00102064	0.0352073	UP
Itih4	3035.4	0.027337	9.51347e-08	2.18627e-05	UP
Pla2g4a	6.71443	0.027355	0.000304179	0.013927	UP
Ucp2	30.2796	0.0275297	0.000716246	0.0270004	UP
Slfn5	81.3833	0.0276646	0.00014821	0.00822573	UP
Emp2	32.3216	0.0277112	0.000458308	0.0190829	UP
Apbb1ip	8.02238	0.027768	0.000528908	0.0213529	UP
Steap4	466.581	0.0277868	3.1459e-06	0.000391598	UP
Clca1	21.0138	0.0278106	0.000919186	0.0327889	UP
Itgal	30.388	0.0279478	0.000863217	0.0311645	UP
Lcp2	24.1871	0.0280509	0.000776317	0.0285967	UP
Oas1a	6.11648	0.0281308	0.000164777	0.00876216	UP
Rassf2	6.71804	0.0281588	0.000263553	0.0125476	UP
Epsti1	23.2897	0.0282293	0.000730391	0.027361	UP
Entpd1	19.1201	0.0282453	0.000750665	0.028024	UP
Pik3cd	15.9874	0.0283134	0.000647732	0.024969	UP
Msn	164.069	0.0283563	0.000122387	0.00724021	UP
Gm5148	10.9449	0.028424	0.000611379	0.0238174	UP
C1qa	33.4252	0.0284872	0.000686723	0.0261348	UP
D14Ertd668e	11.0165	0.0284969	0.000631756	0.0245113	UP
Il1rn	6.44281	0.0285868	0.000155519	0.0084702	UP
Il10ra	13.2992	0.0285876	0.000584841	0.0230655	UP
Csf1	18.1912	0.0287452	0.0006014	0.0236405	UP
Slc3a1	183.764	0.0287775	7.89102e-06	0.000841943	UP
Nebl	3.37199	0.0288105	2.22389e-05	0.00193981	UP
Vsig4	48.4486	0.0288263	0.00034965	0.0154752	UP
Ano6	39.5273	0.0288522	0.000184803	0.00954842	UP
Epb4.1l3	13.0963	0.0288786	0.000568606	0.0225742	UP
Ncf1	13.9564	0.028986	0.000533509	0.0214661	UP
Uba7	21.0728	0.0290001	0.000522548	0.0212859	UP
Saa2	53.4748	0.0290496	7.65616e-05	0.00505476	UP
Nfkb2	24.3754	0.0290588	0.000501171	0.0205199	UP
Acpp	30.6275	0.0291897	0.000468416	0.0193688	UP
Serpina3g	27.2481	0.0292401	0.000491168	0.0202395	UP
Atp8a1	32.7102	0.0292977	0.000325217	0.0146103	UP
Pik3r5	6.69617	0.0293501	0.000113164	0.00676156	UP
Hp	2821.7	0.0293528	4.46302e-07	7.5117e-05	UP
Igsf6	11.6191	0.0293605	0.000393516	0.0170123	UP
H2-D1	776.538	0.0294531	2.05719e-11	1.53647e-08	UP
Cd36	108.694	0.0294908	0.000201888	0.0102662	UP
Fmnl1	9.74021	0.029599	0.000231953	0.0112676	UP
Trim12a	31.1005	0.0296937	0.000303492	0.013927	UP
Irgm2	166.271	0.0297259	7.89529e-05	0.00517776	UP
BC048546	46.3814	0.0298982	2.9991e-05	0.00252389	UP
Mnda	21.453	0.0299003	0.000359612	0.0158574	UP
Ccr2	6.11519	0.0301077	8.33884e-05	0.00538063	UP
Slc16a5	12.3516	0.0301112	0.000185375	0.00954842	UP
Slc11a1	9.85904	0.03026	0.000155353	0.0084702	UP
Abcd2	47.0777	0.0302608	0.000306832	0.0139948	UP
Lsp1	15.848	0.0302773	0.000286168	0.0133063	UP
Cd97	45.8878	0.0303253	0.000135274	0.00780927	UP
Lair1	13.5575	0.0303299	0.00028763	0.0133224	UP
Filip1l	59.1126	0.0303559	6.16821e-05	0.00436155	UP
Il13ra1	83.0554	0.0303951	4.70412e-06	0.000545769	UP
AI607873	40.9266	0.0304177	0.000119908	0.00712884	UP
Cxcl13	10.9792	0.0304504	5.28519e-05	0.0038511	UP
Unc93b1	80.3814	0.030469	7.78993e-06	0.000838705	UP
Tgtp2	41.8342	0.0305342	0.000240503	0.0115422	UP
Stat3	303.327	0.0306491	1.75068e-07	3.48678e-05	UP
Mx1	7.43478	0.0307379	7.09507e-05	0.00479017	UP
Gpx3	15.2302	0.0308804	0.000218882	0.010764	UP
Cotl1	34.3581	0.0309527	7.92912e-05	0.00517776	UP
Rasa4	9.66733	0.0311155	8.3853e-05	0.00538063	UP
Aldh1b1	114.934	0.031302	1.38858e-05	0.00134906	UP
Iqgap1	92.6323	0.031506	1.42585e-05	0.00136312	UP
Chrm3	11.3696	0.031536	9.57619e-05	0.00587959	UP
Ifi204	58.492	0.0317936	0.000103316	0.00623546	UP
Myo1g	6.11846	0.0318077	4.0865e-05	0.00317102	UP
Igj	5.09442	0.0319084	1.67227e-05	0.00156122	UP
Top2a	12.4868	0.0319407	0.000136701	0.00785371	UP
I830012O16Rik	22.4486	0.0319694	0.000124337	0.00731934	UP
Dpy19l3	59.0827	0.031974	6.85842e-05	0.00468332	UP
Ccl6	14.2178	0.0321236	0.000129069	0.00748724	UP
Lilrb3	17.1959	0.0322269	9.32048e-05	0.00578378	UP
H2-Eb1	48.6815	0.0323215	6.42415e-05	0.00446329	UP
Slc8a1	26.5253	0.0323398	9.64351e-05	0.00587959	UP
Dock2	37.5216	0.0323635	8.4199e-05	0.00538063	UP
Soat1	26.1082	0.0324484	7.6498e-05	0.00505476	UP
Akna	17.8334	0.0324854	9.77865e-05	0.00593172	UP
Gm12250	15.3273	0.032508	3.97409e-05	0.00310395	UP
Oas1g	6.5323	0.032553	2.42392e-05	0.00209898	UP
Rassf4	28.9139	0.0327665	4.52396e-05	0.00337883	UP
Fxyd5	9.80111	0.0327794	5.75714e-05	0.00409511	UP
Cd74	151.192	0.0328808	5.45844e-05	0.00395323	UP
Tmsb4x	147.647	0.0329001	1.26008e-05	0.00124446	UP
Coro1a	9.80736	0.0329095	6.54285e-05	0.00451948	UP
Cxcl1	30.6553	0.0329355	4.29523e-06	0.000503216	UP
Parp12	79.9685	0.0329716	1.13962e-06	0.000169035	UP
Sykb	25.1858	0.0332277	7.32228e-05	0.00488833	UP
Samhd1	98.1485	0.0332646	7.79048e-06	0.000838705	UP
Tmem176a	85.5123	0.0334085	2.87655e-07	5.4563e-05	UP
H2-T23	337.655	0.0334445	3.80365e-12	3.49643e-09	UP
Btg2	26.4009	0.0335243	6.36291e-05	0.00444659	UP
Trim34a	28.1935	0.0335754	4.28612e-05	0.00328328	UP
Ifih1	170.106	0.0335846	1.39804e-07	2.98332e-05	UP
Kctd12	42.9863	0.0336343	1.7042e-05	0.0015787	UP
Cdh19	4.51344	0.0336711	5.15816e-07	8.36643e-05	UP
Lrg1	252.026	0.0337192	1.90487e-05	0.00169874	UP
Itga4	23.4157	0.0339042	4.47929e-05	0.00337273	UP
Kif21b	22.5779	0.0340222	4.22986e-05	0.00326108	UP
Tmem176b	294.813	0.0340759	9.32383e-10	3.59418e-07	UP
Tap1	64.0185	0.0341319	2.97905e-06	0.000374733	UP
Myo1f	14.2076	0.0341893	2.88363e-05	0.00246139	UP
Ifi47	30.965	0.0343453	3.10031e-05	0.00257283	UP
Sdc3	103.955	0.0344303	3.8308e-06	0.000454716	UP
Ddx58	121.102	0.0345102	3.96643e-08	9.94277e-06	UP
C1qc	33.6581	0.0346023	3.2261e-05	0.00265875	UP
Cmpk2	13.2286	0.0348225	3.31575e-05	0.00269546	UP
Mki67	38.9898	0.034834	2.12027e-05	0.00187683	UP
Irf9	102.707	0.0349151	4.81652e-09	1.59882e-06	UP
Vim	136.486	0.0352065	5.96112e-07	9.37308e-05	UP
Fmn1	65.4062	0.0354076	1.84379e-06	0.000250378	UP
Nnmt	133.768	0.0358743	1.39246e-06	0.000200481	UP
Evl	16.5755	0.0358893	1.88189e-05	0.00169087	UP
Parp14	320.112	0.0360758	3.12719e-10	1.38407e-07	UP
Serpina7	130.446	0.0364222	5.61218e-06	0.00062678	UP
Apcs	96.1572	0.0364606	1.76302e-06	0.000242161	UP
Icam1	29.4127	0.0365519	1.14212e-05	0.0011478	UP
Hmox1	42.081	0.0366736	1.20828e-05	0.00120325	UP
AW112010	61.989	0.036709	3.64691e-07	6.60311e-05	UP
H2-Q1	29.9295	0.0368228	1.143e-05	0.0011478	UP
Sirpa	54.3436	0.0368872	9.83573e-06	0.00100459	UP
Fyb	92.964	0.0370024	9.37314e-06	0.000965595	UP
Psmb8	47.4865	0.0370539	1.9378e-07	3.79619e-05	UP
H2-Aa	33.4756	0.03711	9.33875e-06	0.000965595	UP
Lgals3bp	111.328	0.0371412	2.9177e-10	1.36776e-07	UP
Dock10	43.0679	0.037224	7.2667e-06	0.00079667	UP
Cybb	75.3204	0.0374197	4.97185e-06	0.000571284	UP
Gbp7	89.7641	0.0374496	3.21819e-06	0.000396468	UP
Vcam1	37.4823	0.0375354	5.48085e-06	0.0006189	UP
Dhx58	38.6882	0.0376862	2.88733e-06	0.00036706	UP
Cd44	43.9874	0.0381023	5.48982e-06	0.0006189	UP
Cd68	13.1457	0.0384924	3.84321e-06	0.000454716	UP
Hpx	3553.43	0.0386689	2.97588e-10	1.36776e-07	UP
Lilrb4	17.9516	0.0387933	3.75469e-06	0.000453217	UP
Lrtm1	20.5738	0.0388596	3.61188e-06	0.000440428	UP
Plek	15.5005	0.0390245	2.8116e-06	0.000361275	UP
Igtp	107.925	0.0390265	4.13877e-07	7.32982e-05	UP
Esm1	16.3195	0.039543	2.44974e-06	0.000321696	UP
Laptm5	29.2811	0.0396045	2.35732e-06	0.000313	UP
Alpk1	11.4548	0.0398806	1.62984e-06	0.000226473	UP
Clec12a	18.1001	0.0406615	1.21961e-06	0.000177736	UP
Irgm1	139.784	0.0406735	1.78066e-10	9.25169e-08	UP
Atp11a	87.6405	0.0407482	6.14399e-08	1.43962e-05	UP
Ddx60	48.5649	0.0408094	7.85172e-07	0.000120292	UP
Prex1	43.3391	0.0408553	9.8295e-08	2.21627e-05	UP
Mx2	23.1621	0.0408992	4.39108e-07	7.4962e-05	UP
Prg4	117.485	0.0410815	9.80118e-09	2.9281e-06	UP
Ccrn4l	56.0722	0.0414901	6.38223e-07	9.90489e-05	UP
Ctss	130.524	0.0415431	1.46393e-07	3.06911e-05	UP
Mmd2	10.1889	0.0416644	4.17094e-07	7.32982e-05	UP
Gp49a	8.856	0.0418039	3.09766e-07	5.78391e-05	UP
Ptprc	53.764	0.0418625	5.18089e-07	8.36643e-05	UP
Slfn8	18.0047	0.0421872	4.69321e-07	7.78942e-05	UP
Itgb2	33.9478	0.0424099	4.26525e-07	7.38693e-05	UP
Slfn9	21.1943	0.0424748	3.18609e-07	5.85751e-05	UP
Clec7a	14.9667	0.043731	1.37865e-07	2.98332e-05	UP
Oasl1	24.5715	0.043769	1.37042e-07	2.98332e-05	UP
Gbp2	43.4321	0.0440312	1.53498e-07	3.10898e-05	UP
Trim30a	34.8532	0.0444617	9.38905e-09	2.8769e-06	UP
Herc6	90.8783	0.0447082	1.25232e-08	3.65005e-06	UP
Stat1	304.004	0.0457706	5.91144e-11	3.53208e-08	UP
Cxcl9	58.3235	0.0457843	3.99375e-08	9.94277e-06	UP
Fgl1	669.561	0.0460377	2.00571e-09	6.84806e-07	UP
Ifi27l1	123.865	0.0461434	4.39458e-12	3.75109e-09	UP
Orm2	22.1335	0.0466565	2.55214e-08	6.67291e-06	UP
Samd9l	84.4044	0.0472682	2.05577e-10	1.0236e-07	UP
Saa1	77.4984	0.0473975	1.57163e-08	4.47166e-06	UP
Trim30d	41.6845	0.0480907	9.08009e-10	3.59418e-07	UP
Apol9b	226.283	0.0487223	1.5397e-13	2.04438e-10	UP
Rsad2	31.7694	0.0489081	7.38483e-10	3.04306e-07	UP
Gbp10	107.075	0.0489661	1.78473e-09	6.46289e-07	UP
Ifit3	63.5216	0.0495298	3.71872e-10	1.5871e-07	UP
Oasl2	20.697	0.0502442	2.0021e-09	6.84806e-07	UP
Apol9a	158.285	0.0513224	2.34021e-12	2.33046e-09	UP
Gbp6	103.516	0.0519856	5.44763e-11	3.42627e-08	UP
Lyz2	135.453	0.0532442	1.21062e-10	6.88899e-08	UP
Rtp4	41.7841	0.0545101	3.95424e-11	2.7796e-08	UP
Gbp3	89.0358	0.0554	5.6836e-12	4.52793e-09	UP
Xaf1	28.9835	0.0566489	1.49919e-12	1.62866e-09	UP
Usp18	39.9123	0.0580004	9.49663e-13	1.13485e-09	UP
Mpeg1	177.736	0.0591389	3.26226e-14	5.56914e-11	UP
Zbp1	40.9854	0.0616958	5.91746e-14	8.83921e-11	UP
Ifi27l2b	34.4767	0.0647959	1.11668e-14	2.22406e-11	UP
Ly6e	305.915	0.0652017	1.45444e-24	8.69031e-21	UP
Ifi44	25.6618	0.0659851	2.6199e-15	6.26157e-12	UP
Ntrk2	26.4631	0.0706897	3.10836e-17	9.28622e-14	UP
Irf7	100.501	0.0725251	1.00389e-27	1.19965e-23	UP
Lcn2	14.069	0.0730808	4.78912e-19	1.90767e-15	UP

## Sheet: D
Cerebellum aging DESeq2 (FDR < 5%)
Gene Name	Mean gene expression	log2(FoldChange per month of life)	p-value	Adjusted p-value (FDR)	Age change
Tnc	397.083	-0.0335425	1.57931e-20	1.13432e-17	DOWN
Gabra2	367.197	-0.0230056	3.64178e-12	8.32257e-10	DOWN
C530008M17Rik	698.721	-0.0215684	8.92204e-10	1.40178e-07	DOWN
Gpr17	237.517	-0.0211648	4.31054e-09	6.01999e-07	DOWN
Asxl3	249.31	-0.0205158	7.3141e-09	9.93861e-07	DOWN
Col23a1	155.163	-0.0184739	1.26664e-07	1.38441e-05	DOWN
Shc3	499.34	-0.0174843	2.37993e-07	2.3159e-05	DOWN
Robo2	1406.95	-0.0174584	2.01826e-07	2.01598e-05	DOWN
Shisa9	718.367	-0.0173763	1.78925e-07	1.83587e-05	DOWN
Col3a1	91.6216	-0.0165036	1.16425e-06	8.86889e-05	DOWN
Cbx8	144.153	-0.0163501	5.07332e-06	0.000328416	DOWN
Cacna1e	5044.71	-0.0162675	1.63529e-11	3.37877e-09	DOWN
Bai2	776.086	-0.0161357	4.32511e-07	3.79277e-05	DOWN
Rims3	393.574	-0.0160914	4.35256e-06	0.000290485	DOWN
Csmd3	600.947	-0.0160806	3.23978e-06	0.000225187	DOWN
Nav3	757.765	-0.0154058	8.08209e-07	6.58931e-05	DOWN
Lhfpl4	713.312	-0.015275	3.35465e-06	0.000228951	DOWN
Snca	297.887	-0.0152747	1.85371e-05	0.00103554	DOWN
Sstr3	137.397	-0.0152596	2.39292e-05	0.00127535	DOWN
Gm1568	262.757	-0.0152313	1.56502e-05	0.000887415	DOWN
Mybpc3	411.608	-0.0151653	2.27102e-05	0.00122773	DOWN
Slitrk5	349.634	-0.0151625	1.87326e-05	0.00103876	DOWN
Fam5b	746.324	-0.0151013	1.90629e-06	0.000140581	DOWN
Adamts18	359.707	-0.0148054	3.90539e-05	0.00187595	DOWN
Cmya5	2784.31	-0.0147442	3.0174e-06	0.000211681	DOWN
Ipcef1	2708.15	-0.0147383	1.01972e-06	8.09493e-05	DOWN
Slitrk3	257.35	-0.0147319	4.4364e-05	0.00211086	DOWN
Slc8a2	1462.68	-0.0147274	9.76554e-07	7.79332e-05	DOWN
Fam38b	56.0205	-0.0145052	3.01495e-05	0.00152599	DOWN
Vgf	262.418	-0.014465	5.15328e-05	0.00236973	DOWN
Hs3st5	107.266	-0.0144246	6.10303e-05	0.00274782	DOWN
Chd3	5069.98	-0.0143117	2.14509e-05	0.00116803	DOWN
Ttyh3	836.882	-0.0141691	3.09797e-07	2.88437e-05	DOWN
Epha5	333.09	-0.0140378	6.36408e-05	0.00282431	DOWN
Tmtc1	1936.31	-0.0139695	4.47493e-06	0.000297337	DOWN
Golga7b	1089.76	-0.0139599	8.01466e-07	6.56984e-05	DOWN
Kalrn	1992.05	-0.0138667	3.02351e-07	2.83252e-05	DOWN
Jakmip1	775.221	-0.0138475	4.50512e-05	0.00213681	DOWN
Fabp7	269.013	-0.0138432	0.00012664	0.00503988	DOWN
Gdf11	215.119	-0.013778	0.000116233	0.00466263	DOWN
Prex1	2726.94	-0.0136658	1.03548e-06	8.13445e-05	DOWN
Necab3	94.4726	-0.0136428	9.94587e-06	0.000597664	DOWN
Ppp1r16b	6640.33	-0.01364	4.67349e-06	0.000306479	DOWN
Numbl	239.909	-0.0135254	4.07441e-05	0.00195093	DOWN
Nwd1	1593.12	-0.0134512	3.67337e-07	3.27843e-05	DOWN
Unc13b	268.338	-0.0133418	0.000183779	0.00679396	DOWN
Rem2	49.0995	-0.0133234	3.38994e-05	0.00167641	DOWN
Sycp1	653.695	-0.013312	2.13693e-05	0.0011678	DOWN
Cbx4	689.514	-0.0132796	3.2397e-05	0.00161802	DOWN
Ncan	363.291	-0.0132267	0.00024867	0.00868214	DOWN
Gm5124	422.87	-0.0131355	6.32659e-05	0.00282431	DOWN
Them4	341.137	-0.0131146	3.03293e-05	0.00152775	DOWN
Camkk2	2137.21	-0.0130684	3.37655e-05	0.00167528	DOWN
Nefm	5941.18	-0.0130047	0.000218477	0.00779029	DOWN
Kctd12	4900.37	-0.0129813	6.19047e-06	0.000390673	DOWN
Sox11	130.514	-0.0129676	5.06142e-05	0.00234176	DOWN
Slc30a10	131.819	-0.0129251	0.000338559	0.011053	DOWN
Prr16	168.052	-0.0129197	0.000341308	0.0110824	DOWN
Maml3	808.351	-0.0129043	0.000111591	0.00451242	DOWN
Gm12824	753.983	-0.0128738	2.65961e-05	0.00139288	DOWN
Calb2	6082.87	-0.0126953	0.000177287	0.00658625	DOWN
Fam70a	732.011	-0.0126872	6.282e-05	0.00281998	DOWN
Rgs8	14914.2	-0.0126815	1.36848e-05	0.000796939	DOWN
Hsph1	3345.62	-0.0126481	3.6719e-05	0.00178107	DOWN
Ppp1r14b	132.578	-0.0126265	0.000355749	0.0113923	DOWN
Ppp1r9b	8113.44	-0.0126234	0.000197052	0.00711039	DOWN
Ccdc64	502.16	-0.0126151	5.14427e-05	0.00236973	DOWN
Vat1l	1506.36	-0.0126015	5.77454e-05	0.00262341	DOWN
Cntnap5b	1401.44	-0.0125404	1.02643e-06	8.10556e-05	DOWN
Nr2f1	425.545	-0.0125337	0.000508605	0.015312	DOWN
Rasal1	40.009	-0.0124881	0.000130719	0.0051749	DOWN
Sertad4	186.627	-0.0124786	0.0005314	0.0157778	DOWN
Pcdh19	192.033	-0.0124378	0.000572817	0.0165976	DOWN
Hs6st3	162.422	-0.0124267	0.00019139	0.00698967	DOWN
Hmgn5	736.74	-0.0124112	0.000343341	0.0110824	DOWN
Dbpht2	55.9546	-0.0123917	0.00016466	0.00623448	DOWN
Kcnj11	240.896	-0.0123386	0.00053806	0.0159129	DOWN
Cd55	113.207	-0.0122822	0.000669886	0.0183707	DOWN
Lphn3	3653.48	-0.0122491	4.37343e-08	5.11353e-06	DOWN
Trim17	50.9121	-0.0122088	0.000447944	0.0137884	DOWN
Stk17b	1318.13	-0.0121998	4.81338e-05	0.00224768	DOWN
Slc8a1	7569.53	-0.0121371	7.60818e-05	0.00326935	DOWN
Cgnl1	2406.28	-0.0121184	0.000575389	0.0166257	DOWN
Atp2a3	2796.81	-0.0120999	2.8191e-05	0.00146119	DOWN
Hhip	334.355	-0.0120896	0.000584156	0.0167506	DOWN
Epha7	862.776	-0.0120696	3.67244e-05	0.00178107	DOWN
Cbx6	2167.57	-0.0120565	5.70263e-07	4.80518e-05	DOWN
Pvrl3	383.553	-0.0120364	0.000337809	0.0110524	DOWN
Satb1	831.761	-0.0119732	5.65098e-06	0.000362696	DOWN
Slc35f1	893.837	-0.0118491	0.000318967	0.0105504	DOWN
Zfp57	28.9822	-0.0117974	6.81441e-05	0.00298784	DOWN
D3Bwg0562e	1846.14	-0.0117737	3.7992e-05	0.00183078	DOWN
Cdh4	410.427	-0.0117492	0.000106143	0.00430363	DOWN
Nr2f2	606.63	-0.0117492	0.000697805	0.0189639	DOWN
Gria1	9579.15	-0.0117135	1.66062e-07	1.71556e-05	DOWN
Tlcd1	112.772	-0.0117008	0.00111076	0.02783	DOWN
Gabbr1	9654.69	-0.0117003	2.37052e-08	2.90687e-06	DOWN
Nefh	7043.23	-0.0116927	0.000205044	0.00736351	DOWN
Col6a1	104.383	-0.011685	0.000690255	0.0187926	DOWN
Phospho1	181.224	-0.0116568	0.000674691	0.0184354	DOWN
Nid1	496.682	-0.0115774	0.000600154	0.0170153	DOWN
Trib2	665.613	-0.0115561	1.83235e-05	0.00102741	DOWN
Fat3	2942.97	-0.0115549	0.000193415	0.00704656	DOWN
Dgkd	3371.7	-0.0115416	1.46235e-05	0.000835481	DOWN
Bche	210.498	-0.0115247	0.00134049	0.0320488	DOWN
C130074G19Rik	179.012	-0.011469	0.00129647	0.0314382	DOWN
Spnb3	28212.1	-0.011451	8.09251e-05	0.00342778	DOWN
Myh14	2553.22	-0.0114366	0.00130173	0.0315151	DOWN
Epn3	316.29	-0.0114049	0.00116176	0.028798	DOWN
Mrc2	199.023	-0.0114022	0.00149812	0.0349936	DOWN
Sv2c	1168.41	-0.011367	0.000186386	0.00684004	DOWN
Dbn1	1163.24	-0.0113656	0.000514308	0.0154221	DOWN
Rspo3	230.272	-0.0113417	0.00104996	0.0265713	DOWN
Slitrk4	1293.46	-0.0113387	0.00052583	0.0156741	DOWN
Shh	82.6373	-0.0112907	0.0017022	0.0383199	DOWN
Etv4	65.0528	-0.0112549	0.00155991	0.0361415	DOWN
Ywhah	14309.7	-0.0112279	3.03869e-05	0.00152775	DOWN
Chga	2969.37	-0.0111779	0.00046513	0.0142303	DOWN
0610040J01Rik	90.2052	-0.0111573	0.00179454	0.0398255	DOWN
Pou3f2	120.75	-0.0111405	0.00176842	0.0395157	DOWN
Lrrc55	72.4165	-0.0111361	0.000278843	0.00943	DOWN
Myo18a	3981.5	-0.0111168	3.44587e-05	0.00169572	DOWN
Nab2	746.683	-0.0111127	0.000367191	0.011709	DOWN
Camk2a	1771.04	-0.0110802	0.00170475	0.03832	DOWN
N4bp3	159.199	-0.0110688	0.00186011	0.0407791	DOWN
Ets2	1149.61	-0.0110619	7.87178e-05	0.00336346	DOWN
Kcnb2	219.106	-0.0110614	0.00217782	0.0455589	DOWN
Cmpk1	601.414	-0.0110281	0.000337025	0.0110508	DOWN
Shank2	4842.6	-0.0110232	0.000143191	0.00558074	DOWN
Ccdc25	1030.04	-0.011022	2.43633e-05	0.00129391	DOWN
P2ry1	129.733	-0.0109853	0.00222834	0.0465513	DOWN
Col9a3	303.471	-0.0108837	0.00235779	0.0485828	DOWN
Tom1l1	465.021	-0.010804	0.00013287	0.0052463	DOWN
Egfr	457.374	-0.010803	0.000233351	0.00824269	DOWN
Pcdh20	536.371	-0.0107946	0.00184577	0.0406419	DOWN
Baalc	1003.19	-0.01078	0.000244707	0.00858354	DOWN
Mmp16	685.883	-0.0107757	0.000270748	0.00923911	DOWN
D430041D05Rik	6348.46	-0.0107674	0.000136323	0.00534068	DOWN
Srf	292.715	-0.0107488	0.00136123	0.0324352	DOWN
Abhd3	716.741	-0.0107311	0.000112755	0.00454729	DOWN
Zbtb7b	399.502	-0.0107259	0.00134289	0.0320488	DOWN
Car8	43860.6	-0.0107043	0.000657384	0.0181933	DOWN
Slc7a10	438.546	-0.0106315	0.000627011	0.0175572	DOWN
Klc2	2341.56	-0.0105777	0.000105575	0.00429216	DOWN
Bdh1	726.512	-0.0105677	0.000392444	0.0124093	DOWN
Tchh	118.4	-0.010543	0.0013224	0.0318114	DOWN
Ptpn3	619.674	-0.0105392	7.37869e-05	0.00319807	DOWN
Zmat3	1410.56	-0.0105341	0.000420803	0.0131136	DOWN
Fam173a	206.858	-0.0104968	0.00197233	0.0427096	DOWN
Icmt	4034.78	-0.0104748	0.000343199	0.0110824	DOWN
Ntf3	64.5823	-0.0104651	0.000473618	0.0144315	DOWN
Lrrfip1	937.388	-0.0104616	0.000173451	0.00647563	DOWN
Fam65b	375.064	-0.0104579	0.00116276	0.028798	DOWN
Adcy1	32475.9	-0.0104414	0.000750018	0.020129	DOWN
Grm7	481.857	-0.0103793	0.000795769	0.0210942	DOWN
C77370	767.73	-0.0103282	0.00216065	0.0454521	DOWN
1700086L19Rik	27.9498	-0.0102939	0.000160734	0.00614122	DOWN
Lrtm2	408.653	-0.0102274	0.0020992	0.044532	DOWN
Cntn3	419.966	-0.0102047	0.000571588	0.0165976	DOWN
Pcdh10	1135.27	-0.0101566	0.00200335	0.0430436	DOWN
Nrn1	1679.09	-0.0101547	0.00179439	0.0398255	DOWN
Syt10	288.086	-0.0101443	0.00150162	0.0350062	DOWN
Epha4	746.781	-0.0101418	0.00207675	0.0442696	DOWN
Samd4	1638.66	-0.0100981	0.000255634	0.0088434	DOWN
Myh10	14981.7	-0.0100457	0.00133786	0.0320488	DOWN
St6gal2	27.7164	-0.0100373	0.000398987	0.0125635	DOWN
Nexn	1210.69	-0.00999936	0.000551674	0.0162249	DOWN
Msl1	2805.15	-0.00997452	6.33809e-05	0.00282431	DOWN
Zfp282	443.156	-0.00994525	0.00160689	0.0370592	DOWN
Hmgn3	615.905	-0.00992582	0.00213922	0.0451271	DOWN
Kif5a	30475.3	-0.00988258	0.000185162	0.00681171	DOWN
Vash1	556.061	-0.00987209	0.000759835	0.0203563	DOWN
March4	651.923	-0.00984653	0.00217376	0.0455372	DOWN
Lrrc47	525.762	-0.00981957	0.00111449	0.0278771	DOWN
Col6a2	113.982	-0.00977198	0.00132895	0.0319182	DOWN
Chrnb2	1023.76	-0.00976081	7.55401e-05	0.00325535	DOWN
Ptprk	944.836	-0.00968435	0.000596999	0.0169763	DOWN
Kcnj6	699.408	-0.00963909	0.000557303	0.0162588	DOWN
Cplx2	18102	-0.00963043	0.00153445	0.0356612	DOWN
Tle3	2147.45	-0.00962458	0.000646551	0.0179776	DOWN
Shank1	7481.93	-0.00960073	0.000227123	0.00804155	DOWN
Mprip	10238.9	-0.00959962	0.000151661	0.00585826	DOWN
Tnr	1452.66	-0.00959656	0.00047983	0.0145619	DOWN
Wwc1	673.771	-0.00958691	0.0022367	0.0466613	DOWN
Arhgap20	2826.97	-0.00955143	6.68884e-06	0.000416319	DOWN
Cecr2	462.728	-0.0095428	0.00130722	0.0315975	DOWN
Camk2n1	2978.56	-0.00953109	0.00215234	0.0453404	DOWN
Psd2	5980.44	-0.00952622	7.36333e-05	0.00319807	DOWN
3830431G21Rik	1756.87	-0.00951773	0.000661883	0.0182286	DOWN
Abca8b	900.802	-0.00948636	0.00110402	0.027707	DOWN
Gopc	1693.92	-0.00948286	0.000782339	0.0207747	DOWN
Trim9	3419.1	-0.00946514	3.45147e-05	0.00169572	DOWN
Slc8a3	1379.05	-0.00944804	0.00155102	0.0359908	DOWN
Calm2	15431.5	-0.00941344	0.00016883	0.00636614	DOWN
Itpr1	123327	-0.00940871	0.00110279	0.027707	DOWN
Leo1	2906.05	-0.00936796	0.000170676	0.00641971	DOWN
Fam174b	1809.5	-0.00934346	0.000126108	0.00503904	DOWN
Fam78b	728.155	-0.00933459	0.00115642	0.0287827	DOWN
Kcnj10	3927.99	-0.00930382	0.00198052	0.0427357	DOWN
Prkab2	511.317	-0.00926562	0.00108127	0.0272723	DOWN
Mink1	5502.43	-0.0092412	0.00180982	0.0399671	DOWN
Ncald	3011.21	-0.00921137	0.00208096	0.0442696	DOWN
Fbxo41	786.158	-0.00920421	0.00167299	0.0378884	DOWN
Ppfia3	1970.45	-0.00919866	0.000826777	0.0218012	DOWN
Snord15a	21.4351	-0.00918172	0.000903233	0.0235118	DOWN
Stx1b	5271.81	-0.00914326	0.00140634	0.0332996	DOWN
Fkbp2	745.409	-0.00913702	0.00124086	0.0303336	DOWN
Nptx1	13575.3	-0.00912721	0.000195478	0.0070875	DOWN
Cacna1g	4949.93	-0.0091208	0.000674109	0.0184354	DOWN
Larp1b	618.587	-0.0091187	0.00134122	0.0320488	DOWN
Pde7b	528.414	-0.00911166	0.00165033	0.0377629	DOWN
Pcdhac2	865.36	-0.00910764	0.000549528	0.0162202	DOWN
Txlna	1211.43	-0.0090522	0.00233942	0.0482701	DOWN
Hspa12a	3021.49	-0.00900443	0.00190802	0.0416164	DOWN
Kctd1	1331.96	-0.0089651	0.000618971	0.0174178	DOWN
Svil	1195.17	-0.00896137	0.000904121	0.0235118	DOWN
Synj2	879.392	-0.00895965	0.00207958	0.0442696	DOWN
Bahcc1	956.154	-0.00895475	0.0017792	0.0396978	DOWN
Glra2	44.0104	-0.00894037	0.000704593	0.0190455	DOWN
Atrnl1	1674.18	-0.00892268	0.000155658	0.00598926	DOWN
Snx25	1096.3	-0.00889748	0.000934393	0.0241326	DOWN
Gria4	11863.2	-0.00888451	0.000142742	0.00557768	DOWN
Pde5a	3994.43	-0.00888257	0.000940804	0.0242567	DOWN
Dagla	1561.69	-0.00887873	0.00017496	0.00651587	DOWN
Hip1r	2580.12	-0.0088768	0.000444909	0.0137512	DOWN
Bicd2	1368.36	-0.00879647	0.00167811	0.0379473	DOWN
Wdr13	1351.14	-0.00879009	0.000780853	0.0207747	DOWN
Purb	1646.14	-0.00877352	0.00230365	0.0475973	DOWN
Ttl	761.261	-0.00876263	0.000648398	0.0179776	DOWN
Pfkp	2843.49	-0.00875842	6.76174e-06	0.000417981	DOWN
Kcna1	8562.29	-0.00874525	0.000269383	0.00923431	DOWN
Atp2b2	27692.8	-0.00872518	6.90692e-05	0.00301413	DOWN
Sbk1	5381.68	-0.00868267	0.00185879	0.0407791	DOWN
Kcnc3	11373.8	-0.00863544	2.30922e-05	0.0012395	DOWN
Dmd	3465.13	-0.00862116	8.23903e-06	0.000503114	DOWN
Ptprm	3414.75	-0.00860892	0.000126285	0.00503904	DOWN
Tubb4	11462.8	-0.00858631	0.00179813	0.0398255	DOWN
Calu	2167.88	-0.00858004	0.00041407	0.0129976	DOWN
Clmn	3936.56	-0.00857229	0.00132084	0.0318114	DOWN
Dpy19l3	956.582	-0.00855481	0.00101738	0.0258337	DOWN
Adcy2	665.522	-0.00855471	0.00238974	0.0491738	DOWN
Rnf19b	2178.22	-0.00853856	0.00157417	0.0363603	DOWN
Luzp2	7373.97	-0.00852103	0.000523747	0.0156429	DOWN
Srcin1	4819.41	-0.00842751	0.000342105	0.0110824	DOWN
Acot7	2187.09	-0.00840463	0.000627418	0.0175572	DOWN
Bcl2l2	1344.32	-0.00821788	0.000395104	0.0124673	DOWN
Arhgef33	6596.57	-0.00817299	0.00087571	0.0229311	DOWN
Pds5b	4917.22	-0.00811554	0.000604676	0.0171113	DOWN
Agap2	2587.38	-0.00807926	0.00113715	0.0283968	DOWN
Tubb2c	3057.3	-0.00802624	0.00166244	0.0377629	DOWN
Morf4l2	2025.94	-0.00795544	0.00114301	0.0284959	DOWN
Adam23	7099.59	-0.00792739	0.000261148	0.00897241	DOWN
Unc13c	11564.5	-0.00792171	0.000985328	0.0251949	DOWN
Ppap2b	4829.93	-0.0078879	0.00131348	0.0316979	DOWN
Ptch1	2558.37	-0.0078798	0.000854893	0.0225032	DOWN
Grid2	3699.84	-0.00787757	0.00094564	0.0243397	DOWN
Hivep1	2492.71	-0.0078583	0.00181493	0.0400214	DOWN
Myo10	3263.62	-0.00785076	0.00190934	0.0416164	DOWN
Cfdp1	2298.56	-0.00784606	0.00203372	0.0435986	DOWN
Cerk	3687.62	-0.00779286	0.00173842	0.038903	DOWN
Gpr26	38.5006	-0.00771805	0.000664958	0.0182688	DOWN
D0H4S114	5168.13	-0.00769792	0.00162352	0.0372717	DOWN
Ap1b1	1706.91	-0.00764255	0.00207062	0.0442368	DOWN
Atp1b1	20429.1	-0.0076121	0.000583467	0.0167506	DOWN
Ank2	29824.9	-0.00747454	0.00149876	0.0349936	DOWN
Sv2b	7506.74	-0.00745128	0.00225747	0.0469646	DOWN
Atg3	1585.31	-0.00744107	0.00197365	0.0427096	DOWN
Rapgef4	6606.08	-0.00739919	0.000583943	0.0167506	DOWN
Ttll5	5956.33	-0.00733984	0.00171493	0.0384916	DOWN
Jph3	3731.01	-0.00732622	0.00224589	0.0467883	DOWN
6430548M08Rik	7026.87	-0.00729673	0.000810814	0.0214177	DOWN
Dynll2	3755.05	-0.00727998	0.000453816	0.0139124	DOWN
Kif3b	1327.96	-0.0070991	0.00105568	0.0266715	DOWN
Pak6	27.5064	-0.00708147	0.000891133	0.0232543	DOWN
Nomo1	3039.43	-0.00706762	0.000873634	0.0229166	DOWN
Camta2	2304.83	-0.00700613	0.00203497	0.0435986	DOWN
Ccdc91	1705.54	-0.00665715	0.00199898	0.043011	DOWN
Eif4g3	8360.2	-0.00661872	0.000999452	0.0254211	DOWN
Arrb1	5061.3	-0.00651542	0.00108986	0.027443	DOWN
Dsc2	7.26887	-0.00651101	0.000304272	0.0101087	DOWN
Asrgl1	1750.79	-0.0062066	0.00210914	0.0446172	DOWN
Chrm3	23.0257	-0.00592903	0.00216624	0.0455061	DOWN
Madd	4890.54	-0.0058299	0.00151897	0.0353559	DOWN
Hsp90ab1	39796.1	-0.00516586	0.00149143	0.0349304	DOWN
9630013A20Rik	11.2771	-0.00498404	0.00185211	0.0407221	DOWN
Atp6v0d2	23.0691	0.0041147	0.000189486	0.00693692	UP
Lyz1	3.51155	0.00425401	0.00137879	0.0327501	UP
Gpr84	3.54687	0.00442842	0.00064814	0.0179776	UP
Cytip	4.08225	0.00446383	0.00166153	0.0377629	UP
Il1rn	4.0025	0.00446419	0.000918017	0.0237503	UP
Apol9b	5.85089	0.00463787	0.000810446	0.0214177	UP
Slamf9	5.39571	0.00465185	0.00179364	0.0398255	UP
Pydc4	6.05692	0.00481358	0.000597655	0.0169763	UP
Cd8b1	3.40194	0.00485394	0.000104213	0.00425973	UP
Ccl12	4.11047	0.00512111	0.000493118	0.0149052	UP
Rgs1	5.88643	0.00515445	0.000295465	0.00988639	UP
Glipr1	5.70749	0.00530909	0.000708605	0.0191196	UP
Csf2rb2	6.40617	0.00536901	0.00124008	0.0303336	UP
Gm4759	4.93664	0.00546369	0.00025539	0.0088434	UP
Cfb	6.23586	0.00557105	0.000251311	0.00875408	UP
Oas3	3.80473	0.00574051	2.89028e-05	0.00148279	UP
Olr1	3.44771	0.00590625	5.62238e-06	0.000362403	UP
Slc16a3	4.52325	0.00595038	9.1185e-05	0.00378882	UP
Oas1c	12.1897	0.00595249	0.00188623	0.0412318	UP
Ikzf3	8.8742	0.00598303	0.00227024	0.0471654	UP
Psmb9	7.52549	0.00601463	0.00194018	0.0422277	UP
Cd200r4	3.93983	0.00603386	2.86016e-05	0.00147739	UP
Fgr	6.6535	0.00611084	0.000415848	0.0129976	UP
Arhgap9	4.30882	0.00612542	4.54594e-05	0.00214942	UP
Gpr65	9.26281	0.00621468	0.000425596	0.0132356	UP
Slamf6	7.32997	0.00625762	0.000161789	0.00616227	UP
Itk	8.72719	0.00641509	0.000910625	0.0236402	UP
Ptafr	11.2868	0.00658873	0.00146442	0.0344047	UP
Ccl3	6.04829	0.0065954	8.37522e-05	0.00351876	UP
Ifi205	6.1508	0.00664482	4.70475e-05	0.00221065	UP
Apol9a	7.05935	0.00673874	4.0993e-05	0.00195664	UP
Dok1	7.4735	0.00678651	0.000345265	0.0110824	UP
Ticam2	10.7024	0.00679557	0.000281458	0.00947595	UP
Osbpl1a	6152.71	0.00681001	0.000320337	0.0105725	UP
Casp4	7.98596	0.00693463	0.000328123	0.0107823	UP
Ms4a6d	9.1419	0.00699539	0.00017345	0.00647563	UP
Ms4a6c	15.6891	0.00711362	0.00032467	0.0106921	UP
Samsn1	19.3362	0.00713904	0.00122528	0.0301474	UP
Ankrd13a	1267.92	0.00717046	0.00117995	0.029128	UP
Bcl2a1a	9.41117	0.00726065	3.73294e-05	0.00180461	UP
Gp49a	4.57892	0.00733923	2.80014e-06	0.000197725	UP
Bcl2a1d	5.87534	0.00735802	1.14136e-05	0.000672467	UP
Cd3g	7.90555	0.0073797	1.25131e-05	0.000731532	UP
P2ry6	9.06481	0.00740384	0.000592079	0.0169135	UP
Pabpc1	3820.63	0.0074196	0.000427455	0.0132661	UP
Tifab	14.8553	0.0074225	0.00165003	0.0377629	UP
Ccl5	5.91409	0.00751698	1.83983e-06	0.0001367	UP
Ifi47	13.9527	0.00753479	0.00216933	0.0455077	UP
St8sia3	2598.03	0.00754979	0.00180667	0.0399559	UP
Il21r	9.70372	0.00756915	0.000193956	0.00704926	UP
C3	394.231	0.00757088	8.26852e-07	6.70506e-05	UP
Clec4a3	12.4927	0.00758445	0.00169443	0.0382018	UP
AW112010	9.76264	0.00767217	0.000573317	0.0165976	UP
Il2rg	15.7949	0.00768753	0.00157033	0.0363271	UP
Msr1	10.8324	0.00769111	0.000345337	0.0110824	UP
Mctp1	3719.99	0.00769273	0.00194847	0.0423469	UP
Rac2	9.83693	0.00770182	0.000203215	0.00731526	UP
Hk3	7.87364	0.00777222	6.55978e-05	0.0029015	UP
BC013712	13.7836	0.0078583	0.000992562	0.0253278	UP
Slc25a21	16.8009	0.00795707	0.000596224	0.0169763	UP
Flnb	1447.58	0.00801079	0.00166003	0.0377629	UP
Eef1a1	9358.47	0.00814447	0.000243552	0.00856291	UP
Hck	18.9924	0.00820323	0.000955863	0.024561	UP
Anxa7	1161.92	0.00824296	0.000554226	0.0162435	UP
Rps3a	1182.1	0.00840054	0.000623152	0.0175028	UP
Cd72	14.4588	0.00840116	0.000278428	0.00943	UP
Aldh6a1	1196.88	0.00844412	0.0020911	0.0444227	UP
Pydc3	13.2572	0.00845491	2.44765e-05	0.00129537	UP
Flt1	1795.46	0.00846837	0.00147211	0.0345317	UP
Reln	10518.3	0.0084792	0.000555702	0.0162435	UP
A2m	2525.33	0.00852565	0.000486736	0.0147419	UP
Rpl23	691.175	0.00853197	0.00115932	0.028798	UP
Neurl3	10.0342	0.00854454	0.000101017	0.00414476	UP
Gm5431	12.7876	0.00856177	0.000127571	0.00506357	UP
Abcc3	16.2999	0.00858832	0.000581829	0.0167506	UP
Ahnak	3650.1	0.00869173	0.00126573	0.0308296	UP
Cyp2e1	12.4601	0.00869285	6.77595e-05	0.00297964	UP
2810047C21Rik1	16.5164	0.00874637	0.0002481	0.00868214	UP
Oas1g	10.4173	0.0087638	4.65248e-05	0.00219292	UP
Lpxn	16.4672	0.00888074	0.000551836	0.0162249	UP
Gsdmd	18.815	0.00888262	0.000660183	0.0182286	UP
Tnfsf8	5.87246	0.00889307	6.53924e-08	7.58703e-06	UP
Parp10	19.8799	0.00893783	0.00167164	0.0378884	UP
Fam46c	35.0383	0.00900411	0.00241444	0.0495468	UP
Mslnl	12.1919	0.00902003	7.77197e-05	0.00333024	UP
Tle4	904.173	0.00902839	0.000377047	0.0119979	UP
Prdx6	1452.9	0.00904897	0.00128149	0.0311251	UP
Cacna1i	1785.48	0.00906836	0.00239509	0.0492169	UP
Spdya	24.0437	0.00908923	0.000914088	0.0236893	UP
Pik3cg	39.8083	0.00909897	0.00169003	0.0381597	UP
Mstn	13.6681	0.00922871	0.000196222	0.00709739	UP
Ucp2	461.258	0.00922997	0.00229286	0.0475043	UP
Ceacam5	5.57586	0.0092894	1.39692e-08	1.77057e-06	UP
Cst3	1090.26	0.00933877	0.00173108	0.0387963	UP
Siglec1	22.5683	0.00935027	1.12134e-06	8.62914e-05	UP
Cd48	11.6956	0.00937964	6.10285e-05	0.00274782	UP
Mx1	10.7126	0.00944085	7.59077e-06	0.000467312	UP
Uba7	23.5793	0.00946825	0.000985545	0.0251949	UP
Spn	12.6906	0.00950842	6.1378e-06	0.000388977	UP
Evi2b	24.243	0.00956933	0.00064103	0.0179049	UP
Adcy7	58.4405	0.00958816	0.00123143	0.030201	UP
Snx5	1381.06	0.00960159	0.000362486	0.0115834	UP
Ogdhl	1535.95	0.00968761	0.000252211	0.00876521	UP
Cd37	16.3451	0.00973437	7.9988e-05	0.00340807	UP
St14	43.5561	0.00977221	0.00141933	0.0335545	UP
Cep70	616.249	0.00980313	0.00179676	0.0398255	UP
Pik3r5	30.7242	0.00983863	0.000270012	0.00923492	UP
H2-Ab1	35.2112	0.00986908	0.00120526	0.029704	UP
Siglec5	9.1749	0.00988266	8.61374e-07	6.91069e-05	UP
Ncf2	30.0243	0.00990097	0.000303358	0.0101006	UP
Samhd1	548.608	0.00991744	0.00160994	0.0370729	UP
Kdm6a	1215.14	0.0100222	7.4512e-05	0.00322024	UP
Pvrl4	310.997	0.0101828	0.00206927	0.0442368	UP
Rasal3	12.9778	0.0101872	7.76159e-06	0.000475886	UP
Ush1g	31.6741	0.0101931	0.00039228	0.0124093	UP
Aldh9a1	370.155	0.0102909	0.000871965	0.0229126	UP
Rprml	28.8873	0.0103387	0.000554897	0.0162435	UP
Ifi30	48.6274	0.0103509	0.00213165	0.0450304	UP
Plcb2	19.233	0.0104359	0.000164925	0.00623448	UP
Serpine2	1857.09	0.0105452	0.00137212	0.032643	UP
Acsf2	332.539	0.0106179	0.000781878	0.0207747	UP
Kcnb1	571.356	0.0106308	0.00165662	0.0377629	UP
Tgfa	363.303	0.0106427	0.00088768	0.0232043	UP
Oas2	20.9396	0.0106671	3.63543e-05	0.00177454	UP
Rps4x	812.589	0.0107034	2.34303e-05	0.00125319	UP
Ly6e	560.554	0.0107208	0.00197731	0.0427274	UP
Itgb5	1624.98	0.0107334	4.72253e-05	0.00221211	UP
Emd	191.337	0.0107347	0.0014522	0.034171	UP
Syngr2	59.6471	0.0107436	0.00210313	0.0445528	UP
Clec5a	37.4393	0.0107852	0.000513938	0.0154221	UP
Tgfbr2	487.223	0.0107883	0.00198541	0.0427799	UP
Arhgap27	159.306	0.010792	0.00228766	0.0474619	UP
Igsf11	397.04	0.0108034	0.00052868	0.015728	UP
Pcdhga10	572.331	0.0108687	0.000518106	0.0155051	UP
Dnahc11	992.925	0.0108779	0.00161821	0.0372066	UP
Ptgs2	24.9095	0.0108967	2.70195e-05	0.00141016	UP
Psme1	720.659	0.0108975	0.0012544	0.0306151	UP
Tprkb	1541.66	0.0109031	3.09508e-05	0.00155093	UP
Marveld1	229.481	0.0109192	0.00187841	0.0411205	UP
Irx3	247.075	0.0109282	0.00229876	0.0475613	UP
Gm4902	11.1398	0.010963	3.25484e-07	2.97532e-05	UP
Slfn9	25.8963	0.0109847	1.92901e-05	0.00106576	UP
Nbeal2	216.354	0.010995	0.00195245	0.0423723	UP
Sykb	48.6055	0.0110139	0.000290401	0.00975527	UP
Sfpi1	23.1316	0.0110704	1.40104e-05	0.00080656	UP
Ctsb	5613.57	0.0111188	2.1422e-07	2.12571e-05	UP
Oas1b	12.2773	0.011137	2.54386e-07	2.42842e-05	UP
Csf2rb	16.4437	0.0111378	5.71799e-06	0.000365443	UP
Trim21	76.1216	0.0111555	0.00165985	0.0377629	UP
Gpr183	25.1108	0.011169	1.38505e-05	0.000800412	UP
Parvg	23.6743	0.0111764	0.0001054	0.00429216	UP
Slc15a3	11.8215	0.0112183	4.89245e-07	4.21137e-05	UP
Zfp442	240.005	0.0112454	0.00144153	0.0339729	UP
Tnfsf10	71.2587	0.0112818	0.00140153	0.0332378	UP
Mmp12	8.24419	0.0113203	1.11312e-10	1.9298e-08	UP
Axl	713.969	0.0113524	0.000135971	0.00534068	UP
Cyth4	54.786	0.0113584	0.000416148	0.0129976	UP
Capn3	38.2258	0.0114262	0.000280679	0.00947087	UP
Padi2	423.377	0.011458	0.000447276	0.0137884	UP
Rorc	225.156	0.0114751	0.000765413	0.0204694	UP
Cyp7b1	124.04	0.0114922	0.00126728	0.0308296	UP
Fcgr1	55.0805	0.0115071	0.000613469	0.0173276	UP
Vcam1	314.777	0.0115088	0.00143617	0.0338994	UP
F2r	93.9742	0.01158	0.000746469	0.0200695	UP
Pisd-ps2	190.738	0.0115987	0.00116515	0.0288098	UP
Pgm5	289.167	0.0116724	0.00122724	0.0301474	UP
Rpl10	389.947	0.0116728	0.000158638	0.00608839	UP
Gltp	187.487	0.0117118	0.000979156	0.0251167	UP
Cd86	21.7482	0.0117842	1.7582e-05	0.000989512	UP
Fcrls	63.1877	0.0118025	6.59088e-05	0.00290673	UP
Pcdhb3	103.267	0.0118152	0.00104181	0.0264095	UP
Stat2	842.819	0.0118332	3.30761e-05	0.00164649	UP
Wdfy4	36.2151	0.0118334	2.8852e-05	0.00148279	UP
Pcdha11	104.033	0.011865	0.000618639	0.0174178	UP
Serping1	228.779	0.0118769	0.000994105	0.0253278	UP
Foxo1	921.408	0.0118953	0.000208144	0.00743943	UP
4931408A02Rik	75.3881	0.0119063	0.00071988	0.0193892	UP
Irf1	64.0981	0.0119516	0.000676729	0.0184577	UP
Th	74.1926	0.0119582	0.000467027	0.0142595	UP
Trank1	3091.86	0.0119685	0.000662285	0.0182286	UP
Zfp951	74.7312	0.0120114	0.000780903	0.0207747	UP
Rftn1	157.906	0.0120634	0.000703709	0.0190455	UP
Apobec1	39.8441	0.0120809	0.000147568	0.00572177	UP
Arhgap25	35.1706	0.0121158	1.5604e-05	0.000887415	UP
Inf2	441.235	0.0121449	2.95799e-05	0.00150727	UP
Pcdhga9	349.793	0.0122072	0.000702902	0.0190455	UP
Per2	588.666	0.0122615	0.000559241	0.0162838	UP
Serpinb9	233.798	0.0122811	0.000317321	0.010519	UP
Gusb	132.984	0.0122894	0.000648353	0.0179776	UP
D14Ertd668e	24.6688	0.0123194	3.61048e-05	0.00176808	UP
Il1r1	234.07	0.01236	0.000501775	0.0151365	UP
Eltd1	663.817	0.0123979	0.000182684	0.00677009	UP
Mgst1	99.6087	0.0124075	0.000537022	0.0159129	UP
Pcdhb13	111.124	0.0124078	0.000590265	0.0168937	UP
Sncg	70.7795	0.0124612	0.000435813	0.0134977	UP
Ly6c1	142.484	0.0125008	0.000479313	0.0145619	UP
Cd274	49.877	0.0125431	9.70127e-05	0.00399793	UP
Tgfb1	56.9624	0.0125605	0.00034168	0.0110824	UP
Bag3	773.817	0.0125753	0.000146056	0.00567774	UP
Tmem176b	201.93	0.0125817	0.000449933	0.0138215	UP
Flnc	91.4485	0.0125976	0.000239698	0.00844711	UP
Pcdhgb1	342.848	0.0126422	0.000416218	0.0129976	UP
Rhoj	184.909	0.0126769	0.000220083	0.00782904	UP
Naip5	21.801	0.0126845	4.03515e-06	0.000272924	UP
Ggta1	52.5656	0.0127083	0.000223693	0.00793873	UP
Pcdha8	40.3162	0.0127569	5.43429e-05	0.0024763	UP
Efemp1	321.215	0.0128039	9.55036e-05	0.00394652	UP
Olfml3	141.666	0.0128126	0.000387819	0.0123147	UP
Txlnb	144.592	0.0128616	0.000260023	0.00895417	UP
Nr3c2	757.135	0.0128674	0.000151865	0.00585826	UP
Vwa1	361.879	0.0128816	0.0001723	0.00646469	UP
Parp3	94.8968	0.0129047	0.000344727	0.0110824	UP
Lag3	17.6793	0.012913	1.10557e-06	8.55447e-05	UP
Abi3	43.4177	0.012994	8.80234e-05	0.00368407	UP
Fmo1	93.487	0.0130277	0.000301832	0.010072	UP
Six4	110.051	0.0130435	0.000295615	0.00988639	UP
Abca1	2338.95	0.0130794	4.61054e-06	0.000303672	UP
Csf1	316.082	0.0130796	0.000274272	0.00933825	UP
Dpyd	169.336	0.0130926	0.000277725	0.00943	UP
Elf4	24.721	0.0131397	2.3466e-06	0.000169348	UP
Pcdhb2	80.666	0.0131434	0.000160829	0.00614122	UP
Icosl	163.044	0.0131786	0.000258478	0.00892135	UP
Gpr34	76.5079	0.0131795	0.000205871	0.00737564	UP
Cd9	339.457	0.0131815	8.81754e-05	0.00368407	UP
F830016B08Rik	19.4132	0.0132282	2.86565e-07	2.70141e-05	UP
Slc11a1	20.3337	0.0132686	1.61066e-07	1.68705e-05	UP
Pm20d1	67.4799	0.0134019	0.000184873	0.00681171	UP
Sema5a	1468.58	0.0134211	5.39253e-05	0.00246471	UP
Tbxas1	32.4161	0.0134291	9.14737e-06	0.00055633	UP
Lcp2	32.9577	0.0134555	2.32453e-06	0.000168562	UP
Serpinb6a	662.228	0.013476	4.91415e-07	4.21137e-05	UP
Treml2	15.3682	0.0135421	3.61729e-08	4.33012e-06	UP
Slc44a5	94.8932	0.0135907	0.000164705	0.00623448	UP
Fmn1	1232.97	0.0136204	6.90767e-07	5.78824e-05	UP
Sp140	22.9817	0.0136371	2.61275e-06	0.000185887	UP
Pcdhb12	196.168	0.0136586	8.11321e-05	0.00342778	UP
Irf5	30.5781	0.0136848	3.29252e-06	0.000227803	UP
Blnk	21.8632	0.0137152	4.53486e-07	3.95372e-05	UP
Clec2d	170.98	0.013738	0.00013332	0.00525028	UP
Tyrobp	27.0101	0.0137444	1.15065e-07	1.27612e-05	UP
Arhgdib	43.0994	0.0137606	4.88902e-05	0.00227094	UP
Casp12	130.661	0.0137711	0.000113334	0.00455844	UP
Ccl6	17.9436	0.0137948	8.66461e-09	1.14639e-06	UP
Fbln5	172.587	0.0138277	6.91433e-05	0.00301413	UP
Trim12c	85.387	0.0138396	6.10168e-05	0.00274782	UP
Hsd17b11	408.901	0.01384	4.79781e-06	0.00031327	UP
Nmi	145.283	0.0138491	8.37352e-05	0.00351876	UP
Aif1	38.7839	0.0138947	1.0814e-05	0.000639636	UP
Capg	16.1222	0.0138986	9.18783e-09	1.20504e-06	UP
Fermt3	35.1873	0.013918	1.04628e-05	0.000626235	UP
Ucma	78.1996	0.0139202	0.000101125	0.00414476	UP
Zfp595	216.79	0.0139221	5.18018e-05	0.00237485	UP
Bcl2a1b	15.777	0.014033	1.60165e-08	2.01313e-06	UP
AF529169	456.125	0.0140336	6.36654e-05	0.00282431	UP
Entpd1	259.225	0.0140714	9.2341e-05	0.00382632	UP
Pamr1	65.2638	0.0140758	8.04905e-05	0.00341983	UP
Plxnd1	626.359	0.0141346	2.94534e-05	0.00150592	UP
Slfn5	377.074	0.0141433	8.91316e-05	0.00371373	UP
Erap1	273.16	0.0141803	4.8933e-05	0.00227094	UP
Hcls1	63.1014	0.0141944	1.0797e-05	0.000639636	UP
Tap1	65.1861	0.0143897	2.99652e-05	0.00152177	UP
Chi3l1	96.4093	0.0144824	2.52189e-05	0.00132999	UP
Apbb1ip	56.2543	0.0144927	4.06258e-06	0.000273553	UP
Stat6	189.58	0.0145465	2.63943e-05	0.00138713	UP
Myo1f	59.9257	0.014603	3.1859e-07	2.93741e-05	UP
St8sia6	62.2935	0.0147138	2.03626e-05	0.00111962	UP
Naalad2	66.5762	0.0148203	2.24055e-05	0.00121562	UP
Pcdhgb6	1132.62	0.0148314	6.70725e-06	0.000416319	UP
Tlr2	24.8665	0.0149009	8.55716e-09	1.14219e-06	UP
1200009I06Rik	62.9844	0.0149445	2.04134e-05	0.00111962	UP
Cyp1b1	138.624	0.0150295	2.73246e-05	0.00142116	UP
Vwa5a	442.093	0.0150914	3.3124e-06	0.000228112	UP
Slamf7	20.8495	0.0151069	8.96992e-13	2.34605e-10	UP
C1ra	29.5493	0.0151797	1.29456e-07	1.3947e-05	UP
Ikzf1	31.869	0.015187	8.56299e-07	6.90672e-05	UP
Osmr	137.118	0.0152016	4.51964e-06	0.00029899	UP
Lair1	186.079	0.0152136	2.3032e-05	0.0012395	UP
Gbp9	156.888	0.0152839	3.32723e-06	0.000228112	UP
Cxcl12	1004.22	0.0153014	3.91246e-07	3.47128e-05	UP
S1pr3	81.2366	0.0153312	2.80536e-06	0.000197725	UP
9930111J21Rik2	101.174	0.0153585	1.18275e-05	0.000694143	UP
Pros1	331.939	0.0154071	1.8692e-05	0.00103876	UP
Pik3cd	141.845	0.0154152	1.37616e-05	0.000798331	UP
Pcdhgb4	229.655	0.0154451	1.58785e-05	0.000896989	UP
Naip2	34.4178	0.0154764	2.2815e-07	2.23454e-05	UP
Tnfrsf1a	65.2719	0.0154931	1.43026e-05	0.000820249	UP
Lsp1	44.5233	0.0156778	1.23723e-06	9.37748e-05	UP
Itgal	25.3848	0.0157747	3.35061e-08	4.04299e-06	UP
Rnase4	98.6887	0.0158564	1.07313e-05	0.000639636	UP
Itpr3	930.791	0.0158596	9.8503e-06	0.000594288	UP
Pcdhga7	459.545	0.0158804	2.40402e-06	0.000172666	UP
Pcdhga6	481.127	0.0159711	1.28158e-07	1.39065e-05	UP
Selplg	109.315	0.0159921	9.19737e-06	0.000557124	UP
Irf8	40.1663	0.0160672	3.44008e-07	3.10699e-05	UP
Grn	867.601	0.0160966	3.3082e-07	3.00588e-05	UP
Fth1	9549.17	0.0161354	7.01894e-10	1.15072e-07	UP
Vwf	402.023	0.0162069	6.41531e-06	0.000403175	UP
Pcdhgb5	305.212	0.0162158	2.52699e-06	0.000180638	UP
Hvcn1	33.5347	0.0162189	3.9383e-09	5.55153e-07	UP
Lpcat2	107.134	0.0162695	6.66109e-06	0.000416319	UP
Ifi203	92.9505	0.0163563	5.94574e-06	0.000378395	UP
Gm4951	35.0873	0.0163848	2.05235e-09	3.0649e-07	UP
Igsf6	33.528	0.0164087	1.52158e-09	2.34183e-07	UP
Ccdc3	162.048	0.016435	4.88614e-06	0.000317662	UP
Nfe2l2	416.038	0.0164798	1.39057e-07	1.48752e-05	UP
Hexa	369.065	0.0165712	1.07841e-07	1.20486e-05	UP
Abca8a	245.314	0.0166005	4.29866e-06	0.000288163	UP
Cd109	79.9298	0.0166562	8.80456e-08	1.00605e-05	UP
Xdh	186.177	0.0166697	3.56279e-06	0.000242061	UP
Stard5	209.098	0.0166888	2.23879e-06	0.000163129	UP
Ftl1	603.131	0.0167238	1.25576e-08	1.63281e-06	UP
Arhgap30	54.6249	0.0167253	4.66404e-07	4.04297e-05	UP
Cmpk2	237.61	0.0167395	1.10596e-06	8.55447e-05	UP
Trim12a	80.6399	0.0167869	1.50496e-06	0.000112373	UP
Tnfaip2	36.8528	0.0167941	2.46834e-07	2.37133e-05	UP
Pcdhb11	153.127	0.0168205	3.21147e-06	0.000224253	UP
P2ry13	43.8227	0.0169183	5.49552e-07	4.65668e-05	UP
Lcn2	24.0691	0.0169644	4.58428e-16	1.86878e-13	UP
Mt1	1054.51	0.01704	1.35727e-11	2.90016e-09	UP
Gbp5	105.357	0.0170687	7.09055e-07	5.90866e-05	UP
4632428N05Rik	158.156	0.0170716	2.17076e-06	0.000158939	UP
Ube2l6	79.5513	0.0170896	1.9107e-06	0.000140581	UP
Plag1	160.857	0.0172958	1.44288e-06	0.000108273	UP
Dhx58	49.1903	0.0173345	5.05674e-07	4.30909e-05	UP
Tor3a	189.855	0.0173406	3.19389e-07	2.93741e-05	UP
Runx1	59.2842	0.0173652	1.87859e-07	1.91451e-05	UP
Cybb	156.263	0.0173693	3.04738e-13	8.83916e-11	UP
Lect1	78.1821	0.0173932	7.92806e-07	6.53436e-05	UP
Mcm6	140.349	0.0174586	1.1548e-06	8.84158e-05	UP
Ly6a	97.8558	0.0174808	1.24603e-06	9.39692e-05	UP
Zfp97	178.027	0.0176039	1.08798e-06	8.50256e-05	UP
Man2b1	348.287	0.0177164	2.01225e-07	2.01598e-05	UP
Ifit1	323.604	0.0177675	1.55516e-09	2.36935e-07	UP
Mndal	95.5974	0.0178697	7.52394e-07	6.23536e-05	UP
Gpr157	56.5662	0.017905	2.40204e-07	2.32243e-05	UP
C4a	34.1959	0.0179267	9.52712e-11	1.69056e-08	UP
Pik3ap1	71.1867	0.0179319	1.24518e-07	1.37088e-05	UP
Hspa2	813.447	0.0180792	1.58472e-11	3.31978e-09	UP
Dock8	122.054	0.0182157	1.90265e-07	1.92602e-05	UP
Pld4	33.86	0.0182561	1.34169e-08	1.72963e-06	UP
Cd33	64.3053	0.0182637	2.18591e-07	2.15491e-05	UP
Tap2	158.576	0.0182659	3.99343e-07	3.52239e-05	UP
Prokr2	45.3431	0.0182748	1.8051e-12	4.2541e-10	UP
Ctsh	109.375	0.0183049	3.5924e-07	3.22525e-05	UP
Csf1r	420.054	0.0183161	1.46489e-07	1.5451e-05	UP
Cd44	442.282	0.018318	1.44865e-07	1.53873e-05	UP
Hpgds	72.1884	0.0184077	2.74912e-07	2.60786e-05	UP
H2-T24	53.5028	0.0184222	2.61937e-08	3.18613e-06	UP
Pcdhga2	245.179	0.0184664	8.8884e-08	1.008e-05	UP
Hmha1	57.9798	0.0185494	7.18564e-08	8.27336e-06	UP
Pcdhga3	711	0.0187089	3.80196e-08	4.48008e-06	UP
Sqrdl	214.879	0.0188015	1.65575e-07	1.71556e-05	UP
Lilrb3	17.6858	0.0189048	7.26281e-13	1.99173e-10	UP
Sp110	45.0324	0.0189732	7.82418e-09	1.05368e-06	UP
H2-T23	120.137	0.0190762	9.84716e-08	1.10839e-05	UP
Gfap	3561.87	0.0190841	2.46095e-09	3.60374e-07	UP
H2-D1	1260.08	0.0192533	1.33985e-09	2.0834e-07	UP
Bst2	31.4319	0.0194653	1.07268e-10	1.8813e-08	UP
Vav1	57.263	0.0194825	5.42919e-09	7.5127e-07	UP
Alox5ap	52.6802	0.0194917	1.39682e-08	1.77057e-06	UP
Icam1	46.2927	0.0195517	2.34258e-09	3.46403e-07	UP
9930111J21Rik1	97.8324	0.0195577	3.7501e-08	4.45376e-06	UP
Csf3r	47.9112	0.0195613	3.16381e-09	4.54474e-07	UP
Tapbp	451.008	0.0196682	3.59146e-09	5.11038e-07	UP
Xaf1	68.5939	0.0196977	2.12892e-08	2.63201e-06	UP
Parp4	1104.51	0.0197673	4.18066e-10	7.00633e-08	UP
Apoe	24381.5	0.0197809	9.03192e-11	1.62177e-08	UP
Gbp7	184.025	0.0198379	1.78541e-08	2.22557e-06	UP
Oasl2	199.023	0.0199086	3.73762e-12	8.41411e-10	UP
Irf7	74.2104	0.0199956	3.68397e-11	7.21627e-09	UP
Ly86	57.4087	0.0200851	8.58943e-10	1.36373e-07	UP
Pcdhb14	556.824	0.0202447	5.63599e-09	7.72796e-07	UP
Tlr7	48.2623	0.0206624	3.76053e-10	6.37304e-08	UP
Havcr2	49.8834	0.0207698	1.74589e-09	2.63332e-07	UP
Ddx60	54.5988	0.0208807	6.18866e-11	1.18156e-08	UP
Mamdc2	215.02	0.0211687	2.57096e-09	3.72863e-07	UP
Parp12	286.444	0.0215622	3.9639e-11	7.66506e-09	UP
Gbp4	79.4158	0.0216024	7.8022e-10	1.26538e-07	UP
Nckap1l	100.96	0.0216926	8.62275e-11	1.58606e-08	UP
Lgals3	38.1998	0.0217794	2.66144e-14	8.72664e-12	UP
Cd53	59.8907	0.0218031	8.88967e-11	1.61546e-08	UP
Slfn8	76.9241	0.0220419	1.88322e-12	4.36995e-10	UP
Trim25	197.792	0.0221473	7.93776e-10	1.27367e-07	UP
Apod	4019.59	0.0222457	1.72944e-12	4.14049e-10	UP
Samd9l	205.082	0.022265	6.64508e-10	1.1014e-07	UP
Tlr13	40.4919	0.0223591	3.9889e-13	1.13518e-10	UP
Pcdhga8	384.262	0.0224297	3.6727e-11	7.21627e-09	UP
Pyhin1	25.5667	0.0226009	1.14331e-16	5.07191e-14	UP
Cd180	45.1281	0.022691	1.36519e-11	2.90016e-09	UP
Parp14	310.099	0.022727	1.6882e-10	2.89354e-08	UP
Rsad2	63.5084	0.0229127	7.74287e-13	2.08546e-10	UP
Ifitm3	55.7865	0.0229879	6.35114e-11	1.19743e-08	UP
Gpx3	95.9699	0.0229924	6.43226e-11	1.19775e-08	UP
Agxt2l1	1390.11	0.0234408	1.40052e-12	3.4071e-10	UP
Rtp4	66.2043	0.0235573	7.61556e-14	2.29731e-11	UP
Ifi44	56.6471	0.0236529	5.06108e-14	1.59034e-11	UP
Ncf1	71.1491	0.0237917	8.9581e-12	1.98699e-09	UP
Tgtp2	82.568	0.0238568	1.71681e-11	3.49927e-09	UP
Unc93b1	107.703	0.0241511	2.27952e-11	4.58427e-09	UP
Itgam	232.617	0.0244531	1.27524e-11	2.78759e-09	UP
Gbp6	414.609	0.0248658	7.86459e-15	2.82433e-12	UP
Lcp1	264.896	0.0249714	1.07395e-13	3.17617e-11	UP
Iigp1	71.7377	0.0250768	9.04311e-13	2.34605e-10	UP
Fcer1g	48.696	0.0252365	3.81968e-15	1.40518e-12	UP
Irgm2	135.869	0.0253186	1.33707e-12	3.30607e-10	UP
Trem2	67.6416	0.0254464	1.07465e-16	4.91179e-14	UP
Lgals9	85.003	0.0254739	6.68235e-13	1.86648e-10	UP
Trim34a	88.9041	0.0254861	9.17703e-13	2.34605e-10	UP
Parp9	123.843	0.0256289	1.26359e-12	3.17645e-10	UP
Ly9	26.6315	0.0259719	4.10497e-21	3.2587e-18	UP
Cd22	20.6561	0.0259927	1.22089e-20	9.20736e-18	UP
Slfn2	58.4691	0.0263985	4.45061e-16	1.86468e-13	UP
Stat1	1535.34	0.0264948	2.50468e-14	8.48066e-12	UP
Ctsz	453.165	0.026566	2.33137e-15	8.791e-13	UP
Igtp	97.2019	0.0266057	2.5302e-14	8.48066e-12	UP
Mnda	27.4061	0.0266499	1.78637e-19	1.17147e-16	UP
Gbp3	391.9	0.0269351	7.34393e-14	2.26058e-11	UP
Nlrc5	48.8301	0.0270867	2.18654e-16	9.42275e-14	UP
Fcgr3	140.841	0.0272231	1.88069e-14	6.59684e-12	UP
Sp100	158.754	0.0273612	3.4168e-14	1.0965e-11	UP
Lilrb4	29.453	0.0273753	2.21804e-23	2.38962e-20	UP
Plek	329.703	0.0280231	2.14958e-18	1.15793e-15	UP
Ifih1	253.477	0.0284173	2.12558e-15	8.22054e-13	UP
Serpina3n	100.241	0.0285674	3.76989e-20	2.5846e-17	UP
Ctsd	2346.79	0.0285914	2.83664e-17	1.38016e-14	UP
Gbp2	186.843	0.0289531	1.08754e-15	4.31668e-13	UP
Fyb	204.703	0.0295836	8.36658e-17	3.94353e-14	UP
C1qa	150.017	0.029648	2.62404e-18	1.36477e-15	UP
Dock2	149.109	0.030061	7.84465e-18	3.94403e-15	UP
Hexb	1192.35	0.0303212	1.38687e-18	7.74745e-16	UP
Usp18	105.958	0.0305303	2.0087e-19	1.26239e-16	UP
Irf9	326.944	0.0317886	9.13201e-19	5.29762e-16	UP
Ifit3	738.719	0.0321457	5.05013e-19	3.04684e-16	UP
Ifi204	64.5407	0.0328962	2.80569e-23	2.82121e-20	UP
Cd84	89.4758	0.0330134	4.21643e-22	3.97478e-19	UP
Laptm5	178.868	0.0341013	3.62861e-21	3.04057e-18	UP
Ifi27l1	203.383	0.0344315	5.90451e-22	5.23869e-19	UP
C3ar1	83.87	0.0346047	1.34362e-23	1.5589e-20	UP
Zc3hav1	478.978	0.0350946	4.73955e-24	5.95721e-21	UP
Trim30a	120.953	0.039191	1.05191e-27	1.44236e-24	UP
C1qc	171.517	0.039822	1.08891e-28	1.6424e-25	UP
C4b	799.385	0.0400968	9.62211e-34	2.07329e-30	UP
Itgb2	195.081	0.04068	1.03105e-29	1.72793e-26	UP
Gbp10	374.043	0.0417162	3.20259e-31	6.03808e-28	UP
B2m	1495.27	0.0440452	4.06275e-42	1.53196e-38	UP
Mpeg1	396.242	0.0449168	2.48315e-36	6.24222e-33	UP
Lgals3bp	400.017	0.0466375	3.77368e-38	1.13837e-34	UP
Irgm1	278.337	0.0480496	7.61356e-45	5.74177e-41	UP
Ctss	1926.88	0.0495107	5.40096e-44	2.71543e-40	UP
Clec7a	108.222	0.0564981	9.20914e-64	1.38901e-59	UP

## Sheet: E
Olfactory bulb aging DESeq2 (FDR < 5%)
Gene Name	Mean gene expression	log2(FoldChange per month of life)	p-value	Adjusted p-value (FDR)	Age change
Prokr2	170.276	-0.0309129	4.16475e-26	3.20227e-22	DOWN
Gpr17	376.477	-0.0275345	1.47439e-20	7.55775e-17	DOWN
Clca1	401.474	-0.0201694	1.80546e-11	1.85096e-08	DOWN
Tnc	134.099	-0.0186072	1.71962e-09	1.20201e-06	DOWN
Tubb2b	1127.82	-0.0176959	2.04452e-09	1.36698e-06	DOWN
Cd24a	334.015	-0.0175129	1.50361e-08	7.22579e-06	DOWN
Unc13c	621.27	-0.0173483	1.69551e-08	7.90107e-06	DOWN
Marcksl1	1890.57	-0.0168299	2.83715e-10	2.56645e-07	DOWN
Dpysl3	711.699	-0.0162783	2.61279e-08	1.1161e-05	DOWN
Mex3a	181.069	-0.0159305	2.24185e-07	8.0175e-05	DOWN
Igfbpl1	51.426	-0.015845	1.81705e-08	8.21843e-06	DOWN
Islr2	350.745	-0.0152002	7.89437e-07	0.000233461	DOWN
Dcx	3550	-0.0142483	1.56798e-06	0.000408686	DOWN
Zfp57	80.0194	-0.0141478	1.1393e-06	0.000312859	DOWN
Camk4	1859.92	-0.0141007	7.22188e-07	0.000226649	DOWN
Dusp4	175.125	-0.0139392	5.24843e-06	0.00106198	DOWN
Pcdh18	247.335	-0.0138205	4.31861e-06	0.000922382	DOWN
Nnat	803.133	-0.0136389	1.83159e-06	0.000461742	DOWN
S100a5	839.765	-0.0130926	2.28672e-05	0.00366304	DOWN
Cacng4	169.595	-0.0129467	2.60403e-05	0.0040862	DOWN
Rhcg	97.3199	-0.0128105	2.43537e-05	0.00386094	DOWN
Necab2	469.902	-0.0127267	1.89495e-05	0.00313339	DOWN
Sncaip	143.14	-0.0121726	8.49266e-05	0.0105323	DOWN
Ptgds	9198.48	-0.0121116	1.38507e-05	0.00244823	DOWN
Vcan	832.639	-0.0119059	0.000113298	0.0131	DOWN
Zic3	175.258	-0.0118329	0.000133151	0.0145023	DOWN
Gm6788	143.157	-0.0118128	0.000127965	0.0143025	DOWN
Gas2l3	67.1599	-0.011548	8.20643e-05	0.0103313	DOWN
Fabp7	2797.51	-0.0115197	0.000200279	0.0199993	DOWN
AW551984	78.3445	-0.0115021	0.000120379	0.0136117	DOWN
Sdk2	466.358	-0.0114217	0.000201861	0.0200272	DOWN
Zbbx	122.787	-0.0112965	0.000161003	0.0168429	DOWN
Cyp39a1	145.531	-0.0112636	0.000274947	0.0257813	DOWN
Efnb2	972.529	-0.0112463	0.000130199	0.0143025	DOWN
Grb14	426.026	-0.0112305	0.000190646	0.0192879	DOWN
Sfrp2	62.7839	-0.0112032	4.86074e-05	0.00667396	DOWN
Vat1l	328.152	-0.0110058	0.000220808	0.0216279	DOWN
Oxtr	148.553	-0.0109993	0.000374859	0.0327533	DOWN
Rnd3	1087.92	-0.0106841	0.000324962	0.0299238	DOWN
Trib2	471.151	-0.010624	0.000169692	0.0176319	DOWN
Col11a1	497.726	-0.0104671	0.000561857	0.0447681	DOWN
Serpinh1	249.904	-0.0103973	0.000640382	0.0497364	DOWN
Kctd12	4717.82	-0.0103122	0.000364107	0.0321184	DOWN
St8sia2	32.0683	-0.0101629	5.95821e-06	0.00117468	DOWN
Tbc1d16	479.886	-0.0101503	0.000344763	0.0311868	DOWN
Cenpf	47.2204	-0.0101195	0.000133914	0.0145023	DOWN
Esyt3	36.5771	-0.010072	5.06271e-05	0.00688977	DOWN
Gpr125	433.906	-0.0100494	0.00055844	0.0447276	DOWN
Cdh4	937.879	-0.00995904	0.000311266	0.0288353	DOWN
Hist1h2ab	80.8286	-0.0097974	0.000444594	0.0373605	DOWN
Crabp2	48.1596	-0.0097268	0.000496698	0.0404139	DOWN
Tuba1a	5692.75	-0.0092589	0.000436237	0.0370633	DOWN
Crabp1	22.6986	-0.00804904	0.00042235	0.0364264	DOWN
2610109H07Rik	14.7327	-0.00728182	6.75796e-05	0.00873311	DOWN
Muc4	4.3681	0.00414087	0.000262665	0.0249338	UP
Apol11b	4.54876	0.00419414	0.000481505	0.0395967	UP
C130026I21Rik	3.4214	0.00424375	2.06362e-05	0.00337599	UP
Snord32a	5.23799	0.00431606	0.000174866	0.0180475	UP
Bpifb9a	6.56054	0.0044892	0.0001165	0.0133697	UP
Capn11	8.96142	0.00461525	0.000502919	0.0407046	UP
Umodl1	86.6682	0.00551308	0.000468078	0.0391201	UP
Lcn2	8.72092	0.00577172	4.23274e-05	0.00591737	UP
Slc5a8	15.5078	0.00651048	0.000286095	0.0266641	UP
2810047C21Rik1	12.1875	0.00670449	0.000108197	0.0127012	UP
Isg15	13.1633	0.00678722	0.000343156	0.0311868	UP
H2-Q6	19.889	0.00683944	9.08233e-05	0.0111734	UP
Oas1a	14.6188	0.00697512	0.000199705	0.0199993	UP
Ankdd1b	16.0981	0.00710295	2.24953e-05	0.0036414	UP
Oas2	17.3929	0.00736892	7.06299e-05	0.00897642	UP
Dhx58	22.8581	0.00743445	0.000332106	0.0303995	UP
Aox3l1	22.6669	0.00775382	1.38499e-05	0.00244823	UP
Gbp4	49.0185	0.00803401	0.000480547	0.0395967	UP
B230206H07Rik	25.5295	0.008524	0.000184478	0.0189127	UP
D14Ertd668e	15.9804	0.00873655	9.42606e-06	0.00174643	UP
Ifit3	430.119	0.008787	0.000243509	0.0237005	UP
Snora7a	35.3325	0.00889366	1.47357e-06	0.000397554	UP
Zbp1	18.0114	0.00892761	4.47517e-06	0.000929988	UP
Rsad2	43.5499	0.00904397	9.87936e-05	0.0119208	UP
Abca13	32.7443	0.00914321	1.95998e-06	0.000478421	UP
Pip4k2a	1222.67	0.00914365	0.000365504	0.0321184	UP
Syne1	19172.3	0.00923159	0.000203237	0.0200345	UP
Gldn	26.6747	0.00927425	0.00011033	0.0128534	UP
Ifi27l2a	20.932	0.00978388	4.4292e-06	0.000929988	UP
Pcdhga3	499.701	0.00993494	0.000600686	0.0476152	UP
Ptprc	85.432	0.00994342	0.000476211	0.0395847	UP
F5	82.1221	0.0100514	0.000258346	0.0247354	UP
A330050F15Rik	330.494	0.0102088	0.000485982	0.0397523	UP
9930111J21Rik2	67.4501	0.0102314	0.000363917	0.0321184	UP
Mbp	6575.47	0.0102342	3.81771e-05	0.0055913	UP
Mndal	32.6942	0.0103311	1.78689e-06	0.00045798	UP
Siglec1	22.6228	0.0104082	3.95072e-06	0.000855693	UP
Ermn	690.066	0.010409	0.000614774	0.0482347	UP
Col6a6	22.6118	0.0104202	2.19643e-06	0.00052776	UP
Slc46a3	210.294	0.0105067	0.000543676	0.0437731	UP
C1qa	123.346	0.0105874	0.000625214	0.0488048	UP
C1qc	169.848	0.0106154	0.000605654	0.0477628	UP
Fmn1	527.716	0.010779	0.000255315	0.0246933	UP
Ggta1	117.82	0.0107813	0.000441123	0.0372725	UP
Scn7a	108.005	0.0108359	0.000258968	0.0247354	UP
Padi2	310.134	0.0109099	0.00042484	0.0364264	UP
Galnt6	123.865	0.0109142	0.000426372	0.0364264	UP
Acta2	237.032	0.0109301	0.000412962	0.0358787	UP
Pcdhb7	174.909	0.0109927	0.000357293	0.0319445	UP
Myh11	726.495	0.0110274	0.000189516	0.0192879	UP
Osmr	171.453	0.0110647	0.000354274	0.0318598	UP
Gm581	115.133	0.0111006	5.661e-05	0.00763639	UP
Dnahc11	1383.76	0.0111379	0.000149364	0.0159508	UP
Cyp26b1	73.6314	0.0111608	0.000100112	0.0119343	UP
Igf2	1113.89	0.011182	0.000129243	0.0143025	UP
C1qb	197.542	0.0112865	0.000266909	0.0251812	UP
Cmya5	629.506	0.0113374	8.26347e-05	0.0103313	UP
Myo1d	261.213	0.011398	0.000157234	0.0165613	UP
Tap1	73.0557	0.0114635	7.01004e-05	0.00897642	UP
Ifitm3	67.3024	0.0115363	3.04683e-05	0.00473274	UP
Hvcn1	73.1672	0.0116307	9.92237e-05	0.0119208	UP
Pisd	266.546	0.0116316	0.000118006	0.0134422	UP
Ptpn6	111.253	0.0116822	0.000152467	0.0161699	UP
Nlrp10	123.358	0.0117333	0.000130209	0.0143025	UP
Tgm2	220.311	0.0117601	0.000144886	0.0155808	UP
Irgm2	113.224	0.0117869	5.97101e-05	0.00784805	UP
Ly6e	354.763	0.0118042	0.00010494	0.0124136	UP
Slfn2	35.7829	0.0118985	2.52027e-07	8.80836e-05	UP
Vmn1r90	169.662	0.0119479	4.14925e-05	0.00585387	UP
Mobp	1906.5	0.0119769	1.10031e-05	0.00201435	UP
Tgtp2	70.5324	0.012065	2.35047e-06	0.000539486	UP
Fyb	179.78	0.0120815	9.35966e-05	0.0114232	UP
Dcdc2a	433.098	0.0121247	4.76839e-05	0.00660615	UP
Pcdhb5	131.977	0.012145	5.84853e-05	0.00775334	UP
Trim30d	49.7776	0.0122529	5.19341e-06	0.00106198	UP
Gfap	2915.2	0.0123591	1.75072e-05	0.00300098	UP
Pcdhb10	143.667	0.0123669	6.24178e-05	0.00813441	UP
Acer2	62.2325	0.0124202	1.52571e-06	0.000404523	UP
Gm98	449.072	0.0124498	5.77041e-05	0.00771629	UP
Nlrc5	33.3763	0.0125166	7.85855e-07	0.000233461	UP
C4a	48.0917	0.0125547	2.9209e-06	0.000660552	UP
Il1r1	81.6136	0.012628	3.11779e-05	0.0047695	UP
Zfp951	75.1721	0.0126357	6.77192e-06	0.00131821	UP
Slfn5	275.596	0.0126561	4.10371e-05	0.00584322	UP
Herc6	272.493	0.0126563	3.20156e-05	0.00482682	UP
Irf9	185.148	0.0126866	4.00798e-05	0.00576438	UP
Gbp7	214.065	0.0127169	4.01085e-05	0.00576438	UP
Gbp9	117.449	0.0127535	3.35255e-05	0.00500538	UP
Oprd1	382.893	0.0127635	3.69113e-05	0.0054579	UP
Ctss	1125.31	0.0128439	1.75633e-05	0.00300098	UP
Eif2ak2	408.685	0.0128474	3.13252e-05	0.0047695	UP
Sulf1	619.008	0.0130435	1.34736e-05	0.00243762	UP
Trim66	425.552	0.0130577	1.8774e-05	0.00313339	UP
Stat1	823.805	0.0132546	1.79358e-05	0.00303096	UP
Ddx58	167.11	0.0134245	1.467e-05	0.00256358	UP
Ifi44	38.4195	0.0134606	5.48245e-09	3.28627e-06	UP
Ifi203	33.9889	0.0134641	2.35348e-08	1.03405e-05	UP
Gbp10	166.857	0.0135403	7.33583e-06	0.00141013	UP
Slfn8	48.7214	0.0136437	6.02571e-07	0.000197156	UP
Hapln2	155.357	0.0137642	8.6726e-06	0.00162643	UP
Pcdhb11	186.767	0.0138119	8.12027e-06	0.00154165	UP
9930111J21Rik1	83.125	0.0139459	1.86564e-06	0.00046274	UP
Il33	340.218	0.0140066	5.82408e-06	0.00116315	UP
Fmo2	45.7967	0.0140738	1.02972e-07	3.95874e-05	UP
Xaf1	48.2659	0.0142035	5.52432e-07	0.000184681	UP
H2-K1	286.185	0.0142259	3.11377e-06	0.000693964	UP
Gbp2	137.639	0.0142844	3.4221e-06	0.000751787	UP
H2-T24	35.3187	0.0142861	1.4955e-08	7.22579e-06	UP
Ifi27l1	138.557	0.0144656	2.26217e-06	0.000535052	UP
Itgb2	124.457	0.0146008	2.29636e-06	0.000535052	UP
Rtp4	54.8628	0.014634	3.42113e-08	1.38448e-05	UP
Eya4	75.8598	0.0149305	7.45741e-07	0.00022936	UP
I830012O16Rik	292.086	0.0149325	6.87462e-07	0.000220246	UP
B2m	940.894	0.0151485	1.00825e-06	0.000281906	UP
Pcdhb9	220.409	0.0151763	9.42998e-07	0.000268545	UP
H2-D1	407.387	0.0152759	8.15261e-07	0.000236549	UP
Lgals9	70.1696	0.0153193	3.00346e-07	0.000102638	UP
Sp100	108.75	0.0153932	1.81634e-07	6.81262e-05	UP
Trim30a	65.3693	0.0155119	2.75017e-08	1.14303e-05	UP
Ddx60	62.3811	0.0160298	1.4407e-08	7.22579e-06	UP
Pcdhb3	196.483	0.0161106	1.97867e-07	7.24477e-05	UP
Agxt2l1	468.55	0.0162481	1.45128e-08	7.22579e-06	UP
Pisd-ps2	337.973	0.0169635	4.34657e-08	1.71388e-05	UP
Pcdhb2	157.291	0.0169772	1.20953e-08	6.64293e-06	UP
Ly6a	77.3419	0.0172221	4.19517e-09	2.68805e-06	UP
Gbp3	366.767	0.017555	5.55619e-09	3.28627e-06	UP
Clec1a	184.274	0.0176986	1.10769e-08	6.30892e-06	UP
Pcdhb8	135.126	0.0186081	1.50979e-09	1.1056e-06	UP
Mpeg1	271.487	0.0188997	6.27156e-10	4.8222e-07	UP
Neat1	329.547	0.0190848	3.37898e-10	2.73484e-07	UP
Parp14	251.906	0.0194481	3.37575e-10	2.73484e-07	UP
Lyz2	169.753	0.0207008	2.27422e-11	2.18581e-08	UP
Pcdhb6	292.105	0.0210943	9.45637e-12	1.03872e-08	UP
Cyp2e1	36.7643	0.0212811	3.24026e-16	6.22859e-13	UP
Lgals3bp	300.295	0.0217314	2.24285e-12	2.65312e-09	UP
Xdh	139.387	0.0217955	1.74162e-12	2.23188e-09	UP
Pcdhb14	385.22	0.0219967	2.43622e-13	4.16268e-10	UP
Serpina3n	344.969	0.0220193	3.71808e-13	5.3897e-10	UP
Gbp6	211.489	0.0224052	3.85529e-13	5.3897e-10	UP
Irf7	44.1645	0.024763	8.47092e-20	2.1711e-16	UP
Zc3hav1	297.688	0.0264959	1.36687e-18	3.00283e-15	UP
Ifit1	239.177	0.0280531	4.77395e-20	1.46827e-16	UP
Vwf	283.206	0.0286039	2.43238e-20	9.35129e-17	UP
C4b	1004.64	0.0370842	1.13355e-34	1.74317e-30	UP
