# Supplementary material for: Remodeling of epigenome and transcriptome landscapes with aging in mice reveals widespread induction of inflammatory responses
Source: HighWire-hosted journal article supplement (doi:10.1101/gr.240093.118), 2019-03-11
Supplement: Supplemental_Table_S5.xlsx [file Supplemental_Table_S5.xlsx]

## Sheet: Index
Supplemental Table S5
Functional enrichments
	A	Ingenuity Pathway Analysis results
	B	KEGG - all gene sets
	C	KEGG - all disease related gene sets removed

## Sheet: A
IPA pathway	Aging_across_tissues		Heart		Liver		Cerebellum		Olfactory bulb
	Z-score	-log10(pvalue)	Z-score	-log10(pvalue)	Z-score	-log10(pvalue)	Z-score	-log10(pvalue)	Z-score	-log10(pvalue)
IFNG	5.903	61.4101	6.982	37.6968	3.914	8.79048	4.707	32.3344	3.91	9.31605		Upregulated IPA gene set
STAT1	3.822	49.0097	5.546	27.1593	2.042	5.65758	3.413	29.056	2.377	14.6478		Downregulated IPA gene set
TNF	3.363	21.6308	3.981	13.5784	1.422	4.99568	3.348	13.71	2.03	5.63639
TLR4	2.544	28.7328	4.773	14.8861	1.506	6.28567	2.875	15.0255	2.392	4.85078
Ifnar	0	0	6.383	41.1824	1.697	7.1296	3.23	39.6478	2.779	22.8097		Significant in at least 4 ot 5 tests
IFNAR1	2.554	35.8928	3.788	20.5214	1.351	6.41567	3.914	20.8601	2.256	16.8041		With an IPA-calculated Z-score
NOS2	3.602	12.2807	3.036	6.96257	1.89	3.07883	3.207	6.67985	1.588	6.84164		Bias-adjusted Z-score is provided when IPA flags the test with bias
IFNB1	2.56	34.4547	3.326	25.3316	1.629	7.74473	2.736	22.5361	2.54	17.3439
IRF3	0	0	5.181	27.6198	1.94	12.0747	2.842	31.7545	2.57	20.1938
IKBKB	2.272	20.8239	4.424	11.9706	1.89	8.95078	1.811	11.4724	2.119	5.47886
IRF7	0	0	5.29	27.0851	1.882	12.3615	2.736	30.6946	2.514	20.9469
FADD	1.714	8.40012	3.268	4.45593	2	2	2.536	8.26281	2.781	6.42946
TLR9	2.329	13.0783	2.951	6.88273	2.433	2.77728	2.248	6.82974	2.203	5.6968
IL1B	2.551	10.7852	4.015	6.20901	1.574	4.00261	2.619	10.2967	1.395	2.84466
MGEA5	4.122	12.4248	3.674	8.85699	0.333	4.35655	2.324	6.6517	1.134	3.23062
PARP1	1.979	16.0696	3.675	10.5482	0	0	2.302	16.0039	2.606	7.22915
IL6	2.104	12.6234	1.599	6.76955	1.425	3.09583	4.029	12.9101	1.131	2.6216
NFATC2	2.094	13.4461	3.5	8.73755	0.503	2.47366	2.141	7.49894	1.846	4.72125
TICAM1	0	0	4.19	13.7235	1.607	5.18977	2.183	16.71	1.754	5.10791
CHUK	0	0	4.179	9.25727	1.701	7.40671	1.822	7.5391	1.724	4.22475
mir-223	1.844	16.4473	3.051	4.32698	0.898	3.52724	1.203	3.66756	2.236	2.75203
TP53	1.651	9.93181	1.14	4.34582	2.198	6.59346	0.995	6.45469	3.1	2.31515
MAVS	0	0	3.847	15.3401	1.292	6.08884	1.824	19.7055	2.048	15.6696
TLR3	0	0	4.213	11.4672	1.281	3.1349	1.94	16.3316	1.408	9.64589
IRF5	0	0	3.672	13.2062	1.177	4.7167	2.03	18.8697	1.93	13.4776
LIF	2.535	5.46597	2.121	3.33819	1.964	2.37882	1.938	5.70997	0	0
IKBKG	1.409	14.6003	3.893	9.98716	-0.507	12.7878	1.588	9.65561	1.937	5.10791
IFN alpha/beta	0	0	4.186	12.9747	-0.214	3.49757	2.23	11.6021	1.886	7.62342
SAMSN1	0	0	4.123	7.8729	0.293	2.47366	2.007	9.16304	1.646	4.85078
SASH1	0	0	4	7.82102	0.293	2.6968	1.939	8.82681	1.646	5.1349
DOCK8	0	0	4	8.19586	0.293	2.82102	1.795	7.13847	1.646	5.39686
STAT2	2.012	13.7545	1.943	7.0278	0	0	1.683	7.41454	2	5.36452
SPI1	2.317	9.6517	2.791	3.97881	0.871	3.57675	1.596	2.27084	0	0
EGR1	2.084	5.55909	2.36	2.99568	1.381	2.25181	1.747	3.20135	0	0
MYD88	0	0	3.699	6.24795	0.313	1.67162	2.448	18.7033	0.908	1.95861
DDX58	0	0	3.837	12.4365	0.381	4.18642	1.631	14.4711	1.445	11.8477
FZD9	0	0	2.619	7.0278	1.052	5.42251	1.539	11.5575	1.63	11.3696
CSF2	0	0	2.693	5.74232	1.352	5.24109	1.092	4.67366	1.495	1.86646
CDKN2A	2.36	5.96257	2.449	2.75449	1	4.59346	0.788	3.4828	0	0
JUN	1.364	6.13549	0.928	3.20691	2.219	6.64782	0	0	0.44	3.67162
CEBPB	1.016	3.40894	2.561	1.95078	0	0	0.816	1.62342	0.478	3.2652
IFIH1	1.184	8.45346	2.214	6.13668	0	0	0.426	6.37059	0.857	7.46344
TBK1	0	0	2.985	7.24336	-0.673	4.00966	1.664	6.69037	0.119	3.07109
PPIF	1.664	5.45223	0.218	1.31247	-0.447	2.6968	2.121	4.15927	0	0
IKBKE	0.653	12.1035	0.707	9.35655	0	0	0.707	9.61439	0.447	6.9431
EBF1	0.334	2.32239	1.244	1.75203	-1.617	3.01728	0.378	3.32422	-0.721	1.53165
FAS	-0.411	6.68194	1.546	4.61618	-1.607	4.49349	-0.512	4.4034	0	0
CTNNB1	-1.248	3.67778	1.283	4.55129	1.347	5.19246	-2.408	1.6925	0	0
PPARD	-1.314	2.62893	0	0	-0.314	3.04769	-1.697	7.64975	0.054	2.7986
IL4	-1.167	14.7878	-0.377	5.22113	-0.571	2.1349	-0.794	9.18575	-0.468	2.76447
HOXA10	-1.296	2.99568	-3	1.85078	0.909	6.70115	-0.377	2.2426	0	0
NR1H2	-2.51	3.56543	-0.175	2.15864	0.132	2.67366	-1.761	4.23807	0	0
IKZF1	-1.39	1.78252	-2.213	0.657577	-1.532	3.17522	0	0	0.547	1.9914
Alpha catenin	0	0	-1.434	4.56384	-1.385	3.53018	-1.85	5.92812	-0.318	1.59176
STAT3	-1.855	40.9355	-1.328	19.4789	0.164	5.29414	-0.676	25.6162	-1.388	13.1555
NR1H4	-1.983	2.34969	-1.467	1.54975	0	0	-1.681	2.22621	0	3.11976
STAT6	-2.376	11.8327	-1.306	8.21467	0	4.20831	-1.686	11.2565	-0.333	7.92812
Nr1h	-2.612	11.9469	-1.802	8.4437	-0.156	5.51004	-2.106	6.36151	0	0
CD3	-1.288	5.87943	-3.121	3.01011	-1.103	1.96658	-0.799	1.64589	-1.091	2.13018
RPSA	-1.694	9.12784	-2.63	5.39686	0	0	-1.518	4.54821	-1.632	6.32057
Irgm1	0	0	-3	5.6517	-1.301	5.9393	-1.795	11.4449	-1.646	7.34008
PSEN2	-2.447	5.11182	-1.144	4.44612	-1.276	4.20135	-0.695	3.4828	-2.211	3.11577
IL10	-1.873	16.1494	-1.586	5.74958	-1	2.51856	-2.098	12.983	-1.342	3.62342
TGFB1	-2.858	14.8928	-3.002	7.14935	0.116	6.35655	-1.79	10.0278	-0.934	3.451
RHO	-2.309	4.82102	-0.905	5.1261	-1.89	5.13608	-2.121	4.67366	-1.342	3.62342
TP73	-1.851	7.10127	-2.031	5.62525	-1.698	2.37059	-3.092	5.35262	0	0
POR	-3.036	5.85387	-1.254	1.77728	0	0	-2.557	11.0931	-1.98	2.22768
PSEN1	-2.821	5.75449	-1.443	5.74232	-1.313	6.89963	-1.042	2.60906	-2.421	3.41567
APOE	-2.49	18.1952	-4.092	9.78252	-1.523	6.07779	-1.941	9.56703	0	0
SOCS1	0	0	-4.432	16.7375	-1.665	8.13727	-2.284	15.8827	-2.218	13.9586
ACKR2	0	0	-4.243	17.7932	-1.503	8.34486	-2.517	23.6055	-2.521	22.1158
TRIM24	0	0	-5.885	29.466	-1.517	11.9666	-3.377	39.6635	-2.868	21.6003
mir-21	-3.088	32.3019	-5.505	29.1864	-1.756	3.86328	-3.398	13.9172	-3.199	13.3439
IL10RA	-5.445	26.2472	-5.192	12.1681	-1.337	8.81531	-4.879	18.8097	-3.959	8.61261
PTGER4	-5.882	26.9788	-5.45	19.5143	-2.789	4.08197	-5.185	23.6716	-3.952	13.1599

## Sheet: B
KEGG - all pathways (before disease gene sets removals)
Autoimmune thyroid disease	path:mmu05320	Tg	H2-Ab1	Il2	Fas	Prf1	H2-T3	H2-D1	H2-M10.5	Gm8909	Tpo	H2-Q6	Cd40lg	H2-Q2	H2-Q4	Il5	Tshr	H2-M3	Fasl	H2-M10.4	H2-M2	H2-Ea-ps	H2-DMa	H2-Q1	Ifna15	H2-Q9	H2-T22	MHC class I family member	Ifna6	Gm11127	Cd40	H2-T9	Ifna14	Ifna1	Il4	CRP55H	Ifna2	Gzmb	H2-M11	Ifna11	H2-T-ps	Ifna7	H2-T24	H2-M10.6	Cd80	Tshb	H2-Oa	H2-Ob	Ifnab
Ribosome	path:mmu03010	Mrpl15	Mrps2	Rps27a	Rpl31-ps12	Rpl41	60S ribosomal protein L23	Rpl5	Mrpl4	Rpl23a	n-R5s133	Rpl14	Rpl10	n-R5s123	Rpl13	Rsl24d1	Rps4x	n-R5s121	Mrpl12	Gm22291	Gm22109	Mrps11	Rpl31	Rps27rt	Gm4705	Mrpl21	Mrpl32	Rps26	Rpl9	Mrpl16	Mrps15	Rpl26	Rps21	n-R5s128	n-R5s139	Gm8210	Rpl18	Rpsa	Rpl39	Rpl24	Rps13	Mrpl2	Rps3a1	Uba52	n-R5s144	Rps9	Mrps18a	Rps14	Rpl17
Measles	path:mmu05162	Myd88	Il1a	Adar	Tnfsf10	Trp73	Pik3r3	Il2ra	Ifna9	Ifna4	Mx2	Il6	Tlr9	Il13	Map3k7	Rab9b	Ifna12	Ccnd1	Ifngr1	Oas1a	Ifnab	Cblb	Cd28	Slamf1	Pik3ca	Tnfaip3	Ifih1	Rela	Cd3g	Eif2ak2	Jak3	Pik3r1	Eif3h	Ifna15	Hspa1b	Stat1	Cd209b	Tab2	Hspa1l	Ikbke	Irf7	Cd209d	Ifna14	Traf6	Cdk4	Il4	Il2rg	Ifna2	Csnk2a1
Graft-versus-host disease	path:mmu05332	Il6	H2-Q10	H2-M10.2	H2-DMb2	H2-M9	H2-Q7	Il1a	H2-Aa	H2-Bl	H2-Eb1	H2-M5	H2-M1	Cd86	Klra7	H2-T18	H2-M10.1	Klrc1	Gm7030	Cd28	H2-Q8	H2-T10	H2-M10.3	H2-L	H2-K1	H2-Oa	Cd80	Klra3	H2-M10.6	H2-T24	Klra9	Gm10499	H2-T23	H2-DMb1	Ifng	Klra1	H2-Ob	H2-T-ps	H2-M11	Gzmb	H2-T22	MHC class I family member	H2-Q9	H2-T9	Gm11127	Fasl	H2-M3	H2-Q4	H2-Q2
Th1 and Th2 cell differentiation	path:mmu04658	Ifngr2	Jag1	Stat5a	Chuk	Nfkbia	Jak2	Il5	Ppp3cb	H2-Ea-ps	H2-DMa	Il12a	Cd4	H2-Ab1	Il2	Prkcq	Tbx21	Cd3d	Rbpjl	Nfkb1	Maf	Il12rb2	Mapk10	Mapk8	Jag2	Mapk14	Maml3	Mapk9	Jun	Notch2	Mapk13	Il4	Il2rg	Mapk12	Tyk2	Ppp3ca	Mapk1	Jak1	Ikbkg	Jak3	Nfatc3	Stat1	Il2rb	Nfatc2	Il12rb1	Mapk11	Nfkbie	Stat5b	Il4ra
Sphingolipid metabolism	path:mmu00600	Sgpp2	Kdsr	Arsa	Plpp2	Smpd1	Sptlc2	Acer1	Degs2	Asah1	B4galt6	Acer2	Plpp1	Cers2	Cers3	Sgms1	Sgpl1	Galc	Sgms2	Glb1	Plpp3	Gba	Sphk2	Neu3	Neu1	Cerk	Gal3st1	Sptlc1	Cers5	Sgpp1	Gba2	Smpd2	Cers4	Gla	Sptlc3	Cers6	Degs1	Asah2	Ugt8a	Smpd4	Neu2	9130409I23Rik	Cers1	Smpd3	Sphk1	Acer3	Neu4	Ugcg	Enpp7
PPAR signaling pathway	path:mmu03320	Plin4	Fabp7	Cyp4a12a	Sorbs1	Cpt1a	Cyp4a32	Slc27a1	Fabp5	Plin5	Apoa5	Pdpk1	Cyp7a1	Cpt1b	1700061G19Rik	Ppara	Plin2	Ehhadh	Ubc	Pck1	Cyp4a12b	Cyp4a14	Fabp2	Cyp4a29	Slc27a4	Scd1	Acox1	Acaa1a	Slc27a2	Scp2	Acaa1b	Acsl5	Mmp1b	Cyp4a10	Plin1	Fabp6	Apoa2	Fabp4	Pparg	Olr1	Rxrg	Ppard	Cyp4a31	Angptl4	Dbi	Slc27a6	Fabp3	Acsl4	Acsbg2
Chronic myeloid leukemia	path:mmu05220	Tgfb2	Cblb	Map2k2	E2f3	Mecom	Crk	Kras	Cdkn1a	Gab2	Shc1	Ccnd1	Ctbp2	Rb1	Smad4	Mdm2	Bcl2l1	Pik3cd	Rela	Hdac1	Sos1	Pik3ca	Stat5b	Akt1	Sos2	Bad	Ikbkb	Braf	Hras	Pik3r3	Shc3	E2f2	Shc2	Mapk3	Ctbp1	Tgfbr2	Smad3	Grb2	Tgfb1	Nras	Cdk6	Ptpn11	Cdkn1b	Runx1	Araf	Akt3	Tgfbr1	Akt2	Nfkb1
Prion diseases	path:mmu05020	Lamc1	C1qc	Bax	Prkacb	Stip1	Il1a	Ccl5	Mapk3	C9	C8g	C7	Prkaca	Hc	Hspa1a	Il6	Egr1	Mapk1	Casp12	C6	Il1b	Map2k2	Sod1	Ncam2	C1qb	C8b	Hspa5	C8a	Fyn	Map2k1	Notch1	Elk1	Prnp	C1qa	Ncam1
Malaria	path:mmu05144	Il12a	Thbs1	Tlr2	Comp	Vcam1	Selp	Gypc	Sdc2	Lrp1	Thbs2	Csf3	Cd40lg	Ccl2	Tnf	Ifng	Il1b	Tgfb2	Gypa	Hgf	Thbs4	Itgb2l	Hba-a1	Hbb-bt	Ackr1	Sdc1	Tgfb1	Itgb2	Tlr9	Hbb-b1	Hbb-bs	Tlr4	Il6	Tgfb3	Thbs3	Ccl12	Hbb-b2	Cd40	Cd81	Il10	Met	Sele	Pecam1	Cd36	Icam1	Hba-a2	Itgal	Il18	Myd88
Hippo signaling pathway -multiple species	path:mmu04392	Wwtr1	Mob1a	Dchs1	Tead1	Rassf4	Tead4	Mob1b	Pak1	Rassf1	Rassf2	Lats2	Nf2	Yap1	Lats1	Frmd6	Wwc1	Rassf6	Sav1	Limd1	Wtip	Fat4	Tead2	Csnk1e	Tead3	Ajuba	Stk3
Maturity onset diabetes of the young	path:mmu04950	Neurod1	Nkx2-2	Slc2a2	Ins2	Rfx6	Mnx1	Gck	Ins1	Pax6	Hnf1a	Pklr	Foxa2	Hnf1b	Bhlha15	Nkx6-1	Pax4	Nr5a2	Hnf4g	Foxa3	Mafa	Hes1	Onecut1	Iapp	Pdx1	Neurog3	Hhex	Hnf4a
p53 signaling pathway	path:mmu04115	Rrm2	Cycs	Ddb2	Chek1	Pten	Steap3	Cdk1	Gtse1	Mdm2	Ccnd3	Ccnd1	Pmaip1	Siah1b	Cdkn1a	Ccne2	Bbc3	Gadd45a	Ccng2	Sfn	Casp3	Cdk6	Sesn3	Gadd45g	Chek2	Mdm4	Adgrb1	Trp73	Cyct	Atr	Rrm2b	Cd82	Ei24	Siah1a	Ccnd2	Gadd45b	Ccng1	Rchy1	Bid	Thbs1	Igfbp3	Fas	Gorab	Shisa5	Perp	Ccnb3	Cdk2	Cdk4	Apaf1
Sulfur relay system	path:mmu04122	Ctu2	Nfs1	Mocs3	Mocs2	Urm1	Tst	Mpst	Ctu1
Sphingolipid signaling pathway	path:mmu04071	Gnai3	Ppp2ca	Prkcb	Map3k5	Gm2446	Sgpp2	Nras	Rock2	Ppp2r5a	Tradd	Cers3	Gna12	Degs2	Mapk3	Acer1	Asah1	Nsmaf	Ppp2r2a	Ppp2r2c	Prkcz	Adora1	Sphk2	Ppp2r2d	Ppp2r5b	Sgms2	Gnaq	Ppp2r1b	Hras	Pik3r3	S1pr4	Plcb4	Smpd2	Bcl2	Tnfrsf1a	Sptlc1	Cers5	Cers6	Asah2	Mapk11	Sptlc3	Akt1	Pik3ca	Traf2	Pik3cd	Pten	Rela	Rhoa	Pdpk1
Neomycin, kanamycin and gentamicin biosynthesis	path:mmu00524	Hkdc1	Gck	Hk3	Hk1	Hk2
Hematopoietic cell lineage	path:mmu04640	Il3	Cd34	Il4	CRP55H	Il7r	Cd55	Kitl	Itga4	Ms4a1	Il3ra	Cd14	Cd22	Fcer2a	Cd36	Cr2	Il5ra	Cd19	Siglech	Cd55b	Anpep	Cd38	Cd1d1	Il5	Tfrc	Fcgr1	Cd33	H2-DMa	H2-Ea-ps	Il6ra	Dntt	Cd3d	Csf1	Itga3	Cd37	Il9r	H2-Ab1	Mme	Cd4	Tnf	Il7	Il11	Il1b	Il11ra1	Csf1r	Gp1bb	Itga2	Il6	Itgam
ABC transporters	path:mmu02010	Abca2	Abcb6	Abca17	Abcg1	Abca3	Abcb5	Abcg5	Abcg8	Abcc6	Abca13	Abca6	Cftr	Abca7	Abcb8	Abcd1	Abcg4	Abcc8	Abcc1	Abcc3	Abca12	Abcb9	Abcd4	Abcd3	Tap2	Abca9	Abcb11	Abca8b	Abcb4	Abcc10	Abcc9	Abca1	Abcb10	Abcg2	Abca5	Tap1	Abca4	Abcc5	Abca8a	Abcd2	Abcc2	Abcc4	Abcc12	Abcg3	Abcb1a	Abcb1b	Abcb7
Vitamin digestion and absorption	path:mmu04977	Apob	Tcn2	Slc5a6	Plb1	Abcc1	Gif	Slc19a2	Slc46a1	Scarb1	Folh1	Btd	Slc23a1	Pnlip	Lrat	Slc19a1	Awat2	Lmbrd1	Apoa1	Apoa4	Slc52a3	Slc19a3	Mmachc	Rbp2	Cubn
Fatty acid biosynthesis	path:mmu00061	Oxsm	Acacb	Acsbg1	Olah	Acaca	Acsl5	Acsl4	Mcat	Acsl3	Fasn	Acsbg2	Acsl1	1700061G19Rik	Acsl6
Glycine, serine and threonine metabolism	path:mmu00260	Shmt2	Srr	Psph	Dmgdh	Gcsh	Bpgm	Aoc2	Maob	Dao	Sds	Alas2	Phgdh	Pgam1	Tdh	Tha1	Bhmt	Cth	Pgam2	Sardh	Dld	Cbs	Agxt2	Gcat	Aoc3	Aldh7a1	Agxt	Chdh	Amt	Gldc	Alas1	Glyctk	Sdsl	Maoa	Gnmt	Pipox	Psat1	Gatm	Grhpr	Shmt1	Gamt
Taste transduction	path:mmu04742	Tas2r115	Tas2r105	Gabra1	Htr1b	Tas2r122	Tas2r137	Tas2r106	Gabbr2	Pkd2l1	Tas2r108	Gm725	Scnn1g	Tas2r121	Hcn4	P2rx3	Tas2r102	Tas2r113	Htr1d	Gabra3	P2ry4	Calhm1	Tas2r117	Htr1f	Pde1a	Tas2r143	Trpm5	Tas2r116	Scn3a	P2ry1	Tas2r124	Entpd2	Chrm3	Asic2	Tas2r104	Tas1r3	Gabra4	Scn9a	Pde1b	Tas2r120	Gabra6	Adcy6	Prkaca	Tas2r131	Adcy8	Adcy4	Cacna1c	Scn2a	Htr1a
Epstein-Barr virus infection	path:mmu05169	Psmd8	Psmd7	Gtf2e2	Spi1	H2-Q1	H2-M2	Vim	Chuk	Irak1	H2-Q6	Fgr	Psmd6	H2-Q2	H2-Q4	Gm11787	Mapk14	Akap8l	Ywhaz	Hspb1	Hspa2	Polr3g	H2-M10.5	Nfkb1	H2-D1	Akt2	H2-T3	Myc	DNA-directed RNA polymerases I	Pik3cb	H2-T-ps	Eif2ak3	H2-M11	Gsk3b	Mapk13	CRP55H	Ywhag	Cdk2	Stat3	Polr2i	Tyk2	Psmd1	H2-T9	Ccna2	Csnk2a2	Cd38	Cd40	Cd19	Polr3c
Arginine biosynthesis	path:mmu00220	Acy1	Nags	Ass1	Nos3	Got1	Got2	Gpt2	Gpt	Nos2	Gls2	Nos1	Glud1	Glul	Cps1	Gls	Arg1	Asl	Arg2	Otc
Pathways in cancer	path:mmu05200	Nfkb1	Col4a3	Akt2	Ret	Smad2	Axin1	Fadd	Abl1	Prkcg	Spi1	Hsp90aa1	Vegfb	Tpr	Birc5	4930544G11Rik	Wnt10b	Dvl1	Eloc	Fgf13	Ednrb	Ptger1	Gng10	Stat3	Tgfb3	Cdk2	Bdkrb1	Rac2	Gsk3b	Adcy6	Myc	Xiap	Fgf5	Vegfc	Birc2	Col4a5	Gng7	Ccne2	Rad51	Fgf18	Gnb2	Gnai1	Fgfr3	Csf3r	Gng5	Bcl2l1	Rhoa	Rb1	Fzd4
Hippo signaling pathway	path:mmu04390	Tgfb2	Rassf6	Dlg3	Bmpr1a	Ppp2r2b	Gm5601	Ywhae	Ccnd1	Sox2	Tead4	Bmp8a	Fzd9	Wwc1	Bmpr1b	Tcf7	Pard6a	Wnt9a	Wnt9b	Dlg1	Wnt5a	Wnt5b	Id1	Wnt8a	Dvl2	Bmpr2	Ywhab	Trp73	Bmp6	Tead2	Cdh1	Ppp2r2d	Scrib	Ajuba	Wnt2b	Tgfbr2	Llgl2	Fzd10	Wwtr1	Prkcz	Wnt11	Nkd1	Csnk1d	Fzd8	Tgfbr1	Wnt8b	Tead3	Csnk1e	Pard3
Staphylococcus aureus infection	path:mmu05150	Cfb	Fpr2	Fcgr1	Dsg1b	C4b	C1s2	C1qa	Fcgr4	H2-DMa	Plg	H2-Ea-ps	Mbl2	Dsg1a	Selp	H2-Oa	Fgg	Itgb2l	C1ra	H2-Ab1	C3	H2-DMb1	Masp2	C1qb	C5ar1	Fcgr2b	Ptafr	Fcgr3	H2-Ob	Cfh	Itgam	C3ar1	CRP55H	H2-DMb2	Cfd	Hc	Itgb2	Fpr3	Fpr1	C2	Selplg	Dsg1c	Masp1	Krt10	Icam1	Itgal	H2-Aa	H2-Eb1	C1s1
Caffeine metabolism	path:mmu00232	Nat3	Uox	Xdh	Nat2	Nat1	Cyp1a2
Cardiac muscle contraction	path:mmu04260	Uqcrq	Tnnc1	Myl4	COX3	Slc8a1	Cox7b	Uqcrc1	Uqcrfs1	Atp1b1	Cox6c	Cacna2d2	Actc1	Cacng4	Myh7	Cacna1s	Cacnb2	Tpm1	Atp1a1	Uqcr10	Cox8a	Cacng2	Cox6a2	Cox6b2	Cacnb4	Cacng3	Cox4i2	Cyc1	Cox6b1	Cacnb3	Cox8c	Tpm3	Cacna2d4	Atp1b3	Slc9a6	Cox4i1	Cacnb1	CYTB	Tnnt2	Cox7c	Myh6	Tpm2	Cacna2d1	Cacng8	Cacna1c	Atp1a2	Atp1b4	Cox5b	Cox8b
VEGF signaling pathway	path:mmu04370	Mapkapk2	Mapk11	Pla2g4a	Pla2g4b	Pik3ca	Raf1	Akt1	Ptgs2	Pla2g4c	Bad	Cdc42	Prkcg	Ppp3r2	Pik3cd	Sh2d2a	Ppp3cb	Nos3	Akt2	Sphk1	Map2k1	Pla2g4d	Rac3	Pxn	Map2k2	Hspb1	Pla2g4e	Mapk14	Kras	Akt3	Mapk12	Mapk1	Ppp3ca	Prkcb	Pla2g4f	Mapk13	Kdr	Mapk3	Src	Rac2	Plcg2	Pik3cb	Nras	Mapkapk3	Prkca	Pik3r2	Rac1	Vegfa	Sphk2
Small cell lung cancer	path:mmu05222	Ptgs2	Lamc2	Chuk	Nfkbia	Rarb	Rxrb	Akt2	Col4a3	Itga3	Nfkb1	Lama5	Rxra	Lama3	Fn1	Cdkn1b	Fhit	Col4a1	Col4a2	Itga2	Akt3	Ccne1	Apaf1	Traf6	Cdkn2b	Cdk4	Cdk2	Ikbkg	Traf4	Myc	Pik3cb	Pik3r2	Trp53	Birc7	Pik3r1	Lamb2	Traf5	E2f1	Casp9	Lama2	Akt1	Pik3ca	Cycs	Rb1	Max	Bcl2l1	Traf2	Pik3cd	Pten
Ubiquinone and other terpenoid-quinone biosynthesis	path:mmu00130	Vkorc1	Coq5	Coq2	Tat	Coq7	Coq3	Ggcx	Hpd	Coq6	Vkorc1l1	Nqo1
Proteoglycans in cancer	path:mmu05205	Camk2b	Fzd5	Wnt10b	Hspg2	4930544G11Rik	Itpr1	Mir21a	Cdc42	Prkcg	Ppp1r12b	Akt2	Mapk14	Wnt1	Smad2	Pxn	Tnf	Igf1	Ddx5	Stat3	Igf2	Eif4b	Mapk13	Wnt3a	Hcls1	Pik3cb	Mir10a	Myc	Prkca	Camk2a	Erbb3	Sdc4	Rps6kb1	Ptpn6	Itpr3	Ppp1cc	Ppp1cb	Cbl	Actg1	Hif1a	Gpc1	Vtn	Gpc3	Ank2	Fzd2	Fzd6	Mapk11	Egfr	Akt1
Chagas disease (American trypanosomiasis)	path:mmu05142	Ppp2r2c	Ppp2r2a	Map2k4	Gna11	Smad3	Mapk3	Tgfbr2	Tgfb1	Tlr9	Tlr4	Il6	Ccl12	Gnai3	Ppp2ca	Ikbkb	Tnfrsf1a	Il10	C1qc	Nos2	Plcb4	Pik3r3	Ppp2r1b	Gnaq	Fos	Ccl5	Myd88	Ppp2r2d	Cd3g	Rela	Pik3cd	Pik3ca	Akt1	Ace3	Mapk11	Il12b	Cd3e	Adcy1	Ifng	Gna15	Tgfb2	Cd247	Gnai1	Ppp2r2b	Ifngr1	C3	Casp8	Ikbkg	Ppp2r1a
Taurine and hypotaurine metabolism	path:mmu00430	Ggt7	Gad1	Ggt1	Ggt5	Gad2	Gadl1	Csad	Baat	Ggt6	Cdo1	Ado
Protein processing in endoplasmic reticulum	path:mmu04141	Man1a	Sec24b	Rpn1	Gm15266	Hsp90b1	Selenos	Ubqln4	Eif2ak3	Sar1b	Sec31a	Sar1a	Calr	Ddost	Mogs	protein transport protein Sec61 subunit gamma	Mbtps2	Bak1	Tram1	Ckap4	Atxn3	Fbxo2	Nsfl1c	Nploc4	Stub1	Sec61b	Man1a2	Ube2j2	Sec31b	Ube4b	Hsp90aa1	Ube2d2a	Prkcsh	Dnajc3	Atf4	Rpn2	Sec23a	Sec62	Cul1	Syvn1	Hspa2	Sec13	Fbxo6	Casp12	Pdia4	Map3k5	Erp29	Mbtps1	Rbx1
Terpenoid backbone biosynthesis	path:mmu00900	Hmgcs1	Zmpste24	Pmvk	Fdps	Fntb	Dhdds	Acat2	Idi2	Pdss1	Rce1	Mvk	Pdss2	Acat1	Ggps1	Fnta	Mvd	Gm38481	Pcyox1	Icmt	Nus1	Hmgcr	Idi1	Hmgcs2
Protein export	path:mmu03060	Spcs3	Srp14	Spcs2	Srpr	Hspa5	Sec61a1	Arxes2	protein transport protein Sec61 subunit gamma	Srp72	Srp54a	Srp54b	Immp1l	Immp2l	Sec11a	Sec11c	Sec62	Arxes1	Srp19	Sec61b	Srprb	Srp9	Gm15266	Sec63	Srp54c	Srp68	Oxa1l	Spcs1	Gm4184	Sec61g	Sec61a2
D-Arginine and D-ornithine metabolism	path:mmu00472	Dao
Leishmaniasis	path:mmu05140	Tgfb3	CRP55H	Mapk13	Il4	Traf6	Jun	Mapk1	Mapk12	Jak1	Ptpn6	Itga4	Stat1	Tab2	Ncf2	Nfkbia	Irak1	Fcgr1	Ifngr2	Fcgr4	Jak2	Ptgs2	Tlr2	Il12a	H2-DMa	H2-Ea-ps	Itgb2l	Irak4	H2-Ab1	Nfkb1	Mapk14	Tnf	Il1b	Marcksl1	Prkcb	Tab1	Itgam	Tlr4	Map3k7	Tgfb1	Itgb2	H2-DMb2	Mapk3	Itgb1	Fos	Il1a	H2-Aa	Myd88	H2-Eb1
Huntington's disease	path:mmu05016	Slc25a31	Ndufs1	Polr2e	Polr2j	Atp5a1	Sod1	Ndufb9	Crebbp	Ndufb11	Polr2f	Dnah7a	Ndufa7	Ndufv2	Polr2d	Clta	Ndufc1	Plcb1	Dnah12	Ndufa11	COX1	COX2	Dnah5	Bax	Uqcrc2	Tbpl1	Ap2a2	Cox7a2l	Ndufa5	Ndufab1	Cox6a1	Plcb2	Cox7b2	Rest	Casp9	Dnaic2	Cox8b	Cox5b	Ndufb10	Hdac2	Ucp1	Ndufv1	Vdac1	Sp1	Taf4b	Ndufa10	Creb3l3	Ndufv3	Casp8
Glycosaminoglycan biosynthesis - heparan sulfate / heparin	path:mmu00534	Ndst1	Hs6st3	Hs6st2	Ndst4	Extl2	Ext1	Extl3	B3galt6	Hs3st5	Xylt2	Hs3st3b1	Ndst2	Extl1	Ndst3	B3gat3	Ext2	Glce	Hs6st1	Xylt1	Hs2st1	Hs3st3a1	Hs3st2	Hs3st1	B4galt7
Lysine biosynthesis	path:mmu00300	Aadat	Aldh7a1
Mucin type O-glycan biosynthesis	path:mmu00512	Galnt18	C1galt1	Galntl5	Galnt6	St3gal2	Galnt2	Galnt11	Galnt4	Galnt5	C1galt1c1	Gcnt1	Galnt1	Galntl6	St6galnac1	St3gal1	Galnt16	B4galt5	Galnt15	Galnt14	Galnt12	Galnt13	Galnt7	Galnt3	Gcnt3	Wbscr17	Gcnt4	B3gnt6	Galnt10
Spliceosome	path:mmu03040	Snrpa	Snrpd3	Prpf19	Alyref2	U2af1	Lsm6	Usp39	Ddx23	Gm8994	Pqbp1	Snw1	Rbm17	Ncbp2	Syf2	Rbmxl1	Thoc1	Aqr	Rbm25	Snrnp40	Prpf40a	Srsf2	Lsm5	Snrnp70	Plrg1	Snrpc	Hspa8	Hnrnpc	Cherp	small nuclear ribonucleoprotein F	Phf5a	Tcerg1	Hspa2	Slu7	Snrpd2	Prpf31	Dhx38	Snrpb	Prpf38a	Zmat2	Srsf3	U2af2	Snrnp27	Thoc3	Snrpe	Nhp2l1	Rp9	Prpf4	Sart1
GnRH signaling pathway	path:mmu04912	Cga	Camk2d	Map2k3	Sos1	Mapk11	Adcy5	Elk1	Egfr	Sos2	Pla2g4c	Adcy1	Calml4	Map2k2	Gnrhr	Kras	Adcy9	Calm1	Map3k1	Mmp2	Mmp14	Mapk7	Adcy3	Mapk3	Map2k4	Gna11	Calml3	Camk2g	Nras	Grb2	Calm3	Hbegf	Prkcb	Map3k3	Hras	Plcb4	Gnaq	Cacna1s	Plcb1	Cacna1f	Cacna1d	Cdc42	Pld1	Adcy7	Gnrh1	Itpr1	Pla2g4a	Adcy2	Camk2b
T cell receptor signaling pathway	path:mmu04660	Mapk3	Ctla4	Pak7	Grb2	Nras	Bcl10	Cd8b1	Map3k7	Malt1	Itk	Rasgrp1	Nck2	Lck	Ikbkb	Dlg1	Ppp3cc	Ppp3r1	Lcp2	Nck1	Pik3r3	Hras	Plcg1	Il10	Grap2	Cd8a	Ptprc	Fos	Rhoa	Cd3g	Ppp3r2	Pik3cd	Map3k8	Rela	Sos1	Mapk11	Nfkbie	Pik3ca	Akt1	Cd28	Sos2	Ifng	Nfkbib	Pdcd1	Cd3e	Cblb	Map2k2	Lat	Cd247
Prolactin signaling pathway	path:mmu04917	Lhb	Prlr	Gsk3b	Src	Gck	Pik3r2	Pik3cb	Esr1	Slc2a2	Csn2	Mapk1	Wap	Mapk12	Stat3	Mapk13	Mapk9	Tnfsf11	Socs7	Socs2	Stat1	Foxo3	Socs4	Galt	Pik3r1	Raf1	Jak2	Ccnd2	Socs3	Shc4	Stat5a	Esr2	Mapk8	Mapk14	Mapk10	Akt3	Nfkb1	Akt2	Map2k1	Th	Tnfrsf11a	Mapk3	Grb2	Nras	Cyp17a1	Ins1	Irf1	Hras	Pik3r3
Natural killer cell mediated cytotoxicity	path:mmu04650	CRP55H	Ifna1	Vav3	Vav1	Mapk1	Ppp3ca	Cd48	Ifna2	Prkca	Gzmb	Pik3r2	Pik3cb	Rac2	Ptpn6	Ifna11	Ifna15	Pik3r1	Klra8	Ifna6	Hcst	Rac1	Ifna14	Nfatc2	Sh2d1a	Icam2	Raet1a	Shc4	Fcgr4	Klrk1	Ifngr2	Fasl	Raf1	Ifnar2	H60a	Raet1b	Pak1	Raet1e	Ppp3cb	Klrc2	Bid	Prkcg	Ifnb1	Fcer1g	Map2k1	Itgb2l	Fas	Klrd1	Fyn
Thiamine metabolism	path:mmu00730	Tpk1	Thtpa	Akp3	Ak8	Alppl2	Alpi	Nfs1	Ntpcr	Ak5	Ak2	Ak7	Ak1	Acp1	Ak4	Alpl
Collecting duct acid secretion	path:mmu04966	Clcnkb	Atp6v1e1	Car2	Atp6v1b1	Atp4b	Atp6v0a2	Atp6v1g1	Atp6v1f	Tcirg1	Atp6v1c1	Atp6v0c	Atp6v0d2	Atp6v0a4	Slc4a1	Atp6v1g2	Slc12a7	Atp6v1g3	Atp6v1a	Atp6v0e	Atp6v1c2	Atp6v1e2	Atp6v1d	Atp6v1b2	Atp6v0d1	Atp6v0a1	Atp6v0e2	Atp4a
Transcriptional misregulation in cancer	path:mmu05202	H3f3b	Hist1h3d	Etv4	Taf15	Per2	Igf1r	Traf1	Bcl2a1b	Ntrk1	Ldb1	Ewsr1	Mllt1	Rela	Aspscr1	Fut8	Hdac1	Rara	Mdm2	Cebpe	Max	Hist2h3b	Flt3	Ptk2	Tfe3	Bcl2a1c	Itgb7	Mllt3	Pax8	Cd86	Six1	Lmo2	Ccnt2	Cdk9	Foxo1	Etv1	Itgam	Rxrg	Ptcra	Il6	Bcl6	Pparg	Hist1h3c	Zbtb17	Plat	Tgfbr2	Hist1h3e	Tlx3	Runx1t1
NOD-like receptor signaling pathway	path:mmu04621	Ikbkb	Gabarap	Ifna9	Ifna4	P2rx7	Naip2	Plcb4	Mfn1	Pstpip1	Ccl5	Ctsb	Myd88	Ifna12	Trp53bp1	Mapk3	Txnip	Map3k7	Tank	Nlrp3	Tab1	Aim2	Il6	Trip6	Nox1	Ifnab	Traf3	Oas1a	Nox3	Gm5136	Cxcl1	Naip7	Casr	Nlrc4	Tnfaip3	Ripk3	Vdac2	Rela	Dnm1l	Nod2	Ifna14	Irf7	Traf5	Plcb2	Ikbke	Mfn2	Camp	Mcu	Tab2
Vasopressin-regulated water reabsorption	path:mmu04962	Aqp2	Dctn6	Creb3l2	Aqp3	Aqp4	Avp	Adcy9	Arhgdig	Dynll2	Creb3l4	Rab5a	Creb3	Dync2h1	Rab11b	Arhgdia	Creb5	Dync1i2	Dctn1	Prkacb	Rab5b	Creb3l1	Dync1i1	Avpr2	Vamp2	Dync2li1	Nsf	Dctn2	Rab5c	Dynll1	Dync1li1	Gnas	Creb1	Dctn4	Dync1h1	Rab11a	Dync1li2	Adcy6	Arhgdib	Prkaca	Creb3l3	Adcy3	Dctn5	Stx4a
Peroxisome	path:mmu04146	Acsl4	Sod1	Nudt19	Mpv17l2	Nudt12	Acox2	Decr2	Hao1	Hmgcl	Pex19	Gnpat	Hmgcll1	Idh2	Dao	Pxmp4	Hacl1	Abcd1	Slc25a17	Mpv17	Acsl3	Acsl1	Paox	Pex16	Nudt7	Phyh	Pex11a	Pex11b	Far1	Pex2	Agps	Crot	Crat	Prdx1	Far2	Idh1	Mpv17l	Acsl6	Acox3	Abcd2	Sod2	Pex11g	Hao2	Acot8	Eci2	Pmvk	Pex13	Ehhadh	Xdh
Allograft rejection	path:mmu05330	Gzmb	H2-M11	H2-T-ps	CRP55H	Il4	Gm11127	Cd40	H2-T9	MHC class I family member	H2-T22	H2-Q9	H2-M10.4	H2-Ea-ps	H2-M2	Il12a	H2-Q1	H2-DMa	H2-Q6	Cd40lg	H2-Q4	H2-Q2	Fasl	Il5	H2-M3	Gm8909	Tnf	H2-Ab1	Fas	Il2	H2-D1	H2-T3	Prf1	H2-M10.5	H2-Q7	H2-M9	H2-DMb2	H2-Q10	H2-M10.2	Il10	Cd86	H2-M1	H2-M5	H2-Bl	H2-Eb1	H2-Aa	H2-K1	H2-L	H2-Q8
Jak-STAT signaling pathway	path:mmu04630	Il7	Il11ra1	Il21	Il12rb2	Pias3	Akt2	Aox3	Tslp	Ifnb1	Cntfr	Gh	Il20	Il17d	Il5	Ccnd2	Stat5a	Stat2	Socs7	Osmr	Il2rb	Il13ra2	Ifna6	Ptpn6	Il3ra	Ifna11	Lifr	Lepr	Myc	Pik3cb	Tyk2	Il3	Il20ra	Stat3	Osm	Ifne	Il7r	Ifna1	Il12b	Ifng	Cdkn1a	Fhl1	Il13ra1	Pias4	Ifna7	Ccnd3	Ptpn2	Aox1	Epor
ErbB signaling pathway	path:mmu04012	Pak6	Gab1	Pik3r1	Cbl	Pak2	Ereg	Erbb4	Pak3	Nrg1	Mapk1	Jun	Mapk9	Nrg3	Gsk3b	Src	Rps6kb1	Pik3cb	Myc	Camk2a	Map2k7	Prkca	Erbb3	Pik3r2	Akt2	Map2k1	Abl2	Cdkn1b	Araf	Mapk8	Mapk10	Akt3	Cblc	Pak1	Raf1	Nrg2	Camk2b	Abl1	Areg	Crkl	Stat5a	Shc4	Pak4	Eif4ebp1	Prkcg	Egf	Shc3	Ptk2	Shc2
Cytokine-cytokine receptor interaction	path:mmu04060	Tnfrsf14	Cx3cl1	Ifna7	Csf2	Il10ra	Epor	Il12b	Ifng	Kit	Tnfsf15	Relt	Egfr	Il9	Csf3	Ccl1	Cxcl13	Flt3l	Gm13304	Il1r1	Il21r	Xcl1	Il22ra2	Cxcl16	c-C motif chemokine 27-like	Prl	Met	Gm13308	Ifnk	Tnfsf13	Ccl12	interleukin-11 receptor subunit alpha-2-like	Clcf1	Ccl24	Ifna5	Tgfb1	Ccl20	Ccl21a	Ccl25	Ccl2	Il1b	Il11ra1	Il12rb2	Cxcl2	Cxcl15	Ackr3	Cntfr	Il17d	Il20
Endocrine resistance	path:mmu01522	Adcy7	Shc4	Jag1	Raf1	Adcy2	Mapk14	Mapk8	Jag2	Mapk10	Akt3	Araf	Cdkn1b	Esr2	Map2k1	Med1	Akt2	Trp53	Pik3r2	Esr1	Pik3cb	Adcy6	Prkaca	Rps6kb1	Sp1	Gper1	Src	Cdk4	Mapk13	Mapk9	Notch2	Jun	Igf1	Mapk1	Mapk12	Adcy8	Adcy4	Gnas	Cdkn2a	Ncor1	E2f1	Cdkn2c	Mmp9	Pik3r1	Carm1	Prkacb	Bax	Pik3cd	Dll4
Primary immunodeficiency	path:mmu05340	Cd40lg	Aicda	Dclre1c	Cd4	Cd79a	Ada	Blnk	Zap70	Cd3d	Tnfrsf13c	Rfxap	Aire	Cd3e	Rfxank	Il7r	CRP55H	Il2rg	Tap1	Icos	Cd8b1	Ikbkg	Jak3	Cd19	Ptprc	Ung	Ciita	Rag2	Cd8a	Tap2	Tnfrsf13b	Cd40	Orai1	Lck	Rfx5	Rag1	Btk
Galactose metabolism	path:mmu00052	Galt	Lalba	G6pc3	Pgm1	B4galt2	Glb1	Akr1b10	Akr1b8	Pgm2	Hk3	Hkdc1	G6pc2	Akr1b3	Gck	Gaa	Hk1	Ugp2	Pfkp	Pfkm	G6pc	Gale	Galk1	Pfkl	Mgam	Sis	Lct	Galm	B4galt1	Gla	Ganc	Hk2	Akr1b7
Parkinson's disease	path:mmu05012	ND5	CYTB	Ndufs2	ND4L	Atp5o	Cycs	Cyc1	Cox6b2	Cox4i1	ND6	Vdac2	ATP6	Uba1	Ndufs3	Atp5g2	Cyct	Sdhb	Gm3873	Ndufb8	Sncaip	Park7	Cox8a	Gm4943	COX3	Slc25a5	Ube2g1	Ndufa12	Ube2j1	Slc18a2	Gm3244	Cox6c	Casp3	Uqcrc1	Slc25a31	Ndufs1	Ubb	Atp5a1	Ube2g2	Ndufb9	Ndufb11	Ndufa7	Ndufv2	Drd2	Ndufc1	Slc6a3	Ndufa11	COX1	COX2
Non-alcoholic fatty liver disease (NAFLD)	path:mmu04932	COX3	Casp7	Ndufa12	Insr	Il6	Irs2	Uqcrc1	Casp3	Adipor2	Cox6c	Itch	Gm3244	Gm3873	Il1a	Sdhb	Cyct	Pik3r3	Gm4943	Cox8a	Prkab1	Ndufb8	Tnfrsf1a	Ikbkb	Cox6b2	Cyc1	Cycs	Pik3ca	Ndufs3	Rela	Mlxip	Cox4i1	Ndufs2	CYTB	Mapk9	Jun	Ndufb10	Ern1	Ndufv1	Cox8b	Cox5b	Ndufs7	Xbp1	Pik3r2	Casp8	Ndufv3	Ndufa10	Pik3r1	Bax
Rap1 signaling pathway	path:mmu04015	Adcy2	Crkl	Plcb3	Fgf11	Pfn4	Epha2	Cdc42	Prkcg	Fgf8	Vegfb	Pard6g	4930544G11Rik	Akt2	Rapgef6	Ctnnd1	Tek	Calm5	Mapk14	Ralgds	Vasp	Rap1b	Igf1	Skap1	Mapk13	Rac2	Pik3cb	Adcy6	Efna5	Prkca	Ngfr	Actg1	Pdgfrb	Lpar4	Fgf13	Flt1	Lpar3	Fgf17	Rala	Angpt4	Mapk11	Adcy5	Prkd3	Egfr	Akt1	Fgfr3	Farp2	Sipa1	Rhoa
FoxO signaling pathway	path:mmu04068	Smad3	Foxg1	Bcl2l11	Nras	Prkab2	Tgfb1	Ins1	Pck1	Plk2	Rag1	Braf	Homer1	Sgk2	Ep300	Foxo6	Foxo4	Smad4	Irs1	Ins2	Agap2	Pik3cd	Pten	Mapk11	Akt1	Egfr	Usp7	Rbl2	Gabarapl2	Atg12	Map2k2	Cdkn1a	Kras	Irs4	Prkaa2	Irs3	S1pr1	Prmt1	Pik3cb	Sod2	G6pc2	Atm	Igf1	Il7r	Mapk13	Stat3	Cdk2	Ccnb3	Tgfb3
Tight junction	path:mmu04530	Prkag3	Myh2	Cgn	Myh7b	Rab8a	Rap1a	Cd1d1	Rac1	Prkacb	Pard6b	Actr3	Myh9	Src	Crb3	Prkaca	Actr2	Ppp2r1a	Map2k7	Myh8	Stk11	Mapk9	Rdx	Jun	Myl6b	Cdk4	Sympk	Rapgef2	Bves	Marveld3	Myl2	Tuba8	Mapk10	Cldn16	Mapk8	Tuba3b	Pard3	Tuba4a	Igsf5	Prkaa1	Cttn	Llgl1	Prkci	Cldn4	Cacna1d	Micall2	Cldn14	Wasl	Cldn22
Lysosome	path:mmu04142	Ap1g2	Ap3d1	Litaf	Ap3m2	M6pr	Ap4m1	Ctsg	Gga1	Cln5	Ap3m1	Hgsnat	Ap1m1	Ctsf	Atp6v0d1	Cltb	Atp6v0a1	Gnptg	Pla2g15	Gla	Ctse	Gm2a	Clta	Igf2r	Dnase2a	Tcirg1	Hexb	Ap1s3	Cltc	Sumf1	Ctss	Ap3b1	Atp6v0d2	Atp6v0c	Ctsw	Lipa	Ppt1	Glb1	Gba	Laptm4b	Cd63	Cd164	Fuca1	Sgsh	Ctsk	Mfsd8	Abcb9	Dnase2b	Ctsl
Cytosolic DNA-sensing pathway	path:mmu04623	Nfkbib	Ifnab	DNA-directed RNA polymerases I	Ifna7	Polr3d	Irf3	Ddx58	Rela	Polr3a	Ripk3	Il33	Polr3gl	Polr3h	Polr2l	Mb21d1	Ikbkb	Tbk1	Ccl4	Ifna4	Ifna9	Ifna13	Ccl5	Adar	Polr2h	Pycard	interferon-activable protein 202-like	Ifna12	Polr3k	Ripk1	Polr1d	Ifna5	Aim2	Tmem173	Il6	Polr3e	Casp1	Trex1	Ifi202b	Il1b	Polr1c	Polr3g	Nfkb1	Cxcl10	Polr2e	Ifnb1	Polr2f	Mavs	Nfkbia
Renin-angiotensin system	path:mmu04614	Klk1b3	Klk1b11	Klk1b21	Atp6ap2	Klk1b1	Klk1	Mme	Nln	Ace	Agt	Ctsg	Lnpep	Mrgprd	Ctsa	Cpa3	Agtr1b	Ace2	Ace3	Agtr1a	Klk1b5	Anpep	Klk1b22	Ren1	Cma1	Klk1b9	Mas1	Prcp	Prep	Klk1b8	Enpep	Thop1	Agtr2	Klk1b26	Klk1b24	Ren2
Antigen processing and presentation	path:mmu04612	Psme1	Tap1	H2-Q7	Cd8b1	Kir3dl2	H2-M9	H2-DMb2	Hspa4	H2-M10.2	H2-Q10	Creb1	Hspa8	Tap2	Canx	H2-M1	Hsp90ab1	H2-M5	H2-Eb1	H2-Bl	Ctsb	Ciita	H2-Aa	Cd8a	H2-K1	H2-L	H2-T10	H2-M10.3	Nfyb	H2-Q8	Psme2	Gm7030	Klrc1	H2-M10.1	H2-T18	H2-Ob	Rfxap	Nfyc	Hspa5	Lgmn	Ifng	H2-DMb1	Gm10499	H2-T23	Tapbp	H2-T24	H2-M10.6	H2-Oa	Hspa1a
Estrogen signaling pathway	path:mmu04915	Pik3r2	Hspa1a	Pik3cb	Adcy6	Esr1	Prkaca	Sp1	Gper1	Creb3l3	Src	Hsp90b1	Jun	Mapk1	Gnas	Adcy8	Adcy4	Itpr2	Gnao1	Plcb2	Mmp9	Hspa1l	Pik3r1	Itpr3	Gnai2	Hspa1b	Prkacb	Creb3	Itpr1	Adcy7	Hsp90aa1	Plcb1	Grm1	Shc4	Calm2	Plcb3	Atf6b	Prkcd	Raf1	Adcy2	Calm4	Akt3	Calm5	Hspa2	Esr2	Map2k1	Gabbr1	Creb3l2	Atf4
Viral myocarditis	path:mmu05416	H2-M10.5	Fyn	H2-T3	H2-D1	Prf1	Itgb2l	H2-Ab1	Rac3	Abl2	Gm8909	H2-M3	Abl1	H2-Q4	H2-Q2	Cd40lg	H2-Q6	H2-Q1	H2-DMa	H2-Ea-ps	H2-M2	H2-M10.4	Bid	Actg1	H2-T22	MHC class I family member	Rac1	H2-Q9	H2-T9	Cd55b	Cd40	Lama2	Eif4g3	Casp9	Gm11127	CRP55H	Rac2	H2-T-ps	Cd55	H2-M11	Casp8	Eif4g2	H2-Oa	Cd80	H2-M10.6	H2-T24	Ccnd1	H2-DMb1	Gm10499
Pancreatic secretion	path:mmu04972	Bst1	Atp1b3	Cftr	Cpa3	Rhoa	Rab27b	Adcy5	Pla2g2d	Pnliprp1	Pla2g10	Adcy9	Chrm3	Pla2g5	Ctrb1	Adcy1	Slc4a2	Clca4b	Cela2a	Clca1	Cpb2	Atp2a1	Atp1b1	Slc4a4	Atp2a3	Cel	Pla2g3	Adcy3	Prkcb	Pla2g12b	Pla2g2c	Atp2b2	Sctr	Cpa2	Pla2g2f	Cpa1	Pla2g1b	Pnlip	Atp1a1	Plcb4	Atp2b3	Pnliprp2	Gnaq	4930544G11Rik	Itpr1	Atp1b2	Adcy7	Plcb1	Tpcn2
Salmonella infection	path:mmu05132	Pfn1	Dync1i1	Il18	Pfn3	Actg1	Rac1	Cd14	Dync1li2	Arpc3	Arpc1b	Mapk13	Jun	Mapk9	Dync1h1	Mapk1	Mapk12	Mapk14	Mapk8	Mapk10	Cxcl3	Ccl3	Il1b	Tlr5	Nfkb1	Wasl	Dync2h1	Cdc42	Dync1i2	Pfn4	Pfn2	Ifngr2	Arpc1a	Cxcl2	Flnc	Nos2	Was	Actb	Ccl4	Plekhm2	Il1a	Fos	Flnb	Myd88	Rab7b	Pycard	Klc3	Wasf1	Arpc4
Primary bile acid biosynthesis	path:mmu00120	Acot8	Baat	Cyp7a1	Scp2	Ch25h	Cyp27a1	Slc27a5	Hsd3b7	Cyp7b1	Cyp46a1	Hsd17b4	Acox2	Cyp39a1	Cyp8b1	Amacr	Akr1d1
Phosphatidylinositol signaling system	path:mmu04070	Inpp5e	Dgka	Pik3ca	Pten	Pik3c3	Pik3cd	Inpp5b	Synj2	Inpp1	Dgkq	Ppip5k1	Pi4kb	Itpk1	Dgke	Impa1	Inpp5j	Impa2	Inpp4a	Mtmr4	Pip4k2a	Calm1	Plcz1	Mtmr1	Calml4	Prkcb	Dgkb	Tmem55a	Plce1	Calm3	Mtmr3	Ip6k1	Plcg2	Calml3	Mtm1	Pip4k2c	Dgkh	Inpp4b	Pip5k1b	Pik3r3	Plcb4	Plcg1	Pik3c2b	Inpp5a	Cdipt	Dgkd	Cds1	Dgki	Calm2
Regulation of lipolysis in adipocytes	path:mmu04923	Prkg1	Pik3r3	Npr1	Prkacb	Ptger3	Gnai2	Pik3r1	Adrb3	Adcy3	Irs3	Pnpla2	Plin1	Aqp7	Adora1	Adrb2	Prkaca	Pik3cb	Adcy6	Pik3r2	Adcy4	Adcy8	Gnas	Insr	Irs2	Fabp4	Pde3b	Mgll	Npy	Gnai3	Ptgs1	Ins1	Adcy1	Gnai1	Akt3	Adcy9	Akt2	Irs4	Lipe	Tshb	Abhd5	Adrb1	Irs1	Ins2	Adcy7	Pik3cd	Cga	Pla2g16	Adcy5
Focal adhesion	path:mmu04510	Prkca	Pik3cb	Rac2	Gsk3b	Rasgrf1	Igf1	Tnc	Rap1b	Vasp	Pak3	Vtn	Col2a1	Flt1	Ppp1cc	Ppp1cb	Actg1	Pdgfrb	Pak6	Parvb	4930544G11Rik	Itgb8	Vegfb	Cdc42	Prkcg	Pak4	Crkl	Zyx	Ccnd2	Actn1	Mylk3	Col6a5	Col6a4	Pxn	Lama3	Ppp1r12b	Col4a3	Itga3	Tnn	Akt2	Itgb4	Cav2	Col4a4	Birc3	Pak7	Ppp1ca	Prkcb	Parva	Ctnnb1
Cell adhesion molecules (CAMs)	path:mmu04514	Vcam1	Itgb8	Lrrc4	H2-M2	H2-Ea-ps	Cldn34d	H2-Q1	Vtcn1	H2-Q6	Cd40lg	Ncam1	Glg1	H2-Q2	Cldn6	H2-Q4	Cldn3	Jam3	Ntng1	Sdc3	Cldn2	Cd4	H2-Ab1	H2-T3	H2-D1	Cldn17	Cd226	H2-M10.5	Sdc4	Mag	H2-M11	Cldn7	Negr1	Cldn20	H2-T-ps	Nlgn2	F11r	Cd34	Cdh2	Cldn15	Icam2	Cd99	Cd40	H2-T9	Cd274	Cdh15	MHC class I family member	Sele	Cldn10
Folate biosynthesis	path:mmu00790	Qdpr	Gch1	Mocs2	Dhfr	Alpi	Alppl2	Akp3	Gphn	Ggh	Fpgs	Mocs1	Spr	Pts	Alpl
Leukocyte transendothelial migration	path:mmu04670	Nox3	Cldn34c4	Vav2	Afdn	Cldn13	Cldn18	Mmp2	Cyba	Nox1	Rock1	Cldn5	Thy1	Myl12b	Txk	Gnai1	Rapgef3	Pik3ca	Mapk11	Ncf1	Cldn23	Sipa1	Myl9	Rhoa	Ncf4	Cldn1	Pik3cd	Ezr	Pecam1	Itgal	Itgb1	Icam1	Ptk2	Actb	Cldn9	Msn	Myl12a	Rassf5	Actn4	Ocln	Plcg1	Esam	Arhgap5	Pik3r3	Cxcl12	Cdh5	Arhgap35	Ctnnb1	Itgam
Arrhythmogenic right ventricular cardiomyopathy (ARVC)	path:mmu05412	Tcf7l2	Itgb8	Cacna1d	Cacna1f	Ctnna1	Cacng5	Dsc2	Itga2	Atp2a2	Itgb6	Cacng1	Gja1	Emd	Cacng7	Ctnna3	Actn2	Itga3	Ryr2	Itga4	Tcf7l1	Cacna1c	Jup	Cacng6	Ctnna2	Cacna2d3	Cdh2	Lama2	Lef1	Actn3	Lmna	Actg1	Itgb3	Cacnb1	Itga7	Cacng3	Sgcd	Tcf7	Itga11	Sgca	Cacnb4	Cacna2d4	Cacnb3	Dsg2	Pkp2	Cacng8	Itga8	Sgcg	Cacna2d1
Central carbon metabolism in cancer	path:mmu05230	Gls	G6pdx	Hkdc1	Hk3	Pdk1	Pkm	Nras	Pdha2	Slc1a5	Hk1	Mapk3	Sirt3	Flt3	Slc7a5	Pdhb	Slc16a3	Met	Hras	Pik3r3	Fgfr1	Mtor	Ntrk1	Akt1	Fgfr3	Egfr	Pik3ca	Pten	Pik3cd	Ldha	Erbb2	Pgam1	Pgam2	Kras	Kit	Pfkl	Map2k2	Pdgfra	Mapk1	Slc2a2	Myc	Pik3cb	Pik3r2	Trp53	Gck	Sco2	Pdha1	Pik3r1	Tigar
Insulin signaling pathway	path:mmu04910	Calm4	Akt3	Mapk10	Fbp2	Mapk8	Araf	Ptprf	Ppp1r3e	Prkaa1	Map2k1	Phka1	Rapgef1	Eif4ebp1	Rps6	Prkci	Inppl1	Prkar2a	40S ribosomal protein S6	Raf1	Socs3	Cblc	Phkb	Calm2	Shc4	Pck2	Prkag3	Socs2	Fasn	Tsc2	Prkar2b	Gys1	Socs4	Prkacb	Pik3r1	Pygl	Pik3r2	Prkaca	Fbp1	Mapk1	Inpp5k	Sh2b2	Rhoq	Slc2a4	Mapk9	Cblb	Rptor	Calm1	Crk
mRNA surveillance pathway	path:mmu03015	Ppp2r5a	Ncbp1	Smg6	Alyref	Nxt1	Ppp2r2c	Ppp2r2a	Sap18	Ppp1ca	Gm2446	Ppp2ca	Pabpc2	Gspt2	Rnps1	Msi2	Pabpc4	Upf2	Casc3	Pabpc1l	Pym1	Nxf2	Ppp2r2d	Cpsf3	Etf1	Ppp2r5b	Pabpn1l	Srrm1	Ppp2r1b	Nxf7	Gm8994	Pabpc1	Cpsf2	Papolg	Ncbp2	Papolb	Upf3b	Smg7	Wdr33	Alyref2	Gspt1	Clp1	Hbs1l	Ppp2r2b	Pelo	Pabpc4l	Nxf3	Gm5601	Pcf11
Base excision repair	path:mmu03410	Poll	Mutyh	Lig3	Pold1	Apex1	Tdg	Ung	Parp1	Mbd4	Pold2	Pole	Pold4	Nthl1	Tdg-ps	Xrcc1	Parp3	Hmgb1	Parp4	Neil1	Mpg	Pole2	Gm21596	Lig1	Smug1	Neil3	Apex2	Pold3	Pole3	Parp2	Pole4	Fen1	Ogg1	Neil2	Pcna	Polb
Biosynthesis of unsaturated fatty acids	path:mmu01040	Elovl6	Hacd4	Acot3	Acot5	Elovl5	Hacd3	Elovl2	Acot4	Fads1	Acot2	Scd4	Scd3	Acaa1a	Acot1	Acox1	Hacd1	Scd1	Hsd17b12	Pecr	Tecr	Baat	Acot7	Acaa1b	Hadha	Fads2	Hacd2	Acox3	Scd2
Adrenergic signaling in cardiomyocytes	path:mmu04261	Atf6b	Cacng5	Slc9a1	Calm2	Ppp1r1a	Rapgef4	Adcy7	Atp1b2	Cacna1d	Cacna1f	Tpm4	Plcb1	Ppp2r3a	Atp1a3	Ppp2r3d	Fxyd2	Gm2436	Calm4	Scn7a	Akt3	Myl3	Myl2	Cacna1c	Mapk12	Atp1b4	Gnas	Adcy8	Adcy4	Mapk1	Prkaca	Rps6ka5	Adrb2	Ppp2r1a	Creb3l3	Ppp2r5c	Gnai2	Prkacb	Tnni3	Cacna2d3	Plcb2	Adra1b	Atp2b4	Kcne1	Cacna2d4	Rapgef3	Creb3l4	Crem	Cacnb1
Long-term potentiation	path:mmu04720	Grin2d	Grm5	Gnaq	Ep300	Ppp3r1	Ppp3cc	Grin2a	Grin2b	Plcb4	Hras	Braf	Rps6ka2	Prkcb	Camk2g	Calml3	Ppp1ca	Mapk3	Calm3	Rps6ka1	Nras	Gm5601	Map2k2	Calml4	Adcy1	Calm1	Kras	Rapgef3	Ppp3r2	Camk2d	Grin1	Prkacb	Gria1	Gria2	Itpr3	Ppp1cc	Ppp1cb	Plcb2	Rap1a	Itpr2	Ppp3ca	Mapk1	Rap1b	Adcy8	Cacna1c	Prkca	Camk2a	Prkaca	Atf4
Antifolate resistance	path:mmu01523	Abcc3	Il1b	Tnf	Ikbkb	Shmt1	Ggh	Gart	Folr1	Slc19a1	Nfkb1	Tyms	Dhfr	Izumo1r	Ikbkg	Mthfr	Folr2	Abcg2	Atic	Alox12	Fpgs	Rela	Abcc5	Shmt2	Il6	Abcc4	Abcc2	Abcc1	Slc46a1	Alox12e	Chuk
Salivary secretion	path:mmu04970	Prkg1	Best2	Itpr2	Kcnn4	Atp2b4	Adra1b	Nos1	Cd38	Camp	Kcnma1	Plcb2	Gucy1b3	Itpr3	Slc12a2	Lyz1	Prkacb	Prkca	Adrb2	Prkaca	Adcy6	Lyz2	Atp1a2	Adcy4	Adcy8	Gnas	Atp1b4	Calm4	Calm5	Fxyd2	Atp2b1	Atp1a3	Trpv6	Gucy1b2	Adra1d	Itpr1	Cst3	Atp1b2	Adcy7	Plcb1	Prkcg	Slc9a1	Plcb3	Calm2	Atp1a4	Prkg2	Adcy2	Gucy1a3	Atp1a1
Oxidative phosphorylation	path:mmu00190	ATP8	Lhpp	Sdha	Cox11	Atp6v1g2	Atp5g1	Uqcr10	Sdhd	Cox6a2	Atp6v1f	Uqcrq	Atp5h	Cox7b	Atp6v0a4	Ndufa8	Uqcrfs1	Ndufs8	Atp6v0b	ND4	Ndufa4l2	Sdhc	Ndufa1	Cox7c	Atp6v1d	Ndufb2	Ndufc2	ND3	Ndufa4	Cox4i2	Cox6b1	Atp5f1	Ndufa6	Cox8c	Atp6v1c1	Atp5j	Uqcr11	Atp5c1	Cox7a1	Atp5b	Cox15	Atp5d	Ndufa13	Ndufb7	Atp6v1c2	Atp6v1g1	Ndufa2	Atp6v0a2	Ndufs4
Fanconi anemia pathway	path:mmu03460	Slx1b	Fan1	Ercc4	Slx4	Hes1	Eme1	Rad51	Faap100	Rpa3	Fanca	Fanci	Fancl	Pms2	Polh	Cenpx	Brca1	Fance	Usp1	Rmi1	Eme2	Apitd1	Rpa1	Fancb	Wdr48	Fancm	Fancg	Polk	Fancc	Atrip	Ube2t	Mus81	Top3b	Rev1	Mlh1	Poli	Brca2	Palb2	Atr	Poln	Rmi2	Fancf	Blm	Top3a	Ercc1	Rpa2	Fancd2	Telo2	Brip1
D-Glutamine and D-glutamate metabolism	path:mmu00471	Gls	Gls2	Glud1
Phospholipase D signaling pathway	path:mmu04072	Plpp1	Prkca	Pik3cb	Adcy6	Dgkk	Ralgds	Fcer1a	CRP55H	Cyth1	Pik3r5	Rala	Pdgfrb	Grm7	Grm4	Dgkg	Lpar3	Cxcr1	Lpar4	Agtr1b	Agpat3	Agpat5	4930544G11Rik	Pld1	Pla2g4b	Adcy2	Pla2g4a	Plcb3	Agpat2	Pld2	Ptgfr	Cyth4	Pla2g4e	Akt2	Fcer1g	Avpr1a	Grm8	Gna12	Nras	Pik3r6	Cyth3	Rras2	Ins1	Mtor	Plcg1	Lpar2	Pdgfc	Agtr1a	Lpar6
Nucleotide excision repair	path:mmu03420	Rfc2	Xpa	Rpa1	Ddb2	Pcna	Ercc3	Pole4	Rfc1	Gm9840	Pole3	Pole2	Gtf2h1	Lig1	Rpa3	Pold3	Ercc4	Rad23b	Rfc5	Gtf2h4	Rfc4	Rbx1	Ercc2	Cul4b	Mnat1	Rpa2	Pold2	Pole	Pold4	Ercc5	Gtf2h5	Gtf2h3	Cdk7	Gtf2h2	Cetn2	Ercc1	Xpc	Ercc6	Ddb1	Ercc8	Pold1	Rad23a	Rfc3	Cul4a	Ccnh
EGFR tyrosine kinase inhibitor resistance	path:mmu01521	Il6	Prkcb	Mapk3	Plcg2	Grb2	Bcl2l11	Nras	Shc3	Pdgfa	Fgf2	Shc2	Bcl2	Eif4e	Eif4e1b	Rps6kb2	Mtor	Pdgfc	Braf	Gas6	Pik3r3	Hras	Met	Tgfa	Plcg1	Sos1	Pik3ca	Egfr	Akt1	Fgfr3	Sos2	Bad	Erbb2	Bcl2l1	Pten	Pik3cd	Shc1	Eif4e2	Map2k2	Igf1r	Kras	Nrg1	Mapk1	Pdgfra	Igf1	Stat3	Pdgfb	Kdr	Gsk3b
Ether lipid metabolism	path:mmu00565	Pld1	Pla2g16	Pla2g4a	Pla2g2d	Pla2g4b	Pla2g4c	Ugt8a	Pla2g4d	Pafah1b3	Lpcat1	Pld2	Pla2g2e	Pla2g5	Pla2g4e	Pla2g10	Pafah1b2	Cept1	Enpp6	Selenoi	Pld4	Plpp2	Pla2g6	Pld3	Plpp1	Pla2g3	Pla2g7	Pla2g2a	Pla2g12a	Agps	Lpcat2	Tmem86b	Chpt1	Plb1	Pla2g12b	Pla2g2c	Pla2g4f	Gal3st1	Pla2g1b	Pla2g2f	Enpp2	Lpcat4	Pafah1b1	Plpp3	Pafah2
Colorectal cancer	path:mmu05210	Smad2	Tgfb2	Axin1	Msh3	Rac3	Araf	Kras	Mapk10	Akt3	Tgfbr1	Mapk8	Akt2	Appl1	Ccnd1	Map2k1	Smad4	Rhoa	Pik3cd	Tcf7l2	4930544G11Rik	Birc5	Akt1	Pik3ca	Raf1	Cycs	Bad	Tcf7	Bcl2	Axin2	Lef1	Braf	Apc2	Pik3r3	Casp9	Msh2	Rac1	Cyct	Bax	Mlh1	Msh6	Pik3r1	Fos	Tcf7l1	Gsk3b	Tgfbr2	Mapk3	Smad3	Apc
Chemokine signaling pathway	path:mmu04062	Gm20878	Gm2506	Plcb1	Gnb1	Gngt2	Cx3cr1	Grk4	Adcy7	Cxcl9	Wasl	Pak1	Prkcd	Raf1	Jak2	Gm10591	Shc4	Nfkbia	Hck	Cxcl3	Ptk2b	Gng11	Grk1	Gm2023	Akt3	Ccr3	Cxcl10	Pard3	Map2k1	Ikbkg	Src	Cxcl5	Prkaca	Pik3r2	Adcy8	Adcy4	Mapk1	Vav1	Vav3	Gm5741	Plcb2	Gm21586	Cxcr4	Ccl6	Rap1a	Ccl17	Prkacb	Rac1	Stat1
Biotin metabolism	path:mmu00780	Btd	Hlcs	Oxsm
TGF-beta signaling pathway	path:mmu04350	Acvr2a	Smad5	Fst	Acvr2b	Amh	Smad1	Myc	Ppp2r1a	Gdf7	Id3	Bmp5	Rps6kb1	Sp1	Cdkn2b	E2f5	Tgfb3	Ppp2cb	Smurf2	Mapk1	Crebbp	Tgfbr1	Smad2	Cul1	Tnf	Acvr1	Inhbb	Gdf6	Bmp2	Smad7	Bmp4	Inhbe	Inhba	Tgif2	Nog	Gdf5	Nbl1	Bambi	4930544G11Rik	Thbs1	Tgif1	Rbl1	Id4	Lefty1	Lefty2	Id1	Smurf1	Skp1a	Smad6
Herpes simplex infection	path:mmu05168	Casp3	Tlr9	Hc	Map3k7	Ptpn11	Alyref	Ifna12	H2-DMb2	Skp2	Hcfc1	Srsf5	Il6	Tab1	Per1	Hnrnpk	Taf10	Il15	Skp1a	Ifna9	Tnfrsf1a	Ifna4	Ikbkb	Ube2r2	Nxf2	Myd88	H2-Eb1	Ccl5	C1qbp	H2-Aa	Cyct	Nxf7	Ifih1	Rela	H2-T10	H2-M10.3	Med8	Cdk1	Eif2ak2	H2-M10.1	Gtf2i	H2-T18	Cycs	Oas1a	Traf3	Ifnab	Gm10499	H2-DMb1	Traf1
Proximal tubule bicarbonate reclamation	path:mmu04964	Slc25a10	Aqp1	Atp1b1	Atp1b2	Slc4a4	Atp1b3	Slc9a3	Car4	Mdh1	Slc38a3	Atp1b4	Atp1a2	Car2	Gls	Atp1a4	Pck2	Glud1	Pck1	Gls2	Atp1a1	Fxyd2	Atp1a3
cGMP-PKG signaling pathway	path:mmu04022	Atp2b2	Irs2	Insr	Slc25a5	Kcnmb1	Atp1b1	Rock2	Atp2a3	Pde2a	Gucy1a2	Gna11	Adora1	Adcy3	Mapk3	Adrb3	Cacna1s	Atp2b3	Adra2b	Npr1	Creb3l1	Plcb4	Atp1a1	Ppp3cc	Bad	Gtf2i	Kcnmb3	Vdac2	Pde5a	Creb3l4	Adrb1	Nfatc1	Gm5601	Atp2a1	Calm1	Adcy9	Adcy1	Rock1	Cacna1c	Vdac1	Mef2d	Mapk1	Mrvi1	Ppp3ca	Adcy4	Adcy8	Atp1b4	Adra2a	Adrb2
Serotonergic synapse	path:mmu04726	Cyp2c68	Map2k1	Htr3b	Pla2g4d	Gabrb1	Gng11	Cacna1a	Cyp2c70	Araf	Ptgs2	Raf1	Alox15	Plcb1	Gngt2	Gnb1	Cacna1d	Cacna1f	Htr6	Alox12	Cyp2d9	Prkacb	Cyp2j12	Maoa	Gnai2	Gnao1	Plcb2	Htr4	Trpc1	Itpr2	Cyp2d26	Mapk1	Cyp2c54	Gnas	Gm5741	Cacna1c	Alox12e	Pla2g4f	Htr2c	Prkaca	Cyp4x1	Cyp2j5	Htr2b	Kcnd2	Cyp2j13	Cyp2c44	Rapgef3	Tph1	Gng12
Fc gamma R-mediated phagocytosis	path:mmu04666	Sphk1	Cfl1	Gab2	Vav2	Gsn	Arf6	Marcks	Asap1	Asap2	Crk	Lat	Fcgr2b	Akt1	Pik3ca	Ncf1	Syk	Wasf2	Asap3	Lyn	Pik3cd	Pip5k1b	Wasf1	Amph	Ptprc	Sphk2	Rps6kb2	Limk1	Plcg1	Pik3r3	Was	Arpc5	Bin1	Dock2	Marcksl1	Prkcb	Plcg2	Arpc5l	Pla2g6	Arpc2	Wasf3	Mapk3	Arpc4	Akt2	Prkce	Map2k1	Pld2	Hck	Gm11787
2-Oxocarboxylic acid metabolism	path:mmu01210	Idh3a	Idh3b	Cs	Csl	Bcat1	Idh1	Aadat	Aco1	Idh3g	Idh2	Got1	4933405O20Rik	Got2	Gpt2	Aco2	Nags	Acy1	Gpt	Bcat2
Nicotinate and nicotinamide metabolism	path:mmu00760	Art2b	Pnp2	Nadk	Bst1	Nt5c3b	Nt5e	Nmnat2	Nmnat3	Aox3	Aox1	Nt5m	Nnmt	Nmnat1	Aox4	Nadsyn1	Nudt12	Naprt	Enpp3	Nt5c	Aox2	Nmrk1	Nadk2	Art2a-ps	Nampt	Nnt	Nt5c1a	Qprt	Nt5c1b	Nt5c3	Enpp1	Nmrk2	Nt5c2	Pnp	4933425L06Rik	Cd38
Hepatitis B	path:mmu05161	Mapk1	Ywhaq	Ifna2	Cdk4	Jun	Mapk9	Casp8	Src	Ikbkg	Creb3l3	Trp53	Pik3r2	Jak1	Stat1	Bax	Pik3r1	Nfatc3	Ifna15	Irf7	Nfatc2	Ifna14	Ikbke	Mmp9	Casp9	Ticam2	E2f1	Fasl	Mavs	Raf1	Nfkbia	Atf6b	Nfatc4	Tlr2	Fas	Map2k1	Cdkn1b	Mapk10	Akt3	Tgfbr1	Mapk8	Crebbp	Ptk2b	Ddx3x	Il6	Ifna12	Tirap	Mapk3	Grb2
Lipoic acid metabolism	path:mmu00785	Lipt2	Lias	Lipt1
Hypertrophic cardiomyopathy (HCM)	path:mmu05410	Tpm1	Itga1	Itga9	Prkab1	Cacng2	Actb	Ttn	Cacna1s	Itgb1	Sgcb	Itgb7	Itga10	Cacnb2	Itgb5	Prkab2	Tgfb1	Itgb4	Actc1	Cacna2d2	Itgav	Cacng4	Myh7	Tnnc1	Itga2b	Dmd	Slc8a1	Il6	Dag1	Tnnt2	Tpm2	Myh6	Des	Cacna2d1	Tgfb2	Sgcg	Cacng8	Itga8	Prkaa2	Itga5	Itga6	Itga7	Itgb3	Cacnb1	Cacnb4	Sgca	Itga11	Sgcd	Cacng3
Tyrosine metabolism	path:mmu00350	Got2	4930438A08Rik	Aldh3a1	Got1	Aox3	Th	Aldh3b1	Aox1	Tat	Fahd1	Tyrp1	Tpo	Aox4	Gstz1	Maob	Aoc2	Mif	Aldh1a3	Pnmt	Maoa	Dct	Comt	Aldh3b2	Dbh	Aldh3b3	Adh7	Ddc	Hgd	Hpd	Gm21948	Lao1	Adh5	Adh4	Tyr	Adh1	Aox2	Fah	Aoc3	Il4i1
Inositol phosphate metabolism	path:mmu00562	Mtm1	Plcg2	Aldh6a1	Mtmr3	Isyna1	Plce1	Pik3c2b	Cdipt	Inpp5a	Plcb4	Plcg1	Pip5k1b	Inpp4b	Pip4k2c	Tpi1	Inpp1	Pi4kb	Pten	Pik3cd	Pik3c3	Synj2	Inpp5b	Pik3ca	Pip5kl1	Inpp5e	Mtmr1	Minpp1	Pip4k2a	Mtmr4	Plcz1	Pik3cg	Inpp4a	Impa2	Inpp5j	Impa1	Itpk1	Plch2	Pikfyve	Pip4k2b	Pik3cb	Pip5k1c	Mtmr2	Mtmr6	Impad1	Pip5k1a	Ocrl	Inpp5k	Plcd4
Toll-like receptor signaling pathway	path:mmu04620	Ikbkb	Tbk1	Ifna9	Ifna4	Ccl4	Ifna13	Cd86	Pik3r3	Ccl5	Fos	Myd88	Map2k4	Ifna12	Tirap	Ripk1	Mapk3	Map3k7	Tlr9	Ifna5	Lbp	Tab1	Tlr4	Il6	Ifnar1	Map2k2	Il12b	Ifnab	Tlr8	Traf3	Cd80	Ifna7	Ly96	Cxcl11	Irf3	Rela	Map3k8	Pik3cd	Tlr7	Akt1	Pik3ca	Mapk11	Map2k3	Irf7	Ifna14	Cd40	Ikbke	Ctsk	Tab2
MAPK signaling pathway	path:mmu04010	Map3k14	Mapk7	Srf	Fgf5	Arrb2	Kras	Rasgrp3	Fgf12	Map2k5	Map2k2	Fgf18	Cacng3	Pla2g4c	Cacnb4	Akt1	Fgfr3	Egfr	Cacnb3	Mapk11	Mapkapk2	Fgf7	Map3k8	Mknk2	Arrb1	Traf2	Il1r2	Ppp3r2	Flnb	Rasgrp2	Fgf2	Fos	Pdgfa	Nr4a1	Fgf15	Atf2	Il1r1	Cacnb2	Rasa1	Rasa2	Dusp1	Braf	Ppp3r1	Dusp5	Map3k3	Rasgrp1	Rps6ka2	Fgf10	Fgf14
Vascular smooth muscle contraction	path:mmu04270	Arhgef1	Plcb4	Npr1	Pla2g2f	Cyp4a12b	Cacna1s	Arhgef12	Adcy3	Pla2g6	Mapk3	Gucy1a2	Gna11	Pla2g3	Rock2	Kcnmb1	Ptgir	Rock1	Adcy1	Pla2g5	Pla2g10	Adcy9	Calm1	Cyp4a12a	Gm5601	Cyp4a32	Arhgef11	Adora2b	Pla2g2d	Ramp2	Kcnmb3	Ramp1	Adra1b	Plcb2	Itpr2	Prkg1	Adora2a	Prkacb	Gucy1b3	Ramp3	Prkaca	Pla2g2a	Adcy4	Cyp4a30b	Gnas	Adcy8	Mapk1	Mrvi1	Cald1
Synaptic vesicle cycle	path:mmu04721	Dnm1	Atp6v1d	Atp6v1e2	Cacna1a	Atp6v0e2	Atp6v0a1	Unc13b	Cltb	Atp6v0d1	Atp6v1g3	Slc18a3	Stx1b	Rims1	Atp6v0e	Atp6v1a	Tcirg1	Atp6v1c1	Slc17a6	Stxbp1	Cltc	Ap2m1	Syt1	Atp6v0c	Atp6v0d2	Slc32a1	Slc17a8	Clta	Cplx2	Atp6v1b2	Vamp2	Ap2a2	Atp6v1c2	Unc13c	Cplx4	Ap2a1	Unc13a	Rab3a	Ap2b1	Cacna1b	Napa	Atp6v1g2	Dnm3	Stx3	Slc18a1	Dnm2	Stx1a	Stx2	Atp6v0b
TNF signaling pathway	path:mmu04668	Mlkl	Atf2	Fos	Pgam5	Icam1	Ccl5	Tnfrsf1a	Ikbkb	Lif	Creb3l1	Pik3r3	Il15	Ifi47	Creb1	Casp7	Il6	Bcl3	Tab1	Edn1	Map3k5	Ccl12	Mapk3	Ripk1	Itch	Map2k4	Casp3	Tradd	Birc3	Map3k7	Birc2	Cxcl1	Csf2	Cx3cl1	Map3k14	Mmp14	Rps6ka4	Traf1	Traf3	Map2k3	Mapk11	Pik3ca	Akt1	Nod2	Creb5	Pik3cd	Creb3l4	Dnm1l	Traf2
Breast cancer	path:mmu05224	Wnt11	Notch3	Ncoa3	Grb2	Notch4	Fzd10	Mapk3	Shc2	Wnt2b	Shc3	E2f2	Flt4	Wnt5b	Hras	Pik3r3	Wnt8a	Fgfr1	Dvl2	Wnt9a	Wnt9b	Wnt5a	Tcf7	Sos2	Sos1	Fzd9	Pik3ca	Dll1	Notch1	Dll4	Ccnd1	Nfkb2	Fgf23	Igf1r	E2f3	Fgf16	Frat1	Jun	Notch2	Cdk4	Fgf20	Mapk1	Esr1	Pik3r2	Trp53	Tcf7l1	Fgf1	Fgf4	Sp1
Glycosaminoglycan degradation	path:mmu00531	Sgsh	Hpse	Idua	Glb1	Hyal6	Hexa	Hyal4	Galns	Hyal2	Hgsnat	Gusb	Hyal3	Hpse2	Gns	Naglu	Ids	Spam1	Hyal5	Arsb	Hexb	Hyal1
Prostate cancer	path:mmu05215	Pik3r1	Pdgfrb	E2f1	Casp9	Lef1	Pdgfra	Igf1	Pdgfb	Cdk2	Ccne1	Mapk1	Insrr	Pik3cb	Pik3r2	Trp53	Gsk3b	Hsp90b1	Ikbkg	Tcf7l1	Creb3l3	Pdgfd	Creb3l2	Map2k1	Akt2	Nfkb1	Atf4	Araf	Crebbp	Gstp1	Akt3	Cdkn1b	Fgfr2	Chuk	Nfkbia	Raf1	Tcf7l2	Egf	Creb3	Hsp90aa1	Ep300	Pdgfa	E2f2	Hras	Pik3r3	Braf	Srd5a2	Creb3l1	Pdgfc
Axon guidance	path:mmu04360	Nfatc3	Rhod	Sema6c	Pik3r1	Gnai2	Pard6b	Sema3g	Rac1	Efna4	Trpc1	Dpysl5	Ilk	Ryk	Sema4c	Cxcr4	Pak2	Nfatc2	Ssh3	Ppp3ca	Mapk1	Dcc	Ntn1	Cfl2	Pik3r2	Wnt4	Src	Fyn	Fes	Pard3	Plxna4	Plxna2	Ephb1	Sema3e	Rac3	Trpc6	Sema3f	Ablim2	Slit3	Lrrc4c	Efna1	Sema3a	Raf1	Pak1	Robo2	Nfatc4	Rras	Arhgef12	Ptk2
Wnt signaling pathway	path:mmu04310	Daam1	Tbl1x	Tcf7	Fzd9	Frat1	Ccnd1	Tbl1xr1	Siah1b	Susp4	Nfatc1	Rock2	Map3k7	Daam2	Ctbp1	Fzd10	Gm9839	Wnt11	Nkd1	Wnt5b	Plcb4	Prickle2	Skp1a	Wnt8a	Dvl2	Wnt9a	Wnt9b	Ppp3cc	Wnt5a	Wnt2b	Wnt10a	Bambi	Tcf7l2	Wif1	Plcb1	Nfatc4	Prickle1	Wnt7a	Fzd1	Dvl3	Frat2	Crebbp	Cer1	Fzd8	Mapk10	Mapk8	Wnt8b	Notum	Rac3
Ascorbate and aldarate metabolism	path:mmu00053	Ugt2a3	Ugt2a2	Ugt1a6a	Ugt2b36	Miox	Ugt2b34	Gulo	Ugt2b5	Ugt2a1	Aldh3a2	Ugt2b1	Ugt2b37	Ugt1a10	Ugt2b35	Ugt1a2	Rgn	Aldh1b1	Ugt2b38	Ugt1a6b	Aldh9a1	Ugt1a7c	Ugdh	Aldh7a1	Aldh2	Ugt1a5	Ugt1a9	Ugt1a1
DNA replication	path:mmu03030	Pold3	Rnaseh2a	Rnaseh2b	Dna2	Pole2	Lig1	Rpa3	Mcm2	Pola2	Mcm6	Rnaseh2c	Mcm3	Pcna	Fen1	Rfc2	Mcm4	Ssbp1	Rpa1	Rnaseh1	Pole3	Pole4	Rfc1	Pola1	Rfc3	Mcm5	Prim2	Pold1	Rfc4	Prim1	Mcm7	Rfc5	Pold4	Pole	Pold2	Rpa2
Amino sugar and nucleotide sugar metabolism	path:mmu00520	Gmds	Galk1	Gale	Chit1	Hexa	Cyb5r4	Chia1	Cyb5r3	Ugp2	Uxs1	Pgm3	Cyb5r1	Fuk	Gmppa	Hexb	Gnpda2	Hk2	Cyb5rl	Cyb5r2	Nagk	Cmas	Gpi1	Gmppb	Pgm2	Npl	Gnpda1	Gne	Gfpt2	Tsta3	Uap1	Pgm1	Galt	Pmm1	Gfpt1	Gck	Ugdh	Gnpnat1	Hk1	Fpgt	Renbp	Hkdc1	Uap1l1	Hk3	Cmah	Nanp	Amdhd2	Pmm2	Nans
Calcium signaling pathway	path:mmu04020	Phka1	Avpr1b	Slc25a31	Calm4	Cacna1a	Ptafr	Ptk2b	Plcd3	Cacna1i	Calm2	Ltb4r2	Phkb	P2rx2	Htr6	Mylk	Adcy7	Orai3	Plcb1	Cacna1f	Cacna1d	Grm1	P2rx1	Cacna1e	Slc8a2	Ptger3	Plcd1	Prkacb	Htr4	Erbb4	Bdkrb2	Mcu	Itpr2	Adora2a	Atp2b4	Adra1b	Plcb2	Vdac1	Cacna1c	Pdgfra	Htr2c	Plcd4	Ppp3ca	Adcy4	Gnas	Cckar	Adcy8	Ntsr1	Cckbr
Starch and sucrose metabolism	path:mmu00500	G6pc2	Hkdc1	Hk3	Enpp3	Gbe1	Pgm2l1	Gck	Gaa	Amy2a4	Pygl	Treh	Hk1	G6pc3	Amy2a2	Enpp1	Amy2a3	Pgm1	Gys1	Gyg	Amy2a5	Pgm2	Pygm	Gpi1	Agl	Pygb	Gys2	Ganc	Hk2	Ugp2	Amy1	G6pc	Mgam	Sis
Alzheimer's disease	path:mmu05010	Bace2	Ndufa1	Ndufa4l2	Capn2	Sdhc	Ndufb2	Calml4	Cox7c	Cox8c	Ide	Ndufa6	Cox4i2	Cox6b1	Atp5f1	Ndufc2	Ndufa4	Ppp3r2	Atp5j	Adam10	Rtn3	Ryr3	Apbb1	Atf6	Gnaq	Capn1	Sdha	ATP8	Ppp3r1	Sdhd	Cox6a2	Grin2b	Grin2a	Uqcr10	Atp5g1	Atp5h	Adam17	Psen2	Psen1	Uqcrq	Casp12	Calml3	Aph1a	Uqcrfs1	Calm3	Ndufs8	Cox7b	Ndufa8	Ndufb6
One carbon pool by folate	path:mmu00670	Gart	Shmt1	Mtr	Tyms	Mthfd1l	Aldh1l2	Dhfr	Mthfd2l	Mthfd1	Aldh1l1	Mthfd2	Amt	Mthfr	Atic	Mthfsl	Mthfs	Mtfmt	Shmt2	Ftcd
Chemical carcinogenesis	path:mmu05204	Ugt1a10	Kyat3	Aldh3b1	Cyp1a1	Ephx1	Mgst3	Cyp1a2	Ugt2b36	Gsta4	Cyp2c29	Gsta2	Ugt2b5	Sult1a1	Kyat1	Cyp2c44	Cyp2c66	Gsto2	Gstm5	Cyp2e1	Gstp2	Gstk1	Mgst1	Cyp2b23	Ugt2b38	Cyp2c39	Cyp1b1	Aldh1a3	Nat1	Ugt2b35	Cyp3a16	Cyp2c55	Cyp3a25	Sult2a1	Sult2a3	Ugt2b1	Cyp2c50	Ugt2b34	Aldh3b3	Gstt3	Ugt2a2	Cyp2b19	Ugt1a5	Adh4	Ugt1a7c	Gsto1	Aldh3a1	Nat2	Cyp2b9
Ribosome biogenesis in eukaryotes	path:mmu03008	n-R5s139	Pop5	Eif6	Lsg1	Nxf7	Pop7	Gnl3l	n-R5s128	Wdr3	Utp18	n-R5s136	Rnr1	Nat10	Ak6	Nxf3	n-R5s111	Efl1	Imp4	n-R5s134	Nvl	Utp15	Xrn1	Gm22109	n-R5s121	Gm22291	n-R5s123	Riok2	Rbm28	Rmrp	Mphosph10	n-R5s143	Rexo2	Utp14b	Nxt1	Nhp2	Rrp7a	n-R5s133	Spata5	Utp6	Csnk2b	1700009N14Rik	Nop58	n-R5s146	Heatr1	Rexo1	Xpo1	Gtpbp4	Rpp25l
Drug metabolism - cytochrome P450	path:mmu00982	Adh4	Ugt1a5	Fmo1	Gsto1	Gm4846	Ugt1a7c	Ugt2b1	Aldh1a3	Ugt2b35	Gstt3	Ugt2a2	Aldh3b3	Ugt2b34	Gstk1	Mgst1	Gstp2	Gstm5	Cyp2e1	Gsto2	Fmo3	Ugt2b38	Aldh3b1	Fmo4	Aox1	Gm4847	Ugt1a10	Fmo6	Aox4	Ugt2b5	Gsta2	Cyp1a2	Gsta4	Ugt2b36	Mgst3	Gstm6	Gsta3	Adh1	Aox2	Ugt1a1	Gstm4	Ugt1a6b	Gstt2	Maoa	Ugt2b37	Mgst2	Ugt2a1	Gstm2	Ugt1a2
Viral carcinogenesis	path:mmu05203	H2bfm	Jak3	Pik3r1	Gtf2h3	Rac1	H2-Q9	Prkacb	H2-T22	Hdac10	Bax	Gm11127	Irf7	Traf5	Tbpl1	Jun	Gtf2h4	Cdkn2b	Cdk4	Hdac2	Mapk1	Ywhaq	Prkaca	Hist1h2bp	Trp53	Pik3r2	Chd4	Jak1	Src	Ikbkg	Kat2a	Casp8	Creb3l3	Sp100	Hist1h4c	Hist1h2bb	Irf9	Hist1h2bj	Ccr3	Rbpjl	Hist2h4	Gm8909	Crebbp	Hdac7	Cdkn1b	Rbl1	Atf6b	Nfkbia	Hist1h2bl
Renin secretion	path:mmu04924	Itpr2	Orai1	Clca2	Kcnma1	Plcb2	Clca3a2	Gnai2	Gucy1b3	Itpr3	Prkacb	Pde1b	Adrb2	Prkaca	Adcy6	Cacna1c	Clca3b	Ppp3ca	Ren2	Pde3b	Gnas	Calm4	Clca4a	Calm5	Clca3a1	Adcyap1	Gucy1b2	Agt	Ace	Ednra	Itpr1	Aqp1	Ppp3cb	Agtr1b	Plcb1	Cacna1d	Cacna1f	Pde1c	Plcb3	Calm2	Prkg2	Gucy1a3	Npr1	Plcb4	Agtr1a	Ppp3cc	Ppp3r1	Adrb3	Cacna1s
Fatty acid metabolism	path:mmu01212	Acsbg1	Hsd17b12	Tecr	Acaca	Cpt1b	Fads2	1700061G19Rik	Acadsb	Scd2	Acads	Ehhadh	Hadh	Oxsm	Elovl6	Acat1	Elovl2	Acsl4	Acsbg2	Cpt1a	Scd4	Hadhb	Acaa2	Acaa1b	Hadha	Acsl5	Ppt2	Pecr	Acadvl	Mcat	Cpt1c	Hacd2	Acat2	Acadl	Echs1	Acox3	Acsl6	Hacd4	Mecr	Elovl5	Hacd3	Acsl1	Acsl3	Fasn	Cpt2	Scd3	Fads1	Ppt1	Acadm
Aminoacyl-tRNA biosynthesis	path:mmu00970	TrnS2	Dars	Aars2	Hars	TrnC	Mars2	Mars	Wars2	TrnE	TrnW	Sars	Sars2	Hars2	Mtfmt	Iars	Yars	Gars	Ears2	Lars	TrnF	Cars	Nars	Eprs	TrnI	TrnY	Nars2	Vars	TrnL1	TrnS1	TrnK	Cars2	TrnN	Pars2	Vars2	TrnV	TrnQ	Tarsl2	Fars2	Gatb	Lars2	TrnT	Gatc	Wars	Yars2	Qrsl1	TrnH	Sepsecs	Rars
African trypanosomiasis	path:mmu05143	Fasl	Plcb3	Ido1	Plcb1	Prkcg	Il12a	Vcam1	Fas	Hbb-bt	Hba-a1	Il12b	Tnf	Il1b	Ifng	Hbb-bs	Il6	Lama4	CRP55H	Thop1	Prkcb	Prkca	Hbb-b1	Tlr9	Sele	Apoa1	F2rl1	Gnaq	Hba-a2	Icam1	Il18	Myd88	Hbb-b2	Plcb2	Ido2	Il10	Plcb4
Citrate cycle (TCA cycle)	path:mmu00020	Sdha	Sdhb	Pdhb	Dlat	Suclg1	Pcx	Pck1	Sdhd	Pck2	Suclg2	Idh3b	Pdha2	Idh1	Fh1	Pdha1	Idh3g	Aco2	Sdhc	Ogdh	4933405O20Rik	Dld	Sucla2	Cs	Csl	Idh3a	Mdh1	Idh2	Ogdhl	Dlst	Mdh2	Aco1	Acly
Pentose and glucuronate interconversions	path:mmu00040	Ugt2a3	Gusb	Ugt2b5	Ugt2b36	Dhdh	Ugt1a6a	Xylb	Ugp2	Ugt1a10	Kl	Akr1b7	Ugt2b38	Ispd	Dcxr	Ugt1a9	Ugt2a2	Cryl1	Ugt2b34	Ugt2b37	Akr1b10	Ugt2b1	Akr1b8	Rpe	Ugt2a1	Sord	Ugt1a2	Ugt2b35	Ugt1a6b	Akr1a1	Ugdh	Ugt1a7c	Akr1b3	Ugt1a1	Ugt1a5
Neuroactive ligand-receptor interaction	path:mmu04080	Drd3	Mc1r	Adcyap1r1	Grm3	Grm2	Gpr156	Adora1	Grin3a	Gabrg1	Gabbr2	Gabre	Sstr2	Gabrb3	Grin2d	Tacr2	Chrna4	Hrh3	Fpr2	Lhcgr	Oprk1	Aplnr	Trhr2	Grin1	A630033H20Rik	P2ry4	Taar7a	Chrne	Npy5r	Adrb1	Htr2b	Oprm1	Gipr	Ghrhr	P2ry2	Htr2c	Chrna10	Prlr	P2rx4	Adrb2	Ntsr1	Grik5	Mas1	Ptger3	Mc5r	Npffr1	Adra1b	Taar7d	Prss2
cAMP signaling pathway	path:mmu04024	Atp1b3	Pik3cd	Ppp1r1b	Camk2d	Cnga3	Rhoa	Creb5	Pde3a	Ppara	Myl9	Adcy5	Cnga1	Npy1r	Akt1	Htr1f	Gnai1	Gria3	Map2k2	Calml4	Afdn	Mc2r	Calm3	Htr1b	Ppp1ca	Camk2g	Calml3	Arap3	Gnai3	Creb1	Rras2	Chrm1	Braf	Ffar2	Grin2b	Grin3b	Grin2a	Ep300	Htr1d	Fos	Drd5	Pln	Pld1	4930544G11Rik	Creb3	Ghrl	Sox9	Atp1a4	Fshb
Metabolism of xenobiotics by cytochrome P450	path:mmu00980	Ugt2a2	Gstt3	Akr7a5	Cyp2f2	Aldh3b3	Ugt2b34	Ugt2b1	Sult2a3	Sult2a1	Cbr3	Ugt2b35	Aldh1a3	Gsto1	Ugt1a7c	Adh4	Cyp2s1	Ugt1a5	Gsta2	Ugt2b5	Cyp1a2	Mgst3	Ugt2b36	Gsta4	Ephx1	Aldh3b1	Cyp1a1	Ugt1a10	Cyp1b1	Ugt2b38	Mgst1	Gstk1	Gstp2	Cyp2e1	Gstm5	Gsto2	Adh5	Aldh3b2	Gstm3	Adh7	Mgst2	Ugt2b37	Ugt2a1	Gstm2	Ugt1a2	Cbr2	Ugt1a6b	Gstm4	Gstt2
Fructose and mannose metabolism	path:mmu00051	Tigar	Sord	Pfkfb1	Tsta3	Pfkfb2	Akr1b10	Tpi1	Pmm1	Akr1b8	Gmppb	Aldoc	Aldoart1	Hk3	Hkdc1	Mpi	Pmm2	Tkfc	Akr1b3	Pfkfb3	Fbp1	Fpgt	Hk1	Pfkfb4	Pfkp	Pfkm	Pfkl	Aldob	Khk	Gmds	Fbp2	Aldoa	Fuk	Gmppa	Hk2	Akr1b7
Bladder cancer	path:mmu05219	Hbegf	Mapk1	Cdk4	Mapk3	Src	Mmp1b	Rps6ka5	Myc	Nras	Trp53	Upk3a	E2f2	Vegfa	Dapk2	Cdh1	Mmp9	Hras	Braf	E2f1	Mmp1a	Cdkn2a	Rassf1	Dapk1	Tymp	Raf1	Egfr	Fgfr3	Thbs1	Rb1	Erbb2	Mdm2	Egf	Dapk3	Mmp2	Map2k1	Ccnd1	Map2k2	E2f3	Araf	Cdkn1a	Kras
Other types of O-glycan biosynthesis	path:mmu00514	Rfng	St3gal3	B3glct	Gxylt1	Pomt1	Eogt	St6gal2	Gxylt2	Plod3	Pofut1	Colgalt1	B4galt1	Colgalt2	Lfng	Poglut1	Pomt2	Ogt	Mfng	St6gal1	B4galt3	Pofut2	B4galt2
mTOR signaling pathway	path:mmu04150	Prkaa2	Eif4e2	Grb10	Depdc5	Deptor	Kras	Map2k2	Atp6v1d	Fzd6	Fzd2	Lamtor1	Akt1	Tsc1	Wdr59	Fzd4	Pik3cd	Pten	Ins2	Irs1	Wnt6	Rhoa	Atp6v1c1	Fzd3	Slc7a5	Lamtor4	Lrp6	Atp6v1g2	Wnt16	Ulk2	Braf	Mtor	Rps6kb2	Strada	Fzd7	Ins1	Rps6ka2	Atp6v1f	Prkcb	Nprl2	Rps6ka1	Nras	Akt2	Rps6ka6	Tnf	Sec13	Wnt1	Akt1s1	Chuk
Legionellosis	path:mmu05134	Casp1	Apaf1	Itgam	Casp7	Tlr4	Il6	Hspa8	Casp3	Itgb2	Rab1b	Cd14	Hspa1a	Clk1	Casp8	Arf1	Il18	Myd88	Pycard	Vcp	Sar1b	Sar1a	Hspd1	Cyct	Hspa1b	Naip2	Eef1a2	Casp9	Naip6	Bcl2l13	Hspa1l	Nfkbia	Sec22b	Bnip3	Cxcl2	Cycs	Tlr2	Rela	Nlrc4	Hsf1	Il12a	Eef1a1	C3	Tlr5	Itgb2l	Nfkb2	Naip7	Hbs1l	Naip5
Regulation of actin cytoskeleton	path:mmu04810	Actn1	Mylk3	Iqgap2	Pxn	Ppp1r12b	Fgd3	Itga3	Diaph2	4930544G11Rik	Itgb8	Pfn4	Fgf8	Cdc42	Crkl	Fgf11	Pak4	Chrm2	Fgf17	Scin	Git1	Ppp1cc	Ppp1cb	Fgf13	Nckap1	Pak6	Myh14	Pdgfrb	Actg1	Arpc3	Pik3cb	Rac2	Ssh2	Bdkrb1	Limk2	Pak3	Insrr	Diaph1	Pip4k2a	Fgf12	Kras	Fgf18	Ppp1r12c	Itga8	Map2k2	Chrm5	Nckap1l	Itga5	Mylk2
HTLV-I infection	path:mmu05166	Slc2a1	H2-Ab1	Elk4	Wnt1	Pcna	H2-Q4	Ccnd2	Anapc7	Fzd5	Adcy2	H2-Q6	Stat5a	Chuk	H2-M2	H2-Ea-ps	Anapc10	H2-Q1	Ranbp1	Pole3	Vcam1	Ppp3cb	MHC class I family member	Calr	Nrp1	Pdgfrb	Anapc11	H2-T9	Ranbp3	Kat5	Cdkn2a	Egr1	Atm	Wnt3a	Bub3	H2-T-ps	Vac14	Pik3cb	Fosl1	Crtc3	Srf	Csf2	Pttg1	Map3k14	Cdc27	H2-M10.6	H2-T23	Kras	Cdkn1a
Circadian entrainment	path:mmu04713	Grin2b	Grin2a	Gnb5	Plcb4	Grin2d	Gng2	Kcnj3	Gnaq	Kcnj6	Fos	Gucy1a2	Calml3	Camk2g	Gnb4	Adcy3	Mapk3	Calm3	Cacna1g	Gng8	Adcyap1r1	Per1	Creb1	Kcnj9	Gnai3	Prkcb	Adcy1	Calml4	Ryr1	Gng7	Calm1	Adcy9	Gnb2	Gria3	Gnai1	Per2	Kcnj5	Gng12	Gngt1	Camk2d	Grin1	Ryr3	Adcy5	Gng5	Gnao1	Nos1	Plcb2	Gng4	Gng13
Insulin resistance	path:mmu04931	Rps6ka3	Mlxipl	Creb3l2	Slc2a1	Prkce	Prkcq	Prkaa1	Akt2	Ppp1r3a	Ptprf	Ppp1r3e	Nfkb1	Tbc1d4	G6pc	Rps6ka6	Mapk8	Akt3	Mapk10	Tnf	Slc27a6	Slc27a5	Nfkbia	Nr1h2	Socs3	Prkcd	Ppp1r3b	Mlx	Creb3	Mgea5	Trib3	Ppp1cb	Ppp1cc	Pik3r1	Cd36	Prkag1	Gys1	Prkag2	Prkag3	Ptpn1	Pck2	Ppargc1b	Mapk9	Stat3	Srebf1	Slc2a4	G6pc2	Pik3cb	Slc2a2
Lysine degradation	path:mmu00310	Aldh1b1	Setd1a	Ogdh	Kmt2d	Kmt2b	Colgalt2	Ezh1	Setd1b	Hadh	Acat1	Plod3	Prdm9	Ehmt2	Hykk	Ehhadh	Kmt2e	Setdb2	Ezh2	Setmar	Dlst	Camkmt	Kmt5b	Plod2	Ogdhl	Setd7	Suv39h2	Dot1l	Prdm6	Kmt2c	Aldh3a2	Kmt2a	Phykpl	Colgalt1	Kmt5c	Ehmt1	Pipox	Bbox1	Whsc1l1	Nsd1	Setdb1	Ash1l	Tmlhe	Suv39h1	Gcdh	Acat2	Echs1	Prdm2	Aldh7a1
Glucagon signaling pathway	path:mmu04922	Foxo1	Pkm	Creb1	Pdha2	Calm3	Prkab2	Gcg	Smek3-ps	Camk2g	Calml3	Smek1	Ppargc1a	Crtc2	Ep300	Sik1	Atf2	Gnaq	G6pc3	Pdhb	Pygb	Prkab1	Creb3l1	Plcb4	Phkg2	Ppp3cc	Pygm	Ppp3r1	Pck1	Smek2	Ppara	Gys2	Akt1	Camk2d	Ldha	Cpt1b	Sirt1	Creb3l4	Pgam1	Creb5	Ppp3r2	Acaca	Ldhb	Gcgr	Sik2	Prkaa2	Phkg1	Pgam2	Calm1
Th17 cell differentiation	path:mmu04659	Tbx21	Il22	Il17a	Cd3d	Nfkb1	H2-Ab1	Cd4	Rxra	Il2	Prkcq	Smad2	Il1b	Runx1	Il21	Tgfbr1	Mapk10	Mapk14	Mapk8	Jak2	Ifngr2	Ahr	Stat5a	Nfkbia	Chuk	H2-Ea-ps	Il6ra	Rorc	H2-DMa	Hsp90aa1	Il17d	Rora	Rxrb	Ppp3cb	Hif1a	Stat1	Jak3	Nfatc3	Nfatc2	Il2rb	Il2rg	Mapk12	Tyk2	Mapk1	Ppp3ca	Mapk9	Jun	Mapk13	Il4
Phototransduction	path:mmu04744	Cngb1	Rcvrn	Calml4	Slc24a1	Grk1	Calm1	Calm4	Calm5	Gucy2e	Gnat1	Pde6a	Rgs9	Gucy2f	Calml3	Gnat2	Gucy2d	Gnb1	Guca1b	Guca1a	Sag	Gngt1	Rho	Calm3	Pde6b	Pde6g	Cnga1	Calm2
Carbohydrate digestion and absorption	path:mmu04973	Hk2	Pik3cd	Atp1b3	Atp1b2	Cacna1d	Slc5a1	Atp1a4	Slc2a5	Pik3ca	Akt1	Fxyd2	Akt3	Mgam	Sis	Lct	Atp1a3	Slc37a4	Amy1	Akt2	Tas1r3	G6pc	Pik3cb	Slc2a2	Hk1	Atp1b1	Pik3r2	Amy2a4	Prkcb	Atp1a2	Atp1b4	Hk3	G6pc2	Hkdc1	Atp1a1	Pik3r3	Tas1r2	Plcb2	Pik3r1	Amy2a5	Amy2a3	Gnat3	Amy2a2	G6pc3
Valine, leucine and isoleucine biosynthesis	path:mmu00290	Sdsl	Bcat1	Bcat2	Sds
Fat digestion and absorption	path:mmu04975	Mogat2	Cd36	Slc27a4	Apoa1	Mttp	Plpp3	Pnliprp2	Pnlip	Fabp2	Pla2g2f	Pla2g1b	Scarb1	Pla2g2c	Pla2g12b	Acat2	Pla2g12a	Pla2g2a	Cel	Apob	Plpp2	Abca1	Plpp1	Pla2g3	Apoa4	Abcg8	Abcg5	Got2	Pla2g5	Pla2g2e	Pla2g10	Npc1l1	Agpat1	Agpat2	Pla2g2d	Pnliprp1	Fabp1	Dgat1	Dgat2	Lipf	Clps
Endometrial cancer	path:mmu05213	Bad	Tcf7	Sos2	Akt1	Pik3ca	Elk1	Egfr	Raf1	Sos1	Tcf7l2	Egf	Pten	Pik3cd	Ctnna1	Erbb2	Ccnd1	Map2k1	Pdpk1	Ctnna3	Akt2	Akt3	Kras	Araf	Map2k2	Axin1	Mapk1	Ctnna2	Ctnnb1	Trp53	Pik3r2	Myc	Nras	Grb2	Pik3cb	Apc	Tcf7l1	Gsk3b	Mapk3	Pik3r1	Mlh1	Cdh1	Foxo3	Casp9	Pik3r3	Apc2	Hras	Braf	Ilk
Pentose phosphate pathway	path:mmu00030	Tktl2	Fbp2	H6pd	Pgls	Prps1l3	Aldob	Pfkl	G6pd2	Idnk	Pfkp	Tktl1	Rgn	Pfkm	Prps2	Pgd	Prps1l1	Aldoa	Rpia	Aldoart1	Taldo1	Pgm2	Rbks	Gpi1	Aldoc	Rpe	Pgm1	Fbp1	Glyctk	Prps1	G6pdx	Tkt	Dera
Aldosterone synthesis and secretion	path:mmu04925	Prkd3	Adcy5	Creb5	Nr4a2	Camk2d	Daglb	Creb3l4	Star	Lipe	Kcnk3	Hsd3b6	Adcy1	Calml4	Calm1	Adcy9	Dagla	Creb1	Gm10681	Scarb1	Prkcb	Gna11	Pde2a	Calml3	Camk2g	Adcy3	Calm3	Cacna1g	Mc2r	Nr4a1	Atf2	Gnaq	Camk1g	Cacna1s	Cyp21a1	Cyp11b1	Npr1	Agtr1a	Creb3l1	Plcb4	Adcy2	Camk2b	Hsd3b2	Plcb3	Calm2	Camk4	Atf6b	Plcb1	Agtr1b
Morphine addiction	path:mmu05032	Gnao1	Gng4	Pde4b	Pde4d	Grk3	Gng13	Prkacb	Gnai2	Pde7b	Gabra4	Prkca	Pde1b	Gabra6	Gng3	Adcy6	Prkaca	Pde3b	Gng10	Gnas	Adcy4	Adcy8	Gm5741	Gm15776	Gabrb1	Pde10a	Gabra2	Gabrg3	Cacna1a	Gng11	Gabrr2	Gabra5	Gnb3	Grk6	Gabbr1	Drd1	Pde1c	Prkcg	Gngt2	Gnb1	Gabrr1	Gabrd	Grk4	Adcy7	Slc32a1	Adcy2	Pde4c	Pde8a	Gabrq
Insulin secretion	path:mmu04911	Gnaq	Atf2	Pdx1	Stx1a	Cacna1s	Vamp2	Plcb4	Creb3l1	Atp1a1	Rab3a	Gpr119	Gip	Pclo	Creb1	Adcyap1r1	Prkcb	Ins1	Rims2	Snap25	Ffar1	Adcy3	Camk2g	Gna11	Gcg	Kcnn2	Atp1b1	Kcnmb1	Trpm4	Kcnn3	Adcy1	Chrm3	Adcy9	Adcy5	Kcnmb3	Abcc8	Creb5	Ins2	Creb3l4	Atp1b3	Camk2d	Kcnu1	Prkacb	Itpr3	Kcnj11	Kcnma1	Plcb2	Kcnn4	Atp1b4
Glycerophospholipid metabolism	path:mmu00564	Chpt1	Lpcat2	Lpgat1	Plb1	Lpin1	Pla2g4f	Lcat	Agpat9	Etnk2	Plpp2	Lypla2	Pld4	Gpd2	Mboat1	Plpp1	Gpd1	Lypla1	Dgkk	Pla2g12a	Pla2g2a	Taz	Cds2	Lpcat4	Plpp3	Dgkg	Chka	Ache	Pla2g16	Pla2g4a	Gpat4	Pla2g15	Phospho1	Pla2g4b	Cds1	Agpat2	Dgkd	Dgki	Agpat3	Pld1	Agpat5	Agpat4	Gnpat	Lpcat3	Mboat2	Pla2g4d	Chkb	Dgkz	Lpin2
Adipocytokine signaling pathway	path:mmu04920	Prkag3	Pck2	Acsl3	Prkag2	Acsl1	Cd36	Prkag1	Irs3	Ikbkg	Agrp	Lepr	G6pc2	Cpt1c	Slc2a4	Adipoq	Mapk9	Acsl6	Stk11	Npy	Stat3	Tnf	Acsbg2	Acsl4	Mapk8	Mapk10	Akt3	Akt2	Nfkb1	Pomc	G6pc	Slc2a1	Prkcq	Rxra	Prkaa1	Acsbg1	Rxrb	Socs3	Jak2	Adipor1	Tnfrsf1b	Nfkbia	Chuk	Tnfrsf1a	Pck1	Ikbkb	Lep	Mtor	Prkab1
Fatty acid elongation	path:mmu00062	Elovl4	Elovl2	Elovl5	Hacd3	Acot5	Acot3	Hacd4	Hadh	Mecr	Elovl6	Hadhb	Hacd1	Acaa2	Elovl3	Acot1	Acot2	Ppt1	Acot4	Elovl1	Hadha	Acot7	Ppt2	Hsd17b12	Tecr	Echs1	Hacd2	Elovl7
Phosphonate and phosphinate metabolism	path:mmu00440	Selenoi	Pcyt1b	Chpt1	Cept1	Pcyt2	Pcyt1a
Phenylalanine metabolism	path:mmu00360	Gm4952	Maoa	Aldh3b1	Aldh1a3	Pah	Got1	4930438A08Rik	Aldh3a1	Got2	Lao1	Hpd	Gm21948	Ddc	Aldh3b3	Aldh3b2	Tat	Aoc3	Mif	Keg1	Glyat	Aoc2	Maob	Il4i1
Mitophagy - animal	path:mmu04137	Mapk8	Mapk10	Kras	Ulk1	Tfeb	Ubb	Gabarapl2	Usp15	Atf4	Ambra1	Rela	Mras	Rhot2	Calcoco2	Bcl2l1	Mitf	Rab7	Sqstm1	Rras	Bnip3	Gabarapl1	Usp30	Nbr1	Atg5	Hras	E2f1	Pink1	Bnip3l	Tomm7	Gabarap	Tax1bp1	Mfn2	Tbk1	Bcl2l13	Fundc1	Csnk2a2	Atg9b	Becn1	Pgam5	Tbc1d17	Tfe3	Rab7b	Hif1a	Foxo3	Fis1	Mfn1	Cited2	Trp53
Pertussis	path:mmu05133	Mapk10	Calm4	Mapk8	C1qb	Mapk14	Calm5	Tnf	Il1b	Ticam1	Irak4	Itgb2l	Nfkb1	4930544G11Rik	Il12a	Nod1	Calm2	Irak1	C1qa	Ticam2	Sftpa1	C1s1	Gnai2	Irf8	Cfl2	Cd14	Cxcl5	Mapk13	Serping1	Mapk9	Jun	Traf6	Mapk1	Mapk12	Calm1	Gnai1	Calml4	Il12b	Itga5	Ly96	C3	C1ra	Cfl1	Rela	Irf3	Rhoa	C4b	C1s2	Mapk11
Intestinal immune network for IgA production	path:mmu04672	Cd28	Icosl	Cd40lg	Pigr	Il5	Madcam1	Aicda	Ltbr	H2-Ea-ps	H2-DMa	H2-Ab1	Ccl25	Ccr9	Il2	Map3k14	Cd80	H2-Oa	Tnfrsf13c	Ccl28	H2-Ob	H2-DMb1	Il15ra	CRP55H	Tnfsf13	Il4	Il6	Cxcl12	Tgfb1	Icos	Itga4	H2-DMb2	Ccr10	H2-Eb1	H2-Aa	Itgb7	Tnfsf13b	Tnfrsf13b	Il15	Cd86	Il10	Cd40	Tnfrsf17	Cxcr4
Apelin signaling pathway	path:mmu04371	Itpr3	Becn1	Pik3r4	Prkag1	Prkag2	Gng13	Nos1	Gng4	Pik3r5	Egr1	Gng10	Pde3b	Adcy6	Gng3	Ryr2	Rps6kb1	Gnb3	Prkce	Akt2	Calm5	Mylk3	Smad2	Adcy10	Gm15776	Gabarapl1	Plcb3	Camk4	Nrf1	Adcy2	Slc8a3	Itpr1	Agtr1b	Sphk2	Ctgf	Gng2	Gnaq	Agtr1a	Nos2	Rps6kb2	Mtor	Gnai3	Tfam	Rras2	Myl4	Slc8a1	Pik3r6	Nras	Prkab2
Retinol metabolism	path:mmu00830	Sdr16c5	Cyp3a41b	Dgat1	Ugt1a9	Cyp2a4	Cyp3a41a	Dhrs9	Ugt1a6a	Retsat	Hsd17b6	Cyp2c70	Cyp3a13	Ugt2a3	Rdh10	Aldh1a7	Cyp2b9	Cyp2c68	Aox3	Cyp26b1	Cyp2b10	Cyp2c37	Ugt1a6b	Cyp3a11	Rdh12	Cyp4a30b	Aox2	Adh1	Cyp2c65	Ugt1a1	Rdh11	Cyp2b13	Cyp2c54	Cyp26a1	Adh7	Dhrs3	Adh5	Cyp3a44	Cyp26c1	Awat2	Rdh8	Ugt1a2	Ugt2a1	Aldh1a1	Aldh1a2	Cyp2c38	Ugt2b37	Cyp2c40	Cyp2b23
Dorso-ventral axis formation	path:mmu04320	Cpeb3	Ets1	Piwil2	Grb2	Spire1	Spire2	Piwil4	Notch4	Ets2	Mapk3	Notch1	Sos2	Fmn2	Notch3	Cpeb2	Notch2	Mapk1	Egfr	Sos1	Kras	Braf	Map2k1	Cpeb1	Cpeb4	Etv6	Piwil1
Endocrine and other factor-regulated calcium reabsorption	path:mmu04961	Plcb3	Vdr	Clta	Atp1a4	Plcb1	Cltc	Prkcg	Atp1b2	Ap2m1	Atp1b3	Trpv5	Kl	Atp1a3	Atp2b1	Klk1	Dnm1	Klk1b1	Adcy9	Cltb	Klk1b21	Klk1b3	Fxyd2	Klk1b11	Ap2s1	Rab11a	Klk1b24	Klk1b26	Gnas	Atp1b4	Slc8a1	Atp1a2	Prkcb	Klk1b8	Atp1b1	Prkca	Prkaca	Adcy6	Esr1	Dnm3	Prkacb	Klk1b9	Gnaq	Dnm2	Ap2a2	Calb1	Klk1b22	Plcb2	Klk1b5
Gastric acid secretion	path:mmu04971	Kcnk10	Kcnq1	Slc26a7	Atp1a3	Atp4a	Calm5	Mylk3	Calm4	Atp1a4	Plcb3	Slc9a1	Calm2	Camk2b	Adcy2	Adcy7	Mylk	Atp1b2	Itpr1	Prkcg	Plcb1	Itpr3	Hrh2	Gnai2	Prkacb	Itpr2	Plcb2	Car2	Atp1a2	Kcnj1	Atp1b4	Gnas	Adcy8	Adcy4	Adcy6	Prkaca	Camk2a	Prkca	Cckbr	Kcne2	Kcnk2	Slc9a4	Mylk2	Gnai1	Sst	Chrm3	Calm1	Adcy9	Kcnj2
Non-small cell lung cancer	path:mmu05223	Erbb2	Rb1	Prkcg	Rarb	Pik3cd	Egf	Rxrb	Sos1	Rassf1	Akt1	Stat5b	Pik3ca	Raf1	Egfr	Bad	Stat5a	Sos2	Map2k2	Fhit	Araf	E2f3	Kras	Akt3	Akt2	Pdpk1	Rxra	Ccnd1	Map2k1	Eml4	Mapk3	Plcg2	Alk	Cdk6	Nras	Pik3cb	Grb2	Trp53	Pik3r2	Prkca	Rxrg	Mapk1	Prkcb	Cdk4	Stat3	Stk4	Braf	Pik3r3	E2f1
Basal transcription factors	path:mmu03022	Gtf2b	Tbpl2	Gtf2i	Taf5l	Gtf2e1	Gtf2e2	Taf13	4933416C03Rik	Ercc3	Taf11	Taf4	Taf6l	Taf15	Taf9b	Gtf2a1l	Gtf2h1	Taf7l	Taf8	Gtf2a2	Gtf2f1	Taf7	expressed sequence AU015228	Ercc2	Mnat1	Gtf2f2	Gtf2h4	Taf4b	Taf12	Tbp	Gtf2a1	Gtf2h5	Taf6	Gtf2h3	Taf5	Cdk7	Gtf2h2	Taf3	Gtf2ird1	Tbpl1	Taf1	Taf2	Taf9	Ccnh	Taf10
Glycolysis / Gluconeogenesis	path:mmu00010	Pdha2	Hk1	Aldh9a1	Aldh2	Aldh7a1	Eno3	Hkdc1	Hk3	Adpgk	Eno1b	Adh4	Pkm	Pklr	Pck1	Aldoc	Aldh3b3	Gpi1	Tpi1	Pdhb	Aldh1a3	G6pc3	Dlat	Pgm1	Bpgm	Ldha	Acss1	Pgam1	Pgk2	Dld	Galm	Pfkl	Minpp1	Gapdhs	Aldh3b1	Ldhb	Gapdh	Acss2	Pgam2	Fbp1	Gck	Akr1a1	Pdha1	Adh1	G6pc2	Adh5	Aldoart1	Ldhal6b	Pgm2
Carbon metabolism	path:mmu01200	Gpt	Fbp2	Glud1	Aldob	Acat1	Prps1l3	Pgls	Mut	G6pd2	Sucla2	Hao1	Aco2	Pccb	4933405O20Rik	Pfkp	Tktl1	Prps2	Pfkm	Me2	Psph	Idh2	Hk2	Ogdhl	Aco1	Pgd	Phgdh	Mthfr	Eno2	Eno1	Prps1l1	Pgk1	Aldoa	Shmt2	Me1	Pgp	Suclg1	Aldoart1	Adh5	Psat1	Cps1	Suclg2	Shmt1	Sdsl	Mcee	Hibch	Acadm	Pcca	Esd
Pyruvate metabolism	path:mmu00620	Acot12	Dlat	Pdhb	Aldh3a2	Pck2	Grhpr	Hagh	Pck1	Pcx	Ldhal6b	Pklr	Pkm	Acat2	Aldh7a1	Aldh2	Pdha1	Fh1	Aldh9a1	Pdha2	Me3	Aldh1b1	Acss2	Ldhb	Acacb	Acat1	Dld	Ldhc	Me1	Acyp1	Mdh1	Acyp2	Ldhd	Acaca	Acss1	Mdh2	Ldha	Me2	Glo1
Glutathione metabolism	path:mmu00480	Txndc12	Gsta3	Rrm1	Gclm	Nat8f1	Gss	G6pdx	Gstm6	Gpx5	Gstt2	Idh1	Ggt7	Gsr	Gsto1	Ggt5	Ggct	Gstm4	Gstm2	Gpx7	Rrm2b	Mgst2	Lap3	Ggt6	Gstm3	Anpep	Gstt3	Gpx8	Gsto2	Odc1	Gstm5	Gstm1	Gstm7	Mgst1	Gstk1	Rrm2	Gsta1	Gclc	Gstp2	Oplah	Gstt1	Pgd	Ggt1	Hpgds	Idh2	Gpx2	Gpx6	Gpx3	Gm14680
Notch signaling pathway	path:mmu04330	Jag2	Crebbp	Maml3	Hes1	Numb	Ctbp2	Aph1b	Dtx4	Lfng	Rbpjl	Hdac1	Rbpj	Kat2b	Dll4	Numbl	Notch1	Maml2	Maml1	Dll1	Jag1	Dvl3	Cir1	Psenen	Dtx1	Snw1	Dvl2	Dtx3	Dtx2	Mfng	Aph1c	Ep300	Dvl1	Rfng	Aph1a	Dtx3l	Ctbp1	Ncor2	Kat2a	Notch4	Hes5	Notch2	Psen1	Ncstn	Notch3	Adam17	Dll3	Hdac2	Psen2
Tuberculosis	path:mmu05152	Ppp3cb	Atp6v0d2	Atp6v0c	4930544G11Rik	Bid	H2-Ea-ps	Ifnb1	Irak1	Mrc1	Camk2b	Atp6v0d1	Mapk14	Cyp27b1	Fadd	Calm5	Tnf	Il1b	Fcer1g	Irak4	H2-Ab1	Card9	Nfkb1	Akt2	Ctsd	Camk2a	Lsp1	Ifna11	Tgfb3	Rab5c	Atp6v1h	CRP55H	Irak2	Mapk13	Atp6v0a2	Ifna1	Apaf1	Atp6ap1	Clec4e	Cd209a	Rfx5	Ifna6	Camk2d	Pik3c3	Rab5a	Cd209e	Ppp3r2	Rab7	Rhoa
Dilated cardiomyopathy	path:mmu05414	Tpm1	Itga9	Itga1	Cacng2	Actb	Cacna1s	Ttn	Itgb1	Sgcb	Itgb7	Cacnb2	Itga10	Itgb5	Pln	Tgfb1	Itgb4	Itgav	Cacna2d2	Actc1	Adcy3	Myh7	Cacng4	Tnnc1	Slc8a1	Itga2b	Dmd	Dag1	Tnnt2	Myh6	Tpm2	Adcy9	Des	Tgfb2	Cacna2d1	Sgcg	Cacng8	Itga8	Adcy1	Adrb1	Itga5	Itga6	Itga7	Cacnb1	Itgb3	Cacnb4	Itga11	Sgca	Sgcd
MicroRNAs in cancer	path:mmu05206	Irs2	Cd44	Mir30c-2	Gls	Plcg2	Mir375	Mdm4	Mir194-2	Mir125a	Casp3	E2f2	Bmpr2	Mir30d	Timp3	Bmf	Mir143	Hras	Mirlet7c-1	Tpm1	Cdc25a	Cyp24a1	Sos2	Ezh2	Itgb3	Mdm2	Mir330	Sirt1	Mir200c	Mir10b	Marcks	Tgfb2	Crk	Mir181a-1	Mir126b	Mir30c-1	Mir99a	Mir34a	Pdgfra	Mir32	Mir7b	Mir135a-1	Mir194-1	Pdcd4	Wnt3	Mir15a	Mir135b	Mir494	Mir152
Inflammatory bowel disease (IBD)	path:mmu05321	H2-Ob	Il21	Il12rb2	Il17f	Il18rap	Tgfb2	Smad2	Il1b	Ifng	Il12b	Tnf	H2-DMb1	H2-Ab1	Il2	Tlr5	Ifngr1	Tbx21	Il22	Il17a	Nfatc1	Nfkb1	H2-Oa	Maf	Il4ra	Rora	Rela	Tlr2	Foxp3	H2-Ea-ps	H2-DMa	Rorc	Il18r1	Il12a	Ifngr2	Il12rb1	Nod2	Il5	Il23r	Il10	H2-Eb1	Stat4	Il18	H2-Aa	Il1a	Il21r	Il23a	Stat6	Stat1
Aldosterone-regulated sodium reabsorption	path:mmu04960	Fxyd4	Pik3r3	Scnn1a	Atp1a1	Scnn1g	Pik3r1	Nr3c2	Pik3r2	Atp1b1	Prkca	Pik3cb	Slc9a3r2	Mapk3	Ins1	Atp1a2	Igf1	Prkcb	Mapk1	Sfn	Insr	Kcnj1	Atp1b4	Nedd4l	Kras	Sgk1	Fxyd2	Hsd11b2	Atp1a3	Pdpk1	Atp1b2	Atp1b3	Pik3cd	Irs1	Ins2	Prkcg	Scnn1b	Atp1a4	Pik3ca
RIG-I-like receptor signaling pathway	path:mmu04622	Traf6	Mapk9	Ifna1	Ifne	Mapk13	Cyld	Mapk12	Ifna2	Ifna11	Azi2	Casp8	Ikbkg	Ifna15	Ifna6	Ikbke	Ifna14	Irf7	Nfkbia	Chuk	Trim25	Atg5	Mavs	Ifnb1	Il12a	Isg15	Cxcl10	Nfkb1	Mapk8	Mapk14	Fadd	Mapk10	Tnf	Tkfc	Ifnk	Sike1	Pin1	Tmem173	Ddx3x	Tradd	Ifna5	Tank	Map3k7	Ripk1	D1Pas1	Ifna12	Otud5	Ifna13	Ifna4
Autophagy - animal	path:mmu04140	Atg7	Akt2	Gm21596	Atg10	Akt1s1	Hmgb1	Rragd	Snap29	Atg5	Nrbf2	Gabarapl1	Itpr1	Atg4d	Pik3r4	Hif1a	Atg4c	Becn1	Atg16l2	Ppp2cb	Eif2ak3	Rps6kb1	Irs3	Ctsd	Pik3cb	Irs4	Atg2a	Prkaa2	Map2k2	Gabarapl2	Atg12	Deptor	Kras	Atg14	Akt1	Tsc1	Dapk1	Irs1	Ins2	Bcl2l1	Rab7	Camkk2	Stx17	Pik3cd	Pik3c3	Pten	Lamp1	Atg16l1	Zfyve1
Cysteine and methionine metabolism	path:mmu00270	Dnmt1	Gclm	Gss	Bcat1	Ahcy	Il4i1	Tst	Amd1	Apip	Cdo1	Sdsl	Mri1	Enoph1	Mat1a	Mpst	Mtap	Gm21948	Ldhal6b	Dnmt3a	Lao1	Mdh1	Bhmt2	Gm4737	Gclc	Mat2b	Sds	Mdh2	Ldha	Ahcyl1	Ahcyl2	Got2	4930438A08Rik	Got1	Adi1	Gm14680	Srm	Ldhb	Cth	Dnmt3b	Bhmt	Tat	Mtr	Agxt2	Sms	Mat2a	Bcat2	Cbs	Ldhc
N-Glycan biosynthesis	path:mmu00510	Man1c1	Fut8	Mgat4b	Dolk	Dpm1	Alg13	Alg11	Man1a2	Rpn2	B4galt1	Alg14	Mgat5b	Alg5	Ganab	Man1b1	Mgat1	Mgat4d	Man2a1	Dpm2	Alg9	Alg8	Dpm3	St6gal1	B4galt3	Alg12	Alg10b	Stt3b	Rpn1	Alg6	Mgat4c	Tusc3	Stt3a	Mgat2	Mgat3	Glt28d2	Man1a	Mgat5	St6gal2	Dolpp1	Alg1	Man2a2	Dad1	Alg2	Alg3	Mgat4a	Dpagt1	Mogs	Ddost
Arginine and proline metabolism	path:mmu00330	Prodh	Aoc1	Nos2	Pycr2	Cndp2	Gamt	Sat2	Gatm	Nos1	Lap3	Maoa	Ckb	Aldh3a2	Amd1	Smox	Arg2	Aldh9a1	Ckmt2	Prodh2	Aldh7a1	Aldh2	L3hypdh	Ckm	Arg1	Aldh4a1	Oat	Hoga1	Gm853	P4ha1	Sms	Srm	Agmat	Pycrl	Pycr1	Aldh1b1	Got2	Got1	Nos3	Gm14680	Ckmt1	Maob	Dao	Azin2	Sat1	Cndp1	Carns1	Aldh18a1	Odc1
Progesterone-mediated oocyte maturation	path:mmu04914	Adcy1	Gnai1	Igf1r	Kras	Adcy9	Cpeb4	Anapc5	Anapc4	Plk1	Cdc27	Mad2l2	Cdk1	Ins2	Pik3cd	Cpeb3	Spdye4a	Adcy5	Mapk11	Pik3ca	Cdc25a	Akt1	Pgr	Anapc13	Hsp90ab1	Pik3r3	Braf	Mapk3	Adcy3	Ccna1	Rps6ka1	Anapc2	Cdc26	Mad1l1	Gnai3	Rps6ka2	Ins1	Rps6ka6	Araf	Mapk8	Mapk14	Mapk10	Akt3	Akt2	Cdc23	Rps6ka3	Cdc25c	Map2k1	Anapc10
Acute myeloid leukemia	path:mmu05221	Ikbkg	Tcf7l1	Mapk3	Ccna1	Rps6kb1	Nras	Myc	Grb2	Pik3cb	Pik3r2	Pml	Zbtb16	Mapk1	Jup	Ppard	Stat3	Rps6kb2	Lef1	Mtor	Ikbkb	Braf	Pik3r3	Hras	Pim1	Flt3	Pik3r1	Eif4ebp1	Spi1	Pik3cd	Tcf7l2	Rara	Pim2	Rela	Sos1	Akt1	Stat5b	Pik3ca	Raf1	Cebpa	Bad	Tcf7	Chuk	Stat5a	Sos2	Map2k2	Runx1	Araf	Akt3
Gap junction	path:mmu04540	Adrb1	Mapk7	Htr2b	Tubb5	Adcy9	Kras	Tubb2a	Gnai1	Map2k5	Adcy1	Map2k2	Tubb1	Sos2	Tubb2b	Egfr	Sos1	Adcy5	Cdk1	Gjd2	Pdgfa	Grm5	Gnaq	Htr2a	Hras	Pdgfc	Plcb4	Tubb6	Tubb4b	Gnai3	Prkcb	Tjp1	Nras	Grb2	Gna11	Gucy1a2	Tubal3	Adcy3	Mapk3	Gja1	Map2k1	Drd1	Gucy1b2	Map3k2	Tuba4a	Tuba1a	Tuba3b	Tuba8	Csnk1d
Choline metabolism in cancer	path:mmu05231	Dgkq	Wasf2	Slc22a3	Pik3cd	Pcyt1a	Egfr	Pik3ca	Tsc1	Akt1	Slc22a4	Sos1	Sos2	Pla2g4c	Dgka	Map2k2	Kras	Slc22a5	Slc44a4	Gpcpd1	Dgke	Rheb	Slc22a21	Pdpk1	Mapk3	Wasf3	Grb2	Nras	Dgkb	Prkcb	Slc22a1	Rps6kb2	Mtor	Plcg1	Pdgfc	Was	Hras	Pik3r3	Wasf1	Pip5k1b	Slc44a1	Fos	Pcyt1b	Pdgfa	Slc5a7	Dgkh	Eif4ebp1	Prkcg	Egf
ECM-receptor interaction	path:mmu04512	Lama3	Fn1	Tnn	Thbs4	Col4a3	Gp6	Lama5	Itga3	Col6a5	Col4a2	Col4a1	Itga2	Col6a4	Gp1bb	Itgb6	Lamc2	Hspg2	Sv2a	Itgb8	Thbs1	Cd36	Agrn	Lama2	Col2a1	Lamb2	Vtn	Tnc	Thbs3	Col6a3	Col1a1	Col6a1	Sdc4	Sdc1	Spp1	Sv2b	Itga4	Gp9	Col4a5	Itga5	Ibsp	Col6a2	Itga6	Lamc3	Tnxb	Col4a6	Itga8	Lama1	Gp1ba
RNA transport	path:mmu03013	Nup62	Nxf1	Eif4ebp1	Sap18b	Nxt2	Eif1ax	Nup133	Nup153	Eif1b	Pabpc5	Paip1	Thoc5	Acin1	Magohb	Cyfip2	Rasl2-9	Nup210	Eif4ebp2	Gm5415	Eif4a2	Pnn	Nup85	Nup88	Upf1	4930444G20Rik	Eif4a1	Eif3a	Phax	Gm4340	Nup205	Rpp40	Rangap1	Nup54	Nmd3	Eif2b5	Thoc6	Tgs1	Eef1a2	Upf3a	Rae1	Sumo3	Rpp30	Pabpc1l2b-ps	Eif3h	Magoh	Pabpc6	Prmt5	Eif4g1
Nicotine addiction	path:mmu05033	Chrna6	Gabra4	Gabra1	Chrnb2	Slc17a7	Gabre	Gabrg1	Grin3a	Gabra6	Gria1	Gria2	Grin2d	Gabrb3	Gabra3	Grin3b	Chrna4	Grin2a	Chrna7	Grin2b	Gabrb2	Cacna1b	Slc17a8	Slc32a1	Gabrq	Gabrg2	Slc17a6	Grin1	Gabrr1	Gabrd	Gabrp	Grin2c	Gabra5	Gabrr2	Gabrb1	Gria4	Gabrr3	Gria3	Gabrg3	Gabra2	Cacna1a
Retrograde endocannabinoid signaling	path:mmu04723	Gabra4	Prkca	Gng3	Gabra6	Adcy6	Slc17a7	Prkaca	Mgll	Mapk1	Mapk12	Gng10	Adcy4	Adcy8	Cacna1c	Abhd6	Mapk13	Gm5741	Mapk9	Gnao1	Faah	Plcb2	Gng4	Cnr1	Gng13	Itpr2	Gria2	Prkacb	Gria1	Itpr3	Gnai2	Cacna1f	Prkcg	Cacna1d	Plcb1	Gngt2	Gnb1	Slc17a6	Grm1	Itpr1	Gabrr1	Gabrd	Adcy7	Slc32a1	Ptgs2	Adcy2	Plcb3	Gabrq	Gria4
Thyroid hormone synthesis	path:mmu04918	Tg	Creb3l2	Atp1a3	Ttf1	Gpx3	Duoxa2	Gpx6	Atf4	Fxyd2	Slc26a4	Asgr1	Tpo	Gpx1	Slc5a5	Atf6b	Atp1a4	Ttr	Plcb3	Adcy2	Tshr	Adcy7	Gpx2	Creb3	Atp1b2	Asgr2	Itpr1	Prkcg	Plcb1	Itpr3	Prkacb	Gpx8	Itpr2	Plcb2	Serpina7	Atp1a2	Atp1b4	Adcy8	Adcy4	Gnas	Adcy6	Prkaca	Prkca	Creb3l3	Hsp90b1	Gpx5	Tshb	Adcy9	Hspa5
Neurotrophin signaling pathway	path:mmu04722	Rap1a	Gab1	Pik3r1	Rac1	Ntrk3	Foxo3	Bax	Rps6ka5	Pik3cb	Bex3	Arhgdib	Trp53	Ngfr	Pik3r2	Map2k7	Camk2a	Gsk3b	Mapk9	Jun	Traf6	Irak2	Mapk13	Ntrk2	Mapk12	Mapk1	Rap1b	Sh2b2	Calm5	Rps6ka6	Calm4	Frs2	Mapk10	Akt3	Mapk14	Mapk8	Arhgdig	Rapgef1	Rps6ka3	Irak4	Map2k1	Akt2	Atf4	Nfkb1	4930544G11Rik	Arhgdia	Cdc42	Crkl	Calm2
Glyoxylate and dicarboxylate metabolism	path:mmu00630	Mut	Glul	Acat1	Grhpr	Shmt1	Dld	Hoga1	Pgp	Hao2	Cat	Pcca	Aco2	Mcee	Afmid	Hao1	Pccb	Aco1	Mdh2	Glyctk	Amt	Gldc	Gcsh	Agxt	Shmt2	Mdh1	Hyi	Cs	Csl	Acat2
AGE-RAGE signaling pathway in diabetic complications	path:mmu04933	Ccnd1	Col4a5	Mmp2	Nox3	Nfatc1	Nos3	Vegfc	Kras	Diaph1	Ager	Nox1	Tgfb2	Col4a6	Akt1	Pik3ca	Stat5b	Mapk11	Col3a1	Rela	Pik3cd	Smad4	Col1a2	Icam1	Il1a	Vegfd	Plcg1	F3	Pik3r3	Hras	Plcb4	Agtr1a	Bcl2	Ccl12	Foxo1	Prkcb	Edn1	Plce1	Il6	Col4a4	Nras	Casp3	Tgfb1	Smad3	Plcg2	Prkcz	Tgfbr2	Mapk3	Fn1
Longevity regulating pathway	path:mmu04211	Atg5	Adipor1	Adcy2	Ehmt2	Atf6b	Camk4	Eif4ebp1	Adcy7	Creb3	Kl	Akt2	Appl1	Atf4	Nfkb1	Creb3l2	Atg13	Prkaa1	Atg101	Akt1s1	Akt3	Sod2	Adcy4	Adcy8	Adipoq	Igf1	Stk11	Irs3	Creb3l3	Rps6kb1	Prkaca	Pik3cb	Adcy6	Pik3r2	Trp53	Sesn2	Foxo3	Prkacb	Bax	Rb1cc1	Prkag1	Pik3r1	Prkag3	Sesn1	Prkag2	Tsc2	Ehmt1	Adcy5	Akt1
Longevity regulating pathway - multiple species	path:mmu04213	Prkaca	Nras	Adcy6	Pik3cb	Prkab2	Pik3r2	Hspa1a	Clpb	Adcy3	Irs3	Rps6kb1	Igf1	Foxo1	Ins1	Sod2	Adcy8	Insr	Adcy4	Hdac2	Irs2	Foxa2	Hspa8	Prkag2	Pik3r3	Hras	Prkab1	Hspa1l	Prkag3	Mtor	Rps6kb2	Pik3r1	Foxo3	Prkacb	Hspa1b	Prkag1	Cat	Adcy7	Pik3cd	Cryab	Hdac1	Sirt1	Ins2	Irs1	Atg5	Adcy5	Adcy2	Akt1	Pik3ca
Arachidonic acid metabolism	path:mmu00590	Cyp2b23	Ptgds	Cyp4f18	Tbxas1	Cyp2j9	Cyp2c39	Ltc4s	Cyp2e1	Ephx2	Pla2g2d	Cyp2c66	Alox5	Cyp2u1	Pla2g4c	Cyp2c29	Cyp2j13	Pla2g10	Cyp4a12a	Pla2g5	Cyp2c44	Cyp4a32	Cyp2j5	Cyp2j8	Pla2g3	Cyp4a10	Pla2g6	Alox12b	Ggt5	Cyp4a31	Pla2g12b	Pla2g2c	Pla2g1b	Fam213b	Pla2g2f	Cyp4a14	Cyp4a12b	Cyp2b19	Cyp4a29	Cyp2c55	Gpx7	Cbr3	Cyp2c50	Ptges2	Cyp2j6	Hpgds	Ggt1	Alox12	Gpx2
Ras signaling pathway	path:mmu04014	Fgf13	Flt1	Pak6	Pdgfrb	Gng13	Gng4	Fgf17	Rala	Angpt4	Igf1	Stk4	Rasgrf1	Rab5c	Ralgds	Gng10	Pak3	Rap1b	Pla2g12a	Pik3cb	Prkca	Efna5	Gng3	Ngfr	Ets2	Rac2	Rel	Gnb3	Akt2	Nfkb1	Rasal3	Pla2g2e	Calm5	Pla2g4e	Gm15776	Abl2	Tek	Pld2	Chuk	Pak4	Fgf11	Rasal2	Pla2g4a	Pla2g4b	Abl1	Pld1	4930544G11Rik	Epha2	Cdc42
Alanine, aspartate and glutamate metabolism	path:mmu00250	Glul	Glud1	Agxt2	Gpt	Rimkla	Aspa	Folh1	Adssl1	Nat8l	Got1	4930438A08Rik	Gpt2	Got2	Cad	Rimklb	Asl	Gad2	Abat	Aldh5a1	Nit2	Gm21948	Cps1	Asns	Lao1	Gls2	Gad1	Gfpt2	Ppat	Adsl	Ass1	Il4i1	Gfpt1	Adss	Agxt	Aldh4a1	Gls	Ddo
Fluid shear stress and atherosclerosis	path:mmu05418	Calm3	Cav2	Map2k4	Calml3	Ccl12	Map3k5	Ctnnb1	Cdh5	Edn1	Dusp1	Gstt3	Bcl2	Hsp90ab1	Actb	Pdgfa	Fos	Il1r1	Pecam1	Il1r2	Pik3cd	Rhoa	Gstp2	Mef2a	Mgst1	Ncf1	Mapk11	Akt1	Trpv4	Txn2	Sumo1	Mgst3	Ifng	Calml4	Cyba	Map2k5	Prkaa2	Txn1	Nfe2l2	Mapk7	Pias4	Nos3	Pik3cb	Mir10a	Sdc4	Hsp90b1	Rac2	Arhgef2	Mapk13
Phenylalanine, tyrosine and tryptophan biosynthesis	path:mmu00400	Tat	Il4i1	Gm21948	Lao1	Got2	4930438A08Rik	Pah	Got1
Type I diabetes mellitus	path:mmu04940	H2-T23	Gm10499	H2-DMb1	Il12b	Ifng	H2-Ob	H2-Oa	Cd80	H2-M10.6	H2-T24	Ica1	Ins2	H2-Q8	H2-M10.3	H2-T10	H2-L	H2-K1	Gad2	Ptprn	H2-T18	H2-M10.1	Gm7030	Cd28	H2-M5	H2-M1	Cd86	Il1a	H2-Aa	H2-Bl	H2-Eb1	H2-DMb2	H2-M9	H2-Q7	Ins1	H2-Q10	H2-M10.2	Tnf	Il1b	Gm8909	H2-M10.5	H2-D1	H2-T3	Lta	Prf1	Fas	Il2	H2-Ab1	Il12a
Amphetamine addiction	path:mmu05031	Creb3l1	Ddc	Ppp3cc	Ppp3r1	Grin2b	Grin3b	Grin2a	Fos	Slc18a1	Stx1a	Atf2	Grin2d	Grin3a	Calm3	Ppp1ca	Camk2g	Calml3	Slc18a2	Prkcb	Creb1	Calm1	Gria3	Calml4	Gm5601	Sirt1	Hdac1	Camk2d	Creb3l4	Ppp1r1b	Grin1	Ppp3r2	Creb5	Adcy5	Fosb	Maoa	Ppp1cc	Ppp1cb	Prkacb	Gria2	Gria1	Prkca	Camk2a	Prkaca	Creb3l3	Cacna1c	Jun	Ppp3ca	Gnas
Osteoclast differentiation	path:mmu04380	Ncf2	Stat2	Fosb	Btk	Pik3cb	Fosl1	signal-regulatory protein beta 1-like	Tnfrsf11b	Tnfsf11	Calcr	Mapk13	Cyld	Tyk2	Lilra6	Junb	Mapk14	Il1b	Tnf	Gm9733	Akt2	Tec	Nfkb1	Cybb	Ppp3cb	Ifnb1	Lilra5	Sqstm1	Spi1	Mitf	Camk4	Chuk	Pira6	Ppp3r1	Fos	Sirpb1b	Il1r1	Gm14548	Pira11	Tgfb1	Lilrb4a	Ifnar1	Creb1	Fcgr2b	Ifng	Cyba	Map3k14	Gm15448	Pik3cd
Propanoate metabolism	path:mmu00640	Ldhb	Pccb	Acss2	Acadm	Mcee	Hibch	Pcca	Ldhal6b	Dld	Mlycd	Suclg1	Ldhc	Sucla2	Acacb	Suclg2	Mut	Acat1	Bckdhb	Acat2	Ehhadh	Echs1	Acss3	Bckdha	Ldha	Abat	Dbt	Aldh6a1	Hadha	Acaca	Echdc1	Acss1
Glycosylphosphatidylinositol (GPI)-anchor biosynthesis	path:mmu00563	Pigp	Pigv	Pigu	Dpm2	Pigs	Pigt	Piga	Pigm	Pigk	Pigq	Pigc	Pigz	Gpaa1	Pigw	Pign	Pigyl	Pigo	Pgap1	Pigf	Pigl	Pigg	Pigh	Gpld1	Pigb	Pigx
Melanogenesis	path:mmu04916	Calm1	Kit	Adcy9	Kras	Gnai1	Calml4	Map2k2	Adcy1	Tcf7	Fzd2	Fzd6	Fzd9	Adcy5	Fzd4	Camk2d	Creb3l4	Wnt6	a	Wnt2b	Fzd3	Ep300	Gnaq	Wnt16	Dvl2	Wnt8a	Plcb4	Creb3l1	Wnt5b	Hras	Wnt5a	Wnt9b	Wnt9a	Fzd7	Prkcb	Wnt11	Gnai3	Edn1	Ctnnb1	Creb1	Mc1r	Calm3	Nras	Camk2g	Calml3	Fzd10	Mapk3	Adcy3	Map2k1
Alcoholism	path:mmu05034	H2bfm	Hist2h3c2	Gm12260	Hist1h2ac	Gnai2	Maoa	Hdac10	Adora2a	Gnao1	Slc29a1	H3f3a	H2afy	Hist2h2aa1	Gm5741	Hdac2	Gnas	Mapk1	Prkaca	H2al1b	Hist1h2bp	Creb3l3	Hist1h4c	Hist1h2ae	Hist1h2bb	Hist1h2bj	Map2k1	Hist2h4	H2al2c	Araf	Gng11	H2al1k	Hdac7	Calm4	Hist1h3a	Pdyn	Atf6b	Drd2	Shc4	Calm2	Hist1h3h	Hist1h2bl	Raf1	Hist1h3b	H2afy2	Hdac3	Hist1h3g	Hist3h2ba	Hist1h2br
Glycosphingolipid biosynthesis - lacto and neolacto series	path:mmu00601	B3gnt5	B3gnt2	A4galt	St3gal3	B3gnt4	Fut1	St3gal6	B3galt2	St8sia1	Fut2	Ggta1	Sec1	B3gnt3	B3galt1	Fut7	B4galt1	B3galnt1	Fut4	Fut9	B4galt3	B4galt2	St3gal4	Gcnt2	B3galt5	Abo	B4galt4	Gm34653
Pancreatic cancer	path:mmu05212	Ikbkg	Rac2	Pik3cb	Pik3r2	Trp53	Jak1	Ralgds	Mapk1	Mapk9	Cdk4	Tgfb3	Stat3	Rala	E2f1	Casp9	Cdkn2a	Rac1	Stat1	Vegfa	Pik3r1	Cdc42	Pld1	Egf	Raf1	Chuk	Smad2	Rac3	Ralbp1	Araf	Mapk10	Akt3	Tgfbr1	Mapk8	Akt2	Nfkb1	Map2k1	Tgfbr2	Mapk3	Smad3	Cdk6	Tgfb1	Arhgef6	Ikbkb	Braf	Pik3r3	Tgfa	E2f2	Ralb
Porphyrin and chlorophyll metabolism	path:mmu00860	Ugt2b38	Urod	Blvra	Alas2	Hmox2	Blvrb	Ugt1a9	Mmab	Hmbs	Gusb	Ugt2a3	Ugt1a6a	Fech	Ugt2b36	Ugt2b5	Ugt1a10	Ugt1a6b	Alas1	Ugt1a7c	Cp	Eprs	Alad	Ugt1a5	Ugt1a1	Cpox	Uros	Fxn	Ugt2a2	Cox15	Ugt2b34	Ppox	Ugt2a1	Hccs	Ugt2b37	Ugt2b1	Cox10	Heph	Ugt2b35	Hmox1	Ears2	Ugt1a2
Oxytocin signaling pathway	path:mmu04921	Cacna1s	Hras	Plcb4	Npr1	Prkab1	Cacng2	Ppp3cc	Kcnj9	Rock2	Adcy3	Mapk3	Cacna2d2	Gucy1a2	Cacng4	Rcan1	Ccnd1	Nfatc1	Gm5601	Adcy9	Calm1	Rock1	Cacna2d1	Adcy1	Cacng8	Eef2	Elk1	Cacna2d4	Cacnb1	Gnai2	Kcnj4	Gucy1b3	Camk1d	Nfatc3	Prkacb	Rgs2	Itpr2	Mef2c	Cacna2d3	Plcb2	Prkag3	Nfatc2	Gnao1	Pla2g4f	Jun	Myl6b	Cacna1c	Gnas	Adcy4
Melanoma	path:mmu05218	Mdm2	Rb1	Fgf7	Pten	Pik3cd	Akt1	Egfr	Pik3ca	Bad	Map2k2	Fgf18	Cdkn1a	Fgf16	Kras	Igf1r	Fgf12	E2f3	Fgf5	Ccnd1	Fgf23	Mapk3	Cdk6	Nras	Fgf14	Fgf10	Fgfr1	Braf	Pik3r3	Met	Hras	Pdgfc	Fgf15	E2f2	Fgf2	Cdh1	Pdgfa	Fgf8	Mitf	Fgf9	Egf	Raf1	Fgf11	Fgf6	Akt3	Araf	Hgf	Fgf3	Akt2
Nitrogen metabolism	path:mmu00910	Cps1	Car12	Glul	Glud1	Car7	Car8	Car6	Car5a	Car9	Car15	Car14	Car1	Car5b	Car2	Car3	Car13	Car4
Cocaine addiction	path:mmu05030	Bdnf	Grin2b	Grin3b	Grin2a	Fosb	Ddc	Creb3l1	Prkacb	Gria2	Atf2	Grin2d	Slc18a1	Dlg4	Gnai2	Maoa	Creb3l3	Prkaca	Grin3a	Gnas	Creb1	Cdk5r1	Cdk5	Gnai3	Grm3	Slc18a2	Jun	Grm2	Pdyn	Gnai1	Grin2c	Nfkb1	Atf4	Gpsm1	Creb3l2	Drd1	Rgs9	Th	Slc6a3	Creb5	Creb3l4	Grin1	Ppp1r1b	Maob	Rela	Creb3	Adcy5	Drd2	Atf6b
Olfactory transduction	path:mmu04740	Olfr582	Olfr427	Olfr11	Olfr785	Olfr583	Olfr298	Olfr1394	Olfr576	Olfr1360	Olfr689	Olfr150	Olfr155	Olfr51	Olfr961	Olfr1499	Olfr589	Olfr458	Olfr1412	Olfr45	Olfr1257	Olfr593	Calm5	Olfr68	Olfr1221	Olfr685	Olfr849	Olfr1085	Gm13769	Olfr654	Olfr319	Olfr1216	Olfr202	Olfr971	Olfr974	Olfr820	Olfr294	Olfr601	Olfr983	Olfr829	Olfr806	Olfr554	Olfr455	Olfr613	Olfr594	Slc8a1	Olfr1466	Olfr883	Olfr418
Linoleic acid metabolism	path:mmu00591	Cyp3a41b	Cyp2c39	Cyp2j9	Cyp2j11	Pla2g4b	Alox15	Cyp2e1	Cyp3a41a	Cyp2c66	Pla2g16	Pla2g2d	Pla2g4a	Pla2g4c	Cyp2j13	Cyp2c29	Cyp1a2	Pla2g4d	Pla2g4e	Pla2g10	Cyp3a13	Pla2g2e	Cyp2c44	Pla2g5	Cyp2c70	Cyp2j5	Cyp2c68	Cyp2j8	Pla2g3	Cyp2c37	Pla2g6	Cyp3a11	Pla2g2a	Pla2g12a	Cyp2c54	Plb1	Cyp2c65	Pla2g12b	Pla2g2c	Pla2g4f	Pla2g1b	Pla2g2f	Cyp3a44	Cyp3a25	Cyp2c55	Cyp3a16	Cyp2j12	Cyp2c40	Cyp2c50
Hedgehog signaling pathway	path:mmu04340	Csnk1g3	Sufu	Kif7	Evc2	Ccnd2	Csnk1g2	Hhip	Arrb1	Spopl	Evc	Gli2	Spop	Kif3a	Shh	Ccnd1	Csnk1e	Cdon	Arrb2	Dhh	Gli3	Csnk1d	Smo	Gli1	Cul1	Lrp2	Grk2	Smurf2	Prkaca	Gpr161	Ihh	Ptch2	Gsk3b	Cul3	Fbxw11	Csnk1g1	Btrc	Prkacb	Csnk1a1	Smurf1	Grk3	Bcl2	Boc	Ptch1	Gas1
Protein digestion and absorption	path:mmu04974	Col6a1	Atp1b4	Col22a1	Slc7a8	2210010C04Rik	Col1a1	Atp1a2	Col6a3	Col5a2	1810009J06Rik	Col10a1	Gm10334	Cpb1	Slc16a10	Xpnpep2	Slc8a2	Eln	Slc38a2	Col2a1	Col27a1	Prss2	Kcnk5	Col11a2	Kcnn4	Col18a1	Dpp4	Col17a1	Try10	Col5a1	Slc9a3	Cela3b	Slc3a2	Atp1a4	Ace2	Slc1a1	Col7a1	Slc8a3	Atp1b2	Try5	Try4	Col4a3	Mme	Kcnq1	Col12a1	Atp1a3	Ctrl	Col14a1	Slc7a9
PI3K-Akt signaling pathway	path:mmu04151	Tcl1b1	Jak3	Ifna15	Efna4	Rac1	Gys1	Vegfa	Lpar1	Casp9	Lamb2	Pck2	Ifna14	Stk11	Pdgfb	Cdk4	Ywhaq	Mapk1	Trp53	Ppp2r1a	Prlr	Kitl	Pdgfd	Ppp2r5c	Ppp2r3a	Ddit4	Map2k1	Rxra	Prkaa1	Thbs4	Brca1	Sgk1	Col4a2	Gng11	Col4a1	Gm2436	Fgf6	Itgb6	Cdkn1b	Fgfr2	Atf6b	Efna1	40S ribosomal protein S6	Tlr2	Il6ra	Rps6	Gnb1	Ppp2r2d	Ptk2
Glutamatergic synapse	path:mmu04724	Slc1a6	Prkca	Gng3	Adcy6	Slc17a7	Prkaca	Shank3	Shank1	Mapk1	Ppp3ca	Slc38a3	Adcy4	Gng10	Adcy8	Gnas	Slc38a1	Cacna1c	Gm5741	Slc1a7	Pla2g4f	Gnao1	Plcb2	Gng4	Grk3	Shank2	Gng13	Trpc1	Gls2	Grik1	Itpr2	Grm7	Grm4	Prkacb	Gria1	Gria2	Grik5	Slc38a2	Itpr3	Gnai2	Prkcg	Cacna1d	Gngt2	Plcb1	Gnb1	Slc17a6	Grm1	Ppp3cb	Grm6
Renal cell carcinoma	path:mmu05211	Nras	Grb2	Tgfb1	Ptpn11	Flcn	Mapk3	Pak7	Fh1	Egln1	Rbx1	Braf	Hras	Met	Pik3r3	Tgfa	Ep300	Pik3cd	Gm9840	Epas1	Sos2	Sos1	Akt1	Pik3ca	Kras	Crk	Tgfb2	Map2k2	Egln3	Pik3cb	Pik3r2	Jun	Egln2	Tgfb3	Pdgfb	Mapk1	Rap1b	Pak3	Rap1a	Pak2	Vhl	Gab1	Pik3r1	Rac1	Pak6	Eloc	Vegfa	Hif1a	Ets1
RNA degradation	path:mmu03018	Cnot7	Btg4	Wdr61	Pabpc1	Lsm6	Pabpc4l	Exosc8	Xrn1	C1d	Exosc1	Cnot4	Pfkl	Dcp2	Eno3	Pabpc2	Eno1b	Ttc37	Pabpc4	Skiv2l	Exosc7	Lsm5	Lsm2	Cnot8	Cnot3	Exosc6	1700080E11Rik	Exosc9	Dcps	Pabpc1l	Cnot9	Mphosph6	Edc4	Xrn2	Pabpc5	Eno2	Tob2	Exosc5	Eno1	Exosc2	Exosc4	Btg1-ps1	Papd7	Papd5	Btg3	Exosc3	Lsm3	Btg1	Pfkm
Homologous recombination	path:mmu03440	Eme1	Shfm1	Rad54l	Rad51	Bre	Rpa3	Gm5136	Pold3	Brca1	Fam175a	Rpa1	Ssbp1	Bard1	Uimc1	Rad51b	Mre11a	Mus81	Top3b	Pold1	Topbp1	Brcc3	Brca2	Palb2	Rad51d	Rad52	Rbbp8	Blm	Top3a	Sycp3	Rpa2	Xrcc2	Pold2	Pold4	Rad54b	Babam1	Nbn	Brip1	Xrcc3	Rad50	Atm	Rad51c
Biosynthesis of amino acids	path:mmu01230	Gapdh-ps15	Ass1	Sdsl	Shmt1	Cps1	Psat1	Aldoart1	Idh3b	Prps1	Arg2	Idh1	Pycr1	Prps2	Tktl1	Pfkp	Pfkm	4933405O20Rik	Aco2	Pycrl	Prps1l3	Aldob	Bcat2	Cbs	Gpt	Pgk1	Aldoa	Shmt2	Prps1l1	Eno1	Eno2	Phgdh	Tha1	Aco1	Idh2	Psph	Asl	Tpi1	Rpe	Aldoc	Mat1a	Pcx	Taldo1	Pycr2	Rpia	Pklr	Pkm	Eno1b	Eno3
alpha-Linolenic acid metabolism	path:mmu00592	Acox1	Acaa1a	Pla2g4d	Pla2g10	Pla2g2f	Pla2g1b	Pla2g4e	Pla2g5	Pla2g2e	Pla2g4b	Plb1	Pla2g4a	Pla2g2d	Pla2g16	Pla2g4c	Pla2g4f	Acox3	Pla2g12b	Pla2g2c	Acaa1b	Pla2g3	Pla2g6	Fads2	Pla2g12a	Pla2g2a
Mismatch repair	path:mmu03430	Rpa3	Mlh3	Lig1	Exo1	Mlh1	Msh6	Pold3	Pms2	Msh2	Pold1	Msh3	Rfc3	Rfc2	Rfc5	Rpa1	Ssbp1	Rfc4	Pcna	Rfc1	Rpa2	Pold2	Pold4
SNARE interactions in vesicular transport	path:mmu04130	Stx5a	Vamp4	Stx17	Snap23	Sec22b	Vamp7	Snap29	Ykt6	Vamp5	Bet1l	Stx1b	Gosr2	Vti1a	Stx4a	Gosr1	Vamp1	Stx6	Stx11	Stx7	Bnip1	Stx8	Stx19	Stx18	Vamp2	Vamp3	Vamp8	Bet1	Stx2	Vti1b	Stx1a	Stx3	Stx16	Use1
Amoebiasis	path:mmu05146	Arg1	Prkcb	Serpinb3b	Lamb1	Tlr4	Il6	Itgam	Serpinb6c	Lama4	Col4a4	Itgb2	Casp3	Tgfb1	Gna11	Serpinb9b	Serpinb9c	Col1a2	Rab7b	Ptk2	Il1r1	Rab5b	Gnaq	Actn4	Nos2	Il10	Serpinb6b	Pik3r3	Lamb3	Plcb4	Lamc1	Serpinb9d	Muc2	Serpinb9f	Pik3ca	Serpinb10	Col3a1	Rela	Rab5a	Il1r2	Pik3cd	Rab7	Col4a5	Serpinb1b	Csf2	C8a	Serpinb9	Lamc3	Serpinb6a
Purine metabolism	path:mmu00230	Pde7b	Pold4	Nme6	Ak5	Nudt16	Adcy8	Adcy4	Prps1	Pde6c	Pgm2	Paics	Polr3b	Ak2	Pnpt1	Ak7	Nme2	Nudt2	Polr3f	Nt5c1b	Gucy1b3	Gmpr2	Ak4	Adcy7	Pole4	Gucy1a3	Gucy2c	Dck	Polr2f	Hddc3	Polr2d	Prps1l1	Prps1l3	Fhit	Polr1c	Gucy2e	Gucy1b2	Gucy2f	Pole2	Polr2e	Polr2j	Prune1	Pde11a	Adcy3	Polr3k	Impdh1	Nudt9	Pde2a	Gucy1a2
Mineral absorption	path:mmu04978	Slc40a1	Vdr	Hmox2	Atp1a4	Slc9a3	Slc26a3	Ftl1	Fth1	Mt1	Atp1b2	Slc6a19	Atp1b3	Slc5a1	Atp1a3	Trpv6	ferritin light chain 1	Steap1	Trf	Atp7a	Trpm7	Slc11a2	Slc26a6	Fxyd2	Atp2b1	1300017J02Rik	Atp1a2	Slc46a1	Slc26a9	Mt2	Slc8a1	Atp1b4	Atox1	Atp1b1	Trpm6	Cybrd1	Slc30a1	Clcn2	Heph	Hmox1	Slc34a2	Slc39a4	Slc31a1	Atp1a1	S100g	Steap2
B cell receptor signaling pathway	path:mmu04662	Ppp3cc	Ppp3r1	Ikbkb	Cd79b	Pik3r3	Hras	Cd81	Pik3ap1	Fos	Mapk3	Plcg2	Nras	Grb2	Bcl10	Malt1	Prkcb	Nfkbib	Map2k2	Fcgr2b	Rasgrp3	Kras	Vav2	Nfatc1	Cd79a	Lyn	Ppp3r2	Pik3cd	Rela	Sos1	Akt1	Pik3ca	Nfkbie	Syk	Sos2	Btk	Nfatc2	Rac1	Cd19	Pik3r1	Cr2	Nfatc3	Ikbkg	Gsk3b	Ptpn6	Rac2	Pik3cb	Cd22	Pik3r2
Steroid hormone biosynthesis	path:mmu00140	Srd5a3	Ugt1a6a	Cyp11b2	Sts	Hsd3b4	Hsd17b6	Cyp19a1	Cyp2c70	Cyp3a13	Cyp7b1	Ugt2a3	Cyp2b9	Cyp2c68	Hsd17b12	Cyp3a41b	Hsd3b5	Cyp11a1	Ugt1a9	Cyp3a41a	Hsd17b2	Hsd3b2	Cyp2d11	Hsd3b1	Cyp2d22	Sult1e1	Cyp3a44	Cyp2d9	Ugt1a2	Akr1d1	Ugt2a1	Cyp2c38	Cyp2c40	Ugt2b37	Cyp2b10	Cyp2c37	Akr1c18	Ugt1a6b	Cyp3a11	Hsd11b1	Cyp2c65	Ugt1a1	Cyp2d26	Cyp2c54	Cyp2b13	Ugt2b36	Cyp1a2	Cyp2c29	Hsd11b2
Ovarian steroidogenesis	path:mmu04913	Adcy3	Cyp2j8	Lhb	Prkaca	Adcy6	Insr	Adcy8	Adcy4	Gnas	Gm10681	Cyp17a1	Pla2g4f	Igf1	Scarb1	Ins1	Hsd3b1	Fshr	Bmp15	Acot2	Prkacb	Cyp2j12	Bmp6	Cyp2j6	Ins2	Hsd3b5	Gdf9	Adcy7	Cyp2j9	Star	Cyp2j11	Cyp11a1	Cga	Cyp1b1	Adcy5	Pla2g4a	Hsd3b2	Hsd17b2	Alox5	Adcy2	Ptgs2	Hsd17b7	Lhcgr	Pla2g4b	Fshb	Pla2g4c	Pla2g4d	Hsd3b4	Adcy1
Synthesis and degradation of ketone bodies	path:mmu00072	Acat1	Hmgcs1	Oxct2a	Oxct1	Oxct2b	Bdh2	Hmgcll1	Bdh1	Hmgcs2	Hmgcl	Acat2
AMPK signaling pathway	path:mmu04152	Pik3cd	Creb3l4	Sirt1	Cpt1b	Acaca	Camkk2	Ins2	Creb5	Irs1	Cftr	Gys2	Eef2	Tsc1	Akt1	Pik3ca	Cpt1a	Ulk1	Igf1r	Rptor	Pfkl	Rab2a	Acacb	Pdpk1	Rheb	Prkaa2	Ccnd1	Ppp2r2b	Irs4	Elavl1	Lipe	Pfkfb4	Ppp2r5a	Prkab2	Map3k7	Adipor2	Ppargc1a	Ppp2r2c	Ppp2r2a	Ccna1	Foxo1	Ppp2ca	Gm2446	Ins1	Creb1	Insr	Pparg	Irs2	Pik3r3
Platinum drug resistance	path:mmu01524	Gstm1	Fasl	Gstm7	Gsta1	Gstt1	Xpa	Birc5	Bid	Brca1	Polh	Atp7a	Akt2	Fas	Msh3	Fadd	Akt3	Gstp1	Mapk1	Gsta3	Atm	Rev3l	Apaf1	Gstm6	Gstt2	Casp8	Pik3r2	Trp53	Gstm4	Pik3cb	Ercc1	Top2b	Gstm2	Bax	Pik3r1	Mgst2	Mlh1	Atp7b	Gstm3	Bak1	Casp9	Slc31a1	Cdkn2a	Akt1	Gsto2	Pik3ca	Gstm5	Cycs	Bad
Oocyte meiosis	path:mmu04114	Adcy9	Plcz1	Aurka	Calm1	Igf1r	Calml4	Ccne2	Adcy1	Cdc27	Mad2l2	Pttg1	Ywhae	Plk1	Gm5601	Ar	Anapc4	Cpeb4	Anapc5	Camk2d	Gm9840	Spdye4a	Cdc20	Cpeb3	Cdk1	Ins2	Ppp3r2	Pgr	Smc1a	Adcy5	Skp1a	Anapc13	Ywhah	Ppp3cc	Ppp3r1	Ppp2r5b	Ppp2r1b	Smc3	Ywhab	Calm3	Ppp2r5a	Rps6ka1	Calml3	Camk2g	Ppp1ca	Mapk3	Adcy3	Ins1	Rps6ka2
Glycosphingolipid biosynthesis - globo and isoglobo series	path:mmu00603	Naga	St3gal1	B3galt5	A3galt2	Gbgt1	Fut9	Hexa	B3galnt1	Sec1	Fut2	St8sia1	Gla	St3gal2	Fut1	A4galt	Hexb
Circadian rhythm	path:mmu04710	Npas2	Per3	Rbx1	Per1	Creb1	Rora	Arntl	Gm9840	Fbxl3	Bhlhe41	Prkab2	Clock	Cry2	Rorc	Prkaa1	Btrc	Prkaa2	Fbxw11	Per2	Nr1d1	Prkag1	Csnk1e	Skp1a	Prkab1	Cry1	Rorb	Prkag2	Cul1	Csnk1d	Prkag3	Bhlhe40
Long-term depression	path:mmu04730	Itpr1	Grm1	Lyn	Plcb1	Prkcg	Plcb3	Pla2g4c	Gucy1a3	Pla2g4a	Gnaz	Prkg2	Pla2g4b	Raf1	Crh	Igf1r	Araf	Cacna1a	Gria3	Gnai1	Kras	Gm11787	Pla2g4e	Pla2g4d	Map2k2	Ryr1	Gucy1b2	Crhr1	Map2k1	Gna13	Nras	Gna12	Ppp2r1a	Prkca	Mapk3	Gucy1a2	Gna11	Grid2	Pla2g4f	Ppp2ca	Gnai3	Igf1	Prkcb	Gnas	Ppp2cb	Mapk1	Braf	Prkg1	Ppp1r17
Other glycan degradation	path:mmu00511	Man2c1	Aga	Hexdc	Hexb	Neu2	Glb1	Fuca2	Manba	Neu3	Fuca1	Neu1	Man2b2	Gba	Neu4	Man2b1	Engase	Gba2	Hexa
Sulfur metabolism	path:mmu00920	Papss1	Cycs	Cyct	Bpnt1	Ethe1	Impad1	Papss2	Sqrdl	Suox	Tst	Mpst
Toxoplasmosis	path:mmu05145	Bad	Cycs	Akt1	Alox5	Mapk11	Map2k3	Rela	Ccr5	Bcl2l1	Socs1	Ly96	Il10ra	Pdpk1	Pik3cg	H2-Oa	Itga6	Xiap	Birc2	Ifngr1	Lamc3	Gnai1	H2-Ob	H2-DMb1	Il12b	Lama1	Ifng	Nfkbib	Tgfb2	Gnai3	Hspa8	Tab1	Pik3r6	Lamb1	Ppif	Lama4	Tlr4	Map3k7	Casp3	Tgfb1	Birc3	H2-DMb2	Mapk3	Irgm1	Itgb1	H2-Aa	Ciita	Myd88	H2-Eb1
Rheumatoid arthritis	path:mmu05323	Atp6v1b1	Tnfsf13	Atp6v1f	Ccl12	Cxcl12	Il6	Tlr4	Itgb2	Atp6v0a4	Tgfb1	H2-DMb2	Atp6v0b	Ctla4	Mmp1b	Ccl5	H2-Aa	Itgal	Icam1	Fos	Il1a	H2-Eb1	Atp6v1g2	Il23a	Il15	Cd86	Acp5	Cd28	Ltb	Atp6v1c1	Atp6v0e	Atp6v1a	Csf2	H2-Oa	Cd80	H2-Ob	Atp6v0e2	H2-DMb1	Tgfb2	Atp6v1d	Ifng	CRP55H	Atp6v0a2	Tgfb3	Atp6v1h	Atp6v1e1	Atp6v1g1	Tnfsf11	Jun
Glycosaminoglycan biosynthesis - chondroitin sulfate / dermatan sulfate	path:mmu00532	B4galt7	Xylt1	Csgalnact2	Chst14	Chst15	Chpf	Chsy3	B3gat3	Chst7	Chst12	Ust	Chst3	Xylt2	B3galt6	Chpf2	Chst13	Dse	Csgalnact1	Chst11	Chsy1
Ubiquitin mediated proteolysis	path:mmu04120	Nedd4l	Ube2e1	Cblb	Map3k1	OTTMUSG00000017000	Fancl	Ube2e2	Anapc5	Anapc4	Siah1b	Det1	Ubr5	Ube2a	Uba1	Pias1	Ube3b	Mdm2	Ube2c	Ube2q1	Socs1	Klhl13	Ube2i	Ube2ql1	Ube2e3	Keap1	Ube2f	Ube2k	Ddb2	Ube2d2b	Huwe1	Skp1a	Smurf1	Ercc8	Cul4a	Ube2r2	Ddb1	Trim37	Fbxo4	Itch	Anapc2	Skp2	Ube2j1	Ube2g1	Ube2z	Ubox5	Nedd4	Ppil2	Aire
Proteasome	path:mmu03050	Psma5	Psmd13	Psma6	Psmb2	Psme1	Psmd1	Psme3	Psmc4	Psmb1	Psmb6	Psma3	Psme4	Psmb11	Psmc3	Psmb7	Psmc1	Psmb9	Psmd11	Psma8	Psmb10	Psmc5	Psmd8	Pomp	Psmd7	Psmb4	Psmd6	Psmc2	Psma7	Adrm1	Psmd3	Psmd4	Psmd14	Psme2	Shfm1	Psmb3	Psmf1	Psma1	Psma4	Ifng	Psma2	Psmd12	Psmd2	Psmb5	Psmb8	Psme2b	Psmc6
beta-Alanine metabolism	path:mmu00410	Aldh9a1	Upb1	Hadha	Aldh6a1	Smox	Echs1	Aoc3	Aldh2	Aldh7a1	Aldh3b3	Cndp2	Aldh3b2	Mlycd	Gad1	Aldh1a3	Hibch	Aldh3a2	Acadm	Gadl1	Gad2	Abat	Aoc2	Ehhadh	Carns1	Dpys	Cndp1	Sms	Dpyd	Gm14680	Aldh3a1	Aldh1b1	Aldh3b1	Srm
Metabolic pathways	path:mmu01100	Fut9	Pla2g4e	Urah	Bpnt1	Nme1	Nat2	Aldh1b1	Atp5j2	Hsd3b5	Dgat1	Abat	Agpat5	Atp6v0d2	Aldoa	Gatb	Ptgis	Gmppb	Cox15	Grhpr	Ugt2a1	Ndufa3	Ndufb4	Aoc3	Fah	Mat2a	Cyp2c29	Acacb	Plcz1	Ivd	Uroc1	Dpm2	Galnt1	Hpse	Cyp7a1	Cyp4f18	Cyp2r1	Bpgm	Gclc	Upp2	Sptlc1	Uros	Prim2	Nmrk2	Taldo1	Alg3	Sdha	Sqle	Scp2
Glycerolipid metabolism	path:mmu00561	Pnpla2	Aldh9a1	Plpp2	Glyctk	Mboat1	Plpp1	Akr1a1	Cel	Dgkk	Lipg	Mogat1	Lpin3	Mgll	Lpin1	Dgkb	Aldh2	Aldh7a1	Tkfc	Akr1b3	Lpl	Agpat9	Pnpla3	Gk2	Pnlip	Plpp3	Pnliprp2	Aldh3a2	Dgkh	Akr1b10	Dgkg	Mogat2	Akr1b8	Dgkq	Lipf	Agpat3	Dgat2	Dgat1	Gk	Agpat4	Akr1b7	Agpat5	Pnliprp1	Lipc	Gla	Gpat4	Dgki	Dgkd	Agpat2
Pantothenate and CoA biosynthesis	path:mmu00770	Bcat2	Pank1	Ppcs	Dpyd	Pank4	Vnn1	Aasdhppt	Pank3	Enpp1	Ppcdc	Gadl1	Upb1	Vnn3	Dpys	Bcat1	Pank2	Enpp3	Coasy
Thyroid cancer	path:mmu05216	Map2k2	Lef1	Tfg	Kras	Ncoa4	Hras	Braf	Pax8	Ccdc6	Map2k1	Rxra	Ccnd1	Cdh1	Ret	Mapk3	Tcf7l1	Tpr	Rxrb	Tcf7l2	Trp53	Nras	Myc	Tpm3	Pparg	Mapk1	Ctnnb1	Rxrg	Tcf7	Ntrk1
GABAergic synapse	path:mmu04727	Gls	Gnai3	Prkcb	Nsf	Adcy3	Gabra1	Gnb4	Gabrg1	Gabre	Gabbr2	Gng8	Gng2	Gabrb3	Cacna1s	Gabra3	Kcnj6	Gabarap	Gabrb2	Gnb5	Cacna1b	Adcy5	Gng5	Hap1	Gabrg2	Gng12	Gad2	Gabrp	Gngt1	Glul	Gabarapl2	Gabrr3	Adcy1	Gng7	Gnai1	Adcy9	Gnb2	Adcy8	Slc38a3	Gng10	Slc38a1	Adcy4	Gm5741	Cacna1c	Src	Gabra4	Prkaca	Adcy6	Gng3
NF-kappa B signaling pathway	path:mmu04064	Cd14	Pidd1	Ikbkg	Card11	CRP55H	Traf6	Tnfsf11	Csnk2a1	Bcl2a1a	Atm	Ticam2	Tab2	Traf5	Btk	Card10	Cd40	Csnk2a2	Bcl2a1d	Parp1	Tnfsf13b	Vcam1	Ltbr	Relb	Chuk	Nfkbia	Irak1	Cd40lg	Cflar	Gm10591	Ptgs2	Cxcl2	Trim25	Gadd45b	Gm2023	Gm11787	Plau	Tnf	Ticam1	Il1b	Tab3	Tnfsf14	Ccl21a	Prkcq	Irak4	Tnfrsf11a	Nfkb1	Tnfrsf13c	Blnk
Type II diabetes mellitus	path:mmu04930	Pik3cb	Slc2a2	Hk1	Cacna1g	Pik3r2	Mapk3	Irs3	Gck	Prkcz	Mapk9	Ins1	Cacna1c	Hk3	Hkdc1	Insr	Slc2a4	Pklr	Pkm	Adipoq	Irs2	Mapk1	Pik3r3	Cacna1b	Socs2	Ikbkb	Mtor	Pdx1	Kcnj11	Pik3r1	Cacna1e	Socs4	Hk2	Pik3cd	Socs1	Cacna1d	Ins2	Irs1	Socs3	Pik3ca	Prkcd	Abcc8	Cacna1a	Mapk8	Mapk10	Mafa	Tnf	Prkce	Irs4
Apoptosis	path:mmu04210	Dab2ip	Tuba8	Parp4	Ctsf	Mapk8	Akt3	Mapk10	Tuba3b	Prf1	Daxx	Tuba4a	Map2k1	Fas	Ctss	Diablo	Tuba1b	Fasl	Raf1	Cflar	Nfkbia	Ctsk	Ddit3	Itpr2	Ctsl	Casp9	Dffb	Bax	Csf2rb	Bcl2a1d	Pik3r1	Pidd1	Ikbkg	Casp8	Endog	Trp53	Pik3r2	Ern1	Bcl2a1a	Mapk1	Jun	Mapk9	Ctsc	Traf1	Mcl1	Pmaip1	Pdpk1	Csf2rb2	Rela
Bile secretion	path:mmu04976	Slc4a5	Adcy7	Aqp1	Atp1b2	Slco1a6	Atp1a4	Slc27a5	Slc9a1	Slc9a3	Adcy2	Fxyd2	Slc2a1	Nr1h4	Atp1a3	Rxra	Abcg8	Ldlr	Aqp4	Adcy6	Prkaca	Abcg2	Abcb1a	Atp1a2	Car2	Atp1b4	Abcc4	Adcy8	Gnas	Adcy4	Slc22a8	Slco1a4	Prkacb	Aqp9	Nceh1	Atp1b3	Cyp7a1	Slc5a1	Cftr	Slco1b2	Adcy5	Slc10a2	Adcy9	Adcy1	Slc4a2	Nr0b2	Aqp8	Ephx1	Abcg5
Dopaminergic synapse	path:mmu04728	Mapk8	Gm2436	Mapk10	Calm4	Akt3	Gng11	Cacna1a	Ppp2r3a	Ppp2r3d	Cacna1d	Gngt2	Plcb1	Slc6a3	Gnb1	Kif5b	Calm2	Drd2	Atf6b	Drd4	Itpr2	Gnao1	Plcb2	Maoa	Gnai2	Gria1	Prkacb	Caly	Ppp2r1a	Arntl	Prkaca	Ppp2r5c	Creb3l3	Cacna1c	Gm5741	Mapk9	Ppp3ca	Mapk12	Gnas	Calm1	Gm5601	Ppp2r2b	Gngt1	Creb3l4	Gng12	Cacna1b	Gnb5	Creb3l1	Plcb4
Histidine metabolism	path:mmu00340	Aspa	Aoc1	Cndp2	Aldh3b2	Aldh3b3	Ddc	Hdc	Aldh3a2	Amdhd1	Maoa	Aldh3b1	Uroc1	Aldh1a3	Aldh1b1	Aldh3a1	Hnmt	Carnmt1	Maob	Aldh9a1	Aldh2	Aldh7a1	Hal	Cndp1	Carns1	Ftcd
Non-homologous end-joining	path:mmu03450	Dntt	Mre11a	Prkdc	Poll	Nhej1	Dclre1c	Lig4	Xrcc6	Xrcc4	Polm	Xrcc5	Fen1	Rad50
Thyroid hormone signaling pathway	path:mmu04919	Slc2a1	Med1	Bmp4	Atp1a3	Rxra	Thrb	Map2k1	Akt2	Thra	Pfkp	Tbc1d4	Crebbp	Fxyd2	Akt3	Atp2a2	Plcd3	Atp1a4	Slco1c1	Plcb3	Slc9a1	Raf1	Hdac3	Rxrb	Atp1b2	Dio1	Plcb1	Prkcg	Pfkfb2	Pik3r1	Plcd1	Slc16a10	Prkacb	Med13l	Actg1	Stat1	Hif1a	Rcan2	Tsc2	Ncor1	Casp9	Ncoa2	Plcb2	Plcd4	Notch2	Atp1a2	Med14	Atp1b4	Hdac2
Apoptosis - multiple species	path:mmu04215	Mapk9	Apaf1	Bbc3	Htra2	Casp7	Casp3	Birc3	Bcl2l11	Ngfr	Casp8	Becn1	Bax	Cyct	Birc7	Casp9	Tnfrsf1a	Bcl2	Bak1	Bok	Sept4	Cycs	Diablo	Bid	Birc5	Bcl2l1	Pmaip1	Birc6	Birc2	Xiap	Mapk8	Fadd	Mapk10
Valine, leucine and isoleucine degradation	path:mmu00280	Hibadh	Bckdhb	Ehhadh	Acads	Acadsb	Mccc2	Bckdha	Oxct2b	Abat	Acsf3	Hsd17b10	Aox3	Hmgcl	Pccb	Hadhb	Aox1	Acaa2	Hmgcs2	Aldh1b1	Mccc1	4930438A08Rik	Hmgcll1	Bcat2	Ivd	Dld	Aox4	Hadh	Agxt2	Mut	Acat1	Aacs	Bcat1	Acat2	Aldh2	Aldh7a1	Echs1	Acad8	Aox2	Oxct1	Aldh6a1	Dbt	Acaa1b	Hadha	Hmgcs1	Il4i1	Aldh9a1	Acadm	Mcee
Drug metabolism - other enzymes	path:mmu00983	Ugt2b34	Upp2	Ugt2a2	Hprt	Ugt1a2	Ugt2b35	Nat1	Ugt2b1	Ugt2b37	Ugt2a1	Impdh1	Upb1	Ugt1a7c	Itpa	Nat3	Ugt1a6b	Ugt1a1	Ugt1a5	Tpmt	Ugt2b5	Upp1	Ugt2b36	Dpyd	Ugt1a6a	Gmps	Ugt2a3	Ces2h	Gusb	Ces2e	Uck1	Nat2	Uckl1	Ces2g	Ugt1a10	Ces1c	Ces2a	Umps	Uck2	Ces2c	Ugt2b38	Impdh2	Tymp	Ces1e	Cda	Ces2b	Tk2	Ugt1a9	Tk1
HIF-1 signaling pathway	path:mmu04066	Ins2	Erbb2	Gm9840	Rela	Ldha	Camk2d	Mknk2	Pik3cd	Akt1	Pik3ca	Egfr	Epo	Map2k2	1300017J02Rik	Nox1	Pfkl	Ifng	Cdkn1a	Igf1r	Egln3	Nox3	Ifngr1	Nos3	Gapdh	Trf	Angpt2	Eif4e2	Plcg2	Camk2g	Mapk3	Pdha2	Hk1	Rbx1	Eno1b	Edn1	Pdk1	Tlr4	Il6	Hkdc1	Insr	Hk3	Egln1	Eno3	Ins1	Prkcb	Eif4e1b	Rps6kb2	Mtor
RNA polymerase	path:mmu03020	Polr1c	Twistnb	Polr3b	Polr2e	Polr2h	Polr2j	Znrd1	Polr3d	Polr3g	Polr3c	DNA-directed RNA polymerases I	Polr3f	Polr3a	Polr3gl	Polr2b	Polr2g	DNA-directed RNA polymerases I	Polr1b	Polr3k	Polr1e	Polr1d	Polr2a	Polr3e	Polr2d	Polr3h	Polr2l	Polr2i	Polr1a	Polr2c	Polr2f
Glioma	path:mmu05214	Map2k1	Akt2	Calm5	Araf	Calm4	Akt3	Calm2	Shc4	Camk2b	Raf1	Egf	Prkcg	Pik3r1	Pdgfrb	E2f1	Cdkn2a	Igf1	Pdgfra	Cdk4	Pdgfb	Mapk1	Pik3cb	Pik3r2	Trp53	Prkca	Camk2a	Shc1	Ccnd1	Igf1r	E2f3	Calm1	Cdkn1a	Kras	Map2k2	Calml4	Sos2	Sos1	Akt1	Egfr	Pik3ca	Pik3cd	Pten	Camk2d	Mdm2	Rb1	Pdgfa	Shc2	E2f2
Bacterial invasion of epithelial cells	path:mmu05100	Bcar1	Elmo1	Ctnnb1	Arpc5	Cav1	Cav2	Arpc4	Arpc2	Arpc5l	Cdh1	Ptk2	Itgb1	Shc2	Shc3	Dnm3	Wasf1	Met	Pik3r3	Was	Sept9	Sept1	Actb	Cd2ap	Pik3ca	Pik3cd	Rhog	Rhoa	Wasf2	Shc1	Itga5	Mad2l2	Dock1	Sept6	Crk	Dnm1	Cblb	Ctnna2	Pik3cb	Hcls1	Arpc3	Arhgef26	Sept11	Pik3r2	Sept8	Src	Arhgap10	Arpc1b	Dnm2
Basal cell carcinoma	path:mmu05217	Trp53	Stk36	Fzd10	Gsk3b	Ptch2	Tcf7l1	Wnt4	Apc	Wnt11	Fzd7	Wnt3a	Ctnnb1	Apc2	Wnt5b	Dvl2	Wnt8a	Wnt7b	Wnt2	Wnt9a	Ptch1	Wnt5a	Axin2	Wnt9b	Lef1	Wnt2b	Fzd3	Wnt16	Wnt3	Dvl1	Wnt10b	Wnt10a	Fzd4	Tcf7l2	Wnt6	Fzd2	Tcf7	Sufu	Fzd6	Wnt7a	Hhip	Fzd9	Fzd1	Dvl3	Fzd5	Wnt8b	Gli3	Fzd8	Wnt1
Glycosphingolipid biosynthesis - ganglio series	path:mmu00604	St6galnac6	St6galnac4	Hexb	B3galt4	Hexa	St6galnac5	St6galnac3	St3gal5	Slc33a1	St8sia5	B4galnt1	St3gal2	Glb1	St8sia1	St3gal1
Riboflavin metabolism	path:mmu00740	Acp5	Acp1	Enpp1	Rfk	Blvrb	Acp2	Enpp3	Flad1
Complement and coagulation cascades	path:mmu04610	Masp1	Tfpi	A2m	F2	F3	Cfi	C1qc	Zp3r	Itgam	F13b	C3ar1	Cfh	Serpinc1	Plat	F10	F2rl3	C4bp	C2	Itgb2	C7	Hc	Serpina1b	C8a	Fgg	Vsig4	C1ra	Cpb2	C3	Cd46	Cd59b	Cfb	F2r	Fga	C1s2	Cd59a	C4b	F7	Vwf	Mbl2	Serpina1e	Plaur	F8	Cr2	C1s1	Mbl1	Vtn	Cd55b	Clu
Fc epsilon RI signaling pathway	path:mmu04664	Mapk3	Map2k4	Plcg2	Grb2	Nras	Il13	Lcp2	Pik3r3	Hras	Plcg1	Alox5	Sos1	Mapk11	Map2k3	Pik3ca	Akt1	Syk	Pla2g4c	Sos2	Lyn	Pik3cd	Vav2	Gab2	Csf2	Pdpk1	Map2k2	Lat	Kras	Mapk12	Fcer1a	Il3	Mapk1	Mapk9	Vav3	Pla2g4f	Vav1	CRP55H	Il4	Mapk13	Rac2	Pik3cb	Prkca	Map2k7	Pik3r2	Rac1	Pik3r1	Btk	Pla2g4a
Cell cycle	path:mmu04110	Skp1a	Anapc13	Ywhah	E2f4	Ccnh	Ep300	Orc6	Rad21	Ywhab	Smc3	Tfdp1	Atr	E2f2	Prkdc	Tgfb1	Zbtb17	Cdk6	Ccna1	Gadd45g	Smad3	Chek2	Cdc14b	Gadd45a	Skp2	Anapc2	Cdc26	Mad1l1	Cdc7	Rbx1	Sfn	Orc2	Cdkn1a	E2f3	Ccne2	Tgfb2	Mcm6	Rbl2	Cdc27	Ttk	Mad2l2	Ywhae	Pttg1	Ccnd1	Ccnd3	Plk1	Anapc4	Anapc5	Chek1
Pyrimidine metabolism	path:mmu00240	Nt5c3	Polr3f	Enpp1	Polr3c	Entpd8	Pola1	Nt5c1b	Polr3b	Entpd5	Pnpt1	Pnp	Nudt2	Txnrd3	Nme2	Rrm1	Polr2i	Enpp3	Upb1	Pold4	DNA-directed RNA polymerases I	Nme6	Nme1	Polr3g	Polr2j	Pole2	Polr2e	Pola2	Dpyd	Upp1	Dctpp1	Polr1c	Dhodh	Tk2	Polr2f	Dck	Polr2d	Nme4	Umps	Polr1b	Polr1e	Dctd	Pole3	Pole4	Cmpk1	Rrm2b	Entpd6	Nt5c1a	Znrd1
Adherens junction	path:mmu04520	Sorbs1	Igf1r	Nectin3	Afdn	Nectin2	Nectin4	Wasf2	Smad4	Erbb2	Rhoa	Iqgap1	Egfr	Farp2	Snai1	Tcf7	Baiap2	Actb	Met	Was	Actn4	Fgfr1	Wasf1	Ep300	Ptprm	Cdh1	Wasf3	Tgfbr2	Mapk3	Smad3	Csnk2b	Map3k7	Insr	Ctnnb1	Tjp1	Smad2	Ctnnd1	Rac3	Crebbp	Actn1	Nectin1	Tgfbr1	Ptprf	Pard3	Fyn	Ctnna3	Snai2	Yes1	Ptprj
Signaling pathways regulating pluripotency of stem cells	path:mmu04550	Pik3cb	Lifr	Myc	Hesx1	Meis1	Gsk3b	Stat3	Mapk13	Wnt3a	Hnf1a	Igf1	Tcf3	Smarcad1	Neurog1	Zic3	Smad5	Acvr2a	Dvl1	Tbx3	Wnt10b	Hand1	Inhba	Id4	Fzd5	Mapk14	Inhbb	Wnt1	Lhx5	Smad2	Axin1	Akt2	Nras	Apc	Smad3	Dusp9	Id2	Fzd7	Skil	Setdb1	Ctnnb1	Isl1	Inhbc	Onecut1	Fgf2	Fzd3	Pcgf6	Nodal	Wnt16
Fatty acid degradation	path:mmu00071	Adh7	Acsl1	Adh5	Cyp4a29	Acsl3	Cyp4a12b	Cyp4a14	Cpt2	Acox1	Aldh3a2	Acaa1a	Acadm	Acsl5	Aldh9a1	Cyp4a10	Acaa1b	Hadha	Acadvl	Adh1	Cpt1c	Cyp4a30b	Adh4	Acox3	Echs1	Acadl	Aldh7a1	Acsl6	Aldh2	Acat2	Gcdh	Cyp4a31	Acat1	Hadh	Acsbg2	Cpt1a	Acsl4	Cyp4a12a	Aldh1b1	Cyp4a32	Acaa2	Hadhb	Eci2	Acsbg1	Cpt1b	Acadsb	Eci1	1700061G19Rik	Acads
Amyotrophic lateral sclerosis (ALS)	path:mmu05014	Ppp3cb	Rab5a	Bid	Grin1	Ppp3r2	Bcl2l1	Als2	Prph	Bad	Derl1	Tnfrsf1b	Tomm40l	Cycs	Mapk11	Map2k3	Nefl	Map2k6	Mapk14	Nefh	Sod1	Tnf	Nefm	Gpx1	Slc1a2	Daxx	Ccs	Grin2c	Trp53	Tomm40	Casp3	Mapk13	Apaf1	Casp1	Casp12	Map3k5	Ppp3ca	Mapk12	Casp9	Ppp3r1	Ppp3cc	Nos1	Bcl2	Grin2b	Tnfrsf1a	Grin2a	Cat	Grin2d	Cyct
Selenocompound metabolism	path:mmu00450	Mars	Mars2	Papss1	Sephs1	Scly	Sephs2	Sepsecs	Txnrd1	Cth	Kyat3	Mtr	Inmt	Txnrd2	Pstk	Txnrd3	Kyat1	Papss2
IL-17 signaling pathway	path:mmu04657	Il17d	Defb4	Muc5ac	Mapk15	Hsp90aa1	Chuk	Nfkbia	Il5	Ptgs2	Cxcl2	Mapk8	Mapk14	Fadd	Mapk10	Cebpb	Il17c	Ccl2	Cxcl3	Tnf	Tab3	Il1b	Mapk4	Nfkb1	S100a8	Ccl20	Il17a	Cxcl10	Fosl1	Cxcl5	Mmp3	Traf4	Gsk3b	Casp8	Hsp90b1	Ikbkg	Mapk13	Il4	Il25	Jun	Mapk9	Traf6	Mapk1	Mapk12	S100a9	Mmp1a	Ccl17	Tab2	Srsf1
Cholinergic synapse	path:mmu04725	Prkacb	Pik3r1	Kcnj4	Gnai2	Itpr3	Ache	Gnao1	Pik3r5	Gng4	Chrm2	Plcb2	Chrna7	Gng13	Itpr2	Mapk1	Gng10	Adcy4	Adcy8	Chrna6	Gm5741	Cacna1c	Creb3l3	Kcnq4	Pik3r2	Gng3	Camk2a	Prkca	Prkaca	Pik3cb	Adcy6	Slc18a3	Fyn	Kcnj12	Chrnb4	Atf4	Akt2	Map2k1	Gnb3	Creb3l2	Kcnj14	Kcnq1	Gm15776	Akt3	Gng11	Chat	Cacna1a	Jak2	Adcy2
Inflammatory mediator regulation of TRP channels	path:mmu04750	Prkch	Cyp2c54	Cyp2c65	Mapk12	Adcy8	Cyp4a30b	Gnas	Adcy4	Mapk13	Bdkrb1	Htr2c	Mapk9	P2ry2	Alox12e	Pla2g4f	Igf1	Cyp2c37	Src	Prkca	Camk2a	Pik3r2	Pik3cb	Adcy6	Prkaca	Prkacb	Cyp2j12	F2rl1	Cyp2c40	Pik3r1	Asic1	Trpv2	Itpr3	Ppp1cc	Ppp1cb	Cyp2c38	Plcb2	Trpm8	Bdkrb2	Itpr2	Prkcd	Pla2g4b	Adcy2	Camk2b	Pla2g4a	Calm2	Plcb3	Trpa1	Prkcg
Endocytosis	path:mmu04144	Tsg101	Vps37a	Acap2	Pard3	Epn3	Chmp4b	Capza1	Csf1r	Washc4	Stambp	H2-M3	Arf3	Tfrc	Egf	Wasl	Rab11b	Snx32	Kif5b	Ldlrap1	Dnm2	Fgfr4	H2-T22	Snf8	Gm11127	Ap2a2	Hspa1l	Vps36	Traf6	Pdgfra	Rab11a	Il2rg	Gbf1	Pip5k1a	Hspa1a	Pip5k1c	Pdcd6ip	Chmp6	Kdr	Src	Acap1	Vps37d	Folr1	Igf1r	Git2	Cblb	Ist1	Arap2	Tgfb2
Systemic lupus erythematosus	path:mmu05322	Gm12657	H3f3c	Ssb	Hist1h2bf	H2al1f	Hist1h2ai	H2al1d	H2afb2	Hist1h2be	Hist1h2bq	H2-Oa	H2al1o	H2afb1	Hist2h2aa2	H2al1j	H2afj	H2al1h	C3	Hist1h2an	Ifng	H2afz	Snrpd3	H2-Ob	Hist1h3i	Hist2h3c1	Hist1h2ad	Elane	Hist1h2ba	Hist1h4n	Hist1h2bm	Hist1h2ab	Hist1h3f	Hist1h2ag	Trove2	H2al1m	Grin2a	Grin2b	Hist2h2ac	C1qc	Actn4	Hist1h4i	Cd40lg	H2-Ea-ps	Hist1h2bk	Hist4h4	H2al1e	Snrpb	1700024P04Rik
Influenza A	path:mmu05164	Hspa8	Tlr4	Ifnar1	Ccl12	Casp1	Prkcb	Map2k4	Nxt1	Eif2ak4	Ifna5	Atf2	Pabpn1l	Ciita	Pycard	Ep300	Actb	Tbk1	Eif2s1	Ifna13	Tlr7	Akt1	Tnfrsf10b	Mapk11	Eif2ak1	Irf3	Ddx58	Il33	Pik3cd	Nlrx1	Rnasel	H2-Oa	Ifna7	Map2k2	Il12b	Nfkbib	Tmprss13	Ifng	H2-Ob	Tyk2	Fdps	Mapk13	Ifna1	Oas3	Eif2ak3	Ivns1abp	1810009J06Rik	Gsk3b	Hnrnpul1
Platelet activation	path:mmu04611	Ptgs1	Pla2g4f	Col1a1	Mapk13	Fermt3	Mapk12	Adcy4	Adcy8	Gnas	Vasp	Rap1b	Mapk1	Pik3cb	Adcy6	Prkaca	Pik3r2	Src	Stim1	Gucy1b3	Itpr3	Gnai2	Ppp1cc	Ppp1cb	Pik3r1	Prkacb	Actg1	P2ry12	Prkg1	Itpr2	Rap1a	Pik3r5	Plcb2	Orai1	Btk	Ppp1r12a	Plcb3	Gucy1a3	Pla2g4a	Pla2g4b	Adcy2	Prkg2	Adcy7	Mylk	4930544G11Rik	Itpr1	P2rx1	Snap23	Prkci
Phagosome	path:mmu04145	Atp6v1d	Cyba	H2-T23	H2-Ob	Fcgr2b	Tubb2a	Colec12	H2-Oa	Cd209f	C3	H2-T24	Itga5	H2-M10.6	Atp6v1c1	H2-Q8	Rab7	Pla2r1	Cd209e	Rab5a	Pik3c3	Mbl2	H2-K1	H2-L	Ncf1	Cd209g	Rilp	Thbs2	Tubb2b	Gm7030	Coro1a	Colec11	H2-M1	Tubb6	Stx18	H2-M5	Actb	Tap2	Canx	Itgb5	Atp6v1g2	Lamp1	Rab7b	H2-Bl	Itgb1	Hgs	H2-M9	Atp6v0b	Atp6v0a4
Tryptophan metabolism	path:mmu00380	Asmt	Ido1	Ehhadh	Kynu	Haao	Maob	Cyp1b1	Ogdhl	Tdo2	Tph1	Ogdh	Cyp1a1	Aox3	Aox1	Kmo	Kyat3	4930438A08Rik	Aldh1b1	Aox4	Kyat1	Hadh	Acat1	Cyp1a2	Gcdh	Acat2	Echs1	Aldh7a1	Aldh2	Aox2	Aanat	Il4i1	Hadha	Aldh9a1	Aadat	Maoa	Acmsd	Tph2	Afmid	Aldh3a2	Cat	Ido2	Aoc1	Lao1	Ddc	Inmt	Gm21948
Butanoate metabolism	path:mmu00650	Echs1	Acads	Ehhadh	Acat2	Aldh5a1	Bdh2	Bdh1	L2hgdh	Gad2	Abat	Oxct1	Oxct2b	Acsm5	Hmgcs1	Acsm4	Hadha	Acsm2	Hmgcs2	Hmgcl	Hmgcll1	Acsm3	Oxct2a	Gad1	Acat1	Aacs	Acsm1	Hadh
Glycosaminoglycan biosynthesis - keratan sulfate	path:mmu00533	B4galt3	St3gal2	Chst5	B4galt2	B4galt4	St3gal1	Chst2	Chst4	B3gnt2	St3gal3	B3gnt7	Chst1	Fut8	B4galt1
Asthma	path:mmu05310	Cd40lg	CRP55H	Il4	Il5	Il9	Fcer1a	Il3	Il13	H2-DMa	H2-DMb2	Ms4a2	H2-Ea-ps	Ccl11	Fcer1g	H2-Aa	H2-Ab1	H2-Eb1	H2-Oa	Prg2	Il10	H2-Ob	Tnf	Epx	H2-DMb1	Cd40
Mannose type O-glycan biosynthesis	path:mmu00515	Large1	Chst10	Pomt1	Pomgnt1	Ispd	Fkrp	B4gat1	B3gat1	Pomgnt2	St3gal3	Pomk	B4galt3	B4galt2	B3galnt2	Pomt2	Mgat5b	B4galt1	Tmem5	Fut4	B3gat2	Fktn	Large2	Fut9
Steroid biosynthesis	path:mmu00100	Lss	Cyp2r1	Nsdhl	Cel	Soat2	Tm7sf2	Fdft1	Sc5d	Hsd17b7	Cyp24a1	Cyp51	Cyp27b1	Dhcr24	Sqle	Msmo1	Lipa	Soat1	Dhcr7	Ebp
Hepatitis C	path:mmu05160	Ifna11	Gsk3b	Eif2ak3	Cldn20	Oas3	Cldn7	Pik3cb	Nr1h3	Ppp2cb	Psme3	Tyk2	Ifna1	Stat3	Mapk13	Stat2	Cldn15	Oas1b	Cldn10	Ifna6	Oas1g	Ifnb1	Cldn34d	Cldn6	Tlr3	Chuk	Ticam1	Tnf	Cldn2	Cldn3	Mapk14	Akt2	Nfkb1	Ldlr	Cldn17	Cldn24	Ppp2r2a	Ripk1	Ppp2r2c	Ifna5	Eif2ak4	Nras	Cldn8	Ifnar1	Ppp2ca	Eif2s1	Tbk1	Braf	Ifna13
Vitamin B6 metabolism	path:mmu00750	Aox1	Aox3	Aox2	Pdxp	Phospho2	Pdxk	Aox4	Psat1	Pnpo
[truncated: 1,267 more columns]

## Sheet: C
KEGG - all disease related gene sets removed (used for enrichment analyses)
2-Oxocarboxylic acid metabolism	path:mmu01210		IDH3A	IDH3B	CS	CSL	BCAT1	IDH1	AADAT	ACO1	IDH3G	IDH2	GOT1	4933405O20RIK	GOT2	GPT2	ACO2	NAGS	ACY1	GPT	BCAT2
ABC transporters	path:mmu02010		ABCA2	ABCB6	ABCA17	ABCG1	ABCA3	ABCB5	ABCG5	ABCG8	ABCC6	ABCA13	ABCA6	CFTR	ABCA7	ABCB8	ABCD1	ABCG4	ABCC8	ABCC1	ABCC3	ABCA12	ABCB9	ABCD4	ABCD3	TAP2	ABCA9	ABCB11	ABCA8B	ABCB4	ABCC10	ABCC9	ABCA1	ABCB10	ABCG2	ABCA5	TAP1	ABCA4	ABCC5	ABCA8A	ABCD2	ABCC2	ABCC4	ABCC12	ABCG3	ABCB1A	ABCB1B	ABCB7
Adherens junction	path:mmu04520		SORBS1	IGF1R	NECTIN3	AFDN	NECTIN2	NECTIN4	WASF2	SMAD4	ERBB2	RHOA	IQGAP1	EGFR	FARP2	SNAI1	TCF7	BAIAP2	ACTB	MET	WAS	ACTN4	FGFR1	WASF1	EP300	PTPRM	CDH1	WASF3	TGFBR2	MAPK3	SMAD3	CSNK2B	MAP3K7	INSR	CTNNB1	TJP1	SMAD2	CTNND1	RAC3	CREBBP	ACTN1	NECTIN1	TGFBR1	PTPRF	PARD3	FYN	CTNNA3	SNAI2	YES1
Adipocytokine signaling pathway	path:mmu04920		PRKAG3	PCK2	ACSL3	PRKAG2	ACSL1	CD36	PRKAG1	IRS3	IKBKG	AGRP	LEPR	G6PC2	CPT1C	SLC2A4	ADIPOQ	MAPK9	ACSL6	STK11	NPY	STAT3	TNF	ACSBG2	ACSL4	MAPK8	MAPK10	AKT3	AKT2	NFKB1	POMC	G6PC	SLC2A1	PRKCQ	RXRA	PRKAA1	ACSBG1	RXRB	SOCS3	JAK2	ADIPOR1	TNFRSF1B	NFKBIA	CHUK	TNFRSF1A	PCK1	IKBKB	LEP	MTOR
Adrenergic signaling in cardiomyocytes	path:mmu04261		ATF6B	CACNG5	SLC9A1	CALM2	PPP1R1A	RAPGEF4	ADCY7	ATP1B2	CACNA1D	CACNA1F	TPM4	PLCB1	PPP2R3A	ATP1A3	PPP2R3D	FXYD2	GM2436	CALM4	SCN7A	AKT3	MYL3	MYL2	CACNA1C	MAPK12	ATP1B4	GNAS	ADCY8	ADCY4	MAPK1	PRKACA	RPS6KA5	ADRB2	PPP2R1A	CREB3L3	PPP2R5C	GNAI2	PRKACB	TNNI3	CACNA2D3	PLCB2	ADRA1B	ATP2B4	KCNE1	CACNA2D4	RAPGEF3	CREB3L4	CREM
Alanine, aspartate and glutamate metabolism	path:mmu00250		GLUL	GLUD1	AGXT2	GPT	RIMKLA	ASPA	FOLH1	ADSSL1	NAT8L	GOT1	4930438A08RIK	GPT2	GOT2	CAD	RIMKLB	ASL	GAD2	ABAT	ALDH5A1	NIT2	GM21948	CPS1	ASNS	LAO1	GLS2	GAD1	GFPT2	PPAT	ADSL	ASS1	IL4I1	GFPT1	ADSS	AGXT	ALDH4A1	GLS	DDO
Aldosterone synthesis and secretion	path:mmu04925		PRKD3	ADCY5	CREB5	NR4A2	CAMK2D	DAGLB	CREB3L4	STAR	LIPE	KCNK3	HSD3B6	ADCY1	CALML4	CALM1	ADCY9	DAGLA	CREB1	GM10681	SCARB1	PRKCB	GNA11	PDE2A	CALML3	CAMK2G	ADCY3	CALM3	CACNA1G	MC2R	NR4A1	ATF2	GNAQ	CAMK1G	CACNA1S	CYP21A1	CYP11B1	NPR1	AGTR1A	CREB3L1	PLCB4	ADCY2	CAMK2B	HSD3B2	PLCB3	CALM2	CAMK4	ATF6B	PLCB1
Aldosterone-regulated sodium reabsorption	path:mmu04960		FXYD4	PIK3R3	SCNN1A	ATP1A1	SCNN1G	PIK3R1	NR3C2	PIK3R2	ATP1B1	PRKCA	PIK3CB	SLC9A3R2	MAPK3	INS1	ATP1A2	IGF1	PRKCB	MAPK1	SFN	INSR	KCNJ1	ATP1B4	NEDD4L	KRAS	SGK1	FXYD2	HSD11B2	ATP1A3	PDPK1	ATP1B2	ATP1B3	PIK3CD	IRS1	INS2	PRKCG	SCNN1B	ATP1A4	PIK3CA
alpha-Linolenic acid metabolism	path:mmu00592		ACOX1	ACAA1A	PLA2G4D	PLA2G10	PLA2G2F	PLA2G1B	PLA2G4E	PLA2G5	PLA2G2E	PLA2G4B	PLB1	PLA2G4A	PLA2G2D	PLA2G16	PLA2G4C	PLA2G4F	ACOX3	PLA2G12B	PLA2G2C	ACAA1B	PLA2G3	PLA2G6	FADS2	PLA2G12A	PLA2G2A
Amino sugar and nucleotide sugar metabolism	path:mmu00520		GMDS	GALK1	GALE	CHIT1	HEXA	CYB5R4	CHIA1	CYB5R3	UGP2	UXS1	PGM3	CYB5R1	FUK	GMPPA	HEXB	GNPDA2	HK2	CYB5RL	CYB5R2	NAGK	CMAS	GPI1	GMPPB	PGM2	NPL	GNPDA1	GNE	GFPT2	TSTA3	UAP1	PGM1	GALT	PMM1	GFPT1	GCK	UGDH	GNPNAT1	HK1	FPGT	RENBP	HKDC1	UAP1L1	HK3	CMAH	NANP	AMDHD2	PMM2
Aminoacyl-tRNA biosynthesis	path:mmu00970		TRNS2	DARS	AARS2	HARS	TRNC	2002-03-01	MARS	WARS2	TRNE	TRNW	SARS	SARS2	HARS2	MTFMT	IARS	YARS	GARS	EARS2	LARS	TRNF	CARS	NARS	EPRS	TRNI	TRNY	NARS2	VARS	TRNL1	TRNS1	TRNK	CARS2	TRNN	PARS2	VARS2	TRNV	TRNQ	TARSL2	FARS2	GATB	LARS2	TRNT	GATC	WARS	YARS2	QRSL1	TRNH	SEPSECS
AMPK signaling pathway	path:mmu04152		PIK3CD	CREB3L4	SIRT1	CPT1B	ACACA	CAMKK2	INS2	CREB5	IRS1	CFTR	GYS2	EEF2	TSC1	AKT1	PIK3CA	CPT1A	ULK1	IGF1R	RPTOR	PFKL	RAB2A	ACACB	PDPK1	RHEB	PRKAA2	CCND1	PPP2R2B	IRS4	ELAVL1	LIPE	PFKFB4	PPP2R5A	PRKAB2	MAP3K7	ADIPOR2	PPARGC1A	PPP2R2C	PPP2R2A	CCNA1	FOXO1	PPP2CA	GM2446	INS1	CREB1	INSR	PPARG	IRS2
Antifolate resistance	path:mmu01523		ABCC3	IL1B	TNF	IKBKB	SHMT1	GGH	GART	FOLR1	SLC19A1	NFKB1	TYMS	DHFR	IZUMO1R	IKBKG	MTHFR	FOLR2	ABCG2	ATIC	ALOX12	FPGS	RELA	ABCC5	SHMT2	IL6	ABCC4	ABCC2	ABCC1	SLC46A1	ALOX12E	CHUK
Antigen processing and presentation	path:mmu04612		PSME1	TAP1	H2-Q7	CD8B1	KIR3DL2	H2-M9	H2-DMB2	HSPA4	H2-M10.2	H2-Q10	CREB1	HSPA8	TAP2	CANX	H2-M1	HSP90AB1	H2-M5	H2-EB1	H2-BL	CTSB	CIITA	H2-AA	CD8A	H2-K1	H2-L	H2-T10	H2-M10.3	NFYB	H2-Q8	PSME2	GM7030	KLRC1	H2-M10.1	H2-T18	H2-OB	RFXAP	NFYC	HSPA5	LGMN	IFNG	H2-DMB1	GM10499	H2-T23	TAPBP	H2-T24	H2-M10.6	H2-OA
Apelin signaling pathway	path:mmu04371		ITPR3	BECN1	PIK3R4	PRKAG1	PRKAG2	GNG13	NOS1	GNG4	PIK3R5	EGR1	GNG10	PDE3B	ADCY6	GNG3	RYR2	RPS6KB1	GNB3	PRKCE	AKT2	CALM5	MYLK3	SMAD2	ADCY10	GM15776	GABARAPL1	PLCB3	CAMK4	NRF1	ADCY2	SLC8A3	ITPR1	AGTR1B	SPHK2	CTGF	GNG2	GNAQ	AGTR1A	NOS2	RPS6KB2	MTOR	GNAI3	TFAM	RRAS2	MYL4	SLC8A1	PIK3R6	NRAS
Apoptosis	path:mmu04210		DAB2IP	TUBA8	PARP4	CTSF	MAPK8	AKT3	MAPK10	TUBA3B	PRF1	DAXX	TUBA4A	MAP2K1	FAS	CTSS	DIABLO	TUBA1B	FASL	RAF1	CFLAR	NFKBIA	CTSK	DDIT3	ITPR2	CTSL	CASP9	DFFB	BAX	CSF2RB	BCL2A1D	PIK3R1	PIDD1	IKBKG	CASP8	ENDOG	TRP53	PIK3R2	ERN1	BCL2A1A	MAPK1	JUN	MAPK9	CTSC	TRAF1	MCL1	PMAIP1	PDPK1	CSF2RB2
Apoptosis - multiple species	path:mmu04215		MAPK9	APAF1	BBC3	HTRA2	CASP7	CASP3	BIRC3	BCL2L11	NGFR	CASP8	BECN1	BAX	CYCT	BIRC7	CASP9	TNFRSF1A	BCL2	BAK1	BOK	2004-09-01	CYCS	DIABLO	BID	BIRC5	BCL2L1	PMAIP1	BIRC6	BIRC2	XIAP	MAPK8	FADD	MAPK10
Arachidonic acid metabolism	path:mmu00590		CYP2B23	PTGDS	CYP4F18	TBXAS1	CYP2J9	CYP2C39	LTC4S	CYP2E1	EPHX2	PLA2G2D	CYP2C66	ALOX5	CYP2U1	PLA2G4C	CYP2C29	CYP2J13	PLA2G10	CYP4A12A	PLA2G5	CYP2C44	CYP4A32	CYP2J5	CYP2J8	PLA2G3	CYP4A10	PLA2G6	ALOX12B	GGT5	CYP4A31	PLA2G12B	PLA2G2C	PLA2G1B	FAM213B	PLA2G2F	CYP4A14	CYP4A12B	CYP2B19	CYP4A29	CYP2C55	GPX7	CBR3	CYP2C50	PTGES2	CYP2J6	HPGDS	GGT1	ALOX12
Arginine and proline metabolism	path:mmu00330		PRODH	AOC1	NOS2	PYCR2	CNDP2	GAMT	SAT2	GATM	NOS1	LAP3	MAOA	CKB	ALDH3A2	AMD1	SMOX	ARG2	ALDH9A1	CKMT2	PRODH2	ALDH7A1	ALDH2	L3HYPDH	CKM	ARG1	ALDH4A1	OAT	HOGA1	GM853	P4HA1	SMS	SRM	AGMAT	PYCRL	PYCR1	ALDH1B1	GOT2	GOT1	NOS3	GM14680	CKMT1	MAOB	DAO	AZIN2	SAT1	CNDP1	CARNS1	ALDH18A1
Arginine biosynthesis	path:mmu00220		ACY1	NAGS	ASS1	NOS3	GOT1	GOT2	GPT2	GPT	NOS2	GLS2	NOS1	GLUD1	GLUL	CPS1	GLS	ARG1	ASL	ARG2	OTC
Ascorbate and aldarate metabolism	path:mmu00053		UGT2A3	UGT2A2	UGT1A6A	UGT2B36	MIOX	UGT2B34	GULO	UGT2B5	UGT2A1	ALDH3A2	UGT2B1	UGT2B37	UGT1A10	UGT2B35	UGT1A2	RGN	ALDH1B1	UGT2B38	UGT1A6B	ALDH9A1	UGT1A7C	UGDH	ALDH7A1	ALDH2	UGT1A5	UGT1A9	UGT1A1
Autophagy - animal	path:mmu04140		ATG7	AKT2	GM21596	ATG10	AKT1S1	HMGB1	RRAGD	SNAP29	ATG5	NRBF2	GABARAPL1	ITPR1	ATG4D	PIK3R4	HIF1A	ATG4C	BECN1	ATG16L2	PPP2CB	EIF2AK3	RPS6KB1	IRS3	CTSD	PIK3CB	IRS4	ATG2A	PRKAA2	MAP2K2	GABARAPL2	ATG12	DEPTOR	KRAS	ATG14	AKT1	TSC1	DAPK1	IRS1	INS2	BCL2L1	RAB7	CAMKK2	STX17	PIK3CD	PIK3C3	PTEN	LAMP1	ATG16L1
Axon guidance	path:mmu04360		NFATC3	RHOD	SEMA6C	PIK3R1	GNAI2	PARD6B	SEMA3G	RAC1	EFNA4	TRPC1	DPYSL5	ILK	RYK	SEMA4C	CXCR4	PAK2	NFATC2	SSH3	PPP3CA	MAPK1	DCC	NTN1	CFL2	PIK3R2	WNT4	SRC	FYN	FES	PARD3	PLXNA4	PLXNA2	EPHB1	SEMA3E	RAC3	TRPC6	SEMA3F	ABLIM2	SLIT3	LRRC4C	EFNA1	SEMA3A	RAF1	PAK1	ROBO2	NFATC4	RRAS	ARHGEF12
B cell receptor signaling pathway	path:mmu04662		PPP3CC	PPP3R1	IKBKB	CD79B	PIK3R3	HRAS	CD81	PIK3AP1	FOS	MAPK3	PLCG2	NRAS	GRB2	BCL10	MALT1	PRKCB	NFKBIB	MAP2K2	FCGR2B	RASGRP3	KRAS	VAV2	NFATC1	CD79A	LYN	PPP3R2	PIK3CD	RELA	SOS1	AKT1	PIK3CA	NFKBIE	SYK	SOS2	BTK	NFATC2	RAC1	CD19	PIK3R1	CR2	NFATC3	IKBKG	GSK3B	PTPN6	RAC2	PIK3CB	CD22
Basal cell carcinoma	path:mmu05217		TRP53	STK36	FZD10	GSK3B	PTCH2	TCF7L1	WNT4	APC	WNT11	FZD7	WNT3A	CTNNB1	APC2	WNT5B	DVL2	WNT8A	WNT7B	WNT2	WNT9A	PTCH1	WNT5A	AXIN2	WNT9B	LEF1	WNT2B	FZD3	WNT16	WNT3	DVL1	WNT10B	WNT10A	FZD4	TCF7L2	WNT6	FZD2	TCF7	SUFU	FZD6	WNT7A	HHIP	FZD9	FZD1	DVL3	FZD5	WNT8B	GLI3	FZD8
Basal transcription factors	path:mmu03022		GTF2B	TBPL2	GTF2I	TAF5L	GTF2E1	GTF2E2	TAF13	4933416C03RIK	ERCC3	TAF11	TAF4	TAF6L	TAF15	TAF9B	GTF2A1L	GTF2H1	TAF7L	TAF8	GTF2A2	GTF2F1	TAF7	EXPRESSED SEQUENCE AU015228	ERCC2	MNAT1	GTF2F2	GTF2H4	TAF4B	TAF12	TBP	GTF2A1	GTF2H5	TAF6	GTF2H3	TAF5	CDK7	GTF2H2	TAF3	GTF2IRD1	TBPL1	TAF1	TAF2	TAF9	CCNH	TAF10
Base excision repair	path:mmu03410		POLL	MUTYH	LIG3	POLD1	APEX1	TDG	UNG	PARP1	MBD4	POLD2	POLE	POLD4	NTHL1	TDG-PS	XRCC1	PARP3	HMGB1	PARP4	NEIL1	MPG	POLE2	GM21596	LIG1	SMUG1	NEIL3	APEX2	POLD3	POLE3	PARP2	POLE4	FEN1	OGG1	NEIL2	PCNA	POLB
beta-Alanine metabolism	path:mmu00410		ALDH9A1	UPB1	HADHA	ALDH6A1	SMOX	ECHS1	AOC3	ALDH2	ALDH7A1	ALDH3B3	CNDP2	ALDH3B2	MLYCD	GAD1	ALDH1A3	HIBCH	ALDH3A2	ACADM	GADL1	GAD2	ABAT	AOC2	EHHADH	CARNS1	DPYS	CNDP1	SMS	DPYD	GM14680	ALDH3A1	ALDH1B1	ALDH3B1	SRM
Bile secretion	path:mmu04976		SLC4A5	ADCY7	AQP1	ATP1B2	SLCO1A6	ATP1A4	SLC27A5	SLC9A1	SLC9A3	ADCY2	FXYD2	SLC2A1	NR1H4	ATP1A3	RXRA	ABCG8	LDLR	AQP4	ADCY6	PRKACA	ABCG2	ABCB1A	ATP1A2	CAR2	ATP1B4	ABCC4	ADCY8	GNAS	ADCY4	SLC22A8	SLCO1A4	PRKACB	AQP9	NCEH1	ATP1B3	CYP7A1	SLC5A1	CFTR	SLCO1B2	ADCY5	SLC10A2	ADCY9	ADCY1	SLC4A2	NR0B2	AQP8	EPHX1
Biosynthesis of amino acids	path:mmu01230		GAPDH-PS15	ASS1	SDSL	SHMT1	CPS1	PSAT1	ALDOART1	IDH3B	PRPS1	ARG2	IDH1	PYCR1	PRPS2	TKTL1	PFKP	PFKM	4933405O20RIK	ACO2	PYCRL	PRPS1L3	ALDOB	BCAT2	CBS	GPT	PGK1	ALDOA	SHMT2	PRPS1L1	ENO1	ENO2	PHGDH	THA1	ACO1	IDH2	PSPH	ASL	TPI1	RPE	ALDOC	MAT1A	PCX	TALDO1	PYCR2	RPIA	PKLR	PKM	ENO1B
Biosynthesis of unsaturated fatty acids	path:mmu01040		ELOVL6	HACD4	ACOT3	ACOT5	ELOVL5	HACD3	ELOVL2	ACOT4	FADS1	ACOT2	SCD4	SCD3	ACAA1A	ACOT1	ACOX1	HACD1	SCD1	HSD17B12	PECR	TECR	BAAT	ACOT7	ACAA1B	HADHA	FADS2	HACD2	ACOX3	SCD2
Biotin metabolism	path:mmu00780		BTD	HLCS	OXSM
Butanoate metabolism	path:mmu00650		ECHS1	ACADS	EHHADH	ACAT2	ALDH5A1	BDH2	BDH1	L2HGDH	GAD2	ABAT	OXCT1	OXCT2B	ACSM5	HMGCS1	ACSM4	HADHA	ACSM2	HMGCS2	HMGCL	HMGCLL1	ACSM3	OXCT2A	GAD1	ACAT1	AACS	ACSM1	HADH
Caffeine metabolism	path:mmu00232		NAT3	UOX	XDH	NAT2	NAT1	CYP1A2
Calcium signaling pathway	path:mmu04020		PHKA1	AVPR1B	SLC25A31	CALM4	CACNA1A	PTAFR	PTK2B	PLCD3	CACNA1I	CALM2	LTB4R2	PHKB	P2RX2	HTR6	MYLK	ADCY7	ORAI3	PLCB1	CACNA1F	CACNA1D	GRM1	P2RX1	CACNA1E	SLC8A2	PTGER3	PLCD1	PRKACB	HTR4	ERBB4	BDKRB2	MCU	ITPR2	ADORA2A	ATP2B4	ADRA1B	PLCB2	VDAC1	CACNA1C	PDGFRA	HTR2C	PLCD4	PPP3CA	ADCY4	GNAS	CCKAR	ADCY8	NTSR1
cAMP signaling pathway	path:mmu04024		ATP1B3	PIK3CD	PPP1R1B	CAMK2D	CNGA3	RHOA	CREB5	PDE3A	PPARA	MYL9	ADCY5	CNGA1	NPY1R	AKT1	HTR1F	GNAI1	GRIA3	MAP2K2	CALML4	AFDN	MC2R	CALM3	HTR1B	PPP1CA	CAMK2G	CALML3	ARAP3	GNAI3	CREB1	RRAS2	CHRM1	BRAF	FFAR2	GRIN2B	GRIN3B	GRIN2A	EP300	HTR1D	FOS	DRD5	PLN	PLD1	4930544G11RIK	CREB3	GHRL	SOX9	ATP1A4
Carbohydrate digestion and absorption	path:mmu04973		HK2	PIK3CD	ATP1B3	ATP1B2	CACNA1D	SLC5A1	ATP1A4	SLC2A5	PIK3CA	AKT1	FXYD2	AKT3	MGAM	SIS	LCT	ATP1A3	SLC37A4	AMY1	AKT2	TAS1R3	G6PC	PIK3CB	SLC2A2	HK1	ATP1B1	PIK3R2	AMY2A4	PRKCB	ATP1A2	ATP1B4	HK3	G6PC2	HKDC1	ATP1A1	PIK3R3	TAS1R2	PLCB2	PIK3R1	AMY2A5	AMY2A3	GNAT3	AMY2A2	G6PC3
Carbon metabolism	path:mmu01200		GPT	FBP2	GLUD1	ALDOB	ACAT1	PRPS1L3	PGLS	MUT	G6PD2	SUCLA2	HAO1	ACO2	PCCB	4933405O20RIK	PFKP	TKTL1	PRPS2	PFKM	ME2	PSPH	IDH2	HK2	OGDHL	ACO1	PGD	PHGDH	MTHFR	ENO2	ENO1	PRPS1L1	PGK1	ALDOA	SHMT2	ME1	PGP	SUCLG1	ALDOART1	ADH5	PSAT1	CPS1	SUCLG2	SHMT1	SDSL	MCEE	HIBCH	ACADM	PCCA
Cardiac muscle contraction	path:mmu04260		UQCRQ	TNNC1	MYL4	COX3	SLC8A1	COX7B	UQCRC1	UQCRFS1	ATP1B1	COX6C	CACNA2D2	ACTC1	CACNG4	MYH7	CACNA1S	CACNB2	TPM1	ATP1A1	UQCR10	COX8A	CACNG2	COX6A2	COX6B2	CACNB4	CACNG3	COX4I2	CYC1	COX6B1	CACNB3	COX8C	TPM3	CACNA2D4	ATP1B3	SLC9A6	COX4I1	CACNB1	CYTB	TNNT2	COX7C	MYH6	TPM2	CACNA2D1	CACNG8	CACNA1C	ATP1A2	ATP1B4	COX5B
Cell adhesion molecules (CAMs)	path:mmu04514		VCAM1	ITGB8	LRRC4	H2-M2	H2-EA-PS	CLDN34D	H2-Q1	VTCN1	H2-Q6	CD40LG	NCAM1	GLG1	H2-Q2	CLDN6	H2-Q4	CLDN3	JAM3	NTNG1	SDC3	CLDN2	CD4	H2-AB1	H2-T3	H2-D1	CLDN17	CD226	H2-M10.5	SDC4	MAG	H2-M11	CLDN7	NEGR1	CLDN20	H2-T-PS	NLGN2	F11R	CD34	CDH2	CLDN15	ICAM2	CD99	CD40	H2-T9	CD274	CDH15	MHC CLASS I FAMILY MEMBER	SELE
Cell cycle	path:mmu04110		SKP1A	ANAPC13	YWHAH	E2F4	CCNH	EP300	ORC6	RAD21	YWHAB	SMC3	TFDP1	ATR	E2F2	PRKDC	TGFB1	ZBTB17	CDK6	CCNA1	GADD45G	SMAD3	CHEK2	CDC14B	GADD45A	SKP2	ANAPC2	CDC26	MAD1L1	CDC7	RBX1	SFN	ORC2	CDKN1A	E2F3	CCNE2	TGFB2	MCM6	RBL2	CDC27	TTK	MAD2L2	YWHAE	PTTG1	CCND1	CCND3	PLK1	ANAPC4	ANAPC5
cGMP-PKG signaling pathway	path:mmu04022		ATP2B2	IRS2	INSR	SLC25A5	KCNMB1	ATP1B1	ROCK2	ATP2A3	PDE2A	GUCY1A2	GNA11	ADORA1	ADCY3	MAPK3	ADRB3	CACNA1S	ATP2B3	ADRA2B	NPR1	CREB3L1	PLCB4	ATP1A1	PPP3CC	BAD	GTF2I	KCNMB3	VDAC2	PDE5A	CREB3L4	ADRB1	NFATC1	GM5601	ATP2A1	CALM1	ADCY9	ADCY1	ROCK1	CACNA1C	VDAC1	MEF2D	MAPK1	MRVI1	PPP3CA	ADCY4	ADCY8	ATP1B4	ADRA2A
Chemokine signaling pathway	path:mmu04062		GM20878	GM2506	PLCB1	GNB1	GNGT2	CX3CR1	GRK4	ADCY7	CXCL9	WASL	PAK1	PRKCD	RAF1	JAK2	GM10591	SHC4	NFKBIA	HCK	CXCL3	PTK2B	GNG11	GRK1	GM2023	AKT3	CCR3	CXCL10	PARD3	MAP2K1	IKBKG	SRC	CXCL5	PRKACA	PIK3R2	ADCY8	ADCY4	MAPK1	VAV1	VAV3	GM5741	PLCB2	GM21586	CXCR4	CCL6	RAP1A	CCL17	PRKACB	RAC1
Cholinergic synapse	path:mmu04725		PRKACB	PIK3R1	KCNJ4	GNAI2	ITPR3	ACHE	GNAO1	PIK3R5	GNG4	CHRM2	PLCB2	CHRNA7	GNG13	ITPR2	MAPK1	GNG10	ADCY4	ADCY8	CHRNA6	GM5741	CACNA1C	CREB3L3	KCNQ4	PIK3R2	GNG3	CAMK2A	PRKCA	PRKACA	PIK3CB	ADCY6	SLC18A3	FYN	KCNJ12	CHRNB4	ATF4	AKT2	MAP2K1	GNB3	CREB3L2	KCNJ14	KCNQ1	GM15776	AKT3	GNG11	CHAT	CACNA1A	JAK2
Circadian entrainment	path:mmu04713		GRIN2B	GRIN2A	GNB5	PLCB4	GRIN2D	GNG2	KCNJ3	GNAQ	KCNJ6	FOS	GUCY1A2	CALML3	CAMK2G	GNB4	ADCY3	MAPK3	CALM3	CACNA1G	GNG8	ADCYAP1R1	PER1	CREB1	KCNJ9	GNAI3	PRKCB	ADCY1	CALML4	RYR1	GNG7	CALM1	ADCY9	GNB2	GRIA3	GNAI1	PER2	KCNJ5	GNG12	GNGT1	CAMK2D	GRIN1	RYR3	ADCY5	GNG5	GNAO1	NOS1	PLCB2	GNG4
Circadian rhythm	path:mmu04710		NPAS2	PER3	RBX1	PER1	CREB1	RORA	ARNTL	GM9840	FBXL3	BHLHE41	PRKAB2	CLOCK	CRY2	RORC	PRKAA1	BTRC	PRKAA2	FBXW11	PER2	NR1D1	PRKAG1	CSNK1E	SKP1A	PRKAB1	CRY1	RORB	PRKAG2	CUL1	CSNK1D	PRKAG3	BHLHE40
Citrate cycle (TCA cycle)	path:mmu00020		SDHA	SDHB	PDHB	DLAT	SUCLG1	PCX	PCK1	SDHD	PCK2	SUCLG2	IDH3B	PDHA2	IDH1	FH1	PDHA1	IDH3G	ACO2	SDHC	OGDH	4933405O20RIK	DLD	SUCLA2	CS	CSL	IDH3A	MDH1	IDH2	OGDHL	DLST	MDH2	ACO1	ACLY
Collecting duct acid secretion	path:mmu04966		CLCNKB	ATP6V1E1	CAR2	ATP6V1B1	ATP4B	ATP6V0A2	ATP6V1G1	ATP6V1F	TCIRG1	ATP6V1C1	ATP6V0C	ATP6V0D2	ATP6V0A4	SLC4A1	ATP6V1G2	SLC12A7	ATP6V1G3	ATP6V1A	ATP6V0E	ATP6V1C2	ATP6V1E2	ATP6V1D	ATP6V1B2	ATP6V0D1	ATP6V0A1	ATP6V0E2	ATP4A
Complement and coagulation cascades	path:mmu04610		MASP1	TFPI	A2M	F2	F3	CFI	C1QC	ZP3R	ITGAM	F13B	C3AR1	CFH	SERPINC1	PLAT	F10	F2RL3	C4BP	C2	ITGB2	C7	HC	SERPINA1B	C8A	FGG	VSIG4	C1RA	CPB2	C3	CD46	CD59B	CFB	F2R	FGA	C1S2	CD59A	C4B	F7	VWF	MBL2	SERPINA1E	PLAUR	F8	CR2	C1S1	MBL1	VTN	CD55B
Cysteine and methionine metabolism	path:mmu00270		DNMT1	GCLM	GSS	BCAT1	AHCY	IL4I1	TST	AMD1	APIP	CDO1	SDSL	MRI1	ENOPH1	MAT1A	MPST	MTAP	GM21948	LDHAL6B	DNMT3A	LAO1	MDH1	BHMT2	GM4737	GCLC	MAT2B	SDS	MDH2	LDHA	AHCYL1	AHCYL2	GOT2	4930438A08RIK	GOT1	ADI1	GM14680	SRM	LDHB	CTH	DNMT3B	BHMT	TAT	MTR	AGXT2	SMS	MAT2A	BCAT2	CBS
Cytokine-cytokine receptor interaction	path:mmu04060		TNFRSF14	CX3CL1	IFNA7	CSF2	IL10RA	EPOR	IL12B	IFNG	KIT	TNFSF15	RELT	EGFR	IL9	CSF3	CCL1	CXCL13	FLT3L	GM13304	IL1R1	IL21R	XCL1	IL22RA2	CXCL16	C-C MOTIF CHEMOKINE 27-LIKE	PRL	MET	GM13308	IFNK	TNFSF13	CCL12	INTERLEUKIN-11 RECEPTOR SUBUNIT ALPHA-2-LIKE	CLCF1	CCL24	IFNA5	TGFB1	CCL20	CCL21A	CCL25	CCL2	IL1B	IL11RA1	IL12RB2	CXCL2	CXCL15	ACKR3	CNTFR	IL17D
Cytosolic DNA-sensing pathway	path:mmu04623		NFKBIB	IFNAB	DNA-DIRECTED RNA POLYMERASES I	IFNA7	POLR3D	IRF3	DDX58	RELA	POLR3A	RIPK3	IL33	POLR3GL	POLR3H	POLR2L	MB21D1	IKBKB	TBK1	CCL4	IFNA4	IFNA9	IFNA13	CCL5	ADAR	POLR2H	PYCARD	INTERFERON-ACTIVABLE PROTEIN 202-LIKE	IFNA12	POLR3K	RIPK1	POLR1D	IFNA5	AIM2	TMEM173	IL6	POLR3E	CASP1	TREX1	IFI202B	IL1B	POLR1C	POLR3G	NFKB1	CXCL10	POLR2E	IFNB1	POLR2F	MAVS
D-Arginine and D-ornithine metabolism	path:mmu00472		DAO
D-Glutamine and D-glutamate metabolism	path:mmu00471		GLS	GLS2	GLUD1
DNA replication	path:mmu03030		POLD3	RNASEH2A	RNASEH2B	DNA2	POLE2	LIG1	RPA3	MCM2	POLA2	MCM6	RNASEH2C	MCM3	PCNA	FEN1	RFC2	MCM4	SSBP1	RPA1	RNASEH1	POLE3	POLE4	RFC1	POLA1	RFC3	MCM5	PRIM2	POLD1	RFC4	PRIM1	MCM7	RFC5	POLD4	POLE	POLD2	RPA2
Dopaminergic synapse	path:mmu04728		MAPK8	GM2436	MAPK10	CALM4	AKT3	GNG11	CACNA1A	PPP2R3A	PPP2R3D	CACNA1D	GNGT2	PLCB1	SLC6A3	GNB1	KIF5B	CALM2	DRD2	ATF6B	DRD4	ITPR2	GNAO1	PLCB2	MAOA	GNAI2	GRIA1	PRKACB	CALY	PPP2R1A	ARNTL	PRKACA	PPP2R5C	CREB3L3	CACNA1C	GM5741	MAPK9	PPP3CA	MAPK12	GNAS	CALM1	GM5601	PPP2R2B	GNGT1	CREB3L4	GNG12	CACNA1B	GNB5	CREB3L1
Dorso-ventral axis formation	path:mmu04320		CPEB3	ETS1	PIWIL2	GRB2	SPIRE1	SPIRE2	PIWIL4	NOTCH4	ETS2	MAPK3	NOTCH1	SOS2	FMN2	NOTCH3	CPEB2	NOTCH2	MAPK1	EGFR	SOS1	KRAS	BRAF	MAP2K1	CPEB1	CPEB4	ETV6	PIWIL1
Drug metabolism - cytochrome P450	path:mmu00982		ADH4	UGT1A5	FMO1	GSTO1	GM4846	UGT1A7C	UGT2B1	ALDH1A3	UGT2B35	GSTT3	UGT2A2	ALDH3B3	UGT2B34	GSTK1	MGST1	GSTP2	GSTM5	CYP2E1	GSTO2	FMO3	UGT2B38	ALDH3B1	FMO4	AOX1	GM4847	UGT1A10	FMO6	AOX4	UGT2B5	GSTA2	CYP1A2	GSTA4	UGT2B36	MGST3	GSTM6	GSTA3	ADH1	AOX2	UGT1A1	GSTM4	UGT1A6B	GSTT2	MAOA	UGT2B37	MGST2	UGT2A1	GSTM2
Drug metabolism - other enzymes	path:mmu00983		UGT2B34	UPP2	UGT2A2	HPRT	UGT1A2	UGT2B35	NAT1	UGT2B1	UGT2B37	UGT2A1	IMPDH1	UPB1	UGT1A7C	ITPA	NAT3	UGT1A6B	UGT1A1	UGT1A5	TPMT	UGT2B5	UPP1	UGT2B36	DPYD	UGT1A6A	GMPS	UGT2A3	CES2H	GUSB	CES2E	UCK1	NAT2	UCKL1	CES2G	UGT1A10	CES1C	CES2A	UMPS	UCK2	CES2C	UGT2B38	IMPDH2	TYMP	CES1E	CDA	CES2B	TK2	UGT1A9
ECM-receptor interaction	path:mmu04512		LAMA3	FN1	TNN	THBS4	COL4A3	GP6	LAMA5	ITGA3	COL6A5	COL4A2	COL4A1	ITGA2	COL6A4	GP1BB	ITGB6	LAMC2	HSPG2	SV2A	ITGB8	THBS1	CD36	AGRN	LAMA2	COL2A1	LAMB2	VTN	TNC	THBS3	COL6A3	COL1A1	COL6A1	SDC4	SDC1	SPP1	SV2B	ITGA4	GP9	COL4A5	ITGA5	IBSP	COL6A2	ITGA6	LAMC3	TNXB	COL4A6	ITGA8	LAMA1
EGFR tyrosine kinase inhibitor resistance	path:mmu01521		IL6	PRKCB	MAPK3	PLCG2	GRB2	BCL2L11	NRAS	SHC3	PDGFA	FGF2	SHC2	BCL2	EIF4E	EIF4E1B	RPS6KB2	MTOR	PDGFC	BRAF	GAS6	PIK3R3	HRAS	MET	TGFA	PLCG1	SOS1	PIK3CA	EGFR	AKT1	FGFR3	SOS2	BAD	ERBB2	BCL2L1	PTEN	PIK3CD	SHC1	EIF4E2	MAP2K2	IGF1R	KRAS	NRG1	MAPK1	PDGFRA	IGF1	STAT3	PDGFB	KDR
Endocrine and other factor-regulated calcium reabsorption	path:mmu04961		PLCB3	VDR	CLTA	ATP1A4	PLCB1	CLTC	PRKCG	ATP1B2	AP2M1	ATP1B3	TRPV5	KL	ATP1A3	ATP2B1	KLK1	DNM1	KLK1B1	ADCY9	CLTB	KLK1B21	KLK1B3	FXYD2	KLK1B11	AP2S1	RAB11A	KLK1B24	KLK1B26	GNAS	ATP1B4	SLC8A1	ATP1A2	PRKCB	KLK1B8	ATP1B1	PRKCA	PRKACA	ADCY6	ESR1	DNM3	PRKACB	KLK1B9	GNAQ	DNM2	AP2A2	CALB1	KLK1B22	PLCB2
Endocrine resistance	path:mmu01522		ADCY7	SHC4	JAG1	RAF1	ADCY2	MAPK14	MAPK8	JAG2	MAPK10	AKT3	ARAF	CDKN1B	ESR2	MAP2K1	MED1	AKT2	TRP53	PIK3R2	ESR1	PIK3CB	ADCY6	PRKACA	RPS6KB1	SP1	GPER1	SRC	CDK4	MAPK13	MAPK9	NOTCH2	JUN	IGF1	MAPK1	MAPK12	ADCY8	ADCY4	GNAS	CDKN2A	NCOR1	E2F1	CDKN2C	MMP9	PIK3R1	CARM1	PRKACB	BAX	PIK3CD
Endocytosis	path:mmu04144		TSG101	VPS37A	ACAP2	PARD3	EPN3	CHMP4B	CAPZA1	CSF1R	WASHC4	STAMBP	H2-M3	ARF3	TFRC	EGF	WASL	RAB11B	SNX32	KIF5B	LDLRAP1	DNM2	FGFR4	H2-T22	SNF8	GM11127	AP2A2	HSPA1L	VPS36	TRAF6	PDGFRA	RAB11A	IL2RG	GBF1	PIP5K1A	HSPA1A	PIP5K1C	PDCD6IP	CHMP6	KDR	SRC	ACAP1	VPS37D	FOLR1	IGF1R	GIT2	CBLB	IST1	ARAP2
ErbB signaling pathway	path:mmu04012		PAK6	GAB1	PIK3R1	CBL	PAK2	EREG	ERBB4	PAK3	NRG1	MAPK1	JUN	MAPK9	NRG3	GSK3B	SRC	RPS6KB1	PIK3CB	MYC	CAMK2A	MAP2K7	PRKCA	ERBB3	PIK3R2	AKT2	MAP2K1	ABL2	CDKN1B	ARAF	MAPK8	MAPK10	AKT3	CBLC	PAK1	RAF1	NRG2	CAMK2B	ABL1	AREG	CRKL	STAT5A	SHC4	PAK4	EIF4EBP1	PRKCG	EGF	SHC3	PTK2
Estrogen signaling pathway	path:mmu04915		PIK3R2	HSPA1A	PIK3CB	ADCY6	ESR1	PRKACA	SP1	GPER1	CREB3L3	SRC	HSP90B1	JUN	MAPK1	GNAS	ADCY8	ADCY4	ITPR2	GNAO1	PLCB2	MMP9	HSPA1L	PIK3R1	ITPR3	GNAI2	HSPA1B	PRKACB	CREB3	ITPR1	ADCY7	HSP90AA1	PLCB1	GRM1	SHC4	CALM2	PLCB3	ATF6B	PRKCD	RAF1	ADCY2	CALM4	AKT3	CALM5	HSPA2	ESR2	MAP2K1	GABBR1	CREB3L2
Ether lipid metabolism	path:mmu00565		PLD1	PLA2G16	PLA2G4A	PLA2G2D	PLA2G4B	PLA2G4C	UGT8A	PLA2G4D	PAFAH1B3	LPCAT1	PLD2	PLA2G2E	PLA2G5	PLA2G4E	PLA2G10	PAFAH1B2	CEPT1	ENPP6	SELENOI	PLD4	PLPP2	PLA2G6	PLD3	PLPP1	PLA2G3	PLA2G7	PLA2G2A	PLA2G12A	AGPS	LPCAT2	TMEM86B	CHPT1	PLB1	PLA2G12B	PLA2G2C	PLA2G4F	GAL3ST1	PLA2G1B	PLA2G2F	ENPP2	LPCAT4	PAFAH1B1	PLPP3	PAFAH2
Fat digestion and absorption	path:mmu04975		MOGAT2	CD36	SLC27A4	APOA1	MTTP	PLPP3	PNLIPRP2	PNLIP	FABP2	PLA2G2F	PLA2G1B	SCARB1	PLA2G2C	PLA2G12B	ACAT2	PLA2G12A	PLA2G2A	CEL	APOB	PLPP2	ABCA1	PLPP1	PLA2G3	APOA4	ABCG8	ABCG5	GOT2	PLA2G5	PLA2G2E	PLA2G10	NPC1L1	AGPAT1	AGPAT2	PLA2G2D	PNLIPRP1	FABP1	DGAT1	DGAT2	LIPF	CLPS
Fatty acid biosynthesis	path:mmu00061		OXSM	ACACB	ACSBG1	OLAH	ACACA	ACSL5	ACSL4	MCAT	ACSL3	FASN	ACSBG2	ACSL1	1700061G19RIK	ACSL6
Fatty acid degradation	path:mmu00071		ADH7	ACSL1	ADH5	CYP4A29	ACSL3	CYP4A12B	CYP4A14	CPT2	ACOX1	ALDH3A2	ACAA1A	ACADM	ACSL5	ALDH9A1	CYP4A10	ACAA1B	HADHA	ACADVL	ADH1	CPT1C	CYP4A30B	ADH4	ACOX3	ECHS1	ACADL	ALDH7A1	ACSL6	ALDH2	ACAT2	GCDH	CYP4A31	ACAT1	HADH	ACSBG2	CPT1A	ACSL4	CYP4A12A	ALDH1B1	CYP4A32	ACAA2	HADHB	ECI2	ACSBG1	CPT1B	ACADSB	ECI1	1700061G19RIK
Fatty acid elongation	path:mmu00062		ELOVL4	ELOVL2	ELOVL5	HACD3	ACOT5	ACOT3	HACD4	HADH	MECR	ELOVL6	HADHB	HACD1	ACAA2	ELOVL3	ACOT1	ACOT2	PPT1	ACOT4	ELOVL1	HADHA	ACOT7	PPT2	HSD17B12	TECR	ECHS1	HACD2	ELOVL7
Fatty acid metabolism	path:mmu01212		ACSBG1	HSD17B12	TECR	ACACA	CPT1B	FADS2	1700061G19RIK	ACADSB	SCD2	ACADS	EHHADH	HADH	OXSM	ELOVL6	ACAT1	ELOVL2	ACSL4	ACSBG2	CPT1A	SCD4	HADHB	ACAA2	ACAA1B	HADHA	ACSL5	PPT2	PECR	ACADVL	MCAT	CPT1C	HACD2	ACAT2	ACADL	ECHS1	ACOX3	ACSL6	HACD4	MECR	ELOVL5	HACD3	ACSL1	ACSL3	FASN	CPT2	SCD3	FADS1	PPT1
Fc epsilon RI signaling pathway	path:mmu04664		MAPK3	MAP2K4	PLCG2	GRB2	NRAS	IL13	LCP2	PIK3R3	HRAS	PLCG1	ALOX5	SOS1	MAPK11	MAP2K3	PIK3CA	AKT1	SYK	PLA2G4C	SOS2	LYN	PIK3CD	VAV2	GAB2	CSF2	PDPK1	MAP2K2	LAT	KRAS	MAPK12	FCER1A	IL3	MAPK1	MAPK9	VAV3	PLA2G4F	VAV1	CRP55H	IL4	MAPK13	RAC2	PIK3CB	PRKCA	MAP2K7	PIK3R2	RAC1	PIK3R1	BTK
Fc gamma R-mediated phagocytosis	path:mmu04666		SPHK1	CFL1	GAB2	VAV2	GSN	ARF6	MARCKS	ASAP1	ASAP2	CRK	LAT	FCGR2B	AKT1	PIK3CA	NCF1	SYK	WASF2	ASAP3	LYN	PIK3CD	PIP5K1B	WASF1	AMPH	PTPRC	SPHK2	RPS6KB2	LIMK1	PLCG1	PIK3R3	WAS	ARPC5	BIN1	DOCK2	MARCKSL1	PRKCB	PLCG2	ARPC5L	PLA2G6	ARPC2	WASF3	MAPK3	ARPC4	AKT2	PRKCE	MAP2K1	PLD2	HCK
Focal adhesion	path:mmu04510		PRKCA	PIK3CB	RAC2	GSK3B	RASGRF1	IGF1	TNC	RAP1B	VASP	PAK3	VTN	COL2A1	FLT1	PPP1CC	PPP1CB	ACTG1	PDGFRB	PAK6	PARVB	4930544G11RIK	ITGB8	VEGFB	CDC42	PRKCG	PAK4	CRKL	ZYX	CCND2	ACTN1	MYLK3	COL6A5	COL6A4	PXN	LAMA3	PPP1R12B	COL4A3	ITGA3	TNN	AKT2	ITGB4	CAV2	COL4A4	BIRC3	PAK7	PPP1CA	PRKCB	PARVA
Folate biosynthesis	path:mmu00790		QDPR	GCH1	MOCS2	DHFR	ALPI	ALPPL2	AKP3	GPHN	GGH	FPGS	MOCS1	SPR	PTS	ALPL
FoxO signaling pathway	path:mmu04068		SMAD3	FOXG1	BCL2L11	NRAS	PRKAB2	TGFB1	INS1	PCK1	PLK2	RAG1	BRAF	HOMER1	SGK2	EP300	FOXO6	FOXO4	SMAD4	IRS1	INS2	AGAP2	PIK3CD	PTEN	MAPK11	AKT1	EGFR	USP7	RBL2	GABARAPL2	ATG12	MAP2K2	CDKN1A	KRAS	IRS4	PRKAA2	IRS3	S1PR1	PRMT1	PIK3CB	SOD2	G6PC2	ATM	IGF1	IL7R	MAPK13	STAT3	CDK2	CCNB3
Fructose and mannose metabolism	path:mmu00051		TIGAR	SORD	PFKFB1	TSTA3	PFKFB2	AKR1B10	TPI1	PMM1	AKR1B8	GMPPB	ALDOC	ALDOART1	HK3	HKDC1	MPI	PMM2	TKFC	AKR1B3	PFKFB3	FBP1	FPGT	HK1	PFKFB4	PFKP	PFKM	PFKL	ALDOB	KHK	GMDS	FBP2	ALDOA	FUK	GMPPA	HK2	AKR1B7
GABAergic synapse	path:mmu04727		GLS	GNAI3	PRKCB	NSF	ADCY3	GABRA1	GNB4	GABRG1	GABRE	GABBR2	GNG8	GNG2	GABRB3	CACNA1S	GABRA3	KCNJ6	GABARAP	GABRB2	GNB5	CACNA1B	ADCY5	GNG5	HAP1	GABRG2	GNG12	GAD2	GABRP	GNGT1	GLUL	GABARAPL2	GABRR3	ADCY1	GNG7	GNAI1	ADCY9	GNB2	ADCY8	SLC38A3	GNG10	SLC38A1	ADCY4	GM5741	CACNA1C	SRC	GABRA4	PRKACA	ADCY6
Galactose metabolism	path:mmu00052		GALT	LALBA	G6PC3	PGM1	B4GALT2	GLB1	AKR1B10	AKR1B8	PGM2	HK3	HKDC1	G6PC2	AKR1B3	GCK	GAA	HK1	UGP2	PFKP	PFKM	G6PC	GALE	GALK1	PFKL	MGAM	SIS	LCT	GALM	B4GALT1	GLA	GANC	HK2	AKR1B7
Gap junction	path:mmu04540		ADRB1	MAPK7	HTR2B	TUBB5	ADCY9	KRAS	TUBB2A	GNAI1	MAP2K5	ADCY1	MAP2K2	TUBB1	SOS2	TUBB2B	EGFR	SOS1	ADCY5	CDK1	GJD2	PDGFA	GRM5	GNAQ	HTR2A	HRAS	PDGFC	PLCB4	TUBB6	TUBB4B	GNAI3	PRKCB	TJP1	NRAS	GRB2	GNA11	GUCY1A2	TUBAL3	ADCY3	MAPK3	GJA1	MAP2K1	DRD1	GUCY1B2	MAP3K2	TUBA4A	TUBA1A	TUBA3B	TUBA8
Gastric acid secretion	path:mmu04971		KCNK10	KCNQ1	SLC26A7	ATP1A3	ATP4A	CALM5	MYLK3	CALM4	ATP1A4	PLCB3	SLC9A1	CALM2	CAMK2B	ADCY2	ADCY7	MYLK	ATP1B2	ITPR1	PRKCG	PLCB1	ITPR3	HRH2	GNAI2	PRKACB	ITPR2	PLCB2	CAR2	ATP1A2	KCNJ1	ATP1B4	GNAS	ADCY8	ADCY4	ADCY6	PRKACA	CAMK2A	PRKCA	CCKBR	KCNE2	KCNK2	SLC9A4	MYLK2	GNAI1	SST	CHRM3	CALM1	ADCY9
Glucagon signaling pathway	path:mmu04922		FOXO1	PKM	CREB1	PDHA2	CALM3	PRKAB2	GCG	SMEK3-PS	CAMK2G	CALML3	SMEK1	PPARGC1A	CRTC2	EP300	SIK1	ATF2	GNAQ	G6PC3	PDHB	PYGB	PRKAB1	CREB3L1	PLCB4	PHKG2	PPP3CC	PYGM	PPP3R1	PCK1	SMEK2	PPARA	GYS2	AKT1	CAMK2D	LDHA	CPT1B	SIRT1	CREB3L4	PGAM1	CREB5	PPP3R2	ACACA	LDHB	GCGR	SIK2	PRKAA2	PHKG1	PGAM2
Glutamatergic synapse	path:mmu04724		SLC1A6	PRKCA	GNG3	ADCY6	SLC17A7	PRKACA	SHANK3	SHANK1	MAPK1	PPP3CA	SLC38A3	ADCY4	GNG10	ADCY8	GNAS	SLC38A1	CACNA1C	GM5741	SLC1A7	PLA2G4F	GNAO1	PLCB2	GNG4	GRK3	SHANK2	GNG13	TRPC1	GLS2	GRIK1	ITPR2	GRM7	GRM4	PRKACB	GRIA1	GRIA2	GRIK5	SLC38A2	ITPR3	GNAI2	PRKCG	CACNA1D	GNGT2	PLCB1	GNB1	SLC17A6	GRM1	PPP3CB
Glutathione metabolism	path:mmu00480		TXNDC12	GSTA3	RRM1	GCLM	NAT8F1	GSS	G6PDX	GSTM6	GPX5	GSTT2	IDH1	GGT7	GSR	GSTO1	GGT5	GGCT	GSTM4	GSTM2	GPX7	RRM2B	MGST2	LAP3	GGT6	GSTM3	ANPEP	GSTT3	GPX8	GSTO2	ODC1	GSTM5	GSTM1	GSTM7	MGST1	GSTK1	RRM2	GSTA1	GCLC	GSTP2	OPLAH	GSTT1	PGD	GGT1	HPGDS	IDH2	GPX2	GPX6	GPX3
Glycerolipid metabolism	path:mmu00561		PNPLA2	ALDH9A1	PLPP2	GLYCTK	MBOAT1	PLPP1	AKR1A1	CEL	DGKK	LIPG	MOGAT1	LPIN3	MGLL	LPIN1	DGKB	ALDH2	ALDH7A1	TKFC	AKR1B3	LPL	AGPAT9	PNPLA3	GK2	PNLIP	PLPP3	PNLIPRP2	ALDH3A2	DGKH	AKR1B10	DGKG	MOGAT2	AKR1B8	DGKQ	LIPF	AGPAT3	DGAT2	DGAT1	GK	AGPAT4	AKR1B7	AGPAT5	PNLIPRP1	LIPC	GLA	GPAT4	DGKI	DGKD
Glycerophospholipid metabolism	path:mmu00564		CHPT1	LPCAT2	LPGAT1	PLB1	LPIN1	PLA2G4F	LCAT	AGPAT9	ETNK2	PLPP2	LYPLA2	PLD4	GPD2	MBOAT1	PLPP1	GPD1	LYPLA1	DGKK	PLA2G12A	PLA2G2A	TAZ	CDS2	LPCAT4	PLPP3	DGKG	CHKA	ACHE	PLA2G16	PLA2G4A	GPAT4	PLA2G15	PHOSPHO1	PLA2G4B	CDS1	AGPAT2	DGKD	DGKI	AGPAT3	PLD1	AGPAT5	AGPAT4	GNPAT	LPCAT3	MBOAT2	PLA2G4D	CHKB	DGKZ
Glycine, serine and threonine metabolism	path:mmu00260		SHMT2	SRR	PSPH	DMGDH	GCSH	BPGM	AOC2	MAOB	DAO	SDS	ALAS2	PHGDH	PGAM1	TDH	THA1	BHMT	CTH	PGAM2	SARDH	DLD	CBS	AGXT2	GCAT	AOC3	ALDH7A1	AGXT	CHDH	AMT	GLDC	ALAS1	GLYCTK	SDSL	MAOA	GNMT	PIPOX	PSAT1	GATM	GRHPR	SHMT1	GAMT
Glycolysis / Gluconeogenesis	path:mmu00010		PDHA2	HK1	ALDH9A1	ALDH2	ALDH7A1	ENO3	HKDC1	HK3	ADPGK	ENO1B	ADH4	PKM	PKLR	PCK1	ALDOC	ALDH3B3	GPI1	TPI1	PDHB	ALDH1A3	G6PC3	DLAT	PGM1	BPGM	LDHA	ACSS1	PGAM1	PGK2	DLD	GALM	PFKL	MINPP1	GAPDHS	ALDH3B1	LDHB	GAPDH	ACSS2	PGAM2	FBP1	GCK	AKR1A1	PDHA1	ADH1	G6PC2	ADH5	ALDOART1	LDHAL6B
Glycosaminoglycan biosynthesis - chondroitin sulfate / dermatan sulfate	path:mmu00532		B4GALT7	XYLT1	CSGALNACT2	CHST14	CHST15	CHPF	CHSY3	B3GAT3	CHST7	CHST12	UST	CHST3	XYLT2	B3GALT6	CHPF2	CHST13	DSE	CSGALNACT1	CHST11	CHSY1
Glycosaminoglycan biosynthesis - heparan sulfate / heparin	path:mmu00534		NDST1	HS6ST3	HS6ST2	NDST4	EXTL2	EXT1	EXTL3	B3GALT6	HS3ST5	XYLT2	HS3ST3B1	NDST2	EXTL1	NDST3	B3GAT3	EXT2	GLCE	HS6ST1	XYLT1	HS2ST1	HS3ST3A1	HS3ST2	HS3ST1	B4GALT7
Glycosaminoglycan biosynthesis - keratan sulfate	path:mmu00533		B4GALT3	ST3GAL2	CHST5	B4GALT2	B4GALT4	ST3GAL1	CHST2	CHST4	B3GNT2	ST3GAL3	B3GNT7	CHST1	FUT8	B4GALT1
Glycosaminoglycan degradation	path:mmu00531		SGSH	HPSE	IDUA	GLB1	HYAL6	HEXA	HYAL4	GALNS	HYAL2	HGSNAT	GUSB	HYAL3	HPSE2	GNS	NAGLU	IDS	SPAM1	HYAL5	ARSB	HEXB	HYAL1
Glycosphingolipid biosynthesis - ganglio series	path:mmu00604		ST6GALNAC6	ST6GALNAC4	HEXB	B3GALT4	HEXA	ST6GALNAC5	ST6GALNAC3	ST3GAL5	SLC33A1	ST8SIA5	B4GALNT1	ST3GAL2	GLB1	ST8SIA1	ST3GAL1
Glycosphingolipid biosynthesis - globo and isoglobo series	path:mmu00603		NAGA	ST3GAL1	B3GALT5	A3GALT2	GBGT1	FUT9	HEXA	B3GALNT1	SEC1	FUT2	ST8SIA1	GLA	ST3GAL2	FUT1	A4GALT	HEXB
Glycosphingolipid biosynthesis - lacto and neolacto series	path:mmu00601		B3GNT5	B3GNT2	A4GALT	ST3GAL3	B3GNT4	FUT1	ST3GAL6	B3GALT2	ST8SIA1	FUT2	GGTA1	SEC1	B3GNT3	B3GALT1	FUT7	B4GALT1	B3GALNT1	FUT4	FUT9	B4GALT3	B4GALT2	ST3GAL4	GCNT2	B3GALT5	ABO	B4GALT4	GM34653
Glycosylphosphatidylinositol (GPI)-anchor biosynthesis	path:mmu00563		PIGP	PIGV	PIGU	DPM2	PIGS	PIGT	PIGA	PIGM	PIGK	PIGQ	PIGC	PIGZ	GPAA1	PIGW	PIGN	PIGYL	PIGO	PGAP1	PIGF	PIGL	PIGG	PIGH	GPLD1	PIGB	PIGX
Glyoxylate and dicarboxylate metabolism	path:mmu00630		MUT	GLUL	ACAT1	GRHPR	SHMT1	DLD	HOGA1	PGP	HAO2	CAT	PCCA	ACO2	MCEE	AFMID	HAO1	PCCB	ACO1	MDH2	GLYCTK	AMT	GLDC	GCSH	AGXT	SHMT2	MDH1	HYI	CS	CSL	ACAT2
GnRH signaling pathway	path:mmu04912		CGA	CAMK2D	MAP2K3	SOS1	MAPK11	ADCY5	ELK1	EGFR	SOS2	PLA2G4C	ADCY1	CALML4	MAP2K2	GNRHR	KRAS	ADCY9	CALM1	MAP3K1	MMP2	MMP14	MAPK7	ADCY3	MAPK3	MAP2K4	GNA11	CALML3	CAMK2G	NRAS	GRB2	CALM3	HBEGF	PRKCB	MAP3K3	HRAS	PLCB4	GNAQ	CACNA1S	PLCB1	CACNA1F	CACNA1D	CDC42	PLD1	ADCY7	GNRH1	ITPR1	PLA2G4A	ADCY2
Hedgehog signaling pathway	path:mmu04340		CSNK1G3	SUFU	KIF7	EVC2	CCND2	CSNK1G2	HHIP	ARRB1	SPOPL	EVC	GLI2	SPOP	KIF3A	SHH	CCND1	CSNK1E	CDON	ARRB2	DHH	GLI3	CSNK1D	SMO	GLI1	CUL1	LRP2	GRK2	SMURF2	PRKACA	GPR161	IHH	PTCH2	GSK3B	CUL3	FBXW11	CSNK1G1	BTRC	PRKACB	CSNK1A1	SMURF1	GRK3	BCL2	BOC	PTCH1	GAS1
Hematopoietic cell lineage	path:mmu04640		IL3	CD34	IL4	CRP55H	IL7R	CD55	KITL	ITGA4	MS4A1	IL3RA	CD14	CD22	FCER2A	CD36	CR2	IL5RA	CD19	SIGLECH	CD55B	ANPEP	CD38	CD1D1	IL5	TFRC	FCGR1	CD33	H2-DMA	H2-EA-PS	IL6RA	DNTT	CD3D	CSF1	ITGA3	CD37	IL9R	H2-AB1	MME	CD4	TNF	IL7	IL11	IL1B	IL11RA1	CSF1R	GP1BB	ITGA2	IL6
HIF-1 signaling pathway	path:mmu04066		INS2	ERBB2	GM9840	RELA	LDHA	CAMK2D	MKNK2	PIK3CD	AKT1	PIK3CA	EGFR	EPO	MAP2K2	1300017J02RIK	NOX1	PFKL	IFNG	CDKN1A	IGF1R	EGLN3	NOX3	IFNGR1	NOS3	GAPDH	TRF	ANGPT2	EIF4E2	PLCG2	CAMK2G	MAPK3	PDHA2	HK1	RBX1	ENO1B	EDN1	PDK1	TLR4	IL6	HKDC1	INSR	HK3	EGLN1	ENO3	INS1	PRKCB	EIF4E1B	RPS6KB2
Hippo signaling pathway	path:mmu04390		TGFB2	RASSF6	DLG3	BMPR1A	PPP2R2B	GM5601	YWHAE	CCND1	SOX2	TEAD4	BMP8A	FZD9	WWC1	BMPR1B	TCF7	PARD6A	WNT9A	WNT9B	DLG1	WNT5A	WNT5B	ID1	WNT8A	DVL2	BMPR2	YWHAB	TRP73	BMP6	TEAD2	CDH1	PPP2R2D	SCRIB	AJUBA	WNT2B	TGFBR2	LLGL2	FZD10	WWTR1	PRKCZ	WNT11	NKD1	CSNK1D	FZD8	TGFBR1	WNT8B	TEAD3	CSNK1E
Hippo signaling pathway -multiple species	path:mmu04392		WWTR1	MOB1A	DCHS1	TEAD1	RASSF4	TEAD4	MOB1B	PAK1	RASSF1	RASSF2	LATS2	NF2	YAP1	LATS1	FRMD6	WWC1	RASSF6	SAV1	LIMD1	WTIP	FAT4	TEAD2	CSNK1E	TEAD3	AJUBA	STK3
Histidine metabolism	path:mmu00340		ASPA	AOC1	CNDP2	ALDH3B2	ALDH3B3	DDC	HDC	ALDH3A2	AMDHD1	MAOA	ALDH3B1	UROC1	ALDH1A3	ALDH1B1	ALDH3A1	HNMT	CARNMT1	MAOB	ALDH9A1	ALDH2	ALDH7A1	HAL	CNDP1	CARNS1	FTCD
Homologous recombination	path:mmu03440		EME1	SHFM1	RAD54L	RAD51	BRE	RPA3	GM5136	POLD3	BRCA1	FAM175A	RPA1	SSBP1	BARD1	UIMC1	RAD51B	MRE11A	MUS81	TOP3B	POLD1	TOPBP1	BRCC3	BRCA2	PALB2	RAD51D	RAD52	RBBP8	BLM	TOP3A	SYCP3	RPA2	XRCC2	POLD2	POLD4	RAD54B	BABAM1	NBN	BRIP1	XRCC3	RAD50	ATM	RAD51C
IL-17 signaling pathway	path:mmu04657		IL17D	DEFB4	MUC5AC	MAPK15	HSP90AA1	CHUK	NFKBIA	IL5	PTGS2	CXCL2	MAPK8	MAPK14	FADD	MAPK10	CEBPB	IL17C	CCL2	CXCL3	TNF	TAB3	IL1B	MAPK4	NFKB1	S100A8	CCL20	IL17A	CXCL10	FOSL1	CXCL5	MMP3	TRAF4	GSK3B	CASP8	HSP90B1	IKBKG	MAPK13	IL4	IL25	JUN	MAPK9	TRAF6	MAPK1	MAPK12	S100A9	MMP1A	CCL17	TAB2
Inflammatory mediator regulation of TRP channels	path:mmu04750		PRKCH	CYP2C54	CYP2C65	MAPK12	ADCY8	CYP4A30B	GNAS	ADCY4	MAPK13	BDKRB1	HTR2C	MAPK9	P2RY2	ALOX12E	PLA2G4F	IGF1	CYP2C37	SRC	PRKCA	CAMK2A	PIK3R2	PIK3CB	ADCY6	PRKACA	PRKACB	CYP2J12	F2RL1	CYP2C40	PIK3R1	ASIC1	TRPV2	ITPR3	PPP1CC	PPP1CB	CYP2C38	PLCB2	TRPM8	BDKRB2	ITPR2	PRKCD	PLA2G4B	ADCY2	CAMK2B	PLA2G4A	CALM2	PLCB3	TRPA1
Inositol phosphate metabolism	path:mmu00562		MTM1	PLCG2	ALDH6A1	MTMR3	ISYNA1	PLCE1	PIK3C2B	CDIPT	INPP5A	PLCB4	PLCG1	PIP5K1B	INPP4B	PIP4K2C	TPI1	INPP1	PI4KB	PTEN	PIK3CD	PIK3C3	SYNJ2	INPP5B	PIK3CA	PIP5KL1	INPP5E	MTMR1	MINPP1	PIP4K2A	MTMR4	PLCZ1	PIK3CG	INPP4A	IMPA2	INPP5J	IMPA1	ITPK1	PLCH2	PIKFYVE	PIP4K2B	PIK3CB	PIP5K1C	MTMR2	MTMR6	IMPAD1	PIP5K1A	OCRL	INPP5K
Insulin secretion	path:mmu04911		GNAQ	ATF2	PDX1	STX1A	CACNA1S	VAMP2	PLCB4	CREB3L1	ATP1A1	RAB3A	GPR119	GIP	PCLO	CREB1	ADCYAP1R1	PRKCB	INS1	RIMS2	SNAP25	FFAR1	ADCY3	CAMK2G	GNA11	GCG	KCNN2	ATP1B1	KCNMB1	TRPM4	KCNN3	ADCY1	CHRM3	ADCY9	ADCY5	KCNMB3	ABCC8	CREB5	INS2	CREB3L4	ATP1B3	CAMK2D	KCNU1	PRKACB	ITPR3	KCNJ11	KCNMA1	PLCB2	KCNN4
Insulin signaling pathway	path:mmu04910		CALM4	AKT3	MAPK10	FBP2	MAPK8	ARAF	PTPRF	PPP1R3E	PRKAA1	MAP2K1	PHKA1	RAPGEF1	EIF4EBP1	RPS6	PRKCI	INPPL1	PRKAR2A	40S RIBOSOMAL PROTEIN S6	RAF1	SOCS3	CBLC	PHKB	CALM2	SHC4	PCK2	PRKAG3	SOCS2	FASN	TSC2	PRKAR2B	GYS1	SOCS4	PRKACB	PIK3R1	PYGL	PIK3R2	PRKACA	FBP1	MAPK1	INPP5K	SH2B2	RHOQ	SLC2A4	MAPK9	CBLB	RPTOR	CALM1
Intestinal immune network for IgA production	path:mmu04672		CD28	ICOSL	CD40LG	PIGR	IL5	MADCAM1	AICDA	LTBR	H2-EA-PS	H2-DMA	H2-AB1	CCL25	CCR9	IL2	MAP3K14	CD80	H2-OA	TNFRSF13C	CCL28	H2-OB	H2-DMB1	IL15RA	CRP55H	TNFSF13	IL4	IL6	CXCL12	TGFB1	ICOS	ITGA4	H2-DMB2	CCR10	H2-EB1	H2-AA	ITGB7	TNFSF13B	TNFRSF13B	IL15	CD86	IL10	CD40	TNFRSF17	CXCR4
Jak-STAT signaling pathway	path:mmu04630		IL7	IL11RA1	IL21	IL12RB2	PIAS3	AKT2	AOX3	TSLP	IFNB1	CNTFR	GH	IL20	IL17D	IL5	CCND2	STAT5A	STAT2	SOCS7	OSMR	IL2RB	IL13RA2	IFNA6	PTPN6	IL3RA	IFNA11	LIFR	LEPR	MYC	PIK3CB	TYK2	IL3	IL20RA	STAT3	OSM	IFNE	IL7R	IFNA1	IL12B	IFNG	CDKN1A	FHL1	IL13RA1	PIAS4	IFNA7	CCND3	PTPN2	AOX1
Leukocyte transendothelial migration	path:mmu04670		NOX3	CLDN34C4	VAV2	AFDN	CLDN13	CLDN18	MMP2	CYBA	NOX1	ROCK1	CLDN5	THY1	MYL12B	TXK	GNAI1	RAPGEF3	PIK3CA	MAPK11	NCF1	CLDN23	SIPA1	MYL9	RHOA	NCF4	CLDN1	PIK3CD	EZR	PECAM1	ITGAL	ITGB1	ICAM1	PTK2	ACTB	CLDN9	MSN	MYL12A	RASSF5	ACTN4	OCLN	PLCG1	ESAM	ARHGAP5	PIK3R3	CXCL12	CDH5	ARHGAP35	CTNNB1
Linoleic acid metabolism	path:mmu00591		CYP3A41B	CYP2C39	CYP2J9	CYP2J11	PLA2G4B	ALOX15	CYP2E1	CYP3A41A	CYP2C66	PLA2G16	PLA2G2D	PLA2G4A	PLA2G4C	CYP2J13	CYP2C29	CYP1A2	PLA2G4D	PLA2G4E	PLA2G10	CYP3A13	PLA2G2E	CYP2C44	PLA2G5	CYP2C70	CYP2J5	CYP2C68	CYP2J8	PLA2G3	CYP2C37	PLA2G6	CYP3A11	PLA2G2A	PLA2G12A	CYP2C54	PLB1	CYP2C65	PLA2G12B	PLA2G2C	PLA2G4F	PLA2G1B	PLA2G2F	CYP3A44	CYP3A25	CYP2C55	CYP3A16	CYP2J12	CYP2C40
Lipoic acid metabolism	path:mmu00785		LIPT2	LIAS	LIPT1
Long-term depression	path:mmu04730		ITPR1	GRM1	LYN	PLCB1	PRKCG	PLCB3	PLA2G4C	GUCY1A3	PLA2G4A	GNAZ	PRKG2	PLA2G4B	RAF1	CRH	IGF1R	ARAF	CACNA1A	GRIA3	GNAI1	KRAS	GM11787	PLA2G4E	PLA2G4D	MAP2K2	RYR1	GUCY1B2	CRHR1	MAP2K1	GNA13	NRAS	GNA12	PPP2R1A	PRKCA	MAPK3	GUCY1A2	GNA11	GRID2	PLA2G4F	PPP2CA	GNAI3	IGF1	PRKCB	GNAS	PPP2CB	MAPK1	BRAF	PRKG1
Long-term potentiation	path:mmu04720		GRIN2D	GRM5	GNAQ	EP300	PPP3R1	PPP3CC	GRIN2A	GRIN2B	PLCB4	HRAS	BRAF	RPS6KA2	PRKCB	CAMK2G	CALML3	PPP1CA	MAPK3	CALM3	RPS6KA1	NRAS	GM5601	MAP2K2	CALML4	ADCY1	CALM1	KRAS	RAPGEF3	PPP3R2	CAMK2D	GRIN1	PRKACB	GRIA1	GRIA2	ITPR3	PPP1CC	PPP1CB	PLCB2	RAP1A	ITPR2	PPP3CA	MAPK1	RAP1B	ADCY8	CACNA1C	PRKCA	CAMK2A	PRKACA
Longevity regulating pathway	path:mmu04211		ATG5	ADIPOR1	ADCY2	EHMT2	ATF6B	CAMK4	EIF4EBP1	ADCY7	CREB3	KL	AKT2	APPL1	ATF4	NFKB1	CREB3L2	ATG13	PRKAA1	ATG101	AKT1S1	AKT3	SOD2	ADCY4	ADCY8	ADIPOQ	IGF1	STK11	IRS3	CREB3L3	RPS6KB1	PRKACA	PIK3CB	ADCY6	PIK3R2	TRP53	SESN2	FOXO3	PRKACB	BAX	RB1CC1	PRKAG1	PIK3R1	PRKAG3	SESN1	PRKAG2	TSC2	EHMT1	ADCY5
Longevity regulating pathway - multiple species	path:mmu04213		PRKACA	NRAS	ADCY6	PIK3CB	PRKAB2	PIK3R2	HSPA1A	CLPB	ADCY3	IRS3	RPS6KB1	IGF1	FOXO1	INS1	SOD2	ADCY8	INSR	ADCY4	HDAC2	IRS2	FOXA2	HSPA8	PRKAG2	PIK3R3	HRAS	PRKAB1	HSPA1L	PRKAG3	MTOR	RPS6KB2	PIK3R1	FOXO3	PRKACB	HSPA1B	PRKAG1	CAT	ADCY7	PIK3CD	CRYAB	HDAC1	SIRT1	INS2	IRS1	ATG5	ADCY5	ADCY2	AKT1
Lysine biosynthesis	path:mmu00300		AADAT	ALDH7A1
Lysine degradation	path:mmu00310		ALDH1B1	SETD1A	OGDH	KMT2D	KMT2B	COLGALT2	EZH1	SETD1B	HADH	ACAT1	PLOD3	PRDM9	EHMT2	HYKK	EHHADH	KMT2E	SETDB2	EZH2	SETMAR	DLST	CAMKMT	KMT5B	PLOD2	OGDHL	SETD7	SUV39H2	DOT1L	PRDM6	KMT2C	ALDH3A2	KMT2A	PHYKPL	COLGALT1	KMT5C	EHMT1	PIPOX	BBOX1	WHSC1L1	NSD1	SETDB1	ASH1L	TMLHE	SUV39H1	GCDH	ACAT2	ECHS1	PRDM2
Lysosome	path:mmu04142		AP1G2	AP3D1	LITAF	AP3M2	M6PR	AP4M1	CTSG	GGA1	CLN5	AP3M1	HGSNAT	AP1M1	CTSF	ATP6V0D1	CLTB	ATP6V0A1	GNPTG	PLA2G15	GLA	CTSE	GM2A	CLTA	IGF2R	DNASE2A	TCIRG1	HEXB	AP1S3	CLTC	SUMF1	CTSS	AP3B1	ATP6V0D2	ATP6V0C	CTSW	LIPA	PPT1	GLB1	GBA	LAPTM4B	CD63	CD164	FUCA1	SGSH	CTSK	MFSD8	ABCB9	DNASE2B
Mannose type O-glycan biosynthesis	path:mmu00515		LARGE1	CHST10	POMT1	POMGNT1	ISPD	FKRP	B4GAT1	B3GAT1	POMGNT2	ST3GAL3	POMK	B4GALT3	B4GALT2	B3GALNT2	POMT2	MGAT5B	B4GALT1	TMEM5	FUT4	B3GAT2	FKTN	LARGE2	FUT9
MAPK signaling pathway	path:mmu04010		MAP3K14	MAPK7	SRF	FGF5	ARRB2	KRAS	RASGRP3	FGF12	MAP2K5	MAP2K2	FGF18	CACNG3	PLA2G4C	CACNB4	AKT1	FGFR3	EGFR	CACNB3	MAPK11	MAPKAPK2	FGF7	MAP3K8	MKNK2	ARRB1	TRAF2	IL1R2	PPP3R2	FLNB	RASGRP2	FGF2	FOS	PDGFA	NR4A1	FGF15	ATF2	IL1R1	CACNB2	RASA1	RASA2	DUSP1	BRAF	PPP3R1	DUSP5	MAP3K3	RASGRP1	RPS6KA2	FGF10
Melanogenesis	path:mmu04916		CALM1	KIT	ADCY9	KRAS	GNAI1	CALML4	MAP2K2	ADCY1	TCF7	FZD2	FZD6	FZD9	ADCY5	FZD4	CAMK2D	CREB3L4	WNT6	A	WNT2B	FZD3	EP300	GNAQ	WNT16	DVL2	WNT8A	PLCB4	CREB3L1	WNT5B	HRAS	WNT5A	WNT9B	WNT9A	FZD7	PRKCB	WNT11	GNAI3	EDN1	CTNNB1	CREB1	MC1R	CALM3	NRAS	CAMK2G	CALML3	FZD10	MAPK3	ADCY3
Metabolic pathways	path:mmu01100		FUT9	PLA2G4E	URAH	BPNT1	NME1	NAT2	ALDH1B1	ATP5J2	HSD3B5	DGAT1	ABAT	AGPAT5	ATP6V0D2	ALDOA	GATB	PTGIS	GMPPB	COX15	GRHPR	UGT2A1	NDUFA3	NDUFB4	AOC3	FAH	MAT2A	CYP2C29	ACACB	PLCZ1	IVD	UROC1	DPM2	GALNT1	HPSE	CYP7A1	CYP4F18	CYP2R1	BPGM	GCLC	UPP2	SPTLC1	UROS	PRIM2	NMRK2	TALDO1	ALG3	SDHA	SQLE
Metabolism of xenobiotics by cytochrome P450	path:mmu00980		UGT2A2	GSTT3	AKR7A5	CYP2F2	ALDH3B3	UGT2B34	UGT2B1	SULT2A3	SULT2A1	CBR3	UGT2B35	ALDH1A3	GSTO1	UGT1A7C	ADH4	CYP2S1	UGT1A5	GSTA2	UGT2B5	CYP1A2	MGST3	UGT2B36	GSTA4	EPHX1	ALDH3B1	CYP1A1	UGT1A10	CYP1B1	UGT2B38	MGST1	GSTK1	GSTP2	CYP2E1	GSTM5	GSTO2	ADH5	ALDH3B2	GSTM3	ADH7	MGST2	UGT2B37	UGT2A1	GSTM2	UGT1A2	CBR2	UGT1A6B	GSTM4
Mineral absorption	path:mmu04978		SLC40A1	VDR	HMOX2	ATP1A4	SLC9A3	SLC26A3	FTL1	FTH1	MT1	ATP1B2	SLC6A19	ATP1B3	SLC5A1	ATP1A3	TRPV6	FERRITIN LIGHT CHAIN 1	STEAP1	TRF	ATP7A	TRPM7	SLC11A2	SLC26A6	FXYD2	ATP2B1	1300017J02RIK	ATP1A2	SLC46A1	SLC26A9	MT2	SLC8A1	ATP1B4	ATOX1	ATP1B1	TRPM6	CYBRD1	SLC30A1	CLCN2	HEPH	HMOX1	SLC34A2	SLC39A4	SLC31A1	ATP1A1	S100G	STEAP2
Mismatch repair	path:mmu03430		RPA3	MLH3	LIG1	EXO1	MLH1	MSH6	POLD3	PMS2	MSH2	POLD1	MSH3	RFC3	RFC2	RFC5	RPA1	SSBP1	RFC4	PCNA	RFC1	RPA2	POLD2	POLD4
Mitophagy - animal	path:mmu04137		MAPK8	MAPK10	KRAS	ULK1	TFEB	UBB	GABARAPL2	USP15	ATF4	AMBRA1	RELA	MRAS	RHOT2	CALCOCO2	BCL2L1	MITF	RAB7	SQSTM1	RRAS	BNIP3	GABARAPL1	USP30	NBR1	ATG5	HRAS	E2F1	PINK1	BNIP3L	TOMM7	GABARAP	TAX1BP1	MFN2	TBK1	BCL2L13	FUNDC1	CSNK2A2	ATG9B	BECN1	PGAM5	TBC1D17	TFE3	RAB7B	HIF1A	FOXO3	FIS1	MFN1	CITED2
mRNA surveillance pathway	path:mmu03015		PPP2R5A	NCBP1	SMG6	ALYREF	NXT1	PPP2R2C	PPP2R2A	SAP18	PPP1CA	GM2446	PPP2CA	PABPC2	GSPT2	RNPS1	MSI2	PABPC4	UPF2	CASC3	PABPC1L	PYM1	NXF2	PPP2R2D	CPSF3	ETF1	PPP2R5B	PABPN1L	SRRM1	PPP2R1B	NXF7	GM8994	PABPC1	CPSF2	PAPOLG	NCBP2	PAPOLB	UPF3B	SMG7	WDR33	ALYREF2	GSPT1	CLP1	HBS1L	PPP2R2B	PELO	PABPC4L	NXF3	GM5601
mTOR signaling pathway	path:mmu04150		PRKAA2	EIF4E2	GRB10	DEPDC5	DEPTOR	KRAS	MAP2K2	ATP6V1D	FZD6	FZD2	LAMTOR1	AKT1	TSC1	WDR59	FZD4	PIK3CD	PTEN	INS2	IRS1	WNT6	RHOA	ATP6V1C1	FZD3	SLC7A5	LAMTOR4	LRP6	ATP6V1G2	WNT16	ULK2	BRAF	MTOR	RPS6KB2	STRADA	FZD7	INS1	RPS6KA2	ATP6V1F	PRKCB	NPRL2	RPS6KA1	NRAS	AKT2	RPS6KA6	TNF	SEC13	WNT1	AKT1S1
Mucin type O-glycan biosynthesis	path:mmu00512		GALNT18	C1GALT1	GALNTL5	GALNT6	ST3GAL2	GALNT2	GALNT11	GALNT4	GALNT5	C1GALT1C1	GCNT1	GALNT1	GALNTL6	ST6GALNAC1	ST3GAL1	GALNT16	B4GALT5	GALNT15	GALNT14	GALNT12	GALNT13	GALNT7	GALNT3	GCNT3	WBSCR17	GCNT4	B3GNT6	GALNT10
N-Glycan biosynthesis	path:mmu00510		MAN1C1	FUT8	MGAT4B	DOLK	DPM1	ALG13	ALG11	MAN1A2	RPN2	B4GALT1	ALG14	MGAT5B	ALG5	GANAB	MAN1B1	MGAT1	MGAT4D	MAN2A1	DPM2	ALG9	ALG8	DPM3	ST6GAL1	B4GALT3	ALG12	ALG10B	STT3B	RPN1	ALG6	MGAT4C	TUSC3	STT3A	MGAT2	MGAT3	GLT28D2	MAN1A	MGAT5	ST6GAL2	DOLPP1	ALG1	MAN2A2	DAD1	ALG2	ALG3	MGAT4A	DPAGT1	MOGS
Natural killer cell mediated cytotoxicity	path:mmu04650		CRP55H	IFNA1	VAV3	VAV1	MAPK1	PPP3CA	CD48	IFNA2	PRKCA	GZMB	PIK3R2	PIK3CB	RAC2	PTPN6	IFNA11	IFNA15	PIK3R1	KLRA8	IFNA6	HCST	RAC1	IFNA14	NFATC2	SH2D1A	ICAM2	RAET1A	SHC4	FCGR4	KLRK1	IFNGR2	FASL	RAF1	IFNAR2	H60A	RAET1B	PAK1	RAET1E	PPP3CB	KLRC2	BID	PRKCG	IFNB1	FCER1G	MAP2K1	ITGB2L	FAS	KLRD1
Neomycin, kanamycin and gentamicin biosynthesis	path:mmu00524		HKDC1	GCK	HK3	HK1	HK2
Neuroactive ligand-receptor interaction	path:mmu04080		DRD3	MC1R	ADCYAP1R1	GRM3	GRM2	GPR156	ADORA1	GRIN3A	GABRG1	GABBR2	GABRE	SSTR2	GABRB3	GRIN2D	TACR2	CHRNA4	HRH3	FPR2	LHCGR	OPRK1	APLNR	TRHR2	GRIN1	A630033H20RIK	P2RY4	TAAR7A	CHRNE	NPY5R	ADRB1	HTR2B	OPRM1	GIPR	GHRHR	P2RY2	HTR2C	CHRNA10	PRLR	P2RX4	ADRB2	NTSR1	GRIK5	MAS1	PTGER3	MC5R	NPFFR1	ADRA1B	TAAR7D
Neurotrophin signaling pathway	path:mmu04722		RAP1A	GAB1	PIK3R1	RAC1	NTRK3	FOXO3	BAX	RPS6KA5	PIK3CB	BEX3	ARHGDIB	TRP53	NGFR	PIK3R2	MAP2K7	CAMK2A	GSK3B	MAPK9	JUN	TRAF6	IRAK2	MAPK13	NTRK2	MAPK12	MAPK1	RAP1B	SH2B2	CALM5	RPS6KA6	CALM4	FRS2	MAPK10	AKT3	MAPK14	MAPK8	ARHGDIG	RAPGEF1	RPS6KA3	IRAK4	MAP2K1	AKT2	ATF4	NFKB1	4930544G11RIK	ARHGDIA	CDC42	CRKL
NF-kappa B signaling pathway	path:mmu04064		CD14	PIDD1	IKBKG	CARD11	CRP55H	TRAF6	TNFSF11	CSNK2A1	BCL2A1A	ATM	TICAM2	TAB2	TRAF5	BTK	CARD10	CD40	CSNK2A2	BCL2A1D	PARP1	TNFSF13B	VCAM1	LTBR	RELB	CHUK	NFKBIA	IRAK1	CD40LG	CFLAR	GM10591	PTGS2	CXCL2	TRIM25	GADD45B	GM2023	GM11787	PLAU	TNF	TICAM1	IL1B	TAB3	TNFSF14	CCL21A	PRKCQ	IRAK4	TNFRSF11A	NFKB1	TNFRSF13C
Nicotinate and nicotinamide metabolism	path:mmu00760		ART2B	PNP2	NADK	BST1	NT5C3B	NT5E	NMNAT2	NMNAT3	AOX3	AOX1	NT5M	NNMT	NMNAT1	AOX4	NADSYN1	NUDT12	NAPRT	ENPP3	NT5C	AOX2	NMRK1	NADK2	ART2A-PS	NAMPT	NNT	NT5C1A	QPRT	NT5C1B	NT5C3	ENPP1	NMRK2	NT5C2	PNP	4933425L06RIK	CD38
Nicotine addiction	path:mmu05033		CHRNA6	GABRA4	GABRA1	CHRNB2	SLC17A7	GABRE	GABRG1	GRIN3A	GABRA6	GRIA1	GRIA2	GRIN2D	GABRB3	GABRA3	GRIN3B	CHRNA4	GRIN2A	CHRNA7	GRIN2B	GABRB2	CACNA1B	SLC17A8	SLC32A1	GABRQ	GABRG2	SLC17A6	GRIN1	GABRR1	GABRD	GABRP	GRIN2C	GABRA5	GABRR2	GABRB1	GRIA4	GABRR3	GRIA3	GABRG3	GABRA2	CACNA1A
Nitrogen metabolism	path:mmu00910		CPS1	CAR12	GLUL	GLUD1	CAR7	CAR8	CAR6	CAR5A	CAR9	CAR15	CAR14	CAR1	CAR5B	CAR2	CAR3	CAR13	CAR4
NOD-like receptor signaling pathway	path:mmu04621		IKBKB	GABARAP	IFNA9	IFNA4	P2RX7	NAIP2	PLCB4	MFN1	PSTPIP1	CCL5	CTSB	MYD88	IFNA12	TRP53BP1	MAPK3	TXNIP	MAP3K7	TANK	NLRP3	TAB1	AIM2	IL6	TRIP6	NOX1	IFNAB	TRAF3	OAS1A	NOX3	GM5136	CXCL1	NAIP7	CASR	NLRC4	TNFAIP3	RIPK3	VDAC2	RELA	DNM1L	NOD2	IFNA14	IRF7	TRAF5	PLCB2	IKBKE	MFN2	CAMP	MCU
Non-homologous end-joining	path:mmu03450		DNTT	MRE11A	PRKDC	POLL	NHEJ1	DCLRE1C	LIG4	XRCC6	XRCC4	POLM	XRCC5	FEN1	RAD50
Notch signaling pathway	path:mmu04330		JAG2	CREBBP	MAML3	HES1	NUMB	CTBP2	APH1B	DTX4	LFNG	RBPJL	HDAC1	RBPJ	KAT2B	DLL4	NUMBL	NOTCH1	MAML2	MAML1	DLL1	JAG1	DVL3	CIR1	PSENEN	DTX1	SNW1	DVL2	DTX3	DTX2	MFNG	APH1C	EP300	DVL1	RFNG	APH1A	DTX3L	CTBP1	NCOR2	KAT2A	NOTCH4	HES5	NOTCH2	PSEN1	NCSTN	NOTCH3	ADAM17	DLL3	HDAC2
Nucleotide excision repair	path:mmu03420		RFC2	XPA	RPA1	DDB2	PCNA	ERCC3	POLE4	RFC1	GM9840	POLE3	POLE2	GTF2H1	LIG1	RPA3	POLD3	ERCC4	RAD23B	RFC5	GTF2H4	RFC4	RBX1	ERCC2	CUL4B	MNAT1	RPA2	POLD2	POLE	POLD4	ERCC5	GTF2H5	GTF2H3	CDK7	GTF2H2	CETN2	ERCC1	XPC	ERCC6	DDB1	ERCC8	POLD1	RAD23A	RFC3	CUL4A	CCNH
Olfactory transduction	path:mmu04740		OLFR582	OLFR427	OLFR11	OLFR785	OLFR583	OLFR298	OLFR1394	OLFR576	OLFR1360	OLFR689	OLFR150	OLFR155	OLFR51	OLFR961	OLFR1499	OLFR589	OLFR458	OLFR1412	OLFR45	OLFR1257	OLFR593	CALM5	OLFR68	OLFR1221	OLFR685	OLFR849	OLFR1085	GM13769	OLFR654	OLFR319	OLFR1216	OLFR202	OLFR971	OLFR974	OLFR820	OLFR294	OLFR601	OLFR983	OLFR829	OLFR806	OLFR554	OLFR455	OLFR613	OLFR594	SLC8A1	OLFR1466	OLFR883
One carbon pool by folate	path:mmu00670		GART	SHMT1	MTR	TYMS	MTHFD1L	ALDH1L2	DHFR	MTHFD2L	MTHFD1	ALDH1L1	MTHFD2	AMT	MTHFR	ATIC	MTHFSL	MTHFS	MTFMT	SHMT2	FTCD
Oocyte meiosis	path:mmu04114		ADCY9	PLCZ1	AURKA	CALM1	IGF1R	CALML4	CCNE2	ADCY1	CDC27	MAD2L2	PTTG1	YWHAE	PLK1	GM5601	AR	ANAPC4	CPEB4	ANAPC5	CAMK2D	GM9840	SPDYE4A	CDC20	CPEB3	CDK1	INS2	PPP3R2	PGR	SMC1A	ADCY5	SKP1A	ANAPC13	YWHAH	PPP3CC	PPP3R1	PPP2R5B	PPP2R1B	SMC3	YWHAB	CALM3	PPP2R5A	RPS6KA1	CALML3	CAMK2G	PPP1CA	MAPK3	ADCY3	INS1
Osteoclast differentiation	path:mmu04380		NCF2	STAT2	FOSB	BTK	PIK3CB	FOSL1	SIGNAL-REGULATORY PROTEIN BETA 1-LIKE	TNFRSF11B	TNFSF11	CALCR	MAPK13	CYLD	TYK2	LILRA6	JUNB	MAPK14	IL1B	TNF	GM9733	AKT2	TEC	NFKB1	CYBB	PPP3CB	IFNB1	LILRA5	SQSTM1	SPI1	MITF	CAMK4	CHUK	PIRA6	PPP3R1	FOS	SIRPB1B	IL1R1	GM14548	PIRA11	TGFB1	LILRB4A	IFNAR1	CREB1	FCGR2B	IFNG	CYBA	MAP3K14	GM15448
Other glycan degradation	path:mmu00511		MAN2C1	AGA	HEXDC	HEXB	NEU2	GLB1	FUCA2	MANBA	NEU3	FUCA1	NEU1	MAN2B2	GBA	NEU4	MAN2B1	ENGASE	GBA2	HEXA
Other types of O-glycan biosynthesis	path:mmu00514		RFNG	ST3GAL3	B3GLCT	GXYLT1	POMT1	EOGT	ST6GAL2	GXYLT2	PLOD3	POFUT1	COLGALT1	B4GALT1	COLGALT2	LFNG	POGLUT1	POMT2	OGT	MFNG	ST6GAL1	B4GALT3	POFUT2	B4GALT2
Ovarian steroidogenesis	path:mmu04913		ADCY3	CYP2J8	LHB	PRKACA	ADCY6	INSR	ADCY8	ADCY4	GNAS	GM10681	CYP17A1	PLA2G4F	IGF1	SCARB1	INS1	HSD3B1	FSHR	BMP15	ACOT2	PRKACB	CYP2J12	BMP6	CYP2J6	INS2	HSD3B5	GDF9	ADCY7	CYP2J9	STAR	CYP2J11	CYP11A1	CGA	CYP1B1	ADCY5	PLA2G4A	HSD3B2	HSD17B2	ALOX5	ADCY2	PTGS2	HSD17B7	LHCGR	PLA2G4B	FSHB	PLA2G4C	PLA2G4D	HSD3B4
Oxidative phosphorylation	path:mmu00190		ATP8	LHPP	SDHA	COX11	ATP6V1G2	ATP5G1	UQCR10	SDHD	COX6A2	ATP6V1F	UQCRQ	ATP5H	COX7B	ATP6V0A4	NDUFA8	UQCRFS1	NDUFS8	ATP6V0B	ND4	NDUFA4L2	SDHC	NDUFA1	COX7C	ATP6V1D	NDUFB2	NDUFC2	ND3	NDUFA4	COX4I2	COX6B1	ATP5F1	NDUFA6	COX8C	ATP6V1C1	ATP5J	UQCR11	ATP5C1	COX7A1	ATP5B	COX15	ATP5D	NDUFA13	NDUFB7	ATP6V1C2	ATP6V1G1	NDUFA2	ATP6V0A2
Oxytocin signaling pathway	path:mmu04921		CACNA1S	HRAS	PLCB4	NPR1	PRKAB1	CACNG2	PPP3CC	KCNJ9	ROCK2	ADCY3	MAPK3	CACNA2D2	GUCY1A2	CACNG4	RCAN1	CCND1	NFATC1	GM5601	ADCY9	CALM1	ROCK1	CACNA2D1	ADCY1	CACNG8	EEF2	ELK1	CACNA2D4	CACNB1	GNAI2	KCNJ4	GUCY1B3	CAMK1D	NFATC3	PRKACB	RGS2	ITPR2	MEF2C	CACNA2D3	PLCB2	PRKAG3	NFATC2	GNAO1	PLA2G4F	JUN	MYL6B	CACNA1C	GNAS
p53 signaling pathway	path:mmu04115		RRM2	CYCS	DDB2	CHEK1	PTEN	STEAP3	CDK1	GTSE1	MDM2	CCND3	CCND1	PMAIP1	SIAH1B	CDKN1A	CCNE2	BBC3	GADD45A	CCNG2	SFN	CASP3	CDK6	SESN3	GADD45G	CHEK2	MDM4	ADGRB1	TRP73	CYCT	ATR	RRM2B	CD82	EI24	SIAH1A	CCND2	GADD45B	CCNG1	RCHY1	BID	THBS1	IGFBP3	FAS	GORAB	SHISA5	PERP	CCNB3	CDK2	CDK4
Pancreatic secretion	path:mmu04972		BST1	ATP1B3	CFTR	CPA3	RHOA	RAB27B	ADCY5	PLA2G2D	PNLIPRP1	PLA2G10	ADCY9	CHRM3	PLA2G5	CTRB1	ADCY1	SLC4A2	CLCA4B	CELA2A	CLCA1	CPB2	ATP2A1	ATP1B1	SLC4A4	ATP2A3	CEL	PLA2G3	ADCY3	PRKCB	PLA2G12B	PLA2G2C	ATP2B2	SCTR	CPA2	PLA2G2F	CPA1	PLA2G1B	PNLIP	ATP1A1	PLCB4	ATP2B3	PNLIPRP2	GNAQ	4930544G11RIK	ITPR1	ATP1B2	ADCY7	PLCB1
Pantothenate and CoA biosynthesis	path:mmu00770		BCAT2	PANK1	PPCS	DPYD	PANK4	VNN1	AASDHPPT	PANK3	ENPP1	PPCDC	GADL1	UPB1	VNN3	DPYS	BCAT1	PANK2	ENPP3	COASY
Pentose and glucuronate interconversions	path:mmu00040		UGT2A3	GUSB	UGT2B5	UGT2B36	DHDH	UGT1A6A	XYLB	UGP2	UGT1A10	KL	AKR1B7	UGT2B38	ISPD	DCXR	UGT1A9	UGT2A2	CRYL1	UGT2B34	UGT2B37	AKR1B10	UGT2B1	AKR1B8	RPE	UGT2A1	SORD	UGT1A2	UGT2B35	UGT1A6B	AKR1A1	UGDH	UGT1A7C	AKR1B3	UGT1A1	UGT1A5
Pentose phosphate pathway	path:mmu00030		TKTL2	FBP2	H6PD	PGLS	PRPS1L3	ALDOB	PFKL	G6PD2	IDNK	PFKP	TKTL1	RGN	PFKM	PRPS2	PGD	PRPS1L1	ALDOA	RPIA	ALDOART1	TALDO1	PGM2	RBKS	GPI1	ALDOC	RPE	PGM1	FBP1	GLYCTK	PRPS1	G6PDX	TKT	DERA
Peroxisome	path:mmu04146		ACSL4	SOD1	NUDT19	MPV17L2	NUDT12	ACOX2	DECR2	HAO1	HMGCL	PEX19	GNPAT	HMGCLL1	IDH2	DAO	PXMP4	HACL1	ABCD1	SLC25A17	MPV17	ACSL3	ACSL1	PAOX	PEX16	NUDT7	PHYH	PEX11A	PEX11B	FAR1	PEX2	AGPS	CROT	CRAT	PRDX1	FAR2	IDH1	MPV17L	ACSL6	ACOX3	ABCD2	SOD2	PEX11G	HAO2	ACOT8	ECI2	PMVK	PEX13	EHHADH
Phagosome	path:mmu04145		ATP6V1D	CYBA	H2-T23	H2-OB	FCGR2B	TUBB2A	COLEC12	H2-OA	CD209F	C3	H2-T24	ITGA5	H2-M10.6	ATP6V1C1	H2-Q8	RAB7	PLA2R1	CD209E	RAB5A	PIK3C3	MBL2	H2-K1	H2-L	NCF1	CD209G	RILP	THBS2	TUBB2B	GM7030	CORO1A	COLEC11	H2-M1	TUBB6	STX18	H2-M5	ACTB	TAP2	CANX	ITGB5	ATP6V1G2	LAMP1	RAB7B	H2-BL	ITGB1	HGS	H2-M9	ATP6V0B
Phenylalanine metabolism	path:mmu00360		GM4952	MAOA	ALDH3B1	ALDH1A3	PAH	GOT1	4930438A08RIK	ALDH3A1	GOT2	LAO1	HPD	GM21948	DDC	ALDH3B3	ALDH3B2	TAT	AOC3	MIF	KEG1	GLYAT	AOC2	MAOB	IL4I1
Phenylalanine, tyrosine and tryptophan biosynthesis	path:mmu00400		TAT	IL4I1	GM21948	LAO1	GOT2	4930438A08RIK	PAH	GOT1
Phosphatidylinositol signaling system	path:mmu04070		INPP5E	DGKA	PIK3CA	PTEN	PIK3C3	PIK3CD	INPP5B	SYNJ2	INPP1	DGKQ	PPIP5K1	PI4KB	ITPK1	DGKE	IMPA1	INPP5J	IMPA2	INPP4A	MTMR4	PIP4K2A	CALM1	PLCZ1	MTMR1	CALML4	PRKCB	DGKB	TMEM55A	PLCE1	CALM3	MTMR3	IP6K1	PLCG2	CALML3	MTM1	PIP4K2C	DGKH	INPP4B	PIP5K1B	PIK3R3	PLCB4	PLCG1	PIK3C2B	INPP5A	CDIPT	DGKD	CDS1	DGKI
Phospholipase D signaling pathway	path:mmu04072		PLPP1	PRKCA	PIK3CB	ADCY6	DGKK	RALGDS	FCER1A	CRP55H	CYTH1	PIK3R5	RALA	PDGFRB	GRM7	GRM4	DGKG	LPAR3	CXCR1	LPAR4	AGTR1B	AGPAT3	AGPAT5	4930544G11RIK	PLD1	PLA2G4B	ADCY2	PLA2G4A	PLCB3	AGPAT2	PLD2	PTGFR	CYTH4	PLA2G4E	AKT2	FCER1G	AVPR1A	GRM8	GNA12	NRAS	PIK3R6	CYTH3	RRAS2	INS1	MTOR	PLCG1	LPAR2	PDGFC	AGTR1A
Phosphonate and phosphinate metabolism	path:mmu00440		SELENOI	PCYT1B	CHPT1	CEPT1	PCYT2	PCYT1A
Phototransduction	path:mmu04744		CNGB1	RCVRN	CALML4	SLC24A1	GRK1	CALM1	CALM4	CALM5	GUCY2E	GNAT1	PDE6A	RGS9	GUCY2F	CALML3	GNAT2	GUCY2D	GNB1	GUCA1B	GUCA1A	SAG	GNGT1	RHO	CALM3	PDE6B	PDE6G	CNGA1	CALM2
PI3K-Akt signaling pathway	path:mmu04151		TCL1B1	JAK3	IFNA15	EFNA4	RAC1	GYS1	VEGFA	LPAR1	CASP9	LAMB2	PCK2	IFNA14	STK11	PDGFB	CDK4	YWHAQ	MAPK1	TRP53	PPP2R1A	PRLR	KITL	PDGFD	PPP2R5C	PPP2R3A	DDIT4	MAP2K1	RXRA	PRKAA1	THBS4	BRCA1	SGK1	COL4A2	GNG11	COL4A1	GM2436	FGF6	ITGB6	CDKN1B	FGFR2	ATF6B	EFNA1	40S RIBOSOMAL PROTEIN S6	TLR2	IL6RA	RPS6	GNB1	PPP2R2D
Platelet activation	path:mmu04611		PTGS1	PLA2G4F	COL1A1	MAPK13	FERMT3	MAPK12	ADCY4	ADCY8	GNAS	VASP	RAP1B	MAPK1	PIK3CB	ADCY6	PRKACA	PIK3R2	SRC	STIM1	GUCY1B3	ITPR3	GNAI2	PPP1CC	PPP1CB	PIK3R1	PRKACB	ACTG1	P2RY12	PRKG1	ITPR2	RAP1A	PIK3R5	PLCB2	ORAI1	BTK	PPP1R12A	PLCB3	GUCY1A3	PLA2G4A	PLA2G4B	ADCY2	PRKG2	ADCY7	MYLK	4930544G11RIK	ITPR1	P2RX1	SNAP23
Porphyrin and chlorophyll metabolism	path:mmu00860		UGT2B38	UROD	BLVRA	ALAS2	HMOX2	BLVRB	UGT1A9	MMAB	HMBS	GUSB	UGT2A3	UGT1A6A	FECH	UGT2B36	UGT2B5	UGT1A10	UGT1A6B	ALAS1	UGT1A7C	CP	EPRS	ALAD	UGT1A5	UGT1A1	CPOX	UROS	FXN	UGT2A2	COX15	UGT2B34	PPOX	UGT2A1	HCCS	UGT2B37	UGT2B1	COX10	HEPH	UGT2B35	HMOX1	EARS2	UGT1A2
PPAR signaling pathway	path:mmu03320		PLIN4	FABP7	CYP4A12A	SORBS1	CPT1A	CYP4A32	SLC27A1	FABP5	PLIN5	APOA5	PDPK1	CYP7A1	CPT1B	1700061G19RIK	PPARA	PLIN2	EHHADH	UBC	PCK1	CYP4A12B	CYP4A14	FABP2	CYP4A29	SLC27A4	SCD1	ACOX1	ACAA1A	SLC27A2	SCP2	ACAA1B	ACSL5	MMP1B	CYP4A10	PLIN1	FABP6	APOA2	FABP4	PPARG	OLR1	RXRG	PPARD	CYP4A31	ANGPTL4	DBI	SLC27A6	FABP3	ACSL4
Primary bile acid biosynthesis	path:mmu00120		ACOT8	BAAT	CYP7A1	SCP2	CH25H	CYP27A1	SLC27A5	HSD3B7	CYP7B1	CYP46A1	HSD17B4	ACOX2	CYP39A1	CYP8B1	AMACR	AKR1D1
Primary immunodeficiency	path:mmu05340		CD40LG	AICDA	DCLRE1C	CD4	CD79A	ADA	BLNK	ZAP70	CD3D	TNFRSF13C	RFXAP	AIRE	CD3E	RFXANK	IL7R	CRP55H	IL2RG	TAP1	ICOS	CD8B1	IKBKG	JAK3	CD19	PTPRC	UNG	CIITA	RAG2	CD8A	TAP2	TNFRSF13B	CD40	ORAI1	LCK	RFX5	RAG1	BTK
Progesterone-mediated oocyte maturation	path:mmu04914		ADCY1	GNAI1	IGF1R	KRAS	ADCY9	CPEB4	ANAPC5	ANAPC4	PLK1	CDC27	MAD2L2	CDK1	INS2	PIK3CD	CPEB3	SPDYE4A	ADCY5	MAPK11	PIK3CA	CDC25A	AKT1	PGR	ANAPC13	HSP90AB1	PIK3R3	BRAF	MAPK3	ADCY3	CCNA1	RPS6KA1	ANAPC2	CDC26	MAD1L1	GNAI3	RPS6KA2	INS1	RPS6KA6	ARAF	MAPK8	MAPK14	MAPK10	AKT3	AKT2	CDC23	RPS6KA3	CDC25C	MAP2K1
Prolactin signaling pathway	path:mmu04917		LHB	PRLR	GSK3B	SRC	GCK	PIK3R2	PIK3CB	ESR1	SLC2A2	CSN2	MAPK1	WAP	MAPK12	STAT3	MAPK13	MAPK9	TNFSF11	SOCS7	SOCS2	STAT1	FOXO3	SOCS4	GALT	PIK3R1	RAF1	JAK2	CCND2	SOCS3	SHC4	STAT5A	ESR2	MAPK8	MAPK14	MAPK10	AKT3	NFKB1	AKT2	MAP2K1	TH	TNFRSF11A	MAPK3	GRB2	NRAS	CYP17A1	INS1	IRF1	HRAS
Propanoate metabolism	path:mmu00640		LDHB	PCCB	ACSS2	ACADM	MCEE	HIBCH	PCCA	LDHAL6B	DLD	MLYCD	SUCLG1	LDHC	SUCLA2	ACACB	SUCLG2	MUT	ACAT1	BCKDHB	ACAT2	EHHADH	ECHS1	ACSS3	BCKDHA	LDHA	ABAT	DBT	ALDH6A1	HADHA	ACACA	ECHDC1	ACSS1
Proteasome	path:mmu03050		PSMA5	PSMD13	PSMA6	PSMB2	PSME1	PSMD1	PSME3	PSMC4	PSMB1	PSMB6	PSMA3	PSME4	PSMB11	PSMC3	PSMB7	PSMC1	PSMB9	PSMD11	PSMA8	PSMB10	PSMC5	PSMD8	POMP	PSMD7	PSMB4	PSMD6	PSMC2	PSMA7	ADRM1	PSMD3	PSMD4	PSMD14	PSME2	SHFM1	PSMB3	PSMF1	PSMA1	PSMA4	IFNG	PSMA2	PSMD12	PSMD2	PSMB5	PSMB8	PSME2B	PSMC6
Protein digestion and absorption	path:mmu04974		COL6A1	ATP1B4	COL22A1	SLC7A8	2210010C04RIK	COL1A1	ATP1A2	COL6A3	COL5A2	1810009J06RIK	COL10A1	GM10334	CPB1	SLC16A10	XPNPEP2	SLC8A2	ELN	SLC38A2	COL2A1	COL27A1	PRSS2	KCNK5	COL11A2	KCNN4	COL18A1	DPP4	COL17A1	TRY10	COL5A1	SLC9A3	CELA3B	SLC3A2	ATP1A4	ACE2	SLC1A1	COL7A1	SLC8A3	ATP1B2	TRY5	TRY4	COL4A3	MME	KCNQ1	COL12A1	ATP1A3	CTRL	COL14A1
Protein export	path:mmu03060		SPCS3	SRP14	SPCS2	SRPR	HSPA5	SEC61A1	ARXES2	PROTEIN TRANSPORT PROTEIN SEC61 SUBUNIT GAMMA	SRP72	SRP54A	SRP54B	IMMP1L	IMMP2L	SEC11A	SEC11C	SEC62	ARXES1	SRP19	SEC61B	SRPRB	SRP9	GM15266	SEC63	SRP54C	SRP68	OXA1L	SPCS1	GM4184	SEC61G	SEC61A2
Protein processing in endoplasmic reticulum	path:mmu04141		MAN1A	SEC24B	RPN1	GM15266	HSP90B1	SELENOS	UBQLN4	EIF2AK3	SAR1B	SEC31A	SAR1A	CALR	DDOST	MOGS	PROTEIN TRANSPORT PROTEIN SEC61 SUBUNIT GAMMA	MBTPS2	BAK1	TRAM1	CKAP4	ATXN3	FBXO2	NSFL1C	NPLOC4	STUB1	SEC61B	MAN1A2	UBE2J2	SEC31B	UBE4B	HSP90AA1	UBE2D2A	PRKCSH	DNAJC3	ATF4	RPN2	SEC23A	SEC62	CUL1	SYVN1	HSPA2	SEC13	FBXO6	CASP12	PDIA4	MAP3K5	ERP29	MBTPS1
Proximal tubule bicarbonate reclamation	path:mmu04964		SLC25A10	AQP1	ATP1B1	ATP1B2	SLC4A4	ATP1B3	SLC9A3	CAR4	MDH1	SLC38A3	ATP1B4	ATP1A2	CAR2	GLS	ATP1A4	PCK2	GLUD1	PCK1	GLS2	ATP1A1	FXYD2	ATP1A3
Purine metabolism	path:mmu00230		PDE7B	POLD4	NME6	AK5	NUDT16	ADCY8	ADCY4	PRPS1	PDE6C	PGM2	PAICS	POLR3B	AK2	PNPT1	AK7	NME2	NUDT2	POLR3F	NT5C1B	GUCY1B3	GMPR2	AK4	ADCY7	POLE4	GUCY1A3	GUCY2C	DCK	POLR2F	HDDC3	POLR2D	PRPS1L1	PRPS1L3	FHIT	POLR1C	GUCY2E	GUCY1B2	GUCY2F	POLE2	POLR2E	POLR2J	PRUNE1	PDE11A	ADCY3	POLR3K	IMPDH1	NUDT9	PDE2A
Pyrimidine metabolism	path:mmu00240		NT5C3	POLR3F	ENPP1	POLR3C	ENTPD8	POLA1	NT5C1B	POLR3B	ENTPD5	PNPT1	PNP	NUDT2	TXNRD3	NME2	RRM1	POLR2I	ENPP3	UPB1	POLD4	DNA-DIRECTED RNA POLYMERASES I	NME6	NME1	POLR3G	POLR2J	POLE2	POLR2E	POLA2	DPYD	UPP1	DCTPP1	POLR1C	DHODH	TK2	POLR2F	DCK	POLR2D	NME4	UMPS	POLR1B	POLR1E	DCTD	POLE3	POLE4	CMPK1	RRM2B	ENTPD6	NT5C1A
Pyruvate metabolism	path:mmu00620		ACOT12	DLAT	PDHB	ALDH3A2	PCK2	GRHPR	HAGH	PCK1	PCX	LDHAL6B	PKLR	PKM	ACAT2	ALDH7A1	ALDH2	PDHA1	FH1	ALDH9A1	PDHA2	ME3	ALDH1B1	ACSS2	LDHB	ACACB	ACAT1	DLD	LDHC	ME1	ACYP1	MDH1	ACYP2	LDHD	ACACA	ACSS1	MDH2	LDHA	ME2	GLO1
Rap1 signaling pathway	path:mmu04015		ADCY2	CRKL	PLCB3	FGF11	PFN4	EPHA2	CDC42	PRKCG	FGF8	VEGFB	PARD6G	4930544G11RIK	AKT2	RAPGEF6	CTNND1	TEK	CALM5	MAPK14	RALGDS	VASP	RAP1B	IGF1	SKAP1	MAPK13	RAC2	PIK3CB	ADCY6	EFNA5	PRKCA	NGFR	ACTG1	PDGFRB	LPAR4	FGF13	FLT1	LPAR3	FGF17	RALA	ANGPT4	MAPK11	ADCY5	PRKD3	EGFR	AKT1	FGFR3	FARP2	SIPA1
Ras signaling pathway	path:mmu04014		FGF13	FLT1	PAK6	PDGFRB	GNG13	GNG4	FGF17	RALA	ANGPT4	IGF1	STK4	RASGRF1	RAB5C	RALGDS	GNG10	PAK3	RAP1B	PLA2G12A	PIK3CB	PRKCA	EFNA5	GNG3	NGFR	ETS2	RAC2	REL	GNB3	AKT2	NFKB1	RASAL3	PLA2G2E	CALM5	PLA2G4E	GM15776	ABL2	TEK	PLD2	CHUK	PAK4	FGF11	RASAL2	PLA2G4A	PLA2G4B	ABL1	PLD1	4930544G11RIK	EPHA2
Regulation of actin cytoskeleton	path:mmu04810		ACTN1	MYLK3	IQGAP2	PXN	PPP1R12B	FGD3	ITGA3	DIAPH2	4930544G11RIK	ITGB8	PFN4	FGF8	CDC42	CRKL	FGF11	PAK4	CHRM2	FGF17	SCIN	GIT1	PPP1CC	PPP1CB	FGF13	NCKAP1	PAK6	MYH14	PDGFRB	ACTG1	ARPC3	PIK3CB	RAC2	SSH2	BDKRB1	LIMK2	PAK3	INSRR	DIAPH1	PIP4K2A	FGF12	KRAS	FGF18	PPP1R12C	ITGA8	MAP2K2	CHRM5	NCKAP1L	ITGA5
Regulation of lipolysis in adipocytes	path:mmu04923		PRKG1	PIK3R3	NPR1	PRKACB	PTGER3	GNAI2	PIK3R1	ADRB3	ADCY3	IRS3	PNPLA2	PLIN1	AQP7	ADORA1	ADRB2	PRKACA	PIK3CB	ADCY6	PIK3R2	ADCY4	ADCY8	GNAS	INSR	IRS2	FABP4	PDE3B	MGLL	NPY	GNAI3	PTGS1	INS1	ADCY1	GNAI1	AKT3	ADCY9	AKT2	IRS4	LIPE	TSHB	ABHD5	ADRB1	IRS1	INS2	ADCY7	PIK3CD	CGA	PLA2G16
Renin secretion	path:mmu04924		ITPR2	ORAI1	CLCA2	KCNMA1	PLCB2	CLCA3A2	GNAI2	GUCY1B3	ITPR3	PRKACB	PDE1B	ADRB2	PRKACA	ADCY6	CACNA1C	CLCA3B	PPP3CA	REN2	PDE3B	GNAS	CALM4	CLCA4A	CALM5	CLCA3A1	ADCYAP1	GUCY1B2	AGT	ACE	EDNRA	ITPR1	AQP1	PPP3CB	AGTR1B	PLCB1	CACNA1D	CACNA1F	PDE1C	PLCB3	CALM2	PRKG2	GUCY1A3	NPR1	PLCB4	AGTR1A	PPP3CC	PPP3R1	ADRB3
Renin-angiotensin system	path:mmu04614		KLK1B3	KLK1B11	KLK1B21	ATP6AP2	KLK1B1	KLK1	MME	NLN	ACE	AGT	CTSG	LNPEP	MRGPRD	CTSA	CPA3	AGTR1B	ACE2	ACE3	AGTR1A	KLK1B5	ANPEP	KLK1B22	REN1	CMA1	KLK1B9	MAS1	PRCP	PREP	KLK1B8	ENPEP	THOP1	AGTR2	KLK1B26	KLK1B24	REN2
Retinol metabolism	path:mmu00830		SDR16C5	CYP3A41B	DGAT1	UGT1A9	CYP2A4	CYP3A41A	DHRS9	UGT1A6A	RETSAT	HSD17B6	CYP2C70	CYP3A13	UGT2A3	RDH10	ALDH1A7	CYP2B9	CYP2C68	AOX3	CYP26B1	CYP2B10	CYP2C37	UGT1A6B	CYP3A11	RDH12	CYP4A30B	AOX2	ADH1	CYP2C65	UGT1A1	RDH11	CYP2B13	CYP2C54	CYP26A1	ADH7	DHRS3	ADH5	CYP3A44	CYP26C1	AWAT2	RDH8	UGT1A2	UGT2A1	ALDH1A1	ALDH1A2	CYP2C38	UGT2B37	CYP2C40
Retrograde endocannabinoid signaling	path:mmu04723		GABRA4	PRKCA	GNG3	GABRA6	ADCY6	SLC17A7	PRKACA	MGLL	MAPK1	MAPK12	GNG10	ADCY4	ADCY8	CACNA1C	ABHD6	MAPK13	GM5741	MAPK9	GNAO1	FAAH	PLCB2	GNG4	CNR1	GNG13	ITPR2	GRIA2	PRKACB	GRIA1	ITPR3	GNAI2	CACNA1F	PRKCG	CACNA1D	PLCB1	GNGT2	GNB1	SLC17A6	GRM1	ITPR1	GABRR1	GABRD	ADCY7	SLC32A1	PTGS2	ADCY2	PLCB3	GABRQ
Riboflavin metabolism	path:mmu00740		ACP5	ACP1	ENPP1	RFK	BLVRB	ACP2	ENPP3	FLAD1
Ribosome	path:mmu03010		MRPL15	MRPS2	RPS27A	RPL31-PS12	RPL41	60S RIBOSOMAL PROTEIN L23	RPL5	MRPL4	RPL23A	N-R5S133	RPL14	RPL10	N-R5S123	RPL13	RSL24D1	RPS4X	N-R5S121	MRPL12	GM22291	GM22109	MRPS11	RPL31	RPS27RT	GM4705	MRPL21	MRPL32	RPS26	RPL9	MRPL16	MRPS15	RPL26	RPS21	N-R5S128	N-R5S139	GM8210	RPL18	RPSA	RPL39	RPL24	RPS13	MRPL2	RPS3A1	UBA52	N-R5S144	RPS9	MRPS18A	RPS14
Ribosome biogenesis in eukaryotes	path:mmu03008		N-R5S139	POP5	EIF6	LSG1	NXF7	POP7	GNL3L	N-R5S128	WDR3	UTP18	N-R5S136	RNR1	NAT10	AK6	NXF3	N-R5S111	EFL1	IMP4	N-R5S134	NVL	UTP15	XRN1	GM22109	N-R5S121	GM22291	N-R5S123	RIOK2	RBM28	RMRP	MPHOSPH10	N-R5S143	REXO2	UTP14B	NXT1	NHP2	RRP7A	N-R5S133	SPATA5	UTP6	CSNK2B	1700009N14RIK	NOP58	N-R5S146	HEATR1	REXO1	XPO1	GTPBP4
RIG-I-like receptor signaling pathway	path:mmu04622		TRAF6	MAPK9	IFNA1	IFNE	MAPK13	CYLD	MAPK12	IFNA2	IFNA11	AZI2	CASP8	IKBKG	IFNA15	IFNA6	IKBKE	IFNA14	IRF7	NFKBIA	CHUK	TRIM25	ATG5	MAVS	IFNB1	IL12A	ISG15	CXCL10	NFKB1	MAPK8	MAPK14	FADD	MAPK10	TNF	TKFC	IFNK	SIKE1	PIN1	TMEM173	DDX3X	TRADD	IFNA5	TANK	MAP3K7	RIPK1	D1PAS1	IFNA12	OTUD5	IFNA13
RNA degradation	path:mmu03018		CNOT7	BTG4	WDR61	PABPC1	LSM6	PABPC4L	EXOSC8	XRN1	C1D	EXOSC1	CNOT4	PFKL	DCP2	ENO3	PABPC2	ENO1B	TTC37	PABPC4	SKIV2L	EXOSC7	LSM5	LSM2	CNOT8	CNOT3	EXOSC6	1700080E11RIK	EXOSC9	DCPS	PABPC1L	CNOT9	MPHOSPH6	EDC4	XRN2	PABPC5	ENO2	TOB2	EXOSC5	ENO1	EXOSC2	EXOSC4	BTG1-PS1	PAPD7	PAPD5	BTG3	EXOSC3	LSM3	BTG1
RNA polymerase	path:mmu03020		POLR1C	TWISTNB	POLR3B	POLR2E	POLR2H	POLR2J	ZNRD1	POLR3D	POLR3G	POLR3C	DNA-DIRECTED RNA POLYMERASES I	POLR3F	POLR3A	POLR3GL	POLR2B	POLR2G	DNA-DIRECTED RNA POLYMERASES I	POLR1B	POLR3K	POLR1E	POLR1D	POLR2A	POLR3E	POLR2D	POLR3H	POLR2L	POLR2I	POLR1A	POLR2C	POLR2F
RNA transport	path:mmu03013		NUP62	NXF1	EIF4EBP1	SAP18B	NXT2	EIF1AX	NUP133	NUP153	EIF1B	PABPC5	PAIP1	THOC5	ACIN1	MAGOHB	CYFIP2	RASL2-9	NUP210	EIF4EBP2	GM5415	EIF4A2	PNN	NUP85	NUP88	UPF1	4930444G20RIK	EIF4A1	EIF3A	PHAX	GM4340	NUP205	RPP40	RANGAP1	NUP54	NMD3	EIF2B5	THOC6	TGS1	EEF1A2	UPF3A	RAE1	SUMO3	RPP30	PABPC1L2B-PS	EIF3H	MAGOH	PABPC6	PRMT5
Salivary secretion	path:mmu04970		PRKG1	BEST2	ITPR2	KCNN4	ATP2B4	ADRA1B	NOS1	CD38	CAMP	KCNMA1	PLCB2	GUCY1B3	ITPR3	SLC12A2	LYZ1	PRKACB	PRKCA	ADRB2	PRKACA	ADCY6	LYZ2	ATP1A2	ADCY4	ADCY8	GNAS	ATP1B4	CALM4	CALM5	FXYD2	ATP2B1	ATP1A3	TRPV6	GUCY1B2	ADRA1D	ITPR1	CST3	ATP1B2	ADCY7	PLCB1	PRKCG	SLC9A1	PLCB3	CALM2	ATP1A4	PRKG2	ADCY2	GUCY1A3
Selenocompound metabolism	path:mmu00450		MARS	2002-03-01	PAPSS1	SEPHS1	SCLY	SEPHS2	SEPSECS	TXNRD1	CTH	KYAT3	MTR	INMT	TXNRD2	PSTK	TXNRD3	KYAT1	PAPSS2
Serotonergic synapse	path:mmu04726		CYP2C68	MAP2K1	HTR3B	PLA2G4D	GABRB1	GNG11	CACNA1A	CYP2C70	ARAF	PTGS2	RAF1	ALOX15	PLCB1	GNGT2	GNB1	CACNA1D	CACNA1F	HTR6	ALOX12	CYP2D9	PRKACB	CYP2J12	MAOA	GNAI2	GNAO1	PLCB2	HTR4	TRPC1	ITPR2	CYP2D26	MAPK1	CYP2C54	GNAS	GM5741	CACNA1C	ALOX12E	PLA2G4F	HTR2C	PRKACA	CYP4X1	CYP2J5	HTR2B	KCND2	CYP2J13	CYP2C44	RAPGEF3	TPH1
Signaling pathways regulating pluripotency of stem cells	path:mmu04550		PIK3CB	LIFR	MYC	HESX1	MEIS1	GSK3B	STAT3	MAPK13	WNT3A	HNF1A	IGF1	TCF3	SMARCAD1	NEUROG1	ZIC3	SMAD5	ACVR2A	DVL1	TBX3	WNT10B	HAND1	INHBA	ID4	FZD5	MAPK14	INHBB	WNT1	LHX5	SMAD2	AXIN1	AKT2	NRAS	APC	SMAD3	DUSP9	ID2	FZD7	SKIL	SETDB1	CTNNB1	ISL1	INHBC	ONECUT1	FGF2	FZD3	PCGF6	NODAL
SNARE interactions in vesicular transport	path:mmu04130		STX5A	VAMP4	STX17	SNAP23	SEC22B	VAMP7	SNAP29	YKT6	VAMP5	BET1L	STX1B	GOSR2	VTI1A	STX4A	GOSR1	VAMP1	STX6	STX11	STX7	BNIP1	STX8	STX19	STX18	VAMP2	VAMP3	VAMP8	BET1	STX2	VTI1B	STX1A	STX3	STX16	USE1
Sphingolipid metabolism	path:mmu00600		SGPP2	KDSR	ARSA	PLPP2	SMPD1	SPTLC2	ACER1	DEGS2	ASAH1	B4GALT6	ACER2	PLPP1	CERS2	CERS3	SGMS1	SGPL1	GALC	SGMS2	GLB1	PLPP3	GBA	SPHK2	NEU3	NEU1	CERK	GAL3ST1	SPTLC1	CERS5	SGPP1	GBA2	SMPD2	CERS4	GLA	SPTLC3	CERS6	DEGS1	ASAH2	UGT8A	SMPD4	NEU2	9130409I23RIK	CERS1	SMPD3	SPHK1	ACER3	NEU4	UGCG
Sphingolipid signaling pathway	path:mmu04071		GNAI3	PPP2CA	PRKCB	MAP3K5	GM2446	SGPP2	NRAS	ROCK2	PPP2R5A	TRADD	CERS3	GNA12	DEGS2	MAPK3	ACER1	ASAH1	NSMAF	PPP2R2A	PPP2R2C	PRKCZ	ADORA1	SPHK2	PPP2R2D	PPP2R5B	SGMS2	GNAQ	PPP2R1B	HRAS	PIK3R3	S1PR4	PLCB4	SMPD2	BCL2	TNFRSF1A	SPTLC1	CERS5	CERS6	ASAH2	MAPK11	SPTLC3	AKT1	PIK3CA	TRAF2	PIK3CD	PTEN	RELA	RHOA
Spliceosome	path:mmu03040		SNRPA	SNRPD3	PRPF19	ALYREF2	U2AF1	LSM6	USP39	DDX23	GM8994	PQBP1	SNW1	RBM17	NCBP2	SYF2	RBMXL1	THOC1	AQR	RBM25	SNRNP40	PRPF40A	SRSF2	LSM5	SNRNP70	PLRG1	SNRPC	HSPA8	HNRNPC	CHERP	SMALL NUCLEAR RIBONUCLEOPROTEIN F	PHF5A	TCERG1	HSPA2	SLU7	SNRPD2	PRPF31	DHX38	SNRPB	PRPF38A	ZMAT2	SRSF3	U2AF2	SNRNP27	THOC3	SNRPE	NHP2L1	RP9	PRPF4
Starch and sucrose metabolism	path:mmu00500		G6PC2	HKDC1	HK3	ENPP3	GBE1	PGM2L1	GCK	GAA	AMY2A4	PYGL	TREH	HK1	G6PC3	AMY2A2	ENPP1	AMY2A3	PGM1	GYS1	GYG	AMY2A5	PGM2	PYGM	GPI1	AGL	PYGB	GYS2	GANC	HK2	UGP2	AMY1	G6PC	MGAM	SIS
Steroid biosynthesis	path:mmu00100		LSS	CYP2R1	NSDHL	CEL	SOAT2	TM7SF2	FDFT1	SC5D	HSD17B7	CYP24A1	CYP51	CYP27B1	DHCR24	SQLE	MSMO1	LIPA	SOAT1	DHCR7	EBP
Steroid hormone biosynthesis	path:mmu00140		SRD5A3	UGT1A6A	CYP11B2	STS	HSD3B4	HSD17B6	CYP19A1	CYP2C70	CYP3A13	CYP7B1	UGT2A3	CYP2B9	CYP2C68	HSD17B12	CYP3A41B	HSD3B5	CYP11A1	UGT1A9	CYP3A41A	HSD17B2	HSD3B2	CYP2D11	HSD3B1	CYP2D22	SULT1E1	CYP3A44	CYP2D9	UGT1A2	AKR1D1	UGT2A1	CYP2C38	CYP2C40	UGT2B37	CYP2B10	CYP2C37	AKR1C18	UGT1A6B	CYP3A11	HSD11B1	CYP2C65	UGT1A1	CYP2D26	CYP2C54	CYP2B13	UGT2B36	CYP1A2	CYP2C29
Sulfur metabolism	path:mmu00920		PAPSS1	CYCS	CYCT	BPNT1	ETHE1	IMPAD1	PAPSS2	SQRDL	SUOX	TST	MPST
Sulfur relay system	path:mmu04122		CTU2	NFS1	MOCS3	MOCS2	URM1	TST	MPST	CTU1
Synaptic vesicle cycle	path:mmu04721		DNM1	ATP6V1D	ATP6V1E2	CACNA1A	ATP6V0E2	ATP6V0A1	UNC13B	CLTB	ATP6V0D1	ATP6V1G3	SLC18A3	STX1B	RIMS1	ATP6V0E	ATP6V1A	TCIRG1	ATP6V1C1	SLC17A6	STXBP1	CLTC	AP2M1	SYT1	ATP6V0C	ATP6V0D2	SLC32A1	SLC17A8	CLTA	CPLX2	ATP6V1B2	VAMP2	AP2A2	ATP6V1C2	UNC13C	CPLX4	AP2A1	UNC13A	RAB3A	AP2B1	CACNA1B	NAPA	ATP6V1G2	DNM3	STX3	SLC18A1	DNM2	STX1A	STX2
Synthesis and degradation of ketone bodies	path:mmu00072		ACAT1	HMGCS1	OXCT2A	OXCT1	OXCT2B	BDH2	HMGCLL1	BDH1	HMGCS2	HMGCL	ACAT2
T cell receptor signaling pathway	path:mmu04660		MAPK3	CTLA4	PAK7	GRB2	NRAS	BCL10	CD8B1	MAP3K7	MALT1	ITK	RASGRP1	NCK2	LCK	IKBKB	DLG1	PPP3CC	PPP3R1	LCP2	NCK1	PIK3R3	HRAS	PLCG1	IL10	GRAP2	CD8A	PTPRC	FOS	RHOA	CD3G	PPP3R2	PIK3CD	MAP3K8	RELA	SOS1	MAPK11	NFKBIE	PIK3CA	AKT1	CD28	SOS2	IFNG	NFKBIB	PDCD1	CD3E	CBLB	MAP2K2	LAT
Taste transduction	path:mmu04742		TAS2R115	TAS2R105	GABRA1	HTR1B	TAS2R122	TAS2R137	TAS2R106	GABBR2	PKD2L1	TAS2R108	GM725	SCNN1G	TAS2R121	HCN4	P2RX3	TAS2R102	TAS2R113	HTR1D	GABRA3	P2RY4	CALHM1	TAS2R117	HTR1F	PDE1A	TAS2R143	TRPM5	TAS2R116	SCN3A	P2RY1	TAS2R124	ENTPD2	CHRM3	ASIC2	TAS2R104	TAS1R3	GABRA4	SCN9A	PDE1B	TAS2R120	GABRA6	ADCY6	PRKACA	TAS2R131	ADCY8	ADCY4	CACNA1C	SCN2A
Taurine and hypotaurine metabolism	path:mmu00430		GGT7	GAD1	GGT1	GGT5	GAD2	GADL1	CSAD	BAAT	GGT6	CDO1	ADO
Terpenoid backbone biosynthesis	path:mmu00900		HMGCS1	ZMPSTE24	PMVK	FDPS	FNTB	DHDDS	ACAT2	IDI2	PDSS1	RCE1	MVK	PDSS2	ACAT1	GGPS1	FNTA	MVD	GM38481	PCYOX1	ICMT	NUS1	HMGCR	IDI1	HMGCS2
TGF-beta signaling pathway	path:mmu04350		ACVR2A	SMAD5	FST	ACVR2B	AMH	SMAD1	MYC	PPP2R1A	GDF7	ID3	BMP5	RPS6KB1	SP1	CDKN2B	E2F5	TGFB3	PPP2CB	SMURF2	MAPK1	CREBBP	TGFBR1	SMAD2	CUL1	TNF	ACVR1	INHBB	GDF6	BMP2	SMAD7	BMP4	INHBE	INHBA	TGIF2	NOG	GDF5	NBL1	BAMBI	4930544G11RIK	THBS1	TGIF1	RBL1	ID4	LEFTY1	LEFTY2	ID1	SMURF1	SKP1A
Th1 and Th2 cell differentiation	path:mmu04658		IFNGR2	JAG1	STAT5A	CHUK	NFKBIA	JAK2	IL5	PPP3CB	H2-EA-PS	H2-DMA	IL12A	CD4	H2-AB1	IL2	PRKCQ	TBX21	CD3D	RBPJL	NFKB1	MAF	IL12RB2	MAPK10	MAPK8	JAG2	MAPK14	MAML3	MAPK9	JUN	NOTCH2	MAPK13	IL4	IL2RG	MAPK12	TYK2	PPP3CA	MAPK1	JAK1	IKBKG	JAK3	NFATC3	STAT1	IL2RB	NFATC2	IL12RB1	MAPK11	NFKBIE	STAT5B
Th17 cell differentiation	path:mmu04659		TBX21	IL22	IL17A	CD3D	NFKB1	H2-AB1	CD4	RXRA	IL2	PRKCQ	SMAD2	IL1B	RUNX1	IL21	TGFBR1	MAPK10	MAPK14	MAPK8	JAK2	IFNGR2	AHR	STAT5A	NFKBIA	CHUK	H2-EA-PS	IL6RA	RORC	H2-DMA	HSP90AA1	IL17D	RORA	RXRB	PPP3CB	HIF1A	STAT1	JAK3	NFATC3	NFATC2	IL2RB	IL2RG	MAPK12	TYK2	MAPK1	PPP3CA	MAPK9	JUN	MAPK13
Thiamine metabolism	path:mmu00730		TPK1	THTPA	AKP3	AK8	ALPPL2	ALPI	NFS1	NTPCR	AK5	AK2	AK7	AK1	ACP1	AK4	ALPL
Thyroid hormone signaling pathway	path:mmu04919		SLC2A1	MED1	BMP4	ATP1A3	RXRA	THRB	MAP2K1	AKT2	THRA	PFKP	TBC1D4	CREBBP	FXYD2	AKT3	ATP2A2	PLCD3	ATP1A4	SLCO1C1	PLCB3	SLC9A1	RAF1	HDAC3	RXRB	ATP1B2	DIO1	PLCB1	PRKCG	PFKFB2	PIK3R1	PLCD1	SLC16A10	PRKACB	MED13L	ACTG1	STAT1	HIF1A	RCAN2	TSC2	NCOR1	CASP9	NCOA2	PLCB2	PLCD4	NOTCH2	ATP1A2	MED14	ATP1B4
Thyroid hormone synthesis	path:mmu04918		TG	CREB3L2	ATP1A3	TTF1	GPX3	DUOXA2	GPX6	ATF4	FXYD2	SLC26A4	ASGR1	TPO	GPX1	SLC5A5	ATF6B	ATP1A4	TTR	PLCB3	ADCY2	TSHR	ADCY7	GPX2	CREB3	ATP1B2	ASGR2	ITPR1	PRKCG	PLCB1	ITPR3	PRKACB	GPX8	ITPR2	PLCB2	SERPINA7	ATP1A2	ATP1B4	ADCY8	ADCY4	GNAS	ADCY6	PRKACA	PRKCA	CREB3L3	HSP90B1	GPX5	TSHB	ADCY9
Tight junction	path:mmu04530		PRKAG3	MYH2	CGN	MYH7B	RAB8A	RAP1A	CD1D1	RAC1	PRKACB	PARD6B	ACTR3	MYH9	SRC	CRB3	PRKACA	ACTR2	PPP2R1A	MAP2K7	MYH8	STK11	MAPK9	RDX	JUN	MYL6B	CDK4	SYMPK	RAPGEF2	BVES	MARVELD3	MYL2	TUBA8	MAPK10	CLDN16	MAPK8	TUBA3B	PARD3	TUBA4A	IGSF5	PRKAA1	CTTN	LLGL1	PRKCI	CLDN4	CACNA1D	MICALL2	CLDN14	WASL
TNF signaling pathway	path:mmu04668		MLKL	ATF2	FOS	PGAM5	ICAM1	CCL5	TNFRSF1A	IKBKB	LIF	CREB3L1	PIK3R3	IL15	IFI47	CREB1	CASP7	IL6	BCL3	TAB1	EDN1	MAP3K5	CCL12	MAPK3	RIPK1	ITCH	MAP2K4	CASP3	TRADD	BIRC3	MAP3K7	BIRC2	CXCL1	CSF2	CX3CL1	MAP3K14	MMP14	RPS6KA4	TRAF1	TRAF3	MAP2K3	MAPK11	PIK3CA	AKT1	NOD2	CREB5	PIK3CD	CREB3L4	DNM1L
Toll-like receptor signaling pathway	path:mmu04620		IKBKB	TBK1	IFNA9	IFNA4	CCL4	IFNA13	CD86	PIK3R3	CCL5	FOS	MYD88	MAP2K4	IFNA12	TIRAP	RIPK1	MAPK3	MAP3K7	TLR9	IFNA5	LBP	TAB1	TLR4	IL6	IFNAR1	MAP2K2	IL12B	IFNAB	TLR8	TRAF3	CD80	IFNA7	LY96	CXCL11	IRF3	RELA	MAP3K8	PIK3CD	TLR7	AKT1	PIK3CA	MAPK11	MAP2K3	IRF7	IFNA14	CD40	IKBKE	CTSK
Tryptophan metabolism	path:mmu00380		ASMT	IDO1	EHHADH	KYNU	HAAO	MAOB	CYP1B1	OGDHL	TDO2	TPH1	OGDH	CYP1A1	AOX3	AOX1	KMO	KYAT3	4930438A08RIK	ALDH1B1	AOX4	KYAT1	HADH	ACAT1	CYP1A2	GCDH	ACAT2	ECHS1	ALDH7A1	ALDH2	AOX2	AANAT	IL4I1	HADHA	ALDH9A1	AADAT	MAOA	ACMSD	TPH2	AFMID	ALDH3A2	CAT	IDO2	AOC1	LAO1	DDC	INMT	GM21948
Tyrosine metabolism	path:mmu00350		GOT2	4930438A08RIK	ALDH3A1	GOT1	AOX3	TH	ALDH3B1	AOX1	TAT	FAHD1	TYRP1	TPO	AOX4	GSTZ1	MAOB	AOC2	MIF	ALDH1A3	PNMT	MAOA	DCT	COMT	ALDH3B2	DBH	ALDH3B3	ADH7	DDC	HGD	HPD	GM21948	LAO1	ADH5	ADH4	TYR	ADH1	AOX2	FAH	AOC3	IL4I1
Ubiquinone and other terpenoid-quinone biosynthesis	path:mmu00130		VKORC1	COQ5	COQ2	TAT	COQ7	COQ3	GGCX	HPD	COQ6	VKORC1L1	NQO1
Ubiquitin mediated proteolysis	path:mmu04120		NEDD4L	UBE2E1	CBLB	MAP3K1	OTTMUSG00000017000	FANCL	UBE2E2	ANAPC5	ANAPC4	SIAH1B	DET1	UBR5	UBE2A	UBA1	PIAS1	UBE3B	MDM2	UBE2C	UBE2Q1	SOCS1	KLHL13	UBE2I	UBE2QL1	UBE2E3	KEAP1	UBE2F	UBE2K	DDB2	UBE2D2B	HUWE1	SKP1A	SMURF1	ERCC8	CUL4A	UBE2R2	DDB1	TRIM37	FBXO4	ITCH	ANAPC2	SKP2	UBE2J1	UBE2G1	UBE2Z	UBOX5	NEDD4	PPIL2
Valine, leucine and isoleucine biosynthesis	path:mmu00290		SDSL	BCAT1	BCAT2	SDS
Valine, leucine and isoleucine degradation	path:mmu00280		HIBADH	BCKDHB	EHHADH	ACADS	ACADSB	MCCC2	BCKDHA	OXCT2B	ABAT	ACSF3	HSD17B10	AOX3	HMGCL	PCCB	HADHB	AOX1	ACAA2	HMGCS2	ALDH1B1	MCCC1	4930438A08RIK	HMGCLL1	BCAT2	IVD	DLD	AOX4	HADH	AGXT2	MUT	ACAT1	AACS	BCAT1	ACAT2	ALDH2	ALDH7A1	ECHS1	ACAD8	AOX2	OXCT1	ALDH6A1	DBT	ACAA1B	HADHA	HMGCS1	IL4I1	ALDH9A1	ACADM
Vascular smooth muscle contraction	path:mmu04270		ARHGEF1	PLCB4	NPR1	PLA2G2F	CYP4A12B	CACNA1S	ARHGEF12	ADCY3	PLA2G6	MAPK3	GUCY1A2	GNA11	PLA2G3	ROCK2	KCNMB1	PTGIR	ROCK1	ADCY1	PLA2G5	PLA2G10	ADCY9	CALM1	CYP4A12A	GM5601	CYP4A32	ARHGEF11	ADORA2B	PLA2G2D	RAMP2	KCNMB3	RAMP1	ADRA1B	PLCB2	ITPR2	PRKG1	ADORA2A	PRKACB	GUCY1B3	RAMP3	PRKACA	PLA2G2A	ADCY4	CYP4A30B	GNAS	ADCY8	MAPK1	MRVI1
Vasopressin-regulated water reabsorption	path:mmu04962		AQP2	DCTN6	CREB3L2	AQP3	AQP4	AVP	ADCY9	ARHGDIG	DYNLL2	CREB3L4	RAB5A	CREB3	DYNC2H1	RAB11B	ARHGDIA	CREB5	DYNC1I2	DCTN1	PRKACB	RAB5B	CREB3L1	DYNC1I1	AVPR2	VAMP2	DYNC2LI1	NSF	DCTN2	RAB5C	DYNLL1	DYNC1LI1	GNAS	CREB1	DCTN4	DYNC1H1	RAB11A	DYNC1LI2	ADCY6	ARHGDIB	PRKACA	CREB3L3	ADCY3	DCTN5	STX4A
VEGF signaling pathway	path:mmu04370		MAPKAPK2	MAPK11	PLA2G4A	PLA2G4B	PIK3CA	RAF1	AKT1	PTGS2	PLA2G4C	BAD	CDC42	PRKCG	PPP3R2	PIK3CD	SH2D2A	PPP3CB	NOS3	AKT2	SPHK1	MAP2K1	PLA2G4D	RAC3	PXN	MAP2K2	HSPB1	PLA2G4E	MAPK14	KRAS	AKT3	MAPK12	MAPK1	PPP3CA	PRKCB	PLA2G4F	MAPK13	KDR	MAPK3	SRC	RAC2	PLCG2	PIK3CB	NRAS	MAPKAPK3	PRKCA	PIK3R2	RAC1	VEGFA
Vitamin B6 metabolism	path:mmu00750		AOX1	AOX3	AOX2	PDXP	PHOSPHO2	PDXK	AOX4	PSAT1	PNPO
Vitamin digestion and absorption	path:mmu04977		APOB	TCN2	SLC5A6	PLB1	ABCC1	GIF	SLC19A2	SLC46A1	SCARB1	FOLH1	BTD	SLC23A1	PNLIP	LRAT	SLC19A1	AWAT2	LMBRD1	APOA1	APOA4	SLC52A3	SLC19A3	MMACHC	RBP2	CUBN
Wnt signaling pathway	path:mmu04310		DAAM1	TBL1X	TCF7	FZD9	FRAT1	CCND1	TBL1XR1	SIAH1B	SUSP4	NFATC1	ROCK2	MAP3K7	DAAM2	CTBP1	FZD10	GM9839	WNT11	NKD1	WNT5B	PLCB4	PRICKLE2	SKP1A	WNT8A	DVL2	WNT9A	WNT9B	PPP3CC	WNT5A	WNT2B	WNT10A	BAMBI	TCF7L2	WIF1	PLCB1	NFATC4	PRICKLE1	WNT7A	FZD1	DVL3	FRAT2	CREBBP	CER1	FZD8	MAPK10	MAPK8	WNT8B	NOTUM
[truncated: 1,268 more columns]
