# Supplementary material for: Remodeling of epigenome and transcriptome landscapes with aging in mice reveals widespread induction of inflammatory responses
Source: HighWire-hosted journal article supplement (doi:10.1101/gr.240093.118), 2019-03-11
Supplement: Supplemental_Table_S6.xlsx [file Supplemental_Table_S6.xlsx]

## Sheet: Index
Supplemental Table S6
HOMER analysis of repetitive element transcription
	A	Heart repetitive element transcription
	B	Liver repetitive element transcription
	C	Cerebellum repetitive element transcription
	D	Olfactory bulb repetitive element transcription
	E	NSCs repetitive element transcription
Analysis of chromatin marks at repetitive elements
	F	Heart histone marks at repetitive elements
	G	Liver histone marks at repetitive elements
	H	Cerebellum histone marks at repetitive elements
	I	Olfactory bulb histone marks at repetitive elements

## Sheet: A
Heart repeat transcription
Repeat Name	Mean gene expression	log2(FoldChange per month of life)	p-value	Adjusted p-value (FDR)	Also significant in TEtranscripts analysis
GSAT_MM|Satellite|Satellite	503.008	0.173923	1.35311e-31	6.54772e-30	Yes			Repetitive elements that are significantly changed with age using both HOMER and TEtranscripts
RMER12B|LTR|ERVK	91.1464	0.0520327	6.30624e-06	0.000109663	Yes
LTR16B1|LTR|ERVL	3.99249	0.0864551	0.00828303	0.0379528	No
MER73|LTR|ERVL	11.0194	0.109663	0.000373514	0.00361131	No
MLT1B-int|LTR|MaLR	7.48092	-0.0744388	0.00156221	0.0108145	No
MLT1F2-int|LTR|MaLR	3.32195	-0.10693	0.00649275	0.0312104	No
MMTV-int|LTR|ERVK	15.766	0.0672592	0.00231694	0.0143196	No

## Sheet: B
Liver repeat transcription
Repeat Name	Mean gene expression	log2(FoldChange per month of life)	p-value	Adjusted p-value (FDR)	Also significant in TEtranscripts analysis
ETnERV3-int|LTR|ERVK	124.642	0.0237148	0.00505047	0.0228015	Yes			Repetitive elements that are significantly changed with age using both HOMER and TEtranscripts
IAPLTR3-int|LTR|ERVK	162.934	0.0682189	4.11335e-13	1.66565e-11	Yes
MER73|LTR|ERVL	40.7156	0.0741759	0.0015611	0.00868818	Yes
MERVK26-int|LTR|ERVK	51.2209	0.03258	7.73508e-05	0.000765973	Yes
RLTR44B|LTR|ERVK	219.763	-0.0324361	0.000421734	0.00309918	Yes
(CAA)n|Simple_repeat|Simple_repeat	416.59	-0.00756816	0.0125679	0.0486514	No
CT-rich|Low_complexity|Low_complexity	10832.2	-0.0144656	0.00508044	0.0229007	No
ETnERV-int|LTR|ERVK	44.0158	0.0284538	0.0123889	0.0481067	No
L1PB4|LINE|L1	8.44279	-0.0596078	0.00935151	0.0380733	No
MER20B|DNA|MER1_type	86.788	0.0194678	0.00129843	0.00752013	No
MER53|DNA|hAT	58.9578	0.0238857	0.00130883	0.00756313	No
MLT1A-int|LTR|MaLR	5.59298	0.0863325	0.012645	0.0488916	No
MLT1G3-int|LTR|MaLR	5.53544	-0.0795443	0.00893951	0.0367248	No
MLT1G|LTR|MaLR	44.2679	0.0260155	0.00702421	0.0300194	No
MMTV-int|LTR|ERVK	44.9715	0.0463147	0.00251463	0.0128081	No
RLTR19-int|LTR|ERVK	391.994	-0.0154126	0.00818493	0.0340481	No
RLTR45-int|LTR|ERVK	135.511	-0.0169243	0.00749912	0.0316997	No
RLTR46|LTR|ERVK	29.7635	0.0322452	0.00145537	0.00821456	No
RLTR6_Mm|LTR|ERV1	106.802	0.0240048	0.00267615	0.0134725	No
RMER15-int|LTR|ERVL	1414.58	0.0211141	0.00842856	0.0348912	No
RMER16-int|LTR|ERVK	708.445	-0.0157448	0.000381461	0.0028658	No
RNLTR23|LTR|ERVK	25.8601	-0.0332717	0.0114238	0.0449447	No

## Sheet: C
Cerebellum repeat transcription
Repeat Name	Mean gene expression	log2(FoldChange per month of life)	p-value	Adjusted p-value (FDR)	Also significant in TEtranscripts analysis
IAPEY3-int|LTR|ERVK	567.242	0.0148556	0.000409051	0.0024417	Yes			Repetitive elements that are significantly changed with age using both HOMER and TEtranscripts
L1M3d|LINE|L1	106.039	0.0303319	5.22707e-07	5.45155e-06	Yes
MER96B|DNA|hAT	432.389	0.00947477	0.000560093	0.00319985	Yes
MMTV-int|LTR|ERVK	190.846	0.028729	2.175e-13	3.7151e-12	Yes
MuLV-int|LTR|ERV1	823.348	0.0513757	3.43155e-08	4.15384e-07	Yes
(CCG)n|Simple_repeat|Simple_repeat	1387.04	-0.00563921	0.00371026	0.0162493	No
(CGAG)n|Simple_repeat|Simple_repeat	385.091	-0.016027	4.97938e-05	0.000387551	No
(CGAGG)n|Simple_repeat|Simple_repeat	14.0932	-0.039558	0.00525343	0.0220832	No
(CGG)n|Simple_repeat|Simple_repeat	1579.83	-0.00579755	0.00455327	0.0194815	No
(TCG)n|Simple_repeat|Simple_repeat	180.841	-0.011354	0.00942048	0.0372041	No
(TTAA)n|Simple_repeat|Simple_repeat	938.305	0.0132289	4.98758e-05	0.000388061	No
(TTC)n|Simple_repeat|Simple_repeat	3625.18	-0.0115838	0.00123337	0.00626168	No
(TTCTCC)n|Simple_repeat|Simple_repeat	501.077	-0.0136532	0.0026928	0.012275	No
BLACKJACK|DNA|AcHobo	415.279	0.0111484	0.000725498	0.00399578	No
C-rich|Low_complexity|Low_complexity	1911.39	-0.00949368	0.0127731	0.0486413	No
CT-rich|Low_complexity|Low_complexity	50426.8	-0.00584383	0.00127057	0.00641999	No
Charlie10|DNA|MER1_type	405.722	0.00796529	0.0047038	0.0200461	No
Charlie15a|DNA|MER1_type	498.869	-0.0093449	0.000316305	0.00196569	No
Charlie2b|DNA|MER1_type	741.554	0.00991544	0.00198261	0.00941681	No
ETnERV-int|LTR|ERVK	253.673	0.0142953	0.00402804	0.0174777	No
ETnERV2-int|LTR|ERVK	4109.18	0.0128482	0.00691121	0.0282118	No
G-rich|Low_complexity|Low_complexity	1406.99	-0.00635164	0.0119208	0.0457236	No
GC_rich|Low_complexity|Low_complexity	3501.04	-0.00621497	9.62655e-06	8.45254e-05	No
IAPLTR1_Mm|LTR|ERVK	628.77	0.0098787	0.0115616	0.044505	No
L1MA10|LINE|L1	478.139	0.0110401	0.0107889	0.0418606	No
L1MEg2|LINE|L1	70.7248	0.0244002	0.0024872	0.0114559	No
MER57F|LTR|ERV1	139.288	0.0191136	0.00238322	0.0110486	No
MER5B|DNA|MER1_type	5455.72	-0.00839794	0.000111325	0.000795154	No
MER89-int|LTR|ERV1	39.7526	0.0266503	0.0110437	0.0427431	No
MER97a|DNA|MER1_type?	127.834	0.0159606	0.0061946	0.0255672	No
MMAR1|DNA|Mariner	724.759	0.00687714	0.00890289	0.0354106	No
MMETn-int|LTR|ERVK	3430.88	0.0159813	0.012403	0.0473935	No
MTB-int|LTR|MaLR	1953.11	0.0051103	0.0110674	0.0428206	No
MYSERV6-int|LTR|ERVK	4090.04	0.00779069	0.00523625	0.0220387	No
RLTR13A|LTR|ERVK	460.347	0.013066	0.0109448	0.0424164	No
RLTR18-int|LTR|ERVK	3631.55	0.0218431	0.000736102	0.00404373	No
RLTR4_MM-int|LTR|ERV1	2438.48	0.0147603	0.000156491	0.00107421	No
RLTR4_Mm|LTR|ERV1	163.657	0.0281164	1.90138e-05	0.000158459	No
RMER16-int|LTR|ERVK	3223.89	0.0195366	0.0108512	0.0420674	No
Zaphod2|DNA|Tip100	357.186	0.00840111	0.00283642	0.0128468	No

## Sheet: D
Olfactory bulb repeat transcription
Repeat Name	Mean gene expression	log2(FoldChange per month of life)	p-value	Adjusted p-value (FDR)	Also significant in TEtranscripts analysis
MuRRS4-int|LTR|ERV1	1101.96	0.00916517	0.00570551	0.0253821	Yes			Repetitive elements that are significantly changed with age using both HOMER and TEtranscripts
(ATGGTG)n|Simple_repeat|Simple_repeat	229.65	0.00903635	0.0100123	0.0421487	No
(CAAAT)n|Simple_repeat|Simple_repeat	21.1209	0.0313413	0.0104369	0.043704	No
(CACCAT)n|Simple_repeat|Simple_repeat	196.099	0.0118757	0.000783498	0.00418476	No
(TTAA)n|Simple_repeat|Simple_repeat	955.442	0.0100092	5.13706e-05	0.00037766	No
(TTG)n|Simple_repeat|Simple_repeat	1814.06	0.0061319	0.00373284	0.0171975	No
5S|rRNA|rRNA	505.615	0.0456524	0.00237585	0.0114682	No
HY1|scRNA|scRNA	144.389	0.0977561	0.011205	0.0464109	No
HY3|scRNA|scRNA	379.946	0.0923842	0.00564266	0.0251434	No
IAPLTR3-int|LTR|ERVK	152.687	0.0141633	0.000927028	0.00487038	No
Kanga11a|DNA|Tc2	247.983	0.0125033	0.00850833	0.036602	No
L1ME4a|LINE|L1	4366.78	0.00782138	0.00311254	0.0145945	No
L1MEb|LINE|L1	411.537	0.00885522	0.0052638	0.0235612	No
MER2|DNA|MER2_type	8001.71	0.00633066	0.00990958	0.0418169	No
MMTV-int|LTR|ERVK	122.407	0.031202	0.00644774	0.0283849	No
RLTR19-int|LTR|ERVK	2080.92	0.00440241	0.00495295	0.0222452	No
Tigger14a|DNA|MER2_type	250.79	-0.0107141	0.00959324	0.0406656	No
U6|snRNA|snRNA	512.337	0.00913352	0.000622894	0.00341206	No

## Sheet: E
NSCs repeat transcription
Repeat Name	Mean gene expression	log2(FoldChange per month of life)	p-value	Adjusted p-value (FDR)	Also significant in TEtranscripts analysis
MER57-int|LTR|ERV1	1.8227	-0.193577	0.00682816	0.0443163	No

## Sheet: F
Heart histone marks at repeats
Repeat Name	Mean normalized ChIP intensity	log2(FoldChange per month of life)	p-value	Adjusted p-value (FDR)	Mark?
(CCTA)n	1056.82	-0.0146061	0.000670641	0.0497169	H3K27ac
Helitron1Na_Mam	32.4883	0.0660713	0.000554525	0.0497169	H3K27ac
IAP-d-int	1585.33	0.019213	0.00016768	0.0207178	H3K27ac
IAP-d-int	1499.62	0.0222017	8.16144e-12	2.31513e-09	H3K4me3
IAPLTR3-int	1164.32	0.0270392	5.02957e-07	0.000186429	H3K27ac
IAPLTR4	621.599	0.0319467	6.05841e-08	3.36848e-05	H3K27ac
IAPLTR4_I	239.188	0.032551	3.66404e-05	0.00509301	H3K27ac
LTR68	35.2382	0.0726092	0.000663694	0.0497169	H3K27ac
LTR84a	378.129	-0.0242145	1.70491e-05	0.00315976	H3K27ac
MLT2C1	1429.43	0.013222	0.000469725	0.0474849	H3K27ac
MMVL30-int	2255.31	0.0145599	0.000188763	0.0267729	H3K4me3
MurERV4-int	2119.03	0.0212142	9.11553e-06	0.00239764	H3K27ac
MuRRS-int	736.385	0.0233235	4.49521e-05	0.00765084	H3K4me3
RLTR10-int	337.592	0.0298977	1.07807e-05	0.00239764	H3K27ac
RLTR10-int	307.126	0.0588199	1.7373e-23	1.47845e-20	H3K4me3
RLTR10A	545.96	0.0206297	0.000662002	0.0497169	H3K27ac
RLTR10A	445.465	0.0414224	8.48871e-20	3.61194e-17	H3K4me3
RLTR14-int	990.149	0.0254965	1.1366e-09	1.2639e-06	H3K27ac
RLTR4_Mm	11575	0.0108832	0.000348332	0.0387345	H3K27ac
RLTR6_Mm	827.281	0.0195488	0.000351832	0.0427728	H3K4me3
RLTR6-int	695.56	0.0271747	6.33115e-10	1.34695e-07	H3K4me3
RMER19C	2976.88	0.0111562	2.78213e-05	0.00441962	H3K27ac

## Sheet: G
Liver histone marks at repeats
Repeat Name	Mean normalized ChIP intensity	log2(FoldChange per month of life)	p-value	Adjusted p-value (FDR)	Mark?
(ATATG)n	31.0416	-0.0751189	0.00108888	0.0320907	H3K4me3
(ATGGTG)n	641.012	0.022944	0.00116266	0.0110353	H3K27ac
(ATGTG)n	206.365	0.0355382	0.00887128	0.0485942	H3K27ac
(C)n	8589.69	0.00707258	0.00399363	0.0263293	H3K27ac
(CAAA)n	108346	-0.00509441	0.00162737	0.0142066	H3K27ac
(CAAAA)n	64935.7	-0.00539765	0.0020593	0.0173075	H3K27ac
(CAAAAA)n	21523.3	-0.00736645	0.00320921	0.0230937	H3K27ac
(CACCAT)n	239.955	0.028232	0.00190672	0.0476681	H3K4me3
(CACCC)n	5707.67	0.00872276	0.00109436	0.0104773	H3K27ac
(CAG)n	22955.3	0.00624872	0.00225674	0.0184318	H3K27ac
(CAGAA)n	305.422	-0.0338834	0.00375573	0.0252138	H3K27ac
(CAGCT)n	1127.23	0.0262434	0.000184416	0.0026369	H3K27ac
(CAGG)n	7313.36	0.00791729	0.000757546	0.00803846	H3K27ac
(CAGGA)n	1267.34	-0.0156517	0.00316464	0.0230746	H3K27ac
(CAGTA)n	104.111	0.0680863	0.000297143	0.00384887	H3K27ac
(CATAA)n	195.144	0.0389402	0.00677138	0.0396558	H3K27ac
(CATAC)n	859.812	-0.0225826	0.00301047	0.0223954	H3K27ac
(CCCCAG)n	9979.41	0.0089757	0.00243081	0.0193665	H3K27ac
(CCCCCG)n	3486.81	0.0165302	3.84685e-05	0.000717862	H3K27ac
(CCCCG)n	42017.6	0.0145786	2.60169e-08	1.22055e-06	H3K27ac
(CCCG)n	41882.3	0.0174447	3.40064e-23	1.87205e-20	H3K27ac
(CCCGAA)n	9.38969	0.145191	0.00512719	0.0317137	H3K27ac
(CCCGG)n	12208.8	0.0143398	8.03645e-12	6.32009e-10	H3K27ac
(CCG)n	148541	0.017693	2.3454e-20	6.45572e-18	H3K27ac
(CCGAA)n	211.63	0.0254074	0.00770311	0.0436354	H3K27ac
(CCGAG)n	1821.08	0.021312	3.55316e-07	1.2022e-05	H3K27ac
(CCGCG)n	16930	0.0151942	1.35419e-12	1.24247e-10	H3K27ac
(CCGG)n	1498.31	0.0226727	3.67458e-07	1.2022e-05	H3K27ac
(CCGGG)n	14856.9	0.01638	3.21529e-15	4.42504e-13	H3K27ac
(CCTCG)n	857.517	0.0163172	0.000633307	0.00697271	H3K27ac
(CG)n	8935.97	0.014074	2.45391e-08	1.22055e-06	H3K27ac
(CGA)n	948.156	0.0151077	0.00106948	0.0104773	H3K27ac
(CGAG)n	7865.13	0.0165528	1.87712e-12	1.58977e-10	H3K27ac
(CGCGG)n	14154.3	0.0145536	2.68663e-11	1.97198e-09	H3K27ac
(CGG)n	148335	0.0163128	3.6199e-17	6.64252e-15	H3K27ac
(CGGA)n	770.214	0.0146636	0.0052363	0.0321725	H3K27ac
(CGGAG)n	2033.15	0.0172378	9.442e-06	0.000212156	H3K27ac
(CGGG)n	43201.6	0.0166501	1.38912e-20	5.09807e-18	H3K27ac
(CGGGG)n	48468.6	0.0142634	1.62509e-08	8.94614e-07	H3K27ac
(CGGGGG)n	6550.11	0.0141575	3.53799e-07	1.2022e-05	H3K27ac
(CTCCG)n	1212.93	0.0153579	0.00465559	0.0294587	H3K27ac
(CTCG)n	8656.14	0.0138822	4.49912e-07	1.41529e-05	H3K27ac
(CTCGG)n	6585.97	0.0145231	5.03773e-05	0.000894604	H3K27ac
(CTG)n	24322.2	0.0125647	1.24121e-10	8.54106e-09	H3K27ac
(CTTTG)n	1209.65	-0.0241334	0.00148025	0.0133586	H3K27ac
(GCATG)n	163.661	-0.0436477	0.00878836	0.0485942	H3K27ac
(GCCTG)n	1058.84	0.0191698	0.000229723	0.00308445	H3K27ac
(GCGTG)n	509.217	0.0313483	0.00156871	0.0139286	H3K27ac
(GCTG)n	1670.68	0.0134238	0.00708133	0.0410344	H3K27ac
(GGA)n	38287.4	0.00477508	0.000592715	0.00672762	H3K27ac
(GGAGAA)n	3630.99	-0.0156398	0.00020643	0.00284099	H3K27ac
(GGCTG)n	3832.04	0.013161	0.000759309	0.00803846	H3K27ac
(GGGA)n	23234.8	0.0103937	3.96038e-08	1.74415e-06	H3K27ac
(TAAAA)n	11824.6	-0.010988	1.14399e-05	0.000251906	H3K27ac
(TAGG)n	1069.51	-0.0142745	0.00329296	0.0232407	H3K27ac
(TCC)n	43163.4	0.00527312	0.000616456	0.0069257	H3K27ac
(TCCC)n	21171.4	0.00637537	0.000224302	0.00304885	H3K27ac
(TCCCG)n	464.73	0.0177626	0.00617343	0.0365427	H3K27ac
(TCCG)n	3224.36	0.0119588	0.000362772	0.00450908	H3K27ac
(TCCGG)n	195.437	0.0444024	0.000752383	0.00803846	H3K27ac
(TCCTG)n	753.736	0.0140185	0.00496626	0.0310673	H3K27ac
(TCG)n	3274.51	0.0145345	5.62875e-05	0.00096832	H3K27ac
(TTAA)n	6603.58	-0.0105731	0.00538957	0.0327841	H3K27ac
(TTATA)n	1819.07	-0.0153157	0.000840626	0.00856972	H3K27ac
(TTG)n	28521.9	-0.00432643	0.00578176	0.0347853	H3K27ac
(TTGG)n	8360.09	-0.00927186	1.21408e-05	0.000262099	H3K27ac
(TTTTA)n	8083.47	-0.0111411	7.96787e-06	0.000182763	H3K27ac
AluF_3	569.64	-0.0268816	5.53248e-05	0.000966867	H3K27ac
AT_rich	297479	-0.00448636	0.00582904	0.0348792	H3K27ac
B1_Mm	175114	-0.00473191	0.00295473	0.0223569	H3K27ac
B1_Mur1	210255	-0.00439138	0.00226003	0.0184318	H3K27ac
B1_Mur3	150440	-0.00510144	0.00222028	0.0183799	H3K27ac
B1_Mus2	370922	-0.00500996	0.0038582	0.0257447	H3K27ac
B1F1	118714	-0.00558184	0.000352307	0.00449097	H3K27ac
B1F2	93913.8	-0.00364459	0.0028216	0.0215735	H3K27ac
B2_Mm1t	76922.9	-0.0047358	0.00728901	0.0420167	H3K27ac
B2_Mm2	345731	-0.00478319	0.00296468	0.0223569	H3K27ac
B3	567696	-0.00482595	0.000716274	0.00780809	H3K27ac
B3A	342632	-0.00425436	0.00443622	0.028397	H3K27ac
BGLII_B	463.039	0.0189642	0.00199221	0.0476797	H3K4me3
C-rich	105246	0.0117633	4.18114e-08	1.77055e-06	H3K27ac
Charlie15a	1167.4	-0.0150592	0.00178438	0.0152295	H3K27ac
Charlie24	1492.23	-0.014891	0.00104346	0.01035	H3K27ac
Charlie5	9187.61	-0.0100289	0.00625107	0.0368044	H3K27ac
Charlie7	3410.16	-0.0143662	4.32001e-05	0.000792722	H3K27ac
CT-rich	140197	0.00381071	0.0032525	0.0232407	H3K27ac
ERVL-E-int	1363.17	0.0148977	0.000816457	0.00844537	H3K27ac
ERVL-int	986.745	0.0202286	0.00163873	0.0142066	H3K27ac
ETnERV-int	84.826	0.072395	0.000403943	0.0177927	H3K4me3
ETnERV2-int	20645.6	-0.0172363	1.57762e-07	5.98953e-06	H3K27ac
ETnERV3-int	353.208	0.0360342	0.00234586	0.0189911	H3K27ac
G-rich	120098	0.011937	2.28113e-10	1.47737e-08	H3K27ac
GA-rich	138088	0.00372123	0.00505434	0.0314397	H3K27ac
GC_rich	1.00617e+06	0.0152184	4.62231e-18	1.01783e-15	H3K27ac
GSAT_MM	136.336	0.0456836	0.00120955	0.0112857	H3K27ac
HERVL40-int	5260.93	-0.0222017	1.35416e-07	5.32474e-06	H3K27ac
IAP-d-int	685.612	0.0348119	9.23571e-07	2.74825e-05	H3K27ac
IAP-d-int	897.333	0.0485015	4.02539e-09	4.13721e-07	H3K4me3
IAPEY_LTR	178.375	0.0384217	0.00144435	0.0131424	H3K27ac
IAPEY2_LTR	59.9936	0.0869344	5.28957e-05	0.0032619	H3K4me3
IAPEY3_LTR	57.7848	0.0578893	0.00112471	0.0320907	H3K4me3
IAPEY3-int	457.124	0.0411716	0.00100316	0.0100407	H3K27ac
IAPEY3-int	258.794	0.0692512	9.63515e-11	1.27322e-08	H3K4me3
IAPEz-int	1436.16	0.029129	7.37612e-06	0.000176433	H3K27ac
IAPEz-int	771.711	0.025517	0.000551203	0.0200931	H3K4me3
IAPLTR1_Mm	2482.17	0.0126315	0.000919207	0.00928483	H3K27ac
IAPLTR1a_Mm	342.186	0.0307781	0.000768251	0.00805566	H3K27ac
IAPLTR2b	219.489	0.0592309	4.09825e-06	0.000107433	H3K27ac
IAPLTR2b	84.3168	0.201422	0.000139144	0.00715045	H3K4me3
IAPLTR3	47.8816	0.0804536	0.000183897	0.0026369	H3K27ac
IAPLTR3-int	1395.47	0.0669583	1.1461e-26	1.26186e-23	H3K27ac
IAPLTR3-int	994.194	0.0597669	4.08551e-28	1.88955e-25	H3K4me3
IAPLTR4	851.362	0.0583509	6.27715e-14	7.67905e-12	H3K27ac
IAPLTR4	654.747	0.0514638	2.89726e-32	2.67997e-29	H3K4me3
IAPLTR4_I	253.162	0.0329456	0.00281171	0.0215735	H3K27ac
ID4	240621	-0.00351505	0.00771711	0.0436354	H3K27ac
L1_Mur2	9174.82	-0.0129268	1.32918e-05	0.000281429	H3K27ac
L1_Mur3	27465.6	-0.00865011	6.08799e-05	0.00103121	H3K27ac
L1_Mus2	8204.02	-0.011207	4.96738e-05	0.000894604	H3K27ac
L1_Mus3	16240	-0.00989837	1.50173e-05	0.000306185	H3K27ac
L1M1	2222.77	-0.0197398	6.29282e-05	0.00104976	H3K27ac
L1M2	27909	-0.00517917	0.00126489	0.0116054	H3K27ac
L1M2a	175.724	0.0511498	0.00178094	0.0152295	H3K27ac
L1M4c	9618.56	-0.00937614	0.000354872	0.00449097	H3K27ac
L1MA4	9584.42	-0.0093261	0.000287361	0.00379783	H3K27ac
L1MA4A	4525.81	-0.0112802	6.41919e-05	0.00105486	H3K27ac
L1MA8	6741.02	-0.00893487	0.00848566	0.0474249	H3K27ac
L1MB2	11567.1	0.0058023	0.00362802	0.0245058	H3K27ac
L1Md_F2	32642.7	-0.00734646	0.000504146	0.00596843	H3K27ac
L1Md_F3	9492.78	-0.00667797	0.00481646	0.0303024	H3K27ac
L1Md_T	880.081	0.0148482	0.000785107	0.0268972	H3K4me3
L1MD1	9808.35	-0.0162035	0.000289753	0.00379783	H3K27ac
L1MD1	1773.05	-0.053573	8.52365e-06	0.00060649	H3K4me3
L1ME3	2499.18	-0.00935844	0.00306742	0.0225149	H3K27ac
L1MEb	408.324	0.0322259	0.00011045	0.00173722	H3K27ac
L1VL4	2577.74	-0.0166087	0.000143087	0.00218804	H3K27ac
LTR16A	1704.66	0.0161003	0.000364495	0.00450908	H3K27ac
LTR33A	2955.65	0.0142776	6.20417e-06	0.000155245	H3K27ac
LTR59	15.374	0.194181	0.000198208	0.00279778	H3K27ac
LTR75	1206.51	-0.0140098	0.0044198	0.028397	H3K27ac
LTR81A	86.5438	-0.0388177	0.000564779	0.0200931	H3K4me3
LTR82B	176.291	0.0377549	0.00119191	0.0112162	H3K27ac
LTRIS2	8188.67	0.00868673	0.003202	0.0230937	H3K27ac
LTRIS3	232.755	0.0392687	1.49159e-05	0.000306185	H3K27ac
Lx2A	645.217	-0.0283901	0.00335021	0.0234941	H3K27ac
Lx2B	466.657	-0.0230786	0.00114486	0.0320907	H3K4me3
Lx3A	2543.46	0.0127566	0.000820758	0.00844537	H3K27ac
Lx4B	11335.1	-0.0148231	1.99778e-06	5.49889e-05	H3K27ac
Lx7	47763.7	-0.00637651	0.00109355	0.0104773	H3K27ac
MamGypLTR2	388.669	0.0334322	0.00269907	0.0212263	H3K27ac
MamSINE1	582.006	0.0201113	0.00356976	0.0244665	H3K27ac
MER106B	400.489	-0.0214868	0.00402013	0.0263462	H3K27ac
MER117	2268.47	0.0127994	0.00328154	0.0232407	H3K27ac
MER34	1553.28	-0.0130836	0.00772835	0.0436354	H3K27ac
MER34A1	3130.77	-0.00890243	0.00690285	0.0402118	H3K27ac
MER45B	1270.83	0.0140637	0.00734091	0.0420955	H3K27ac
MER57C2	2565.88	-0.0100231	0.00887142	0.0485942	H3K27ac
MER58A	484.236	-0.0204105	0.00024567	0.0119602	H3K4me3
MER58B	662.443	-0.0155577	0.00201028	0.0476797	H3K4me3
MER70B	239.003	-0.0328462	0.000576205	0.00665671	H3K27ac
MER73	510.708	0.0328307	6.52343e-06	0.000159607	H3K27ac
MER90a	2283.08	-0.0165586	0.000135544	0.00210189	H3K27ac
MER96	105.747	0.0448768	0.000580422	0.00665671	H3K27ac
MERVK26-int	3210.36	0.0158107	0.00244499	0.0193665	H3K27ac
MERVL_2A-int	13096.3	-0.0143093	7.2156e-08	2.94236e-06	H3K27ac
MERVL-int	3674.33	0.0172306	0.00306418	0.0225149	H3K27ac
MLT1A	8394.51	0.00791773	0.00278123	0.0215735	H3K27ac
MLT1F1	4121.16	0.0130424	0.000513306	0.00601224	H3K27ac
MLT1G1	3776.23	0.00994117	0.00543277	0.0328653	H3K27ac
MLT1J-int	1709.13	0.0105057	0.00453271	0.0288469	H3K27ac
MLT1K	7147.33	0.00816002	0.0019174	0.0162389	H3K27ac
MMERGLN-int	3168.35	-0.0471216	0.00243	0.0193665	H3K27ac
MMERGLN-int	339.516	-0.0919837	6.32459e-05	0.0036564	H3K4me3
MMERVK10C-int	782.689	0.0239359	4.38543e-06	0.000368775	H3K4me3
MMSAT4	977.415	-0.0721048	5.01815e-16	1.54726e-13	H3K4me3
MMVL30-int	27681.3	0.013168	2.6606e-08	1.22055e-06	H3K27ac
MT2B	86598.7	-0.00561692	0.000172437	0.00253138	H3K27ac
MTE-int	1082.78	-0.0268751	6.8838e-06	0.000530626	H3K4me3
MTE2a-int	1480.86	-0.0220806	0.00434261	0.0281248	H3K27ac
MTEa-int	6986.32	-0.0226287	0.0001701	0.00253081	H3K27ac
MuLV-int	10236.8	-0.0167026	2.37152e-07	8.70347e-06	H3K27ac
MurERV4-int	3226.28	0.0217641	1.33849e-06	3.77866e-05	H3K27ac
MuRRS4-int	6236.72	0.012446	3.71252e-07	1.2022e-05	H3K27ac
MuRRS4-int	480.283	0.0299448	7.32657e-05	0.00398652	H3K4me3
MurSatRep1	1655.86	-0.0507613	3.00008e-14	6.93769e-12	H3K4me3
MusHAL1	5425.15	-0.022465	8.90102e-09	5.15791e-07	H3K27ac
MYSERV-int	7408.6	-0.0268657	3.46068e-13	3.81021e-11	H3K27ac
ORR1A3	8168.97	-0.00930157	0.00359997	0.0244665	H3K27ac
ORR1A4-int	181.432	-0.0279215	0.00187604	0.0476681	H3K4me3
ORR1B1	26884.5	-0.00529144	0.00407449	0.0265445	H3K27ac
ORR1B1-int	11012.5	-0.00991045	0.000154095	0.00232409	H3K27ac
RLTR10	26.1041	-0.139058	2.28781e-05	0.00151159	H3K4me3
RLTR10-int	1844.5	0.0240433	0.000202222	0.00281831	H3K27ac
RLTR10-int	907.457	0.044589	7.24849e-10	8.38107e-08	H3K4me3
RLTR10A	576.312	0.0473559	8.59304e-12	1.32476e-09	H3K4me3
RLTR11A2	17157	-0.0106698	1.59419e-05	0.000319127	H3K27ac
RLTR13B3	124.009	0.0502642	8.44973e-05	0.00136811	H3K27ac
RLTR13C2	2198.91	0.0250968	3.76501e-05	0.000714702	H3K27ac
RLTR17	526.331	0.0241066	0.00124356	0.0336366	H3K4me3
RLTR19-int	12358.9	-0.00816746	0.00160916	0.0141735	H3K27ac
RLTR19C	10404.5	-0.018487	1.852e-08	9.70978e-07	H3K27ac
RLTR1C	1917.04	-0.094436	0.000394541	0.00482655	H3K27ac
RLTR1C	252.077	-0.201292	0.000479949	0.0200931	H3K4me3
RLTR20A2	105.045	-0.0466318	0.000863376	0.0285223	H3K4me3
RLTR20B2	3118.61	-0.0134358	0.000462478	0.00553465	H3K27ac
RLTR23	11787.4	0.00713888	0.00525981	0.0321725	H3K27ac
RLTR27	975.485	0.021647	0.00299263	0.0223954	H3K27ac
RLTR3_Mm	218.802	0.0531356	6.64554e-07	2.03243e-05	H3K27ac
RLTR30	6073.25	-0.0206053	7.53163e-06	0.000176433	H3K27ac
RLTR42-int	8680.95	-0.0151429	4.60282e-06	0.000117854	H3K27ac
RLTR45	2137.03	-0.022463	0.00062581	0.00695976	H3K27ac
RLTR45-int	5286.21	-0.0351716	5.69833e-13	5.70351e-11	H3K27ac
RLTR46	581.941	0.0322456	1.1713e-06	3.3937e-05	H3K27ac
RLTR46	442.966	0.0209811	0.000503496	0.0200931	H3K4me3
RLTR6_Mm	29677.8	0.00953033	0.00150905	0.0135079	H3K27ac
RLTR6-int	7667.5	0.00809196	0.000406787	0.00492167	H3K27ac
RLTR6-int	932.341	0.0180062	0.000527275	0.0200931	H3K4me3
RLTR9A	9045.94	-0.0245581	4.31934e-17	6.7937e-15	H3K27ac
RLTR9E	1849.4	0.0132996	0.00349543	0.0243574	H3K27ac
RMER12B	5679.03	-0.00793259	0.00122001	0.0112876	H3K27ac
RMER15-int	397.954	-0.0268032	0.000358258	0.0165695	H3K4me3
RMER16-int	15931.8	-0.037392	3.92746e-06	0.000105467	H3K27ac
RMER17A	3037.61	0.00981199	0.00858429	0.0477339	H3K27ac
RMER17A-int	1187.36	0.0247467	0.00603738	0.0359305	H3K27ac
RMER17C-int	5068.05	0.0238979	4.92734e-09	3.01389e-07	H3K27ac
RMER17C-int	412.869	0.0348695	3.31804e-12	6.13837e-10	H3K4me3
RMER17D2	5343.7	0.0139862	9.99679e-05	0.00159514	H3K27ac
RMER19A	10728.2	-0.0090195	0.00107602	0.0104773	H3K27ac
RMER1C	6230.84	-0.0113651	0.00280954	0.0215735	H3K27ac
RMER2	10595.6	-0.00659737	0.00357432	0.0244665	H3K27ac
RMER20A	189.348	-0.0301006	0.000982516	0.0313389	H3K4me3
RMER6A	17256.8	-0.00964792	0.00786714	0.0441925	H3K27ac
RMER6C	267.29	-0.0392806	0.00114306	0.0320907	H3K4me3
RNERVK23-int	88.3715	0.0350325	0.00127273	0.0336366	H3K4me3
SRV_MM-int	2243.72	0.0309109	3.44798e-05	0.000666005	H3K27ac
SRV_MM-int	1118.91	0.0382242	2.03646e-06	0.000188372	H3K4me3
SUBTEL_sa	629.418	0.0184857	0.0039771	0.0263293	H3K27ac
tRNA-Arg-AGA	406.278	0.0324686	0.00215811	0.0180006	H3K27ac
tRNA-Tyr-TAC	581.159	0.0229028	0.00358928	0.0244665	H3K27ac
Zaphod	3782.97	-0.0173648	2.89012e-05	0.000568217	H3K27ac

## Sheet: H
Cerebellum histone marks at repeats
Repeat Name	Mean normalized ChIP intensity	log2(FoldChange per month of life)	p-value	Adjusted p-value (FDR)	Mark?
(AGGTG)n	154.204	0.0210565	0.00337769	0.0345345	H3K27ac
(ATTTG)n	1340.46	0.0091799	0.00150752	0.0217003	H3K27ac
(CAAAT)n	952.034	0.0120765	0.00156823	0.0217169	H3K27ac
(CAAGA)n	81.8745	0.0344878	0.000605447	0.0113918	H3K27ac
(CACAA)n	588.312	-0.0123377	0.00266923	0.0295712	H3K27ac
(CACAT)n	907.834	-0.00986703	0.00214865	0.0264115	H3K27ac
(CACG)n	6838.07	-0.00562421	0.00214046	0.0264115	H3K27ac
(CACTG)n	56.0642	0.0558418	8.3077e-06	0.000908862	H3K27ac
(CATG)n	8595.93	-0.00531575	0.00122365	0.0180902	H3K27ac
(CATTA)n	271.858	0.0223053	3.34292e-05	0.00182858	H3K27ac
(CCA)n	16828.2	-0.0046412	0.00212488	0.0264115	H3K27ac
(CCCCAG)n	12550.9	-0.0081832	0.000395765	0.00883606	H3K27ac
(CCCCCG)n	8193.09	-0.0115194	3.61341e-05	0.00188241	H3K27ac
(CCCCCT)n	5081.03	-0.00614941	0.000922604	0.0148431	H3K27ac
(CCCGG)n	11851.5	-0.0107822	0.000131808	0.00465156	H3K27ac
(CCGGG)n	13783.7	-0.00788797	0.00316938	0.0330219	H3K27ac
(CG)n	16634	-0.00692481	0.00277379	0.029786	H3K27ac
(CGAAA)n	199.278	0.0224415	0.00315271	0.0330219	H3K27ac
(CGGGA)n	354.648	-0.0232889	3.18601e-05	0.0122502	H3K4me3
(CGGGGG)n	7556.01	-0.00752244	0.0019072	0.025095	H3K27ac
(CGTG)n	10135.9	-0.00459013	0.00491339	0.0419941	H3K27ac
(CTAAA)n	1153.25	-0.0113002	4.93164e-05	0.00224801	H3K27ac
(CTAGG)n	267.207	-0.0179869	0.00198972	0.0253111	H3K27ac
(CTCG)n	10546	-0.0100791	0.000469039	0.00993011	H3K27ac
(CTCGG)n	7062.06	-0.0097817	0.000565208	0.010848	H3K27ac
(CTG)n	33162.1	-0.00706913	0.00163357	0.022339	H3K27ac
(TAAG)n	351.633	0.0155472	0.00573887	0.0479262	H3K27ac
(TATAA)n	2473.13	-0.00914042	1.28124e-05	0.00109712	H3K27ac
(TCCCG)n	1073.89	-0.0112833	0.000624781	0.0113918	H3K27ac
(TCG)n	3875.94	-0.00916018	0.00116922	0.0175223	H3K27ac
(TCTTG)n	122.105	0.0367739	4.35321e-05	0.00214566	H3K27ac
(TGG)n	16919.6	-0.00533673	0.000390195	0.00883606	H3K27ac
(TGGGGG)n	16845.1	-0.00434618	0.00469275	0.041164	H3K27ac
4.5SRNA	5547.15	-0.00445465	0.00592486	0.048392	H3K27ac
Arthur1	1414.69	0.00739914	0.00467975	0.041164	H3K27ac
Arthur1B	4296.42	-0.010494	6.31172e-06	0.000863127	H3K27ac
BGLII_Mus	126.462	-0.0240525	0.00412924	0.0386102	H3K27ac
C-rich	133700	-0.00739896	0.0015362	0.0217169	H3K27ac
Charlie12	4219.99	-0.00736745	0.004252	0.0387641	H3K27ac
Charlie19a	845.469	0.00928792	0.00367768	0.0352726	H3K27ac
Charlie2a	339.203	0.0142905	0.00436647	0.0393976	H3K27ac
Charlie2b	1372.74	0.010923	6.3019e-05	0.00275771	H3K27ac
Charlie4	612.287	-0.0120844	0.00470338	0.041164	H3K27ac
Charlie4a	3582.35	0.00656278	0.00111564	0.0171903	H3K27ac
ERVL-E-int	4849	-0.00731485	0.00168748	0.0225135	H3K27ac
ETnERV2-int	3395.2	0.0208051	1.55837e-22	1.70485e-19	H3K27ac
FordPrefect	1015.79	-0.00954656	0.00225932	0.0268662	H3K27ac
FordPrefect_a	1023.99	-0.0128884	4.51098e-05	0.00214566	H3K27ac
G-rich	155945	-0.00744744	0.000882089	0.0144031	H3K27ac
HAL1	6633.95	0.00592809	0.000390633	0.00883606	H3K27ac
HAL1b	1705.83	-0.0110013	1.0553e-05	0.00104955	H3K27ac
Helitron1Na_Mam	18.0146	0.0809326	0.00033421	0.00850291	H3K27ac
HERV16-int	458.792	-0.0215701	0.000233973	0.00711017	H3K27ac
HERVL74-int	280.521	0.0257065	2.29705e-05	0.00167532	H3K27ac
IAP-d-int	582.372	0.0162739	7.15114e-05	0.00289753	H3K27ac
IAPEY3-int	623.125	0.0134774	0.0042233	0.0387641	H3K27ac
IAPEz-int	892.533	0.0122729	0.00517411	0.0438797	H3K27ac
L1_Mm	4799.74	0.00730311	6.99707e-05	0.00289753	H3K27ac
L1_Mur2	8293.56	0.00793424	1.30371e-05	0.00109712	H3K27ac
L1_Rod	11754	0.00504328	0.00235237	0.0273904	H3K27ac
L1M3	12859.9	0.00479815	0.000561139	0.010848	H3K27ac
L1M3e	2864.89	-0.0068577	0.000684251	0.0118821	H3K27ac
L1M4b	5252.94	0.00622933	0.000653745	0.0117245	H3K27ac
L1M4c	4576.12	0.00569824	0.00101946	0.0159328	H3K27ac
L1MA10	773.646	0.0109053	0.00342504	0.0346944	H3K27ac
L1MB2	11397.7	0.00482947	0.000810223	0.0136367	H3K27ac
L1MB7	21926	0.00390814	0.00242882	0.0276784	H3K27ac
L1MB8	19387.3	0.00429215	0.00584644	0.048392	H3K27ac
L1MC1	11919.8	0.0043104	0.00270244	0.0295712	H3K27ac
L1MCb	2899.11	0.00815391	0.000349893	0.00869961	H3K27ac
L1Md_F	90.9817	-0.0470443	1.84354e-06	0.00141768	H3K4me3
L1MD1	9056.33	0.00423739	0.00195335	0.0251408	H3K27ac
L1ME2	5440.72	0.00714351	2.46239e-05	0.00168366	H3K27ac
L1MEc	8141.07	0.0049458	0.00353501	0.0348405	H3K27ac
L1MEd	1661.74	0.0116461	2.42715e-06	0.00044255	H3K27ac
L1VL1	45.4872	-0.0473125	0.000322579	0.0496127	H3K4me3
LTR16B1	1491.25	-0.00764057	0.00265527	0.0295712	H3K27ac
LTR16B2	948.107	0.01359	2.88879e-05	0.00175574	H3K27ac
LTR33B	4218.13	-0.00527962	0.00609828	0.0494186	H3K27ac
LTR41B	1314.79	-0.0112908	3.28445e-05	0.00182858	H3K27ac
LTR83	1630.16	-0.0136542	1.61285e-07	4.41115e-05	H3K27ac
LTR88c	1377.01	-0.0105793	0.000119229	0.00434788	H3K27ac
LTR89	450.991	0.0130659	0.00370782	0.0352726	H3K27ac
Lx3_Mus	69.6249	-0.0403348	0.000316244	0.0496127	H3K4me3
Lx3A	2188.55	0.00719406	0.00548162	0.0461299	H3K27ac
Lx6	29534.2	0.00445802	0.000262681	0.00756245	H3K27ac
MamGypLTR1c	634.952	-0.0138835	0.000140897	0.00481691	H3K27ac
MER106A	1077.34	-0.00952434	0.00409604	0.0386102	H3K27ac
MER115	4027.4	-0.0062194	0.000390713	0.00883606	H3K27ac
MER31B	1684.94	0.0121775	5.67694e-06	0.000863127	H3K27ac
MER44C	412.046	0.0243796	1.49082e-07	4.41115e-05	H3K27ac
MER44D	5463.23	-0.004991	0.00360346	0.0348866	H3K27ac
MER47A	1540.47	-0.0119525	7.12574e-06	0.000866173	H3K27ac
MER58C	746.139	0.0113654	0.00352873	0.0348405	H3K27ac
MER70-int	595.004	0.0356652	0.00359629	0.0348866	H3K27ac
MER74A	2983.33	-0.00650786	0.000666795	0.0117657	H3K27ac
MER89	1689.37	0.00749235	0.00155814	0.0217169	H3K27ac
MER96	435.208	-0.017509	0.000876456	0.0144031	H3K27ac
MIR3	65762.6	-0.00384463	0.000623685	0.0113918	H3K27ac
MIRc	131971	-0.00342159	0.00192686	0.025095	H3K27ac
MLT-int	2690.88	0.00631606	0.00219742	0.0264174	H3K27ac
MLT1A	21451.4	-0.00529335	0.000207728	0.00668396	H3K27ac
MLT1E1A	4303.2	-0.00600709	0.00028571	0.00781416	H3K27ac
MLT1G3	2561.2	0.00687447	0.00270303	0.0295712	H3K27ac
MLT1J1	6004.28	-0.00649219	0.000316374	0.00844178	H3K27ac
MLT2B2	3463.16	-0.00619795	0.00240839	0.0276784	H3K27ac
MT-int	407.702	0.0201418	0.000329207	0.00850291	H3K27ac
MTC-int	6151.03	0.00546822	0.00165553	0.0223599	H3K27ac
MTE2a-int	5615.28	-0.00765495	0.00477088	0.0414234	H3K27ac
MTEb-int	1027.84	0.0112439	0.0029807	0.0316591	H3K27ac
MuLV-int	8072.9	-0.00490889	0.00592736	0.048392	H3K27ac
ORR1B2	18504	0.00548924	9.17543e-05	0.00358497	H3K27ac
ORR1B2-int	1879.27	0.0100995	0.00027439	0.00769698	H3K27ac
RLTR10D	411.505	0.0160198	0.000220146	0.00688114	H3K27ac
RLTR12B	5370.33	0.00608541	0.000245297	0.00725284	H3K27ac
RLTR13D6	359.873	0.0285998	2.69613e-05	0.00173504	H3K27ac
RLTR18	2437.08	-0.00668272	0.000963063	0.0152694	H3K27ac
RLTR19-int	6489.5	0.00674265	0.000169447	0.00561743	H3K27ac
RLTR20D	132.128	-0.0315128	5.63863e-05	0.0144537	H3K4me3
RLTR28B	1610.51	0.00715174	0.00489667	0.0419941	H3K27ac
RLTR4_Mm	46079.7	-0.006115	0.00325227	0.0335659	H3K27ac
RLTR42-int	3069.46	0.00770385	0.000471998	0.00993011	H3K27ac
RLTR44-int	647.086	0.0264096	8.34028e-11	4.56213e-08	H3K27ac
RLTR44B	396.822	0.0235228	2.11311e-06	0.00044255	H3K27ac
RLTR9A	2773.64	-0.00714122	0.00075472	0.012901	H3K27ac
RLTR9E	1037.55	0.00863065	0.00277713	0.029786	H3K27ac
RLTRETN_Mm	2730.8	0.00733499	0.000493183	0.00999152	H3K27ac
RMER12B	1921.41	0.0134957	2.11682e-05	0.00165414	H3K27ac
RMER16	2389.66	0.00822747	0.000111713	0.00421426	H3K27ac
RMER17A2	2370.22	0.00663841	0.00439352	0.0393976	H3K27ac
RMER2	3823.04	-0.0058755	0.00217401	0.0264174	H3K27ac
RMER21A	4496.39	-0.00599554	0.000465627	0.00993011	H3K27ac
RMER21B	3377.29	-0.00656723	0.000482092	0.00995111	H3K27ac
SUBTEL_sa	741.909	-0.0131227	0.00035966	0.00874373	H3K27ac
Tigger1	1239.39	0.0107667	0.00113713	0.0172781	H3K27ac
Tigger15a	1644.99	0.00684813	0.00420626	0.0387641	H3K27ac
Tigger5	8425.37	0.00481072	0.00142277	0.0207535	H3K27ac
tRNA-His-CAY	502.423	-0.0121593	0.00347181	0.0348405	H3K27ac
tRNA-Phe-TTY	1058.7	-0.00906377	0.00235347	0.0273904	H3K27ac
U5	659.235	0.01526	0.000529387	0.01053	H3K27ac

## Sheet: I
Olfactory bulb histone marks at repeats
Repeat Name	Mean normalized ChIP intensity	log2(FoldChange per month of life)	p-value	Adjusted p-value (FDR)	Mark?
IAPLTR3	82.5186	0.0773004	3.15228e-05	0.0354316	H3K27ac
