# Supplementary material for: Remodeling of epigenome and transcriptome landscapes with aging in mice reveals widespread induction of inflammatory responses
Source: HighWire-hosted journal article supplement (doi:10.1101/gr.240093.118), 2019-03-11
Supplement: Supplemental_Table_S7.xlsx [file Supplemental_Table_S7.xlsx]

## Sheet: Index
Supplemental Table S7
CIBERSORT analysis results
	A	Trained signature matrix for CIBERSORT for 21 mouse cell types (bm.K999.0)
	B	CIBERSORT results for signature matrix validation samples
	C	CIBERSORT results for hippocampus in mouse Alzheimer’s disease models
	D	CIBERSORT results for aging tissue and cell RNA-seq

## Sheet: A
NAME	Adipocytes	aNSCs	Astrocytes	Endothelial_cells	Erythrocytes	Granulocytes	Macrophages	Microglia	Monocytes	Neurons	NK_cells	NPCs	Oligodendrocytes	qNSCs	T_cells	Cardiomyocytes	Hepatocytes	B_cells	Cardiac Fibroblasts	Dermal Fibroblasts	Ependymal
0610010O12Rik	40.2388	49.0016	44.412	21.1724	12.8233	28.6619	18.5403	12.8233	12.8233	20.2407	12.8233	134.392	295.932	1148.06	12.8233	143.65	113.512	16.4906	61.2052	25.5374	587.505
1100001G20Rik	45.4393	13.1888	12.9797	13.5071	86.2964	4401.87	16.3966	15.7135	50.998	12.9689	15.5244	13.1712	12.9895	16.822	15.3405	13.2263	609.363	53.7129	12.9537	16.0035	13.8461
1110032A03Rik	175.206	311.801	79.6588	240.08	205.654	72.3482	48.6567	63.4169	78.1579	99.7798	65.1105	271.373	264.231	366.231	58.5511	44.8619	39.2681	41.2449	54.8166	51.9292	1590.25
1110058L19Rik	61.7329	606.143	27.6113	325.508	196.473	40.8745	59.9249	33.4067	66.9366	23.3343	97.6793	591.576	95.2356	698.685	85.482	163.691	52.5162	62.765	26.0432	36.9538	568.229
1190002F15Rik	14.401	604.506	13.2888	31.9603	1233.58	42.3758	28.5333	13.1396	51.0503	12.9693	76.9384	330.591	15.5487	141.623	103.752	17.4315	15.2054	35.0682	19.0503	37.3943	31.194
1190002H23Rik	849.056	21.8989	309.529	381.694	2569.03	116.231	57.4098	18.0631	47.8327	19.6134	57.84	39.1205	39.3301	733.753	259.083	112.13	18.7028	32.3095	104.373	53.9173	81.3464
1300017J02Rik	12.9951	13.8476	13.3082	14.5502	1536.3	17.2322	16.0166	15.2117	14.5844	14.4475	14.7493	14.7923	18.3054	16.0077	14.9107	13.8926	1412.79	15.2832	14.3147	14.8606	212.626
1500009C09Rik	12.8299	90.2449	128.295	12.8837	12.8821	12.8716	12.8716	13.1441	12.8827	50.2432	12.8821	89.7845	26.9751	554.928	12.8818	12.8714	12.8707	12.8835	12.8703	12.8299	51.1458
1500015O10Rik	15.5481	24.7179	14.8619	16.2728	12.8233	12.8233	12.8233	12.8233	12.8233	18.1275	12.8233	50.122	12.8233	12.8233	12.8233	17.7075	12.8233	12.8233	49.5583	150.365	8623.53
1700017B05Rik	154.297	75.7234	162.051	38.288	355.137	119.398	189.328	2790.95	98.5098	35.7673	77.6868	46.5923	27.0834	106.26	166.311	61.5605	500.211	200.463	190.067	250.444	69.6607
1700084C01Rik	12.908	50.4497	498.983	13.8395	13.0346	12.9537	12.9597	13.8681	13.086	15.1749	13.0474	62.5085	20.0176	224.401	13.0145	12.9442	17.0034	13.099	12.9104	12.9019	92.2625
1810011O10Rik	79.0746	42.5017	13.1335	1138.95	13.2786	13.905	87.2865	73.1108	13.4441	12.9099	13.279	16.314	14.926	14.2258	13.3998	291.578	184.852	13.5206	77.3541	29.9788	17.908
1810022K09Rik	64.8703	267.23	32.9349	164.482	69.6002	26.0479	44.6263	40.8015	46.7069	28.5387	101.554	952.525	102.783	759.325	84.4786	37.414	27.6744	73.6	31.614	515.246	181.218
1810033B17Rik	17.0925	15.3336	15.5792	15.4042	60.7768	3725.54	747.763	27.282	876.76	20.8508	25.0792	15.2669	13.7355	29.9341	20.0177	15.4811	17.1913	22.8135	15.0821	13.2305	17.7654
2010001M09Rik	12.8257	12.8292	13.2856	12.8697	299.652	100.875	28.3826	12.8292	26.0593	12.8257	12.8697	13.3998	15.7314	12.8518	24.3288	18.2674	12.8292	1498.29	12.8292	12.8257	12.8299
2010015L04Rik	17.2337	33.6928	140.273	18.5602	12.9099	12.9203	20.0735	611.732	12.9104	126.16	23.8434	25.6832	22.9326	46.0362	26.2721	12.9881	19.5421	29.3918	27.4715	28.9583	416.091
2010320M18Rik	42.0308	93.7047	24.9368	76.1837	100.098	44.3458	42.84	18.3515	97.8825	18.4297	46.3651	145.63	34.6618	746.289	45.0603	71.7598	31.9017	36.153	20.7348	30.792	167.308
2310042D19Rik	26.9502	19.6132	63.9088	12.9056	183.125	49.9442	15.9729	28.6199	12.901	39.0056	12.9022	17.1151	42.1165	12.9054	26.704	2329.57	23.4008	17.2523	32.7702	13.7444	12.8841
2410091C18Rik	114.346	288.763	102.592	212.472	107.486	149.493	88.9897	130.968	286.698	151.465	123.981	313.804	115.08	362.531	112.81	149.553	106.311	77.3099	63.7618	87.5646	1394.2
2610017I09Rik	13.1524	1650.68	288.864	20.6329	16.5297	14.0063	14.2169	17.91	17.03	28.529	16.511	3228.47	92.9678	4350.93	15.7077	13.3223	13.6126	13.4928	12.9849	21.4496	70.197
2610034M16Rik	13.1501	25.5462	115.786	14.2499	16.2078	14.0727	14.5759	15.0735	16.721	13.0903	16.1683	16.0314	17.1963	1405.95	15.5158	13.264	13.5121	13.3998	12.9795	13.0159	49.9458
2610109H07Rik	20.2433	341.08	22.659	14.6837	13.4927	17.2339	13.1138	12.9611	13.591	12.956	13.9765	214.44	19.6039	79.1764	13.3953	16.1574	12.9825	13.9438	12.9849	20.9267	13.1714
2610203C20Rik	84.4961	80.7881	2470.94	41.6198	18.342	18.9847	15.4807	28.6616	18.9302	763.64	18.2355	207.766	42.4767	758.51	17.7868	27.8517	16.7212	14.3043	311.726	823.459	270.213
2610305D13Rik	17.2954	23.8418	14.2957	295.908	12.8703	12.8299	16.8464	12.8511	12.8716	12.8262	12.8714	27.075	16.7115	34.4661	12.8716	20.257	12.8299	12.8716	24.8047	27.4444	109.205
2700094K13Rik	45.2189	2308.66	37.0926	183.35	386.433	71.7964	107.038	53.4423	410.982	22.454	235.327	1030.06	81.3287	793.022	583.013	69.5549	56.0651	335.134	28.9077	74.7661	48.9253
2810417H13Rik	22.3589	2255.08	43.4845	56.2667	1581.41	183.7	159.817	25.7911	167.113	30.8406	153.434	1000.02	14.8697	843.67	93.9221	22.7986	24.543	95.8225	19.0765	272.852	107.941
2900052N01Rik	12.8233	18.7033	555.738	15.4007	12.8233	12.8233	12.8233	15.3755	12.8233	16.0944	12.8233	29.0712	17.6923	403.476	12.8233	12.8257	12.8233	12.8233	12.8233	12.8233	61.1024
2900092D14Rik	12.935	348.764	901.669	16.4194	13.3535	12.9974	13.0344	15.143	13.4442	149.734	13.4381	461.403	105.621	539.128	13.2351	12.9505	12.9789	12.9756	12.9041	25.898	39.2684
2900097C17Rik	426.042	1396.73	173.968	284.762	32.5166	248.521	347.305	96.9165	44.4192	310.54	86.5102	465.665	1135.87	175.596	83.8557	443.94	200.448	483.919	364.581	484.045	2867.08
3425401B19Rik	15.3647	12.8262	19.493	12.8283	12.8292	12.8299	12.8292	13.7707	12.8299	12.8257	12.8292	12.8292	12.8278	12.8498	12.8295	1194.68	12.8257	17.5516	20.7758	13.8184	12.8292
4632428N05Rik	128.785	81.8293	98.1739	428.799	596.324	6379.65	3876.5	4946.29	3545.44	15.6843	557.261	19.9672	107.965	34.8664	1434.55	151.463	24.018	175.029	65.126	102.553	63.7736
4833427G06Rik	13.1501	16.1082	13.9202	13.9872	16.4549	13.9473	14.1859	13.1502	16.9364	13.0565	17.1858	14.9973	13.1014	19.7567	15.6275	13.7813	13.5805	13.4487	13.5908	24.9942	313.155
4930523C07Rik	147.851	14.3626	84.5489	320.572	371.57	601.373	163.976	38.5936	386.03	13.9427	700.376	23.2507	12.9056	221.986	719.226	154.712	67.2953	1402.89	528.307	133.688	95.719
4930578C19Rik	14.7425	13.5377	13.1637	214.187	13.8257	13.087	13.1115	13.0059	14.0266	12.9097	14.067	13.2604	12.9399	15.2249	13.4943	32.8408	13.0183	12.9978	13.0101	12.9095	13.2947
4932425I24Rik	13.618	12.8482	16.8315	12.8292	12.8257	12.8257	12.8257	12.8257	12.8262	17.2209	12.8257	14.3269	12.8245	31.1567	12.8262	12.8274	18.361	12.8267	14.6699	15.1315	527.33
4932438H23Rik	14.7486	16.732	99.378	13.9915	12.8233	12.8233	12.8233	12.8233	12.8233	15.1258	12.8233	19.1071	23.4634	239.331	17.7741	13.2455	12.8233	12.8233	15.2035	14.3536	480.744
4933404M02Rik	13.3772	25.4689	23.0063	20.3085	17.9903	15.8998	16.1299	13.9056	18.5637	20.0945	17.9084	20.5653	15.3309	23.1056	17.014	14.4271	14.3106	18.8883	17.5517	15.946	379.401
4933434E20Rik	184.482	1017.15	240.79	826.793	138.277	213.539	152.971	274.236	160.261	152.408	267.32	1115.49	367.353	815.571	233.856	307.469	192.704	298.834	141.11	188.563	4945.33
5031414D18Rik	14.7551	15.8912	14.9491	12.8703	25.555	126.602	39.7613	558.419	74.6732	14.5058	22.0246	15.0854	13.59	12.8709	12.8703	21.8683	12.8292	302.849	14.6711	18.1136	54.6026
5430435G22Rik	45.845	12.9445	22.5604	12.8924	58.7328	58.2699	384.452	24.4308	289.818	13.2393	15.1233	19.1383	479.194	38.3023	12.8928	20.525	34.8966	18.7088	143.057	50.3451	57.6278
5730469M10Rik	1359.48	626.48	830.767	75.1046	2931.46	54.3236	39.1422	55.7097	58.7562	118.69	39.9069	220.981	423.644	2416.16	83.2972	95.523	233.879	109.578	44.4634	50.9295	3933.11
5730508B09Rik	74.8693	17.6283	14.1417	97.0194	1633.31	206.993	168.976	15.2023	338.2	19.4036	47.1109	15.7179	46.6169	14.0352	122.753	23.2444	31.4965	48.6911	22.8111	28.567	17.1685
5830416P10Rik	12.8703	12.8788	12.8911	15.519	69.5208	889.373	27.7758	15.4941	107.331	17.4003	1001.05	13.3084	12.8771	40.601	155.341	12.8882	23.4437	499.774	13.4487	13.1983	37.2099
6030468B19Rik	12.8721	12.8929	12.8721	12.9031	663.49	12.9037	13.7498	86.3709	12.902	12.8716	12.9023	12.8839	12.9033	12.9066	12.9022	12.8968	12.8818	20.4867	12.8818	12.87	12.8922
6330403K07Rik	16.8146	257.651	265.357	12.9773	12.9604	12.9691	12.9087	18.5597	12.9691	181.444	31.091	431.084	36.5321	1735.47	44.173	14.6096	12.9028	12.9789	19.1377	15.2602	213.214
6330406I15Rik	273.281	12.8498	13.4128	13.9048	12.8728	12.8732	12.8703	12.8718	12.873	21.823	12.8732	12.8818	13.6514	12.8788	12.8734	24.5059	12.8571	12.8732	1480.88	1465.95	30.5772
8430408G22Rik	230.548	17.5121	13.0411	1801.32	12.9086	12.9094	12.9228	48.3861	12.9089	12.8828	12.9083	13.386	13.4554	12.944	12.909	428.971	115.548	12.8844	21.5946	19.483	12.9028
9230110C19Rik	21.4508	43.1066	23.0486	31.0412	13.2034	13.2798	13.0222	12.9957	13.2612	35.4942	13.5317	97.7745	19.5241	14.0194	16.1224	15.9707	31.4984	13.3084	22.9198	57.4037	356.934
9330159F19Rik	52.475	352.59	1210.82	19.6441	14.1202	13.8161	13.2787	20.8929	14.3861	834.646	14.1717	448.663	209.329	2272.35	14.1946	16.086	13.0605	13.0341	19.6391	14.1223	362.528
9430020K01Rik	775.002	21.2052	78.7218	2674.92	29.9487	22.621	39.9093	25.4156	39.4904	885.507	12.9008	84.7137	415.743	19.8734	28.2272	335.491	187.07	32.5412	579.893	207.058	12.8833
9430076G02Rik	13.4946	15.0745	13.4595	20.158	530.247	20.6887	16.6471	14.0688	21.361	13.2785	20.5411	15.0662	13.6185	28.1739	18.5787	14.1349	15.0186	16.6091	14.4654	13.189	17.31
9530091C08Rik	15.2023	18.2592	1470.72	94.311	12.8299	12.8292	12.8292	18.7861	12.8311	1010.64	12.8299	26.2305	13.3429	979.946	12.8507	19.4669	12.8292	12.8267	31.4233	26.4686	171.854
9630013A20Rik	12.8233	17.3459	46.6479	18.1443	12.8233	12.8233	12.8233	12.8257	12.8233	23.3543	12.8233	20.8867	742.902	26.0466	12.8233	12.8233	12.8233	12.8233	12.8233	12.8233	16.2238
9830001H06Rik	517.795	347.084	779.073	191.326	40.6053	42.857	503.566	2546.7	82.6406	274.134	13.0037	313.332	1389.38	298.694	13.0184	209.774	20.3612	34.4142	1652.35	660.843	176.341
9830107B12Rik	12.8821	12.8925	12.8818	12.9055	12.9088	601.047	22.8572	15.5681	39.1702	12.8732	12.9104	12.9018	12.8959	12.9444	12.9103	12.94	12.8847	12.9104	12.8847	12.8724	12.9033
9930013L23Rik	32.2851	15.8825	18.6204	18.6981	13.1286	12.9691	12.9887	14.8117	13.156	180.446	13.1843	17.8558	15.5712	13.7335	13.1037	16.6231	19.7036	13.2138	19.6222	1183.39	13.007
9930111J21Rik2	25.4963	87.1368	19.3507	90.5727	24.7036	79.7823	63.8768	1105.53	46.645	14.7073	33.7608	16.7618	15.2014	40.1092	49.0658	29.6559	33.4158	113.026	70.3662	77.6206	52.8009
A330093E20Rik	12.9604	39.2553	269.037	13.3734	13.9128	13.1286	13.1802	14.5404	14.1019	121.373	13.9207	131.25	16.3621	532.331	13.5373	24.7667	16.6568	13.0101	13.0101	12.932	27.2668
A430093F15Rik	12.8703	12.8724	12.8697	12.9015	12.8839	25.5297	12.8931	12.8943	12.8845	12.8703	12.8847	12.8721	12.87	12.894	200.356	14.163	12.8719	19.1901	14.4819	12.8316	12.8822
A430110N23Rik	125.237	12.893	19.8125	14.8311	12.8736	12.8818	12.8732	14.6705	12.8818	42.5396	12.8824	16.8146	13.2508	12.8909	15.3646	33.0658	12.8697	12.8821	857.513	295.269	12.8722
A530016L24Rik	339.349	14.7247	13.3424	19.0491	19.0567	15.1746	15.6143	13.7398	19.6148	19.7718	18.9122	13.9751	13.4157	25.5729	17.7412	438.254	14.6705	14.4693	20.0089	17.6182	16.6534
A630001G21Rik	19.1927	22.2519	16.5571	24.4109	158.988	227.108	187.182	319.694	269.103	13.202	172.649	15.0286	14.1071	25.3358	273.758	23.8003	18.0779	1075.2	29.98	22.4402	24.4774
A930011O12Rik	12.8267	12.8779	43.1139	12.8505	12.8703	12.8299	12.8299	18.7147	12.8703	1663.64	12.8703	22.8135	12.8719	12.8764	12.87	12.8278	12.8299	12.8292	12.8292	12.8262	12.8507
AA387883	13.0751	18.2341	254.549	13.3983	15.9688	13.905	14.1637	13.241	16.5407	16.4427	15.9846	38.1034	16.9829	613.241	15.7297	13.2528	13.4937	13.3883	13.0606	13.0145	14.8466
AB124611	22.9775	130.462	26.4219	20.2632	243.353	2775.74	918.486	34.7819	3017.02	16.3821	565.351	26.1078	18.7556	74.4038	309.596	29.5281	23.8344	555.194	20.4396	15.4218	60.2628
AF251705	20.7377	149.367	15.2148	12.893	152.227	746.57	255.074	958.036	1218.39	12.8913	12.9056	13.317	28.3648	12.9066	12.9027	12.9326	12.8952	29.5156	13.9051	12.871	124.221
AI464131	176.373	38.5326	749.438	18.9372	12.9689	12.9761	19.6812	16.2315	12.9778	19.9188	12.9776	44.0917	97.9196	876.692	12.9775	417.968	41.2399	12.9763	116.488	56.9846	159.295
AI593442	12.8827	72.9458	95.1232	12.9643	12.9104	12.9094	12.9025	21.0316	12.9231	1263.12	12.9104	89.4992	14.6614	26.2519	12.9095	13.6731	12.9008	12.9001	15.9688	13.1562	12.9063
AI607873	375.332	160.625	13.0401	18.0161	55.1515	77.3319	384.003	93.3402	1205.28	12.8732	52.5022	12.9759	12.8957	12.932	16.5628	18.7065	30.205	33.3168	1643.89	23.5843	151.49
AI854517	12.8732	134.892	486.769	13.6139	12.9031	12.8839	12.8924	14.3357	12.9033	135.027	12.9027	152.864	83.8443	686.061	12.9019	12.8773	12.8827	12.8821	12.8821	12.8712	87.6108
AU021092	18.2691	12.8233	12.8233	1344.4	12.8233	12.8233	12.8233	14.5333	12.8233	12.8233	12.8233	17.9317	12.8233	12.8233	12.8233	31.8316	12.8233	12.8233	20.9259	13.6444	12.8233
AW112010	56.8265	42.1776	13.5021	2194.31	19.75	59.0494	81.5206	28.0974	120.592	13.1384	9171.39	20.4407	13.3732	25.2994	1839.85	27.411	420.396	122.392	24.0294	13.1158	16.5323
Aass	16.1511	29.3376	195.714	17.5044	13.3172	12.9974	13.0344	13.7218	13.4394	13.1464	13.3436	18.0737	13.9869	415.648	13.29	19.095	189.172	12.9697	22.4942	44.7128	165.985
Aatk	40.312	19.1196	380.142	30.524	31.3664	742.471	118.233	111.775	62.2703	400.513	13.5964	43.1647	4793.05	154.947	13.4964	25.3658	18.7215	15.2834	32.6539	18.2129	35.239
Abca8a	169.761	23.8771	72.9423	20.1382	14.0063	14.2548	19.5245	26.7141	14.316	23.8354	14.4292	17.8558	36.6178	95.1254	14.5619	211.585	47.7474	14.6115	2174.1	22.7202	75.3019
Abca9	72.4822	202.477	30.1809	22.2638	26.9735	66.1817	257.994	2832.49	238.563	21.6638	15.8819	15.2278	35.7236	12.8789	12.8818	25.7183	20.3058	21.0636	469.863	27.0602	172.913
Abcb10	128.266	28.5134	141.161	82.6712	5193.33	104.135	99.8154	93.5982	142.767	111.805	147.898	55.9876	355.348	53.7365	52.7576	416.205	138.033	136.129	105.22	102.43	205.126
Abcb1a	23.9938	25.0201	34.6421	2562.15	367.738	19.8488	54.614	46.7774	45.2676	21.5332	375.626	28.2845	17.6707	25.8511	109.989	102.232	96.3936	44.2705	71.177	60.7642	13.7583
Abcb4	15.9149	22.4151	49.1119	16.1953	1607.32	31.1177	52.0577	239.039	39.274	43.881	18.337	20.8091	27.3505	26.4965	21.5724	141.308	590.628	46.7554	18.6773	12.8292	27.9287
Abcc2	15.2231	12.851	15.1887	12.8833	12.8732	16.8035	21.1684	12.8818	12.8777	15.4901	12.8732	12.8716	12.8775	23.7056	12.8777	12.8697	1748.45	12.8697	13.9751	12.8571	12.8719
Abcc3	34.578	85.2962	15.5147	16.2776	125.271	58.4714	279.02	1271.95	41.6055	15.575	20.9797	15.2457	19.0821	12.8794	14.378	27.7519	3525.19	17.7677	28.9851	26.5757	34.084
Abcc9	81.6952	12.9038	29.1816	136.654	12.8732	12.8818	15.8303	18.9248	12.8734	13.9845	12.8777	20.3262	14.0718	12.8791	12.8818	1818.58	20.3022	12.8818	473.695	16.8002	12.8719
Abcg2	81.2658	115.633	18.1181	4443.52	671.452	41.6711	60.1247	171.326	49.8305	26.9008	178.137	134.719	68.27	37.4103	83.0271	113.446	494.606	31.8815	120.247	82.3039	108.602
Abcg4	16.2563	23.1209	176.093	12.9017	1559.29	24.0716	16.7315	16.7146	21.1387	201.857	12.8847	43.4737	47.1534	84.1439	12.8851	15.5289	12.887	12.8854	24.7221	19.8928	19.7259
Abhd14b	152.328	25.2794	402.87	117.061	55.1614	30.7114	70.5856	55.7874	76.753	74.222	66.6461	24.9844	52.9264	261.381	71.6173	44.5843	294.146	73.5362	97.2641	107.06	1163.59
Abhd3	35.1926	59.4414	1130.63	21.7051	12.8292	12.8292	29.2133	50.2365	12.8292	43.2259	12.8292	28.5514	420.957	1270.85	12.8292	29.484	80.2254	12.8292	29.8428	18.6432	662.749
Abi3	521.337	19.5394	22.6681	185.214	187.594	695.72	1515.81	2601.41	2019.08	20.5784	162.868	15.9688	86.7191	14.1917	217.419	895.78	60.083	364.3	48.961	16.0711	33.7386
Abi3bp	52.8577	12.9071	39.5808	23.7634	12.9797	13.0753	12.9651	16.9557	13.0017	77.3401	23.677	13.9717	13.4496	13.1855	13.0547	54.2345	15.261	13.0315	1096.17	3591.76	37.6403
Ablim1	587.821	26.4506	351.626	3621.8	173.612	97.2641	89.2278	107.89	25.6256	849.294	2503.34	43.4002	20.1438	69.2682	3978.73	2535.12	222.108	3117.9	320.947	200.118	1856.47
Acaa2	4041.92	220.044	305.501	462.218	289.611	178.304	319.853	56.3776	691.064	29.6718	159.453	331.509	52.0524	769.485	385.129	3089.66	1281.03	147.033	243.496	135.486	2443.8
Acacb	1576.48	17.0415	113.406	131.885	18.5348	19.1927	22.9879	20.0587	19.1677	18.6923	20.3685	19.5209	20.2979	57.7687	22.8757	2326.3	270.195	20.196	75.734	27.1572	133.803
Acap1	15.7285	14.6459	16.4589	45.3992	120.131	1290.94	41.4552	20.1719	103.815	13.2003	1262.64	15.8508	18.7002	25.2931	1323.86	19.9147	18.6614	1836.97	14.6184	14.3951	46.0248
Ace	501.027	12.8843	19.8929	286.694	85.9937	85.728	30.135	19.0077	1625.26	52.763	15.4384	17.4178	19.2471	12.872	21.0015	83.6507	12.8506	40.6978	1673.77	28.0729	454.036
Acer2	358.94	16.1544	15.3696	531.267	12.8703	17.0617	34.5196	18.2116	12.8707	15.6674	17.5175	18.9695	19.6912	12.8764	51.6231	84.2033	55.6731	19.1263	63.5534	20.2702	12.8507
Ache	15.5423	17.8038	21.0369	19.6593	1813.86	54.491	13.435	75.278	13.2409	87.7799	13.2315	19.2206	14.2865	13.8332	13.2137	25.4013	13.3348	13.3082	20.3415	15.0937	13.029
Acox2	15.0684	12.9441	15.9583	13.021	12.9695	12.96	12.9092	13.2084	12.9776	15.0717	12.9743	12.9424	12.8928	13.0962	12.9723	13.2611	251.35	12.9031	12.9031	30.9005	258.458
Acp5	341.907	20.6088	12.9094	17.8416	1515.68	148.509	48.2511	14.6453	163.55	12.9081	241.71	12.9896	13.4043	13.8146	1362.22	17.3641	574.884	1342.1	22.621	21.7262	13.0151
Acsbg1	18.4113	447.404	2843.33	26.8983	20.3527	21.1992	19.2782	37.1228	21.0758	22.3381	73.2072	1770.28	37.9935	2648.29	165.923	16.3405	23.74	21.5071	16.9512	19.06	26.6353
Acsl1	7039.51	47.9295	68.3459	123.151	896.758	760.008	213.408	292.313	213.447	223.726	64.7224	78.1528	1277.79	38.5974	56.1839	3235.76	250.723	125.632	144.139	64.5173	176.808
Acsl3	211.326	202.663	4419.78	112.95	54.9255	31.0458	41.1995	57.3914	59.5273	265.202	62.5836	400.685	1591.79	3777.89	71.775	43.412	115.723	64.9473	190.308	140.079	320.323
Acsl6	12.8721	219.578	2392.04	21.6092	27.6566	12.9018	12.9012	23.6053	12.902	426.271	12.9017	101.959	32.7962	2605.91	12.9036	102.759	12.8952	12.8818	13.9187	15.2861	233.152
Acta1	60.5082	24.8341	14.1695	18.7704	59.6561	133.749	58.2313	25.6446	38.3544	26.1295	50.1025	26.7931	14.0061	21.2298	49.056	2579.22	543.561	17.0964	150.903	60.8125	23.5905
Acta2	1000.88	31.2897	21.5573	38.6759	47.4178	449.793	33.4273	20.7661	74.6658	18.4287	70.2109	74.246	21.8457	12.9282	40.376	1367.38	15.1392	29.5469	955.072	7643.86	357.923
Actc1	18.6238	12.8952	12.8732	12.9088	12.9037	12.9078	12.9036	12.8822	12.906	13.0734	30.1919	12.9015	12.8946	12.9383	12.9095	23863.8	24.7106	12.908	523.23	17.4395	12.9017
Actn2	16.0347	13.0565	17.072	12.9091	12.9031	12.9037	12.9015	16.6059	12.9036	304.197	12.908	18.1107	12.908	12.932	60.3439	9720.57	12.8827	12.9074	17.3548	13.6796	16.381
Acvr1c	406.54	16.571	33.0575	12.9086	12.9018	12.9008	12.8839	12.9351	12.9022	191.907	12.9042	15.5252	12.8877	23.7562	12.9039	12.9892	12.8818	12.9031	12.8821	13.3572	17.4692
Acyp2	125.121	131.597	47.1329	114.725	159.377	18.3821	36.0851	20.8207	41.7291	29.0168	33.1182	207.702	87.4659	940.274	18.7001	463.176	22.1292	17.8882	99.9456	29.1271	90.2499
Adam12	739.6	63.7155	30.4986	38.3334	24.8084	24.1417	20.2373	18.9432	26.3232	51.9289	25.6884	58.6437	205.957	51.5847	31.3651	22.293	20.7371	16.2606	79.5056	235.81	20.2003
Adam22	23.9184	421.456	380.99	36.9933	26.8367	36.874	30.746	75.9695	27.972	2549.69	27.2609	154.616	729.389	86.5675	30.059	48.8022	19.993	27.0533	25.7874	19.3959	482.993
Adam8	96.3024	74.4827	26.8119	21.1744	68.1945	3496.42	872.404	43.6762	98.0634	53.1189	41.7743	29.1648	21.5279	28.2018	79.5894	21.8463	43.5071	45.6537	35.8123	44.4528	37.1189
Adamts1	724.252	29.414	156.015	2862.55	14.3043	13.9109	15.185	255.313	14.4609	29.5327	14.6122	48.1992	58.7108	38.4254	14.7077	297.644	213.81	14.5737	5313.83	476.825	471.436
Adamts14	30.6552	13.1161	13.1574	18.0024	14.4693	24.1952	15.4403	15.0577	14.6904	12.9788	1351.7	13.3773	14.6311	16.2253	35.8457	18.66	17.22	38.5547	97.4923	20.3514	13.616
Adamts2	417.542	13.0942	17.2855	15.8649	14.3043	14.581	18.9998	15.4716	14.471	28.4119	14.6131	13.6258	138.439	15.8456	14.7131	76.4881	14.4037	14.5779	1354.49	578.814	13.4803
Adamts4	49.487	45.2637	25.2664	92.1041	14.3043	13.9109	14.3454	18.0111	14.639	15.5102	14.6122	84.4123	2296.87	264.523	14.4165	19.1094	26.215	14.5737	2353.96	59.6167	13.4739
Adamts5	1515.68	13.806	25.3167	32.1588	14.3043	36.1206	14.3455	14.9381	14.471	24.7815	14.7068	15.7815	15.5739	15.8456	14.1019	115.552	14.4018	13.0344	2833.35	1519.98	29.6917
Adamtsl3	38.2611	14.4599	68.8795	28.5922	15.2669	24.1217	13.9691	15.6962	15.5622	15.6503	15.837	36.7378	22.6908	17.6944	16.5091	24.3078	13.2638	13.2032	287.844	849.605	196.443
Adap2	136.215	103.804	38.9274	21.6827	129.373	54.7174	134.494	3313.89	413.718	15.1683	22.7476	17.2007	16.5331	28.3813	20.2922	41.5963	84.4009	23.5891	165.329	15.9734	101.706
Adcy1	24.4398	79.9293	111.307	25.3846	23.3203	17.4888	18.0543	52.445	24.6811	1628.71	24.0119	54.7907	30.3747	37.1265	27.6747	28.5097	42.669	15.7682	30.3214	27.4769	19.4305
Adcy4	38.197	17.8041	17.9638	658.52	23.3225	40.1063	39.8258	23.4987	34.771	14.0771	23.0197	17.8582	17.7064	37.163	24.5012	132.998	21.3808	22.8181	132.733	30.1024	19.4328
Adcyap1r1	69.7207	444.562	3237.61	27.5188	14.895	15.2199	15.5822	43.2024	15.1744	706.154	14.8688	518.58	48.229	1354.51	14.7018	35.6504	15.1245	13.1524	76.6023	25.3993	36.0166
Add2	12.908	78.2212	24.8531	13.2787	2000.55	22.2457	13.1878	18.8716	39.3991	583.293	13.1714	85.556	15.559	20.8393	13.2032	14.2316	12.9389	19.3314	16.5855	13.8161	12.9988
Adh1	395.397	14.6585	13.0262	174.1	15.4588	15.0828	14.5898	13.1982	16.6998	12.9795	16.0255	13.905	13.0293	18.1524	34.6059	70.6568	690.92	15.9661	19.6543	23.4993	14.4833
Adig	791.068	13.3937	13.006	13.724	15.4559	15.8127	13.9927	14.5734	15.799	12.9795	15.7856	13.0751	14.1281	18.1329	14.9991	19.9839	18.3158	16.4889	13.2783	12.9871	14.4821
Adipoq	6445.68	12.9934	12.91	13.5318	13.386	13.5428	13.2978	12.9388	13.4606	12.9083	13.4692	13.0344	13.5031	14.4334	13.5428	14.76	12.9792	13.5406	12.9791	15.4725	13.148
Ado	198.934	1681	68.5155	90.7344	105.193	77.595	192.797	85.7894	192.973	95.1081	128.6	390.017	2870.71	140.68	143.359	121.697	118.098	120.488	134.018	122.657	854.298
Adora3	12.8818	14.5226	13.1765	12.9044	12.9043	92.6437	31.6701	583.038	49.343	12.8777	12.9082	12.9974	18.0366	12.9386	12.9095	13.606	14.3517	15.8854	17.3881	12.8719	36.6539
Adpgk	114.218	49.2958	54.7667	124.012	147.613	5356.62	175.218	89.3682	262.448	54.6253	102.034	91.1684	206.63	86.737	171.554	69.484	121.549	247.146	103.63	212.261	32.649
Adprhl1	12.9849	22.2925	12.9775	13.1712	14.7968	14.232	13.3171	14.2182	14.7833	12.976	14.5299	15.0821	18.4107	16.3403	14.142	2438.04	13.1385	13.0987	28.2694	14.1616	13.7
Adrb3	838.042	12.8934	12.9031	12.9187	12.9104	12.9018	12.9022	12.884	12.9228	26.3295	12.9103	12.9037	12.8972	12.9644	12.9229	13.5511	20.1779	12.9001	12.96	16.7603	39.767
Aebp1	1012.59	25.1002	38.0607	52.6046	14.3705	14.399	18.0629	33.981	14.2818	19.0569	14.8614	42.4095	60.8889	15.618	32.285	149.171	34.3267	28.5064	1717.34	11904.7	430.91
Agap2	19.0765	23.5708	90.9868	22.9854	28.9851	220.751	45.403	185.245	54.1234	991.533	218.551	21.6225	33.815	12.9847	648.887	50.8297	20.5895	266.933	63.6286	15.3209	52.2482
Agpat2	2341.38	19.5423	19.3037	53.1325	13.905	242.306	51.242	59.1511	23.9502	13.4384	25.2558	15.7807	15.3402	15.2663	14.6429	156.402	270.906	37.2223	56.6708	47.6111	25.1584
Agt	395.397	39.5229	440.691	19.5554	12.8703	12.8716	12.8507	15.7425	12.8703	15.1665	12.8707	31.9913	20.24	858.629	12.8707	35.2056	863.39	12.8716	17.3783	19.6306	423.405
Ahnak	7915.24	47.5206	362.522	3332.36	70.1284	297.288	3800.75	165.226	2364.19	66.9564	4740.76	39.9441	23.184	243.41	1110.56	2600.01	613.601	993.831	18410.5	15952.7	309.537
Ahsg	17.3749	14.5965	13.2948	19.208	18.8127	15.2666	15.3523	13.4716	20.8246	13.1244	18.6316	13.9473	13.3723	25.0506	17.5944	19.1199	7926.26	14.4228	46.7554	13.1886	16.4767
Aif1	19.2004	422.116	17.5446	16.2669	219.034	198.718	252.256	1106.15	899.442	18.3966	41.0019	16.6113	21.0151	26.0367	25.208	21.6168	21.0077	34.2255	20.4136	13.2346	137.379
Aif1l	22.9321	860.897	111.634	157.892	14.2322	14.0742	16.8645	15.2625	14.1306	14.1266	14.4145	671.093	349.215	166.407	14.613	23.7663	14.1865	13.0101	84.9239	48.4573	95.1673
Aifm3	14.7693	24.2201	959.107	24.4645	14.9176	13.386	13.6986	19.6863	15.1841	188.908	14.8851	23.5635	16.4901	382.991	15.658	14.9459	25.5849	13.1524	13.3956	13.8556	616.654
Ak1	94.7758	159.213	104.313	25.0347	12.8711	15.5796	19.4666	128.574	12.8707	142.41	12.8714	264.814	375.369	355.988	12.8716	3451.4	16.7838	12.8299	192.416	312.622	1123.92
Akap12	944.048	16.6429	78.1181	1011.62	38.2258	37.7009	19.4886	53.7419	12.8732	98.7861	35.4338	59.177	31.4122	12.8783	78.3751	238.302	122.371	148.31	4485.3	808.411	12.871
Akap2	889.992	18.5813	118.013	1336.26	61.2341	33.7674	24.6301	21.2471	13.57	260.685	54.9301	51.8254	38.6583	14.2364	84.2373	1365.33	248.947	154.804	6261.13	1522.9	309.389
Akap6	16.5273	96.5091	925.745	20.0428	13.2786	13.1895	13.1502	23.3839	13.352	2075.93	13.4065	150.393	189.319	202.922	13.5806	1227.62	12.9727	13.3969	74.1137	22.9938	217.608
Alad	298.902	524.218	57.442	330.649	7500.14	67.973	75.6253	39.6133	132.903	66.1537	217.09	572.748	279.83	115.363	149.621	588.178	218.641	146.938	35.9443	38.8496	252.049
Alas2	39.7737	24.0219	73.183	31.7794	33101.2	153.198	14.9074	59.1506	30.8445	116.413	51.0365	20.5653	37.5554	34.4218	14.4737	38.3698	117.42	30.1748	20.3987	12.9091	25.6732
Alb	17.1605	12.8295	12.8292	12.8716	12.8711	12.8299	12.851	21.9233	12.8716	12.8267	12.8703	12.8316	12.8279	12.8764	12.8707	12.8822	114731	12.8299	12.8299	12.8537	18.155
Aldh1a2	23.6312	17.8233	13.2495	12.9774	12.9537	16.922	60.7981	13.1139	12.9568	13.1598	12.9692	12.9789	12.9744	13.0248	12.96	18.6713	12.9018	15.0358	324.467	12.8777	12.9091
Aldh1a7	1377.89	13.2501	14.7666	12.9775	38.2563	17.2647	12.9567	12.9005	20.6873	12.8844	12.9568	12.9693	13.5268	13.025	12.9694	13.1351	508.088	12.9689	22.0687	311.006	17.599
Aldh1l1	604.708	95.2549	1285.69	26.0386	13.0181	28.6643	78.7812	27.0717	20.9887	20.9384	13.1005	164.711	24.2159	948.244	26.6913	28.7762	1030.59	13.0971	18.4922	32.8054	150.263
Aldh2	2785.3	107.223	147.517	316.146	394.058	4897.57	2899.5	97.8911	4052.76	43.9109	98.0732	83.6167	55.8564	234.098	163.792	1596.73	3509.26	1576.48	827.853	622.611	230.365
Aldh3b1	53.8426	130.42	25.9662	43.557	123.998	1331.79	752.392	84.6751	1028.54	17.3587	29.8334	58.2699	274.673	26.8636	19.2332	20.8621	64.2703	222.085	26.7931	65.9321	88.8084
Aldob	13.7101	13.0274	18.9671	14.1888	13.618	13.0753	13.1559	16.2417	14.2477	45.0702	13.6225	14.1192	13.9556	68.4955	13.7434	19.5766	6854.39	12.9896	13.0344	12.9086	17.9496
Aldoc	43.858	1671.59	5844.7	38.2167	61.3359	40.0114	26.9549	112.835	35.7556	100.521	19.1033	580.151	299.666	19863.8	42.1775	15.3378	75.1618	57.1085	14.0063	21.4685	870.732
Alox15	12.9008	12.9052	12.8847	13.2498	56.0505	96.3334	988.834	13.9423	12.9775	12.8839	12.9761	12.9097	12.8924	13.0706	12.9797	15.4765	12.9031	23.2535	12.9031	12.8827	12.9261
Alox5	17.9744	105.088	20.7333	18.2312	31.9913	1972.38	937.045	203.229	106.818	19.0204	18.8348	18.1343	96.2525	21.1512	18.8701	50.0004	13.9417	22.6379	37.6267	15.466	32.2244
Alox5ap	31.2456	160.346	12.8779	19.4735	156.35	6379.65	2603.89	810.527	4895.54	14.4873	35.4578	12.9689	37.1835	12.8929	31.1011	23.7795	12.8859	54.491	17.1734	19.6432	118.837
Alpk2	12.8711	12.8724	12.871	12.8789	12.8844	12.8844	15.5645	12.871	12.8851	12.9158	12.9008	12.8818	12.8773	12.8944	24.9115	1353.98	12.8721	65.6829	23.9386	12.8678	12.8822
Alpk3	14.9278	12.9135	36.4327	14.8815	12.8844	21.0244	12.9005	12.8849	12.8843	16.4541	21.5466	13.618	12.9006	116.643	29.4121	1229.15	14.2403	21.2839	32.5166	12.8678	42.909
Als2cl	35.1302	32.9959	766.423	213.031	18.3174	23.4632	47.4085	64.6303	62.4943	17.9508	20.1405	18.7183	22.9892	78.0675	771.377	139.503	365.03	33.3099	40.0346	280.169	39.5006
Ambp	14.6848	16.472	14.4787	18.3855	24.0122	39.3719	21.5182	14.7091	26.7634	13.566	23.6209	14.2319	14.3949	38.4901	21.642	15.0141	10996.8	15.8998	15.8855	13.594	19.7301
Amica1	13.3969	23.8745	13.7613	16.8586	51.806	1864.82	45.4587	17.2335	315.447	14.4897	160.272	15.293	14.028	22.8877	84.1499	15.4368	15.6604	120.738	16.6759	15.1707	15.9231
Amotl2	715.052	101.879	170.481	426.74	14.7922	86.8671	25.6932	21.4134	37.0193	27.7287	15.2548	83.0347	257.743	153.744	15.3739	565.253	310.765	15.301	201.27	3056.32	526.593
Ang	21.3993	80.3438	13.799	14.7496	25.7006	24.5327	31.1899	402.743	97.3454	12.9848	19.0124	13.6181	15.8371	12.8767	12.8716	14.3699	114.734	12.8716	33.8425	35.6969	92.6258
Angptl2	617.422	15.3115	40.3092	27.2164	13.0182	19.5008	25.3895	40.6944	43.1895	57.8889	13.0678	29.7481	18.846	34.427	31.2906	553.77	18.9168	17.2928	1366.57	1051.06	425.51
Angptl4	3202.54	21.1572	56.9458	273.74	48.099	20.3195	46.7619	14.7915	36.5609	12.9028	33.4418	21.9413	20.1447	112.959	55.132	64.1003	358.571	18.8799	258.632	139.621	43.1386
Ank1	20.5167	20.6258	43.2045	21.2512	6204.02	36.0081	39.0147	43.7314	51.0825	300.921	34.0559	19.0719	25.6824	36.0597	22.9721	1850.45	18.2491	26.6247	45.3272	37.33	19.1922
Ank2	65.6655	510.67	6549.64	32.9714	22.9225	21.1042	29.7929	515.643	24.1351	3450.7	23.7455	740.515	1040.77	3265.84	25.0436	907.899	19.9472	22.8672	468.934	105.819	156.746
Ank3	112.445	34.35	332.079	29.3134	24.6625	25.8242	21.4239	69.0593	29.5008	5386.68	32.6445	363.467	2581.7	223.517	27.1939	570.354	102.574	24.8354	115.81	367.02	369.644
Ankle1	15.3851	31.1159	13.0001	18.4307	1294.04	54.8913	40.3837	15.7393	53.962	16.5376	12.8716	43.8637	12.871	12.8718	27.5148	13.8884	12.8506	31.9759	16.9459	71.6677	12.8308
Ankrd1	19.789	12.9071	12.901	13.0427	12.9799	12.9099	12.9107	12.9053	13.0016	12.9011	12.9798	12.9352	12.9013	13.1917	12.9975	8860.25	276.457	13.0101	44.2589	142.835	12.9614
Ankrd22	12.9074	13.0596	12.9074	13.0662	13.1199	828.434	13.1159	12.9109	13.1452	12.9018	13.1765	13.2034	12.9057	13.6912	13.0976	12.9276	12.9479	13.1636	12.9352	12.9027	13.0055
Ankrd23	36.7744	18.5591	44.5628	21.1826	13.1525	34.5923	29.1876	84.7689	33.8972	26.2981	82.1337	24.7473	66.8893	13.6912	63.1227	3128.55	200.158	58.8551	40.296	23.0504	28.6439
Ankrd42	28.0725	21.1707	27.032	20.5559	13.0989	13.1617	22.1916	23.5767	13.1405	127.448	13.1318	21.3758	20.865	13.6886	13.1303	17.6261	35.6609	13.1616	27.6638	37.2949	384.391
Ankrd43	12.9109	68.0201	25.2882	18.8047	1810.17	18.1072	13.0738	18.8105	13.2201	108.54	13.1665	33.9982	93.1122	13.6886	13.0871	15.1943	18.9762	15.2761	13.2798	12.9016	12.999
Ankrd45	12.908	95.8275	57.8488	13.235	13.0989	12.9604	12.9691	14.915	13.1406	293.157	13.1094	59.015	18.8433	107.784	13.1304	19.7647	12.9425	13.1616	12.9532	15.5545	529.093
Anks1b	15.2223	36.3342	144.489	18.8922	13.0339	13.0184	12.9744	26.204	13.0473	2380	13.0222	57.5547	1860.08	88.9447	13.0139	14.8187	14.4944	13.0787	38.7939	22.9364	12.9694
Antxr1	162.847	43.3332	444.338	90.6238	12.9097	12.9104	16.7098	15.8664	12.9104	149.782	12.9389	46.8644	61.298	191.331	12.9479	56.5775	18.1158	14.9549	1153.21	1376.06	262.84
Anxa1	2941.74	14.295	12.8257	717.922	64.0638	10181.7	1060.09	23.6122	1105.76	12.8245	391.154	24.5766	12.8292	26.9006	43.9079	50.5437	16.0995	77.0379	5000.25	4650.5	166.95
Anxa2	3253.76	35.2089	27.9506	2013.87	134.143	7129.67	1479.47	32.0934	5172.25	14.4733	2556.33	127.34	26.4261	172.36	404.703	272.52	3856.2	85.5036	3639.26	3387.97	3446.11
Anxa8	24.7221	12.8495	12.8233	13.4512	12.8257	12.8257	12.8257	12.8245	12.8292	12.8233	69.8292	12.8257	12.8292	12.8283	12.8292	14.5019	12.8257	12.8292	74.4112	798.955	21.3483
Aoc3	3407.29	20.5312	15.4562	38.7768	42.4335	21.3837	18.814	14.8234	22.1832	13.9534	21.8616	15.2833	17.05	30.0826	22.4455	100.356	18.7223	21.8324	92.5512	43.6061	19.5665
Apbb1	33.7785	275.276	121.766	52.3595	21.4293	26.965	35.56	47.1808	50.3544	365.133	28.6018	158.801	3032.4	216.914	37.5904	424.382	35.4267	32.963	36.1488	83.8985	397.147
Apbb1ip	161.648	23.2774	34.5024	12.8295	290.257	1847.5	1685	2785.29	2178.97	18.1449	1659.43	17.1343	35.6471	12.8295	1540	26.7159	12.8274	751.539	313.7	133.011	51.4335
Aplnr	16.9034	12.8779	12.8837	1272.51	12.9008	53.9297	12.902	14.2138	70.0237	14.0055	12.9015	12.8839	13.2227	12.9054	12.9017	318.764	12.8888	12.9015	26.4087	13.9959	12.8841
Aplp1	23.443	119.34	1144.92	55.8351	12.9008	24.7036	20.777	95.8676	12.9019	1332.71	34.7922	176.521	15609.1	3115.1	41.241	31.8433	21.1237	15.833	51.2159	43.5071	147.799
Apoa1	14.2978	13.0308	14.6584	16.1985	12.9086	12.9091	12.9052	12.8841	12.9104	13.5074	12.9095	16.2962	12.932	45.3955	12.909	12.9396	8356.49	12.8844	12.8844	12.9264	16.9988
Apoa2	15.3883	13.0308	12.9022	12.9205	12.9086	12.935	17.8577	17.6347	30.3985	12.8775	12.9095	12.9028	12.8779	12.944	15.1001	13.8194	6056.37	19.0582	12.8847	16.4865	34.1313
Apoa4	12.8818	12.8922	12.8775	12.937	12.9086	12.9008	12.9008	12.8818	12.9104	12.8721	12.909	12.8847	12.8779	12.944	12.9057	12.8784	5539.16	12.8844	12.8844	12.8722	12.9028
Apob	13.9197	15.0594	16.7019	23.607	19.8882	15.4372	15.8635	25.5656	20.5603	14.1695	19.7173	15.8368	14.5234	28.057	18.5297	14.3289	6441.61	14.7656	14.7665	19.612	38.7544
Apobec1	202.546	59.1922	49.7763	49.1745	115.717	752.992	753.015	481.358	2654.32	14.9392	170.213	22.5235	15.3374	61.1534	72.1775	38.2554	326.319	690.043	123.943	41.1164	144.161
Apobec2	14.5561	14.6741	13.0974	13.0898	13.2034	15.4172	15.3331	27.0834	13.1875	12.9059	13.2933	12.9937	13.2064	13.8332	31.5217	1356.65	12.957	24.2755	14.812	13.1452	13.029
Apobec3	54.024	222.638	197.723	262.362	1527.19	308.398	468.694	637.445	1002.07	14.3581	1594.36	99.7667	16.4366	23.8757	920.959	26.2767	31.4329	3608.43	69.7634	69.6647	109.527
Apobr	57.3645	18.1953	21.8014	12.9092	71.177	1766.91	591.119	131.434	753.838	13.2913	514.202	17.318	18.1694	26.5782	93.0872	17.1218	36.7242	34.7242	46.7475	48.1015	12.9015
Apoc1	506.869	34.7057	24.8353	12.9094	93.3221	41.2449	74.9816	18.6522	148.321	12.8724	12.9089	23.9501	12.9094	222.716	12.9034	14.9808	3707.1	12.908	14.7922	13.0912	106.494
Apoc2	18.8843	17.5422	12.8732	12.9083	63.6286	116.207	268.073	13.9369	1031.34	12.8716	12.9089	12.9008	12.8882	12.9339	12.9034	13.4504	182.113	16.8052	12.8835	12.8714	12.9015
Apoc3	19.1056	12.8837	14.8942	12.8961	12.9035	12.8844	12.8847	12.8777	12.9084	12.8716	12.9036	12.8835	12.8773	83.4883	12.9025	12.8841	2647.52	12.8827	12.8827	12.871	47.3821
Apod	229.641	101.68	69.6892	136.371	19.8853	21.1711	18.7352	32.3957	21.268	21.6113	20.0179	515.159	8393.49	5236.68	19.2138	26.4327	14.9941	19.4993	212.3	283.191	165.265
Apoe	12075.4	6353.19	7859.97	1502.31	1342.1	1205.25	21252.4	1365.12	8214.73	73.0458	87.2456	324.718	1150.6	7789.64	61.0168	636.167	20718	689.154	716.904	274.678	10132
Apof	14.6183	15.0594	14.0467	15.1132	42.2981	18.7162	21.8345	15.7135	28.1404	13.2791	21.6222	15.2669	13.6141	28.0547	22.0373	14.1217	1106.63	36.1488	13.1636	13.1775	17.2601
Apoh	13.8177	17.3208	13.6279	17.9998	19.9029	18.7603	16.0586	13.8025	20.5838	13.2784	19.7271	15.4694	18.051	28.0844	18.5421	15.2232	2931.62	15.4192	14.7665	18.1989	17.2759
Apol11b	12.8257	12.8274	12.8257	16.6341	2766.13	20.7092	12.8292	12.8257	12.8507	12.8257	12.8316	12.8316	13.1348	12.8508	12.8299	13.0374	12.8495	12.8316	16.9387	12.8257	12.8295
Apol6	624.47	12.8841	12.8734	13.1701	39.3794	12.908	12.8928	12.8822	12.9077	13.2315	12.9042	12.9091	12.8946	12.9386	12.9031	14.348	18.5835	12.8835	18.3737	39.2358	12.9018
Apol9a	22.7427	15.5246	13.6974	42.8597	74.2219	16.4529	16.8157	14.0959	22.7954	13.3975	23.2438	15.4179	14.3897	31.0256	36.8088	17.3048	1857.33	15.42	24.9844	42.4212	18.0328
Apol9b	18.1921	15.549	13.9068	52.5851	87.3566	17.2638	17.2542	14.0959	22.7976	13.3526	23.2491	14.6717	14.3123	31.0295	32.9463	15.444	1218.04	18.342	19.9126	36.1889	18.0328
Apold1	38.4007	43.4787	22.2667	5207.86	178.173	23.5845	21.519	19.0087	21.9091	19.1337	22.4655	21.4402	21.3492	27.1967	22.6729	157.164	22.4179	20.5331	277.777	18.556	16.9931
Aqp1	91.7648	12.8245	12.8257	1291.42	11126.2	205.371	19.1738	12.8233	94.8349	12.8233	12.8257	12.8257	17.3387	12.8274	12.8257	935.888	24.8489	25.4308	166.052	103.314	55.8446
Aqp4	12.8233	145.424	5980.22	25.49	12.8257	12.8257	12.8257	57.9361	12.8257	29.1889	12.8257	22.4234	38.6253	2638.66	12.8257	61.0375	12.8233	12.8257	12.8233	12.8262	841.727
Aqp7	705.053	12.8278	13.1836	29.0222	12.8257	12.8257	12.8257	12.8257	12.8257	13.1107	12.8257	12.8257	12.8233	12.8274	12.8257	85.3734	12.8233	12.8257	19.935	16.3702	16.2386
Aqp8	12.8233	12.8245	12.8233	12.8257	12.8257	12.8233	12.8257	12.8233	12.8257	12.8233	12.8257	12.8257	12.8257	12.8274	12.8257	44.7563	1145.76	12.8233	14.5737	12.8233	12.8257
Arap3	39.1338	27.1783	22.2635	738.299	73.9037	2347.15	112.712	1934.35	181.923	19.5593	374.266	19.6693	22.4995	35.5574	37.2574	304.722	32.4972	31.0954	37.055	20.0082	19.1013
Arhgap22	21.2357	16.4429	16.4088	13.1443	26.2528	12.8847	24.1688	591.75	31.0187	26.25	12.8928	14.6709	17.6126	12.8945	12.9001	14.4734	60.4869	19.1651	60.9332	87.4757	71.7606
Arhgap29	1162.36	16.0393	69.3597	2202.83	12.8839	18.7088	97.5893	147.351	33.6733	167.227	12.8928	72.0092	53.2927	12.8961	46.5688	434.582	237.948	23.1	411.503	2145.86	74.7246
Arhgap30	27.2336	79.7871	20.4738	14.5105	128.731	2258.31	984.312	960.256	1146.91	17.3093	7509.65	15.2669	19.2162	12.8961	990.845	31.5819	15.0698	2437.08	17.2361	12.8507	104.764
Arhgap4	19.9708	19.5288	23.2267	13.1044	157.596	1836.97	646.204	1199.82	532.368	24.4461	839.938	20.0914	20.2276	23.8223	1447.4	26.8105	25.0433	1861.74	19.8949	18.0556	16.4993
Arhgap44	24.9559	64.6987	102.276	50.5016	12.8847	12.8847	12.8818	26.0505	12.8845	464.649	12.8845	52.0636	104.108	108.671	21.8327	249.202	46.1774	15.818	113.836	77.8179	1036.43
Arhgap9	19.968	24.7565	22.8463	13.2704	155.174	1928.78	454.522	281.542	1461.32	12.9439	1918.48	18.342	15.4721	13.2886	2356.75	54.8158	13.0617	541.268	16.5691	12.9012	12.9739
Arhgdib	96.466	230.743	14.0395	606.407	308.511	8908.27	2385.43	631.791	4320.45	20.4027	2837.3	15.9343	46.6735	12.8233	4311.12	55.9667	22.317	4041.92	413.271	666.707	206.075
Arhgef10	114.428	94.1574	409.651	161.436	47.2264	20.9457	31.6578	41.577	65.6861	95.7412	21.7923	82.3033	1713.53	146.841	61.0788	195.056	24.5263	45.2189	311.463	227.465	36.3271
Arhgef15	25.7035	18.1571	17.0154	715.442	12.9001	12.9008	12.9015	18.26	12.9005	97.914	12.901	12.9689	15.0656	12.905	12.9017	276.395	15.2294	12.9011	32.0069	16.6951	39.1436
Arhgef26	23.0069	192.625	1911.35	53.5409	12.8854	21.0985	12.8927	22.641	12.9012	76.31	12.9008	241.806	22.9609	1367.65	12.9018	24.1673	100.192	17.8254	38.848	32.8076	176.364
Arl11	20.1508	33.6698	13.7168	14.6448	31.2418	539.695	189.006	133.559	615.761	12.9793	53.2721	13.8257	16.0916	18.0014	22.3075	17.8775	15.6965	19.75	15.7495	15.6797	19.8029
Arl4a	649.359	132.698	106.757	2350.51	1132.2	47.6886	76.5701	48.4049	85.7584	188.258	380.073	254.643	117.127	160.264	138.259	96.8633	83.8156	88.3616	277.011	41.5717	1310.25
Arl5a	520.584	320.095	187.84	348.1	67.3771	158.656	303.164	187.243	116.062	226.631	349.27	491.857	856.907	197.985	369.896	214.468	710.02	518.861	652.06	729.351	3351.35
Arl5c	17.1605	20.4329	16.9719	32.0603	94.7758	97.9793	92.2726	64.4566	1454.92	16.0341	297.941	16.7811	16.7962	32.5327	583.43	20.5941	18.2519	560.215	24.5405	19.2731	17.5361
Arl6	40.6189	302.753	50.3892	117.144	26.2345	12.8299	35.1871	19.7783	32.6355	54.4565	20.8378	373.473	153.247	299.336	30.2527	44.4951	55.2065	31.3895	46.9172	98.1496	834.485
Arpp21	12.8233	28.3395	493.642	26.8336	61.8942	26.1218	21.3168	88.3596	19.1468	14988.6	12.8267	29.6583	32.9581	151.544	21.3112	19.3307	12.8257	31.1154	12.9937	12.8233	40.0796
Art1	12.8257	12.8257	12.8257	12.8274	12.8292	12.8257	12.8257	12.8257	12.8292	12.8257	12.8292	12.8299	13.114	12.8495	12.8299	1282.35	12.8257	12.8292	12.9974	12.8477	12.8279
Art3	76.6464	14.6997	24.3389	44.2071	12.8292	19.2483	12.8295	16.9952	12.8292	15.4466	12.8292	28.8596	14.3488	38.9151	12.8295	1438.88	14.9612	34.8607	71.513	16.4521	18.6228
Art4	14.3168	12.8257	12.8257	12.8308	1047.23	23.6727	12.8279	12.8257	12.8299	13.0989	12.8292	12.8292	12.8295	12.8495	46.9427	24.0899	12.8257	36.1488	31.8394	12.8465	12.8279
Arxes1	845.142	62.024	116.052	23.7826	18.3526	14.8155	16.252	20.2683	18.9541	90.2957	18.7733	69.9119	105.811	269.651	20.7705	22.8003	16.7218	18.9695	24.6665	24.9239	53.181
Asb11	12.8233	12.8233	12.8233	12.8233	12.8233	12.8233	12.8233	12.8233	12.8233	16.7036	12.8233	12.8233	12.8233	12.8233	12.8233	784.428	16.7928	12.8233	13.6178	12.8233	12.8233
Asb2	17.1208	12.8274	12.8295	13.0557	153.833	48.7384	29.5203	435.437	12.8295	16.0279	83.0336	12.8267	12.8295	12.8304	78.8607	2804.32	14.9563	56.2843	25.9167	16.9715	12.8279
Asb4	18.5896	12.8716	12.8279	341.083	12.8292	12.8292	39.7547	13.2478	12.8292	13.1313	12.8292	13.9467	12.8299	12.8304	12.8292	35.5078	17.0359	12.8292	90.2758	13.6171	12.8279
Ascl1	19.2528	896.907	56.1054	13.4257	12.8257	12.8233	12.8245	12.8257	12.8257	25.6829	12.8257	367.296	14.3531	97.5859	12.8257	12.8262	12.8233	12.8233	12.8233	12.8233	24.4656
Asf1b	32.3447	675.189	19.9726	27.2406	1756.71	105.58	87.8136	21.94	122.273	18.694	74.3394	200.366	21.629	87.7254	77.637	23.1519	27.5633	54.4426	17.3053	102.987	57.2886
Asgr1	14.4941	21.7291	14.7812	16.7689	25.109	17.42	18.2251	15.9501	26.5581	13.9728	24.5168	19.1036	20.8481	40.9041	22.298	15.3442	1180.3	16.2801	15.4173	16.178	35.744
Aspa	101.537	15.3395	81.6499	21.1454	12.8233	12.8233	68.2965	18.9168	12.8233	13.7172	12.8233	89.8552	1832.38	204.685	12.8233	12.8233	26.1624	12.8233	35.0357	15.0767	134.615
Aspn	105.22	31.9043	15.2336	21.0245	12.8233	12.8233	12.8233	15.1431	12.8233	15.2424	12.8233	75.7571	14.793	117.66	14.3607	91.8767	14.8134	12.8233	1057.48	334.835	12.8233
Asprv1	13.4487	12.9026	12.9224	12.9794	31.3702	1426.56	17.3617	12.905	12.9743	16.7384	16.086	13.3969	14.9473	13.0443	12.9774	12.9031	14.4498	24.0736	12.9022	14.2074	12.9099
Astn1	12.954	346.288	1252.04	22.8251	13.4928	13.0315	13.0343	21.1743	13.6238	1237.93	13.4965	405.823	85.2117	941.912	13.4174	17.811	12.9873	13.7427	23.5845	15.573	30.3101
Atf3	103.697	144.479	12.8257	3145.12	25.8819	95.2225	133.969	194.582	501.385	12.8233	53.2571	22.7812	159.111	12.8257	17.4581	90.8408	346.985	25.3606	1376.17	24.4941	628.241
Atf5	984.49	72.8595	51.6897	41.8846	148.413	107.936	120.865	39.6681	119.783	23.9495	45.817	42.6901	72.1229	90.8932	58.5139	232.483	2159.38	64.8585	847.034	546.631	37.2433
Atp13a4	12.908	17.9179	2184.77	13.2303	13.0971	13.1483	12.982	15.0709	13.1608	18.1941	13.098	22.5117	16.1163	350.696	13.157	12.9276	90.4344	12.92	14.1192	13.1401	113.763
Atp13a5	12.9037	17.7908	791.813	36.8839	13.0971	12.96	12.9688	14.3461	13.138	15.8438	13.098	30.9336	13.1836	498.994	13.0395	13.6463	12.9388	12.92	12.9426	13.6917	17.109
Atp1a2	2392.31	1268.54	33101.2	94.3477	17.3425	17.9374	17.0171	279.033	17.8596	173.729	19.3168	659.08	142.723	17694.4	19.3157	6040.65	24.4409	18.19	530.247	20.8814	1230.58
Atp1a3	63.3752	90.212	162.332	19.7553	79.1684	2038.18	549.255	149.408	571.851	4175.39	46.8468	42.8143	22.3329	21.7105	19.2256	20.879	14.0395	32.3736	18.5836	16.4536	23.5082
Atp1b1	29.3861	262.51	790.56	31.9108	51.6866	73.0554	29.6406	45.4639	28.1144	3703.02	1517.99	381.267	35.2027	527.313	263.104	2202.73	303.383	119.499	102.864	82.9925	1233.76
Atp1b2	23.5653	562.806	11140.7	59.7405	213.763	18.1366	17.8005	71.6716	51.6194	250.387	18.4341	411.666	85.5004	9722.92	18.9688	111.469	17.8567	18.1107	116.41	24.8409	1498.23
Atp2a3	117.795	17.4399	19.3223	133.13	84.4092	1000.02	339.678	44.8679	230.673	13.8895	934.945	19.3083	19.3373	23.3955	384.929	57.5305	15.72	5489.87	122.158	15.3865	233.582
Atp2b2	14.0222	359.38	816.663	22.2119	18.0653	18.9647	19.0699	102.836	19.1903	3916.05	18.4838	294.408	22.5715	339.938	19.1332	28.9127	20.8362	15.4483	14.9392	13.1499	1028.21
Atp5l	515.419	283.261	109.065	284.841	351.816	272.681	68.1518	99.3661	245.653	25.6237	243.209	713.237	224.044	2637.77	96.5969	678.152	53.1867	136.955	143.587	257.329	856.598
Atp6v0e	656.399	2539.66	234.401	1345.37	658.73	924.139	629.504	96.6803	1086.5	77.145	599.331	2385.37	410.427	7422.11	560.562	189.869	402.102	291.584	230.595	959.666	1426.01
Atp6v0e2	82.331	1231.67	235.611	148.016	12.9025	12.9031	12.9051	27.8847	12.903	423.467	12.9031	920.336	1712.13	687.283	12.9074	120.612	32.9751	12.9037	32.3768	19.7035	1786.99
Atp6v1g1	480.518	1525.99	255.99	1308.22	877.582	909.565	511.46	118.285	837.472	46.07	248.402	2089.53	1159.2	3224.97	297.42	665.253	367.802	264.814	273.384	704.004	3422.74
Atp8a2	14.8173	26.0846	28.7222	40.7934	15.5085	16.0148	20.208	1194.53	16.1901	412.467	17.1022	18.5897	43.1014	66.6069	30.3748	48.7949	18.8723	19.8676	14.3909	16.2323	14.4986
Atp8b4	24.1754	13.3938	13.9456	15.5003	66.3647	745.48	266.978	20.5245	521.274	12.9975	528.139	13.905	15.0601	18.1773	195.947	15.5156	15.7678	34.8647	17.3425	24.9443	14.4882
Atp9a	636.52	152.504	56.1574	125.096	13.9073	25.2303	26.6246	37.5648	29.113	591.893	29.3364	72.1564	3368.33	41.6632	53.8128	567.763	481.716	31.9636	203.447	76.9467	76.9232
Atpif1	167.09	2006.98	73.3853	578.102	13660.2	447.638	632.464	91.7278	1216.44	127.93	325.634	2983.22	281.936	1562.11	429.167	597.11	103.63	222.56	102.286	586.949	1022.16
Aurka	24.3341	523.071	16.1095	29.0226	1609.46	108.834	52.6229	22.8673	60.3284	16.8202	44.6889	256.607	26.2934	90.6059	46.711	21.1496	45.9222	45.7344	21.3126	242.053	28.7415
Aurkb	28.4902	561.301	15.3758	38.9148	1617	116.918	72.1894	21.592	171.084	13.1513	45.7861	370.733	17.6275	89.7681	45.1286	21.899	23.3524	75.1302	23.4964	105.498	15.1328
Axl	686.745	265.58	1545.79	102.11	212.596	136.103	416.943	238.06	722.608	18.5142	52.6693	101.11	37.3948	256.532	117.265	148.762	23.2646	46.5642	5401.39	2469.14	63.4963
Azgp1	12.8292	12.8302	12.8292	12.8516	12.8711	12.8299	12.8311	12.8292	12.8714	12.8257	12.8711	12.8316	12.8504	12.8767	12.871	12.8278	2319.96	12.8299	12.8257	15.4222	55.7613
B3gnt5	14.6711	280.784	17.5902	18.3101	12.8257	59.6561	31.3935	12.8257	12.8257	13.1079	263.066	128.979	23.181	71.4569	65.3776	12.8274	12.8233	915.51	37.9248	17.8664	12.8245
B430306N03Rik	17.9207	12.8245	12.8233	12.8233	50.5521	1932.62	436.908	220.278	180.311	12.8233	12.8233	12.8233	12.8233	12.8233	70.7134	13.38	14.819	56.6708	12.8233	12.8233	20.8369
B9d1	24.063	335.731	60.753	137.586	38.2258	12.9535	23.6773	16.8216	12.9443	57.3097	12.9537	470.498	52.5628	525.171	24.9913	45.1369	38.7399	25.7874	33.1502	39.47	1001.67
BC006779	255.374	22.1956	28.6176	433.337	379.394	490.485	221.064	54.5003	479.877	22.6986	177.233	22.5235	21.1675	24.8807	678.153	185.886	1335.43	1996.88	1256.25	166.659	23.7941
BC020535	15.9688	12.8769	12.8844	405.165	12.8847	41.0695	49.009	17.0174	12.8931	13.1006	12.8924	12.8831	12.9015	12.9041	12.8928	71.2516	22.7907	12.9008	21.543	12.8889	12.8831
BC026585	49.9245	150.006	52.0262	45.3719	12.9097	39.5938	36.8005	55.267	19.7909	12.8837	33.8473	39.8923	43.2862	26.6427	16.5752	30.8149	71.6908	40.1082	24.7473	29.2352	880.135
BC028528	35.3587	28.5791	19.0531	2028.72	12.9535	76.4072	92.557	55.2938	191.281	14.8549	12.9759	22.0934	110.327	13.0163	12.9692	31.1991	12.9475	83.0347	33.2968	19.5934	43.4047
BC049730	12.8821	12.9061	12.8827	12.901	28.8458	90.7456	23.5413	12.9023	500.967	12.8732	12.9099	12.9001	12.8827	12.96	12.909	12.887	12.9001	12.8854	12.8851	12.8726	12.9059
BC060267	16.3096	21.4587	47.0396	17.5422	21.4508	19.1921	18.3052	22.4625	22.2781	43.9482	25.3579	16.5061	20.7784	57.961	22.9043	16.2483	23.0394	20.3984	15.525	18.342	553.132
Bach2	27.5666	49.0259	213.103	73.8196	127.677	91.9164	96.1884	232.206	72.8836	151.756	519.042	82.2077	84.0503	192.798	654.486	65.3973	54.9582	1932.62	88.843	21.2479	26.0436
Bai3	12.8839	56.1296	1121.65	19.5473	12.9352	12.9025	12.9037	20.7303	12.9481	2373.13	12.9334	89.3877	62.6197	322.017	12.91	12.8916	12.9011	12.9008	12.8732	12.8822	34.5134
Baiap3	30.5715	25.1845	48.9282	32.4138	15.1828	87.1051	15.9572	36.1565	15.1266	90.3096	795.261	29.2844	35.5507	126.749	73.7486	29.0509	46.2105	19.9547	28.5179	16.84	73.3689
Banf1	215.913	1939.55	84.0537	1028.86	1215.3	217.397	266.152	62.1471	562.114	37.8314	421.799	1750.95	223.787	1316.98	615.215	336.117	478.114	360.463	185.421	431.599	318.186
Bank1	12.8257	99.5299	13.3809	12.8295	167.173	191.13	495.394	607.783	52.9066	17.8069	56.4623	12.9542	12.8299	12.8304	41.6331	12.8286	12.8278	3496.42	12.8257	14.3433	900.076
Bcam	141.634	18.7713	31.8281	288.456	13.317	13.3703	37.6403	17.7571	13.2977	15.8117	13.3809	21.8342	19.459	14.0496	36.7948	1961.43	32.3275	16.2224	215.992	42.0621	29.4224
Bcan	12.9104	113.259	12703.9	27.4648	13.2138	13.1617	13.0077	58.132	13.2977	113.848	13.2177	156.383	898.047	3757.8	13.1721	14.5048	12.9692	12.9684	12.9695	16.6066	130.438
Bcas1	17.2241	25.7992	410.302	12.8935	12.8835	15.8855	14.2883	73.8166	12.8837	28.6592	12.8845	45.3272	1441.17	25.5313	27.3171	12.9034	12.8716	24.7036	13.0101	13.053	84.1956
Bcl11a	12.8316	240.324	41.7861	17.6311	250.802	97.8111	48.7256	27.0346	187.599	654.663	27.9107	311.726	18.9123	128.246	22.8994	49.0779	12.8697	1314.92	12.8697	16.2031	12.8714
Bcl11b	16.1973	23.439	20.4845	14.4213	46.2808	21.0622	22.4105	17.3215	12.8775	226.303	129.137	40.392	16.7237	72.0008	3713.7	34.6127	12.8762	37.0288	12.9537	20.4683	39.811
Bcl6b	42.2646	36.2155	13.0022	296.979	59.9328	12.9935	15.6105	24.1649	12.9866	17.3849	12.9963	31.1553	13.5149	13.1467	13.0262	149.935	24.9332	25.4644	34.2347	15.0632	18.8375
Beta-s	20.2438	143.318	20.9886	1128.59	157602	1760.22	41.5155	27.2123	275.577	13.8215	1464.19	13.9318	354.357	14.6144	61.8871	230.607	13.8593	335.286	22.5564	12.9064	13.1714
Bex1	15.8981	335.748	21.6067	13.6316	61.4024	13.0184	13.5887	15.9565	13.5792	57.4893	13.8606	343.537	26.8654	62.0895	14.1994	23.6158	13.8581	13.9368	13.5908	15.0879	23.2476
Bex2	15.818	807.62	40.6573	24.3424	13.4487	13.3082	13.9589	17.3774	13.7714	226.487	14.1306	890.688	89.0077	95.2044	17.4393	15.382	13.8585	12.9791	13.2292	16.8764	158.704
Bex4	12.9537	330.559	18.7924	18.5737	312.965	13.618	13.3758	12.9781	13.9146	21.0114	13.8607	322.185	31.2584	281.292	13.8248	17.0788	15.5925	13.702	16.0327	14.5046	79.127
Bgn	5532.58	281.347	86.0714	963.332	29.1801	18.9621	18.2795	15.6038	12.873	15.2951	12.8728	238.52	39.0728	82.2918	12.8732	614.083	26.3492	12.8732	26067.5	31018.5	326.162
Bicc1	159.533	23.2835	38.7482	34.6809	17.9212	16.5076	14.9353	17.2912	18.199	55.779	17.2211	22.272	56.2499	21.3884	18.4265	50.6839	41.6841	18.0108	699.46	875.455	197.175
Birc5	20.9702	884.963	18.8833	42.7702	3292.98	170.116	76.8432	16.3436	134.918	18.5293	53.9656	338.157	19.3704	125.032	49.9866	21.1259	18.4788	41.8179	20.7816	175.8	12.8849
Blk	12.8299	12.8498	12.8292	13.0999	148.157	54.7174	20.8842	12.8299	12.873	12.8292	12.8728	12.8703	12.8732	12.8783	26.6008	34.9927	12.8316	2450.33	12.8316	12.8274	12.871
Blnk	19.9167	93.3967	15.8399	19.2374	156.383	107.615	126.22	1398.65	37.387	19.4465	19.072	17.5517	19.1161	21.5736	25.2281	20.2644	64.8456	1779.31	54.1875	13.1019	51.7004
Blvrb	316.678	722.108	33.4359	315.843	12075.4	250.802	691.633	75.1046	378.784	24.7877	59.9136	287.114	28.4252	251.213	52.1803	76.8534	1096.75	321.074	95.743	71.8036	153.499
Bmper	218.344	180.899	134.902	15.6557	12.8292	12.8257	12.8257	12.8292	12.8292	48.0801	12.8292	119.715	14.8051	81.9004	12.8292	22.7063	25.5001	12.8292	264.632	898.684	12.8262
Bmpr1b	17.0701	40.5564	1006.57	16.6677	12.8267	12.8257	12.8257	12.8299	12.8292	25.1899	12.8279	134.066	17.5445	728.725	12.8292	17.3129	12.8257	12.8292	20.5658	49.6005	35.8274
Bmx	15.5795	12.8513	12.8707	70.3264	12.8721	897.734	46.6711	12.8786	112.087	12.8292	36.0019	12.8711	12.851	96.0825	12.8728	17.91	12.8316	16.8511	21.5246	13.9931	12.871
Bnc2	79.0386	14.6263	19.4324	20.7069	18.8873	15.0894	16.8845	47.1637	19.4675	13.8202	18.7317	14.6675	16.5777	25.165	18.2444	18.9481	14.5926	15.8368	64.342	474.25	16.508
Bola3	162.155	35.3684	31.9235	120.982	3191.22	48.4472	80.5724	23.0923	124.208	22.1696	167.013	68.3058	76.6741	84.6391	149.019	556.852	96.5087	74.1593	36.7378	104.245	132.702
Bpgm	64.0522	197.278	174.895	134.935	5626.87	92.8785	52.5969	56.6027	112.068	82.1715	99.0567	329.583	2019.7	275.27	138.298	100.171	52.2026	74.7183	69.9119	102.566	405.478
Bpnt1	213.17	336.595	120.561	129.743	42.7853	37.7974	81.1658	61.4883	59.1067	117.453	86.834	425.516	977.992	385.329	72.0366	106.428	379.994	71.9457	148.769	150.177	2184.74
Bst1	19.1915	18.9475	14.7396	36.8038	68.6234	1458.72	406.921	18.6887	251.739	14.3382	25.0852	15.1672	16.2503	36.226	25.155	20.7626	16.589	45.8355	31.1154	54.8072	19.2161
Btk	16.9138	19.395	14.2031	12.8773	103.325	624.131	373.279	482.652	440.996	12.8292	17.5308	12.8721	18.3094	12.8769	22.4078	14.4273	12.8516	1134.43	12.8299	12.8279	35.6875
Btla	12.8233	12.8233	12.8233	12.8233	63.7618	63.9856	32.1009	19.5739	195.998	17.6463	12.8233	12.8233	12.8233	12.8233	402.135	12.8233	14.0533	1936.23	12.8233	12.8233	12.8233
Butr1	12.8316	12.8712	12.8308	12.8778	1096.17	12.8835	12.873	12.8703	12.8833	12.8299	12.8831	12.8716	12.8498	12.8929	12.8824	12.8508	12.8716	12.8835	12.8711	12.8295	12.8775
C030030A07Rik	13.2138	12.9005	15.1549	12.8516	12.8716	12.8716	12.8724	12.8721	12.8716	16.3532	12.8716	45.2958	555.56	96.9957	18.4722	13.8896	12.8299	12.8716	14.6701	12.8279	29.7548
C130074G19Rik	445.421	20.0206	17.6881	529.648	19.414	17.3061	16.366	17.3399	20.3452	20.4295	20.3834	17.2804	19.2905	26.717	20.3764	144.791	697.854	21.222	96.2371	19.0486	16.8275
C130080G10Rik	12.9791	13.1715	12.9795	13.2149	14.7425	13.2733	13.2985	12.9955	15.0279	13.4276	14.7241	13.0343	13.7386	16.6776	14.3507	992.388	13.1625	13.1286	18.3686	12.968	13.7827
C1qa	35.3664	791.843	19.5614	18.9254	602.335	385.684	5718.18	2015.41	74.8994	14.8003	35.0744	18.0052	110.664	31.8448	23.7082	77.1184	26.5908	23.6134	20.3547	14.4089	82.1922
C1qb	79.7823	3949.46	30.914	16.7284	721.428	358.387	7623.26	6303.75	173.278	15.788	37.3892	18.0094	104.808	31.8489	23.7181	139.552	25.8998	26.2475	25.058	14.0772	1057.2
C1qc	85.8485	1176.19	19.4248	17.8784	438.962	182.575	6843.76	3489.44	55.2886	16.303	29.0938	18.0052	106.344	31.8139	23.6893	111.801	23.2872	24.1731	17.8903	13.4698	170.61
C1s	717.933	12.8508	16.0349	27.2466	12.8711	15.4192	17.5725	12.8292	12.8716	16.0948	12.8707	13.9438	12.8716	12.8767	12.8721	51.8856	1848.84	12.8716	1103.83	108.689	101.655
C2	234.105	108.139	24.1806	19.7479	46.0779	23.4885	20.8935	14.8766	23.5427	16.0046	12.8257	19.9712	15.2777	110.769	12.8257	15.3425	1014.01	28.3419	44.1146	20.9021	33.429
C3	5313.83	14.1775	15.4721	22.0365	90.8969	3996.52	604.483	32.5736	2557.57	12.9687	17.154	14.4624	12.8245	12.8274	29.7371	208.107	21823.7	31.9636	3836.06	1366.85	30.2763
C330021F23Rik	313.993	1403.95	41.8766	534.802	37.5414	22.7826	12.8233	163.668	31.3932	51.2693	24.65	1536.3	100.292	631.779	54.7439	123.251	800.015	45.8128	321.97	13.9096	124.463
C3ar1	87.6473	384.466	21.068	19.7327	19.6687	38.8905	2014.78	687.718	54.6945	24.1486	19.8365	21.6225	26.4422	25.1516	17.6401	35.5213	21.6799	19.789	19.9878	14.1325	108.379
C4b	3143.34	232.787	578.23	22.6785	12.8316	29.3846	636.513	76.4658	32.789	16.6851	12.8697	22.0564	25.6755	450.8	14.3255	48.0843	3830.66	21.1845	378.076	928.025	81.0719
C4bp	12.8257	12.8279	12.8257	12.8507	12.8299	12.8292	12.8292	12.8262	12.8311	13.035	12.8299	12.8299	12.8286	12.8516	12.8299	12.8292	580.632	12.8292	12.8292	18.314	12.8295
C8a	12.8257	12.8495	12.8308	12.8707	12.8697	12.8299	12.8299	12.8267	12.8697	12.8913	12.8507	12.8299	12.8262	12.8713	12.8308	12.8274	775.124	12.8697	12.8292	12.8257	12.8299
C8b	12.8257	12.8295	12.851	12.8498	12.8697	12.8292	12.8299	12.8262	12.8697	13.2848	12.8697	12.8299	12.8697	12.8713	12.8308	12.8274	538.147	12.8292	12.8257	12.8257	12.8299
C9	12.8233	12.8233	12.8233	12.8257	12.8257	12.8233	12.8257	12.8233	12.8257	12.8233	12.8257	12.8257	12.8233	12.8274	12.8257	12.8233	786.21	12.8233	12.8233	12.8233	12.8257
C920021L13Rik	29.5064	37.8594	28.8213	930.831	25.739	28.8409	17.615	115.962	21.9233	21.0742	12.8724	33.7097	96.2118	12.8767	15.545	33.5104	20.3827	38.1386	20.8867	18.8911	51.2895
Cacna1b	18.9695	12.932	21.2401	15.3083	12.9542	12.9604	17.3596	20.0883	12.9601	937.144	12.954	20.3727	40.4967	13.0431	12.9693	13.166	12.9559	12.9695	15.0855	23.5386	12.9096
Cacna1c	33.6918	17.0195	42.3421	17.2595	12.9542	12.9041	12.9259	23.1811	12.96	1151.84	12.9687	24.4198	26.2309	13.0398	12.9789	2032.72	17.9052	17.8879	99.0054	100.24	12.9095
Cacna1e	15.748	18.1723	89.6347	24.1938	12.9604	51.3494	12.978	42.7182	12.9641	2709.69	12.969	19.4993	14.2068	13.0443	12.9758	13.0159	12.9022	444.975	17.9064	14.0952	12.9096
Cacna1i	12.9001	13.7908	18.3464	14.2892	45.9503	40.4478	21.1024	15.2036	12.9641	316.677	12.9689	13.3981	16.9558	13.0443	12.9761	13.166	12.9022	514.107	13.2631	13.9069	34.8934
Cacna2d3	13.1288	28.4484	55.6844	15.7794	14.7665	13.2785	13.4004	20.6139	15.0687	1487.94	14.7673	25.5353	17.2806	16.7905	14.3917	18.1087	13.1665	15.2035	13.1637	18.6769	91.7078
Cacnb4	28.6619	45.7738	144.095	39.1189	13.9751	17.4646	53.379	60.2625	14.1205	1727.75	26.4374	60.7349	513.21	53.7416	19.7618	22.0745	26.1777	33.7358	29.9308	16.7374	785.871
Cadm2	17.3425	141.525	2643.4	21.5172	12.8818	12.8716	12.8716	27.4656	12.882	2052.3	12.8822	67.7697	594.478	1855.59	12.8775	12.9015	12.8703	12.8827	19.9442	25.0649	220.386
Cadm3	22.0226	85.097	105.713	27.5105	12.8821	16.6349	18.8201	21.5444	77.3349	1382.51	12.8837	70.346	246.879	19.7583	12.8831	19.0343	12.8775	12.8827	229.407	18.8683	12.873
Cadm4	24.2022	45.0133	156.254	12.8831	12.8821	12.8736	12.8837	22.5633	12.882	66.6083	12.8827	49.1246	4747.89	154.501	12.8835	161.247	60.0466	26.0619	26.5269	24.5489	29.345
Cadps	12.8697	85.479	233.36	15.9046	12.8835	12.8728	12.8775	21.8647	12.8837	4143.43	12.8835	110.624	85.0418	70.9751	12.8824	12.8875	12.8716	12.8716	12.8716	12.8308	12.8817
Calcrl	99.4778	484.875	37.4822	2396.36	62.874	179.799	234.499	169.618	72.1354	19.6219	93.9404	102.935	21.1906	33.6366	123.085	139.792	32.6991	86.8671	554.888	39.2764	54.5884
Cald1	1098.23	406.784	134.817	503.529	46.4167	40.8296	378.73	35.4474	25.8328	89.2352	13.0905	801.56	155.914	170.776	13.077	345.299	4499.36	13.0751	5401.39	11580.7	1708.09
Calml4	18.2605	18.8964	15.3148	33.4228	12.8233	14.3168	55.6055	17.4854	29.5079	14.0453	12.8233	14.4211	13.9944	12.8233	12.8233	13.38	12.8233	12.8233	21.562	19.958	3735.79
Camk2a	19.7718	96.7677	503.433	20.5915	18.9626	23.4964	33.7919	133.09	32.743	3681.72	20.1772	42.1196	26.5138	48.4236	30.8937	376.173	15.726	47.2167	51.8341	114.588	16.0925
Camk2b	22.2126	44.6176	87.4554	24.7842	43.8662	31.225	26.5615	157.94	39.6349	2988.98	298.718	124.314	25.5156	23.5468	60.2476	79.7477	71.0122	44.8999	20.0577	22.7959	175.949
Camk4	17.7683	31.3317	74.298	133.379	13.0958	17.2523	20.2372	33.912	13.1122	1715.09	42.67	35.3587	28.3284	13.4919	663.382	17.8185	17.0938	25.4482	36.0625	310.619	53.5294
Camkv	12.9043	18.7399	36.3281	13.326	13.0343	13.0097	12.9932	15.0432	13.1078	673.15	13.0658	22.4604	13.1916	13.4465	13.0263	12.9314	12.9104	13.0971	12.9107	12.8934	12.9815
Camp	12.8827	12.8931	12.8833	12.9597	334.337	21999.9	31.7534	30.1558	83.4492	12.8822	12.9597	12.9031	12.9445	12.96	12.9203	12.9554	12.9348	15.6294	14.3168	12.95	12.9059
Capg	240.027	24.0397	13.8984	632.744	269.359	1827.07	1506.1	113.623	3117.87	13.2995	160.596	21.6172	19.4296	12.9538	370.443	35.6799	37.1528	2695.76	413.896	982.493	83.7062
Capn3	15.6095	15.7614	28.9526	12.9353	12.9074	21.8288	25.3425	1968.54	12.9086	22.8123	46.5748	12.9759	19.9021	12.9388	79.537	45.0486	15.1554	36.9422	14.3145	15.7092	12.9022
Capsl	12.8821	19.5099	17.0395	12.9387	12.9086	12.9091	18.9864	13.7354	12.9089	14.5759	12.937	15.3227	12.9321	12.944	28.6894	12.8924	12.9219	17.1581	12.8847	14.8008	1606.51
Car1	15.4173	12.9061	12.882	12.9326	1366.57	37.2975	12.9094	12.8831	155.967	12.8815	12.9389	12.9031	12.8967	12.954	12.9535	12.887	12.9348	12.9424	12.8732	12.8726	33.3982
Car14	26.5022	101.365	52.723	62.6928	12.9078	12.9104	12.9008	34.49	12.9083	22.3147	12.9083	222.028	1478.87	84.2047	12.9098	1363.12	95.102	12.9094	32.6461	12.8722	632.936
Car2	76.0296	284.142	1699.54	550.839	50604	83.4112	35.6623	50.3613	578.542	56.3128	1017.73	719.921	5232.09	10746.5	83.0117	36.2202	28.6748	139.132	26.6786	18.2426	7372.06
Car3	20504.8	13.2922	17.2414	15.0763	30.9911	12.9104	12.9323	12.8928	12.9481	12.9302	12.9156	26.5273	13.4953	86.33	12.9087	20.6467	832.298	12.9424	17.0655	12.9459	114.745
Car4	102.082	22.2652	18.3991	4274.99	12.9107	12.9025	12.9025	13.2767	12.9568	41.8136	12.9105	28.7588	15.4042	20.1432	12.9268	94.0946	12.9008	12.9008	17.5384	12.9582	12.9064
Car5b	964.278	16.4503	68.4469	48.5145	12.9086	22.7781	47.8986	20.1341	12.9089	20.2618	261.953	24.0378	28.021	75.1877	28.2698	18.1477	23.2163	19.0679	53.9297	82.6245	114.246
Card11	12.8732	12.8934	12.8924	13.9858	101.255	56.6107	40.4948	66.6194	64.4292	12.8721	407.731	12.9001	13.689	12.9227	469.759	14.144	12.8956	944.794	13.2138	12.8716	16.3749
Caskin1	19.9792	63.0173	2145.42	77.3794	13.1501	17.5508	13.1512	74.8794	13.1833	432.834	13.178	66.9379	72.6367	317.809	13.3698	38.1056	21.2715	15.7165	28.0721	17.0817	63.4915
Casq1	18.6224	12.9408	32.881	15.2216	12.9022	12.9025	12.8841	15.913	12.9027	19.1501	12.9027	20.1974	50.4192	37.9162	12.9034	1077.86	17.326	12.9037	21.561	18.4996	42.1231
Casq2	21.9413	20.2876	17.001	19.1439	12.9025	12.8835	12.8837	12.8821	12.9033	15.4806	12.9022	25.8892	14.6938	12.9282	12.9013	3449.02	12.8821	12.8818	124.359	15.9506	245.848
Cav1	6653.6	117.609	26.8458	5655.14	12.9104	12.9426	82.3957	17.2041	12.9231	14.5686	12.9266	36.3736	37.5293	12.9647	12.9568	679.577	29.5126	12.9426	694.08	4305.1	51.7645
Cav2	1003.48	194.698	71.6632	1823.57	27.311	22.0735	375.955	27.7158	77.71	20.5832	12.9646	318.733	39.7362	12.9647	17.7584	185.754	190.418	23.222	92.7826	856.025	272.734
Cav3	12.8835	12.917	12.8827	12.9224	12.9104	12.9022	12.9023	12.8833	12.9231	12.8822	12.9104	12.9037	12.8828	12.9647	12.9095	531.1	12.9008	12.9001	18.1307	32.4246	12.9063
Cbfa2t3	25.8183	93.9615	16.1987	570.677	1139.46	142.035	480.861	370.228	2388.8	100.42	1076.69	86.2485	14.2577	34.747	41.4539	180.915	16.037	1440.14	118.883	13.0968	42.6117
Cbr2	96.604	863.043	12.892	15.8831	55.8931	46.9688	96.3804	27.148	82.4736	12.8835	30.9944	13.3969	17.7107	13.0443	12.9564	31.6304	12.9022	12.9695	27.8922	150.925	149.384
Cbs	23.5471	327.023	2083.29	14.9104	12.8716	12.8716	12.8697	27.1392	12.8719	19.0087	12.8716	269.707	21.9397	438.711	12.8721	13.3956	547.83	12.8728	20.9259	16.741	589.077
Ccdc109b	20.7919	20.0028	14.7256	63.5498	45.5114	61.2512	244.831	22.9153	1037.36	16.9332	32.6647	18.9224	17.5886	40.0488	78.327	17.6212	32.7984	26.7685	30.4949	103.605	20.1355
Ccdc135	12.8233	12.8245	15.903	12.8245	12.8257	12.8257	12.8233	12.8245	12.8257	12.9558	12.8257	12.9532	12.8257	12.8257	12.8245	12.8233	12.8233	12.8257	12.8233	12.8233	1880.3
Ccdc141	25.6056	28.0635	1088.38	506.909	25.867	12.8257	15.5853	18.0849	12.8257	25.7622	12.8257	39.7574	17.6983	335.638	17.1583	684.818	52.3203	19.0582	64.2388	33.4537	560.499
Ccdc3	525.049	12.9433	37.4639	18.3956	13.1483	12.9759	12.9777	14.8054	13.1793	25.3821	13.1513	18.8799	25.079	13.7851	13.1237	20.0294	13.2862	13.2783	79.9958	17.6225	88.9894
Ccdc80	2231.25	105.484	281.033	42.2627	13.1199	110.032	23.0196	23.5195	20.1396	35.9107	25.8257	118.818	20.3738	277.43	13.1675	404.555	16.3022	13.1286	2841.85	6582.92	241.431
Ccl2	62.4355	680.462	12.9535	21.5667	12.96	18.013	35.4314	139.225	61.9457	12.8847	12.96	27.5499	17.3519	13.0606	12.9481	41.2226	1149.39	12.9022	4199.83	92.1104	712.262
Ccl3	20.3852	65.7093	13.9968	12.9747	12.9689	73.5064	57.6104	393.723	116.801	12.8835	879.547	13.2138	22.2183	13.0605	20.3622	16.5486	15.3218	19.1651	18.2553	12.8822	175.731
Ccl4	15.7525	62.2326	12.9535	13.0344	12.9691	53.7454	38.4397	329.015	52.9296	12.8835	1553.57	12.9791	18.8173	13.0606	37.1452	13.7913	16.4262	17.2638	12.9025	13.0237	497.067
Ccl5	17.574	14.0483	13.8607	14.0921	71.1304	70.1612	36.3732	24.3469	210.483	15.8492	27501.6	12.9791	12.9884	13.0606	244.567	13.7913	49.2194	45.5114	24.8584	22.0657	12.9223
Ccl6	28.5179	102.814	12.9317	13.0344	174.673	6806.93	3651.4	149.067	5649.47	13.0191	40.2101	12.9791	20.8436	13.0607	20.7159	23.3482	12.9672	40.6219	36.4861	16.5215	132.437
Ccl7	56.8734	598.333	12.9089	20.7183	12.96	12.9689	21.3378	26.066	12.9689	12.8835	12.96	14.6115	13.559	13.0606	12.9482	27.9474	76.3394	12.9022	1487.41	113.121	331.536
Ccl9	90.0809	26.4051	12.9535	14.0822	84.8523	227.947	2757.49	241.132	6512.24	13.5615	45.2251	12.9102	20.7185	13.0606	17.2182	20.1487	310.418	37.8292	36.4777	98.6957	61.7118
Ccnb1	33.7217	1386.16	13.4003	49.5798	633.521	65.5974	53.5801	17.9485	60.4807	12.9018	24.7561	714.54	14.102	104.615	38.0808	16.2286	15.5892	29.1121	22.0756	283.135	34.8629
Ccnb2	24.1417	394.49	16.6909	34.7431	3279.08	247.085	91.4361	18.843	160.19	23.0326	52.9796	159.858	13.6105	86.615	74.5431	19.7059	17.8603	71.2063	27.5754	152.46	12.9816
Ccnd2	1652.35	6286.32	267.055	440.238	193.75	300.828	180.977	48.7699	123.514	389.399	5906.32	6731.1	36.3721	248.492	4457.44	597.513	25.3325	1011.66	896.758	3477.22	2150.18
Ccr1	15.524	220.191	12.9008	12.944	29.5292	2695.76	735.563	45.0235	234.659	12.8844	12.9846	12.9937	15.7157	13.0899	26.3988	13.3046	12.9037	49.5818	12.9037	14.4659	21.6226
Ccr2	12.9035	15.0299	12.9103	12.9992	73.9037	153.833	318.878	75.4647	7868.17	12.8839	3310.14	13.2292	12.9805	13.1004	203.544	13.0845	13.0001	42.7303	17.888	12.8833	12.9352
Ccr5	18.4939	17.8768	17.636	12.9991	12.9759	39.4747	386.073	1731.12	56.0431	13.9261	1030.16	13.0103	24.0904	13.1004	64.9773	14.5655	13.0001	36.9051	12.9074	12.8843	48.3991
Ccr6	12.9011	12.9059	12.9001	12.9991	111.605	23.4964	20.0597	30.5084	12.9865	12.8847	12.9913	12.9426	12.9914	13.1004	30.077	13.0789	16.4294	490.485	12.9041	12.8833	12.9352
Ccr7	12.9015	12.9442	12.906	18.66	127.366	46.31	32.9878	13.2887	25.0534	12.8847	38.1326	12.9426	13.0162	13.1004	1407.71	13.8639	13.0001	1245.8	12.9041	14.6915	12.9352
Cd101	12.9043	15.7687	12.969	14.5408	13.0343	1338.59	22.9229	97.6732	86.2589	12.9092	37.1225	12.9693	13.0816	13.4465	98.6991	14.4351	12.9104	24.1696	18.2325	13.1323	12.9815
Cd14	43.1823	361.648	13.4431	51.9713	95.0575	166.479	1701.41	1639.91	125.32	12.9047	12.9789	16.2788	32.4165	13.0397	12.9776	41.1165	1150.17	24.1276	51.9346	22.5177	120.277
Cd160	15.2237	12.9314	18.156	15.6112	13.0317	26.3368	13.1136	14.3379	13.0548	23.7575	454.084	13.0182	13.1772	13.3832	73.0037	14.9356	15.4494	32.6641	15.8832	13.4385	12.9745
Cd177	12.9074	14.091	12.9023	13.1202	56.4322	6653.6	96.8985	14.8739	587.718	12.901	13.1405	12.9689	13.0664	39.6615	13.1272	12.9231	13.0942	17.8739	12.9099	13.34	12.9745
Cd180	29.8301	22.3743	19.301	13.12	13.0315	80.3382	184.05	2639.1	108.821	14.0221	13.1067	13.702	16.9292	13.341	13.1243	13.9685	13.0867	506.412	14.9261	13.3217	12.9745
Cd19	12.9015	12.9025	12.8839	14.8979	518.05	153.607	32.904	13.0375	12.9739	12.8821	12.9687	12.9086	12.9613	13.0398	36.9527	13.1659	12.902	9982.64	12.9018	12.8831	12.9095
Cd2	12.8292	12.8709	12.8292	12.8732	128.47	60.5258	35.6054	12.8299	44.5019	12.8292	1375.98	12.8732	12.8292	12.8776	2748.88	13.3956	12.8299	1770.28	12.8299	12.8274	12.87
Cd200	56.837	45.6993	28.5401	1441.62	28.3759	25.3756	19.0166	15.7782	13.0206	299.407	13.0263	52.1816	266.158	13.1929	124.175	153.718	13.035	150.055	295.376	26.3826	38.7056
Cd209b	13.0341	500.625	13.0119	13.2394	14.8173	15.2833	38.5199	15.4433	15.156	12.9569	14.8593	13.905	15.0177	16.9684	14.4538	14.531	13.1805	15.525	13.1501	12.9556	17.2919
Cd209f	17.8297	2093.42	12.9823	13.2393	14.8148	22.8636	16.8505	15.4363	15.5304	12.969	15.0852	13.905	15.5069	16.9632	14.6715	16.7223	14.9121	15.2669	13.1525	12.9519	65.8573
Cd209g	13.1483	411.631	12.985	13.1615	14.8155	15.1759	16.0429	15.4013	15.156	12.9537	14.8591	14.8173	14.6194	16.9636	14.6736	15.0674	13.1803	15.2669	13.1525	12.9519	19.8963
Cd22	14.4941	33.2422	12.9088	13.2172	385.362	115.269	75.175	91.8701	27.7414	12.8837	37.0103	15.3889	12.9726	13.0443	41.6174	14.4606	15.3023	6261.13	12.9025	12.8831	12.9099
Cd244	14.4694	12.9474	12.9351	13.0548	29.7131	148.269	163.07	27.5229	246.407	12.901	1207.6	12.9537	12.8935	13.1441	21.1232	13.9292	12.9079	47.9504	12.9074	16.1492	12.9554
Cd247	40.8745	17.7413	211.085	100.678	31.7752	58.7168	20.2886	47.4464	12.9865	103.821	694.335	18.3724	43.2621	134.008	2085.1	36.2737	32.739	62.1997	63.8819	13.2659	12.9554
Cd248	689.154	13.7354	15.0485	27.1193	12.9851	12.9097	13.029	13.0251	12.9865	14.2171	12.9863	28.4159	14.3061	13.1441	12.9955	40.2228	13.0183	12.9935	707.634	1088.72	12.9554
Cd24a	17.3748	52.0649	27.9019	241.373	8772.36	3165.95	1106.32	24.6763	108.646	34.7646	43.2879	1279.46	19.9856	83.9962	58.5453	20.7431	12.9076	2952.57	72.2464	741.906	1479.8
Cd27	18.4742	14.9703	29.148	15.1529	27.5833	31.8029	17.6835	27.7587	38.8172	15.0498	425.035	12.9759	13.5079	13.0443	1890.81	13.1713	15.2483	48.6795	13.2136	12.8822	12.9099
Cd28	15.4483	13.8388	12.8922	13.0071	12.9684	28.0521	45.135	12.902	12.9691	12.8847	370.094	13.3998	12.9726	13.0443	1891.86	19.6365	12.9563	38.8282	23.1706	60.5955	17.9589
Cd300a	22.2993	165.929	14.3853	18.8353	136.66	1054.29	896.684	424.11	2187.52	14.0222	30.6003	17.4725	17.6398	14.8753	15.6512	17.3194	20.1529	31.9099	23.0069	13.4231	90.9072
Cd300lb	19.1241	12.8233	12.8233	12.8233	45.269	2392.31	614.644	21.0087	511.218	12.8233	12.8233	12.8233	12.8233	12.8233	14.2572	12.8233	12.8233	23.9386	17.483	14.2963	12.8233
Cd300ld	21.4293	23.2575	12.8233	12.8233	56.837	1310.25	868.942	29.3399	276.497	12.8233	28.4896	12.8233	12.8233	12.8233	12.8233	26.6971	12.8233	28.0521	16.2049	12.8233	47.9766
Cd300lf	15.1828	12.8233	12.8233	12.8233	80.4015	2378.56	57.8872	29.2301	136.153	14.1192	179.353	12.8233	13.9555	12.8233	15.1561	12.8233	12.8233	51.3397	12.8233	12.8233	12.8233
Cd300lg	64.9112	12.8233	12.8233	1157.33	34.8244	50.5581	195.602	12.8233	468.331	15.2555	12.8233	12.8233	12.8233	12.8233	12.8233	503.442	12.8233	18.9917	17.95	12.8233	25.2789
Cd33	20.9942	83.4366	22.9279	13.007	12.9595	1652.35	115.822	1820.7	66.158	13.9239	12.9726	12.9759	19.6233	13.0443	12.979	14.4544	12.9022	25.666	14.9148	12.8831	68.2079
Cd34	53.6544	25.6561	17.2437	8652.9	31.2456	25.612	24.8247	636.789	100.855	42.5501	12.9792	21.5433	17.2591	13.0443	28.4308	282.352	21.825	27.4455	3378.48	72.1248	12.9098
Cd36	13660.2	230.373	12.9222	4660.54	400.367	52.3567	683.6	26.3724	75.2706	13.625	14.4361	27.0533	15.2552	13.0443	12.9776	2004.94	40.8615	251.277	318.589	13.769	134.926
Cd37	19.2004	83.4159	15.0975	17.3156	404.068	1636.11	732.343	1096.01	416.12	12.8837	1408.76	20.373	26.3696	13.0443	1053.91	19.1928	12.9561	6153.29	14.7985	13.2508	59.1843
Cd38	34.9042	229.325	169.671	613.967	85.2407	83.0553	332.385	24.3409	12.9743	15.0918	102.902	25.5822	20.2456	182.533	57.333	44.565	27.7999	793.43	19.3067	41.9119	124.044
Cd3d	12.9001	12.9381	12.8922	13.7297	31.4187	193.86	21.0429	12.905	12.9723	12.884	79.5041	12.908	12.9645	13.0447	2973.98	14.2916	12.9025	31.3962	12.9025	12.8831	12.91
Cd3e	15.5844	12.9041	12.9085	12.905	12.9684	28.4491	12.982	12.9018	12.9644	12.8833	12.9793	12.9763	12.9226	13.0447	1815.72	14.4616	12.9025	40.2108	12.9022	12.8822	12.91
Cd3g	12.8854	12.9041	12.8844	12.9743	12.9598	32.4728	21.3494	12.9018	12.9644	12.8829	82.5129	12.9088	12.8845	13.0447	2310.29	13.0269	12.9025	38.4479	12.9022	12.8822	12.9147
Cd4	15.4179	53.8387	17.0076	12.8732	26.6115	31.0166	26.7498	12.8829	12.873	29.0451	36.5209	13.2783	12.8726	12.8774	869.986	17.6253	12.8558	36.0106	21.7185	12.8274	17.2913
Cd40	17.5155	18.7206	12.9041	128.578	102.015	60.6968	171.49	17.4301	469.161	12.8837	12.9725	15.4211	12.9198	13.0443	26.8382	24.3712	20.5542	443.329	62.9016	13.5351	12.9099
Cd44	230.726	63.6135	144.327	22.6449	118.551	3709.69	1656.86	52.5532	1956.81	18.7375	1169.48	47.7907	16.1137	73.1104	652.45	43.7747	94.6747	365.99	1170.68	2741.18	25.5592
Cd48	18.8306	140.585	12.9083	12.9742	31.41	85.0805	452.689	169.207	611.298	12.8833	782.585	12.9761	13.508	13.0447	1136.05	13.0261	17.5623	565.946	12.9025	12.8831	79.308
Cd5	12.8299	12.8498	12.87	14.1672	46.2306	21.4576	19.1017	16.3431	12.873	12.9139	12.8721	12.8697	12.8508	12.8776	1512.99	12.8833	12.8299	46.8019	13.905	12.8292	12.8704
Cd52	17.8227	40	12.9226	19.033	584.143	5672.06	634.928	117.29	7224.55	13.0316	5274.98	12.9097	15.8697	13.0447	4850.52	13.7591	31.4682	3215.42	12.9022	12.8831	22.6505
Cd53	38.7956	1001.47	14.8959	17.332	64.1963	2898.84	1528.1	896.01	662.885	17.1842	2053.6	13.3981	59.9853	13.0447	3363.22	13.6114	12.9603	1779.31	17.8258	66.0755	206.861
Cd55	75.2265	38.103	15.0858	129.946	173.566	186.421	53.5454	18.0992	28.867	34.4614	195.387	16.4906	22.1017	32.9823	148.259	30.8564	22.3714	1370.34	854.778	87.1543	966.919
Cd59a	374.373	50.7677	19.9372	785.096	647.358	30.908	43.1893	22.1039	32.0775	33.3456	29.6457	121.064	230.75	100.189	17.3243	686.937	128.4	26.3531	128.395	146.97	1269.86
Cd5l	29.0049	12.9019	12.8833	12.9678	196.565	116.41	3562.16	20.6381	20.6871	12.882	26.1772	12.9043	12.9645	13.0204	12.969	13.6218	36.3103	20.1853	15.0854	12.991	12.9091
Cd6	12.8292	12.8498	12.8498	12.8709	12.8721	111.345	17.6942	12.8697	12.8724	14.7547	12.8721	12.8299	12.8504	12.8776	1951.02	16.2324	12.8558	23.391	12.8299	13.2358	36.2019
Cd63	1381.57	1981.56	703.302	163.037	60.4746	849.608	150.17	237.533	49.749	32.2575	29.1535	2624.54	529.117	9221.75	17.8982	458.723	996.968	22.3658	1924.94	3552.43	3003.89
Cd68	116.14	902.546	34.2659	47.411	76.6257	319.422	990.322	901.503	619.379	34.1581	48.4662	49.6756	54.4387	46.0794	36.3267	27.0089	833.1	63.7741	65.441	33.1211	273.445
Cd69	12.8847	13.2374	12.8839	12.9679	12.9595	53.5626	29.0162	13.1139	65.7895	12.8827	413.873	12.9691	12.8837	13.0205	292.786	13	12.9017	173.612	12.9015	12.8777	12.9091
Cd7	12.8299	12.8498	12.8292	12.8726	38.5296	42.194	18.7577	12.8299	23.9309	12.8292	1013.31	12.8703	12.8292	12.8776	183.807	12.8571	12.8299	42.6542	12.8299	13.7043	12.8704
Cd72	39.9991	35.5858	28.2826	32.2402	160.565	102.85	64.8554	92.5023	22.7242	32.5221	400.234	20.0084	31.7451	24.9587	154.224	63.8468	38.4862	2085.04	41.9786	13.7654	33.7382
Cd74	18.2521	672.784	14.5404	438.032	2921.26	1279.46	2745.3	575.974	18592.3	14.5697	114.384	12.9691	27.6107	13.0163	293.41	139.807	29.0999	157602	78.8078	17.4971	34.836
Cd79a	18.9341	14.0921	12.8703	14.5775	160.972	149.902	32.527	12.8721	12.8719	12.912	12.8716	13.4132	12.8719	12.8767	26.6361	13.4508	15.0159	2909.97	12.8299	12.8544	12.87
Cd79b	12.8292	38.4619	12.87	14.6683	724.252	365.99	109.454	116.488	245.786	12.8262	33.2149	12.8697	13.143	12.8767	81.4813	13.394	12.8516	9982.64	12.8299	12.8262	12.87
Cd86	15.4088	203.634	13.0796	12.976	54.1652	111.345	231.874	542.024	87.09	12.8839	34.4081	14.5561	21.1784	13.0145	55.9562	21.0345	12.9475	154.055	13.9751	12.8775	113.155
Cd8b1	12.8703	12.8782	12.8779	13.1098	29.8269	29.777	16.9449	12.8791	12.8928	12.8697	12.9005	12.8818	12.8773	19.783	193.848	15.0348	12.887	42.0629	13.2138	13.7162	17.379
Cd9	96.8974	4096.84	151.536	1466.5	68.9488	2437.08	1566.96	656.54	83.5687	15.2015	427.909	2553.26	4797.66	7556.14	177.358	76.8285	748.463	107.085	759.454	2018.63	3518.44
Cd93	304.485	68.1556	16.9423	7001.44	52.8441	166.297	1251.09	40.1553	464.424	26.2323	58.8833	40.1172	14.2631	13.0256	45.6846	461.243	36.9678	142.903	119.429	18.9992	23.3695
Cd96	12.8847	12.9316	12.8837	13.0052	12.9598	17.1302	12.968	12.9686	12.9644	12.8827	429.579	12.9693	12.8837	13.0256	747.351	13.001	12.9496	26.1408	12.9011	14.6373	12.9093
Cdc25b	50.4672	379.182	150.793	70.9459	3049.24	337.341	110.842	26.453	71.9422	109.974	175.392	150.933	23.6957	82.1962	436.596	33.5336	22.4863	588.866	24.7117	91.6427	20.2122
Cdc25c	18.1024	416.326	14.5885	28.1187	650.136	43.2834	31.7346	16.0143	39.5445	13.4707	23.7865	144.528	18.9795	69.2236	36.0661	16.1521	16.5532	22.2963	14.6709	57.8189	16.6055
Cdca3	24.725	914.04	16.7786	30.7038	5193.33	244.964	79.0437	20.9276	157.811	13.359	62.6349	343.855	21.7054	110.85	87.3489	21.2021	29.6768	64.8409	19.6074	168.176	16.0074
Cdca7	23.2915	543.437	36.7549	75.4768	99.016	155.984	53.0585	76.7706	63.5778	20.881	42.0318	369.683	18.9688	1183.83	120.15	25.1717	72.3362	100.383	25.1848	67.4666	34.8087
Cdca8	23.3233	895.649	18.8536	48.8361	2952.57	180.824	71.129	20.0503	139.56	20.9968	93.1405	508.259	28.0133	98.7629	68.3222	22.8829	48.7678	56.3114	20.0236	182.41	16.0045
Cdh1	15.0684	13.7168	12.969	13.7744	28.2941	23.4985	19.1945	13.2501	13.0079	14.3558	31.9406	14.4624	13.6521	13.1289	30.1344	13.7834	1769.31	19.1944	12.9074	14.6961	12.9458
Cdh4	14.4858	275.79	172.732	31.4838	12.9787	12.9088	12.9097	15.2145	12.9795	108.557	12.9955	750.055	15.1545	69.8521	13.0099	25.8101	13.0048	13.0097	18.7603	12.8847	26.8164
Cdh5	187.786	16.475	17.2489	4280.83	12.9787	17.2078	19.0796	28.0769	13.008	13.3014	12.9892	18.2173	15.1044	13.129	13.0099	971.039	53.5517	47.8916	169.761	17.0244	12.9475
Cdk1	31.0848	1833.76	13.4452	55.4581	2670.66	129.526	122.752	22.928	128.993	12.9008	73.4684	943.259	14.1605	295.879	47.404	26.9699	29.6224	46.2602	22.2953	478.67	43.2919
Cdk18	46.7475	18.3219	23.2146	13.2478	13.1483	18.101	59.6109	43.3714	13.1925	26.7527	33.2177	16.3171	950.824	13.6006	13.1748	178.809	352.959	13.197	98.9725	50.8469	21.3136
Cdkn1a	1235.04	140.46	19.7597	940.746	171.549	86.1012	327.524	140.743	869.627	77.3163	177.652	175.953	46.0361	13.9122	61.9906	165.37	1233.51	38.848	4320.45	1198.54	254.476
Cdkn3	19.2565	314.573	16.3401	25.2011	1149.36	117.093	38.0224	18.1933	57.748	17.3168	34.0566	88.7019	14.8885	79.0821	36.41	15.7302	18.6847	44.4984	18.3986	47.0032	13.1194
Cdo1	5232.34	23.3349	68.3719	13.0331	40.5744	32.3245	21.6613	20.0884	12.9992	46.6415	19.7807	22.3149	22.101	348.461	35.8443	21.4636	886.149	25.058	59.9153	109.979	12.9433
Cdr1	12.9015	86.4151	866.649	12.9222	12.9978	12.9109	12.9345	70.0909	13.0209	1310.18	12.9976	22.3593	19.6351	13.2556	12.9819	12.8972	12.909	12.9086	12.9094	12.892	2051.72
Cdr2	317.718	23.9058	14.1749	139.957	2679.85	67.973	51.0011	24.2398	62.7656	26.3869	39.8186	49.9644	160.886	39.5636	83.2343	47.7533	33.7838	39.4227	430.379	178.036	201.562
Ceacam10	13.0343	13.3107	12.9887	15.5787	31.1154	900.609	18.707	13.3783	16.1967	12.9604	15.6608	13.075	13.0066	17.5969	15.0461	13.1236	15.3553	15.6472	13.1971	12.9647	14.2021
Ceacam2	19.8551	13.3321	54.8064	205.889	92.336	1350.53	486.044	124.047	1853.42	26.9823	21.8088	15.9344	30.3681	47.5501	22.605	23.7726	51.8735	151.079	20.2937	14.1013	60.4365
Cebpa	2179.1	42.6779	21.3526	29.9064	42.6542	256.607	808.018	279.778	694.851	17.7406	24.0255	18.9647	28.6928	39.9299	23.2128	30.0484	650.256	26.1486	70.0253	32.5613	64.2967
Cebpb	168.83	42.2654	16.6068	44.9298	178.471	1364.86	1555.96	46.42	2346.06	17.97	366.283	20.1528	22.172	32.6884	58.2188	201.55	371.798	48.2283	233.958	161.781	46.9247
Cebpe	14.3043	15.7671	13.7825	15.8304	49.7694	773.415	24.4974	17.1344	85.0511	13.3619	23.4834	13.1714	13.9709	32.6	19.9523	14.4864	21.1331	23.0676	15.3693	13.5156	18.3641
Celf4	21.0189	84.2441	214.228	18.6029	13.3969	19.4858	31.529	143.557	134.684	2513.85	13.8847	87.9226	24.5742	22.4961	22.7535	16.1473	21.0115	23.4203	24.0537	65.4238	119.81
Celf5	17.2091	33.9914	48.6044	16.2463	13.3969	16.5806	13.8199	20.8595	13.3585	844.042	13.5805	48.9278	17.748	14.2637	18.998	17.1084	12.9758	13.3999	18.9341	31.2787	13.1111
Cenpa	45.9067	595.064	15.8617	53.1735	4041.92	274.703	185.457	24.0021	368.321	15.3802	158.659	284.364	26.1632	69.7178	372.597	144.446	23.0851	225.874	54.6954	198.93	41.626
Cenpf	30.7185	1339.05	21.7545	41.0564	4248.07	198.447	155.996	67.3756	94.7714	17.0243	103.256	702.961	18.9698	99.4239	45.0173	72.6256	15.7135	60.6346	76.6464	638.037	98.671
Cenpk	17.8907	257.128	13.1528	21.2198	248.948	29.8301	34.0302	14.7881	49.0164	17.4329	58.8927	202.402	15.5754	102.902	46.8044	14.4364	20.2624	31.1824	13.7059	56.4632	39.1153
Cenpm	17.1569	1008.06	13.6051	32.1862	823.487	47.2264	34.4571	13.925	50.3936	16.1223	47.0866	333.53	19.2669	94.5775	61.3459	15.1337	21.1094	52.7253	16.0401	31.6381	49.5122
Cenpq	22.7826	577.411	38.2763	49.7007	257.17	90.0312	48.1574	31.0221	61.9583	19.6639	334.539	196.985	67.9667	277.326	118.671	36.97	22.2707	117.542	34.1016	65.1768	118.722
Ces1c	12.908	12.9213	12.9015	13.077	12.9974	12.9107	12.9352	12.9027	13.0208	12.8849	12.9974	12.9094	12.902	13.2555	12.9819	12.91	4713.86	13.0339	12.8847	12.8931	12.9679
Ces1d	2424.16	12.9213	12.902	13.134	13.0184	84.4123	12.9482	12.9084	13.0208	12.9008	13.0328	12.9107	12.902	13.2554	13.0473	788.87	762.319	13.0317	249.035	12.8924	28.9694
Ces2a	12.9018	12.9249	12.902	13.1371	12.9978	12.9107	12.9478	12.9027	13.0208	12.8849	12.9976	12.9107	12.902	13.2555	12.9819	12.91	517.087	13.0339	12.9086	12.892	12.9681
Ces2g	39.7259	12.9215	12.9287	102.482	1520.36	34.9205	13.113	12.9086	48.8478	12.902	13.0341	12.9094	12.9564	13.2555	13.0159	21.6386	133.853	21.491	206.019	73.4177	12.9681
Ces3a	12.9018	12.9249	12.902	12.9222	12.9978	12.9109	12.9388	12.9027	13.0209	12.8847	12.9976	12.9598	12.902	13.2556	12.9819	12.91	2420.29	12.9086	12.8847	12.9006	12.9681
Ces3b	12.9011	12.9075	12.9012	13.057	12.9898	12.9102	12.9109	12.9031	13.0037	12.8844	12.9873	12.9424	12.9013	13.2047	12.9777	13.3651	1187.61	12.908	12.8844	12.893	12.9617
Cfb	578.695	18.6133	53.5812	132.13	38.8334	65.4029	588.818	35.5866	512.803	72.5231	17.6014	17.2921	20.8508	40.4017	25.3482	23.7906	8286.42	27.8426	96.7255	40.4824	44.7488
Cfd	6204.02	12.871	12.8306	12.871	12.8818	12.8716	12.8721	12.8719	12.8824	12.8299	12.8822	12.8711	12.8498	12.8921	12.8818	16.909	15.0688	12.8827	13.0101	15.4645	12.873
Cfh	134.467	503.078	26.366	271.802	12.8818	30.364	386.943	2543.35	134.645	14.7037	12.8835	20.3363	33.4031	12.8921	12.8829	269.199	1505.74	17.7698	6880.59	32.1579	393.192
Cfi	18.013	12.871	12.8502	12.8833	12.8818	12.8716	12.8716	12.87	12.8824	12.8507	12.8818	12.8728	12.8824	12.8921	12.8818	14.6686	1518.41	15.5482	18.9695	13.3449	12.873
Cfp	42.9682	858.648	93.9638	23.0151	496.294	1810.17	5557.57	55.814	1157.05	112.825	52.4081	38.7939	43.909	72.9595	64.4698	32.4162	26.3547	462.608	37.9919	28.0303	77.5468
Chchd10	3746.51	19.144	76.6787	23.0744	1641.32	56.1445	48.0244	22.5794	105.223	118.241	40.1216	23.1004	25.0716	230.68	203.48	2376.5	674.364	1420.54	24.0971	19.4672	1060.73
Chgb	15.8832	63.7362	63.2837	16.5306	13.3969	13.2604	13.2161	25.546	13.4781	1680.7	13.5806	86.4371	21.1957	21.6257	13.2961	15.909	16.3203	12.9763	14.3882	15.7445	47.4121
Chi3l1	15.5844	27.2262	118.798	20.4338	30.4695	6095.27	25.3859	59.6434	12.9062	15.24	12.9039	29.2966	38.9388	1029.47	12.908	14.2126	15.105	16.2049	32.6641	782.193	91.7052
Chi3l3	14.396	12.8831	12.8775	12.9099	141.138	9434.51	67.5327	15.5501	5105.7	13.2459	21.3439	12.8847	12.8884	12.929	12.9077	12.8835	12.8963	21.1042	12.8827	12.8719	17.4879
Chia	12.9426	13.0014	13.1832	13.0053	13.3998	13.5416	13.0679	12.9777	13.5108	22.0578	13.6219	13.0604	13.5193	14.4838	17.1641	12.9465	12.9795	15.22	12.9787	12.9062	362.14
Chl1	24.0476	68.3924	133.371	14.535	13.386	13.2292	13.1236	18.6821	13.4635	1048.6	35.4258	474.791	32.0113	22.6326	13.9244	15.9871	12.9793	13.5416	34.2568	39.7207	17.9585
Chpt1	1893.95	108.132	237.922	92.874	49.0497	54.6724	94.1605	78.2673	118.164	94.8606	110.14	92.5512	170.849	456.445	59.4355	840.04	206.21	40.185	102.195	168.63	380.444
Chst3	19.1086	37.8638	37.9119	22.3424	95.7542	54.0637	27.1431	15.2688	13.3472	14.0628	13.474	33.9982	301.21	39.6116	24.5109	26.4788	12.9689	1988.91	18.8817	17.6812	13.0787
Churc1	137.396	208.867	36.2314	425.822	215.666	90.9494	101.429	38.2187	107.832	24.4494	98.4674	299.849	220.971	1673.61	203.848	223.469	160.463	119.246	42.755	61.4206	794.396
Cidec	9434.51	14.0477	12.8257	12.8295	12.8292	12.8257	12.8295	12.8257	12.8295	12.8233	12.8292	12.8292	12.8299	12.8304	12.8292	13.3437	51.3503	12.8257	12.9974	12.8233	12.8274
Ciita	15.4088	12.8777	34.0501	17.0919	226.685	75.4141	97.0988	38.0927	339.04	36.2754	12.8716	13.2733	12.8719	12.876	28.0422	21.3412	14.9699	2646.6	20.8621	12.8257	12.8507
Ckap2	23.6471	701.525	13.622	49.2883	665.109	49.5232	47.596	16.6848	67.046	13.4905	45.4483	508.259	16.2823	77.0804	53.7413	20.5144	51.5165	34.1089	38.5069	502.907	12.8722
Ckap2l	21.1805	924.042	18.0359	21.432	1607.32	107.067	80.3518	28.345	86.908	15.1661	55.6274	544.335	17.8017	416.746	41.2775	19.4351	18.3931	36.1488	19.9442	402.383	12.8722
Ckb	247.35	11760.8	4098.85	74.7158	86.1722	81.6815	801.887	1243.29	354.105	1446.43	50.0159	8908.27	3424.87	4532.49	129.754	290.056	18.4316	28.8985	313.935	159.085	5483.31
Ckm	12.8697	12.8707	12.8498	12.8703	12.8818	12.8736	12.8837	12.8703	22.1269	13.9888	34.4298	12.8721	12.8822	12.8919	12.8831	11400.4	12.8703	12.8827	25.8229	12.8299	12.873
Ckmt2	12.8835	12.8934	12.8833	12.9742	12.9104	12.9022	12.9023	12.9481	12.9231	20.2155	12.9104	12.9074	16.2595	28.0748	12.9094	5880.62	12.9008	12.9426	44.5678	12.882	12.9062
Cks1b	93.2263	786.138	15.5681	52.0553	1269.04	92.5663	60.2376	28.0267	129.723	18.4394	63.131	404.933	30.4371	208.92	81.7006	35.6889	57.0998	40.3279	57.4273	115.213	40.4086
Cldn10	14.1192	195.057	913.04	22.0696	35.1926	20.4541	28.3605	20.076	20.9045	23.4472	21.7119	247.96	28.2938	13830.5	42.3918	15.4652	15.1123	50.2491	14.229	13.2629	46.8599
Cldn11	14.7656	111.709	37.2782	21.7636	20.2438	15.8678	16.0609	22.829	20.9011	16.8199	20.0206	207.702	20205.2	2527.52	20.6144	15.3519	16.1365	19.0528	15.4588	13.2038	30.7208
Cldn13	13.9019	15.1683	13.508	22.4467	4456.38	26.3637	16.888	13.905	47.5903	13.197	20.6998	13.1286	17.0269	29.1376	19.5373	14.1907	15.1194	21.3547	13.1895	13.2044	17.5429
Cldn3	12.8299	12.8878	12.8299	12.8775	12.8728	12.8721	12.8703	12.8299	12.8772	12.8299	12.8728	12.8818	12.8295	12.8788	12.8732	13.4612	1700.74	12.8732	14.6029	12.8279	51.9652
Cldn5	24.5119	17.4008	16.3047	1844.37	12.8728	12.8703	12.8703	12.8818	12.8815	12.8302	12.873	17.9744	16.4173	12.8788	12.8734	131.868	32.1732	12.8812	13.874	12.8279	12.8714
Clec12a	22.3456	35.76	12.8274	12.87	75.0007	1000.88	236.659	25.4844	1660.45	16.4179	33.1218	12.8316	13.1952	12.8505	16.1975	14.9444	14.9584	91.152	12.8257	12.8257	25.8653
Clec14a	31.4461	23.0568	12.8498	1104.13	12.8299	12.8299	12.8292	12.8304	12.8299	15.6354	12.8299	19.1671	12.8507	12.8508	12.8311	66.5086	12.8495	12.8316	48.0116	30.4951	12.8295
Clec4a1	22.1557	327.718	12.8822	12.8928	207.609	219.232	475.983	49.112	2360.63	12.8697	39.9136	12.9001	13.8336	19.8009	17.8328	13.8375	15.0956	32.0069	12.8721	13.5701	68.5079
Clec4a3	16.6879	156.257	12.8822	12.8789	51.8142	100.293	228.417	311.052	1708.78	12.8697	40.7096	12.9001	15.5366	12.8945	12.8928	14.0042	15.0955	37.6436	12.8721	12.8507	151.535
Clec4d	19.0503	13.9788	12.902	13.2293	40.6053	2137.63	738.846	13.5122	56.8095	12.9013	13.0771	12.9107	12.9564	13.2565	13.0546	14.151	19.6162	16.2938	17.5382	13.1092	12.9681
Clec4e	15.4639	12.9249	12.902	12.9847	53.4872	1196.98	197.658	12.9943	140.576	12.9005	45.4364	12.8847	12.902	13.2594	13.0546	13.2155	18.9181	15.6913	12.9091	12.892	12.9693
Clec7a	22.6379	71.1011	14.429	22.0953	56.5809	1337	841.223	74.8108	2200.95	13.844	29.876	17.8558	20.8098	37.1361	25.6458	22.3732	26.7532	28.7588	15.7692	15.1462	135.269
Clic5	38.4128	15.81	12.8233	865.174	12.8233	12.8233	22.1428	12.8233	12.8233	14.4934	58.9421	17.8903	15.1658	12.8233	17.0597	1705.74	32.3545	12.8233	73.4283	12.8233	12.8233
Clip3	111.88	826.713	640.327	30.3777	12.8233	12.8233	12.8233	40.1578	12.8233	986.887	41.6485	874.44	2463.14	778.292	22.6119	32.1627	12.8233	12.8233	709.965	615.443	45.2258
Clip4	21.0622	64.0183	234.851	14.5337	12.8233	12.8233	12.8233	16.7152	12.8233	347.621	228.225	108.256	32.2422	184.727	12.8233	1562.13	14.8698	12.8233	50.1843	172.019	408.229
Clmn	137.981	29.452	2189.65	36.2332	14.6717	20.3852	94.3048	46.724	30.2516	164.711	14.9981	29.7713	596.467	747.237	15.2684	28.3672	255.338	14.7423	28.8705	170.643	589.797
Clnk	13.0344	13.3092	13.0444	14.4128	15.525	16.706	14.6381	13.0184	15.5723	16.3812	390.696	13.3703	14.0884	17.5255	15.7539	13.3133	13.2137	15.5996	13.1286	12.9745	18.5932
Clu	217.842	2872.02	9006.41	477.868	29.6839	57.4451	19.1133	78.0179	12.8837	268.372	25.3859	191.779	154.601	31018.5	12.8837	1462.67	26067.5	14.7656	356.341	84.6887	52480.5
Clybl	368.466	252.66	591.213	88.2715	169.634	33.7587	57.8278	25.3224	46.3745	29.0065	97.3818	335.759	26.063	968.316	71.9623	560.021	143.262	45.0813	60.7316	53.2116	765.402
Cma1	14.7923	16.4116	12.9956	13.5166	15.0613	15.2886	29.651	13.1492	15.2945	12.9599	648.462	13.9393	14.6203	17.2133	15.6156	13.4006	13.2002	17.4171	12.9595	12.9559	14.0672
Cmah	36.0081	57.4379	14.7481	39.5597	114.95	418.985	107.218	23.5324	41.0369	14.8891	552.39	13.8218	14.9614	17.03	906.724	19.014	82.7489	1611.85	35.3815	34.1107	46.2463
Cmklr1	120.112	41.0283	17.0726	22.9454	34.0099	36.7834	575.003	844.475	98.9976	14.7312	376.97	14.6699	17.7858	18.8848	17.2046	55.8274	16.2054	22.7826	216.086	89.377	26.3026
Cml1	22.4147	45.6091	857.73	47.2718	78.6669	31.614	29.6587	21.5721	49.4679	18.0494	49.8621	90.3902	81.7007	1870.76	43.7418	24.2809	98.8801	35.8123	15.301	21.3443	234.142
Cml2	13.0101	18.5206	25.8066	17.0774	14.7985	15.1354	15.5331	13.0668	15.2415	13.3934	15.4837	15.3883	15.3337	16.9575	15.6581	13.2375	2383.19	15.266	13.0604	15.3154	23.4708
Cmtm5	12.9018	554.735	1205.34	17.357	12.9761	12.9086	12.9092	21.0237	12.9792	16.7995	12.978	410.077	5321.3	9720.57	12.9646	18.9393	12.9059	12.9037	15.1026	17.8937	236.204
Cmya5	36.6703	13.1755	230.419	17.7742	13.386	19.4141	29.5889	455.387	13.512	62.5608	77.2306	24.6665	18.1368	84.9118	36.3955	4376.05	13.6115	22.1923	91.1684	30.448	21.1709
Cnksr2	16.299	18.0357	49.1578	17.169	12.9097	12.9015	12.9025	20.7563	12.9102	1490.47	12.9097	22.4975	21.7044	12.9538	12.9103	17.6418	12.8854	12.8854	13.0339	14.7313	266.208
Cnn2	223.751	32.0518	17.3388	800.064	425.163	5073.24	574.554	75.0528	3639.26	17.2674	2295.43	46.8644	16.5937	17.6976	5255.74	189.338	71.6231	2424.16	203.848	2397.56	27.1165
Cnn3	253.759	374.888	769.55	1645.11	91.5473	46.9458	34.2148	19.7807	68.5746	38.1135	19.5597	856.766	615.234	918.107	128.881	229.781	1155.27	572.213	919.423	2579.17	4791.25
Cnnm1	13.2217	12.9019	21.4764	13.5559	12.8721	12.8721	12.8703	17.7886	12.8724	595.127	12.8724	17.2322	24.5482	12.8778	12.8728	14.2567	18.0605	12.8299	13.3085	16.4374	12.871
Cnp	115.854	712.87	342.154	106.316	209.374	209.836	313.21	206.659	577.046	73.8814	310.062	401.953	50604	3627.82	983.462	49.7467	65.7793	2085.04	134.196	51.3995	618.413
Cnr1	25.3685	48.6222	131.912	18.485	15.2223	16.8083	13.5694	18.9773	15.4973	783.869	15.4295	55.296	22.984	41.0986	15.6391	13.6989	13.2215	15.8981	19.5977	22.282	14.2021
Cntn1	13.4487	98.3981	480.217	22.5741	12.9091	12.9097	12.9011	36.218	12.9094	1239.54	12.9107	166.517	2738.42	79.5099	12.9105	12.9404	12.8847	12.9104	13.3535	21.514	1456.66
Cntn2	17.4767	15.6844	217.429	12.9615	12.9091	12.908	12.9013	26.4777	12.9094	440.222	12.9095	30.8632	2031.32	169.31	12.9095	31.9711	12.8847	12.9104	13.2306	17.0947	18.8521
Cntnap2	12.9542	25.8329	46.4885	14.8744	33.53	13.0341	13.1405	18.7957	14.1318	1243.12	13.724	24.5177	15.1547	28.5508	13.4502	13.1291	12.9955	12.9797	12.9937	15.7576	55.5089
Col11a1	30.9024	72.3935	79.6951	19.8662	21.4588	17.268	17.2267	17.8474	23.3723	383.422	21.2121	46.7996	23.8536	93.8132	20.4734	22.5728	15.4205	15.2669	34.2046	2930.28	24.6037
Col12a1	1019.4	18.0427	21.3942	25.2869	20.0631	20.7812	18.6937	22.5515	20.737	247.584	21.2399	24.2755	19.9768	28.5737	22.318	39.3612	368.897	21.1608	494.638	4774.75	21.8735
Col14a1	78.8436	24.7521	17.7173	27.0467	57.1363	24.1276	28.9018	45.9088	27.2269	22.7156	24.8712	17.4818	19.963	35.4409	25.4214	90.906	23.5662	36.4861	1374.36	72.3516	29.1487
Col15a1	1948.68	17.0883	15.5913	450.816	18.0052	22.9846	20.5849	396.255	17.9914	21.5371	19.187	15.6283	19.5348	21.545	29.7305	288.7	49.1957	18.7162	5672.06	123.496	15.5461
Col18a1	684.199	31.2945	17.7116	153.387	51.7117	18.0626	48.8971	21.0235	18.0353	17.7879	18.3392	25.7874	21.1351	21.9592	19.7942	63.4655	2315.48	19.9126	319.807	152.001	66.0887
Col1a1	3393.34	19.355	90.426	23.8136	12.9078	55.6923	33.7476	18.6251	12.9089	16.5583	12.909	19.313	15.7081	42.4856	28.2583	411.852	17.387	12.9094	7804.71	10313.7	12.9023
Col1a2	4569.49	22.3088	73.0301	32.563	12.9078	17.1302	24.6121	16.5664	12.909	16.142	25.065	19.1888	24.6297	12.9422	12.9092	311.363	17.3891	12.9094	12075.4	9691.42	56.6754
Col27a1	139.781	19.8056	153.083	23.283	33.6421	28.4549	39.1861	3054.36	43.8975	22.3305	22.1331	24.217	58.7571	177.904	22.1375	36.334	97.0723	112.054	206.931	197.67	83.3261
Col2a1	12.9695	25.402	22.1447	14.569	14.2978	14.3269	13.2656	14.6711	14.1645	20.002	14.3599	17.2638	25.3477	136.229	14.4621	15.6808	16.837	14.3267	18.2543	2482.6	13.3141
Col3a1	7915.24	22.5433	14.9349	33.1955	14.4858	21.1992	17.408	15.224	14.9326	13.0069	14.6804	19.5897	16.1914	16.3021	15.0461	785.39	21.9933	14.8194	11747.6	8556.15	13.6768
Col4a1	8146.31	41.4629	85.5825	6554.94	15.0828	19.8896	24.4496	18.7724	35.1295	304.118	19.2794	89.8245	57.8807	92.8588	15.82	2430.08	402.305	17.3025	12395.5	2798.26	60.5746
Col4a2	6323.08	32.8449	174.217	3883.73	15.0854	36.1056	25.22	21.9307	15.5469	384.728	15.2641	45.2297	35.3703	30.7668	16.0324	2304.71	253.844	15.748	4199.83	2956.4	186.725
Col4a5	73.6762	19.7824	317.548	30.5068	15.0684	16.4896	25.777	18.2788	15.5317	15.9453	15.4711	34.1849	17.6561	99.0386	15.5917	607.799	33.2273	16.4029	1063.69	447.471	60.8297
Col5a1	1638.79	14.6736	52.0296	28.0079	708.075	54.9754	21.0751	19.9052	39.8699	219.933	16.0705	16.2607	26.366	18.1833	17.0582	192.526	20.4725	16.5273	4824.44	3923.88	19.3228
Col5a2	1638.79	50.5745	143.528	75.8357	15.4743	15.7702	14.8576	16.7672	15.8277	24.5623	16.0711	141.634	26.9491	54.9077	16.6664	218.945	18.3392	16.0148	3240.99	16316.3	68.0275
Col5a3	1316.64	13.4007	58.1719	21.477	15.8854	22.3875	16.9915	14.8786	15.8285	15.5983	15.7405	15.2832	41.749	18.1854	16.6066	59.8253	32.1623	25.8376	666.691	104.892	214.144
Col6a1	3527.3	13.088	20.5175	23.796	13.1616	13.0989	15.0113	17.2159	13.1888	441.57	13.1887	20.5003	15.5406	13.8394	13.3126	275.171	13.3507	13.3082	3153.71	3878.73	13.0363
Col6a2	3082.46	14.9355	16.68	24.7746	13.1616	13.2034	13.182	15.7509	13.2422	125.624	13.2315	17.2529	86.9684	13.8394	13.3809	132.347	18.5985	13.3082	4540.71	2485.13	13.0363
Col6a3	2898.84	14.9362	17.1673	38.3158	13.1616	16.3808	15.3356	164.392	13.1977	21.3304	13.1887	19.609	40.2562	13.8394	13.261	202.67	13.3507	13.2136	2183.8	3285.77	13.0364
Col8a1	122.435	16.1064	13.9715	23.2774	13.3969	13.2493	13.2613	13.8764	13.6052	20.043	13.4714	13.1501	14.1491	14.4573	13.4705	170.369	12.9793	13.5431	4320.45	6186.84	367.073
Col8a2	17.2638	16.2729	14.1565	15.1016	13.3956	13.5006	13.0549	13.8764	13.4781	12.9308	53.1932	13.8161	14.884	14.4573	13.9247	15.3391	12.9793	13.5431	27.4658	62.4422	607.623
Colec12	182.002	106.341	31.8249	40.2651	14.2975	19.5748	176.754	19.0794	38.949	15.6556	14.6072	19.8446	16.5599	30.9564	14.8623	40.3097	239.865	14.7694	548.124	1165.84	45.8948
Comp	23.4863	13.757	15.5686	18.1902	41.3739	18.497	18.4493	39.4707	36.1622	16.0322	18.1782	13.9128	14.4665	19.7387	18.1779	21.6043	19.1687	20.8929	137.072	507.657	15.0236
Corin	14.9965	13.8925	13.2227	19.4809	16.9112	17.2638	14.7298	16.9936	17.2858	15.4564	17.4872	14.5561	18.8185	20.5573	16.6871	1260.05	16.278	17.4178	23.0195	14.6671	15.288
Coro1a	22.5479	98.0439	18.5214	37.1066	773.415	12075.4	1411.08	1409.45	23863.8	102.718	2604.86	63.6199	30.6581	12.8274	11029.4	18.7693	18.2125	12763.9	17.1302	18.4347	49.0233
Coro2a	22.8181	12.8233	13.9649	13.7961	79.8141	192.173	153.99	159.824	382.641	74.5156	1175.4	14.3267	15.2065	12.8274	236.373	14.6618	30.9405	352.508	17.0976	17.4118	12.8257
Cotl1	131.184	375.175	64.5056	139.721	334.638	4569.49	3800.75	328.727	4949.12	32.891	1207.75	264.632	58.0317	156.918	2397.36	61.0484	105.908	1717.34	176.61	39.4869	103.514
Cox6a2	27.0445	19.105	14.6174	14.2461	18.2251	29.98	20.7797	28.5982	19.3824	14.6692	37.2997	15.8691	36.1644	23.6955	18.5866	5211.92	18.6718	39.4685	23.9575	16.5894	16.142
Cox7a1	527.682	28.2894	19.5358	17.1976	18.0959	19.968	25.5889	17.9595	40.7259	16.9311	20.5524	24.8528	17.0578	58.4809	22.1312	3782.74	20.8804	18.8817	22.5032	15.257	179.853
Cox8b	150.101	17.0927	13.1634	13.2132	14.6709	13.2817	13.2843	15.3953	14.9178	12.9646	14.6472	15.7867	13.8324	27.674	14.266	2427.48	13.1513	15.0684	22.9751	12.9354	197.211
Cp	1000.88	315.86	36.1757	728.123	12.8257	27.6059	198.505	75.8332	12.8257	30.5555	12.8257	164.389	33.3682	12.8257	12.8257	279.664	8240.77	16.9084	2583.24	421.295	167.993
Cpb2	13.2135	13.9319	14.7657	13.9184	17.0617	17.3548	14.4351	14.2266	17.4007	15.3403	17.3174	13.7793	13.8397	20.7685	16.1182	13.7308	3988.01	15.4179	13.0097	13.0097	26.9263
Cpe	173.372	2369.41	11911.5	505.983	12.8827	17.5689	12.884	206.972	12.8831	974.309	12.8831	7404.48	432.725	11030.8	27.954	1032.82	429.451	12.8835	377.414	8089.12	9845.7
Cpm	18.4892	17.6135	18.3447	26.8761	65.126	42.6606	16.1231	16.6386	12.8827	23.3444	12.8835	20.3396	1052.29	12.8921	185.176	46.2414	20.8865	417.092	151.079	16.1647	16.3249
Cpn1	13.2783	16.0361	14.028	13.9209	17.2684	17.8217	15.1963	20.5837	17.7353	13.0788	17.638	15.3889	16.3418	21.4572	18.0895	13.6652	648.105	18.0626	13.9051	13.7971	176.087
Cpox	109.235	69.647	49.837	56.9362	10644.8	68.1945	136.225	67.0566	199.055	78.863	186.055	103.644	1663.06	488.514	134.913	286.638	200.677	125.409	169.06	119.124	53.6293
Cr2	13.0101	17.8218	73.714	12.8922	193.86	42.6542	29.7159	21.6095	12.8824	25.755	12.8827	14.7551	12.8837	12.8921	21.996	12.8866	15.0292	3765.44	12.8703	12.8657	33.5938
Creg1	508.259	75.9515	165.526	104.38	8397.53	997.197	1087.27	361.613	2236.29	97.8756	288.76	44.508	93.05	60.924	173.108	600.648	1730.52	109.051	308.398	216.376	271.447
Crip1	174.923	165.323	21.9602	1410.04	334.445	358.055	1510.58	37.2379	7357.37	12.9064	1649.44	178.919	27.9295	325.658	1626.19	187.507	13.114	1864.82	752.027	186.453	308.618
Crip2	329.864	1486.21	222.221	5024.23	1173.06	52.475	27.8291	20.3491	46.9261	92.3128	29.678	2220.92	364.551	3057.9	32.4155	4007.92	325.087	34.2807	660.281	1042.45	3676.74
Crispld2	37.7009	27.3681	24.9036	20.57	27.629	1693.52	29.8027	12.8233	20.3332	12.8233	22.7165	22.2403	18.4128	87.196	20.2484	89.6168	14.0497	12.8233	3094.26	38.4454	18.532
Crlf2	71.8873	22.9302	16.6238	43.0287	180.011	808.436	638.793	41.6416	1522.98	31.2306	296.066	22.8816	35.9991	102.166	297.484	47.2636	48.5995	250.294	105.662	67.2747	17.7106
Crmp1	14.3238	249.92	46.1396	15.1032	12.9316	12.9532	12.909	15.614	12.9442	510.348	28.942	419.939	73.826	56.8347	81.9794	18.9564	12.9008	12.9595	18.1578	16.854	17.5766
Cryab	318.981	224.109	133.61	50.3958	15.9344	16.7811	19.4438	40.5734	49.6309	24.9388	17.2754	715.052	4910.81	5893.85	17.374	5758.92	28.489	17.2289	459.688	1252.45	1454.82
Crybb1	12.9099	67.1228	16.5978	13.1385	13.3082	13.6181	20.6643	641.999	119.853	12.9081	13.3436	20.1974	29.5854	48.8233	13.1873	21.433	12.9689	12.9602	12.9691	12.903	13.0757
Crym	15.0662	47.3918	50.3391	20.5878	19.2004	15.2199	15.3532	16.9468	19.7954	84.1451	19.0459	40.8296	20.7135	919.231	17.8675	15.5948	47.2148	14.4858	19.7665	14.6592	108.711
Csf1	827.264	34.5158	549.058	317.272	36.2011	189.303	85.5612	160.952	35.8897	64.3947	39.262	52.9261	473.347	80.0242	52.5556	403.256	434.625	50.3629	14711.7	2873.9	26.368
Csf1r	51.5987	3535.94	84.9515	18.6018	504.336	1095.12	6885.31	19436	7718.21	30.0314	70.2667	15.7198	198.763	17.4931	32.9002	111.349	20.0575	50.3549	195.1	22.796	582.654
Csf2ra	58.5572	59.2766	59.5174	34.5631	186.297	2531.18	1339.76	385.283	4167.05	119.067	74.034	30.6116	45.4345	123.152	73.8575	58.7312	56.7778	255.62	61.188	34.3055	44.9996
Csf2rb	24.3341	41.5377	15.3336	295.617	108.203	2599.64	1319.26	930.258	2595.23	13.0612	34.4961	12.9031	14.6907	12.9061	30.0811	14.4886	19.7156	289.984	75.0416	12.8904	42.3952
Csf3r	14.8148	58.4574	30.4701	16.8062	61.9754	11747.6	518.506	5442.48	1173.74	13.9007	30.0063	14.1192	27.3731	17.5508	16.2982	18.5813	18.0027	38.8905	13.214	12.9776	40.3883
Csmd1	36.153	14.7556	251.877	18.8531	12.8233	12.8233	12.8233	20.4507	12.8233	2819.04	12.8233	25.5783	34.9939	32.0381	12.8233	13.7454	12.8233	12.8233	28.8486	30.2773	80.2691
Csmd3	12.8233	26.659	160.188	14.3829	12.8233	12.8233	12.8233	3533.87	12.8233	1517.13	12.8233	31.1097	191.956	196.357	12.8233	12.8233	12.8233	12.8233	13.197	14.6837	357.217
Cspg4	336.852	27.3604	83.6334	12.87	12.8299	12.8292	12.8295	21.2585	12.8299	14.2551	12.8299	37.6639	42.9019	12.8505	12.8299	150.29	12.8267	12.8299	131.221	902.604	16.9152
Cspg5	13.9187	356.926	3069.64	38.301	25.4386	12.8299	21.1137	31.6248	12.8299	230.127	15.0568	713.237	128.363	3722.02	12.8316	14.1299	12.8482	15.5249	16.2788	18.1375	75.9548
Csrnp3	12.8299	15.4382	40.4962	14.7076	12.8721	12.8716	12.87	14.4939	12.8724	927.535	12.8728	22.8181	130.381	21.8535	12.8732	13.6179	12.8316	12.8732	13.0097	13.846	136.811
Csrp2	69.442	106.316	19.7973	716.904	29.3861	51.4914	54.8275	21.3923	229.491	21.5882	37.1274	158.412	18.6358	46.2957	27.2976	130.927	67.1473	116.966	191.269	109.868	1071.59
Csrp3	12.8854	13.4139	12.8843	12.9053	12.9602	12.9935	12.9087	12.8928	12.969	12.8835	12.96	12.9791	12.9303	13.0652	12.9484	5801.26	22.8024	12.9695	26.5889	13.2397	12.9223
Cst3	3608.43	18410.5	12558.5	5881.81	658.349	3082.46	5362.95	20504.8	10756.1	389.802	451.519	8146.31	1635.56	71859.7	446.709	2329.15	414.187	643.604	3467.15	2118.67	9275.75
Cst7	18.0991	20.4259	16.7668	19.5095	36.4544	54.8166	24.8541	25.6299	58.7386	17.3895	696.677	16.2724	16.6252	29.0291	550.054	14.3803	17.1058	23.6471	14.9176	13.2038	17.5179
Ctgf	230.548	18.5241	20.1158	229.18	20.3082	18.7695	19.281	18.4494	21.0219	41.0865	20.7724	24.5405	19.6041	29.3109	22.0055	1133.36	948.346	21.4576	6261.13	7222	36.7055
Ctla2a	119.871	21.638	13.4213	5855.53	13.9438	34.7873	38.0288	17.3365	14.2698	12.9642	4237.28	24.9933	14.3579	15.5289	162.987	98.4463	25.665	24.9079	175.953	21.1156	13.349
Ctla2b	33.818	52.2831	13.5764	877.759	13.9438	21.8753	128.171	54.7528	14.6121	12.9352	705.082	14.4694	14.1729	15.5289	63.4445	27.735	22.541	17.6078	57.1085	17.034	61.251
Ctla4	12.8703	12.8712	12.8316	12.8845	12.8827	12.8844	12.8843	12.8714	12.8829	12.87	43.5459	12.8728	12.8498	12.8929	211.301	21.39	12.8714	21.4068	12.8711	12.8295	12.8775
Ctnnd2	14.9176	791.296	3600.93	22.7244	12.8818	31.9301	19.8826	149.897	12.8822	1060.05	24.8796	994.663	153.161	4484.73	12.8831	13.6838	12.8703	16.1174	14.3909	29.4611	219.885
Ctse	15.2201	36.2274	13.9416	22.977	7804.71	436.588	33.2661	24.2379	126.291	13.4927	69.9967	17.3197	19.4097	32.5195	84.2537	16.7306	19.4515	110.008	15.5797	13.5156	81.8719
Ctss	132.026	1535.57	19.1366	25.1714	488.106	625.258	4502.19	5800.03	13903.3	17.938	323.126	18.2416	106.822	32.7723	1120.43	62.4341	27.021	2889.53	24.1824	13.7628	850.197
Ctsw	16.922	19.2301	23.3236	28.2663	45.0042	38.2914	23.8785	40.7975	25.306	18.4593	4727.13	16.5061	14.9196	32.8571	524.855	16.6323	26.5548	32.4298	17.2685	22.4575	18.4029
Cttn	500.692	536.376	189.886	568.477	95.6366	27.0761	40.8063	24.8992	23.7642	353.317	25.5814	461.645	437.045	286.607	37.6962	276.156	1480.36	23.2957	799.33	3005.65	590.775
Cttnbp2	18.2416	153.342	667.868	59.7606	12.9756	12.9091	12.9095	23.2425	12.9776	3800.95	12.9776	214.058	182.541	161.805	12.9777	20.3221	12.9039	12.9795	24.0449	24.1428	62.1548
Cttnbp2nl	158.852	234.869	202.039	584.687	12.8835	21.4835	139.055	2985.96	33.8345	139.309	12.8845	169.413	233.308	351.25	16.0989	169.119	75.4609	19.1688	776.784	434.663	147.703
Cx3cr1	15.2874	574.834	30.2655	12.8707	75.2645	104.908	207.323	12395.5	3248.75	17.0848	530.148	12.96	49.5488	12.8715	27.5901	35.9925	12.8504	31.8964	19.2565	13.4729	149.719
Cxcl1	21.1042	28.4765	14.4597	318.559	14.9973	15.2231	38.8537	13.1386	15.2629	12.9693	15.2123	14.1113	15.1473	17.1359	14.793	30.8932	496.83	13.1616	2775.74	46.8285	105.757
Cxcl12	1125.23	58.8354	32.4013	7084.59	19.1263	37.5097	79.1078	23.9333	19.4275	28.9419	18.7039	29.9541	336.135	23.8374	19.2618	1033.26	84.8804	19.866	584.143	1444.32	39.0633
Cxcl13	22.6379	15.6818	13.2942	23.2939	19.1187	18.9224	401.022	15.3202	18.8495	13.1626	18.6967	13.3999	13.3061	23.8158	17.2218	14.7169	18.6943	18.155	14.9548	13.0898	16.1863
Cxcl5	15.8368	13.2336	16.1908	14.1973	15.0286	14.5534	13.5004	13.0097	15.2659	13.3014	15.0015	13.9318	14.6604	17.138	15.3867	23.2181	35.6808	13.1616	1813.86	582.35	14.0235
Cxcr2	13.0317	14.7619	13.0035	15.7614	55.842	8397.53	21.5625	19.2606	24.542	12.9756	15.8806	14.0063	14.6995	17.3706	20.9833	14.582	13.2085	27.0843	13.1714	12.9742	14.1521
Cxcr4	33.3913	101.423	28.5134	78.0865	741.525	2398.95	83.1659	20.4547	225.76	13.0141	493.675	88.0519	28.5826	43.3937	168.952	42.1593	20.0082	352.093	41.7909	15.4094	61.6052
Cxcr5	18.0717	19.2566	16.2597	26.6801	171.091	49.0974	40.5718	20.7037	22.3598	14.6496	15.5684	16.2925	18.5577	28.7219	77.7535	17.3868	16.801	2553.26	15.2847	12.9743	38.7897
Cxcr6	19.6222	16.1759	23.0574	14.9412	15.1502	18.3977	19.986	46.7776	15.4042	18.6334	83.8107	14.0222	14.7923	17.4285	445.189	17.2788	13.2087	26.9216	13.197	16.9918	50.7202
Cxcr7	108.423	192.959	28.1176	506.954	58.7494	15.7284	30.5241	22.2512	15.4042	24.3634	15.6895	161.802	25.7872	136.396	15.7073	1033.5	45.4845	44.0041	2148.31	125.57	179.014
Cyb561	50.6107	12.964	16.9665	151.329	12.8847	17.0168	19.2948	17.7001	12.901	68.9035	12.8928	13.317	24.5965	12.9041	12.9008	52.9273	169.706	14.7694	43.9616	18.7598	1169.59
Cyba	157.566	693.282	26.4423	824.122	442.593	3153.71	2798	536.01	5469.59	12.8233	1319.91	209.836	39.4922	242.418	1806.44	118.968	24.8341	981.766	267.341	294.97	193.229
Cybasc3	105.647	82.347	65.3994	105.009	223.367	451.377	149.897	410.619	149.311	46.6439	107.016	46.4167	74.5924	84.6063	140.569	97.4259	236.72	1844.19	67.4422	80.1212	54.6394
Cybb	68.083	378.909	12.8233	12.8233	277.185	5626.87	9310.28	103.158	14988.6	15.518	93.9762	12.9352	16.5986	12.8233	46.035	17.7276	51.7693	2398.95	17.0701	12.976	184.296
Cyp1b1	285.738	107.083	23.6945	21.3682	18.4355	17.3804	19.3164	14.7609	19.6286	14.567	18.8773	25.6175	19.75	24.3518	19.8252	38.8712	17.975	17.4858	1273.17	3592.17	16.3333
Cyp2a12	12.9031	12.9348	12.9031	12.9354	13.075	12.9542	12.9642	12.9074	13.1391	12.9017	13.0679	12.9759	12.9051	13.5191	13.0219	12.9216	559.45	12.9104	12.9104	12.902	12.987
Cyp2a4	13.2034	14.2051	13.2537	14.0063	17.8023	14.6184	15.201	13.6149	18.2845	13.0345	17.6684	14.243	13.2523	22.5165	17.3031	13.6898	767.761	13.9751	13.0344	13.0545	15.8458
Cyp2a5	13.2798	14.1936	13.2214	16.7991	17.7698	14.6183	14.9405	13.8066	18.2566	13.2383	17.6426	14.2345	13.2523	22.4869	17.4903	13.6898	2106.39	13.9751	13.0343	13.0545	15.8393
Cyp2c29	12.8233	12.8233	12.8233	12.8233	12.8233	12.8233	12.8233	12.8233	12.8233	12.8233	12.8233	12.8233	12.8233	12.8233	12.8233	12.8233	2069.76	12.8233	12.8233	12.8233	12.8233
Cyp2d10	12.8233	12.8233	12.8233	12.8233	12.8233	12.8233	12.8233	12.8233	12.8233	12.8233	12.8233	12.8233	12.8233	12.8233	12.8233	12.8233	1036.47	12.8233	12.8233	12.8233	12.8233
Cyp2d22	109.391	153.278	1039.22	757.678	12.8233	25.1209	25.7433	30.8941	12.8233	16.3446	36.7754	114.85	27.48	2097.13	40.7784	136.043	360.104	40.3763	268.607	65.6598	37.6757
Cyp2d26	12.8233	12.8233	13.449	14.5235	12.8233	12.8233	12.8233	12.8233	12.8233	12.9387	12.8233	12.9424	12.8233	12.8233	12.8233	12.8233	923.05	14.5845	15.3851	13.3108	12.8233
Cyp2d9	13.2786	14.1548	15.4372	18.7936	17.5517	14.7693	15.0632	14.9932	18.1726	13.0343	18.3265	13.9073	13.2411	22.2631	16.8087	13.8977	856.831	13.9467	13.1525	13.0534	15.7974
Cyp2e1	715.959	19.6484	13.349	19.2725	86.8671	19.7718	20.5157	15.284	54.0464	14.0724	34.0059	14.229	13.2229	58.0825	20.0095	19.4619	2394.97	18.4355	22.5983	13.1247	21.8603
Cyp2f2	36.7378	14.1432	13.5195	14.2825	18.3252	14.7586	14.8833	13.4006	18.1212	13.1199	17.4457	15.2002	15.343	22.1371	18.3638	13.6464	925.659	18.3799	13.9467	21.1248	19.4708
Cyp2j12	12.8316	12.8776	12.8833	12.8716	12.8827	12.8721	12.8721	12.8841	12.8831	12.8299	12.8827	17.5151	302.021	12.8929	12.882	12.8508	12.8714	12.8711	12.8299	12.8661	16.327
Cyp2j9	32.9627	207.877	1294.87	66.9967	17.3783	16.6738	21.1452	20.5792	17.9159	15.745	17.7861	115.872	80.1848	1299.78	17.1036	20.2453	22.1626	18.2326	30.7919	21.3771	62.7787
Cyp39a1	22.7672	552.841	18.6982	23.2885	33.4135	43.107	23.4063	17.3529	79.3903	17.792	26.3746	131.903	85.3005	81.2999	16.7434	23.5944	64.8873	82.9715	38.6389	55.0744	191.002
Cyp3a11	12.8716	12.8779	12.8714	12.8923	12.9008	12.8821	12.8829	12.8719	12.9012	12.87	12.9008	12.8835	12.8716	12.9057	12.8924	12.8758	2246.65	12.8732	12.8697	12.87	12.8843
Cyp4f15	12.8721	16.2414	877.719	12.9056	12.9008	21.1061	18.3624	15.1692	33.0025	14.458	12.903	20.0725	14.9963	393.347	12.9015	12.9226	62.9425	12.8732	12.8697	12.851	23.5509
Cyp4f18	14.9392	12.9387	12.9015	12.9028	171.512	3215.42	78.2392	25.5789	1447.16	17.4309	23.0095	12.9025	12.9022	12.9056	18.3534	13.8387	12.8888	1205.25	12.8812	12.851	12.8843
Cyr61	921.787	153.405	195.515	2247.97	12.9953	13.0101	13.1036	19.9594	13.014	27.1266	13.0069	30.0243	29.5424	131.182	13.0477	1292.75	3228.41	13.0184	4131.82	4207.16	477.213
Cyth4	25.8063	337.803	22.3537	56.3747	185.833	1714.59	1561.87	3677.94	1834.2	14.9617	1649.27	14.3144	24.6251	12.8245	772.774	21.5443	14.8399	924.139	17.0701	12.8245	44.9434
Cytip	14.243	12.8257	12.8257	12.8292	116.731	1442.19	521.19	33.7342	2032.25	12.8233	1762.13	12.8292	14.7726	12.8274	3355.92	13.3967	12.8274	1436.01	13.6379	14.2458	12.8257
D0H4S114	191.779	484.913	58.8937	351.173	12.9935	13.0097	18.2855	71.4242	13.0038	303.59	13.0262	495.978	75.2839	108.624	13.0855	211.951	17.799	13.0344	143.317	36.0809	1123.86
D10Bwg1379e	15.109	22.6172	32.8892	25.0182	23.9739	18.8731	22.2408	28.439	23.4674	1101.22	22.071	21.3171	45.1677	34.6647	29.4186	18.8908	16.4986	15.5467	25.2602	13.8925	52.0248
D3Bwg0562e	17.5896	107.295	38.2856	14.8414	12.9689	12.9756	16.7971	50.1387	33.399	1574.04	12.9775	15.467	31.5936	13.0827	12.9644	15.41	12.9031	12.9763	17.318	14.8832	951.418
D430041D05Rik	14.0063	114.163	40.938	19.6329	19.0764	15.181	15.4991	33.2344	19.6527	1548.78	19.1932	102.082	218.838	61.0252	20.9861	14.8869	16.7797	17.1302	14.4693	13.1161	33.2714
D830015G02Rik	13.1614	16.3456	19.4828	15.22	16.6113	14.0724	14.302	15.4409	17.0958	26.3497	16.5952	15.0399	18.8376	20.0795	15.7743	11270	13.6467	13.5006	29.0495	12.9988	30.0305
Daam2	47.2585	30.5834	7447.55	43.4488	12.8818	23.6395	12.8777	37.9896	12.8818	61.7562	12.8818	39.6956	869.145	793.044	12.8827	66.1482	22.9572	12.8827	98.079	71.2107	37.1691
Dab1	12.8721	305.871	1422.39	15.2113	12.9018	12.8835	12.8835	22.6968	12.9023	681.325	12.902	247.536	249.099	180.916	12.9019	12.8829	18.5052	12.8818	12.8821	12.907	235.407
Dab2	225.941	2664.44	187.955	1045.11	12.9018	29.7197	626.348	252.751	12.9036	20.2131	12.903	47.591	52.675	77.442	12.9037	110.798	36.3376	12.9035	748.98	1142.01	1539.35
Dap	519.341	386.883	15.7677	282.662	581.734	794.126	310.33	80.1679	845.121	21.4103	369.791	301	68.6124	79.6064	640.565	77.4111	1184.09	219.875	684.199	3428.42	247.23
Darc	17.8023	21.0589	21.2507	163.704	1446.41	17.8324	12.9059	12.9309	12.9039	138.333	12.9037	36.1221	22.5183	12.929	12.9033	12.9644	16.5111	14.8173	59.1235	12.9158	12.9008
Dbc1	14.4538	50.295	35.4239	12.9013	12.8854	12.8818	12.8821	16.1112	12.9005	924.798	12.8854	23.443	24.8394	12.9048	12.8851	13.9507	12.8732	12.8728	17.3106	32.5798	98.9797
Dbi	5582.56	4513.01	2345.1	501.263	203.671	166.465	423.783	147.774	1106.24	53.5962	537.451	4401.87	1017.1	7771.64	286.27	602.361	948.194	149.902	528.307	947.423	18737.7
Dbndd2	73.4493	87.2513	406.784	165.634	51.9651	71.1657	101.287	95.3001	162.482	273.621	91.5259	398.853	5991.35	5300.34	63.5747	109.581	231.642	39.6007	93.016	87.1547	82.9891
Dbx2	14.3721	248.511	495.119	14.6441	12.9008	12.8854	14.0482	12.9107	12.9019	16.6555	12.9028	204.075	38.5199	497.354	12.9017	12.8758	12.8943	12.8732	12.8732	12.87	18.1971
Dclk1	126.931	852.554	5587.24	57.2287	13.4008	13.5206	13.235	84.2505	13.5554	5356.62	13.5195	1142.87	64.9681	7764.12	16.3045	23.6311	16.3849	13.6181	498.811	925.543	398.444
Dcn	2470.2	35.8027	14.9541	48.7615	12.8732	18.1634	17.2025	12.8822	12.8777	18.2512	12.8775	14.4228	17.6808	12.8909	12.8821	513.266	50.2899	12.8818	38197.9	1017.09	12.8722
Dctpp1	71.9954	828.575	22.5061	95.7499	293.309	110.722	56.6016	53.578	163.48	21.2285	65.1315	531.782	65.983	117.122	127.52	117.962	103.166	163.03	27.3808	93.9952	25.3936
Dcx	12.8299	155.886	29.9847	12.8835	12.8732	12.8703	12.8707	13.7369	12.8775	846.701	12.8732	305.616	147.203	61.7382	12.8726	12.8497	12.8697	12.8697	12.8292	13.7963	12.8722
Ddah1	184.712	677.056	1773.01	561.564	12.8818	12.8818	12.8716	58.3081	12.882	58.7874	12.8818	1627.93	31.1141	2738.88	12.8818	89.3262	742.53	12.8697	85.5217	1999.22	1215.81
Ddah2	113.836	773.967	66.3088	280.688	62.7502	65.8802	45.85	131.612	52.5365	15.0674	31.4957	894.472	193.168	156.71	46.204	149.311	30.0538	80.9647	314.251	44.9079	87.1297
Ddr1	114.329	273.598	379.276	22.0376	12.9086	16.9978	22.7284	21.5044	44.2697	75.7256	12.909	289.984	4347.05	319.258	62.1133	401.269	98.2826	29.8428	162.55	320.216	342.009
Ddr2	834.091	48.0179	115.922	46.3488	12.9086	16.9978	16.2433	13.7187	12.9085	26.117	12.9086	41.1212	17.2191	12.9424	12.9104	246.82	19.8829	12.9097	3130.08	1436.26	246.321
Ddt	649.749	356.715	68.1027	144.474	219.733	71.6525	133.657	45.2323	235.963	31.6533	176.835	509.246	93.0524	2158.57	398.355	208.467	226.791	94.7758	50.9894	120.561	283.883
Def6	39.956	17.9874	12.9717	59.167	101.125	573.321	92.3292	171.622	455.521	16.1833	683.622	19.3067	14.2335	13.0663	1110.2	21.7517	12.9686	364.95	20.5496	182.115	12.926
Dennd2d	29.98	18.3659	16.2016	30.5912	46.3453	254.461	76.259	31.64	58.71	17.7924	182.81	13.2493	14.8457	13.1853	679.491	14.9077	42.9078	295.589	14.399	17.5245	72.2821
Des	64.1118	12.893	12.8716	14.6759	12.8818	12.8818	12.8767	12.8697	12.882	12.8856	12.8818	15.524	12.8831	12.8909	12.8824	8927.46	18.4213	12.8821	201.117	19.5921	12.8722
Dgat2	2298.32	17.0267	19.421	12.8233	25.5636	924.798	24.9128	18.6967	131.371	75.2861	12.8233	45.8035	377.463	12.8233	28.1409	1810.99	1119.6	25.6832	69.2525	32.0774	1789.27
Dgka	59.6711	35.9524	145.374	250.515	146.305	577.506	247.869	289.929	378.662	121.226	812.543	62.342	88.154	25.6272	4512.93	82.6191	24.1887	1337	173.053	104.236	12.9698
Dgkb	12.9037	134.862	1874.29	20.7727	13.0101	12.9352	12.954	21.413	13.0264	1783.49	13.0101	208.837	22.2624	708.395	12.9948	15.3138	12.9094	12.9088	24.2022	12.8922	27.0502
Dhcr24	161.285	88.9167	526.345	52.8113	119.363	62.3774	65.0979	33.3017	63.3477	202.974	39.1221	145.881	6582.92	287.348	171.89	29.6375	1190.25	79.0458	93.8054	372.172	47.9035
Dhrs11	99.8481	20.7032	46.5108	37.3268	5489.87	140.692	50.2983	41.3787	122.838	15.5708	81.05	23.1944	40.3027	36.3161	60.1186	451.527	106.209	69.8043	25.8092	41.9565	92.4734
Dhrs7c	12.8233	12.8245	12.8233	12.8262	12.8257	12.8257	12.8257	12.8233	12.8257	12.8233	12.8257	12.8257	12.8257	12.8274	12.8257	797.793	12.8245	12.8233	15.1672	12.8233	12.8257
Dio2	27.075	91.2073	1858.75	24.3738	13.5206	13.4929	13.4108	23.7897	13.4635	35.0163	13.7325	46.3453	24.0326	487.871	13.8613	16.8383	12.9793	13.5416	378.741	54.5596	13.151
Disp2	18.3987	70.7654	53.6761	46.2924	12.9107	12.9424	12.9086	20.4487	12.9312	793.531	12.9107	73.8152	67.4335	22.0431	12.9104	13.5701	14.3985	12.9532	14.3168	18.7729	12.9066
Dkk3	31.1425	173.479	1989.23	46.6716	13.2034	13.2034	13.4394	29.0619	13.2016	283.025	13.2385	116.002	36.0551	2079.52	13.3472	46.4593	13.3696	13.3084	718.587	2740.8	807.105
Dlc1	1940.2	24.948	679.733	1112.69	13.1525	18.9647	24.9462	96.7519	13.1452	204.128	13.2002	42.8143	31.8561	373.339	13.2085	711.11	194.877	13.2034	1139.46	945.348	34.9174
Dlec1	18.4232	12.851	22.4082	13.07	12.8292	12.8257	16.7861	23.395	12.8295	27.8535	12.8299	14.399	19.0166	12.8498	12.8299	12.87	27.0999	14.6709	14.7508	19.5115	191.604
Dlg2	21.5695	16.1714	150.047	16.2762	40.9406	24.063	14.9072	38.425	13.1405	2426.36	13.1663	19.5978	263.749	13.6241	21.0435	21.0307	13.1956	13.2031	47.7048	29.7717	17.1104
Dlgap1	35.135	98.6714	1310.37	21.135	23.001	19.3333	17.4162	56.5471	24.2452	1990.86	22.7043	129.315	46.4338	2414.17	20.9956	18.4121	32.916	22.5479	20.101	18.2189	430.564
Dlgap5	24.5961	207.167	15.7766	28.4073	1554.67	99.0703	85.7201	21.6065	73.5485	14.0671	57.9172	172.451	20.518	40.3453	101.914	18.7447	31.2582	51.5987	20.5247	277.299	19.2486
Dll4	33.7433	99.5396	13.7898	513.016	13.0958	13.1524	13.1792	15.6981	13.1251	15.908	13.1803	31.0486	14.5929	357.369	13.197	144.186	18.4447	13.1959	18.6295	14.0234	12.9947
Dmd	82.3807	147.273	3743.72	190.481	12.8839	12.8839	19.1393	43.2543	12.8841	901.047	12.8926	262.705	68.1144	1258.44	12.8928	633.426	77.9078	19.1899	123.621	223.989	1491.9
Dmgdh	12.8292	12.8843	14.5974	12.8724	12.8703	12.8299	12.8299	12.8505	12.8703	20.1818	12.8703	12.8716	12.8497	12.872	12.87	12.8299	819.505	12.8292	12.8257	12.8257	29.8749
Dnahc11	25.8809	46.7645	51.4331	23.9522	13.4064	18.0155	13.3867	17.501	30.0347	27.0911	26.2382	26.9243	19.3501	69.2436	35.3913	15.6574	16.147	24.4607	15.0866	15.5906	604.507
Dnahc2	16.9381	18.6379	82.7488	34.082	13.317	21.5169	51.7634	45.5726	48.9385	41.8397	13.2987	20.9942	17.906	40.4591	13.5076	20.323	17.1495	15.1827	18.342	15.2932	451.465
Dnaic1	13.0344	25.1821	92.027	22.6959	15.1671	15.7285	15.404	19.3899	15.4052	21.3154	15.1556	34.0295	17.0044	499.929	14.6389	30.2362	13.2087	15.3647	13.2138	15.1401	1444.06
Dnm1	57.5547	18.0565	125.933	18.2671	14.9392	15.2457	37.2102	78.1829	15.1996	2515.22	15.3594	20.5372	231.052	17.0829	15.5052	27.9262	16.8823	15.593	507.285	400.001	13.9784
Dock10	302.849	46.7613	322.86	31.0429	99.0054	145.494	698.703	6478.96	845.411	188.337	934.394	115.854	1723.06	200.168	979.585	27.7991	21.4128	1193.15	376.432	51.9948	28.2144
Dock2	30.0243	81.7765	22.9753	15.0429	158.081	1372.21	1254.96	3294.25	1361.14	15.4384	2215.72	19.9547	31.2757	15.0522	2220.92	19.1896	14.0529	2200.24	19.5404	13.4317	69.0347
Dock3	19.1688	50.2052	329.171	16.3298	13.7059	13.9438	17.2274	29.1995	13.9557	2515.22	13.9192	75.5991	262.636	197.655	14.3855	15.7394	20.2815	14.3237	19.8463	18.9245	26.4885
Dock8	51.6465	20.8167	58.7042	33.5285	159.533	1379.66	1305.43	3556.07	1394.28	19.0397	975.247	14.396	24.3808	15.093	1268.46	153.552	108.706	1392.48	40.9714	34.0394	71.1731
Dok2	22.9838	48.9277	13.5047	15.458	55.9111	201.812	510.049	22.0042	96.7745	14.9487	1098.35	15.7529	14.8866	17.8942	321.721	20.0116	15.5995	36.8705	15.7495	17.2571	17.5053
Dok3	20.6322	32.1291	16.3828	20.5763	322.185	2017.07	580.971	151.943	1827.16	22.1756	32.4718	15.966	18.9933	108.697	38.9677	21.3438	21.6286	3153.71	19.9126	18.8784	22.7534
Dpcd	51.0882	434.749	47.9473	185.026	127.869	133.038	90.588	99.6001	206.416	62.4897	120.708	296.607	109.666	257.838	140.129	97.1766	114.246	73.5064	28.7106	72.5725	1486.6
Dpep1	657.614	12.9431	12.9059	13.6668	13.129	13.1714	13.0428	12.9389	13.2023	12.9027	13.1736	12.9791	12.9061	13.7759	13.2262	64.0867	12.9537	13.2493	982.65	25.5883	13.014
Dpep2	45.4106	15.9282	13.0444	13.4475	39.1205	45.6656	1150.99	20.4367	266.201	12.9077	13.2383	13.0101	13.0288	13.7759	21.5762	15.2219	12.9537	16.1387	18.3724	16.1007	17.7934
Dpp4	19.1628	17.2827	15.5429	57.1139	58.4284	66.4073	39.7348	16.9078	267.014	35.5969	32.0605	14.4819	14.5197	15.5582	370.643	21.0878	481.844	525.754	86.4978	20.5514	19.4965
Dpp6	16.0788	54.0642	60.4934	18.1227	40.2108	13.1199	14.91	21.1799	14.1989	941.666	14.1892	59.2751	30.5082	22.5166	14.1625	16.0985	13.0343	13.0182	13.099	13.2012	30.0524
Dpt	674.009	12.8724	12.8831	12.902	12.8839	12.8835	12.8772	12.8716	12.8845	12.8703	12.8843	12.8818	12.8773	12.8961	12.9001	286.974	12.8721	16.9746	8261.75	137.417	12.8824
Dpysl2	258.067	15049.6	883.588	1253.38	72.2464	43.8662	265.233	1134.74	79.8033	1337.16	352.368	6653.6	1796.65	4591.45	115	124.761	20.8945	61.7329	960.083	713.456	7984
Dpysl3	38.2416	1273.45	32.5708	90.443	14.4228	15.4138	66.1625	15.1082	14.612	57.7367	15.0316	797.644	30.1718	113.482	15.1036	77.9995	20.4801	14.7437	668.777	145.204	13.5698
Dsg2	13.618	16.2805	18.4645	23.734	18.4892	17.2928	15.5545	14.5785	25.2066	34.5899	20.3164	14.895	13.98	24.4748	20.7582	514.231	1114.38	19.4717	29.655	15.1124	773.029
Dsp	17.4147	15.2472	13.5865	28.4114	12.8839	29.794	12.8828	12.8728	12.8845	17.8905	39.6079	14.7665	12.8773	12.8945	12.9005	6761.72	1221.97	17.8159	107.169	17.047	160.483
Dtl	28.363	521.087	12.8831	28.8569	253.064	39.1338	57.7612	18.5433	49.8205	42.0494	52.7063	483.919	14.4905	57.5607	48.5819	17.4278	37.0051	60.8773	27.2712	170.61	28.8481
Dtna	23.001	766.423	5389.61	21.7761	16.5061	17.0193	15.9041	53.2003	17.2921	976.157	16.8369	805.561	386.527	4764.62	17.3976	329.118	20.0655	17.1581	111.88	87.9315	507.201
Dusp2	15.6085	12.9066	12.8934	123.626	139.814	112.622	48.2381	20.4402	125.856	15.0984	3344.03	12.9074	16.1131	12.9602	1350.83	17.6136	15.1965	1552.4	17.8023	12.9566	12.9062
Dydc2	14.8194	20.4562	15.1038	16.232	25.3414	17.4812	17.8541	14.9729	26.7359	14.5981	24.7416	15.5085	14.6914	41.2262	22.4311	15.4108	17.0399	16.3096	16.3096	15.444	197.275
Dync2li1	31.8452	298.395	48.3629	36.0331	15.593	65.256	26.1839	21.4142	33.3345	45.5332	16.6516	273.926	49.4854	291.378	17.1845	29.4572	29.4109	16.6738	46.2435	94.2861	683.803
Dynll1	286.676	3088.08	340.999	1998.34	583.402	423.516	276.119	133.722	335.775	205.127	374.603	3858.12	1789.1	7921.87	385.249	198.341	401.279	351.221	519.805	1206.07	4356.31
Dyrk3	14.6699	29.4604	18.9107	14.1224	879.648	42.1096	45.2592	13.5429	47.7256	23.8351	18.3193	51.1766	13.9962	34.795	20.5541	16.1488	66.9081	43.5272	21.0244	23.5911	106.183
E030010A14Rik	20.9942	18.3959	16.9658	1728.7	14.6701	13.2798	13.347	13.3563	14.9139	13.3829	14.6416	15.22	15.2458	16.5372	15.0745	169.172	15.7763	15.0662	20.7201	12.9648	13.7337
E130003G02Rik	14.0222	19.6494	48.2063	20.1757	19.4146	15.2669	15.6267	29.0528	20.3566	1191.87	19.2291	17.7998	26.4231	41.8659	18.7333	14.9948	17.6117	16.6037	14.6115	13.8486	19.4253
E130114P18Rik	12.8233	1085.97	122.383	14.7249	12.8233	12.8233	12.8233	12.8233	12.8233	13.0974	12.8233	1035.94	19.6951	1162.44	12.8233	12.8233	12.8233	12.8233	12.935	14.5708	95.6301
E130309D14Rik	17.2638	14.4887	19.1059	12.8775	731.029	12.8721	21.218	14.3146	12.8716	114.043	12.8719	16.2259	15.1839	12.8772	12.8719	13.4531	12.8299	12.8721	12.8299	14.8494	12.87
E2f2	30.9708	54.171	15.2621	21.0006	10181.7	1333.65	75.3411	48.2536	1699.11	14.7631	236.692	37.7115	42.9834	372.488	181.198	22.3537	27.8585	797.053	15.7702	20.001	15.4652
E2f8	20.3243	130.327	15.6354	20.9875	1347.1	158.988	63.0597	23.1986	119.379	13.1926	39.4874	138.571	18.1781	21.0704	47.6499	26.3124	38.4637	44.1878	18.6224	89.303	15.4681
Ebf1	510.64	12.8931	15.7196	314.319	52.7778	46.2919	23.7224	12.8719	12.8716	26.3392	12.8719	23.9652	12.8722	27.3795	14.8902	45.2043	12.8516	744.41	280.843	400.6	17.2746
Ebf2	324.828	12.8308	12.8304	13.0951	12.8711	12.8306	12.8316	12.8299	12.8716	12.8292	12.8711	12.8721	12.8504	109.67	12.8703	20.8664	12.8299	12.8299	170.342	23.6978	12.87
Ecm1	361.919	57.6598	35.6552	314.68	12.8697	66.2883	833.036	45.9843	116.162	54.9321	38.1724	45.7824	21.5955	12.8715	176.871	229.769	57.0185	50.0671	2632.08	7361.95	62.7511
Ecscr	28.4881	22.8487	16.4551	1701.3	17.847	15.897	19.1511	732.631	18.3625	13.1766	17.7033	19.8446	20.3931	22.6843	18.0251	58.7895	21.5528	18.0998	95.8225	34.203	15.8586
Edil3	21.5946	164.063	51.203	18.6366	12.8839	12.8847	28.2647	16.9467	12.8841	286.548	12.8839	136.02	3050.59	213.889	12.8845	13.4913	12.8719	12.8847	19.4125	128.455	23.8247
Edn1	34.5184	15.5738	12.9345	634.86	12.9104	12.9091	12.9315	38.2233	12.9211	15.3001	12.9228	14.4674	12.9617	12.9644	12.9352	38.036	35.9476	12.9535	159.377	39.5247	12.9062
Ednrb	82.1886	2036.09	1963.93	147.265	12.8257	17.5642	183.695	39.2485	40.9984	19.8655	12.8257	693.147	82.5988	3661.94	15.5291	51.0324	33.6312	14.6184	262.996	22.3189	553.547
Eef1a2	16.0826	16.181	21.4171	13.1138	12.9951	12.9791	13.0053	29.6228	13.0139	253.383	13.0068	19.1377	25.0786	13.2116	13.0696	5215.08	13.0403	12.908	28.0721	22.6107	12.9677
Efcab1	12.9097	16.7152	13.5179	13.93	13.2031	12.9791	12.9822	12.9447	13.2467	29.6607	13.2032	13.5206	17.8156	79.244	13.2527	12.9726	12.9645	12.96	12.9689	18.1944	901.606
Efemp1	494.81	36.8951	206.19	26.8382	12.9763	12.9799	12.9436	13.0103	12.9795	14.954	12.9806	47.4599	18.391	335.154	12.9974	32.6458	12.9074	12.9849	255.374	1571.57	438.285
Efemp2	257.855	154.038	151.678	53.7851	12.9763	21.1256	51.0846	53.2181	20.0758	31.8478	28.6308	202.194	21.1558	195.907	26.1432	52.2172	17.1491	12.9978	207.258	2976.33	419.753
Efhb	14.15	14.3396	20.2115	12.9038	12.9011	12.9018	12.8922	12.893	12.9017	15.6708	12.9013	17.9352	13.2245	12.9064	12.9025	12.8968	15.0882	12.8818	21.6188	15.8512	331.72
Efhc2	12.9102	14.5755	14.7696	16.5736	13.2138	12.9849	13.0035	13.3984	13.2977	20.2959	33.3272	13.4064	14.3369	14.0486	13.2948	13.5487	12.9692	15.2833	12.9689	14.7646	364.533
Efhd1	23.3001	20.2166	48.3951	14.1036	13.3172	13.3082	13.6611	15.3513	13.316	16.5396	13.4937	48.9811	1132.33	44.47	13.1726	17.6512	13.5218	13.4786	107.318	16.7176	62.4081
Efna1	23.5251	25.9834	15.2148	1224.65	15.3841	15.7165	17.797	13.7715	15.6574	15.2722	16.0112	27.0519	112.263	17.9085	16.6275	206.166	225.827	16.2724	20.9259	81.237	14.3462
Efnb3	15.2854	41.7081	72.2531	20.603	81.4288	21.2157	19.3191	25.965	15.6805	131.862	17.089	83.2623	2591.44	73.715	27.4444	841.67	13.2808	24.4398	19.6391	17.915	38.1762
Egfl7	86.0346	61.7853	17.5367	4078.26	29.794	32.4808	23.0812	19.9808	35.8667	21.3386	13.0139	34.4956	17.264	13.1917	23.3947	314.146	49.5014	23.2862	47.1674	22.3462	21.6521
Ehd2	3482.45	50.1866	48.1145	743.093	40.6619	32.397	35.9903	15.7945	20.2392	17.438	13.0474	63.5131	20.2809	13.2884	16.2811	466.56	44.039	94.8911	1760.22	996.494	24.5889
Elavl2	12.9091	266.73	21.0926	15.4384	13.0186	12.9424	12.9597	13.8221	13.0473	259.147	13.025	296.731	24.3905	105.391	12.9948	13.9655	12.9098	12.9094	13.0604	14.2357	12.9743
Elavl3	15.7285	155.902	153.403	25.2637	13.0184	12.9935	12.9566	40.2939	13.0788	901.473	13.1079	495.01	1877.43	206.321	13.0752	13.2996	13.0796	13.0751	18.0355	15.8561	12.9743
Elavl4	12.9031	920.689	41.5185	13.053	13.0184	12.9935	12.9691	98.6023	13.0473	384.847	13.0184	1102.7	33.9302	99.3384	13.075	15.3219	12.9098	12.9091	13.1483	13.3019	21.8471
Elmo1	53.2054	82.1379	58.7266	324.672	84.8907	578.695	339.958	4233.07	264.893	453.352	269.063	102.911	893.672	38.0671	410.943	40.575	63.2192	349.892	282.589	37.5046	22.9033
Elmod1	15.593	24.2182	41.1477	13.0352	12.96	12.9074	12.9077	16.8825	12.9689	1035	12.9648	16.9146	55.2484	120.114	12.9483	13.0989	12.9684	12.9022	12.9025	12.8835	455.645
Eln	173.845	27.5636	37.479	490.262	12.8233	12.8233	12.8233	12.8233	12.8233	17.4825	12.8233	48.0696	23.3467	125.203	12.8233	115.052	12.8233	12.8233	1654.76	292.491	24.6388
Elovl7	17.5689	18.0076	67.9086	77.1595	13.2135	258.925	24.7943	19.8655	13.3849	46.2391	397.18	30.3006	3364.73	125.678	48.2901	15.0868	381.727	17.4178	15.0286	24.7757	844.667
Eltd1	78.7822	25.5356	17.2958	5747.4	12.8839	42.8234	33.0596	12.8938	43.7114	13.2238	34.5196	25.3566	14.2304	12.8934	12.8845	162.802	19.5468	20.7622	28.3551	17.1247	12.8779
Emb	426.191	28.543	19.5333	17.6162	124.696	2405.34	296.33	25.7876	2799.86	138.225	400.907	38.5215	19.7542	12.8233	1660.14	18.3719	12.8233	80.2161	47.7478	1102.42	1909.16
Emcn	54.1485	23.5301	14.768	6420.26	14.243	13.905	13.1965	13.5157	14.4289	15.1479	14.2682	21.0622	14.5145	15.826	14.6741	139.169	13.0752	14.5259	82.2946	15.2175	13.4301
Emilin2	214.099	26.2721	16.7568	13.1452	1720.48	1897.76	1461.41	53.5865	3091.37	16.7742	52.8921	19.1926	202.195	13.2878	20.6088	114.33	26.3749	36.1056	425.737	102.373	19.6133
Eml1	100.844	119.906	120.356	427.824	14.399	34.3787	31.7154	17.7033	14.7455	317.832	14.5718	157.797	2264.37	52.064	15.2477	581.29	21.609	14.732	320.07	240.318	108.941
Emp1	911.011	70.646	16.5301	1329.82	14.7334	30.1862	215.344	13.2052	37.7335	13.1172	34.3197	35.952	17.8501	57.0462	45.3508	160.281	26.9031	24.4742	8637.92	3576.48	41.883
Emp3	143.438	84.262	19.6222	209.868	227.9	701.61	1402.31	92.6242	4471.31	17.0925	1004.38	51.2363	19.5656	67.5215	566.195	57.4126	32.2069	580.742	556.08	1079.34	83.6878
Emr1	48.0795	1208.72	17.8489	14.1587	129.395	282.989	7497.65	1244.02	1094.86	12.9777	31.2496	13.6473	42.3146	16.0214	17.4885	19.9783	20.255	63.9856	13.099	13.2233	331.669
Emr4	13.0751	17.25	14.2441	15.8532	72.2628	86.0046	517.655	27.6869	328.58	13.5631	39.1928	13.3999	15.657	16.0217	16.8019	18.3443	18.2948	21.996	13.0787	12.9611	13.5887
Eng	206.777	22.5383	26.4036	1950.82	67.973	55.8931	274.693	553.957	164.399	17.122	15.2966	23.1901	24.4045	30.5912	47.7619	888.164	61.4291	27.2712	1242.55	201.632	33.9736
Enho	21.6687	46.2391	234.298	38.5604	15.109	17.878	17.6267	19.1073	22.9397	20.6276	15.4716	74.0087	99.8065	1605.44	14.5703	79.2727	42.4666	15.1746	22.927	19.6411	123.941
Eno2	49.5232	29.2734	148.418	18.7428	14.7922	15.1409	19.0136	41.2301	15.1257	1533.01	15.5465	30.1439	194.738	46.9019	34.7669	25.2443	15.7941	17.8739	152.28	87.5028	32.3146
Eno3	48.961	36.54	82.2394	25.0552	160.1	119.924	53.7763	156.034	309.913	38.8484	94.6471	25.8229	42.1159	27.5396	165.655	6582.92	38.0236	123.255	72.4142	45.151	42.6554
Enpp2	2263.54	339.282	480.401	1553.59	13.4928	32.7758	18.7712	115.441	13.8114	284.715	19.1737	93.239	15332.2	1751.4	36.19	24.1701	43.6796	16.2724	605.058	19.4696	35957.1
Enpp6	16.3101	34.2836	23.7617	16.7097	13.702	13.3085	16.7798	17.1027	13.6264	17.0734	14.0238	23.9739	4281.39	55.0247	14.0989	30.1326	12.9873	17.3548	69.5321	16.78	26.956
Entpd1	30.5126	241.536	115.339	917.588	76.6464	978.268	720.374	2370.28	188.823	30.3271	324.146	46.1187	38.5411	154.947	57.759	64.8584	21.9903	111.453	173.272	19.1641	118.421
Eomes	17.0561	103.973	12.9044	12.9822	12.9598	12.9691	12.982	12.9388	12.9644	12.8845	3332.04	40.8543	12.974	13.0447	70.625	13.1819	12.9603	30.5812	12.9025	13.018	18.2392
Epas1	1549.97	85.1702	930.952	6178.66	34.1801	23.2421	107.121	44.978	38.4269	44.4094	44.2018	84.1812	197.037	683.487	69.9074	1721.57	365.543	23.1778	1654.76	150.863	130.297
Epb4.1l2	1489.49	144.041	1478.18	355.528	91.423	195.802	299.24	5649.47	314.818	424.118	300.646	155.751	1346.47	367.673	339.072	178.53	129.603	733.877	1705.87	1470.87	207.814
Epb4.1l3	118.041	92.2731	111.189	19.7149	62.25	31.7809	40.8513	146.559	17.3363	916.341	18.3558	105.933	2052.9	254.15	17.4293	58.7359	18.9119	17.1695	311.463	973.321	102.767
Epb4.2	14.4693	16.1702	16.3029	19.5159	2274.49	22.621	20.2244	16.5222	35.0868	14.2667	23.2861	15.8923	16.0633	41.7692	20.6435	14.7444	17.4528	21.996	13.3883	14.1512	19.0032
Epb4.9	80.6294	29.543	54.5546	48.8888	4248.07	21.2069	21.9679	55.6027	33.6823	728.572	24.1324	20.6379	39.5237	35.0348	21.5375	28.2703	28.4437	19.5209	49.0974	25.3648	160.837
Ephb1	17.3262	133.628	475.569	25.1111	69.1566	12.8732	12.8716	15.6757	12.8818	172.983	12.8818	179.596	1841.12	289.394	12.8818	40.4561	12.87	12.8818	17.5516	14.436	17.3027
Ephx2	1847.5	54.0221	565.853	40.2543	27.0944	12.8847	19.0334	14.9612	12.8831	36.3399	12.8831	44.5127	19.7212	1259.87	12.8835	1131.31	691.362	19.1651	26.2282	24.3175	85.2402
Epor	18.7048	46.7454	14.7867	26.8518	2822.41	43.8637	26.6444	22.4261	39.3183	22.3839	16.7886	16.299	16.6832	18.2967	17.3909	26.4622	13.3437	16.6091	16.7811	12.9884	33.7365
Eppk1	152.227	12.9603	13.0276	15.2973	12.9849	13.0181	12.9693	12.9097	13.0209	14.236	13.0141	13.0344	14.7915	13.1972	13.0697	21.8456	783.889	17.1734	21.9911	22.3817	407.354
Eps8l2	23.3796	12.8233	19.9814	108.421	12.8233	25.8964	12.8233	12.8233	12.8233	13.912	12.8233	12.8233	32.9961	12.8233	12.8233	24.4966	936.819	18.5336	44.0823	263.1	226.311
Epsti1	22.9351	42.2943	13.4947	19.4292	149.818	442.95	426.577	262.401	2266.16	12.981	3185.91	14.4694	14.9866	15.5292	965.555	17.4429	18.5155	308.174	13.0343	14.5803	34.4829
Erc2	17.5945	27.8006	78.9316	13.3382	13.1909	18.9853	14.5317	24.4762	13.2383	1573.57	13.2934	50.9236	14.6087	13.9423	13.1716	16.9138	81.134	12.9598	13.0341	22.6471	50.673
Ereg	17.4879	12.9737	12.9091	12.9692	13.2604	12.9935	13.0039	12.9104	13.3295	12.9086	13.2638	13.0339	12.9095	14.1524	13.2169	16.9606	19.9697	12.9689	251.143	505.436	63.9568
Erh	108.256	967.962	102.847	434.021	464.277	84.2869	113.398	42.2767	158.667	31.1626	93.5856	931.797	221.217	1718.96	178.071	109.165	170.92	141.188	169.359	283.399	419.465
Ermap	15.2051	12.9022	18.3083	12.8822	7602.65	30.4884	12.8775	78.2351	79.5862	13.1138	17.0912	12.8711	12.8775	12.8783	12.8732	14.1882	12.8567	19.8169	17.1344	13.5333	12.871
Ermn	12.9094	24.4446	90.8906	13.2447	13.2136	12.9799	12.9797	19.5767	13.2789	20.5285	13.2099	166.801	7580.8	172.613	13.4729	12.9363	12.969	12.9604	12.9031	13.1518	69.9532
Errfi1	624.131	31.4939	126.337	278.919	14.7665	53.0983	47.7919	227.005	43.1619	136.264	122.235	43.0714	301.55	71.3479	57.331	95.9489	2701.53	30.1629	8146.31	476.169	24.4982
Esam	33.004	22.3037	16.0887	4052.12	13.4132	32.4669	18.2382	15.3206	20.4936	20.0376	13.6429	26.6238	16.9017	14.31	13.759	282.791	25.6303	17.2504	105.647	15.5475	13.1233
Esco2	18.2281	431.549	14.8797	27.6991	624.47	44.4356	64.7134	19.7025	45.3732	14.5405	55.0401	232.297	18.5737	101.813	37.1335	17.7943	22.3188	28.7768	20.1081	100.666	26.8945
Ets1	281.177	23.1528	20.887	2791.45	190.441	620.346	136.45	388.598	26.6618	18.6055	5171.84	47.7391	26.6143	116.459	3954.16	374.965	236.865	3593.43	548.124	129.407	37.1695
Ezr	88.1898	659.723	619.893	125.616	819.078	1178.28	334.598	50.2037	442.764	27.8704	2105.6	688.798	31.9655	1154.71	2096.84	478.042	134.147	2973.32	357.171	433.219	4828.4
F10	12.8716	12.8785	12.8697	13.9099	44.9191	120.581	511.907	12.8793	1068.78	12.8697	12.9005	12.8732	12.8771	12.8939	12.8845	13.6062	1060.45	12.8847	13.8742	12.8302	12.8822
F11r	408.341	27.6495	18.587	1600.83	40.9406	63.8431	30.2425	2066.19	44.213	17.722	15.8695	19.3314	26.867	17.1645	26.3175	465.15	1929.83	23.5492	139.645	43.5896	282.299
F12	12.8703	12.8724	12.87	12.8726	12.8835	49.5698	12.8851	12.8703	12.8841	13.9907	12.9005	12.8732	12.87	12.8939	12.8854	12.8719	1972.18	19.6687	13.1286	12.8311	12.8822
F13a1	113.206	1467.88	14.6978	13.9146	102.156	208.011	434.623	47.3454	4402.88	12.941	22.1535	13.0101	20.2865	13.095	22.7434	138.975	12.9037	30.3273	17.2387	16.1703	221.249
F2	12.8233	12.8245	14.4029	15.8795	12.8257	12.8257	12.8233	12.8279	12.8257	14.9797	12.8257	12.9537	12.8245	12.8262	12.8257	12.8233	4554.66	12.8257	13.8177	12.8233	12.8245
F2r	533.058	111.499	40.5304	868.043	12.8844	19.435	23.8685	20.3087	12.8845	24.1889	456.65	137.369	20.5148	92.2402	233.879	273.792	139.808	27.5911	2280.58	805.117	21.5085
F3	209.164	77.0537	1509.34	23.1674	12.8257	51.3397	29.3951	31.1567	12.8257	26.7707	12.8257	75.3646	46.9869	3861.18	12.8257	107.152	412.98	12.8257	673.136	660.615	193.729
F5	17.3822	12.8274	17.2704	76.1802	25.9013	835.376	682.732	19.5079	205.966	13.7233	12.8257	14.396	14.4073	12.8262	12.8257	15.542	904.896	23.3233	19.6646	75.316	1973
F630028O10Rik	19.1688	24.6053	12.9722	13.1668	14.7664	890.688	166.913	18.7818	253.483	12.9484	15.0424	13.3082	12.9699	16.2422	15.217	15.555	14.663	31.4979	13.0958	12.9323	70.979
Fa2h	15.1409	21.633	39.8434	12.8292	12.8316	12.8292	12.8299	13.6692	12.8697	18.998	12.8316	42.9503	2909.01	200.517	12.8308	14.2755	12.8292	12.8292	12.8292	13.682	17.2244
Fabp3	20.2285	18.2541	16.6327	18.7746	14.6184	14.9148	22.9604	18.8212	38.5069	39.7373	15.068	30.9024	22.9311	16.4936	15.5245	11631.5	15.6902	15.2666	45.7958	37.9484	309.197
Fabp4	38197.9	13.1563	12.979	6080.83	34.3605	28.7355	562.922	13.0461	48.8994	13.0913	15.7109	13.1524	12.9779	16.4943	15.0518	1414.82	35.838	15.2666	158.93	25.3106	13.72
Fabp5	2009.27	856.66	696.471	248.33	42.5588	184.032	250.613	21.3406	207.34	37.2276	36.3827	2038.18	1408.86	3971.86	77.936	95.6437	291.427	49.0974	91.9476	121.722	503.732
Fabp7	16.2793	4103.33	1225.11	34.0401	14.6183	15.0613	157.737	20.0635	22.1686	20.5619	14.8521	6880.59	115.478	1672.8	14.2106	13.9373	17.4226	15.0391	22.9751	19.3164	37.1046
Fads3	1368.55	22.8767	186.321	20.6274	224.625	21.5798	40.2511	110.413	16.6807	87.4334	16.2163	22.9607	23.5299	77.5696	16.8952	474.176	555.262	28.363	431.252	1063.39	67.3992
Faim3	12.9424	12.989	12.9104	13.5179	395.846	97.1548	26.0202	13.0052	13.5418	12.9086	13.5211	12.9424	13.1599	14.3455	46.6736	14.8765	12.9789	6445.68	12.9761	12.9056	13.1427
Fam101b	84.2322	39.1848	18.6228	639.567	83.4008	2766.13	42.823	21.9837	107.779	23.885	83.9546	35.6183	23.4331	27.4657	962.335	251.351	26.6675	319.566	153.457	237.776	161.87
Fam107a	13.934	101.325	2507.49	141.487	20.401	16.136	15.6946	106.481	20.8188	64.4418	19.396	51.9346	42.9752	2219.94	18.8943	48.7281	14.8066	14.6709	25.4915	29.012	341.268
Fam117a	150.445	29.1563	55.9596	40.2834	3593.43	234.894	121.627	45.965	267.717	22.6847	416.3	25.1923	41.3969	135.707	264.343	33.4201	26.5718	324.936	79.4006	34.9936	158.535
Fam129c	23.5845	30.4612	18.977	20.6172	109.304	95.6712	32.0086	35.3121	27.1664	26.575	39.3672	19.9365	23.949	22.5423	67.2541	28.1809	24.3741	1055.2	22.0537	19.687	15.849
Fam161a	26.1411	19.9761	25.5718	35.7221	123.255	21.488	29.9064	25.2166	37.0433	18.4279	51.3049	21.0648	46.0437	25.5237	23.8592	19.6689	22.1519	27.6426	30.4768	26.4245	824.069
Fam164c	17.6137	21.2164	49.5443	16.7243	14.7922	15.9661	13.478	18.0524	15.1157	31.2925	15.0159	15.8133	19.6302	40.7626	15.7054	37.0082	36.6212	15.4211	23.0195	20.6122	311.534
Fam166a	46.6587	305.007	69.8946	152.622	30.9336	35.9427	13.5952	31.968	15.3201	38.0441	15.3594	171.858	130.486	327.804	15.7345	137.071	137.285	38.743	85.9937	15.4585	1565.44
Fam169b	15.2833	13.2667	13.0425	16.3981	78.8436	76.2129	24.2603	13.1885	15.4063	13.1818	16.6745	13.2138	13.0051	17.4431	641.991	14.5809	104.713	382.983	18.9621	24.9114	14.1882
Fam184a	19.1263	24.3697	866.933	25.576	13.8177	14.229	13.595	16.4607	14.003	191.492	221.308	52.3705	40.8213	582.531	14.2305	24.305	18.8696	14.399	20.2438	20.8377	519.62
Fam198b	226.488	13.8476	14.6393	157.68	14.4008	15.3889	60.8008	15.7657	14.5853	26.0368	14.7507	13.8177	19.3009	16.011	15.1008	197.843	17.0852	15.0391	1387.18	1508.82	13.553
Fam46a	378.479	168.42	20.0933	27.2742	116.051	369.817	5251.81	370.323	2205.36	25.5149	754.522	27.5647	62.0719	39.2344	496.825	208.796	114.021	363.467	599.694	68.6713	499.672
Fam47e	14.8173	22.0477	16.8999	16.6362	24.566	17.3147	17.6605	14.7946	25.9744	13.6528	24.1544	18.8858	15.4883	39.9085	21.9955	15.2246	20.8798	16.1511	13.5429	13.6571	507.353
Fam55b	15.4179	17.7576	24.2866	152.428	2392.31	28.4902	47.3643	17.3602	46.8467	22.0827	22.0896	15.966	17.0158	34.7054	21.7184	17.4708	19.9414	204.529	15.5797	13.4016	48.1262
Fam60a	21.9678	221.244	19.343	110.214	12.8257	30.4477	31.2038	22.1335	28.2211	27.8783	73.3094	163.376	38.1428	187.602	54.5685	12.8299	29.6444	73.5064	15.3235	27.3258	600.146
Fam64a	24.6625	908.511	14.2306	33.234	26.0991	61.5081	33.6097	12.8295	43.4986	14.3993	18.437	439.409	13.75	86.7011	27.5364	18.4807	12.8257	16.6091	14.243	117.038	12.8257
Fam78a	15.8832	14.8215	12.8299	28.4209	529.978	67.6226	152.639	72.8433	251.089	20.2611	169.467	13.9467	17.4866	12.8511	906.076	173.107	17.0923	195.563	14.3882	12.8257	12.8295
Fasl	12.8299	12.851	12.8295	12.8818	12.8732	17.1099	12.882	12.8316	12.8732	12.9474	699.72	12.8703	12.8734	12.8789	63.987	12.8771	12.8697	18.6847	12.8316	12.8569	12.8719
Fasn	15265.5	622.441	1958.85	50.7306	64.6348	76.0989	221.76	167.443	122.64	313.685	265.701	547.22	5465.46	815.994	681.829	208.538	831.19	511.891	778.716	1423.56	131.715
Fat1	894.472	149.377	1771.57	35.5321	12.8732	12.8721	21.2708	89.4457	12.8732	671.565	12.8734	207.533	679.206	168.306	12.8818	377.358	880.794	12.8812	3130.08	7154.83	265.534
Fat3	20.7056	35.7759	1292.61	17.6672	12.8732	12.8732	14.2456	1425.18	12.8732	1502.91	12.8732	45.2873	21.4337	143.23	12.8732	20.1509	12.8697	12.8316	42.2674	16.4446	55.1249
Fbln1	107.677	68.6384	98.3817	35.1061	13.0788	13.2631	13.0069	21.6367	13.1463	16.8218	13.1504	101.216	19.4731	13.5675	35.0497	115.673	13.1675	13.1894	2822.41	123.659	519.348
Fbln2	1280.99	230.612	55.8553	1130.97	13.1288	25.4605	13.027	14.109	13.1139	100.023	13.1221	188.485	24.8066	13.5675	13.1843	391.006	19.6084	12.9109	7319.42	14146.4	12.9946
Fbln5	288.054	14.4285	25.2998	621.108	13.0788	13.1286	18.211	13.1664	13.1139	17.9381	13.1504	21.2087	16.7218	20.7781	13.1609	66.9123	13.1675	13.1483	1208.12	3611.87	44.5487
Fbn1	1361.33	18.2121	65.3006	78.165	12.8821	12.8827	16.532	16.9021	12.8824	222.385	12.8824	27.2927	17.9947	23.3326	12.8831	255.633	17.2211	24.9294	5532.58	5223.33	183.928
Fbn2	85.0097	12.8772	19.6566	13.1383	12.8821	12.8716	12.8721	16.3788	12.8827	100.491	12.8821	20.0622	49.5642	29.9367	12.8827	23.4453	12.8707	12.8831	67.3335	1580.18	12.8775
Fbp1	12.8697	12.8962	12.8507	12.8778	12.8827	29.5218	14.2879	12.8703	12.8829	12.8316	12.8835	12.8732	26.2163	12.8927	12.8835	12.8716	768.091	12.8839	12.8703	13.9697	12.8775
Fcer1g	64.1963	1334.99	16.187	50.5387	357.571	3895.49	1615.2	800.465	7554.45	15.2097	5755.28	18.3063	53.1587	13.509	36.7658	20.3773	36.8863	52.7226	18.5816	15.7417	300.028
Fcer2a	15.7285	12.9345	16.3839	13.4967	250.533	61.6227	23.3788	15.9758	27.9806	19.7041	13.1547	12.9756	13.225	13.5079	23.4119	15.5756	12.9107	3996.52	12.9266	12.902	12.9866
Fcgr1	19.8619	207.076	14.5666	12.893	84.2574	84.0704	267.797	1015.03	1506.87	13.615	12.9036	13.3172	28.6637	12.9187	12.9028	15.2191	12.8952	29.7367	12.8821	12.8704	84.2109
Fcgr3	34.2697	478.896	16.3859	12.9033	176.116	3800.65	2861.44	2154.99	2591.44	14.3191	334.753	12.9094	43.7436	12.9187	32.8199	28.7683	16.2837	36.6818	14.7508	14.8771	162.447
Fcgr4	17.5508	12.9913	12.8784	12.8828	96.7782	908.866	230.499	41.8849	172.023	12.8716	29.5208	12.9693	12.9027	12.917	12.9037	12.9472	12.8952	35.0627	17.1569	13.6499	12.8924
Fcho1	14.6711	35.1218	24.6443	13.8763	1617	121.933	63.834	22.1645	206.57	282.759	454.994	36.0483	520.814	26.2013	622.968	15.1212	12.96	957.482	16.0788	15.5964	16.6133
Fcna	20.6199	260.44	12.8233	12.8233	299.109	124.903	1777.06	14.7276	39.6367	14.2737	29.4689	12.8257	33.9652	12.8257	12.8257	14.8806	51.5588	18.6224	16.6378	16.5234	155.508
Fcrl1	13.1716	15.4585	13.8399	14.3469	119.567	159.771	45.3442	186.904	55.1543	13.0141	17.3791	14.396	15.7779	19.7088	47.3264	14.8805	15.2606	1723.54	13.4928	12.9932	15.0125
Fcrla	13.2031	13.6989	13.1093	17.3352	209.193	123.846	26.8323	17.3277	24.4846	13.1272	17.7177	13.0787	14.4624	19.5557	23.7137	13.9124	13.5418	2822.41	13.2783	13.0222	14.969
Fcrls	15.9343	1884.82	24.3483	16.0672	16.2962	36.5195	55.8215	3934.4	32.6836	15.0481	27.7987	17.2339	107.098	19.5747	17.2777	37.3428	13.5424	17.0702	13.4928	12.9931	516.417
Fech	494.418	148.563	132.502	171.159	10405.2	147.521	240.543	146.157	183.354	177.162	94.017	134.564	560.257	173.549	98.1342	589.76	534.361	106.749	288.633	480.58	373.758
Fermt3	31.8452	292.781	40.3034	31.9755	548.384	1239.59	1569	1462.75	1392.89	20.1175	601.569	34.4844	32.1814	100.844	1274.59	78.8318	38.2624	1257.73	28.8668	17.6762	46.7877
Fes	50.9139	50.3787	18.6015	167.101	143.011	3709.69	1251.33	1002.14	2772.21	13.155	312.111	15.9145	16.1121	36.6149	47.3385	76.0555	39.404	274.703	84.1049	56.479	148.456
Fetub	20.8572	14.1777	13.1874	13.9751	17.574	14.5962	15.0705	13.2798	18.1995	13.0974	17.5148	14.2978	13.2494	22.2961	18.5382	14.5563	1297.31	17.1128	42.4903	25.9151	15.8062
Fez1	26.4781	960.692	752.722	46.6319	12.8257	12.8257	12.8257	18.8892	12.8257	292.626	12.8257	736.256	7127.05	1458.45	12.8257	14.8839	12.8245	12.8257	31.0606	79.1091	868.45
Fga	12.8233	12.8233	12.8233	12.8233	12.8233	12.8233	12.8233	12.8233	12.8233	12.8233	12.8233	12.8233	13.0968	12.8233	12.8233	12.8233	4199.06	12.8233	12.8233	19.1089	12.8233
Fgb	12.8233	12.8233	12.8233	12.8233	12.8233	12.8233	12.8233	12.8233	12.8233	12.8233	12.8233	12.8233	12.8233	12.8233	12.8233	12.8233	6854.53	12.8233	12.8233	12.8233	12.8233
Fgd2	17.5689	58.6497	67.4645	13.0037	174.724	188.485	196.165	3767.94	941.778	14.4308	27.5334	16.2939	21.3234	20.2461	33.1715	19.001	12.9688	2576.12	12.9035	12.8827	71.7361
Fgd5	32.0573	14.1893	18.0288	853.168	27.8456	12.9759	22.6007	15.1278	12.9725	26.1425	30.0992	18.0108	13.5811	13.0795	12.9796	194.601	18.9519	12.9793	90.5725	13.0407	28.6823
Fgf7	63.4282	13.648	13.7438	13.7623	12.9759	12.9604	12.9722	12.9067	12.9778	18.0878	12.9974	15.4138	34.1854	13.0963	12.9963	15.9203	13.0001	12.9795	120.047	1643.89	99.9998
Fgfr2	62.4067	88.8013	1536.09	41.4503	12.9424	12.9537	12.9036	22.5441	12.9482	53.488	12.9483	97.9631	1616.38	910.115	12.9644	19.0634	46.0153	12.9595	61.7329	702.989	376.156
Fgfr3	21.4769	222.677	4260.04	104.485	12.9424	12.9537	16.595	32.8143	12.9482	31.4376	12.9568	235.626	40.281	2962.26	23.8634	74.142	92.1374	12.96	39.7574	54.9998	263.912
Fgg	12.8233	12.8233	12.8233	13.0262	12.8233	12.8233	12.8233	12.8233	12.8233	12.8233	12.8233	12.8233	13.1149	12.8233	12.8233	12.8233	2623.92	12.8233	12.8233	18.4723	12.8233
Fgl1	17.0702	13.6054	12.8854	12.9037	12.9695	12.908	12.91	12.9008	12.9774	12.8841	12.9692	12.9937	12.9865	13.0898	12.9614	12.8958	1860.41	12.9031	12.8827	16.266	12.9321
Fgl2	116.496	17.1524	14.0255	15.7822	31.653	984.49	153.029	51.6049	505.525	15.4554	1608.02	22.2996	15.3228	13.0898	100.642	327.267	12.9894	39.5427	2952.57	30.1985	12.9321
Fgr	15.2505	12.8233	12.8233	19.1352	239.77	3561.09	806.766	66.7843	3657.04	12.8233	218.658	12.8233	12.8233	12.8233	52.6858	14.2281	33.5377	200.463	12.8233	14.5747	12.8233
Fhad1	12.9542	19.8148	27.2996	14.0018	13.4946	13.6379	17.3958	112.941	13.6611	20.2084	49.506	20.1207	14.274	21.796	14.0402	15.4932	26.8181	13.7793	14.3909	15.3558	1175.81
Fhdc1	24.2586	13.1485	28.2299	27.0033	2931.46	71.7223	22.4561	15.8995	30.4882	23.5614	15.3517	16.2939	50.5766	32.6255	31.1272	20.8867	29.898	17.9744	55.2222	426.932	13.7063
Fhl2	43.6642	13.7689	15.2962	15.151	12.9537	12.9791	12.9723	13.3227	12.9597	55.7035	120.184	21.3439	34.1735	13.0294	50.0145	5285.38	78.8756	12.9693	433.876	613.008	12.9095
Fhod3	19.6242	17.664	34.0147	17.8922	36.8293	12.8233	13.5735	19.248	12.8233	202.109	12.8233	26.5734	17.7907	19.5858	12.8233	2358.83	62.2798	20.9997	20.3466	21.3812	56.9418
Fitm1	13.2136	12.8233	12.8233	12.8233	12.8233	12.8233	12.8233	12.8233	12.8233	12.8233	12.8233	12.8233	12.8233	12.8233	12.8233	705.497	18.1425	12.8233	14.5737	12.8233	12.8233
Fjx1	19.5633	40.2338	684.342	40.6363	12.9797	12.9094	15.534	15.7641	12.982	47.3335	12.9819	72.5247	49.2649	1293.79	12.9843	16.0429	21.7562	13.0097	33.6421	25.8069	54.2689
Fli1	38.37	369.195	18.2803	3671.6	47.3541	433.529	564.82	1036.02	272.415	14.7377	903.779	44.5953	17.6837	22.4034	432.985	80.0579	19.8809	628.927	102.222	61.1434	131.886
Flnc	109.578	12.8919	38.3116	35.8168	12.9008	12.9008	12.9025	12.9099	12.9008	14.4207	12.9017	17.188	24.3709	12.9053	12.9015	2704.55	41.7297	12.9015	735.372	1102.9	41.1059
Flt1	95.7542	36.58	25.6452	6163.67	27.5499	32.2969	24.169	26.6439	261.175	17.3761	12.9023	26.5793	15.5214	12.905	12.9017	420.105	17.5262	14.7922	72.1022	17.271	12.884
Flt4	37.0704	12.9725	12.8934	399.818	12.9001	15.0662	20.9622	12.9018	12.9012	14.419	12.9008	15.3889	12.9021	12.905	12.9012	112.252	114.803	12.9015	114.401	53.2838	12.884
Fmn2	15.1051	156.951	2034.32	17.6203	12.9107	12.9094	12.9033	18.2665	12.9266	593.769	12.9107	118.434	68.0424	376.139	12.9268	13.927	16.6778	16.2563	19.3677	18.9724	267.329
Fmo1	927.854	39.0149	778.118	574.463	12.9104	12.9266	12.9071	13.046	12.9231	18.3888	12.9264	49.5818	20.895	1458.66	12.9481	87.0391	88.4566	12.9424	103.124	16.574	219.321
Fmo2	227.108	12.9112	13.9402	675.143	12.9104	12.9094	12.9031	12.8841	12.9443	12.8818	12.9264	12.954	12.8972	12.9646	12.954	53.804	31.1942	12.9426	164.845	17.6633	12.9062
Fmod	52.1816	15.5107	16.5106	12.9768	12.9104	12.9094	12.9034	13.0249	12.9231	14.6413	12.9266	13.9018	14.211	12.9647	12.9484	23.135	12.9008	12.9426	377.276	1832.02	68.4703
Fn1	5773.1	70.1309	81.6215	2888.24	130.647	226.354	7587.78	78.7165	5627.14	41.6716	19.9529	111.345	34.0482	97.176	25.791	833.183	6588.39	38.3238	5313.83	157602	16.2307
Fn3k	26.5734	18.0389	109.78	12.9013	2353.96	18.3783	19.1536	21.4424	12.901	222.199	12.901	25.7729	78.8921	330.234	12.902	99.7244	12.8883	17.0561	12.9542	13.969	234.883
Fndc1	88.6521	15.0018	17.7924	26.6409	19.7618	19.5374	16.7534	18.3171	20.319	62.4975	19.5393	17.0463	23.7444	27.461	20.0403	67.0166	14.8716	14.679	827.264	746.566	44.4697
Fndc4	19.8089	186.22	294.319	29.9813	19.7597	18.4742	19.6315	35.2756	20.6835	146.353	40.2831	232.862	51.6583	981.496	18.657	35.9883	126.177	19.8896	54.4505	35.4303	36.8959
Fndc5	20.4063	17.8042	119.235	26.9022	104.099	18.4742	19.0496	27.8761	21.0193	156.189	20.7688	20.7377	22.0237	27.4534	22.1432	2047.53	16.7027	14.6759	20.1541	17.3348	41.9157
Folh1	48.2391	20.8888	320.194	13.9104	12.9689	12.9078	12.9087	13.1676	12.9725	17.1325	12.9761	23.5251	450.403	446.32	12.9567	13.0485	12.9031	12.9025	13.5206	12.884	16.4567
Folr4	12.8854	12.9045	12.8843	12.9747	29.3716	16.0347	12.9648	12.9006	12.9688	12.8933	12.9694	12.8839	12.8918	13.0606	626.534	13.0326	12.9027	31.0384	12.8821	12.8822	12.9223
Fosb	18.0737	119.411	21.8646	2818.64	14.9548	55.4474	35.8928	157.154	15.7297	27.4397	695.678	43.5771	124.72	17.0997	25.4704	179.847	34.2693	47.2022	10405.2	123.815	235.723
Foxg1	12.8233	319.777	594.129	15.2958	12.8233	12.8233	12.8233	12.8233	12.8233	351.917	12.8233	362.07	41.8171	275.088	12.8233	12.8233	12.8233	12.8233	20.3241	23.457	33.3451
Fpr1	13.197	128.823	13.0141	15.0533	15.7093	1219.48	93.2115	16.627	37.7652	17.282	16.4742	14.2977	13.0198	17.8206	16.0208	13.6524	15.5687	18.0052	22.9406	12.9679	70.7058
Fpr2	13.0989	21.9989	13.0141	14.5705	50.0205	2183.8	88.3976	17.2431	149.927	13.0184	16.7432	13.8177	13.999	17.8236	16.3634	13.8165	18.0923	17.42	13.2138	12.9679	14.3001
Fsd2	39.3205	22.2395	18.0941	14.9194	30.4605	14.6711	18.0867	16.3029	14.5677	15.5819	35.2749	14.7694	12.9667	29.7538	36.8739	2175.52	13.0974	30.9336	29.1648	12.9567	13.506
Fstl1	1795.71	393.346	340.477	1571.17	38.5919	18.9621	20.1047	17.2831	12.873	134.965	41.486	692.75	25.418	732.052	12.8732	574.2	22.6908	20.2426	10405.2	7360.31	213.817
Fut9	12.9542	252.361	1071.91	21.7875	13.6258	13.0604	13.1079	19.9395	14.0315	869.8	13.66	302.089	22.426	818.732	13.4351	12.9636	13.0039	12.9935	12.9086	14.1152	41.7912
Fxyd1	519.805	180.39	715.287	25.953	12.8233	12.8233	12.8233	16.5271	12.8233	20.1131	12.8233	186.297	23.1659	4107.75	12.8233	1526.23	150.521	12.8233	243.353	52.9574	1077.48
Fxyd3	19.5165	20.5031	316.764	15.7363	12.8233	12.8233	12.8233	19.6406	12.8233	13.5553	12.8233	35.7709	18.6678	463.839	12.8233	16.1066	12.8233	12.8233	19.4234	37.8127	19.2509
Fxyd5	138.505	29.5918	18.7317	2937.54	189.259	4374.17	2047.65	92.3548	5470.35	36.0171	1879.32	25.2303	14.2714	12.8233	3904.87	71.9726	20.6304	254.198	504.336	412.199	12.8233
Fxyd6	24.6719	1263.31	172.424	56.7334	12.8233	12.8233	12.8233	15.6525	12.8233	90.1624	12.8233	1041.97	37.0826	90.4036	12.8233	171.013	12.8233	12.8233	293.309	124.344	12.8233
Fyb	37.0288	118.331	32.5245	12.8245	225.941	1602.09	1246.56	2367.23	2920.29	14.3062	4443.59	12.9426	22.071	12.8245	2454.56	21.0822	16.1532	67.0163	22.7773	24.368	74.414
Fyn	97.3783	158.61	387.033	520.672	106.762	80.7078	210.221	105.562	175.279	259.528	5171.18	324.145	1394.49	232.806	1761.47	238.578	23.3068	302.197	425.737	142.667	160.824
Fzd4	881.827	20.0859	56.3105	192.774	20.196	21.3439	44.2866	66.0309	44.9918	17.9876	30.4281	17.2638	24.1896	103.411	21.839	188.159	59.1501	21.2692	139.487	50.6796	86.317
Fzd6	24.8588	42.8187	104.054	772.388	20.1974	20.3339	23.3648	19.6803	22.5639	16.2273	25.181	27.0761	19.9624	93.6984	24.0012	171.518	53.4294	28.6277	64.3086	31.3952	90.2121
G0s2	1100.51	75.7677	36.7115	15.7794	14.7665	376.12	21.1798	18.5142	27.5835	15.2614	67.1722	75.1302	43.8328	81.7151	38.5497	321.923	43.6578	15.4192	59.8629	117.276	20.8646
Gabra1	12.9756	21.5444	17.6651	15.6071	14.0724	13.1614	13.2055	17.6925	14.4734	791.954	14.2904	14.7694	17.1521	15.7037	14.2359	13.1122	13.0475	14.4624	13.0348	17.2173	13.3901
Gabrb1	13.0339	88.9899	930.865	17.6565	14.1944	13.1637	13.2032	17.0216	14.3901	224.914	14.5082	28.8622	18.582	988.577	13.7749	13.113	14.349	13.0341	13.0606	18.0874	66.0318
Gabrb2	13.0339	49.2643	54.2497	15.9807	14.1914	13.1484	13.1872	19.8971	14.39	1560.86	14.3508	54.014	16.3119	66.8866	14.4839	14.7537	13.0678	13.0341	13.0343	19.917	13.4244
Gabrb3	15.2231	77.0139	90.39	16.8066	14.1914	13.1501	13.2333	18.6186	14.39	1613.74	14.5077	132.091	31.7867	45.3378	13.7749	17.7822	14.3423	13.0341	13.0606	16.2925	58.2955
Gabrg1	12.9689	81.6691	982.871	18.7543	14.0063	13.1286	13.1822	16.597	14.3087	41.5233	14.0238	85.0805	30.495	1639.07	13.677	13.0152	13.0345	13.0184	12.9099	12.9145	149.33
Gabrg2	12.96	36.1174	17.0821	14.9157	14.0063	13.1286	13.1504	16.5168	14.3072	569.417	14.0238	61.2341	15.4714	15.6393	13.677	12.9855	13.0345	13.0184	12.9099	13.2012	13.3855
Gad1	13.1894	33.4155	74.3853	22.4328	17.2437	18.9002	15.0104	20.0795	17.1264	996.019	17.3392	31.9301	17.854	25.9449	17.2981	14.29	13.6735	39.2099	13.6379	13.3465	15.1089
Gad2	13.1286	29.7335	53.3207	20.4292	16.6378	14.3267	14.5883	21.7691	17.1264	698.54	16.6433	21.7145	17.285	64.7242	18.1576	13.508	13.6719	13.5206	13.5428	18.2699	15.1089
Gadd45a	109.315	22.3204	23.0237	86.2188	2456.1	1142.87	103.271	24.1862	77.1044	24.2278	104.44	38.8282	49.0772	41.6584	62.3904	95.9898	447.189	107.65	425.737	244.678	31.1312
Gal3st1	13.3757	12.9025	17.1522	12.8827	12.8728	12.8732	12.871	14.6395	12.8732	15.5949	12.8732	14.399	1714.78	12.8785	12.8719	12.8768	15.8898	12.8732	14.7656	18.58	12.871
Gal3st4	21.8566	52.5208	129.427	17.9189	12.8728	37.7679	18.5613	1101.51	12.873	36.9441	12.873	66.1015	29.8293	148.044	12.8777	22.2169	20.8989	12.8732	31.9533	24.9466	40.7668
Galnt6	22.0919	25.2768	47.1192	15.7566	88.6683	144.927	72.9839	52.3877	89.2893	15.6377	623.986	32.8415	683.847	248.981	817.223	17.731	15.2136	152.712	29.0864	13.79	14.0469
Gamt	110.946	44.3286	43.0404	50.4561	38.5215	30.6196	58.4211	38.411	223.117	21.3305	27.6007	71.3552	1076.68	318.624	12.8847	44.3481	78.9281	25.5353	43.601	39.7008	28.5
Gap43	17.2399	74.9038	26.0931	20.6044	13.3998	13.0315	13.0474	19.0308	13.5109	239.134	13.5094	200.724	39.2979	14.4865	13.9393	15.374	12.9795	12.9787	21.6299	26.3377	13.1617
Gapdh	2075.47	891.966	701.985	502.714	13.129	137.513	88.1604	62.1741	41.7042	107.971	27.5504	3800.65	1866.02	5488.86	52.2004	514.758	1577.19	108.898	73.7241	3469.08	3887.76
Gas1	201.117	290.537	134.564	32.69	12.8835	12.8835	15.6258	12.903	12.8837	16.6051	12.8837	322.659	22.701	190.3	12.8831	143.788	21.7269	12.8839	536.63	838.595	76.0304
Gas6	1229.15	209.445	290.278	422.956	29.7197	28.4099	58.9645	497.209	12.8845	339.598	12.8839	47.1121	102.665	69.7701	12.8847	828.161	557.231	20.0914	810.793	2445.13	982.591
Gata1	12.9691	13.0541	12.9596	13.3315	2065.64	67.4137	14.7045	12.9738	49.5844	12.9095	14.4269	13.0315	12.94	15.2803	46.0963	12.972	13.025	14.2322	13.0097	12.9095	13.2996
Gata2	21.0717	18.2269	15.1835	497.244	58.2546	59.714	22.9036	16.5703	39.7334	12.954	14.701	14.396	14.7537	15.2803	14.5872	89.9557	18.2121	14.4624	85.9017	126.71	30.0715
Gata3	17.6078	14.9547	13.0738	40.933	42.0984	20.6401	21.6177	14.5163	14.5198	12.954	914.627	13.193	12.94	15.2776	414.912	17.8054	13.025	24.47	17.4646	18.3505	18.092
Gata4	12.96	13.0541	12.957	14.3465	13.905	13.1286	13.1755	12.9686	14.0865	12.9107	13.9124	13.1525	12.94	15.2792	13.5123	788.592	68.9832	13.0097	398.276	12.9095	13.2996
Gatm	37.155	1299.25	331.981	503.013	177.22	124.407	239.638	404.409	87.8651	46.2841	15.8271	599.258	5362.54	644.711	26.5701	18.1439	19.1421	28.8953	45.1769	18.2847	69.8555
Gbas	490.724	653.321	381.593	360.541	153.457	252.315	204.26	108.114	221.798	170.288	184.016	533.058	452.38	564.994	196.48	3115.26	139.789	155.089	150.746	129.193	3297.19
Gbp4	49.5232	15.2345	14.7446	714.725	38.5296	40.667	31.9467	30.5825	53.7263	12.8707	756.116	18.155	12.8924	12.894	890.583	79.9503	27.2677	272.781	32.3095	12.8671	12.8822
Gbp8	20.9778	14.345	13.4736	41.4445	75.6207	56.8734	31.3041	39.2471	49.1648	12.8299	1170.52	12.9088	12.8567	12.8913	578.258	15.1587	24.6852	62.7121	17.5517	12.8654	16.3175
Gc	14.0742	12.8233	12.8233	12.8262	12.8257	12.8233	12.8233	12.8233	12.8257	12.8233	12.8257	12.8233	12.8257	12.8262	12.8257	12.8233	22257.6	12.8233	12.8233	13.1606	12.8257
Gch1	34.663	12.9092	12.8726	125.054	3608.43	171.882	161.704	26.4568	256.473	13.2408	65.4313	16.2724	15.2925	286.046	73.3611	60.5327	508.153	76.6828	169.159	36.2846	17.3328
Gclm	245.346	65.2327	111.609	143.529	4272.01	232.484	179.152	52.7865	144.487	74.7735	132.675	71.9457	182.133	30.7168	118.678	78.8125	795.967	60.7316	339.524	321.912	171.369
Gcnt1	25.9218	32.5827	16.8661	38.7315	523.686	695.369	84.0261	1146.85	185.293	13.6479	184.17	13.2034	22.0541	12.932	37.6472	229.74	16.3775	155.626	38.8282	24.6068	1076.34
Gcom1	19.1628	12.8922	12.9025	116.598	12.9091	22.818	16.2614	12.8837	12.9091	14.3933	12.9104	12.9761	13.3897	12.9441	23.8524	2243.62	15.1673	81.47	32.6773	22.8886	19.1234
Gda	486.2	17.4076	18.9774	356.928	974.68	3800.65	1624.84	30.9842	1399.64	407.447	46.8332	13.2034	19.0984	12.8233	24.9911	33.6539	43.2631	34.5772	255.459	160.008	118.578
Gdpd2	22.7781	36.1143	1499.27	15.4375	12.9851	13.0097	13.0586	19.2434	13.0545	36.3383	12.985	150.933	15.1843	201.193	13.0141	16.2225	12.9086	13.0343	13.5416	17.2822	12.9616
Gfap	12.8257	254.283	2738.24	19.0085	373.778	12.8299	12.8292	33.5529	12.8299	22.2199	12.8299	22.4298	68.5872	687.16	12.8299	12.8477	12.8286	12.8299	14.5962	15.2235	121.844
Gfi1b	12.8233	12.8233	12.8233	12.8233	908.054	48.0882	43.8957	12.8233	20.3322	12.8233	12.8233	12.8233	12.8233	12.8233	12.8233	12.8233	12.8233	17.5508	12.8233	12.8233	12.8233
Gfpt2	106.97	113.87	86.1984	25.5805	17.4818	18.1072	24.8398	16.3244	18.1001	58.6406	21.2735	55.8931	51.0934	55.8394	19.4407	39.8697	20.2457	16.539	11126.2	93.2846	164.565
Ghr	3059.99	20.5247	545.704	223.426	12.8233	12.8233	23.1344	17.1557	12.8233	76.1448	12.8233	29.5064	19.4311	253.676	12.8233	626.734	362.259	12.8233	419.206	947.054	144.496
Gimap1	18.7603	18.3683	13.1902	270.615	127.96	64.0638	54.5478	64.8243	35.2692	12.9793	1160.69	13.5428	14.6921	16.3103	1329.25	39.3364	19.9284	1290.94	18.3523	12.9323	13.6768
Gimap3	13.0097	17.9441	13.1437	30.3215	116.231	65.2256	55.8809	15.1831	14.9565	12.9532	2765.74	14.0724	13.7357	16.3325	3209.95	18.4477	13.1384	1156.99	13.0989	12.935	13.6782
Gimap4	48.7384	13.1311	13.4601	815.647	78.5144	64.1304	44.6577	16.9466	14.8802	12.9596	10644.8	13.5428	12.9725	16.3315	3371.63	148.773	25.2418	1044.07	28.1845	13.2317	13.6769
Gimap5	16.5061	24.7993	13.1437	345.252	73.3293	48.3477	39.1395	21.9388	14.9533	12.9602	916.119	13.5429	13.7335	16.3315	433.509	27.1501	19.7435	410.235	22.9109	12.935	13.6769
Gimap6	34.1016	79.2504	14.2225	2576.08	174.211	73.7241	140.918	100.933	46.9412	12.9601	2828.05	17.5402	18.8758	16.3297	3467.61	194.374	21.0975	2983.22	35.1117	20	38.2068
Gimap7	12.9898	13.1311	12.9725	13.7133	96.3753	34.2967	21.5889	12.9796	15.1175	12.9352	993.51	13.3862	12.9725	16.3306	469.986	14.6977	13.1384	388.546	13.0971	12.935	20.7588
Gimap8	20.196	13.95	13.7573	293.803	72.2788	45.4393	33.2847	15.2551	14.7432	14.2718	1445.15	13.6258	14.3835	16.3295	1078.87	63.5149	37.8589	746.01	15.7198	13.6371	17.1156
Gimap9	18.0355	24.7753	13.1902	473.013	40.5124	123.345	52.5419	33.3485	30.33	12.9601	1233.57	15.2669	13.4957	16.3295	636.788	21.7518	58.4412	239.849	23.4752	21.1176	40.6946
Gja1	357.171	1177.31	5605.78	1465.8	13.0753	13.1286	20.3491	22.6912	13.1292	21.0344	13.1396	638.597	65.2303	27438.9	26.4536	2443.71	28.3377	13.1712	1772.81	151.802	5278.39
Gjb1	12.9074	17.654	18.1448	12.9401	13.0751	12.9595	12.9688	14.6865	13.1122	13.109	13.0752	46.9979	1971.07	366.119	13.0548	12.9217	701.816	12.9104	12.9104	12.902	12.9942
Gjb2	15.7495	19.6792	114.704	16.1957	13.0753	13.129	13.1631	13.1971	13.1242	13.3618	31.4252	13.1637	15.1394	116.492	13.2054	13.7496	847.08	13.1637	12.9109	15.8186	12.9942
Gjb6	12.9037	52.5998	1069.56	18.4432	13.0751	12.9595	12.9687	17.3129	13.1122	16.7473	13.0752	24.0378	21.3047	1688.78	13.0222	12.9482	12.9188	12.9104	12.9008	12.8935	293.573
Gjc2	15.2023	15.8122	17.2066	13.3854	13.1199	13.2138	13.0005	13.944	13.111	14.9979	13.075	18.8843	2158.23	171.246	13.1019	14.3474	12.9156	13.1286	20.2426	14.0063	12.987
Gjc3	12.9102	44.1962	128.576	13.5311	13.0751	12.9542	12.9642	22.8664	13.1122	17.4007	13.075	38.6123	2912.49	105.316	13.0221	14.1021	22.4188	12.9104	15.633	13.1391	19.0235
Gldc	42.2674	174.179	796.911	15.125	12.9695	12.908	13.0078	16.2877	12.9775	19.2185	12.9694	426.042	19.288	310.693	12.9691	14.4699	370.996	12.9791	39.0188	18.8019	161.851
Gli3	43.8188	198.342	1725.18	44.8363	12.9791	12.9604	12.9102	15.9405	12.9777	47.2966	12.9776	199.667	14.3039	799.79	13.0097	21.3453	14.5151	12.9935	227.753	399.908	18.9479
Glrx5	539.432	48.014	27.1164	50.311	11126.2	97.207	148.229	25.2795	358.083	36.6172	212.572	114.897	159.018	85.9615	217.581	438.045	436.993	158.245	162.465	207.641	56.1878
Gm10069	19.3394	116.229	24.2932	40.1155	12.9001	16.2962	19.0491	21.3825	12.9008	26.9956	22.6733	128.266	31.3367	187.623	27.4572	59.5197	2064.63	20.7694	21.1819	19.0498	52.152
Gm10790	12.9086	22.4098	13.0679	13.0705	13.1286	16.3101	13.0381	576.008	13.1609	12.9031	13.1599	12.9978	15.3305	13.7441	13.0651	13.6797	12.9536	20.5247	12.9535	12.9022	22.228
Gm11428	76.3541	109.498	12.9778	14.222	42.6086	156.042	469.55	19.0229	562.331	12.9643	28.4915	14.8173	15.6136	16.9328	14.659	16.8098	18.5741	34.4611	15.7198	15.9209	309.757
Gm11992	15.593	19.7774	17.6959	12.9086	12.9035	38.4608	12.9091	12.8833	12.9056	12.8734	12.9056	21.0378	17.6276	12.9339	12.9074	20.5116	21.7308	12.9078	12.8835	17.3873	450.808
Gm12839	17.2891	13.1561	12.9726	16.3939	561.368	18.6797	13.3619	12.9796	15.3106	12.9479	15.0027	13.1483	13.7596	16.3923	14.429	16.2096	13.1396	14.9549	13.1286	12.9351	13.7063
Gm13253	48.298	211.823	35.0747	173.716	188.642	117.234	185.66	82.9991	356.934	26.246	1010.12	292.173	37.2881	118.368	1558.58	34.1052	229.825	724.752	77.5085	63.4458	46.0507
Gm16897	20.4526	16.2105	27.0505	785.08	13.1524	19.6079	14.8433	75.1145	13.1873	25.7051	31.3107	16.1358	18.1269	13.8282	13.2086	93.0001	15.4742	15.1672	520.584	15.557	13.0289
Gm1821	1609.46	41852.6	234.667	9708.57	2075.47	2128.27	603.211	134.207	573.939	188.283	308.845	26067.5	5642.32	11584.6	1076.62	1667.86	1685.95	1379.66	2546.11	1503.89	10975.6
Gm19897	62.7906	140.854	129.666	81.4967	46.0926	168.906	34.5463	146.864	70.9486	59.4432	109.289	73.1727	3036.05	65.4518	57.7922	105.204	79.304	108.088	87.3915	13.4632	223.372
Gm221	17.2312	12.8278	20.3978	12.8507	12.8299	12.8316	12.8292	12.8292	12.8299	12.8257	12.8299	12.9598	12.8308	12.8508	12.8316	13.8418	12.8292	14.6711	17.004	13.0176	271.736
Gm4759	13.6178	12.8233	12.8233	14.044	12.8233	22.84	20.4097	17.9364	19.0216	12.8233	813.466	12.8233	12.8233	12.8233	75.004	12.8233	12.8233	128.082	12.8233	12.8233	12.8233
Gm4902	21.4603	19.1109	12.8715	18.9443	89.3277	49.6364	172.069	61.897	1043.57	12.8862	341.601	12.9687	13.6831	12.8939	218.353	17.201	23.9873	231.177	48.7599	16.7479	18.1845
Gm4956	12.8703	12.8724	12.8697	12.8784	12.8839	12.8844	12.8835	12.8703	12.8841	12.8308	405.011	12.8721	12.87	12.8942	44.9125	12.8882	16.3317	20.5492	14.4941	12.8308	12.8822
Gm5088	166.801	27.2205	35.1209	46.7024	73.6841	18.9626	14.5159	100.529	17.1818	46.476	17.5269	21.5798	41.7272	26.906	18.3634	1131.23	489.93	17.8903	175.643	14.4501	38.8973
Gm606	12.9041	12.9345	13.2901	12.9354	13.0604	12.9537	12.9599	12.9099	13.0872	15.1203	13.0605	12.9759	12.9914	13.5138	13.0158	12.9446	12.9108	12.9102	12.9008	12.8935	285.442
Gm6682	235.027	2836.67	72.608	438.535	468.717	153.057	303.025	145.02	64.8306	131.564	84.47	1901.49	483.408	271.919	122.442	139.4	1303.15	77.3951	844.432	140.714	300.527
Gm8369	13.9467	18.0546	13.6482	14.8067	73.6239	23.6637	25.7635	22.1312	42.1909	13.2048	32.1873	13.099	13.6615	29.0105	147.291	14.2291	15.0959	301	13.8218	13.3371	17.5174
Gm973	13.4928	45.233	767.39	13.6533	12.9109	12.9426	12.9087	15.9608	12.9371	19.3075	12.9321	55.284	14.463	1134.23	12.9597	12.9015	12.9008	12.9008	13.3624	20.7331	1936.4
Gm98	31.1922	25.4629	93.7116	14.153	12.9791	15.2669	18.2876	28.1176	12.9948	26.7739	12.9955	49.9047	3595.06	165.169	13.0339	53.3677	883.328	13.0181	172.682	25.3871	17.6891
Gna15	12.9025	35.4107	13.2601	13.0855	71.2417	228.18	343.104	878.756	154.867	12.9011	108.365	13.0182	20.7158	13.1854	78.5406	14.388	13.0291	88.6521	17.9471	14.2883	17.0649
Gnai1	1019.4	60.1764	77.0012	15.626	12.9595	12.9684	16.4548	24.5535	12.9644	440.472	12.969	84.5922	1106.64	67.1423	12.9776	24.6984	25.1918	12.9689	82.048	49.1102	104.316
Gnao1	222.421	441.666	10579	41.2319	12.9537	17.1208	12.9144	130.396	12.9568	1796.39	12.9776	505.602	2301.27	2920.24	12.9645	144.602	16.7112	15.0334	284.82	70.7425	167.906
Gnb2l1	2880.35	4111.63	339.319	2293.45	4224.01	1395.79	5557.57	891.987	10996.8	394.701	3539.45	5721.69	1009.56	1730.09	19970.4	1820.27	5423.17	13175.9	3561.09	5015.29	1291.33
Gng11	46.2722	50.1909	25.7455	4272.23	12.9604	50.0205	26.9408	12.9387	35.3691	12.94	47.9279	119.871	588.751	226.148	12.979	193.288	33.8458	21.1256	113.868	81.4436	65.7039
Gngt2	47.7478	15.575	12.9071	247.31	267.011	402.941	650.898	313.954	2952.57	12.8775	89.0394	15.7601	18.011	12.9389	230.217	56.3157	20.8	154.496	19.7825	21.3964	17.5161
Gnmt	15.5482	12.8931	14.6393	14.0039	12.9097	55.178	23.7119	16.7316	52.4324	16.0716	21.8612	16.2362	15.6796	12.9541	17.8517	19.217	1017.01	25.6357	17.0519	14.1013	127.927
Golm1	80.9487	307.778	121.973	464.385	519.341	198.698	211.499	3234.59	173.805	115.335	451.044	389.052	114.153	95.0609	263.723	105.977	181.195	116.117	134.719	210.917	44.2677
Gp49a	97.9793	16.1599	12.8233	12.8233	37.7404	1795.71	619.553	203.741	176.766	12.8233	63.5592	12.8233	12.8245	12.8245	30.6154	13.7975	16.1476	44.0528	17.0925	13.3987	23.7482
Gpc4	299.736	46.3547	45.5698	20.6698	84.4238	12.9037	12.9083	12.9597	21.3623	27.1953	12.9059	53.4872	18.002	62.0864	12.9062	145.832	371.726	15.8709	323.598	518.927	322.149
Gpc5	12.8732	36.0262	2231.87	12.8968	12.9031	12.8839	12.8847	16.0635	12.9036	30.0639	12.9031	34.8244	33.1656	816.346	12.9022	12.9219	12.8827	12.9074	12.8827	12.9162	16.9933
Gpc6	233.475	129.07	617.277	23.6146	12.9031	12.9022	12.9015	17.7031	12.9036	104.394	12.9077	99.8273	23.6633	82.046	12.9022	84.2143	15.1326	12.9074	698.546	1129.95	165.335
Gpd1	8146.31	1604.61	92.8322	15.0253	39.5614	28.4549	29.0519	105.095	22.4419	132.669	12.9094	157.748	1493.83	12.9386	12.9095	518.765	745.964	18.7676	22.347	20.5232	17.3193
Gpihbp1	21.1774	12.8295	12.8257	635.837	12.8697	12.8316	12.8299	12.8279	12.8697	12.8257	12.8697	12.8299	12.8262	12.8713	12.8507	372.75	16.2403	12.8292	17.1128	12.8257	12.8302
Gpm6a	12.8728	2231.05	5773.1	95.5788	12.8851	12.9008	12.9012	60.2886	12.8928	2492.25	12.8931	1847.5	63.61	6115.88	12.9008	17.697	12.8732	18.9587	29.871	12.8498	2797.54
Gpm6b	190.097	3349.67	6131.84	49.574	26.3417	21.511	18.535	161.461	12.8928	2118.56	12.9008	8637.92	9348.59	5962.44	53.4292	65.4517	12.873	38.4565	840.149	849.795	802.505
Gpnmb	588.866	14.2484	60.039	12.953	12.9759	17.3061	34.4086	13.2	38.9664	17.1904	28.5004	15.911	13.4692	13.0863	27.5078	16.4515	96.7273	15.0662	205.021	337.825	24.0731
Gpr116	443.719	20.6695	20.7493	5091.62	12.8233	12.8233	18.2191	13.6405	12.8233	18.2802	12.8233	25.224	17.8148	12.8233	12.8233	1200.7	41.7085	12.8233	259.315	19.5243	16.1816
Gpr132	12.8233	12.8233	12.8233	12.8233	96.0636	160.972	74.7079	16.8087	563.572	12.8233	517.197	12.8233	12.8233	12.8233	665.622	12.8233	12.8233	367.738	12.8233	12.8233	12.8233
Gpr133	249.177	16.6184	12.8233	16.6962	51.9739	12.8233	17.9622	12.8233	12.8233	29.6393	12.8233	14.2615	12.8233	12.8233	23.2982	24.0355	12.8233	27.841	602.335	30.844	12.8233
Gpr141	12.8233	12.8233	12.8233	12.8233	12.8233	297.953	24.0827	12.8233	711.989	12.8233	39.3317	12.8233	12.8233	12.8233	12.8233	12.8233	12.8233	27.8431	12.8233	16.0509	12.8233
Gpr158	12.8233	14.1451	115.035	12.8233	12.8233	12.8233	12.8233	15.9585	12.8233	986.053	12.8233	16.5273	27.1922	12.8233	12.8233	19.1043	12.8233	12.8233	12.8233	12.8233	12.8233
Gpr165	13.7091	25.1288	14.8205	12.8233	12.8233	12.8233	12.8233	331.361	12.8233	20.2418	12.8233	14.4654	40.7937	12.8233	12.8233	12.8233	12.8233	12.8233	19.7618	12.8233	40.7459
Gpr17	24.7304	20.5838	84.2781	96.1407	12.8292	12.8257	12.8257	18.3852	12.8292	17.5649	12.8292	24.8584	2661.52	12.8495	12.8292	131.107	143.922	12.8257	42.869	12.9936	17.1981
Gpr171	12.8233	22.4162	98.0708	12.8233	25.4587	39.1338	24.637	12.8233	36.5856	88.3727	1035.71	20.2909	12.8233	107.679	250.957	14.6739	12.8233	266.19	12.8233	13.2494	67.1913
Gpr174	12.8233	12.8233	12.8233	12.8233	12.8233	20.11	12.8233	12.8233	12.8233	12.8233	641.463	12.8233	12.8233	12.8233	401.94	12.8233	12.8233	342.337	15.76	12.8233	12.8233
Gpr18	16.314	12.8504	15.9399	12.8299	117.275	71.7351	37.4981	34.5221	472.724	20.201	173.17	12.8257	13.114	12.8495	373.405	12.8507	14.9578	650.136	12.8257	12.8233	30.9051
Gpr34	15.1026	226.643	20.0953	12.8507	26.2067	24.2962	38.0764	2069.02	12.8299	16.8352	35.0074	13.2292	49.4742	12.8501	56.505	12.8704	12.8257	31.2268	16.8511	12.8257	187.488
Gpr37	12.8257	114.522	206.56	15.7278	12.8299	12.8267	12.8292	15.1178	12.8299	19.3048	12.8299	48.0586	3024.39	548.487	12.8295	13.647	12.8257	12.8257	12.8257	12.8257	127.568
Gpr37l1	12.8257	2223.71	4007.92	21.9591	12.8316	12.8299	12.8292	19.6377	12.8507	19.0359	12.8316	216.773	545.249	4557.52	12.8299	13.3868	12.8497	12.8292	16.9843	12.8257	330.22
Gpr56	51.6866	1651.06	1782.63	709.461	210.058	76.0148	32.0241	1763.76	108.509	68.5782	17.8239	1679.29	811.916	1141.9	38.6363	251.521	45.1994	37.8537	36.786	35.2177	49.7321
Gpr65	18.0688	147.512	12.8257	12.8292	26.1379	427.651	195.491	53.348	392.357	12.8257	972.838	12.9542	12.8292	12.8299	292.538	15.7292	14.8928	159.94	12.8257	12.8233	30.4531
Gpr84	12.8257	17.143	14.938	12.8292	12.8292	160.064	34.5056	576.178	52.9335	13.8962	12.8292	12.8257	15.4659	12.8295	12.8292	12.8278	16.183	12.8292	14.6011	13.7285	12.8257
Gpr97	19.2321	12.8257	12.9631	67.411	58.3977	1000.88	15.9176	16.1463	91.7437	12.8257	35.622	15.1672	14.4198	12.8295	58.6143	16.1036	19.1078	20.1508	34.0584	12.8269	12.8262
Gpsm3	41.8769	40.7601	18.1335	69.2803	179.072	2174.1	642.698	253.267	1315.2	14.8615	959.659	12.8257	16.8301	12.8245	792.214	22.7676	19.397	482.808	31.9358	19.6841	26.9369
Gpx1	1056.19	1142.19	73.5586	2912.18	71859.7	3143.34	6207.21	657.878	31018.5	62.8556	304.065	829.04	452.061	254.094	1416.75	293.534	6207.21	2168.61	500.273	879.364	968.516
Gpx3	5626.87	1102.39	15.5677	35.1489	52.1816	59.35	95.796	21.6457	153.492	17.493	12.908	76.4551	31.7411	20.0041	12.9086	1036.37	27.3026	22.2538	3674.39	1998.01	157.978
Gpx8	182.763	393.015	36.5679	62.4633	12.9031	12.9035	12.8847	12.957	12.9034	14.5069	73.0754	827.853	36.5261	966.952	12.908	97.6196	12.8965	12.9078	313.7	679.11	1310.92
Grap	22.1869	68.7266	14.7882	572.827	234.519	98.9264	84.4951	239.177	99.5156	12.8703	765.877	19.3014	19.5401	12.8966	755.045	68.159	19.352	1350.53	25.8984	15.0192	50.9705
Grap2	14.0727	15.1215	13.8076	19.9977	411.215	54.7821	25.6185	19.7673	22.7271	13.5173	125.624	13.0989	16.9012	28.5856	274.575	17.2924	15.0721	222.86	14.8148	13.2035	20.4329
Grb10	1014.68	53.9064	25.04	615.608	20.0084	19.849	21.3577	20.0679	32.2104	356.17	20.1454	133.194	20.7199	33.7872	21.8087	802.831	84.6481	21.0158	1394.15	1376.19	94.7053
Grem1	17.0611	16.4601	14.6099	16.4734	23.9335	17.5296	18.3583	14.9542	25.1863	17.2559	23.4269	14.2322	15.0552	38.2997	21.5652	18.408	16.772	15.8738	16.2962	1053.26	19.6702
Gria1	12.954	132.369	460.838	16.7475	13.5206	13.0341	13.088	41.0699	13.7218	2747.7	13.7239	21.0533	27.0822	14.704	13.6524	16.37	12.9944	12.9795	27.5754	17.4527	17.2793
Gria2	12.9535	535.872	5075.12	21.9179	13.5206	13.3703	13.1394	48.3305	13.7199	11910.4	14.1082	756.871	193.024	2848.61	13.449	13.0552	12.9944	13.8742	12.9795	12.9068	31.8516
Gria3	45.5429	20.7291	90.2898	15.4835	13.8177	21.6795	18.1293	21.2672	61.0128	2128.87	14.0149	24.5219	35.0276	25.9643	27.4665	18.5859	31.0714	24.4693	137.981	370.713	13.2153
Gria4	17.8611	22.9724	37.7248	14.7964	13.5238	13.0341	13.088	20.8783	13.7218	1313.53	13.5308	34.9338	307.375	22.8505	13.4501	13.5528	12.9944	12.9795	19.4409	17.3408	13.2153
Grik2	12.9799	159.776	432.755	21.6574	13.5908	13.0346	13.1245	21.0559	13.8109	1381.01	13.5806	109.433	251.801	288.013	13.3829	16.1325	13.0035	12.9849	30.9708	15.8107	25.0339
Grin1	12.9849	24.4743	68.4684	20.0107	13.6181	13.3998	13.4952	34.3621	13.858	2958	13.6328	25.8162	27.1164	46.7181	13.5553	13.8643	13.0037	14.2548	13.618	20.7116	19.4089
Grin2b	12.8728	169.289	353.104	14.3062	12.9025	12.8835	12.8847	26.7967	12.903	2639.04	12.9059	238.068	14.0774	386.335	12.9022	12.8831	15.1422	12.8821	12.8827	12.8719	16.3777
Grin2c	12.8732	13.0261	1400.36	13.1543	12.9025	12.9031	12.908	20.8126	12.903	18.6065	12.9037	19.4234	19.3741	1071.68	12.903	16.6623	12.8962	12.8821	12.8827	12.871	18.2097
Grm3	12.8703	124.905	3474.8	32.0136	12.8847	12.8736	12.8818	35.708	12.8928	388.041	12.8926	124.595	164.794	2371.58	12.8851	12.9094	12.8732	12.8728	12.8728	12.8498	67.2881
Grm5	12.8711	42.927	57.967	17.0404	12.8847	12.9001	12.8818	18.8515	12.8928	1997.42	12.8851	38.5284	32.4898	19.9186	12.8851	12.8715	12.8732	12.9008	12.8728	12.87	27.37
Gsn	14146.4	421.27	188.592	53.2493	83.2448	3292.98	157.535	53.5977	794.296	27.9097	46.9913	91.6593	11744.7	398.728	247.55	1055.69	33.5269	374.045	19436	2849.55	1092.69
Gsta2	12.8299	12.8769	12.8299	12.8772	12.8818	12.8716	12.8716	12.87	12.882	12.8299	12.882	13.1909	12.8308	12.8919	12.8775	12.9015	1261.51	12.8703	14.3043	12.8295	12.8726
Gsta3	61.8084	12.8759	41.4185	12.8833	12.8818	12.8827	17.2047	12.901	12.882	29.4556	12.8831	15.1012	17.0835	36.9367	12.8835	28.2298	1320.35	12.8827	108.978	13.5225	12.8726
Gsta4	159.453	304.155	127.05	105.767	100.993	16.6304	18.7351	19.0359	12.8831	39.7272	12.8829	402.655	21.2477	398.268	18.7874	361.251	734.099	12.8827	38.5668	26.3587	2360.91
Gstk1	125.987	149.877	122.36	196.399	46.4557	45.349	64.4545	38.1115	49.2743	17.1531	50.6001	224.147	94.8442	1916.69	57.4256	286.403	67.5943	31.4108	45.0813	66.0773	199.087
Gstm1	1187.57	1686.18	2007.32	1003.47	81.4192	142.457	393.678	126.249	1513.44	70.7555	196.352	1619.59	116.172	36301.9	31.5843	878.668	5801.56	58.5884	2038.18	210.844	4019.67
Gstm5	93.016	2527.62	550.862	208.943	451.377	17.0925	38.5718	62.0303	29.4684	106.392	12.8844	2794.84	1192.66	13903	12.8845	198.98	110.315	18.8988	113.473	89.2056	940.539
Gtf2a1	196.698	729.554	314.164	340.479	182.216	165.355	158.466	360.571	83.5135	230.264	231.046	557.791	407.156	207.065	113.446	115.859	73.6686	174.361	112.561	425.456	2833.21
Gypa	14.7656	17.7051	14.5233	18.8568	11747.6	32.0143	21.2614	15.0014	102.198	13.9402	27.8882	15.21	19.7734	38.6339	22.6828	15.0775	16.2902	24.5119	13.5004	14.1377	19.7636
Gypc	146.305	127.265	16.7959	53.6469	3973.69	100.262	181.336	16.1592	265.988	13.9366	63.0557	53.7585	16.0261	38.6415	167.077	243.008	58.943	139.207	223.1	162.8	19.7877
Gzma	14.5536	16.9176	14.0779	18.9744	35.9443	38.5217	20.3368	16.8636	23.6778	13.4066	35649.6	15.9045	14.5033	35.1809	138.521	15.8708	15.7915	38.2724	15.2505	13.748	19.0296
Gzmb	14.7423	16.1912	14.3191	16.1543	24.191	24.0263	21.3882	17.9395	23.6932	13.3983	2494.89	15.9046	14.9557	35.199	58.9647	15.3036	15.7918	29.526	13.3956	13.748	19.0322
H2-Aa	15.4172	146.724	13.3558	218.33	2060.53	868.076	1510.74	133.579	9348.93	12.8835	108.5	12.9099	20.2878	12.9848	148.828	56.047	15.2613	33101.2	44.5953	12.8775	16.4222
H2-Ab1	21.727	77.2535	13.6428	80.2133	1256.25	619.952	1519.2	199.314	5219.78	12.876	111.548	13.7059	36.0695	12.8929	187.366	51.5802	51.7248	21999.9	31.0486	20.3107	12.8775
H2-DMa	25.1904	73.4734	18.3804	33.6978	63.5131	107.475	144.824	122.677	265.429	25.211	51.192	26.1641	30.9733	34.0783	98.1159	20.952	20.317	765.747	25.2589	25.2551	37.029
H2-DMb1	20.6371	30.3867	12.8299	39.5223	173.566	160.653	217.942	172.887	1138.27	13.7966	37.9256	12.9542	14.0837	12.8508	30.0787	15.4369	14.9906	937.54	21.1143	25.6299	75.5428
H2-DMb2	17.1099	15.8859	12.8257	25.8259	12.8299	59.8629	35.735	47.9187	32.8874	12.8484	12.8316	12.908	12.8316	12.8508	21.9302	13.8418	12.8495	490.485	19.1671	13.0176	18.111
H2-Eb1	49.2998	68.5953	16.9071	50.4939	1205.25	214.378	684.535	73.1514	2236.61	15.6079	68.442	19.983	24.5528	40.6829	77.5888	20.6126	27.7693	19436	24.7187	17.4394	20.295
H2-Eb2	15.21	16.829	14.7773	21.341	67.7422	34.7873	28.2549	15.8358	26.5147	13.7406	29.2675	13.386	14.6673	40.7238	26.8564	15.6963	16.6464	479.243	14.2298	13.6683	20.2971
H2-K1	6963.36	447.702	335.299	2836.81	950.131	3117.9	3907.74	1671.61	8711.85	20.1269	26067.5	113.912	176.371	274.087	18228.8	274.139	9898.51	11413.9	1289.3	442.139	347.167
H2-Oa	12.8847	12.9282	12.8942	14.2424	186.667	85.0235	28.3722	123.694	56.1808	12.8818	38.2544	12.9083	12.9573	12.9886	98.6779	13.1044	12.9011	847.679	13.9395	12.8775	12.9084
H2-Ob	12.8847	13.1766	12.909	32.5126	197.04	97.1254	48.9808	125.73	42.8709	12.8818	42.8337	12.9604	12.9683	12.9886	208.533	13.1044	12.9011	4064.28	12.9011	12.8822	16.4229
H2-Q10	48.1959	20.2749	12.976	74.5076	14.4624	806.238	42.6095	18.1851	22.005	12.9542	62.4392	14.7922	15.4053	16.0676	45.8429	19.9982	5677.19	35.9427	59.4329	14.9115	13.6079
H2afx	77.2121	117.361	40.3158	42.3569	5038.17	295.888	148.64	59.6036	337.072	63.0299	230.63	150.631	123.704	86.8199	263.421	86.7199	74.4961	331.367	102.427	331.508	72.8011
H2afz	331.597	5454.79	162.744	769.299	717.414	414.338	629.698	152.96	327.19	194.541	372.783	2775.74	232.016	2919.89	218.565	103.497	303.659	166.724	385.53	275.116	569.773
Haao	14.0222	13.1563	14.1851	14.2584	121.025	232.862	64.995	98.3897	473.54	12.9761	52.2448	14.4858	12.9771	16.4672	47.7542	13.178	85.5493	406.156	13.1199	15.2122	100.125
Hagh	220.599	253.367	80.0651	184.093	5232.34	163.419	116.379	84.0659	343.221	110.265	97.9914	245.151	387.478	252.709	125.983	276.705	424.153	79.4096	69.32	84.4818	353.353
Hand2	12.8292	12.8498	12.8292	12.8502	12.8716	12.8316	12.8697	12.8292	12.8724	12.8267	12.8716	12.8697	12.8295	12.8778	12.8714	355.292	15.0042	12.8299	67.4993	19.9483	12.8707
Hapln1	12.8818	35.4349	526.89	19.2325	12.9041	12.8847	12.9005	12.9725	12.9077	38.5745	12.9077	24.7949	24.0569	753.029	12.9077	14.8457	12.8837	12.908	12.8839	147.794	22.2934
Has2	27.5909	16.3492	13.5113	13.7262	13.9467	33.1666	13.5314	13.0099	14.1989	12.9686	13.9751	13.6181	18.4776	15.5568	13.6571	18.3944	13.0343	14.3722	1183.71	146.775	13.349
Haus1	44.4032	467.331	46.6198	103.593	187.012	38.0211	66.7809	52.1722	60.1718	28.4913	48.7292	334.11	70.1077	213.856	77.8655	78.7956	56.5217	65.5974	46.3973	55.9611	190.733
Havcr2	18.0688	12.8974	16.8708	12.9005	27.2885	23.9652	27.1536	1065.13	99.5294	13.9467	12.9005	13.197	22.182	12.8939	27.7588	12.9056	14.2471	20.4541	17.2638	16.2646	23.5604
Hbq1b	12.8292	12.8308	12.8292	12.873	1529.32	22.4676	12.8507	12.8292	12.8724	13.0412	12.8721	12.8697	12.8719	12.8772	12.871	12.8563	12.8299	12.8721	12.8299	12.8274	29.6574
Hc	19.1835	12.8245	17.8603	12.8262	12.8257	27.8456	12.8257	12.8233	12.8257	13.5674	12.8257	14.8155	15.8169	23.6396	14.5598	12.8245	1327.4	12.8257	16.2235	16.8017	352.986
Hck	18.5491	28.5622	14.1848	12.8274	163.992	2298.32	540.032	783.365	2021.65	17.0092	31.8639	13.2036	15.6965	12.8274	28.6499	14.1685	14.9212	657.614	16.9138	20.0169	21.1072
Hcls1	39.3719	54.8428	12.8779	65.7077	264.446	3496.42	1005.09	617.133	1858	13.2352	1061.33	15.2457	21.9637	12.8836	1056.2	49.6556	22.1358	1817.54	41.0768	15.1367	74.9781
Hcst	15.966	26.0138	12.9824	16.5332	105.586	414.188	226.248	39.8614	377.063	12.9691	1033.39	13.7793	14.972	16.9701	430.216	15.183	13.1811	62.985	13.1525	12.9592	13.9275
Hdc	19.2528	12.8278	21.6812	32.1959	37.8596	4131.82	145.497	17.1221	66.0961	14.6721	12.8257	12.9537	15.5721	12.8274	21.1214	21.1503	24.2909	40.4617	16.6592	12.8233	1261.45
Hddc2	55.842	146.416	51.4647	177.188	66.9509	38.5217	46.1616	32.8351	78.8921	22.9615	113.259	138.413	37.7119	1162.26	226.905	35.4439	46.6128	73.0691	27.629	53.9376	231.606
Hebp1	131.25	63.5636	35.088	57.1829	2662.05	117.978	106.826	57.7104	64.701	20.8721	19.568	68.5193	103.775	246.658	19.7789	82.9669	97.7424	35.5597	72.9775	43.709	19.5131
Hecw1	13.0753	19.3066	24.9125	17.3971	16.093	15.1051	14.3921	22.7092	16.6774	619.842	16.0585	17.0951	17.1733	27.277	15.4853	15.3663	13.4967	13.3969	20.8929	14.0369	14.891
Heg1	480.087	25.9638	156.44	361.846	12.8847	40.4478	62.0848	40.8944	34.456	113.368	47.4197	34.2568	139.986	57.0774	40.4271	531.123	63.6004	159.896	2316.36	558.597	116.457
Hemgn	12.9091	12.9553	12.9087	13.0949	12075.4	35.3664	13.0735	12.9101	54.6515	12.9037	60.6255	12.9795	13.0366	13.8415	21.3233	12.9314	12.9597	28.3986	12.9537	13.1452	13.0365
Hepacam	14.5259	149.348	2915.61	23.2124	22.9321	17.2638	17.4088	52.7773	24.144	32.6565	22.6361	239.012	679.905	1675.85	20.928	15.1713	17.2495	18.4028	15.7077	15.1102	240.833
Hexb	184.291	470.749	256.326	253.723	109.992	359.831	1203.3	17948	1106.86	154.797	262.271	77.0899	232.625	667.154	262.052	176.666	109.293	602.666	401.441	244.975	662.933
Hfe2	12.8732	12.8786	12.8721	12.9056	12.9015	12.9008	12.9012	12.873	12.902	12.8721	12.9015	12.8847	12.8724	12.9112	12.9015	1066.36	116.357	12.8818	14.546	12.8959	12.8924
Hgfac	12.8697	12.8722	13.6382	12.8926	12.8839	12.8839	12.8835	12.8716	12.8843	12.8316	12.8853	12.8847	12.851	12.8935	15.5872	12.9051	733.24	12.8847	15.181	14.0491	18.7241
Hhatl	12.8703	19.4429	179.954	12.8916	12.8844	12.8736	12.8734	12.9001	12.8849	18.7135	12.8845	13.3082	87.7056	207.837	12.8843	781.527	12.8876	12.8721	20.11	13.7406	62.8911
Hhip	12.8844	26.725	31.3929	18.0106	12.9088	12.9011	12.9012	17.2594	12.9094	17.1807	12.9095	25.7874	826.612	108.87	12.9109	12.9992	14.3646	12.9099	17.9515	35.7187	16.3996
Hip1r	48.884	25.2507	260.903	144.577	109.526	589.765	34.3248	22.7675	33.4331	145.351	830.465	36.1584	577.018	209.931	139.682	142.666	589.918	1387.18	92.2067	46.58	67.9929
Hist1h2ab	12.8716	12.9268	12.8697	12.8928	1199.82	25.7133	77.6805	15.7867	33.7845	12.8707	30.8158	15.0286	13.2007	12.8935	24.9017	12.851	12.8864	17.803	12.8716	61.4454	27.5064
Hist1h2ac	17.5296	19.8607	16.958	12.8928	1830.31	107.591	103.552	15.8582	86.2677	13.552	51.6134	27.3012	22.328	23.7244	21.77	14.5654	15.2053	24.0055	17.2268	38.7577	37.2713
Hist1h2ak	16.4914	12.9268	12.8836	12.8928	1836.97	24.0449	80.771	19.926	96.7776	13.1659	25.4817	13.618	12.8931	12.8935	41.6567	12.9054	12.8864	17.8023	13.0101	153.912	28.0465
Hist1h2bc	503.694	296.829	86.4907	119.25	1079.45	574.305	163.859	123.564	75.9246	18.2813	65.1878	1006.21	532.504	335.845	50.8396	216.832	246.313	59.363	51.2363	717.865	2924.08
Hist1h4d	18.3737	492.13	15.6295	72.9955	143.202	27.4341	65.5013	120.588	58.6531	14.9391	44.6206	294.737	17.0887	379.609	27.085	15.9441	12.8233	22.897	20.5265	26.0699	62.7446
Hk3	26.2304	160.227	14.2704	13.4741	130.704	3482.45	498.709	350.823	687.948	23.0578	54.8751	15.1827	17.1093	12.8274	24.2265	16.0412	12.8245	33.0067	15.301	12.9868	18.6499
Hmbs	156.976	171.645	53.6461	106.62	5313.83	79.7313	102.344	60.1669	91.3288	67.1983	47.1226	128.521	178.147	67.2713	79.4807	175.462	177.054	53.6544	37.5633	88.0772	40.1742
Hmga2	22.1878	17.5893	12.9616	21.8313	12.9791	22.4147	23.4266	20.9827	12.9865	21.9736	13.0182	24.0665	13.0146	13.1441	13.0342	18.1725	23.5579	13.0103	32.6461	775.96	21.2086
Hmgb1	155.586	3664.99	419.753	1946.45	381.766	115.743	126.812	153.005	127.896	58.6429	380.569	2168.61	895.046	1882.35	171.41	93.7705	69.8808	188.413	124.615	489.634	9315.58
Hmgb2	38.88	3394.78	79.773	218.463	6095.27	1909.81	282.449	103.709	1292.2	21.6507	2048.15	1424.45	89.6851	749.661	684.428	66.5858	46.1768	377.007	72.2302	273.717	187.099
Hmgb3	47.7391	479.099	62.9615	86.7892	630.675	32.3768	30.1139	17.1959	51.9266	29.2841	49.2496	416.371	64.0215	172.476	50.1653	198.984	59.267	51.8142	20.3116	27.913	323.553
Hmgcs1	1158.14	1278.34	1599.43	311.344	80.4927	217.329	134.173	86.9563	145.18	254.353	124.765	1909.81	11584.6	2116.59	323.085	235.865	1106.13	158.206	332.637	1408.28	1655.4
Hmgn2	55.7881	12537	158.609	289.527	386.241	595.702	118.013	117.608	99.0466	89.9661	103.956	5980.22	682.462	2220.33	183.031	166.421	94.1694	311.831	86.1012	386.609	1103.37
Hmgn3	50.6211	814.539	494.91	361.758	38.5215	23.9575	26.5676	36.9571	39.0427	220.599	16.8117	776.004	236.686	1197.13	35.8931	20.9921	24.4591	91.857	55.3341	317.017	935.055
Hmha1	26.9366	48.1967	19.8397	13.0534	422.591	5150.35	2353.74	2780.49	3764.22	14.2435	3584.76	13.9073	20.0355	13.0704	5912.67	26.5038	24.8843	5928	44.7582	17.1416	37.171
Hmmr	34.0295	670.04	12.8233	14.2699	1129.99	99.3411	92.9137	17.556	78.6515	14.012	53.7345	481.963	12.8233	90.1822	32.3346	15.505	16.038	42.6001	17.4403	449.613	12.8233
Hmox1	846.37	408.579	19.5639	201.971	447.414	752.027	498.778	90.0953	700.674	16.4634	29.8588	92.5512	68.6495	81.582	35.6676	67.0591	642.368	34.8184	4320.45	1484.7	66.4383
Hnf4a	12.8292	12.8295	12.8292	12.8716	12.8703	12.8697	12.8299	12.8292	21.9026	12.8257	12.8703	12.8299	12.8279	12.872	12.8697	12.8278	1083.31	12.8292	13.2031	13.0262	12.8507
Hnmt	32.9565	74.8401	45.3851	18.5115	12.8233	214.183	54.6943	60.9035	25.7491	26.0544	12.8233	102.445	121.69	853.644	12.8233	37.4517	54.3506	12.8233	18.8843	23.2418	735.605
Hp	7319.42	12.8245	12.8257	15.6512	164.026	11413.9	321.619	20.8028	4893	12.8233	16.4892	12.8257	12.8257	12.8274	22.9964	14.7317	14174.1	26.4925	26.2035	21.6087	151.542
Hpd	14.7437	12.8292	12.8257	12.87	12.8316	12.8292	12.8292	12.8274	12.8507	12.8257	12.8316	12.8299	12.8257	23.6806	12.8299	12.8722	424.036	12.8697	12.8292	12.8257	12.8299
Hpgd	123.865	357.071	18.2068	13.0465	134.467	64.3757	63.9933	919.786	817.186	14.6102	35.1873	24.8528	25.3516	12.8295	12.8292	13.3266	134.162	20.4435	60.7349	19.0649	323.007
Hpgds	40.0469	162.6	23.7315	13.0228	54.2642	24.8584	54.9003	1509.71	12.9777	32.5285	29.6408	32.9695	21.1398	13.0584	31.8527	21.0634	17.7034	47.7375	12.9025	13.2348	310.255
Hpn	19.0958	12.8822	14.3703	12.871	38.2563	19.6986	57.6431	82.6449	31.9367	16.3999	12.8697	12.96	12.8286	90.5152	17.9793	28.7018	1041.23	20.0236	16.9746	17.3985	12.8299
Hpse	36.8974	12.851	12.8279	12.8299	53.6654	114.329	322.66	13.7238	1294.08	14.1639	45.8231	13.618	13.1753	12.8498	33.0785	15.4546	20.9256	185.728	29.8269	33.0697	23.4438
Hpx	18.0653	12.8292	21.018	16.6094	12.8316	18.3986	14.5385	14.3817	12.8507	12.8946	12.8507	12.8697	13.1351	12.8516	12.8308	13.1294	61231.8	12.8697	18.6185	18.4734	17.223
Hrc	14.3145	12.8567	12.8299	14.5114	12.8306	12.8292	12.8292	14.5284	12.8316	24.3906	12.8299	15.0828	12.8286	12.8516	12.8299	5539.16	12.8292	12.8697	44.2945	15.1389	17.2187
Hrct1	80.4626	21.8435	13.0815	334.517	15.525	15.0828	14.1893	13.2003	15.8451	12.9797	15.5191	22.486	15.188	18.2075	15.3211	28.296	13.3128	13.2732	23.9096	83.6428	14.5207
Hrg	12.8257	12.8292	12.8257	12.8292	12.8306	12.8292	12.8292	12.8257	12.8316	12.8257	12.8299	12.8292	12.8257	12.8516	12.8299	12.8274	945.213	12.8697	12.8292	12.8257	12.8299
Hrsp12	83.2024	301.361	140.723	165.879	74.2401	52.6203	48.297	46.3363	45.6851	28.4413	76.0779	603.401	156.967	3643.07	75.8972	40.0897	1404.25	89.6693	43.6642	91.6009	772.054
Hs6st2	21.3126	17.367	15.5004	18.1077	34.2046	14.229	17.7275	16.8871	16.8615	141.447	17.1401	19.414	19.2137	19.5992	17.1183	21.3659	13.5424	16.5273	29.9024	1141.3	141.348
Hsd11b1	163.03	34.5954	193.743	20.1228	86.1548	752.027	76.3668	17.1224	86.312	17.7663	909.788	24.1779	16.9686	1557.61	335.187	35.2343	1018.16	72.3482	430.895	70.5647	25.7666
Hsd17b13	12.8847	12.9061	12.8824	12.9691	12.9097	12.9104	12.902	12.8847	12.9102	12.8818	12.9095	12.9031	12.8827	12.9526	12.9102	13.0157	2307.13	15.9012	12.9001	12.8775	12.9056
Hsd17b2	12.8697	12.8712	12.8308	12.8778	12.8827	37.762	12.873	12.8697	12.8837	12.8299	12.8827	12.8728	12.8502	12.8929	12.882	12.8716	988.864	12.8711	12.8703	12.8299	12.8775
Hspa8	2298.32	5906.32	1292.32	3728.91	71.5637	362.889	701.102	4167.46	95.0451	702.432	342.566	4401.87	5401.93	1216.12	397.871	1740.09	5401.39	1381.57	2123.05	6601.83	12151
Hspb1	170.915	15.1665	13.0815	651.287	13.2733	17.5642	20.5378	18.9859	13.4232	12.9074	13.2951	16.6237	14.2358	13.9427	13.4057	866.621	1364.73	13.386	270.638	318.329	100.135
Hspb6	190.006	121.298	70.187	55.5954	468.157	46.6587	39.675	48.3051	48.6579	32.2645	47.238	155.048	41.9542	144.471	50.9015	2959.54	97.9409	39.5938	108.754	712.478	592.737
Hspb7	121.25	12.9611	12.9222	13.9288	13.1971	12.9795	13.0263	12.9568	13.2461	12.9074	13.2425	13.0344	13.2558	13.9465	13.2395	10865.1	12.9645	12.96	114.652	21.1656	13.0586
Hspb8	486.674	51.4036	135.499	135.874	13.1971	12.9795	13.1632	15.0953	13.2461	17.3869	13.2425	19.7742	18.6677	22.9304	13.334	2411.56	1298.52	13.3862	346.058	97.2494	842.702
Hspg2	3858.12	18.4568	70.3681	1029.96	30.7919	13.1716	28.8355	20.3116	13.1787	16.781	13.2033	19.8542	341.605	13.7811	13.2934	4515.84	59.0157	54.0323	10867.4	7002	61.4126
Htra1	467.064	88.3938	2542.43	199.474	13.1636	13.2034	14.8858	19.407	13.2023	26.8339	25.6394	153.664	97.3754	5794.82	13.3128	657.056	18.6222	13.3085	474.181	150.527	100.823
Htra3	1460.87	34.3192	78.2809	29.1608	13.206	13.4927	96.118	67.7595	13.2034	13.0922	22.6027	28.4099	95.2648	42.3189	13.2651	145.46	13.3878	13.3085	1879.11	46.9872	38.2193
Hvcn1	104.962	39.2341	50.3223	30.8468	311.463	1045.09	500.837	671.652	149.716	38.7196	256.965	20.3528	37.879	12.8233	551.385	38.1879	29.6996	4824.44	117.009	25.7233	29.1547
Icam2	31.0886	17.0094	12.9955	1889.98	104.751	161.619	382.095	20.1474	203.499	12.9015	251.753	17.2511	13.1659	13.3263	251.609	137.653	19.2746	344.392	27.3565	13.7133	12.9742
Icam4	12.9043	12.9309	12.9053	15.2317	1748.07	19.2508	16.7883	13.3359	20.2916	15.0175	15.2731	12.9687	13.0637	13.3301	15.5479	16.53	13.0695	19.7718	17.2524	16.413	12.9742
Icos	13.0989	14.5055	13.0587	16.7611	15.6961	19.928	47.2765	53.5412	15.7504	13.0139	241.293	13.7059	13.0198	17.794	467.386	14.9801	13.2784	26.3368	18.771	16.3794	14.2883
Id1	60.6537	103.271	83.8111	1068.55	25.3414	324.323	76.0423	16.4459	122.372	14.8058	29.1068	99.3792	19.7198	371.343	35.4958	213.971	33.9844	22.9212	163.132	152.003	159.799
Id2	81.8275	681.874	1139.4	963.238	130.788	449.381	1274.25	54.5901	570.53	31.3124	9445.45	652.754	101.956	6704.1	1085.34	73.9688	168.74	73.3369	449.381	262.975	1513.88
Id3	415.428	243.368	595.201	7645.76	143.796	52.6926	45.3894	19.1678	42.2193	15.0485	35.0281	489.985	56.4224	4625.24	524.254	217.071	216.955	321.074	1123.81	1539.84	1668.94
Id4	25.8092	64.569	531.015	39.2626	12.8292	12.8257	12.8292	19.84	12.8295	37.0055	12.8295	232.607	21.1226	1366.65	12.8299	15.3884	17.4886	12.8299	42.9227	83.8621	617.028
Idh3a	2510.16	1061.22	449.893	329.992	206.567	64.3932	221.036	80.8389	175.082	316.749	206.413	1114.27	423.762	579.439	330.249	2210.46	139.079	204.529	197.442	417.071	4747.72
Ier3	105.696	345.522	18.7656	1352.28	184.213	724.252	131.242	115.459	63.0422	27.6972	34.4512	41.7976	23.8499	16.0246	50.6999	233.259	469.885	24.2022	1557.01	239.335	224.013
Ifi203	94.1169	75.8302	15.4134	728.96	116.308	124.491	711.682	41.6283	1698.39	15.5943	3124.72	18.3376	13.1893	21.5331	1466.63	77.5053	22.0717	2104.15	1267.31	42.2985	104.983
Ifi204	392.62	57.9611	13.2897	93.7911	51.6604	320.364	446.662	124.32	1664.14	13.1675	262.747	15.2457	14.1718	21.5093	48.3506	20.0402	36.9422	35.8534	726.625	88.0658	29.4934
Ifi205	206.931	28.3114	13.2947	22.0372	91.8029	69.345	224.027	27.1554	2215.72	13.1418	1186.11	15.0662	13.1893	21.5144	162.115	16.3356	22.6864	37.8292	611.804	115.636	44.1047
Ifi27l2a	1662.83	141.932	18.5298	92.339	501.313	399.181	720.237	63.252	9632.16	13.9403	81.1643	25.739	24.8647	38.6367	1592.7	29.5484	28.7137	493.661	169.827	24.7996	82.869
Ifi30	112.934	85.2698	26.7899	26.6024	889.992	376.576	1273.28	312.431	7039.51	19.9913	72.1378	48.1178	33.4934	14.1165	220.859	61.957	133.228	1544.94	374.373	109.749	59.1026
Ifi47	50.9832	39.5556	13.1569	444.076	213.489	185.306	160.275	22.502	672.128	12.9074	652.225	13.5238	13.4394	14.0412	1052.44	20.4052	230.882	310.441	46.6254	28.9426	37.9468
Ifitm1	22.2079	19.7785	15.5261	44.6302	67.9165	1756.71	24.5293	17.948	117.278	13.1386	28.567	15.7633	14.0339	34.4421	37.6341	23.3817	18.2568	21.2069	48.6087	24.6847	41.1741
Ifitm2	759.454	600.692	39.3663	5253.49	103.899	1496.28	681.418	34.9658	1221.31	14.6713	38.4742	421.642	20.7078	167.063	45.6981	209.795	419.291	39.4227	1515.68	789.464	258.157
Ifitm3	896.007	438.304	38.297	13943.8	982.65	2038.18	1495.16	94.2814	9259.39	13.4558	48.6714	201.583	20.6897	152.651	49.2892	250.454	3433.87	59.032	3608.43	1553.3	1009.65
Ifitm6	16.1511	35.7492	15.9582	15.0163	67.9506	4320.45	268.892	19.4249	971.105	13.1039	20.7476	13.3998	15.3805	23.206	19.1709	15.2289	15.6853	19.6074	14.1915	14.0877	18.5359
Ifng	12.9974	13.1713	13.0055	13.1387	14.7312	15.0399	14.1455	12.9917	14.9506	12.9535	611.862	13.1616	12.9832	16.61	37.8955	13.2462	13.157	17.9903	13.1286	12.94	13.7746
Ift74	39.2155	370.65	150.271	91.8339	39.3269	23.1482	52.9327	72.3142	49.5874	143.497	82.8064	345.696	75.7032	467.809	50.8863	30.5037	42.8636	44.7582	48.5498	151.124	2448.76
Igdcc4	19.6242	173.147	1541.77	23.5884	12.8257	12.8257	16.5022	19.6234	12.8257	141.29	12.8257	235.626	20.9808	953.665	12.8262	151.265	12.8262	12.8257	189.544	63.4788	69.55
Igf1	605.058	398.286	16.517	47.3149	138.982	51.0882	844.406	39.5968	41.7328	66.6156	29.3681	32.8097	28.5634	15.751	14.8649	30.0649	696.256	23.5153	304.1	131.007	192.437
Igfbp1	12.8716	12.8779	12.871	14.8346	12.9001	12.8818	12.8824	12.8716	12.9008	12.8716	12.9005	12.8827	12.8712	12.9053	12.8851	12.8758	562.022	12.8732	12.8732	12.8507	12.8841
Igfbp2	19.7825	20.2337	68.7845	12.9028	12.9001	12.8821	12.8827	18.0632	12.9008	16.3516	12.9005	55.0898	26.604	124.185	12.8931	24.3887	396.611	12.9015	13.0182	2004.73	397.014
Igfbp4	1368.55	164.865	17.3627	617.3	81.6386	95.6471	471.956	60.1586	256.332	78.0935	12.9022	28.4317	43.319	37.7165	553.32	187.162	1385.31	35.6842	1359.48	5496.42	170.031
Igfbp5	613.623	292.431	2299.59	41.3847	12.9008	24.6665	14.3157	39.4121	12.9013	243.644	12.901	217.045	41.7411	585.139	12.902	956.534	12.8732	12.9018	1665.46	2966.35	210.488
Igfbp7	1636.11	39.0621	30.0724	2440.6	38.8193	35.3907	25.5686	26.4276	31.4396	30.0641	12.9022	45.3272	41.3474	153.733	43.5527	579.539	59.179	28.7805	6579.4	1598.12	62.7585
Igj	14.229	12.8504	13.2527	12.8299	157.748	78.2685	28.4567	12.8697	12.8292	15.1178	12.8299	13.2138	12.8299	12.8495	22.6207	12.8507	14.1194	212.3	12.8257	14.0031	12.8279
Igsf6	35.5671	141.013	24.2305	14.7504	111.782	2183.8	974.621	306.198	2204.42	40.4844	46.6883	12.9799	17.9449	13.2116	20.6936	23.4397	22.0074	44.2225	18.1578	13.6014	35.6525
Iigp1	200.366	37.6068	17.8521	666.884	12.8292	28.0521	50.3868	26.5545	35.9937	12.8257	35.113	14.4656	12.8292	12.8304	145.427	84.7203	1283.39	31.6456	459.829	28.2938	12.8274
Ikbke	52.5442	12.8924	147.92	12.8728	53.9942	116.854	391.42	32.7751	264.336	17.181	192.347	17.2322	17.1426	74.1276	881.228	21.015	503.139	80.8084	76.4208	57.1118	18.672
Ikzf1	45.1819	82.1766	18.9044	22.7315	363.467	1056.19	438.68	1584.33	708.678	16.2598	2948.76	17.8031	21.1748	30.2617	1871.33	20.9421	19.9158	2994.74	15.109	13.4232	85.9936
Ikzf3	16.8511	15.4449	14.1797	18.0725	68.3372	84.4238	38.1905	19.9892	21.4873	13.246	1421.5	15.3038	13.796	30.2742	390.402	17.1795	17.1293	1657.34	15.0855	13.6989	17.8347
Il10ra	18.5491	148.633	15.9501	12.8726	107.124	355.137	922.373	1925.48	1401.97	15.3978	570.829	12.9086	24.98	12.8772	210.611	19.4885	15.0502	902.976	12.8299	12.8274	66.3205
Il18r1	15.0613	16.5147	15.1293	16.0693	24.1025	160.333	26.3737	17.9328	26.8906	14.4802	1986.72	16.5343	14.4507	38.7627	342.841	16.8157	16.3017	37.7862	16.1345	22.4103	19.7991
Il18rap	12.9022	12.9065	12.9443	13.014	12.9791	626.684	24.8149	21.9641	12.9846	12.8847	396.948	12.9104	12.8933	13.144	48.4442	13.1087	12.9076	29.063	13.4946	33.0932	12.9478
Il1a	16.2607	14.9107	18.7119	12.9013	12.8854	18.3724	44.9117	859.836	12.901	13.8526	12.9008	16.9512	22.3793	12.9048	12.9015	14.1518	25.5755	12.9011	17.1605	12.8502	57.75
Il1b	15.2854	16.4704	12.8847	12.9017	46.6851	2316.36	45.0594	57.7125	130.644	12.8707	34.8242	12.9935	12.9013	12.9048	15.4184	13.4236	19.2861	31.9454	21.1711	12.8502	12.8833
Il1f9	12.9791	13.1034	12.9644	14.8016	14.3238	1687.83	13.734	14.9341	14.5352	12.9537	14.6717	13.0317	14.2788	15.9125	14.7985	13.1302	36.0416	17.9423	13.0958	12.9315	97.2251
Il1r1	389.881	23.4758	40.6348	811.325	172.776	30.1502	35.1135	36.1566	23.427	29.6282	18.068	23.1101	14.6388	67.7002	34.6238	51.9708	107.024	17.6121	1893.95	440.629	173.782
Il1r2	17.9921	22.2694	12.97	15.8843	14.3853	900.609	17.3039	16.9792	37.1873	13.0692	14.6749	13.6182	14.9477	15.6609	33.6307	13.2035	13.0345	14.6675	22.818	15.5425	13.3865
Il1rl1	16.9445	12.8837	12.8498	14.8092	125.066	74.5793	65.5983	80.4101	19.7626	12.8267	23.9277	12.8703	12.8703	12.8715	34.3707	12.8555	12.8504	20.036	18.218	5786.21	115.959
Il1rn	65.517	17.6056	12.9644	14.6027	42.2022	1502.52	52.3112	19.4668	139.95	12.9388	14.3614	13.3084	13.4533	15.4405	14.732	14.5385	172.263	19.9368	17.1783	422.463	34.3509
Il21r	15.4173	25.0917	13.4276	14.4817	170.808	76.8388	95.9203	552.111	61.9614	12.9481	119.059	13.2138	14.9392	15.0655	832.313	15.297	13.0099	799.33	13.0101	12.909	54.566
Il27ra	26.3482	20.5938	14.457	101.089	73.7734	35.8342	99.5338	20.9493	39.5964	14.7541	135.143	17.2921	17.5103	33.0583	1415.17	27.9543	19.3752	401.441	49.0377	18.9995	18.5202
Il28ra	14.9148	16.8345	15.1523	18.3671	36.0883	653.154	20.8734	18.5161	25.5587	14.3856	23.2522	15.8923	14.8928	36.4189	20.9893	47.8555	27.7893	39.2099	16.0326	17.9862	19.2396
Il2ra	20.2096	13.1562	13.4496	15.1115	14.6029	26.4214	23.7114	15.1715	14.8673	12.9724	48.6301	14.4858	13.6489	16.4624	522.553	19.9811	13.1503	52.4243	28.7355	12.9646	18.3057
Il2rb	13.0101	13.1562	13.1826	15.1156	34.3151	38.6052	24.5262	15.4209	14.87	12.9776	2833.7	13.618	13.6909	16.4624	1050.33	16.9276	17.4121	62.7502	17.7998	15.432	13.7144
Il2rg	29.3434	26.7569	13.8397	752.861	242.724	292.39	446.415	67.2303	2003.44	12.9738	1779.39	15.1671	15.0711	16.4327	5157.04	55.6618	23.298	2118.15	24.9844	18.8848	68.0714
Il33	24.9844	24.9186	171.285	33.9743	12.8854	12.9008	12.8828	17.6586	12.9001	18.2717	12.8854	44.2225	27.7741	769.091	12.9013	16.2338	37.0475	17.0519	449.216	20.9423	37.0059
Il6	13.5428	12.8257	12.8257	59.7533	12.8292	12.8292	17.7778	20.0325	12.8295	12.8233	12.8292	12.8257	12.8274	12.8304	12.8292	16.45	14.9012	12.8257	2060.53	103.477	12.8262
Il6ra	120.488	47.4134	19.8708	37.9452	146.143	961.048	802.684	1206.61	2647.33	19.1499	32.9097	17.6121	21.3249	20.1226	630.258	25.8872	88.9509	194.022	315.505	47.1405	79.575
Il7r	18.2281	12.9198	12.8824	12.9006	12.8847	40.6999	31.9785	255.099	12.8928	14.1247	295.99	12.9691	15.1021	12.8967	1888.51	12.8906	15.0712	50.2491	12.8721	12.8498	41.7373
Il9r	12.8711	12.8769	12.8703	12.8909	51.9047	18.618	12.9006	12.8716	12.8851	12.8697	12.9001	12.8818	12.8784	12.9041	12.9012	12.9088	12.8728	319.566	12.8728	13.0557	12.8831
Impact	309.906	761.237	738.176	731.376	56.1374	94.092	173.322	429.74	67.0723	808.734	262.044	753.483	338.892	1917.22	100.31	160.88	89.6584	85.6641	391.139	733.954	5852.25
Inpp5d	28.3224	73.9361	25.4189	149.687	278.218	1140.48	943.448	5514.13	882.322	22.3009	646.803	18.2251	30.9675	12.9441	462.581	43.224	16.3606	1159.76	24.7937	13.1144	145.351
Insc	15.525	15.0653	12.939	12.9813	12.9109	12.9022	12.903	12.9284	12.9388	13.082	12.9108	16.2725	483.547	12.9844	12.9152	13.077	46.0962	12.9008	14.5561	19.7494	12.9067
Insm1	12.9074	317.679	12.9863	13.5092	13.099	13.1501	12.9777	12.9268	13.1406	17.2358	13.1675	165.174	35.9675	161.776	13.0545	12.9568	13.2178	13.1617	12.9535	13.1402	12.999
Irf4	78.5742	17.8463	12.8299	12.8316	75.1302	67.6366	188.005	103.038	205.505	15.6691	12.8302	12.9795	13.7514	22.315	151.032	17.5091	12.8482	1029.1	20.6713	12.8257	12.8292
Irf5	22.5983	72.3703	17.4967	14.4549	156.941	343.725	889.781	1326.87	2794.84	15.7622	73.1101	13.618	19.3951	12.8501	52.3304	18.0137	274.165	919.423	48.9811	36.541	12.8292
Irf7	122.367	34.6464	22.6287	370.728	2539.06	840.149	439.699	61.2909	3603.06	19.8134	403.284	13.2138	16.5054	12.8501	268.659	32.6657	1737.11	176.322	188.739	42.8961	44.2141
Irf8	22.5564	50.2021	15.7907	49.5384	353.033	269.408	684.785	2059.57	3222.52	16.4247	6612.47	19.6074	21.2059	12.8501	191.672	36.9238	22.8689	3378.48	181.526	12.8257	59.374
Irs1	473.057	132.965	473.334	16.0539	12.8233	12.8233	17.9308	19.5389	12.8233	287.183	12.8233	192.269	99.977	122.061	12.8233	592.572	41.853	17.5508	246.825	1647.34	264.554
Irx2	25.9332	12.8233	12.8233	12.8233	12.8233	12.8233	12.8233	12.8233	12.8233	12.8233	12.8233	12.8233	12.8233	12.8233	12.8233	42.4376	14.8396	12.8233	15.8933	310.608	47.7247
Isg15	59.714	34.9877	19.3095	256.13	12763.9	393.383	87.7012	22.6052	946.498	17.2178	40.3218	16.9262	17.4386	12.8909	107.933	23.0562	635.348	47.6599	231.548	45.0651	19.6998
Isg20	103.63	16.4582	14.4789	103.827	18410.5	391.931	40.9132	29.7083	540.801	13.6581	121.404	18.6847	17.4907	12.8909	166.607	20.6743	68.7246	62.4259	132.553	64.0666	12.8722
Islr	214.543	20.17	39.1276	18.4629	12.8233	12.8233	12.8233	12.8233	12.8233	18.1231	12.8233	15.1746	18.1306	12.8245	12.8233	47.1345	12.8233	12.8233	1193.15	168.506	21.2973
Itga1	215.367	19.5816	40.7437	761.439	16.2606	23.2813	27.2892	17.7613	84.4768	17.2874	62.4125	28.8703	15.7651	18.4887	17.1999	180.233	50.4664	16.8962	184.782	771.596	14.6028
Itga11	175.556	12.8774	15.7748	18.7802	36.5697	12.8827	19.6241	16.732	12.8827	41.015	12.8824	16.2733	12.8843	12.8924	12.8839	22.9806	12.8783	12.8835	357.935	1109.53	55.1427
Itga4	27.6025	58.8856	29.4466	36.4961	794.126	778.716	1523.4	53.2349	2379.15	154.283	4268.75	59.418	80.8099	18.4888	1938.62	21.7047	25.8996	1932.62	84.2322	21.2932	178.961
Itga5	403.437	30.7064	42.5451	489.25	33.818	102.97	131.943	336.618	68.8198	133.399	156.051	14.4694	16.5656	18.4594	42.6285	557.078	300.702	21.7345	1785.75	761.855	39.9554
Itgal	16.4544	21.0798	14.4118	17.5349	56.1374	2378.56	89.7534	29.339	237.827	13.5593	519.064	14.9548	24.498	18.8366	269.74	22.7099	22.2733	521.657	19.1086	13.006	14.7665
Itgam	75.6543	101.03	42.5569	19.173	103.547	5401.39	3522.45	8584.94	2246.1	18.3893	4086.87	16.8511	70.9941	18.8488	48.2298	25.3439	21.6512	63.3318	21.7361	13.7072	76.0747
Itgax	21.052	19.7959	13.7345	16.3925	56.11	171.47	59.765	113.776	87.936	13.077	1211.71	14.9278	17.65	18.8204	17.3401	17.1406	18.5231	46.16	15.22	15.0118	14.7644
Itgb1bp2	14.0727	15.1003	13.4836	12.8233	45.8888	16.4529	17.5751	15.306	12.8233	16.8176	21.6291	15.5797	13.5689	12.8245	21.5534	1068.75	12.8233	25.9218	16.5704	20.4169	12.8233
Itgb1bp3	12.8233	12.8233	12.8233	12.8233	12.8233	12.8233	12.8233	12.8233	12.8233	14.6397	12.8233	12.8233	12.8233	35.0879	12.8233	251.784	12.8233	12.8233	14.6011	12.8233	12.8233
Itgb2	38.3113	92.6827	17.4595	16.8145	228.266	7039.51	4143.98	1584.42	4029.86	13.5211	2215.96	16.9079	28.8772	18.8982	2846.69	27.7111	27.041	738.636	32.9639	16.6244	61.7065
Itgb2l	12.8703	12.8726	12.871	17.1664	36.8056	2231.25	21.8083	12.9074	12.9005	12.8697	12.8853	12.8818	12.8704	12.8961	12.9001	12.8517	25.2793	18.7166	12.8299	12.8308	12.8824
Itgb5	644.423	125.459	349.141	43.4538	121.401	124.062	110.368	3171.61	335.179	20.0534	41.5698	46.0779	51.6338	281.389	35.303	694.482	443.058	23.1482	548.384	571.635	101.4
Itgb7	18.7989	16.3667	28.6002	18.2103	184.712	467.93	842.774	43.624	1999.09	17.4378	993.506	14.3351	37.8697	18.8563	2931.5	19.9964	16.1703	1045.09	23.3225	22.2457	14.7678
Itih1	12.8233	12.8233	12.8233	12.8233	12.8233	12.8233	12.8233	12.8233	12.8233	12.8233	12.8233	12.8233	12.8233	12.8233	12.8233	12.8233	1969.88	12.8233	12.8233	12.8233	12.8233
Itih2	19.0441	12.8245	15.8488	13.0186	12.8233	12.8233	12.8233	13.7208	12.8233	14.5043	12.8233	13.2032	12.8233	12.8233	12.8233	13.2667	2790.61	12.8233	43.5518	208.016	17.1198
Itih3	12.8233	200.196	1902.12	22.7874	12.8233	12.8233	12.8233	16.0189	12.8233	16.4037	12.8233	233.275	585.32	1418.59	12.8233	12.8233	4271.59	12.8233	16.5856	14.236	21.1888
Itih4	44.6747	12.8233	13.0702	12.8233	12.8233	12.8233	12.8233	12.8233	12.8233	12.8233	12.8233	12.8233	12.8233	12.8233	12.8233	19.8552	6939.89	12.8233	49.9047	14.236	12.8233
Itih5	2113.15	30.9333	426.065	822.901	12.8233	296.524	19.6383	16.2583	27.5836	18.7321	503.557	24.8017	50.8932	172.332	138.289	73.659	83.6668	68.6434	1436.01	20.2574	65.7804
Itk	12.8839	12.8941	12.9098	12.9834	31.1553	79.2325	22.377	12.9021	12.9443	14.5641	403.239	12.96	13.2893	12.9884	1333.55	21.7916	12.9008	33.2873	12.9008	12.8822	12.9084
Itm2a	59.6172	129.155	17.6234	7698.33	25.4993	23.209	22.8946	14.9144	25.5951	19.4805	186.045	117.816	91.072	52.8222	579.591	23.3525	12.8292	38.68	642.457	277.408	258.859
Itpr3	73.0691	15.4753	16.2084	189.834	122.998	90.6418	106.179	196.029	71.5276	20.5005	418.406	12.9022	17.3477	12.9051	497.644	76.955	97.275	1611.85	145.695	1018.93	12.8841
Itpripl2	377.276	18.1921	106.571	224.457	28.1672	756.089	980.87	304.216	356.74	14.8517	189.33	23.5845	16.1186	36.6529	58.4078	193.037	137.564	40.4478	2850.81	767.343	89.487
Jam3	61.7173	657.119	129.528	238.746	17.6121	23.5653	17.798	61.3831	18.2328	130.928	18.5924	393.961	2332.68	236.875	19.3999	122.987	21.2729	19.1944	206.897	130.153	221.431
Jph2	21.5162	12.8828	13.204	12.9059	12.9018	12.9022	12.8835	12.8839	12.9022	12.8719	12.9022	12.8847	12.9034	95.6866	12.9025	3750.86	15.1255	12.9028	129.85	45.4308	12.8928
Kalrn	42.2539	31.6828	634.701	58.9302	26.9808	24.7708	18.6668	101.973	12.9087	2915.73	34.3194	67.0932	23.3593	110.973	12.9102	135.199	139.889	33.3224	176.61	99.6477	490.315
Kank3	48.8445	23.8406	24.1811	1449.83	28.9555	31.6357	70.0979	57.9427	127.945	54.7478	37.7526	33.9982	25.6414	34.4757	39.5991	184.464	49.1386	35.1302	47.2585	30.5095	12.8507
Kazn	57.4451	26.5928	111.243	39.0514	19.1377	19.7919	20.4635	28.7257	19.7193	270.046	20.1004	36.4861	1172.04	25.9024	21.4953	41.2583	32.6739	20.0259	170.947	29.892	632.937
Kbtbd10	14.3714	12.8845	14.4706	12.8714	12.8703	12.8703	12.8716	14.3124	12.871	17.744	12.8703	13.9196	12.8719	12.876	12.87	501.754	21.7628	16.7799	16.9512	17.7353	25.8176
Kcna1	31.4233	17.7378	116.851	17.2019	12.9086	12.9008	12.9017	24.3829	12.9092	1165.31	12.9104	29.9454	1675.48	26.5952	12.9062	16.5399	12.8847	12.8847	47.6507	19.0008	172.876
Kcne1l	12.8835	350.651	30.2124	12.9059	12.9091	12.9011	12.9011	12.9229	12.9096	12.8777	12.9091	121.25	18.9554	54.4062	12.9089	13.0084	12.8847	12.9104	21.9675	12.9376	29.7921
Kcng2	15.0662	13.1502	12.9072	12.9357	12.908	21.2052	22.0592	17.1566	23.506	20.0692	12.9092	12.9099	12.9097	88.1423	12.9084	792.801	15.1148	12.9091	21.162	14.6475	12.9023
Kcnip3	21.687	1220.89	865.526	17.8015	24.9294	38.4565	16.5941	227.49	30.2753	341.462	275.162	424.773	21.125	226.376	20.6855	16.665	12.8233	20.11	34.0548	22.5346	80.6667
Kcnj10	14.2298	440.437	1877	21.6691	53.1449	48.2543	24.9351	77.0128	12.8233	32.9069	12.8233	213.681	2830.25	606.072	12.8233	12.8233	14.0554	18.3421	13.3998	12.8233	395.332
Kcnj11	12.8233	12.8233	15.9793	12.8233	12.8233	12.8233	12.8233	12.8233	12.8233	69.8743	12.8233	16.5704	12.8233	12.8233	12.8233	1127.69	12.8233	12.8233	12.8233	12.8233	25.2819
Kcnj5	12.8818	12.8916	12.8822	12.9107	12.9074	12.9104	12.9091	12.8818	12.9083	14.6156	12.9074	12.8844	12.9084	12.9418	12.9059	502.709	12.8839	12.9094	17.5158	12.8726	12.9023
Kcnk1	12.8835	29.401	1150.59	17.5376	12.9074	12.9031	12.9015	18.307	12.9079	205.837	12.9091	75.3951	25.0583	1272.25	12.909	15.5378	12.8839	12.9086	12.96	14.2975	444.027
Kcnk3	510.64	16.311	15.2549	12.9105	12.908	12.908	19.4545	12.909	12.9086	57.7074	12.9103	16.2925	15.4415	12.9388	12.9094	1921.54	12.9186	14.9148	21.8942	15.2556	18.8366
Kcnk6	23.4885	39.7605	12.907	48.2656	30.6552	121.994	283.212	514.392	121.564	15.9961	28.9054	12.9097	21.0262	12.9388	32.5035	25.8519	15.1361	42.3482	32.8297	20.5309	30.9703
Kcnn2	12.8818	100.074	557.998	16.3447	12.9074	12.8854	12.9001	14.9194	12.9083	238.357	12.9082	295.376	18.4717	1019.27	12.9059	66.7584	22.0824	12.8839	12.8839	12.9246	23.2718
Kcnn4	19.8396	12.9044	12.9037	12.9354	2756.92	69.9308	145.903	38.3902	100.22	12.8775	94.281	12.9097	13.9595	12.9421	1260.62	14.3194	14.3594	237.289	18.9092	30.8086	102.389
Kcnq2	13.4132	16.5519	26.9811	12.9092	12.908	12.9031	12.9008	18.5973	12.9077	880.857	12.9059	19.3083	16.9583	12.9386	12.9059	12.8778	12.8839	12.8835	12.8839	12.8726	17.6878
Kcnt1	15.6128	12.8963	136.066	12.9317	12.9037	12.8847	12.8847	24.715	12.9056	798.625	12.9057	14.4211	17.3243	248.366	12.9057	14.2189	12.8835	12.8831	16.9033	12.8716	48.376
Kctd14	16.922	64.1775	52.6016	12.8233	1165.91	31.3962	19.9466	15.0684	77.7732	13.0564	16.9625	47.3259	16.2838	102.689	25.9534	14.8931	14.056	147.595	12.8233	17.1961	50.1435
Kdr	46.8444	14.2091	16.6752	1703.24	12.9689	20.3082	20.9294	49.1013	12.9726	15.1002	12.9774	18.2605	24.4419	13.0813	12.9779	737.475	29.4286	21.4508	108.046	19.3701	34.6239
Kel	12.8854	12.9052	12.8847	12.9868	4131.82	22.1869	12.9096	12.9025	41.6128	12.8837	12.9761	12.9099	12.9349	13.0795	12.9796	12.8932	12.9031	12.9793	12.9031	12.884	12.9316
Kif18b	19.1927	36.6462	12.9086	12.9789	1300.59	53.6684	48.5322	13.5579	64.6274	12.8844	12.9792	49.0418	12.9611	13.0292	32.6844	17.1217	21.2299	31.4979	17.1513	181.306	12.9095
Kif1a	47.2825	434.813	6067.4	31.0077	16.9512	17.2921	18.3124	147.07	18.4658	6125.54	17.6259	1354.49	2814.45	1201.98	17.9992	30.3204	15.4117	17.4818	150.534	81.9595	316.328
Kif22	23.5596	663.548	25.3181	49.9261	2517.22	164.514	88.7238	25.8367	130.182	53.2984	50.3257	341.028	23.9746	111.339	69.7755	24.2952	46.7094	48.2199	17.2638	170.327	47.2695
Kif5a	24.2399	117.943	828.163	20.513	17.3053	24.6793	24.5152	224.751	43.8833	1838.99	18.1541	46.0779	310.858	26.0684	18.6226	21.091	24.84	26.3044	30.9881	31.0224	46.6883
Kif5c	20.3082	109.337	343.505	21.229	16.7811	17.2284	26.1169	70.8887	17.473	1501.51	40.9377	201.117	53.9036	20.3226	53.7855	19.5757	22.5872	17.4403	34.6369	23.5495	32.7884
Kif9	23.2132	25.2391	90.7318	15.2227	55.296	38.4479	43.1608	94.502	66.5235	66.4967	28.8235	19.8429	29.6862	43.2073	19.4108	15.5135	33.6531	48.7384	22.7928	24.1394	1209.17
Kifc1	19.789	62.8528	16.8719	25.0851	1471.89	94.7858	50.42	24.1816	73.6962	22.1027	22.0514	52.0546	28.496	26.4652	55.6766	21.6704	29.4876	39.5825	19.5633	64.235	23.2073
Kirrel	370.178	23.3021	52.9725	34.1803	12.8835	15.4639	16.5297	12.8845	12.8837	52.3185	12.8831	25.8853	13.6754	12.893	12.8835	40.1647	18.4863	12.8839	953.298	1034.1	65.6804
Kitl	126.044	247.626	20.2291	2947.51	13.5431	13.933	52.3964	70.6986	13.9586	102.833	13.933	349.397	21.0244	81.0139	14.2634	166.406	30.8872	17.2638	386.433	136.72	81.9297
Klf1	14.5845	15.2337	13.3948	12.9795	5532.58	22.9607	18.345	13.2055	62.512	12.9323	13.4065	13.0339	14.5693	14.1316	13.5076	13.1044	20.0583	15.748	12.9695	13.4068	13.0912
Klf2	76.8388	55.7325	19.3634	2154.69	157.837	2017.07	1394.72	128.217	1051	14.3556	3365.93	25.3414	23.7939	14.1316	888.656	273.021	23.1607	1407	302.197	271.499	37.4223
Klf4	149.559	77.6868	20.8293	2739.82	85.7521	125.066	331.987	114.157	2028.57	15.2576	694.626	41.1232	104.486	38.6003	35.257	348.688	26.2301	104.408	4272.01	454.223	147.591
Klhdc7a	442.95	21.8553	303.267	18.9383	16.9138	14.2322	14.6331	18.2494	17.2876	13.2984	17.1605	17.803	17.7364	342.62	17.0786	73.1575	97.0368	13.5943	13.6181	33.0705	94.9214
Klhl31	13.2138	13.803	14.5099	25.0903	31.8964	18.0331	14.4188	16.7671	17.9338	17.0128	16.9133	14.6183	13.1028	19.9542	20.4447	689.652	13.628	15.3883	19.6646	14.0621	376.047
Klhl4	19.0451	22.1444	20.03	516.92	13.9018	14.0063	13.162	14.9506	14.0447	29.088	146.353	20.2937	1153.09	15.2588	14.5145	18.5734	16.7524	14.232	20.3015	12.9095	56.3491
Klk6	12.908	12.9609	13.0814	12.9695	13.1714	12.9763	12.979	12.9846	13.2263	12.9043	13.2371	14.6848	403.895	13.9109	13.1608	12.9359	12.9602	12.9595	12.9595	13.6302	22.6486
Klra1	13.5428	14.764	13.4234	14.8529	19.1628	19.8089	15.6569	13.5206	19.7334	13.1385	1388.83	14.7423	13.416	25.953	21.116	14.5279	14.7012	24.434	13.1286	13.1322	16.7242
Klra10	12.9008	13.5838	12.8854	12.9037	12.9691	12.9595	12.9105	12.9005	12.9741	12.8833	540.951	12.9094	12.8924	13.0895	12.9894	13.0556	12.9036	12.9789	12.9031	12.8828	20.9866
Klra14	12.9008	13.6027	12.8851	12.9062	12.9693	12.9763	12.9099	12.9001	12.9742	12.8833	435.675	12.9037	12.8924	13.0896	12.979	12.8939	12.9036	15.2278	12.8827	12.8828	12.932
Klra18	12.9008	12.9054	12.8851	12.9037	12.9693	12.9791	12.9088	12.9001	12.9742	12.8837	1571.63	12.8818	12.8924	13.0897	12.9924	12.9062	12.9036	19.211	12.8827	20.1565	12.932
Klra21	12.8847	13.5476	12.8849	12.906	12.9691	12.9086	12.9095	12.9013	12.9729	12.8827	551.669	12.9037	12.8924	13.0865	12.9788	13.0555	12.9035	12.9787	12.9028	12.8827	12.9317
Klra23	12.8854	12.9052	12.8851	12.9036	12.9691	12.9086	12.909	12.9001	12.9729	12.8827	1339.59	12.8818	12.8924	13.0895	12.9745	12.9059	12.9035	12.9797	12.8827	12.8828	12.932
Klra3	13.6258	17.7589	13.3382	14.4858	19.1485	18.0052	17.8316	13.5318	19.7216	13.129	1003.87	13.0344	13.416	25.9297	27.8688	14.9638	14.678	23.6378	13.1286	13.1322	16.7239
Klra7	13.5431	18.0217	13.3383	14.4858	19.9453	20.0936	17.2432	13.7449	19.7369	13.1481	3630.93	14.0063	13.4198	25.9562	25.5921	13.9468	14.7012	29.1642	13.3862	13.1323	16.7259
Klra8	13.5429	19.8479	13.3377	14.4838	19.1338	18.2722	17.0779	13.5206	19.7143	13.1243	1828.64	14.7334	13.416	25.8985	21.8973	13.9232	14.6771	20.9115	13.1286	13.1322	16.7113
Klra9	13.6258	21.1752	13.3636	18.4808	19.1377	19.8383	15.831	13.7322	19.7193	13.129	3279.59	13.8177	13.416	25.9135	26.3333	18.2137	14.678	25.2001	14.1439	13.1322	42.3673
Klrb1a	12.9022	12.9072	12.901	12.9095	12.9974	13.0872	17.9885	13.2024	13.0016	12.9001	866.244	12.96	12.9013	13.1917	13.0345	13.1133	12.9083	20.2609	12.908	12.8841	12.9615
Klrb1b	12.9028	12.9072	12.901	13.0427	12.9974	22.4655	23.2258	15.6879	13.014	12.8928	1338.78	12.9535	13.0016	13.1917	17.8945	13.1533	12.9083	27.0627	12.908	12.8841	12.9615
Klrb1c	12.9022	12.9539	12.901	13.0427	29.777	28.7938	21.4481	13.3969	23.643	12.8853	4630.96	17.3548	12.9013	13.1917	31.3622	13.1533	12.9083	32.6478	12.908	12.8924	12.9615
Klrb1f	12.9028	12.9072	12.9013	13.0871	12.9974	31.672	16.0689	12.9092	102.745	12.8847	1673.81	12.96	12.9013	13.1918	60.9415	13.1539	12.9083	33.3913	12.8844	12.8924	42.2464
Klrd1	13.5428	14.7296	13.405	14.5764	19.8725	23.6134	22.3505	33.0725	19.6783	13.1289	3171.11	14.732	13.4159	25.6873	145.356	14.8884	14.6713	29.5064	13.1286	14.4032	16.6909
Klre1	13.5406	14.7248	13.4459	14.9268	19.0679	21.8288	18.3051	13.7398	19.6273	13.1748	2915.64	13.099	13.4158	25.615	37.8101	14.8803	14.671	25.1923	14.4624	13.1456	26.0493
Klrg1	13.618	21.7575	13.3935	19.6174	32.8297	19.6543	17.6583	14.026	19.5816	13.4242	746.164	14.6711	13.4107	25.4904	36.49	14.107	14.6692	20.6887	14.4656	14.0418	16.6113
Klri2	13.5006	14.6483	14.7953	19.5725	18.9587	19.8602	21.315	15.7144	20.0965	13.2001	2098.63	14.6709	13.3732	25.3523	21.2525	14.1093	14.6395	24.5177	13.5431	14.1595	16.5611
Klrk1	13.5206	17.2394	13.3176	16.1686	44.0528	38.1647	45.3275	16.3501	121.256	13.1385	3537.79	14.6701	13.3732	25.3072	61.0269	14.8644	14.6097	36.3121	14.4588	13.1925	19.7919
Kmo	12.9015	22.9804	12.8935	12.9946	56.1445	40.4881	30.0934	17.2613	107.952	12.8844	12.9937	12.9935	12.8928	13.0897	19.6207	13.3009	75.0605	802.174	12.9037	13.0492	12.9321
Kndc1	12.9102	106.635	186.816	15.9885	13.3998	12.9974	13.0263	36.0237	13.3767	703.787	13.453	85.2407	2852.87	14.2835	13.5953	13.0276	12.976	13.4064	12.9691	14.1864	95.3751
Kng1	20.2643	12.9064	12.9008	12.9086	12.9789	12.9799	13.006	13.0078	12.9821	12.8845	12.9893	12.9352	12.8933	13.1297	12.9691	12.896	4052.45	12.9037	12.9041	14.8861	12.9476
Kng2	53.8702	12.9064	12.9008	13.0138	12.9789	12.9849	12.9096	20.3845	12.9821	12.8847	12.9776	12.9352	12.8933	13.1297	12.9691	12.9083	1671.55	12.9037	12.9074	16.8791	12.9477
Kpna2	96.8038	1659.76	73.7383	107.57	90.5725	47.6599	66.6382	55.4994	46.1991	37.5955	20.939	625.55	124.82	124.34	88.5498	104.242	140.856	103.644	103.46	265.708	41.2132
Krt18	13.2493	13.9336	13.2443	20.7064	17.0874	21.2772	21.6389	15.2923	46.3942	13.0697	19.3659	14.6709	15.6689	20.832	20.0289	23.3909	13661.2	17.5945	17.2893	17.3934	1011.71
Krt8	12.8818	12.9047	12.8818	14.2322	12.908	14.5779	16.3952	12.8826	12.9099	12.8818	12.909	12.9018	12.8954	12.9423	12.9098	16.8624	14146.4	12.9091	17.4606	13.8248	173
LOC433374	13.0182	13.0954	57.3396	12.9475	12.9102	12.9018	12.9022	12.8854	12.9153	14.3449	12.9103	19.0568	12.9481	317.074	12.9091	13.1793	12.9001	12.9352	17.7881	14.025	12.9062
Lag3	20.2426	14.2306	15.0894	25.8963	38.2416	21.7126	22.2781	365.688	12.8507	15.2227	12.8697	15.21	23.1563	12.8511	62.3235	17.4259	14.1235	29.6583	31.8964	18.2137	27.7193
Lair1	18.7048	27.2598	304.542	12.8835	69.1359	202.929	255.27	2996.55	238.413	21.8402	302.814	26.4087	34.4482	249.783	65.9323	13.9134	12.8766	45.4476	12.8697	14.5801	75.7252
Lama2	238.275	110.832	890.464	23.9328	12.8233	12.8233	12.8233	15.9539	12.8233	48.139	12.8233	53.6104	160.272	430.27	12.8233	652.144	14.8189	12.8233	6153.29	135.747	238.455
Lama4	2286.78	14.2556	32.7395	601.59	12.8233	12.8233	12.8233	14.7425	12.8233	94.7329	12.8233	25.1309	22.6961	12.8233	12.8233	437.331	22.4744	12.8233	2220.92	1459.32	12.8233
Lamb1	2056.55	26.4148	20.253	443.277	12.8233	16.7078	12.8233	15.9343	12.8233	199.783	27.3439	125.214	19.75	60.0503	12.8233	799.57	24.0006	20.0631	4131.82	899.161	616.973
Lamb2	814.049	62.1555	456.461	395.581	12.8233	19.5076	36.1601	97.812	23.3448	17.6851	12.8233	90.6418	27.4288	80.9141	26.1817	2872.79	19.3811	16.5061	1554.67	970.497	101.88
Lamc1	2880.35	106.391	294.879	910.229	34.9522	36.186	113.191	125.954	31.1579	396.767	61.1967	126.637	756.463	40.0968	89.1671	943.543	843.303	200.552	8261.75	720.805	272.88
Laptm5	84.3559	2265.17	30.0198	22.2542	881.079	5928	9083.83	10636.3	14806.5	17.9477	3883.07	13.3703	214.495	13.9418	4155.51	49.1242	16.9351	6323.08	34.4357	14.7789	461.283
Lat	18.5078	12.9485	14.5787	13.029	40.6619	59.5326	28.0425	19.6314	38.0011	16.1944	402.521	13.0315	13.0218	13.1511	4401.87	13.8315	13.0281	46.6726	15.7814	14.9122	12.9557
Lax1	14.1944	12.8257	12.8257	13.0524	176.849	34.9109	23.9009	12.8257	12.8292	13.5639	1082	12.8292	12.8274	12.8495	504.114	12.8507	12.8278	864.2	12.8257	12.8477	12.8279
Lbp	302.499	14.6443	16.8608	34.1848	48.6087	524.839	389.334	16.2179	79.6739	13.4031	13.0035	16.0148	14.1525	76.032	32.072	18.7697	274.771	19.2242	187.526	120.363	1237.53
Lcat	21.5715	40.0566	622.347	60.1776	45.969	12.8233	20.2768	23.8501	12.8233	16.5074	15.0167	26.2035	39.3609	592.943	25.0841	25.8125	472.346	20.0084	42.8786	22.9261	12.8233
Lck	12.9041	14.6817	14.5331	22.8175	161.959	61.4024	23.5689	21.3951	13.0019	16.4936	2304.9	18.8322	13.5856	13.151	4775.95	15.3266	15.3679	310.312	14.0222	14.1639	32.3568
Lcn2	66.7172	12.8233	12.8233	12.8257	209.836	23863.8	32.4876	23.6262	86.2556	12.8233	21.6867	12.8233	12.8257	12.8257	12.8257	20.5207	7059.73	18.6195	31.2418	24.4911	12.8245
Lcp1	181.613	571.41	18.1193	666.008	251.995	16679.9	2169.41	1803.74	3101.48	18.6587	6417.66	18.3345	139.949	12.8257	4110.56	57.4147	2008.67	3783.78	25.7698	19.3937	199.424
Lcp2	25.5417	190.325	18.1154	64.3927	63.8717	1394.15	999.351	1864.46	691.166	18.6974	586.55	22.4147	18.0038	12.8257	1502.91	14.3651	20.7115	46.0615	21.0158	12.8233	83.4295
Ldb3	32.8415	12.8233	20.5623	14.7262	12.8233	12.8233	12.8233	13.7385	12.8233	48.6673	12.8233	19.3689	176.935	74.0059	12.8233	5096.95	16.1198	12.8233	55.3733	24.6955	12.8233
Ldhb	1263.95	1448.67	1445.02	102.832	26.0479	41.2042	43.2234	817.976	108.364	474.861	16.4256	2411.63	603.575	7827.41	114.485	6292.1	12.8859	16.9344	103.815	134.643	10224.4
Lect1	14.9278	26.1962	28.2236	19.9239	24.5405	17.3129	17.8018	18.0373	25.9295	15.9777	24.607	19.8397	91.6579	55.8386	21.977	16.9309	17.8774	16.1387	34.2645	355.631	94.9866
Lef1	12.8299	36.0016	45.9529	149.777	26.9911	24.9896	17.5233	14.6446	12.8775	14.1944	359.49	38.8616	16.8078	12.8836	801.659	13.8578	12.8697	52.5127	14.0063	23.9577	60.4301
Leprel1	24.6625	18.9719	23.4178	21.2848	12.9011	12.9015	12.9005	366.35	12.9017	23.8514	12.9015	13.3085	20.9163	12.9061	12.9022	25.8714	12.8818	12.9025	129.831	27.4578	55.2393
Lgals1	3106.11	397.636	35.3484	71.716	151.857	197.921	321.26	24.2129	1836.05	14.8348	3199.54	633.95	21.2335	382.463	1346.25	706.388	79.3012	155.048	1013.55	2324.44	562.952
Lgals12	691.895	12.8937	56.1985	12.8938	12.9025	12.8839	12.8839	12.9039	12.903	12.9336	12.9025	13.4928	12.9066	135.317	12.9023	12.9614	12.8827	12.8821	14.5522	14.0865	12.8933
Lgals3	1402.89	46.6808	15.6071	19.8566	209.412	3130.08	3659.49	25.648	10605.8	12.8704	202.993	37.7115	15.5653	88.6188	65.066	18.7047	175.551	78.0871	402.655	363.288	264.035
Lgi3	17.1151	17.7275	98.0578	14.3881	12.8316	12.8292	12.8299	20.2365	12.8697	144.716	12.8507	25.2589	5420.14	12.8709	12.8697	29.1923	16.2546	12.8697	20.2732	18.7133	12.8299
Lgi4	42.6542	46.7168	691.687	16.7132	12.8316	12.8703	20.4854	45.9974	12.8697	15.9278	12.87	47.6886	25.8865	636.397	12.8703	19.9361	12.8504	12.8697	65.4029	50.4419	36.1774
Lgmn	354.076	2002.76	294.379	501.729	209.193	160.734	2329	7361.95	744.29	161.276	41.566	328.282	3322.35	359.487	80.2327	641.686	446.996	480.355	418.531	356.976	689.596
Lhb	12.9018	14.9166	12.9775	12.9095	12.9849	12.9099	12.9107	13.0332	13.0019	12.9018	12.9824	13.0344	12.9461	13.1965	12.9821	14.3095	12.9086	12.908	12.9086	12.8922	132.723
Lhfp	122.574	80.7034	82.1478	50.5394	12.8716	12.8728	12.87	12.8724	12.8716	38.6509	12.8716	170.001	47.1344	352.171	17.7239	274.001	22.8996	12.8721	1270.29	2121.55	72.3812
Lhx2	13.2783	460.072	615.875	13.6545	12.9037	12.9025	12.9023	14.92	12.9079	30.0604	12.908	514.362	15.6335	863.28	15.9159	13.3405	12.9076	12.908	15.5617	19.8545	59.0697
Lilra6	16.6304	22.5103	13.0157	14.7641	51.2159	1178.28	145.876	26.2536	707.878	12.9799	19.4376	13.9368	14.1472	18.3963	16.6025	16.7048	15.891	67.7545	13.3082	12.97	14.5595
Lilrb3	41.8955	68.0121	14.1257	17.1926	159.579	3934.03	2131.71	265.386	3575.94	13.1361	31.7268	19.4945	22.963	18.3822	31.0824	20.4489	18.536	758.472	15.8508	12.9885	59.6848
Lilrb4	132.733	62.1738	14.7626	14.1818	94.8491	4724.21	1874.83	351.542	3357.42	13.0249	171.484	14.229	16.2628	18.3815	118.634	21.9608	20.7333	67.1976	22.9491	16.1561	190.878
Limd2	119.217	117.335	41.3177	121.712	417.542	3608.43	732.668	626.549	2596.78	104.839	950.243	92.8213	46.8526	160.314	3782.11	72.3081	156.071	2576.12	71.1197	115.533	20.4602
Lims2	120.027	30.1584	20.6031	873.613	15.1759	14.7334	26.4973	17.2881	15.4246	15.4064	15.3725	31.9221	914.923	82.5659	15.9657	744.195	541.792	15.5797	192.91	30.3376	24.4164
Lipe	4789.69	27.7235	113.698	180.575	148.004	566.549	118.57	480.29	578.317	68.7912	58.2688	38.1436	117.785	32.4571	91.8669	217.798	65.7604	180.011	46.5582	27.4659	38.1751
Lix1	17.1783	966.1	255.527	28.8774	12.9102	12.9102	14.3617	22.2472	12.9185	38.4242	12.9108	925.528	23.4298	1272.1	14.625	29.2648	14.3292	14.9548	17.4879	19.2674	144.448
Lmo2	76.9916	38.6317	15.0531	851.986	3895.49	427.448	698.202	421.827	1224.97	36.9514	29.2191	23.2507	46.3495	13.1854	24.242	113.358	25.3992	831.709	87.708	13.1086	111.883
Lmo7	52.3626	19.5515	31.4607	456.508	12.9799	14.6711	19.6552	19.9797	12.9937	743.21	13.0261	21.153	51.1024	13.1899	13.0345	2132.94	233.215	27.0588	76.4551	375.338	183.726
Lmod2	12.8292	12.8498	12.8495	12.8507	12.8716	12.8697	12.8697	12.8713	12.8721	12.8292	12.8716	12.8703	12.8295	12.8778	12.8714	3813.83	12.8308	12.8299	26.2518	13.3893	12.8707
Lmod3	12.8299	12.8498	12.8498	12.8726	12.8716	12.8697	12.8697	12.8732	12.8721	13.1135	12.8719	12.8697	12.851	12.8778	12.873	1105.72	12.8308	12.8299	14.2978	13.6523	35.6935
Lox	2113.15	12.9767	12.929	22.8575	12.9974	13.0181	13.0157	14.1884	13.0208	12.9022	13.0145	12.9689	20.4184	13.2554	13.068	68.0806	17.8161	13.0315	1091.67	15972.7	12.9679
Loxl1	362.889	14.2688	31.1533	17.4594	12.8257	12.8257	12.8233	12.8233	12.8257	12.8233	12.8257	18.7716	14.9191	62.7491	12.8257	80.3727	12.8245	18.6224	1113.19	1473.17	48.9691
Loxl2	707.23	12.8274	19.4934	19.3295	12.8257	21.543	36.8059	16.3091	12.8257	19.4531	12.8257	21.5549	16.4528	12.8257	12.8257	164.811	472.478	20.4256	3467.15	323.892	24.4441
Loxl4	43.4002	12.8233	18.1838	27.9546	12.8257	17.8254	12.8233	23.2177	12.8257	21.6739	12.8257	13.3998	17.1926	12.8262	12.8257	27.1145	242.928	19.0696	197.256	935.279	22.0299
Lpar1	103.547	141.955	61.6021	36.7255	19.1338	19.211	46.0124	21.1745	18.8656	21.5205	20.0562	72.4364	2987.89	249.843	18.6321	35.801	14.4298	19.2045	837.362	345.953	1038.11
Lpcat2	19.3689	26.4706	21.8377	20.6323	87.7845	1377.89	399.488	3078.6	254.855	23.4957	47.0242	15.907	132.229	12.8233	12.8233	15.6658	14.8376	54.9255	24.7473	35.6678	117.491
Lpl	28935.7	37.6766	12.9793	29.6307	66.6582	89.4527	3078.6	81.595	986.337	81.6362	33.3367	52.8357	14.3292	116.708	13.0678	16679.9	21.1795	22.3127	2833.35	71.874	79.2064
Lrg1	1515.68	13	13.182	145.53	49.6067	6653.6	510.772	13.7086	42.698	13.1078	13.66	13.0346	13.1759	14.456	13.9201	209.039	1255.27	13.8177	17.8913	15.742	18.7049
Lrmp	20.1143	36.4886	13.6683	20.6573	249.102	663.895	499.085	346.816	727.39	15.5422	672.069	14.7656	22.1469	14.5606	590.627	31.8339	18.1466	1450.21	14.1914	12.9063	163.33
Lrp1	5881.66	379.564	8334.93	31.6385	240.76	181.481	3953.86	11360.1	2398.82	2141.62	36.5768	294.991	71.6096	225.723	32.476	575.487	1080.84	42.194	13660.2	6009.88	197.169
Lrp1b	12.9008	18.9212	392.69	13.3482	12.9797	12.9097	12.9231	21.3848	12.9913	2224.48	12.9795	21.7677	323.771	76.4962	12.9741	16.7449	13.0291	12.9074	12.908	13.1009	31.8292
Lrp4	28.3986	293.76	2149.72	46.6142	33.3099	86.7387	58.4871	172.794	42.1803	42.4705	16.067	95.6171	134.281	358.836	27.8051	124.09	60.5397	20.2548	140.045	50.8169	42.5843
Lrrc10	12.8299	12.851	12.8299	12.876	12.8732	12.8703	12.8707	12.8316	12.8732	12.8299	12.8732	12.8697	12.8295	12.8789	12.8724	1208.51	12.8697	12.8697	13.0101	12.8292	12.8719
Lrrc14b	42.2744	39.6738	50.774	39.9122	12.9088	20.8572	12.909	29.0112	12.9094	53.38	12.9092	32.4035	61.8367	12.9444	18.2338	896.891	64.8813	12.9104	31.0848	17.3579	128.273
Lrrc15	19.6102	12.851	12.8299	12.8828	12.8732	12.8732	12.8703	12.8507	12.8732	12.8292	12.8732	12.8716	12.8516	12.8789	12.8724	362.707	21.5809	12.8818	22.6379	21.531	12.8719
Lrrc2	12.9104	13.1509	45.2926	16.9829	13.3624	16.5051	17.0331	14.9961	13.3278	16.0201	13.5058	16.1511	13.3224	21.2784	13.5058	1040.15	18.0493	17.3184	18.5641	14.2366	33.511
Lrrc25	17.2714	72.7707	12.871	12.8775	75.5092	569.57	523.793	123.854	563.482	12.8292	12.8775	12.8818	14.9723	12.8789	12.8818	13.4099	18.372	62.5843	13.8161	12.8292	20.1284
Lrrc3	28.3121	20.1458	15.2234	17.4141	13.2493	19.6681	19.8891	666.149	13.3278	50.7858	13.2423	19.1944	20.9307	22.3817	13.3001	16.7071	114.506	13.4928	36.6818	16.9164	13.0816
Lrrc32	298.065	12.8718	16.1957	318.133	12.8728	29.9417	29.5149	12.8818	12.8732	21.8411	12.8732	18.4797	13.2365	54.8051	41.7558	80.4427	40.3381	20.0631	2450.33	951.884	12.8716
Lrrc33	47.3781	364.904	52.4437	245.511	249.229	747.966	1565.56	1219.32	2174.3	24.0375	271.831	17.905	23.6709	21.1238	499.18	32.0889	20.3021	973.012	25.7456	15.6078	60.0124
Lrrc46	14.7968	21.8456	14.5047	12.8828	12.8818	31.1824	12.8779	12.8827	12.8829	13.9794	12.8827	20.6461	18.2683	12.8915	12.8824	13.0578	22.9623	12.8827	13.126	17.9727	454.988
Lrrc7	12.9099	20.6532	120.295	14.8343	13.2732	12.9935	13.0039	22.7434	13.347	1221.69	13.2638	47.0038	13.7287	26.9995	13.1777	12.9399	12.9694	12.9689	12.9697	15.7085	13.0914
Lrrc9	20.4867	17.9434	460.32	16.4338	13.2631	13.317	20.1505	38.112	13.347	31.7448	13.4066	21.9802	14.1536	542.423	13.392	14.1607	19.6179	12.9689	13.5431	15.4962	493.537
Lrriq1	12.9018	14.5353	73.3599	13.0082	12.9763	12.9088	12.9094	13.1119	12.9795	30.2853	12.9762	22.0186	13.0353	13.1289	12.9729	12.896	12.9074	12.9037	12.8835	18.9915	837.297
Lrrn1	17.3064	275.274	265.984	16.1145	13.2031	12.9795	12.9894	18.3227	13.2478	278.185	13.2558	199.454	2000.98	154.02	13.2556	15.7709	12.9687	13.2819	12.9689	12.9028	69.5314
Lrrtm4	12.9789	334.348	39.7904	15.3458	14.6711	13.2217	13.4395	15.5359	14.9303	1117.39	14.6993	194.264	17.7879	68.3732	14.2904	14.1973	13.1558	13.1262	12.9532	12.9648	13.7567
Lrtm1	16.6349	17.7438	37.2841	14.4451	29.8752	13.905	14.4747	15.9894	31.6235	319.332	14.0046	13.6071	12.9351	14.8586	25.7995	2419.87	18.1913	12.9849	36.153	21.1079	38.6702
Lsamp	14.5561	135.851	2490.01	21.4067	22.8575	16.8564	17.35	28.2829	24.0148	386.014	22.5383	189.156	244.379	1861.09	20.8493	17.386	15.8632	17.5383	75.6891	13.449	45.1987
Lsp1	51.4262	16.7061	28.8572	19.78	382.391	7500.14	1463.15	298.844	6096.41	15.7594	2077.62	21.6075	14.8277	68.8903	3211.21	203.542	16.1834	3016.11	495.477	669.843	23.2346
Lsr	23.5873	15.958	38.454	302.191	28.4099	56.8116	102.779	74.8591	361.578	35.472	29.2376	20.2433	19.7153	13.2117	38.2755	31.3999	1988.46	32.0235	26.8381	16.7977	65.6427
Lst1	17.8558	113.186	13.1154	15.5729	220.805	1760.22	168.043	129.707	3456.94	15.5268	53.1524	13.0341	20.2225	13.9032	56.4157	15.7242	13.4325	38.1386	22.4793	15.5925	74.9064
Lta	13.0339	12.9196	12.9698	13.2035	76.8723	31.3702	13.102	12.9883	13.0263	12.903	37.1739	12.9542	16.8468	13.2116	259.215	14.6272	12.9087	171.338	15.6283	13.405	17.0735
Ltb	12.9031	12.9196	12.9285	13.1138	368.717	2378.56	47.7066	28.5698	101.296	12.9013	85.2526	12.9426	13.1126	13.2116	1840.21	13.9966	20.2016	2482.59	12.9086	13.1968	12.965
Ltb4r1	12.9535	13.0912	12.9087	22.542	64.8585	1109.35	34.024	15.5133	965.016	12.9037	21.2383	12.9974	13.0405	13.8486	32.9852	14.8531	17.9923	13.317	18.4046	17.6485	13.0425
Ltbp2	214.44	14.2051	15.2214	45.967	32.4374	19.2286	19.4098	17.1716	18.3147	18.6739	18.6909	17.9447	18.6586	107.726	19.4706	30.4871	17.9546	18.618	282.243	2965.71	15.8463
Ltbp4	132.971	29.1023	36.0247	1489.66	17.8119	19.1671	22.2301	21.8772	18.3127	208.656	32.2926	58.6383	43.0213	34.9376	20.5423	944.488	21.1205	36.0883	8908.27	98.4008	31.158
Ltf	12.9022	12.9155	12.9535	13.2035	211.2	28935.7	22.7187	35.5901	59.8629	12.8928	13.0739	12.9542	13.4822	13.2082	13.0679	12.9096	13.0401	25.6958	12.9091	13.1968	17.7134
Lum	148.631	15.686	12.957	22.2688	12.9935	12.9789	12.9535	13.034	13.0077	18.6499	13.0058	13.0348	13.1044	13.2052	13.0264	162.953	13.04	12.908	5582.56	259.369	12.9649
Luzp2	13.6178	130.627	2459.63	25.12	19.3053	15.2237	15.583	35.9071	19.9093	178.75	19.691	77.3185	965.162	1696.3	17.9443	16.0243	14.7495	14.537	14.7586	45.5787	101.743
Lxn	70.0904	647.177	859.022	414.332	60.7134	80.7515	103.486	98.0958	170.039	39.5644	68.6941	690.377	21.8549	5701.65	80.9177	38.4617	31.7008	37.49	51.4091	686.185	308.484
Ly6a	834.723	35.8795	15.3974	14347.7	190.157	176.763	44.4721	32.386	103.474	13.9077	42.0224	63.1703	21.9934	16.3782	765.388	106.818	36.876	1414.35	594.229	1535.51	17.1268
Ly6c1	450.583	106.06	14.7101	17657.7	28.9077	285.88	22.2673	14.6557	467.09	12.8835	62.7172	89.3877	18.5498	12.9846	190.171	301.786	23.3549	27.2819	346.585	117.555	16.4186
Ly6c2	31.4904	15.5055	12.8931	1353.86	220.221	3915.54	24.1903	15.261	21252.4	12.8818	919.805	13.2136	12.9568	38.707	217.109	20.4398	12.94	121.301	21.2849	17.0679	12.9067
Ly6d	18.8848	15.6054	12.9776	16.3845	392.076	163.132	27.906	13.0394	15.179	12.9642	15.3215	13.5431	14.7245	16.3787	40.337	15.702	34.9254	4512.87	13.934	12.9643	13.7063
Ly6e	1928.78	1307.22	41.7309	24965.7	3143.34	2094.02	2275.92	3011.41	33101.2	212.717	2489.32	524.208	105.708	120.687	5937.49	684.053	4287.63	15265.5	747.495	310.39	326.829
Ly86	19.205	395.811	15.399	14.6764	285.801	163.24	930.395	1704.74	4443.11	14.7472	37.9986	15.1502	31.934	16.4221	31.6482	16.7467	14.8015	2310.15	13.1199	12.9351	98.0156
Lyl1	20.3528	22.934	18.3499	93.1273	2021.08	633.95	476.196	810.1	1626.51	15.3154	14.7335	19.6712	17.317	15.215	36.6616	31.9111	17.0602	728.601	19.1383	14.9264	24.1438
Lyz1	26.5962	135.397	14.1088	20.2828	163.03	5829.41	4361.16	91.6143	7141.39	13.3746	31.7304	16.3096	14.0043	25.2053	20.2089	27.9001	19.5184	20.9942	23.5031	13.1888	20.1815
Lyz2	737.745	4575.55	18.0237	24.4584	687.436	20504.8	27501.6	725.833	157602	15.7369	72.5543	16.3096	29.5728	25.2208	62.9659	158.398	23.0705	171.132	178.173	30.8345	1117.81
Mafb	112.445	71.862	23.6792	60.46	167.663	103.844	1908.84	1563.14	329.766	25.8357	55.0887	27.0944	31.841	29.5089	23.8256	89.9381	41.1251	22.6557	218.045	86.5683	99.6987
Maff	110.271	19.0862	23.5239	86.5099	21.4389	42.7335	24.5881	41.1407	29.4711	22.1302	95.218	17.3388	22.077	29.5213	43.6035	76.6019	293.987	28.7406	1113.19	149.19	23.9826
Mag	15.5797	78.1388	88.069	13.1156	30.1629	51.1766	27.6808	133.657	30.9591	14.9669	150.02	78.8806	22931.9	224.449	13.0976	13.1261	13.0864	13.1199	12.9102	14.4776	23.98
Mal	18.3737	167.417	117.186	211.319	13.0315	12.9424	12.9566	28.2884	13.0473	19.2335	13.025	267.83	26067.5	605.007	12.9948	57.8806	12.9098	13.0751	25.1904	16.477	39.6929
Map3k15	500.692	208.897	229.219	169.903	46.1313	608.794	156.292	130.961	209.164	115.589	29.8709	232.394	194.829	611.601	56.8802	2071.63	200.553	63.2157	219.948	24.2055	770.491
Map4k1	22.9614	21.8701	19.2624	25.248	156.607	149.952	73.7655	46.972	454.474	21.9062	206.598	19.4146	26.3717	30.6519	572.258	18.162	19.0888	2258.31	15.7525	20.8913	20.6332
Map6d1	14.5561	24.2036	49.4075	16.1714	18.9227	18.2553	16.4212	26.1716	19.4909	114.32	18.7633	28.8668	1813.73	99.7542	19.2196	17.6581	17.9911	19.8411	15.8222	16.3125	18.8841
Mapk10	15.7051	170.569	969.392	19.7559	17.3588	14.6711	15.0601	33.3975	17.8677	1893.95	18.2559	134.196	101.547	249.154	17.2537	171.684	14.0456	13.9073	16.6592	13.1021	716.33
Mapk13	14.494	14.0959	13.7031	19.4135	34.4823	1247.13	19.8743	15.0638	40.4288	13.1452	18.3339	15.2237	13.2037	21.7469	18.406	22.0896	20.4045	20.3547	17.2897	140.062	18.2292
Mapk8ip1	42.6086	64.8137	338.696	22.4922	12.8257	12.8257	20.6724	45.8067	12.8257	269.344	12.8257	94.9652	4249.69	141.807	19.8375	35.6994	31.3564	12.8257	84.4092	47.3049	101.04
Marcks	583.402	13903.3	231.748	1743.89	216.65	1128.69	582.06	1187.43	1865.53	193.043	104.904	6806.93	2874.14	1026.15	86.0699	145.959	36.5897	743.38	888.677	2367.23	2401.77
Marco	21.3126	13.3107	13.0035	13.3083	42.8234	89.259	569.504	13.4305	16.17	12.9775	15.6497	13.6178	13.0065	17.5592	15.6106	14.3002	24.9572	15.8738	14.6709	12.9776	14.2011
Mat1a	13.0097	13.2464	12.9841	15.5845	15.0399	13.3172	13.4635	13.0099	15.4906	12.9602	15.0397	13.2031	12.994	17.2114	14.8111	13.2559	694.509	15.4172	12.9595	12.974	14.0672
Matn2	226.757	20.5845	31.0749	19.3055	14.3145	17.9207	23.4199	17.8229	14.948	118.438	14.7188	24.6423	205.53	15.8879	24.9401	23.406	39.9288	20.6199	836.16	230.816	429.11
Mb	42.8028	12.8233	12.8233	12.8257	12.8257	12.8233	12.8257	12.8233	12.8257	13.2201	12.8257	12.8257	12.8257	12.8274	12.8257	50604	12.8233	12.8233	149.493	19.0321	226.777
Mbl2	13.6181	14.9582	13.5178	14.7149	19.6646	15.3798	15.5333	13.6258	20.9078	13.2055	19.4559	14.9261	13.5566	27.3124	18.2968	14.7944	1090.54	14.6711	14.671	15.4799	17.0258
Mbp	137.624	269.813	1921.82	25.8975	403.437	1021.39	330.935	623.961	960.172	283.434	745.081	314.557	33101.2	4349.56	714.453	20.4907	30.7272	291.681	32.3095	29.8177	296.192
Mdh1b	12.9203	13.2041	14.1505	12.9931	13.317	12.9974	13.0141	12.9615	13.4174	15.1559	13.3128	14.7334	15.2727	14.31	13.2093	12.9844	15.3543	12.9695	12.9695	15.089	520.434
Mdk	19.7568	1253.76	132.355	39.0533	31.9855	61.5695	27.8365	24.2744	43.8005	32.4749	51.5876	2205.42	29.4289	2693.87	64.9358	22.2241	15.5304	27.5513	76.9916	33.8339	99.6749
Me1	2080.34	35.3241	276.198	53.4902	13.0606	13.0606	34.6325	17.0938	13.0548	89.4575	13.0856	71.6525	542.947	221.45	13.1569	371.083	835.35	13.0753	232.43	275.479	405.45
Mecom	27.4686	14.4179	15.2864	561.441	12.8851	12.9001	12.8845	12.873	12.9005	14.151	12.8931	15.2023	12.8859	12.9047	12.9013	46.59	16.9827	12.9008	211.2	262.3	161.671
Mefv	12.8257	12.8257	12.8233	12.8257	12.8267	281.856	45.8556	13.9481	426.848	12.8233	12.8292	12.8257	12.8274	12.8295	12.8292	12.8257	16.9974	21.153	12.8257	12.8233	12.8257
Meg3	73.6	37.1272	752.667	30.9035	12.8292	22.0003	19.1727	238.147	12.8292	50604	12.8292	34.4611	20.832	169.767	12.8292	81.0541	12.8257	12.8257	1408.75	2236.61	677.847
Megf10	17.2404	99.233	1094.61	14.5823	13.2034	12.9763	13.0691	16.8271	13.1874	21.8616	13.1886	84.463	271.383	585.755	13.102	15.4081	12.9568	17.3118	107.475	23.1115	137.024
Melk	18.4028	477.634	13.1007	12.8295	339.6	47.3369	57.3484	15.4769	50.8224	19.0091	30.9783	196.272	12.8279	35.9171	39.8928	18.0381	22.6133	27.2897	16.8065	116.331	100.655
Meox1	19.8896	19.3851	14.5418	569.252	22.9805	17.2685	20.2048	21.369	24.202	13.706	22.6876	17.6093	18.1953	36.2705	20.9655	88.199	32.3425	15.7179	160.333	17.7519	82.6376
Mertk	105.696	160.028	1904.39	174.114	17.168	36.796	291.607	3818.97	18.7562	22.4185	18.3693	53.3417	37.1146	410.711	18.2163	28.1706	27.5111	17.8588	80.5879	34.6366	125.004
Mest	157.703	144.819	106.192	187.592	12.8257	27.6025	12.8257	47.909	12.8257	442.902	12.8257	130.758	57.8503	47.3198	18.6343	143.297	55.1748	17.209	185.354	1173.24	328.215
Mfap2	32.5739	3100.45	33.3071	64.582	13.0101	13.0339	13.1362	15.4237	13.0264	29.6703	13.0224	2553.26	15.689	453.351	13.0077	23.0146	12.9095	13.0958	98.053	55.324	19.0098
Mfap3l	49.2919	28.9238	1036.03	33.0986	12.9104	29.526	25.8213	37.601	19.6958	236.094	12.957	242.306	79.4175	649.614	12.954	84.6681	24.8746	12.9424	53.9743	28.2851	18.2289
Mfap4	31.6611	360.658	13.5617	13.4244	13.0101	12.9799	12.9478	13.0751	13.0549	13.7373	13.0224	265.251	14.2444	92.359	13.0653	26.256	12.9095	13.0346	1395.79	27.8617	12.9738
Mfap5	446.61	14.0649	12.9336	15.1296	13.0101	13.0346	12.9566	12.9031	13.0264	12.9017	13.0102	17.2504	13.1546	13.2886	13.0347	30.256	12.9095	13.0346	2347.15	221.951	12.9738
Mfge8	1705.87	6011.33	5292.55	1084.2	39.7259	44.1146	120.208	91.1546	118.997	35.7187	105.54	1450.21	266.564	4499.43	103.431	814.721	706.88	91.7328	628.592	551.178	636.179
Mfsd2b	18.3798	15.7388	23.2702	19.4509	1960.04	80.0459	22.2847	18.8474	56.3437	21.3552	25.0247	14.732	19.2063	13.4199	21.2878	20.5577	19.9621	25.7006	20.4867	17.1866	12.9771
Mgam	15.3769	12.8257	12.8274	12.8295	12.8292	662.399	21.2788	13.7217	12.8292	12.8257	12.8292	12.8267	12.8292	12.8304	12.8292	14.9897	212.24	12.8292	46.6625	18.5781	17.1943
Mgat3	38.8282	44.8714	110.101	12.8726	12.8711	12.8711	12.8507	22.4428	12.8707	225.189	12.871	68.5041	1052.74	135.648	12.8716	41.3892	12.8513	12.8716	31.7495	42.0398	30.0724
Mgp	320.723	16.12	15.2492	461.118	13.0184	13.0346	13.1018	15.5298	13.0781	15.1277	13.068	23.5393	23.6422	13.3263	13.1124	387.206	12.9098	13.0989	4272.01	1507.32	76.1478
Mgst1	3228.47	255.63	89.3916	1107.26	116.181	2654.08	726.179	17.5302	2135.53	18.9666	24.9823	638.597	25.584	7417.04	17.6903	99.0553	3955.78	108.256	338.692	157.666	996.855
Mgst3	427.061	202.29	23.3727	220.159	2775.74	35.5597	60.8769	39.0691	96.7736	55.5536	37.5889	323.469	213.852	228.682	27.0881	1099.57	62.2104	33.3041	42.1581	34.0187	107.097
Mia2	12.8292	12.8308	12.8292	12.8308	12.8716	12.8316	12.87	12.8299	12.8716	12.8292	12.8716	12.8697	12.8292	12.8772	12.8707	12.8283	481.14	12.8299	12.8299	12.8559	12.87
Miat	12.8299	104.592	334.555	18.6942	12.8716	12.8316	12.8507	19.9816	12.8716	3465.83	12.873	137.826	22.396	97.4896	12.8724	13.0436	12.8299	12.8721	17.0168	14.9129	12.87
Micall2	47.2751	13.0495	101.241	21.2298	988.927	69.6238	87.9607	12.9848	69.8921	14.1761	12.9095	17.1099	25.4011	12.9448	12.9102	23.6213	29.8622	16.8293	151.446	238.844	25.3468
Mir451	12.8844	12.9048	12.8843	12.9419	607.139	12.908	12.9083	12.8928	12.9742	12.8827	12.9728	12.8844	12.8922	13.0663	12.951	12.8932	12.903	12.9025	12.9028	12.8824	12.926
Mir703	20.0236	359.65	15.9999	91.8404	610.513	53.8615	309.648	21.2323	1366.3	14.0819	219.089	137.732	24.73	83.841	165.029	15.0993	31.1026	95.6275	24.2844	30.129	48.1318
Mki67	91.7648	899.376	23.8946	61.711	14146.4	322.522	989.424	76.0278	351.453	72.6096	159.146	1097.25	16.655	170.714	178.458	74.2014	30.4649	153.993	182.268	4246.67	20.1983
Mkrn1	181.564	197.391	129.907	251.409	6153.29	981.766	387.698	209.258	596.078	335.891	383.705	166.091	581.088	142.581	375.451	167.356	814.123	363.578	151.77	112.767	699.498
Mlc1	12.8716	504.665	1538.12	24.6436	12.9008	12.8854	12.8829	16.4637	12.9012	18.7085	12.9012	951.692	41.2806	1397.92	12.9012	12.8818	12.8736	12.9018	12.8697	12.8707	909.965
Mlf1	19.6761	35.4768	16.8351	39.7445	46.8333	12.9015	22.2628	12.9028	12.9013	14.1688	17.6879	69.8769	27.1822	76.2344	21.6304	826.363	16.4779	12.9025	38.8524	26.8536	1943.26
Mlph	20.7348	12.8921	12.9016	45.794	12.9008	12.8827	25.329	407.868	12.901	12.8724	12.9015	13.6181	13.2857	31.5626	12.9005	17.2533	19.2867	12.9015	17.5945	23.7784	12.8843
Mlxipl	736.256	24.1016	57.5937	13.6735	14.3144	15.7702	92.2995	4007.8	14.9256	13.5563	14.7151	18.9853	16.6221	132.543	14.4218	171.388	515.891	14.7968	18.8127	16.6018	33.9354
Mmd2	82.3617	4678.65	3792.21	27.5465	12.9025	12.8839	12.8841	26.2036	12.9033	90.8263	12.9027	1058.51	1625.59	5985.72	12.9019	12.8835	12.8963	12.8827	12.8821	12.8719	309.978
Mmp2	940.175	20.1444	18.9193	48.6195	12.9025	36.8387	20.0649	191.985	12.9036	13.1878	12.9033	20.9778	110.18	12.9286	12.9056	87.4858	16.8736	12.9043	5489.87	1802.44	55.3111
Mmp25	13.6379	14.7809	15.2288	20.6377	19.1915	618.476	21.6192	20.8739	21.3505	13.3829	20.755	15.1026	16.3536	26.0339	21.1363	14.7021	14.7062	20.1081	14.7334	14.9753	16.7449
Mmp8	15.3841	12.8831	12.8724	12.9059	76.2129	10644.8	51.563	14.7401	602.593	12.8716	12.9083	12.9008	12.9059	12.9286	12.9076	12.9189	12.8962	12.9043	14.5522	15.2233	12.8935
Mmp9	17.4269	528.008	12.8832	15.071	76.0989	15265.5	109.594	20.2687	34.5304	14.3437	36.3927	15.2834	16.0212	12.9286	32.9345	16.8681	16.2928	30.5068	14.7656	15.3612	105.322
Mmrn2	41.7557	19.9785	25.5015	1658.56	20.7762	20.2096	16.3286	21.5479	22.3353	18.4931	20.1513	21.2804	14.4032	27.9359	21.0023	209.558	27.4234	15.4192	47.7478	15.5659	25.8292
Mn1	28.8703	558.739	44.6897	61.8643	13.0751	13.0606	13.1241	22.0771	13.055	106.038	13.1385	300.132	28.7934	132.744	13.162	181.789	30.87	19.8853	124.58	372.506	168.466
Mnda	154.104	21.1011	12.873	63.8678	73.0016	86.0448	161.622	42.9662	1004.92	12.8721	216.463	12.9695	12.8769	12.932	109.353	12.9682	27.649	28.2845	593.878	170.045	75.3974
Mndal	100.857	106.355	13.2669	568.56	122.339	91.8029	635.4	52.1965	1412.28	17.4138	5853.77	13.1286	12.9028	13.3812	1388.77	19.5154	24.5197	2437.08	306.313	56.1124	54.8251
Mns1	14.243	95.2908	51.6836	12.935	1772.81	66.079	24.6338	15.2962	86.1336	31.1776	82.5331	119.018	27.354	96.3656	102.895	14.3919	12.9132	46.0541	21.7988	45.6294	856.931
Mobkl2b	64.8308	139.32	55.6955	34.5292	12.8257	62.8545	111.574	23.5644	200.928	17.8538	62.4404	147.915	1808.3	52.4615	51.0356	15.0694	207.494	50.1843	25.7874	26.1307	230.095
Mobp	12.8821	68.7481	277.632	12.9057	12.9091	12.9011	12.9017	78.7434	12.9096	22.2411	12.909	61.9233	13418	220.406	12.908	12.8791	12.8847	12.8847	12.8728	12.8726	24.2348
Mog	12.9037	119.495	36.5226	13.2888	13.0341	12.9537	12.954	19.6608	13.0566	15.3195	13.0342	413.518	8007.79	2455.32	13.0447	12.9266	12.9103	12.9097	12.9099	12.8929	20.2997
Mpeg1	126.792	26.1562	34.1517	15.3777	111.88	2722.02	2558.4	2543.18	6232.58	34.9969	55.2608	13.4132	58.6279	13.2554	50.4834	23.3909	435.409	333.172	26.3838	17.4067	30.1888
Mpo	12.9037	12.9349	12.9039	13.0245	196.985	233.4	20.443	13.5596	1565.66	12.9041	13.1607	12.9799	12.9934	13.523	13.0548	12.9482	13.1575	44.1878	14.7985	12.902	12.9942
Mpzl1	69.748	182.427	239.086	1236.76	44.5025	108.256	41.8616	21.5952	19.937	76.904	21.3412	244.035	1243.5	372.872	21.9748	115.737	48.1675	20.2643	205.54	174.086	52.3068
Mrap	674.425	15.9709	12.9005	12.9446	47.7907	20.9784	12.995	12.907	12.9988	12.9003	12.9779	12.9795	13.035	13.1142	12.9779	65.8202	108.509	12.9799	21.8566	13.0816	12.9354
Mrc1	148.216	2263.77	14.8551	20.9316	107.863	96.3753	782.202	218.697	88.3808	13.2945	32.0545	14.6184	25.3302	13.1142	21.2942	71.3648	22.4941	29.0474	40.1063	16.5914	1087.99
Mrc2	349.254	14.5296	26.7293	13.0264	29.655	13.0339	15.5324	255.193	12.9792	17.647	12.9823	24.0736	17.6289	13.1142	13.0035	90.809	15.3326	12.9799	1310.25	551.475	23.587
Mrfap1	1397.62	4018.13	653.947	2334.62	614.879	541.768	762.85	342.864	853.163	459.453	530.691	2670.66	2985.25	1486.33	657.948	878.654	981.149	614.561	1119.06	1220.41	8393.49
Mrgpra2a	12.908	13.0966	12.9083	13.1041	29.1314	597.289	13.1453	13.1534	13.2695	12.9025	13.2356	12.9684	12.907	13.9075	13.1608	12.9359	12.96	13.3703	12.9025	12.9025	13.0486
Mrgpra2b	12.908	12.9608	12.9083	13.3108	39.196	1679.29	13.1453	13.76	13.3546	12.9027	13.2346	12.9604	12.907	13.9074	13.2223	12.9723	12.96	15.2832	12.96	12.9025	13.0486
Ms4a1	12.8716	12.8775	12.8716	15.2255	192.72	82.048	45.342	12.8732	12.9005	12.8697	12.9013	12.8835	12.9012	12.905	41.0152	12.9099	12.8732	5626.87	12.8732	12.8507	12.884
Ms4a4b	14.6709	13.2028	12.9103	13.2052	13.4008	34.0433	29.714	13.7977	204.856	12.9086	9437.34	13.0315	12.9255	14.3042	5514.13	13.4013	12.9762	85.7607	12.9693	12.9054	13.1194
Ms4a4c	16.5077	18.494	12.9103	13.6112	119.246	97.207	65.9983	26.7587	1811.63	12.9086	243.459	13.3956	13.1254	14.2992	193.091	13.7697	13.6742	1028.21	12.9695	12.9054	23.6965
Ms4a6b	22.2559	271.619	13.0605	19.4257	41.8093	108.898	174.65	263.432	2428.13	12.9109	707.868	13.1288	17.0394	14.3576	3228.21	16.6889	18.1193	135.844	12.9791	12.9056	124.057
Ms4a6c	21.1992	228.124	12.91	19.6669	120.843	206.567	557.437	118.851	5627.31	12.9088	266.227	13.129	17.0671	14.4067	201.852	30.1292	20.7805	135.188	16.4914	12.909	61.2937
Ms4a8a	12.9426	12.9894	12.91	13.5594	33.0078	30.0151	368.867	12.9558	431.218	12.9059	13.9559	12.9795	12.9312	14.4142	13.5422	12.9436	13.7305	16.9746	12.9074	12.906	13.148
Msr1	79.9252	83.9986	12.936	13.1965	30.3273	59.508	2369.52	47.2394	466.885	12.9031	13.1972	13.1501	13.0945	13.4764	13.1237	21.7978	25.5161	20.1963	17.5402	12.8931	96.0063
Mt1	1294.04	2268.66	630.938	87.1851	122.392	70.1797	375.732	125.269	109.618	44.4084	35.0176	2047.34	273.335	31018.5	17.6138	724.199	3112.78	31.1024	1314.92	381.112	7121.48
Mt2	1123.81	1267.75	664.984	49.6892	151.77	20.3412	53.5302	38.0516	52.1601	23.2276	16.7781	1581.41	76.2727	6076.38	13.2086	244.053	1976.21	21.8982	2553.26	52.6579	740.814
Mt3	12.908	701.903	39.2832	24.3833	13.0788	12.9604	13.0068	13.0664	13.1138	18.8653	13.1176	471.15	68.4314	12021.7	13.2086	19.7396	13.1591	12.9107	17.1784	12.901	4415.51
Mtap1a	210.779	148.7	1817.74	29.4899	70.0966	28.5548	18.0815	94.8289	30.2572	2722.33	24.924	156.423	2704.95	157.85	21.7815	159.291	17.4284	17.8362	736.256	893.04	101.574
Mtap1b	426.191	789.22	627.956	437.691	12.9091	19.609	22.7926	79.1941	12.9103	9524.89	12.9152	1279.46	3462.25	337.082	12.9478	142.658	32.5319	17.1695	815.78	486.562	3598.55
Mtap2	17.888	1339.78	1899.62	37.9045	14.7551	15.0662	14.8364	70.0579	15.0339	2146.54	15.1952	1564.33	247.257	732.14	21.2747	27.3539	13.1626	32.7799	173.932	56.5562	606.556
Mtap9	48.2391	134.988	280.978	27.1359	15.0894	15.1759	16.9307	26.806	14.9774	906.575	18.0543	149.193	40.0509	149.756	27.6513	24.7074	32.966	29.871	45.0209	76.0655	581.905
Mtss1l	120.309	137.903	4742.4	39.59	16.3096	27.2838	22.2557	69.9598	17.2142	367.182	17.9406	275.001	62.6108	354.135	17.6355	421.733	24.4518	23.5873	247.01	178.569	70.4031
Mug-ps1	13.9467	15.9618	14.983	18.4488	21.9911	16.4529	17.0477	15.2094	22.8943	13.5067	22.5474	15.7249	14.0428	33.4906	20.1983	14.553	836.878	15.4179	13.317	13.3532	18.6212
Mug1	12.9091	12.9553	12.9096	15.9706	13.1617	12.9787	12.9793	12.9695	13.2023	12.9027	13.1674	12.9974	12.9067	13.8415	13.1037	12.9314	5529.64	12.9537	12.9537	12.9053	13.0365
Mug2	12.908	12.9553	12.9086	13.301	13.1617	12.9759	12.9793	12.9535	13.2023	12.9027	13.1674	12.9974	12.9067	13.8415	13.1037	12.9314	1456.78	12.9537	12.9022	12.9053	13.0365
Mup1	12.908	12.943	12.9059	12.9616	13.1714	12.9695	12.9791	12.9086	21.1898	12.9018	13.1386	12.9001	12.9061	13.7678	13.0659	12.9308	643.561	12.9426	12.9018	12.9017	13.0119
Mup10	13.702	14.9749	13.4059	14.9927	19.6995	15.6472	15.7633	13.6379	20.2934	13.155	19.5166	13.0753	13.5918	27.4249	18.3522	14.0654	1778.78	14.6717	13.1525	13.2654	17.0607
Mup14	13.6258	14.9661	13.4051	15.0398	19.6816	15.3851	15.7509	13.6258	20.2742	13.1626	19.4778	13.1288	13.5769	27.375	18.3145	14.0616	2630.45	14.6711	13.1524	13.1563	17.0483
Mup20	13.8742	14.9626	13.5668	19.5967	19.676	15.3851	15.7368	14.3253	20.2469	13.1636	19.4702	14.9278	13.5758	27.3499	18.3115	14.0616	8218.11	14.6711	13.1524	13.1563	17.0368
Mup21	13.7101	14.9626	13.405	14.6711	19.6723	15.3841	15.5351	13.6258	20.2439	13.1636	19.4657	13.0753	13.5758	27.3418	18.311	14.0615	839.89	14.6711	13.1524	13.1563	17.0302
Mup3	12.9352	12.943	12.908	12.9616	13.129	12.9691	12.9729	12.9086	13.1709	12.9023	13.1386	12.9542	12.9061	13.7678	13.0668	12.9642	11341.3	12.9426	12.9018	12.9017	13.012
Mup7	12.9088	12.943	12.9059	12.9616	13.1288	12.9691	12.979	12.9085	13.1709	12.9018	13.1386	12.9001	12.9061	13.7669	13.0658	12.9307	3002.24	12.9426	12.9018	12.9017	13.0097
Mup8	12.908	12.9401	12.9079	12.9616	13.1714	12.9689	12.9727	12.9083	13.1619	12.9018	13.1385	12.9789	12.906	13.766	13.1123	12.9307	1008.06	12.9426	12.9015	12.9017	13.0096
Mup9	12.9086	12.9401	12.9057	12.9616	13.1286	12.9689	12.9727	12.9094	13.1619	12.9018	13.1385	12.9001	12.906	13.766	13.0652	12.9307	2412.9	12.9426	12.9015	12.9017	13.0096
Murc	19.6222	12.9431	21.4052	13.2957	13.129	13.1636	12.9996	13.2611	13.1717	21.0817	13.1396	13.2217	27.9361	13.7744	13.1479	648.48	12.9537	13.197	18.861	21.1217	13.0121
Mxd1	101.216	45.9864	217.352	146.864	1742.02	8146.31	90.729	116.425	118.64	132.649	861.091	37.762	201.077	65.4365	177.265	46.7221	32.3606	104.519	182.357	40.698	71.2039
Mxra8	531.598	77.6649	173.857	208.732	12.908	24.5177	20.264	37.8195	12.9086	26.3484	29.609	151.325	90.7244	139.807	18.8063	86.0053	21.7866	29.7713	1627.93	963.909	249.591
Mybpc3	12.8233	12.8233	12.8233	12.8233	12.8233	66.0429	23.6516	34.8763	20.3273	16.4335	12.8233	12.8233	12.8233	12.8233	12.8233	15332.2	12.8233	15.9145	25.5417	13.0968	12.8233
Mycbp	91.6593	123.968	78.5064	188.945	282.67	114.95	87.6187	72.6795	151.017	98.8743	132.31	85.4642	80.4602	228.827	84.3773	93.8025	84.1772	79.0619	47.3045	57.7228	916.994
Mycbpap	15.833	15.062	18.0497	16.2928	19.9213	18.6238	20.0257	24.7988	20.6117	20.1387	21.6515	17.1399	18.5689	28.104	18.5614	24.8785	15.0154	18.2708	20.0259	20.914	669.337
Myct1	22.3817	18.1951	14.6753	1089.32	17.3749	25.109	18.5234	13.6836	18.1535	13.0344	17.1696	13.8177	13.8797	20.5783	16.5133	74.1538	21.0742	16.5077	35.114	13.065	15.2885
Myef2	79.0211	3071.75	156.168	654.571	253.94	45.5082	71.436	114.257	44.2807	632.752	134.017	2952.57	383.012	385.456	96.3131	46.4284	199.999	132.091	125.086	332.399	1419.88
Myh11	154.852	25.9344	20.8137	27.5699	19.7568	19.6898	15.9832	20.4071	19.4951	18.7813	20.3301	19.866	17.5301	25.3123	21.4166	171.098	15.8574	19.846	852.325	118.198	16.5355
Myh6	12.9851	19.5045	306.354	18.2489	14.4857	13.2032	14.6335	15.3518	14.73	18.3724	14.4827	20.6267	147.854	174.69	14.1269	157602	13.1288	13.0958	201.27	13.2317	89.2318
Myh7	12.9791	18.2458	23.1259	15.1332	14.4819	13.2217	14.7402	15.5822	14.7299	109.859	14.4808	18.8816	18.0208	30.2907	14.1269	25467.8	13.1288	14.8148	47.2264	14.8967	41.9247
Myl2	12.9691	21.5133	14.696	14.4301	14.3973	81.8459	13.3329	48.0149	14.3279	12.9478	14.2913	15.266	14.2123	15.7045	13.724	24033.7	13.0475	13.0315	83.4112	13.8881	18.1434
Myl3	12.9795	13.0757	13.0915	13.0934	14.0726	13.1288	13.1797	12.9747	14.3279	12.9566	14.5237	13.1971	12.9593	15.7045	13.9557	17948	13.0475	13.0315	80.0551	12.9446	13.3901
Myl9	259.092	127.737	24.9209	112.415	14.399	60.9722	14.2717	14.7321	14.7368	15.1499	15.1299	140.787	17.2353	202.244	14.8081	145.03	24.9238	14.6711	329.311	1047.7	143.379
Mylk3	12.9104	12.9717	12.9261	12.9769	651.711	19.6642	27.0831	12.9822	13.357	15.7516	13.3781	16.7169	14.3237	14.0473	13.4122	2586.35	12.969	13.3537	27.319	16.617	13.0814
Mylk4	12.9088	12.9716	13.1055	13.6218	13.2138	12.9849	12.9824	12.96	13.2977	13.9327	13.292	13.075	13.4394	14.0473	13.2023	1118.12	12.969	12.9684	18.5447	12.9051	13.0814
Myo10	384.841	1202.17	3030.99	1763.89	72.8307	46.4077	157.375	66.2916	13.8023	139.238	40.6268	810.793	53.3193	1739.26	78.5497	611.324	800.787	48.3719	318.733	1883.97	2090.48
Myo18b	13.0315	13.2372	20.6444	18.8283	31.0198	15.2832	18.7578	474.899	15.4783	16.756	15.2216	13.9341	16.1945	17.1662	15.5491	2671.47	15.2019	16.3808	23.5512	17.5919	14.0469
Myo1c	1779.31	43.0724	97.2906	723.558	508.548	491.591	834.608	374.004	740.985	94.7283	185.693	45.5429	30.3697	14.4744	168.869	1127.66	1768.19	3094.26	656.824	2179.12	38.5796
Myo1f	33.7637	72.7826	17.2787	14.1193	115.687	4224.01	1409.08	2276.88	3240.81	13.5089	1475.29	13.8177	27.9831	14.4621	227.806	19.642	16.3343	133.338	19.4234	14.7596	142.907
Myo1g	26.2475	32.2708	14.1599	16.3859	180.91	1084.83	852.342	467.161	2619.17	12.9389	588.777	13.5429	15.2538	14.4601	1358.72	16.0315	16.3685	2225.97	12.9795	14.1018	13.1617
Myo5b	37.8292	18.6614	14.8077	14.3634	47.3369	13.3998	16.5638	16.8807	13.4323	272.076	13.5318	20.0236	14.1531	102.17	13.8613	196.477	316.742	13.6258	19.9368	15.9341	337.315
Myof	420.435	23.6936	19.1122	126.454	65.6498	46.8857	539.792	32.6004	201.854	20.8833	14.7316	16.6395	16.0823	15.6032	25.4891	47.2315	57.4968	135.903	951.692	4098.87	116.762
Myom1	30.9336	14.07	32.1115	17.3922	40.1964	32.5412	21.7746	114.414	34.6605	21.5748	14.4424	17.5508	13.8081	13.0607	12.9797	5904.83	34.9478	15.2237	107.936	26.1948	30.1833
Myom2	13.9467	12.9048	12.8847	12.9868	12.96	12.9535	12.9077	12.8851	12.9689	12.8843	12.9728	12.9094	12.9774	13.0607	12.9646	4189.76	12.9028	12.9695	21.7605	14.3643	12.9223
Myoz2	12.9001	12.9052	17.7699	12.9033	12.9689	12.9078	12.9083	12.8928	12.9725	12.8837	12.9688	12.9099	12.9739	69.2992	12.9568	3981.19	12.9031	12.9025	52.1693	17.6923	49.8194
Mypn	12.9689	13.0687	12.974	13.0921	34.0334	13.6258	13.2346	13.0868	14.2819	19.6385	14.6507	13.2136	14.5662	15.618	14.1738	1113.86	15.9959	13.0184	19.2045	15.8473	13.3855
Myt1l	12.9011	25.3066	103.257	13.0265	12.9761	12.9088	12.9102	27.8112	12.9792	3166.14	12.976	32.5882	15.1235	13.1211	12.9646	13.6167	12.9059	12.9037	12.9043	12.8843	12.9354
Naip2	27.6426	29.8058	16.0817	45.3893	50.5521	354.076	469.218	1094.36	503.807	13.1932	146.666	15.6283	19.3992	21.1408	51.2803	19.2698	91.6282	64.6545	19.9389	19.8128	51.9027
Naip5	17.4456	21.6939	16.0347	30.626	35.6684	179.696	240.343	1591.02	437.205	13.2984	145.732	14.6709	17.0316	21.1518	25.7218	17.246	19.9448	80.3244	13.9393	14.8934	29.8963
Napsa	14.6725	17.8207	14.6018	13.7143	237.551	721.428	247.715	16.1035	5096.95	22.0456	194.779	16.9381	14.3021	49.0635	39.0854	15.9918	13.7233	2437.08	12.9763	12.9056	13.1469
Nat1	15.7633	24.9423	52.7615	16.8457	17.8907	17.0951	17.0533	20.03	18.4745	13.5746	18.0397	19.8463	14.4828	580.009	19.4613	15.8835	21.37	18.4438	13.0346	15.171	24.8338
Nav3	60.7677	17.7114	113.282	31.3276	18.0108	14.9548	17.6425	7932.2	18.5881	854.516	17.9312	21.2157	103.371	33.0929	17.4156	57.1957	14.3425	14.1113	98.3963	69.7255	535.637
Nbea	112.106	54.5931	660.215	164.406	22.1487	21.9678	26.7008	1363.02	21.8303	3920.41	34.73	134.437	412.409	168.66	23.8154	181.952	30.8639	22.3149	253.141	366.59	206.032
Ncald	18.5641	882.775	72.0955	25.7616	12.8257	12.8257	18.3612	20.2767	12.8257	248.947	286.711	548.622	378.507	116.238	25.7516	47.76	20.3791	12.8267	174.629	18.477	324.386
Ncam1	114.183	4263.95	4984.6	54.4502	12.8257	326.487	19.772	80.9625	34.1687	2061.06	12.8257	4344.41	3600.61	4429.74	17.9135	40.2324	12.825	12.8257	173.489	640.847	1501.78
Ncan	36.5697	1271.92	9706.51	35.5848	19.4234	16.1345	15.7493	75.9589	20.0007	1093.7	19.2459	2274.49	55.4212	1774.86	18.7355	14.856	14.7639	20.3363	14.4694	13.5097	203.015
Ncf1	21.2839	98.8035	21.8819	25.7985	173.331	8261.75	1869.4	1813.24	2061.99	18.174	92.5178	17.1208	38.3439	27.9996	133.594	26.6758	23.5698	1726.68	15.223	16.4949	19.6622
Ncf2	25.7006	73.3996	31.1446	23.0748	153.153	4248.07	1221.67	791.49	2437.53	55.9154	60.0803	23.9096	91.1351	27.9925	46.6033	29.1598	22.548	523.955	30.1483	16.6999	37.9057
Ncf4	17.5508	77.1927	16.0411	21.4704	195.802	3306.28	676.738	400.123	1625.61	13.2798	384.927	15.9688	19.5668	28.0037	380.486	21.4013	22.8722	864.83	15.0333	13.1746	19.2506
Nckap1l	44.0962	162.56	28.7317	17.4764	128.1	2482.59	2240.36	5913.03	1247.38	31.8994	605.65	17.6093	34.0234	17.5418	805.059	22.04	20.0304	2113.15	15.748	14.1363	271.746
Nckap5	19.9442	96.0841	630.086	28.237	12.8233	12.8233	12.8233	13.183	12.8233	85.7784	12.8233	134.361	151.431	383.302	12.8233	69.3276	12.8233	12.8233	42.6307	24.3556	107.729
Ncr1	13.9019	15.1023	13.5799	14.7661	19.9708	24.1754	20.6634	14.5784	20.6771	13.1619	2918.2	15.0854	13.6244	28.2405	21.5673	16.3315	15.0486	26.4283	13.1637	13.189	17.3275
Ndp	12.8703	184.94	148.676	15.2226	12.8844	12.8732	12.8732	12.8724	12.8847	14.2799	12.8844	213.125	53.5416	479.679	12.8837	12.9083	12.8721	12.8721	12.8721	14.0084	16.3462
Ndrg1	498.811	29.9152	52.8727	1990.84	32.6941	646.959	55.8907	22.9218	619.073	31.045	81.9356	54.4426	4978.27	379.37	118.649	177.394	724.955	64.1963	399.181	340.998	63.7886
Ndrg2	1083.78	1891.1	13212	57.8743	162.498	34.0255	24.2123	248.799	35.2862	287.062	48.0371	850.228	144.452	4175.09	123.9	6512.54	643.265	18.6797	281.445	53.2632	2025.46
Ndrg4	36.816	108.098	364.062	16.1312	13.2034	13.2733	16.8294	64.4385	13.261	6768.84	13.3654	156.807	85.4595	26.5779	23.1571	645.556	12.9687	13.3998	295.589	312.531	119.754
Ndufa12	344.274	716.207	61.2908	410.95	226.16	53.3417	74.3676	42.3822	133.989	35.0328	110.793	1004.31	198.136	2481.98	141.95	1067.63	124.59	85.6219	71.4465	222.635	719.575
Ndufc2	539.695	3778.81	125.69	785.032	491.857	93.3877	341.053	155.943	762.005	99.25	258.692	4824.44	380.485	2746.51	385.115	860.427	278.888	164.472	122.209	305.859	716.936
Negr1	111.382	76.0496	578.095	13.3531	13.0958	12.9595	14.875	23.2537	13.0861	1242.5	13.0797	104.173	126.266	100.397	13.046	16.7243	12.9105	13.099	68.4729	22.0711	59.6154
Neil3	17.8247	220.858	13.812	31.3443	1000.88	126.602	62.5913	15.1028	64.1617	12.9001	49.5768	107.884	17.1372	141.866	33.9234	14.7825	16.5097	28.3551	14.7437	49.467	12.932
Nek11	12.9001	14.2639	18.7213	12.9881	12.9689	12.9595	12.9693	12.9873	12.9727	19.1488	12.9726	18.2691	14.2901	13.0863	12.9645	13.2557	12.9033	12.9795	13.3703	16.8617	258.137
Nell2	12.8732	387.322	39.7379	17.1496	12.9031	12.8844	12.8849	18.1937	12.9038	797.77	12.9055	241.032	40.1436	284.218	12.9023	12.8776	12.8831	12.9074	12.8835	15.1269	12.9013
Nexn	25.4587	45.4735	90.5513	29.918	23.0676	17.2893	19.6683	55.8707	25.6429	212.472	24.5895	25.9218	18.5968	148.555	21.3915	3593.09	30.9822	20.0617	170.564	212.596	45.8917
Nfam1	21.8566	169.933	13.1047	19.4497	106.749	4131.82	1365.54	893.347	2020.7	14.1192	25.1471	14.4577	16.4314	12.8245	19.9474	14.0944	12.8233	142.68	14.6029	12.8245	115.127
Nfasc	21.0695	51.1053	942.692	17.9453	12.8233	12.8233	12.8233	74.8469	12.8233	2355.79	12.8233	164.541	6847.23	365.653	12.8233	15.1399	19.3747	12.8233	21.479	30.1979	162.377
Nfe2	14.7922	12.9034	12.8722	14.9428	3692.38	1840.57	487.969	19.6638	843.627	13.0342	51.115	12.9684	12.8818	12.8789	16.2418	15.4745	19.2066	18.861	14.3882	12.8569	12.8719
Nfia	778.716	8643.9	4214.86	2241.03	75.5714	62.985	355.582	828.02	57.3293	305.844	137.165	7915.24	226.868	6196.95	59.9198	670.611	81.1783	36.1172	379.559	411.925	3469.98
Nfib	901.344	5438.09	1811.99	1887.73	12.8736	12.8736	23.3535	40.7645	12.882	1046.63	12.8818	2803.85	250.189	1543.08	12.8818	1212.11	215.116	12.8818	1145.34	1645.78	1681.23
Ngf	19.7958	12.8769	12.8703	12.9015	12.8847	12.8732	12.8777	12.8714	12.8851	15.4538	12.8847	12.8827	12.8924	12.8967	12.8845	38.9396	39.8492	12.8721	2025.7	117.86	12.8828
Ngp	12.8703	12.8769	12.8767	12.9017	383.559	38197.9	23.3251	37.0302	66.2479	12.8703	17.9412	12.8831	12.9017	12.9041	25.2954	12.8732	12.8876	28.9228	13.2034	12.8498	12.8831
Nid1	5313.83	31.6016	33.346	1495.02	26.5513	30.0151	20.6262	19.5343	12.8714	15.1143	12.8714	24.7708	83.8423	12.8767	12.8716	406.66	2281.72	102.195	8637.92	2079.7	12.8507
Ninj1	215.474	439.036	39.5503	176.833	130.543	1005.28	1777.07	84.9422	987.675	23.1115	93.899	114.022	322.55	95.6018	74.5444	384.683	491.63	104.099	405.994	231.282	361.638
Nipal4	13.9439	15.8977	21.0459	14.6139	17.4146	18.0136	15.1193	18.6199	18.0103	15.7937	17.8173	18.5045	988.522	103.651	18.3287	14.4675	14.0482	18.9341	19.5075	18.3058	18.2454
Nkain1	59.5326	87.4019	79.3662	14.3791	13.5006	13.8257	18.4811	15.7825	13.6796	51.1757	13.6812	260.938	1628.65	104.239	17.5296	166.992	33.9781	14.0063	65.0982	94.1084	13.2053
Nkain2	12.9604	19.7973	45.4884	15.8588	13.7793	13.0346	13.0551	14.4511	13.6796	206.977	13.5176	34.3284	651.136	252.693	13.3377	14.1978	12.9893	12.9795	16.5261	15.6533	13.2053
Nkain4	15.907	329.433	264.918	30.9664	13.5006	13.6258	13.1341	14.2376	13.6855	19.6878	13.6836	661.826	43.8795	11742.1	13.4448	22.0655	12.9915	13.8177	59.2889	17.4762	827.147
Nkg7	12.8233	12.8257	12.8233	12.8274	53.549	84.0511	20.2793	12.8257	47.145	12.8233	11815.7	12.8257	12.8262	12.8274	298.399	12.8274	12.8257	38.2914	12.8233	12.8233	12.8257
Nlrc5	119.259	15.938	24.9211	122.283	81.4477	200.402	178.582	126.793	458.219	15.6947	714.366	14.4858	12.8924	12.894	1529.26	17.8456	253.657	521.961	53.2385	39.3234	47.0051
Nlrp12	12.9791	13.116	12.968	15.0197	30.5213	928.661	15.4168	15.1447	15.1852	12.9595	14.6444	13.2817	12.9698	16.186	15.2137	13.1591	22.5701	17.8224	13.0958	14.8141	13.6092
Nlrp1b	14.7693	21.3302	16.5623	16.3328	14.7656	55.7731	80.0509	1237.15	50.0267	12.9772	15.5228	13.5206	14.3601	16.2348	22.0468	17.9482	13.1286	23.5251	13.0958	12.9323	22.0124
Nlrp1c-ps	12.8728	12.9912	13.6043	12.8923	12.9015	18.8306	31.3799	1064.21	35.1502	12.8716	12.9025	12.8847	12.8882	12.917	12.9022	12.8765	12.8818	14.7968	12.8703	12.8704	12.8924
Nlrp3	15.2874	34.8292	12.8834	12.884	38.4565	810.21	155.206	785.402	195.821	12.87	20.9997	14.4616	16.0609	12.8929	12.8839	16.8585	17.4007	23.061	16.957	12.8295	43.355
Nme1	290.356	1956.93	93.1598	609.844	419.601	111.117	208.531	72.4445	501.479	147.83	394.864	1980.71	415.611	1449.22	985.894	188.092	778.987	549.255	257.675	587.075	768.004
Nmral1	31.8964	798.484	33.7728	30.2734	302.018	39.1886	70.8359	77.8963	169.325	24.1166	36.6077	657.972	968.076	149.72	61.0332	23.5955	36.4244	72.8898	25.3566	58.8302	86.0807
Nnat	112.372	961.277	665.074	25.0865	12.8257	17.8217	12.8233	42.4619	12.8257	177.906	12.8257	963.469	101.775	398.971	12.8257	32.5456	22.6672	24.1402	31.0166	16.494	1903.9
Nnmt	316.113	12.8233	12.8233	13.25	12.8233	12.8233	12.8233	12.8233	12.8233	12.8233	12.8233	12.8233	12.8233	12.8245	12.8233	17.0181	192.665	12.8233	134.497	46.403	12.8233
Nop10	216.335	1428.5	31.8273	856.481	45.1769	45.794	101.198	49.611	82.0979	59.3799	355.903	1305.41	152.04	1090.06	178.414	166.563	199.091	163.953	83.3367	255.324	393.984
Nos3	47.9674	18.4185	20.6449	350.02	12.9795	12.9898	16.3883	18.0858	13.0159	30.3438	27.8175	19.5396	18.3446	43.644	18.8672	176.341	24.9374	15.0854	22.3127	14.8973	68.3049
Nostrin	17.132	24.4195	13.3558	835.776	12.9693	24.8584	54.3399	23.4753	109.346	16.3251	12.9872	22.9109	12.9865	13.0897	16.8991	39.3748	110.547	19.1899	27.4906	23.5249	24.306
Npas3	12.9691	311.412	1077.89	30.1699	13.3773	13.4927	13.1124	17.4848	13.4501	98.3953	13.5418	388.546	53.0463	1124.44	13.8005	15.0756	12.979	12.9759	23.1	22.6039	425.571
Nppa	12.9041	15.3171	14.9203	13.1607	13.0182	13.0341	12.9536	13.5422	13.0331	17.3061	13.0181	14.9965	15.8219	13.3261	13.0605	1136.7	12.9097	13.0989	24.4252	14.0379	12.9742
Nppb	12.9022	12.9309	12.9025	12.9097	13.0182	12.9352	12.9536	12.903	13.0331	12.9011	13.0181	12.9102	12.9024	13.3261	12.9885	1269.11	15.5193	12.9091	17.5389	17.7249	12.9742
Npr1	114.428	20.1413	13.073	410.865	13.0182	13.1614	20.4103	25.8357	13.0605	15.8339	13.0678	14.4858	18.2426	13.3262	13.1406	171.818	16.5399	20.5084	114.401	16.9681	19.4167
Npr3	1044.07	12.9309	14.8777	43.4739	13.0182	12.9851	13.5168	13.3351	13.061	55.3442	13.0393	13.9318	13.5074	13.3263	13.1287	94.8808	17.8406	13.0989	69.4991	566.955	564.236
Nqo1	29.8269	45.9468	31.7151	85.0464	144.9	46.3404	18.838	12.9957	12.9388	18.8344	12.969	75.6891	25.4805	254.255	12.9646	376.521	100.857	17.8476	24.1846	335.458	383.422
Nr2e1	12.8233	98.6874	603.52	14.5667	12.8233	12.8233	12.8233	12.8233	12.8233	15.6843	12.8233	121.301	16.1768	645.266	12.8233	12.8233	12.8233	12.8233	12.8233	12.8233	74.634
Nr2f1	21.9951	290.498	201.807	25.4165	12.8233	12.8233	12.8233	14.4039	12.8233	66.1791	12.8233	392.229	52.6745	457.559	12.8233	25.2783	14.0534	12.8233	25.5981	159.273	67.5685
Nr4a2	22.3817	15.9161	19.0458	279.401	25.1293	12.8267	28.4435	19.1944	19.6077	72.7244	1109.67	50.2491	24.6449	12.8283	54.8298	24.2938	24.768	12.8292	831.053	116.418	36.5639
Nrap	15.5797	15.9403	13.4598	13.2829	12.9759	17.1569	22.8522	22.229	12.9791	16.3855	13.0077	13.0097	18.3455	13.1041	13.0039	4085.69	25.374	12.9795	22.3817	14.8998	24.5214
Nrbp2	157.987	59.1094	1308.4	102.707	47.6507	12.9604	19.6904	32.1228	21.8121	666.584	12.9693	96.4489	1505.83	783.904	25.4056	198.307	216.815	15.966	96.0744	145.817	1414.39
Nrcam	29.3716	239.352	2296.51	38.3405	12.92	12.9097	12.909	28.4824	12.9389	1993.61	12.9536	337.104	105.03	1029.4	12.9566	14.5351	20.5182	12.9595	18.8843	32.6373	103.054
Nrn1	44.9791	59.4607	39.8191	12.9816	12.96	12.9535	12.9745	18.5306	12.9689	135.868	12.9648	190.788	18.2277	13.0607	76.8564	34.9794	552.809	12.9787	22.1557	200.032	381.242
Nrxn1	12.9974	2476.4	9434.51	22.1417	12.8267	12.8292	12.8292	77.6958	28.4213	4946.29	12.8292	1833.66	99.1907	4144.33	12.8292	15.0881	12.8257	18.6532	24.2737	13.4181	114.449
Nrxn3	12.8233	89.6855	180.132	19.7957	12.8257	12.8257	12.8257	27.6945	12.8267	5309.63	12.8262	31.9913	15.2016	729.314	12.8257	13.7259	12.8257	12.8257	14.232	12.8266	76.5953
Nsg1	40.785	365.83	84.818	97.5912	12.9074	14.5737	14.5062	30.9732	12.9083	395.852	12.9082	800.816	133.452	113.71	14.1247	39.8615	19.9082	12.9094	114.897	384.565	32.2109
Ntm	15.9149	146.67	1761.17	27.3617	12.8854	12.8818	12.8818	71.8407	12.9005	1003.58	12.8928	477.889	46.277	1541.95	12.8845	20.25	12.8732	12.8728	17.8314	16.4634	19.3271
Ntrk2	359.614	1013.12	9890.19	44.3486	13.4135	13.0182	13.0678	100.646	13.5632	2287.03	13.4496	936.523	469.98	5696.89	13.8213	15.6615	14.697	13.6379	38.048	40.8636	1502.39
Ntrk3	25.9153	37.0478	371.675	18.203	13.4487	13.2819	13.0473	18.9289	13.5632	1534.64	13.9209	63.197	18.8291	110.22	56.1841	16.1011	12.9823	13.9341	56.4514	36.6629	24.7893
Ntsr2	30.8886	292.878	5423.2	16.6638	21.4424	16.1358	16.772	44.7947	22.2693	34.3698	21.1896	641.688	35.5279	7333.89	19.8099	47.9721	15.4195	15.2669	14.4858	13.2984	135.527
Nuf2	20.9115	575.286	29.6096	24.7905	241.343	30.7152	47.9007	15.3792	26.5399	12.9668	30.9691	343.965	19.5534	63.0061	32.0694	14.8519	18.5279	38.2258	17.888	200.766	301.026
Nusap1	30.6827	1113.57	27.5149	55.0518	1540.72	130.797	118.815	19.4499	56.5388	33.769	59.29	412.434	15.7842	101.854	51.8706	23.188	23.4084	49.2423	23.9407	326.571	96.6203
Nwd1	12.8728	78.287	5879.75	20.4152	12.9011	12.9018	16.4876	25.1333	12.9017	70.4632	12.9022	156.941	30.8504	364.057	12.9027	13.6035	12.8949	12.9025	12.8818	13.9964	241.561
Oas1g	21.2962	36.7497	12.9567	98.7051	434.897	196.749	296.685	56.2617	2056.27	12.9008	108.816	13.0787	13.0983	13.2594	57.8534	17.0647	129.436	40.3343	32.802	18.3929	17.4177
Obscn	13.9438	12.9318	18.0611	19.4427	48.2199	12.96	12.9778	16.9704	12.9571	24.7875	12.9687	13.3703	15.6971	13.0293	12.9775	8088.49	14.4343	30.3326	33.3041	17.0161	12.9095
Odz2	18.7603	22.6566	43.0175	19.8115	19.866	15.748	15.8434	36.0177	20.89	1147.79	19.6973	23.1169	27.9518	28.0254	18.5115	15.0416	14.9941	14.7586	17.873	15.2278	24.8346
Ogn	227.947	22.5839	14.7351	27.0882	12.9015	12.9018	12.8843	16.032	12.9019	16.302	12.9022	38.2481	13.3047	12.9066	12.903	253.291	12.8818	12.9025	1614.37	3792.14	198.205
Olfm2	44.0356	666.429	22.8256	17.6937	12.8233	12.8233	12.8233	16.5835	12.8233	72.4452	12.8233	291.748	22.38	19.5578	12.8233	14.9277	29.2707	12.8233	19.2004	19.5899	16.1803
Olfml3	101.819	74.6298	23.5574	25.1658	44.5127	33.8263	26.6077	3900.96	21.6875	17.7631	20.699	28.9555	45.4291	26.7273	22.5614	47.5258	21.8265	21.234	657.178	131.582	199.498
Olig1	12.8257	158.277	109.411	12.8262	12.8257	12.8257	12.8257	16.9111	12.8262	18.9053	12.8257	80.302	7129.67	383.454	12.8257	12.8257	12.8257	12.8257	12.8257	12.8233	12.8257
Olig2	12.8233	171.526	507.039	16.0331	12.8257	12.8257	12.8257	15.3586	12.8262	15.4989	12.8257	97.4581	1203.36	21.7426	12.8257	12.8245	12.8257	12.8257	12.8233	12.8233	16.9116
Omg	12.8821	186.569	515.331	18.9513	12.9025	27.2885	19.2335	68.8872	22.635	388.154	17.3068	165.13	3060.88	4406.79	12.908	13.9484	12.8827	12.9074	13.4929	12.8712	47.6964
Opalin	12.9008	22.604	19.1889	12.9096	12.9849	12.9099	12.9107	13.4003	13.0026	12.9001	12.9824	99.3792	2079.9	728.658	12.9774	12.9094	12.9086	12.908	12.908	12.8928	12.9616
Opcml	16.8052	51.8201	57.6259	17.2775	12.9025	12.9031	12.8839	20.9754	12.903	970.946	12.9025	52.3626	273.297	216.669	12.9017	16.7349	12.8827	12.8821	17.2438	21.4052	12.8933
Ophn1	196.985	229.433	666.912	236.914	12.9537	22.8397	48.4039	2245.98	67.9733	387.049	12.9568	96.7137	48.8252	516.527	12.9645	53.1243	33.2511	12.9689	82.1478	56.2662	587.416
Orm1	238.52	13.2233	12.8837	12.9728	12.9426	217.916	20.1823	13.8452	12.9538	12.8818	12.951	12.9018	12.8837	13.0143	12.951	12.9022	5044.04	12.9684	15.377	13.5043	12.909
Osbpl3	35.7076	20.5476	33.6837	29.4147	15.4724	47.0387	34.7365	80.866	132.486	422.186	1150.91	17.6121	21.5279	18.1664	144.153	309.056	94.4541	38.9591	77.3774	316.769	215.712
Osgin1	32.4755	18.7748	15.2987	23.3351	12.8267	573.321	37.6394	34.8853	34.4609	15.1717	34.1976	14.3705	14.0246	21.7494	37.3084	32.1937	2138.91	31.8815	107.486	103.395	31.7182
Osmr	542.943	21.088	121.988	868.354	12.9689	12.9078	12.9396	13.2053	12.9725	13.9129	12.9687	18.9695	12.9984	13.0795	12.9778	47.1366	131.633	12.9761	2247.27	1942.33	12.9316
Otx2	12.9001	14.6121	34.0236	12.9516	12.9789	12.9091	12.9096	12.9037	12.9822	12.8847	12.9842	15.5079	13.0077	13.1297	12.972	12.896	12.9076	12.9041	12.9041	12.8835	1805.8
P2rx7	27.2531	447.892	181.716	103.921	28.5406	56.837	390.651	1502.76	268.37	30.3843	25.1405	84.9239	154.33	33.65	130.015	24.3065	24.3137	44.43	126.838	119.918	286.224
P2ry10	15.5079	12.8934	12.8822	12.9742	27.3012	31.6456	25.6026	15.0944	12.9231	12.8777	1293.34	12.9542	12.8972	12.9646	454.079	12.9665	12.9008	429.508	13.9572	14.4928	12.9062
P2ry12	15.525	326.235	66.9413	17.7329	31.0486	69.442	96.808	4280.83	63.326	25.3356	12.9602	30.669	81.9385	152.244	12.957	16.4801	12.9386	25.6424	12.9008	12.882	938.663
P2ry13	15.4192	366.94	45.9146	12.9476	76.4551	382.391	61.7126	2223.75	55.9901	40.7498	12.9602	13.0097	38.0335	12.9646	12.957	12.9665	12.9008	20.7815	12.9008	12.8773	196.959
P2ry6	23.2421	316.926	14.9069	13.074	28.5499	78.2785	88.984	968.508	330.755	13.5076	12.8299	13.2217	14.0357	12.8498	12.8299	26.3783	12.8278	20.1866	93.239	22.9246	149.07
Padi2	17.9921	64.0858	425.227	18.0967	59.201	95.0575	81.2582	409.552	638.21	19.7742	2350.55	30.8828	792.239	254.95	167.152	19.579	15.8539	75.1553	14.396	16.6664	35.0294
Padi4	15.6472	14.7334	13.0344	18.2247	68.6337	3349.92	1154.99	19.8739	369.298	12.973	70.4471	14.232	13.7339	18.3109	20.9238	17.4888	44.1443	34.8244	15.7507	14.5292	14.5405
Pak3	32.3447	484.379	44.5556	17.8293	13.129	13.0753	12.9792	17.516	13.1717	573.986	13.2435	245.346	152.62	90.6589	13.1235	15.6596	17.0805	12.9532	40.4881	309.869	17.7903
Palmd	255.304	19.0048	57.3258	1402.62	12.9018	12.9008	12.8837	17.1101	12.9023	98.5108	12.9023	48.0586	14.1461	37.8785	12.9031	497.679	198.687	12.8818	39.0956	714.144	308.101
Papss2	179.596	37.7169	353.421	205.882	15.3389	31.6962	52.3542	20.5413	108.902	48.4326	16.1471	20.6636	16.0149	1147.69	17.9592	71.4522	455.638	18.9475	535.827	367.951	23.4466
Paqr5	13.3537	17.3118	14.3568	57.4854	12.8711	39.0371	18.741	12.8719	12.8716	18.2307	41.8124	21.5798	13.612	12.8767	12.8716	12.8563	12.8299	17.2339	13.7793	13.972	635.925
Paqr6	15.4261	22.825	176.738	12.851	38.0598	12.8299	12.8311	14.4974	12.8714	14.9881	12.8716	29.657	25.9104	811.899	12.8716	17.1991	12.8299	12.8716	16.9747	21.6408	33.2824
Paqr8	31.0886	247.45	1692.13	73.8435	12.8703	26.8381	26.0289	37.3696	12.8719	120.555	39.301	68.083	1356.06	233.004	53.4009	21.1196	21.7299	41.9786	68.7748	24.8666	21.9826
Parva	787.409	206.458	193.204	407.323	12.8839	12.8844	16.2246	16.9925	12.8851	54.0988	12.8843	259.874	26.4151	79.0439	12.8851	338.049	482.876	12.8854	1023.33	1507.27	811.624
Pax5	12.9791	13.0021	12.9388	13.0097	33.3913	27.2838	14.3509	12.9775	13.8496	12.9092	13.8613	12.9031	12.9346	14.6732	14.0402	13.4482	16.4923	735.372	12.9898	12.9098	13.1988
Pbk	18.4113	2725.95	13.3215	23.5341	480.725	46.7996	68.2719	12.9687	57.5135	12.8928	20.6	1095.12	13.8963	125.54	31.2213	15.2642	21.7778	32.9627	21.8329	316.305	12.9017
Pcdh10	12.8827	150.878	1660.38	25.8071	12.9041	12.8847	12.9005	22.7665	12.904	856.806	12.9079	299.355	483.175	1332.32	12.9031	12.9262	12.8833	12.8827	12.8835	15.8437	123.919
Pcdh9	18.9847	178.365	1695.82	22.1174	17.2289	14.5522	14.9178	47.9345	17.6314	1549.94	17.1821	237.473	3593.02	1078.73	16.2824	18.1627	15.4429	18.4797	286.137	374.905	71.2935
Pck1	1107.12	13	12.9458	13.5652	13.5206	13.4982	13.0263	12.9424	13.7923	12.9077	13.3914	13.0346	12.9314	14.4553	13.3471	15.3217	43.9209	12.9761	12.9763	12.9091	13.1526
Pclo	21.0847	40.7013	706.008	17.5639	13.3998	13.0315	13.4632	32.7876	13.6424	13737.8	13.5094	78.5065	130.601	96.4719	13.5074	16.8214	18.0905	18.3779	18.4892	20.4775	25.9604
Pcnp	232.394	1612.1	297.722	1441	214.099	155.751	172.285	135.836	134.621	203.379	371.807	1259.34	513.966	1311.71	197.341	200.614	171.534	208.602	331.114	392.693	5076.83
Pcolce	1235.04	21.8949	25.3122	40.0027	14.4654	27.5513	21.9218	40.2422	14.39	17.0294	14.7202	52.1898	17.3151	15.7678	14.7781	257.503	22.3739	29.8474	2889.53	3005.21	543.186
Pcolce2	63.5904	12.9571	14.3146	12.9023	54.5553	15.0399	17.5135	12.8909	12.8924	31.5973	12.9005	23.4863	59.3715	12.8966	12.901	87.1793	16.3371	14.7693	814.682	122.165	321.076
Pcp4l1	16.2362	18.7776	21.8893	260.651	12.8257	25.7006	18.3636	19.2836	12.8279	80.5348	12.8262	62.7446	20.7194	148.644	12.8257	655.304	14.1049	16.6738	84.0237	143.15	5174.15
Pcsk2	12.8292	48.3524	30.4347	12.8726	44.508	12.8697	12.8726	23.6972	19.9115	1717.18	12.8716	22.0186	65.2419	24.8121	16.0352	13.8262	12.8299	12.8728	21.2388	13.2369	329.368
Pcsk6	148.631	36.8646	370.183	55.3045	12.8716	12.8716	12.8697	12.8829	12.8719	21.2498	12.8719	122.8	468.251	327.504	12.8724	136.733	449.366	12.8721	2341.38	988.926	24.9078
Pcsk9	14.3722	12.8865	20.0884	12.8726	12.8716	12.8316	12.8697	23.9739	12.8719	23.5787	12.8721	13.2783	14.7789	12.8776	12.8719	12.8311	769.52	12.8721	14.4858	22.3722	12.87
Pcx	1976.57	545.317	299.601	63.189	486.445	20.9923	38.6587	38.862	29.6811	63.438	12.9095	122.616	493.015	220.857	34.0094	255.136	1117.54	36.874	27.5839	123.319	177.671
Pde10a	34.0751	18.2754	91.3108	88.5498	12.9091	23.9115	41.0425	35.3799	12.9096	2182.02	16.7215	33.3168	67.5069	12.9448	12.9102	21.8092	35.8446	12.9107	165.252	103.83	119.649
Pdgfra	586.603	69.7558	74.117	35.6983	19.9328	18.7695	17.8591	22.692	20.6175	18.8396	20.3606	31.4233	25.1405	35.9366	21.0804	44.6795	23.8296	21.0192	1649.25	1136.13	70.9976
Pdgfrb	604.708	37.5233	874.101	41.4379	20.9247	21.0847	23.6105	30.8644	37.9876	18.3054	21.7977	35.3907	19.7091	422.713	22.7443	366.826	22.351	21.981	2042.95	1446.88	33.8835
Pdk4	1875.45	61.5337	290.544	80.8392	20.9923	19.6079	22.0859	17.0336	21.6934	15.8946	20.664	44.7825	50.3672	374.317	22.2525	1948.8	79.101	15.1426	106.775	81.1741	437.105
Pdpn	73.6841	524.476	380.34	38.7255	21.4769	42.5588	18.1574	20.8089	21.1851	15.2416	20.9093	225.726	28.7714	681.924	22.9587	31.9484	18.2773	20.9942	814.682	1590.48	982.104
Pdzk1ip1	15.3693	17.3721	13.1842	19.417	3996.52	118.33	24.8682	19.9904	18.8204	13.0546	18.1965	14.991	13.1871	21.2025	21.4424	14.4197	23.8188	17.905	13.8257	22.4613	26.3802
Pear1	143.522	13.1443	18.4356	371.429	47.9504	44.4465	74.2912	121.152	12.9481	12.8845	1055.93	21.2804	12.9566	12.9791	142.252	93.9624	21.1054	218.686	230.093	183.725	12.9066
Pebp1	643.604	988.334	109.908	196.045	175.206	66.7172	190.556	88.5298	167.775	53.6931	133.948	1247.13	809.677	533.077	225.217	937.156	440.478	263.622	270.527	855.204	2400.58
Pecam1	99.1095	14.3367	16.3553	7868.09	140.617	128.285	46.3327	162.2	64.8271	14.3985	146.356	20.3246	18.0142	51.2159	473.696	575.236	38.1028	1198.51	130.647	17.2905	23.4918
Peg3	276.513	183.981	1135.97	48.7152	19.9665	15.7647	16.4167	39.4856	20.664	7975.51	20.4099	261.775	95.6034	536.14	20.9061	91.4045	27.6568	17.5151	268.51	119.09	518.584
Pf4	27.0445	1740.12	12.8867	85.4585	30.5715	165.888	1474.14	25.2144	37.374	12.8724	29.8829	27.3251	18.0062	12.9379	12.9034	27.6605	12.8972	15.5996	26.5273	12.8724	236.902
Pfn2	55.3588	524.09	598.927	117.478	24.0294	25.6085	20.8053	66.9681	25.3532	286.932	28.9046	978.268	1210.98	1134.52	57.1938	147.834	37.9148	43.9652	71.9626	371.349	1775.46
Pgam2	23.5977	15.7083	15.0947	13.1405	13.0315	46.6625	12.9481	20.6353	13.0473	21.3122	13.022	12.9691	36.0683	13.2761	13.0856	2922.77	21.5465	13.0753	26.9286	73.5227	12.9694
Pglyrp1	15.7523	33.7319	19.1279	1347.66	137.887	7214.59	81.4684	32.4164	296.079	15.6609	444.397	32.482	19.5164	28.5796	111.853	15.9174	24.1538	115.872	18.9587	14.8578	17.448
Pglyrp2	14.396	15.1231	13.5845	14.7923	35.1506	28.4237	20.33	22.6298	20.7576	13.1969	282.618	15.109	13.6466	28.6185	311.094	15.11	200.206	59.3144	14.4819	13.3321	17.454
Pgm5	42.7335	18.8917	29.8166	449.292	22.9077	17.2529	18.9995	17.4107	24.1008	16.5089	22.5891	19.9126	22.5737	35.9957	23.8644	1273.08	15.8904	20.398	49.1615	36.4638	21.2631
Phgdh	110.525	1003.91	368.094	21.9877	42.1096	46.16	25.4368	125.46	51.2996	15.4182	63.4182	824.792	2255.54	1434.37	132.114	20.7007	75.6108	422.182	163.992	282.069	283.736
Phkg1	31.635	23.0271	983.738	21.6514	13.1525	13.0989	13.2948	30.4436	13.1874	19.3168	13.1886	30.165	25.9019	867.743	13.1831	167.047	15.4509	13.3082	24.0026	16.4335	162.816
Phlda3	972.086	16.4092	18.1728	31.96	28.4099	27.9018	38.5947	13.7965	35.1219	17.5708	16.5051	35.7176	600.909	12.8278	32.929	44.7407	132.47	26.6976	178.853	435.636	46.0001
Phldb1	689.661	66.8953	269.041	130.888	26.0432	12.8292	48.8868	100.747	34.9872	137.877	12.8292	108.851	2198.04	255.898	43.6966	1145.36	159.879	12.8292	1116.63	450.561	136.025
Phldb2	181.753	101.098	224.305	467.347	12.8257	36.2209	14.2684	16.559	12.8262	32.8038	12.8279	76.6164	23.517	221.897	15.5677	158.363	1203.49	12.8292	376.715	1900.55	68.5295
Phyhd1	182.002	150.226	267.069	66.8361	86.0775	28.9228	46.2262	1440.06	45.5832	53.4305	44.8929	59.201	41.5814	277.787	58.5062	502.323	172.925	116.181	102.668	102.486	180.339
Pi15	31.7074	16.2364	17.8787	26.2827	22.8575	18.8843	18.3318	15.4143	24.0267	19.5651	22.5388	16.5077	17.3822	35.8038	22.368	22.0527	15.8641	15.691	687.948	362.448	422.471
Pi16	21.5071	18.6336	15.1031	27.3405	45.2418	3593.43	314.022	21.0006	595.223	15.9016	24.6361	16.0347	15.1811	35.8121	23.0602	77.3405	16.5661	24.7221	2456.1	15.6845	39.1176
Pigr	15.302	14.8736	13.088	13.9238	16.1174	16.9164	20.6739	13.2466	17.5486	13.0679	16.4904	13.9052	13.0813	50.5351	17.1671	14.8545	1927.49	92.9125	13.3981	13.2885	14.8928
Pik3cg	29.2922	158.299	15.9817	33.9609	70.1284	920.336	358.679	2118.56	556.224	15.7907	588.843	15.9343	20.5172	12.8233	255.946	22.6812	17.0257	440.882	17.4786	16.0738	40.0603
Pilra	21.8761	55.1586	24.7299	19.4897	152.712	2576.12	887.246	179.724	720.945	19.9978	39.274	36.153	36.6961	116.091	33.4537	18.8676	51.2278	43.1409	21.5703	18.5495	19.4413
Pilrb1	12.9598	20.0333	12.9479	13.0068	90.6737	938.351	342.014	20.5758	460.529	12.9079	31.8047	13.1021	13.614	14.5636	19.572	15.5738	27.6607	26.2397	12.9791	12.9094	13.1711
Pilrb2	15.5085	24.2003	12.9277	13.6126	66.5697	1001.75	223.584	23.6292	173.306	12.9086	15.981	13.3969	14.4323	14.5636	15.5307	16.191	19.7972	27.5754	12.9791	12.9063	13.1711
Pim1	81.6113	42.661	22.231	70.9868	2194.77	1038.94	334.425	27.7306	694.318	17.2425	3608.43	24.47	18.507	19.8696	427.465	140.633	182.433	547.838	450.327	56.9033	20.1851
Pip5k1b	17.1573	36.652	18.1459	26.402	1401.07	300.354	26.5567	20.9693	41.405	52.8545	42.6714	34.4844	43.4391	57.6918	43.3938	287.183	17.4696	64.8308	19.6102	14.743	944.609
Pklr	13.3772	15.9845	13.6482	20.0753	86.8802	18.5641	17.3401	15.245	26.8433	15.7296	18.1468	15.266	15.9436	23.1763	18.9489	13.742	2944.5	18.9224	14.0741	13.0734	16.0171
Pkp2	173.795	36.7556	18.8823	17.0029	18.1014	17.2322	17.1791	17.1838	19.2602	71.3001	43.4208	25.5822	16.8217	23.4636	20.316	974.083	639.291	19.7618	25.6786	27.6652	83.6395
Pkp3	16.226	14.4092	13.2346	19.0931	89.596	46.3319	41.5511	14.9159	121.196	13.1524	229.099	15.2223	13.2807	23.4619	417.703	14.6274	22.3161	278.387	14.2322	14.7892	18.5984
Pla1a	170.342	12.8233	12.8233	20.1585	12.8233	28.2941	17.306	15.8209	12.8233	12.8233	12.8233	17.0556	13.3954	12.8233	12.8233	37.1221	281.087	12.8233	703.788	21.843	12.8233
Pla2g7	31.6296	1535.22	3003.16	37.1894	121.448	1854.88	1075.27	53.0411	1118.51	52.0254	32.1025	137.68	57.1627	6909.35	17.7926	44.0794	18.9898	48.4011	20.0231	20.5252	801.468
Plac8	65.4578	12.8245	12.8233	15.1002	214.483	744.995	60.4709	14.2143	8221.31	12.8233	109.1	12.8233	13.1058	12.8262	166.64	13.3879	24.4447	1662.83	20.3727	28.0704	12.8245
Plagl1	63.4848	25.7261	128.709	42.1626	13.4487	17.8119	17.3858	15.1332	13.5732	72.8294	13.5974	72.2628	50.2516	179.264	22.471	49.4375	16.396	15.2201	192.72	195.571	1061.7
Plat	119.499	75.6998	83.4639	327.987	17.7748	16.957	16.4825	17.7189	18.2591	92.1095	18.657	328.183	2042.91	48.3764	19.9514	79.9554	52.8056	19.2331	1141.61	110.129	366.885
Plbd1	292.173	16.2714	14.3275	12.8299	191.13	4485.3	104.863	26.597	6420.26	14.1391	37.0721	13.2785	15.323	12.8299	28.8599	203.479	40.4172	299.42	19.167	12.8274	84.0732
Plcb2	18.4892	14.8226	16.2274	12.8707	95.9107	991.709	467.308	1293.18	293.398	19.7604	417.354	12.8299	14.3261	12.8715	465.568	28.7845	12.8504	514.107	15.42	12.8257	12.8308
Plcd4	18.3986	101.546	1733.11	22.0915	12.8697	12.8703	12.8299	29.9522	12.87	44.6864	12.8703	181.232	23.3533	671.414	12.8714	18.5519	19.0835	12.8703	26.1641	16.4973	715.007
Plce1	114.716	22.4081	421.559	35.4488	12.8697	12.8697	15.2484	15.6576	12.8697	55.6936	15.4319	50.1843	22.6871	25.1886	14.3268	249.469	155.113	12.8703	236.042	283.588	670.58
Plcg2	22.4401	17.6816	27.9079	72.0536	160.773	1256.25	902.235	1548.91	1964.02	18.9229	520.147	18.0638	52.7641	12.8718	55.0335	70.5263	18.308	2194.77	78.303	53.0351	29.7277
Pld1	63.1082	89.9612	237.106	107.436	32.4035	153.607	152.471	1742.21	85.691	21.987	81.623	122.65	254.208	68.5829	19.1201	37.4546	73.1963	19.1927	147.292	104.224	119.453
Pld4	21.9884	964.364	18.3492	18.0874	262.411	335.759	1449.32	2651.52	4226.03	14.6759	41.8448	15.593	34.2062	22.3023	40.5365	36.6379	21.2728	1498.29	22.6379	13.943	60.5396
Plek2	14.3908	12.8764	12.8719	12.8835	792.14	12.8703	12.8732	12.8827	12.8818	16.2314	12.8732	13.3082	12.8822	12.8909	12.8818	14.403	27.2654	12.8697	21.0234	18.4936	161.282
Plekhb1	23.6903	250.371	830.46	25.8894	24.0624	19.3699	17.8081	137.801	25.4027	78.1528	23.6556	149.493	6220.12	906.155	21.6772	19.0009	81.6383	17.4786	25.9013	29.571	2373.59
Plekhh1	36.0609	111.074	294.143	90.7975	22.5564	25.8162	28.9896	89.6087	27.0472	68.0088	25.0523	171.091	2663.31	330.105	27.3139	57.7917	108.62	50.4586	28.1264	19.4154	164.238
Plg	12.8732	12.8942	12.8775	12.9091	12.9031	12.9022	12.8943	12.8829	12.9036	12.8732	12.9037	12.9008	12.9055	12.932	12.9022	12.8837	3272.48	12.8827	12.8827	12.871	12.901
Plin1	4569.49	13.0641	12.9602	13.0801	13.9341	13.129	13.7257	12.9976	14.1633	12.91	13.9393	13.2032	14.1526	15.4172	14.5687	15.2919	13.034	14.3168	13.0182	14.9627	13.3101
Plin2	4248.07	373.438	80.9152	586.14	66.8934	607.139	1226.7	132.011	590.621	14.1301	92.9657	304.244	54.3393	118.426	60.0027	394.64	3286.62	52.3049	555.459	219.668	367.65
Plin4	4961.55	18.0795	56.043	19.146	13.9366	51.0075	15.8353	39.2387	14.3816	53.4913	14.3525	21.5798	21.5045	130.584	14.678	1858.05	42.9265	20.2822	40.1361	392.78	32.6348
Plk1	23.0261	395.103	15.2833	15.4847	1446.41	144.726	46.65	23.9619	82.3831	22.3102	40.091	215.474	17.2089	113.25	67.6801	19.4723	35.8226	37.095	17.7683	217.505	45.785
Plk2	136.875	170.661	93.1664	1520.25	12.9104	65.2902	122.453	87.9403	31.6854	948.017	95.0861	229.974	59.4973	38.5745	37.1568	209.763	661.374	45.4213	642.457	1109.61	407.694
Pllp	17.8346	50.3268	48.4739	215.929	12.9102	19.3064	12.9447	18.6803	12.9368	27.5324	12.9228	32.4298	5382.46	455.779	12.9228	15.2749	63.7347	12.9532	16.9084	15.7388	33.0365
Pln	15.2886	14.3857	112.463	18.0526	45.34	15.5468	12.8847	25.7287	12.9036	19.821	12.9037	20.7812	12.9055	76.2484	12.9022	7158.47	12.8827	12.9074	106.762	12.8719	19.3515
Plp1	27.0285	814.354	791.685	19.3204	31.0059	28.9228	21.5694	182.725	12.9326	87.048	60.7549	1035.94	157602	19377.6	42.2743	25.7927	20.2594	54.4663	51.7732	26.6344	318.413
Pls3	383.685	148.63	226.296	2025.56	12.935	15.5844	37.9277	56.7194	20.625	185.476	16.7427	487.867	255.841	232.681	25.2437	128.101	1412.46	24.0624	740.089	3260.19	199.135
Plscr1	36.1248	86.5937	31.2705	396.754	34.2645	213.376	55.2733	25.7771	45.3052	13.6787	72.9314	74.5967	20.4167	132.017	56.2044	56.7239	2415.55	49.5698	110.032	63.3062	103.486
Plxdc2	105.662	34.4839	316.062	25.5267	14.0222	26.1511	274.797	5652.13	25.1182	218.268	14.6135	35.7034	356.949	228.699	45.2974	101.4	14.1192	14.396	1041.01	521.71	242.888
Plxna4	34.5456	22.9061	188.135	140.783	37.7862	30.165	166.25	1725.83	29.8727	2070.68	16.5103	81.47	17.7986	34.3891	21.2589	190.433	17.4002	12.9094	188.333	66.8225	91.1842
Plxnb1	33.3525	187.137	5361.1	58.2785	12.908	12.9086	16.7618	48.2331	12.9087	70.2606	15.6382	315.917	804.329	1249.14	42.6836	582.34	178.689	24.0537	107.486	154.042	308.739
Plxnb3	21.3925	22.0522	154.779	14.535	12.9088	42.0984	26.8616	164.943	32.4164	14.9666	12.9107	38.8616	1978.57	12.9436	12.9099	36.4658	12.919	17.2638	21.6185	18.3384	119.486
Pm20d2	68.2128	37.8544	36.0965	16.3268	14.6711	14.601	19.1556	14.8172	14.5853	64.9717	14.9961	34.4357	31.0517	59.36	14.9706	561.104	55.7433	15.7692	38.2165	25.1659	385.353
Pnpla2	12763.9	334.767	148.978	416.408	275.89	831.053	335.911	315.588	710.227	32.5691	294.524	190.689	148.011	51.0558	242.159	1940.53	311.595	345.321	206.304	125.867	400.275
Pnpla3	1020.32	16.642	64.4259	14.7129	13.2217	13.2138	17.3321	21.4233	13.2319	134.533	13.3472	15.6086	44.0887	13.9406	13.3816	23.6542	24.3187	12.9595	15.0662	14.1489	72.5309
Pnpo	99.4075	34.2082	16.4201	69.2915	1395.79	128.1	115.231	93.3289	150.416	60.1716	93.6664	16.3002	29.2785	12.9282	92.0497	102.122	461.04	95.0256	21.6453	26.75	843.028
Podxl	27.9831	15.0169	40.4348	1349.96	12.8835	12.8839	27.4759	22.1982	12.8843	56.2099	12.8928	42.2646	20.1586	12.8935	12.8847	726.227	38.9597	12.8847	77.8366	12.8674	36.1872
Pon1	12.8818	12.8827	12.8843	12.9033	12.9015	12.8835	12.8837	12.9072	12.902	12.9691	12.9017	12.8821	12.8877	12.9187	12.9025	12.8765	988.397	12.9025	12.8818	12.8704	40.4369
Popdc2	20.2643	14.2442	15.4049	16.7188	638.597	47.4599	15.6333	14.3014	15.193	15.3986	15.7931	14.8194	15.6632	125.055	17.2258	2613.41	15.1534	17.4147	53.9297	16.8439	13.941
Postn	2679.85	19.0113	13.0679	29.9218	13.386	13.4487	20.4596	46.2351	13.4593	21.6093	13.4651	15.4285	17.4156	14.4182	13.8451	256.305	13.7306	13.7793	3765.44	4338.72	13.148
Pou2af1	12.8233	12.8233	12.8233	12.8257	122.367	99.9811	32.3352	12.8233	12.8233	12.8233	12.8257	12.8233	12.8233	12.8245	67.7811	12.8245	12.8233	4401.87	12.8233	12.987	12.8233
Pou2f2	18.6295	33.8242	20.0868	15.1192	559.209	141.661	686.032	1504.12	3490.43	50.6252	265.376	21.5798	15.1983	16.4809	105.998	18.7899	18.9213	1448.4	28.5305	12.9646	13.7186
Pou3f3	13.0184	260.319	518.956	15.0503	14.0222	13.1525	13.1932	17.2187	14.314	58.2691	14.0402	471.576	248.199	440.001	13.7233	13.1018	13.0345	13.0315	13.0346	75.1143	97.6169
Ppap2a	137.68	23.3111	43.8944	473.711	563.661	20.362	50.2237	170.736	39.0642	41.127	13.8896	34.9338	73.3684	226.54	22.3339	182.013	66.8655	24.1649	323.963	2223.78	528.072
Ppap2b	1297.06	957.865	7602.28	468.256	77.6886	27.4658	40.5422	71.8878	39.5089	31.8671	14.138	1498.29	554.965	12867.8	13.9207	573.18	221.74	122.367	2722.02	1726.61	405.655
Pparg	1082.7	19.5235	18.3625	94.3206	68.8378	34.8287	38.3072	17.779	110.269	48.5364	27.6563	16.5704	15.3156	38.9935	29.1873	48.919	58.8748	26.2315	46.8644	71.1339	20.7817
Ppargc1a	139.422	59.5428	1639.71	20.2975	12.8716	12.8721	12.873	18.4374	12.8726	530.475	39.164	118.763	16.8558	740.288	12.8724	672.753	25.5634	44.467	21.2692	21.8542	567.88
Ppfia2	16.3101	44.9835	110.206	31.9363	19.8089	15.4192	15.9619	28.6274	20.4168	929.527	19.6256	62.0947	68.1277	52.0234	18.4519	18.2343	16.0462	14.7334	34.9891	18.2256	40.5532
Ppia	2085.04	2937.39	602.398	2190.3	81.5457	66.2626	150.186	241.692	50.466	73.9838	41.9741	3496.42	1737.32	8711.85	161.064	65.9215	749.454	149.368	378.644	1282.71	3635.54
Ppic	443.159	88.8419	23.792	1556.93	27.4789	15.9046	25.1633	13.6523	12.9012	14.6705	12.9018	349.254	17.6519	95.1539	83.0441	107.156	25.3157	12.9011	757.435	875.746	30.6054
Ppm1j	18.7603	12.8828	12.8788	25.9631	12.9018	20.1143	19.6629	16.5438	12.9022	12.8728	331.965	12.8847	12.9059	12.9188	213.022	158.931	20.4366	23.129	23.2915	17.5313	12.8928
Ppp1r14c	14.4656	22.786	30.0706	12.9692	12.9097	17.3626	12.9315	12.9012	12.9228	48.1332	12.9345	46.5877	23.8272	12.9536	21.6943	711.399	12.8854	12.9109	19.9547	16.4154	42.9792
Ppp1r15a	166.765	149.203	45.5836	2190.4	5672.06	206.567	122.055	265.199	80.6178	42.2283	599.52	70.4678	294.197	37.0833	128.606	475.323	215.172	148.458	601.715	258.356	411.505
Ppp1r16b	26.4384	111.394	297.595	1104.31	94.6028	79.2127	33.3637	91.5255	12.921	414.509	470.26	80.2161	5135.76	380.066	383.747	92.2011	18.2779	719.497	21.5162	13.4513	49.4107
Ppp1r3a	12.8233	12.8233	12.8233	12.8233	12.8233	12.8233	12.8233	12.8233	12.8233	13	12.8233	12.8233	12.8233	12.8233	12.8233	503.879	12.8233	12.8233	17.0651	12.8233	12.8233
Ppp1r3c	242.647	70.0996	1131.59	33.5958	12.8233	12.8233	12.8233	26.4125	12.8233	23.4763	12.8233	153.414	18.811	296.644	12.8233	492.64	61.041	12.8233	49.3792	43.0088	40.2889
Ppp2r2c	13.8719	25.017	89.5064	20.1215	19.8949	16.9725	15.6704	39.3722	20.5794	641.994	22.6905	44.0632	1147.31	28.074	18.7313	20.291	16.0879	18.2671	14.7665	14.551	292.676
Pram1	18.1887	12.9089	69.5701	16.9472	65.1147	2590.82	149.406	145.322	253.135	90.8655	23.4253	13.2798	13.9832	26.5092	26.4799	19.6246	20.3405	42.857	23.3001	15.3448	12.873
Prdx1	2803.85	5716.55	1108.92	4898.72	69.6459	160.1	981.422	406.922	1061.64	147.003	739.152	7039.51	4512.13	22184.3	737.822	919.231	8470.1	550.094	922.634	2597.22	6929.49
Prdx2	699.845	4949.44	506.434	1304.69	23863.8	170.342	660.966	143.985	999.656	177.402	239.13	5271.27	1049.86	6399.7	591.821	2163.71	706.911	375.06	199.624	742.281	2135.48
Prdx6	1273.17	2981.4	2498.26	755.642	444.628	976.532	714.684	107.665	944.799	130.669	423.311	3215.42	1026.95	17948	785.077	994.511	3461.62	251.843	385.018	637.213	6394.05
Prelp	3028.08	192.24	1038.99	114.336	12.8292	12.8292	12.8295	19.1867	12.8292	14.9746	12.8292	22.0325	17.7664	415.007	12.8292	82.9583	24.3015	12.8292	4824.44	6495	1440.23
Prex2	163.953	61.1302	7084.59	1231.43	28.4357	27.4455	13.7504	50.3094	33.0921	86.8538	29.5415	52.4243	30.5646	1221.72	29.6386	259.378	92.9881	27.8975	525.471	123.813	74.6453
Prf1	12.9022	12.9474	12.9008	13.0474	12.9791	20.2798	12.9871	15.5116	12.9846	12.8847	3426.43	12.9537	12.8933	13.1441	71.6014	13.4251	13.0182	39.3205	13.0346	12.8849	12.9479
Prg4	92.0975	79.0811	61.4356	98.3367	12.9851	35.1656	4501.82	73.6085	35.7798	42.389	13.014	38.1522	34.0461	100.362	91.4551	109.927	588.16	44.2562	1434.21	151.532	88.1804
Prkar2b	2378.56	30.2869	20.5265	52.1241	1145.34	412.888	94.7002	18.8394	155.641	157.924	41.7902	96.2485	35.5213	52.9912	39.5912	19.09	19.0473	55.9111	114.442	71.7998	89.9509
Prkch	27.8077	24.9419	17.1403	1142	34.9891	80.8084	147.117	206.345	283.371	32.5605	685.02	19.4945	18.7244	26.9091	1048.65	129.027	24.3702	38.2724	24.0736	20.7598	19.7886
Prkcq	18.9271	21.1781	35.1807	22.3436	20.2997	53.1378	26.1238	57.1744	21.7513	15.5922	876.938	28.4357	548.359	515.707	1354.89	31.8211	14.7793	46.2435	17.1114	13.2414	104.012
Prkcz	18.3174	43.3098	67.9602	21.5512	35.0275	21.2849	21.9537	53.5049	20.0792	377.232	32.964	36.5007	1599.12	31.5275	70.2981	28.6799	75.0268	64.9027	21.4239	23.6074	248.206
Prm1	12.9008	13.6439	12.9001	12.9059	12.9761	12.9684	12.9097	12.903	32.724	12.8845	12.9778	12.8821	12.9806	631.983	12.9797	13.0934	12.9059	12.9797	12.9043	12.8833	12.9353
Prnp	849.608	486.239	4329.12	1113.1	675.479	67.6172	36.8152	40.9919	12.9992	556.124	35.6691	596.02	2534.83	9636.23	51.4537	993.654	137.688	38.2272	586.603	1122.44	2447.59
Proc	12.9011	12.9062	12.8931	13.0083	12.9763	12.9088	12.9098	12.9018	12.9795	12.8839	12.9781	12.9102	12.8931	13.1289	12.965	12.896	998.1	12.9037	12.9037	12.8847	12.9433
Procr	30.8683	16.4053	15.7662	262.677	19.1056	19.9969	22.7148	31.7884	19.6676	13.393	19.4473	15.6085	16.0839	25.6625	21.295	27.9642	41.4407	18.2186	390.625	74.2292	16.6863
Prr18	13.618	39.689	76.6969	25.8443	17.0438	39.4168	20.0091	75.1603	18.5298	35.5498	31.7225	46.0926	1021.38	20.7254	18.3653	16.8407	17.8109	19.9878	19.6858	15.9592	205.483
Prrx1	765.747	33.5506	479.49	26.4998	15.5796	15.1672	16.156	15.7236	15.9503	17.2882	16.1935	136.177	16.4052	340.287	15.5918	263.543	19.9049	13.2783	794.126	2171.94	18.823
Prss23	447.414	157.849	29.8233	747.422	13.1199	13.1501	13.2103	12.9728	13.1452	22.3515	13.1449	80.868	18.1112	13.6912	13.2222	105.17	15.6998	19.7825	627.349	6885.31	73.8593
Prtn3	20.6067	13.0641	12.9698	13.3597	170.915	212.48	210.612	14.5697	497.309	13.8201	14.4431	13.6181	14.1532	15.4263	13.8144	14.2688	20.0693	38.4007	13.0184	14.7075	32.8115
Psd2	17.6121	43.7842	1831.87	14.5515	12.9759	32.6478	19.3893	23.6599	12.9727	93.2756	31.814	56.9064	23.045	328.351	19.6235	13.2837	12.9033	18.5897	17.4352	17.8426	141.552
Psd4	54.5273	17.7924	14.5354	17.4007	128.979	973.882	308.088	499.904	349.305	15.1952	493.667	18.2091	14.4586	13.0863	825.708	19.5837	103.368	1352.34	18.2091	63.397	12.9317
Psmb8	275.746	152.637	17.1775	331.832	341.138	1017.39	569.935	230.89	3213.81	13.1079	1168.42	24.1824	20.1465	21.5584	3123.99	41.1795	445.848	1129.99	75.407	22.9292	81.4658
Pstpip1	18.3414	16.2652	24.6239	20.3383	81.8085	1956.11	167.556	44.0807	1067.32	17.743	603.874	17.168	17.2893	22.0892	745.93	31.6039	20.3174	435.798	59.4927	38.1877	15.7108
Ptgds	18.3686	726.121	343.583	33.6361	12.8299	12.8299	12.8292	42.446	12.8299	29.2077	12.8299	1202.25	446.661	5043.39	12.8299	1104.75	24.0879	12.8299	15.0399	13.135	2934.26
Ptges3	358.198	6080.98	394.581	3867.34	212.702	184.712	302.733	257.537	244.487	171.386	793.421	4295.72	838.695	7229.15	325.794	214.635	739.504	206.019	602.335	1127.33	15947.9
Ptgis	37.5097	12.8495	12.8299	12.871	38.2721	16.5604	706.023	12.8508	12.8507	15.9537	16.5399	12.9595	12.87	12.8518	12.8697	57.0439	16.7595	12.8697	959.211	251.363	137.476
Ptgs1	133.338	191.057	112.119	54.9479	100.098	499.316	2214.45	3324.78	107.324	34.4662	133.909	17.2638	26.7327	44.7314	12.8257	45.2232	12.8245	26.6786	107.51	289.274	154.129
Ptgs2	18.8858	12.8278	13.4972	22.9862	12.8257	94.092	12.8257	20.0113	12.8257	49.1601	12.8257	13.3956	12.8257	12.8274	12.8257	20.4014	20.9091	16.5704	4724.21	994.089	12.8257
Ptma	510.413	8204.2	554.316	4396.77	1250.17	346.34	844.862	215.503	2030.52	105.593	3893.8	9259.39	2662.33	5935.8	2100.14	443.997	968.252	2070.42	465.523	2556.97	3701.74
Ptn	19.9389	820.843	5580.47	674.74	12.908	12.9001	12.9008	41.3404	12.9089	360.285	12.9082	2822.41	3729.09	8397.7	12.909	23.1868	12.8844	12.8839	109.075	21.5956	193.447
Ptp4a3	95.6712	105.458	42.3633	209.558	3858.12	272.207	205.495	338.355	207.468	75.7325	554.888	73.797	49.1431	59.1939	714.66	1779.09	65.0326	3349.92	168.795	182.277	114.323
Ptplad2	34.3151	98.4312	18.9617	90.9613	61.5915	835.376	813.783	95.7155	961.831	39.7505	31.7741	21.3547	16.8242	12.8233	12.8233	27.9714	22.0086	22.1242	37.6012	104.799	68.519
Ptpn18	20.2798	23.3298	12.8775	68.8423	286.676	794.126	1094.08	330.011	3585.59	14.9946	1252.43	17.3197	19.0712	12.8794	732.32	27.6957	12.8766	369.169	14.732	13.0382	79.4519
Ptpn22	15.4211	15.6095	24.8298	12.8824	107.728	317.794	186.176	66.0166	613.766	20.5428	1509.98	14.7486	12.8818	12.8791	1152.16	12.8928	15.0199	303.846	12.8697	17.9159	40.738
Ptpn5	19.8489	30.9321	67.9945	17.4009	19.1271	17.9921	15.6436	24.3357	19.709	880.167	45.1296	48.9278	22.0861	38.2836	39.1741	14.138	14.6751	18.497	14.4941	14.6246	16.6974
Ptpn6	23.1944	126.214	18.1763	19.3673	375.437	3836.06	1999.13	1483.61	3474.8	18.1646	1108.51	20.2096	27.8811	25.8832	1367.96	34.6471	70.8144	4456.38	25.7192	19.3995	141.933
Ptpn7	19.1628	14.7315	14.269	19.8405	163.992	417.993	635.589	24.4488	311.303	16.4109	1430.54	16.5704	14.3861	25.8848	999.924	19.4548	15.8972	362.724	19.3053	15.4276	16.6974
Ptprb	52.4279	41.0373	24.8949	6545.82	19.3131	19.2508	16.8078	20.9605	21.5926	26.6155	20.3104	29.5079	89.349	26.4955	21.3007	699.13	32.1144	20.2822	366.698	21.1452	20.1017
Ptprc	27.8039	116.269	19.1139	21.4421	367.076	9434.51	2515.33	3209.85	5775.55	16.5677	19457.7	19.7958	20.9617	26.4894	8709.99	40.7061	22.3654	4199.83	14.7657	16.0188	94.1855
Ptprcap	16.6753	12.8498	14.8757	12.8732	383.44	254.043	51.7544	21.4844	72.5869	17.2149	1950.12	12.8697	13.1432	12.8772	2578.11	15.2123	14.9725	2638.69	16.4906	14.2476	12.87
Ptprd	146.673	130.434	1129.17	84.0323	20.1884	18.7579	18.6458	80.7895	27.7358	3137.92	25.5031	159.13	5423.2	2056.89	21.7434	80.7142	158.799	20.2821	200.038	113.672	128.299
Ptprn	25.7035	19.3148	95.771	20.9363	18.4232	19.1263	17.1205	35.5426	19.0644	1898.34	19.4865	32.963	99.4325	24.3231	20.6888	59.5909	24.0547	18.1887	24.6867	241.728	16.331
Ptprn2	12.8233	36.308	146.871	12.8257	12.8233	12.8233	12.8233	21.6536	12.8233	1059.01	12.8233	72.5153	29.6865	348.867	12.8233	23.1792	12.8245	12.8233	16.2259	12.8245	119.048
Ptprs	710.847	3772.41	3328.78	184.899	44.2705	62.4355	217.073	857.798	151.388	3006.79	69.0112	3746.51	985.686	3487.03	125.2	512.333	44.3897	111.984	619.952	1140.33	653.791
Ptprz1	18.2605	3032.74	13418	37.1363	12.8233	12.8233	12.8233	71.2166	12.8233	439.688	12.8233	3496.42	260.363	5655.33	12.8233	19.2327	12.8233	12.8233	51.3962	19.4213	1095.64
Ptrf	3934.03	137.92	29.5649	2642.88	12.935	30.6552	30.4568	16.2387	27.4155	18.1884	12.9537	246.825	24.7269	103.045	12.9687	1345.35	151.233	15.0214	1058.51	2762.14	1336.38
Ptx3	554.686	63.6912	27.7425	13.6922	12.9109	12.9025	12.906	12.8843	12.9388	12.8835	12.9109	41.9514	12.9323	29.5478	12.9369	29.5771	12.9008	12.9535	2994.74	2099.96	12.9067
Pycard	28.4302	226.674	27.6491	57.4695	176.272	246.54	1361.29	311.5	1447.02	30.8317	789.423	88.5864	26.4976	53.2533	1100.02	52.564	21.152	376.576	27.5909	22.5011	61.3316
Pygl	1006.95	17.338	82.9319	15.0891	64.7316	4897.57	1714.9	98.6799	935.313	18.2072	83.4859	32.5166	14.6573	52.7491	25.4392	124.89	1016.73	43.7024	38.1597	128.346	80.6473
Pygm	19.3677	36.7936	176.133	29.5802	29.7574	41.3138	22.3538	31.1071	12.8843	21.0868	40.5924	39.9612	21.3207	149.352	49.6784	6067.4	17.2405	46.5923	103.227	18.7339	469.581
Pyhin1	15.412	13.0797	12.8909	12.9086	63.6657	114.674	231.3	92.996	1169.27	12.8728	775.951	12.9086	12.8773	12.9339	712.121	12.9266	15.1495	1121.57	12.8835	15.6158	74.987
Pzp	12.8835	16.401	20.237	12.9095	12.9074	12.9001	12.9092	15.2799	12.9083	19.9713	12.9076	17.1473	12.9095	34.9979	12.9056	24.8562	9058.17	12.8839	14.7694	12.8719	21.1544
Qrfp	15.4693	13.0566	13.2483	13.1879	28.7167	18.8803	12.903	16.8922	12.9099	14.5702	702.896	12.9037	20.5004	12.9517	38.6982	13.157	18.2754	36.0424	14.3168	12.8726	29.2853
Rab32	111.423	78.4468	15.167	48.7688	59.7913	907.304	861.477	133.734	776.831	16.1821	53.7533	32.7702	48.4047	22.4524	56.1431	18.4984	147.458	45.4861	71.5513	204.943	42.4241
Rab33a	15.4743	62.4431	19.3754	16.5489	22.6131	19.2832	22.4339	22.6076	24.4753	31.0848	23.3821	62.7502	682.382	38.9377	24.6212	16.3518	35.4074	18.4025	15.6283	14.5185	19.0625
Rab36	17.5165	48.0644	241.471	14.961	12.9041	19.6723	18.9883	19.6273	77.8317	189.337	12.9097	55.6923	30.0402	414.514	12.909	18.2652	16.3663	17.1237	29.5156	29.5353	701.707
Rab3c	12.8812	229.121	60.3189	16.1497	12.9043	12.8854	12.9005	26.734	12.9077	832.621	12.9058	155.089	18.7005	80.0683	12.9033	12.9747	12.8837	12.8835	15.0684	19.8686	12.9018
Rab3il1	87.3915	198.317	48.2397	68.3415	2378.56	58.2841	75.5502	1803.42	67.5928	18.1752	13.0018	22.2996	39.5779	13.0802	12.9797	27.9721	15.2927	25.4605	64.1304	46.3473	201.835
Rab44	15.6857	12.8841	12.8734	12.8967	55.2359	1847.5	32.2733	12.969	215.046	12.8736	12.9097	12.9091	22.7283	12.9386	12.9094	12.9746	12.913	19.0451	13.0315	14.5702	12.9018
Rabl5	40.6999	446.988	88.6326	95.7793	38.743	35.2284	65.1057	36.8399	67.0547	80.3567	29.7895	613.292	155.538	905.763	37.256	34.2809	51.3946	102.779	38.2481	88.8777	649.611
Rac2	27.1452	174.812	13.0159	18.6058	606.063	8772.36	1738.98	415.929	2920.29	14.0929	3620.41	13.2819	18.3517	12.8919	5313.83	20.6474	17.004	4295.72	14.7334	12.8655	75.5467
Rad23a	301.711	321.387	144.793	248.947	19436	169.06	448.002	248.567	480.58	140.184	288.747	234.023	372.766	78.9609	415.452	845.346	560.366	418.819	247.261	228.127	671.214
Rai14	75.2645	16.8289	41.5831	914.143	12.8316	15.7815	148.198	44.5561	21.8611	116.439	26.3125	75.2769	14.5045	24.4047	25.1341	49.6507	306.484	16.7169	306.666	702.915	70.465
Ralgps2	25.8969	161.416	268.758	30.7813	126.394	96.6669	92.0465	347.465	104.399	419.514	38.9754	110.722	36.7707	233.814	196.776	65.9533	116.01	2822.41	34.3787	20.557	285.877
Ramp2	40.1172	64.8423	48.7766	1540.69	25.3437	19.4439	18.9416	23.3549	28.5585	17.3952	24.759	42.8713	28.371	86.0904	27.9811	114.809	18.0192	26.965	148.067	26.0317	23.2653
Rapgef5	52.3203	19.8808	42.0432	264.262	12.9086	20.2096	58.0158	1322	21.5309	207.406	12.9098	20.4541	453.032	12.9443	12.9334	84.3447	30.9563	55.0898	143.63	13.2613	12.903
Rarres2	1723.54	50.2108	67.7543	59.0222	12.9763	19.4085	17.4541	19.156	12.9794	16.8888	12.979	92.336	88.621	1770.28	12.9964	159.266	1868.71	12.9799	575.045	33.6148	13075.7
Rasal3	17.8751	15.8497	19.8083	13.7098	108.046	258.563	132.707	2413.26	146.7	14.1855	872.954	12.9935	19.8523	13.8282	2197.53	15.0366	12.9568	994.663	14.15	14.2228	13.029
Rasgrf1	12.9102	52.451	379.029	18.5227	13.2034	13.2783	13.046	37.0019	13.2649	4041.92	13.3473	20.286	15.0561	654.422	13.1499	12.974	12.9688	13.3998	15.6229	14.67	13.0757
Rasgrp1	12.9104	17.2165	321.33	32.4913	54.8166	59.9328	58.1125	21.1697	52.7147	1497.65	462.727	19.5374	13.5059	64.4798	1355.62	14.4517	18.0029	554.458	20.5653	18.631	538.815
Rasgrp2	33.9982	23.8966	40.3619	109.418	180.58	1446.41	572.839	18.8127	786.323	107.695	413.543	27.3251	18.2548	29.3166	932.072	117.599	33.2446	1643.89	37.7679	14.8406	13.053
Rasgrp3	55.6141	56.5187	63.8677	1571.68	87.5749	45.4213	164.217	2790.55	13.2263	19.8554	13.3997	31.1268	124.8	244.601	18.1044	195.848	25.9281	1320.08	89.9003	74.8213	29.4649
Rasgrp4	36.186	29.8812	58.3356	128.837	77.3648	2679.85	393.366	296.546	823.844	113.76	36.1228	19.6079	46.6874	13.9159	64.1929	70.6964	43.5675	98.9264	40.6123	12.9055	88.7322
Rasip1	35.9228	64.6179	30.3627	829.718	31.8029	107.63	20.2963	18.7059	17.5365	29.896	18.0094	67.7061	23.1794	87.5049	29.6601	288.712	40.6328	18.0052	24.2539	14.5359	14.9583
Rassf4	80.4927	103.883	19.6451	51.8945	103.003	194.086	1155.14	591.842	2205.95	16.2123	58.1401	21.7345	64.6749	26.8333	32.2495	47.1409	124.735	335.665	43.858	33.744	114.84
Rassf9	15.1426	12.8233	12.8233	456.916	12.8233	12.8233	12.8233	12.8233	12.8233	12.8233	12.8233	13.5206	12.8233	12.8233	12.8233	37.4401	12.8233	12.8233	16.1511	17.5464	322.227
Rbfox1	13.3172	35.695	82.4134	17.2046	15.6128	15.2023	14.4729	116.679	16.0063	1288.39	15.6377	30.3788	17.4556	18.4106	15.1329	302.325	13.3738	13.2798	18.9751	19.2787	14.5637
Rbfox3	13.129	54.7766	23.3584	23.8435	15.6229	15.2035	16.3943	36.6941	16.9264	734.401	40.3628	57.0199	17.4556	18.4161	15.9902	13.4248	15.0792	13.2798	14.3267	12.9887	14.5815
Rbm20	21.2577	30.768	97.4798	32.7311	12.8233	12.8233	12.8233	21.1377	12.8233	37.6104	12.8233	55.7821	13.5689	44.0439	12.8233	1656.4	25.4632	12.8233	31.0848	47.6082	112.51
Rbm24	12.8233	64.1312	17.8452	12.8233	12.8233	12.8233	12.8233	12.8233	12.8233	77.599	12.8233	63.4756	12.8233	110.718	12.8233	1306.48	12.8233	12.8233	25.4644	12.8233	136.465
Rbm38	68.9639	38.6852	20.981	28.1975	8261.75	780.792	74.0618	148.88	560.379	17.681	174.912	56.11	26.8199	12.8233	1088.42	793.04	53.9936	917.752	71.1657	25.9969	22.6043
Rbp1	54.024	50.2731	90.1949	264.154	110.983	18.1024	21.2513	20.1187	24.5706	21.4911	18.7117	73.9768	19.1835	966.221	23.1475	39.6537	57.4977	20.3547	258.707	36.3859	2014.1
Rbp4	931.068	22.8289	15.0506	18.6558	17.3129	15.8923	14.8623	13.4781	17.8201	19.3033	17.2844	18.3986	18.2423	21.6769	18.1151	15.5752	6083.92	18.1318	54.4663	40.0261	30.2377
Rcan2	46.4077	98.2173	155.418	41.9005	12.8257	12.8267	12.8257	20.7331	12.8267	265.036	12.8257	260.752	631.042	39.491	12.8262	1834.02	19.6195	12.8292	147.833	174.988	17.1676
Rcn3	188.044	400.287	34.1389	122.591	67.6172	31.614	61.9845	34.6427	27.4177	13.1549	40.9141	227.4	55.9668	87.1885	48.8337	84.1215	16.0051	52.7434	752.561	1097.32	41.1216
Reep6	425.331	23.4838	28.7319	16.4468	435.587	21.7122	26.0238	19.1163	35.8523	44.4779	23.2985	19.8676	38.6546	37.9711	25.9629	73.563	1128.19	23.3035	24.6799	27.0999	20.6188
Reln	24.8084	43.8106	79.595	25.9199	225.273	22.9321	18.9552	21.4808	18.9571	709.796	18.2859	27.0715	20.0347	24.0916	18.6469	38.014	129.545	37.0104	61.1728	23.8733	52.9576
Retn	1502.52	15.1117	13.66	15.1588	20.0089	98.8013	17.8954	14.6706	20.6988	20.3251	19.8132	13.4132	13.6269	28.398	18.6525	15.2514	15.0527	14.7694	13.1712	14.6109	22.1612
Retnlg	12.9352	12.9893	13.1661	14.0046	141.138	23863.8	22.394	16.4776	44.512	15.8738	14.1004	12.9025	13.4645	14.3938	13.8634	14.1886	13.7233	22.7168	12.9759	12.9056	13.147
Rfc4	36.7412	1098.95	32.6073	55.1121	383.167	69.748	82.2807	38.8145	106.39	28.1241	84.042	616.326	35.0786	453.267	89.6677	36.2161	49.6868	86.9615	24.5435	95.2179	41.4782
Rfx4	14.2345	171.269	1756.23	23.4848	21.2692	22.1981	16.7	23.2273	22.0696	52.875	21.0378	296.964	25.2914	440.386	19.9447	15.4206	15.4012	18.3686	15.2223	14.4074	163.92
Rgs1	19.8601	21.6729	14.7609	15.5887	35.6099	26.5962	65.6568	349.102	26.6096	13.3926	2061.78	17.7698	21.2596	30.6712	289.029	16.9182	19.615	33.3417	15.3647	13.4359	40.6682
Rgs20	13.3772	255.44	1166.24	19.5342	17.5509	14.7665	15.1767	19.63	18.1703	108.455	17.4861	165.484	19.7464	291.635	17.2459	14.4807	20.4474	17.3626	17.2523	18.3054	31.6391
Rhag	14.4694	16.2398	15.1108	24.0716	3005.48	21.6795	18.4273	15.4955	45.3757	13.7793	25.9403	15.1672	14.999	35.8398	21.4859	14.7538	15.8716	24.725	13.3998	15.6386	20.3889
Rhd	13.3085	15.6412	13.3915	15.1174	21999.9	54.9861	15.614	15.1715	47.3695	13.3653	15.3151	14.0726	15.1623	16.4665	15.3421	99.0692	14.888	32.4298	13.7793	15.1003	24.6895
Rhoh	15.3693	57.4685	17.2846	20.3061	102.706	155.804	112.722	564.195	103.194	13.6719	162.753	18.5348	18.0159	33.9737	1047.71	17.3227	17.1417	763.087	15.4724	13.8635	18.7498
Rhoj	259.315	32.829	28.7775	714.761	22.1479	23.1901	19.8199	16.5587	23.0495	15.7958	25.7188	53.7585	23.0927	33.9163	21.5933	63.4364	22.5696	20.9998	579.039	359.337	24.4032
Rian	88.798	19.9955	57.9695	27.817	24.7744	25.5979	18.7475	53.1882	26.2575	7357.37	24.2914	20.4322	32.9561	40.2853	23.3458	51.4216	16.5851	16.2259	673.136	554.118	104.886
Rims2	14.9261	56.0955	401.505	12.8233	12.8233	12.8233	12.8233	23.3261	12.8233	1110.61	12.8233	49.9402	169.404	30.3174	12.8233	13.2206	20.7262	12.8233	12.8233	13.136	68.5685
Rinl	33.7628	36.5363	21.0927	45.2602	63.6286	1167.07	269.552	196.754	341.07	15.5266	598.661	19.3083	42.6596	37.4695	1139.71	23.0239	21.4729	253.94	21.3851	20.3627	24.2381
Rlbp1	13.0339	417.779	185.322	17.4641	15.6696	13.6071	13.9768	15.9987	16.0528	13.8444	15.9727	120.503	26.3899	399.779	15.4318	13.1879	13.3816	15.3851	14.0724	14.1548	38.1066
Rltpr	17.5551	18.6192	20.0639	18.0518	196.81	101.125	26.4692	24.5305	26.9518	75.3189	89.8343	22.632	23.1795	22.4286	385.412	38.5131	23.45	865.477	21.6795	18.6953	24.1095
Rmrp	64.1755	13.0019	20.871	16.2857	49.0201	17.8217	37.2641	39.9969	13.7278	18.9782	13.8451	14.0222	14.2106	14.6679	19.3868	16.2332	13.8777	13.9717	19.0568	1425.68	13.1887
Rnase1	12.9086	24.4503	28.2066	13.9261	13.0101	12.9424	12.9425	12.9086	13.0264	12.9017	13.0101	19.3689	13.1368	775.481	12.9873	19.6727	12.9095	13.0344	13.5416	16.2939	12.9698
Rnase4	637.309	561.472	19.9601	157.821	13.0341	57.1143	104.799	2524.89	233.069	15.2968	22.5604	33.7628	76.618	501.932	30.3	61.9371	280.86	35.7401	1102.7	917.637	1095.06
Rnase6	12.9037	17.7584	12.9023	13.0947	74.023	86.3195	47.7526	33.4877	543.473	12.9008	34.9177	12.9695	12.9024	13.2884	15.6631	13.2269	13.0566	439.799	12.9097	12.9008	16.494
Rnd2	29.1801	34.7635	69.9624	22.8993	13.6181	13.905	14.5346	17.4607	13.8579	30.1147	14.0628	42.4956	892.31	77.1506	14.3538	18.5668	35.4535	14.2347	39.9991	25.2877	22.097
Rnf112	12.9595	16.928	21.3285	14.9881	13.6474	13.0606	13.1129	16.7493	13.8914	664.05	13.7086	13.618	261.581	15.0573	13.5594	14.95	13.0099	12.9935	13.0101	14.2093	13.2532
Rnf125	69.0937	19.1101	15.2948	596.254	29.9541	106.91	40.85	14.637	30.1656	12.9541	906.233	14.2345	13.86	15.0807	136.254	19.6167	82.5019	31.1685	149.221	19.9745	13.2533
Rnf182	12.96	89.0434	198.66	15.3196	13.6181	13.0787	13.1154	14.4	13.858	38.7482	13.6327	76.0873	19.0614	423.991	13.4315	13.3314	13.0036	12.9898	15.7682	13.162	352.012
Rnf32	16.0148	34.2411	40.7866	24.385	15.2816	13.5206	14.197	17.3984	15.5683	114.161	15.5143	49.6364	78.0026	34.1535	30.0854	15.6662	15.9067	13.2034	13.2783	18.2789	288.807
Robo2	12.8831	55.1873	260.318	18.0139	12.9088	12.9011	12.9442	16.4463	12.9094	875.378	12.9095	36.9459	24.2954	78.3525	12.9099	18.9179	12.9224	12.9104	39.5398	19.4477	42.7136
Robo4	41.0209	12.8968	14.3086	1369.28	12.9097	12.9097	14.5637	12.9797	12.9094	13.1309	12.9095	17.3689	15.8421	12.9445	12.9099	225.616	25.0239	12.9104	21.1711	12.9334	12.9034
Rorb	19.1972	289.685	2269.45	18.6445	34.2645	13.2493	13.5555	19.1661	14.7453	99.11	14.9618	318.136	24.8723	902.562	15.0739	24.6743	13.1385	13.0971	14.2975	28.5045	121.568
Rph3a	12.8716	20.0026	53.333	14.8446	12.9008	20.2548	12.8845	23.1975	12.901	551.83	12.9008	16.1788	30.6764	12.9056	12.9005	12.8818	12.8903	12.8732	13.2138	14.0965	12.8843
Rpl21	478.421	1286.27	241.36	1459.71	749.522	79.619	78.468	586.466	202.556	40.8021	63.5784	5582.56	430.793	2177.16	380.346	114.968	31.7864	657.972	251.049	4948.91	868.856
Rpl3l	14.3722	12.9041	12.9609	12.9796	12.9684	66.5792	16.9079	12.9788	39.5096	13.2415	12.9642	12.9088	12.9225	13.0446	12.9566	1372.12	12.9023	12.9689	15.0866	12.8831	12.91
Rplp0	3336.12	8394.78	220.286	4248.07	9259.39	1337	4042.54	351.721	17948	62.2737	3079.6	6261.13	1376.95	3671.68	24720.3	2269.45	3821	15952.7	3934.03	3416.81	1715.39
Rps18	898.399	2732.58	105.847	1783.33	4086.03	374.254	1245.11	352.743	15332.2	61.9494	1605.97	2941.74	469.856	640.37	8424.43	420.509	1513.87	3482.45	357.06	928.894	726.447
Rps27l	366.698	1085.39	50.978	725.961	547.007	137.732	306.546	79.4257	371.057	23.9288	348.721	2405.34	197.007	577.188	214.705	284.563	922.668	187.229	200.263	1313.82	595.146
Rrad	20.7068	22.9213	17.3857	28.8619	15.9045	22.3934	30.9027	61.4459	60.6928	14.9118	111.607	20.0259	17.4994	18.2241	139.176	1218.33	30.1859	45.1463	41.9583	35.3432	14.5265
Rragd	43.1647	105.854	173.984	21.0835	107.988	76.3896	26.5074	36.78	16.635	183.137	17.2127	90.0723	23.5019	121.516	62.3125	609.638	57.4965	35.348	91.2579	21.5988	754.258
Rrm2	34.9633	2337.29	21.539	57.4273	3082.46	139.836	137.157	19.2741	111.89	17.2909	64.4552	2437.08	19.7442	258.464	71.0522	27.2609	41.4646	76.3541	48.4145	840.677	226.541
Rsad2	74.2587	47.4177	31.6911	230.807	8146.31	744.41	160.503	29.7712	1054.34	13.9252	93.9892	21.0158	21.02	53.9676	60.919	75.8033	1112.22	41.3671	81.1608	20.5233	44.7689
Rsph1	16.5076	22.5447	17.1832	14.6605	14.7968	66.2053	15.1765	13.326	14.9623	18.911	26.6953	28.879	15.5019	16.3381	17.3168	19.522	17.3369	15.7693	15.1625	21.6634	5032.22
Rsph9	19.3141	135.902	70.5552	33.2084	86.2013	32.6461	23.7383	18.2294	14.961	37.5521	15.2429	275.191	36.9671	611.241	21.9114	17.1183	16.4446	38.5833	29.3434	28.6101	1302.44
Rtkn	31.6477	63.1981	96.9603	34.6704	13.0181	31.4028	23.1355	21.2941	13.014	148.666	13.0262	174.923	1419.73	108.34	16.2202	74.9143	366.96	13.0604	96.2061	119.637	123.975
Rtn1	19.1972	770.413	373.167	36.92	13.0181	28.0521	24.0286	550.594	113.654	5062.8	13.0781	2052.04	550.268	227.489	13.0476	31.4454	14.6047	30.7919	110.398	15.778	451.95
Rtn4rl1	172.494	19.2542	19.4691	17.924	15.301	36.1434	33.2121	1164.6	16.3966	288.69	154.957	17.2684	16.7324	17.7811	157.823	45.6706	56.8405	28.5499	68.9639	20.7876	160.165
Runx3	16.4548	16.8064	14.7679	24.678	85.2407	118.883	90.4153	28.491	337.515	13.8005	5584.05	16.0314	14.852	40.5557	428.72	18.2274	19.6715	414.038	16.2788	21.6899	20.2325
Ryr2	29.7713	13.046	86.7161	19.6235	12.9031	12.9031	64.2861	34.4298	12.9033	3161.37	12.9033	21.1061	25.925	12.929	12.9076	8674.88	12.8827	12.9074	58.148	13.0868	46.812
Ryr3	15.5252	12.9724	30.044	21.1976	12.9031	12.9031	12.9083	36.8438	12.9033	2111.15	30.5134	18.1887	20.2904	12.929	25.7347	28.8158	15.1288	15.8691	17.1784	17.1626	17.4908
S100a1	745.48	589.944	203.42	376.408	96.6264	93.8751	311.06	37.0185	196.832	18.6409	128.799	563.661	324.808	6260.24	30.5669	2513.5	231.744	28.7768	72.4002	249.986	1273.35
S100a10	629.609	165.392	24.4726	566.858	146.673	187.461	941.015	31.0277	1930.85	22.2981	3766.69	437.581	22.5473	61.3072	3643.72	159.723	1722.14	831.053	1513.53	430.053	121.522
S100a11	1135.79	114.821	17.1608	658.033	99.5797	3467.15	153.399	30.8989	1159.02	14.4194	1359.66	193.367	21.8842	36.0205	122.379	112.686	257.89	262.53	1029.1	4317.03	259.748
S100a16	239.326	1262.52	434.078	1461.61	24.6264	17.2921	18.3995	27.6619	25.4191	22.69	22.5956	1302.04	1847.7	4744.53	22.902	221.428	148.634	23.2957	218.686	235.283	127.891
S100a4	331.234	23.3264	23.1878	23.2713	145.546	241.554	730.657	23.319	14220.7	12.8716	422.48	28.7138	14.5121	205.216	180.432	23.8301	20.9693	39.9724	164.568	10396.5	12.884
S100a6	1554.67	224.241	87.537	361.451	216.201	7704.42	601.425	25.7126	7047.59	20.2869	1893.9	296.881	245.724	1382.55	646.145	131.576	52.953	116.388	1245.8	9053.47	137.201
S100a8	12.8732	12.9256	12.8843	12.905	144.551	50604	35.9482	44.9779	130.644	12.8697	39.2195	12.8306	14.8447	12.905	34.8611	12.8954	12.8885	37.2223	15.5797	13.8373	12.884
S100a9	12.8721	12.8775	12.8837	12.9023	337.762	157602	33.399	40.136	200.303	12.87	39.7369	12.8732	13.7386	12.905	39.0679	12.9099	12.8885	39.7661	12.8732	12.8507	12.884
S100b	31.8258	85.2432	547.755	20.1159	12.8257	12.8257	12.8257	50.8598	12.8257	35.2177	12.8257	44.4775	2407.11	1399.79	12.8257	18.0951	12.8233	12.8257	21.0657	98.5505	803.439
S1pr4	15.3038	12.8782	12.8299	42.7322	71.9626	616.782	66.6663	34.3515	106.766	12.9744	526.571	12.8697	12.8719	12.8767	785.504	17.2484	14.128	597.922	14.6717	12.8257	12.8697
S1pr5	14.7665	18.6958	29.678	12.8302	25.7133	37.0639	109.376	16.0692	133.389	17.1073	1396.84	15.8323	665.207	141.931	14.3483	27.9275	19.0373	25.4993	12.8299	12.8257	12.8697
Saa1	13.3998	12.8262	12.8257	12.8283	12.8292	12.8299	20.2421	12.8257	12.8299	12.8257	12.8292	12.8292	12.8257	12.8498	12.8295	12.8257	4709.75	12.8257	12.8257	12.8465	12.8292
Saa2	12.8257	12.8262	12.8257	12.8299	12.8292	12.8257	12.8292	12.8257	12.8299	12.8257	12.8292	12.8292	12.8257	12.8498	12.8292	12.8257	4747.89	12.8257	12.8257	12.8245	12.8292
Saa3	84.6715	12.8274	12.8257	12.8295	12.8299	40.312	837.902	12.8257	82.4341	12.8257	12.8299	12.8292	12.8257	12.8501	12.8292	13.7971	207.644	12.8299	40.2541	17.4945	12.8292
Sall1	12.8697	319.55	491.111	17.1638	12.8835	12.8721	12.8837	5180.87	12.8841	23.1515	12.8835	334.445	284.097	141.305	12.8824	15.8085	201.879	12.8716	16.3096	12.8308	103.724
Sall3	12.8316	226.016	593.998	17.2155	26.1641	12.8835	14.2871	1100.51	12.8837	15.0016	12.8837	621.288	35.0064	955.883	12.8831	13.306	12.8716	12.8839	21.052	12.8308	34.4007
Samd14	39.3855	28.3114	54.1373	24.1192	2424.16	77.6886	16.0209	17.3093	47.4448	41.4216	12.8299	88.798	50.0172	28.6501	12.8299	44.9118	20.4587	24.5647	50.0452	74.6928	139.012
Samd3	12.8299	12.876	12.8714	13.1005	12.8732	17.1114	14.2474	12.8821	12.8775	16.6752	1592.99	12.96	12.8516	12.8836	51.7842	12.8772	12.8697	24.6719	12.8697	12.8295	32.4366
Samhd1	388.72	120.199	160.371	433.375	864.2	4961.55	2141.64	765.183	8584.94	92.6784	1285.44	84.0884	48.3498	111.646	2878.21	145.807	227.389	3153.71	422.591	385.865	173.617
Sash3	17.5165	49.648	13.3161	12.9803	141.661	1171.78	469.825	416.613	989.069	13.6226	575.281	12.9791	16.7605	13.0652	1789.1	14.0973	16.5087	1465.56	12.9028	12.8824	17.6233
Satb1	27.233	149.9	324.827	34.0819	70.2137	573.321	40.8501	162.286	95.1838	393.282	3012.86	240.111	128.952	195.742	5135.43	144.586	12.9008	631.079	51.7788	17.0526	158.542
Sbk1	177.52	125.587	131.69	24.062	120.581	86.8802	89.7367	26.8791	200.355	98.5602	144.642	229.458	413.991	96.7208	317.314	1062.94	61.0289	1879.11	38.1522	27.6992	17.8416
Scand1	126.838	19.6292	18.1471	42.4223	628.133	365.856	539.531	35.1671	2250.2	23.7727	100.462	21.981	58.1147	31.8087	56.2765	136.588	265.12	197.142	78.6669	122.586	29.2774
Scara3	77.0899	52.275	1203.84	34.9787	12.908	12.9086	12.9013	12.9761	12.9083	26.2808	12.9091	48.2391	17.9713	846.704	12.9099	18.1302	16.002	12.9091	242.425	601.599	16.9957
Sccpdh	123.57	275.691	203.635	125.028	42.2674	29.0547	58.2354	134.587	42.2722	108.036	70.7215	279.489	3326.04	733.483	55.853	316.709	77.7195	40.7638	84.8229	150.964	995.773
Scd1	157602	115.878	577.359	53.3522	122.294	74.2219	45.1825	58.1403	12.8233	68.4339	20.4039	436.929	1538.32	149.07	43.6524	29.8601	15865.3	1963.93	360.463	1547.34	225.455
Scd2	9615.28	1954.75	6130.65	488.003	71.177	88.7591	152.145	380.197	146.666	640.255	301.411	8031.93	29584.4	9314.09	687.161	105.993	73.5473	699.46	773.415	3770.53	3228.92
Scd3	2353.96	16.9269	61.3287	21.3468	12.8233	17.6121	18.0687	21.6645	12.8233	17.3794	12.8233	24.8047	101.795	114.148	19.8096	14.0684	141.909	25.7035	23.1421	15.8013	41.4004
Scg2	12.8233	29.845	34.4328	12.8233	12.8233	12.8233	12.8233	14.5521	12.8233	834.091	12.8233	22.4793	15.417	12.8233	12.8233	12.8233	12.8233	12.8233	13.618	21.0772	16.2105
Scg3	15.0399	760.196	5083.79	52.0891	12.8233	12.8233	12.8233	47.6277	12.8233	420.916	12.8233	781.307	355.146	4322.3	12.8233	15.022	12.8233	12.8233	19.8169	12.8233	798.341
Scg5	12.8233	901.062	109.624	25.2695	12.8233	12.8233	12.8233	18.6239	12.8233	339.878	12.8233	1984.84	414.159	1567.43	29.7913	12.8233	12.8233	12.8233	13.6181	13.7505	217.957
Scn1a	12.8257	12.8295	26.7298	13.0893	12.8299	12.8292	12.8292	16.7372	12.8299	1736.22	12.8299	16.1511	15.6705	12.8501	12.8299	12.8485	12.8267	12.8257	12.9426	15.2533	19.4267
Scn2a1	24.9852	61.7397	82.234	25.604	12.9695	12.9088	12.9091	21.4498	12.9775	2545.01	12.9867	31.3638	60.9339	31.1691	12.9646	14.6058	12.9037	12.9791	41.9645	43.4234	12.9323
Scn3a	15.8832	29.2522	38.5651	16.7032	12.8316	12.8316	12.8292	17.0535	12.8316	1162.45	12.8697	28.5179	41.2556	19.6684	12.8697	22.3745	12.8292	12.8697	30.9745	20.1177	12.8299
Scn5a	15.2833	12.8292	13.8237	12.87	12.8316	12.8299	12.8299	12.87	12.8507	28.2036	12.8697	12.8697	16.0293	12.8518	12.8697	2554.9	19.0761	12.8697	18.2285	13.1359	12.8299
Scn7a	316.356	12.8304	13.2439	12.8697	12.8299	12.8299	12.8295	13.5847	12.8308	69.2171	12.8308	12.8299	12.8697	12.8511	12.8697	101.962	12.8292	12.8316	775.455	19.6162	128.251
Scn8a	15.8804	53.3587	414.618	29.7554	12.8299	12.8299	12.8295	30.6308	12.8302	2917.86	12.8316	95.8621	179.489	117.21	12.8316	13.5525	149.86	20.0193	16.9512	13.7825	37.8862
Scrg1	12.8292	248.222	200.299	16.1822	12.8716	295.986	12.8724	16.3698	12.8724	14.9282	12.8716	265.882	454.462	8120.29	12.871	12.856	12.8299	12.8721	12.8299	13.027	37.2465
Sdc1	297.953	40.1762	12.9419	33.388	36.7112	26.9735	36.1582	12.8233	48.952	12.8233	12.8233	96.8533	22.2638	66.7125	41.3438	36.9985	1536.46	129.831	216.201	435.566	60.4973
Sdc3	563.661	281.797	338.205	277.742	252.068	152.195	3911	193.567	1303.79	257.918	51.2863	217.142	50.5902	172.589	51.4114	440.74	36.2501	53.7585	1047.23	882.746	40.5566
Sdc4	463.016	960.689	1317.01	88.36	57.4565	42.8713	50.9621	74.5895	12.8233	21.6801	201.289	173.489	71.3452	3895.22	38.5427	87.9372	1452.43	747.495	1726.68	1121.59	5867.1
Sdpr	2713.34	21.9014	18.9965	2908.29	23.5153	38.9729	21.9562	16.5586	27.369	30.291	30.6711	23.5635	39.806	33.9311	24.6437	739.062	22.4807	23.6903	412.888	1369.89	407.762
Sell	14.732	16.9725	14.4185	19.2653	120.222	5313.83	180.639	23.2399	1199.33	13.4937	2582.55	15.1746	15.6363	36.7463	2278.67	17.2641	17.8987	2029.78	15.748	13.467	19.358
Selplg	20.6168	111.031	23.4633	25.1649	198.698	4569.49	2237.45	8411.75	4139.11	16.0524	2330.03	18.7676	52.8293	34.7598	2596.78	28.5318	22.5816	597.922	19.9708	14.2858	247.327
Sema3c	223.832	18.377	16.383	270.906	13.0606	13.0971	15.5904	15.0323	13.0994	45.6246	13.1018	85.9487	21.634	13.5177	13.1664	149.757	13.1441	13.1286	450.963	561.718	38.6361
Sema5a	79.4096	55.2635	81.2658	32.016	13.0348	18.9625	18.0816	19.6819	13.087	263.317	13.1243	53.7487	1675.72	43.6248	13.1391	60.5536	20.0419	66.8696	206.897	76.0152	49.9343
Sema6a	39.196	122.04	667.656	609.211	13.0958	13.0872	13.0066	21.9973	13.1129	239.942	42.8027	193.402	2303.7	297.406	13.1351	133.873	15.5877	13.1524	199.013	79.6365	108.521
Sept1	27.8039	30.2244	14.4655	69.3629	253.684	285.01	31.9845	21.1254	16.8551	13.1394	716.414	24.191	31.9529	19.581	555.204	23.9609	20.4098	1060.53	20.0259	29.5261	18.3609
Sept2	1527.19	4023.68	998.199	3189.3	364.117	368.11	728.601	371.933	487.962	384.071	483.5	2210.46	2821.99	1251.33	369.442	632.312	892.276	467.283	1108.37	840.095	10490.3
Sept3	16.6879	394.138	279.621	26.9358	16.2962	17.0185	18.8615	42.3343	16.8575	1489.24	17.1298	531.344	47.4742	185.235	15.9899	18.9397	15.9558	17.3822	13.9368	24.801	27.2041
Sept4	32.4907	145.905	301.939	839.813	41.3413	17.2893	23.5468	72.0751	17.7193	121.283	145.129	208.359	8214.73	2081.14	33.1538	108.879	13.5424	23.5845	108.527	20.4084	179.979
Sept6	37.9248	97.7952	112.897	29.4022	86.7604	255.552	90.0479	78.9717	233.811	234.604	2109.37	131.595	19.0558	25.4557	1332.37	47.1	28.9522	966.03	137.3	33.6449	51.2097
Sepx1	306.092	88.266	25.7272	77.5938	450.583	9082.57	818.026	36.6305	4485.68	22.4978	127.867	73.3037	101.613	194.321	108.872	578.977	326.732	96.4315	73.8564	204.17	40.9282
Serf1	31.4815	382.005	30.8828	46.9944	53.4541	27.3028	33.1924	18.1161	47.4933	17.2363	41.1173	607.464	46.2207	221.404	39.1449	39.3488	56.928	31.6584	33.3913	75.664	65.5694
Serpina10	12.8716	12.8781	12.8928	12.8818	12.9011	12.8827	12.8827	12.8721	12.9017	16.6224	12.9011	12.8818	12.8871	12.9061	12.8931	12.876	597.868	12.8736	12.8812	12.87	12.8847
Serpina1a	14.3721	12.8781	12.8784	31.982	12.9008	12.8821	12.8827	12.8721	12.902	12.8711	12.901	12.8839	12.8722	12.9061	12.8931	14.2828	23863.8	12.8736	12.8818	12.871	12.8847
Serpina1b	13.3998	12.8781	12.8716	96.8559	12.9008	12.8821	12.8827	12.8721	12.902	12.8703	12.901	12.8835	12.8722	12.9061	12.8931	13.9934	6237.46	12.8736	12.8818	12.87	12.8847
Serpina1c	12.8721	12.8781	12.8716	13.1395	12.9008	12.8821	12.8827	12.8726	12.9022	12.8703	12.901	12.8839	12.8722	12.9061	12.8931	12.876	5483.22	12.8736	12.8818	12.87	12.8847
Serpina1d	12.8728	12.8781	12.8784	25.4772	12.9008	12.8821	12.8827	12.8719	12.9022	12.8703	12.901	12.8839	12.8722	12.9061	12.8931	12.932	4740.25	12.8736	12.8818	12.871	12.8847
Serpina1e	12.8716	12.8779	12.8716	19.4315	12.9001	12.8818	12.8824	12.8716	12.9008	12.8697	12.9001	12.8835	12.8712	12.9053	12.8851	12.8956	9949.26	12.8732	12.8732	12.8507	12.8841
Serpina3g	29.3846	12.9726	14.4185	116.749	118.028	66.8231	42.3554	12.8779	92.9086	12.9269	809.356	12.9018	12.9012	12.905	88.4014	16.0826	42.6339	493.008	54.9618	15.4188	12.884
Serpina3k	15.3137	12.8915	12.8716	14.8211	12.9001	12.8818	12.8822	12.8719	12.9005	12.8697	12.9005	12.8839	12.871	12.905	12.8926	12.91	8914.84	12.9011	13.0182	12.8507	12.884
Serpina3m	37.7009	14.914	12.8774	12.9051	12.9001	12.8818	12.8818	12.8716	12.9005	12.8703	12.9001	13.2031	12.9012	60.6619	12.9005	16.0262	1066.87	12.9011	39.0235	14.1607	12.884
Serpina3n	902.976	89.0127	131.488	22.744	12.9001	12.9008	12.8827	12.9015	12.9005	25.2587	12.9005	29.9541	39.7999	708.987	12.9008	57.5592	2075.34	12.9015	1520.36	402.965	12.884
Serpinb10-ps	13.5908	14.5268	13.2559	16.6959	19.3014	248.191	284.681	15.3453	1114.96	13.123	21.2823	14.4694	14.6569	24.2772	17.8708	14.7333	15.7687	20.9293	14.3144	15.4613	34.9213
Serpinb1b	12.8821	12.8832	12.9022	13.8964	12.9028	24.2733	24.7503	12.908	12.9034	14.7488	45.5419	12.9008	12.9077	12.929	12.908	12.8778	22.8794	18.5078	15.0662	16.6981	574.816
Serpinb2	13.1021	13.157	12.9792	14.2759	14.6699	23.6374	57.2803	13.0137	15.1311	12.9775	15.1792	13.1524	15.2237	16.5277	14.2659	13.3274	17.3812	15.0662	20.3971	18.7098	13.7337
Serpinb6b	26.3531	12.8935	12.9008	330.548	383.817	20.9778	33.2588	12.9538	12.9056	12.8728	2039.22	12.9001	13.2251	12.9283	188.278	209.061	72.646	47.3475	34.8123	66.444	189.601
Serpinb9	109.391	28.0863	49.9488	737.523	81.2163	35.7709	77.1782	58.2166	36.2625	16.8717	2756.43	25.3566	15.7115	23.2864	99.3576	61.6134	183.975	63.8431	160.155	193.466	182.257
Serpinc1	15.593	18.5164	23.0743	26.4051	14.6709	22.9966	19.8133	19.3124	14.9139	23.997	15.4785	19.2832	15.0152	16.5433	24.5169	14.3508	3333.46	23.1211	17.2714	16.1704	20.7966
Serpine1	1273.17	13.1485	14.1192	93.2641	14.8194	18.2802	34.7726	66.2888	15.0312	15.7714	14.7696	13.5431	15.0587	16.3727	15.4712	338.177	2477.33	14.9392	14146.4	8988.97	13.7063
Serpinf1	2310.15	27.4062	90.6973	40.2331	14.9176	20.11	25.8655	191.298	56.9555	20.1971	15.1315	20.5085	29.781	16.435	20.8231	98.4742	1606.12	19.9442	1893.95	918.113	20.0229
Serpinf2	12.9935	14.0103	16.0283	15.9646	42.5175	19.8229	14.7488	20.9205	15.0654	12.9568	15.3848	13.1501	15.1583	16.4439	15.3055	13.1779	1824.84	23.5251	13.1483	15.2866	21.2969
Serping1	1948.68	36.945	28.3181	35.2685	61.7173	26.3863	18.928	15.4994	14.8441	14.6908	14.8112	45.5331	15.5854	68.8771	15.1497	180.568	3295.62	17.8362	5928	318.613	109.929
Serpinh1	2456.1	134.03	137.556	1016.4	14.9261	15.0333	21.4384	16.0028	15.086	13.0781	14.8336	438	93.3694	185.237	15.1534	1654.42	25.7532	19.609	3266.2	6397.99	125.414
Sez6l2	18.994	54.4694	87.4646	36.6303	13.0787	35.8307	21.1985	40.6868	20.3393	369.272	43.1112	76.4419	2090.23	793.62	25.6048	60.8474	28.7604	35.114	20.3262	15.7054	12.9945
Sfpi1	24.566	25.2445	16.8408	17.4105	178.617	2359.54	1225.52	606.552	1956.89	14.1289	31.3187	15.8355	26.5125	41.172	24.3463	28.1246	28.9512	364.581	19.6242	14.5387	37.5884
Sfrp1	182.827	276.156	381.468	21.4245	17.8734	17.6093	21.0177	17.36	17.6546	21.2666	17.1975	383.44	52.1734	558.353	17.5594	55.2153	15.4552	13.8177	537.417	940.792	718.283
Sfxn5	136.215	411.126	3038.67	63.3209	26.0619	756.089	40.3141	129.005	30.2722	191.235	23.254	83.5329	151.749	1330.56	23.7546	25.5834	87.3491	34.2142	37.5721	22.694	250.291
Sgca	13.8177	15.9937	15.7027	16.2657	19.8209	15.4192	15.8084	14.0253	20.4208	13.3541	19.6321	16.2962	13.6068	27.8085	18.689	869.523	14.9585	15.525	17.3783	14.6596	17.199
Sgcg	13.8177	19.1134	17.3147	17.7415	19.7987	15.7051	15.8051	13.983	20.4145	18.4007	19.6233	15.6911	14.7883	27.7109	18.4497	1659.25	14.9363	14.7334	19.789	15.8287	124.159
Sgms2	54.5722	24.0475	22.2771	178.448	21.0695	908.866	79.2652	20.2782	101.323	24.9603	22.7047	22.818	54.3917	30.8802	22.3508	23.4456	654.35	22.2963	569.9	265.668	940.75
Sh2d1a	12.8299	12.8504	12.8292	12.8718	12.8728	12.8732	12.8721	12.8299	12.873	12.8299	384.348	12.8703	12.8295	12.8788	337.717	12.8768	12.8507	23.9938	12.8299	12.8279	12.8714
Sh2d2a	15.42	12.8498	12.8721	14.8892	26.7947	28.0782	20.4097	12.8718	12.873	13.4108	1635.99	12.8711	12.873	12.8788	738.255	13.3991	12.8507	140.209	12.8316	12.8292	16.3101
Sh3bgr	15.6911	32.9922	15.5168	19.7333	16.4595	14.2345	14.8489	15.1104	16.9527	15.7865	16.8142	22.9846	17.3105	41.5754	16.0566	1990.12	20.0528	17.1344	24.063	19.2531	39.0972
Sh3gl2	12.8299	46.0673	50.5246	12.8817	12.8732	12.8703	12.8703	19.7106	12.8732	587.247	12.8734	54.7907	163.163	12.8789	12.8732	16.4954	12.8697	12.8697	13.0097	12.8292	12.8719
Sh3gl3	13.6474	25.9701	19.1502	15.8647	12.8732	12.8721	12.8707	16.4697	12.8732	70.234	12.8734	28.5064	1277.29	12.8789	28.4573	14.6698	12.8697	12.8818	18.3798	15.9427	34.107
Sh3pxd2a	3437.45	29.228	36.9185	143.652	86.0271	61.2341	105.955	647.812	62.4185	277.601	38.6798	21.162	24.9828	15.125	163.586	734.845	206.87	409.389	1080.59	2042.26	16.8316
Sh3tc2	19.9631	13.1825	15.4817	142.232	935.68	18.8731	14.5467	12.945	12.9098	13.9393	12.9091	17.2091	163.384	12.9441	12.91	50.8708	15.1646	19.2206	23.6661	37.8954	43.4626
She	23.4403	13.0688	13.595	733.584	14.0063	17.2048	95.1644	23.5319	14.3006	13.3109	14.2097	14.5536	14.1665	15.6193	35.4896	102.586	23.2678	14.6183	89.3518	12.937	13.3855
Shisa4	24.0328	283.723	434.113	16.248	13.2783	13.1714	14.507	16.6736	13.3471	94.6167	13.3377	217.092	2486.62	426.167	13.5686	23.6477	48.495	15.2023	100.182	135.955	160.408
Shisa5	866.76	500.373	168.063	763.234	382.251	1463.13	1128.03	388.809	2797.3	109.217	4004.09	151.894	95.5882	154.094	6846.56	174.914	520.781	6379.65	1379.66	777.385	321.882
Shisa7	12.9352	18.222	36.6517	13.7654	13.2783	13.3772	13.0209	34.9015	13.3472	722.95	13.2784	20.5555	29.7217	14.1917	13.3981	13.8138	12.9726	13.5206	12.9756	13.1527	13.0924
Shroom2	24.3321	56.123	497.679	247.431	12.9008	12.9008	12.8829	18.735	12.901	113.141	12.9012	140.831	1427.79	89.5117	12.9022	40.1629	127.416	12.9015	63.2071	120.902	113.534
Sidt1	12.908	15.6426	19.8498	13.1585	30.3788	26.552	18.1147	14.7064	13.087	264.431	451.143	13.1525	14.8133	13.5034	576.83	17.1134	12.9107	110.661	12.92	13.1364	12.9866
Sigirr	17.2523	19.7733	13.664	353.867	62.8109	47.7868	33.3456	20.7077	74.9092	13.1525	213.836	19.4948	14.4989	23.8046	425.068	37.7381	54.8987	213.763	17.3804	13.0802	16.1832
Siglecg	18.453	20.6997	13.6619	15.2342	160.773	226.16	39.4304	75.6945	61.4795	13.2609	21.4072	15.2669	14.8045	29.1331	22.8068	21.1531	16.8189	2931.46	15.524	85.9547	17.5427
Siglech	14.1333	90.1861	35.3487	17.323	36.4861	39.7883	22.0399	4462.77	20.9146	14.7105	38.2008	17.2764	26.1596	29.1591	19.5375	16.3521	15.1201	22.4727	14.9278	13.2044	183.703
Sirpb1b	12.9355	15.5617	12.9091	13.1778	13.386	556.924	40.8555	16.0228	615.984	12.9056	13.7837	13.0958	13.1026	14.1928	13.4714	12.9778	13.6141	22.1955	12.9691	12.908	13.0924
Sit1	13.386	14.3304	13.2103	14.4583	34.6451	23.578	17.6507	14.8058	19.167	13.0873	19.8361	12.9974	13.2746	23.2825	308.583	14.531	14.3437	61.188	14.0742	13.0734	18.5572
Skap1	12.9535	12.985	12.9943	13.9383	13.3172	35.8342	20.3256	13.5798	13.4174	15.371	1189.2	13.1286	13.89	14.3138	2277.54	14.1302	13.6899	42.6901	12.9787	16.2903	13.1251
Slain1	15.2035	61.5928	128.688	18.8162	45.138	66.7509	26.3221	30.6077	28.1336	190.181	164.664	147.887	1950.08	463.584	231.333	15.8821	16.9712	182.002	14.5461	14.5652	34.4267
Slamf6	12.9532	16.0583	12.9108	13.8861	29.655	40.7236	33.053	97.5499	40.0681	12.9088	57.3457	13.1501	13.5075	14.4553	435.975	13.1973	12.9793	476.624	12.9789	12.906	13.1511
Slamf7	19.1338	13	12.9108	14.1004	57.2064	61.8778	68.8121	21.0289	259.451	12.937	1076.72	13.1484	13.5075	14.4551	108.091	13.5352	17.2651	382.697	12.9789	12.906	13.1511
Slc11a1	28.4609	189.752	19.773	14.5824	178.352	1058.51	1842.6	993.85	1087.7	14.514	31.7727	16.2724	23.122	16.2038	20.8911	19.3851	55.3684	28.5548	19.1671	13.954	25.813
Slc12a2	123.21	191.53	176.099	282.746	54.3542	46.9688	122.713	798.759	79.6357	253.843	103.791	400.685	5118.05	253.694	103.89	235.491	119.564	67.4785	460.97	281.356	1591.08
Slc12a5	19.7825	22.3926	64.4239	36.3185	14.399	86.6245	45.7305	29.755	14.3329	1221.57	15.1208	21.4679	17.9869	41.9396	14.8048	24.2729	21.5569	18.3986	22.9101	17.4198	13.3902
Slc13a4	25.8261	15.3612	32.8256	12.9103	12.9043	12.8854	12.9005	14.76	12.9077	14.4287	12.908	18.2174	14.1776	12.9387	12.9086	15.0929	16.5902	12.8835	13.6379	14.5697	1127.87
Slc13a5	12.8818	48.7634	498.852	18.8153	12.9043	12.8854	12.9005	13.8237	12.9077	19.9741	12.9059	30.6386	29.3166	295.062	12.9033	12.8843	31.3476	12.8835	13.2036	14.28	30.6365
Slc15a2	20.101	330.261	1404.01	126.653	64.8767	94.1315	31.6753	85.8681	57.9345	37.1203	151.86	323.963	47.73	3803.57	61.1787	31.7978	20.0549	83.0742	45.2418	15.2518	304.972
Slc16a10	280.583	15.5898	15.0972	12.8245	2880.35	156.35	357.914	103.827	519.648	42.9493	48.985	19.2045	17.7511	12.8245	82.4796	201.726	336.625	46.0403	168.051	36.3465	12.8233
Slc16a3	64.9604	12.9409	16.2082	19.3126	99.6399	2109.08	255.414	160.919	484.961	17.9058	49.0874	12.9031	49.1678	24.8427	58.0785	35.2229	144.051	22.2984	121.726	60.5032	12.8922
Slc1a2	12.9094	4076.44	50604	53.5816	13.1636	18.9647	17.2096	440.16	13.2054	2741.04	13.1676	834.723	225.976	19742.7	13.2216	18.1215	28.8505	13.317	19.9792	21.2272	493.36
Slc1a3	441.976	5459.92	18460.8	59.97	53.8702	13.4928	18.7398	483.536	13.2054	64.6799	13.3437	7129.67	328.783	35554.4	13.2224	20.6994	12.9599	16.1511	81.7754	37.218	1410.76
Slc1a5	3378.48	18.9506	35.0815	94.452	3153.71	160.602	214.592	48.6801	572.586	15.1981	547.651	52.1898	38.305	13.8506	1054.28	132.254	33.653	1289.3	642.914	257.365	17.803
Slc24a2	14.6759	29.2578	297.035	18.1451	13.5428	13.0606	13.0854	27.5159	13.7654	3593.43	14.0628	24.5244	1419.23	193.791	13.3574	30.4804	12.9956	16.2788	19.0104	20.5432	19.2515
Slc24a5	40.6189	2991.9	40.7388	636.196	202.546	31.672	36.9135	39.0208	38.9802	207.118	14.0654	2962.04	142.751	370.175	55.989	24.833	76.7026	62.7906	67.7234	14.8427	1366.8
Slc25a18	17.5945	296.902	589.25	23.3375	34.0622	22.7973	17.4317	42.4742	22.1645	35.276	21.8453	206.132	26.8773	216.092	21.861	16.8045	19.1263	24.2192	21.8523	13.2955	732.922
Slc25a34	120.342	16.812	154.344	22.6352	21.153	19.1835	17.4721	18.6908	21.9326	14.4775	21.6666	15.109	19.8672	58.762	21.5497	1666.02	30.4049	18.2884	30.9637	14.145	45.5718
Slc25a37	114.003	77.6652	188.945	134.859	6806.93	710.473	285.082	512.214	238.187	287.246	162.845	66.2293	52.4365	120.293	157.156	93.3317	487.26	645.544	256.29	227.583	152.029
Slc25a5	1571.6	7653.53	1213.59	2450.35	977.456	708.497	1295.18	717.904	3027.71	134.096	550.211	11747.6	1378.87	6778.88	2004.92	1048.26	1436.37	1552.4	559.209	1578.26	8142.35
Slc27a1	1311.93	311.415	3860.1	43.8682	12.9756	29.7131	44.9802	134.287	35.3928	135.702	29.5807	503.431	208.617	1830.75	36.6609	1021.35	43.034	66.071	97.8404	60.1449	349.331
Slc27a5	13.5006	12.9052	14.535	13.0561	12.9756	12.9759	12.9726	12.982	12.9726	15.0121	20.4133	13.3998	12.9739	13.0813	17.7007	13.2571	1038.17	12.9795	12.9035	13.0437	57.4471
Slc28a2	23.9115	15.4744	12.9275	38.712	104.692	568.432	255.389	16.1823	164.368	12.9001	415.929	12.9604	13.0145	13.2052	909.613	96.8565	16.5728	1060.53	17.9921	13.176	12.9649
Slc2a3	60.5461	80.3649	26.4008	25.4178	126.394	3593.43	31.4905	51.8664	42.34	516.736	300.968	56.8116	34.607	14.1709	465.383	20.6564	16.1225	197.635	94.2486	20.1896	13.0914
Slc2a4	957.482	73.8733	33.636	13.72	740.939	13.3885	13.5075	13.2122	13.3471	12.9099	13.3369	44.1878	13.7316	40.4716	13.448	2527.48	13.6008	13.386	40.7236	14.6269	13.0914
Slc2a5	15.6936	18.3201	15.336	13.618	13.2783	13.1714	20.222	1543.83	13.3471	14.4737	13.2707	13.5406	21.5786	14.1785	13.1779	15.323	14.6329	13.5004	13.0787	14.9796	52.8219
Slc30a10	12.8818	17.6729	1229.97	34.0692	212.998	12.9018	12.9062	13.008	12.9102	80.6035	12.9095	52.6203	15.1052	1075.93	12.9084	12.9491	27.586	12.8851	13.0339	12.9348	104.651
Slc36a2	1344.05	12.9846	16.9026	14.3039	13.3082	13.4487	20.1469	45.8977	13.3812	12.9371	13.2951	13.7793	13.4006	14.2843	13.1925	283.534	19.7942	13.5431	17.2685	15.2449	13.1183
Slc38a3	12.9104	195.165	3303.31	428.47	13.0958	12.96	12.9775	22.6787	13.1341	23.5117	13.0965	109.358	111.177	1964.05	13.0393	440.499	909.299	12.9109	17.188	15.4961	1697.47
Slc38a4	15.8508	12.9393	12.9058	14.0418	13.0958	12.9684	12.9727	12.9099	13.1341	18.103	13.0965	12.9849	13.2784	13.5754	13.0393	92.3663	2352.77	13.1501	88.0374	19.0652	12.9947
Slc38a5	12.908	17.4005	13.0097	349.791	2304.22	20.2997	12.9747	12.9229	52.8832	12.9095	13.157	19.1671	14.3229	13.595	13.1247	14.7939	12.9351	17.3626	18.3079	12.901	12.9986
Slc39a12	14.6183	45.9084	1577.13	25.1403	23.4536	17.38	20.8615	117.738	24.8281	21.1191	23.1265	30.1748	26.4646	1500.57	21.3036	15.6827	16.1153	15.7729	15.7692	13.8023	575.357
Slc40a1	79.1684	164.186	19.6634	602.933	263.962	1886.35	64.7066	376.237	24.4141	16.5376	33.7923	16.136	22.7856	12.8929	12.8839	26.4598	379.284	26.2146	56.4514	48.1029	192.089
Slc43a1	81.2021	36.3603	12.8716	20.7378	3934.03	37.49	12.8775	44.2656	49.3059	14.39	12.8732	24.9852	12.8732	60.8751	33.5712	16.4491	46.822	99.3411	69.4991	21.9858	12.871
Slc43a3	342.439	24.9319	24.0302	1159.13	3336.12	94.4157	51.3542	40.9612	116.298	12.8292	56.4917	22.7812	13.1652	12.8782	101.765	251.388	39.3262	111.84	1699.42	552.491	43.4235
Slc44a1	197.442	60.9967	185.063	129.889	53.8319	204.645	44.2884	112.886	12.909	184.344	33.5197	135.285	7452.31	282.281	12.9095	165.385	246.354	46.3404	669.497	215.335	46.1795
Slc4a1	13.2135	13.3465	12.9976	16.8586	38197.9	54.3004	16.9798	13.2415	24.947	12.9886	24.6846	13.7793	16.935	17.9055	16.4029	15.065	14.9993	19.3184	13.2136	12.9691	14.3462
Slc4a10	12.908	22.2822	64.4292	14.1981	13.1286	13.1524	12.9759	29.9037	13.1559	1460.49	13.15	19.1688	28.5573	13.7284	13.2462	13.7531	12.9534	13.2136	15.6085	21.9045	1694.66
Slc4a4	936.523	83.8341	6934.1	38.5989	15.3798	14.9278	17.4741	50.5855	15.6472	1288.78	16.8461	133.886	55.0162	2013.88	24.0133	204.4	913.835	15.7867	226.757	60.6706	144.258
Slc6a1	12.9849	535.456	7005.13	26.4433	14.4819	14.1202	13.803	80.4222	14.7053	858.116	14.6455	1068.61	1204.93	2894.58	14.3849	13.0507	13.1287	14.7985	13.0958	12.9615	123.511
Slc6a11	12.9025	301.18	3479.29	20.4715	13.0343	13.0097	12.9599	31.3768	13.0696	62.833	13.0344	190.006	51.456	493.643	13.0059	12.9314	12.9103	12.9099	12.9099	12.8929	24.9561
Slc6a17	16.4906	16.4583	71.2006	15.4649	13.0343	12.9537	12.9599	25.2251	13.0696	858.908	13.0343	19.6687	14.3968	13.4464	13.0263	55.1882	12.9103	13.0958	84.7137	31.877	77.1788
Slc6a9	73.4124	83.7911	377.503	20.1052	4131.82	28.1627	18.9485	31.8624	34.4472	50.427	14.9919	72.8781	969.566	438.729	20.1555	24.8839	770.245	17.8228	121.222	77.3321	133.704
Slc7a10	111.164	40.2567	1571.58	21.7695	12.8292	12.8257	12.8257	15.0668	12.8292	54.5578	12.8292	69.9119	46.0984	1595.82	12.8299	37.3358	24.3705	12.8257	25.9204	12.8245	126.795
Slc7a11	100.908	950.732	2046.96	175.136	12.8292	357.571	22.1967	56.7602	12.8299	44.0825	12.8295	887.925	68.4585	601.254	14.2995	70.052	754.394	15.5085	212.596	36.0741	63.6091
Slc7a2	97.1548	64.1055	1901.73	38.2138	12.8697	21.4424	98.5066	24.0953	12.8707	27.4815	12.8703	63.753	24.3525	719.425	12.8703	63.1695	355.534	12.8703	500.451	80.2115	62.8429
Slc7a8	66.4459	128.392	23.5488	12.8719	44.43	68.0664	284.806	1545.91	69.4755	244.303	12.8703	21.5765	76.8482	12.8715	12.8707	24.7466	15.0058	19.609	28.8504	19.6626	147.965
Slc9a3r2	99.3792	22.8202	39.903	1741.18	12.8703	88.6521	150.73	25.9944	31.9524	66.3581	36.3038	47.0535	569.343	413.46	15.3376	561.138	62.7353	16.8035	219.59	63.6008	25.4617
Slco1a4	12.8292	60.3494	25.7033	2215.88	12.8716	12.8316	12.8507	14.717	12.8716	14.6828	12.8716	38.3113	17.4371	12.8772	12.8716	12.8566	23.3205	12.8299	12.8299	15.2702	300.868
Slco1c1	12.8292	240.482	2001.12	5334	12.8716	12.8697	12.8507	17.0582	12.8719	17.3462	12.8716	175.591	21.3359	2382.27	12.8714	15.7373	12.8558	12.8299	17.3147	13.7963	1924.08
Slco2b1	140.432	429.52	27.813	720.828	52.6789	37.1083	40.6912	5980.22	12.87	13.399	12.8697	28.8668	46.9941	12.8709	12.87	62.577	73.2377	12.8697	58.2313	13.449	71.6556
Slfn1	15.966	15.5866	12.9091	13.1906	67.3987	2392.31	204.375	17.0724	1646.94	12.9039	48.4093	12.9759	12.9198	14.2182	705.864	14.6759	16.1987	42.1683	12.9691	12.905	16.6711
Slfn14-ps	12.9935	13.2498	13.0364	15.7092	1428.54	40.5124	13.8407	13.5554	15.559	12.9727	15.5004	13.2036	14.6903	17.3412	14.9135	14.1982	13.2035	15.467	13.1714	12.9614	14.148
Slfn2	54.6329	215.174	13.065	261.203	197.256	3725.54	1046.18	110.228	1608.32	13.3929	657.116	13.0958	15.3342	14.2181	895.338	18.7288	30.1718	1052.33	36.712	16.9526	38.0492
Slfn4	15.5085	18.931	12.9924	50.5445	64.954	5000.25	146.056	16.3209	405.487	12.908	26.2882	13.5004	12.9173	14.1996	34.443	14.8273	16.144	35.7576	12.9756	12.905	13.0925
Slfn5	1156.99	48.6036	18.752	2503.11	95.8621	369.817	733.901	69.2853	2025.57	15.3389	78.6886	21.153	14.8111	66.0666	236.273	667.207	32.0892	176.116	1763.83	23.7734	26.9802
Slit2	34.5016	19.9547	43.6346	18.1133	13.4132	13.2798	14.7332	15.7181	13.5563	355.066	13.674	24.1919	70.9173	40.92	13.9396	30.1359	12.9797	13.6258	508.548	732.364	275.506
Slit3	770.249	17.3459	16.843	18.9615	13.4132	13.5416	13.5452	18.4244	13.5563	289.486	13.674	15.6085	15.0375	14.5606	14.0402	32.8067	12.9797	15.22	526.571	203.19	17.601
Slitrk2	15.7601	471.612	1345.61	29.9117	30.4695	12.96	12.9691	17.5785	13.1585	370.434	13.0679	121.763	31.6495	543.821	13.0545	14.4238	12.9108	12.9104	19.4694	25.8424	24.3581
Slpi	23.0479	14.081	13.1629	18.3605	218.106	4199.83	1996.23	18.3975	443.789	13.0958	22.6511	15.4178	49.8314	46.4513	34.4958	17.4446	3893.05	52.0383	37.9987	1026.04	15.5485
Smc4	181.686	763.805	216.798	372.368	4540.71	432.708	693.823	126.628	690.377	55.7793	3953.26	985.485	101.806	1064.09	4527.3	112.825	84.3406	1432.31	169.222	920.491	114.495
Smoc2	26.0133	15.8729	13.6768	22.9155	14.3909	14.6115	13.2707	13.2462	14.5703	37.0598	21.8561	17.1604	14.7734	15.9709	14.7091	180.03	13.0981	14.6816	2411.63	258.173	13.5488
Smpdl3a	344.518	139.992	1236.25	394.237	115.489	933.258	2267.34	96.1677	2189.32	27.8401	497.072	164.783	108.966	1378.64	403.364	170.128	78.1549	152.535	443.159	133.847	1412.34
Smpx	12.9795	13.1889	12.9824	13.157	14.7923	13.2798	13.4132	12.9956	15.1278	12.9643	14.7919	13.1714	12.9896	16.884	14.4163	1732.4	13.1676	13.1483	18.9695	12.9518	18.3801
Smtn	108.638	102.776	54.4914	188.759	42.6542	112.889	34.6501	44.7775	43.3394	19.9759	47.1722	40.3614	46.248	16.8974	39.4893	835.115	54.8527	25.7526	651.285	1188.88	17.7575
Smyd1	17.0701	18.8292	22.117	14.8043	21.1805	15.833	16.252	15.625	20.8482	14.7203	21.3539	16.6051	21.5037	28.8587	22.5371	2314.37	30.9108	15.5481	34.2967	15.2774	17.5035
Snai1	36.4544	12.8274	12.8245	63.8925	25.2001	77.3185	12.8292	12.8257	12.8279	12.8233	12.8292	12.9791	12.8292	12.8295	12.8292	22.8513	19.4694	19.4945	91.5473	449.261	12.8257
Snai2	69.1479	15.1251	12.8279	184.917	12.8267	12.8257	12.8257	12.8245	12.8292	15.7433	12.8279	14.3973	12.8245	12.8295	12.8292	28.5735	45.565	12.8257	93.2263	410.127	57.2795
Snap25	14.7968	232.209	288.306	25.9771	24.7797	17.3689	18.3524	64.5752	26.2692	9409.83	24.2998	308.398	32.0614	73.1289	22.1561	19.9372	16.5859	16.226	15.377	13.9294	26.345
Snap91	13.8257	26.9879	81.3573	22.875	19.6317	15.5996	15.8335	37.9409	20.1872	1217.94	19.4333	91.8928	274.387	27.2196	18.9258	57.8852	14.8081	14.6709	14.6709	15.7739	328.119
Sncg	1487.41	16.5354	13.9592	277.088	15.524	13.5206	14.1859	13.2086	15.842	13.0017	15.505	16.2724	16.2128	18.1924	15.7253	28.5444	13.3128	13.263	51.6131	125.952	520.282
Snhg11	90.1531	19.2057	167.588	29.0244	13.1909	19.2561	32.7158	144.638	13.1877	33101.2	20.3432	22.1606	34.9012	49.1521	13.2032	13.684	33.996	12.9532	12.9595	70.2453	44.3753
Snn	144.927	136.831	156.445	272.704	166.517	91.9592	64.9781	580.531	14.8313	237.717	20.2314	258.925	250.285	115.088	77.4157	193.58	27.3642	2748.54	51.1616	129.377	196.268
Snrpd1	84.2322	1141.09	105.437	334.235	918.547	130.834	162.814	45.5429	359.158	38.4863	501.561	1220.8	140.595	1642.83	370.293	98.6896	146.188	153.799	231.808	384.236	388.146
Snrpg	91.9476	1076.51	37.9277	343.881	575.685	93.6855	87.7148	33.936	368.783	24.4357	292.901	1048.16	93.2518	878.309	481.567	92.016	99.6453	230.042	89.1377	176.089	218.06
Sod1	2523.79	1899.13	415.887	2197.6	3674.39	415.271	811.377	324.566	2691.75	281.82	888.477	1649.25	724.675	1138.74	1954.99	1037.63	2015.23	778.206	944.794	513.938	10651.9
Sod3	987.061	18.3887	117.287	62.6052	15.3275	14.9176	17.5422	16.7731	15.899	13.8267	15.3378	26.4384	16.6654	200.111	15.518	121.417	20.7267	13.2036	856.098	3761.74	130.109
Sox10	24.2776	22.906	60.9473	13.2783	13.1501	12.9693	12.979	21.2757	13.1804	16.458	13.1513	38.848	2225.75	344.549	13.2033	15.791	12.954	12.9535	24.2876	22.5525	17.7953
Sox11	22.7951	4428.02	231.996	45.4673	13.197	13.0958	13.0019	19.4823	13.2094	291.848	13.1514	6204.02	35.8123	1222.13	13.2802	14.4342	12.954	12.9535	18.5641	23.3587	56.9514
Sox17	21.0158	13.0737	13.0427	721.36	13.1501	13.087	12.9789	12.9484	13.1794	12.9083	13.2084	12.9791	13.183	13.7861	13.2408	37.3869	21.3315	12.9535	18.7676	12.902	13.0142
Sox18	35.8733	16.3819	12.9975	712.506	13.1484	13.1895	13.166	13.2789	13.1794	13.3458	13.1778	12.9937	13.4014	13.7861	13.279	194.23	19.0141	13.2031	32.8047	15.7459	13.0141
Sox2	15.5446	428.361	315.099	15.4829	13.7793	13.0751	13.1385	16.7675	13.9618	32.9271	13.7618	537.646	71.0613	540.63	13.5945	13.0395	13.0141	12.9974	13.0103	19.127	162.549
Sox2ot	15.6229	190.993	418.286	17.8332	13.1481	13.0787	12.976	20.6131	13.2048	84.2457	13.1757	242.038	1418.38	362.484	13.0668	13.5396	12.9537	13.1971	13.0751	15.4602	150.308
Sox7	26.6142	13.516	30.1881	740.579	13.7793	13.4487	39.9672	13.6858	13.9637	12.9863	13.7639	14.3043	14.807	15.1094	14.255	115.452	21.9673	14.0726	144.726	17.247	13.2836
Sox8	14.3145	346.868	336.717	16.7084	13.7793	13.9717	13.1549	19.4976	14.081	48.425	14.5563	230.858	1256.48	86.3049	13.8708	16.0977	13.0141	17.5551	23.0676	18.8564	13.2836
Sox9	54.7644	1314.7	1242.87	55.4871	14.0063	13.4512	13.4075	20.1332	14.1385	37.3414	14.6303	773.415	26.0477	5083.79	14.2551	24.9379	215.822	12.9974	500.042	1765.65	6781.58
Spa17	19.3333	99.6856	19.0426	45.4552	51.6465	20.5167	23.2322	18.0104	17.727	27.5262	45.79	86.9615	21.4025	182.628	19.4077	41.4335	20.0417	19.7958	16.3096	24.9276	325.735
Spag16	12.9091	17.4461	20.4273	12.97	13.2031	12.9791	12.9793	12.932	13.2467	13.4309	13.2032	17.566	13.0568	13.9495	13.2527	12.9361	12.9645	12.96	12.9604	12.9059	427.496
Spag6	12.8728	12.9999	14.8453	12.8932	12.9018	12.9025	12.8928	12.9231	12.9023	67.449	12.9018	14.5522	15.1222	12.9188	12.9028	12.8827	12.8818	12.9031	12.8703	12.8704	2428.89
Sparc	20504.8	605.579	796.209	15332.2	28.1112	28.8953	41.8206	9346.95	45.8131	35.9427	12.9037	2304.22	688.683	1225.99	12.9076	1589.51	60.8629	18.9917	21999.9	19436	1758.53
Sparcl1	588.178	1973.54	17948	11945	14.7968	15.1425	14.0998	161.461	15.1315	743.585	15.4715	5829.41	140.686	19287.8	15.3854	1743.32	15.0529	15.2238	5672.06	28.363	1852.9
Spc24	20.9247	554.584	18.8813	34.3878	1840.57	119.499	54.6192	12.9535	128.277	15.6337	53.0177	158.245	14.2067	154.237	52.5712	31.741	25.4564	43.2834	15.4192	58.8636	25.2481
Spc25	21.2357	1409.59	12.8922	58.5657	956.751	78.916	67.4588	17.0604	34.3662	13.2393	77.5144	485.473	17.887	371.337	57.8473	18.8793	35.1284	40.5886	17.38	341.093	17.4717
Sphk1	40.6189	14.1802	17.2949	39.5265	757.435	18.0973	18.853	14.023	46.6719	20.5055	13.0565	16.0116	13.9859	13.4199	13.1122	18.2352	15.5574	13.0788	202.402	72.5536	12.9771
Spib	13.0101	13.1536	13.3962	18.5832	283.97	176.849	49.1949	17.7559	35.246	13.6613	15.3523	13.317	13.7438	16.3796	38.2105	15.3552	13.1396	5582.56	15.1625	13.643	17.1281
Spn	17.2685	13.7943	12.9642	15.1369	159.053	503.92	106.988	17.6877	1093.38	12.9534	6301.14	13.2136	14.4187	15.8322	2192.36	17.2712	14.3976	345.913	18.4502	19.5566	21.3614
[truncated: 254 more rows]

## Sheet: B
Input validation sample	Adipocytes	aNSCs	Astrocytes	Endothelial Cells	Erythrocytes	Granulocytes	Macrophages	Microglia	Monocytes	Neurons	NK Cells	NPCs	Oligodendrocytes	qNSCs	T Cells	Cardiomyocytes	Hepatocytes	B Cells	Cardiac Fibroblasts	Dermal Fibroblasts	Ependymal Cells	CIBERSORT p-value	CIBERSORT Pearson Correlation	CIBERSORT RMSE
Adipocytes	0.899663	0	0.00189709	0	0	0.0003	0	0	0.00431405	0	0.00184165	0	0.0011589	0	0	0	0	0	0.0317628	0.0582829	0.0007	0	0.967889	0.256578
aNSCs	0	0.209987	0	0	0.0007	0.0002	0	0	0	0	0	0.765978	0	0.0156599	0.0065586	0.0003	0	0	0	0.0007	0	0	0.829449	0.791905
Astrocytes	0.0002	0.00828237	0.950575	0	0	0	0	0	0	0.0369512	0	0	0.00360987	0	0.0002	0.0001	0	0	0	0.0001	0	0	0.953514	0.539687
Endothelial_cells	0.0002	0	0	0.996112	0	0	0.0002	0	0	0	0.0003	0	0	0.0001	0	0	0.0001	0.0009	0.00204469	0	0	0	0.442048	0.906209
Erythrocytes	0.00266263	0.0292608	0	0.00454319	0.720267	0.108575	0	0	0.00412599	0	0	0.0887658	0.0005	0	0.0375721	0.0006	0.0008	0	0	0.00135436	0.001	0	0.711639	0.717857
Granulocytes	0.0002	0	0	0	0.0207313	0.968085	0	0	0	0.00102384	0	0.00803909	0	0.00129938	0	0.0003	0	0	0	0.0004	0	0	0.969383	0.326017
Macrophages	0	0	0.0001	0.0001	0.0003	0.0002	0.998103	0	0	0.0001	0	0.0009	0	0.0001	0	0	0	0	0	0.0001	0	0	0.521576	0.905968
Microglia	0	0.0193395	0	0	0.0006	0	0.109837	0.867228	0	0.0005	0	0	0	0	0	0	0.0004	0	0	0.00212175	0	0	0.335544	0.944962
Monocytes	0.0006	0.00558506	0	0	0	0.820631	0.00226561	0.0171014	0.100098	0	0.00192366	0.0211459	0	0	0.0195735	0.0007	0	0	0.00271887	0.00704489	0.0006	0	0.942552	0.337199
Neurons	0.00210491	0	0.0901721	0.00236656	0.00250003	0	0.0116901	0.0110889	0.0007	0.557367	0	0.302012	0.0009	0	0.0147882	0	0.0004	0.0004	0.00104164	0	0.00249495	0	0.333052	0.947248
NK_cells	0	0.0002	0	0.0001	0.0008	0.0001	0	0	0.00109961	0	0.986238	0.0004	0	0	0.0111303	0	0	0	0	0	0	0	0.849451	0.737328
NPCs	0.00367995	0	0.0361272	0	0.0001	0	0.00865186	0.00355715	0	0.00219508	0	0.944892	0	0	0	0	0	0.0003	0	0.0005	0	0	0.467379	0.910901
Oligodendrocytes	0.00986776	0	0.010847	0	0.00439617	0.0002	0.0023359	0.00482761	0	0.0003	0	0.0140499	0.942541	0.00526147	0.00527335	0	0	0.0002	0	0	0	0	0.662347	0.830308
qNSCs	0.0002	0.00760246	0.0935792	0.00141632	0	0	0	0	0	0	0	0	0	0.89284	0	0	0	0	0	0	0.00420586	0	0.945159	0.420597
T cells	0	0	0	0	0.0017394	0.0003	0	0.0001	0.00112776	0	0.0003	0	0	0.0002	0.99449	0	0	0.0016545	0	0	0	0	0.793135	0.830031
Cardiomyocytes	0.00117242	0	0.0004	0.0395042	0.0006	0.0001	0.00476474	0.00600795	0.0009	0.0001	0.0003	0	0	0	0	0.912266	0	0.00173135	0.0320499	0	0.0001	0	0.528906	1.28995
Hepatocytes	0.00104667	0	0	0	0	0.0001	0.00293832	0	0	0.0003	0.0006	0	0	0.0005	0	0	0.992584	0	0.00188289	0	0	0	0.979448	0.285253
B cells	0.00818333	0.0029018	0.0006	0.001019	0	0.0002	0	0.0006	0	0.0003	0	0	0.0001	0	0.00395566	0	0	0.982157	0	0	0	0	0.980881	0.194878
Cardiac Fibroblasts	0	0.031566	0	0.00168246	0.00232839	0	0	0.00748335	0.0009	0	0	0	0	0.0105125	0.035021	0.0219468	0.00118517	0.0005	0.0998717	0.787028	0	0	0.87895	0.479034
Dermal Fibroblasts	0	0	0	0.00289905	0	0.0004	0.00693091	0.00712686	0	0.00373037	0.00158299	0	0	0.00886525	0	0	0.0005	0	0	0.968022	0	0	0.957786	0.290363
aNSCs	activated Neural Stem Cells
NPCs	Neural Progenitor Cells
qNSCs	quiescent Neural Stem Cells

## Sheet: C
Dataset of origin	Sample type	Sample name (from GEO)	Adipocytes	aNSCs	Astrocytes	Endothelial Cells	Erythrocytes	Granulocytes	Macrophages	Microglia	Monocytes	Neurons	NK Cells	NPCs	Oligodendrocytes	qNSCs	T Cells	Cardiomyocytes	Hepatocytes	B Cells	Cardiac Fibroblasts	Dermal Fibroblasts	Ependymal Cells	CIBERSORT p-value	CIBERSORT Pearson Correlation	CIBERSORT RMSE
CKp25 alzheimer's model (GSE65159)	Control	CK_2wk_RNA_rep1	0	0	0.222371	0	0.0002	0	0	0.111301	0.0093206	0.306314	0	0.176044	0.0334312	0	0	0.0815671	0.017165	0	0.00143611	0	0.0408455	0.09	0.0836763	1.02617
	Control	CK_2wk_RNA_rep2	0	0	0.187785	0.017964	0	0	0	0.0986664	0.0107599	0.302129	0	0.198507	0.050937	0	0.0716985	0.0602836	0	0	0.0008	0	0.0004	0.24	0.0567157	1.02906
	Control	CK_2wk_RNA_rep3	0	0.00689508	0.154804	0	0	0	0	0.0965874	0.00636601	0.478093	0	0.114347	0.0769295	0	0	0.0465011	0	0.0164005	0	0.00298513	0.0001	0.12	0.0798808	1.03852
	Control	CK_6wk_RNA_rep1	0.0049415	0.042277	0.230776	0	0	0	0	0.0256826	0.023611	0.448938	0	0.0666978	0.058149	0	0.00438216	0.0840552	0	0	0	0.0104896	0	0.16	0.0754453	1.04291
	Control	CK_6wk_RNA_rep2	0	0	0.30432	0	0.0115636	0	0	0.114856	0.038378	0.227818	0.0136698	0.0449131	0.0943363	0	0	0.117842	0	0	0.0323031	0	0	0.24	0.0565478	1.04849
	Control	CK_6wk_RNA_rep3	0	0	0.225492	0.0184184	0.0292594	0	0	0.0496098	0.0230764	0.248155	0	0.205103	0.0628558	0	0	0.0860516	0.0200902	0	0	0	0.0318886	0.2	0.0671479	1.03151
	Disease	CKp25_2wk_RNA_rep1	0	0	0.226007	0.0642846	0	0.00389842	0	0.162556	0	0.148275	0.121675	0	0.0724159	0	0	0.142974	0.00786461	0	0	0	0.0500514	0.41	0.0422124	1.04262
	Disease	CKp25_2wk_RNA_rep2	0	0	0.150461	0	0	0	0	0.120054	0.0121863	0.182161	0	0.357223	0.0635808	0	0.0186546	0.0956782	0	0	0	0	0	0.46	0.0371225	1.03627
	Disease	CKp25_2wk_RNA_rep3	0	0	0.172925	0	0	0	0	0.221823	0.0229543	0.0403893	0	0.216147	0.0680203	0	0.0679756	0.0794062	0.0257739	0.014107	0	0.0250624	0.0454163	0.59	0.0305787	1.0343
	Disease	CKp25_6wk_RNA_rep1	0	0	0.228238	0	0	0	0.0742336	0.138154	0	0.0619081	0.0615029	0.136626	0.0979056	0	0	0.121044	0.0171057	0.00373122	0.0247268	0.0137987	0.021026	0.21	0.065462	1.03404
	Disease	CKp25_6wk_RNA_rep2	0	0	0.279774	0.0873256	0	0	0	0.0722581	0.0105938	0.181024	0.0319781	0.0740111	0.0973142	0.015224	0	0.113226	0	0	0	0	0.0372704	0.22	0.0635639	1.04303
	Disease	CKp25_6wk_RNA_rep3	0	0	0.219309	0	0	0	0	0.23967	0.00224789	0.121316	0.0471498	0.146349	0.0782033	0	0	0.0965138	0.00814846	0	0	0.00789407	0.0331989	0.23	0.0572887	1.03168
5XFAD model with 40Hz oscillations (GSE77471)	Control	Hippocampal_CA1_CTRL1_RNASeq	0.00436831	0	0.291415	0.00183057	0	0	0.130322	0	0	0.411994	0.0275517	0.0890359	0.0303626	0	0	0.00102122	0.00235094	0	0	0	0.00974838	0.1	0.0683544	1.04165
	Control	Hippocampal_CA1_CTRL2_RNASeq	0.00346154	0	0.28617	0.001008	0	0	0.0744954	0	0	0.47154	0	0.0868975	0.0461053	0	0	0.00171433	0.0156151	0.00298658	0	0	0.0100064	0.11	0.0676586	1.05146
	Control	Hippocampal_CA1_CTRL3_RNASeq	0.00688126	0	0.278611	0	0.0005	0	0.108715	0	0	0.434892	0.00232386	0.0696963	0.0808353	0	0.00133331	0.00218684	0.00208668	0	0	0.00394386	0.00801423	0.14	0.0619923	1.05281
	40Hz oscillations	Hippocampal_CA1_GAMMA1_RNASeq	0.0023361	0	0.342597	0.00226078	0	0	0.168092	0	0	0.362129	0	0.0418051	0.060236	0	0	0.0006	0.01991	0	0	0	0	0.04	0.0850986	1.04085
	40Hz oscillations	Hippocampal_CA1_GAMMA2_RNASeq	0	0	0.267604	0.0035763	0	0	0.130691	0.00164079	0	0.417419	0.00981337	0.0841206	0.0532337	0	0	0.0009	0.0110269	0	0.001	0	0.0189592	0.07	0.0774349	1.03841
	40Hz oscillations	Hippocampal_CA1_GAMMA3_RNASeq	0.00108686	0.00258113	0.32504	0.00188345	0	0	0.137641	0	0	0.403746	0	0.0451289	0.0564699	0	0.018758	0.00431289	0.00335154	0	0	0	0	0.07	0.0772073	1.04349
									Inflammatory cell fraction
aNSCs	activated Neural Stem Cells
NPCs	Neural Progenitor Cells
qNSCs	quiescent Neural Stem Cells

## Sheet: D
Tissue of origin	Sample	Adipocytes	aNSCs	Astrocytes	Endothelial Cells	Erythrocytes	Granulocytes	Macrophages	Microglia	Monocytes	Neurons	NK Cells	NPCs	Oligodendrocytes	qNSCs	T Cells	Cardiomyocytes	Hepatocytes	B Cells	Cardiac Fibroblasts	Dermal Fibroblasts	Ependymal Cells	CIBERSORT p-value	CIBERSORT Pearson Correlation	CIBERSORT RMSE
Heart	3m1	0.0007	0	0.00314926	0.010942	0.0001	0	0.00310153	0.00792704	0.0005	0	0.00120783	0.00376785	0.0008	0	0	0.944428	0	0.00113023	0.020861	0	0.0013568	0	0.776803	0.726257
	3m2	0.001	0	0.00235527	0.00879028	0.0008	0	0.00763493	0.00761908	0.00113237	0	0.0005	0.00487252	0.0007	0	0	0.939921	0.0006	0.00147482	0.0212491	0	0.00136473	0	0.778349	0.721132
	3m3	0.00113946	0	0.00312872	0.00852493	0.0009	0	0.00553298	0.00592864	0.0007	0	0.00109479	0.00461994	0.0008	0	0	0.946704	0.0008	0.0004	0.0185274	0	0.00117256	0	0.731698	0.790877
	12m1	0.00165679	0.00155598	0.00506957	0.00456125	0.0007	0.0005	0	0.00145324	0.00272429	0.0004	0.0025436	0	0.00173485	0	0	0.963581	0.00166794	0.0023361	0.00779514	0	0.0016711	0	0.780075	0.742677
	12m2	0.0009	0	0.00225591	0.0100631	0.0004	0	0.0060375	0.00520608	0.0011716	0.0008	0.001	0	0.0006	0	0	0.95279	0	0.0022574	0.0135214	0	0.0029486	0	0.778168	0.728128
	12m3	0.00108127	0	0.003845	0.00782179	0.00102492	0	0.00906538	0.00548168	0.00101847	0	0.0007	0.00243613	0.0008	0	0	0.946614	0	0.00184815	0.0159745	0	0.00230227	0	0.77851	0.728437
	29m1	0.00179059	0	0.00410526	0.010337	0.0003	0	0.00587169	0.00677269	0.00221775	0	0.0006	0.00190247	0.0009	0	0	0.928439	0.00353098	0.0014924	0.0296632	0	0.0020931	0	0.733625	0.804095
	29m2	0.00113372	0	0.00269997	0.00983393	0.0004	0.0001	0.0181857	0.00879547	0.00174495	0.0005	0.00121382	0.00227719	0.0007	0	0	0.916433	0	0.00428209	0.0296284	0	0.00209648	0	0.782602	0.73119
	29m3	0.0009	0	0.00308814	0.00836197	0.0010922	0	0.00951973	0.00616272	0.0008	0.0001	0.0007	0.00116645	0.0008	0	0.00101353	0.945601	0.0001	0.00188227	0.018706	0	0	0	0.781101	0.729471
Liver	3m1	0.118668	0.0302686	0.0121029	0	0	0	0	0.00767154	0.00702247	0	0.0003	0	0	0	0	0	0.790214	0.00131147	0	0.0147341	0.0176604	0.01	0.244341	1.09844
	3m2	0.119138	0.0310332	0.0130621	0	0	0	0	0.0103809	0.00783759	0	0	0	0	0	0	0	0.777449	0	0	0.0191766	0.0219231	0.01	0.248979	1.07955
	3m3	0.117013	0.0251716	0.0140029	0	0	0	0	0.00990152	0.00894641	0	0	0	0	0	0	0	0.785277	0	0	0.0212957	0.018392	0.01	0.254161	1.07876
	12m1	0.141689	0.042368	0.0186401	0	0	0	0	0.00865608	0.00642324	0	0.0007	0	0	0	0	0	0.755852	0	0	0.00816339	0.0174705	0.01	0.245763	1.08605
	12m2	0.143018	0.0465207	0.0188024	0	0	0	0	0.00811766	0.00891374	0	0.001	0	0	0	0	0	0.7462	0	0	0.00798033	0.0194573	0.01	0.293598	1.04797
	12m3	0.120775	0.0470384	0.0148885	0	0	0	0	0.00384455	0.00634465	0	0.0003	0	0	0	0	0	0.776242	0	0	0.00706052	0.0234626	0.01	0.247087	1.09801
	29m1	0.101864	0.0570861	0.019163	0	0	0	0	0.0109031	0.00824272	0	0.00139284	0	0	0	0	0	0.774163	0.00343555	0	0.00876478	0.014985	0.01	0.25697	1.10118
	29m2	0.109519	0.0493845	0.0227968	0	0	0	0	0.00923505	0.00333055	0	0.00105437	0	0	0	0	0	0.774153	0.00355925	0	0.0125148	0.0144522	0.01	0.281871	1.1116
	29m3	0.12723	0.0396753	0.0143865	0	0	0	0	0.00808019	0.00999028	0	0.0009	0	0	0	0	0	0.785769	0	0	0.00609907	0.00787792	0.01	0.264555	1.09878
Cerebellum	3m1	0.00670531	0	0.230093	0.00490344	0.0007	0.0002	0	0	0.00205059	0.552959	0.00123535	0.0737214	0.0709366	0	0	0	0.0006	0.0009	0	0.00279317	0.0521651	0	0.525173	0.883075
	3m2	0.00810262	0	0.227094	0.00469304	0.0009	0.0003	0	0	0.00466117	0.538399	0.00133029	0.0819114	0.0773292	0	0	0	0	0.0009	0	0.0050457	0.0493219	0	0.545983	0.87529
	3m3	0.00586817	0	0.238621	0.00571349	0.00101334	0.0002	0	0.00419914	0.00174592	0.558877	0.00118698	0.0642788	0.0702137	0	0	0	0.0007	0.00102007	0	0.00701713	0.0393475	0	0.509476	0.887469
	12m1	0.00657878	0	0.233049	0.00515577	0.001	0.0003	0	0.00245052	0.00139775	0.591592	0.00110753	0.0518367	0.0509188	0	0	0	0.0005	0.0009	0	0.00308759	0.0502544	0	0.525203	0.881481
	12m2	0.00886423	0	0.210805	0.0114416	0.0004	0	0.0009	0.00732422	0	0.585028	0	0.0593631	0.0515497	0	0	0	0	0.0003	0.0003	0.00228002	0.0615092	0	0.529997	0.880088
	12m3	0.00683871	0.00783753	0.238808	0.00707592	0.0009	0.0003	0	0.00498383	0.00139847	0.608456	0.00101515	0.0462264	0.069041	0	0	0	0.0007	0.0008	0	0.00392086	0.00169093	0	0.517828	0.882993
	29m1	0.0061148	0	0.235943	0.0068734	0.001	0.0003	0	0	0.00266418	0.572126	0.0009	0.0924709	0.0496823	0	0	0	0.0005	0.0007	0	0.00252423	0.0282255	0	0.543932	0.875371
	29m2	0.00520724	0	0.234754	0.00556082	0.0003	0.0004	0	0.0116996	0.00577697	0.520109	0.00130864	0.078506	0.0771333	0	0	0	0.0008	0.001	0	0.0043054	0.0531655	0	0.528329	0.878427
	29m3	0.0054459	0	0.232291	0.00428856	0.0002	0.0003	0	0.00734872	0.00578078	0.544855	0.00139829	0.0743186	0.0682838	0	0	0	0.0006	0.0008	0	0.00316938	0.0508141	0	0.529758	0.877249
Olfactory Bulb	3m1	0.00985459	0	0.187668	0.00149379	0	0.0002	0	0.00798682	0.00352919	0.615722	0.0010168	0.116005	0.0492257	0	0	0	0	0.0008	0	0.00543585	0.00105023	0	0.555879	0.864884
	3m2	0.0122597	0	0.222436	0.00206351	0.0008	0.0002	0	0.0136467	0.00246695	0.582187	0.0009	0.109277	0.0443309	0	0	0	0	0.0009	0	0.00763533	0.001	0	0.549493	0.868748
	3m3	0.0106733	0	0.21285	0.00228426	0.0009	0.0003	0	0.00969845	0.0047641	0.575511	0.001	0.146348	0.0268546	0	0	0	0	0.0008	0	0.00725913	0.0007	0	0.534104	0.87658
	12m1	0.0103885	0	0.207884	0.00365134	0.0008	0.0002	0	0.0121856	0.00118299	0.621534	0.0008	0.089721	0.0447091	0	0	0	0	0.0007	0	0.00559092	0.0007	0	0.543599	0.86897
	12m2	0.00947546	0	0.189852	0	0.00111832	0.0003	0	0.0159784	0.00539911	0.63392	0.001	0.0870049	0.0460381	0	0	0	0	0.0008	0	0.00833892	0.0008	0	0.515985	0.879461
	29m1	0.00995857	0	0.187749	0.00377663	0.0008	0	0	0.0171159	0.00174616	0.644025	0.0006	0.0872764	0.0396918	0	0	0	0	0.0008	0	0.00594956	0.0005	0	0.530299	0.871915
	29m2	0.0112039	0	0.193637	0.00573501	0.0007	0	0	0.0186536	0.00131942	0.631909	0.00103838	0.0818893	0.0450228	0	0	0	0	0.001	0	0.00759489	0.0004	0	0.526911	0.872241
	29m3	0.00939071	0	0.19817	0.00587364	0.0009	0	0	0.0140324	0.00158785	0.611684	0.0009	0.106533	0.0430136	0	0	0	0	0.0009	0	0.00650644	0.0006	0	0.548288	0.864845
primary NSCs	3m1	0.00906112	0	0.154457	0	0.001	0	0	0.0134717	0.00173508	0.00107696	0	0.754878	0.00441052	0	0.0204112	0.0146955	0	0	0	0.00332695	0.021479	0	0.519283	0.873578
	3m2	0.0093014	0	0.164563	0	0.0007	0	0	0.01128	0.00203962	0.001021	0	0.717324	0.00506007	0	0.0226804	0.0384573	0.0004	0	0	0.00378628	0.0233659	0	0.519814	0.87309
	12m1	0.00764092	0	0.150722	0	0.0008	0	0.00493496	0.0136152	0.00177386	0.00358546	0	0.749088	0.00499023	0	0.0258783	0.0162422	0	0	0.001	0.00315997	0.0165709	0	0.511285	0.876907
	12m2	0.00964993	0	0.154749	0	0.0006	0	0.00391809	0.0143825	0.0023176	0.00301074	0.00614789	0.733699	0.00466142	0	0.0130414	0.0260695	0	0	0.00210997	0.00257857	0.0230779	0	0.525355	0.871764
	29m1	0.00913794	0	0.152704	0	0.0004	0	0.0012899	0.00856554	0.00190643	0.00135727	0	0.746052	0.00515805	0	0.0305059	0.0165116	0	0	0.00276789	0.00533354	0.0183115	0	0.512295	0.876543
	29m2	0.00981577	0	0.162474	0	0.0001	0	0	0.015633	0.00162708	0	0.00664493	0.751197	0.00538939	0	0.015323	0	0	0	0	0.00357204	0.0281758	0	0.517046	0.874684
								Inflammatory cell fraction
aNSCs	activated Neural Stem Cells
NPCs	Neural Progenitor Cells
qNSCs	quiescent Neural Stem Cells
3m	3 month old
12m	12 month old
29m	29 month old
