# Supplementary figures and images for: Remodeling of epigenome and transcriptome landscapes with aging in mice reveals widespread induction of inflammatory responses
Source: HighWire-hosted journal article supplement (doi:10.1101/gr.240093.118), 2019-03-11

# brain (Nfur)

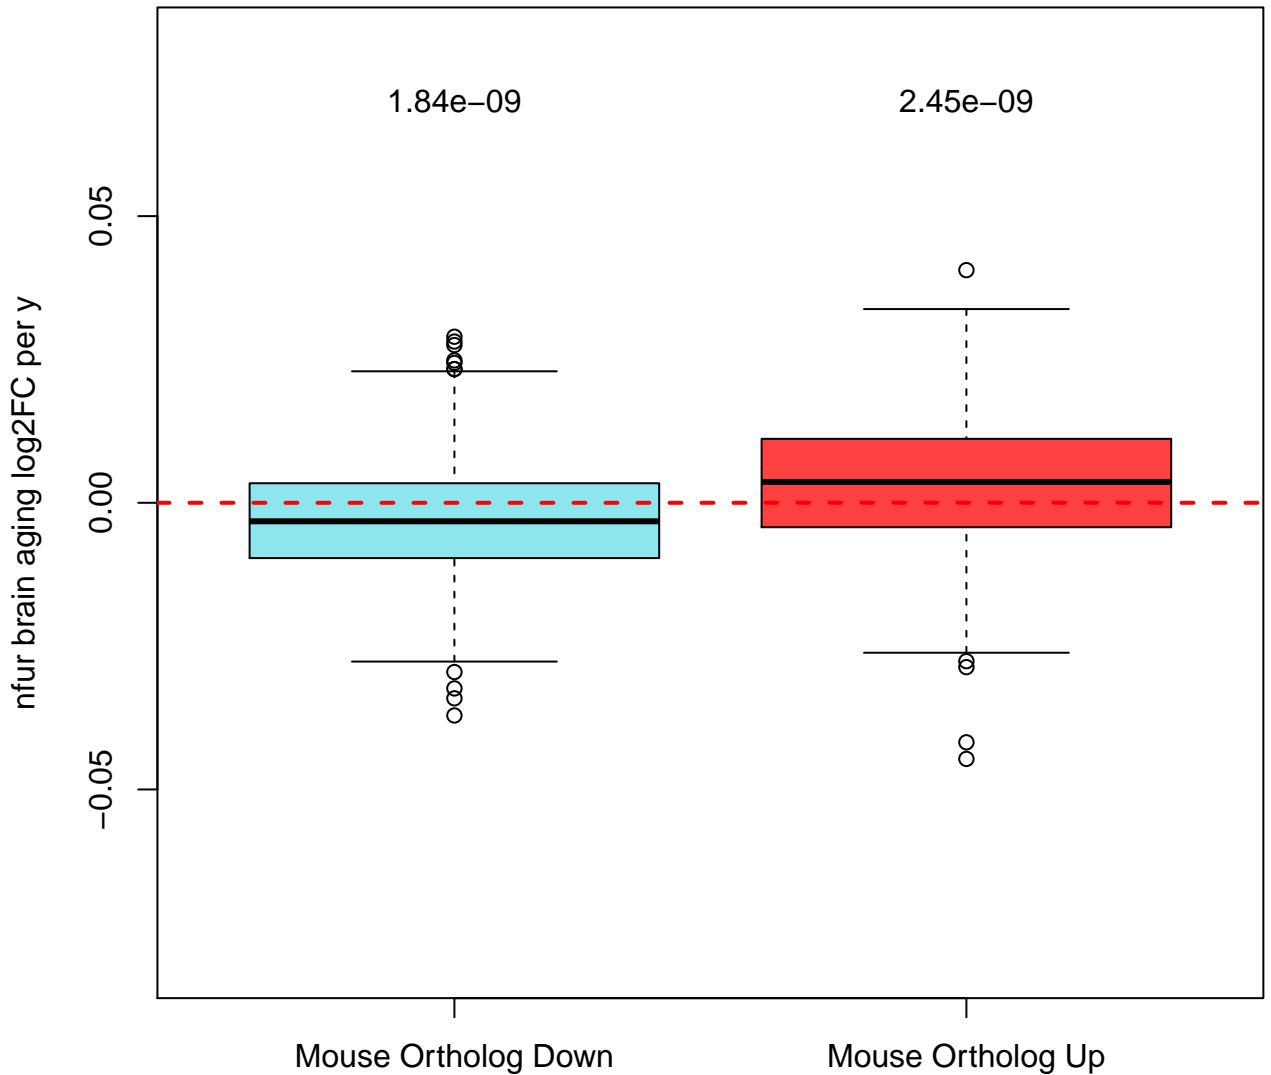

Supplement: Supplemental_Code_Figure5_Conservation.zip [file 2018-06-04_LogFC_of_mouse_orthologs_brain_Nfur.pdf › Killifish_aging_RNAseq/Brain/2018-06-04_LogFC_of_mouse_orthologs_brain_Nfur.pdf]

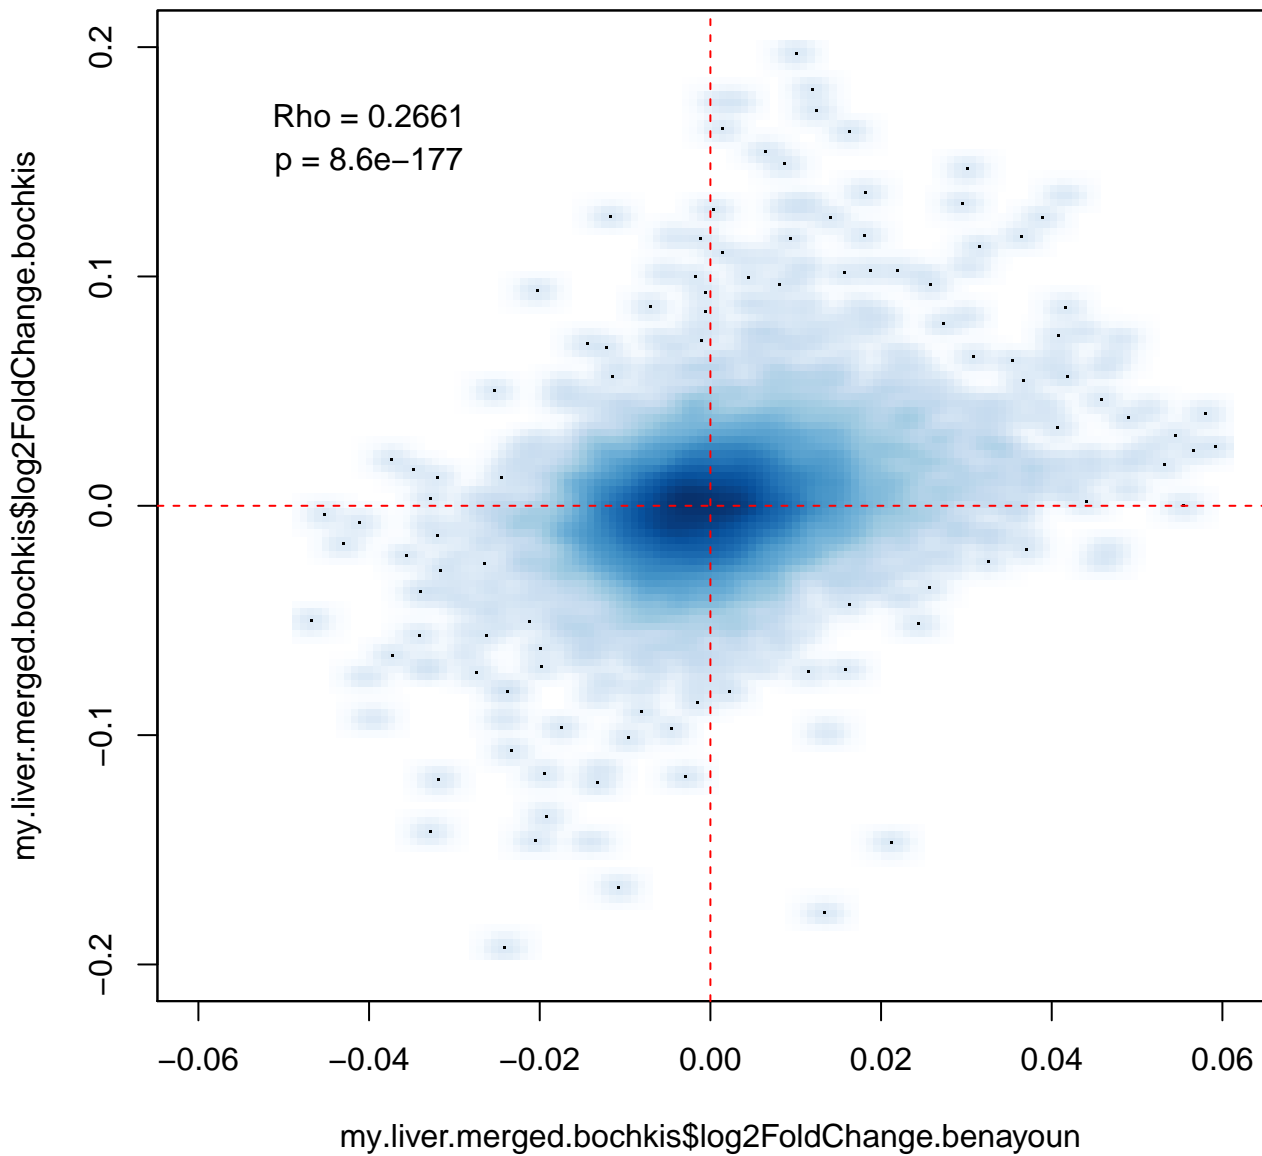

Supplement: Supplemental_Code_FigureS6_comparisons.zip [file Bochkis_liver_correlation.pdf › FigureS6_comparisons/DESeq2/OUTPUT/Bochkis_liver_correlation.pdf]

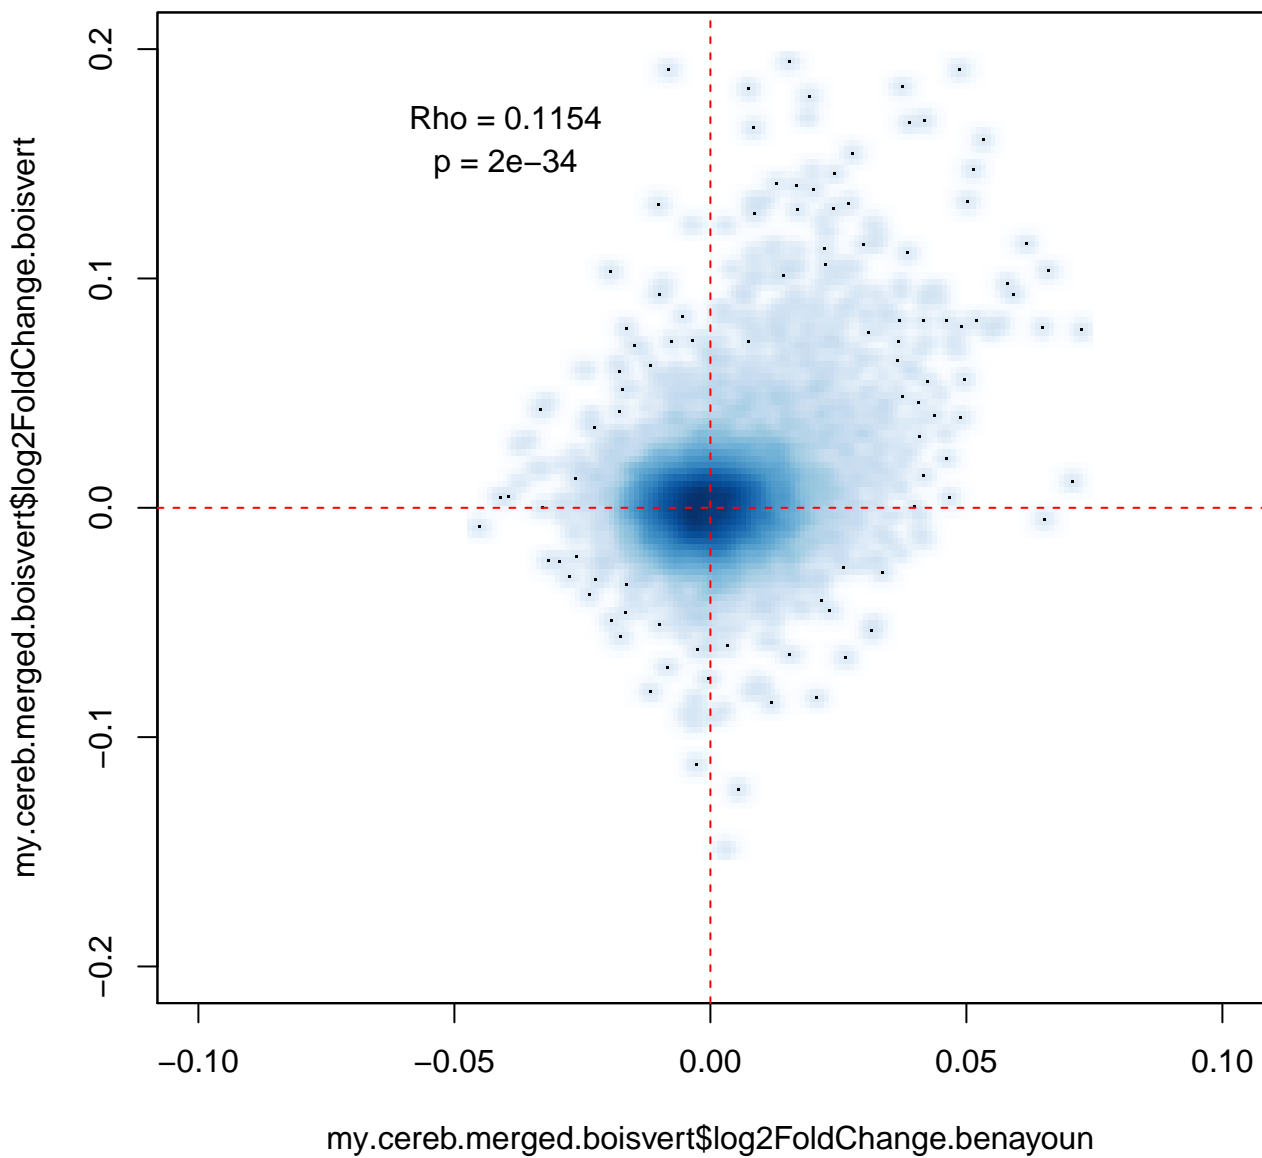

Supplement: Supplemental_Code_FigureS6_comparisons.zip [file Boisvert_liver_correlation.pdf › FigureS6_comparisons/DESeq2/OUTPUT/Boisvert_liver_correlation.pdf]

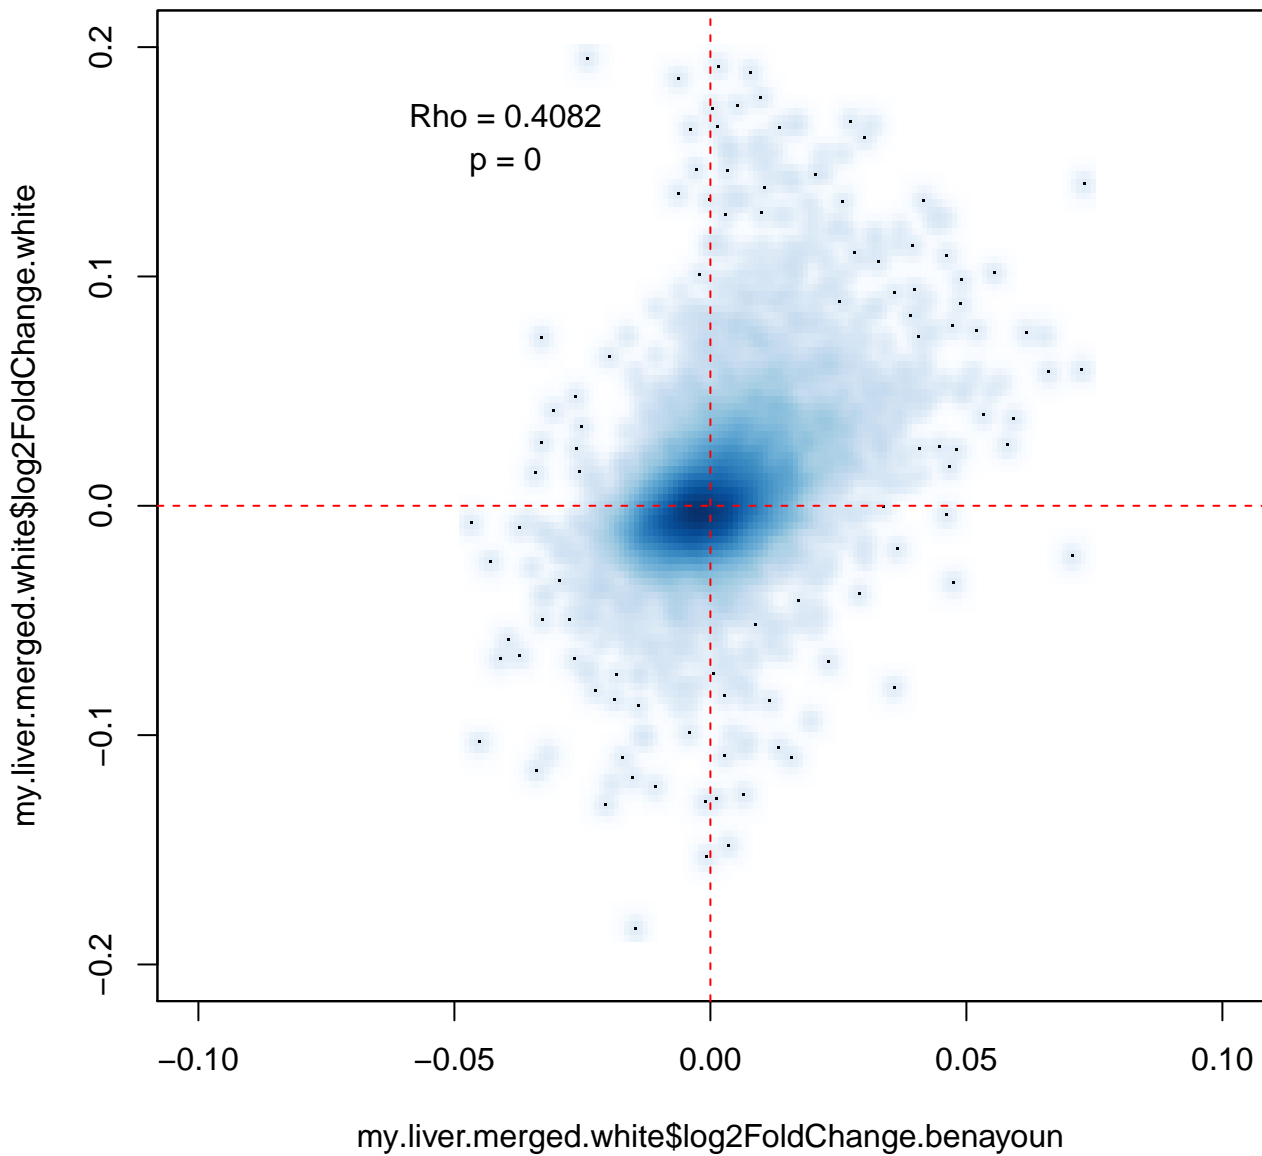

Supplement: Supplemental_Code_FigureS6_comparisons.zip [file White_liver_correlation.pdf › FigureS6_comparisons/DESeq2/OUTPUT/White_liver_correlation.pdf]

Boisvert

Benayoun

168

10

275

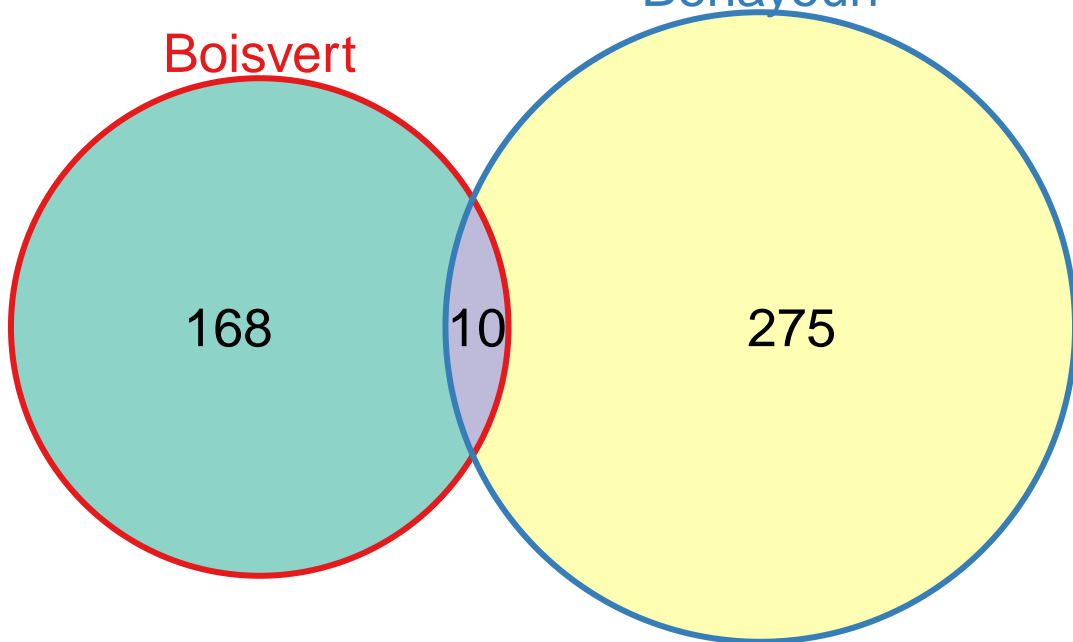

Supplement: Supplemental_Code_FigureS6_comparisons.zip [file 2018-09-24_Venn_Aging_Cereb_RNA_DWN.pdf › FigureS6_comparisons/Venn/2018-09-24_Venn_Aging_Cereb_RNA_DWN.pdf]

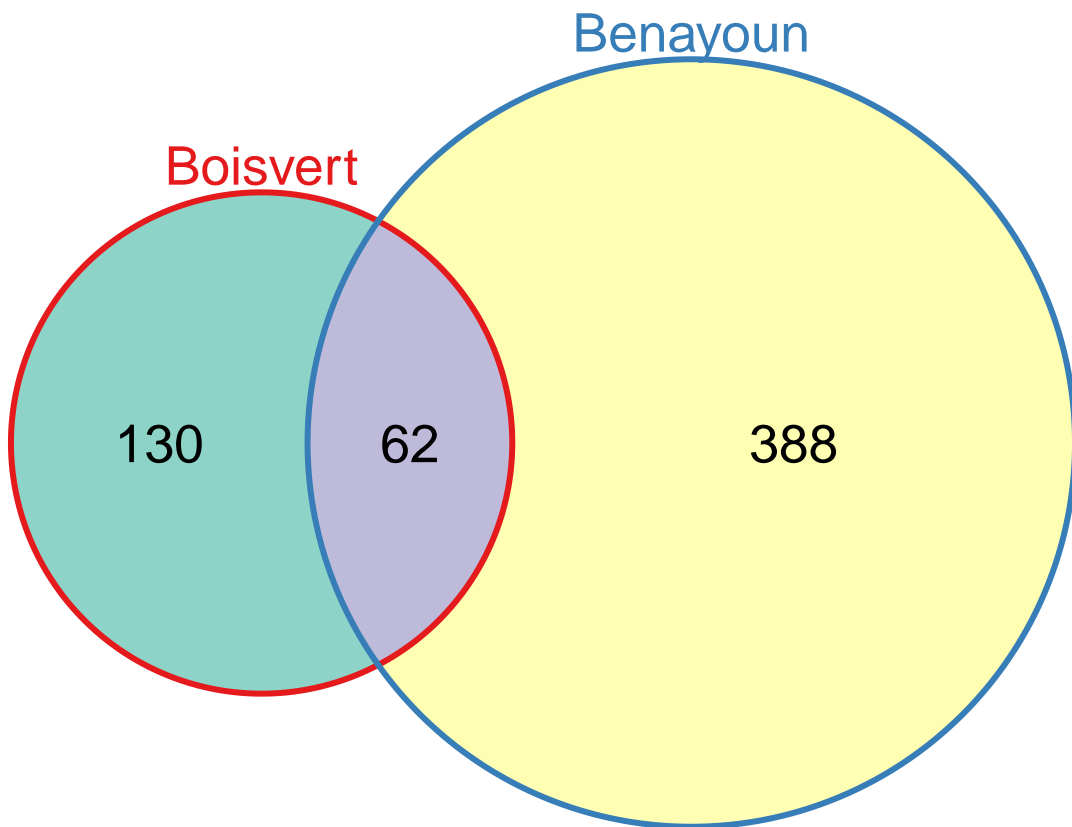

Supplement: Supplemental_Code_FigureS6_comparisons.zip [file 2018-09-24_Venn_Aging_Cereb_RNA_UP.pdf › FigureS6_comparisons/Venn/2018-09-24_Venn_Aging_Cereb_RNA_UP.pdf]

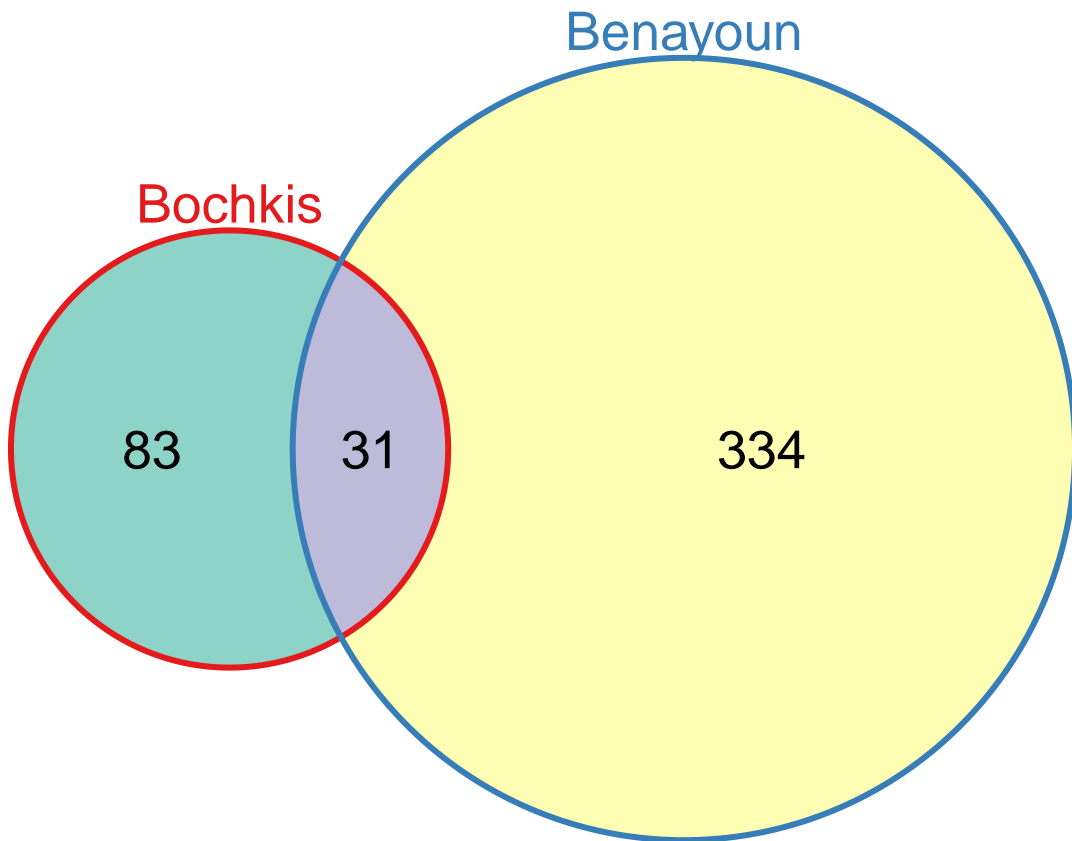

Supplement: Supplemental_Code_FigureS6_comparisons.zip [file 2018-09-24_Venn_Aging_Liver_RNA_DWN_Bochkis.pdf › FigureS6_comparisons/Venn/2018-09-24_Venn_Aging_Liver_RNA_DWN_Bochkis.pdf]

White

Benayoun

464

58

307

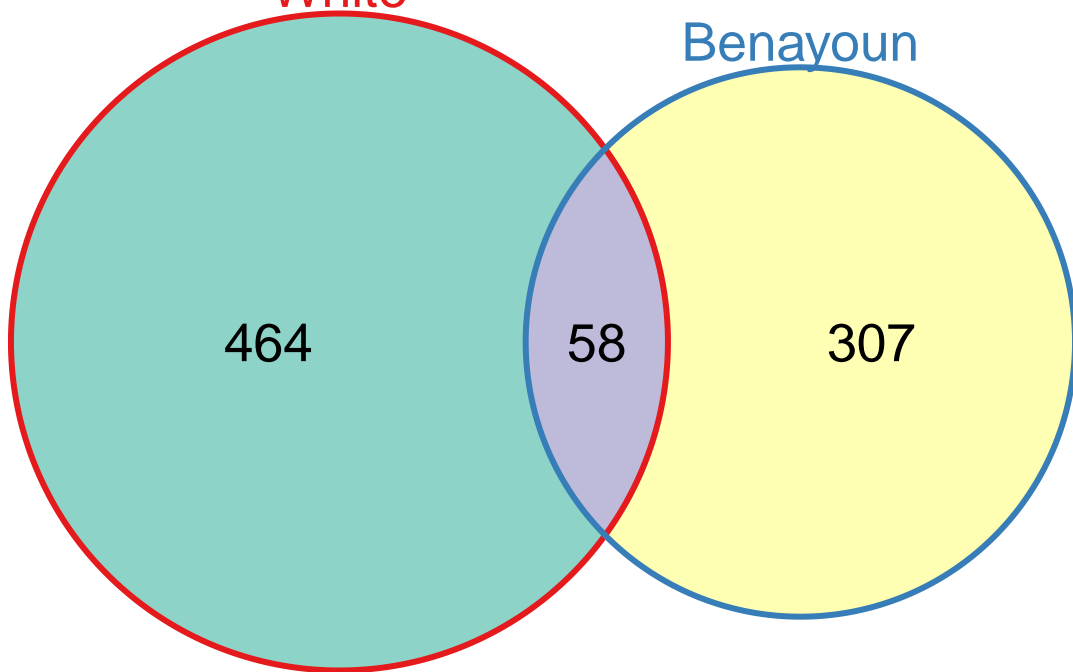

Supplement: Supplemental_Code_FigureS6_comparisons.zip [file 2018-09-24_Venn_Aging_Liver_RNA_DWN_White.pdf › FigureS6_comparisons/Venn/2018-09-24_Venn_Aging_Liver_RNA_DWN_White.pdf]

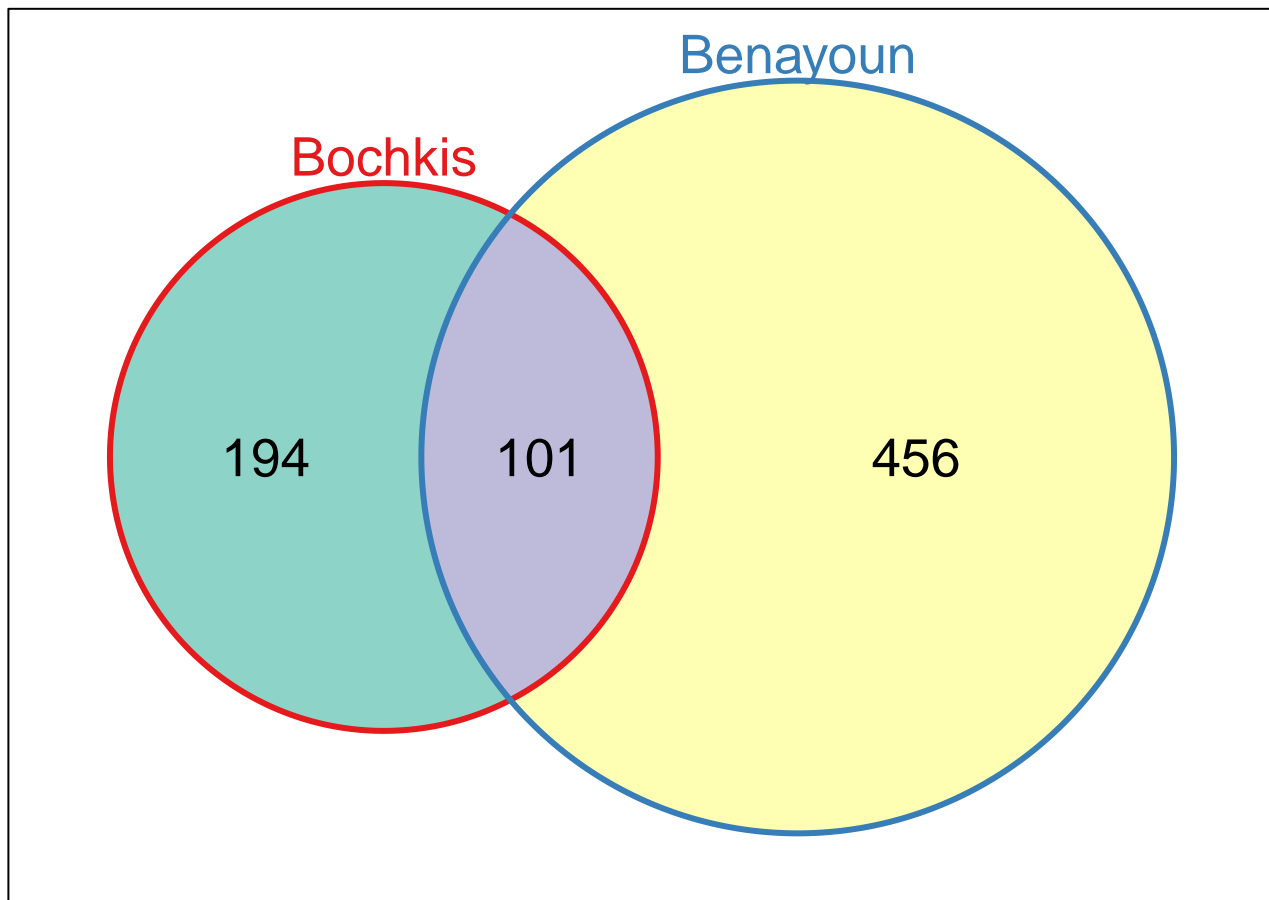

Supplement: Supplemental_Code_FigureS6_comparisons.zip [file 2018-09-24_Venn_Aging_Liver_RNA_UP_Bochkis.pdf › FigureS6_comparisons/Venn/2018-09-24_Venn_Aging_Liver_RNA_UP_Bochkis.pdf]

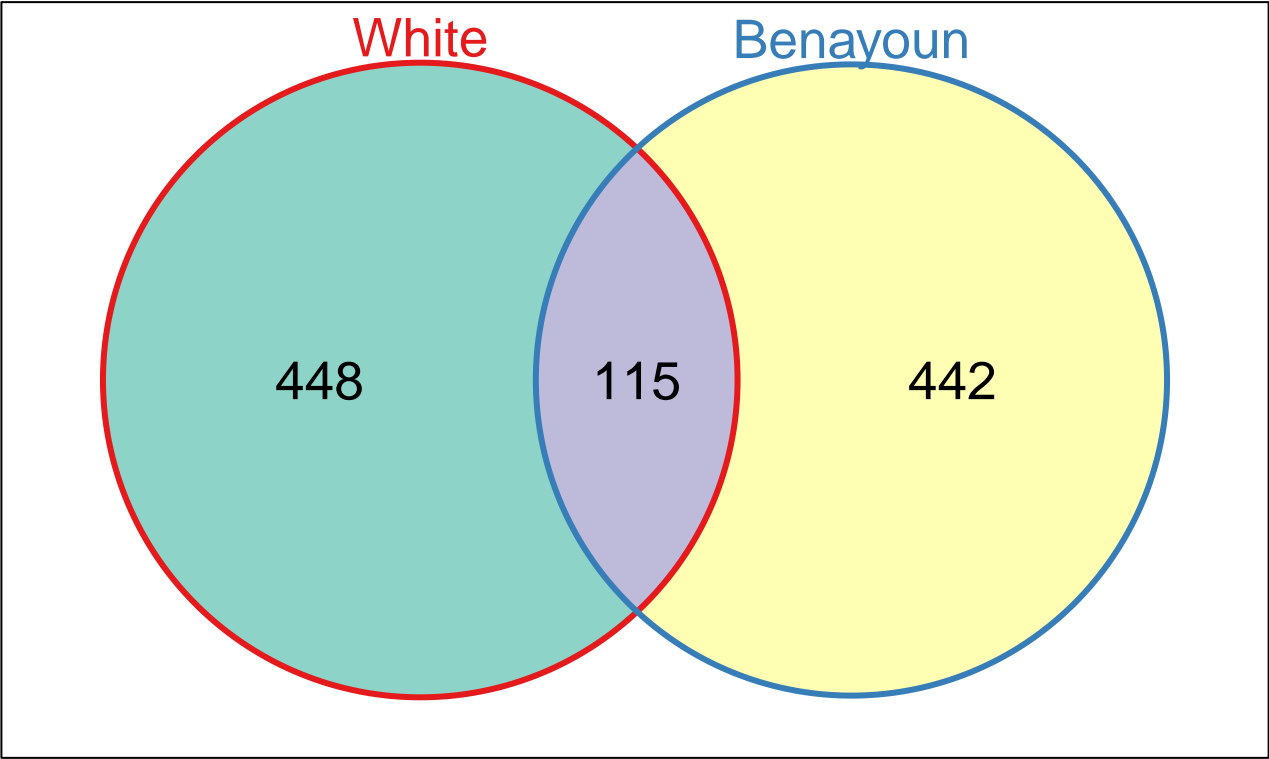

Supplement: Supplemental_Code_FigureS6_comparisons.zip [file 2018-09-24_Venn_Aging_Liver_RNA_UP_White.pdf › FigureS6_comparisons/Venn/2018-09-24_Venn_Aging_Liver_RNA_UP_White.pdf]
